# Supplementary material for: Feasibility of Phosphoproteomics on Leftover Samples After RNA Extraction With Guanidinium Thiocyanate
Source: PubMed Central journal article supplement — Mol Cell Proteomics. 2021 Apr 2;20:100078. doi: 10.1016/j.mcpro.2021.100078 (PMC8111777; doi:10.1016/j.mcpro.2021.100078), 2021-04-02
Supplement: mmc18.pdf [file mmc18.pdf]

YSHSYLSDS(Phospho (STY))DTEAKLETNA-2+

Source : QE3\_201126\_FR\_TiOx\_hum\_tissue\_Urea\_RNAB\_N Scan : 25929

Andromeda score : 668.99

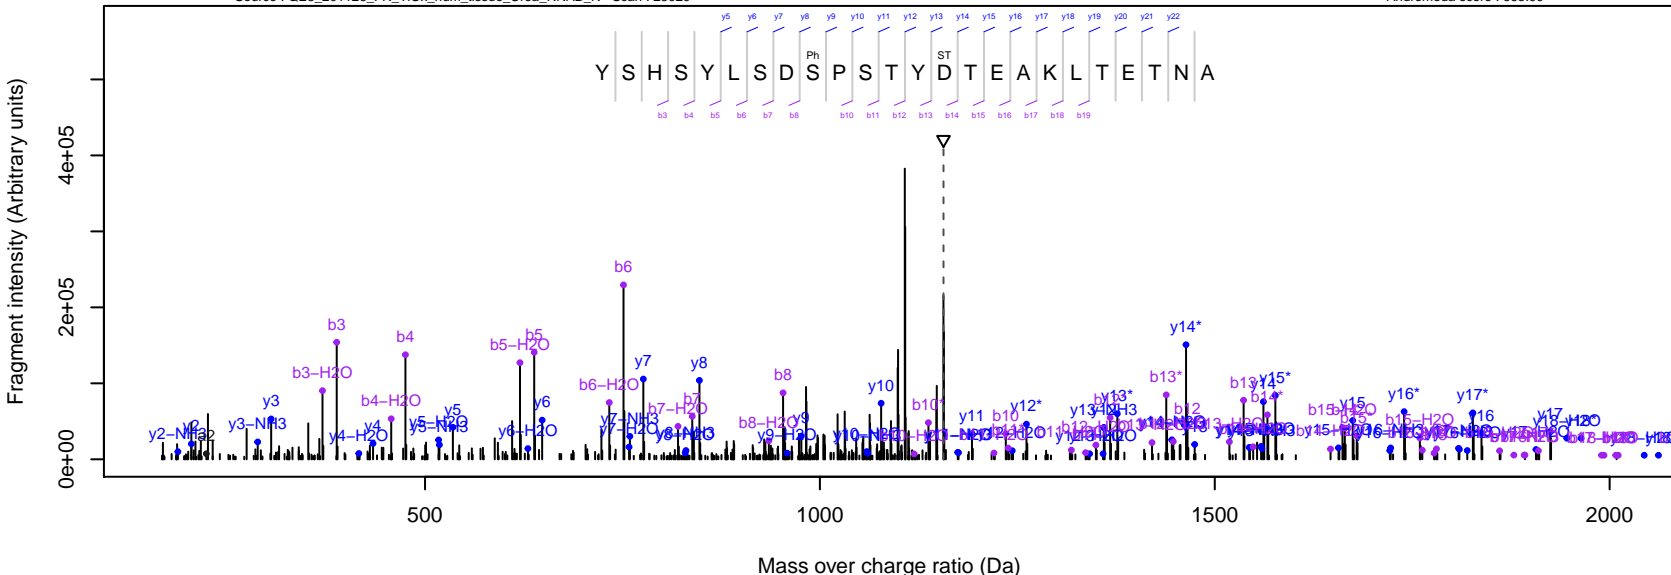

(Acetyl (Protein N-term))AASAAAASAAAASAGS(Phospho (STY))PGPGEGSAGGEKR-2+

Source : QE3\_201126\_FR\_TiOx\_hum\_tissue\_Urea\_RNAB\_B Scan : 29072

Andromeda score : 648.35

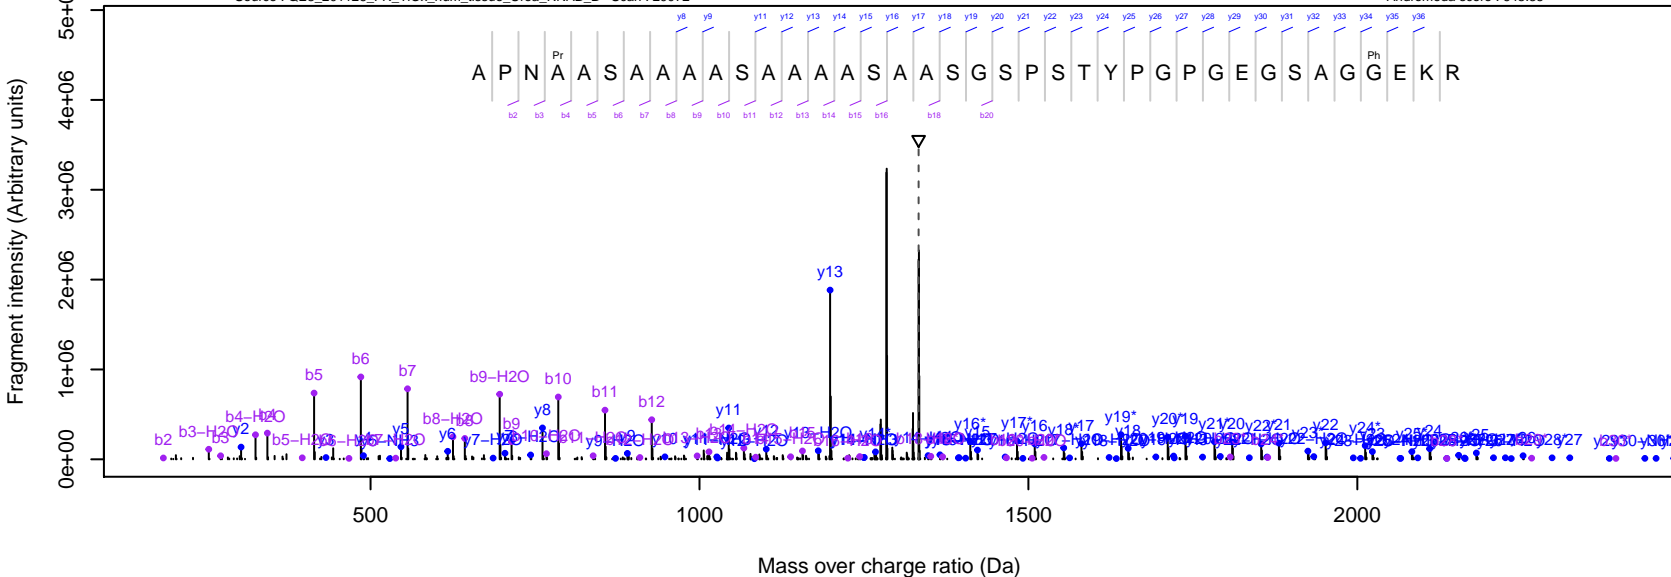

TPEELDDS(Phospho (STY))DFETEDFVDR-2+

Source : QE3\_201126\_FR\_TiOx\_hum\_tissue\_Urea\_RNAB\_B Scan : 47204

Andromeda score : 624.77

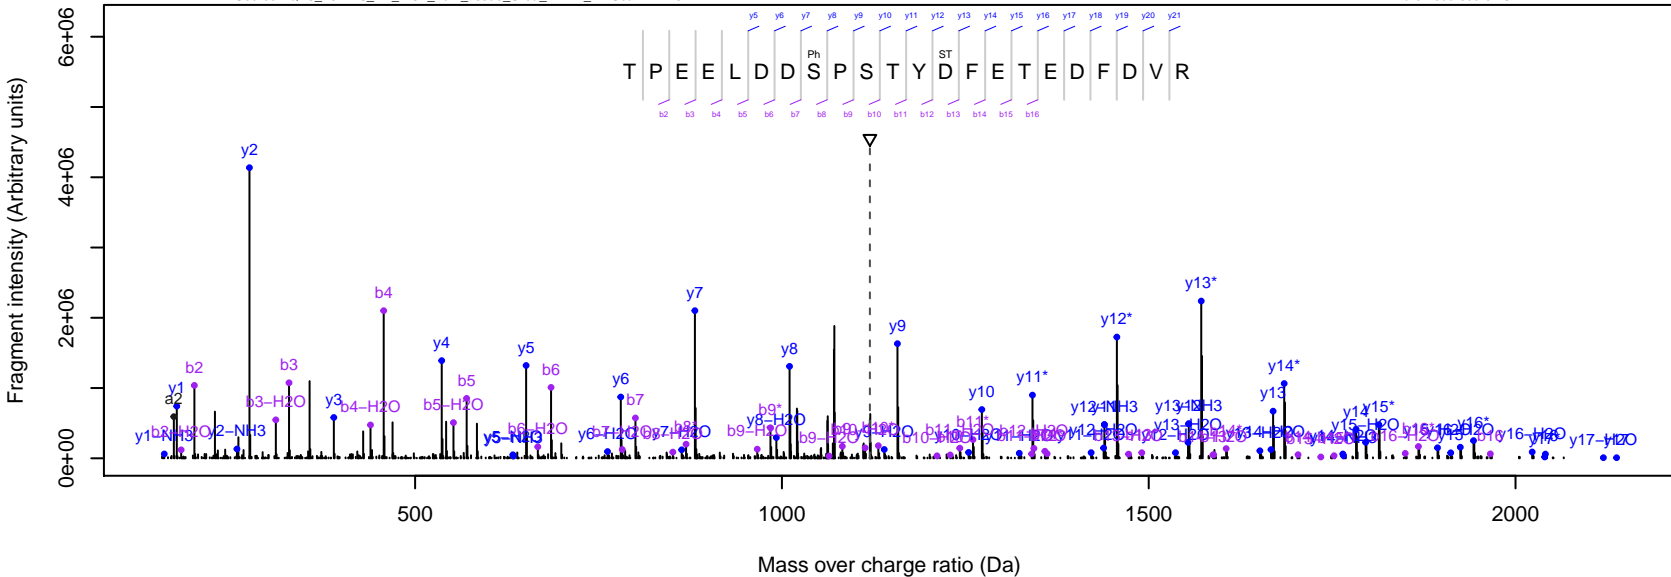

KPATPAEDEDDIDLFGS(Phospho (STY))DNEEEDKEAQLR-3+

Source : QE3\_201126\_FR\_TIOx\_hum\_tissue\_Urea\_RNAB\_B Scan : 35513

Andromeda score : 619.08

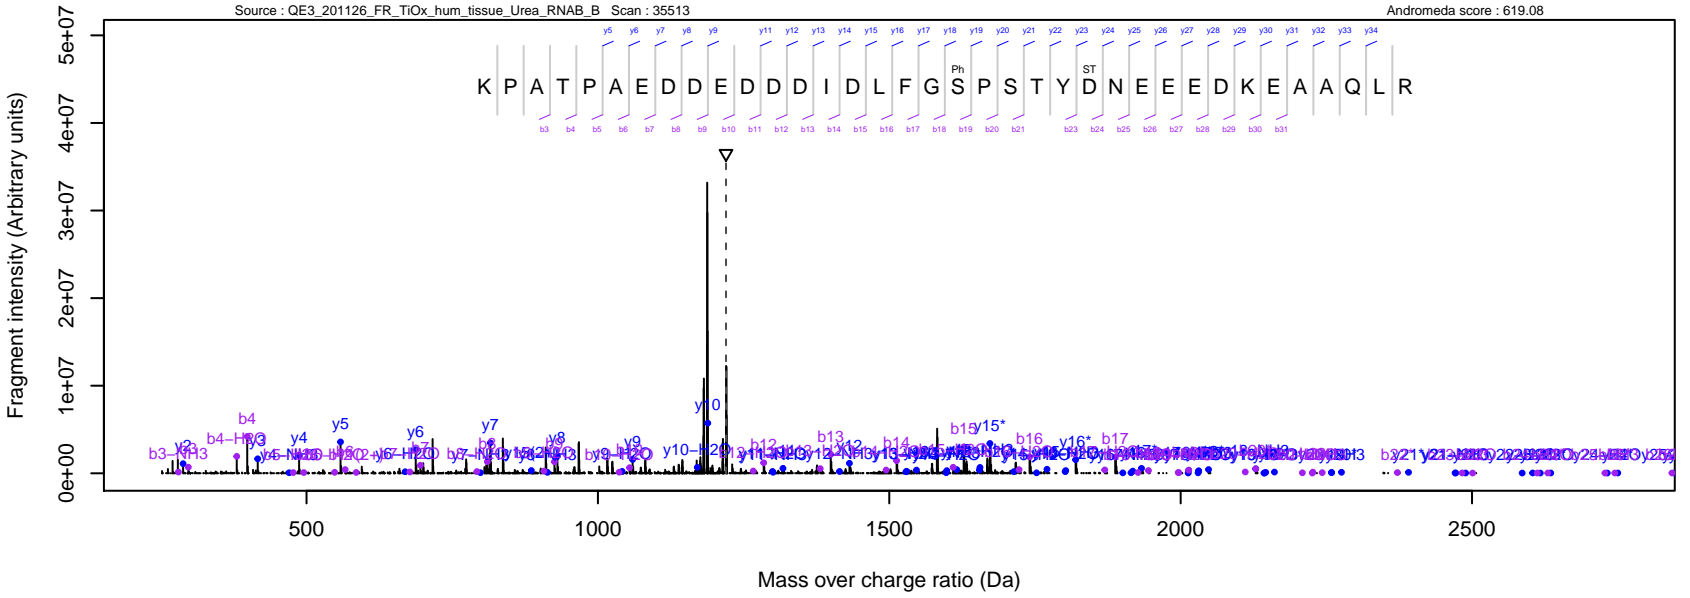

CGSGPVHISGQHLVAVEEDAES(Phospho (STY))EDEEEDVKLLSISGK-4+

Source : QE3\_201126\_FR\_TIOx\_hum\_tissue\_Urea\_RNAB\_H Scan : 40365

Andromeda score : 616.84

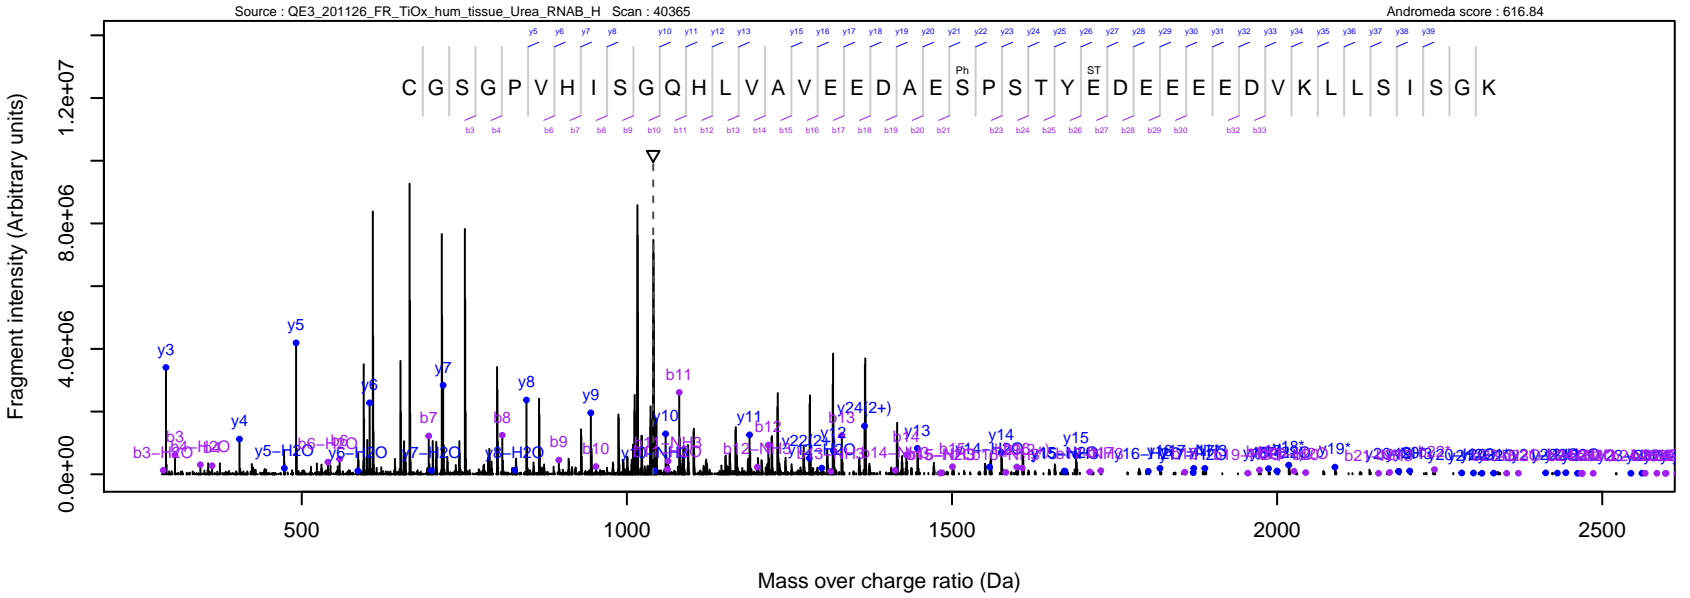

GGMGSGLATGIAGGLAGMGGIQNEKETMQS(Phospho (STY))LNDR-3+

Source : QE3\_201126\_FR\_TIOx\_hum\_tissue\_Urea\_RNAB\_H Scan : 47997

Andromeda score : 585.24

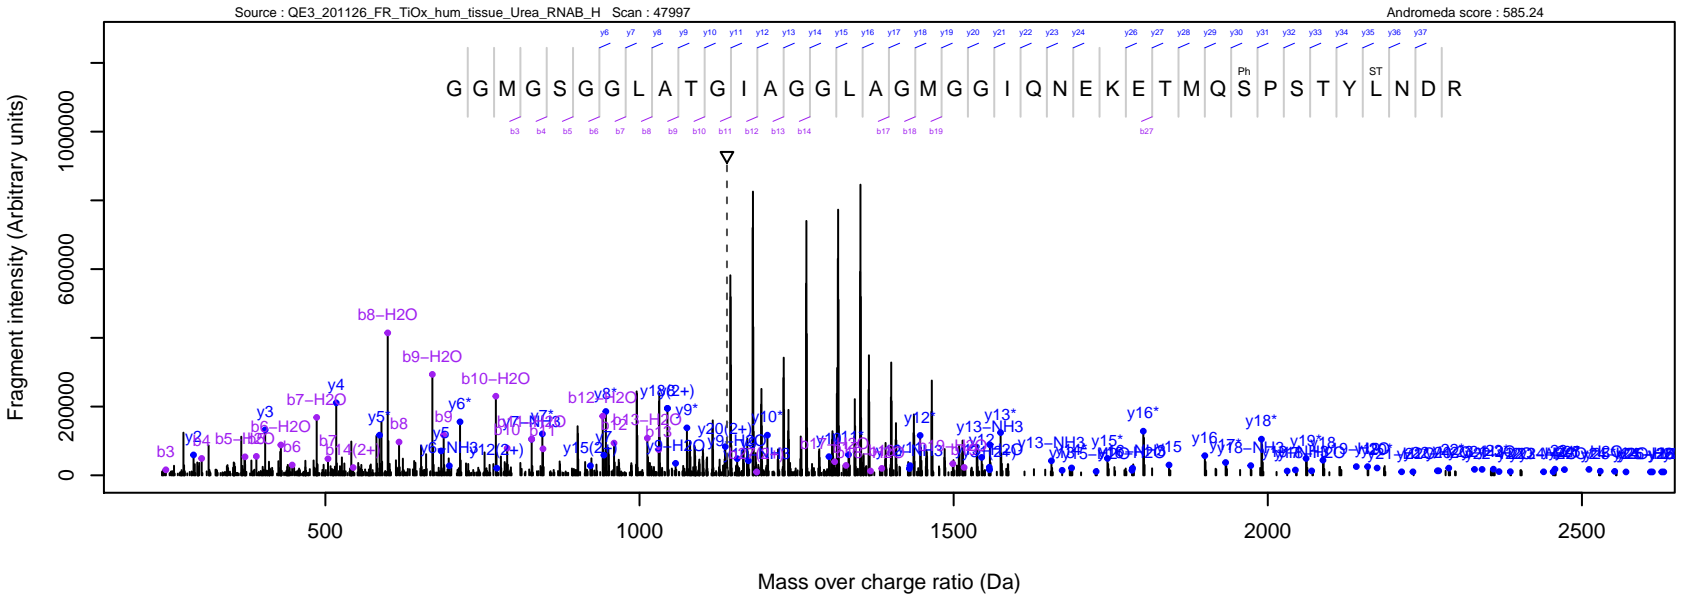

CGSGPVIHSQHLVAVEEDAES(Phospho (STY))EDEEEEDVK-3+

Source : QE3\_201126\_FR\_TiOx\_hum\_tissue\_Urea\_RNAB\_N Scan : 28270

Andromeda score : 565.94

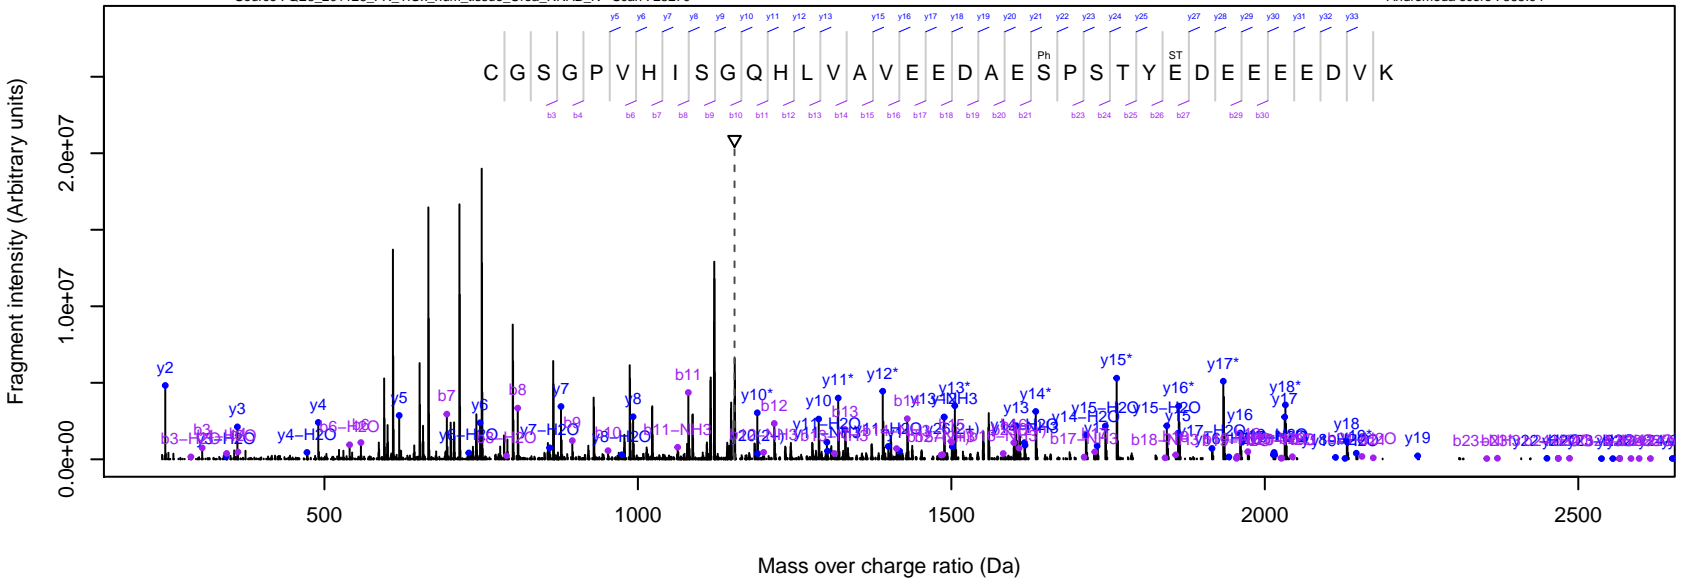

EVEDKES(Phospho (STY))EGEEEDDEDLSK-2+

Source : QE3\_201126\_FR\_TiOx\_hum\_tissue\_Urea\_RNAB\_H Scan : 12456

Andromeda score : 564.55

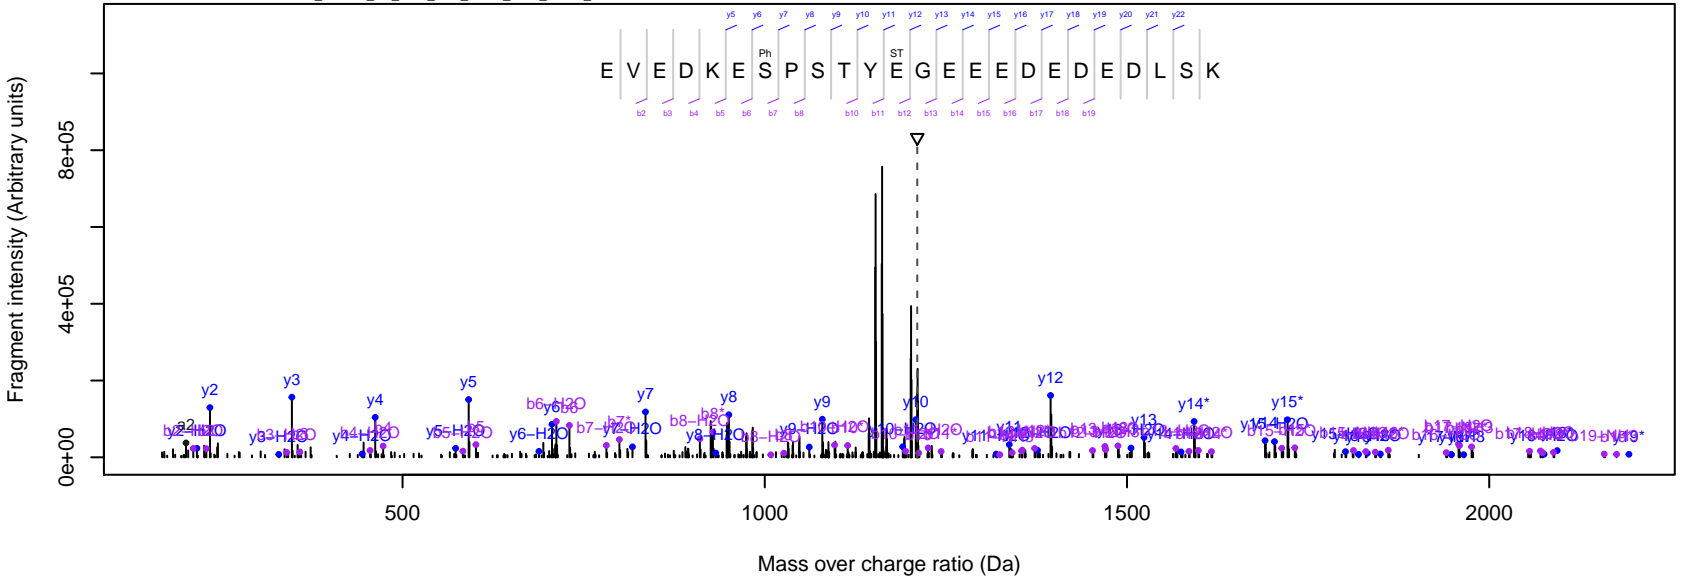

YGPADVETTGSGATDSKDDDDIDLFGSPSTYDDEEESEEA K-3+

Source : QE3\_201126\_FR\_TiOx\_hum\_tissue\_Urea\_RNAB\_N Scan : 43399

Andromeda score : 561.56

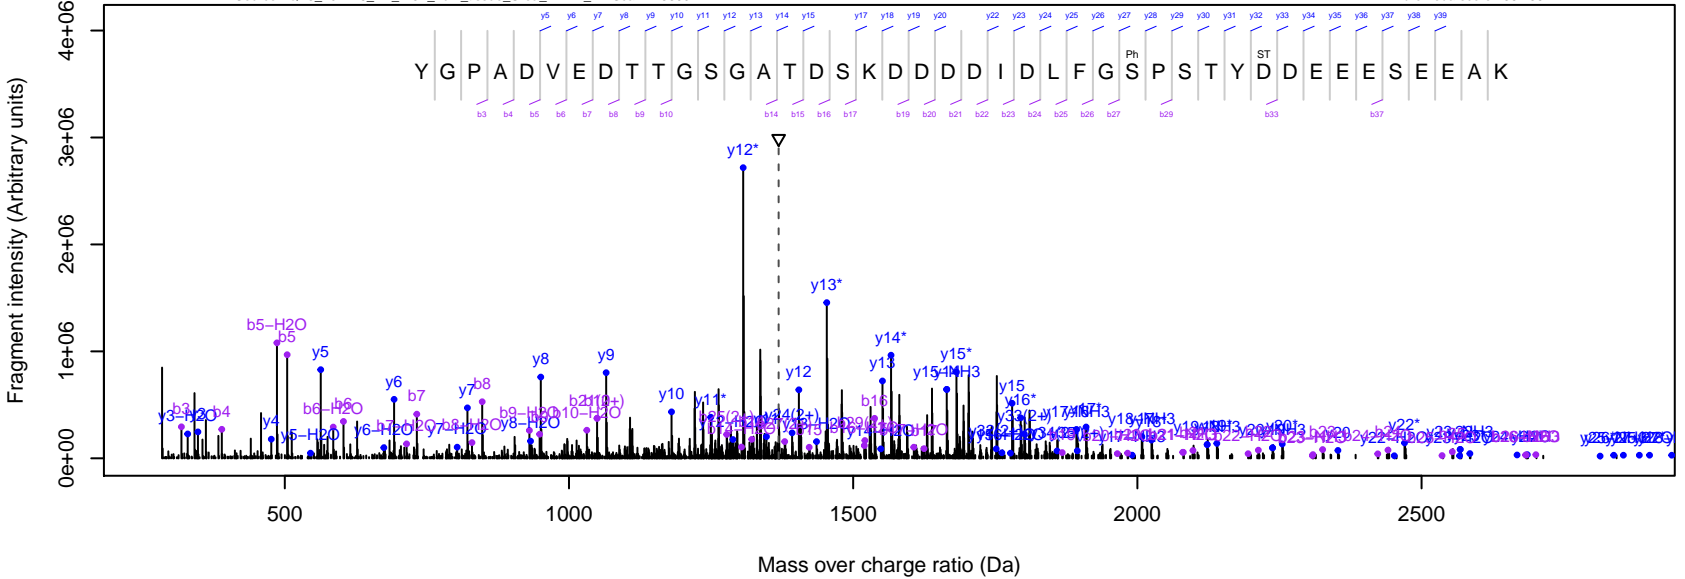

SSKS(Phospho (STY))AEDLTGSDYDDLNAEQLQK-2+

Source : QE3\_201126\_FR\_TIOx\_hum\_tissue\_Urea\_RNAB\_B Scan : 37035

Andromeda score : 560.53

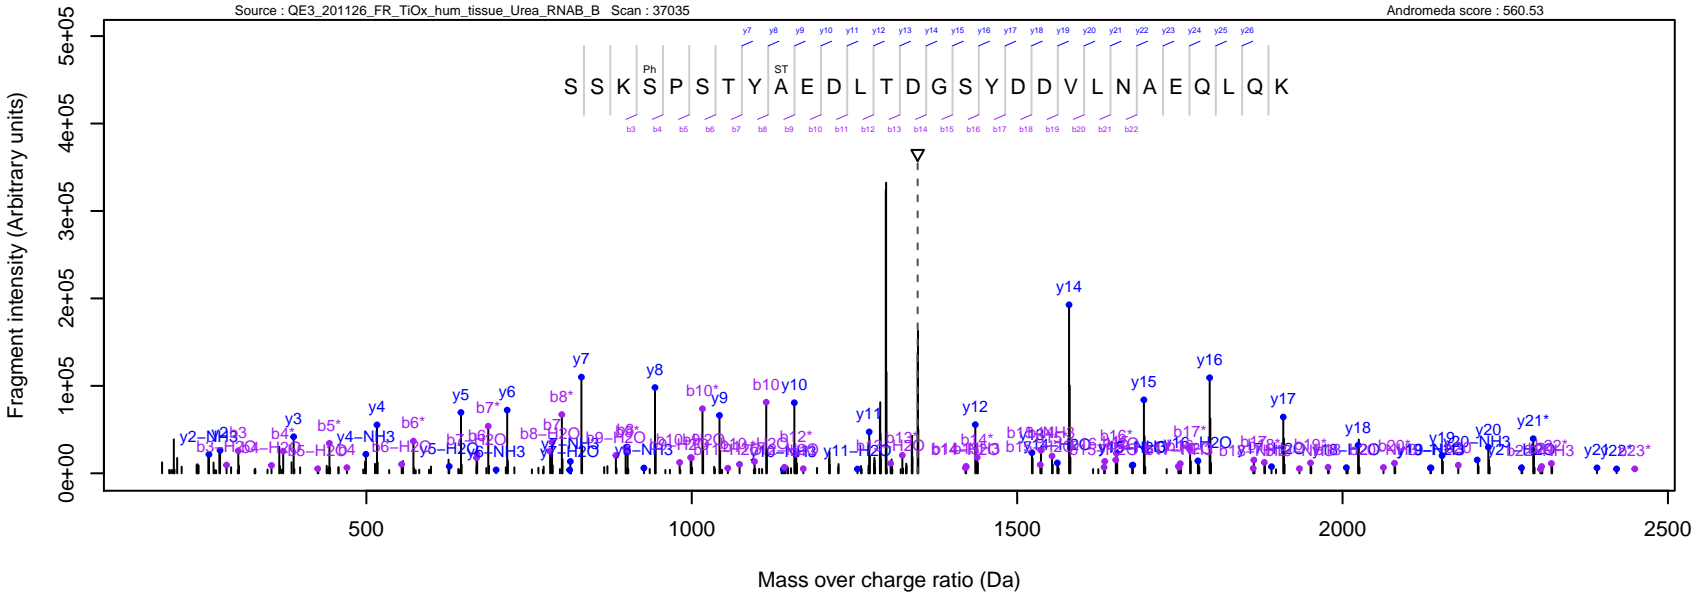

RVS(Phospho (STY))VCAETYNPDEEEEDTDP-2+

Source : QE3\_201126\_FR\_TIOx\_hum\_tissue\_Urea\_RNAB\_H Scan : 20955

Andromeda score : 558.58

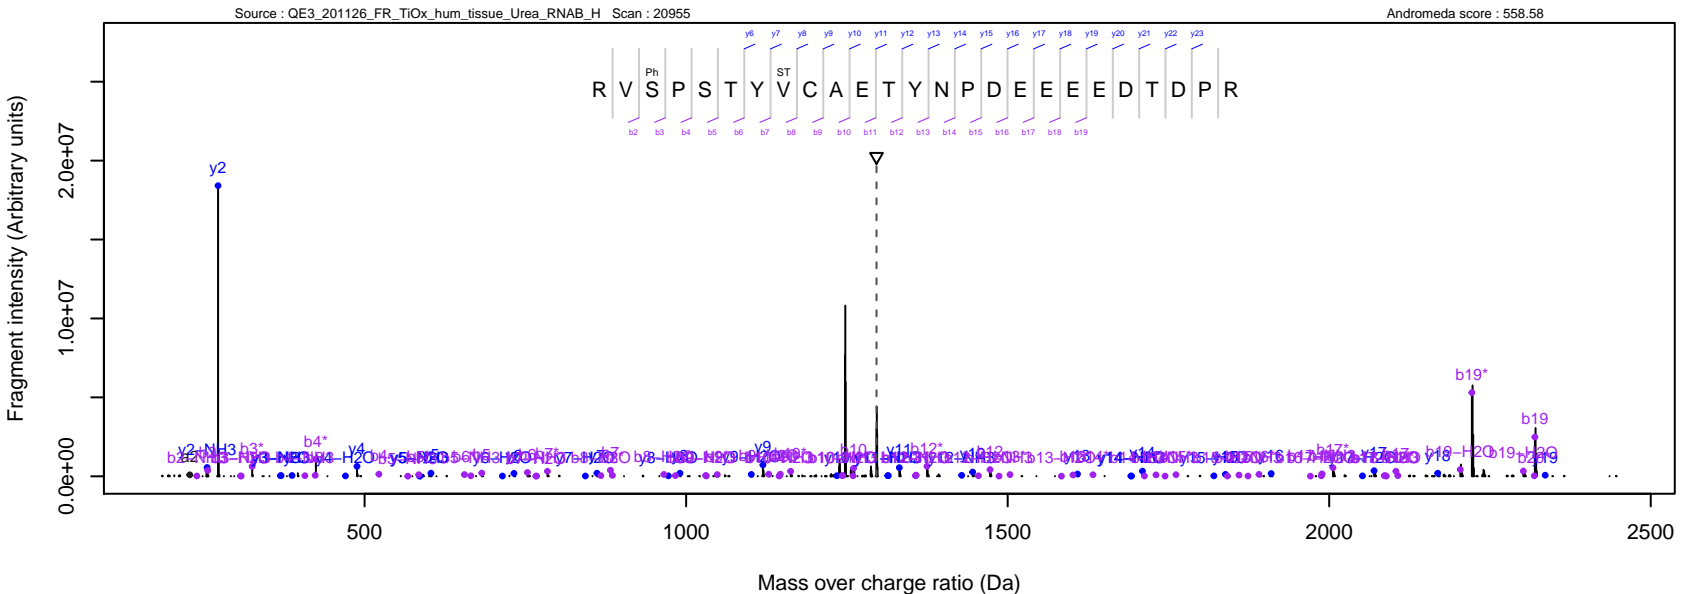

KGTENGNGTLTSNVADS(Phospho (STY))P-2+

Source : QE3\_201126\_FR\_TIOx\_hum\_tissue\_Urea\_RNAB\_N Scan : 14442

Andromeda score : 551.81

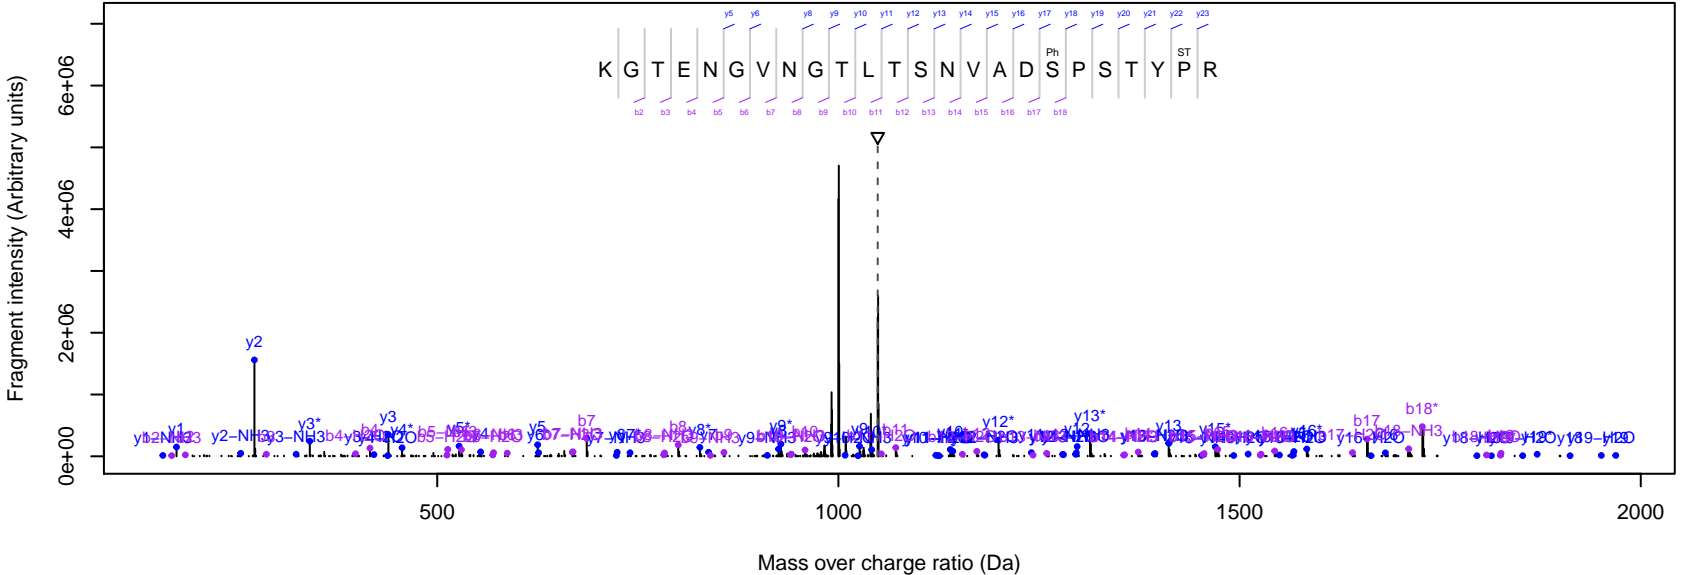

LLKEGEEPTVYS(Phospho (STY))DEEPPKDESAR-2+

Source : QE3\_201126\_FR\_TiOx\_hum\_tissue\_Urea\_RNAB\_H Scan : 17431

Andromeda score : 551.33

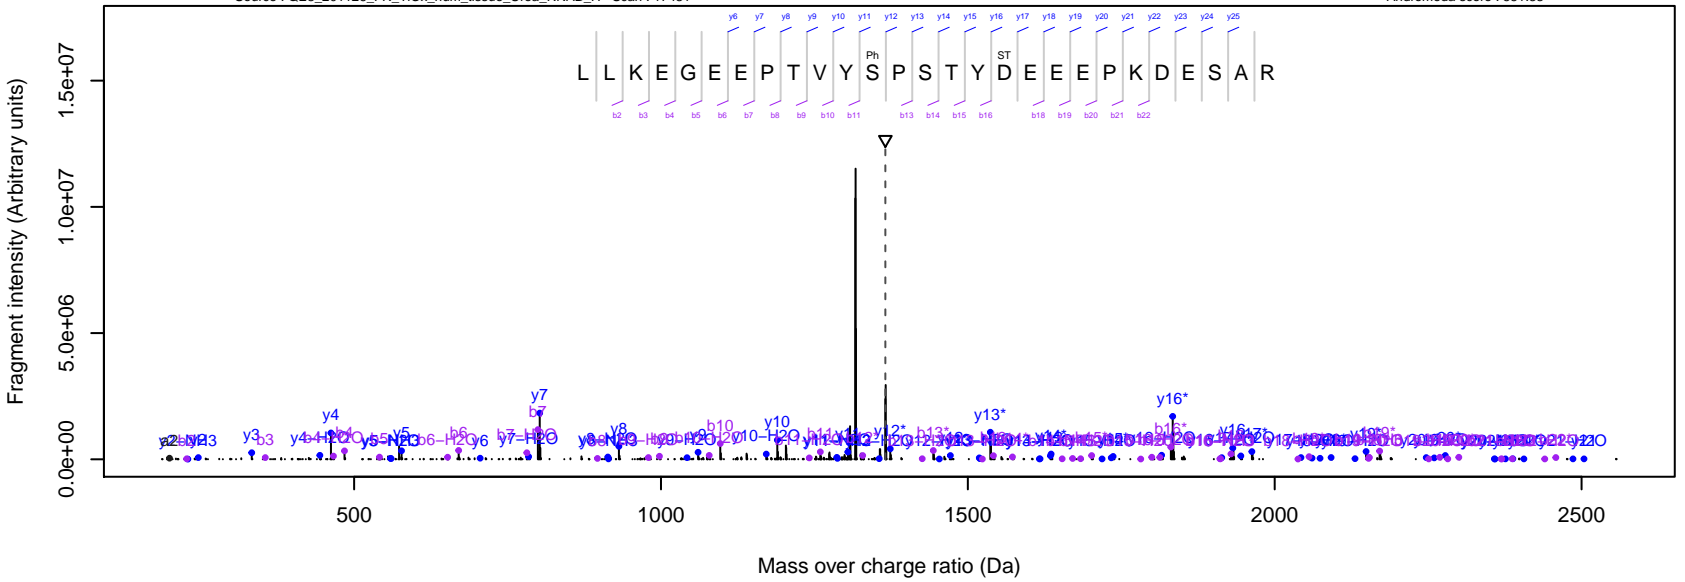

ETTCSKES(Phospho (STY))NEELTESCETK-2+

Source : QE3\_201126\_FR\_TiOx\_hum\_tissue\_Urea\_RNAB\_N Scan : 8837

Andromeda score : 550.65

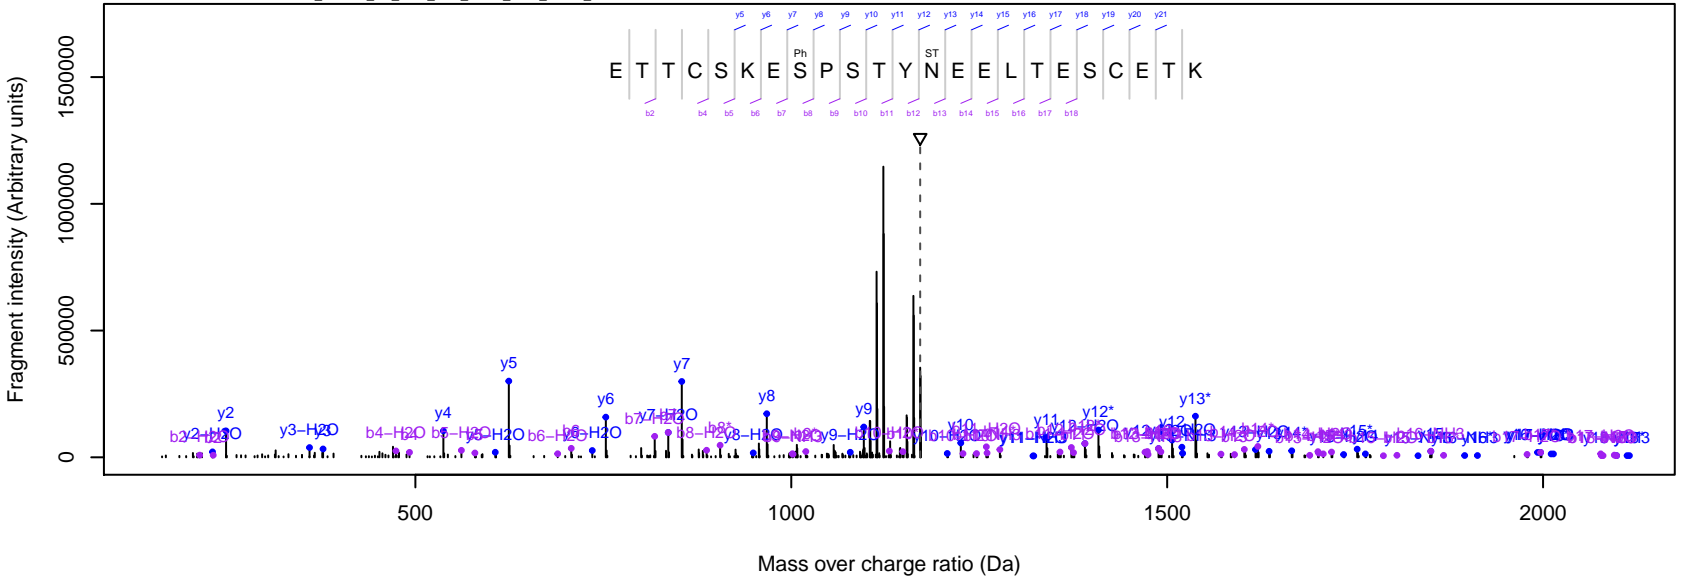

KVVDYSQFQES(Phospho (STY))DDADEDYGR-2+

Source : QE3\_201126\_FR\_TiOx\_hum\_tissue\_Urea\_RNAB\_B Scan : 25265

Andromeda score : 548.37

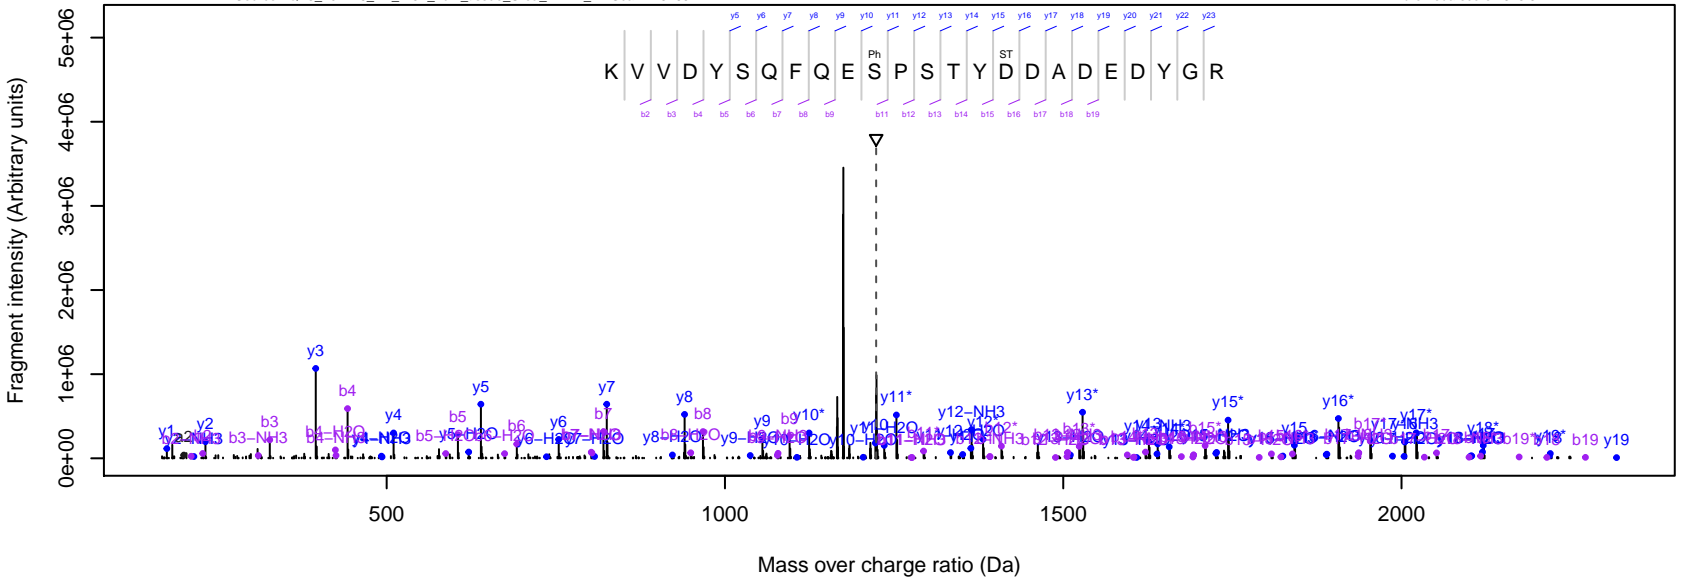

QLHLEGASLELS(Phospho (STY))DDDTESK-2+

Source : QE3\_201126\_FR\_TiOx\_hum\_tissue\_Urea\_RNAB\_B Scan : 33947

Andromeda score : 543.32

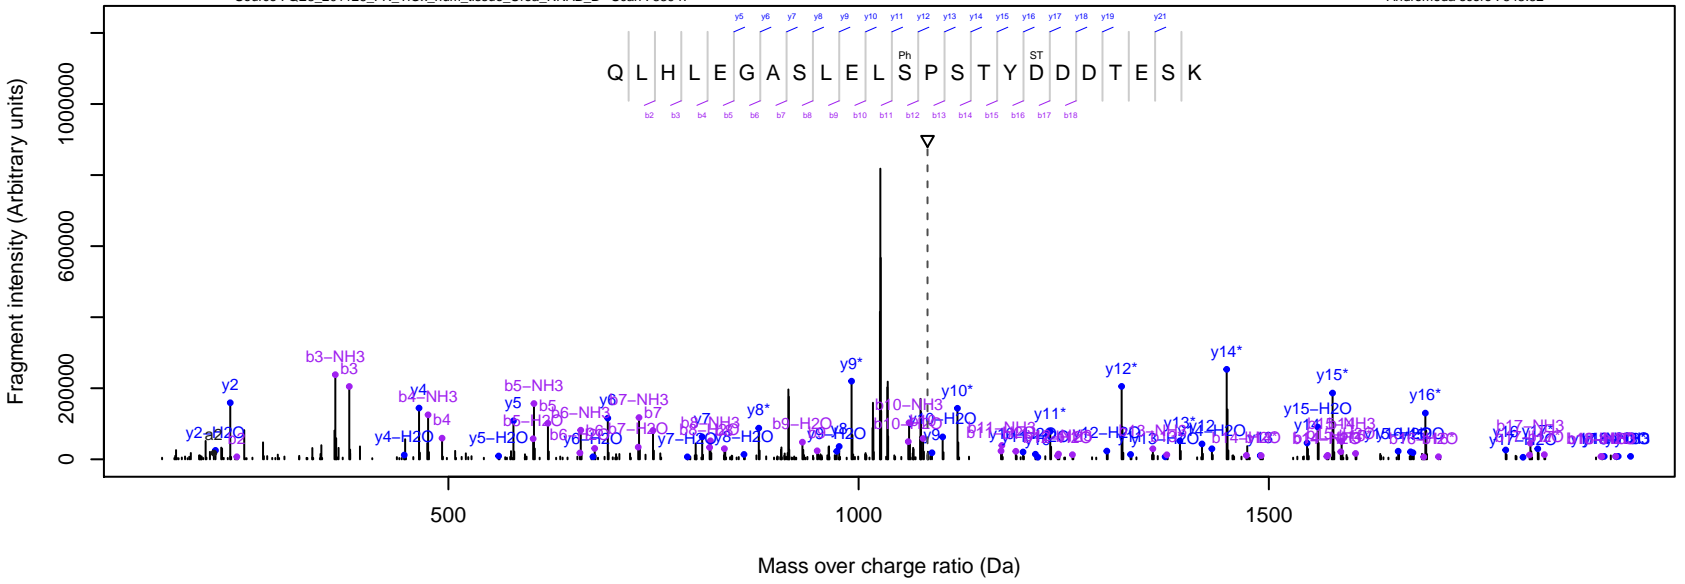

EGEEPTVYS(Phospho (STY))DEEEKDESAR-2+

Source : QE3\_201126\_FR\_TiOx\_hum\_tissue\_Urea\_RNAB\_B Scan : 15923

Andromeda score : 537.49

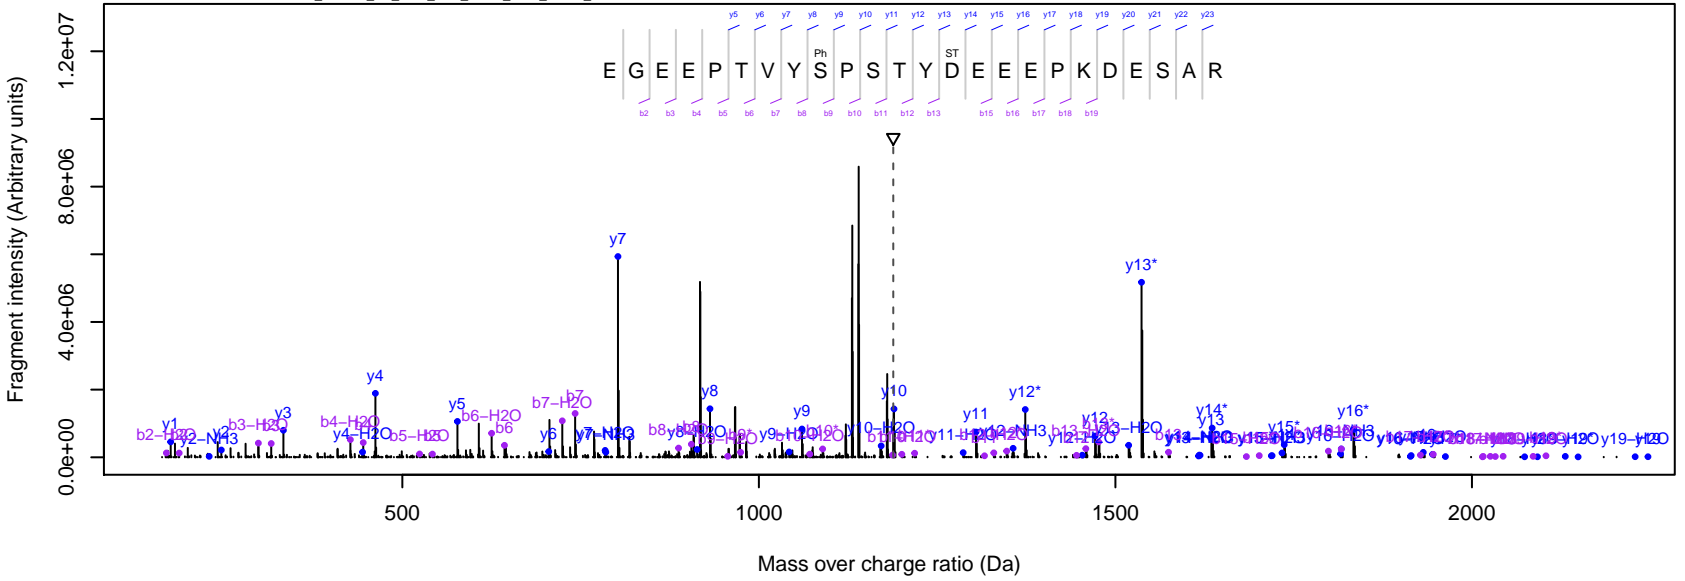

SAS(Phospho (STY))PDDLGSNWEAADLGNEER-2+

Source : QE3\_201126\_FR\_TiOx\_hum\_tissue\_Urea\_RNAB\_H Scan : 40500

Andromeda score : 532.91

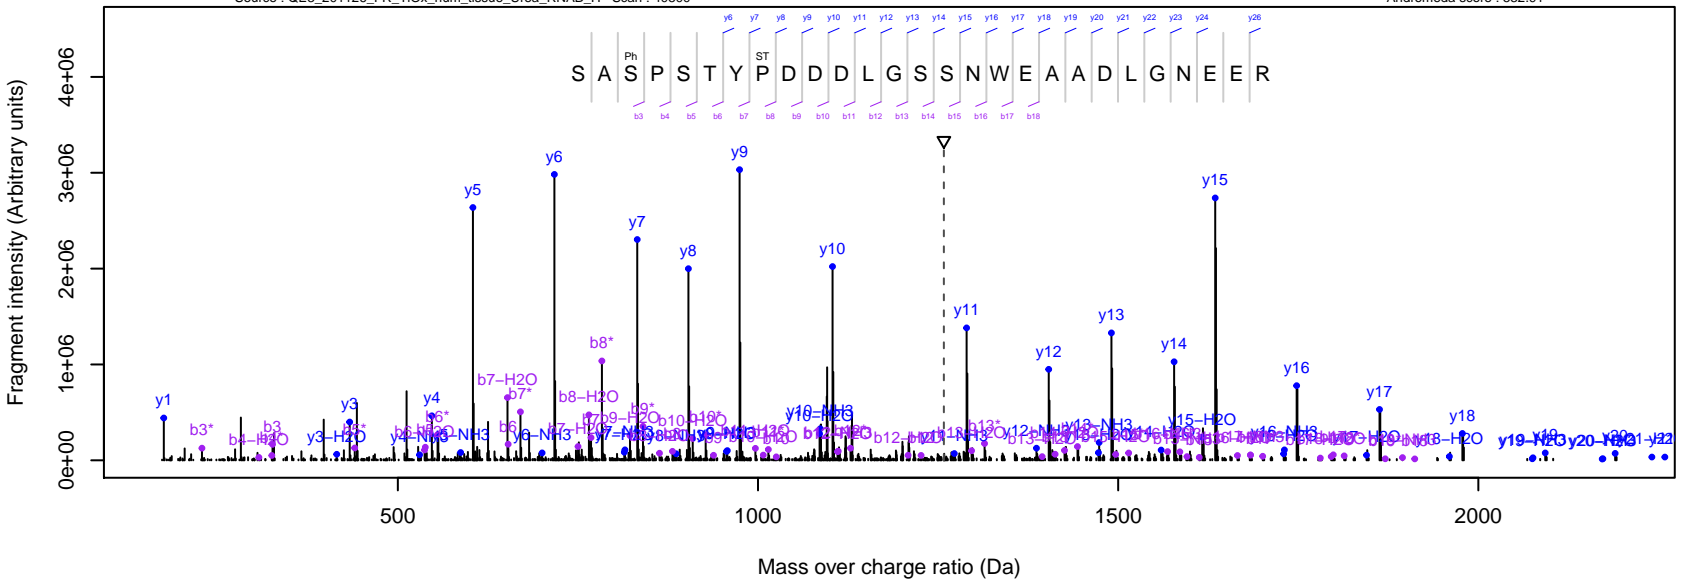

AKLNLWLSVDFNNWKDWEDDS(Phospho (STY))DEDMSNFDR-3+

Source : QE3\_201126\_FR\_TiOx\_hum\_tissue\_Urea\_RNAB\_N Scan : 58393

Andromeda score : 532.74

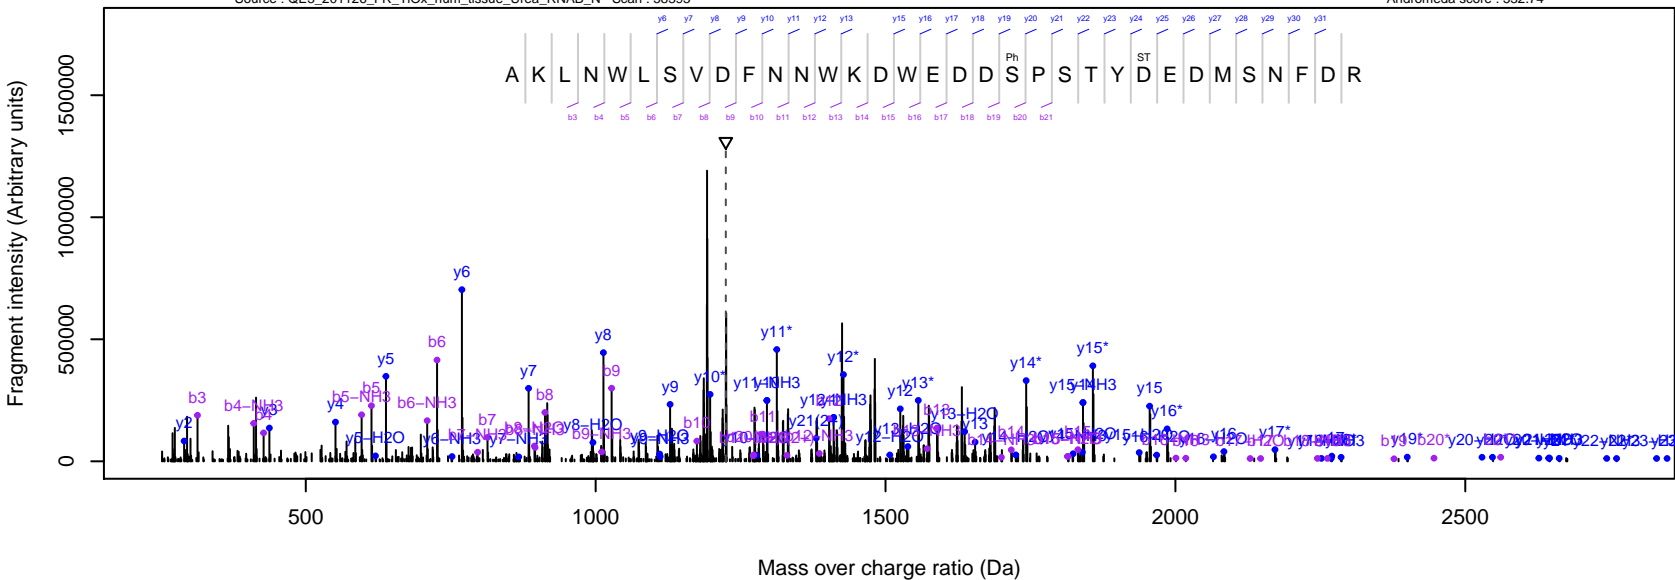

KVEEEQEADEEDVS(Phospho (STY))EEEAESK-2+

Source : QE3\_201126\_FR\_TiOx\_hum\_tissue\_Urea\_RNAB\_B Scan : 13040

Andromeda score : 530.08

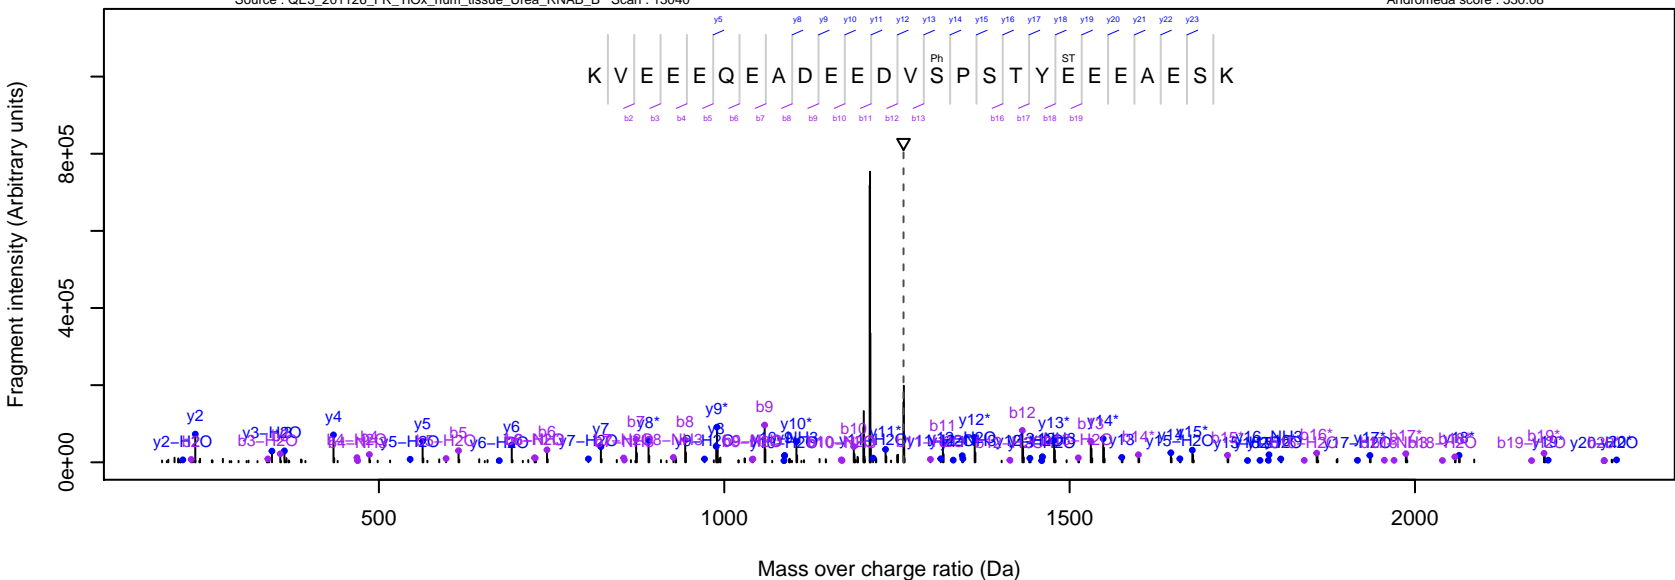

MGAPESGLAEYLFDKHTLGDSPSTYDNE S-2+

Source : QE3\_201126\_FR\_TiOx\_hum\_tissue\_Urea\_RNAB\_B Scan : 52065

Andromeda score : 527.73

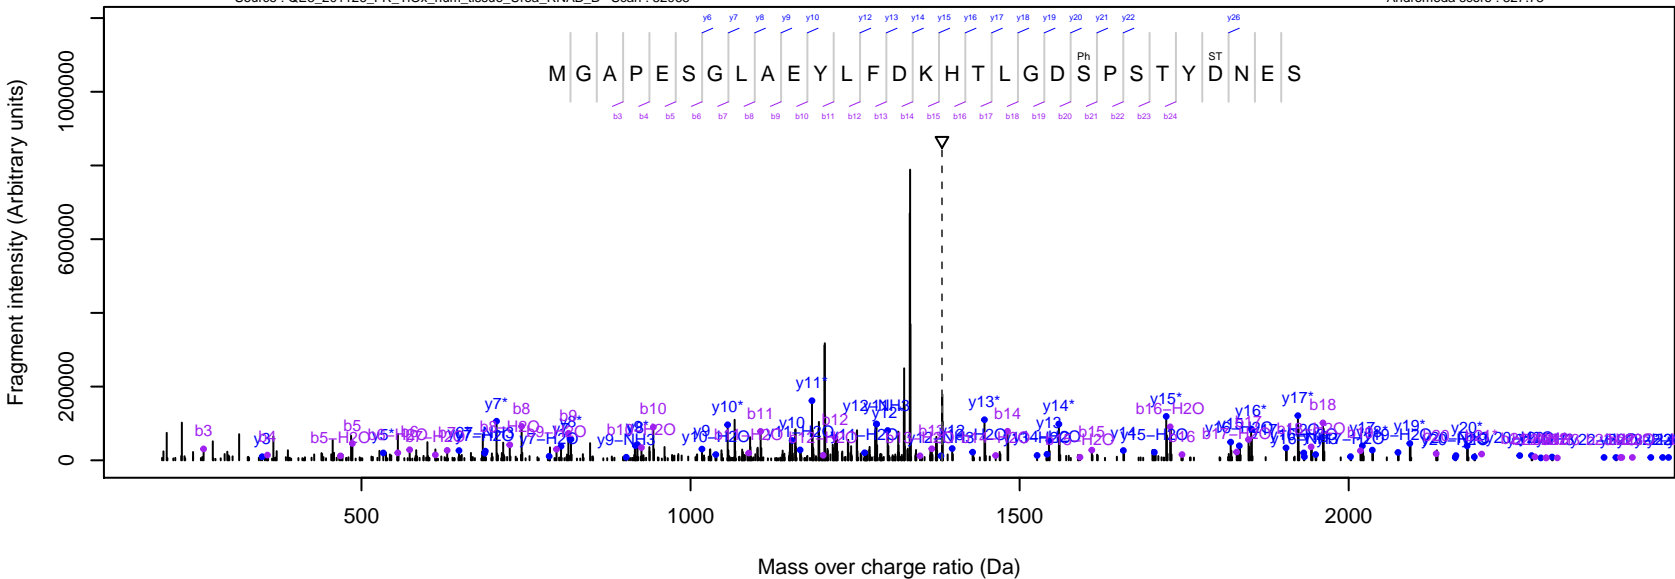

KETES(Phospho (STY))EAEDNLDDEK-2+

Source : QE3\_201126\_FR\_TIOx\_hum\_tissue\_Urea\_RNAB\_H Scan : 22251

Andromeda score : 525.64

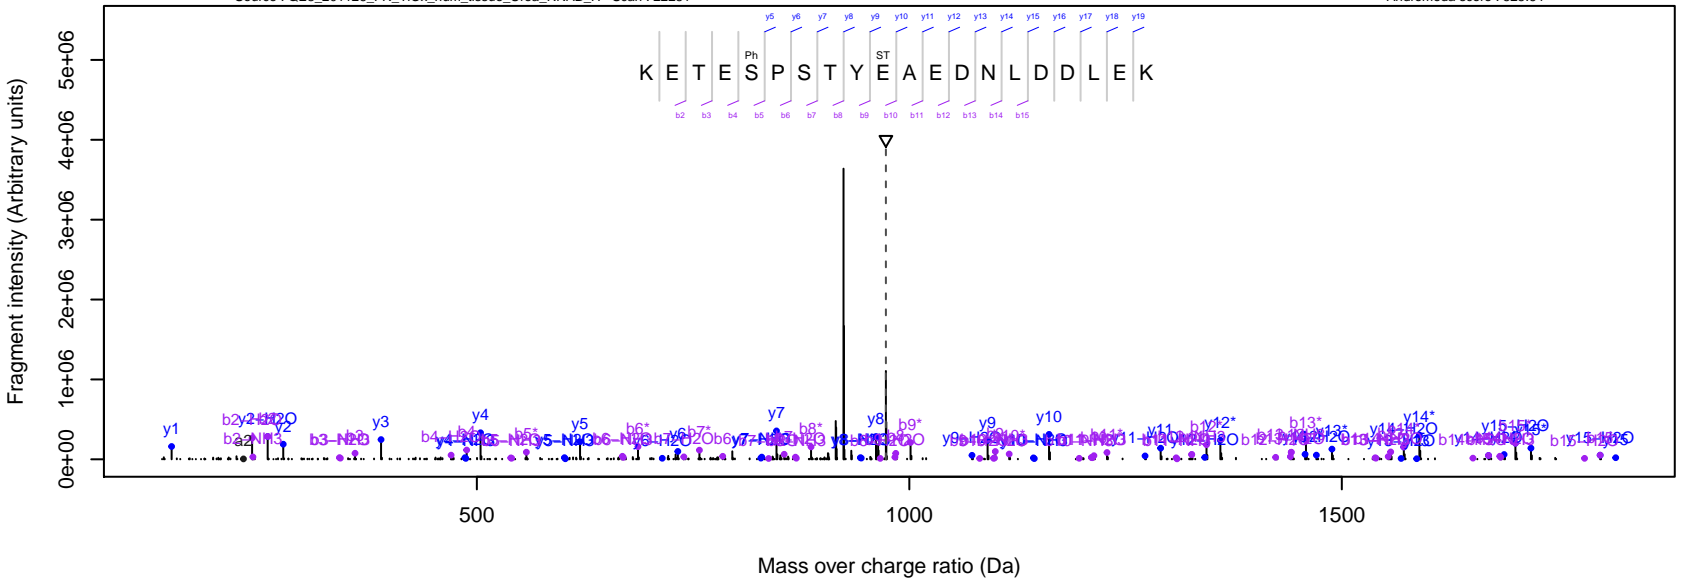

GPDEAMEDGEEGS(Phospho (STY))DDEAEWVVTK-2+

Source : QE3\_201126\_FR\_TIOx\_hum\_tissue\_Urea\_RNAB\_H Scan : 40103

Andromeda score : 520.15

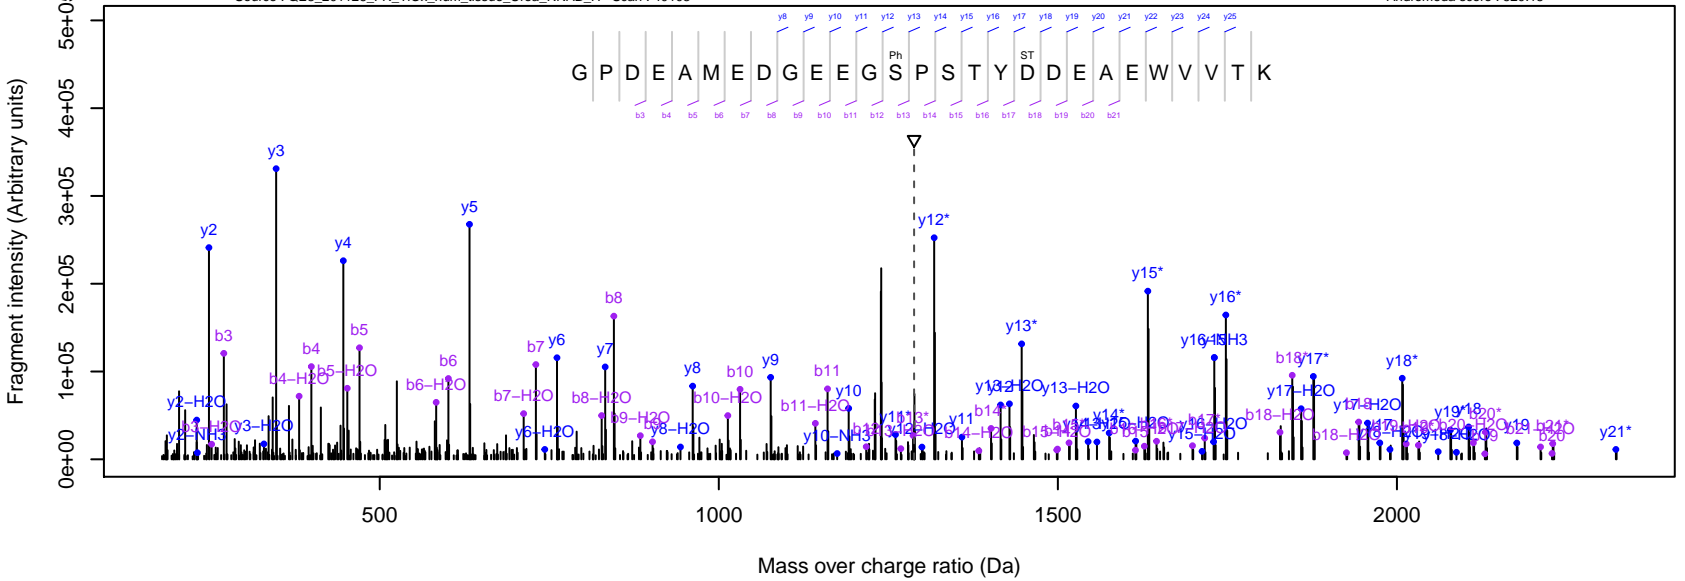

IVRGDQPAASGDS(Phospho (STY))DDEPPPLPR-2+

Source : QE3\_201126\_FR\_TIOx\_hum\_tissue\_Urea\_RNAB\_H Scan : 21083

Andromeda score : 518.29

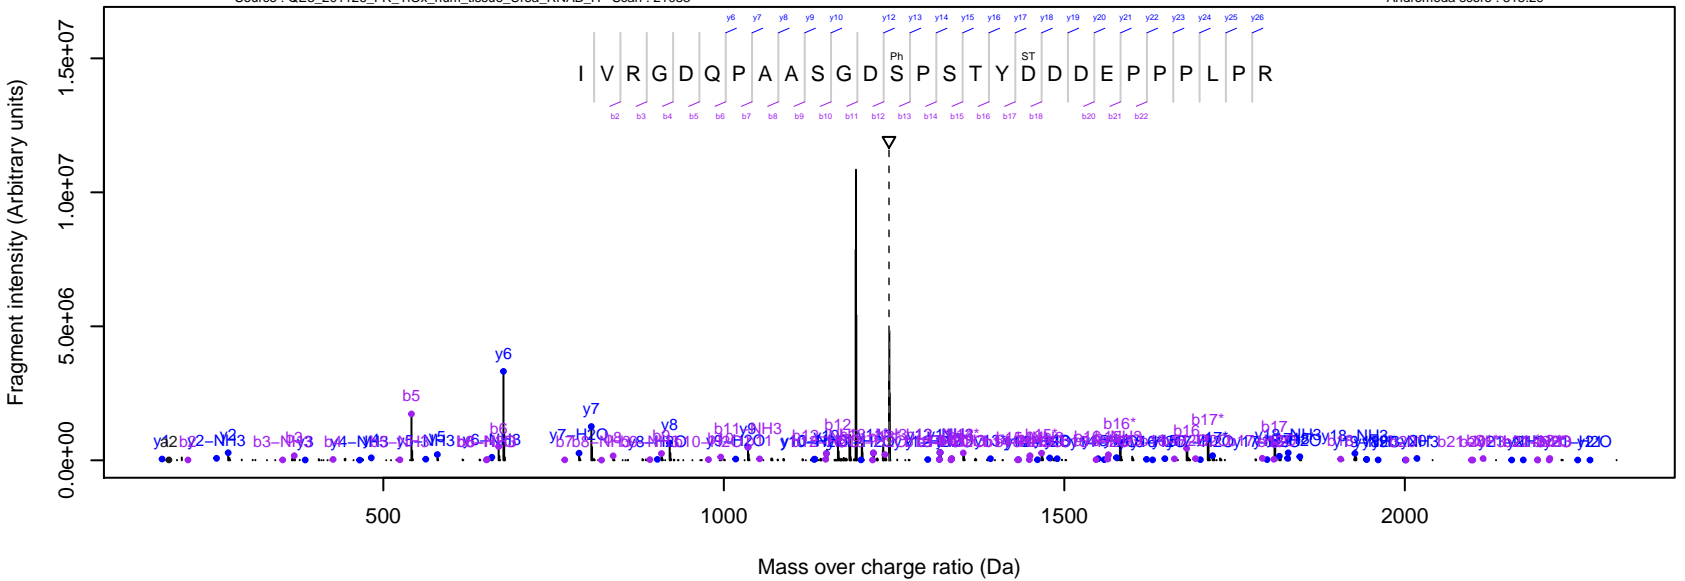



KIALESEGRPEEQMESDNCSPSTYGGDDDDWTHLSSK-3+

Source : QE3\_201126\_FR\_TiOx\_hum\_tissue\_Urea\_RNAB\_N Scan : 27038

Andromeda score : 509.7

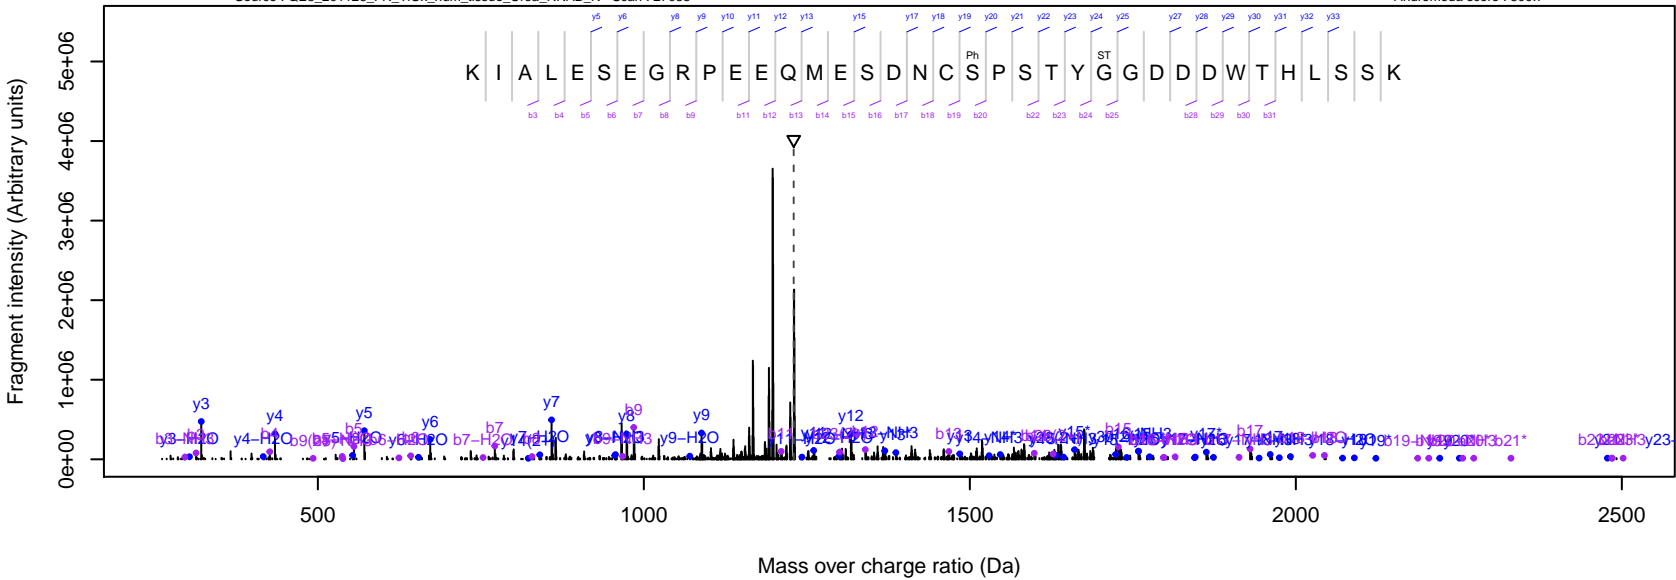

VEEQEAEEDVSPSTYEEAEK-2+

Source : QE3\_201126\_FR\_TiOx\_hum\_tissue\_Urea\_RNAB\_H Scan : 16759

Andromeda score : 507.34

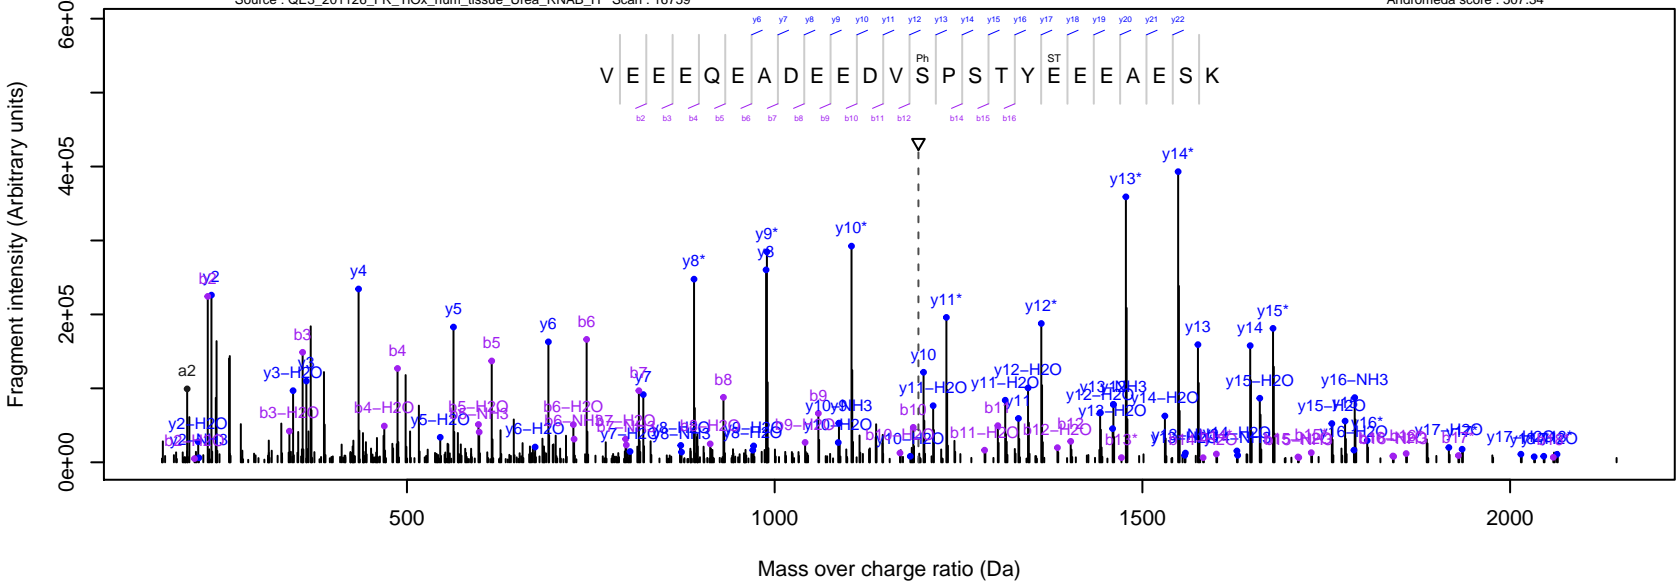

PGPTAESASPSSTYGPSEDPVNFLLK-2+

Source : QE3\_201126\_FR\_TiOx\_hum\_tissue\_Urea\_RNAB\_H Scan : 38038

Andromeda score : 506.76

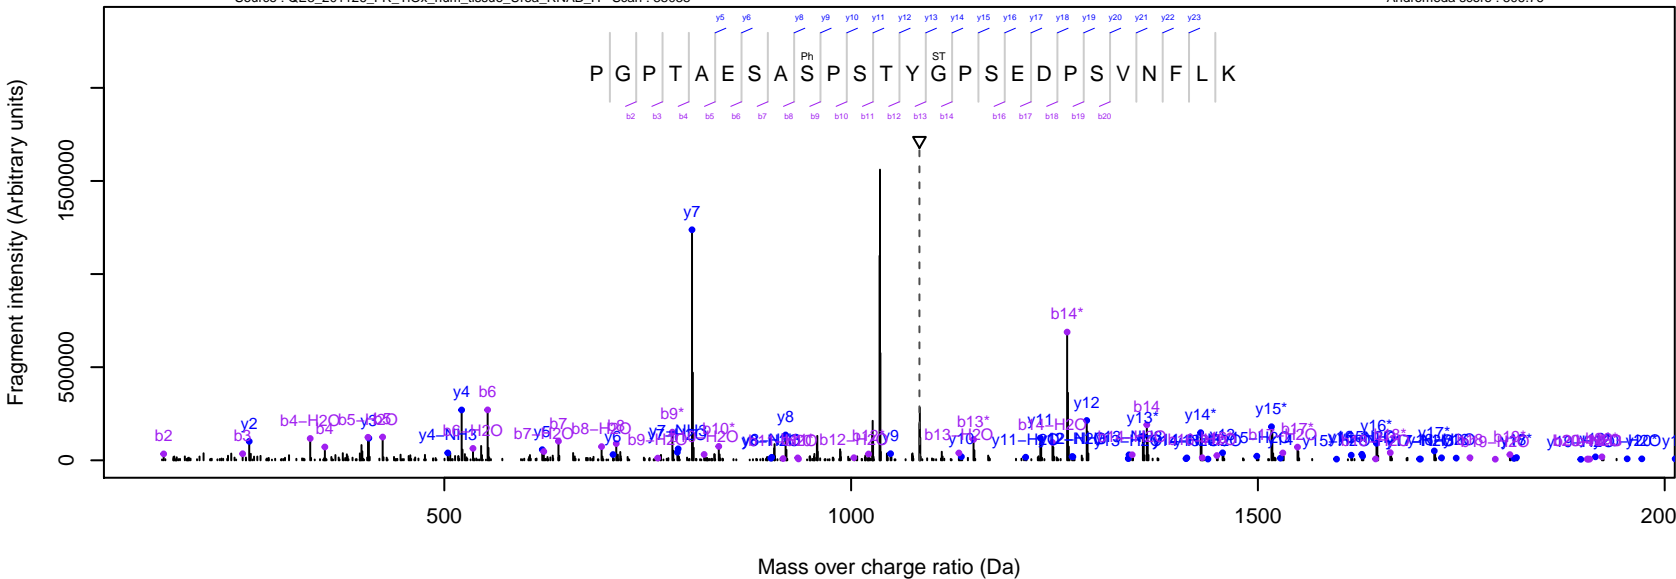

SLDS(Phospho (STY))DESEDEDDYQQKR-2+

Source : QE3\_201126\_FR\_TIOx\_hum\_tissue\_Urea\_RNAB\_H Scan : 13544

Andromeda score : 505.06

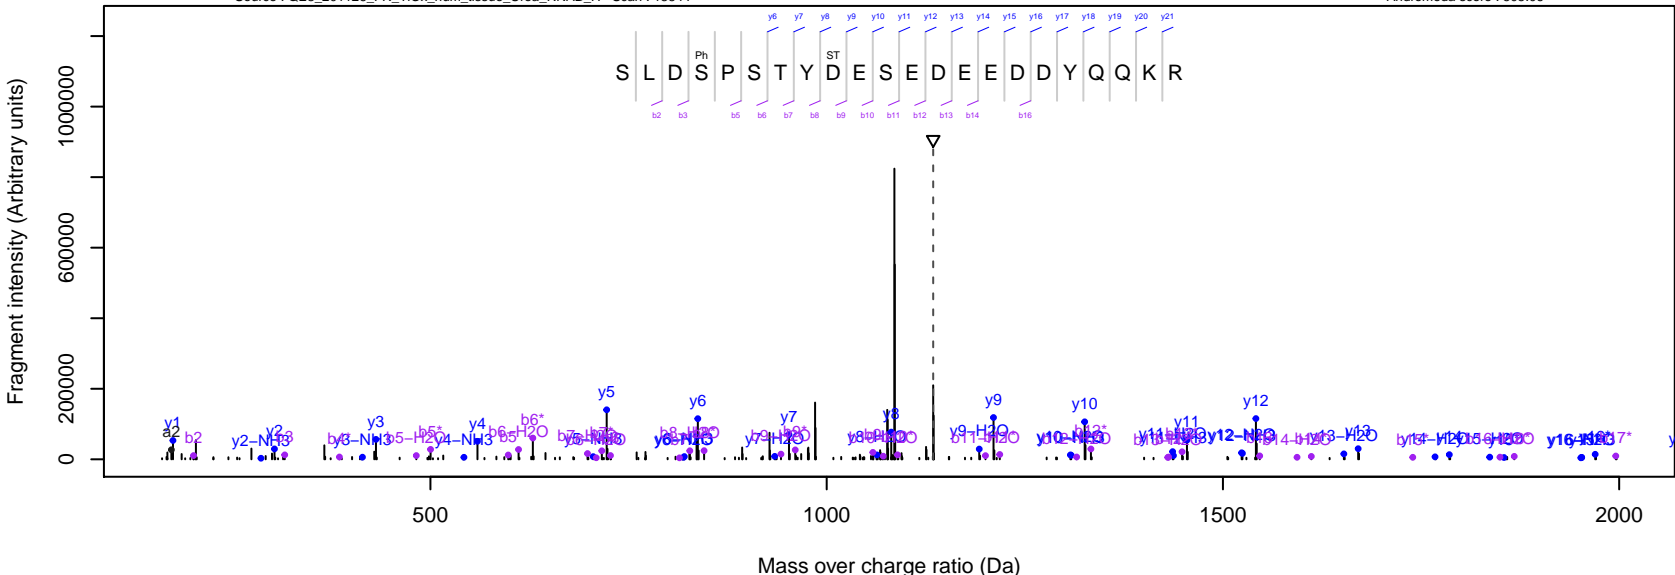

TRDDGDEEGLLTHS(Phospho (STY))EEEEHSQDTDADDGALQ-3+

Source : QE3\_201126\_FR\_TIOx\_hum\_tissue\_Urea\_RNAB\_H Scan : 30042

Andromeda score : 504.53

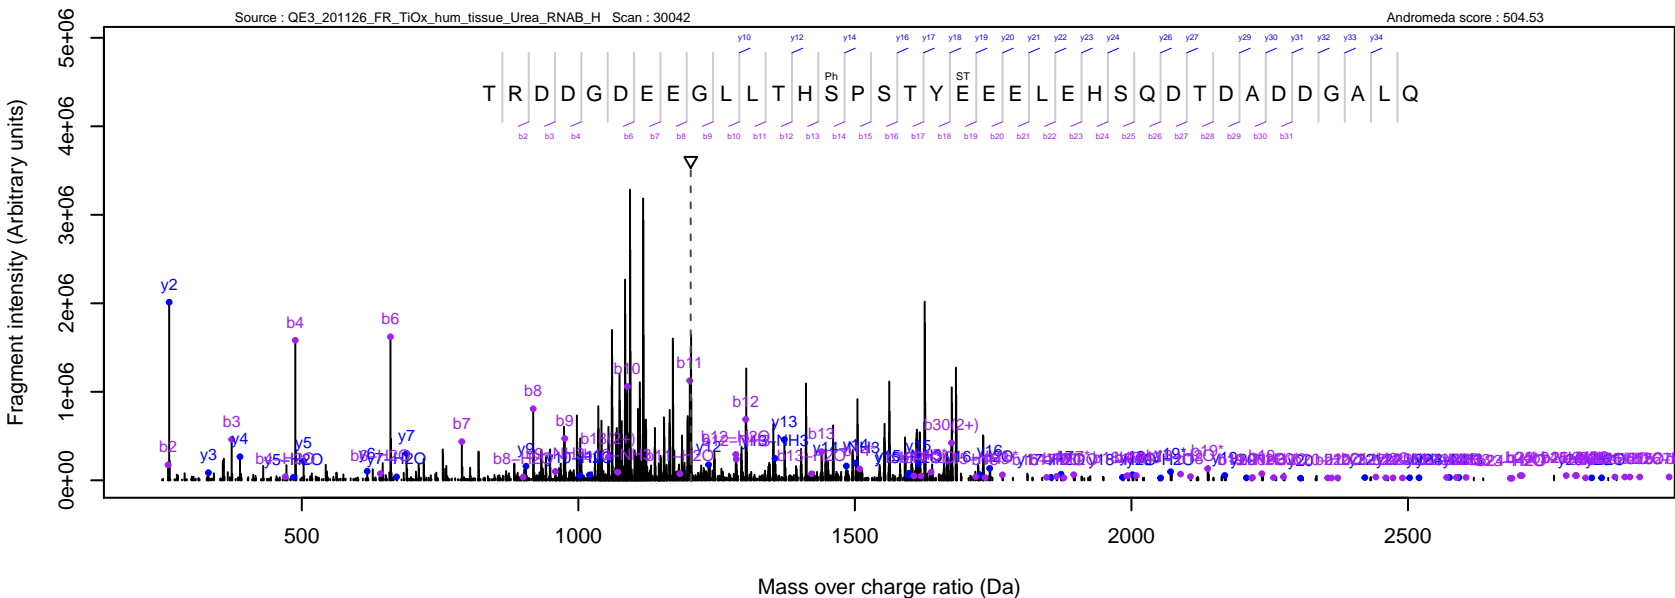

QSFDNDNDS(Phospho (STY))EELEDKDSK-2+

Source : QE3\_201126\_FR\_TIOx\_hum\_tissue\_Urea\_RNAB\_H Scan : 14704

Andromeda score : 499.05

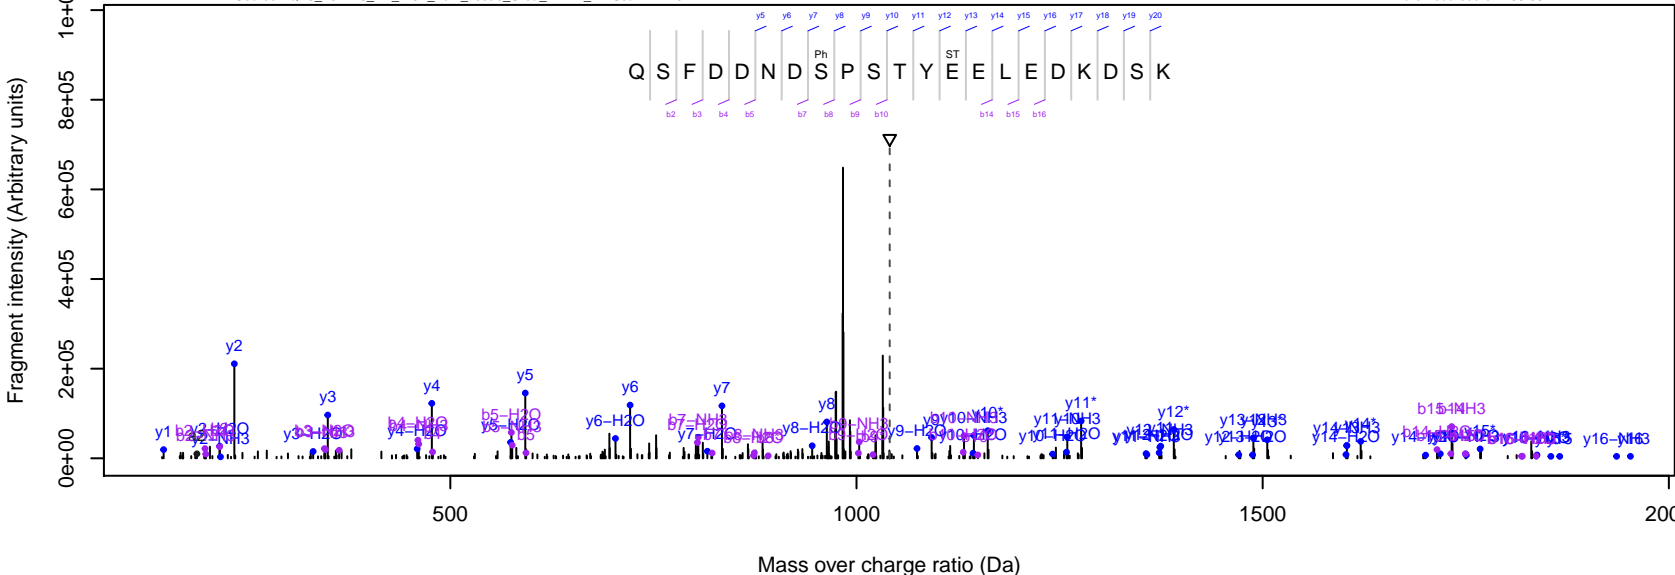

HSS(Phospho (STY))WGDVGVGSLK-2+

Source : QE3\_201126\_FR\_TIOx\_hum\_tissue\_Urea\_RNAB\_B Scan : 23764

Andromeda score : 497.96

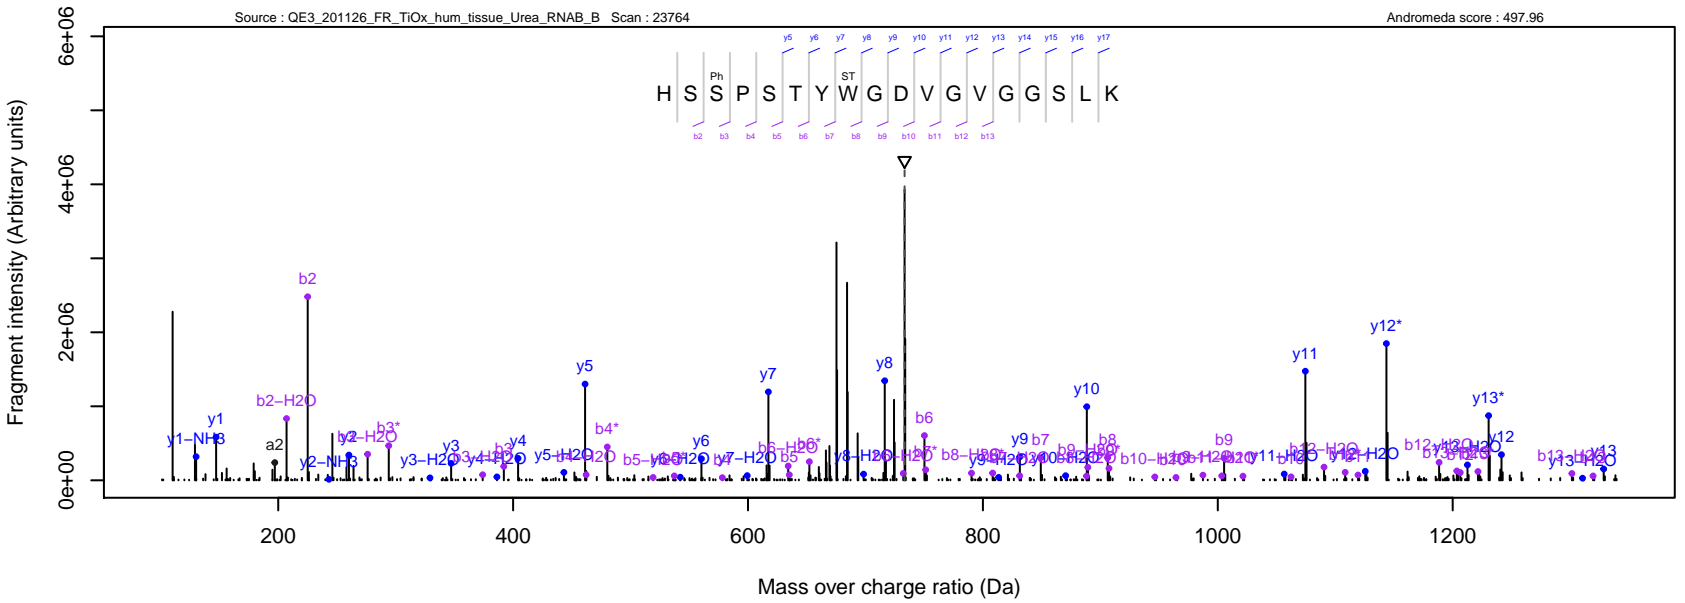

KQS(Phospho (STY))LGLIGLTNAAK-2+

Source : QE3\_201126\_FR\_TIOx\_hum\_tissue\_Urea\_RNAB\_H Scan : 40799

Andromeda score : 497.5

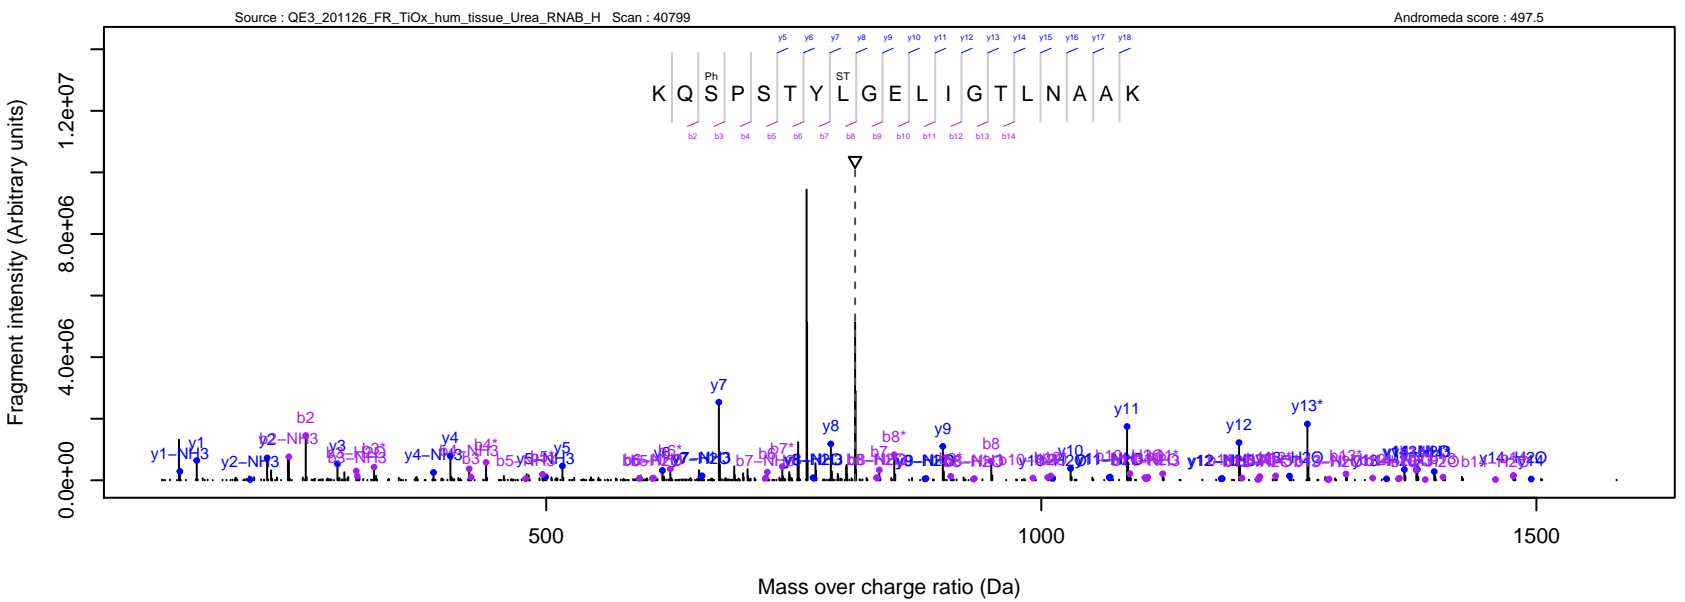

KPATPSTYPAEDDEDIDLFGSPSTYDNEEEDKEAQLR-3+

Source : QE3\_201126\_FR\_TIOx\_hum\_tissue\_Urea\_RNAB\_H Scan : 40277

Andromeda score : 496.51

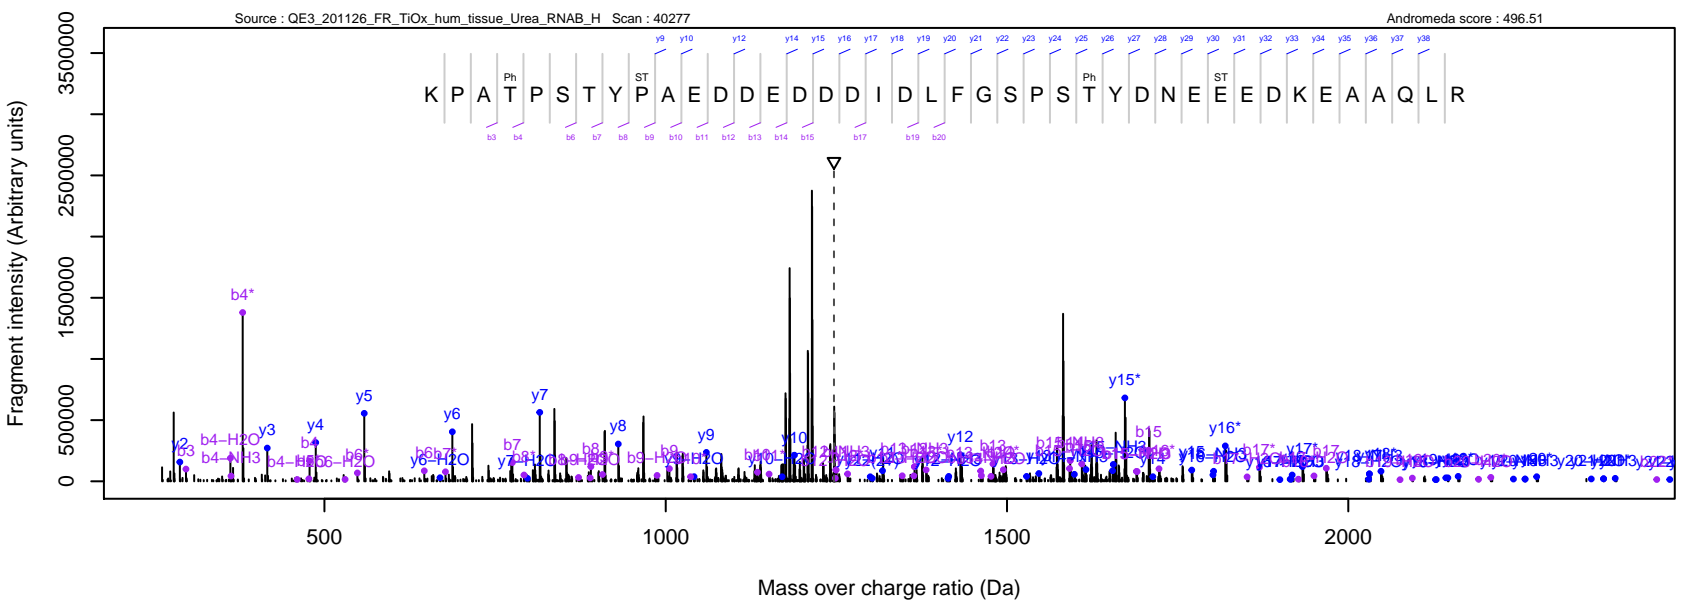

IYHLPDAES(Phospho (STY))DEDEFKQTR-2+

Source : QE3\_201126\_FR\_TiOx\_hum\_tissue\_Urea\_RNAB\_N Scan : 25448

Andromeda score : 494.12

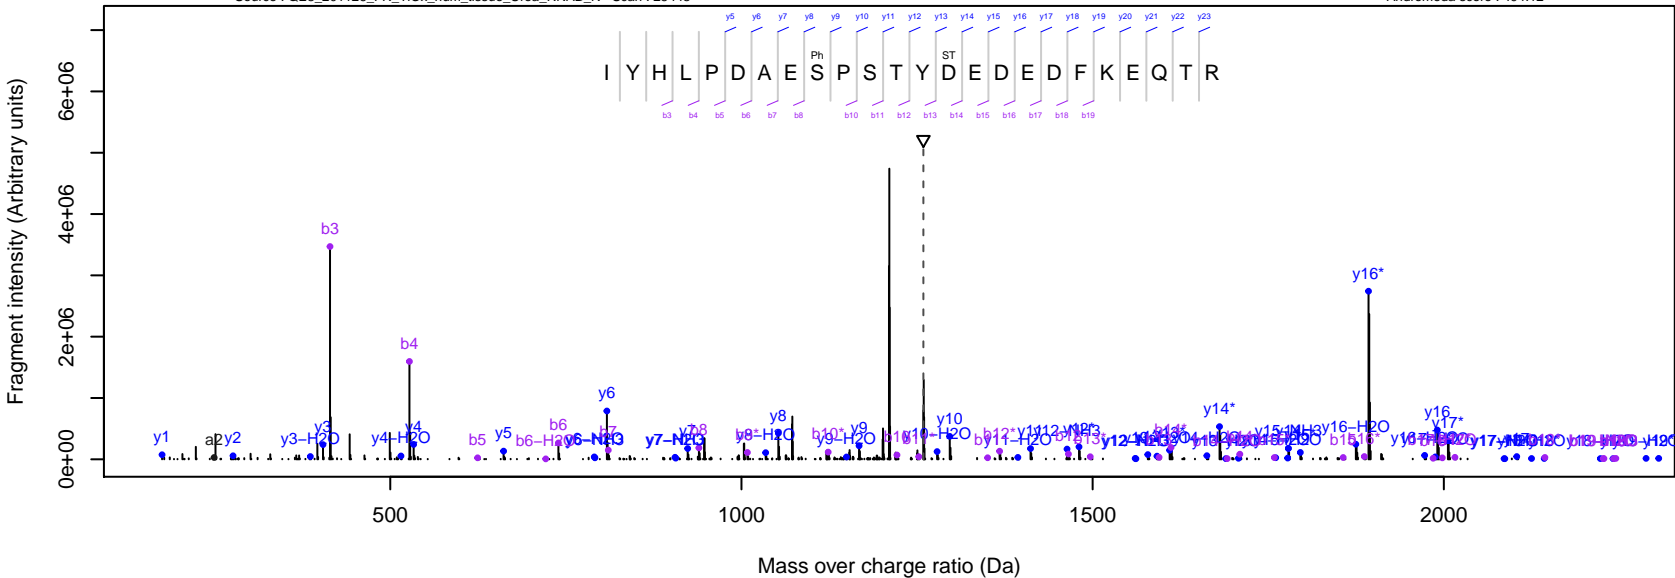

NGVIQHTGAAAEFNDDT(Phospho (STY))D-2+

Source : QE3\_201126\_FR\_TiOx\_hum\_tissue\_Urea\_RNAB\_N Scan : 24084

Andromeda score : 493.41

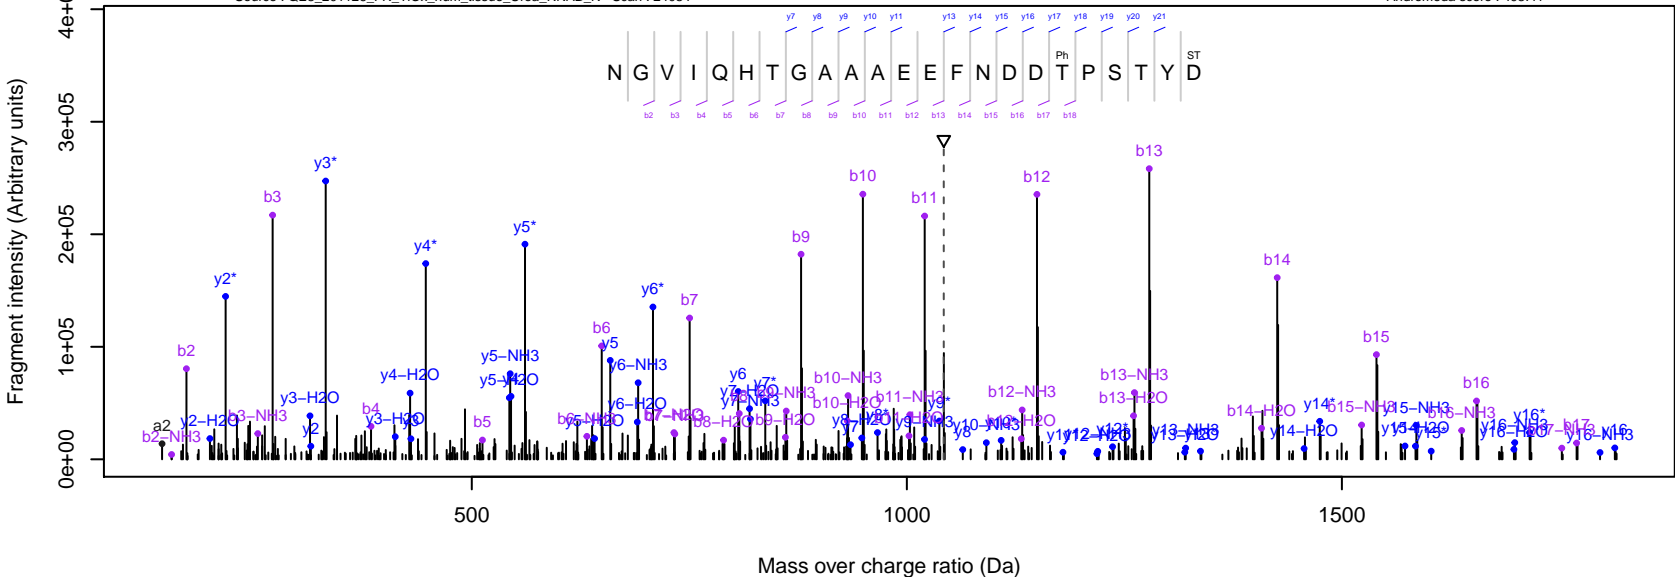

IALESEGRPEEQMESDNCS(Phospho (STY))GGDDDWTHLSSK-3+

Source : QE3\_201126\_FR\_TiOx\_hum\_tissue\_Urea\_RNAB\_N Scan : 31172

Andromeda score : 491.01

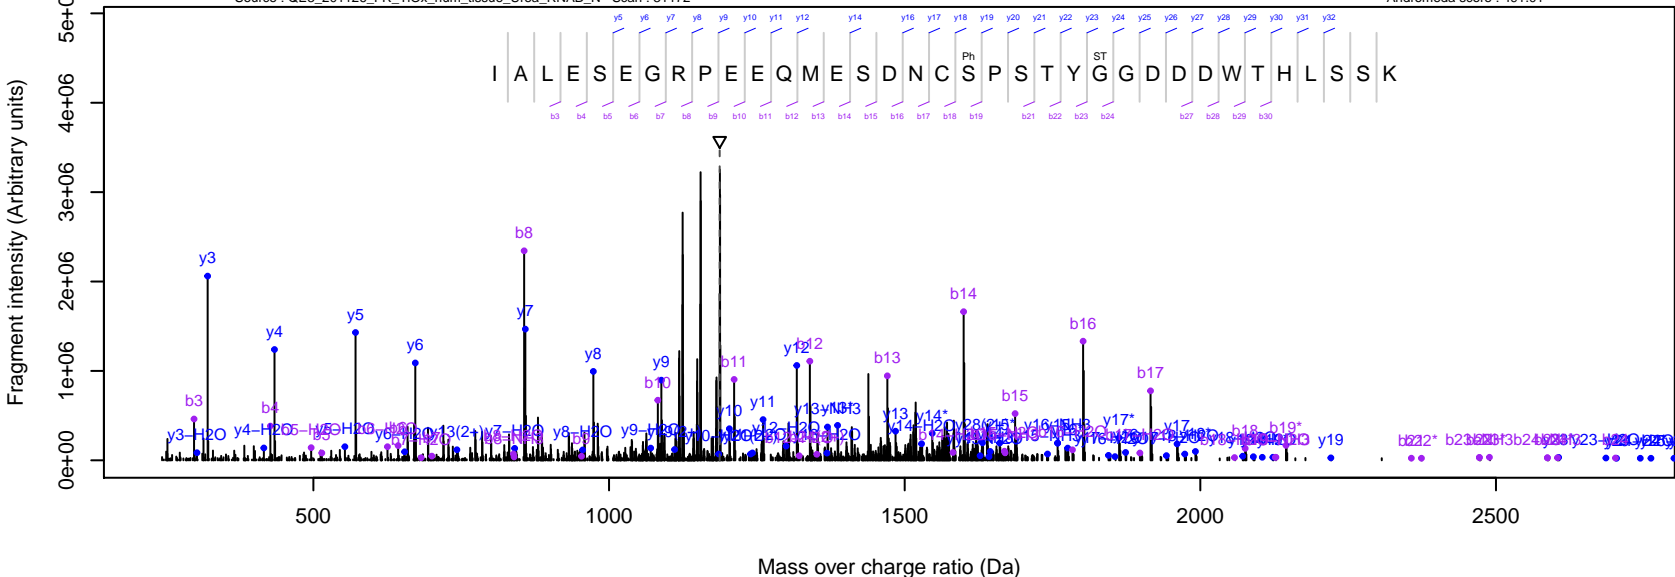

GNRSPSTYTPVDPVEDPATEEPGESFC DK-2+

Source : QE3\_201126\_FR\_TiOx\_hum\_tissue\_Urea\_RNAB\_H Scan : 27552

Andromeda score : 489.82

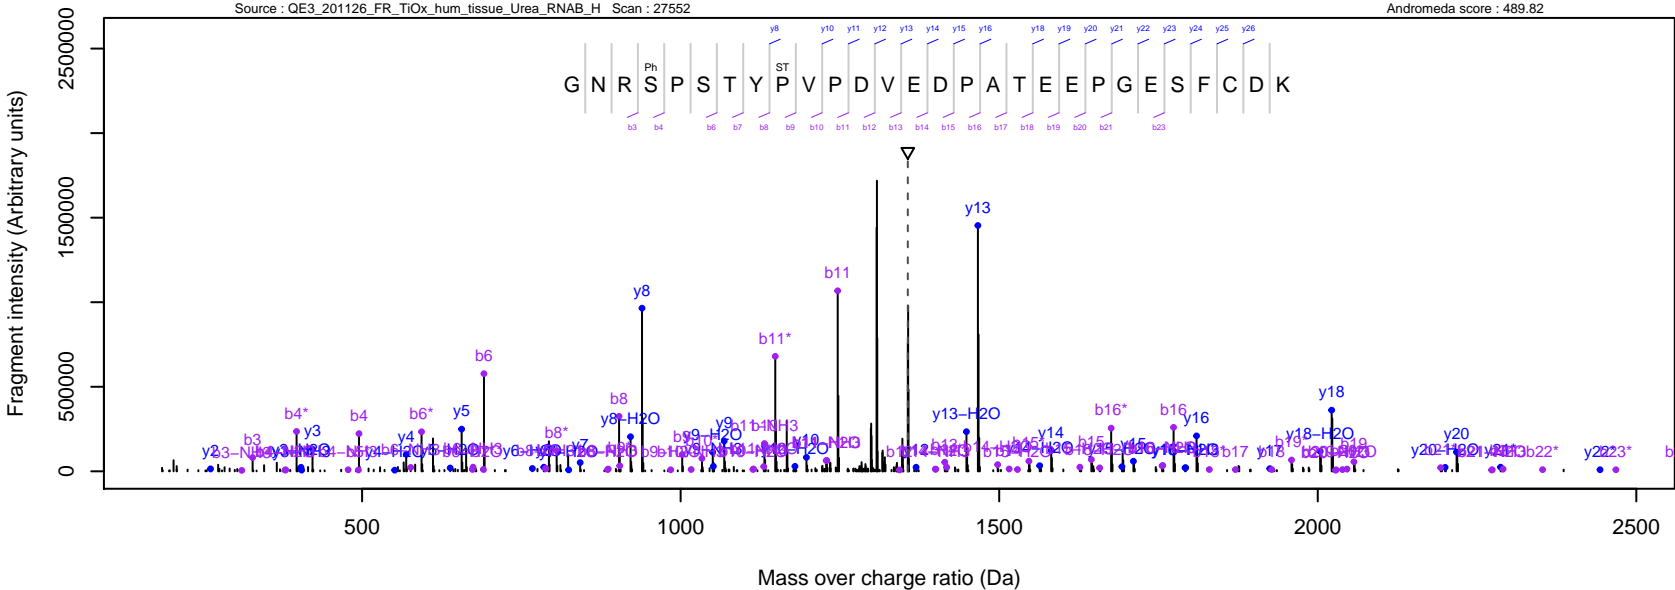

GAGDGS(Phospho (STY))DEEVDGKADGAEAKPAE-2+

Source : QE3\_201126\_FR\_TiOx\_hum\_tissue\_Urea\_RNAB\_B Scan : 10479

Andromeda score : 489.18

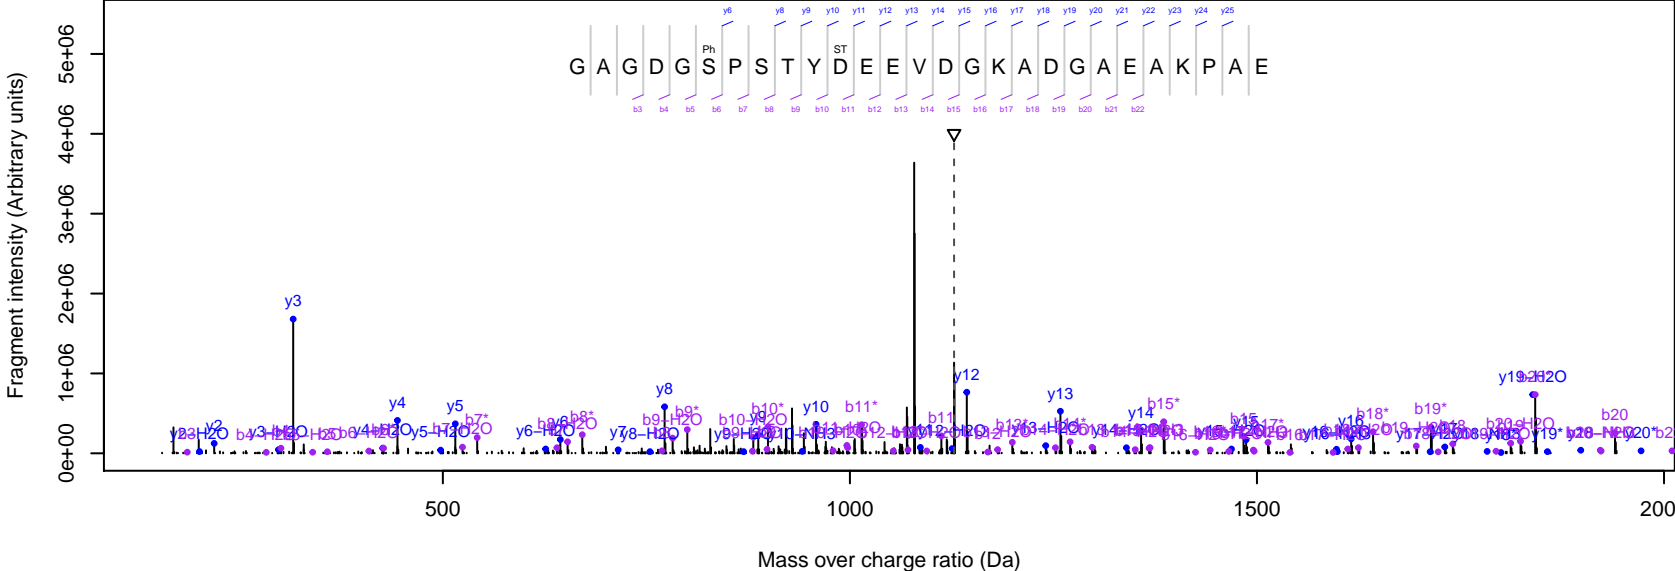

HSLPS(Phospho (STY))GLGLSETQITSHGF DNTK-3+

Source : QE3\_201126\_FR\_TiOx\_hum\_tissue\_Urea\_RNAB\_N Scan : 35707

Andromeda score : 484.44

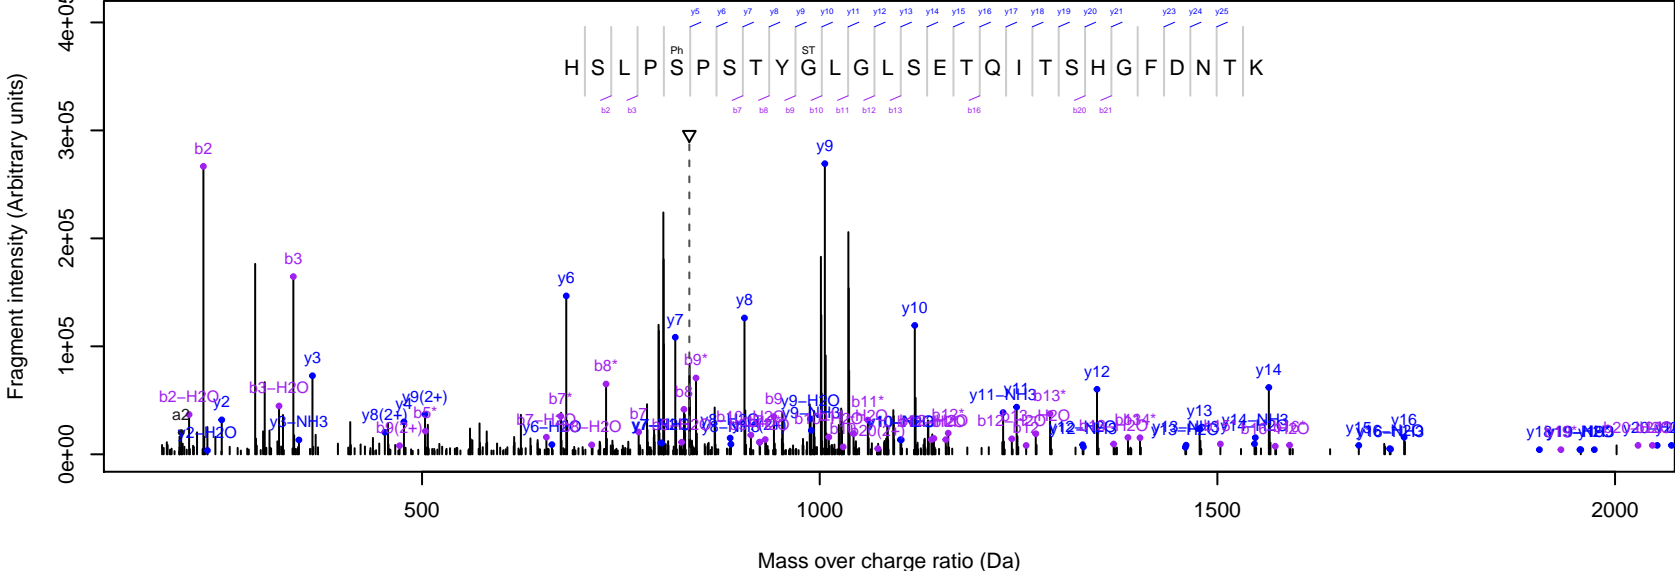

LPDS(Phospho (STY))DDEDEETAQR-2+

Source : QE3\_201126\_FR\_TiOx\_hum\_tissue\_Urea\_RNAB\_H Scan : 21964

Andromeda score : 482

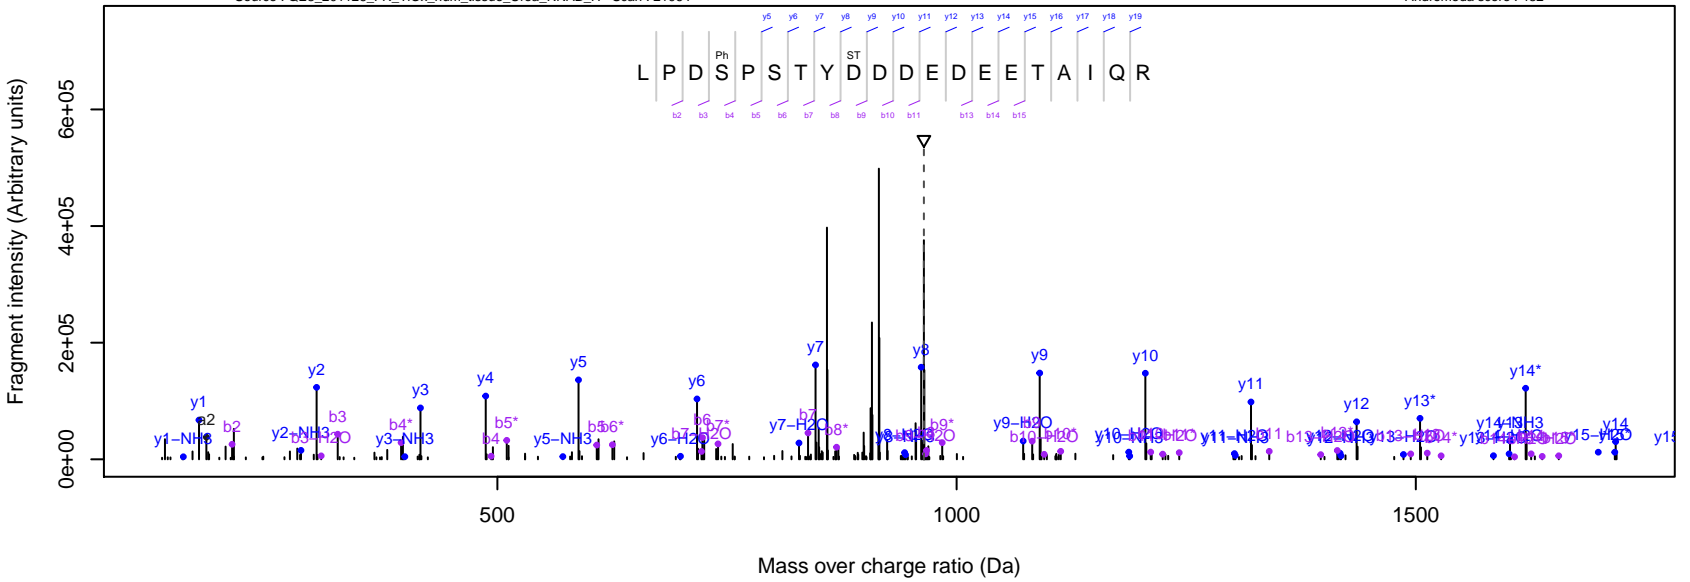

IAS(Phospho (STY))DEEIQTGKDAVIQDLER-2+

Source : QE3\_201126\_FR\_TiOx\_hum\_tissue\_Urea\_RNAB\_H Scan : 42621

Andromeda score : 480.16

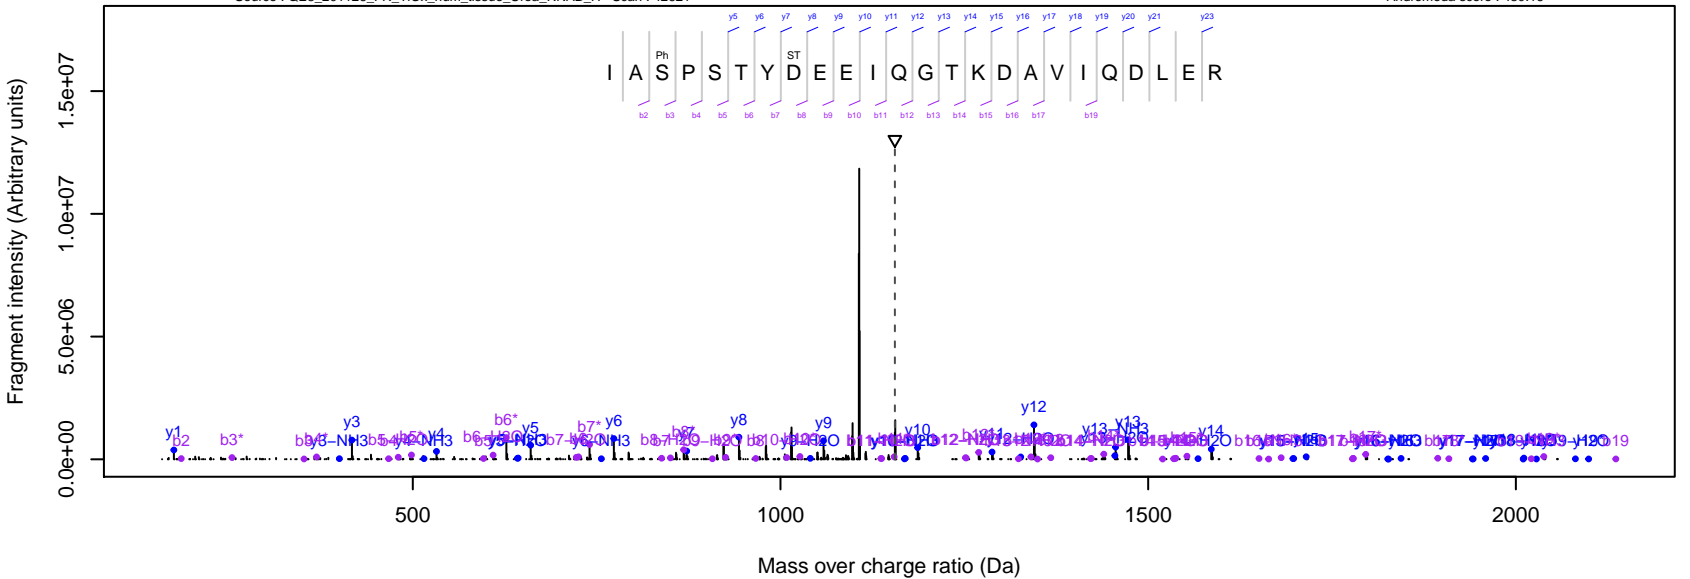

LPSGGAAS(Phospho (STY))PTGSAVDIR-2+

Source : QE3\_201126\_FR\_TiOx\_hum\_tissue\_Urea\_RNAB\_H Scan : 23098

Andromeda score : 475.17

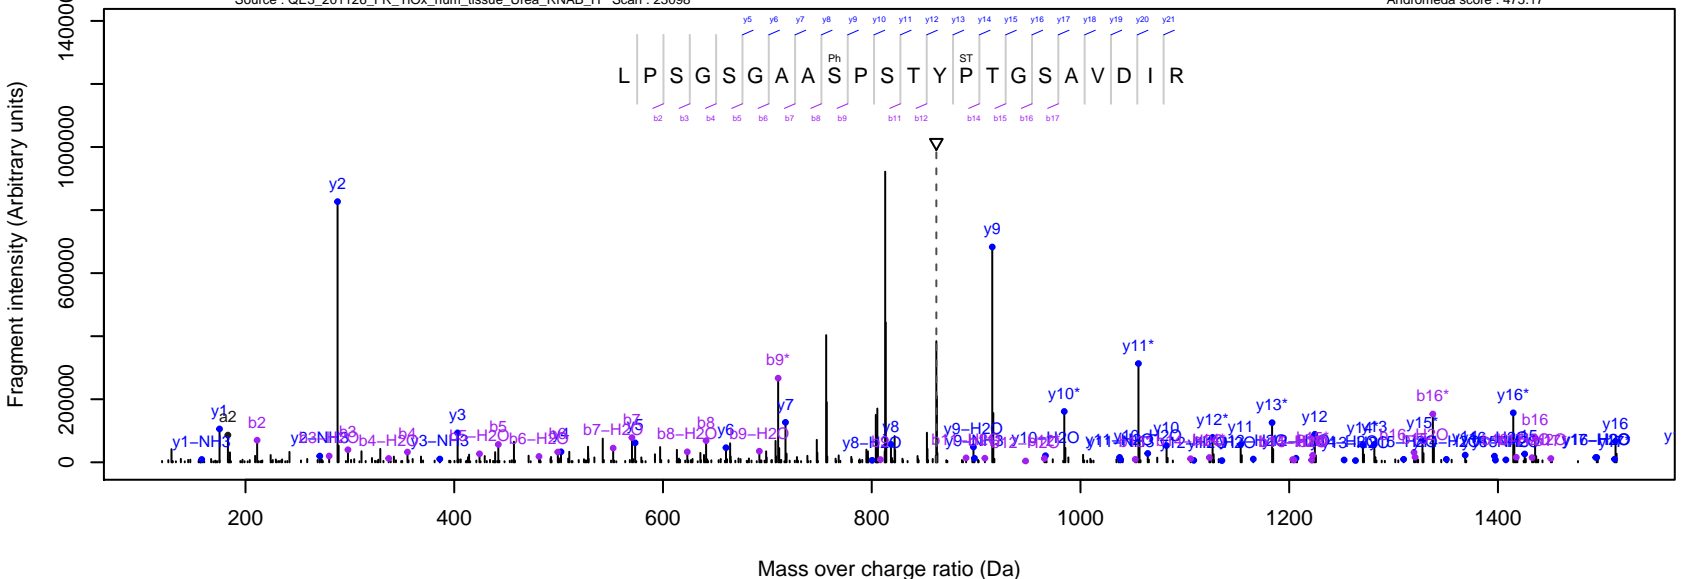

AKS(Phospho (STY))PQPPVEEEDHFD DTVVCLDLYNCDLHFK-3+

Source : QE3\_201126\_FR\_TiOx\_hum\_tissue\_Urea\_RNAB\_H Scan : 42415

Andromeda score : 474.56

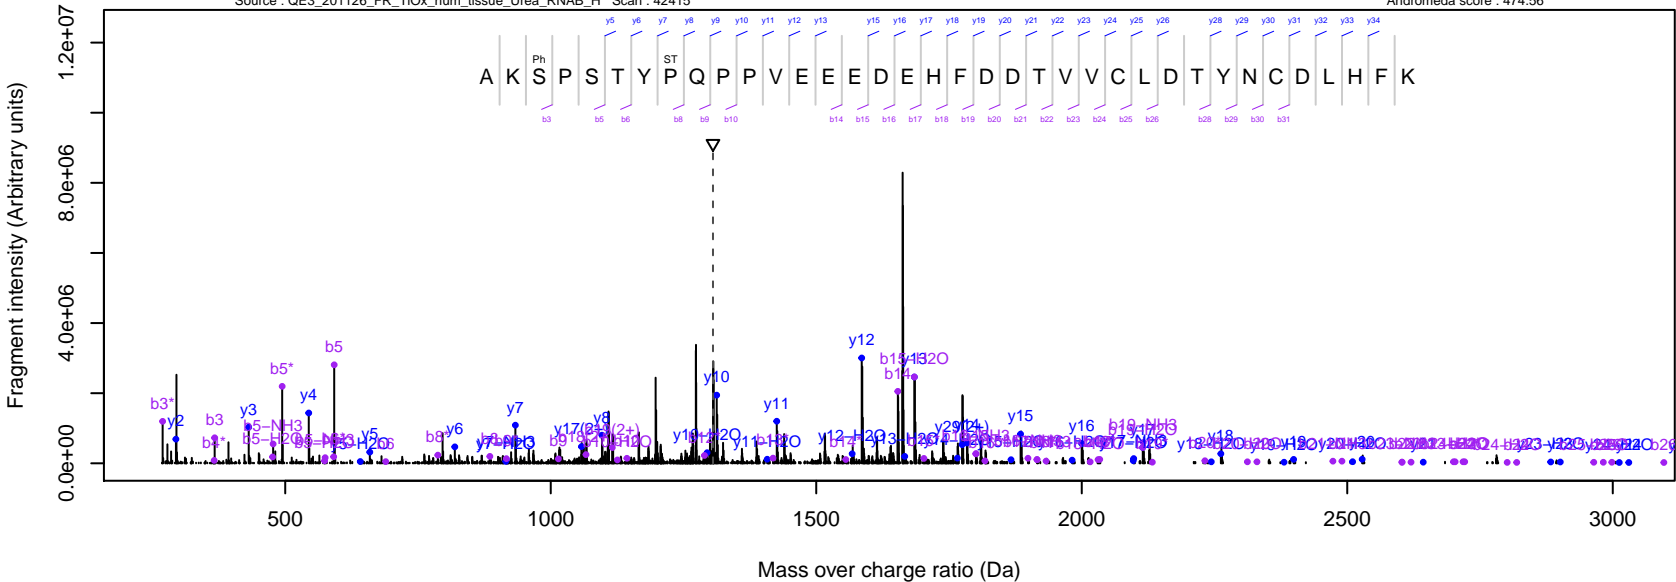

DSPSKSS(Phospho (STY))AEAQTPEDTPNK-2+

Source : QE3\_201126\_FR\_TiOx\_hum\_tissue\_Urea\_RNAB\_B Scan : 7207

Andromeda score : 472.02

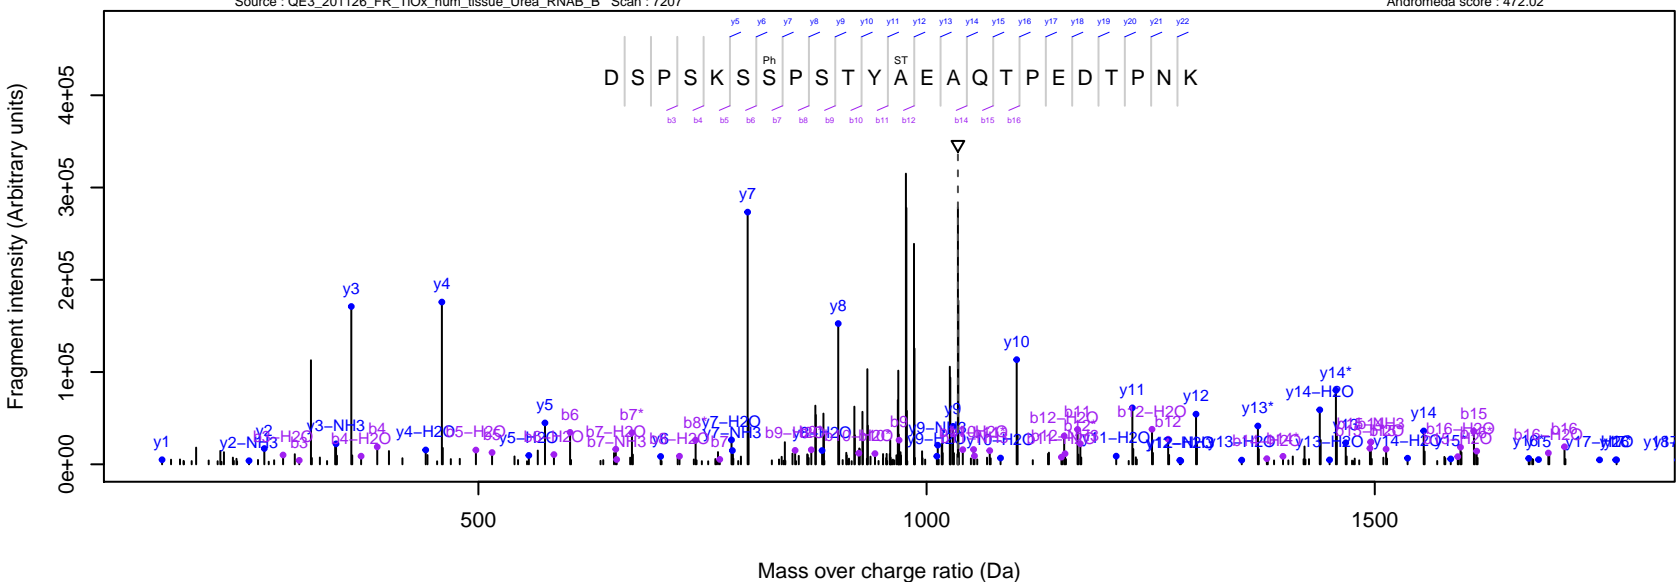

GPDEAM(Oxidation (M))EDGEEGS(Phospho (STY))DDEAEWVVK-2+

Source : QE3\_201126\_FR\_TiOx\_hum\_tissue\_Urea\_RNAB\_B Scan : 35139

Andromeda score : 469.34

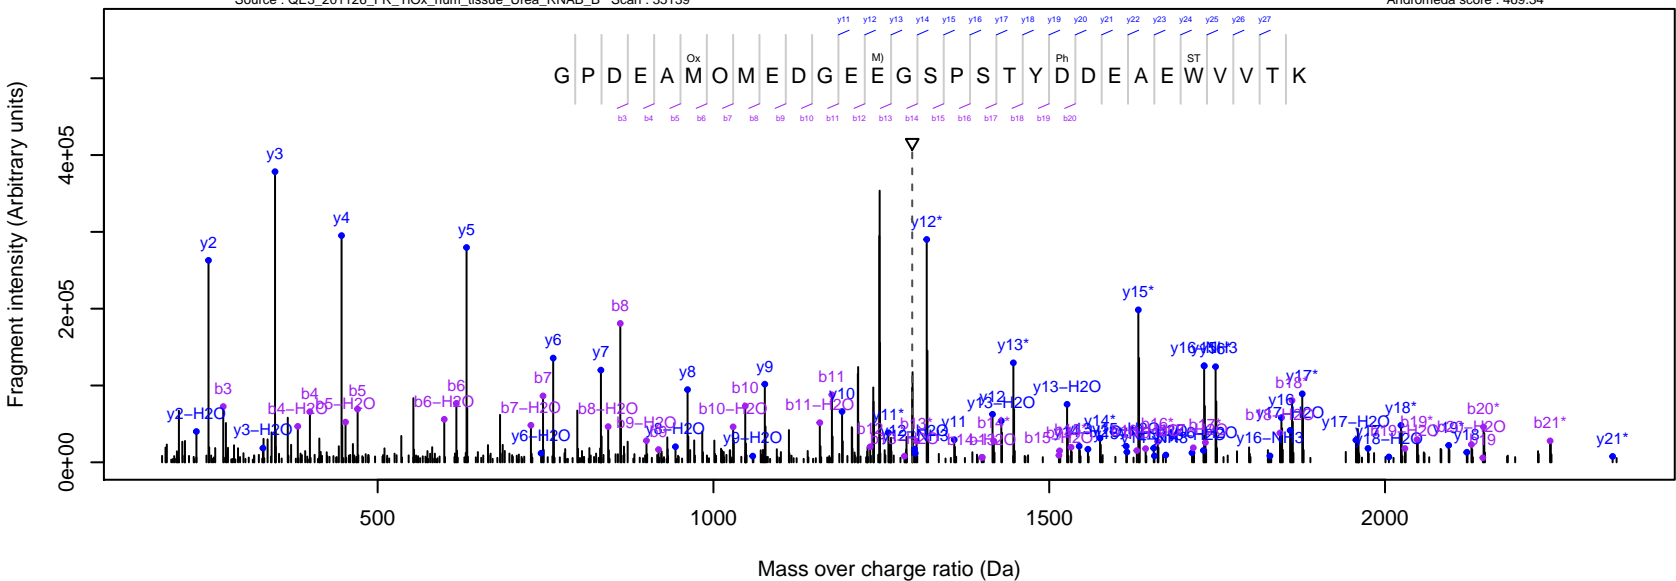

KQSFDDNDS(Phospho (STY))ELEDKDSK-2+

Source : QE3\_201126\_FR\_TIOx\_hum\_tissue\_Urea\_RNAB\_H Scan : 9921

Andromeda score : 468.67

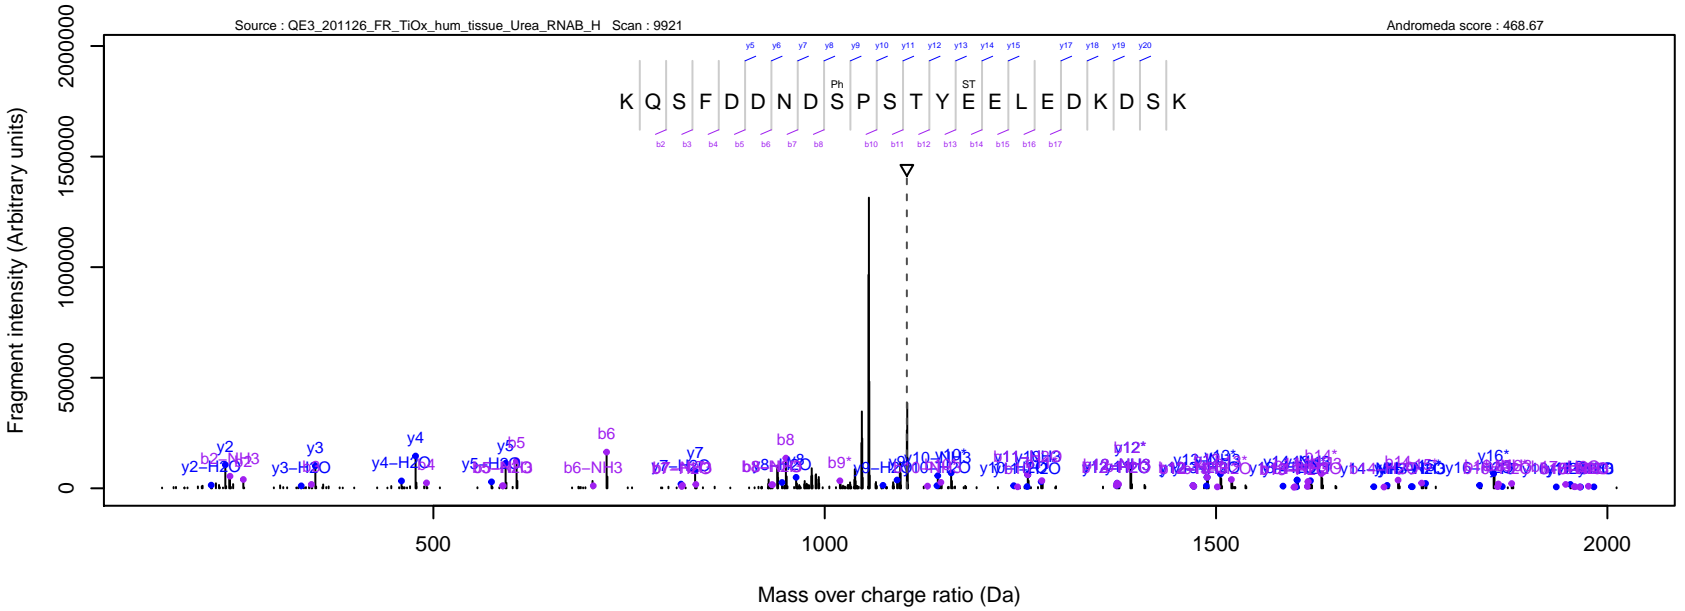

PGPTPSGTNVGSSGRS(Phospho (STY))PSK-2+

Source : QE3\_201126\_FR\_TIOx\_hum\_tissue\_Urea\_RNAB\_N Scan : 6944

Andromeda score : 468.64

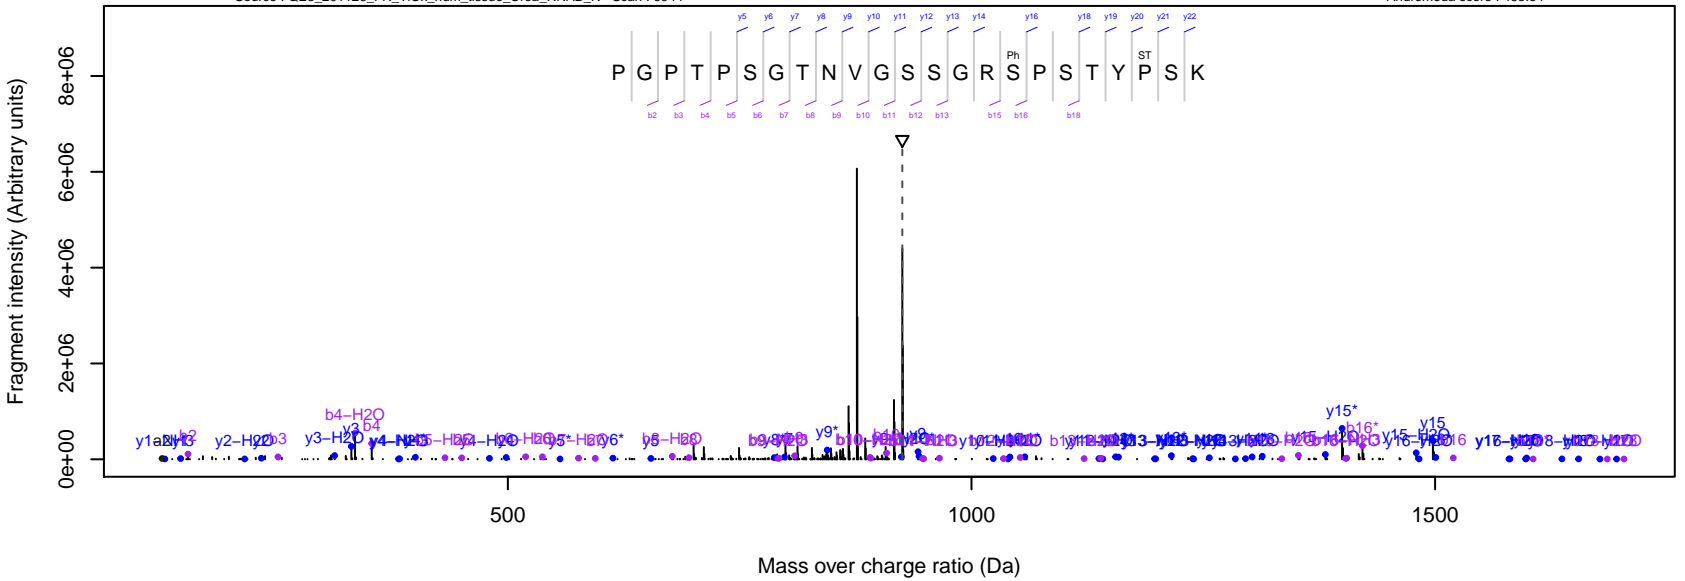

KLEKEEEGISQES(Phospho (STY))SEEEQ-2+

Source : QE3\_201126\_FR\_TIOx\_hum\_tissue\_Urea\_RNAB\_N Scan : 11415

Andromeda score : 468.47

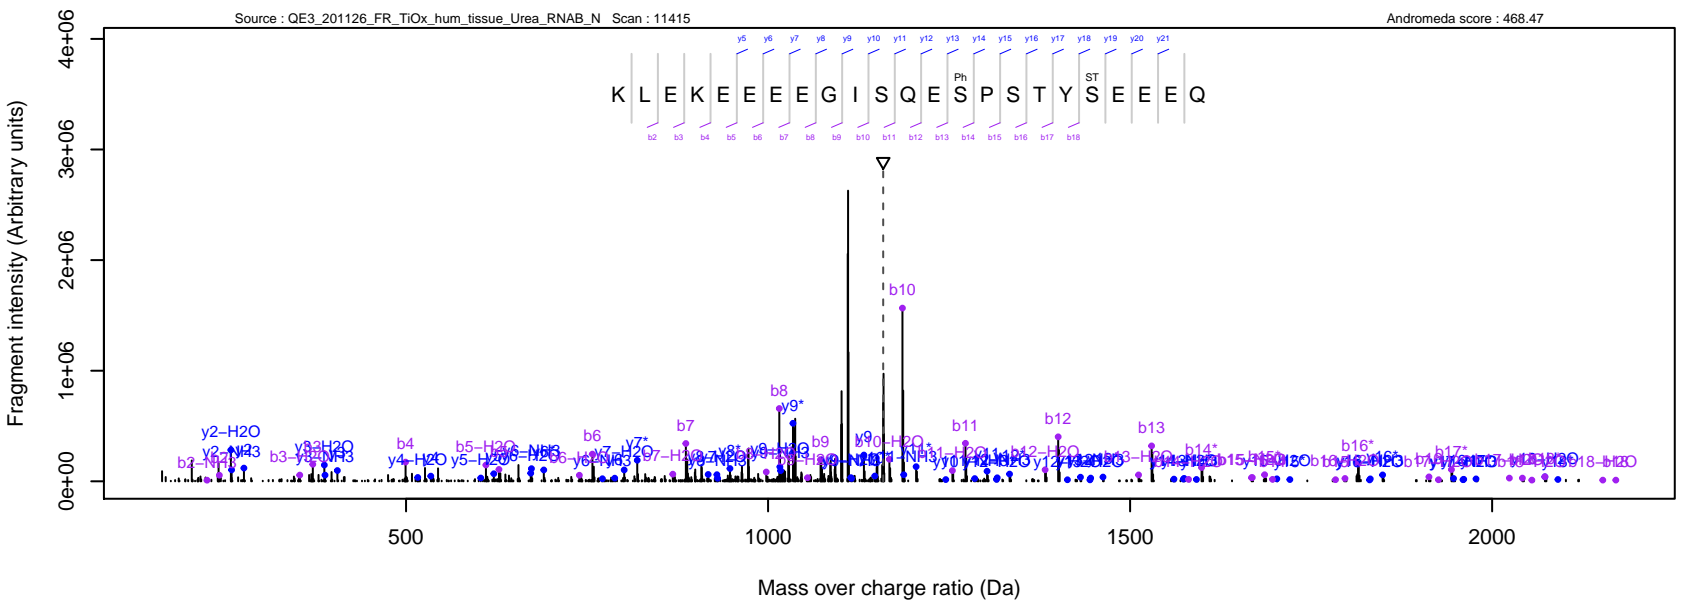



STAQQELDGKPA SPSTYPTPIVIVASHTANKEEK-3+

Source : QE3\_201126\_FR\_TiOx\_hum\_tissue\_Urea\_RNAB\_B Scan : 16023

Andromeda score : 466.93

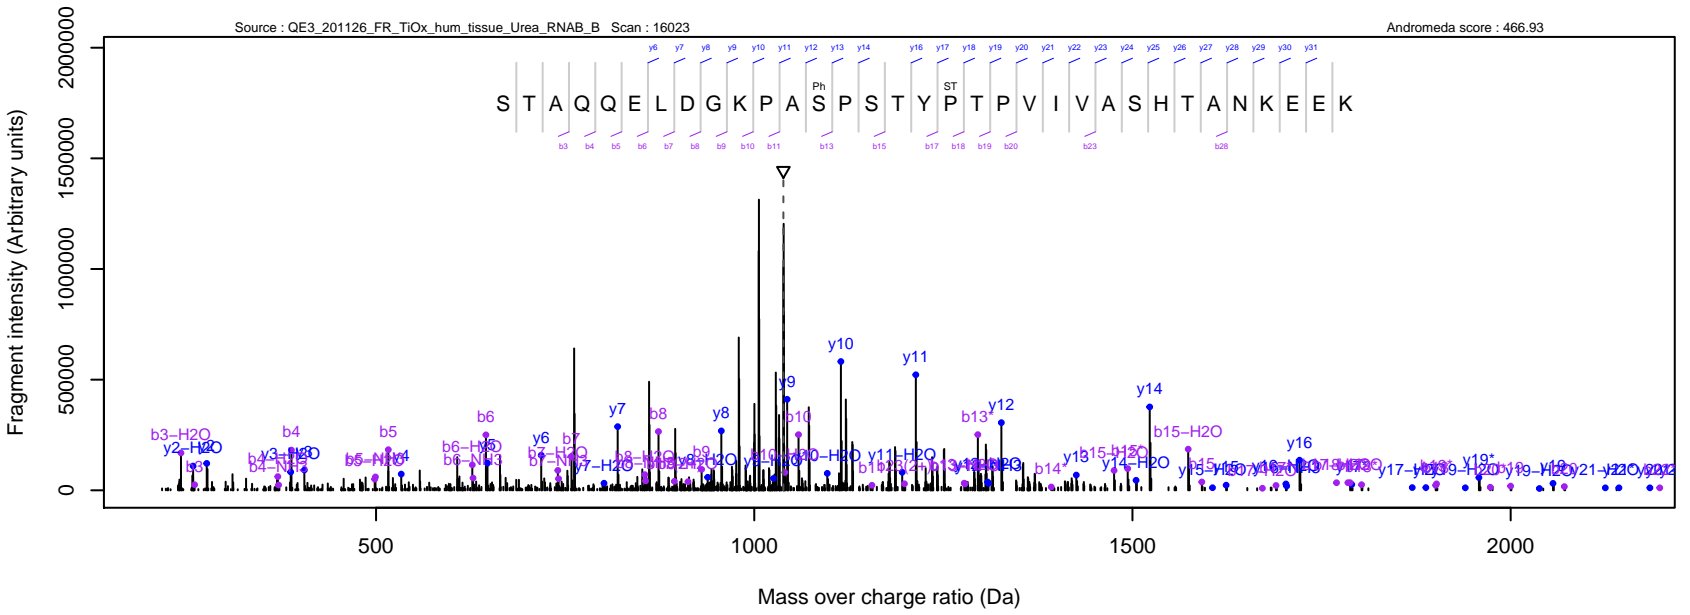

(Acetyl (Protein N-term))AASAAAASAAAASASGS(Phospho (STY))PGPGEGSAGEK-2+

Source : QE3\_201126\_FR\_TiOx\_hum\_tissue\_Urea\_RNAB\_H Scan : 35989

Andromeda score : 466.78

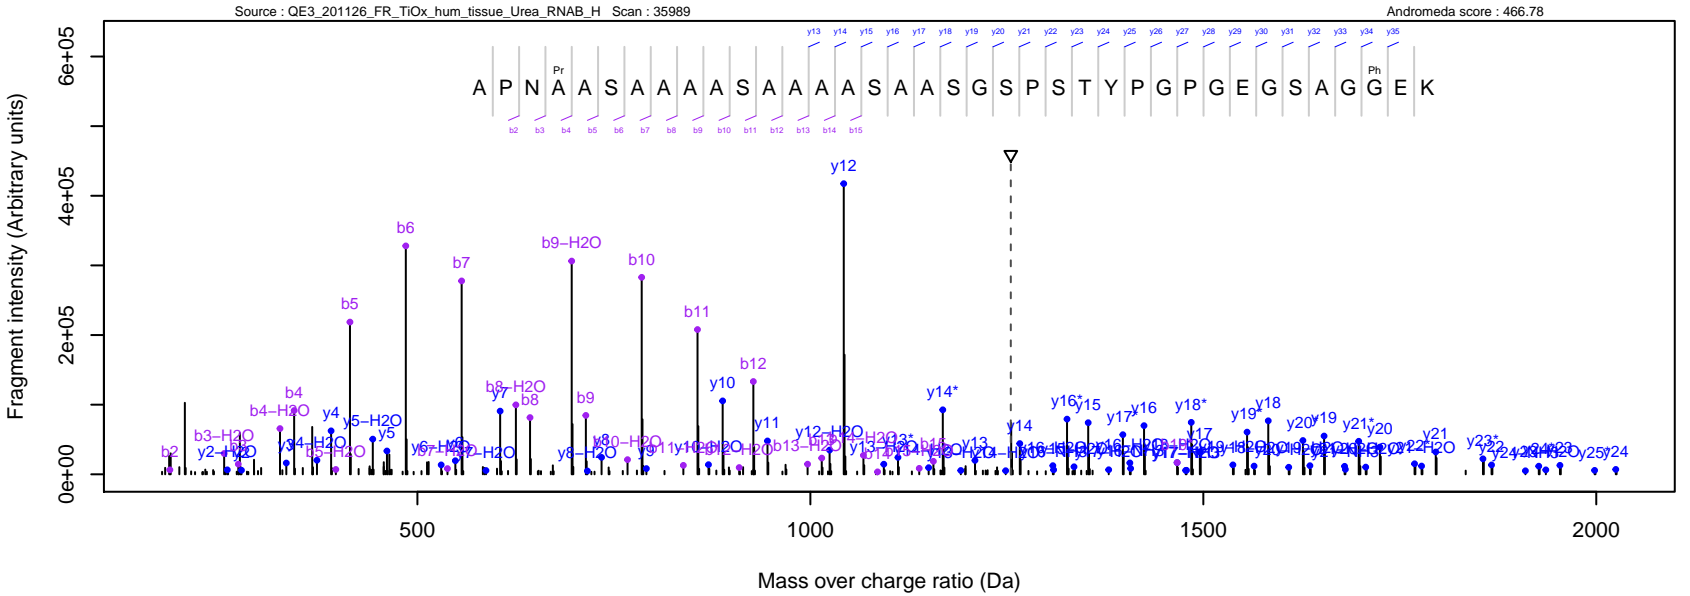

KAS(Phospho (STY))LSLHVLETNDEKDKQTANLNTNQGK-4+

Source : QE3\_201126\_FR\_TiOx\_hum\_tissue\_Urea\_RNAB\_N Scan : 24484

Andromeda score : 463.23

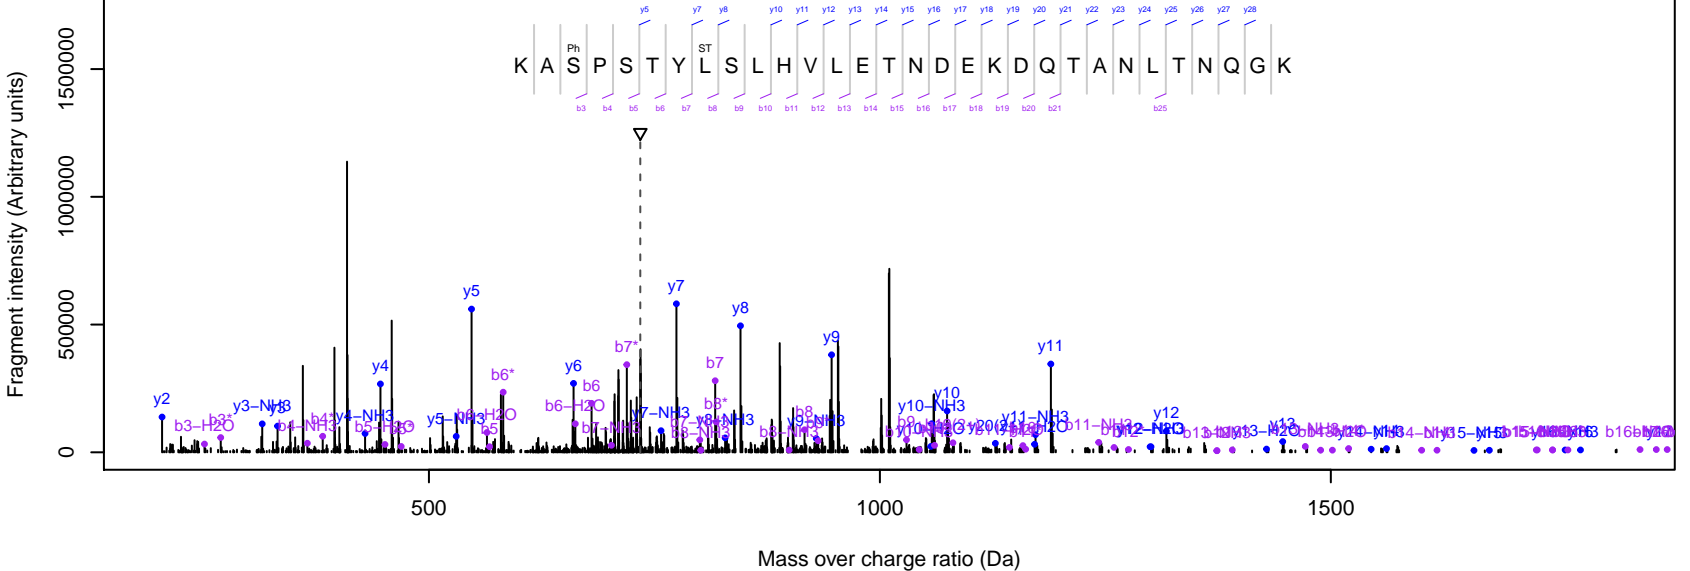

STGVSFWTQDSDENEQQS(Phospho (STY))DTEEGSNKKTQTDsisr-4+

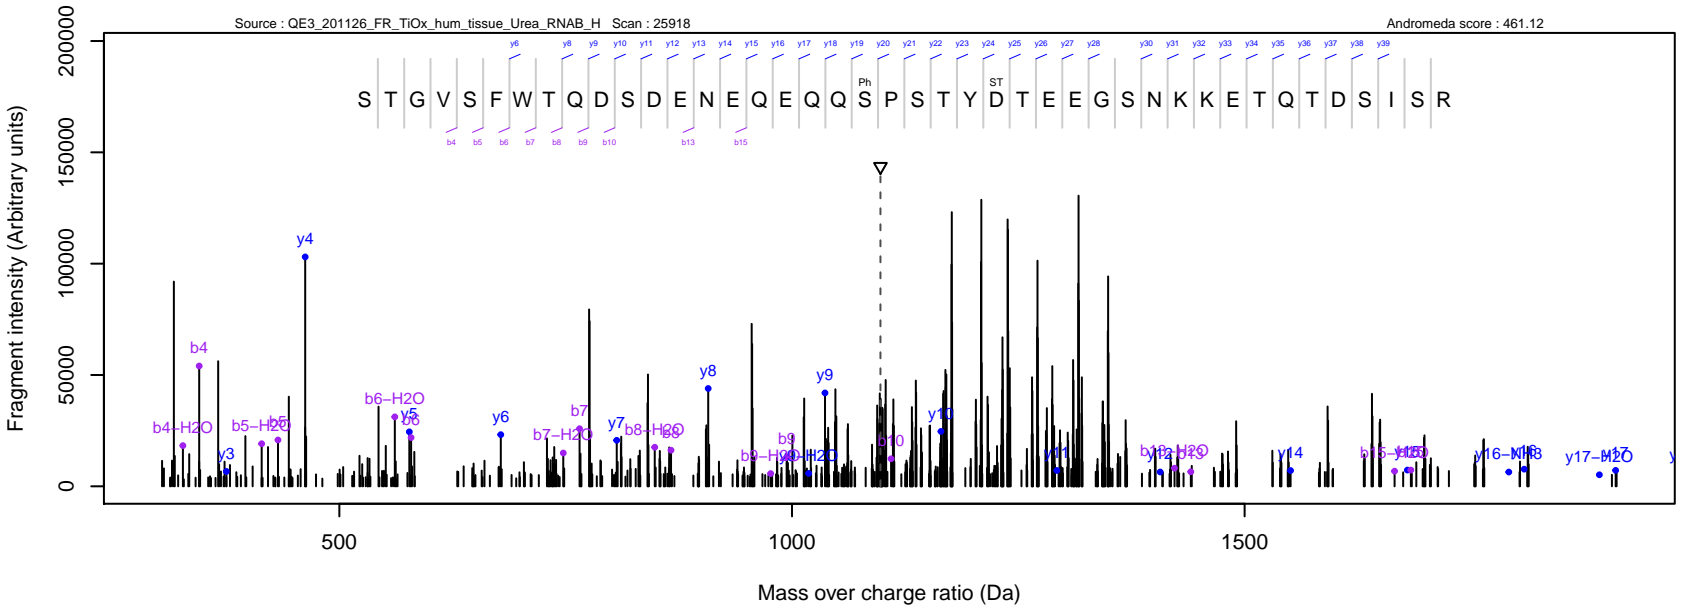

SQS(Phospho (STY))LPNSLDYQTSDPGR-2+

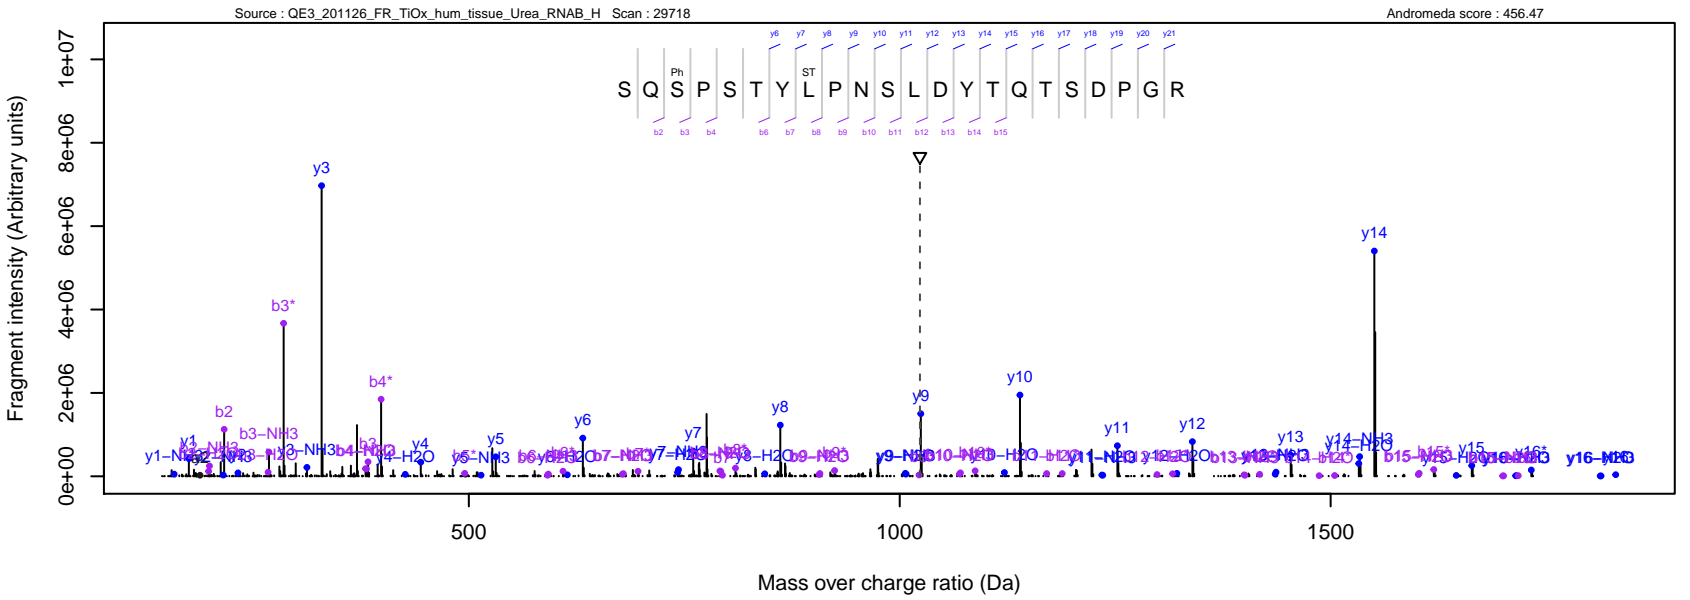

QEVNPRQEIESETTSPSTYEEQIQEEK-3+

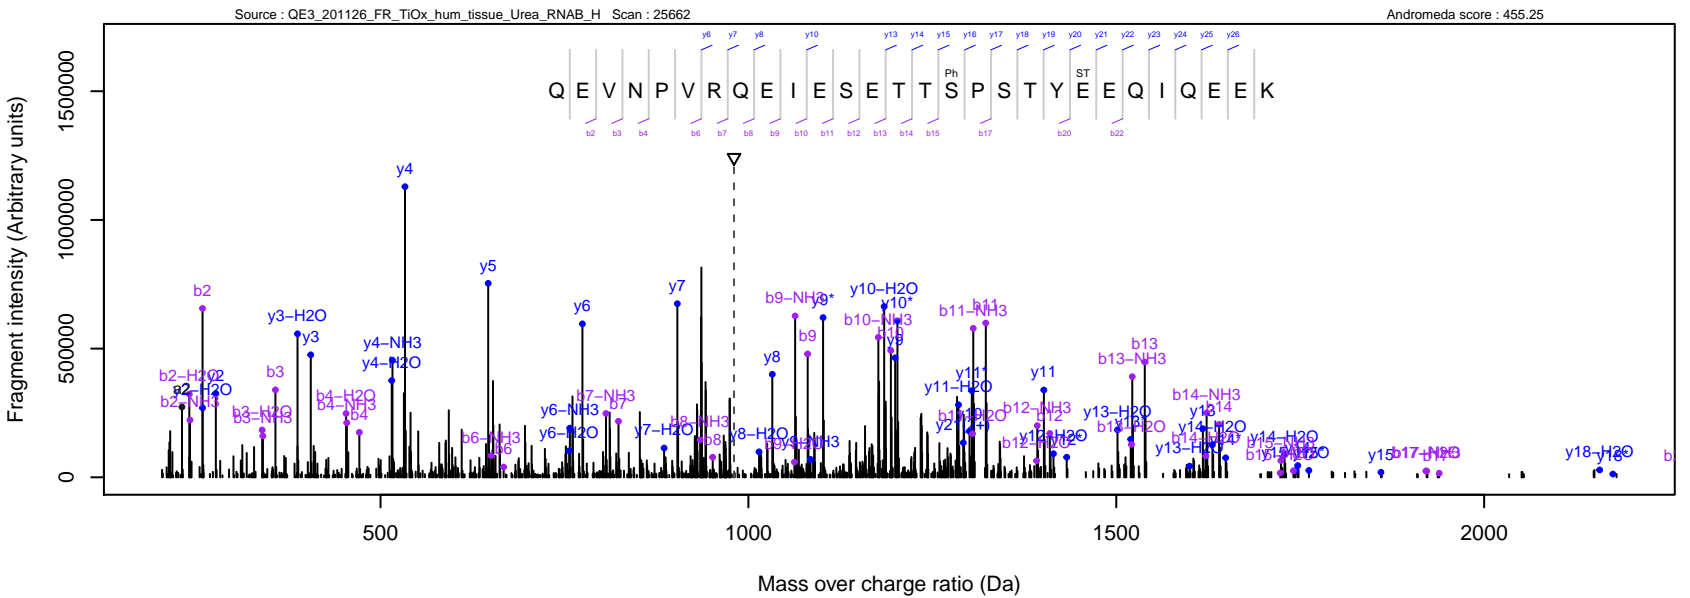

**AIGGILTAS(Phospho (STY))HNPGGPNGDFGIK-2+**

Source : QE3\_201126\_FR\_TIOx\_hum\_tissue\_Urea\_RNAB\_B Scan : 42129

Andromeda score : 452.81

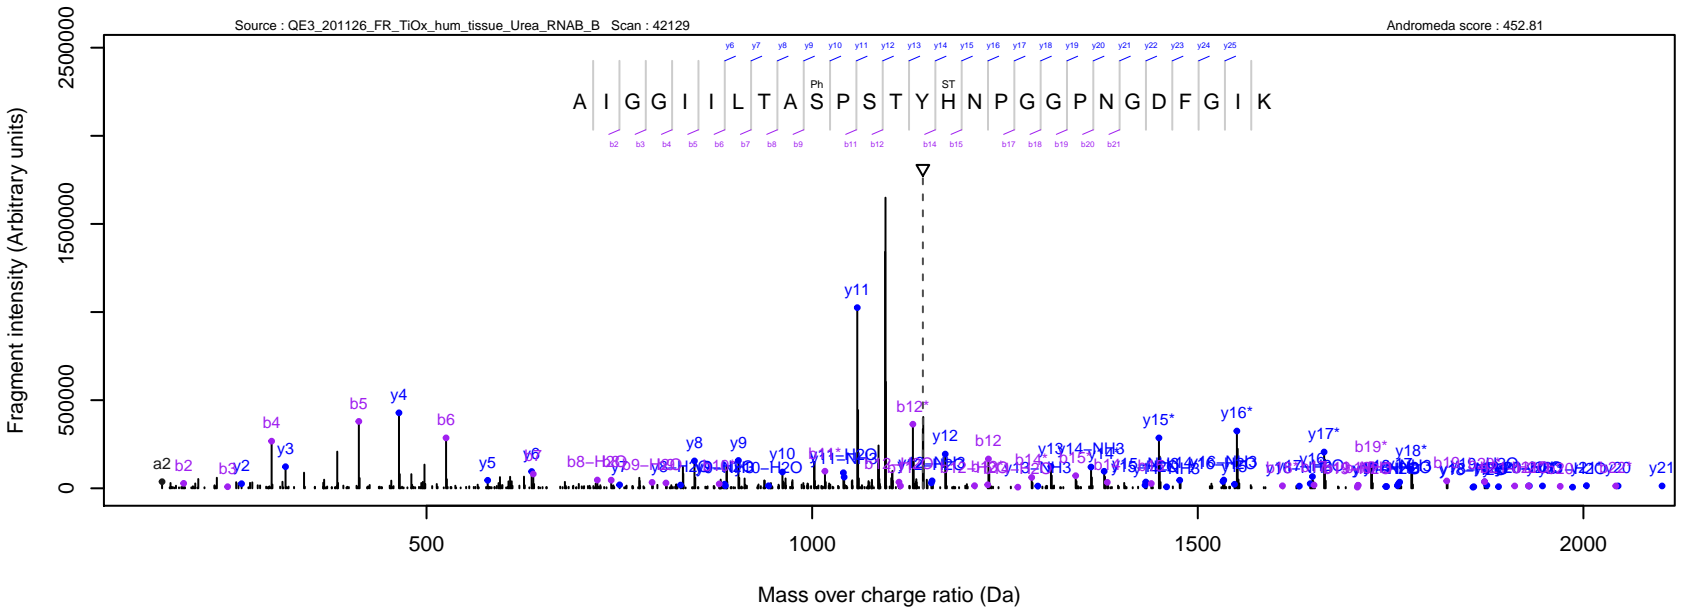

**VADAKGDS(Phospho (STY))ESEEDLEVPVPSR-2+**

Source : QE3\_201126\_FR\_TIOx\_hum\_tissue\_Urea\_RNAB\_N Scan : 26861

Andromeda score : 452.19

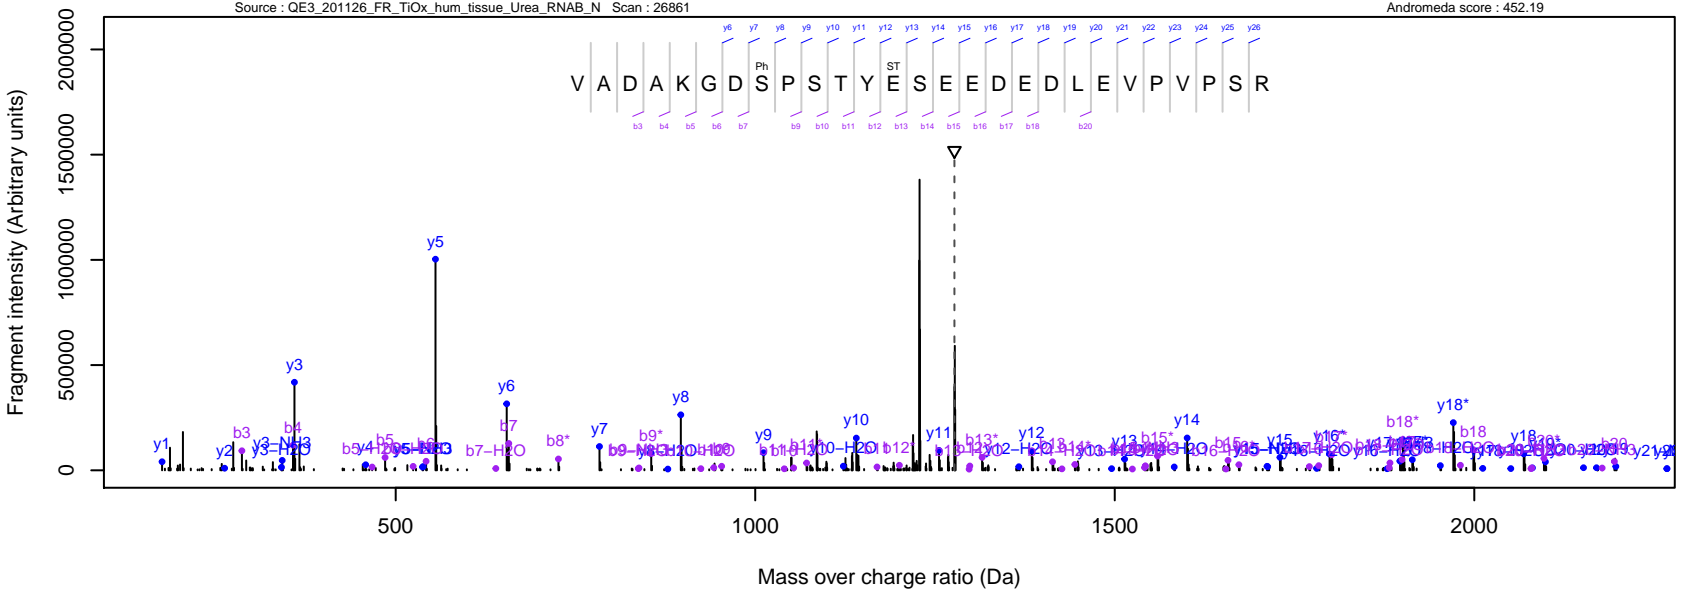

**LKDLGHPVEEEDLES(Phospho (STY))GDQEDEDESDPGKDLDDHI-4+**

Source : QE3\_201126\_FR\_TIOx\_hum\_tissue\_Urea\_RNAB\_N Scan : 32341

Andromeda score : 451.61

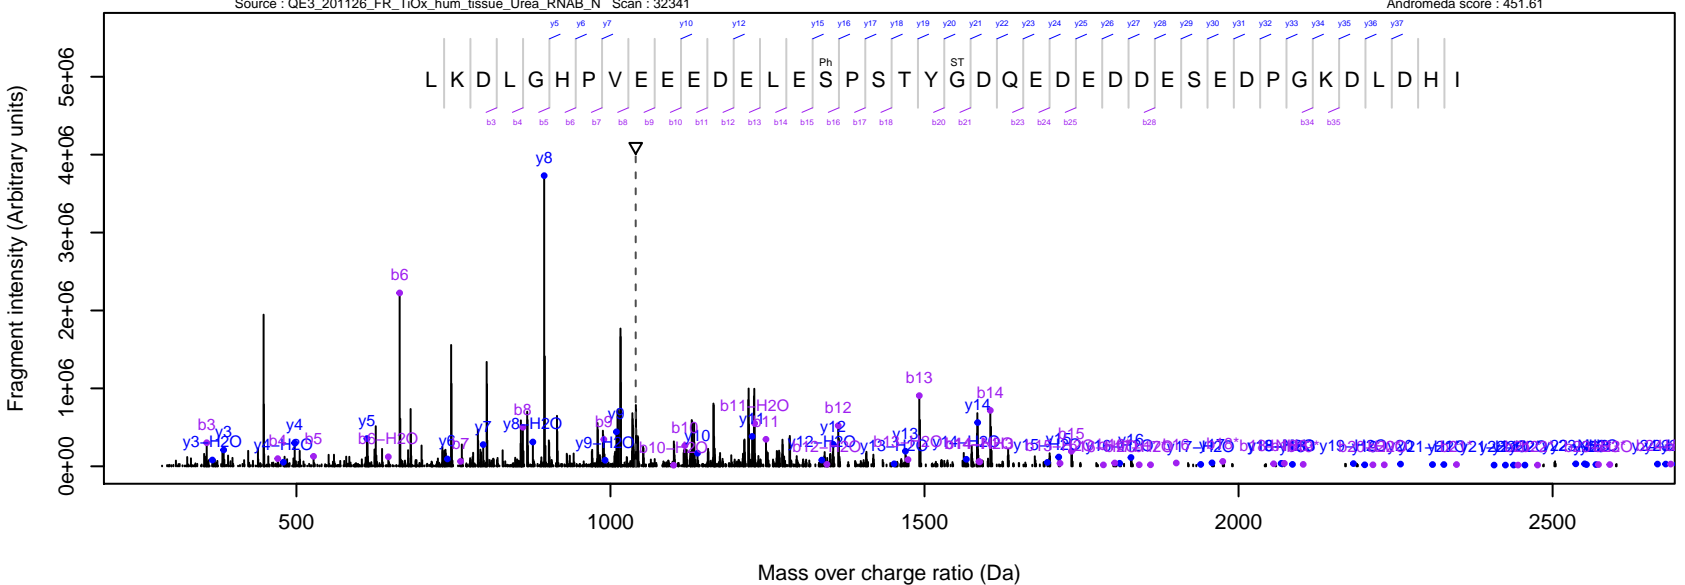

VHDRS(Phospho (STY))EEEEEEEEEEEEEQPR-3+

Source : QE3\_201126\_FR\_TiOx\_hum\_tissue\_Urea\_RNAB\_N Scan : 11695

Andromeda score : 451.58

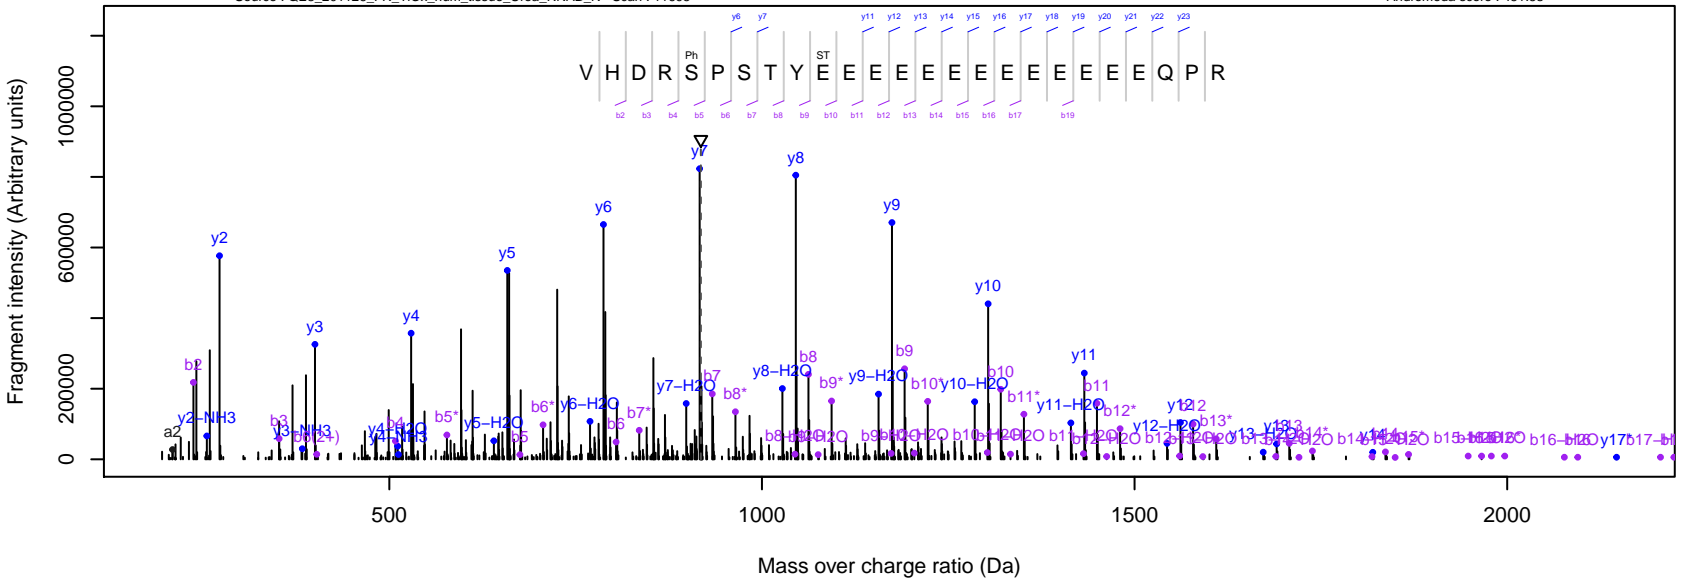

KLS(Phospho (STY))GDQITLPTTVDYSSVPK-2+

Source : QE3\_201126\_FR\_TiOx\_hum\_tissue\_Urea\_RNAB\_B Scan : 38594

Andromeda score : 448.63

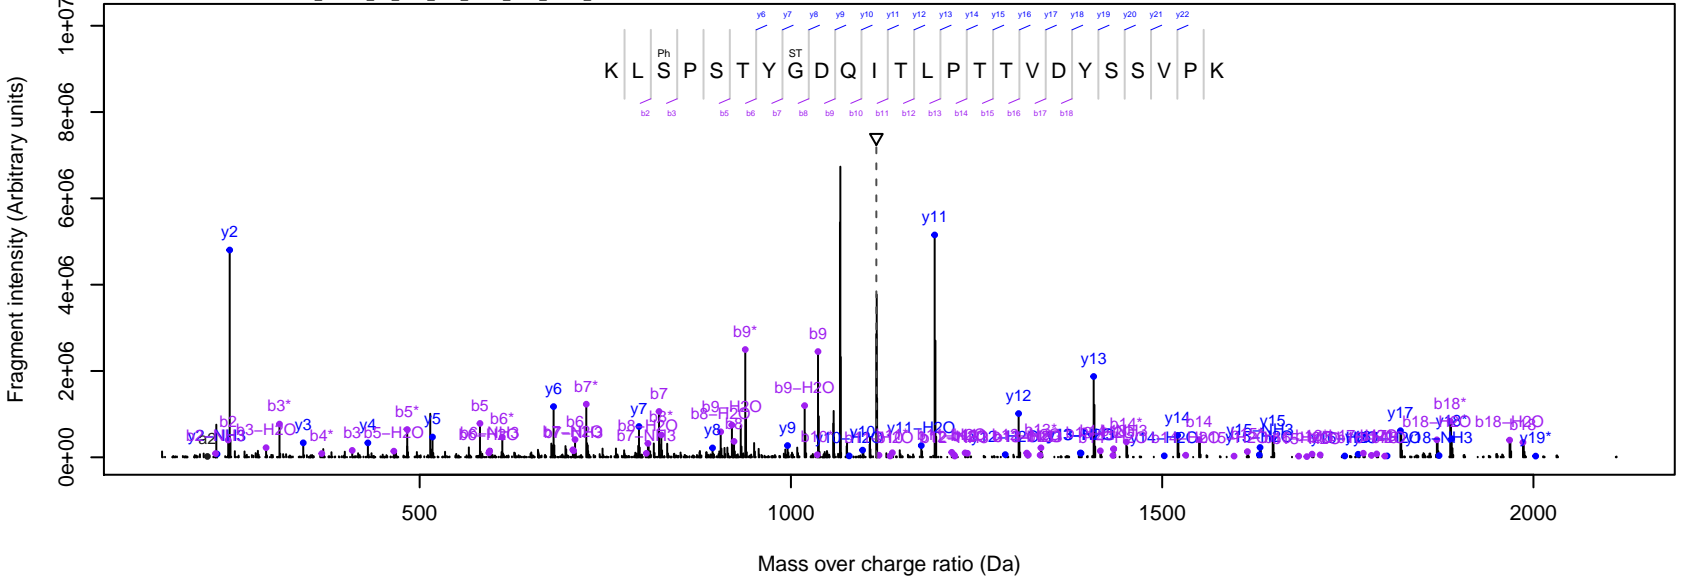

VEMOMGTS(SQNDVDM)SWIPQETLNQINKAS(Phospho (STY))PR-3+

Source : QE3\_201126\_FR\_TiOx\_hum\_tissue\_Urea\_RNAB\_H Scan : 48172

Andromeda score : 446.82

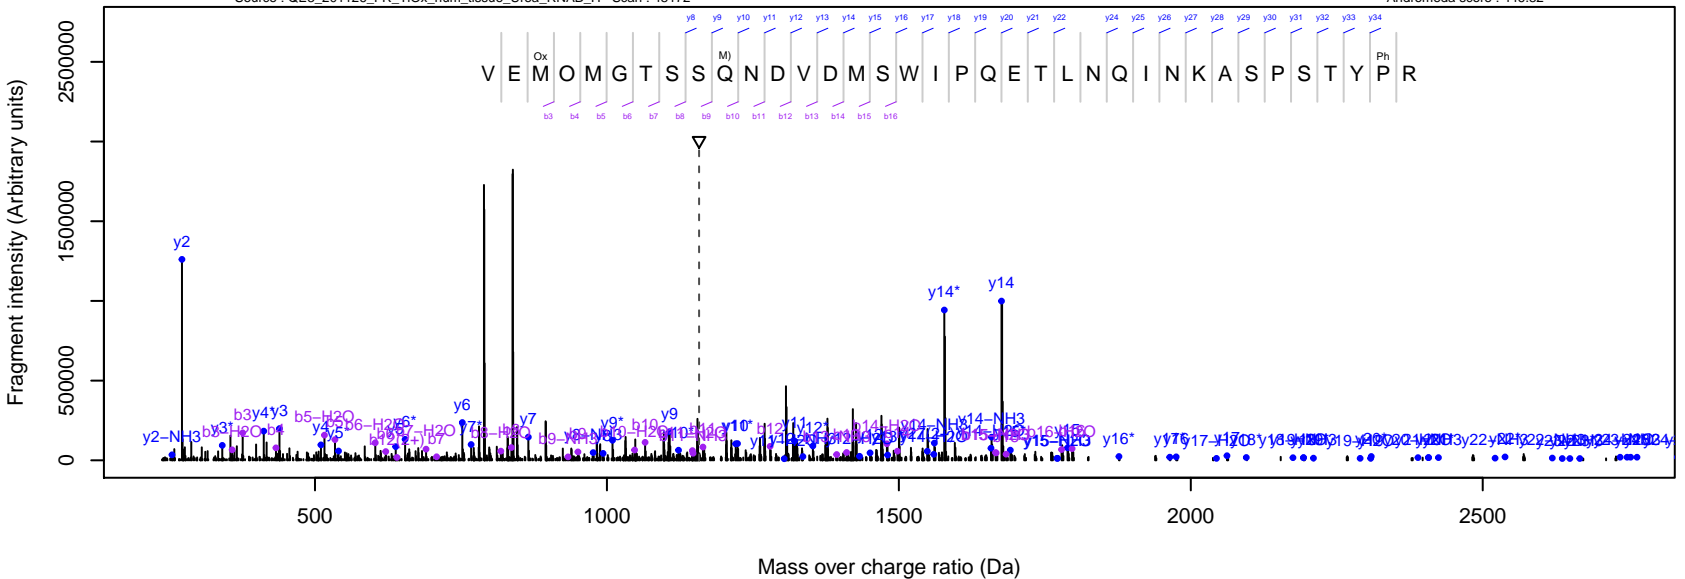

M(Oxidation (M))GAPESGLAEYLFDKHTLGLDSPSTYDNE S-2+

Source : QE3\_201126\_FR\_TiOx\_hum\_tissue\_Urea\_RNAB\_N Scan : 49709

Andromeda score : 445.93

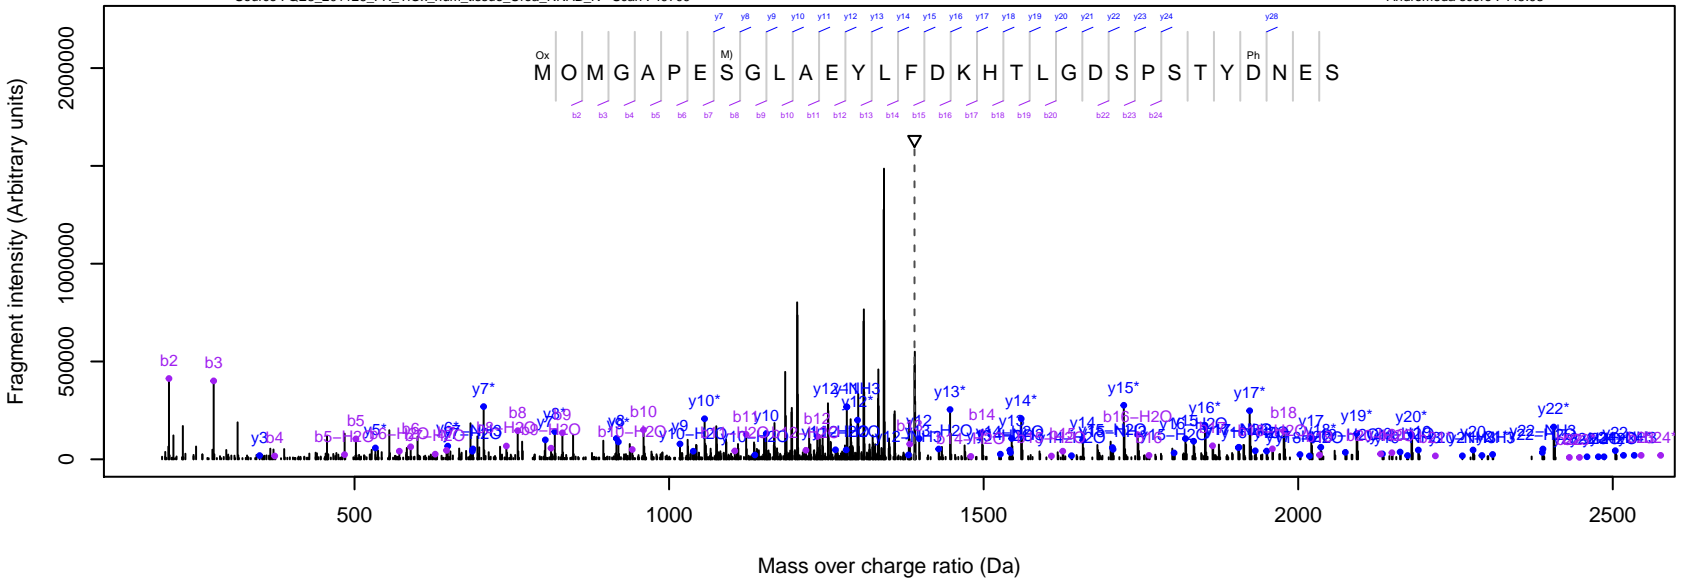

VG EDEDGSPSTYDEEVVHNEDIHFEPIVSLPEVEVK-3+

Source : QE3\_201126\_FR\_TiOx\_hum\_tissue\_Urea\_RNAB\_H Scan : 51446

Andromeda score : 445.75

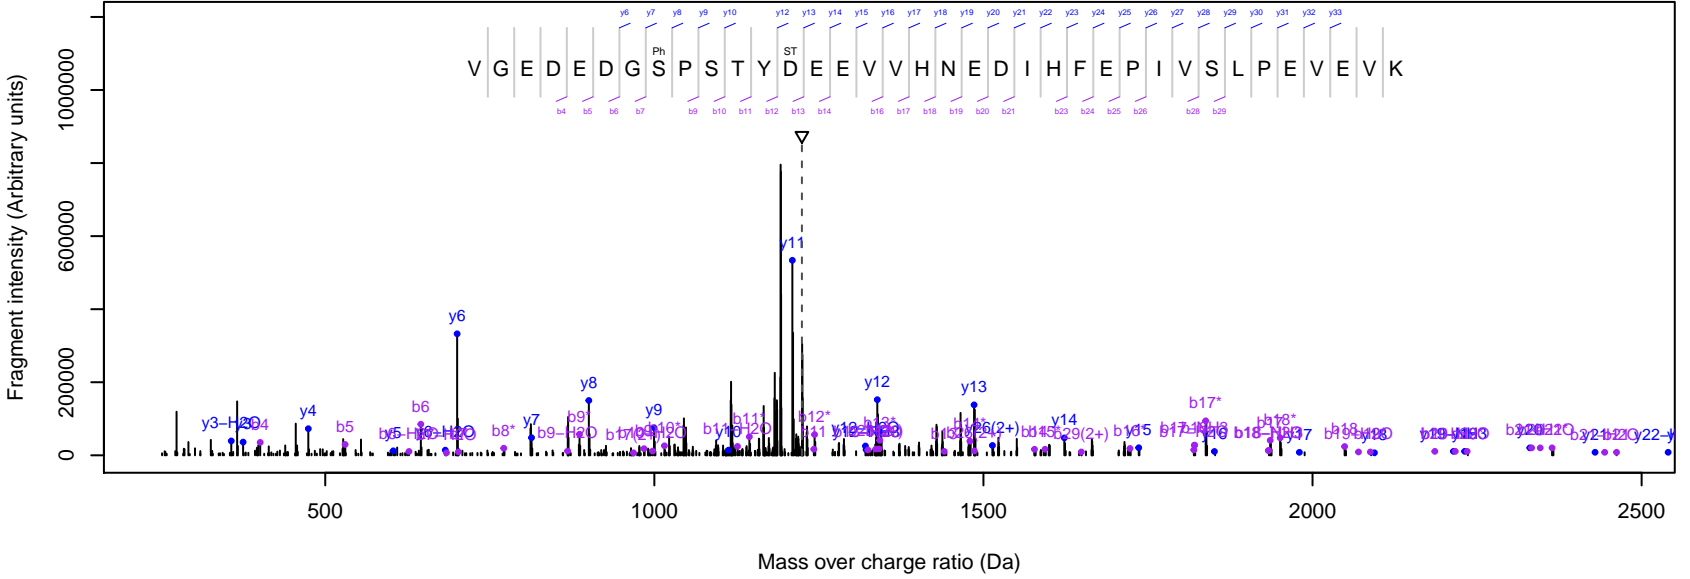

AFVEDSPSTYEDDEDGAGEGGSSLLQK-2+

Source : QE3\_201126\_FR\_TiOx\_hum\_tissue\_Urea\_RNAB\_B Scan : 33821

Andromeda score : 443.39

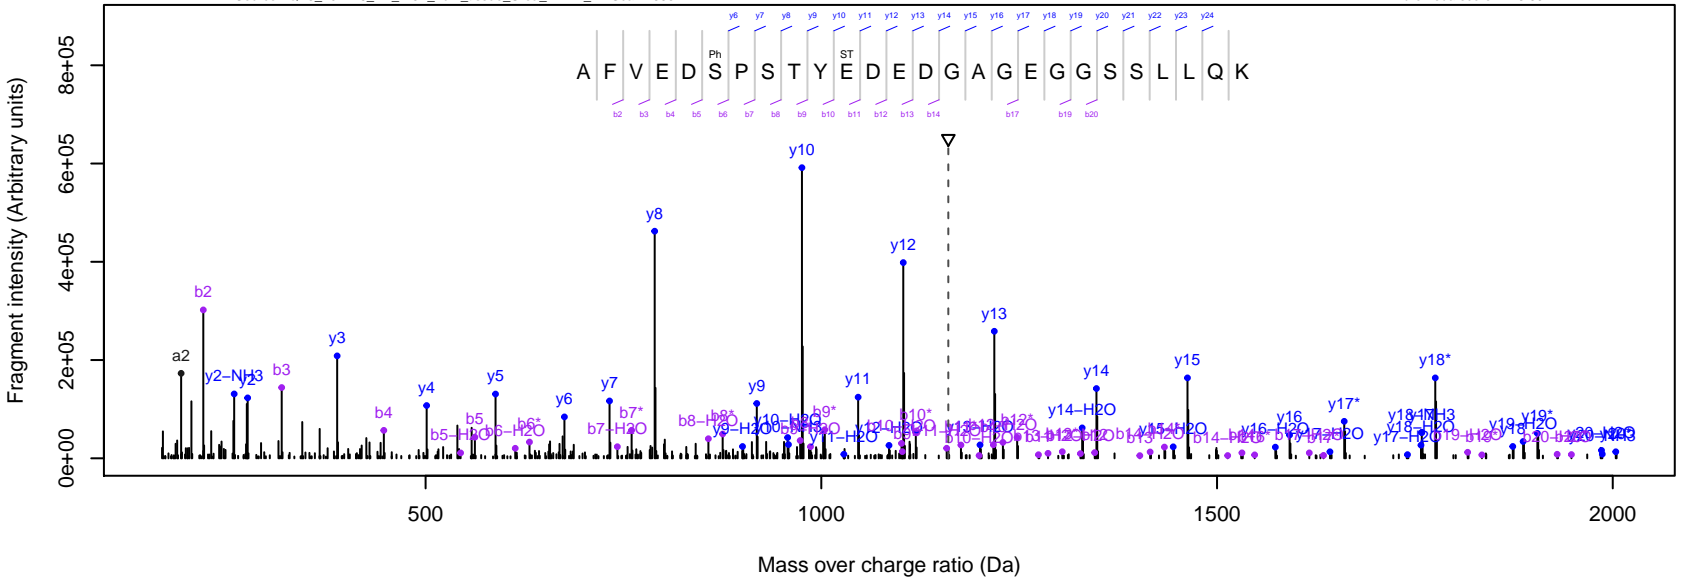

VVDYSQFQES(Phospho (STY))DDADEDYGR-2+

Source : QE3\_201126\_FR\_TiOx\_hum\_tissue\_Urea\_RNAB\_H Scan : 31970

Andromeda score : 443.09

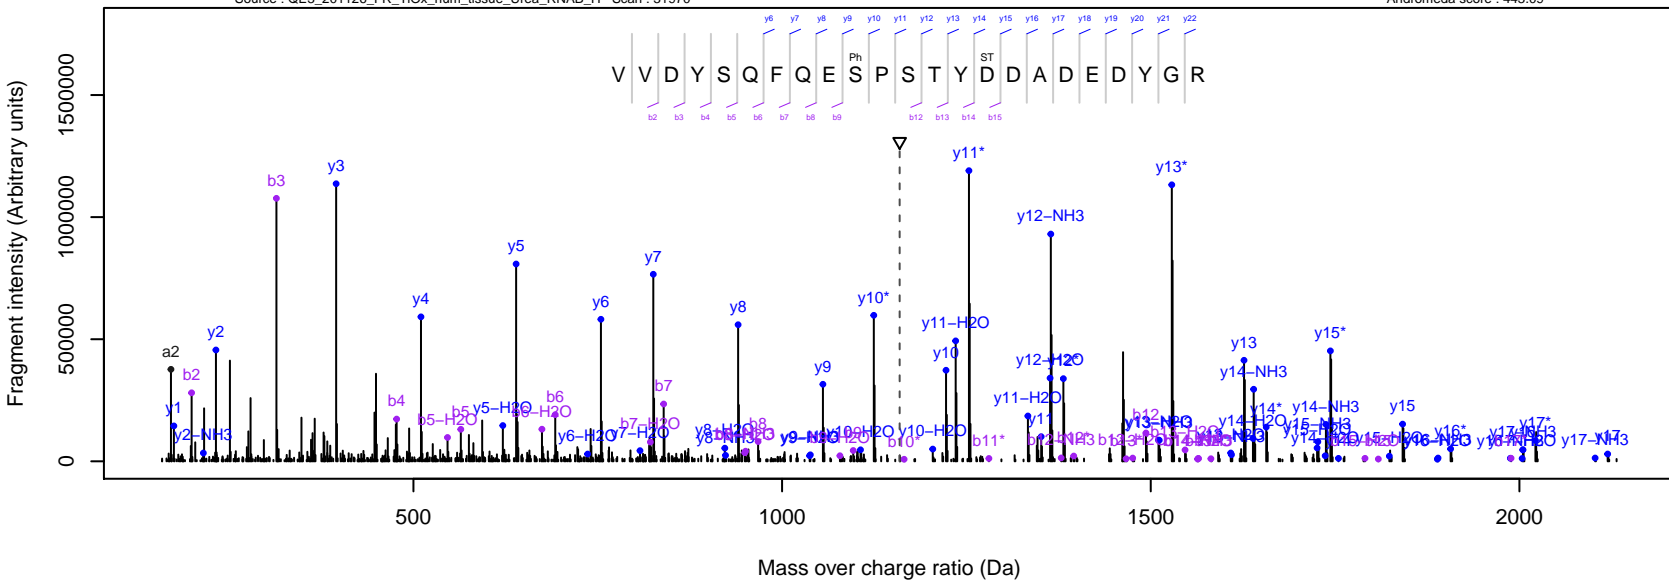

KLEKEEEGISQES(Phospho (STY))S(Phospho (STY))EEEEQ-2+

Source : QE3\_201126\_FR\_TiOx\_hum\_tissue\_Urea\_RNAB\_N Scan : 14801

Andromeda score : 442.31

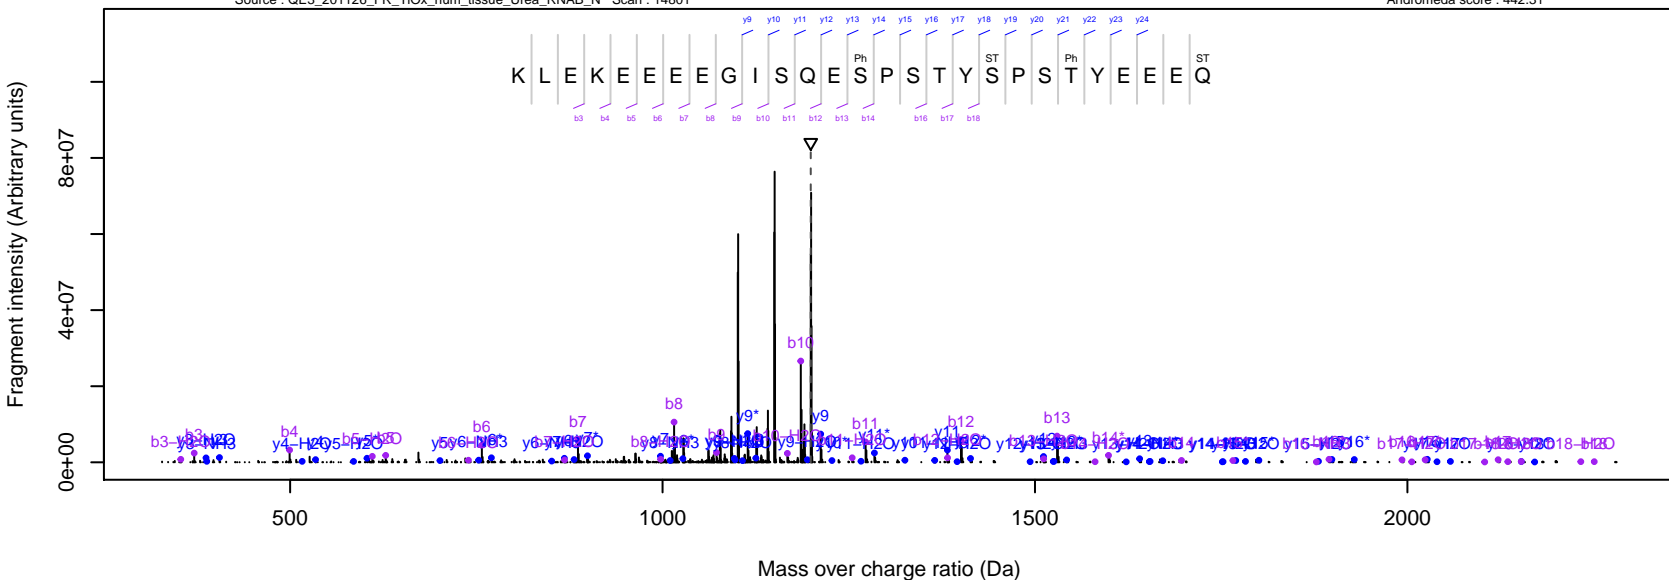

DSGSDEDFLMEDDD(Phospho (STY))DYGSK-2+

Source : QE3\_201126\_FR\_TiOx\_hum\_tissue\_Urea\_RNAB\_N Scan : 43187

Andromeda score : 442.11

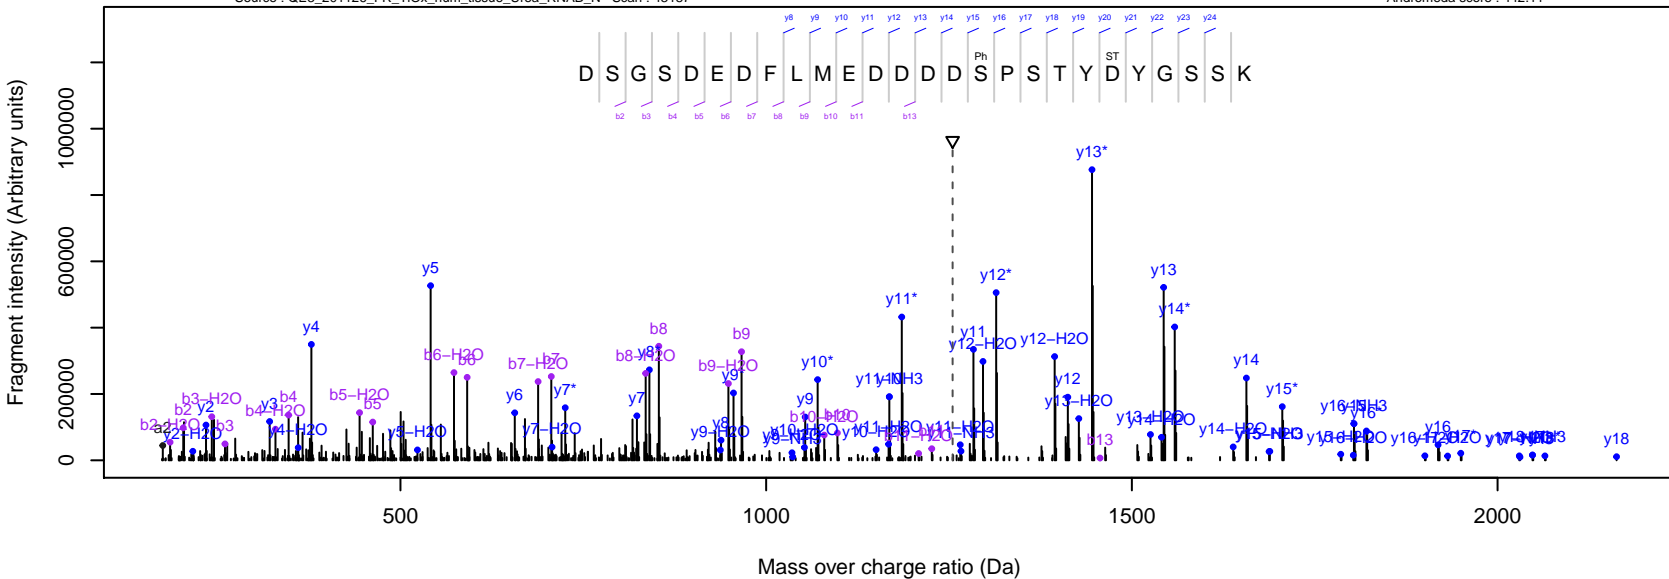

VIENADGS(Phospho (STY))EEETDRDADFNGTK-2+

Source : QE3\_201126\_FR\_TiOx\_hum\_tissue\_Urea\_RNAB\_N Scan : 17424

Andromeda score : 441.87

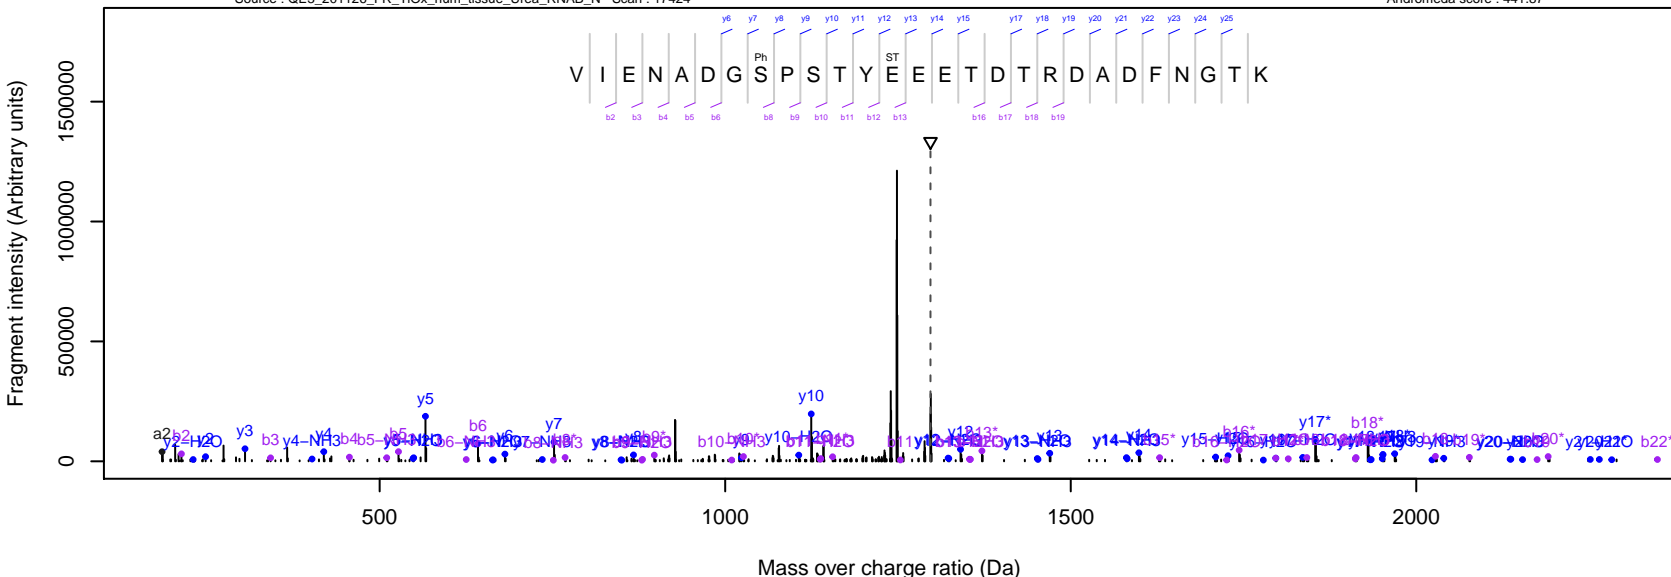

ELVSSSSGSDSDS(Phospho (STY))EVDKK-2+

Source : QE3\_201126\_FR\_TiOx\_hum\_tissue\_Urea\_RNAB\_N Scan : 8880

Andromeda score : 440.11

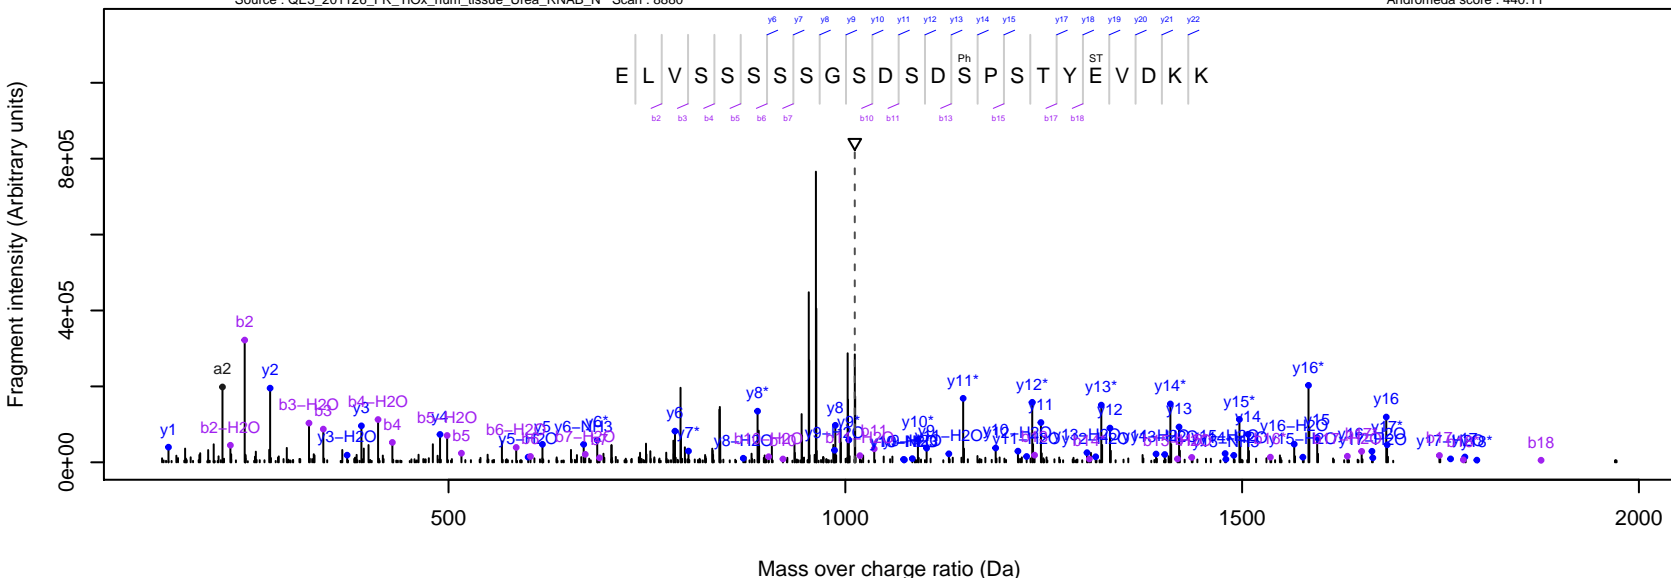

STAPSAAASASAAASS(Phospho (STY))PAGGGAEALLEHCGVCR-3+

Source : QE3\_201126\_FR\_TiOx\_hum\_tissue\_Urea\_RNAB\_N Scan : 48067

Andromeda score : 438.06

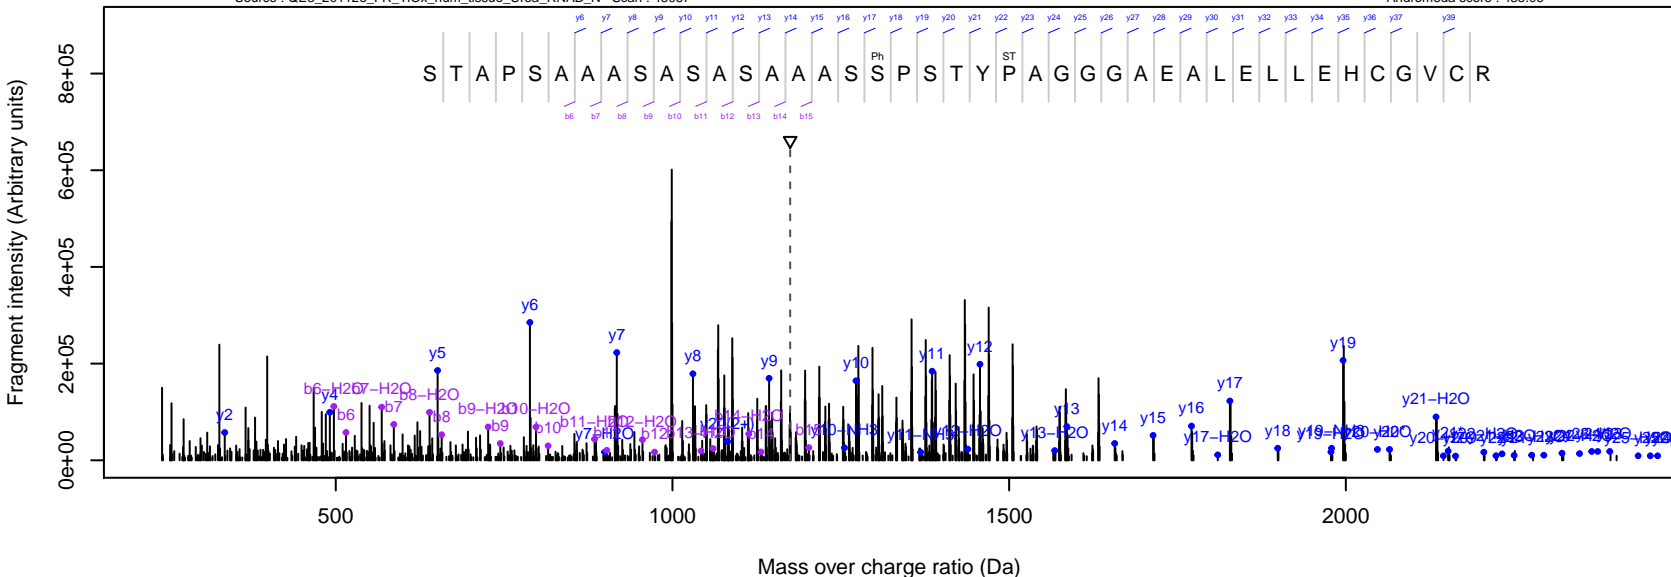

SSGS(Phospho (STY))PYGGGYGSGGGSGGYGSR-2+

Source : QE3\_201126\_FR\_TiOx\_hum\_tissue\_Urea\_RNAB\_H Scan : 16315

Andromeda score : 435.36

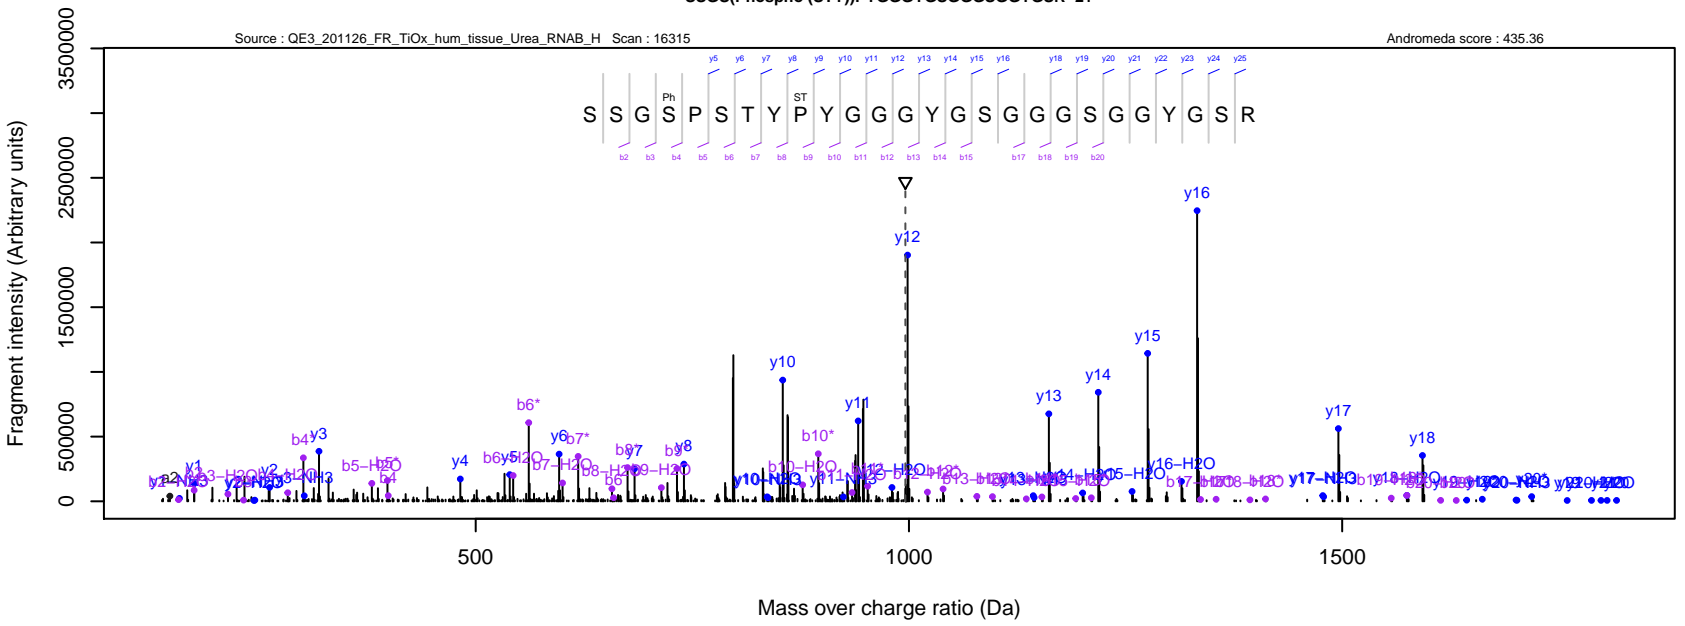

VADAKGDS(Phospho (STY))ES(Phospho (STY))EEDELEVPVPSR-2+

Source : QE3\_201126\_FR\_TiOx\_hum\_tissue\_Urea\_RNAB\_B Scan : 32926

Andromeda score : 433.76

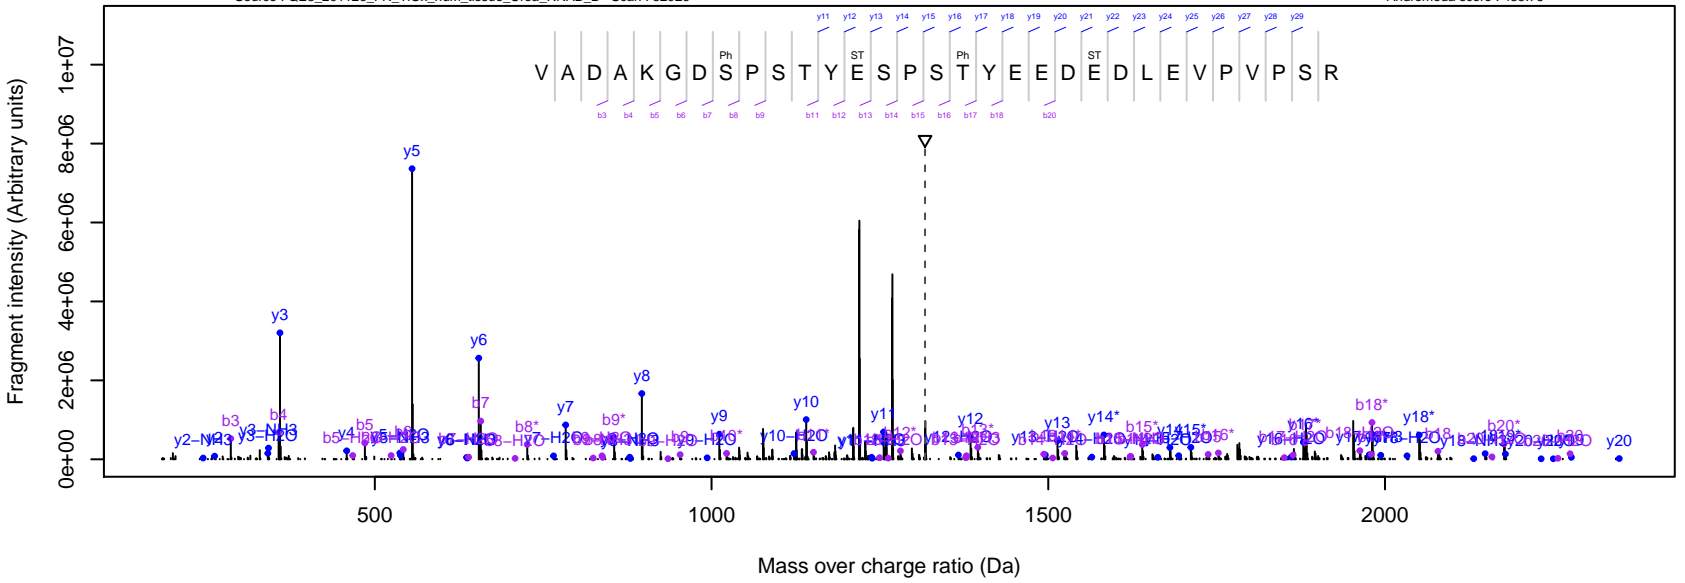

EEDEPEERS(Phospho (STY))GDETPGSEVPGDKAAEEQGDDQDSEK-3+

Source : QE3\_201126\_FR\_TiOx\_hum\_tissue\_Urea\_RNAB\_N Scan : 14614

Andromeda score : 431.99

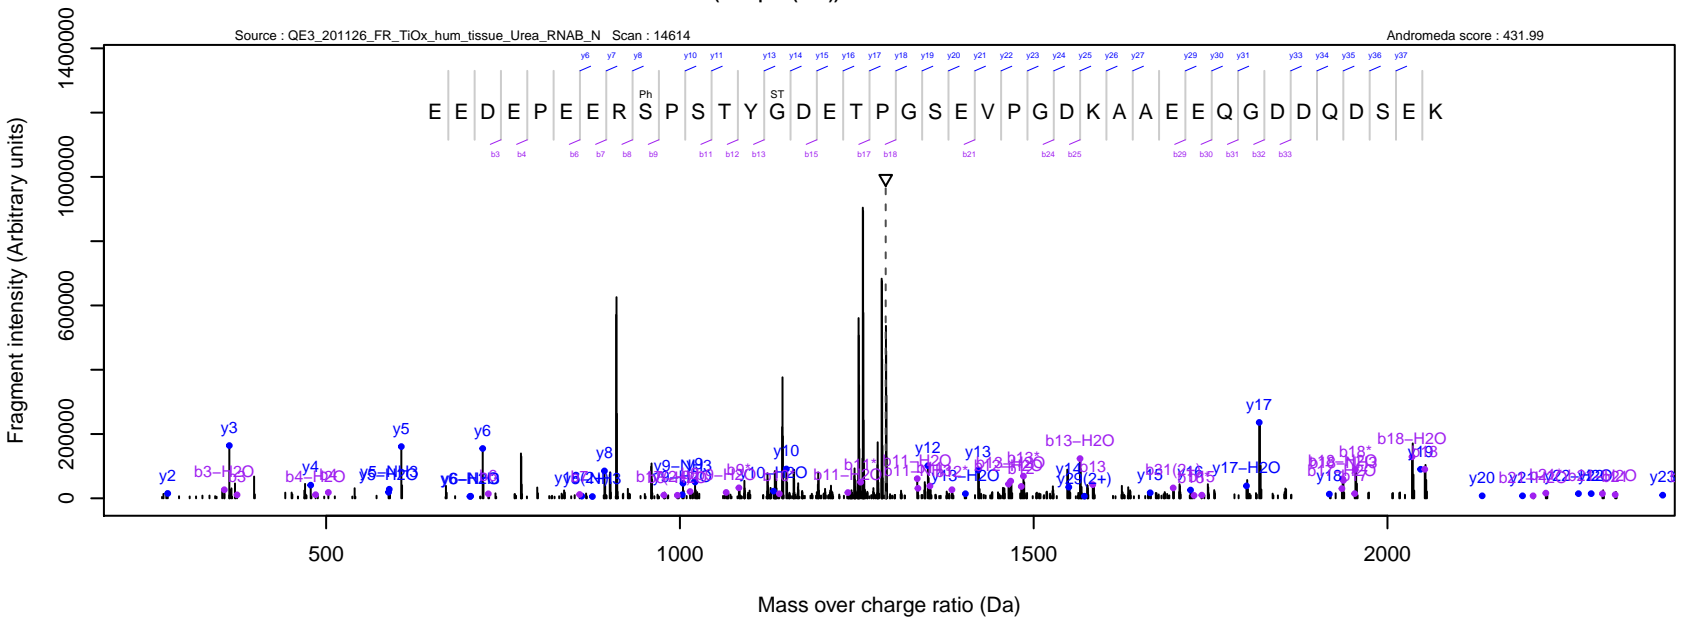



AGEEDEGEEDS(Phospho (STY))DSDYEISAK-2+

Source : QE3\_201126\_FR\_TiOx\_hum\_tissue\_Urea\_RNAB\_H Scan : 20421

Andromeda score : 431.72

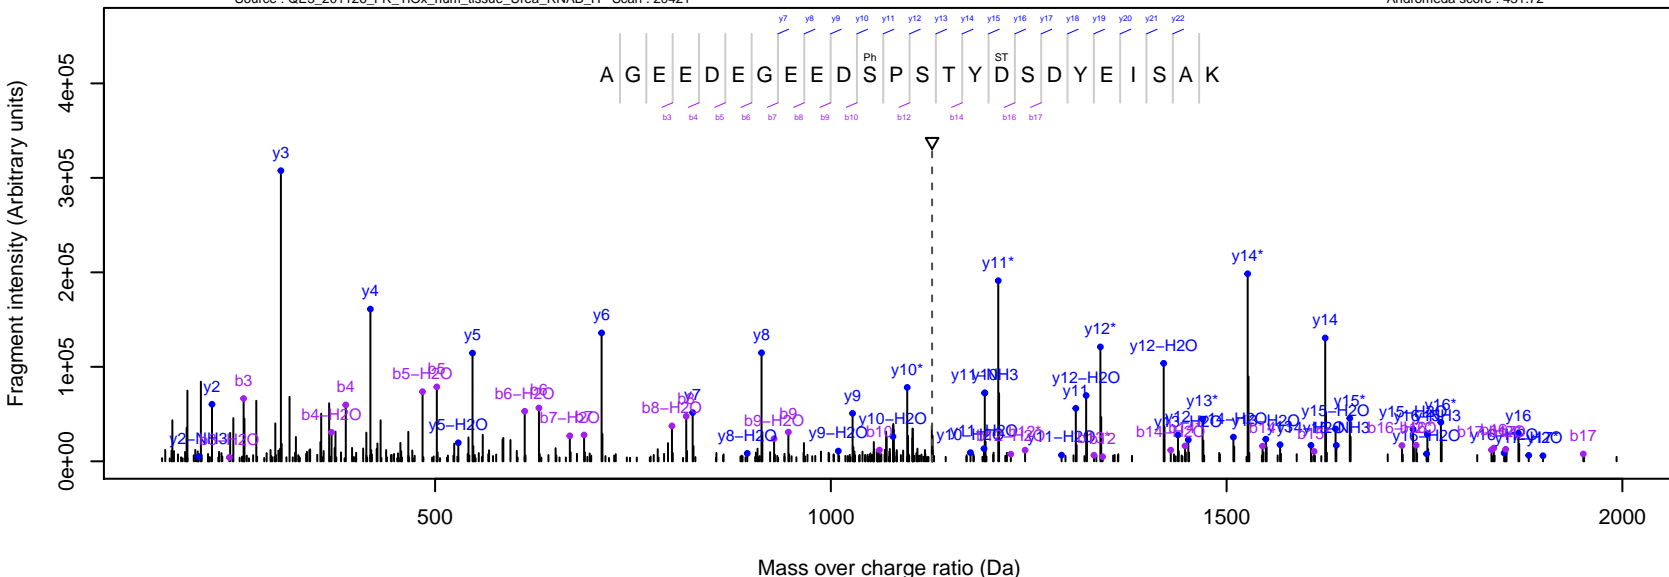

VEMGTSSQNDVMSWIPQETLNQINKAS(Phospho (STY))PR-3+

Source : QE3\_201126\_FR\_TiOx\_hum\_tissue\_Urea\_RNAB\_N Scan : 50977

Andromeda score : 431.68

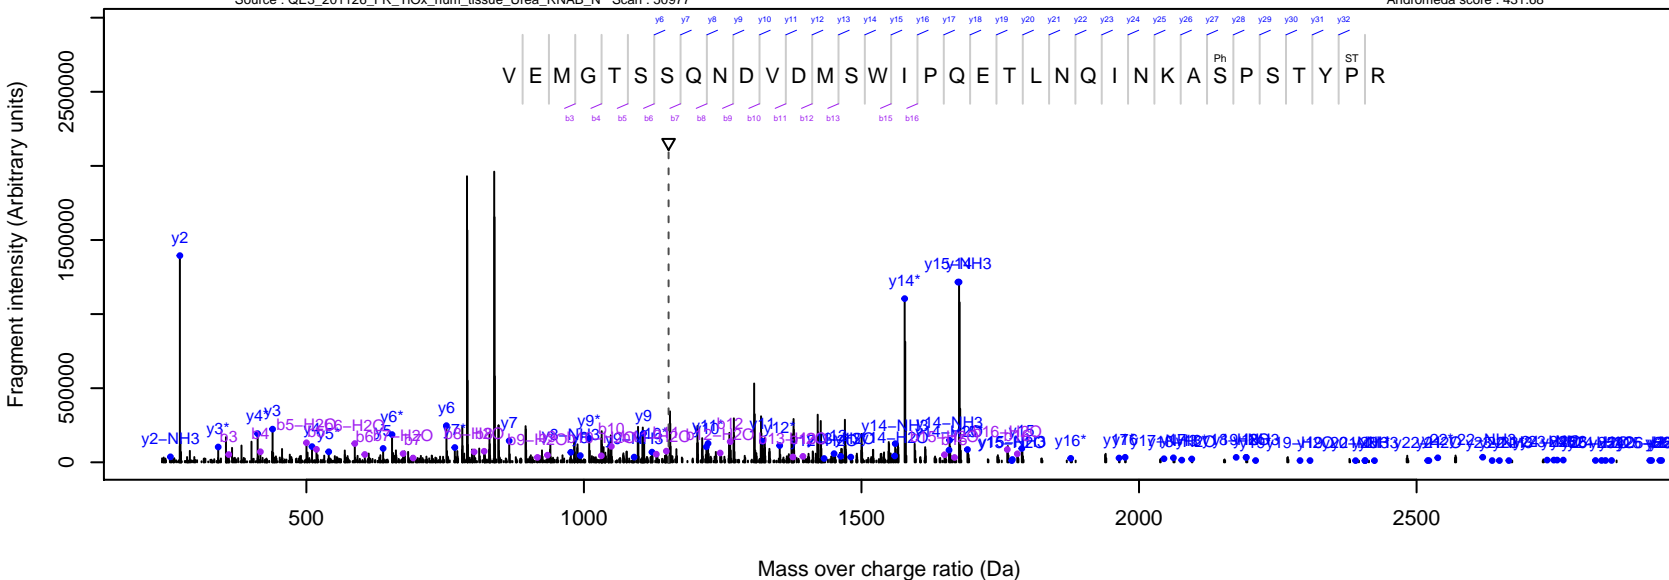

NHSVNEEQEEQEGES(Phospho (STY))EDEWEQVGPR-3+

Source : QE3\_201126\_FR\_TiOx\_hum\_tissue\_Urea\_RNAB\_N Scan : 24200

Andromeda score : 431.62

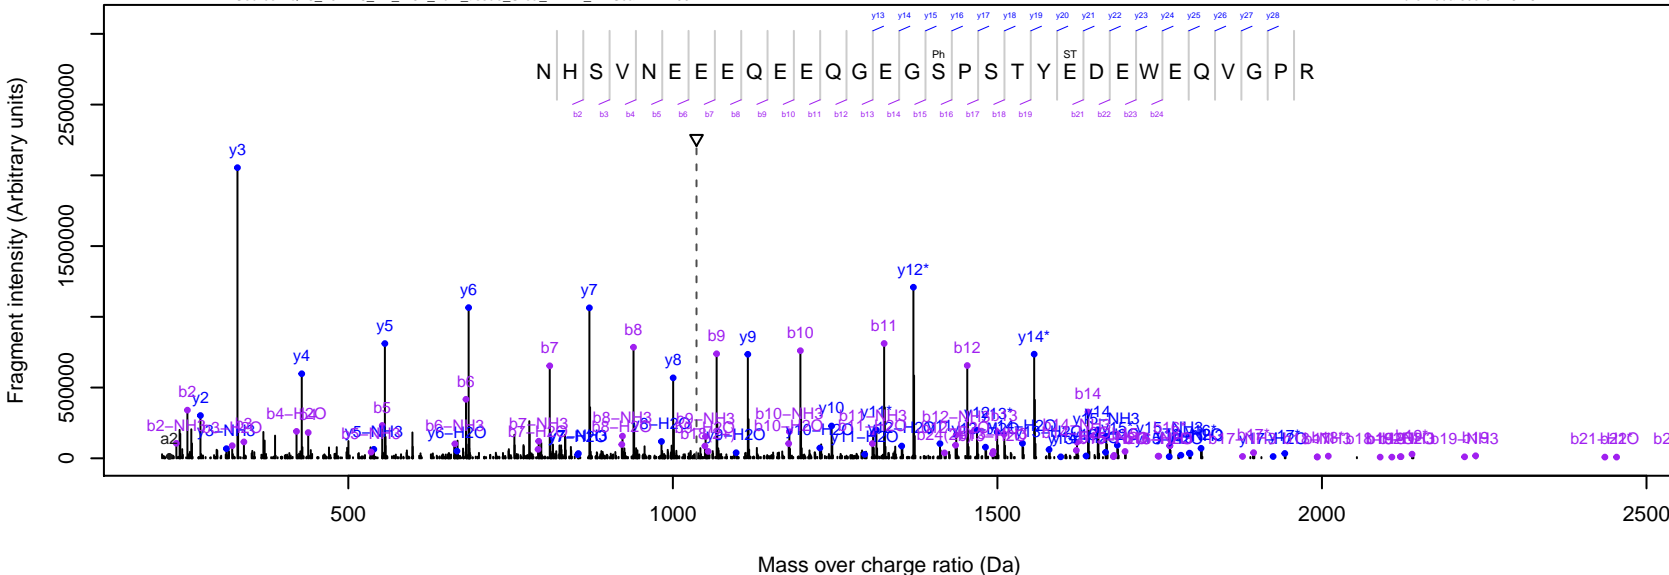

QEIESETT(Phospho (STY))SEEQIIEEK-2+

Source : QE3\_201126\_FR\_TiOx\_hum\_tissue\_Urea\_RNAB\_B Scan : 17689

Andromeda score : 430.86

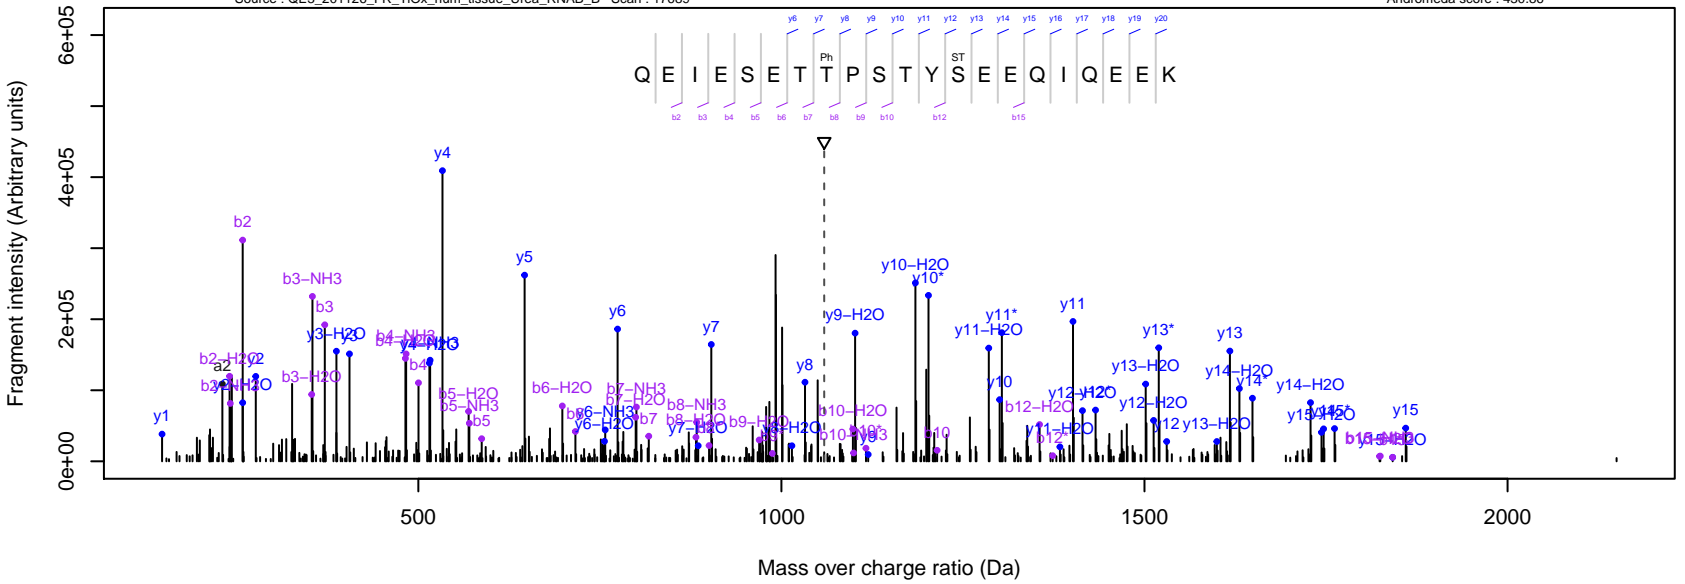

GGM(Oxidation (M))GSGGLATGIAGGLAGMGGIQNEK(Phospho (STY))LNDR-3+

Source : QE3\_201126\_FR\_TiOx\_hum\_tissue\_Urea\_RNAB\_N Scan : 45037

Andromeda score : 429.93

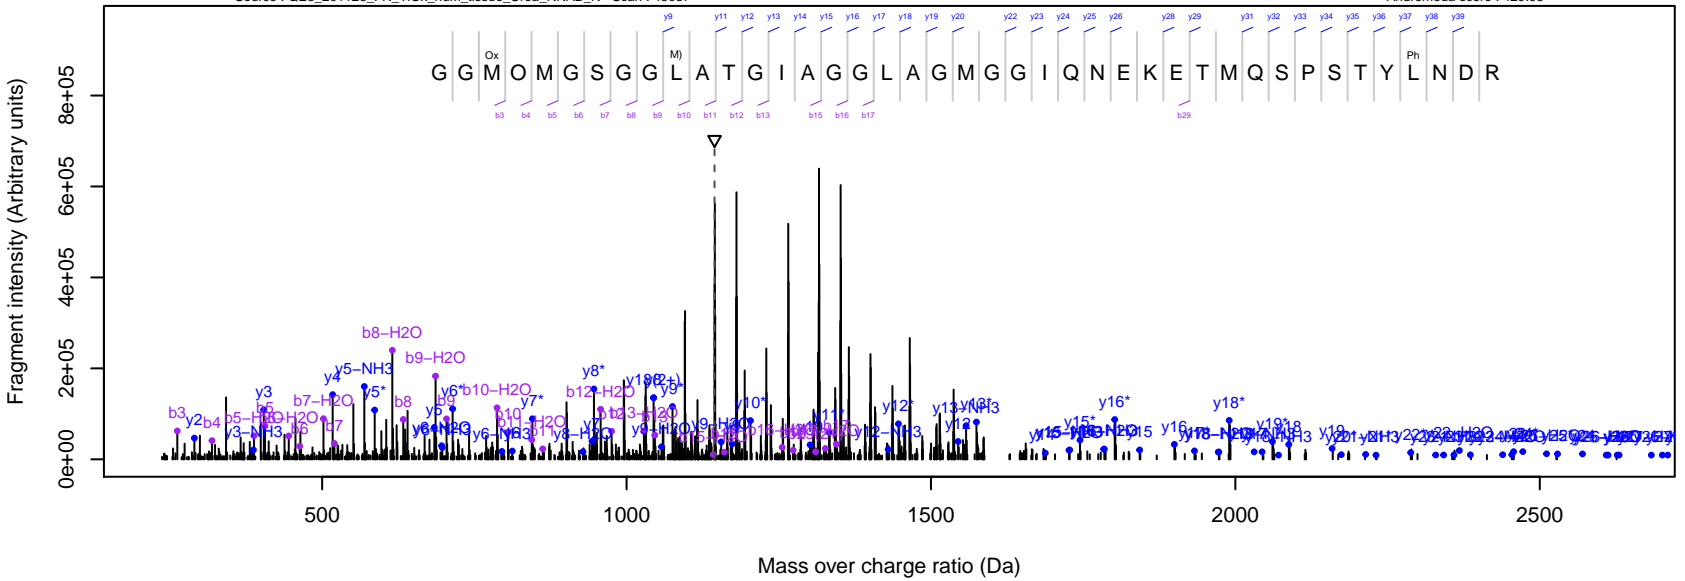

TKEYVSNDA(Phospho (STY))DDEKLSQPTD(Phospho (STY))DGG-3+

Source : QE3\_201126\_FR\_TiOx\_hum\_tissue\_Urea\_RNAB\_H Scan : 14354

Andromeda score : 423.5

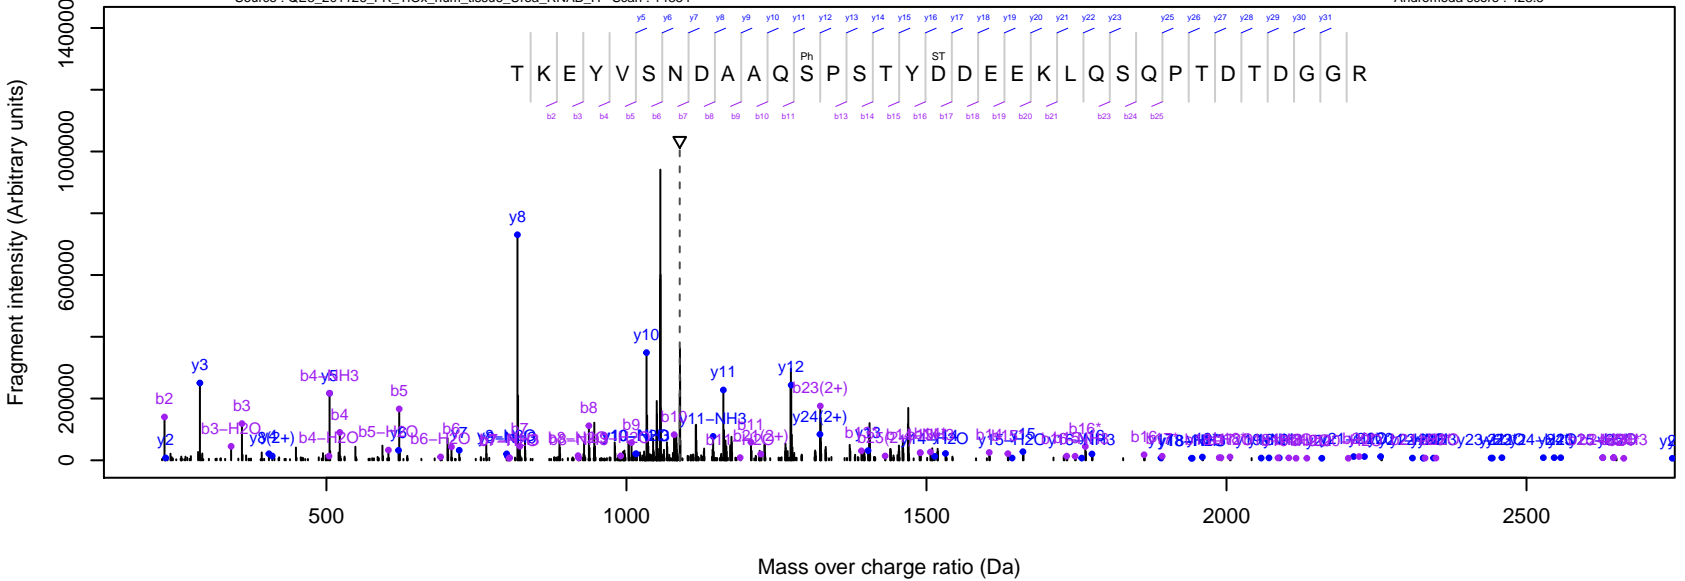

ETTCSKES(Phospho (STY))NEELTESCETKK-2+

Source : QE3\_201126\_FR\_TiOx\_hum\_tissue\_Urea\_RNAB\_H Scan : 6509

Andromeda score : 420.82

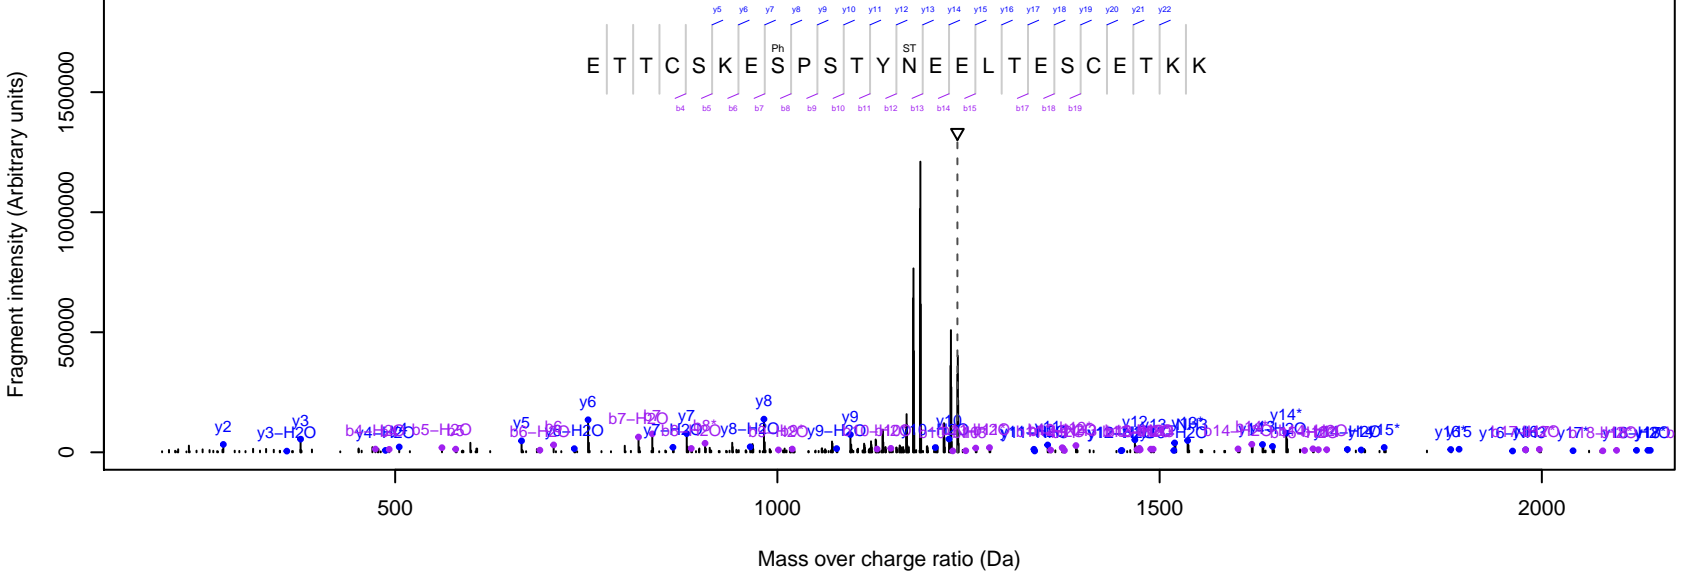

GTGSGQLQLDCSSS(Phospho (STY))DDEGAQNSTKPSATK-3+

Source : QE3\_201126\_FR\_TiOx\_hum\_tissue\_Urea\_RNAB\_H Scan : 17111

Andromeda score : 419.82

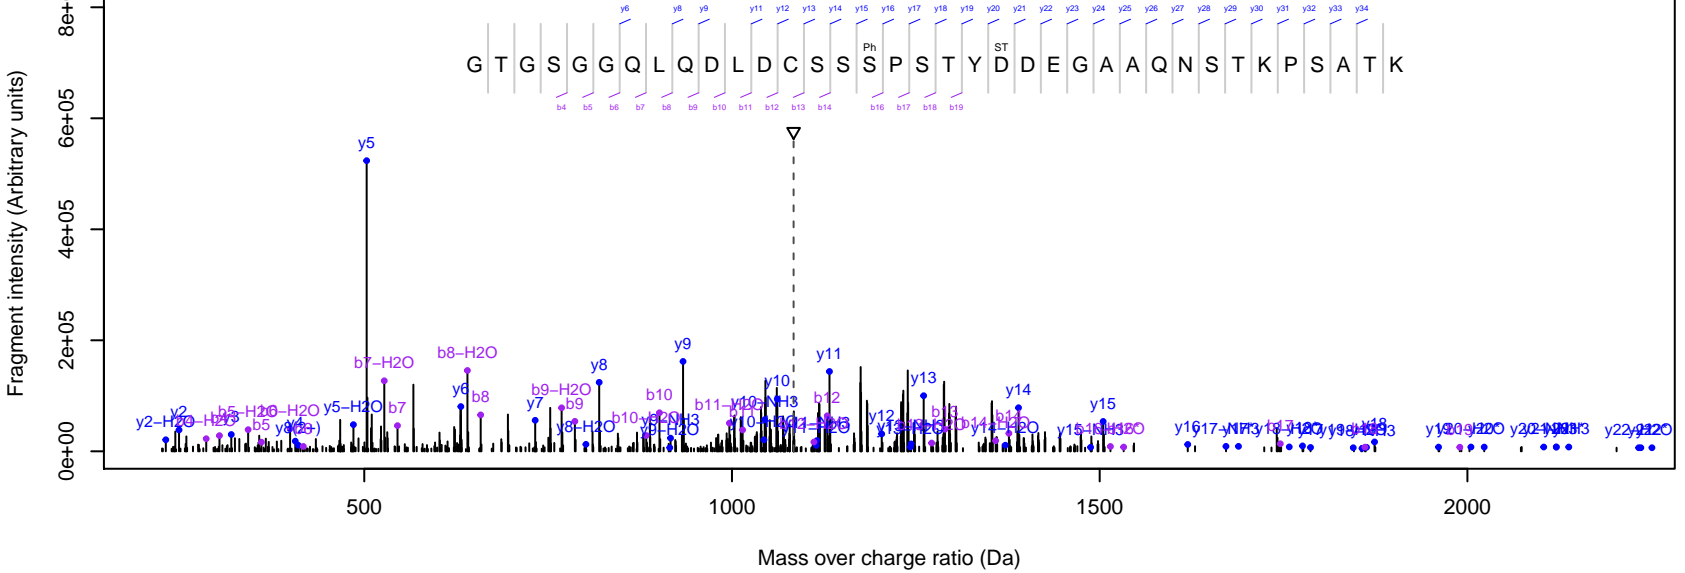

(Acetyl (Protein N-term))S(Phospho (STY))GEDEQQEQTIAEDLVVTK-2+

Source : QE3\_201126\_FR\_TiOx\_hum\_tissue\_Urea\_RNAB\_H Scan : 55423

Andromeda score : 416.15

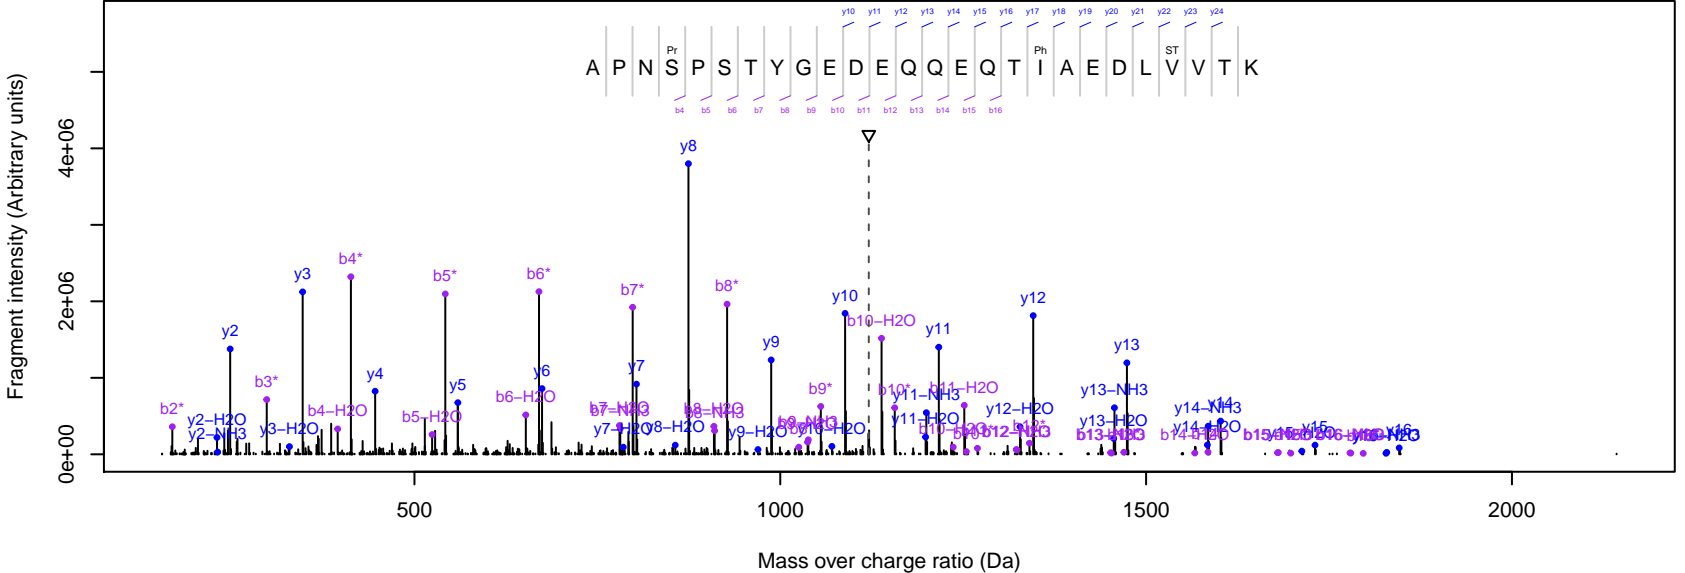

TLNSAEDYLDDEDSPSTYD-2+

Source : QE3\_201126\_FR\_TiOx\_hum\_tissue\_Urea\_RNAB\_N Scan : 41708

Andromeda score : 415.78

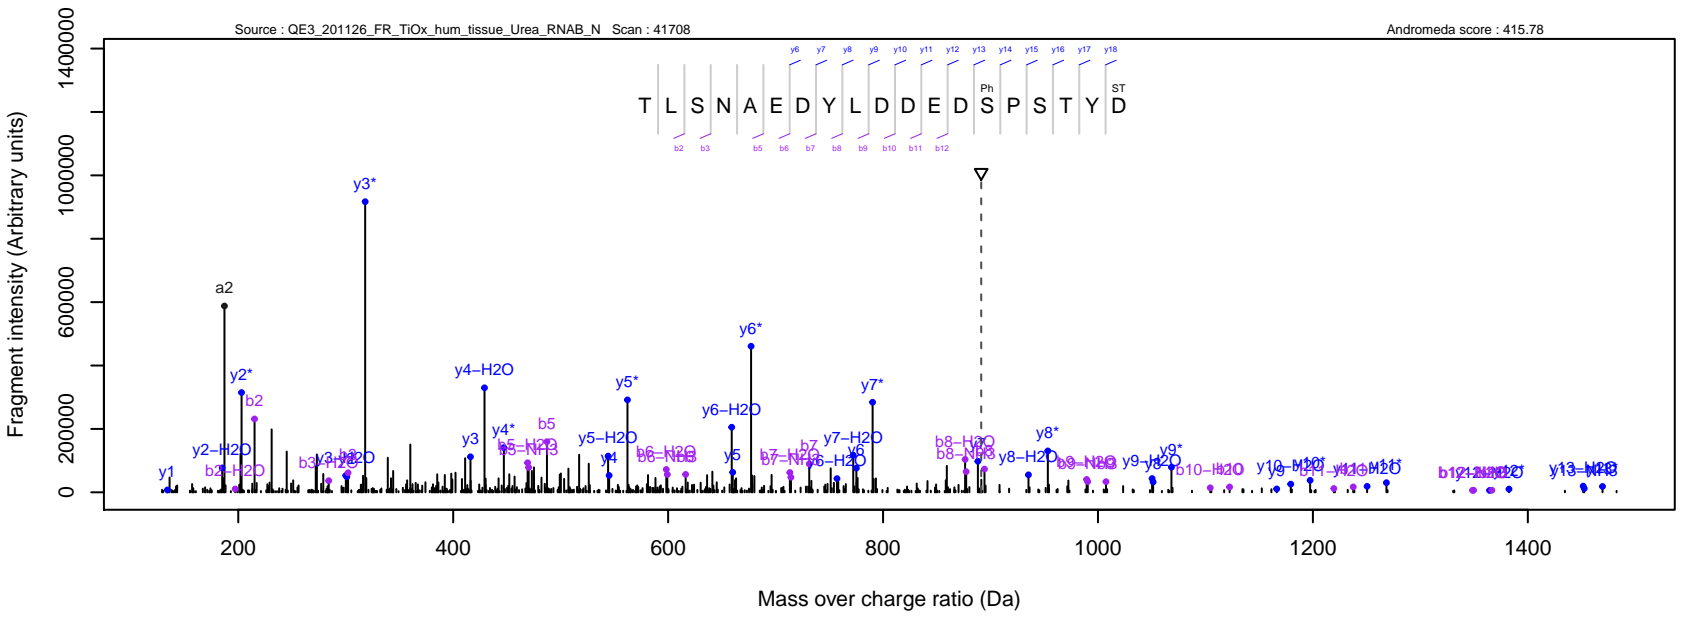

QICLVMLETSLSQSPSTYPQGR-2+

Source : QE3\_201126\_FR\_TiOx\_hum\_tissue\_Urea\_RNAB\_B Scan : 55886

Andromeda score : 415.74

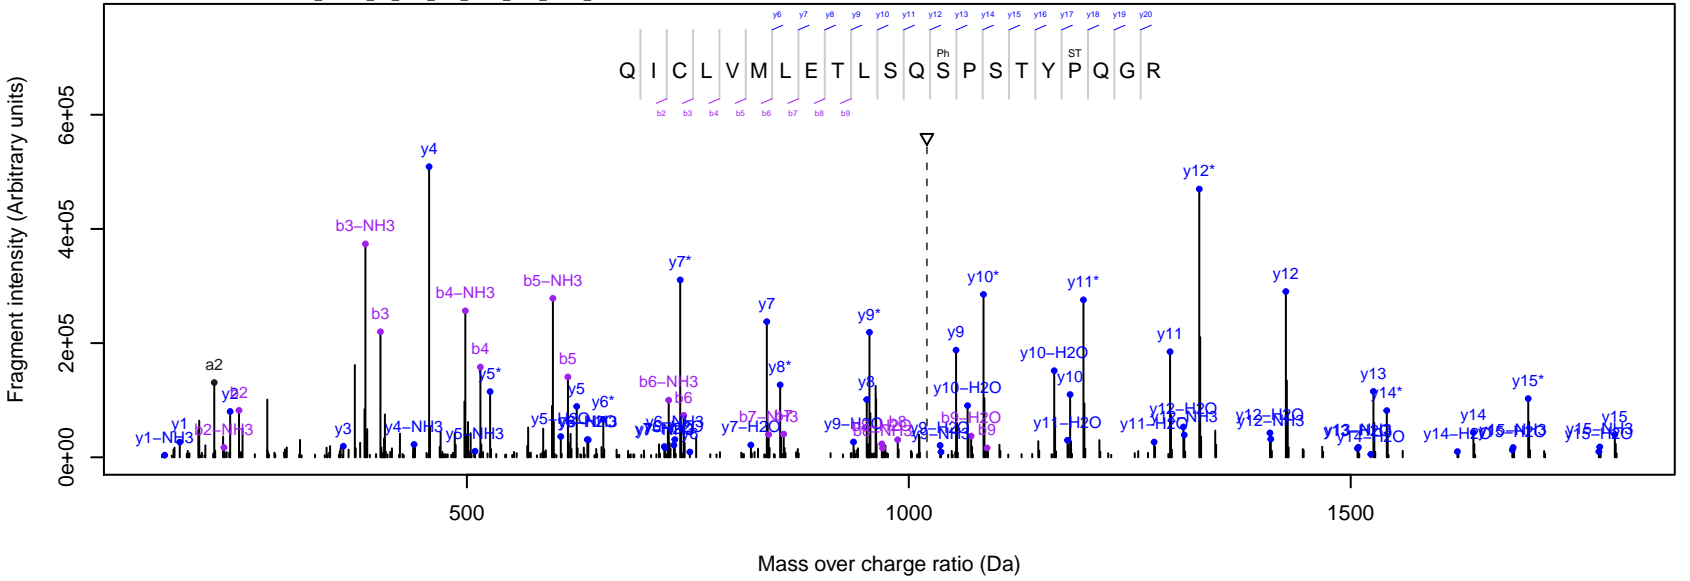

INSSGESGDESPSTYDEF LQSR-2+

Source : QE3\_201126\_FR\_TiOx\_hum\_tissue\_Urea\_RNAB\_B Scan : 24751

Andromeda score : 414.29

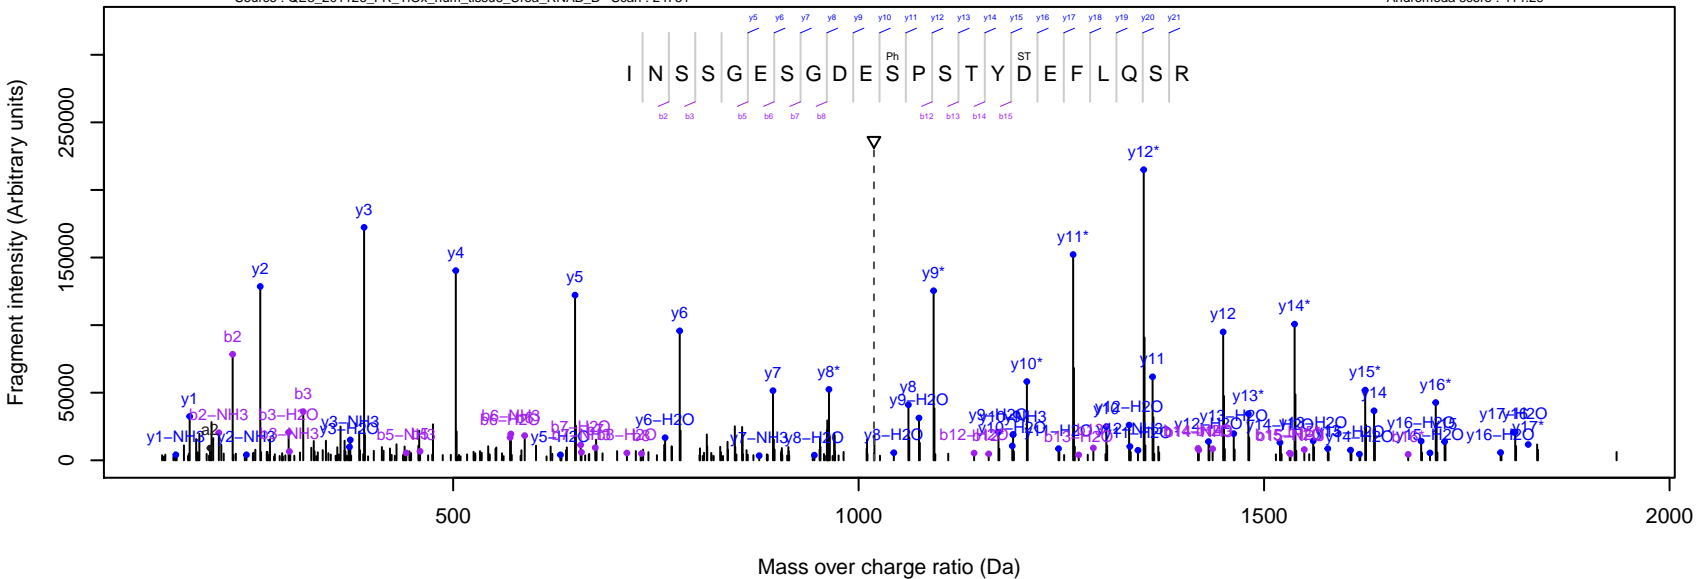

DSHS(Phospho (STY))S(Phospho (STY))EEDEASSQTDLSTISK-2+

Source : QE3\_201126\_FR\_TIOx\_hum\_tissue\_Urea\_RNAB\_B Scan : 25069

Andromeda score : 414.12

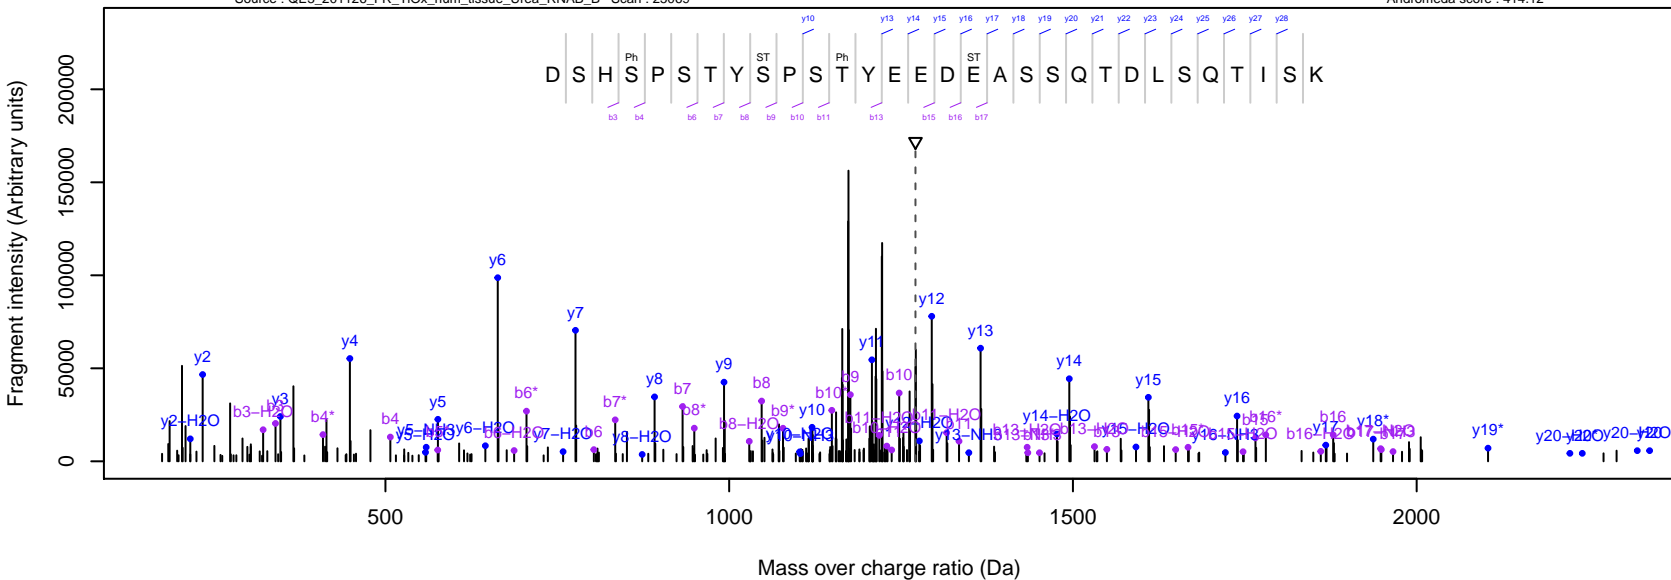

LNWLSVDFNNWKDWEEDS(Phospho (STY))DEDMNSFDR-3+

Source : QE3\_201126\_FR\_TIOx\_hum\_tissue\_Urea\_RNAB\_N Scan : 61722

Andromeda score : 413.21

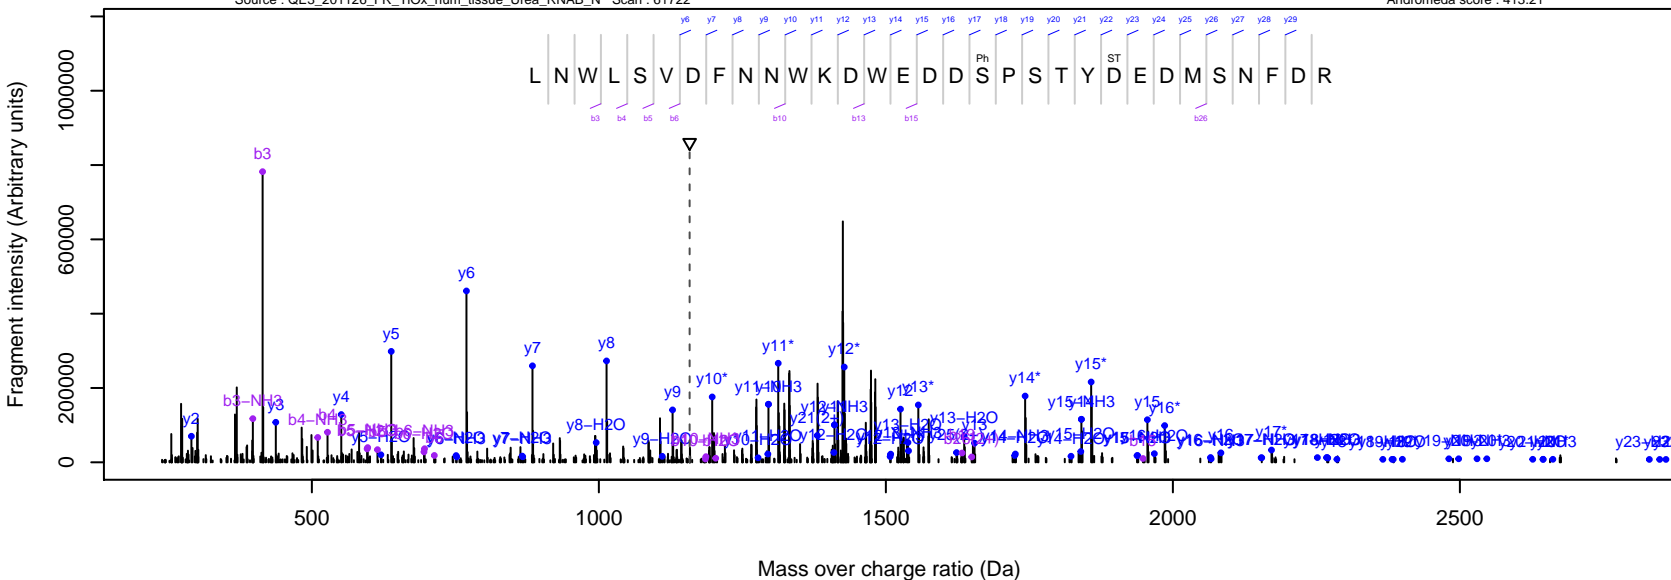

(Acetyl (Protein N-term))MDTDLYDFGNYPGLDS(Phospho (STY))DEDDDELGRETK-3+

Source : QE3\_201126\_FR\_TIOx\_hum\_tissue\_Urea\_RNAB\_H Scan : 62309

Andromeda score : 412.21

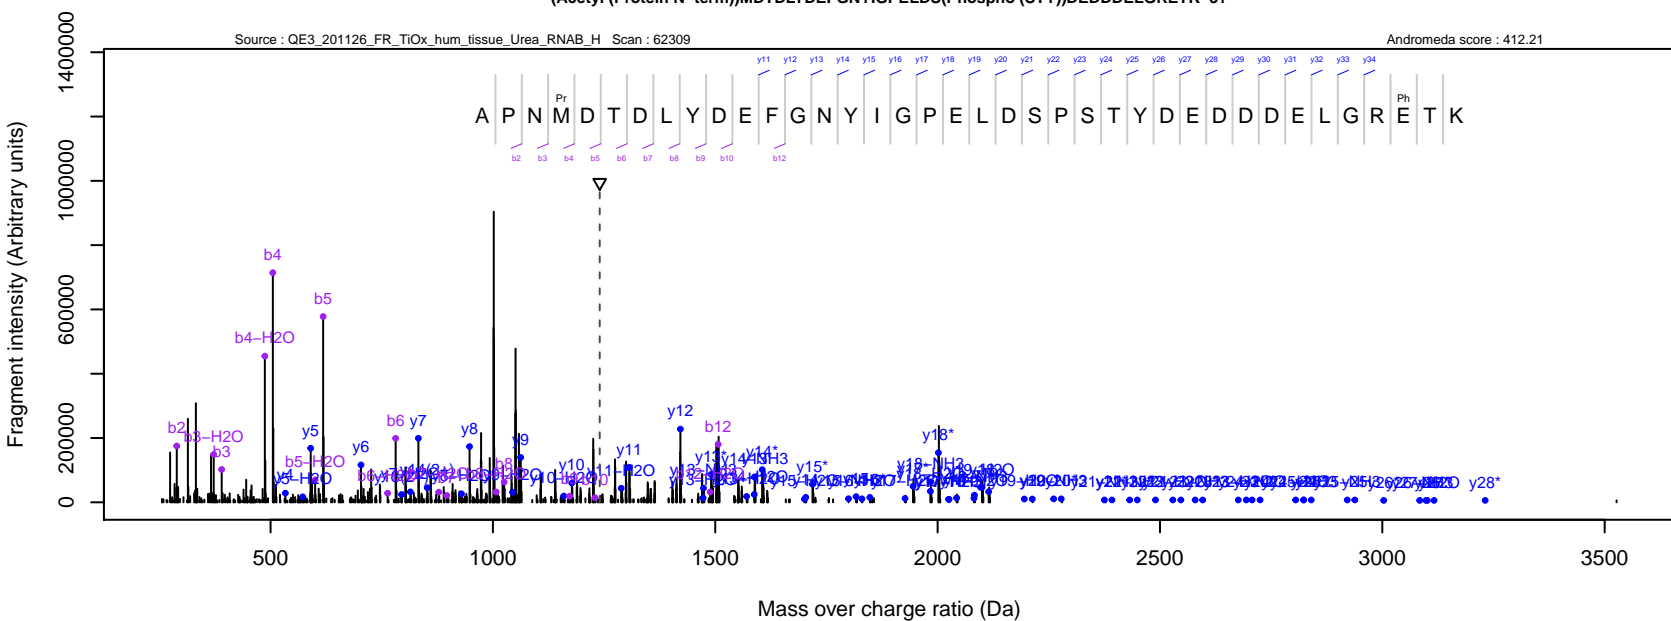

YMAENPTAGVVQEEEDNLEYDS(Phospho (STY))DGNPIAPTKK-3+

Source : QE3\_201126\_FR\_TIOx\_hum\_tissue\_Urea\_RNAB\_H Scan : 39249

Andromeda score : 412.04

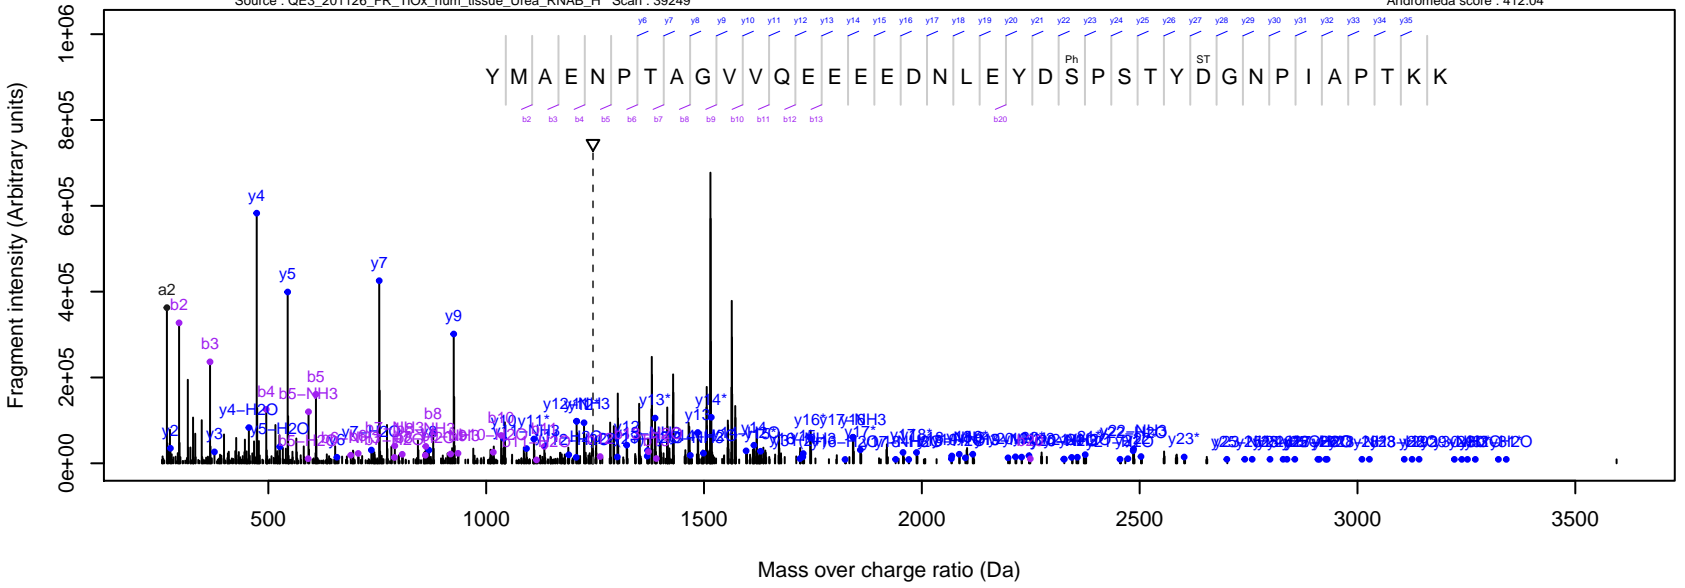

RAS(Phospho (STY))LSDLTLDLEDIEGLTVR-2+

Source : QE3\_201126\_FR\_TIOx\_hum\_tissue\_Urea\_RNAB\_H Scan : 54897

Andromeda score : 411.59

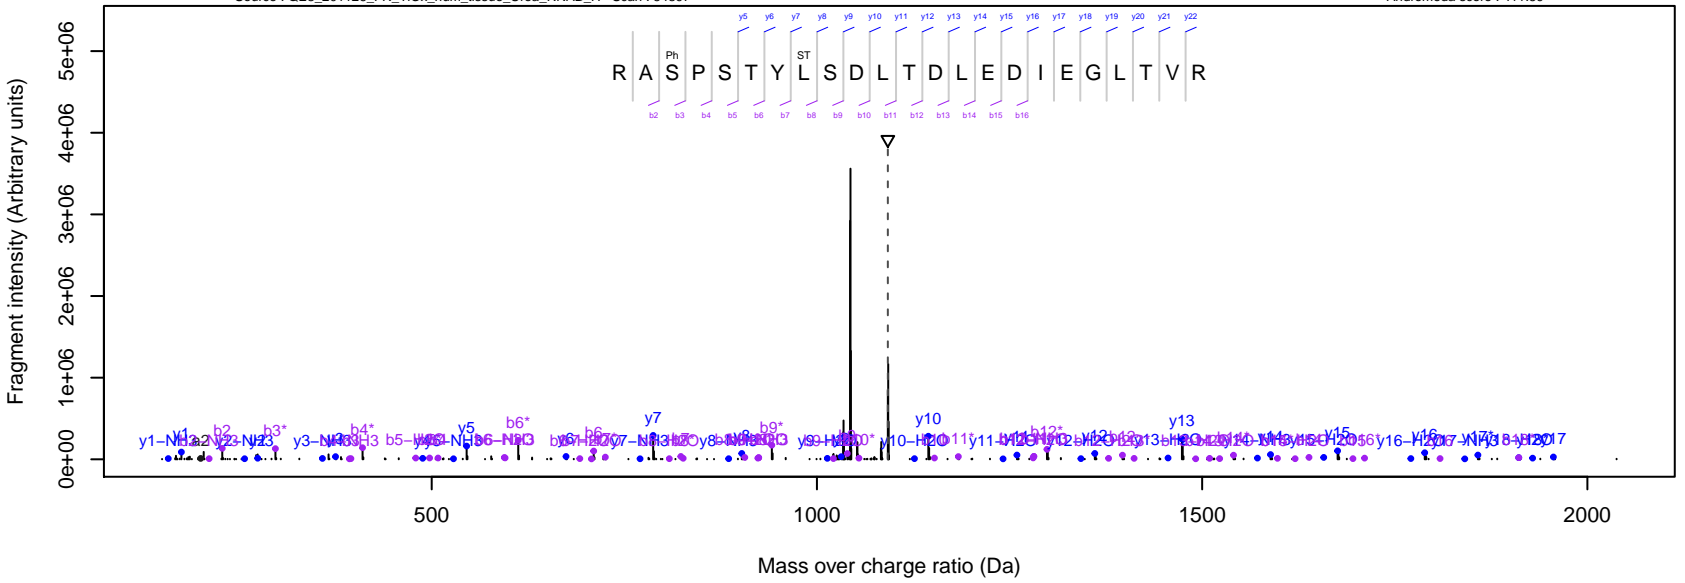

IALESEGRPEEQM(Oxidation (M))ESDNCS(Phospho (STY))GGDDDWTHLSSK-3+

Source : QE3\_201126\_FR\_TIOx\_hum\_tissue\_Urea\_RNAB\_H Scan : 27456

Andromeda score : 411.39

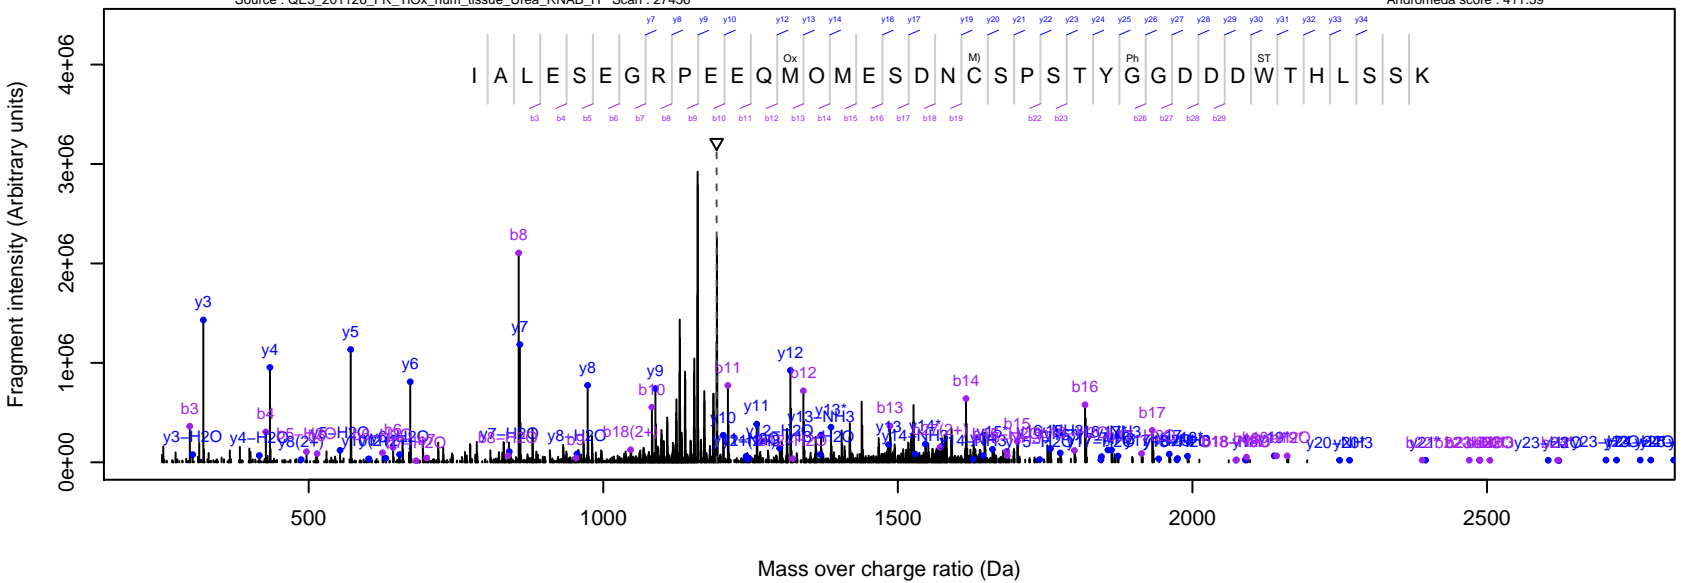

SLS(Phospho (STY))TSGESLYHVLGDK-2+

Source : QE3\_201126\_FR\_TiOx\_hum\_tissue\_Urea\_RNAB\_N Scan : 52394

Andromeda score : 409.77

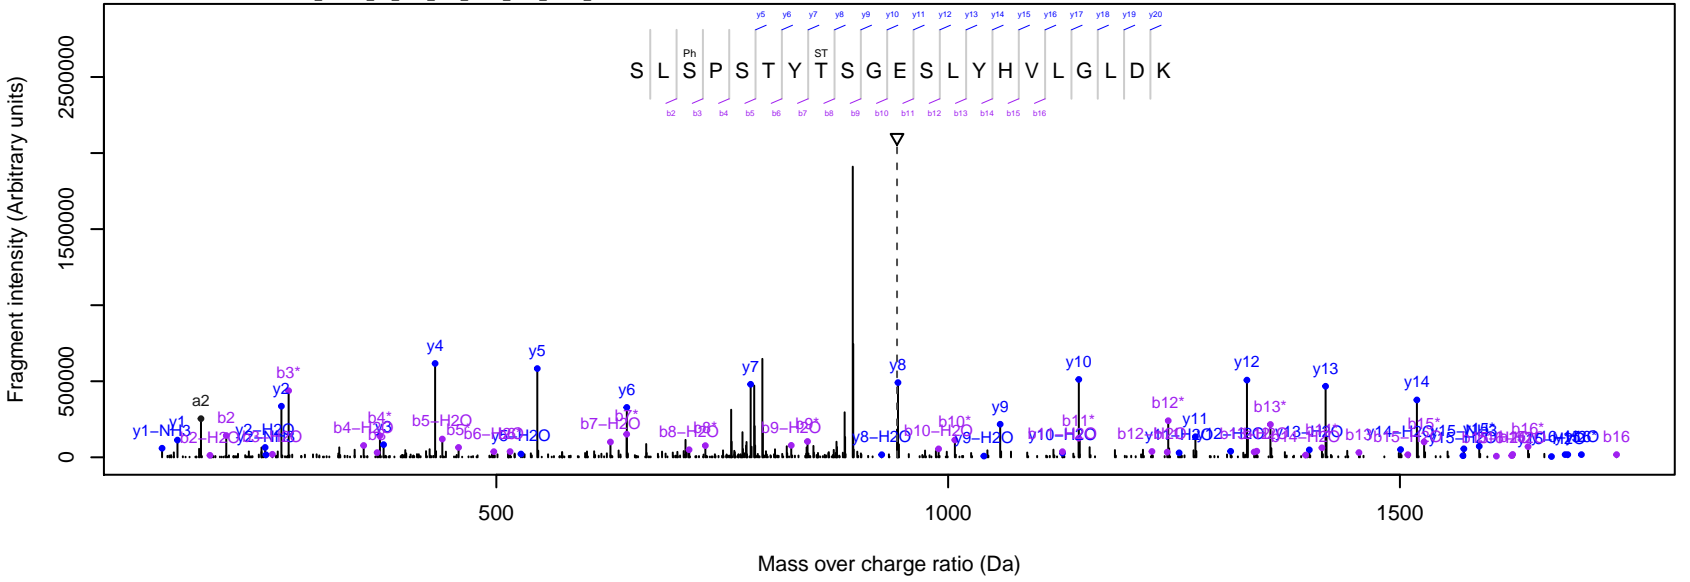

SSSPAPEFLASSPPDNKSPDEATAADQES(Phospho (STY))EDLSASR-3+

Source : QE3\_201126\_FR\_TiOx\_hum\_tissue\_Urea\_RNAB\_H Scan : 33136

Andromeda score : 408.19

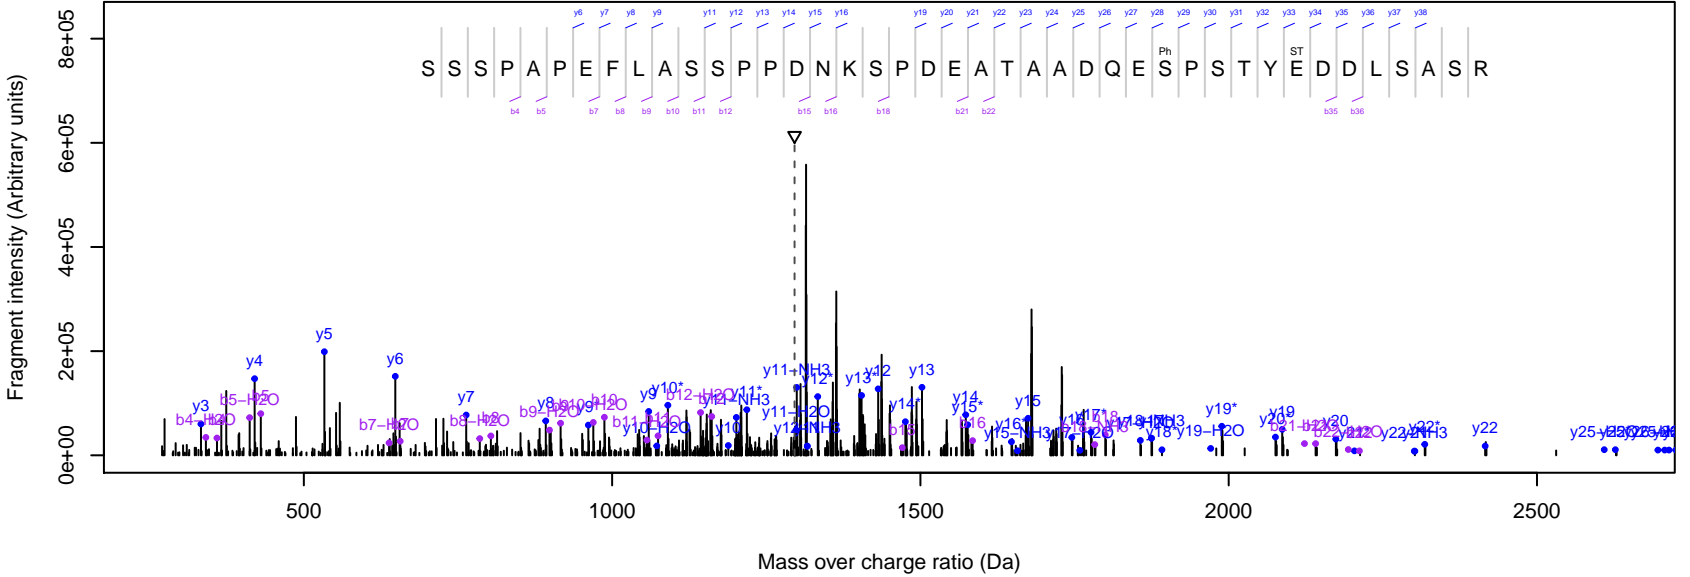

KIALESEGRPEEQM(Oxidation (M))ESDNCS(Phospho (STY))GGDDWTHLSSK-3+

Source : QE3\_201126\_FR\_TiOx\_hum\_tissue\_Urea\_RNAB\_H Scan : 23244

Andromeda score : 407.99

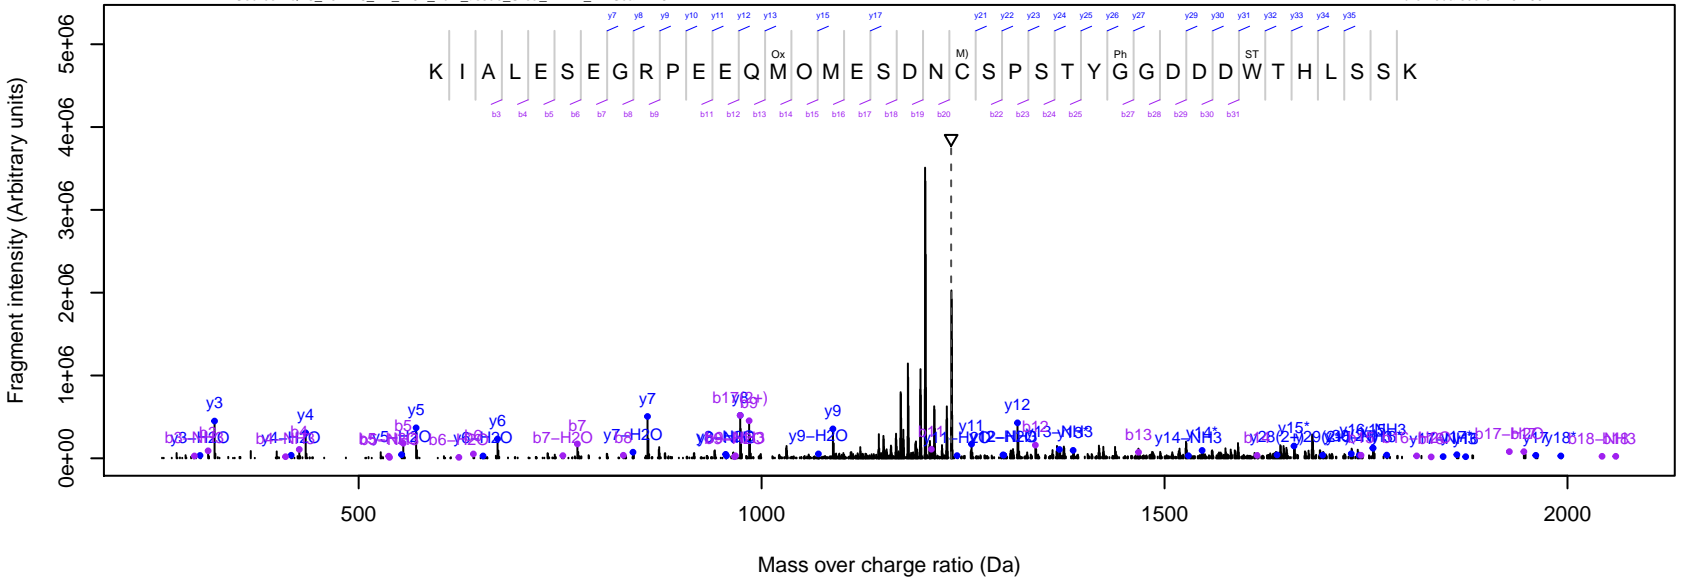

KLS(Phospho (STY))LGQYDNDAGGQLPFSK-2+

Source : QE3\_201126\_FR\_TIOx\_hum\_tissue\_Urea\_RNAB\_N Scan : 39328

Andromeda score : 407.13

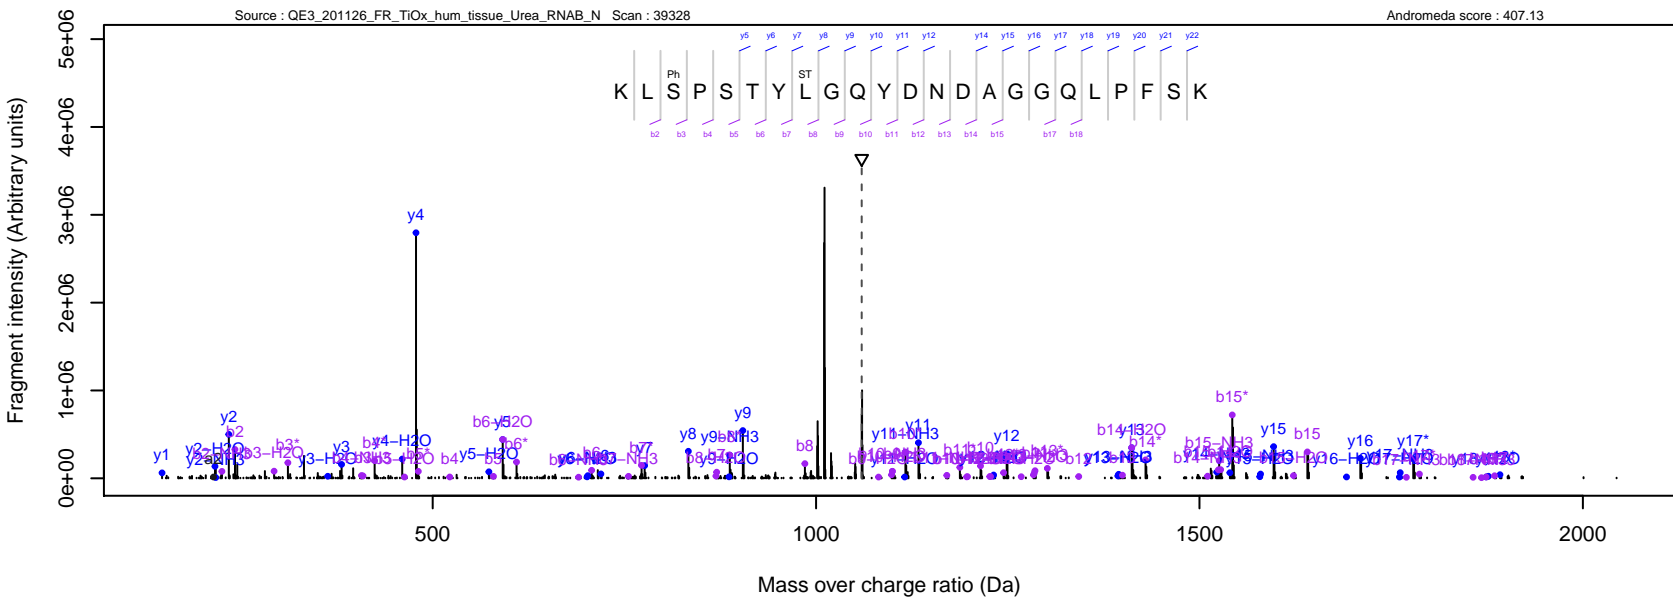

SLDS(Phospho (STY))DESEDEDDYQK-2+

Source : QE3\_201126\_FR\_TIOx\_hum\_tissue\_Urea\_RNAB\_N Scan : 17418

Andromeda score : 405.31

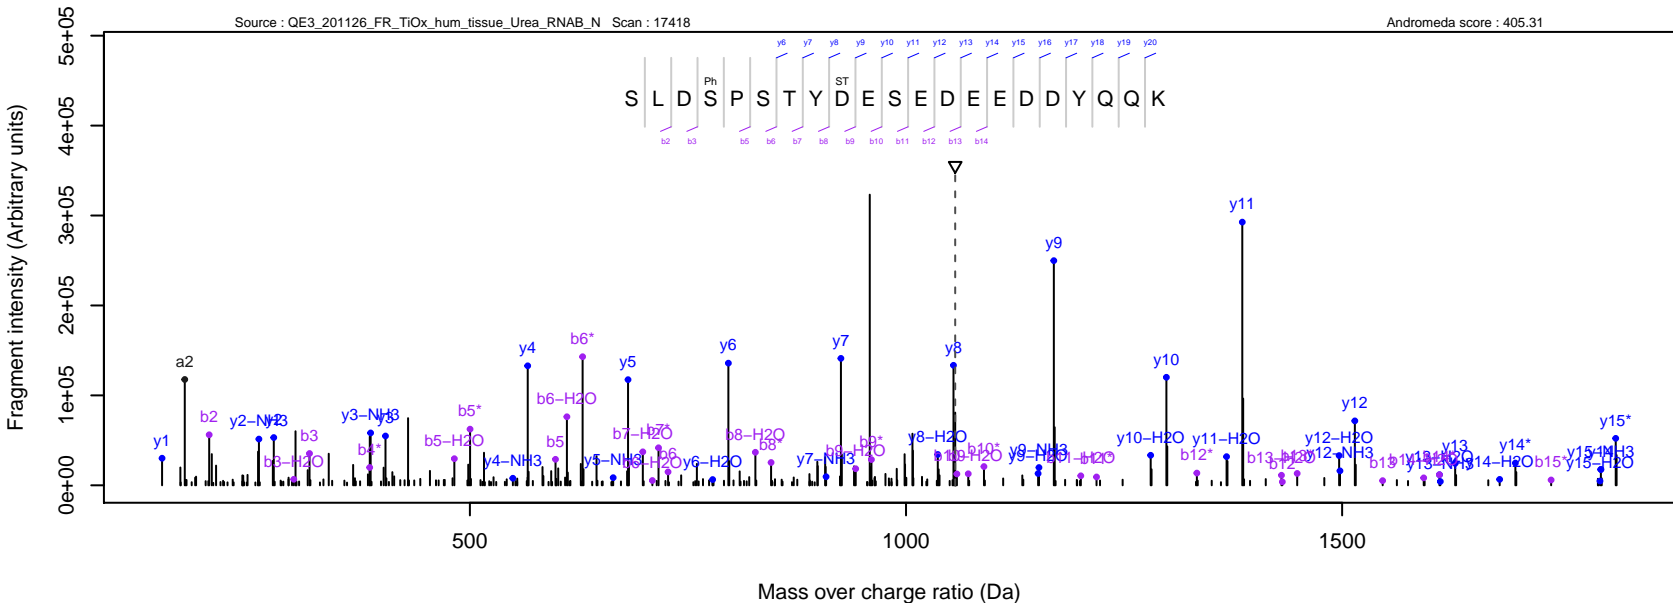

TNTNVNCPICFMPLDVQADREDS(Phospho (STY))RE-3+

Source : QE3\_201126\_FR\_TIOx\_hum\_tissue\_Urea\_RNAB\_H Scan : 49517

Andromeda score : 404.3

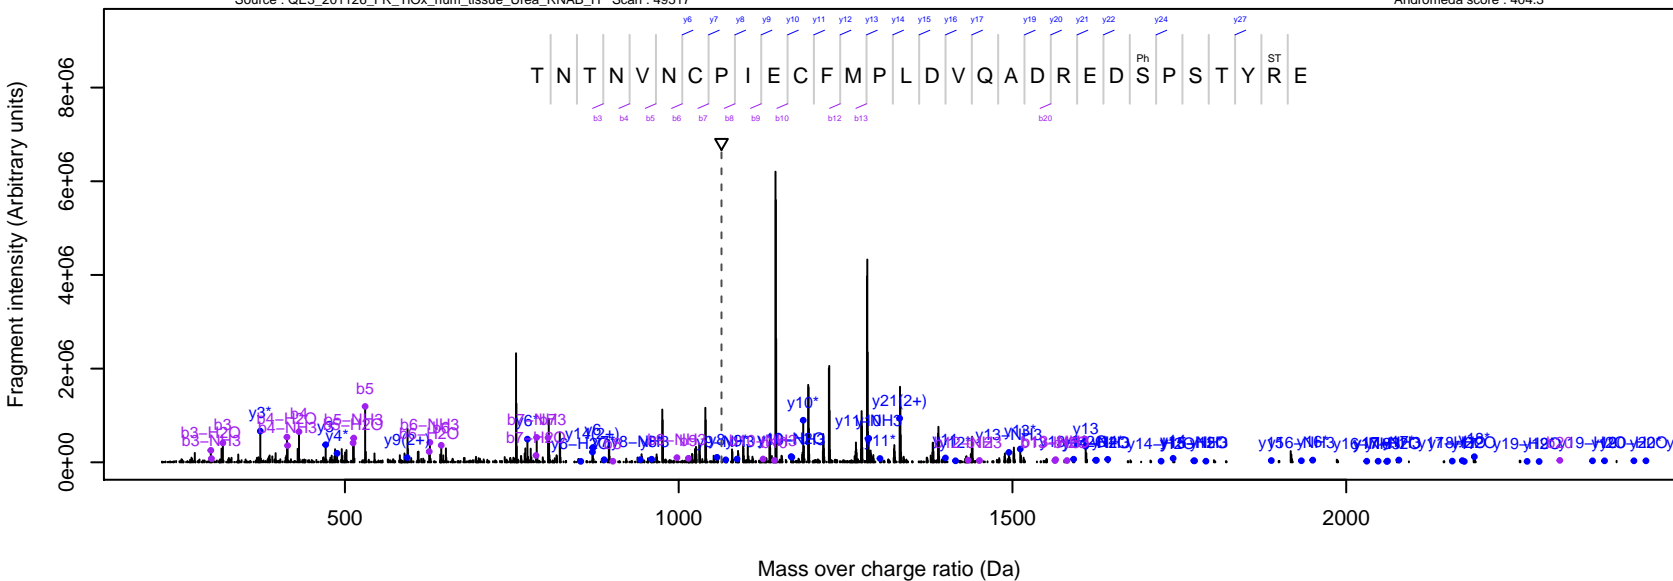



LIESLSQMLS(Phospho (STY))M(Oxidation (M))GFSDEGGWLTR-2+

Source : QE3\_201126\_FR\_TiOx\_hum\_tissue\_Urea\_RNAB\_N Scan : 62601

Andromeda score : 403.58

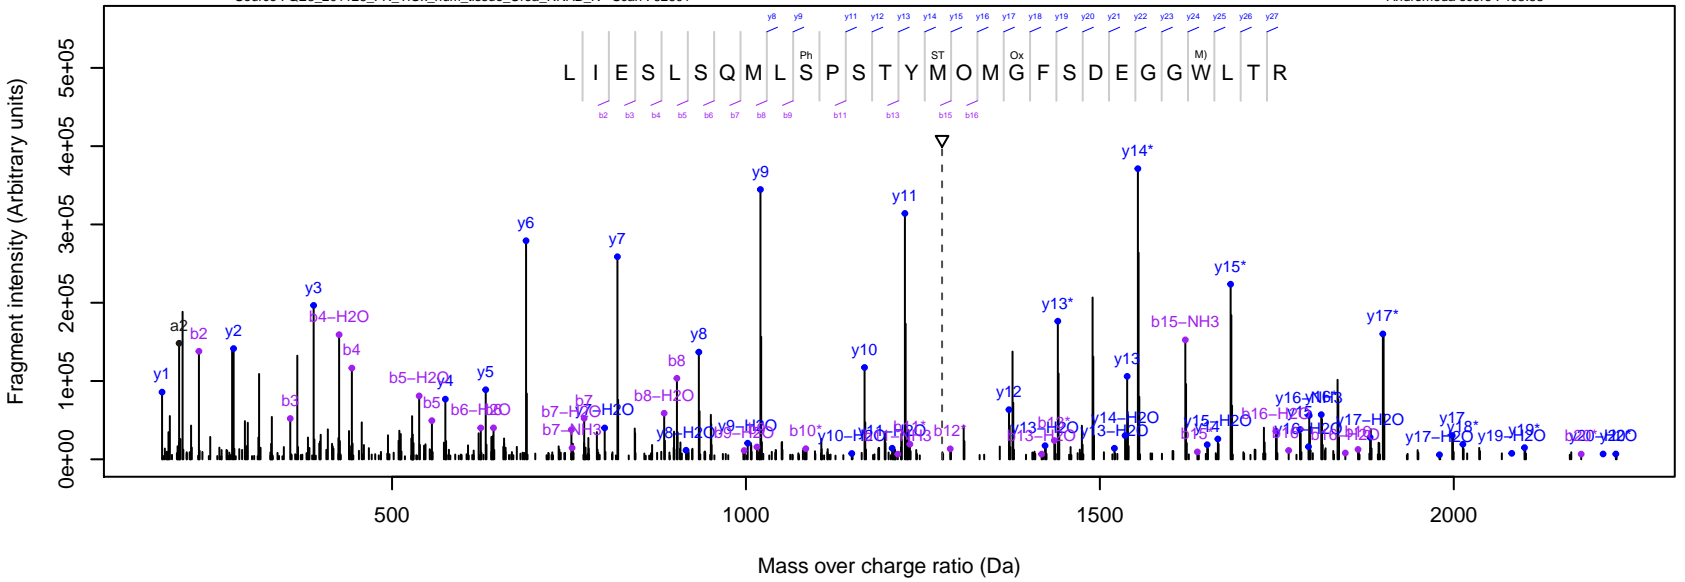

YSHSYLS(Phospho (STY))DS(Phospho (STY))DTEAKLTETNA-2+

Source : QE3\_201126\_FR\_TiOx\_hum\_tissue\_Urea\_RNAB\_H Scan : 32650

Andromeda score : 403.03

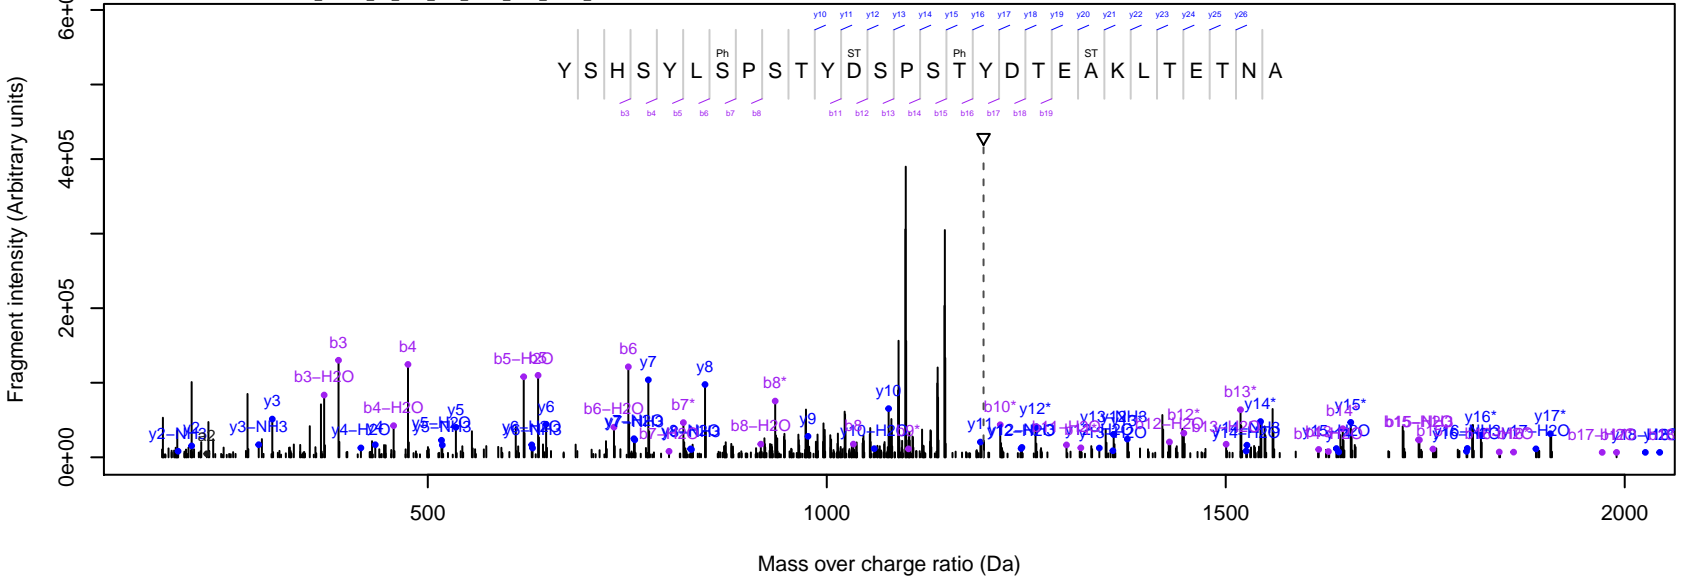

HIDS(Phospho (STY))AHLYNNEEQVGLAIR-3+

Source : QE3\_201126\_FR\_TiOx\_hum\_tissue\_Urea\_RNAB\_H Scan : 28497

Andromeda score : 402.32

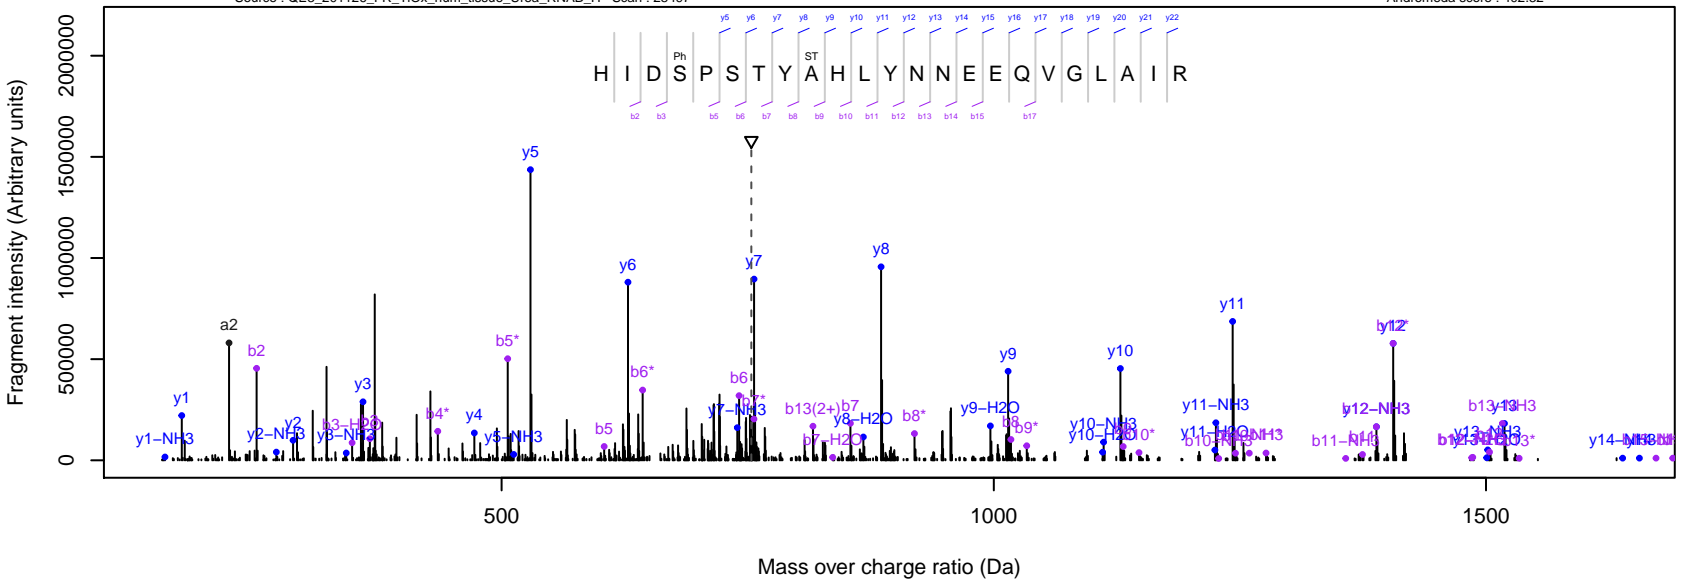

DSPSKSS(Phospho (STY))AEAQTPEDTPNKSGAEAK-3+

Source : QE3\_201126\_FR\_TiOx\_hum\_tissue\_Urea\_RNAB\_N Scan : 6110

Andromeda score : 402.22

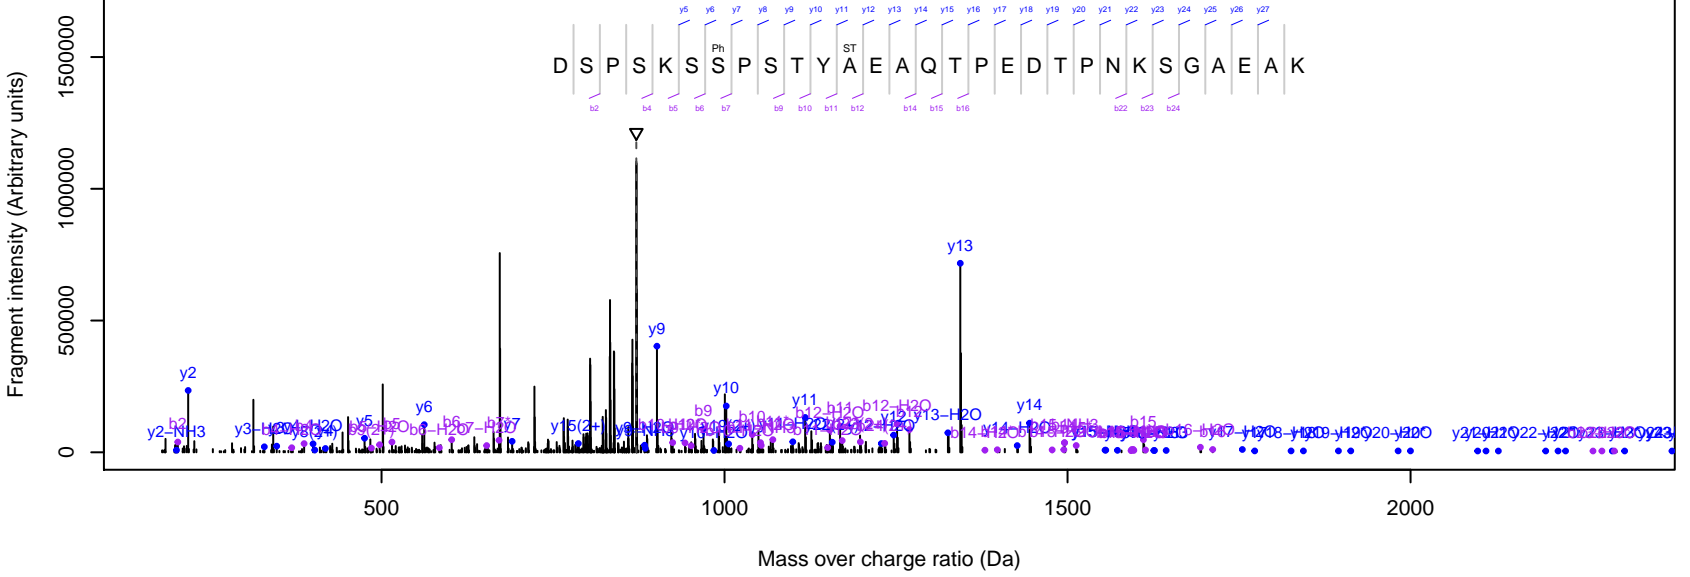

(Acetyl (Protein N-term))VDYSVWDHIEVS(Phospho (STY))DDEDETHPNIDTASLFR-3+

Source : QE3\_201126\_FR\_TiOx\_hum\_tissue\_Urea\_RNAB\_N Scan : 59852

Andromeda score : 401.66

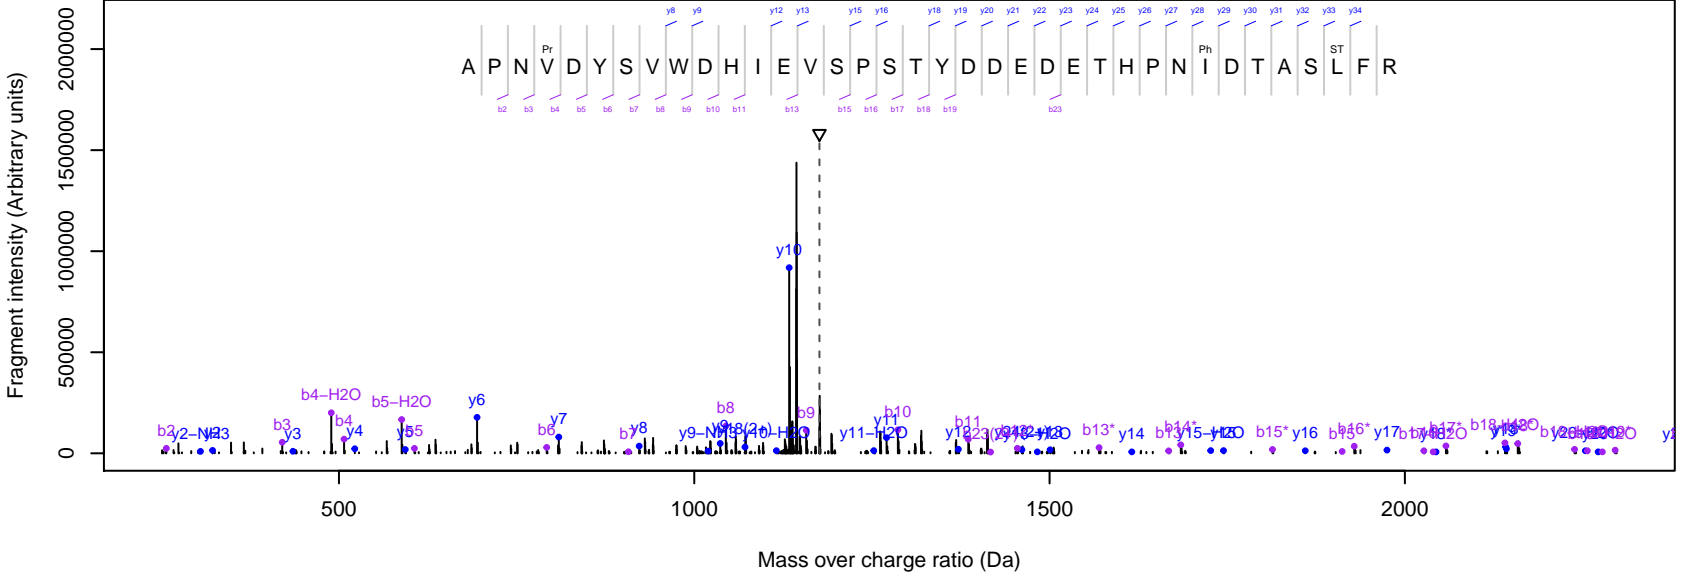

DSGSD E D F L M O M E D D D S P S T Y D Y G S S K-2+

Source : QE3\_201126\_FR\_TiOx\_hum\_tissue\_Urea\_RNAB\_H Scan : 36115

Andromeda score : 400.46

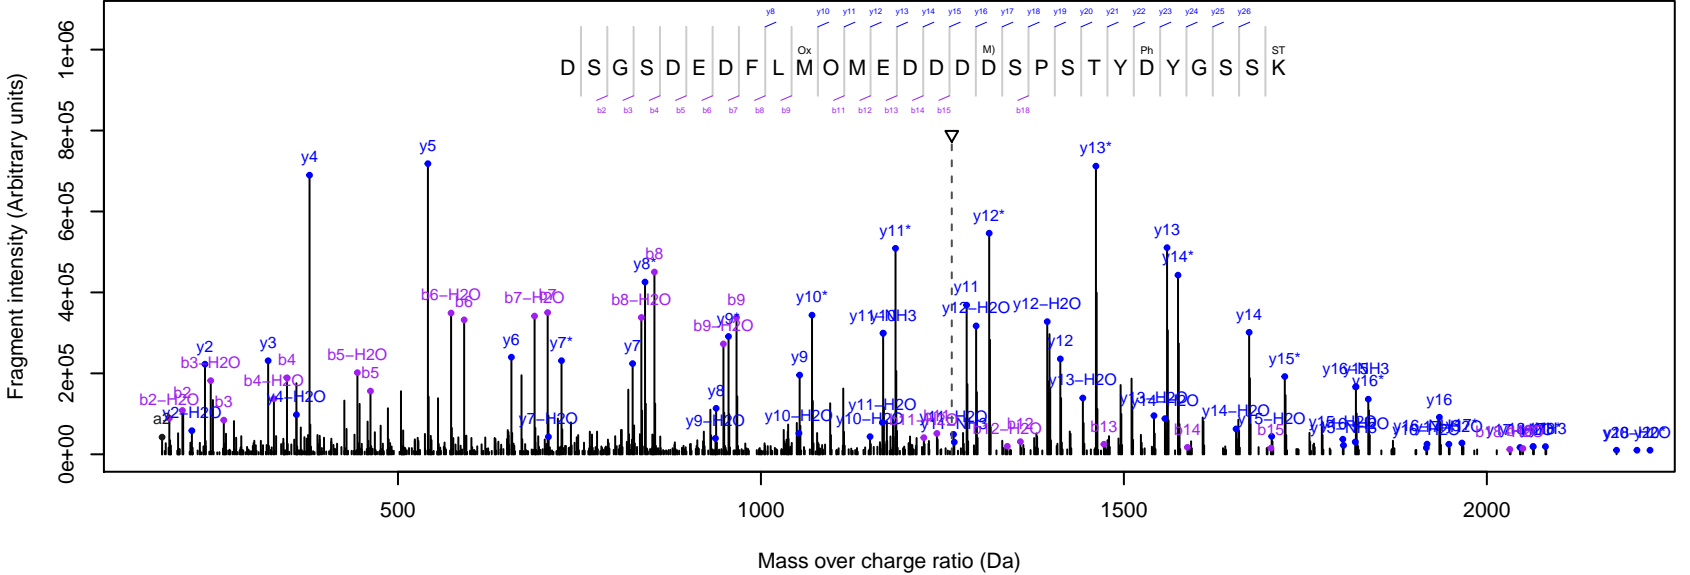



SKFDS(Phospho (STY))DEEEEDTENVEAASSGK-2+

Source : QE3\_201126\_FR\_TIOx\_hum\_tissue\_Urea\_RNAB\_B Scan : 19067

Andromeda score : 394.01

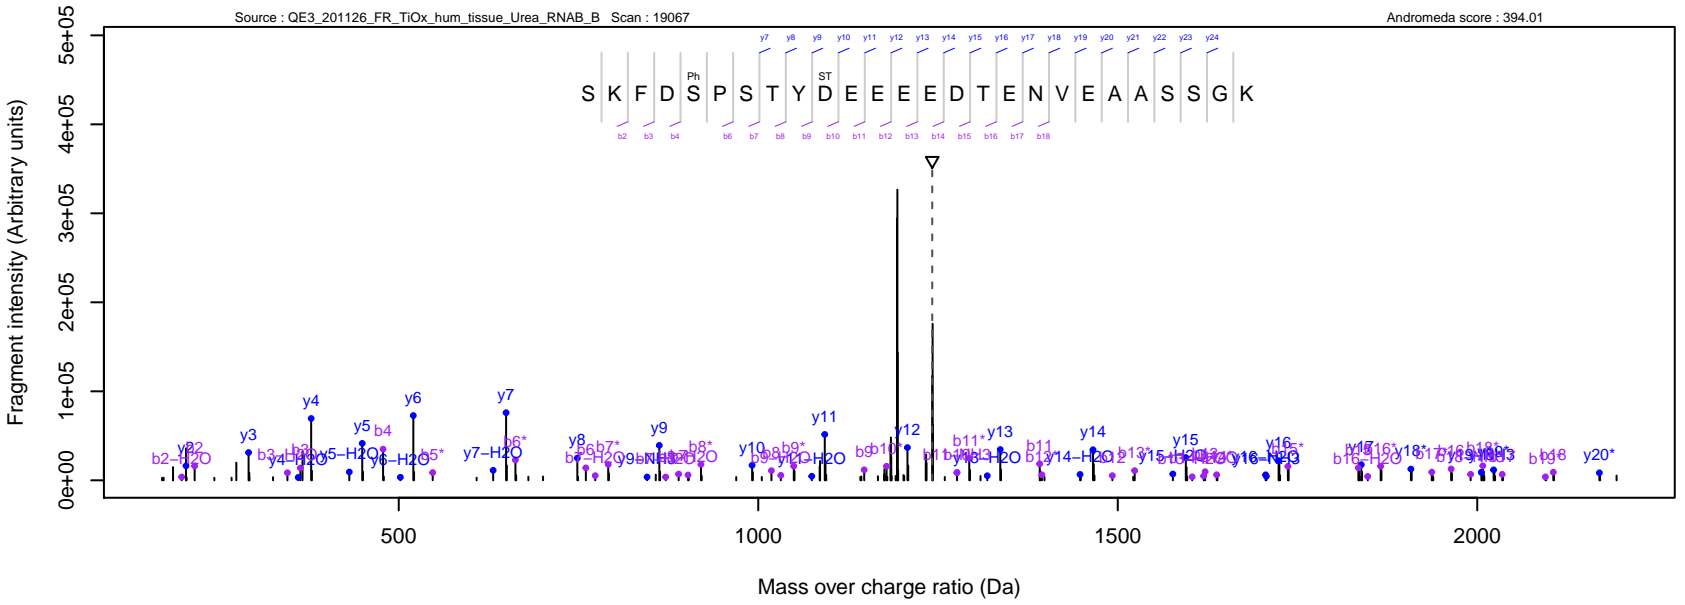

GDQPAASGDS(Phospho (STY))DDEPPPLPR-2+

Source : QE3\_201126\_FR\_TIOx\_hum\_tissue\_Urea\_RNAB\_N Scan : 24756

Andromeda score : 393.38

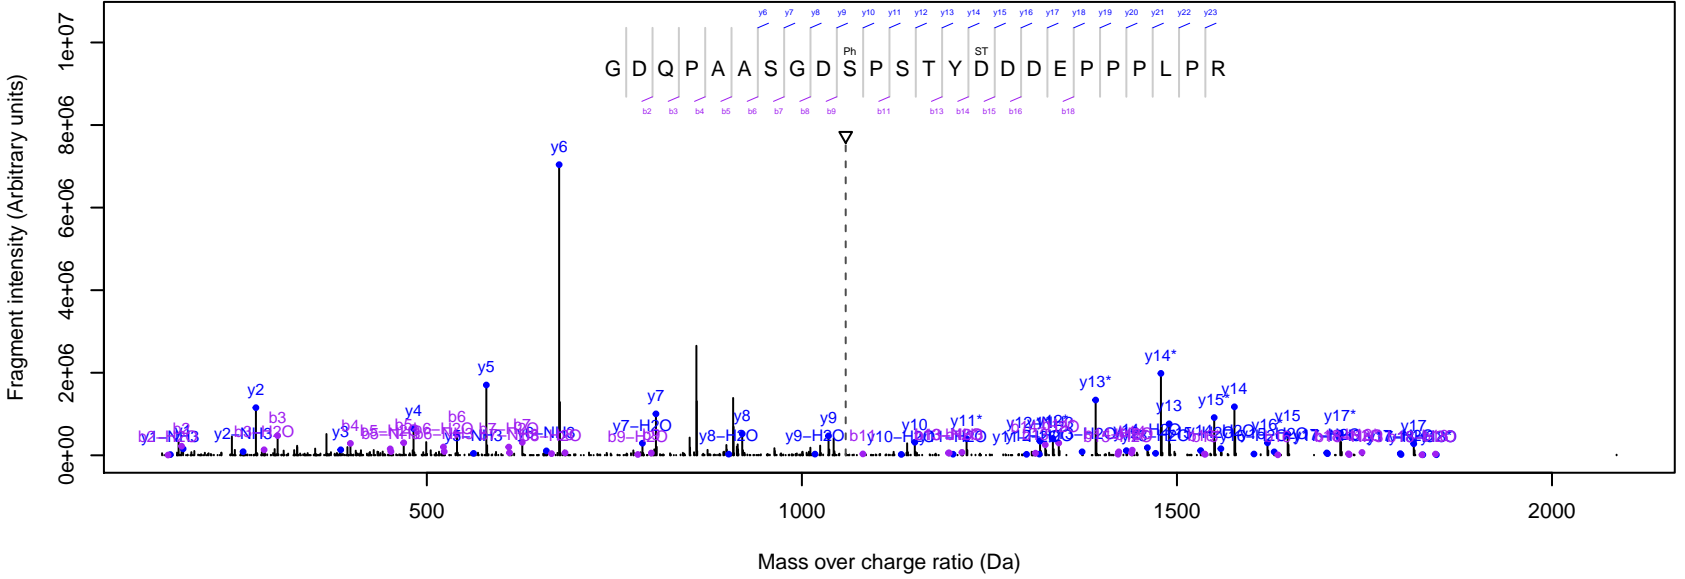

(Acetyl (Protein N-term))M(Oxidation (M))DTLDYDEFGNYIGPELDS(Phospho (STY))DEDDDELGRETK-3+

Source : QE3\_201126\_FR\_TIOx\_hum\_tissue\_Urea\_RNAB\_N Scan : 60754

Andromeda score : 393.03

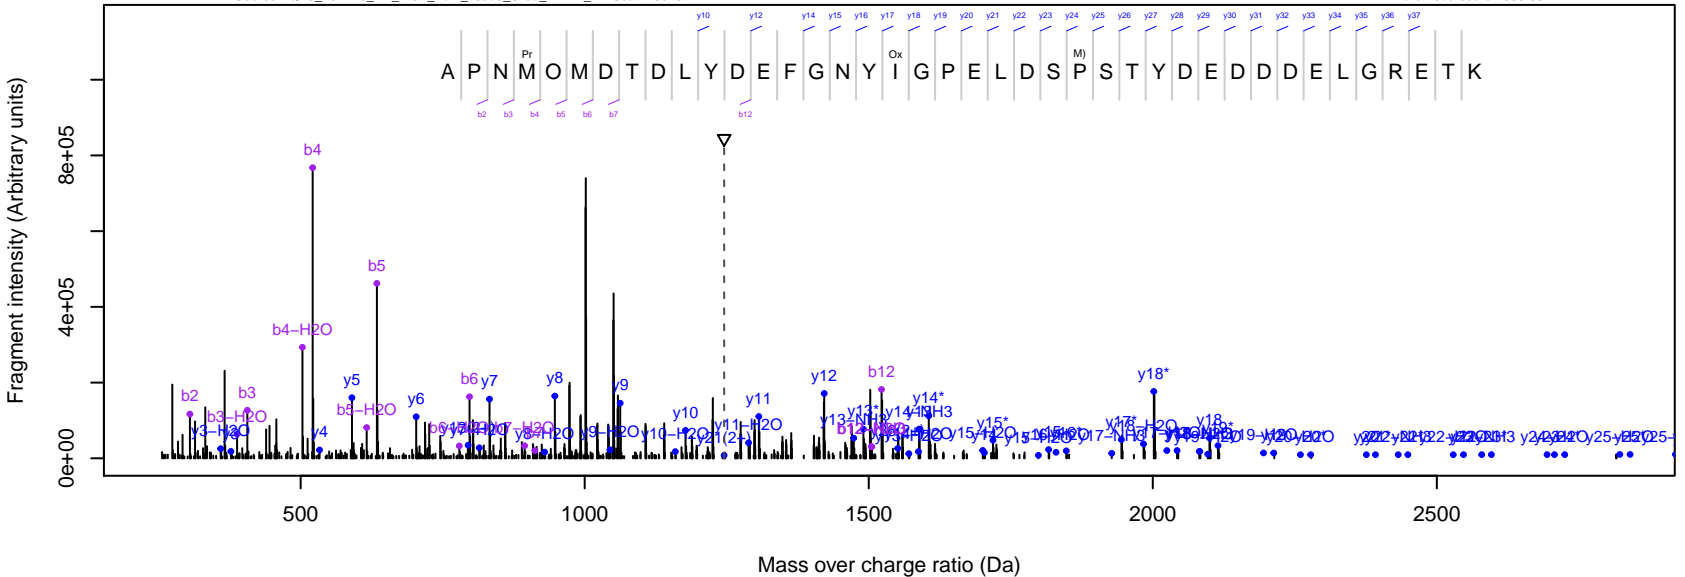

(Acetyl (Protein N-term))AAAAAAGDS(Phospho (STY))DSWDADAFSVEDPVRK-2+

Source : QE3\_201126\_FR\_TIOx\_hum\_tissue\_Urea\_RNAB\_H Scan : 52127

Andromeda score : 391.59

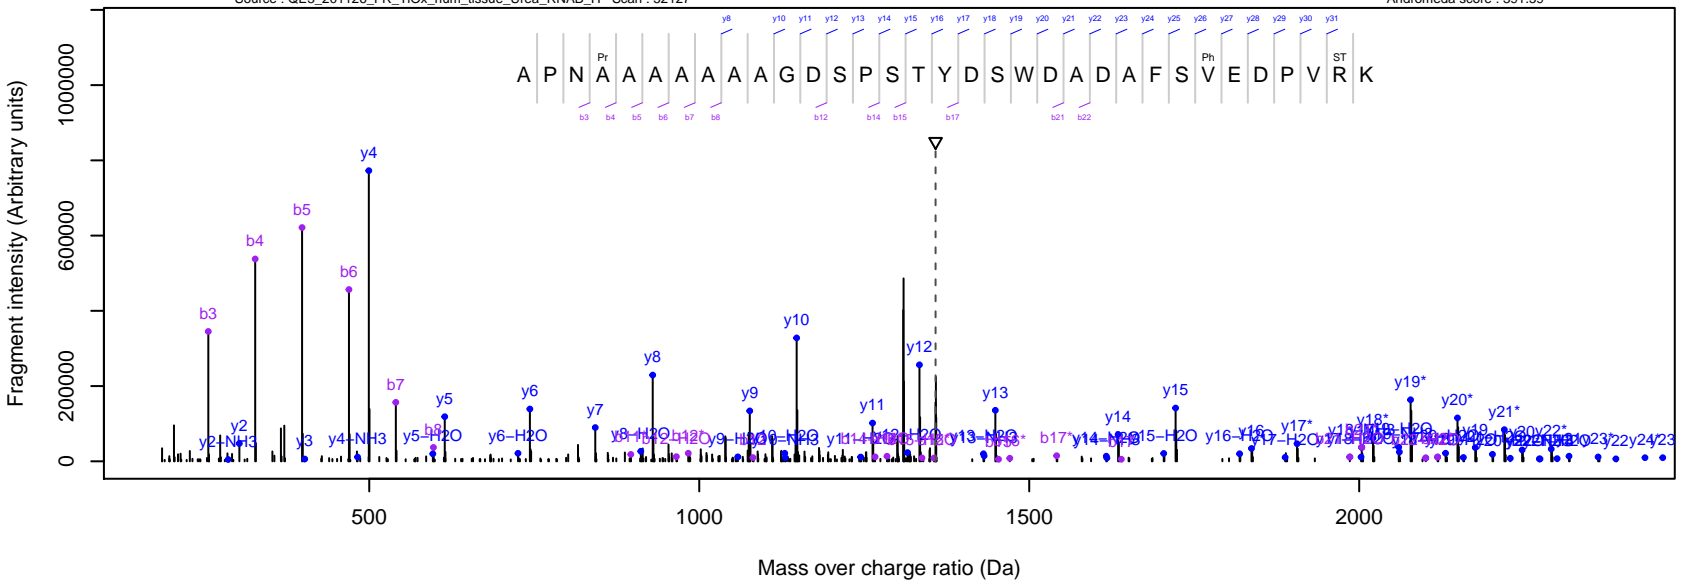

SLDS(Phospho (STY))DES(Phospho (STY))EDEDYQQKR-2+

Source : QE3\_201126\_FR\_TIOx\_hum\_tissue\_Urea\_RNAB\_H Scan : 16318

Andromeda score : 390.97

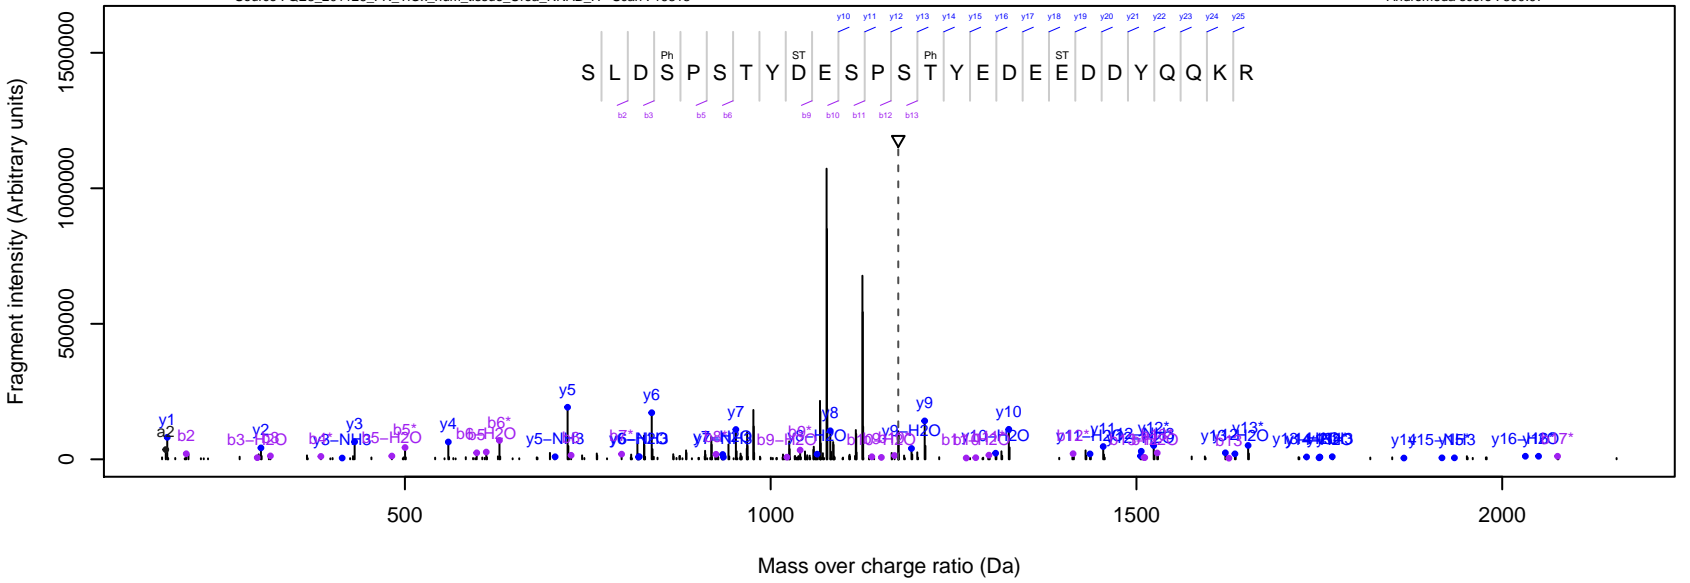



LIESLSQMLS(Phospho (STY))MGFSDEGGWLTR-2+

Source : QE3\_201126\_FR\_TiOx\_hum\_tissue\_Urea\_RNAB\_H Scan : 62772

Andromeda score : 387.99

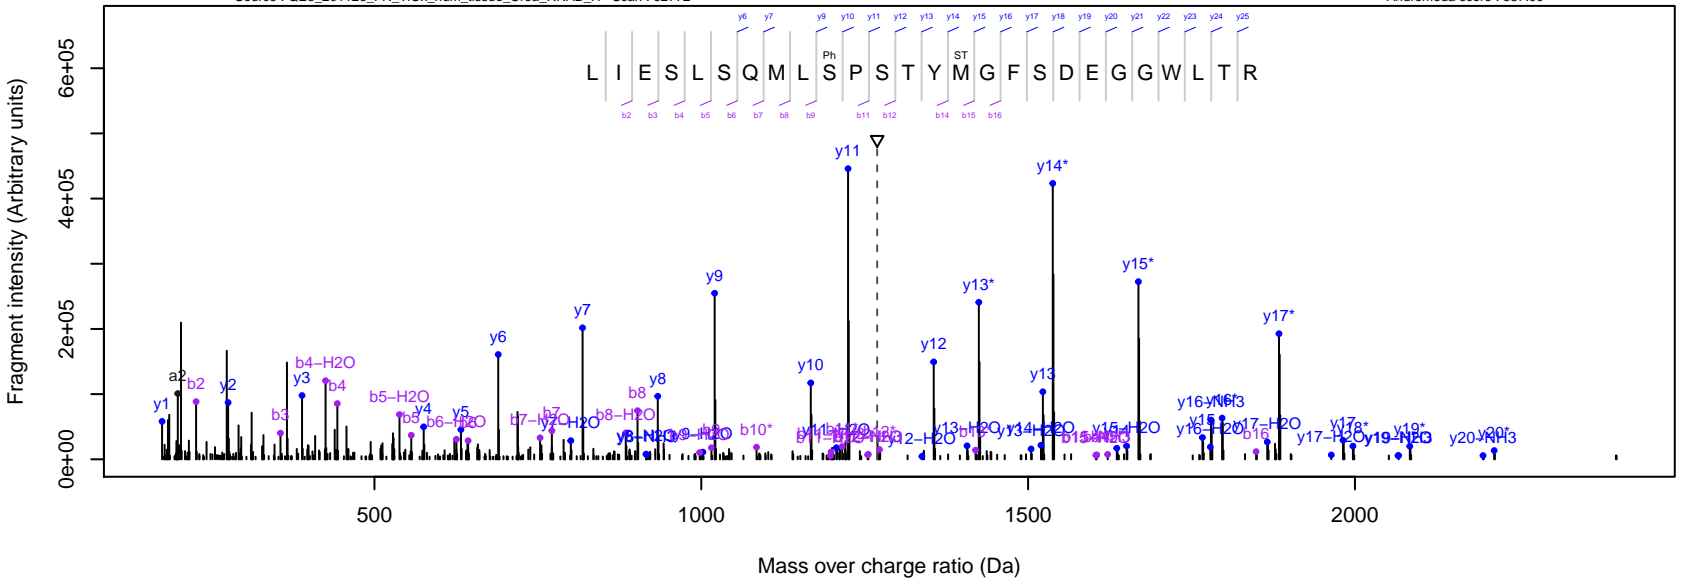

GQKS(Phospho (STY))PGALETPSAAGSQGNTASQGK-2+

Source : QE3\_201126\_FR\_TiOx\_hum\_tissue\_Urea\_RNAB\_H Scan : 10626

Andromeda score : 387.59

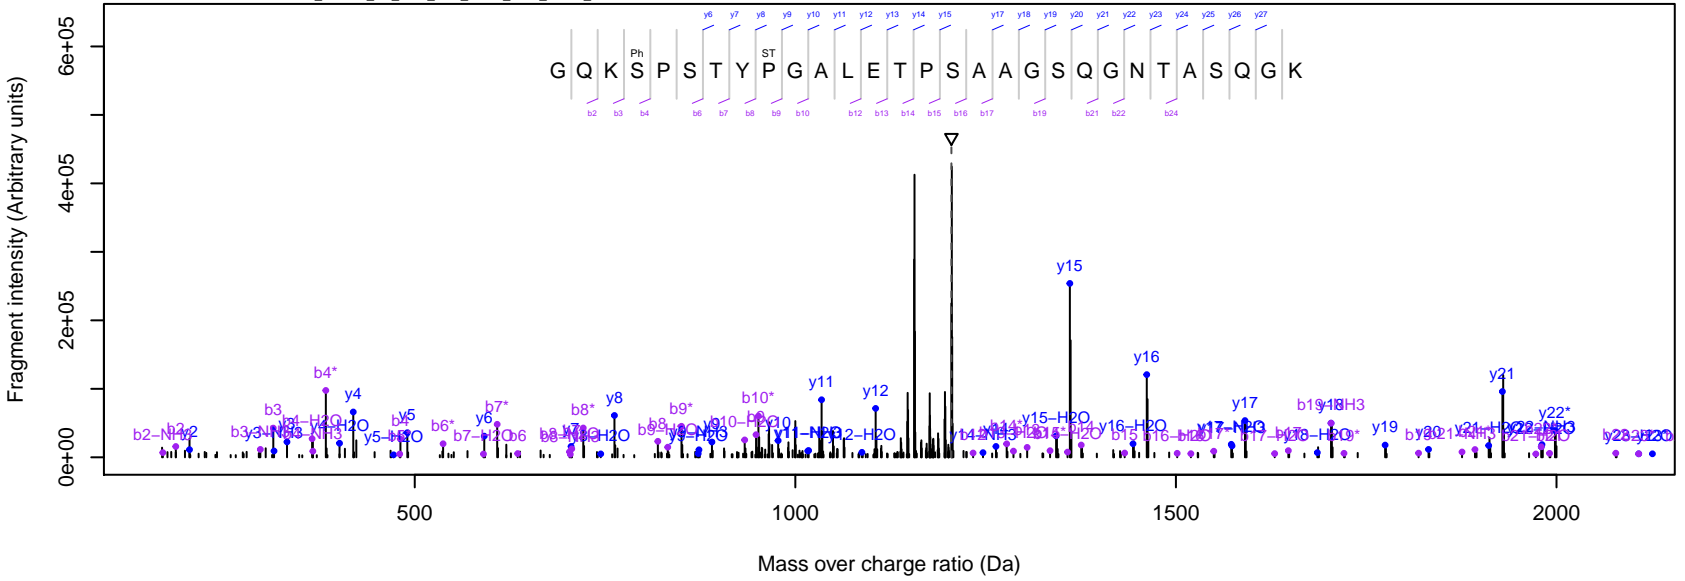

HTGPNS(Phospho (STY))PDTANDGFVR-2+

Source : QE3\_201126\_FR\_TiOx\_hum\_tissue\_Urea\_RNAB\_H Scan : 13213

Andromeda score : 387.14

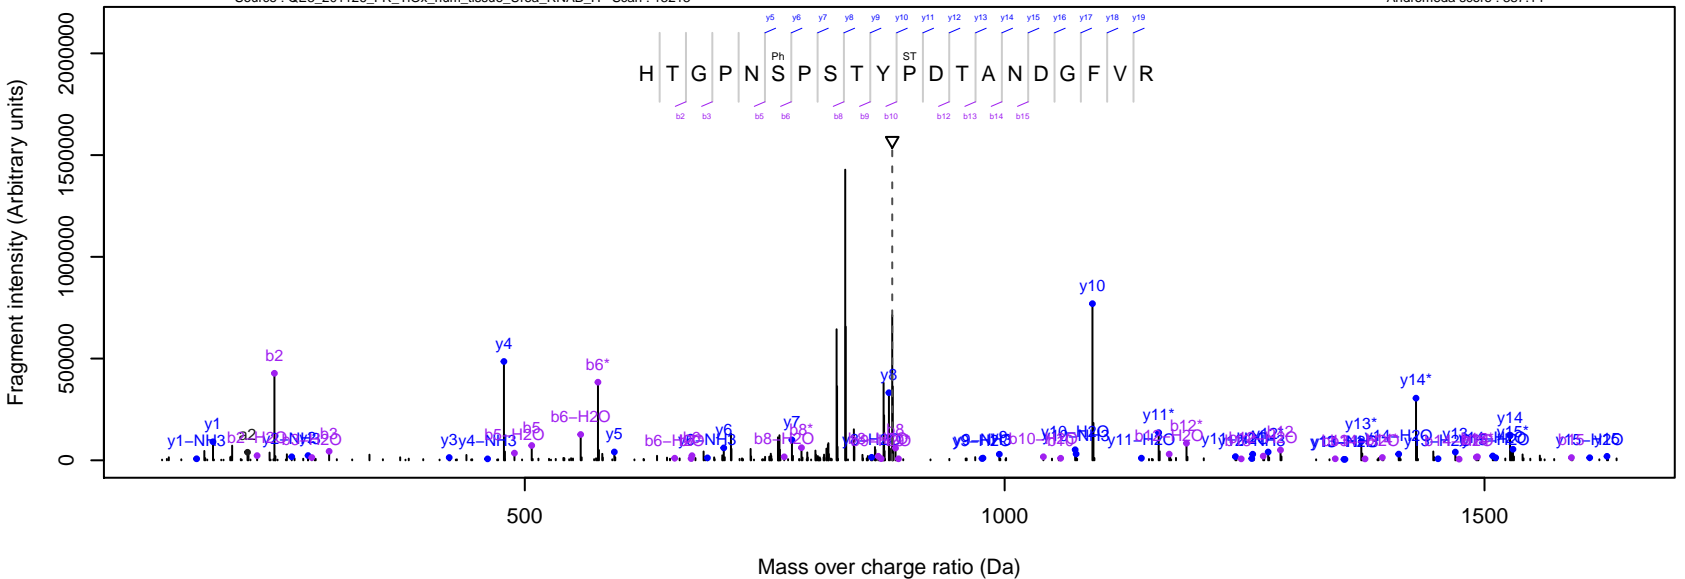





DLGHPVEEEDLES(Phospho (STY))GDQEDEDESEDPGKDL DHI-3+

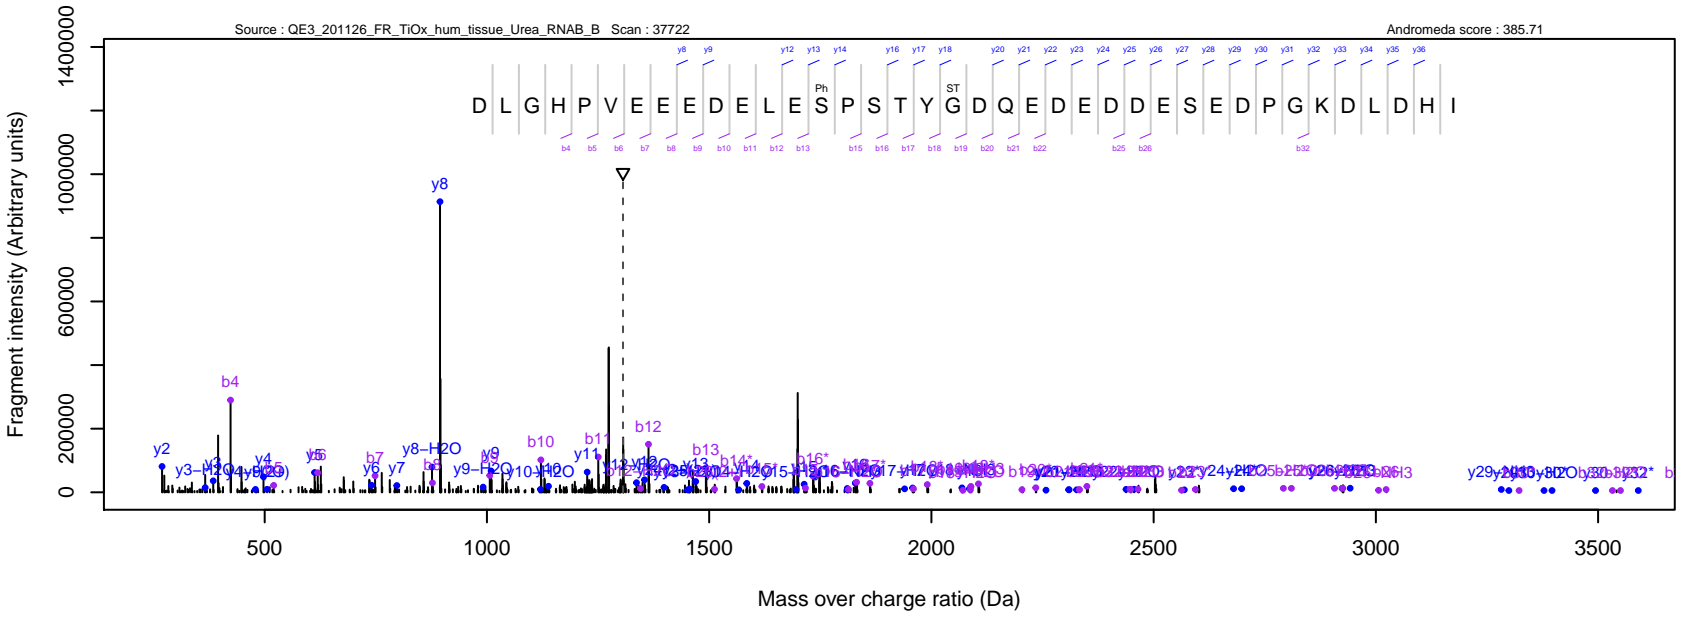

KSLDS(Phospho (STY))DESEDEDDYQQ-2+

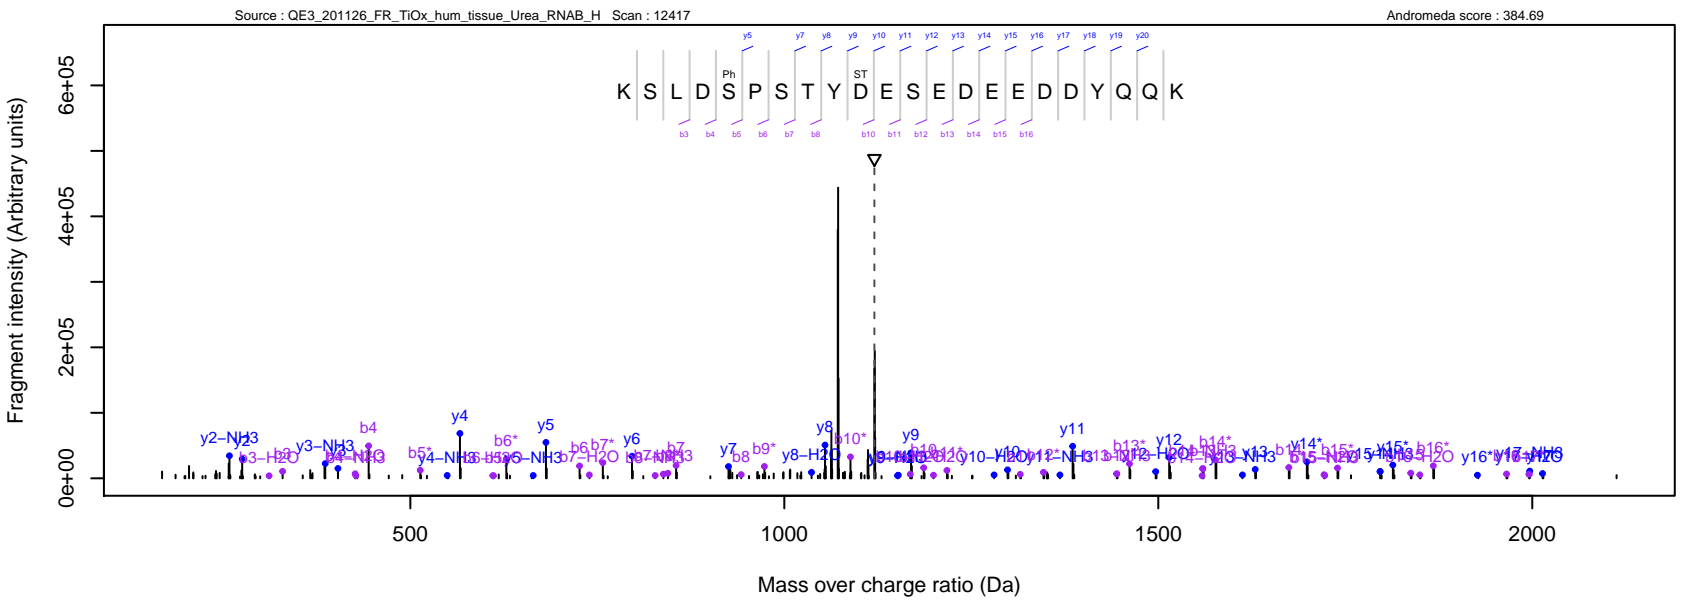

SSS(Phospho (STY))PAPADIAQT VQEDLR-2+

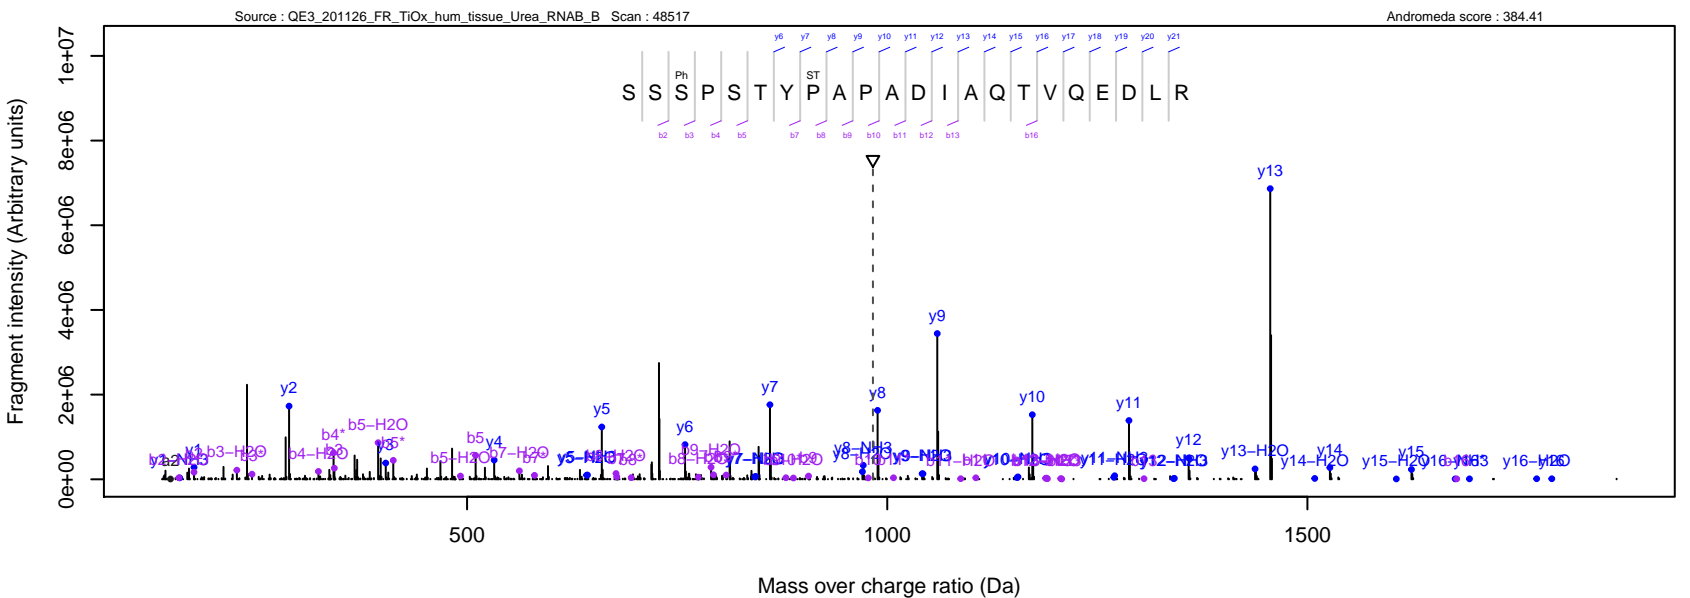



DLFDLNS(Phospho (STY))S(Phospho (STY))EEDDTEGFSER-2+

Source : QE3\_201126\_FR\_TiOx\_hum\_tissue\_Urea\_RNAB\_B Scan : 63402

Andromeda score : 380.03

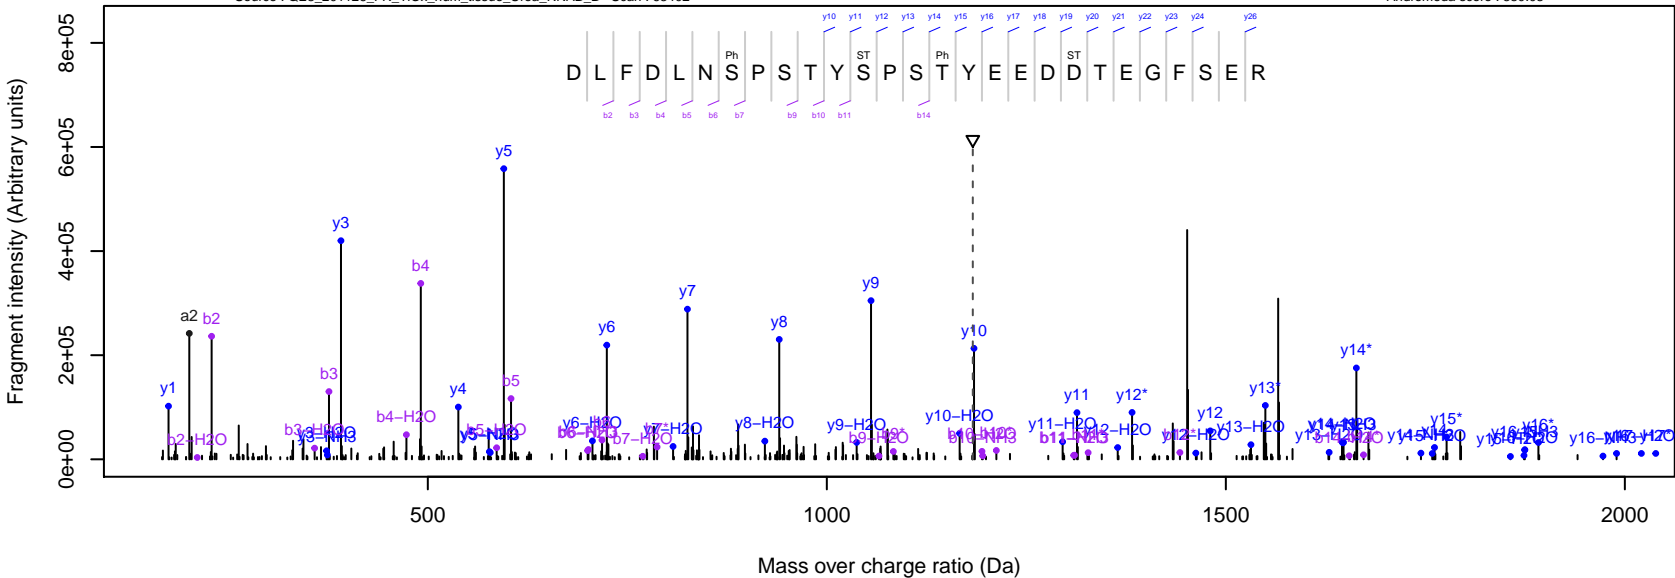

SFSKEELMSS(Phospho (STY))DLEETAGSTSIPK-2+

Source : QE3\_201126\_FR\_TiOx\_hum\_tissue\_Urea\_RNAB\_B Scan : 36606

Andromeda score : 379.92

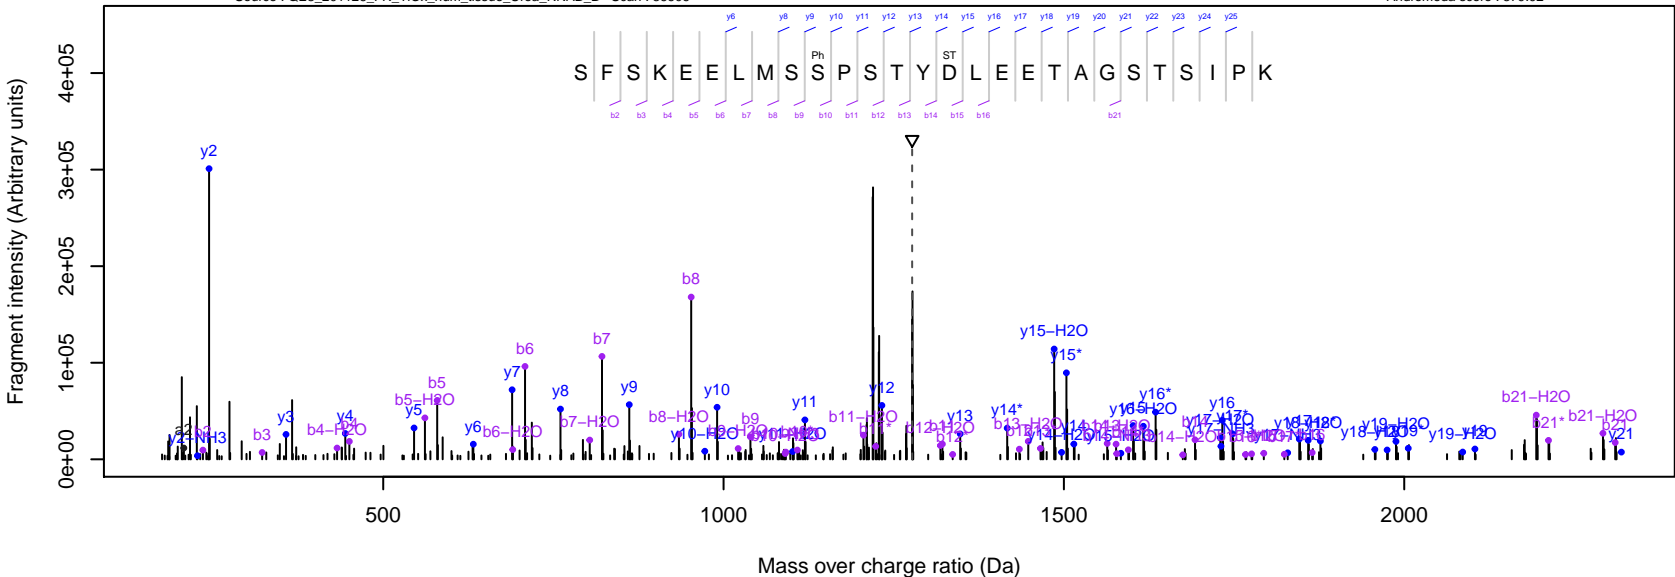

TPSPLVLEGTIEQSS(Phospho (STY))PPLSPTTK-2+

Source : QE3\_201126\_FR\_TiOx\_hum\_tissue\_Urea\_RNAB\_B Scan : 48740

Andromeda score : 378.9

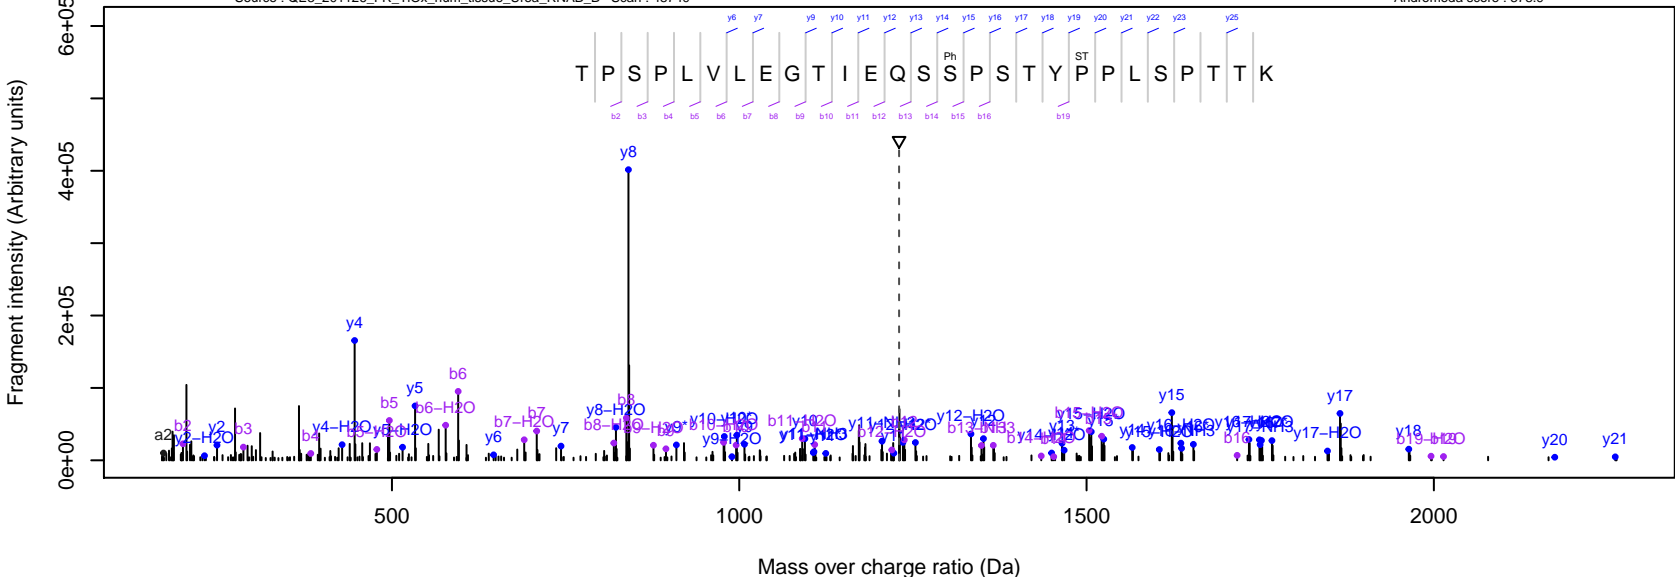

IALESEGRPEEQMES(Phospho (STY))DNCS(Phospho (STY))GGDDWTHLSSK-3+

Source : QE3\_201126\_FR\_TiOx\_hum\_tissue\_Urea\_RNAB\_N Scan : 35405

Andromeda score : 377.57

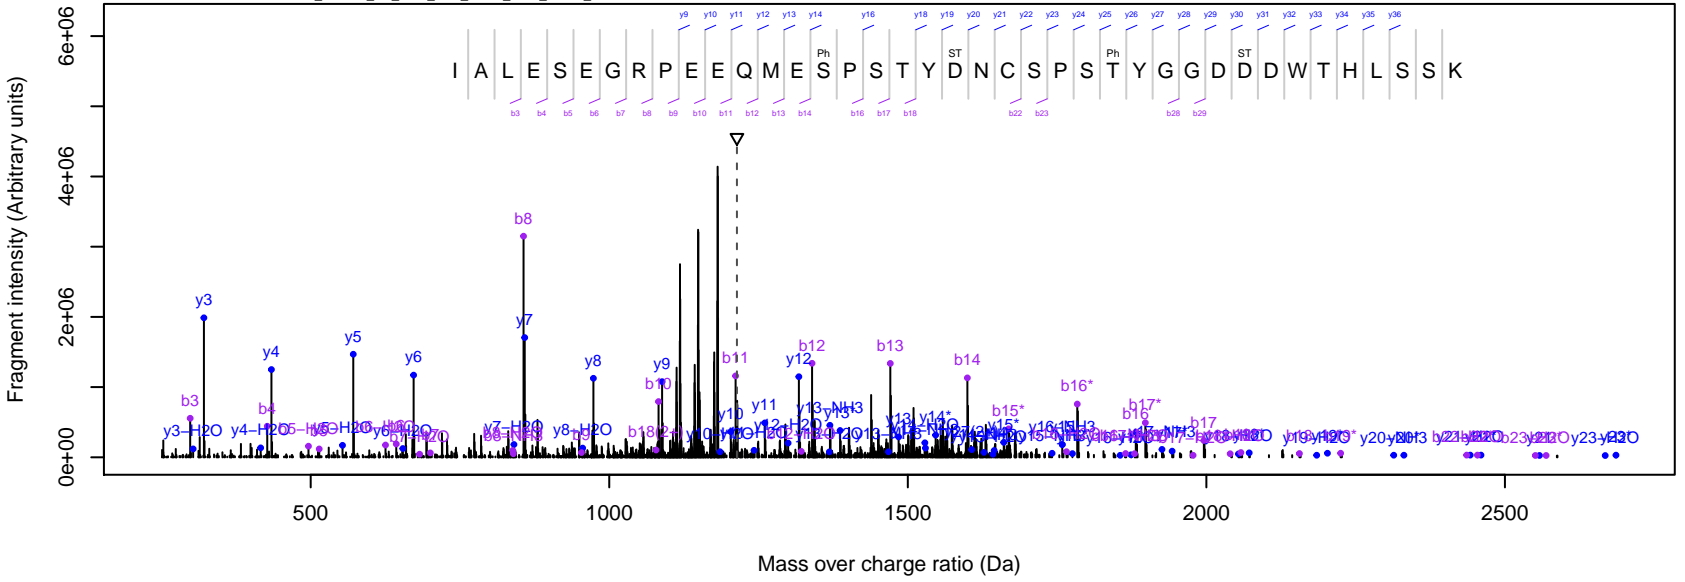

RGS(Phospho (STY))GDTSSLIDPDTLSSELR-2+

Source : QE3\_201126\_FR\_TiOx\_hum\_tissue\_Urea\_RNAB\_N Scan : 39104

Andromeda score : 377.46

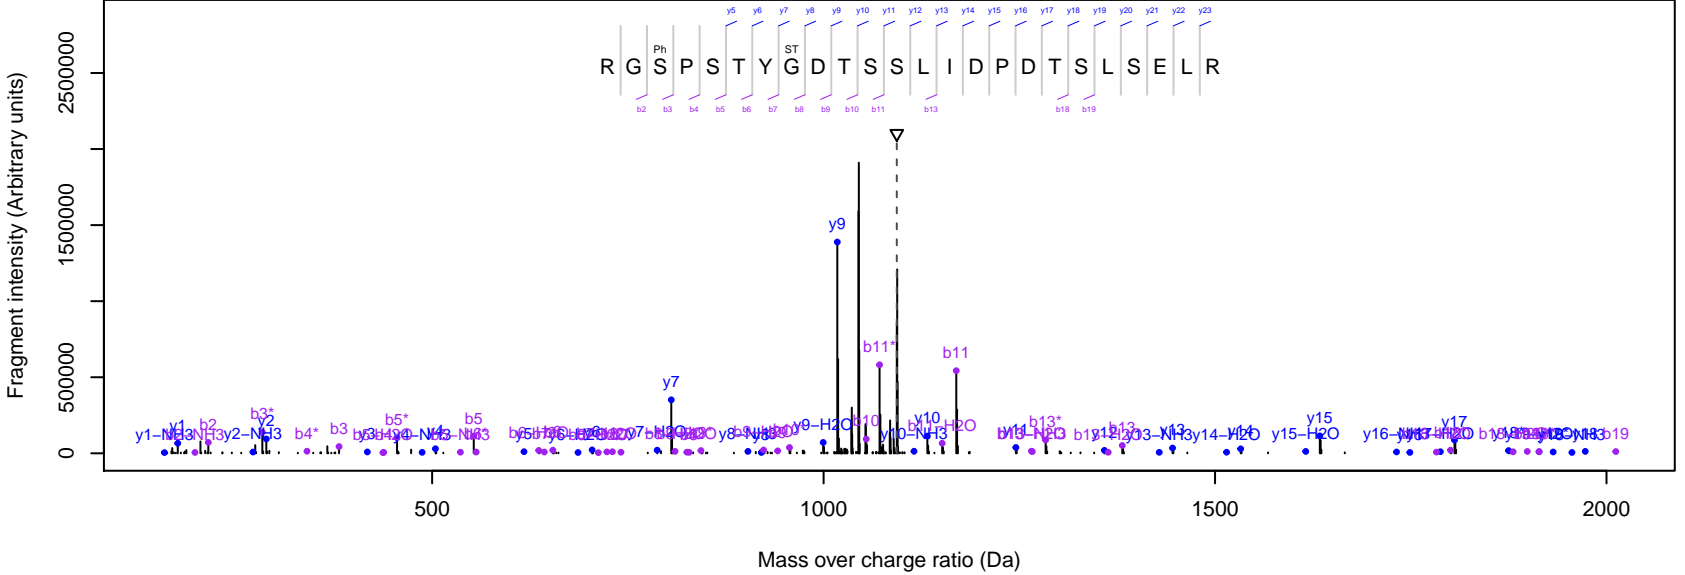

S(Phospho (STY))KSPLPPEEEAKDEEEDQTLVNLDTYTSDLHFQVSK-4+

Source : QE3\_201126\_FR\_TiOx\_hum\_tissue\_Urea\_RNAB\_H Scan : 46402

Andromeda score : 376.97

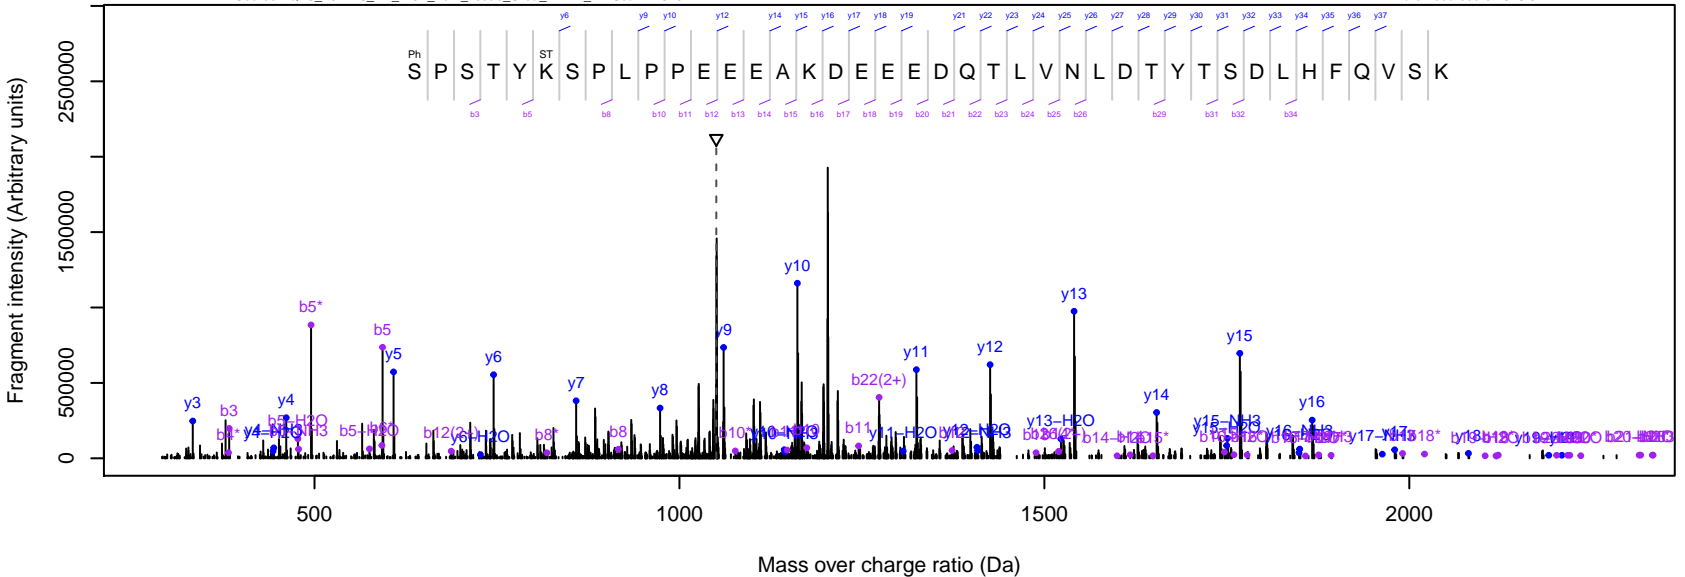

FEESKEPVADEEEEDS(Phospho (STY))DDVEPITEFR-3+

Source : QE3\_201126\_FR\_TIOx\_hum\_tissue\_Urea\_RNAB\_H Scan : 37941

Andromeda score : 376.26

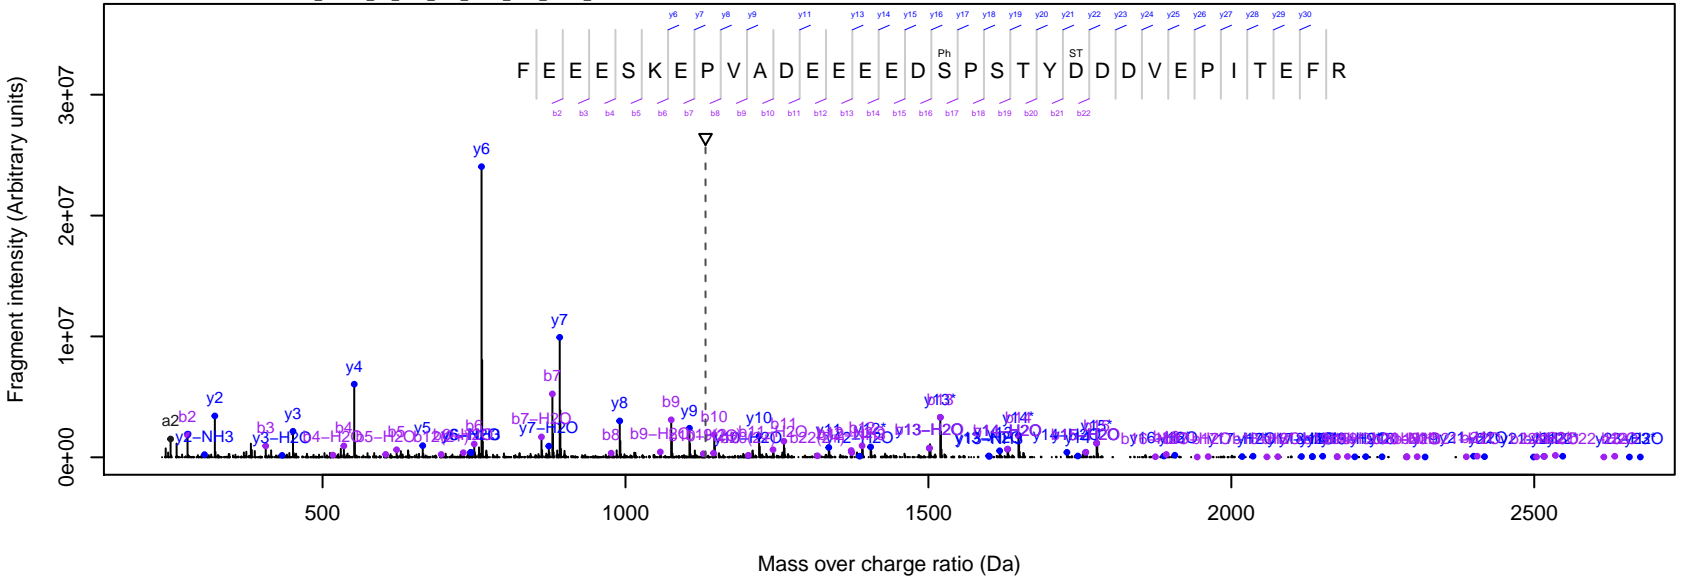

DPSAS(Phospho (STY))PGDAGEQAIR-2+

Source : QE3\_201126\_FR\_TIOx\_hum\_tissue\_Urea\_RNAB\_N Scan : 17530

Andromeda score : 375.75

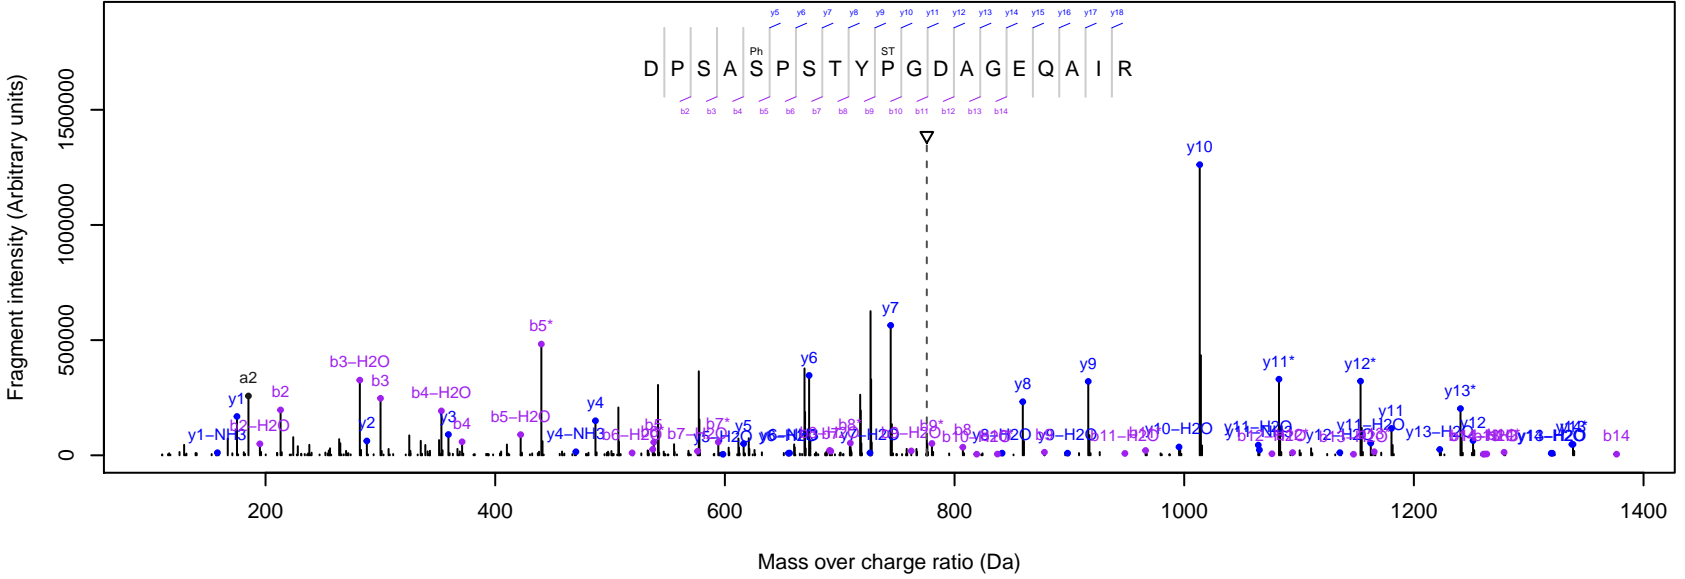

M(Oxidation (M))ETVSNASSSSNPSS(Phospho (STY))PGR-2+

Source : QE3\_201126\_FR\_TIOx\_hum\_tissue\_Urea\_RNAB\_H Scan : 7792

Andromeda score : 375.69

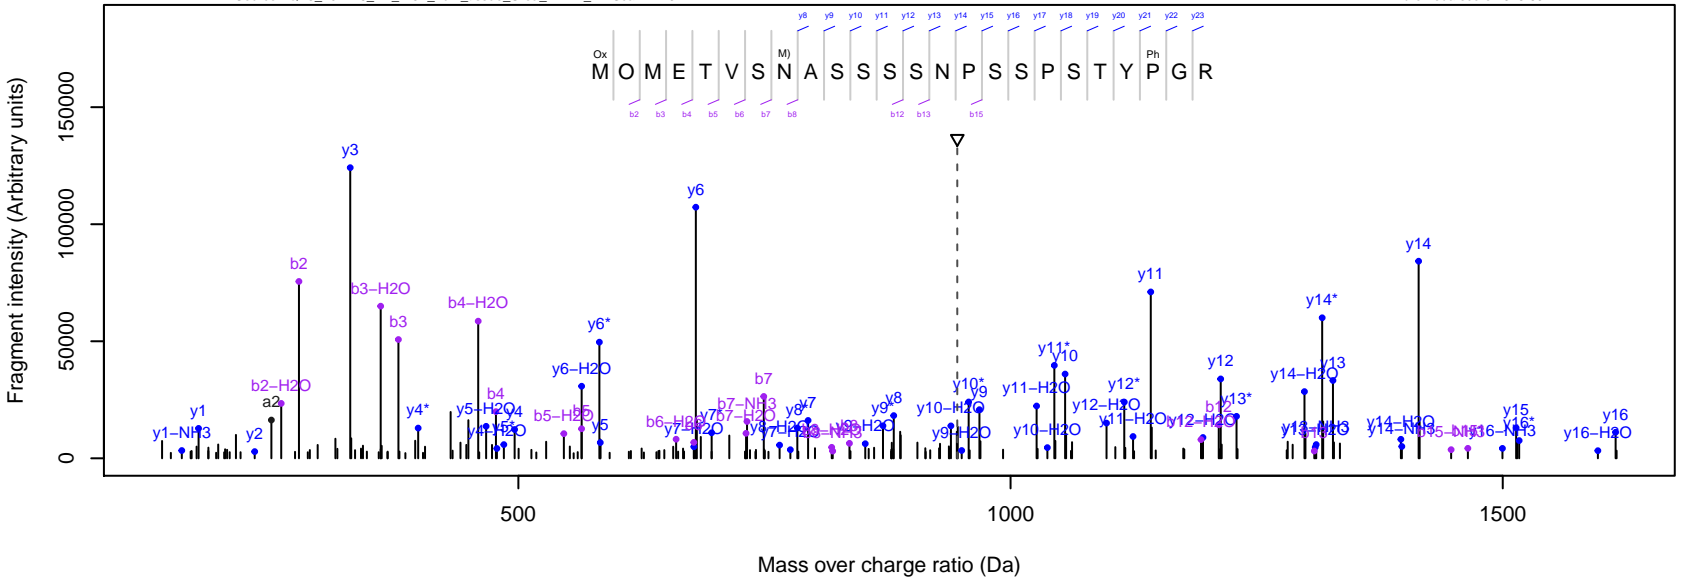

YNDWS(Phospho (STY))DDDDSNESK-2+

Source : QE3\_201126\_FR\_TiOx\_hum\_tissue\_Urea\_RNAB\_N Scan : 16793

Andromeda score : 375.49

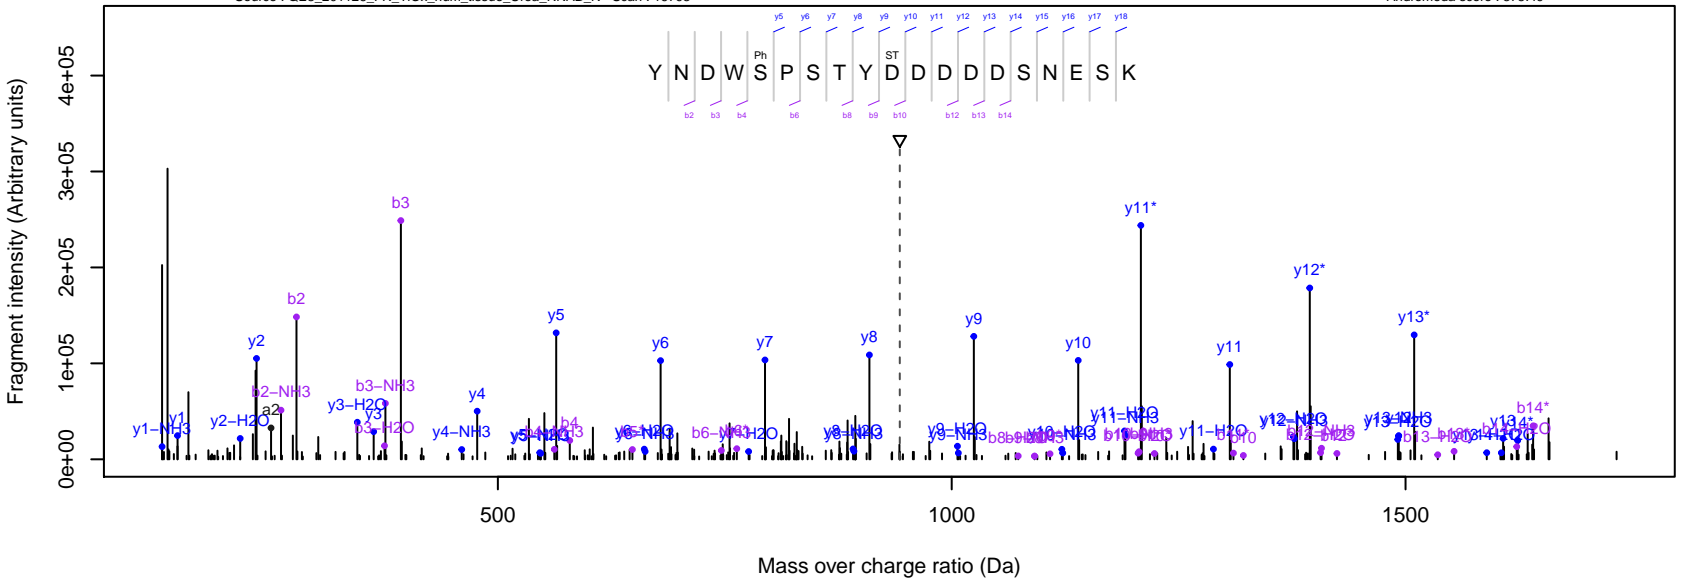

STIGVMVTAS(Phospho (STY))HNPEEDNGVK-2+

Source : QE3\_201126\_FR\_TiOx\_hum\_tissue\_Urea\_RNAB\_B Scan : 23010

Andromeda score : 375.17

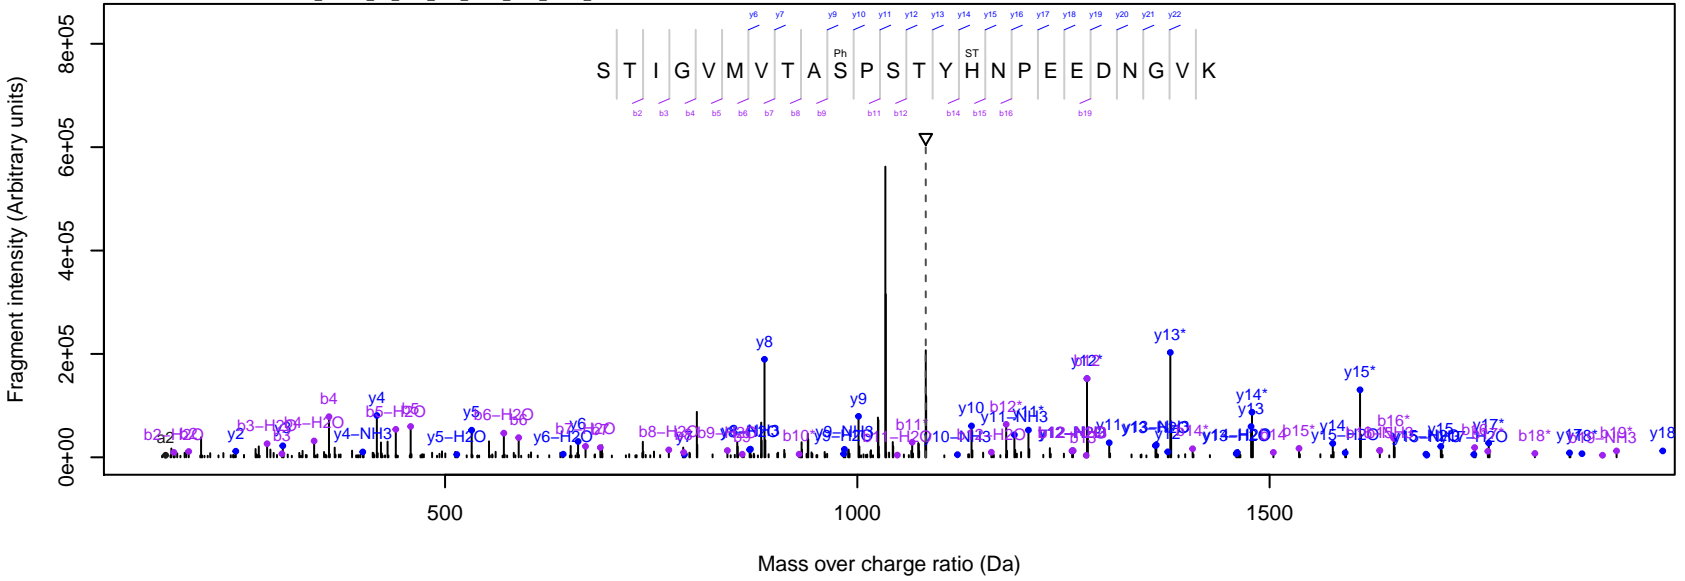

KMGAPESGLAEYLFDKHTLGDS(Phospho (STY))DNES-3+

Source : QE3\_201126\_FR\_TiOx\_hum\_tissue\_Urea\_RNAB\_N Scan : 45547

Andromeda score : 373.51

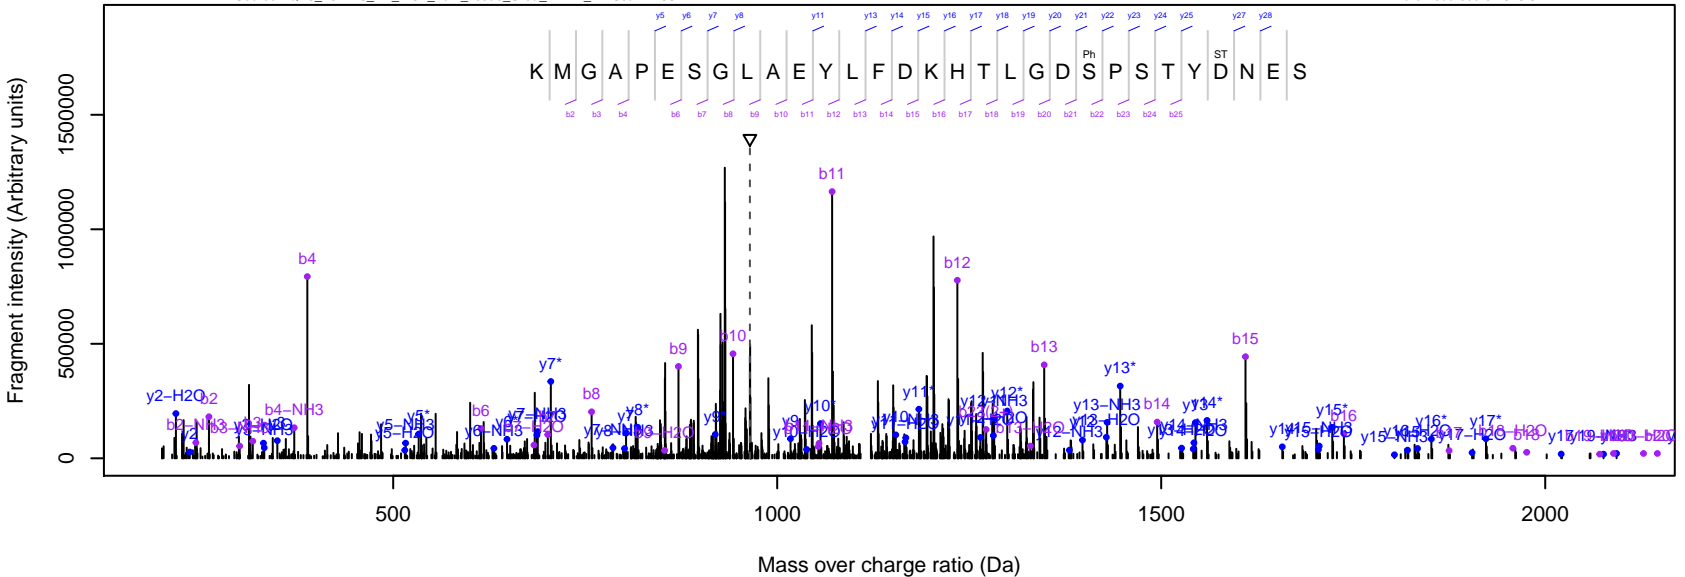

VQGEAVSNIQENTQTPVQEEES(Phospho (STY))EEEEVDETGVEVK-3+

Source : QE3\_201126\_FR\_TIOx\_hum\_tissue\_Urea\_RNAB\_B Scan : 35949

Andromeda score : 372.54

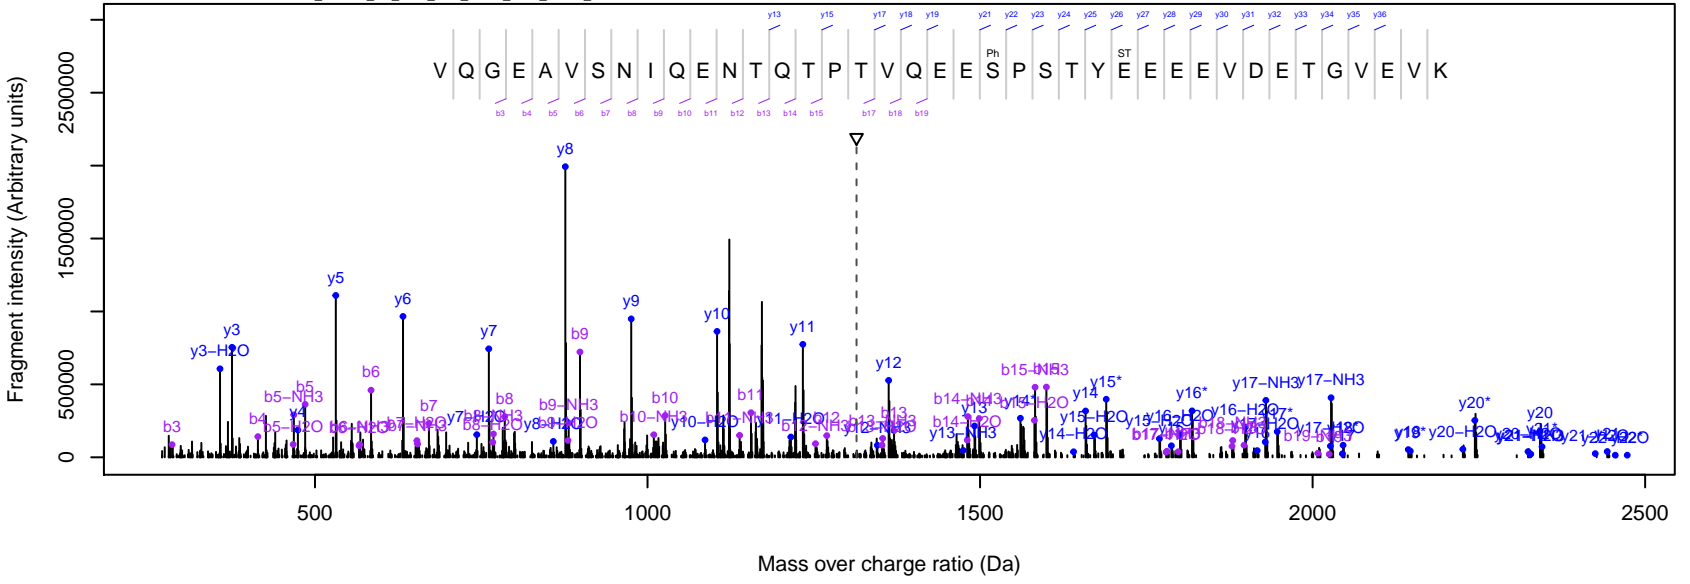

AEGEWEDQEALDYFS(Phospho (STY))DKESGK-3+

Source : QE3\_201126\_FR\_TIOx\_hum\_tissue\_Urea\_RNAB\_H Scan : 39078

Andromeda score : 372.33

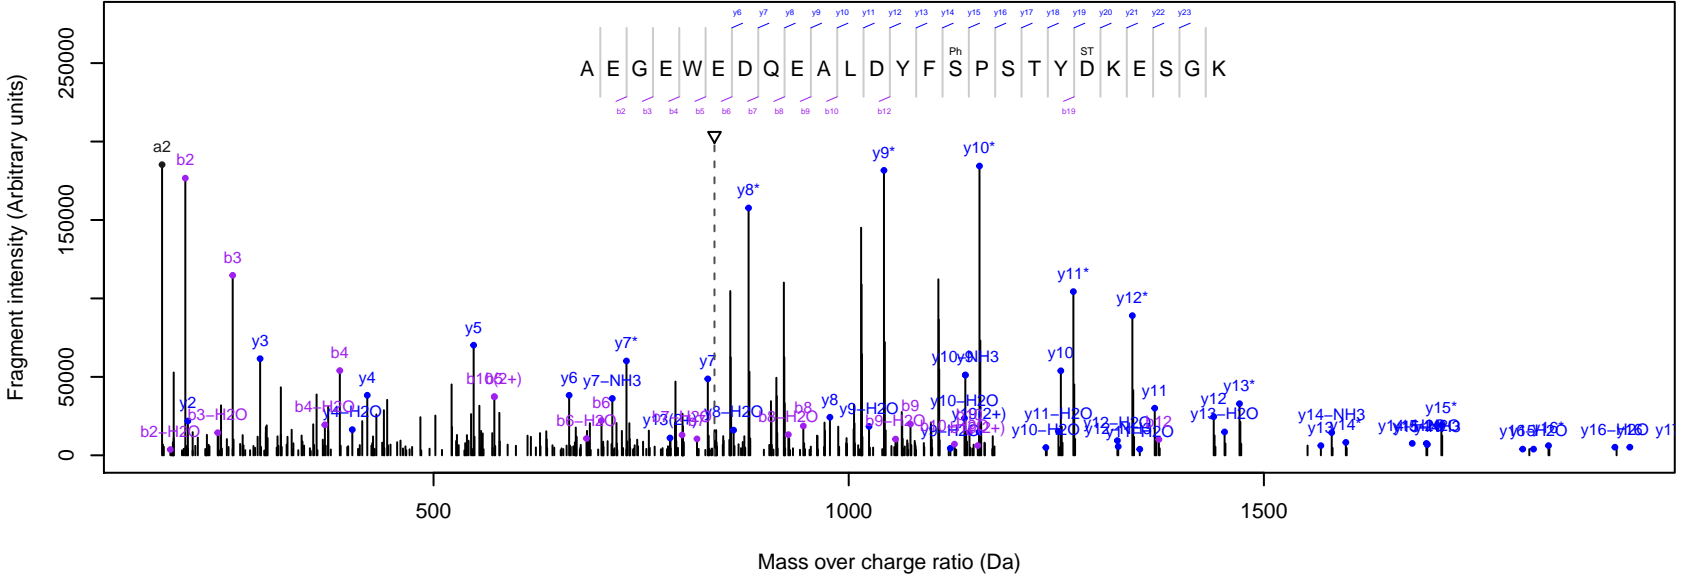

VEM(Oxidation (M))GTSSQNDVDM(Oxidation (M))SWIPQETLNQINKAS(Phospho (STY))PR-3+

Source : QE3\_201126\_FR\_TIOx\_hum\_tissue\_Urea\_RNAB\_B Scan : 41086

Andromeda score : 370.25

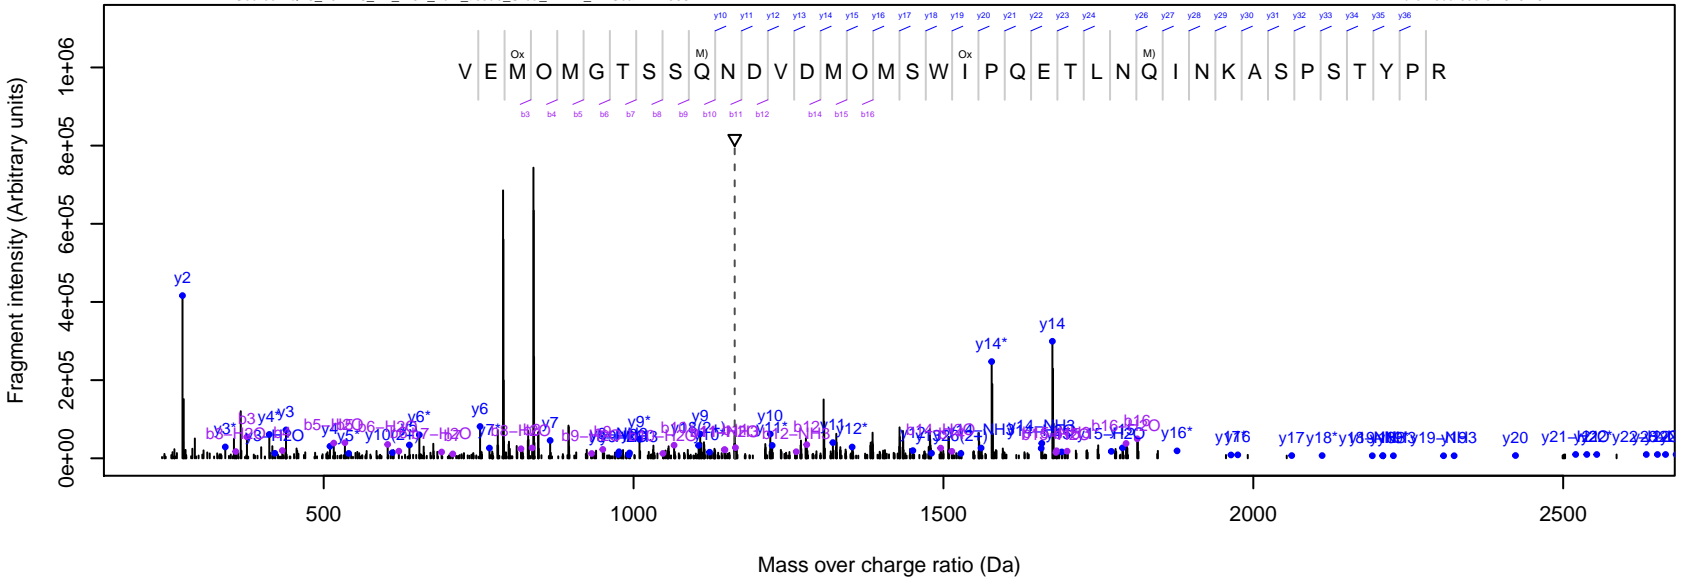











DNLLDTYSADQGDSPSTYSEGGTLAR

Source : QE3\_201126\_FR\_TiOx\_hum\_tissue\_Urea\_RNAB\_N Scan : 41455

Andromeda score : 359.5

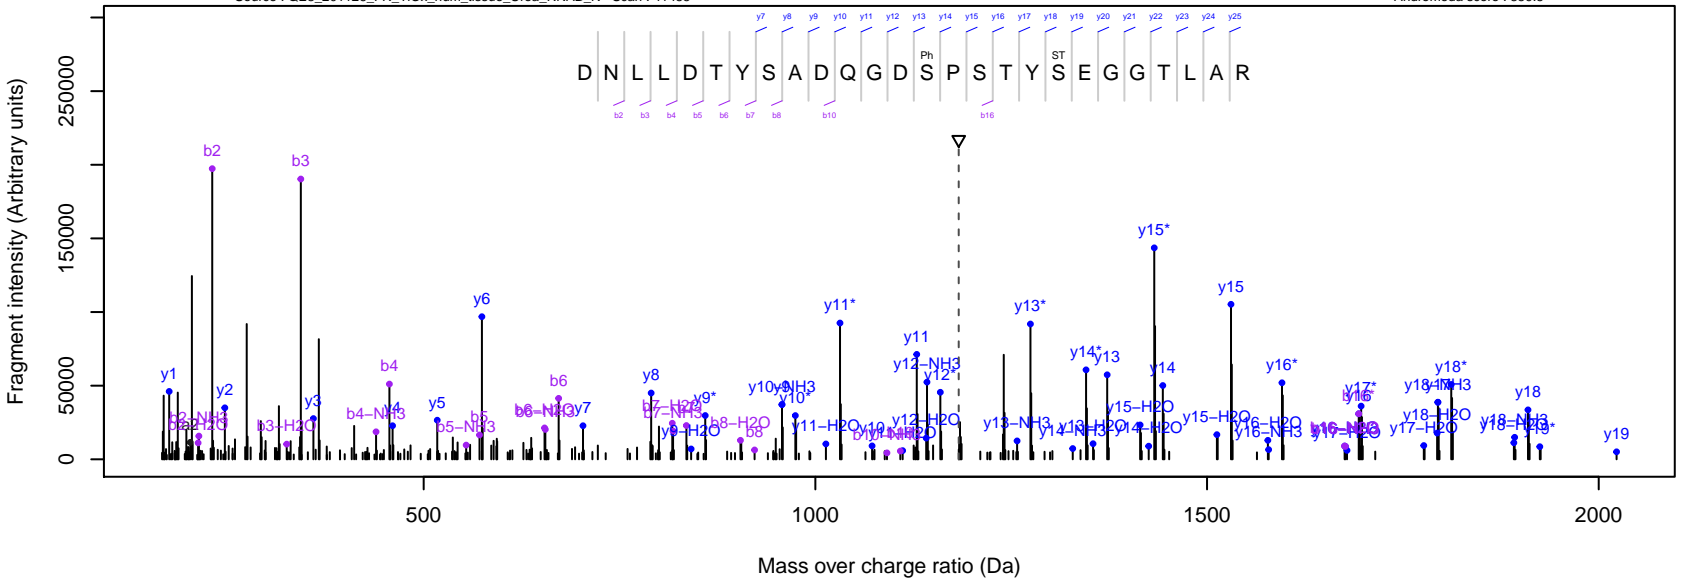

KET(Phospho (STY))ES(Phospho (STY))EAEDNLDLEK

Source : QE3\_201126\_FR\_TiOx\_hum\_tissue\_Urea\_RNAB\_H Scan : 27970

Andromeda score : 359.19

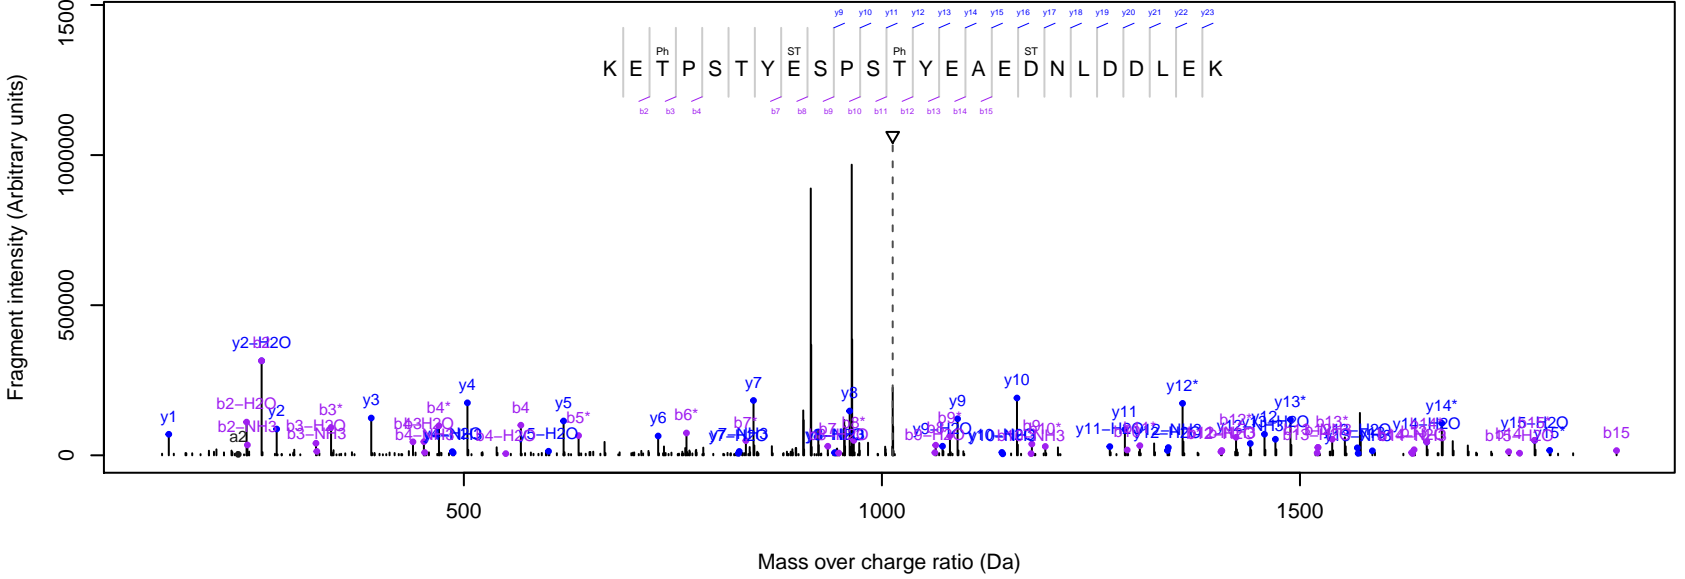

DKS(Phospho (STY))PVREPIDNLTPEER

Source : QE3\_201126\_FR\_TiOx\_hum\_tissue\_Urea\_RNAB\_N Scan : 19817

Andromeda score : 357.93

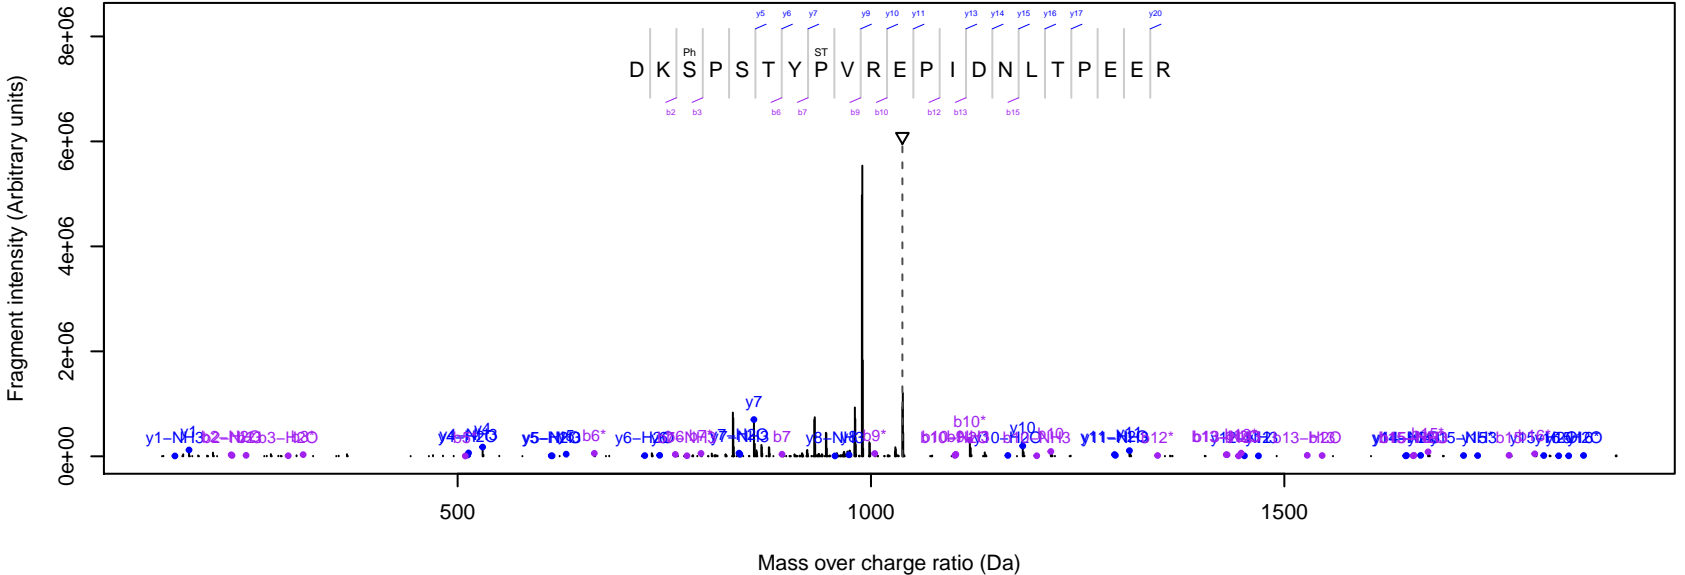

VIHDNFGIV EGLMTTVHAITAT(Phospho (STY))QK-3+

Source : QE3\_201126\_FR\_TiOx\_hum\_tissue\_Urea\_RNAB\_H Scan : 57134

Andromeda score : 357.78

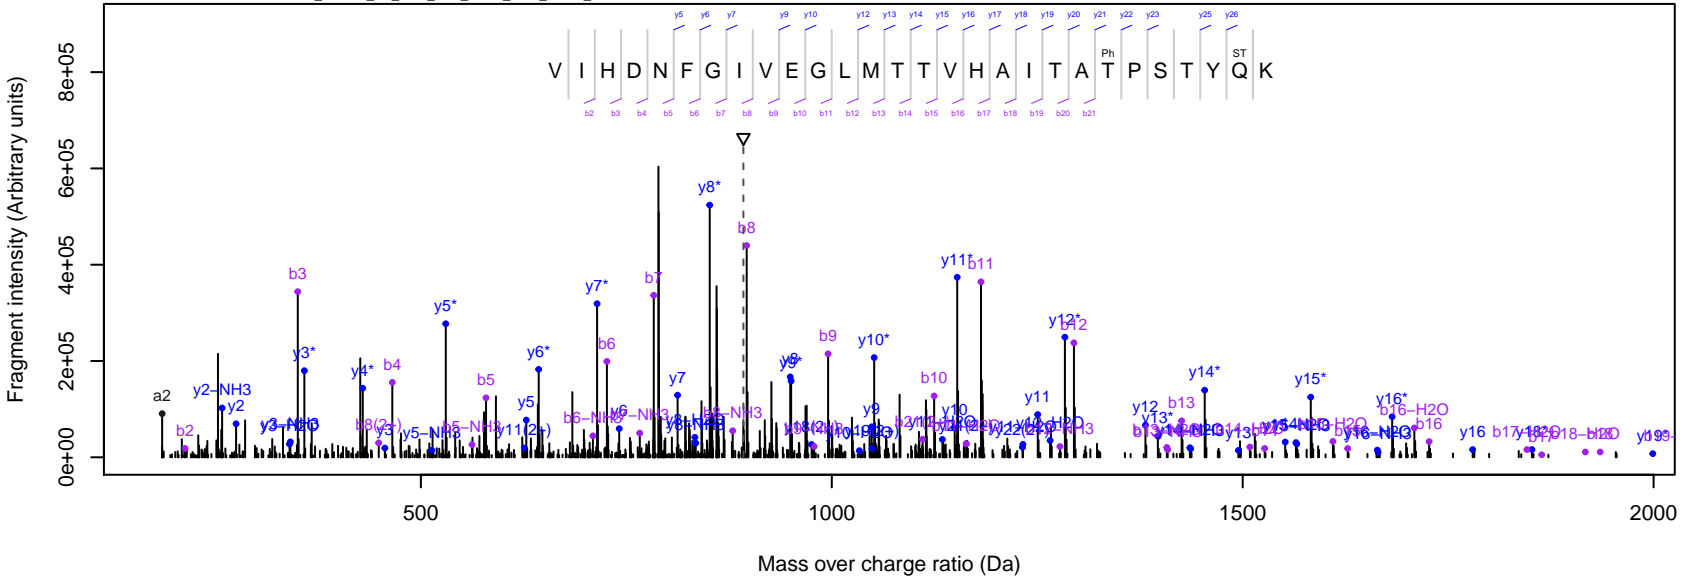

LGIAVIHGEAQDAESDLVDGRHS(Phospho (STY))PPMVR-4+

Source : QE3\_201126\_FR\_TiOx\_hum\_tissue\_Urea\_RNAB\_H Scan : 34825

Andromeda score : 357.36

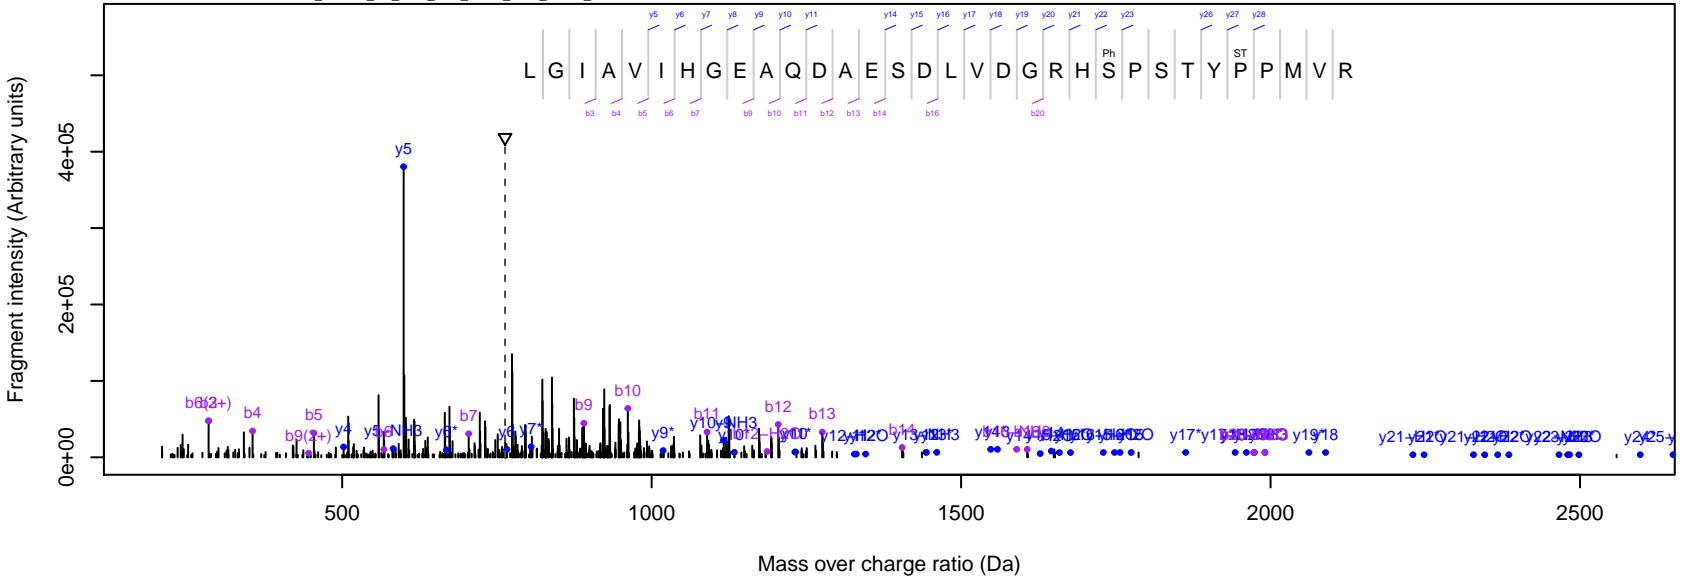

RDS(Phospho (STY))FDDRGPLNPLVDYDHGSR-3+

Source : QE3\_201126\_FR\_TiOx\_hum\_tissue\_Urea\_RNAB\_N Scan : 27996

Andromeda score : 357.27

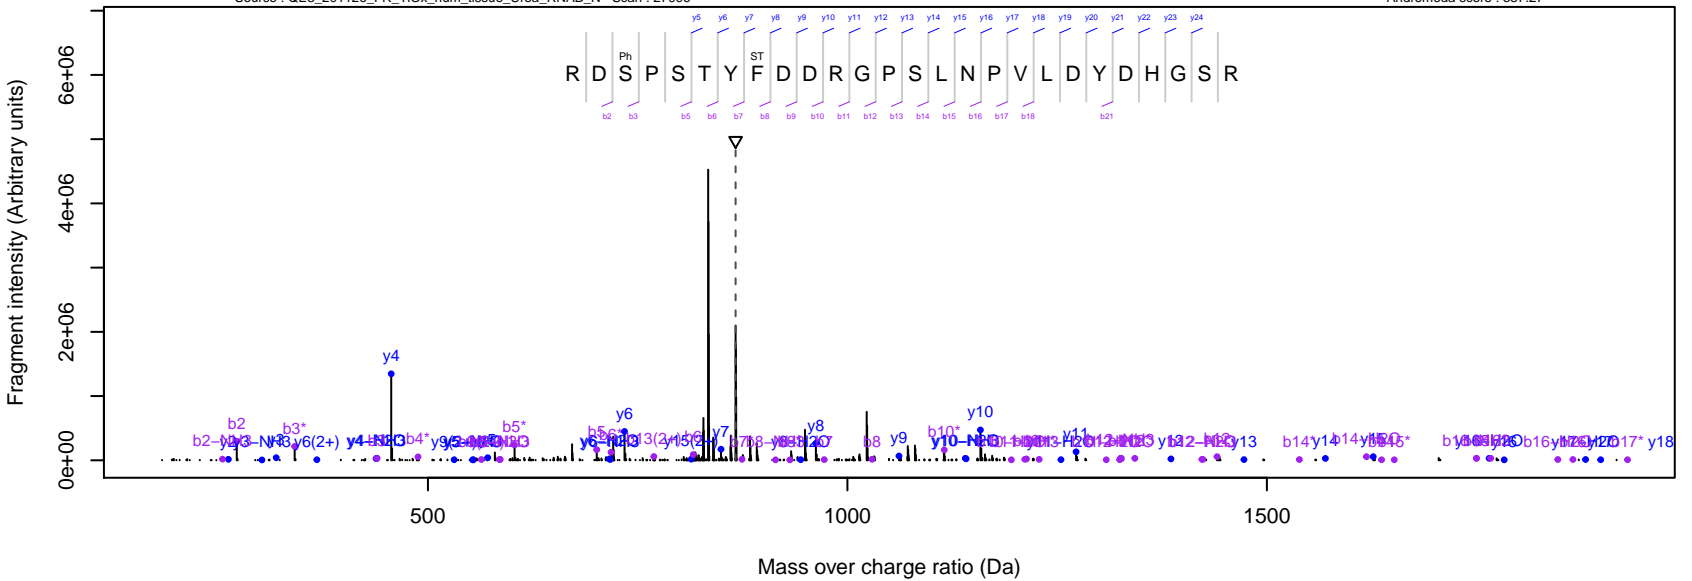

AKLNWLSVDFNNWKDWEDES(Phospho (STY))DEDM(Oxidation (M))SNFDR-3+

Source : QE3\_201126\_FR\_TIOx\_hum\_tissue\_Urea\_RNAB\_H Scan : 56755

Andromeda score : 357.13

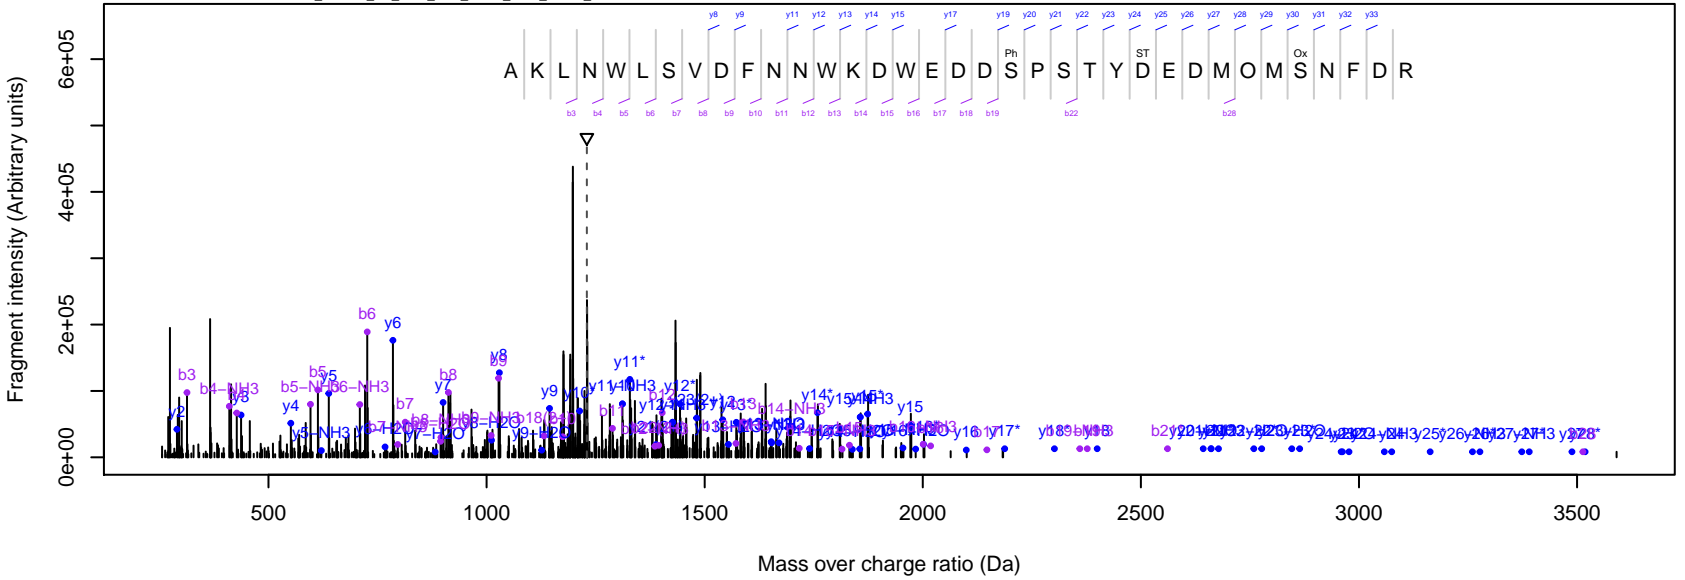

KEES(Phospho (STY))EESDDMGFLFD-2+

Source : QE3\_201126\_FR\_TIOx\_hum\_tissue\_Urea\_RNAB\_B Scan : 56559

Andromeda score : 355.49

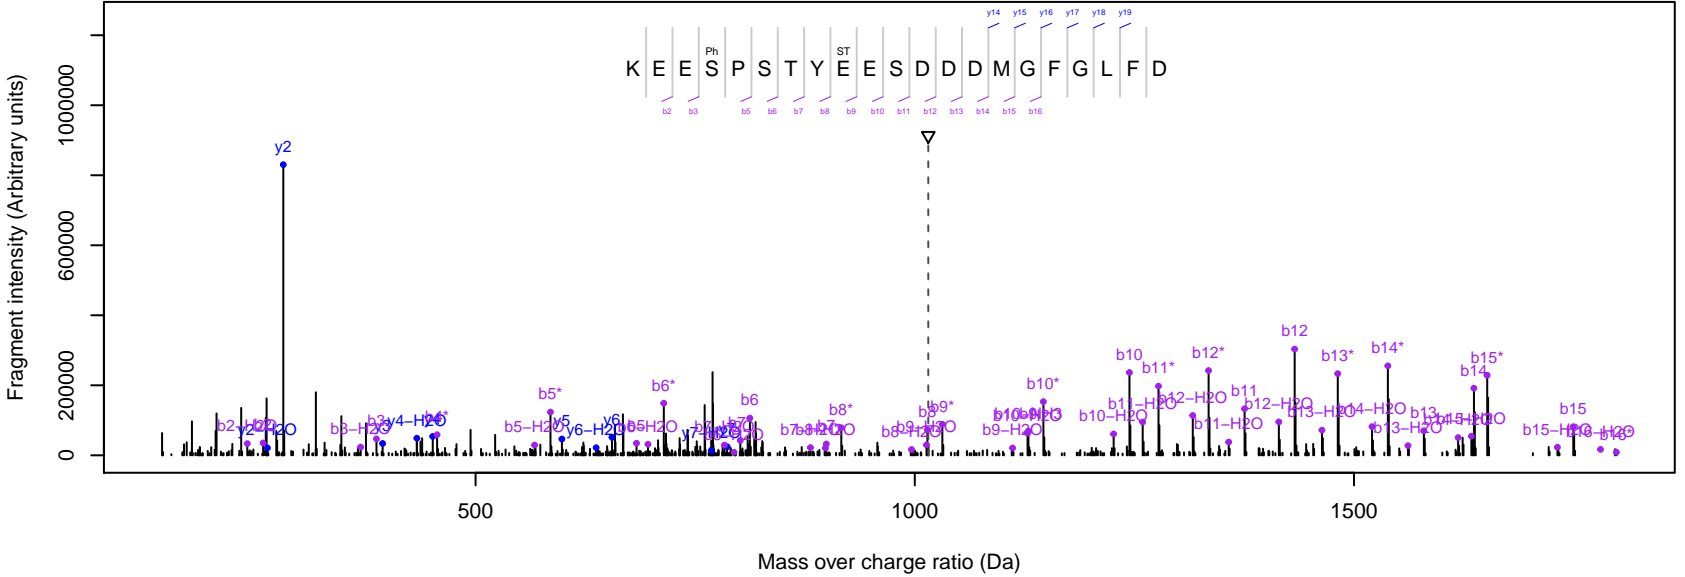

DSENLAS(Phospho (STY))PSEYPENGER-2+

Source : QE3\_201126\_FR\_TIOx\_hum\_tissue\_Urea\_RNAB\_N Scan : 22948

Andromeda score : 355.43

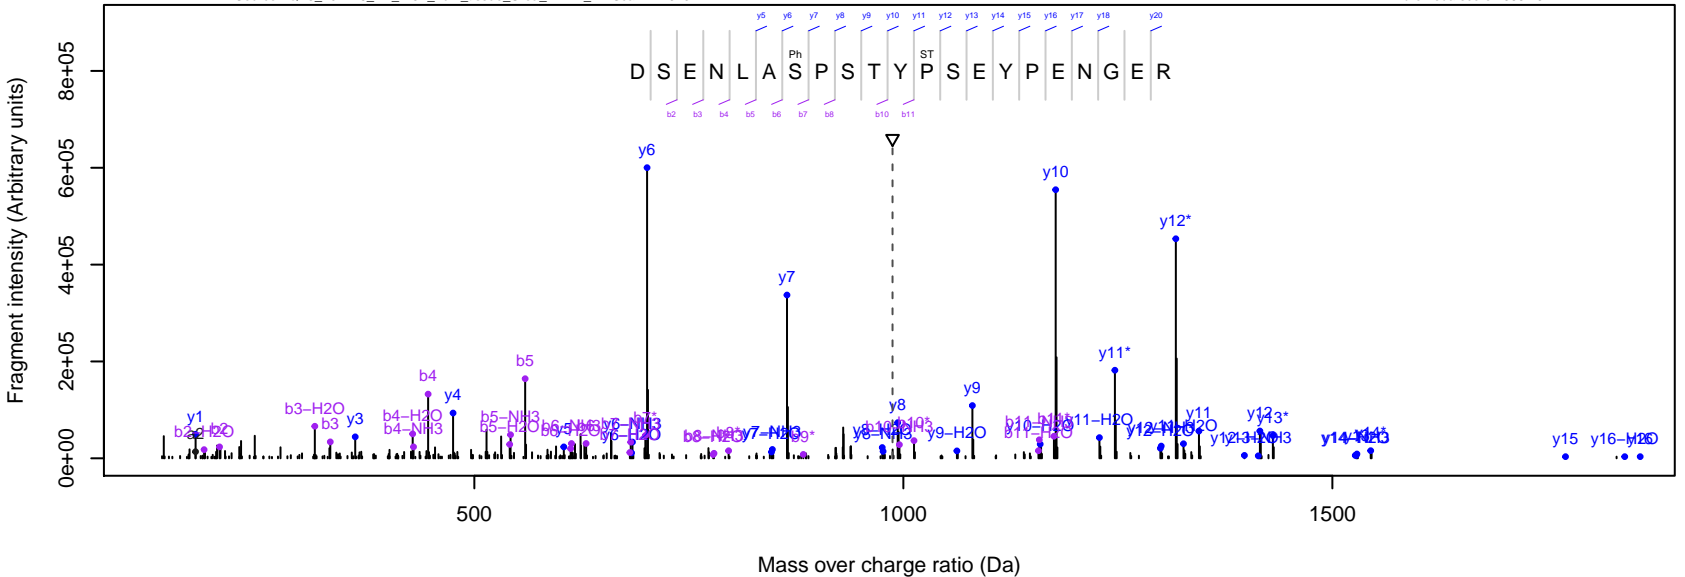

KTGS(Phospho (STY))YGALAEITASK-2+

Source : QE3\_201126\_FR\_TiOx\_hum\_tissue\_Urea\_RNAB\_H Scan : 25694

Andromeda score : 355.04

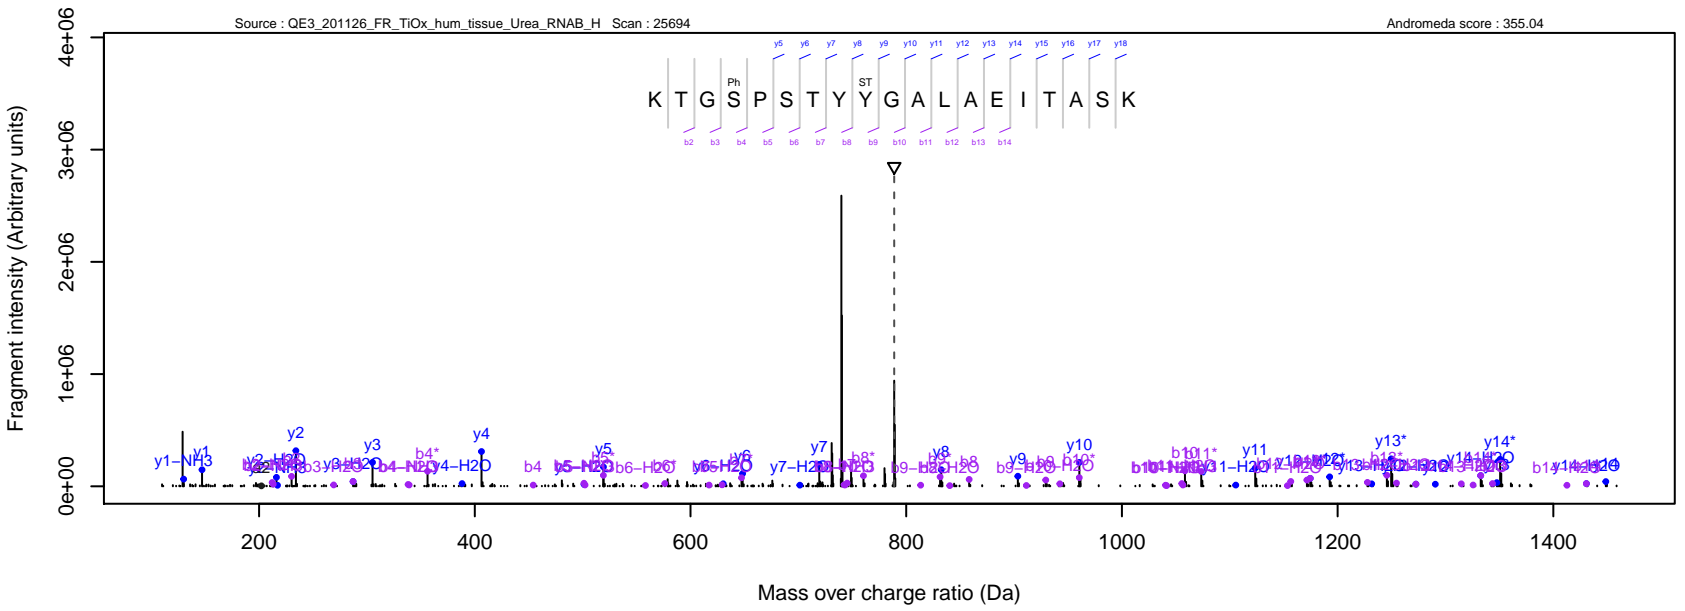

GTLDEEEDS(Phospho (STY))DTDDIDHR-2+

Source : QE3\_201126\_FR\_TiOx\_hum\_tissue\_Urea\_RNAB\_H Scan : 18392

Andromeda score : 354.53

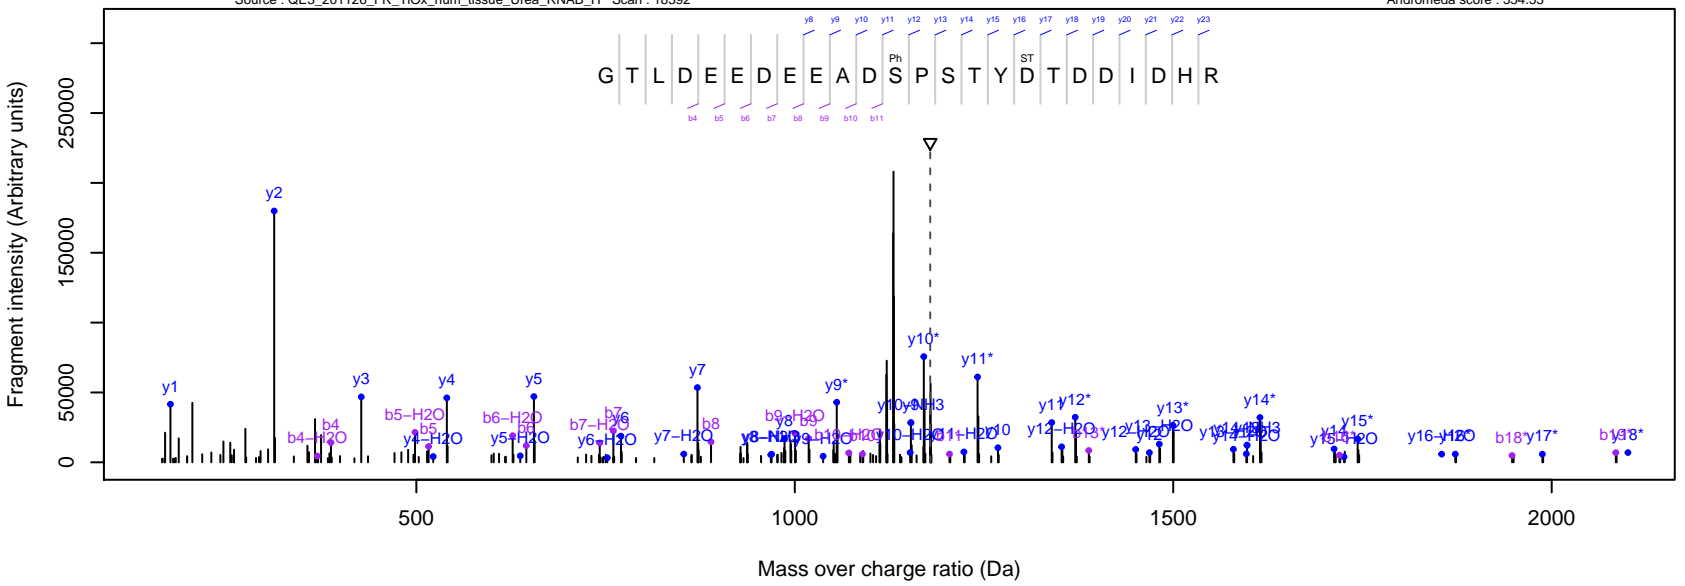

VAGEAAETDS(Phospho (STY))EPEPEPEPTAAPR-2+

Source : QE3\_201126\_FR\_TiOx\_hum\_tissue\_Urea\_RNAB\_B Scan : 20400

Andromeda score : 353.85

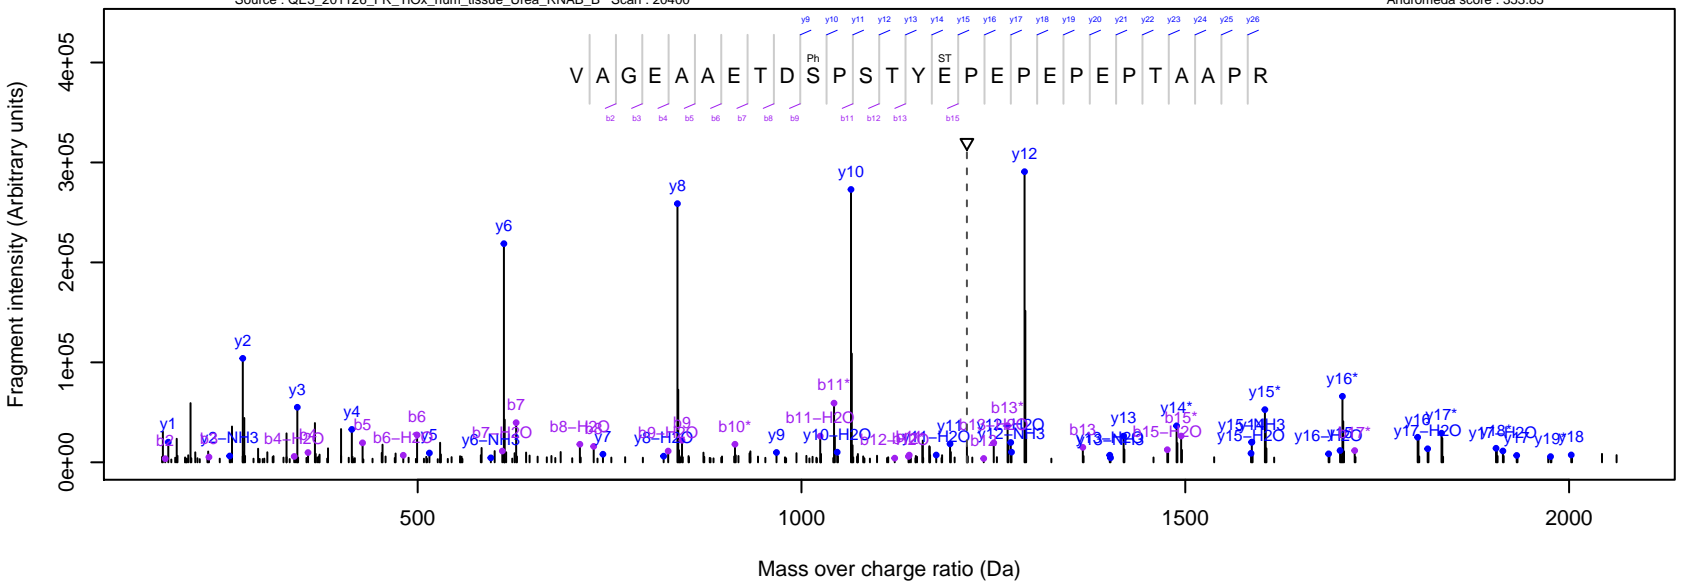

SVSDPVEDKKEQES(Phospho (STY))DEEEEEEEDEPSGATTR-3+

Source : QE3\_201126\_FR\_TIOx\_hum\_tissue\_Urea\_RNAB\_H Scan : 15562

Andromeda score : 353.46

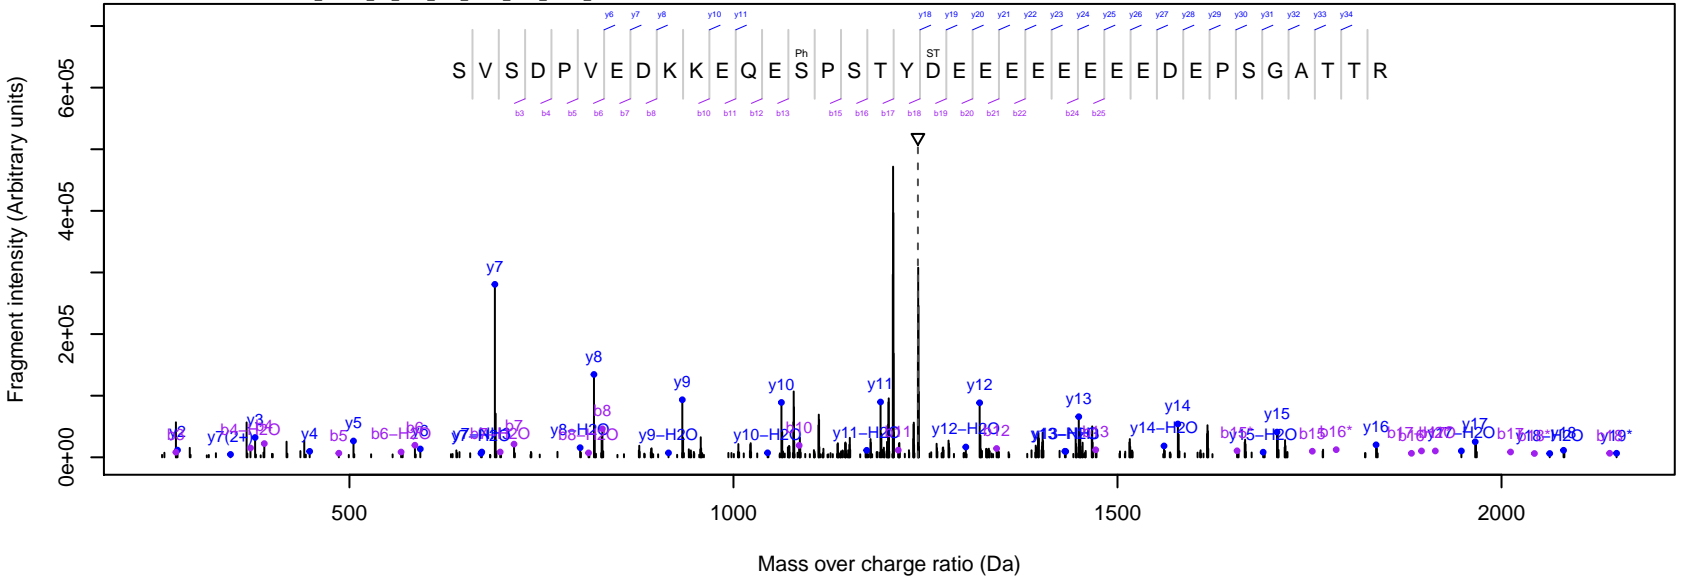

M(Oxidation (M))GPSGGEGMEPERRDS(Phospho (STY))QDGSSYR-3+

Source : QE3\_201126\_FR\_TIOx\_hum\_tissue\_Urea\_RNAB\_H Scan : 9563

Andromeda score : 353.13

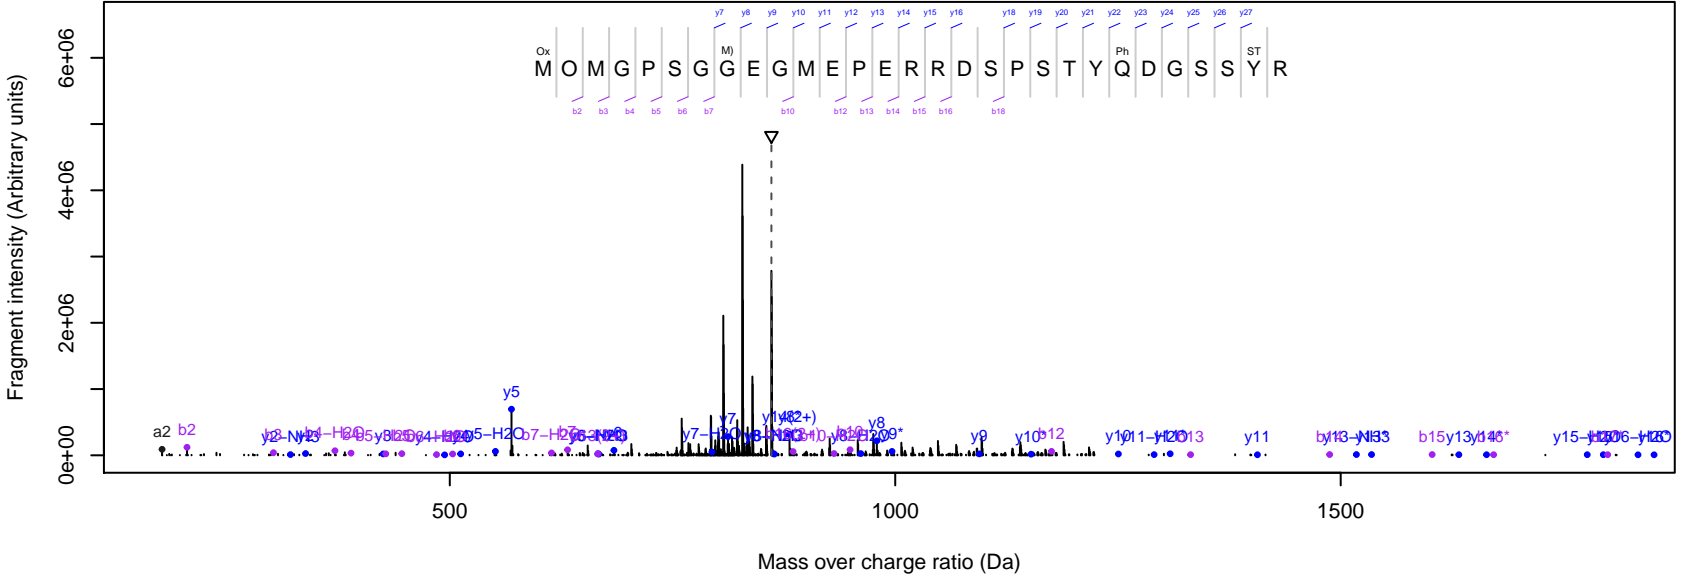

RGS(Phospho (STY))LTLTISGESPK-2+

Source : QE3\_201126\_FR\_TIOx\_hum\_tissue\_Urea\_RNAB\_B Scan : 22050

Andromeda score : 352.64

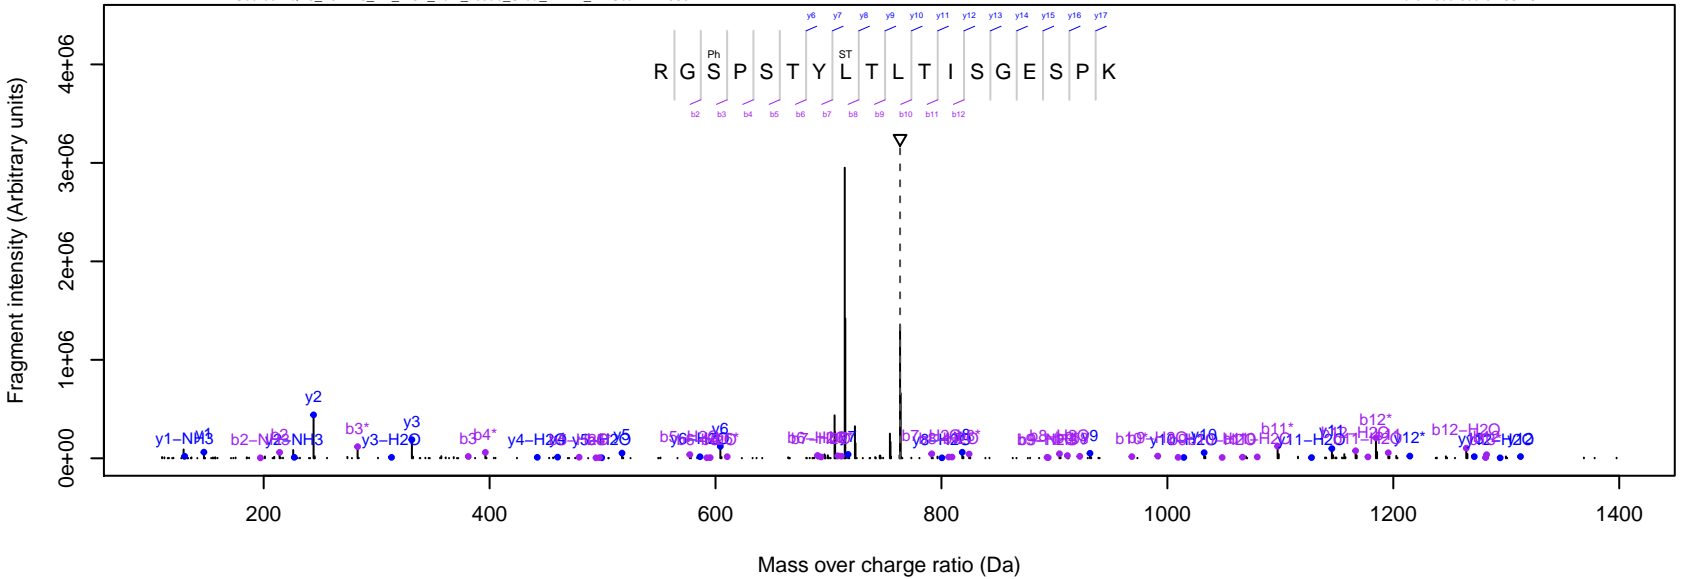



SEDEDS(Phospho (STY))LEEAGSPAGPCPR-2+

Source : QE3\_201126\_FR\_TiOx\_hum\_tissue\_Urea\_RNAB\_N Scan : 21739

Andromeda score : 352.05

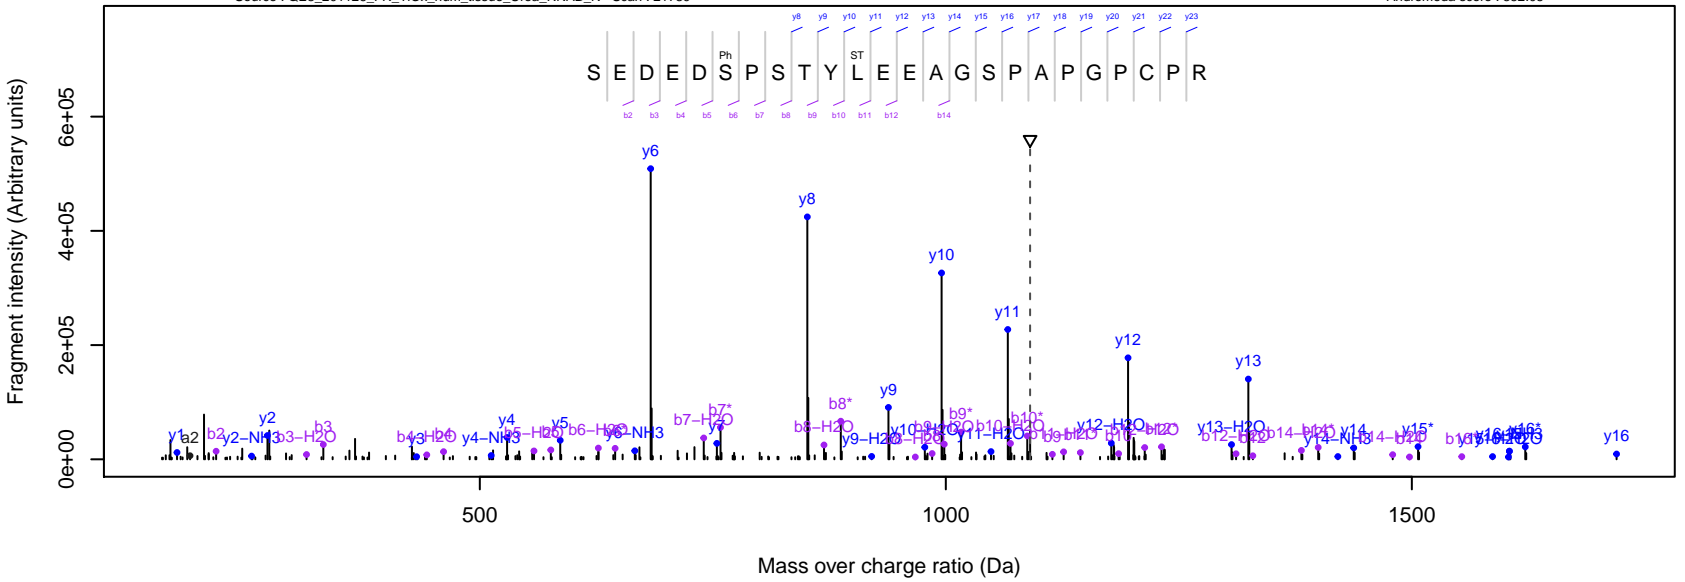

NKPGPNIES(Phospho (STY))GNEDDDASFK-2+

Source : QE3\_201126\_FR\_TiOx\_hum\_tissue\_Urea\_RNAB\_B Scan : 16298

Andromeda score : 351.81

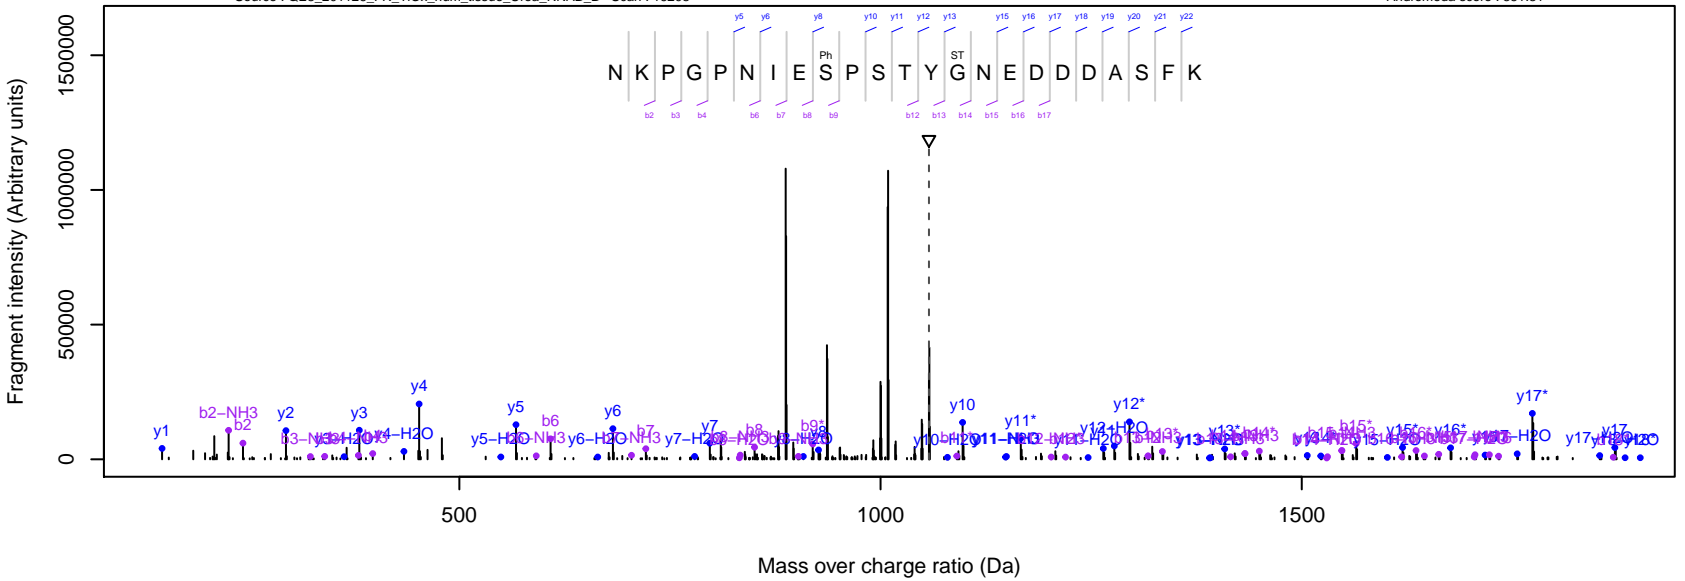

SSKAS(Phospho (STY))LGSLEGEAEAEASSPK-2+

Source : QE3\_201126\_FR\_TiOx\_hum\_tissue\_Urea\_RNAB\_H Scan : 30459

Andromeda score : 351.81

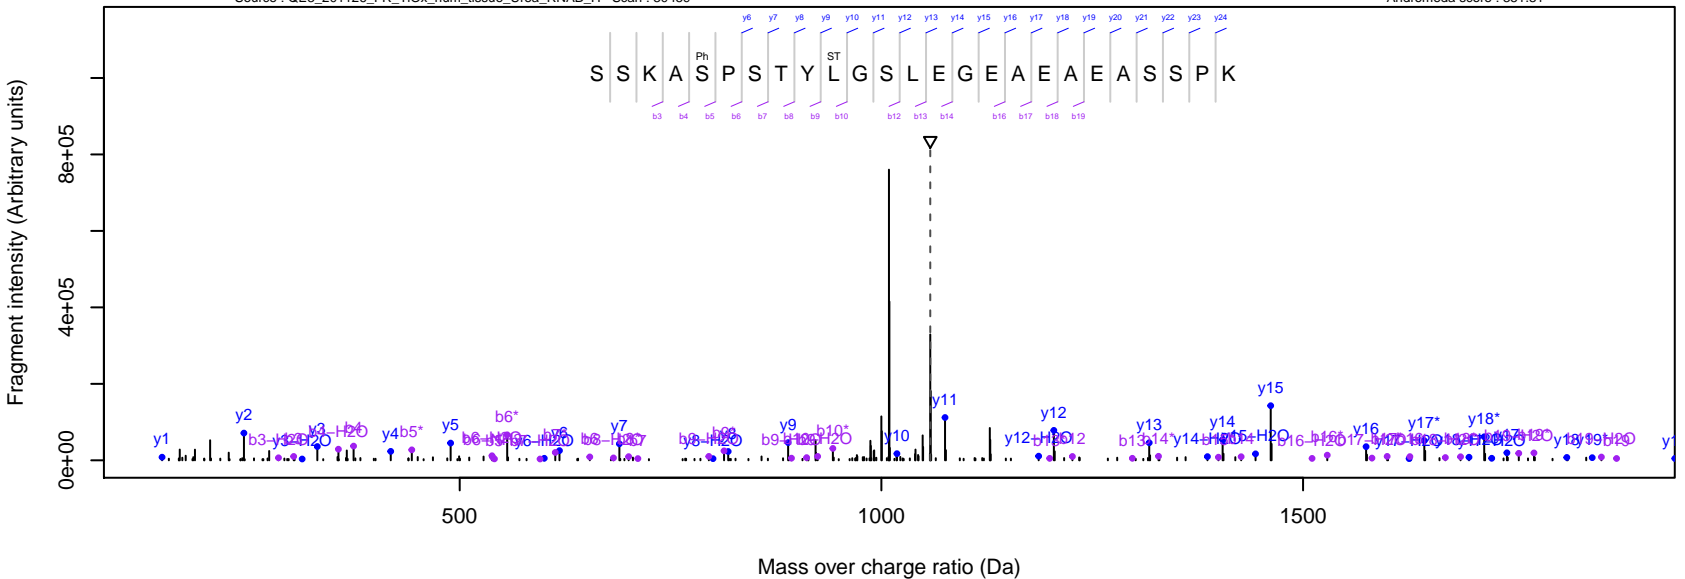







M(Oxidation (M))LAES(Phospho (STY))DES(Phospho (STY))GDEESVQTDKTELQNTLR-3+

Source : QE3\_201126\_FR\_TIOx\_hum\_tissue\_Urea\_RNAB\_N Scan : 33810

Andromeda score : 347.43

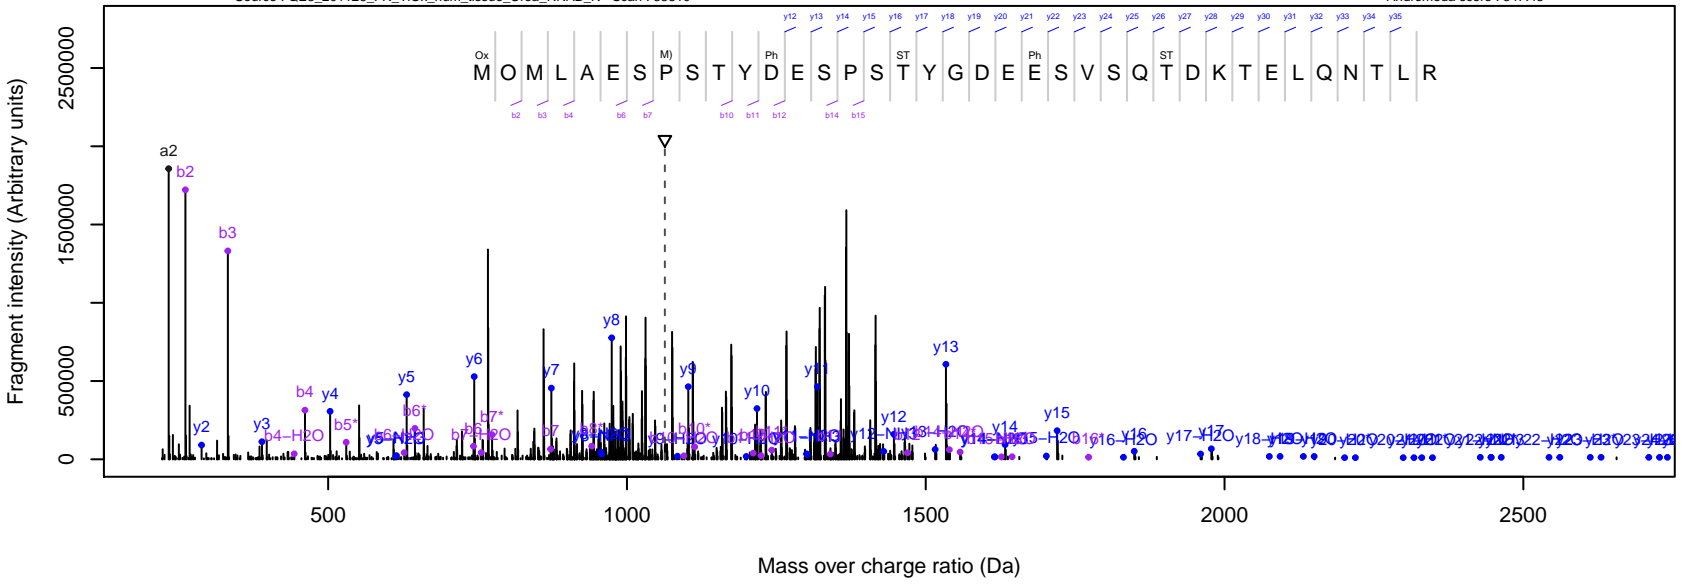

LAEDEGDS(Phospho (STY))EPEAVGQSR-2+

Source : QE3\_201126\_FR\_TIOx\_hum\_tissue\_Urea\_RNAB\_N Scan : 15887

Andromeda score : 347.33

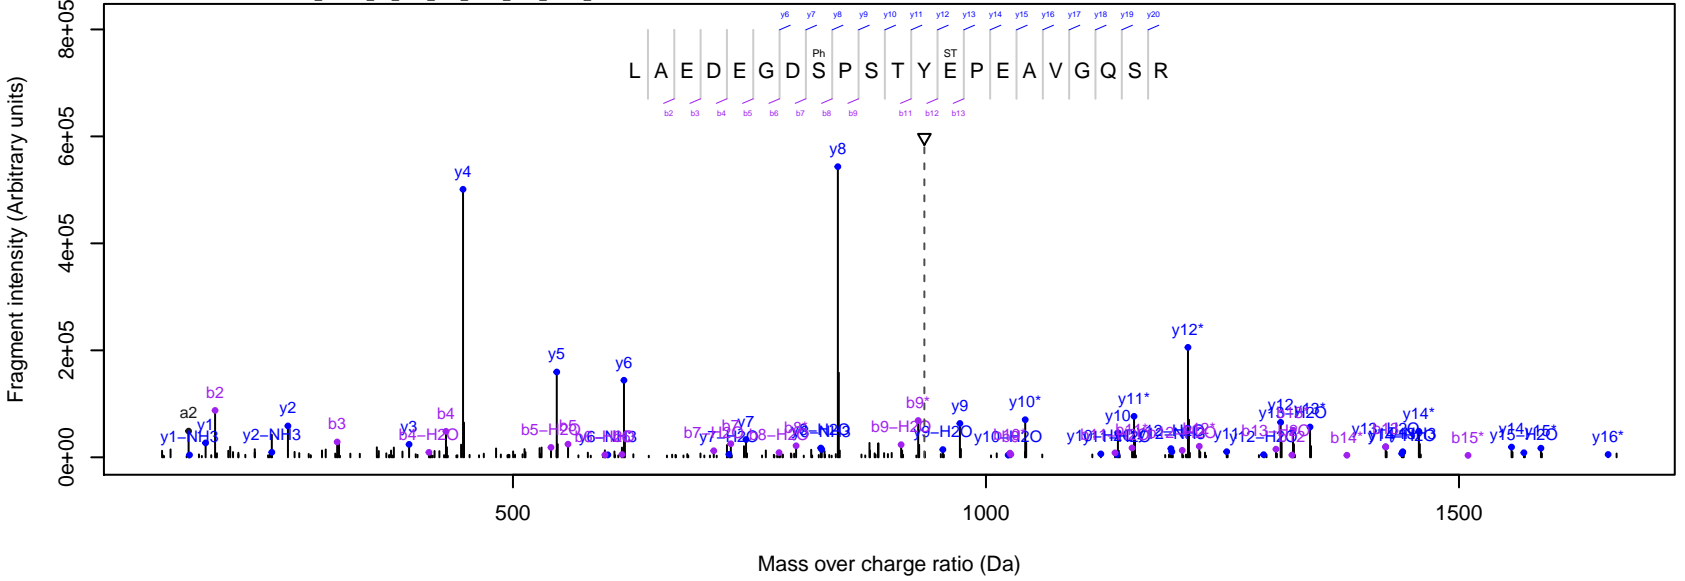

HGS(Phospho (STY))DPAFAPGPR-2+

Source : QE3\_201126\_FR\_TIOx\_hum\_tissue\_Urea\_RNAB\_B Scan : 11981

Andromeda score : 347.01

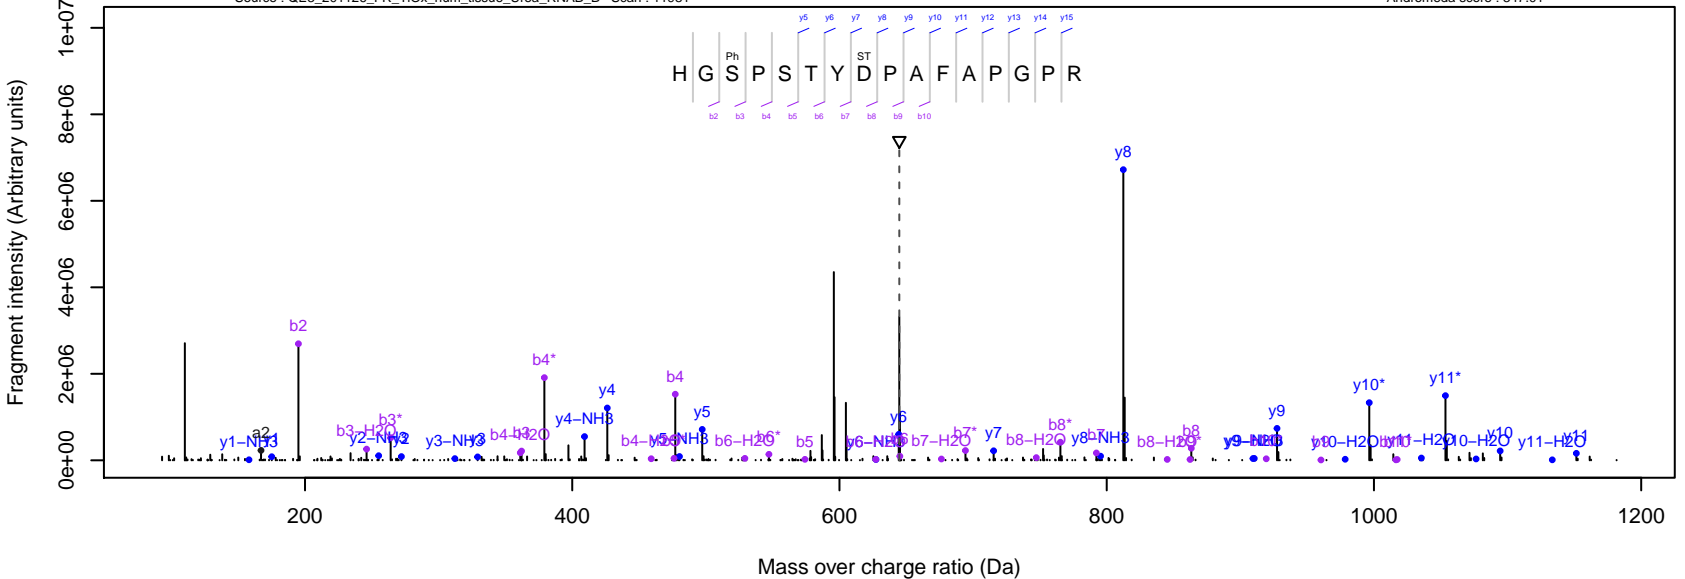

RGS(Phospho (STY))IGENQIKDEK-2+

Source : QE3\_201126\_FR\_TiOx\_hum\_tissue\_Urea\_RNAB\_H Scan : 6795

Andromeda score : 346.99

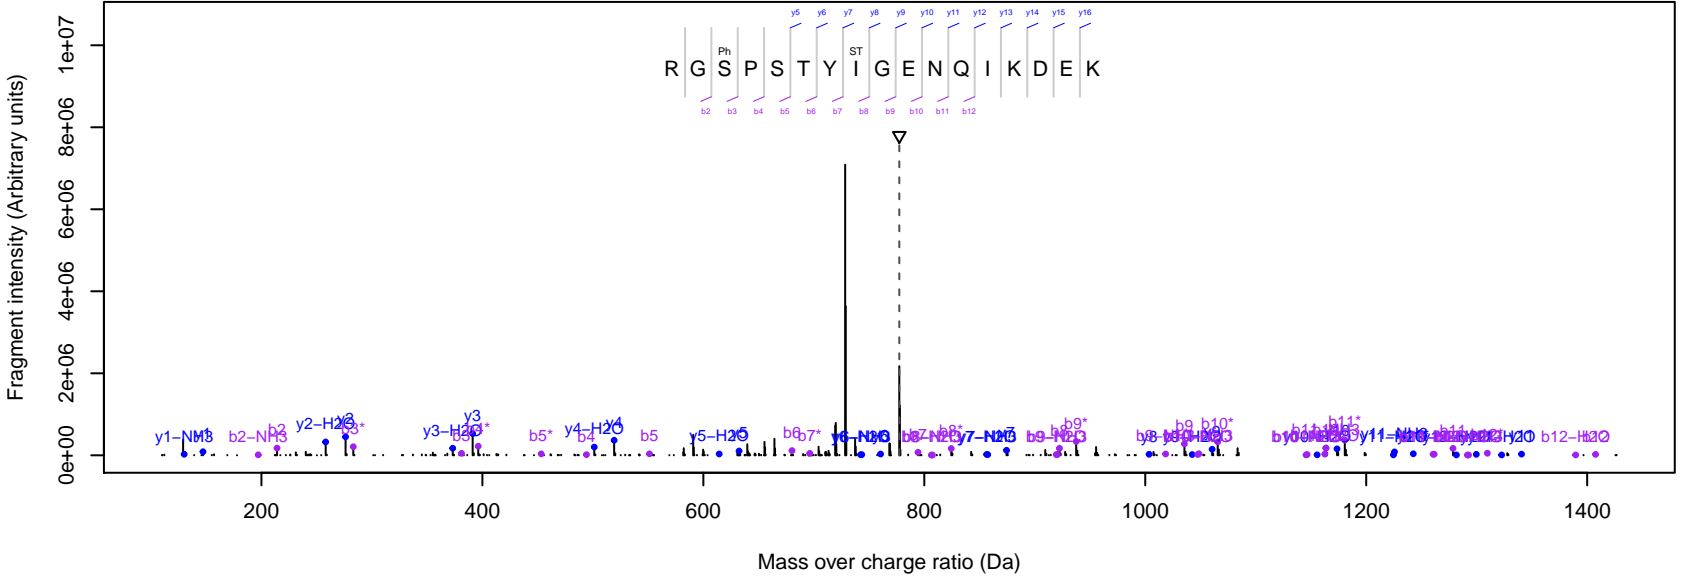

(Acetyl (Protein N-term))AEQEPTAEQLAQIAAENEDEHS(Phospho (STY))VNYKPPAQK-3+

Source : QE3\_201126\_FR\_TIOx\_hum\_tissue\_Urea\_RNAB\_B Scan : 42727

Andromeda score : 346.33

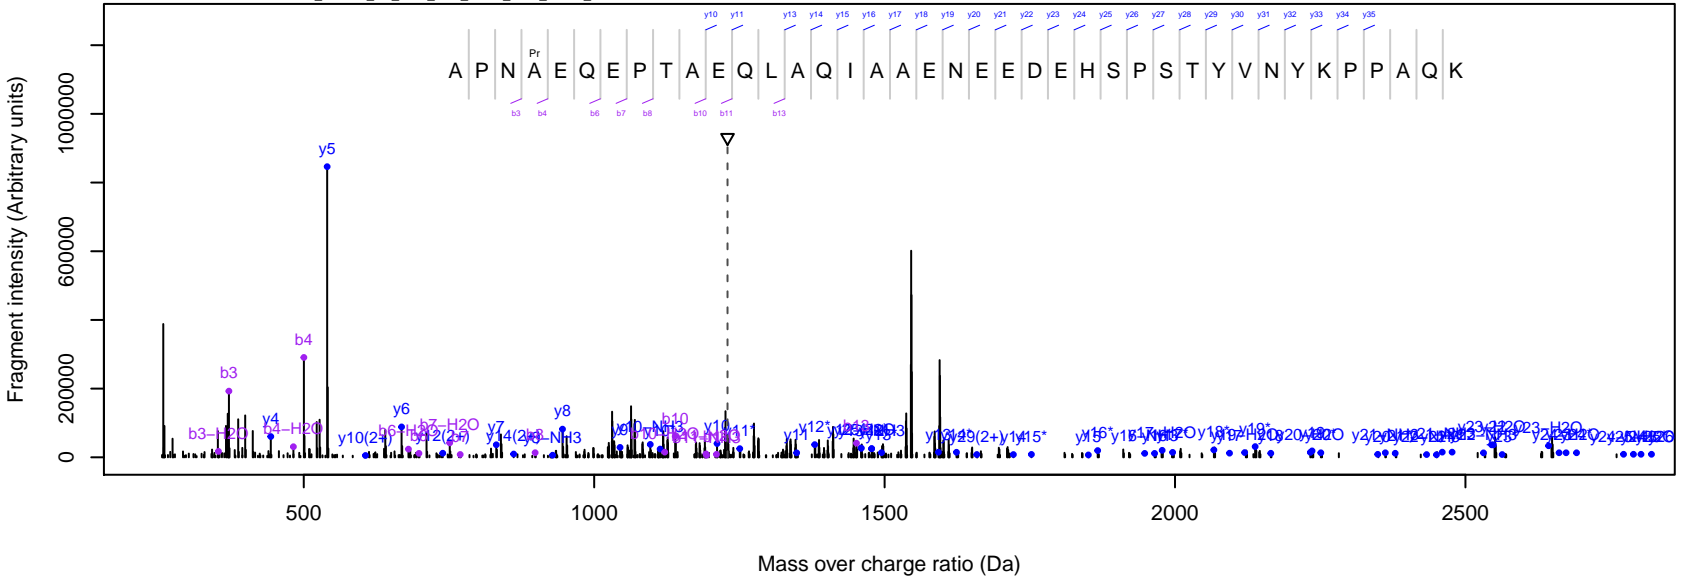

KAEGEPQEEs(Phospho (STY))PLKSK-3+

Source : QE3\_201126\_FR\_TIOx\_hum\_tissue\_Urea\_RNAB\_H Scan : 5948

Andromeda score : 346.18

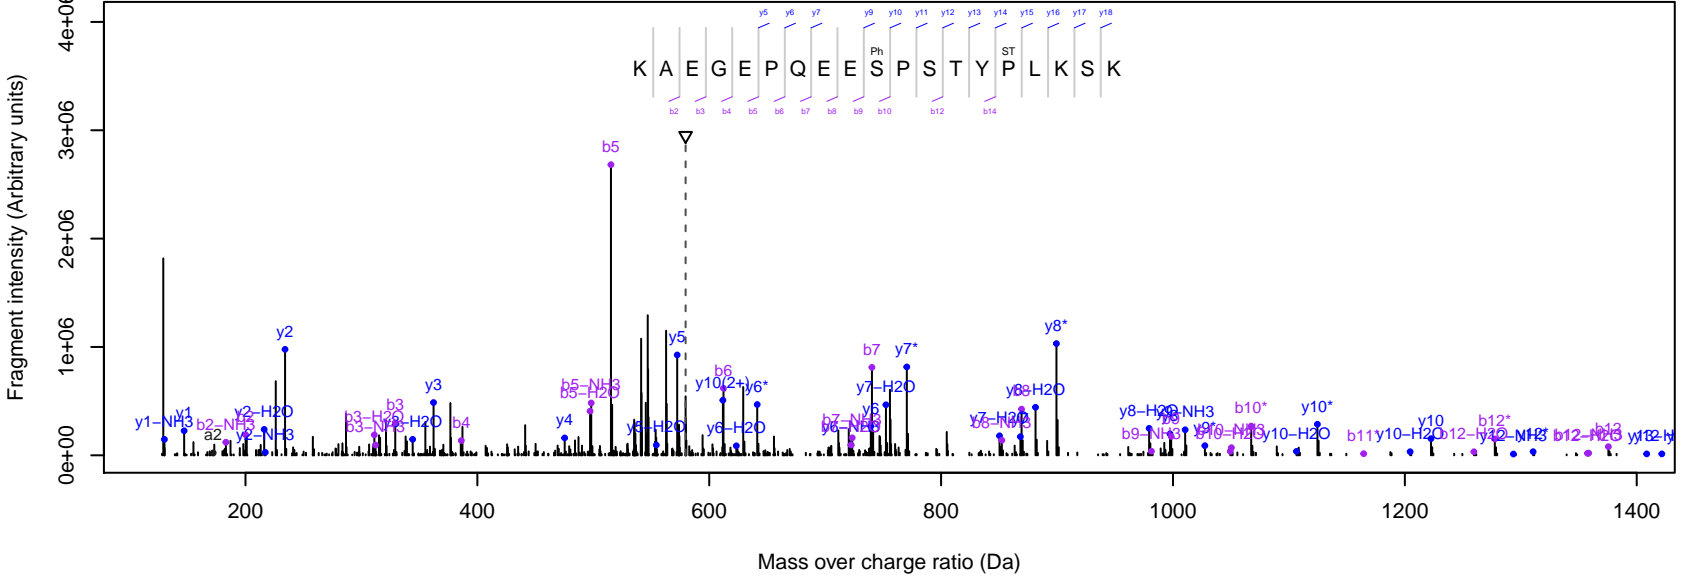

SKELVSSSSGSDSDS(Phospho (STY))EVDK-3+

Source : QE3\_201126\_FR\_TIOx\_hum\_tissue\_Urea\_RNAB\_B Scan : 6317

Andromeda score : 345.95

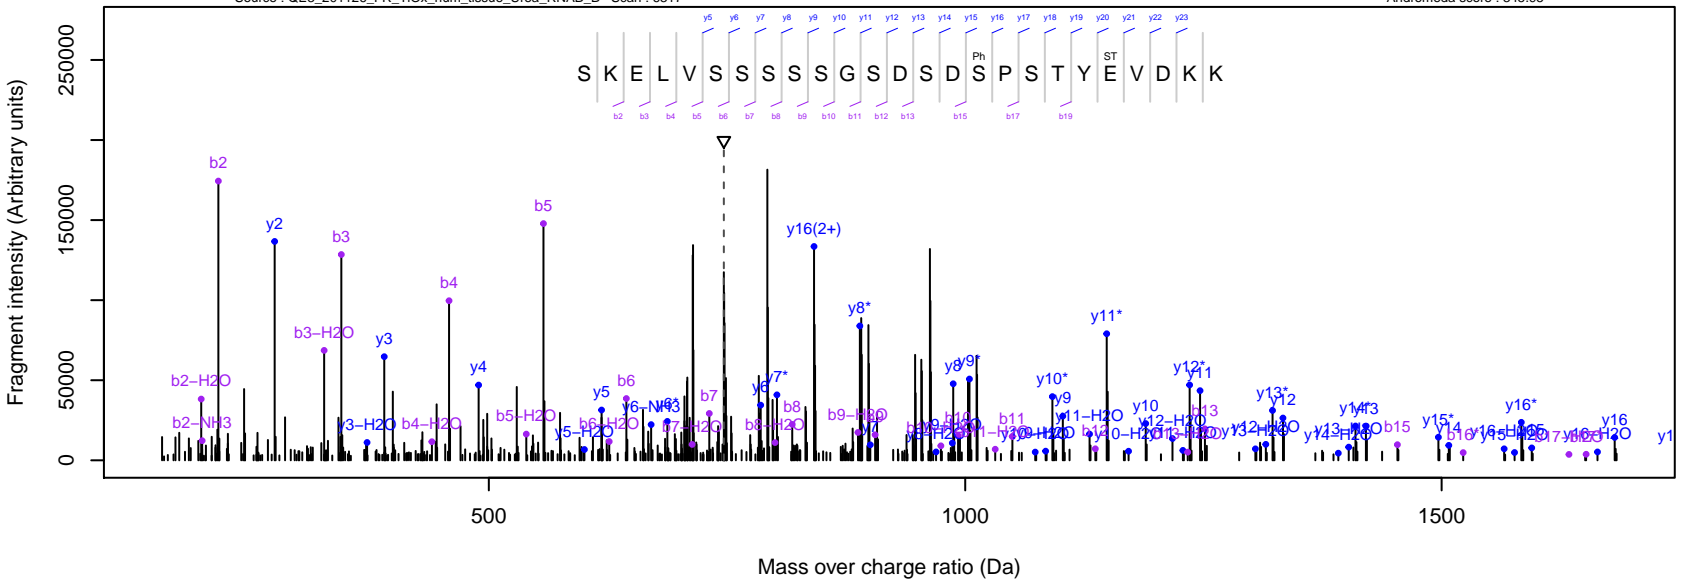

GAEAFGDS(Phospho (STY))EEDGVDVFEVEK-2+

Source : QE3\_201126\_FR\_TIOx\_hum\_tissue\_Urea\_RNAB\_B Scan : 43821

Andromeda score : 345.93

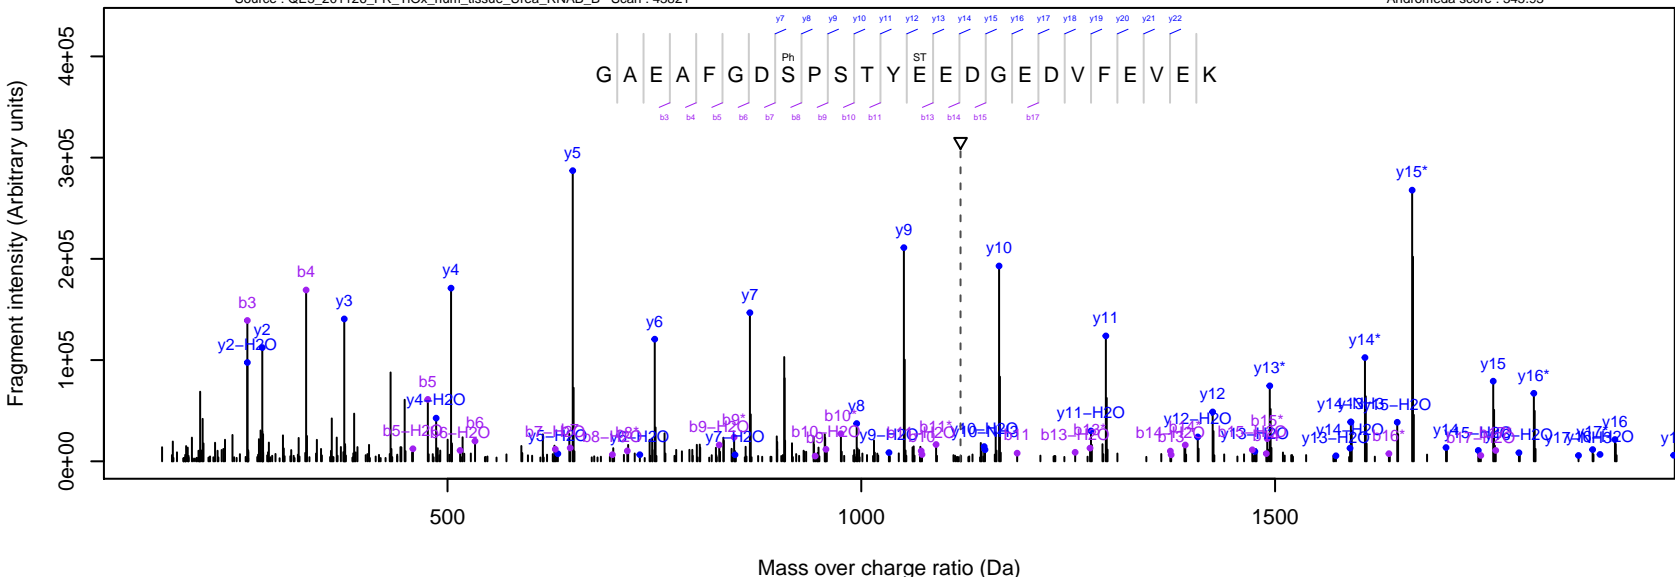

YM(Oxidation (M))AENPTAGVVQEEEEEDNLEYDS(Phospho (STY))DGNPIAPTKK-3+

Source : QE3\_201126\_FR\_TIOx\_hum\_tissue\_Urea\_RNAB\_N Scan : 36990

Andromeda score : 345.69

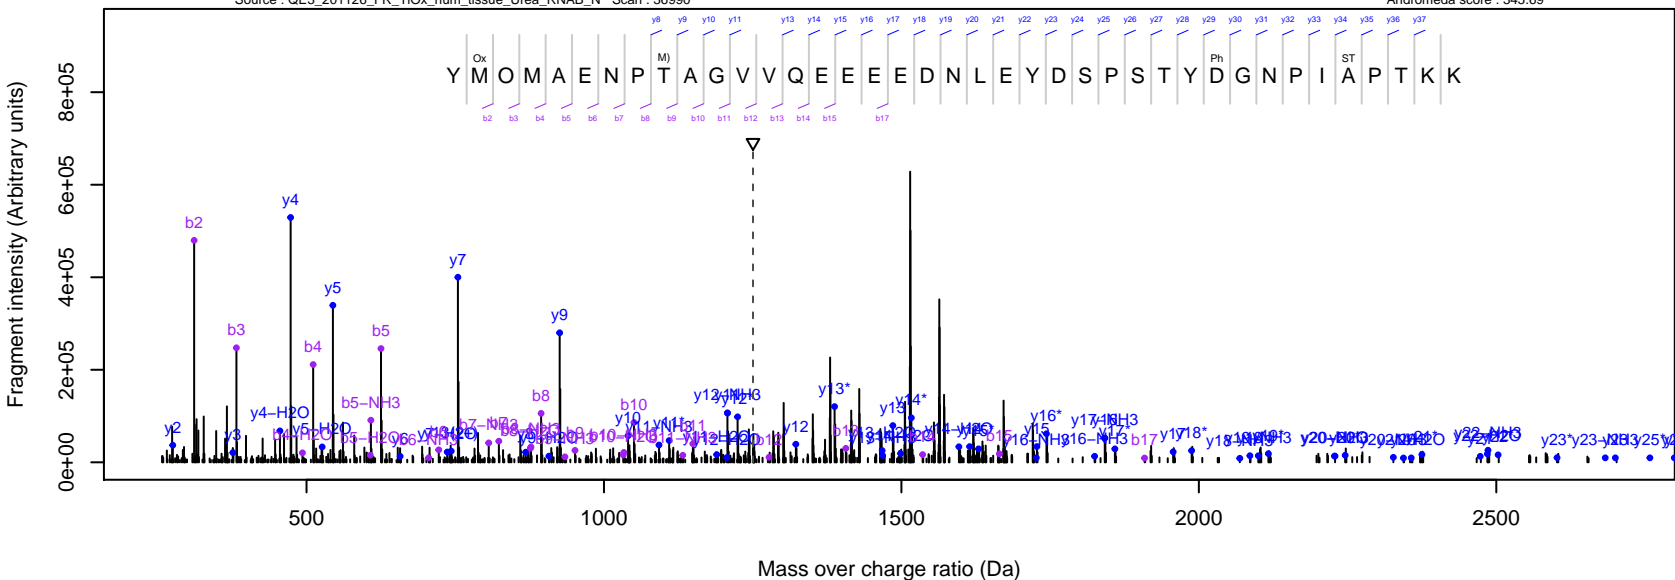

IALESEGRPEEQMOMESPSTYDNCSPSTYGGDDDWTHLSSK-3+

Source : QE3\_201126\_FR\_TIOx\_hum\_tissue\_Urea\_RNAB\_N Scan : 32588

Andromeda score : 345.63

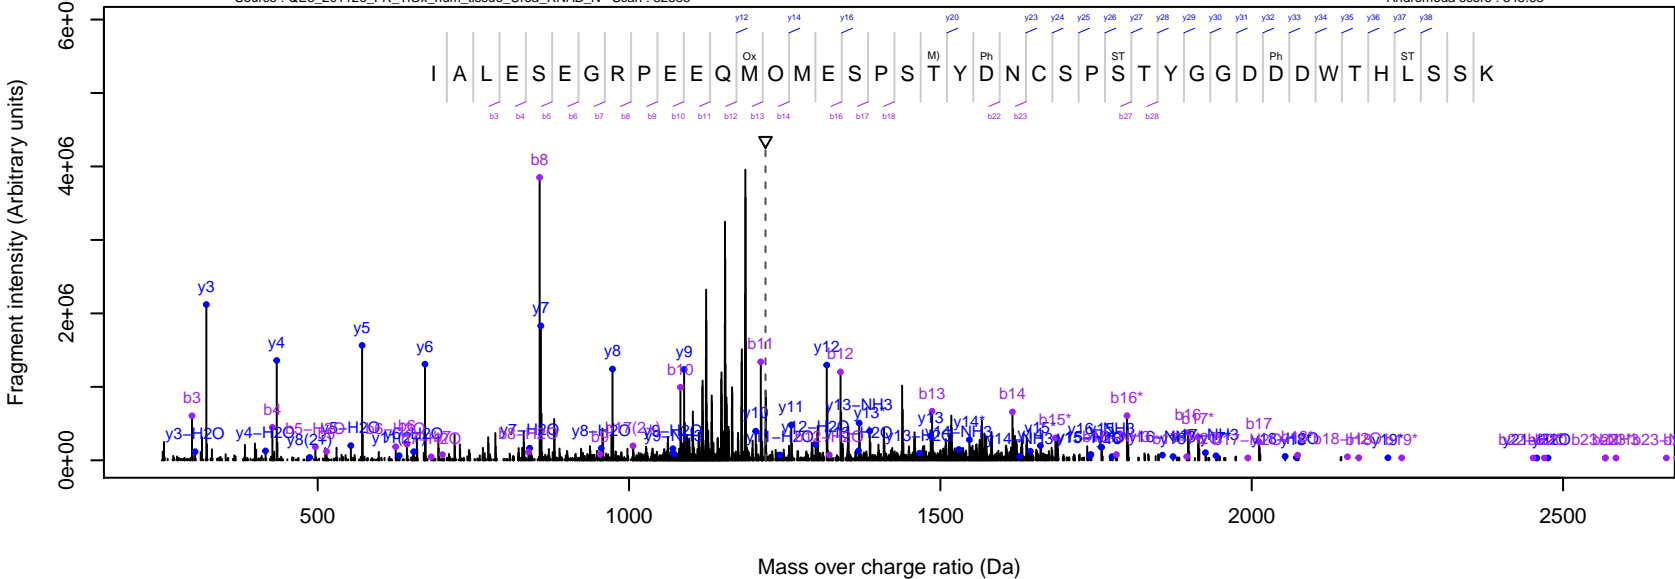





DGESDGFADDEES(Phospho (STY))GEEGEDQEEGREPGAGR-3+

Source : QE3\_201126\_FR\_TIOx\_hum\_tissue\_Urea\_RNAB\_N Scan : 20612

Andromeda score : 343.43

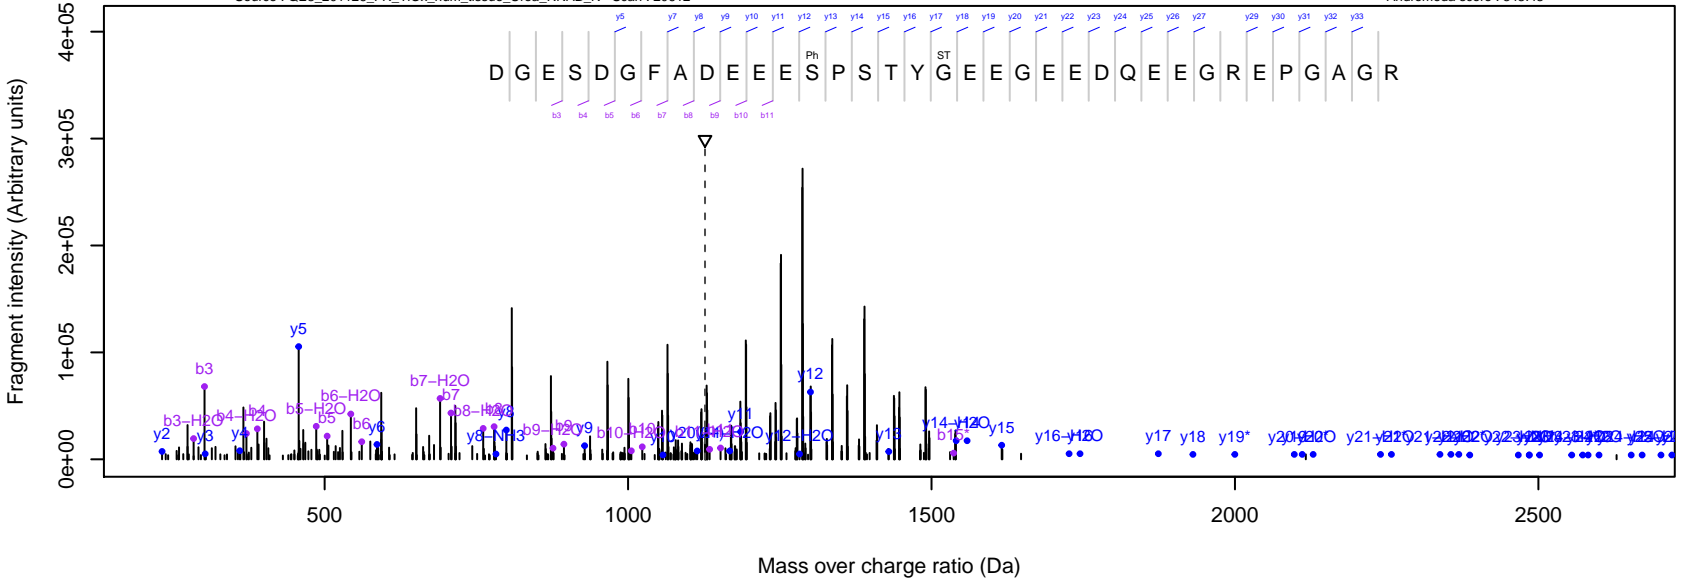

KEES(Phospho (STY))EESDDDM(Oxidation (M))GFGLFD-2+

Source : QE3\_201126\_FR\_TIOx\_hum\_tissue\_Urea\_RNAB\_N Scan : 2259

Andromeda score : 343.26

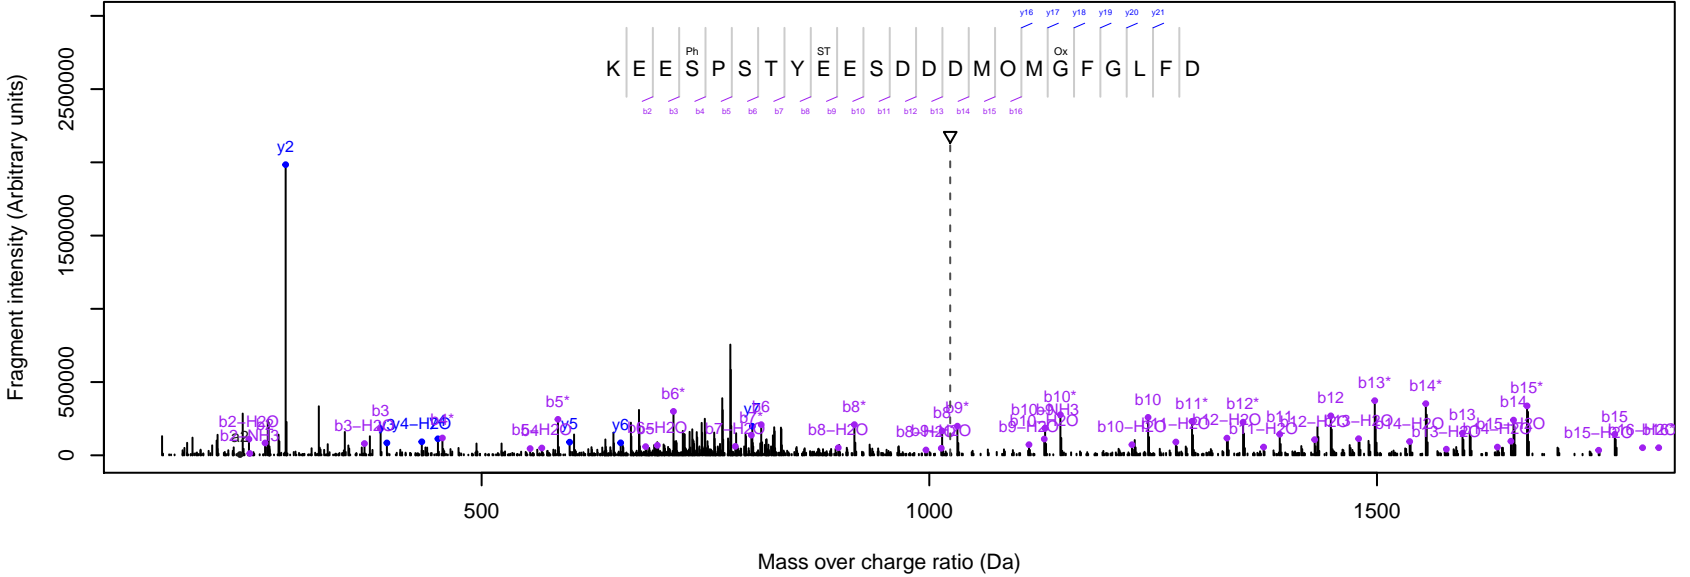

SRLT(Phospho (STY))PVS(Phospho (STY))PESSSTEELK-2+

Source : QE3\_201126\_FR\_TIOx\_hum\_tissue\_Urea\_RNAB\_B Scan : 13846

Andromeda score : 341.36

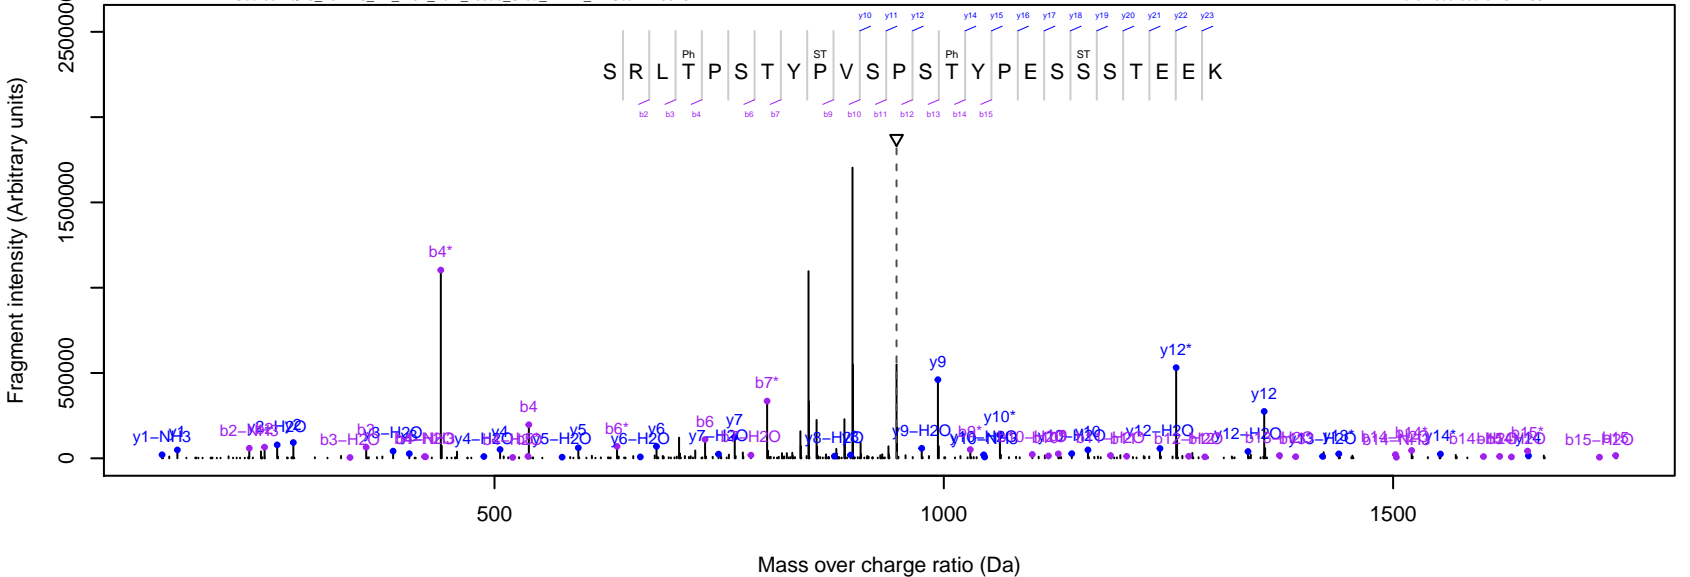





HIDS(Phospho (STY))AYLYNNEEQVGLAIR-2+

Source : QE3\_201126\_FR\_TiOx\_hum\_tissue\_Urea\_RNAB\_H Scan : 41229

Andromeda score : 338.73

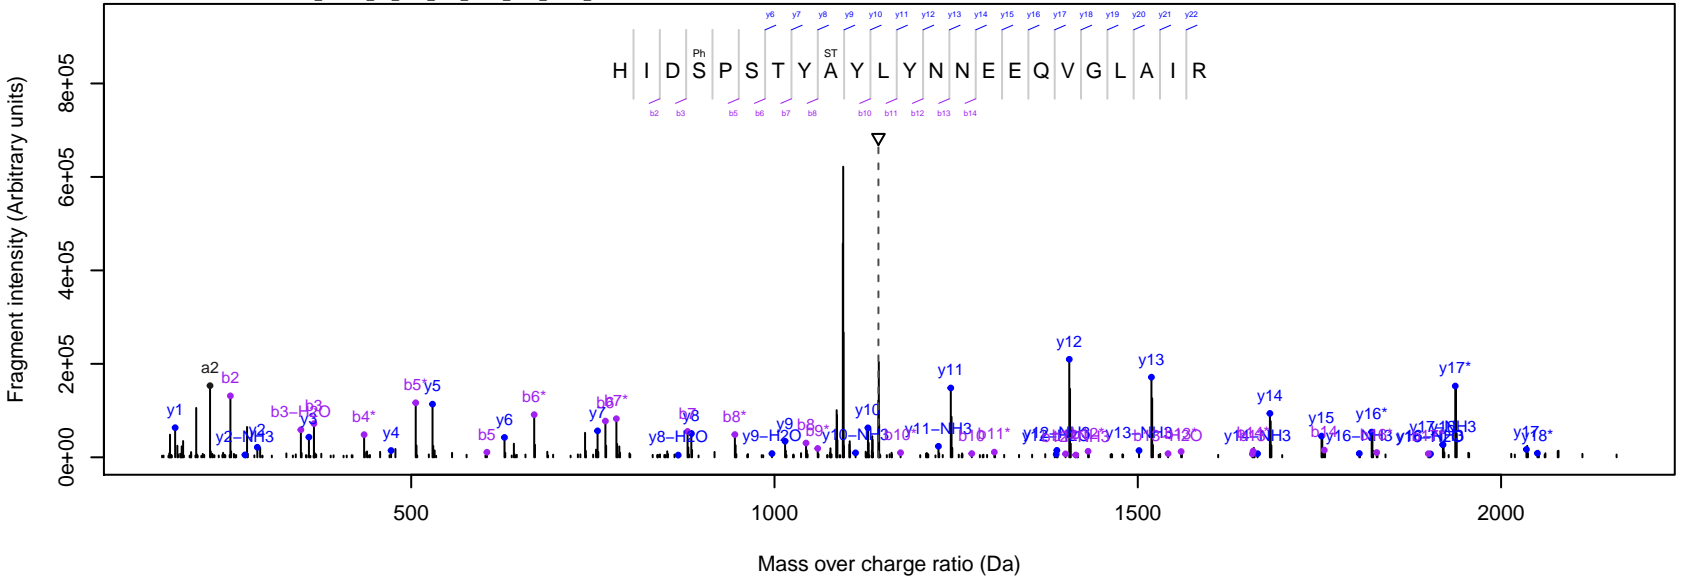

S(Phospho (STY))PVSTRPLPSASQK-2+

Source : QE3\_201126\_FR\_TiOx\_hum\_tissue\_Urea\_RNAB\_N Scan : 10416

Andromeda score : 338.04

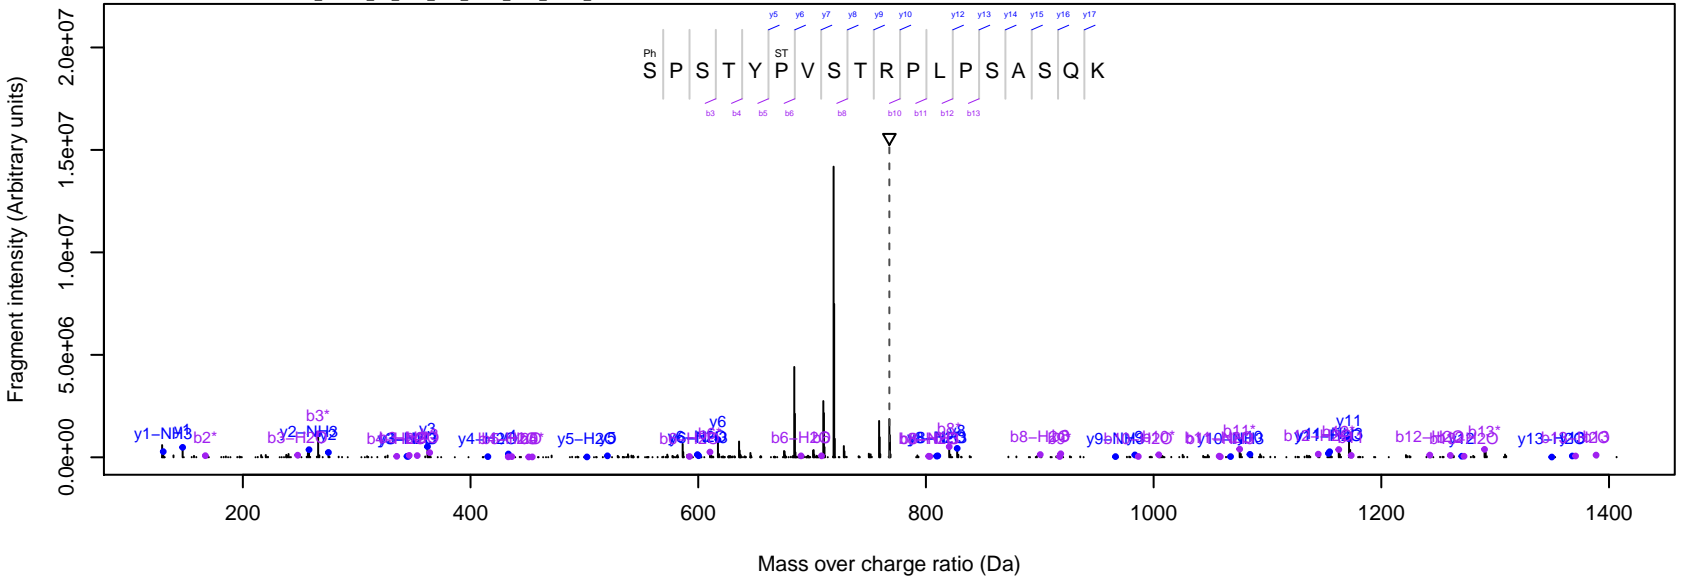

GFGDGYNGYGGPGGGNFGGS(Phospho (STY))PGYGGGR-2+

Source : QE3\_201126\_FR\_TiOx\_hum\_tissue\_Urea\_RNAB\_N Scan : 37389

Andromeda score : 337.83

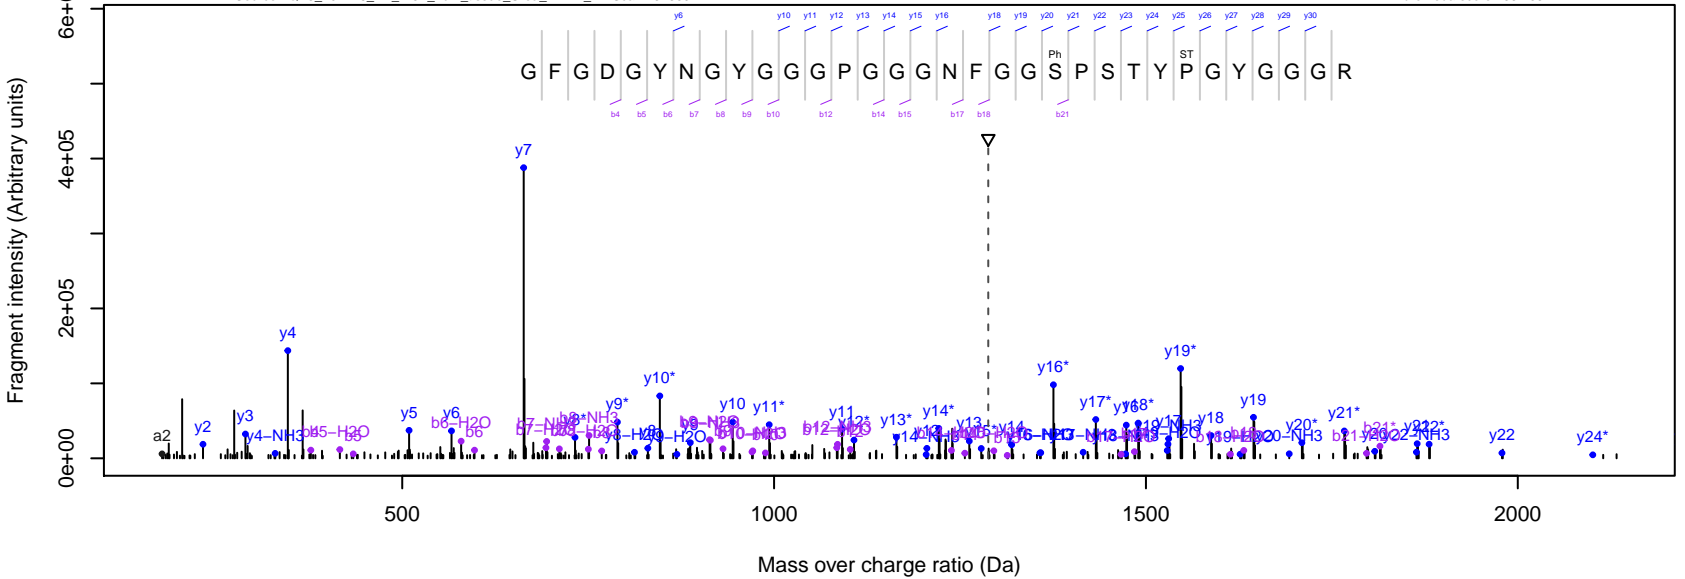

LPS(Phospho (STY))GSGAAS(Phospho (STY))PTGSAVDIR-2+

Source : QE3\_201126\_FR\_TiOx\_hum\_tissue\_Urea\_RNAB\_N Scan : 30981

Andromeda score : 337.64

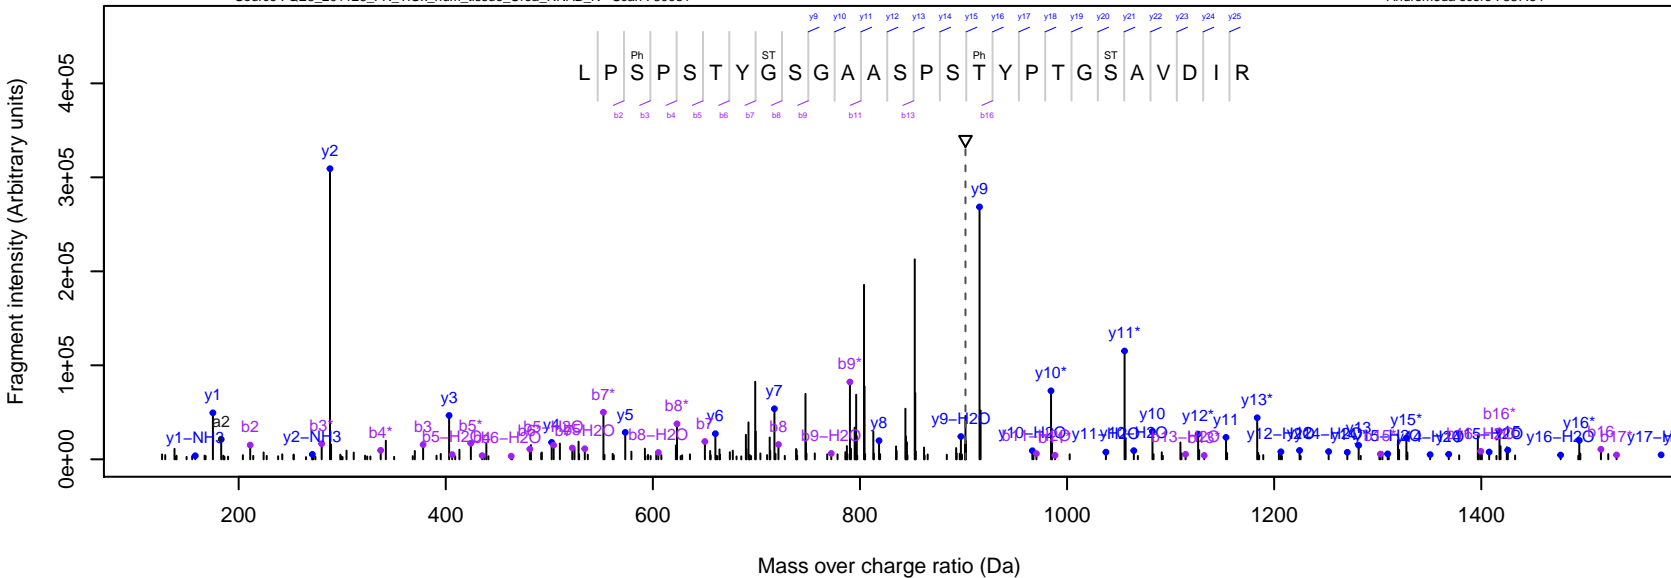

EFITGDVEPTDAESEWHS(Phospho (STY))ENEEEEKLAGDM(Oxidation (M))K-3+

Source : QE3\_201126\_FR\_TiOx\_hum\_tissue\_Urea\_RNAB\_H Scan : 37134

Andromeda score : 335.82

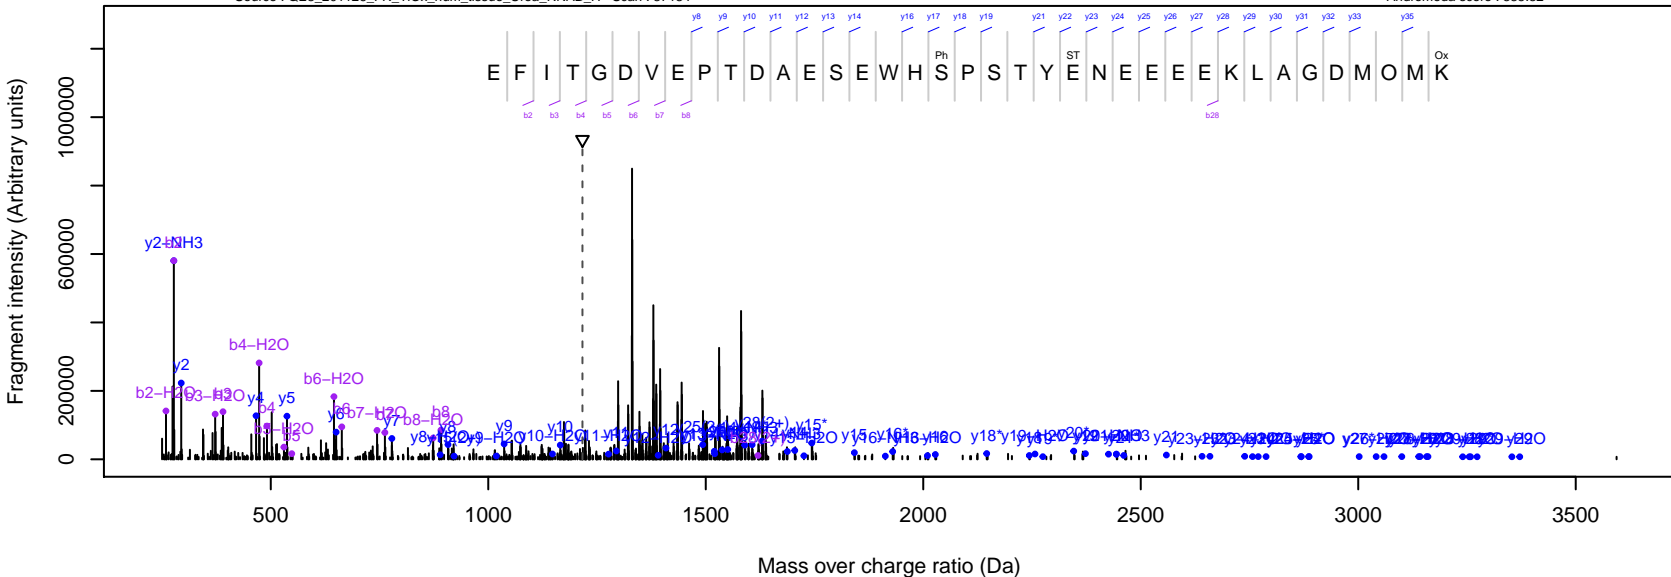

RQLHLEGASLELS(Phospho (STY))DDTESK-3+

Source : QE3\_201126\_FR\_TiOx\_hum\_tissue\_Urea\_RNAB\_B Scan : 25981

Andromeda score : 335.77

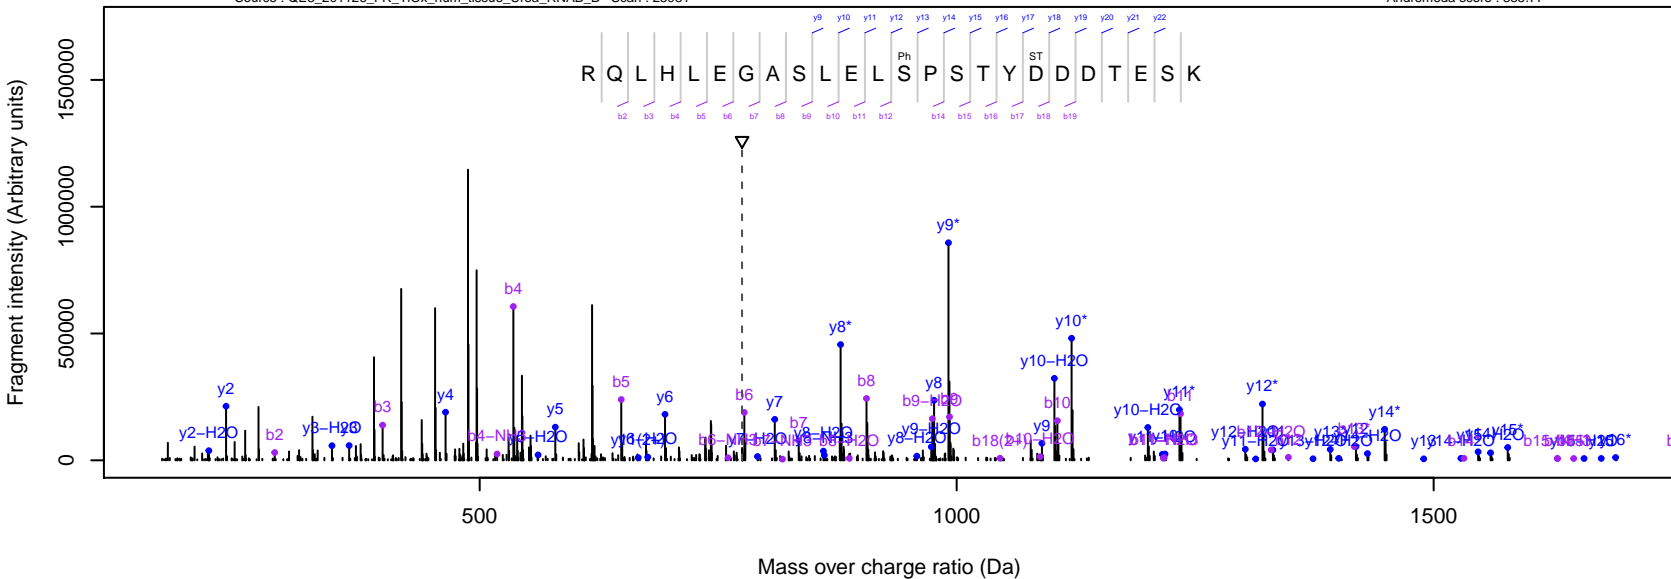

VEAKEES(Phospho (STY))EESDEDMGFLFD-2+

Source : QE3\_201126\_FR\_TiOx\_hum\_tissue\_Urea\_RNAB\_B Scan : 55950

Andromeda score : 334.62

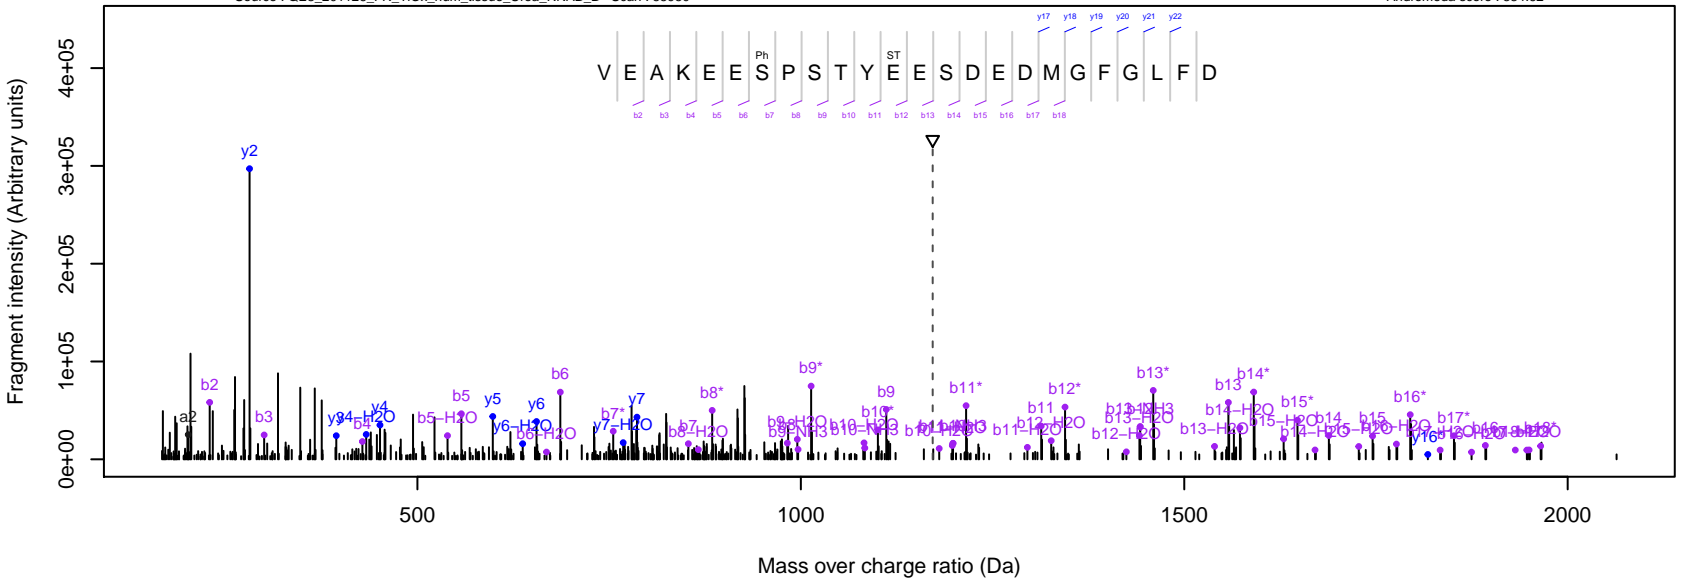

QAS(Phospho (STY))TDAGTAGALTPQHVR-2+

Source : QE3\_201126\_FR\_TiOx\_hum\_tissue\_Urea\_RNAB\_B Scan : 14549

Andromeda score : 334.51

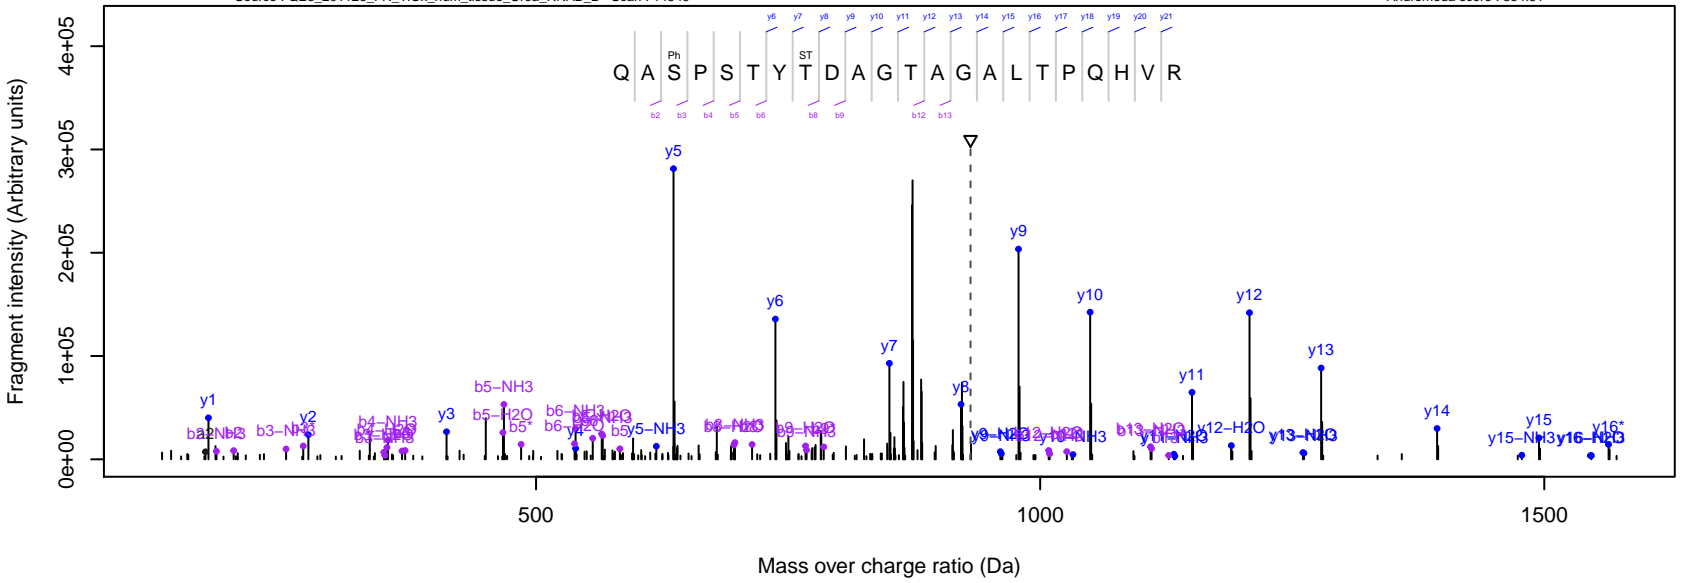

FSGEIEGEEDES(Phospho (STY))GTENREEKDNIQPTTE-3+

Source : QE3\_201126\_FR\_TiOx\_hum\_tissue\_Urea\_RNAB\_H Scan : 22390

Andromeda score : 334.39

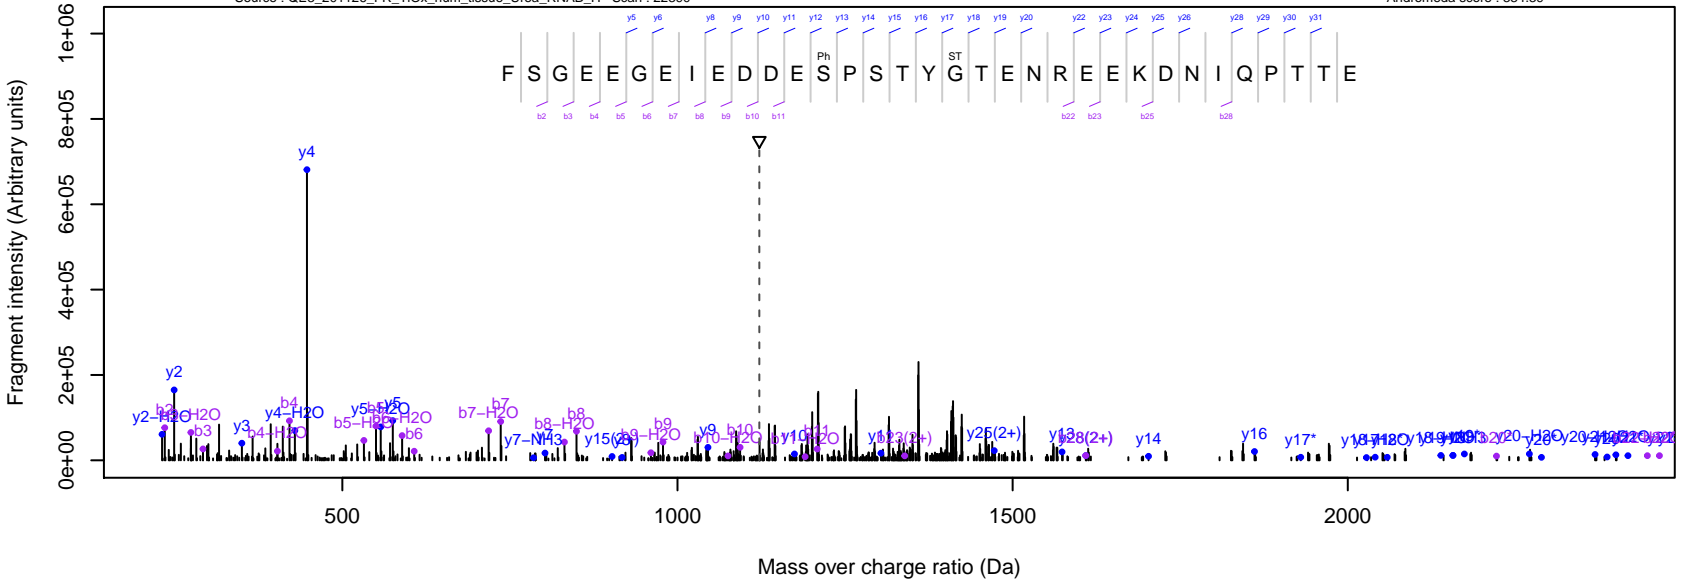

GSGTAS(Phospho (STY))DDEFENLR-2+

Source : QE3\_201126\_FR\_TiOx\_hum\_tissue\_Urea\_RNAB\_H Scan : 26190

Andromeda score : 334.04

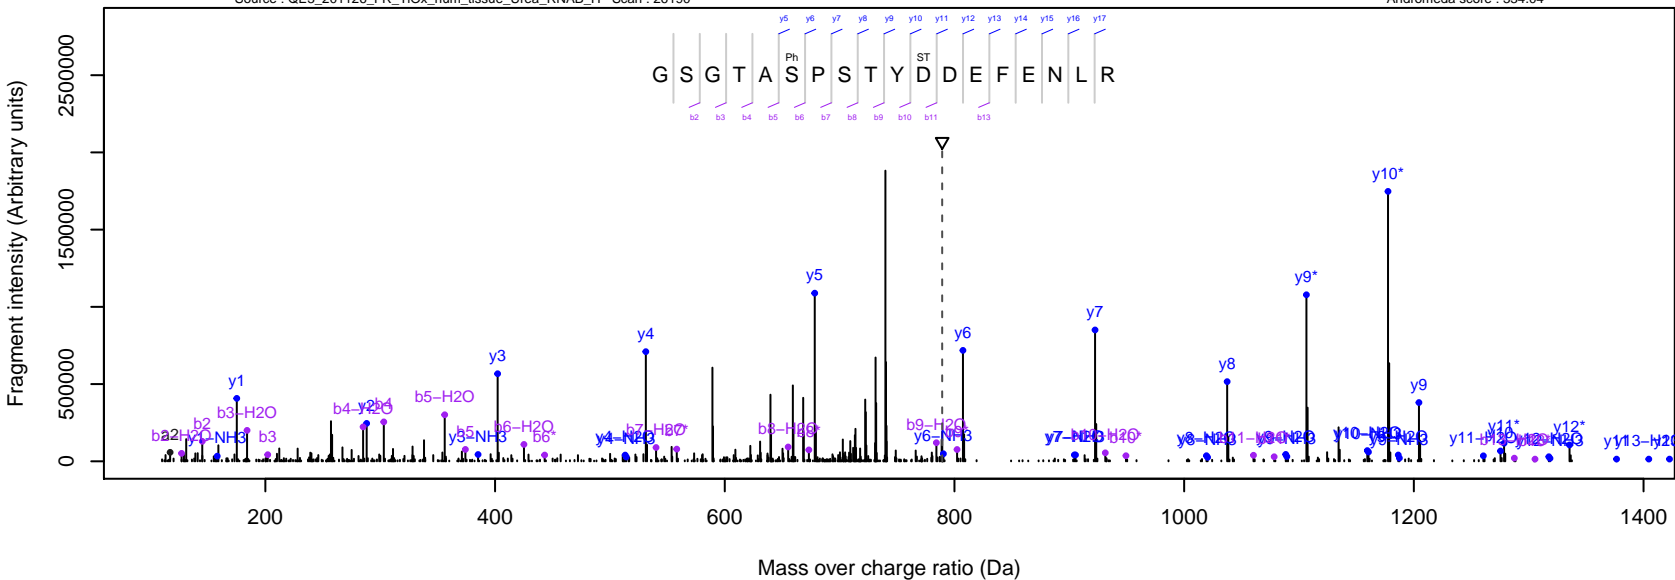

AAS(Phospho (STY))DGQYENQSPEATSPR-2+

Source : QE3\_201126\_FR\_TiOx\_hum\_tissue\_Urea\_RNAB\_H Scan : 13409

Andromeda score : 333.69

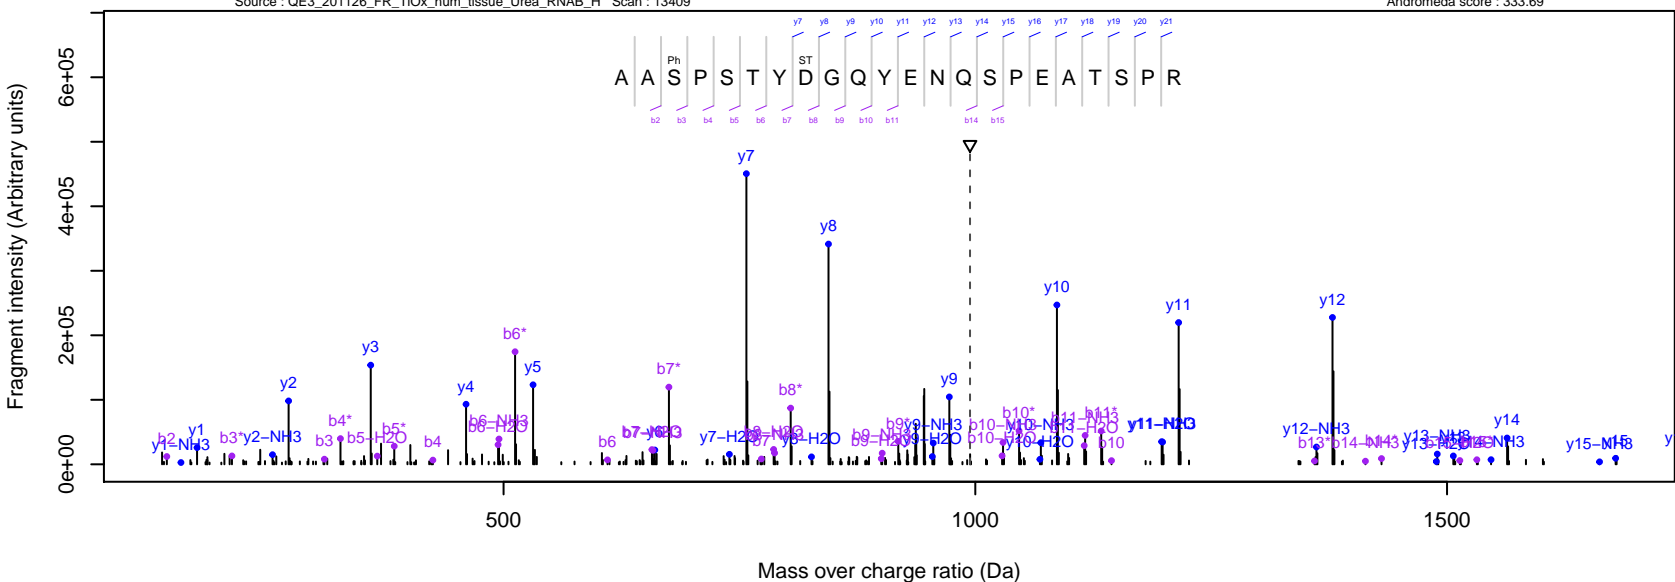

KAEDS(Phospho (STY))DS(Phospho (STY))EPEPEDNVR-2+

Source : QE3\_201126\_FR\_TiOx\_hum\_tissue\_Urea\_RNAB\_H Scan : 11461

Andromeda score : 333.39

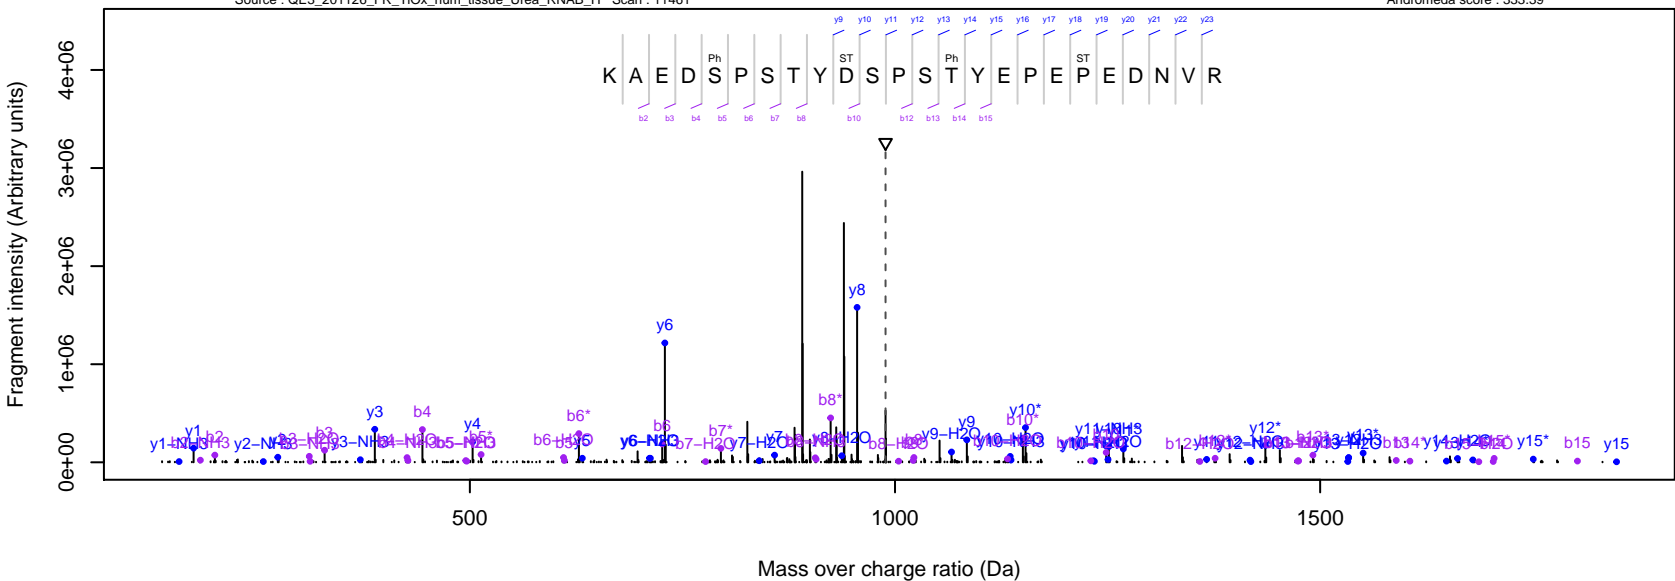



FIIGSVSEDNS(Phospho (STY))EDEISNLVK-2+

Source : QE3\_201126\_FR\_TIOx\_hum\_tissue\_Urea\_RNAB\_H Scan : 54507

Andromeda score : 332.96

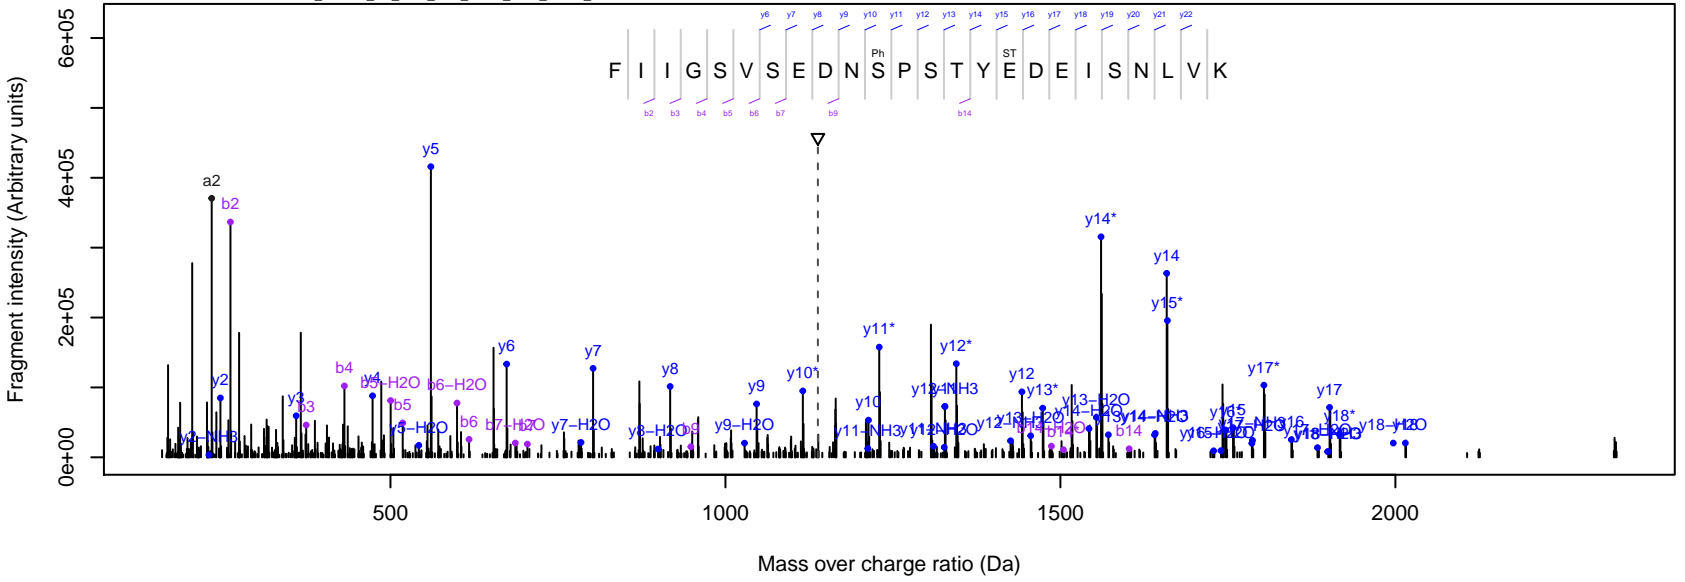

SQS(Phospho (STY))PAASDCSSSSSSASLPSSGR-2+

Source : QE3\_201126\_FR\_TIOx\_hum\_tissue\_Urea\_RNAB\_B Scan : 13470

Andromeda score : 332.96

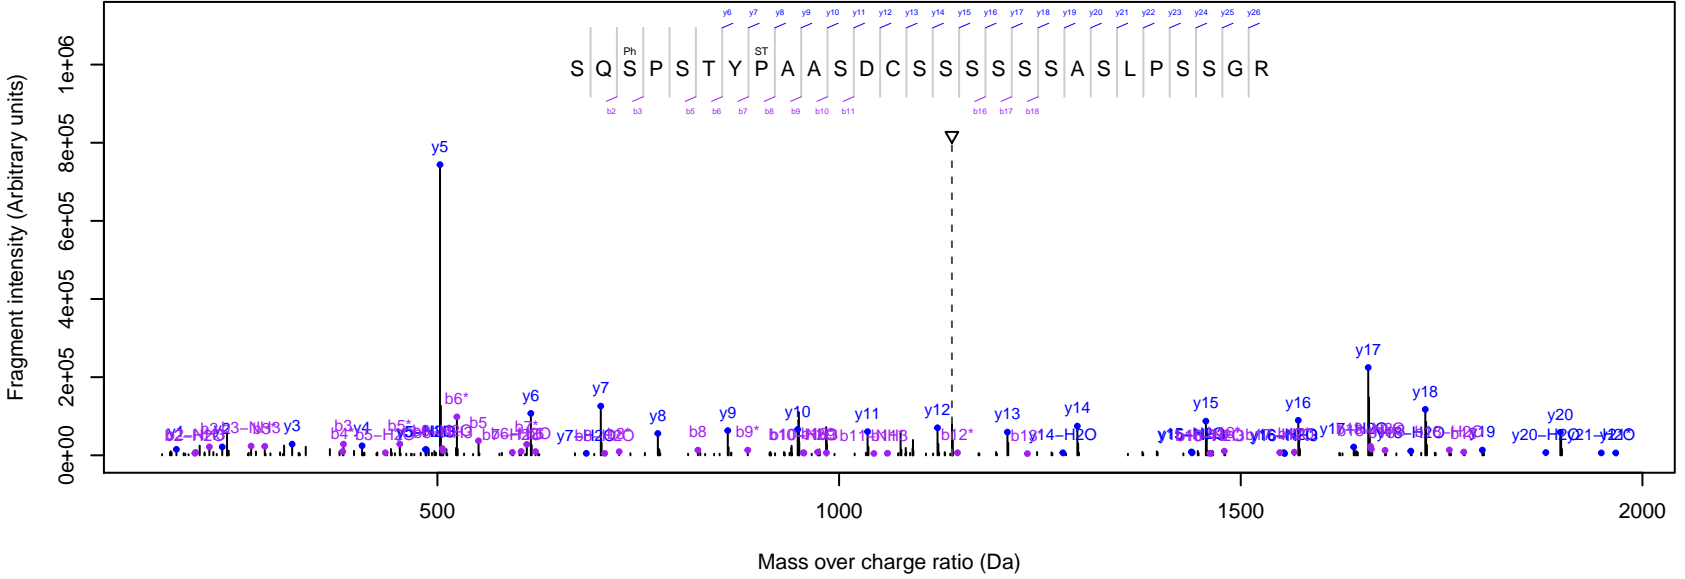

KIALESEGRPEEQMOMESPSTYDNCSPSTYGGDDDWTHLSSK-3+

Source : QE3\_201126\_FR\_TIOx\_hum\_tissue\_Urea\_RNAB\_H Scan : 27205

Andromeda score : 332.8

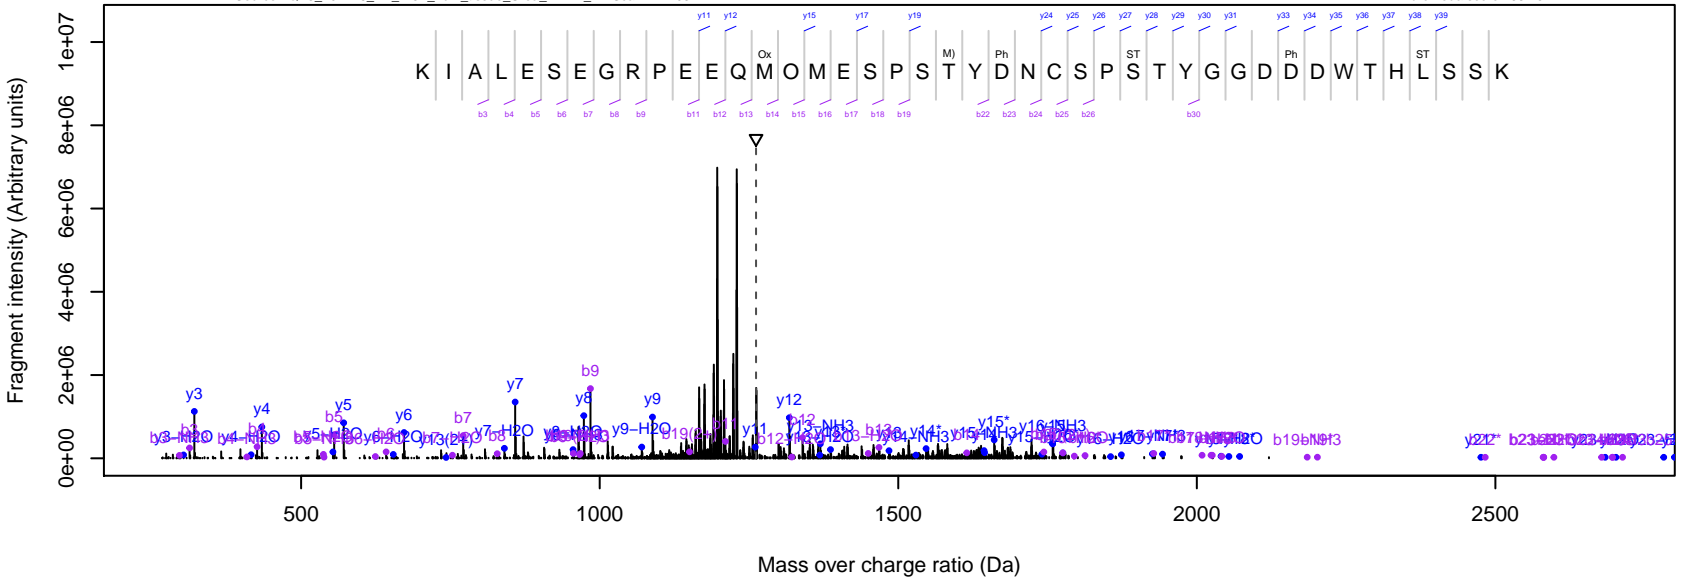

STPSHGVSSSLNSTGSLs(Phospho (STY))PK-2+

Source : QE3\_201126\_FR\_TiOx\_hum\_tissue\_Urea\_RNAB\_N Scan : 14474

Andromeda score : 332.2

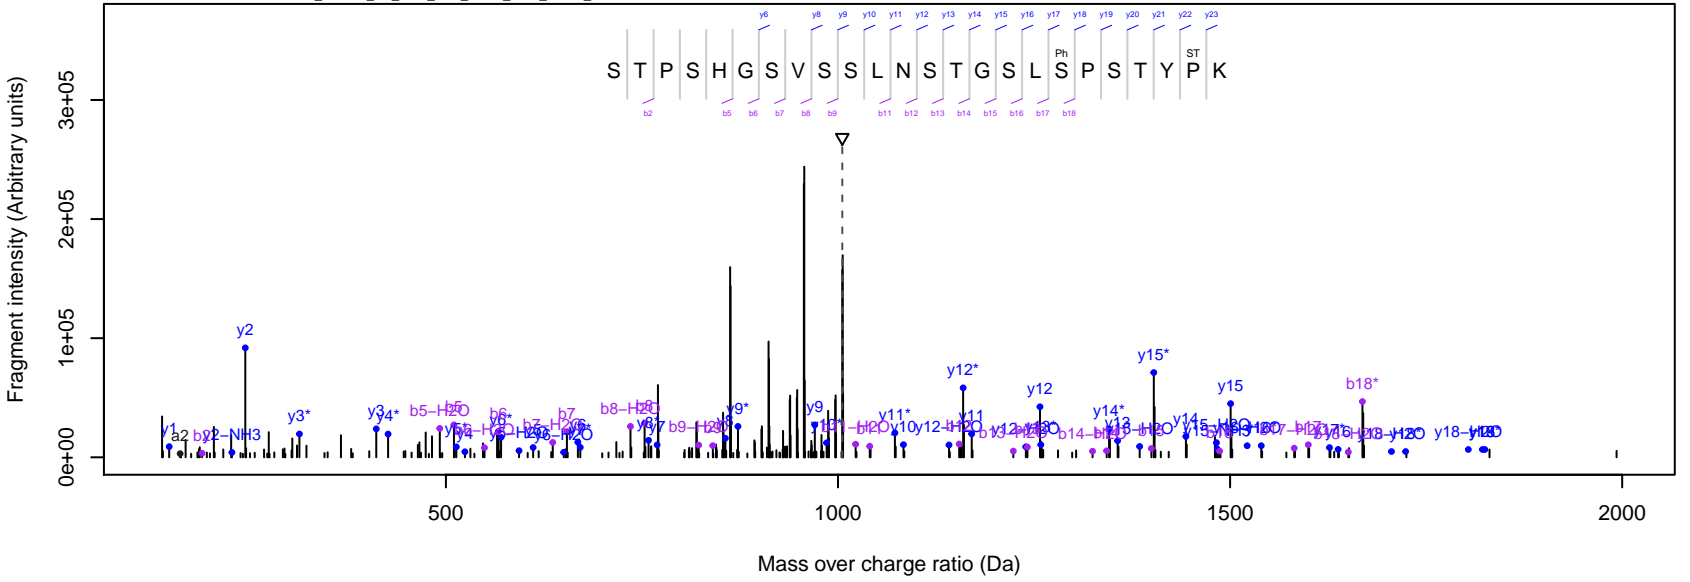

LKS(Phospho (STY))EDGVEGLGETQSR-2+

Source : QE3\_201126\_FR\_TiOx\_hum\_tissue\_Urea\_RNAB\_B Scan : 15972

Andromeda score : 331.9

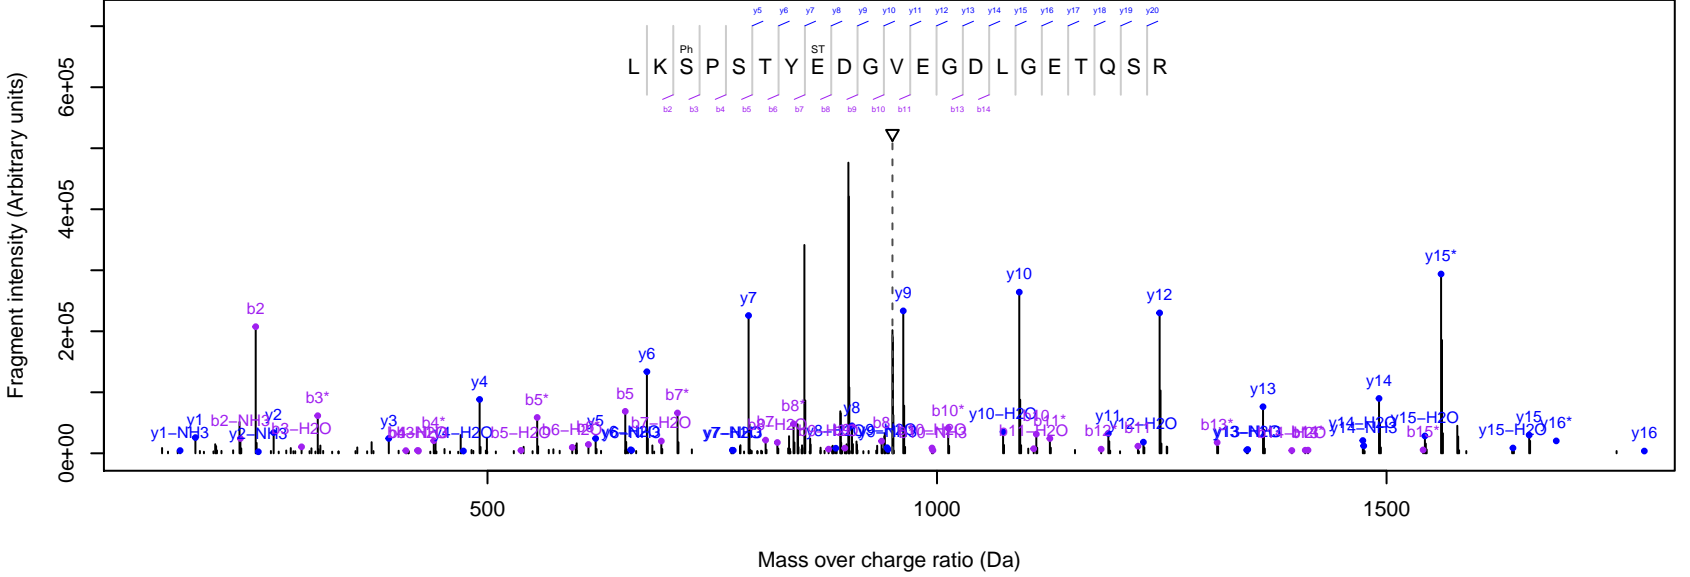

EVAATEEDVTRLPS(Phospho (STY))PTSPFSSLSQDQAATSK-3+

Source : QE3\_201126\_FR\_TiOx\_hum\_tissue\_Urea\_RNAB\_N Scan : 43983

Andromeda score : 331.57

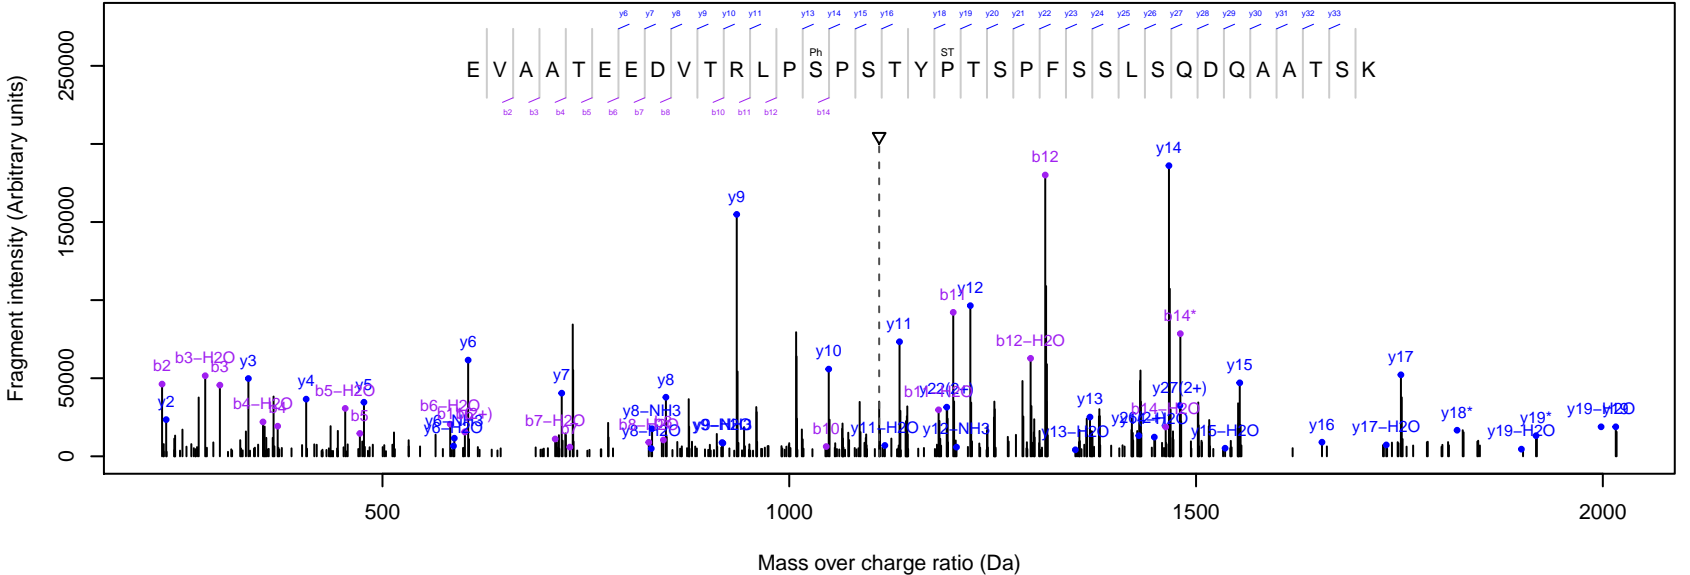

SYS(Phospho (STY))SPDITQAIQEEEK-2+

Source : QE3\_201126\_FR\_TIOx\_hum\_tissue\_Urea\_RNAB\_N Scan : 32974

Andromeda score : 331.27

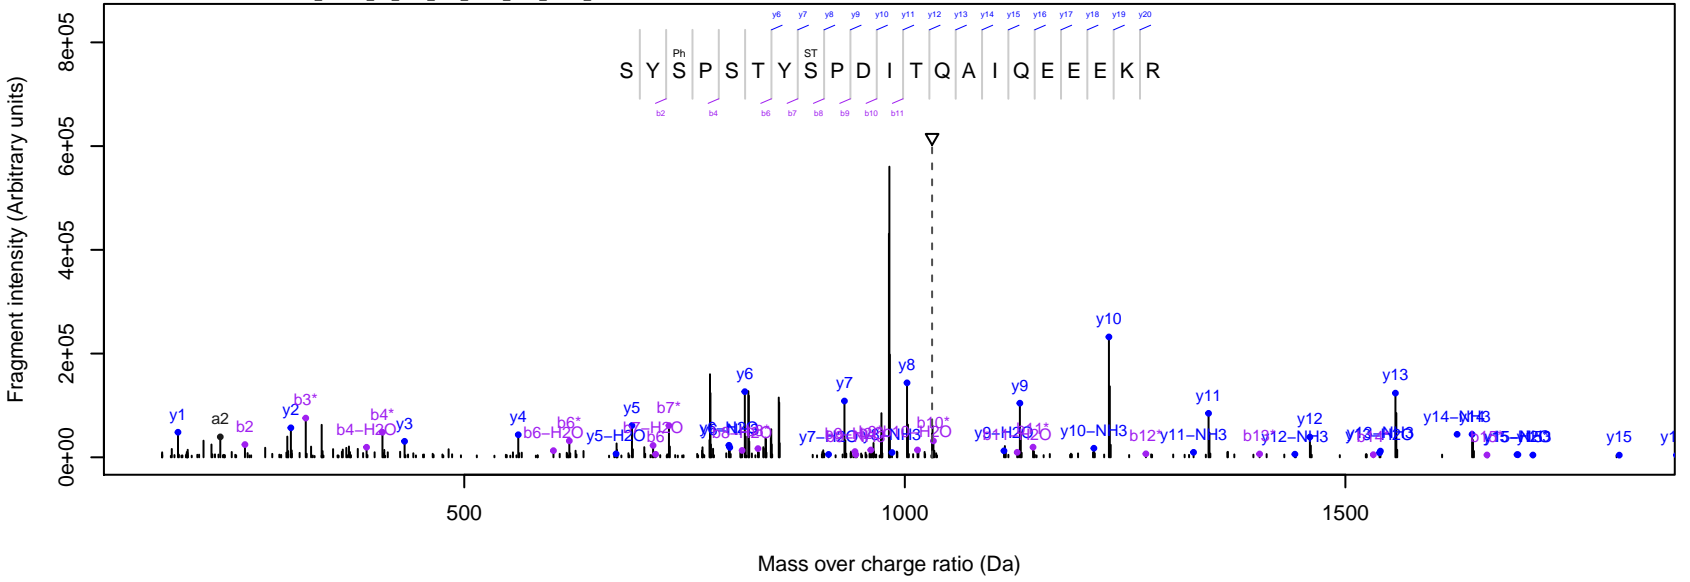

DSSDSADGRATPSTYPSENLVPSAR-3+

Source : QE3\_201126\_FR\_TIOx\_hum\_tissue\_Urea\_RNAB\_H Scan : 19563

Andromeda score : 330.74

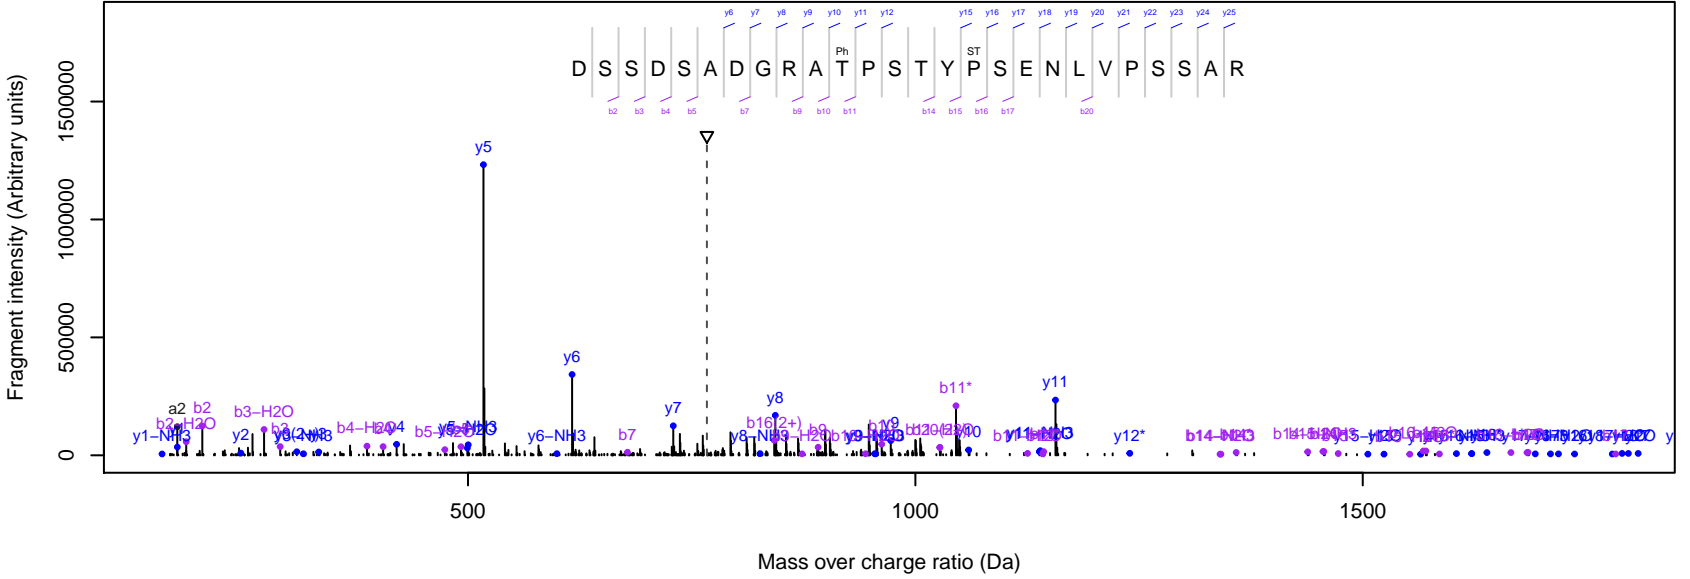

NQKPSQVNGAPGSPSTYPTEPAGQK-2+

Source : QE3\_201126\_FR\_TIOx\_hum\_tissue\_Urea\_RNAB\_H Scan : 7953

Andromeda score : 330.43

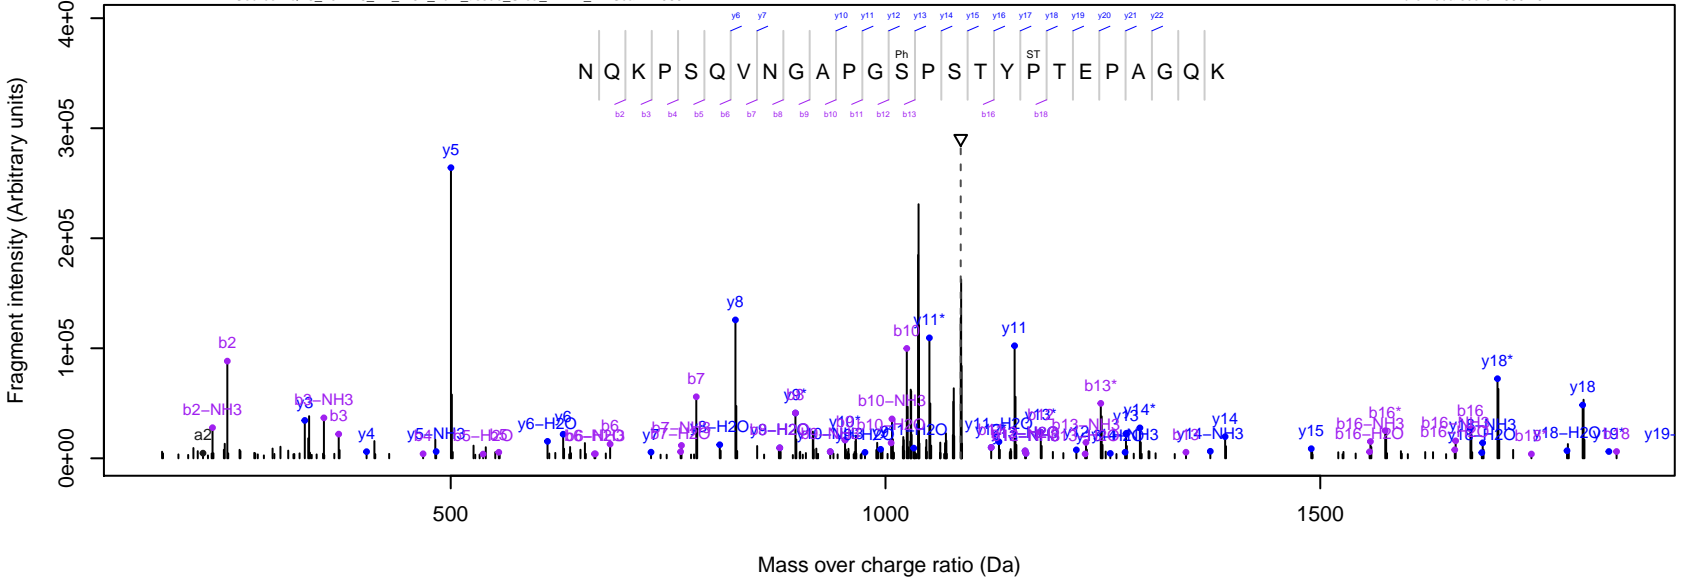

NLGS(Phospho (STY))INTELQDVQR-2+

Source : QE3\_201126\_FR\_TIOx\_hum\_tissue\_Urea\_RNAB\_B Scan : 37911

Andromeda score : 330.04

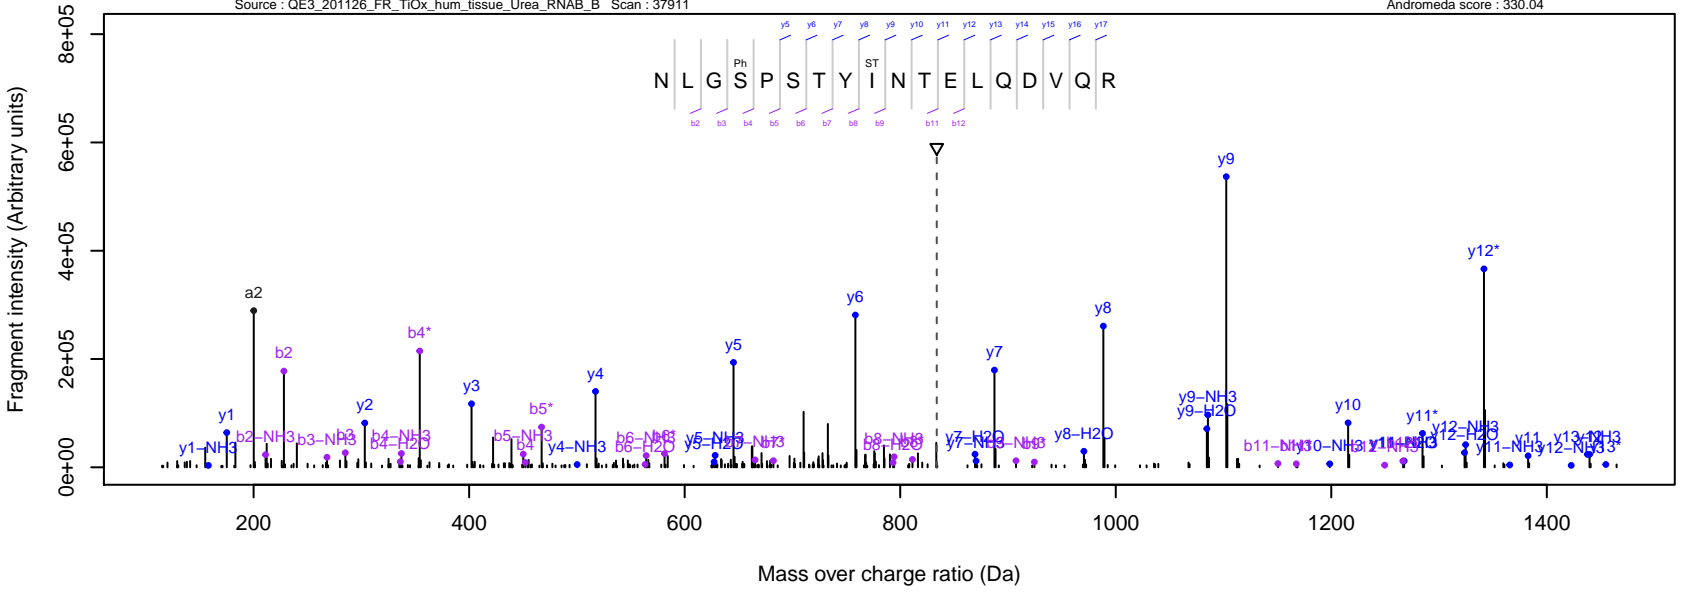

SRLT(Phospho (STY))PVSPESSTEELK-2+

Source : QE3\_201126\_FR\_TIOx\_hum\_tissue\_Urea\_RNAB\_H Scan : 10834

Andromeda score : 329.93

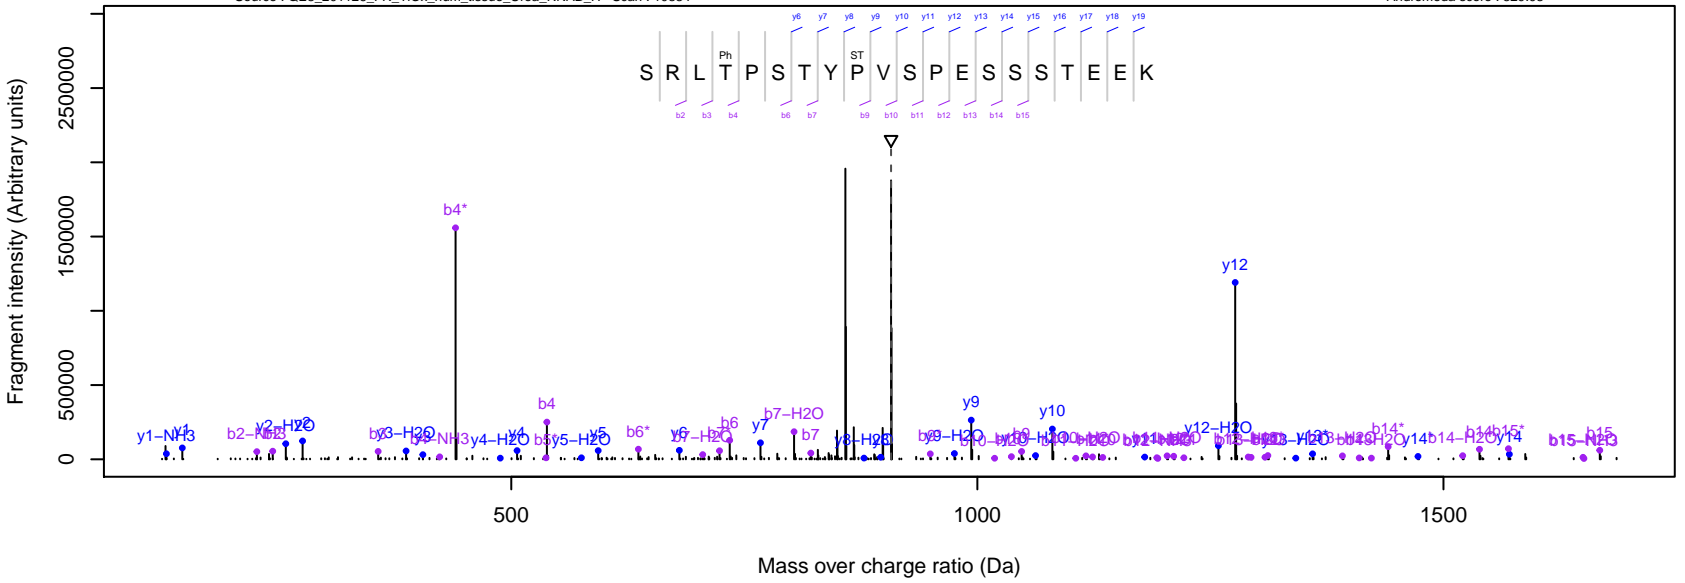

SGPKPFSAPKQTS(Phospho (STY))PSPK-2+

Source : QE3\_201126\_FR\_TIOx\_hum\_tissue\_Urea\_RNAB\_N Scan : 10847

Andromeda score : 329.56

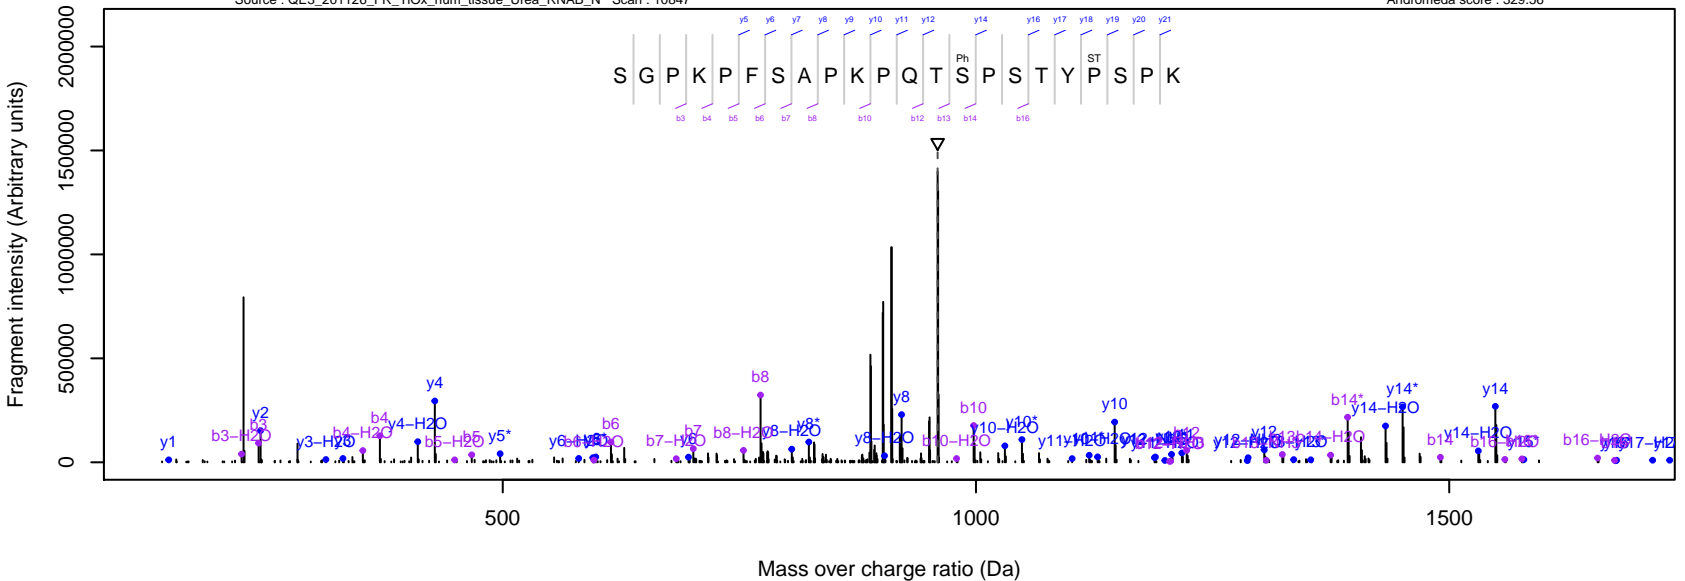

### FNDS(Phospho (STY))EGDDTEETEDYRQFR-3+

Source : QE3\_201126\_FR\_TiOx\_hum\_tissue\_Urea\_RNAB\_H Scan : 24122

Andromeda score : 329.08

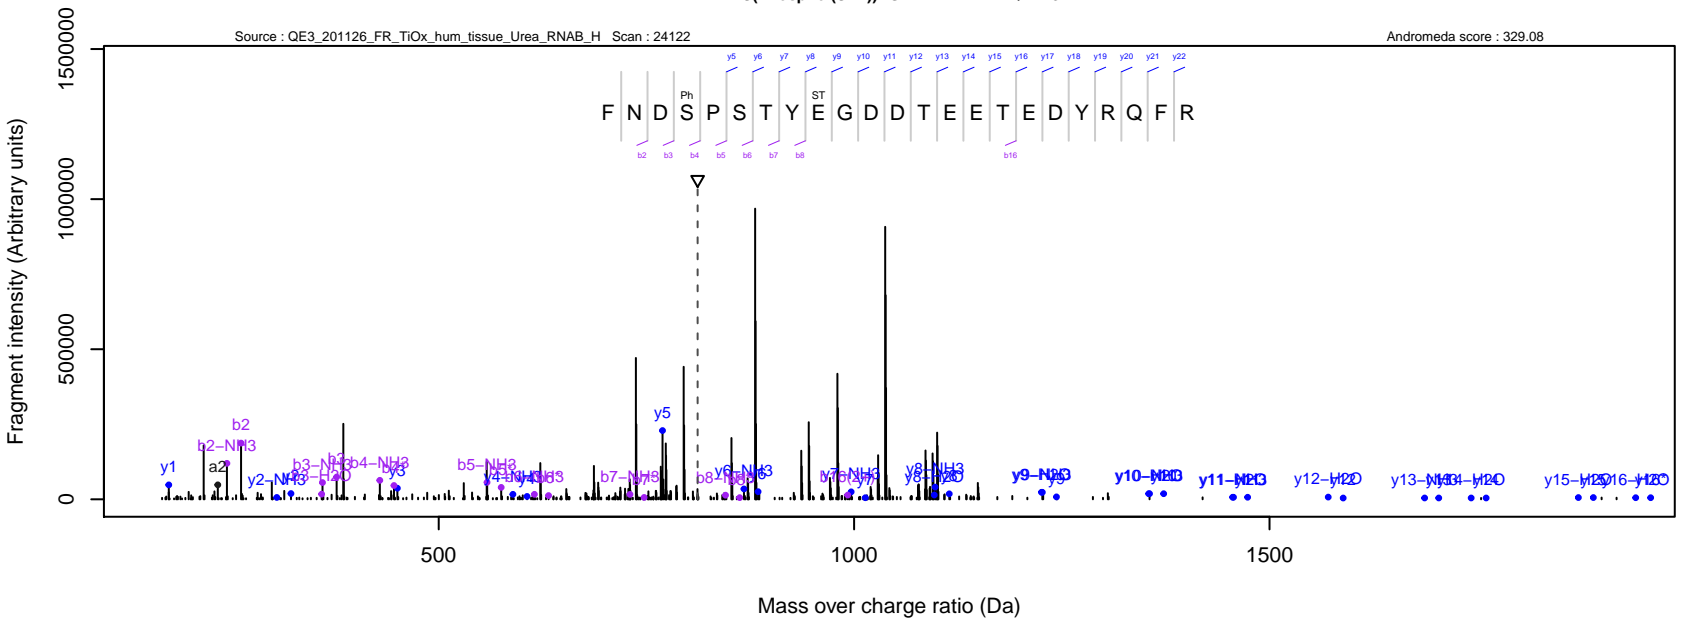

### EGKHEPVQPSAHHSAEPAEAGKAETSEGGSPAVPEASAS(Phospho (STY))PK-4+

Source : QE3\_201126\_FR\_TiOx\_hum\_tissue\_Urea\_RNAB\_N Scan : 11510

Andromeda score : 328.88

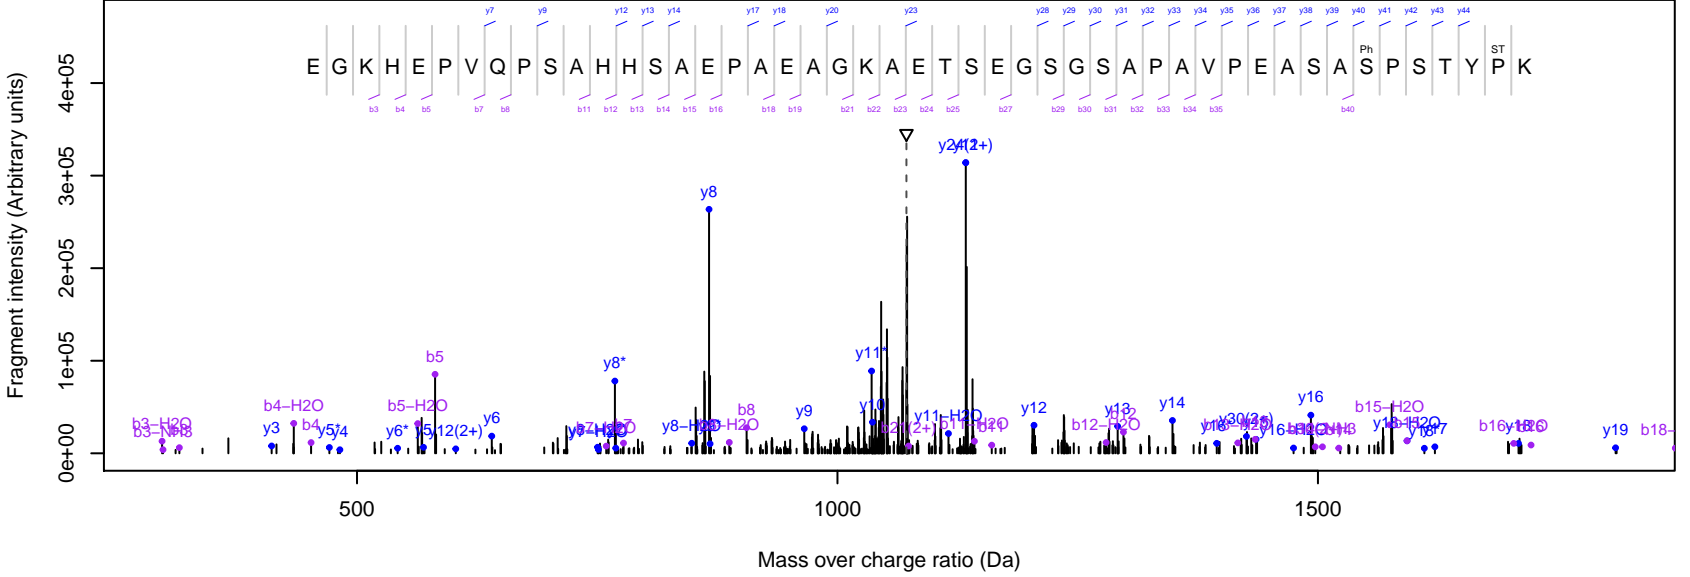

### S(Phospho (STY))AGEEEDGPVLTDEQK-2+

Source : QE3\_201126\_FR\_TiOx\_hum\_tissue\_Urea\_RNAB\_N Scan : 19383

Andromeda score : 328.73

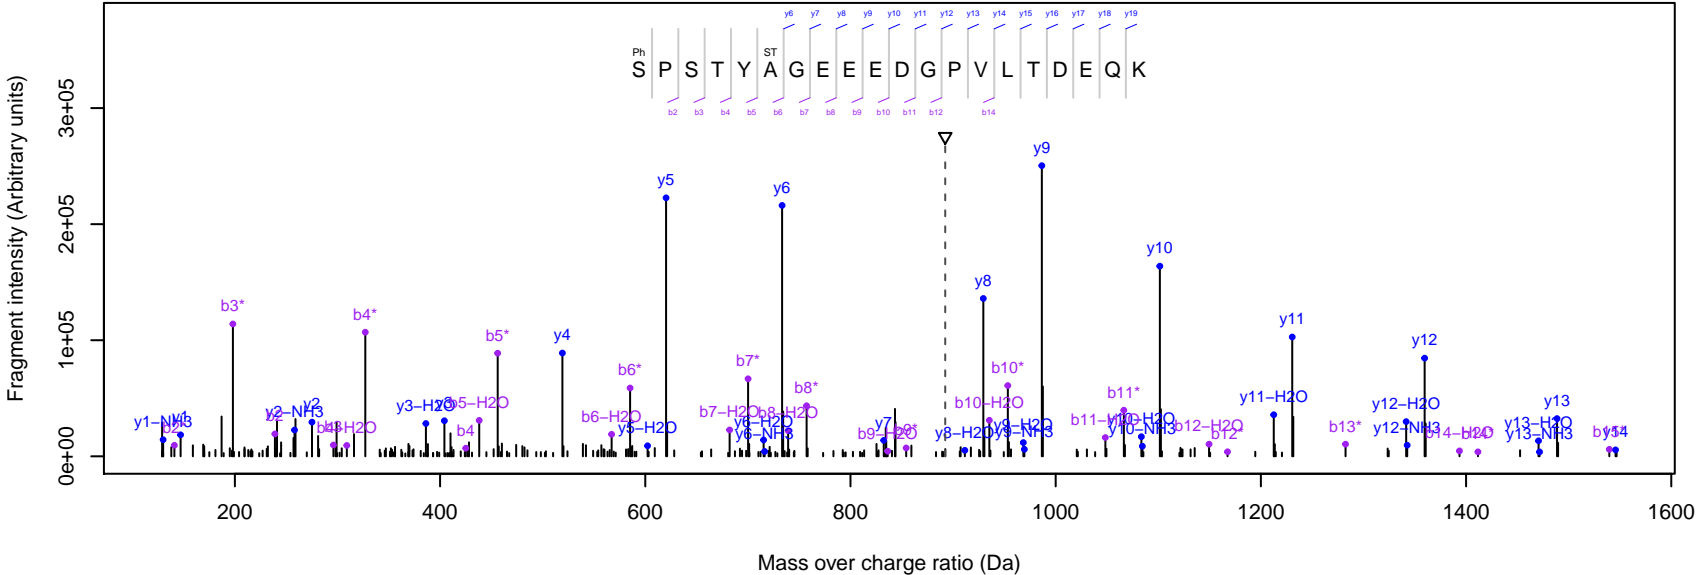

DRAS(Phospho (STY))PAAAEVVP EWASCLK-2+

Source : QE3\_201126\_FR\_TIOx\_hum\_tissue\_Urea\_RNAB\_H Scan : 46492

Andromeda score : 328.62

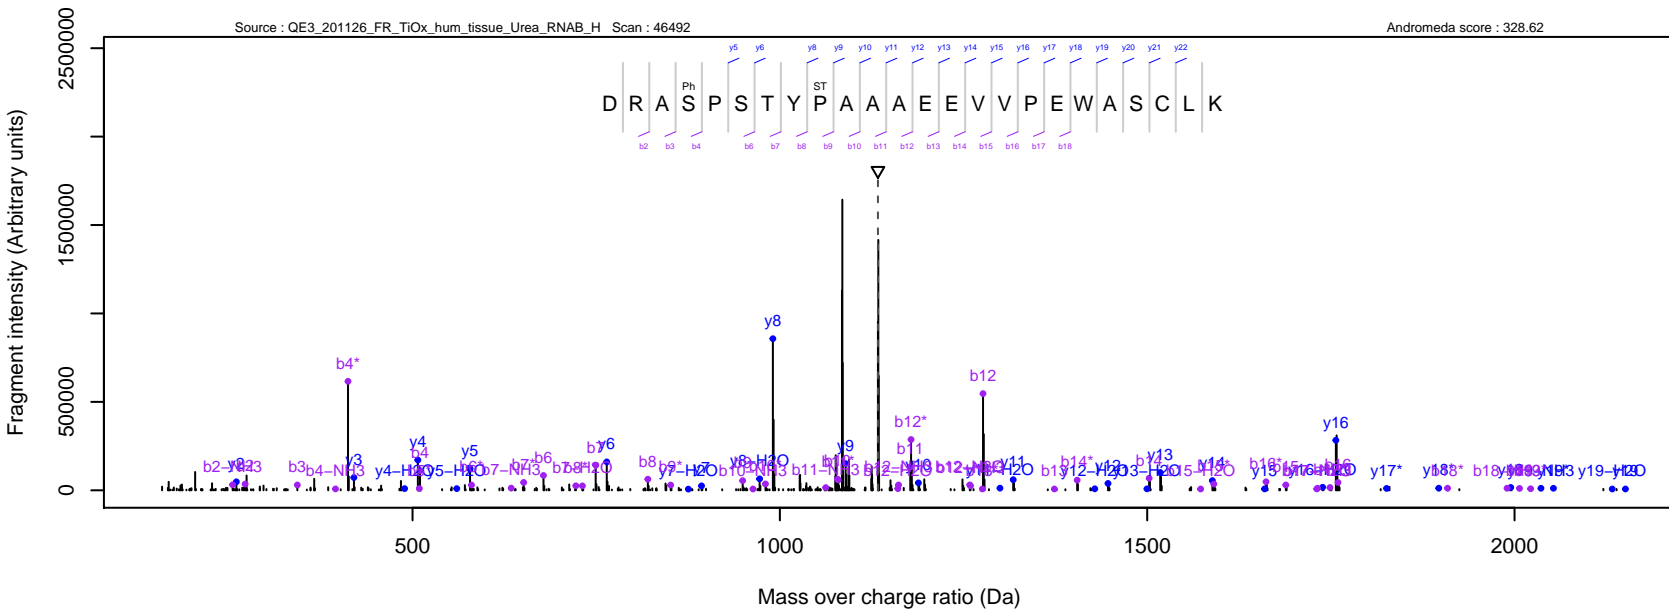

DSSFTEVPRS(Phospho (STY))PK-2+

Source : QE3\_201126\_FR\_TIOx\_hum\_tissue\_Urea\_RNAB\_N Scan : 15787

Andromeda score : 328.49

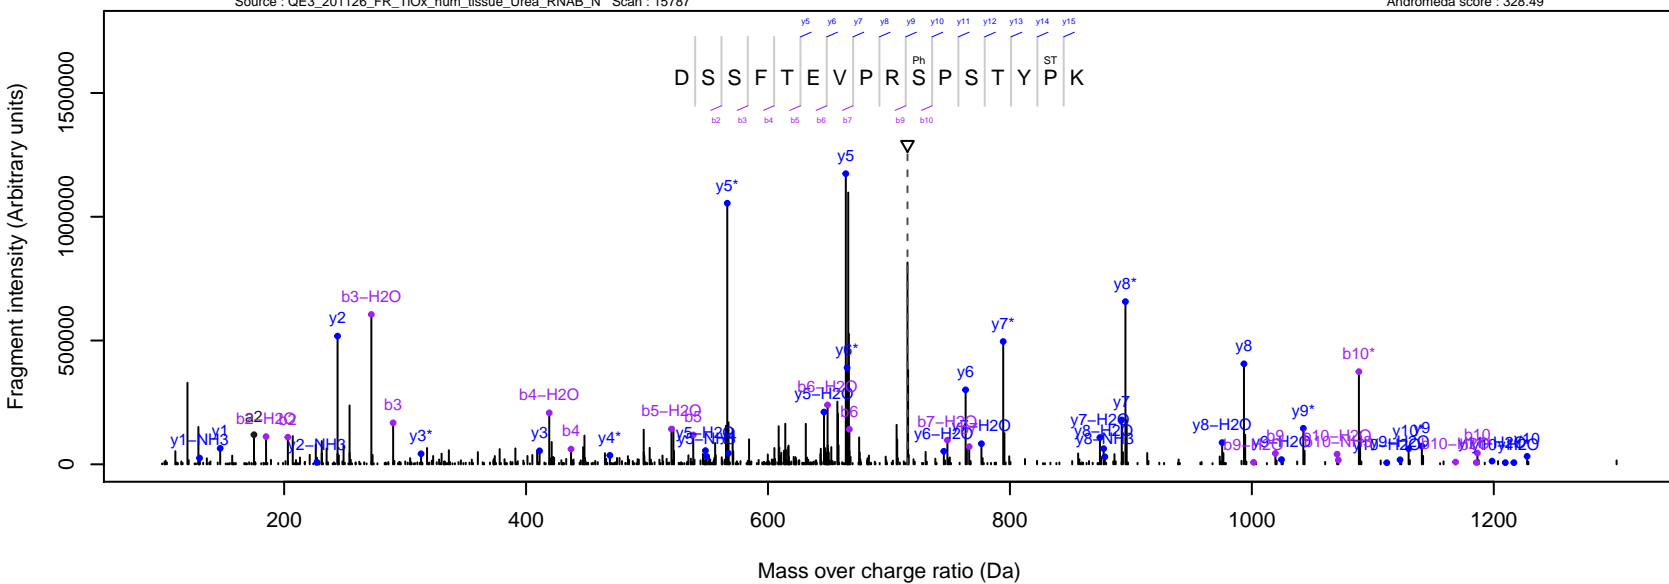

ESPRQLPGAEGPAIS(Phospho (STY))DGEEGGEPGAGGGAAGAGR-3+

Source : QE3\_201126\_FR\_TIOx\_hum\_tissue\_Urea\_RNAB\_N Scan : 34543

Andromeda score : 328.49

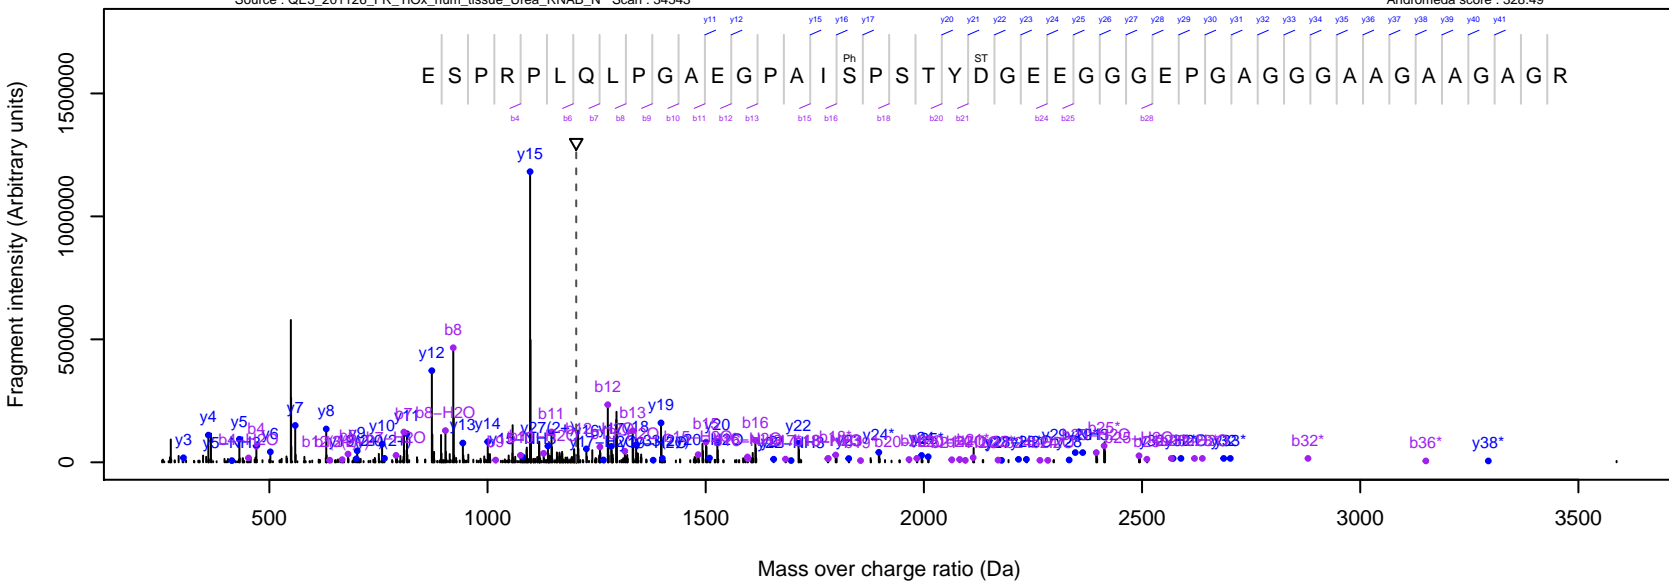

RGS(Phospho (STY))PTTGFIQKGS(Phospho (STY))PTSAYPER-3+

Source : QE3\_201126\_FR\_TiOx\_hum\_tissue\_Urea\_RNAB\_H Scan : 21610

Andromeda score : 328.41

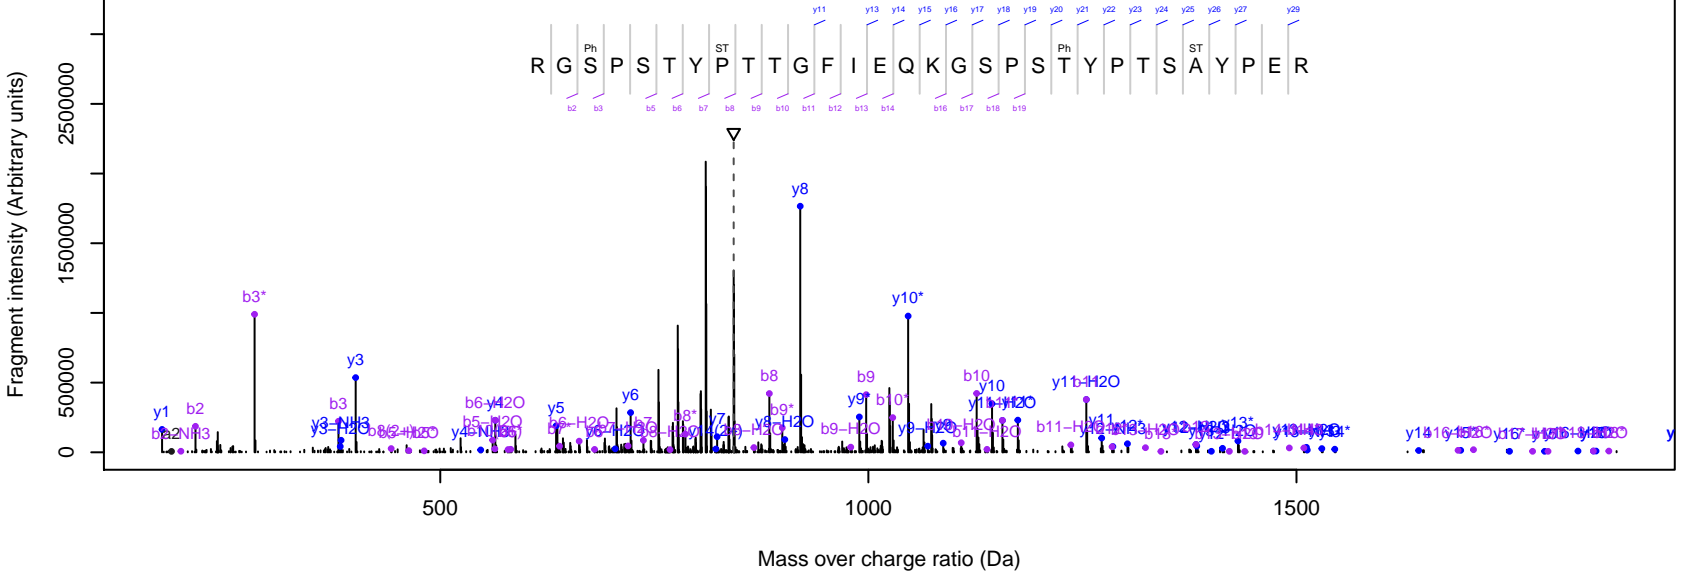

HFFHHADEDEEDDS(Phospho (STY))PPER-3+

Source : QE3\_201126\_FR\_TiOx\_hum\_tissue\_Urea\_RNAB\_H Scan : 13713

Andromeda score : 328.28

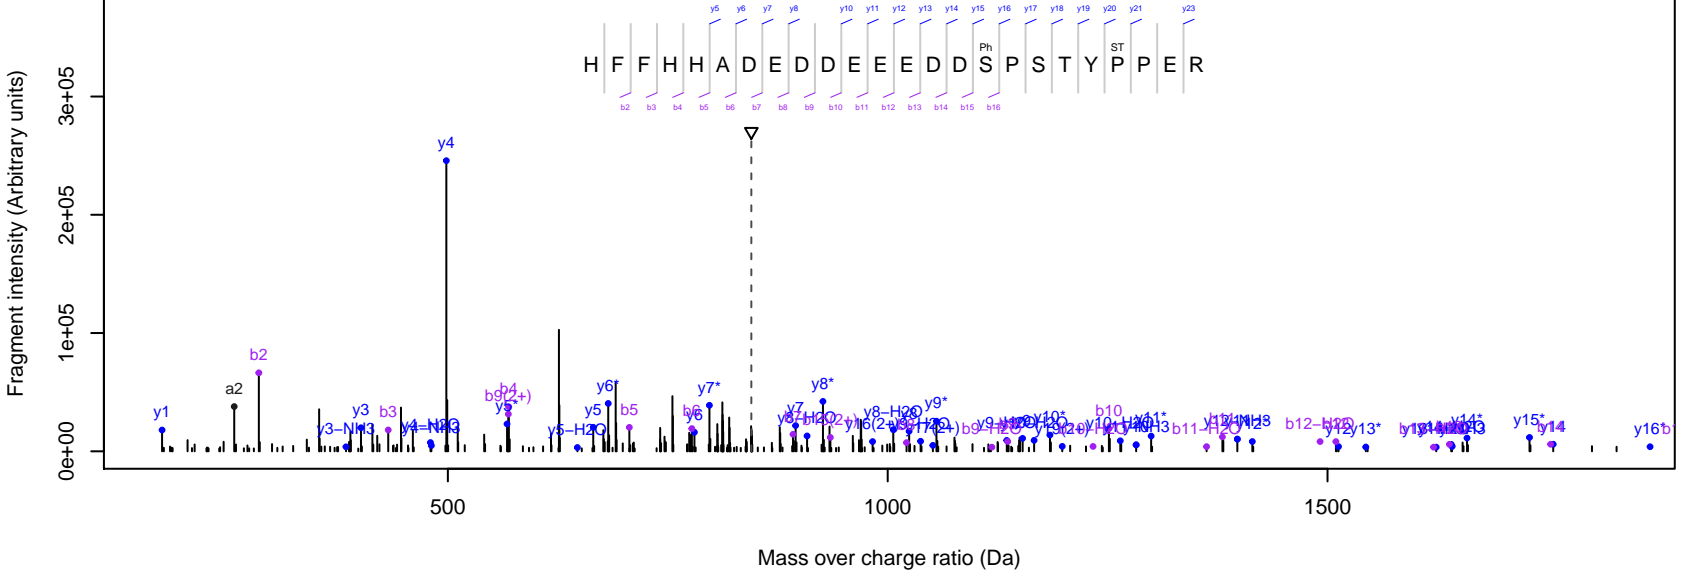

GTENGVNGTLTSNVADS(Phospho (STY))PR-2+

Source : QE3\_201126\_FR\_TiOx\_hum\_tissue\_Urea\_RNAB\_B Scan : 20226

Andromeda score : 327.02

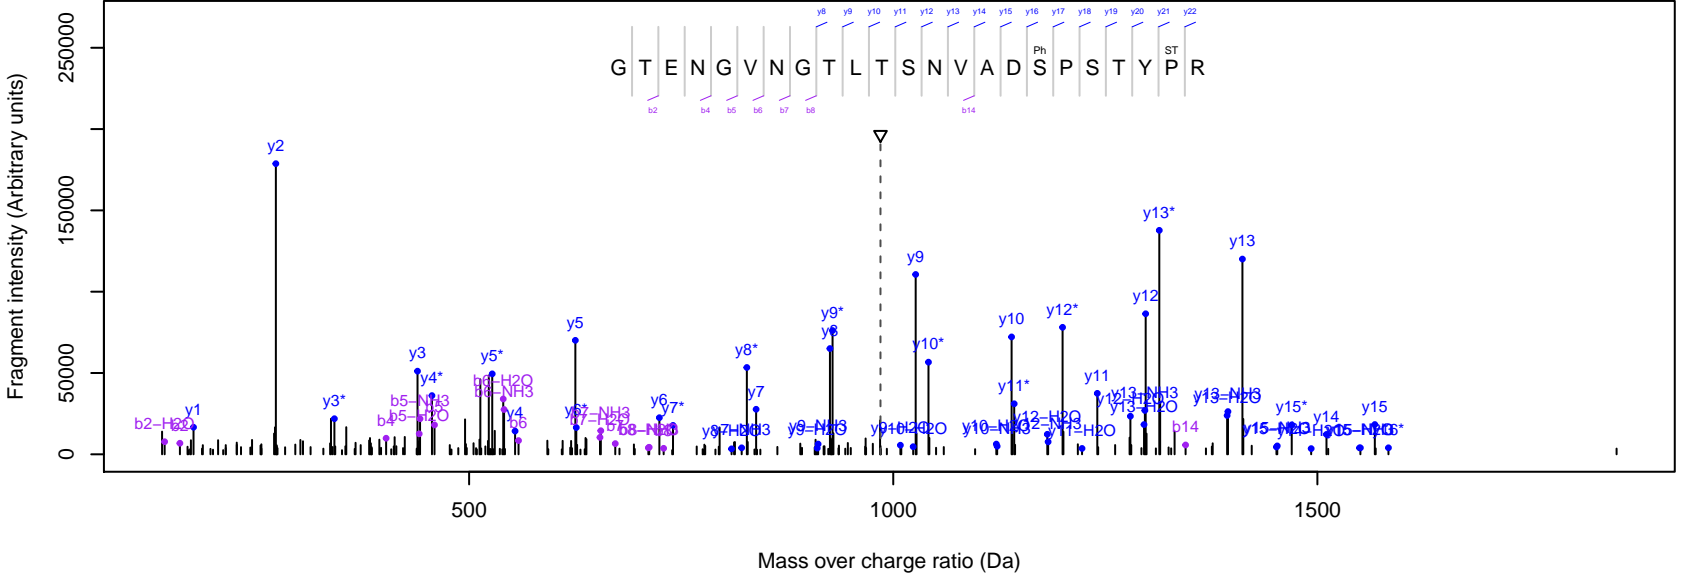

VGGTKPAGGDFGEVLNSAANASATTTTEPLPEK(TQES)(Phospho (STY))L-3+

Source : QE3\_201126\_FR\_TIOx\_hum\_tissue\_Urea\_RNAB\_N Scan : 44602

Andromeda score : 326.95

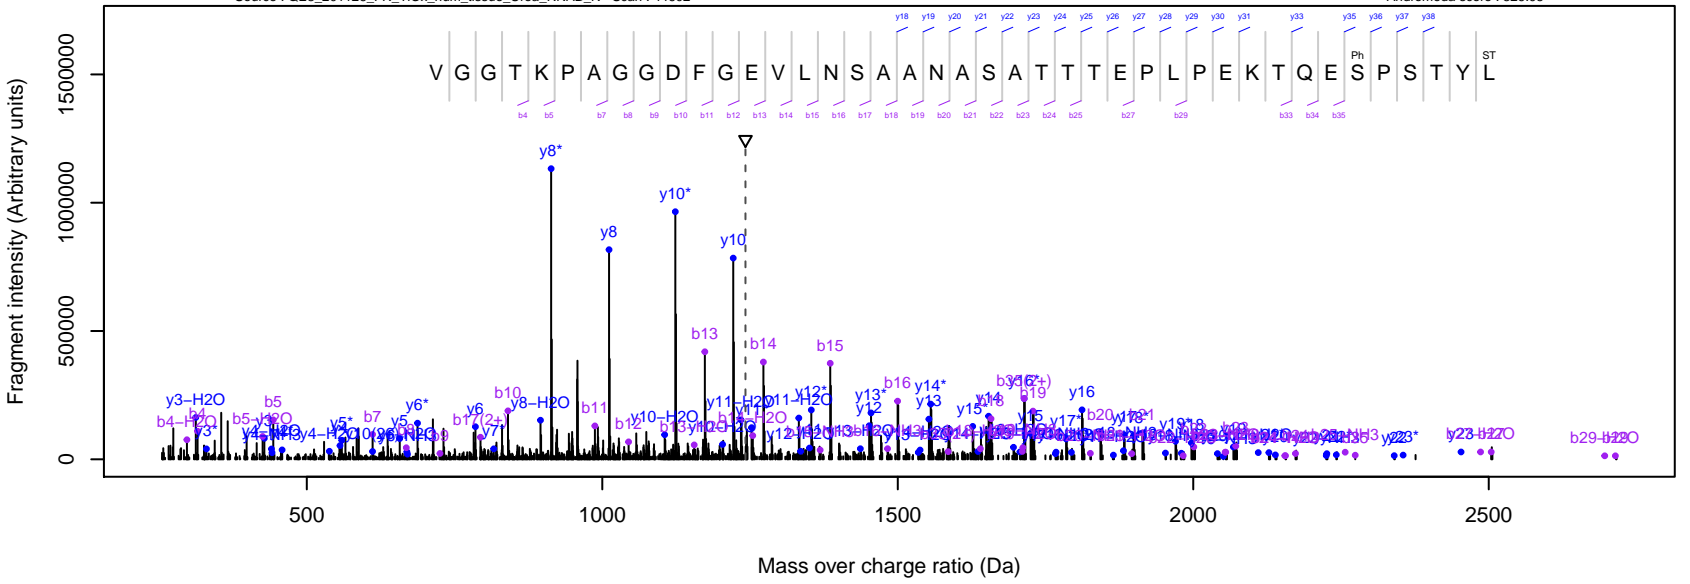

KANDES(Phospho (STY))NEHSDVIDSQELSK-3+

Source : QE3\_201126\_FR\_TIOx\_hum\_tissue\_Urea\_RNAB\_H Scan : 12472

Andromeda score : 326.51

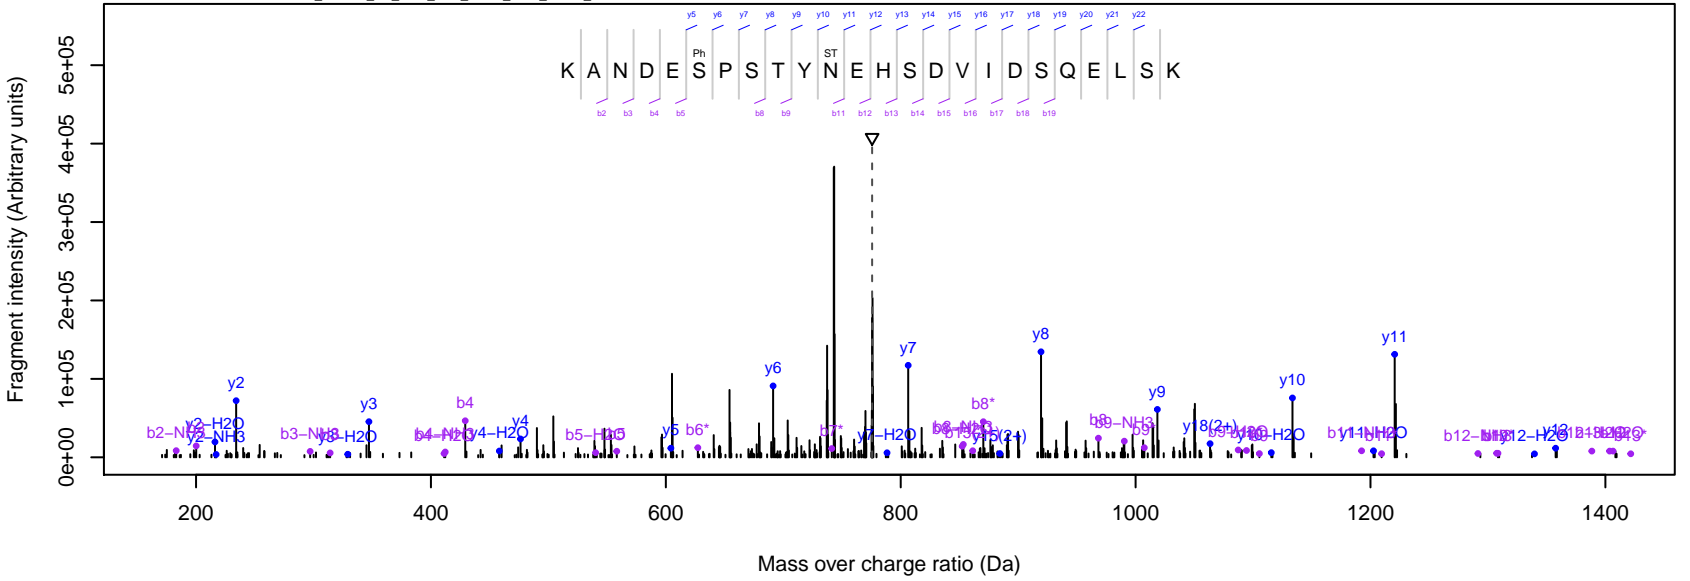

PVSSAASVYAGAGGS(Phospho (STY))GSRIS(Phospho (STY))VSR-2+

Source : QE3\_201126\_FR\_TIOx\_hum\_tissue\_Urea\_RNAB\_N Scan : 25623

Andromeda score : 326.21

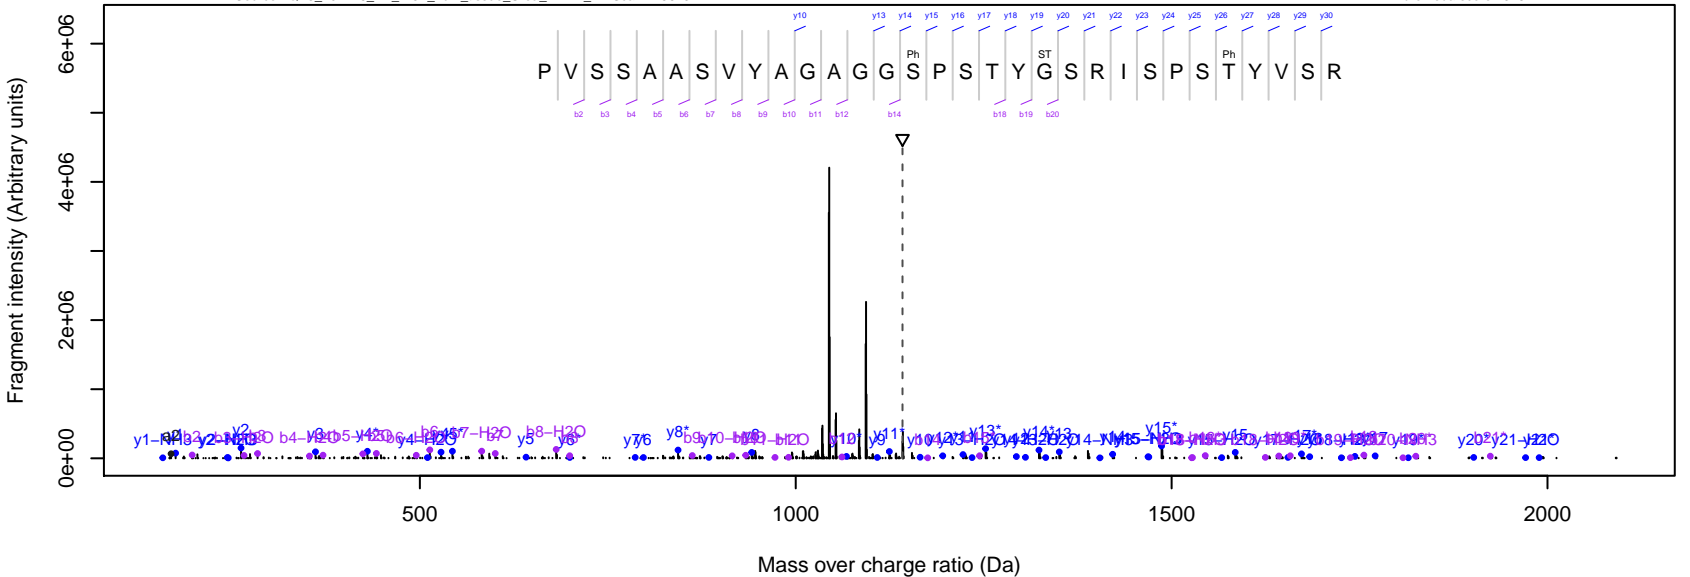



MLAES(Phospho (STY))DES(Phospho (STY))GDEESVSQDKTELQNTLR-3+

Source : QE3\_201126\_FR\_TIOx\_hum\_tissue\_Urea\_RNAB\_N Scan : 37361

Andromeda score : 326.15

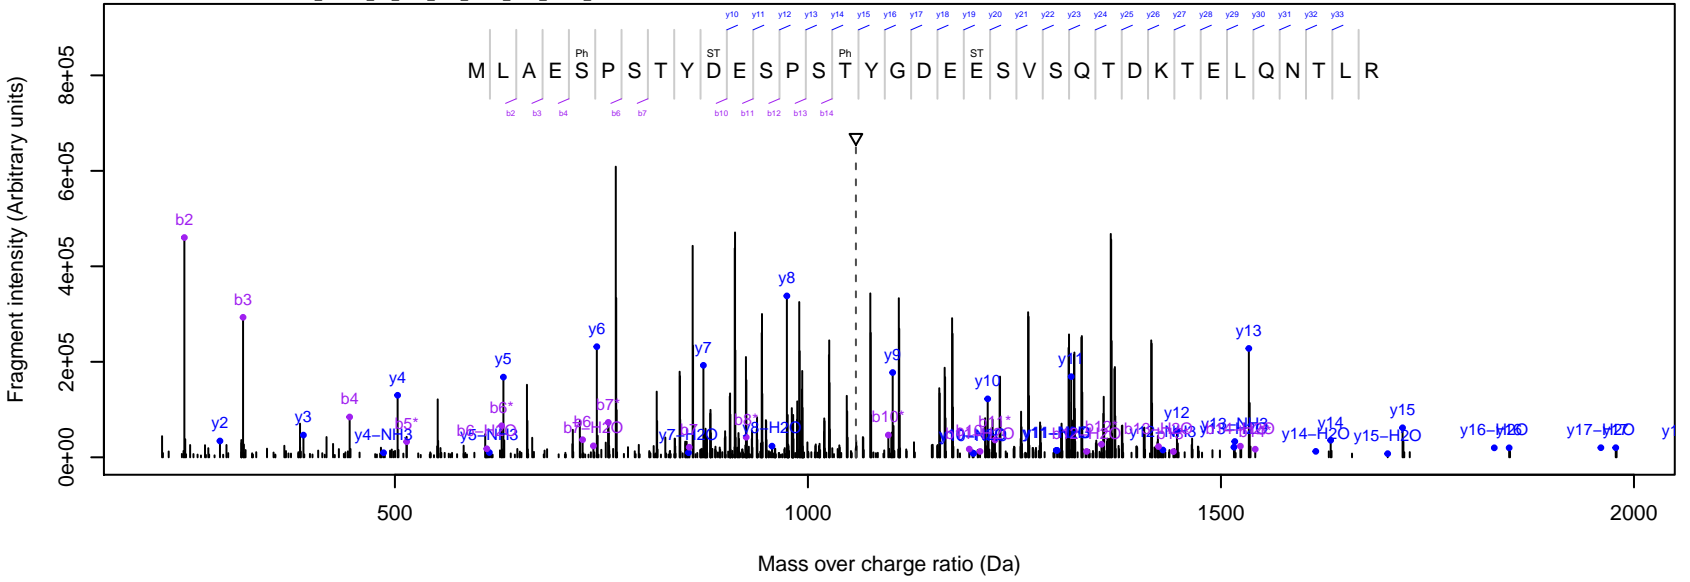

ATNES(Phospho (STY))EDEIPQLVPIGK-2+

Source : QE3\_201126\_FR\_TIOx\_hum\_tissue\_Urea\_RNAB\_N Scan : 46225

Andromeda score : 326.02

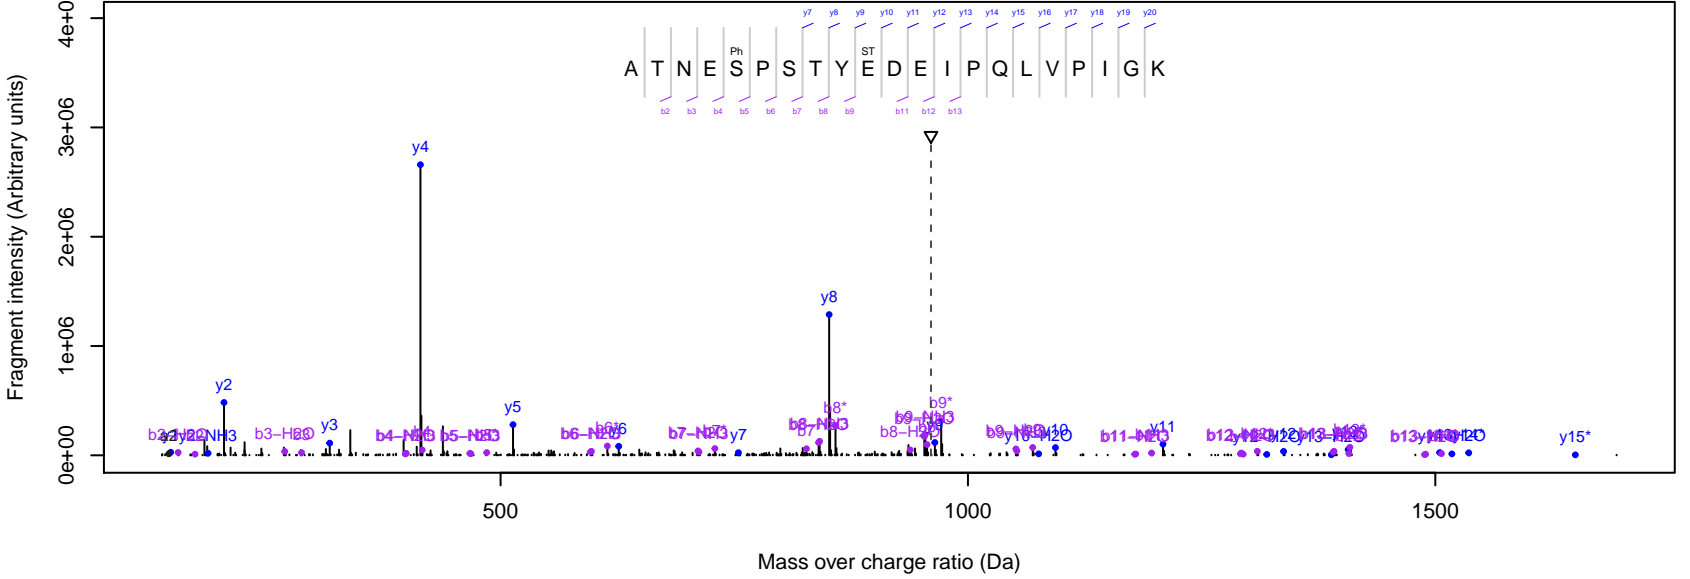

GYYSYSPYS(Phospho (STY))GSGSTAGSR-2+

Source : QE3\_201126\_FR\_TIOx\_hum\_tissue\_Urea\_RNAB\_B Scan : 24482

Andromeda score : 325.61

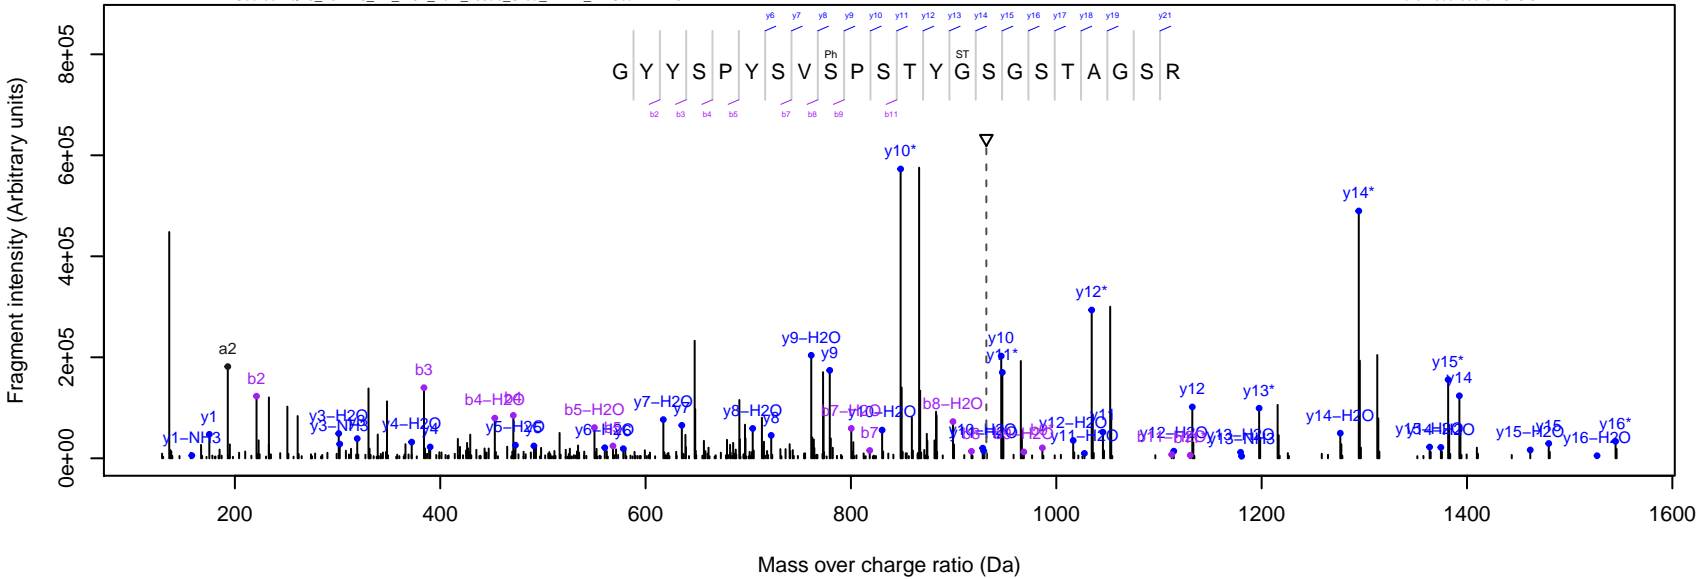

HTGPEEEATVHDGS(Phospho (STY))EEEDDDYGLISSVEEIPEDAASITMR-4+

Source : QE3\_201126\_FR\_TIOx\_hum\_tissue\_Urea\_RNAB\_N Scan : 57120

Andromeda score : 325.56

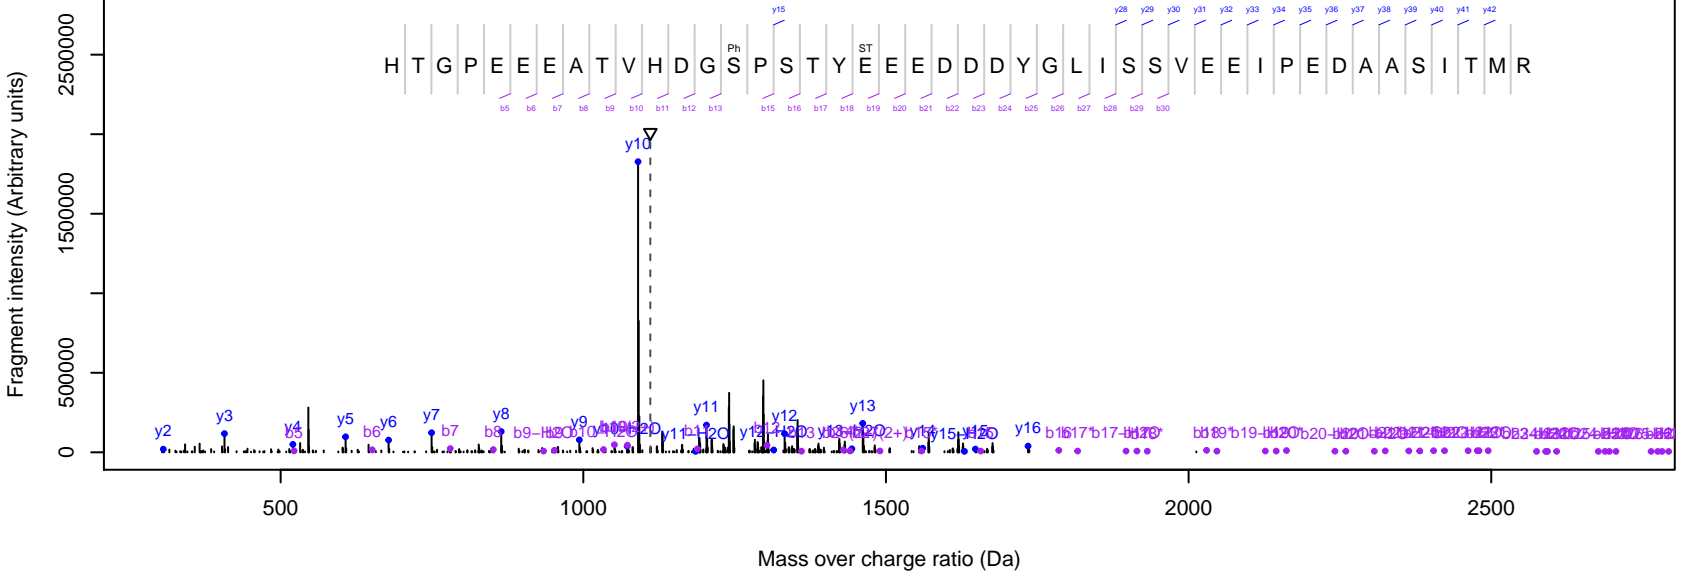

M(Oxidation (M))LAESDES(Phospho (STY))GDEESVSQTDKTELQNTLR-3+

Source : QE3\_201126\_FR\_TIOx\_hum\_tissue\_Urea\_RNAB\_H Scan : 28128

Andromeda score : 325.19

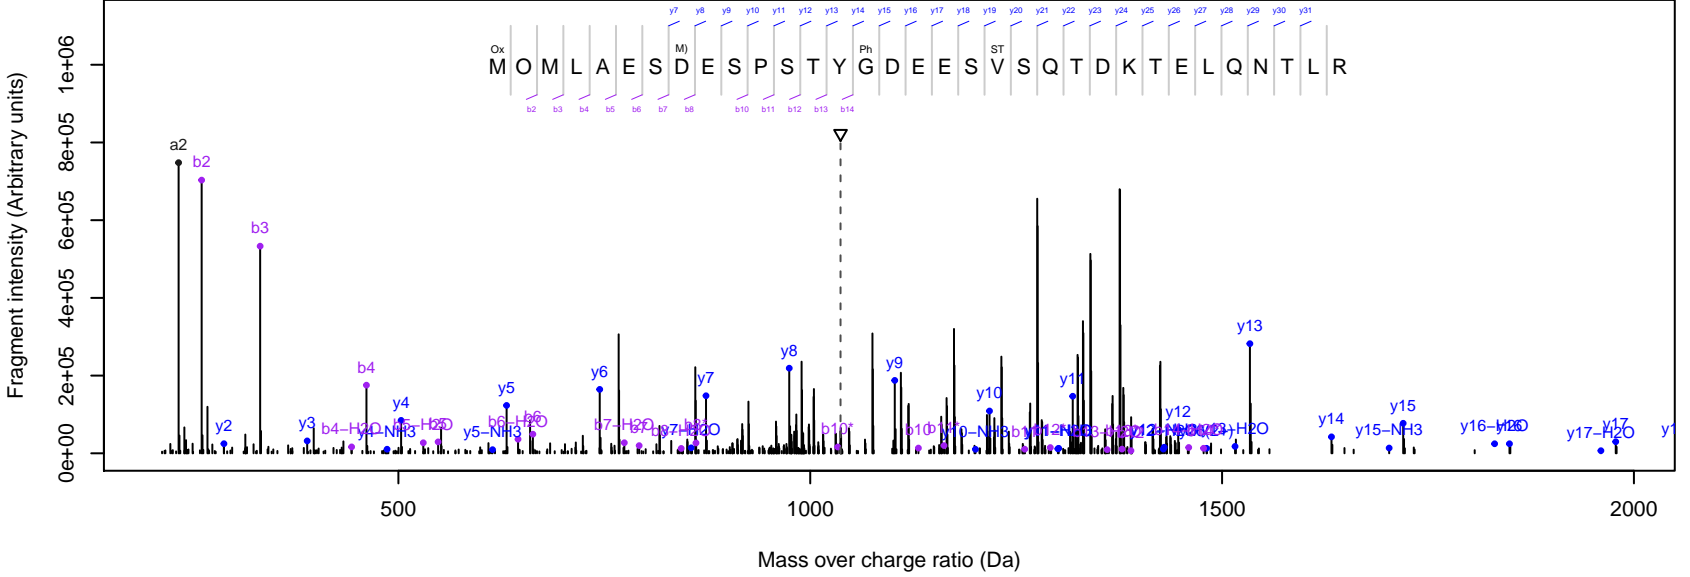

KM(Oxidation (M))GAPESGLAEYLFDKHTLGDSPSTYDNE S-3+

Source : QE3\_201126\_FR\_TIOx\_hum\_tissue\_Urea\_RNAB\_N Scan : 41960

Andromeda score : 325.17

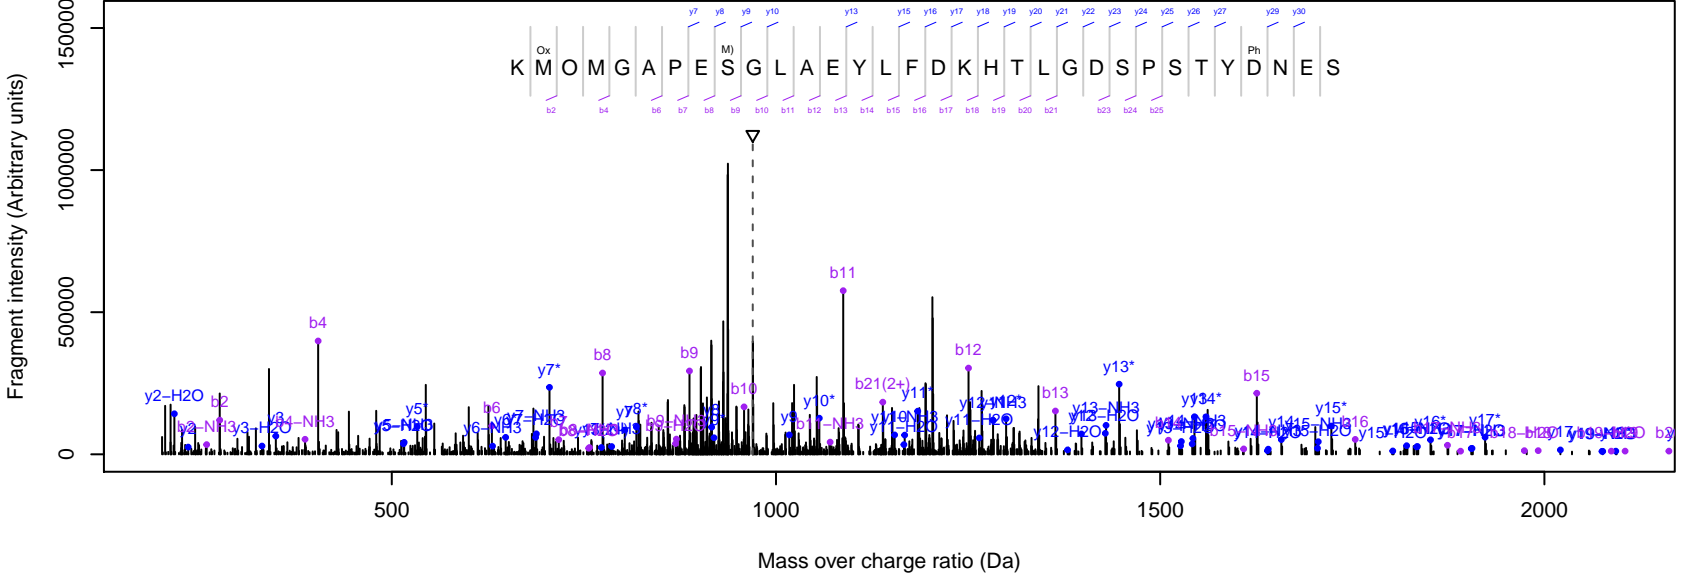

FGEESEVEM(Oxidation (M))EVES(Phospho (STY))DEEDDKQEK-3+

Source : QE3\_201126\_FR\_TIOx\_hum\_tissue\_Urea\_RNAB\_B Scan : 24562

Andromeda score : 325.1

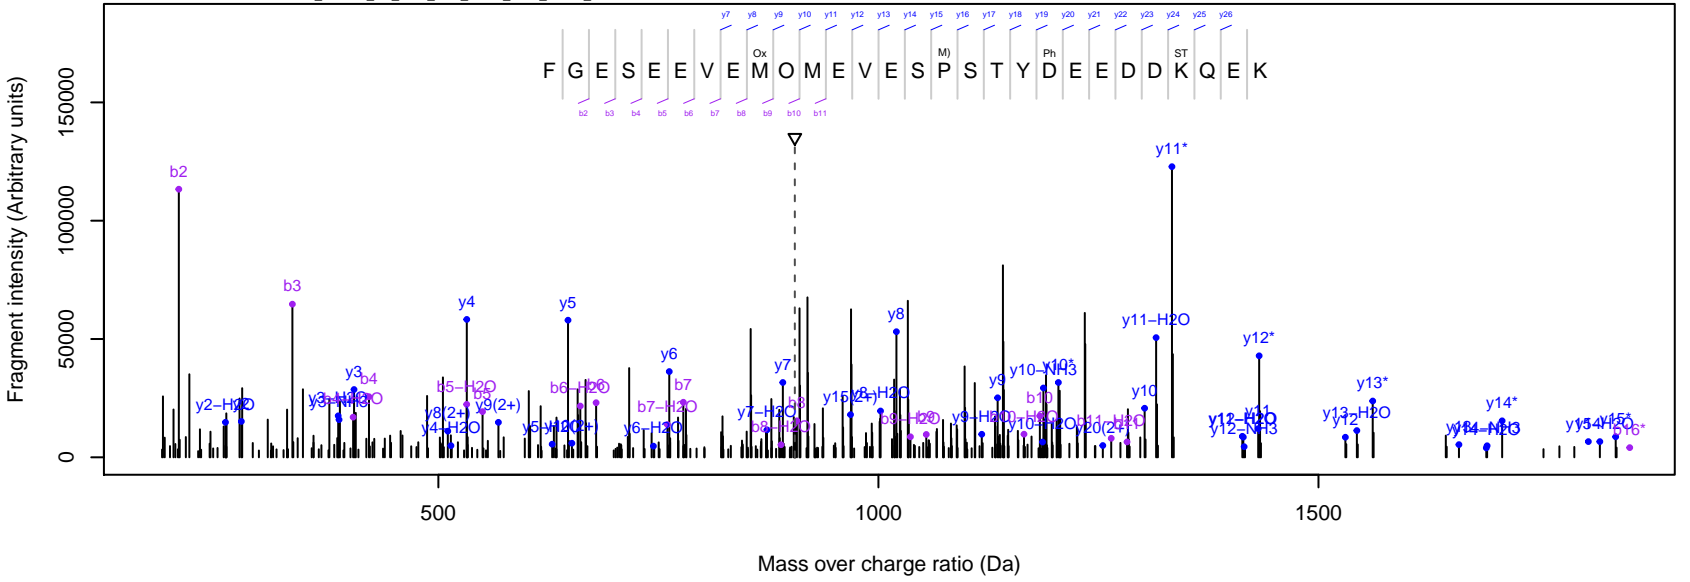

IGHHS(Phospho (STY))TSDSSAYS(Phospho (STY))VDEVNYWDK-4+

Source : QE3\_201126\_FR\_TIOx\_hum\_tissue\_Urea\_RNAB\_H Scan : 24908

Andromeda score : 324.96

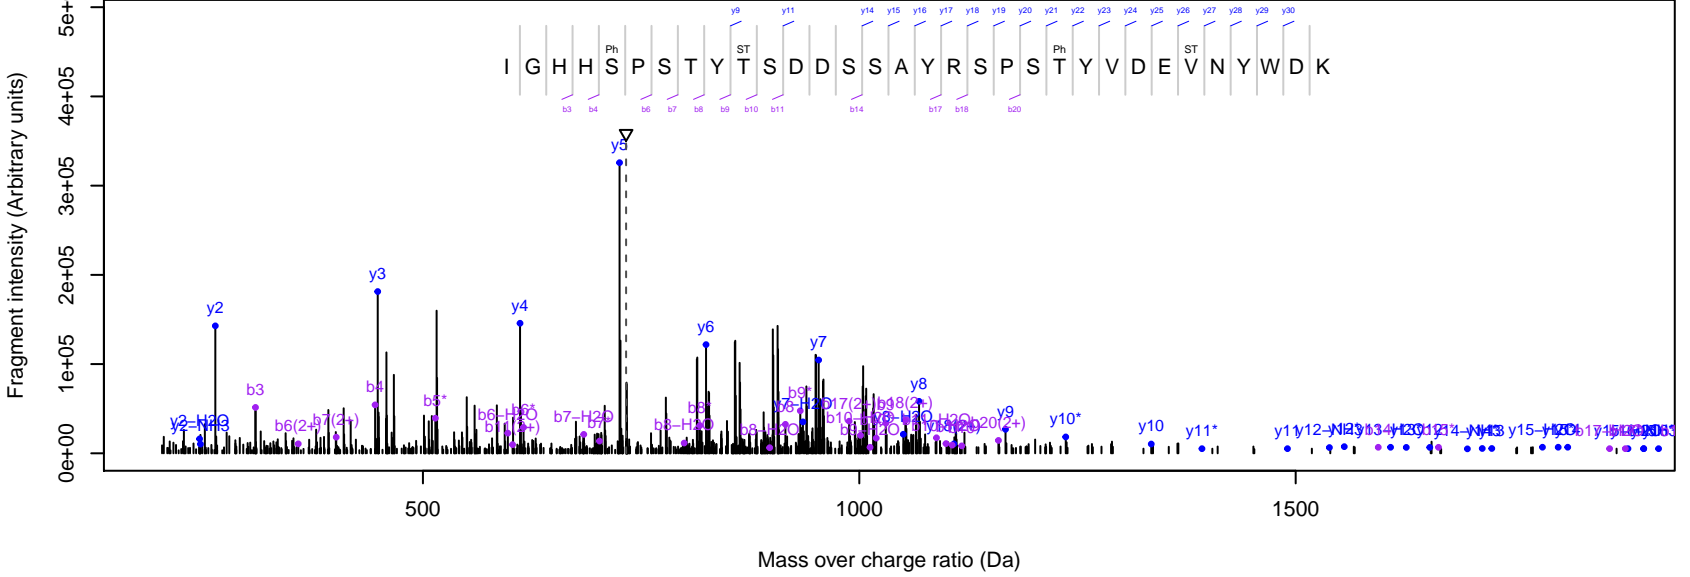

DSQDASAEQS(Phospho (STY))DHDDEVASLASASGGFGTK-3+

Source : QE3\_201126\_FR\_TIOx\_hum\_tissue\_Urea\_RNAB\_N Scan : 35292

Andromeda score : 324.94

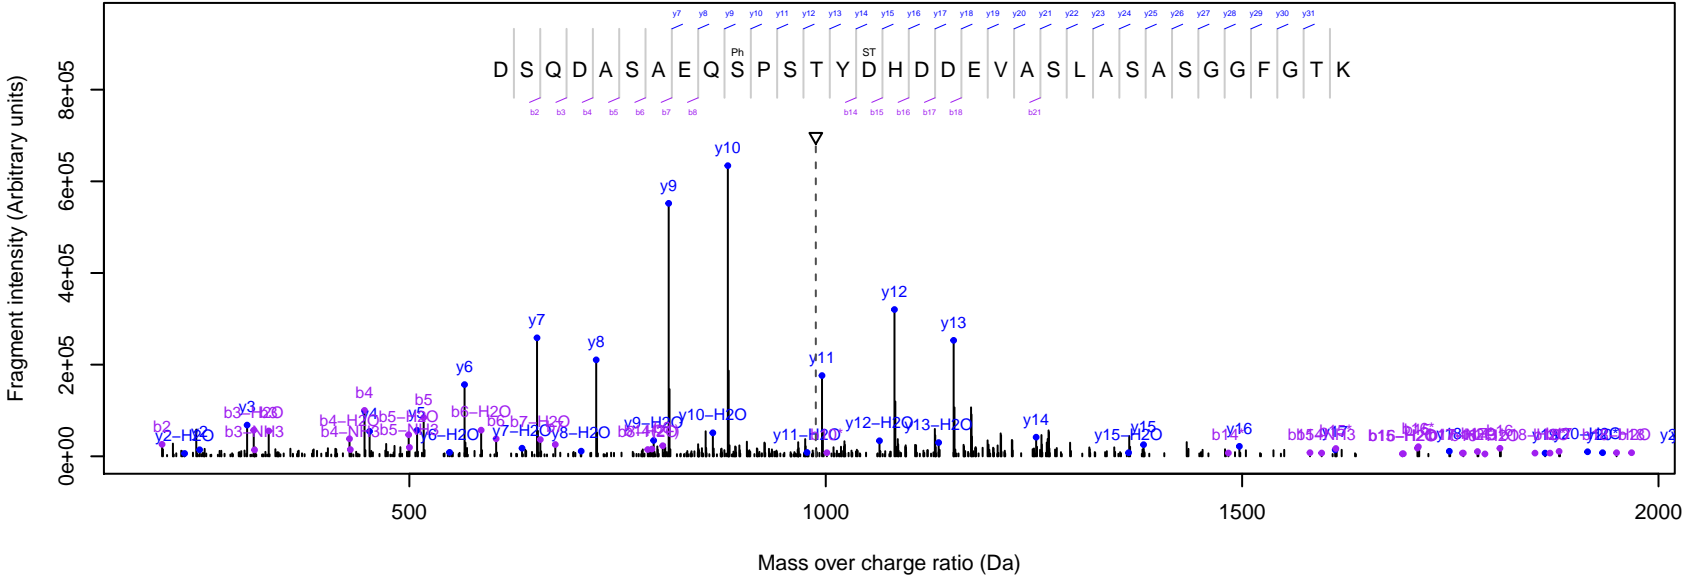

S(Phospho (STY))AEDLTGGSYDDVLNAEQLQK-2+

Source : QE3\_201126\_FR\_TiOx\_hum\_tissue\_Urea\_RNAB\_N Scan : 46716

Andromeda score : 324.91

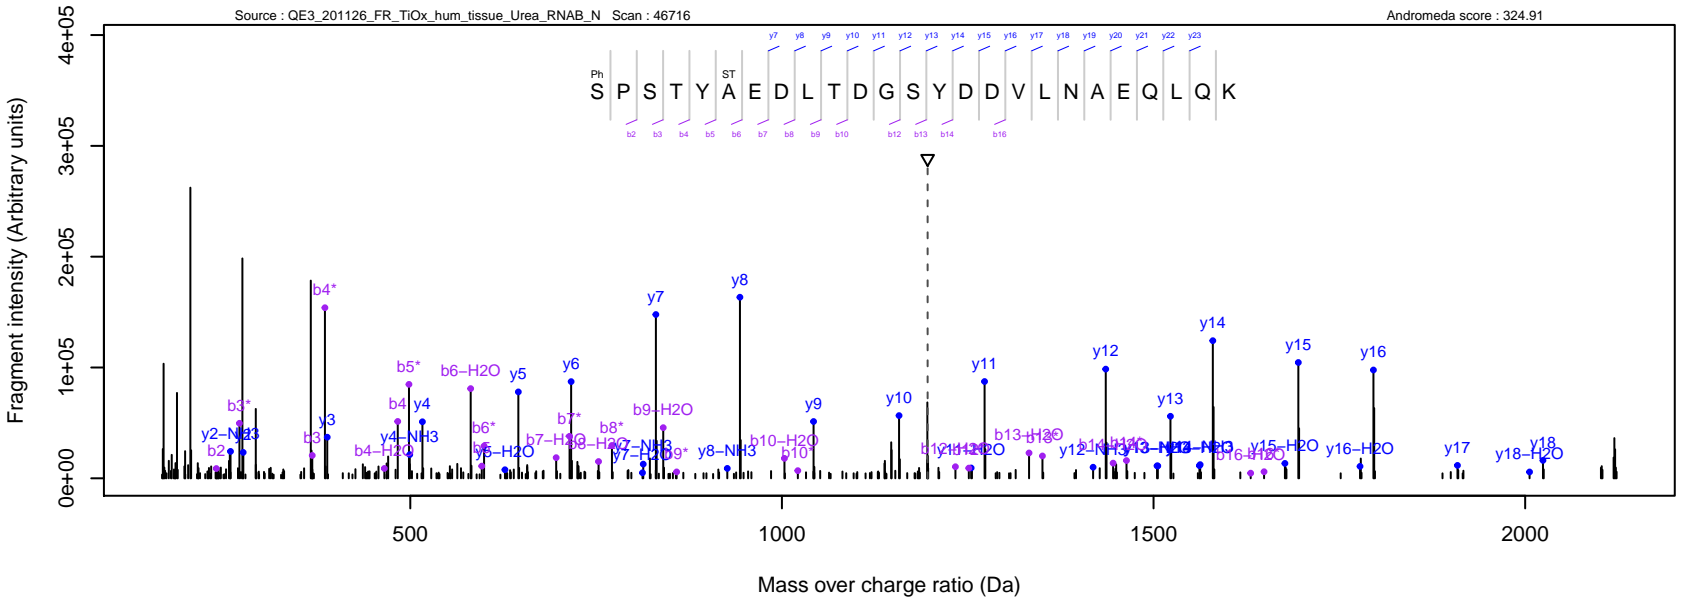

RAS(Phospho (STY))APLPGLSAPGR-2+

Source : QE3\_201126\_FR\_TiOx\_hum\_tissue\_Urea\_RNAB\_H Scan : 21450

Andromeda score : 324.59

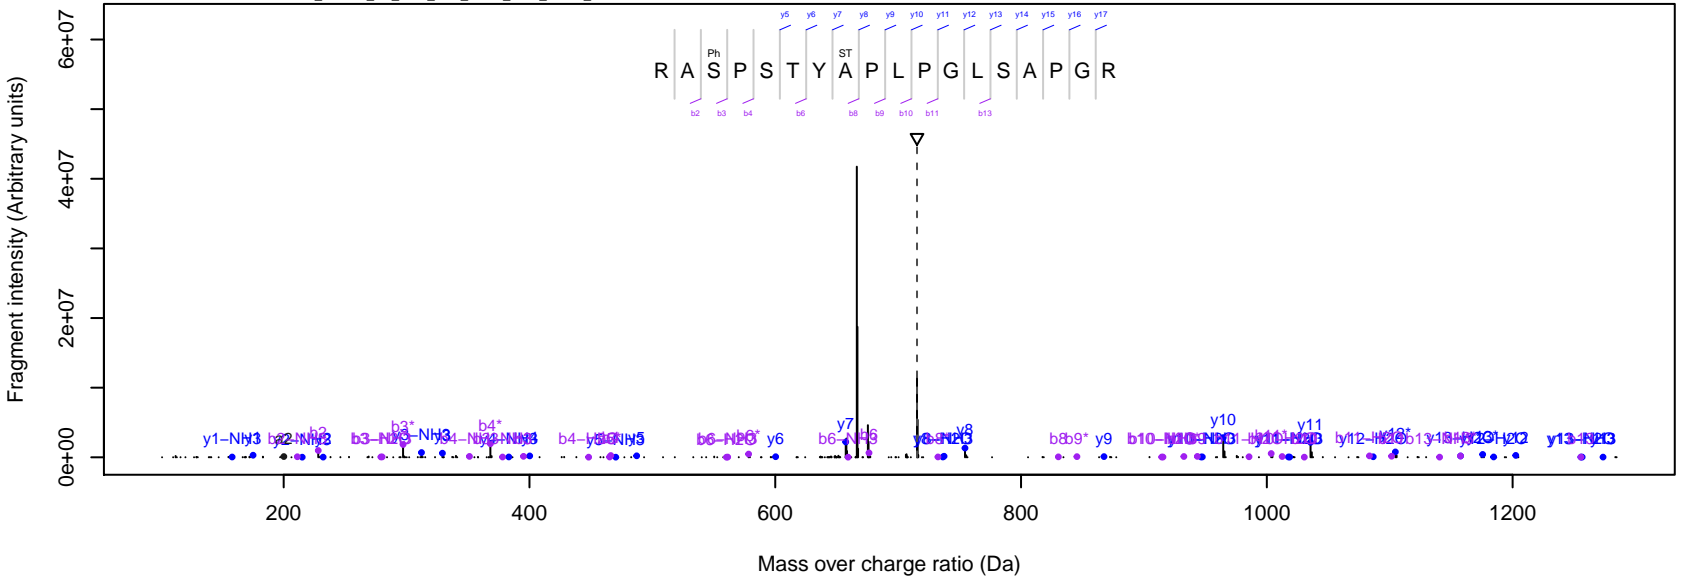

SLGLSLS(Phospho (STY))GGDQEDAGR-2+

Source : QE3\_201126\_FR\_TiOx\_hum\_tissue\_Urea\_RNAB\_B Scan : 33068

Andromeda score : 323.91

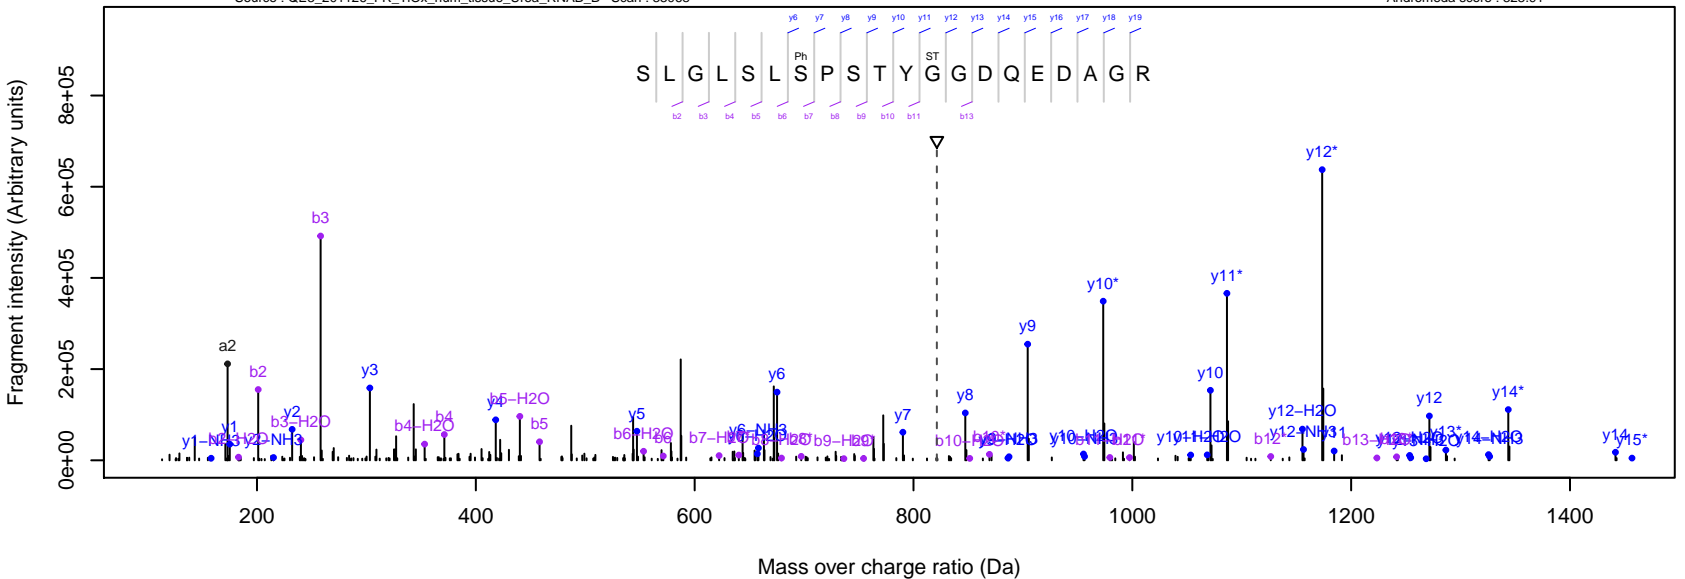



STS(Phospho (STY))FRGGM(Oxidation (M))GSGGLATGIAGGLAGMGGIQNEKETMQLNDR-3+

Source : QE3\_201126\_FR\_TIOx\_hum\_tissue\_Urea\_RNAB\_B Scan : 43633

Andromeda score : 321.54

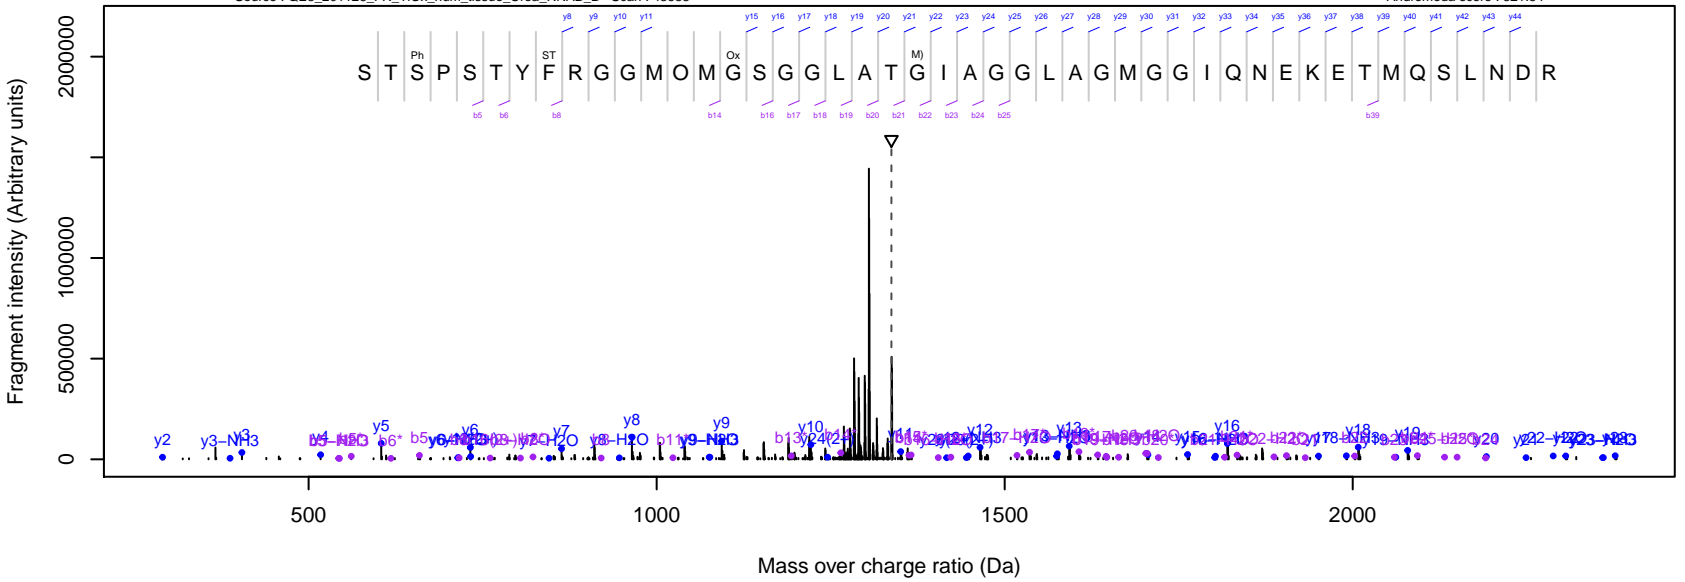

KKS(Phospho (STY))PNELVDDLFK-2+

Source : QE3\_201126\_FR\_TIOx\_hum\_tissue\_Urea\_RNAB\_N Scan : 33645

Andromeda score : 321.48

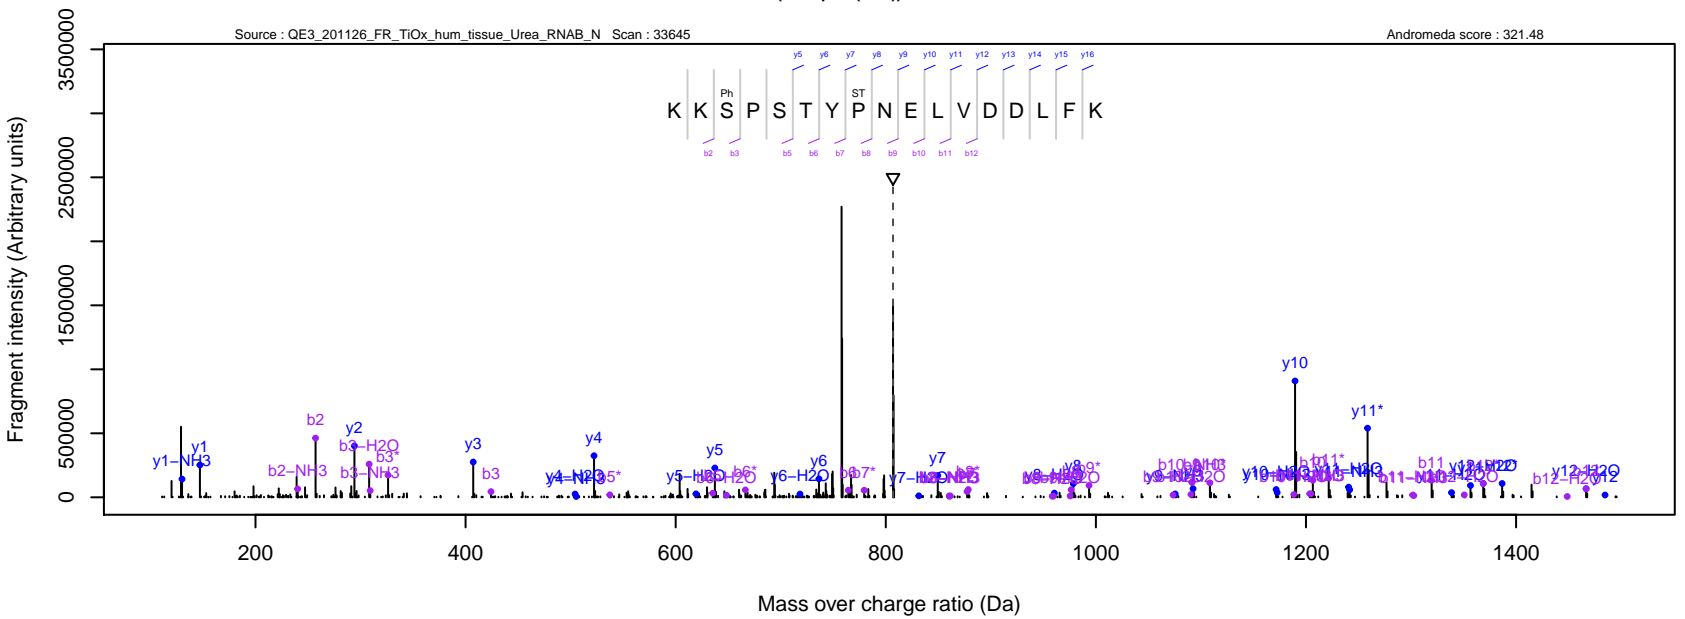

GQLS(Phospho (STY))DDEKFLFVDKFNFSVPAQADWAAK-3+

Source : QE3\_201126\_FR\_TIOx\_hum\_tissue\_Urea\_RNAB\_N Scan : 55895

Andromeda score : 321.4

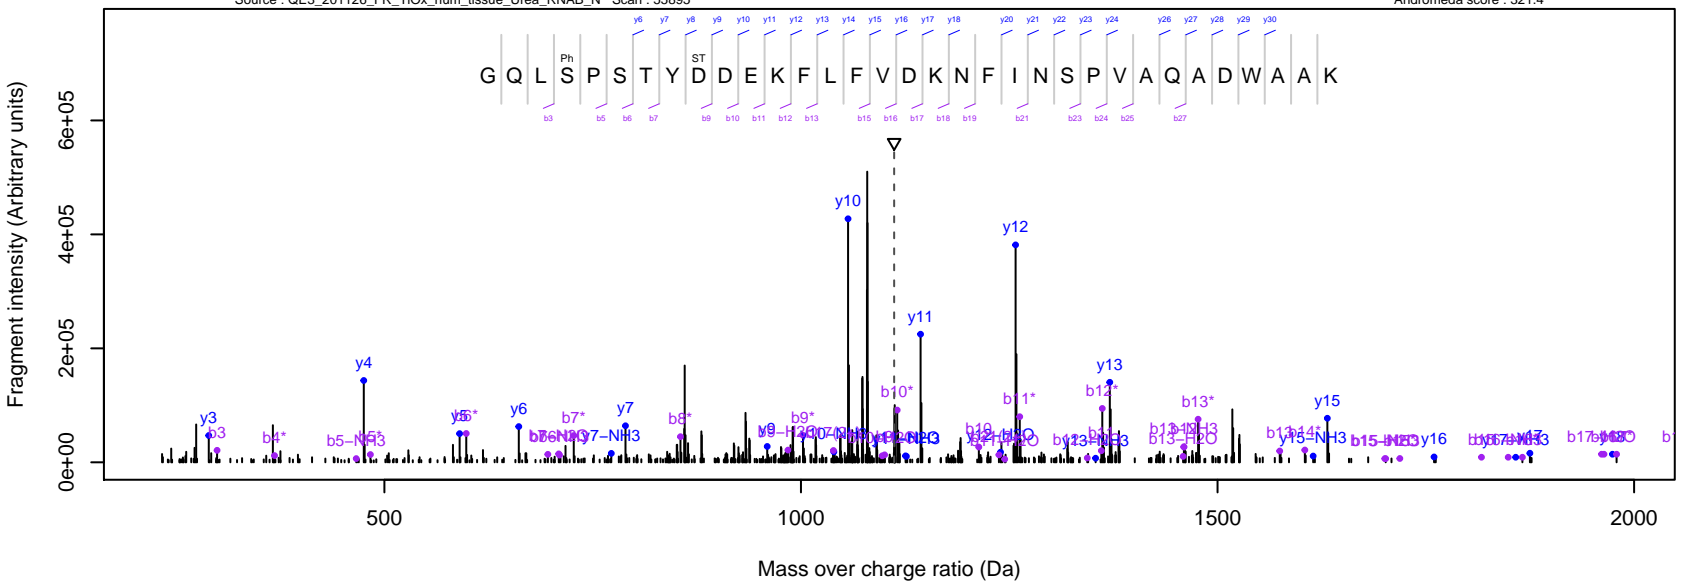

QKS(Phospho (STY))DAEEDGGTVSQEEEDR-2+

Source : QE3\_201126\_FR\_TiOx\_hum\_tissue\_Urea\_RNAB\_B Scan : 8403

Andromeda score : 321.09

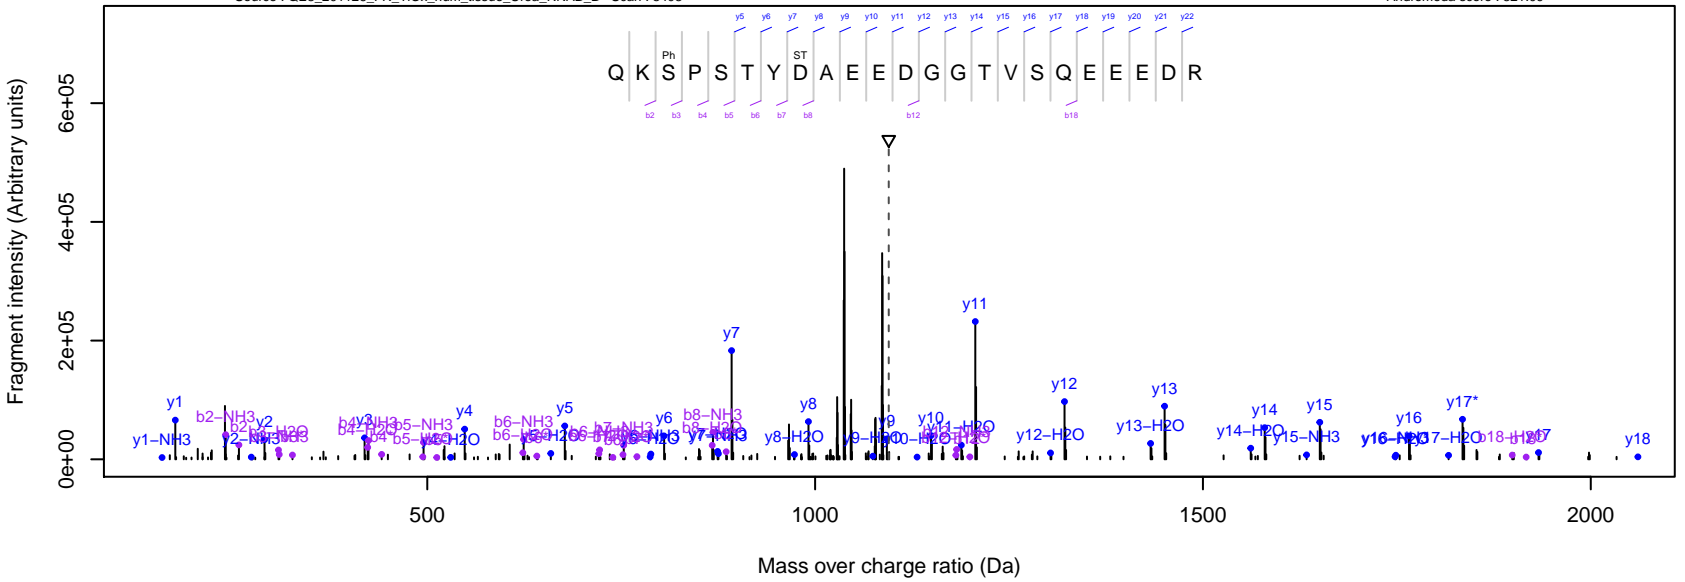

DSHS(Phospho (STY))S(Phospho (STY))EEDEASSQTDLSTISKK-3+

Source : QE3\_201126\_FR\_TiOx\_hum\_tissue\_Urea\_RNAB\_H Scan : 19325

Andromeda score : 320.77

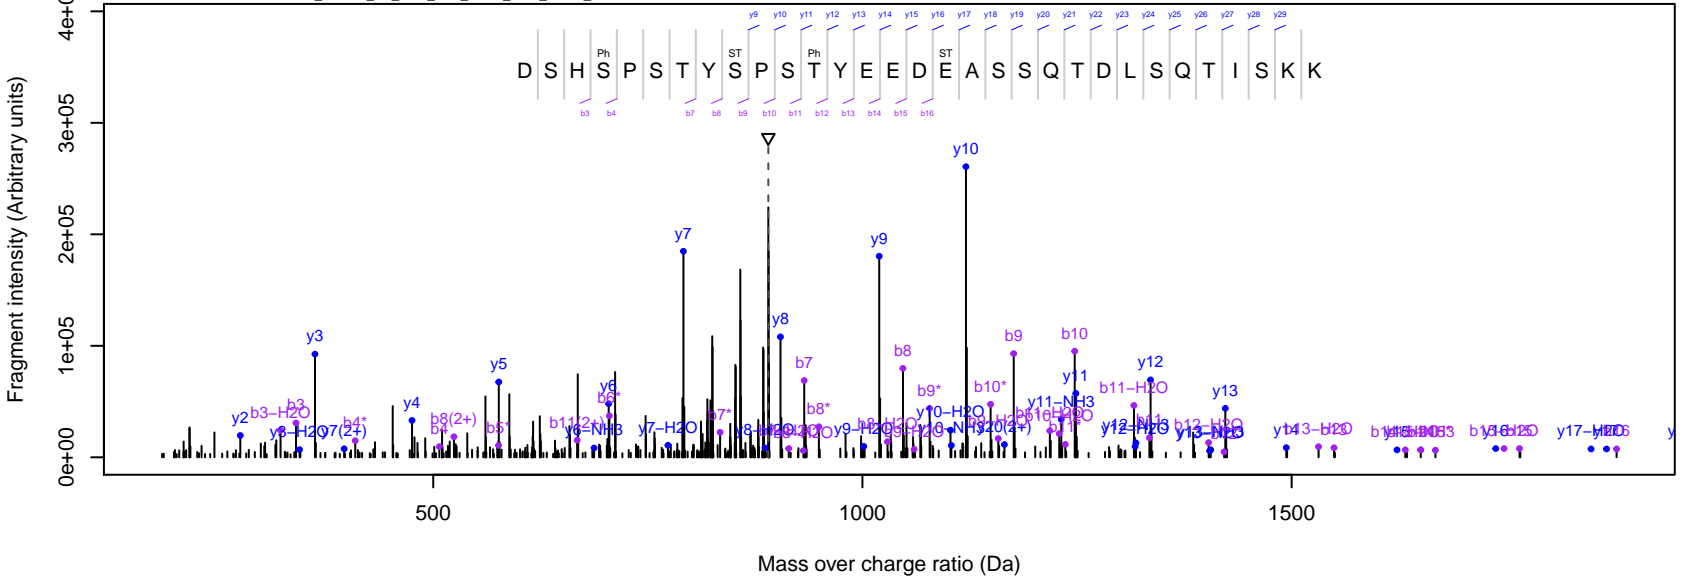

QICLVM(Oxidation (M))LETLSQS(Phospho (STY))PQGR-2+

Source : QE3\_201126\_FR\_TiOx\_hum\_tissue\_Urea\_RNAB\_H Scan : 47518

Andromeda score : 320.73

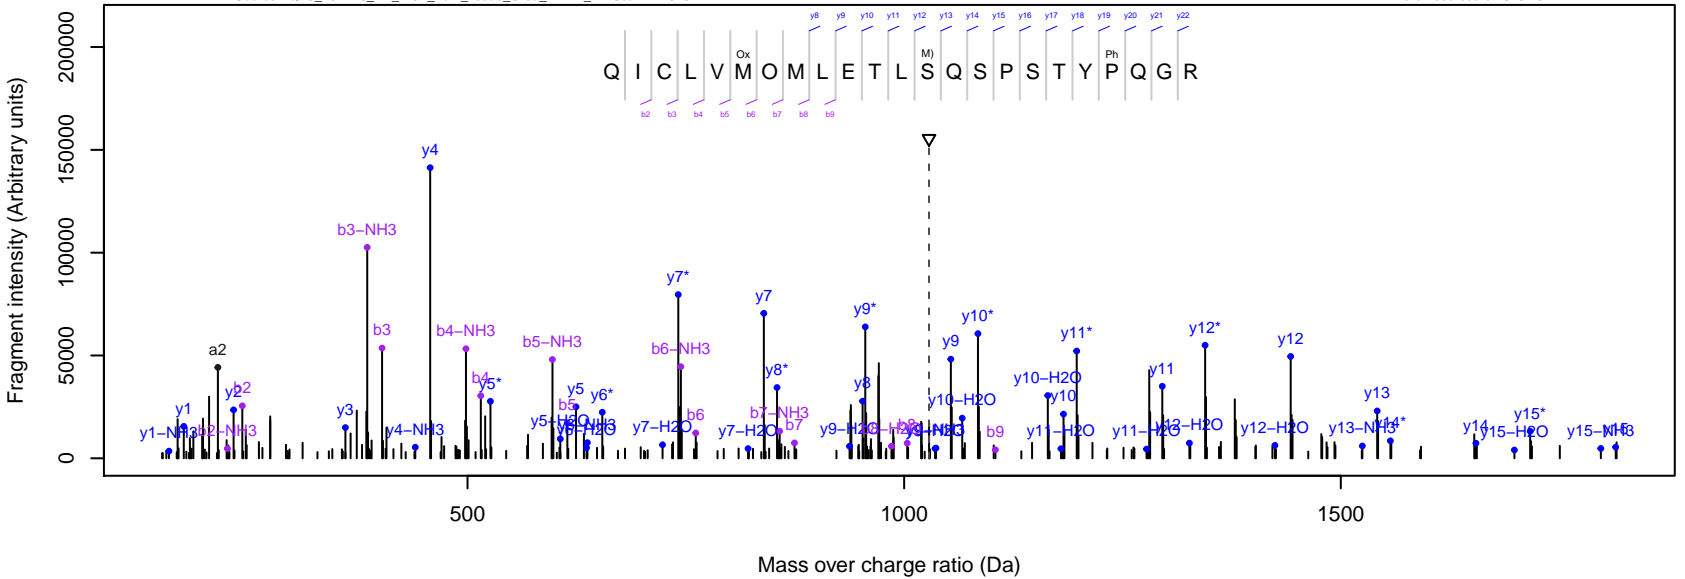

FAS(Phospho (STY))DDEHDEHDENGATGPVKR-3+

Source : QE3\_201126\_FR\_TiOx\_hum\_tissue\_Urea\_RNAB\_B Scan : 7864

Andromeda score : 320.72

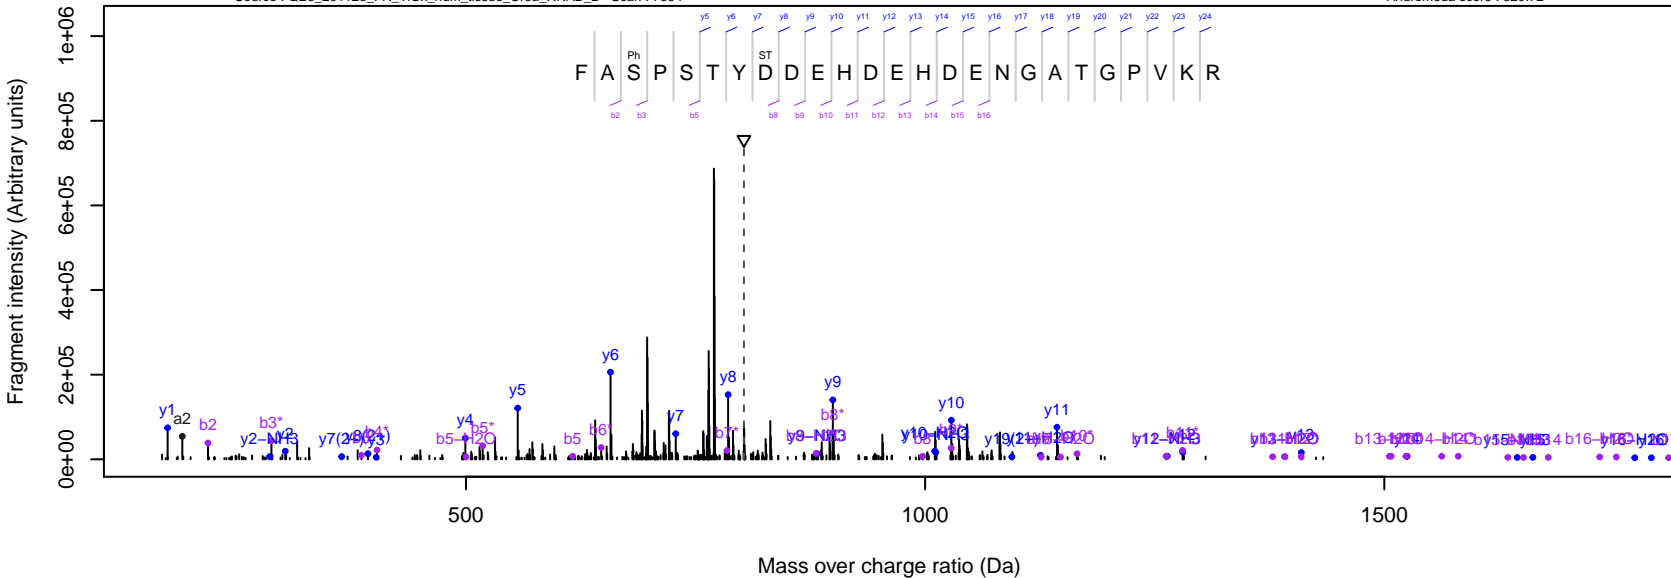

DRAS(Phospho (STY))PESLDLTR-2+

Source : QE3\_201126\_FR\_TiOx\_hum\_tissue\_Urea\_RNAB\_H Scan : 19324

Andromeda score : 320.35

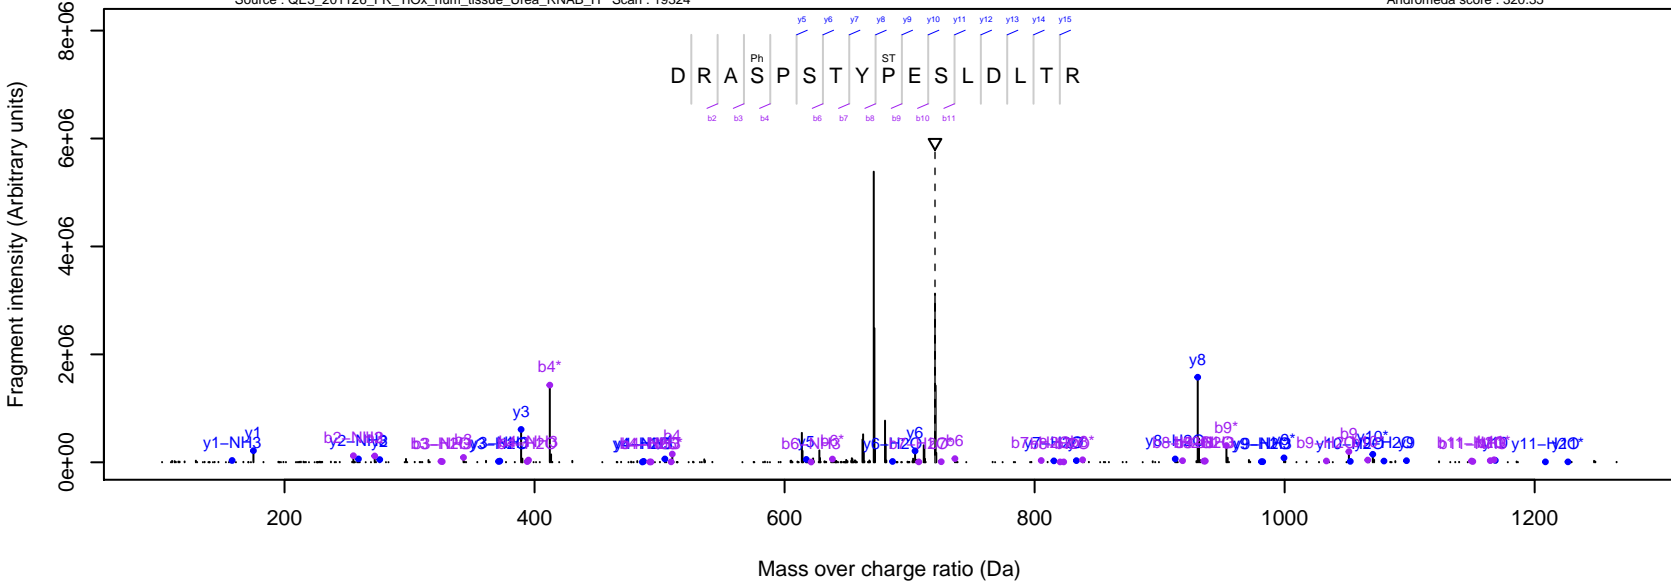

GDMS(Phospho (STY))DEDDENEFFDAPEIITMPENLGHK-3+

Source : QE3\_201126\_FR\_TiOx\_hum\_tissue\_Urea\_RNAB\_N Scan : 58422

Andromeda score : 320.23

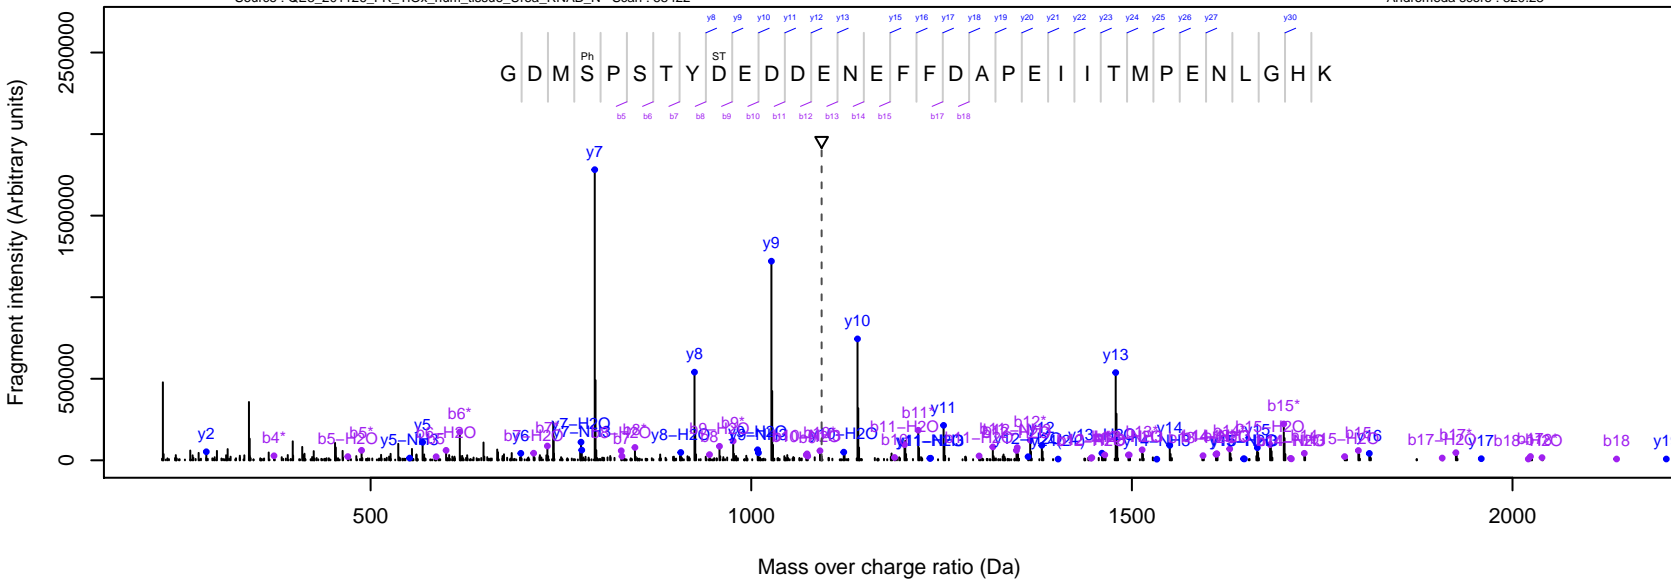



EKT(Phospho (STY))PS(Phospho (STY))PKEEDEEPESPEK-2+

Source : QE3\_201126\_FR\_TiOx\_hum\_tissue\_Urea\_RNAB\_B Scan : 9539

Andromeda score : 319.99

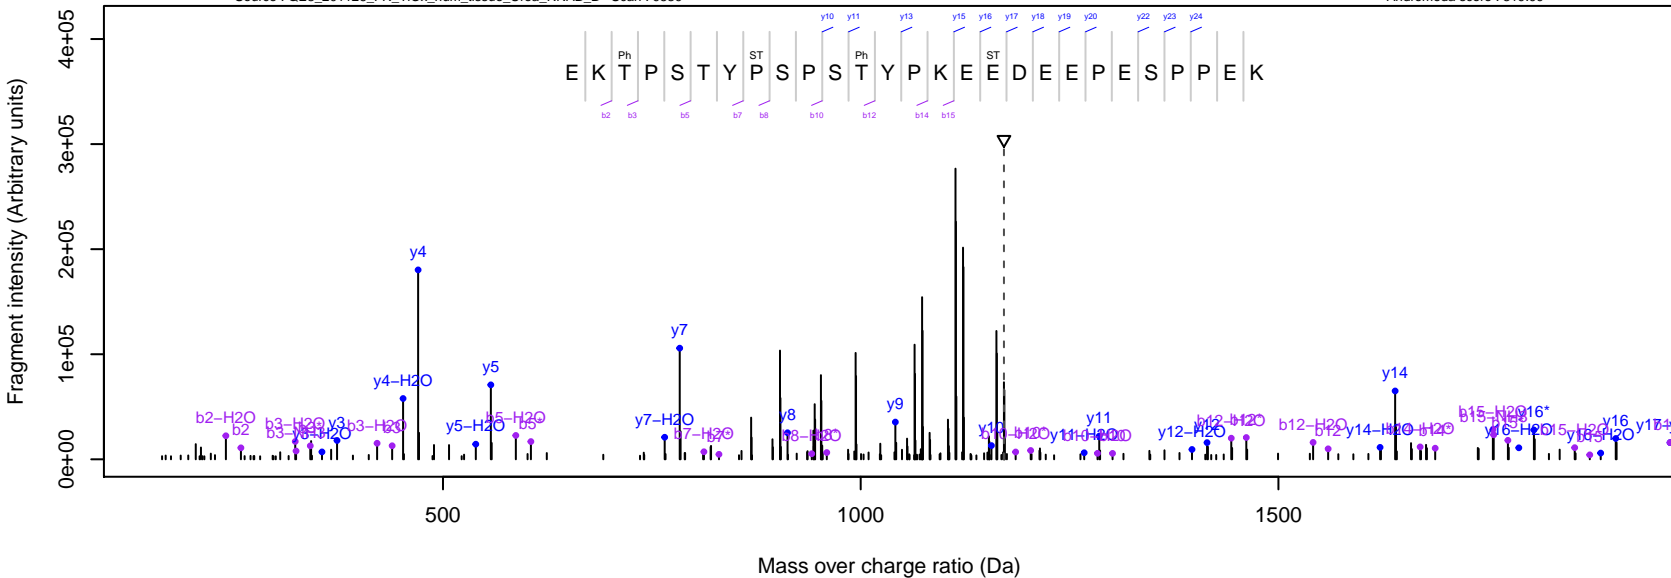

S(Phospho (STY))HNNFVAILDLPEGEHQYK-2+

Source : QE3\_201126\_FR\_TiOx\_hum\_tissue\_Urea\_RNAB\_N Scan : 39714

Andromeda score : 319.98

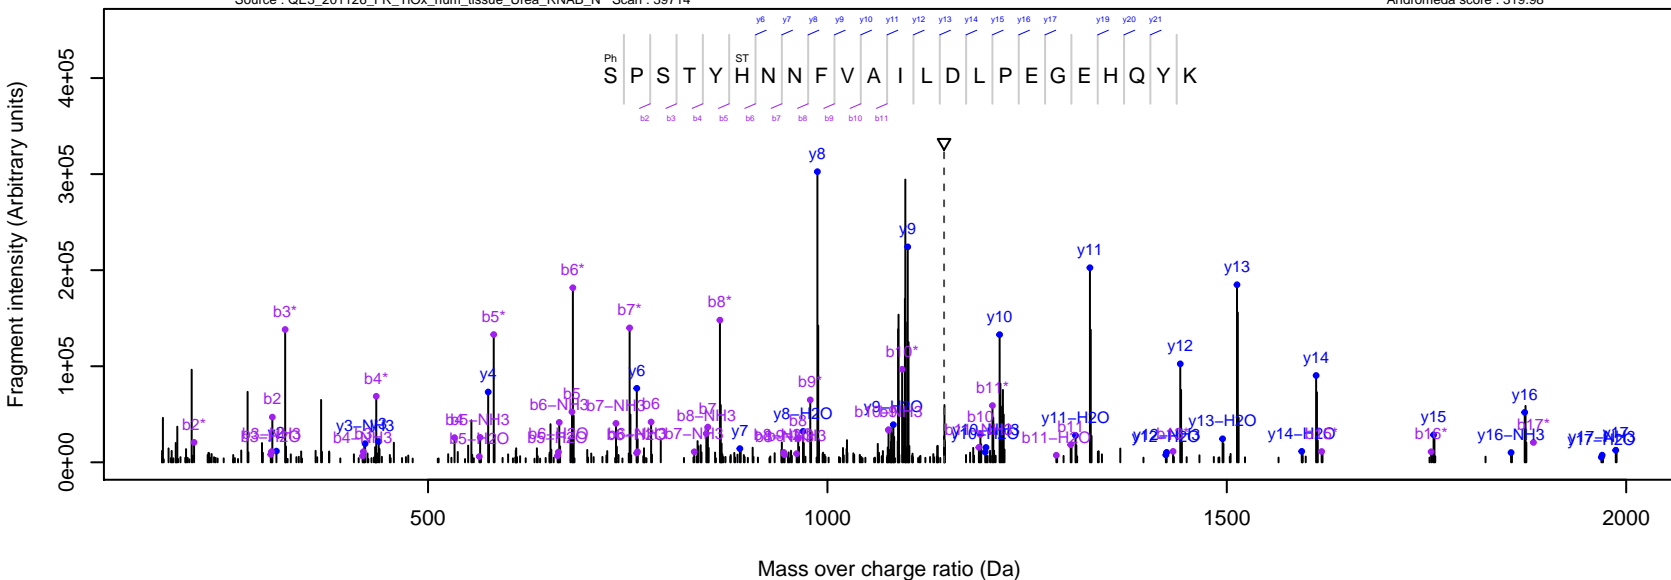

CDDS(Phospho (STY))PRTPSNTPSAEADWSPGLELHPDYK-3+

Source : QE3\_201126\_FR\_TiOx\_hum\_tissue\_Urea\_RNAB\_N Scan : 34832

Andromeda score : 319.88

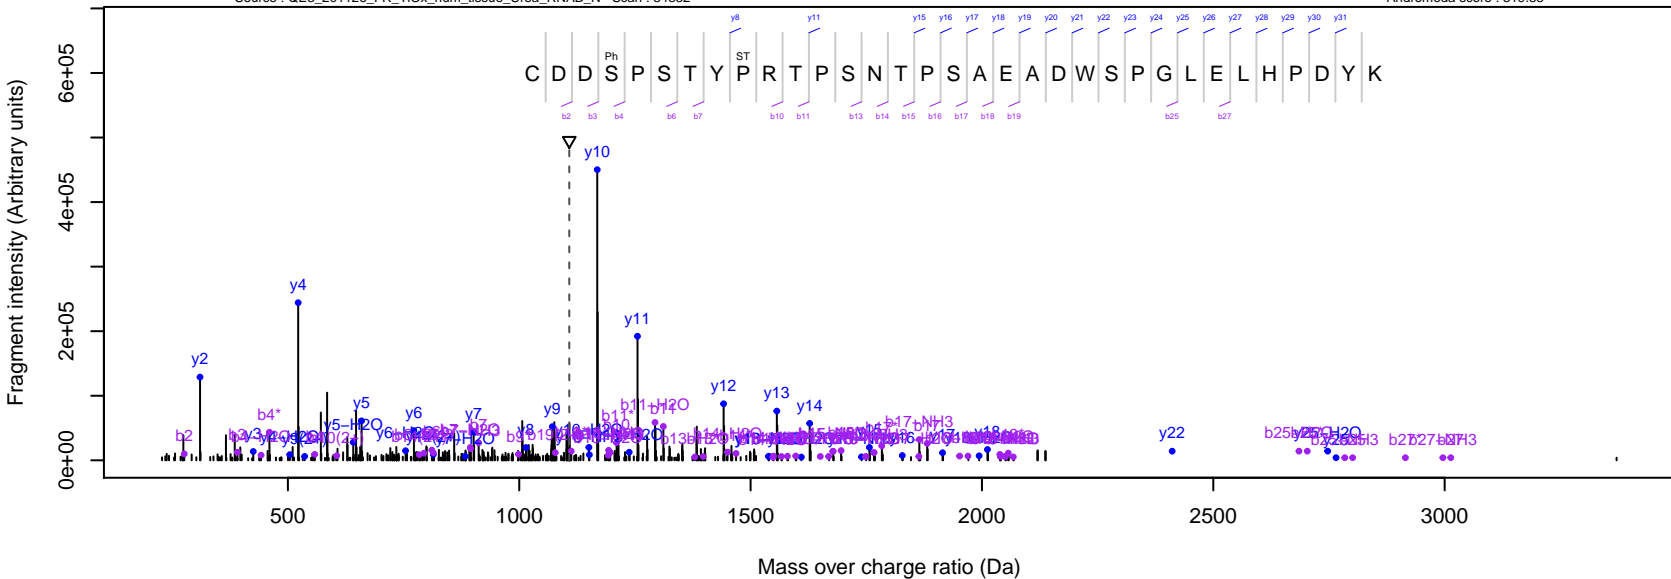

GLFS(Phospho (STY))DEEDSEDLFSSQSASK-2+

Source : QE3\_201126\_FR\_TiOx\_hum\_tissue\_Urea\_RNAB\_B Scan : 52951

Andromeda score : 319.29

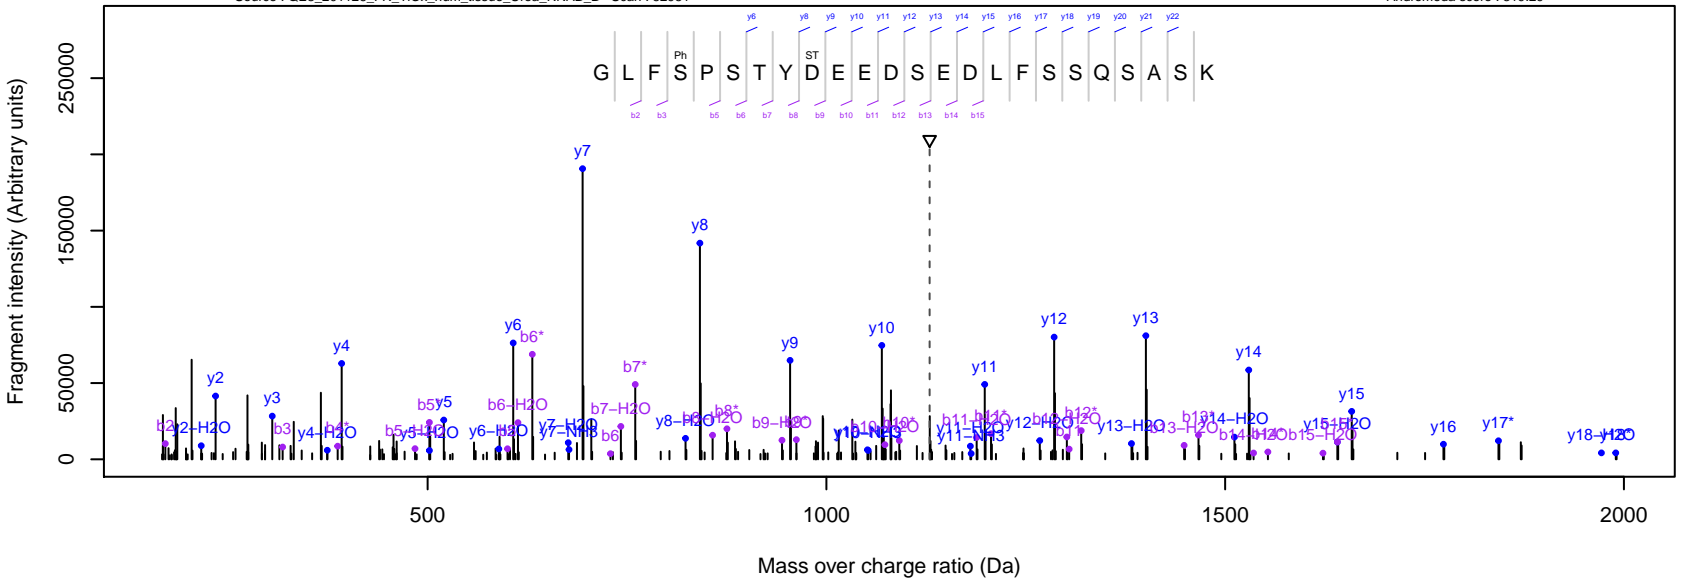

AEIKEMLAS(Phospho (STY))DDEEDVSSKVEK-3+

Source : QE3\_201126\_FR\_TiOx\_hum\_tissue\_Urea\_RNAB\_H Scan : 22714

Andromeda score : 319.24

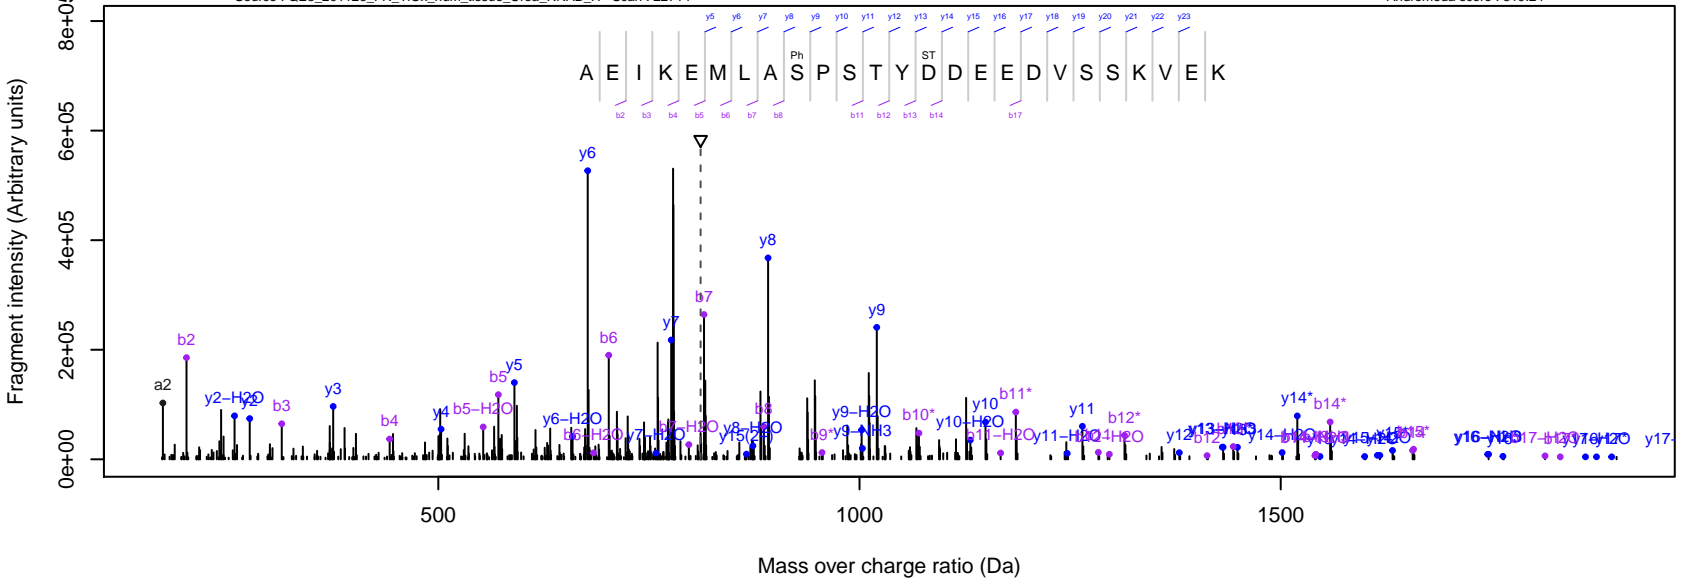

GDKEELT(Phospho (STY))PQKCEPQSSK-3+

Source : QE3\_201126\_FR\_TiOx\_hum\_tissue\_Urea\_RNAB\_N Scan : 5411

Andromeda score : 318.18

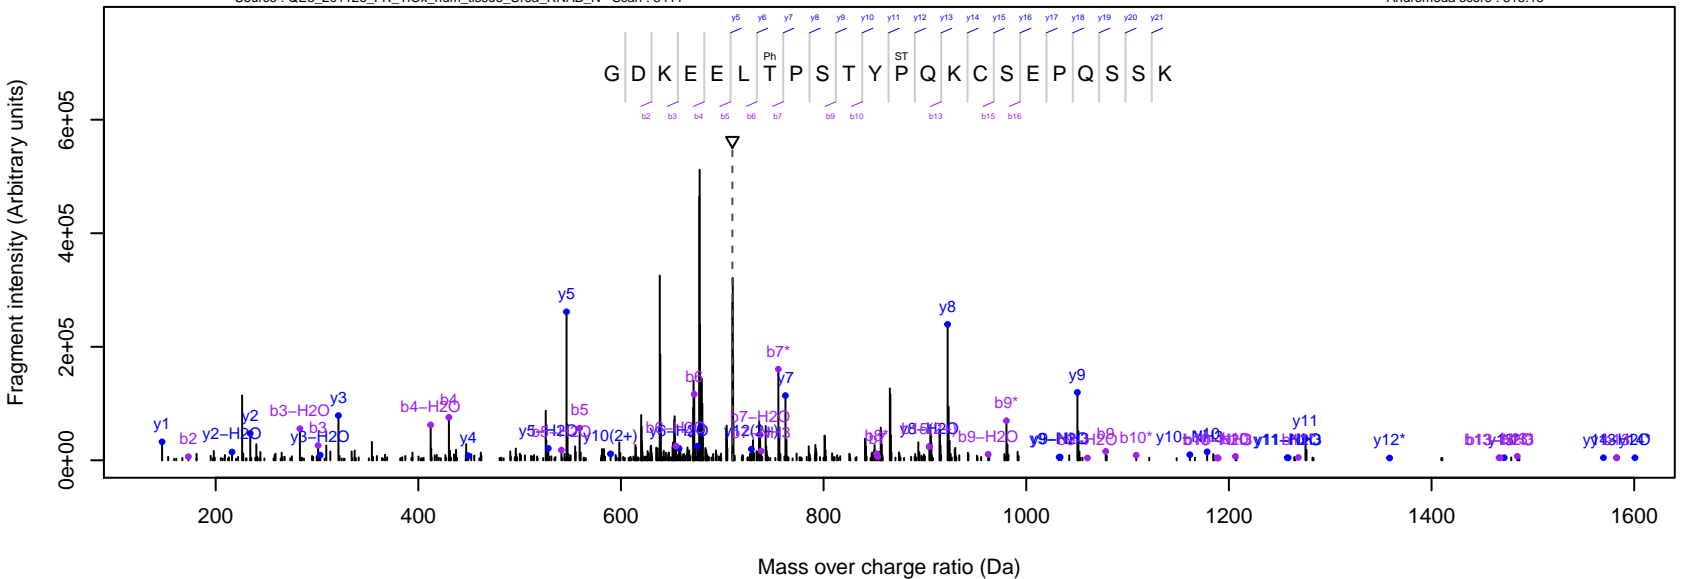

TPQRGDEELGGEEEEEEEEEDDS(Phospho (STY))AEEGGAAR-3+

Source : QE3\_201126\_FR\_TIOx\_hum\_tissue\_Urea\_RNAB\_H Scan : 20372

Andromeda score : 317.83

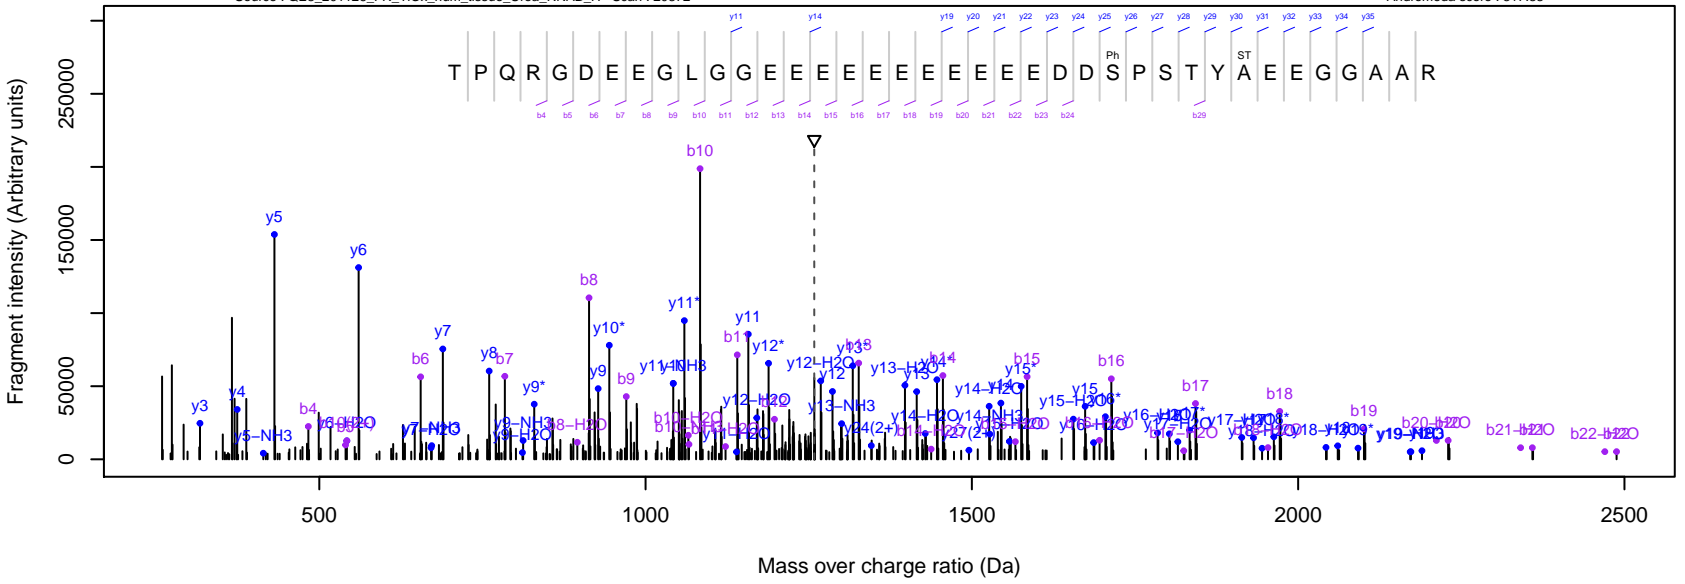

LKCGSGPVHISGQHLVAVEEDAES(Phospho (STY))EDEEEEDVKLLSISGK-4+

Source : QE3\_201126\_FR\_TIOx\_hum\_tissue\_Urea\_RNAB\_H Scan : 38414

Andromeda score : 317.78

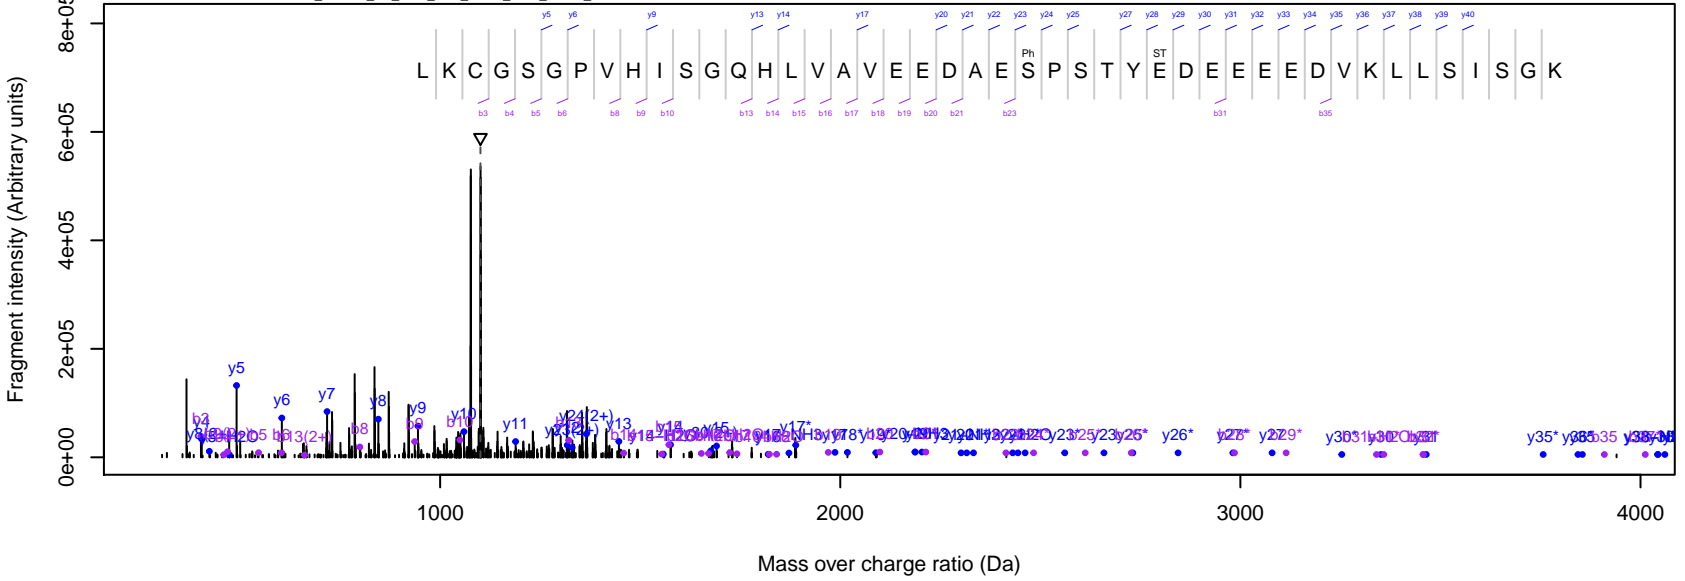

GPPDFSSDEEREPT(Phospho (STY))PVLGSGAAAAGR-3+

Source : QE3\_201126\_FR\_TIOx\_hum\_tissue\_Urea\_RNAB\_H Scan : 28545

Andromeda score : 317.25

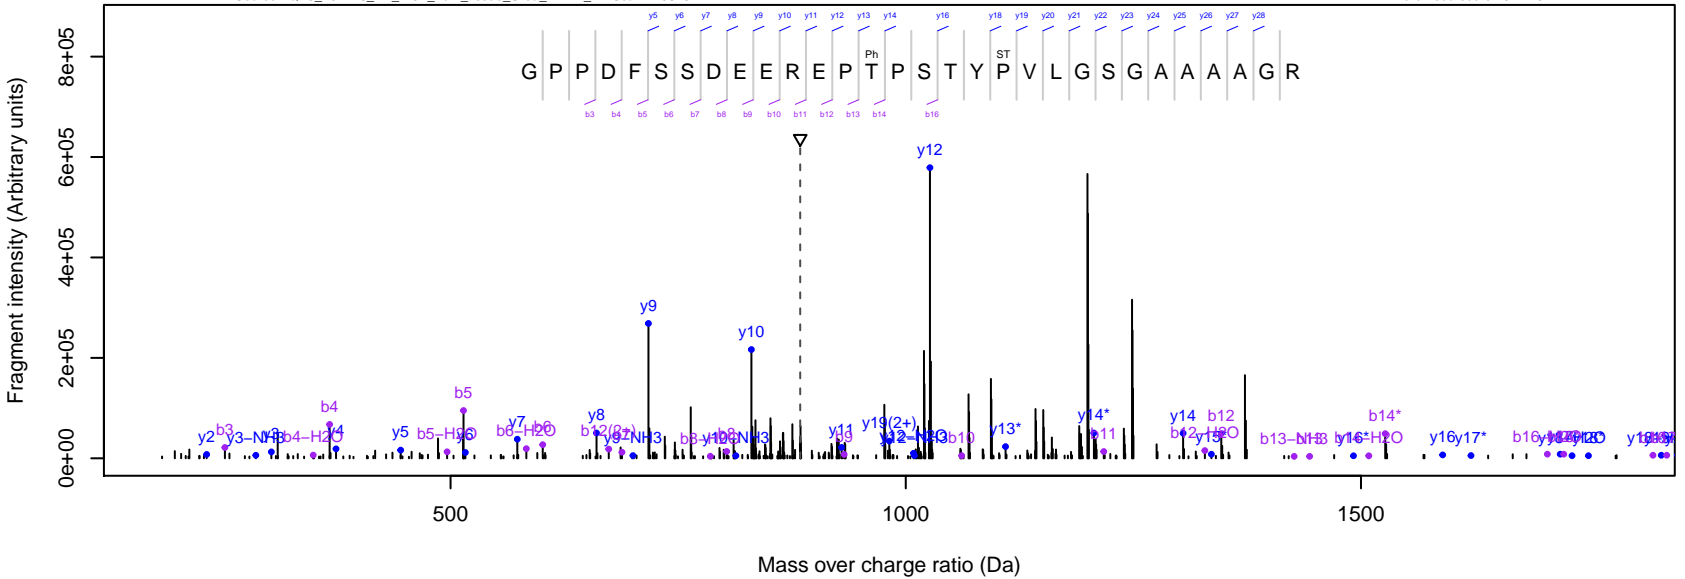

ERES(Phospho (STY))EDELEEANGNPIDIEVDQNK-3+

Source : QE3\_201126\_FR\_TiOx\_hum\_tissue\_Urea\_RNAB\_H Scan : 33674

Andromeda score : 317.08

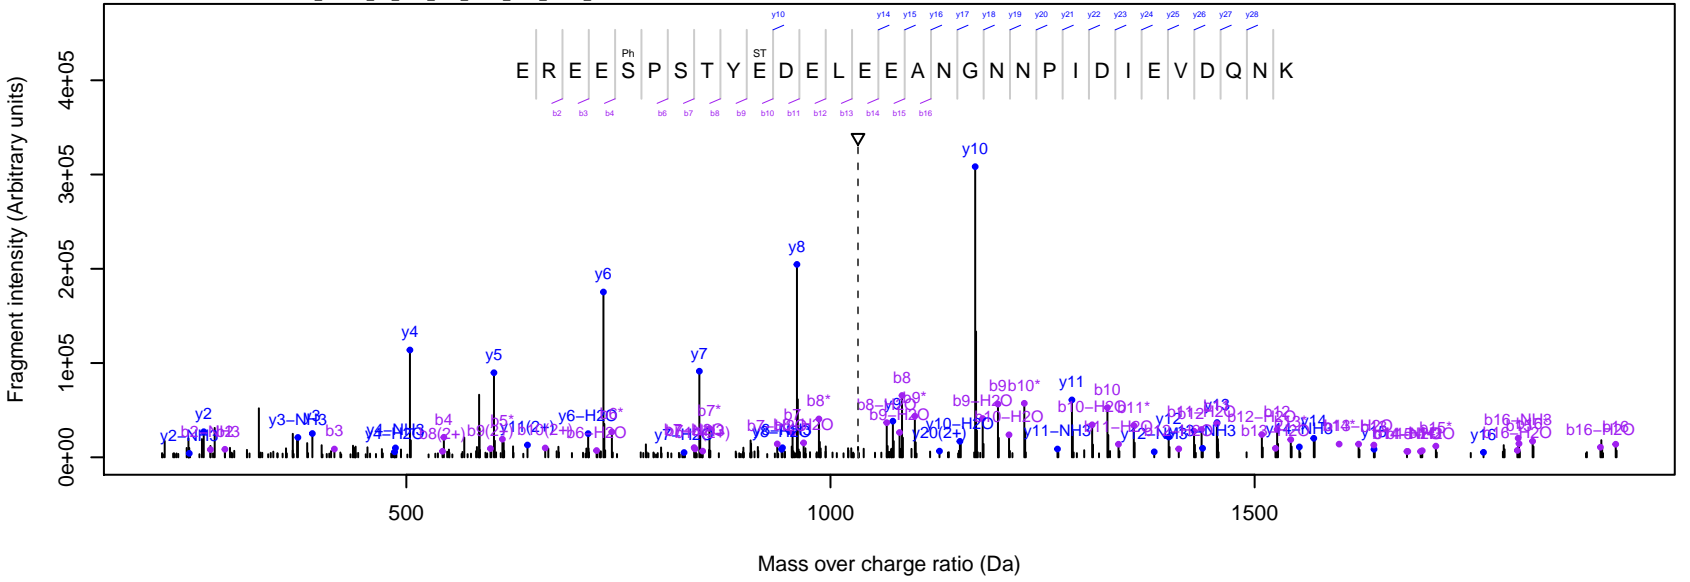

GKGGVTGS(Phospho (STY))PEASISGSK-2+

Source : QE3\_201126\_FR\_TiOx\_hum\_tissue\_Urea\_RNAB\_B Scan : 9671

Andromeda score : 317.07

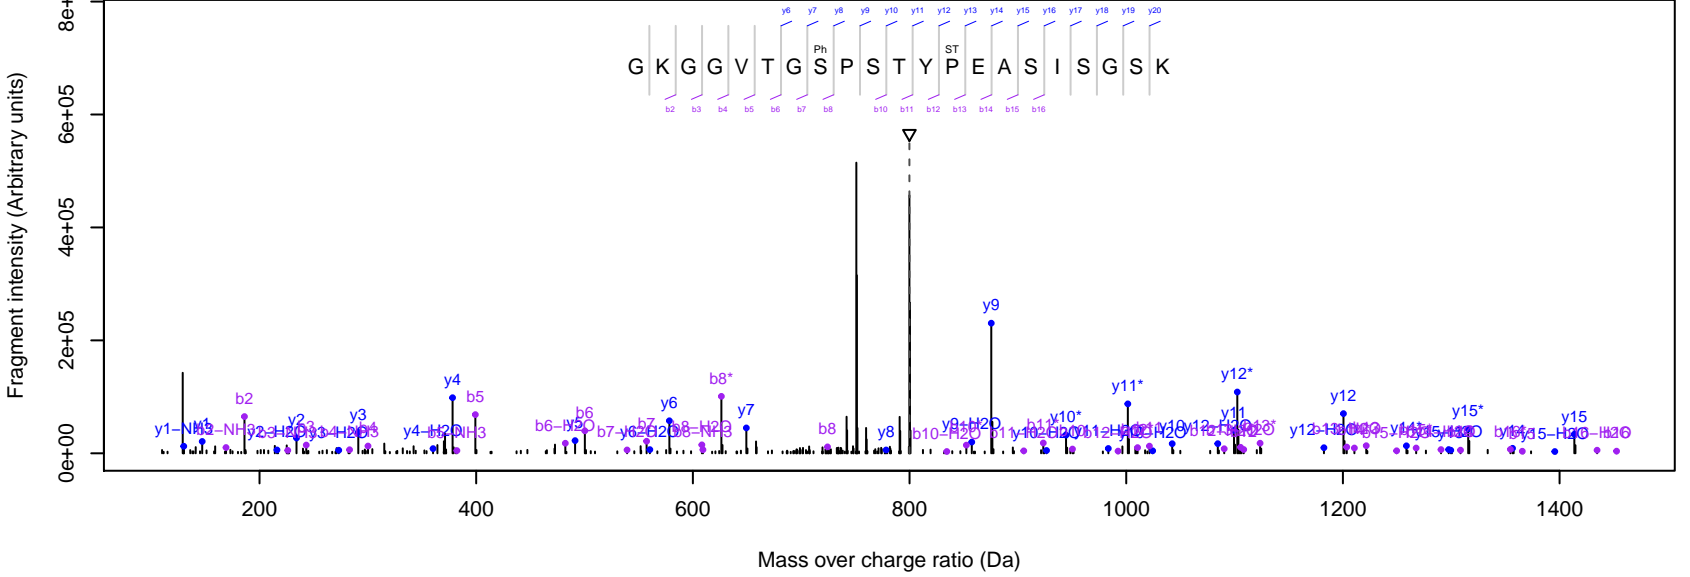

EKGS(Phospho (STY))TLDSLDAEK-2+

Source : QE3\_201126\_FR\_TiOx\_hum\_tissue\_Urea\_RNAB\_H Scan : 29911

Andromeda score : 317

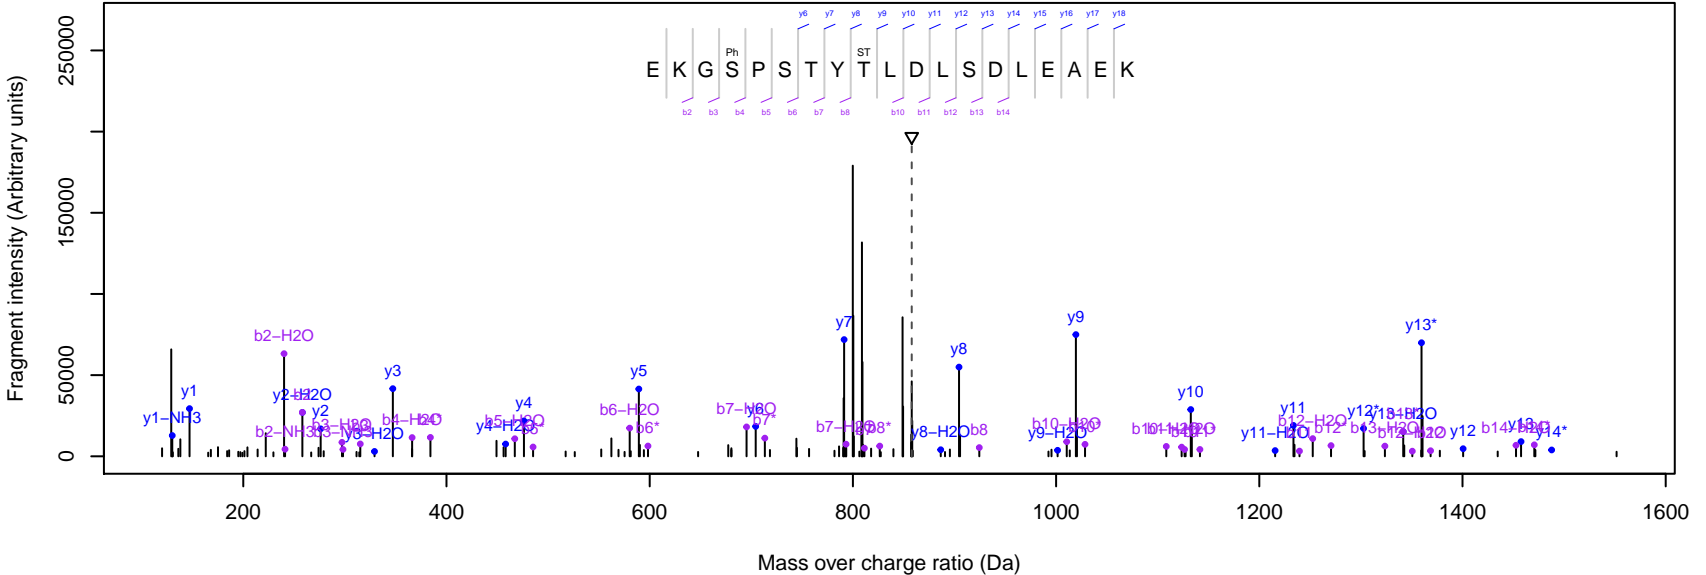

DIKES(Phospho (STY))DEEEEDDEESGR-2+

Source : QE3\_201126\_FR\_TiOx\_hum\_tissue\_Urea\_RNAB\_H Scan : 10037

Andromeda score : 316.97

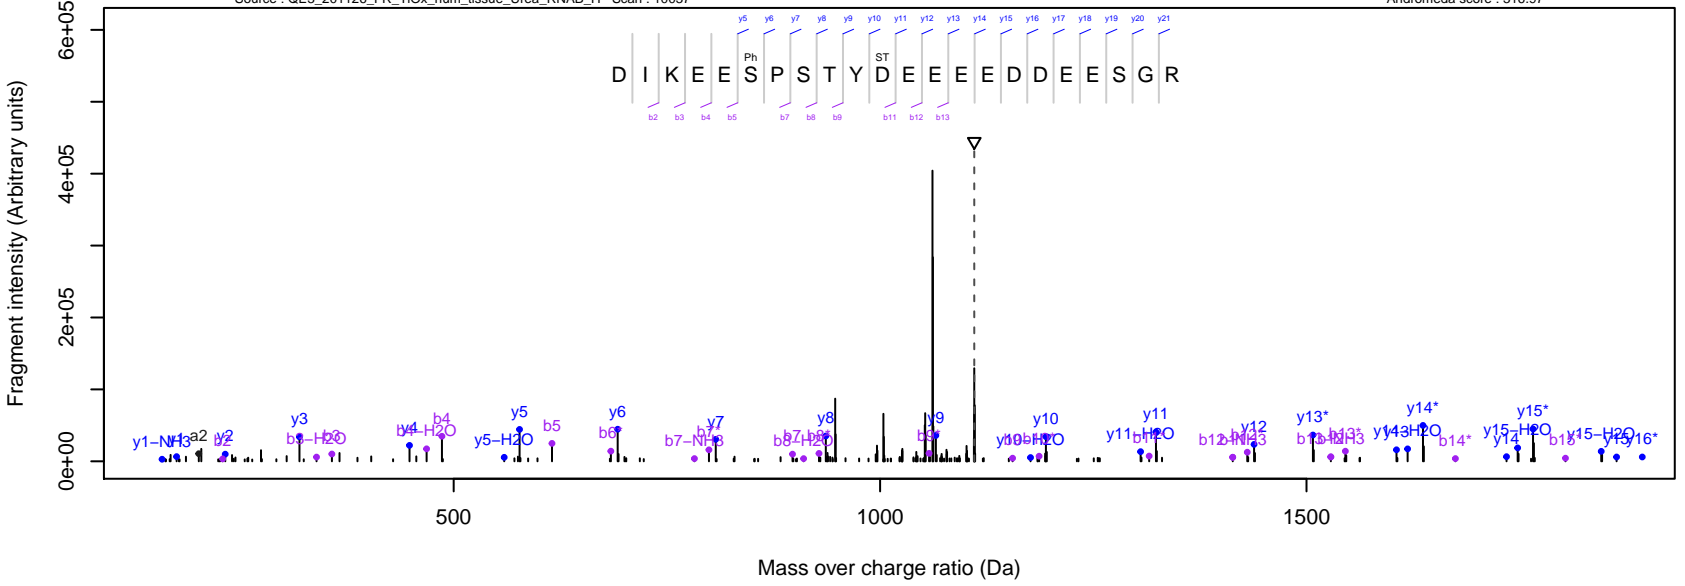

SGSSS(Phospho (STY))PDSEITELKFPSINHD-2+

Source : QE3\_201126\_FR\_TiOx\_hum\_tissue\_Urea\_RNAB\_B Scan : 43621

Andromeda score : 316.66

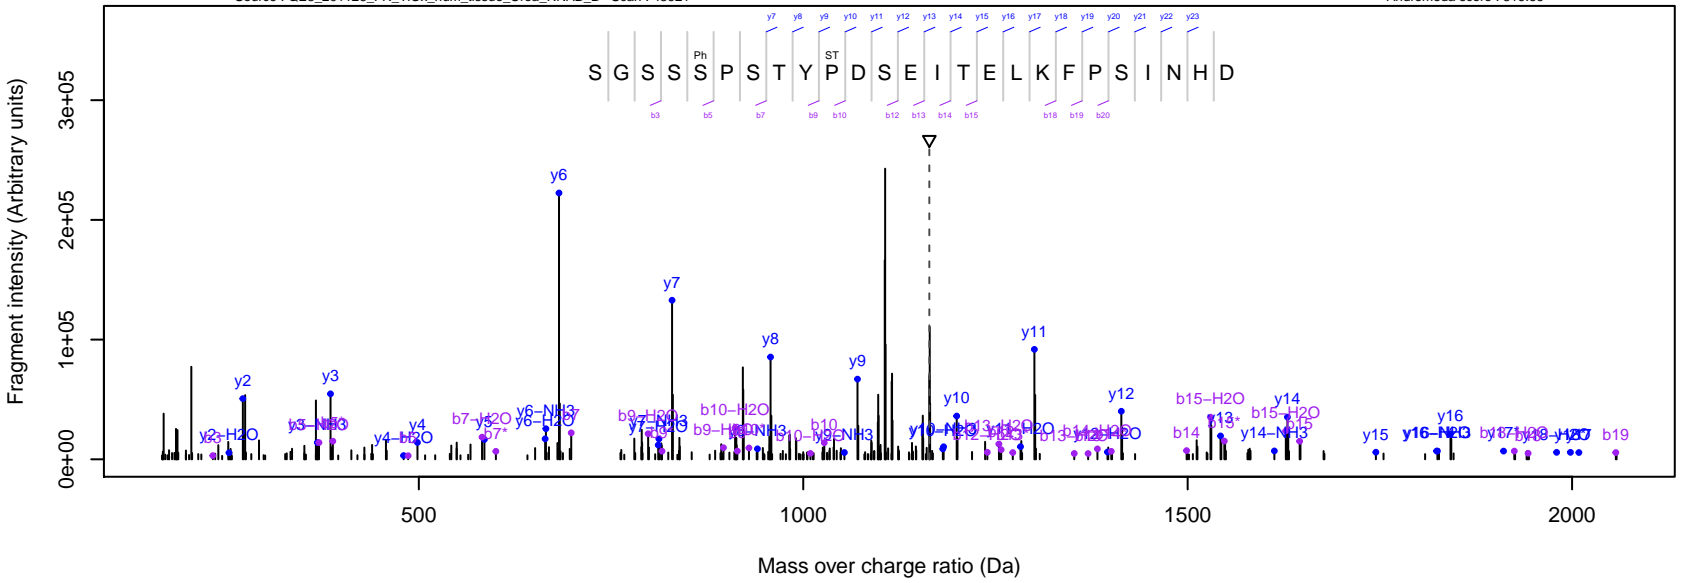

RGS(Phospho (STY))PTTGFIQK-2+

Source : QE3\_201126\_FR\_TiOx\_hum\_tissue\_Urea\_RNAB\_H Scan : 13310

Andromeda score : 316.54

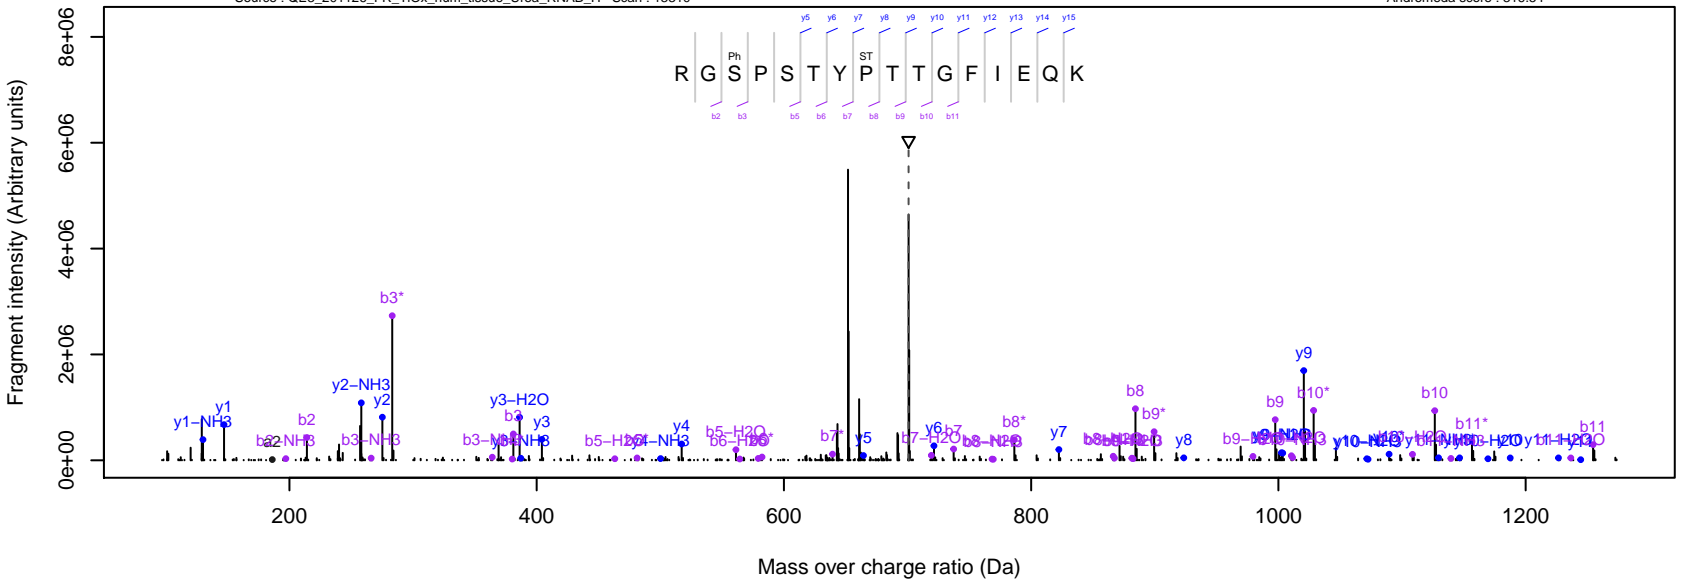

SQS(Phospho (STY))FSEAEPLPPAVR-2+

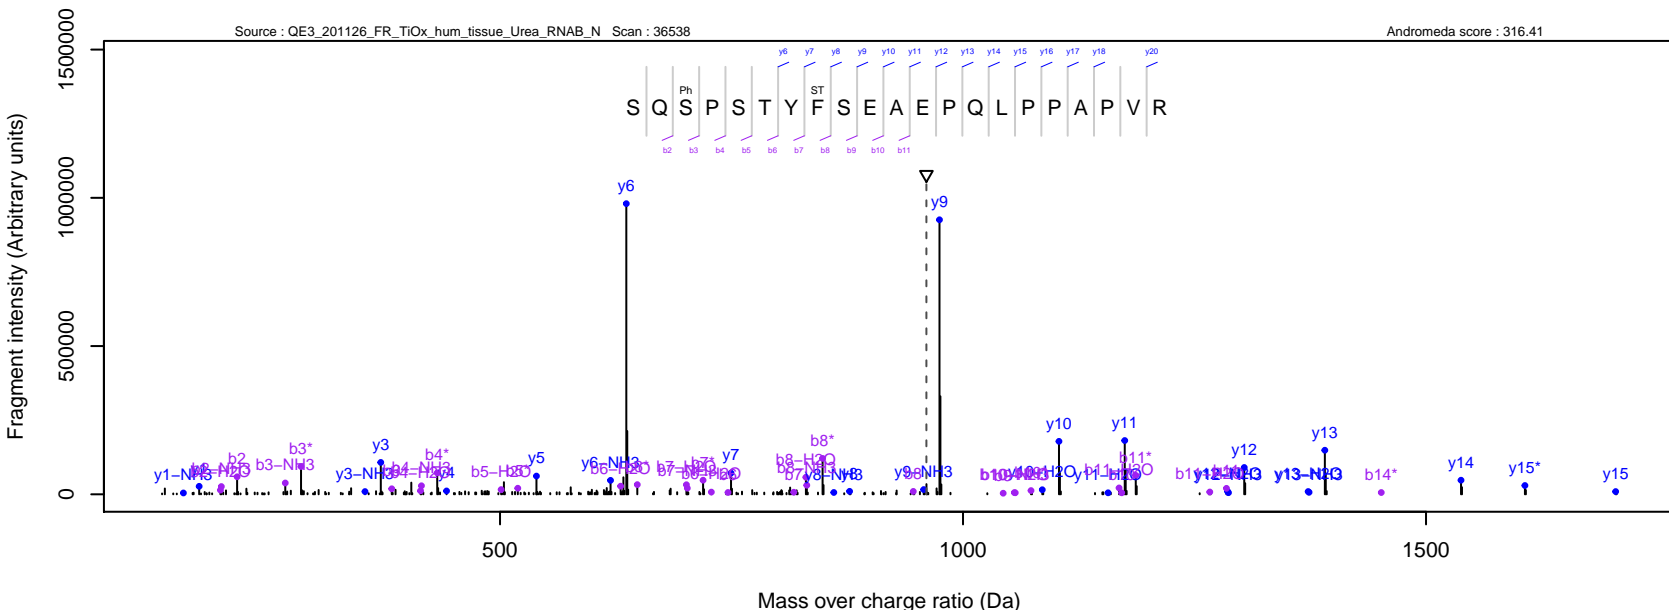

SNS(Phospho (STY))FSDEREFSGPSTPTGTLEFEGGEVSLGGK-3+

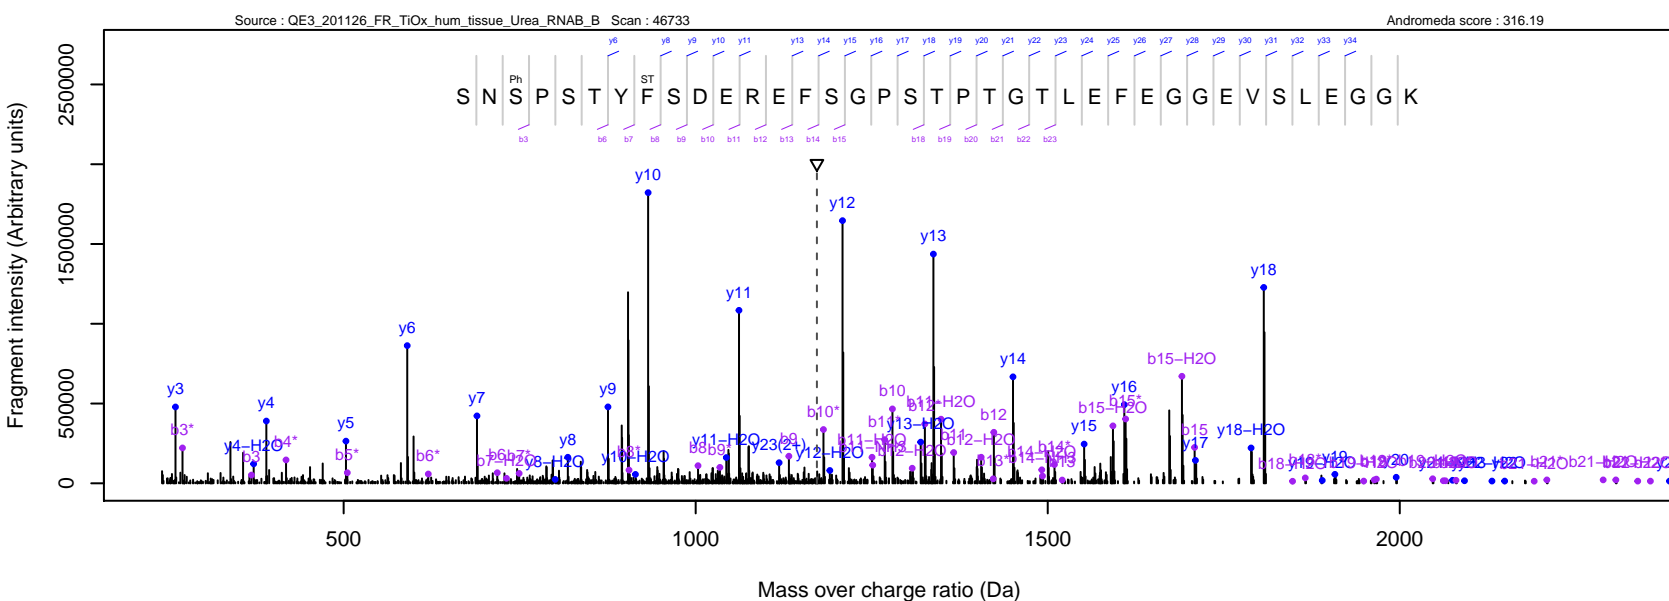

PVSS(Phospho (STY))AASVYAGAGGS(Phospho (STY))GSR-2+

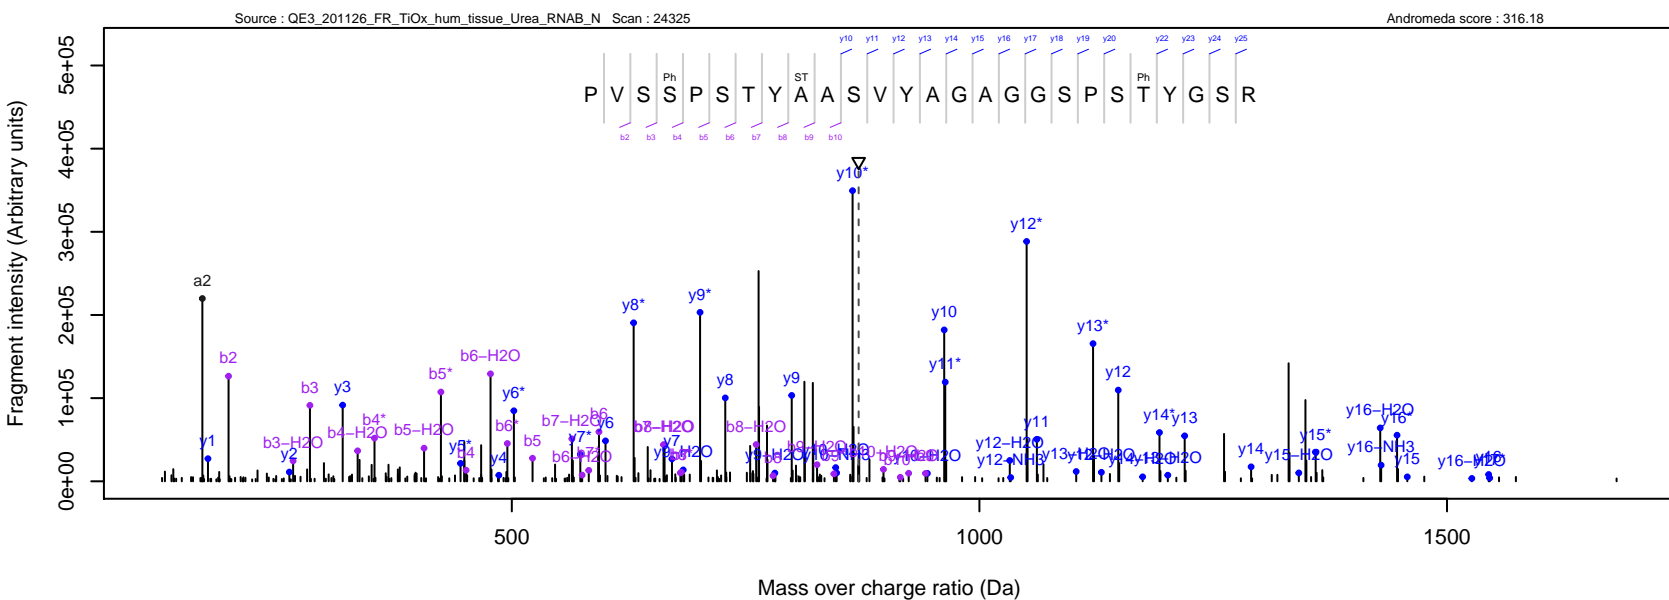

VSEEAESQQQWDTSKGEQVSPSTYQNGLPAEQGSPR-3+

Source : QE3\_201126\_FR\_TIOx\_hum\_tissue\_Urea\_RNAB\_N Scan : 23114

Andromeda score : 315.7

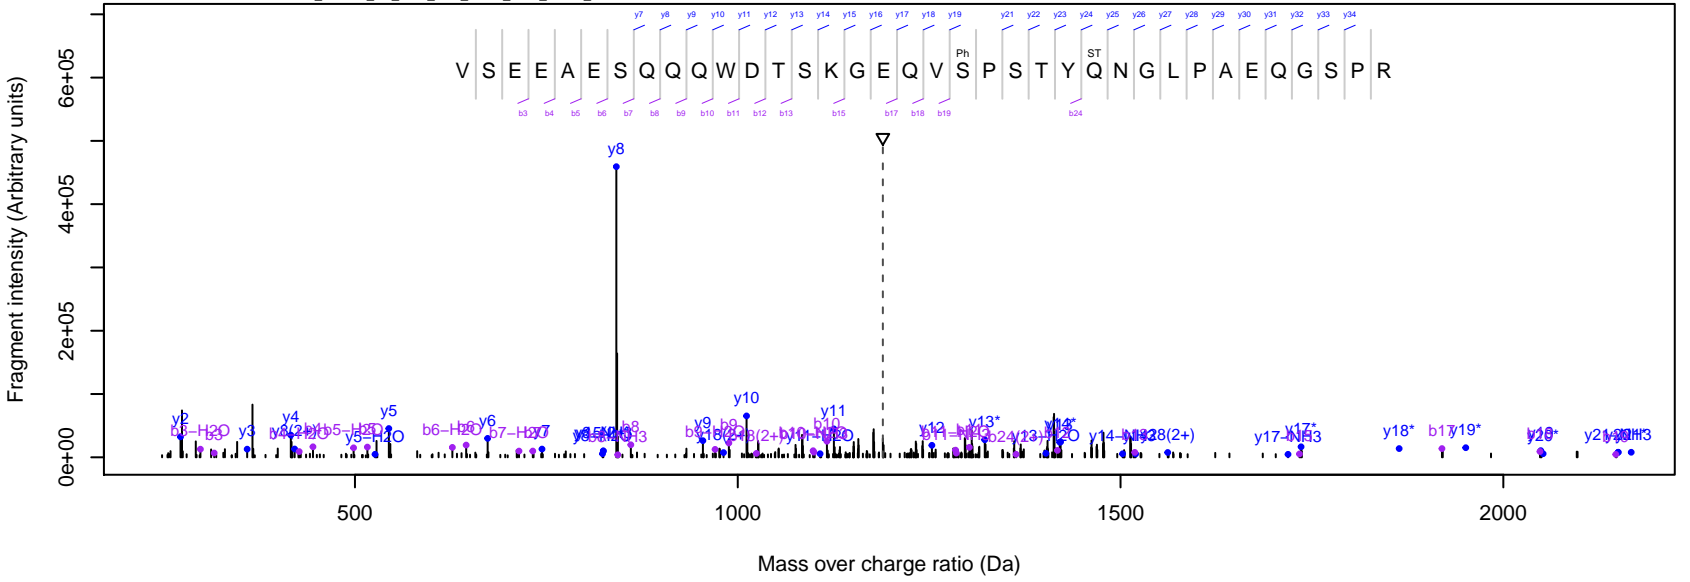

YGPADVEDTTGSAGATDSSPSTYKDDDDIDLFGSPSTYDDEESEEAKR-4+

Source : QE3\_201126\_FR\_TIOx\_hum\_tissue\_Urea\_RNAB\_H Scan : 41993

Andromeda score : 314.79

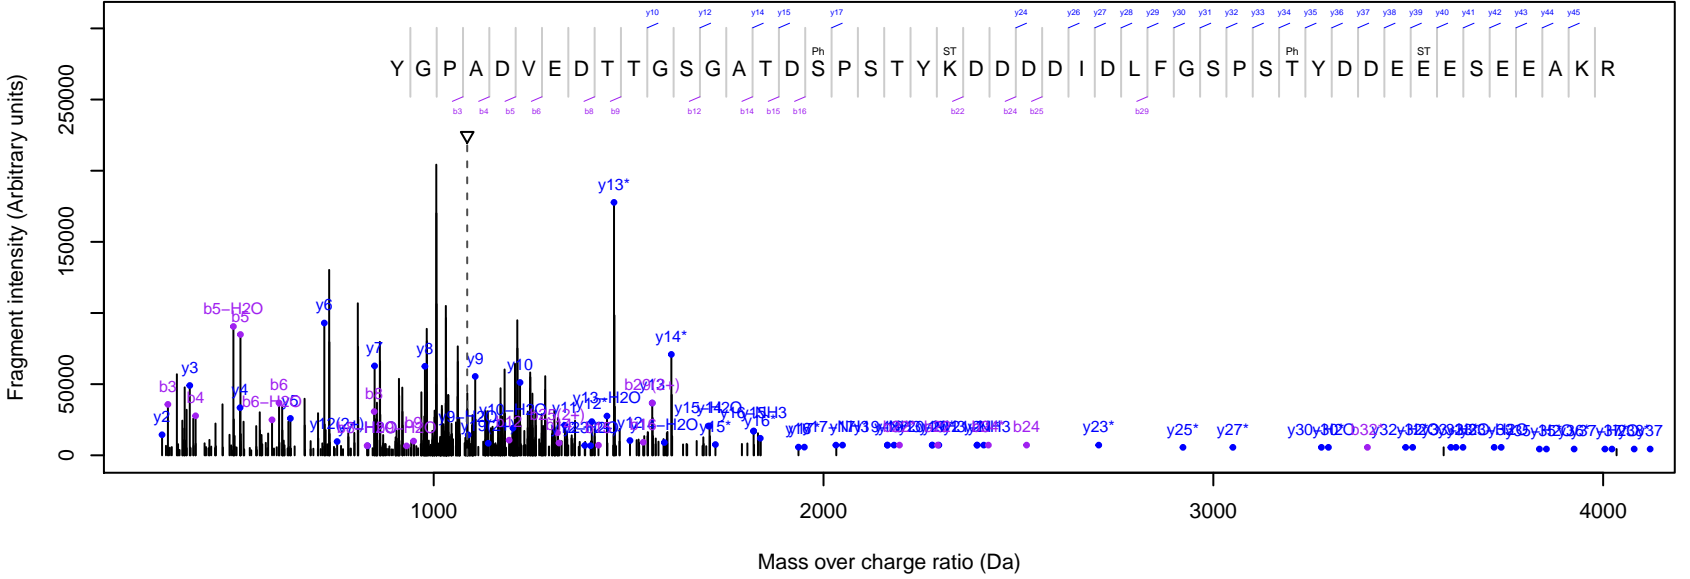

RGTGQS(Phospho(STY))DDSPSTYDIWDDTALIK-2+

Source : QE3\_201126\_FR\_TIOx\_hum\_tissue\_Urea\_RNAB\_B Scan : 49499

Andromeda score : 314.31

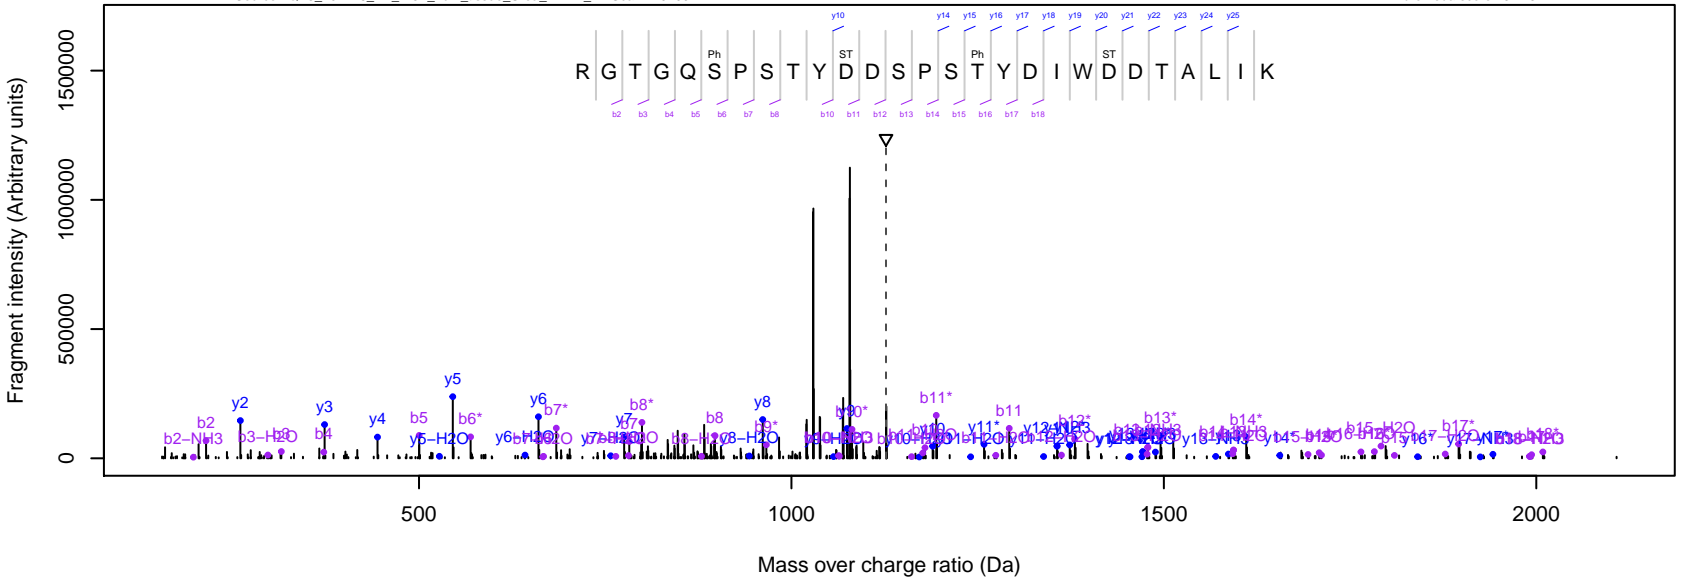

EGNTTEDDFPSS(Phospho (STY))PGNGNK-2+

Source : QE3\_201126\_FR\_TIOx\_hum\_tissue\_Urea\_RNAB\_B Scan : 16669

Andromeda score : 314.17

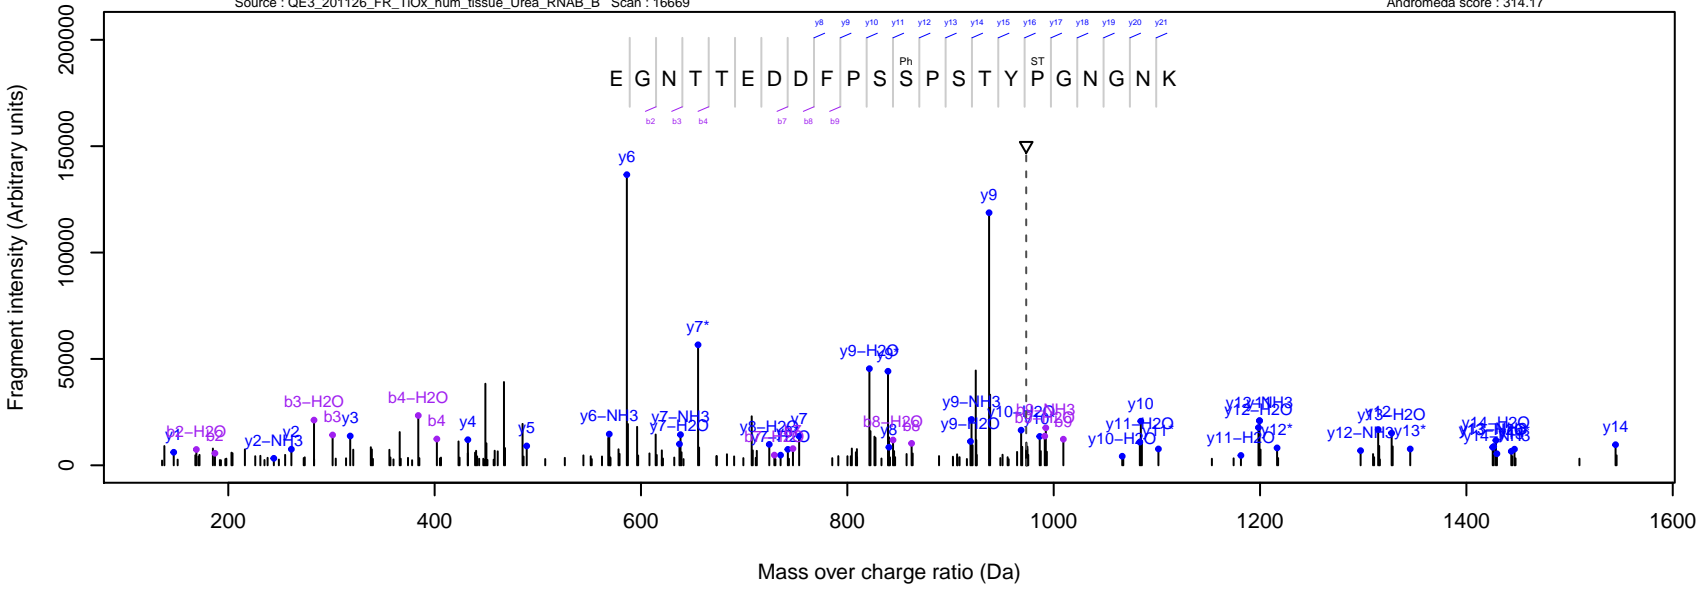

IACEEEFS(Phospho (STY))DSEEEGEGGRK-2+

Source : QE3\_201126\_FR\_TIOx\_hum\_tissue\_Urea\_RNAB\_H Scan : 15197

Andromeda score : 314.11

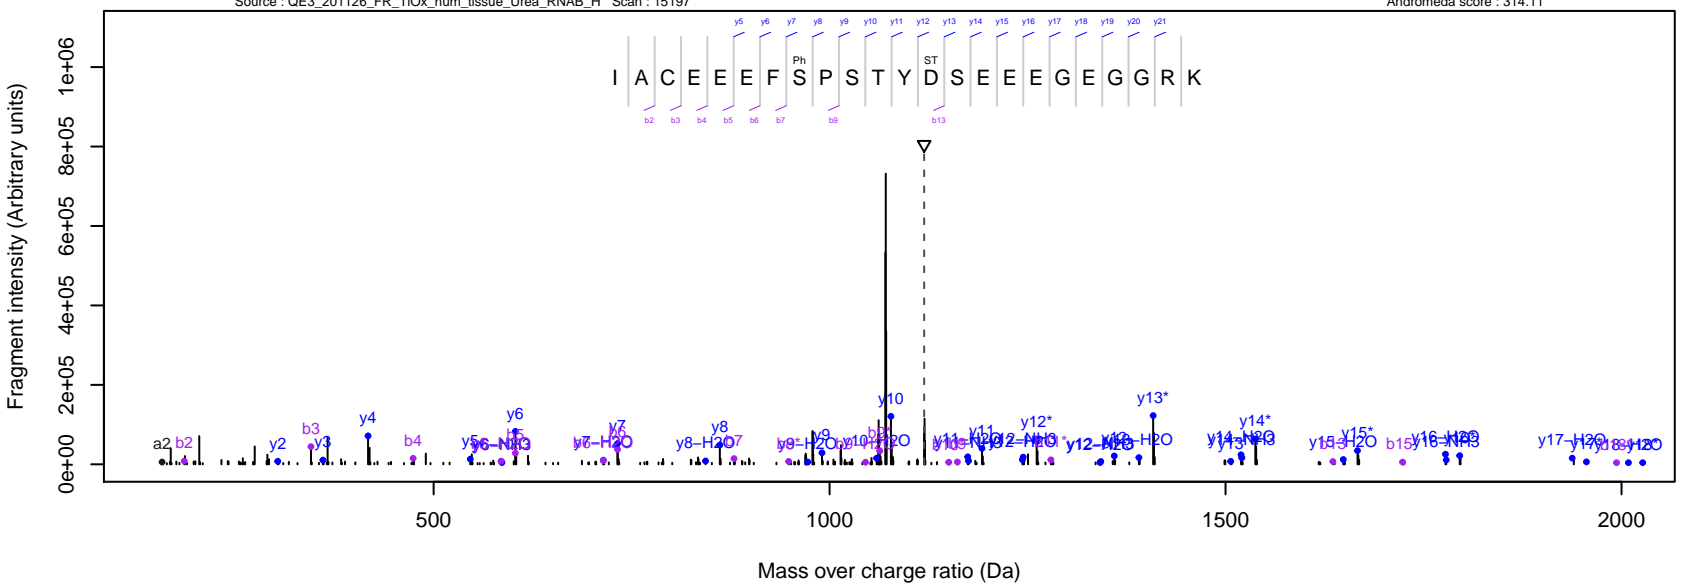

VAHEPVAPPEDKESSEAKVDGETAS(Phospho (STY))DSES-4+

Source : QE3\_201126\_FR\_TIOx\_hum\_tissue\_Urea\_RNAB\_H Scan : 12066

Andromeda score : 313.82

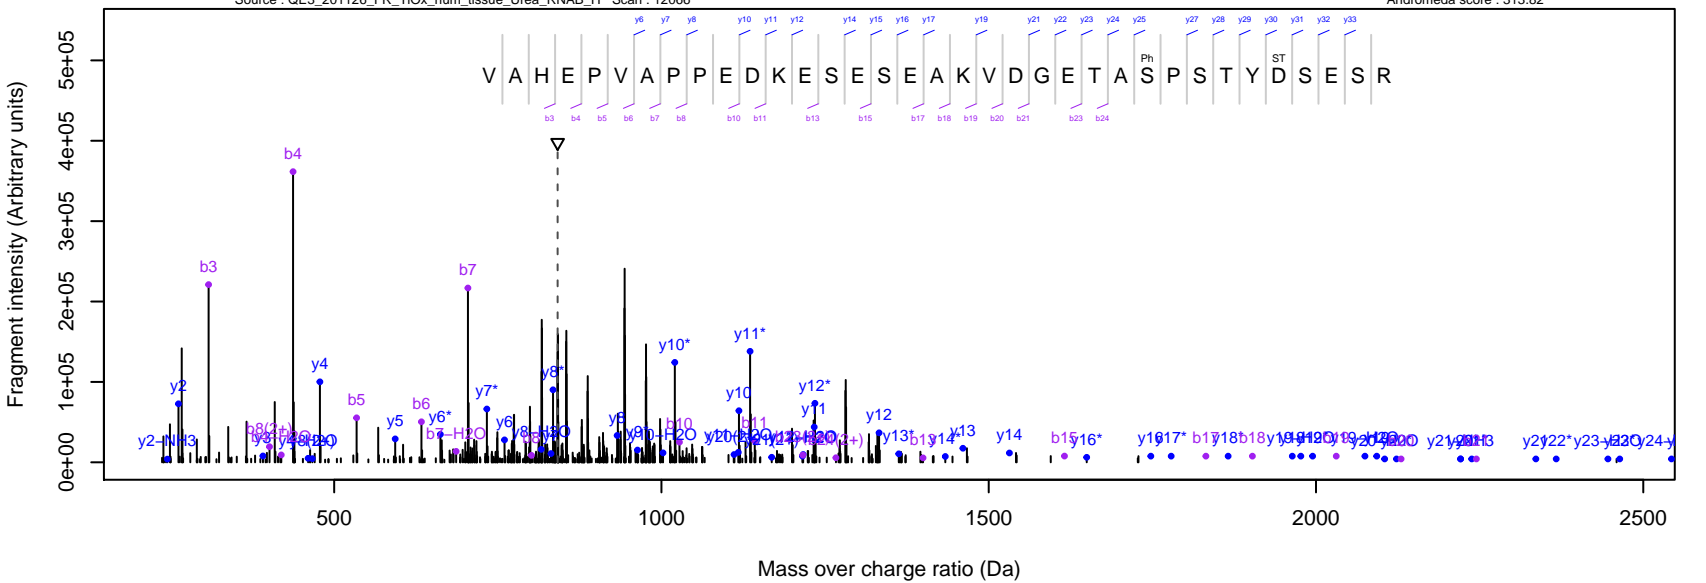



GNAEGSS(Phospho (STY))DEEGKLVIDEPAKEK-2+

Source : QE3\_201126\_FR\_TiOx\_hum\_tissue\_Urea\_RNAB\_N Scan : 15591

Andromeda score : 313.7

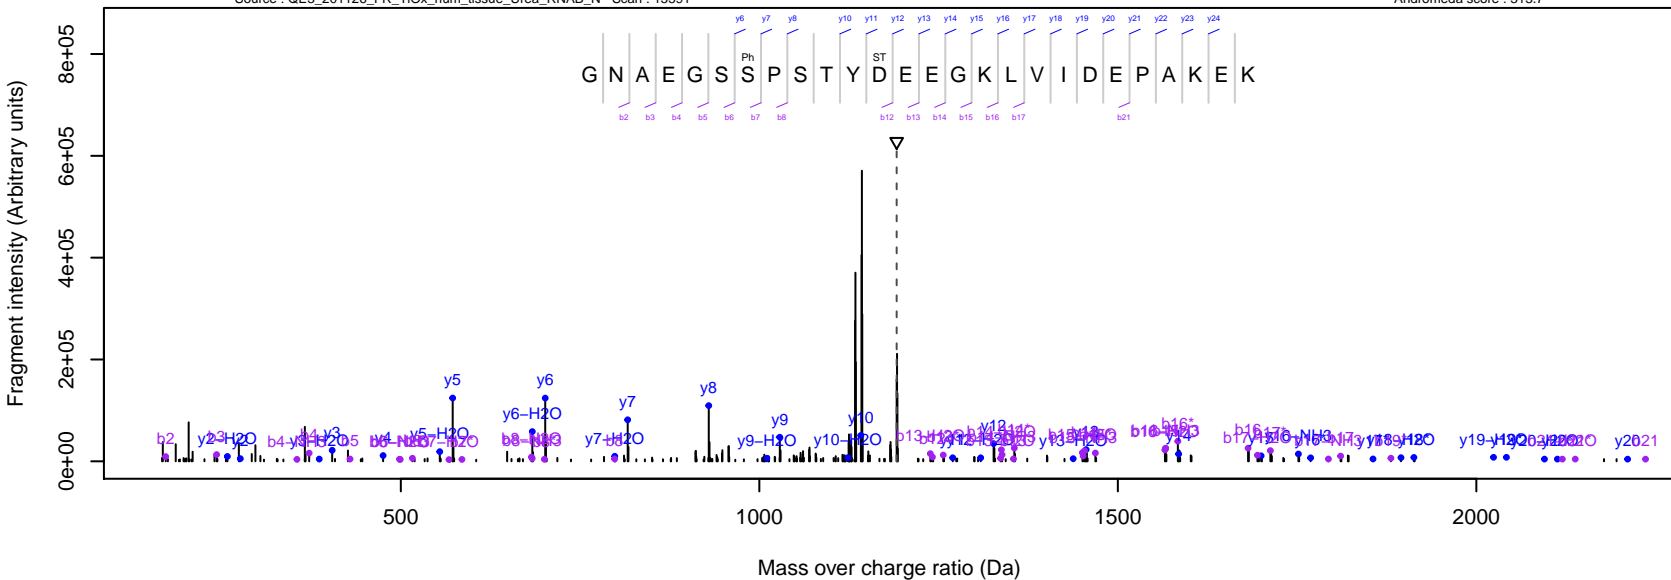

AAS(Phospho (STY))QQEIEQSIETLNMLMLDLEPASAAAPLHK-3+

Source : QE3\_201126\_FR\_TiOx\_hum\_tissue\_Urea\_RNAB\_N Scan : 62856

Andromeda score : 313.55

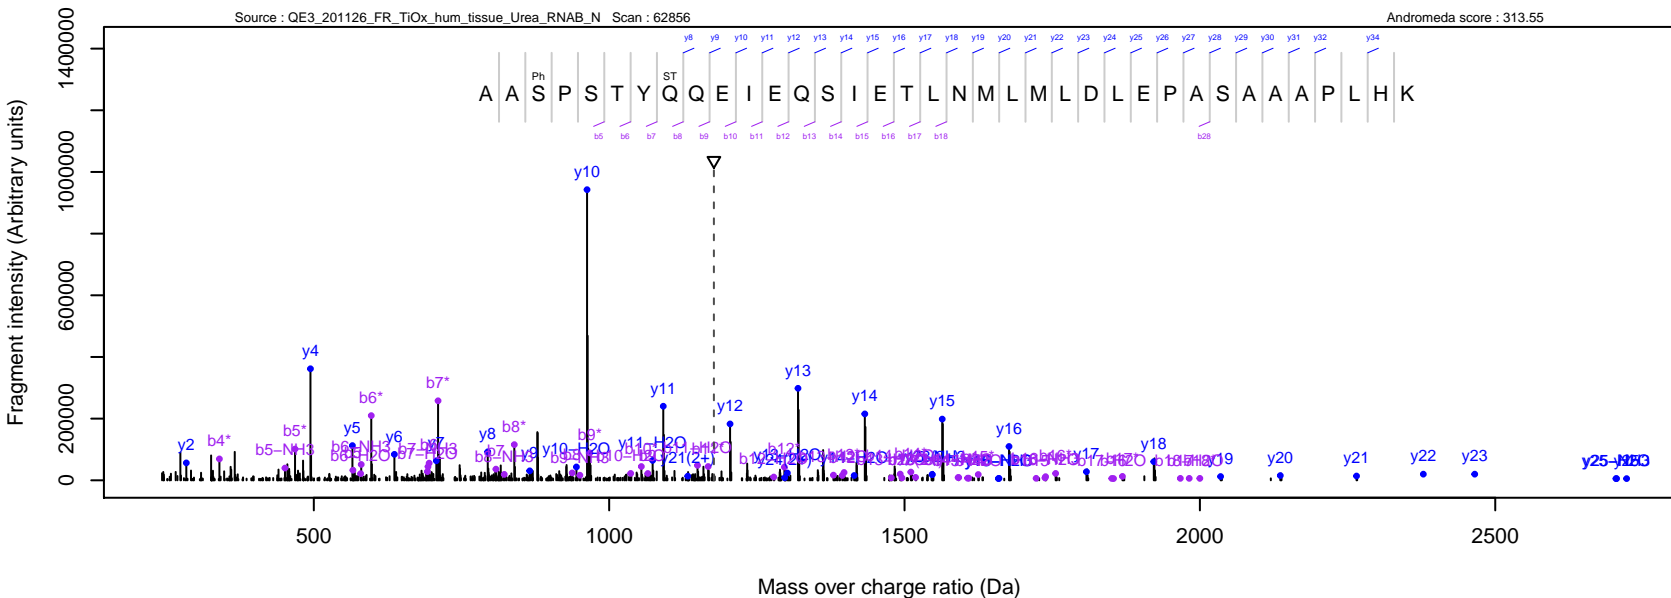

ELVSSSSSGSDSDS(Phospho (STY))EVDKCLK-2+

Source : QE3\_201126\_FR\_TiOx\_hum\_tissue\_Urea\_RNAB\_H Scan : 12469

Andromeda score : 313.36

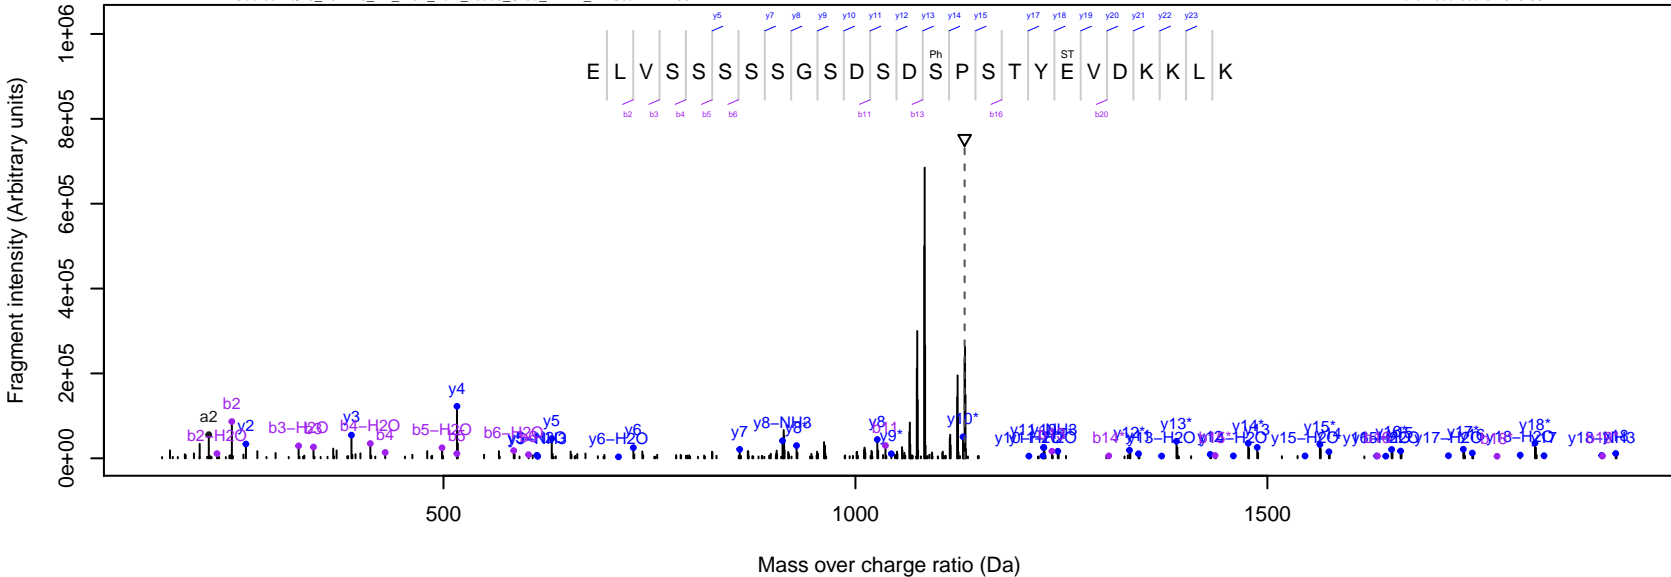

LIESLSQM(Oxidation (M))LS(Phospho (STY))M(Oxidation (M))GFSDEGGWLR-2+

Source : QE3\_201126\_FR\_TiOx\_hum\_tissue\_Urea\_RNAB\_H Scan : 58499

Andromeda score : 313.36

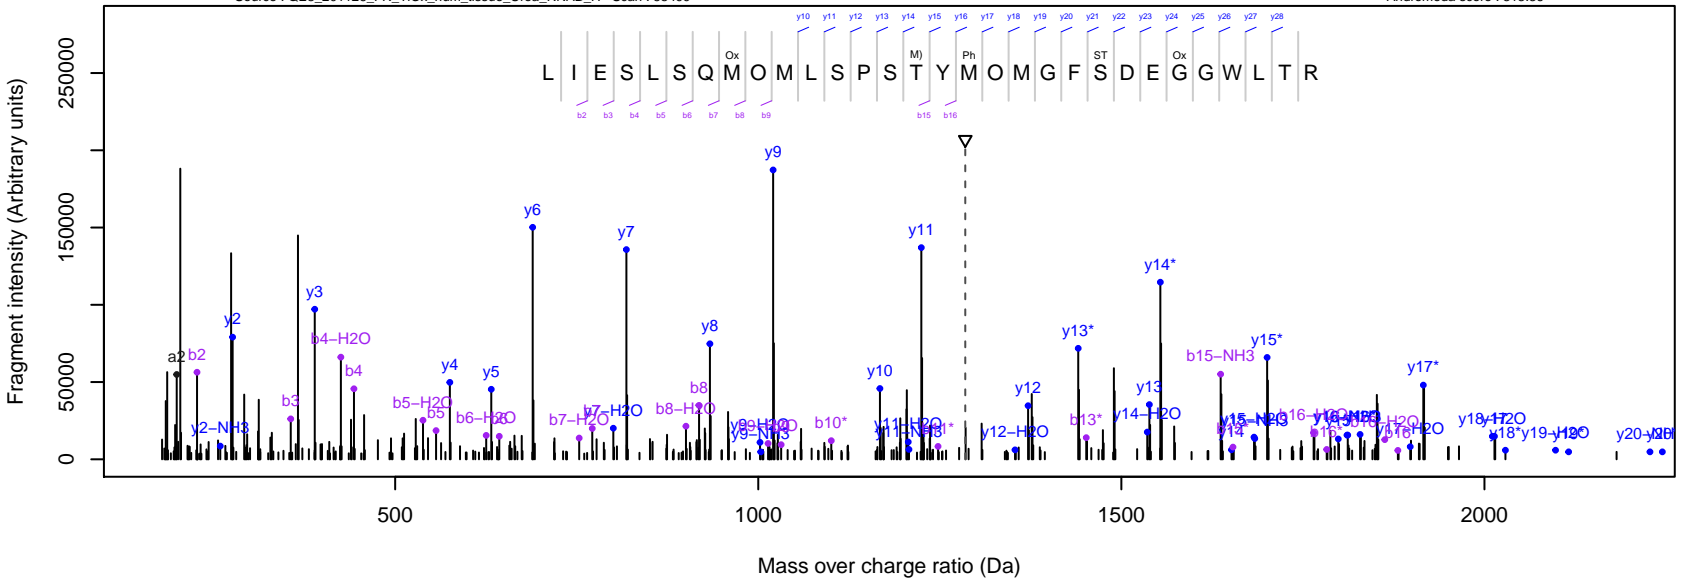

(Acetyl (Protein N-term))SKSES(Phospho (STY))PKEPEQLR-2+

Source : QE3\_201126\_FR\_TiOx\_hum\_tissue\_Urea\_RNAB\_H Scan : 9723

Andromeda score : 313.32

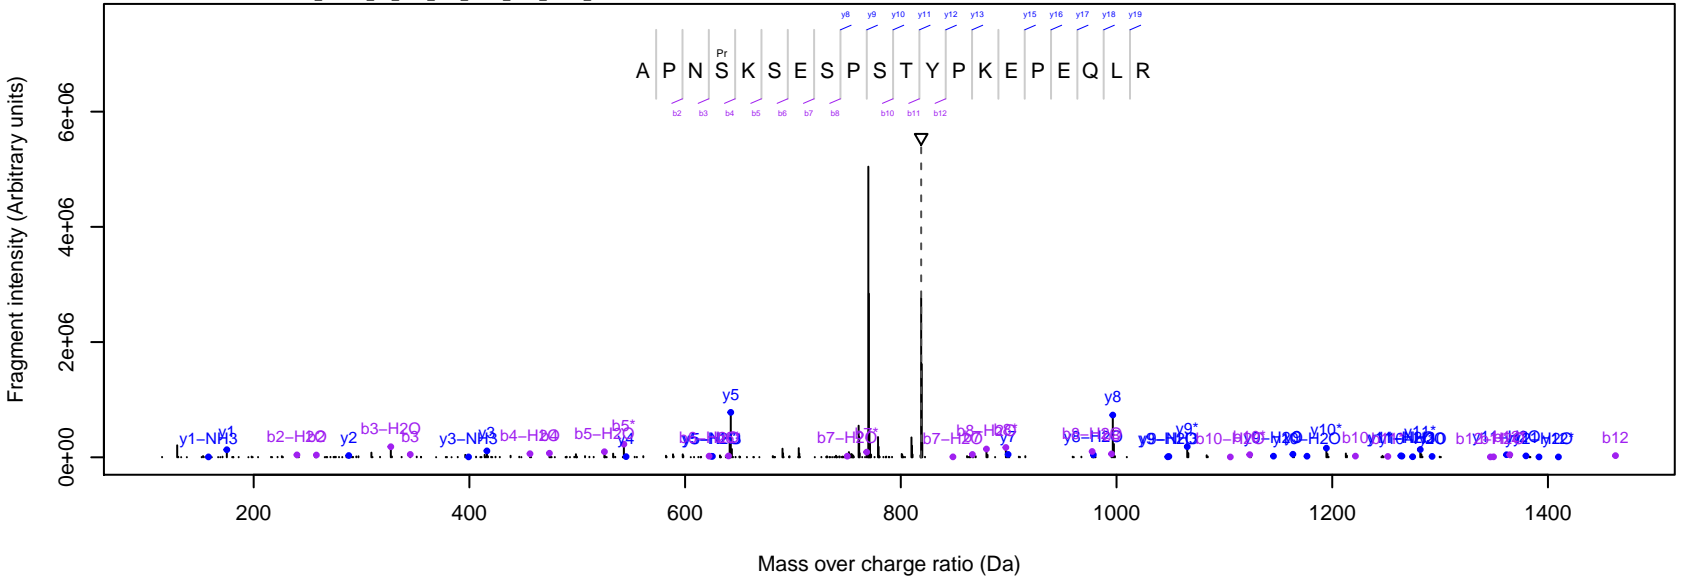

KEEQAASAAEDTCDVGVS(Phospho (STY))DDDKGQAAR-3+

Source : QE3\_201126\_FR\_TiOx\_hum\_tissue\_Urea\_RNAB\_B Scan : 13183

Andromeda score : 313.31

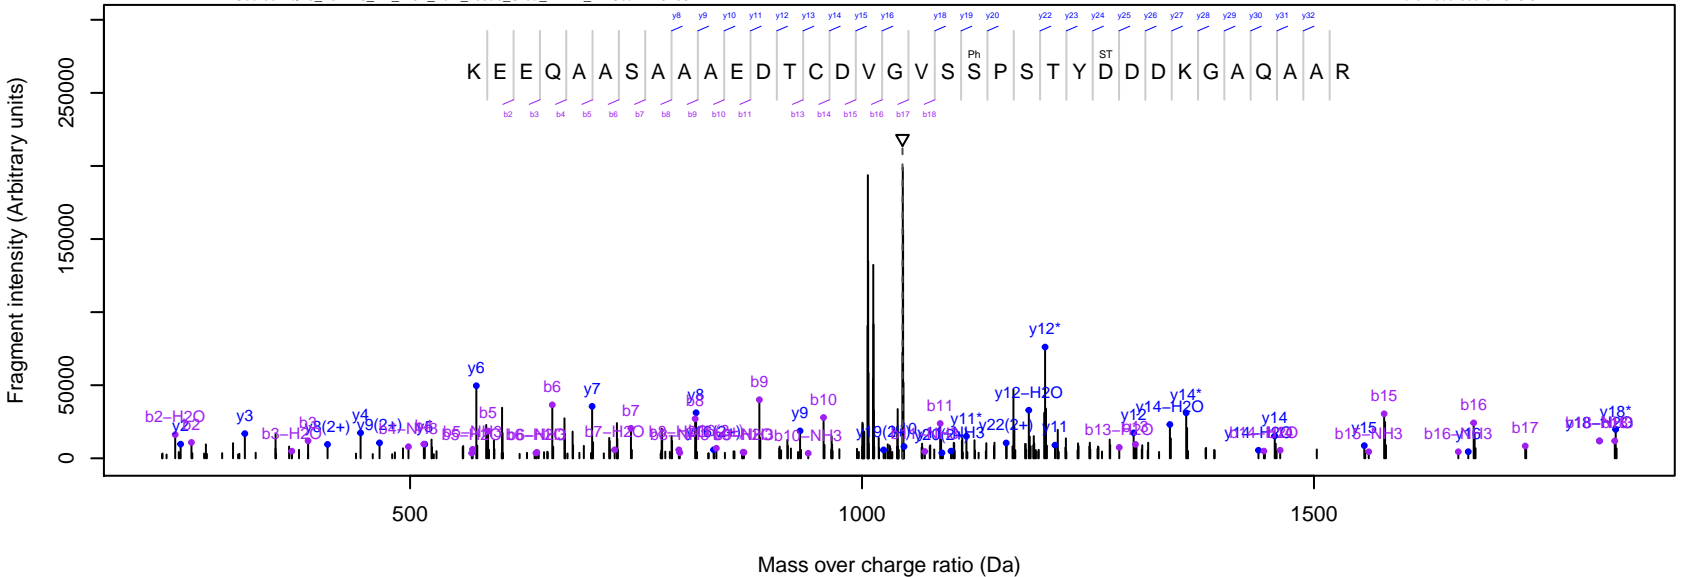

RQVS(Phospho (STY))ASELHTSGILGPETLR-3+

Source : QE3\_201126\_FR\_TiOx\_hum\_tissue\_Urea\_RNAB\_B Scan : 27765

Andromeda score : 313.2

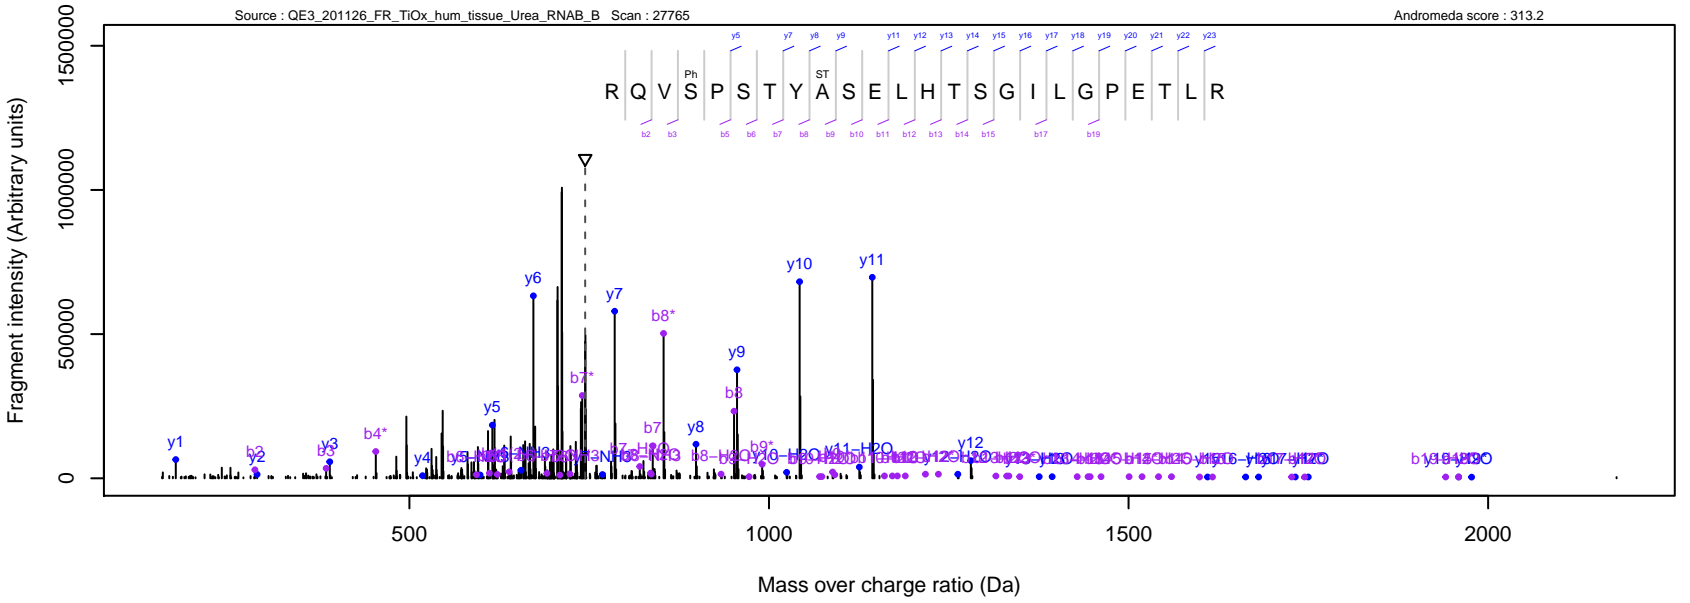

FNDS(Phospho (STY))EGDDTEETEDYR-2+

Source : QE3\_201126\_FR\_TiOx\_hum\_tissue\_Urea\_RNAB\_B Scan : 19447

Andromeda score : 312.28

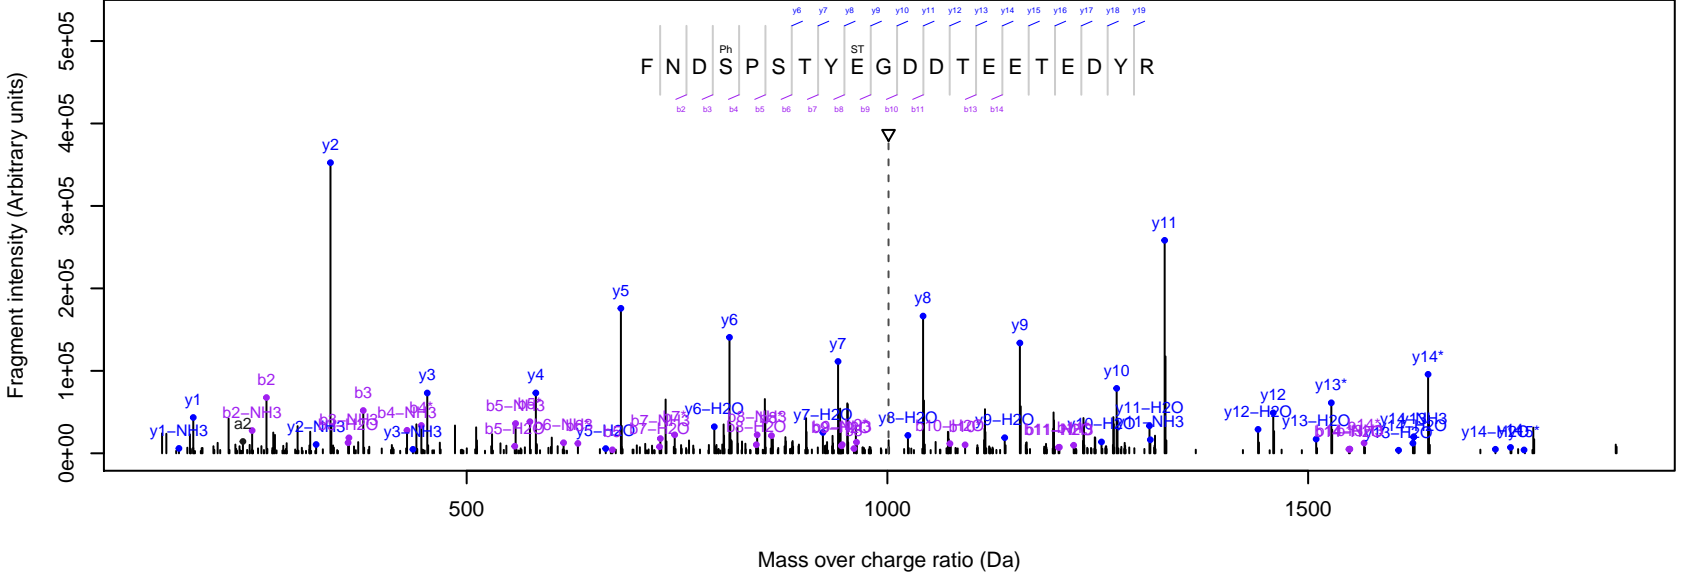

KAS(Phospho (STY))GPPVSELITK-2+

Source : QE3\_201126\_FR\_TiOx\_hum\_tissue\_Urea\_RNAB\_N Scan : 21911

Andromeda score : 312.28

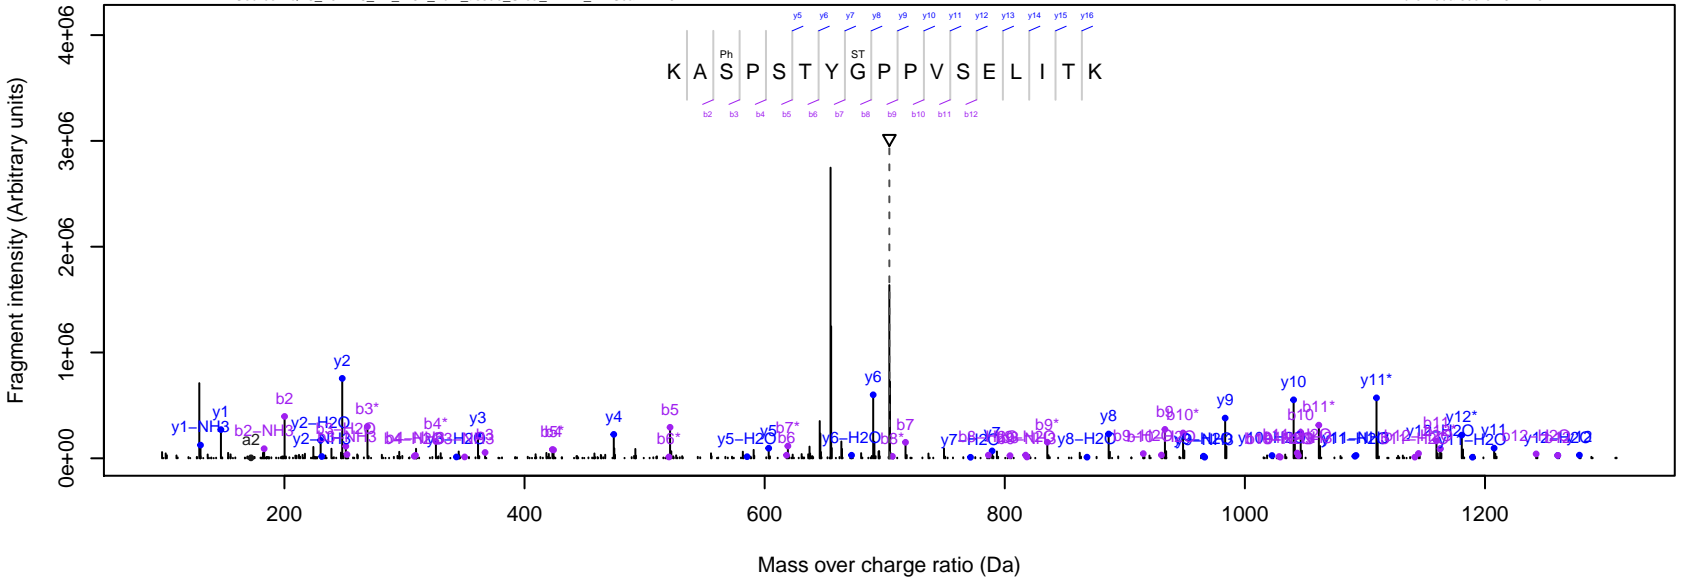

RPNEDS(Phospho (STY))DEDEEKGA VVPPVHDIYR-4+

Source : QE3\_201126\_FR\_TiOx\_hum\_tissue\_Urea\_RNAB\_N Scan : 20489

Andromeda score : 312.13

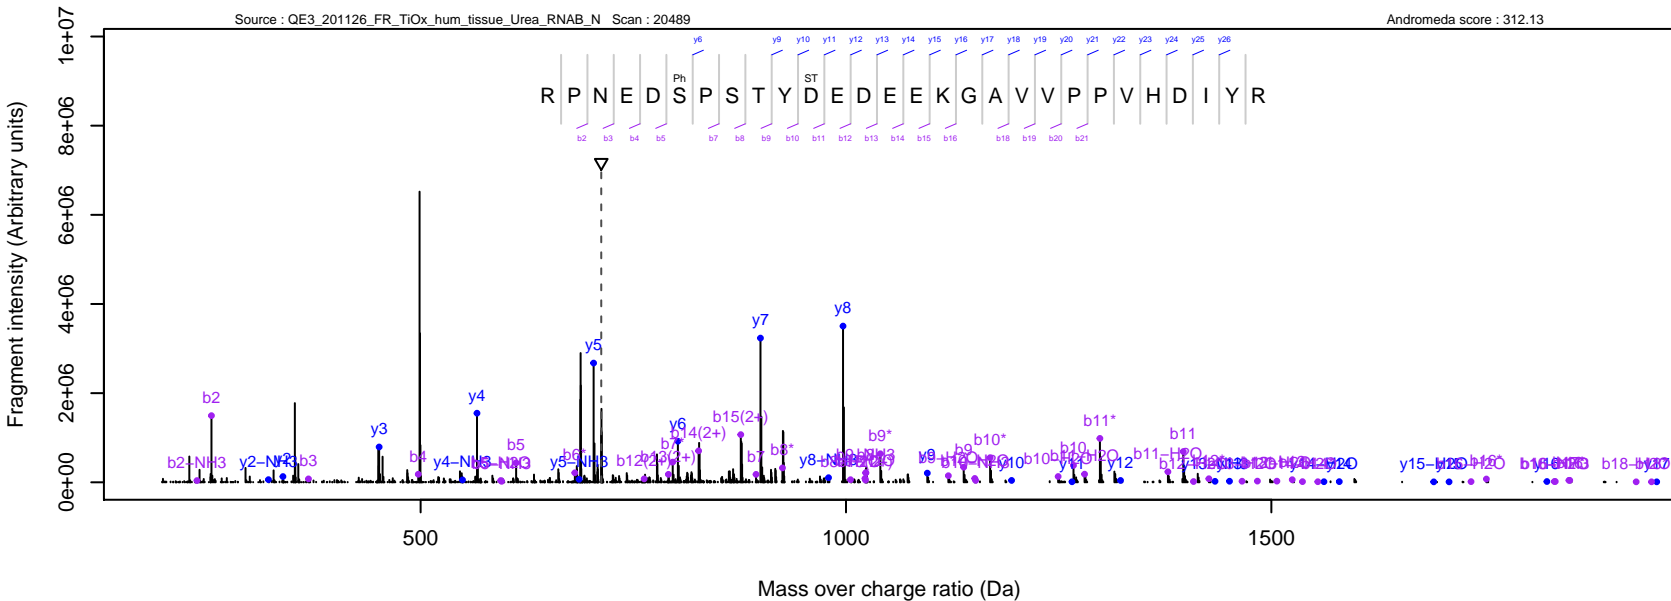

IHIDPEIQDGS(Phospho (STY))PTTSR-2+

Source : QE3\_201126\_FR\_TiOx\_hum\_tissue\_Urea\_RNAB\_H Scan : 21388

Andromeda score : 311.92

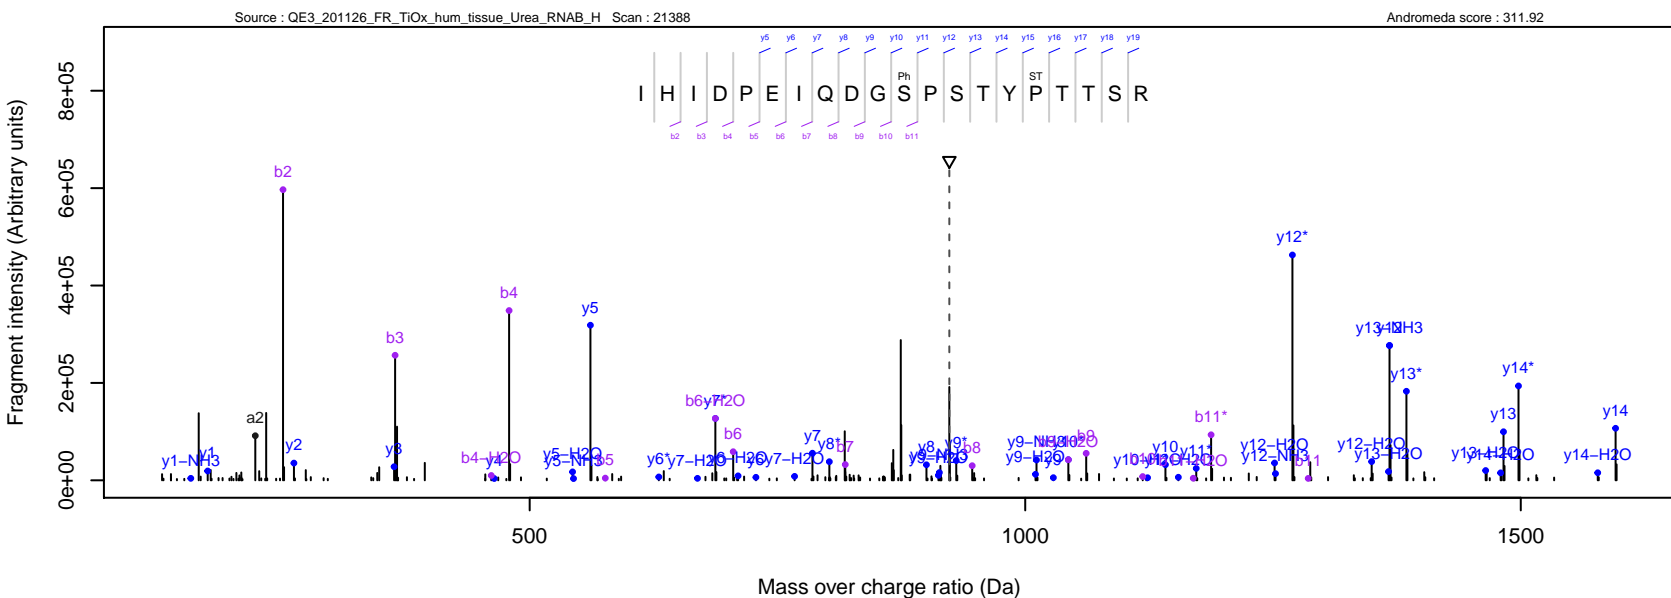

AHLESVLVSRPS(Phospho (STY))PQPLAETPIPSLPEFPR-3+

Source : QE3\_201126\_FR\_TiOx\_hum\_tissue\_Urea\_RNAB\_H Scan : 51104

Andromeda score : 311.9

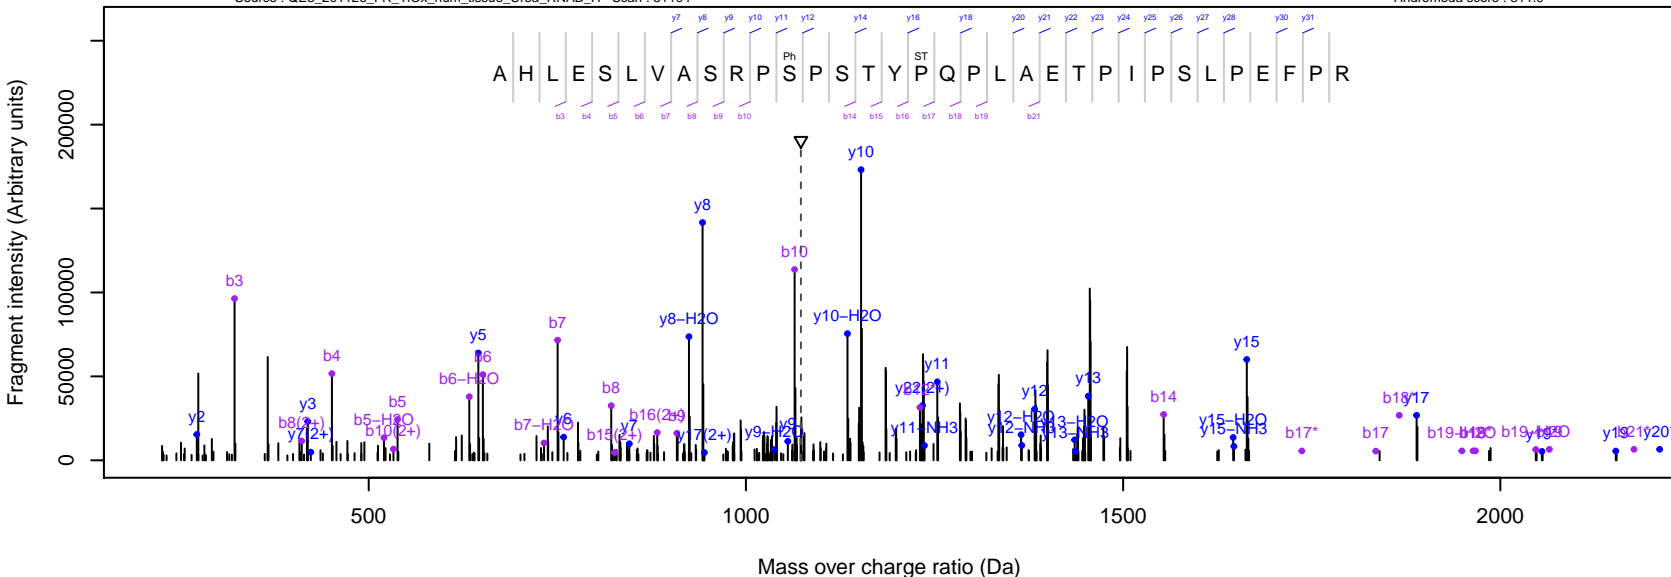

YGVYEDENYEVGS(Phospho (STY))DDEEIPFK-2+

Source : QE3\_201126\_FR\_TIOx\_hum\_tissue\_Urea\_RNAB\_B Scan : 49313

Andromeda score : 311.87

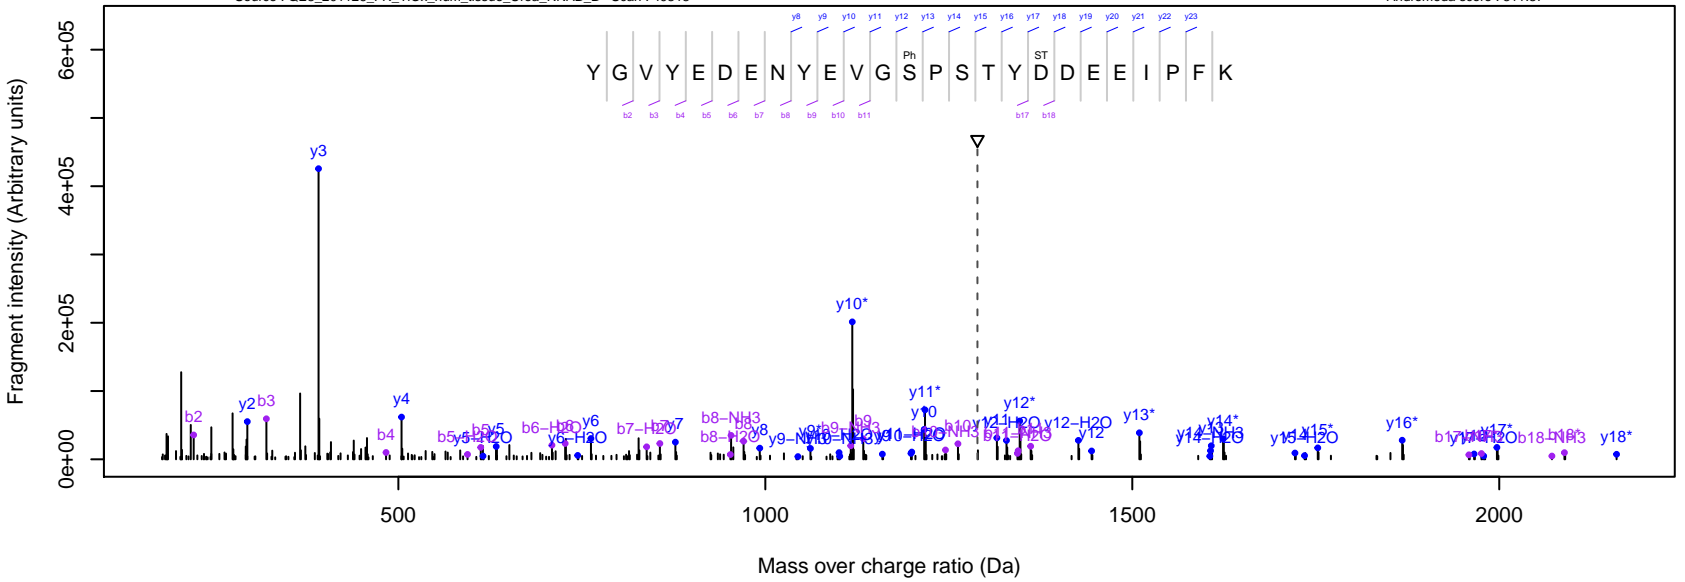

SDAEEDGGTVS(Phospho (STY))QEEEDRKPK-3+

Source : QE3\_201126\_FR\_TIOx\_hum\_tissue\_Urea\_RNAB\_B Scan : 7685

Andromeda score : 311.65

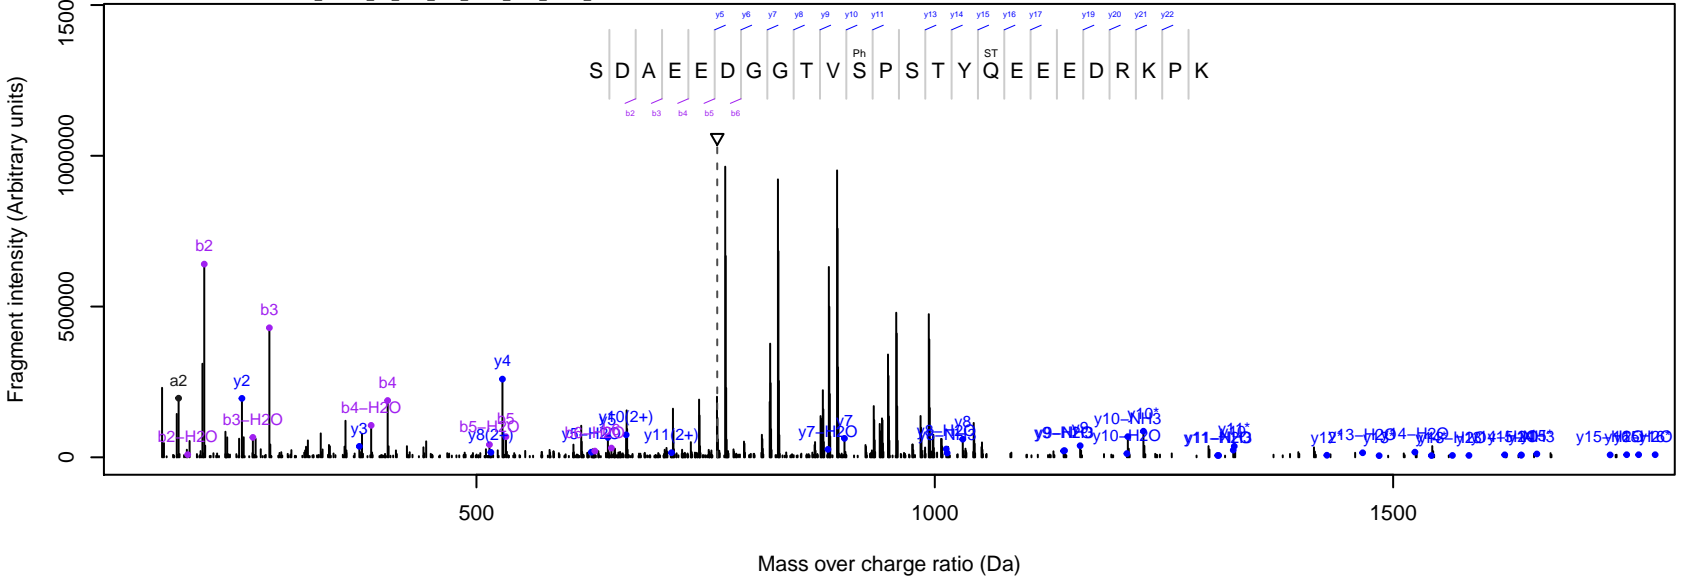

GGM(Oxidation (M))GS(Phospho (STY))GGLATGIAGGLAGM(Oxidation (M))GGIQNEKETMQLNDR-3+

Source : QE3\_201126\_FR\_TIOx\_hum\_tissue\_Urea\_RNAB\_N Scan : 41166

Andromeda score : 310.96

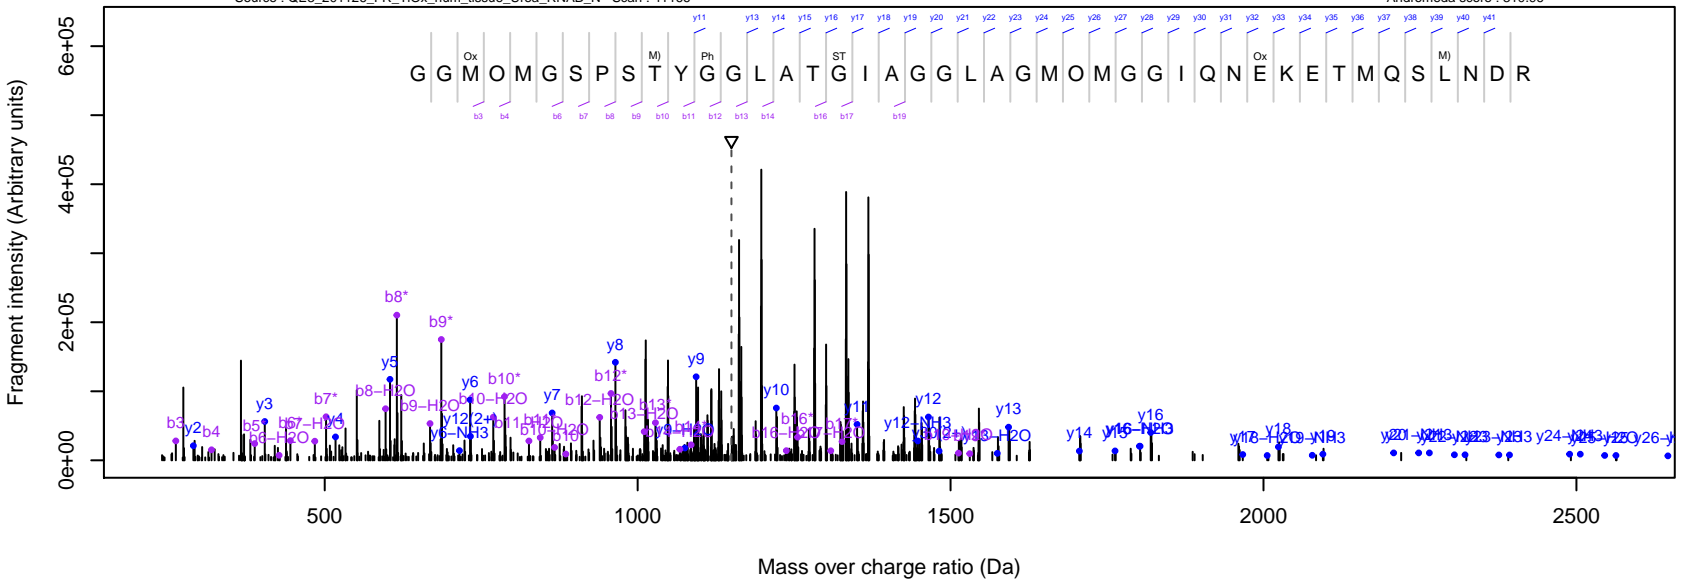

QLHLEGASLELS(Phospho (STY))DDTESKTSVDVNETQPQSE-3+

Source : QE3\_201126\_FR\_TIOx\_hum\_tissue\_Urea\_RNAB\_H Scan : 36755

Andromeda score : 310.71

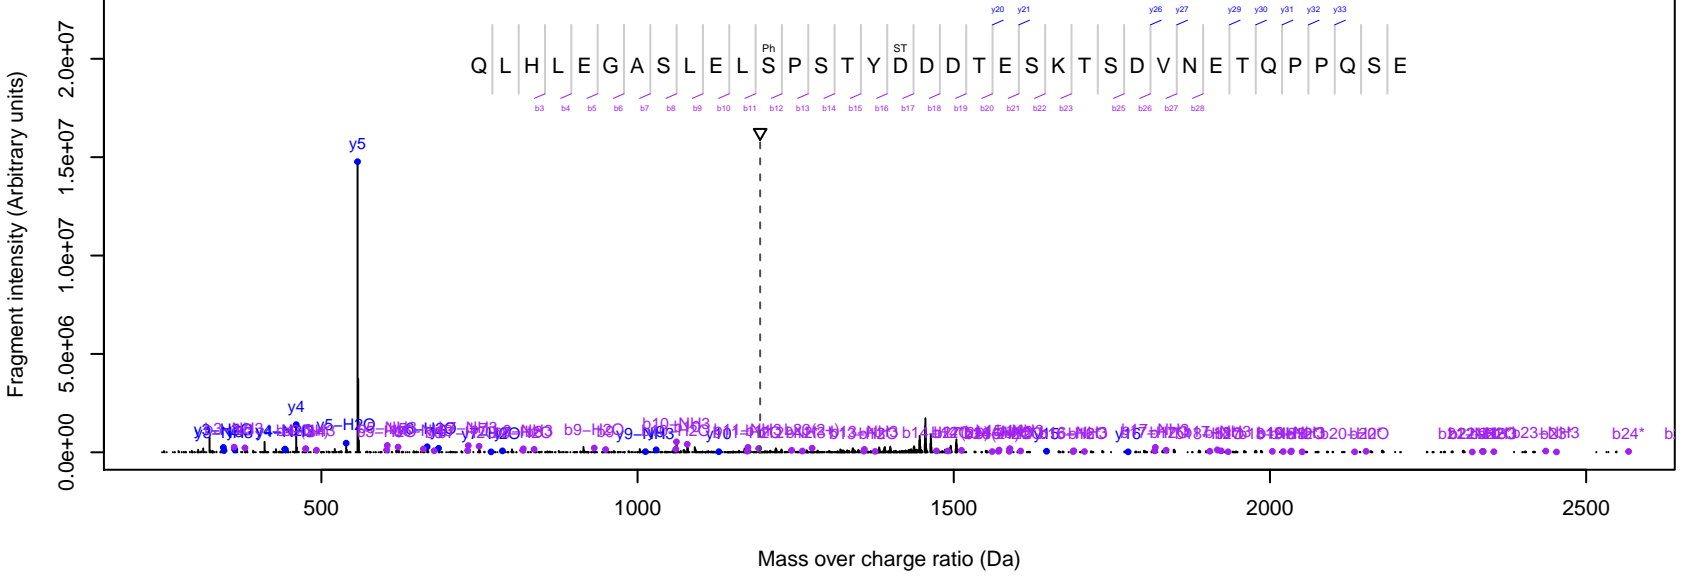

RGEGDAPFSEPGTTSTQRSS(Phospho (STY))PETATK-3+

Source : QE3\_201126\_FR\_TIOx\_hum\_tissue\_Urea\_RNAB\_H Scan : 14594

Andromeda score : 310.41

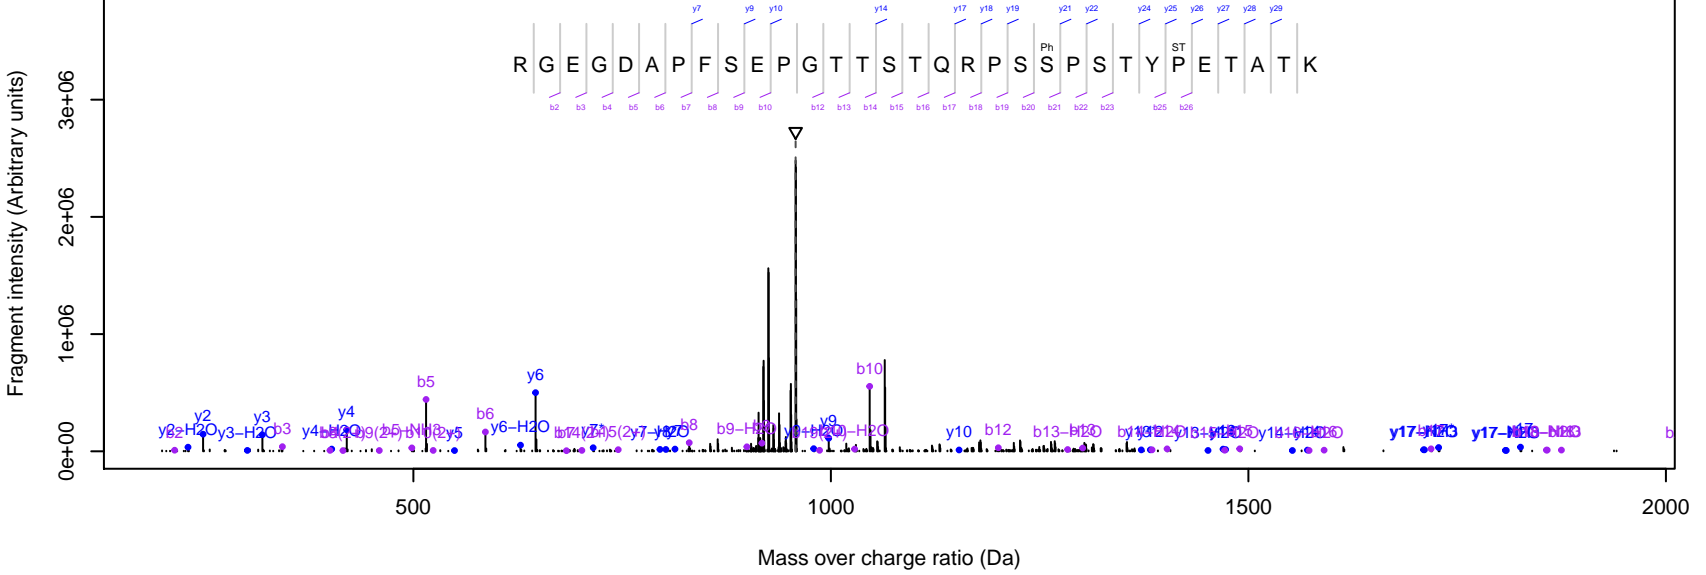

ERDTSPDKGELVS(Phospho (STY))DEEEDT-2+

Source : QE3\_201126\_FR\_TIOx\_hum\_tissue\_Urea\_RNAB\_N Scan : 15826

Andromeda score : 310.23

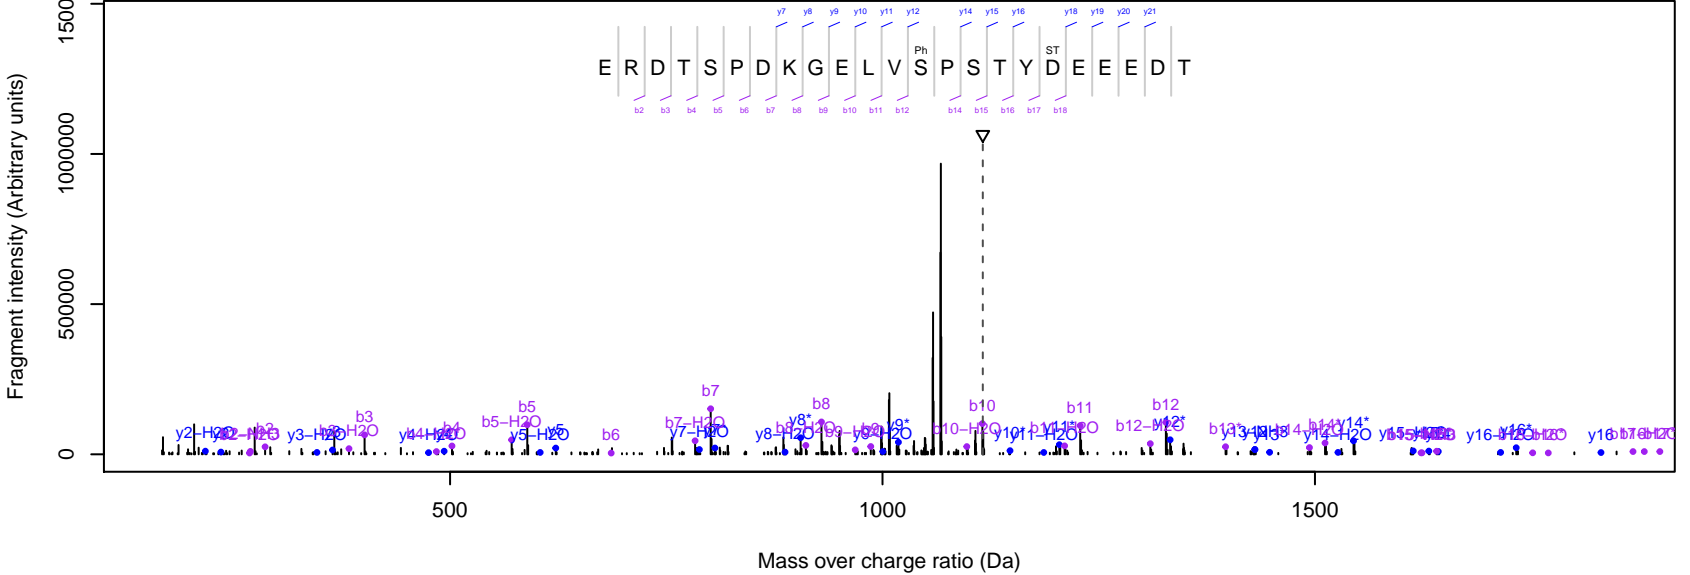

RST(Phospho (STY))QGVTLTLQEA EK-2+

Source : QE3\_201126\_FR\_TiOx\_hum\_tissue\_Urea\_RNAB\_N Scan : 24132

Andromeda score : 310.11

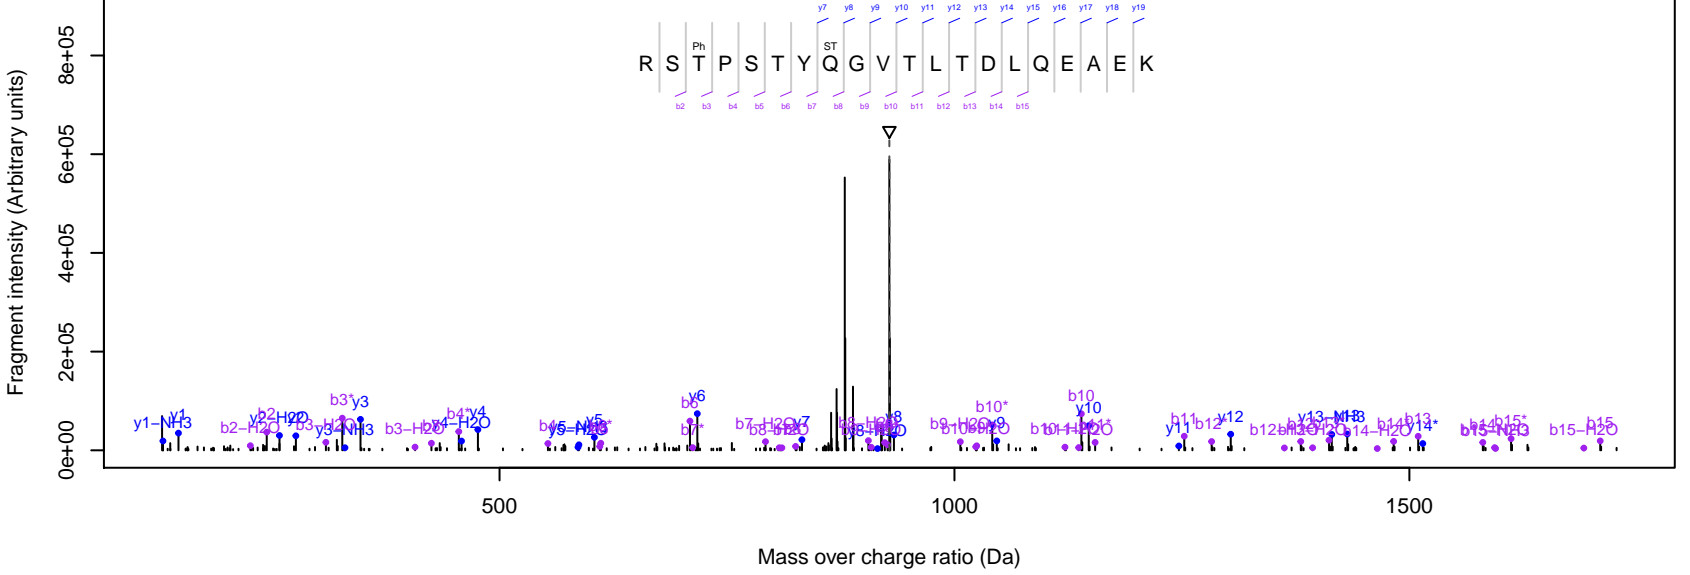

KVVDYSQFQES(Phospho (STY))DDADEYGRDSGPPTK-3+

Source : QE3\_201126\_FR\_TiOx\_hum\_tissue\_Urea\_RNAB\_B Scan : 22098

Andromeda score : 310.1

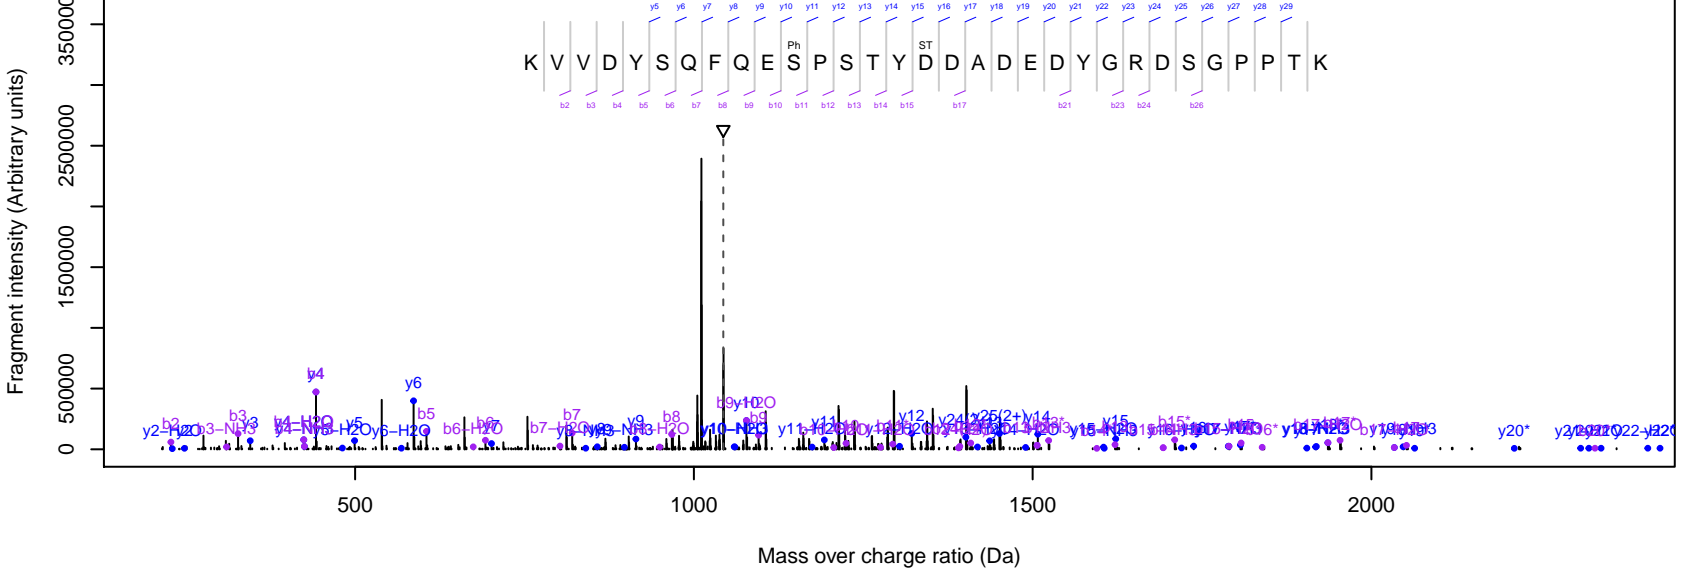

GKGGVTGSPEASIS(Phospho (STY))KGD LK-3+

Source : QE3\_201126\_FR\_TiOx\_hum\_tissue\_Urea\_RNAB\_B Scan : 10959

Andromeda score : 309.83

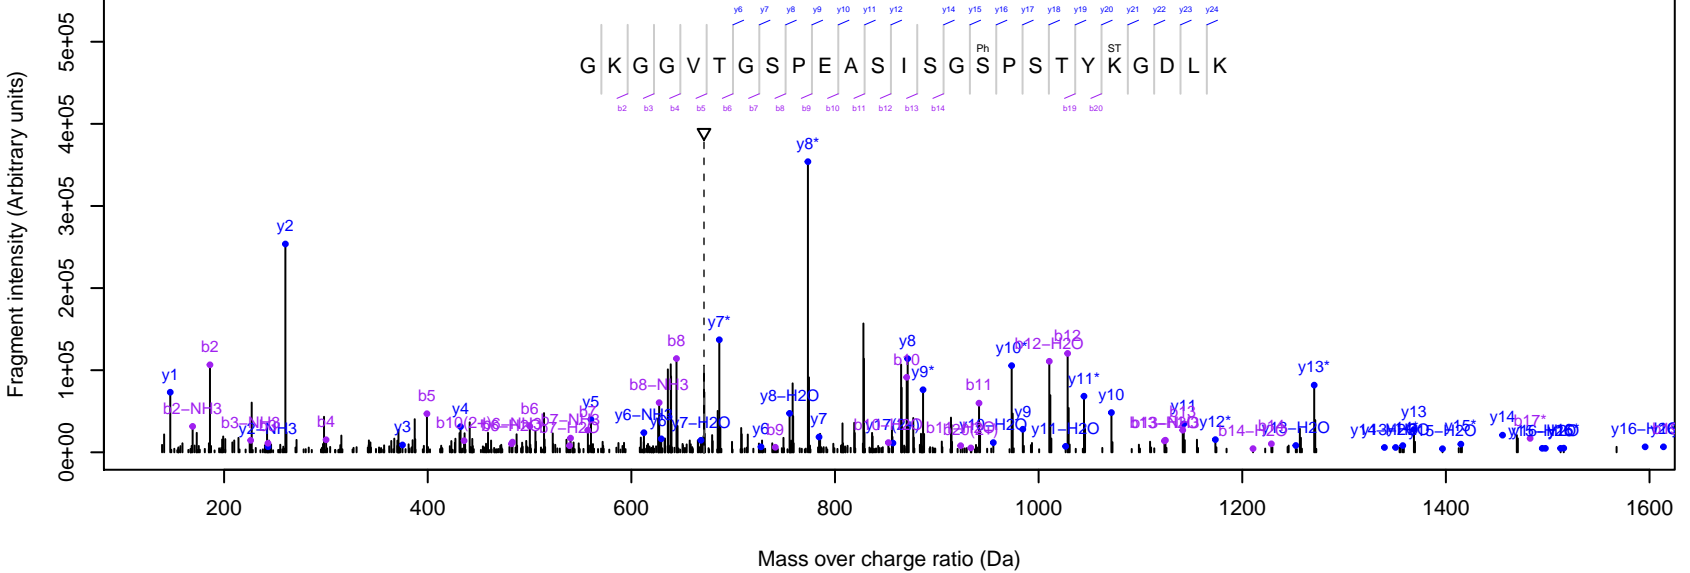

KVEEEGS(Phospho (STY))PGDPDHEASTQGR-3+

Source : QE3\_201126\_FR\_TiOx\_hum\_tissue\_Urea\_RNAB\_N Scan : 5769

Andromeda score : 309.52

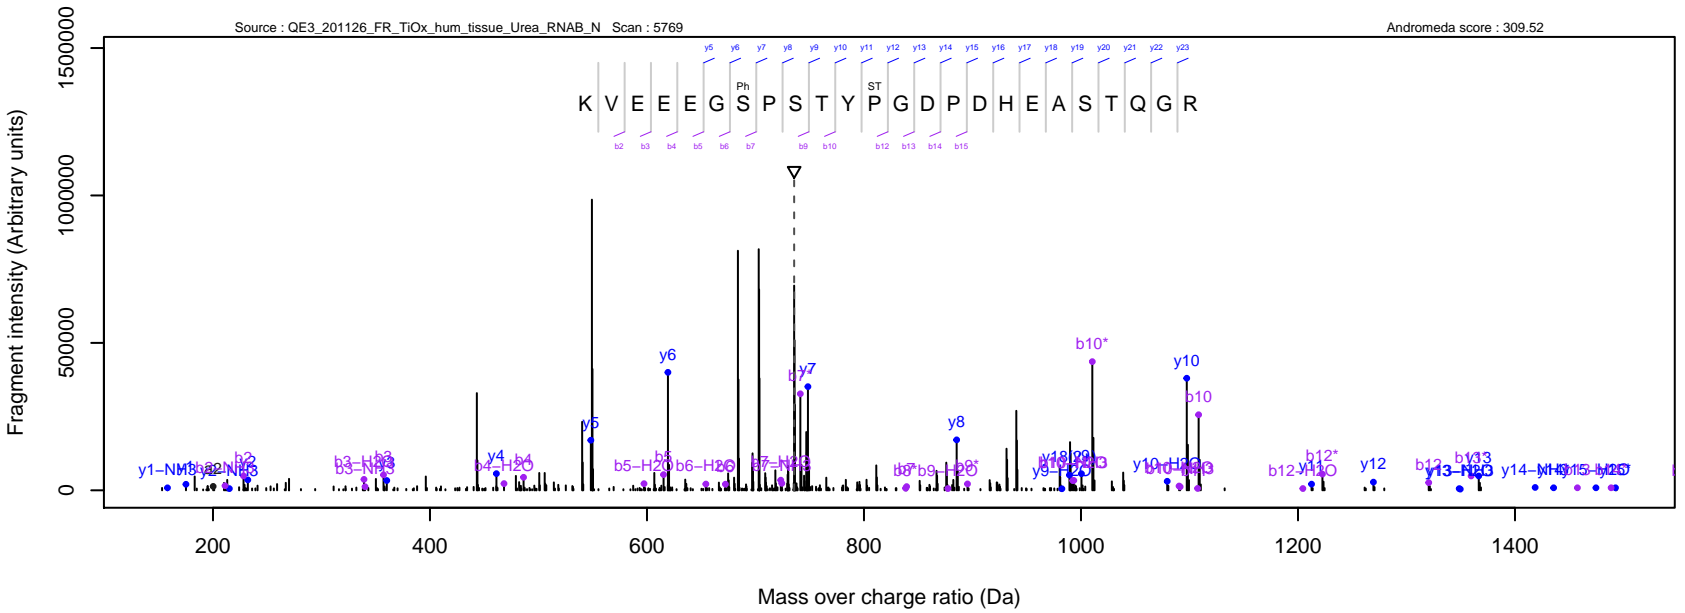

IDASKNEEDEGHNS(Phospho (STY))SPR-3+

Source : QE3\_201126\_FR\_TiOx\_hum\_tissue\_Urea\_RNAB\_H Scan : 3793

Andromeda score : 309.43

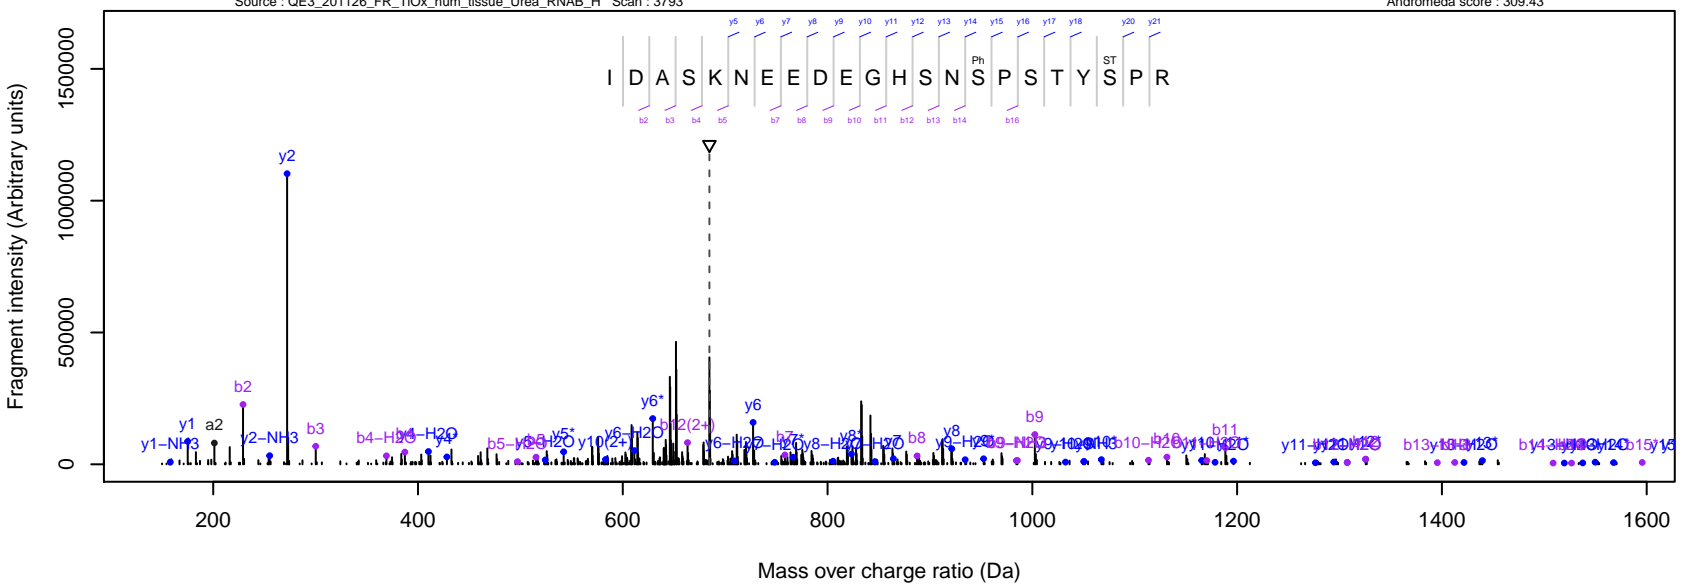

VDHGAEIITQS(Phospho (STY))PGR-2+

Source : QE3\_201126\_FR\_TiOx\_hum\_tissue\_Urea\_RNAB\_B Scan : 13972

Andromeda score : 309.35

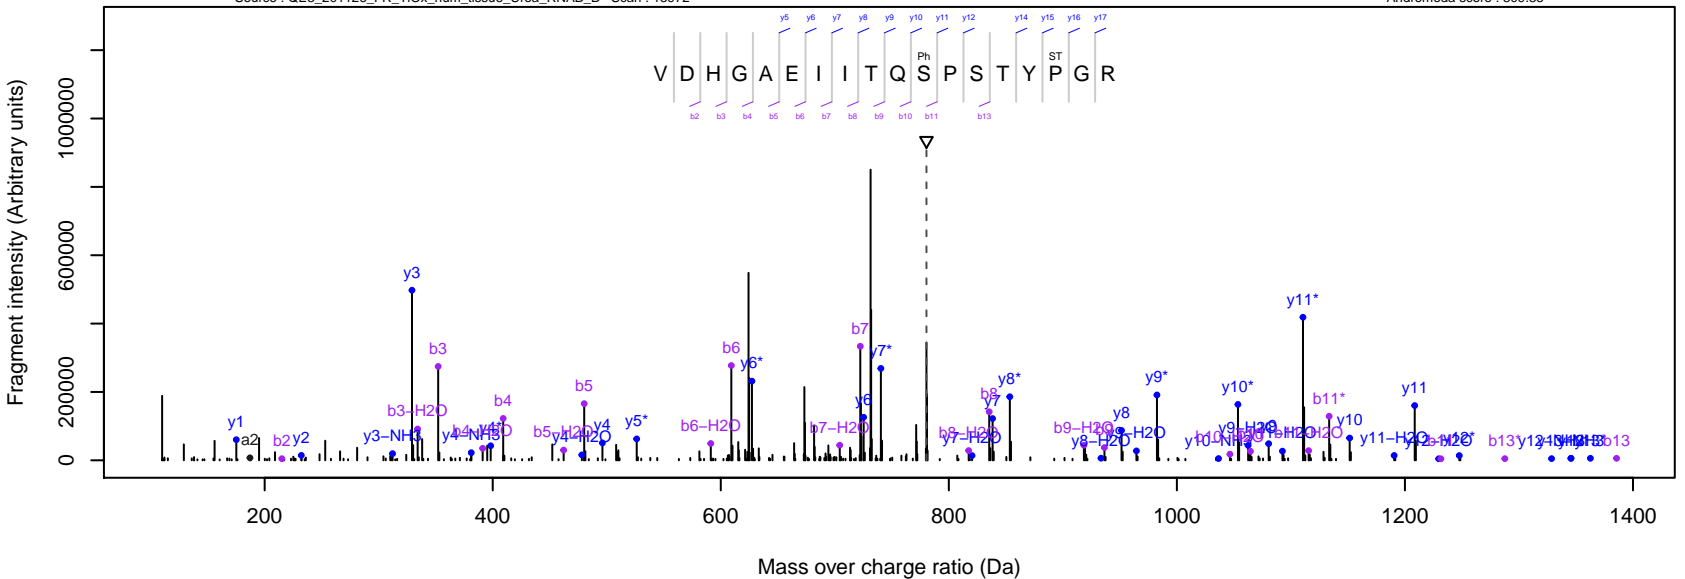



LVSFHDDS(Phospho (STY))DELLHI-2+

Source : QE3\_201126\_FR\_TiOx\_hum\_tissue\_Urea\_RNAB\_H Scan : 47998

Andromeda score : 308.74

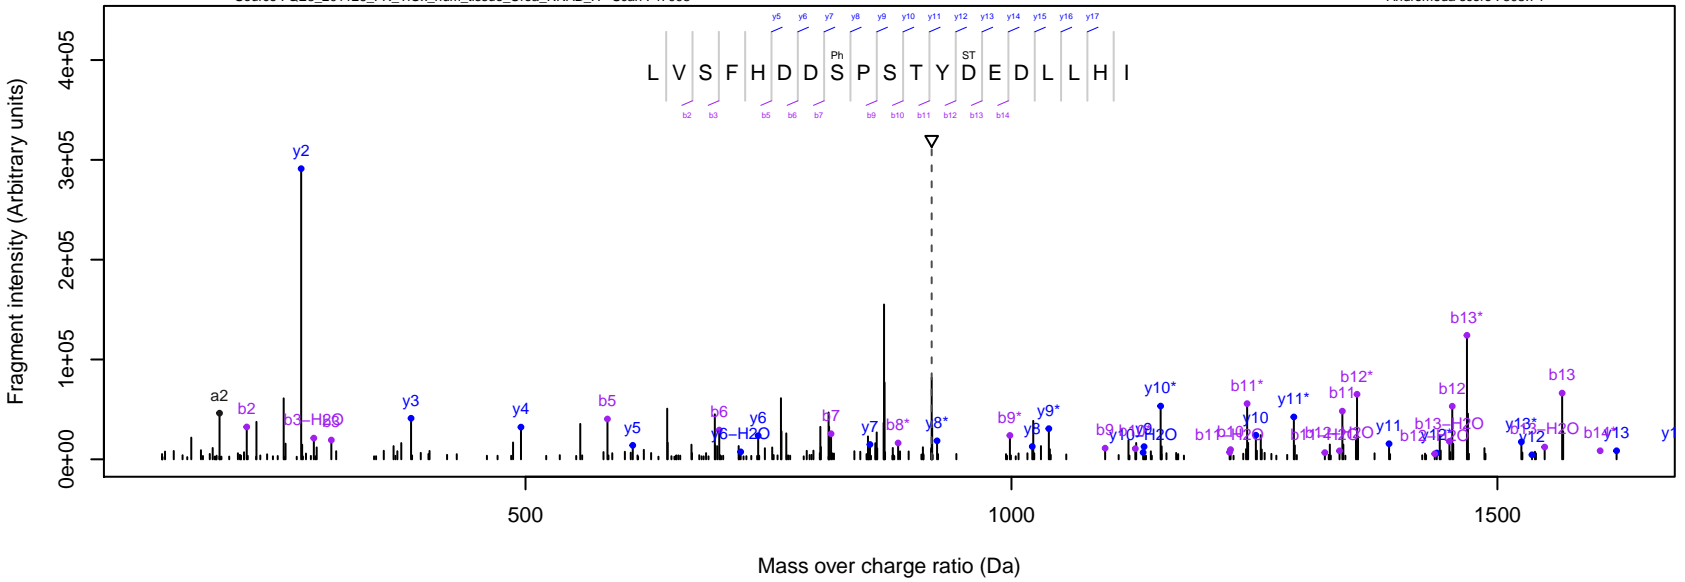

ANS(Phospho (STY))FVGTAQYVSPPELLTEK-2+

Source : QE3\_201126\_FR\_TiOx\_hum\_tissue\_Urea\_RNAB\_H Scan : 50070

Andromeda score : 308.68

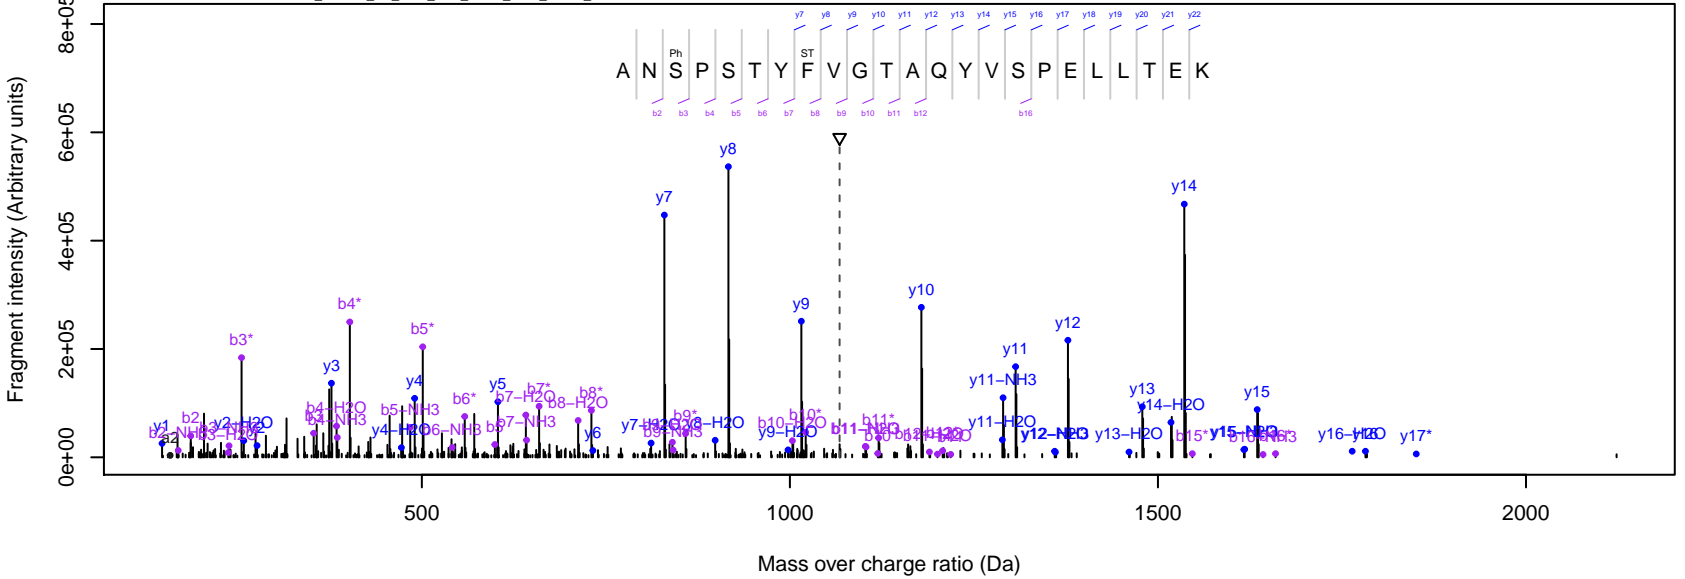

VEEQEADEEDVS(Phospho (STY))EEEAESKEGNTKDFPQNAIR-3+

Source : QE3\_201126\_FR\_TiOx\_hum\_tissue\_Urea\_RNAB\_H Scan : 23456

Andromeda score : 308.42

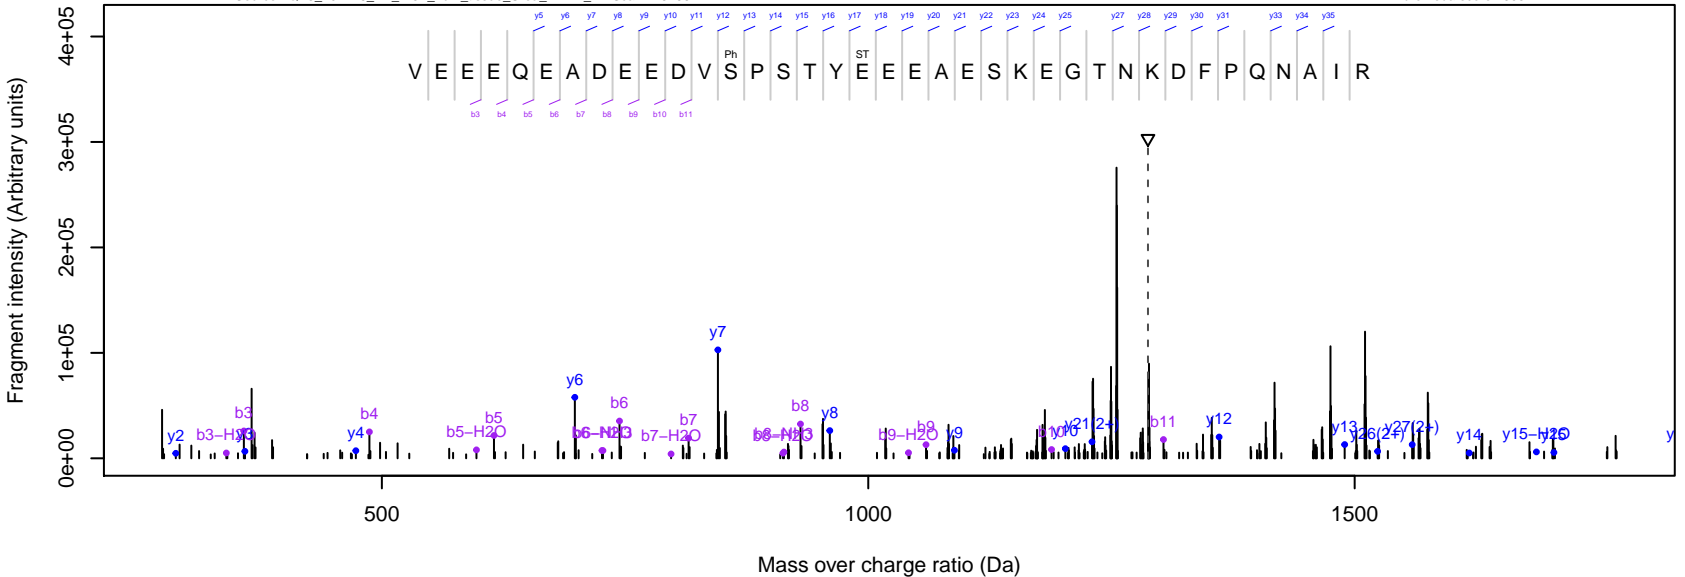

**KSLDS(Phospho (STY))DES(Phospho (STY))EDEEDDYQQK-3+**

Source : QE3\_201126\_FR\_TiOx\_hum\_tissue\_Urea\_RNAB\_H Scan : 11793

Andromeda score : 308.16

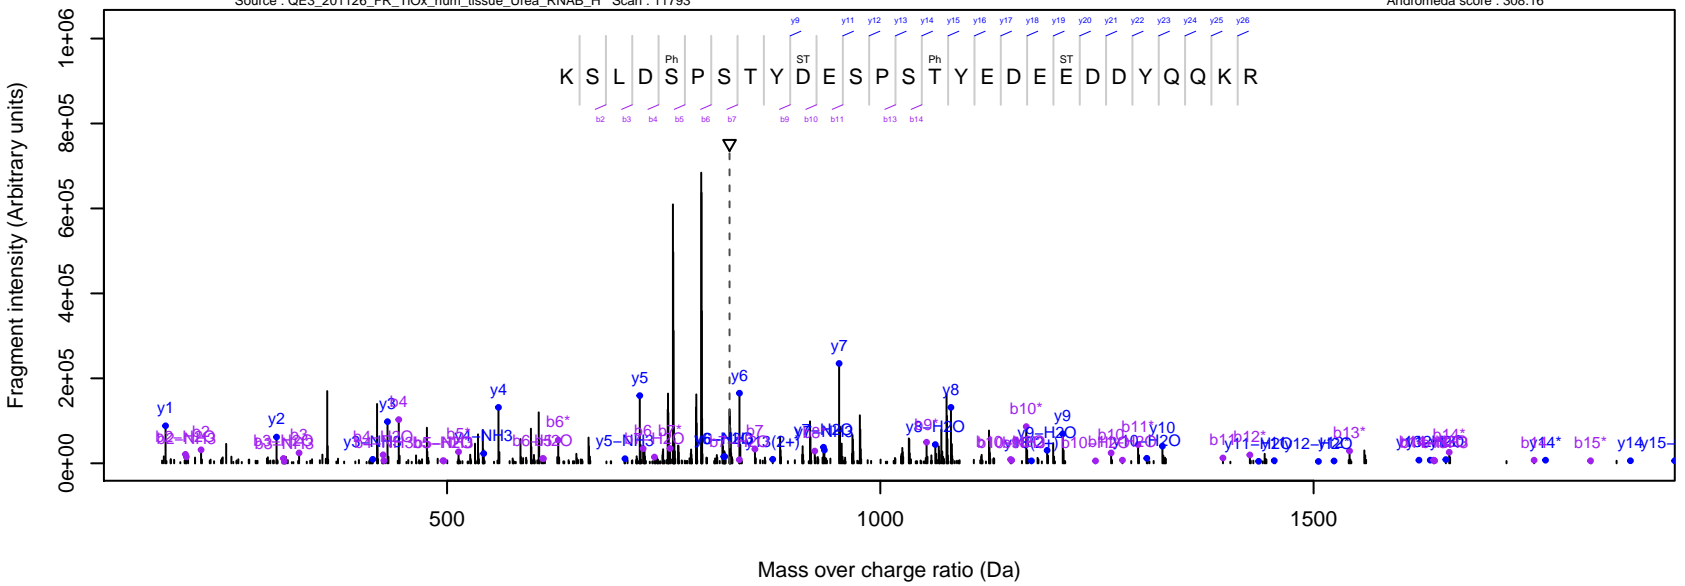

**TAHNSEADLEESFNEHELEPSS(Phospho (STY))PK-3+**

Source : QE3\_201126\_FR\_TiOx\_hum\_tissue\_Urea\_RNAB\_B Scan : 26534

Andromeda score : 307.94

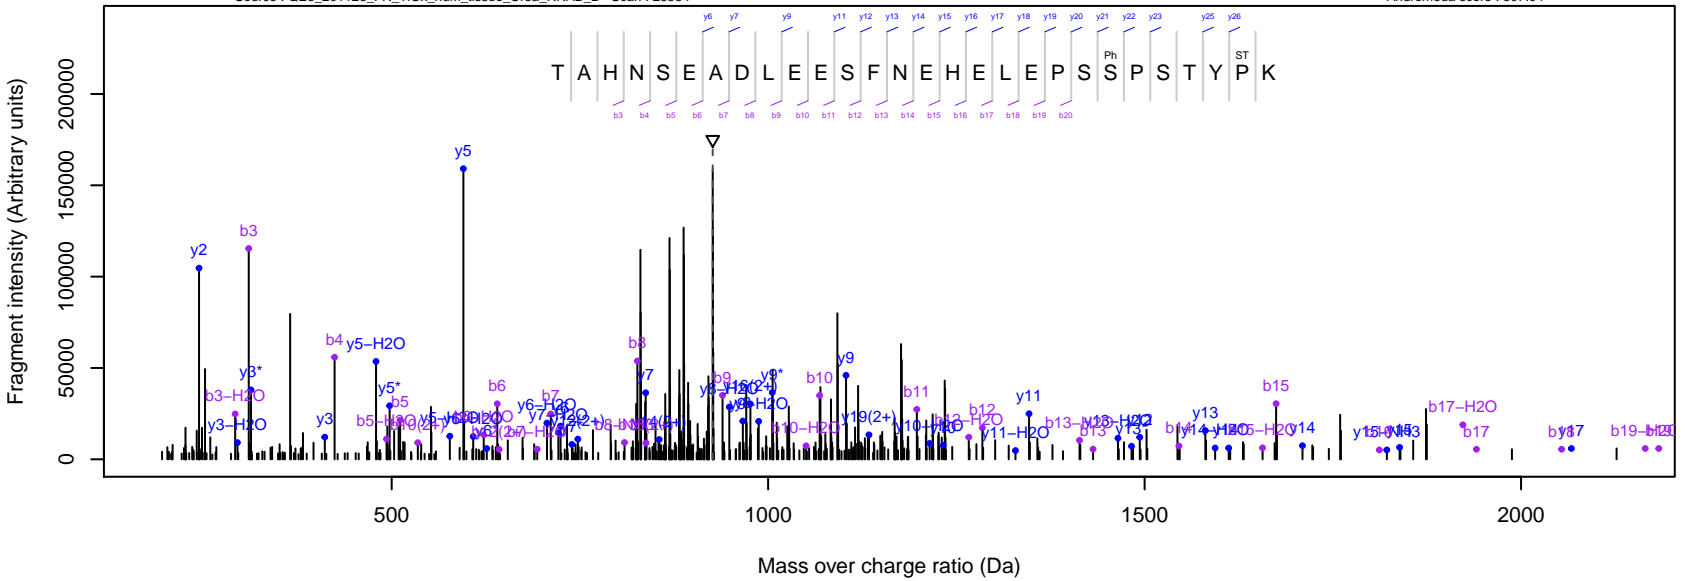

**LATQSNEITIPVTFES(Phospho (STY))R-2+**

Source : QE3\_201126\_FR\_TiOx\_hum\_tissue\_Urea\_RNAB\_N Scan : 46661

Andromeda score : 307.55

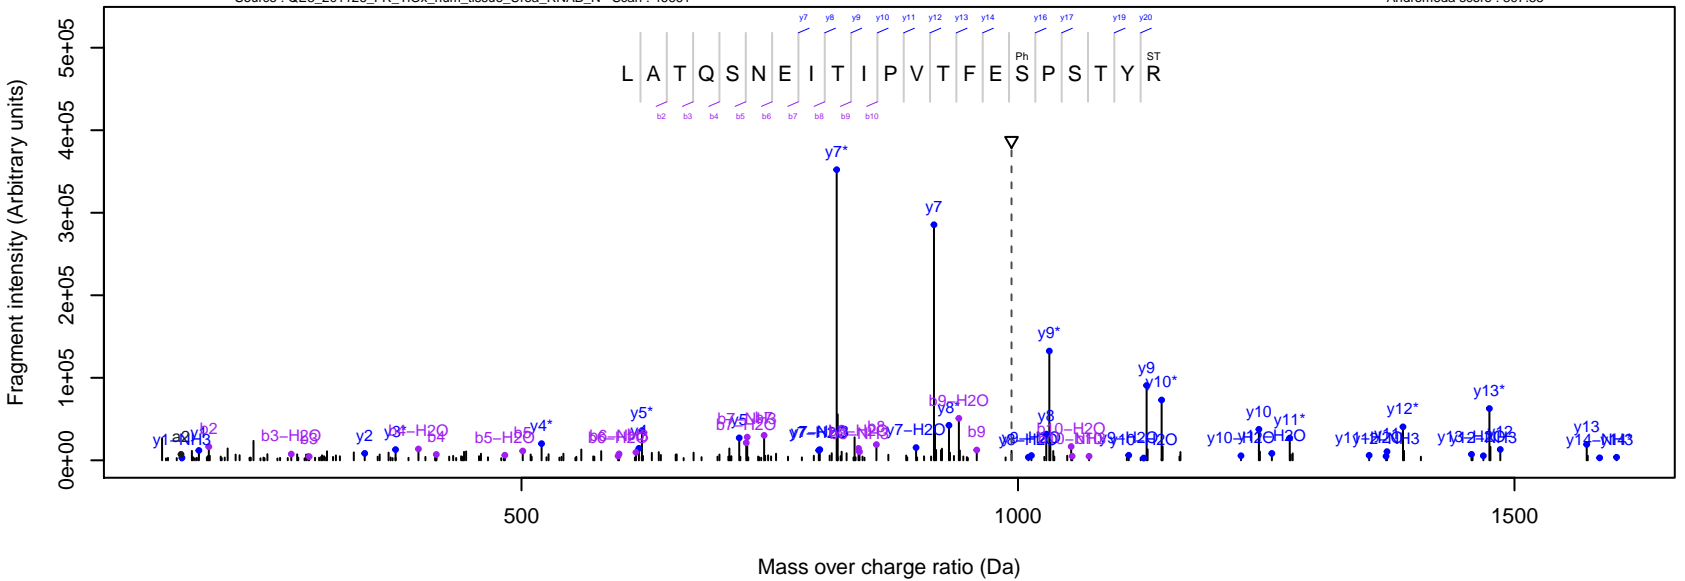

CSVCPDYDLCSPSTYVCEGK

Source : QE3\_201126\_FR\_TiOx\_hum\_tissue\_Urea\_RNAB\_N Scan : 30835

Andromeda score : 306.96

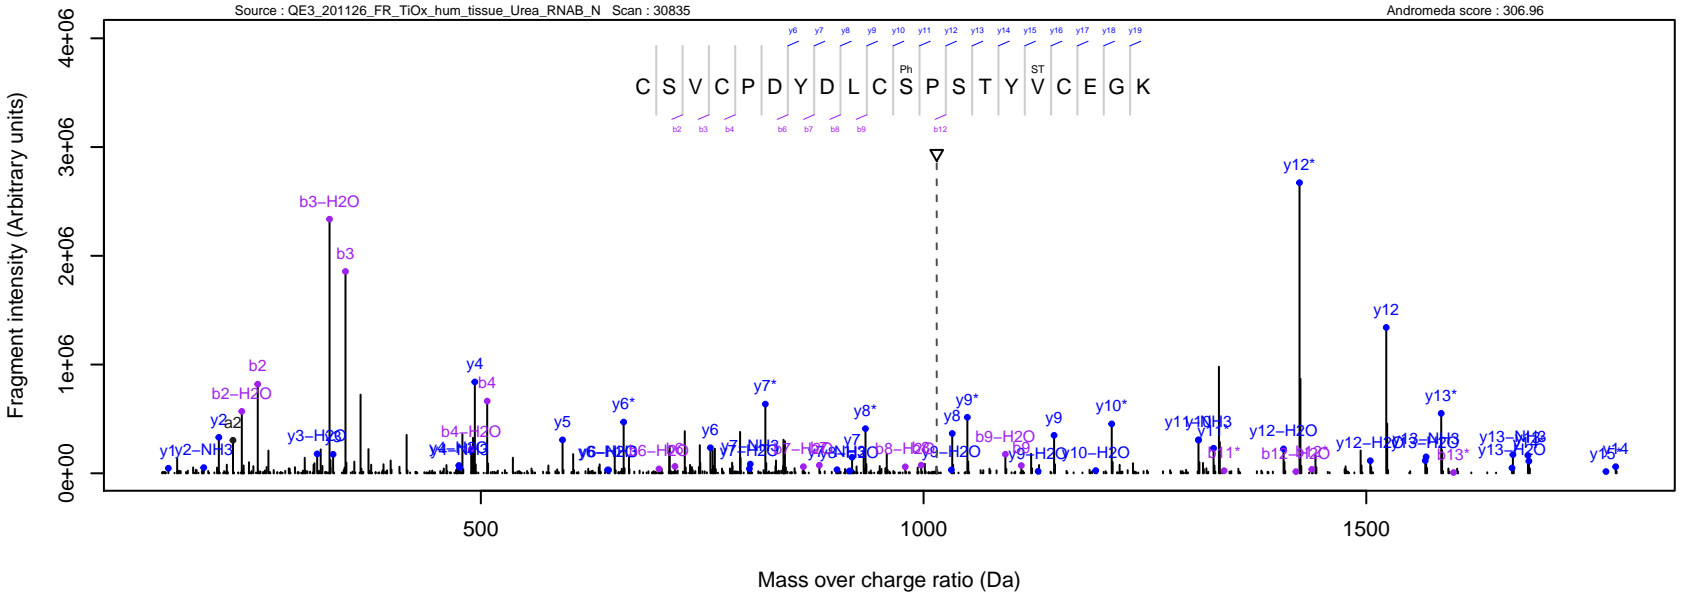

EVDPTSTGELQSLQMPSESGPSSPSTYLDPSQEGPTGLK

Source : QE3\_201126\_FR\_TiOx\_hum\_tissue\_Urea\_RNAB\_N Scan : 50465

Andromeda score : 306.33

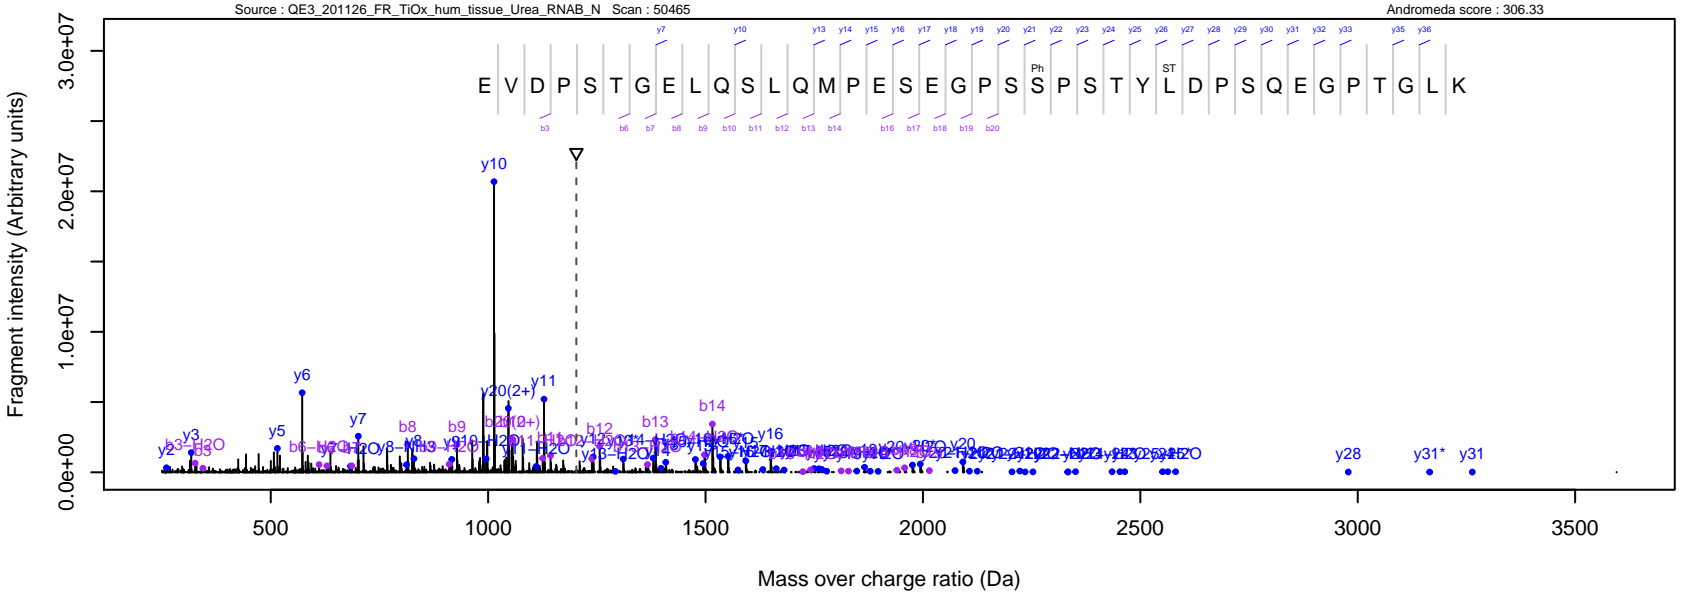

RQLHLEGASLELSPSTYDDDTESKTSVDVNETQPPQSE

Source : QE3\_201126\_FR\_TiOx\_hum\_tissue\_Urea\_RNAB\_N Scan : 30374

Andromeda score : 305.8

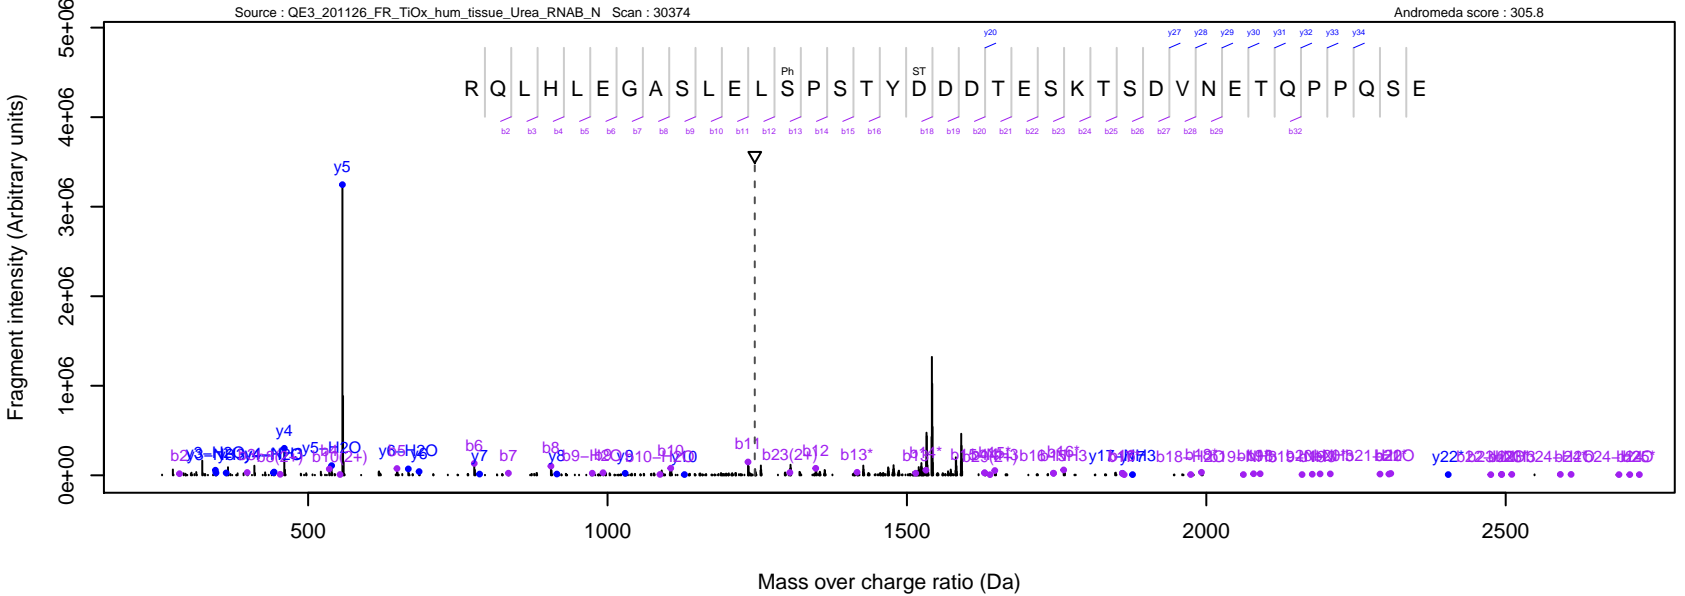

(Acetyl (Protein N-term))PGPTPSGTVNGSSGRS(Phospho (STY))PSK-2+

Source : QE3\_201126\_FR\_TiOx\_hum\_tissue\_Urea\_RNAB\_H Scan : 14256

Andromeda score : 305.44

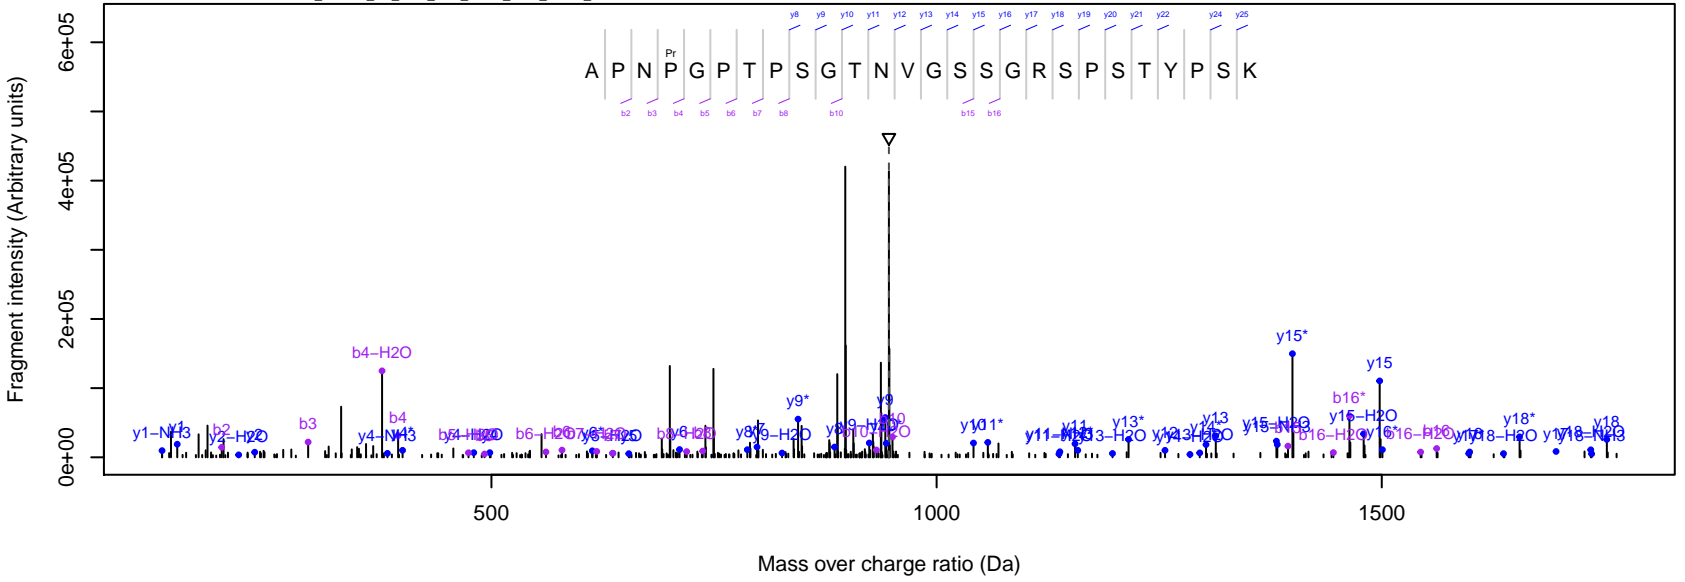

GLM(Oxidation (M))AGGRPEGQYS(Phospho (STY))EDED(Phospho (STY))DTDEYKEAK-3+

Source : QE3\_201126\_FR\_TiOx\_hum\_tissue\_Urea\_RNAB\_H Scan : 17144

Andromeda score : 305.37

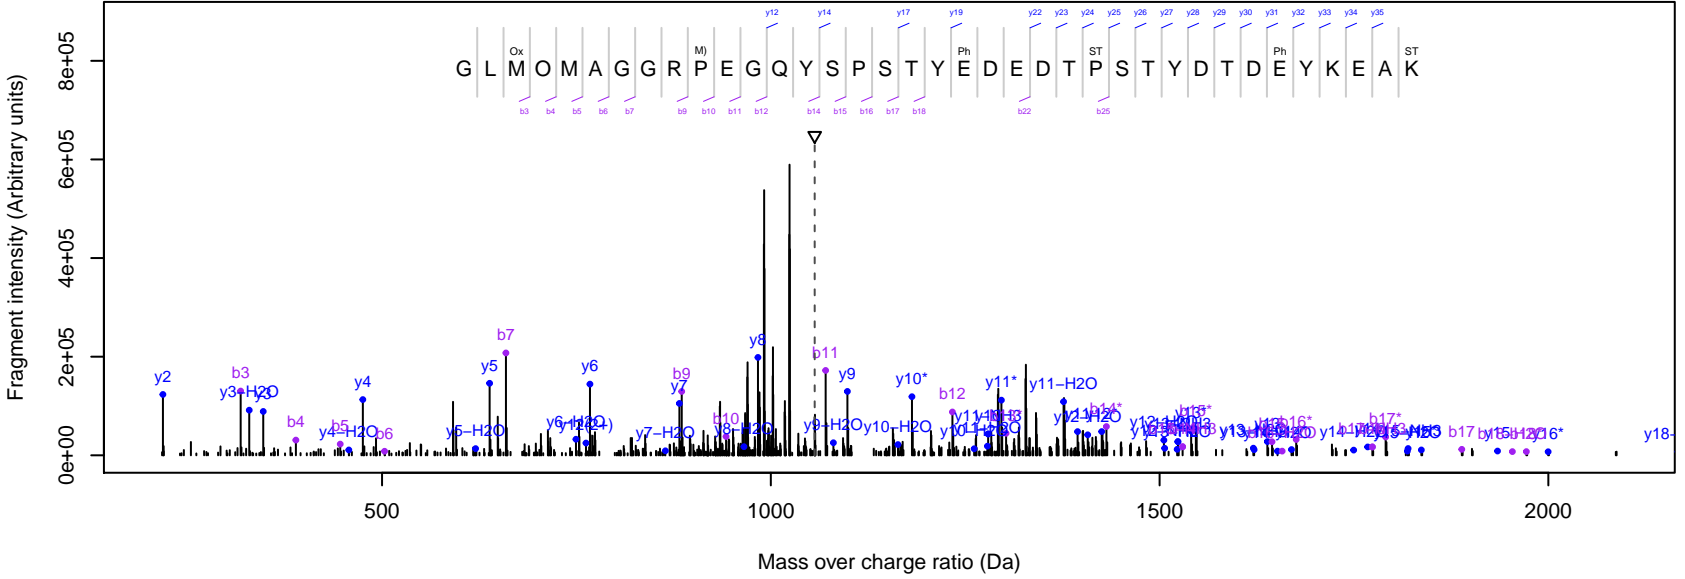

KAS(Phospho (STY))VDPSTESSPAPQEGSEQPASPASPLSSR-3+

Source : QE3\_201126\_FR\_TiOx\_hum\_tissue\_Urea\_RNAB\_H Scan : 22960

Andromeda score : 304.77

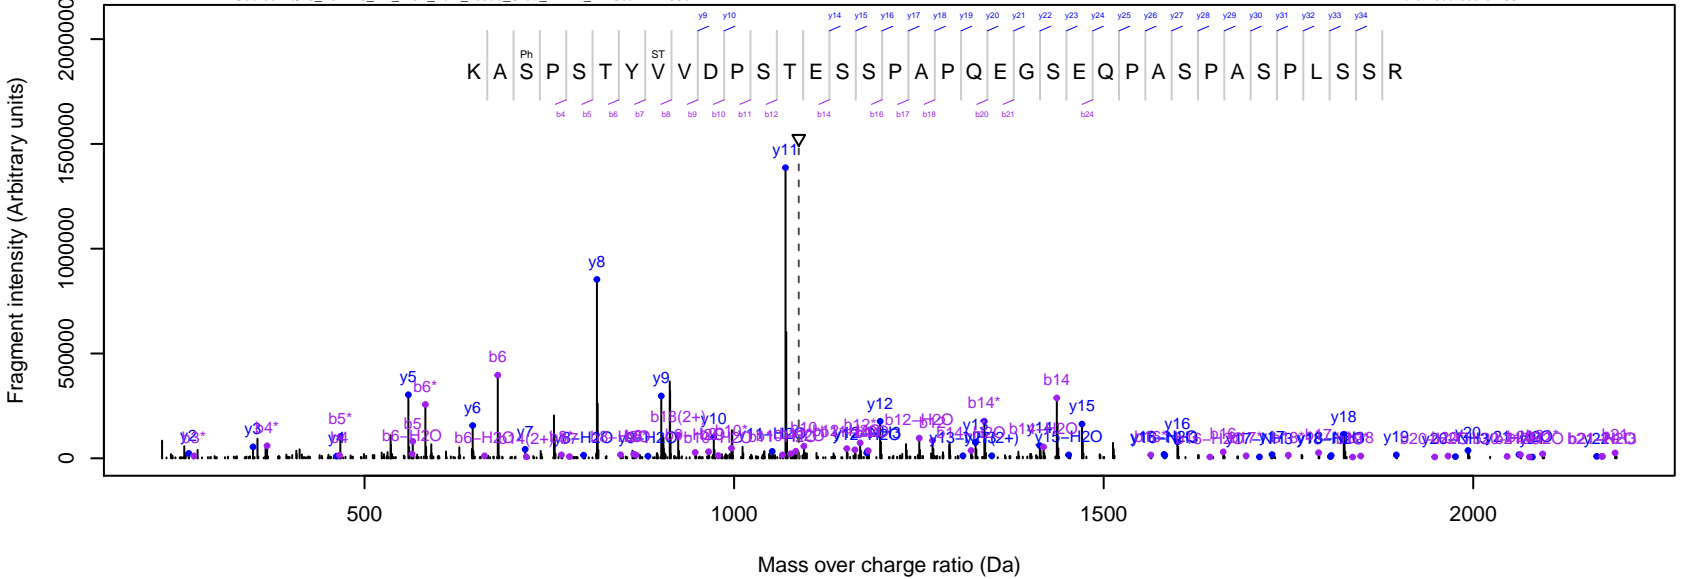

HADGEKEDQFN(SPhospho (STY))PPRPQPR-4+

Source : QE3\_201126\_FR\_TiOx\_hum\_tissue\_Urea\_RNAB\_N Scan : 9216

Andromeda score : 304.37

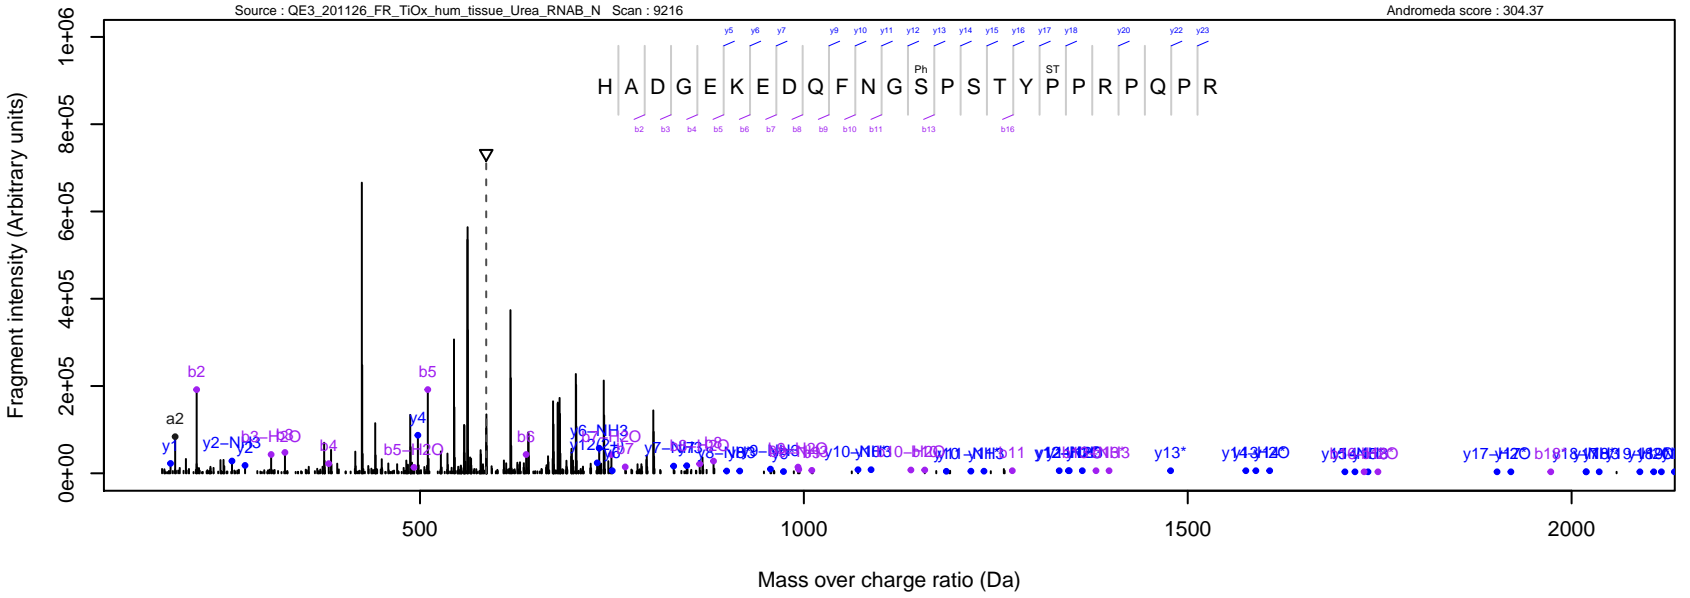

ALTDDS(Phospho (STY))DENEEDAFDQK-2+

Source : QE3\_201126\_FR\_TiOx\_hum\_tissue\_Urea\_RNAB\_H Scan : 28429

Andromeda score : 304.2

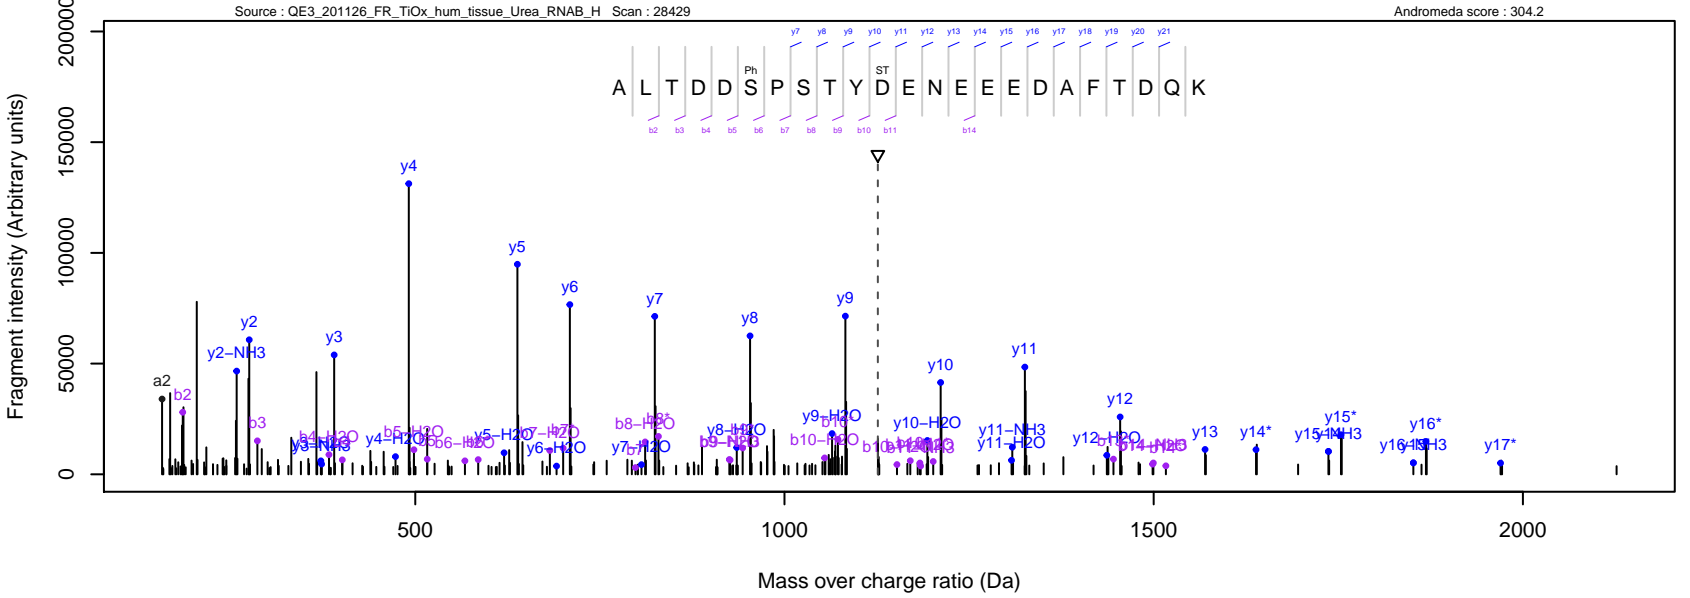

GFENVIHDKLPLQES(SPhospho (STY))EEEEER-4+

Source : QE3\_201126\_FR\_TiOx\_hum\_tissue\_Urea\_RNAB\_H Scan : 28576

Andromeda score : 304.19

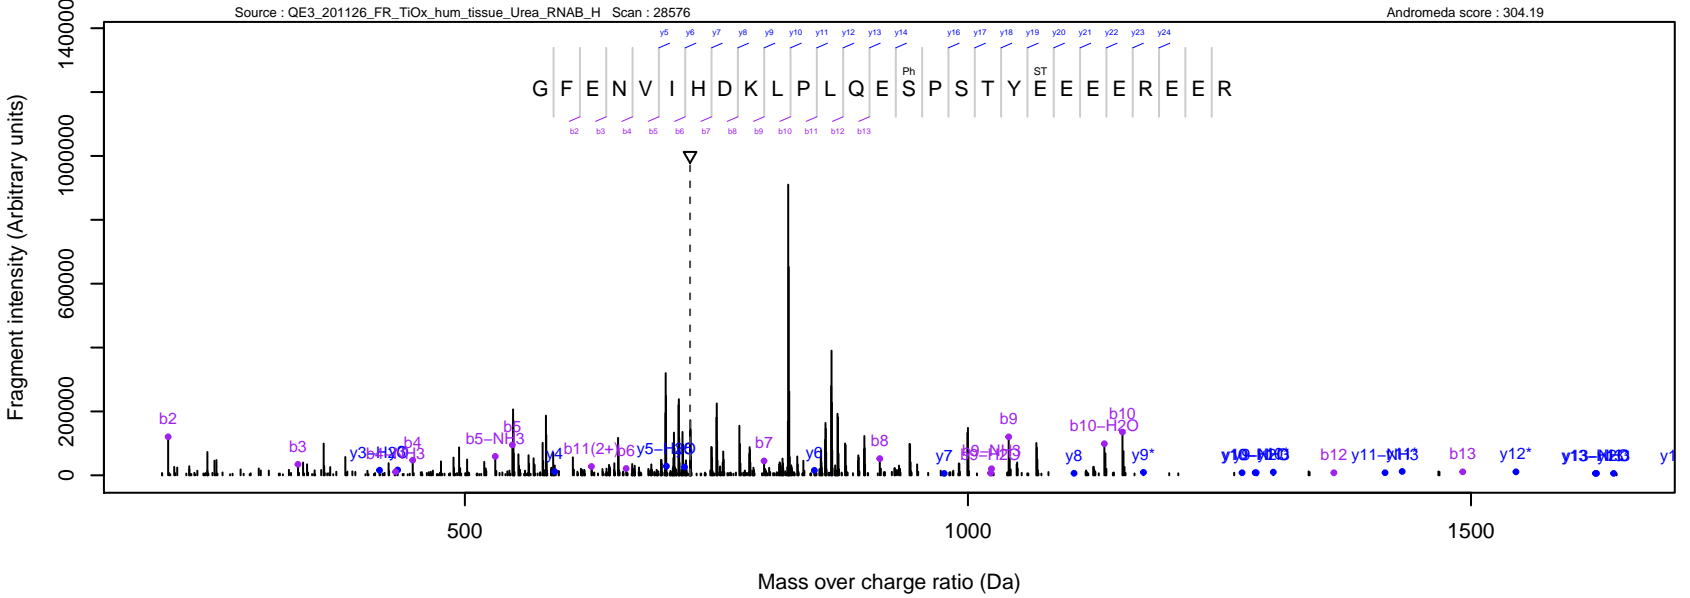

LLEDGEDFNLGDALDSSNS(Phospho(STY))MQTIQK-3+

Source : QE3\_201126\_FR\_TiOx\_hum\_tissue\_Urea\_RNAB\_H Scan : 54391

Andromeda score : 304.17

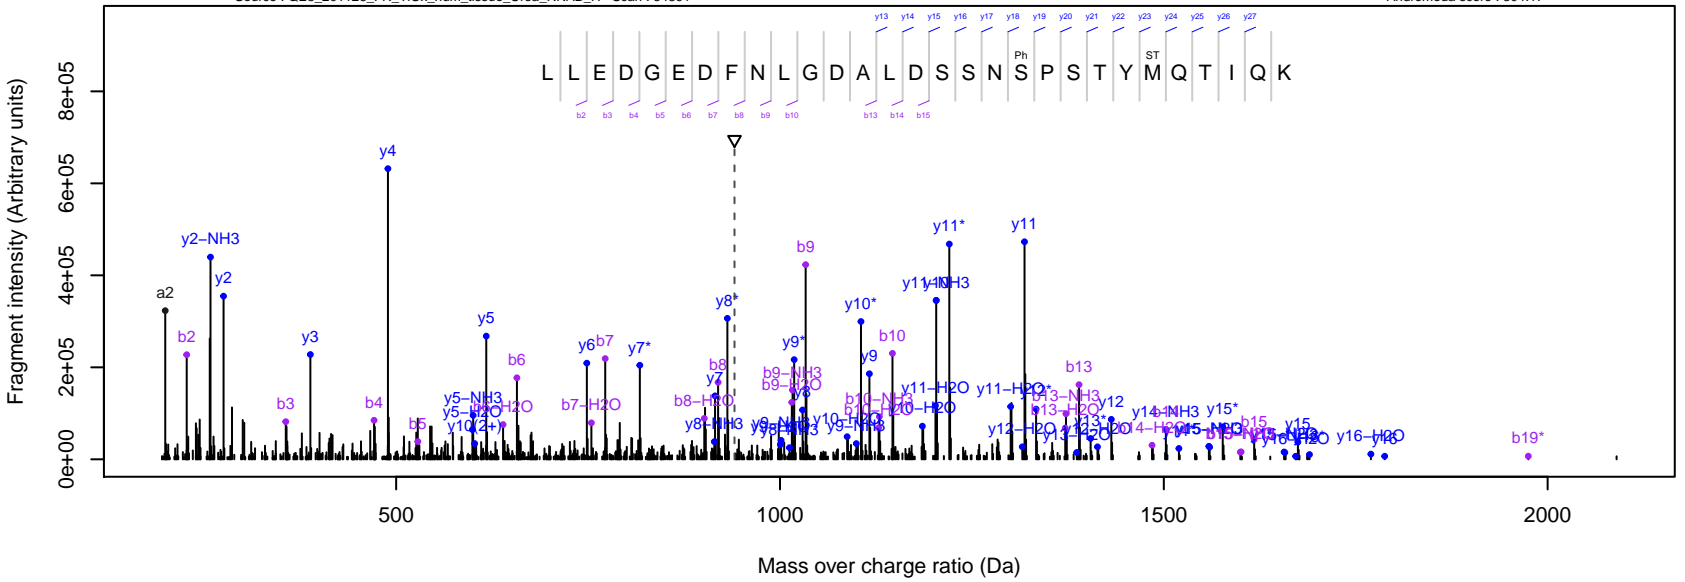

S(Phospho(STY))LGSVQAPSYGAR-2+

Source : QE3\_201126\_FR\_TiOx\_hum\_tissue\_Urea\_RNAB\_N Scan : 23126

Andromeda score : 304.08

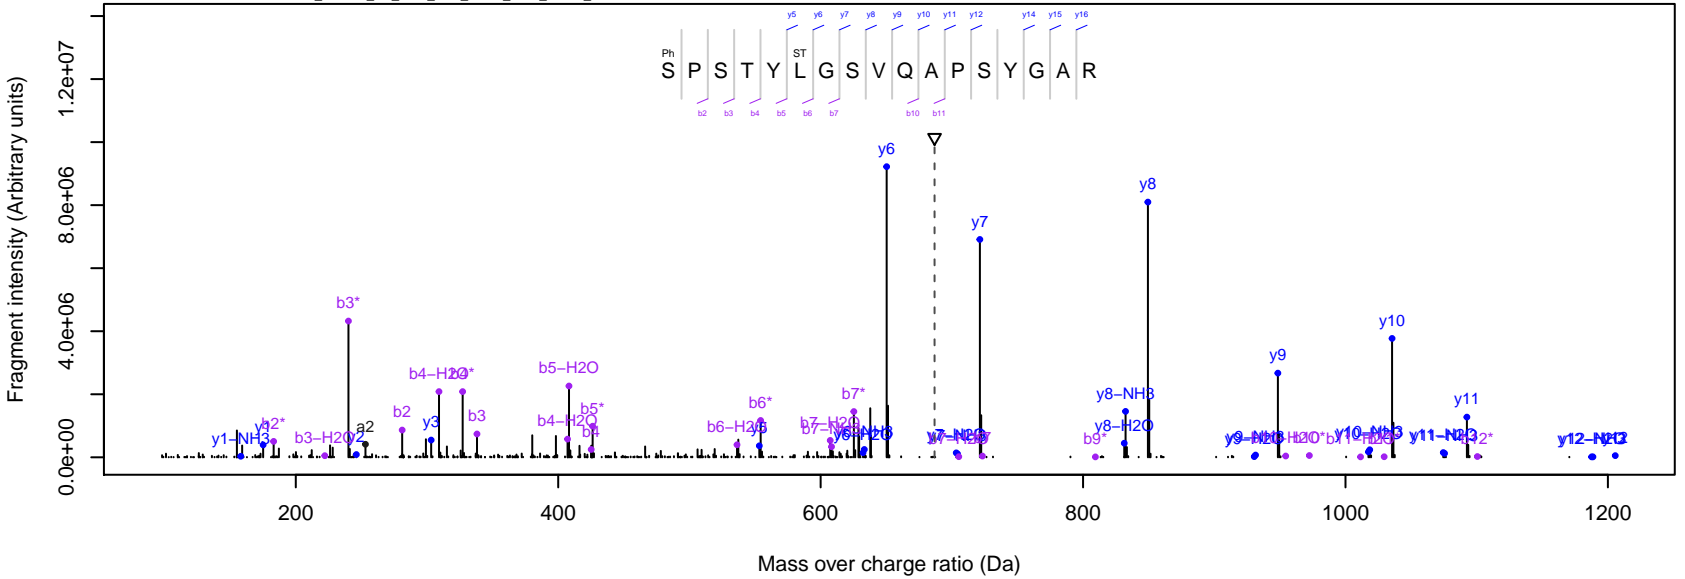

NLHYFNDS(Phospho(STY))FASHPNYPYSDEY-2+

Source : QE3\_201126\_FR\_TiOx\_hum\_tissue\_Urea\_RNAB\_N Scan : 42604

Andromeda score : 302.59

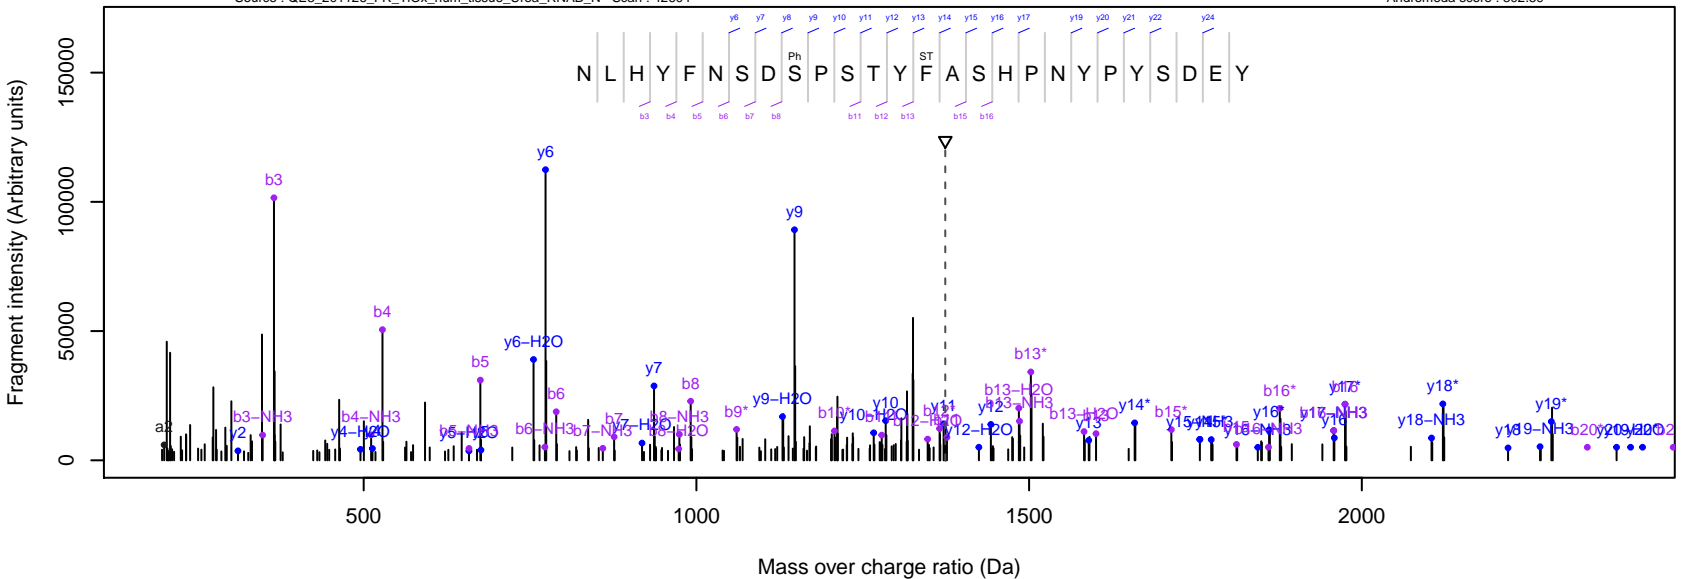

GGPEGVAQAVASAASAGPADAEMEEIFDDAS(Phospho (STY))PGKQK-3+

Source : QE3\_201126\_FR\_TIOx\_hum\_tissue\_Urea\_RNAB\_H Scan : 54937

Andromeda score : 302.57

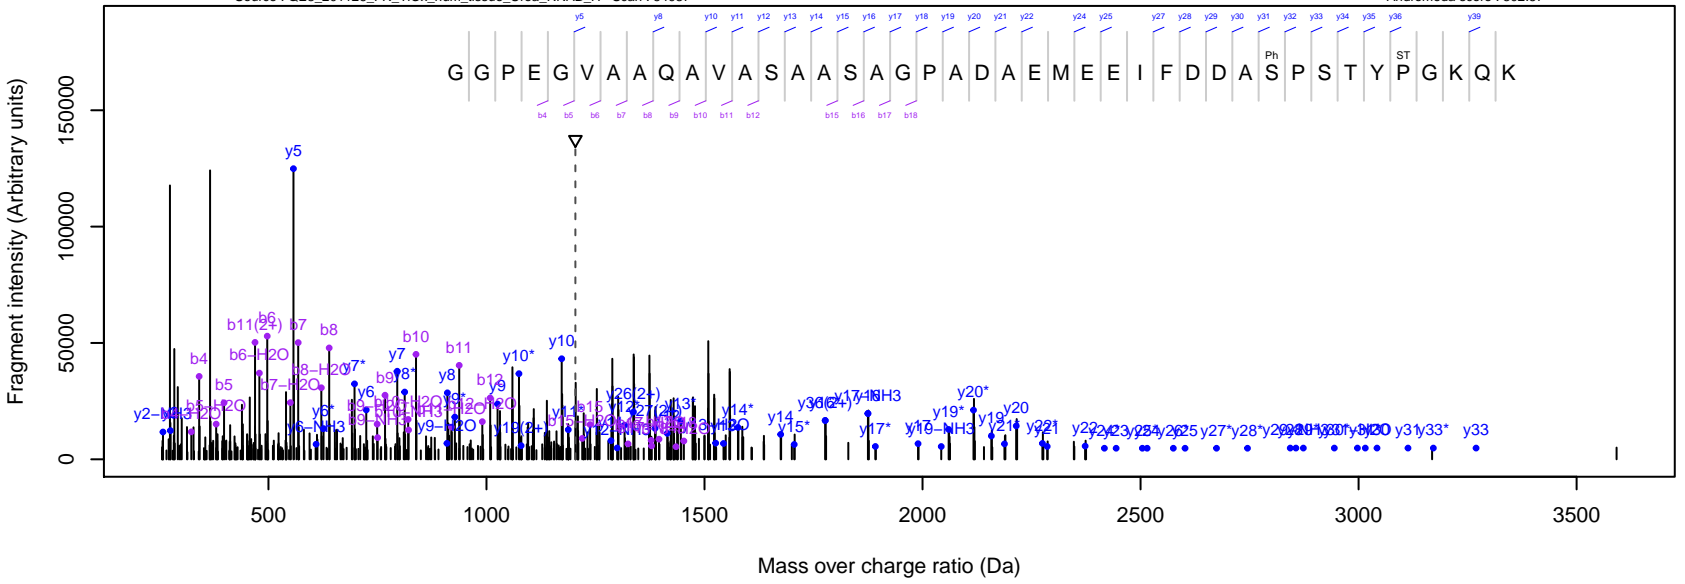

GLKEGMNPSYDEYADS(Phospho (STY))DEDQHDAYLER-3+

Source : QE3\_201126\_FR\_TIOx\_hum\_tissue\_Urea\_RNAB\_N Scan : 26920

Andromeda score : 302.55

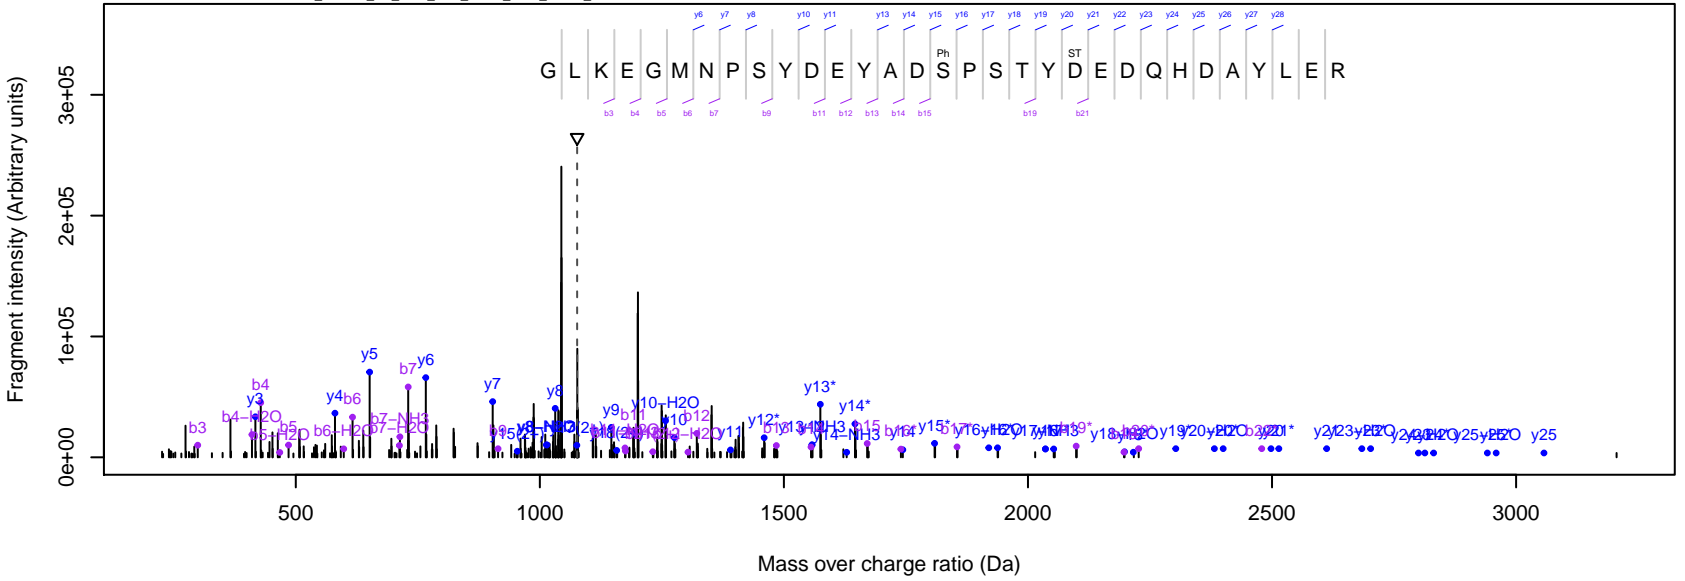

QAS(Phospho (STY))IELPSMAVASTK-2+

Source : QE3\_201126\_FR\_TIOx\_hum\_tissue\_Urea\_RNAB\_N Scan : 40523

Andromeda score : 302.4

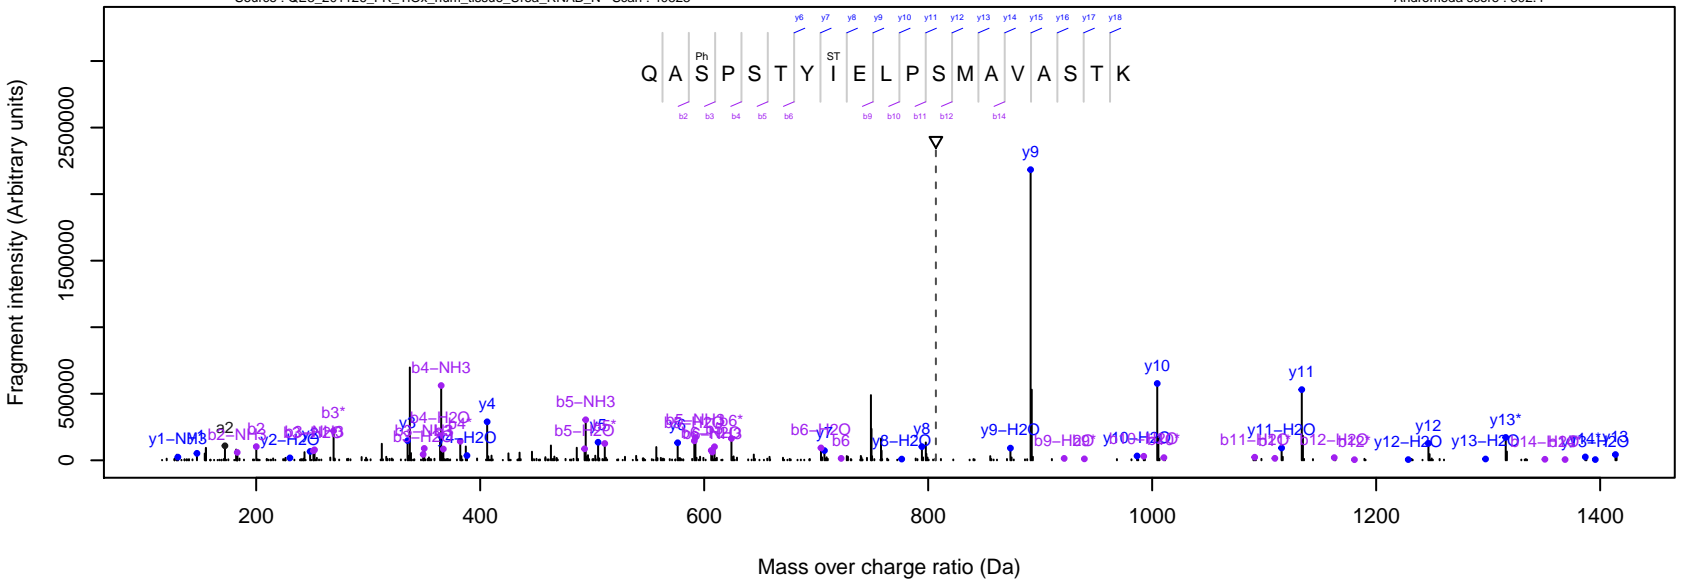

SLSQS(Phospho (STY))FENLLDEPAYGLIQK-2+

Source : QE3\_201126\_FR\_TiOx\_hum\_tissue\_Urea\_RNAB\_B Scan : 60458

Andromeda score : 302.26

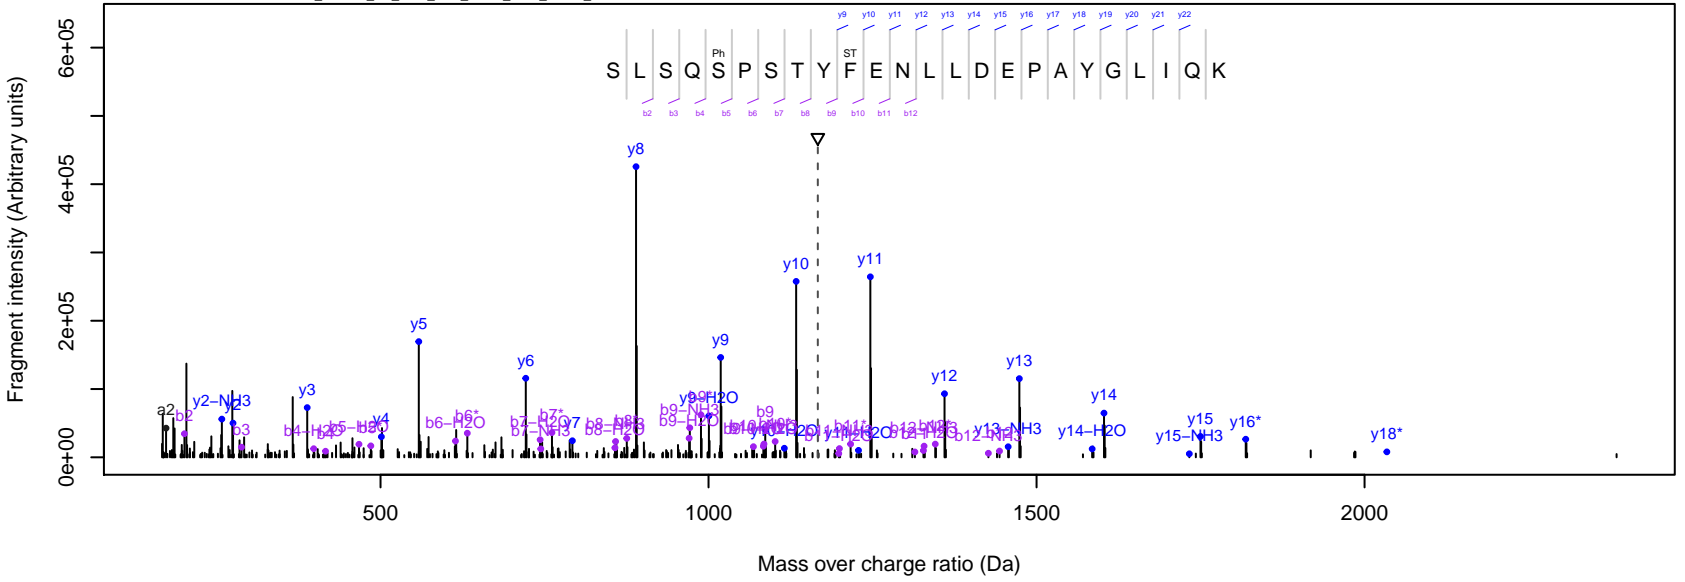

GDSIEELADS(Phospho (STY))EDEDNEEEER-2+

Source : QE3\_201126\_FR\_TiOx\_hum\_tissue\_Urea\_RNAB\_B Scan : 44343

Andromeda score : 302.18

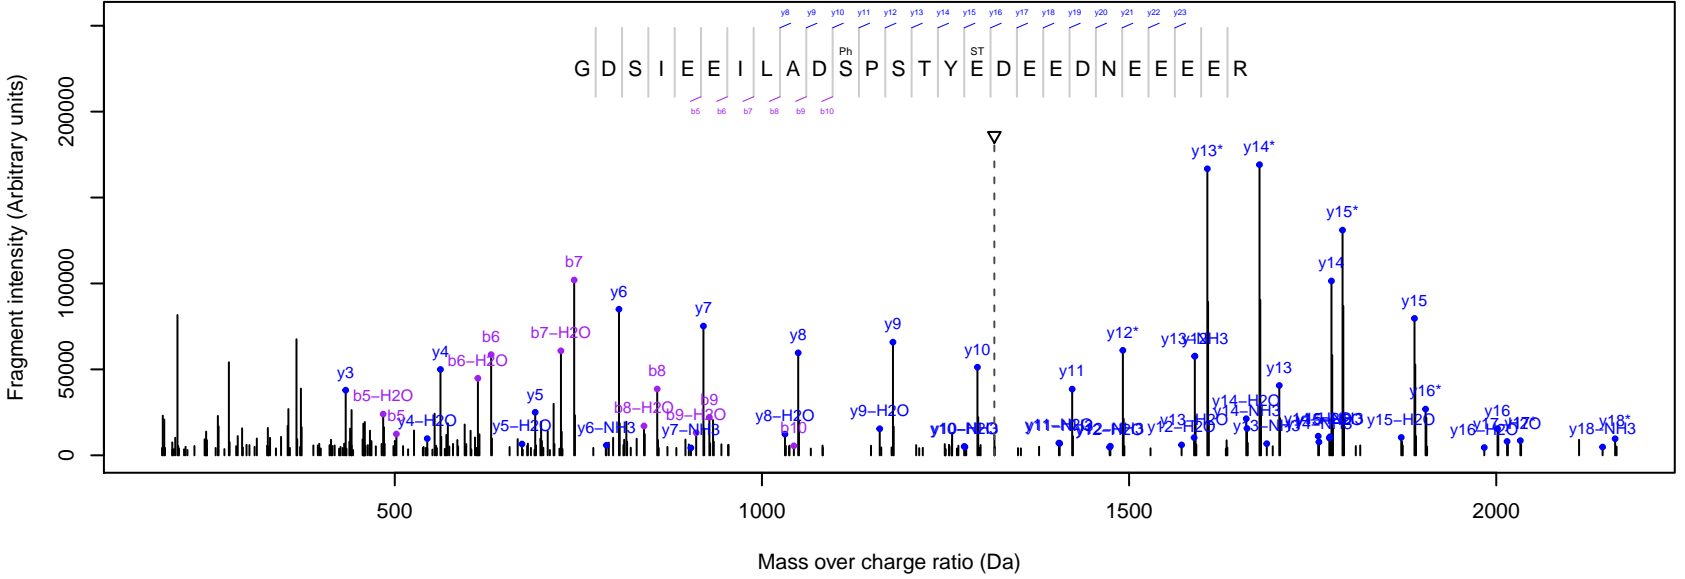

TRDDGDEGLLTHS(Phospho (STY))EEEEHSQDTP(Phospho (STY))DADDGALQ-3+

Source : QE3\_201126\_FR\_TiOx\_hum\_tissue\_Urea\_RNAB\_H Scan : 33434

Andromeda score : 302.18

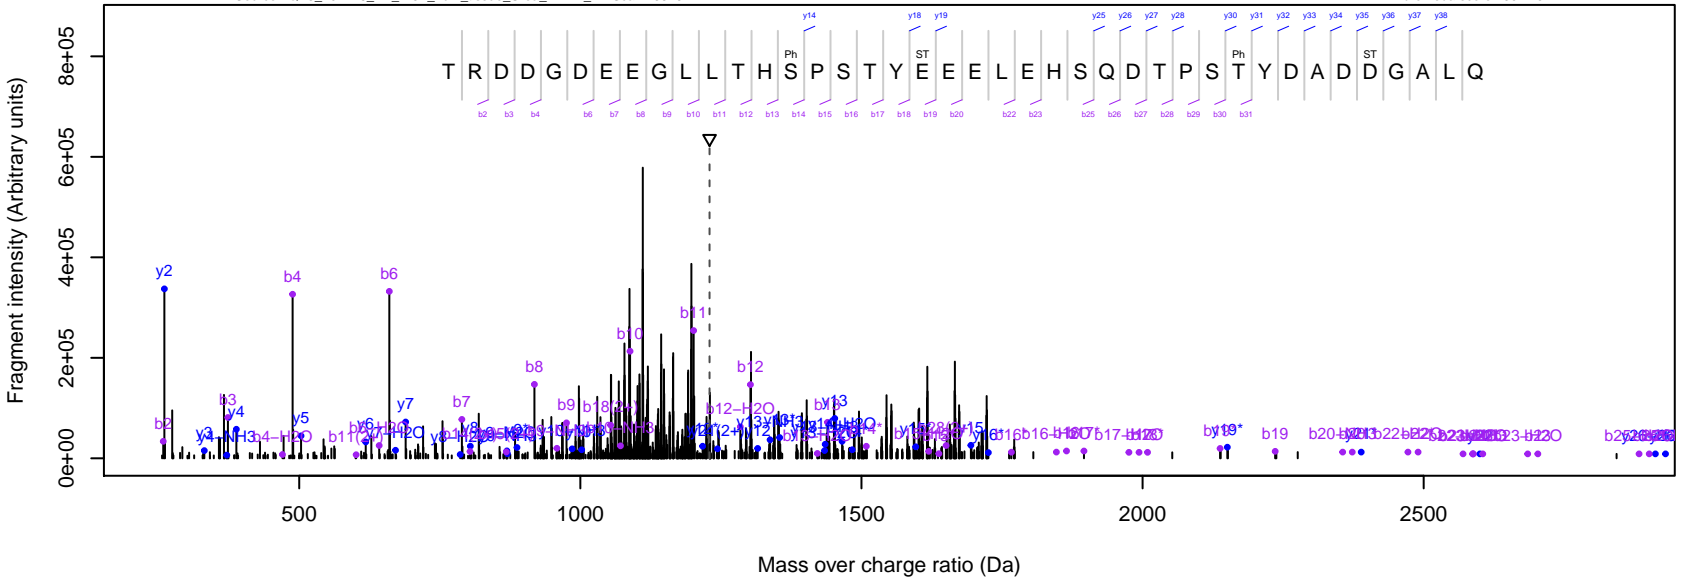





S(Phospho (STY))PSSDLDTDAEGDDFELLLDQSELSQLDPASSR-3+

Source : QE3\_201126\_FR\_TiOx\_hum\_tissue\_Urea\_RNAB\_N Scan : 60516

Andromeda score : 301.92

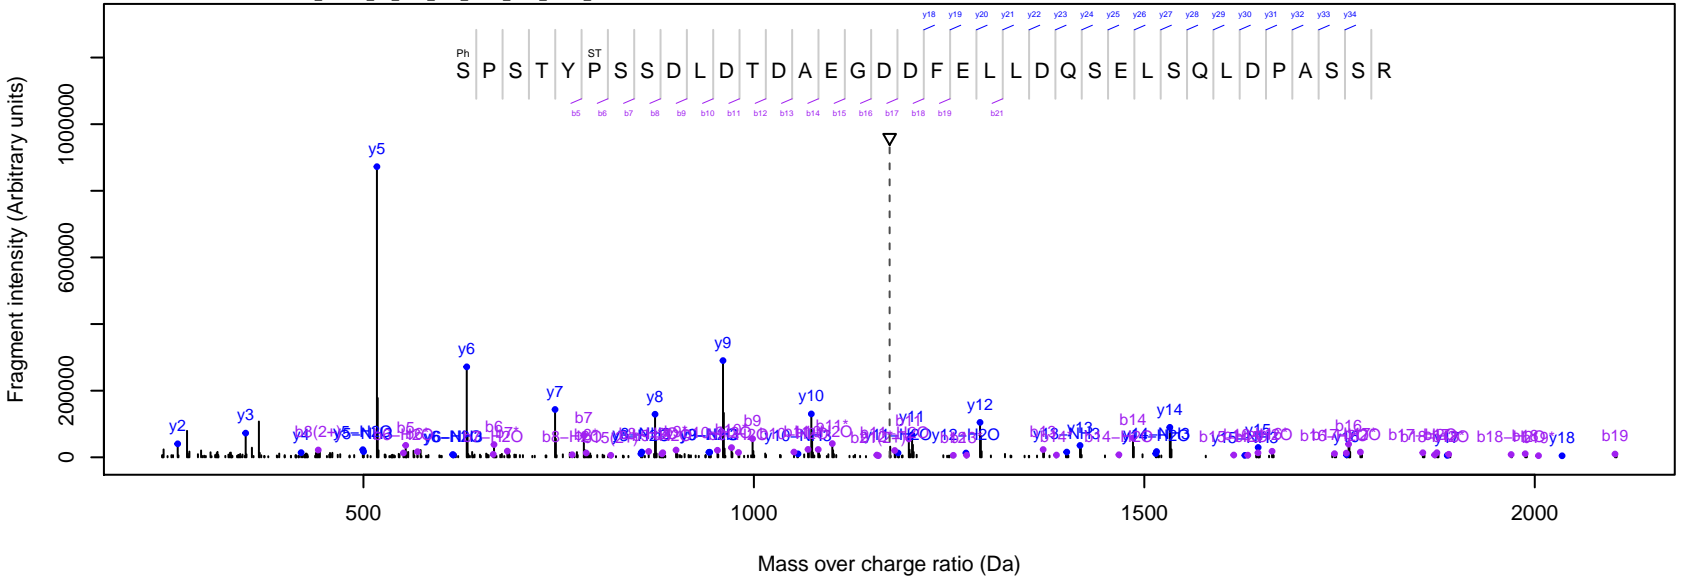

SETSWES(Phospho (STY))PKQIK-2+

Source : QE3\_201126\_FR\_TiOx\_hum\_tissue\_Urea\_RNAB\_N Scan : 14635

Andromeda score : 301.78

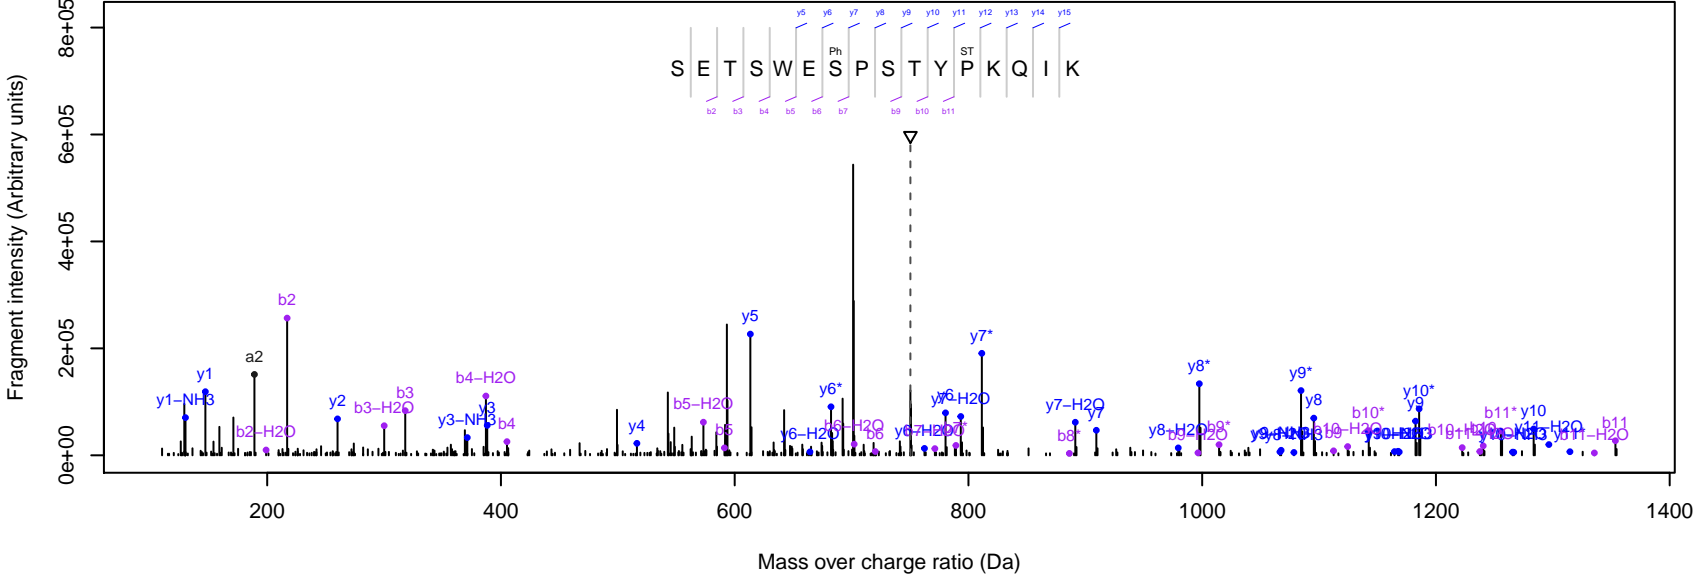

NSADDEELTNDSPSTYLTLSQSK-2+

Source : QE3\_201126\_FR\_TiOx\_hum\_tissue\_Urea\_RNAB\_B Scan : 28144

Andromeda score : 301.77

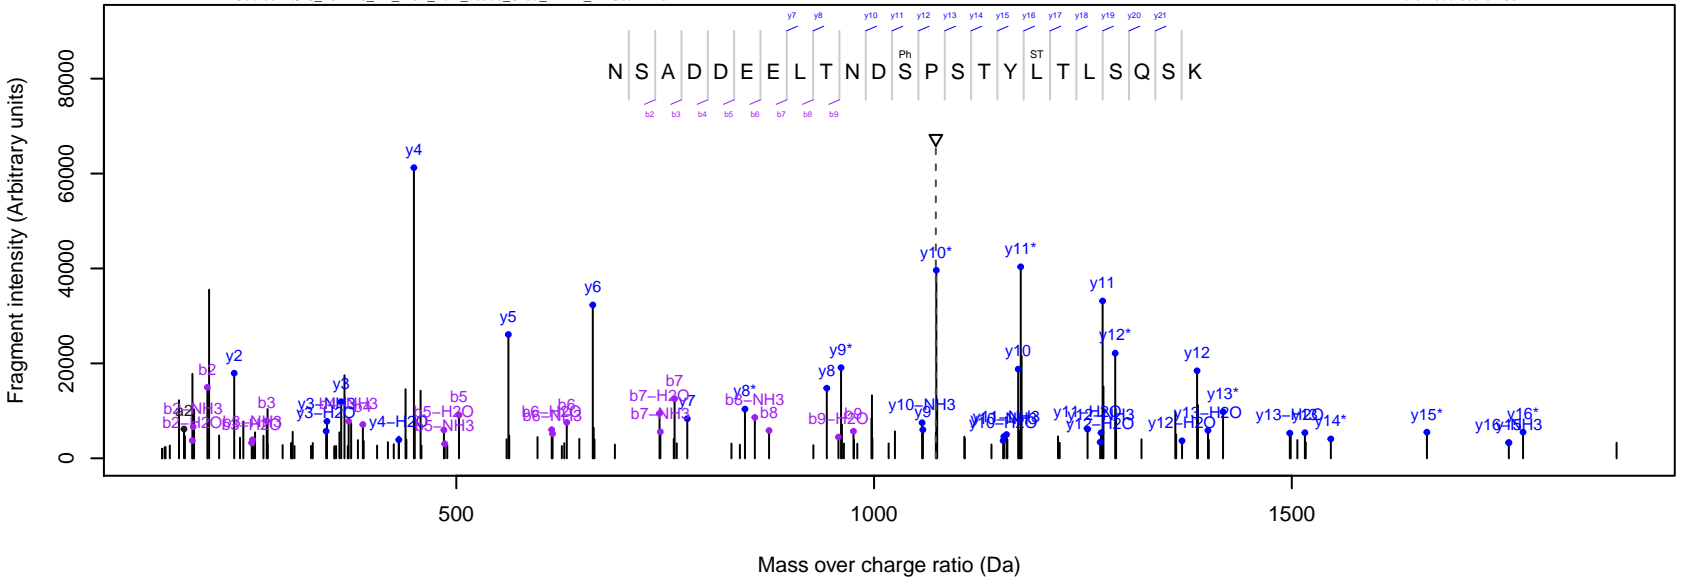

GDS(Phospho (STY))ETDLEALFNAVMNPK-2+

Source : QE3\_201126\_FR\_TiOx\_hum\_tissue\_Urea\_RNAB\_B Scan : 63305

Andromeda score : 301.48

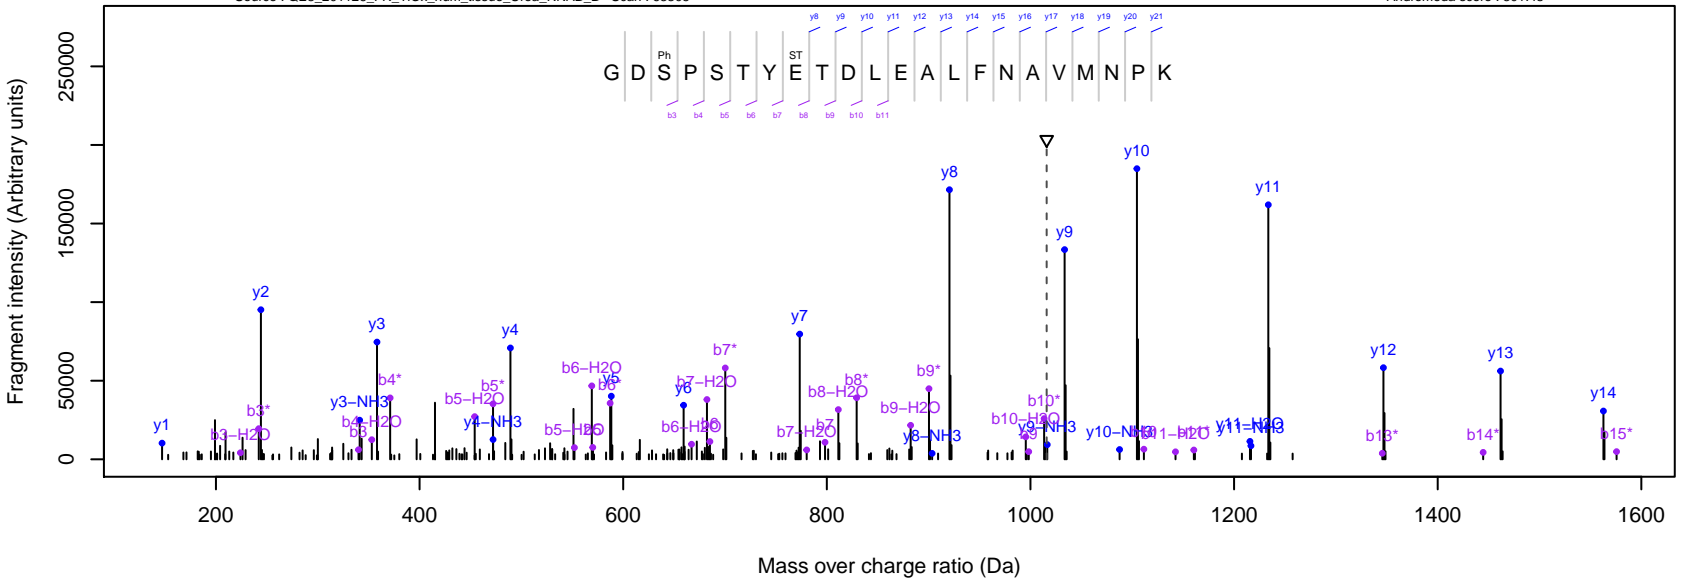

LNS(Phospho (STY))NNALIEFLLEGTPEIR-2+

Source : QE3\_201126\_FR\_TiOx\_hum\_tissue\_Urea\_RNAB\_B Scan : 63136

Andromeda score : 301.34

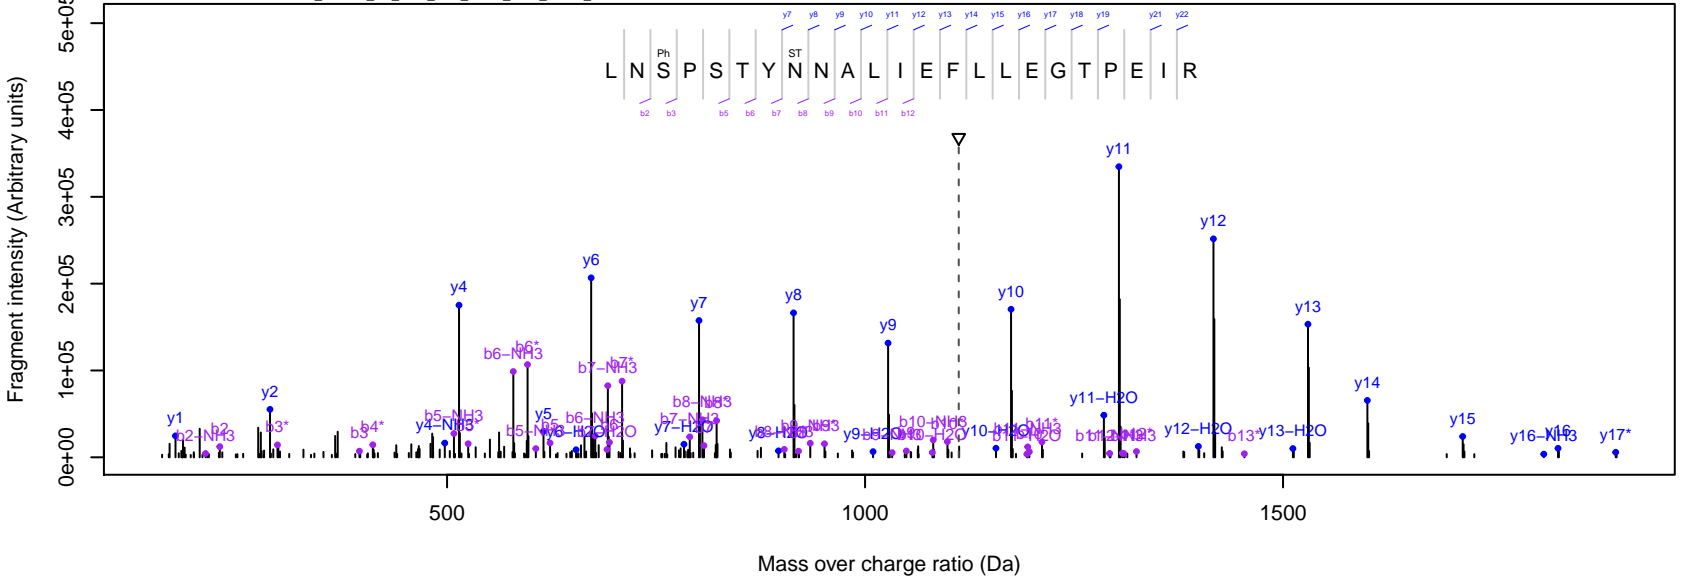

QKDFDIAEQNESSPSTYDEESLRK-3+

Source : QE3\_201126\_FR\_TiOx\_hum\_tissue\_Urea\_RNAB\_N Scan : 17802

Andromeda score : 300.79

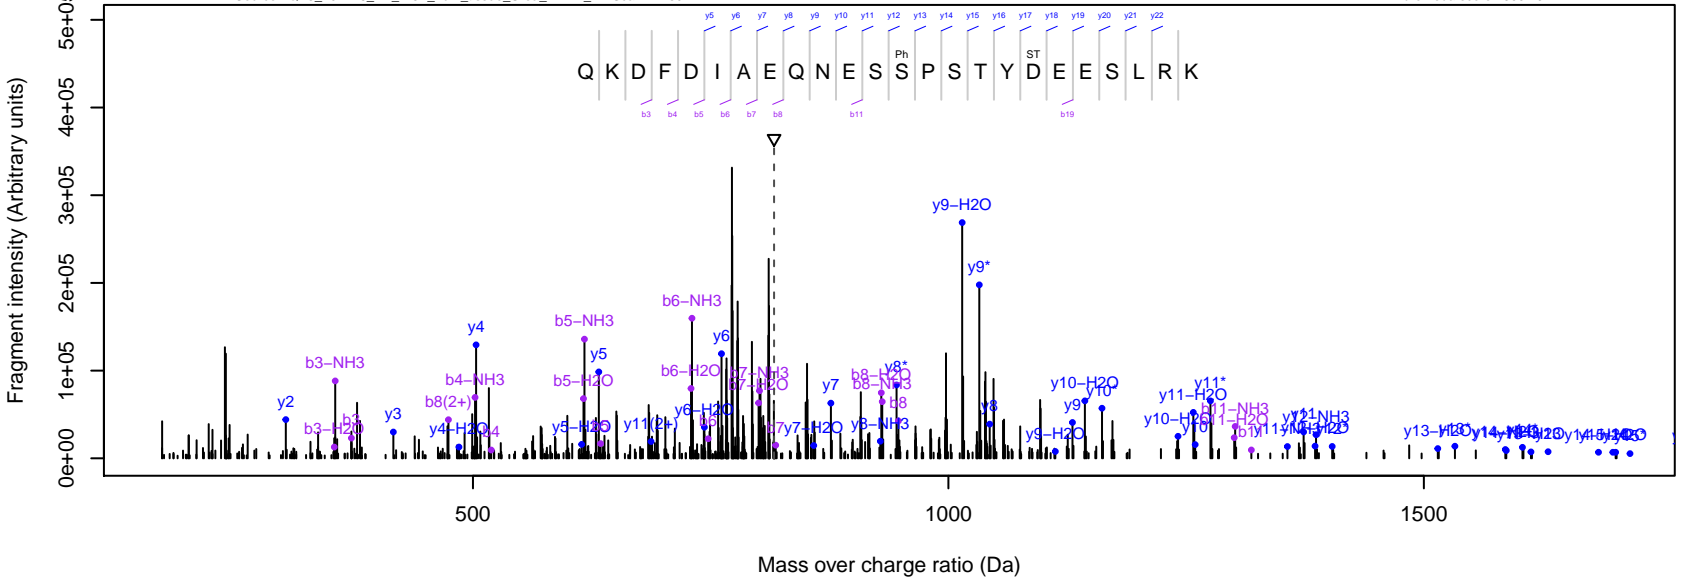

VGGS(Phospho (STY))DEEASGIPSR-2+

Source : QE3\_201126\_FR\_TiOx\_hum\_tissue\_Urea\_RNAB\_H Scan : 15029

Andromeda score : 300.61

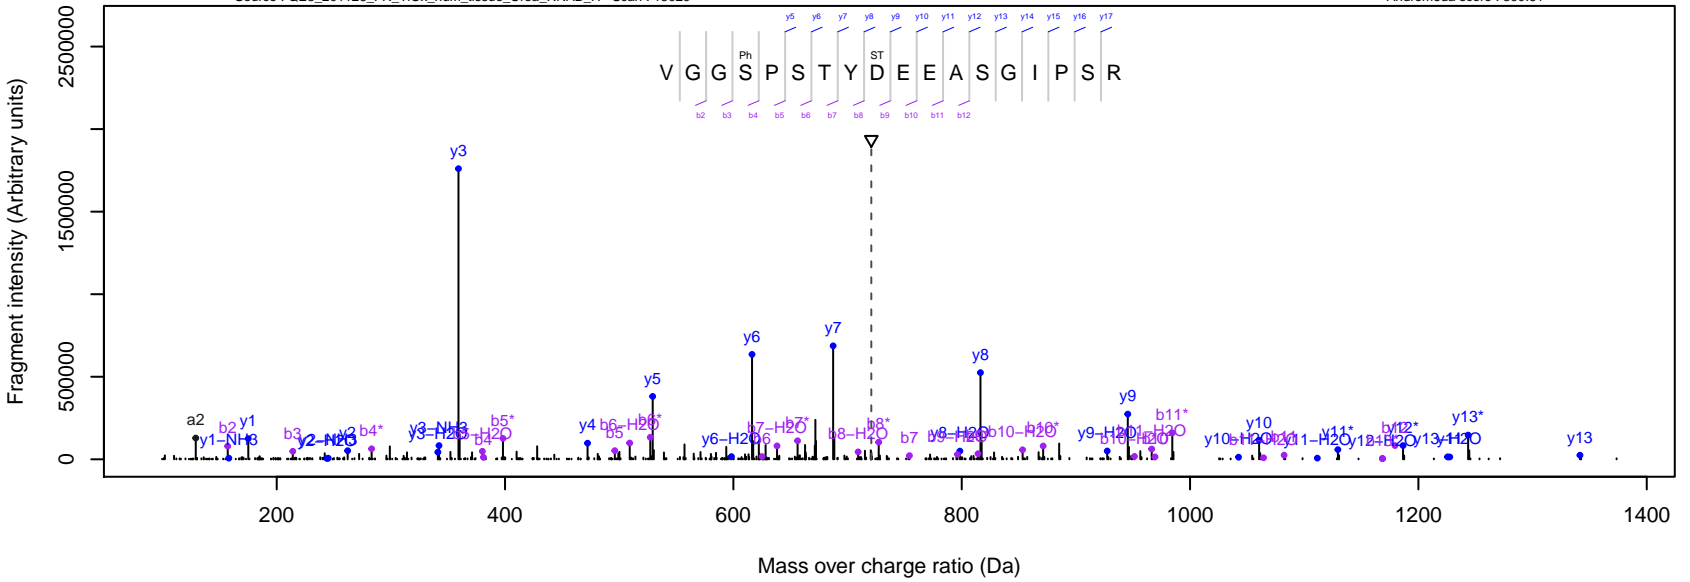

VVDYSQFQES(Phospho (STY))DDADEDYGRDSGPPPTKK-3+

Source : QE3\_201126\_FR\_TiOx\_hum\_tissue\_Urea\_RNAB\_N Scan : 21449

Andromeda score : 300.15

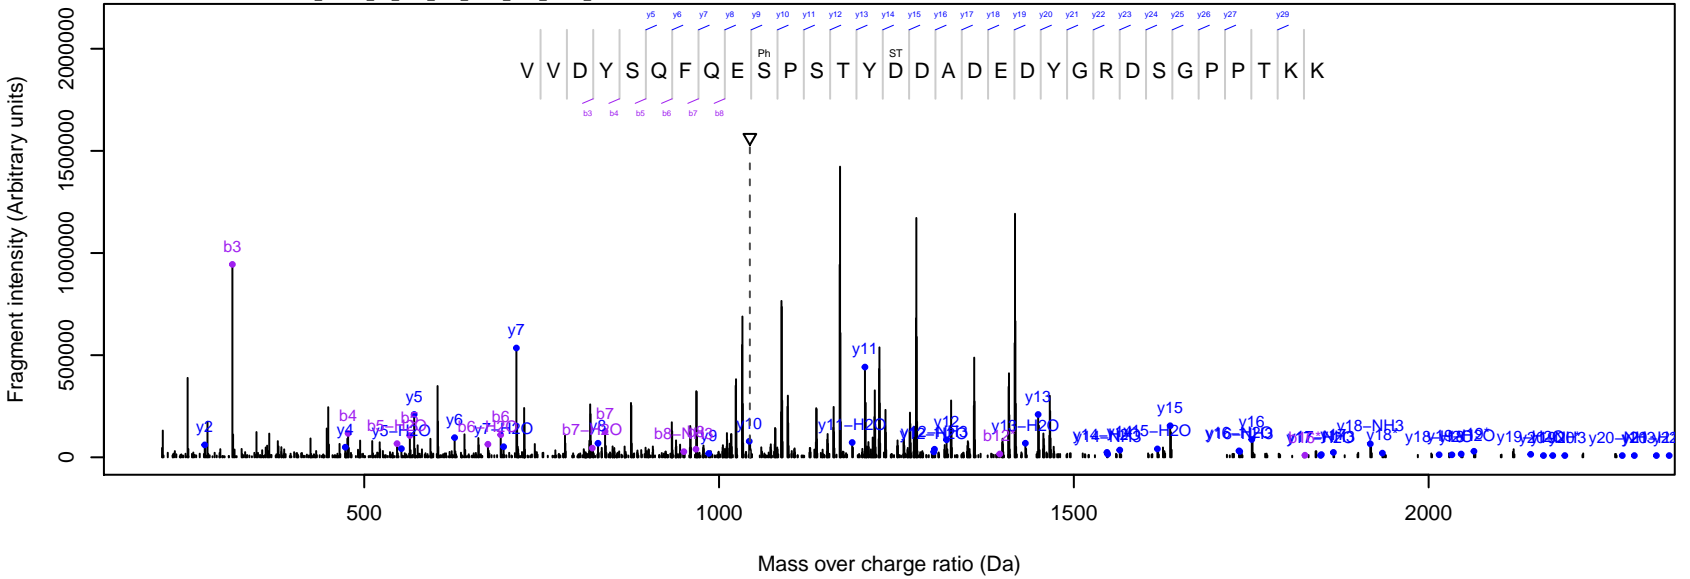

AQTLPTS VVTITSES(Phospho (STY))SPGKR-2+

Source : QE3\_201126\_FR\_TiOx\_hum\_tissue\_Urea\_RNAB\_B Scan : 28246

Andromeda score : 300

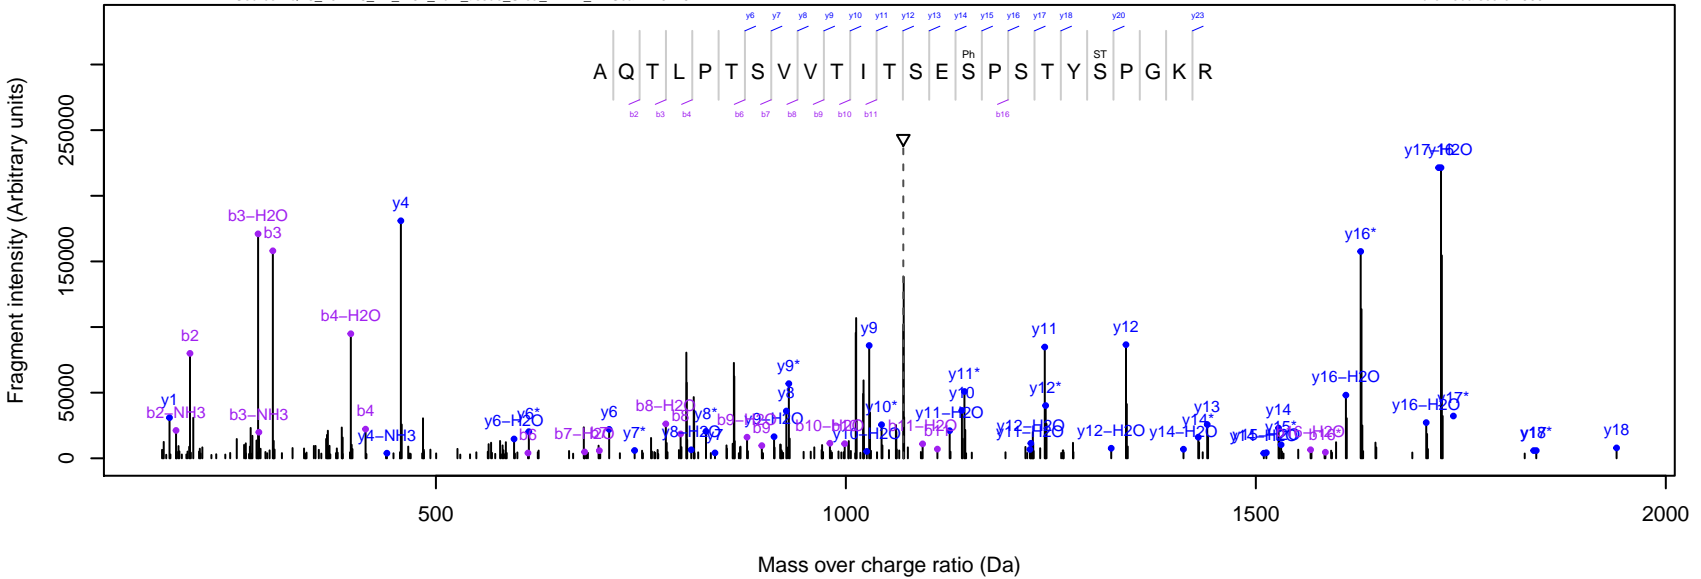

AGLESGAEPGDGDS(Phospho (STY))DTTKKK-3+

Source : QE3\_201126\_FR\_TiOx\_hum\_tissue\_Urea\_RNAB\_H Scan : 6427

Andromeda score : 299.85

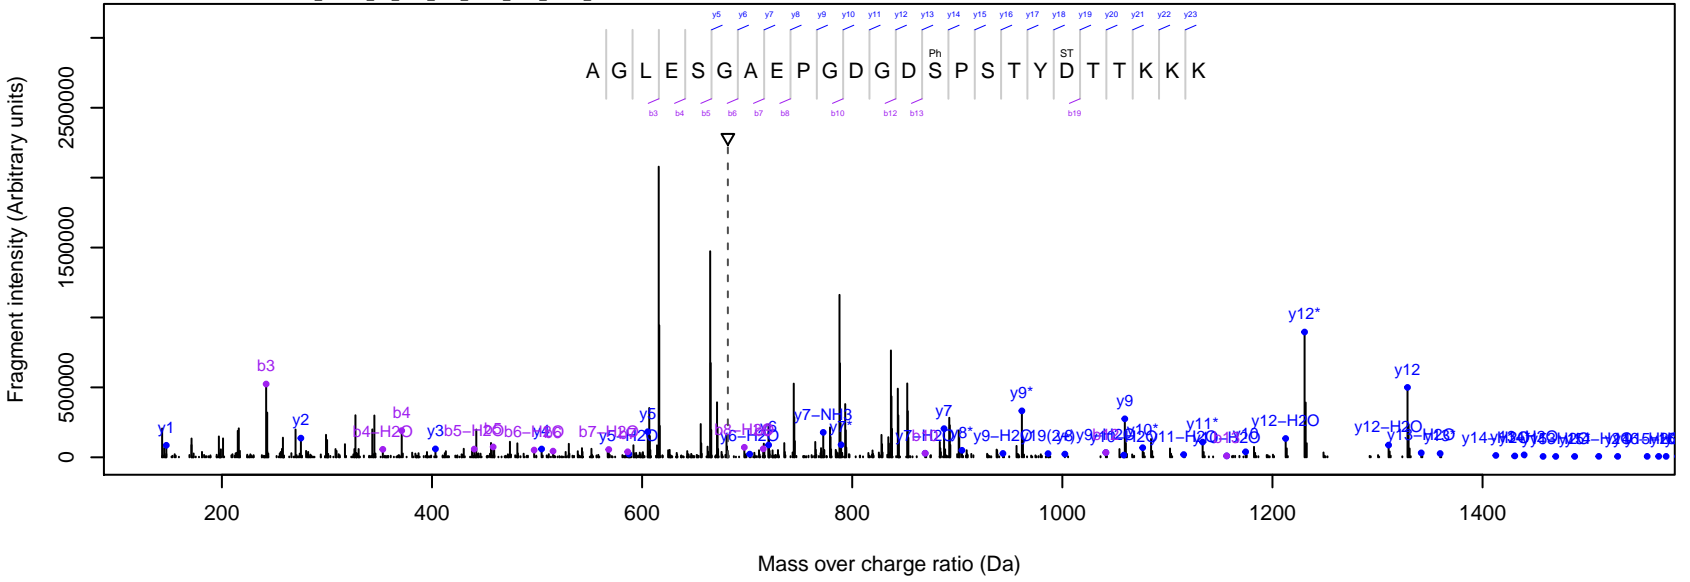

NFS(Phospho (STY))DNQLQEGK-2+

Source : QE3\_201126\_FR\_TiOx\_hum\_tissue\_Urea\_RNAB\_B Scan : 17580

Andromeda score : 299.66

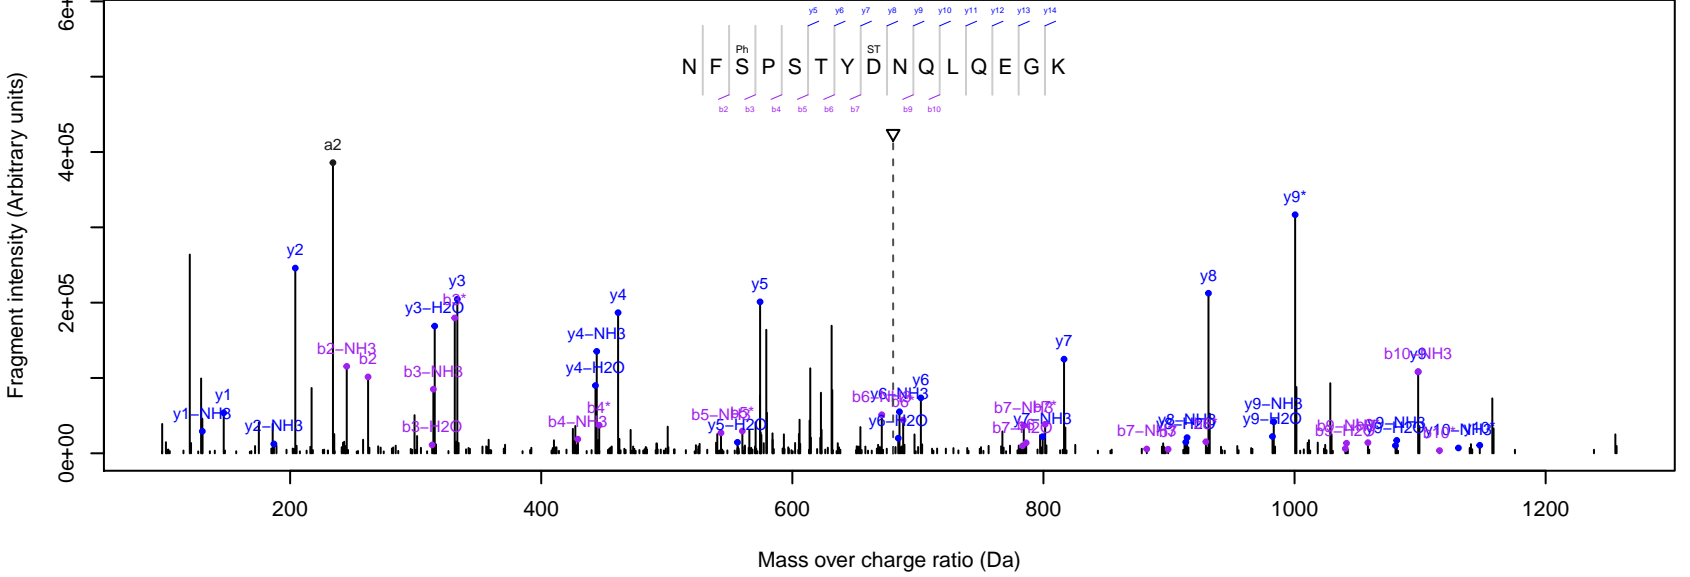

STS(Phospho (STY))FRGGMGSGGLATGIAGGLAGMGGIQNEKETMQSLNDR-3+

Source : QE3\_201126\_FR\_TiOx\_hum\_tissue\_Urea\_RNAB\_B Scan : 47183

Andromeda score : 299.65

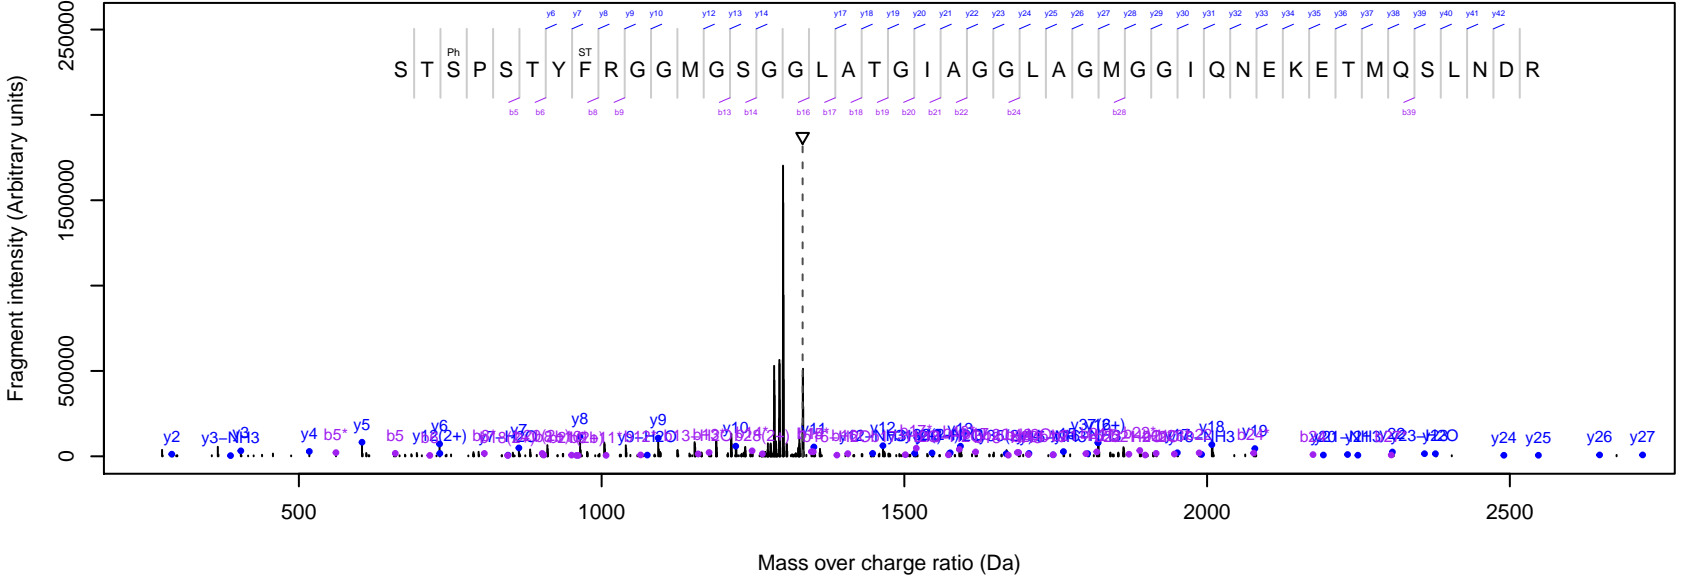

### KNS(Phospho (STY))LISSLEEEVSILNR-2+

Source : QE3\_201126\_FR\_TiOx\_hum\_tissue\_Urea\_RNAB\_H Scan : 58336

Andromeda score : 299.43

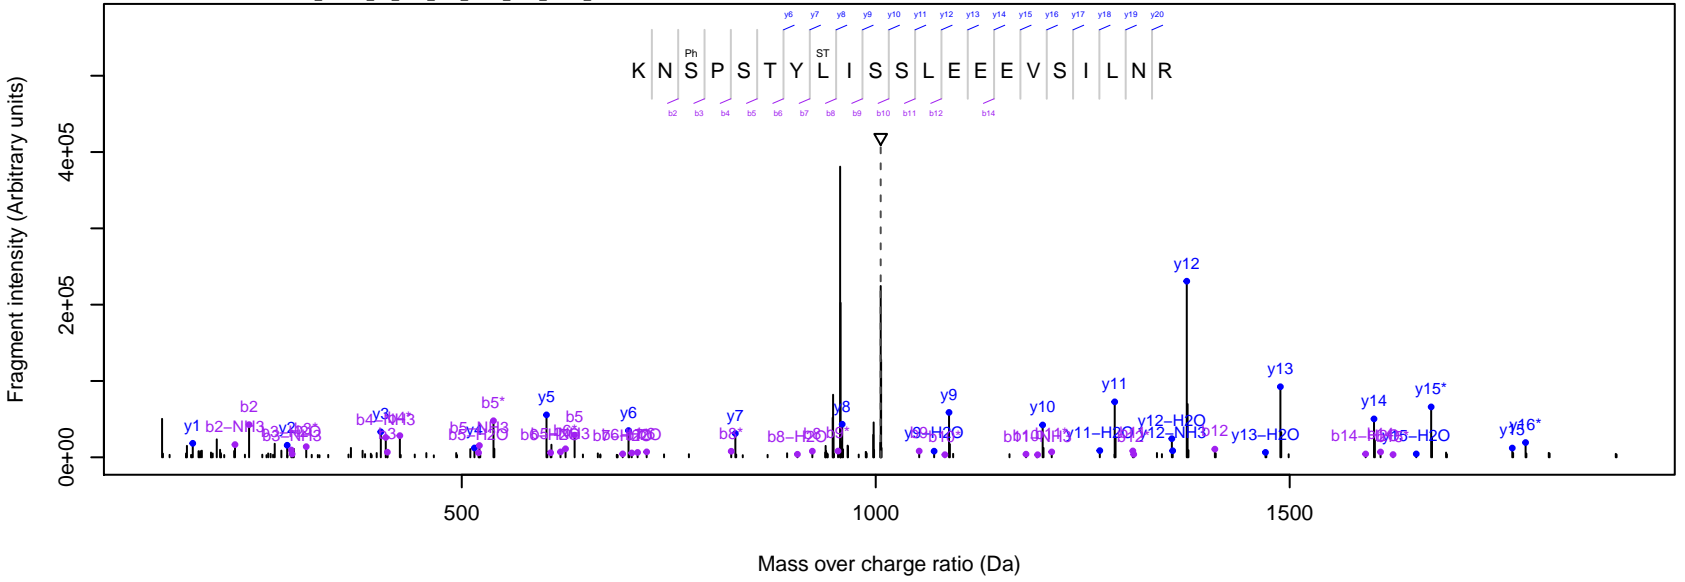

### DM(Oxidation (M))ES(Phospho (STY))PTKLDVTLAK-2+

Source : QE3\_201126\_FR\_TiOx\_hum\_tissue\_Urea\_RNAB\_B Scan : 24626

Andromeda score : 299.38

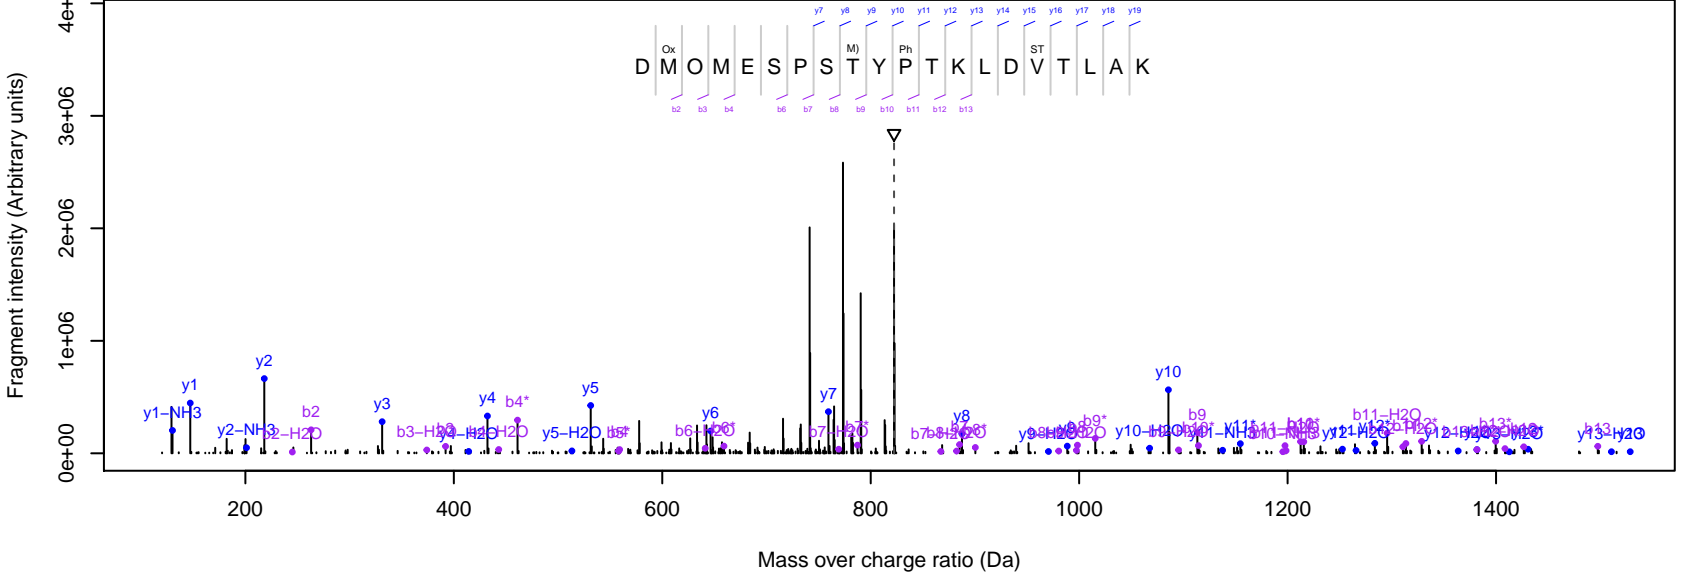

### HNGTGGS(Phospho (STY))YGEKFEDEFILK-4+

Source : QE3\_201126\_FR\_TiOx\_hum\_tissue\_Urea\_RNAB\_B Scan : 27911

Andromeda score : 298.97

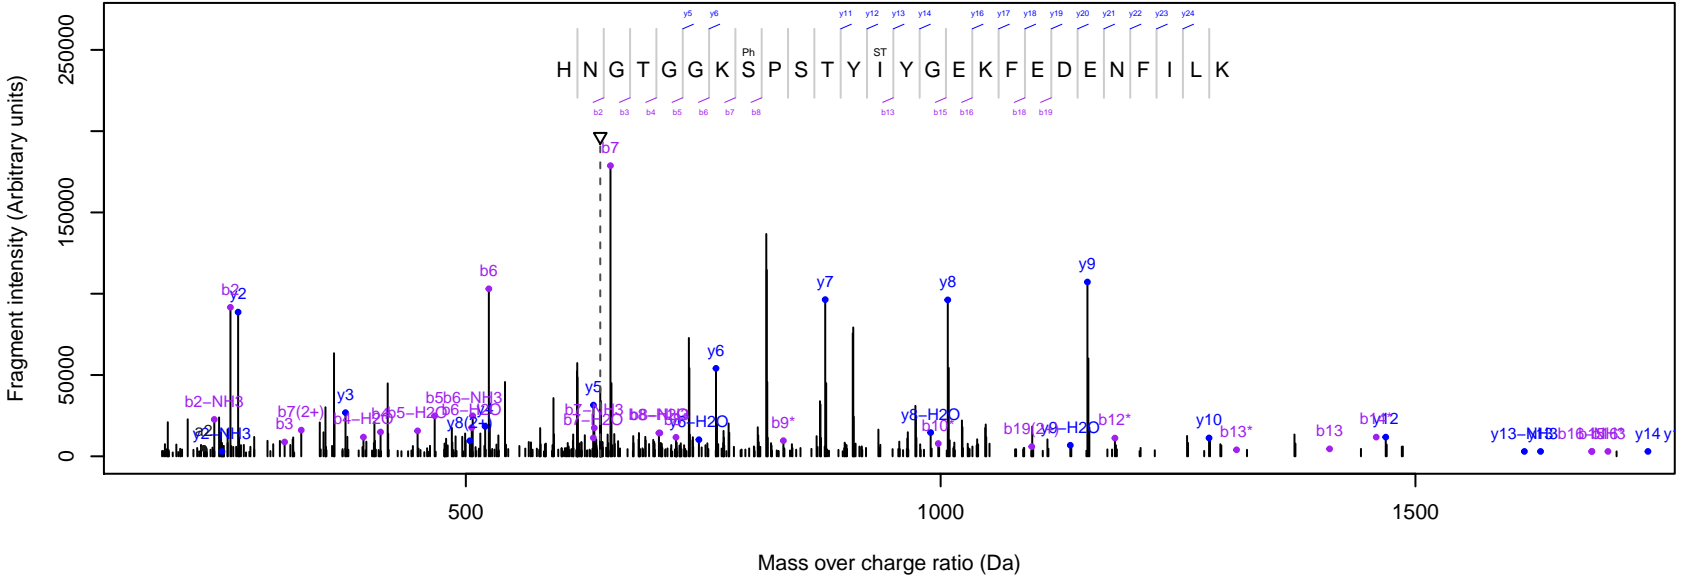

TNTNVNCPICFM(Oxidation (M))PLDVQADREDS(Phospho (STY))RE-3+

Source : QE3\_201126\_FR\_TIOx\_hum\_tissue\_Urea\_RNAB\_B Scan : 40533

Andromeda score : 298.75

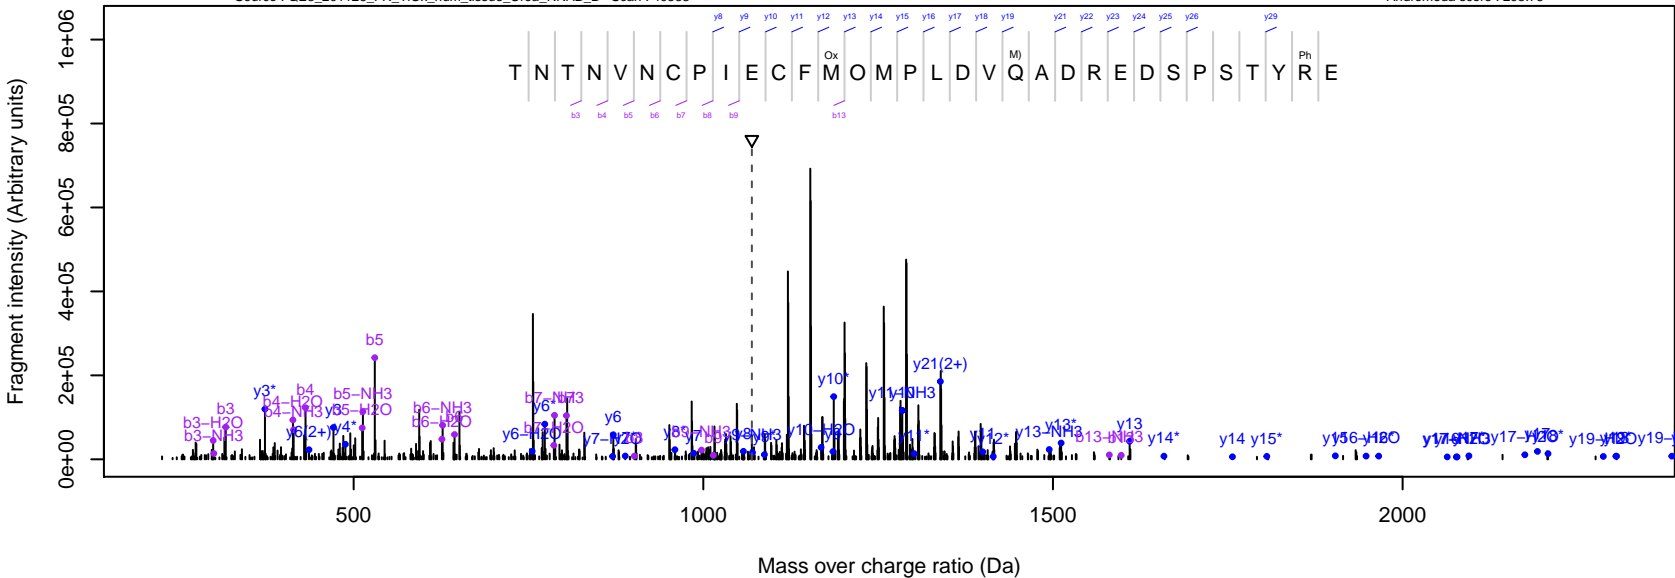

SLS(Phospho (STY))TSGESLYHVLGLDKNATSDDIK-4+

Source : QE3\_201126\_FR\_TIOx\_hum\_tissue\_Urea\_RNAB\_H Scan : 40291

Andromeda score : 298.39

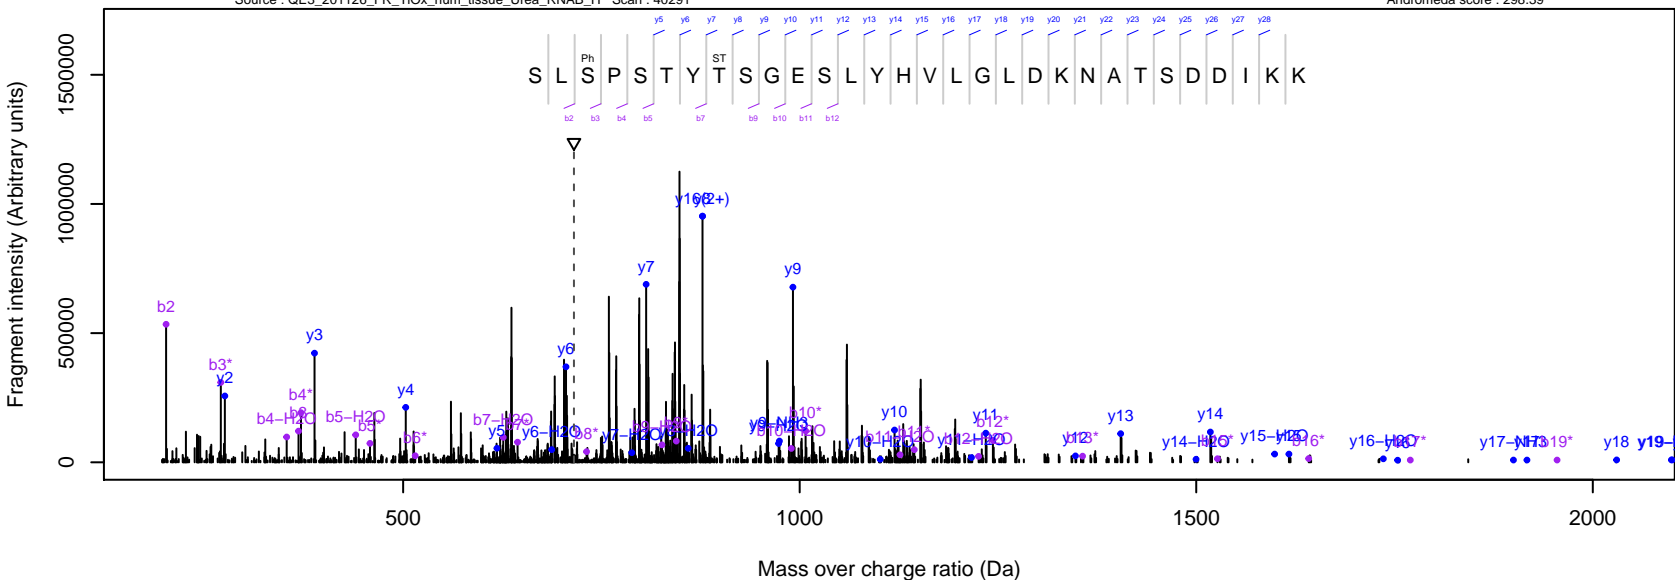

LKDLGHPVEEDEL(Phospho (STY))GDQEDEDES(Phospho (STY))EDPGKDLDDHI-4+

Source : QE3\_201126\_FR\_TIOx\_hum\_tissue\_Urea\_RNAB\_B Scan : 36025

Andromeda score : 297.59

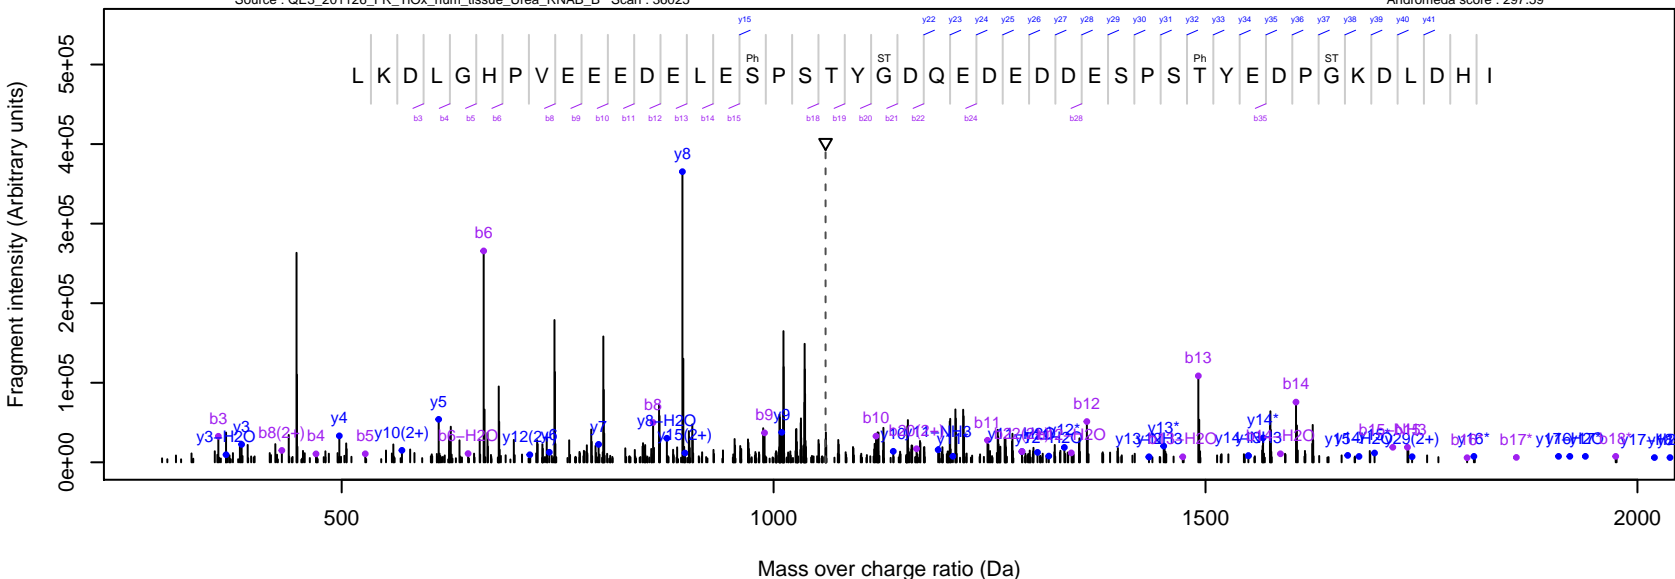

TEPAAEAEASGPSES(Phospho (STY))PSPPAEEELPGSHAEPVPAQGEAPGEQAR-4+

Source : QE3\_201126\_FR\_TIOx\_hum\_tissue\_Urea\_RNAB\_N Scan : 32053

Andromeda score : 297.18

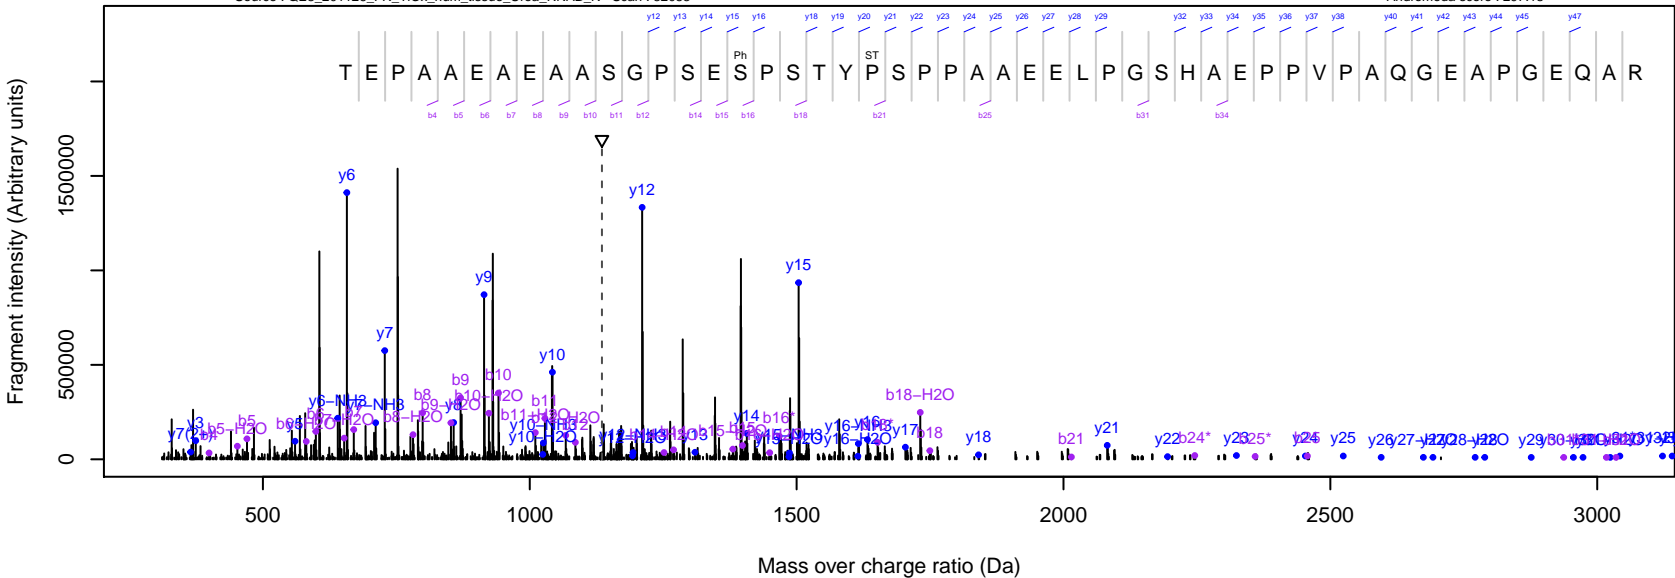

FAS(Phospho (STY))DDEHDEHDEHDENGATGPVK-2+

Source : QE3\_201126\_FR\_TIOx\_hum\_tissue\_Urea\_RNAB\_H Scan : 9636

Andromeda score : 296.73

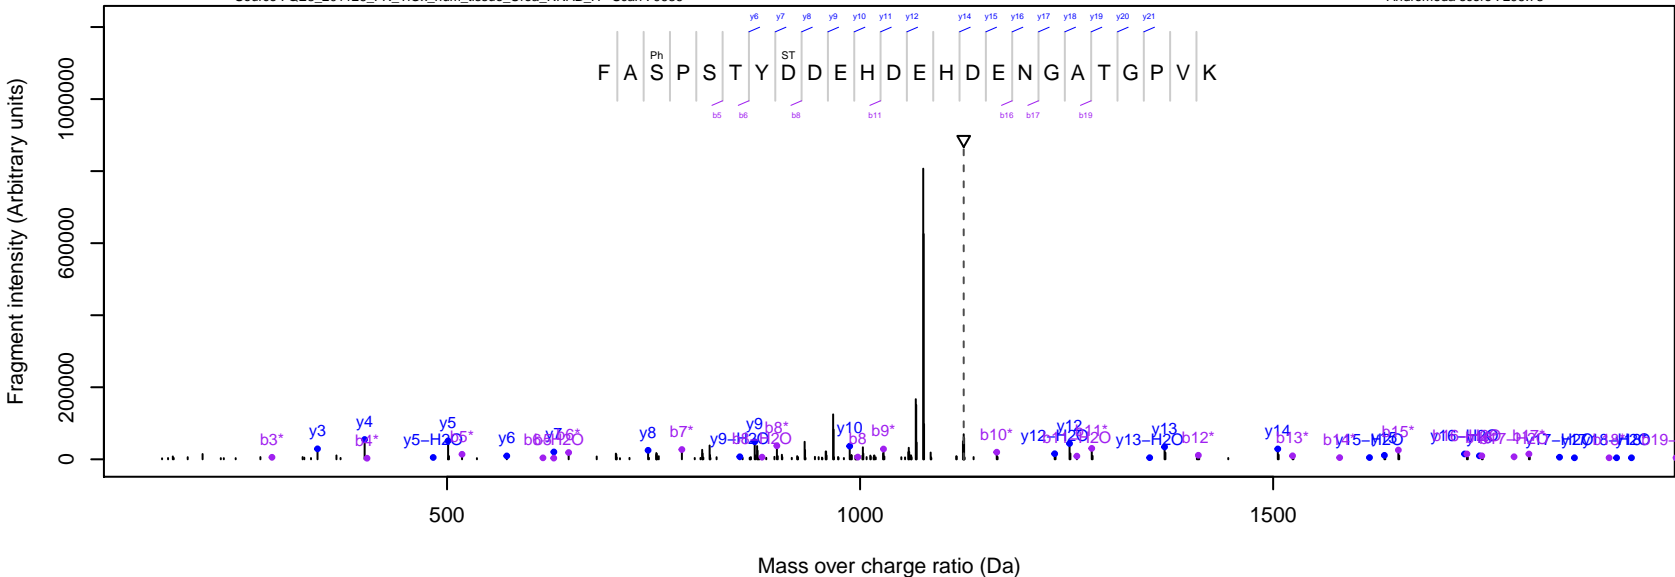

HIKEEPLS(Phospho (STY))EEEPCTSTAIASPEK-2+

Source : QE3\_201126\_FR\_TIOx\_hum\_tissue\_Urea\_RNAB\_N Scan : 20378

Andromeda score : 296.45

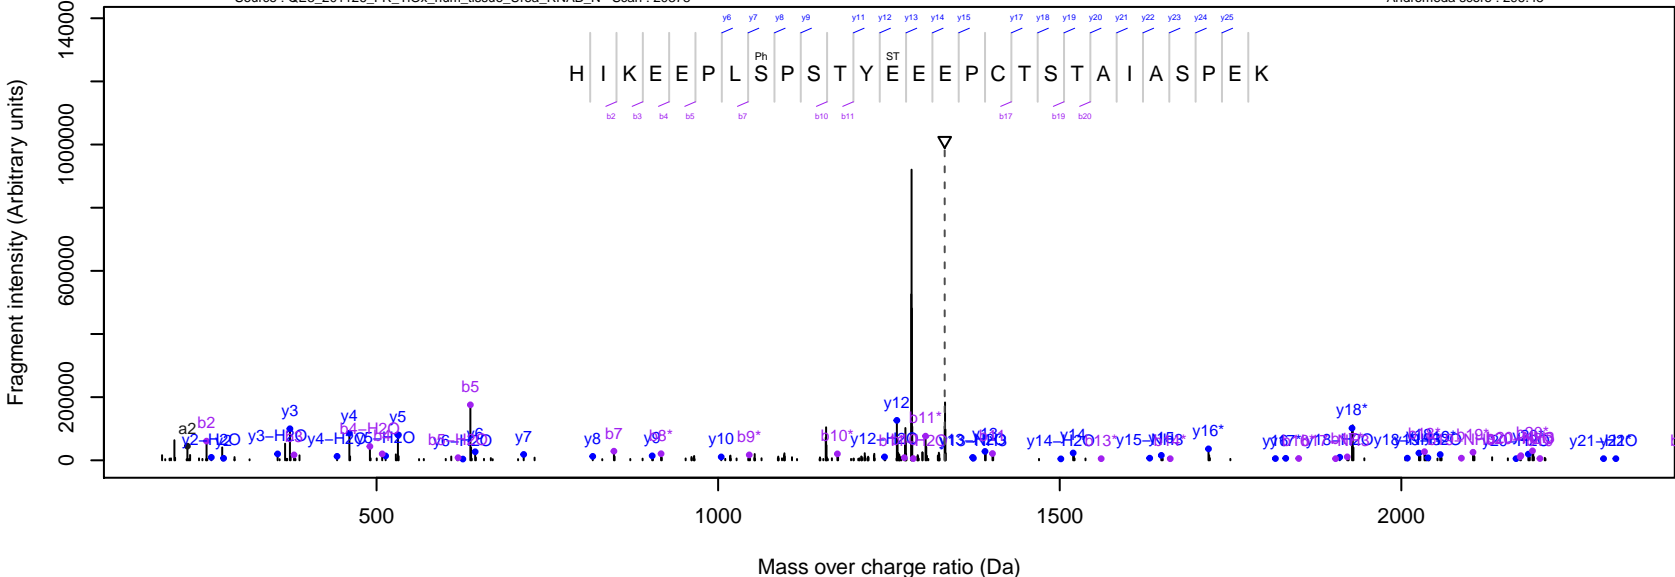



GLKEGM(Oxidation (M))NPSYDEYADS(Phospho (STY))DEDQHDAYLER-3+

Source : QE3\_201126\_FR\_TiOx\_hum\_tissue\_Urea\_RNAB\_B Scan : 22790

Andromeda score : 296.41

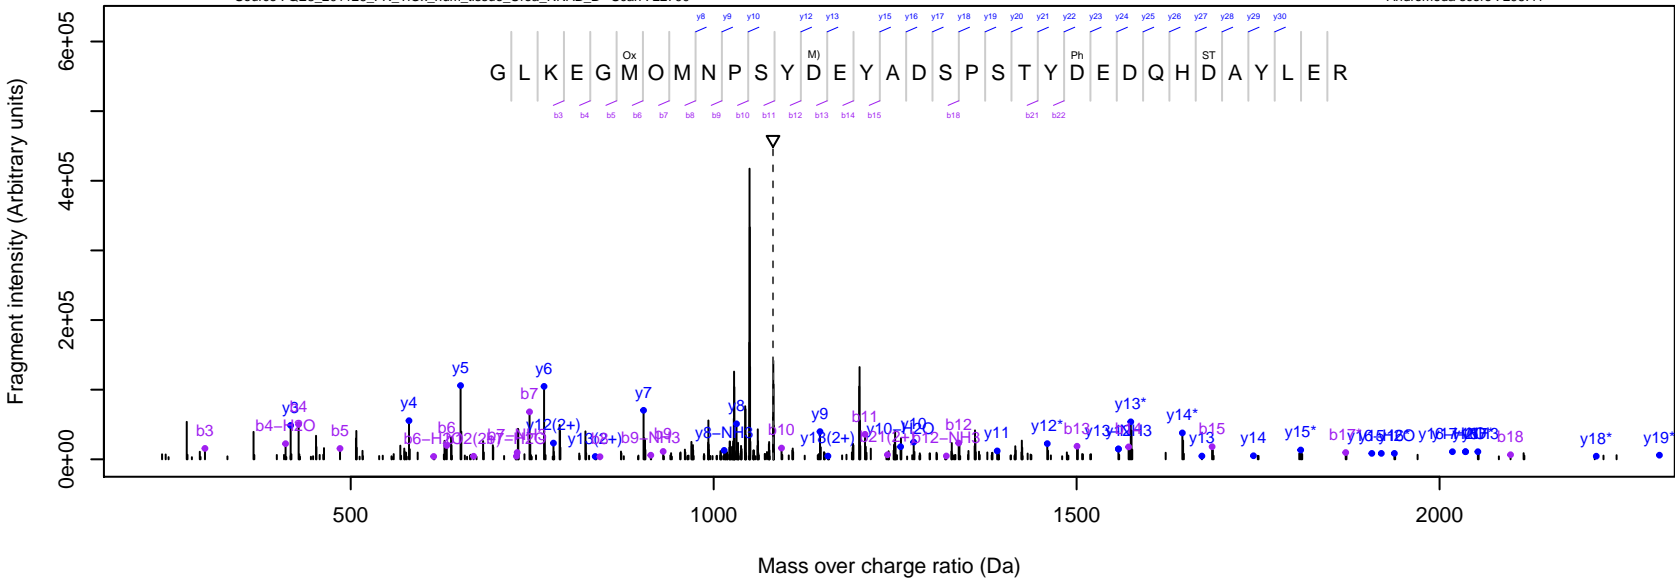

SLDS(Phospho (STY))DES(Phospho (STY))EDEEDDYQK-2+

Source : QE3\_201126\_FR\_TiOx\_hum\_tissue\_Urea\_RNAB\_H Scan : 21483

Andromeda score : 296.35

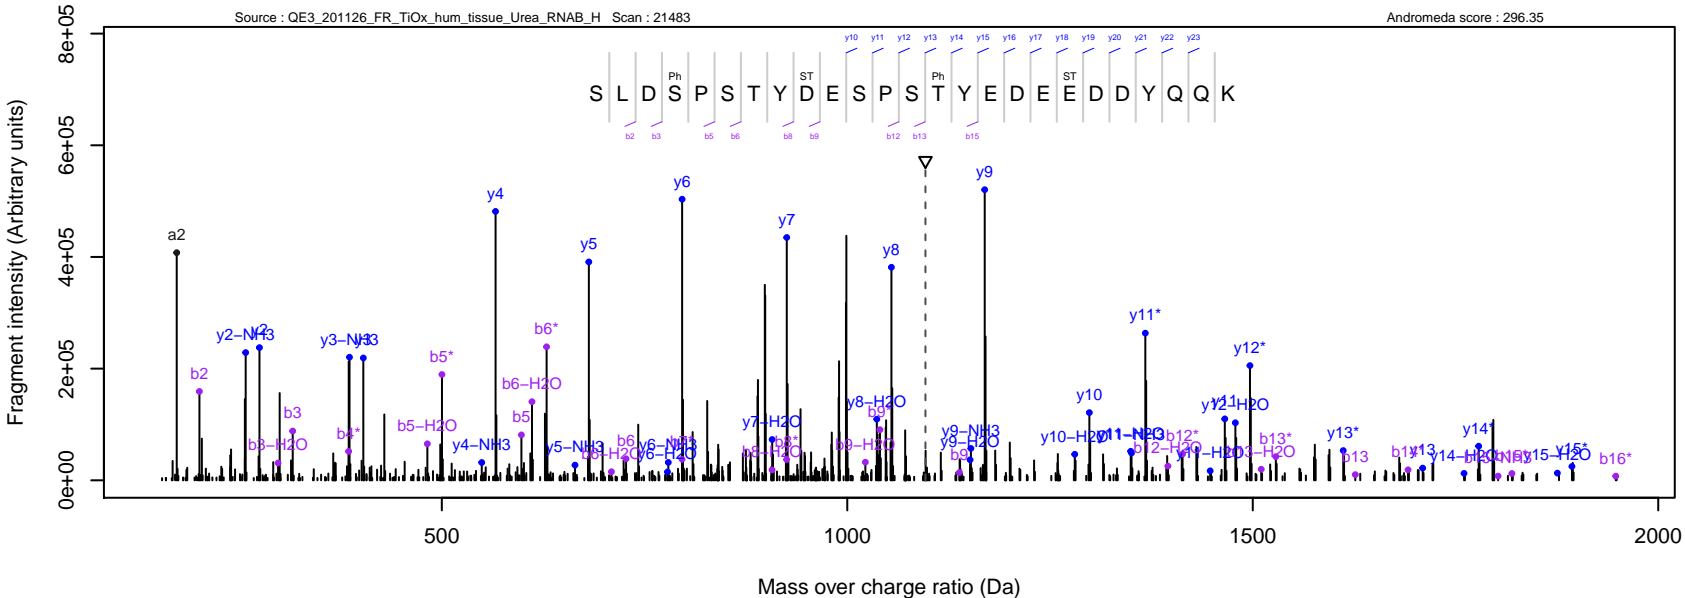

ENGVCCLDQGINGLPEFEEGSKT(Phospho (STY))SPK-3+

Source : QE3\_201126\_FR\_TiOx\_hum\_tissue\_Urea\_RNAB\_N Scan : 41340

Andromeda score : 296.34

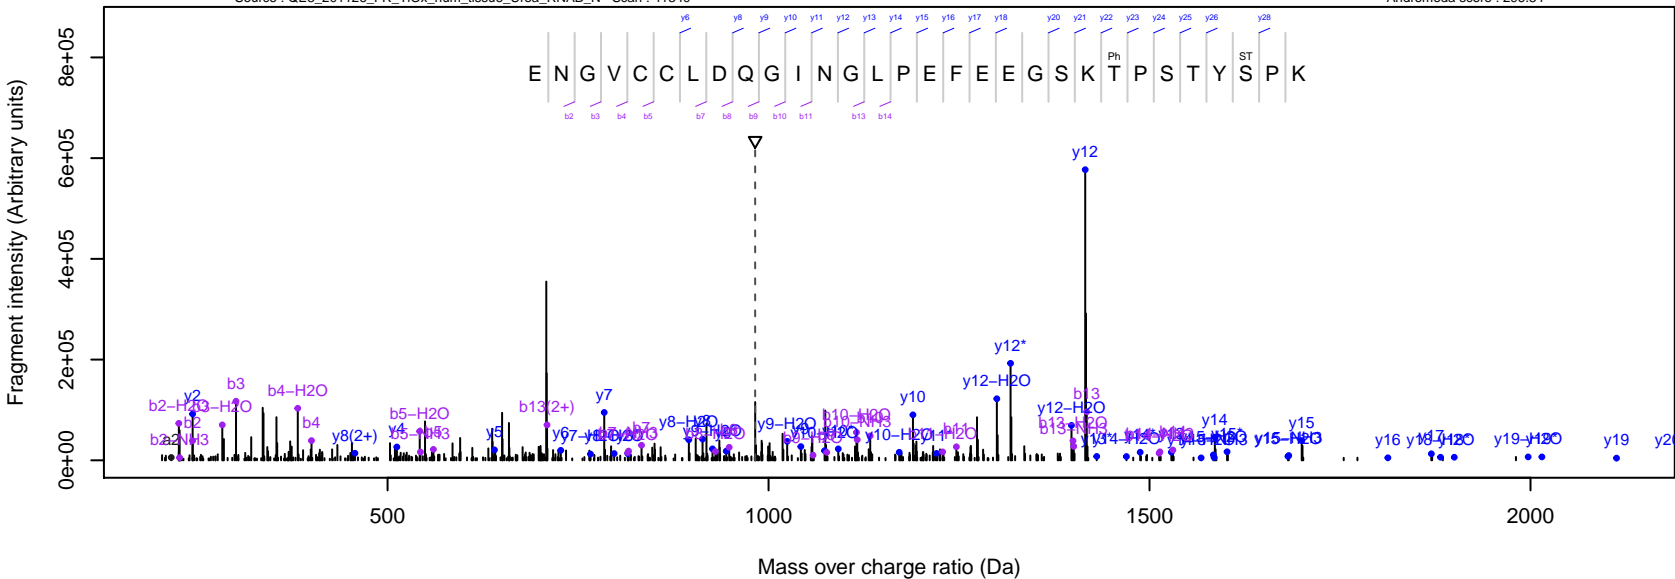

ISLPLPNFS(Phospho (STY))SLNLR-2+

Source : QE3\_201126\_FR\_TiOx\_hum\_tissue\_Urea\_RNAB\_H Scan : 61144

Andromeda score : 296.22

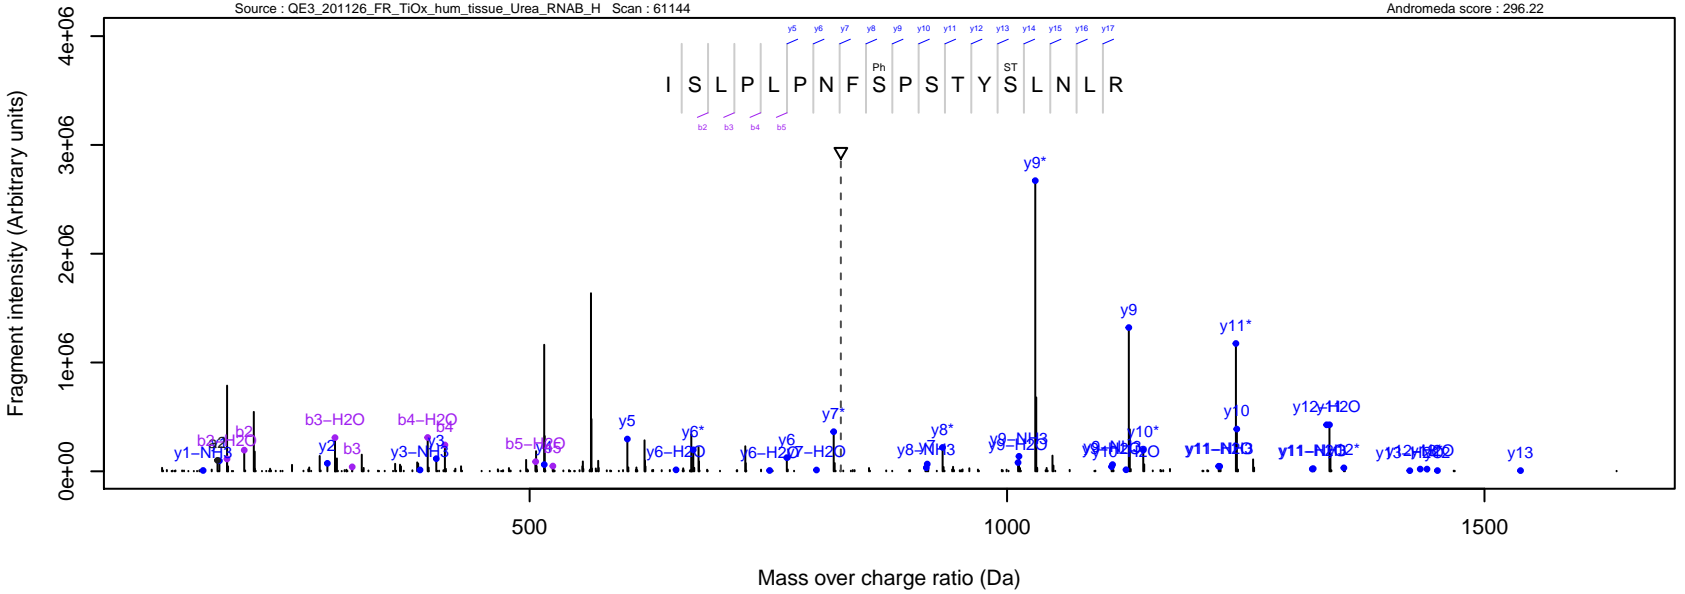

DKDDQEWESPS(Phospho (STY))PPKPTVFISGVIAR-3+

Source : QE3\_201126\_FR\_TiOx\_hum\_tissue\_Urea\_RNAB\_H Scan : 49179

Andromeda score : 295.78

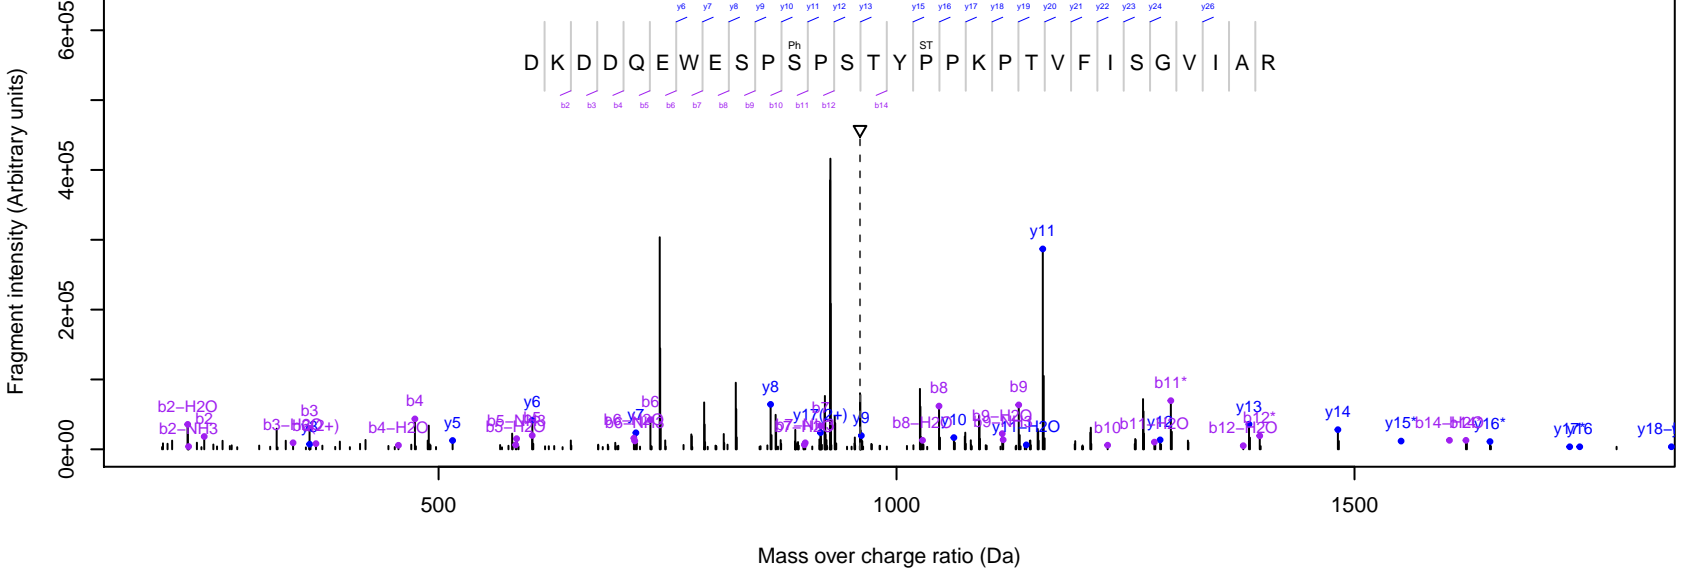

AQAVS(Phospho (STY))EEEEEEGKSSSPK-2+

Source : QE3\_201126\_FR\_TiOx\_hum\_tissue\_Urea\_RNAB\_B Scan : 9274

Andromeda score : 295.65

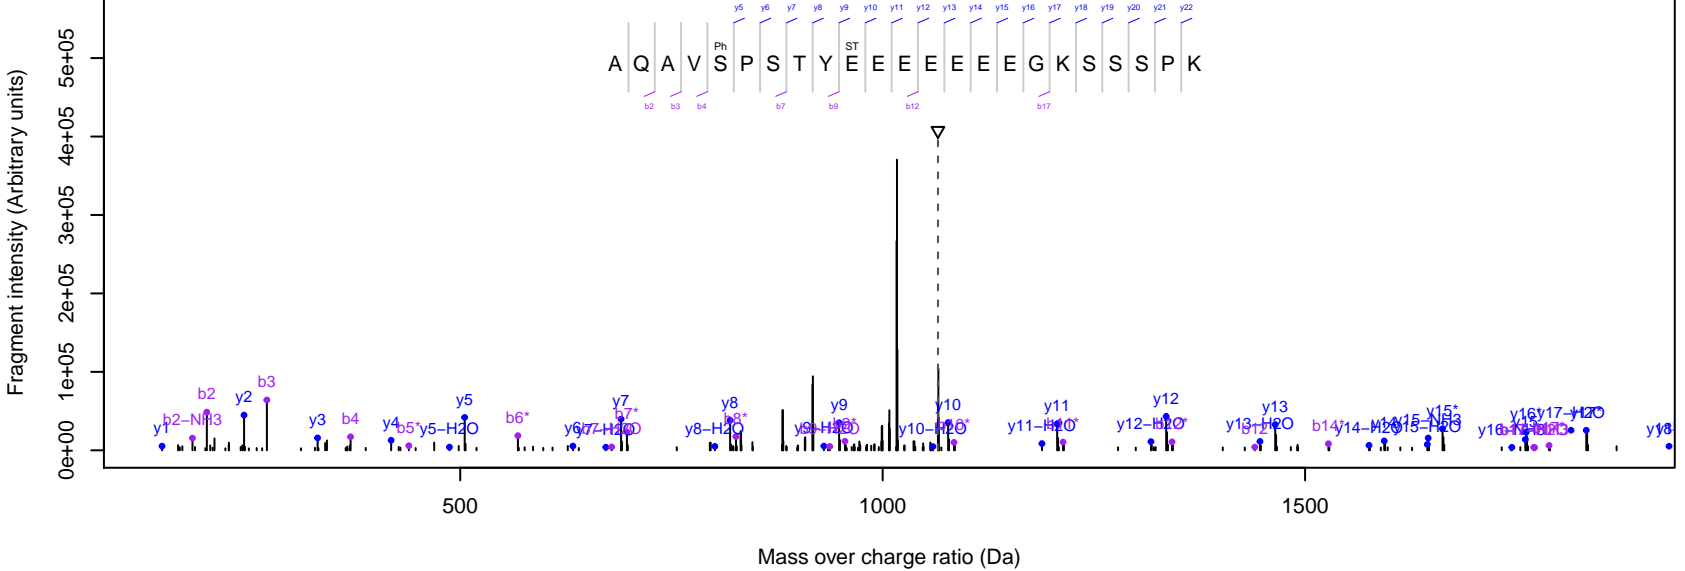

SAS(Phospho (STY))ADNLTLP-2+

Source : QE3\_201126\_FR\_TiOx\_hum\_tissue\_Urea\_RNAB\_H Scan : 24074

Andromeda score : 295.26

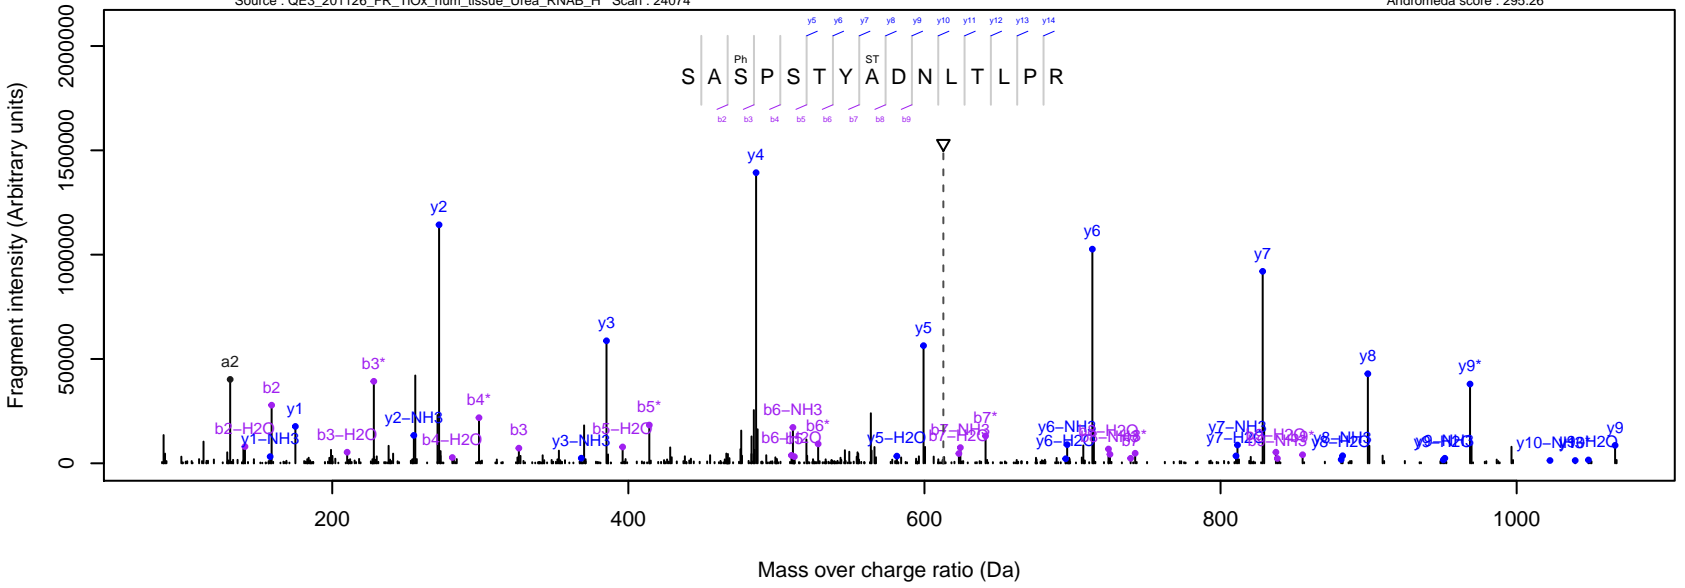

HYEDGYPGSDNYGS(Phospho (STY))LSR-2+

Source : QE3\_201126\_FR\_TiOx\_hum\_tissue\_Urea\_RNAB\_H Scan : 20204

Andromeda score : 295.17

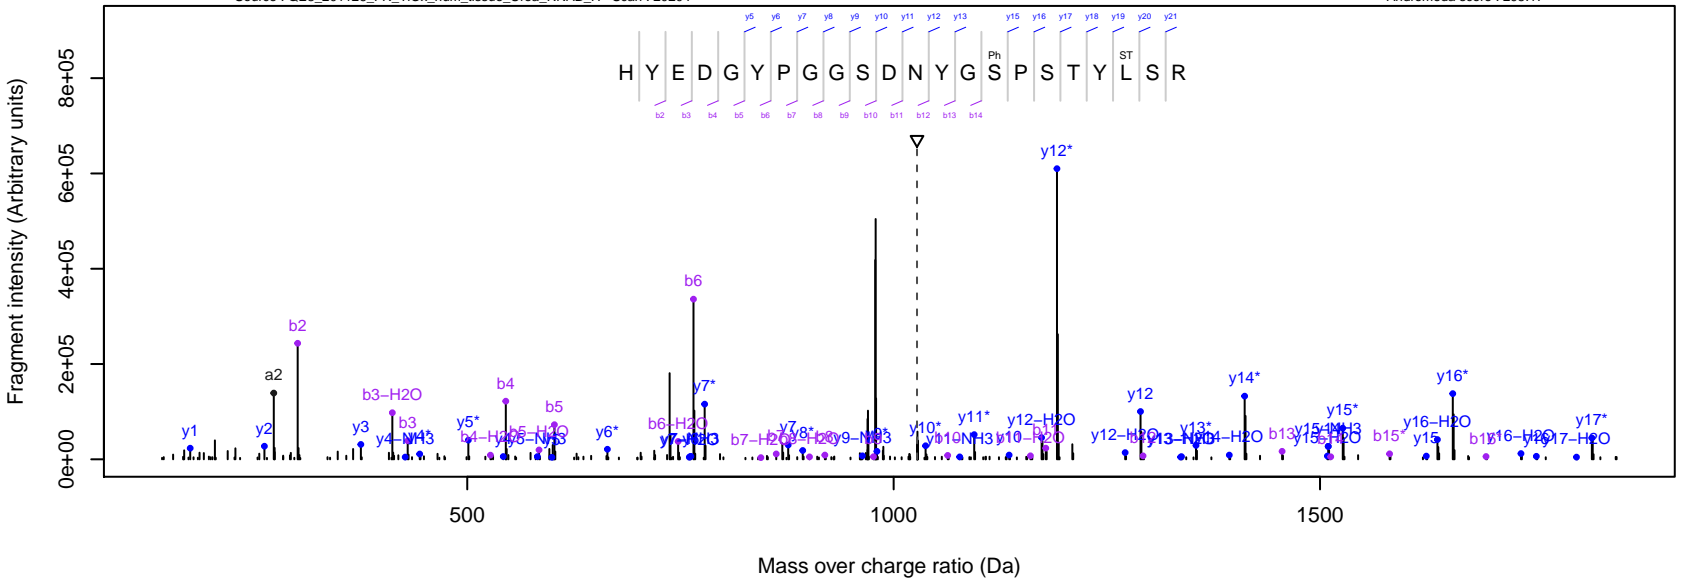

SAS(Phospho (STY))SDTSEELNSQDSPK-2+

Source : QE3\_201126\_FR\_TiOx\_hum\_tissue\_Urea\_RNAB\_N Scan : 15053

Andromeda score : 295.12

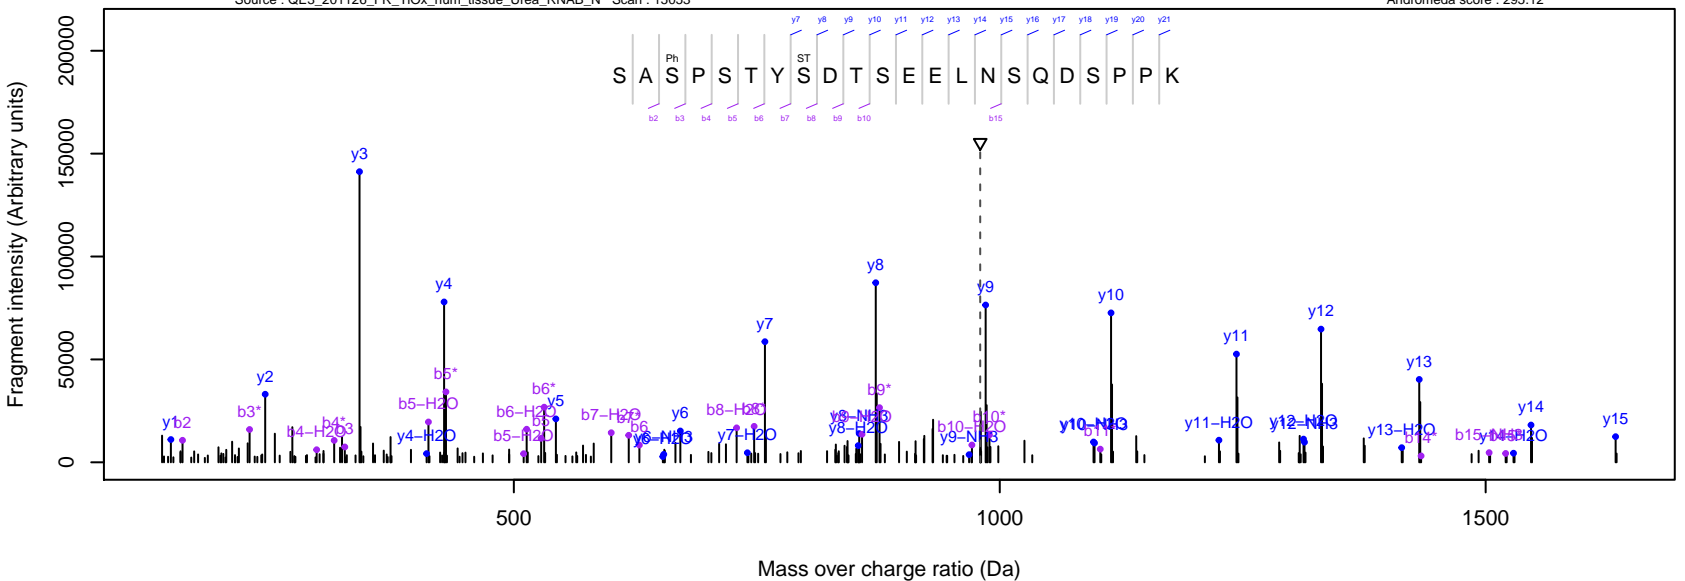

DIKEES(Phospho (STY))DEEEEDDEESGLR-3+

Source : QE3\_201126\_FR\_TiOx\_hum\_tissue\_Urea\_RNAB\_B Scan : 13287

Andromeda score : 295.01

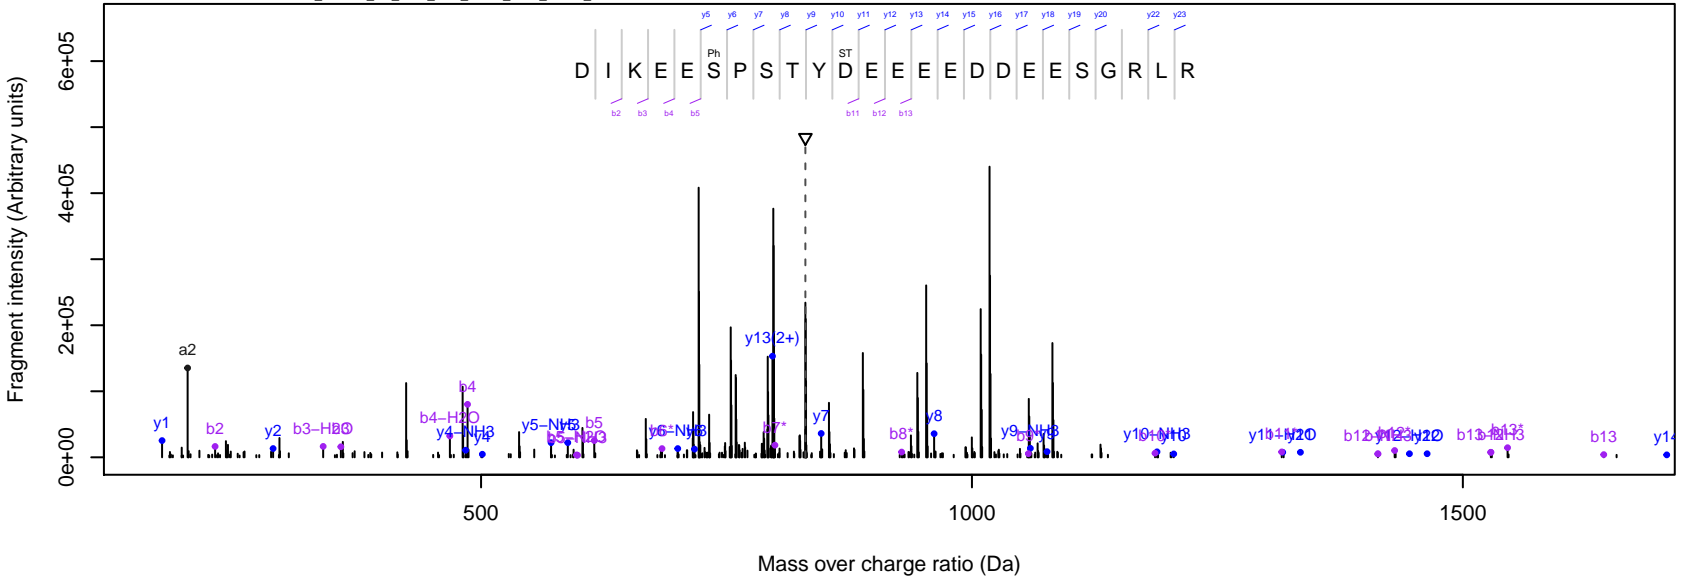

VDEEDS(Phospho (STY))DEESHDEMS(Phospho (STY))EQEELEDDPTVVK-3+

Source : QE3\_201126\_FR\_TiOx\_hum\_tissue\_Urea\_RNAB\_B Scan : 31406

Andromeda score : 294.71

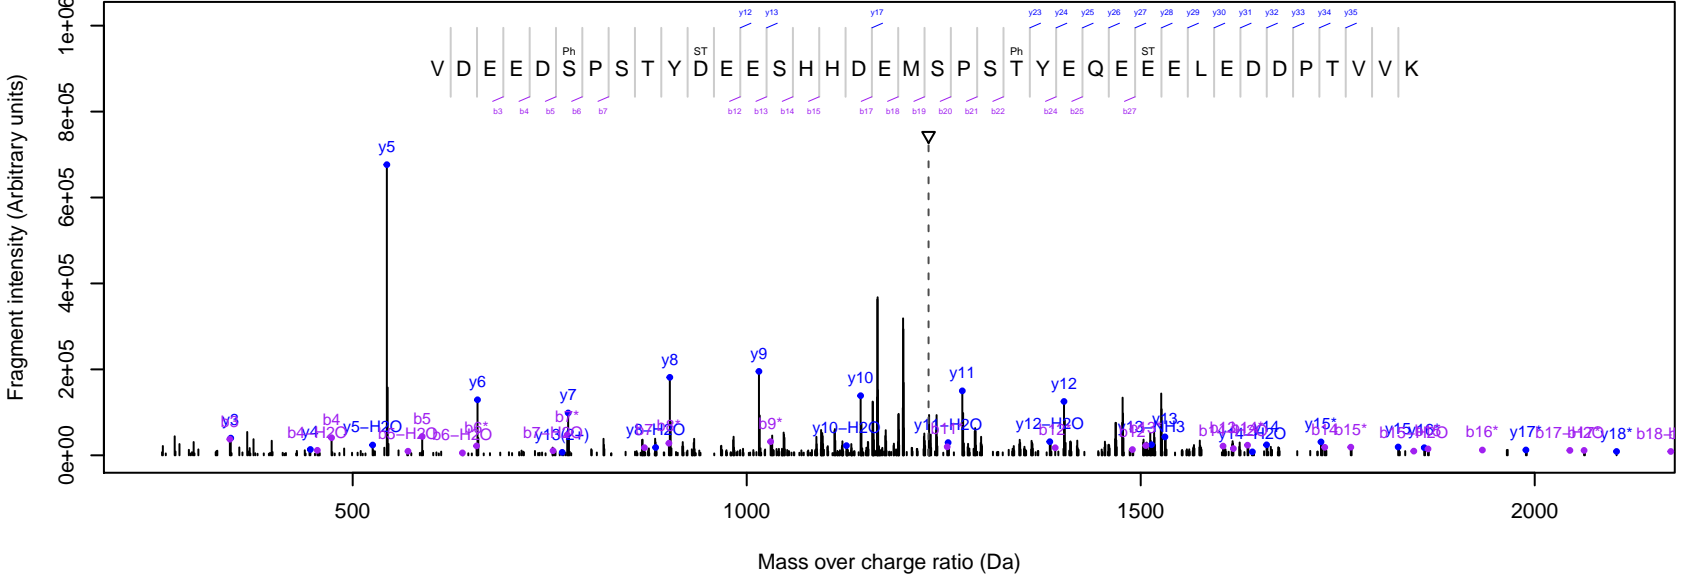

QPLLLS(Phospho (STY))EDEDTKR-2+

Source : QE3\_201126\_FR\_TiOx\_hum\_tissue\_Urea\_RNAB\_H Scan : 21579

Andromeda score : 294.48

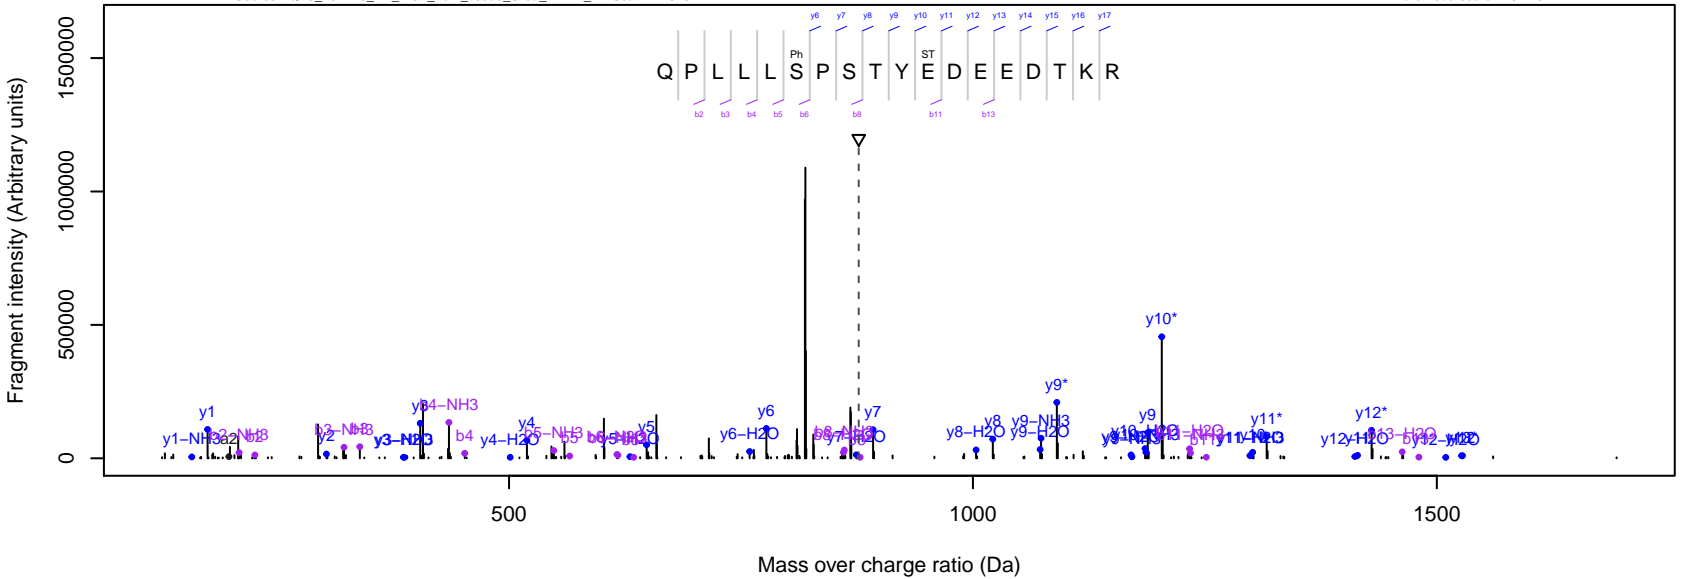

LRLS(Phospho (STY))PSPTSQR-2+

Source : QE3\_201126\_FR\_TiOx\_hum\_tissue\_Urea\_RNAB\_B Scan : 12837

Andromeda score : 294

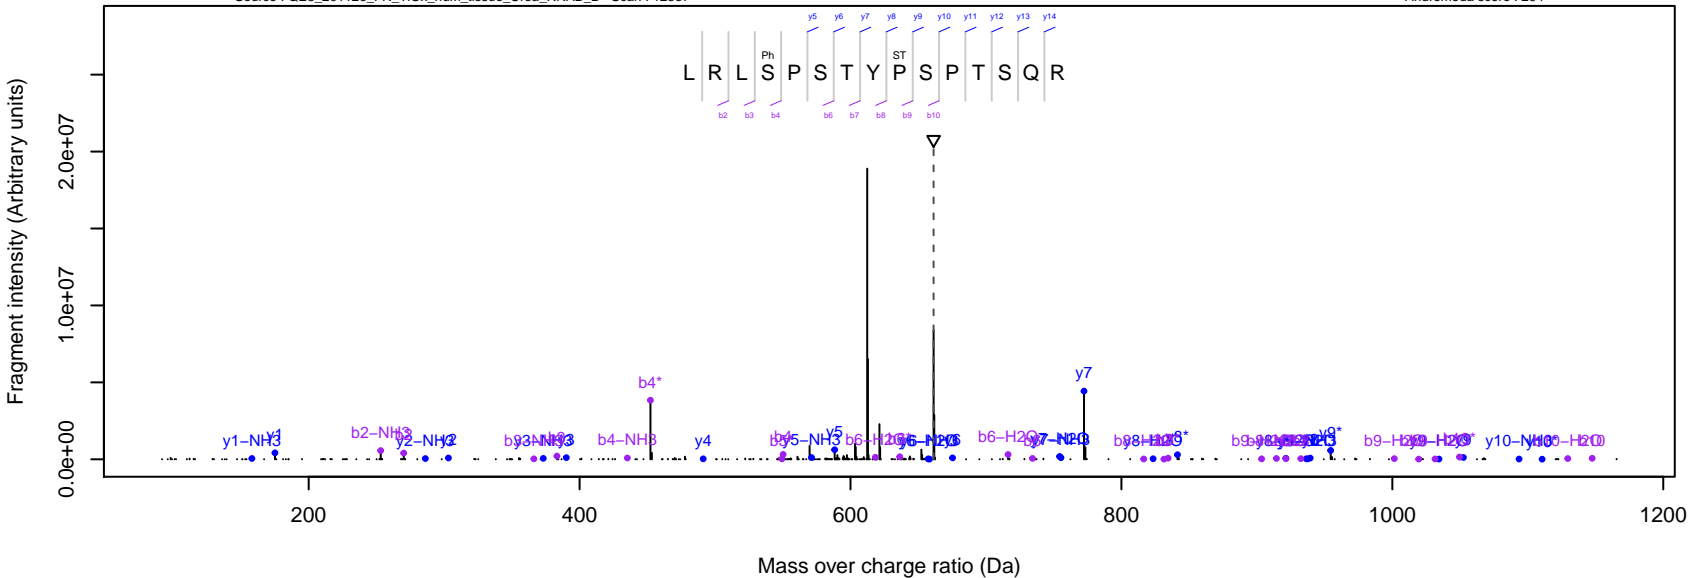

NRNS(Phospho (STY))NVIPYDYNR-2+

Source : QE3\_201126\_FR\_TiOx\_hum\_tissue\_Urea\_RNAB\_N Scan : 19831

Andromeda score : 293.52

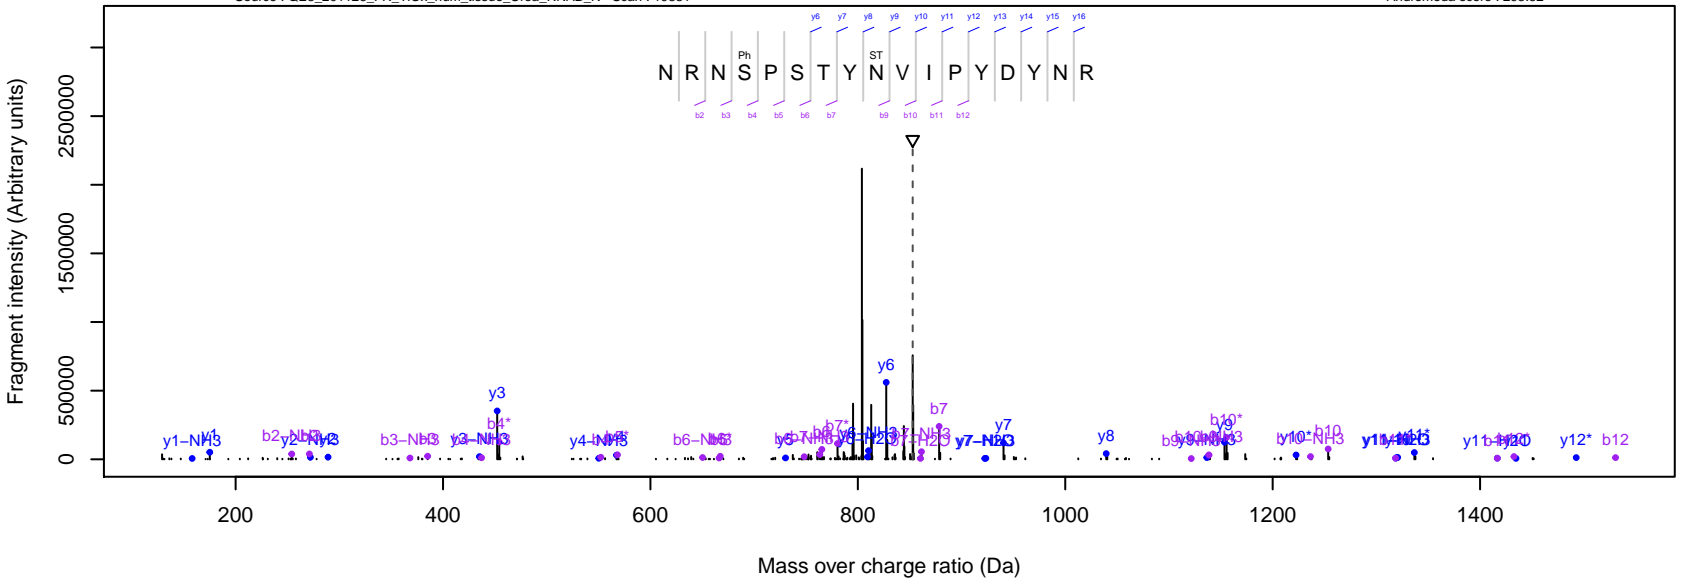

SIS(Phospho (STY))ADDLQESSR-2+

Source : QE3\_201126\_FR\_TiOx\_hum\_tissue\_Urea\_RNAB\_H Scan : 17127

Andromeda score : 293.13

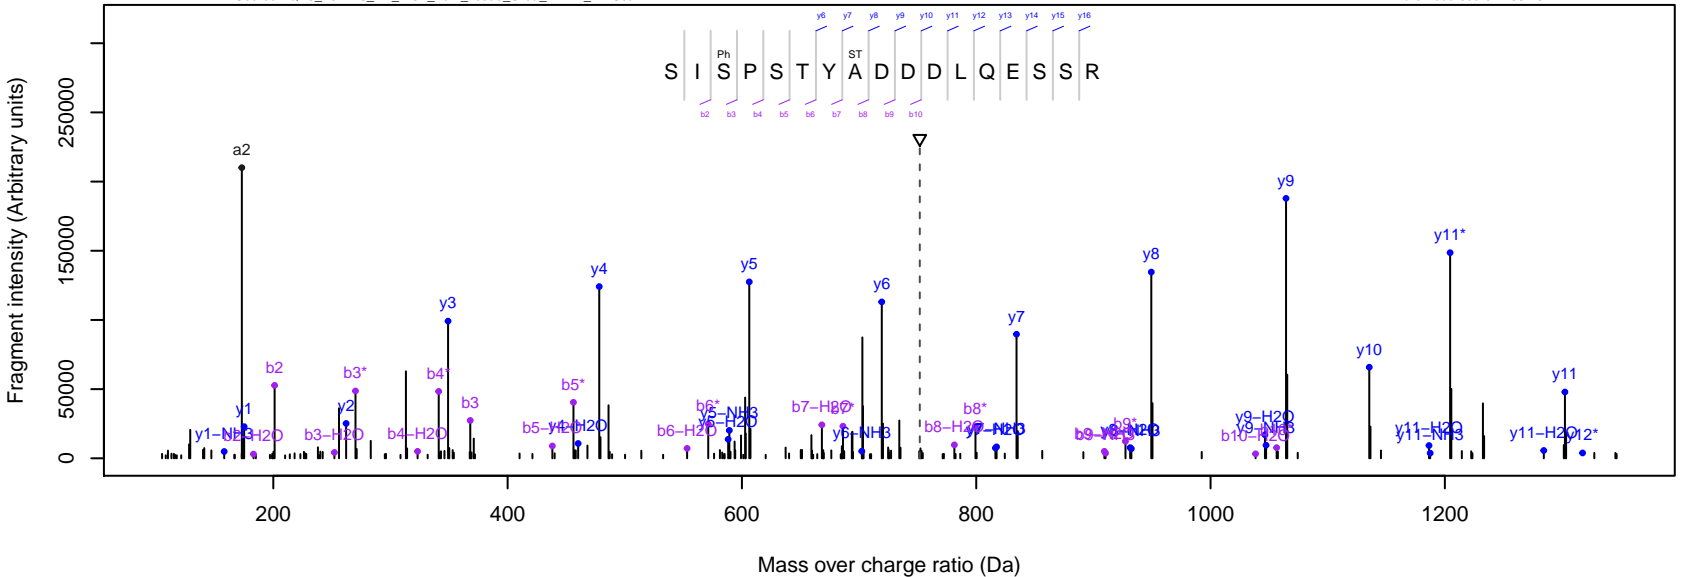

NYQSSS(Phospho (STY))PLPTVGSSYSSPDYSLQHFSSSPESQAR-3+

Source : QE3\_201126\_FR\_TiOx\_hum\_tissue\_Urea\_RNAB\_H Scan : 39850

Andromeda score : 293.09

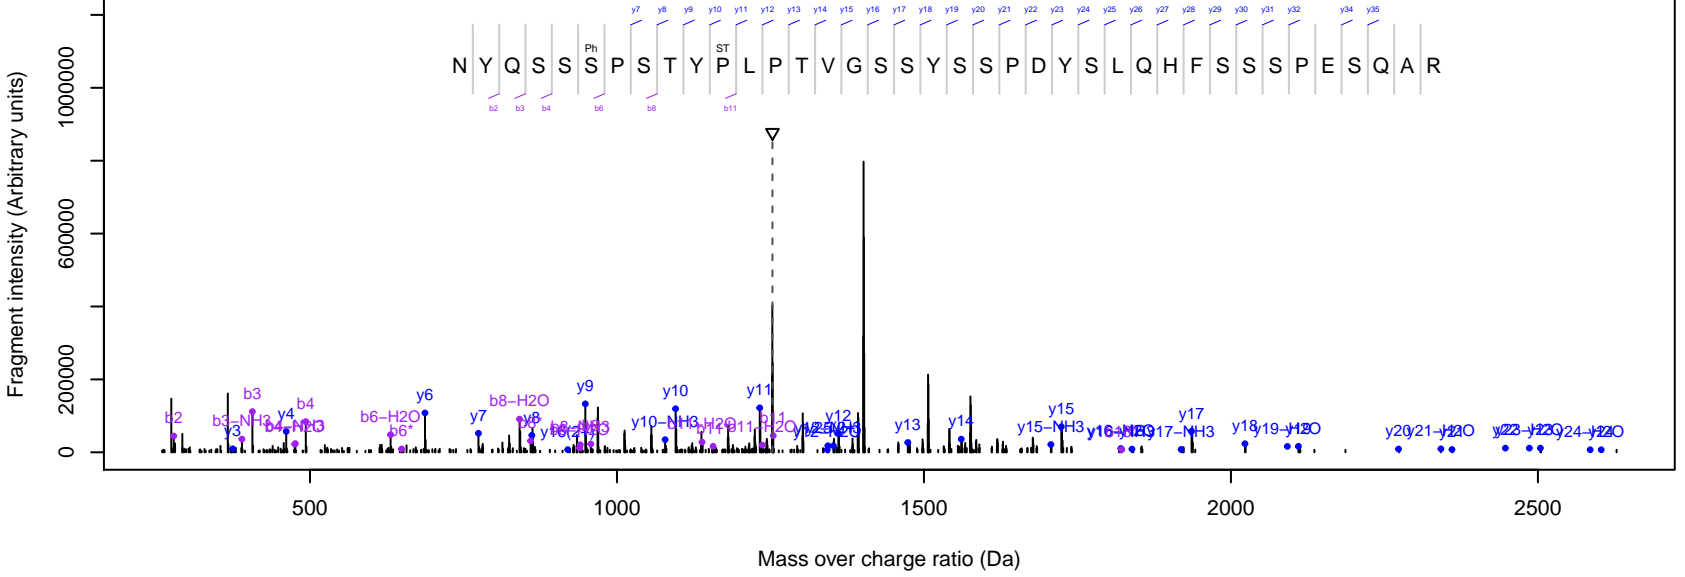

RSS(Phospho (STY))SPAELDKDDLQQTQGK-3+

Source : QE3\_201126\_FR\_TiOx\_hum\_tissue\_Urea\_RNAB\_N Scan : 23268

Andromeda score : 292.98

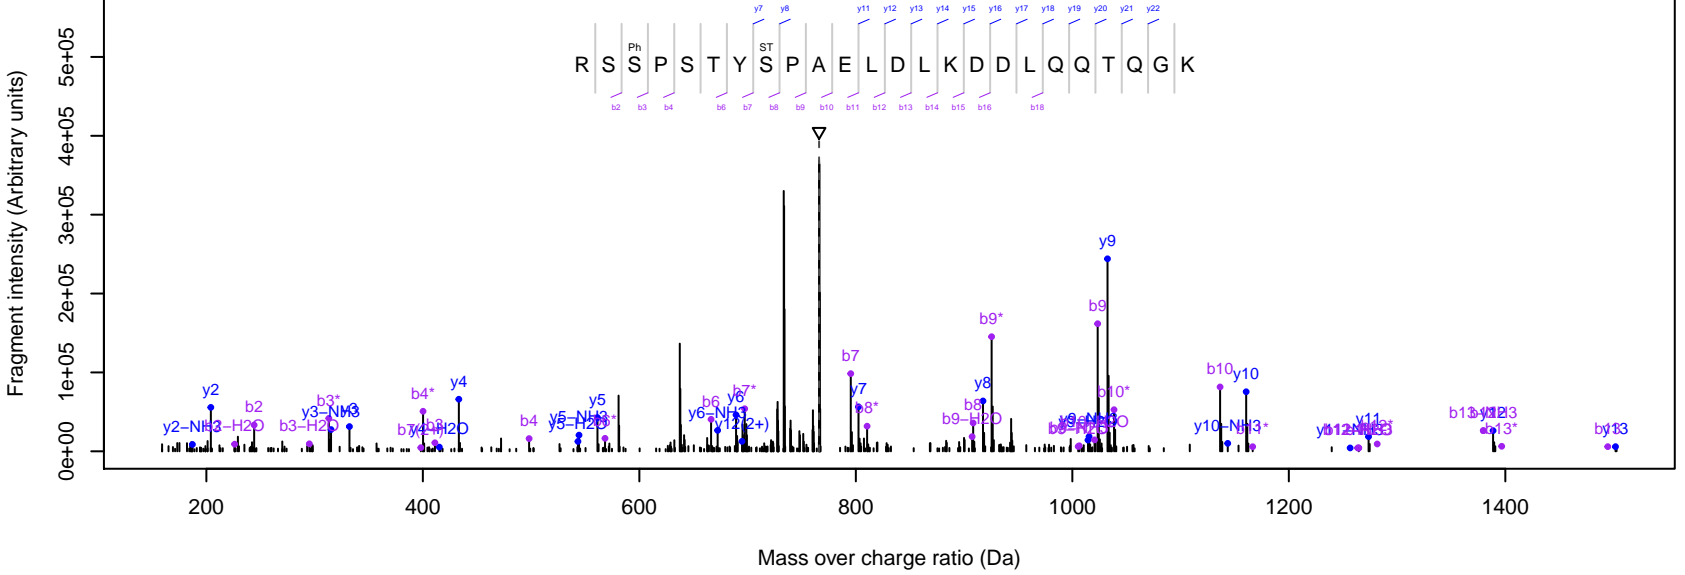

AEQGS(Phospho (STY))EEEEEGEEEEEGESKADDPYAHLSK-3+

Source : QE3\_201126\_FR\_TiOx\_hum\_tissue\_Urea\_RNAB\_H Scan : 17703

Andromeda score : 292.66

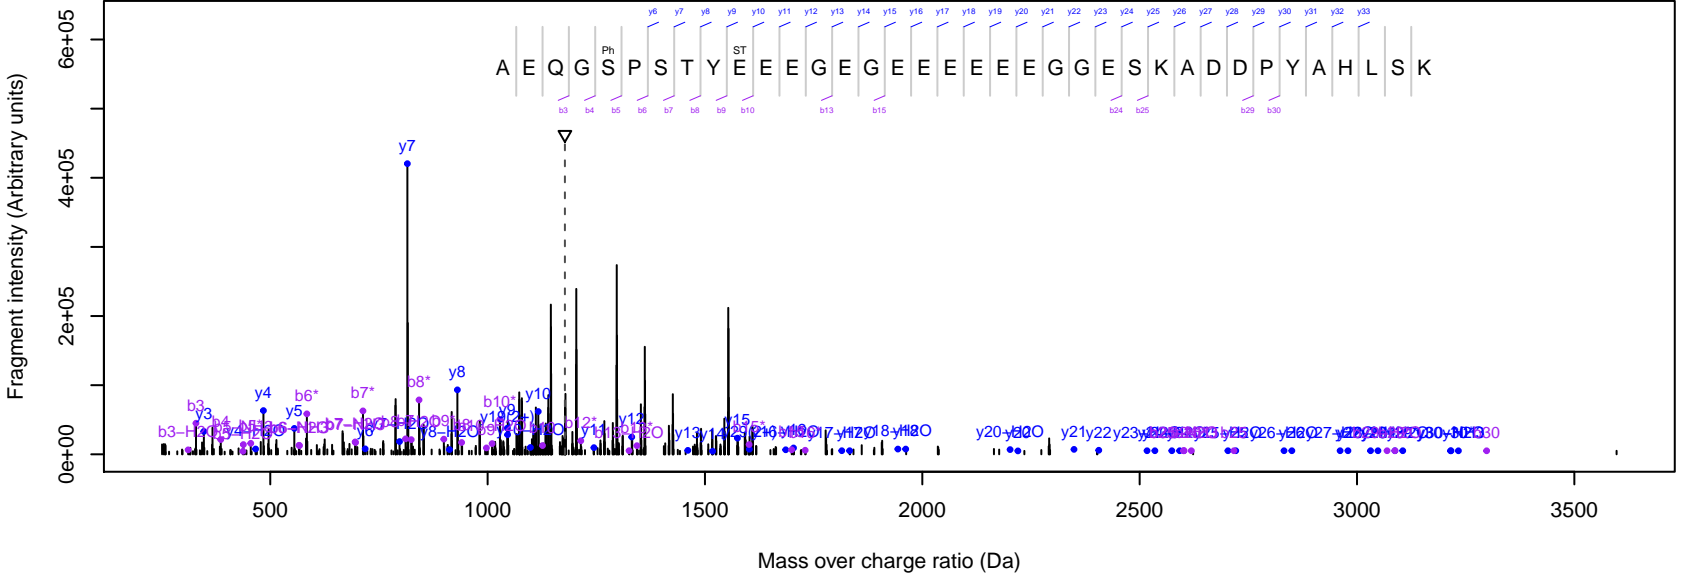

RSS(Phospho (STY))S(Phospho (STY))PAELDLKDDLQQTQGK-3+

Source : QE3\_201126\_FR\_TiOx\_hum\_tissue\_Urea\_RNAB\_N Scan : 26867

Andromeda score : 292.38

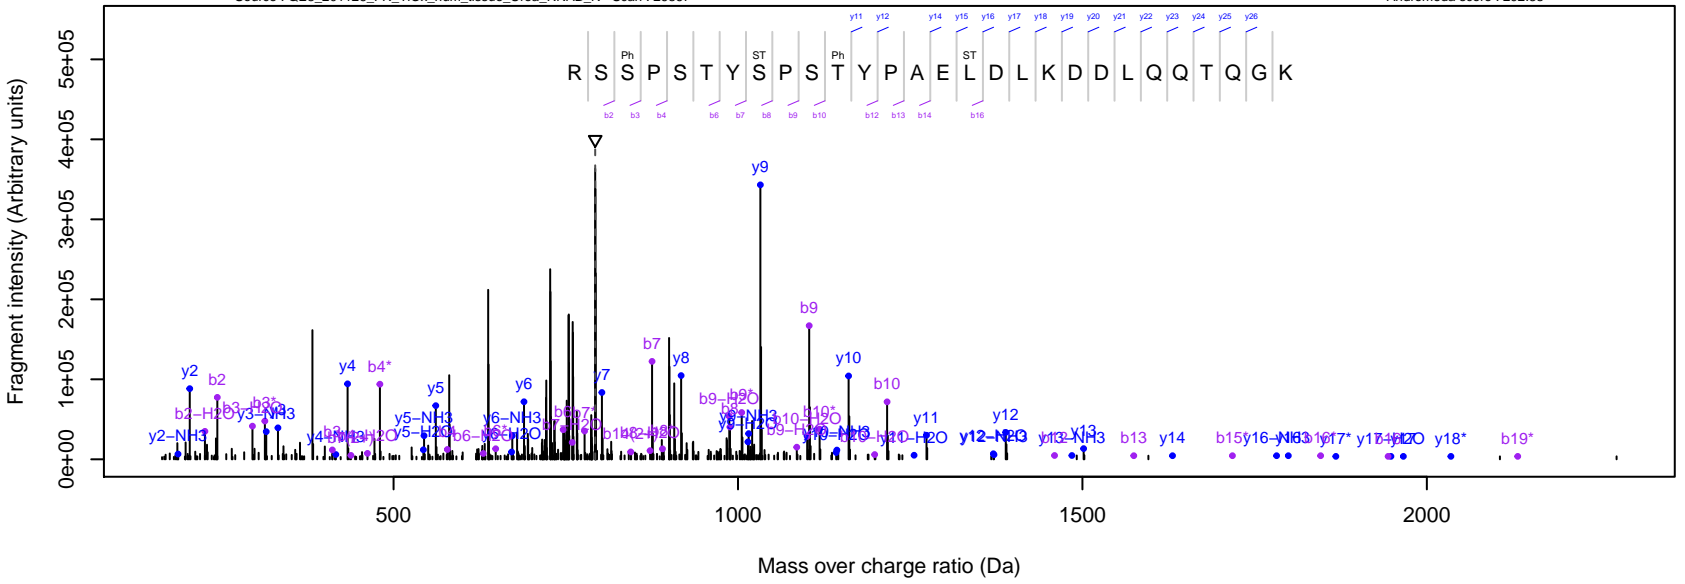

SRS(Phospho (STY))GEGEVSGLMR-2+

Source : QE3\_201126\_FR\_TiOx\_hum\_tissue\_Urea\_RNAB\_B Scan : 15981

Andromeda score : 292.38

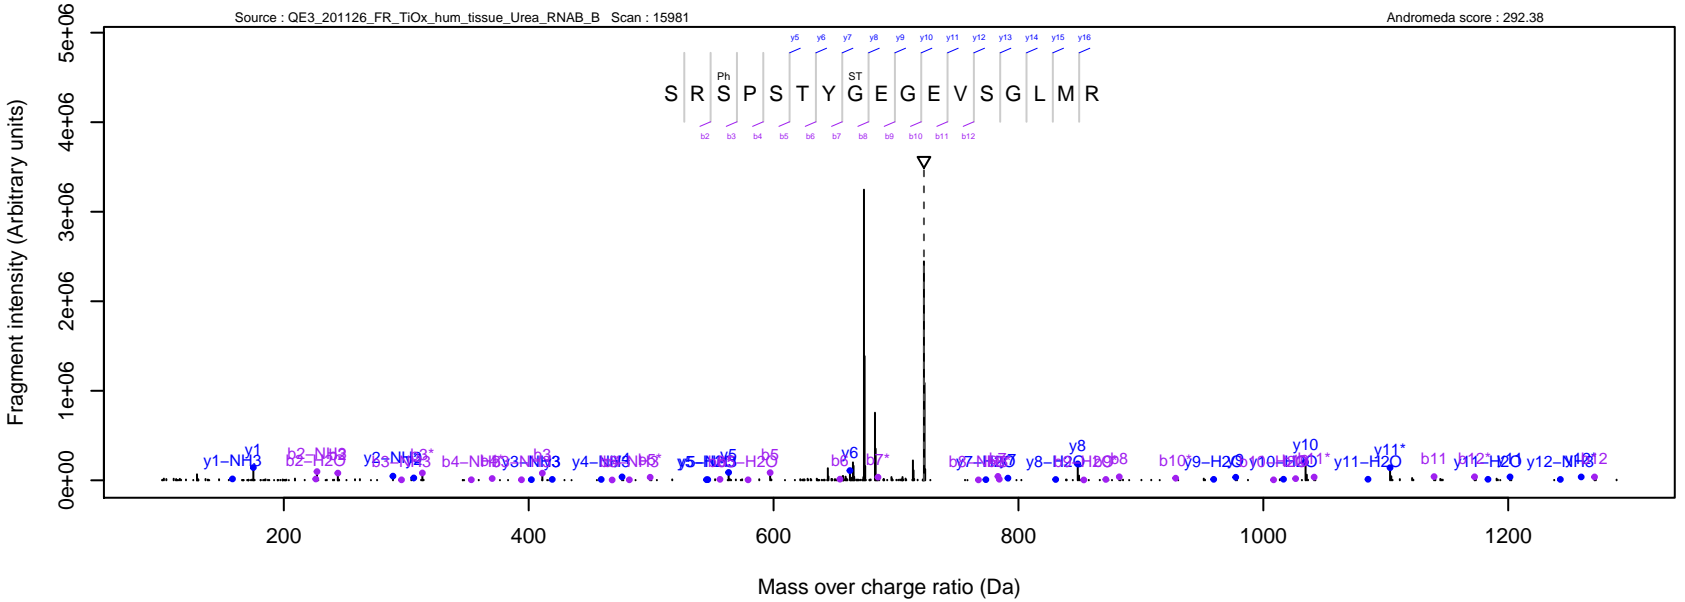

SHT(Phospho (STY))SEGAHLDITPNSGAAGNSAGPK-3+

Source : QE3\_201126\_FR\_TiOx\_hum\_tissue\_Urea\_RNAB\_H Scan : 13773

Andromeda score : 291.8

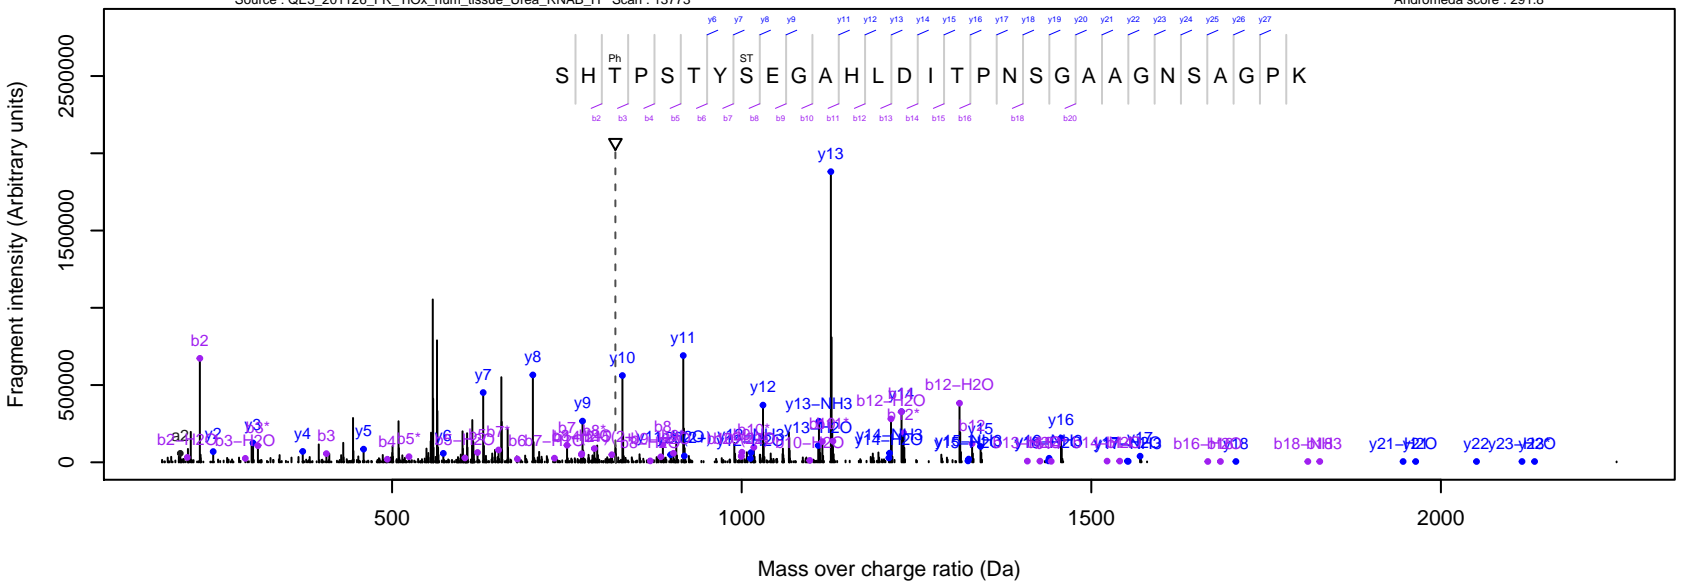

NAIS(Phospho (STY))LPQLNQAAYDSLVLVGK-2+

Source : QE3\_201126\_FR\_TiOx\_hum\_tissue\_Urea\_RNAB\_N Scan : 57576

Andromeda score : 291.57

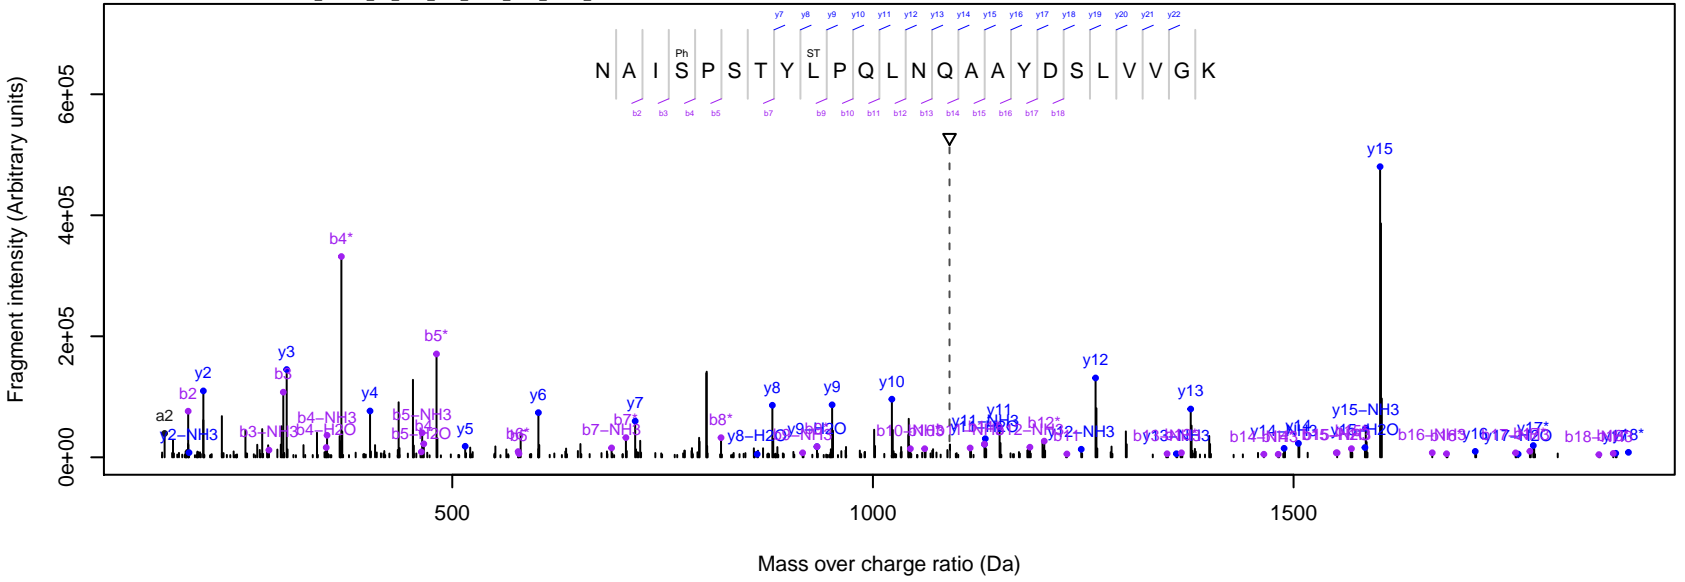

KDS(Phospho (STY))EEEVSLLSQDIEEGNHQVEDGCR-3+

Source : QE3\_201126\_FR\_TiOx\_hum\_tissue\_Urea\_RNAB\_N Scan : 28657

Andromeda score : 291.47

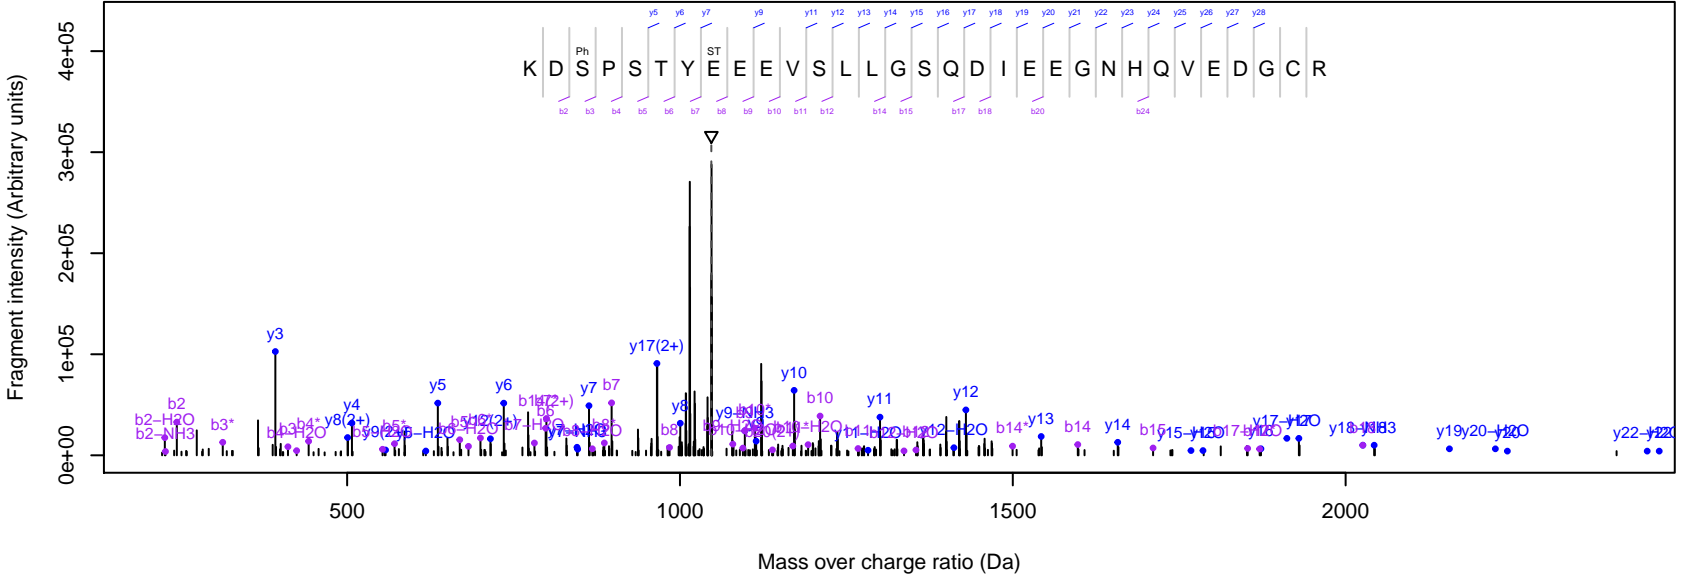

TAKPFGSVNQPATPFS(Phospho (STY))PTR-2+

Source : QE3\_201126\_FR\_TiOx\_hum\_tissue\_Urea\_RNAB\_B Scan : 28013

Andromeda score : 291.33

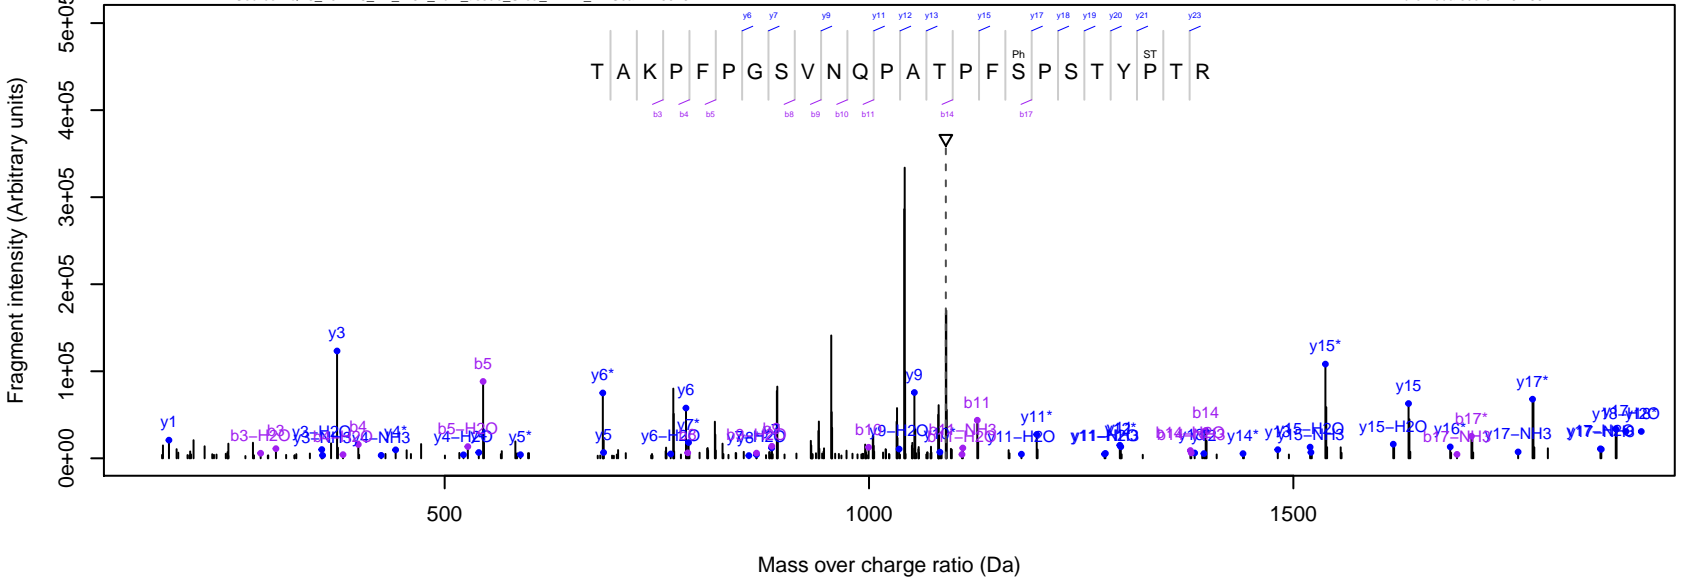



RLLLEDGFNLDGALDSSNS(Phospho (STY))M(Oxidation (M))QTIQK-3+

Source : QE3\_201126\_FR\_TIOx\_hum\_tissue\_Urea\_RNAB\_H Scan : 45331

Andromeda score : 291.31

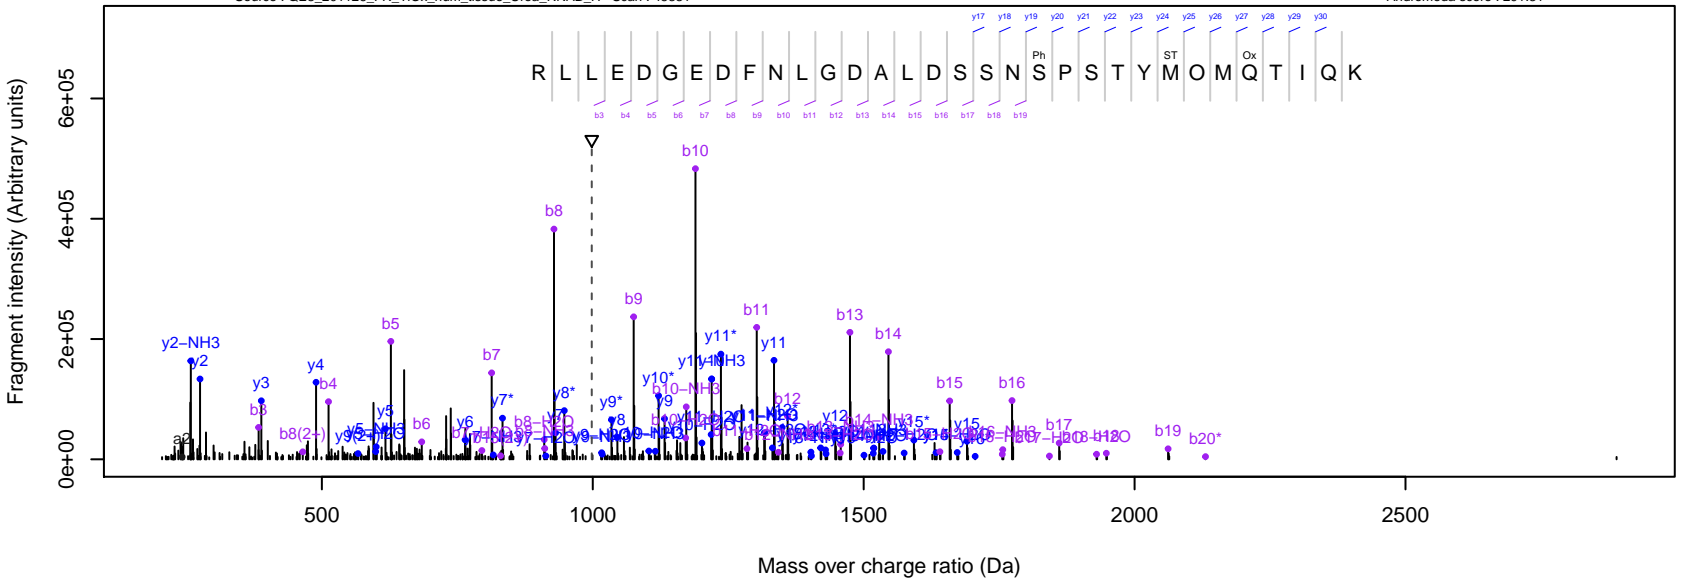

GHYEVTGS(Phospho (STY))DDETKLQGGVSLASK-3+

Source : QE3\_201126\_FR\_TIOx\_hum\_tissue\_Urea\_RNAB\_H Scan : 20477

Andromeda score : 291.2

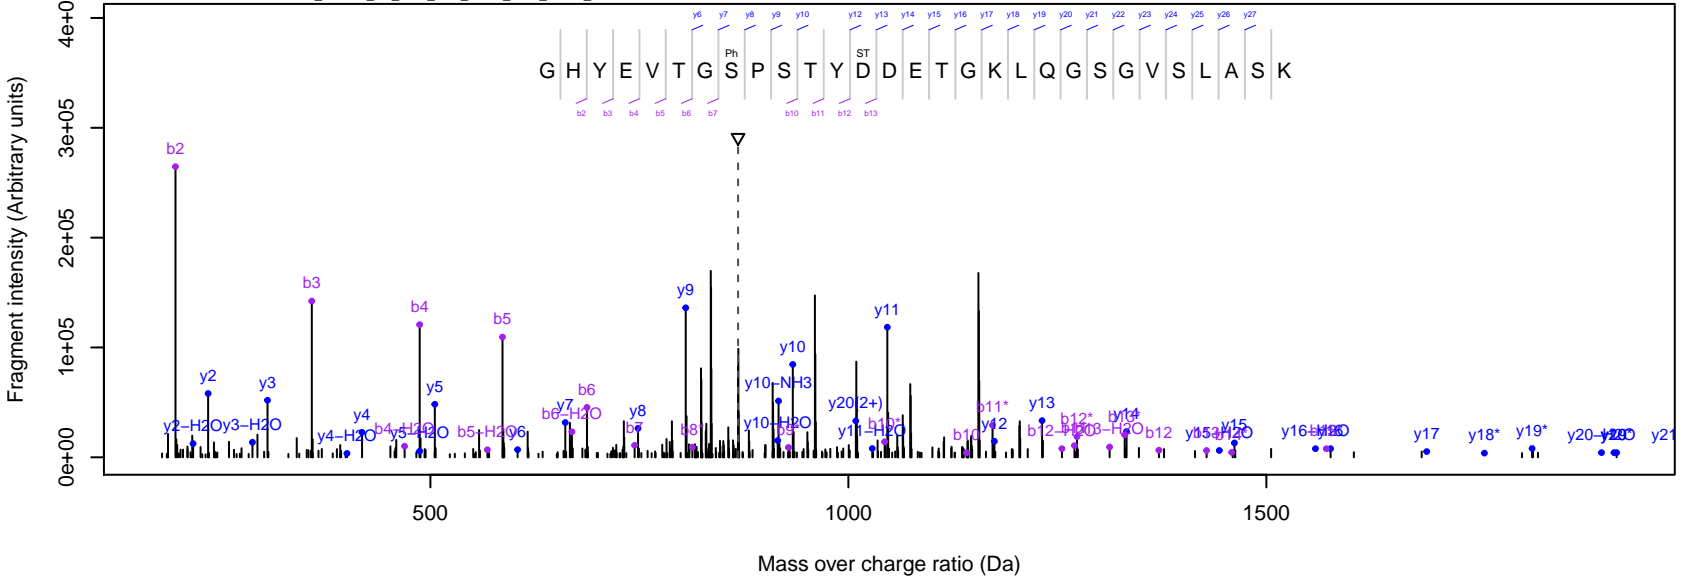

EVDPSTGELQSLQM(Oxidation (M))PESEGPSS(Phospho (STY))LDPSQEGPTGLK-3+

Source : QE3\_201126\_FR\_TIOx\_hum\_tissue\_Urea\_RNAB\_N Scan : 44491

Andromeda score : 291.06

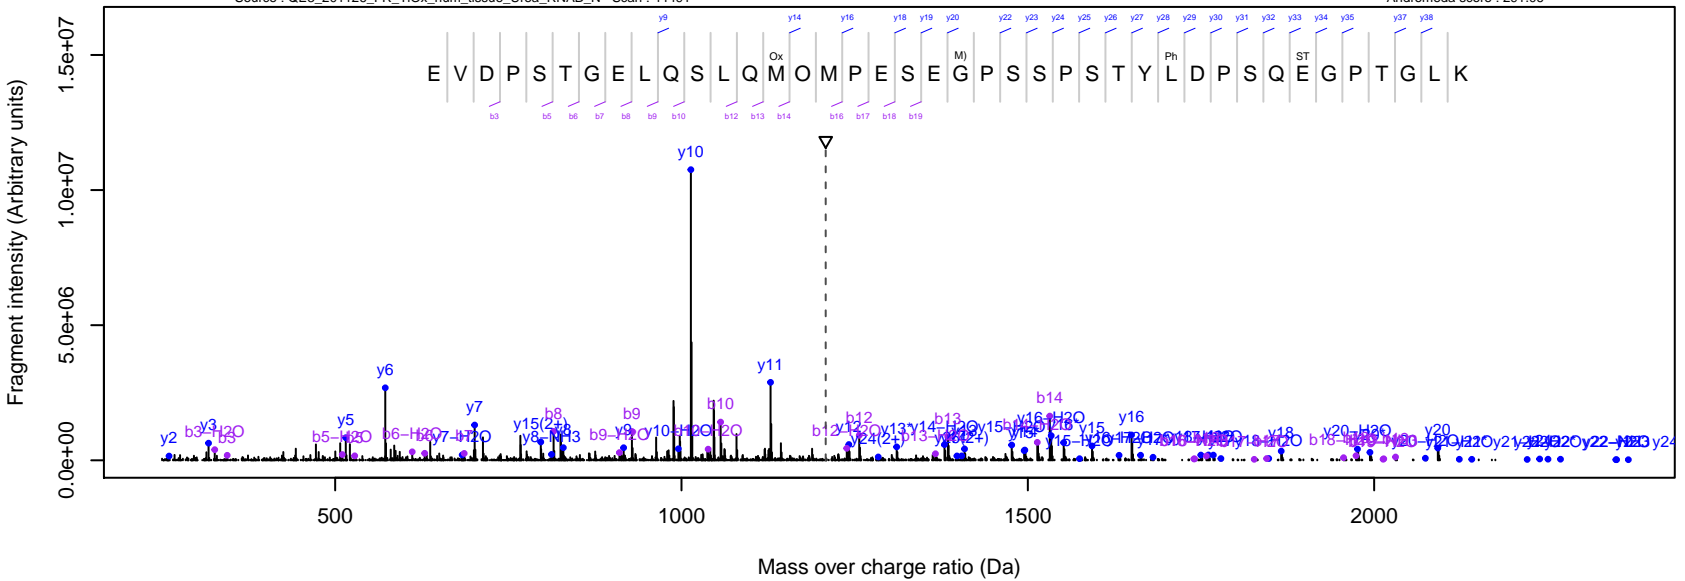

NVPQEELEDS(Phospho (STY))DVDADFK-2+

Source : QE3\_201126\_FR\_TiOx\_hum\_tissue\_Urea\_RNAB\_N Scan : 34275

Andromeda score : 290.92

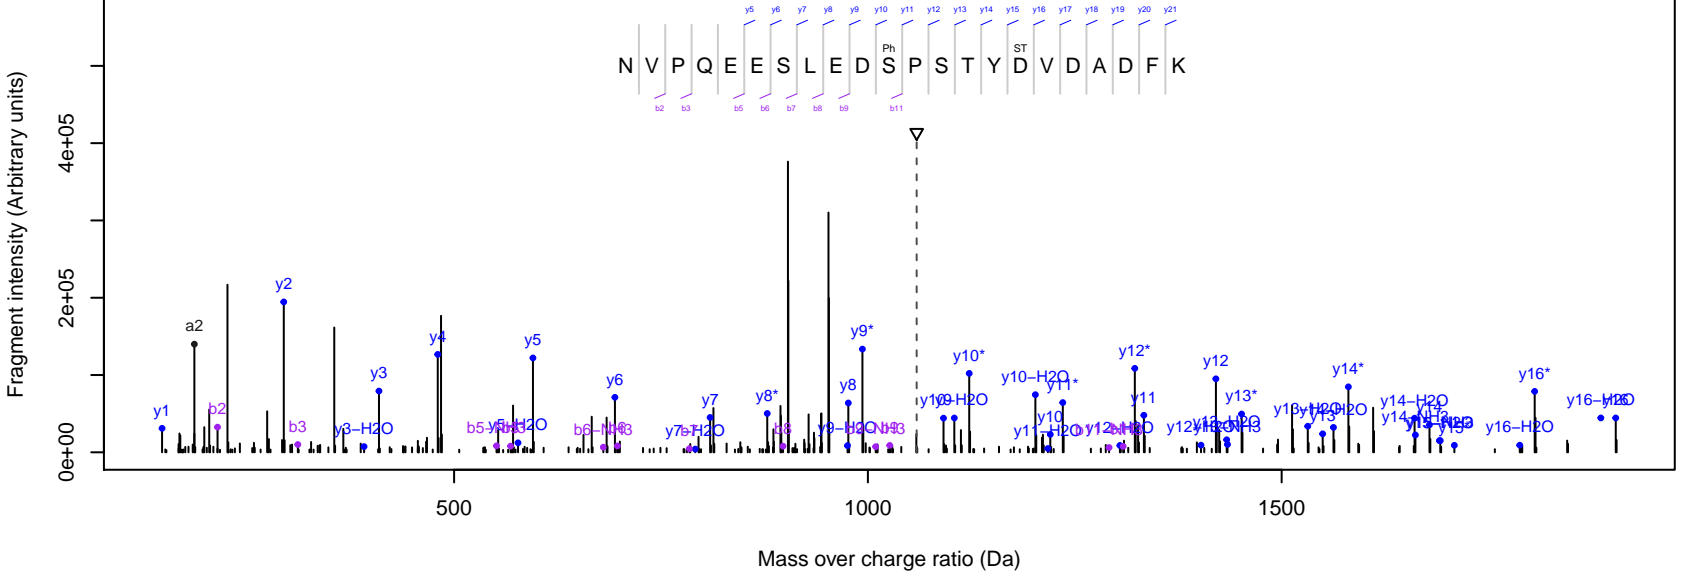

NTFTAWS(Phospho (STY))DEES(Phospho (STY))DYEIDDRDVNK-3+

Source : QE3\_201126\_FR\_TiOx\_hum\_tissue\_Urea\_RNAB\_B Scan : 43728

Andromeda score : 290.8

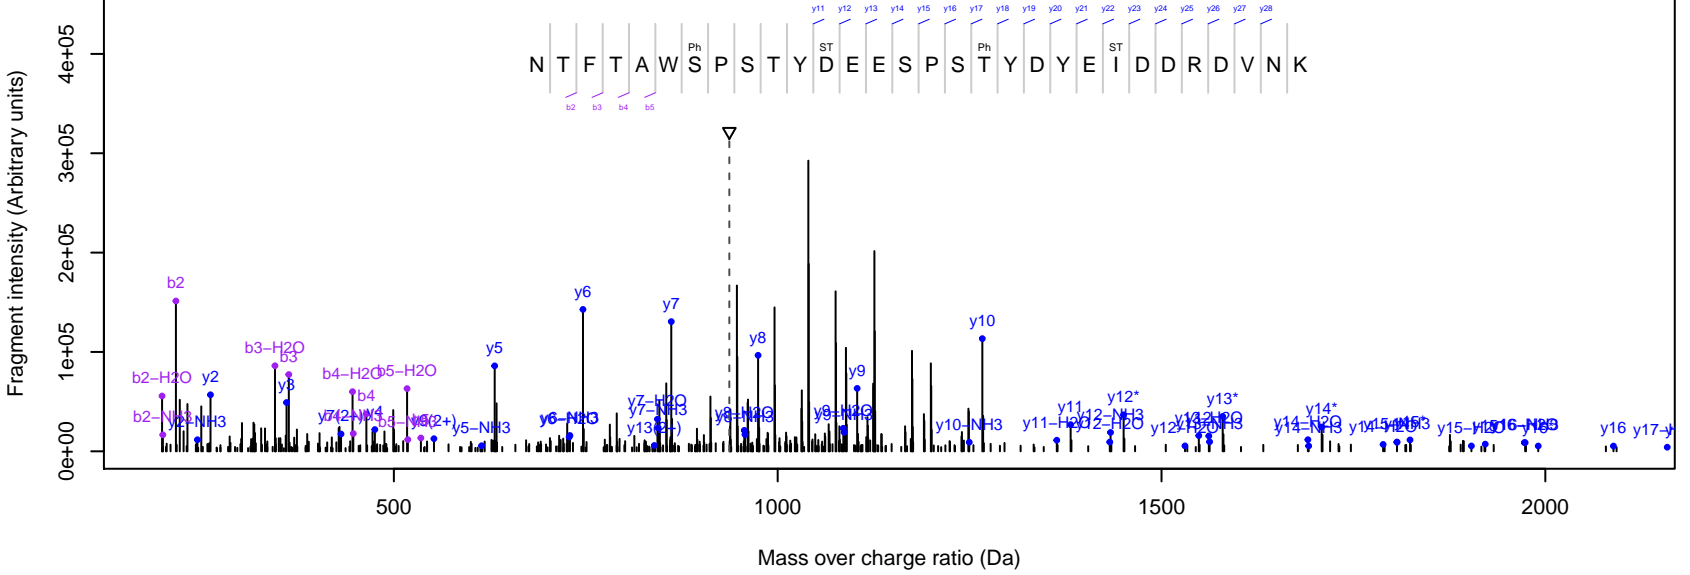

MESEGGADDS(Phospho (STY))AEEGLDDDDNEDRGDDQLLEIKDDEK-4+

Source : QE3\_201126\_FR\_TiOx\_hum\_tissue\_Urea\_RNAB\_H Scan : 39112

Andromeda score : 290.59

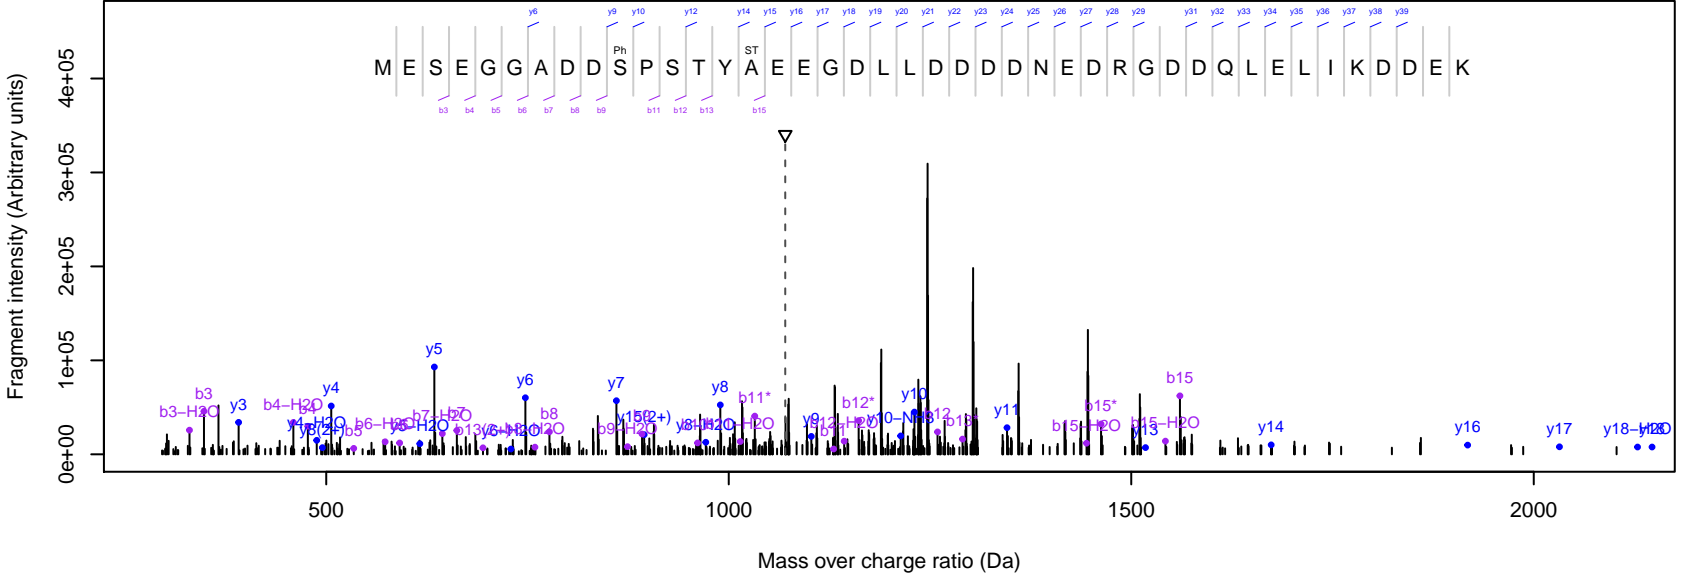

SRTS(Phospho (STY))VQT(Phospho (STY))EDDQLIAGQSAR-2+

Source : QE3\_201126\_FR\_TiOx\_hum\_tissue\_Urea\_RNAB\_B Scan : 21800

Andromeda score : 290.49

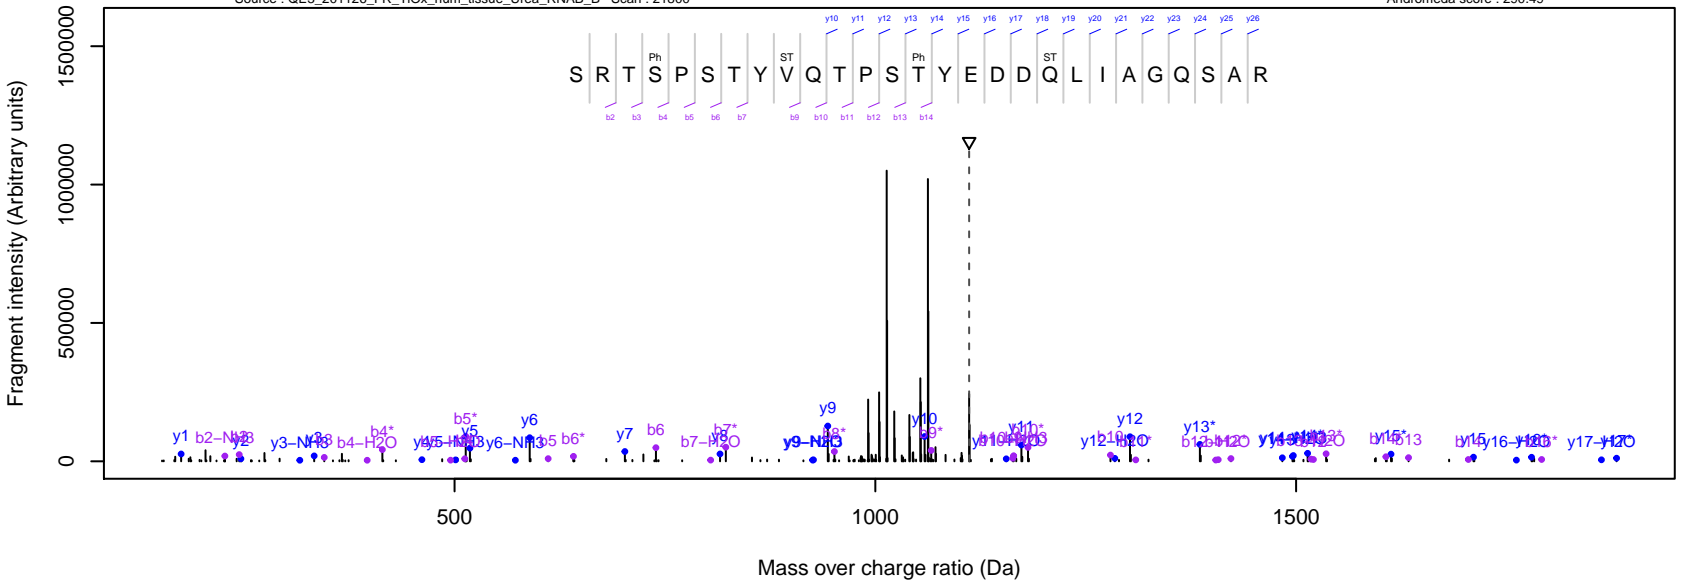

TPS(Phospho (STY))PLVLEGTIEQSS(Phospho (STY))PPLSPPTTK-2+

Source : QE3\_201126\_FR\_TiOx\_hum\_tissue\_Urea\_RNAB\_N Scan : 55001

Andromeda score : 290.49

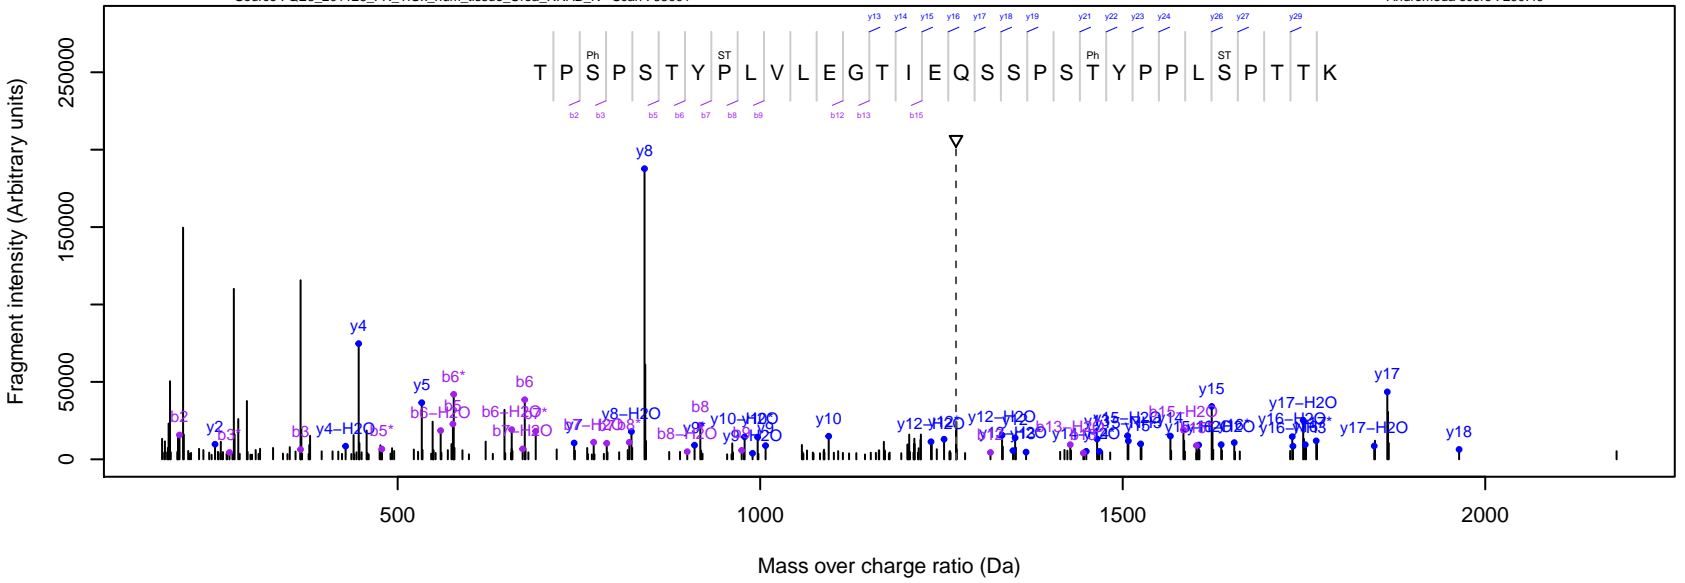

ELEKPIQSKPQSPVIQAAAVS(Phospho (STY))PK-3+

Source : QE3\_201126\_FR\_TiOx\_hum\_tissue\_Urea\_RNAB\_N Scan : 20729

Andromeda score : 290.27

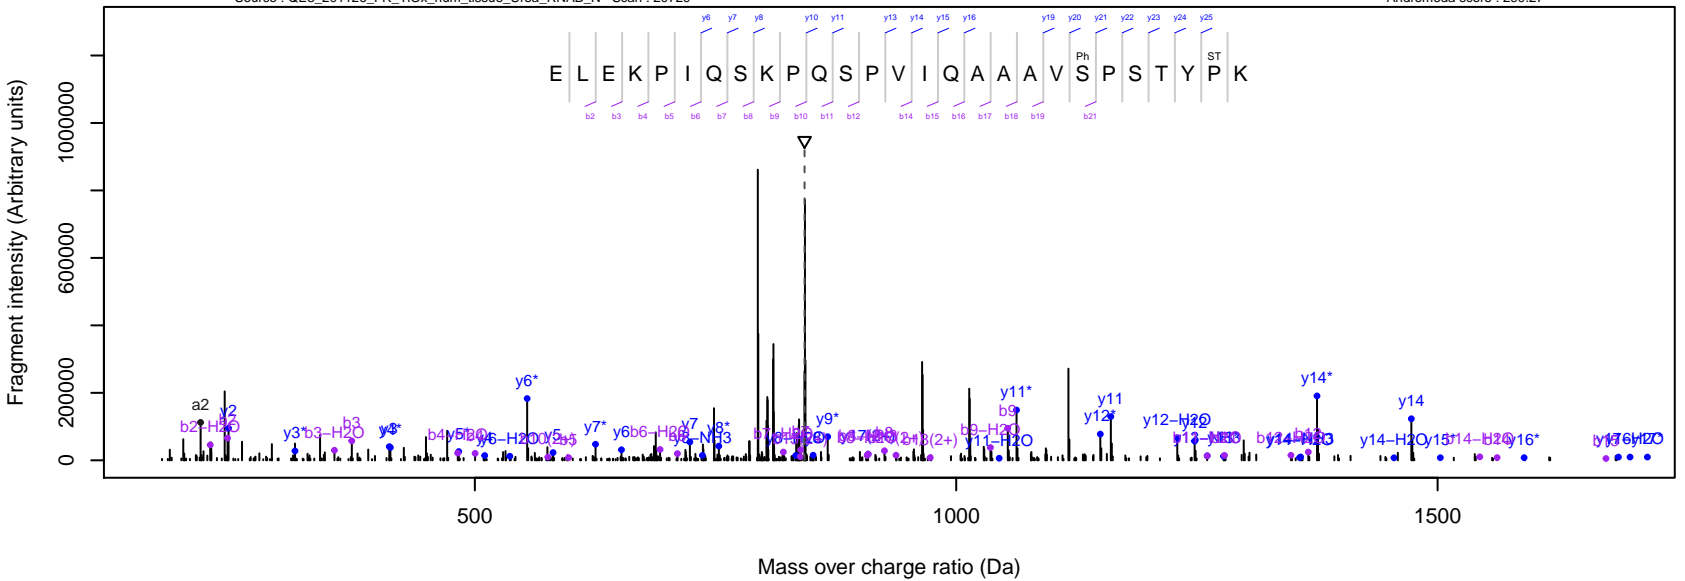

NTDVAQS(Phospho (STY))PEAPKQEAPAK-2+

Source : QE3\_201126\_FR\_TiOx\_hum\_tissue\_Urea\_RNAB\_N Scan : 8372

Andromeda score : 290.18

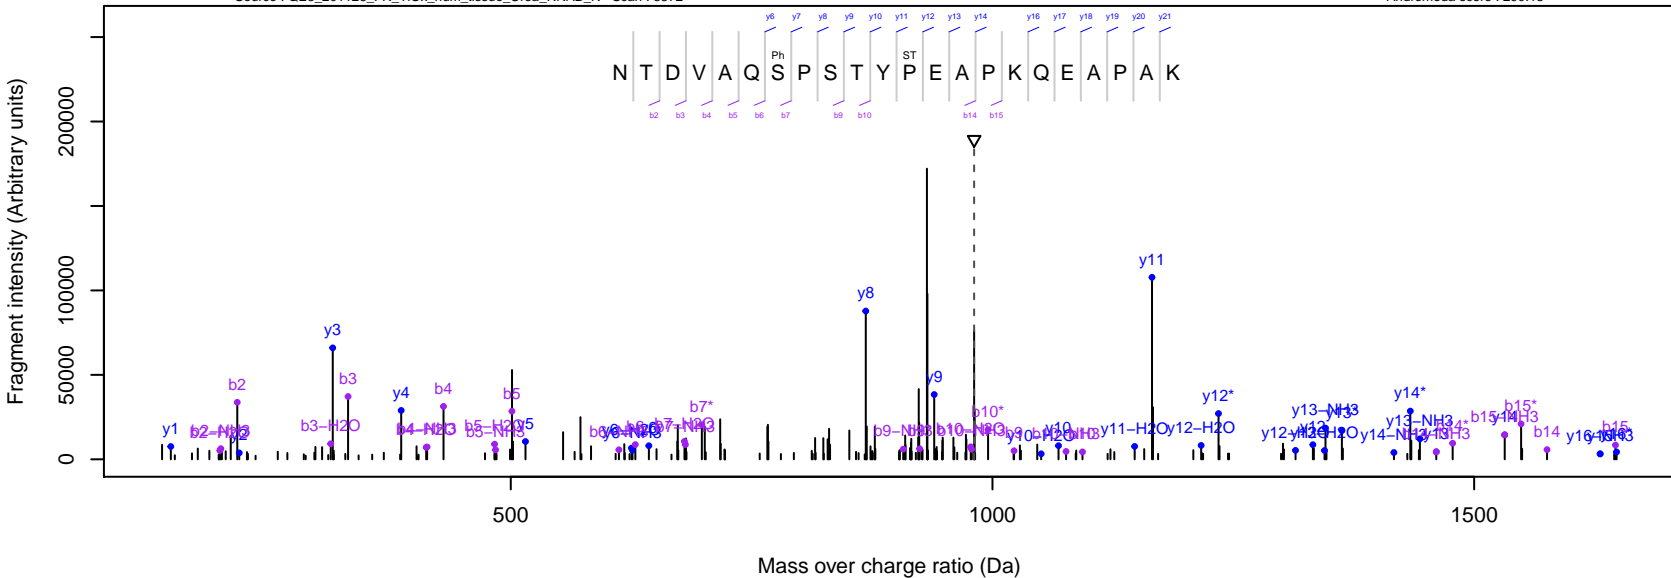

TYS(Phospho (STY))ECEDGTYSPEISWHHR-3+

Source : QE3\_201126\_FR\_TiOx\_hum\_tissue\_Urea\_RNAB\_N Scan : 24810

Andromeda score : 289.96

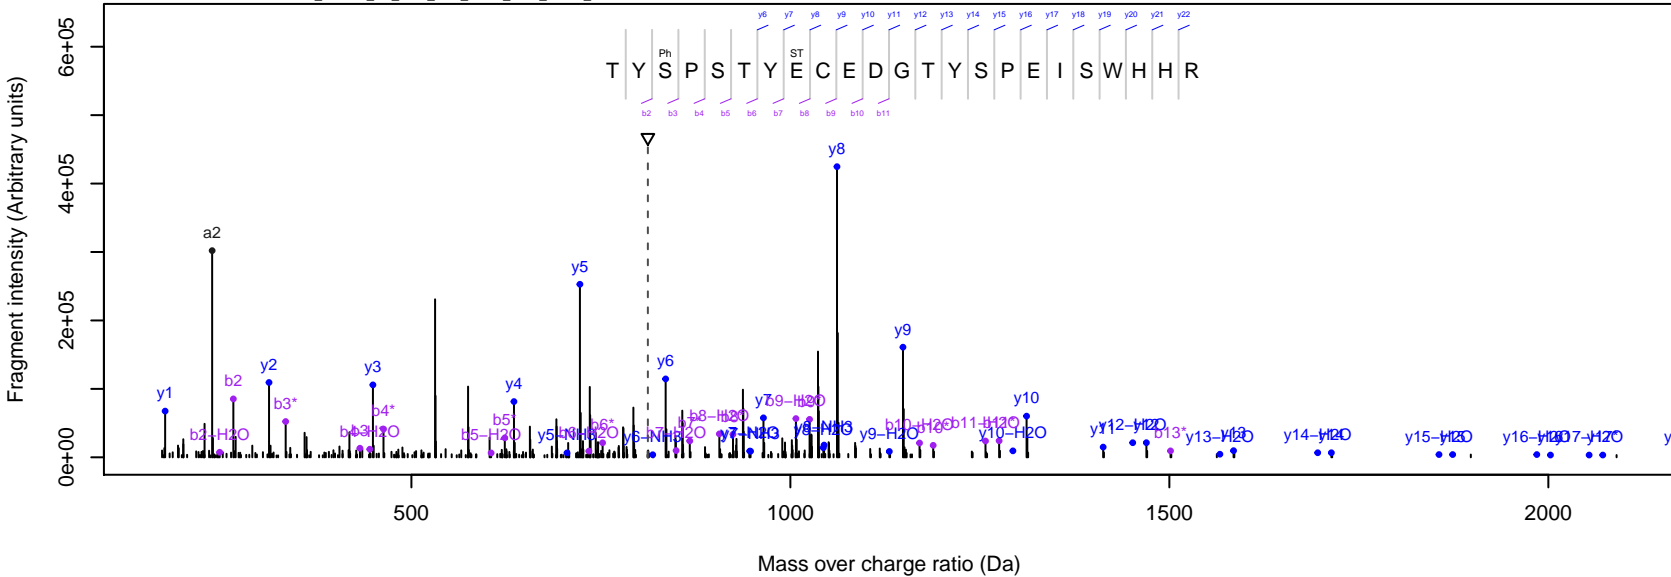

RLLLEDGFNLGDALDSSNS(Phospho (STY))MQTIQK-3+

Source : QE3\_201126\_FR\_TiOx\_hum\_tissue\_Urea\_RNAB\_B Scan : 48282

Andromeda score : 289.73

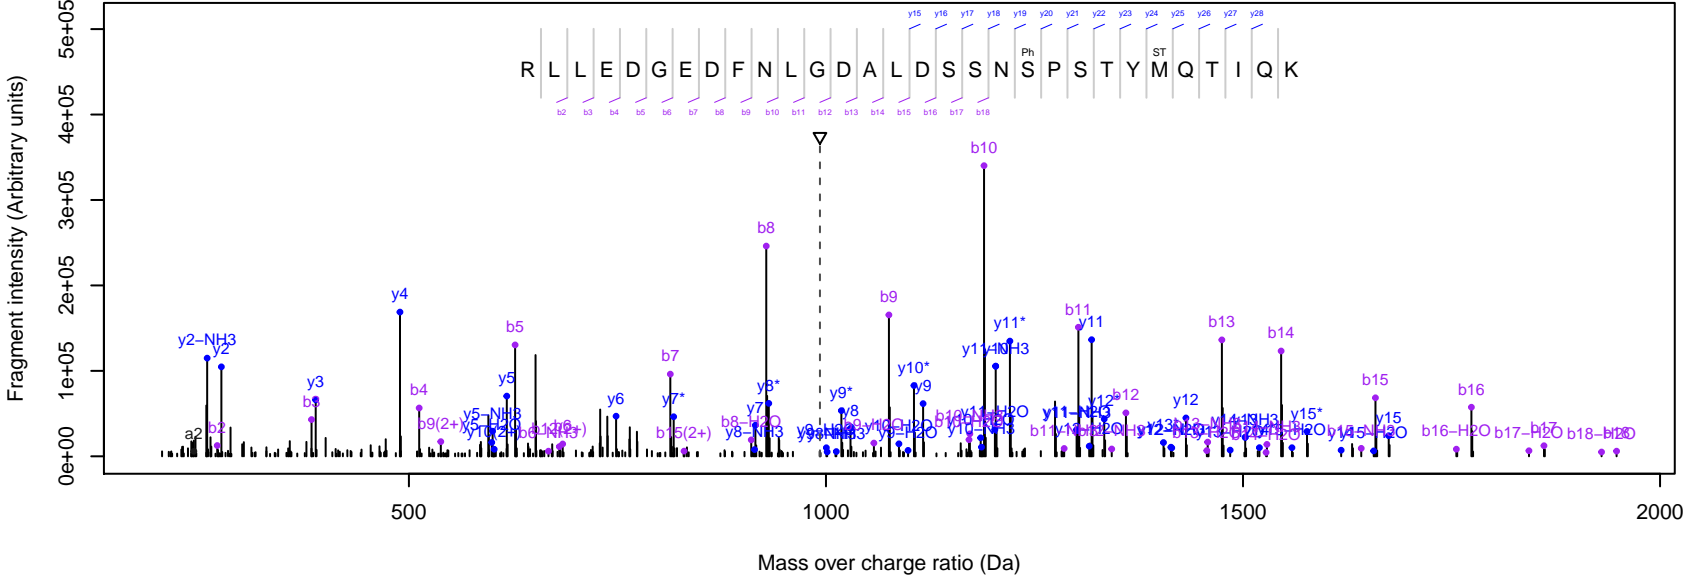

SQGDEAGGHGEGDRPEPLSPSTYPK-3+

Source : QE3\_201126\_FR\_TIOx\_hum\_tissue\_Urea\_RNAB\_N Scan : 8734

Andromeda score : 288.96

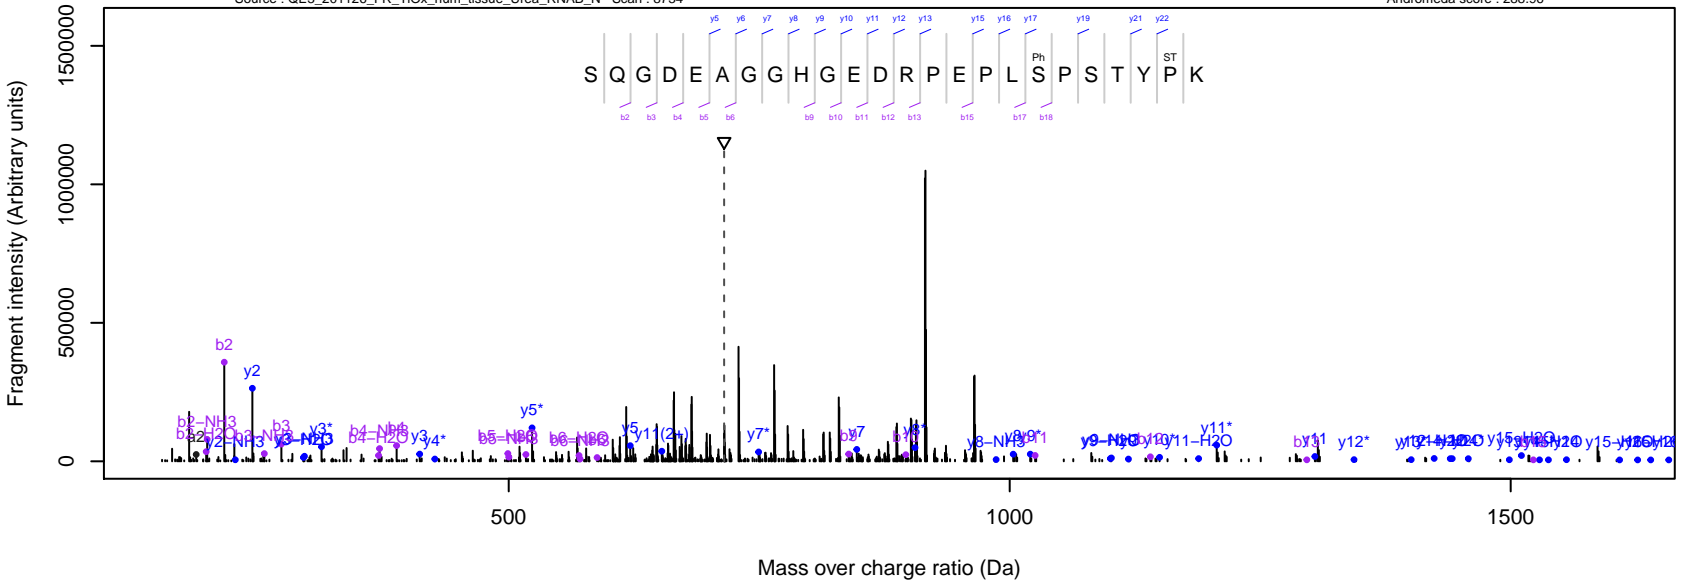

AGLESGAEPGDGDS(Phospho (STY))DTTKK-2+

Source : QE3\_201126\_FR\_TIOx\_hum\_tissue\_Urea\_RNAB\_B Scan : 9034

Andromeda score : 288.53

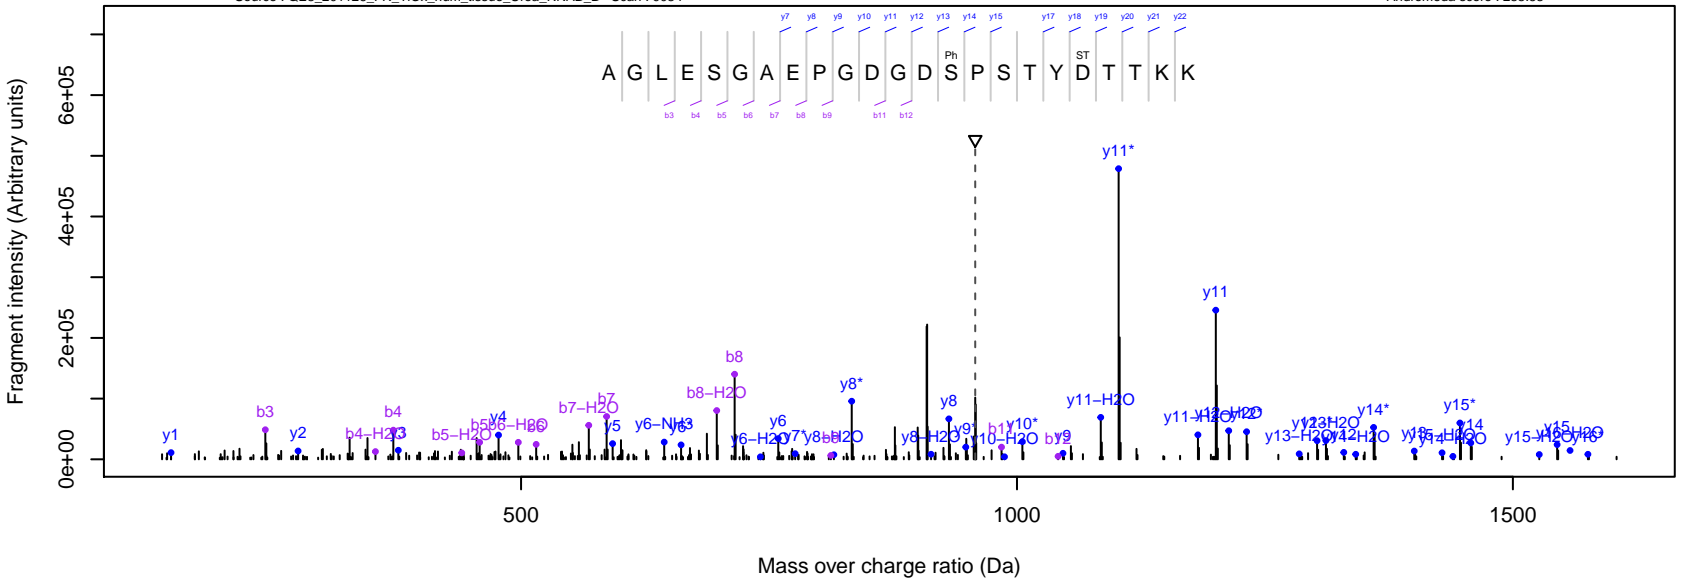

VVDYSQFQES(Phospho (STY))DDADEDYGRD SGPPPTK-3+

Source : QE3\_201126\_FR\_TIOx\_hum\_tissue\_Urea\_RNAB\_N Scan : 26925

Andromeda score : 288.48

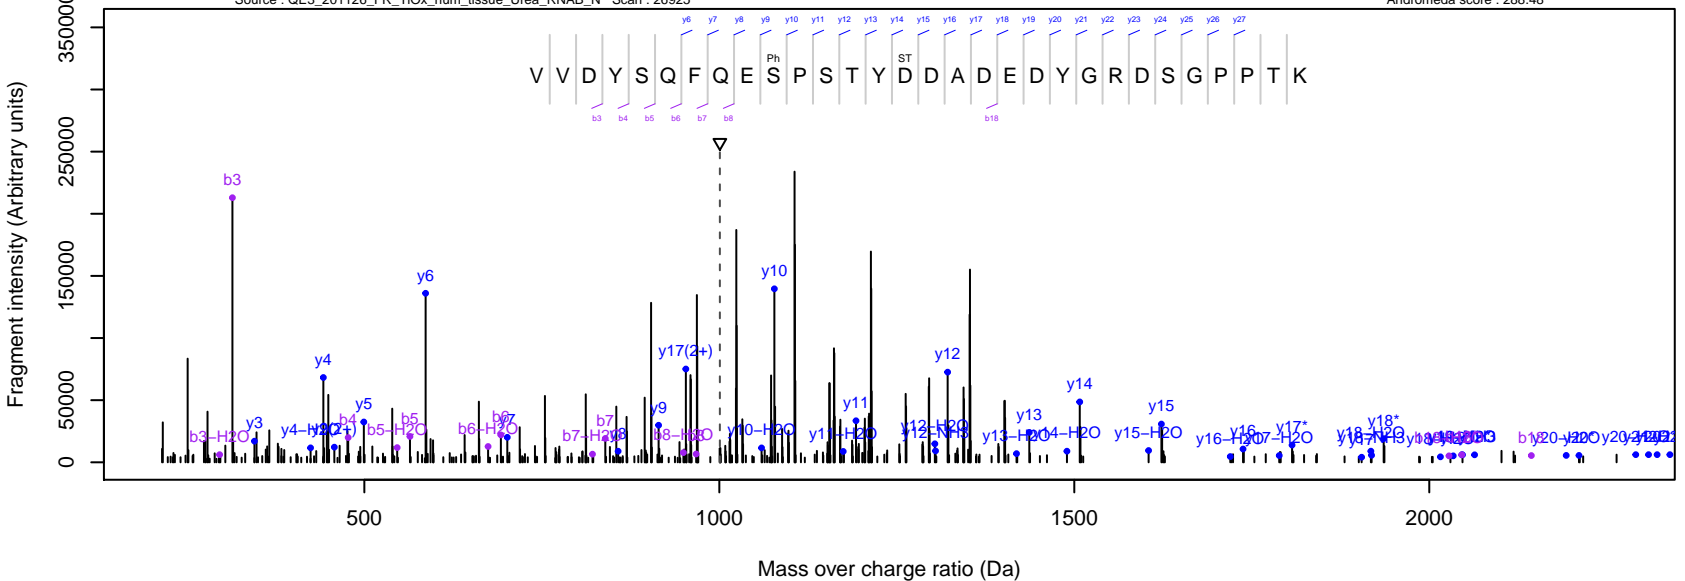

RNS(Phospho (STY))LTGEEGLAR-2+

Source : QE3\_201126\_FR\_TiOx\_hum\_tissue\_Urea\_RNAB\_B Scan : 13220

Andromeda score : 288.39

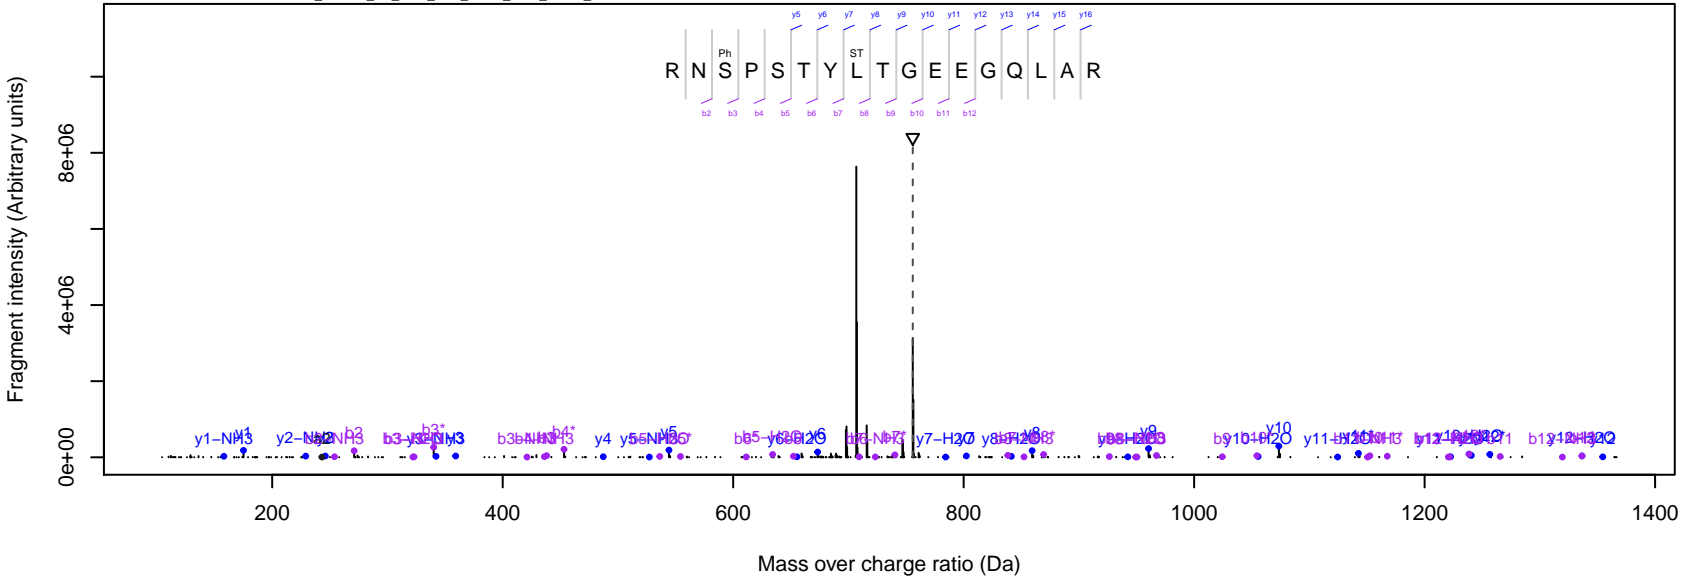

ESDTKNEVNGTSEDIKSEGDTS(Phospho (STY))N-3+

Source : QE3\_201126\_FR\_TiOx\_hum\_tissue\_Urea\_RNAB\_N Scan : 11273

Andromeda score : 288.23

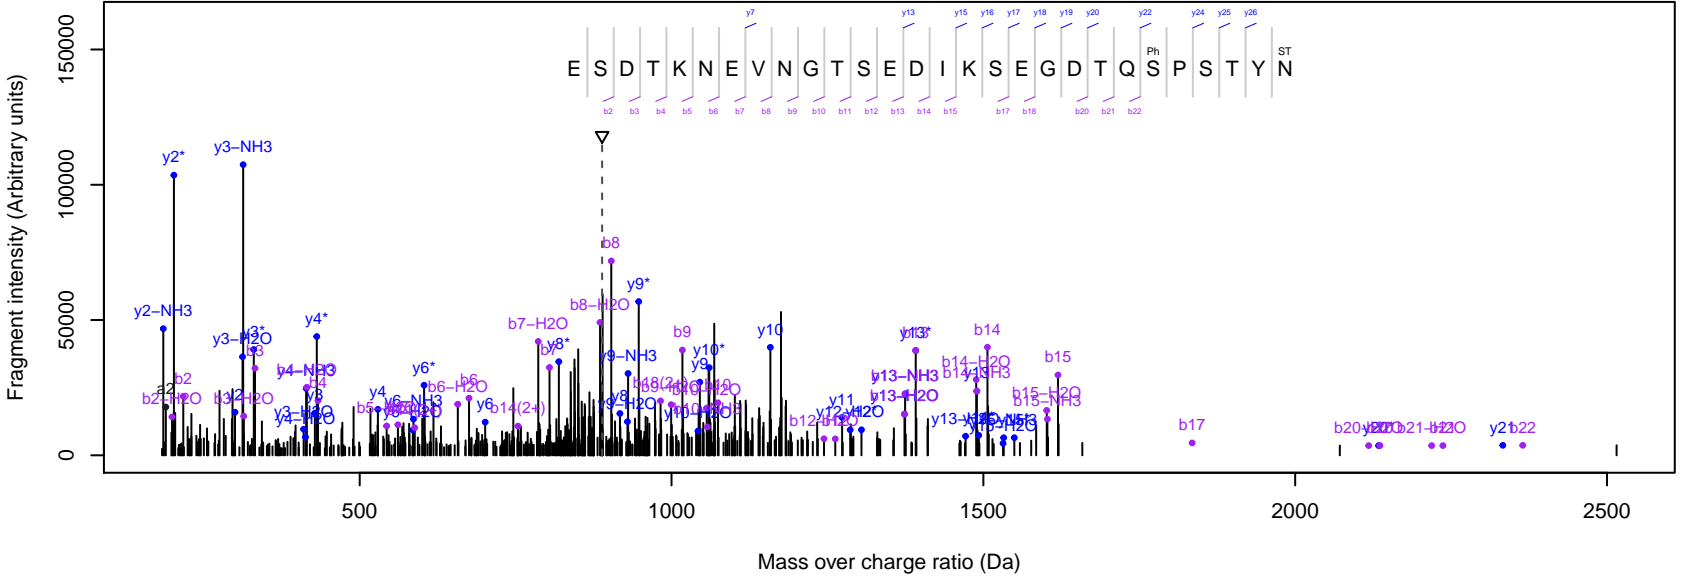

ASLGSPSTYLEGEAEAEASSPK-2+

Source : QE3\_201126\_FR\_TiOx\_hum\_tissue\_Urea\_RNAB\_N Scan : 41629

Andromeda score : 287.57

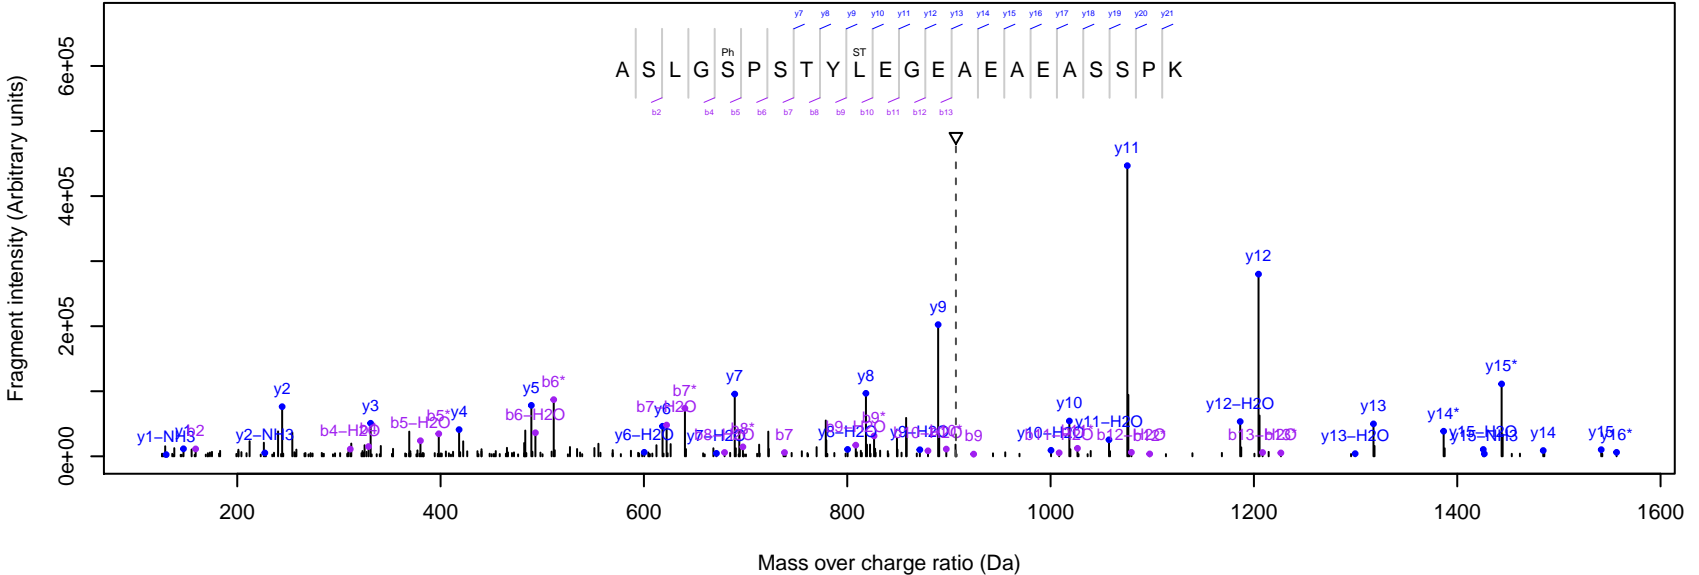

EKT(Phospho (STY))PELPEPSVK-2+

Source : QE3\_201126\_FR\_TiOx\_hum\_tissue\_Urea\_RNAB\_B Scan : 17879

Andromeda score : 287.54

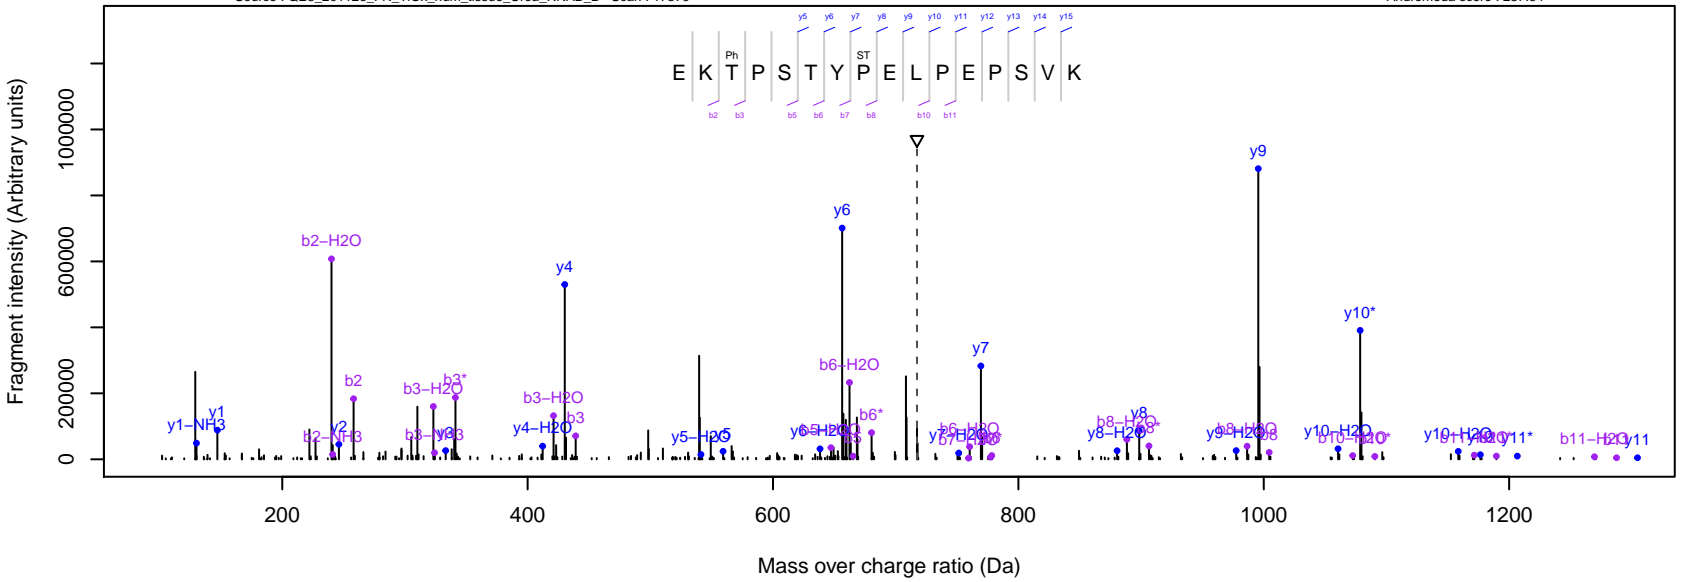

HSTPSNSSNPSGPPS(Phospho (STY))PNSPHR-3+

Source : QE3\_201126\_FR\_TiOx\_hum\_tissue\_Urea\_RNAB\_N Scan : 4886

Andromeda score : 287.17

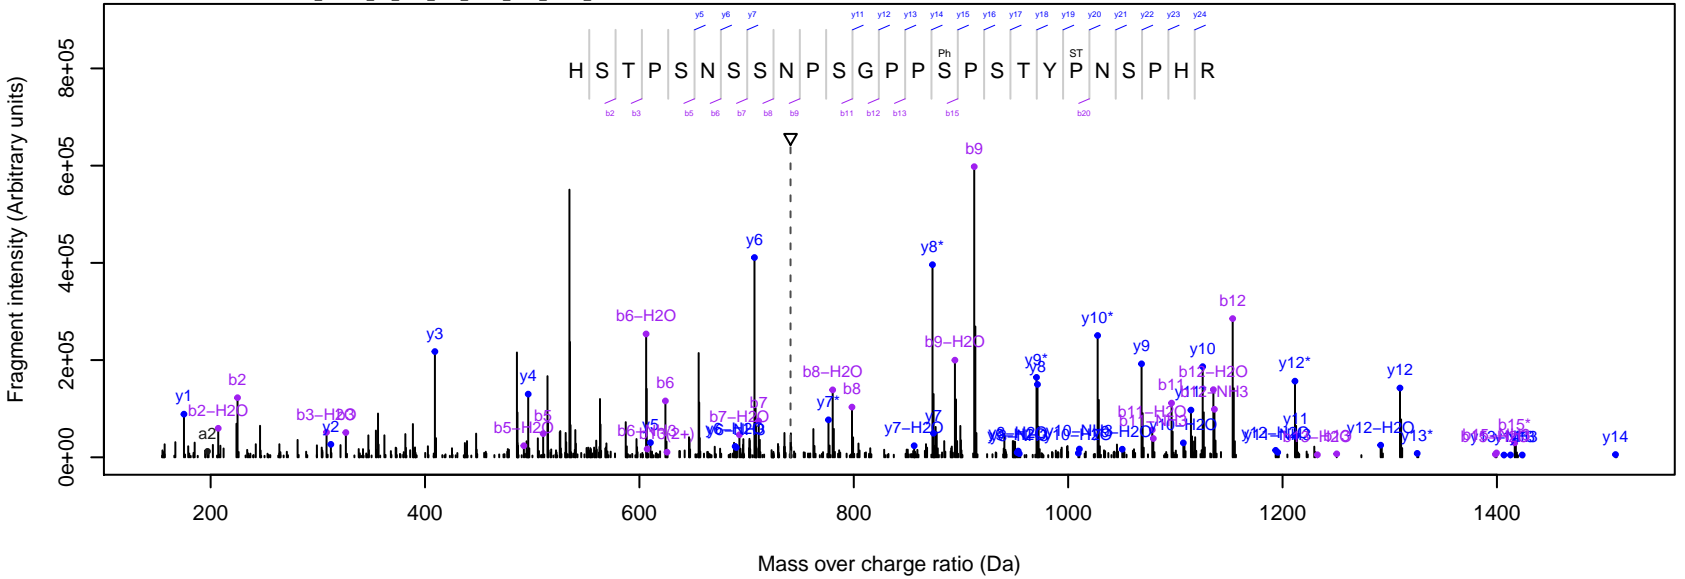

VDS(Phospho (STY))TTCLFPVEEK-2+

Source : QE3\_201126\_FR\_TiOx\_hum\_tissue\_Urea\_RNAB\_N Scan : 39408

Andromeda score : 287.04

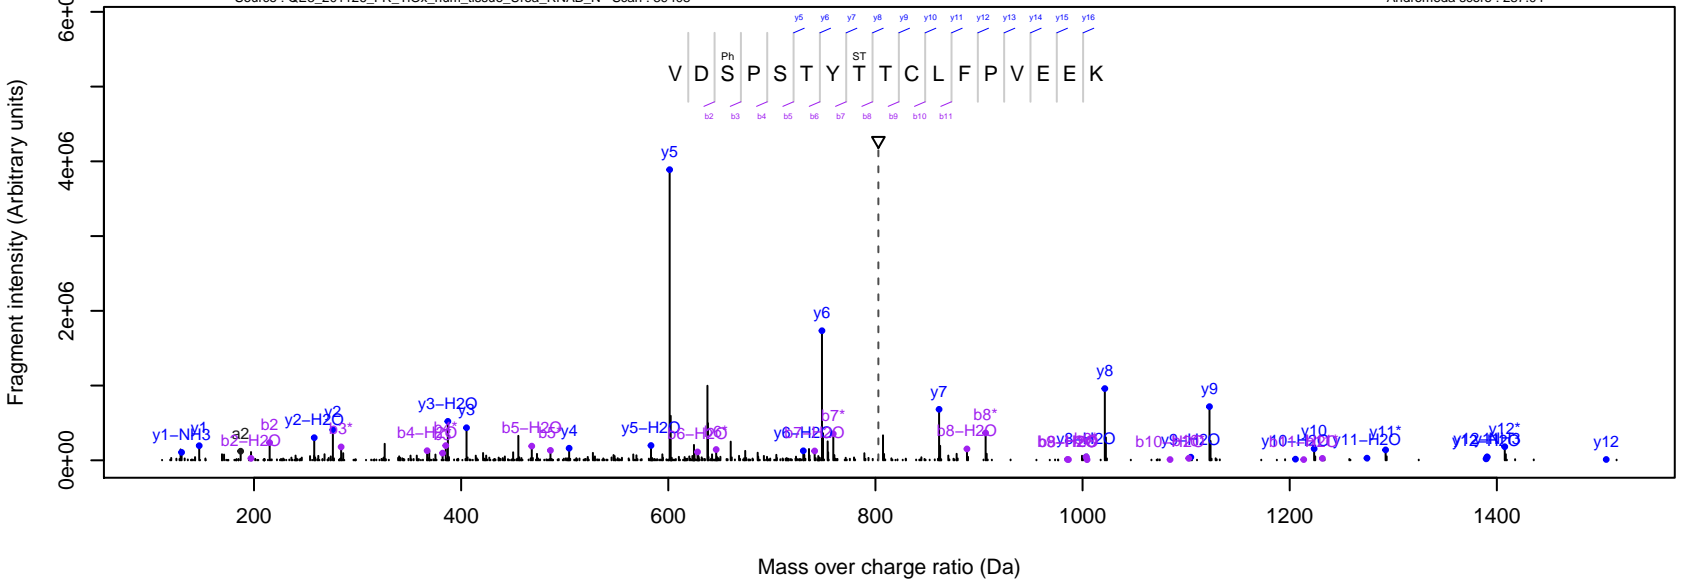

RPLFLAPDFRWLDES(Phospho (STY))DAEM(Oxidation (M))ELR-3+

Source : QE3\_201126\_FR\_TiOx\_hum\_tissue\_Urea\_RNAB\_N Scan : 56758

Andromeda score : 286.74

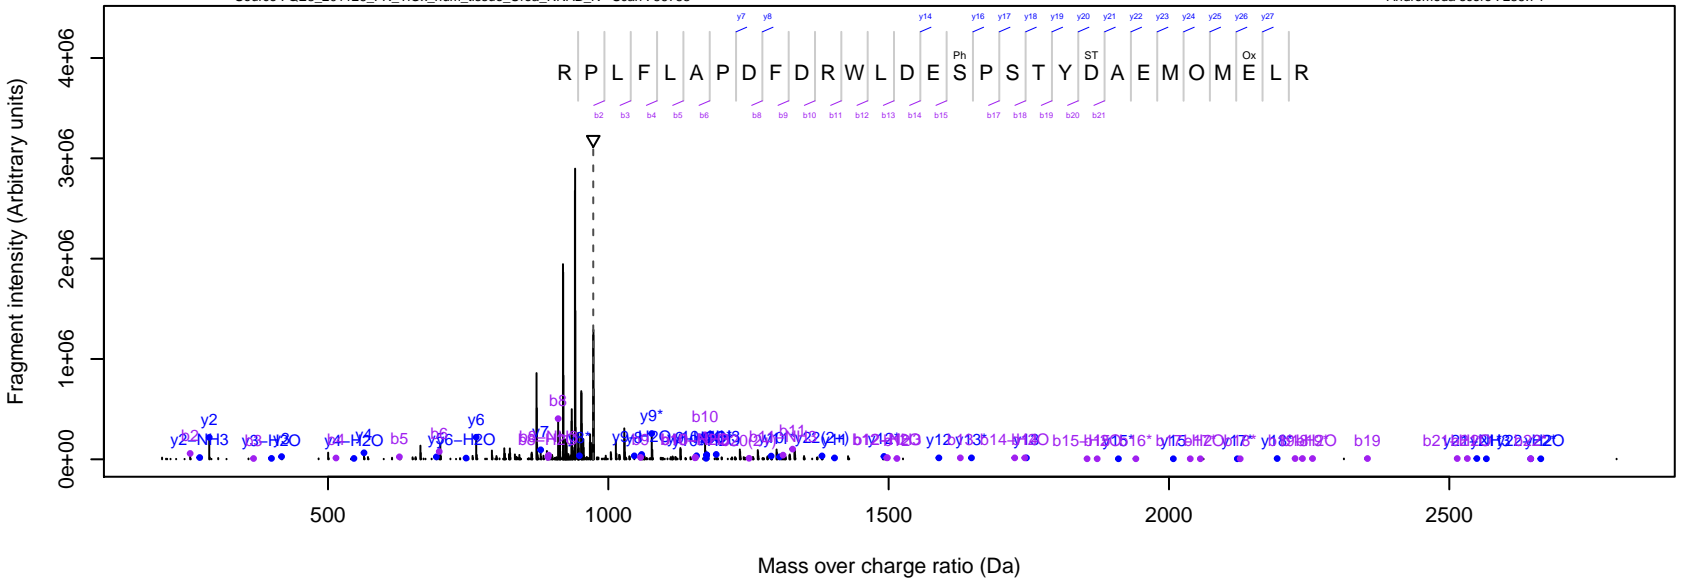

QNGSNDSDRY(Phospho (STY))DNEEDSKIELK-2+

Source : QE3\_201126\_FR\_TiOx\_hum\_tissue\_Urea\_RNAB\_H Scan : 13867

Andromeda score : 286.7

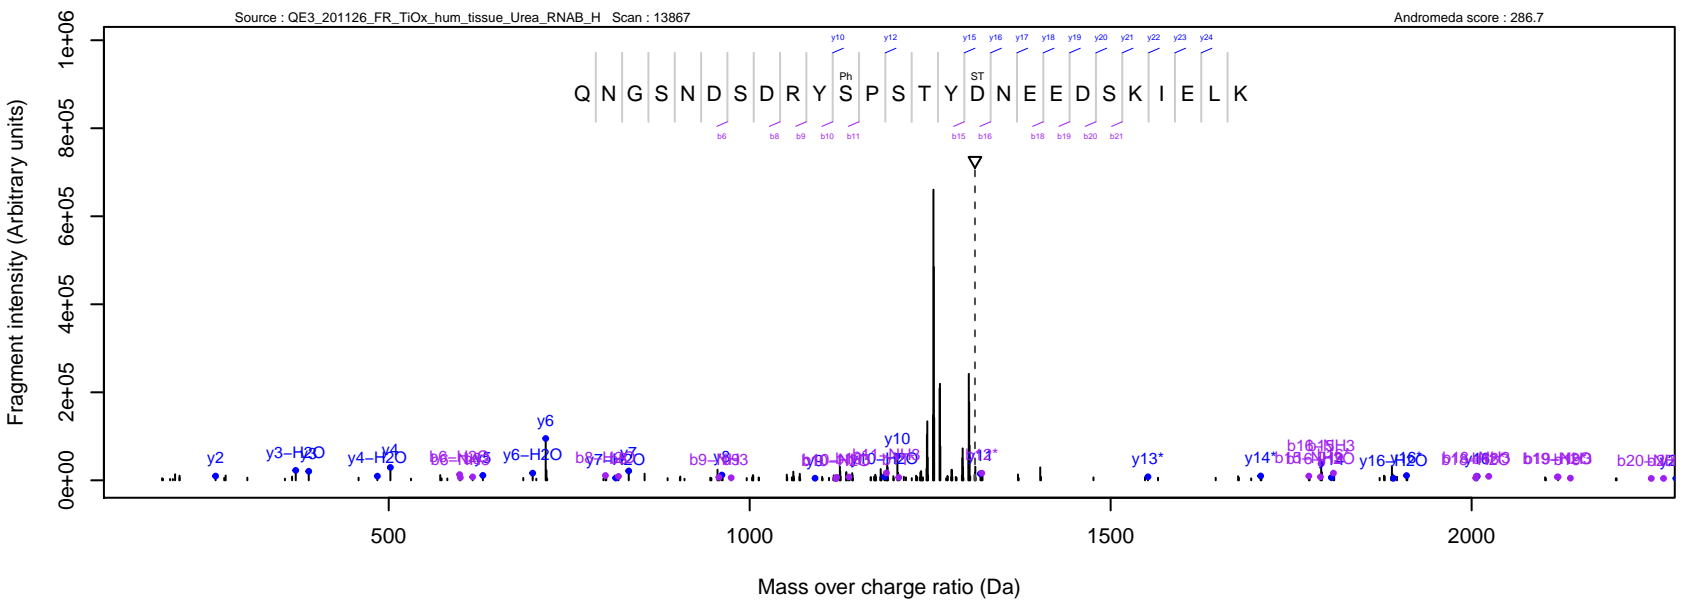

TYS(Phospho (STY))LGSALRPSTR-2+

Source : QE3\_201126\_FR\_TiOx\_hum\_tissue\_Urea\_RNAB\_N Scan : 26067

Andromeda score : 286.59

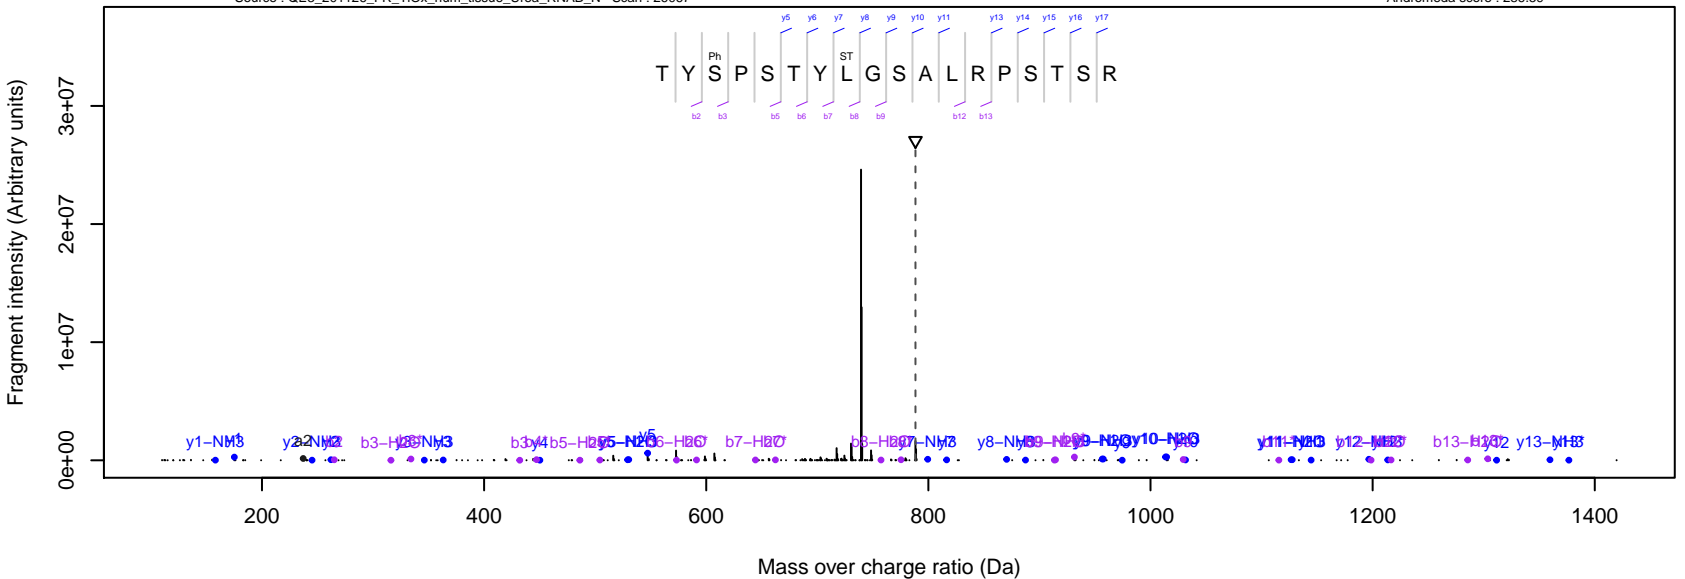



KLS(Phospho (STY))SSDAPAQDTGSSAAAVETDASR-2+

Source : QE3\_201126\_FR\_TiOx\_hum\_tissue\_Urea\_RNAB\_H Scan : 16767

Andromeda score : 286.44

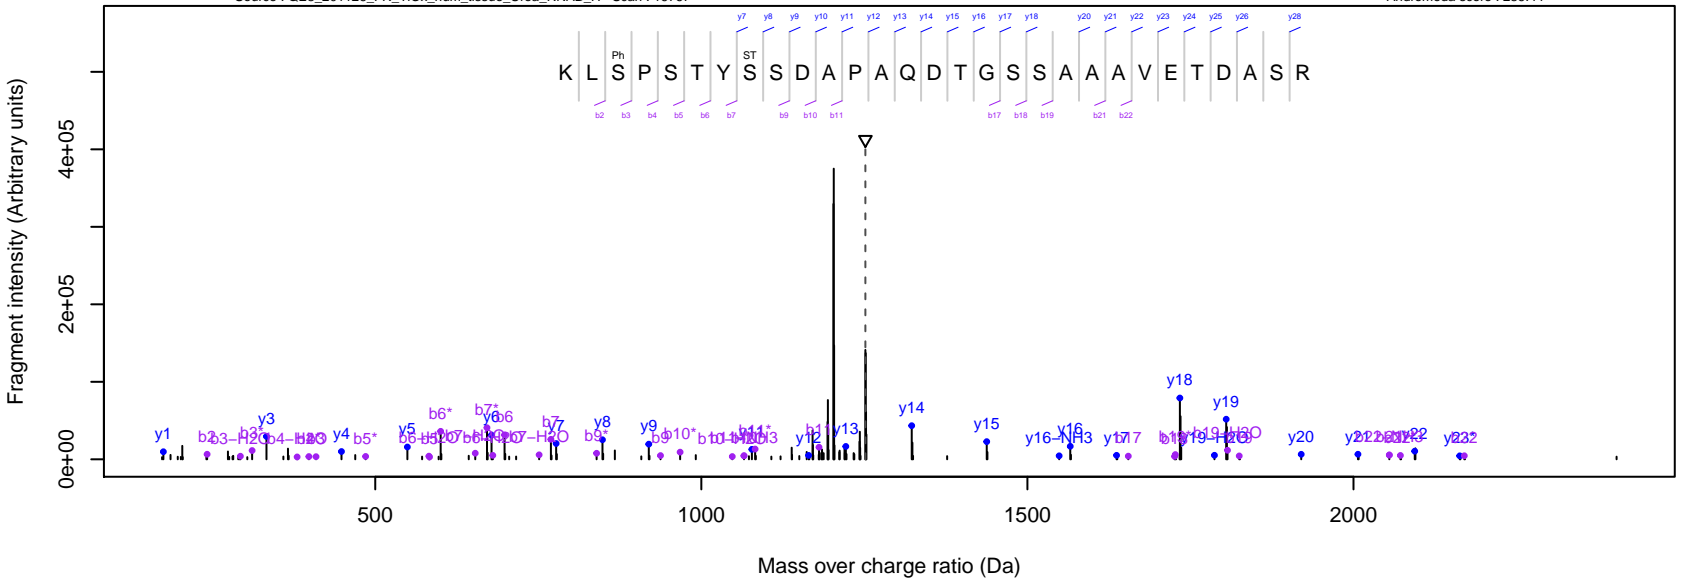

KTS(Phospho (STY))DANETEDHLESICK-3+

Source : QE3\_201126\_FR\_TiOx\_hum\_tissue\_Urea\_RNAB\_H Scan : 28321

Andromeda score : 286.44

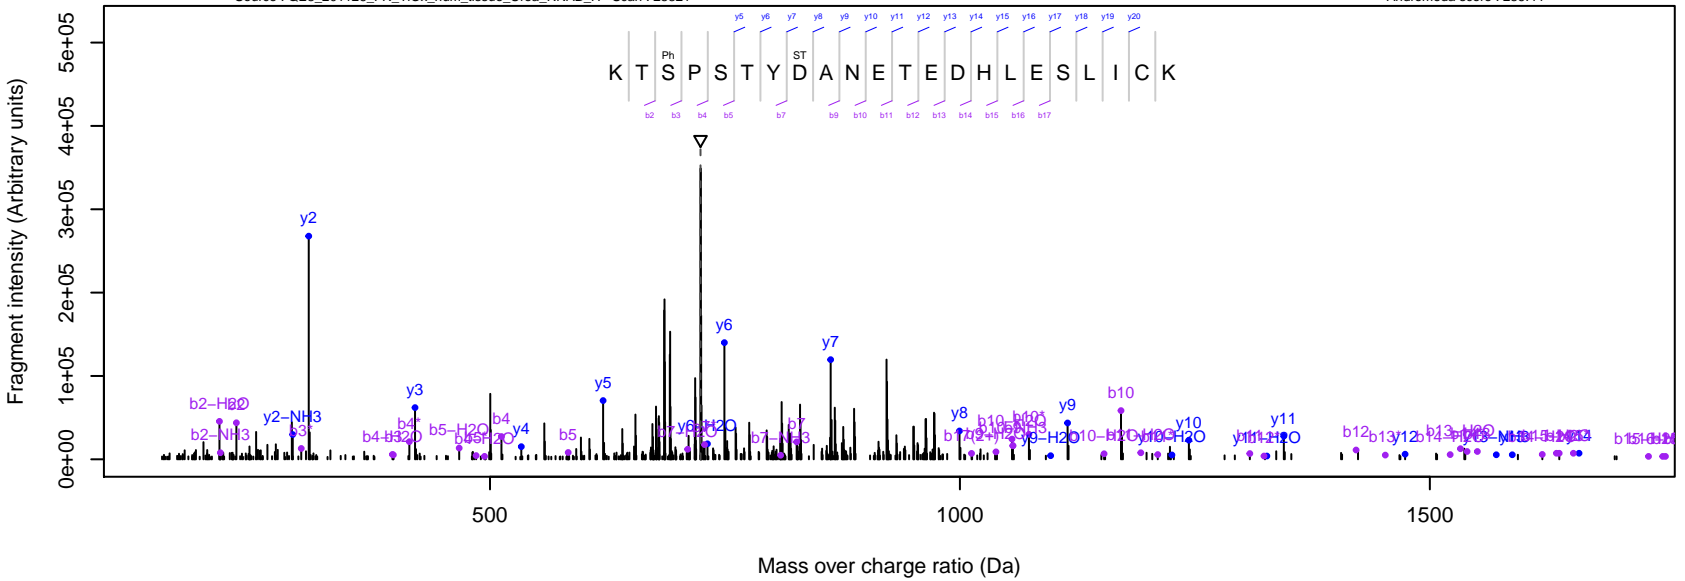

M(Oxidation (M))TGLVDEAIDTKS(Phospho (STY))LLDASEEAIKK-3+

Source : QE3\_201126\_FR\_TiOx\_hum\_tissue\_Urea\_RNAB\_H Scan : 45772

Andromeda score : 286.37

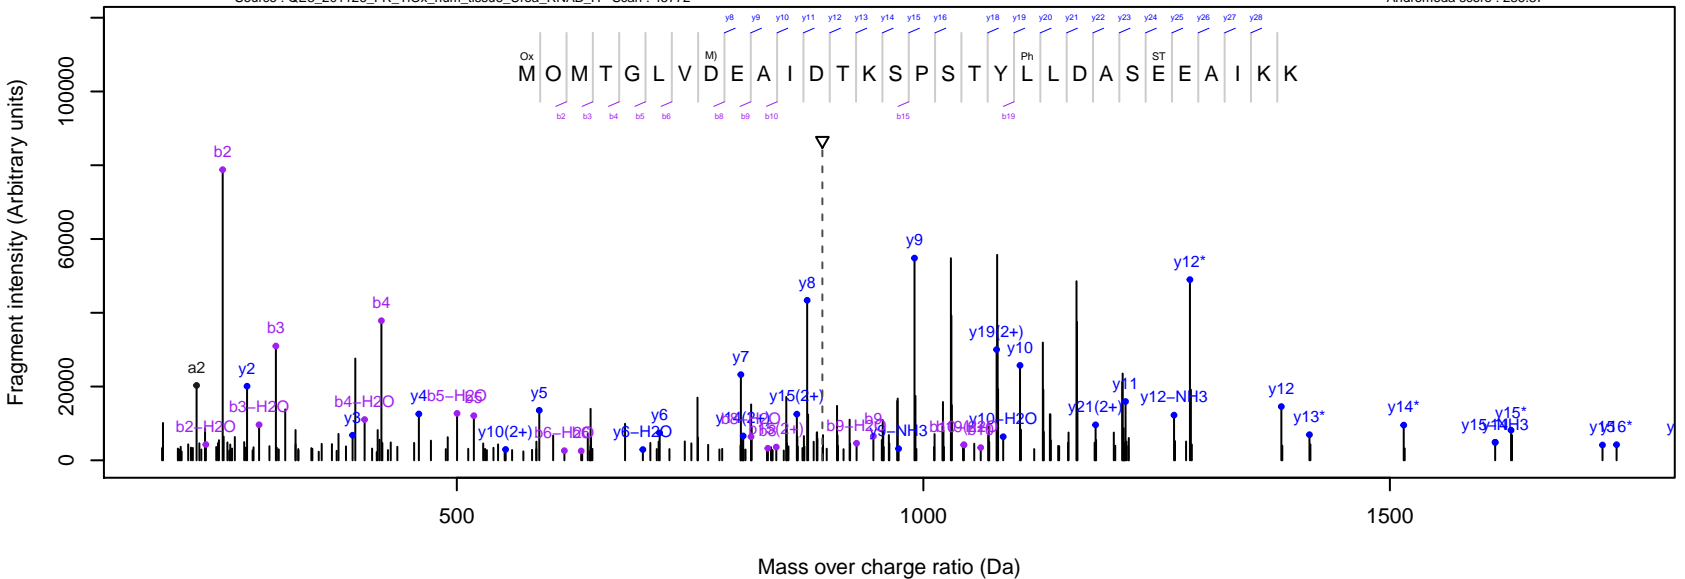

SFS(Phospho (STY))ADNFIGQR-2+

Source : QE3\_201126\_FR\_TIOx\_hum\_tissue\_Urea\_RNAB\_H Scan : 44763

Andromeda score : 286.19

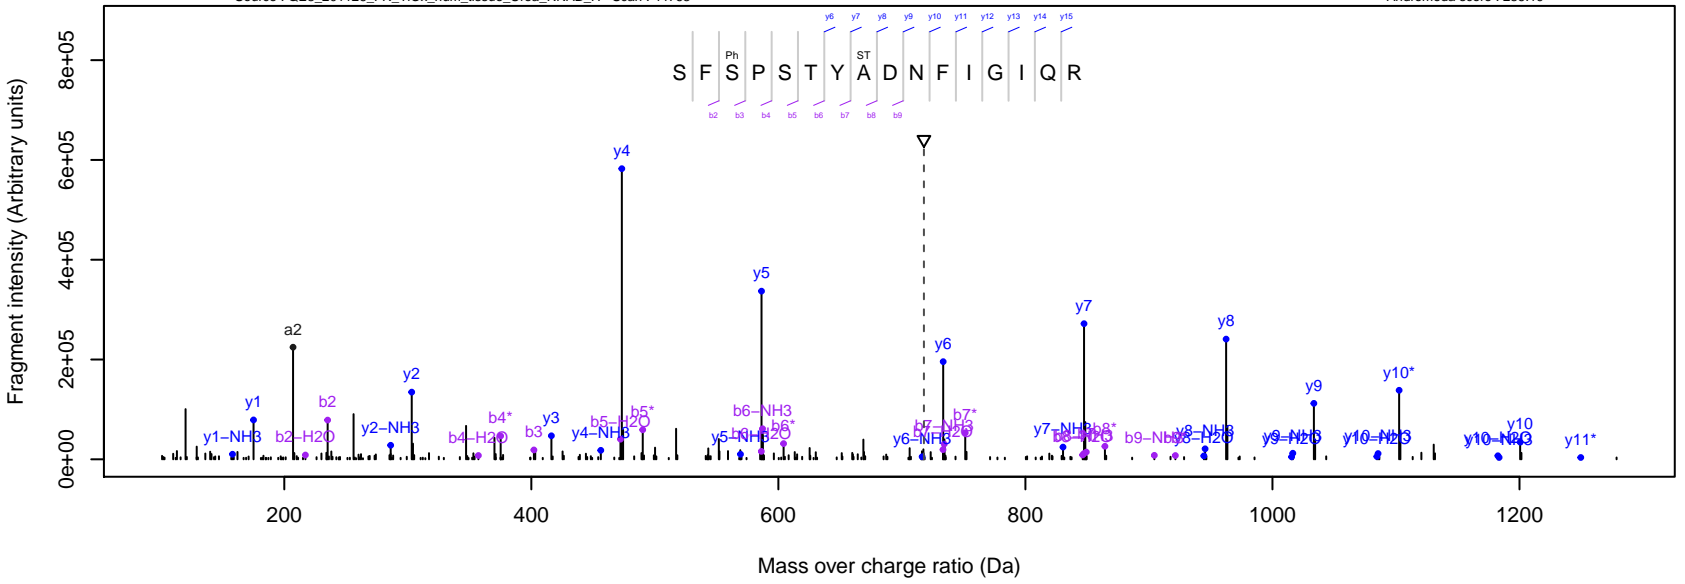

SLQKVDEEDS(Phospho (STY))DEESHDEM(Oxidation (M))S(Phospho (STY))EQEELEDDPTVVK-4+

Source : QE3\_201126\_FR\_TIOx\_hum\_tissue\_Urea\_RNAB\_N Scan : 23319

Andromeda score : 285.7

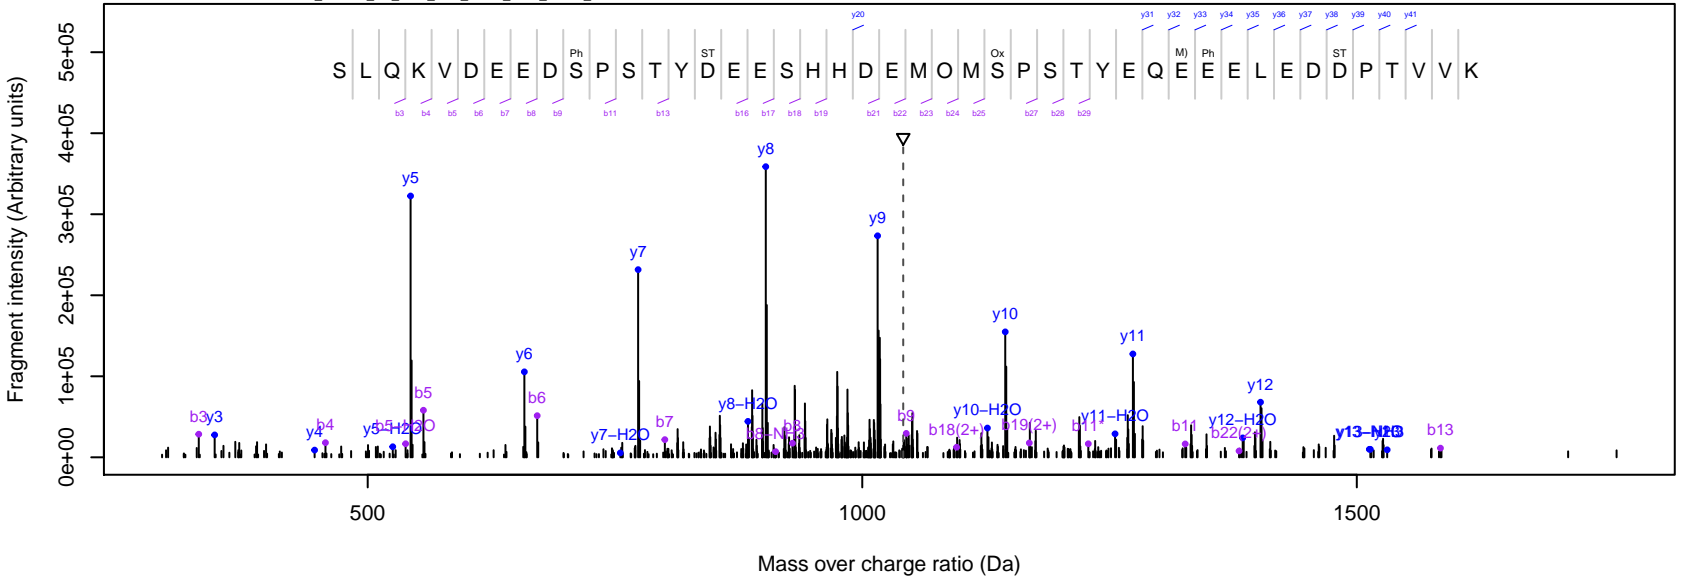

GLNTSQES(Phospho (STY))DDDILDESSPEGTQK-2+

Source : QE3\_201126\_FR\_TIOx\_hum\_tissue\_Urea\_RNAB\_H Scan : 29684

Andromeda score : 285.55

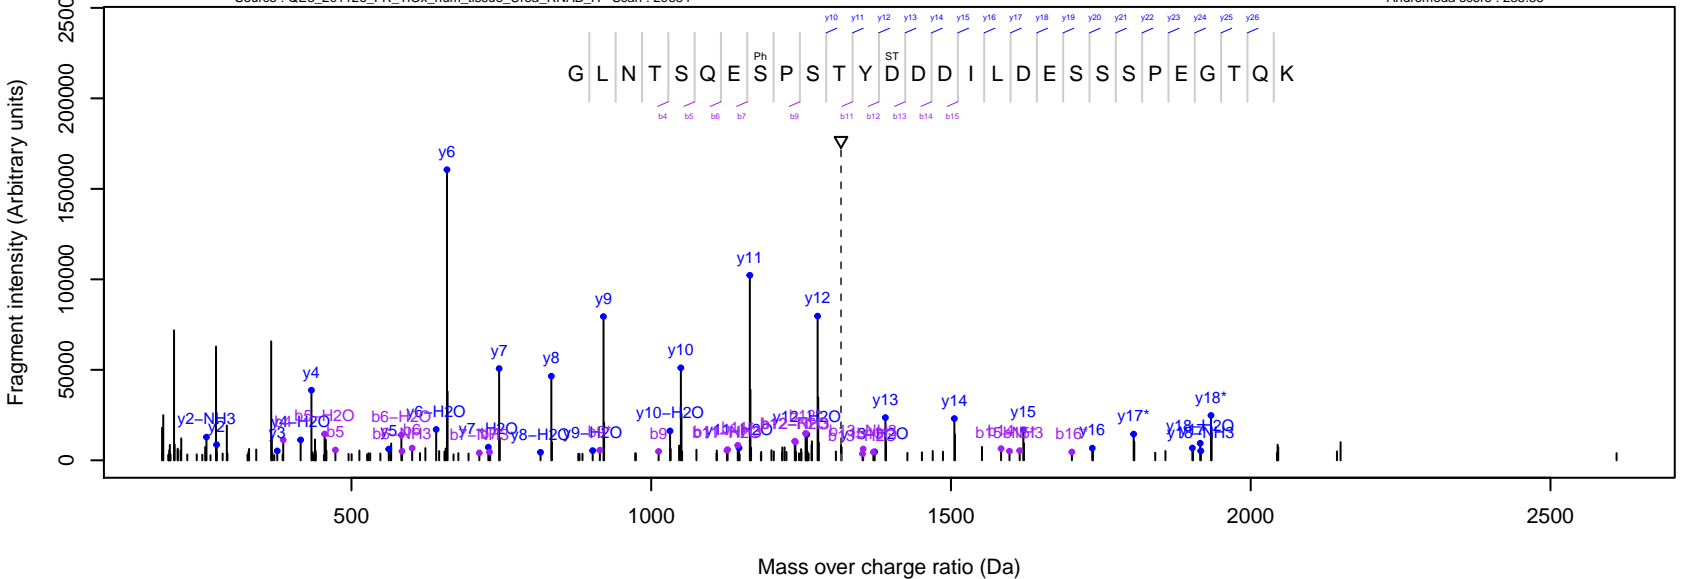

SNS(Phospho (STY))ELEDEILCLEK-2+

Source : QE3\_201126\_FR\_TIOx\_hum\_tissue\_Urea\_RNAB\_H Scan : 54018

Andromeda score : 285.43

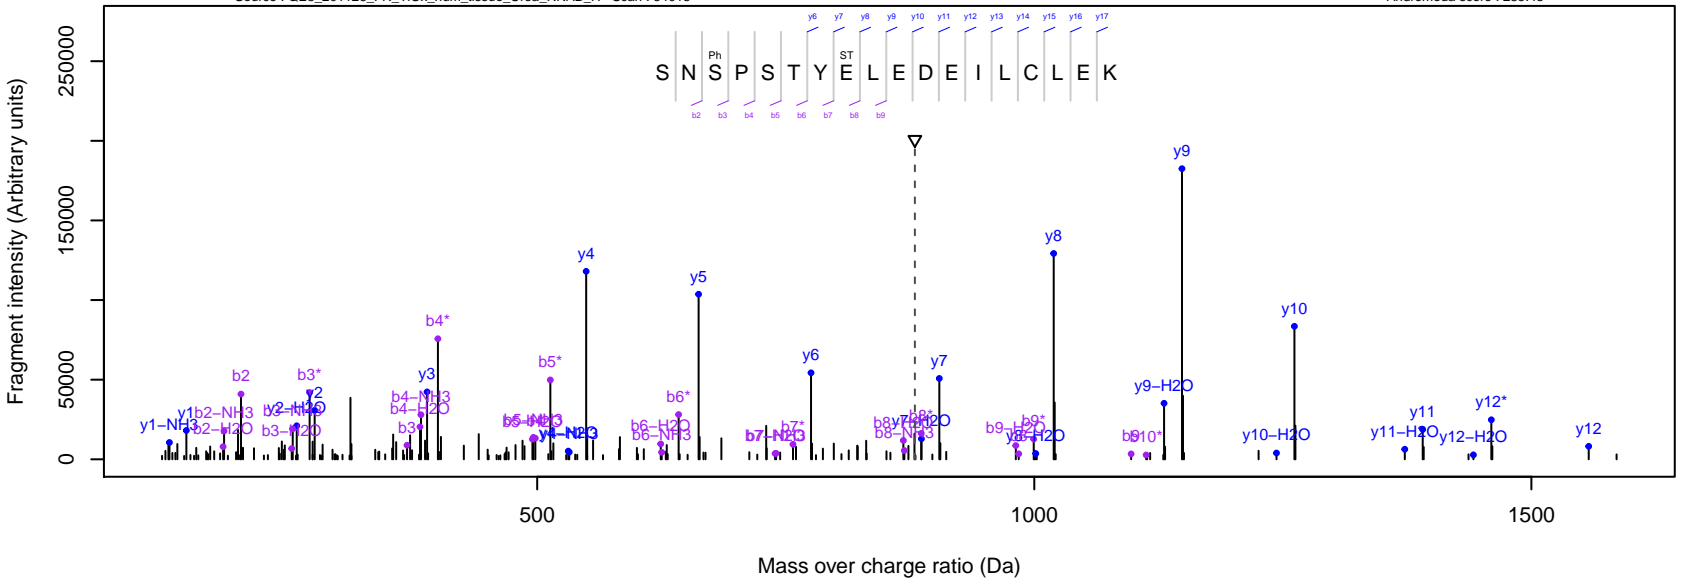

S(Phospho (STY))LDGLSEACGGAGSSGSAESGAGGR-2+

Source : QE3\_201126\_FR\_TIOx\_hum\_tissue\_Urea\_RNAB\_H Scan : 22838

Andromeda score : 285.27

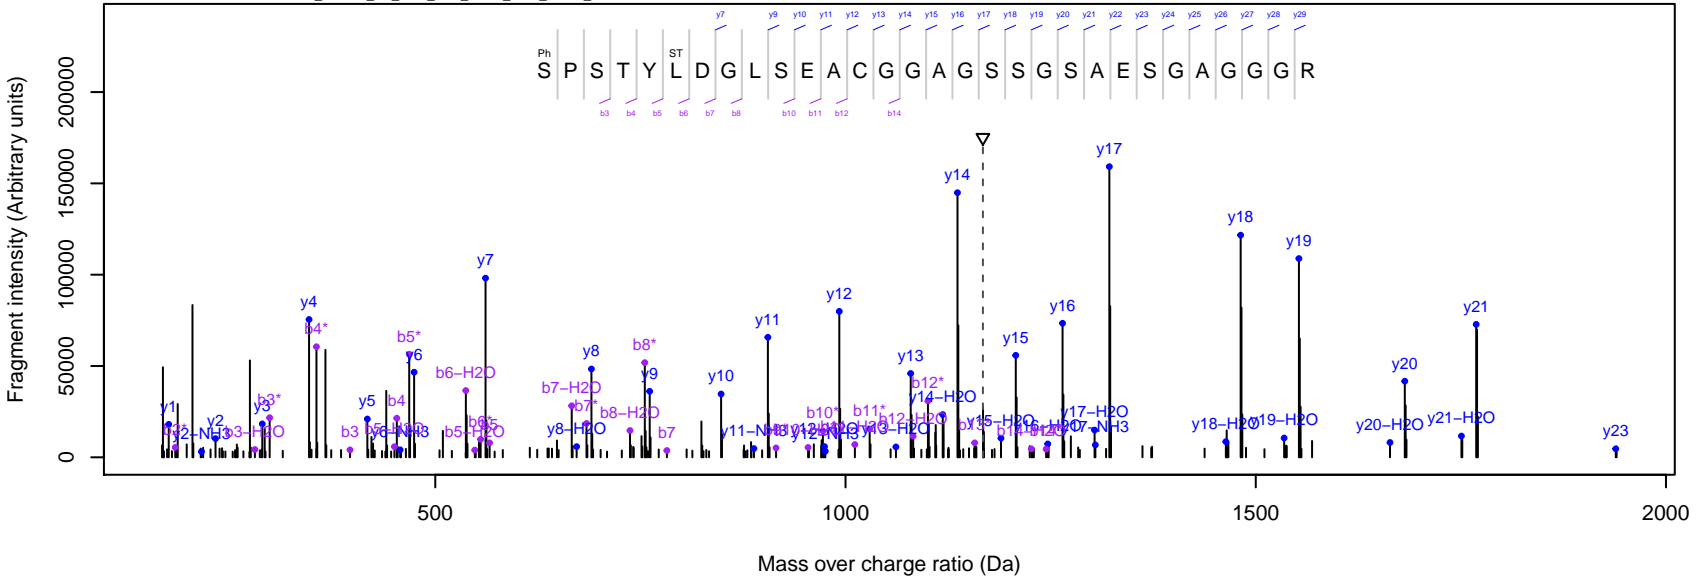

LLESSLSS(Phospho (STY))SEGEEPVEYK-2+

Source : QE3\_201126\_FR\_TIOx\_hum\_tissue\_Urea\_RNAB\_H Scan : 32731

Andromeda score : 285.19

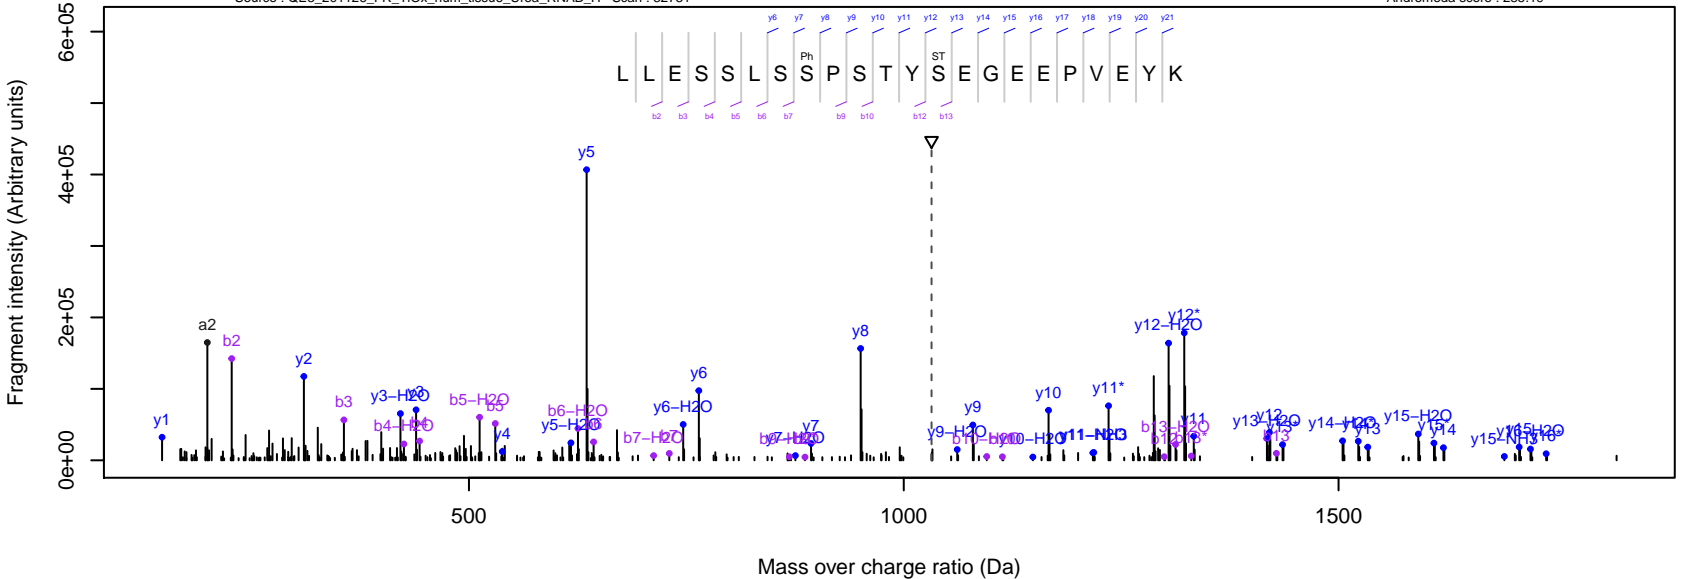

AGLESGAEPGDGDS(Phospho (STY))DTTK-2+

Source : QE3\_201126\_FR\_TIOx\_hum\_tissue\_Urea\_RNAB\_N Scan : 13561

Andromeda score : 284.81

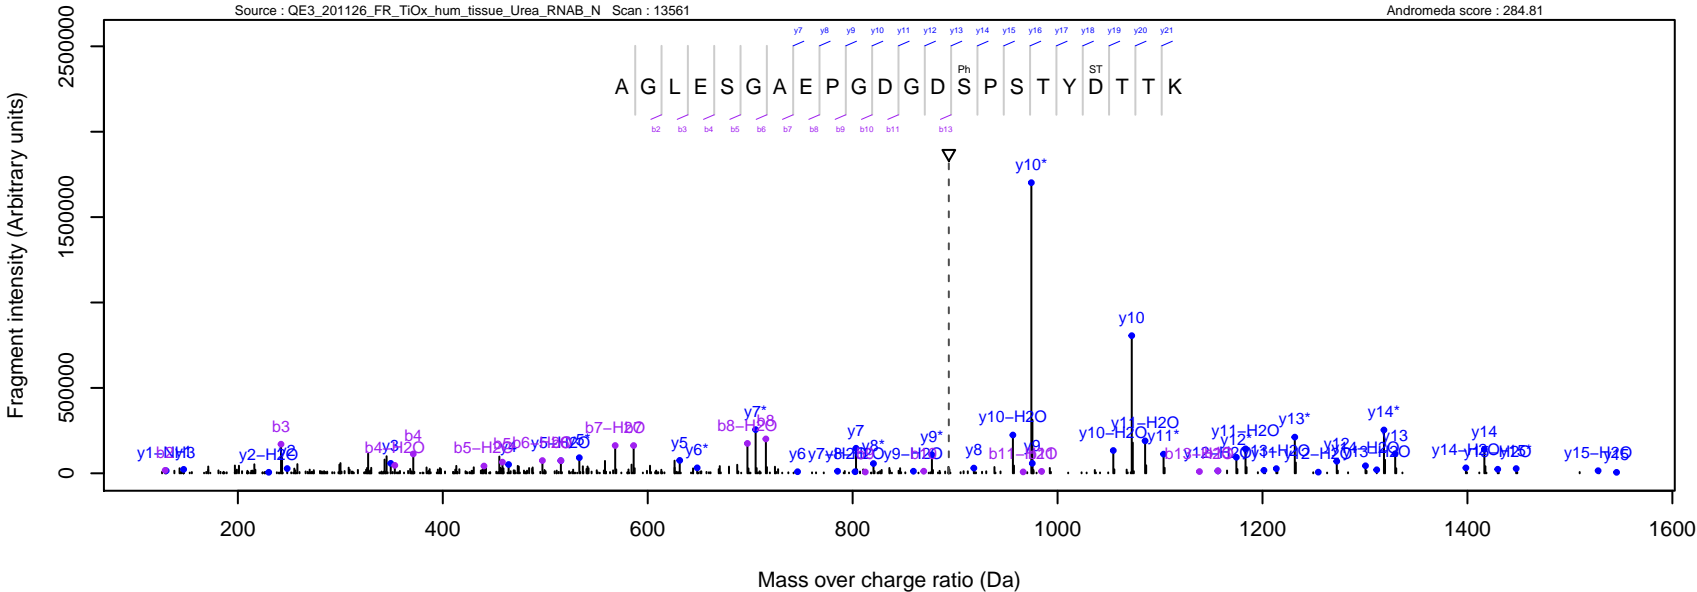

NRPTS(Phospho (STY))ISWDGLDSGKLYTLVLTDPDAPSR-3+

Source : QE3\_201126\_FR\_TIOx\_hum\_tissue\_Urea\_RNAB\_H Scan : 55038

Andromeda score : 284.81

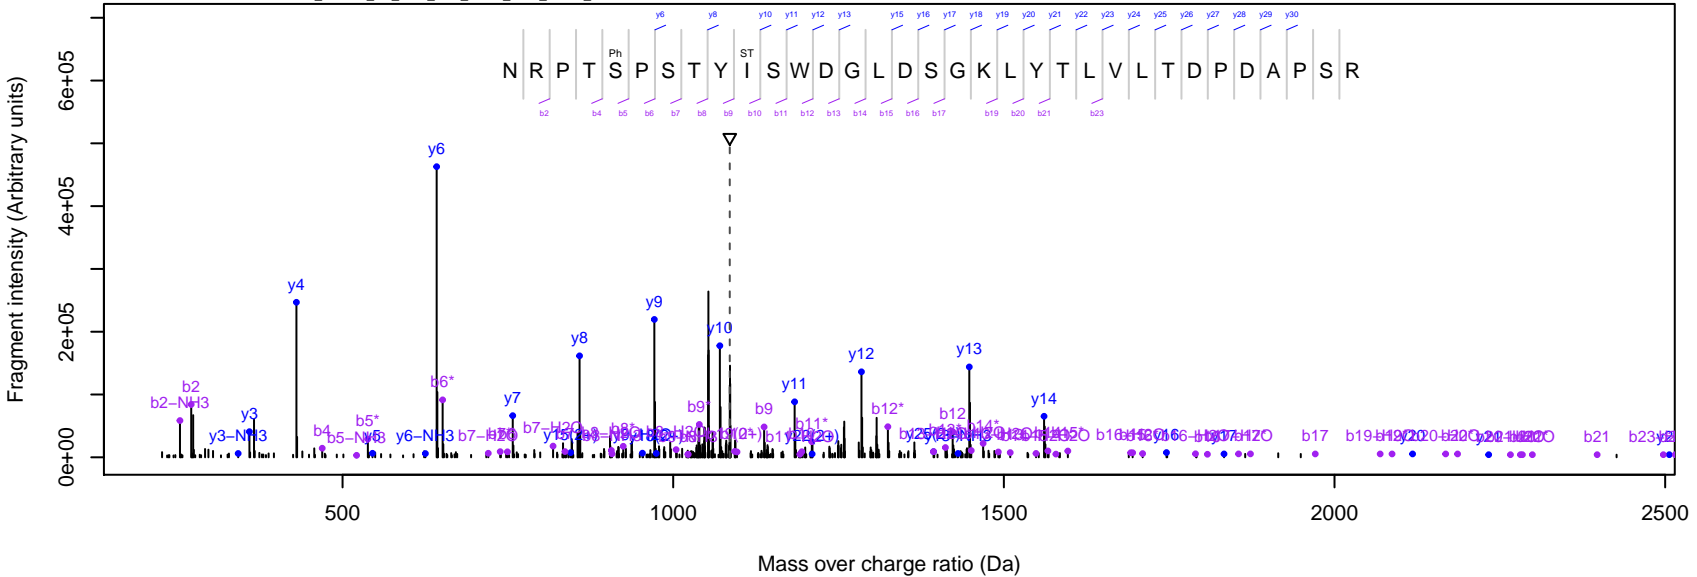

TGS(Phospho (STY))YGALAEITASK-2+

Source : QE3\_201126\_FR\_TIOx\_hum\_tissue\_Urea\_RNAB\_B Scan : 36781

Andromeda score : 284.79

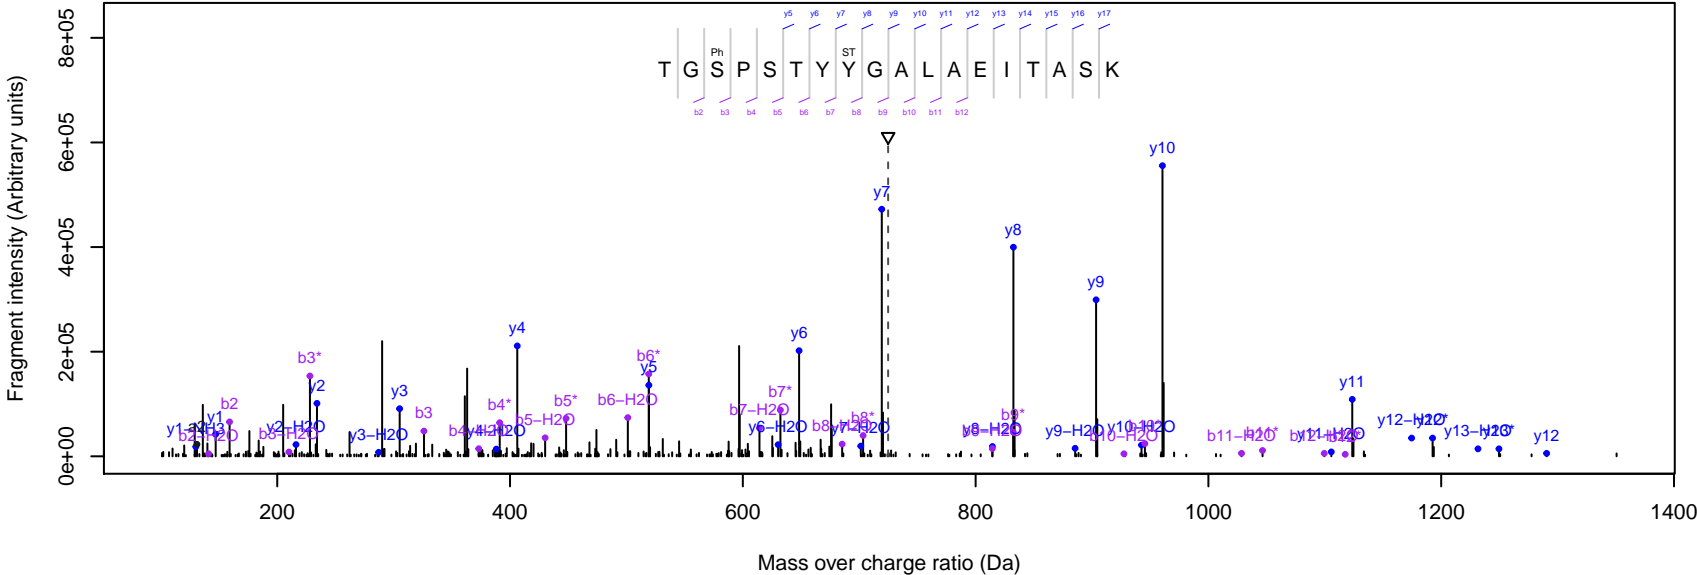

LLEDGEDFNLDALDSSNS(Phospho (STY))M(Oxidation (M))QTIQK-3+

Source : QE3\_201126\_FR\_TIOx\_hum\_tissue\_Urea\_RNAB\_B Scan : 52225

Andromeda score : 284.74

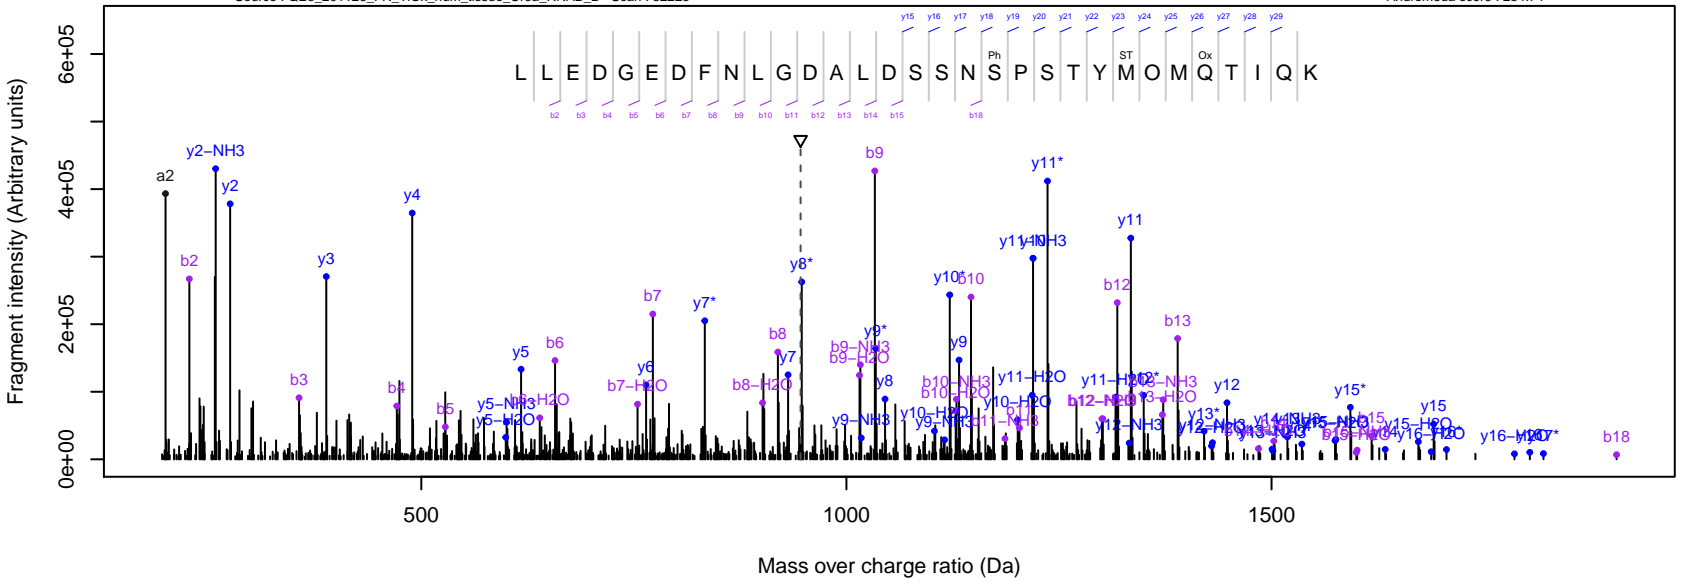

ERS(Phospho (STY))PALKSPLQSVVVR-3+

Source : QE3\_201126\_FR\_TIOx\_hum\_tissue\_Urea\_RNAB\_H Scan : 24378

Andromeda score : 284.43

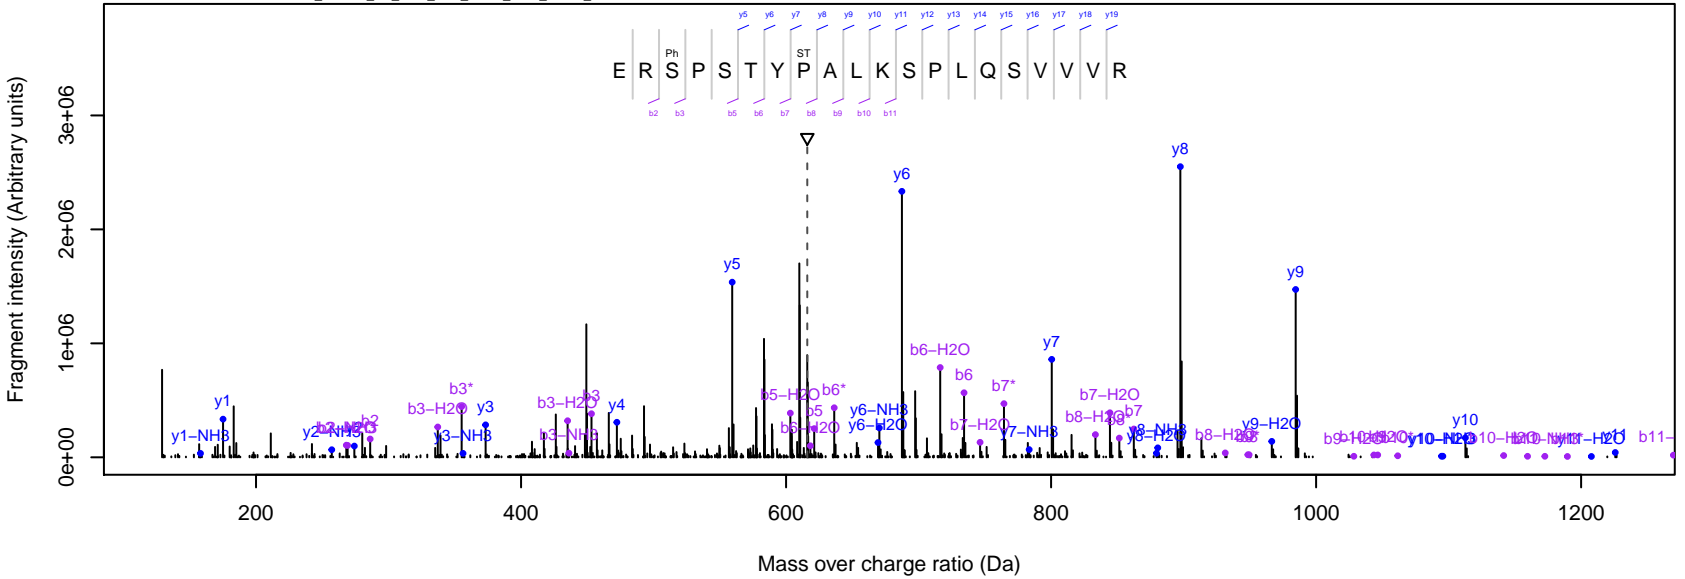

GDM(Oxidation (M))S(Phospho (STY))DEDDENEFFDAPEIITMPENLGHK-3+

Source : QE3\_201126\_FR\_TIOx\_hum\_tissue\_Urea\_RNAB\_H Scan : 57400

Andromeda score : 283.95

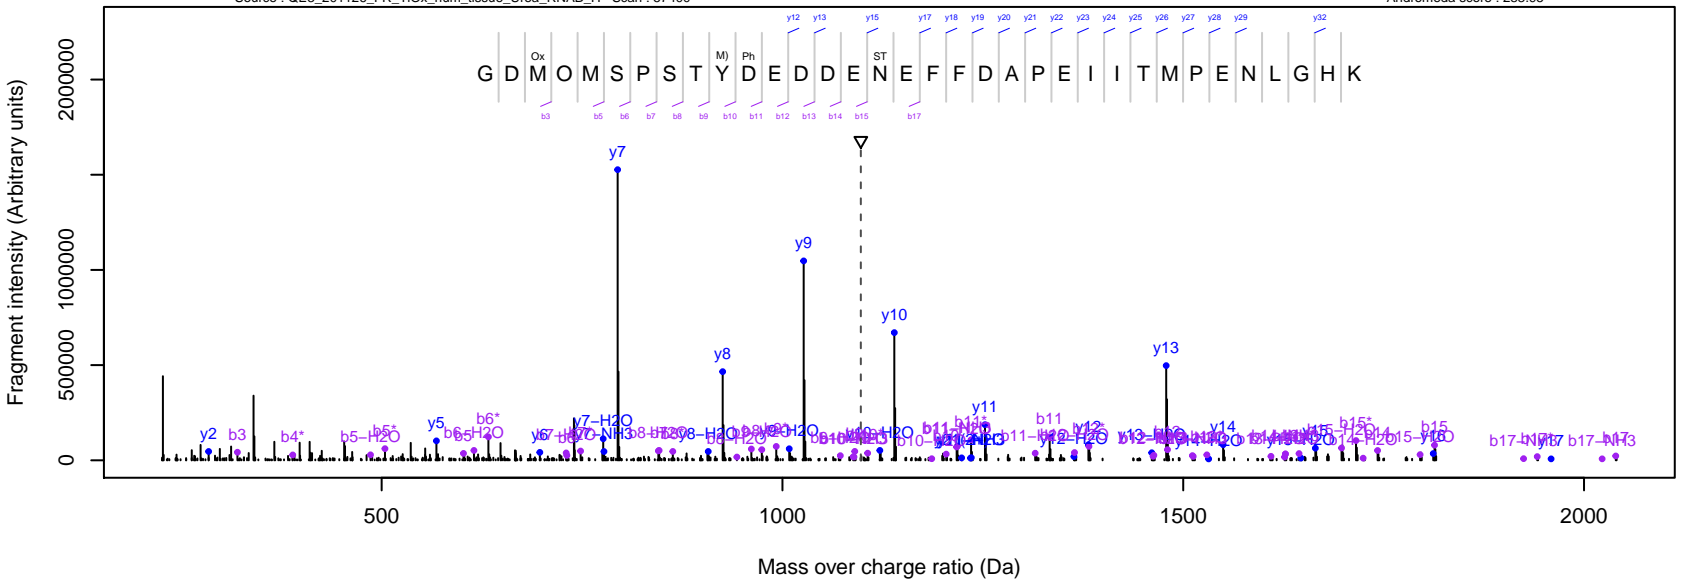

RPDPDS(Phospho (STY))DEDEDYERER-3+

Source : QE3\_201126\_FR\_TIOx\_hum\_tissue\_Urea\_RNAB\_B Scan : 8758

Andromeda score : 283.75

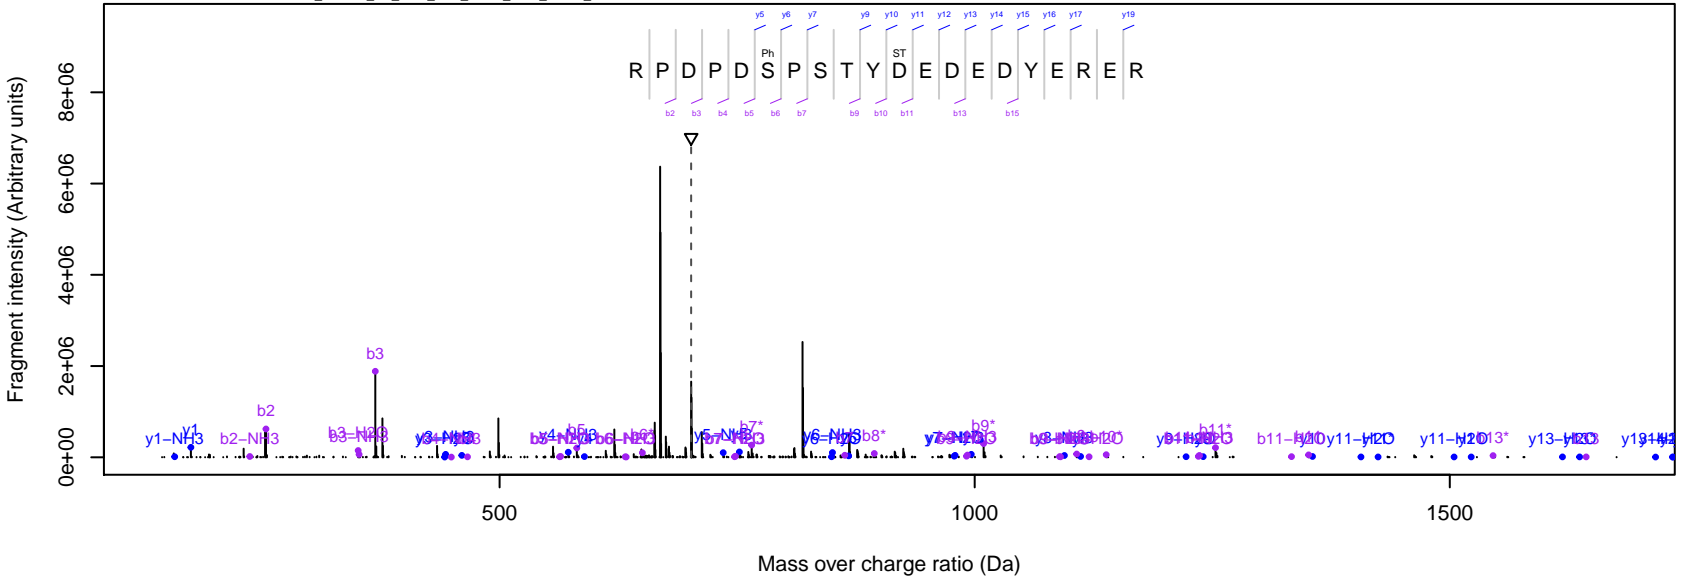

HSLDSD(Phospho (STY))DEEEDDDGGSSKYDILASEDVEGQEAATLPSEGGVR-4+

Source : QE3\_201126\_FR\_TIOx\_hum\_tissue\_Urea\_RNAB\_B Scan : 40660

Andromeda score : 283.14

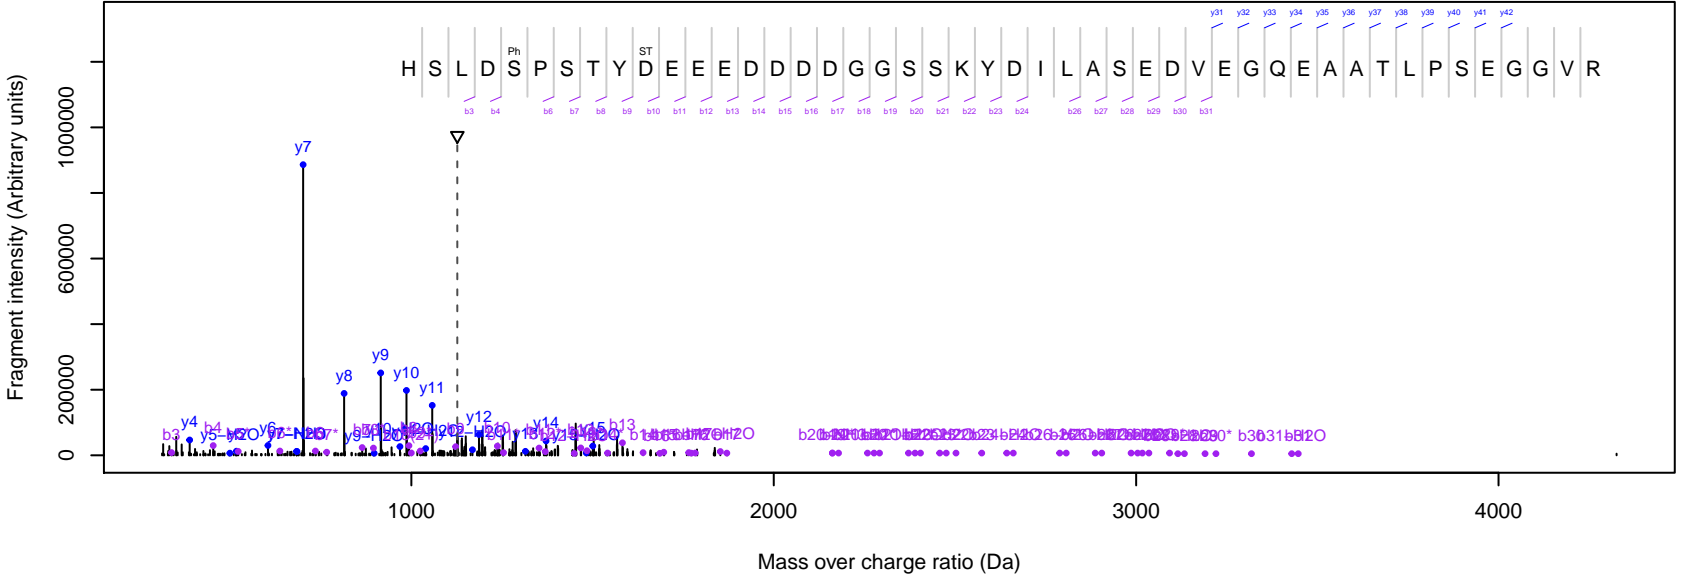

DSSKGEDS(Phospho (STY))AEETEAKPAVVAPVVEAVSTPSA AFPSDATAENVK-4+

Source : QE3\_201126\_FR\_TIOx\_hum\_tissue\_Urea\_RNAB\_H Scan : 44121

Andromeda score : 282.81

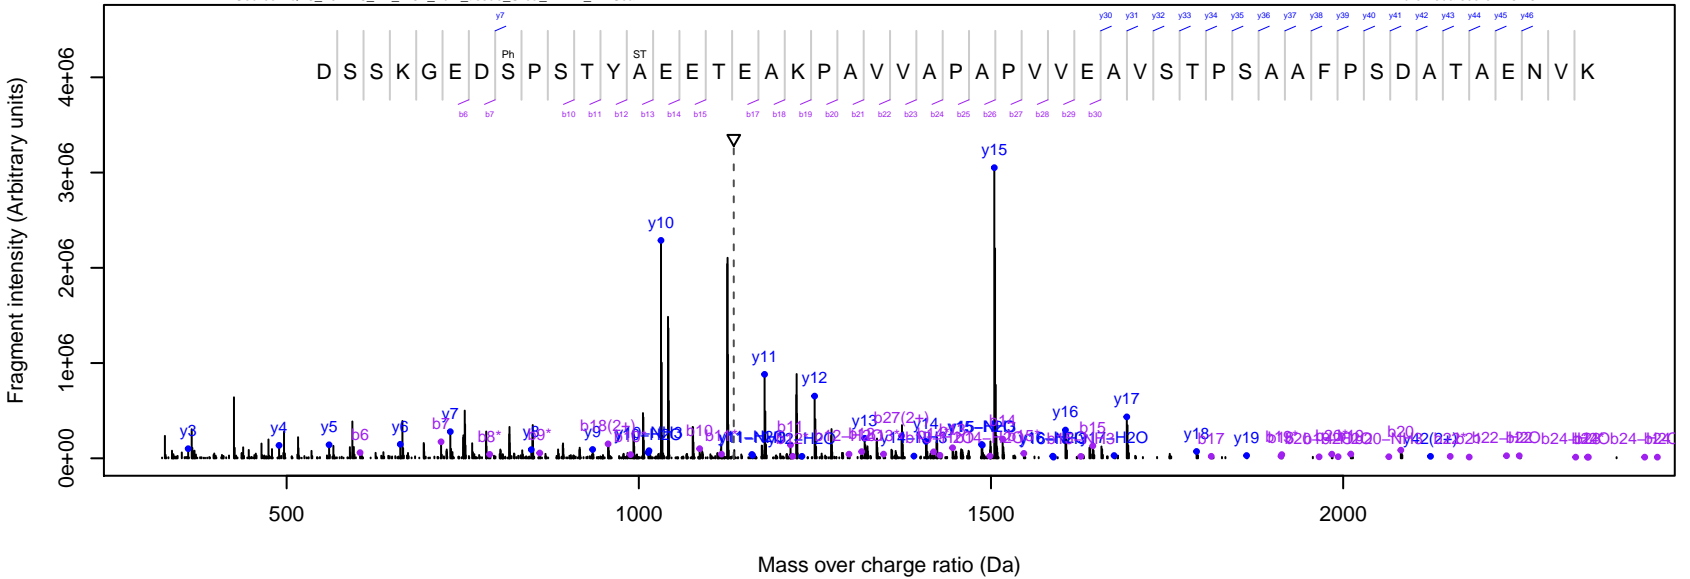

ENVEYIEREES(Phospho (STY))DGEYDEFGR-3+

Source : QE3\_201126\_FR\_TIOx\_hum\_tissue\_Urea\_RNAB\_B Scan : 32013

Andromeda score : 282.76

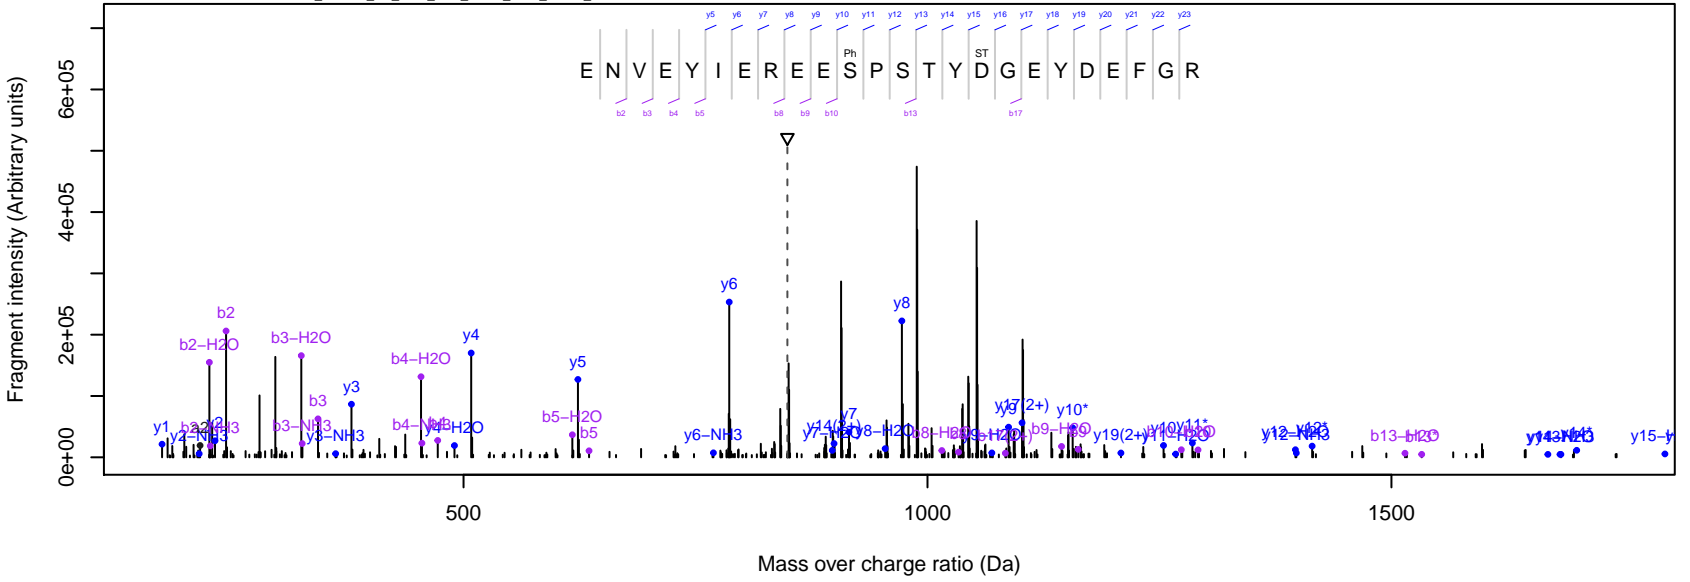

SLSNS(Phospho (STY))NPDISGTPSPDDEV-2+

Source : QE3\_201126\_FR\_TIOx\_hum\_tissue\_Urea\_RNAB\_H Scan : 24546

Andromeda score : 282.62

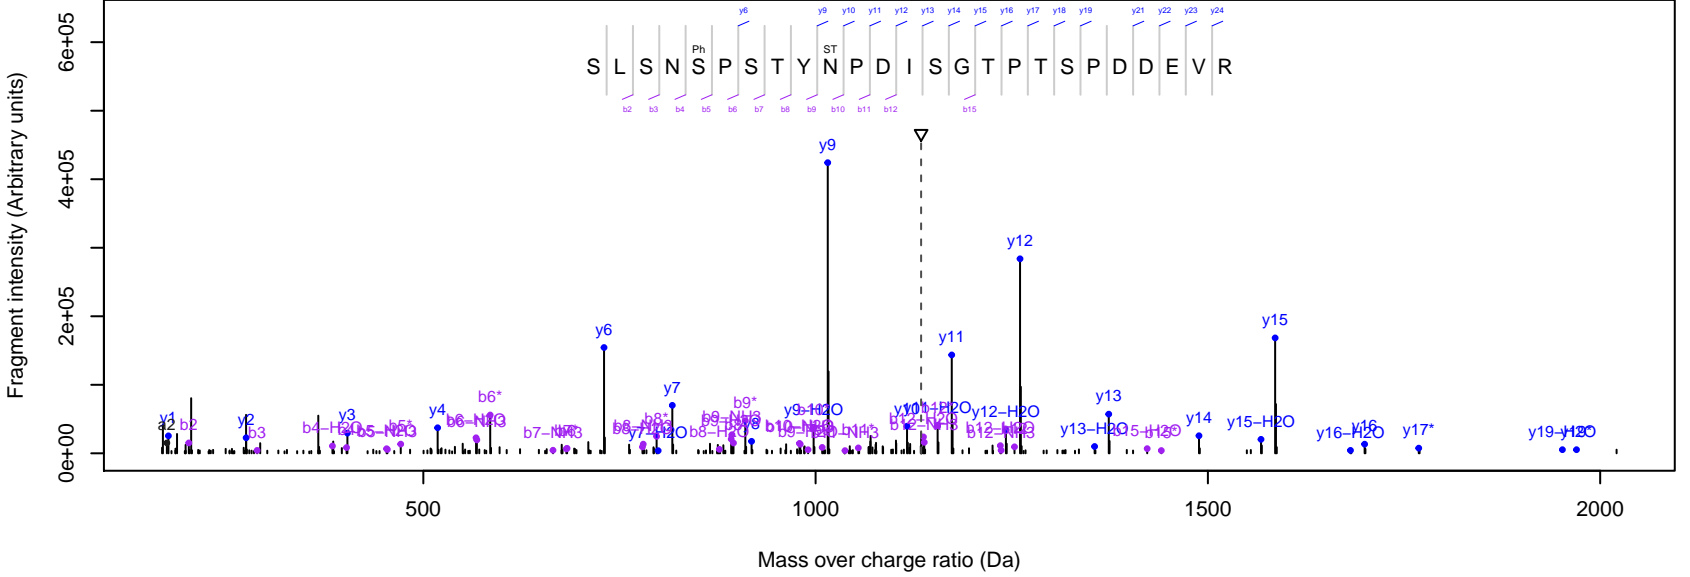

NWEDEDFYDS(Phospho (STY))DDDTFLDR-2+

Source : QE3\_201126\_FR\_TIOx\_hum\_tissue\_Urea\_RNAB\_N Scan : 55896

Andromeda score : 282.49

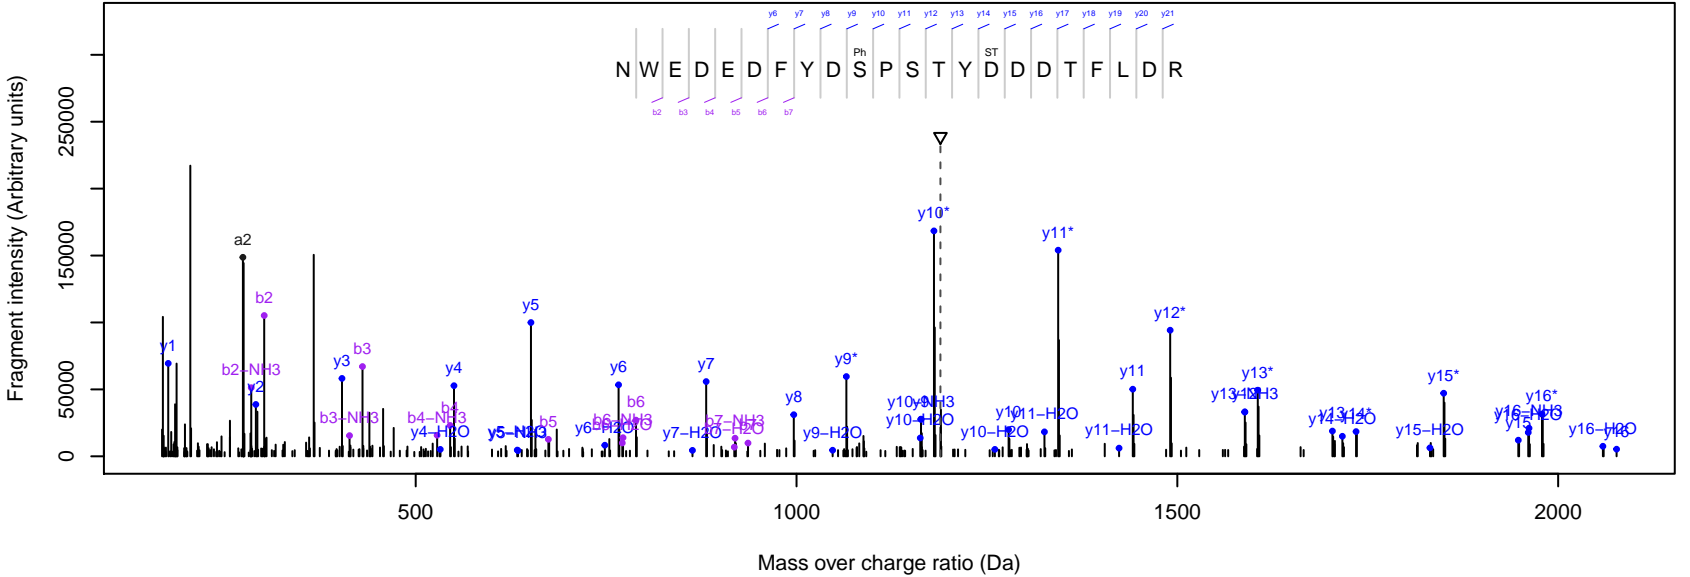

IACEEFS(Phospho (STY))DS(Phospho (STY))EEEEGGGRK-2+

Source : QE3\_201126\_FR\_TiOx\_hum\_tissue\_Urea\_RNAB\_B Scan : 17799

Andromeda score : 282.47

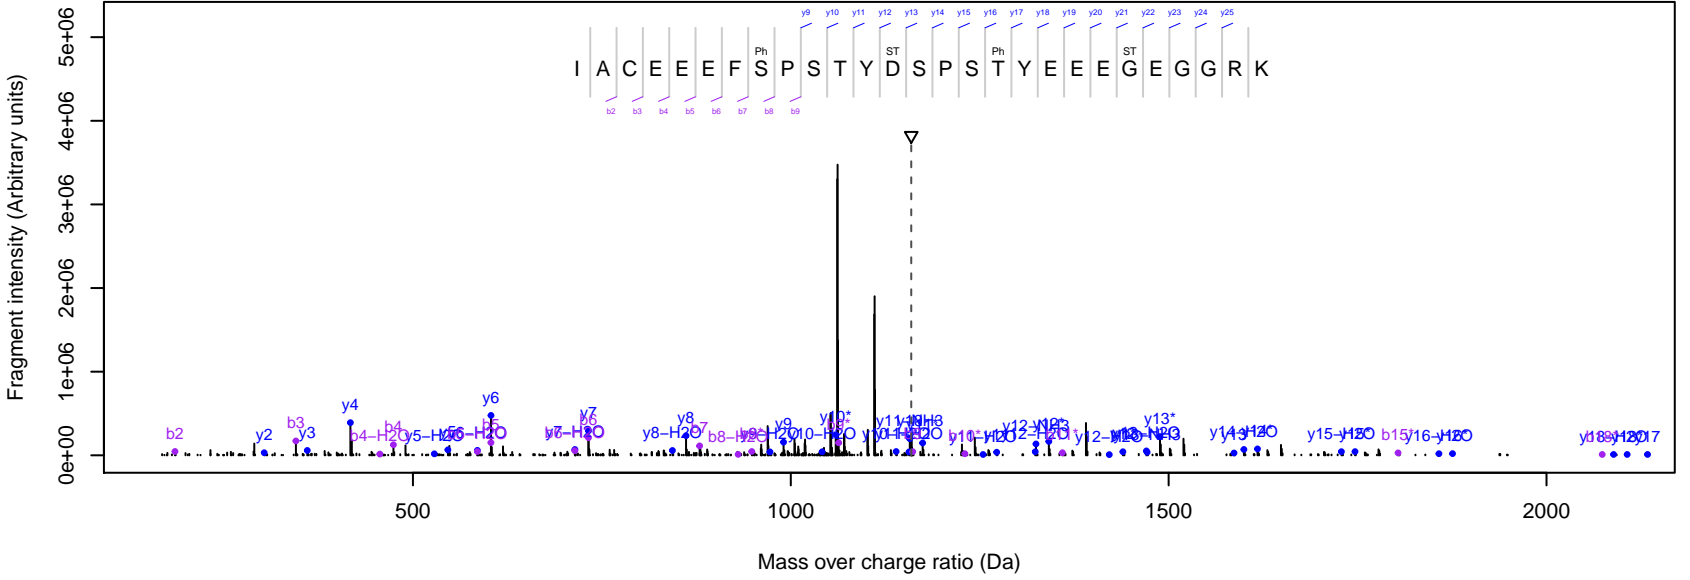

CQQPRT(Phospho (STY))PS(Phospho (STY))PLVLEGTIEQSS(Phospho (STY))PPLSPTTK-3+

Source : QE3\_201126\_FR\_TiOx\_hum\_tissue\_Urea\_RNAB\_B Scan : 52302

Andromeda score : 282.28

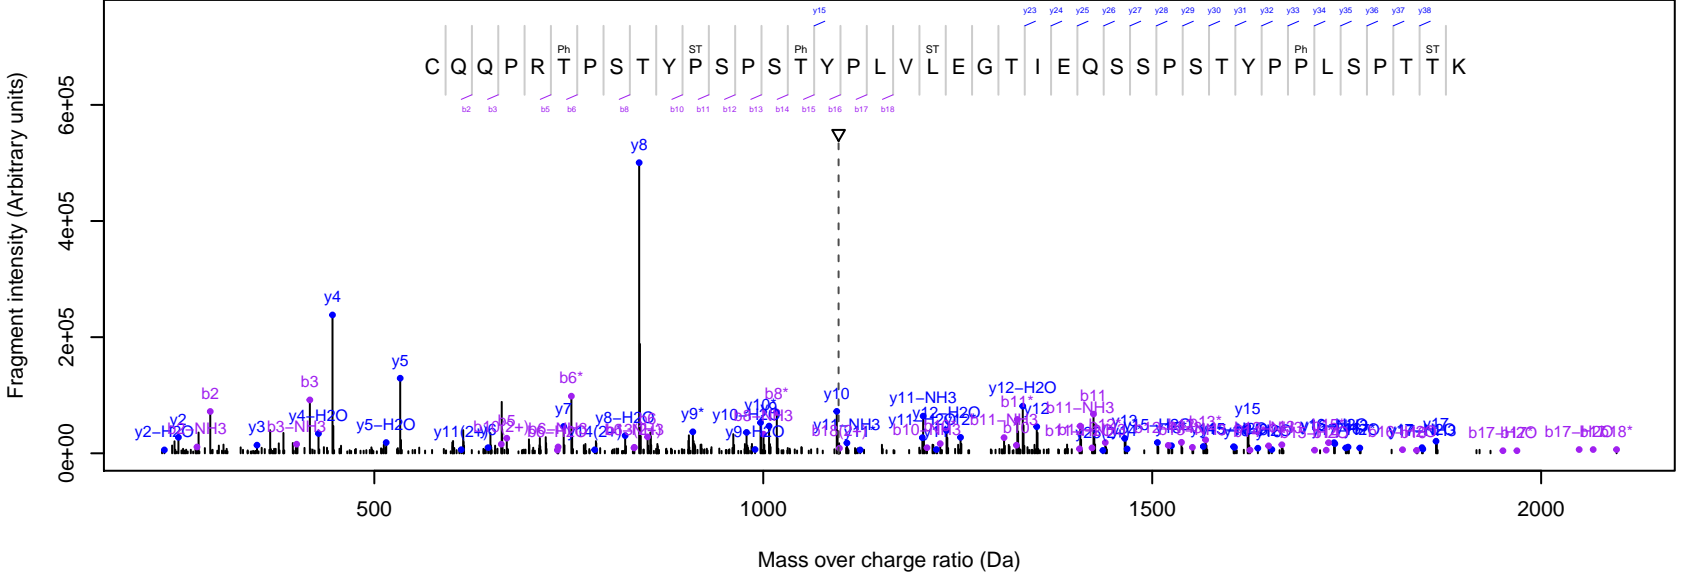

DHS(Phospho (STY))PTPSVFNSEER-2+

Source : QE3\_201126\_FR\_TiOx\_hum\_tissue\_Urea\_RNAB\_H Scan : 19251

Andromeda score : 282.24

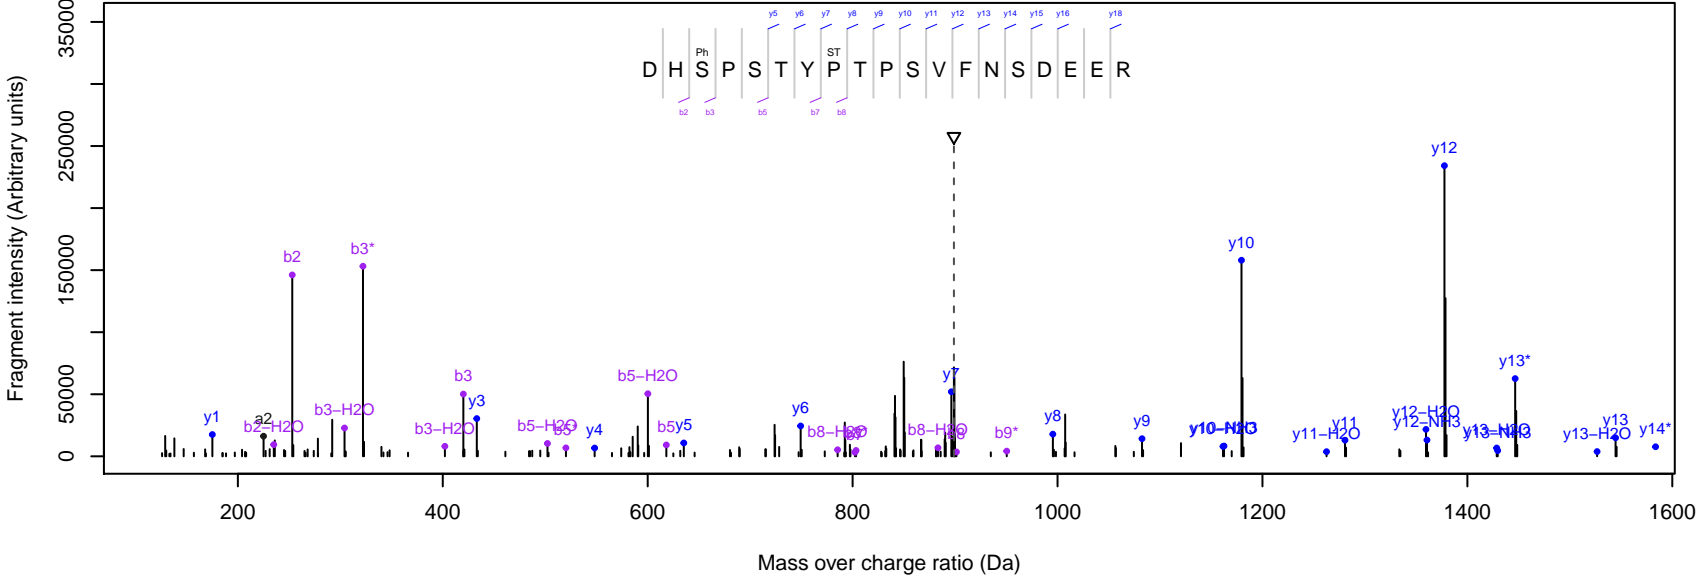



RAHT(Phospho (STY))PTPGIYMRPTHSGGGGGGGGGGGGGGR-4+

Source : QE3\_201126\_FR\_TiOx\_hum\_tissue\_Urea\_RNAB\_H Scan : 8675

Andromeda score : 282.13

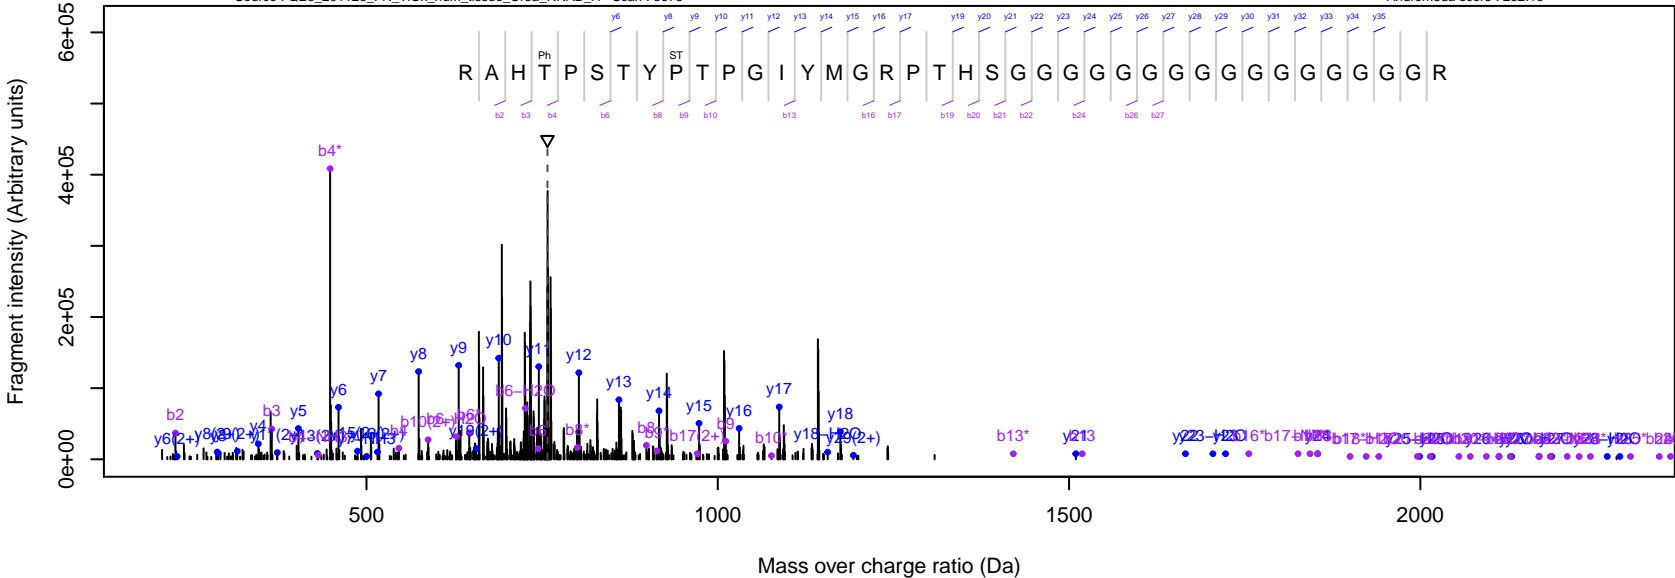

TPS(Phospho (STY))SEEISPTKFPGLYR-3+

Source : QE3\_201126\_FR\_TiOx\_hum\_tissue\_Urea\_RNAB\_H Scan : 35780

Andromeda score : 281.9

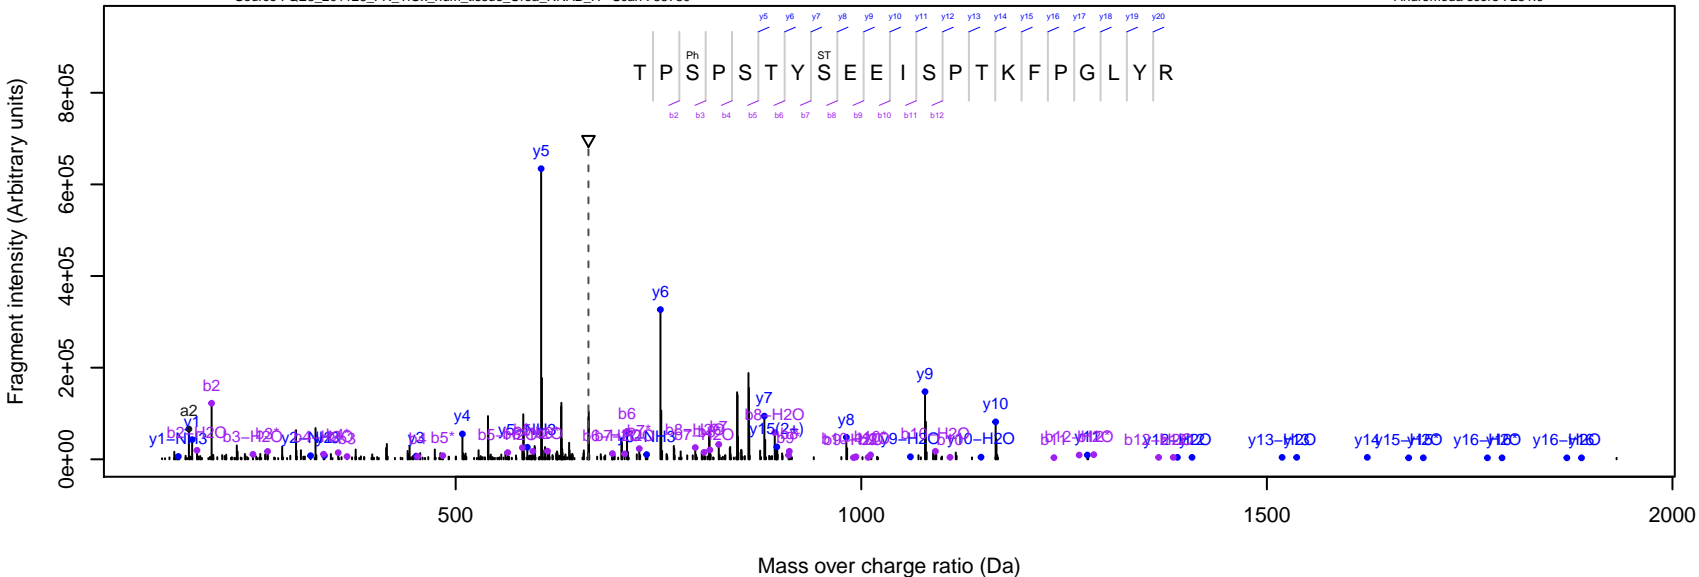

EVAATEEDVTRLPS(Phospho (STY))PTS(Phospho (STY))PFSSLSQDQAATSK-3+

Source : QE3\_201126\_FR\_TiOx\_hum\_tissue\_Urea\_RNAB\_N Scan : 49524

Andromeda score : 281.39

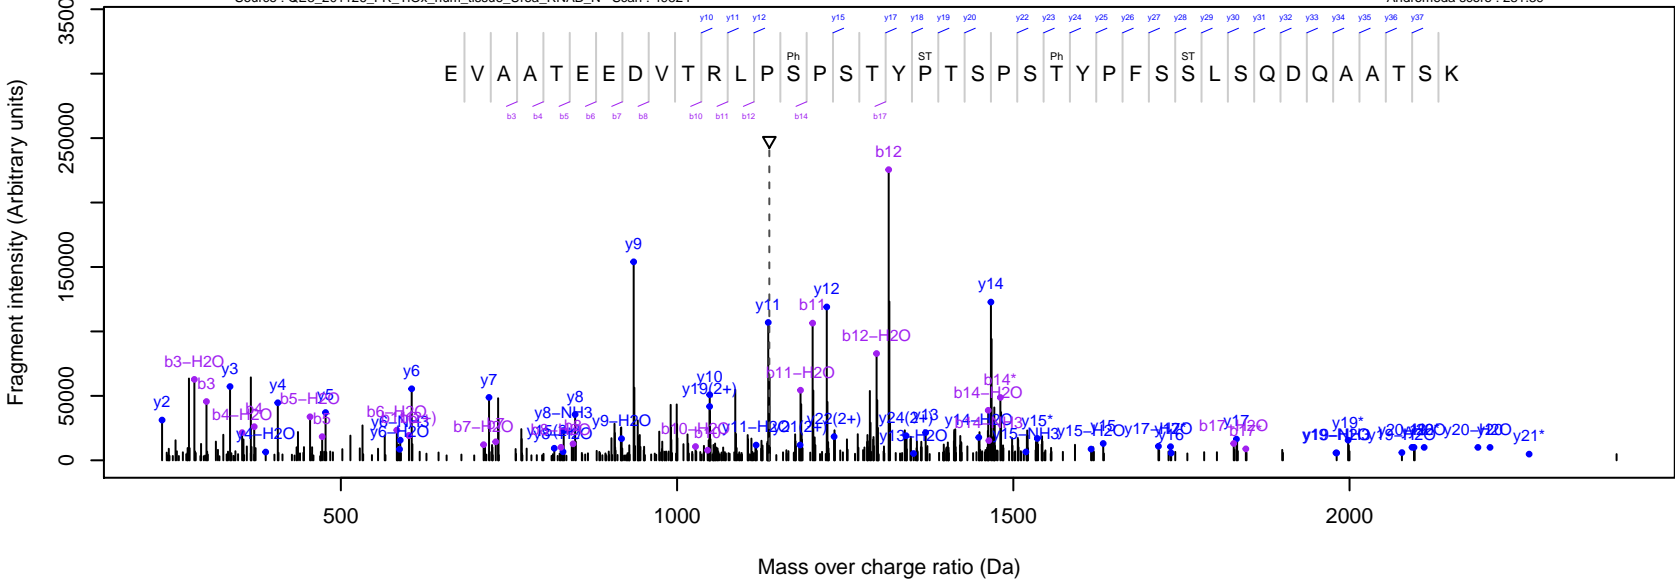

EES(Phospho (STY))EEEEDEDEEEEEEEKEK-3+

Source : QE3\_201126\_FR\_TiOx\_hum\_tissue\_Urea\_RNAB\_H Scan : 11055

Andromeda score : 281.29

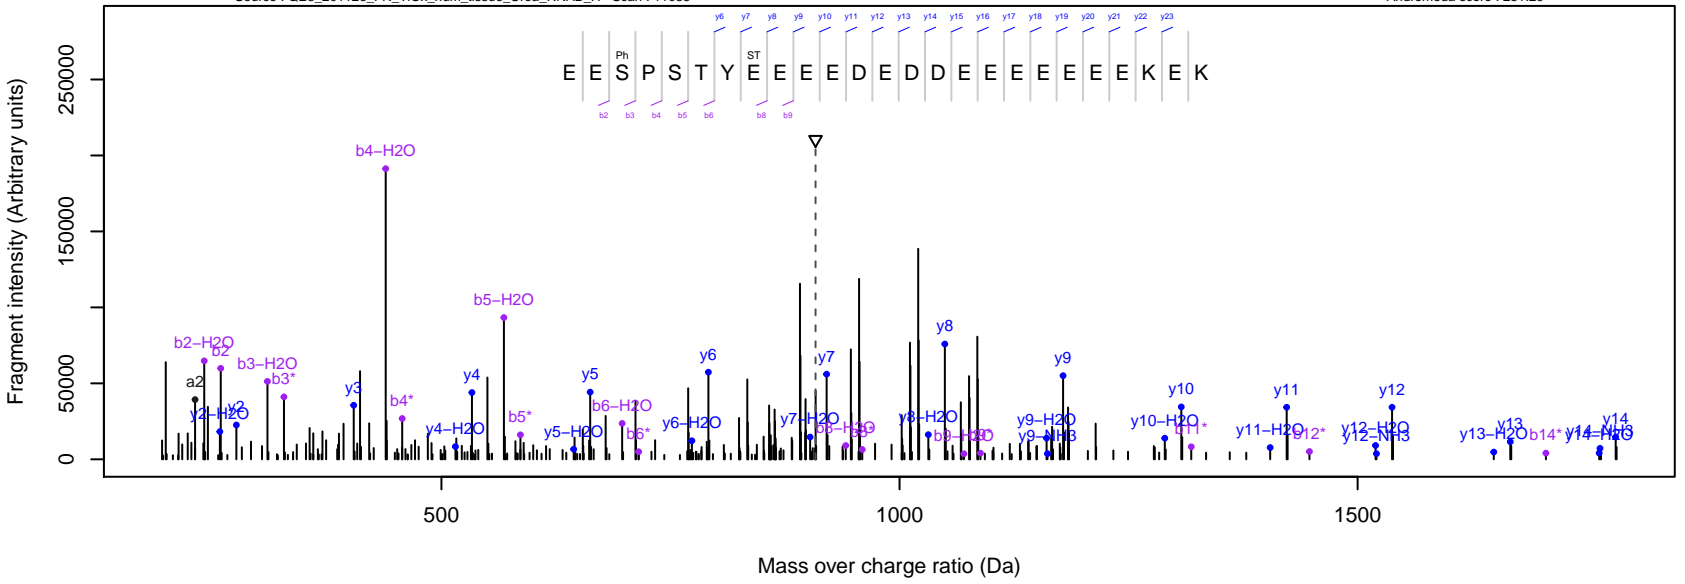

ASLGSLEGEAEAEASS(Phospho (STY))PKGK-3+

Source : QE3\_201126\_FR\_TiOx\_hum\_tissue\_Urea\_RNAB\_H Scan : 25584

Andromeda score : 280.75

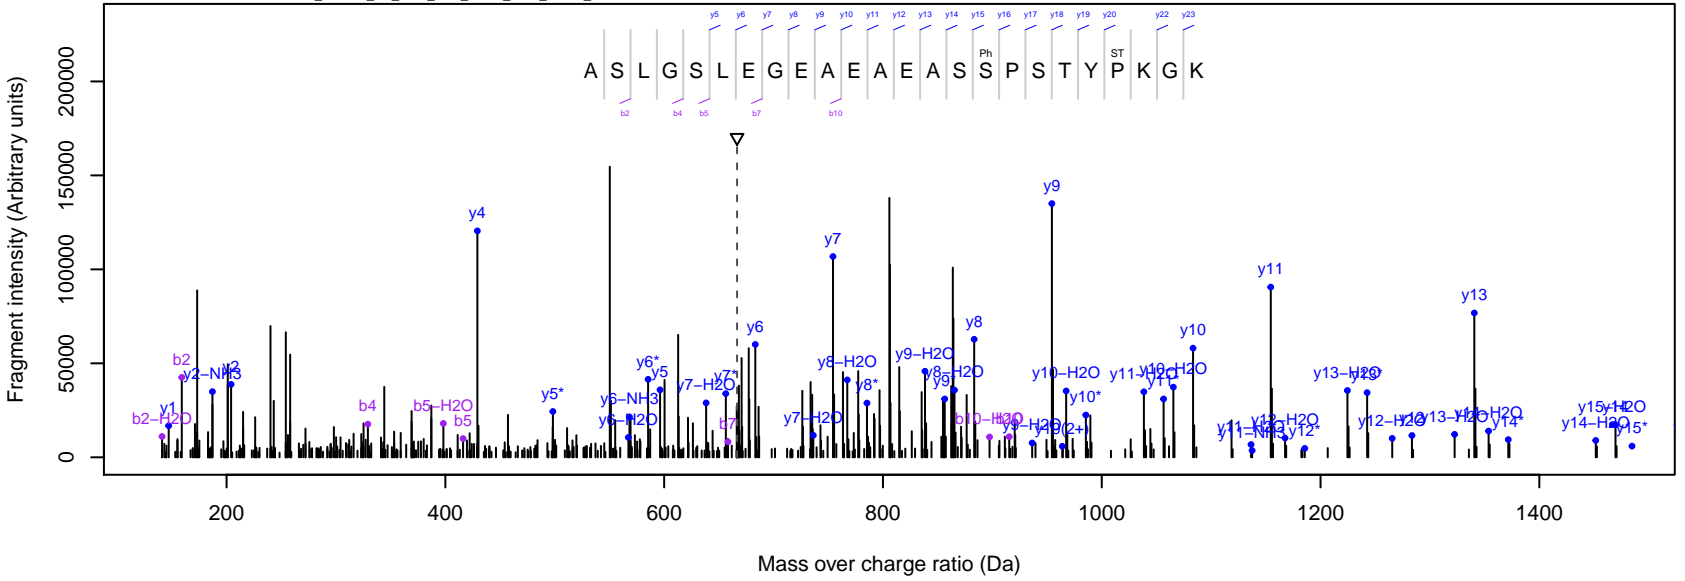

GWL R D P S A S P S T Y P G D A G E Q A I R

Source : QE3\_201126\_FR\_TiOx\_hum\_tissue\_Urea\_RNAB\_N Scan : 28669

Andromeda score : 280.75

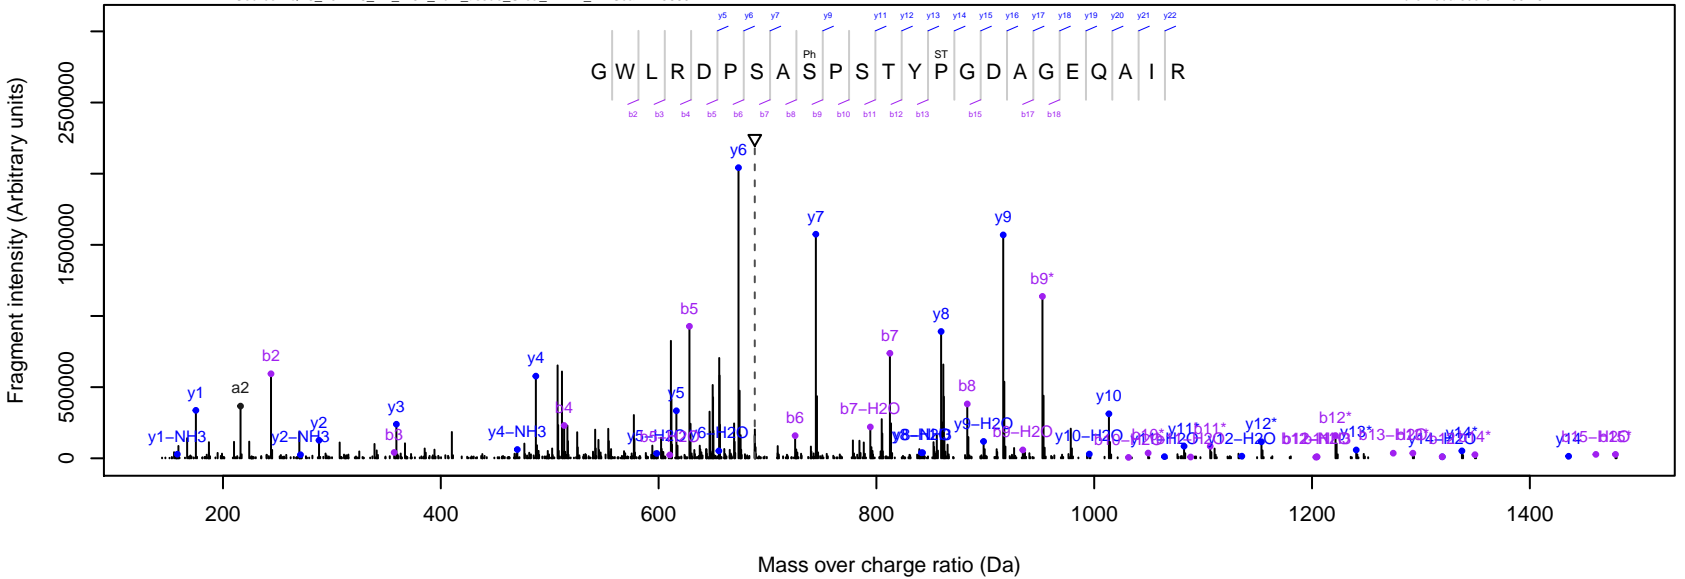

(Acetyl (Protein N-term))AAAVAAAGAGEPQS(Phospho (STY))PDELLPK-2+

Source : QE3\_201126\_FR\_TIOx\_hum\_tissue\_Urea\_RNAB\_N Scan : 56336

Andromeda score : 280.63

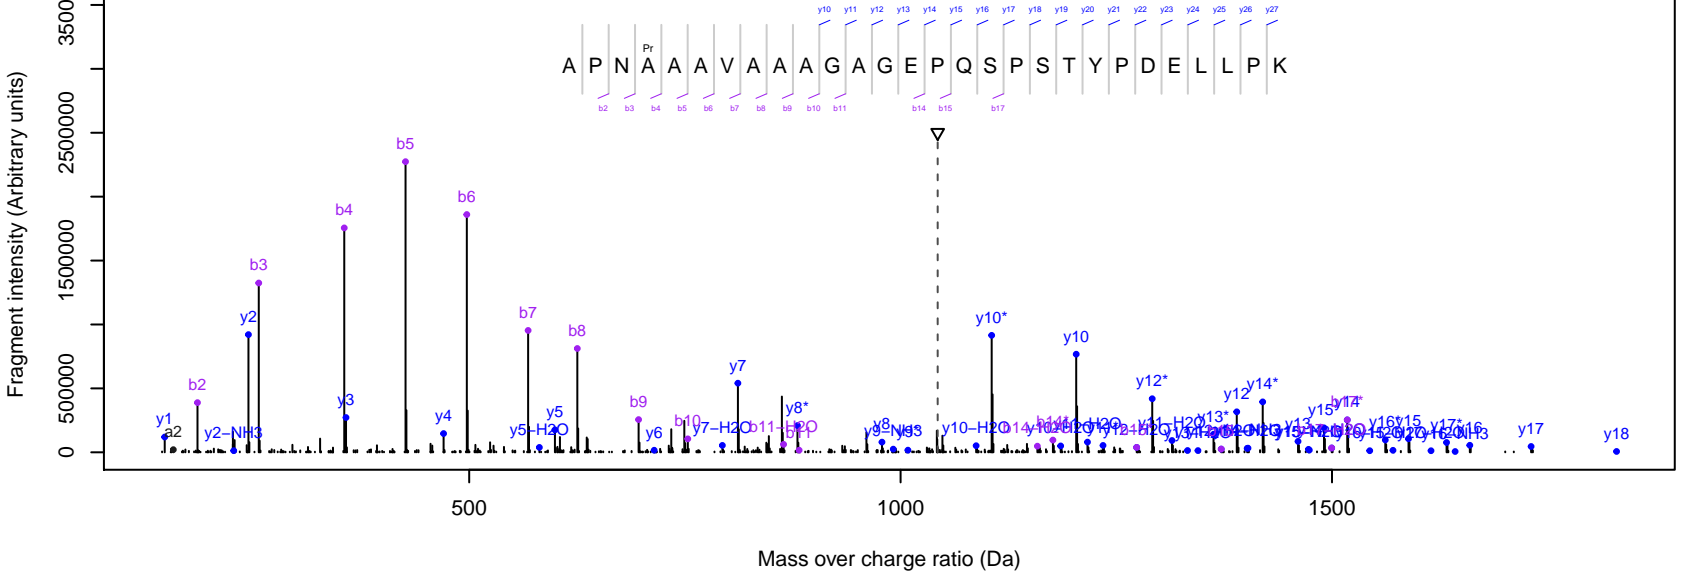

(Acetyl (Protein N-term))S(Phospho (STY))DNGELEDKPPAPPV R-2+

Source : QE3\_201126\_FR\_TIOx\_hum\_tissue\_Urea\_RNAB\_H Scan : 24945

Andromeda score : 280.62

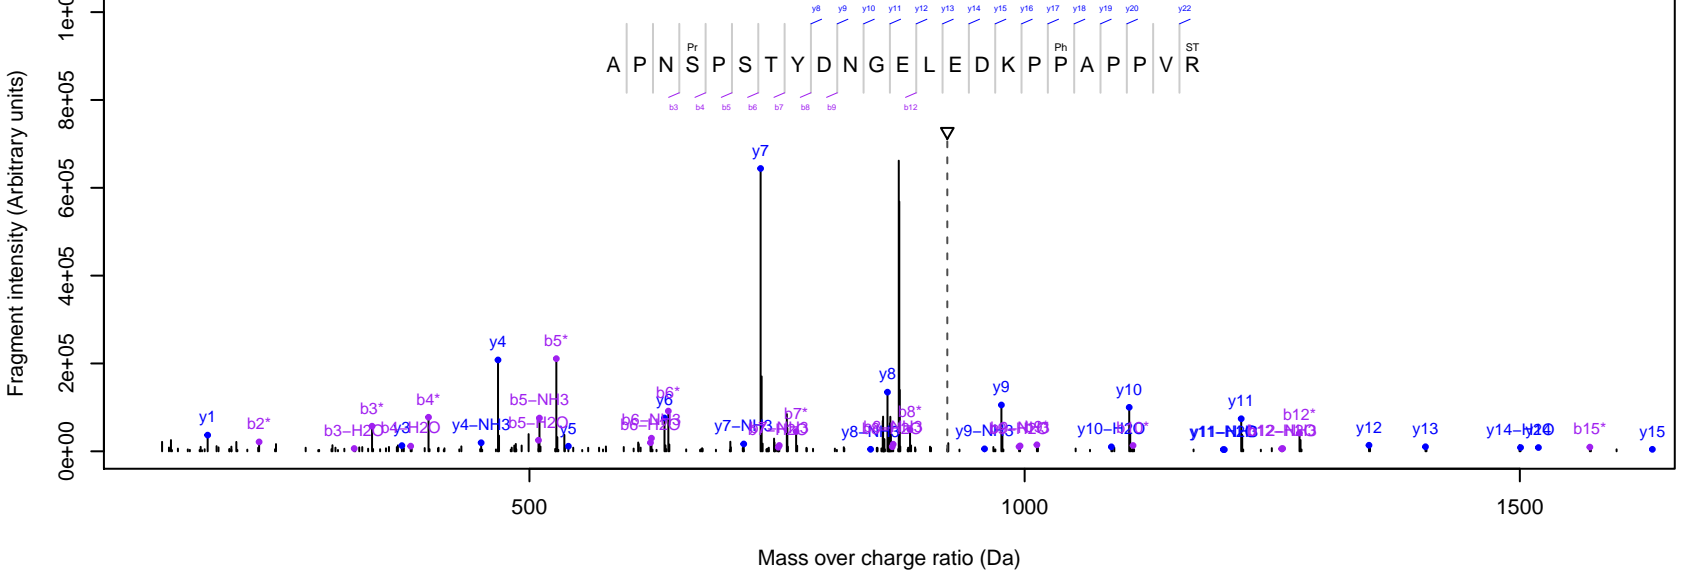

QVAEQGDLS(Phospho (STY))PAANR-2+

Source : QE3\_201126\_FR\_TIOx\_hum\_tissue\_Urea\_RNAB\_N Scan : 12805

Andromeda score : 280.5

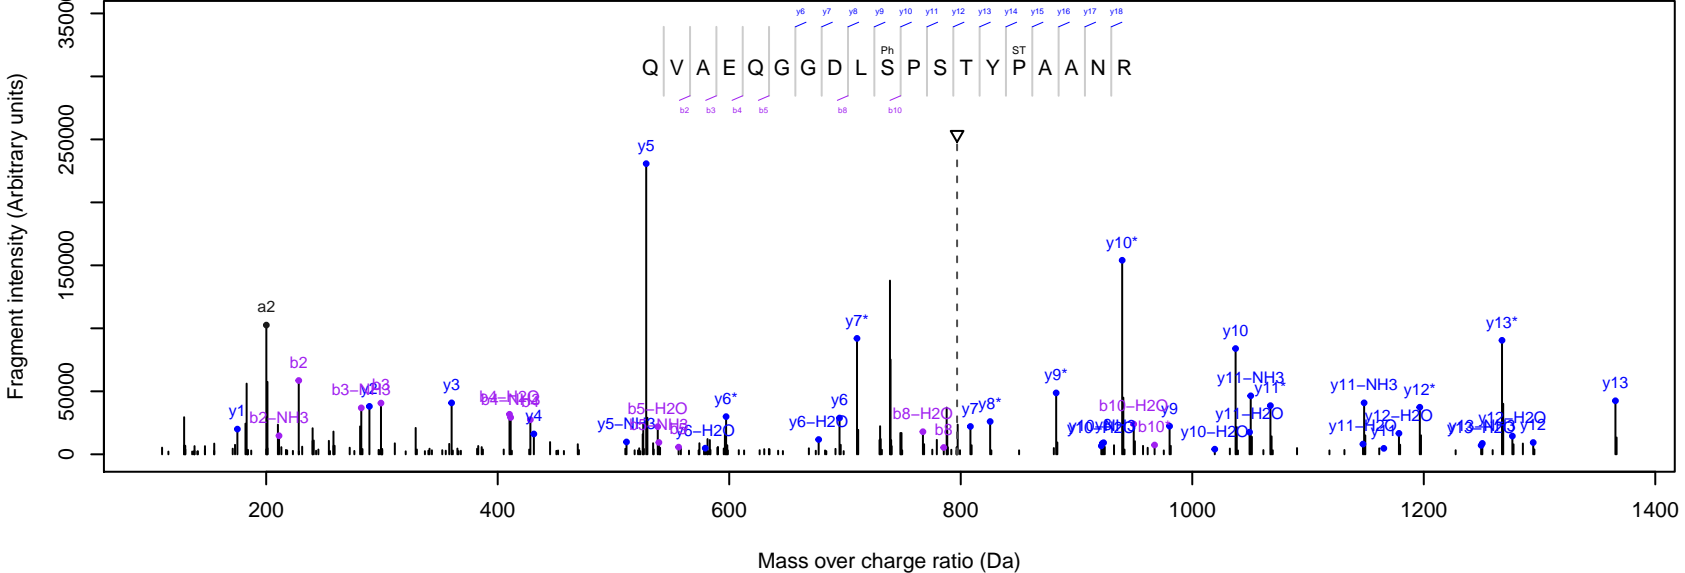

M(Oxidation (M))LAES(Phospho (STY))DES(Phospho (STY))GDEESVSQTDK-2+

Source : QE3\_201126\_FR\_TiOx\_hum\_tissue\_Urea\_RNAB\_H Scan : 18728

Andromeda score : 280.43

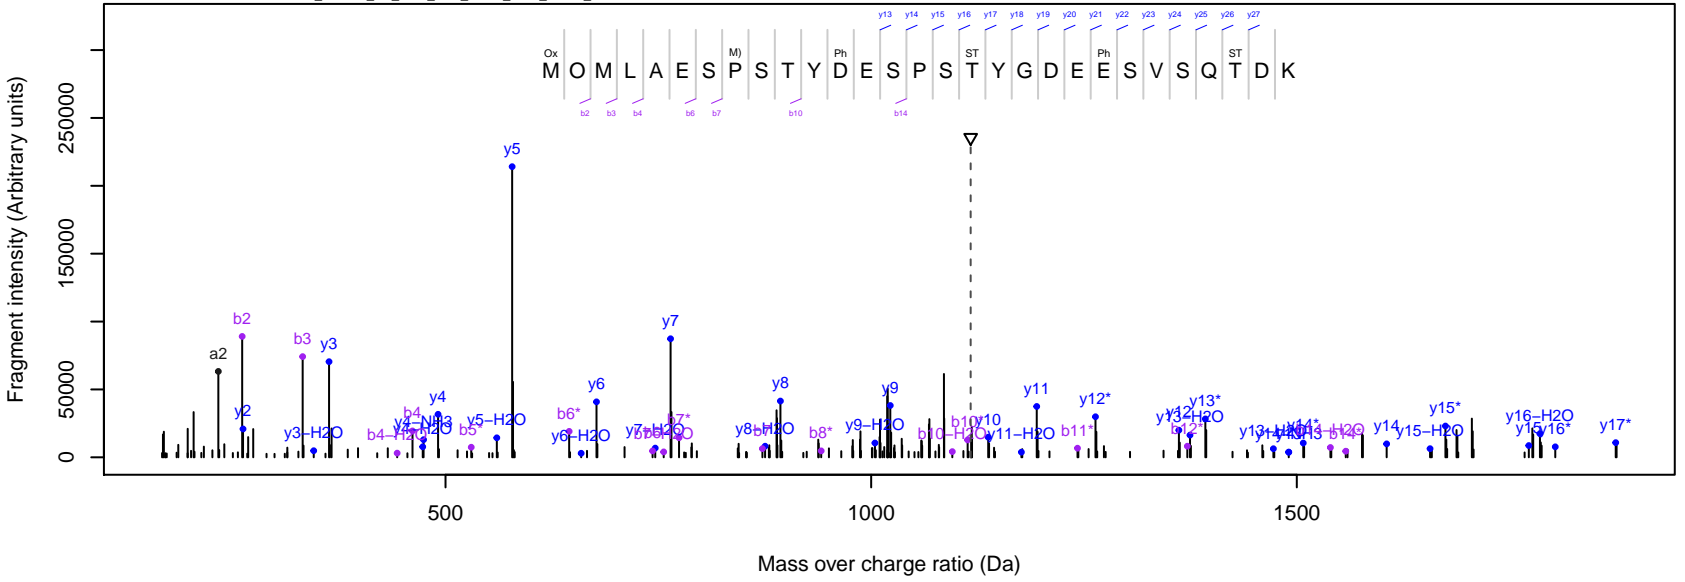

GKDSYETSLDDQS(Phospho (STY))AETHSHK-3+

Source : QE3\_201126\_FR\_TiOx\_hum\_tissue\_Urea\_RNAB\_N Scan : 7514

Andromeda score : 280.36

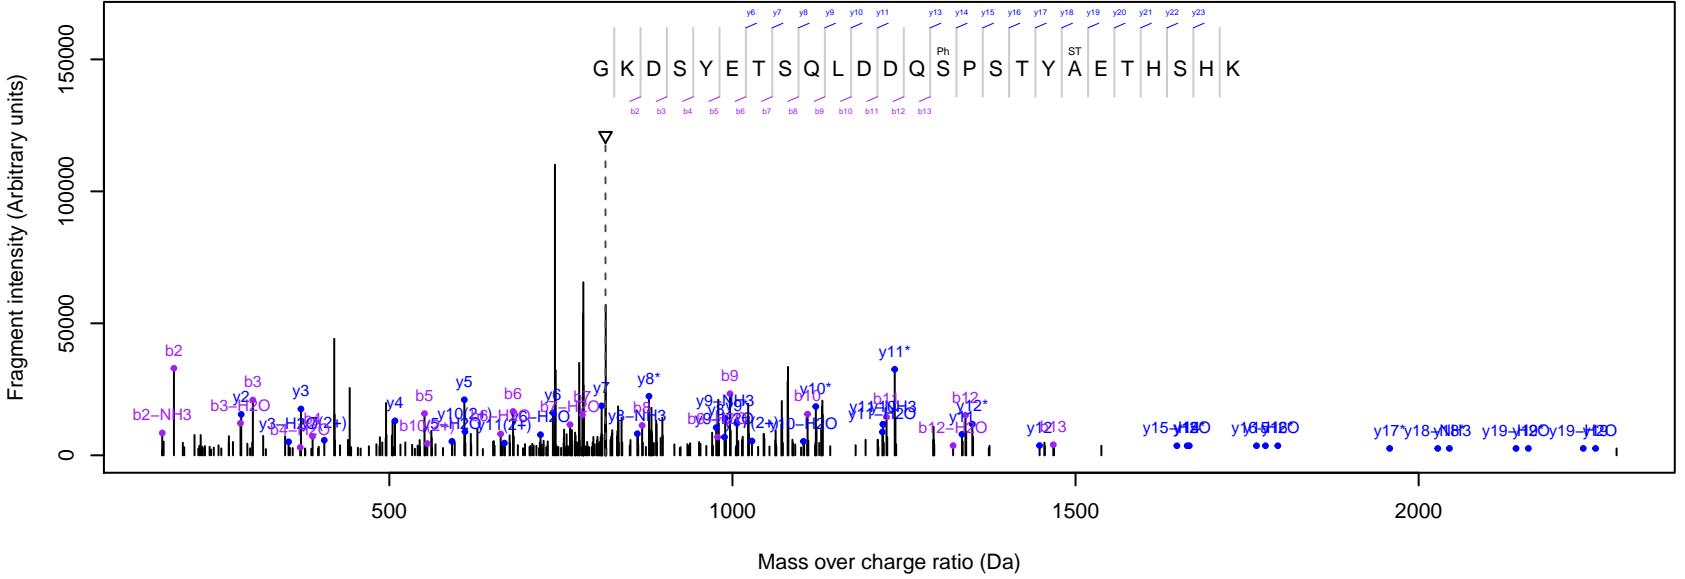

KQS(Phospho (STY))TDEEVTS LAK-2+

Source : QE3\_201126\_FR\_TiOx\_hum\_tissue\_Urea\_RNAB\_H Scan : 13118

Andromeda score : 279.91

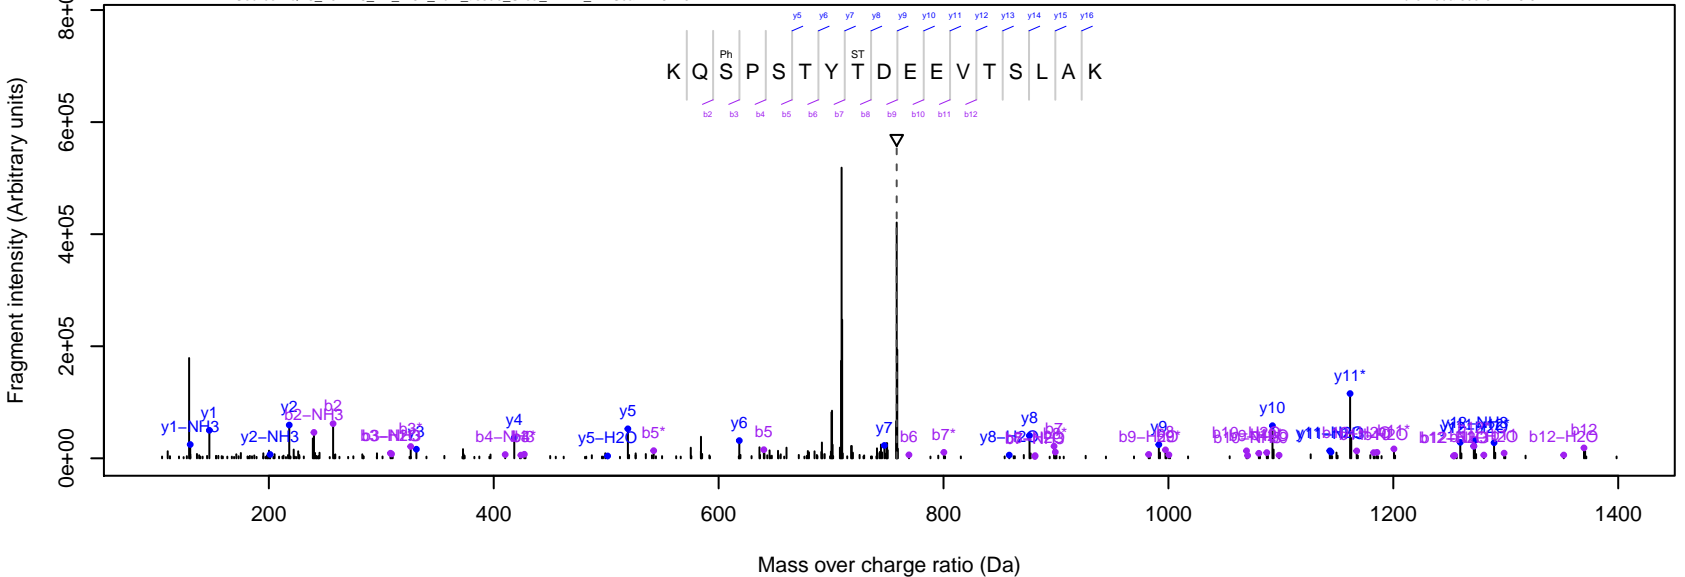

EM(Oxidation (M))EHNTVCAAGTSPSTYPVGEIGEEK-2+

Source : QE3\_201126\_FR\_TiOx\_hum\_tissue\_Urea\_RNAB\_N Scan : 19056

Andromeda score : 279.79

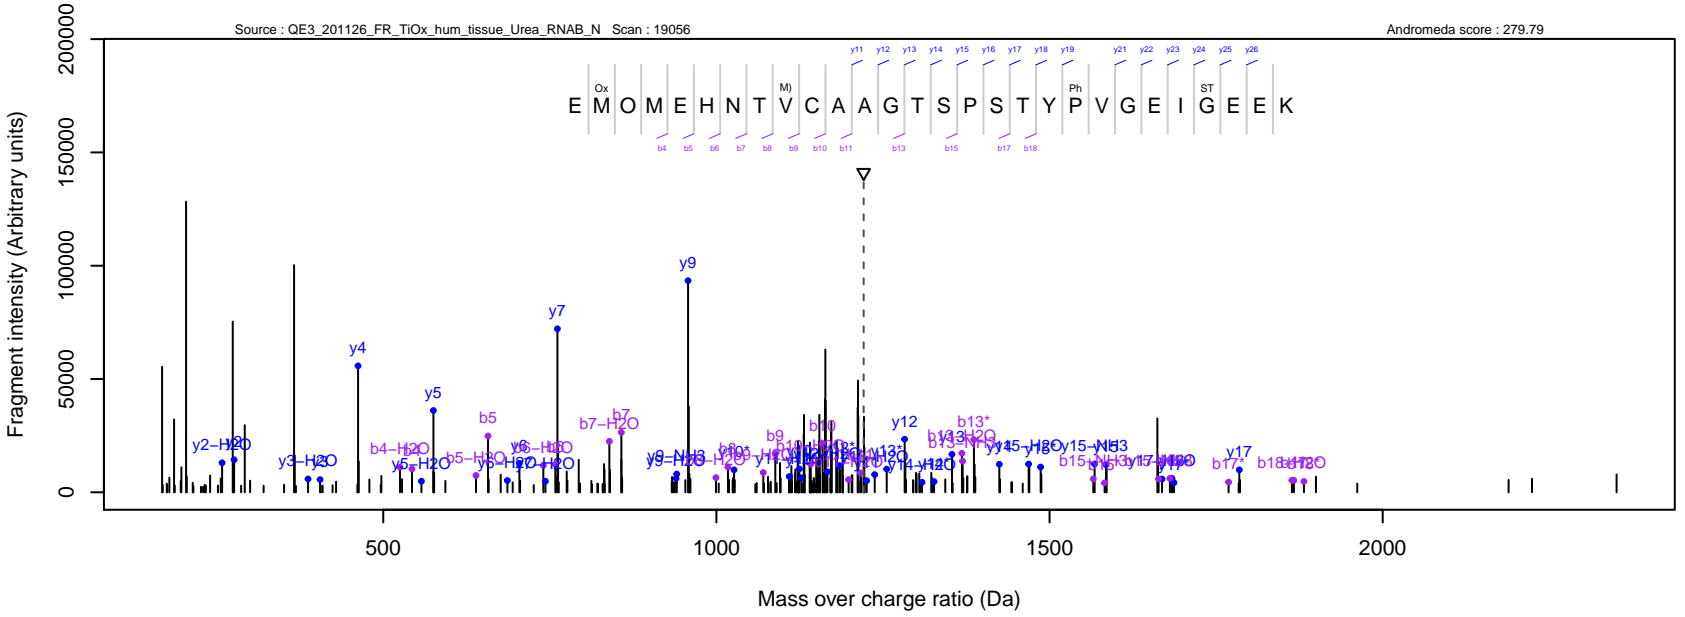

ATS(Phospho (STY))NVFAMFDQSQIQEFK-2+

Source : QE3\_201126\_FR\_TiOx\_hum\_tissue\_Urea\_RNAB\_N Scan : 59551

Andromeda score : 279.63

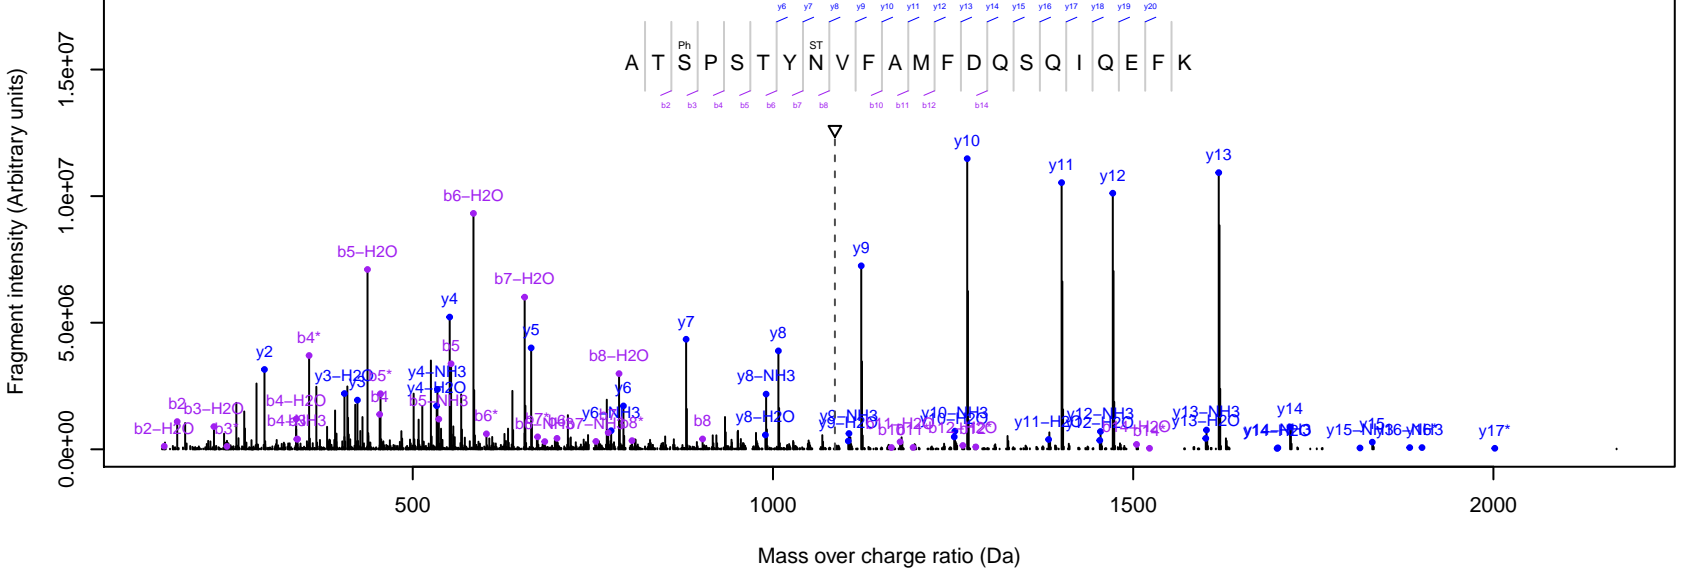

APVSTESVIQSNTPTPSTYPPPSQPLNETAEESR-3+

Source : QE3\_201126\_FR\_TiOx\_hum\_tissue\_Urea\_RNAB\_N Scan : 37230

Andromeda score : 279.28

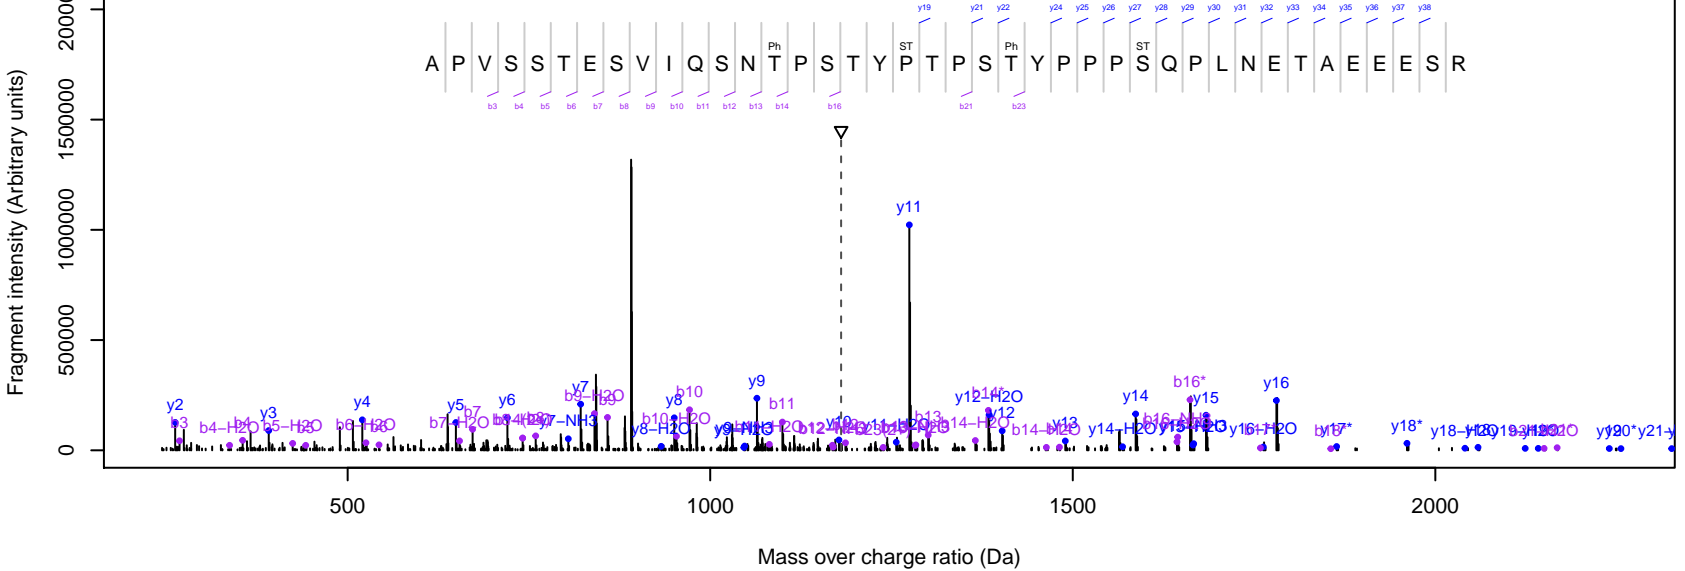

AQFSVAGVHTVPGSPSTYPQAR-2+

Source : QE3\_201126\_FR\_TiOx\_hum\_tissue\_Urea\_RNAB\_B Scan : 23381

Andromeda score : 278.93

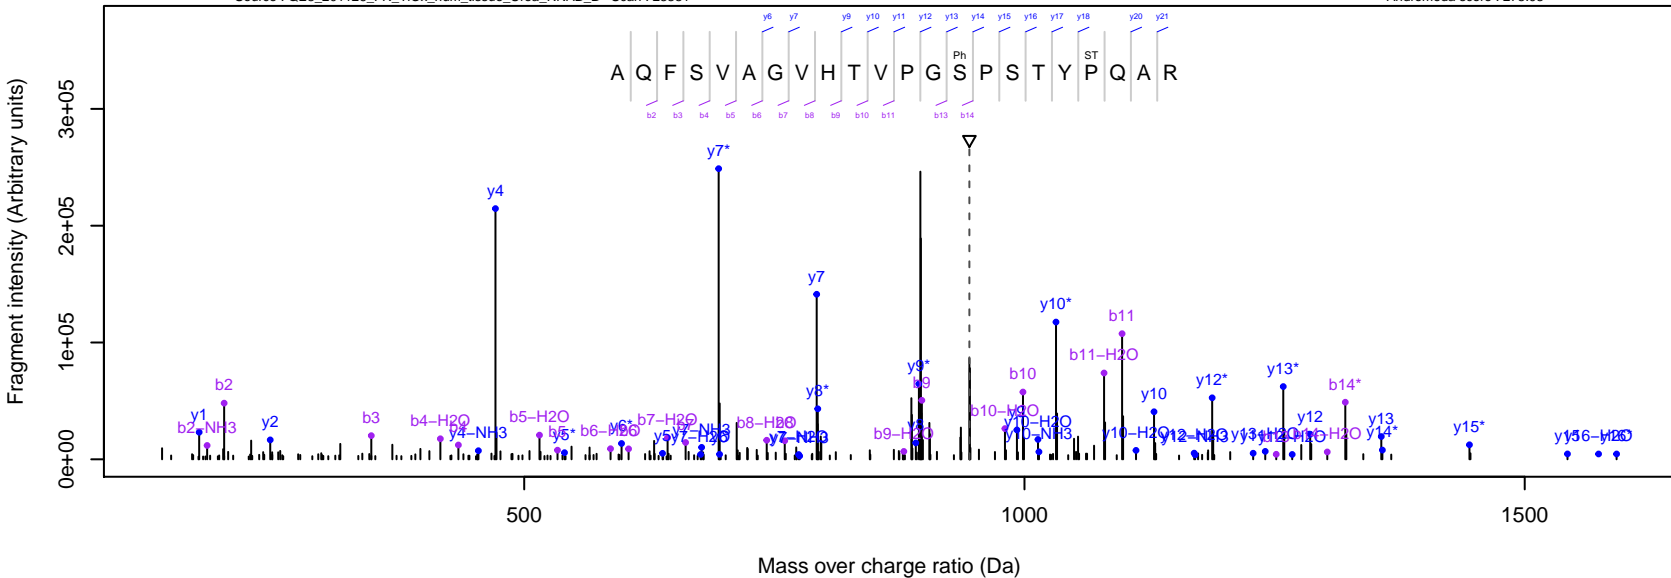

EREDES(Phospho (STY))EDESIDILEESP CGR-2+

Source : QE3\_201126\_FR\_TiOx\_hum\_tissue\_Urea\_RNAB\_H Scan : 24766

Andromeda score : 278.93

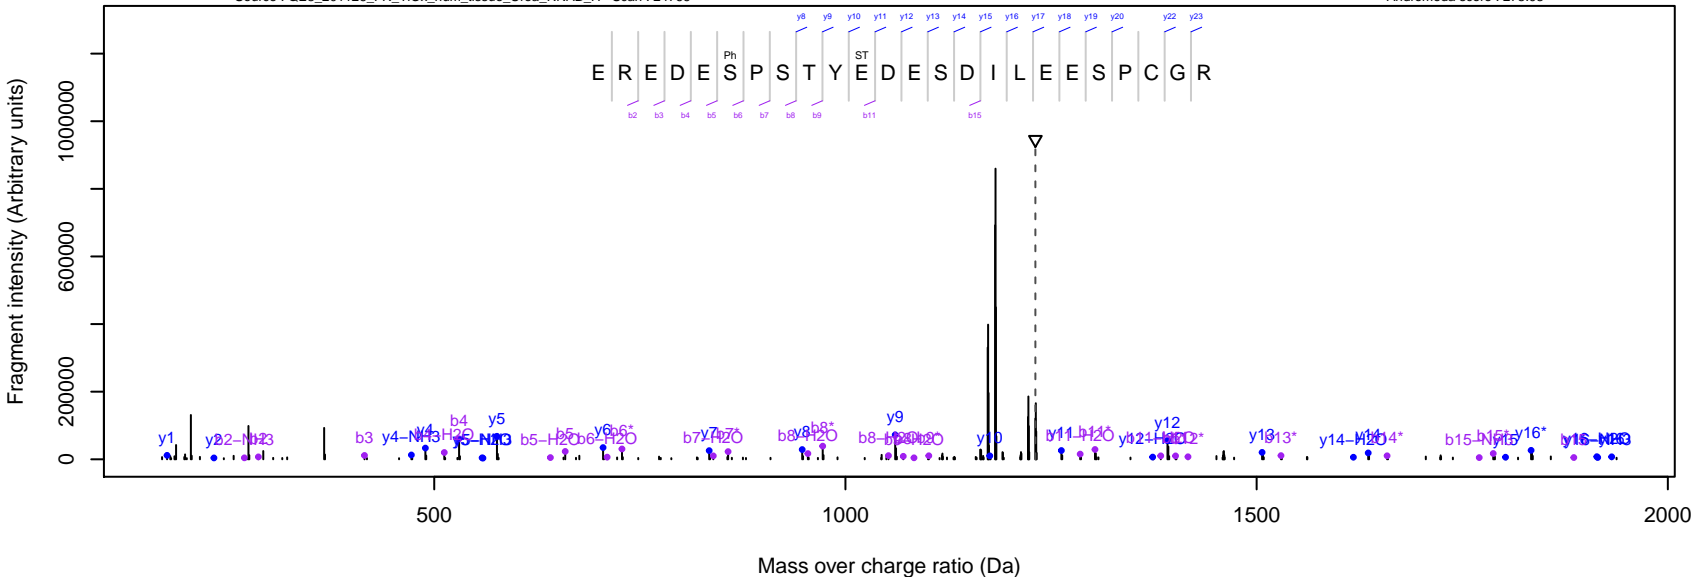

AGDLEDS(Phospho (STY))PKRPK-2+

Source : QE3\_201126\_FR\_TiOx\_hum\_tissue\_Urea\_RNAB\_H Scan : 9659

Andromeda score : 278.79

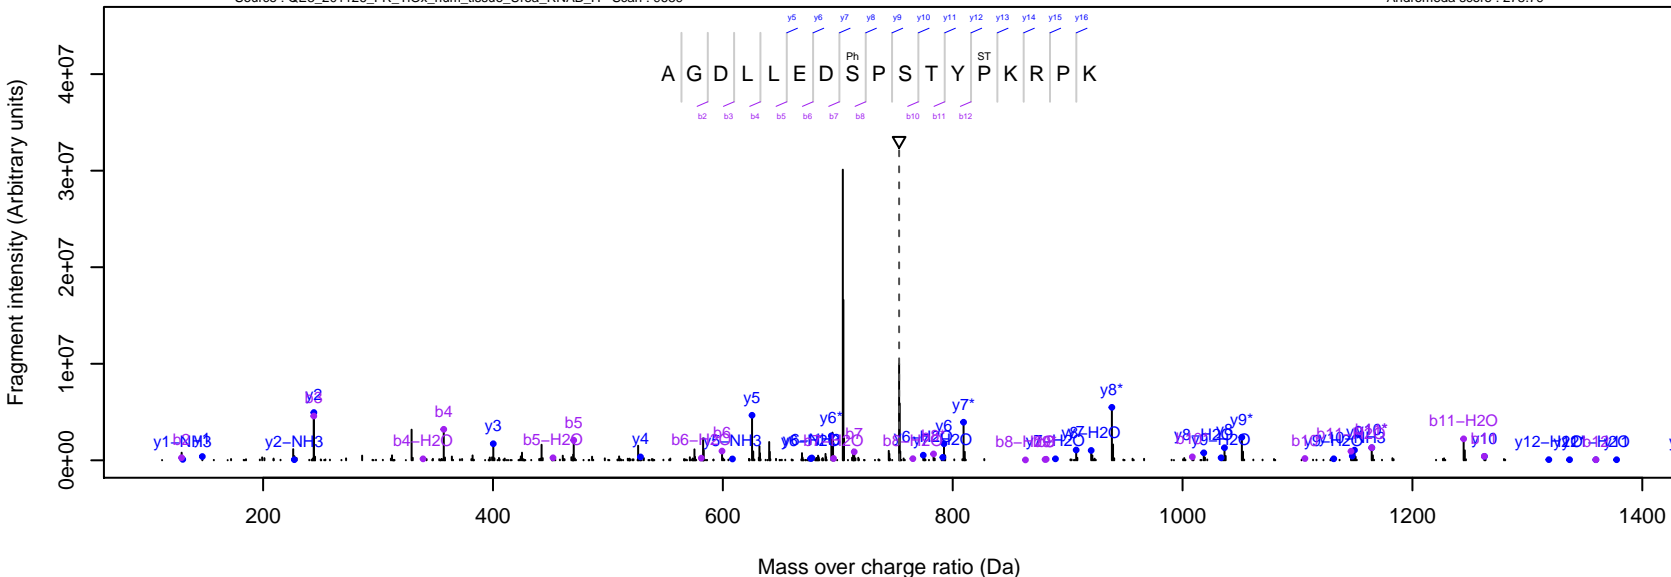

RRS(Phospho (STY))QAELETLVLSR-3+

Source : QE3\_201126\_FR\_TiOx\_hum\_tissue\_Urea\_RNAB\_N Scan : 27324

Andromeda score : 278.46

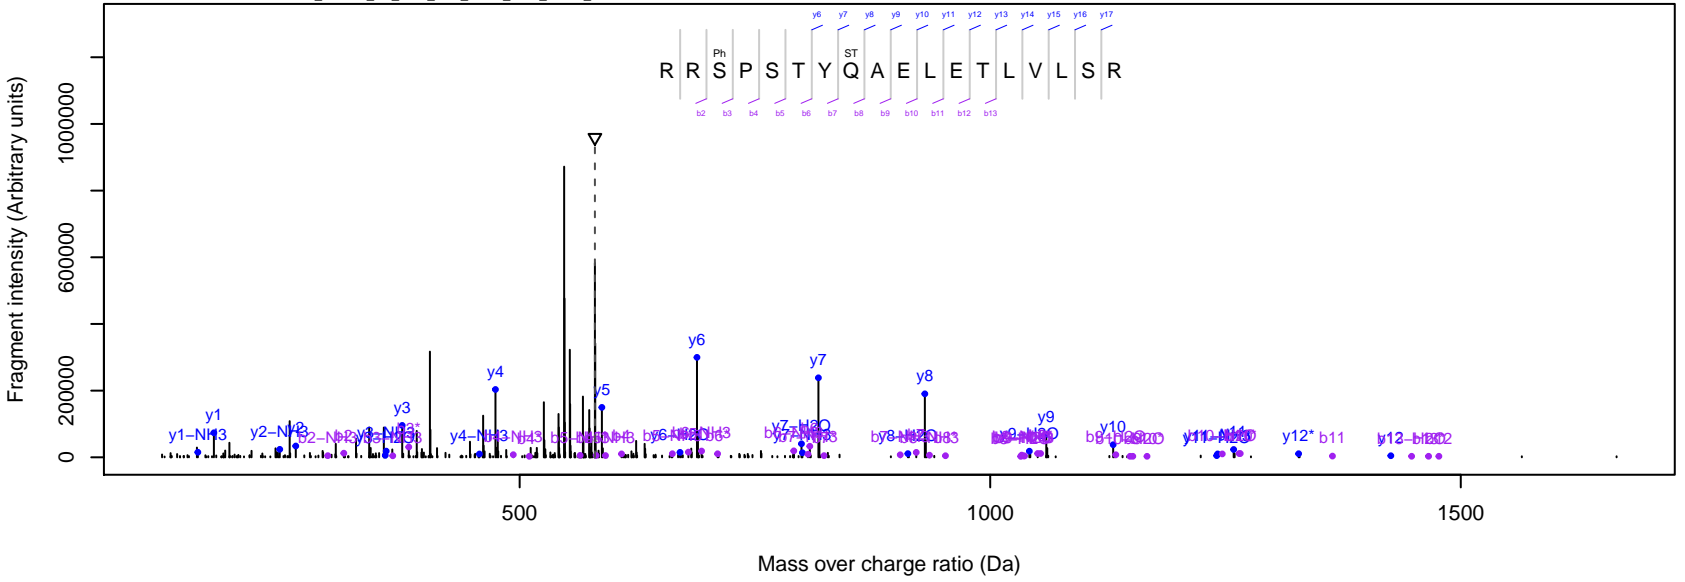

LNSSGSSEDS(Phospho (STY))FVEIR-2+

Source : QE3\_201126\_FR\_TiOx\_hum\_tissue\_Urea\_RNAB\_H Scan : 29544

Andromeda score : 278.39

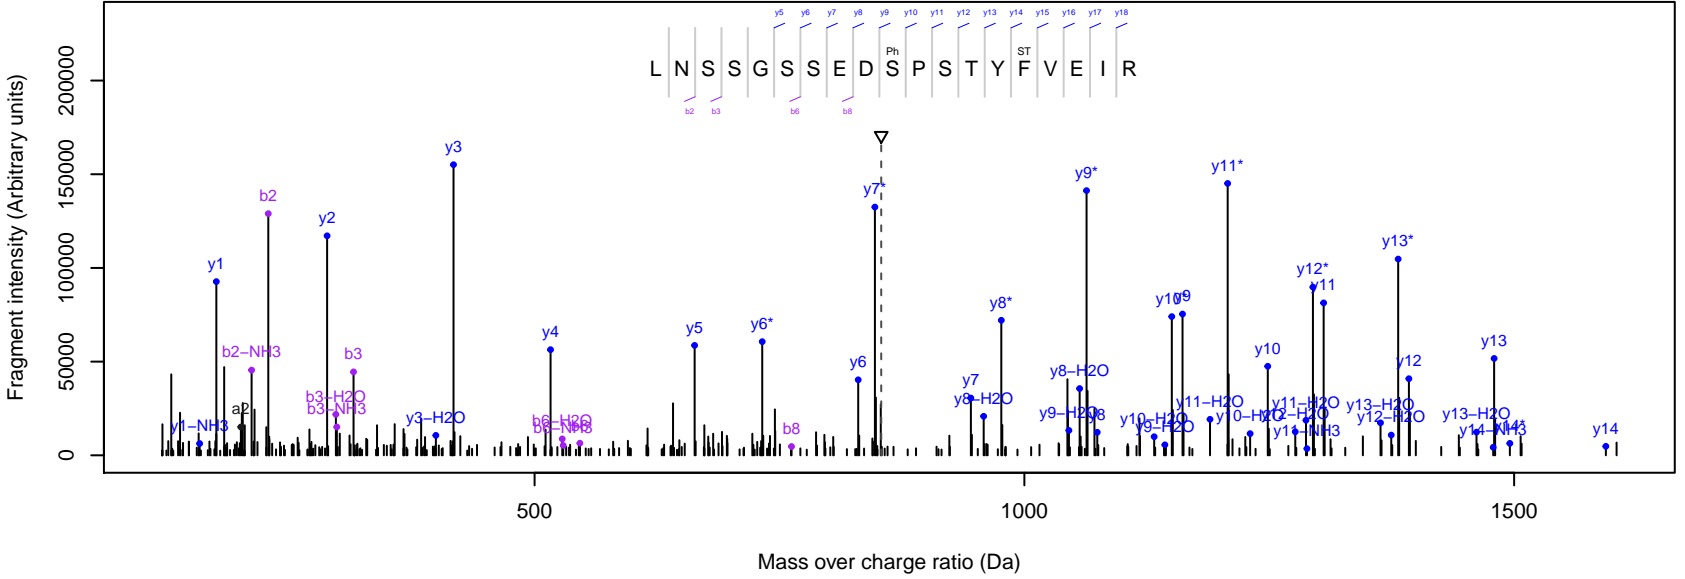

TEAQDLCRAS(Phospho (STY))PEPPGPSSSR-3+

Source : QE3\_201126\_FR\_TiOx\_hum\_tissue\_Urea\_RNAB\_B Scan : 15730

Andromeda score : 278.16

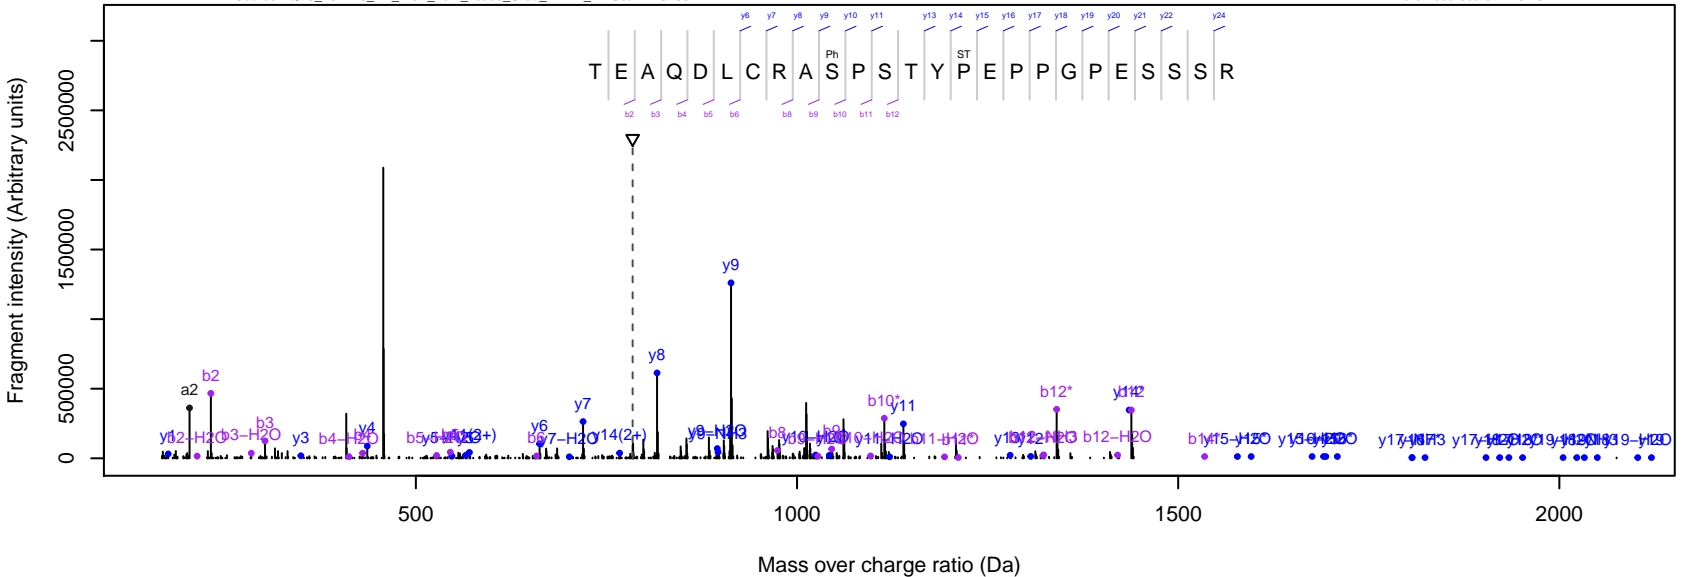





ASAVSELS(Phospho (STY))PR-2+

Source : QE3\_201126\_FR\_TiOx\_hum\_tissue\_Urea\_RNAB\_H Scan : 14733

Andromeda score : 277.15

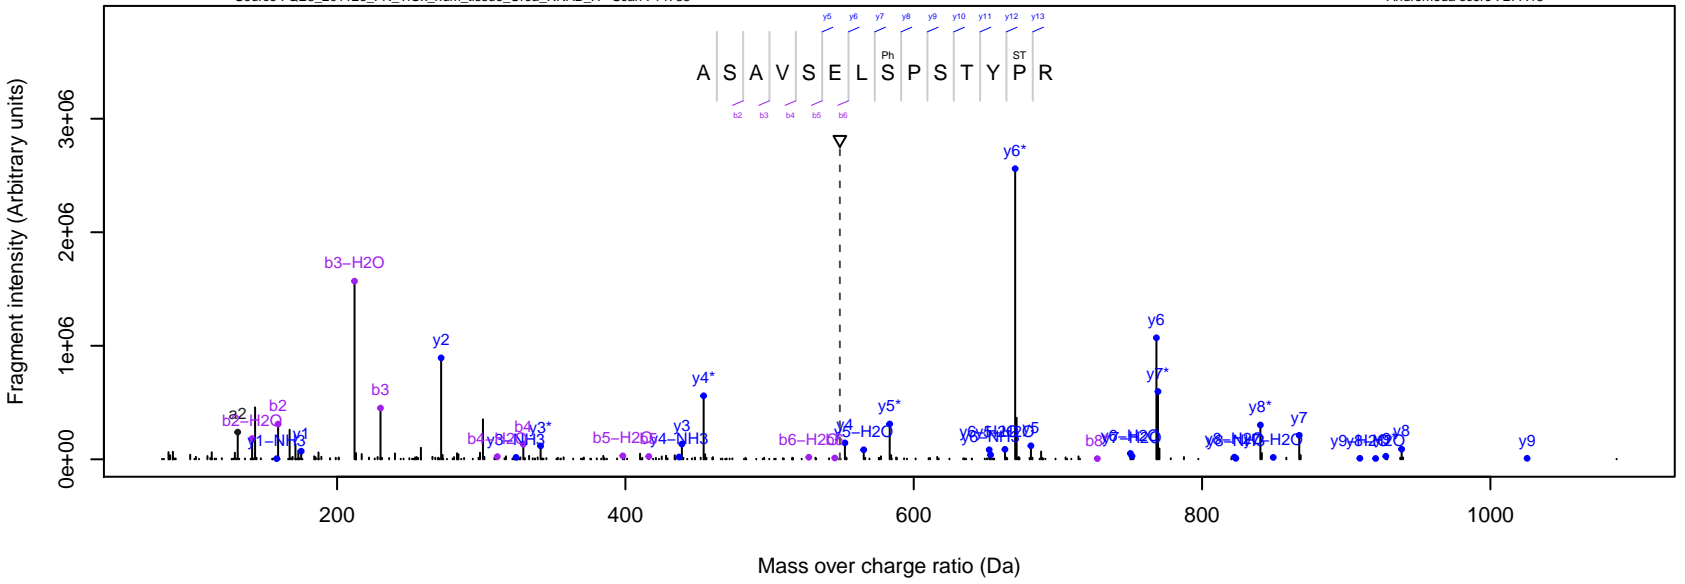

RFS(Phospho (STY))FCCSPEPEAEAAAGGPCER-3+

Source : QE3\_201126\_FR\_TiOx\_hum\_tissue\_Urea\_RNAB\_N Scan : 33628

Andromeda score : 277.05

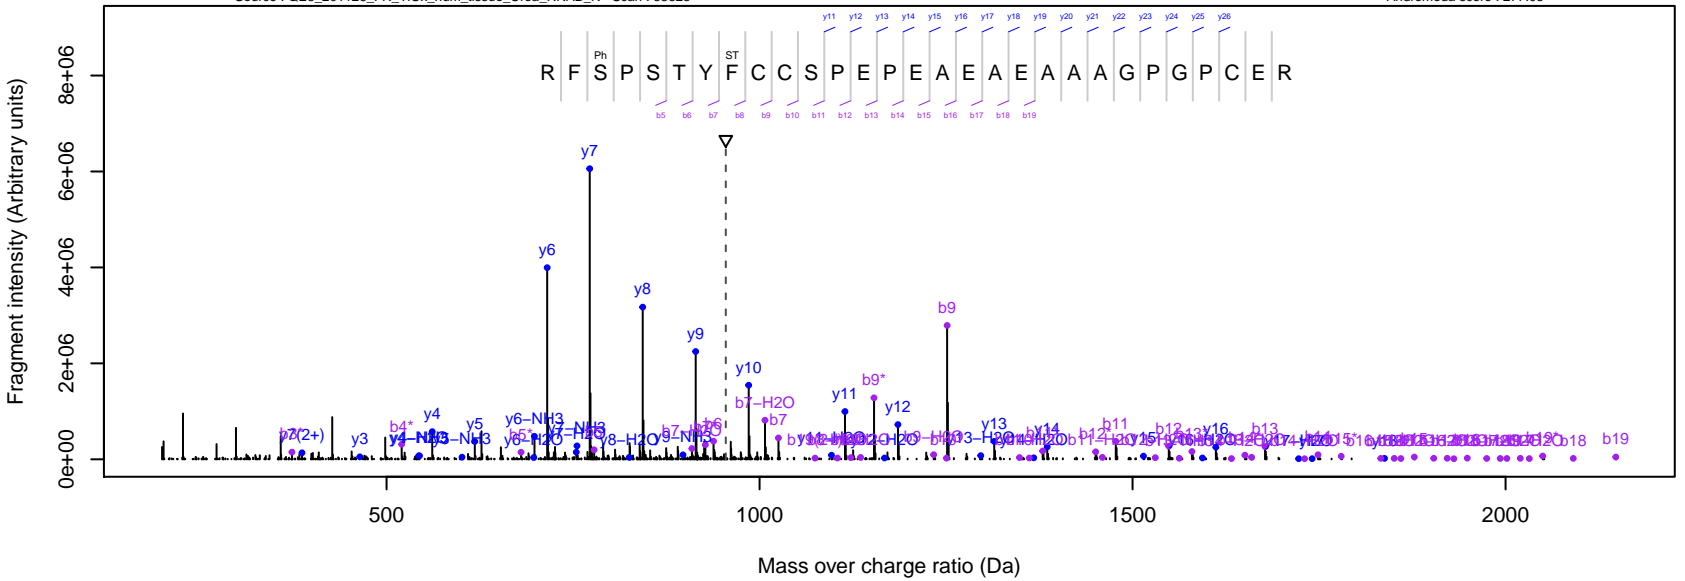

ELSNS(Phospho (STY))PLENSFGS(Phospho (STY))PLEFR-2+

Source : QE3\_201126\_FR\_TiOx\_hum\_tissue\_Urea\_RNAB\_H Scan : 48434

Andromeda score : 276.73

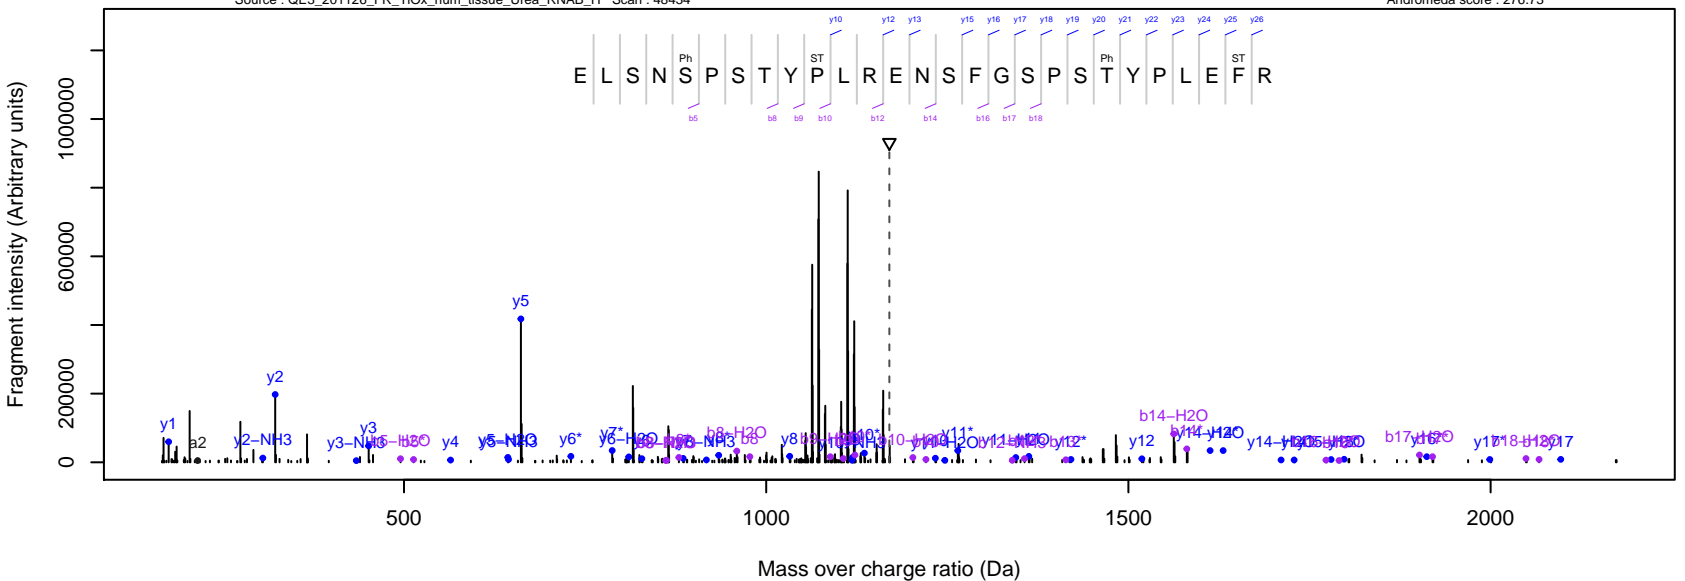

(Acetyl (Protein N-term))AS(Phospho (STY))GVQVADEVCR-2+

Source : QE3\_201126\_FR\_TIOx\_hum\_tissue\_Urea\_RNAB\_B Scan : 34643

Andromeda score : 276.71

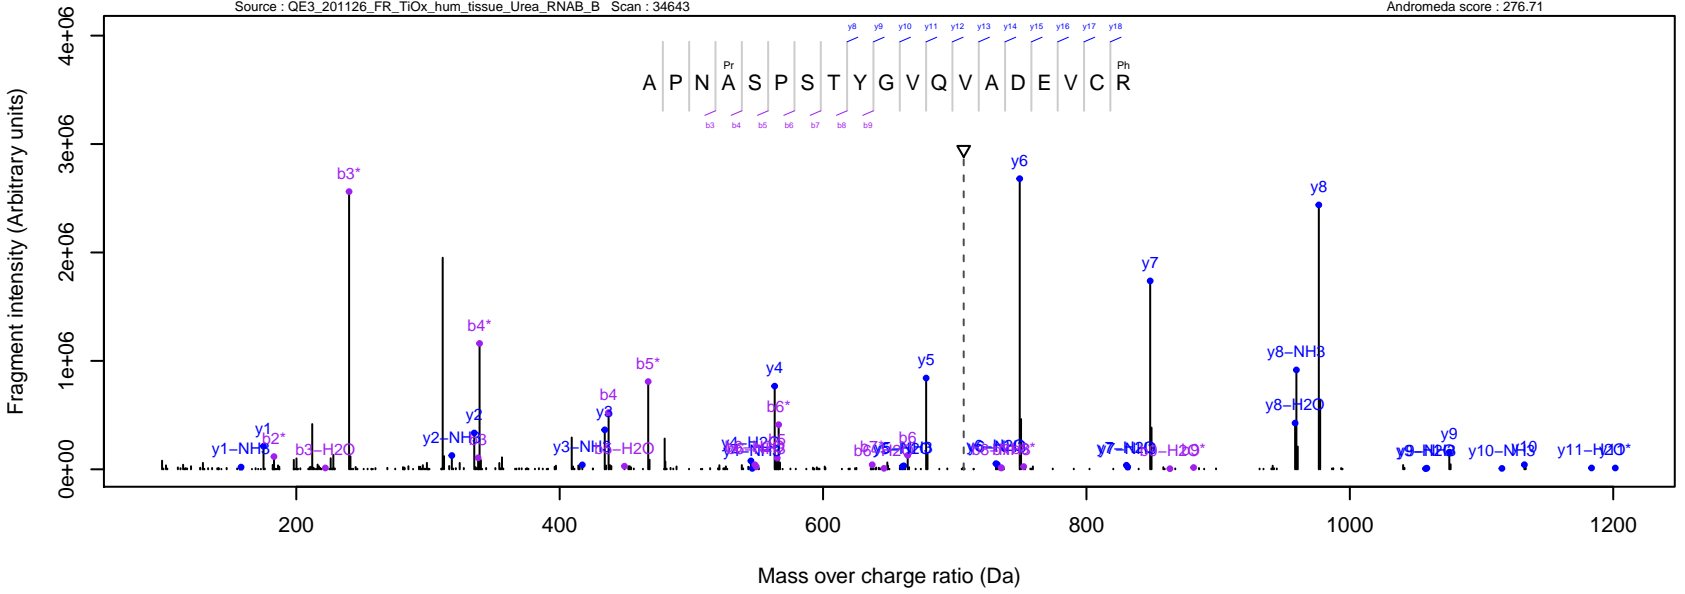

SHS(Phospho (STY))QASLAGPGVPDPSNR-2+

Source : QE3\_201126\_FR\_TIOx\_hum\_tissue\_Urea\_RNAB\_N Scan : 15013

Andromeda score : 276.26

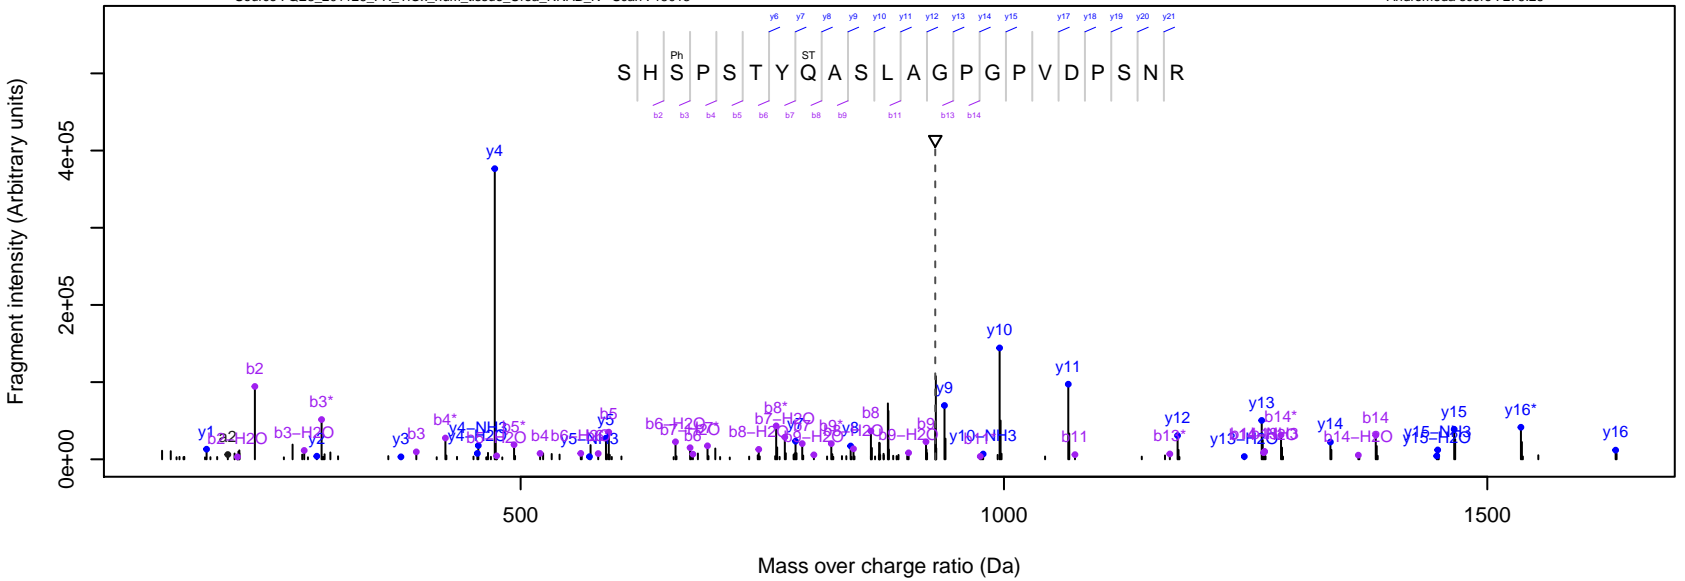

STLNPQWNES(Phospho (STY))FTFK-2+

Source : QE3\_201126\_FR\_TIOx\_hum\_tissue\_Urea\_RNAB\_B Scan : 47578

Andromeda score : 276.19

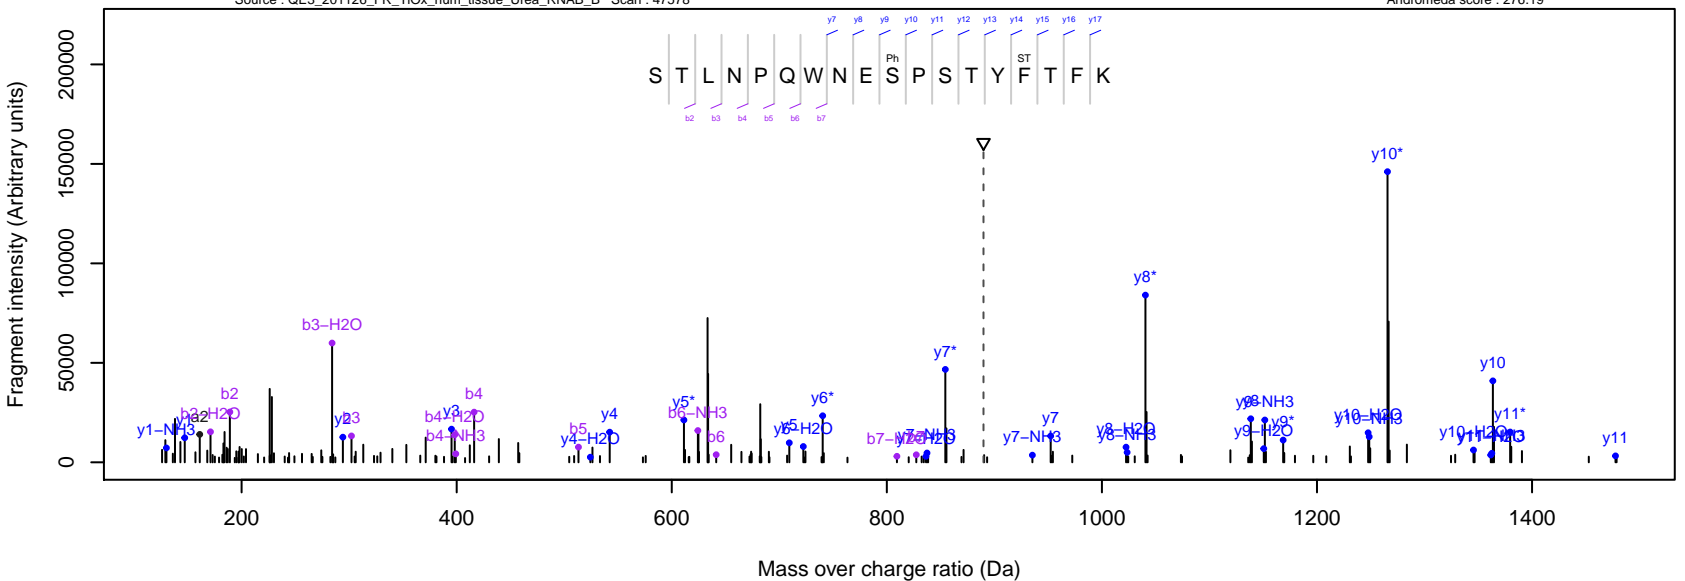



LGAGGGS(Phospho (STY))PEKSPSAQELK-2+

Source : QE3\_201126\_FR\_TiOx\_hum\_tissue\_Urea\_RNAB\_H Scan : 12021

Andromeda score : 275.23

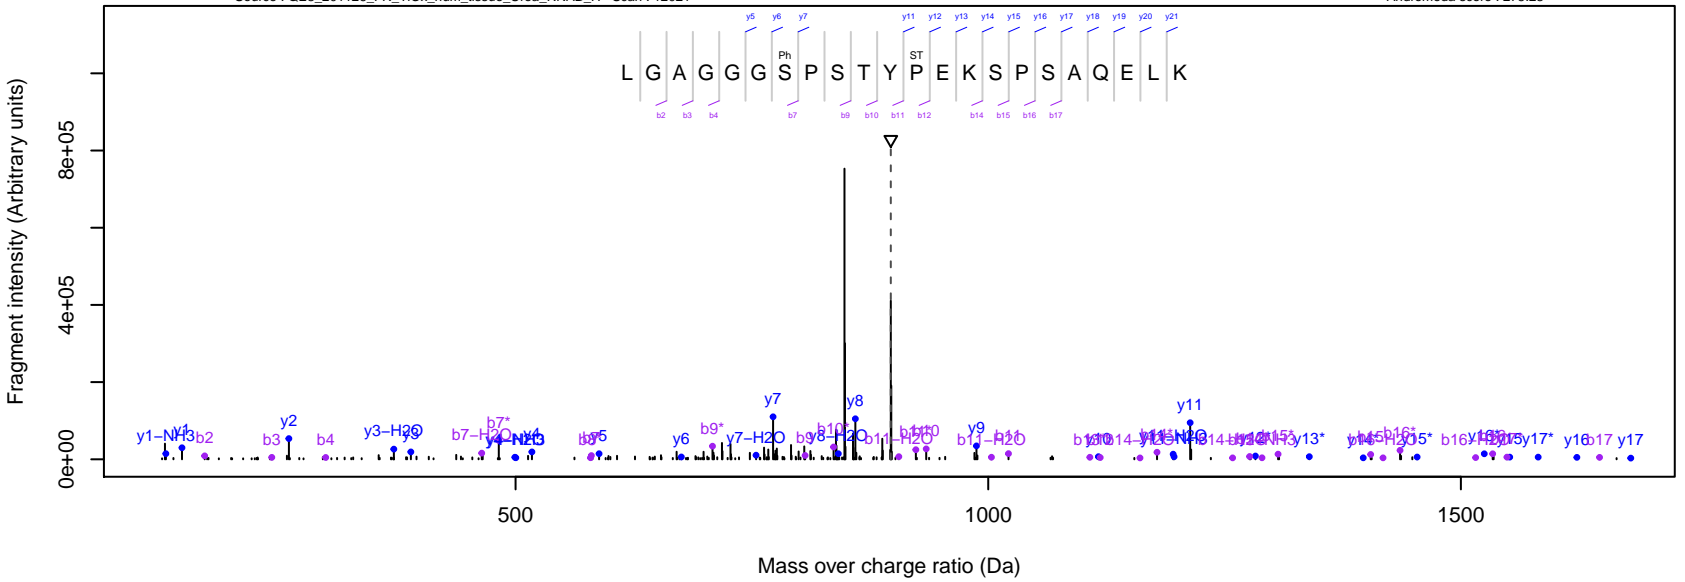

(Acetyl (Protein N-term))AS(Phospho (STY))ADELTFHEFEATNLLADTPDAATTSR-3+

Source : QE3\_201126\_FR\_TiOx\_hum\_tissue\_Urea\_RNAB\_N Scan : 62748

Andromeda score : 274.91

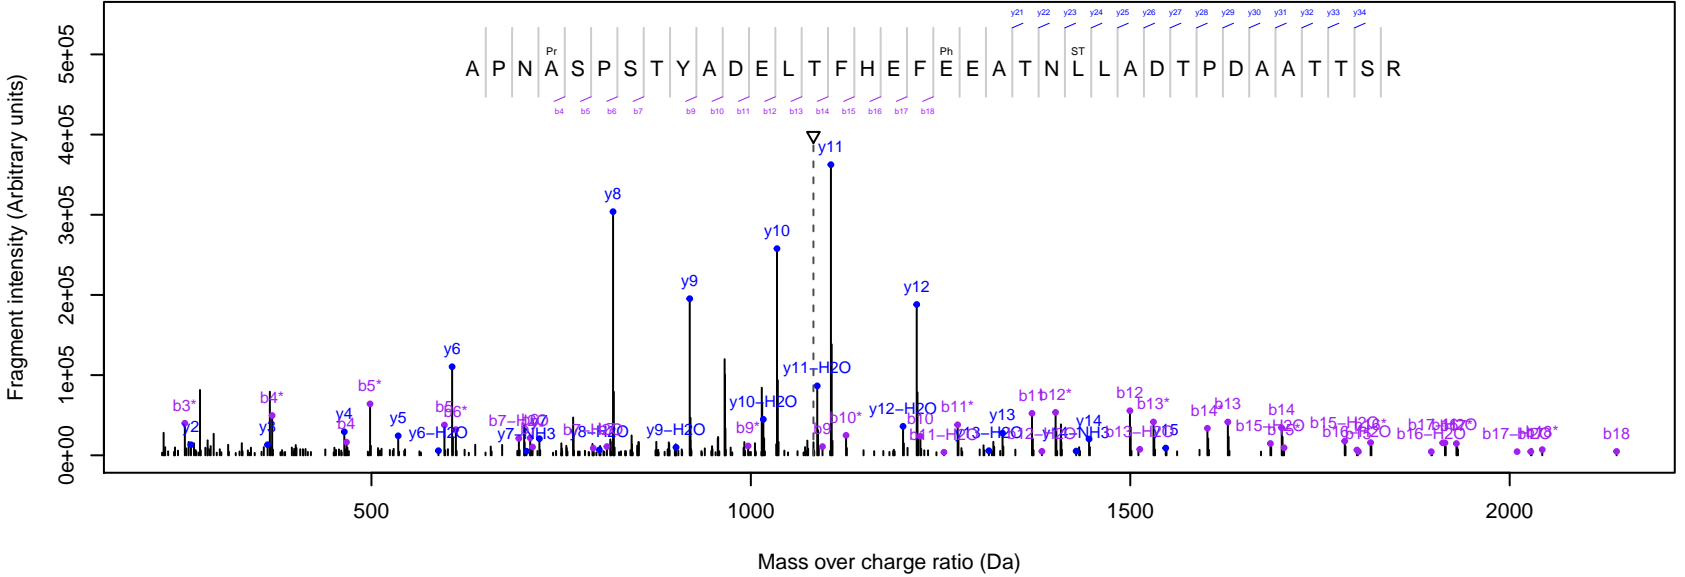

SQS(Phospho (STY))DCGELGDFR-2+

Source : QE3\_201126\_FR\_TiOx\_hum\_tissue\_Urea\_RNAB\_N Scan : 25816

Andromeda score : 274.89

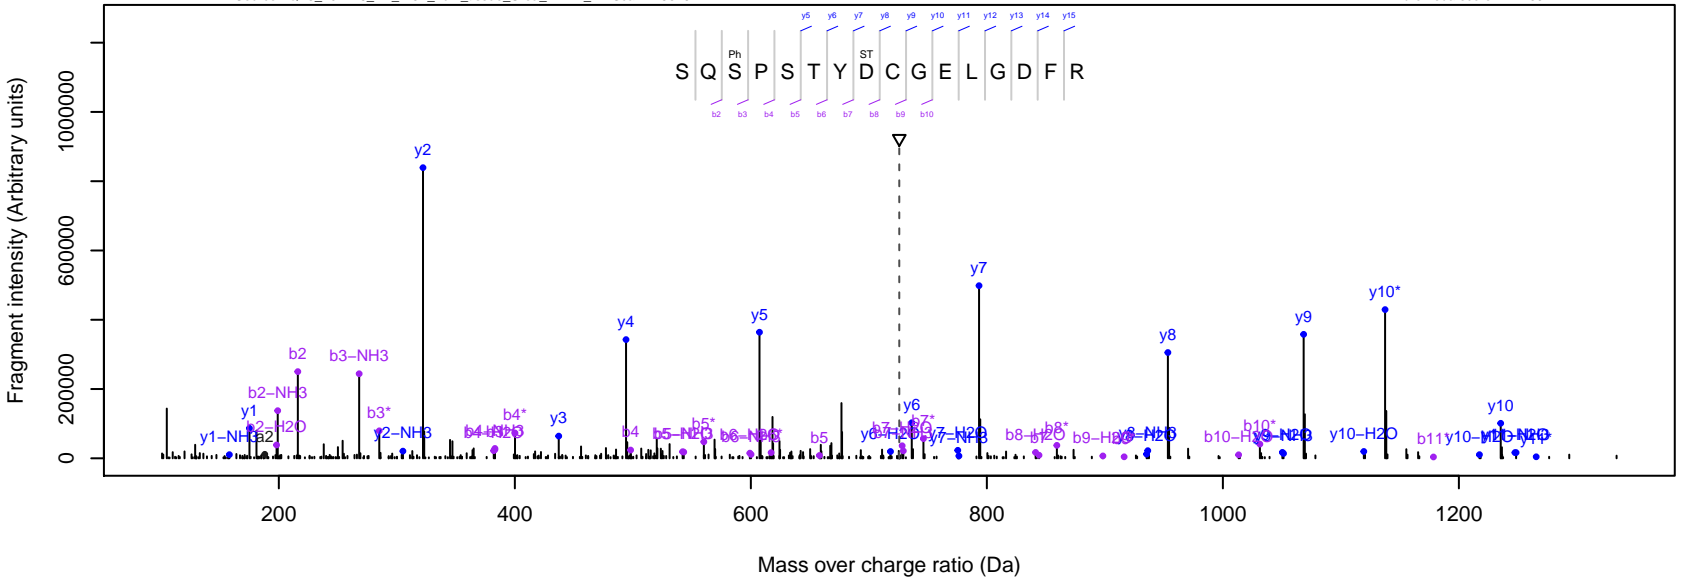

TLS(Phospho (STY))DESIYNSQR-2+

Source : QE3\_201126\_FR\_TiOx\_hum\_tissue\_Urea\_RNAB\_N Scan : 22231

Andromeda score : 274.8

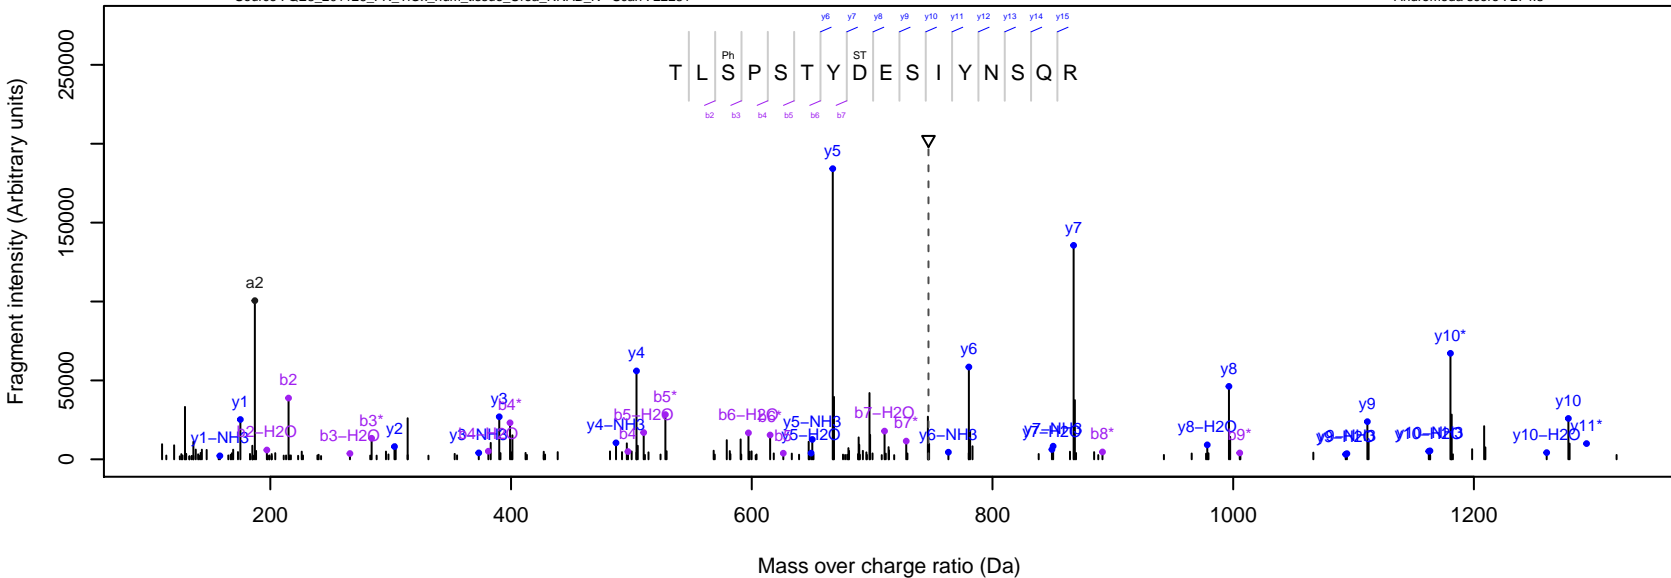

KLGDVS(Phospho (STY))PTQIDV SQFGSFK-2+

Source : QE3\_201126\_FR\_TiOx\_hum\_tissue\_Urea\_RNAB\_B Scan : 44775

Andromeda score : 274.75

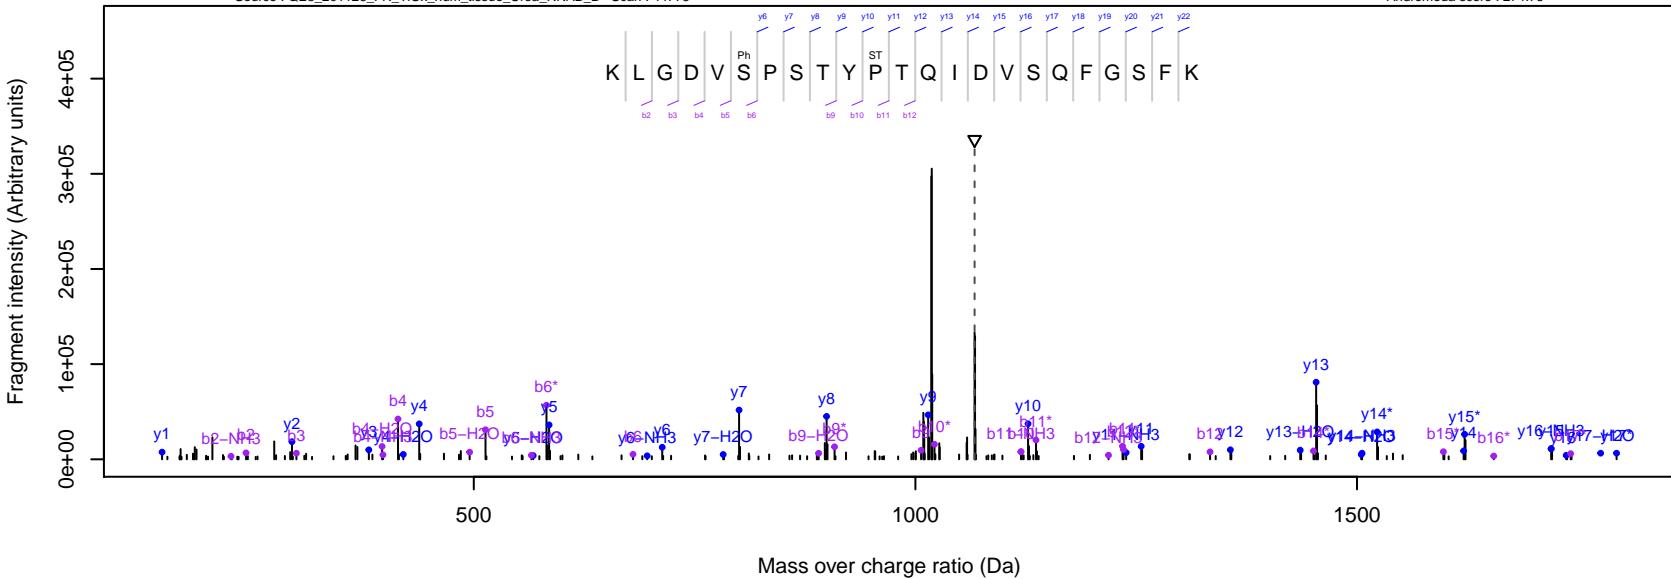

KRES(Phospho (STY))ES(Phospho (STY))EJSDTPPAAPQLIK-2+

Source : QE3\_201126\_FR\_TiOx\_hum\_tissue\_Urea\_RNAB\_B Scan : 21636

Andromeda score : 274.59

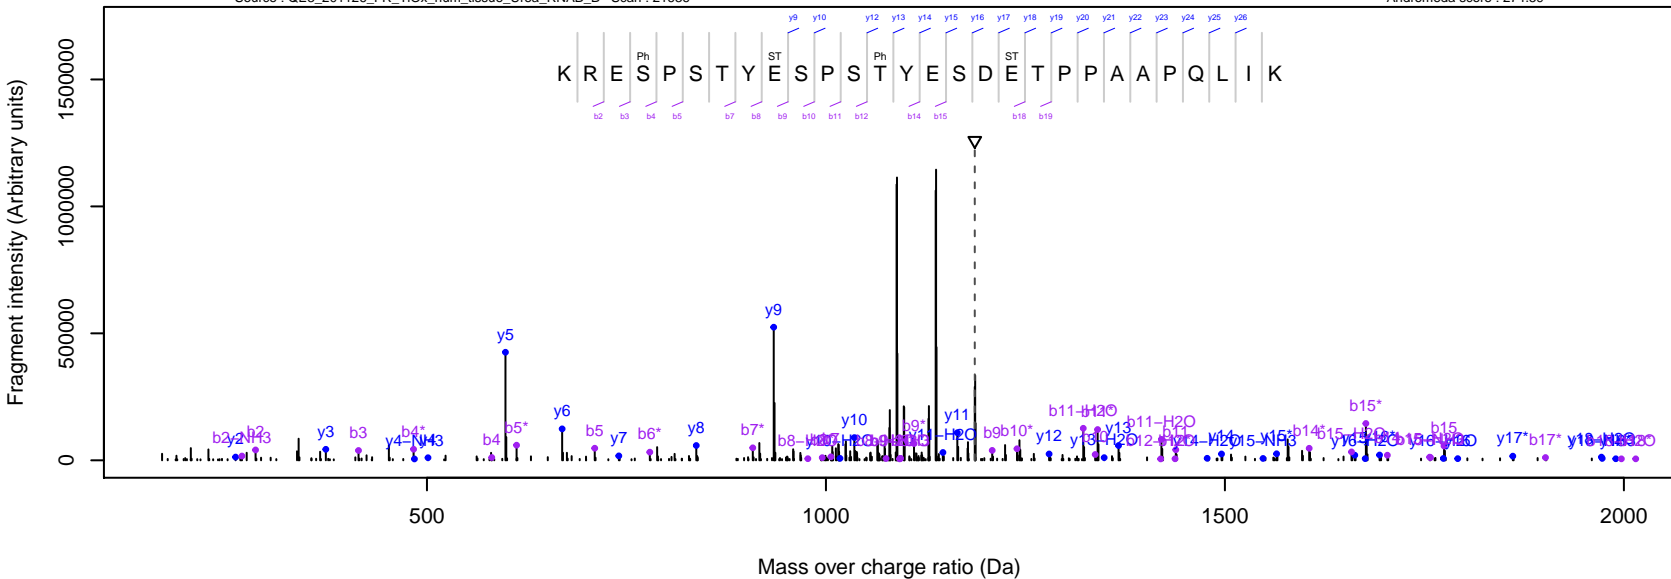



AIEPQKEEADENYNS(Phospho (STY))VNTR-3+

Source : QE3\_201126\_FR\_TiOx\_hum\_tissue\_Urea\_RNAB\_H Scan : 13398

Andromeda score : 274.48

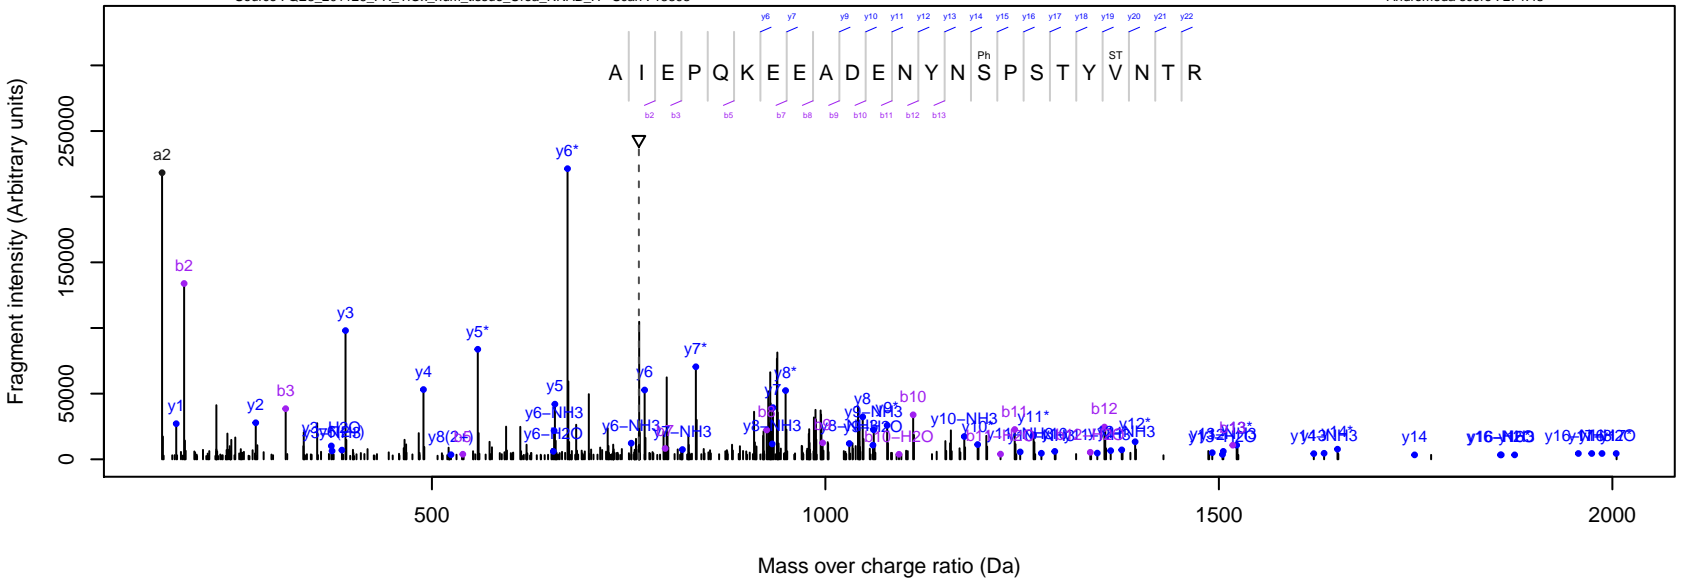

NLLEDDSPSTYDEEEDFLR-2+

Source : QE3\_201126\_FR\_TiOx\_hum\_tissue\_Urea\_RNAB\_H Scan : 58424

Andromeda score : 274.48

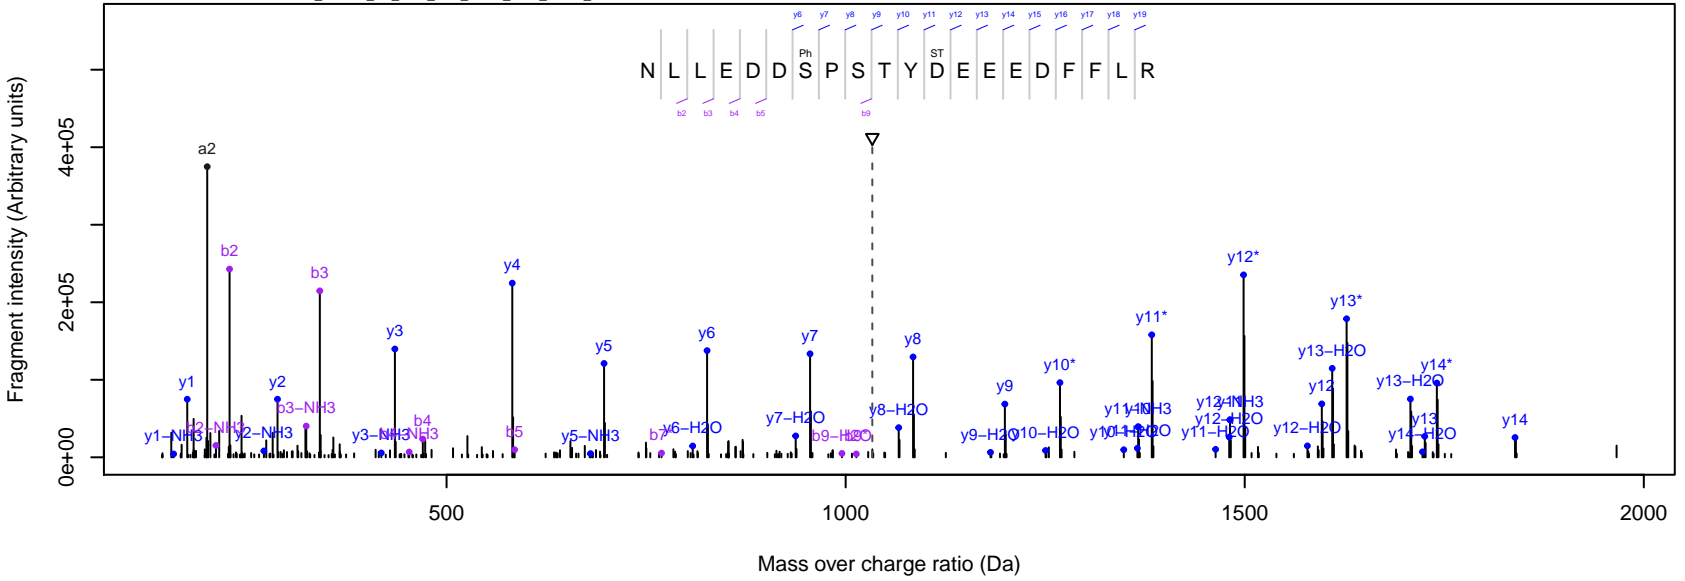

ATS(Phospho (STY))NVFAMOM(oxidation)FDQSQIQEFK-2+

Source : QE3\_201126\_FR\_TiOx\_hum\_tissue\_Urea\_RNAB\_H Scan : 53820

Andromeda score : 274.45

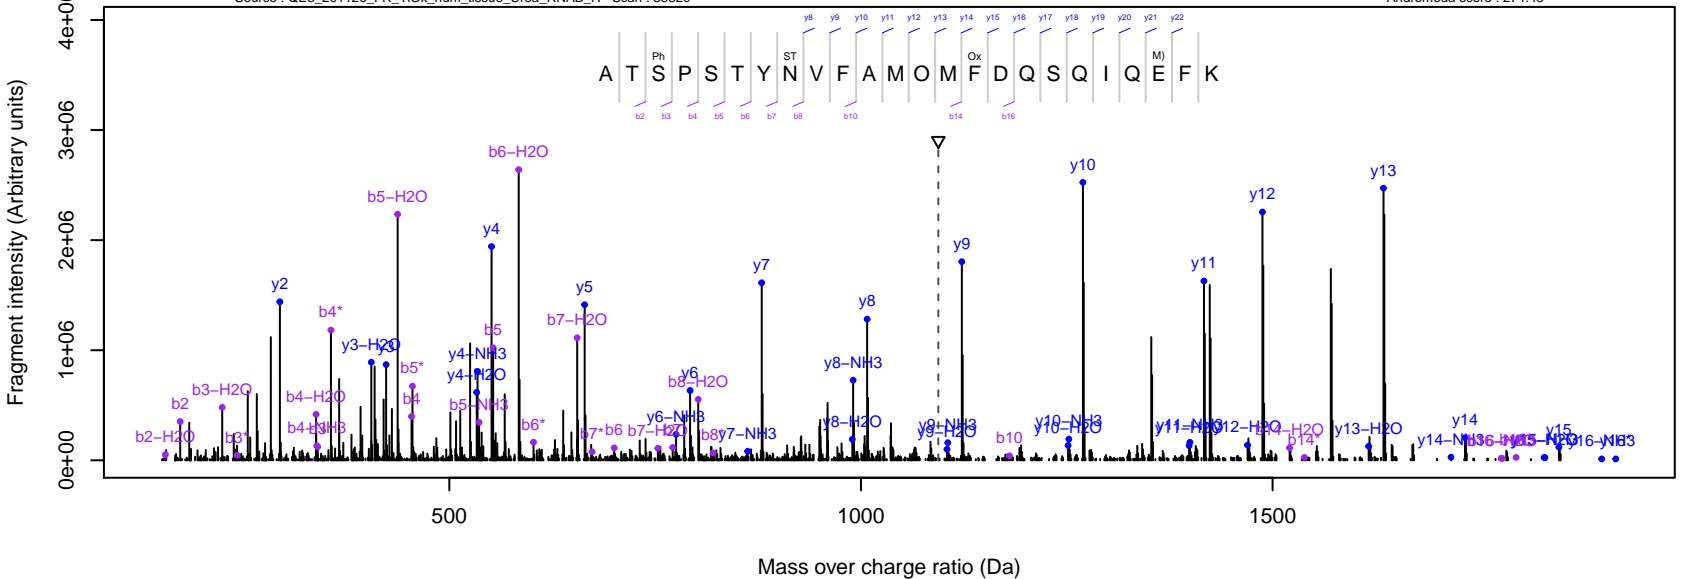

QAS(Phospho (STY))IELPSM(Oxidation (M))AVASTK-2+

Source : QE3\_201126\_FR\_TiOx\_hum\_tissue\_Urea\_RNAB\_B Scan : 29209

Andromeda score : 274.1

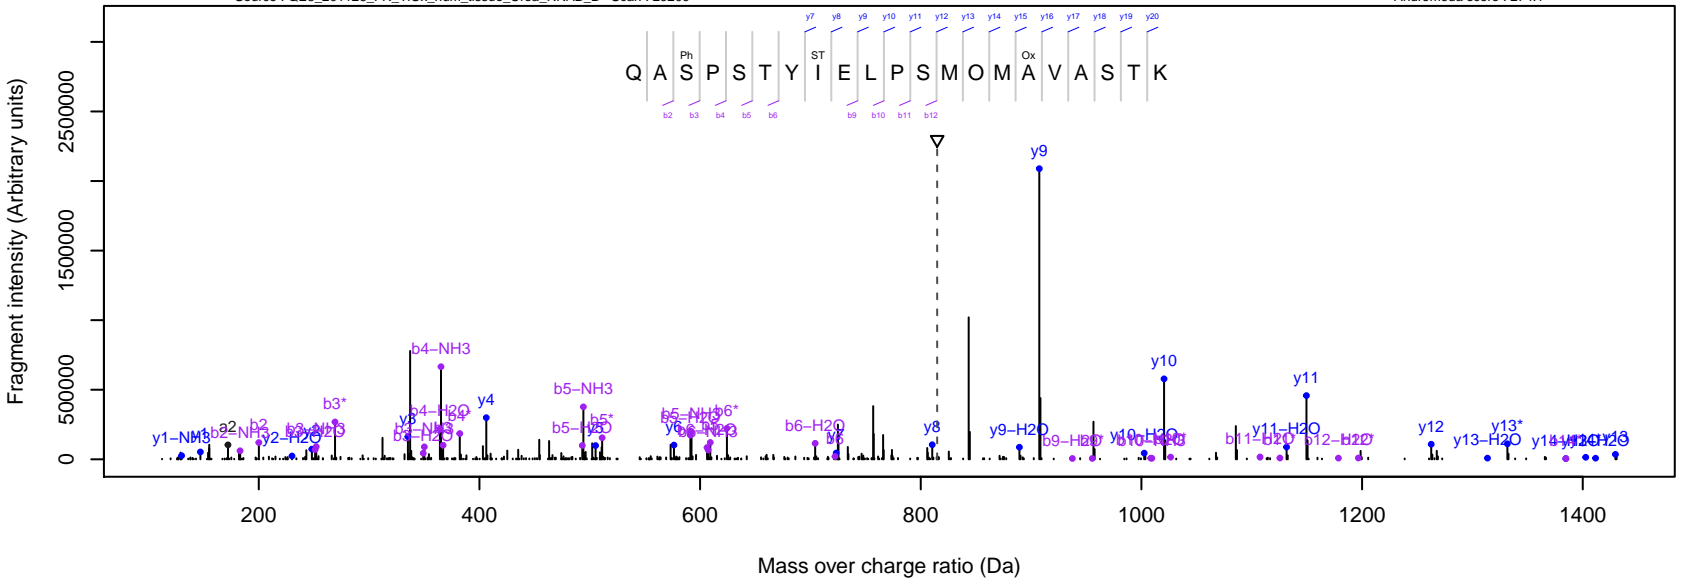

SPSLSPSPPS(Phospho (STY))PLEK-2+

Source : QE3\_201126\_FR\_TiOx\_hum\_tissue\_Urea\_RNAB\_N Scan : 26750

Andromeda score : 273.94

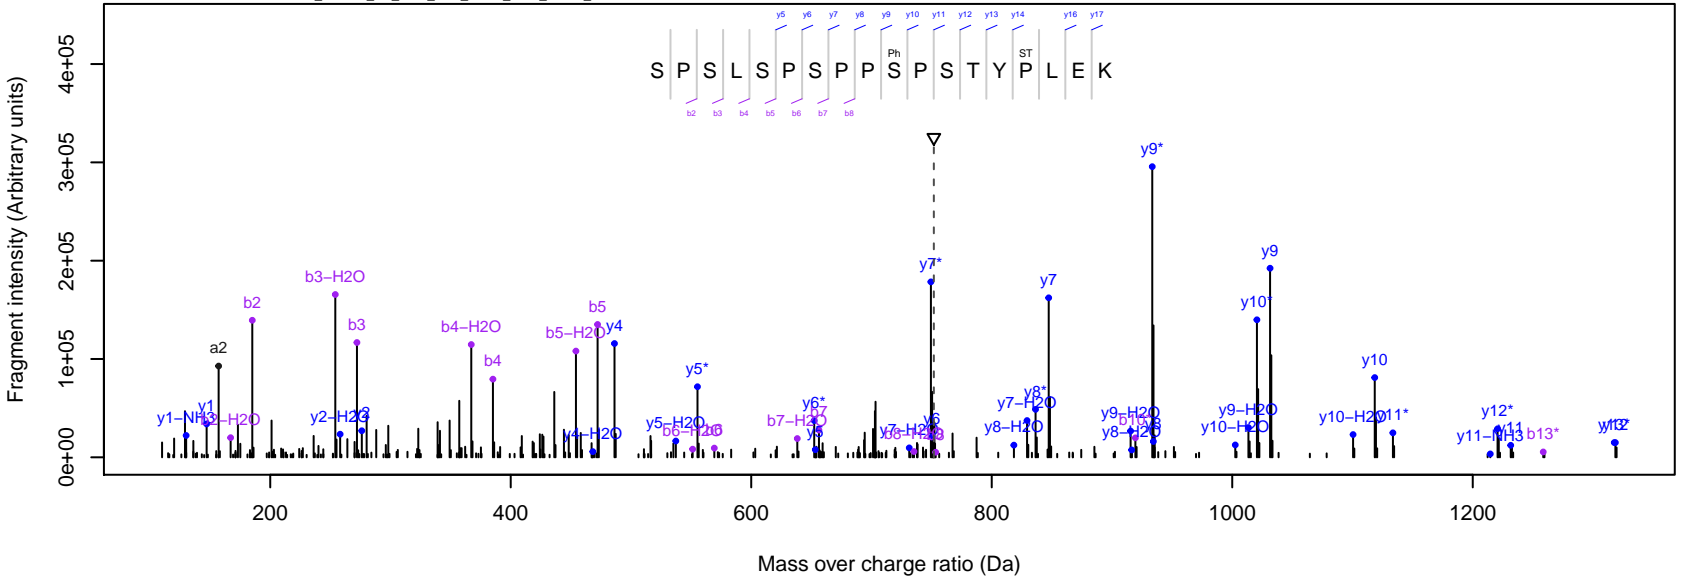

FKT(Phospho (STY))QPVTFDEIQVEVEEGVSPMEEEEK-3+

Source : QE3\_201126\_FR\_TiOx\_hum\_tissue\_Urea\_RNAB\_H Scan : 50516

Andromeda score : 273.84

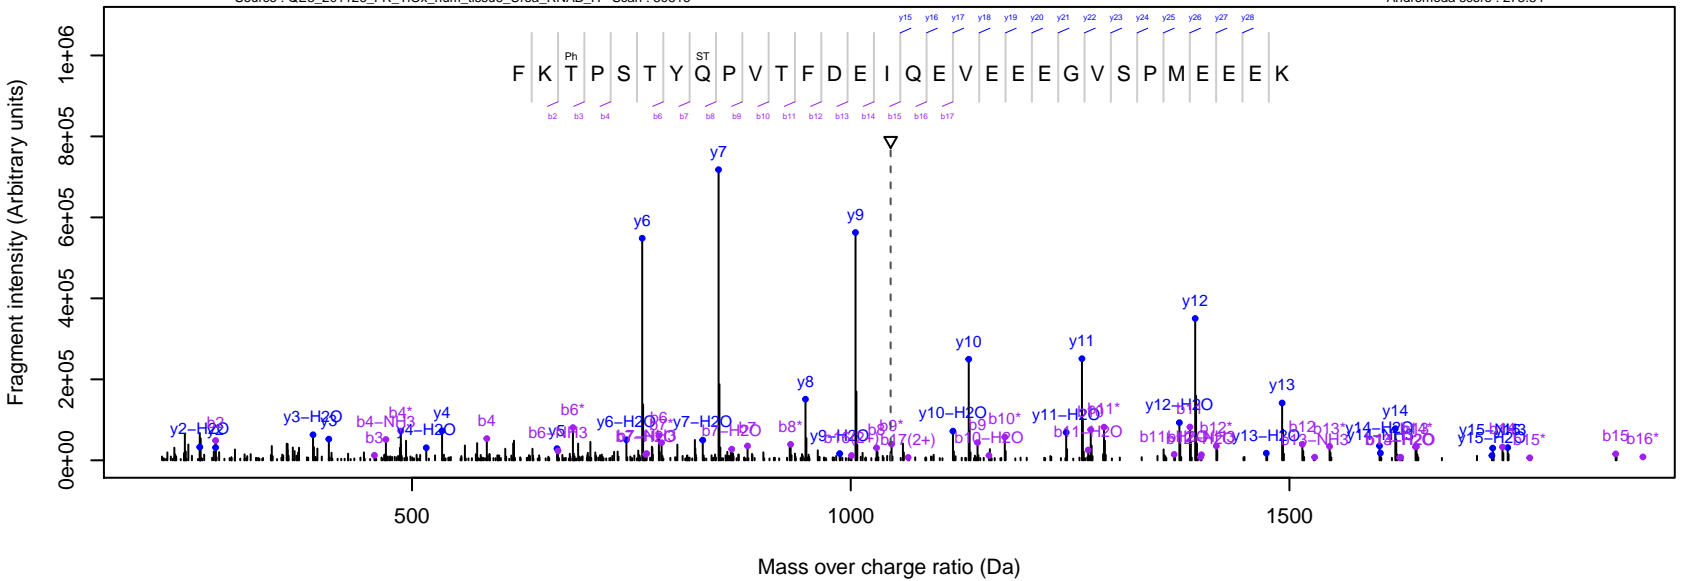



SKS(Phospho (STY))VIEQVSWDT

Source : QE3\_201126\_FR\_TIOx\_hum\_tissue\_Urea\_RNAB\_N Scan : 33548

Andromeda score : 273.72

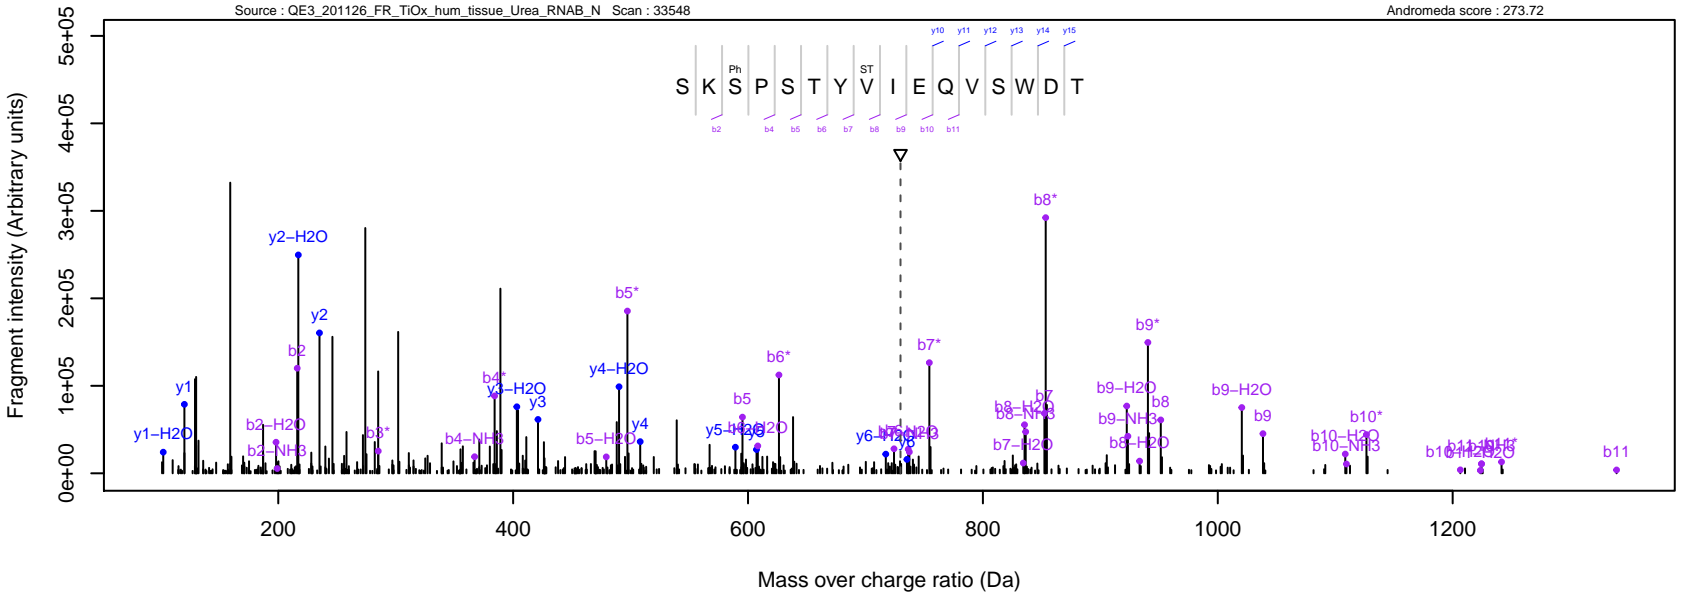

KEDS(Phospho (STY))DEEEDDD(Phospho (STY))EEDEEDEDDEDEDEIEPAAMK

Source : QE3\_201126\_FR\_TIOx\_hum\_tissue\_Urea\_RNAB\_H Scan : 33244

Andromeda score : 273.46

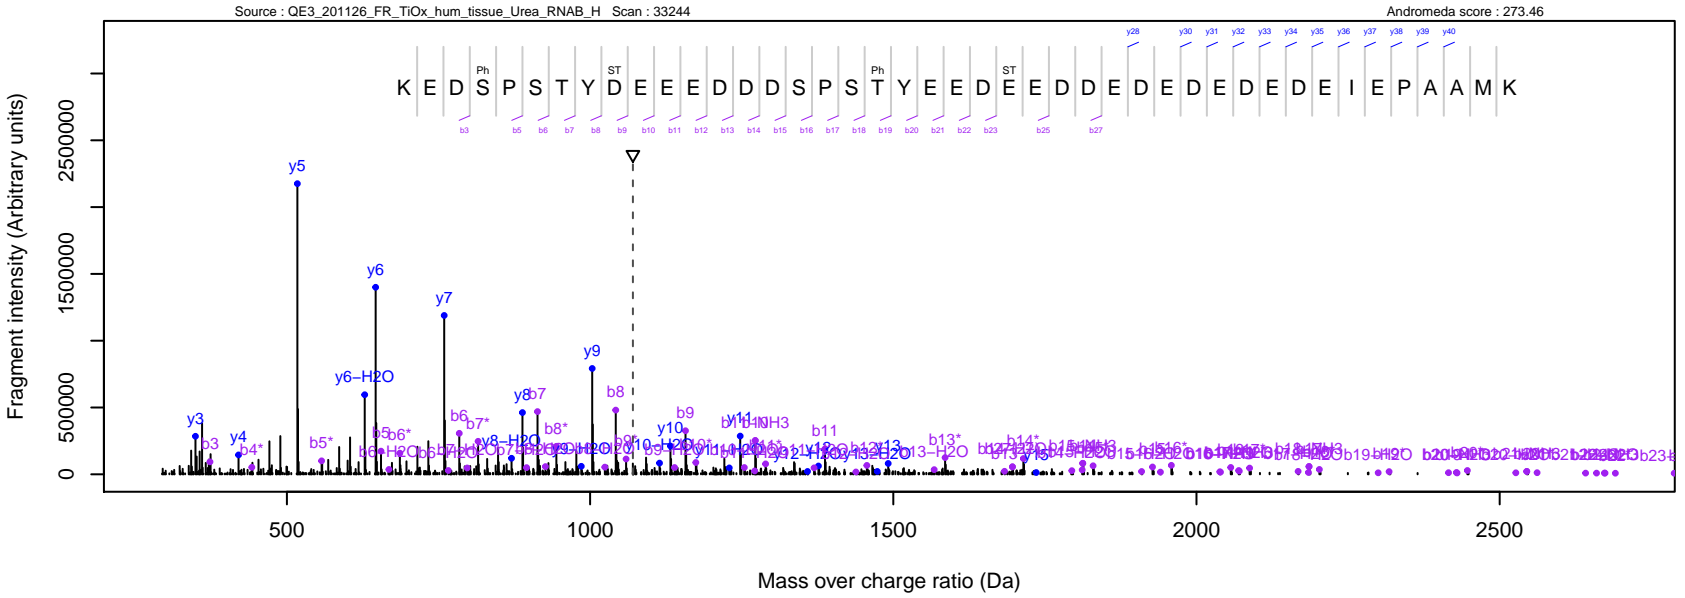

SPEKIEEVLSPGSPSKS(Phospho (STY))PSK-3+

Source : QE3\_201126\_FR\_TIOx\_hum\_tissue\_Urea\_RNAB\_N Scan : 19847

Andromeda score : 273.21

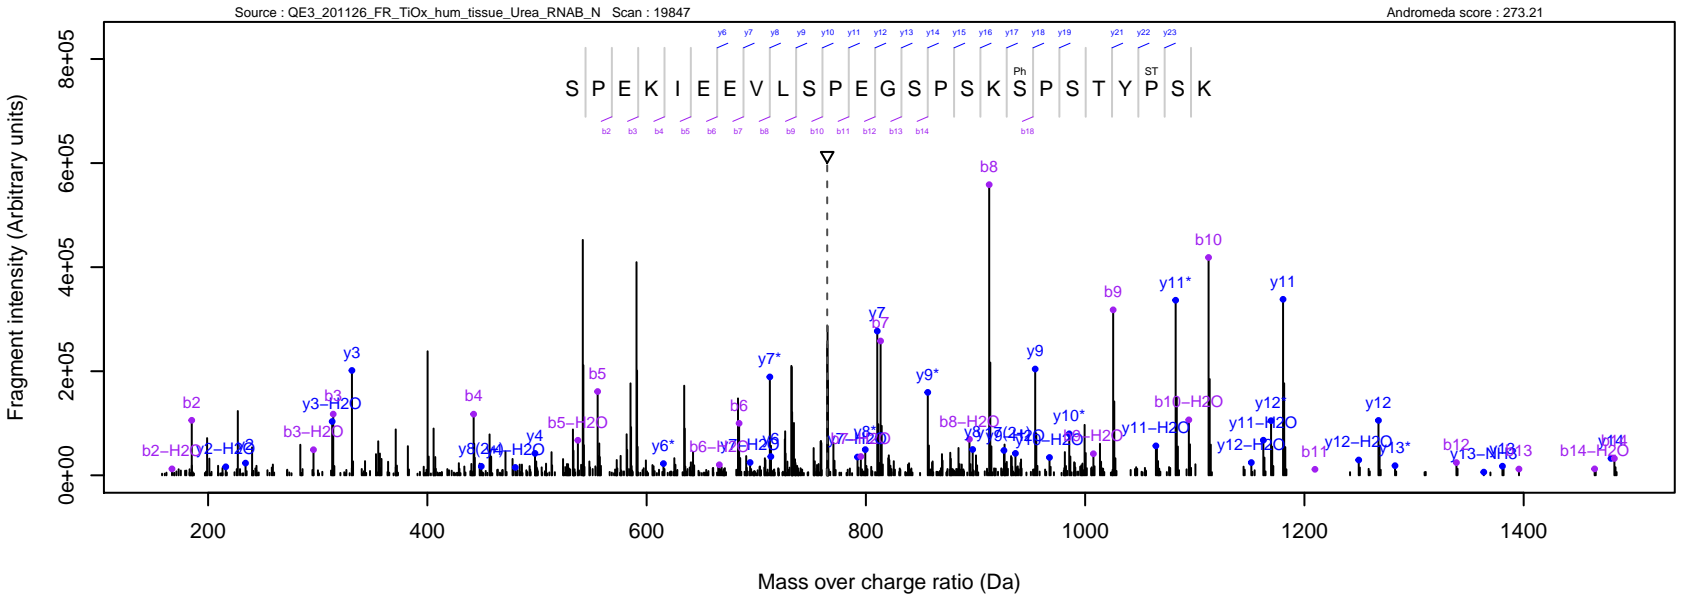

LIRGPGENDDSPSTY--2+

Source : QE3\_201126\_FR\_TiOx\_hum\_tissue\_Urea\_RNAB\_N Scan : 12452

Andromeda score : 273.07

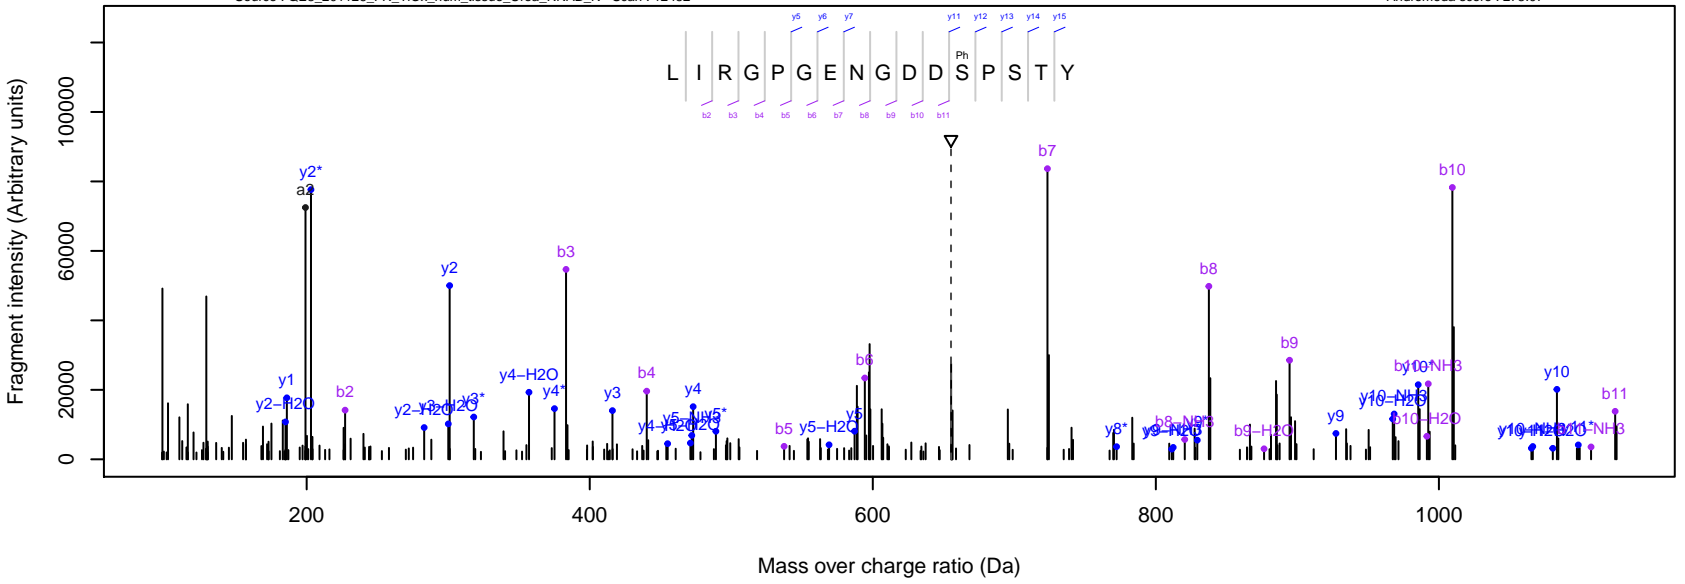

(Acetyl (Protein N-term))AETLSGLD SGAGAAALSS(Phospho (STY))ASSETGTRR-3+

Source : QE3\_201126\_FR\_TiOx\_hum\_tissue\_Urea\_RNAB\_H Scan : 44545

Andromeda score : 273.01

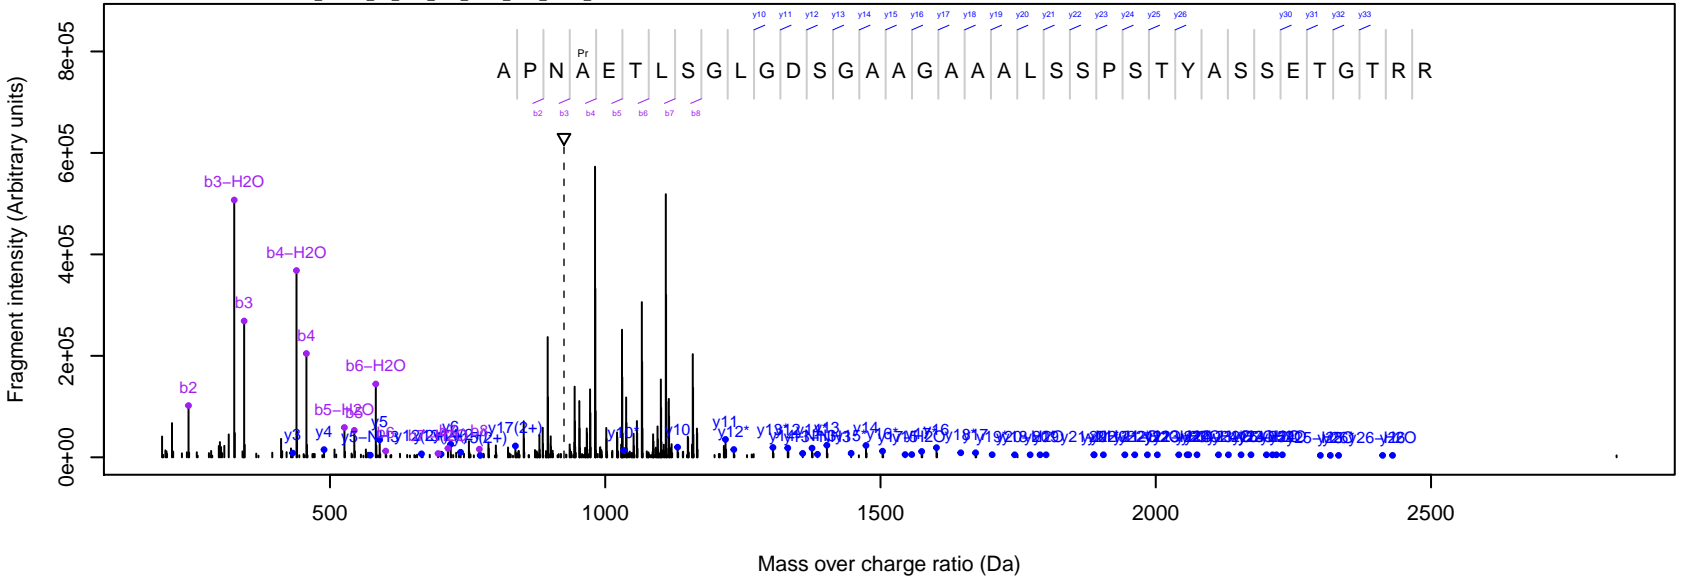

SSSISEEKGDS(Phospho (STY))DDEKPR-3+

Source : QE3\_201126\_FR\_TiOx\_hum\_tissue\_Urea\_RNAB\_H Scan : 4568

Andromeda score : 272.71

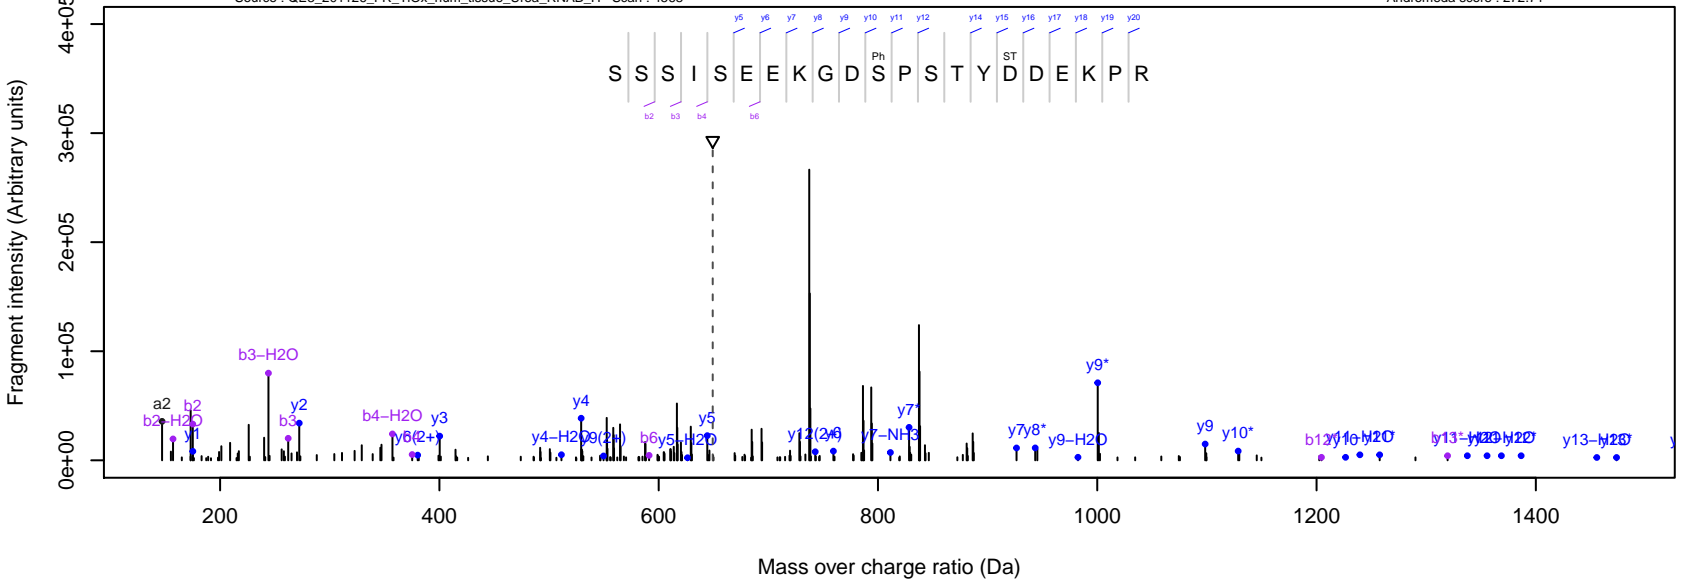

AVS(Phospho (STY))PPHLDGPPS(Phospho (STY))PRS(Phospho (STY))PVGISEVFLPNSNHVASGAGEAER-4+

Source : QE3\_201126\_FR\_TIOx\_hum\_tissue\_Urea\_RNAB\_H Scan : 45883

Andromeda score : 272.55

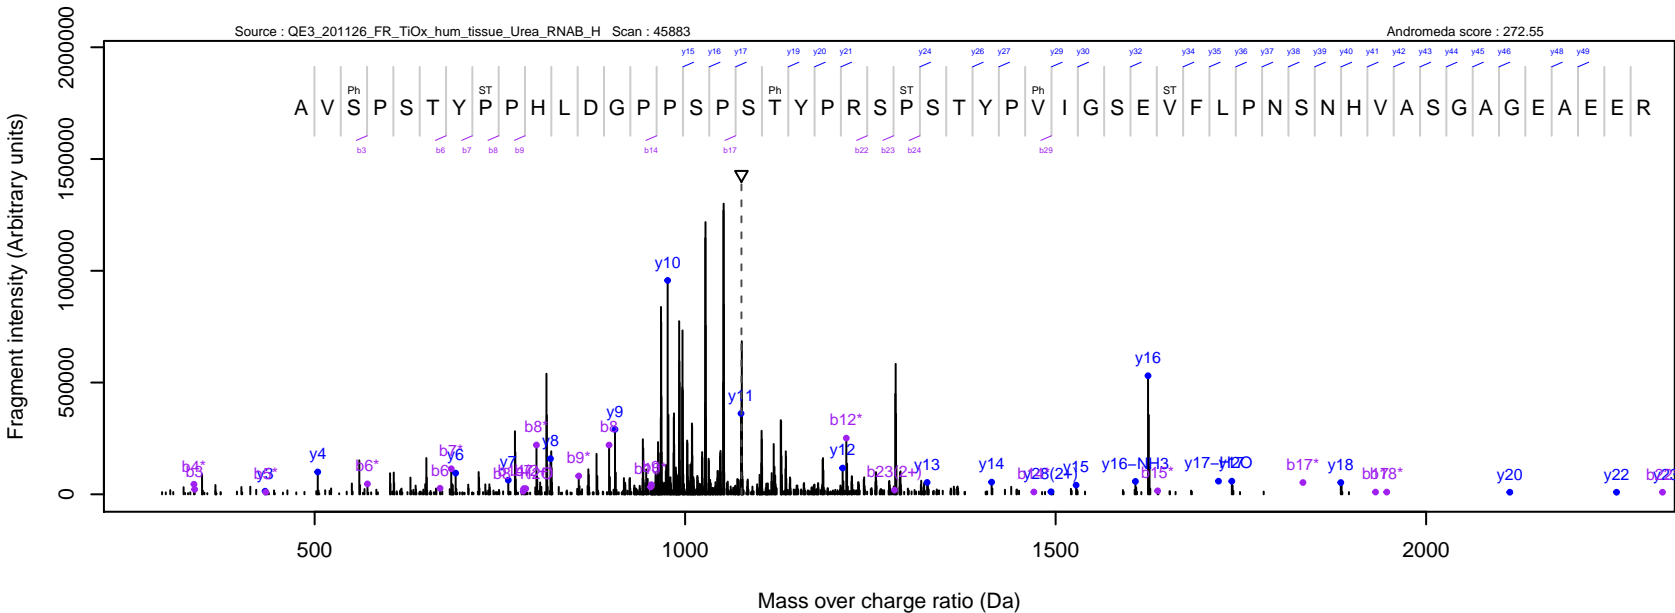

SNS(Phospho (STY))VEKPVSSILSR-3+

Source : QE3\_201126\_FR\_TIOx\_hum\_tissue\_Urea\_RNAB\_N Scan : 23812

Andromeda score : 272.31

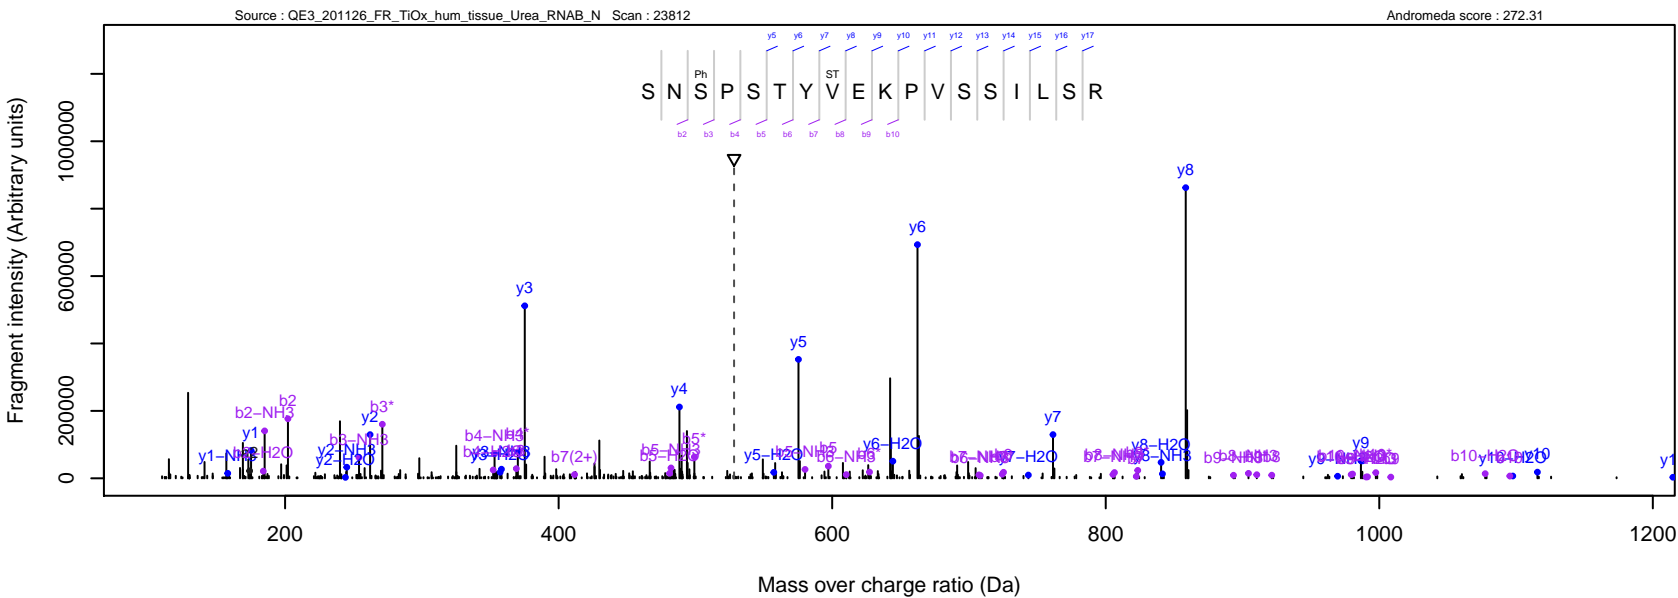

RSS(Phospho (STY))LPLDHGSPAQENPESEK-3+

Source : QE3\_201126\_FR\_TIOx\_hum\_tissue\_Urea\_RNAB\_H Scan : 13054

Andromeda score : 272.18

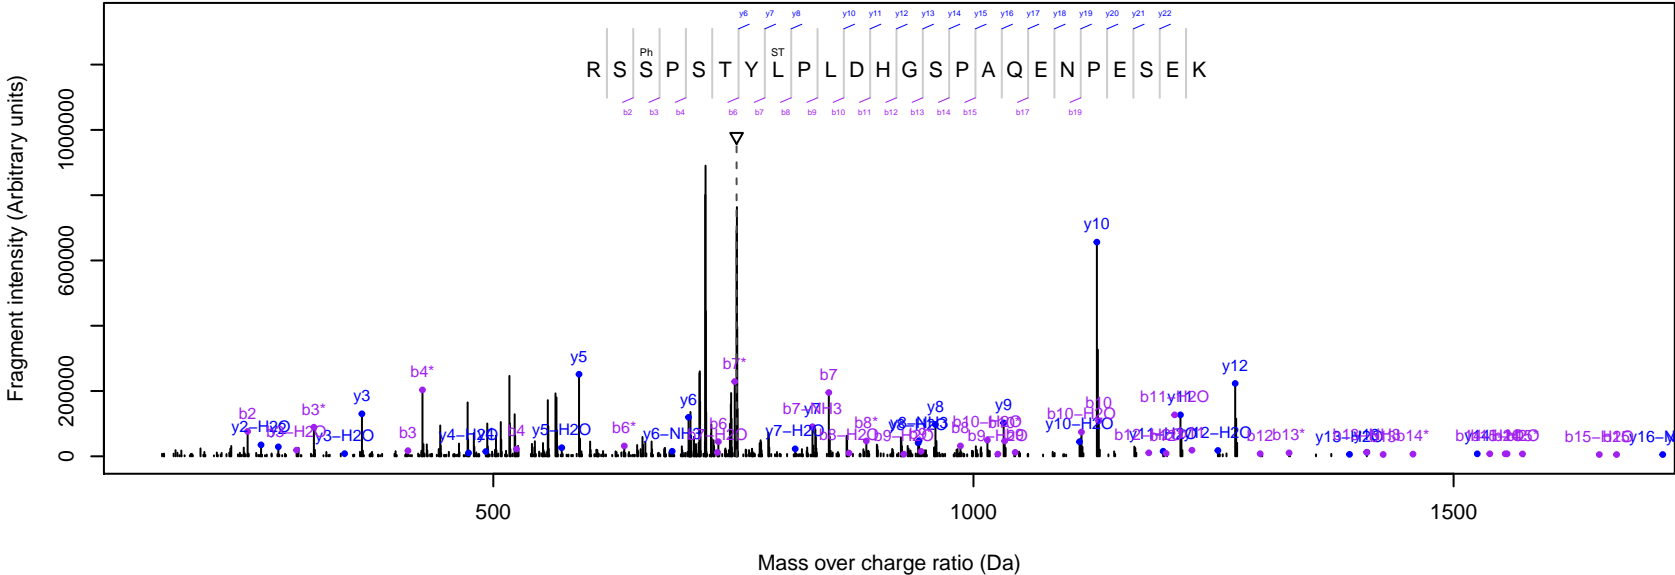

TAFDEAIAELDTLSPSTYEEESYKDESTLIMQLLR-3+

Source : QE3\_201126\_FR\_TIOx\_hum\_tissue\_Urea\_RNAB\_B Scan : 62998

Andromeda score : 271.39

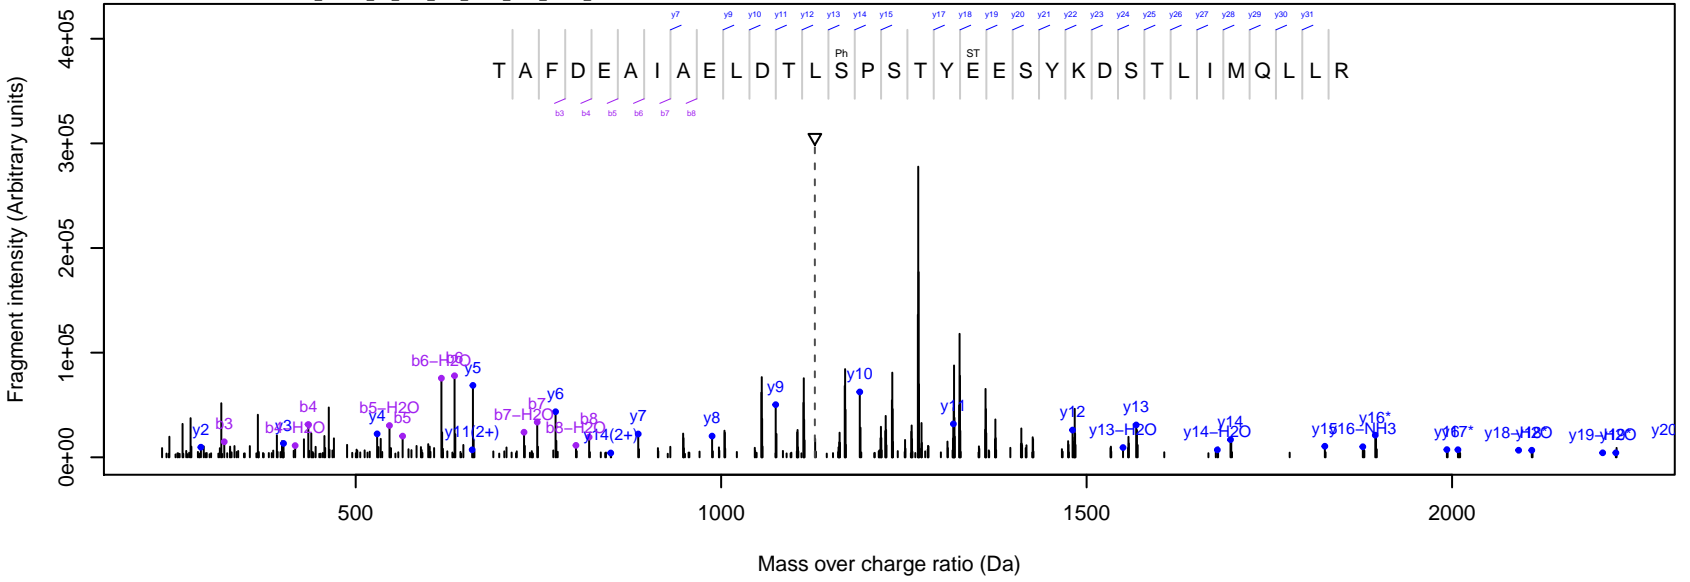

KGAGDGS(Phospho (STY))DEEVDGKADGAEAK-3+

Source : QE3\_201126\_FR\_TIOx\_hum\_tissue\_Urea\_RNAB\_H Scan : 5115

Andromeda score : 271.38

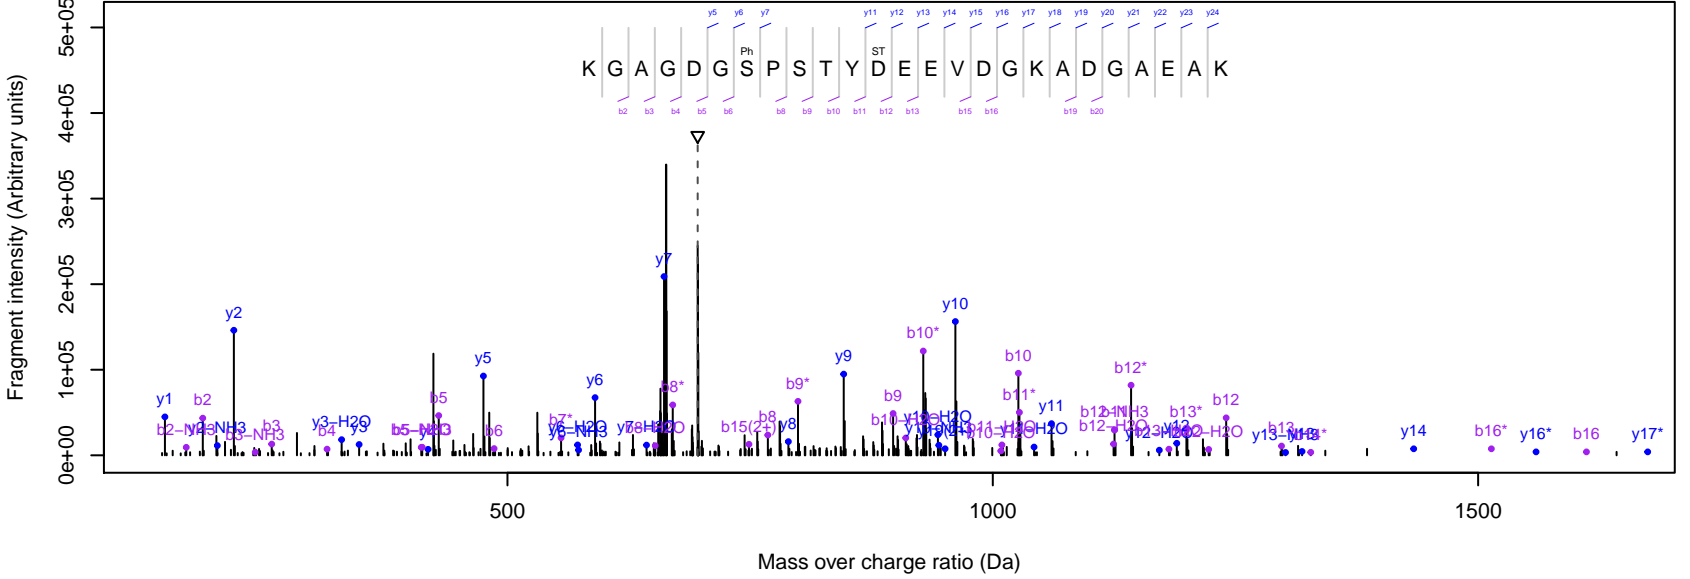

IVEPEVVGES(Phospho (STY))DSPSTYEEVEGDWR-2+

Source : QE3\_201126\_FR\_TIOx\_hum\_tissue\_Urea\_RNAB\_N Scan : 51450

Andromeda score : 271.2

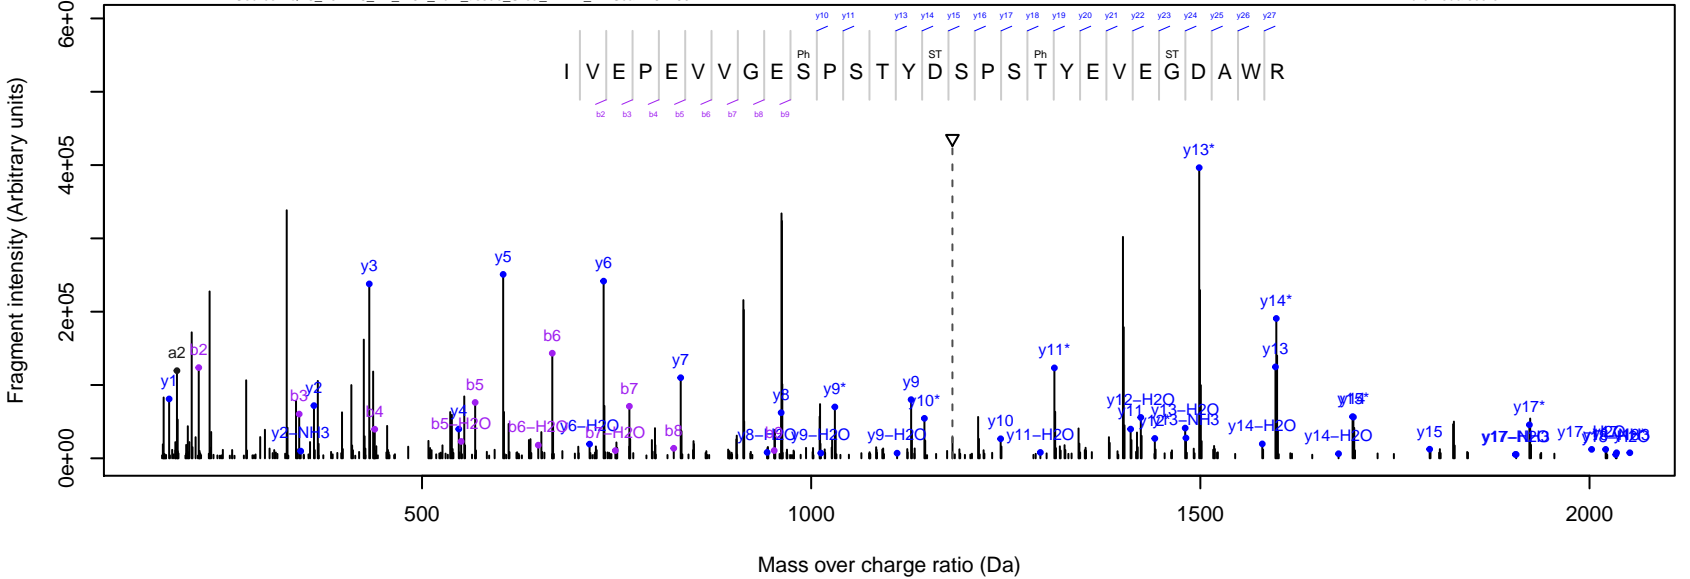

SASQSS(Phospho (STY))LDKLDQELKEQQK-3+

Source : QE3\_201126\_FR\_TIOx\_hum\_tissue\_Urea\_RNAB\_B Scan : 21186

Andromeda score : 271.07

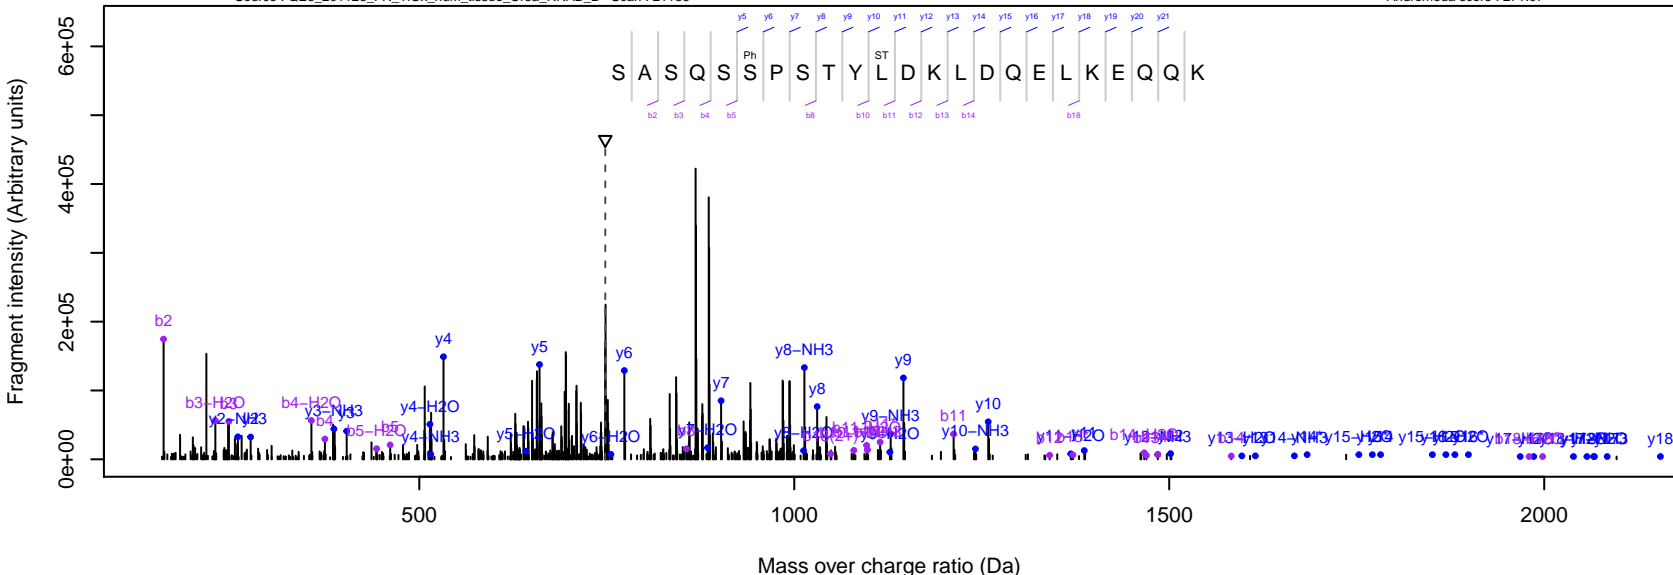

S(Phospho (STY))QEADVQDWEFR-2+

Source : QE3\_201126\_FR\_TIOx\_hum\_tissue\_Urea\_RNAB\_N Scan : 39200

Andromeda score : 270.79

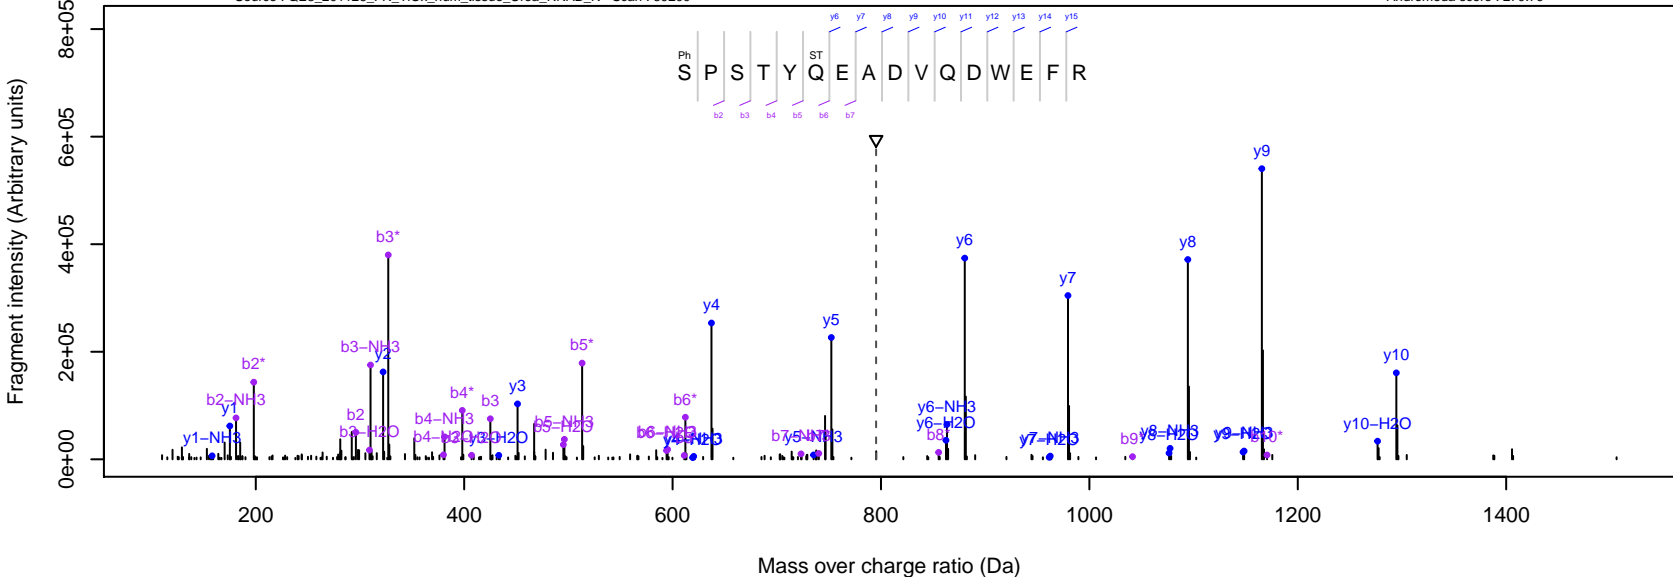

GTGQS(Phospho (STY))DDS(Phospho (STY))DIWDDTALIK-2+

Source : QE3\_201126\_FR\_TIOx\_hum\_tissue\_Urea\_RNAB\_H Scan : 59555

Andromeda score : 270.35

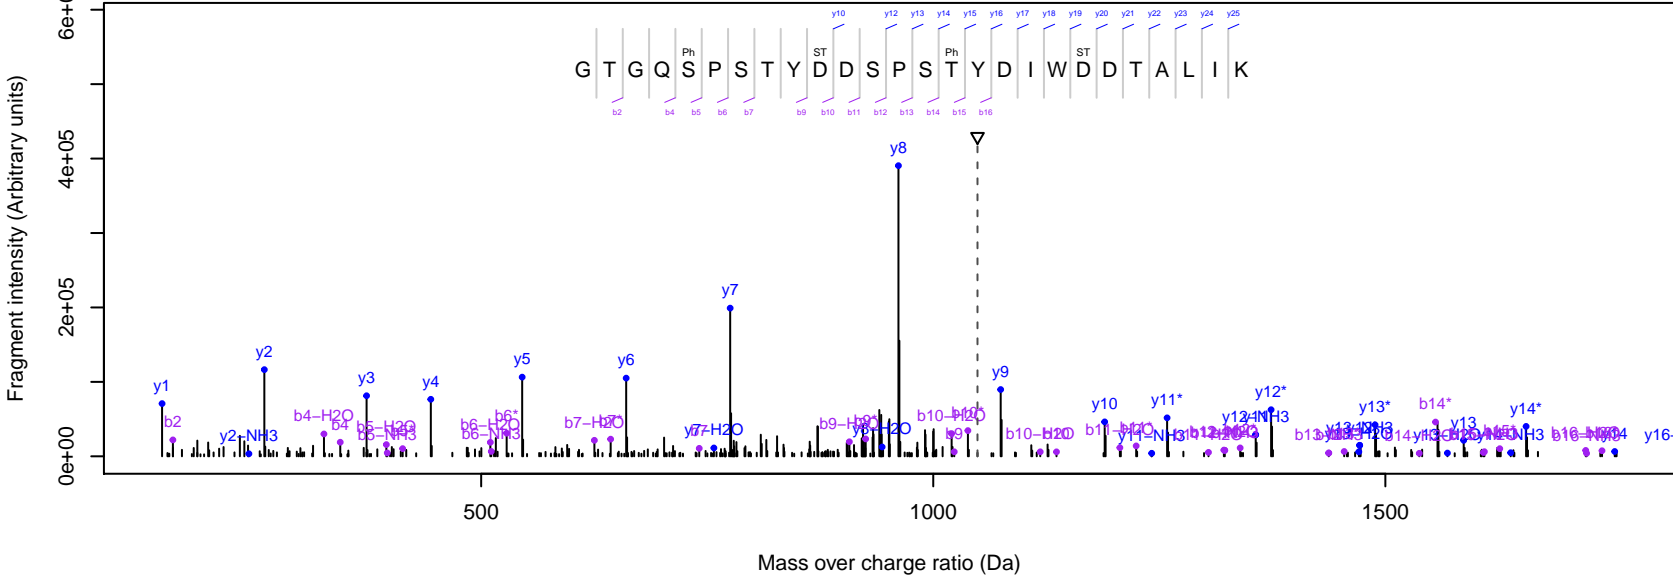

GKDS(Phospho (STY))YETSQLDDQS(Phospho (STY))AETHSHK-3+

Source : QE3\_201126\_FR\_TIOx\_hum\_tissue\_Urea\_RNAB\_H Scan : 9252

Andromeda score : 270.28

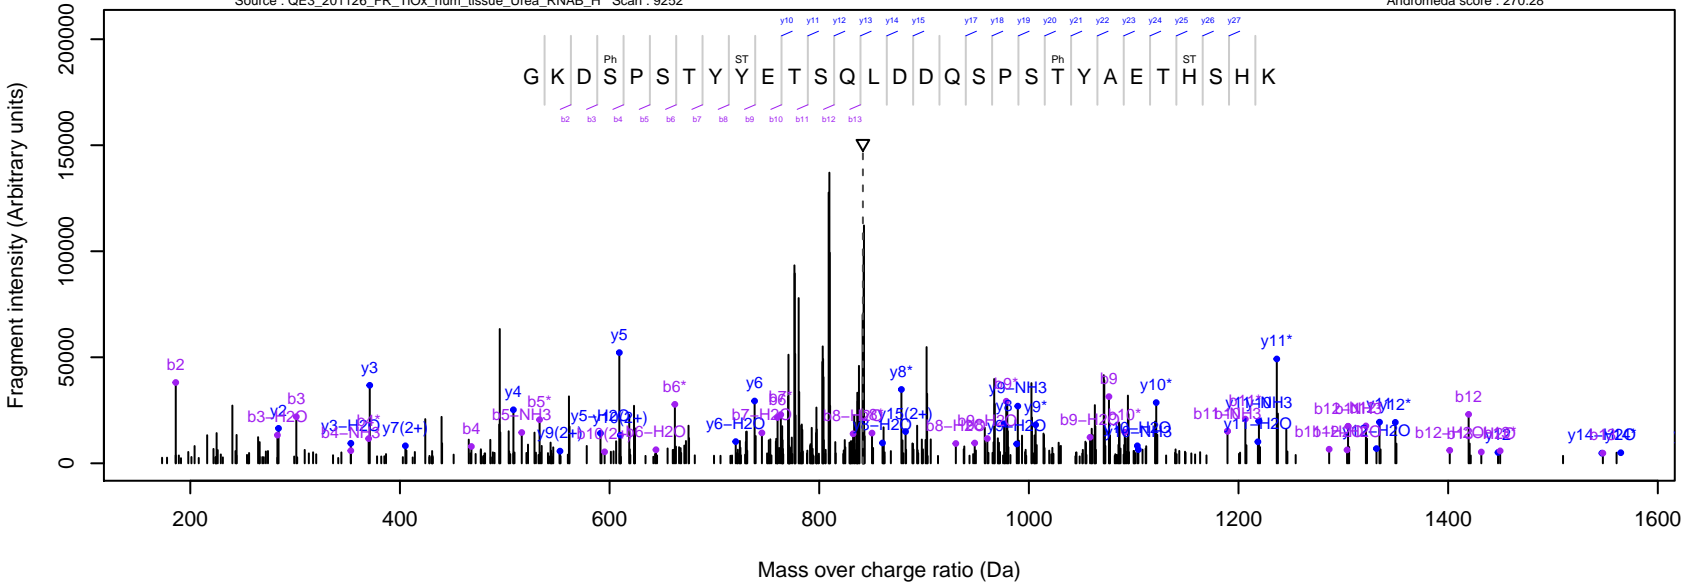

LGSSGLG(Phospho (STY))ASSIQAAVR-2+

Source : QE3\_201126\_FR\_TIOx\_hum\_tissue\_Urea\_RNAB\_N Scan : 31811

Andromeda score : 270.26

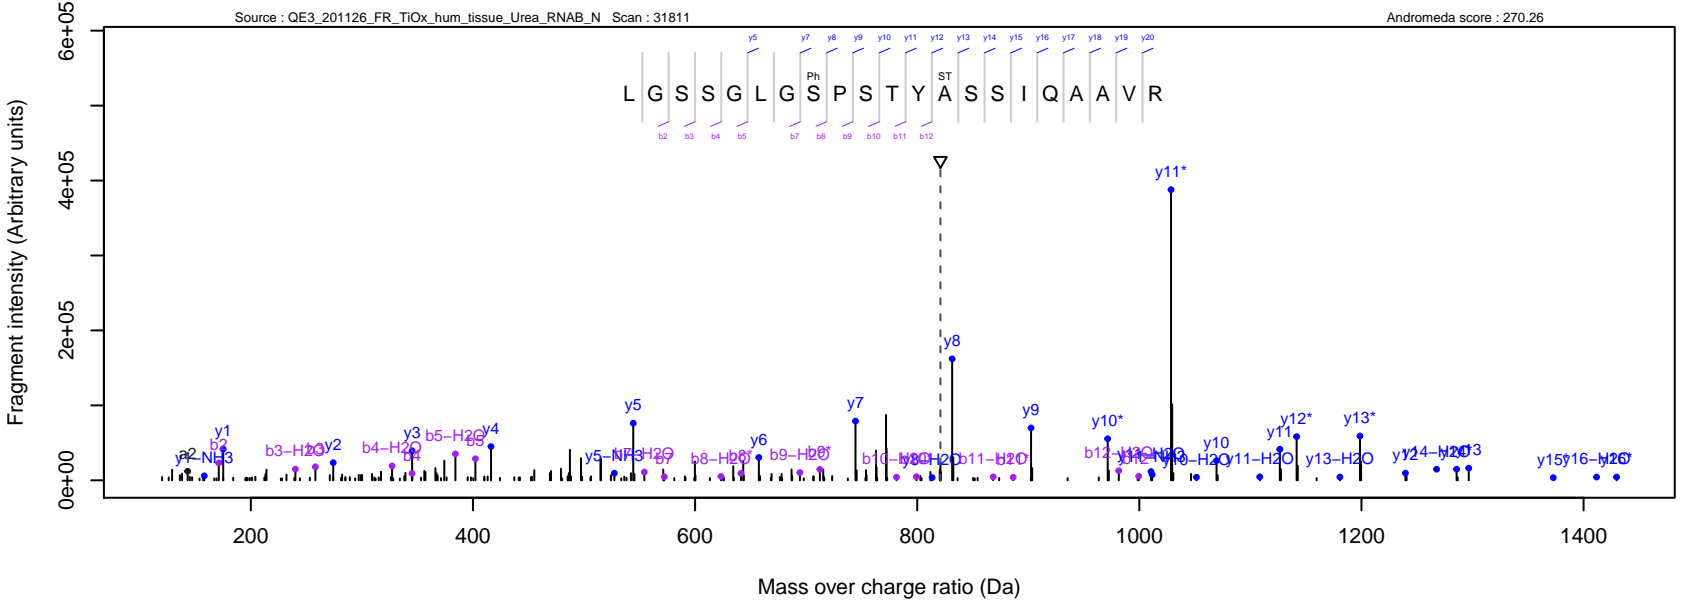

SLVESVSS(Phospho (STY))PNKESNEEQVWHFLGK-3+

Source : QE3\_201126\_FR\_TIOx\_hum\_tissue\_Urea\_RNAB\_H Scan : 46589

Andromeda score : 270.2

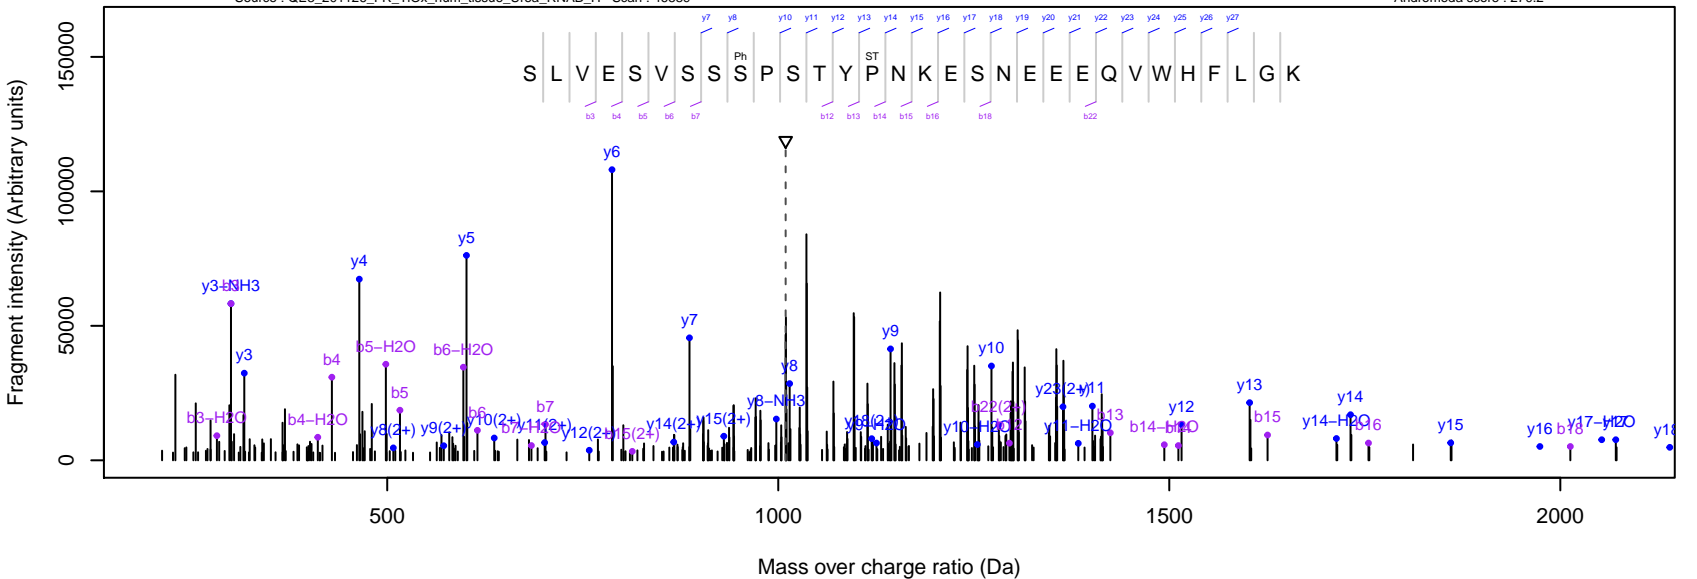

VIHDFNFGIVELMTTVHAITAT(Phospho (STY))QKTVDGPSGK-4+

Source : QE3\_201126\_FR\_TIOx\_hum\_tissue\_Urea\_RNAB\_H Scan : 53996

Andromeda score : 270.02

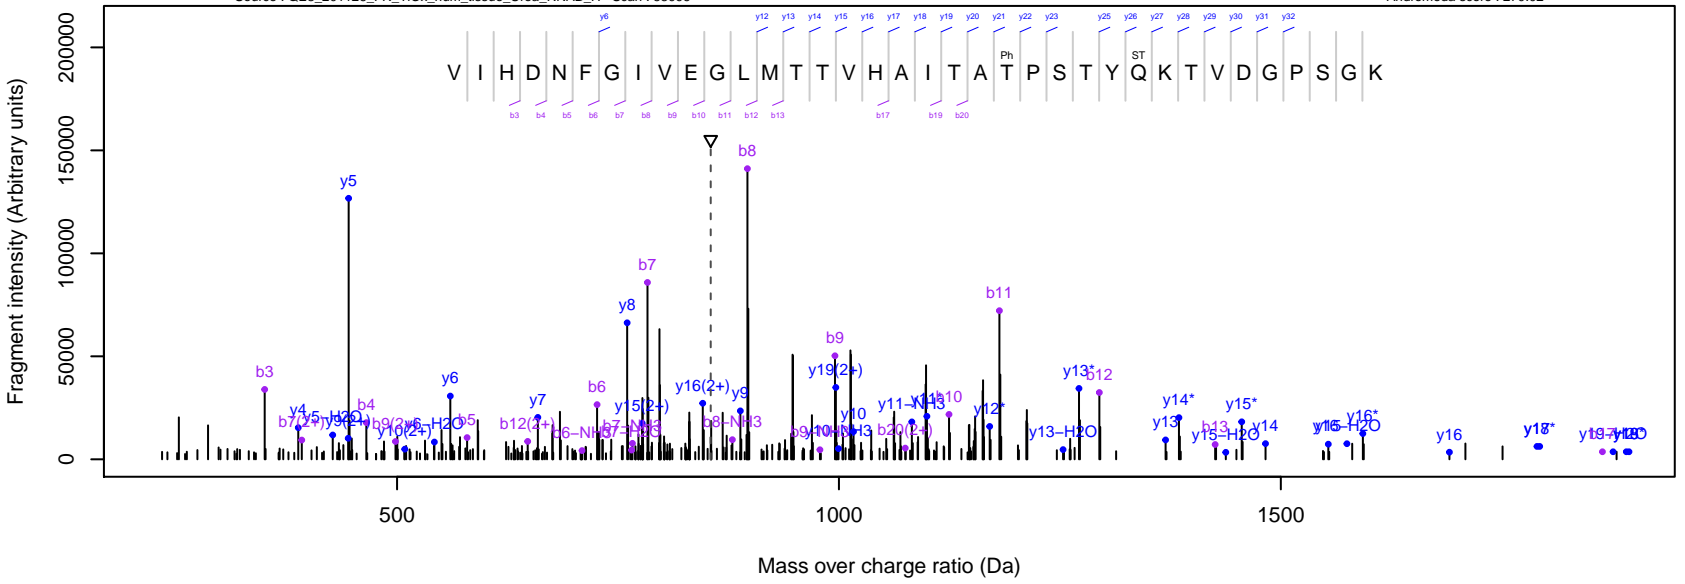

LCDFGSASHVADNDITPY(LVSR)-3+

Source : QE3\_201126\_FR\_TIOx\_hum\_tissue\_Urea\_RNAB\_B Scan : 40041

Andromeda score : 269.83

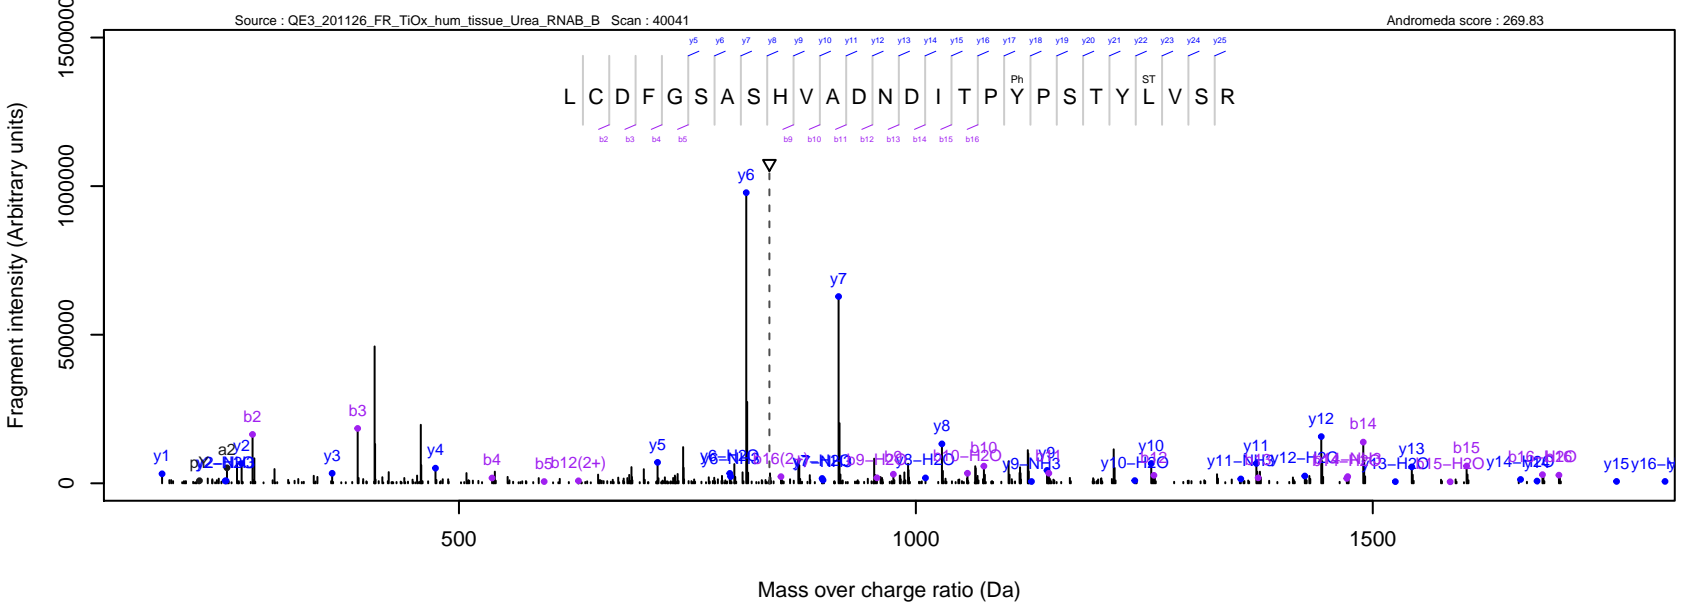

ASS(Phospho (STY))VTTFTEPNTCPR-2+

Source : QE3\_201126\_FR\_TIOx\_hum\_tissue\_Urea\_RNAB\_N Scan : 22212

Andromeda score : 269.78

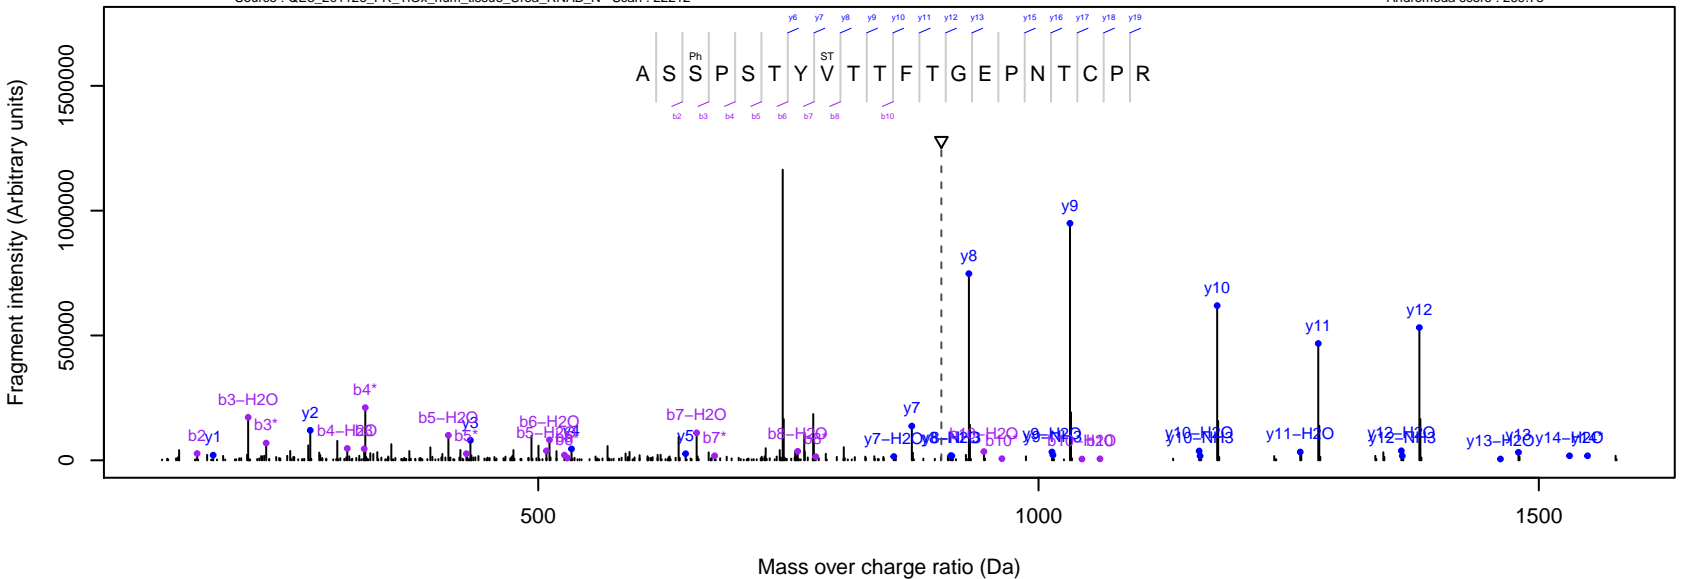

QIDSS(Phospho (STY))PVGGTDETTVSQNYR-2+

Source : QE3\_201126\_FR\_TIOx\_hum\_tissue\_Urea\_RNAB\_H Scan : 23245

Andromeda score : 269.71

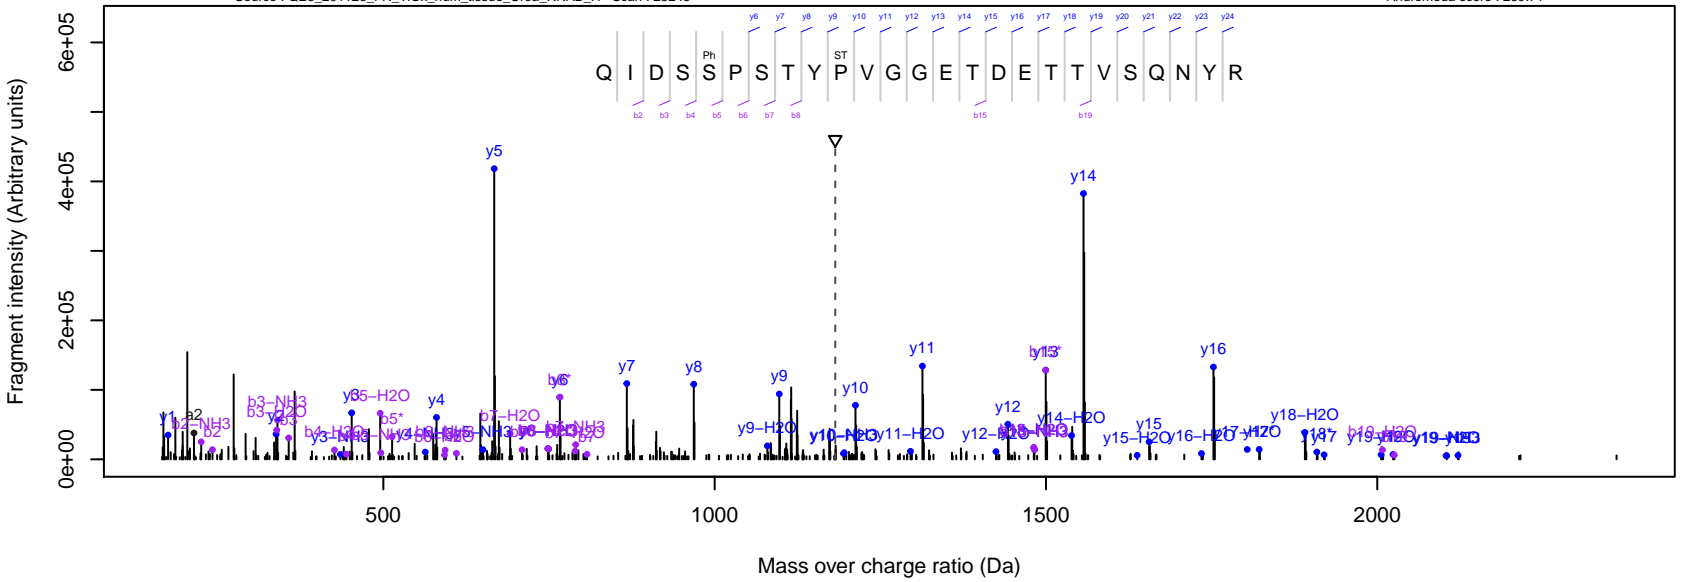

RKPVLPALTINPTIAEGPS(Phospho (STY))PTSEGASEANLVDLQK-3+

Source : QE3\_201126\_FR\_TIOx\_hum\_tissue\_Urea\_RNAB\_N Scan : 49218

Andromeda score : 269.25

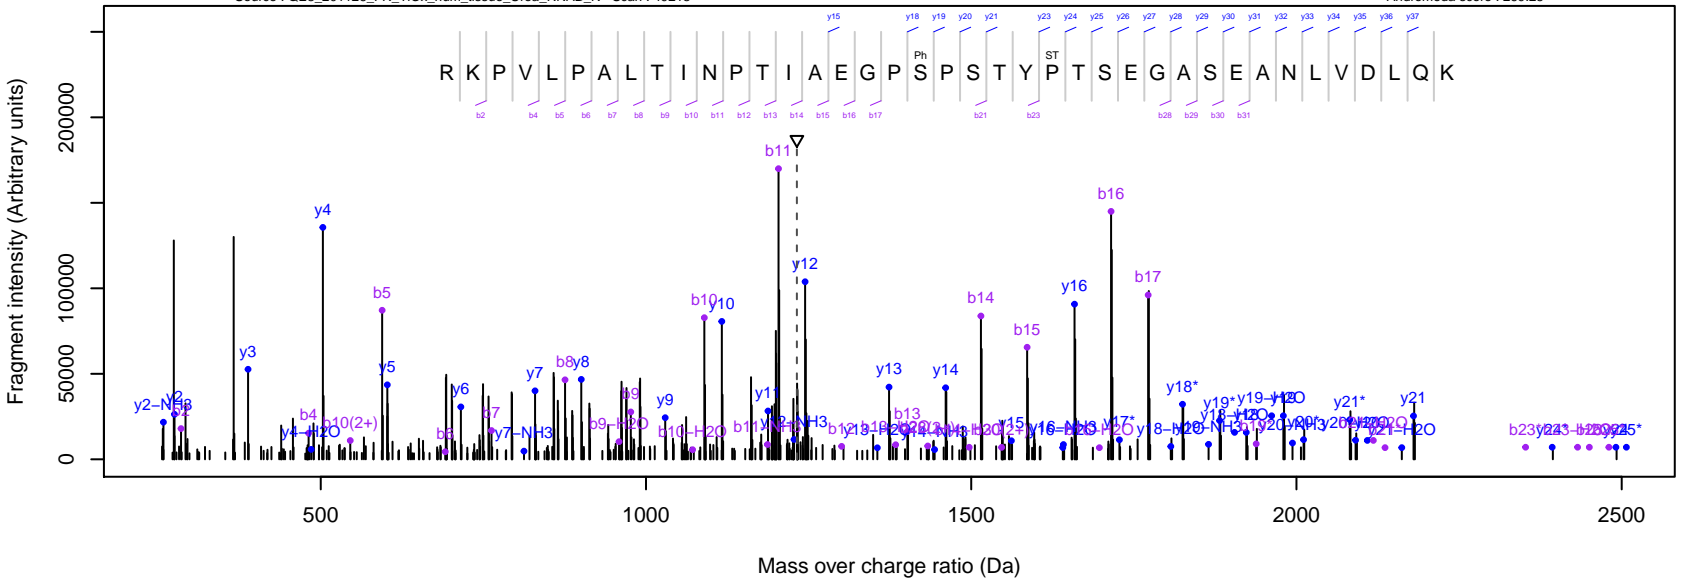

(Acetyl (Protein N-term))ADGDS(Phospho (STY))GSEGGGGPCGFQPASR-3+

Source : QE3\_201126\_FR\_TIOx\_hum\_tissue\_Urea\_RNAB\_N Scan : 20393

Andromeda score : 269.05

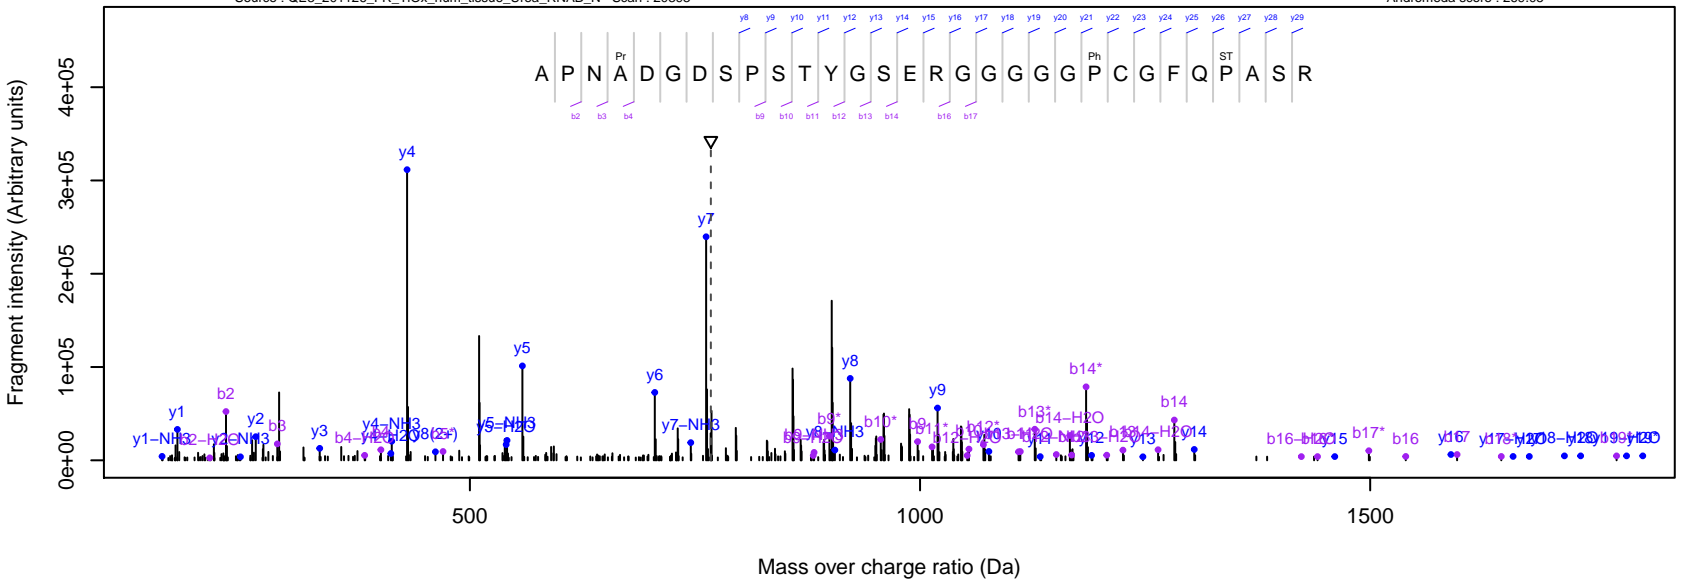





SPSGGAAGPLLTPS(Phospho (STY))QLDGSRR-3+

Source : QE3\_201126\_FR\_TIOx\_hum\_tissue\_Urea\_RNAB\_N Scan : 24299

Andromeda score : 268.24

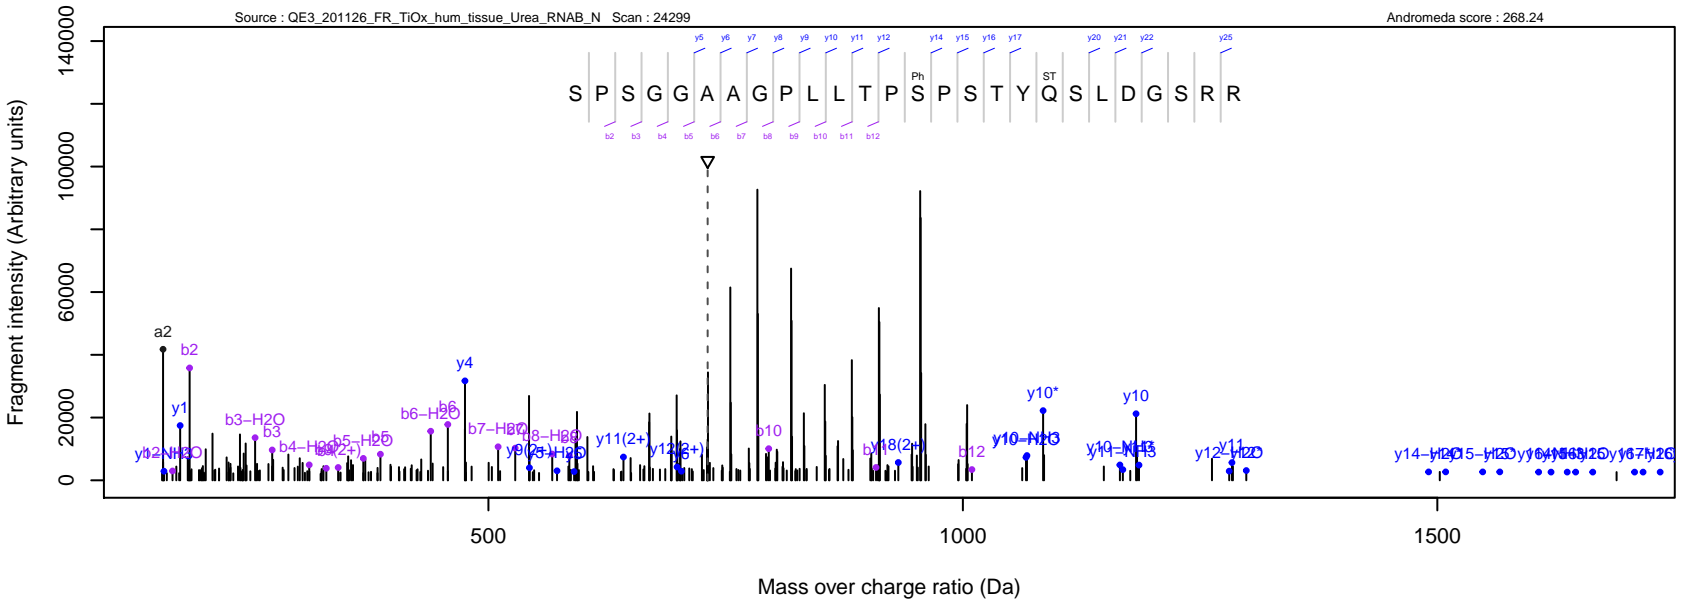

(Acetyl (Protein N-term))S(Phospho (STY))DQEAKPSTEDLGDKK-2+

Source : QE3\_201126\_FR\_TIOx\_hum\_tissue\_Urea\_RNAB\_H Scan : 10014

Andromeda score : 268.12

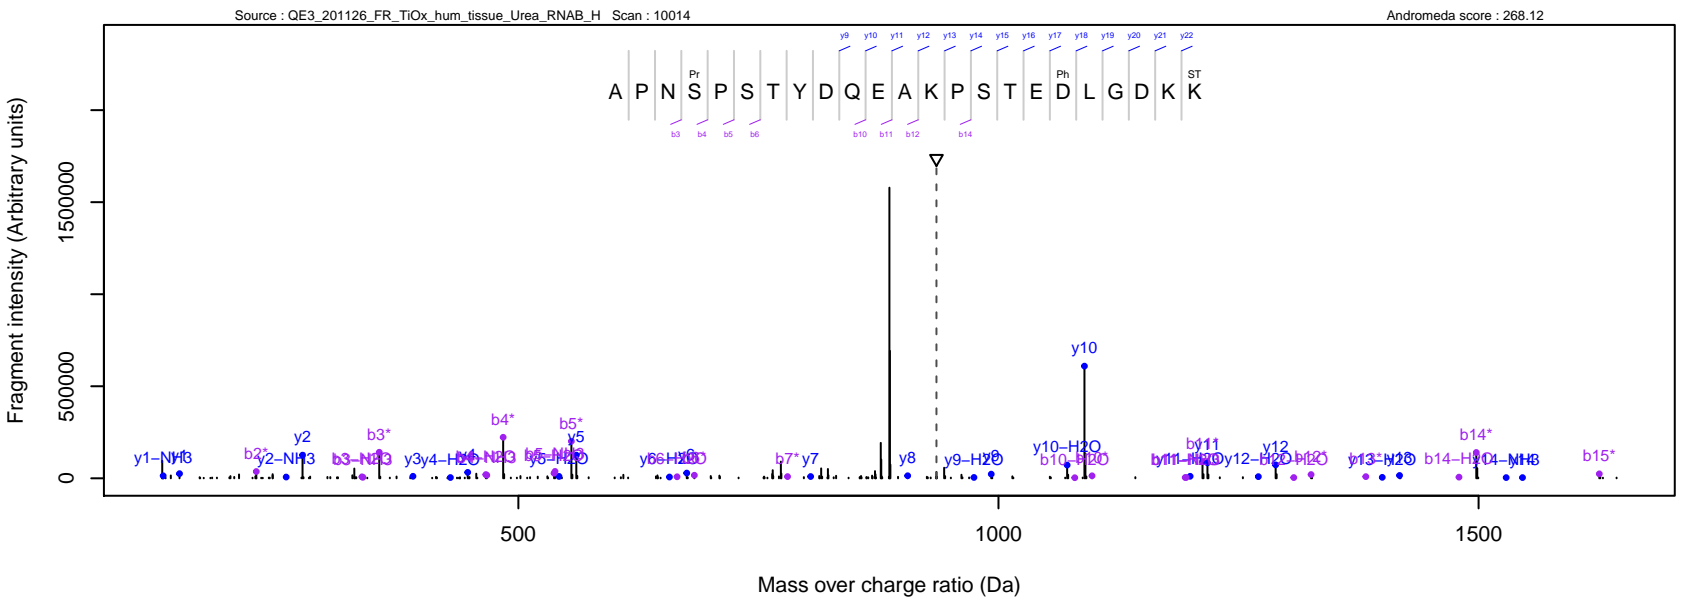

RSS(Phospho (STY))DTSGSPATPLK-2+

Source : QE3\_201126\_FR\_TIOx\_hum\_tissue\_Urea\_RNAB\_N Scan : 7867

Andromeda score : 267.92

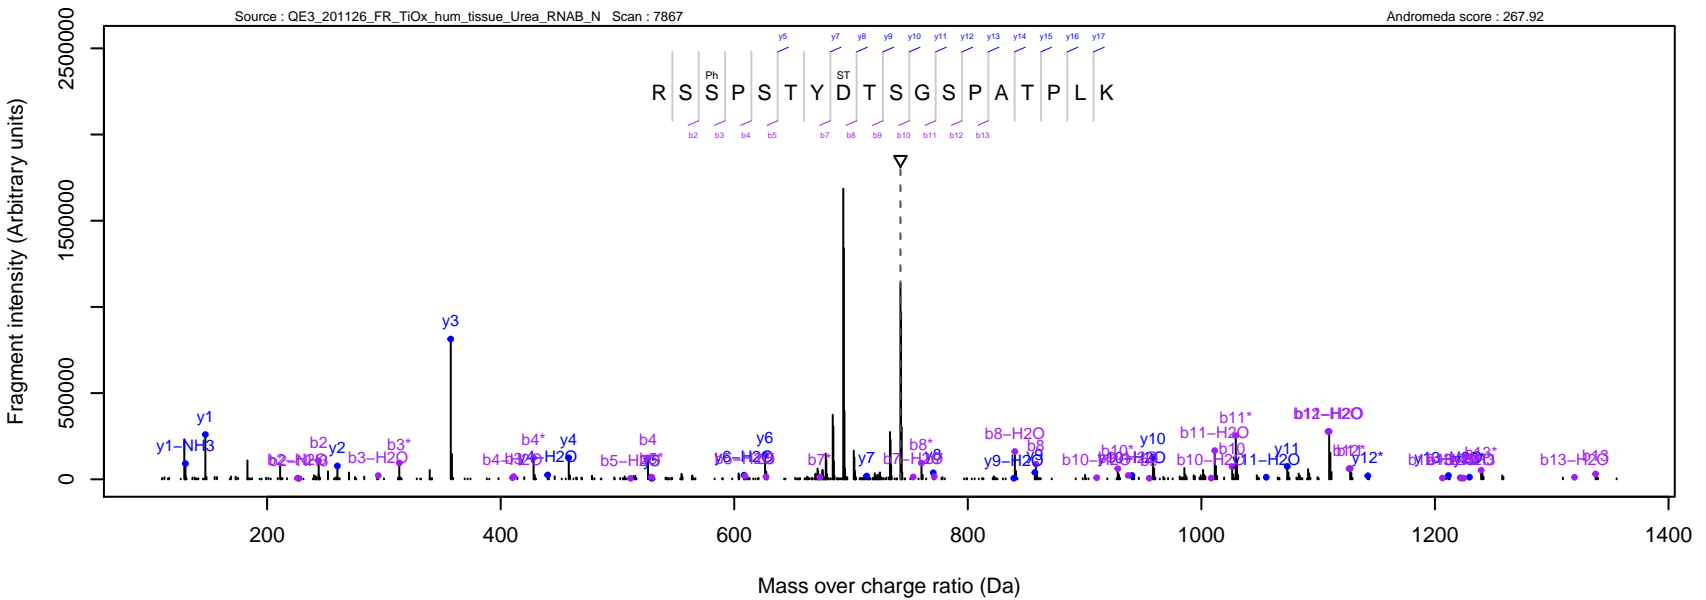



SHS(Phospho (STY))GPAGSFNKPAIR-3+

Source : QE3\_201126\_FR\_TiOx\_hum\_tissue\_Urea\_RNAB\_H Scan : 10613

Andromeda score : 267.46

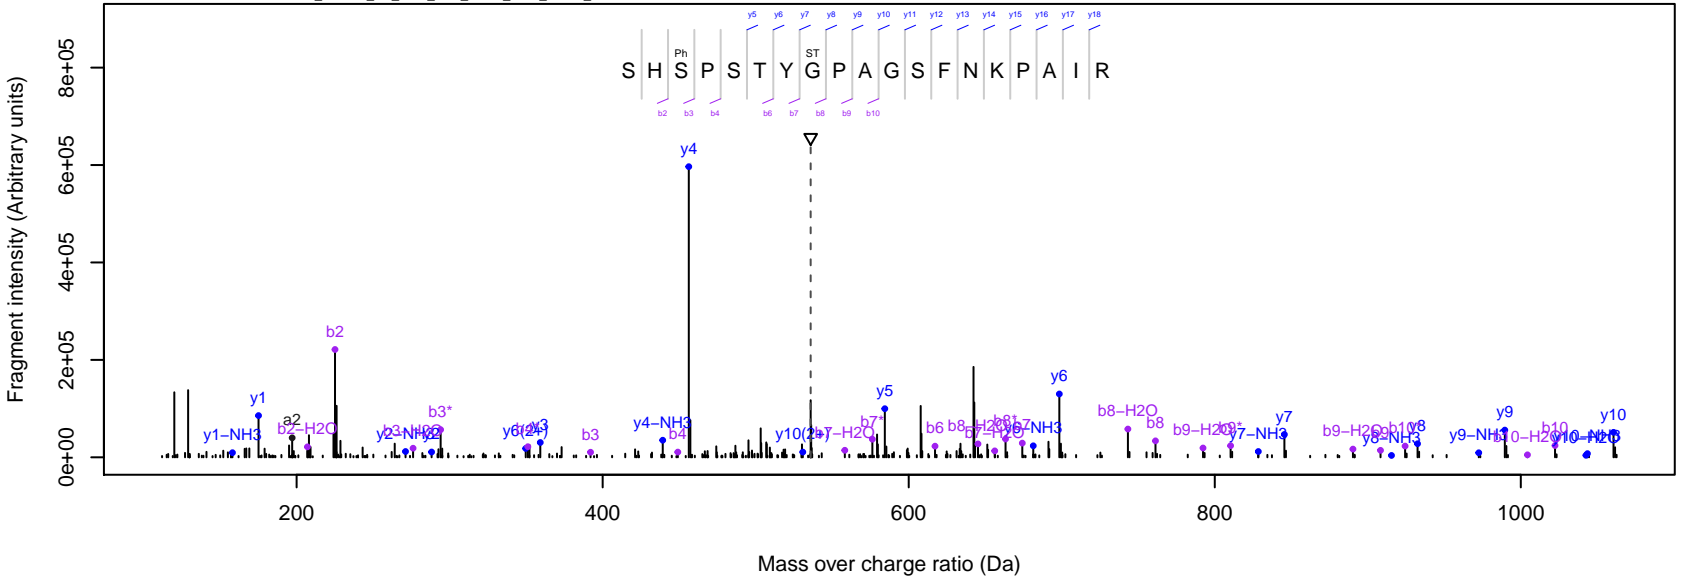

(Acetyl (Protein N-term))ADELS(Phospho (STY))EKQVYDAHTK-2+

Source : QE3\_201126\_FR\_TiOx\_hum\_tissue\_Urea\_RNAB\_N Scan : 19517

Andromeda score : 267.38

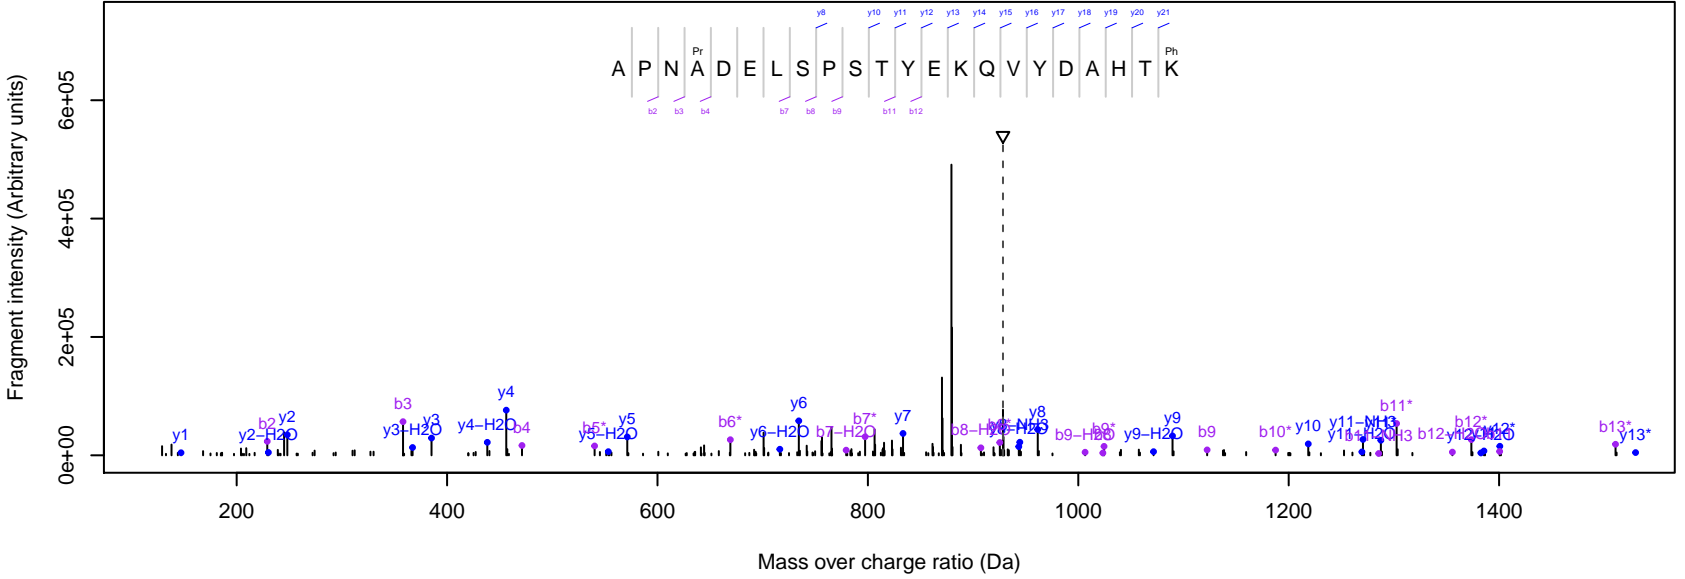

KQS(Phospho (STY))FDDNDS(Phospho (STY))EELDKDSK-2+

Source : QE3\_201126\_FR\_TiOx\_hum\_tissue\_Urea\_RNAB\_B Scan : 12335

Andromeda score : 267.24

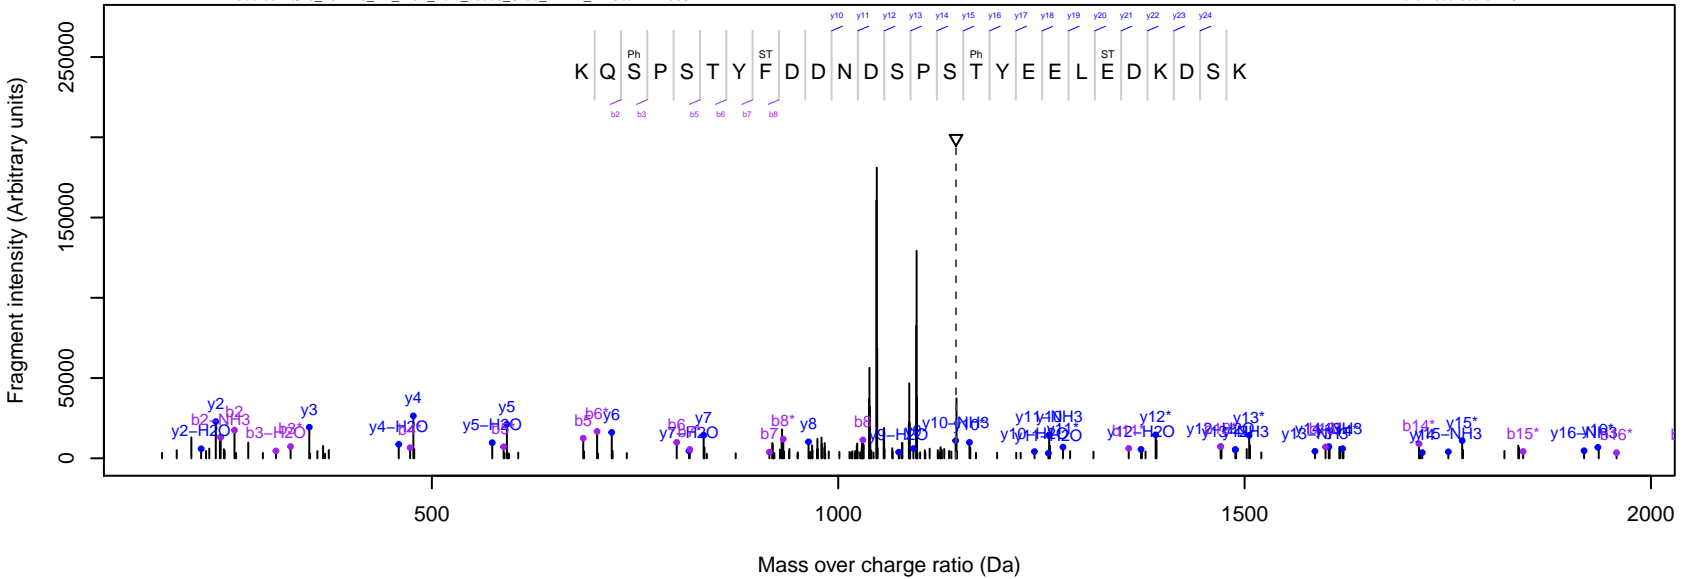

GS(Phospho (STY))PHYFSPFRPY-2+

Source : QE3\_201126\_FR\_TiOx\_hum\_tissue\_Urea\_RNAB\_N Scan : 38192

Andromeda score : 266.93

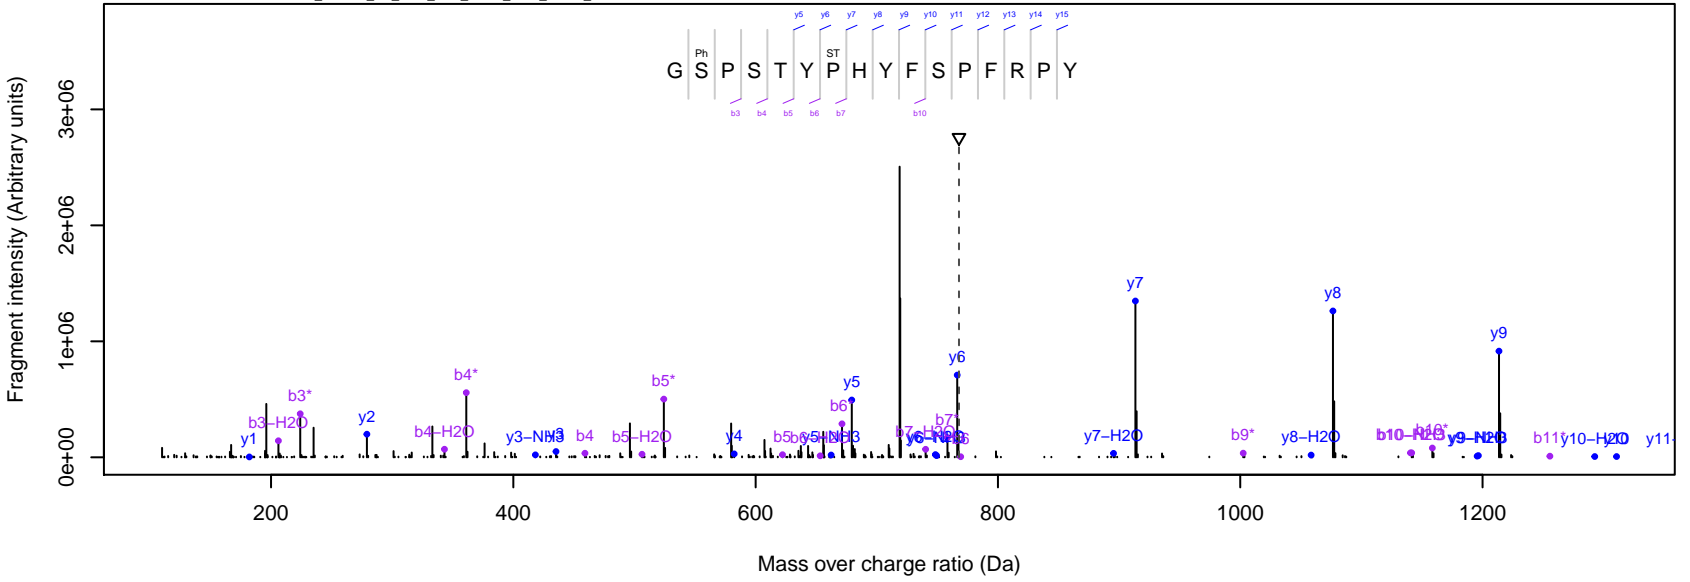

SKS(Phospho (STY))DSYTLDPDLR-2+

Source : QE3\_201126\_FR\_TiOx\_hum\_tissue\_Urea\_RNAB\_N Scan : 24772

Andromeda score : 266.71

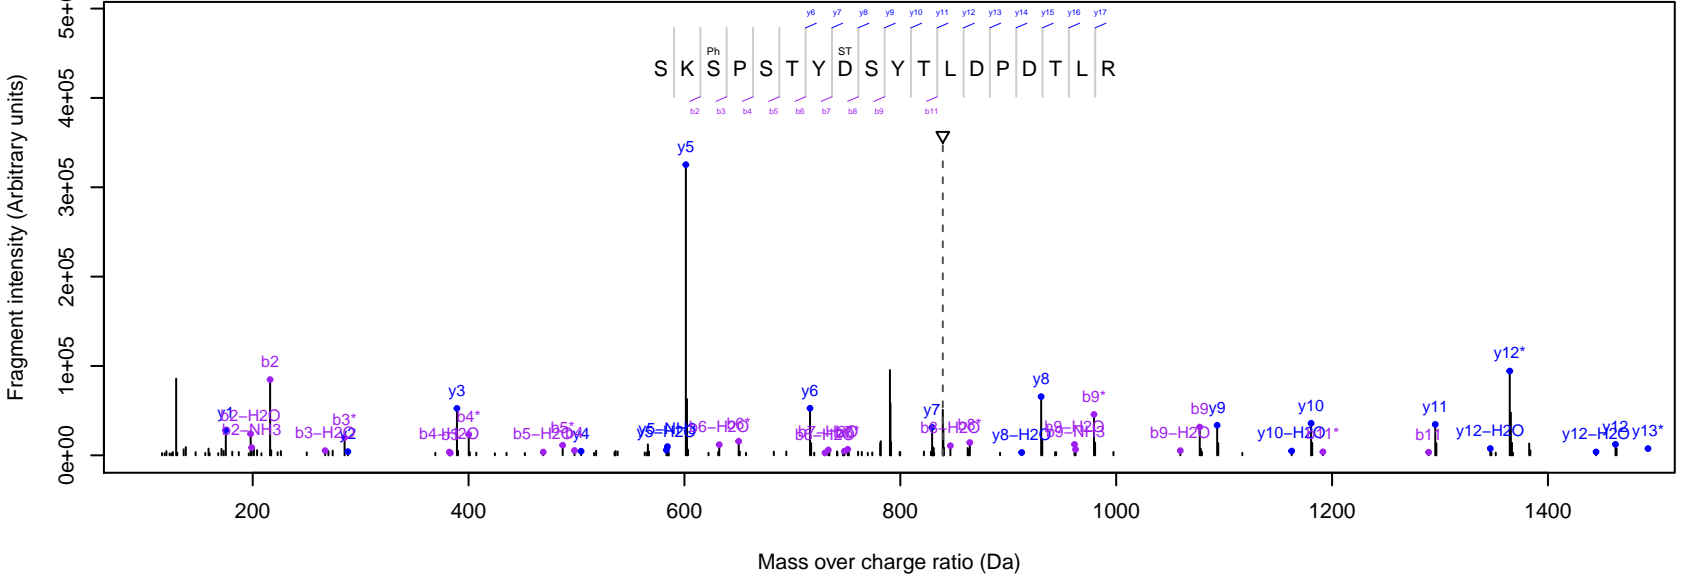

IADPEHDHTGLTEY(Phospho (STY))VATR-3+

Source : QE3\_201126\_FR\_TiOx\_hum\_tissue\_Urea\_RNAB\_N Scan : 27805

Andromeda score : 266.7

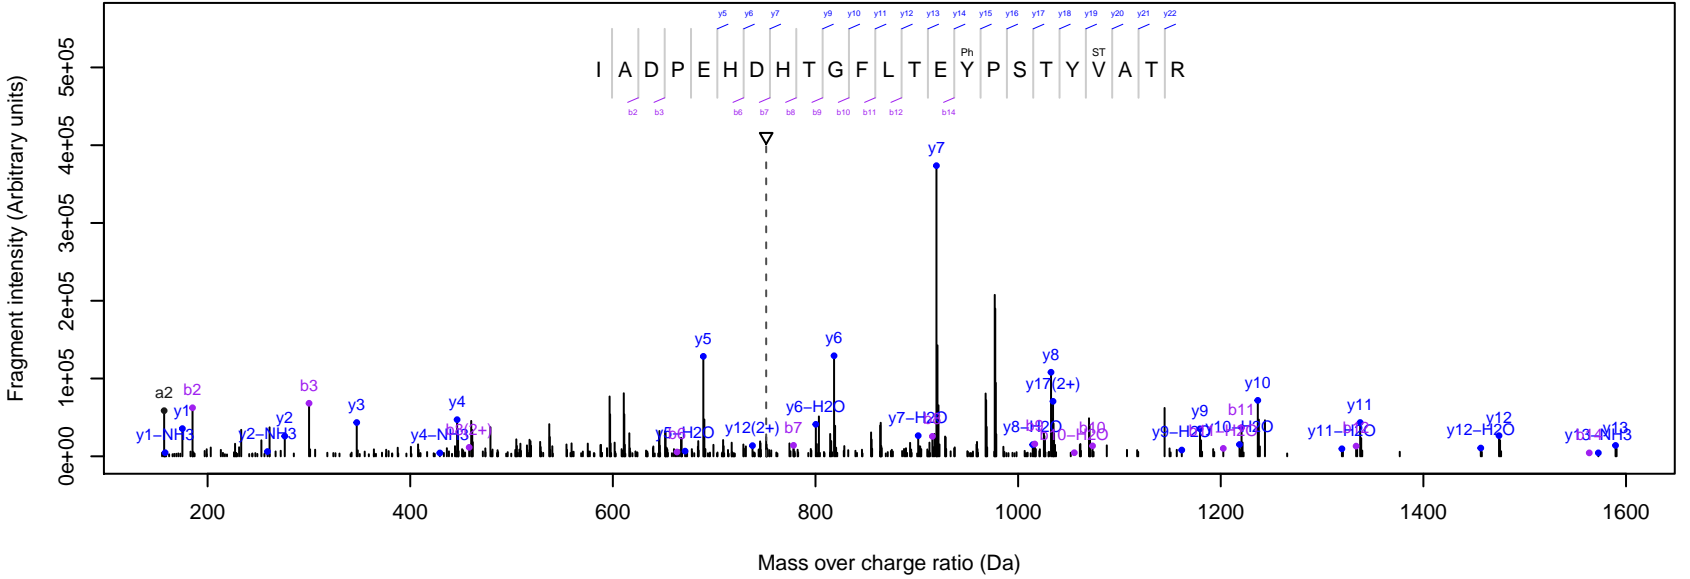

VSALEEDMDDVES(Phospho (STY))S(Phospho (STY))EEEEEEDEKLER-3+

Source : QE3\_201126\_FR\_TIOx\_hum\_tissue\_Urea\_RNAB\_N Scan : 38193

Andromeda score : 266.57

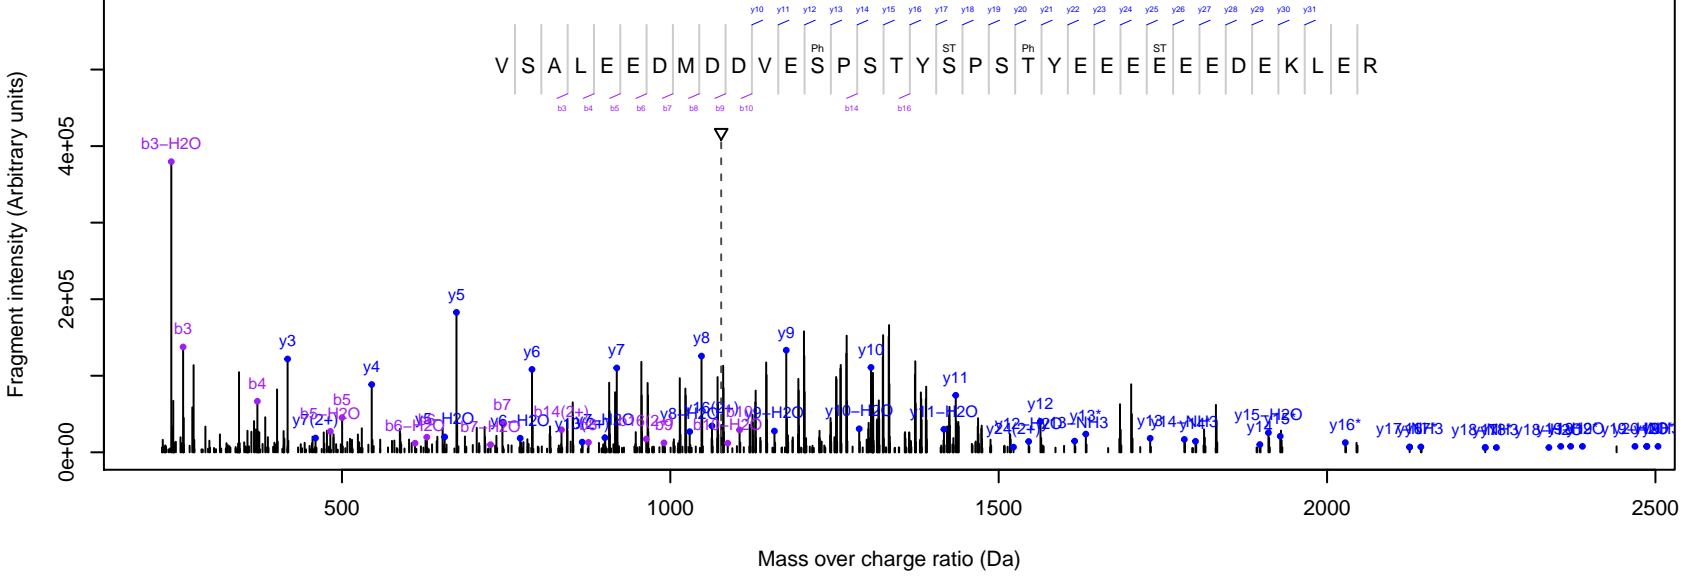

EKEIS(Phospho (STY))DDEAEKGEK-3+

Source : QE3\_201126\_FR\_TIOx\_hum\_tissue\_Urea\_RNAB\_H Scan : 6259

Andromeda score : 265.96

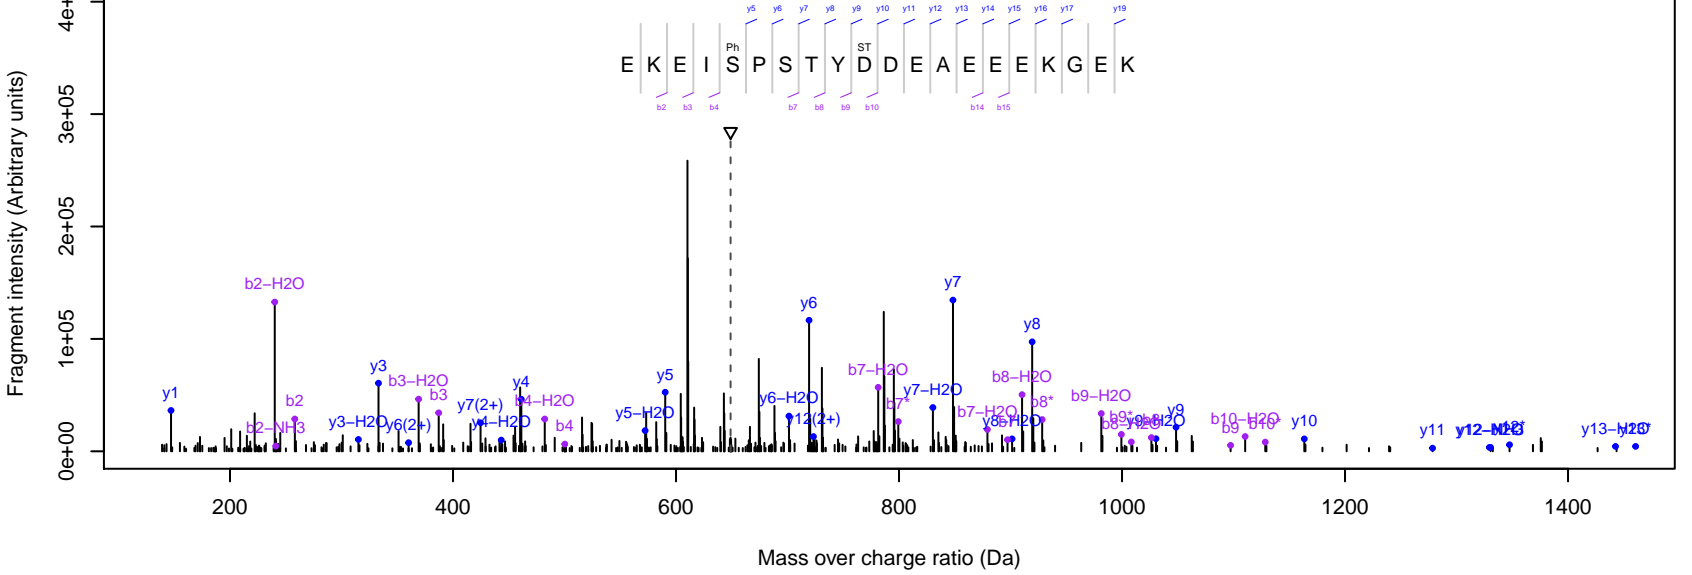

AVAEDNGSIGEETDSS(Phospho (STY))PGR-2+

Source : QE3\_201126\_FR\_TIOx\_hum\_tissue\_Urea\_RNAB\_N Scan : 15941

Andromeda score : 265.85

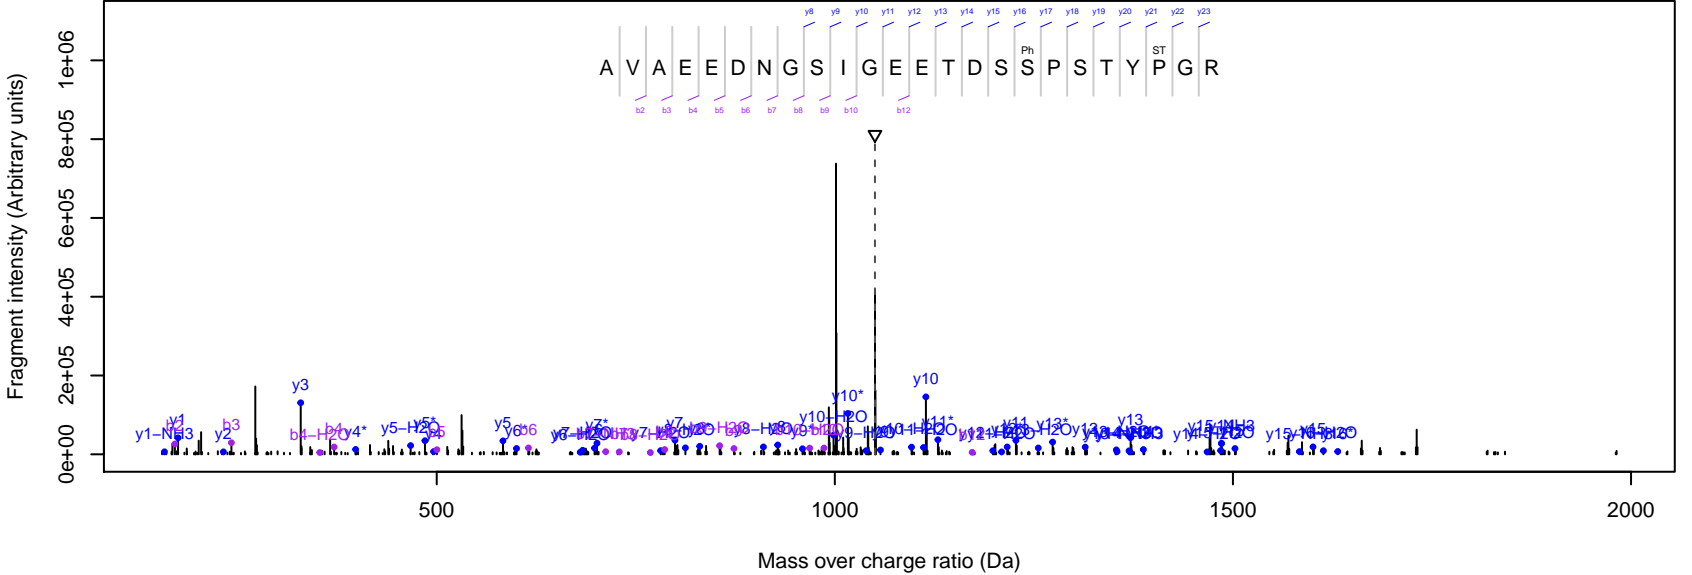

RGS(Phospho (STY))FDATGSGFSM(Oxidation (M))TFSSSSYSYSSGGR-3+

Source : QE3\_201126\_FR\_TIOx\_hum\_tissue\_Urea\_RNAB\_N Scan : 35004

Andromeda score : 265.72

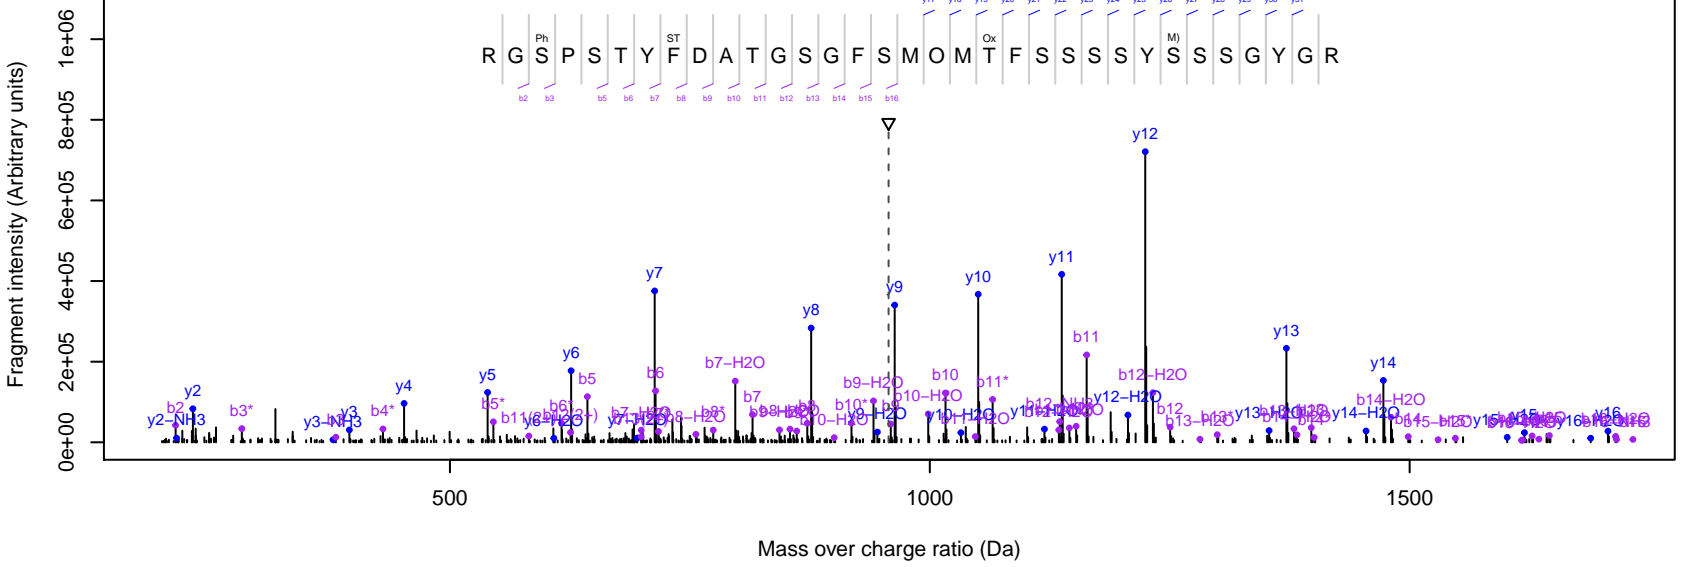

GNAEGS(Phospho (STY))S(Phospho (STY))DEEGLVIDEPAK-2+

Source : QE3\_201126\_FR\_TIOx\_hum\_tissue\_Urea\_RNAB\_N Scan : 26201

Andromeda score : 265.54

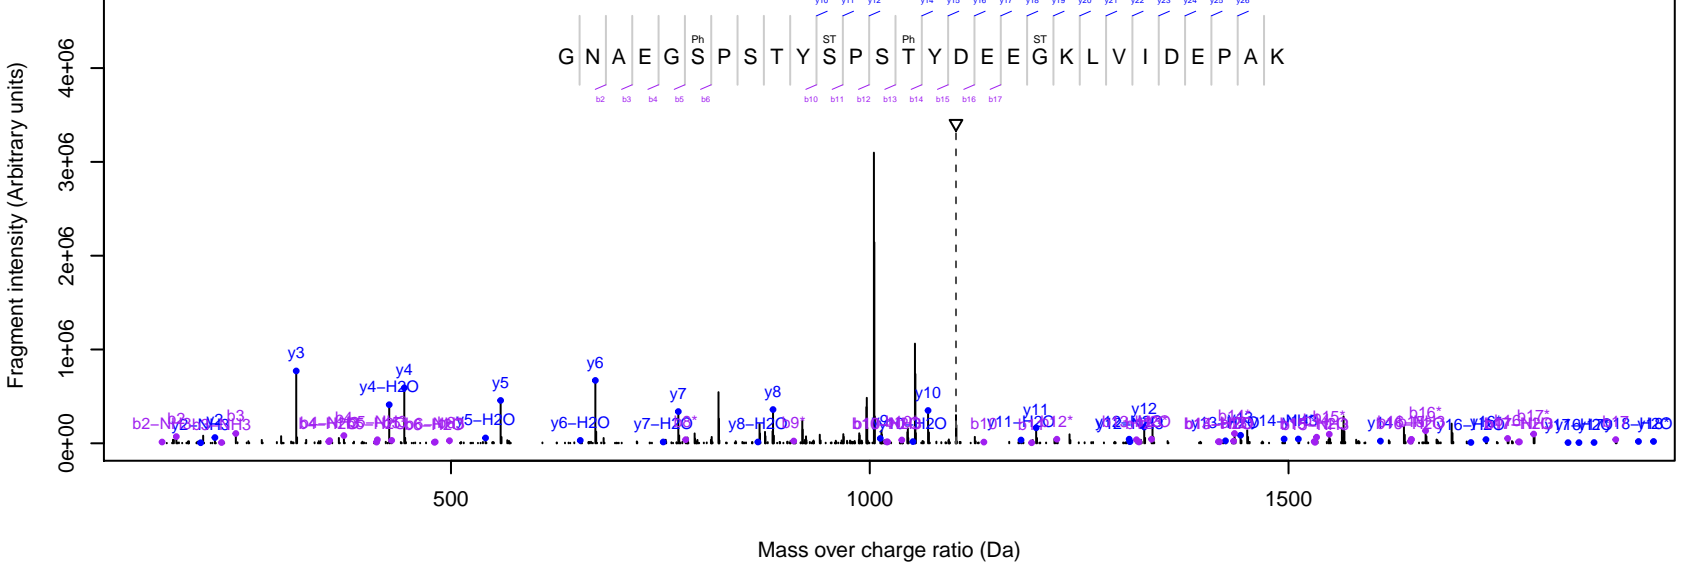

SRPTSEGS(Phospho (STY))DIESTEPQK-2+

Source : QE3\_201126\_FR\_TIOx\_hum\_tissue\_Urea\_RNAB\_N Scan : 8915

Andromeda score : 265.54

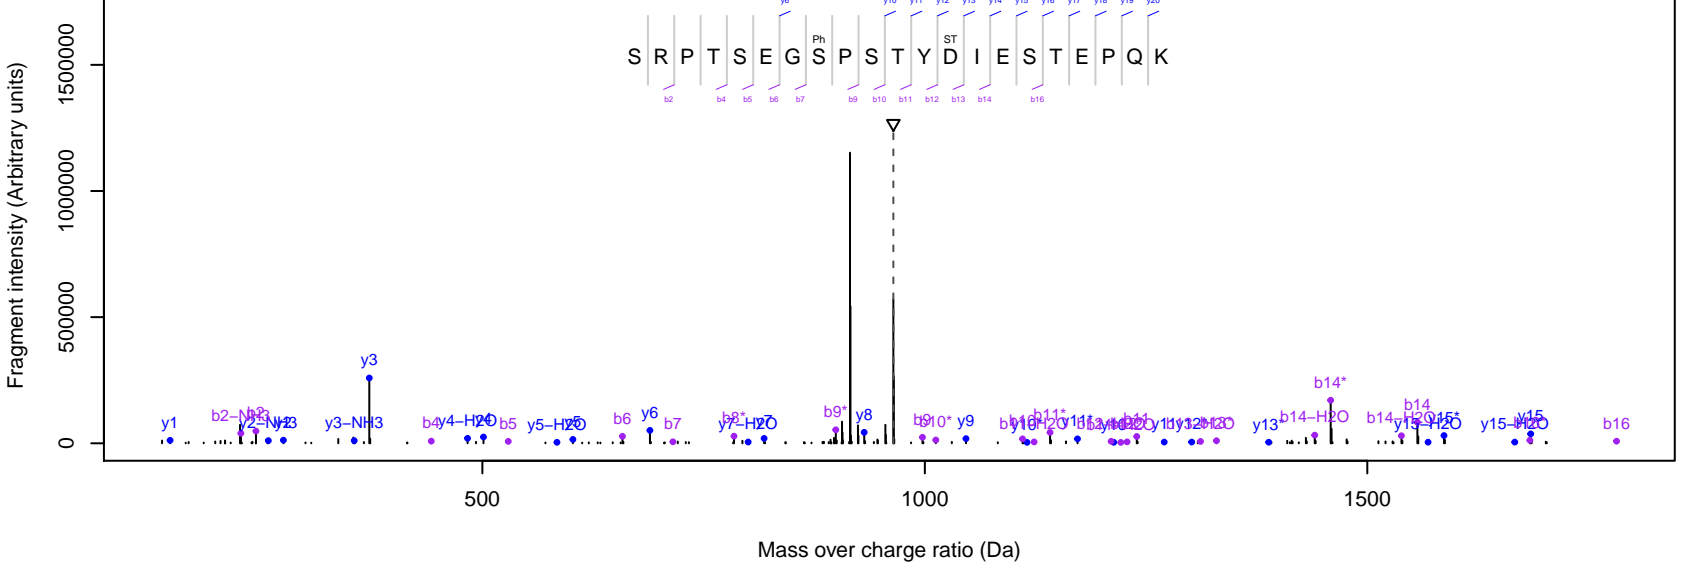

SSSQPSSCCS(Phospho (STY))DPSKPGGNVEGATQSLAEQMR-3+

Source : QE3\_201126\_FR\_TIOx\_hum\_tissue\_Urea\_RNAB\_H Scan : 28384

Andromeda score : 265.82

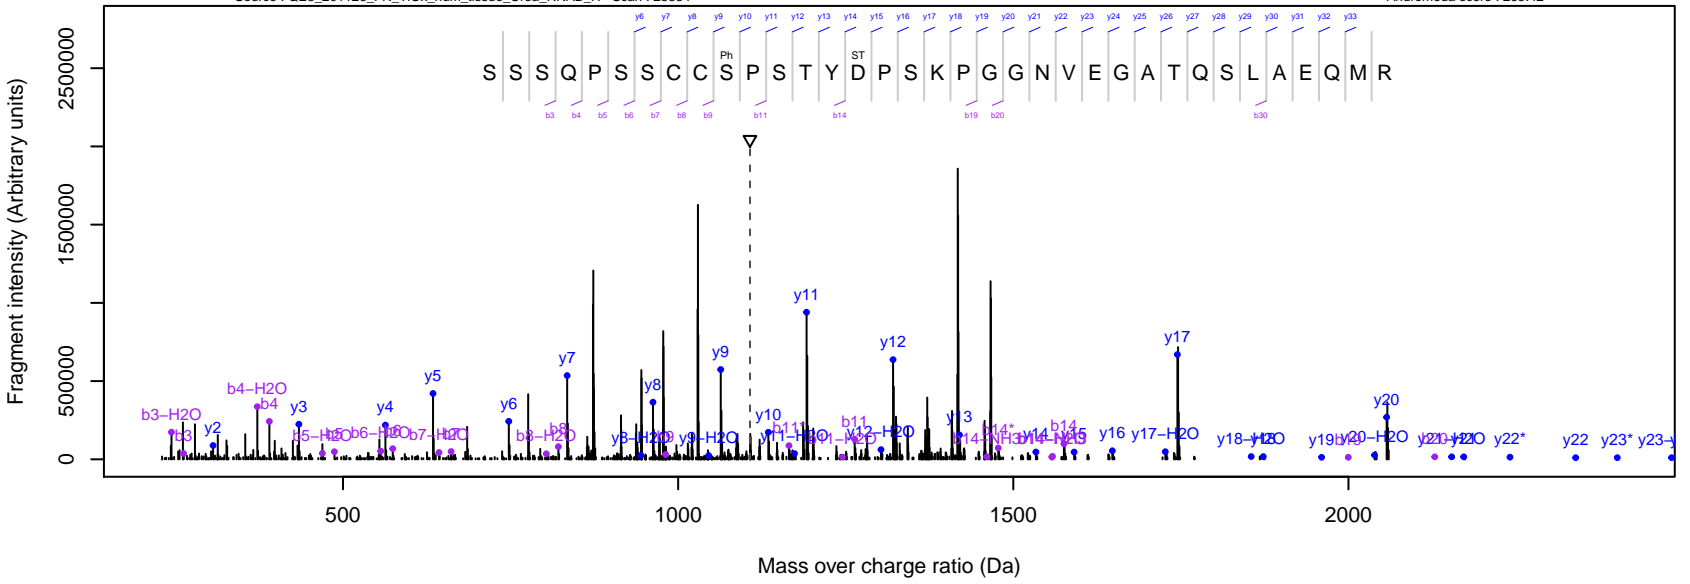

LNGGENVS(Phospho (STY))EDEAQSSNQR-2+

Source : QE3\_201126\_FR\_TIOx\_hum\_tissue\_Urea\_RNAB\_H Scan : 14532

Andromeda score : 264.83

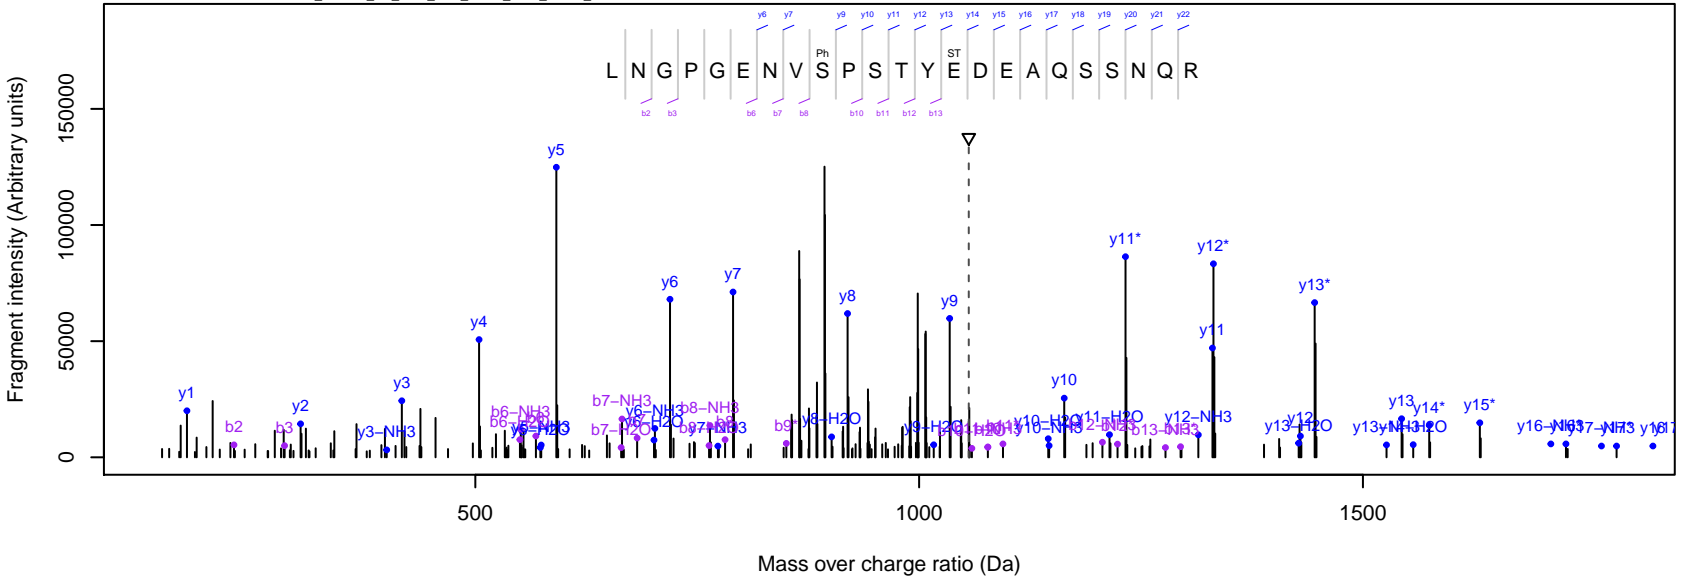

FLENGS(Phospho (STY))QEDLLHGNGPSTYLAASNSTSA PNWK-3+

Source : QE3\_201126\_FR\_TIOx\_hum\_tissue\_Urea\_RNAB\_B Scan : 45463

Andromeda score : 264.82

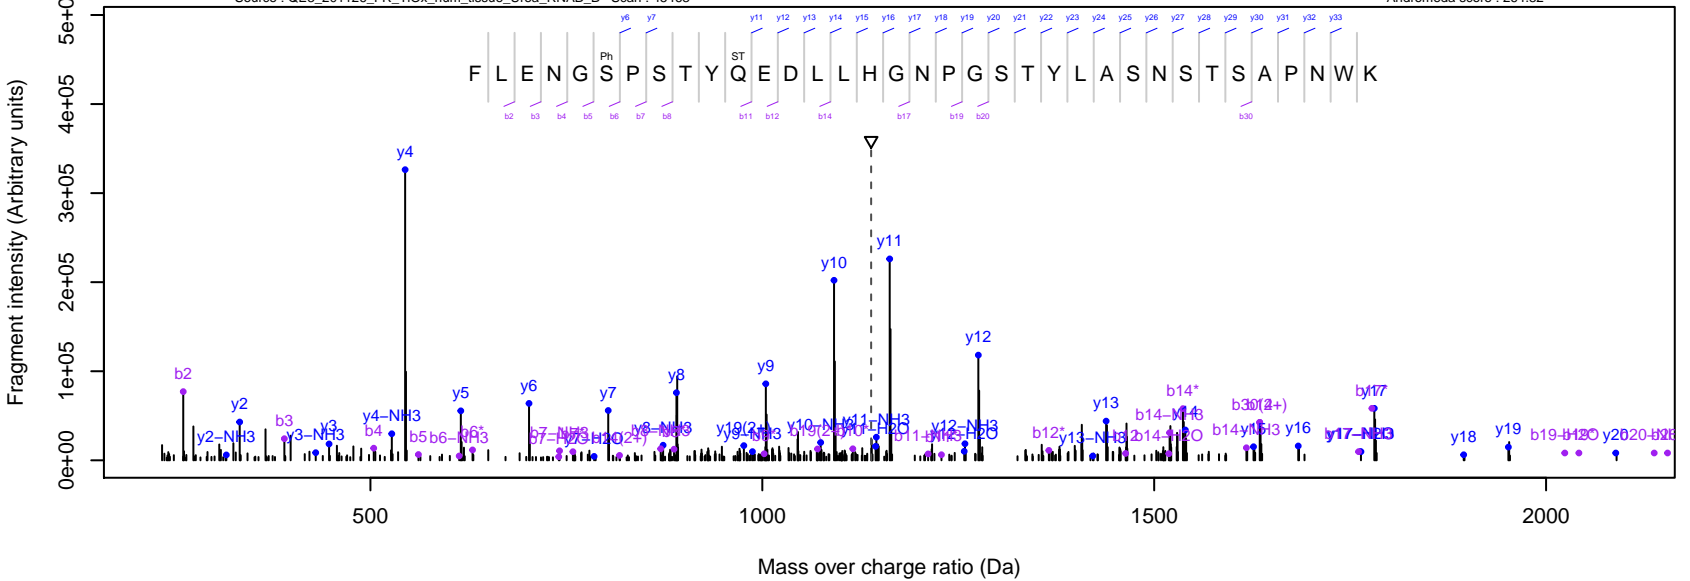



HRS(Phospho (STY))NS(Phospho (STY))FSDEREFSGPSTPTGTLEFEGGEVSLLEGGK-4+

Source : QE3\_201126\_FR\_TiOx\_hum\_tissue\_Urea\_RNAB\_H Scan : 40023

Andromeda score : 264.72

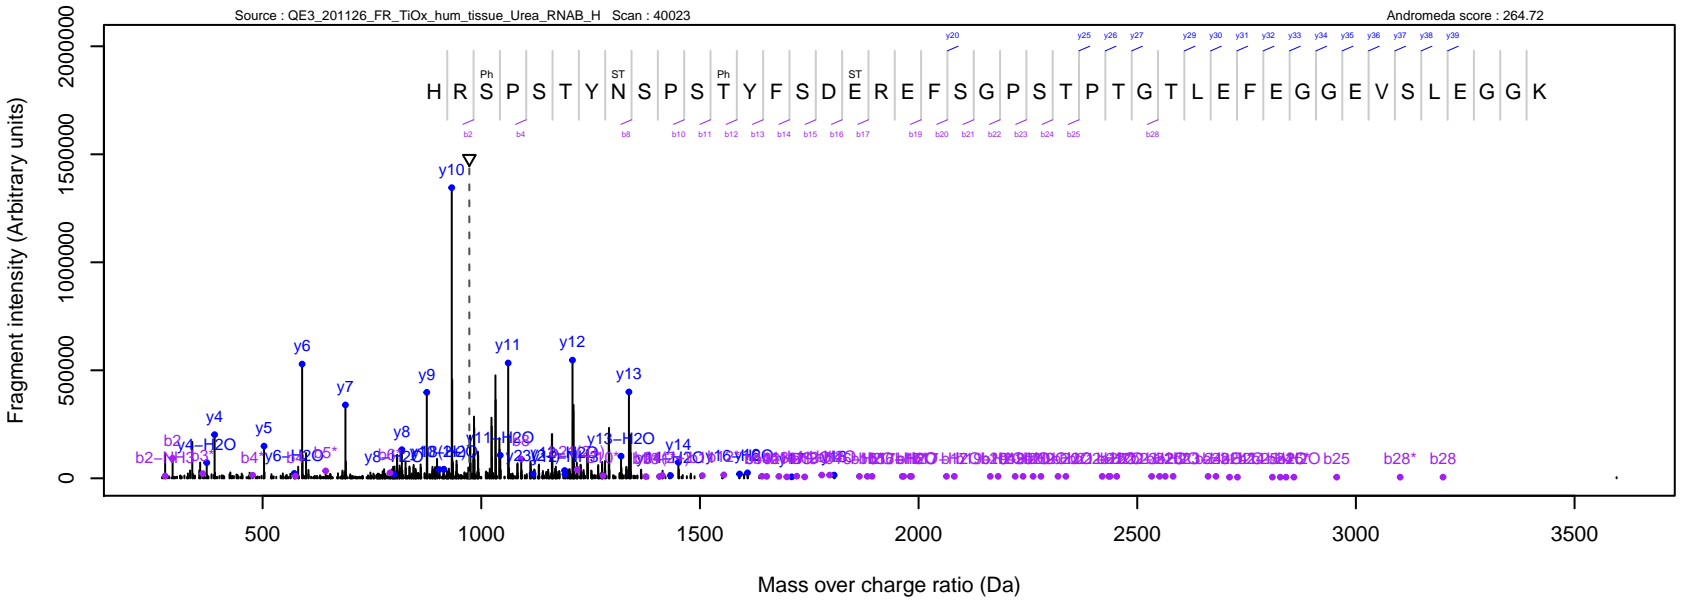

MLAESDES(Phospho (STY))GDEESVSQDKTELQNTLR-3+

Source : QE3\_201126\_FR\_TiOx\_hum\_tissue\_Urea\_RNAB\_N Scan : 31188

Andromeda score : 264.48

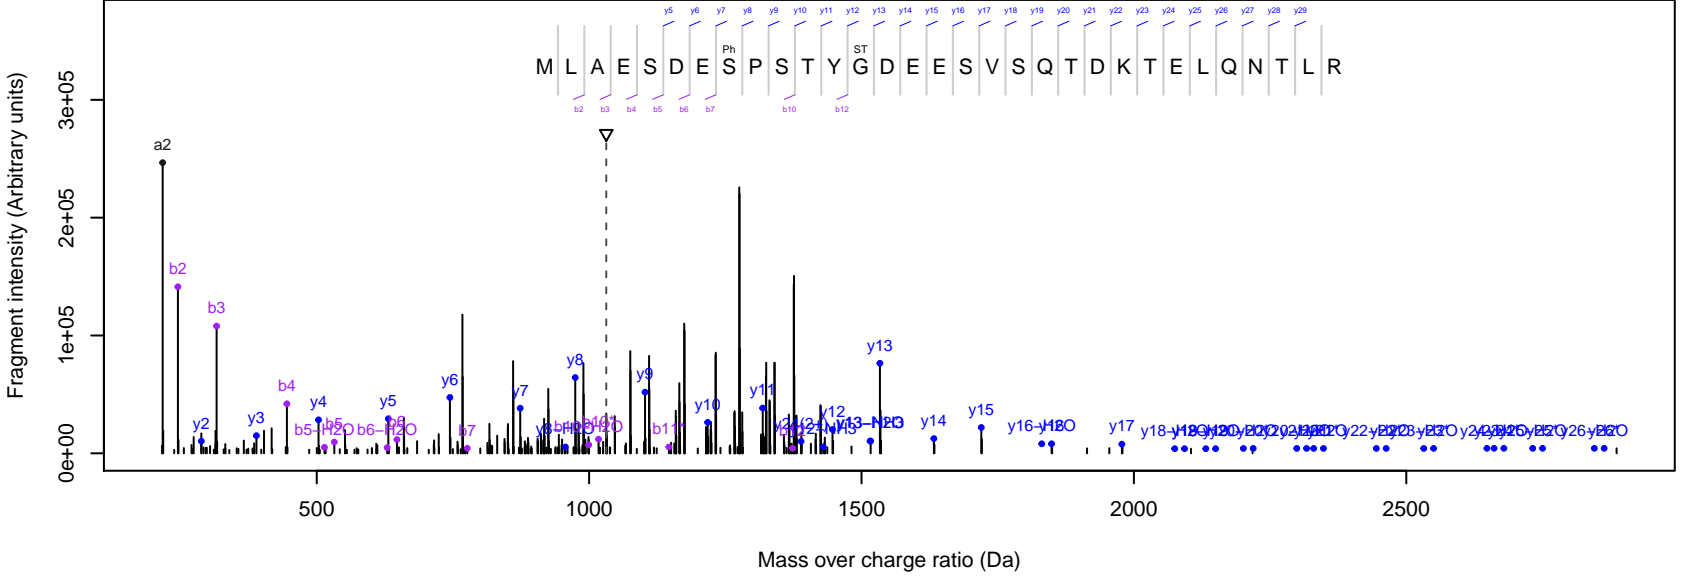

GHTDTEGRPPS(Phospho (STY))PPPTSTPEK-3+

Source : QE3\_201126\_FR\_TiOx\_hum\_tissue\_Urea\_RNAB\_B Scan : 8437

Andromeda score : 264.44

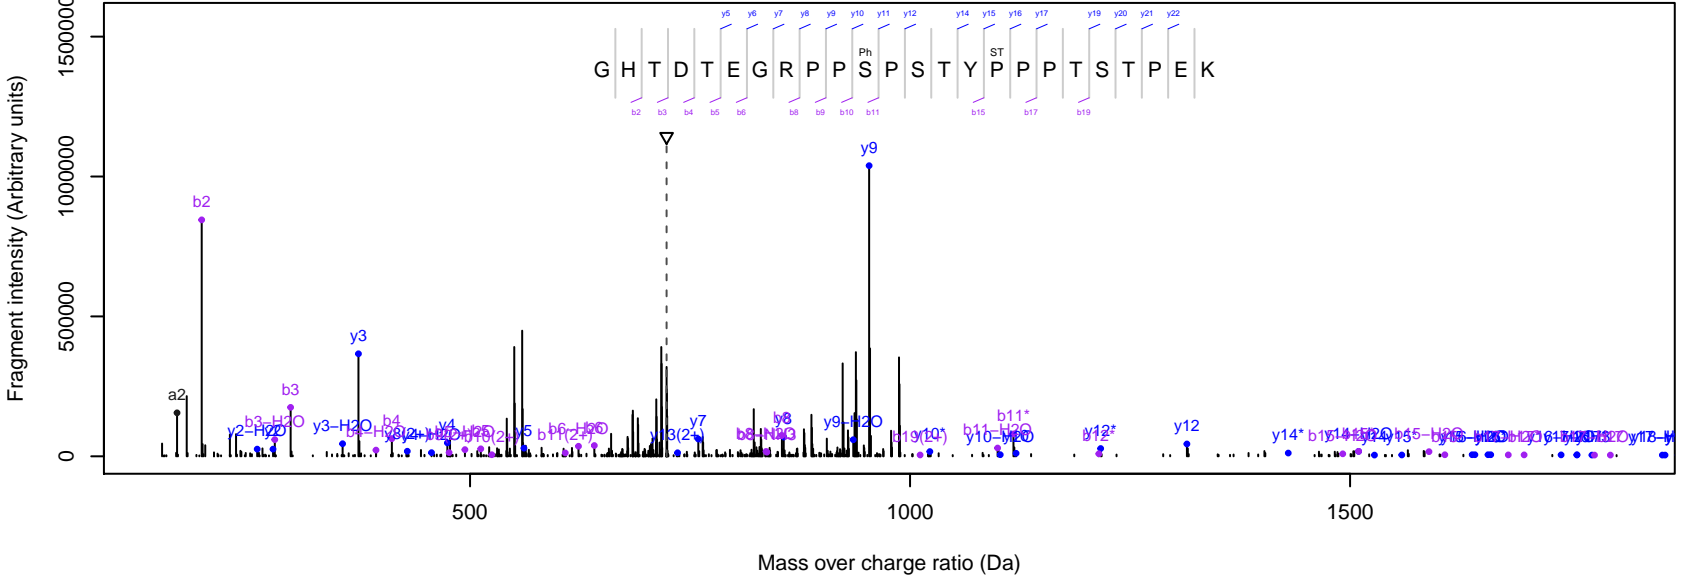

S(Phospho (STY))PTDSDVLSLSEDSGAK-2+

Source : QE3\_201126\_FR\_TiOx\_hum\_tissue\_Urea\_RNAB\_N Scan : 17612

Andromeda score : 264.03

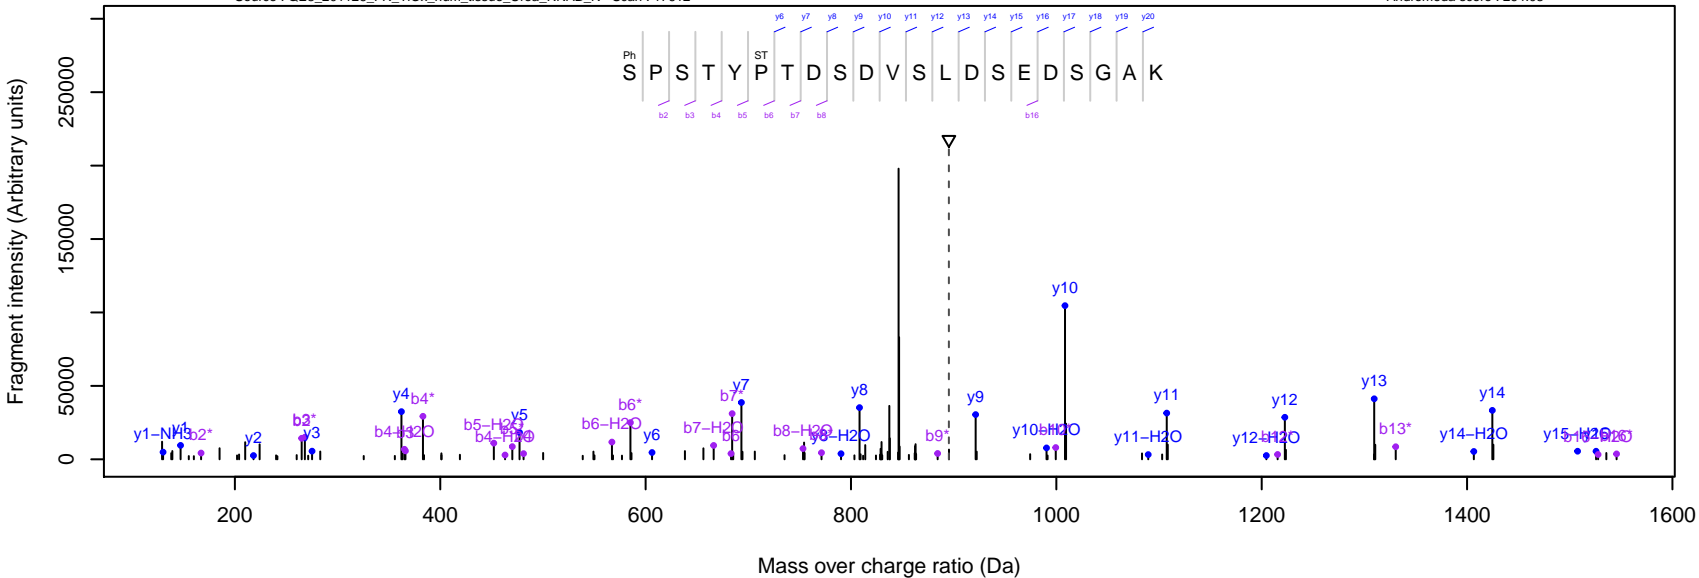

YSHSYLSDSPSTYDTEAK-2+

Source : QE3\_201126\_FR\_TiOx\_hum\_tissue\_Urea\_RNAB\_H Scan : 12810

Andromeda score : 263.75

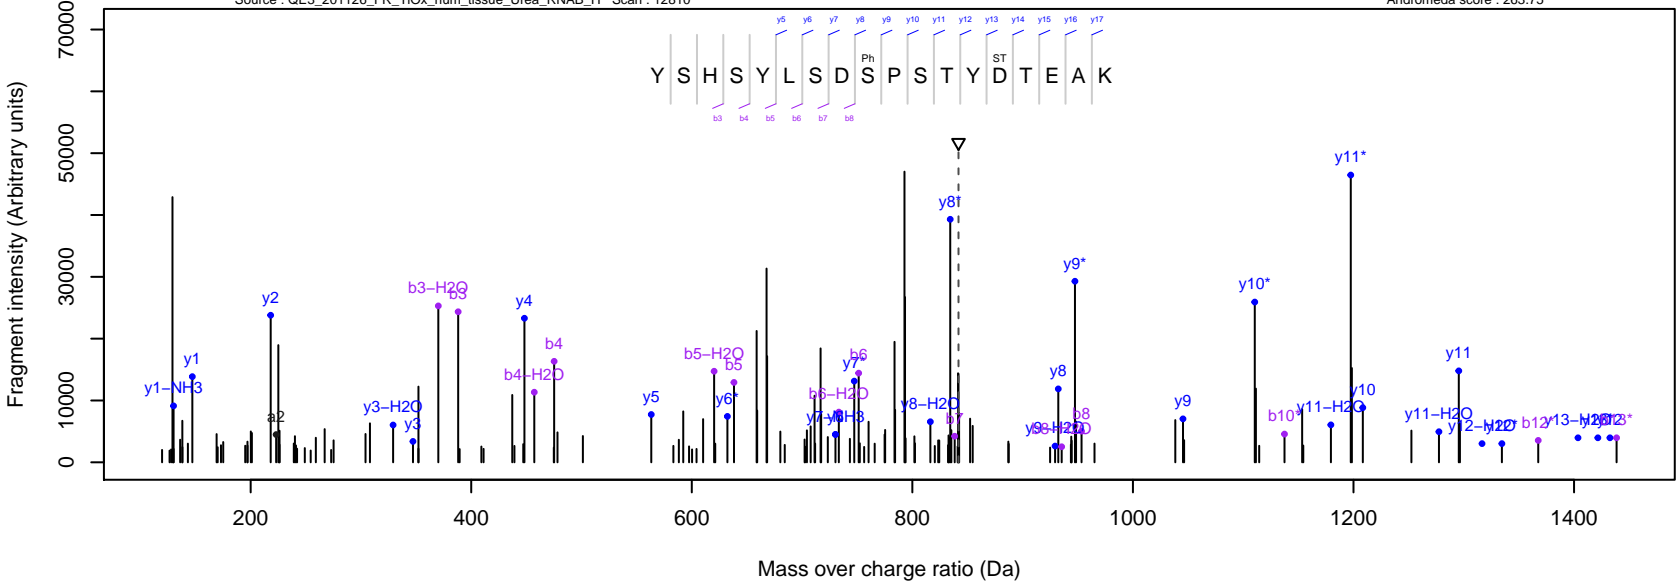

EREES(Phospho (STY))EDELEEANGNPNPIDIEVDQNKESK-3+

Source : QE3\_201126\_FR\_TiOx\_hum\_tissue\_Urea\_RNAB\_N Scan : 27831

Andromeda score : 263.68

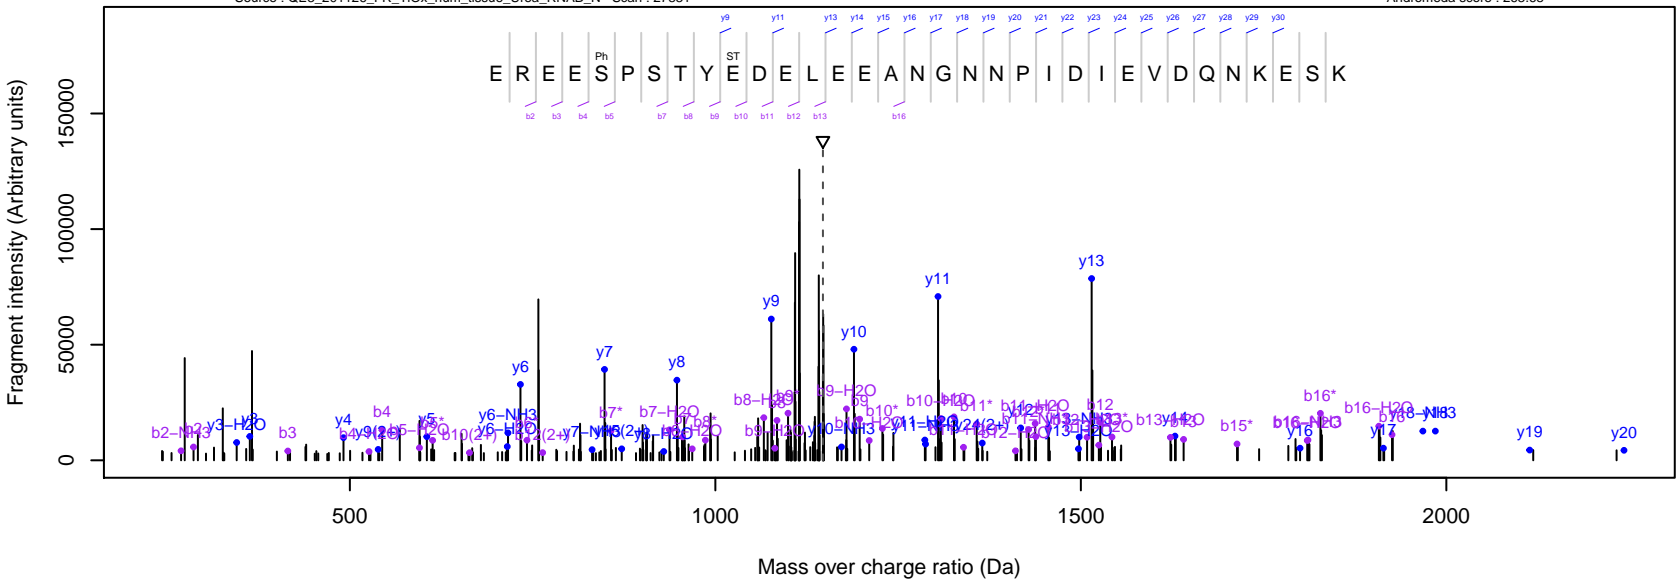

GFGFGGAGALVHS(Phospho (STY))E-2+

Source : QE3\_201126\_FR\_TiOx\_hum\_tissue\_Urea\_RNAB\_H Scan : 40426

Andromeda score : 263.27

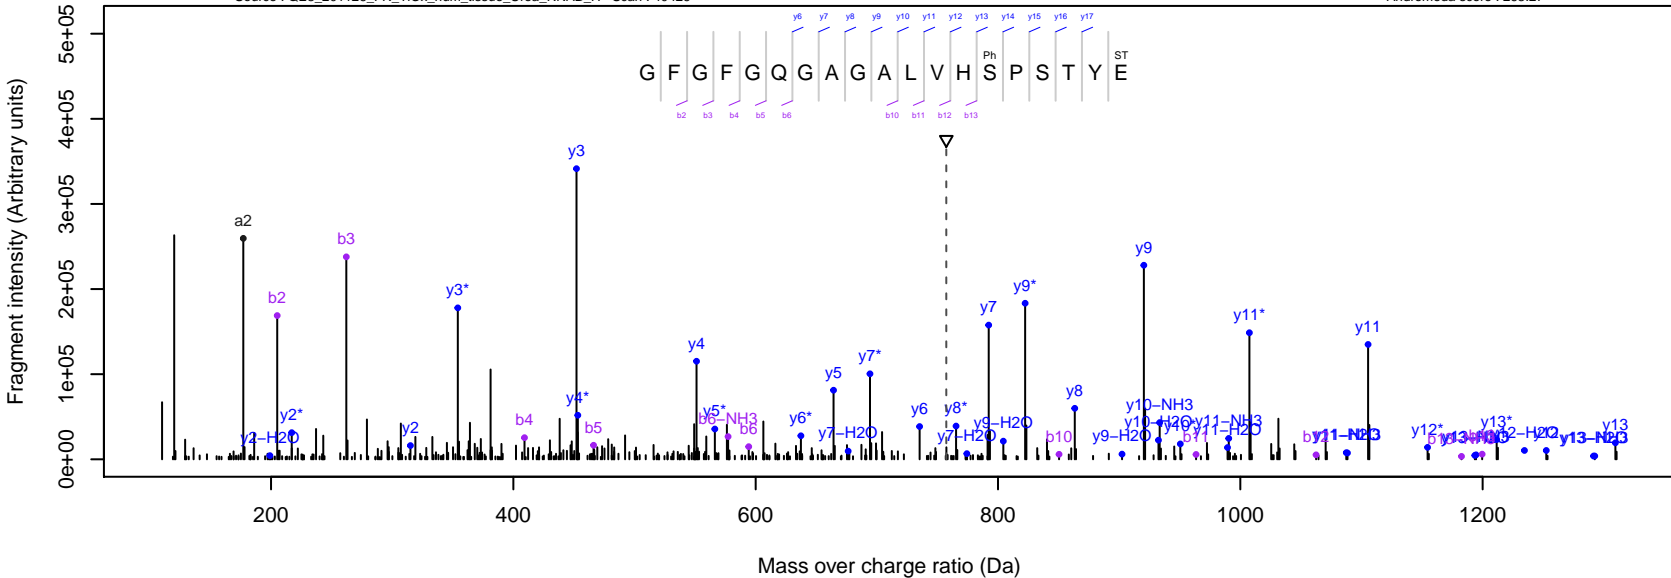

YQDEVFGGFVTEPQEESEPEER-3+

Source : QE3\_201126\_FR\_TiOx\_hum\_tissue\_Urea\_RNAB\_H Scan : 51430

Andromeda score : 263.16

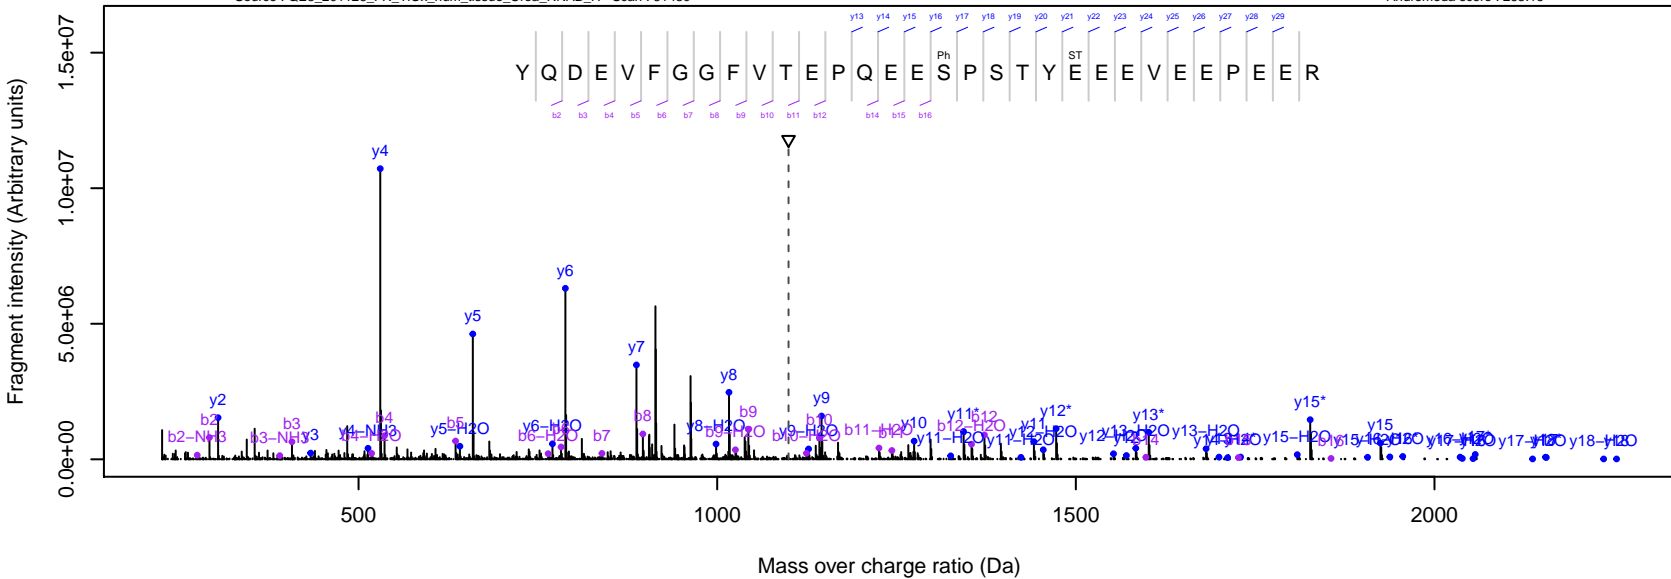

DNTFFRES(Phospho (STY))PVGR-2+

Source : QE3\_201126\_FR\_TiOx\_hum\_tissue\_Urea\_RNAB\_H Scan : 24943

Andromeda score : 263.15

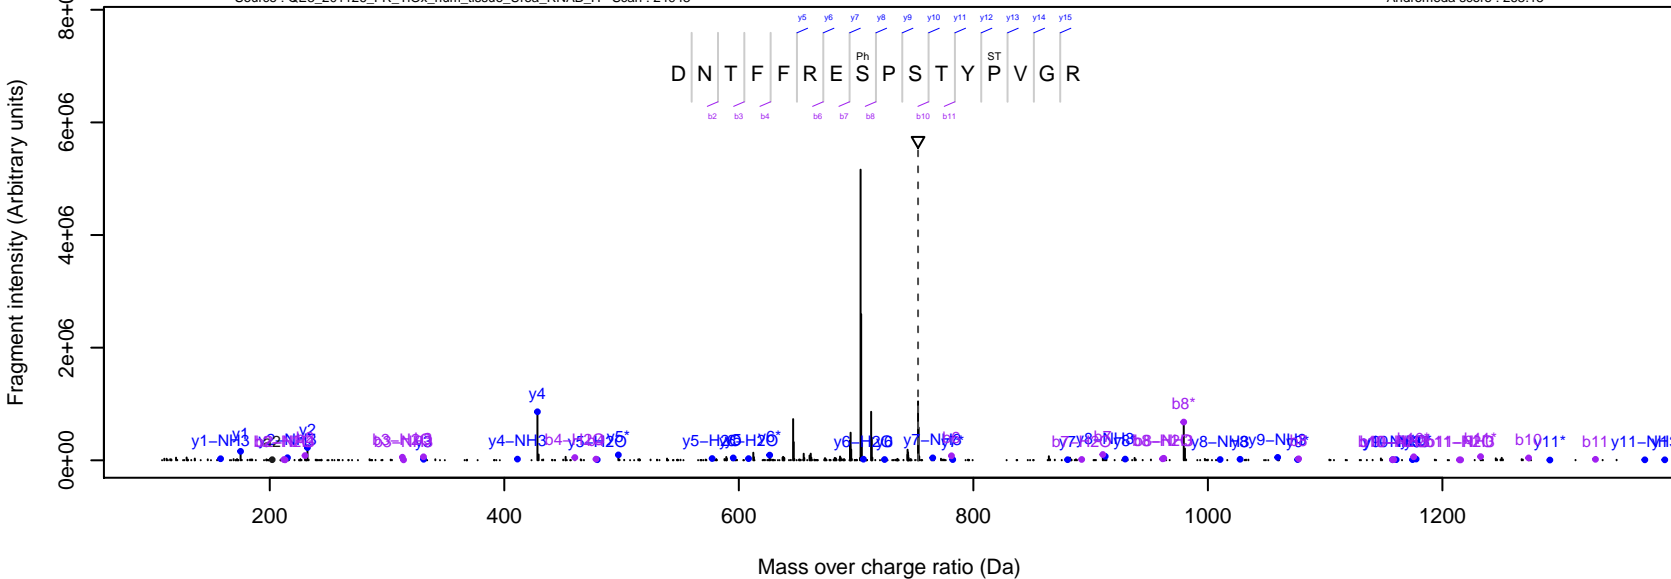



RVS(Phospho (STY))SSELDLP~~SGDHCEAGLLQLD~~VPLLR-3+

Source : QE3\_201126\_FR\_TiOx\_hum\_tissue\_Urea\_RNAB\_H Scan : 54085

Andromeda score : 262.95

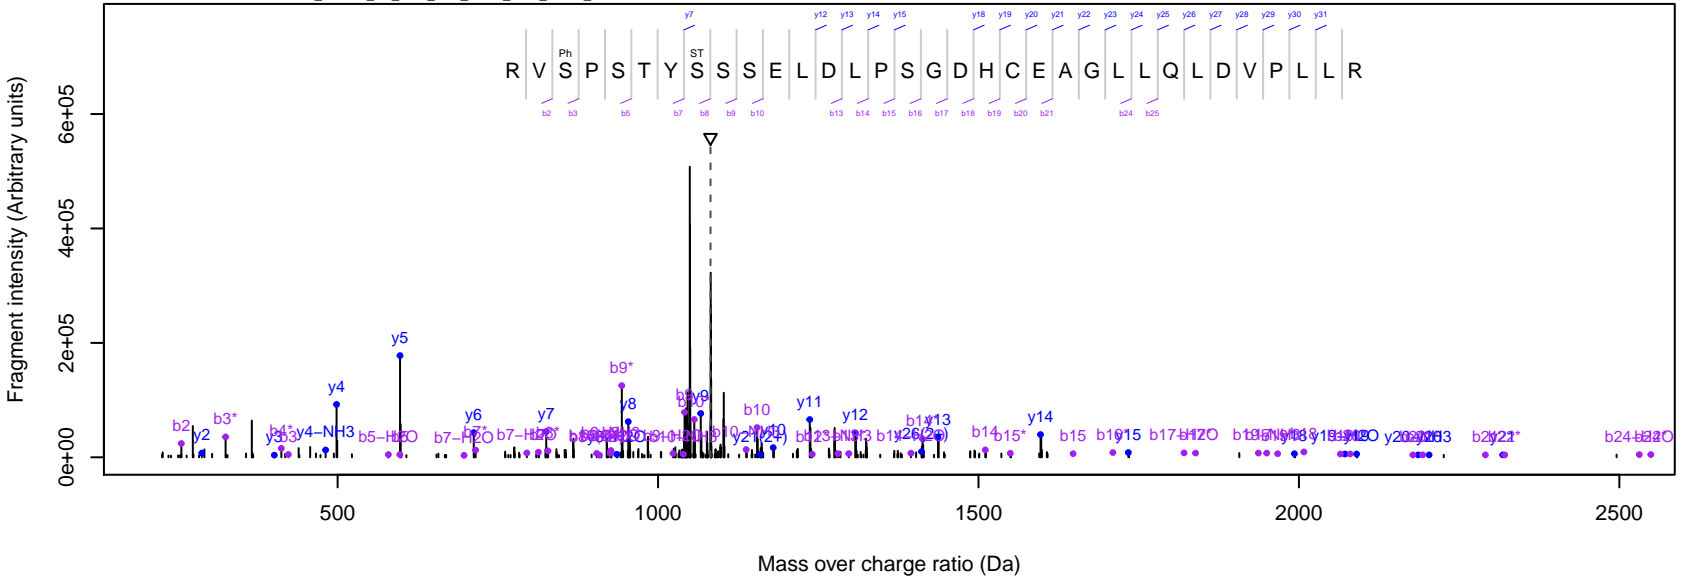

TIDL~~GAAHYTGDKAS~~(Phospho (STY))PDQ~~NASTHTPQSSV~~K-4+

Source : QE3\_201126\_FR\_TiOx\_hum\_tissue\_Urea\_RNAB\_H Scan : 18812

Andromeda score : 262.95

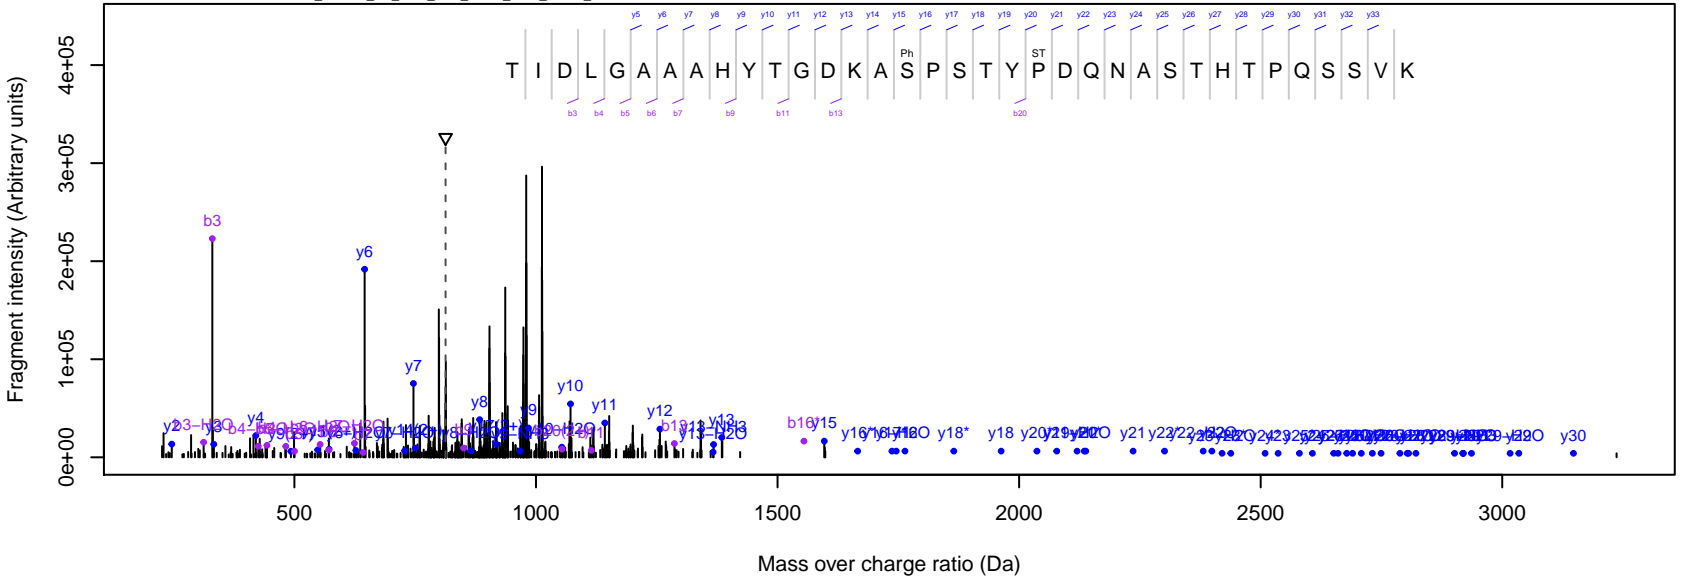

TLNAETPKSS(Phospho (STY))PLPAK-2+

Source : QE3\_201126\_FR\_TiOx\_hum\_tissue\_Urea\_RNAB\_H Scan : 12617

Andromeda score : 262.83

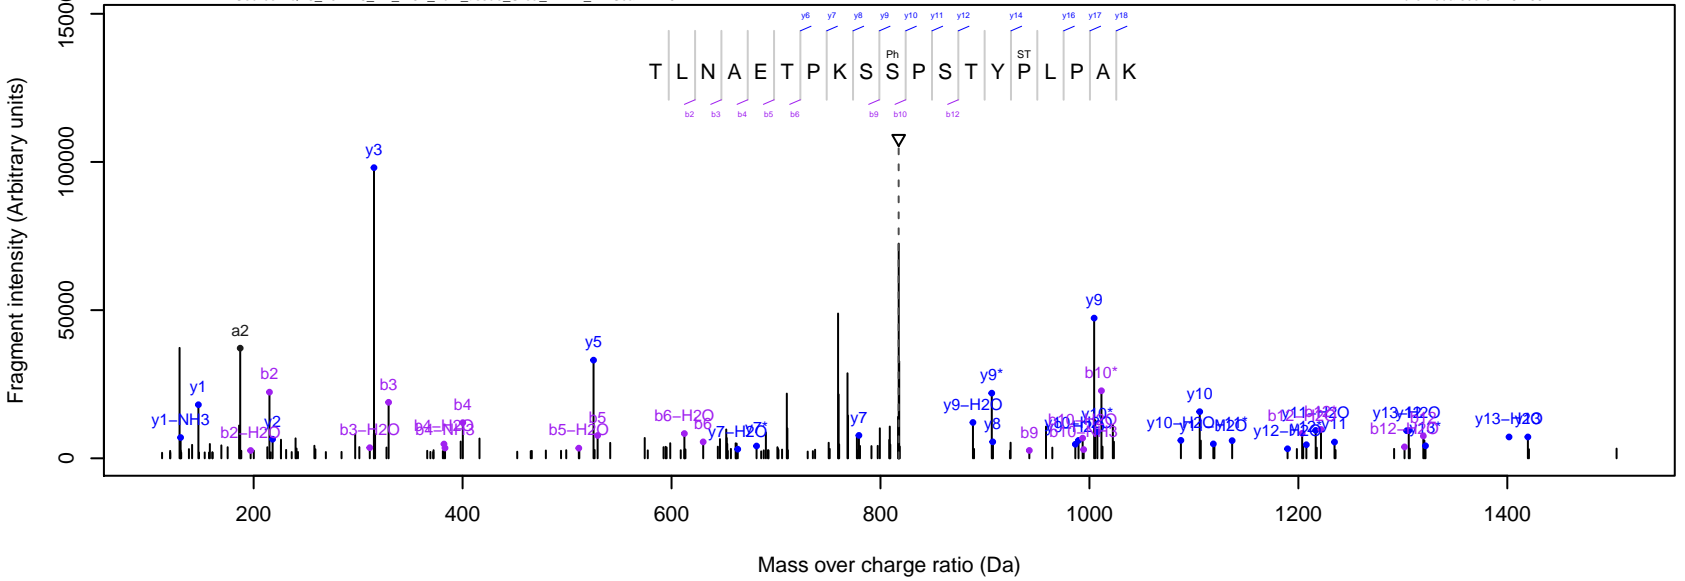

HRAEAPPLEREDS(Phospho (STY))GTFSLGK-3+

Source : QE3\_201126\_FR\_TiOx\_hum\_tissue\_Urea\_RNAB\_H Scan : 20075

Andromeda score : 262.77

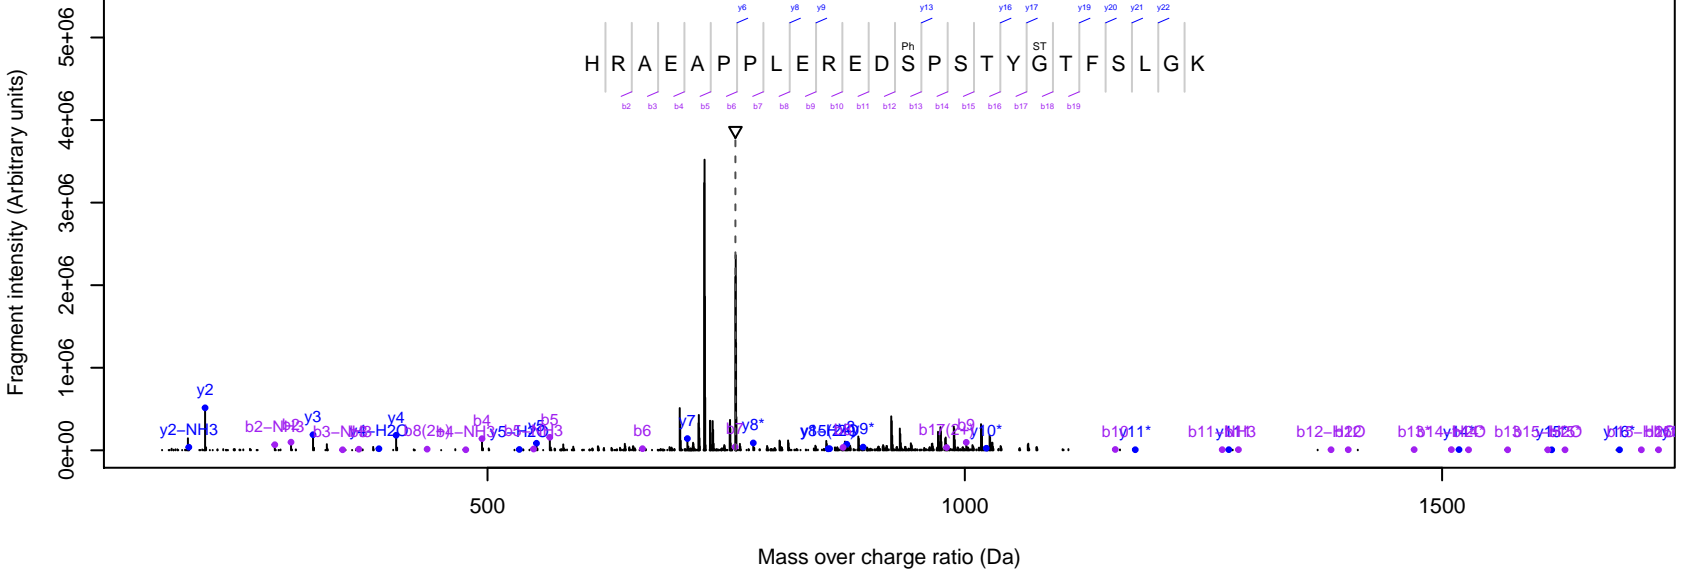

AQRLS(Phospho (STY))QETEALGR-2+

Source : QE3\_201126\_FR\_TiOx\_hum\_tissue\_Urea\_RNAB\_H Scan : 15750

Andromeda score : 262.73

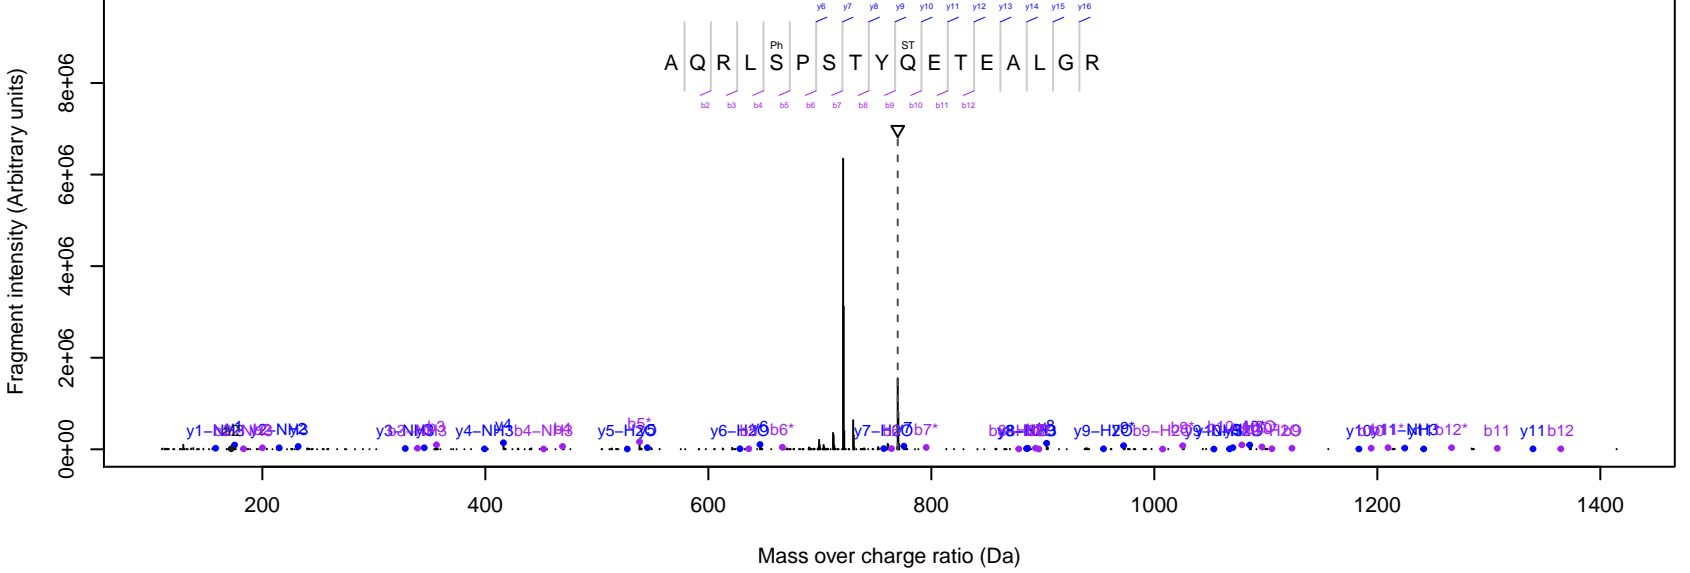

TDSREDEIS(Phospho (STY))PPPPNPVVK-2+

Source : QE3\_201126\_FR\_TiOx\_hum\_tissue\_Urea\_RNAB\_B Scan : 20786

Andromeda score : 262.58

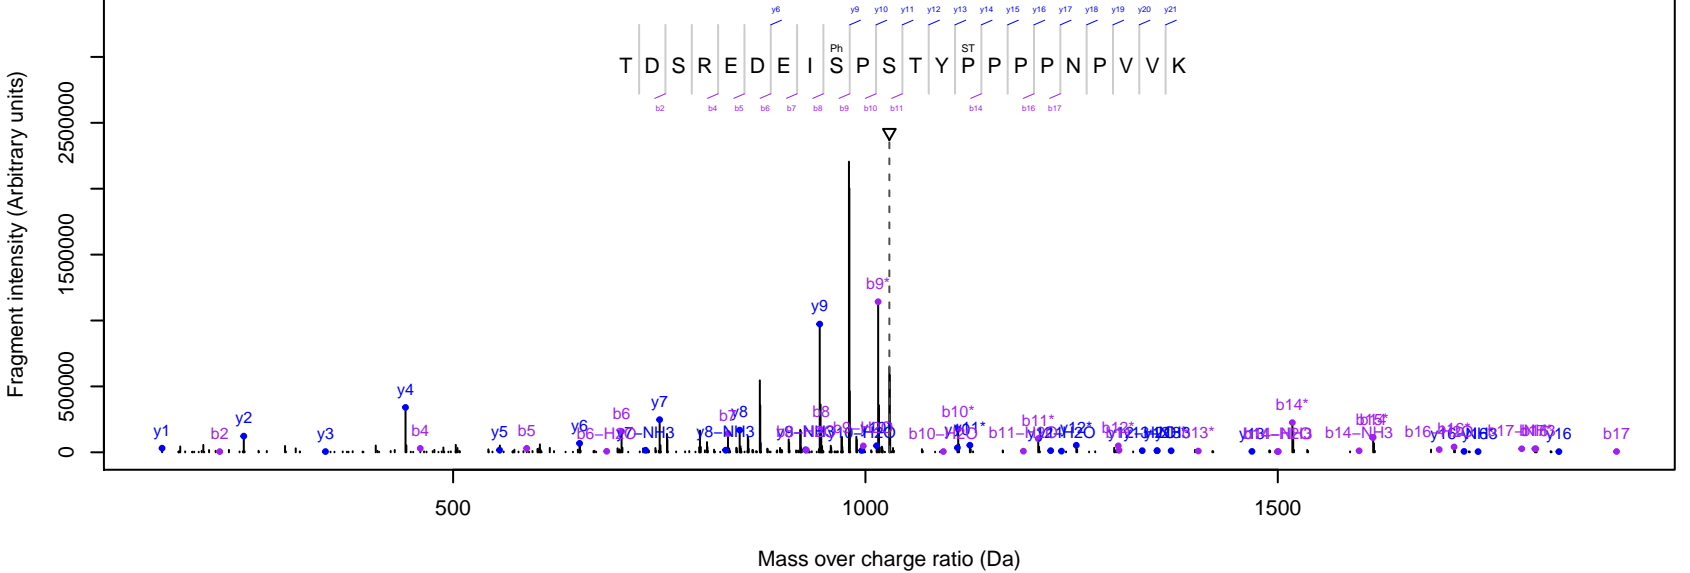

ANS(Phospho (STY))TSDSVFTETPSPVLK-2+

Source : QE3\_201126\_FR\_TIOx\_hum\_tissue\_Urea\_RNAB\_N Scan : 39918

Andromeda score : 262.5

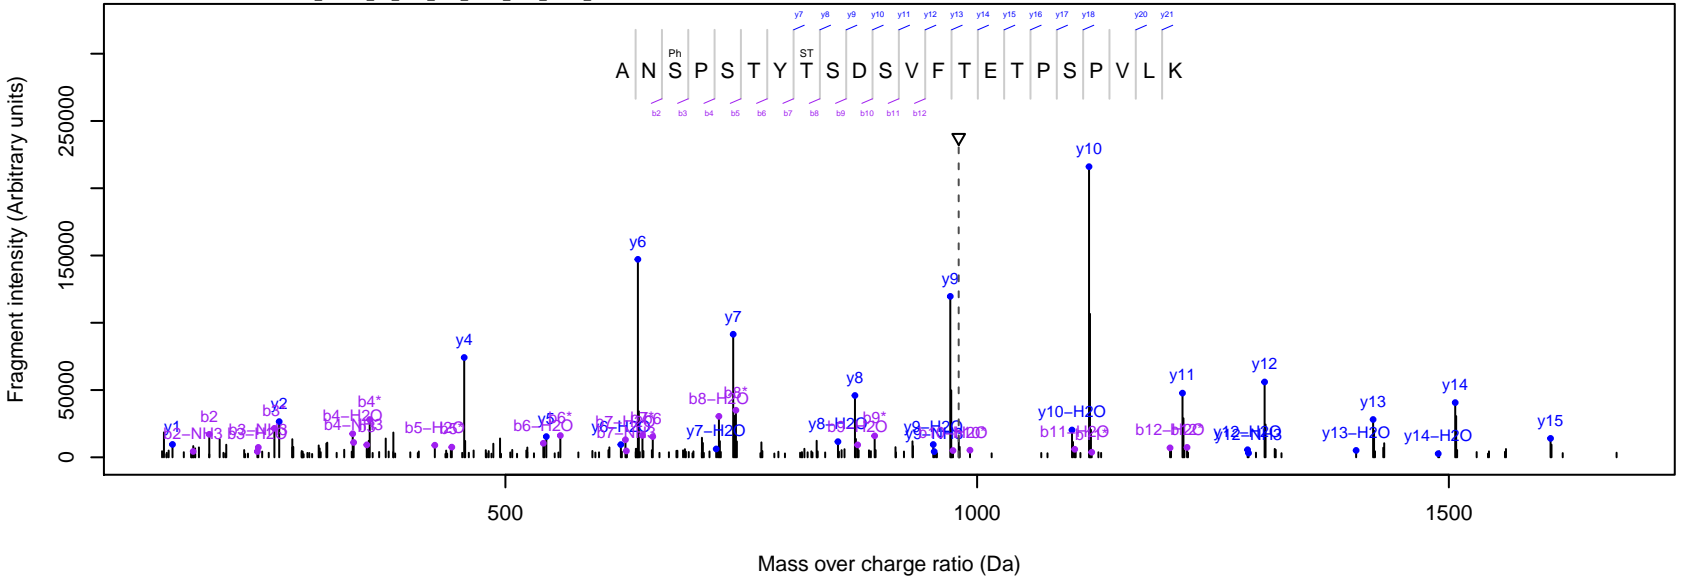

IAS(Phospho (STY))DEEIQTGK-2+

Source : QE3\_201126\_FR\_TIOx\_hum\_tissue\_Urea\_RNAB\_H Scan : 13246

Andromeda score : 262.35

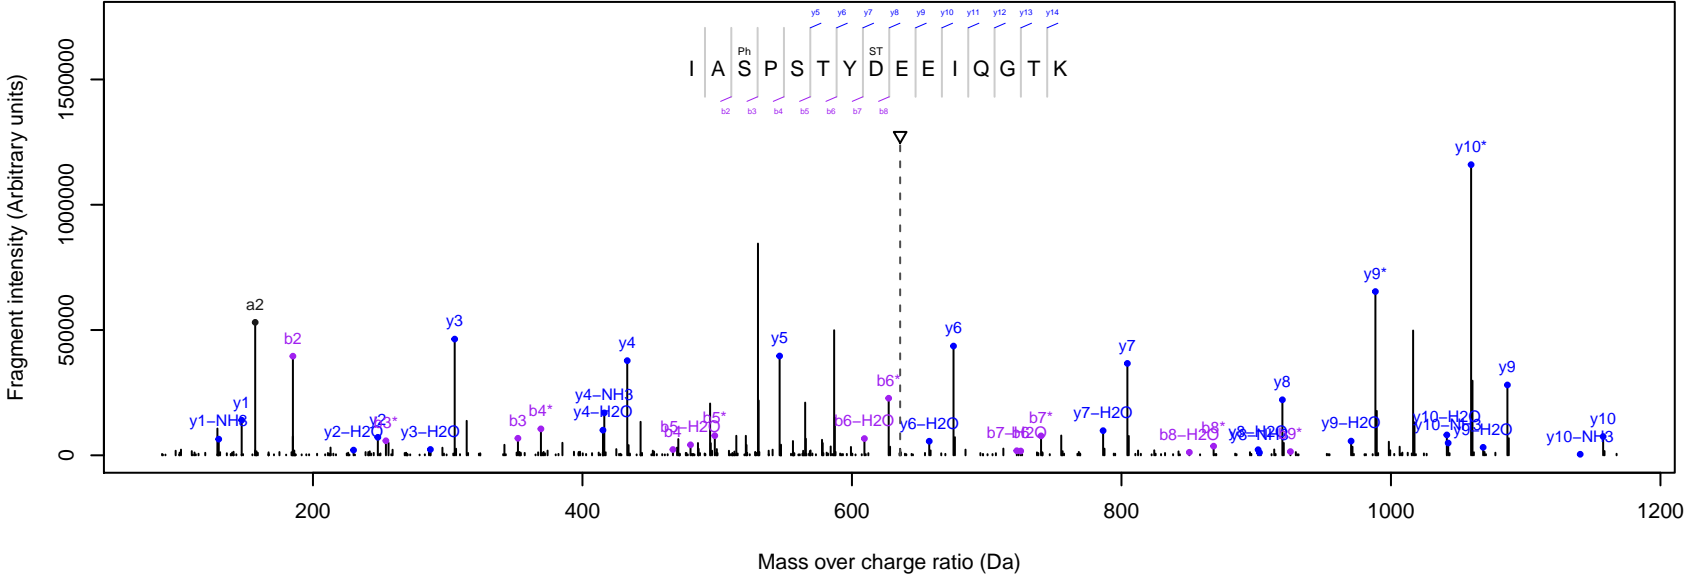

TLS(Phospho (STY))DYNIQK-2+

Source : QE3\_201126\_FR\_TIOx\_hum\_tissue\_Urea\_RNAB\_N Scan : 22052

Andromeda score : 262.32

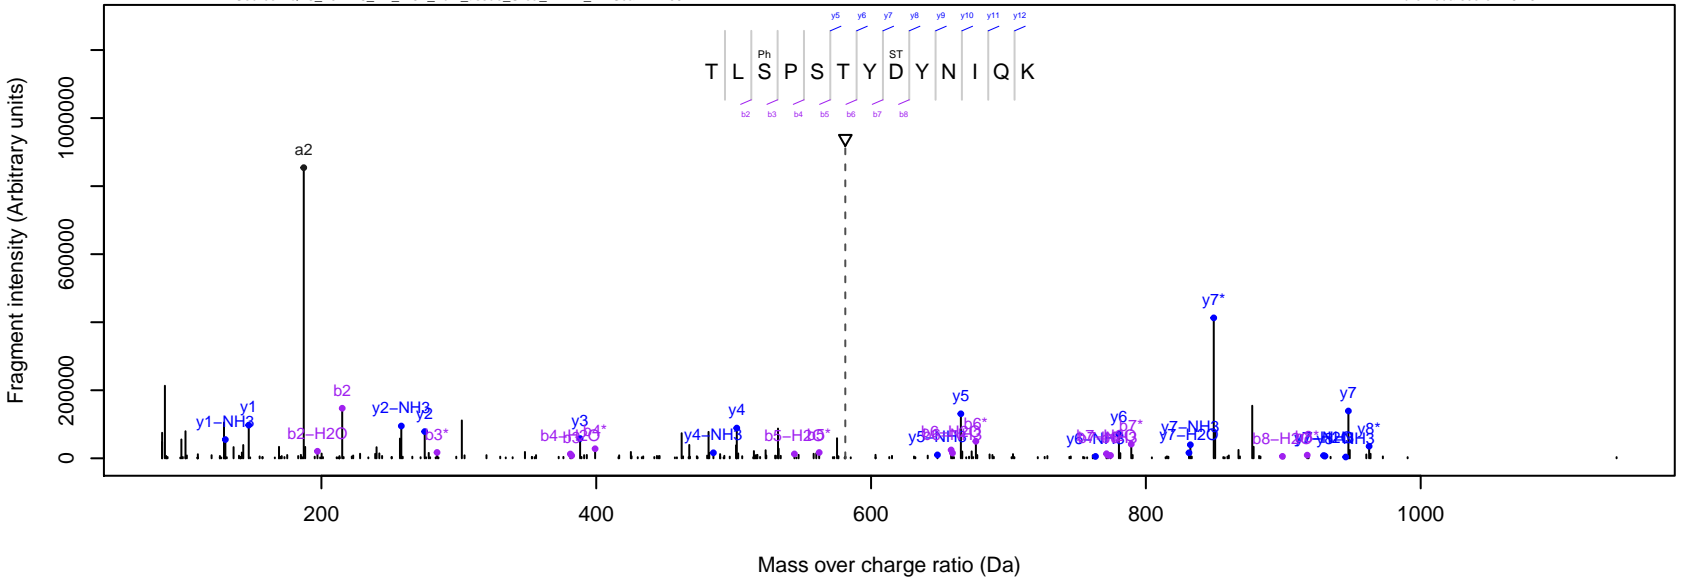

ATWLSLFSS(Phospho (STY))EESNLGANNYDDYR-2+

Source : QE3\_201126\_FR\_TiOx\_hum\_tissue\_Urea\_RNAB\_N Scan : 62017

Andromeda score : 262.21

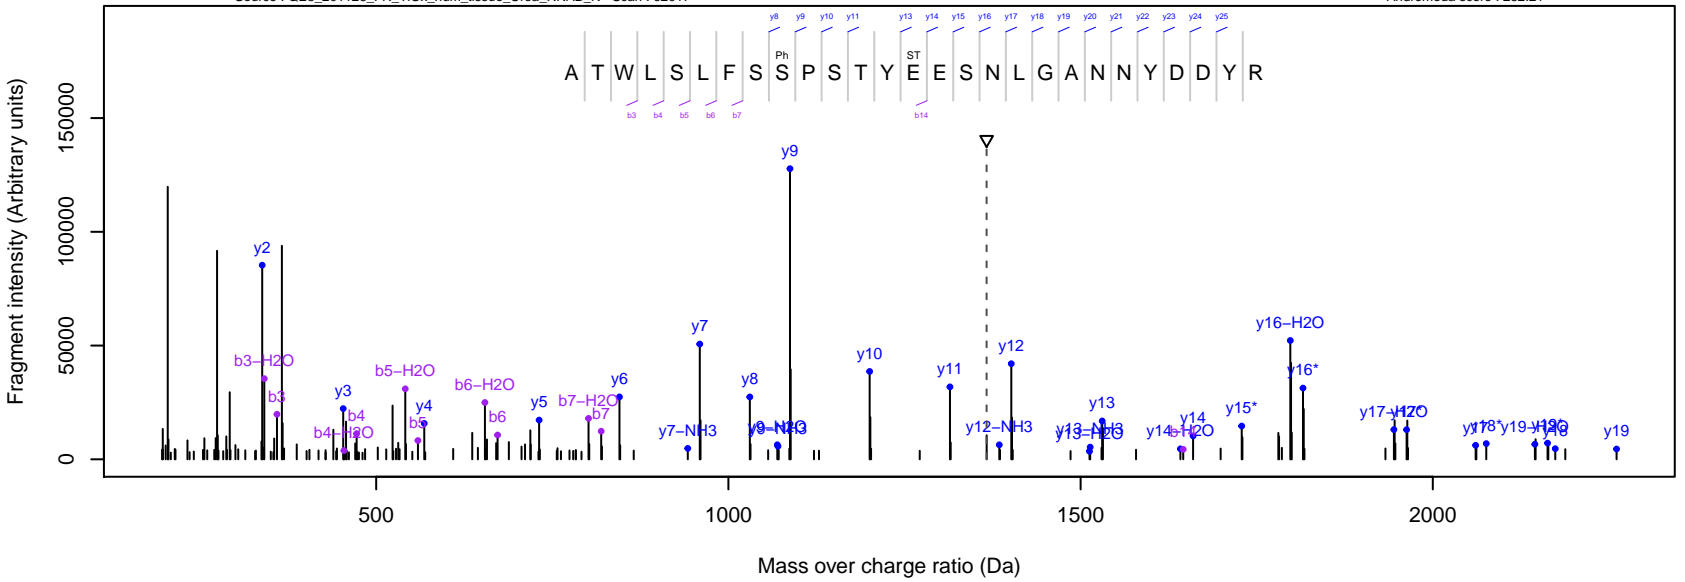

KNS(Phospho (STY))ITEISDNEDDLLEYHR-3+

Source : QE3\_201126\_FR\_TiOx\_hum\_tissue\_Urea\_RNAB\_N Scan : 31237

Andromeda score : 261.97

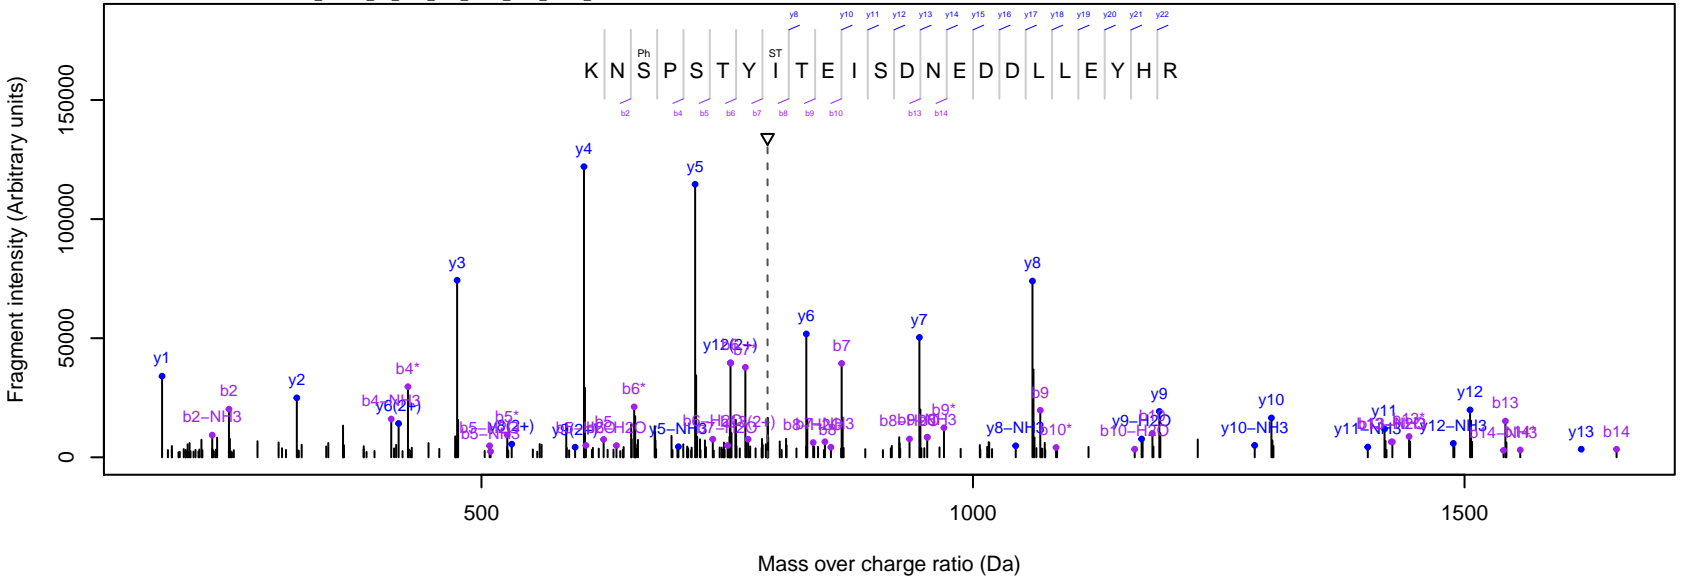

NLALDEAGQRST(Phospho (STY))M(Oxidation (M))-2+

Source : QE3\_201126\_FR\_TiOx\_hum\_tissue\_Urea\_RNAB\_B Scan : 19698

Andromeda score : 261.94

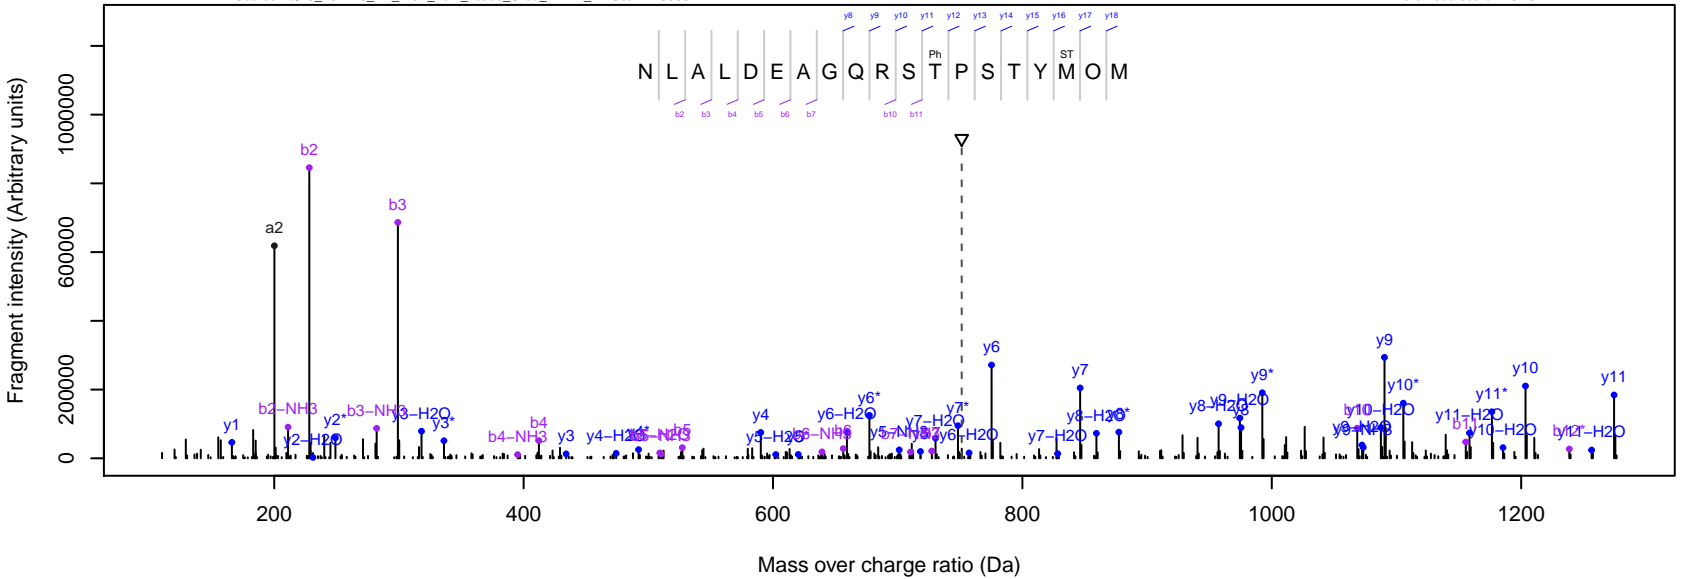



SDDSKSS(Phospho (STY))SPELVTHLK-3+

Source : QE3\_201126\_FR\_TiOx\_hum\_tissue\_Urea\_RNAB\_H Scan : 13821

Andromeda score : 261.92

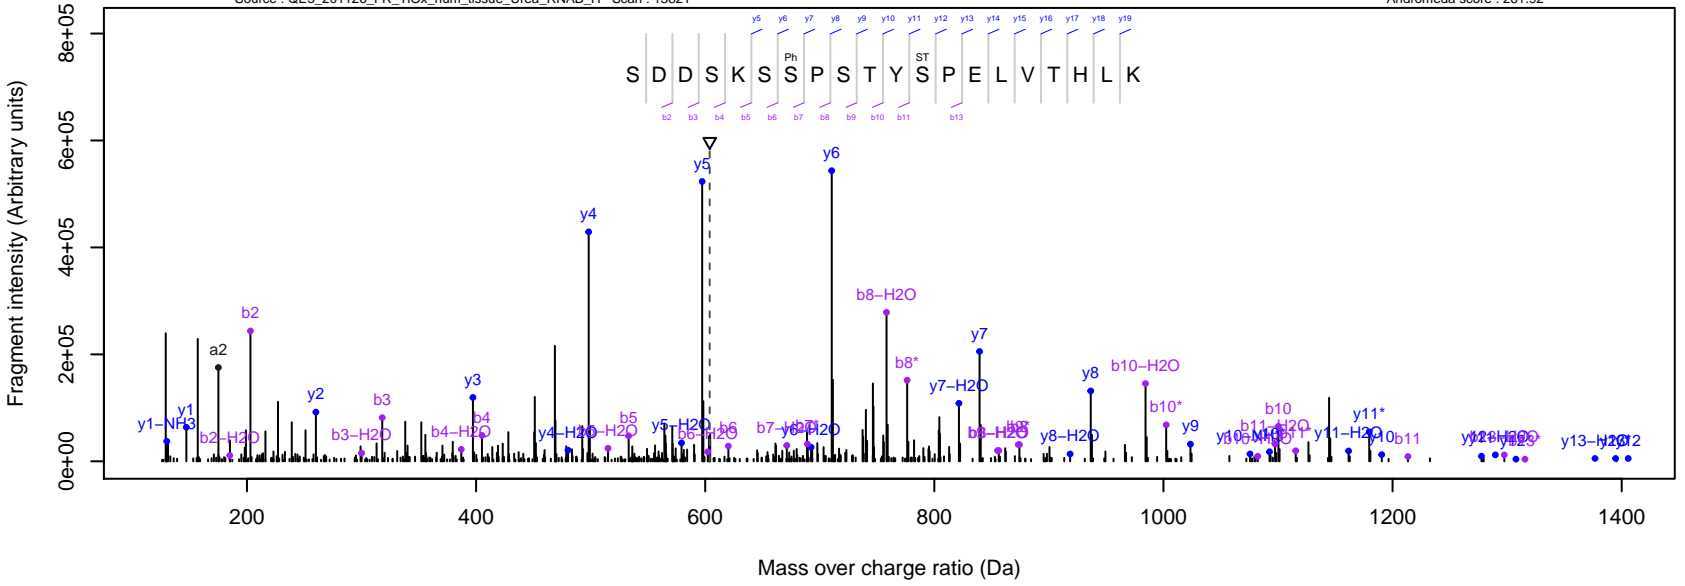

VEEESTGDPFGFDS(Phospho (STY))DDESLPVSSK-2+

Source : QE3\_201126\_FR\_TiOx\_hum\_tissue\_Urea\_RNAB\_B Scan : 48862

Andromeda score : 261.83

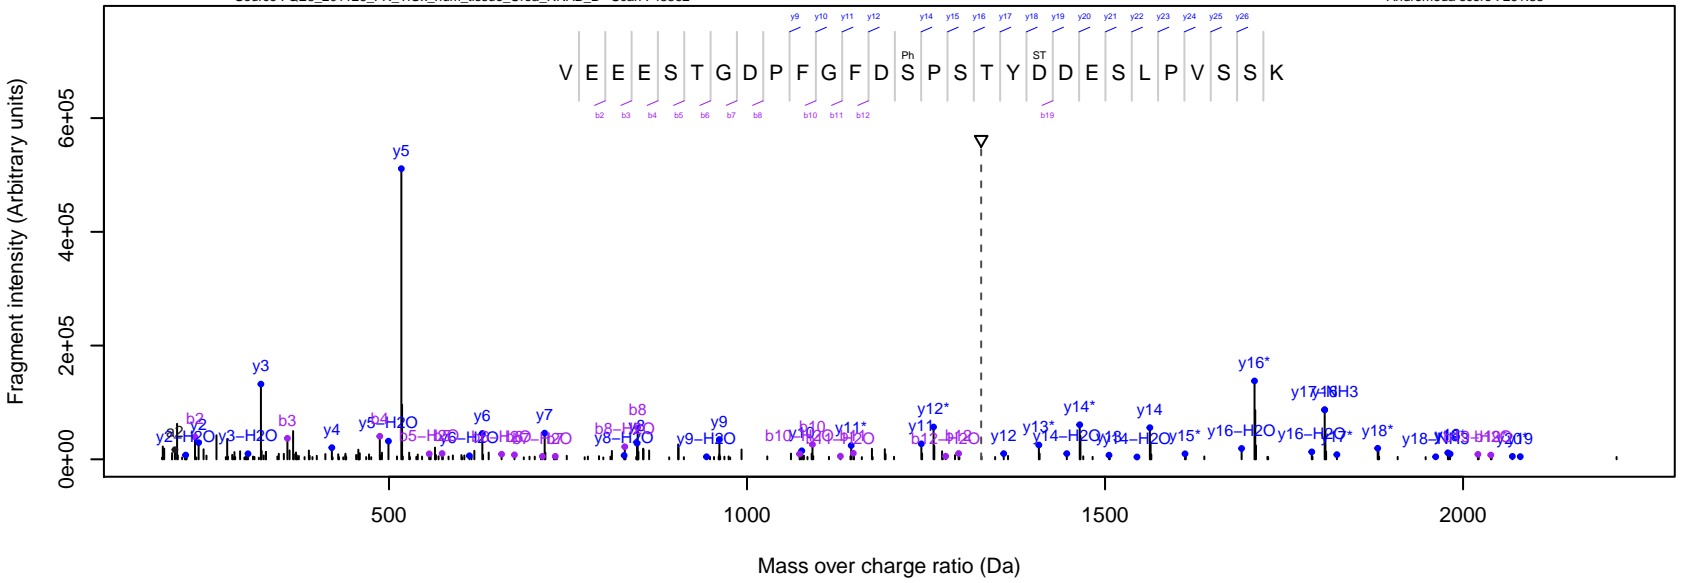

RRFS(Phospho (STY))DSEGEETVPEPR-3+

Source : QE3\_201126\_FR\_TiOx\_hum\_tissue\_Urea\_RNAB\_H Scan : 12925

Andromeda score : 261.82

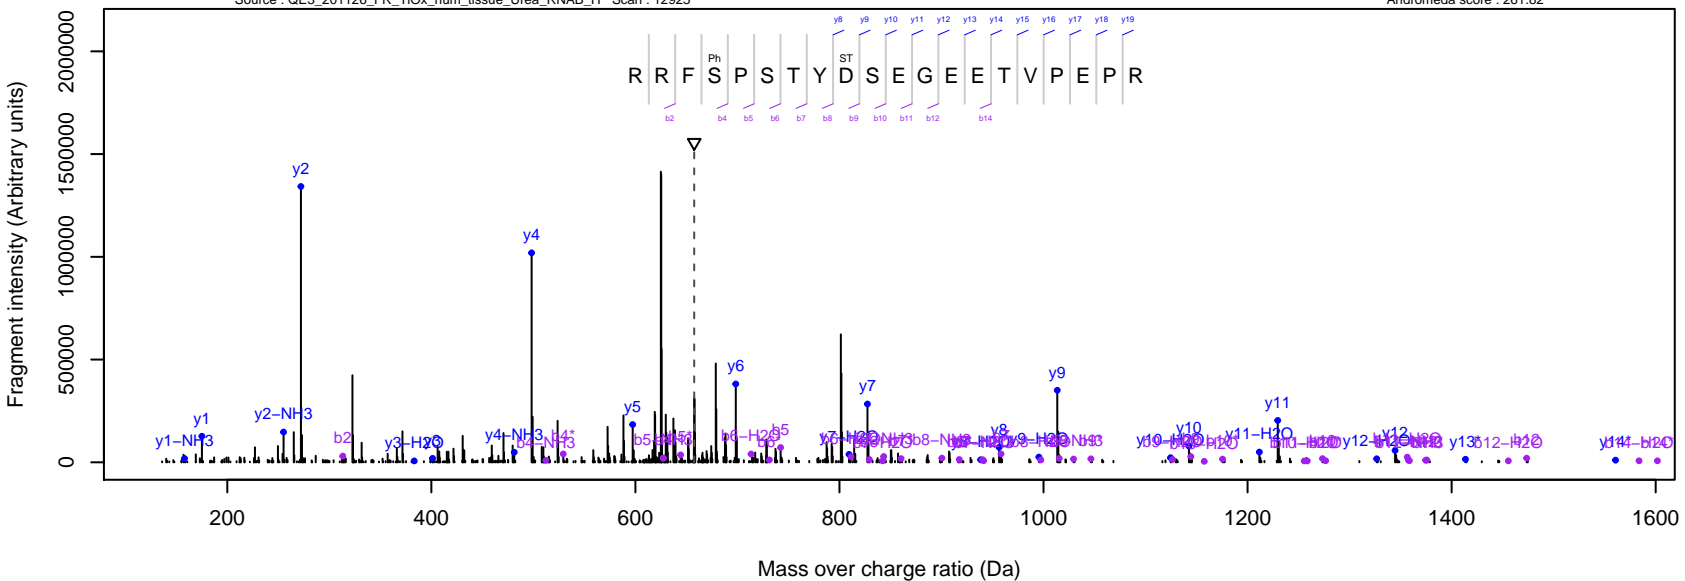



STVLTPM<sup>Ph</sup>FVETQAS<sup>Ph</sup>SPSTY<sup>ST</sup>QGT<sup>ST</sup>LQTR-3+

Source : QE3\_201126\_FR\_TiOx\_hum\_tissue\_Urea\_RNAB\_N Scan : 49602

Andromeda score : 261.74

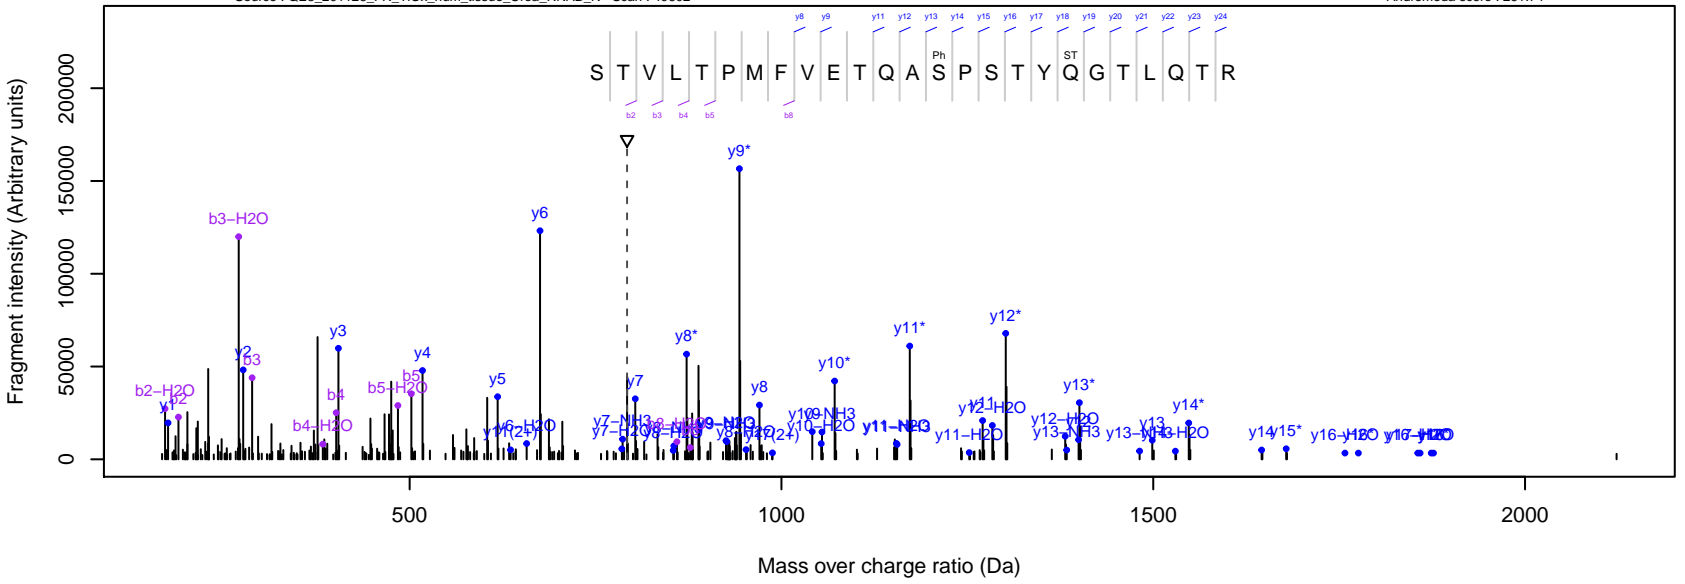

KDS<sup>Ph</sup>PS<sup>Ph</sup>STY<sup>ST</sup>LTQA<sup>ST</sup>QE<sup>ST</sup>QGNLLN-2+

Source : QE3\_201126\_FR\_TiOx\_hum\_tissue\_Urea\_RNAB\_H Scan : 25295

Andromeda score : 261.56

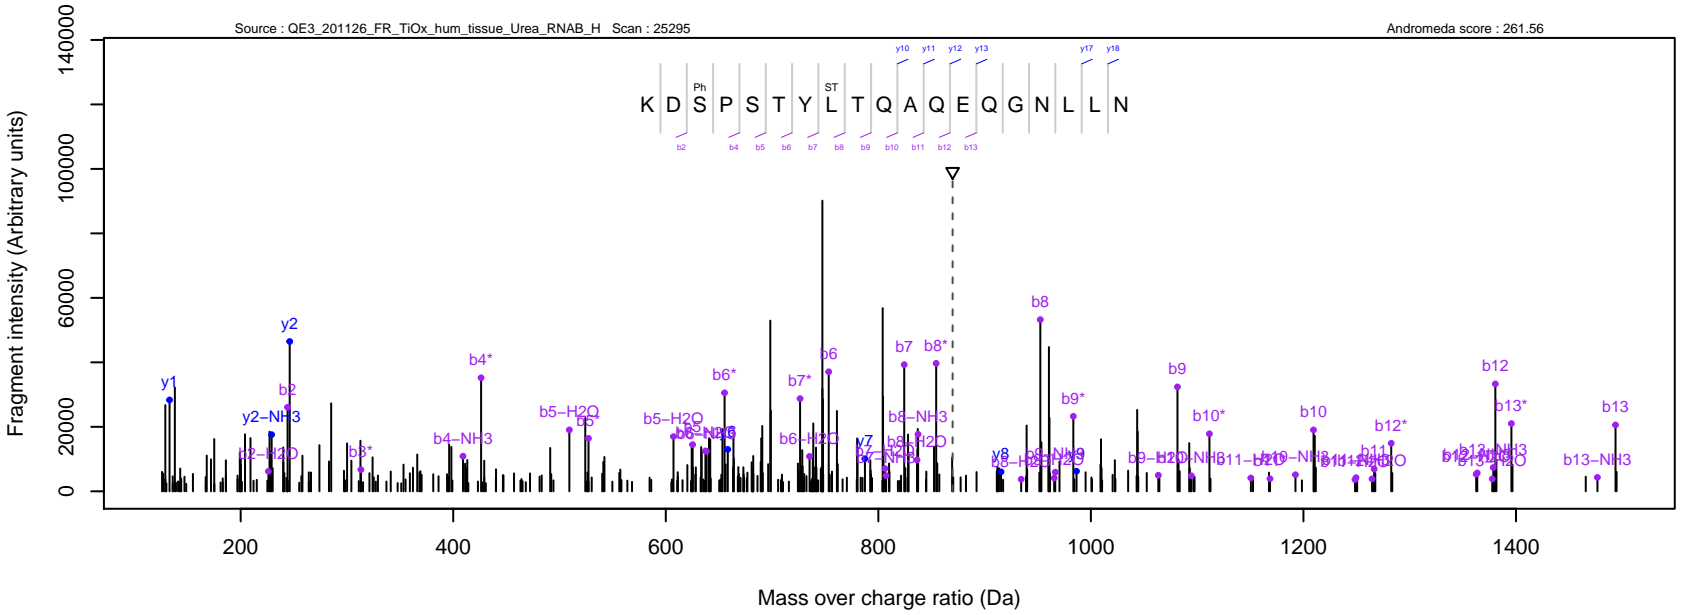

ESGLSS<sup>Ph</sup>PS<sup>Ph</sup>STY<sup>ST</sup>SSYEL<sup>ST</sup>SQYIR-2+

Source : QE3\_201126\_FR\_TiOx\_hum\_tissue\_Urea\_RNAB\_B Scan : 45732

Andromeda score : 261.45

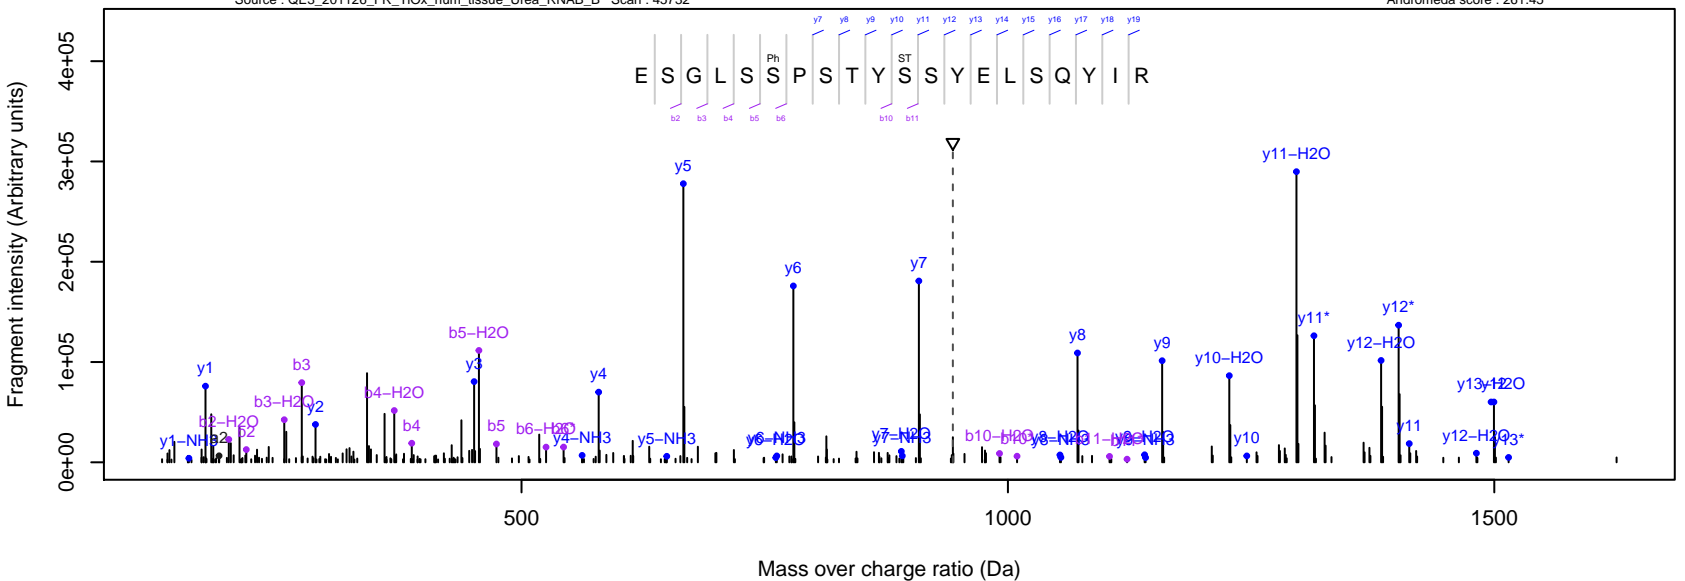

TVQSLEIDLDS(Phospho (STY))MR-2+

Source : QE3\_201126\_FR\_TiOx\_hum\_tissue\_Urea\_RNAB\_H Scan : 44642

Andromeda score : 261.39

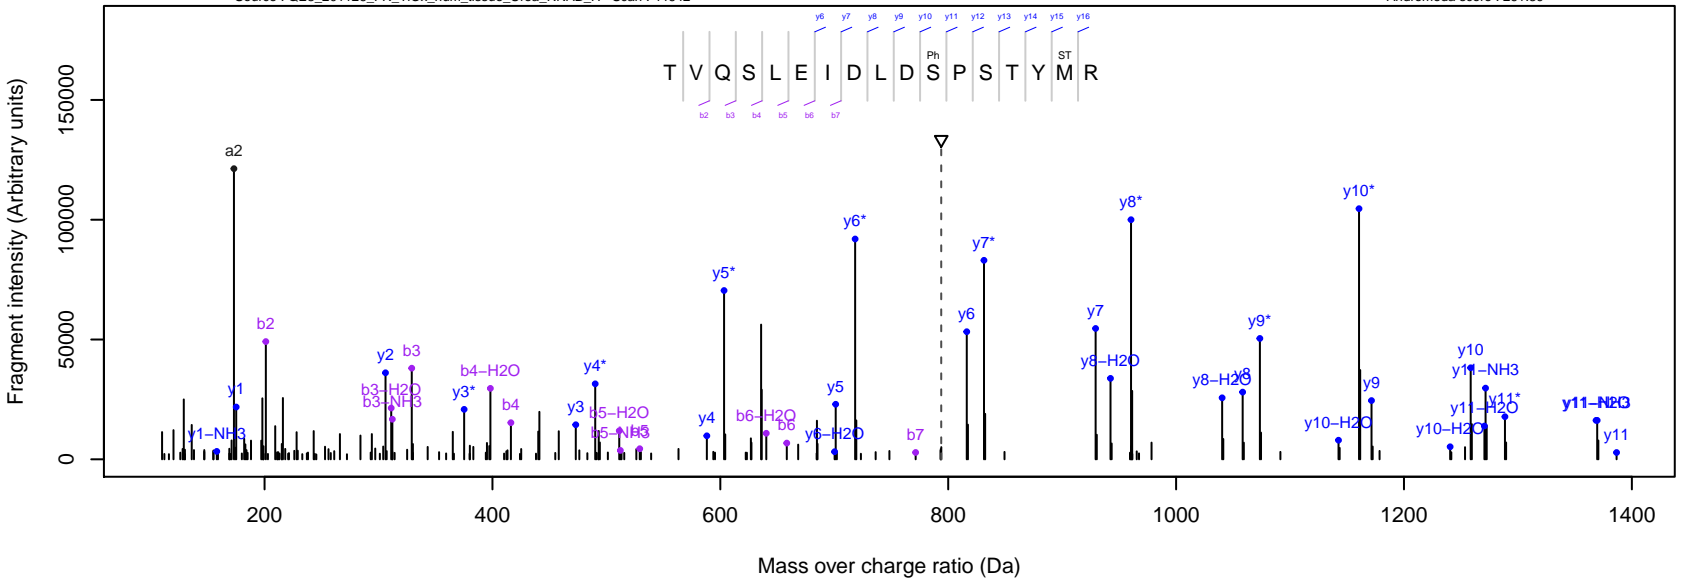

ALPSLNTGSSS(Phospho (STY))PR-2+

Source : QE3\_201126\_FR\_TiOx\_hum\_tissue\_Urea\_RNAB\_H Scan : 22074

Andromeda score : 260.97

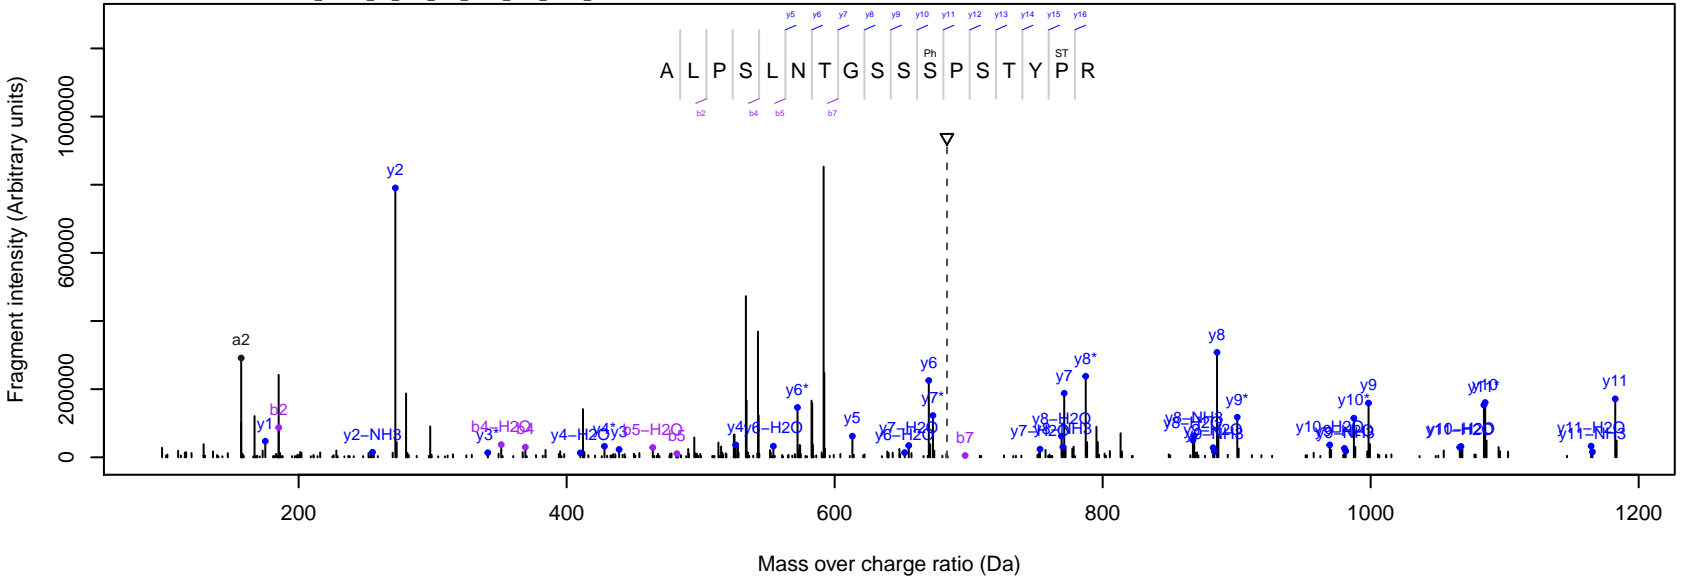

FTDKDQQPS(Phospho (STY))GSEGEDDAAEALKK-3+

Source : QE3\_201126\_FR\_TiOx\_hum\_tissue\_Urea\_RNAB\_B Scan : 14086

Andromeda score : 260.97

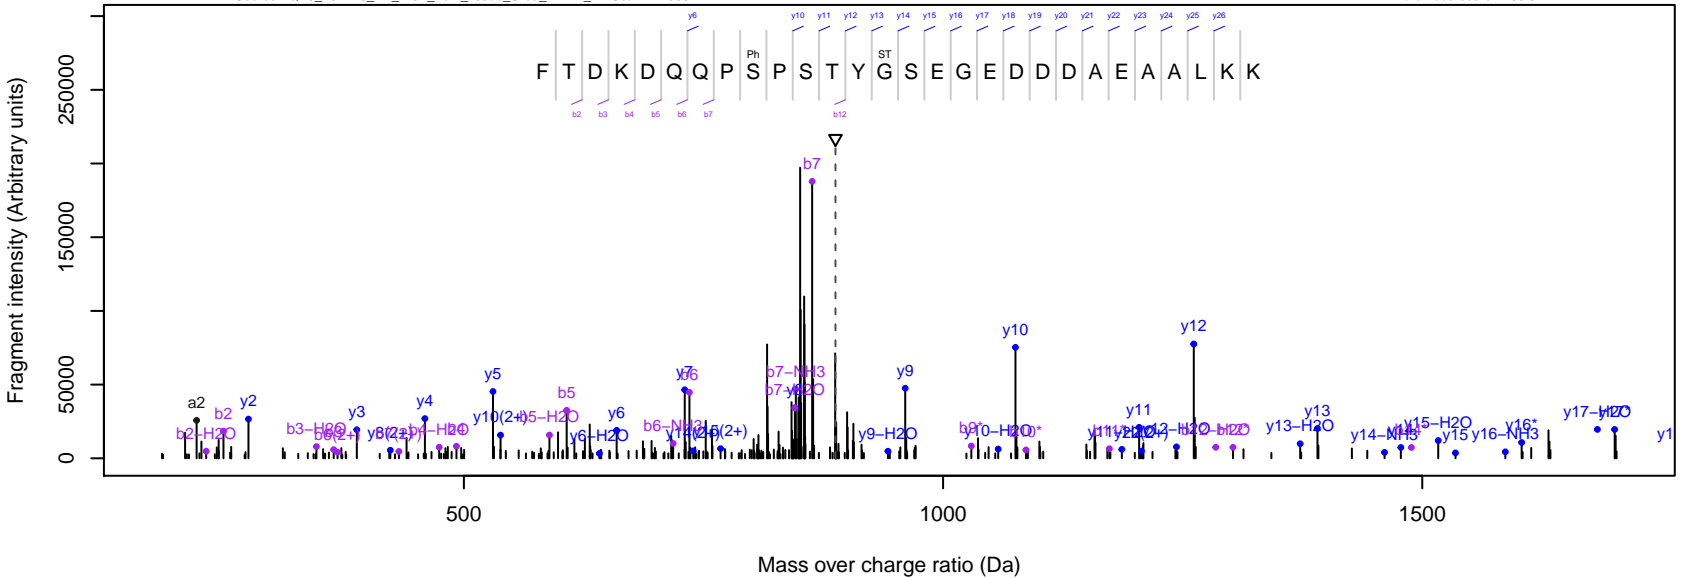

ERS(Phospho (STY))PALKS(Phospho (STY))PLQSVVVR-3+

Source : QE3\_201126\_FR\_TIOx\_hum\_tissue\_Urea\_RNAB\_B Scan : 26171

Andromeda score : 260.89

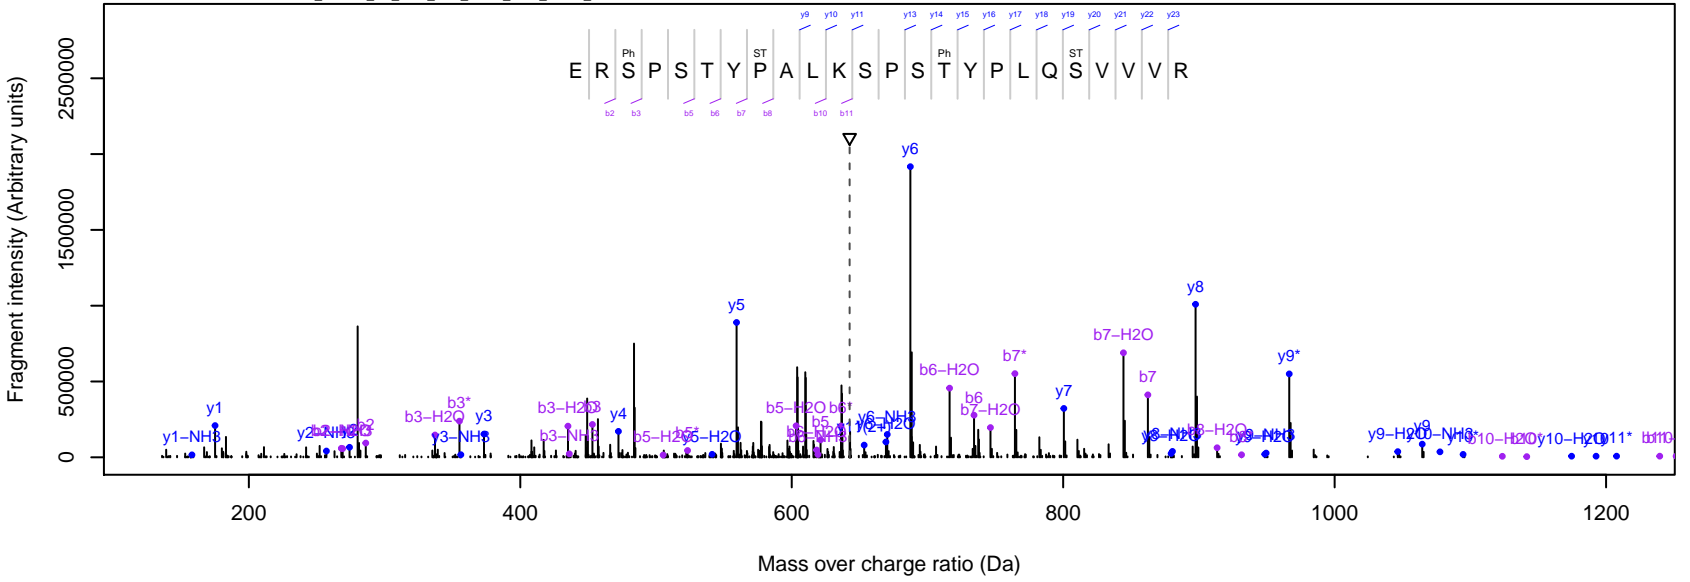

KIALESEGRPEEQMES(Phospho (STY))DNCS(Phospho (STY))GGDDWTHLS(Phospho (STY))SK-3+

Source : QE3\_201126\_FR\_TIOx\_hum\_tissue\_Urea\_RNAB\_B Scan : 33116

Andromeda score : 260.88

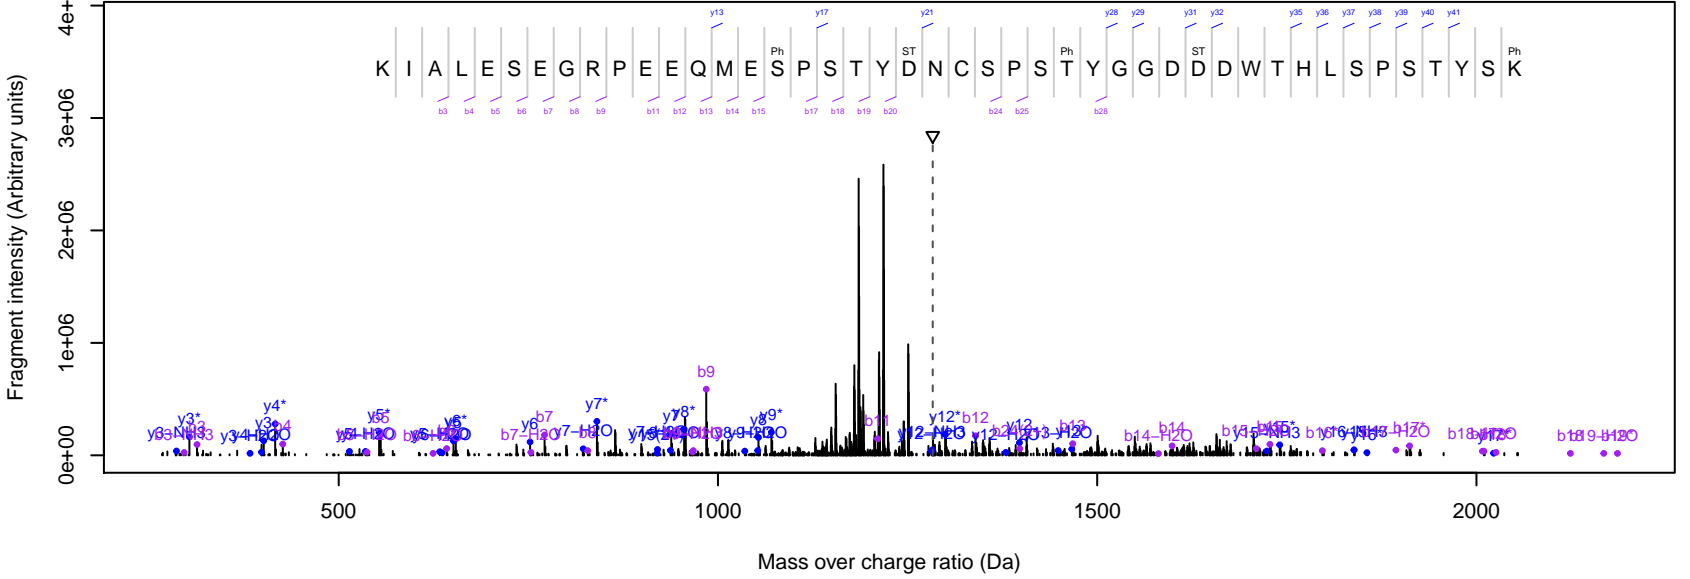

RGS(Phospho (STY))S(Phospho (STY))PDVHALLEITEESDAVLVDKSPSTYD(Phospho (STY))D-3+

Source : QE3\_201126\_FR\_TIOx\_hum\_tissue\_Urea\_RNAB\_B Scan : 63160

Andromeda score : 260.73

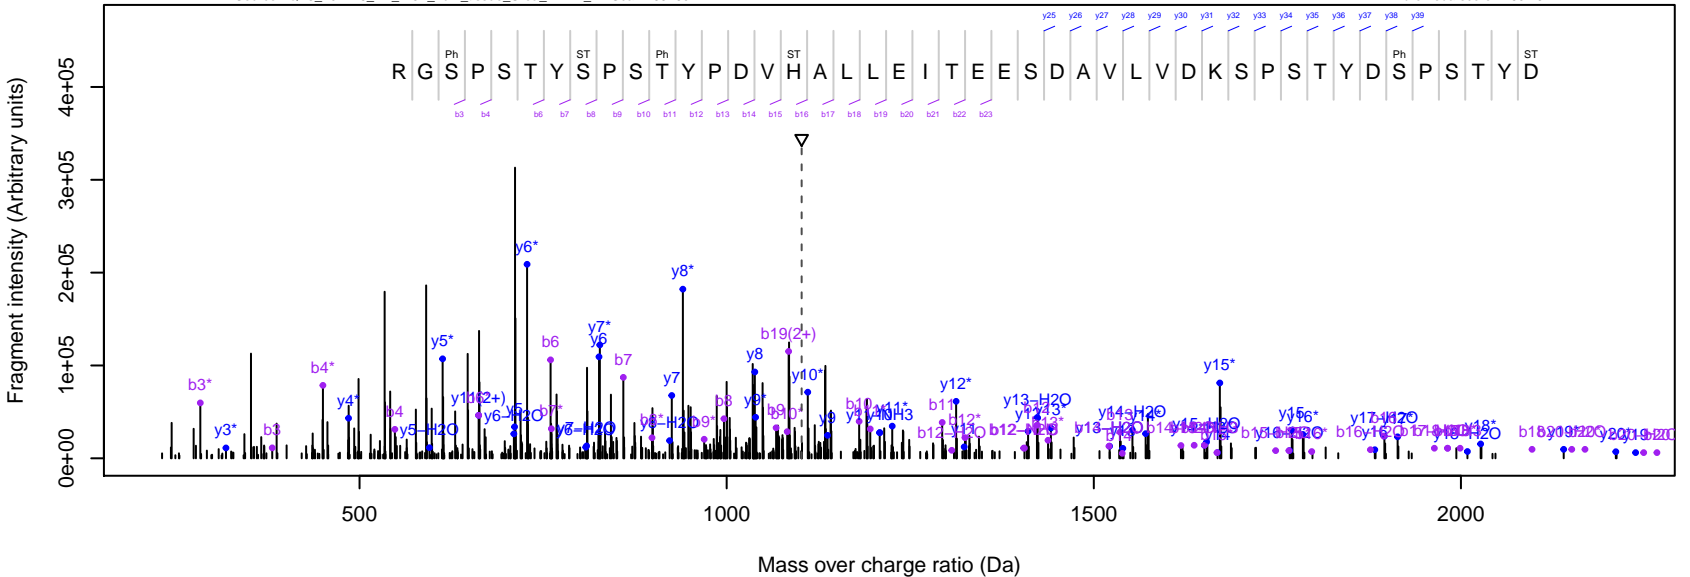



KGDRS(Phospho (STY))PEPGQTWTR-3+

Source : QE3\_201126\_FR\_TiOx\_hum\_tissue\_Urea\_RNAB\_H Scan : 8364

Andromeda score : 259.96

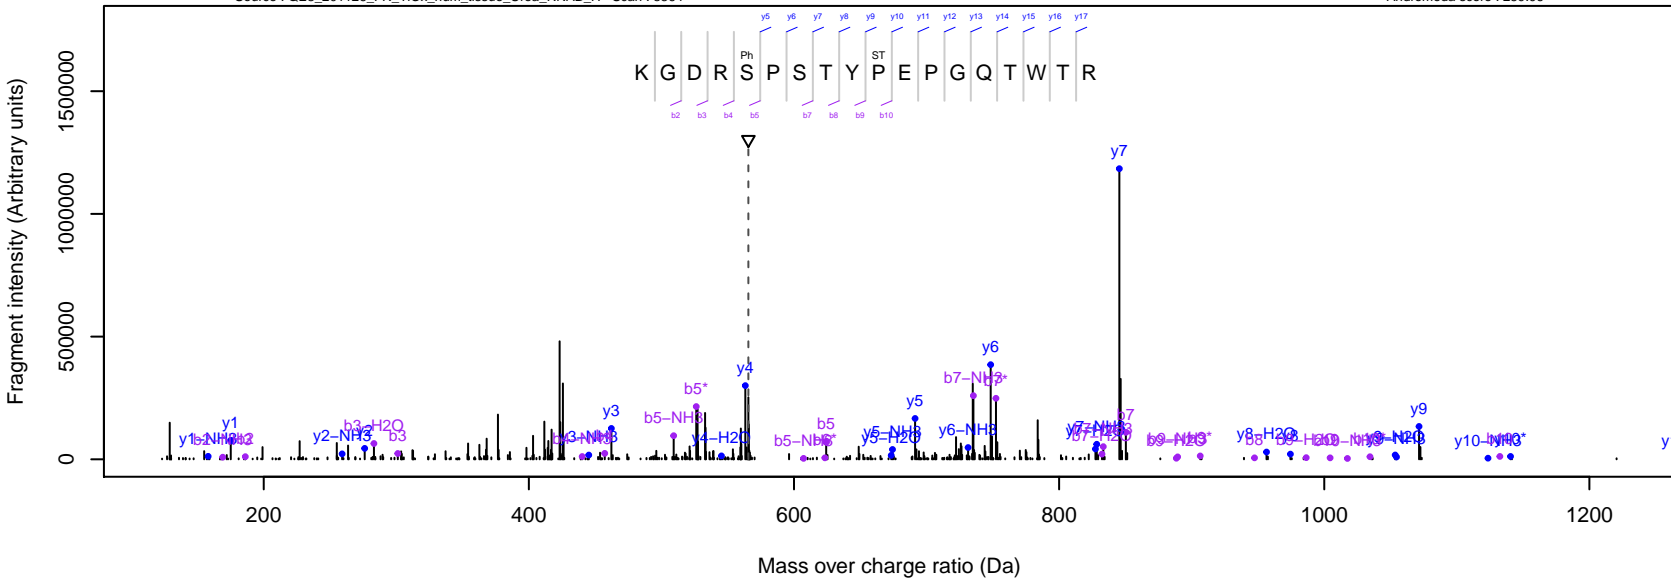

QKQEEESLGQVTDQVEVNAQNS(Phospho (STY))VPDEEAK-3+

Source : QE3\_201126\_FR\_TiOx\_hum\_tissue\_Urea\_RNAB\_N Scan : 28663

Andromeda score : 259.93

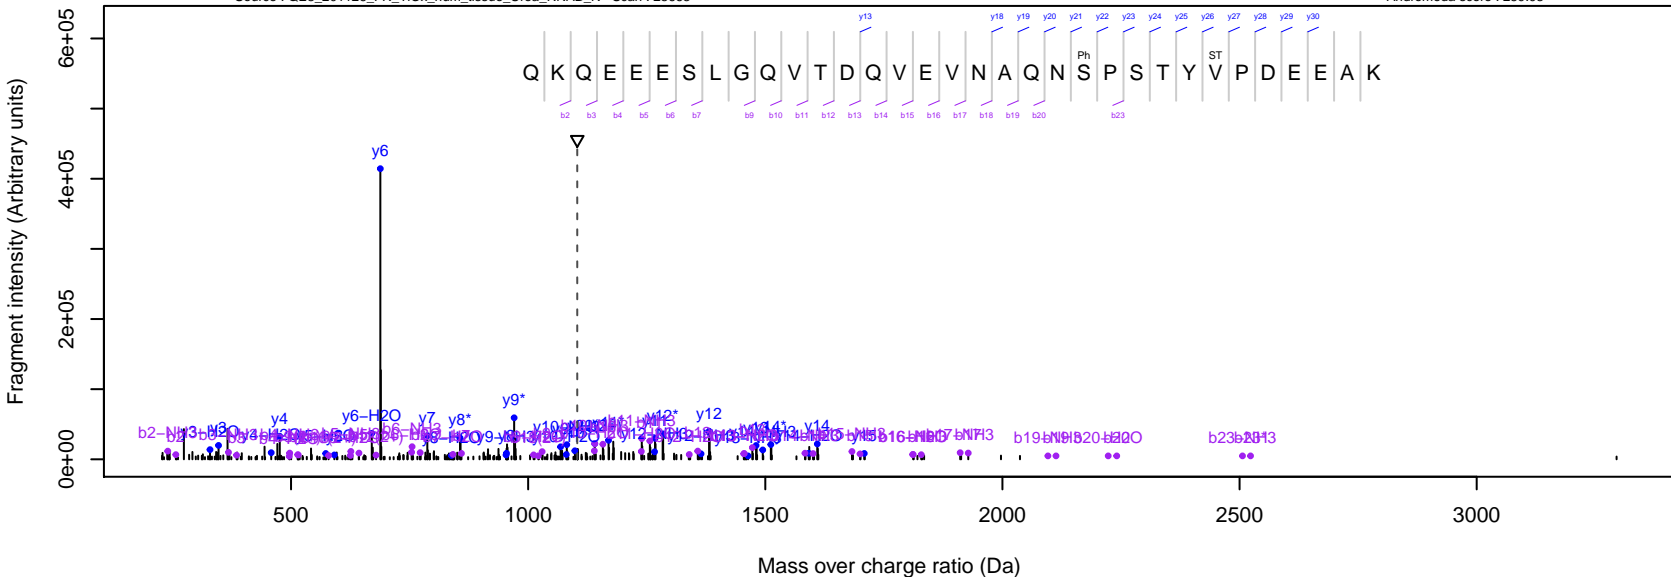

KREEGS(Phospho (STY))DIEDEDMEELLNDR-3+

Source : QE3\_201126\_FR\_TiOx\_hum\_tissue\_Urea\_RNAB\_H Scan : 38709

Andromeda score : 259.8

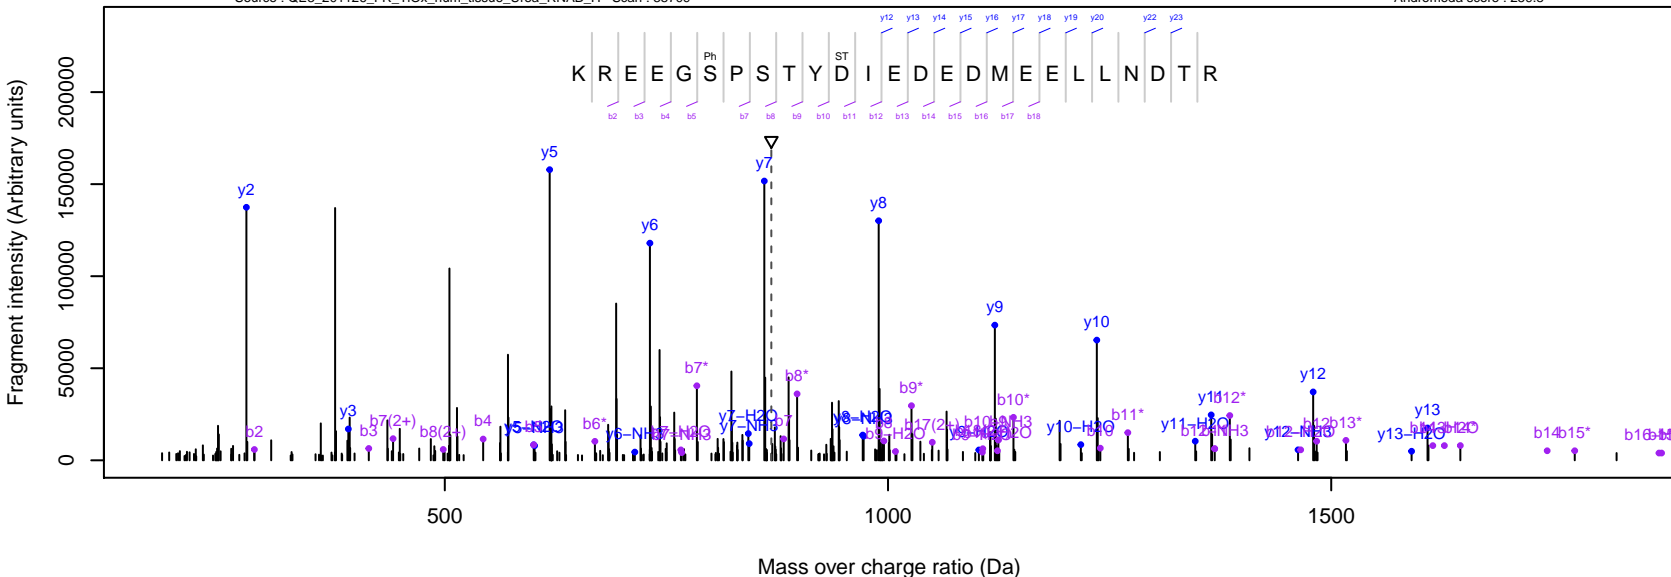

QGEDLAHVQHPHGAGPHAQEEDS(Phospho (STY))QEEEEEEEAASR-4+

Source : QE3\_201126\_FR\_TiOx\_hum\_tissue\_Urea\_RNAB\_H Scan : 15492

Andromeda score : 259.77

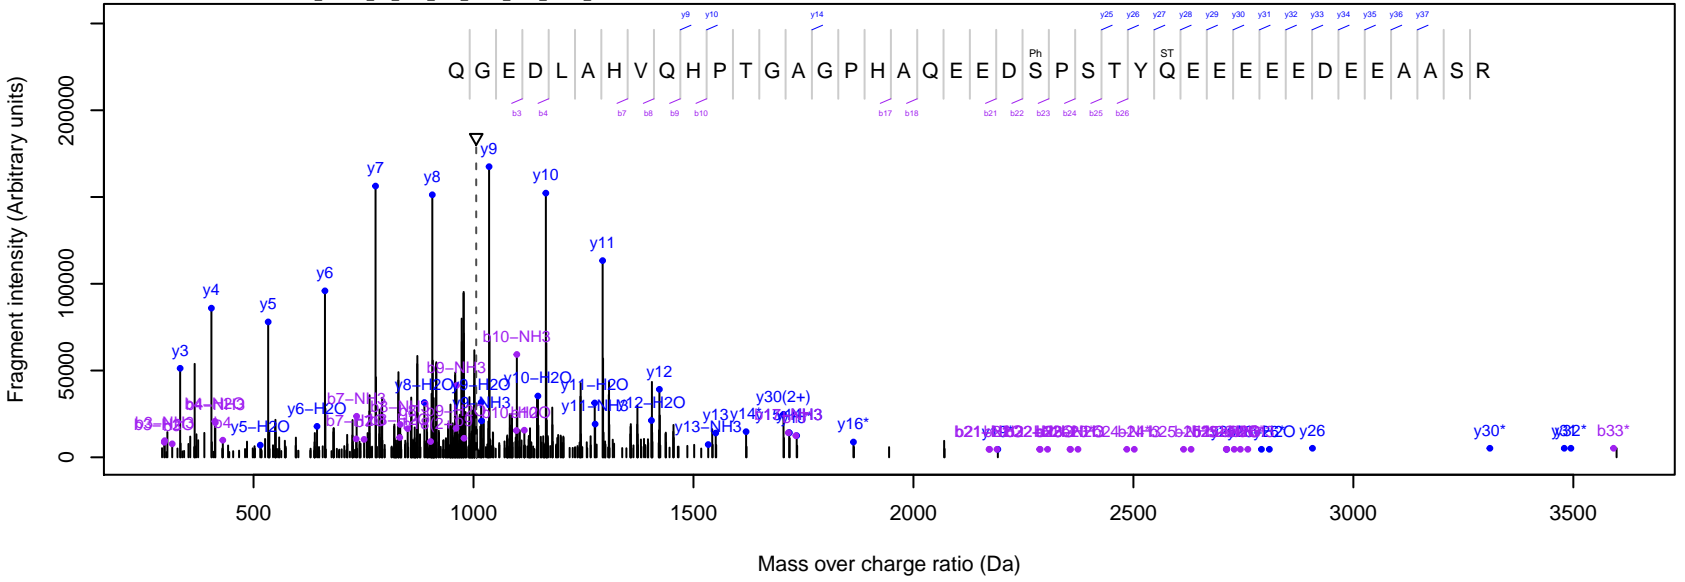

QEEIDES(Phospho (STY))DDDLDKPSPIK-2+

Source : QE3\_201126\_FR\_TiOx\_hum\_tissue\_Urea\_RNAB\_H Scan : 16184

Andromeda score : 259.55

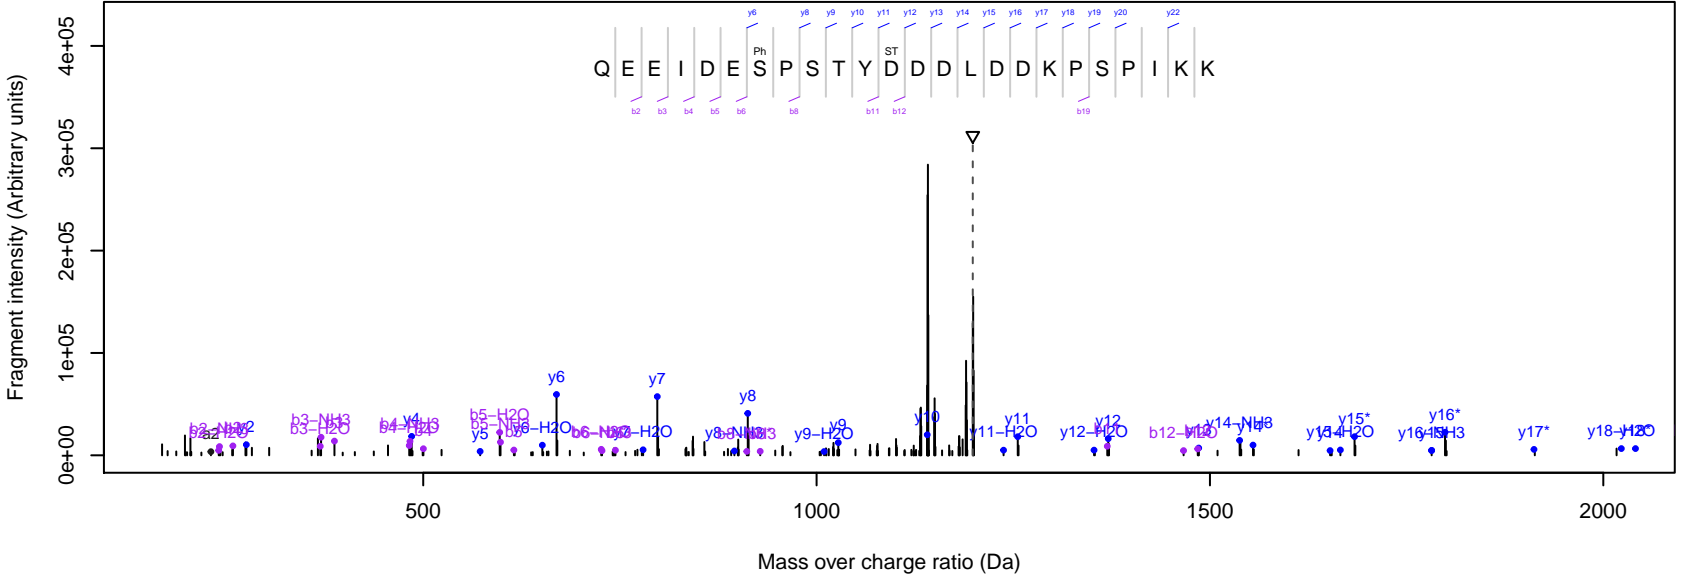

GGISVQVNSIKFDS(Phospho (STY))E-2+

Source : QE3\_201126\_FR\_TiOx\_hum\_tissue\_Urea\_RNAB\_B Scan : 39648

Andromeda score : 259.53

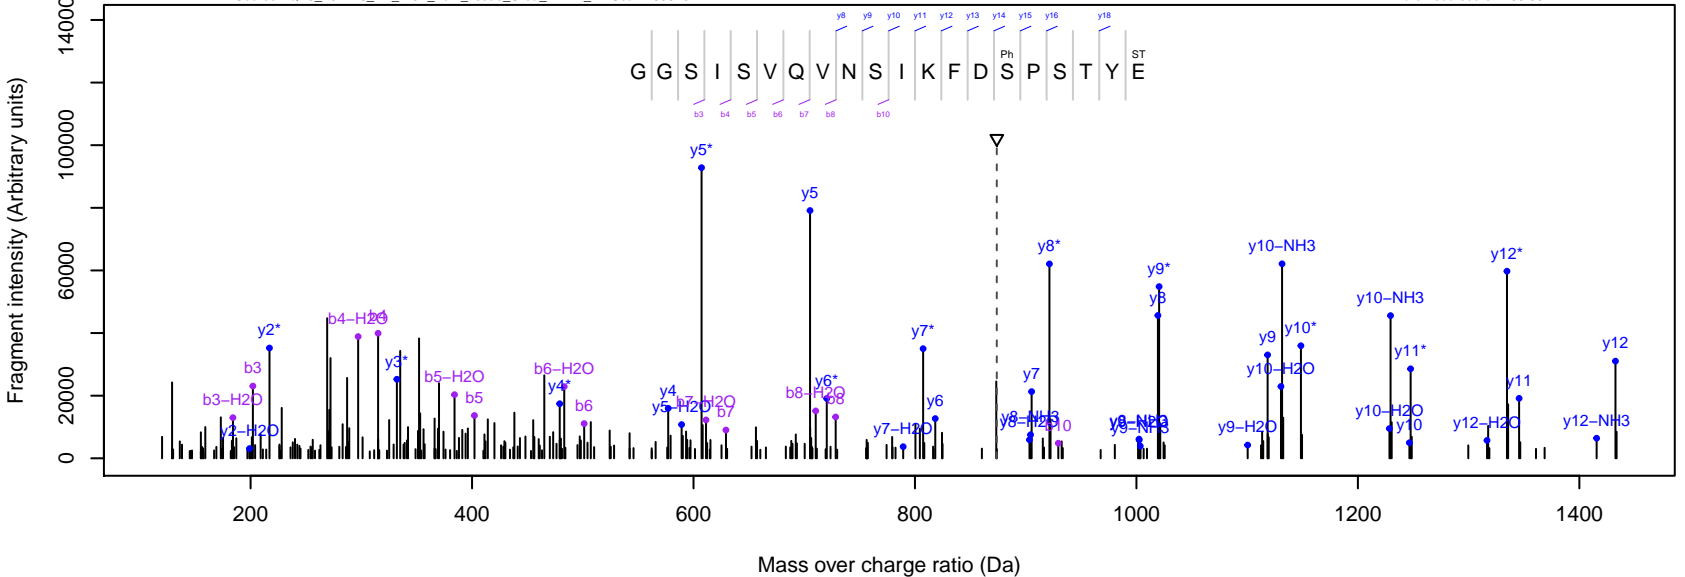



AGTLSITEFADMLSGNAGGFRS(Phospho (STY))R-3+

Source : QE3\_201126\_FR\_TiOx\_hum\_tissue\_Urea\_RNAB\_H Scan : 59146

Andromeda score : 259.45

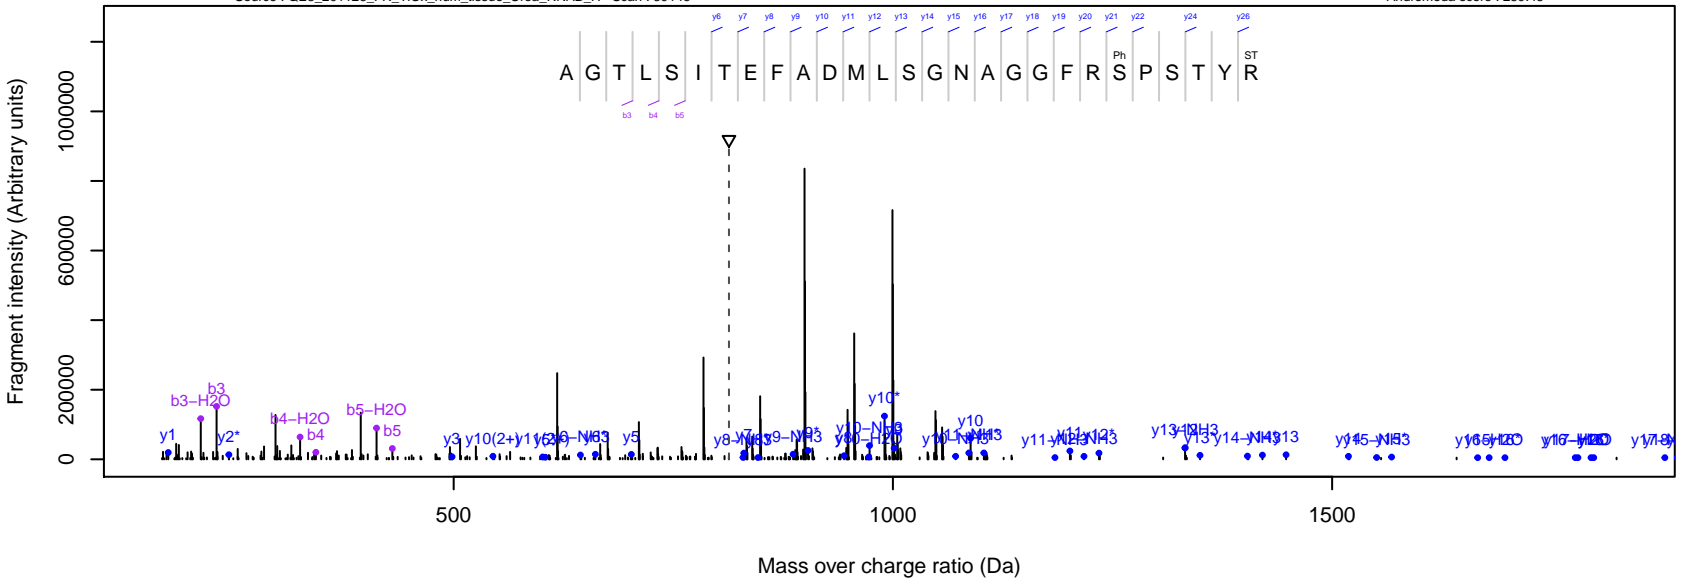

IEDVGS(Phospho (STY))DEEDDSGKDK-2+

Source : QE3\_201126\_FR\_TiOx\_hum\_tissue\_Urea\_RNAB\_B Scan : 8357

Andromeda score : 259.22

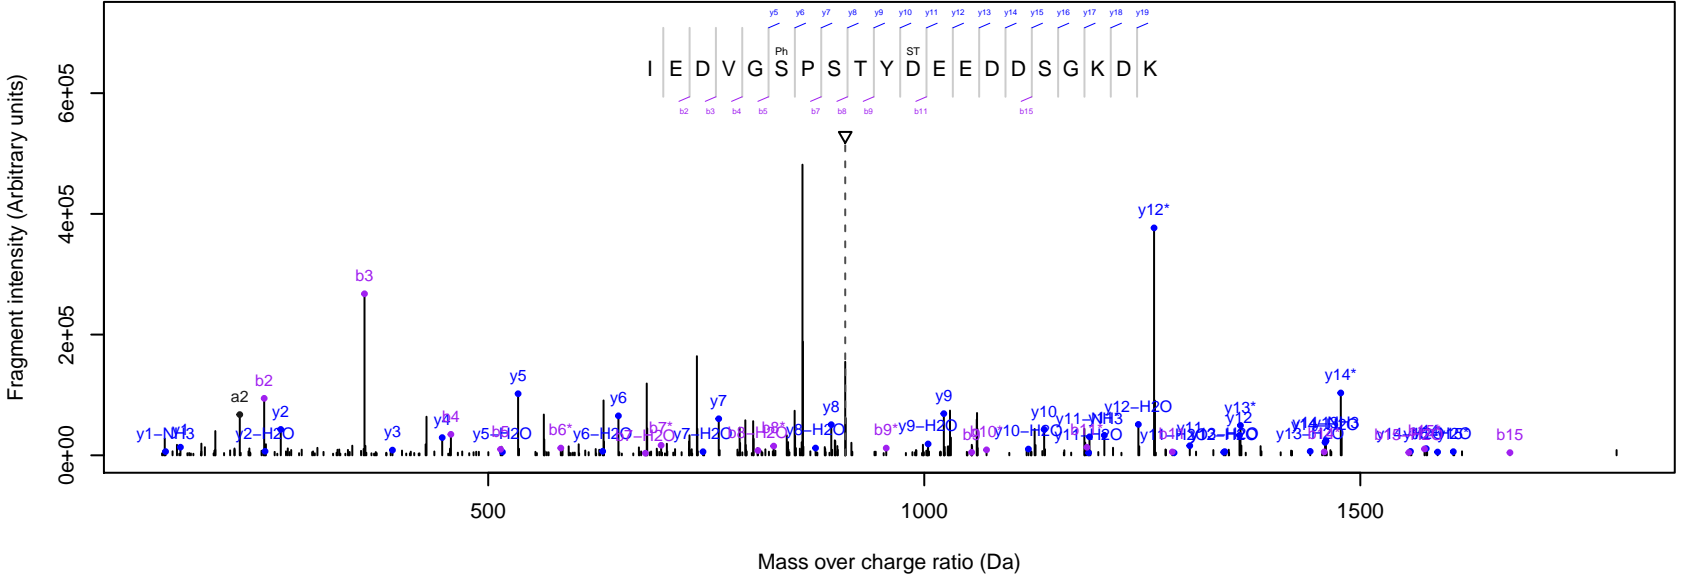

SLS(Phospho (STY))ELESLESLKLPAESNEK-2+

Source : QE3\_201126\_FR\_TiOx\_hum\_tissue\_Urea\_RNAB\_N Scan : 41947

Andromeda score : 259.22

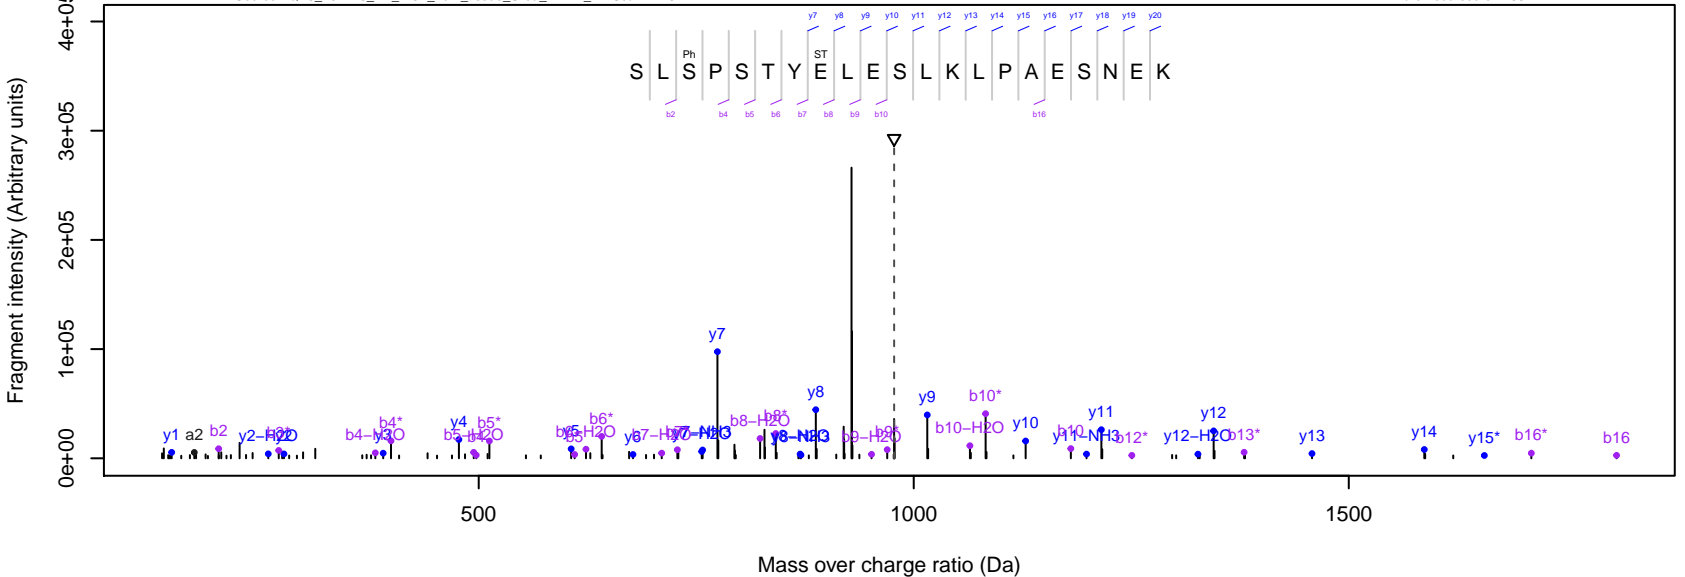

GPS(Phospho (STY))WDPFRDWYPHSR-2+

Source : QE3\_201126\_FR\_TiOx\_hum\_tissue\_Urea\_RNAB\_H Scan : 48285

Andromeda score : 259.08

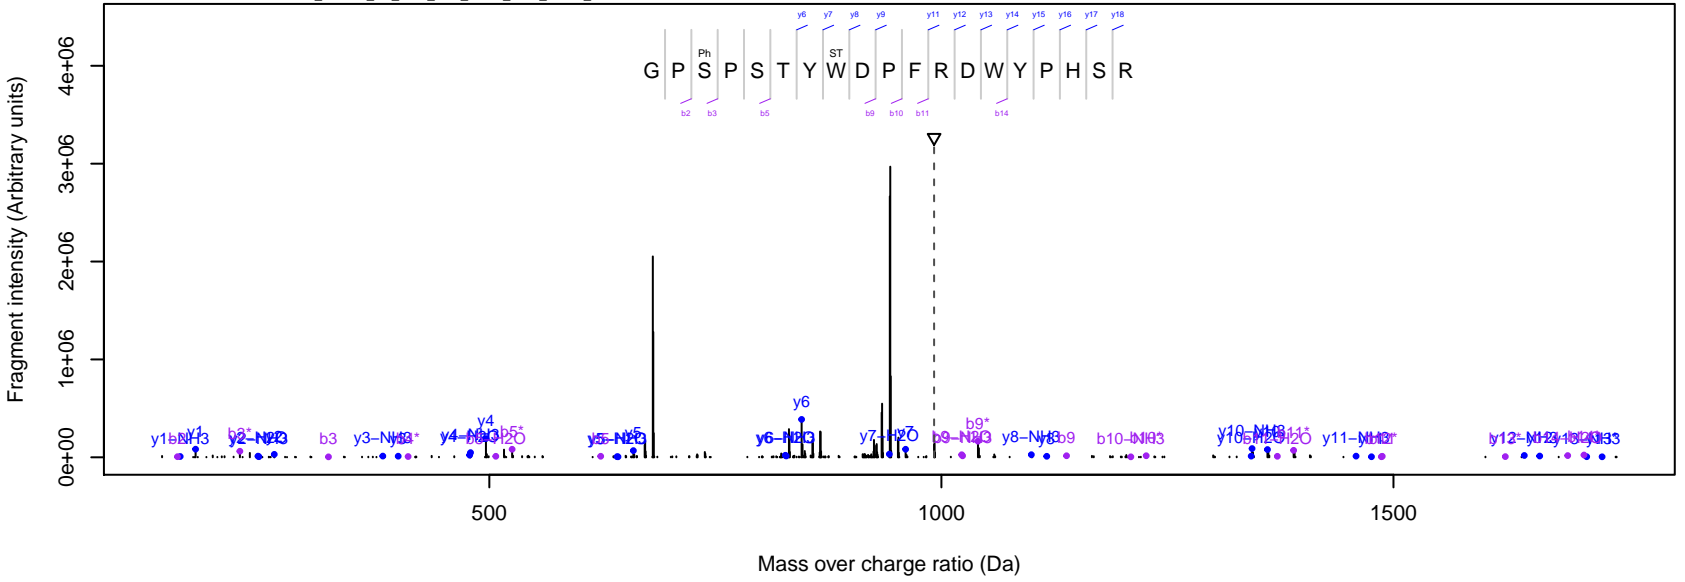

RGRS(Phospho (STY))PQPPAEEDDDFDLVAIDTYNCDLHFK-4+

Source : QE3\_201126\_FR\_TiOx\_hum\_tissue\_Urea\_RNAB\_H Scan : 49003

Andromeda score : 258.93

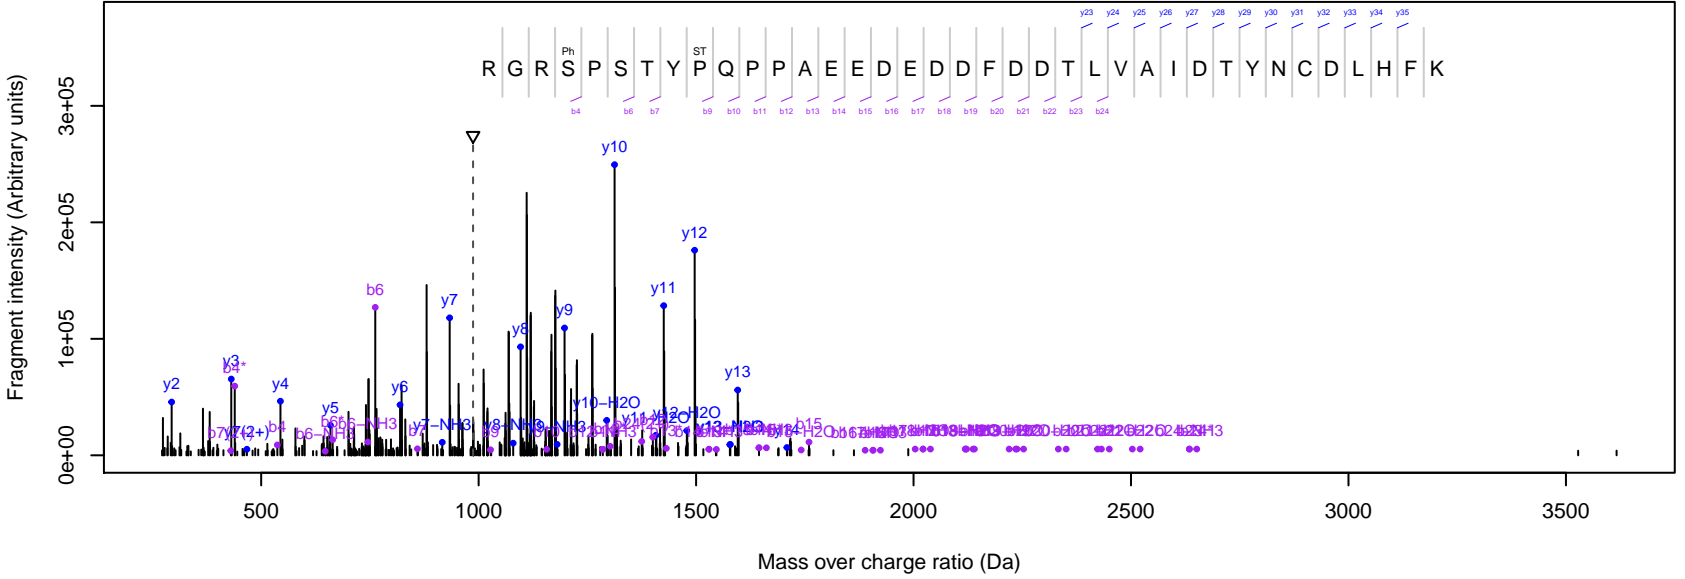

SLGSVQAPSYGARPVSPSTYSAASVYAGAGGSGSR-3+

Source : QE3\_201126\_FR\_TiOx\_hum\_tissue\_Urea\_RNAB\_H Scan : 29851

Andromeda score : 258.91

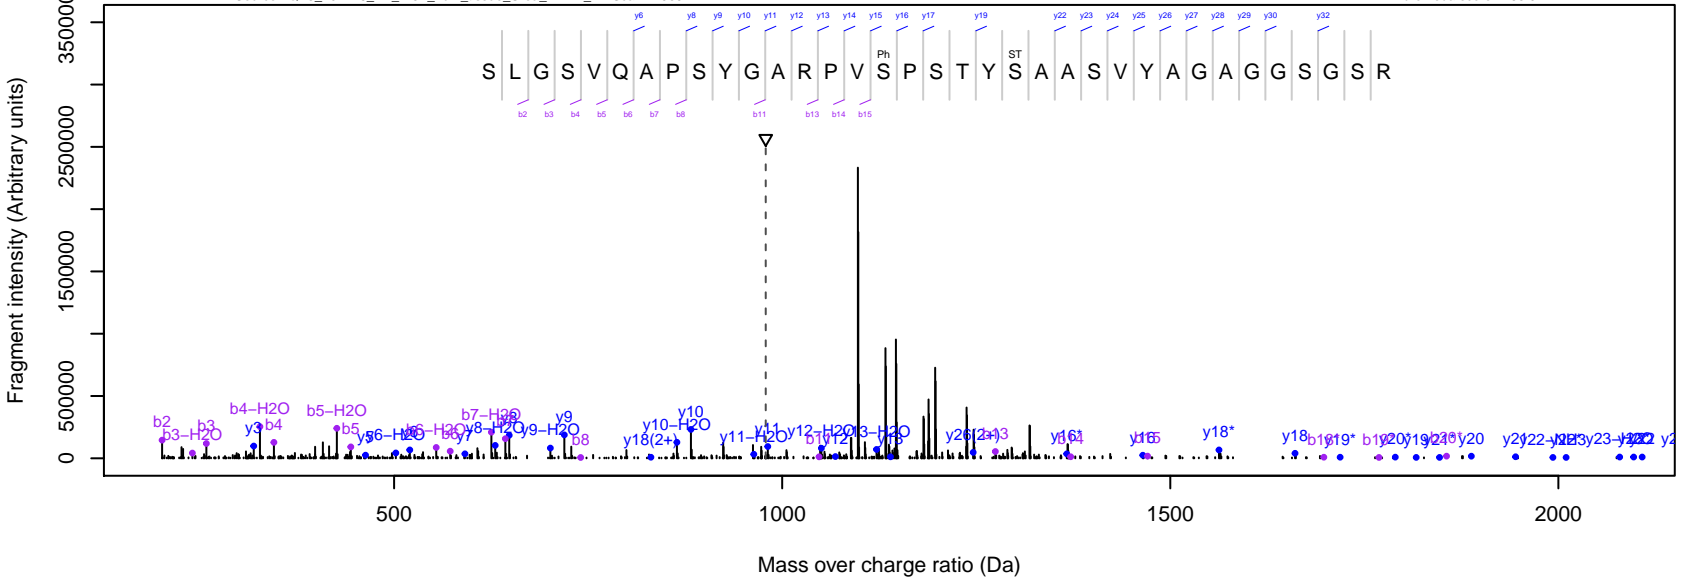

VPS(Phospho (STY))SDEEVVEEPQSR-2+

Source : QE3\_201126\_FR\_TiOx\_hum\_tissue\_Urea\_RNAB\_B Scan : 19636

Andromeda score : 258.79

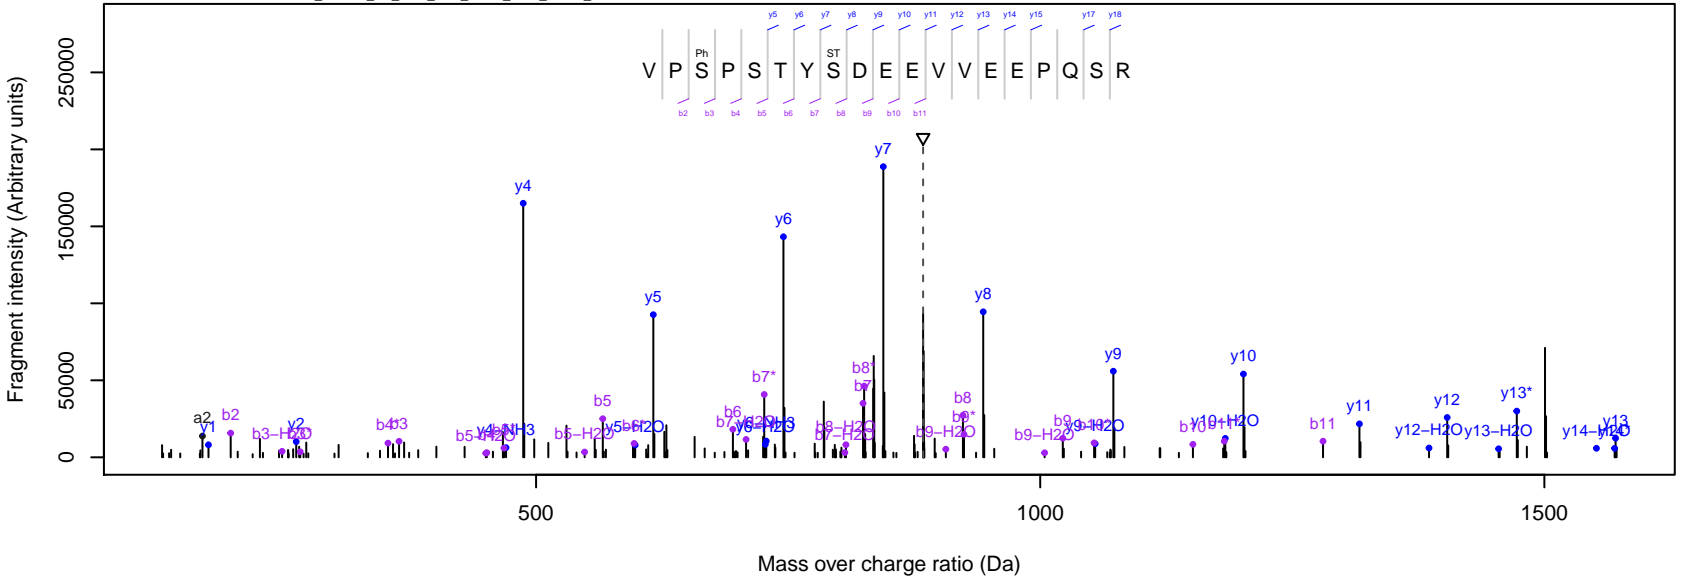

GDMS(Phospho (STY))DEDDENEFFDAPEIITMPENLGHKR-3+

Source : QE3\_201126\_FR\_TiOx\_hum\_tissue\_Urea\_RNAB\_H Scan : 53679

Andromeda score : 258.67

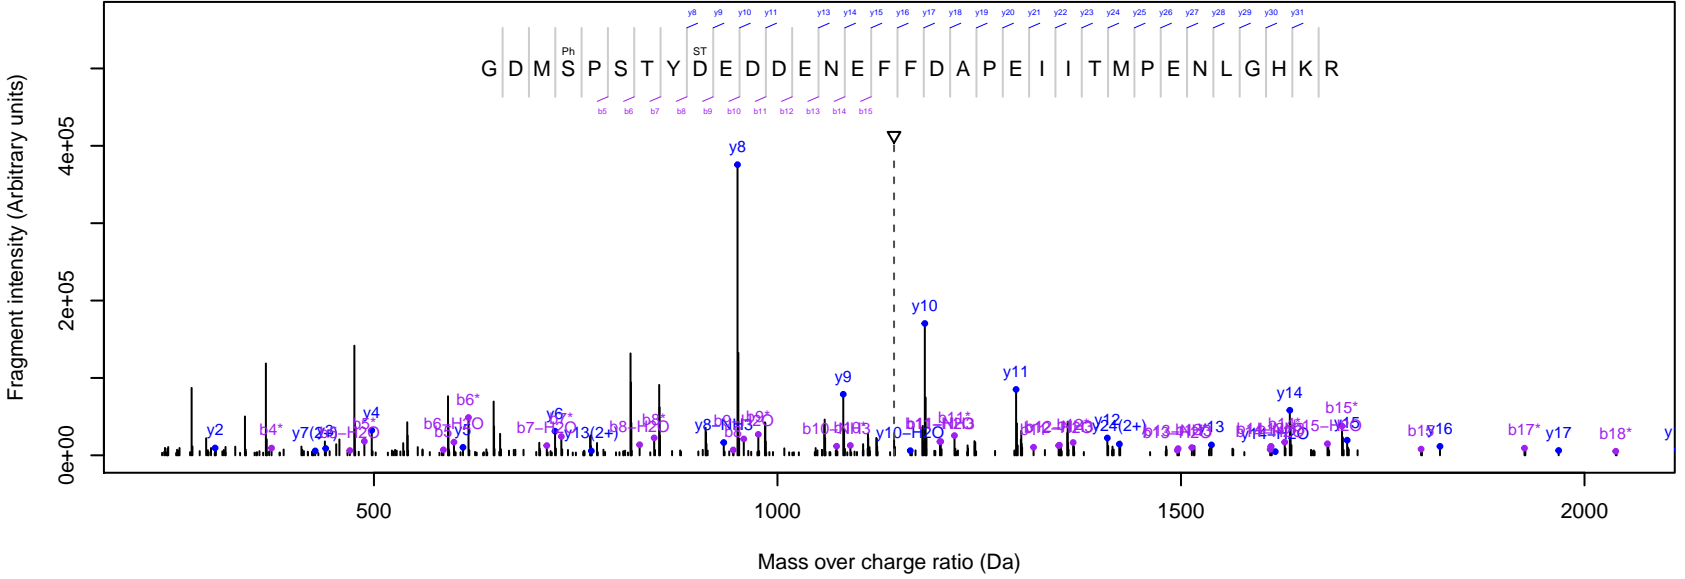

AAS(Phospho (STY))SAAQGFQGN-2+

Source : QE3\_201126\_FR\_TiOx\_hum\_tissue\_Urea\_RNAB\_H Scan : 19323

Andromeda score : 258.65

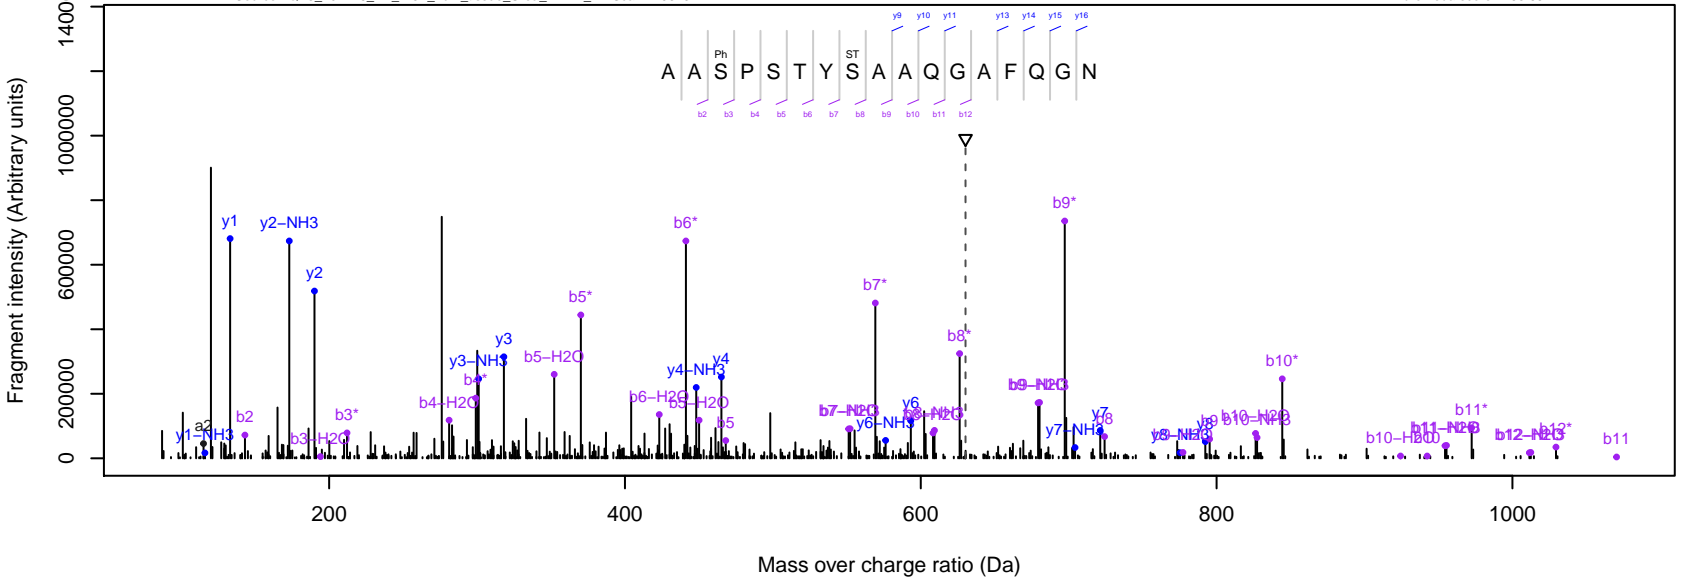

ERS(Phospho (STY))PS(Phospho (STY))PLRGNVPSPLPTR-2+

Source : QE3\_201126\_FR\_TiOx\_hum\_tissue\_Urea\_RNAB\_B Scan : 28452

Andromeda score : 258.43

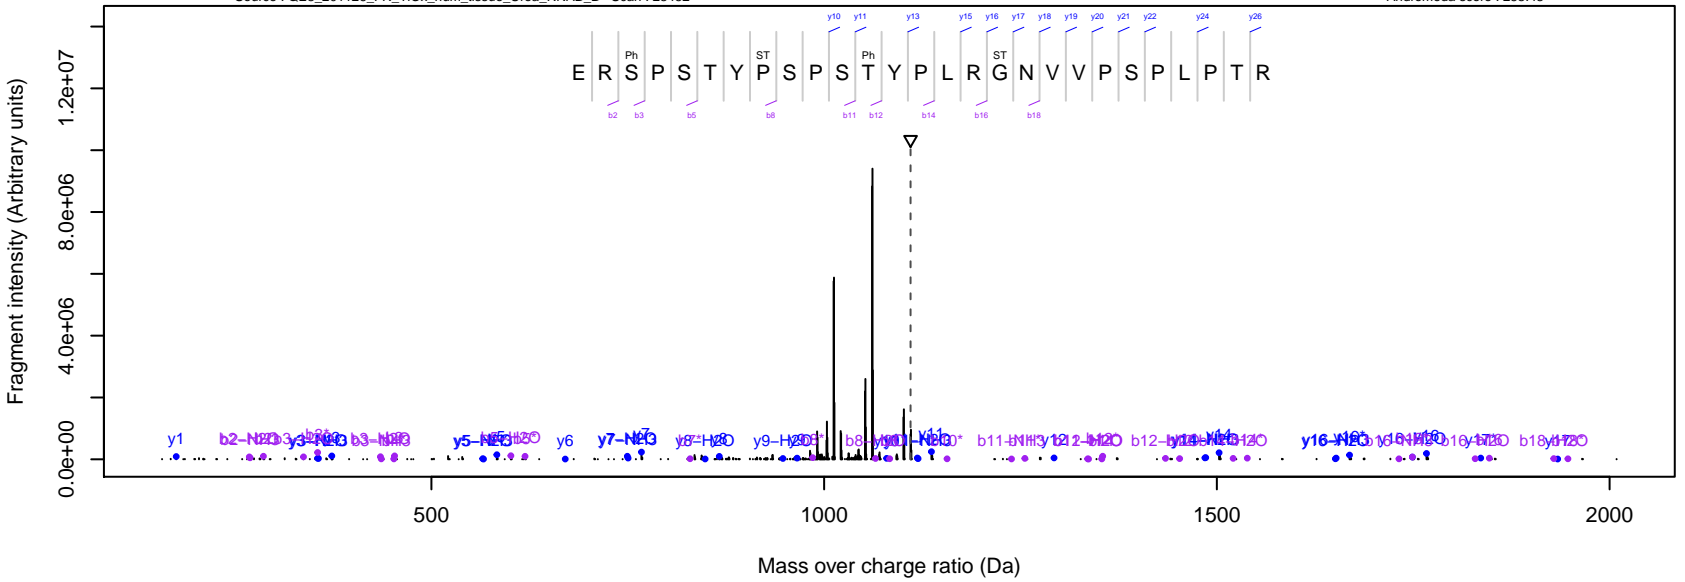

PGSTGTWNPGS(Phospho (STY))SER-2+

Source : QE3\_201126\_FR\_TiOx\_hum\_tissue\_Urea\_RNAB\_N Scan : 16632

Andromeda score : 258.41

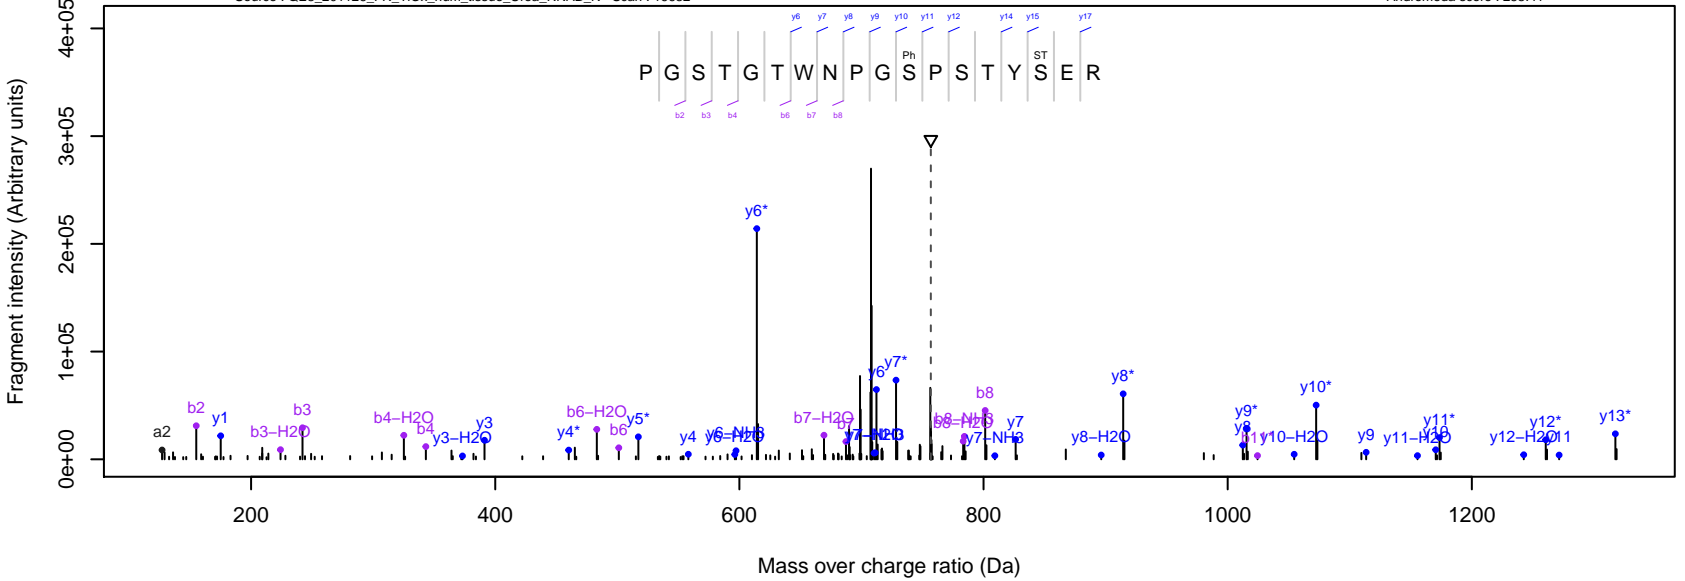

KPDGVKES(Phospho (STY))TESSNTTIEDVDK-3+

Source : QE3\_201126\_FR\_TiOx\_hum\_tissue\_Urea\_RNAB\_H Scan : 10405

Andromeda score : 258.09

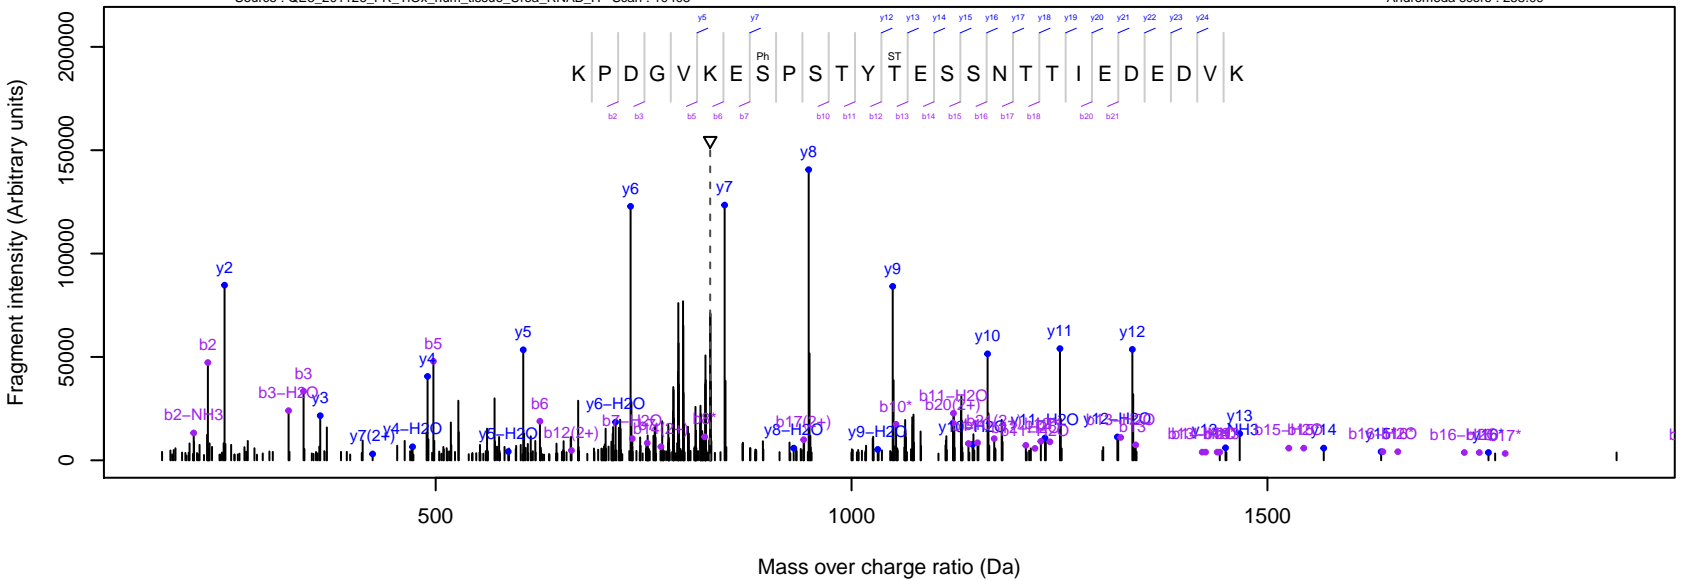

VGDST(Phospho (STY))PVSEKPVSAAVDANASESP-2+

Source : QE3\_201126\_FR\_TIOx\_hum\_tissue\_Urea\_RNAB\_N Scan : 26372

Andromeda score : 257.94

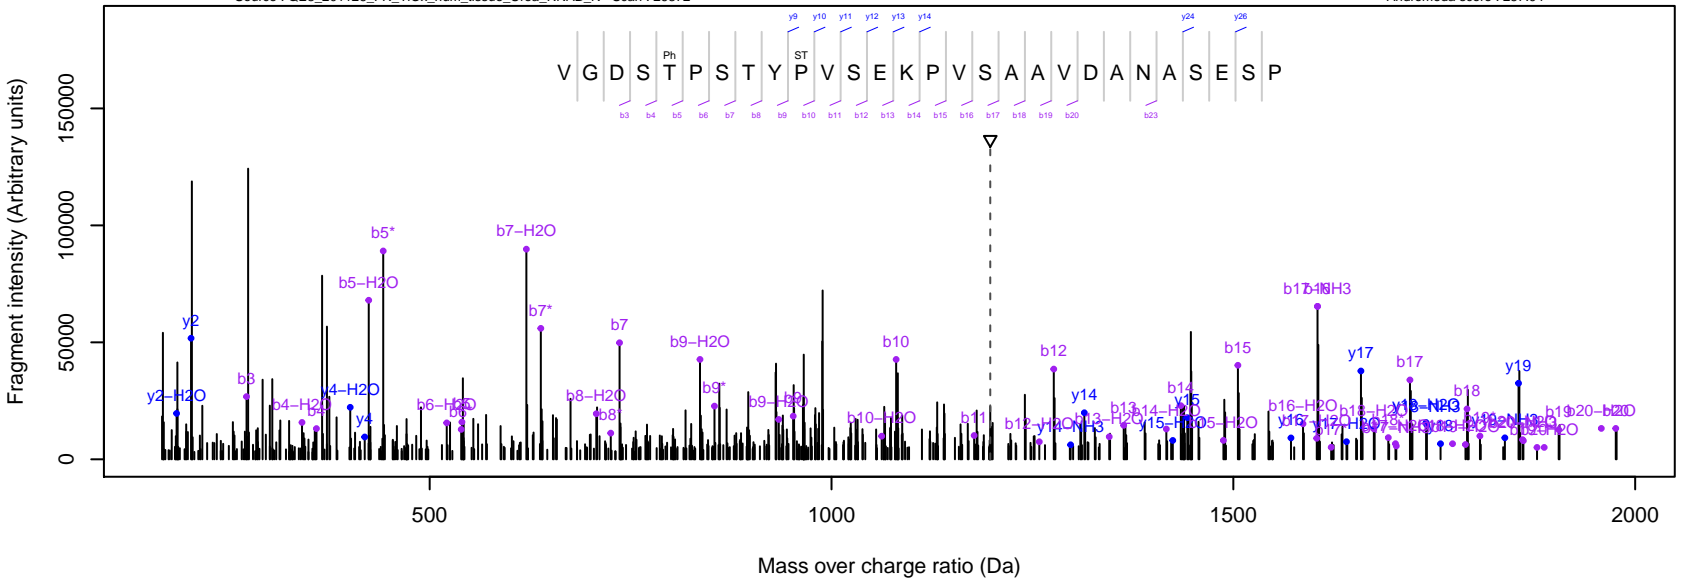

DFS(Phospho (STY))LEQLR-2+

Source : QE3\_201126\_FR\_TIOx\_hum\_tissue\_Urea\_RNAB\_N Scan : 40738

Andromeda score : 257.83

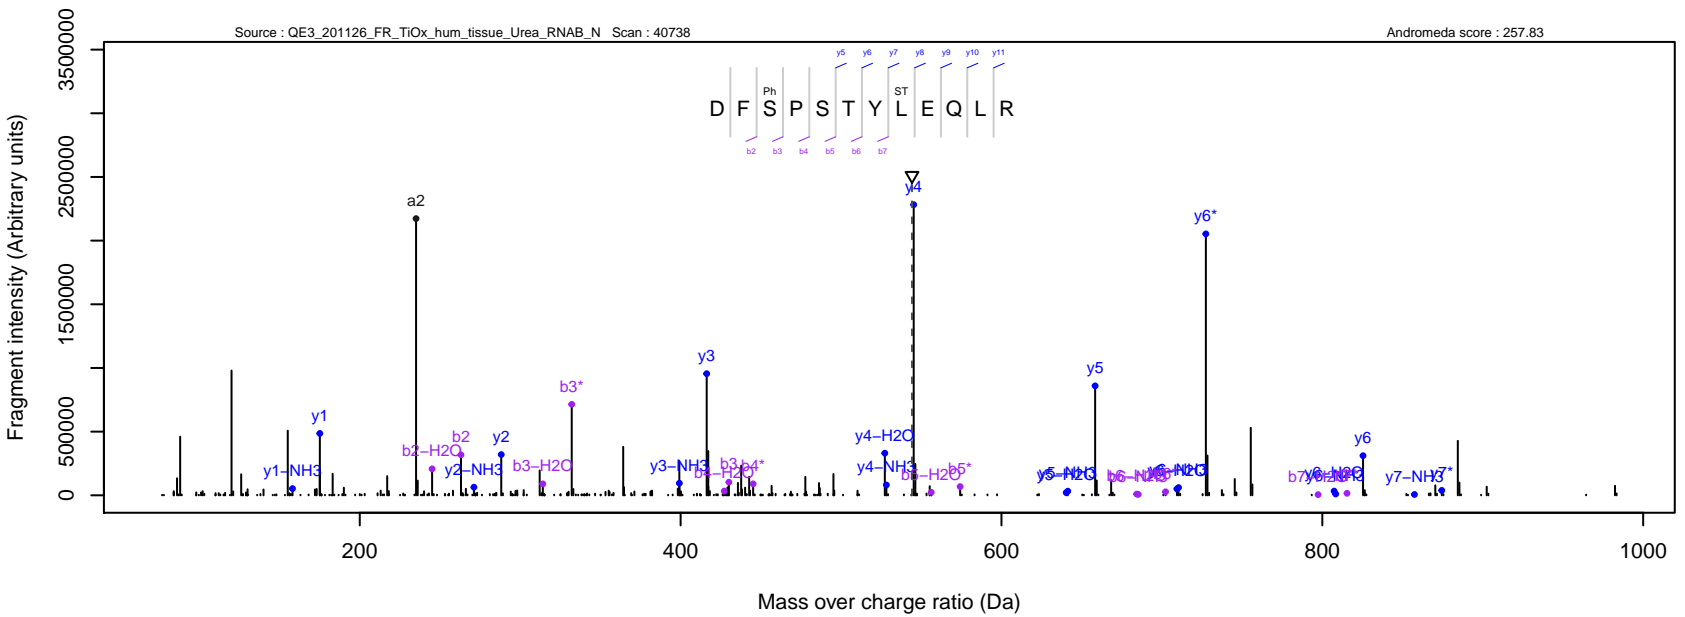

DAELQDQEFGRDS(Phospho (STY))LGTYSR-3+

Source : QE3\_201126\_FR\_TIOx\_hum\_tissue\_Urea\_RNAB\_N Scan : 22597

Andromeda score : 257.43

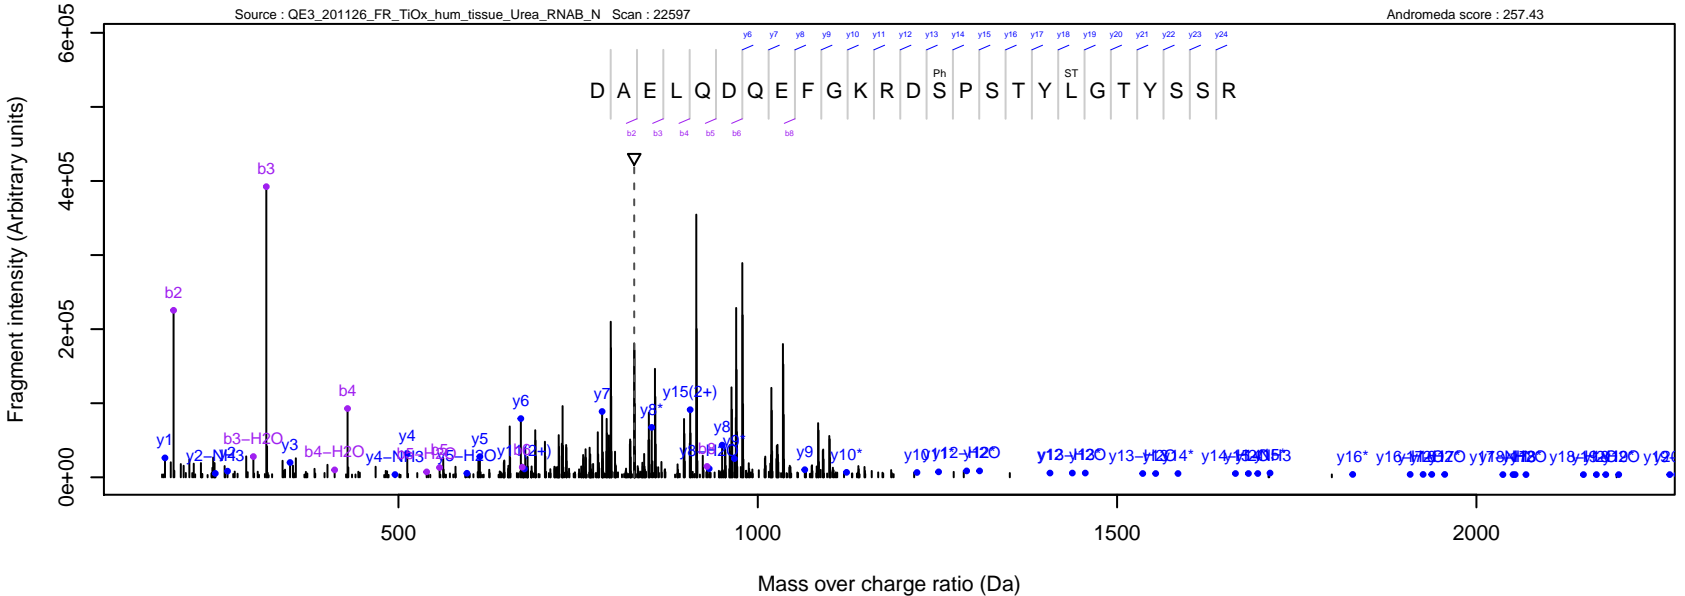

LVEDERS(Phospho (STY))DREETESS(Phospho (STY))EGEEAAAGGAK-3+

Source : QE3\_201126\_FR\_TiOx\_hum\_tissue\_Urea\_RNAB\_B Scan : 12400

Andromeda score : 257.2

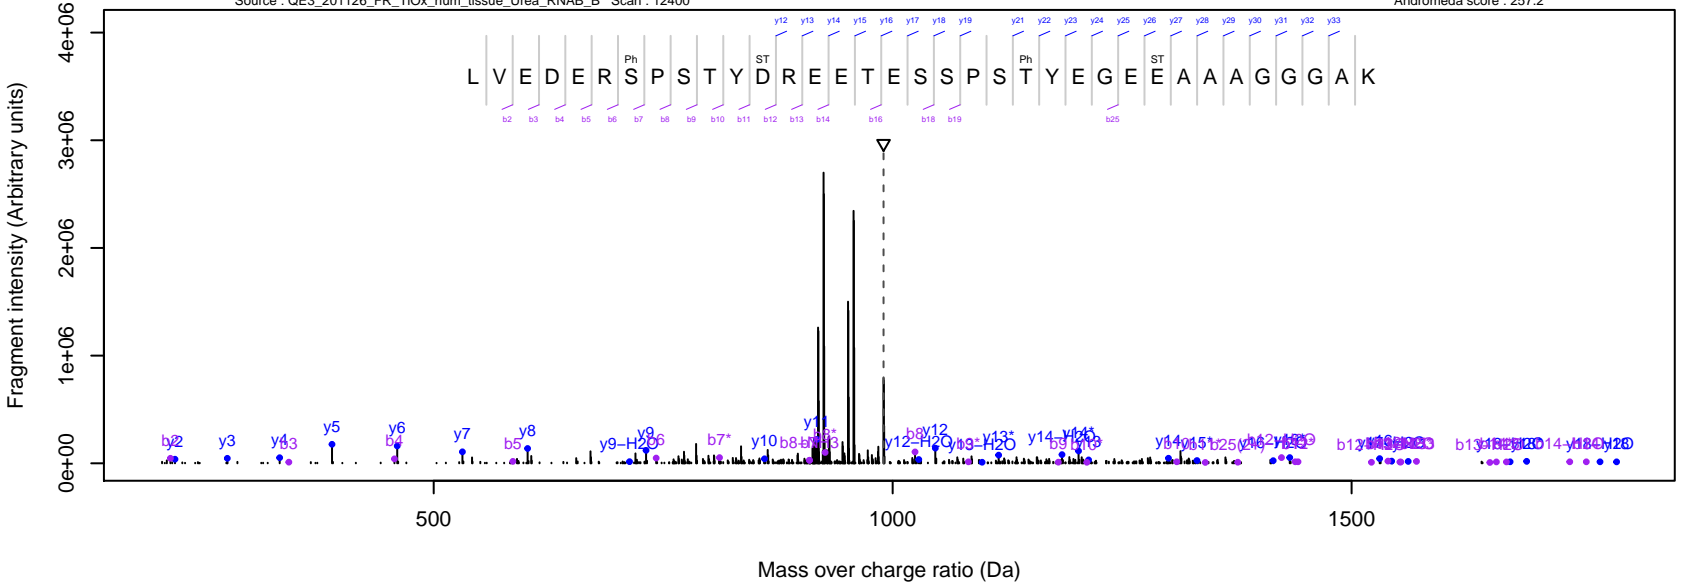

RAPS(Phospho (STY))VANVGSCHDSLK-3+

Source : QE3\_201126\_FR\_TiOx\_hum\_tissue\_Urea\_RNAB\_N Scan : 17721

Andromeda score : 257.2

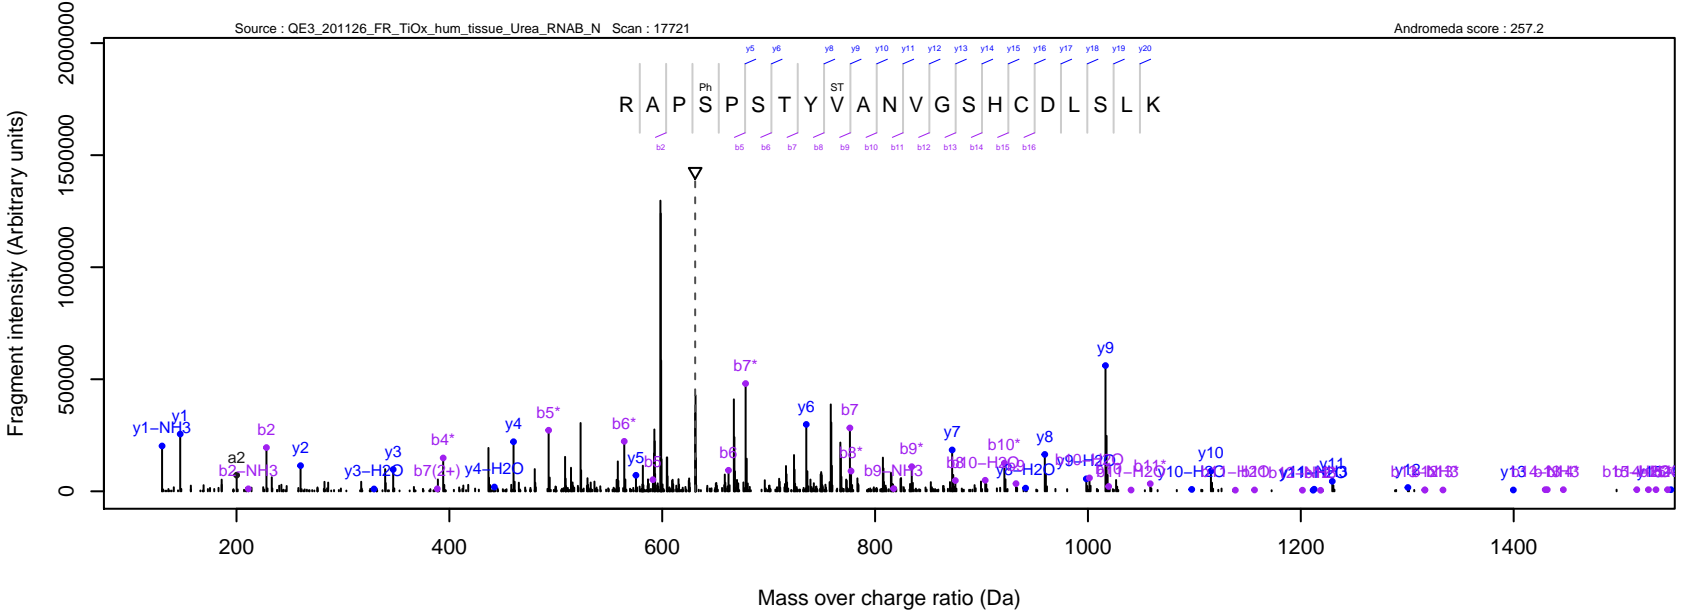

SLPTTVPE(Phospho (STY))PNYR-2+

Source : QE3\_201126\_FR\_TiOx\_hum\_tissue\_Urea\_RNAB\_N Scan : 25287

Andromeda score : 257.2

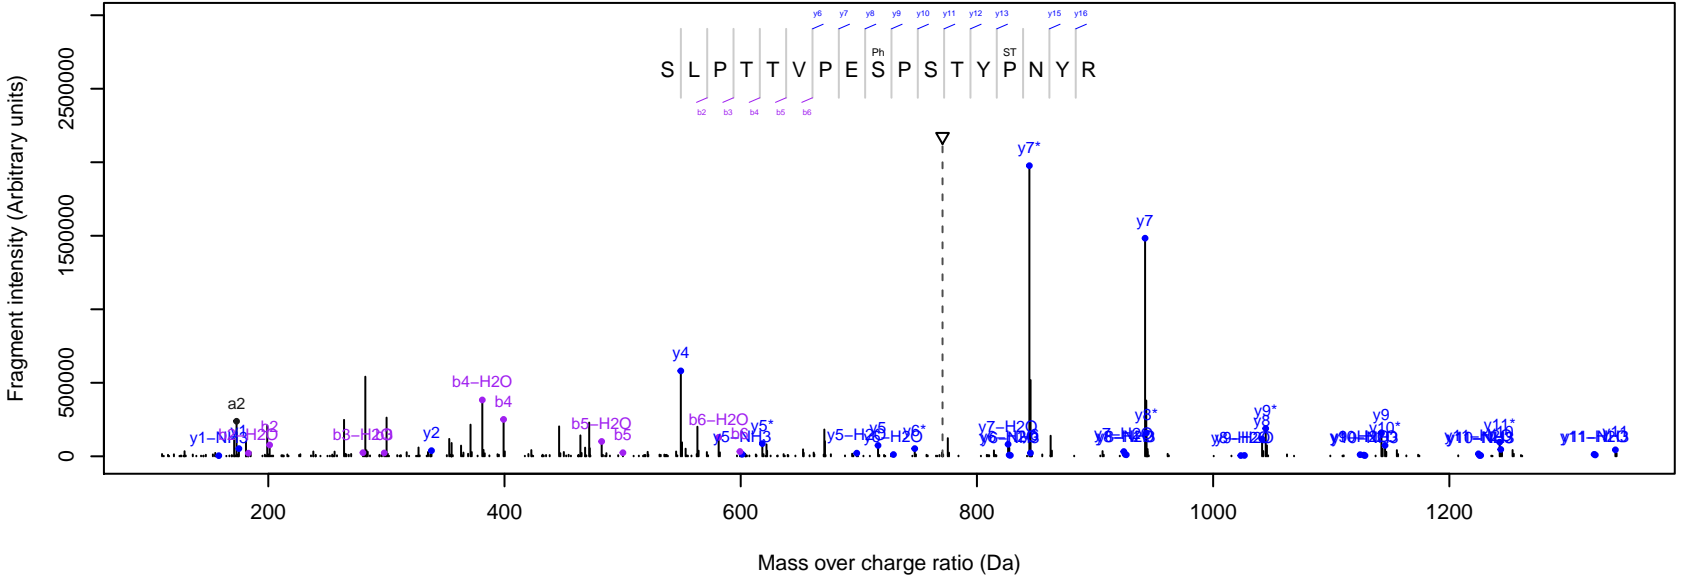



RDS(Phospho (STY))SESQLASTESDKPTTGR-3+

Source : QE3\_201126\_FR\_TiOx\_hum\_tissue\_Urea\_RNAB\_N Scan : 8504

Andromeda score : 256.56

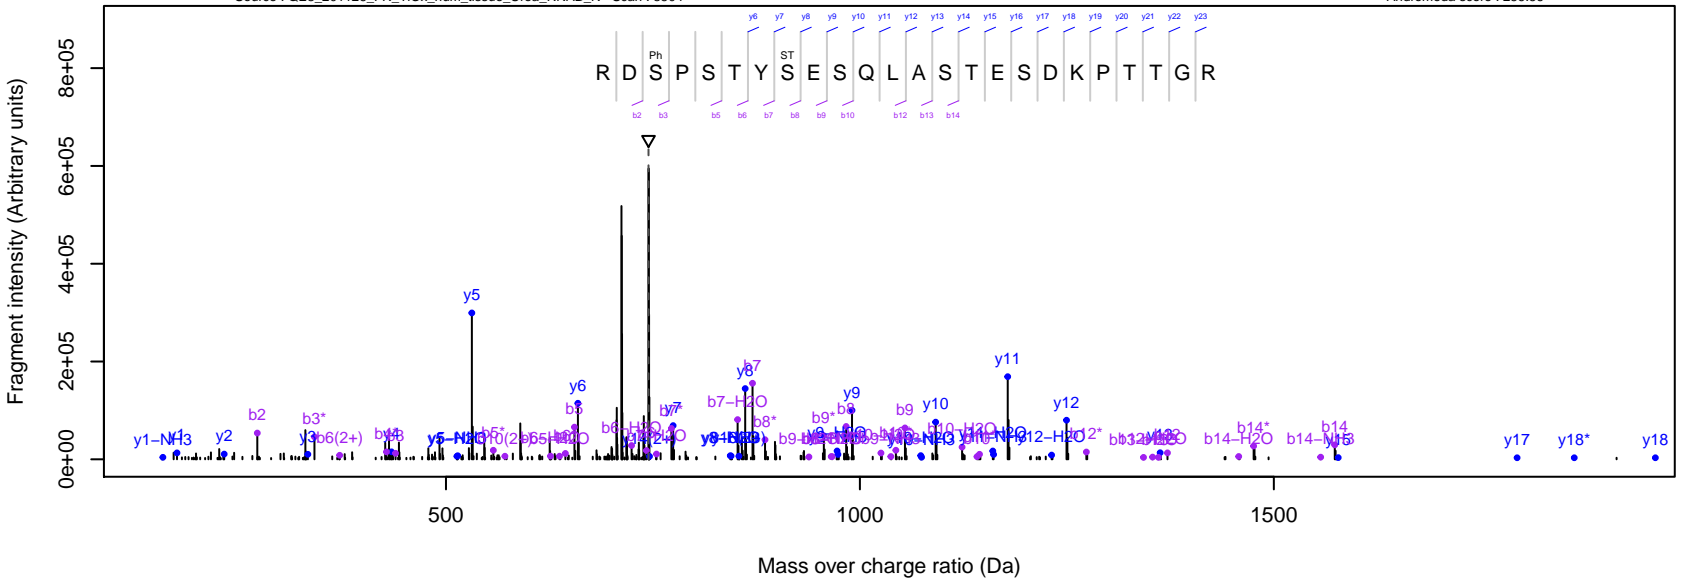

HGS(Phospho (STY))GPNILTGDSPPGFSK-2+

Source : QE3\_201126\_FR\_TiOx\_hum\_tissue\_Urea\_RNAB\_N Scan : 30182

Andromeda score : 256.28

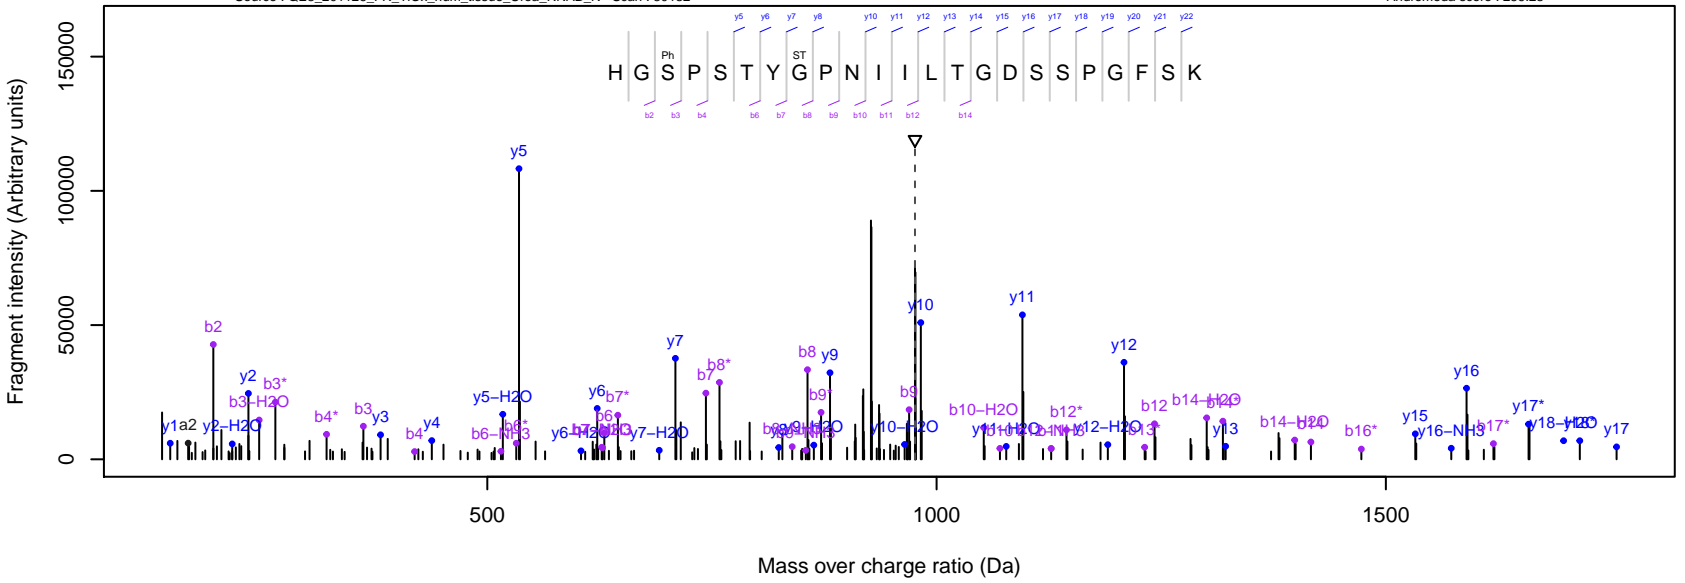

LKDLFDYS(Phospho (STY))PPLHK-2+

Source : QE3\_201126\_FR\_TiOx\_hum\_tissue\_Urea\_RNAB\_H Scan : 33625

Andromeda score : 256.18

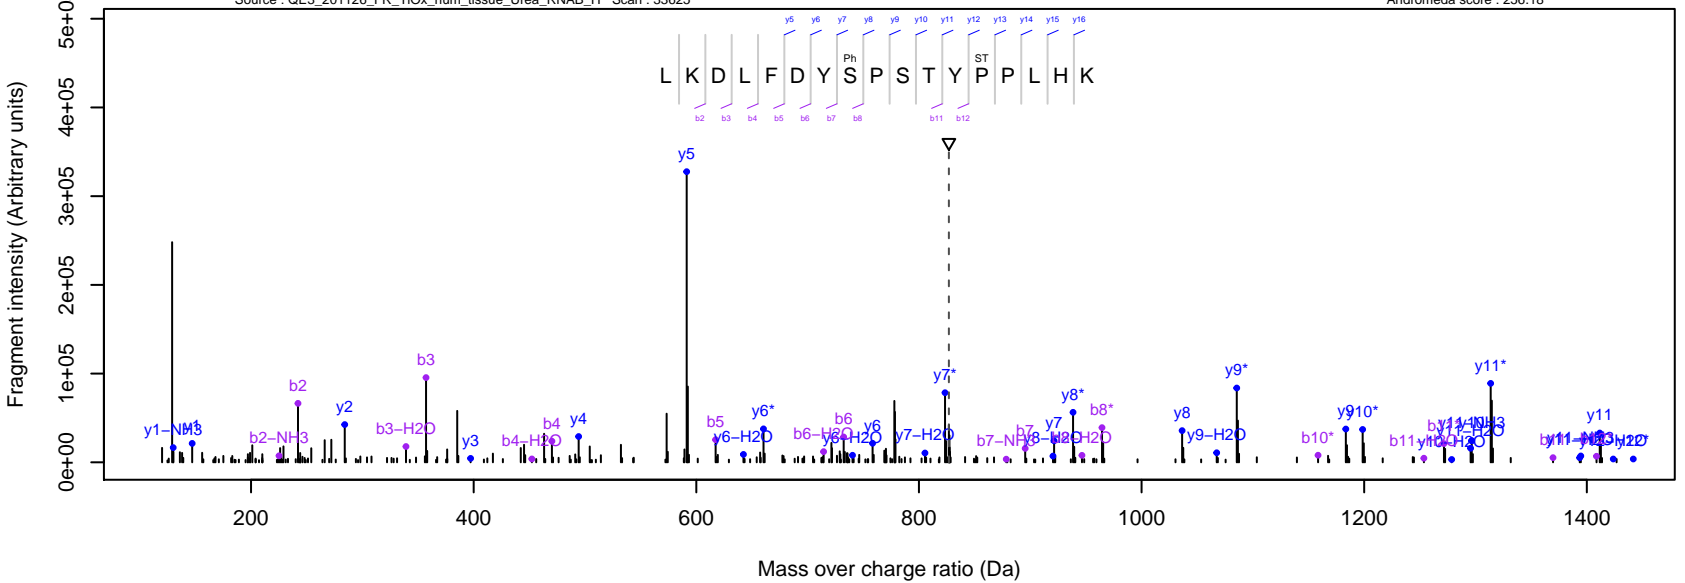



YFQISQDEDES(Phospho (STY))ESED-2+

Source : QE3\_201126\_FR\_TiOx\_hum\_tissue\_Urea\_RNAB\_N Scan : 38512

Andromeda score : 256.13

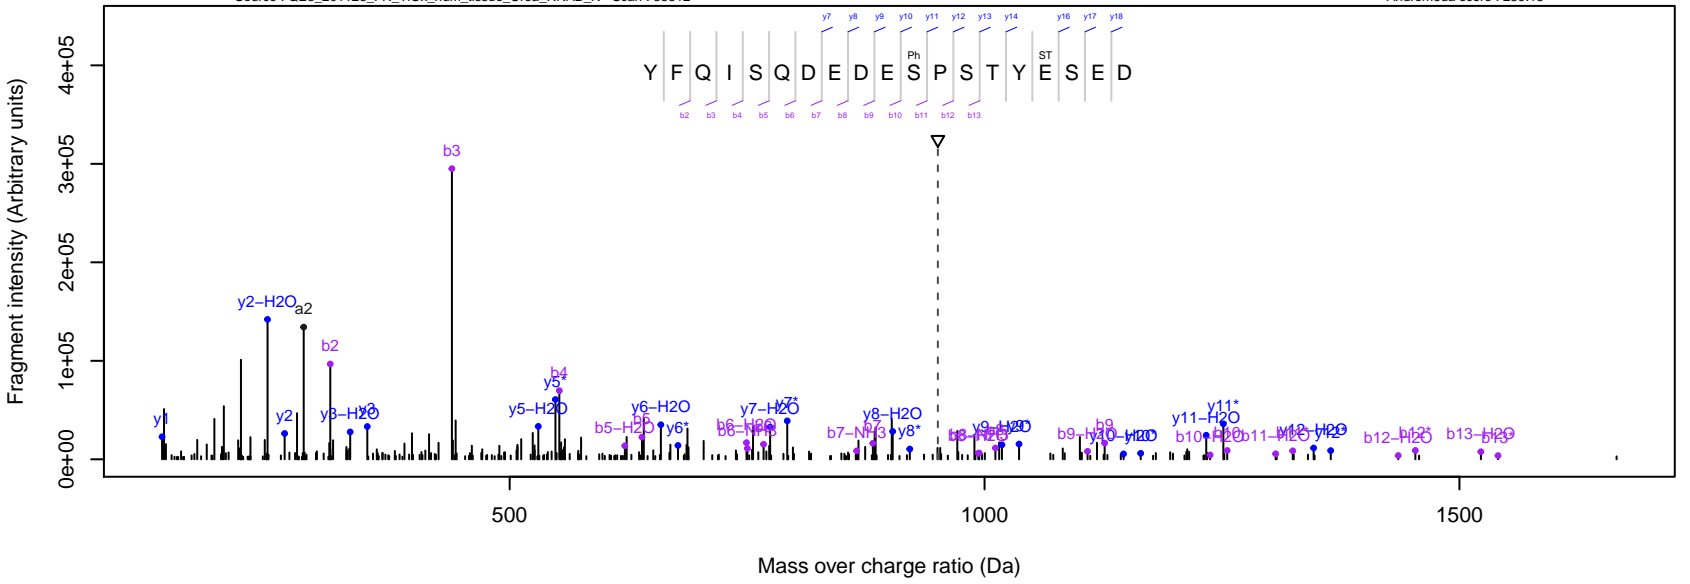

DSHS(Phospho (STY))SEDEASSQTDLSTISK-3+

Source : QE3\_201126\_FR\_TiOx\_hum\_tissue\_Urea\_RNAB\_H Scan : 15989

Andromeda score : 256.07

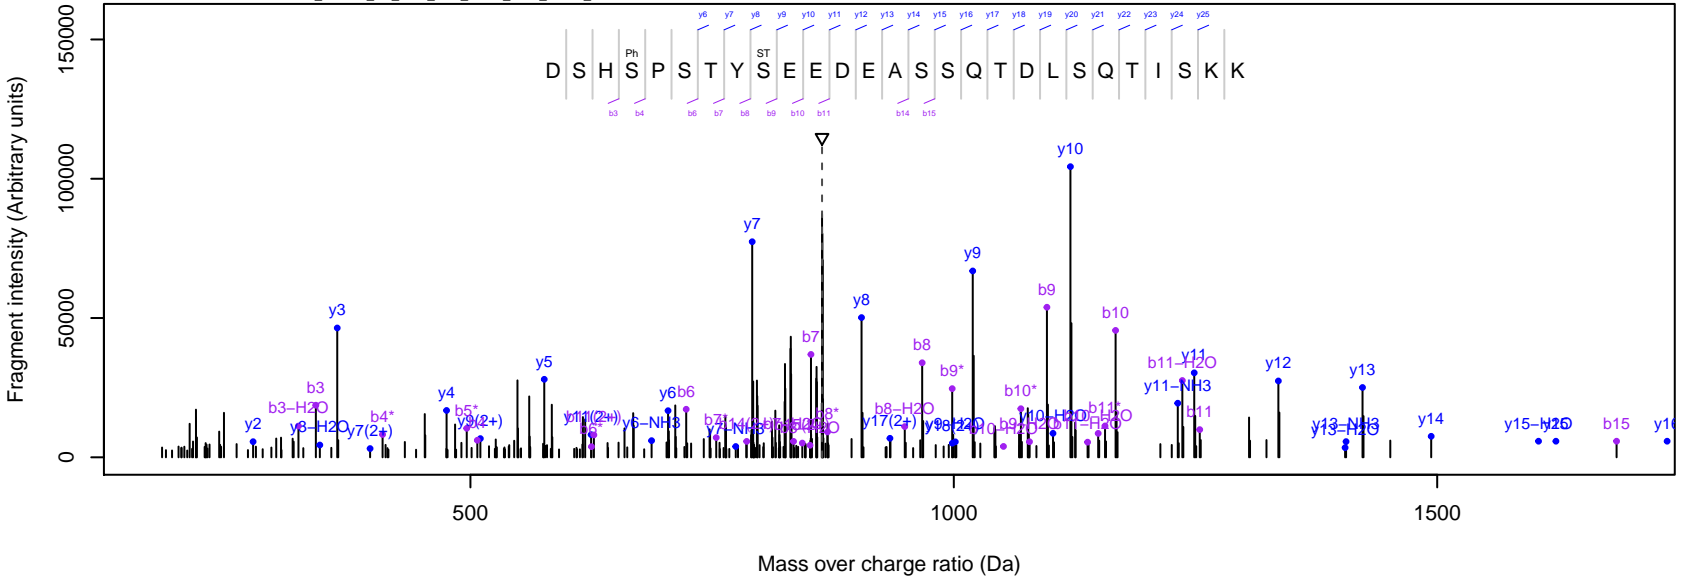

NS(Phospho (STY))SEKLPTELSKEEPSTK-3+

Source : QE3\_201126\_FR\_TiOx\_hum\_tissue\_Urea\_RNAB\_H Scan : 15510

Andromeda score : 255.99

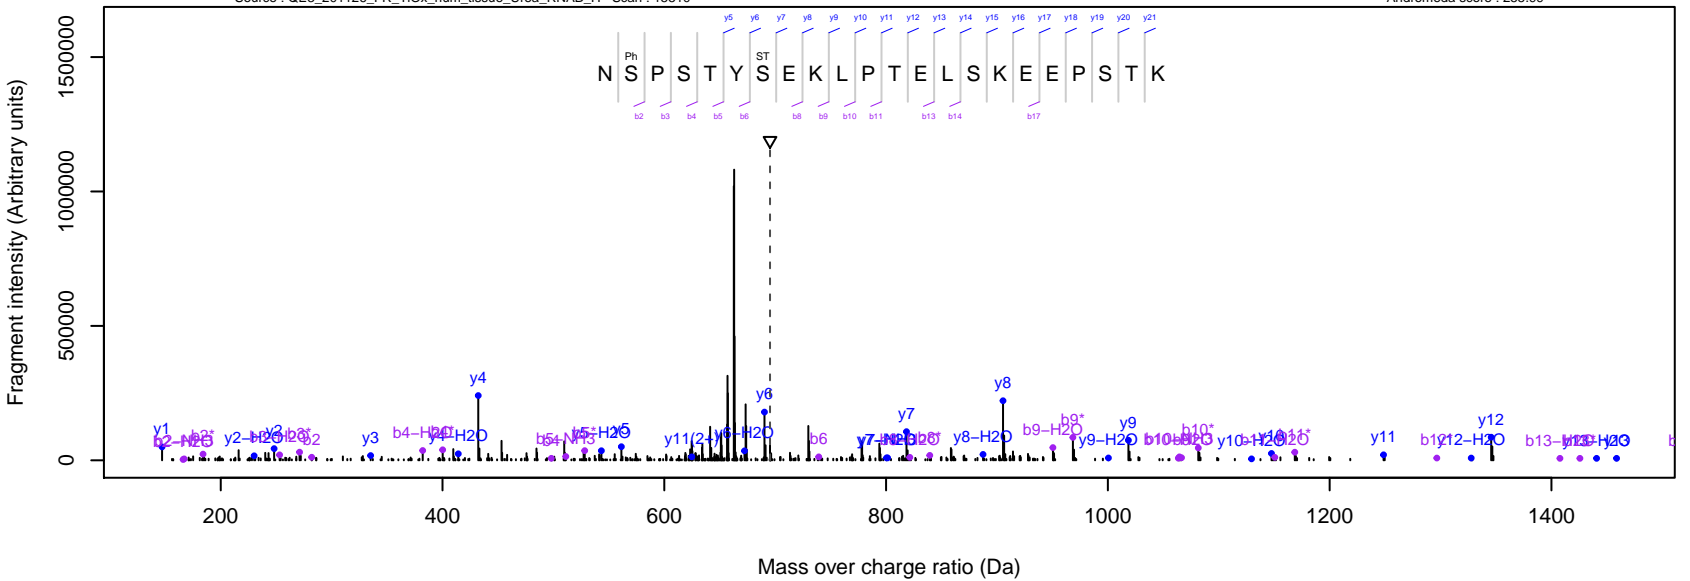

AQGEPVAGHES(Phospho (STY))PKIPYEK-2+

Source : QE3\_201126\_FR\_TiOx\_hum\_tissue\_Urea\_RNAB\_B Scan : 14293

Andromeda score : 255.82

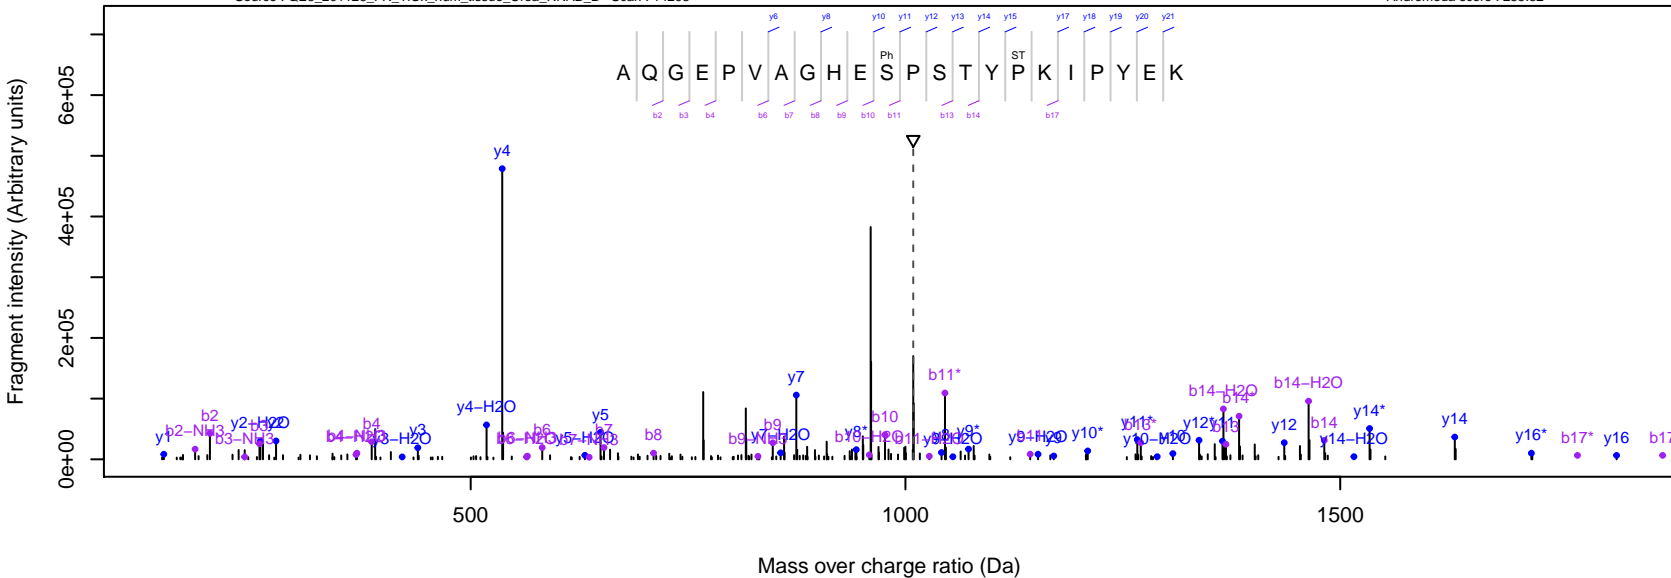

(Acetyl (Protein N-term))ASLEVSRS(Phospho (STY))PR-2+

Source : QE3\_201126\_FR\_TiOx\_hum\_tissue\_Urea\_RNAB\_H Scan : 18348

Andromeda score : 255.63

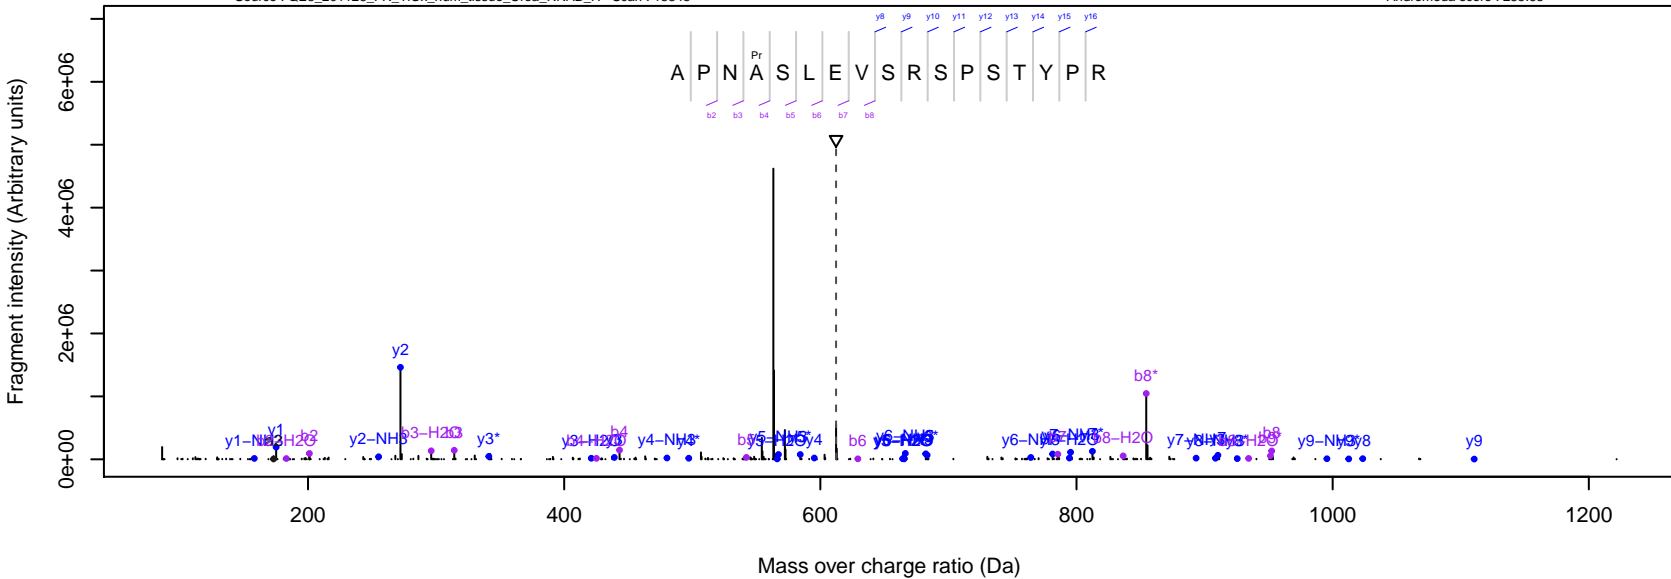

APTTVEDRVGDST(Phospho (STY))PVSEKPVSAAVDANASESP-3+

Source : QE3\_201126\_FR\_TiOx\_hum\_tissue\_Urea\_RNAB\_H Scan : 26547

Andromeda score : 255.52

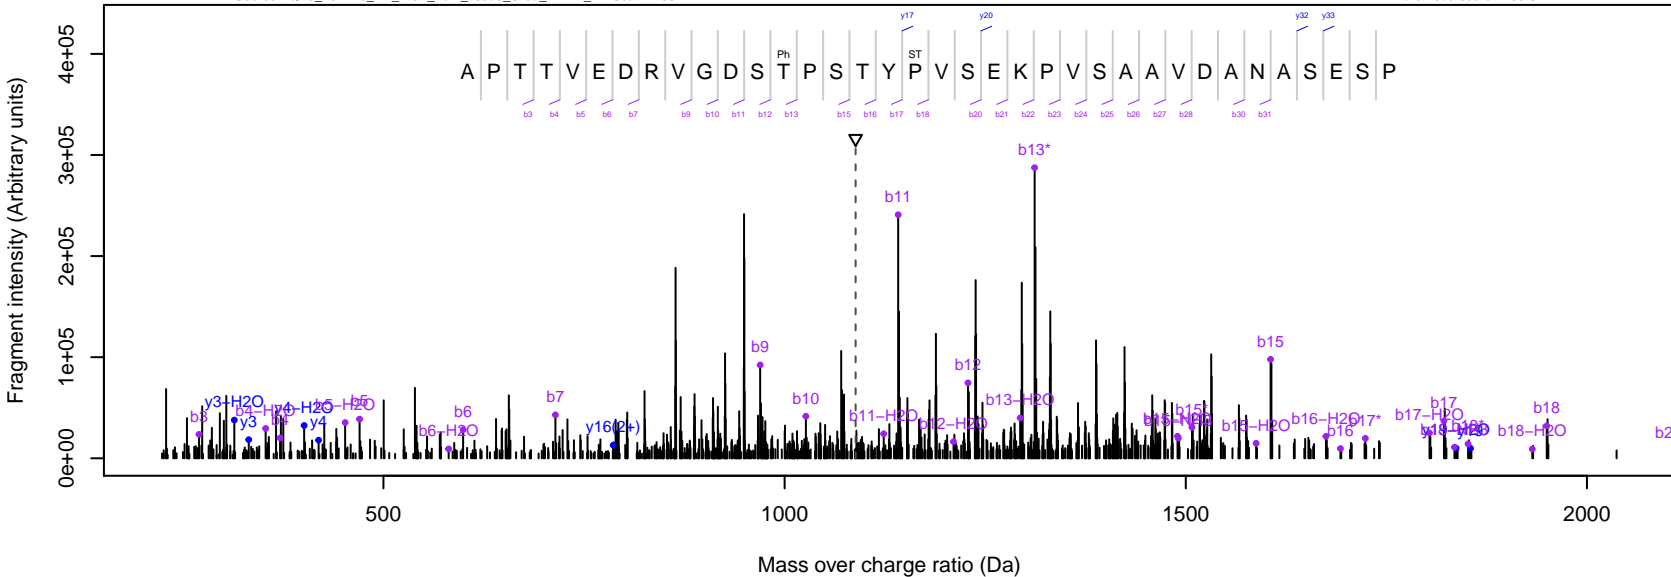

NQSQS(Phospho (STY))QDALVLEDVEK-2+

Source : QE3\_201126\_FR\_TIOx\_hum\_tissue\_Urea\_RNAB\_H Scan : 35589

Andromeda score : 255.49

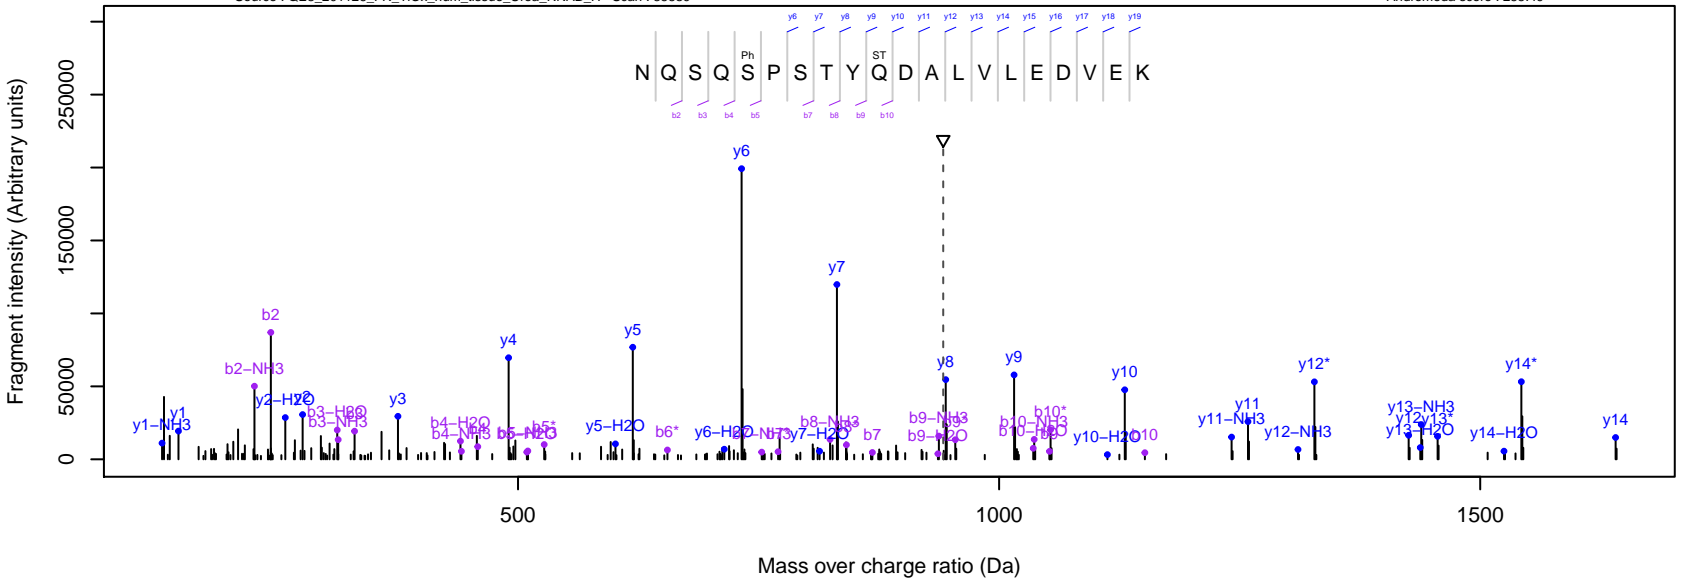

S(Phospho (STY))LAALSQIAYQR-2+

Source : QE3\_201126\_FR\_TIOx\_hum\_tissue\_Urea\_RNAB\_H Scan : 41915

Andromeda score : 255.41

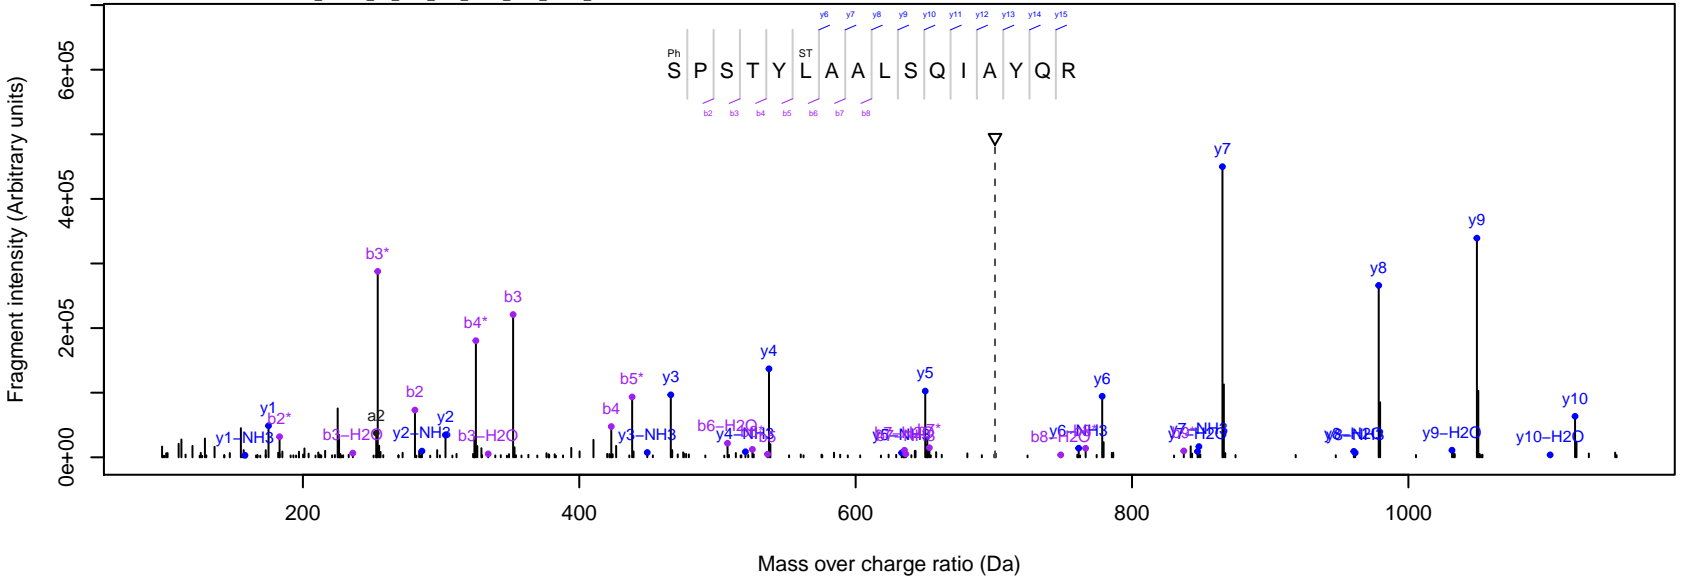

RS(Phospho (STY))SDPALIGLSTSVSDSNFSEEPSR-3+

Source : QE3\_201126\_FR\_TIOx\_hum\_tissue\_Urea\_RNAB\_H Scan : 39436

Andromeda score : 255.39

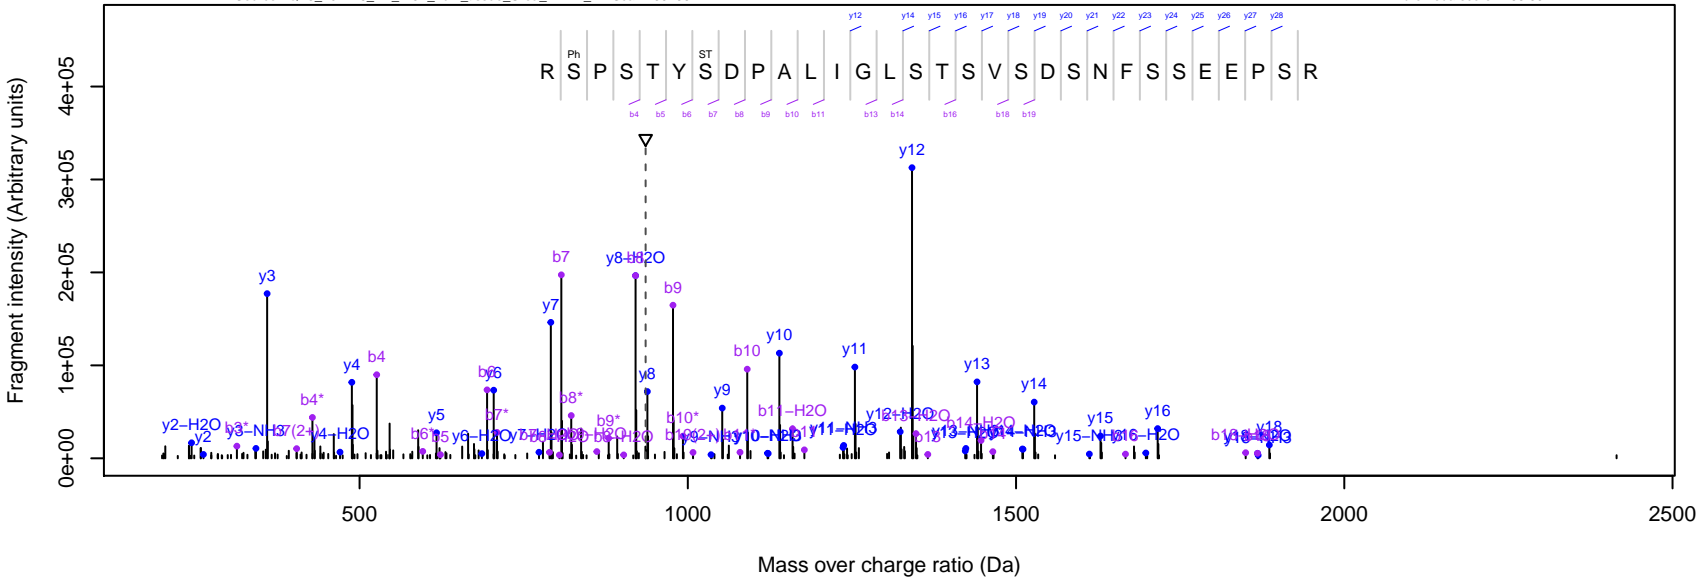

TWT(Phospho (STY))LCGTPEYL APE I I L S K-2+

Source : QE3\_201126\_FR\_TiOx\_hum\_tissue\_Urea\_RNAB\_B Scan : 61874

Andromeda score : 255.23

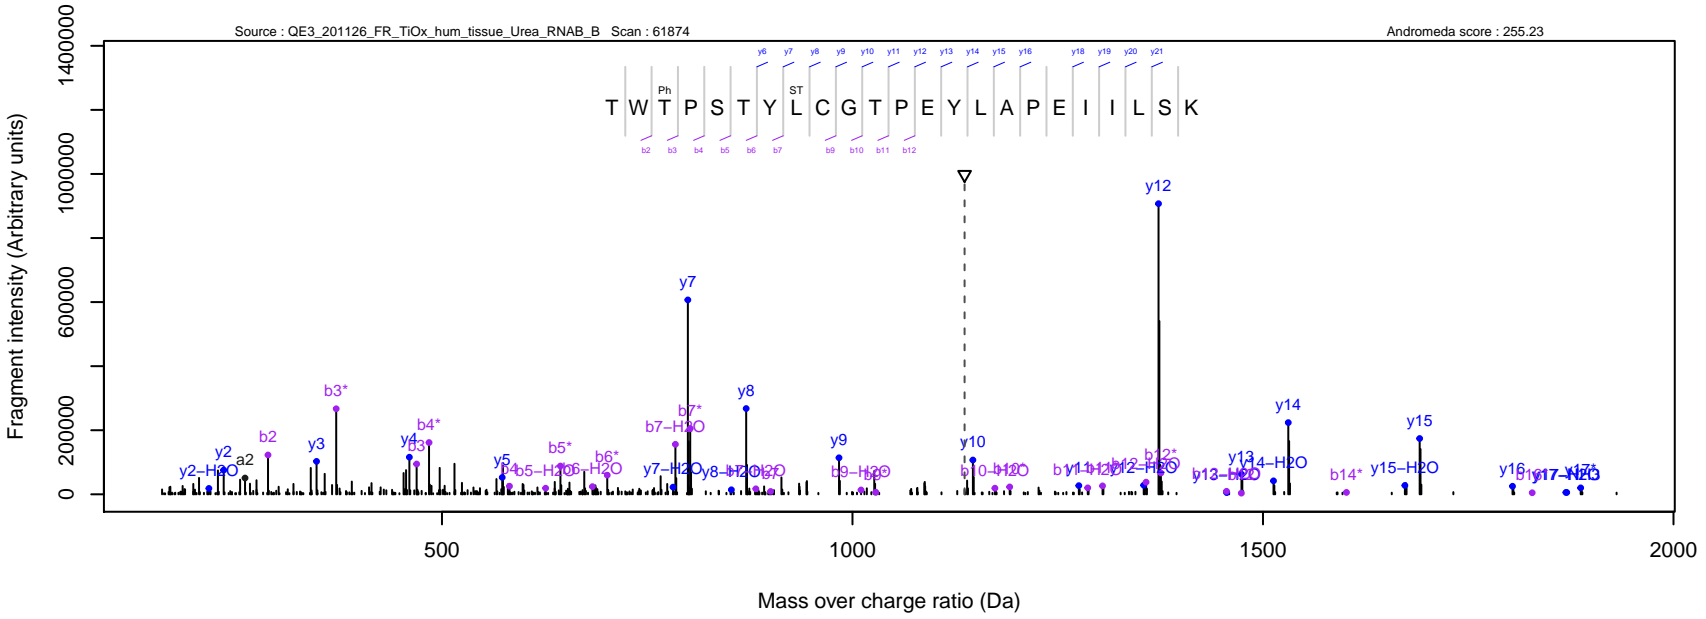

SHS(Phospho (STY))ANDSEEFFREDDGGADLHNATNLR-4+

Source : QE3\_201126\_FR\_TiOx\_hum\_tissue\_Urea\_RNAB\_N Scan : 26442

Andromeda score : 255

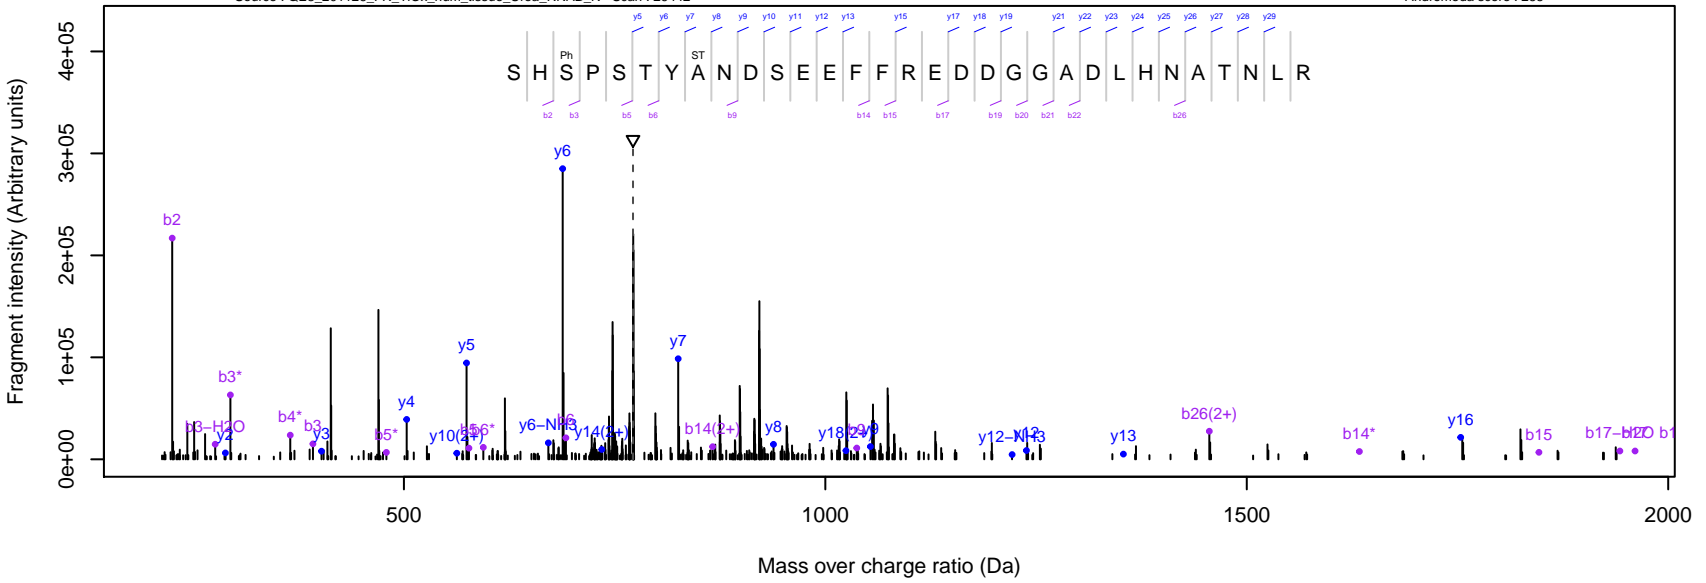

KPVTVSPTTPTS(Phospho (STY))PTEGEAS-2+

Source : QE3\_201126\_FR\_TiOx\_hum\_tissue\_Urea\_RNAB\_H Scan : 18078

Andromeda score : 254.89

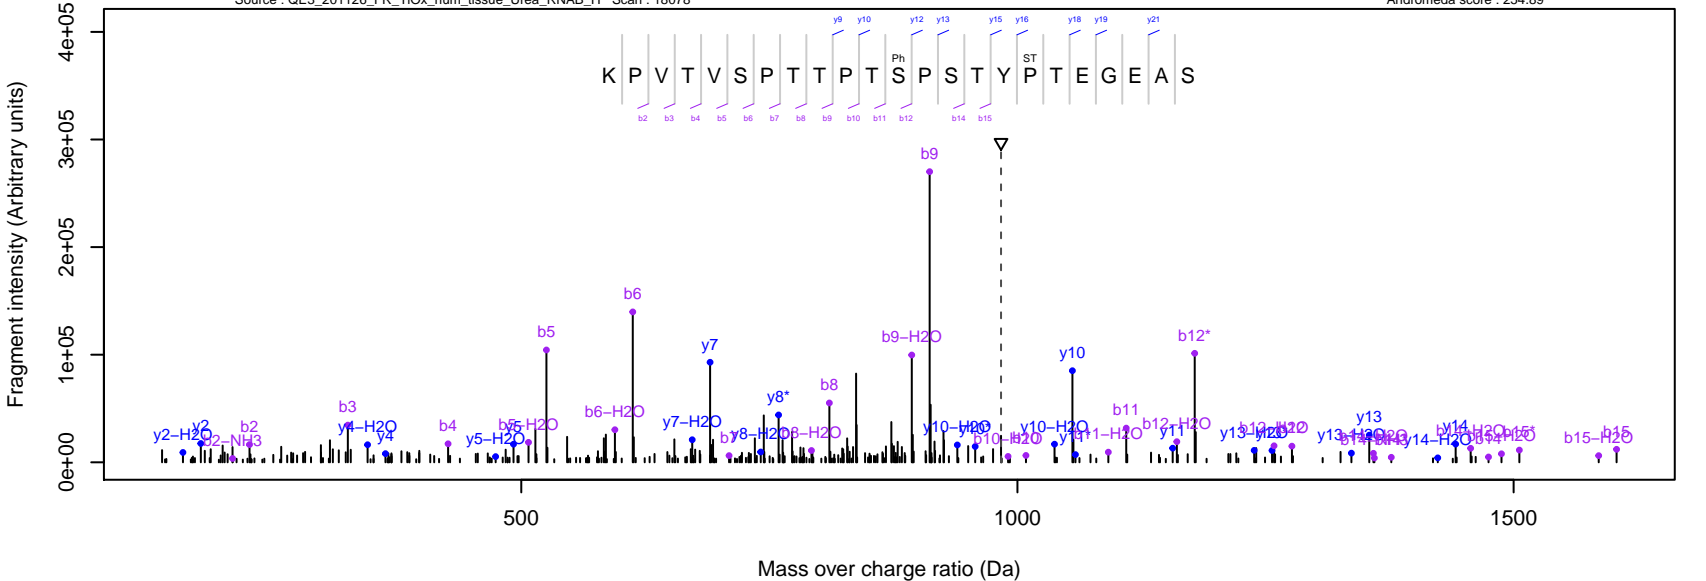

DHS(Phospho (STY))PTPSVFNSEERYR-3+

Source : QE3\_201126\_FR\_TiOx\_hum\_tissue\_Urea\_RNAB\_H Scan : 19851

Andromeda score : 254.82

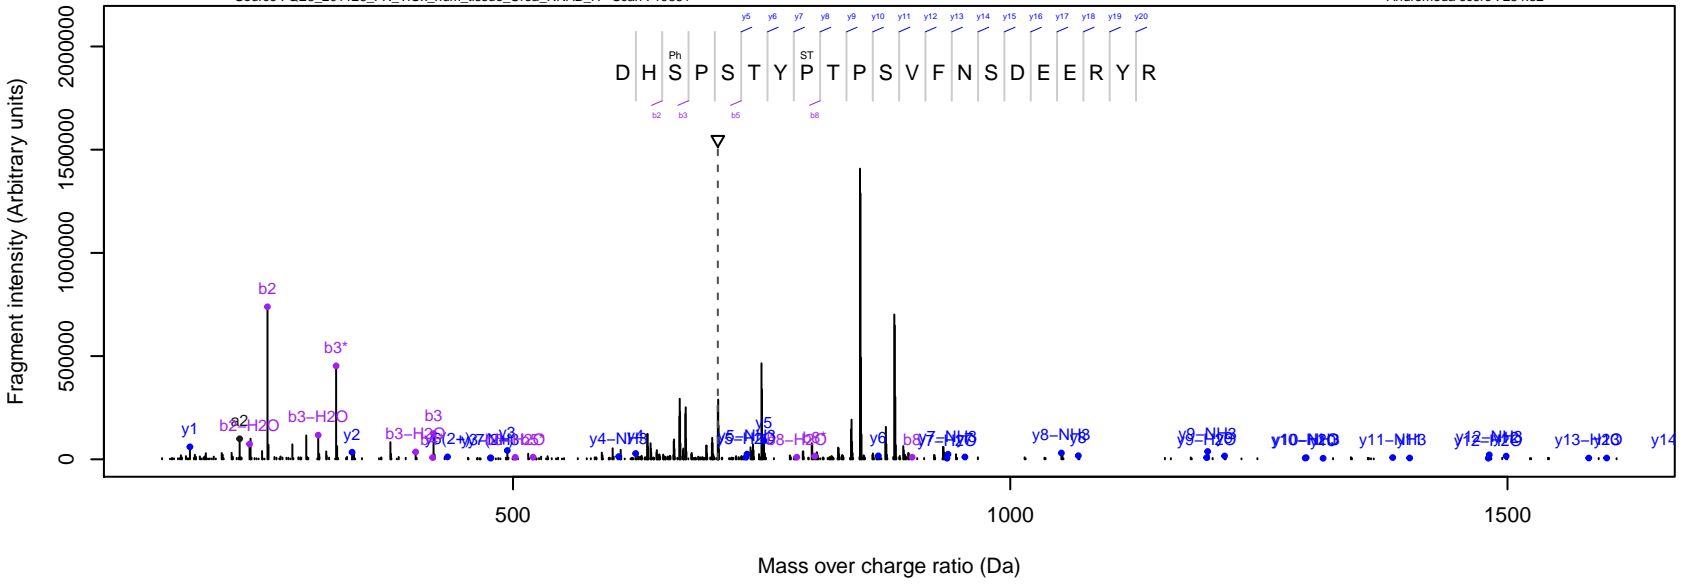

GLFS(Phospho (STY))DEEDSEDLFSSQSASNLK-2+

Source : QE3\_201126\_FR\_TiOx\_hum\_tissue\_Urea\_RNAB\_N Scan : 55359

Andromeda score : 254.82

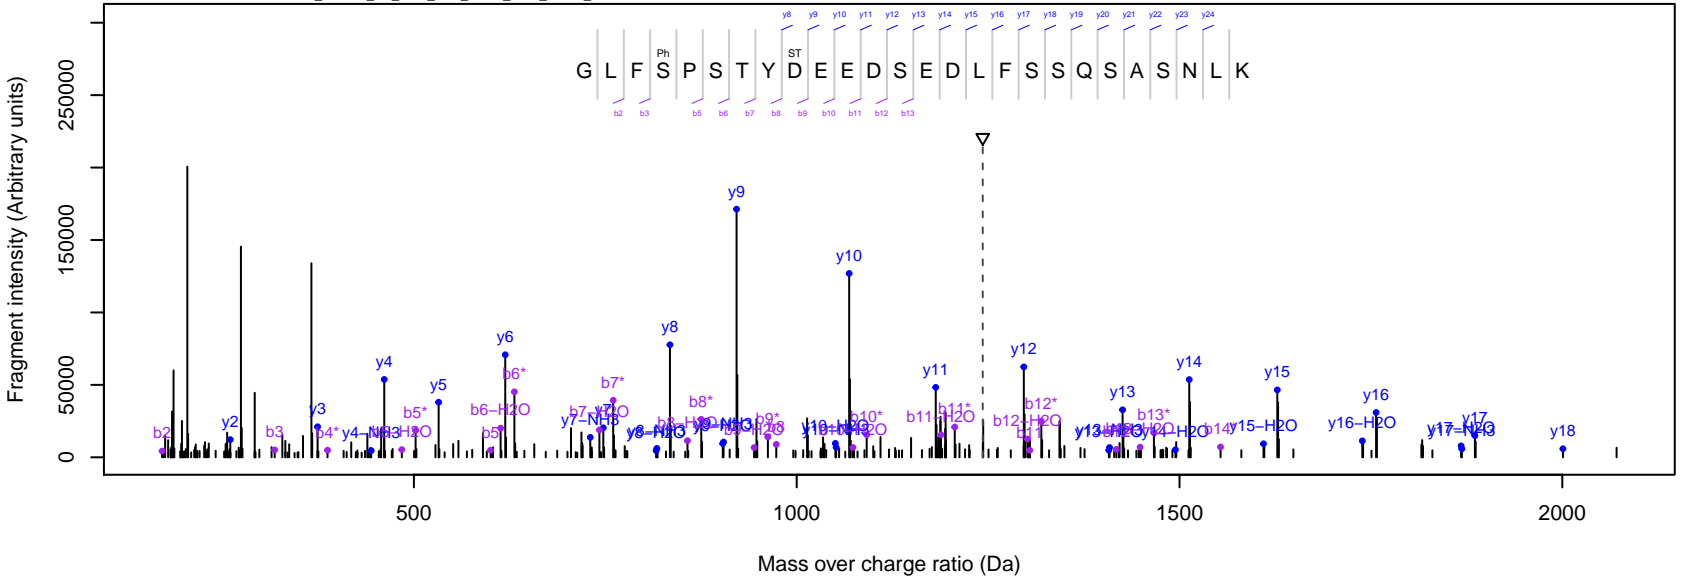

RGS(Phospho (STY))GHPAYAEVEPEVGEKEGFIVSEQC-3+

Source : QE3\_201126\_FR\_TiOx\_hum\_tissue\_Urea\_RNAB\_N Scan : 30611

Andromeda score : 254.81

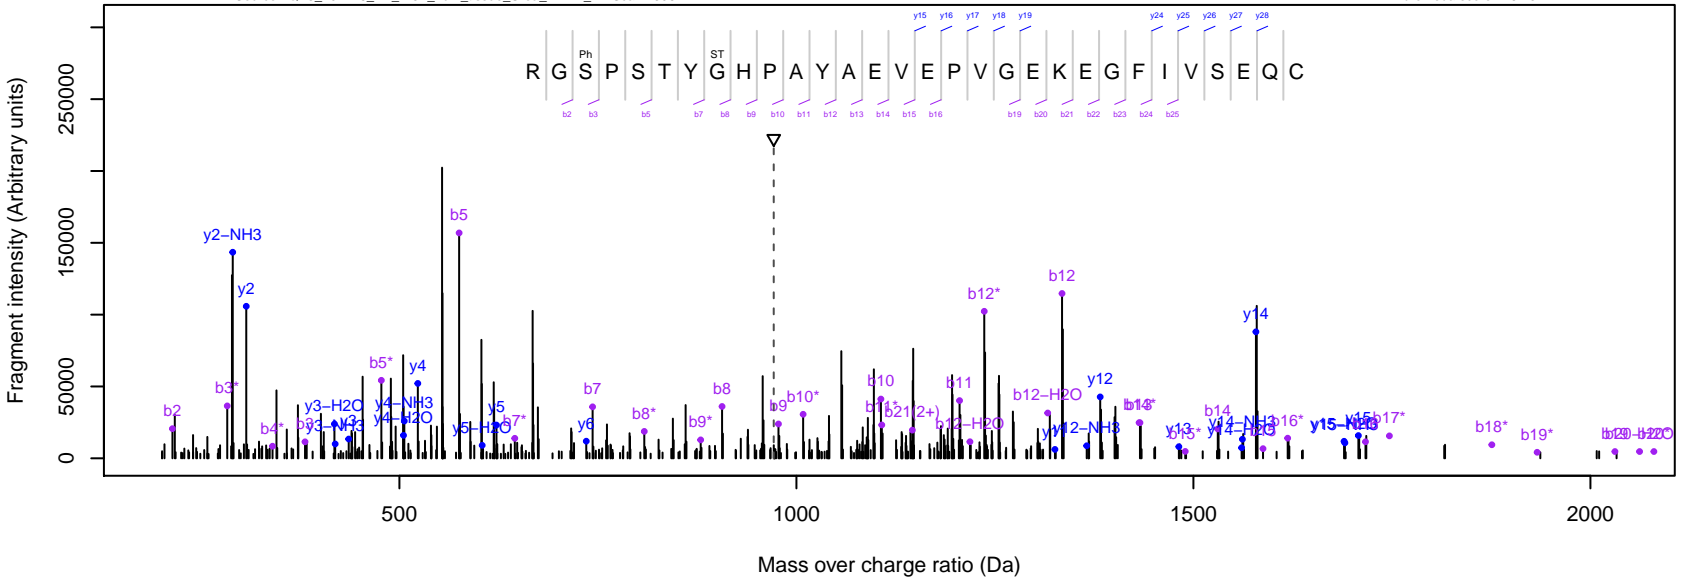

**AKQDFLKTDS(Phospho (STY))DSDLQLYK-3+**

Source : QE3\_201126\_FR\_TiOx\_hum\_tissue\_Urea\_RNAB\_N Scan : 28014

Andromeda score : 254.75

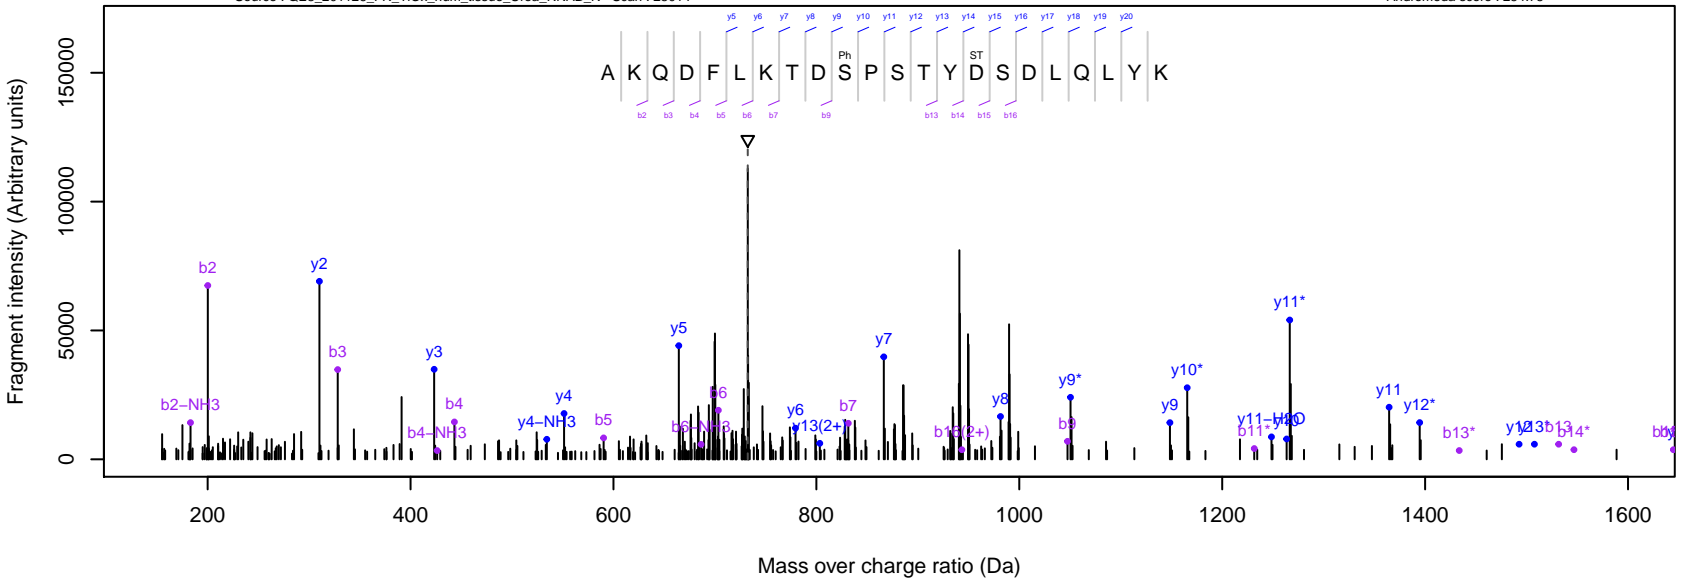

**ERSPS(Phospho (STY))PLRGNVVPSPLPTR-3+**

Source : QE3\_201126\_FR\_TiOx\_hum\_tissue\_Urea\_RNAB\_N Scan : 24052

Andromeda score : 254.75

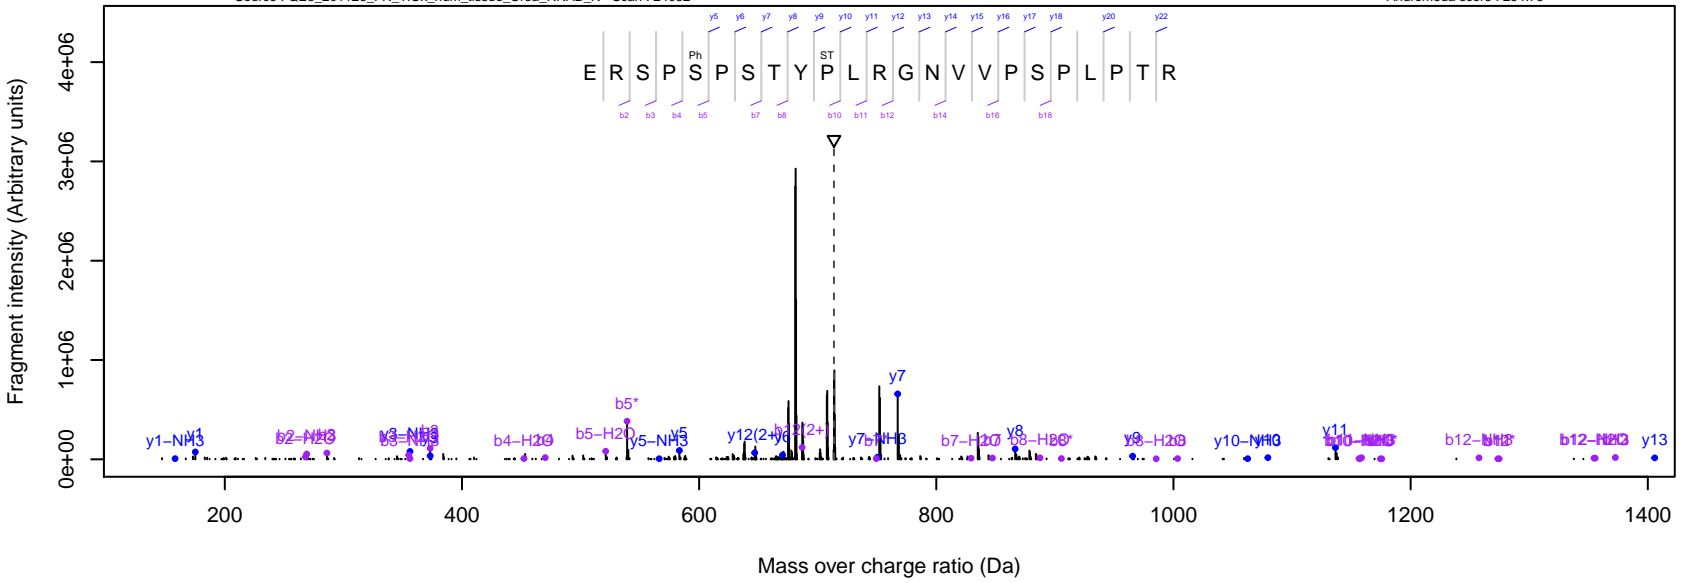

**VEEQEAEDEEDVS(Phospho (STY))EEEEESKEGTNK-3+**

Source : QE3\_201126\_FR\_TiOx\_hum\_tissue\_Urea\_RNAB\_H Scan : 14662

Andromeda score : 254.72

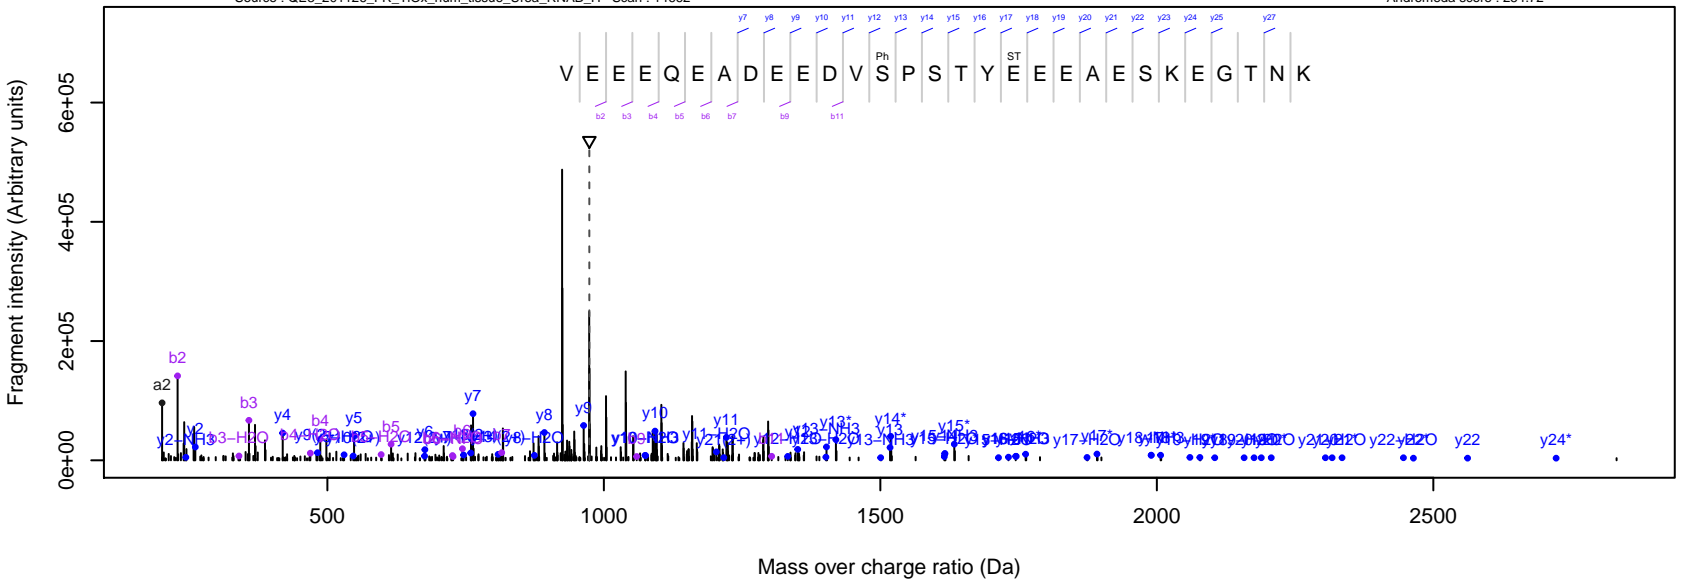

VPEASSEPFDTSSPSTYPAQR-2+

Source : QE3\_201126\_FR\_TiOx\_hum\_tissue\_Urea\_RNAB\_N Scan : 23160

Andromeda score : 254.59

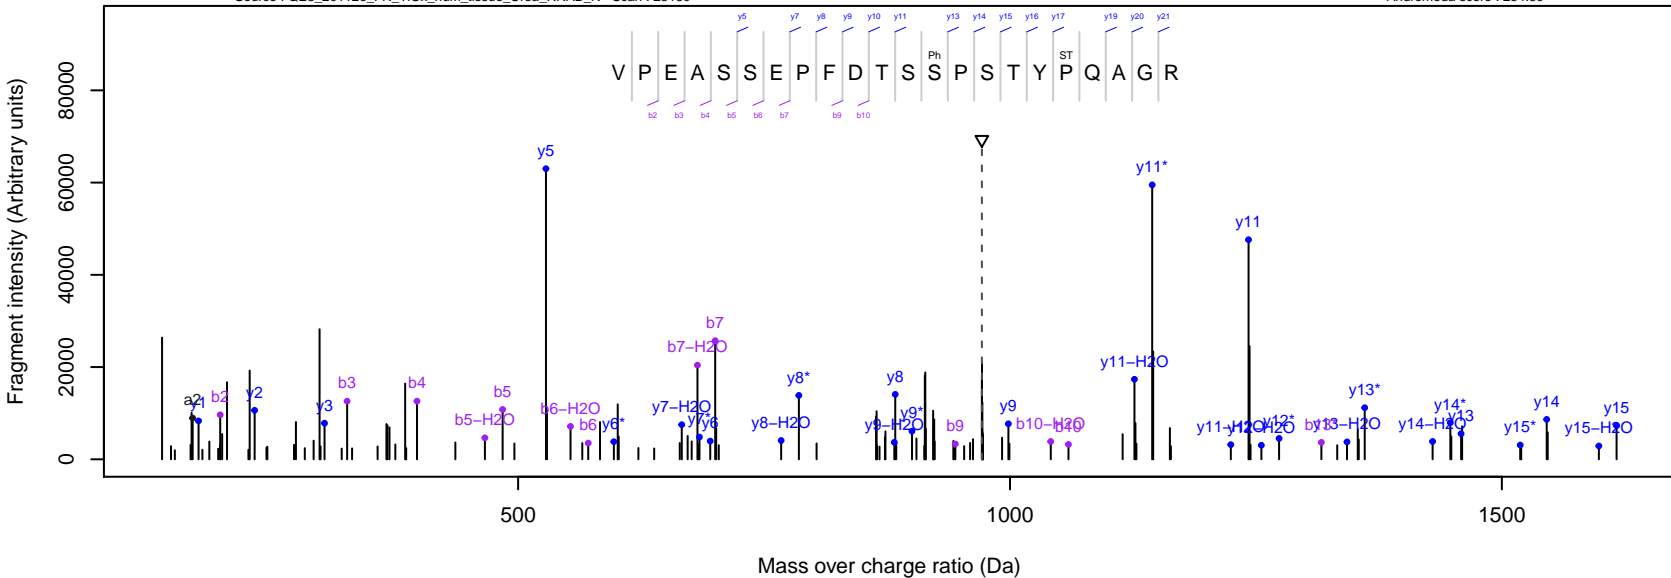

VEM(Oxidation (M))YSGS(Phospho (STY))DDDDFNKLPK-2+

Source : QE3\_201126\_FR\_TiOx\_hum\_tissue\_Urea\_RNAB\_N Scan : 24764

Andromeda score : 254.53

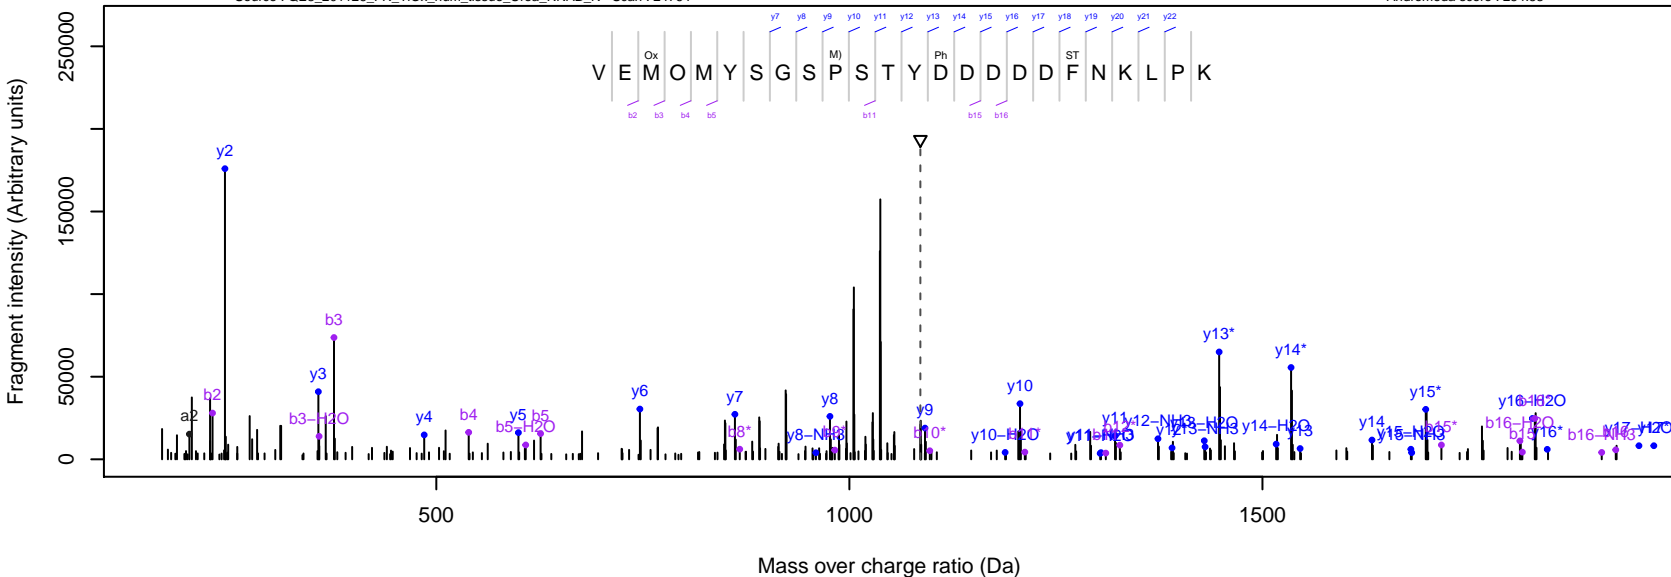

DYEIESQNPLASPSSTYPTNTLLGSAK-2+

Source : QE3\_201126\_FR\_TiOx\_hum\_tissue\_Urea\_RNAB\_N Scan : 53640

Andromeda score : 254.39

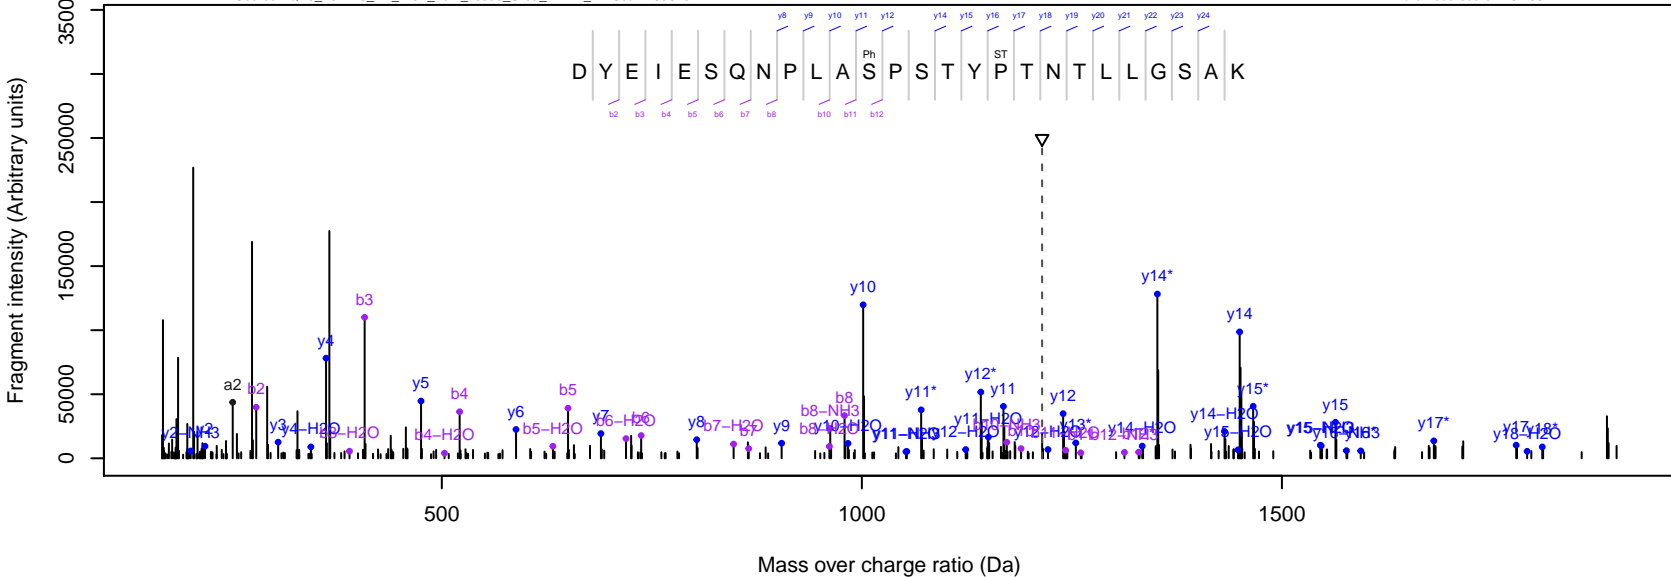

QQFHSPVDS(Phospho (STY))DS(Phospho (STY))DDDDPLEAFMAEVEDQAAR-4+

Source : QE3\_201126\_FR\_TiOx\_hum\_tissue\_Urea\_RNAB\_N Scan : 61659

Andromeda score : 254.33

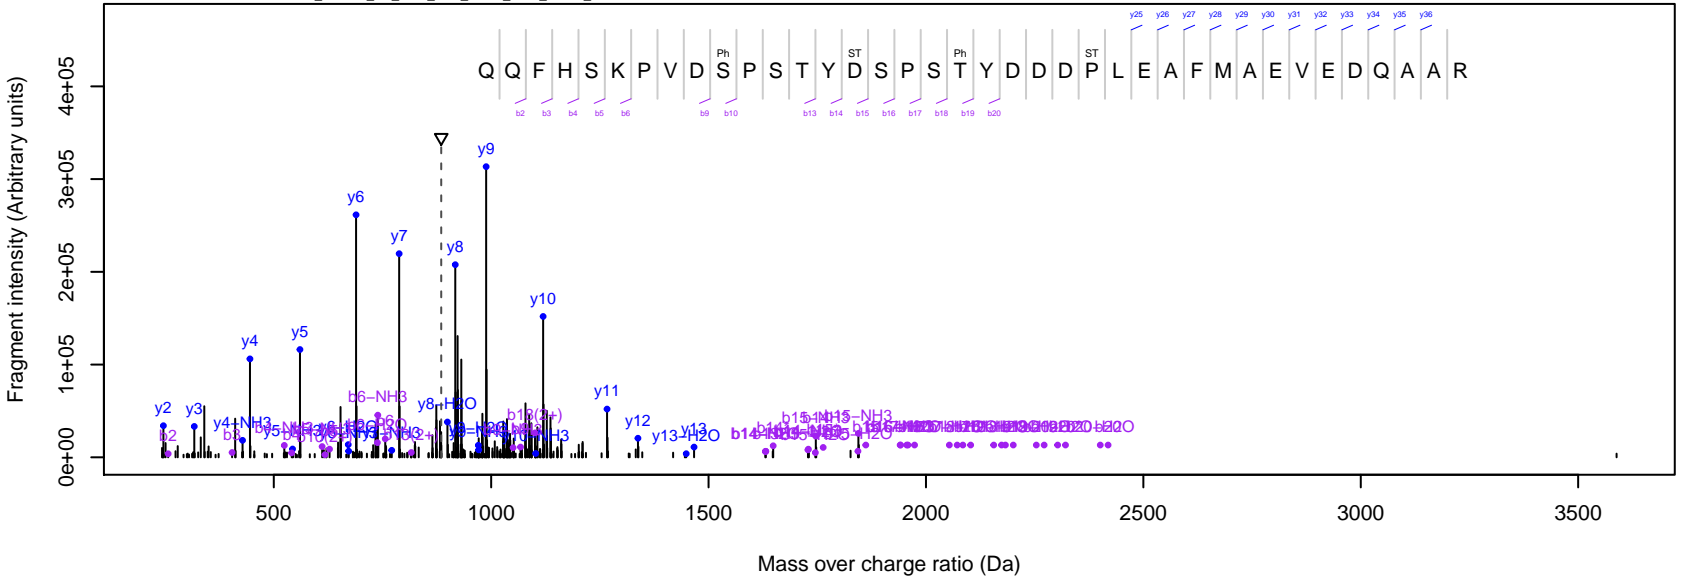

RKPS(Phospho (STY))VPDSASPADDSFVDPGER-3+

Source : QE3\_201126\_FR\_TiOx\_hum\_tissue\_Urea\_RNAB\_N Scan : 21015

Andromeda score : 254.3

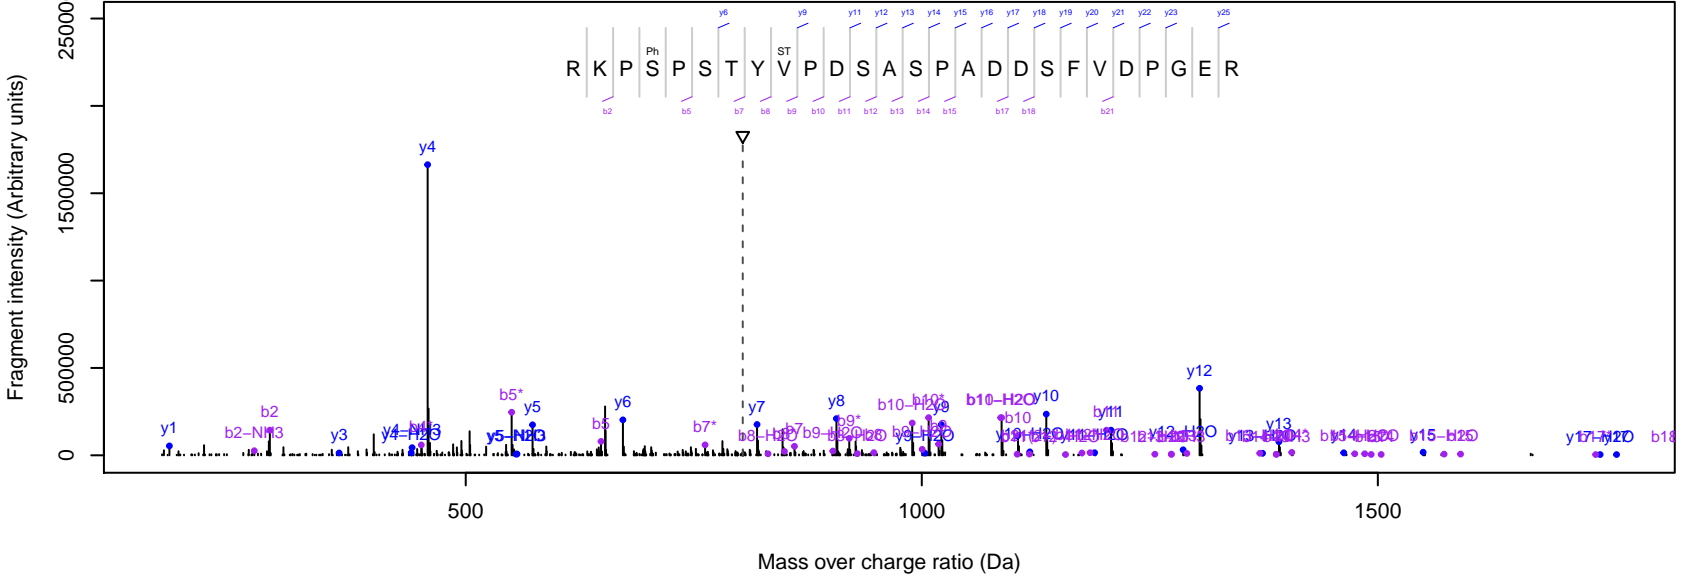

GILAADESTGS(Phospho (STY))IAKR-2+

Source : QE3\_201126\_FR\_TiOx\_hum\_tissue\_Urea\_RNAB\_H Scan : 18296

Andromeda score : 254.18

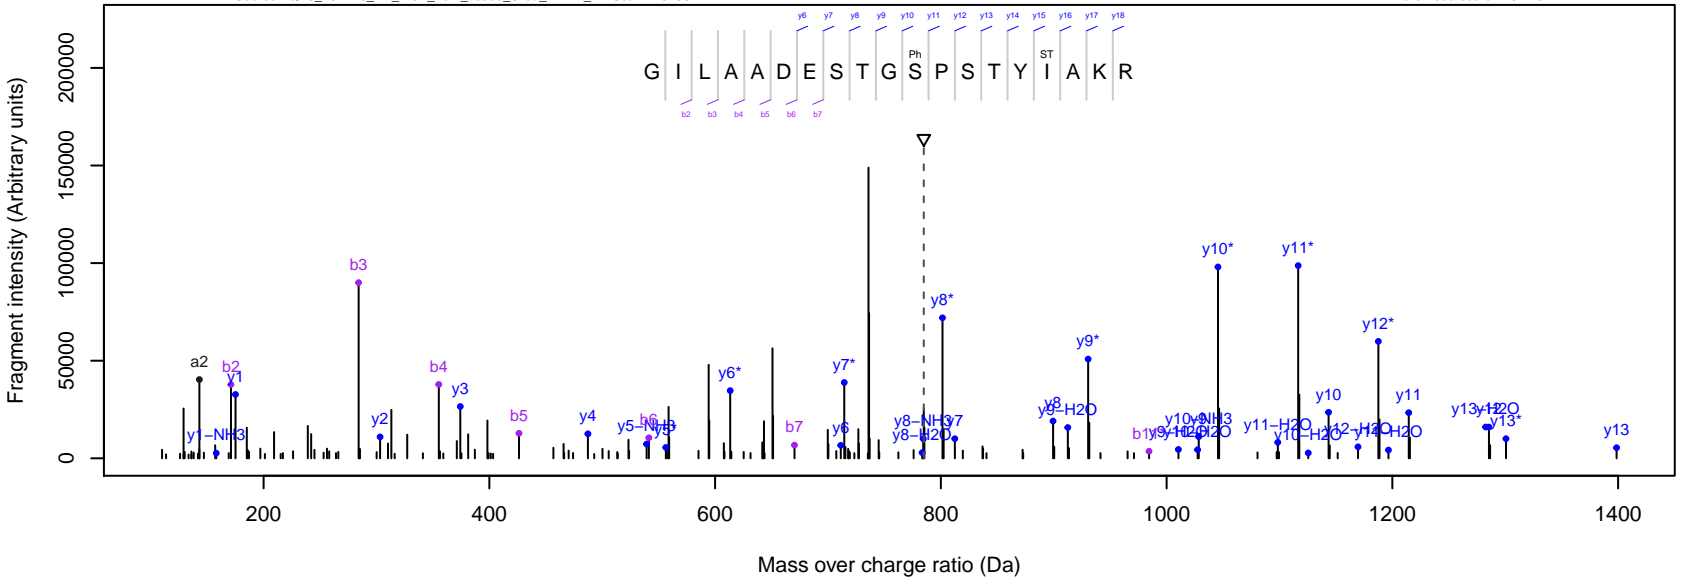



MHEGDEGPGHHKPLGEGT(Phospho (STY))P-2+

Source : QE3\_201126\_FR\_TiOx\_hum\_tissue\_Urea\_RNAB\_H Scan : 7845

Andromeda score : 253.48

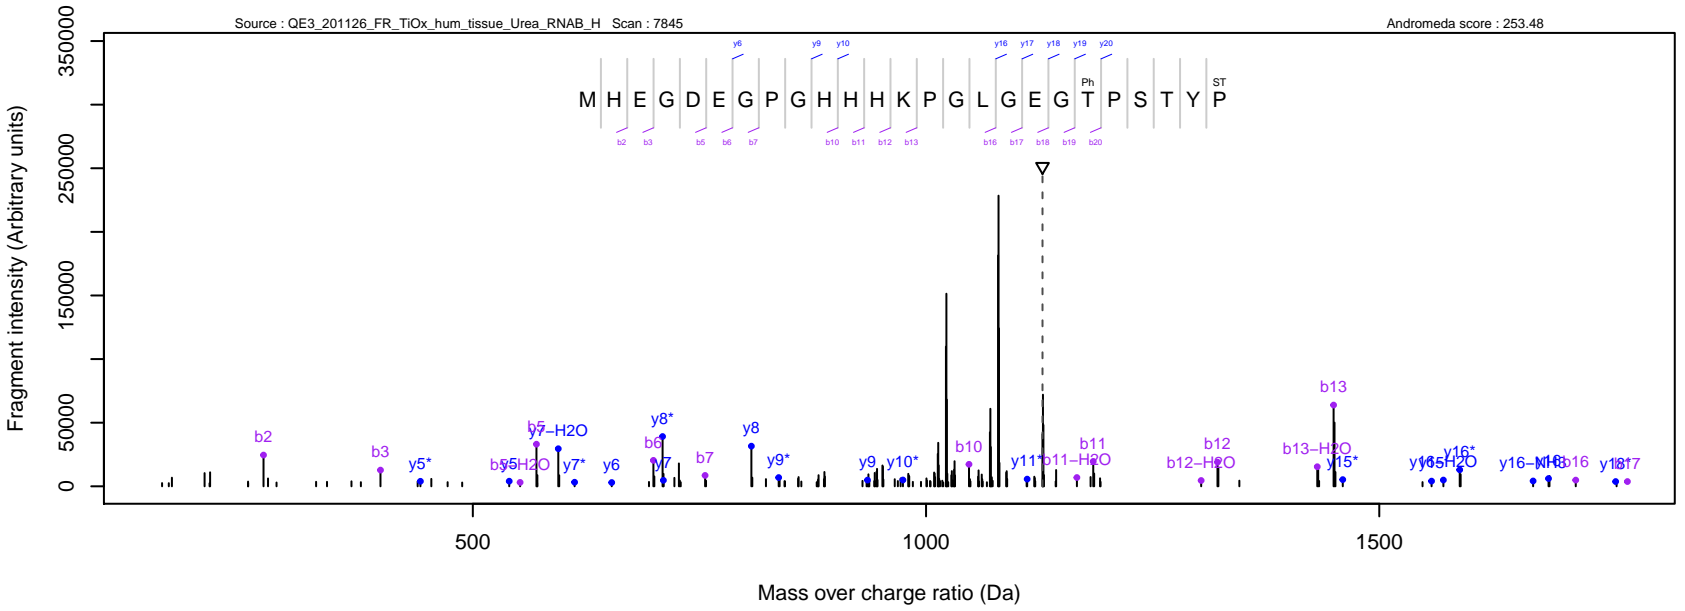

VADPDHDHTGLTEY(VATR)-3+

Source : QE3\_201126\_FR\_TiOx\_hum\_tissue\_Urea\_RNAB\_N Scan : 25686

Andromeda score : 253.48

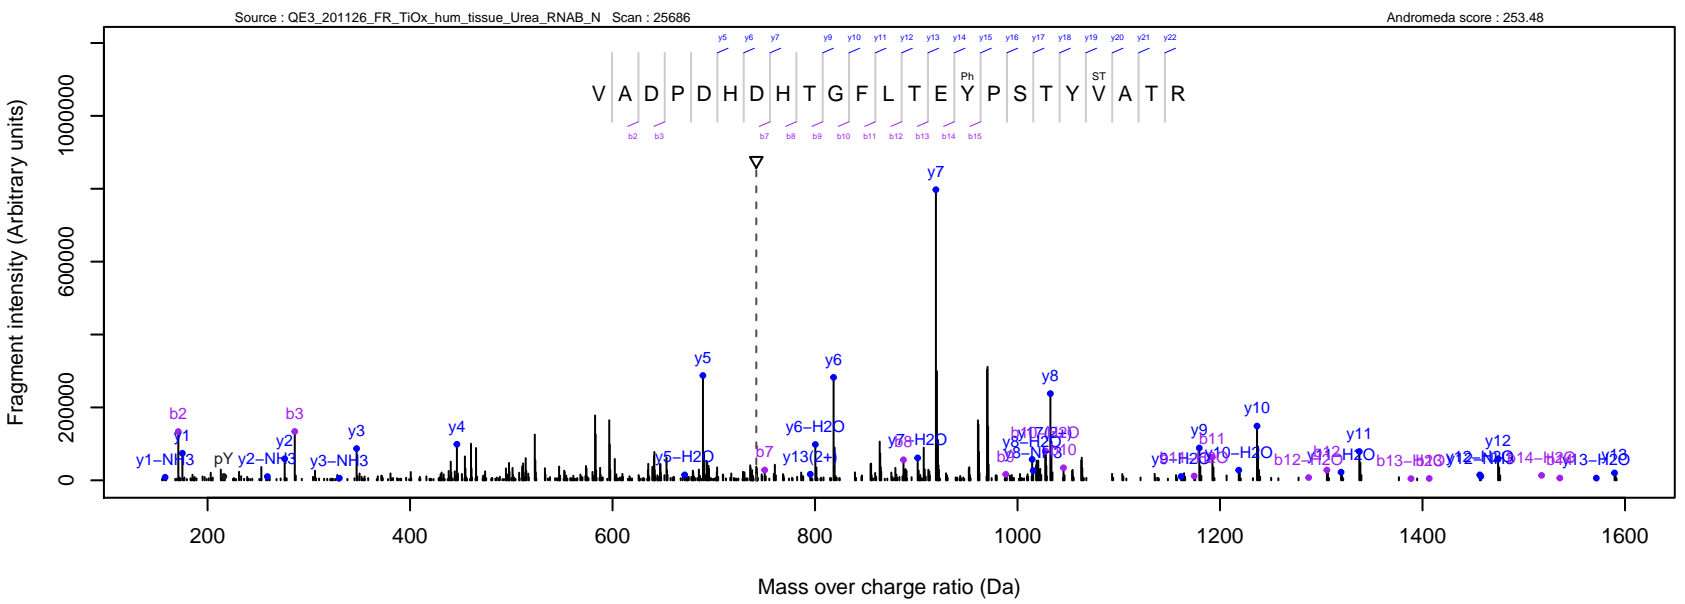

SPS(Phospho (STY))GSFAGSQENLR-2+

Source : QE3\_201126\_FR\_TiOx\_hum\_tissue\_Urea\_RNAB\_B Scan : 20501

Andromeda score : 253.16

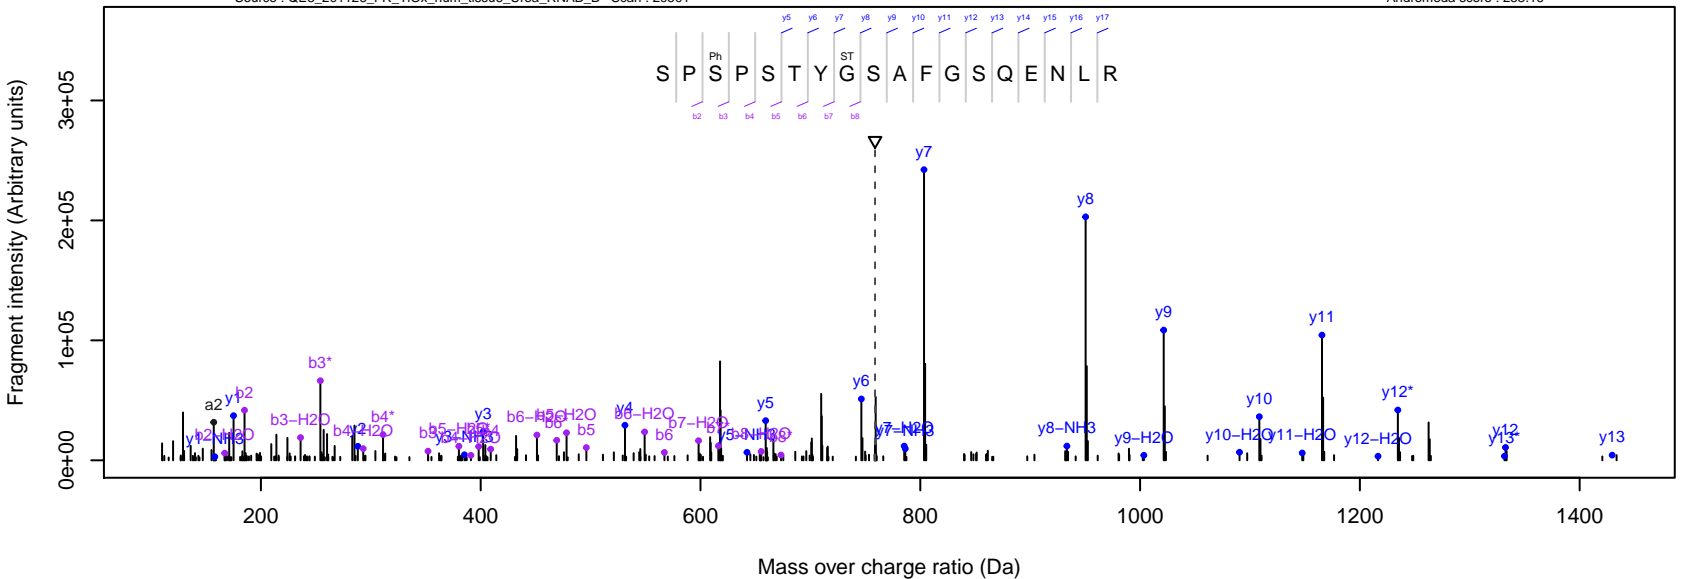

KDS(Phospho (STY))LSVNEFK-2+

Source : QE3\_201126\_FR\_TiOx\_hum\_tissue\_Urea\_RNAB\_H Scan : 19086

Andromeda score : 253.06

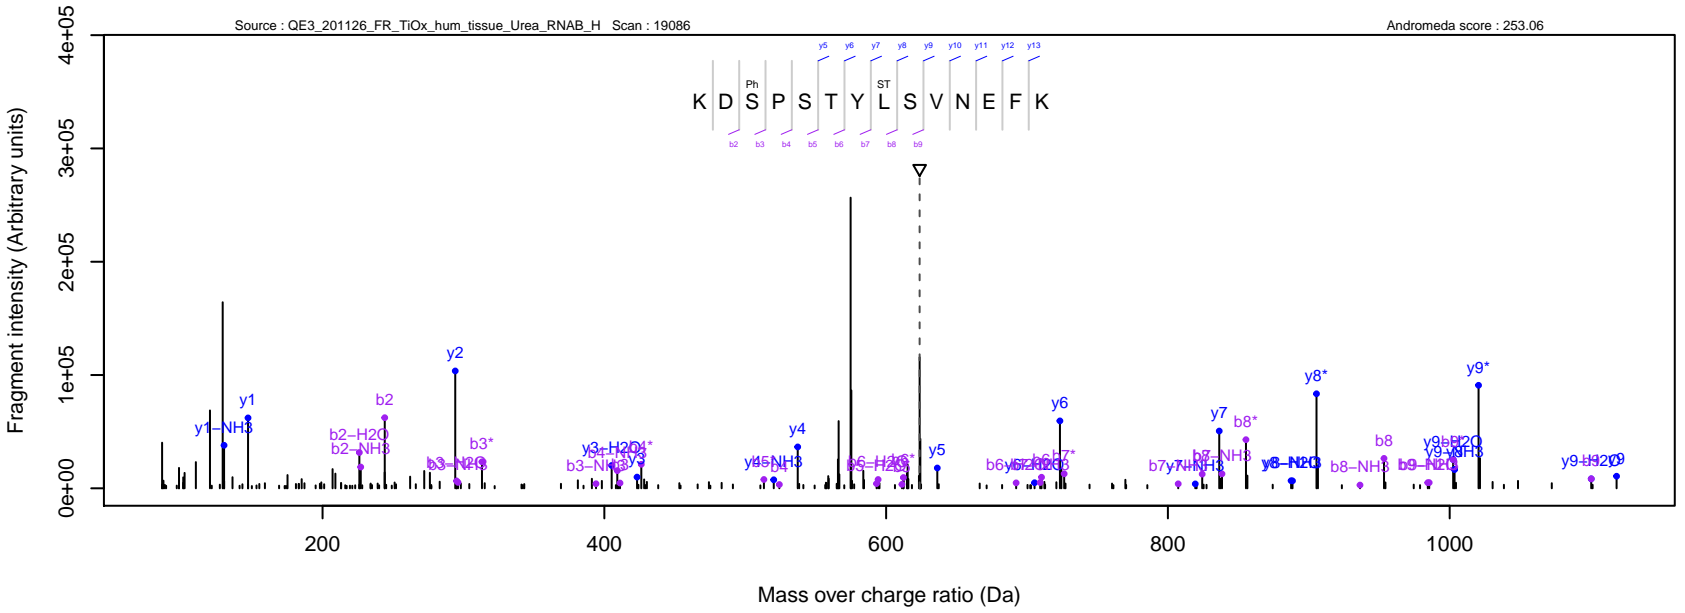

RAHT(Phospho (STY))PTPGIYM(Oxidation (M))GRPTHSGGGGGGGGGGGGGGR-4+

Source : QE3\_201126\_FR\_TiOx\_hum\_tissue\_Urea\_RNAB\_B Scan : 6022

Andromeda score : 252.89

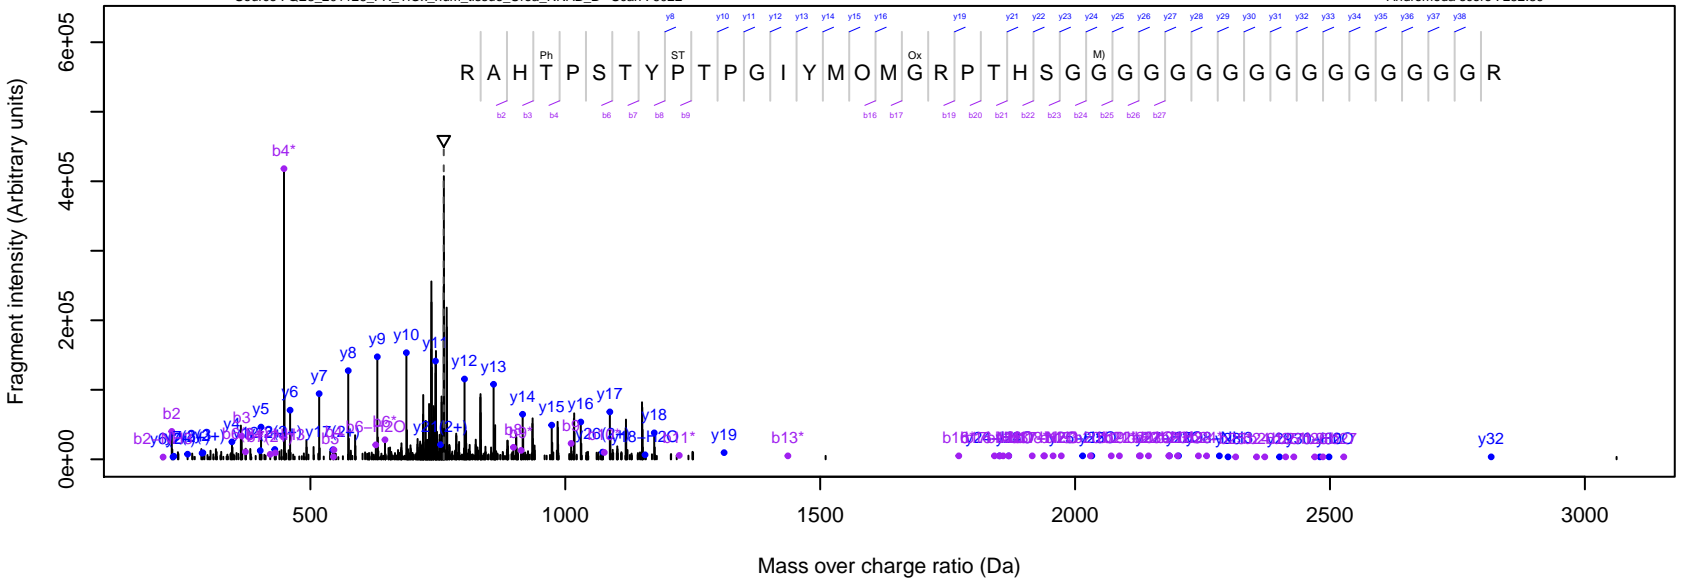

HTFMGVSLGSPS(Phospho (STY))GEVSHPR-3+

Source : QE3\_201126\_FR\_TiOx\_hum\_tissue\_Urea\_RNAB\_N Scan : 31139

Andromeda score : 252.84

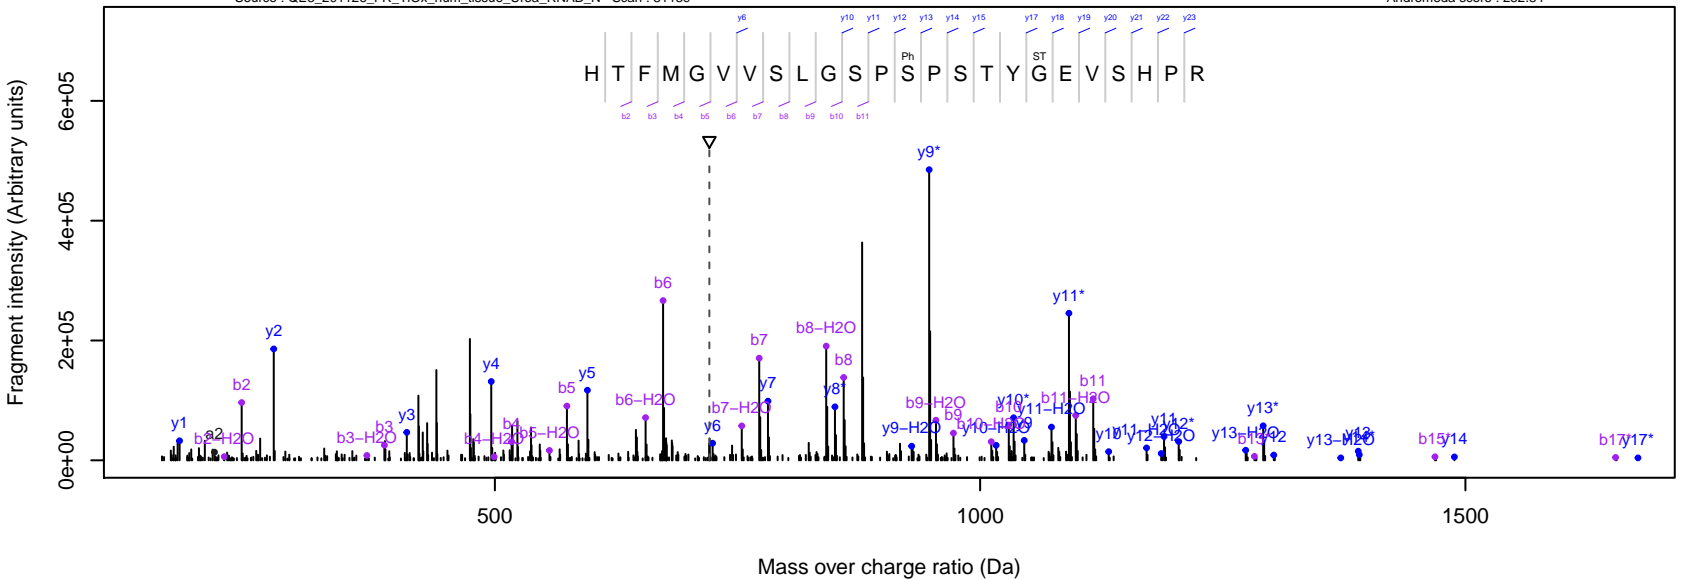

QVEKEET(Phospho (STY))NEIQVVNEEPQR-2+

Source : QE3\_201126\_FR\_TiOx\_hum\_tissue\_Urea\_RNAB\_B Scan : 17979

Andromeda score : 252.83

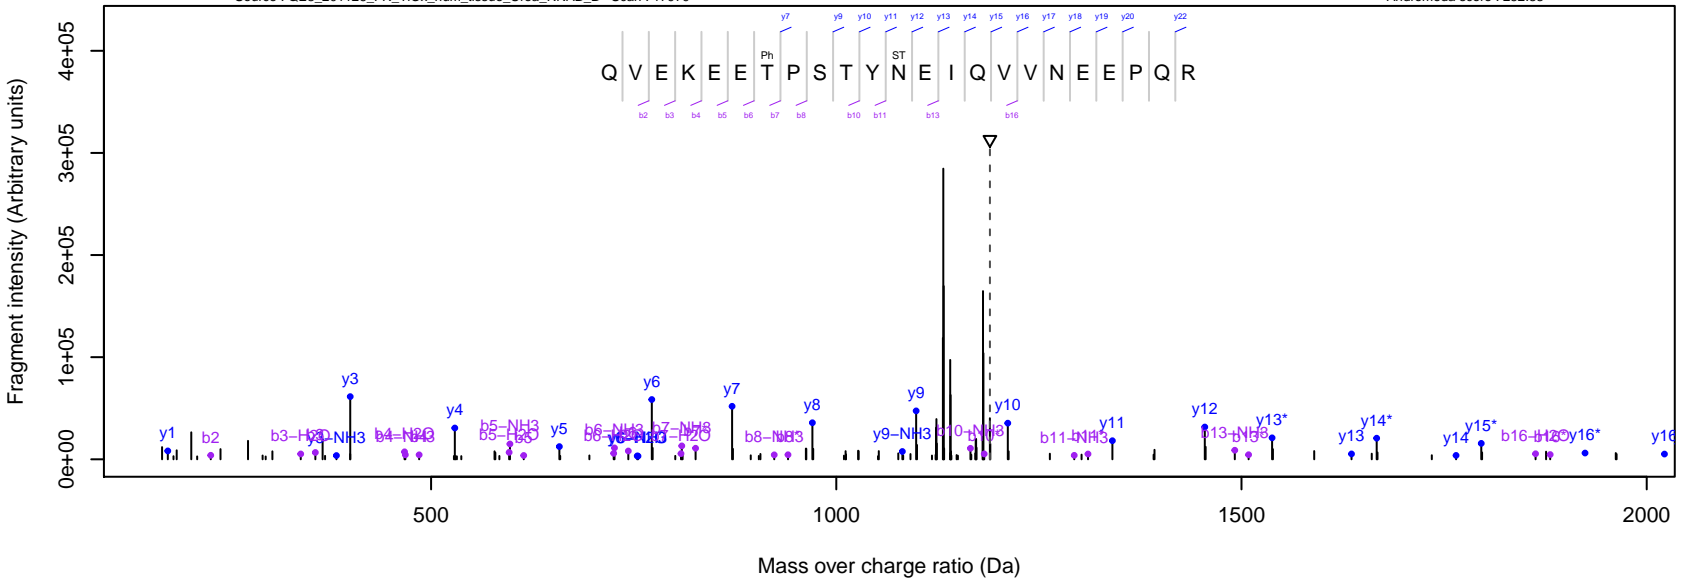

VLVQNAAGS(Phospho (STY))QEKLAAQSSVATITR-3+

Source : QE3\_201126\_FR\_TiOx\_hum\_tissue\_Urea\_RNAB\_N Scan : 38962

Andromeda score : 252.78

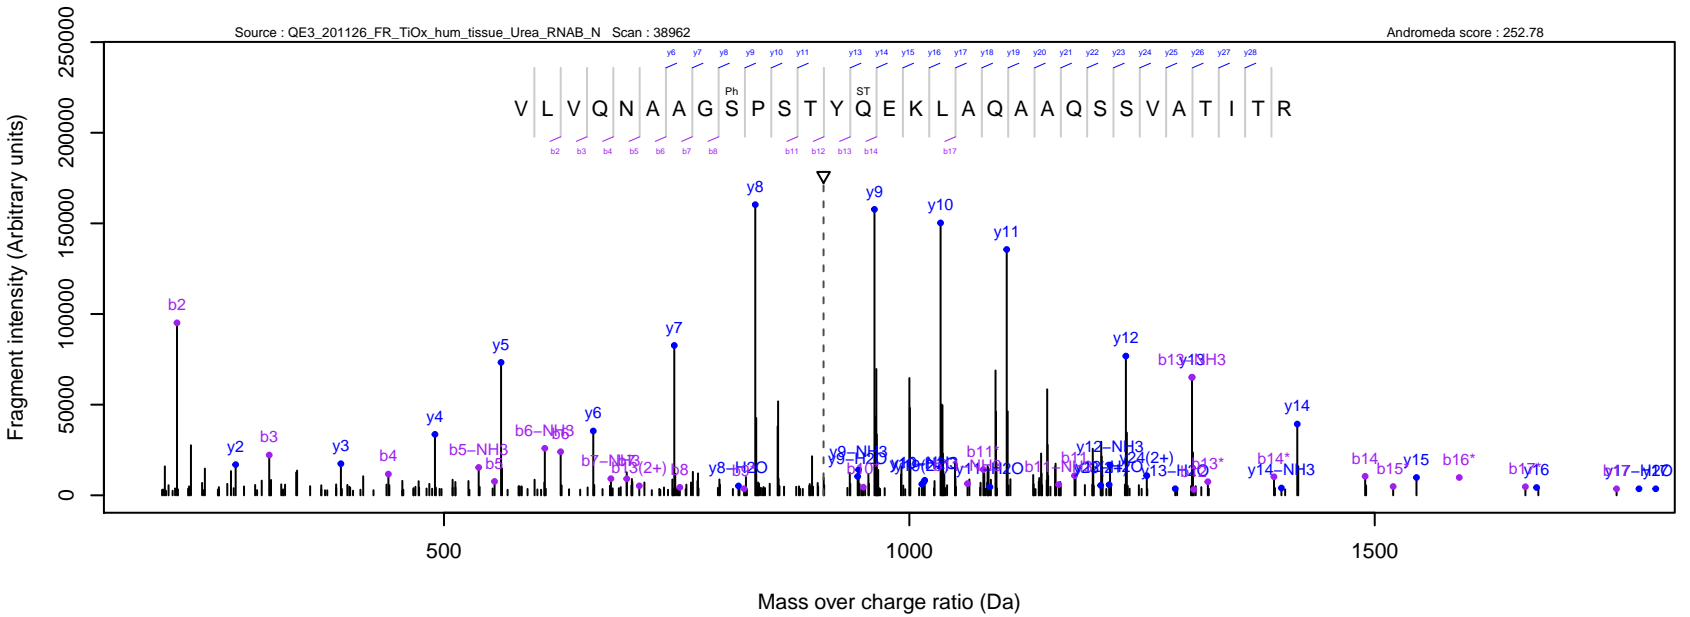

ELVSSSSGSDS(Phospho (STY))DS(Phospho (STY))EVDKCLK-2+

Source : QE3\_201126\_FR\_TiOx\_hum\_tissue\_Urea\_RNAB\_N Scan : 15625

Andromeda score : 252.55

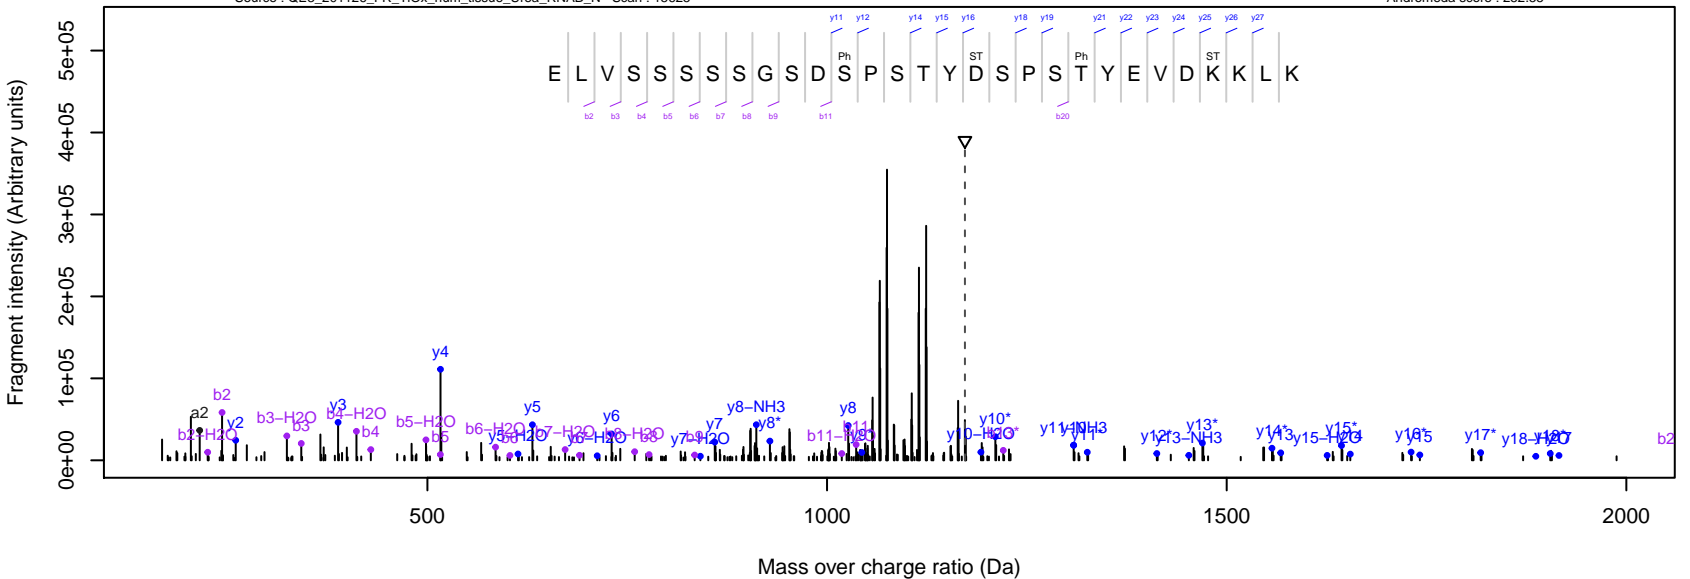

KLS(Phospho (STY))PQDPSEDVSSVDPLK-2+

Source : QE3\_201126\_FR\_TIOx\_hum\_tissue\_Urea\_RNAB\_N Scan : 31301

Andromeda score : 252.55

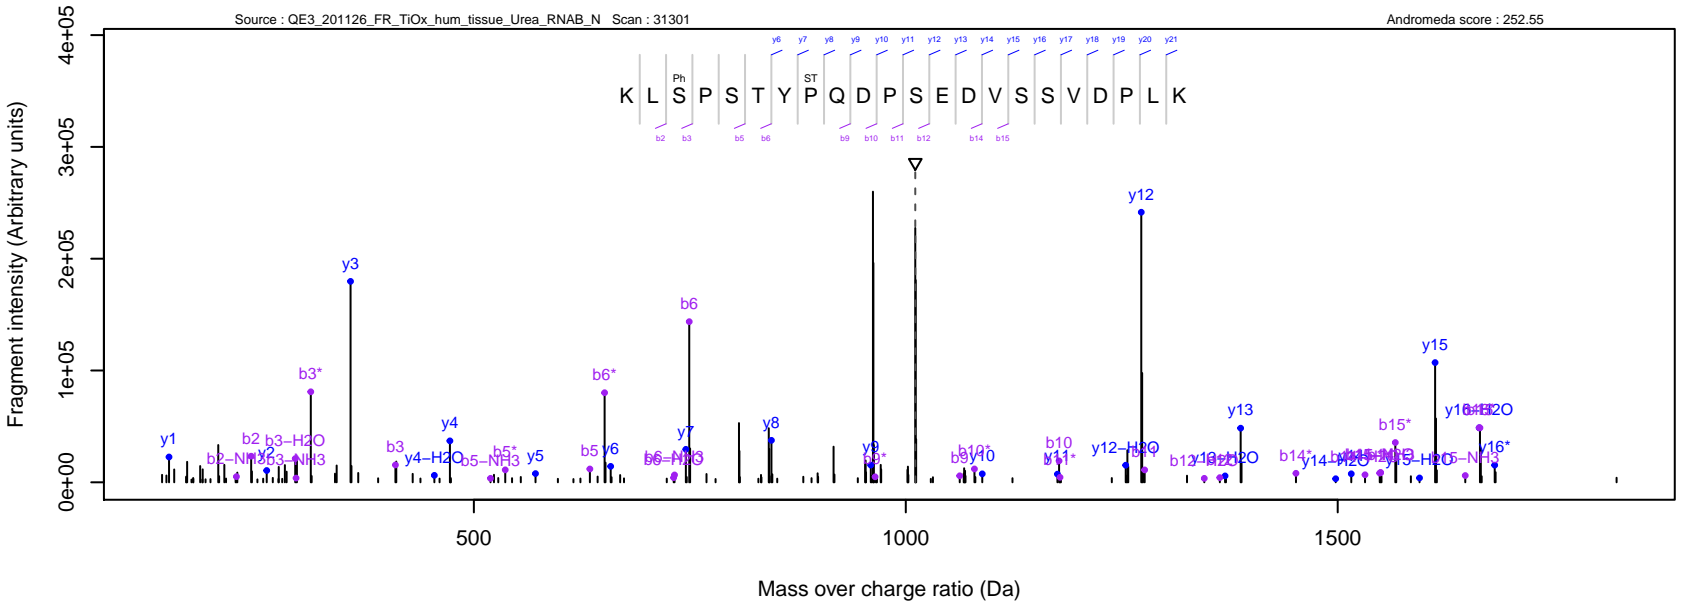

NKS(Phospho (STY))NEDQSM(Oxidation (M))GNWQIK-2+

Source : QE3\_201126\_FR\_TIOx\_hum\_tissue\_Urea\_RNAB\_H Scan : 13812

Andromeda score : 252.47

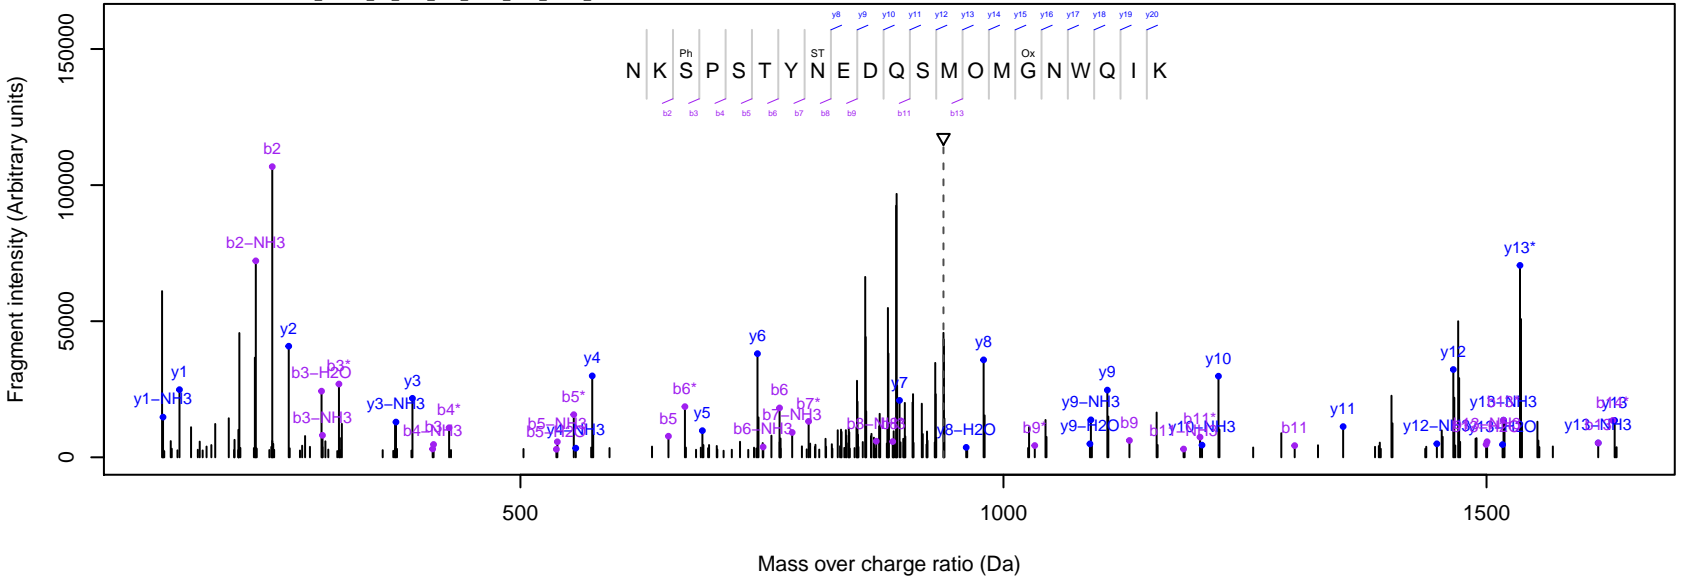

GIPLATGDTSPSTYPEPELELLPGAPLPPPKVEVINGNIK-3+

Source : QE3\_201126\_FR\_TIOx\_hum\_tissue\_Urea\_RNAB\_N Scan : 53373

Andromeda score : 252.26

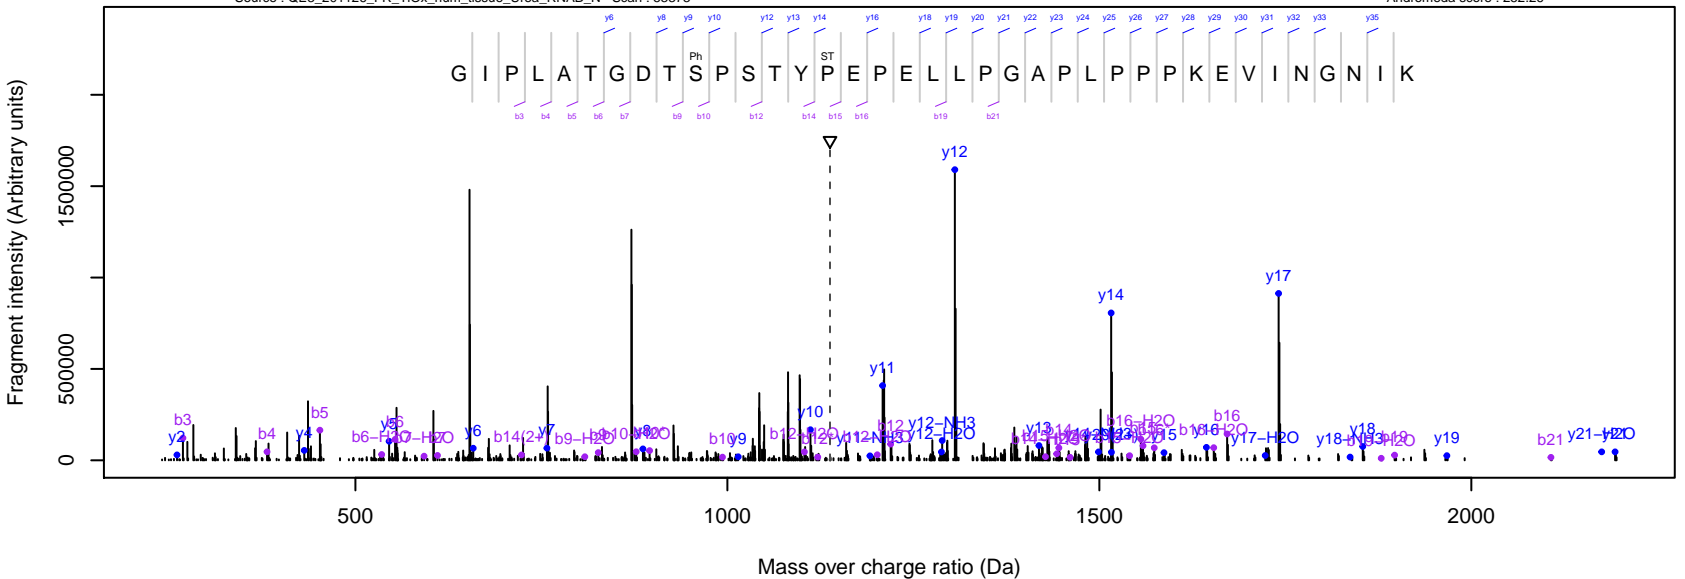

SSEP VQHEESIRKPS(Phospho (STY))PEPR-3+

Source : QE3\_201126\_FR\_TIOx\_hum\_tissue\_Urea\_RNAB\_N Scan : 8227

Andromeda score : 252.13

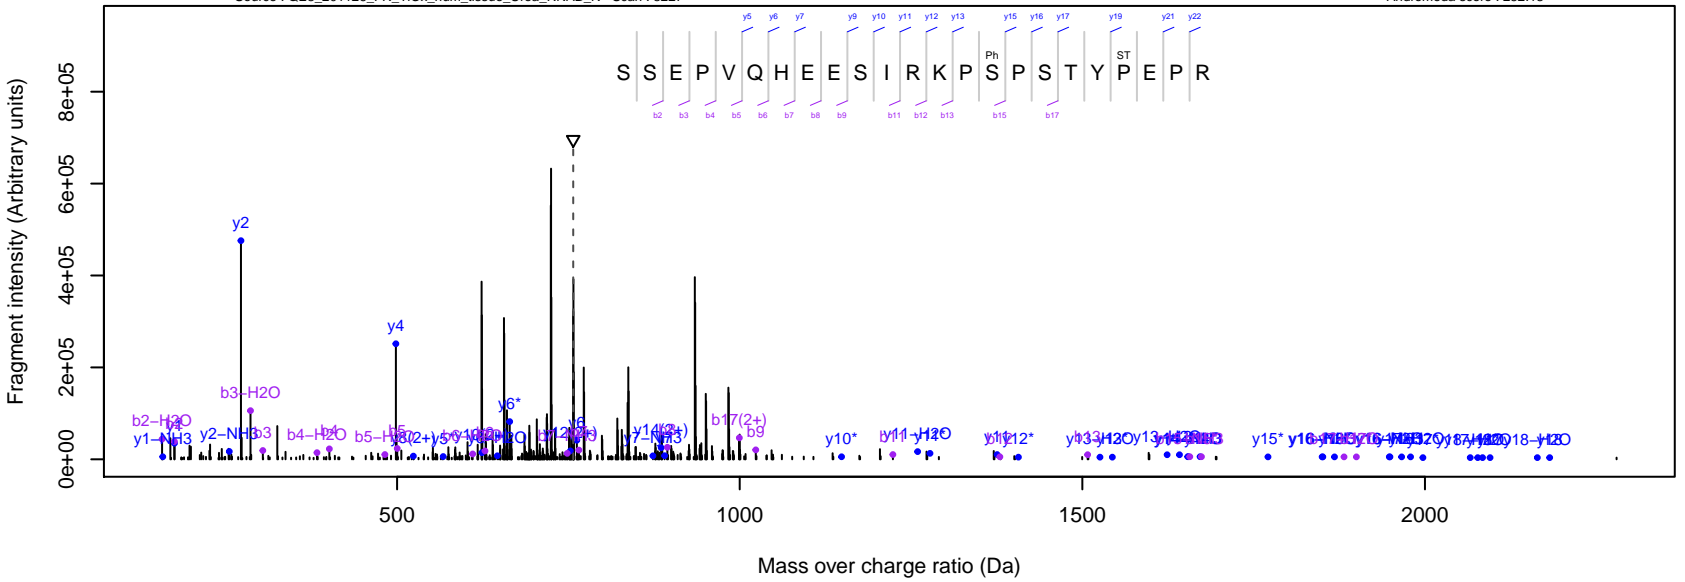

SPS(Phospho (STY))TDNVVNVDFTPR-2+

Source : QE3\_201126\_FR\_TIOx\_hum\_tissue\_Urea\_RNAB\_H Scan : 37410

Andromeda score : 252.1

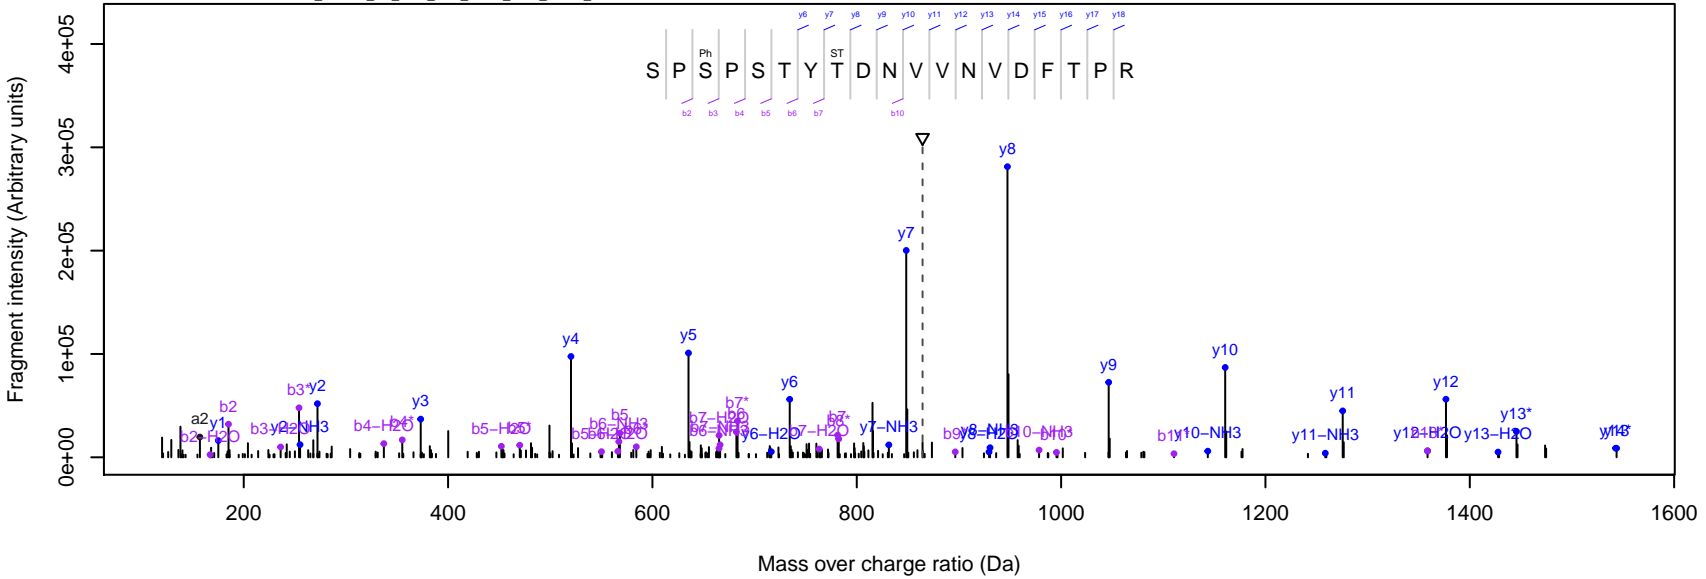

YRS(Phospho (STY))DIHTEAVQAALAK-3+

Source : QE3\_201126\_FR\_TIOx\_hum\_tissue\_Urea\_RNAB\_H Scan : 19550

Andromeda score : 252.1

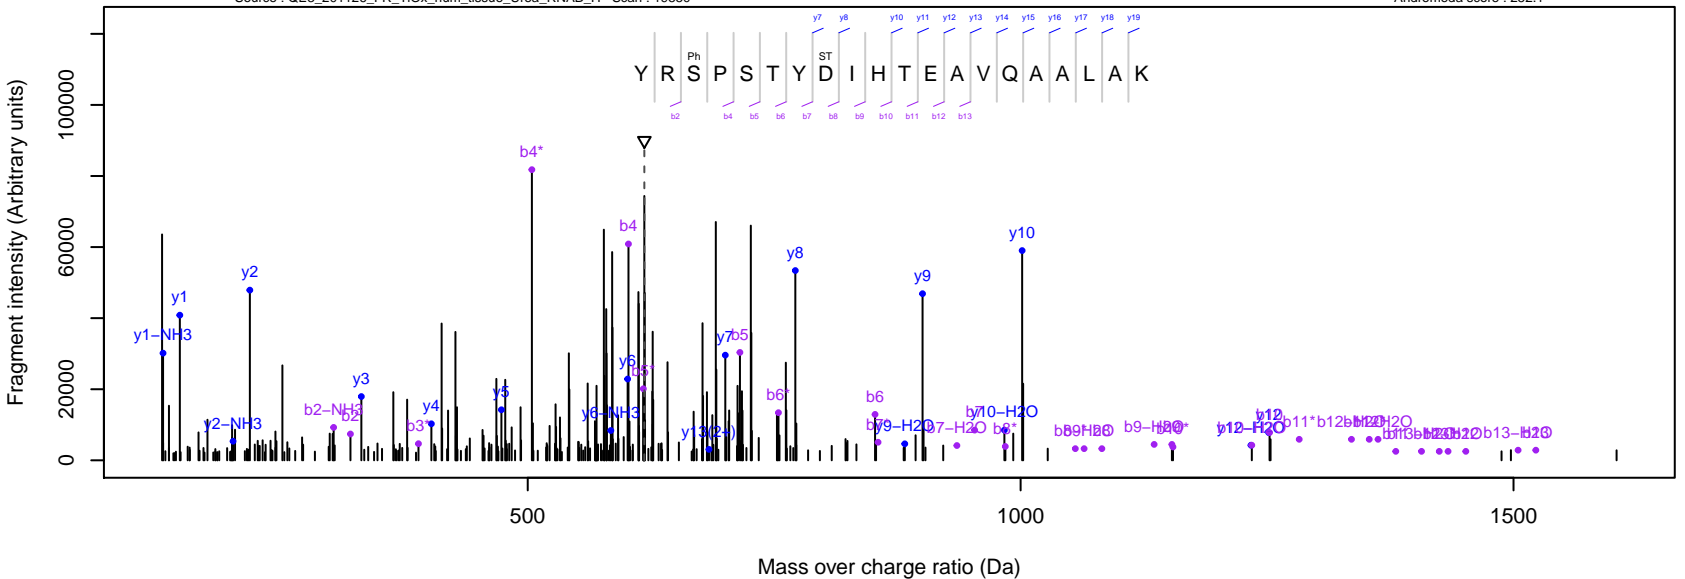



LSSQIS(Phospho (STY))AGEEKWNSVSPASAGK-2+

Source : QE3\_201126\_FR\_TiOx\_hum\_tissue\_Urea\_RNAB\_H Scan : 26691

Andromeda score : 251.55

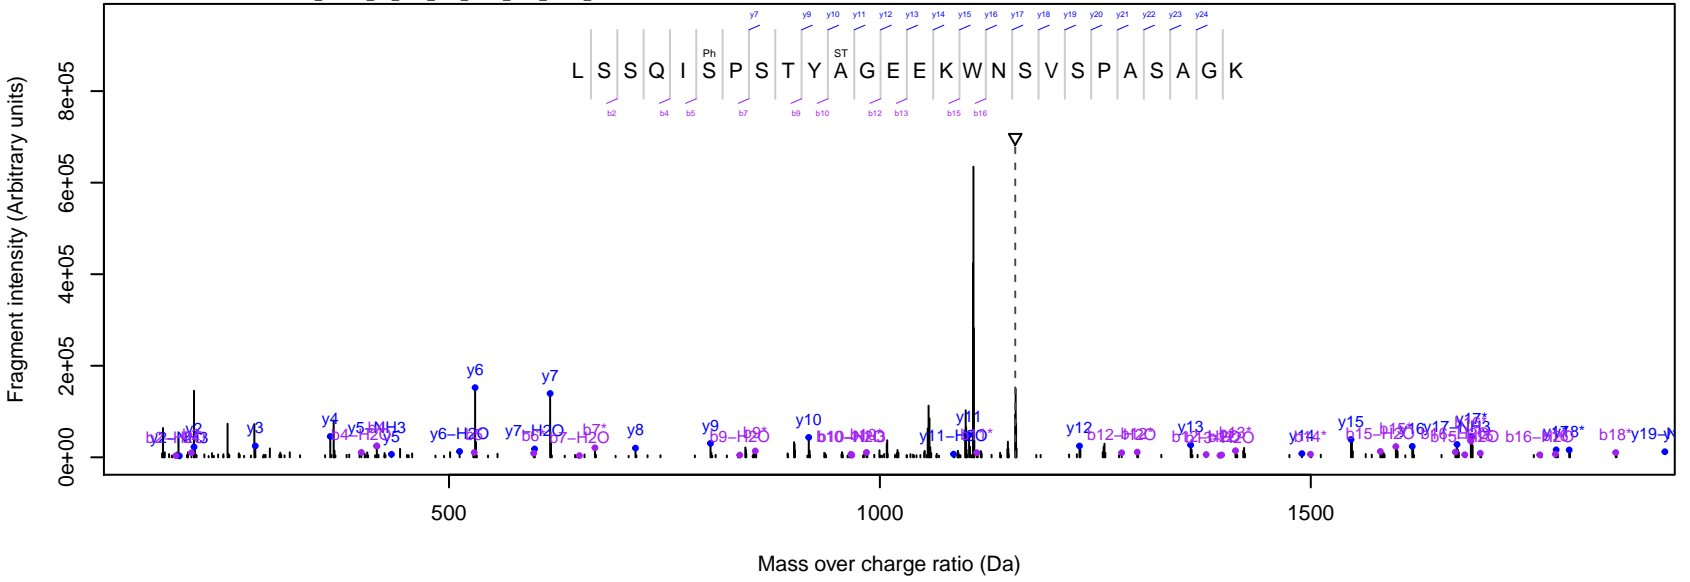

SEDPPEAGS(Phospho (STY))EEEGSSASGLAK-2+

Source : QE3\_201126\_FR\_TiOx\_hum\_tissue\_Urea\_RNAB\_N Scan : 16194

Andromeda score : 251.55

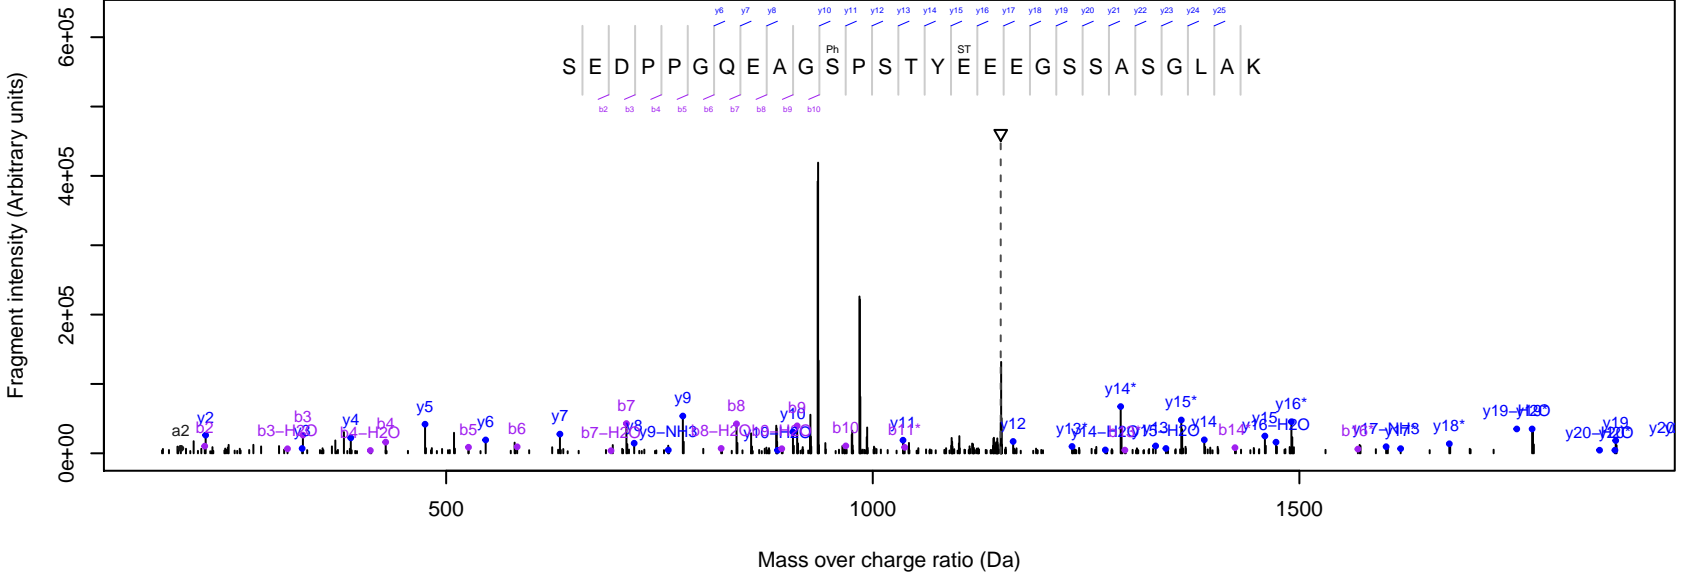

KKEIQNGLHES(Phospho (STY))DSESVPR-3+

Source : QE3\_201126\_FR\_TiOx\_hum\_tissue\_Urea\_RNAB\_B Scan : 7938

Andromeda score : 251.44

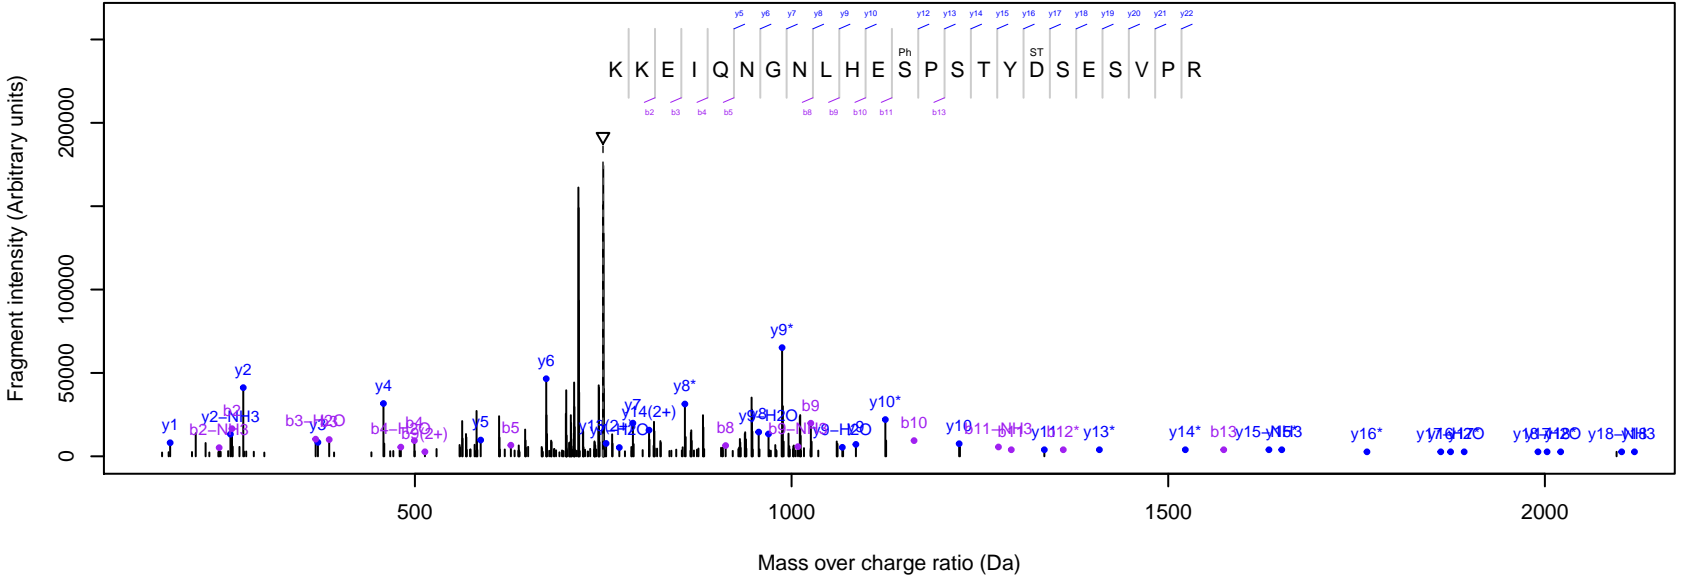

RRDS(Phospho (STY))DGVDFEAE GK-3+

Source : QE3\_201126\_FR\_TiOx\_hum\_tissue\_Urea\_RNAB\_H Scan : 10730

Andromeda score : 251.44

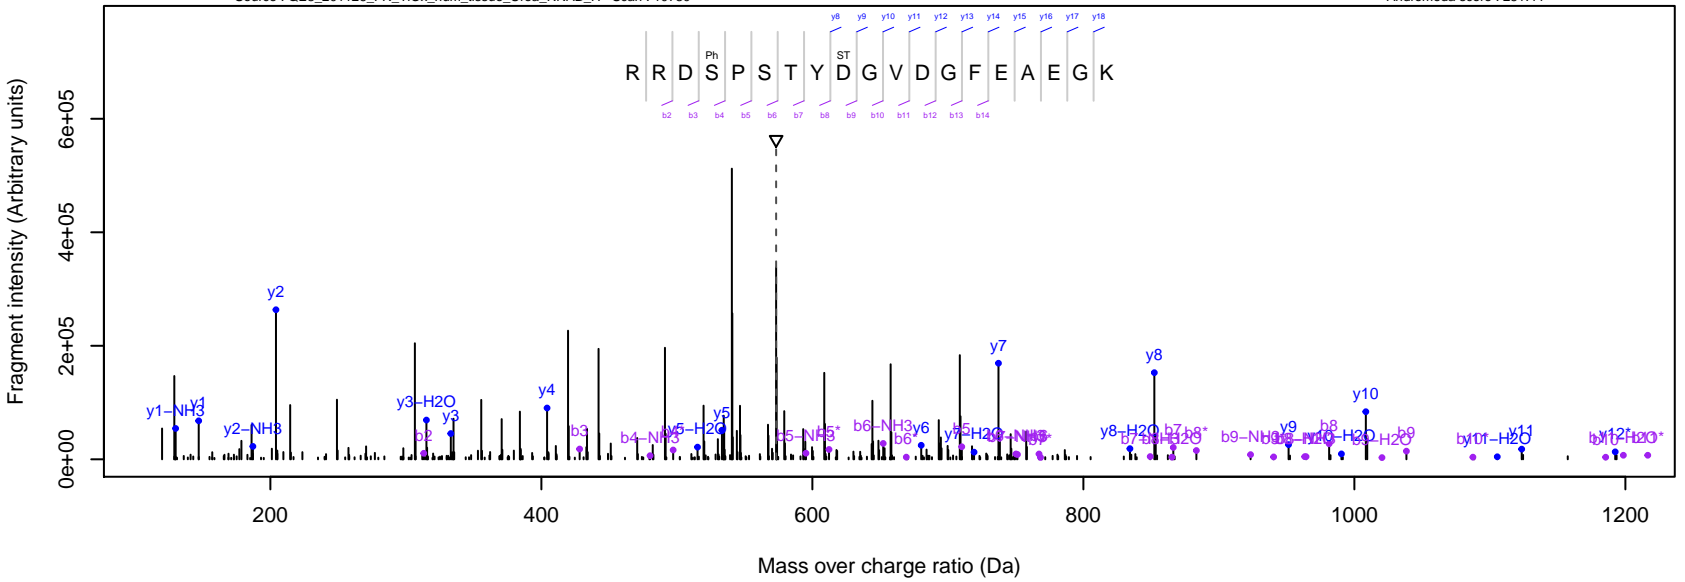

RPTETNPVTSNS(Phospho (STY))DEECNETVKEK-3+

Source : QE3\_201126\_FR\_TiOx\_hum\_tissue\_Urea\_RNAB\_N Scan : 9421

Andromeda score : 251.19

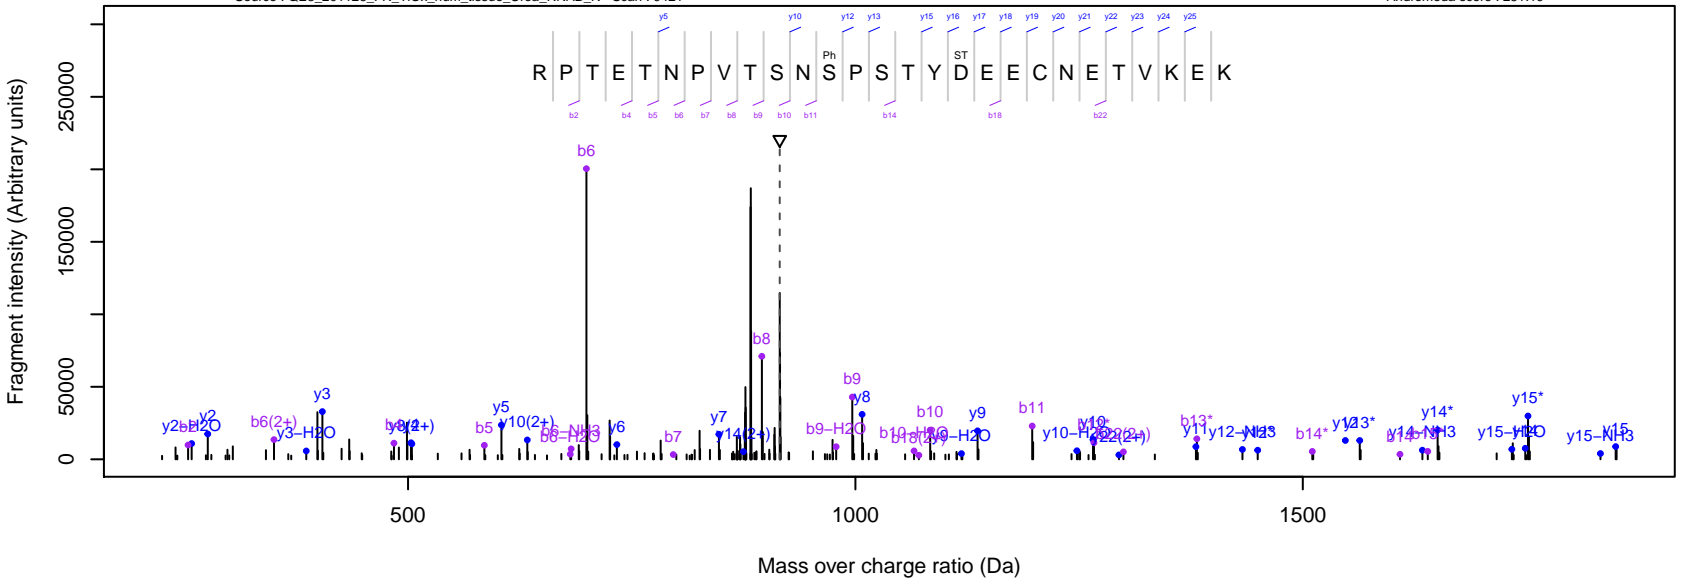

ADEASELACPT(Phospho (STY))PKEDGLAQQQTQLNLR-3+

Source : QE3\_201126\_FR\_TiOx\_hum\_tissue\_Urea\_RNAB\_H Scan : 33530

Andromeda score : 251.18

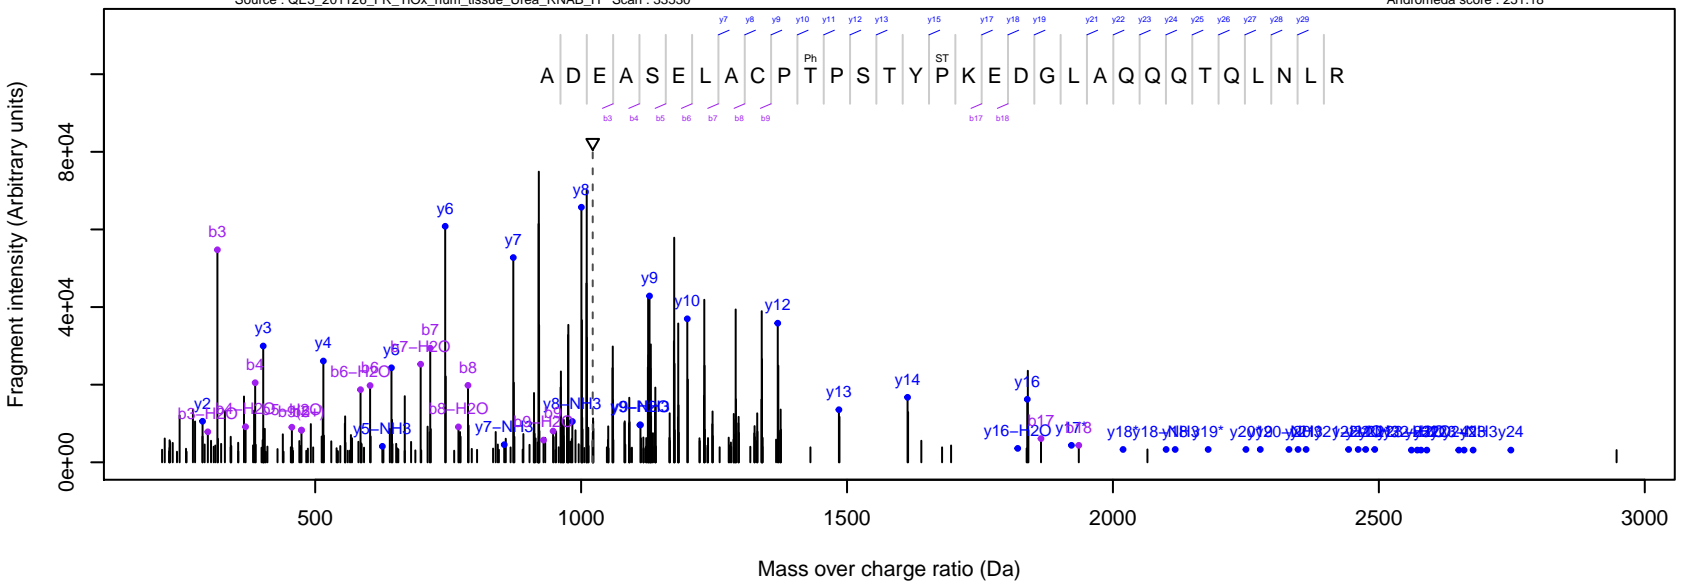



EQTLS(Phospho (STY))PTITSGLHNIAR-2+

Source : QE3\_201126\_FR\_TiOx\_hum\_tissue\_Urea\_RNAB\_N Scan : 33293

Andromeda score : 251.02

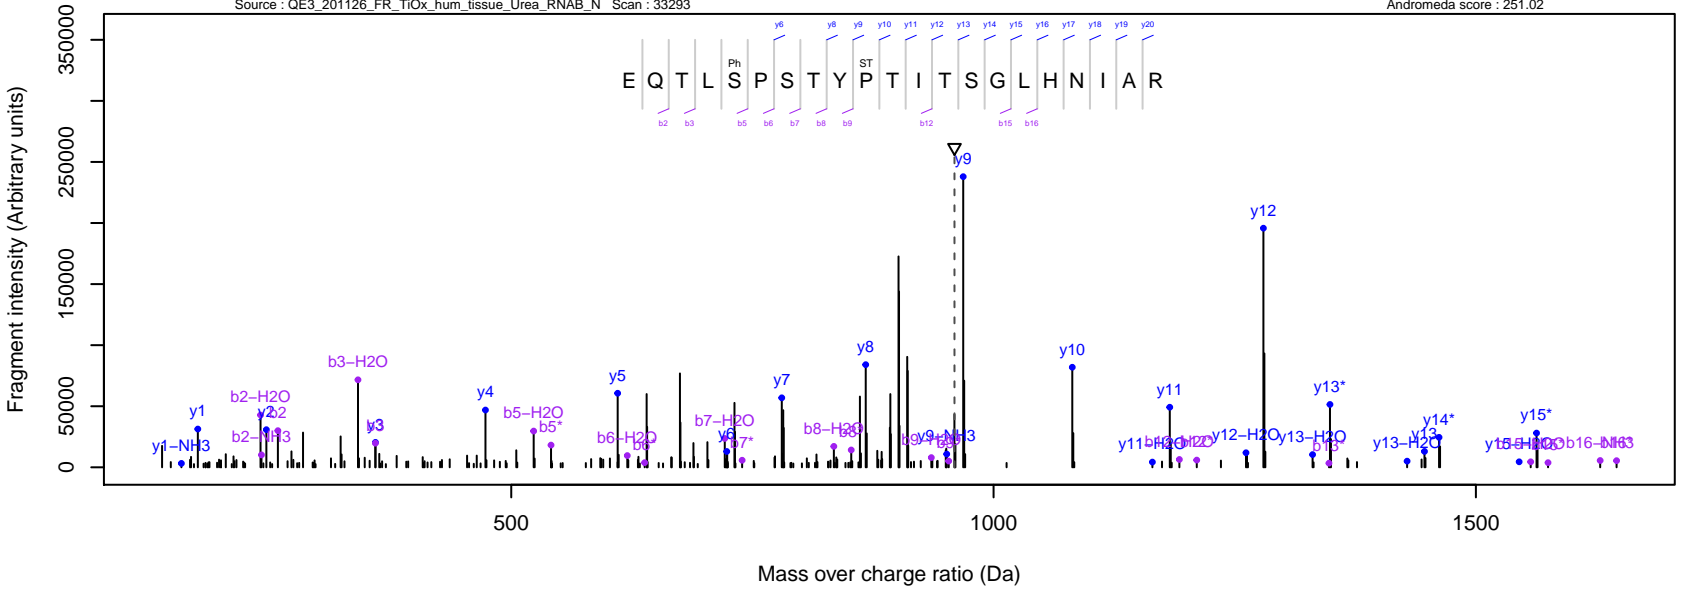

ATS(Phospho (STY))NVFAMFDQSQIQEFKEAFNMIDQNR-3+

Source : QE3\_201126\_FR\_TiOx\_hum\_tissue\_Urea\_RNAB\_H Scan : 62229

Andromeda score : 251.01

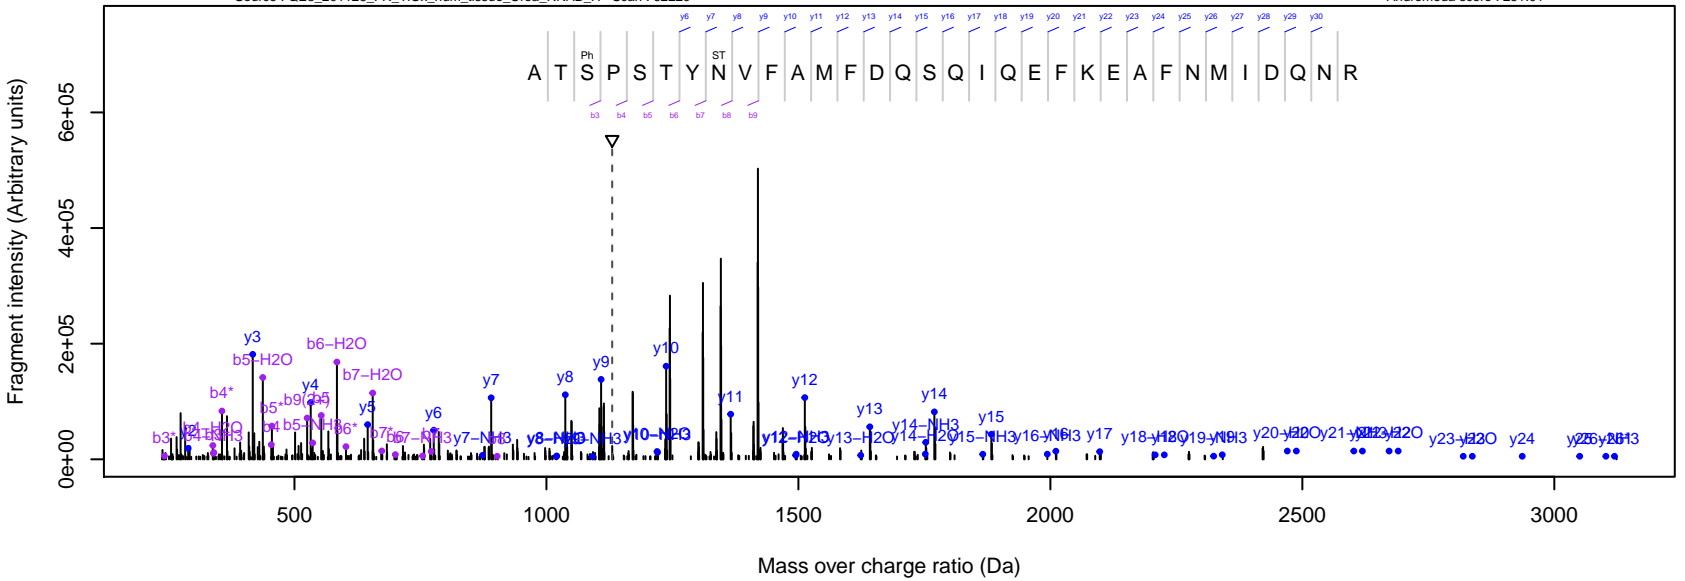

AHT(Phospho (STY))PTPGIYM(Oxidation (M))GRPTHTSGGGGGGGGGGGGGGR-4+

Source : QE3\_201126\_FR\_TiOx\_hum\_tissue\_Urea\_RNAB\_B Scan : 7446

Andromeda score : 250.99

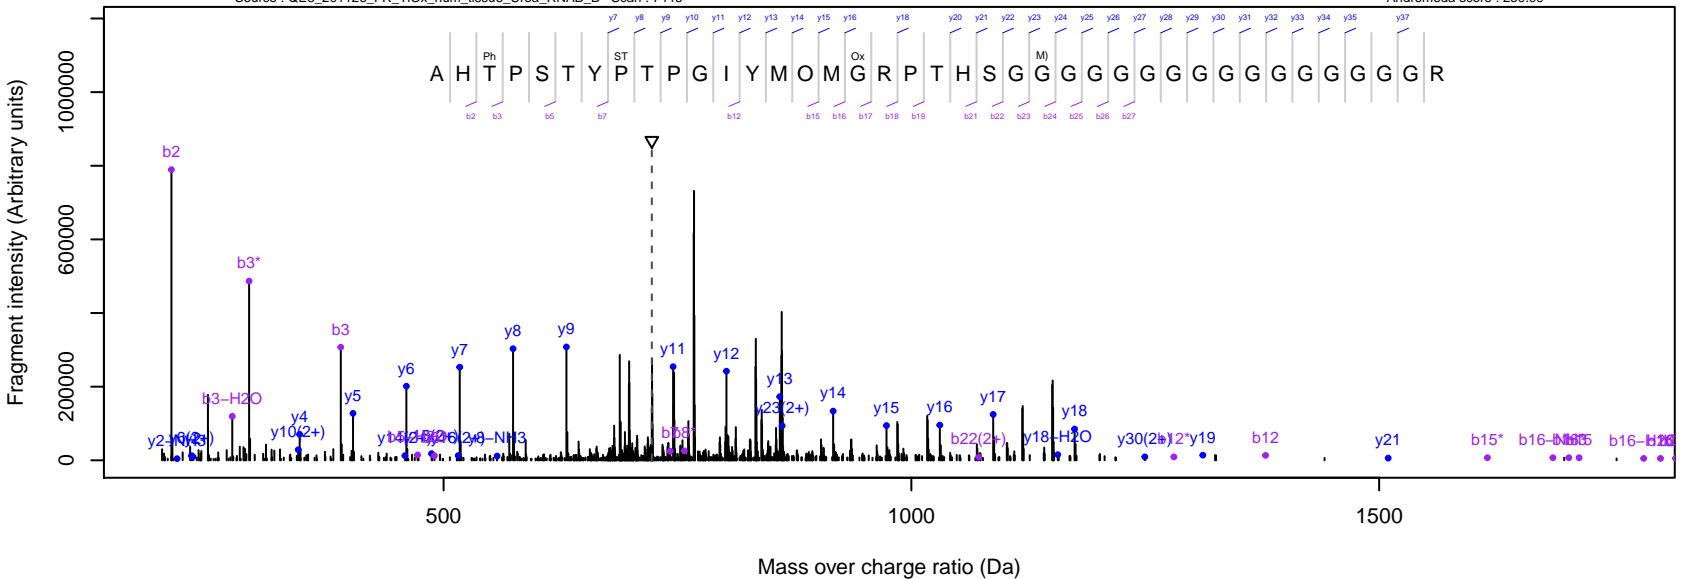

SPAVATSTAAPPPS(Phospho (STY))SPLPSK-2+

Source : QE3\_201126\_FR\_TiOx\_hum\_tissue\_Urea\_RNAB\_B Scan : 22340

Andromeda score : 250.86

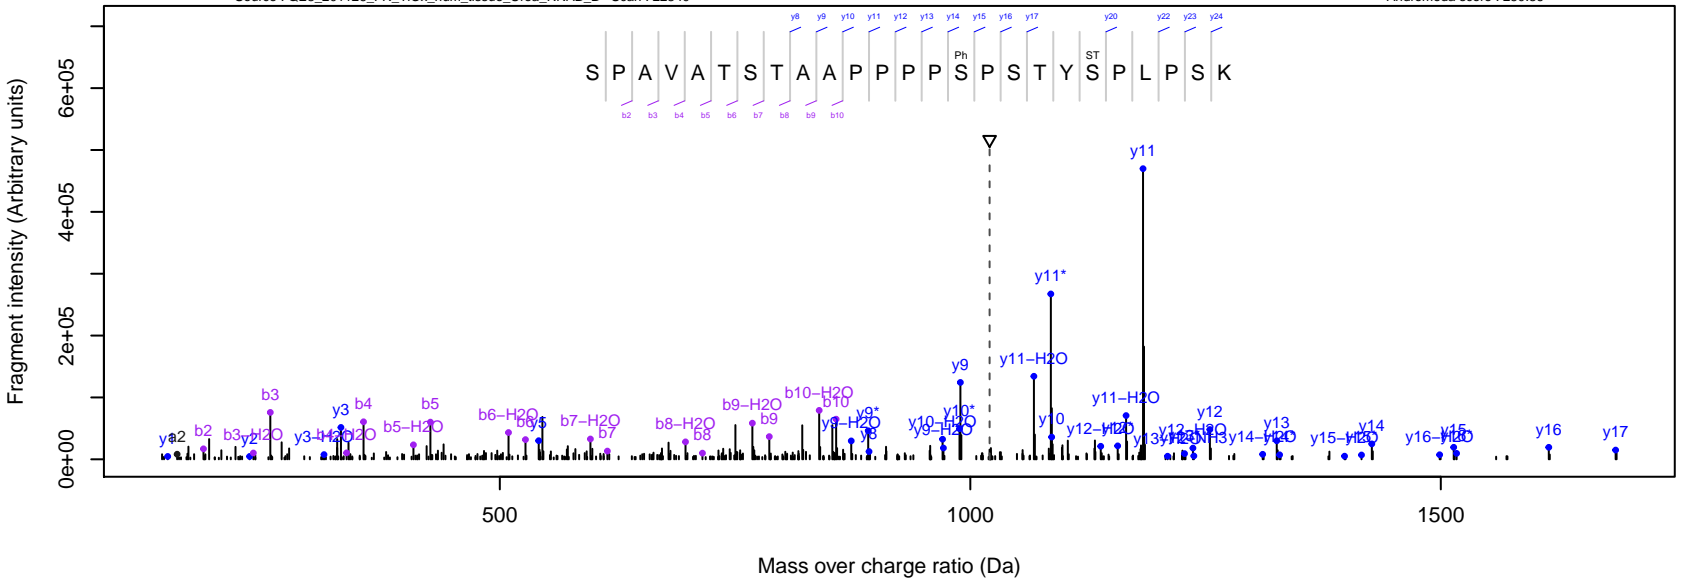

RPES(Phospho (STY))PSEISPIK-2+

Source : QE3\_201126\_FR\_TiOx\_hum\_tissue\_Urea\_RNAB\_H Scan : 15987

Andromeda score : 250.6

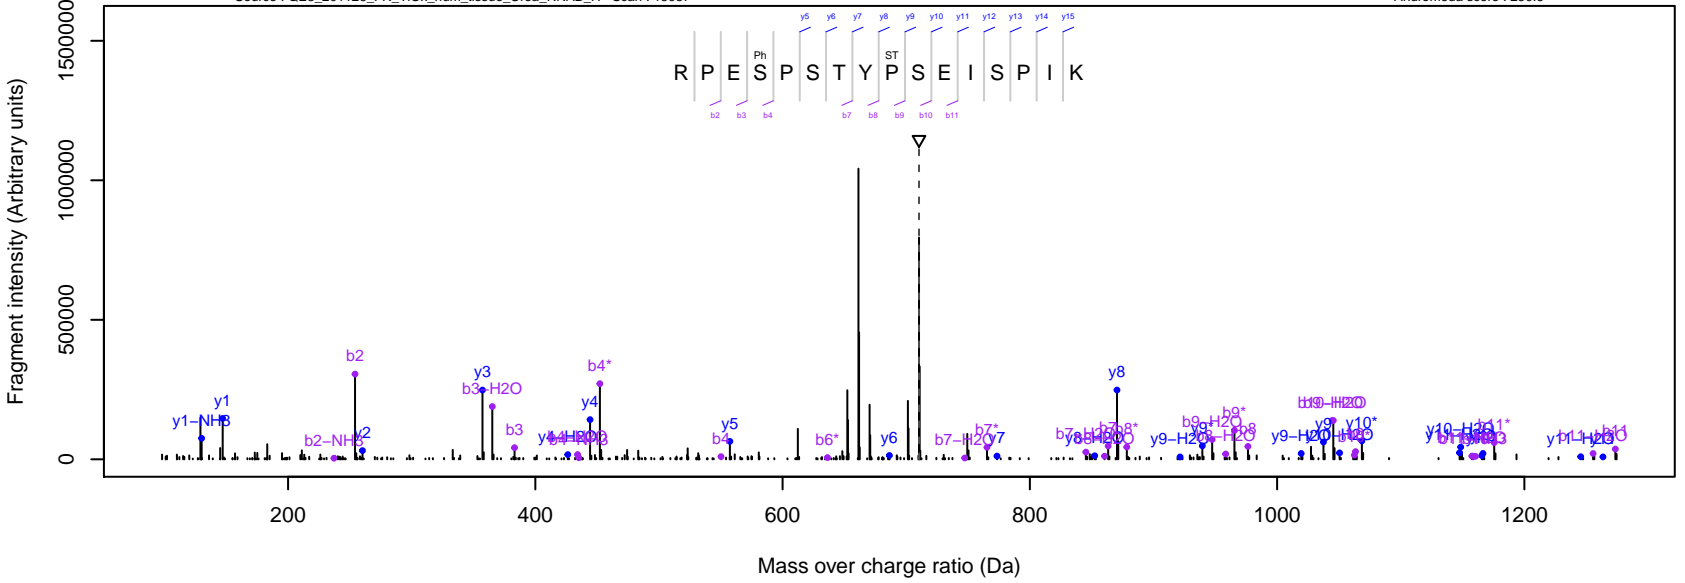

SS(Phospho (STY))SQPSSCCS(Phospho (STY))DPSKPGGNVEGATQSLAEQMR-3+

Source : QE3\_201126\_FR\_TiOx\_hum\_tissue\_Urea\_RNAB\_B Scan : 34868

Andromeda score : 250.41

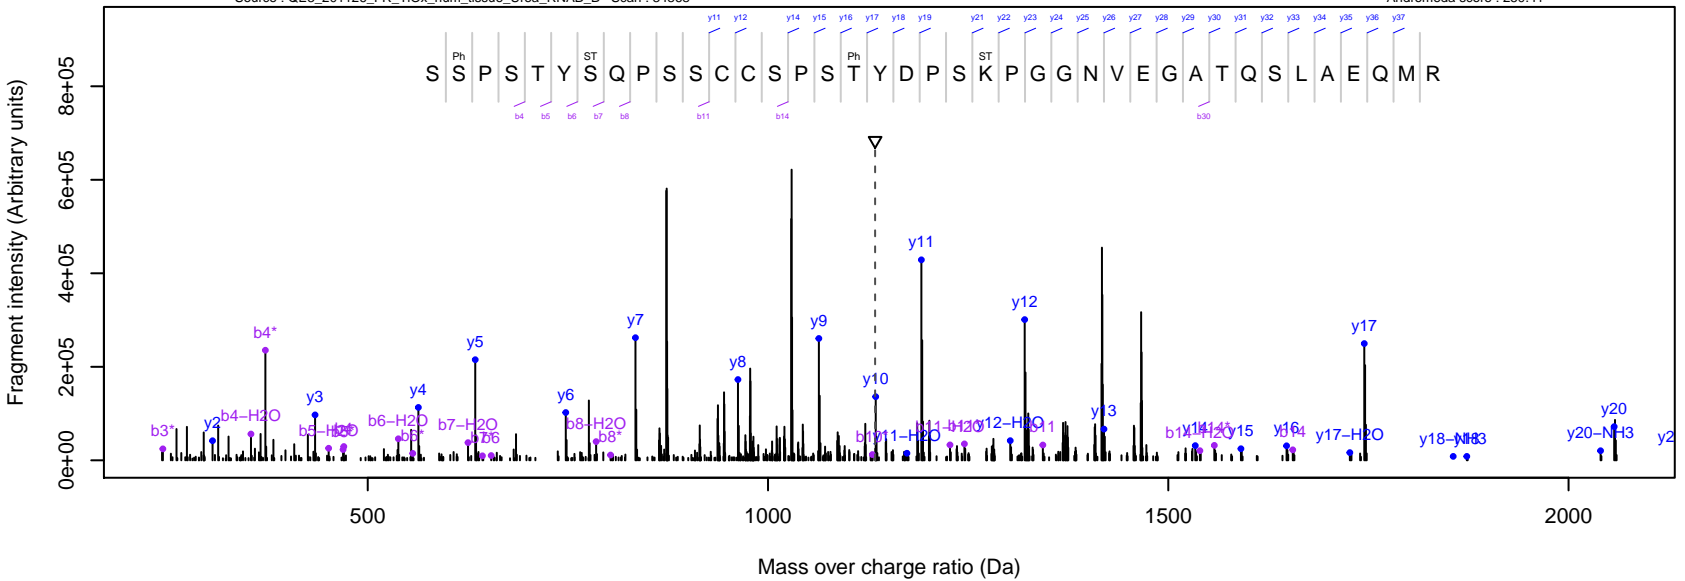

**KDS(Phospho (STY))SSVVEWTQAPK-2+**

Source : QE3\_201126\_FR\_TIOx\_hum\_tissue\_Urea\_RNAB\_N Scan : 22295

Andromeda score : 250.08

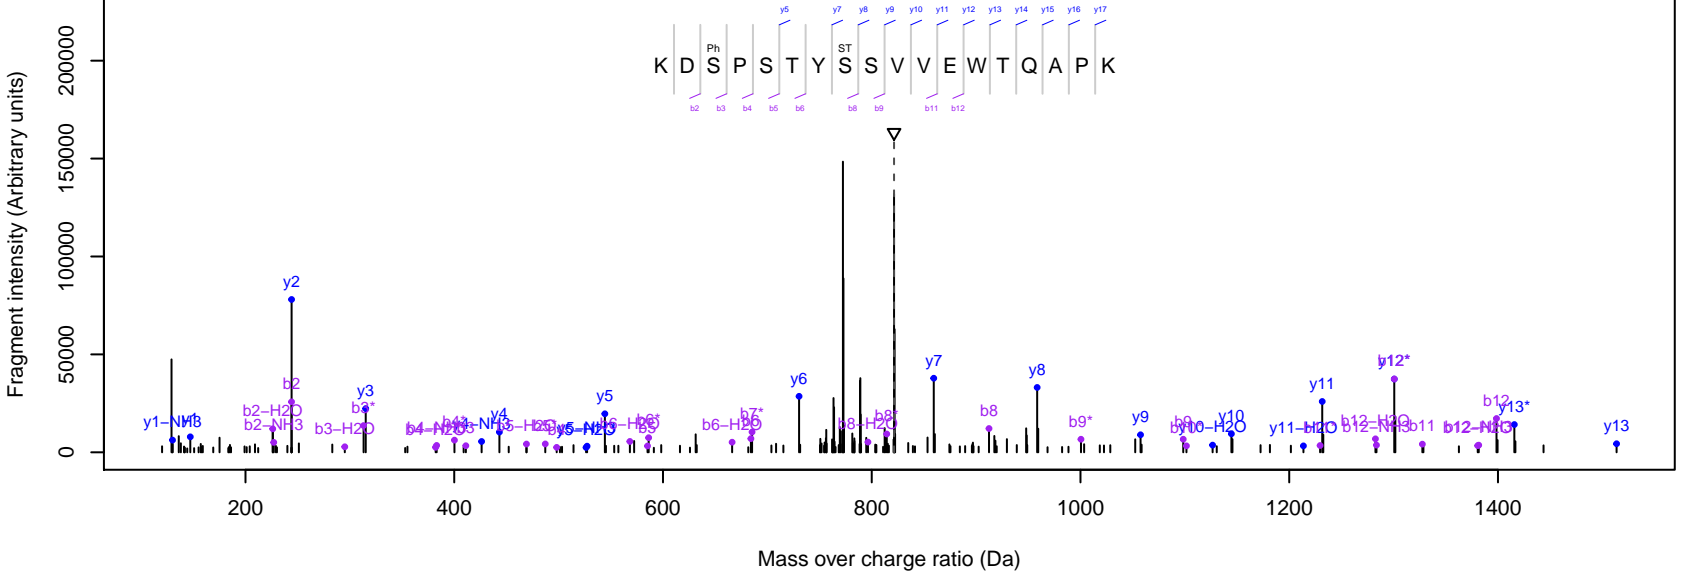

**GQTPLTEGSELDLGH(S Phospho (STY))DPEESFAR-2+**

Source : QE3\_201126\_FR\_TIOx\_hum\_tissue\_Urea\_RNAB\_N Scan : 30863

Andromeda score : 249.59

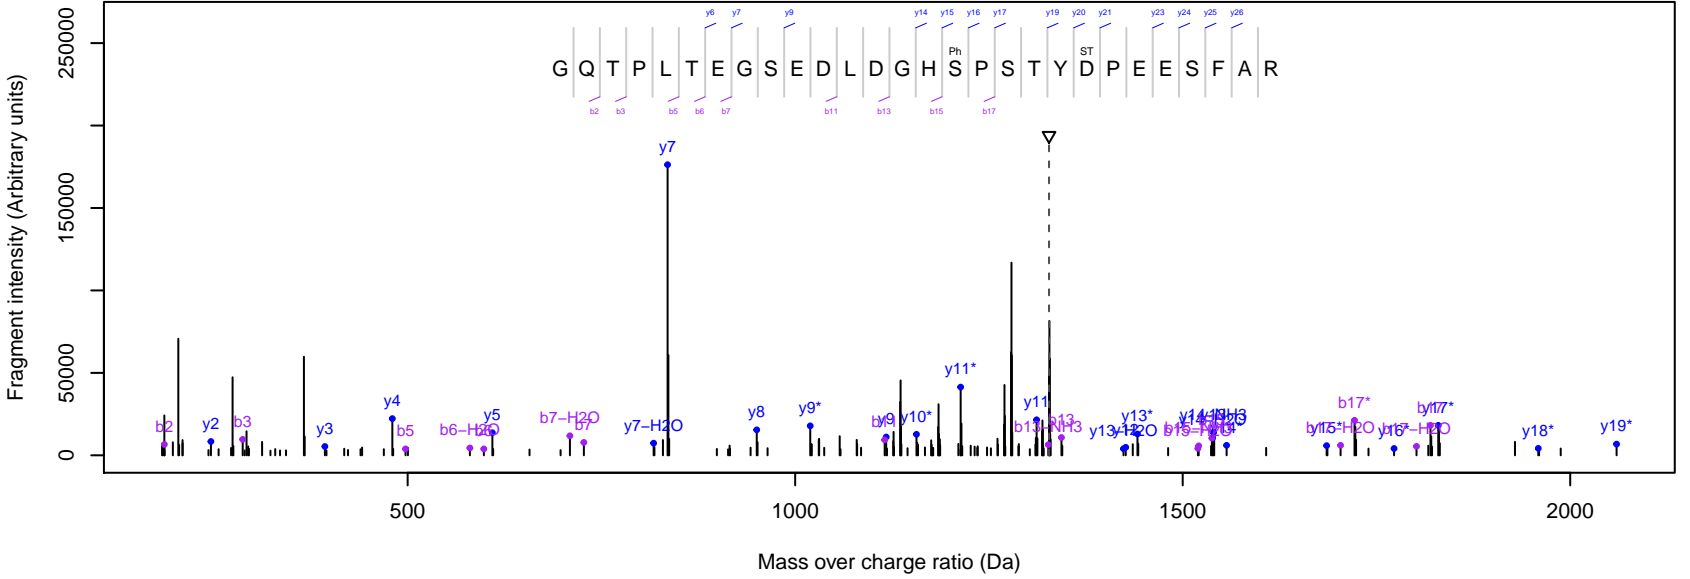

**EVDPSTGELQSLQM(Oxidation (M))PES(Phospho (STY))EGPSS(Phospho (STY))LDPSQEGPTGLK-3+**

Source : QE3\_201126\_FR\_TIOx\_hum\_tissue\_Urea\_RNAB\_N Scan : 50322

Andromeda score : 249.51

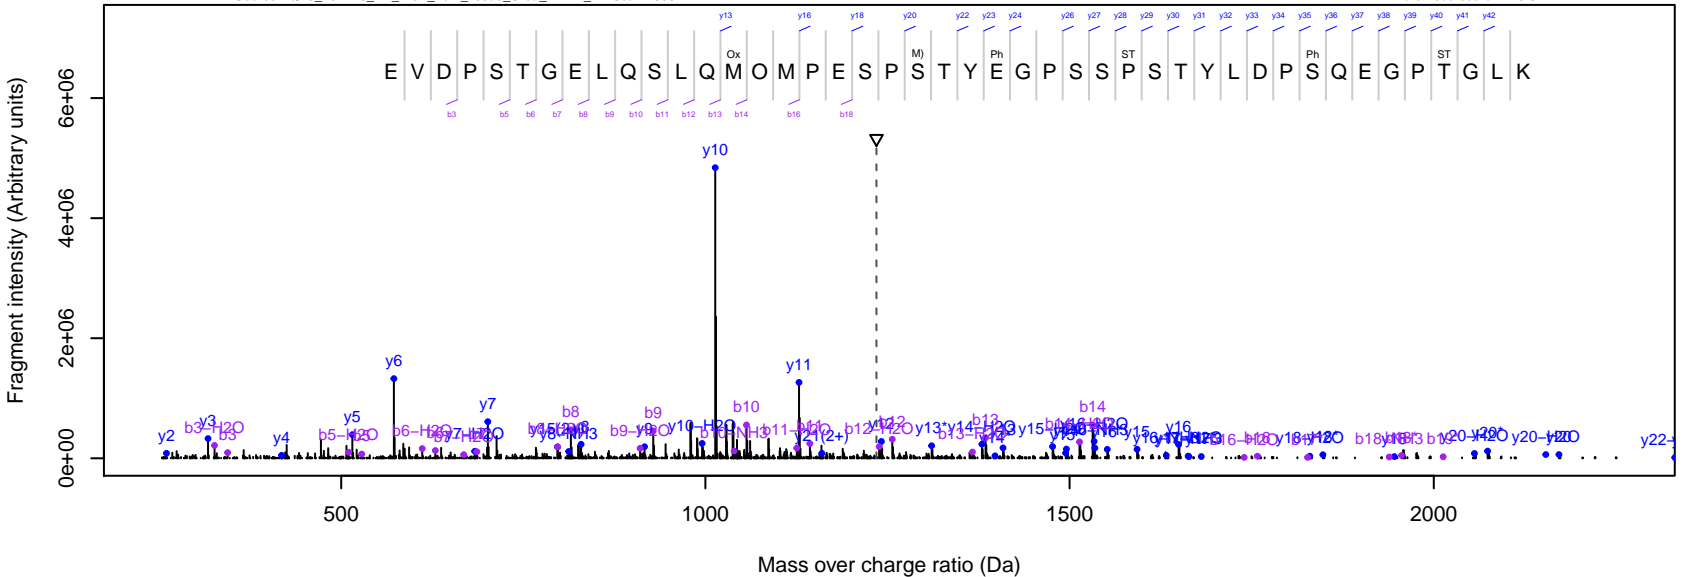

(Acetyl (Protein N-term))S(Phospho (STY))DNDDIEVESDADKR-2+

Source : QE3\_201126\_FR\_TiOx\_hum\_tissue\_Urea\_RNAB\_B Scan : 19941

Andromeda score : 249.41

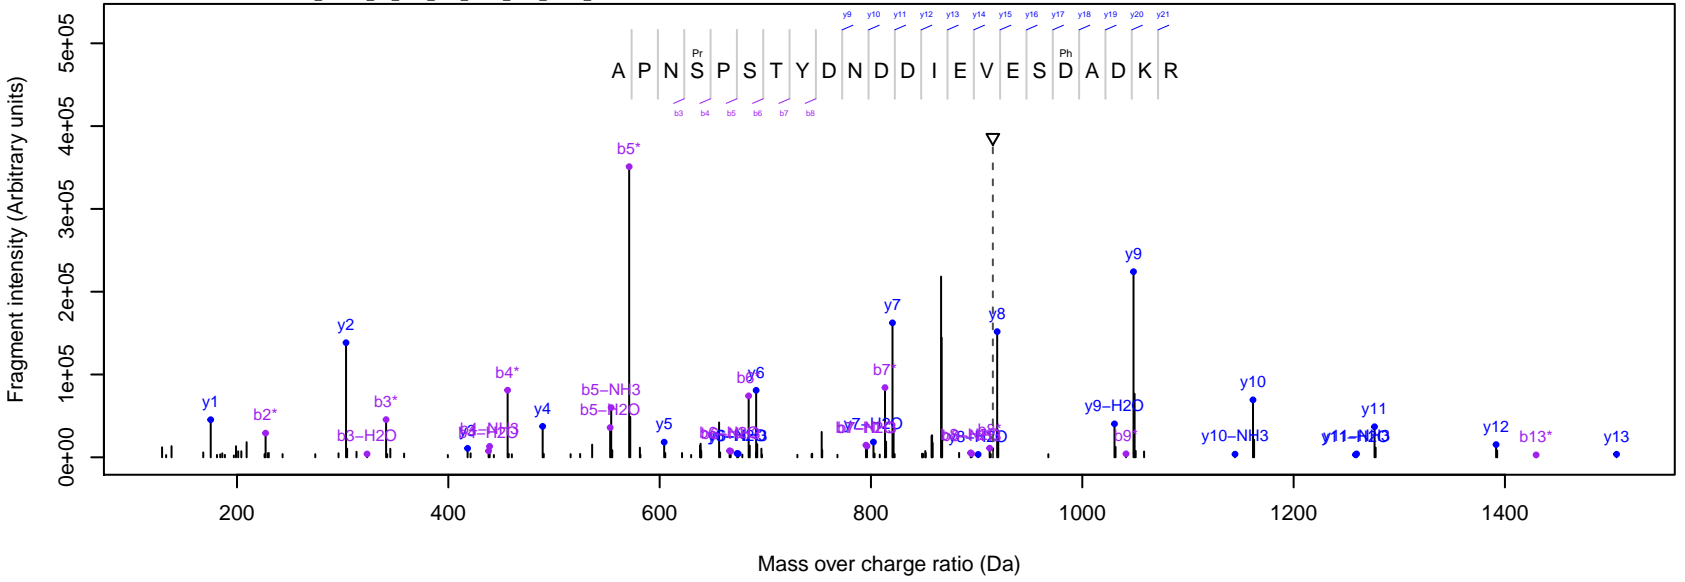

ASTAS(Phospho (STY))PCNNNINAATAVALQEPR-2+

Source : QE3\_201126\_FR\_TiOx\_hum\_tissue\_Urea\_RNAB\_B Scan : 34962

Andromeda score : 249.38

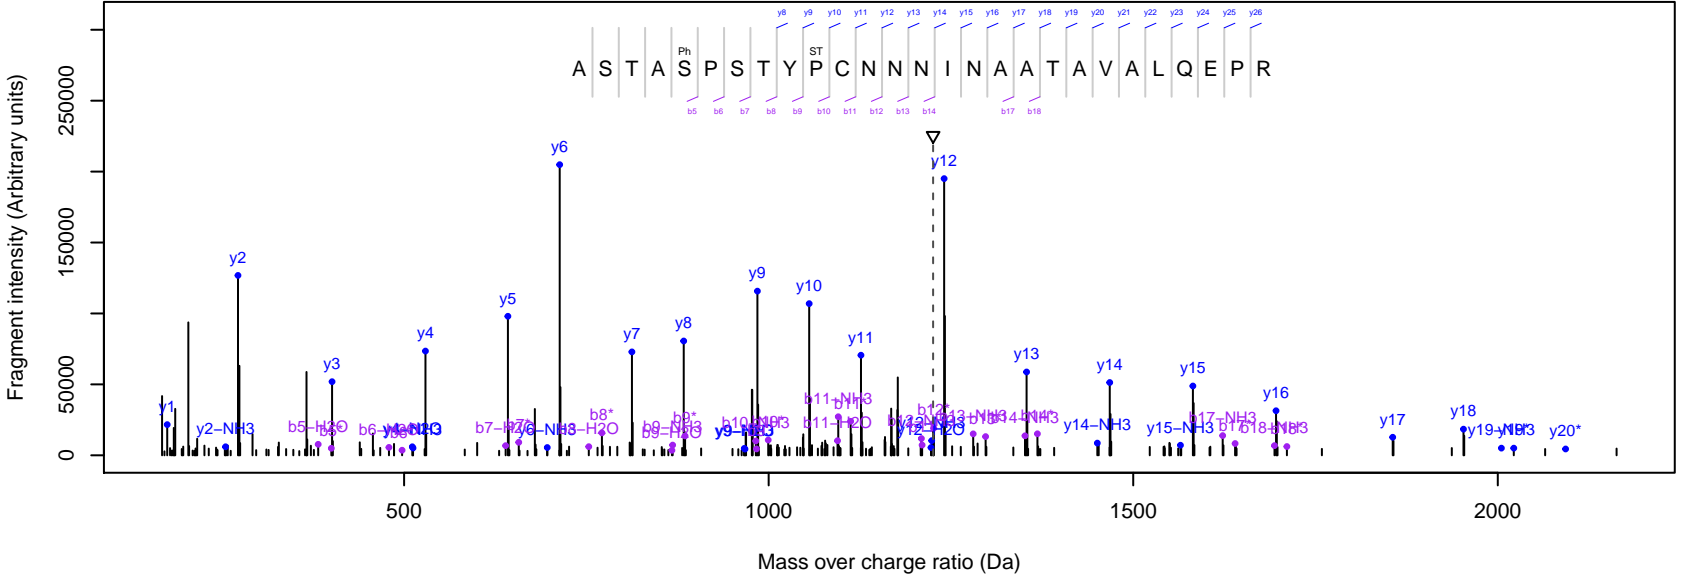

SAS(Phospho (STY))SSWLEGTSTQAK-2+

Source : QE3\_201126\_FR\_TiOx\_hum\_tissue\_Urea\_RNAB\_N Scan : 26165

Andromeda score : 249.32

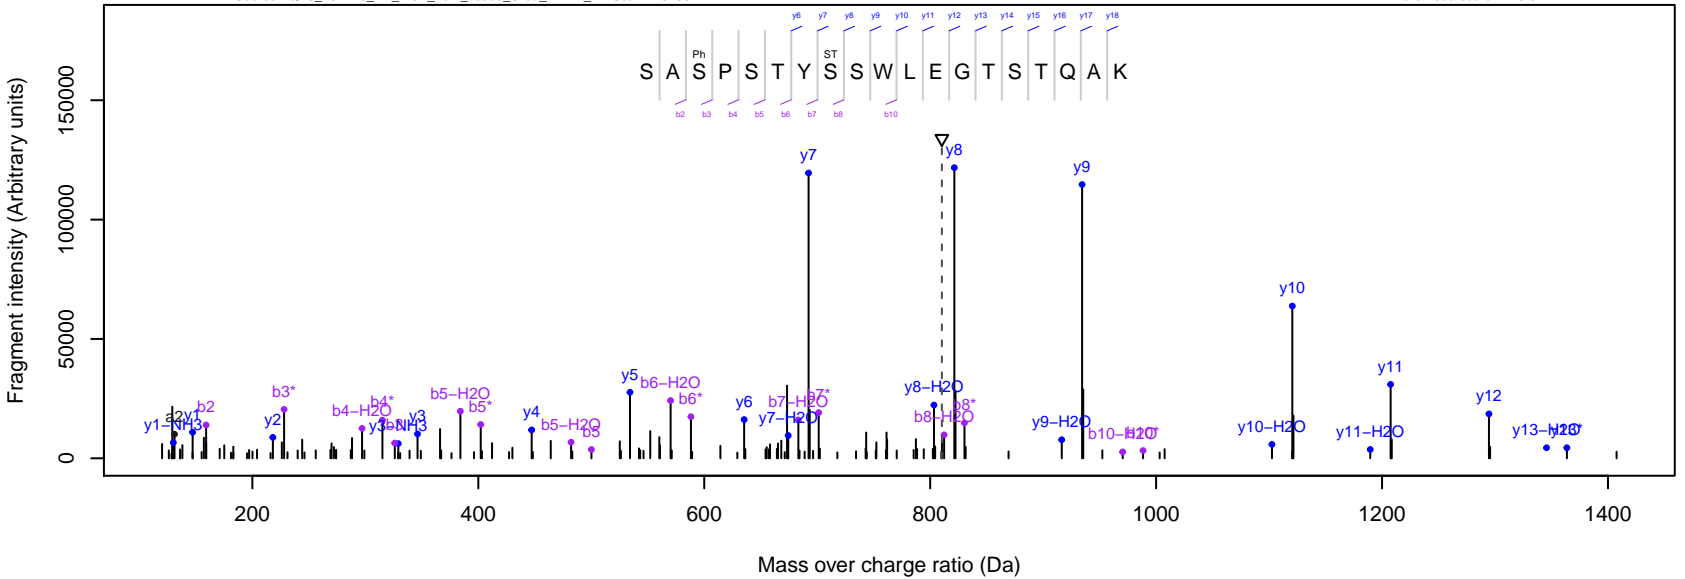

### LQAALDDEEAGGRPAM(Oxidation (M))EPGNNGS(Phospho (STY))LDLGGDSAGR-3+

Source : QE3\_201126\_FR\_TIOx\_hum\_tissue\_Urea\_RNAB\_B Scan : 29793

Andromeda score : 249.23

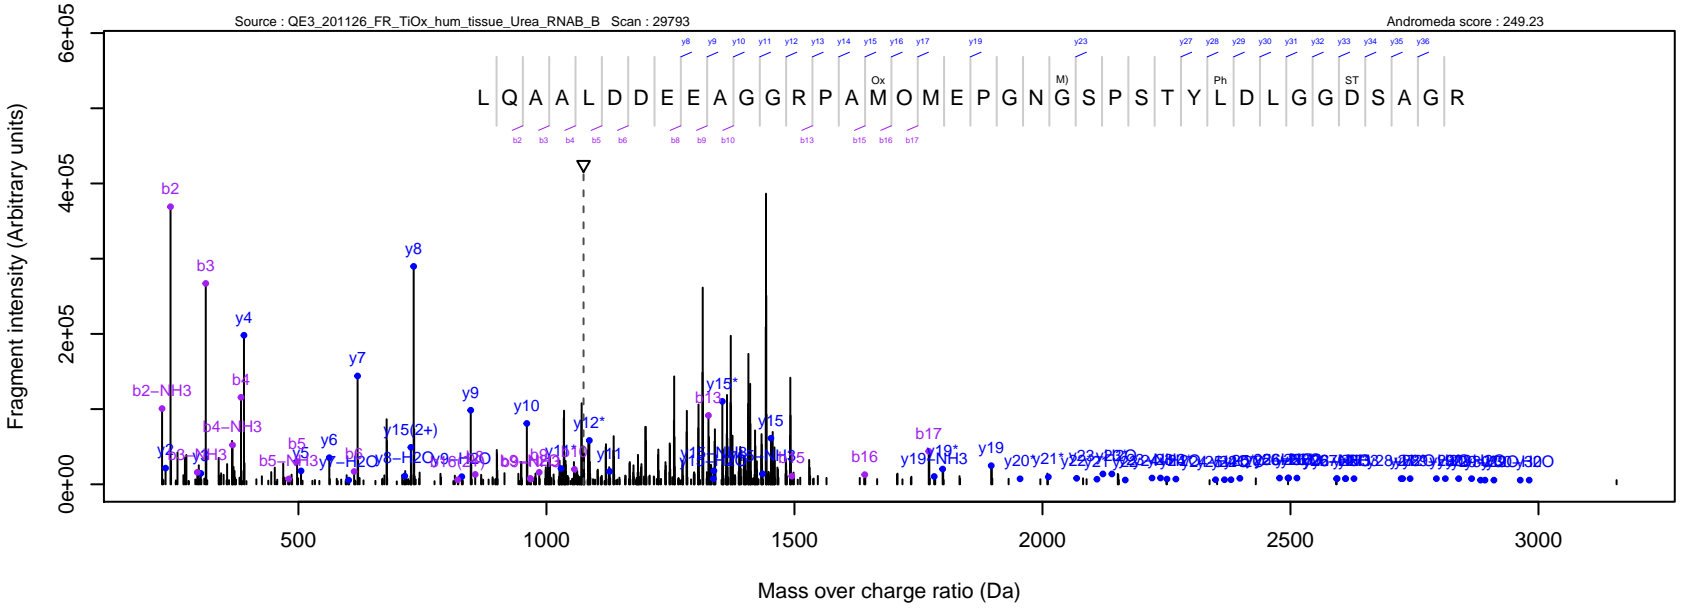

### VEAKEES(Phospho (STY))EES(Phospho (STY))DEDMGFLFD-2+

Source : QE3\_201126\_FR\_TIOx\_hum\_tissue\_Urea\_RNAB\_N Scan : 62646

Andromeda score : 249.2

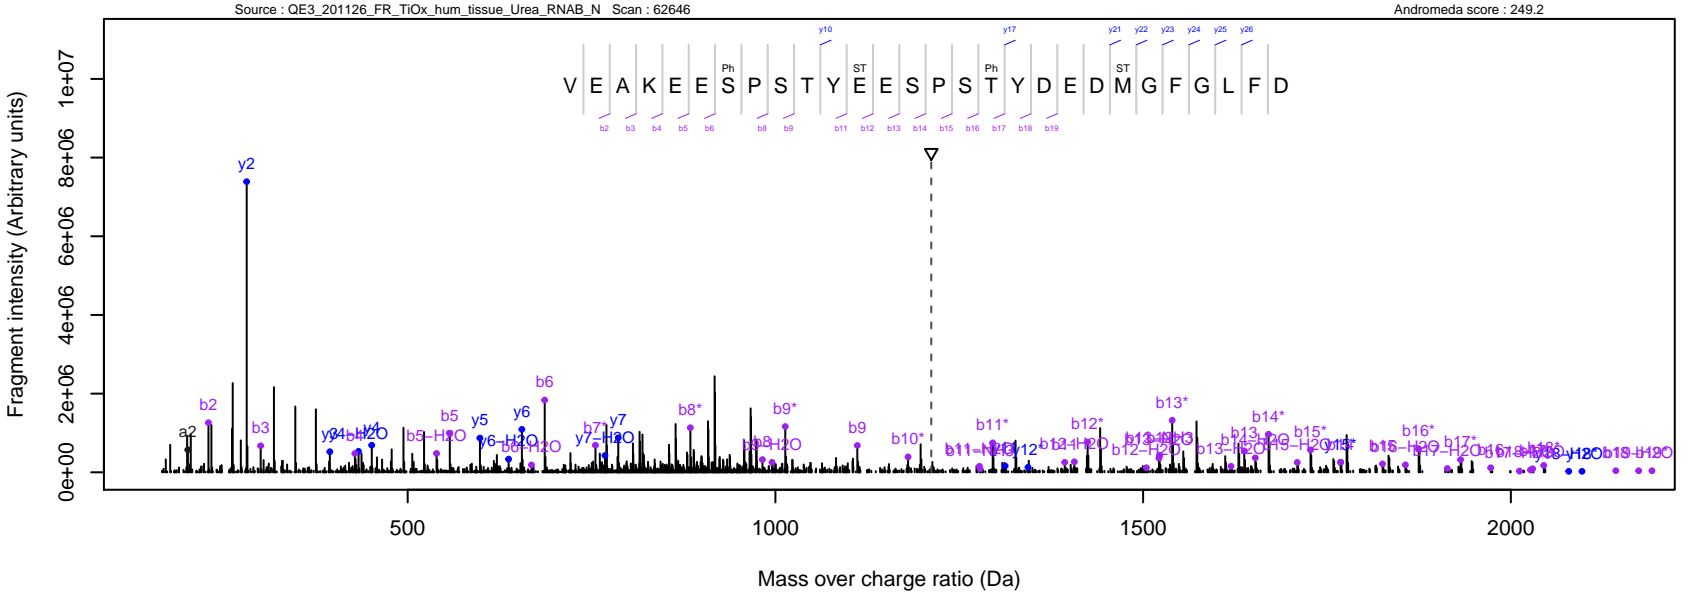

ESEDKPEIEDVGS(Phospho (STY))DEEEKK-3+

Source : QE3\_201126\_FR\_TiOx\_hum\_tissue\_Urea\_RNAB\_B Scan : 12805

Andromeda score : 249.12

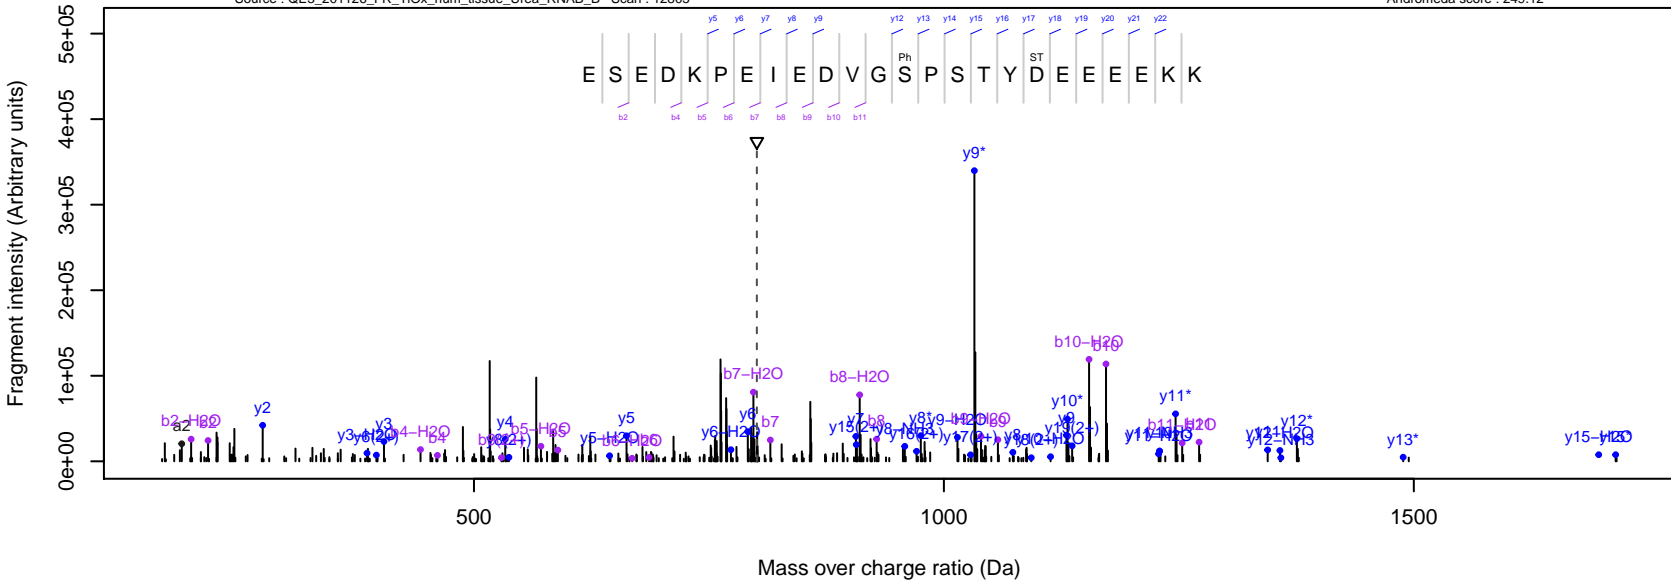

SGS(Phospho (STY))PSDNSGAEEMVSLAKPK-2+

Source : QE3\_201126\_FR\_TiOx\_hum\_tissue\_Urea\_RNAB\_H Scan : 23486

Andromeda score : 249.06

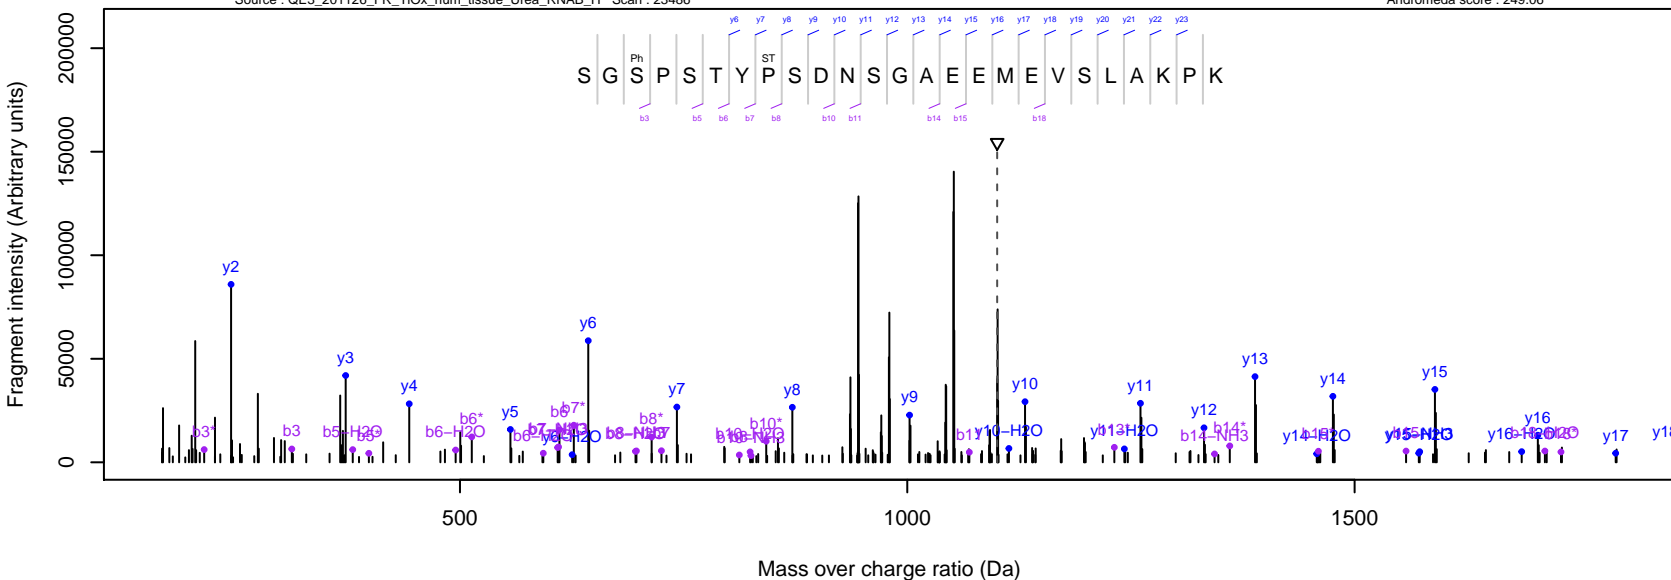

VGDTKEPEPERS(Phospho (STY))PPNR-3+

Source : QE3\_201126\_FR\_TiOx\_hum\_tissue\_Urea\_RNAB\_B Scan : 5702

Andromeda score : 248.91

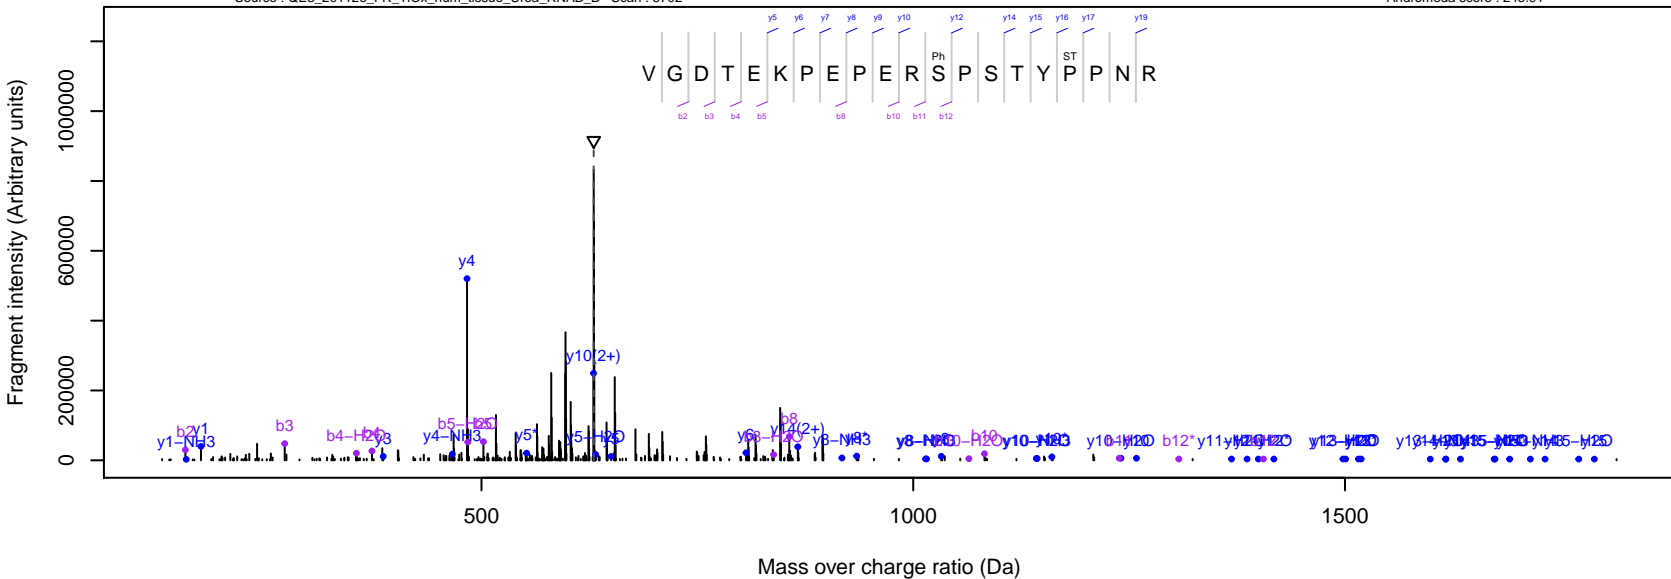

NSKS(Phospho (STY))PTEYHEPVYANPFYRPTTPQR-4+

Source : QE3\_201126\_FR\_TIOx\_hum\_tissue\_Urea\_RNAB\_N Scan : 24709

Andromeda score : 248.73

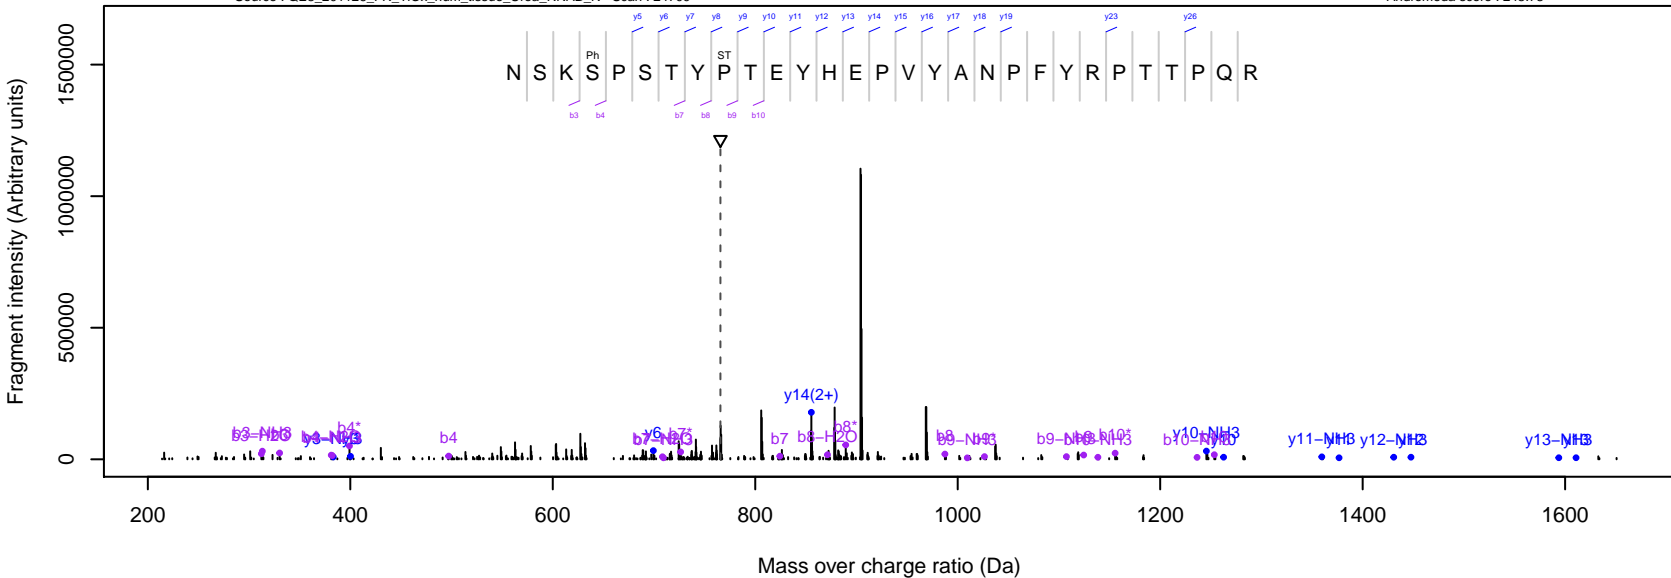

TM(Oxidation (M))TTNSS(Phospho (STY))DPFLNSGTYHSR-3+

Source : QE3\_201126\_FR\_TIOx\_hum\_tissue\_Urea\_RNAB\_B Scan : 21699

Andromeda score : 248.7

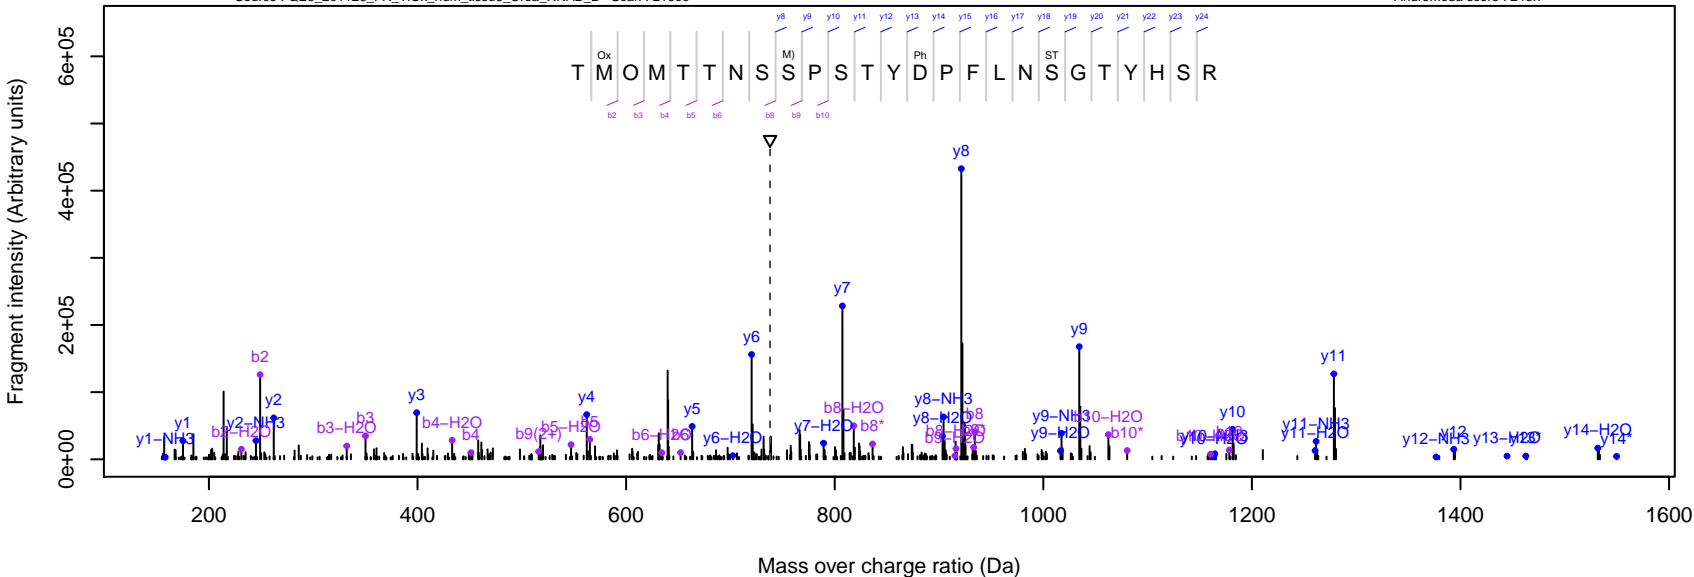

HAEAT(Phospho (STY))LGSGLNR-2+

Source : QE3\_201126\_FR\_TIOx\_hum\_tissue\_Urea\_RNAB\_H Scan : 10601

Andromeda score : 248.67

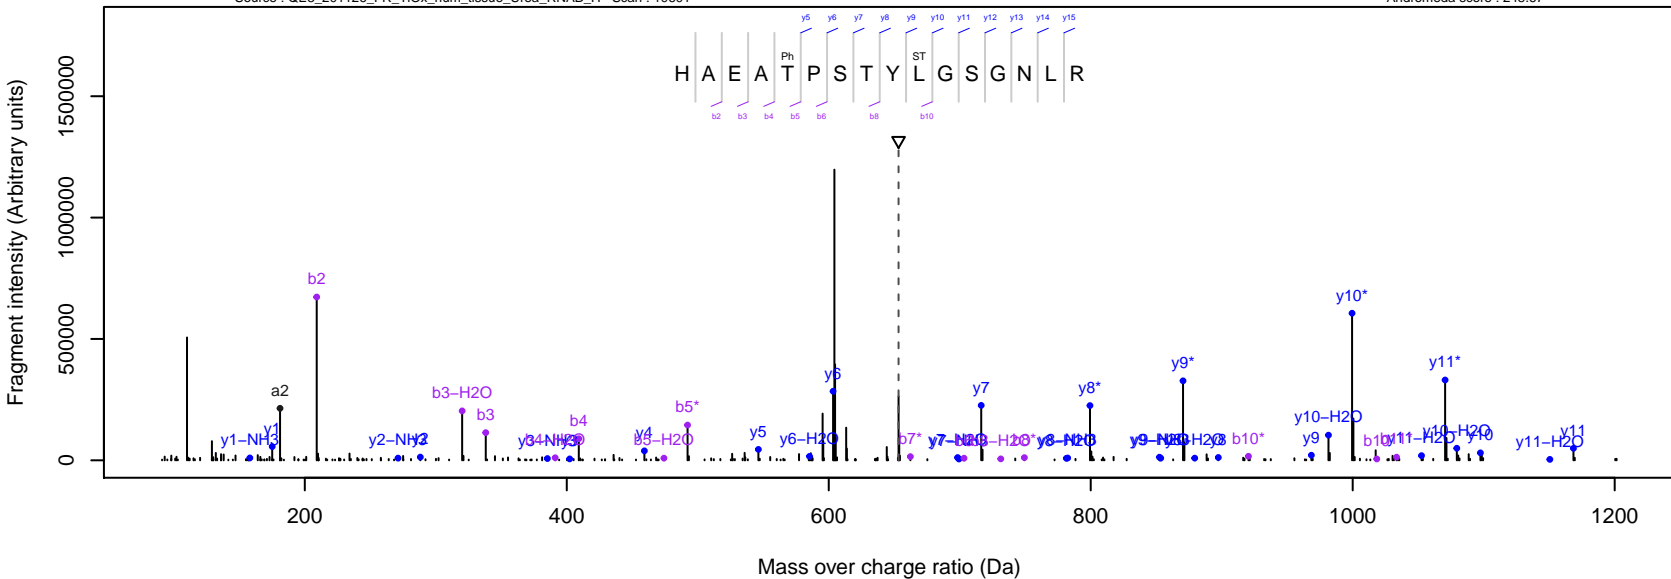

VQEHEDS(Phospho (STY))GDS(Phospho (STY))EVENEAK-2+

Source : QE3\_201126\_FR\_TIOx\_hum\_tissue\_Urea\_RNAB\_H Scan : 10916

Andromeda score : 248.52

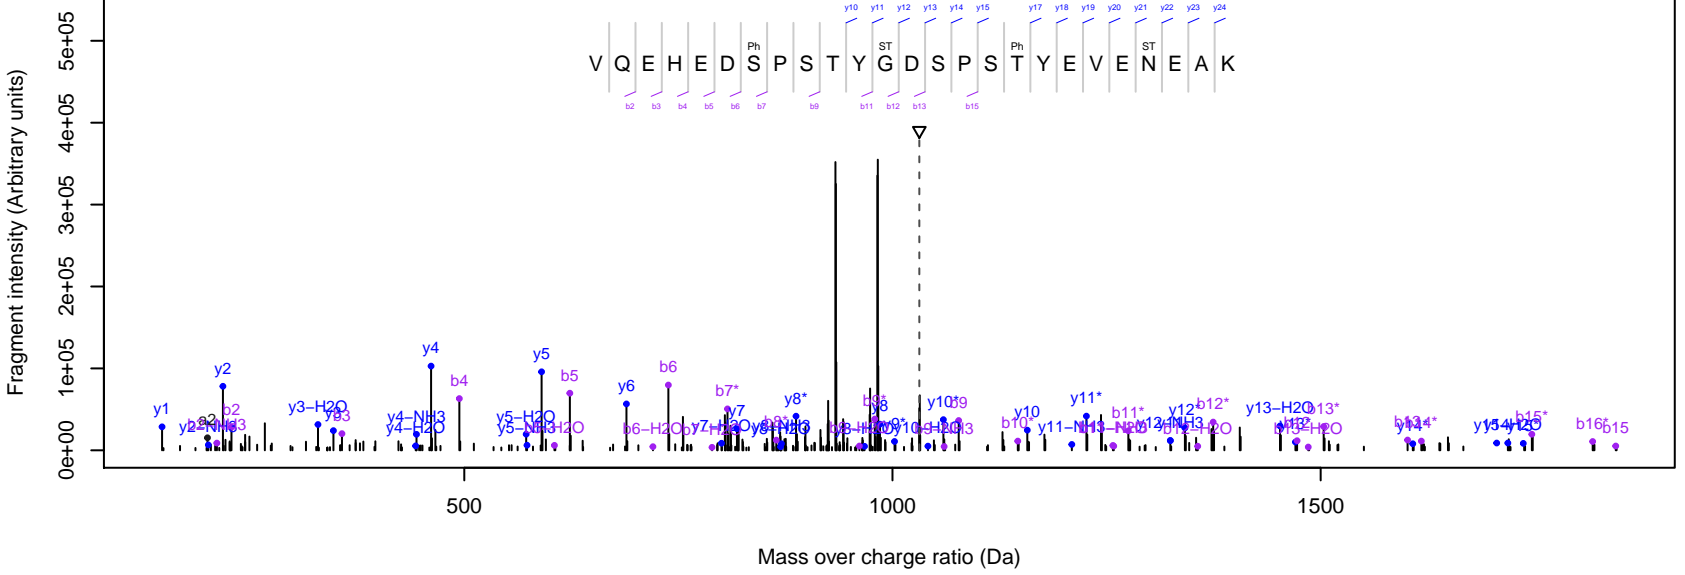

SKEGHSLEMENENLVENGADS(Phospho (STY))DEDDNSFLKQQS(Phospho (STY))PQEPK-4+

Source : QE3\_201126\_FR\_TIOx\_hum\_tissue\_Urea\_RNAB\_N Scan : 31685

Andromeda score : 248.48

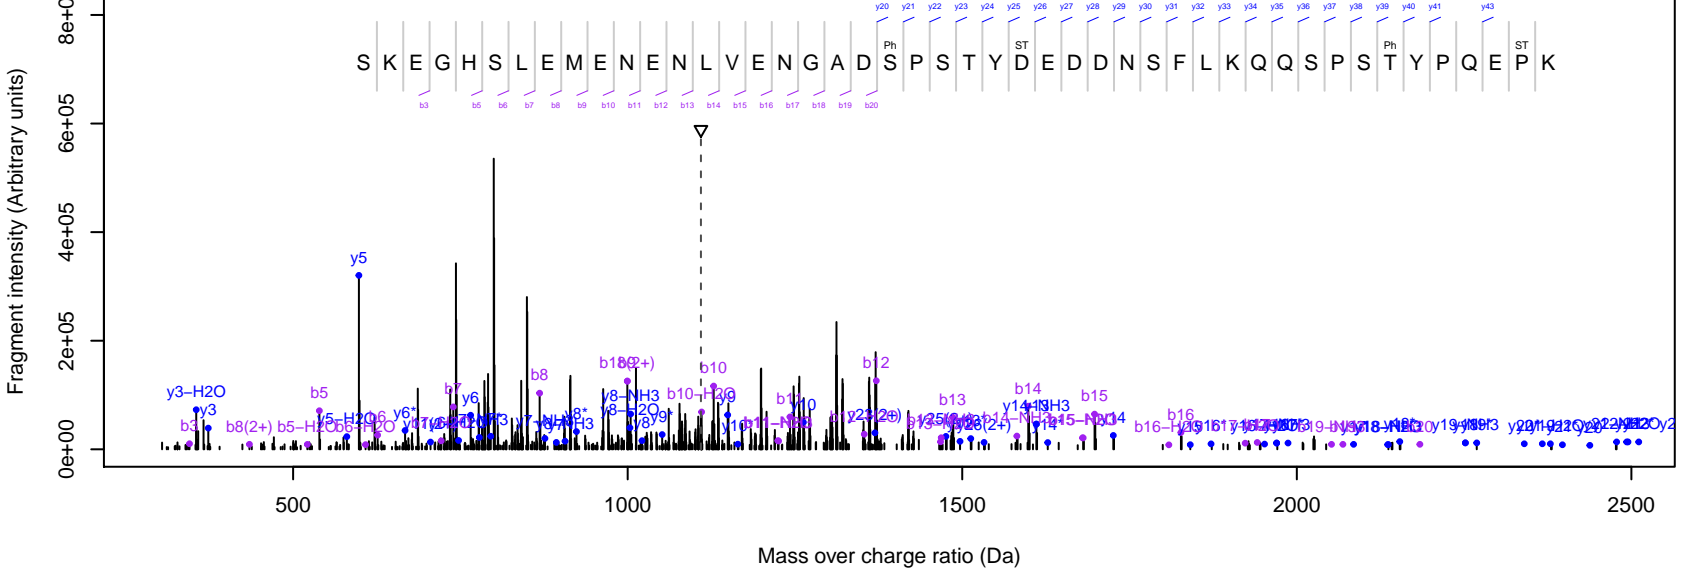

NGPLNESQEDEEDS(Phospho (STY))EHGTLNLR-3+

Source : QE3\_201126\_FR\_TIOx\_hum\_tissue\_Urea\_RNAB\_H Scan : 14775

Andromeda score : 248.47

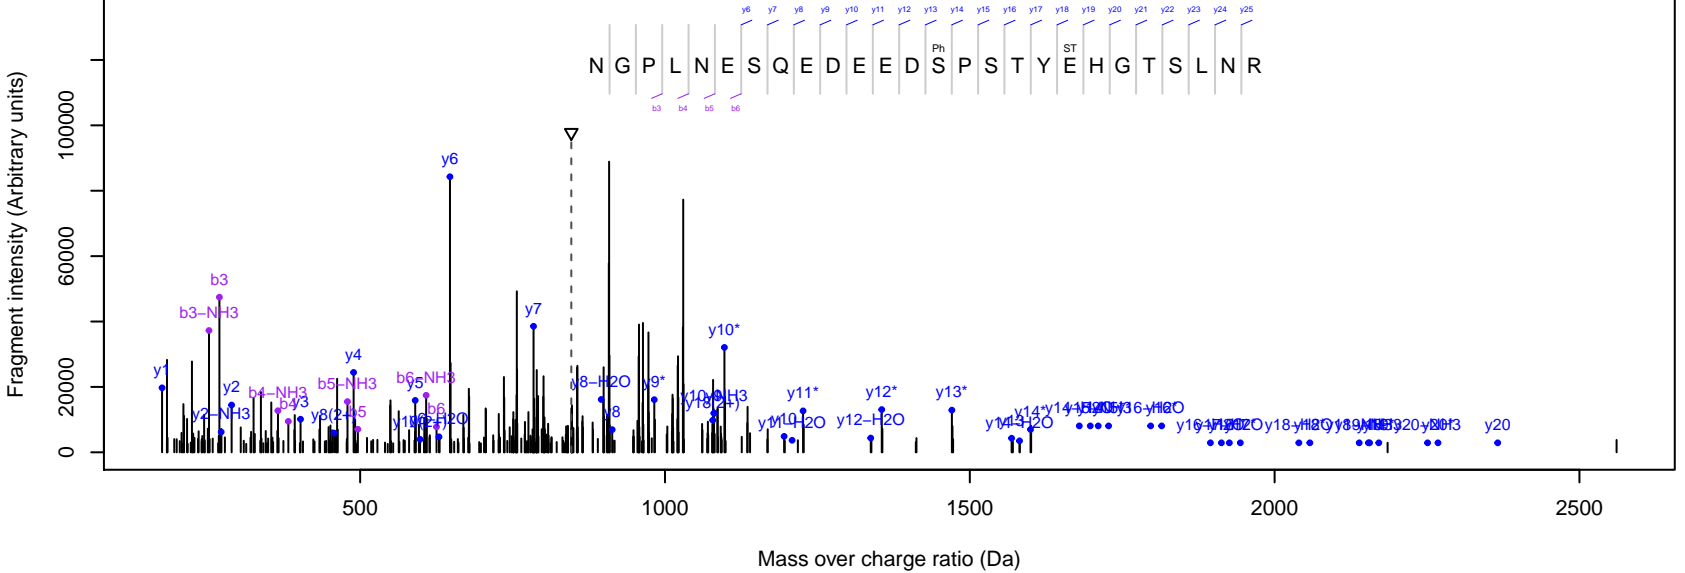





MPQDGS(Phospho (STY))DDEDEEWPTLEK-2+

Source : QE3\_201126\_FR\_TiOx\_hum\_tissue\_Urea\_RNAB\_H Scan : 39710

Andromeda score : 247.89

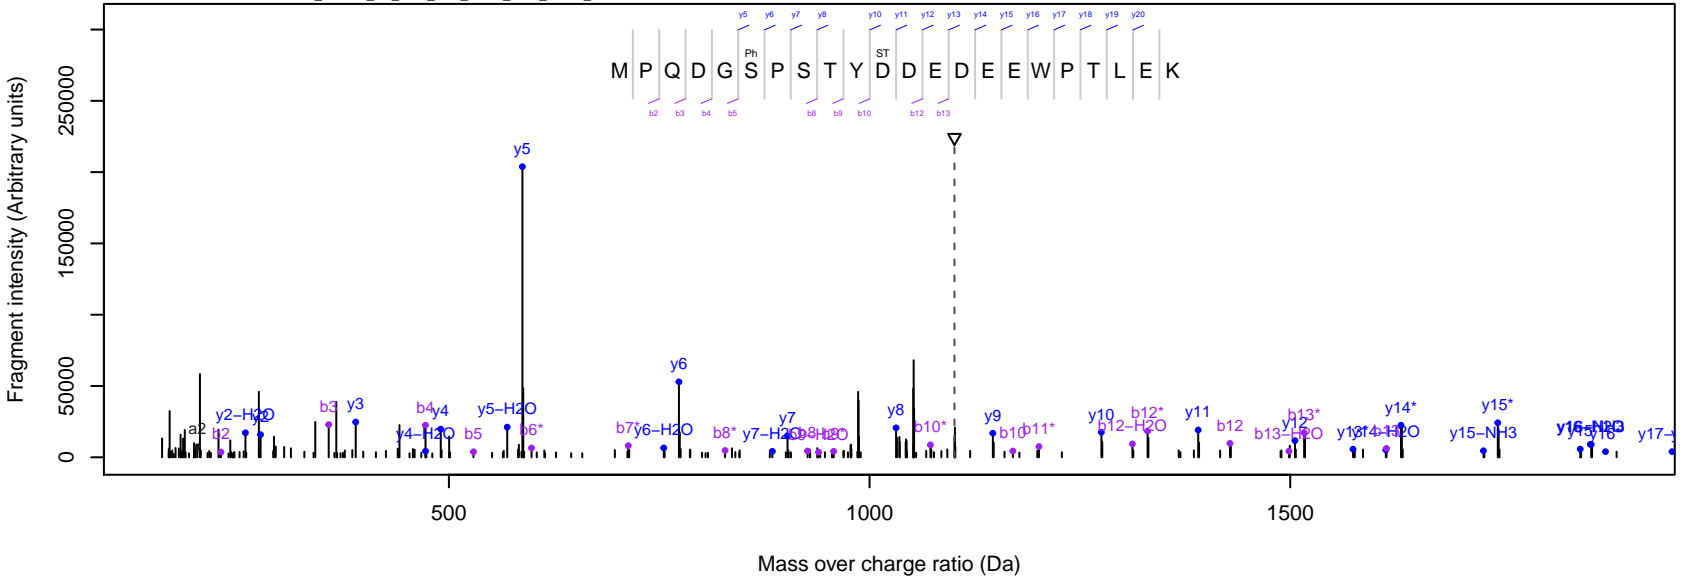

LAEAPSPAPTPSPT(Phospho (STY))PVEDLGPQTSTSPGRLS(Phospho (STY))PDFAEELR-4+

Source : QE3\_201126\_FR\_TiOx\_hum\_tissue\_Urea\_RNAB\_H Scan : 53884

Andromeda score : 247.75

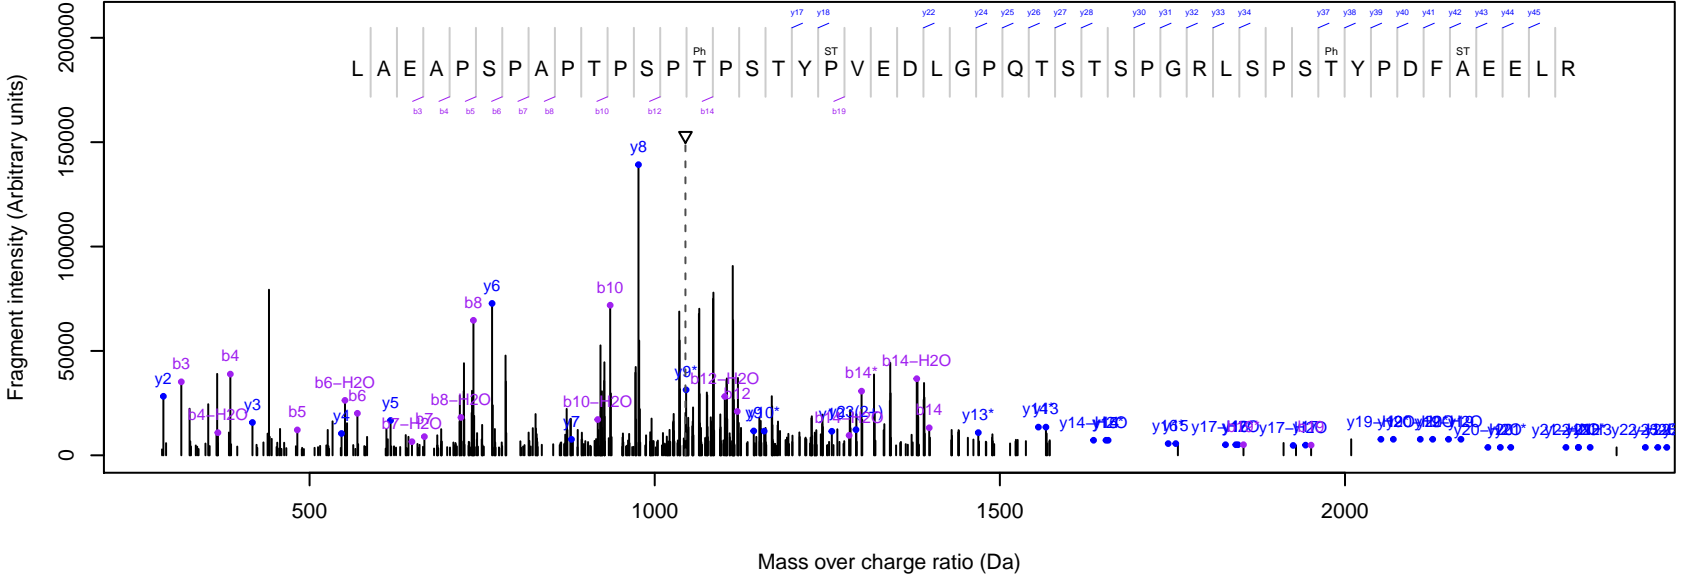

TYNTNAQVPDS(Phospho (STY))AGTATAYLCGVK-2+

Source : QE3\_201126\_FR\_TiOx\_hum\_tissue\_Urea\_RNAB\_H Scan : 39641

Andromeda score : 247.66

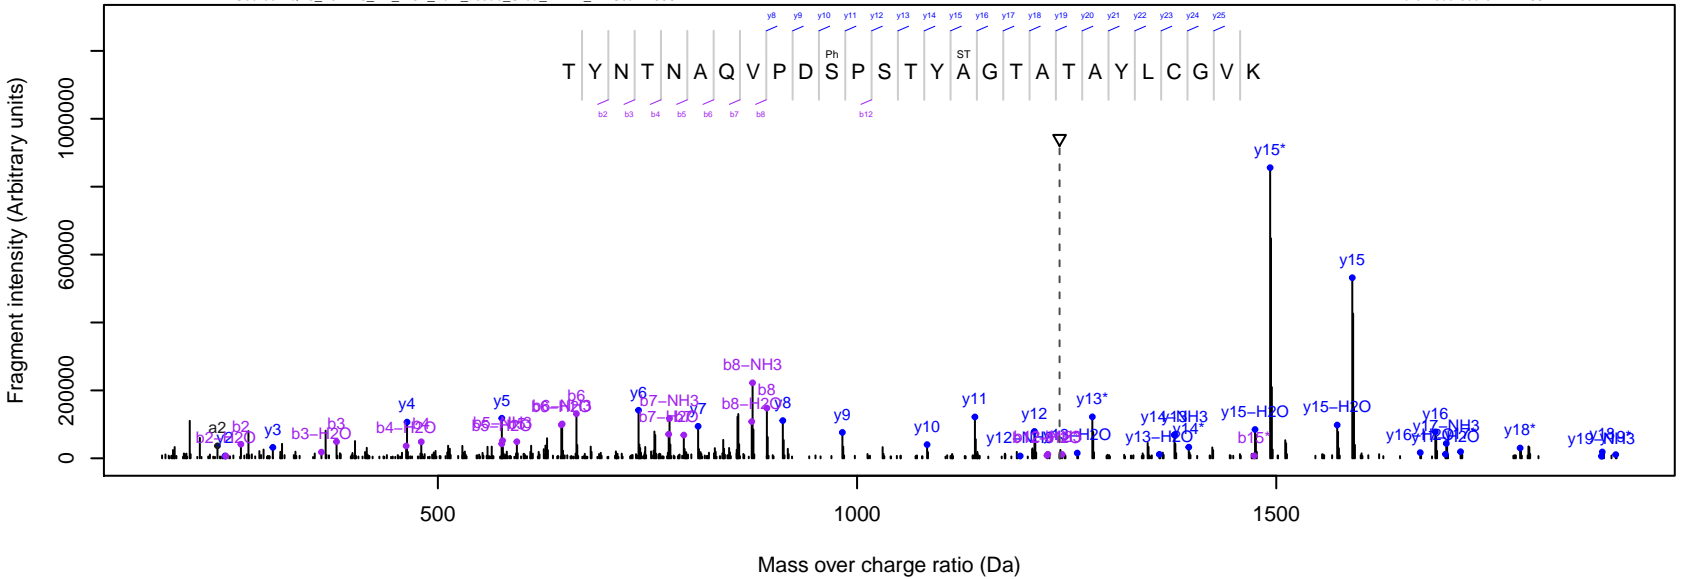

ATAPQTQHVS(Phospho (STY))PMR-2+

Source : QE3\_201126\_FR\_TiOx\_hum\_tissue\_Urea\_RNAB\_H Scan : 8638

Andromeda score : 247.45

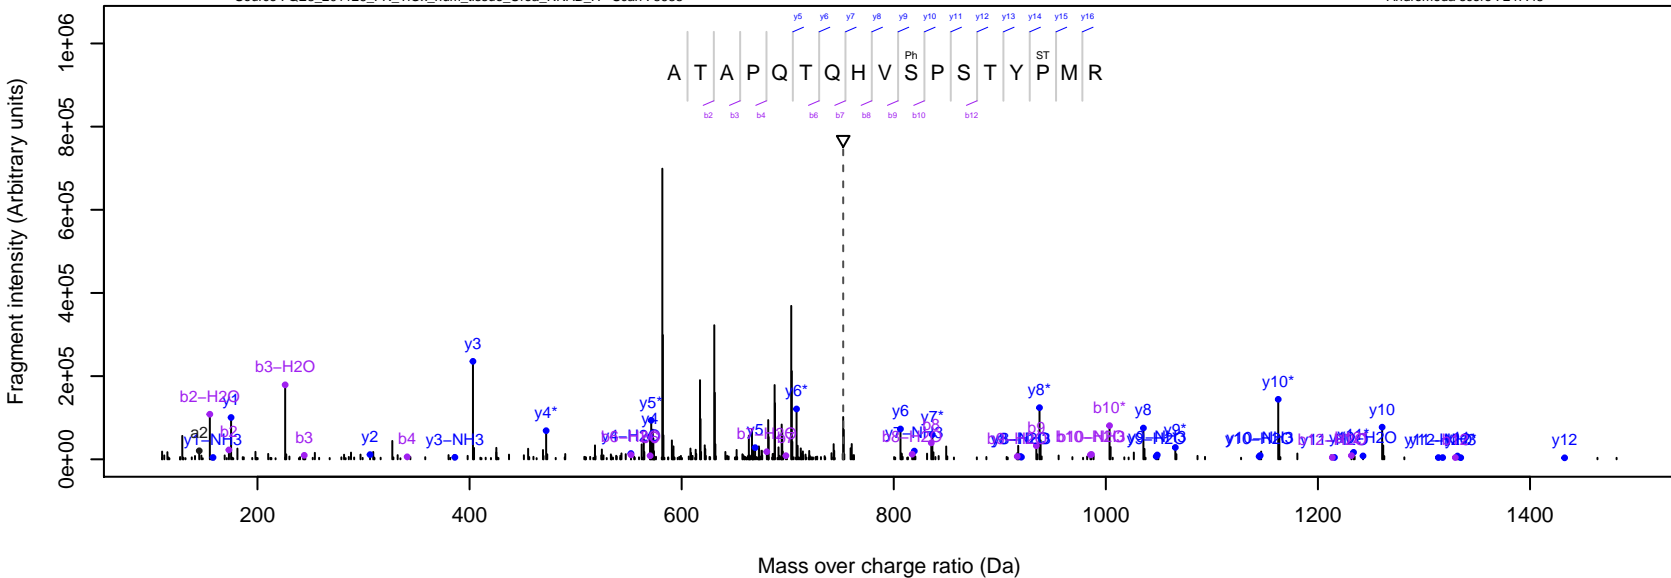

VIENADGS(Phospho (STY))EETDTR-2+

Source : QE3\_201126\_FR\_TiOx\_hum\_tissue\_Urea\_RNAB\_N Scan : 10849

Andromeda score : 247.38

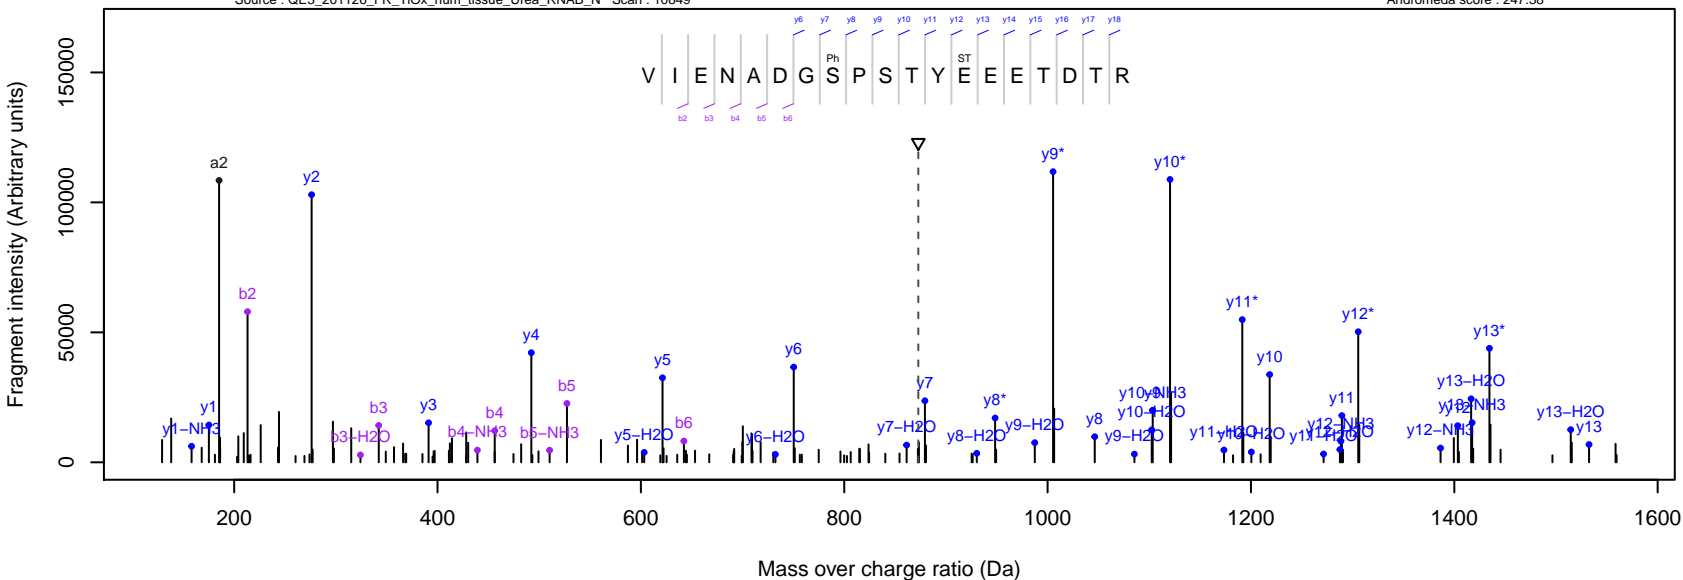

AESS(Phospho (STY))DSGAES(Phospho (STY))EEEEAEVVK-2+

Source : QE3\_201126\_FR\_TiOx\_hum\_tissue\_Urea\_RNAB\_H Scan : 23335

Andromeda score : 247.36

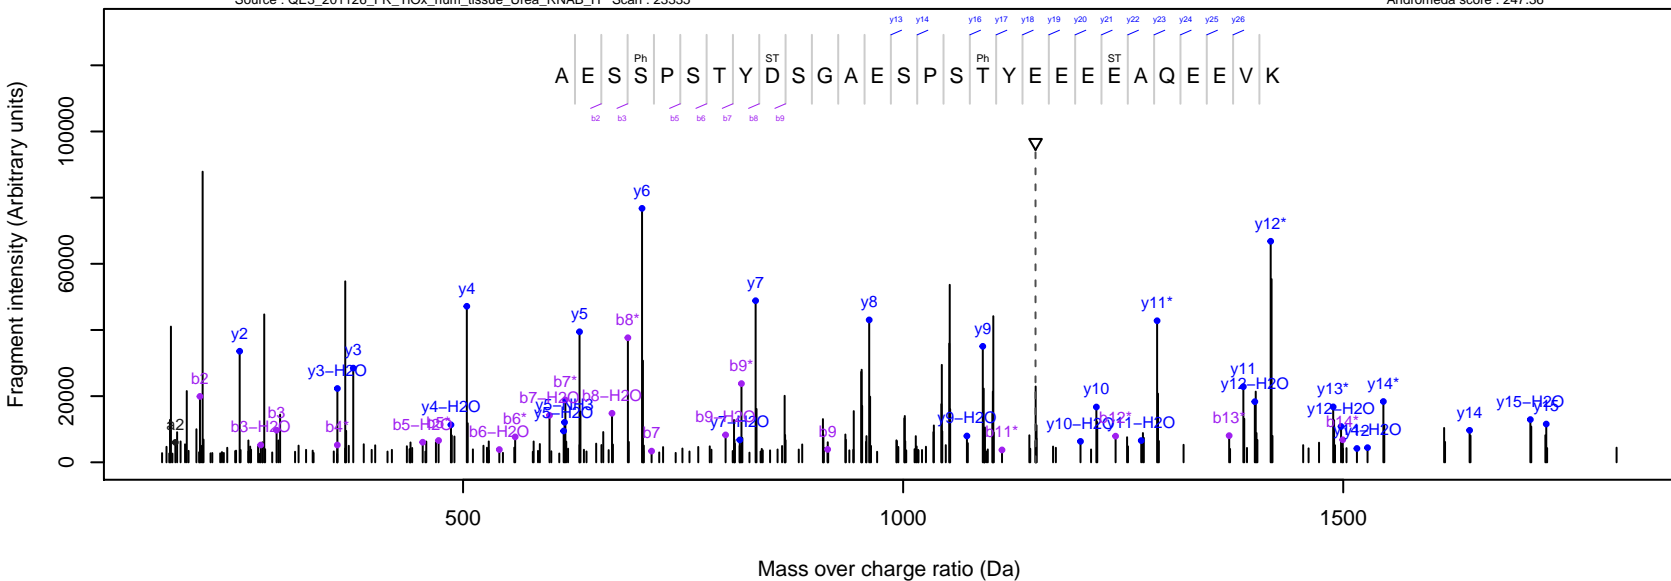

DVYLS(Phospho (STY))PRDDGYSTK-2+

Source : QE3\_201126\_FR\_TiOx\_hum\_tissue\_Urea\_RNAB\_B Scan : 20834

Andromeda score : 247.34

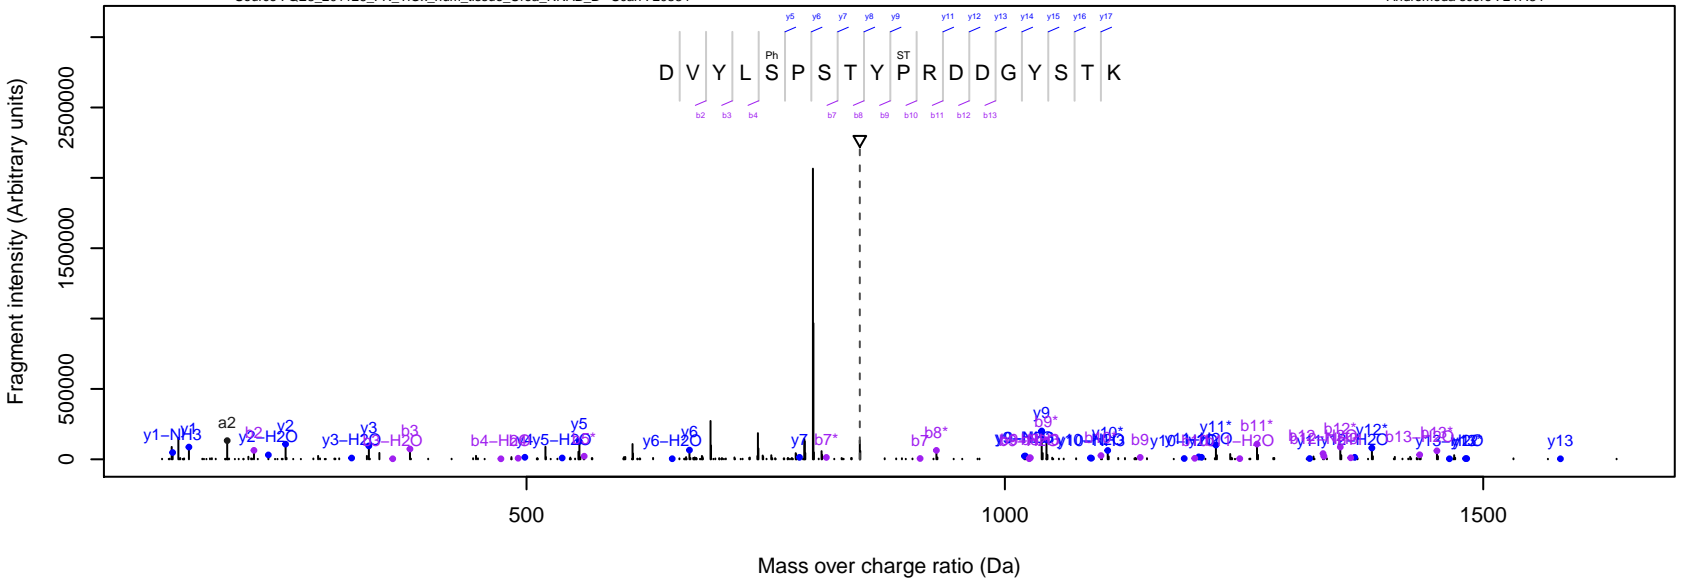

VLDTSSLTQSAPAS(Phospho (STY))PTNK-2+

Source : QE3\_201126\_FR\_TiOx\_hum\_tissue\_Urea\_RNAB\_B Scan : 24264

Andromeda score : 247.3

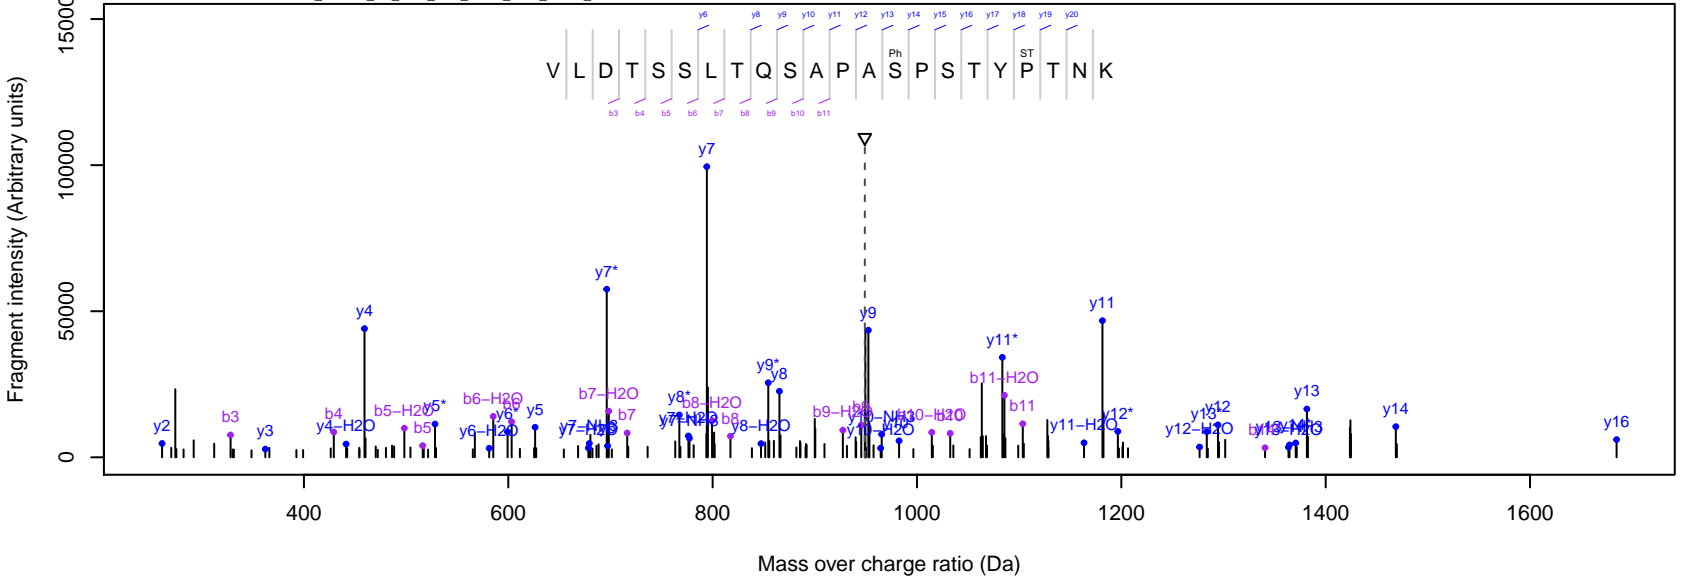

LVEDERS(Phospho (STY))DREETESSEGEAAAGGGAK-3+

Source : QE3\_201126\_FR\_TiOx\_hum\_tissue\_Urea\_RNAB\_H Scan : 10635

Andromeda score : 247.26

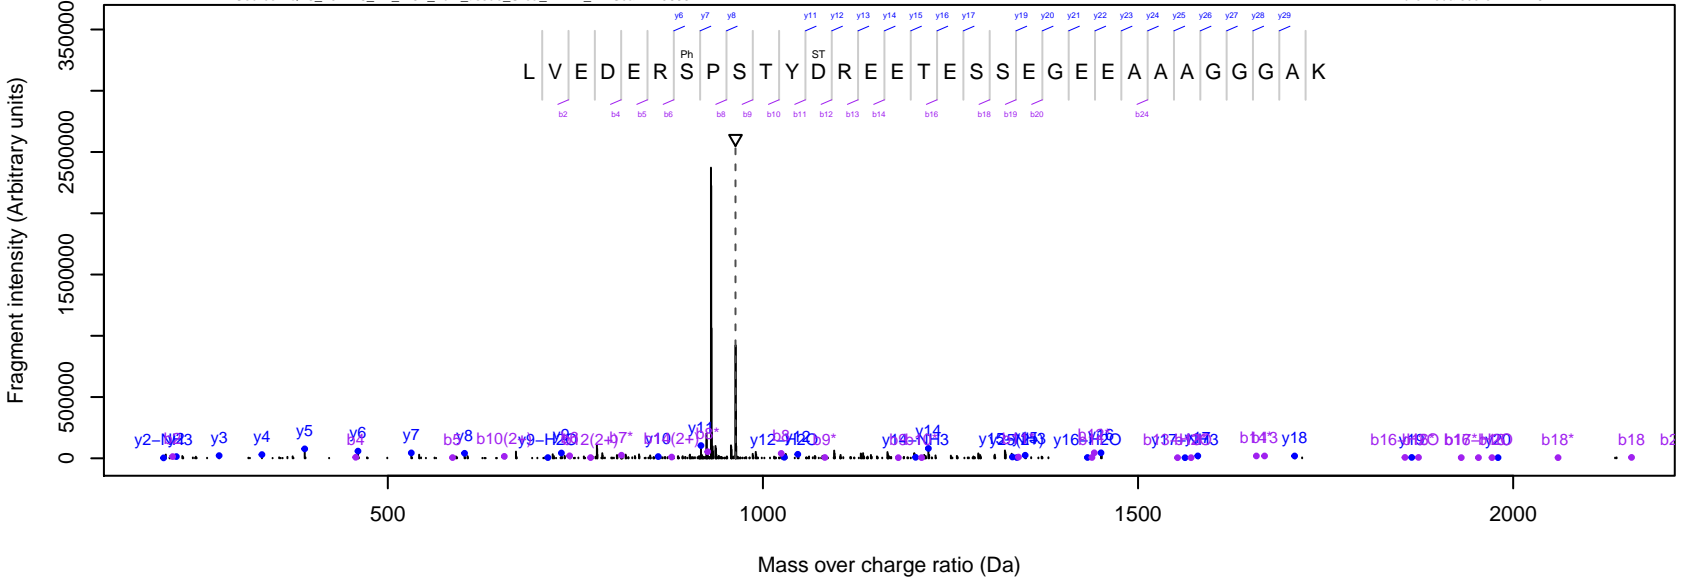

RAAS(Phospho (STY))DGQYENQSPPEATSPR-3+

Source : QE3\_201126\_FR\_TiOx\_hum\_tissue\_Urea\_RNAB\_H Scan : 9372

Andromeda score : 247.22

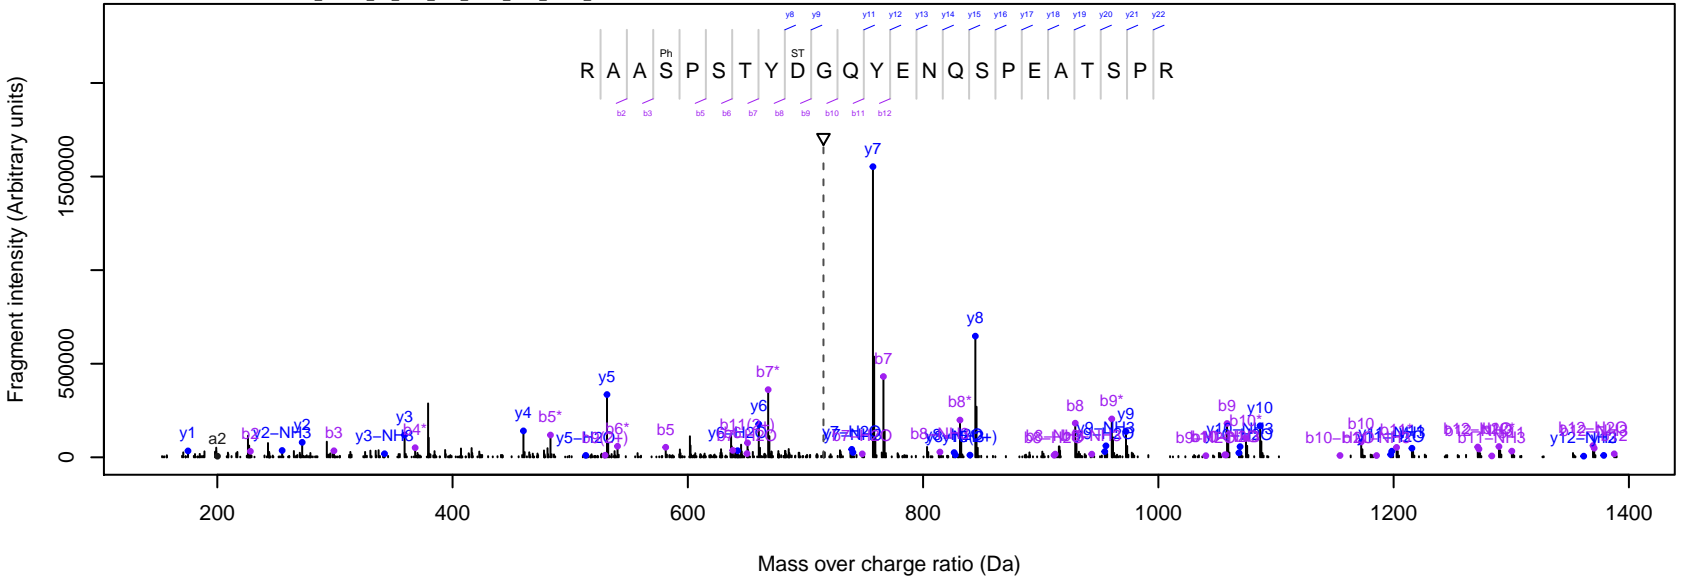

ETERAS(Phospho (STY))PIKM(Oxidation (M))DLAPSK-3+

Source : QE3\_201126\_FR\_TiOx\_hum\_tissue\_Urea\_RNAB\_N Scan : 10369

Andromeda score : 247.18

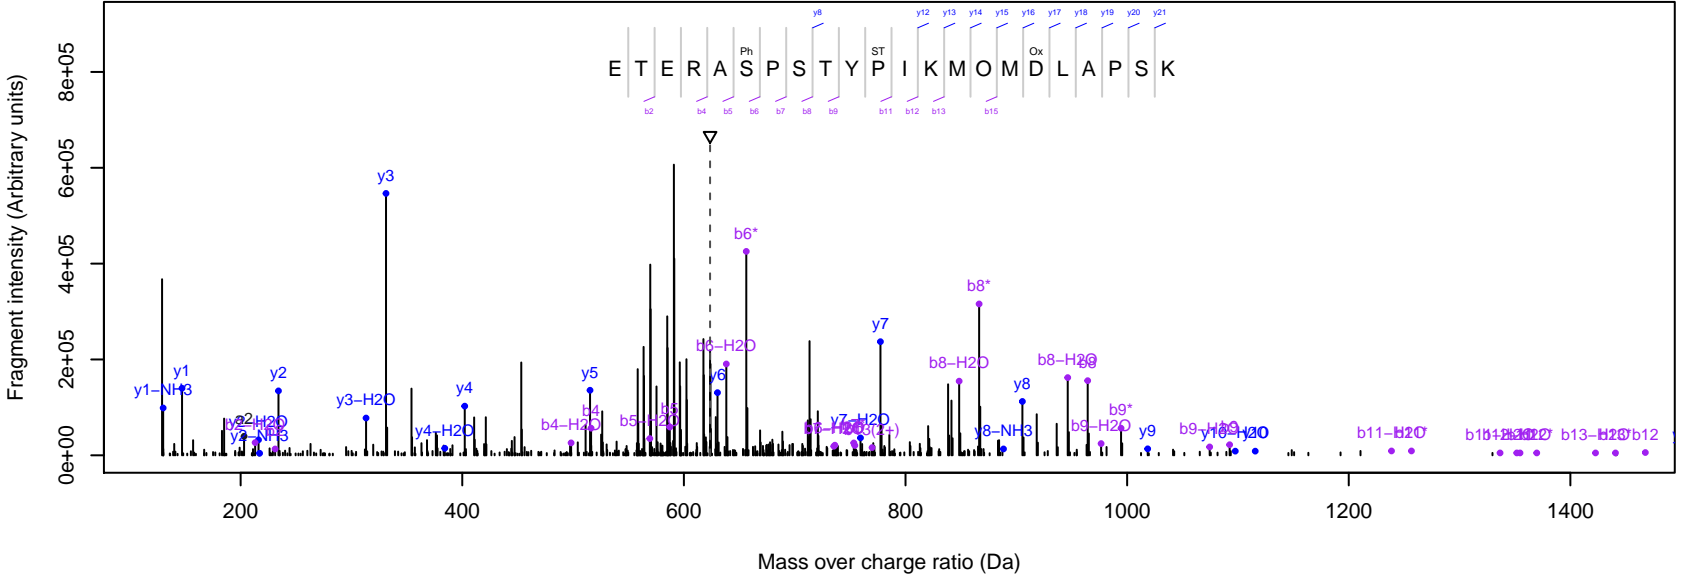

QLS(Phospho (STY))SGVSEIR-2+

Source : QE3\_201126\_FR\_TiOx\_hum\_tissue\_Urea\_RNAB\_H Scan : 19531

Andromeda score : 246.82

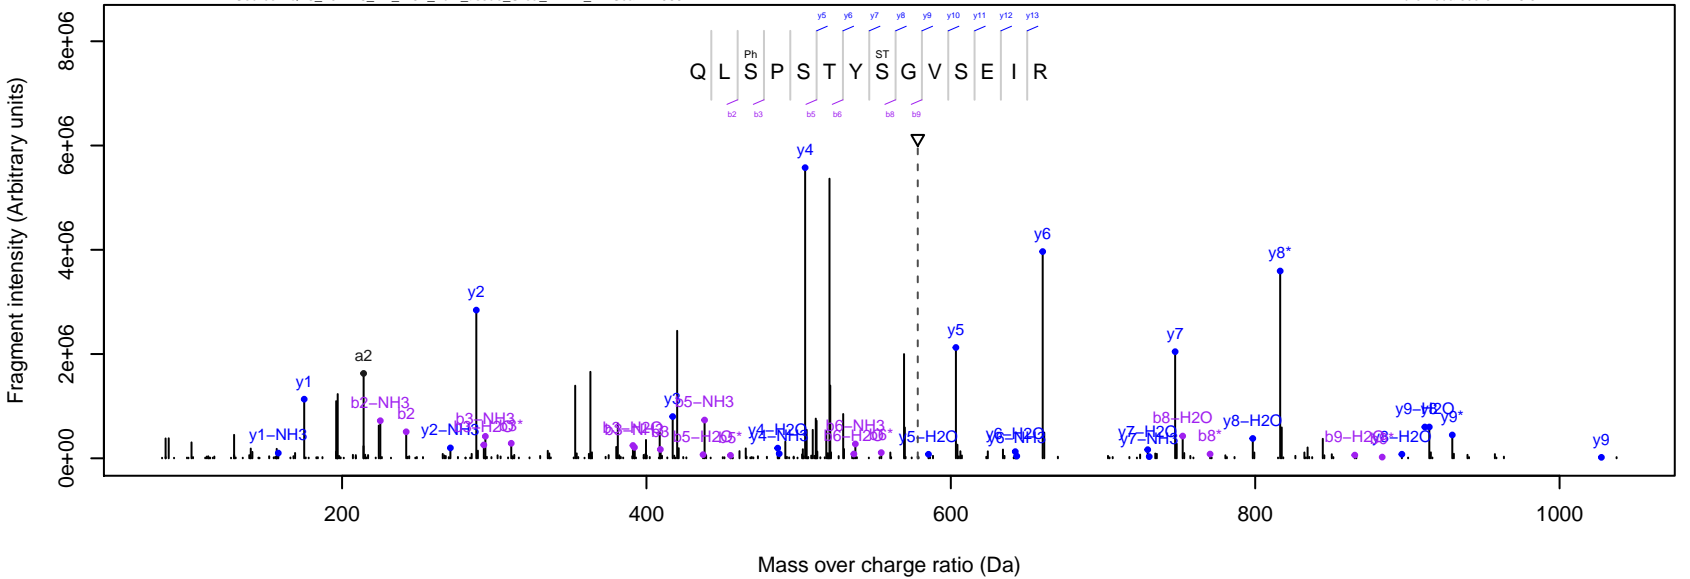

**HIKEEPLS(Phospho (STY))EEEPCTSTAIASPEKK-2+**

Source : QE3\_201126\_FR\_TIOx\_hum\_tissue\_Urea\_RNAB\_H Scan : 16323

Andromeda score : 246.39

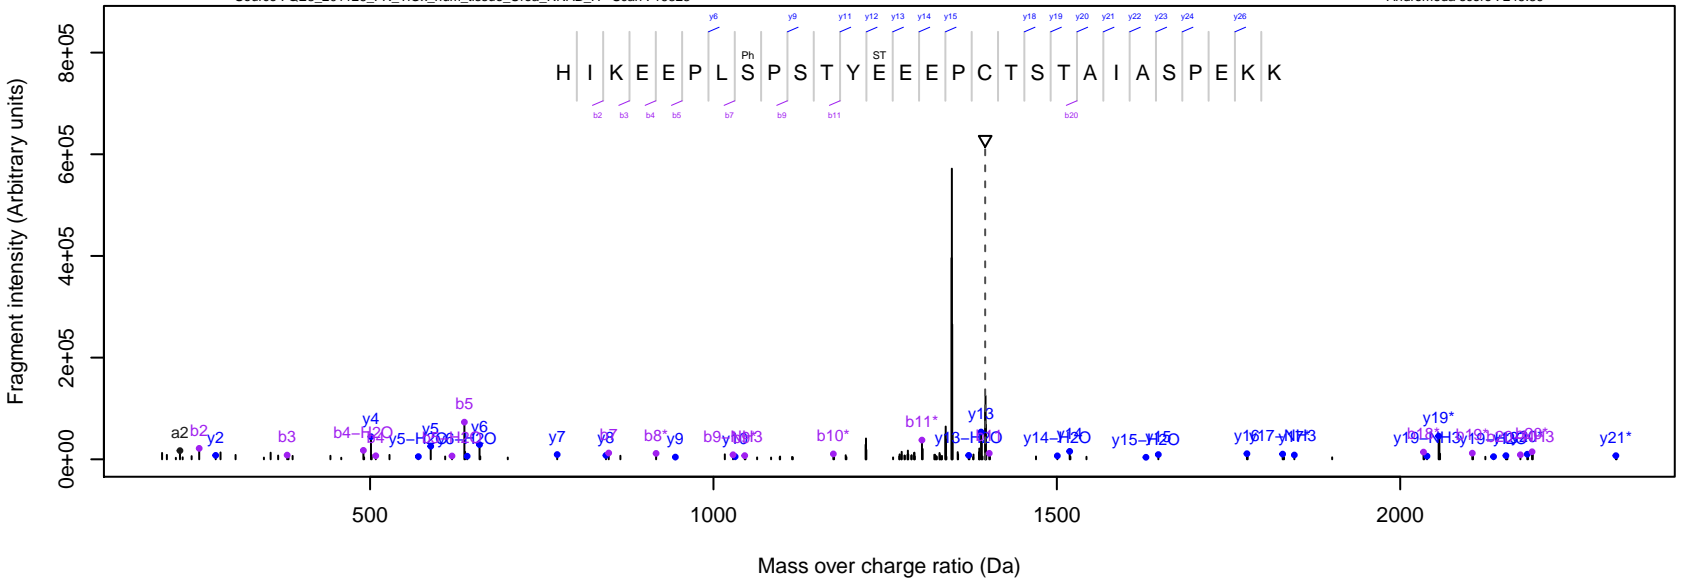

**EM(Oxidation (M))LAS(Phospho (STY))DDEEDVSSKVEK-2+**

Source : QE3\_201126\_FR\_TIOx\_hum\_tissue\_Urea\_RNAB\_B Scan : 16848

Andromeda score : 246.34

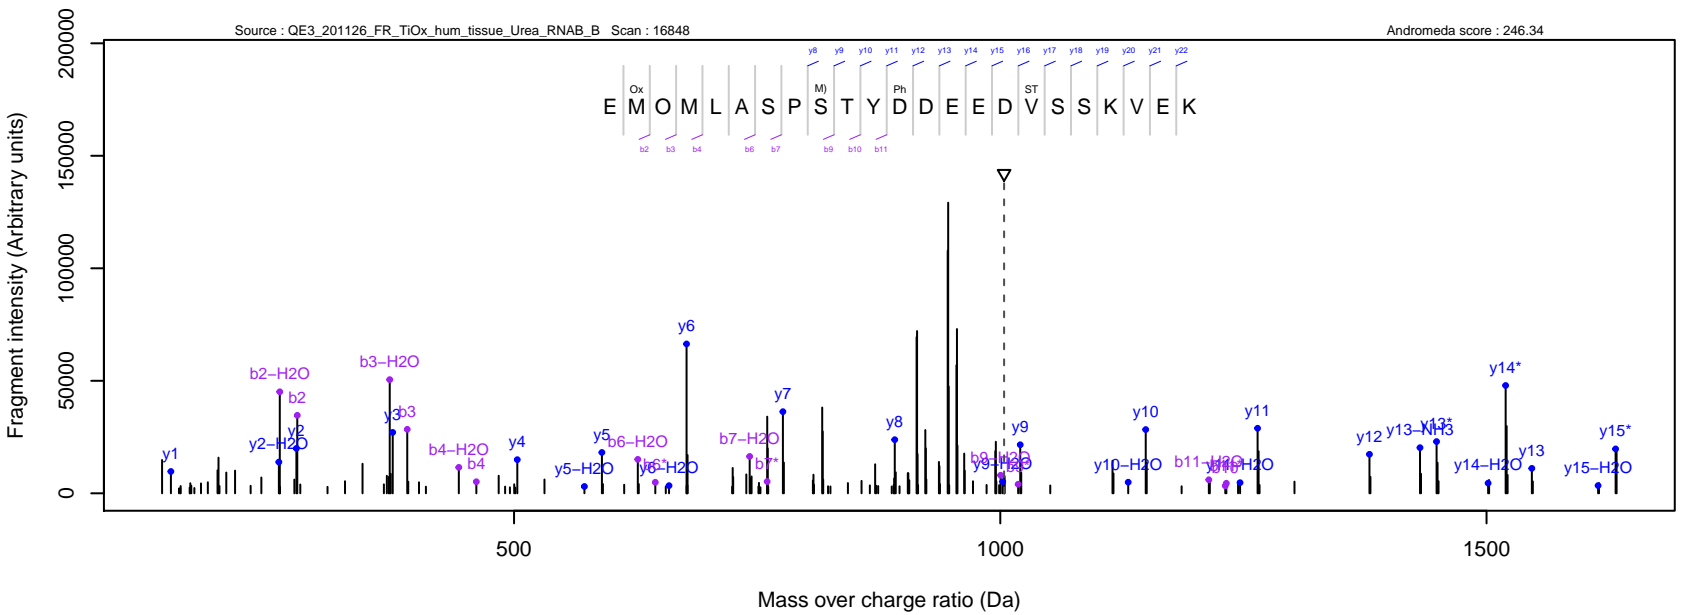

**SLKESEQES(Phospho (STY))EEEILAKK-3+**

Source : QE3\_201126\_FR\_TIOx\_hum\_tissue\_Urea\_RNAB\_B Scan : 14139

Andromeda score : 246.34

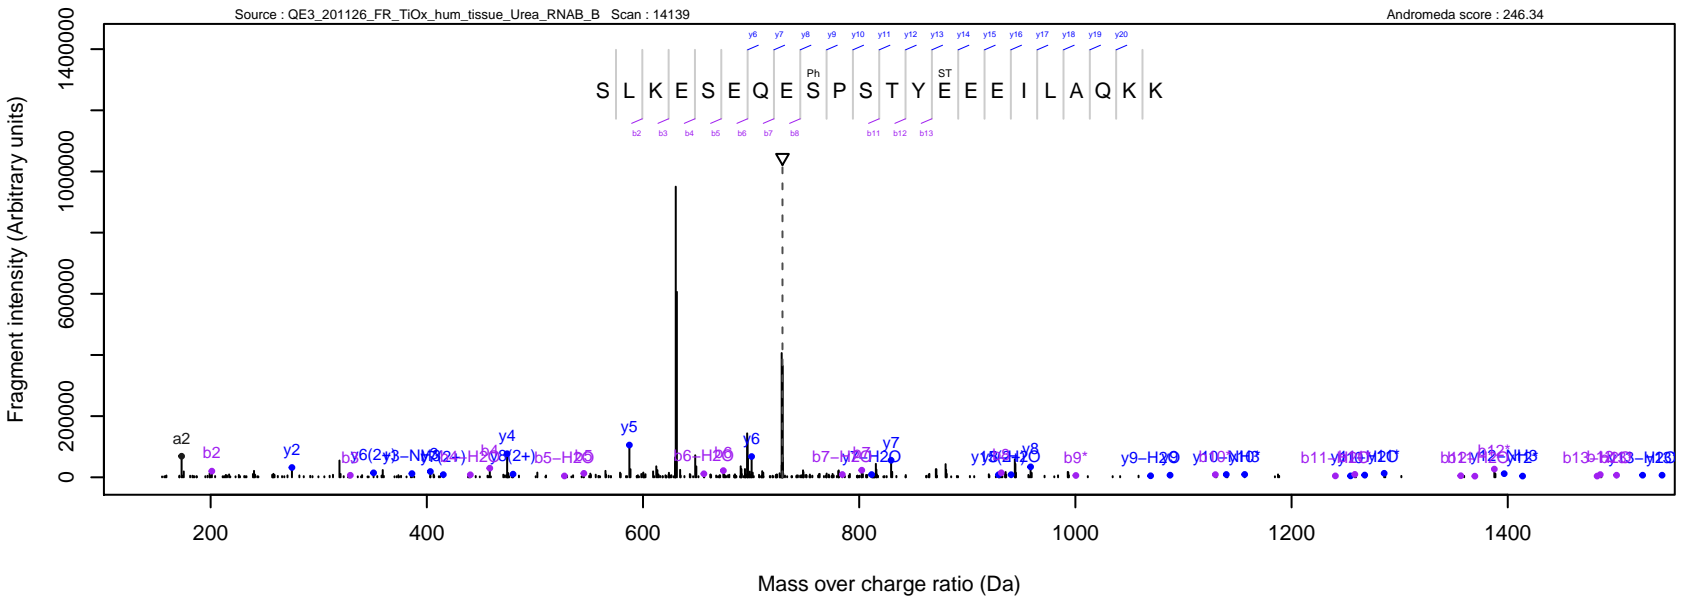

SLAPDRS(Phospho (STY))DDEHDPLDNTSRPR-4+

Source : QE3\_201126\_FR\_TiOx\_hum\_tissue\_Urea\_RNAB\_B Scan : 13605

Andromeda score : 246.31

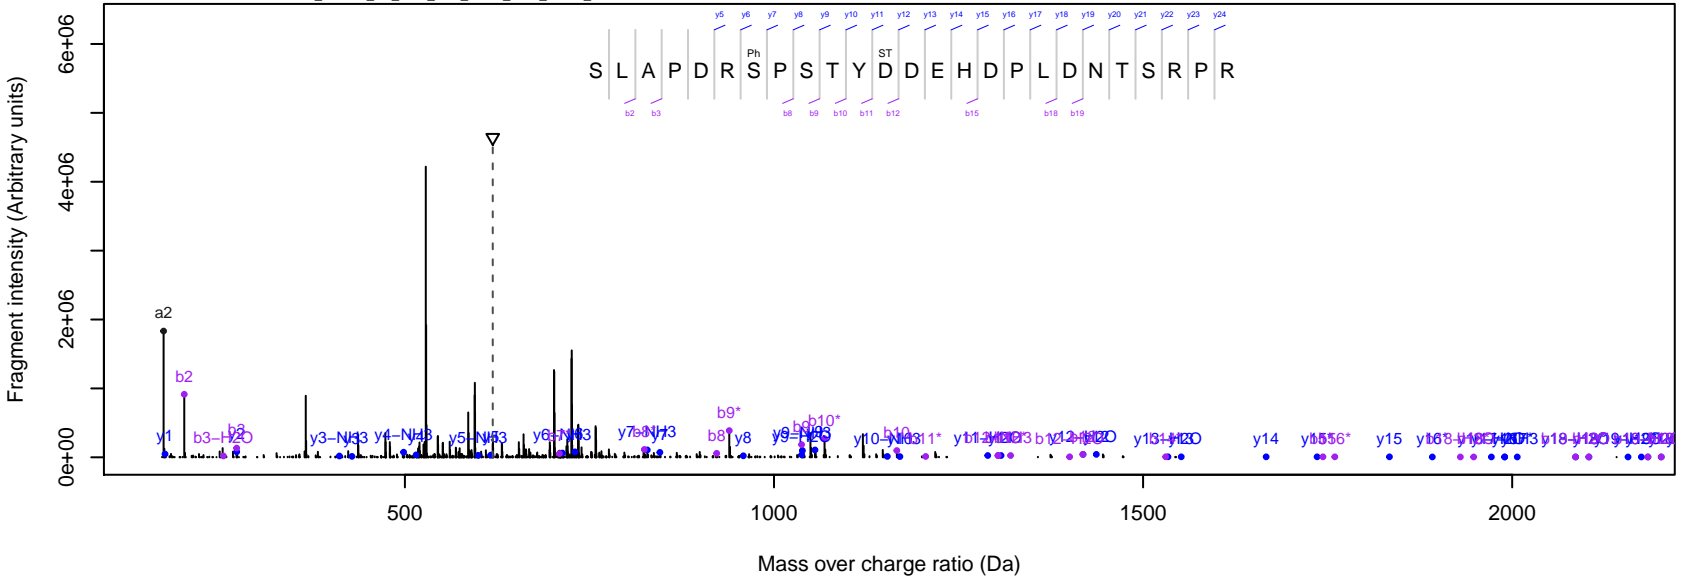

QIS(Phospho (STY))LPDLSQEEPQLK-2+

Source : QE3\_201126\_FR\_TiOx\_hum\_tissue\_Urea\_RNAB\_N Scan : 47429

Andromeda score : 245.93

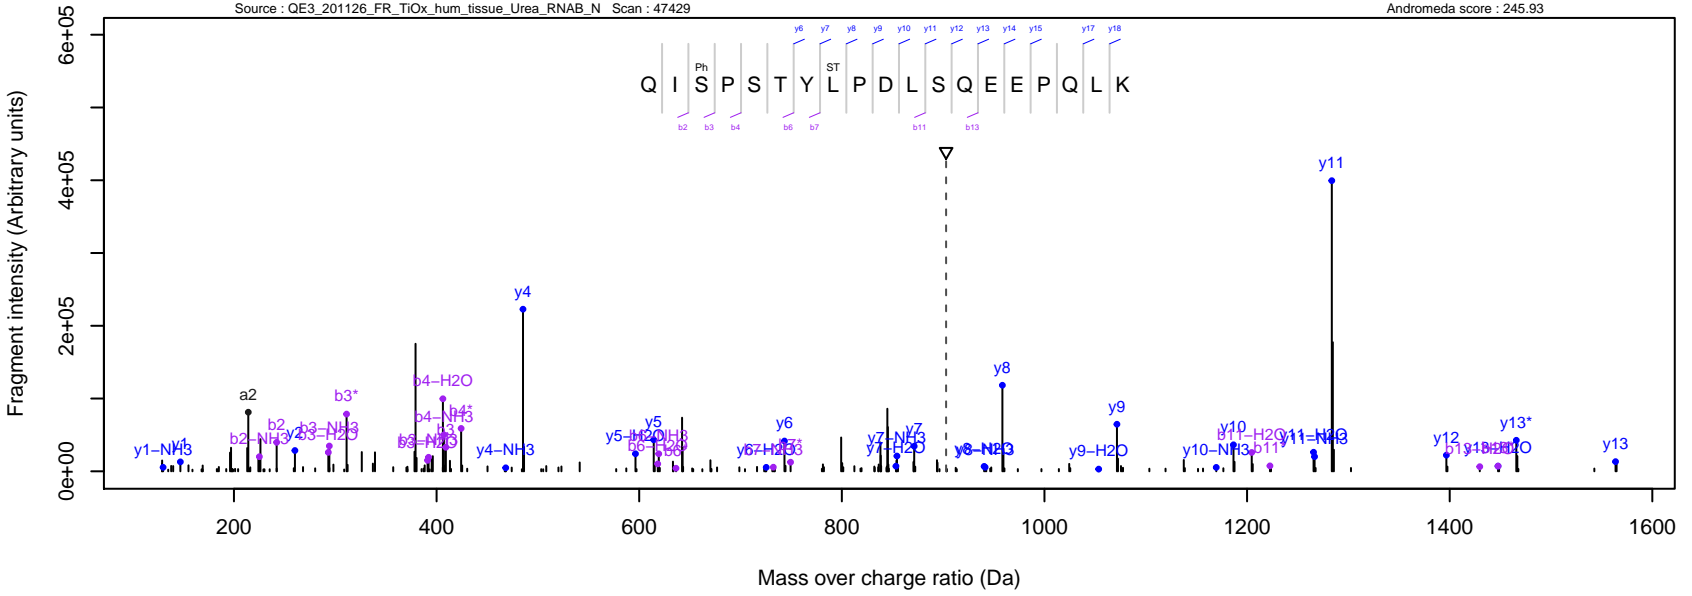

VLVQNAAGS(Phospho (STY))QEK-2+

Source : QE3\_201126\_FR\_TiOx\_hum\_tissue\_Urea\_RNAB\_H Scan : 10249

Andromeda score : 245.72

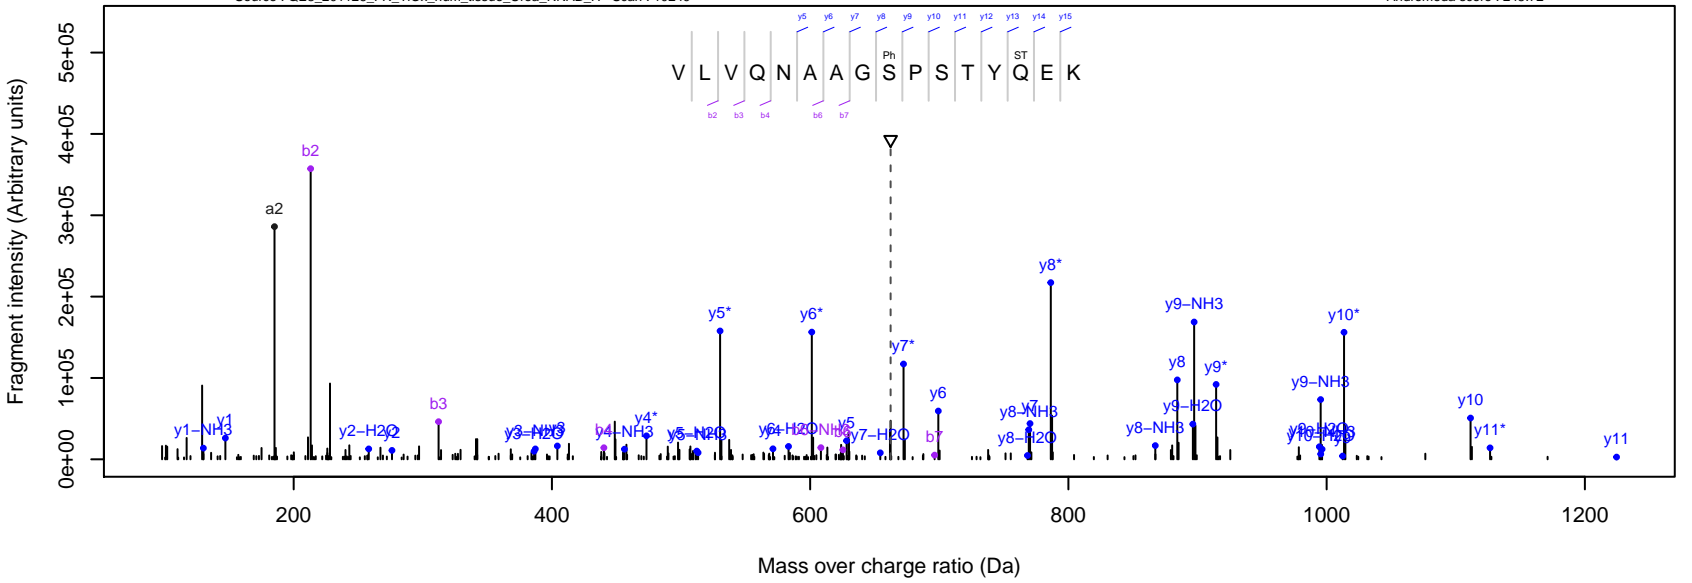

SPSLSPSPS(Phospho (STY))PLEKTPLGER-3+

Source : QE3\_201126\_FR\_TiOx\_hum\_tissue\_Urea\_RNAB\_N Scan : 32972

Andromeda score : 245.38

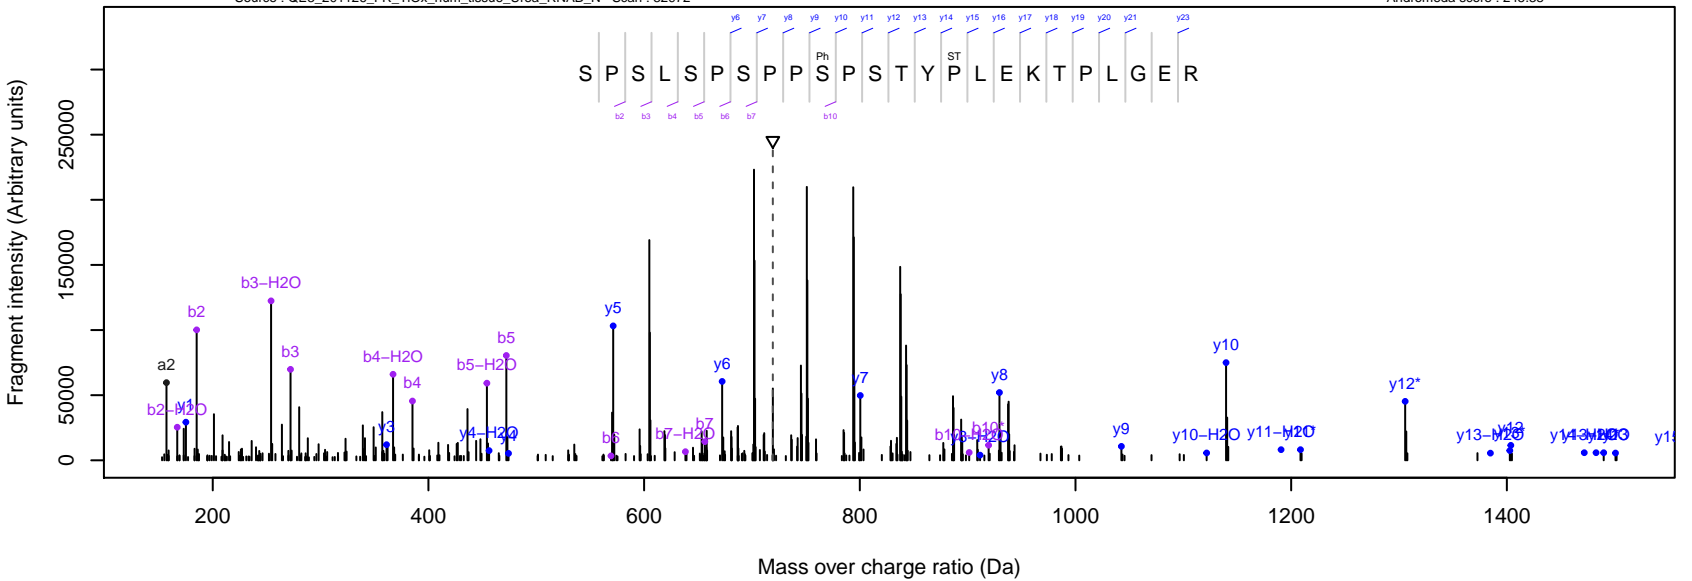



VPKPEIPEPEPS(Phospho (STY))PEK-3+

Source : QE3\_201126\_FR\_TIOx\_hum\_tissue\_Urea\_RNAB\_H Scan : 15316

Andromeda score : 245.36

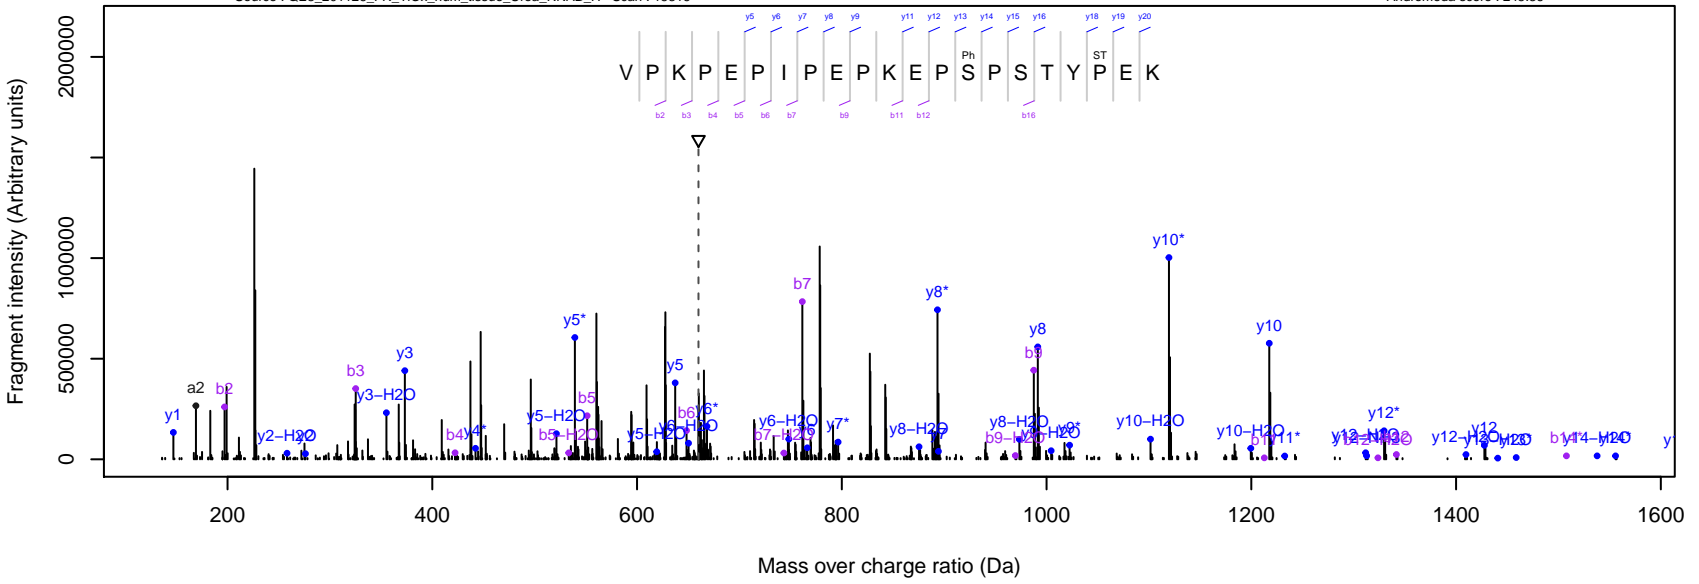

LGADSEEEGRGS(Phospho (STY))LSNAGDPEIVK-3+

Source : QE3\_201126\_FR\_TIOx\_hum\_tissue\_Urea\_RNAB\_H Scan : 18136

Andromeda score : 245.21

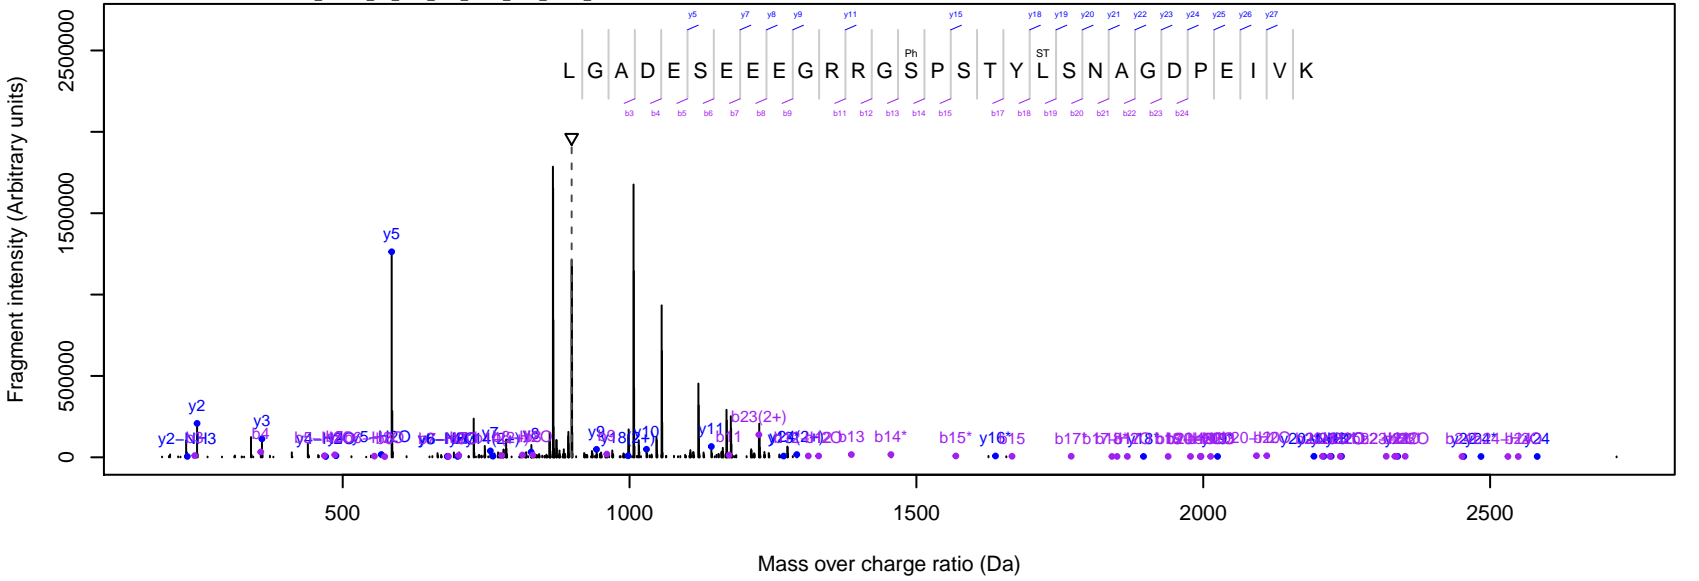

S(Phospho (STY))REDLSAQPVQTK-2+

Source : QE3\_201126\_FR\_TIOx\_hum\_tissue\_Urea\_RNAB\_H Scan : 9583

Andromeda score : 245.18

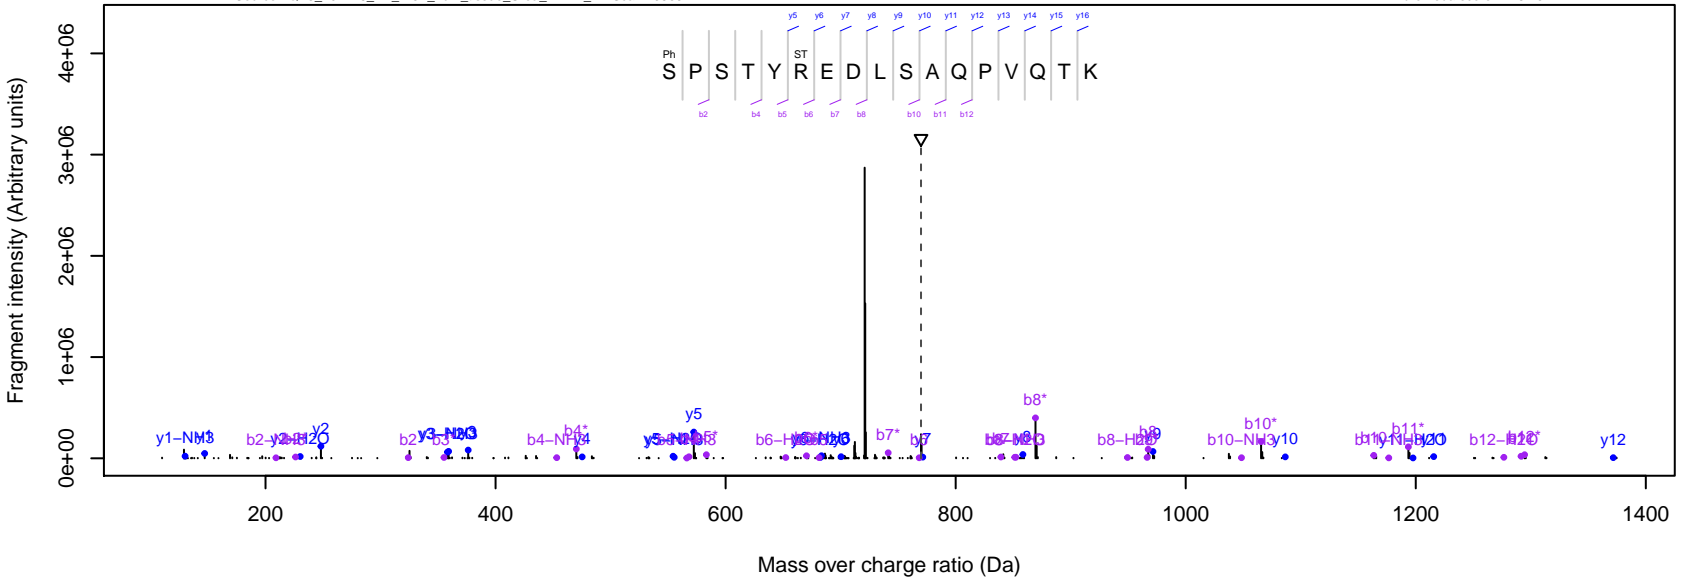

(Acetyl (Protein N-term))SDSEDSNFSEEEESERSS(Phospho (STY))DGEEAEVDEERR-3+

Source : QE3\_201126\_FR\_TIOx\_hum\_tissue\_Urea\_RNAB\_H Scan : 21236

Andromeda score : 245.17

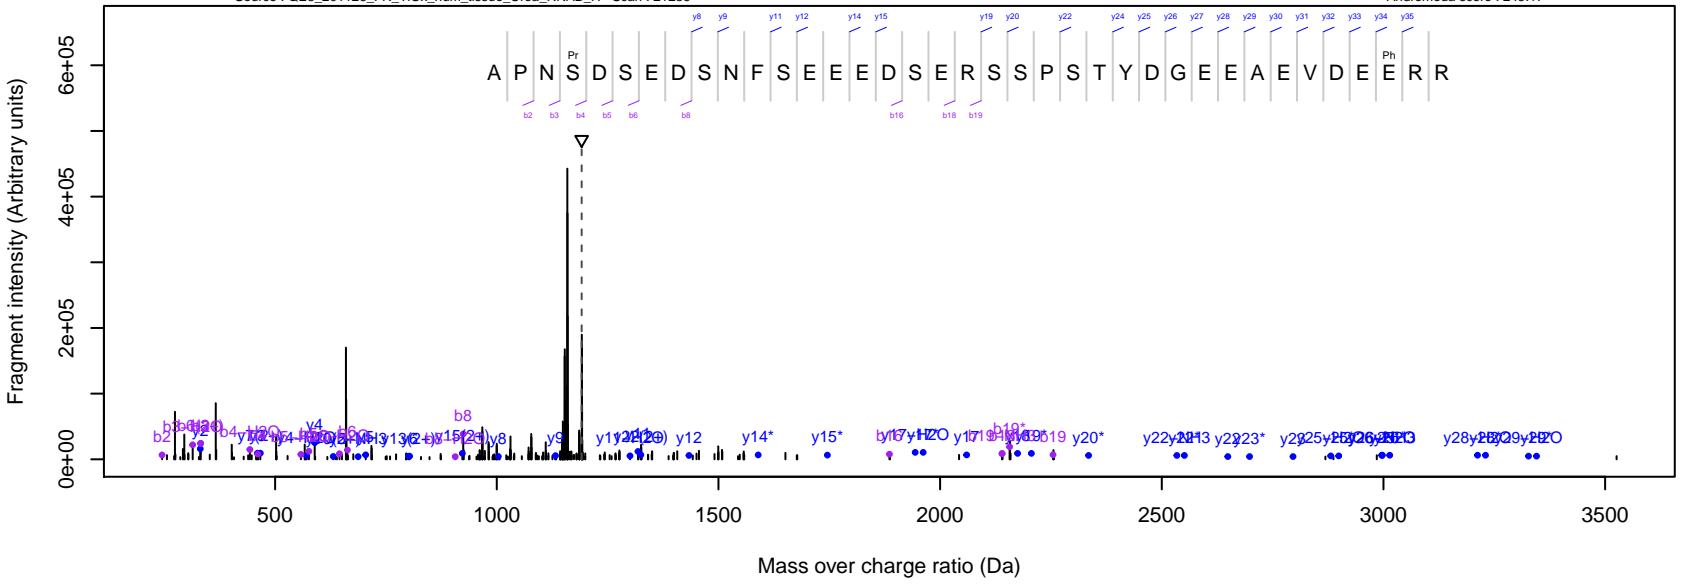

KANDES(Phospho (STY))NEHSVIDS(Phospho (STY))QELSK-2+

Source : QE3\_201126\_FR\_TIOx\_hum\_tissue\_Urea\_RNAB\_B Scan : 15153

Andromeda score : 244.77

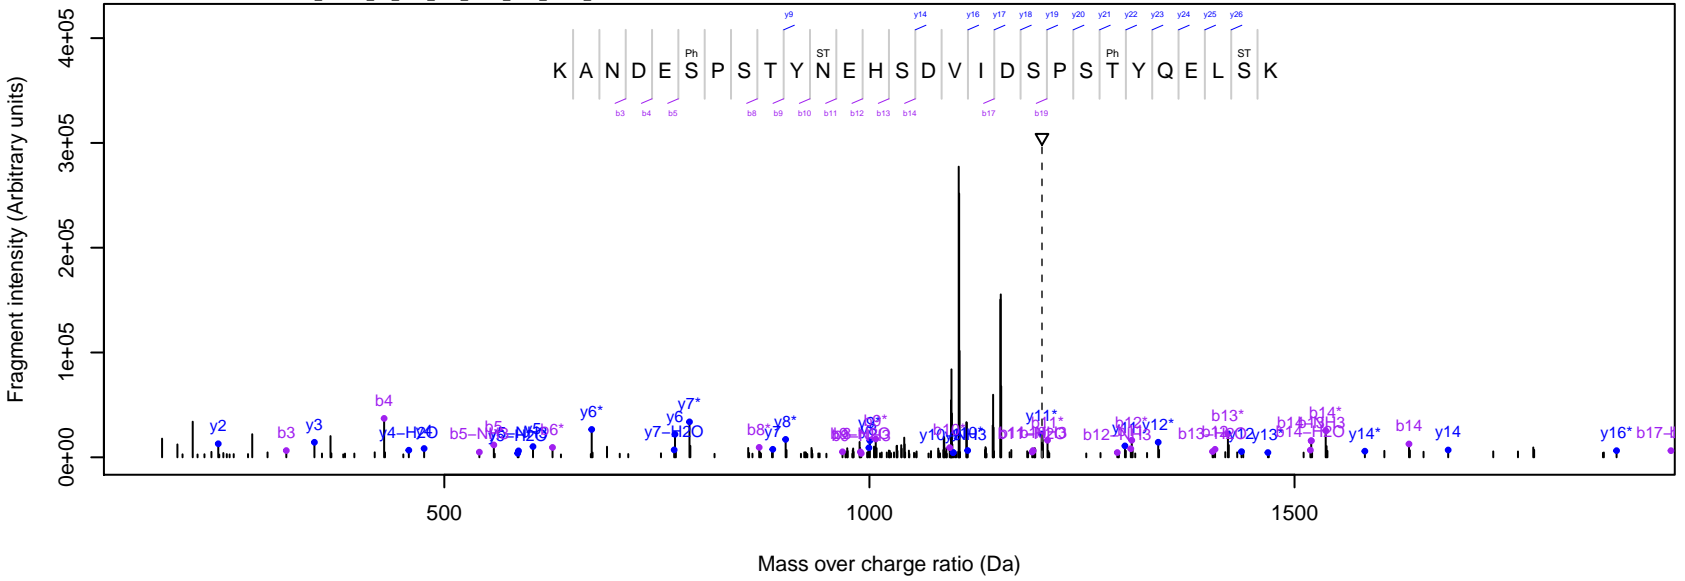

NM(Oxidation (M))GGPYGGNYGPGSGGS(Phospho (STY))GGYGGR-2+

Source : QE3\_201126\_FR\_TIOx\_hum\_tissue\_Urea\_RNAB\_N Scan : 20050

Andromeda score : 244.77

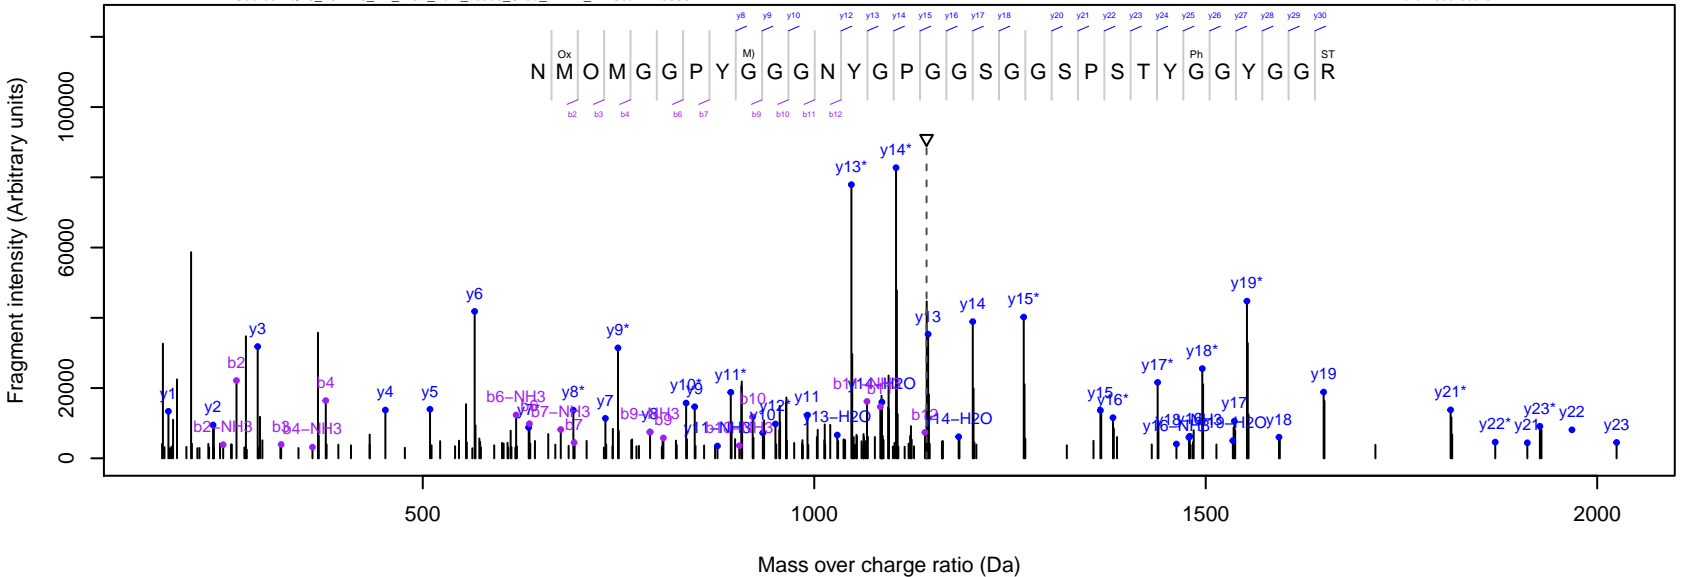

GRS(Phospho (STY))PQPPAEEDDDFDLTLVAIDTYNCDLHFK-3+

Source : QE3\_201126\_FR\_TIOx\_hum\_tissue\_Urea\_RNAB\_B Scan : 53079

Andromeda score : 244.65

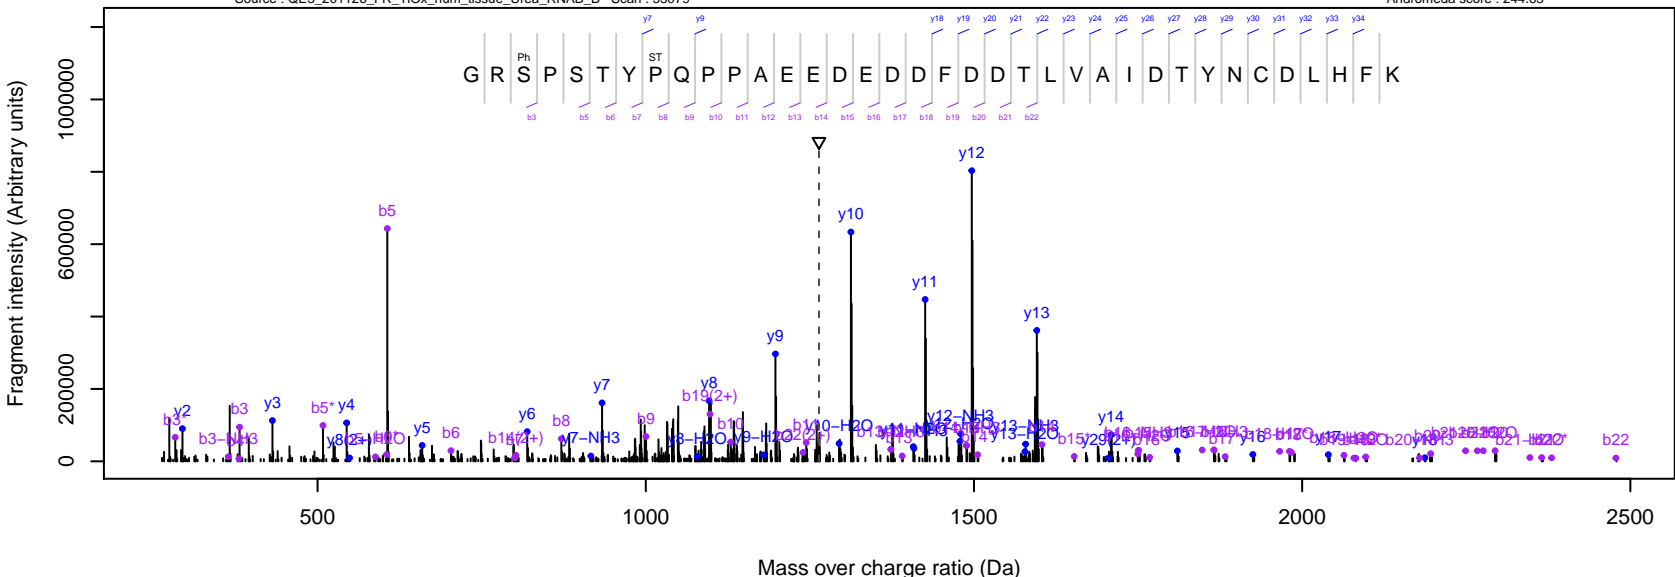

KYTLENKEEGSLS(Phospho (STY))DTEADAVSQLPDPTTNP SAGK-3+

Source : QE3\_201126\_FR\_TIOx\_hum\_tissue\_Urea\_RNAB\_B Scan : 31398

Andromeda score : 244.65

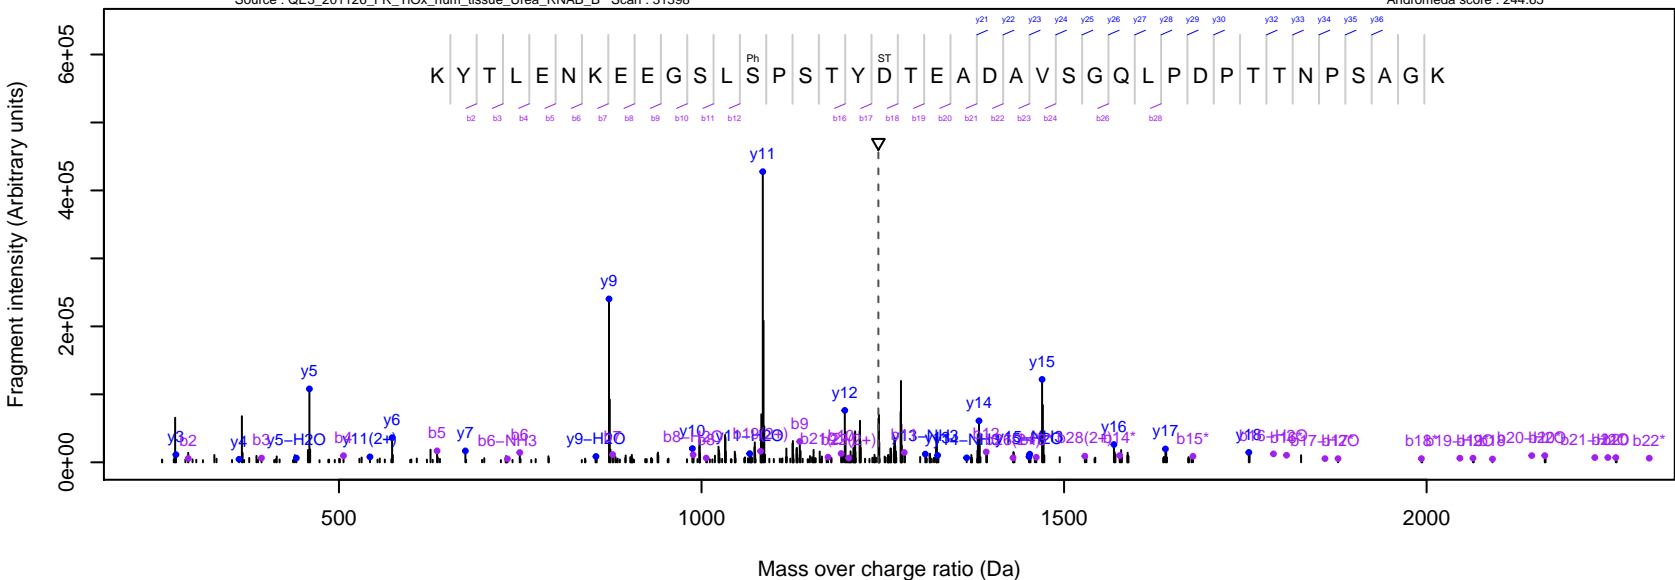

S(Phospho (STY))LGSVQAPSYGARPVSSAASVYAGAGGS(Phospho (STY))GSR-3+

Source : QE3\_201126\_FR\_TIOx\_hum\_tissue\_Urea\_RNAB\_H Scan : 36165

Andromeda score : 244.58

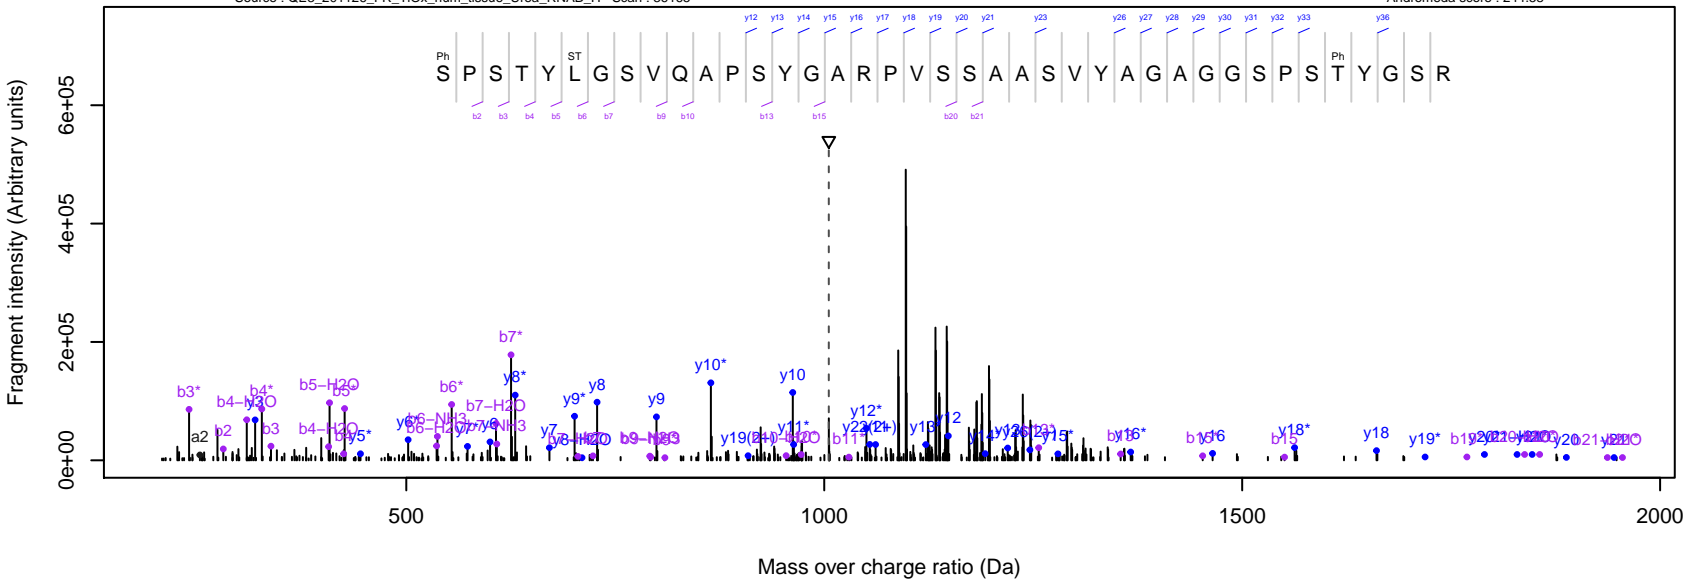

**GSAPHSEDLPEQEEELGSPSTYDDDEQEDPNDYCK-3+**

Source : QE3\_201126\_FR\_TiOx\_hum\_tissue\_Urea\_RNAB\_B Scan : 33612

Andromeda score : 244.51

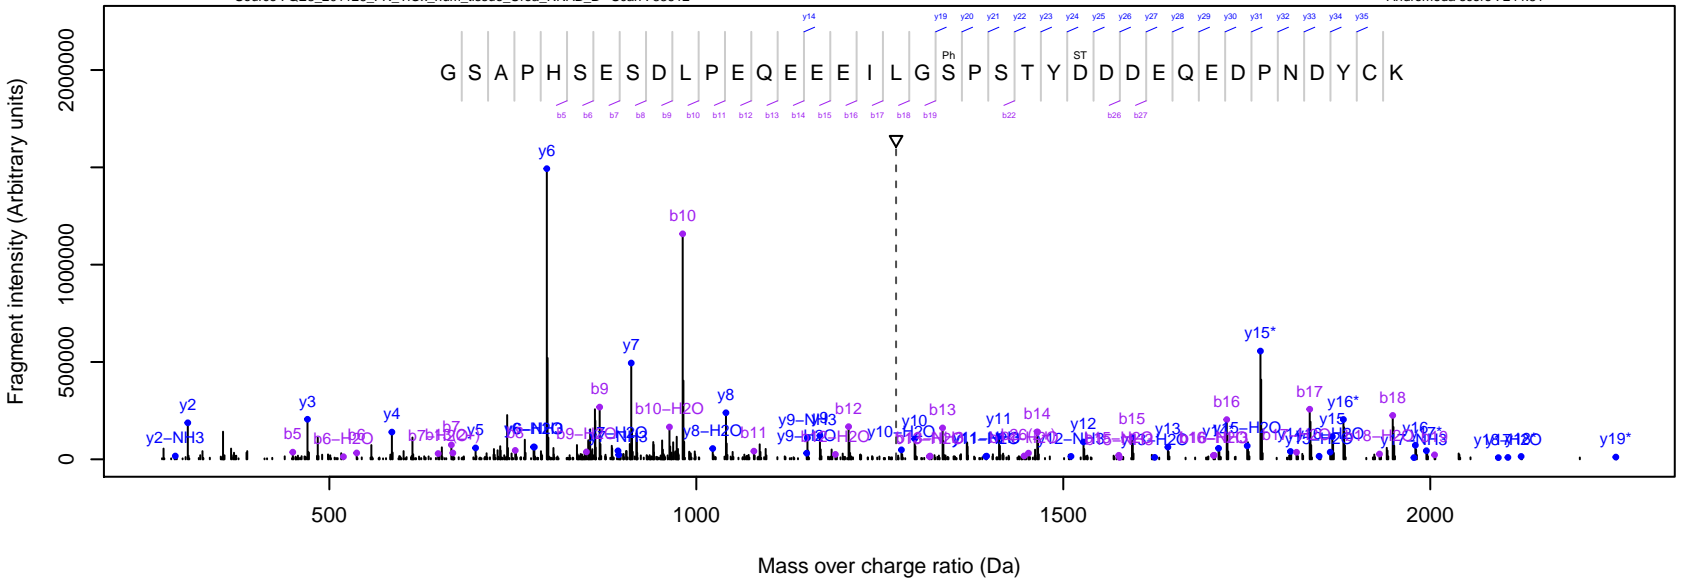

**SKEGHSLEMENENLVENGADSPSTYDEDDNSFLK-3+**

Source : QE3\_201126\_FR\_TiOx\_hum\_tissue\_Urea\_RNAB\_B Scan : 32818

Andromeda score : 244.5

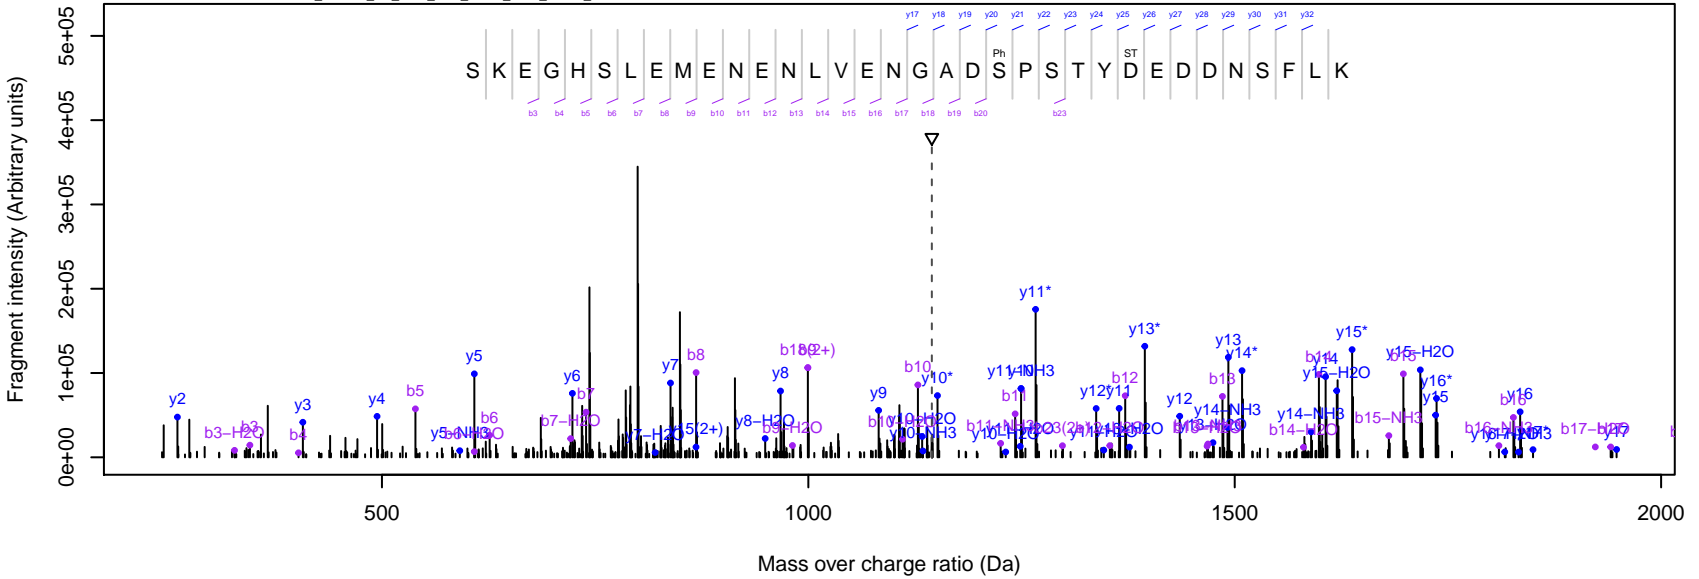

**GLM(Oxidation (M))AGGRPEGQYS(Phospho (STY))EDEDTDDEYKEAK-3+**

Source : QE3\_201126\_FR\_TiOx\_hum\_tissue\_Urea\_RNAB\_N Scan : 15571

Andromeda score : 244.31

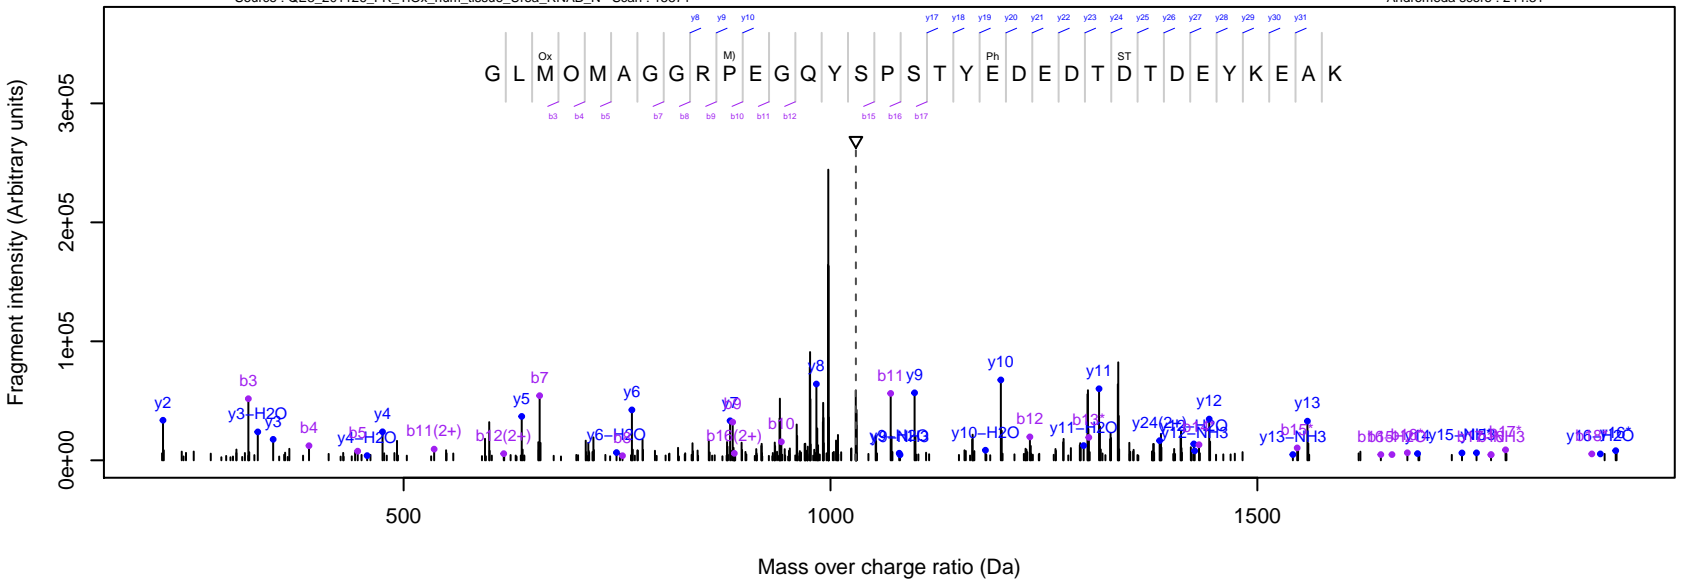

EVDPTSTGELQS(Phospho (STY))LQMPSEGPSS(Phospho (STY))LDPSQEGPTGLK-3+

Source : QE3\_201126\_FR\_TiOx\_hum\_tissue\_Urea\_RNAB\_B Scan : 55119

Andromeda score : 244.05

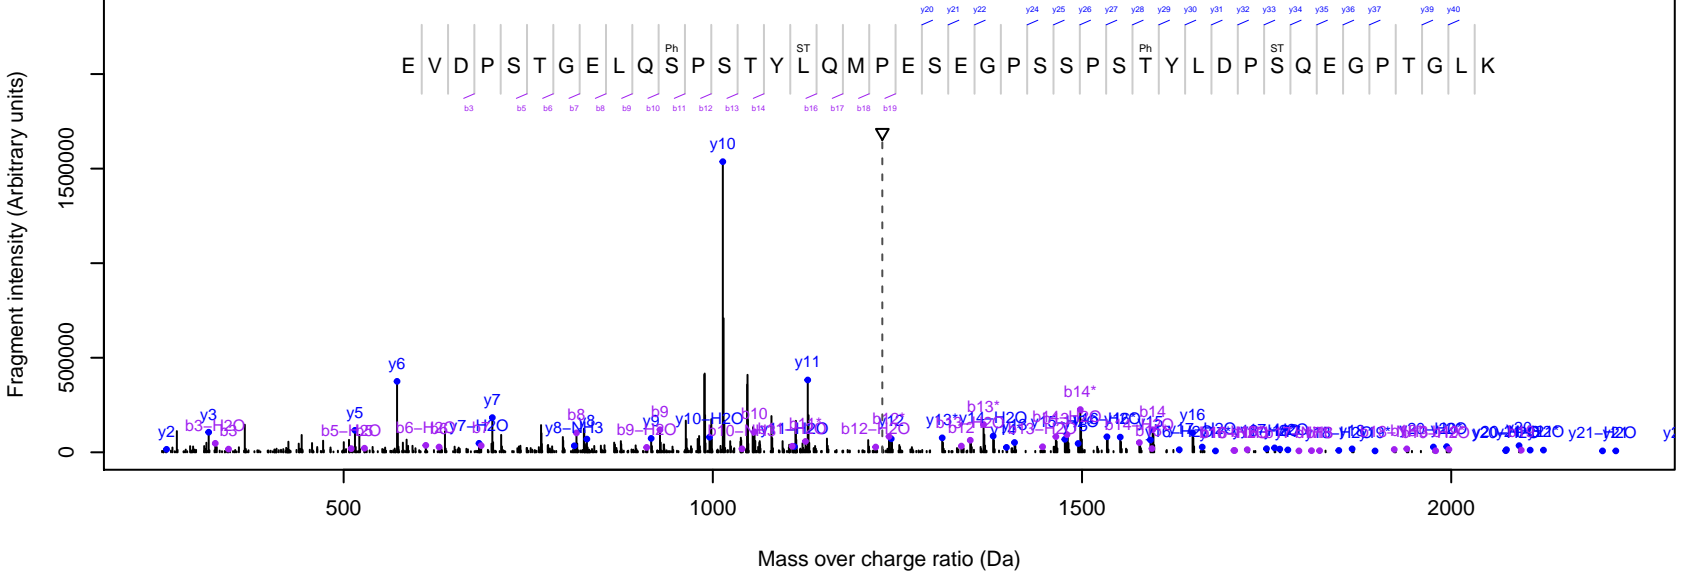

NTFTAWS(Phospho (STY))DEESDYEIDDRDVK-3+

Source : QE3\_201126\_FR\_TiOx\_hum\_tissue\_Urea\_RNAB\_H Scan : 37959

Andromeda score : 243.87

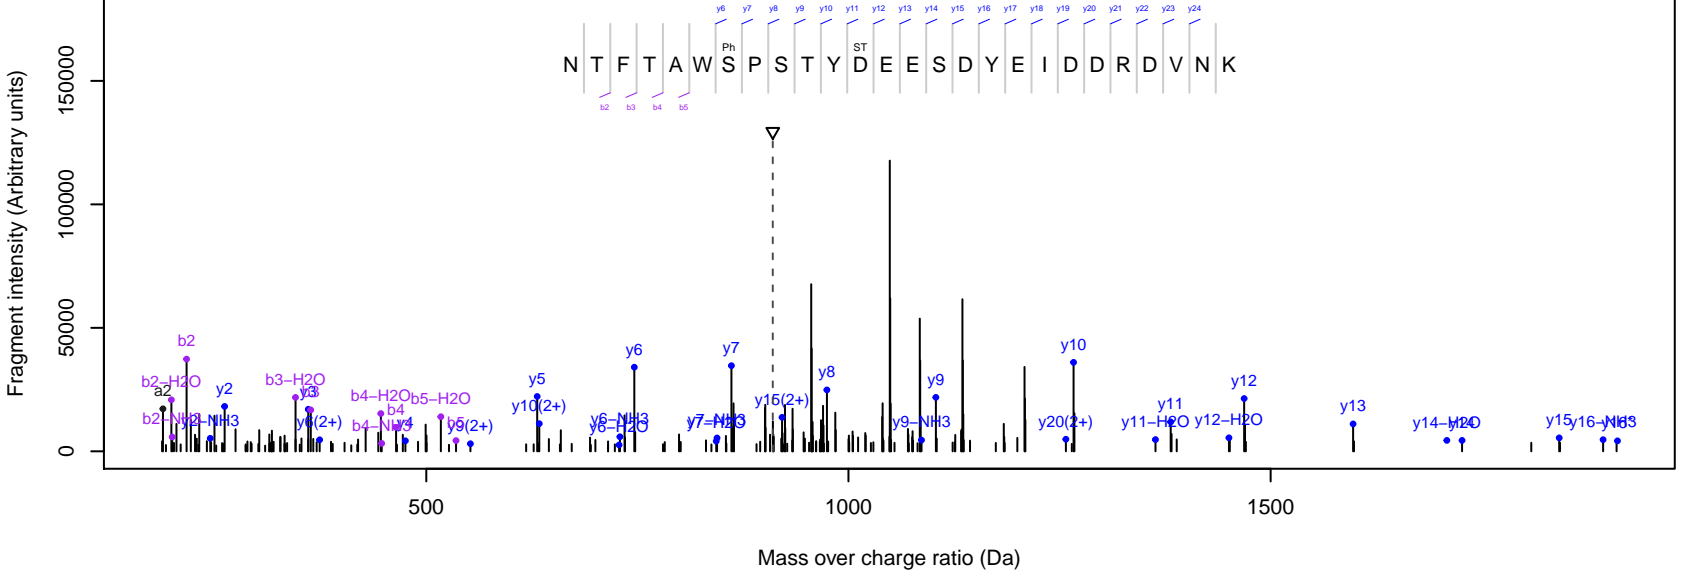

TQT(Phospho (STY))PPVSPAPQPT(Phospho (STY))EERLPSSPVYEDAASFK-3+

Source : QE3\_201126\_FR\_TiOx\_hum\_tissue\_Urea\_RNAB\_H Scan : 43414

Andromeda score : 243.63

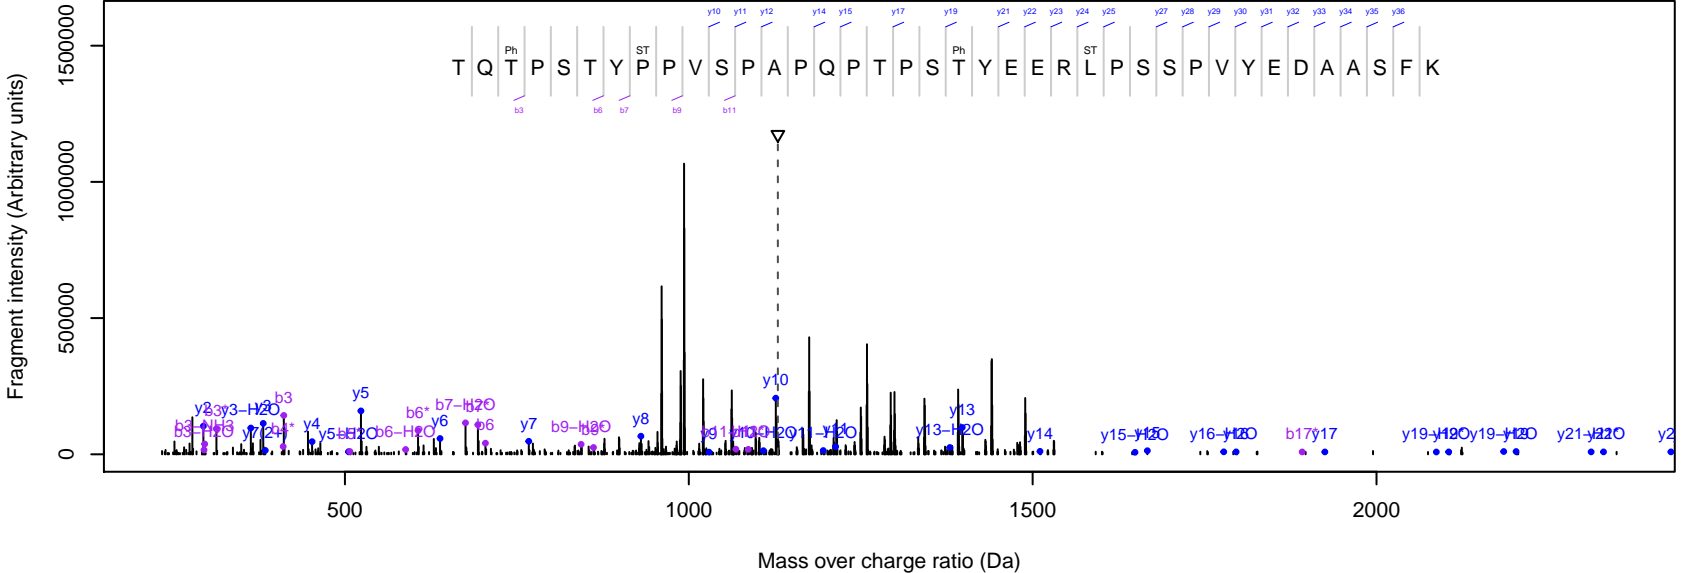



NLALDEAGQRST(Phospho (STY))M-2+

Source : QE3\_201126\_FR\_TIOx\_hum\_tissue\_Urea\_RNAB\_B Scan : 24721

Andromeda score : 242.98

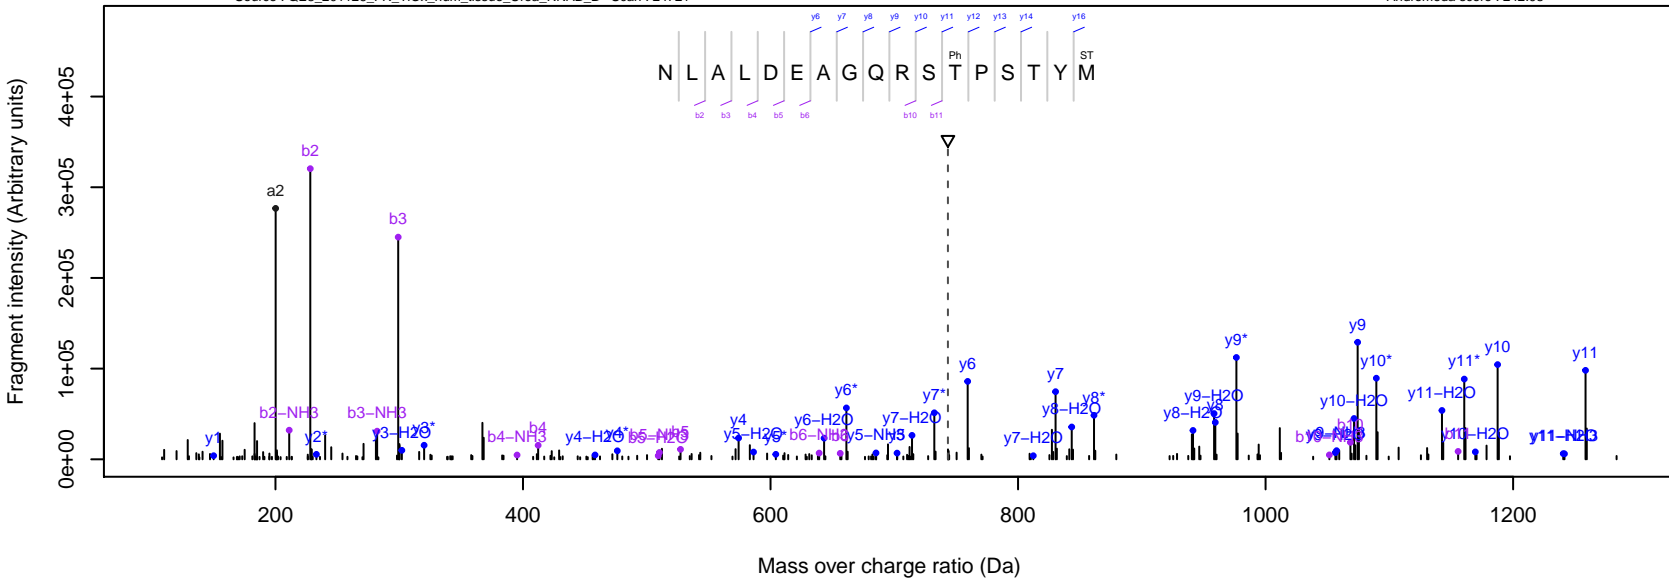

TVQSLEIDLDS(Phospho (STY))M(Oxidation (M))R-2+

Source : QE3\_201126\_FR\_TIOx\_hum\_tissue\_Urea\_RNAB\_B Scan : 35978

Andromeda score : 242.91

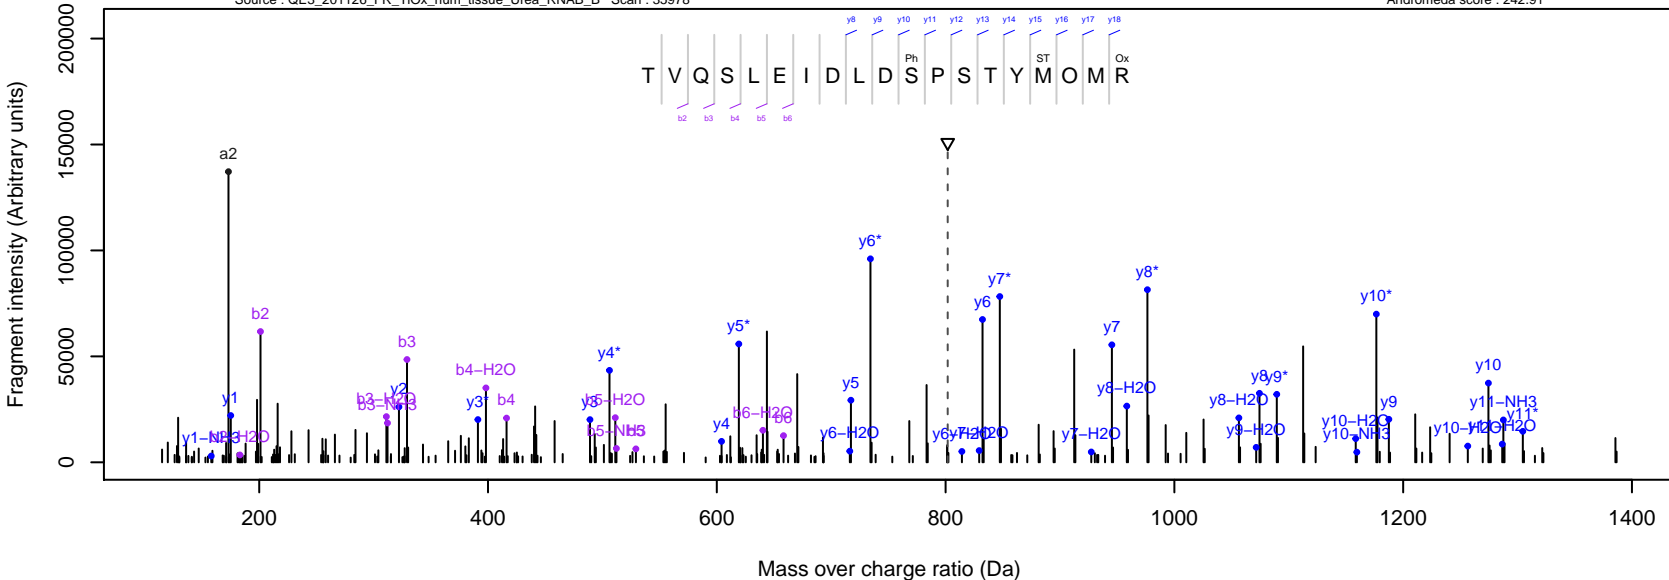

KKEPAITSQNS(Phospho (STY))PEAR-3+

Source : QE3\_201126\_FR\_TIOx\_hum\_tissue\_Urea\_RNAB\_H Scan : 5451

Andromeda score : 242.84

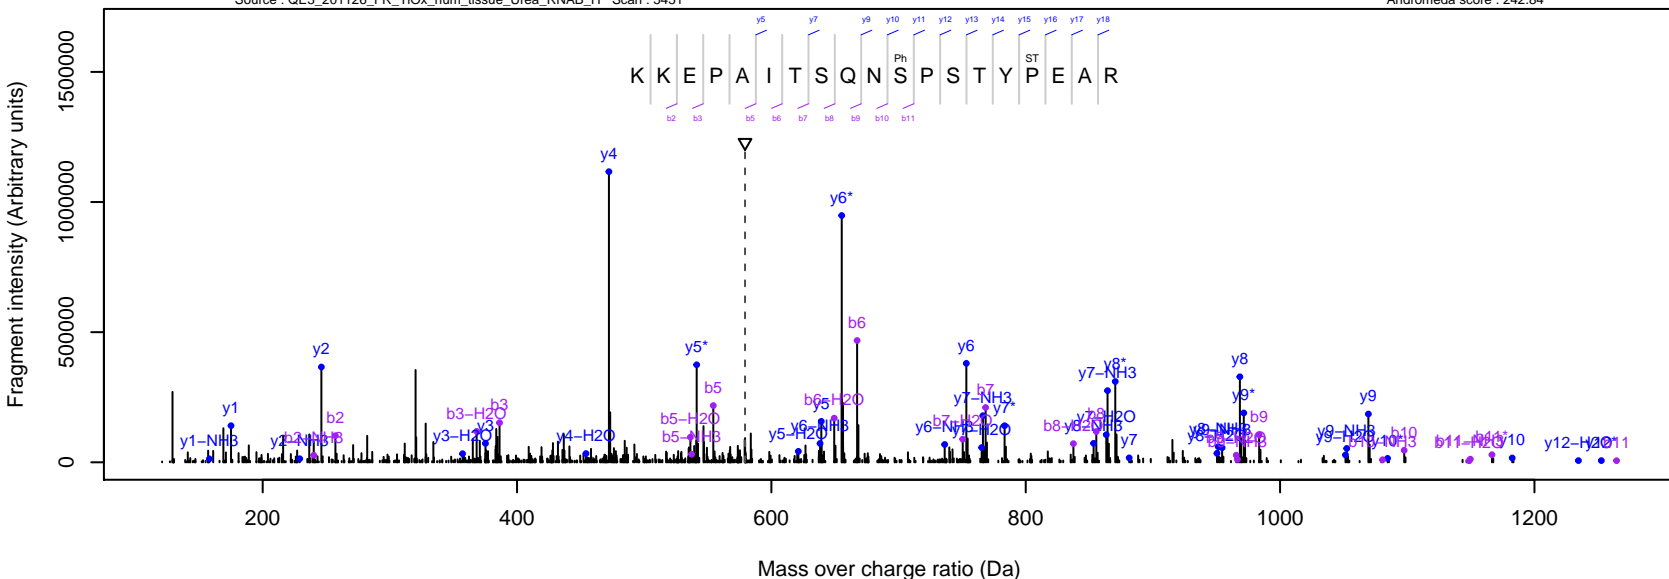

AS(Phospho (STY))PAPGSGHPEGPGAHLDMNSLDR-2+

Source : QE3\_201126\_FR\_TiOx\_hum\_tissue\_Urea\_RNAB\_H Scan : 20959

Andromeda score : 242.53

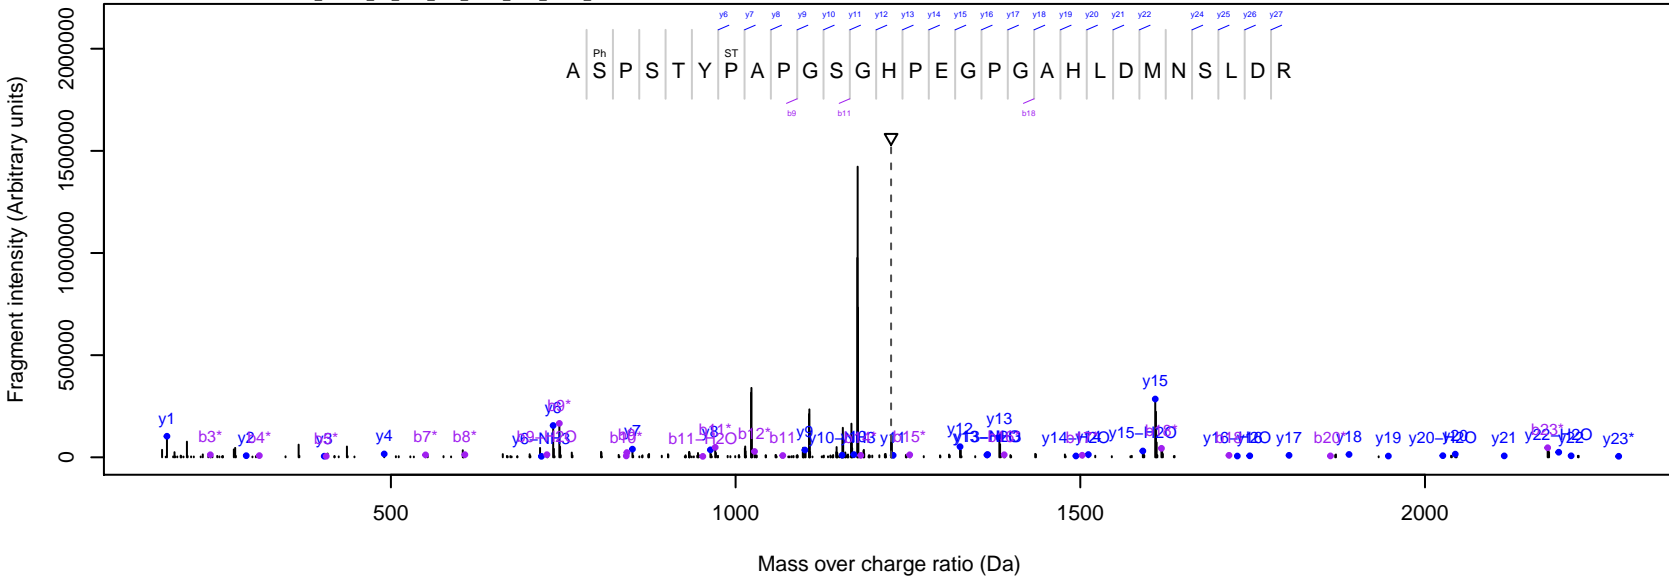

APQTSSS(Phospho (STY))PPPV-2+

Source : QE3\_201126\_FR\_TiOx\_hum\_tissue\_Urea\_RNAB\_H Scan : 8910

Andromeda score : 242.48

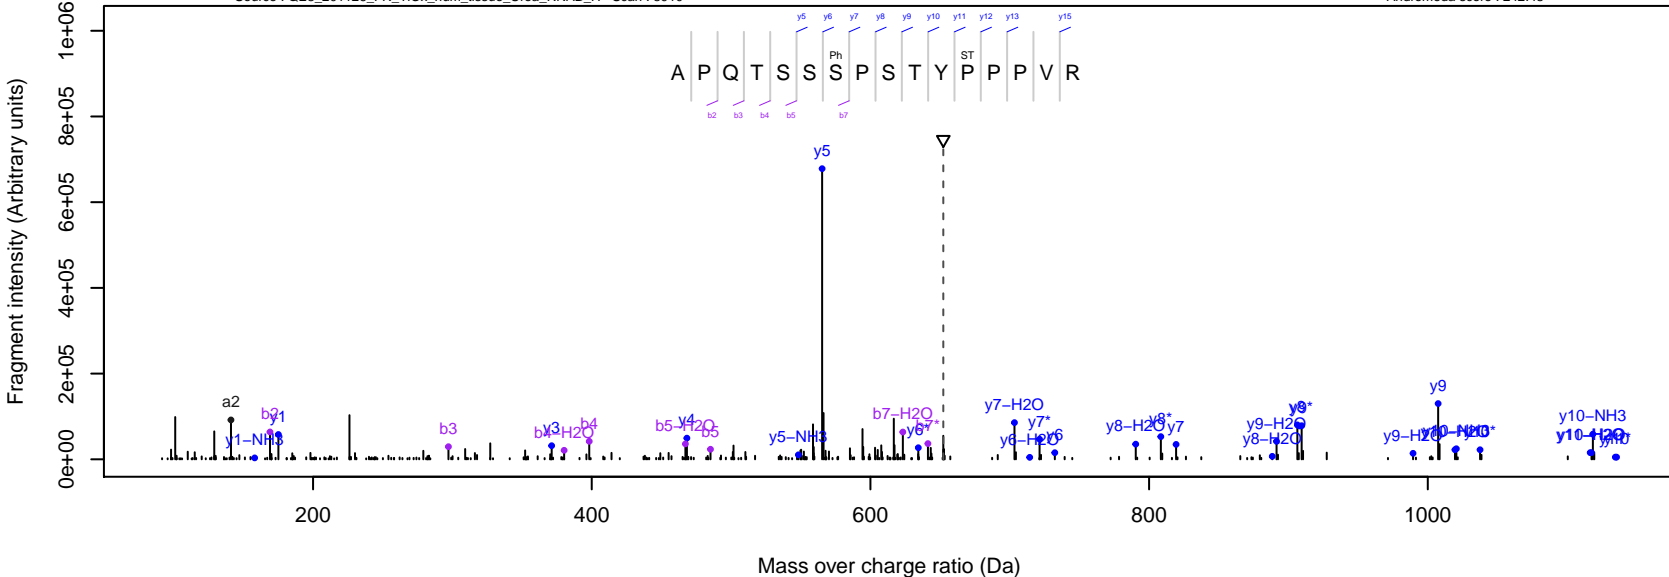

ERVPS(Phospho (STY))VAEAPQLRPAGTAAAK-3+

Source : QE3\_201126\_FR\_TiOx\_hum\_tissue\_Urea\_RNAB\_N Scan : 19639

Andromeda score : 242.36

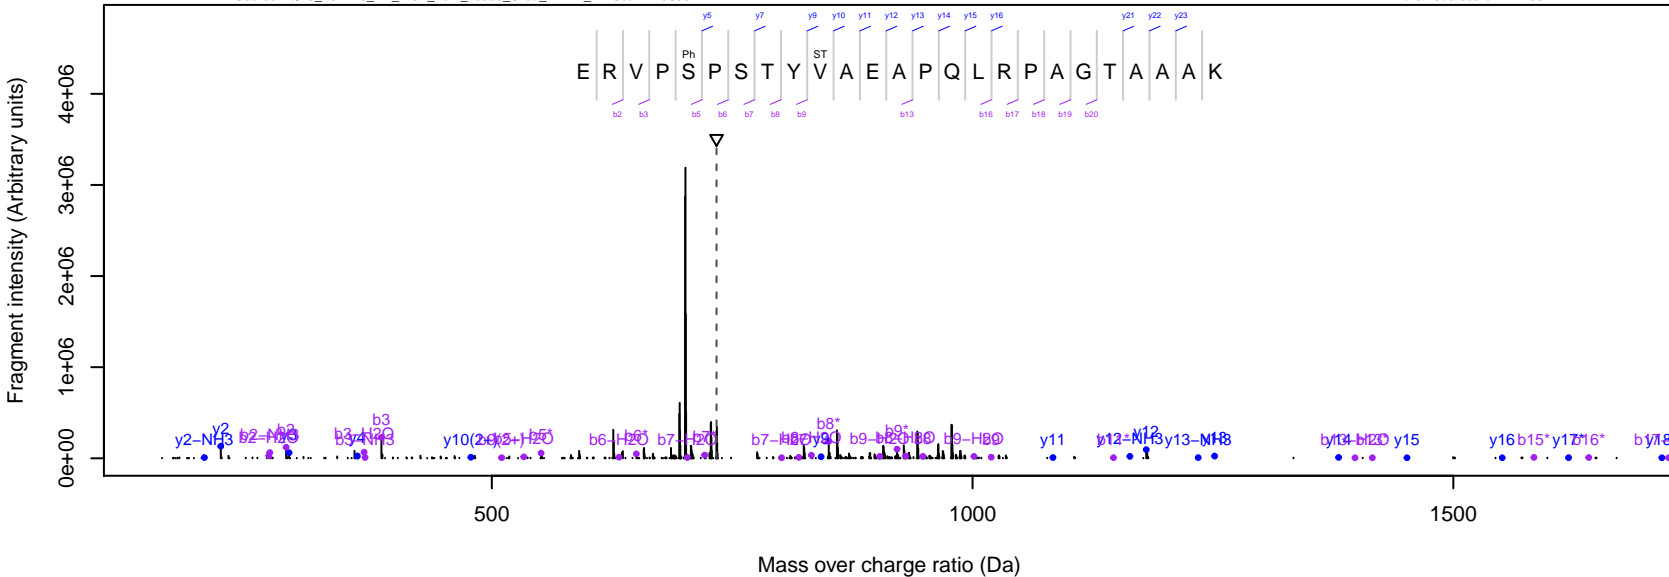



GLDS(Phospho (STY))GAETEEKDTWEEK-2+

Source : QE3\_201126\_FR\_TIOx\_hum\_tissue\_Urea\_RNAB\_H Scan : 21239

Andromeda score : 242.26

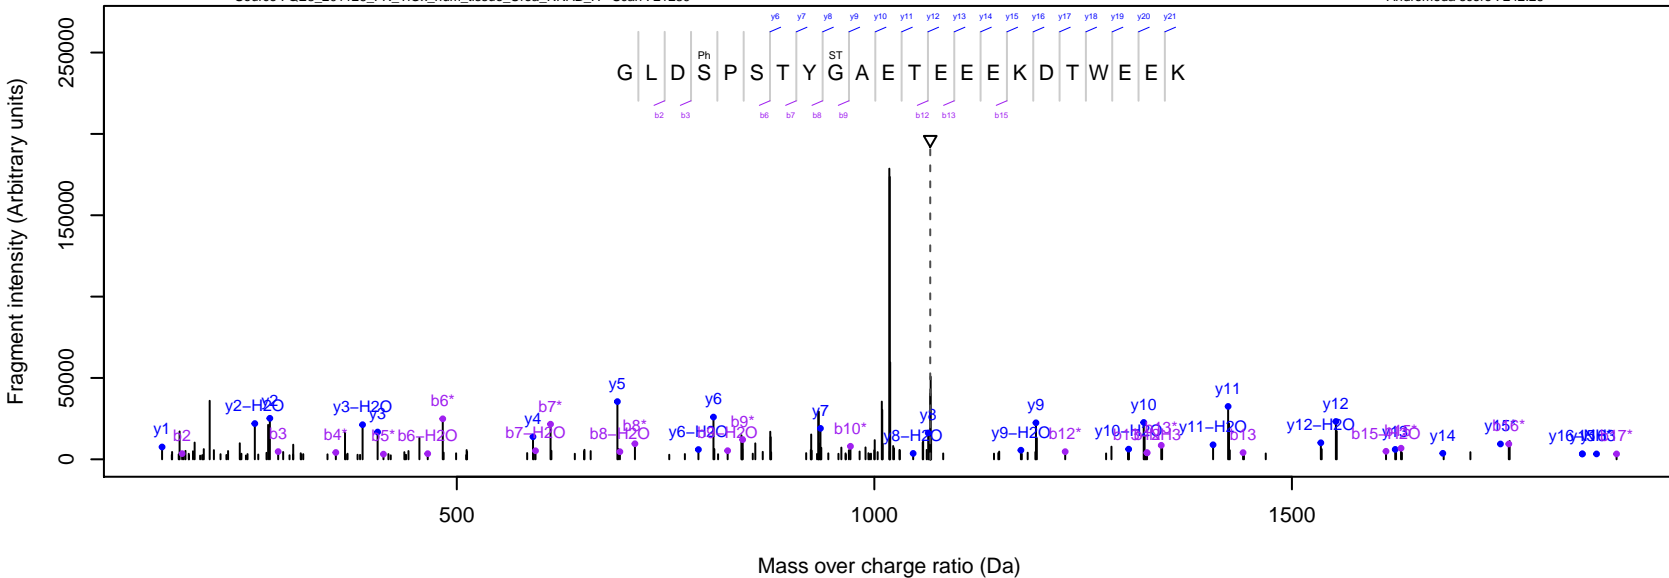

DIS(Phospho (STY))PEEIDLKNEPWYK-2+

Source : QE3\_201126\_FR\_TIOx\_hum\_tissue\_Urea\_RNAB\_N Scan : 44034

Andromeda score : 242.19

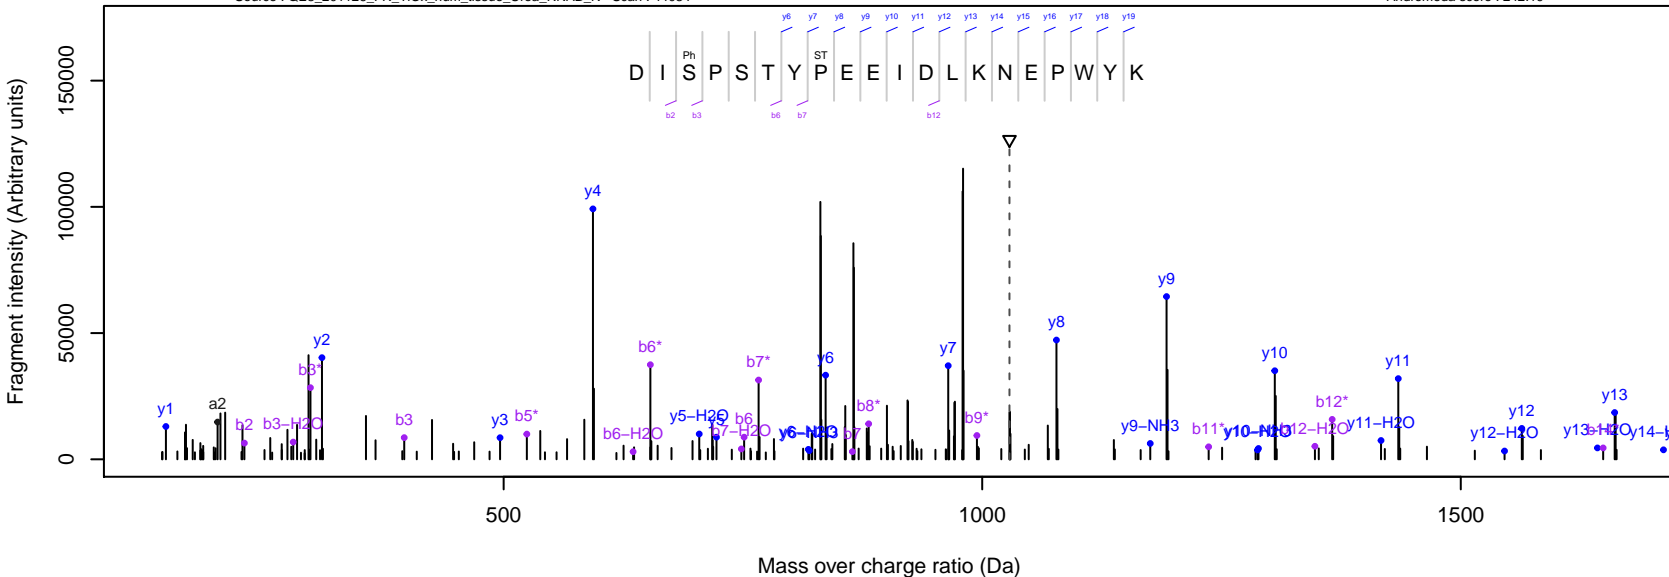

NAPAAVDEGSISPSTYPR-2+

Source : QE3\_201126\_FR\_TIOx\_hum\_tissue\_Urea\_RNAB\_N Scan : 17064

Andromeda score : 242.19

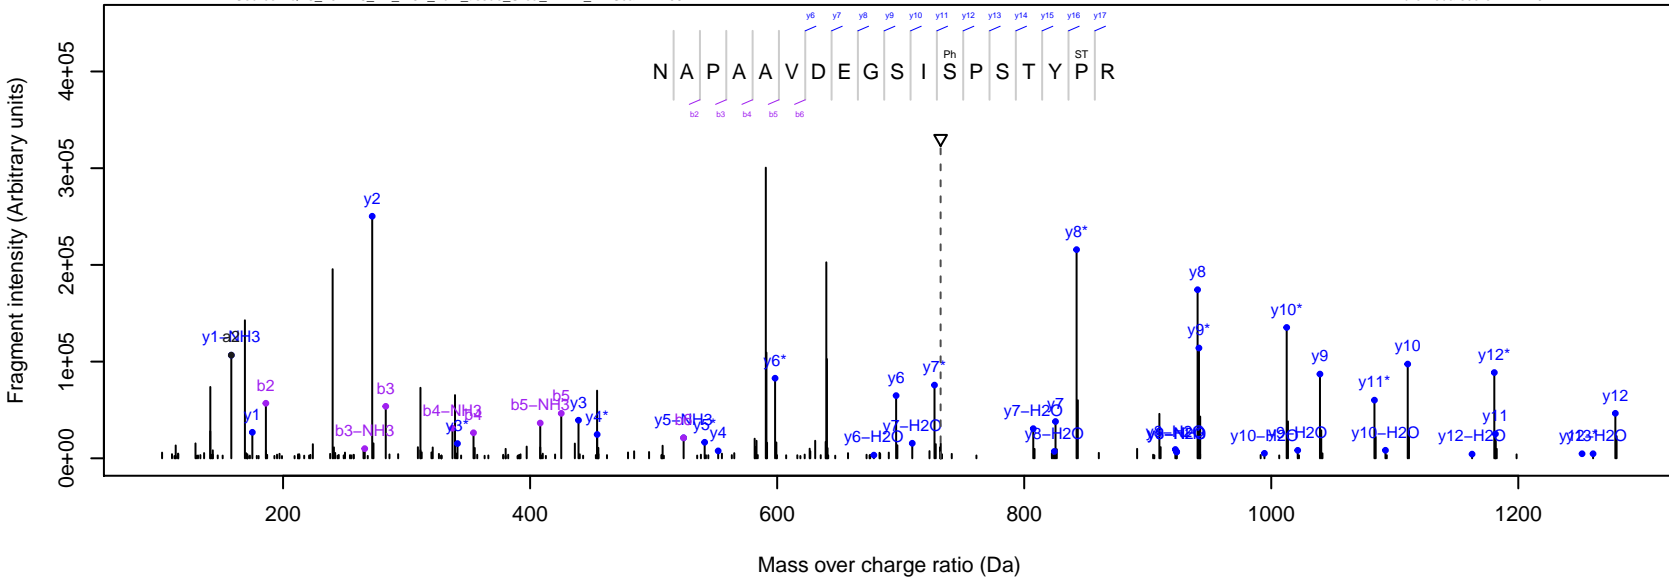

DLTHS(Phospho (STY))DSESSLHM(Oxidation (M))SDR-3+

Source : QE3\_201126\_FR\_TIOx\_hum\_tissue\_Urea\_RNAB\_H Scan : 8545

Andromeda score : 242.16

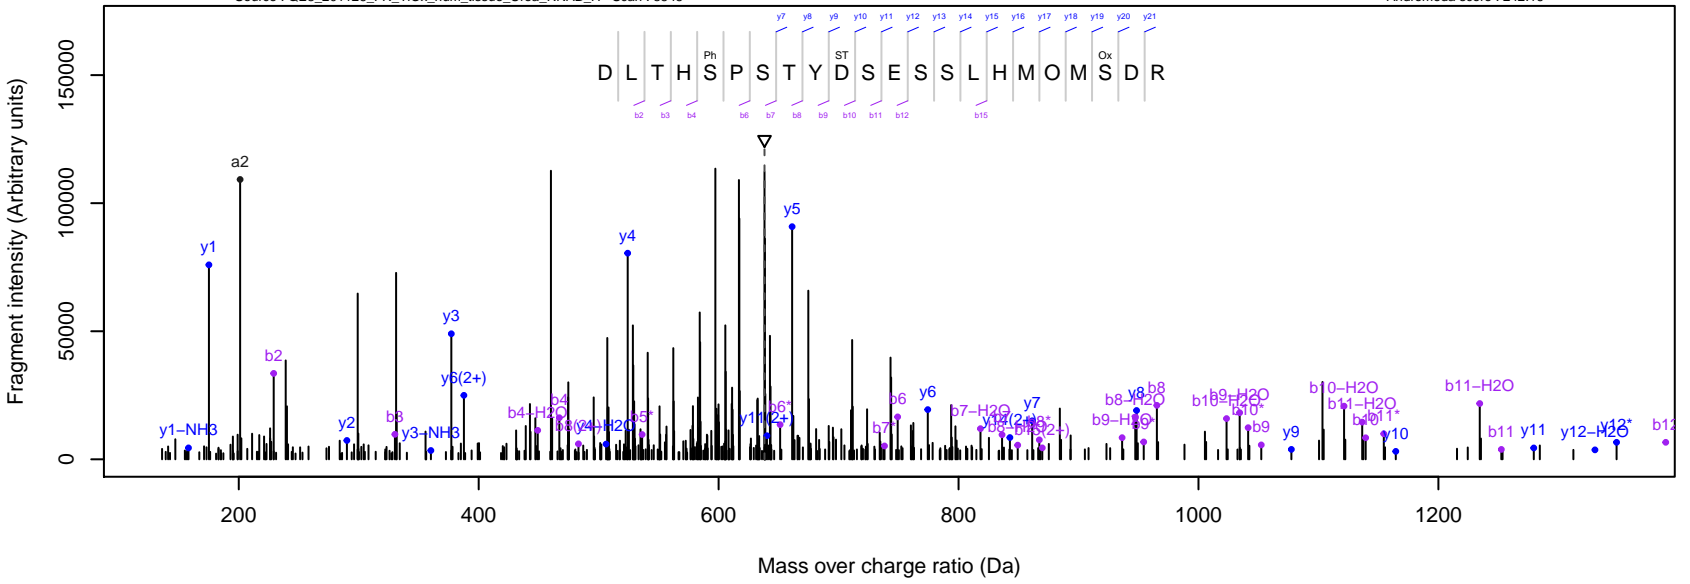

MFSFSGFDS(Phospho (STY))TNQHTVQTENR-3+

Source : QE3\_201126\_FR\_TIOx\_hum\_tissue\_Urea\_RNAB\_N Scan : 37246

Andromeda score : 242.11

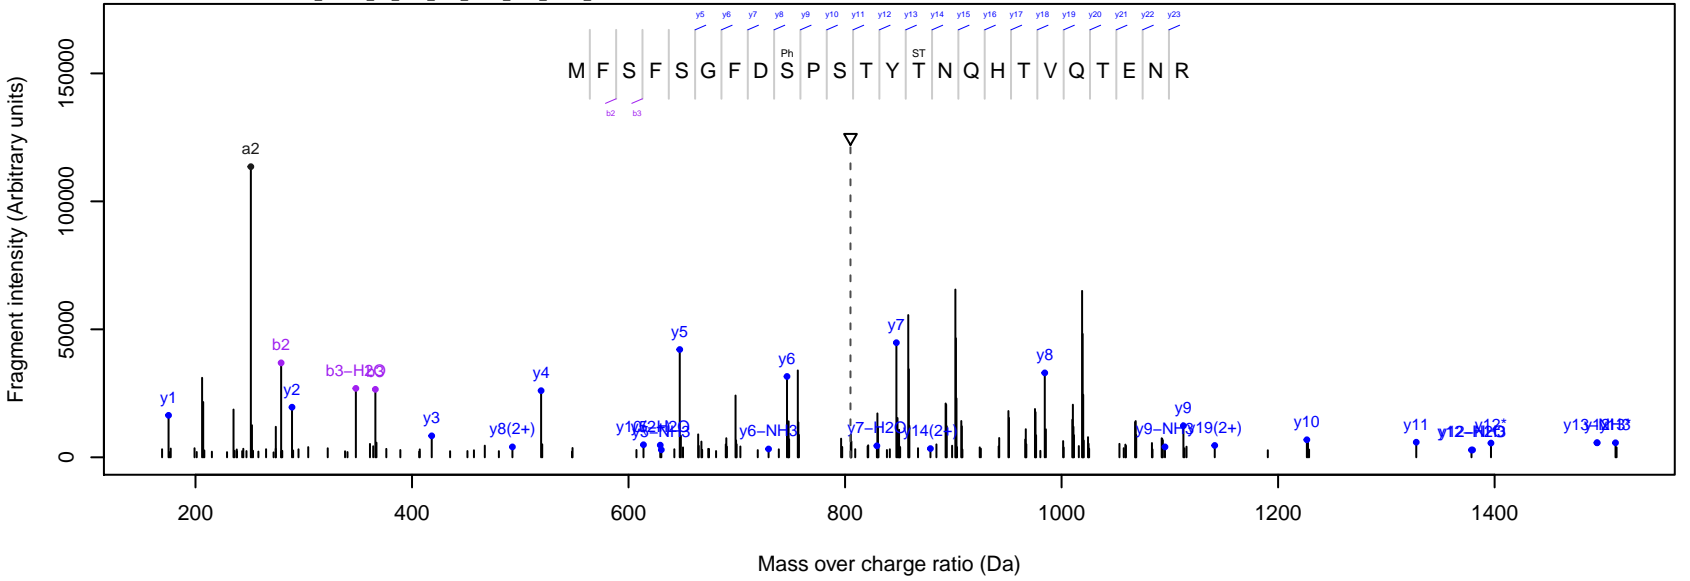

(Acetyl (Protein N-term))SDEFSLADALPEHS(Phospho (STY))PAK-2+

Source : QE3\_201126\_FR\_TIOx\_hum\_tissue\_Urea\_RNAB\_N Scan : 48934

Andromeda score : 242.09

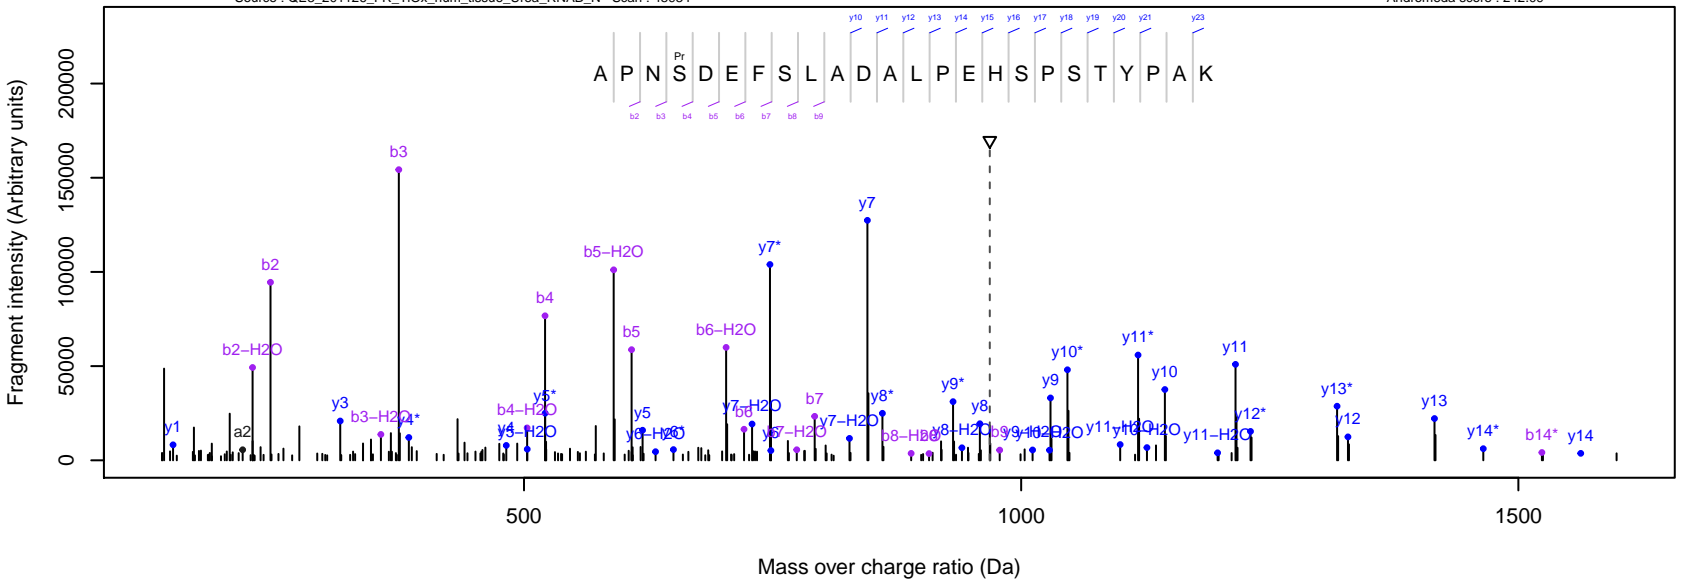

WSGPLS(Phospho (STY))LQEVDQPHLHVTYAGAAVDELGK-3+

Source : QE3\_201126\_FR\_TiOx\_hum\_tissue\_Urea\_RNAB\_H Scan : 46888

Andromeda score : 242.07

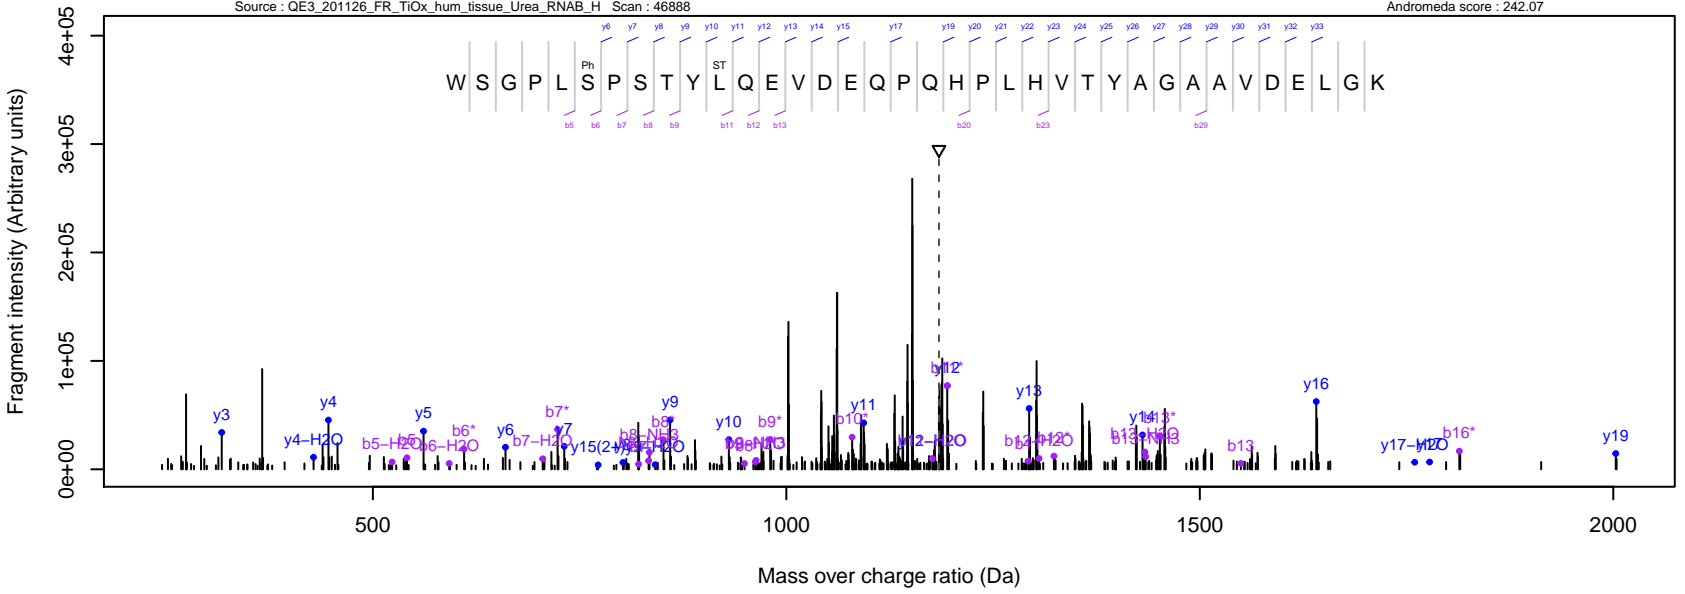

LNSDDTYQTALLSGSPSTYDEE-2+

Source : QE3\_201126\_FR\_TiOx\_hum\_tissue\_Urea\_RNAB\_B Scan : 46605

Andromeda score : 241.8

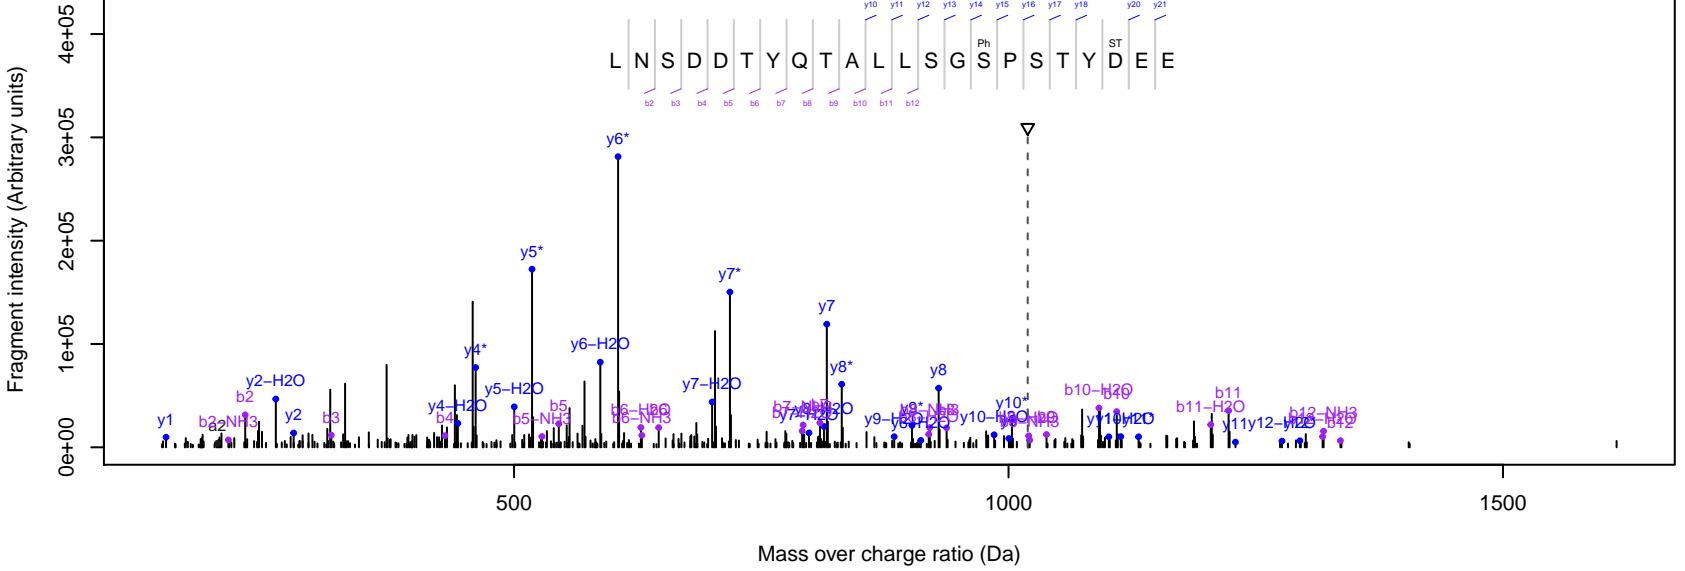

RSS(Phospho (STY))EEVDGQHPAQEEVPEESPQTSGPEAENR-3+

Source : QE3\_201126\_FR\_TiOx\_hum\_tissue\_Urea\_RNAB\_B Scan : 14986

Andromeda score : 241.74

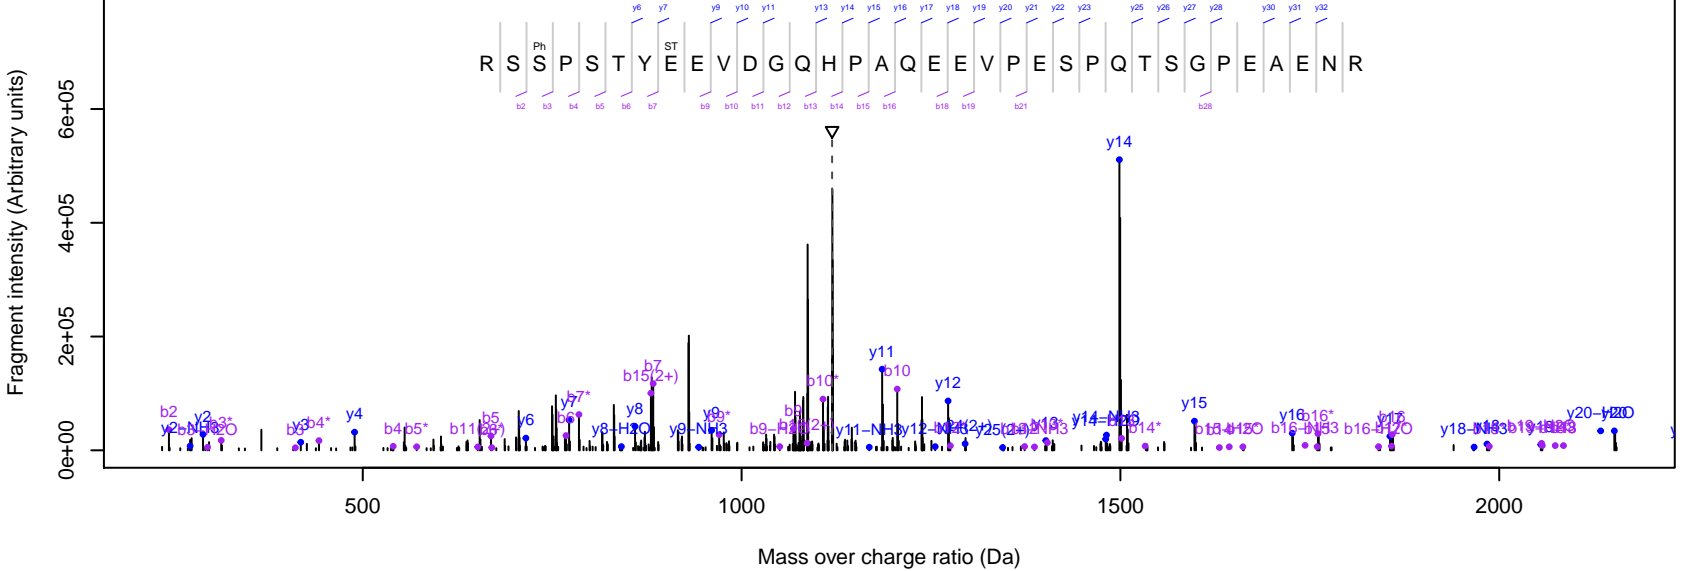

RGAE EEEEE E E D D D S P S T Y G E E M K

Source : QE3\_201126\_FR\_TiOx\_hum\_tissue\_Urea\_RNAB\_N Scan : 8873

Andromeda score : 241.68

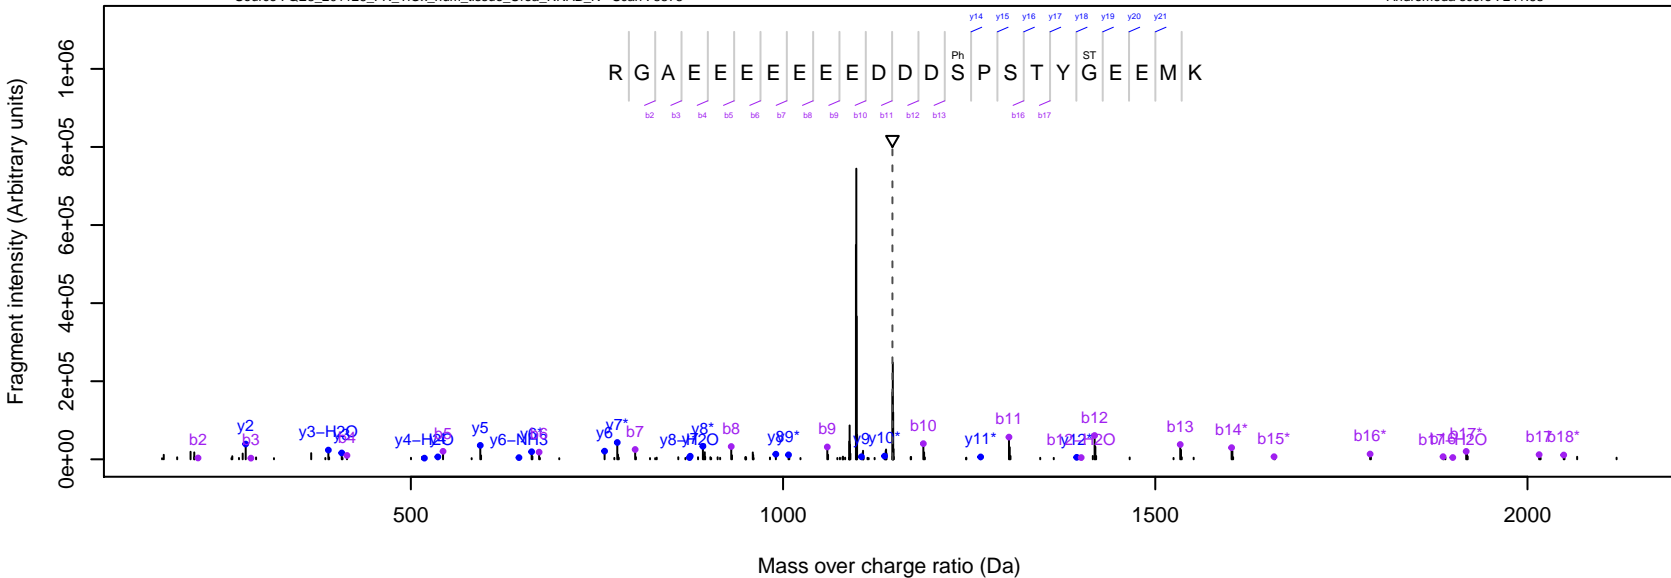

AESSD SGAES(Phospho (STY)) EEEEE AQEEVKGAEQSDNDKK-3+

Source : QE3\_201126\_FR\_TiOx\_hum\_tissue\_Urea\_RNAB\_B Scan : 20559

Andromeda score : 241.51

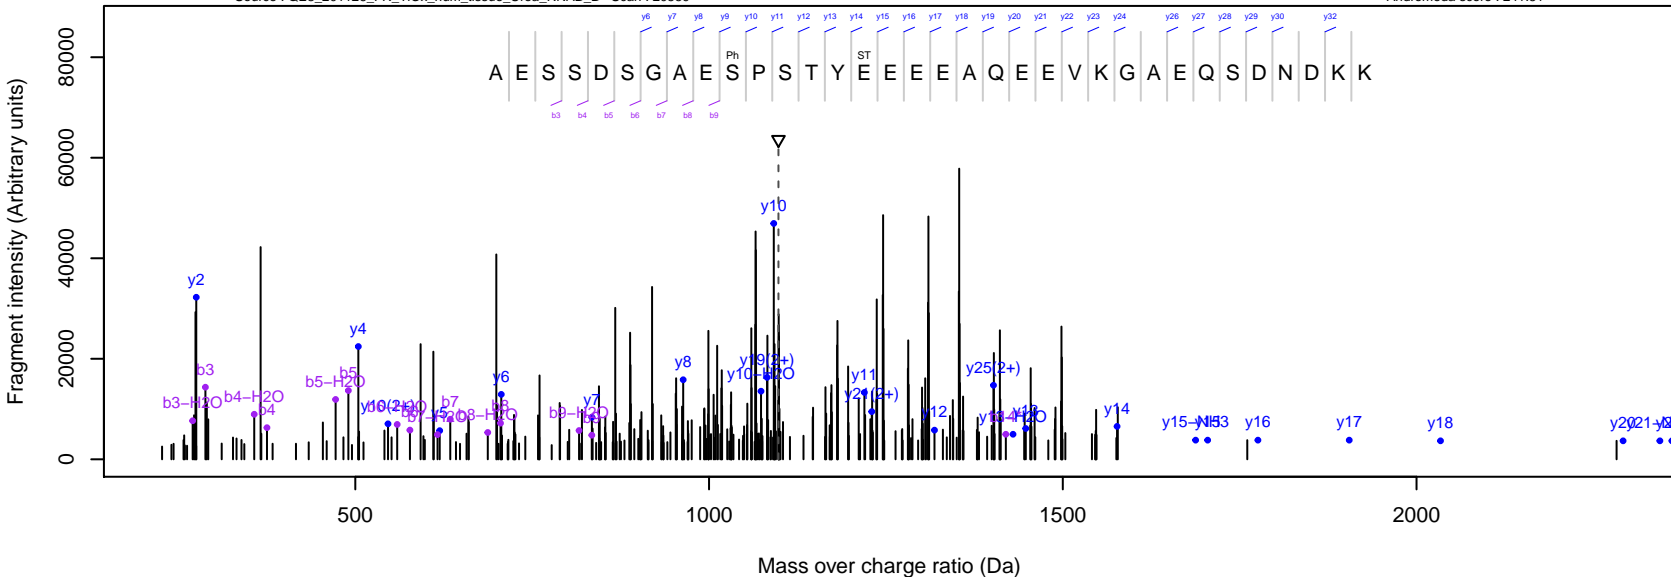

YVAS YLLAALGGNS(Phospho (STY)) SPSAK-2+

Source : QE3\_201126\_FR\_TiOx\_hum\_tissue\_Urea\_RNAB\_H Scan : 56844

Andromeda score : 241.51

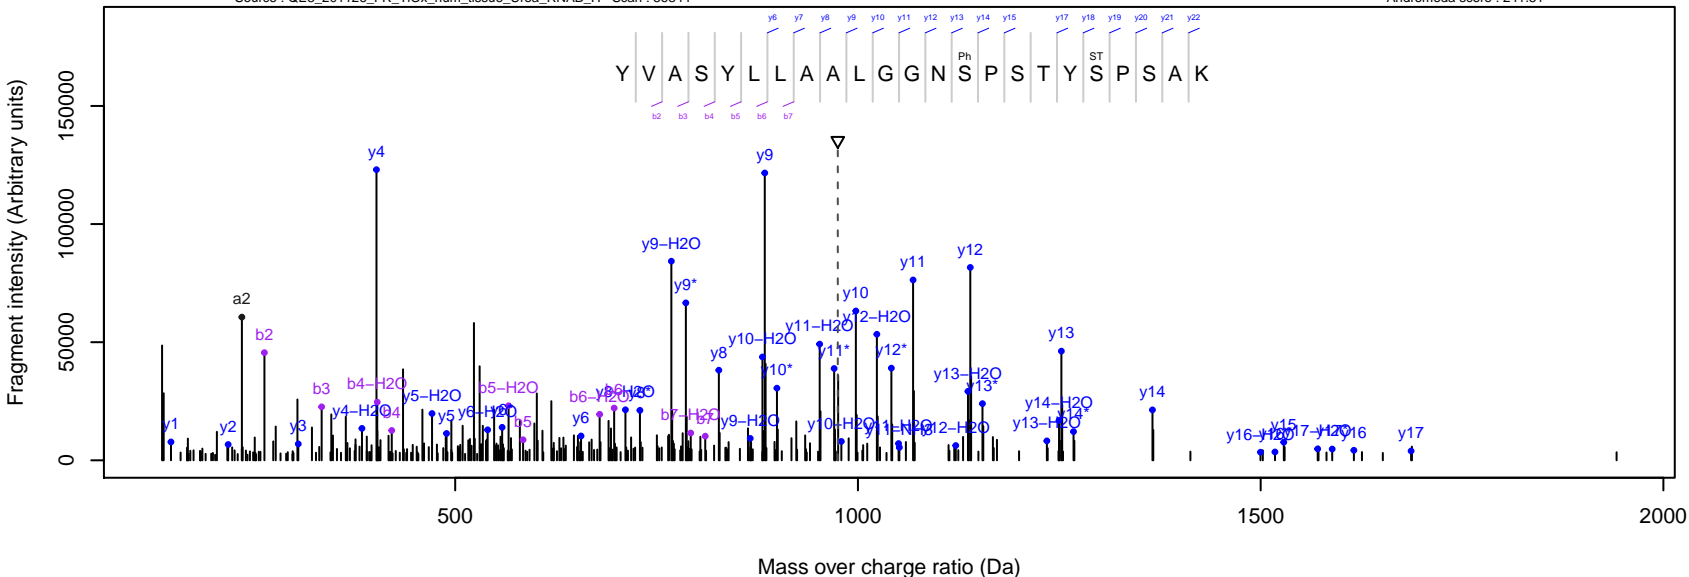

NDS(Phospho (STY))WGSFDLR-2+

Source : QE3\_201126\_FR\_TIOx\_hum\_tissue\_Urea\_RNAB\_N Scan : 44266

Andromeda score : 241.35

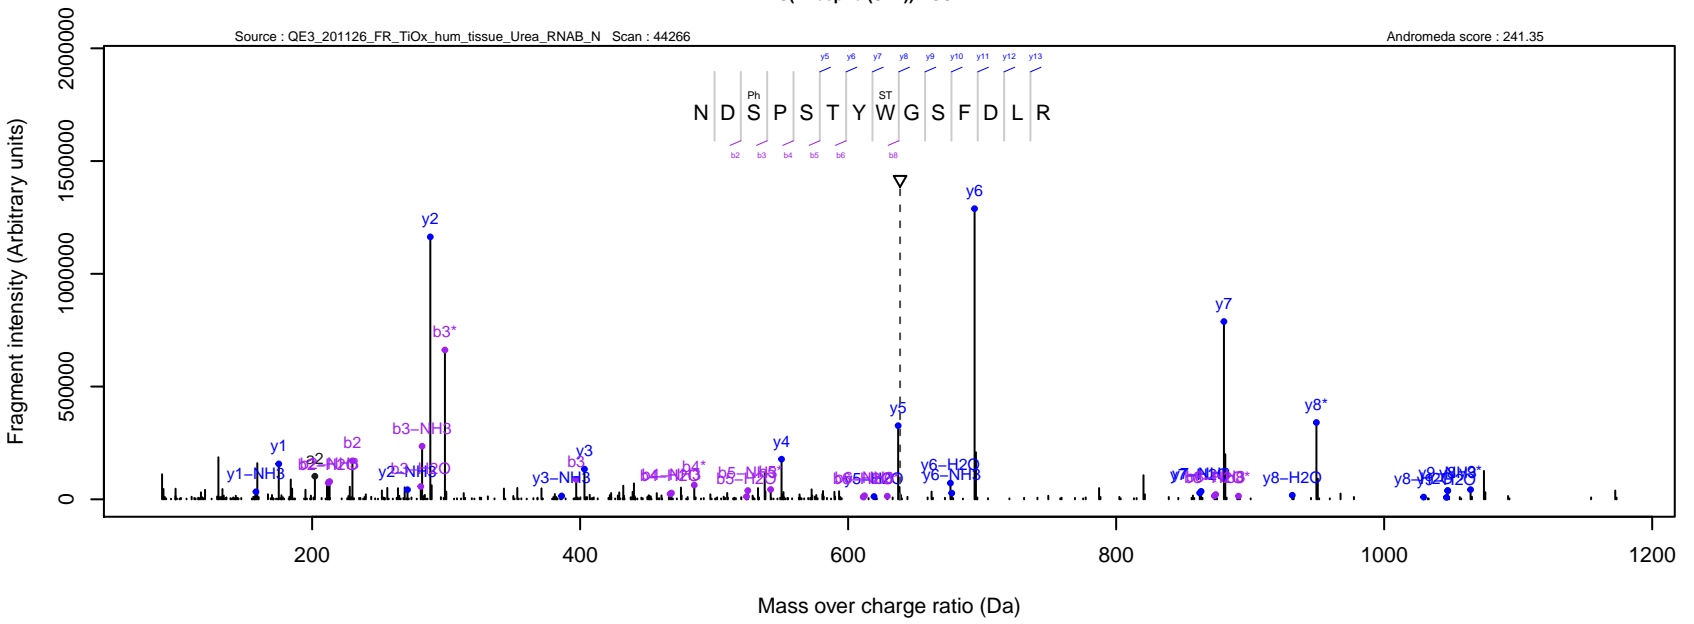

SYS(Phospho (STY))LSELSVLQAK-2+

Source : QE3\_201126\_FR\_TIOx\_hum\_tissue\_Urea\_RNAB\_N Scan : 49009

Andromeda score : 241.15

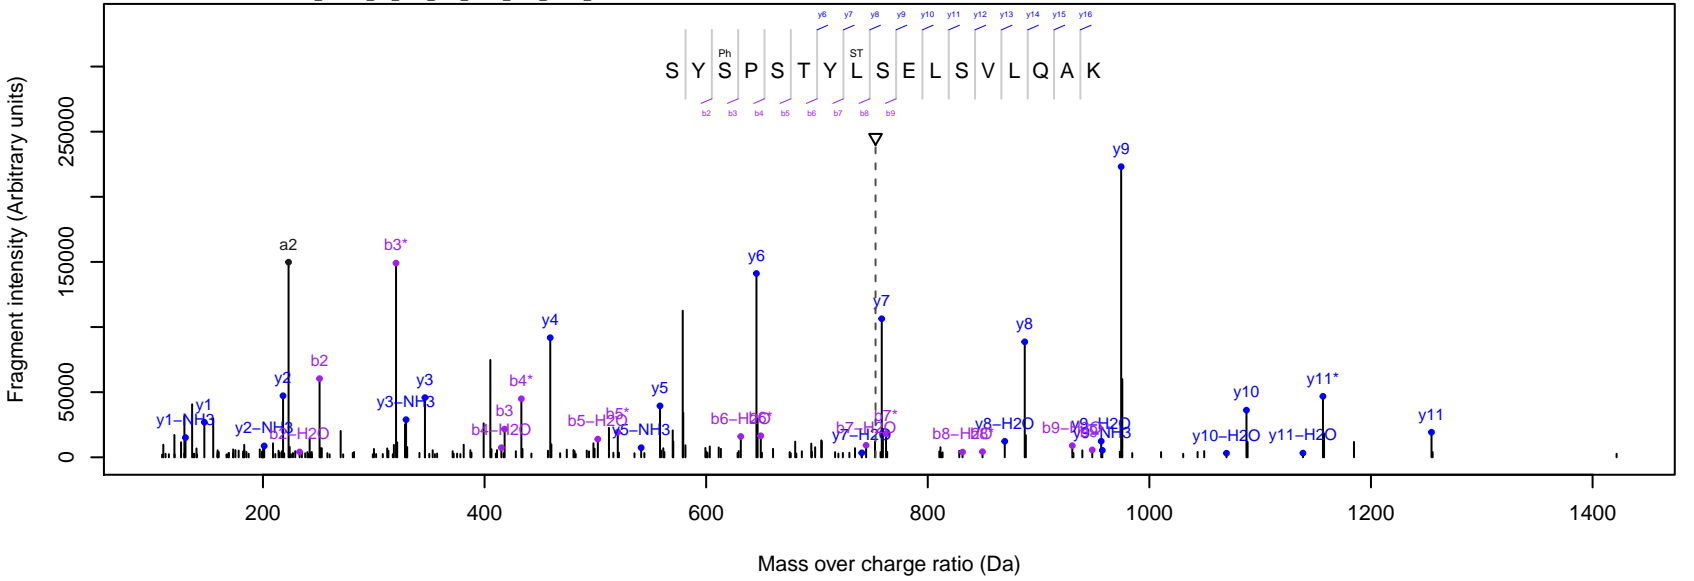

TALPTSGSS(Phospho (STY))AGELELLAGEVPAR-2+

Source : QE3\_201126\_FR\_TIOx\_hum\_tissue\_Urea\_RNAB\_H Scan : 53552

Andromeda score : 241.13

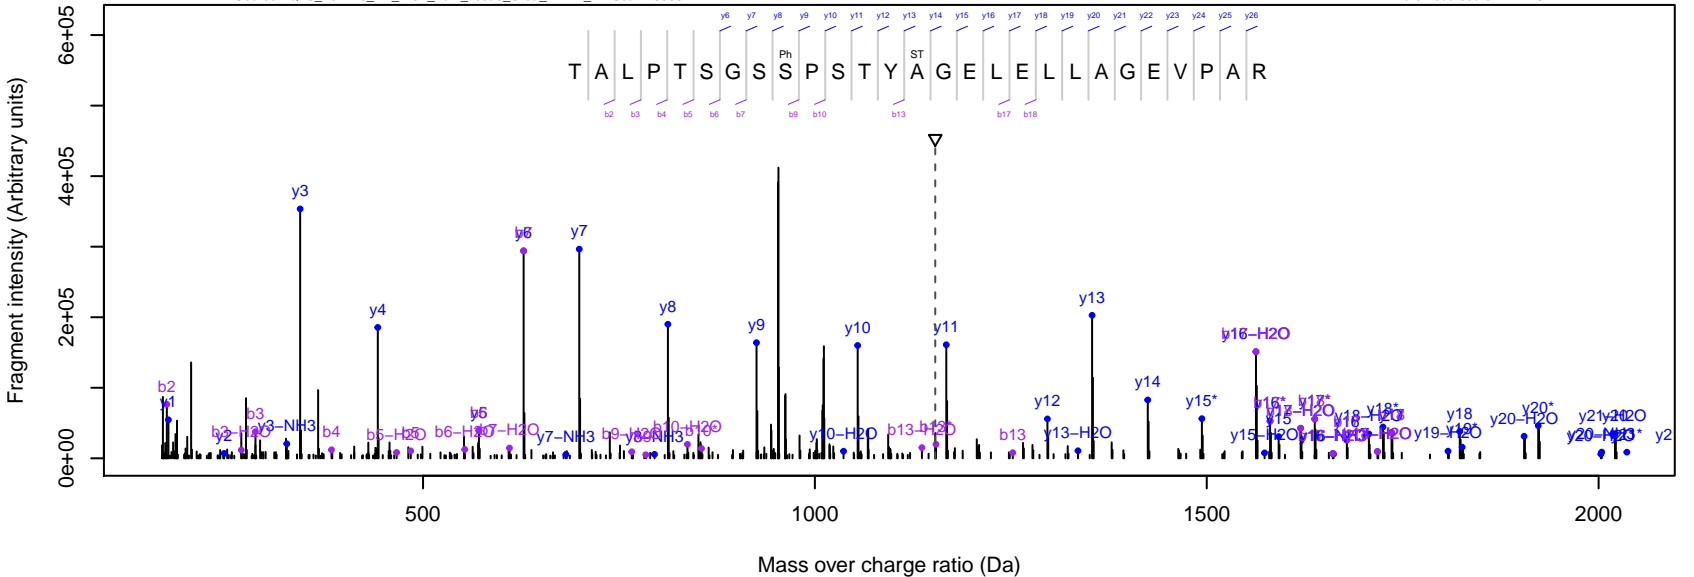

S(Phospho (STY))SPINPAQSGSPNHVDSAYFFPGSSTSSSSDNDDEGSGGATNHISGNK-4+

Source : QE3\_201126\_FR\_TIOx\_hum\_tissue\_Urea\_RNAB\_N Scan : 23899

Andromeda score : 241.01

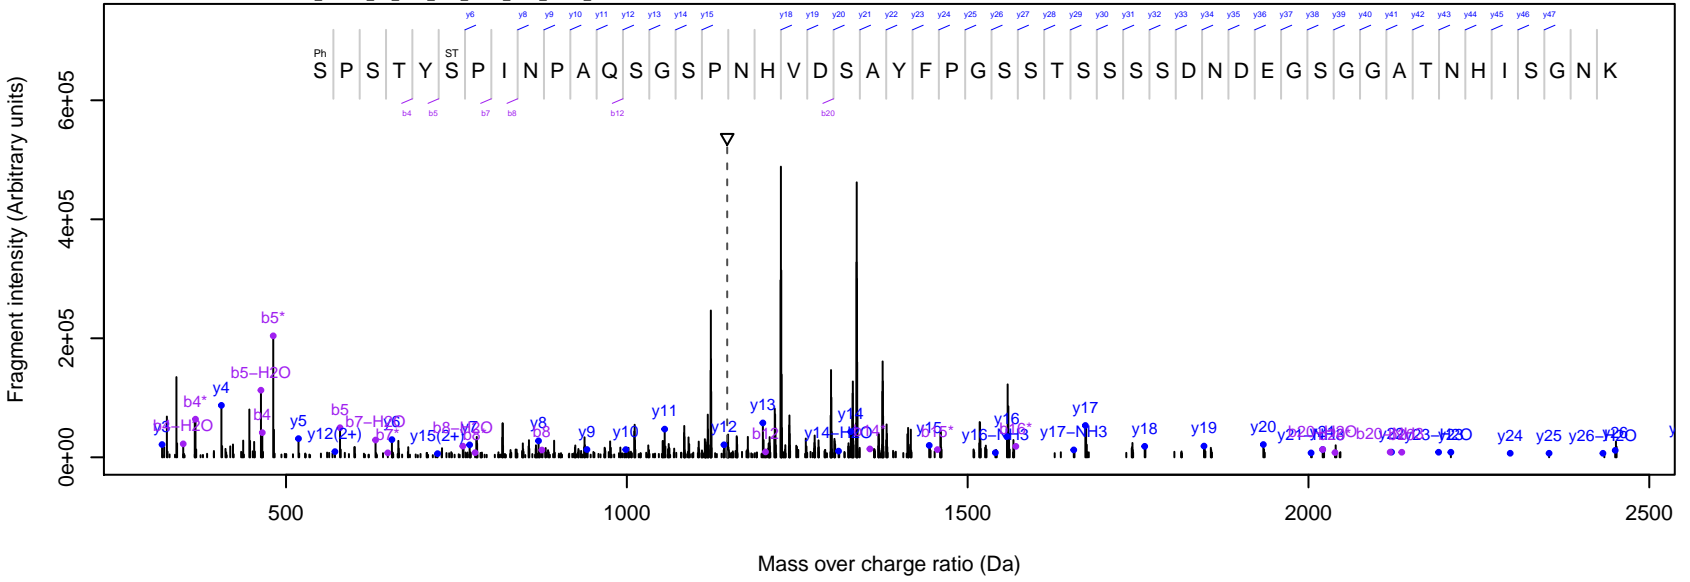

MTGLVDEAIDTKS(Phospho (STY))LLDASEEAIAIKK-3+

Source : QE3\_201126\_FR\_TIOx\_hum\_tissue\_Urea\_RNAB\_H Scan : 48544

Andromeda score : 240.86

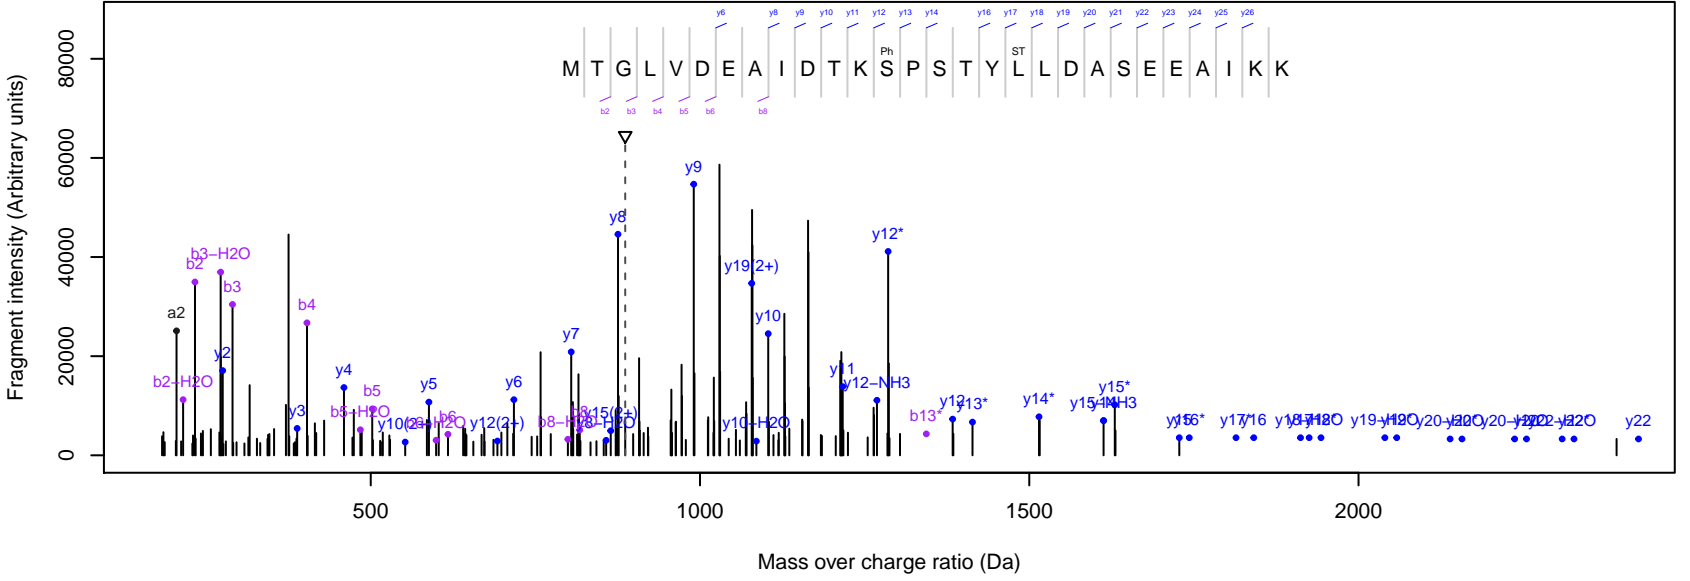

S(Phospho (STY))RDDLYDQDSDRDFPR-3+

Source : QE3\_201126\_FR\_TIOx\_hum\_tissue\_Urea\_RNAB\_B Scan : 20370

Andromeda score : 240.71

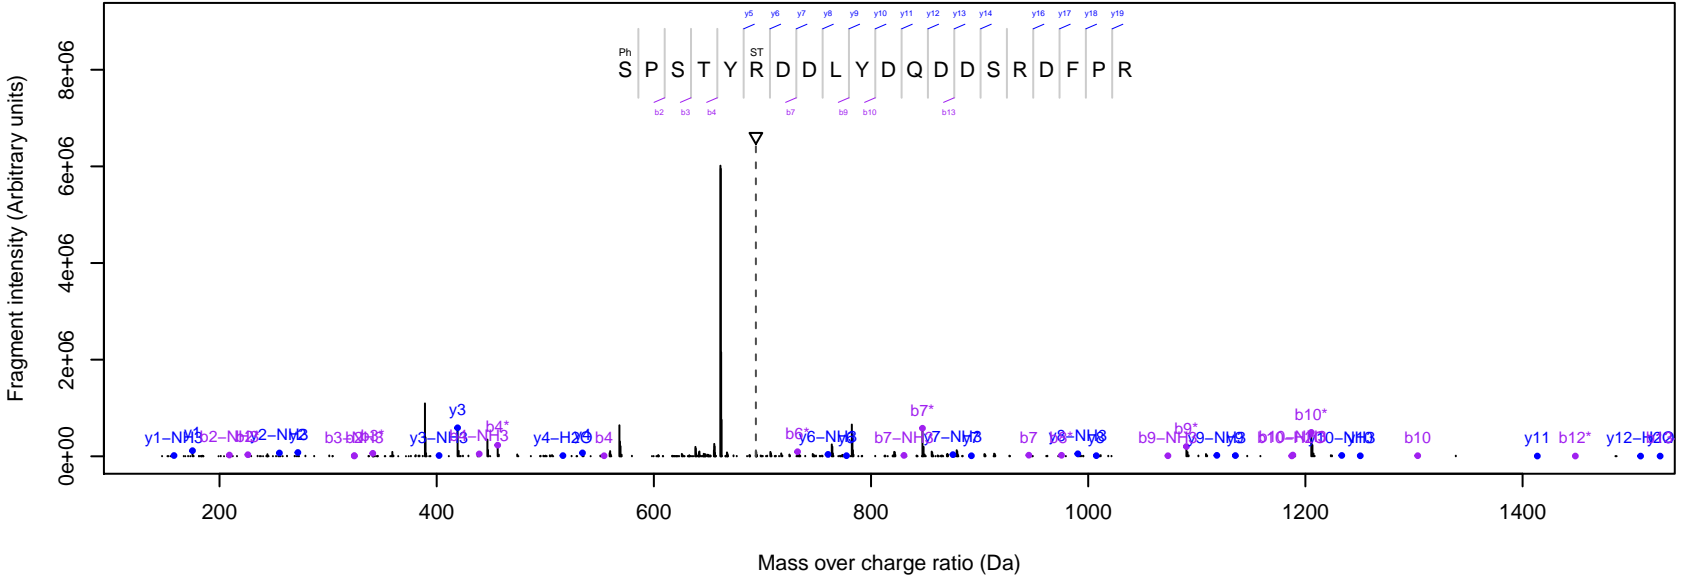

(Acetyl (Protein N-term))S(Phospho (STY))DLEDDETPQLSAHALAALQEFYAEQK-3+

Source : QE3\_201126\_FR\_TIOx\_hum\_tissue\_Urea\_RNAB\_H Scan : 62137

Andromeda score : 240.55

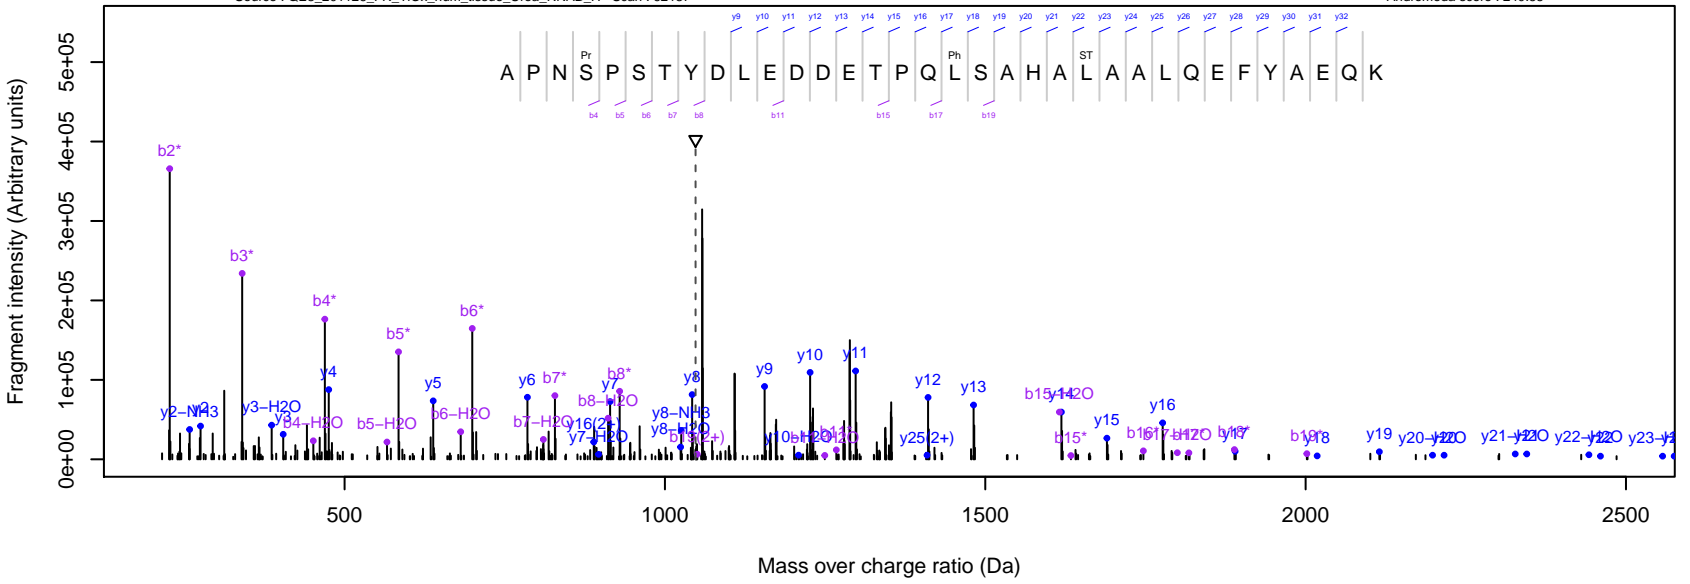

FPGDQVVNGAGPELSTGSPGSPSTYPTLDIDQSIQLNR-3+

Source : QE3\_201126\_FR\_TIOx\_hum\_tissue\_Urea\_RNAB\_B Scan : 58604

Andromeda score : 240.41

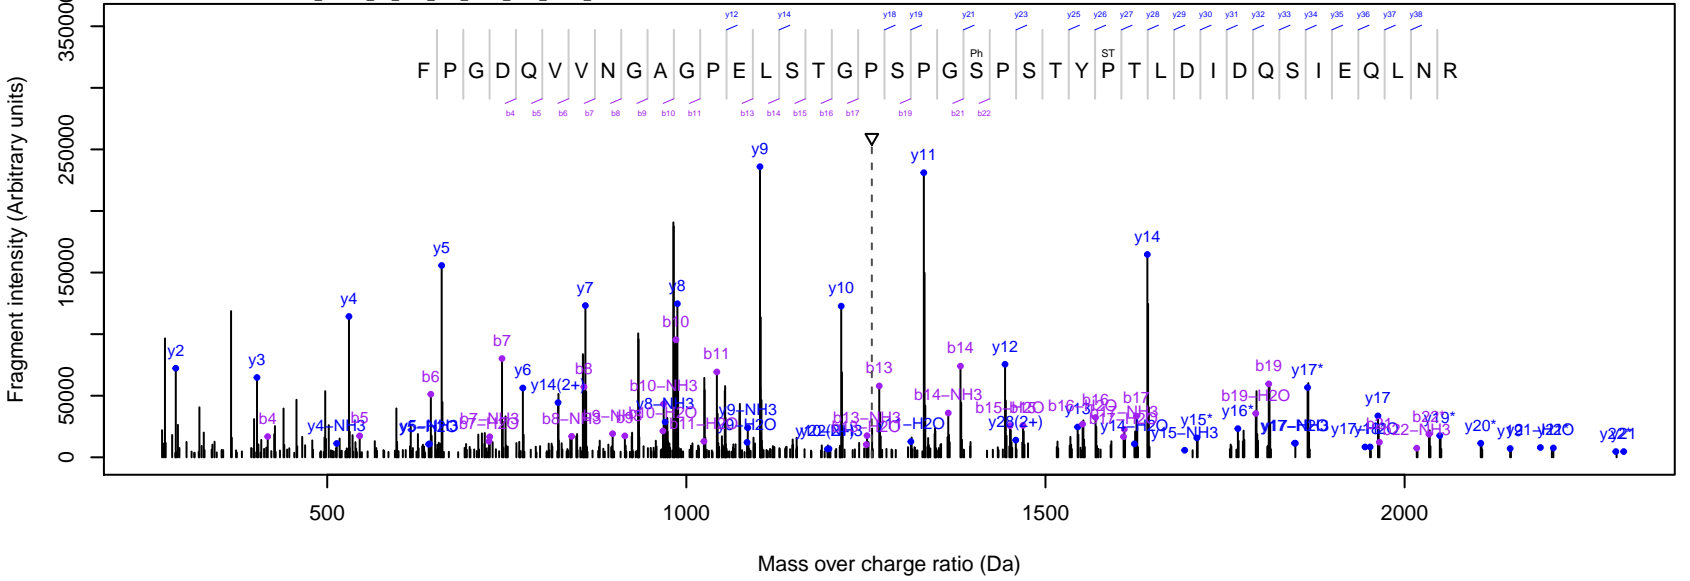

EGHSLEMENLVENGADSPSTYDEDDNSFLK-3+

Source : QE3\_201126\_FR\_TIOx\_hum\_tissue\_Urea\_RNAB\_H Scan : 39720

Andromeda score : 240.33

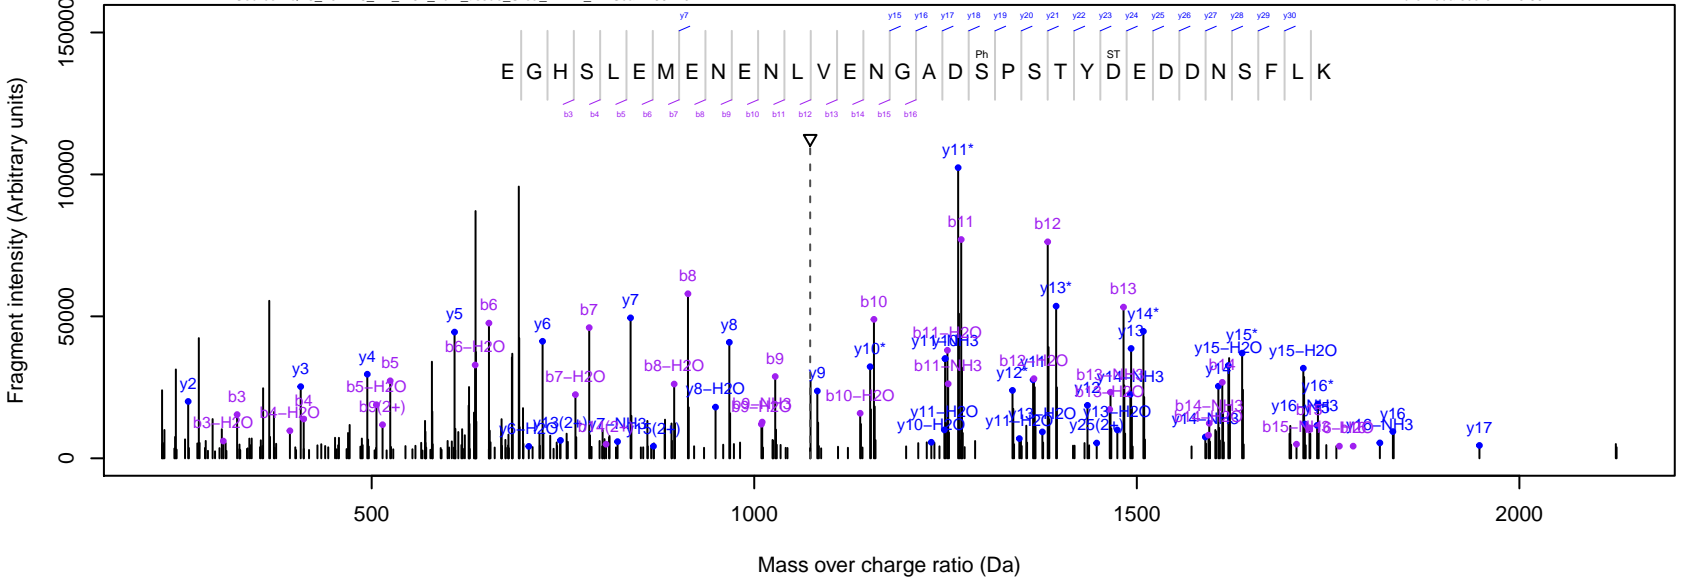

GTGSGGQLQLDCS(Phospho (STY))SS(Phospho (STY))DDEGAAQNSTKPSATK-3+

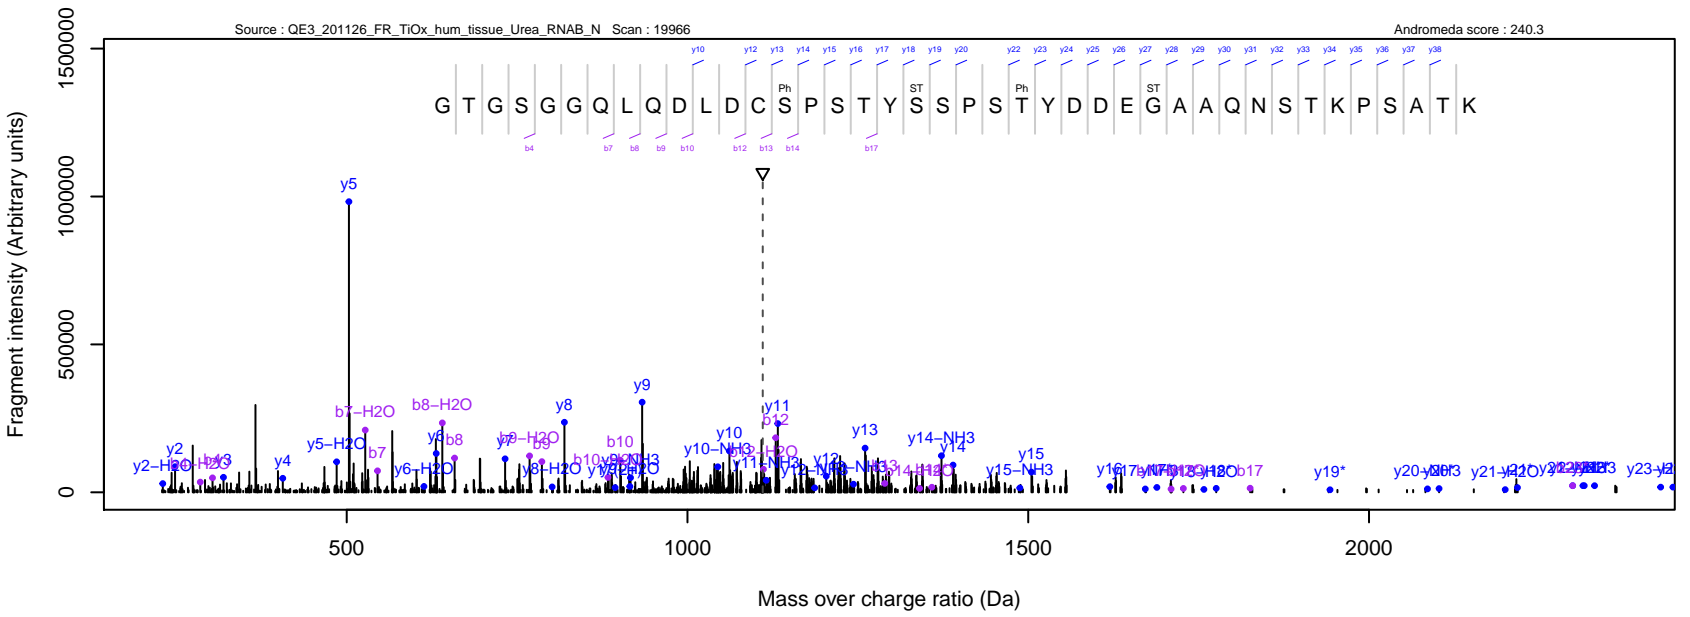

QSNASS(Phospho (STY))DVEVEEKETSVSKEEDTHEEK-4+

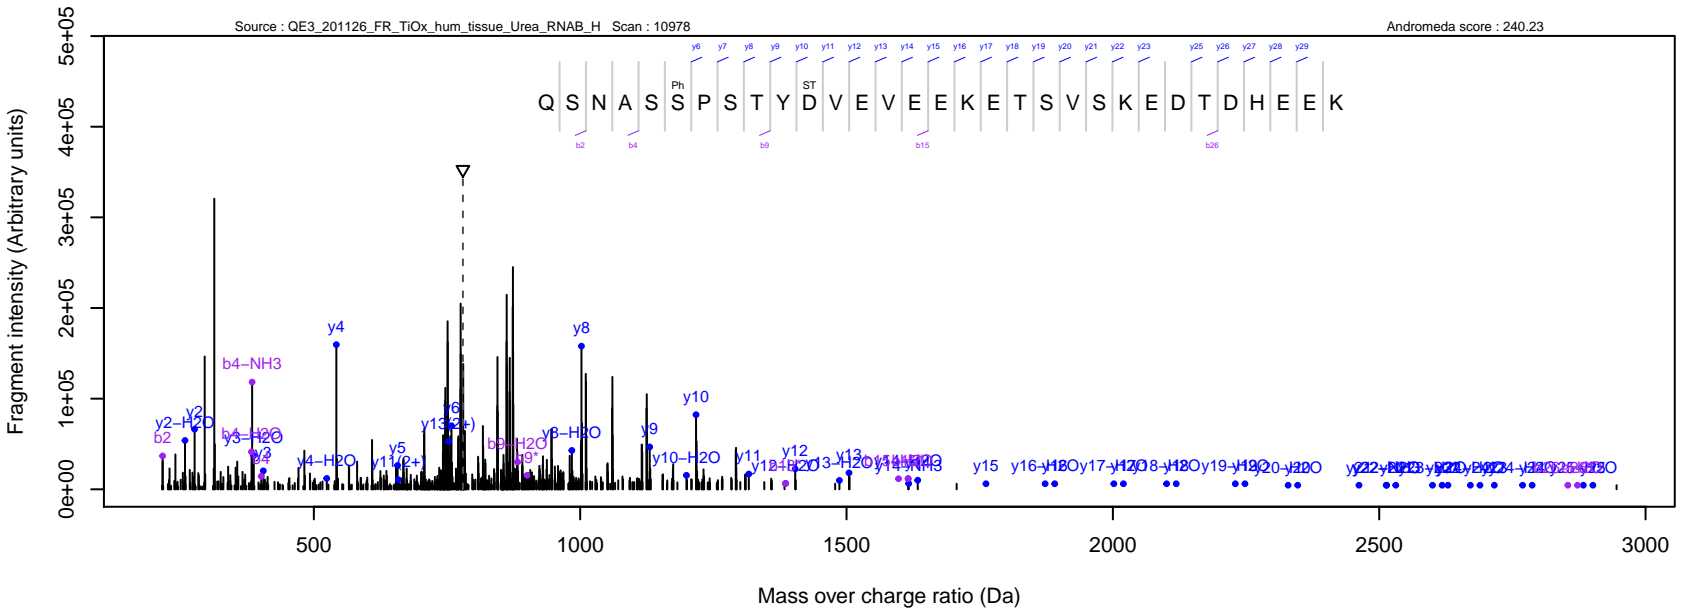

GEALSALDS(Phospho (STY))KANNLSSLSK-3+

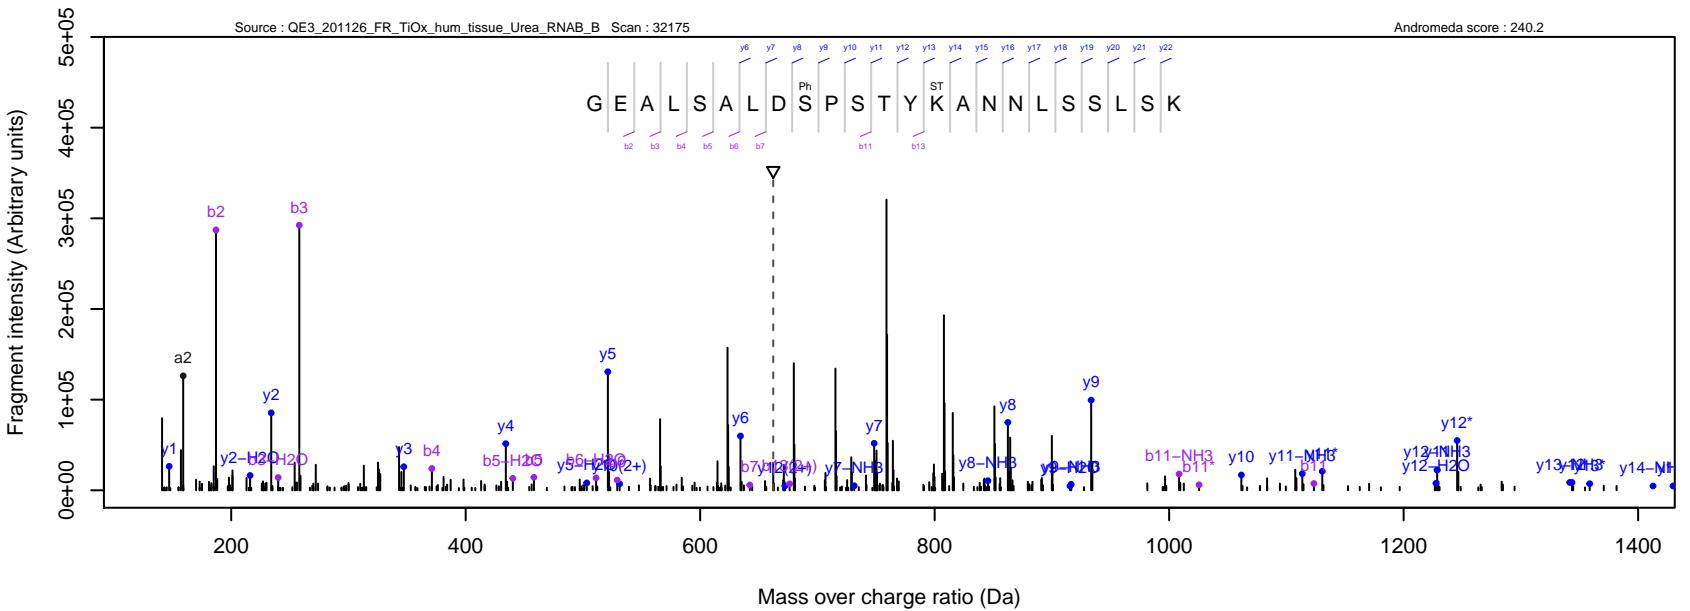



GGM(Oxidation (M))GSGGLATGIAGGLAGM(Oxidation (M))GGIQNEKETM(Oxidation (M))QS(Phospho (STY))LNDR-3+

Source : QE3\_201126\_FR\_TIOx\_hum\_tissue\_Urea\_RNAB\_H Scan : 32221

Andromeda score : 240.06

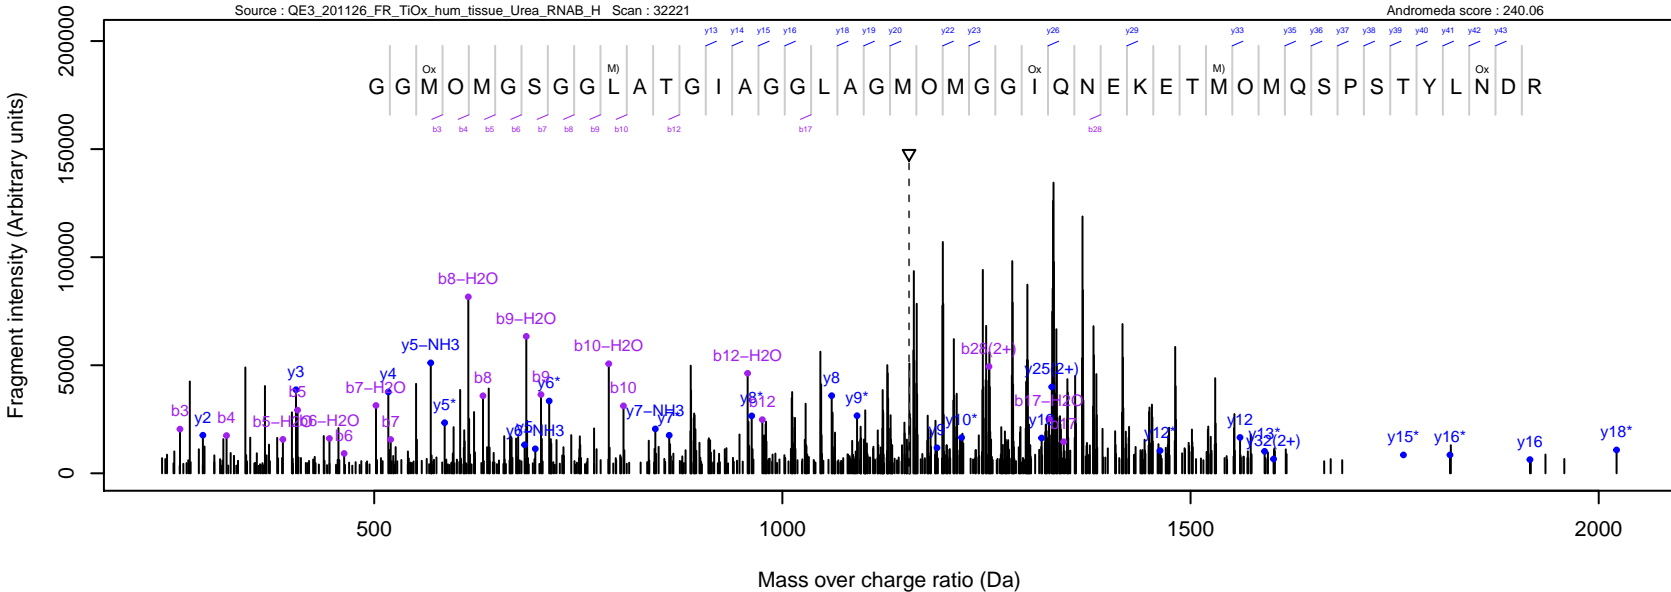

EGSGRFS(Phospho (STY))LPGATCLQGEGQHLSQK-3+

Source : QE3\_201126\_FR\_TIOx\_hum\_tissue\_Urea\_RNAB\_H Scan : 27090

Andromeda score : 239.97

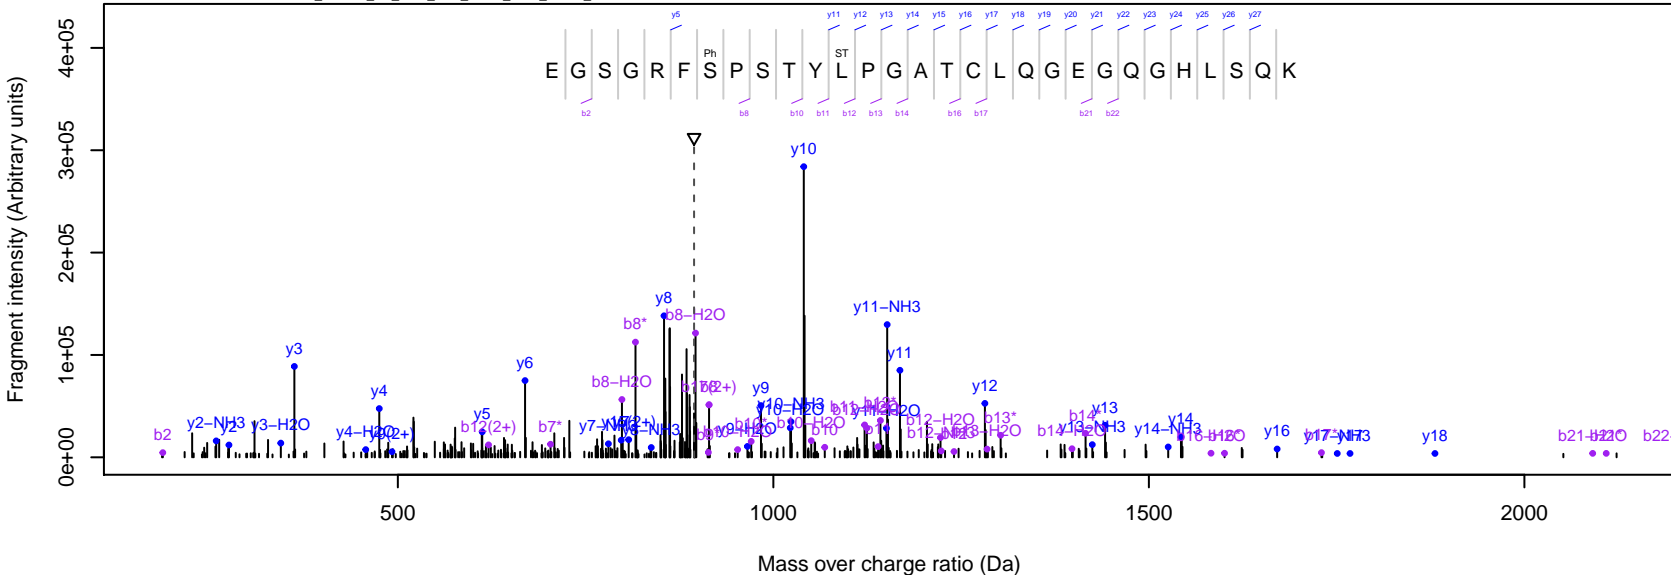

S(Phospho (STY))T(Phospho (STY))SFRGGMGSGGLATGIAGGLAGMGGIQNEKETMQSLNDR-4+

Source : QE3\_201126\_FR\_TIOx\_hum\_tissue\_Urea\_RNAB\_H Scan : 52623

Andromeda score : 239.73

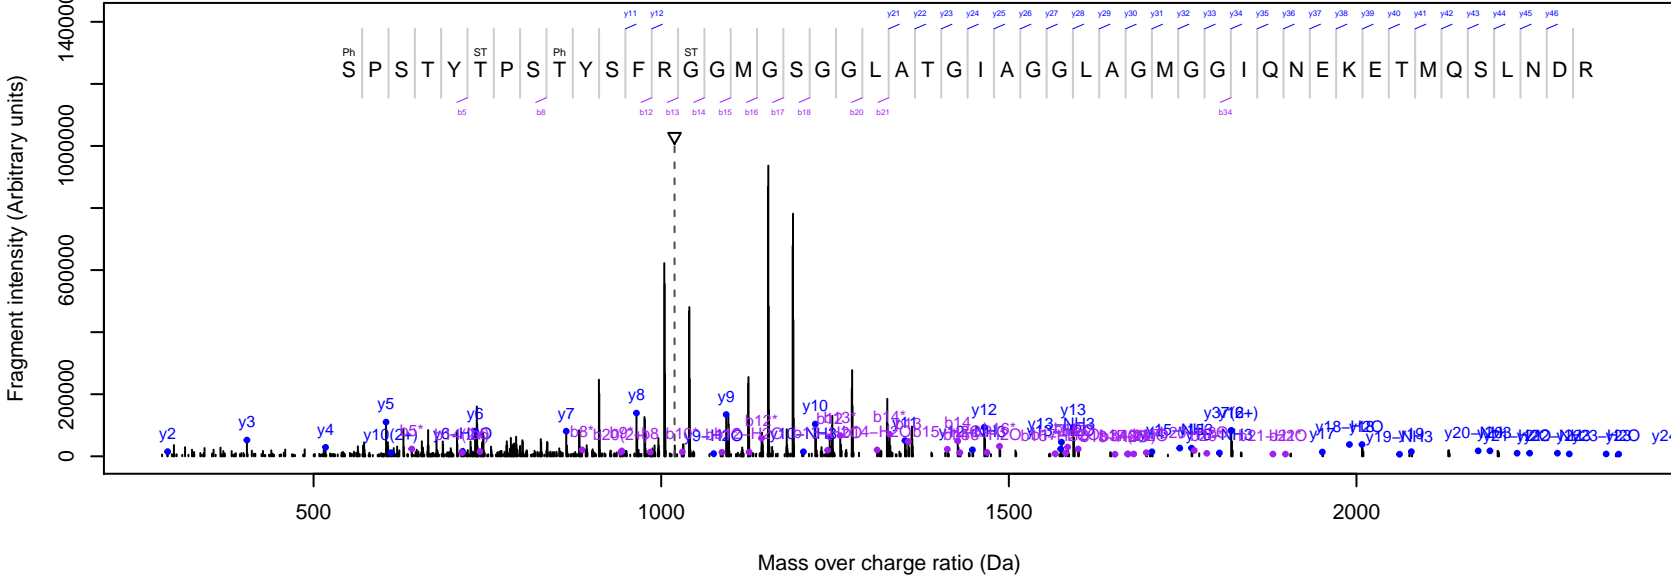

WDS(Phospho (STY))YENLSADGEVLHTQGPDGSLYAK-3+

Source : QE3\_201126\_FR\_TiOx\_hum\_tissue\_Urea\_RNAB\_H Scan : 45425

Andromeda score : 239.69

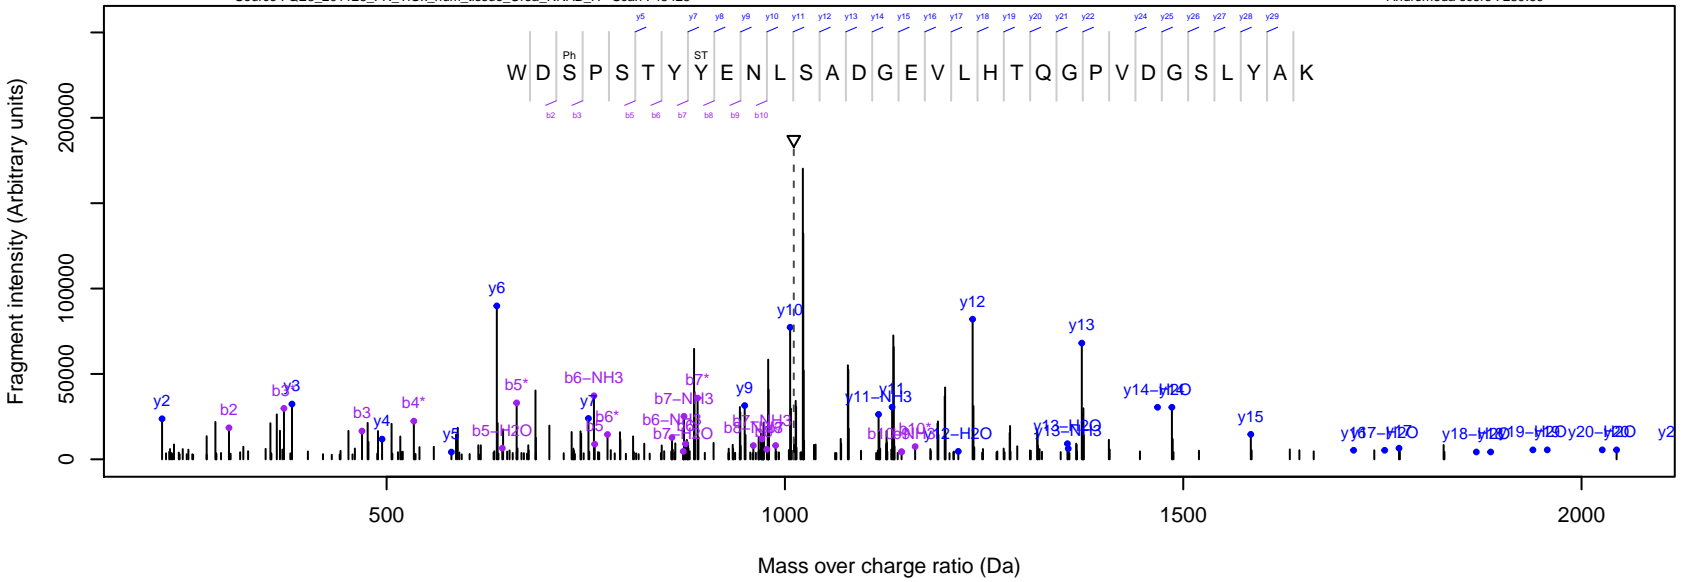

HRS(Phospho (STY))NSFSDEREFSGPSTPTGTLEFEGGEVSLLEGK-4+

Source : QE3\_201126\_FR\_TiOx\_hum\_tissue\_Urea\_RNAB\_B Scan : 35555

Andromeda score : 239.68

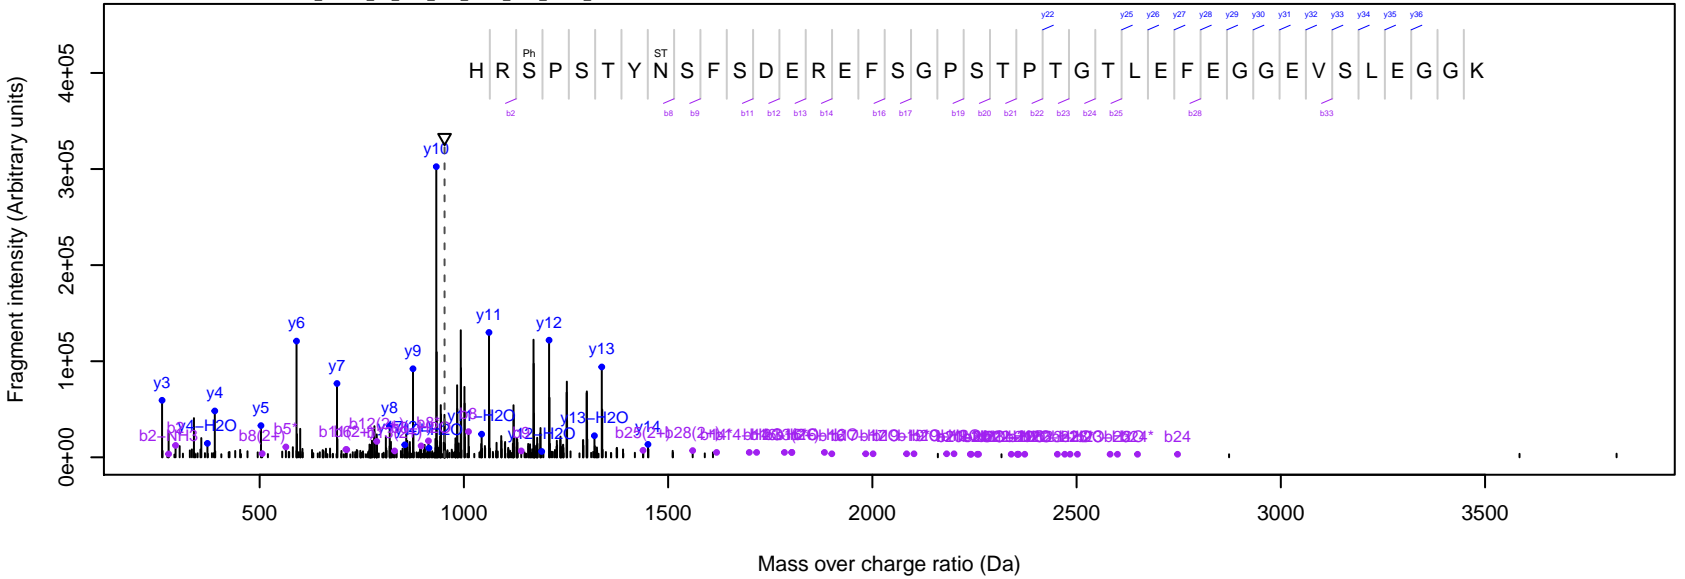

AHT(Phospho (STY))PTPGIYMRPTHSGGGGGGGGGGGGGGR-4+

Source : QE3\_201126\_FR\_TiOx\_hum\_tissue\_Urea\_RNAB\_N Scan : 10481

Andromeda score : 239.51

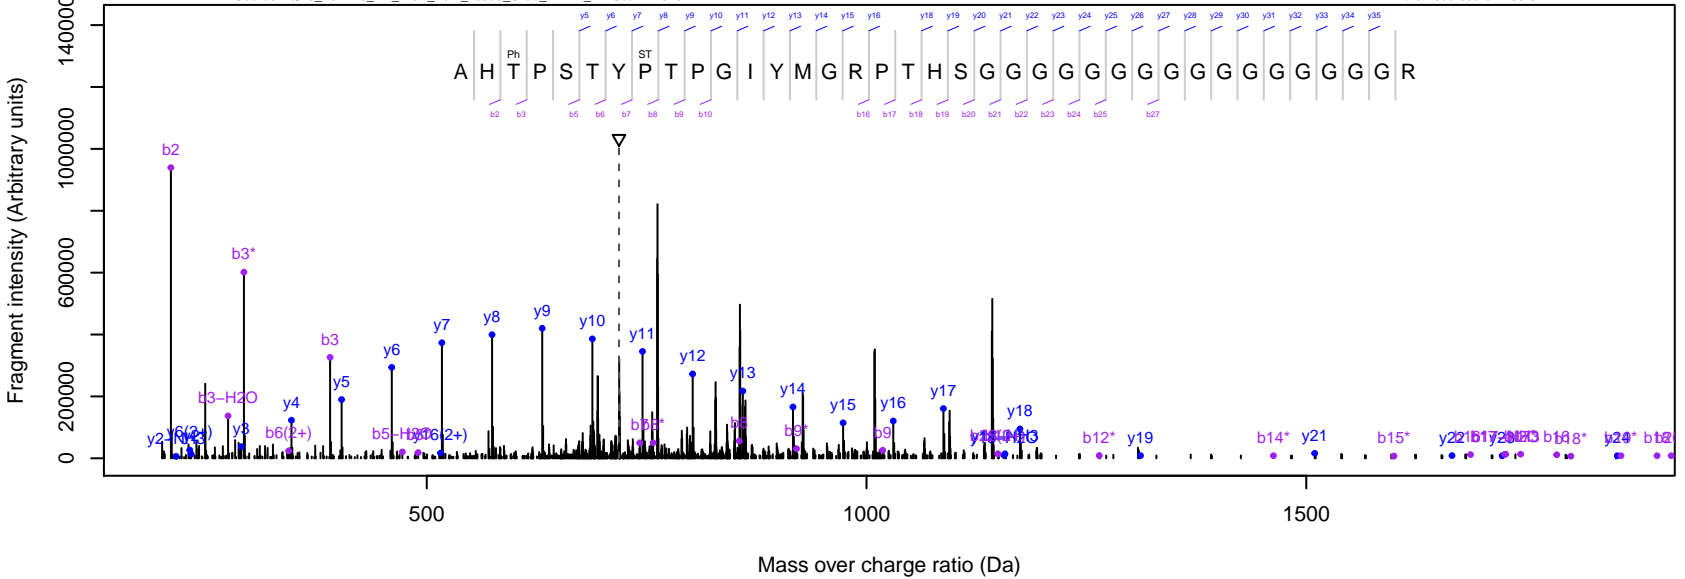

LELQGPRGS(Phospho (STY))PNAR-2+

Source : QE3\_201126\_FR\_TiOx\_hum\_tissue\_Urea\_RNAB\_N Scan : 12561

Andromeda score : 239.48

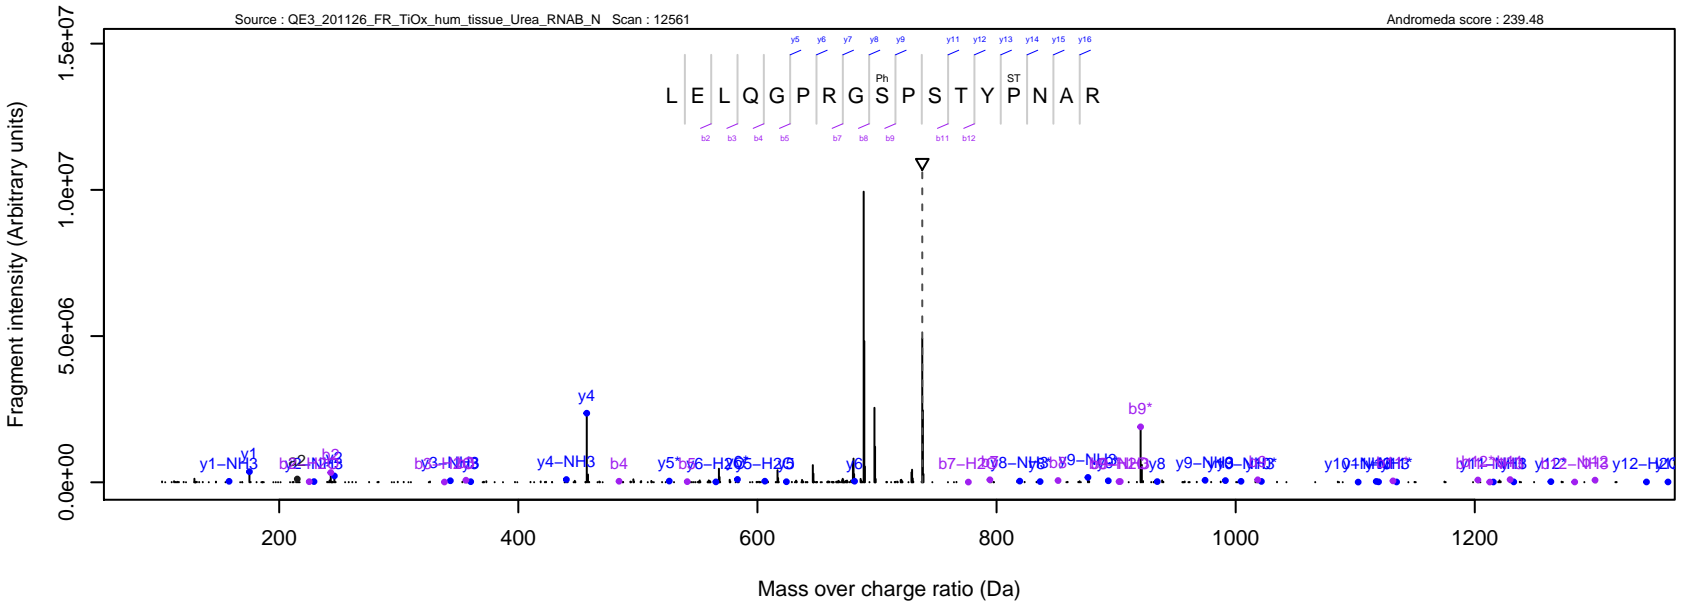

SRS(Phospho (STY))DIDVNAASAK-2+

Source : QE3\_201126\_FR\_TiOx\_hum\_tissue\_Urea\_RNAB\_H Scan : 10341

Andromeda score : 239.43

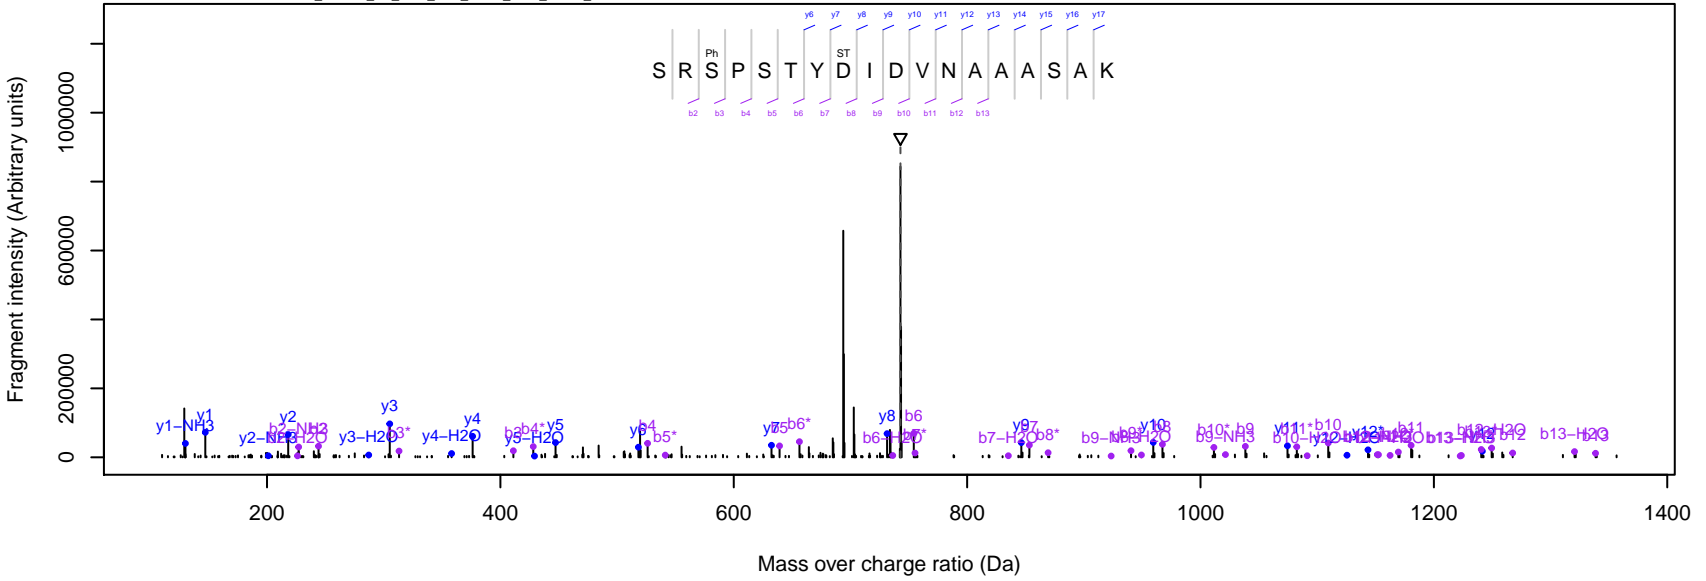

SSS(Phospho (STY))PGKQAVSSLNSSHRS-3+

Source : QE3\_201126\_FR\_TiOx\_hum\_tissue\_Urea\_RNAB\_H Scan : 7391

Andromeda score : 238.89

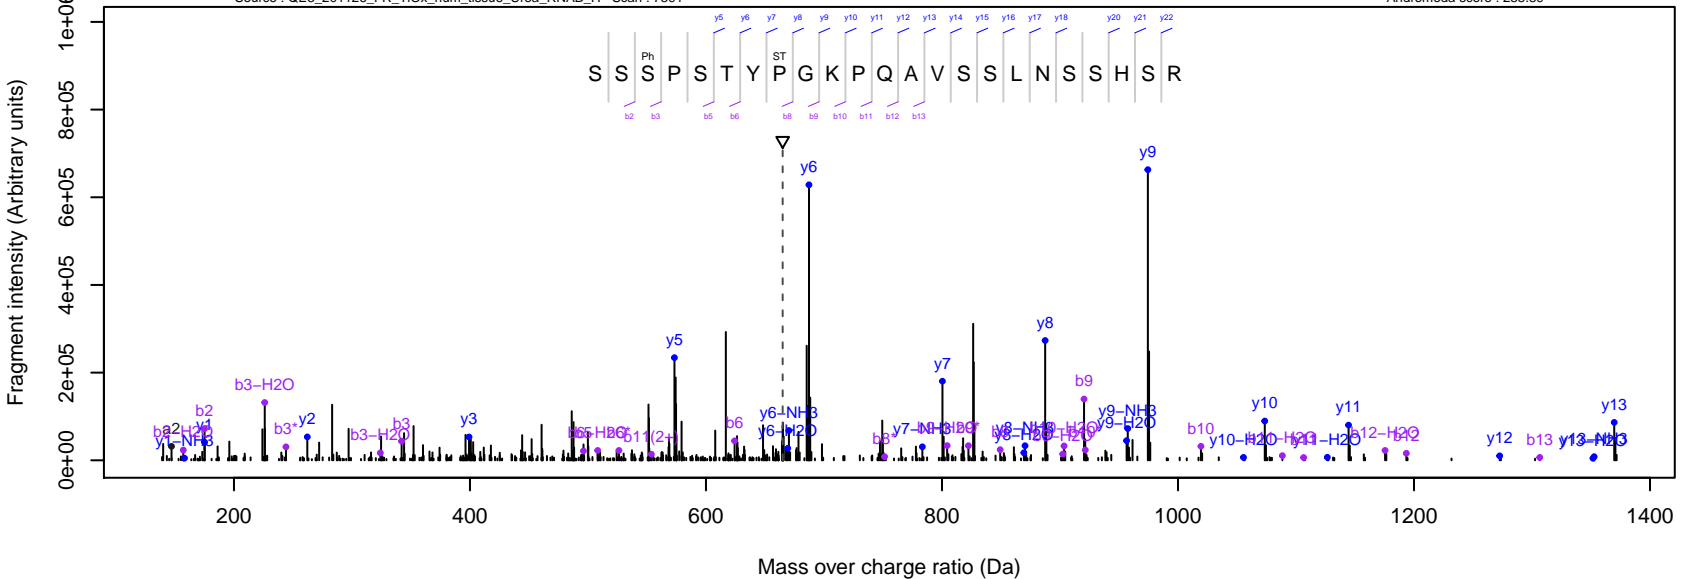

S(Phospho (STY))FTAADSKDEEVK VAPR-3+

Source : QE3\_201126\_FR\_TiOx\_hum\_tissue\_Urea\_RNAB\_H Scan : 14422

Andromeda score : 238.79

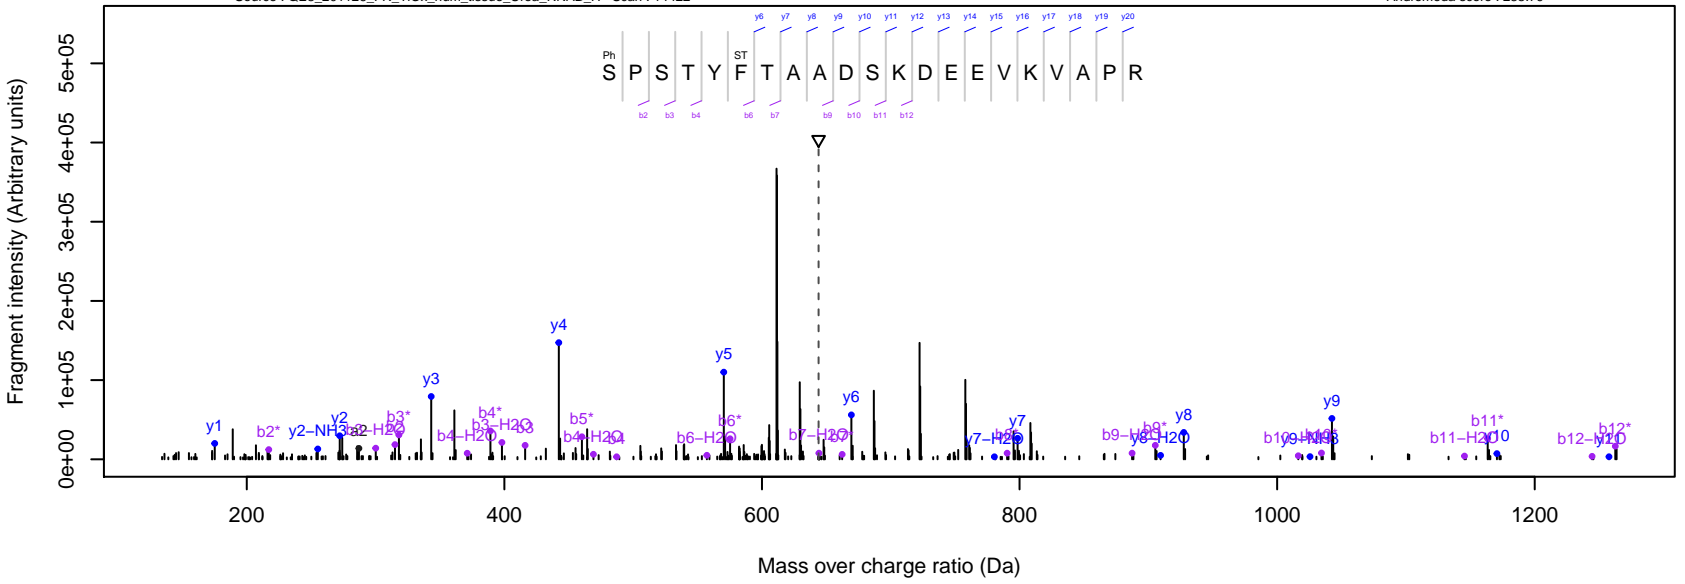

WRS(Phospho (STY))LQLAEER-2+

Source : QE3\_201126\_FR\_TiOx\_hum\_tissue\_Urea\_RNAB\_B Scan : 27941

Andromeda score : 238.65

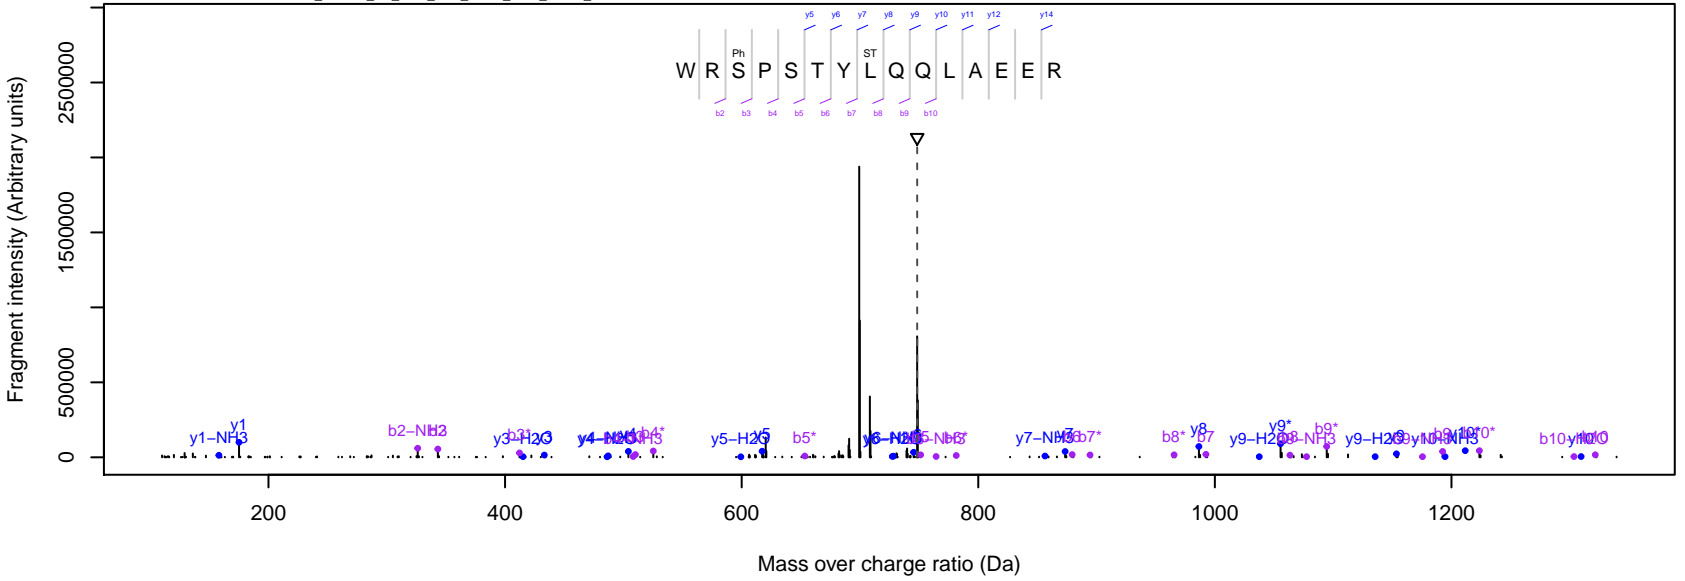

GGVTGS(Phospho (STY))PEASISGSK-2+

Source : QE3\_201126\_FR\_TiOx\_hum\_tissue\_Urea\_RNAB\_N Scan : 15021

Andromeda score : 238.64

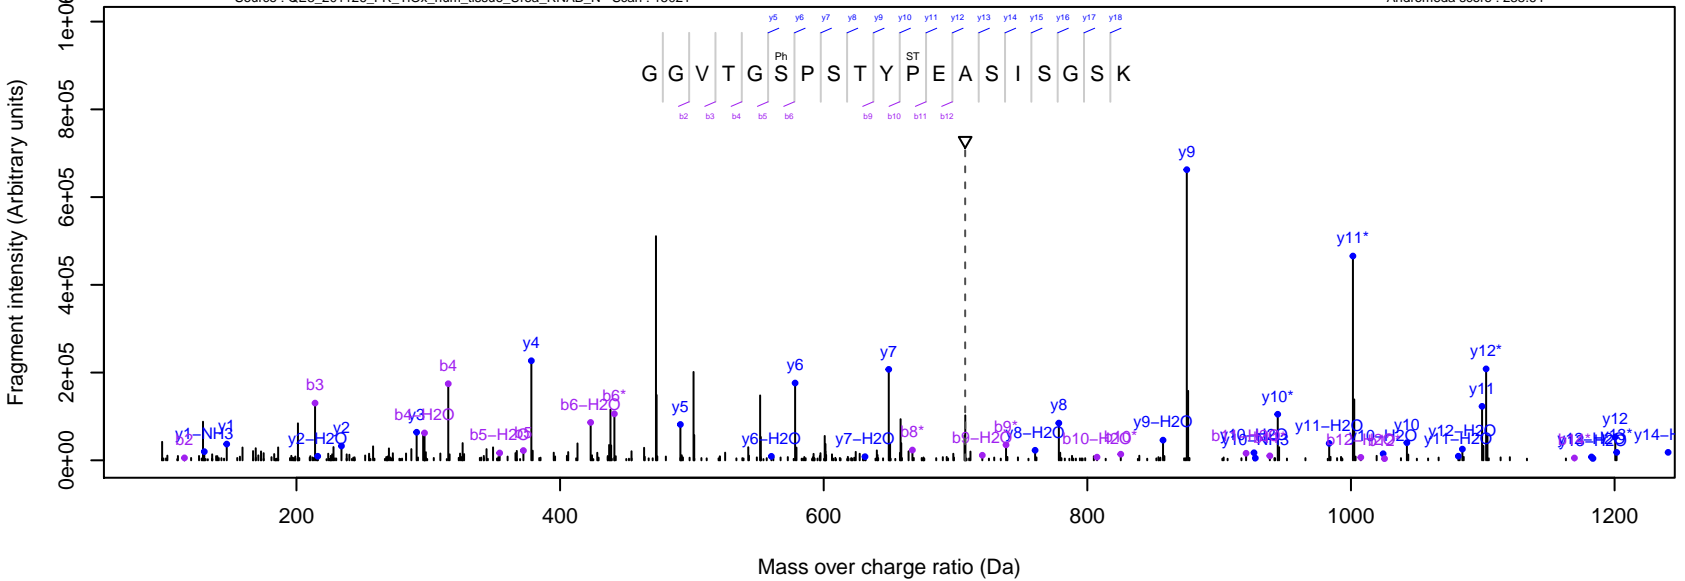

AKAGLESGAEPGDGDS(Phospho (STY))DTTK-2+

Source : QE3\_201126\_FR\_TIOx\_hum\_tissue\_Urea\_RNAB\_N Scan : 8791

Andromeda score : 238.63

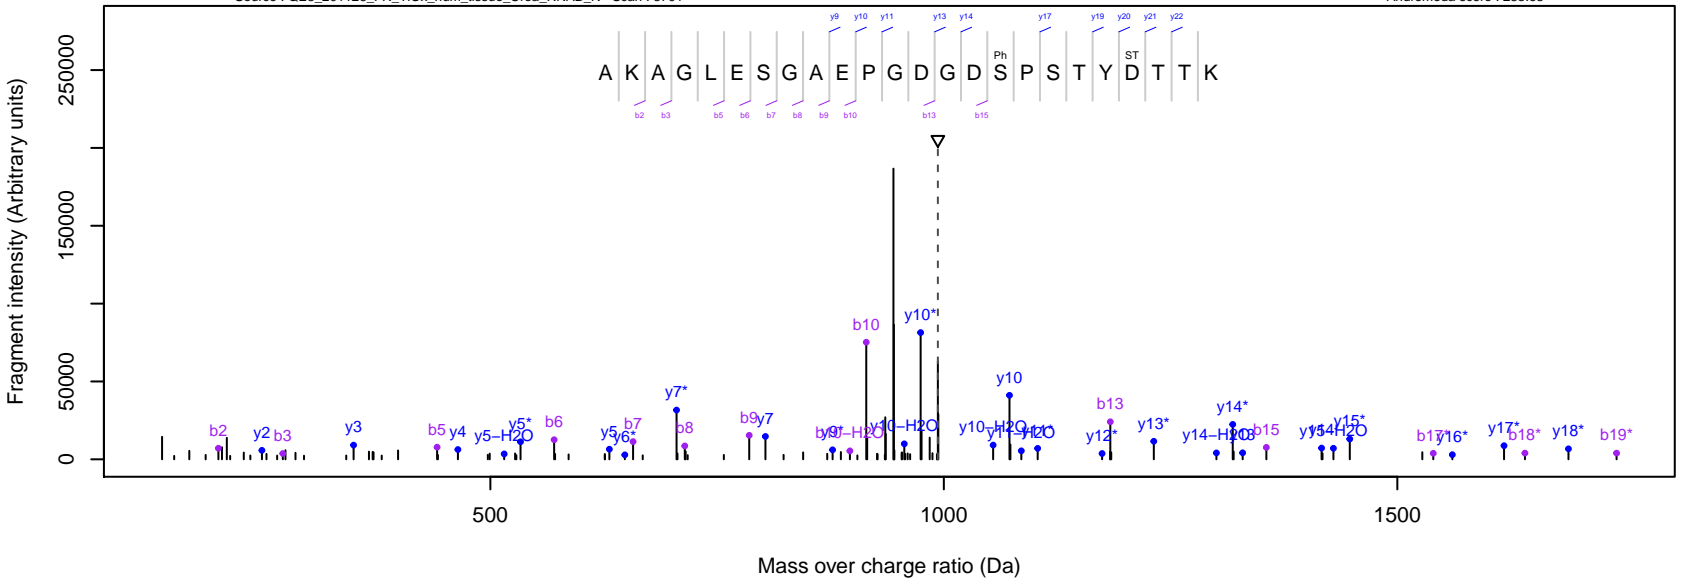

GKDSL(Phospho (STY))DDGVDLK-2+

Source : QE3\_201126\_FR\_TIOx\_hum\_tissue\_Urea\_RNAB\_N Scan : 17611

Andromeda score : 238.51

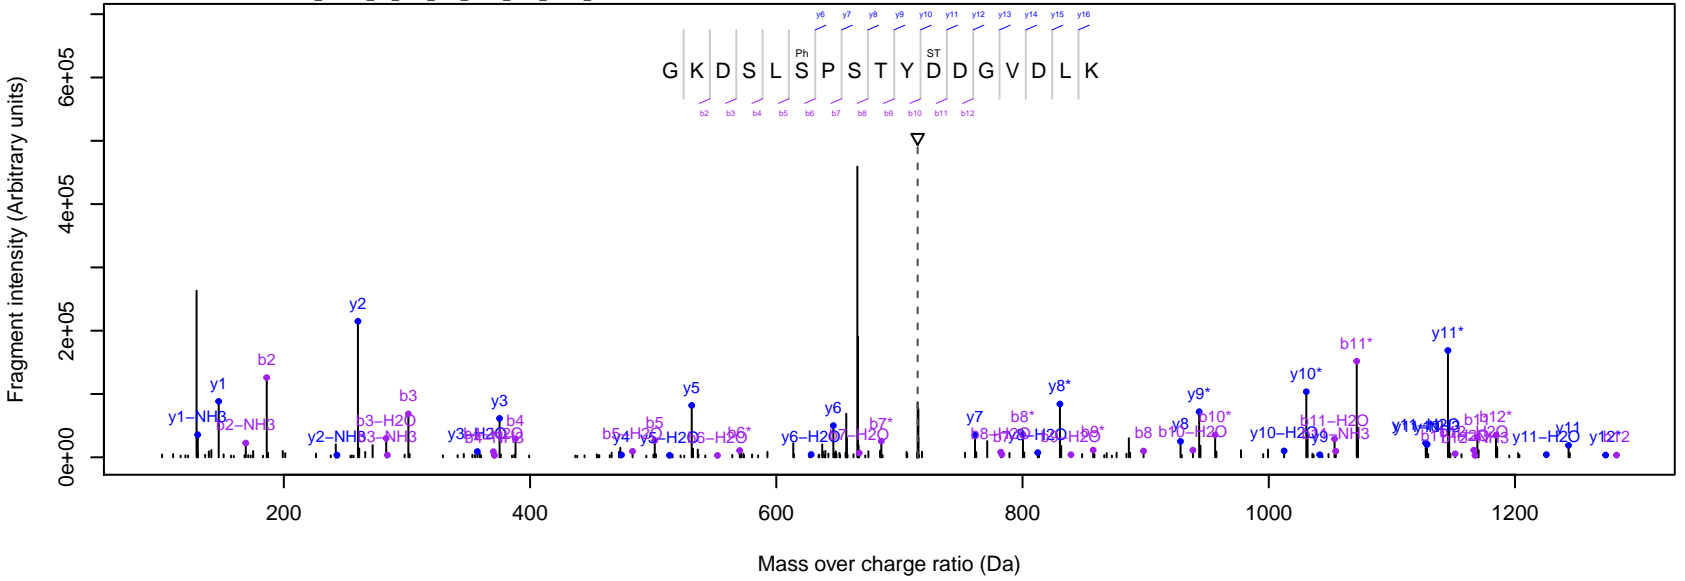

DIIRQPS(Phospho (STY))EEEEIK-2+

Source : QE3\_201126\_FR\_TIOx\_hum\_tissue\_Urea\_RNAB\_B Scan : 28054

Andromeda score : 238.37

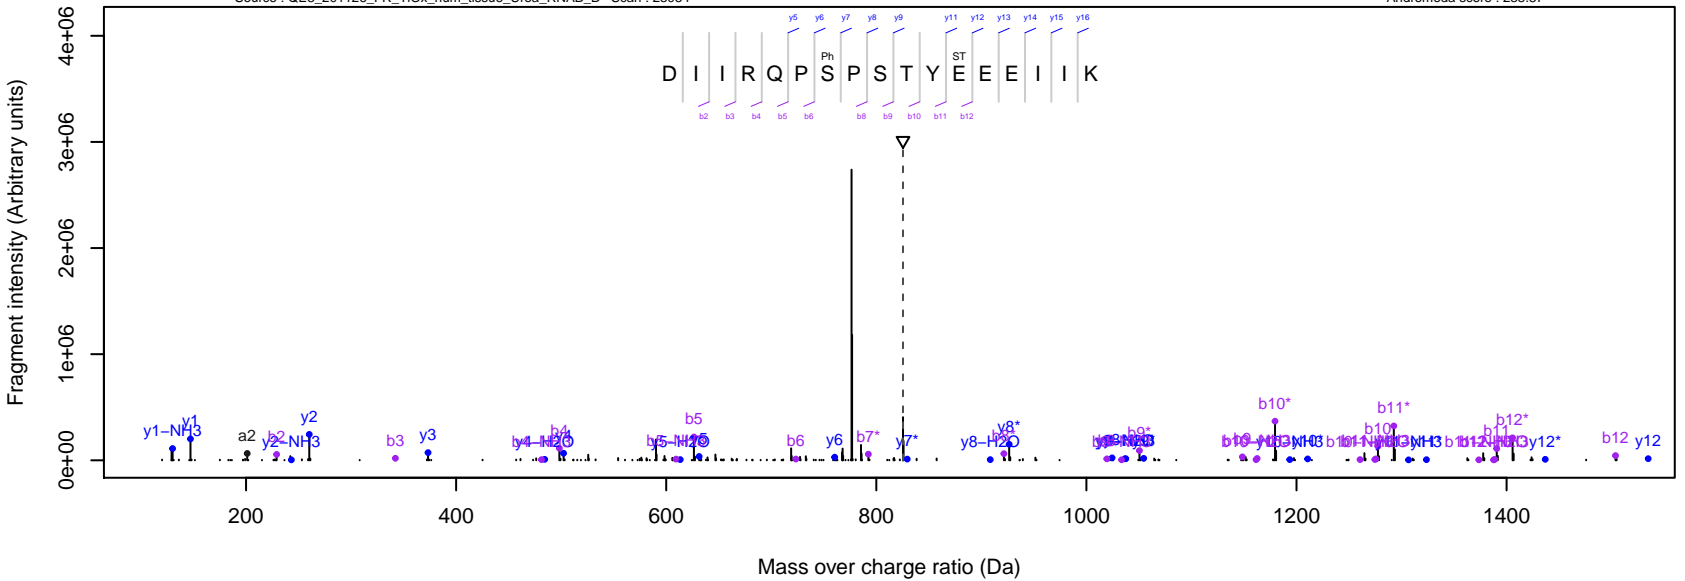

YTLLENKEEGLS(Phospho (STY))DTEADAVSQGLPDPTTNP SAGK-3+

Source : QE3\_201126\_FR\_TiOx\_hum\_tissue\_Urea\_RNAB\_N Scan : 36923

Andromeda score : 238.09

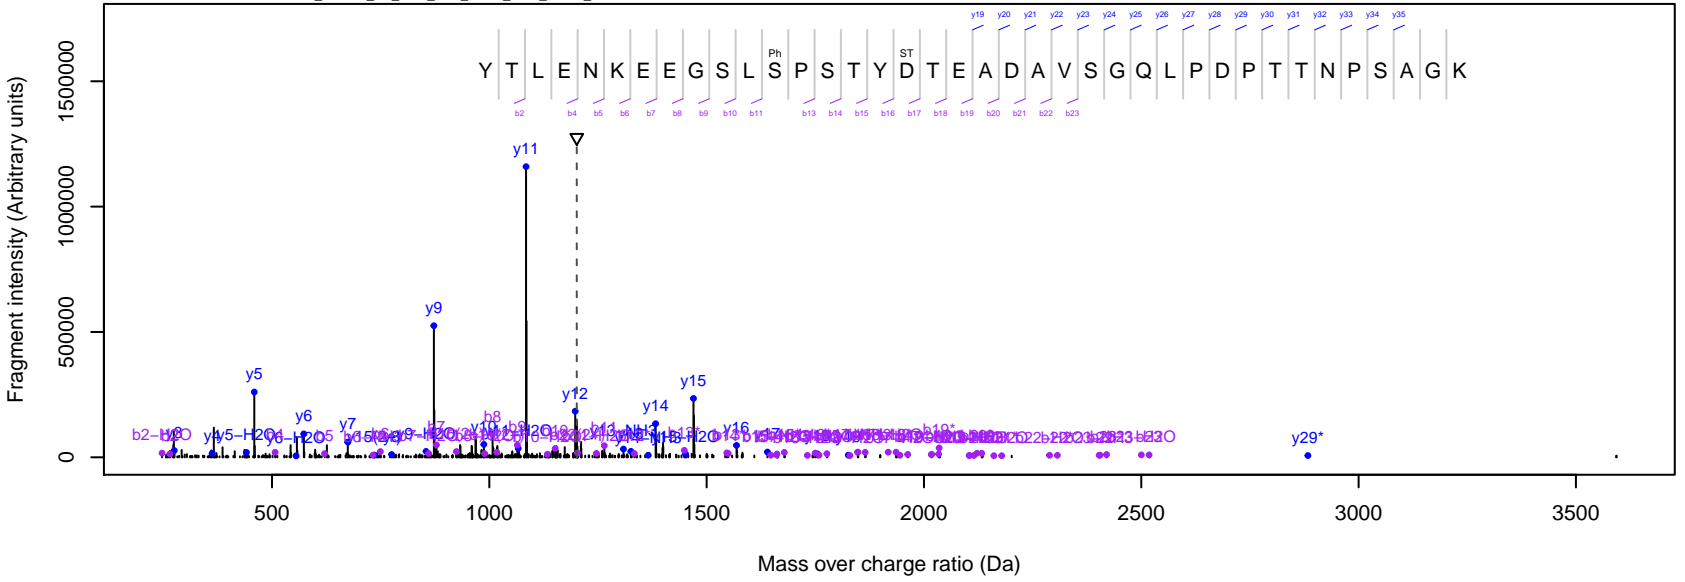

AEEKS(Phospho (STY))PISINVK-2+

Source : QE3\_201126\_FR\_TiOx\_hum\_tissue\_Urea\_RNAB\_B Scan : 14957

Andromeda score : 238.07

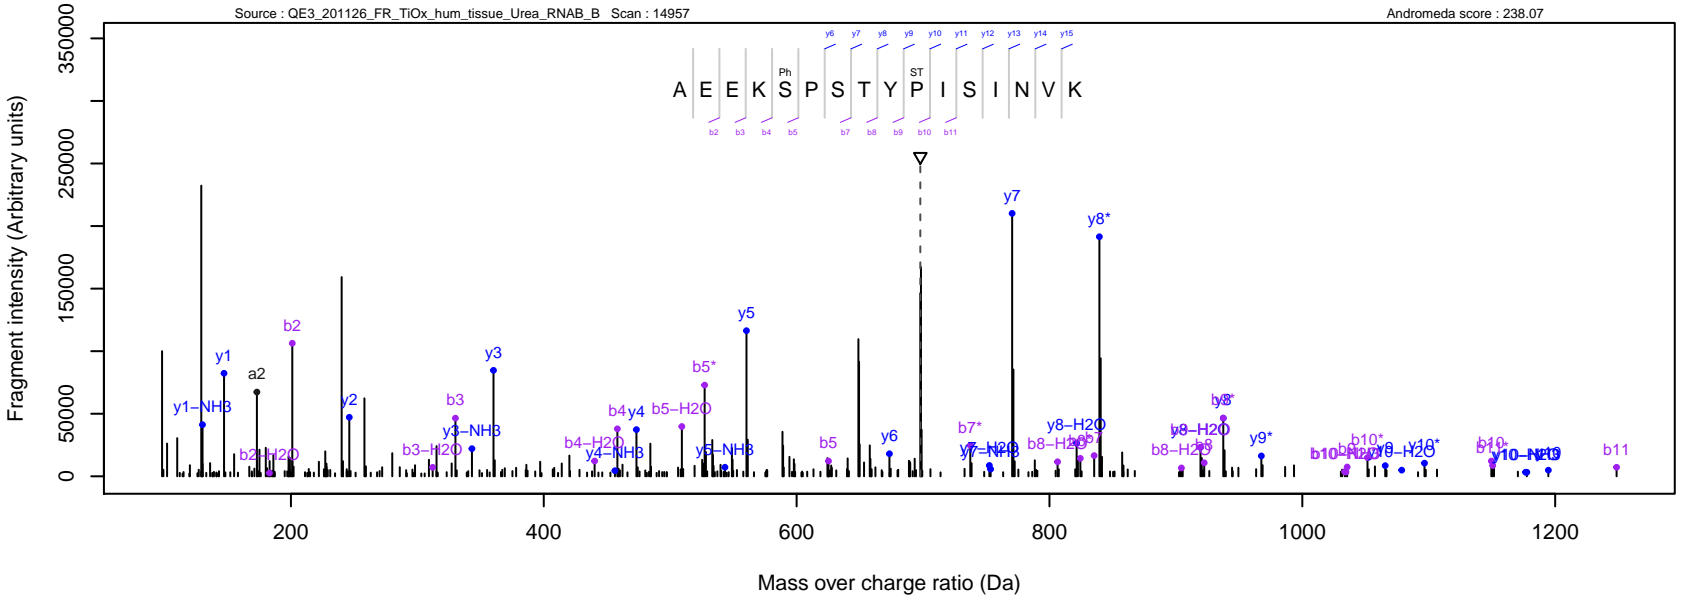

SES(Phospho (STY))PKEPEQLR-3+

Source : QE3\_201126\_FR\_TiOx\_hum\_tissue\_Urea\_RNAB\_N Scan : 9184

Andromeda score : 238.03

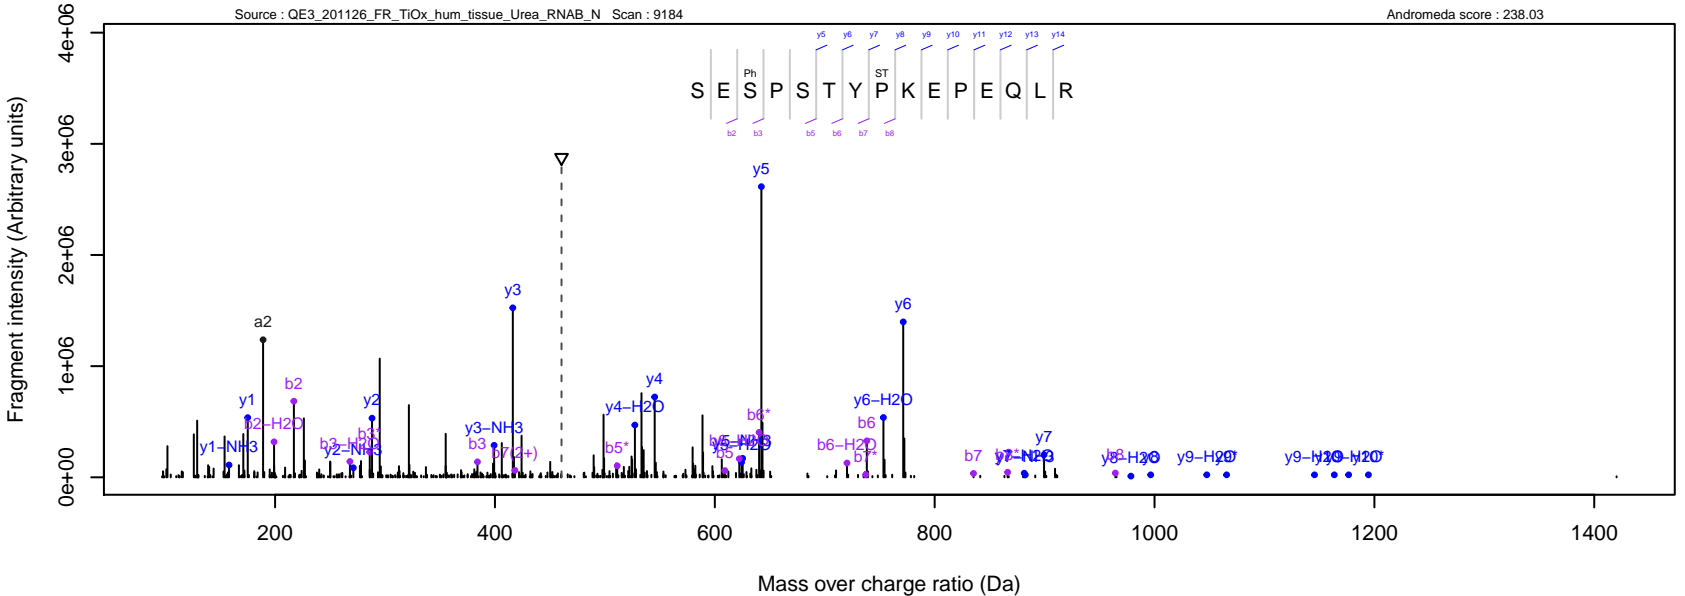

DGQDAIQS(Phospho (STY))PEKESK-2+

Source : QE3\_201126\_FR\_TiOx\_hum\_tissue\_Urea\_RNAB\_H Scan : 8028

Andromeda score : 237.89

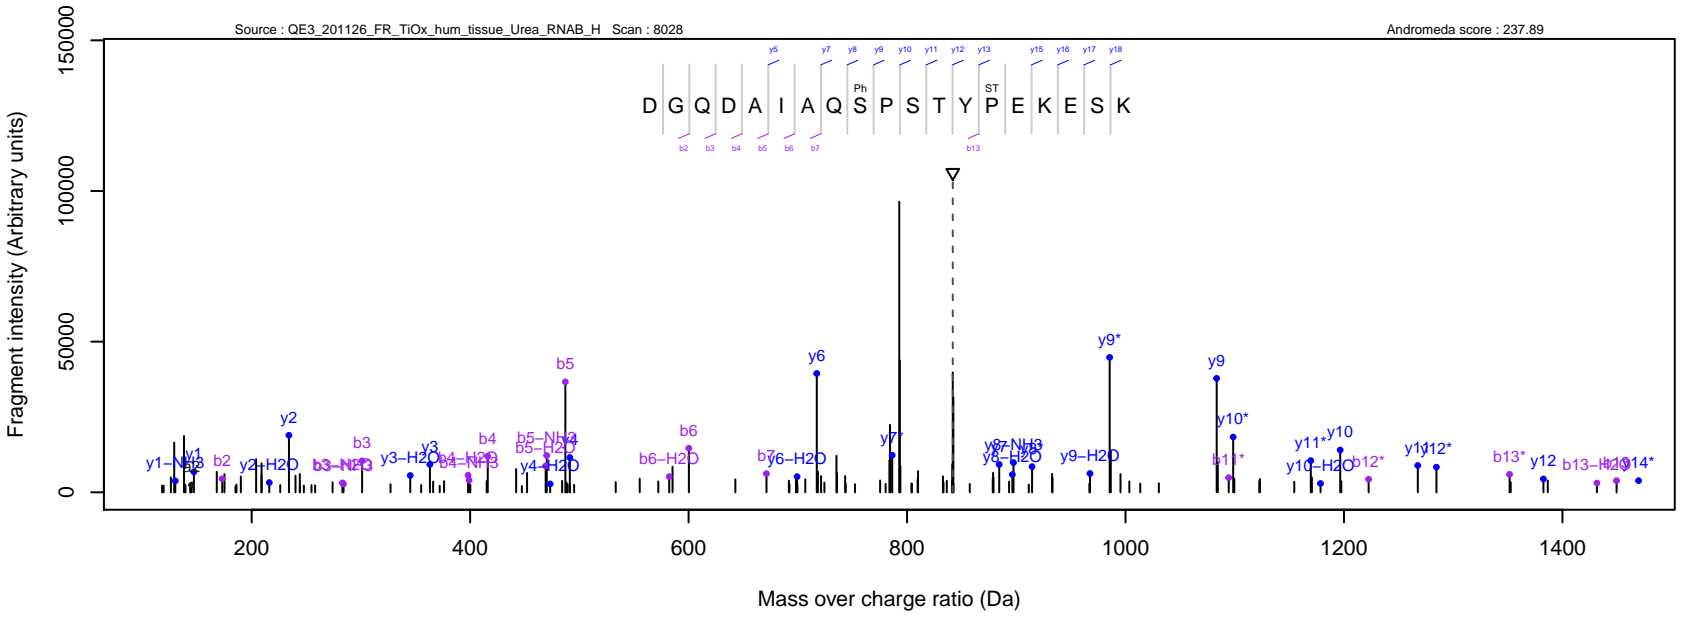

ARVDHGAEITQS(Phospho (STY))PGR-3+

Source : QE3\_201126\_FR\_TiOx\_hum\_tissue\_Urea\_RNAB\_N Scan : 11743

Andromeda score : 237.76

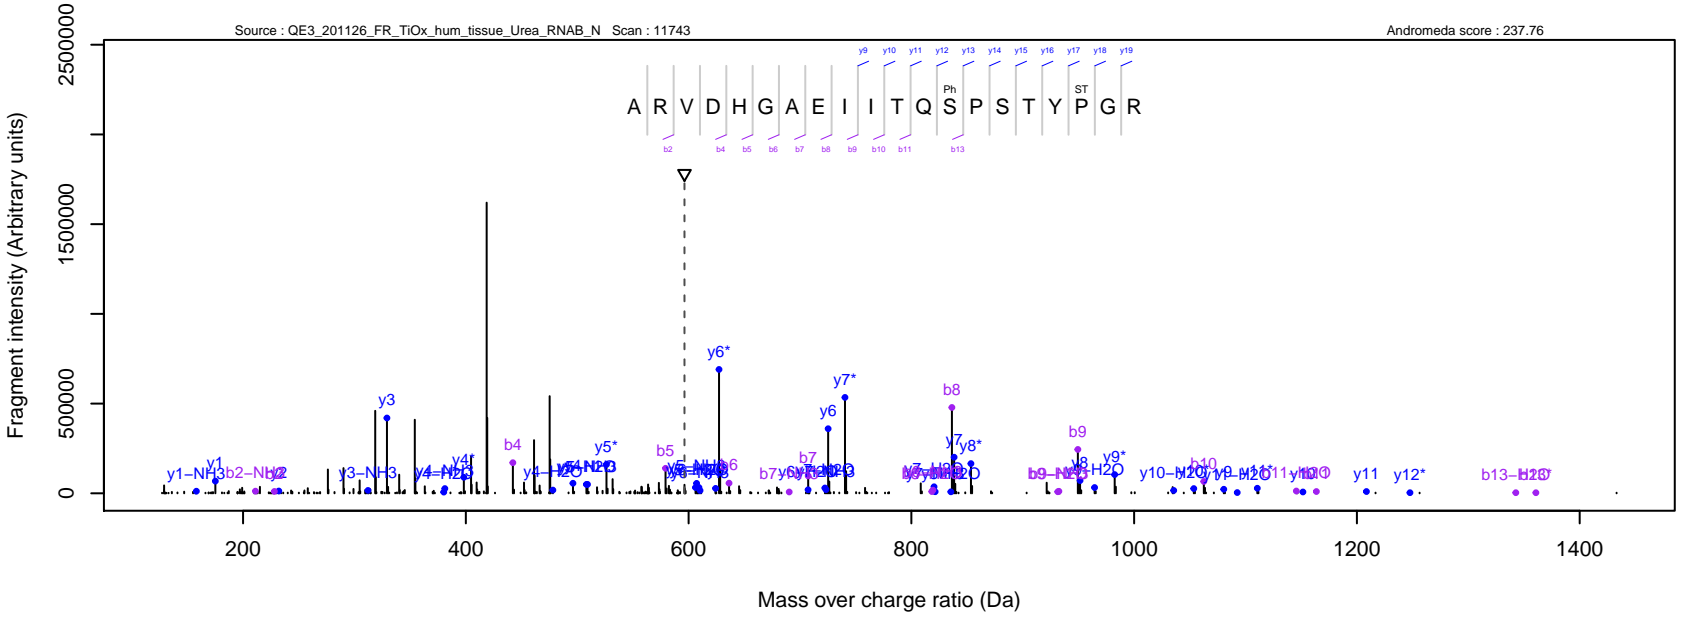

SQSSHS(Phospho (STY))YDDSTLPLIDR-2+

Source : QE3\_201126\_FR\_TiOx\_hum\_tissue\_Urea\_RNAB\_B Scan : 28889

Andromeda score : 237.76

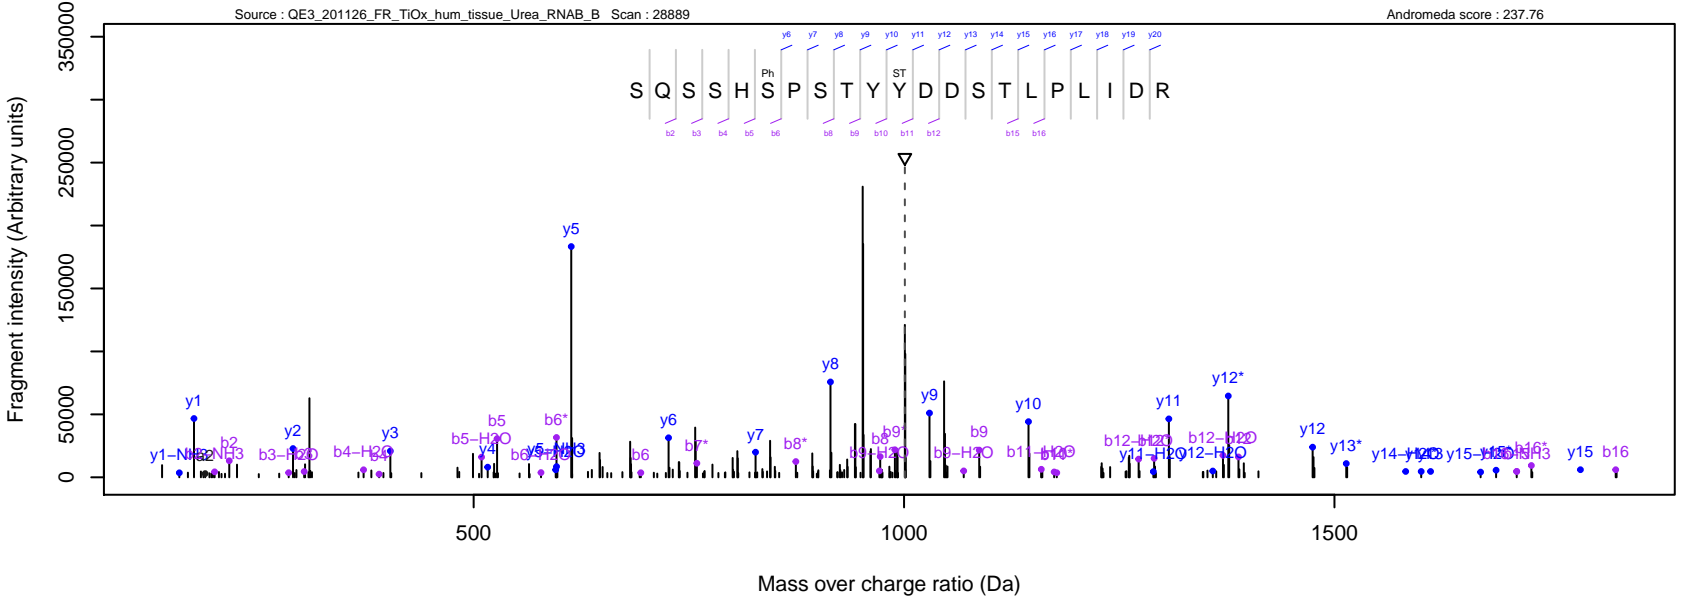

IADQCPSS(Phospho (STY))LAIQENANALAR-2+

Source : QE3\_201126\_FR\_TIOx\_hum\_tissue\_Urea\_RNAB\_B Scan : 35111

Andromeda score : 237.73

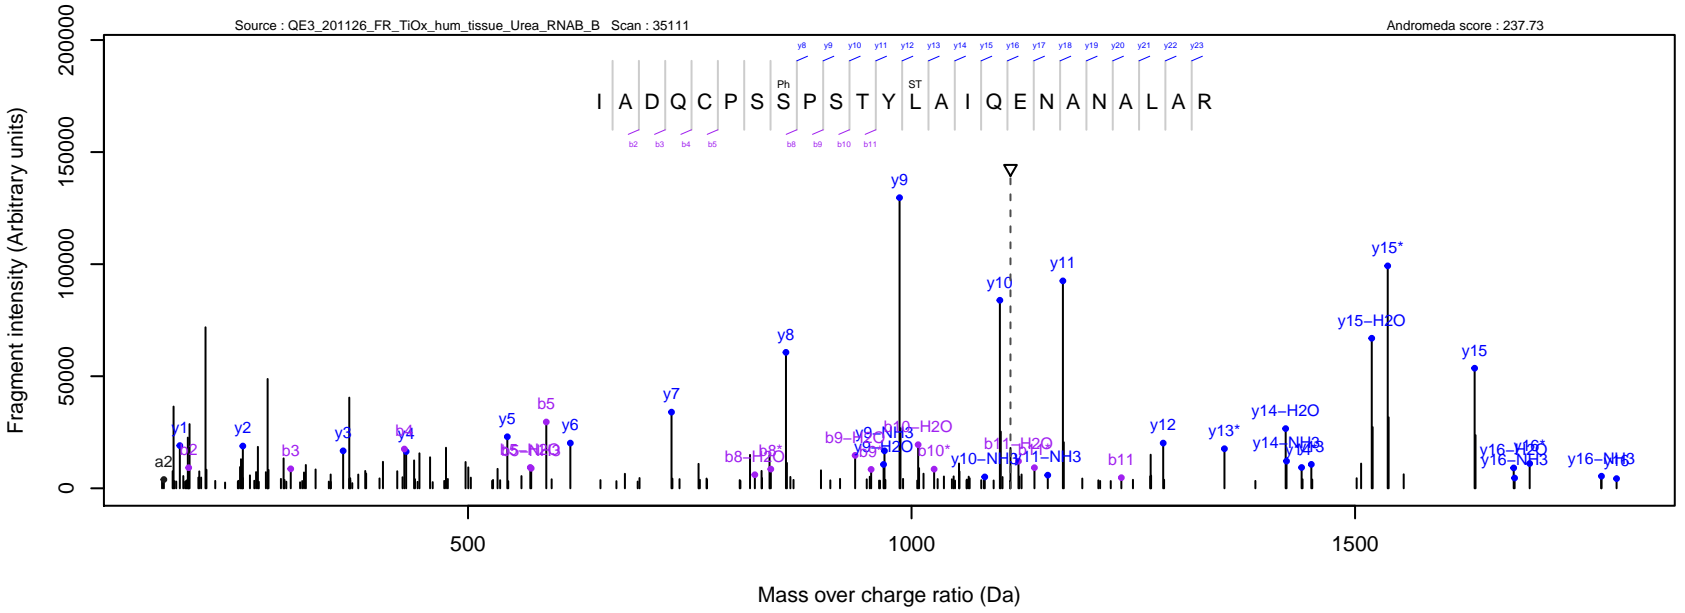

QPGLRQPS(Phospho (STY))PSHDGSLSPQLQDR-3+

Source : QE3\_201126\_FR\_TIOx\_hum\_tissue\_Urea\_RNAB\_N Scan : 19496

Andromeda score : 237.2

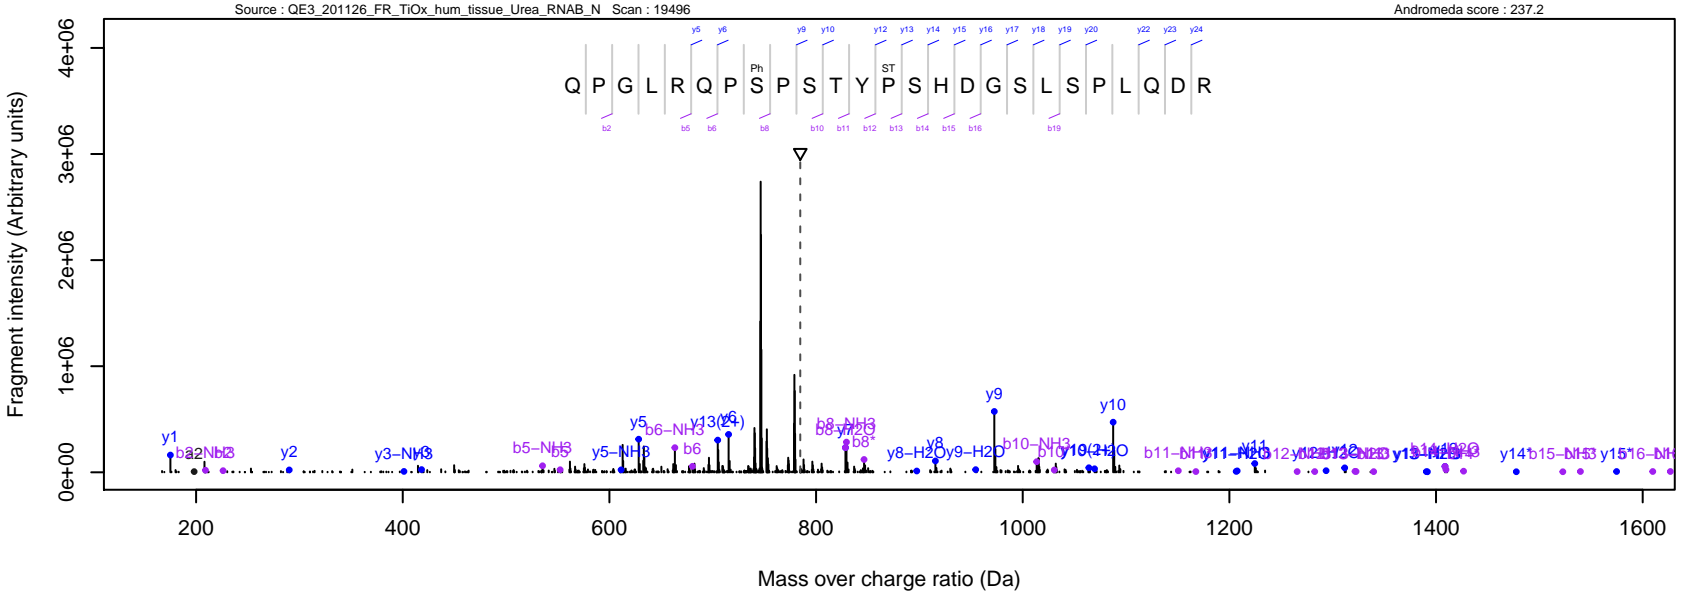

FTGS(Phospho (STY))FDDDDPDRPYGEEVDRR-4+

Source : QE3\_201126\_FR\_TIOx\_hum\_tissue\_Urea\_RNAB\_N Scan : 21031

Andromeda score : 237.19

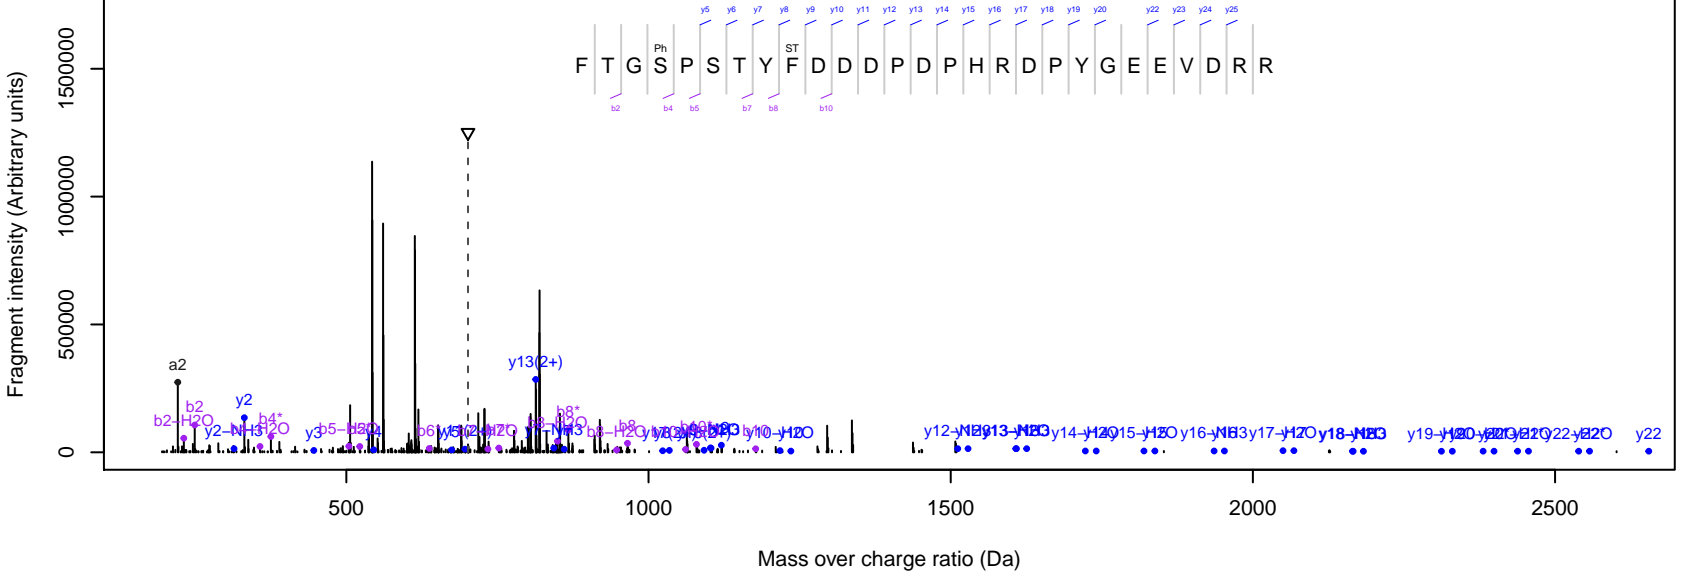



KVEEEQEADEEDVS(Phospho (STY))EEEEASKEGTNK-3+

Source : QE3\_201126\_FR\_TiOx\_hum\_tissue\_Urea\_RNAB\_B Scan : 11985

Andromeda score : 237.01

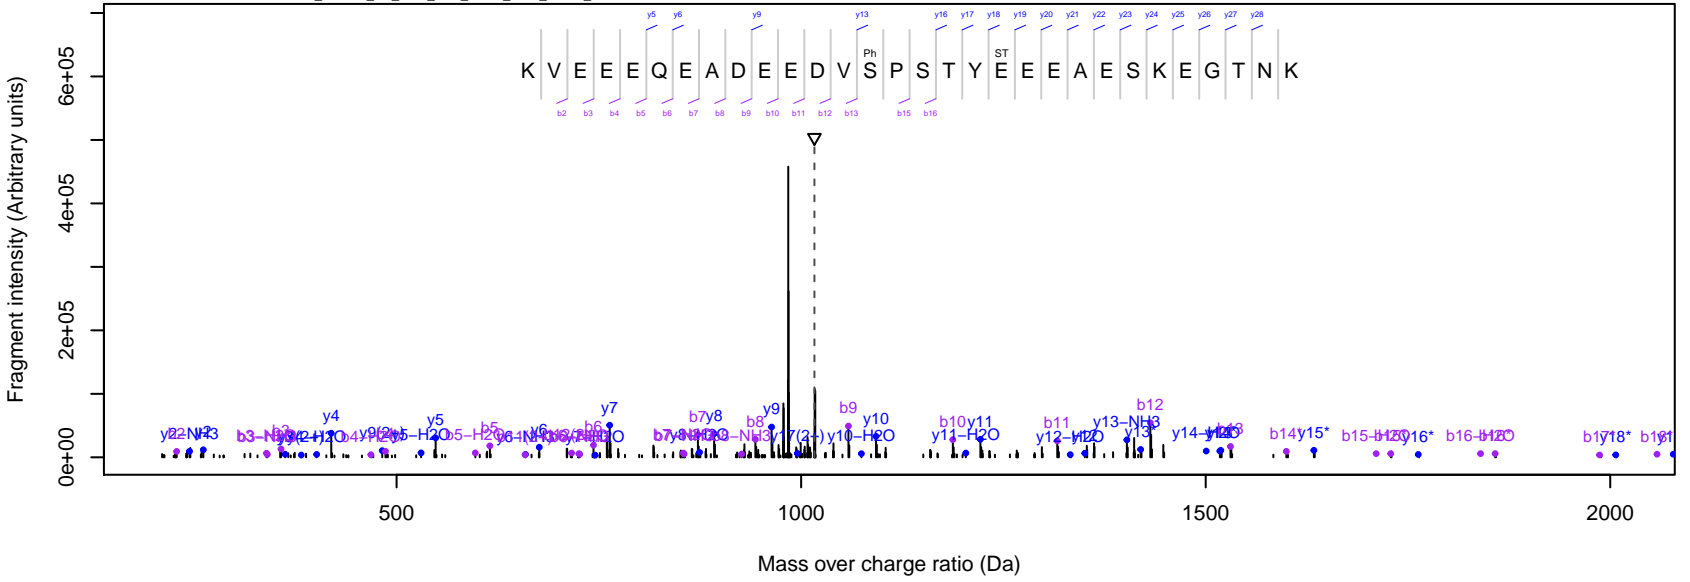

IQQFDDGGS(Phospho (STY))DEEDIWEEK-2+

Source : QE3\_201126\_FR\_TiOx\_hum\_tissue\_Urea\_RNAB\_B Scan : 42511

Andromeda score : 237

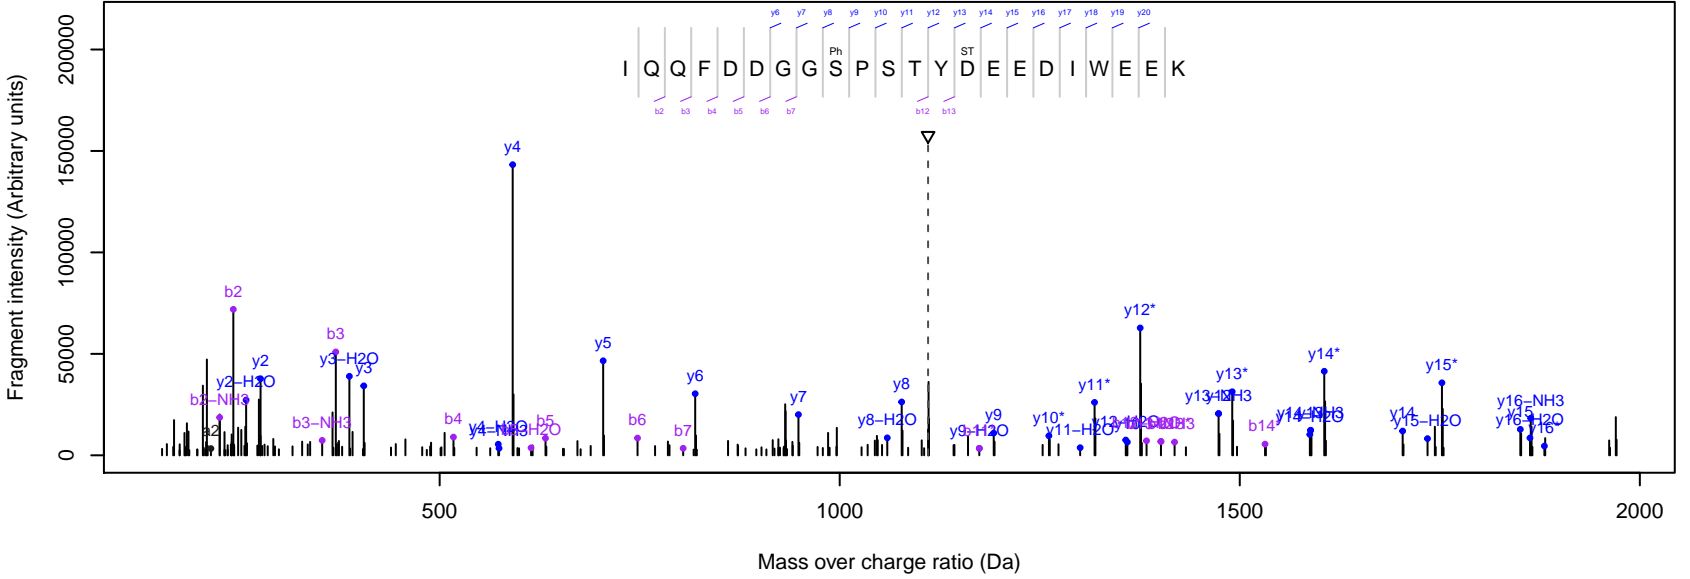

GNPESDRS(Phospho (STY))PS(Phospho (STY))PSKND SFFTPDSNHNSLSQSTTGHLSPQK-4+

Source : QE3\_201126\_FR\_TiOx\_hum\_tissue\_Urea\_RNAB\_H Scan : 28564

Andromeda score : 236.88

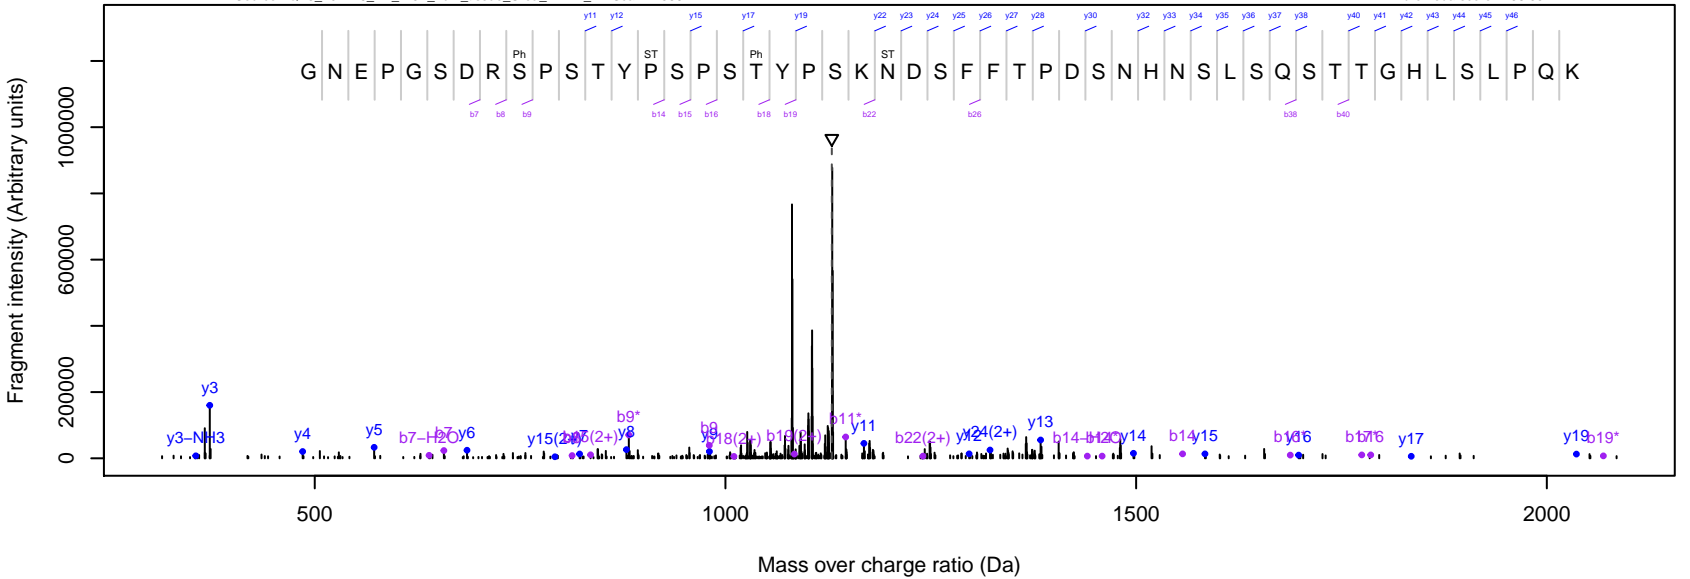

EATSDPSRT(Phospho (STY))PEEPLNLEGLVAHR-3+

Source : QE3\_201126\_FR\_TiOx\_hum\_tissue\_Urea\_RNAB\_B Scan : 36336

Andromeda score : 236.79

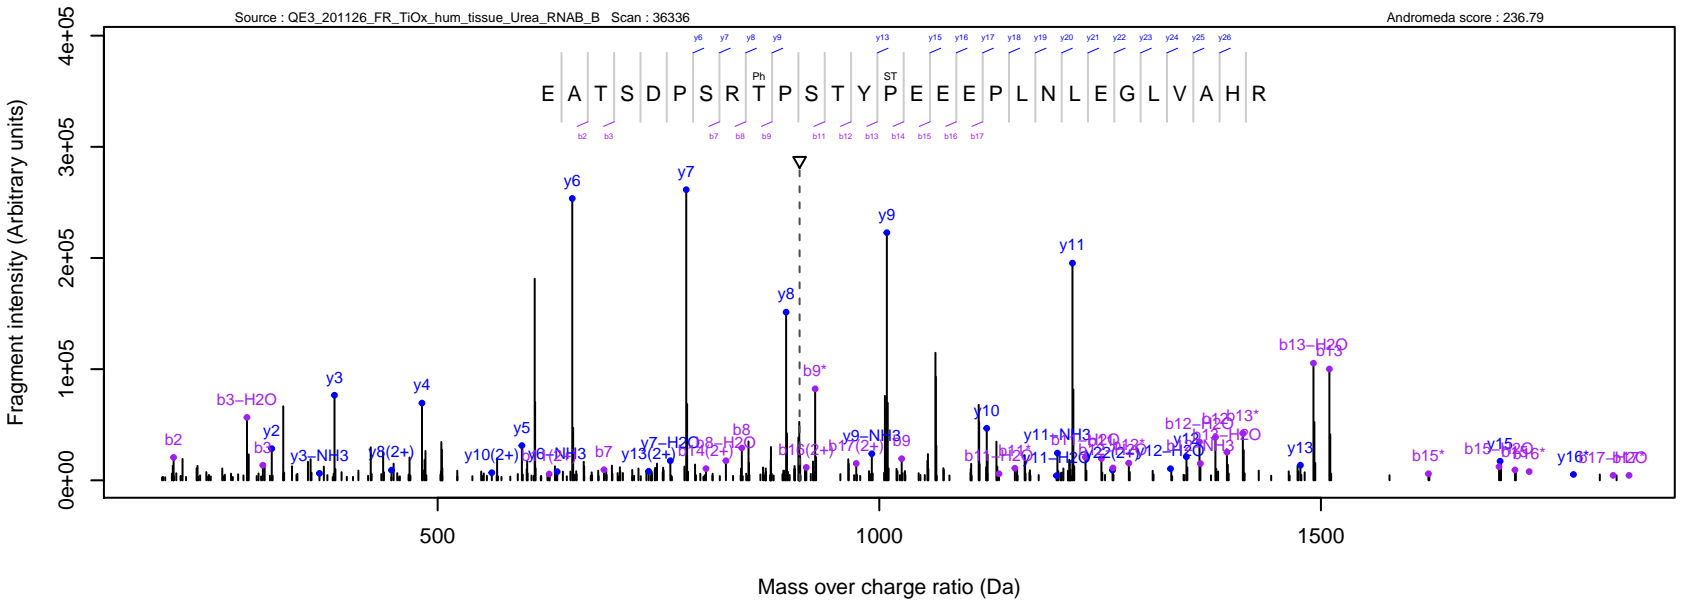

QAVEMKNDKS(Phospho (STY))EEEQSSSSVK-3+

Source : QE3\_201126\_FR\_TiOx\_hum\_tissue\_Urea\_RNAB\_B Scan : 6248

Andromeda score : 236.77

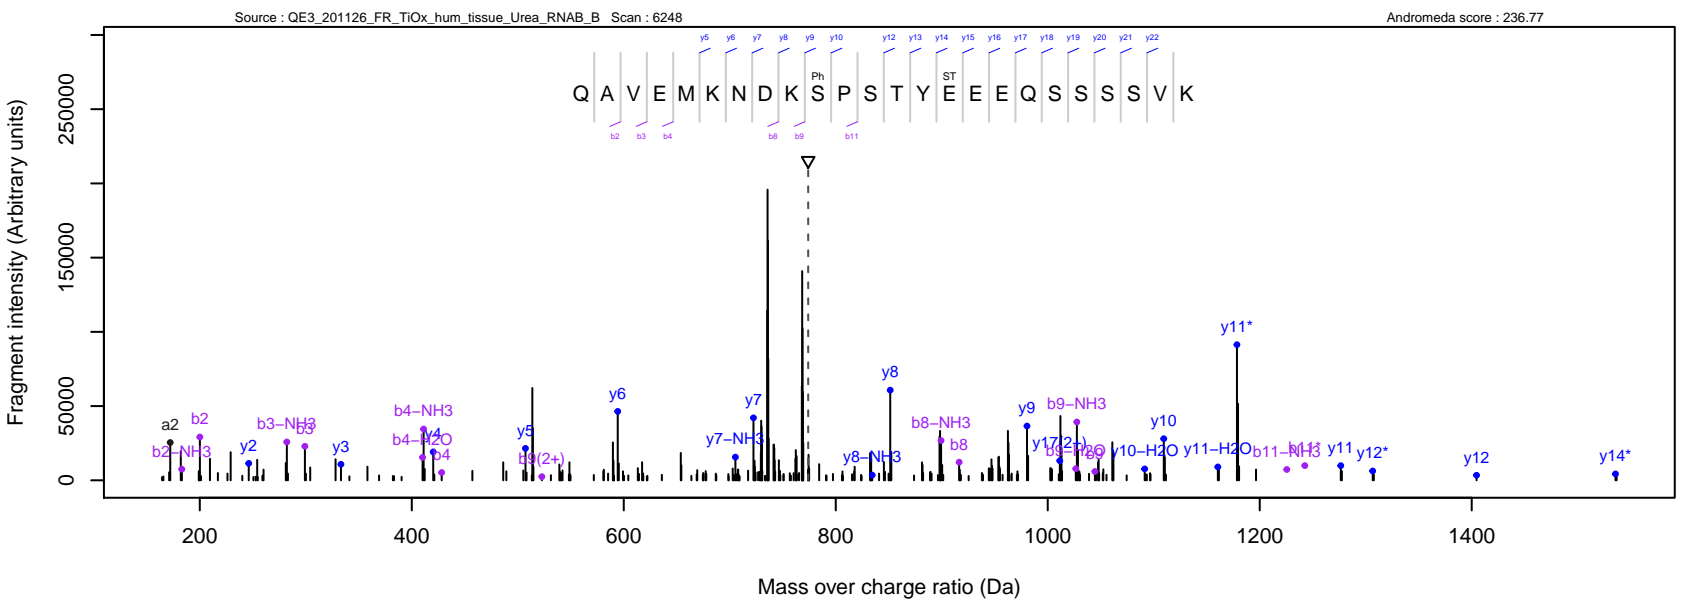

S(Phospho (STY))LESCLLDLR-2+

Source : QE3\_201126\_FR\_TiOx\_hum\_tissue\_Urea\_RNAB\_B Scan : 50376

Andromeda score : 236.77

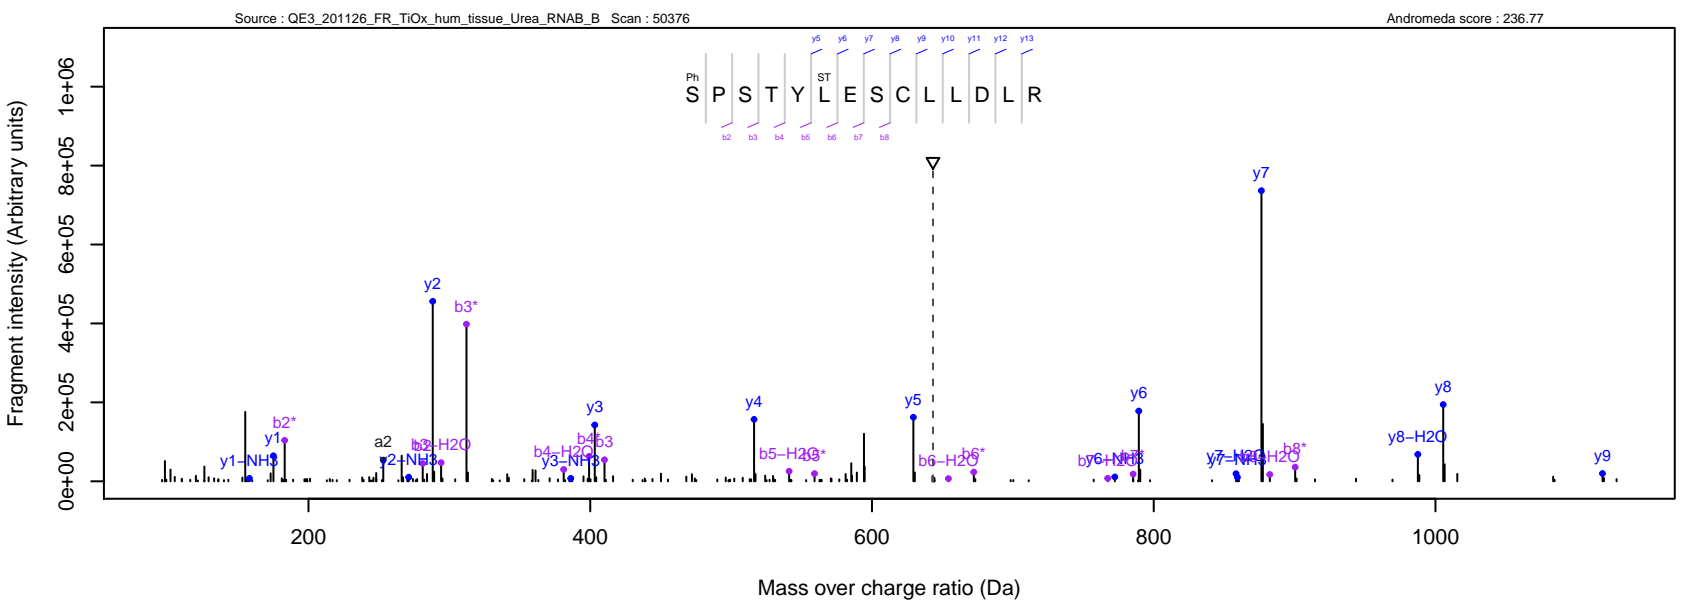

RFS(Phospho (STY))DFLGLYEK-2+

Source : QE3\_201126\_FR\_TiOx\_hum\_tissue\_Urea\_RNAB\_H Scan : 47417

Andromeda score : 236.75

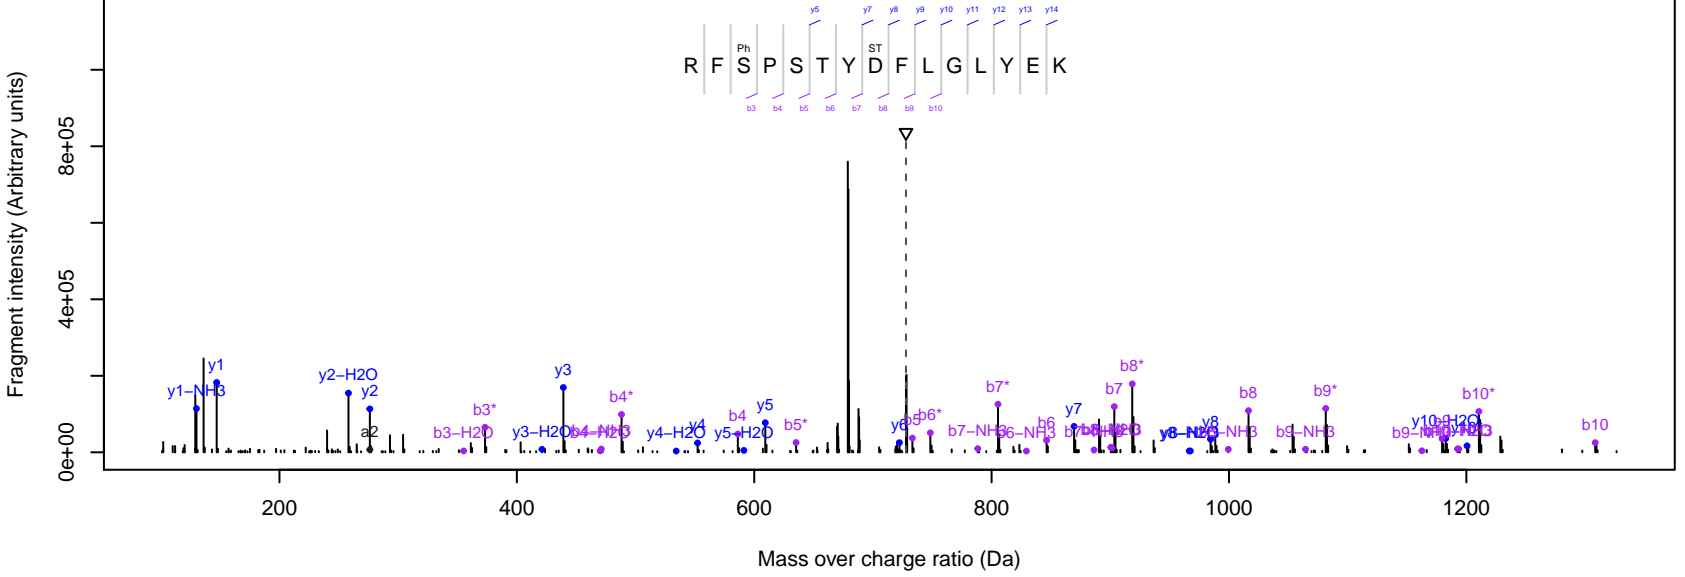

RNS(Phospho (STY))VERPAEPVAGAATPSLVEQK-3+

Source : QE3\_201126\_FR\_TiOx\_hum\_tissue\_Urea\_RNAB\_H Scan : 19581

Andromeda score : 236.73

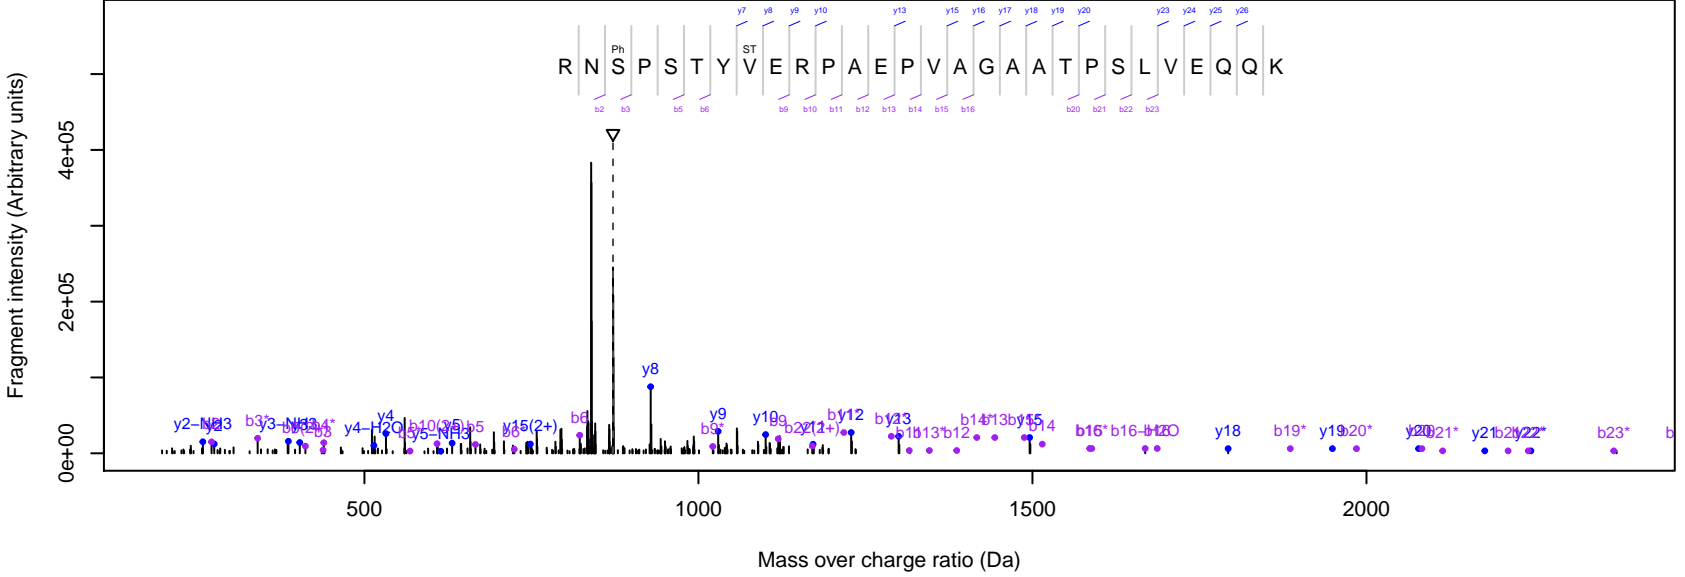

SKGHYEVTGS(Phospho (STY))DDETGKLGSGVSLASK-4+

Source : QE3\_201126\_FR\_TiOx\_hum\_tissue\_Urea\_RNAB\_H Scan : 17095

Andromeda score : 236.73

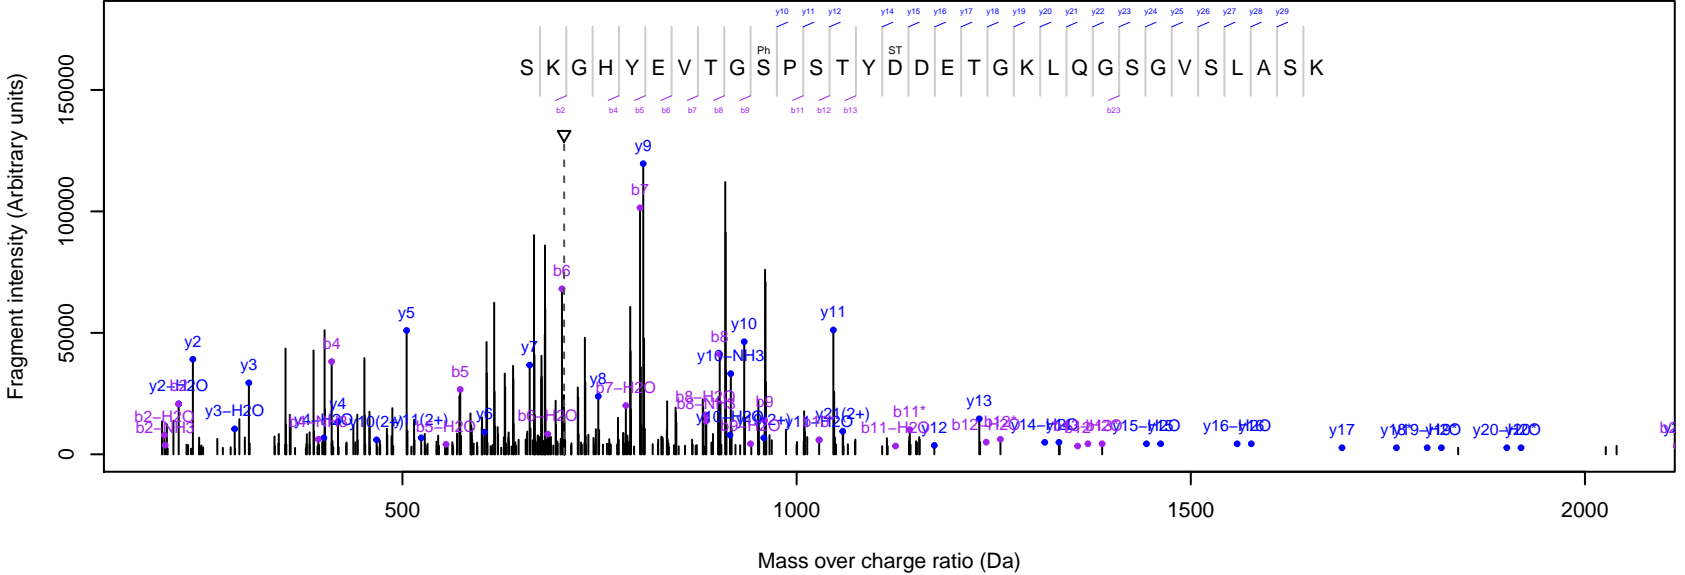

S(Phospho (STY))RS(Phospho (STY))RDS(Phospho (STY))GDENEPIQER-2+

Source : QE3\_201126\_FR\_TiOx\_hum\_tissue\_Urea\_RNAB\_B Scan : 10822

Andromeda score : 236.66

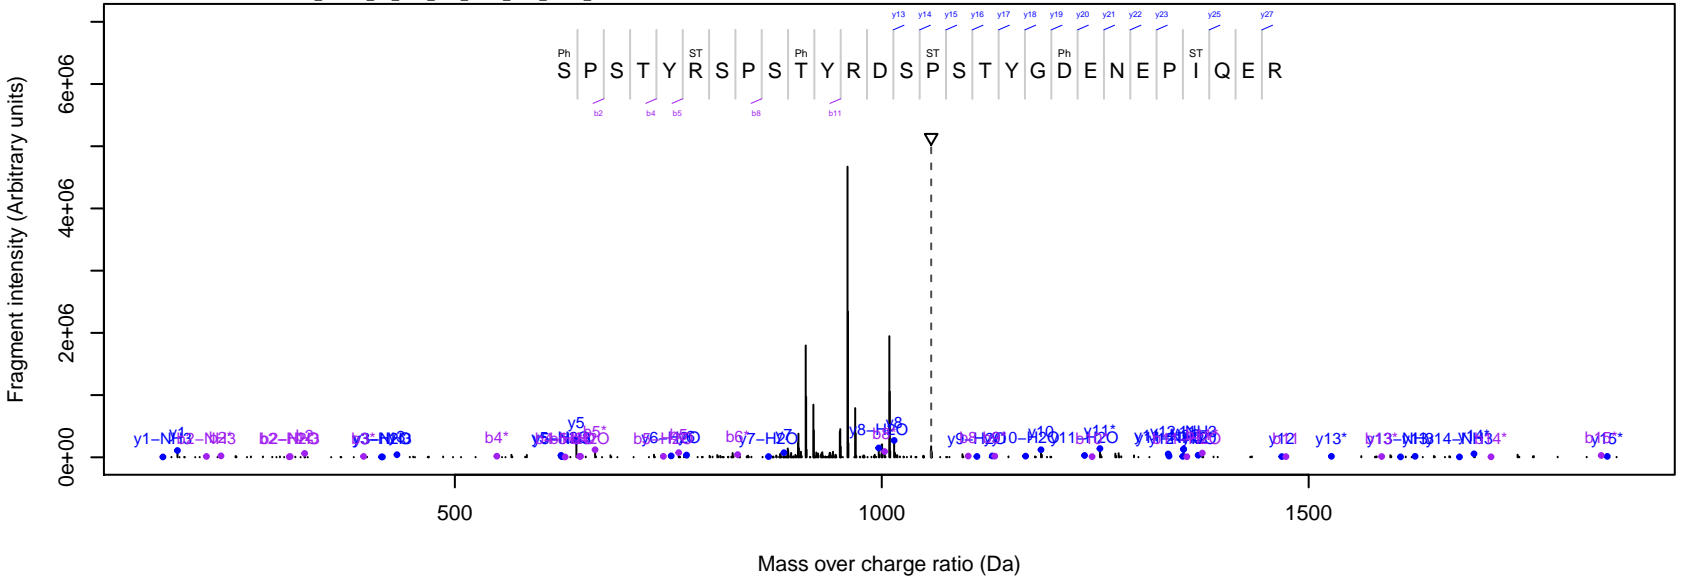

VPEVVQTSS(Phospho (STY))PR-2+

Source : QE3\_201126\_FR\_TiOx\_hum\_tissue\_Urea\_RNAB\_N Scan : 15177

Andromeda score : 236.28

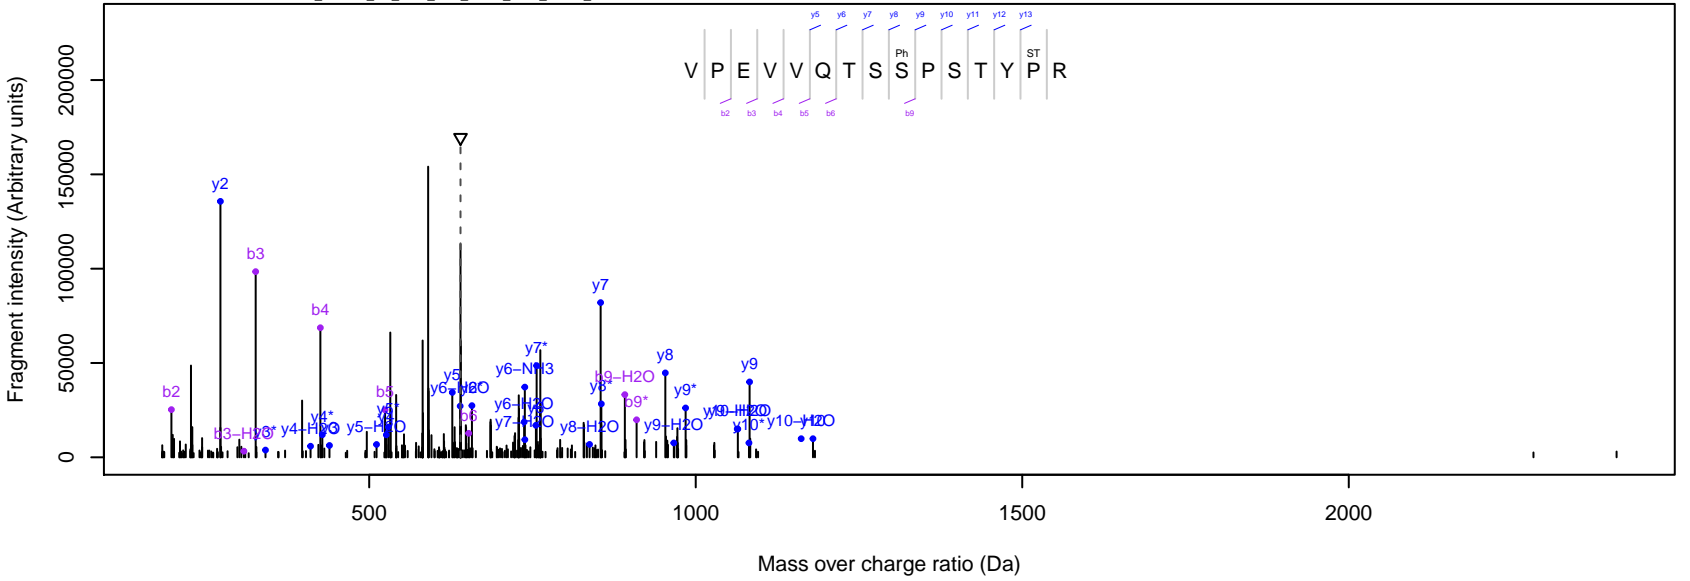

RGS(Phospho (STY))SGSVVVDLLYWR-2+

Source : QE3\_201126\_FR\_TiOx\_hum\_tissue\_Urea\_RNAB\_N Scan : 54876

Andromeda score : 236.16

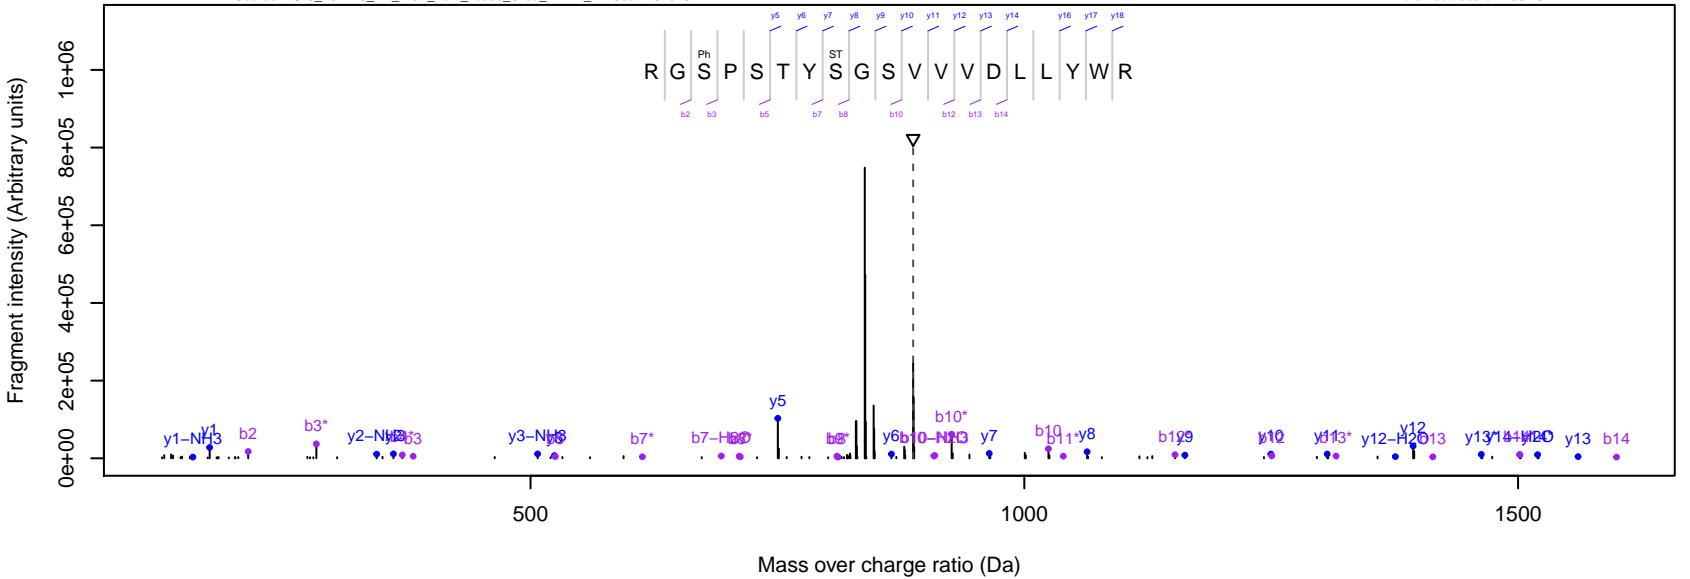

**AALGLQDS(Phospho (STY))DDEDAAVDIDEQIESMFNSK-3+**

Source : QE3\_201126\_FR\_TiOx\_hum\_tissue\_Urea\_RNAB\_H Scan : 62647

Andromeda score : 235.97

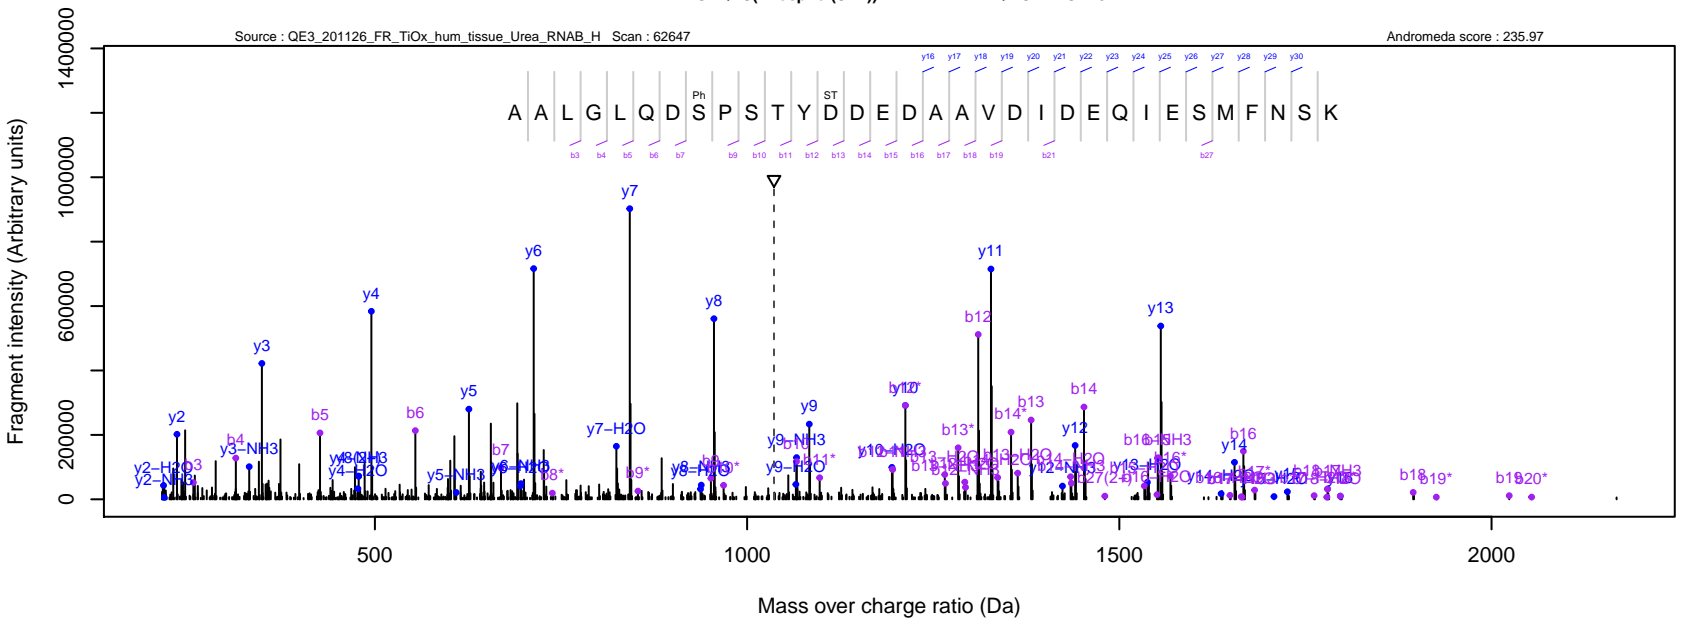

**LHKTEDGGWEWS(Phospho (STY))DDEFDEESEEGKAAISQLR-4+**

Source : QE3\_201126\_FR\_TiOx\_hum\_tissue\_Urea\_RNAB\_H Scan : 44183

Andromeda score : 235.94

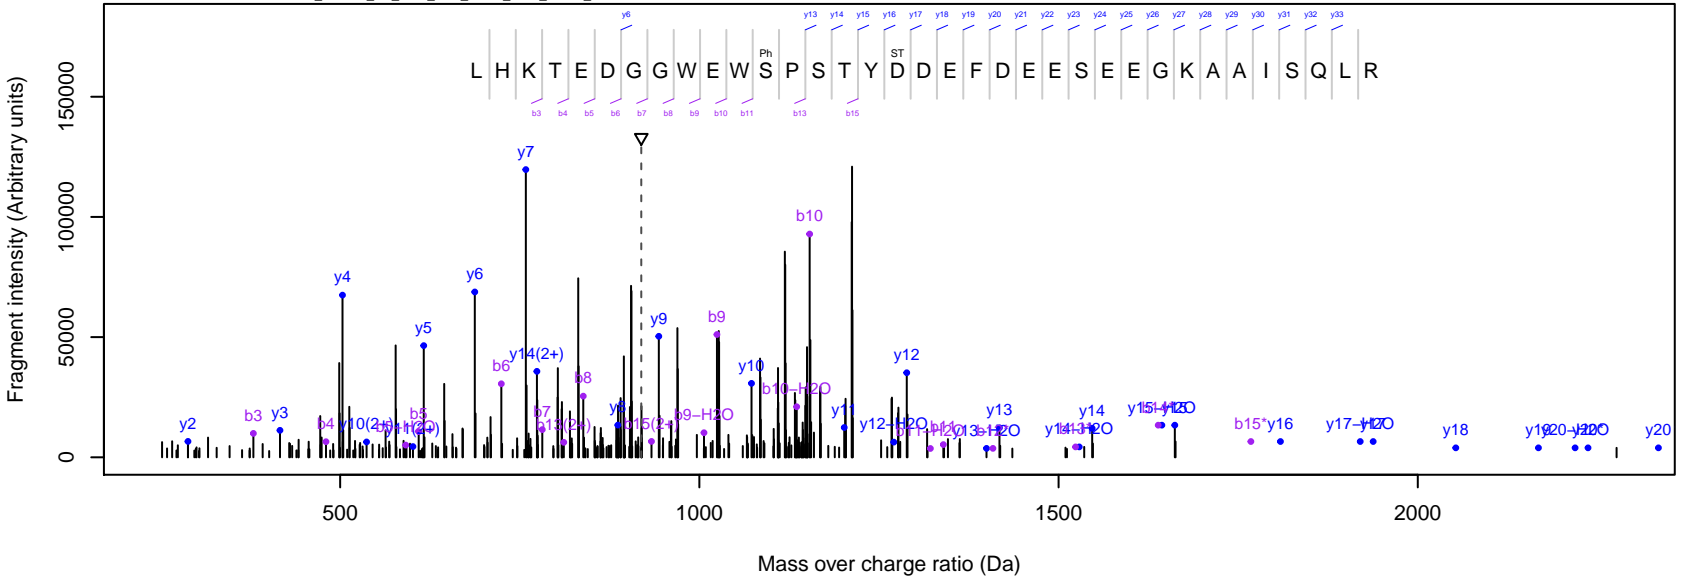

**RYPSSISS(Phospho (STY))PQKDLTQAK-3+**

Source : QE3\_201126\_FR\_TiOx\_hum\_tissue\_Urea\_RNAB\_H Scan : 15460

Andromeda score : 235.92

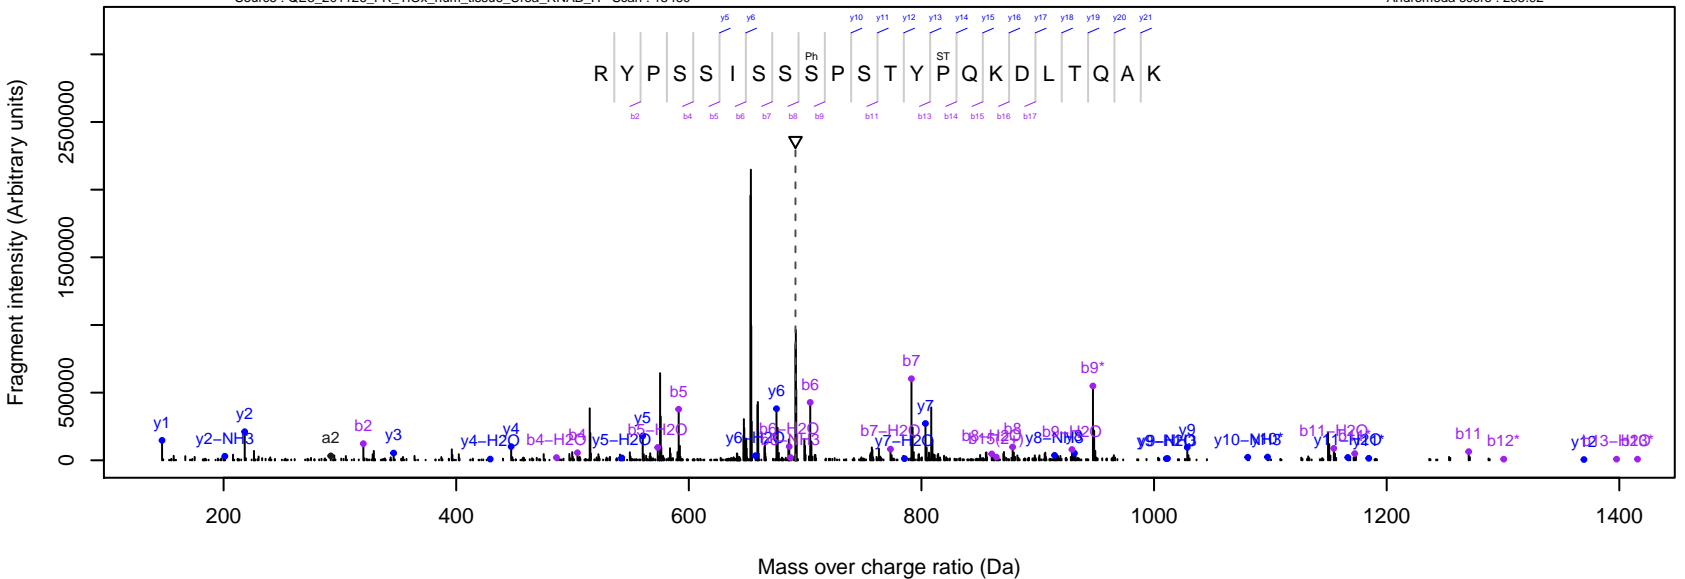

AAATT(Phospho (STY))PTKVYSEVHFHTLAKPPSVVNR-4+

Source : QE3\_201126\_FR\_TiOx\_hum\_tissue\_Urea\_RNAB\_N Scan : 33469

Andromeda score : 235.86

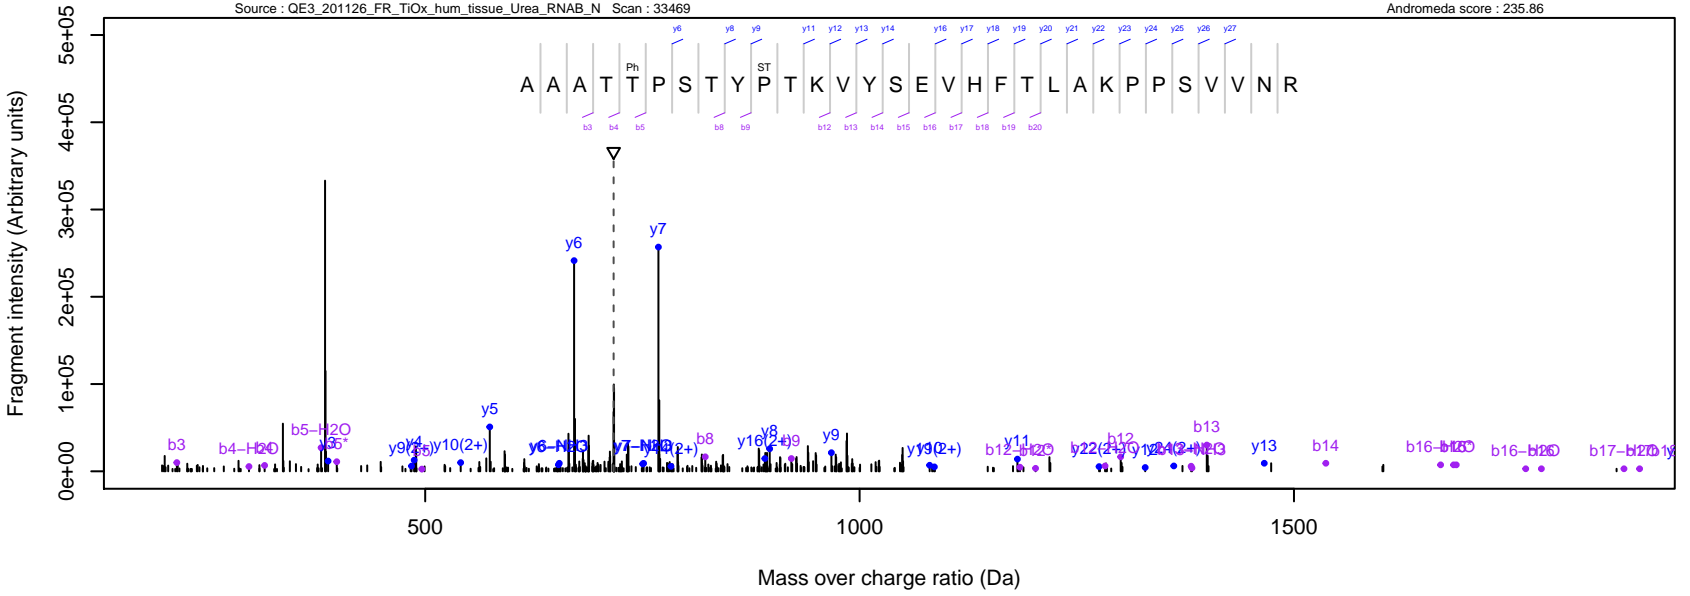

LKATVTPS(Phospho (STY))PVK GK-2+

Source : QE3\_201126\_FR\_TiOx\_hum\_tissue\_Urea\_RNAB\_B Scan : 7399

Andromeda score : 235.71

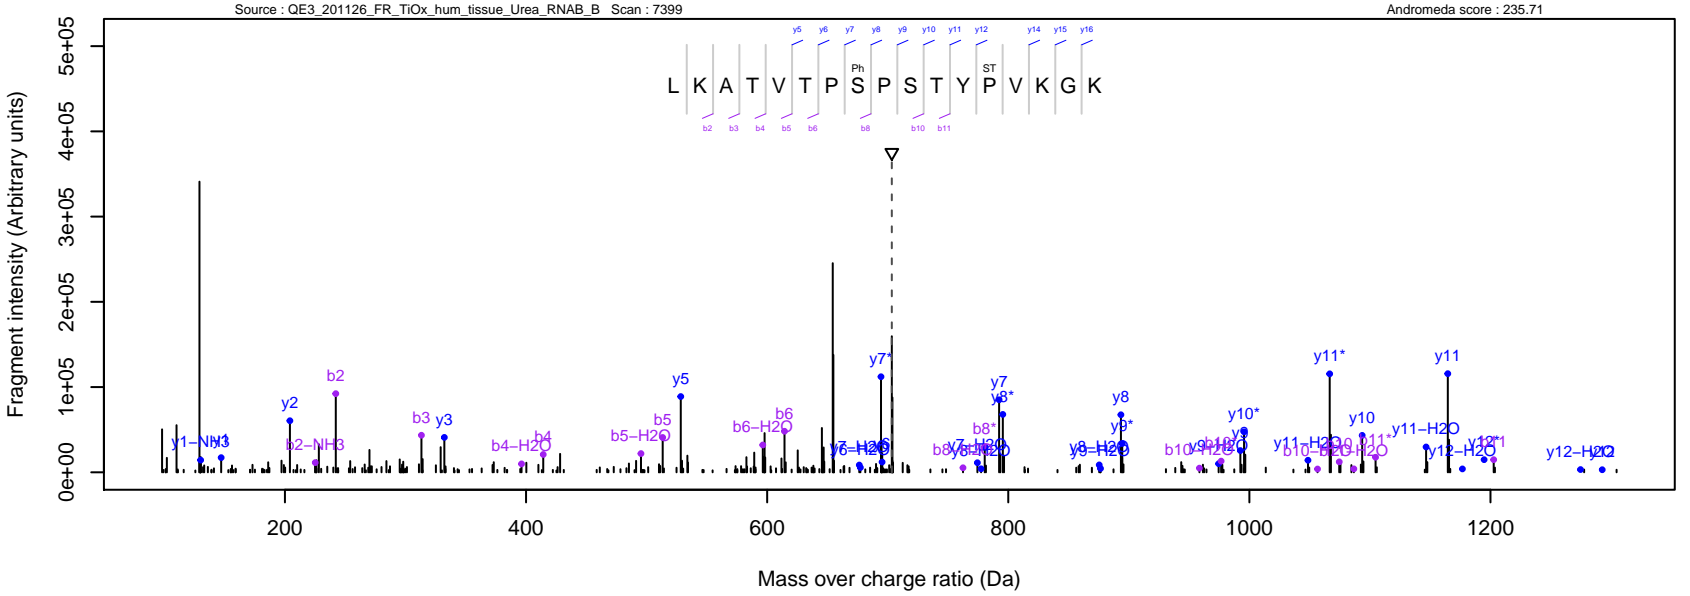

ESEDKPEIEDVGS(Phospho (STY))DEEEK-2+

Source : QE3\_201126\_FR\_TiOx\_hum\_tissue\_Urea\_RNAB\_H Scan : 16830

Andromeda score : 235.26

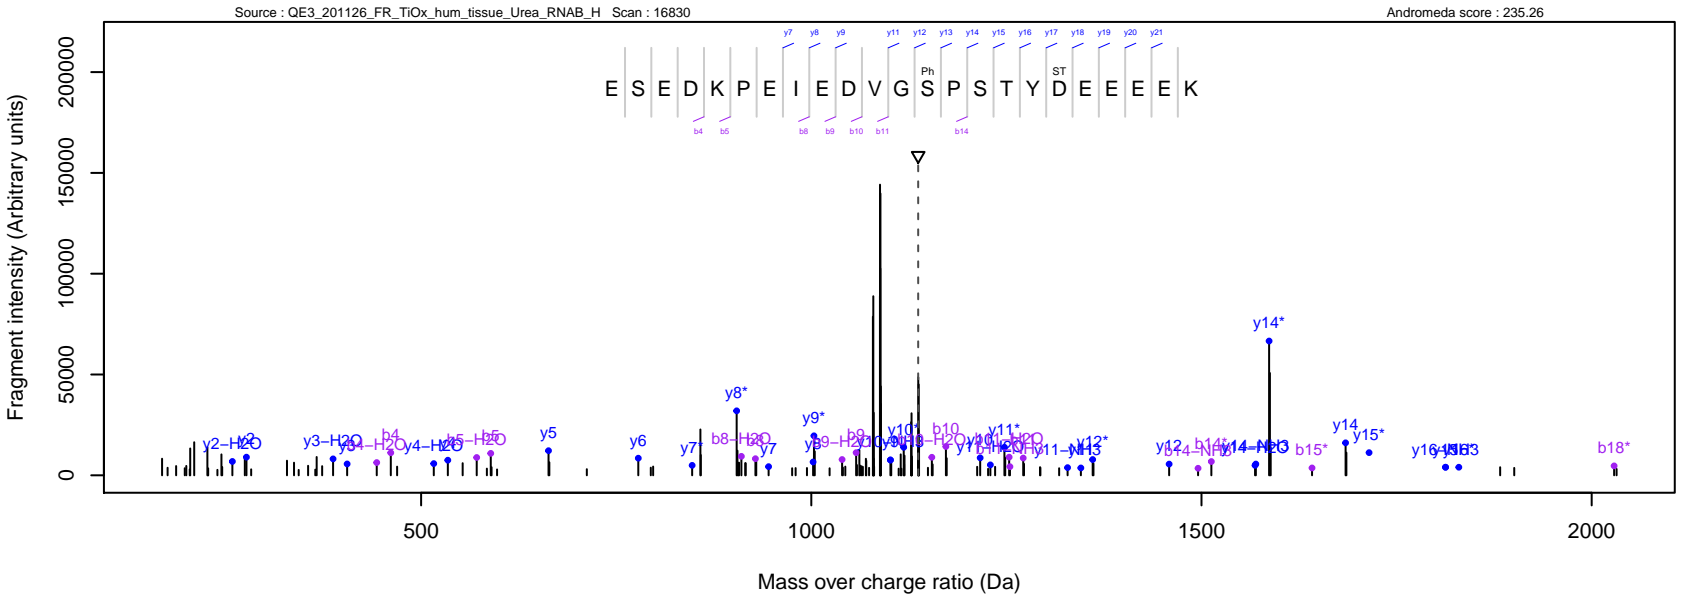

DLSSS(Phospho (STY))PPGPYQEMYAFR-3+

Source : QE3\_201126\_FR\_TIOx\_hum\_tissue\_Urea\_RNAB\_H Scan : 50862

Andromeda score : 235.24

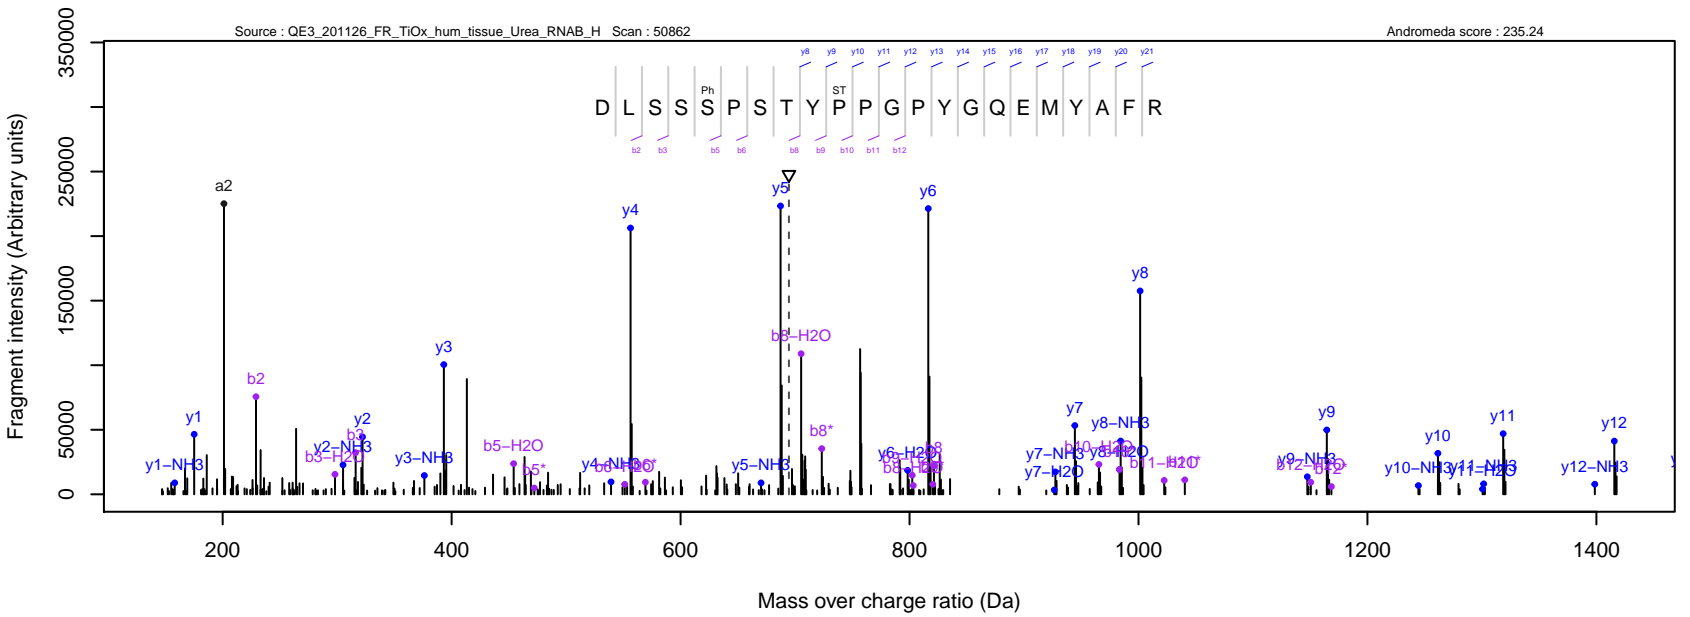

ALENGDADEPSFS(Phospho (STY))DPEDFVDDVSEELLGDVLK-3+

Source : QE3\_201126\_FR\_TIOx\_hum\_tissue\_Urea\_RNAB\_H Scan : 62753

Andromeda score : 235.17

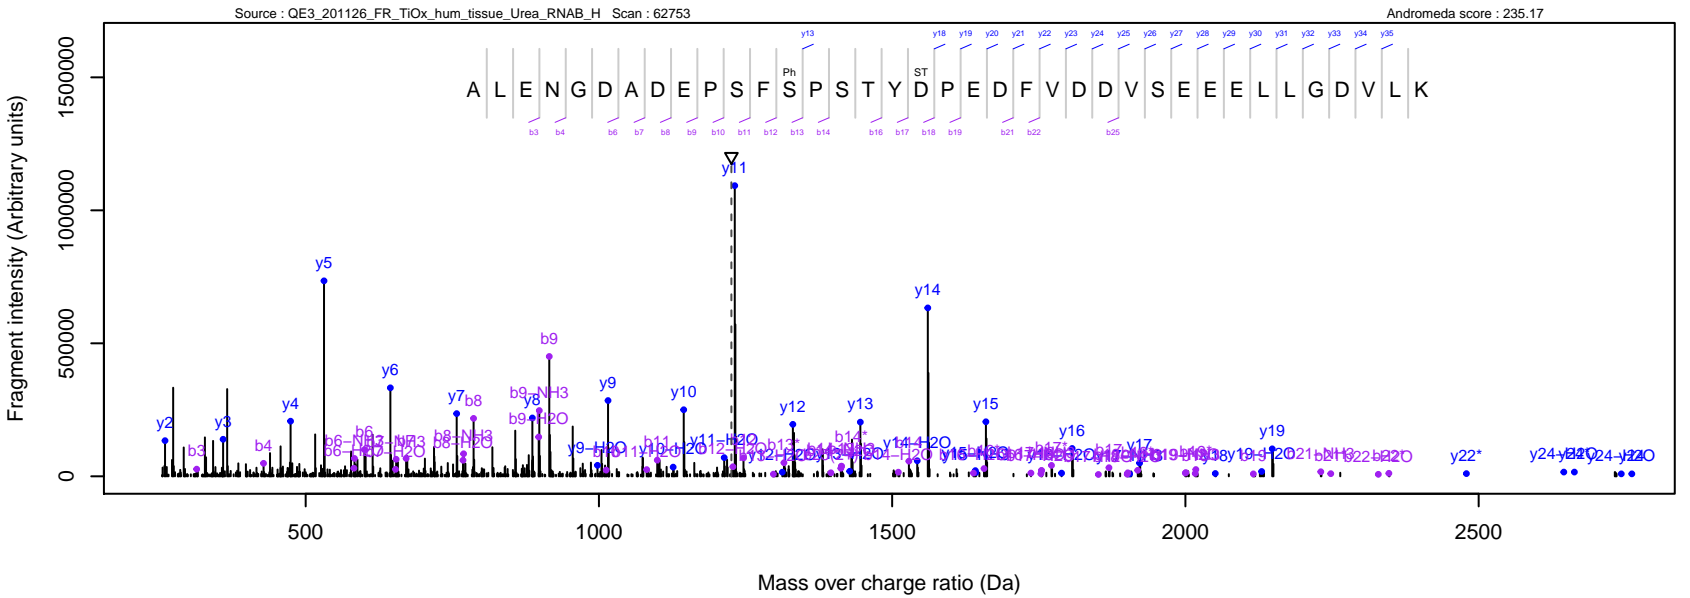

GILADES(Phospho (STY))VGTM(Oxidation (M))GNR-2+

Source : QE3\_201126\_FR\_TIOx\_hum\_tissue\_Urea\_RNAB\_H Scan : 22908

Andromeda score : 234.93

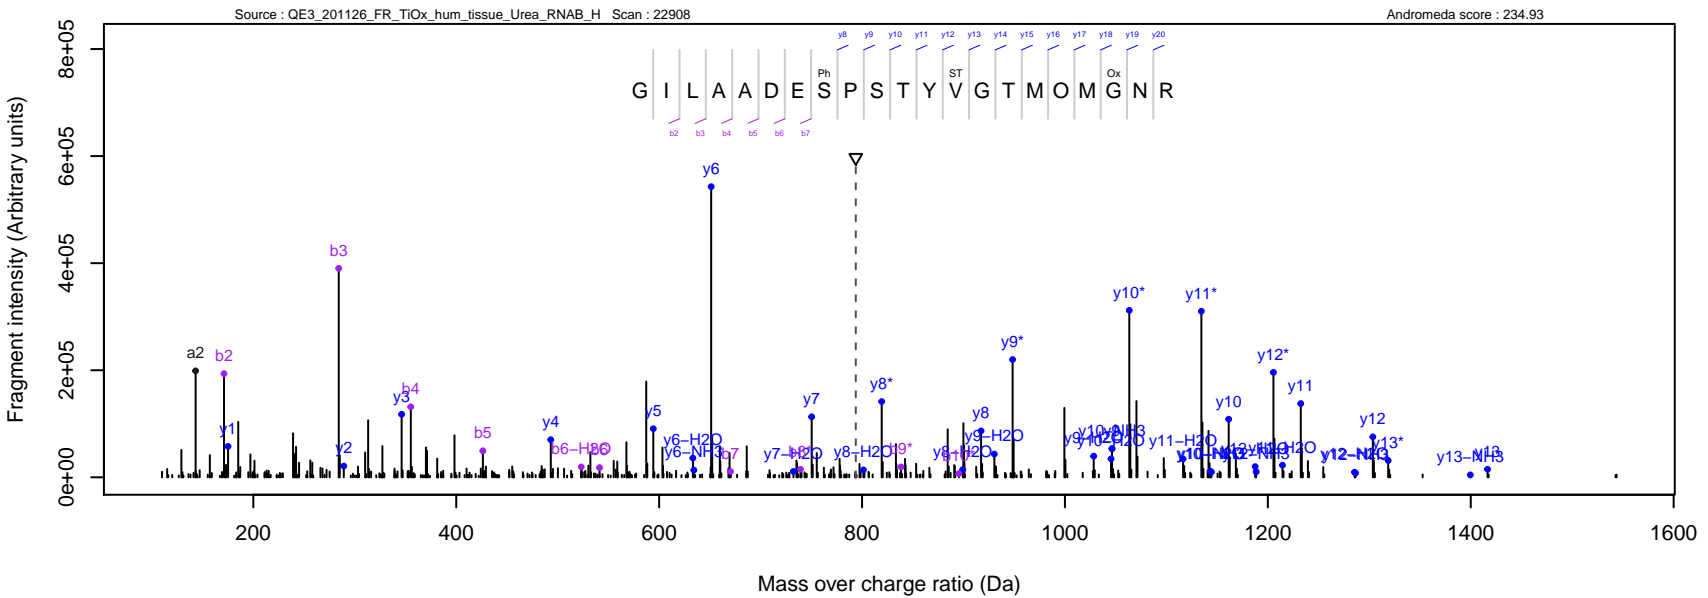

LHVS(Phospho (STY))TINLQK-2+

Source : QE3\_201126\_FR\_TiOx\_hum\_tissue\_Urea\_RNAB\_N Scan : 20875

Andromeda score : 234.79

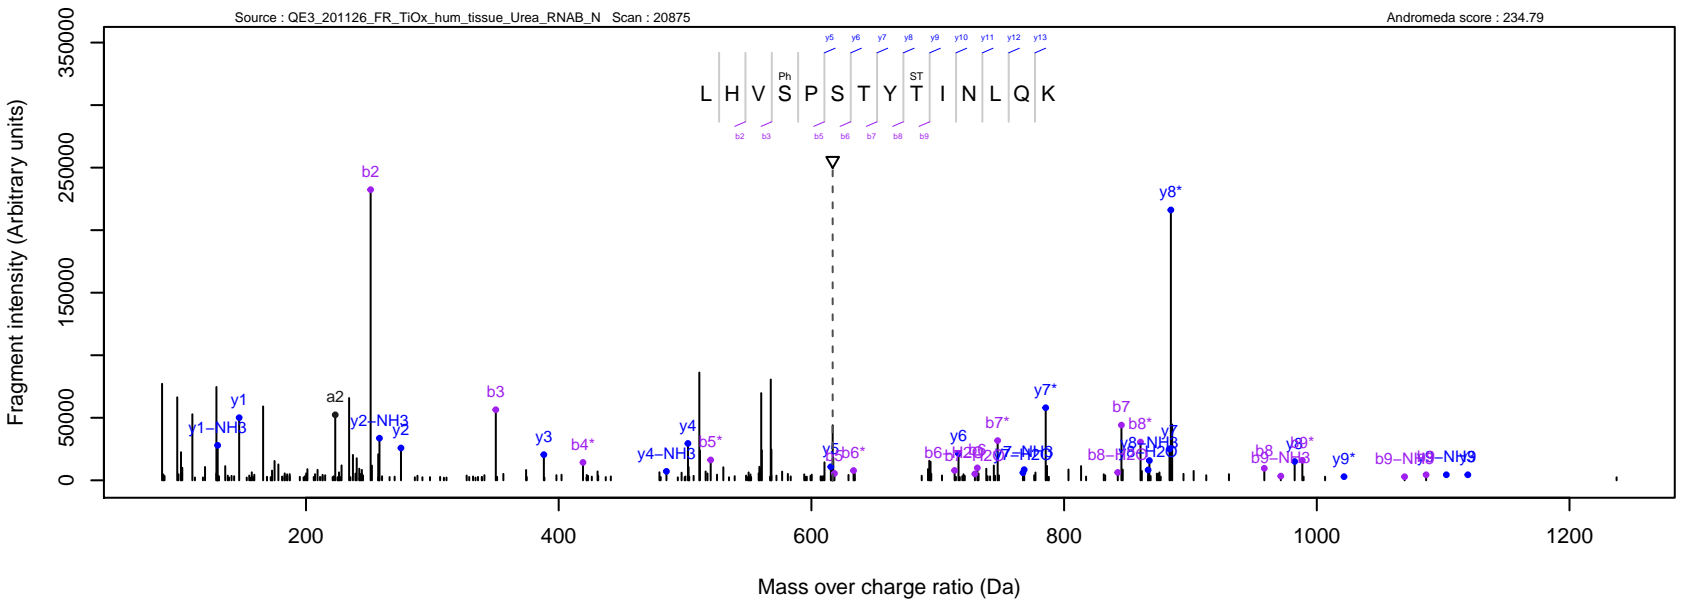

HDSIPAADTFEDLS(Phospho (STY))DVEGGGSEPTQR-3+

Source : QE3\_201126\_FR\_TiOx\_hum\_tissue\_Urea\_RNAB\_N Scan : 38626

Andromeda score : 234.71

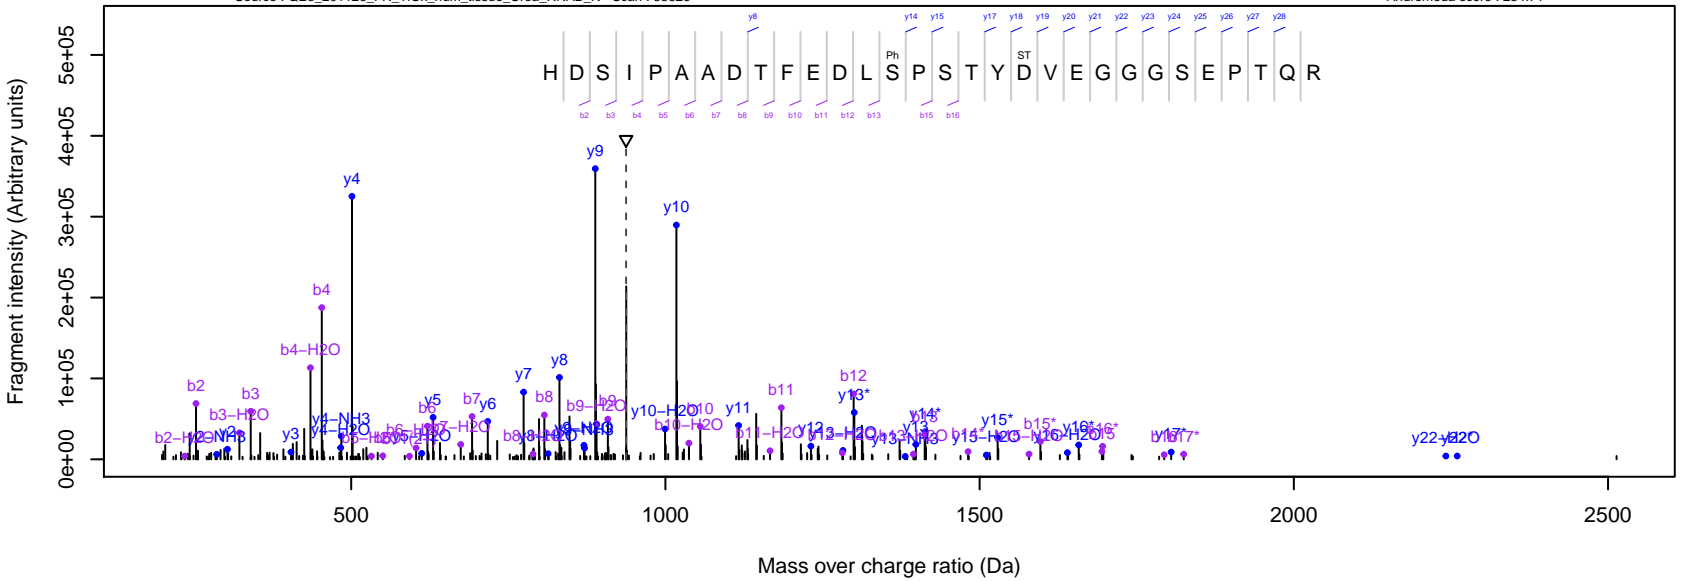

EGM(Oxidation (M))NPSYDEYADS(Phospho (STY))DEDQHDAYLER-3+

Source : QE3\_201126\_FR\_TiOx\_hum\_tissue\_Urea\_RNAB\_N Scan : 25814

Andromeda score : 234.52

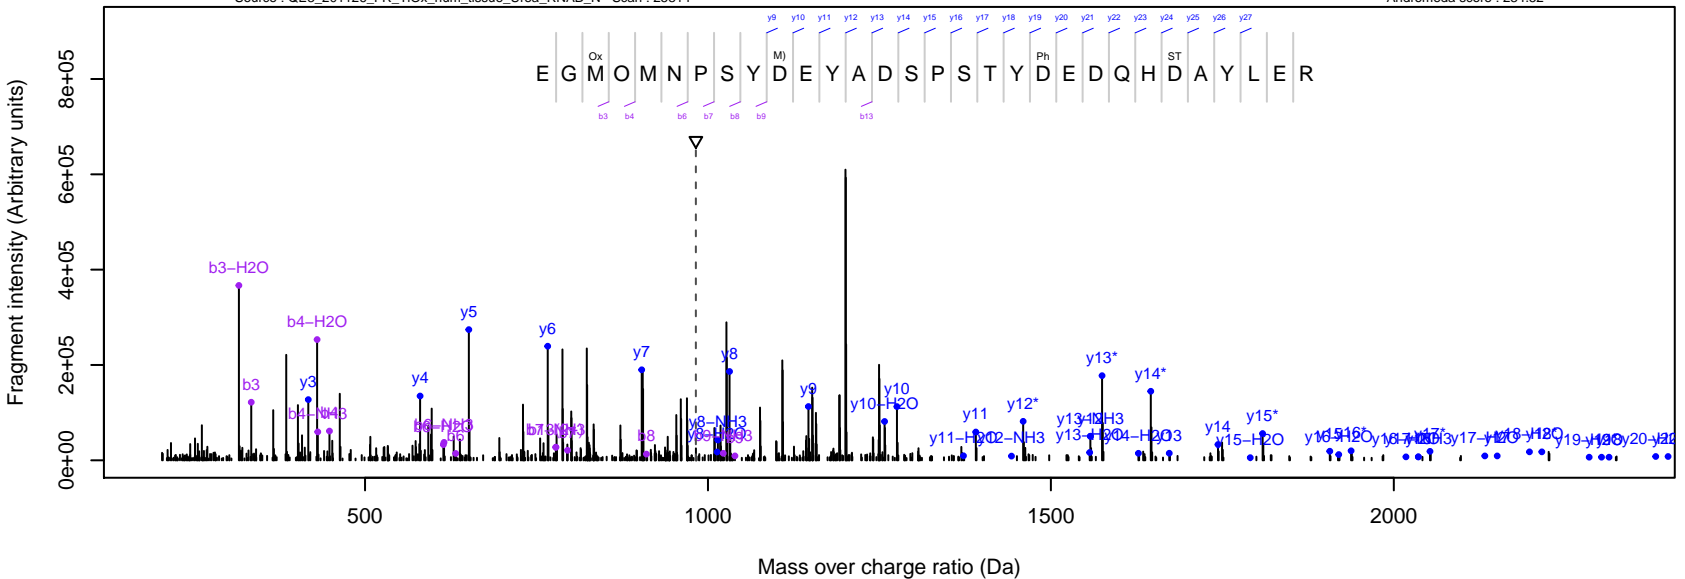



SSTLEPDDDEEDT(Phospho (STY))VTR-2+

Source : QE3\_201126\_FR\_TiOx\_hum\_tissue\_Urea\_RNAB\_B Scan : 20187

Andromeda score : 234.28

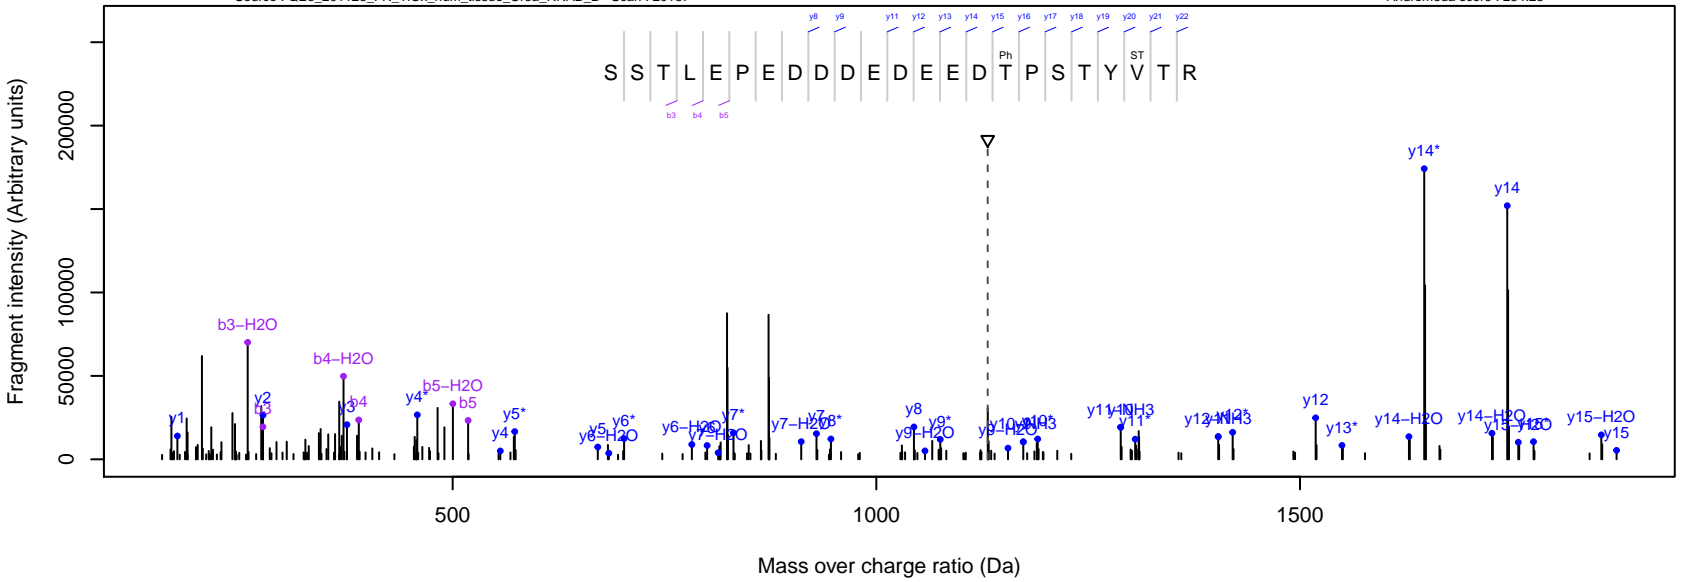

HSS(Phospho (STY))IS(Phospho (STY))PVRLPLNSSLGAELSR-3+

Source : QE3\_201126\_FR\_TiOx\_hum\_tissue\_Urea\_RNAB\_B Scan : 43240

Andromeda score : 234.27

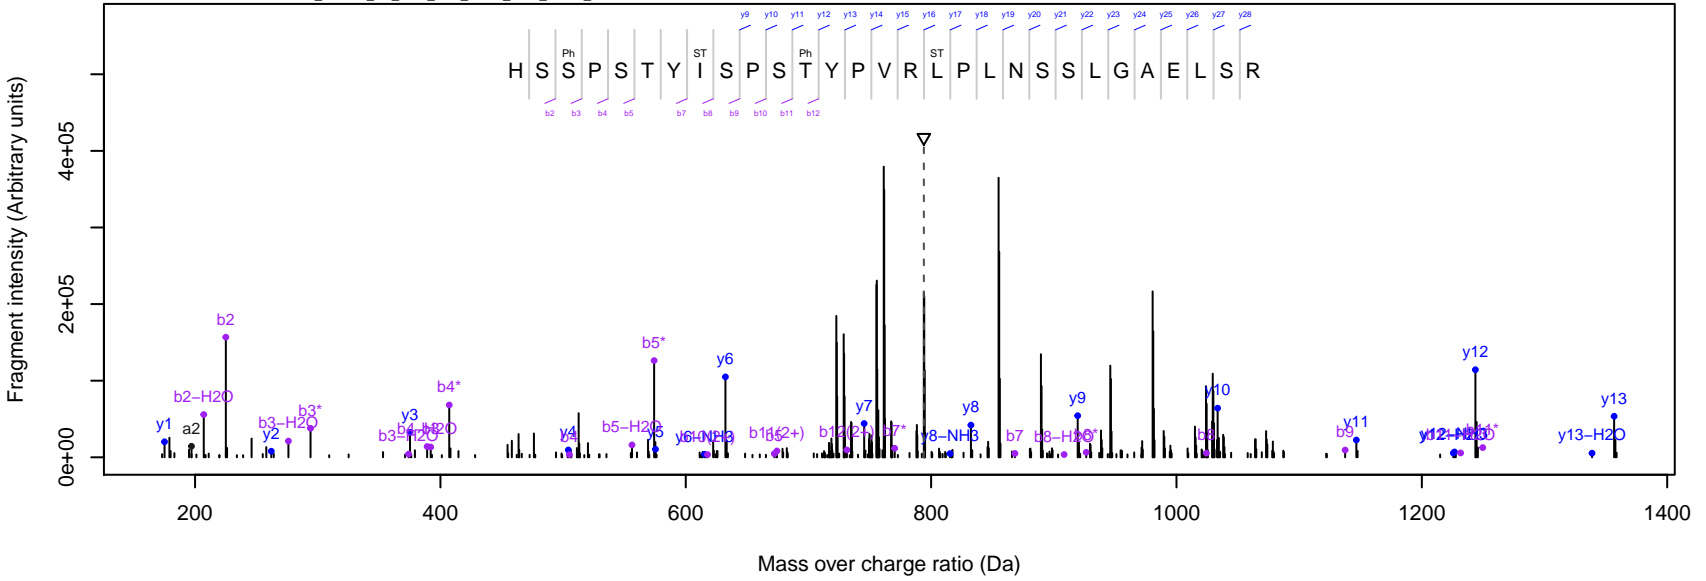

QNS(Phospho (STY))QLPAQVQNGPSQEELEIQR-3+

Source : QE3\_201126\_FR\_TiOx\_hum\_tissue\_Urea\_RNAB\_H Scan : 33372

Andromeda score : 234.18

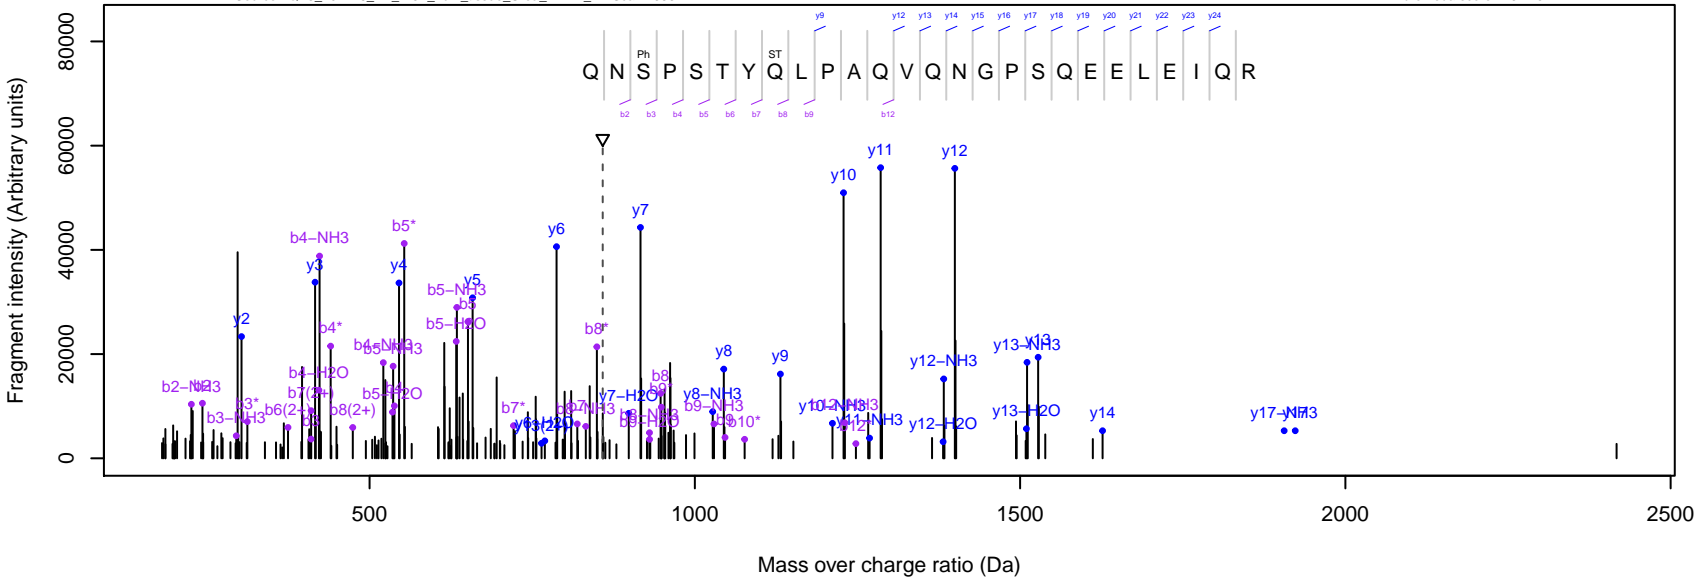

RPS(Phospho (STY))QEQSASASSGQPQAPLNR-3+

Source : QE3\_201126\_FR\_TiOx\_hum\_tissue\_Urea\_RNAB\_B Scan : 10243

Andromeda score : 234.18

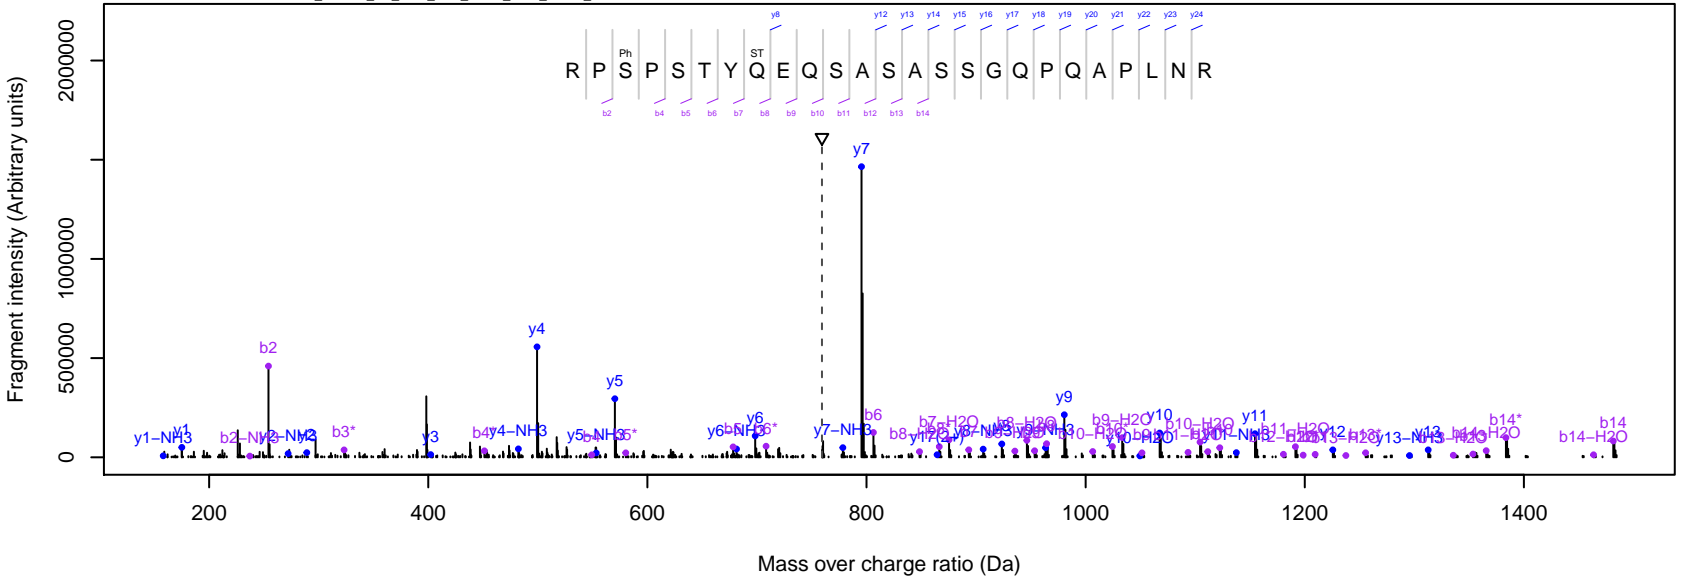

KLEKEEEEGIS(Phospho (STY))QES(Phospho (STY))S(Phospho (STY))EEEQ-2+

Source : QE3\_201126\_FR\_TiOx\_hum\_tissue\_Urea\_RNAB\_N Scan : 18232

Andromeda score : 234.14

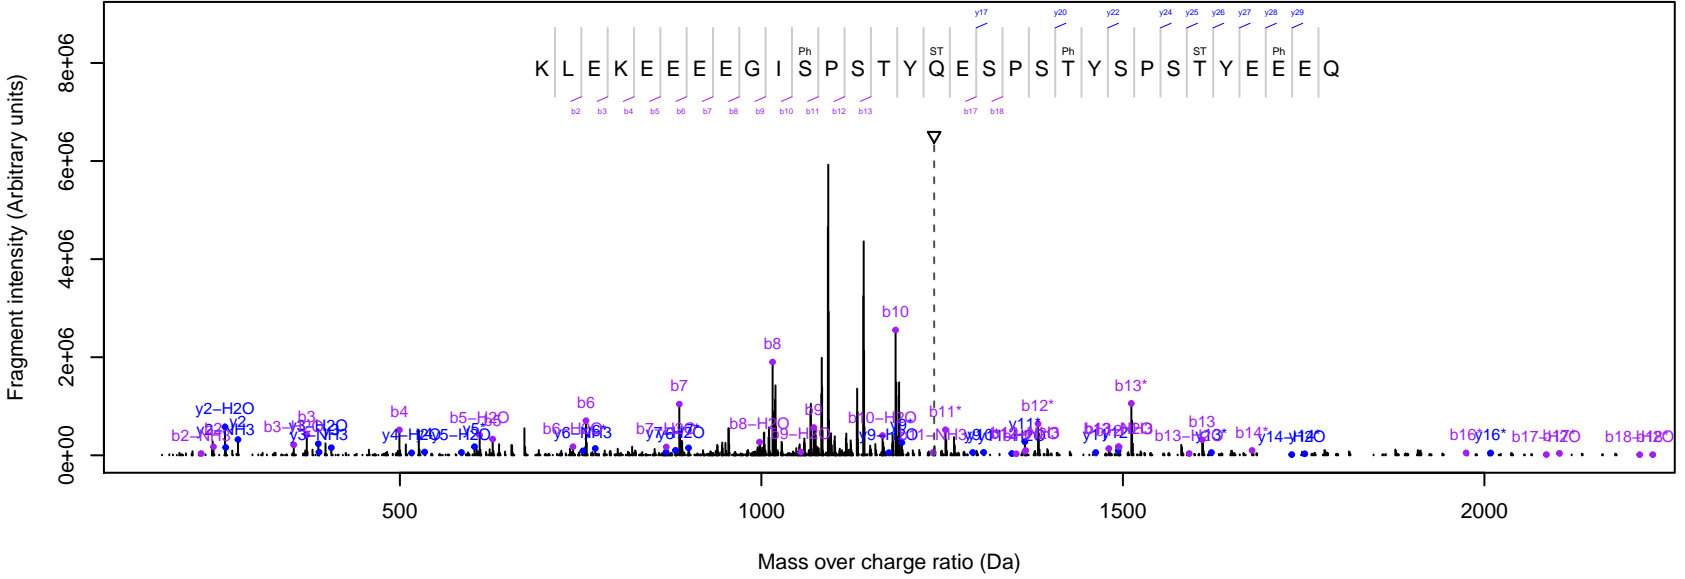

QFIAAQLGPASGHGTPASSPSSSSSLP(Phospho (STY))PM(Oxidation (M))S(Phospho (STY))PTPR-3+

Source : QE3\_201126\_FR\_TiOx\_hum\_tissue\_Urea\_RNAB\_B Scan : 35777

Andromeda score : 234.14

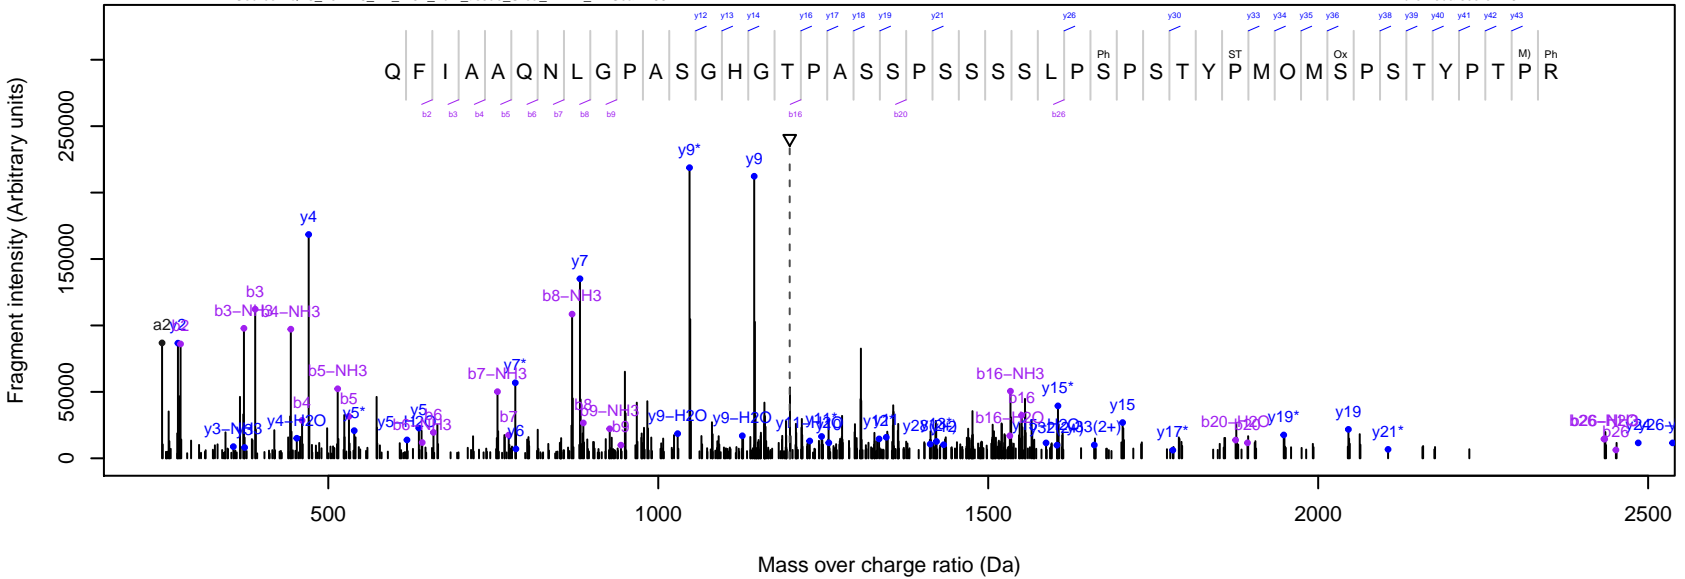



KEES(Phospho (STY))EES(Phospho (STY))DDDM(Oxidation (M))GFGLFD-2+

Source : QE3\_201126\_FR\_TiOx\_hum\_tissue\_Urea\_RNAB\_B Scan : 60664

Andromeda score : 233.49

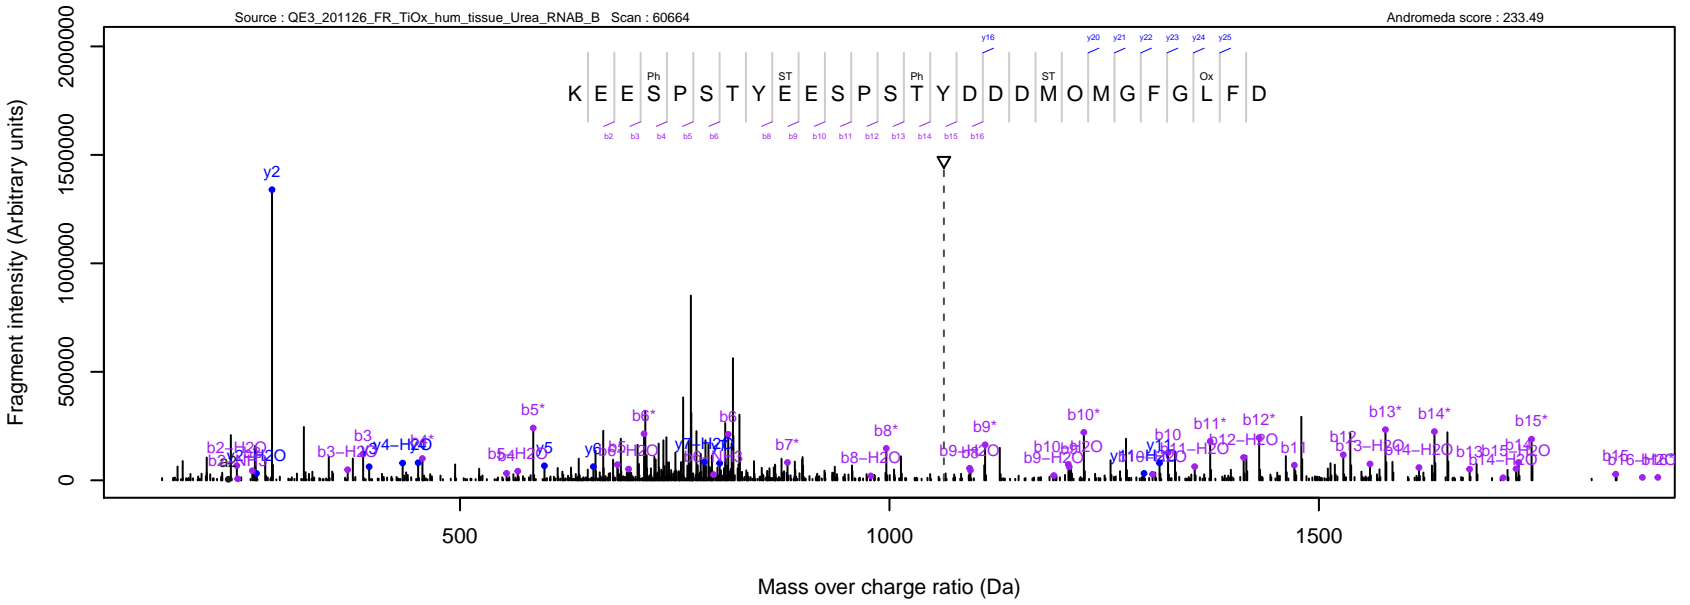

QAHDLS(Phospho (STY))PAAESSSTFSFSGR-2+

Source : QE3\_201126\_FR\_TiOx\_hum\_tissue\_Urea\_RNAB\_B Scan : 27944

Andromeda score : 233.49

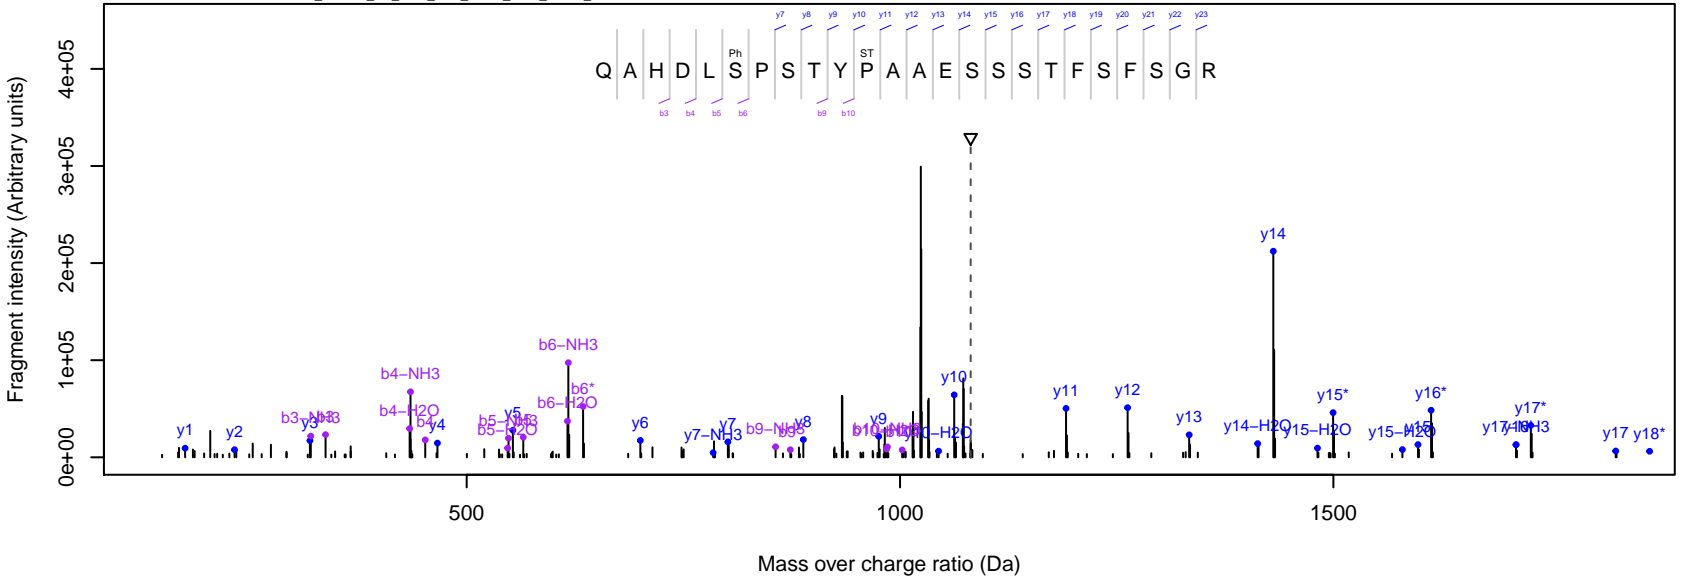

(Acetyl (Protein N-term))S(Phospho (STY))DKPDMAEIEKFDK-2+

Source : QE3\_201126\_FR\_TiOx\_hum\_tissue\_Urea\_RNAB\_N Scan : 31749

Andromeda score : 233.4

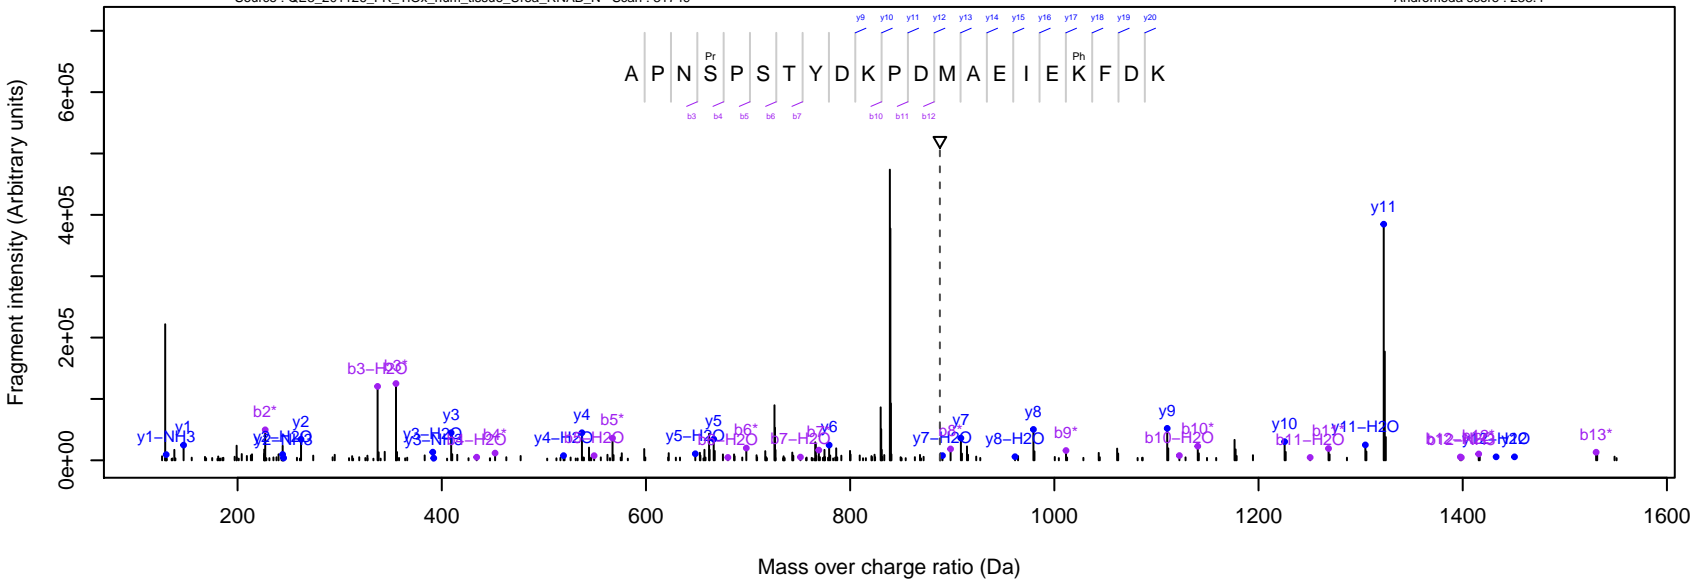

NLKAS(Phospho (STY))LENSLR-2+

Source : QE3\_201126\_FR\_TIOx\_hum\_tissue\_Urea\_RNAB\_N Scan : 20312

Andromeda score : 233.31

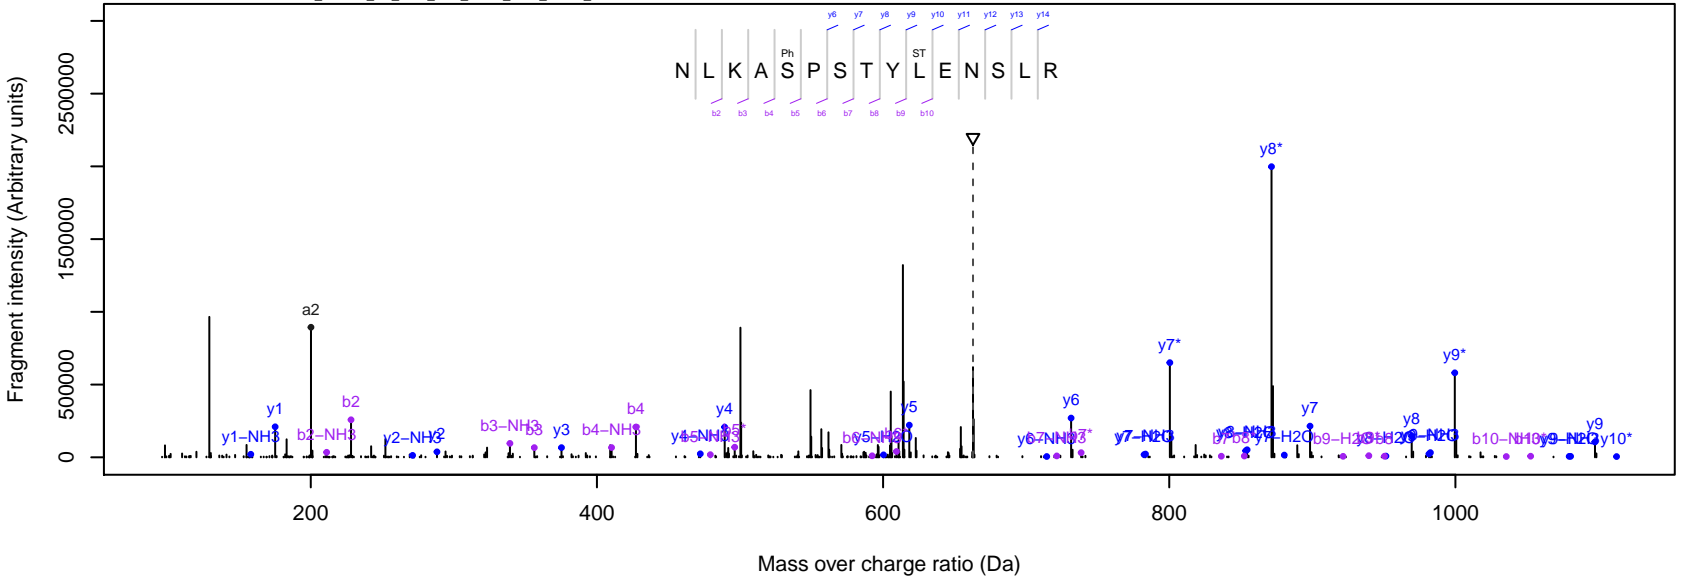

SSS(Phospho (STY))VGSSSSYPISPAVSR-2+

Source : QE3\_201126\_FR\_TIOx\_hum\_tissue\_Urea\_RNAB\_H Scan : 25438

Andromeda score : 233.31

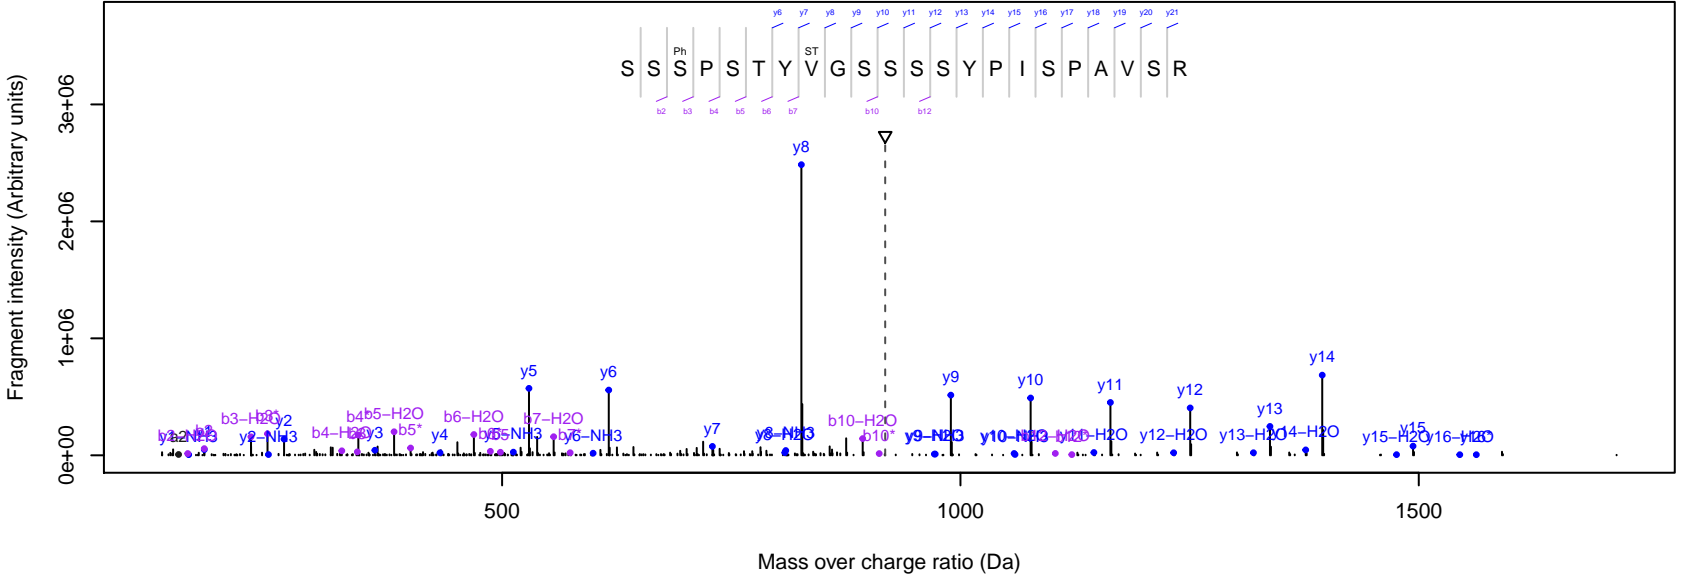

LRNS(Phospho (STY))LDSSSDSAL-2+

Source : QE3\_201126\_FR\_TIOx\_hum\_tissue\_Urea\_RNAB\_N Scan : 21822

Andromeda score : 233.28

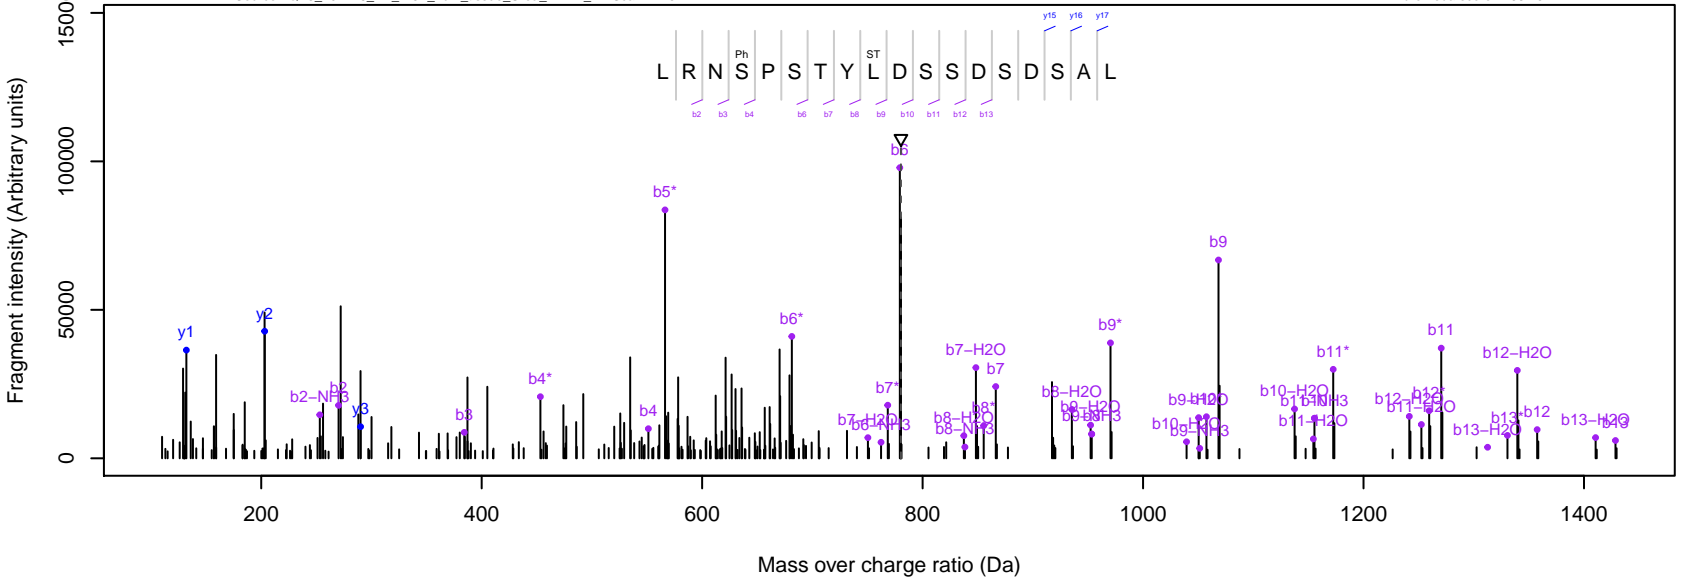

S(Phospho (STY))WSDRSIFSGIGSTAEVPVSQSTTSDYQWDVSR-3+

Source : QE3\_201126\_FR\_TiOx\_hum\_tissue\_Urea\_RNAB\_N Scan : 53654

Andromeda score : 233.22

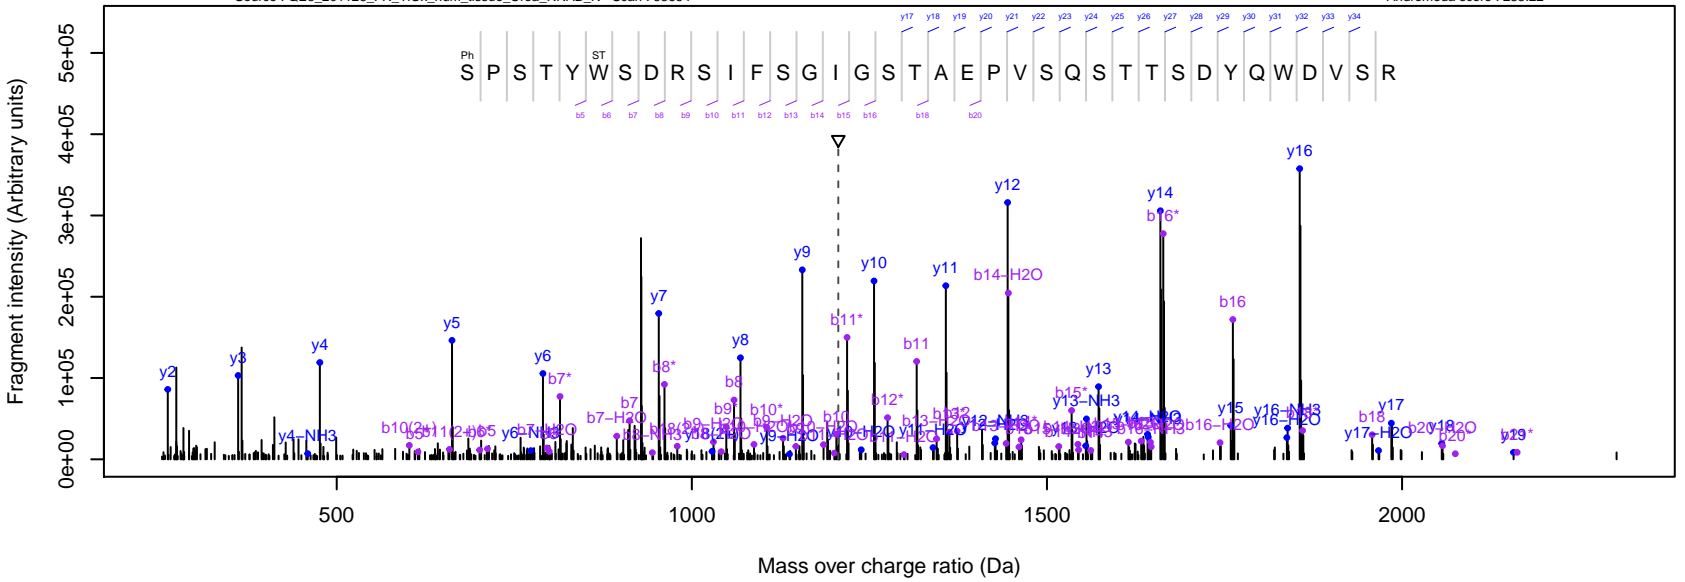

AAVGQES(Phospho (STY))PGGLEAGNAK-2+

Source : QE3\_201126\_FR\_TiOx\_hum\_tissue\_Urea\_RNAB\_B Scan : 15977

Andromeda score : 233.14

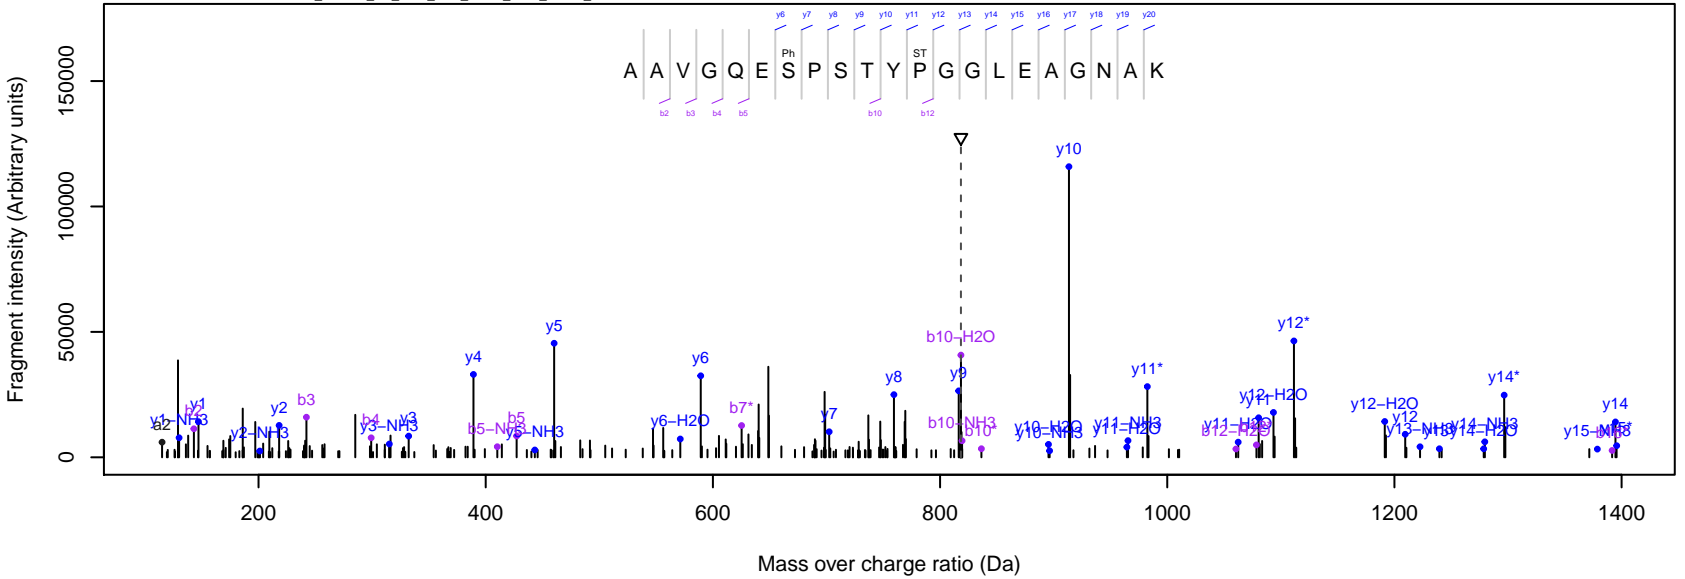

GGM(Oxidation (M))GS(Phospho (STY))GGLATGIAGLAGMGGIQNEK-3+

Source : QE3\_201126\_FR\_TiOx\_hum\_tissue\_Urea\_RNAB\_B Scan : 48423

Andromeda score : 233.08

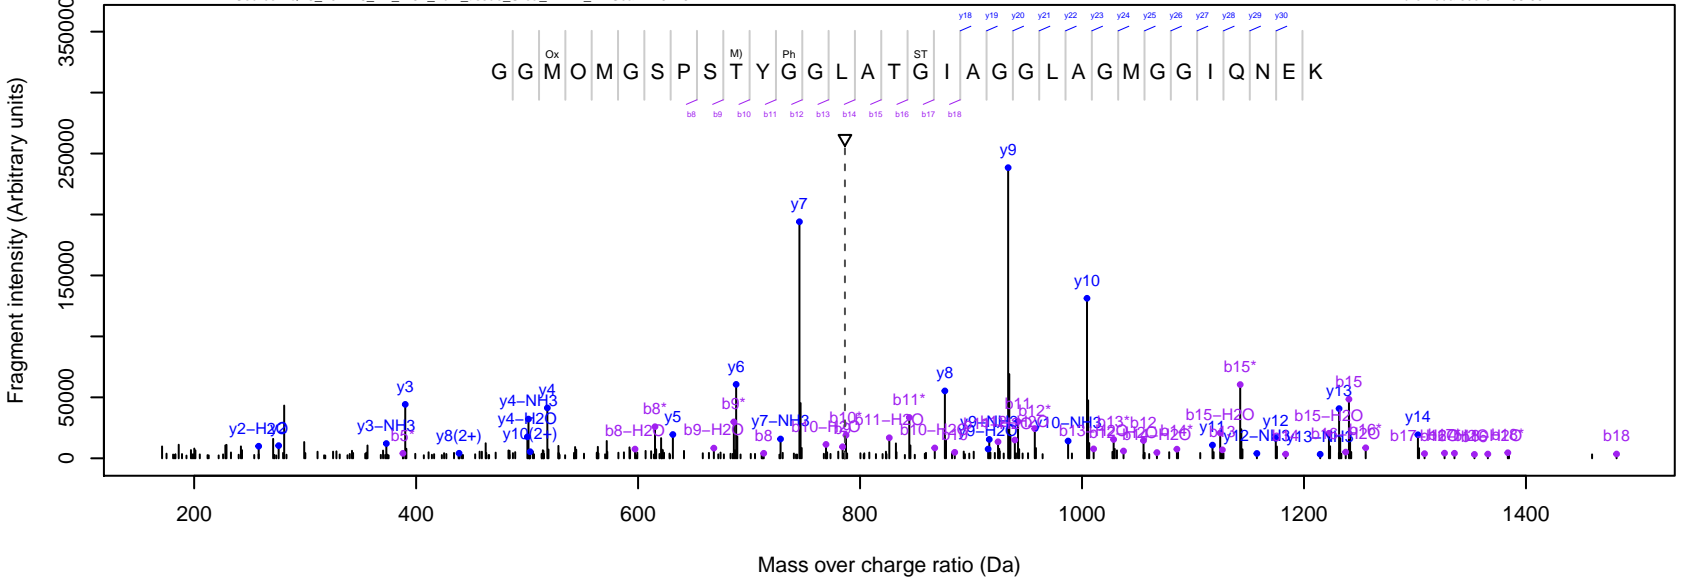

SSS(Phospho (STY))PEDPERDEEVLNHVLR-3+

Source : QE3\_201126\_FR\_TiOx\_hum\_tissue\_Urea\_RNAB\_N Scan : 32177

Andromeda score : 232.87

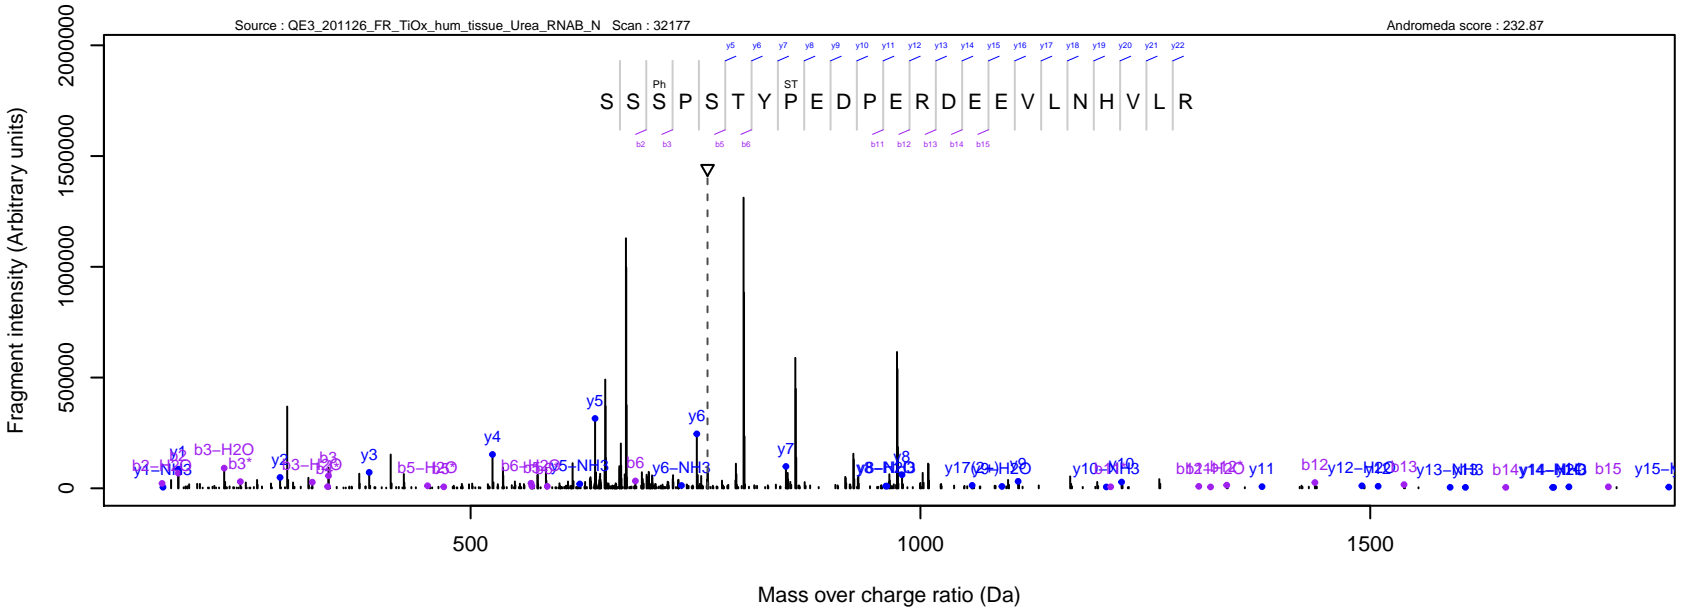

GDM(Oxidation (M))S(Phospho (STY))DEDDENEFFDAPEIITMPENLGHKR-3+

Source : QE3\_201126\_FR\_TiOx\_hum\_tissue\_Urea\_RNAB\_H Scan : 52768

Andromeda score : 232.81

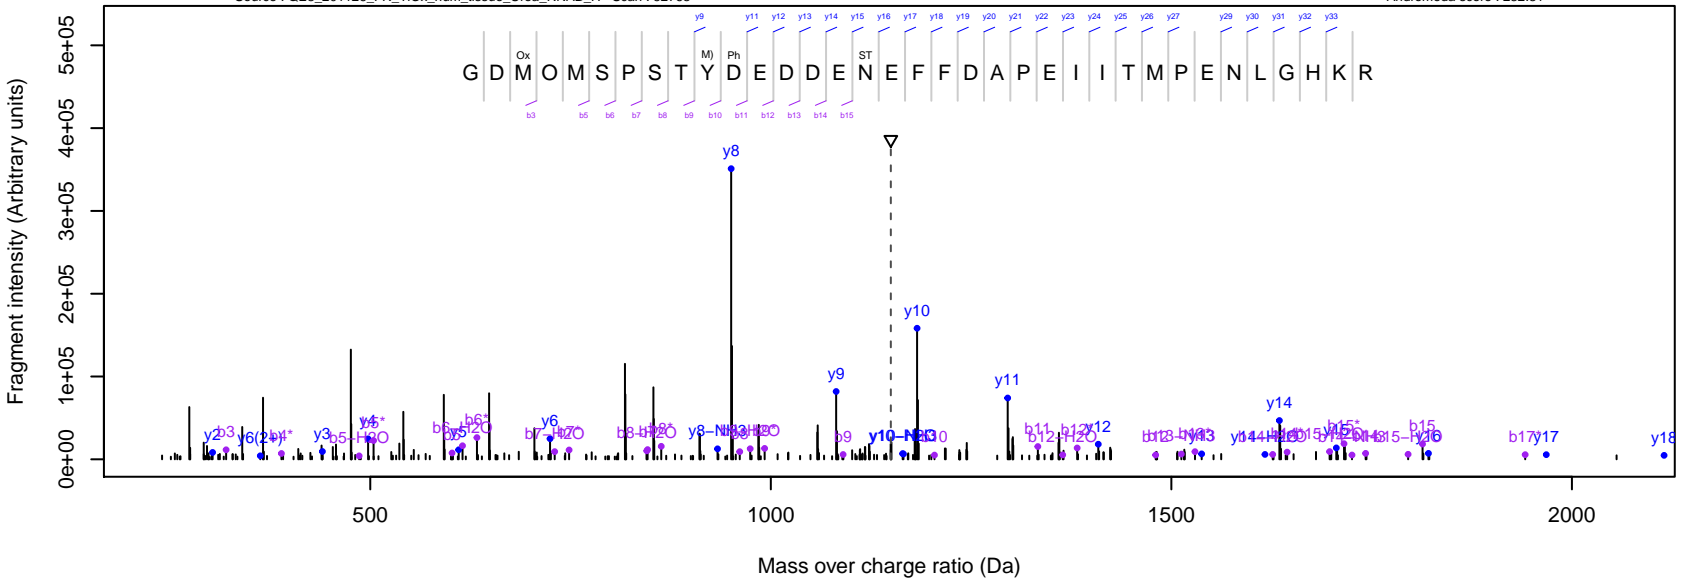

S(Phospho (STY))TSFRGGMGSGGLATGIAGGLAGMGGIQNEK-3+

Source : QE3\_201126\_FR\_TiOx\_hum\_tissue\_Urea\_RNAB\_H Scan : 47211

Andromeda score : 232.73

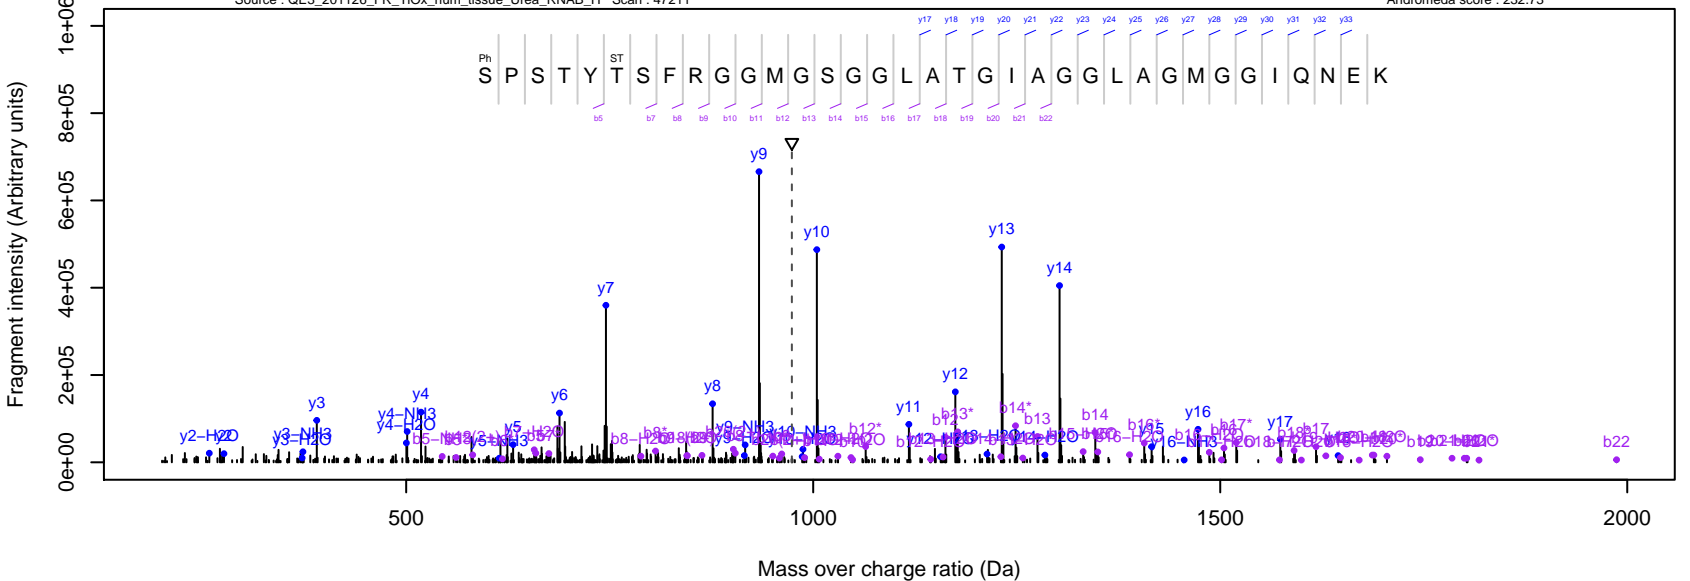

NIDQSEFGS(Phospho (STY))FVNSEFLKPEVK-3+

Source : QE3\_201126\_FR\_TiOx\_hum\_tissue\_Urea\_RNAB\_H Scan : 57307

Andromeda score : 232.62

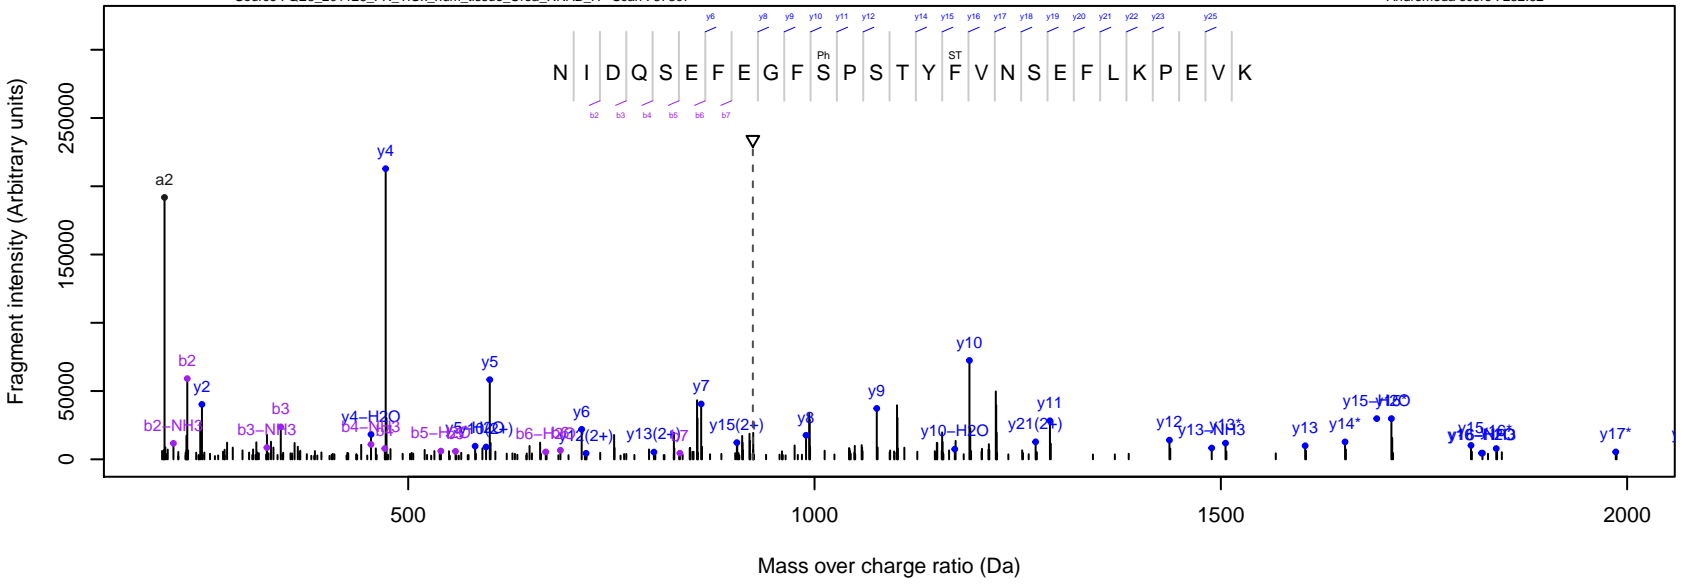

GSYGS(Phospho (STY))DAEEEEYRQLSEHSK-3+

Source : QE3\_201126\_FR\_TiOx\_hum\_tissue\_Urea\_RNAB\_H Scan : 19115

Andromeda score : 232.59

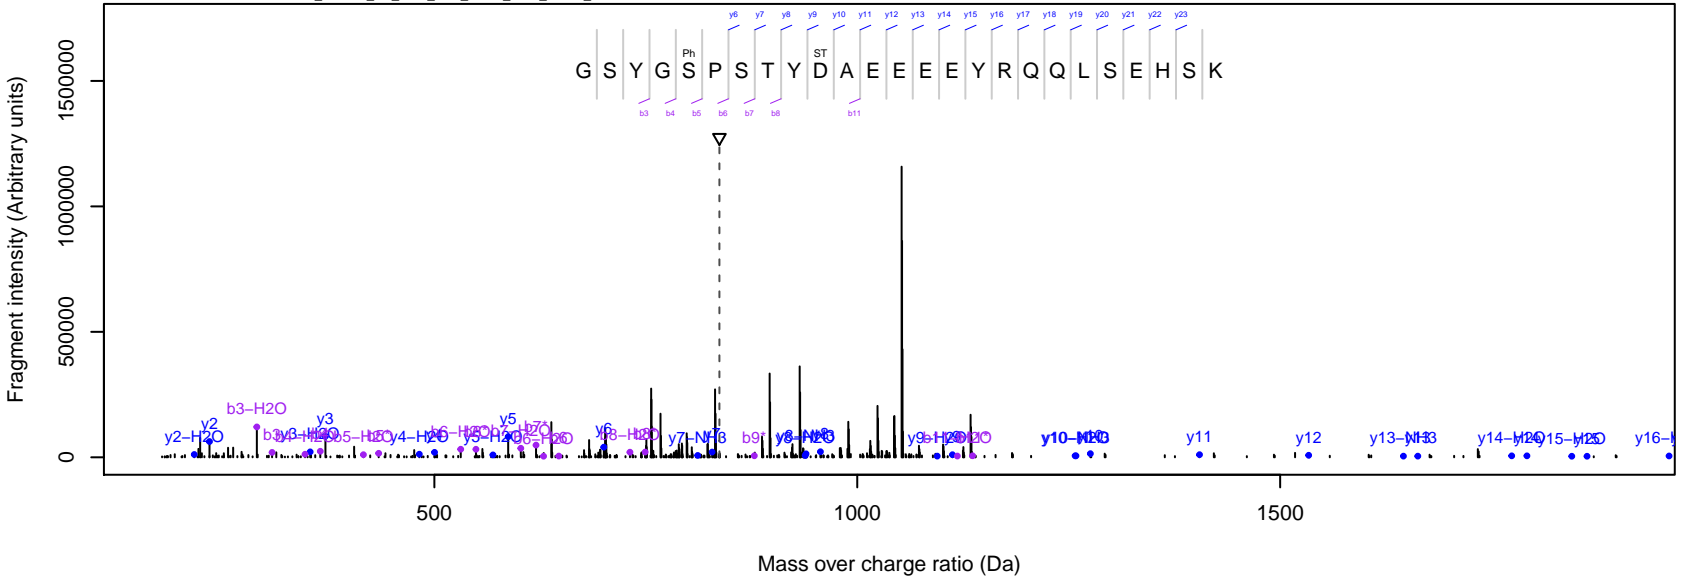

SEDES(Phospho (STY))ETEDEEEKSQEDQEK-3+

Source : QE3\_201126\_FR\_TiOx\_hum\_tissue\_Urea\_RNAB\_H Scan : 8631

Andromeda score : 232.59

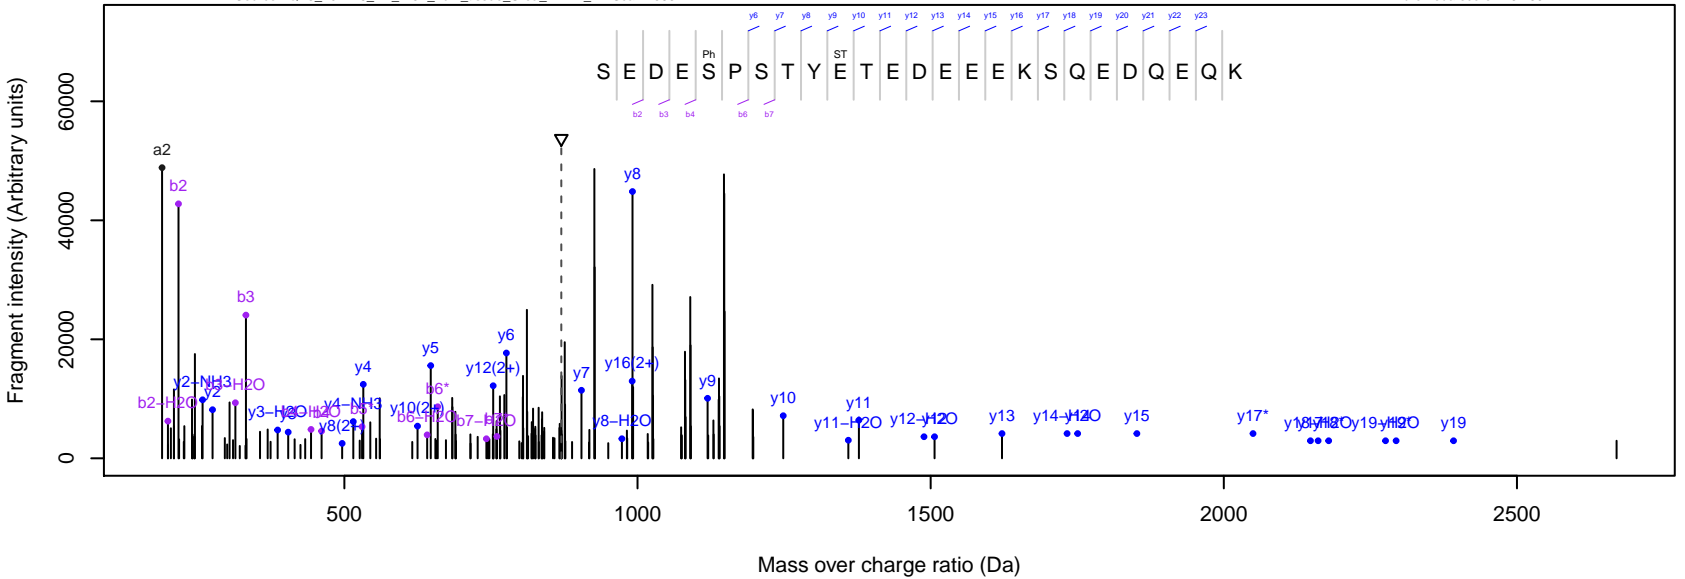



DALGDSLQVPVSPS(Phospho (STY))STTSSR-2+

Source : QE3\_201126\_FR\_TiOx\_hum\_tissue\_Urea\_RNAB\_B Scan : 38959

Andromeda score : 232.54

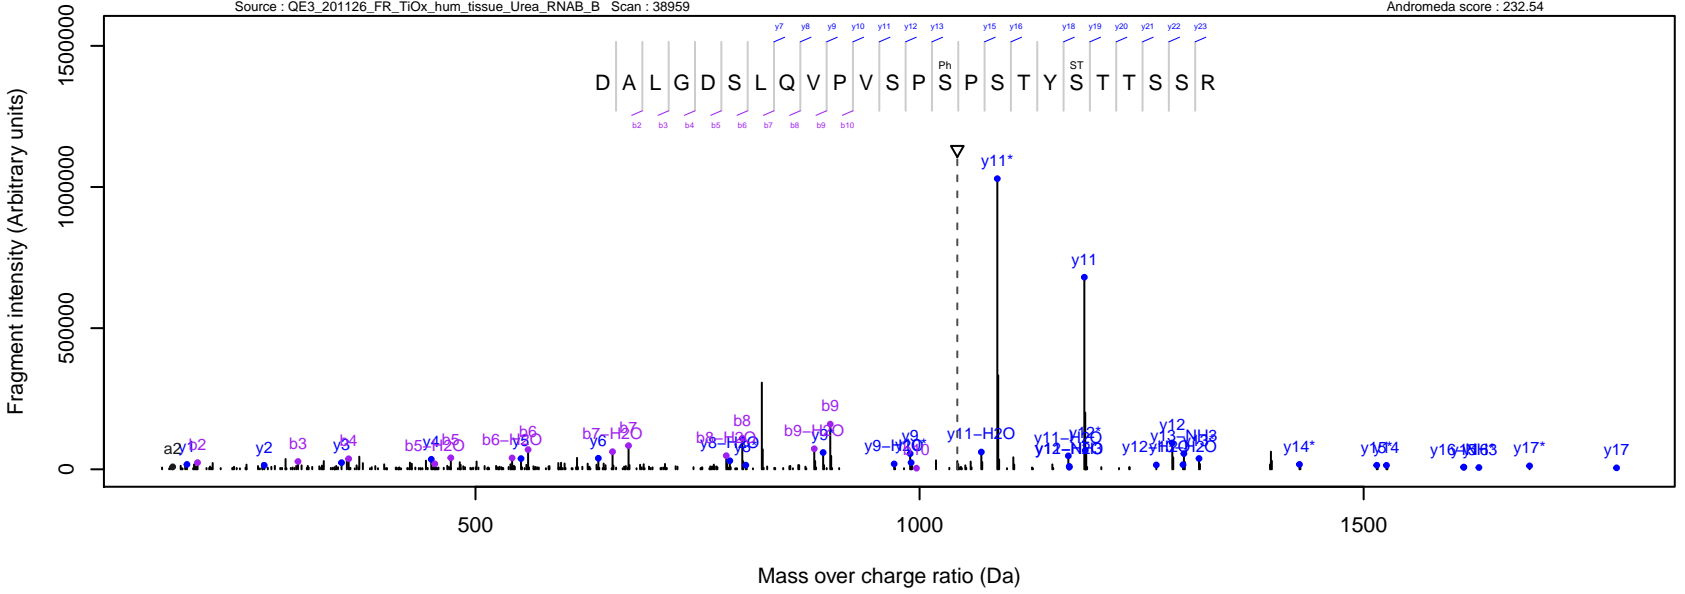

YESQEPLAGQES(Phospho (STY))PLPLATR-2+

Source : QE3\_201126\_FR\_TiOx\_hum\_tissue\_Urea\_RNAB\_N Scan : 37644

Andromeda score : 232.51

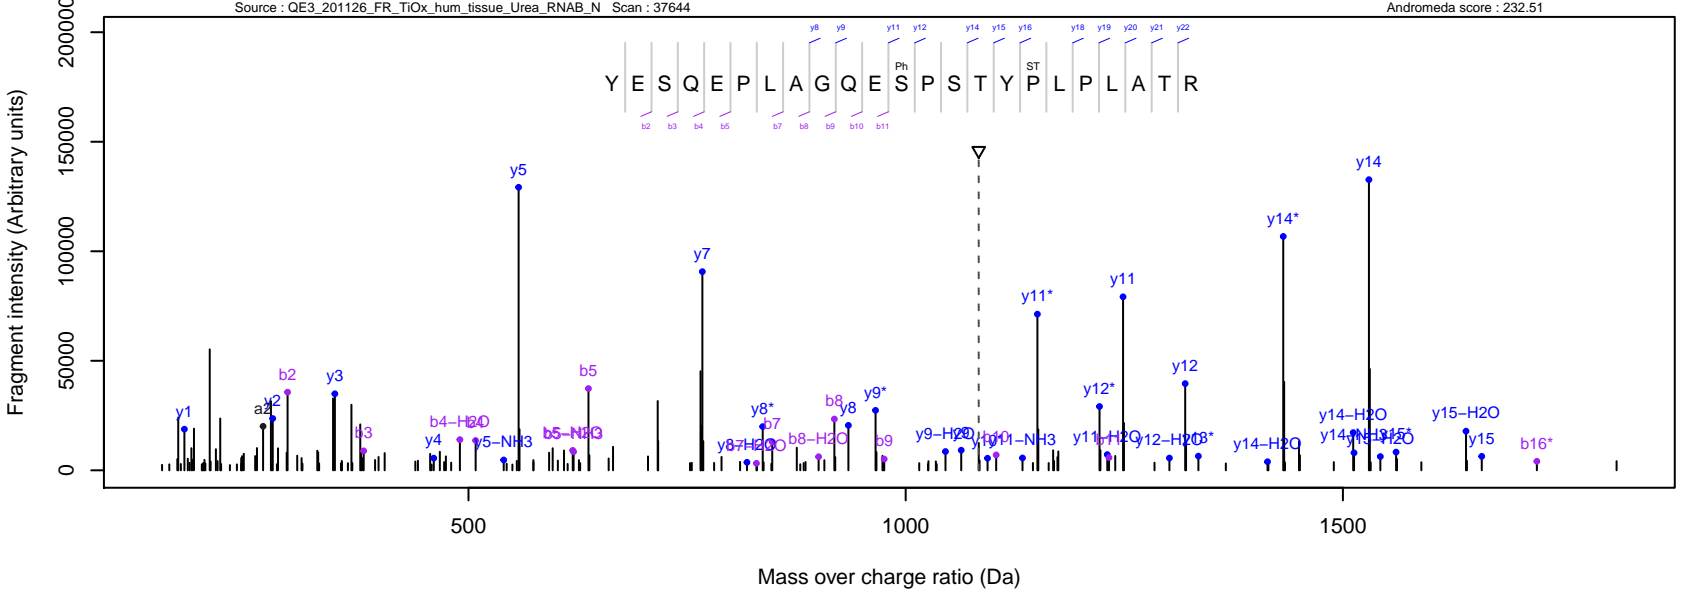

DFDIAEQNESS(Phospho (STY))DEESLRK-3+

Source : QE3\_201126\_FR\_TiOx\_hum\_tissue\_Urea\_RNAB\_H Scan : 25902

Andromeda score : 232.29

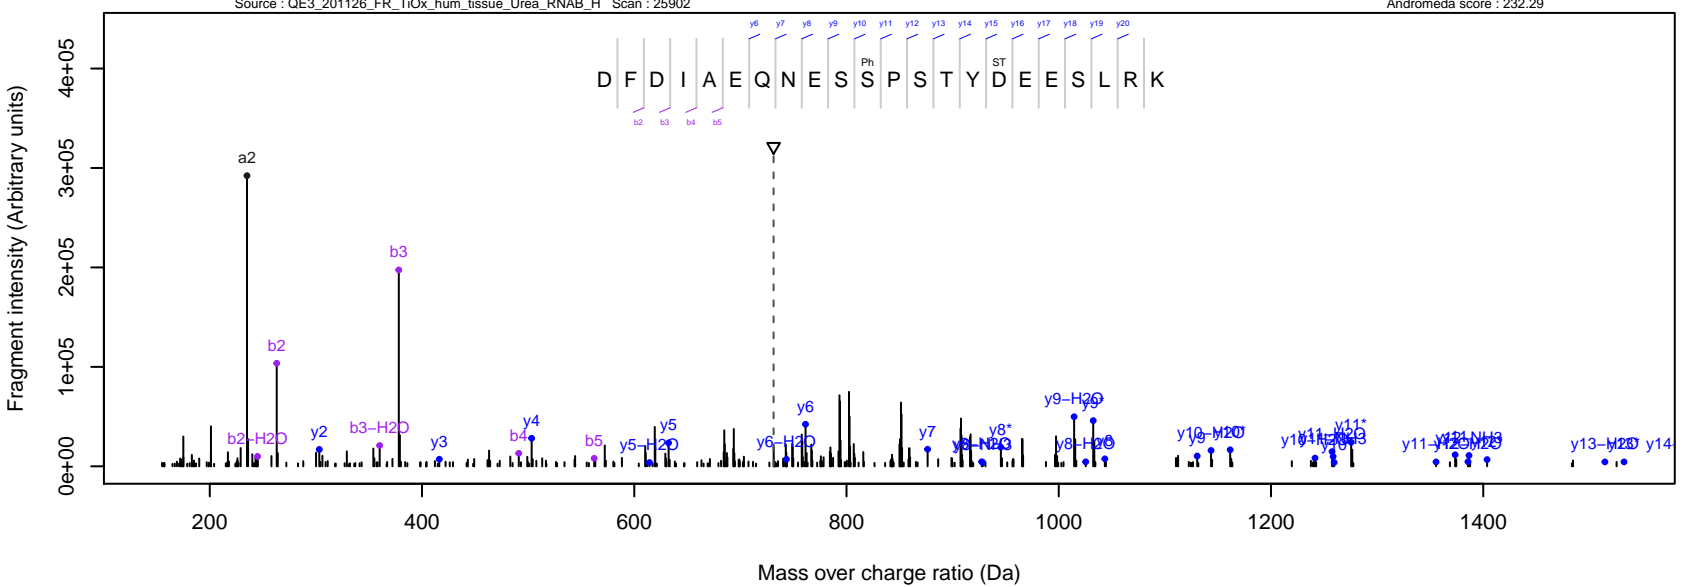

ETNLDS(Phospho (STY))LPLVDTHSK-2+

Source : QE3\_201126\_FR\_TIOx\_hum\_tissue\_Urea\_RNAB\_N Scan : 33420

Andromeda score : 232.28

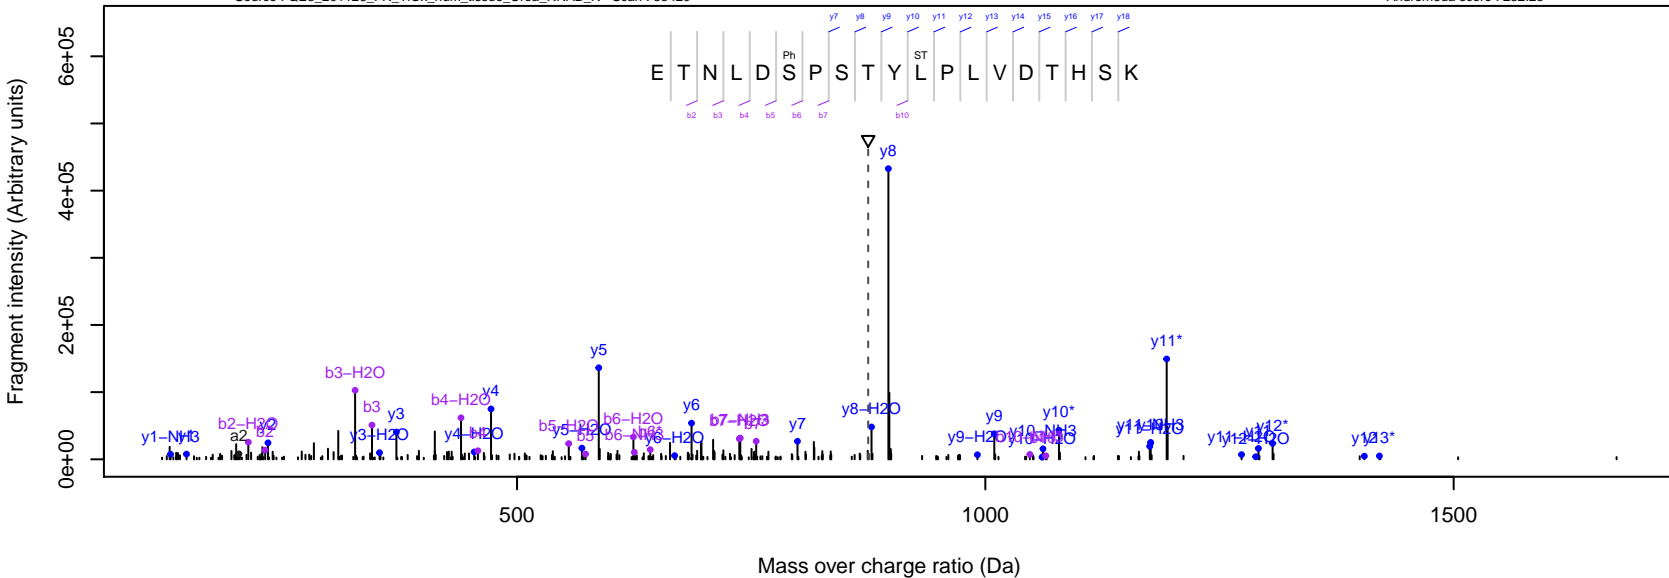

NSATFKS(Phospho (STY))FEDR-2+

Source : QE3\_201126\_FR\_TIOx\_hum\_tissue\_Urea\_RNAB\_B Scan : 15841

Andromeda score : 232.22

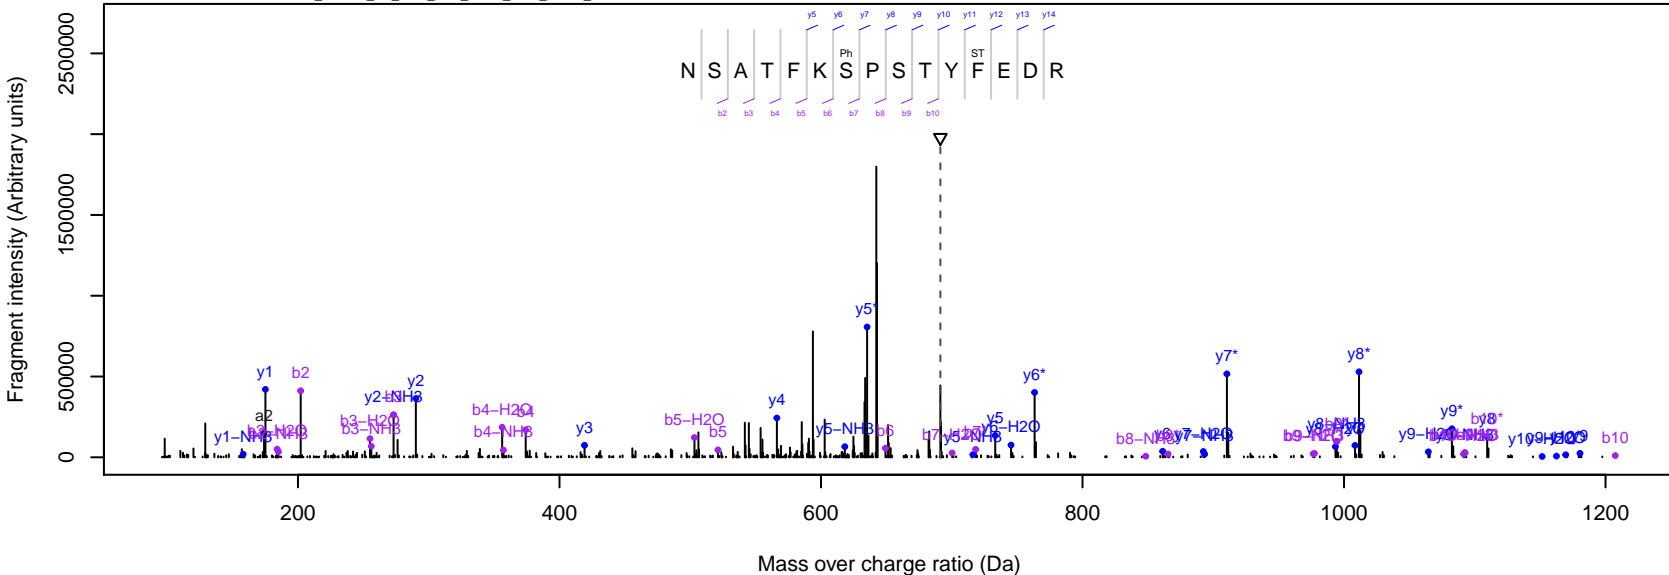

LVHSGPGKGS(Phospho (STY))PQAGVDSLFA TR-3+

Source : QE3\_201126\_FR\_TIOx\_hum\_tissue\_Urea\_RNAB\_B Scan : 22450

Andromeda score : 232.18

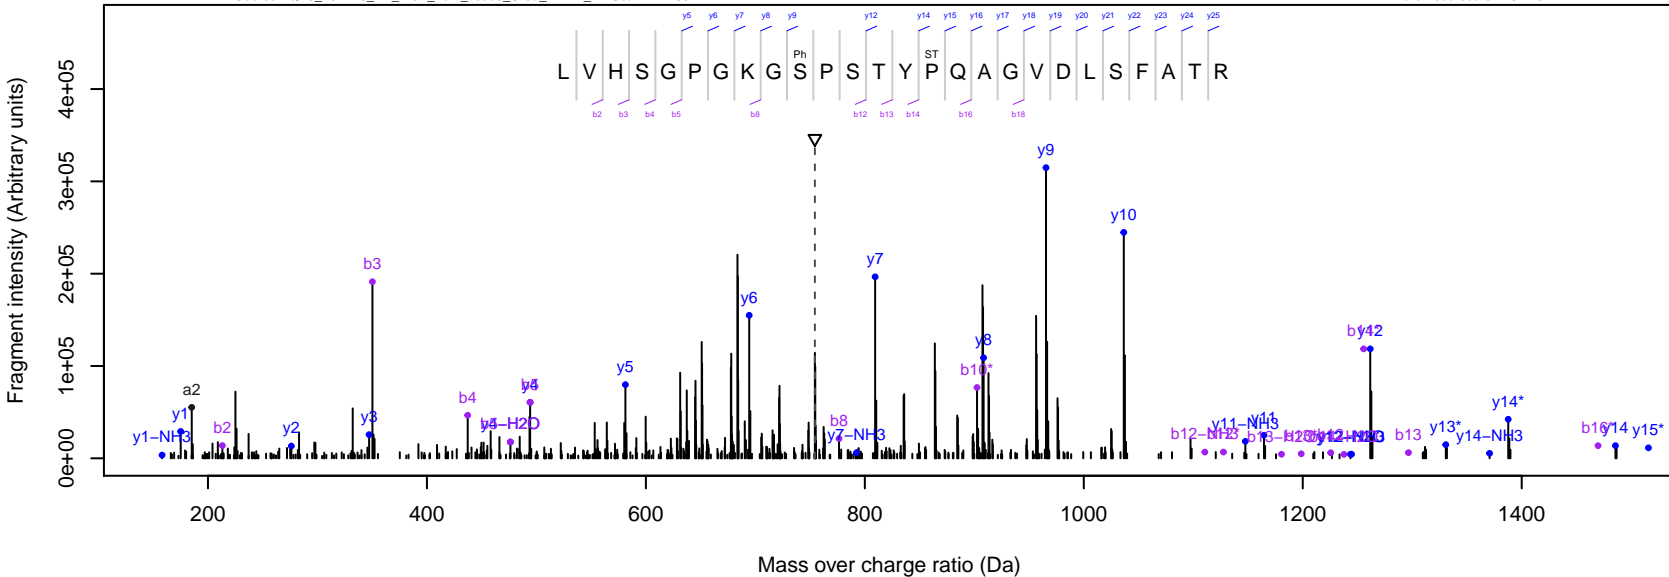

SRS(Phospho (STY))DIDVNAAGAK-2+

Source : QE3\_201126\_FR\_TiOx\_hum\_tissue\_Urea\_RNAB\_H Scan : 10083

Andromeda score : 232.15

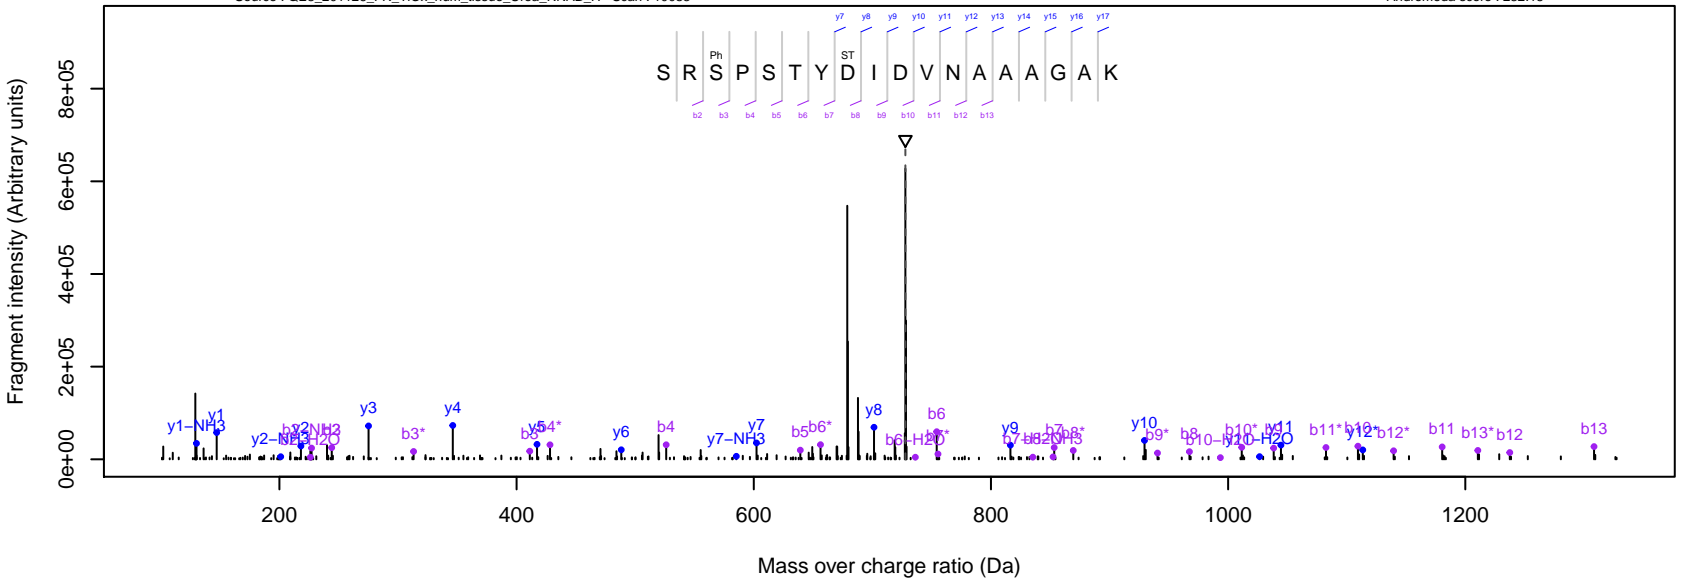

YLLGDAPVS(Phospho (STY))PSSQK-2+

Source : QE3\_201126\_FR\_TiOx\_hum\_tissue\_Urea\_RNAB\_H Scan : 29326

Andromeda score : 232.13

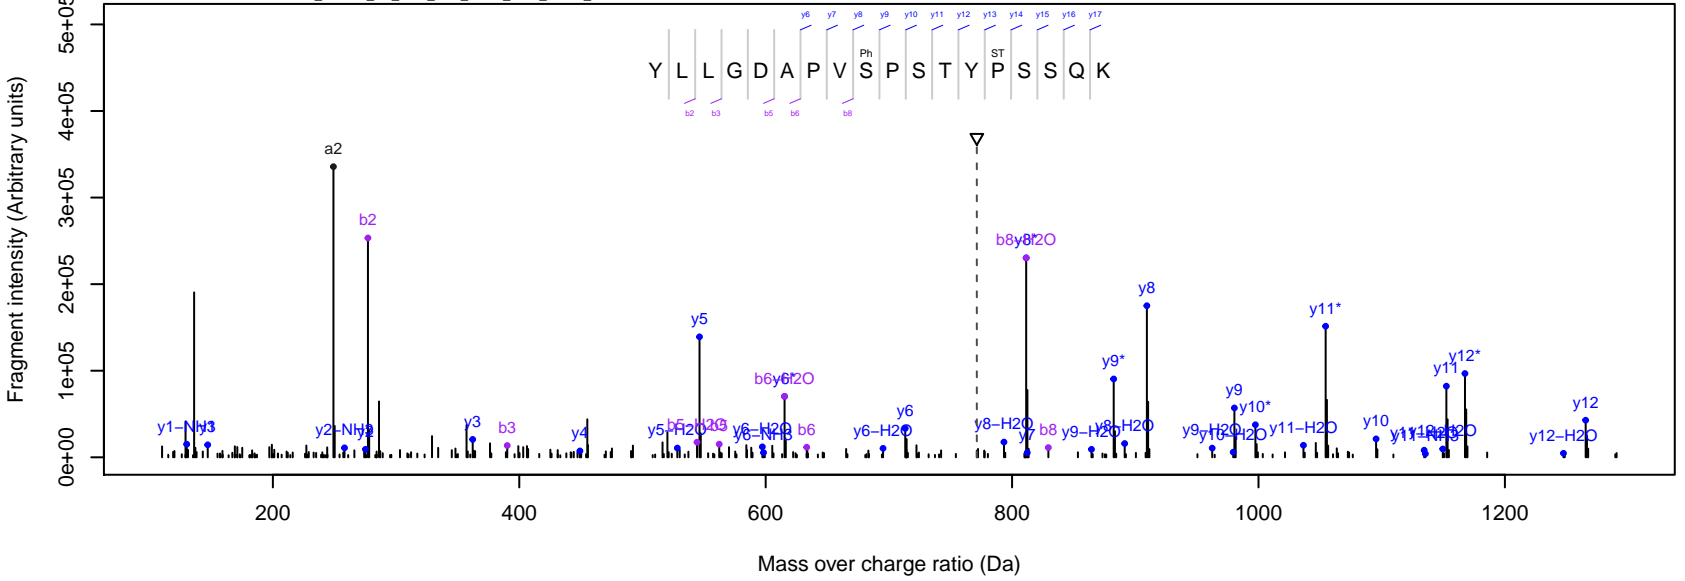

KAS(Phospho (STY))PEAASTPRDPIDVDLPEEAER-3+

Source : QE3\_201126\_FR\_TiOx\_hum\_tissue\_Urea\_RNAB\_H Scan : 27920

Andromeda score : 231.94

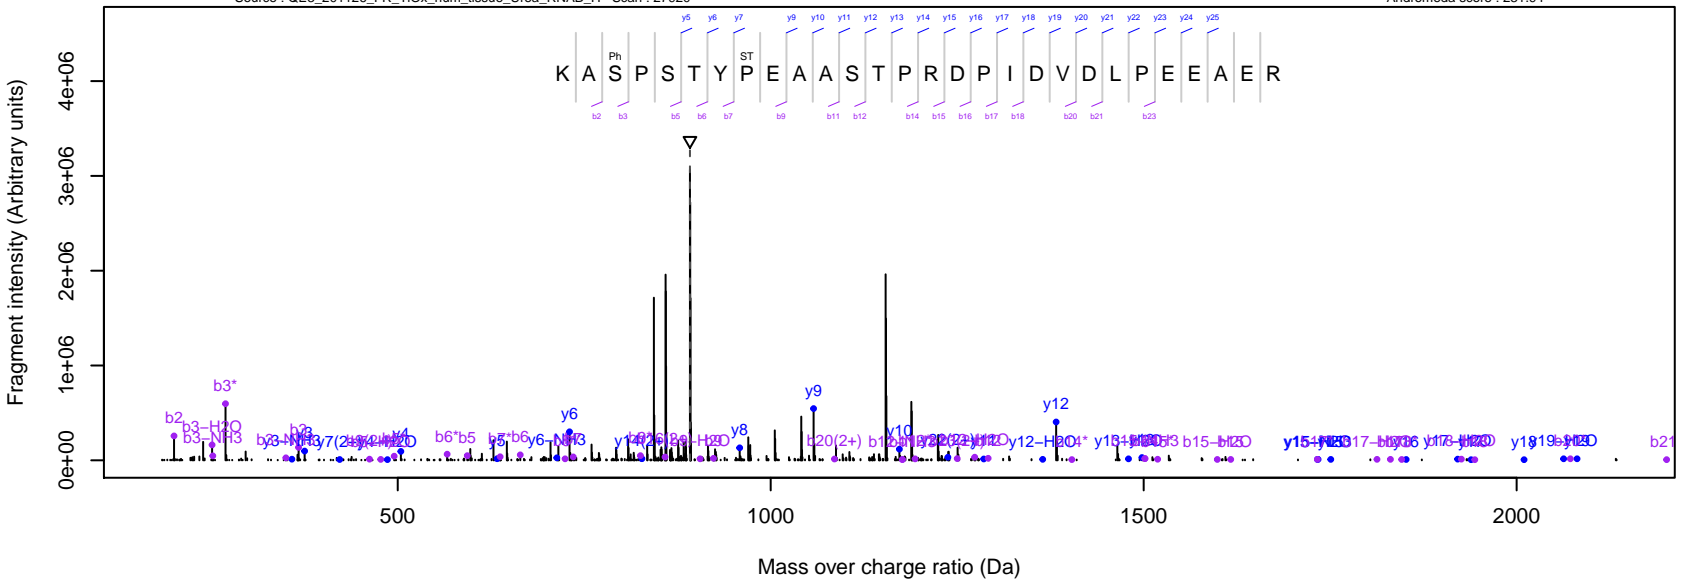

KPPAPP(Phospho (STY))PVQSQS(Phospho (STY))PSTNWSPAVPVKK-3+

Source : QE3\_201126\_FR\_TiOx\_hum\_tissue\_Urea\_RNAB\_H Scan : 27299

Andromeda score : 231.93

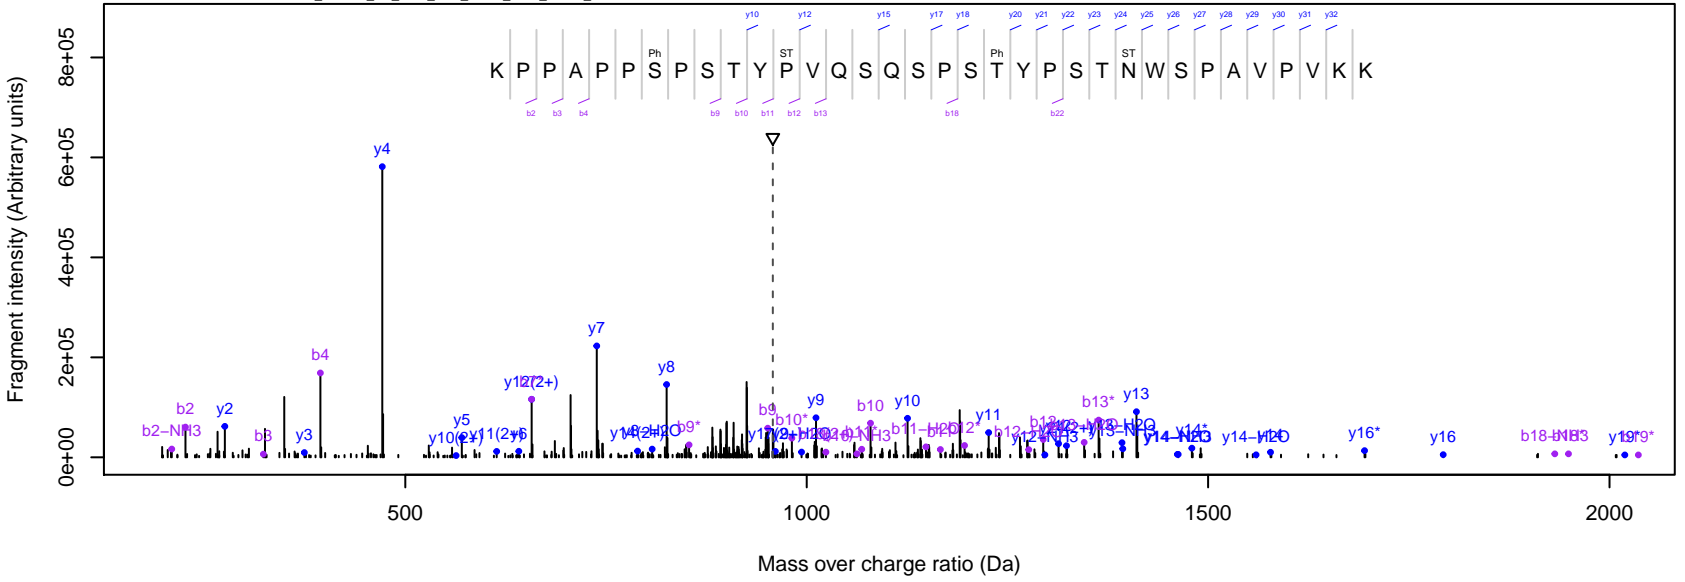

IALESEGRPEEQM(Oxidation (M))ES(Phospho (STY))DNCS(Phospho (STY))GGDDWTHLS(Phospho (STY))SK-3+

Source : QE3\_201126\_FR\_TiOx\_hum\_tissue\_Urea\_RNAB\_H Scan : 36617

Andromeda score : 231.78

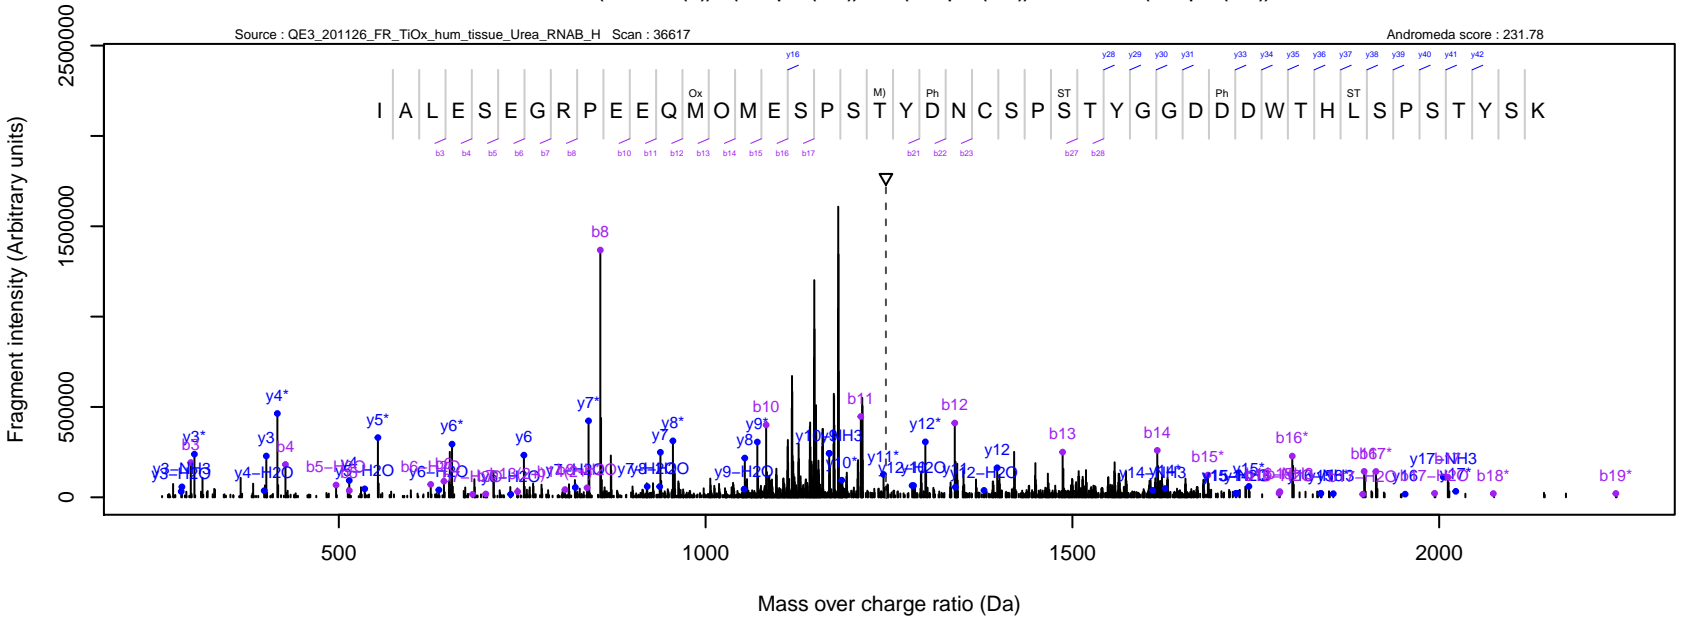

KTS(Phospho (STY))ASDVTNIYPGDAGK-2+

Source : QE3\_201126\_FR\_TiOx\_hum\_tissue\_Urea\_RNAB\_N Scan : 19019

Andromeda score : 231.77

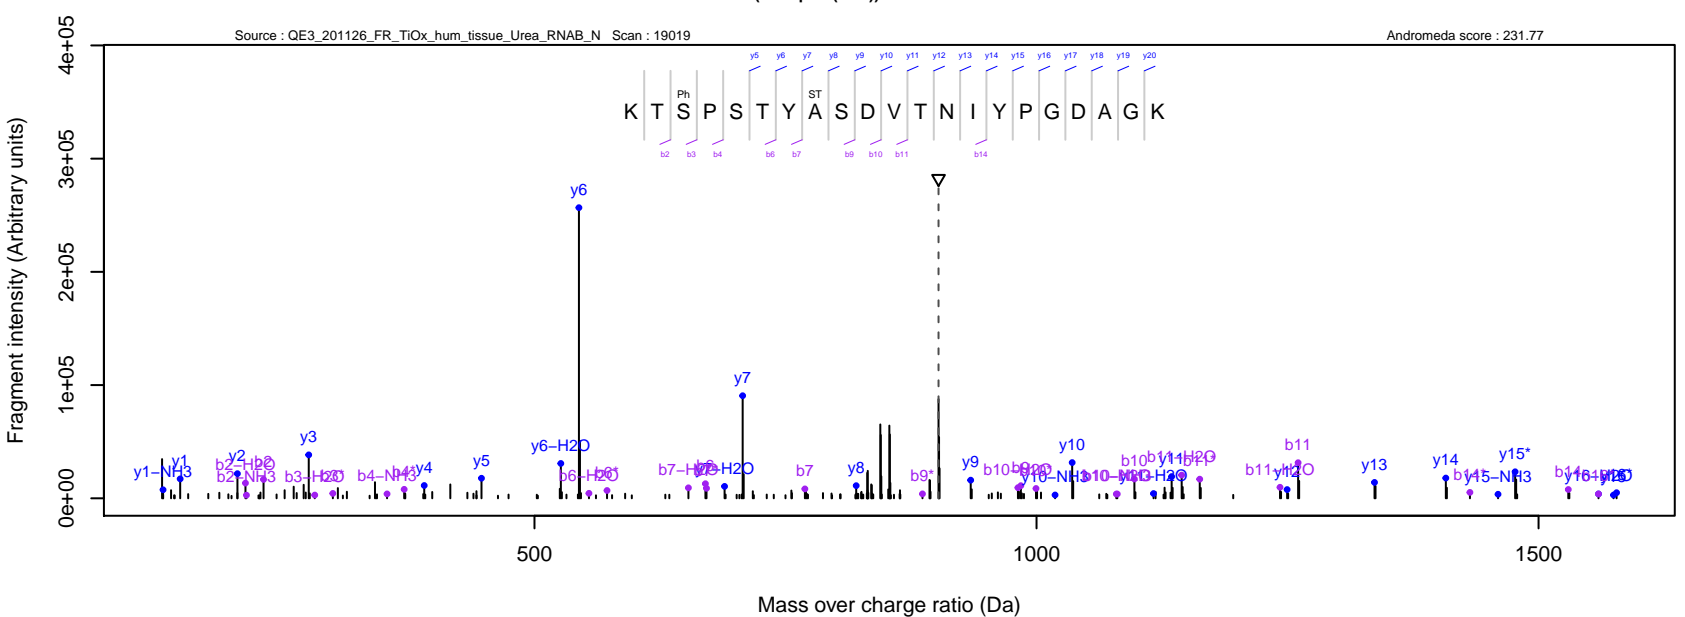

AEIKEM(Oxidation (M))LAS(Phospho (STY))DDEEDVSSK-2+

Source : QE3\_201126\_FR\_TIOx\_hum\_tissue\_Urea\_RNAB\_N Scan : 15969

Andromeda score : 231.49

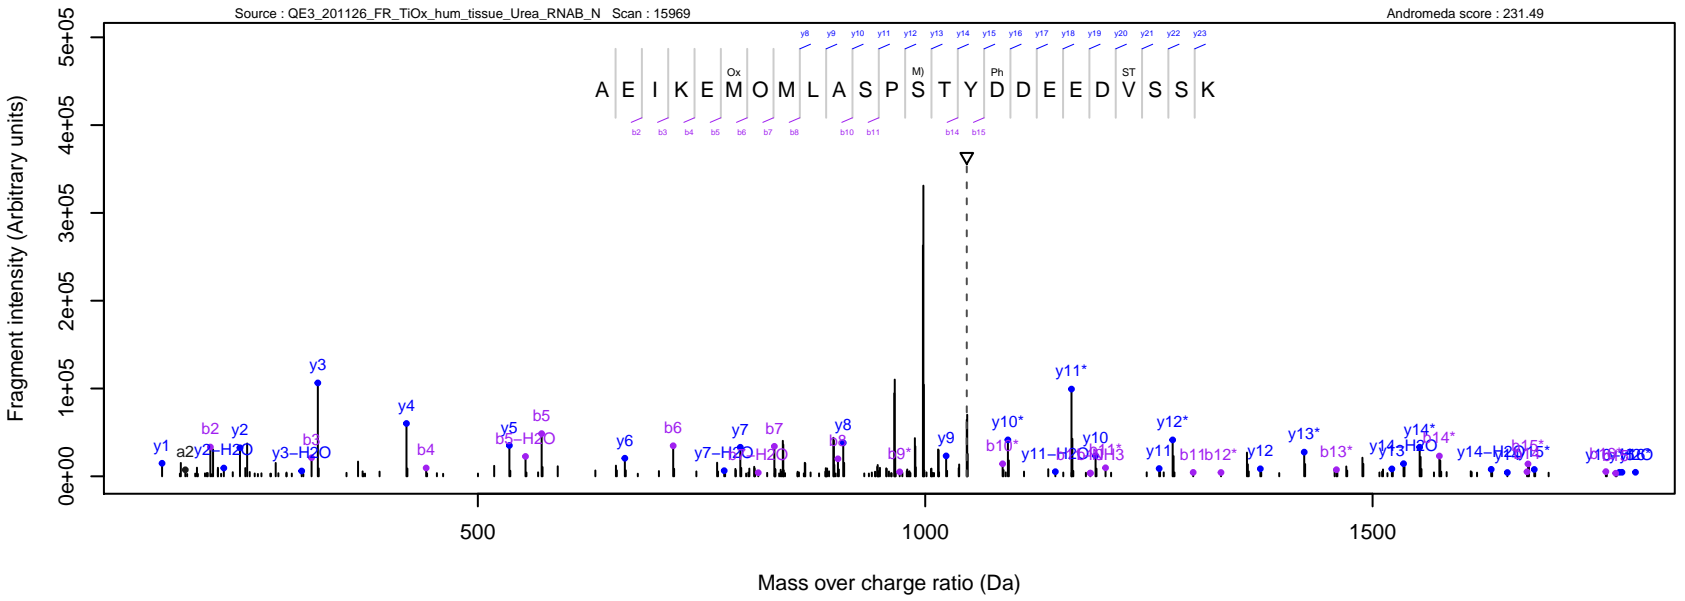

KGES(Phospho (STY))QTDIEITREEDFTR-3+

Source : QE3\_201126\_FR\_TIOx\_hum\_tissue\_Urea\_RNAB\_N Scan : 22014

Andromeda score : 231.44

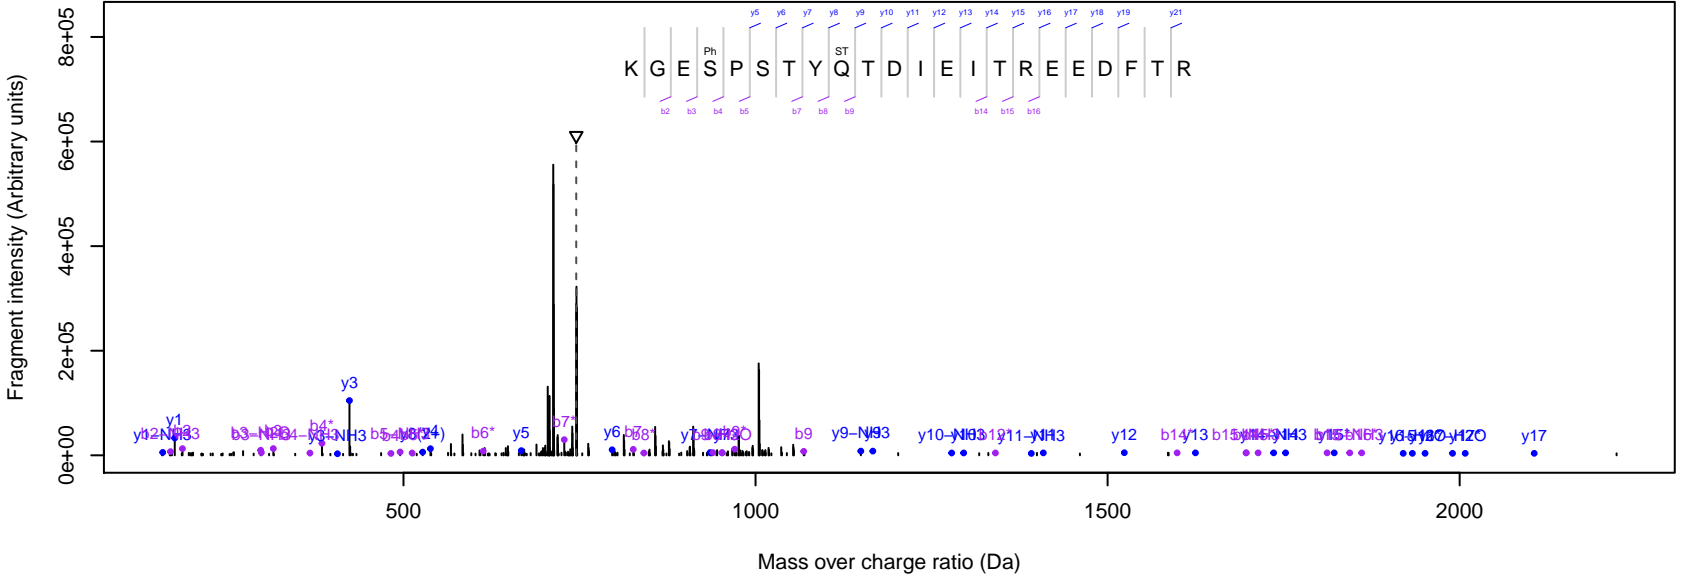

SKS(Phospho (STY))PDPDPNLSHDR-3+

Source : QE3\_201126\_FR\_TIOx\_hum\_tissue\_Urea\_RNAB\_N Scan : 6448

Andromeda score : 231.38

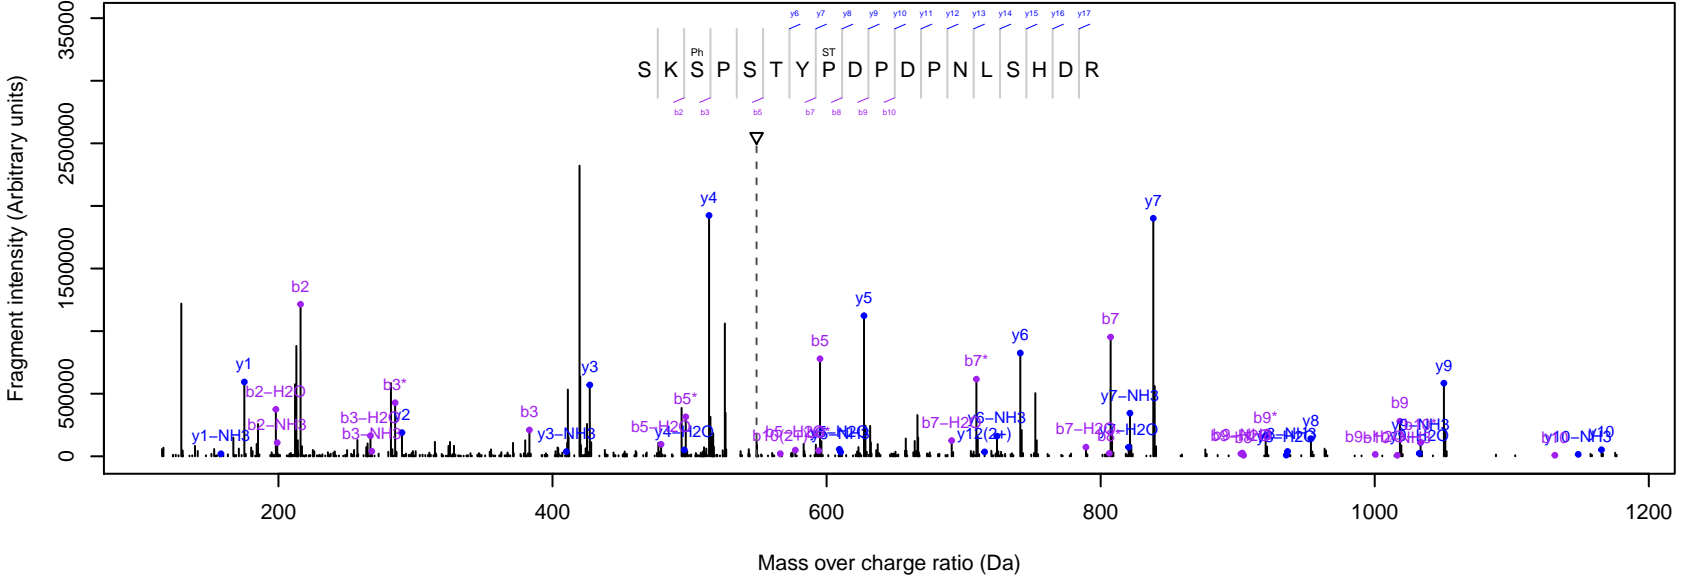

QGS(Phospho (STY))PTPALPEKR-2+

Source : QE3\_201126\_FR\_TiOx\_hum\_tissue\_Urea\_RNAB\_H Scan : 9919

Andromeda score : 231.22

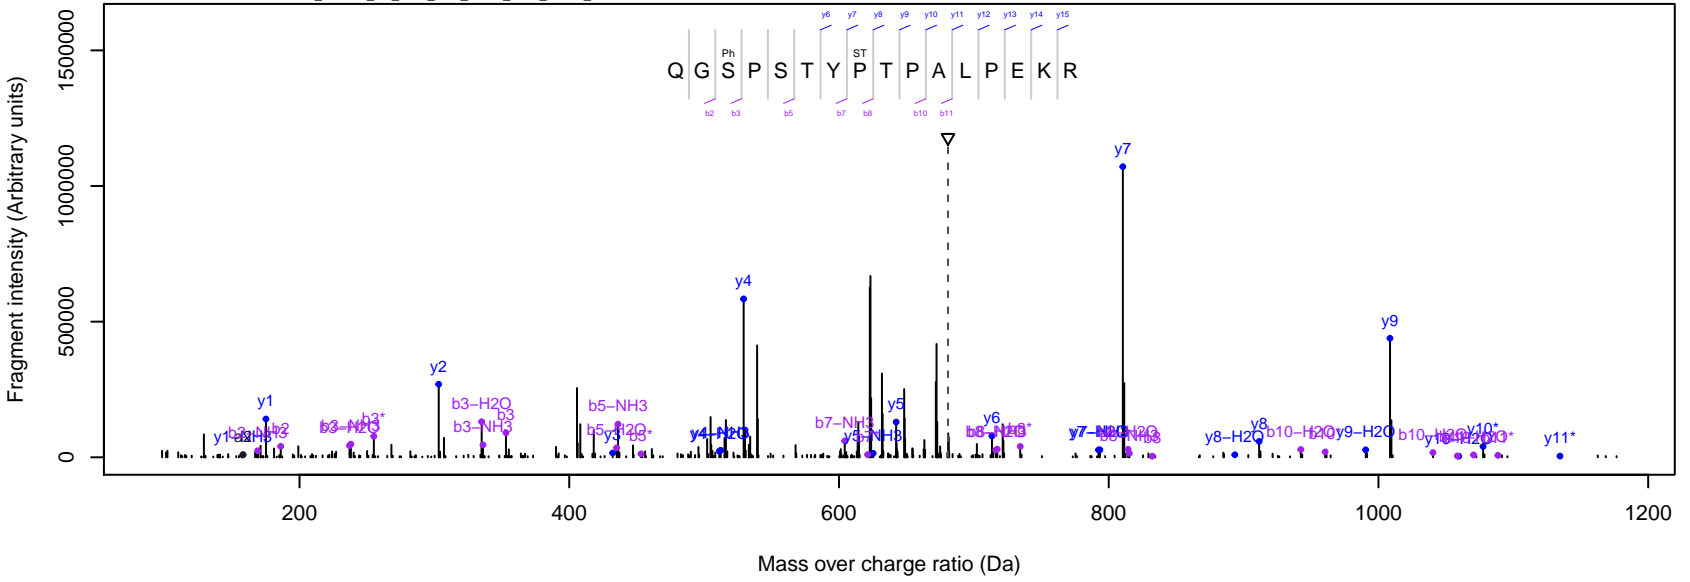

LSVPTS(Phospho (STY))DEEDEVPAKPR-2+

Source : QE3\_201126\_FR\_TiOx\_hum\_tissue\_Urea\_RNAB\_B Scan : 23426

Andromeda score : 231.21

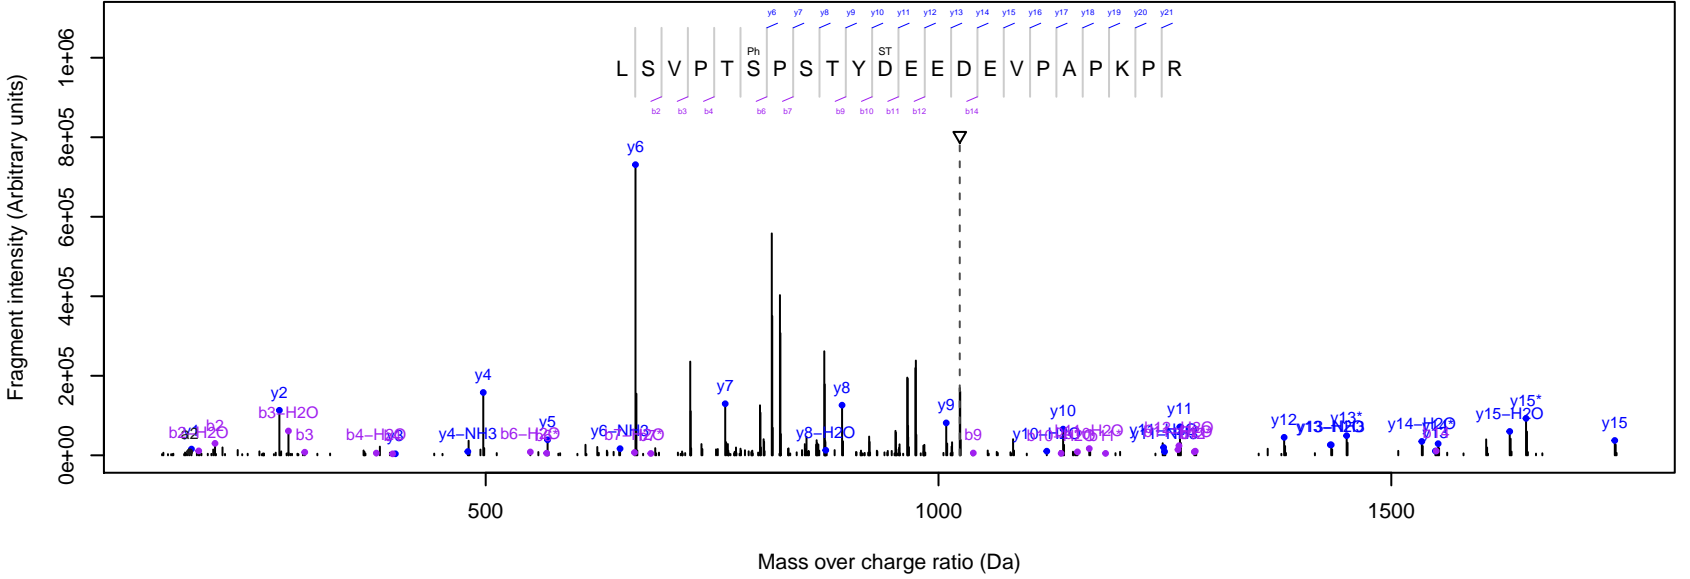

QRIDEFES(Phospho (STY))M(Oxidation (M))-2+

Source : QE3\_201126\_FR\_TiOx\_hum\_tissue\_Urea\_RNAB\_N Scan : 19835

Andromeda score : 231.16

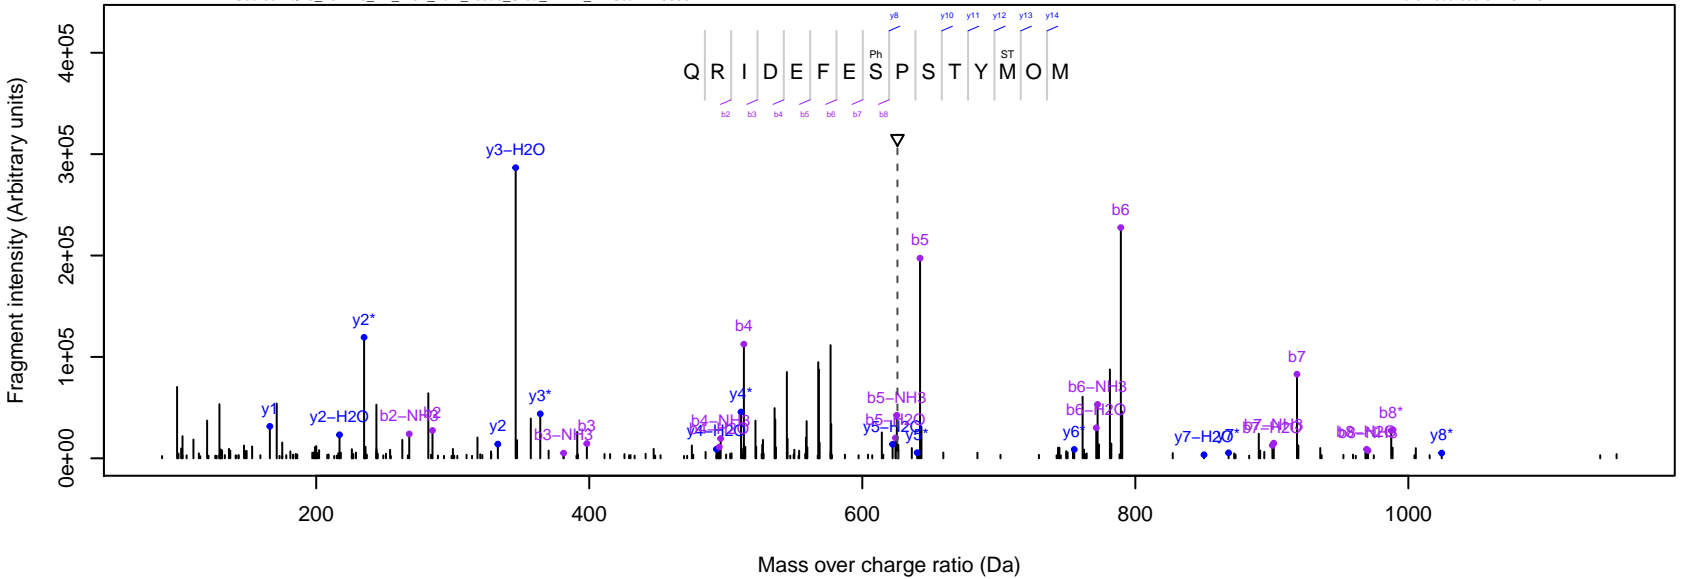

AKKAEQGS(Phospho (STY))EEEEEEEEEEEEGGESK-3+

Source : QE3\_201126\_FR\_TiOx\_hum\_tissue\_Urea\_RNAB\_B Scan : 5119

Andromeda score : 230.88

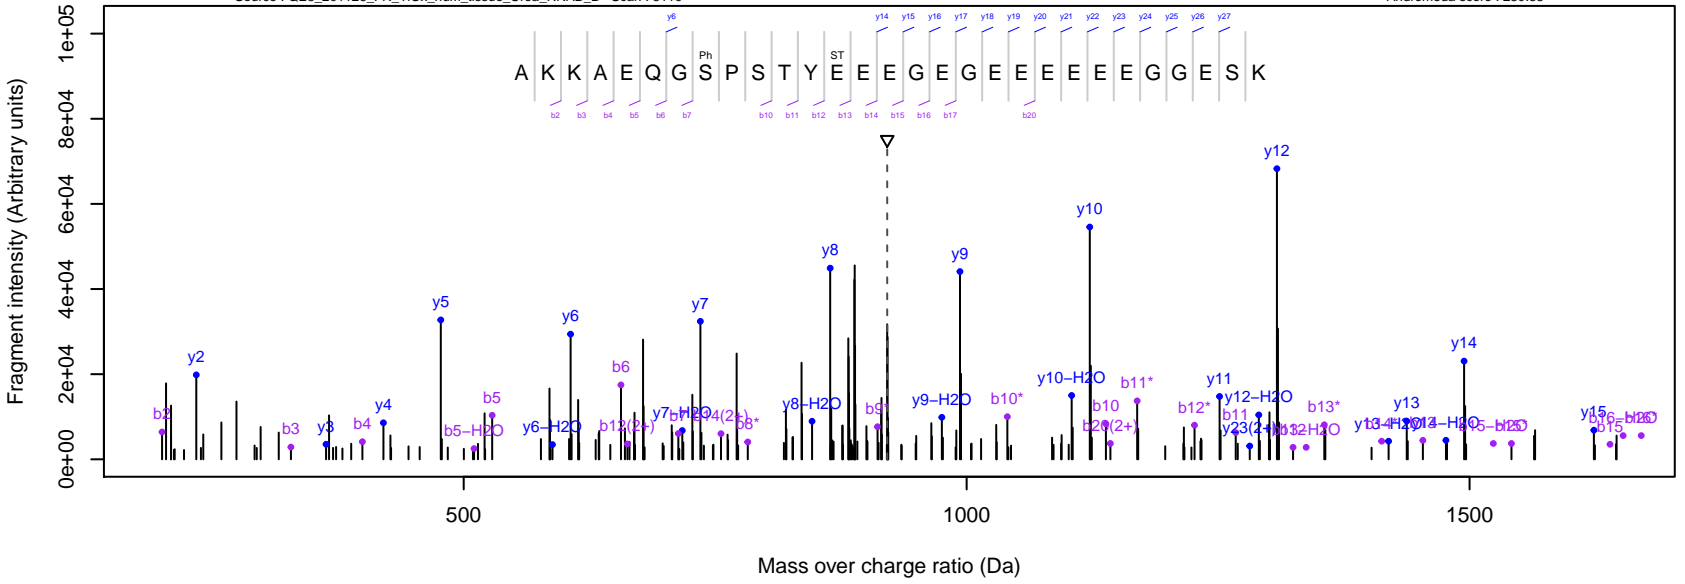

IADPEHDHTGFLT(Phospho (STY))EY(Phospho (STY))VATR-3+

Source : QE3\_201126\_FR\_TiOx\_hum\_tissue\_Urea\_RNAB\_H Scan : 32692

Andromeda score : 230.86

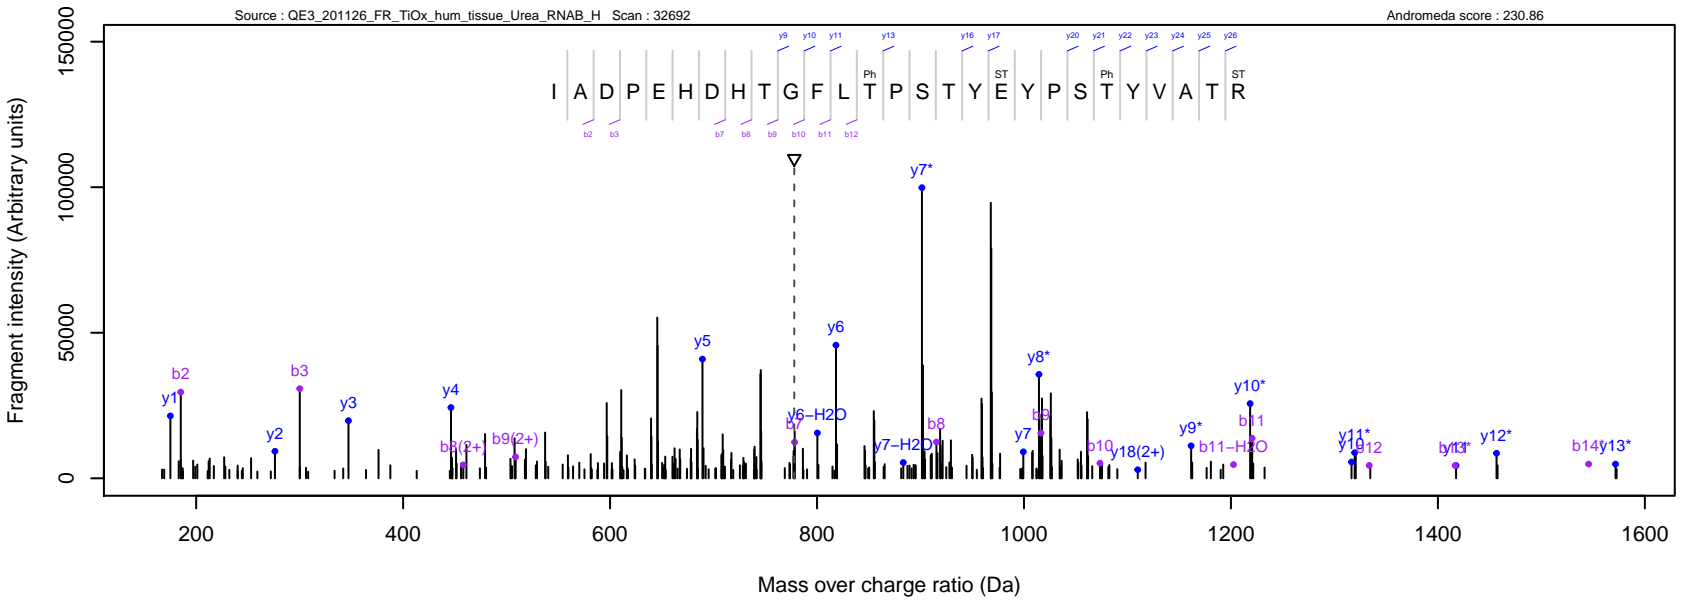

NYDIGAALDT(Phospho (STY))IQYSK-2+

Source : QE3\_201126\_FR\_TiOx\_hum\_tissue\_Urea\_RNAB\_B Scan : 41413

Andromeda score : 230.82

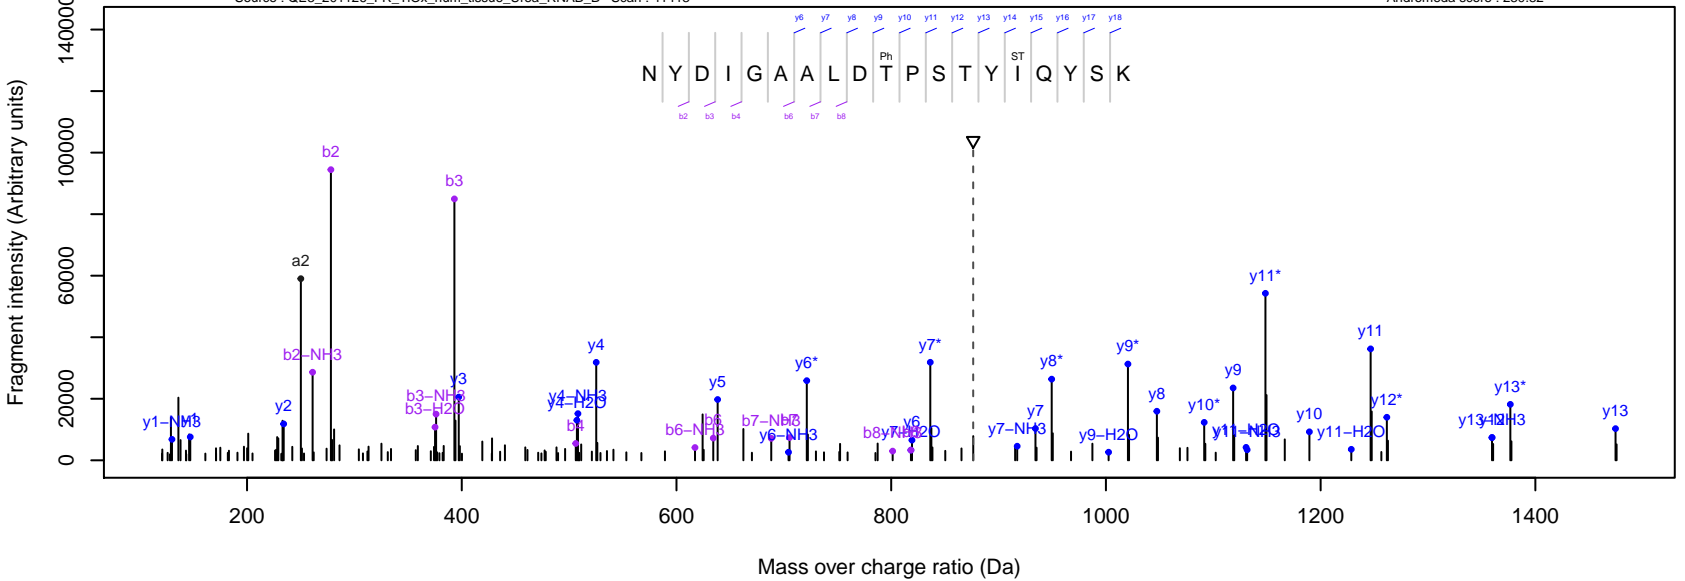

AEIKEM(Oxidation (M))LAS(Phospho (STY))DDEEDVSSKVEK-3+

Source : QE3\_201126\_FR\_TiOx\_hum\_tissue\_Urea\_RNAB\_N Scan : 17688

Andromeda score : 230.8

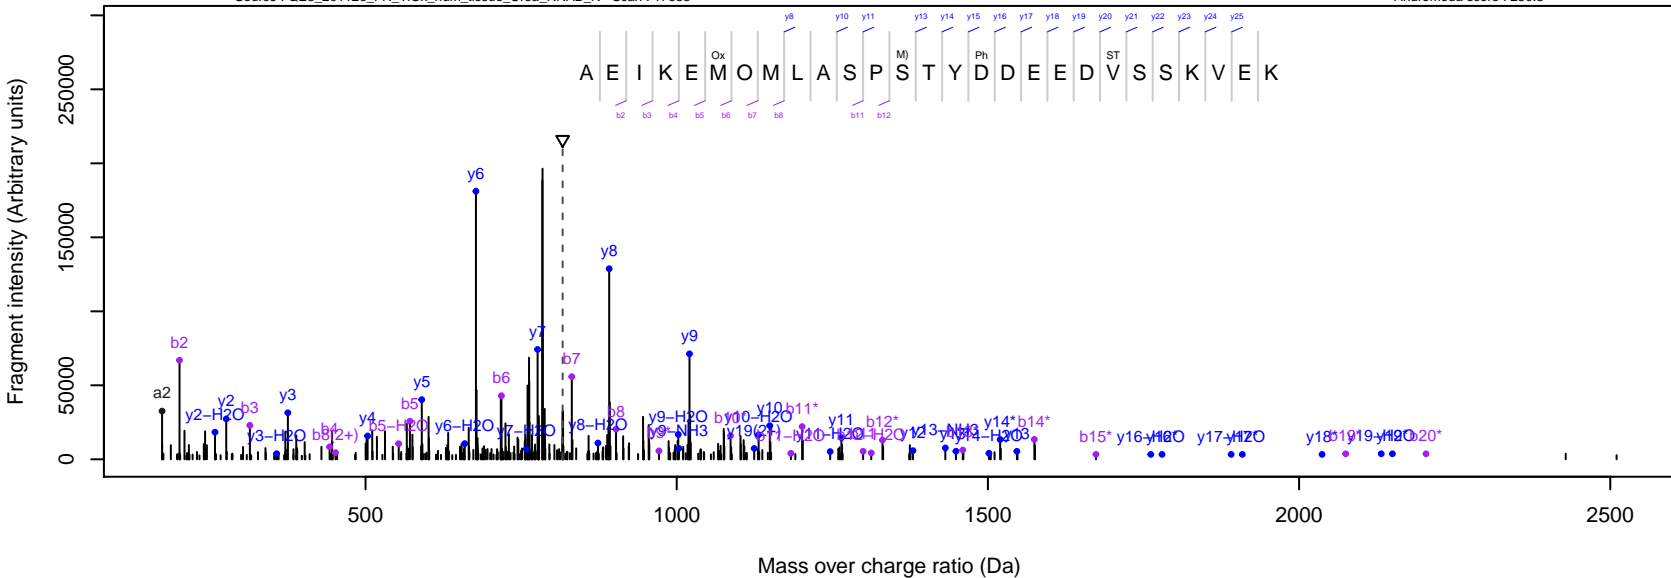

LVS(Phospho (STY))PGSANETSSILVESVTR-2+

Source : QE3\_201126\_FR\_TiOx\_hum\_tissue\_Urea\_RNAB\_N Scan : 49058

Andromeda score : 230.67

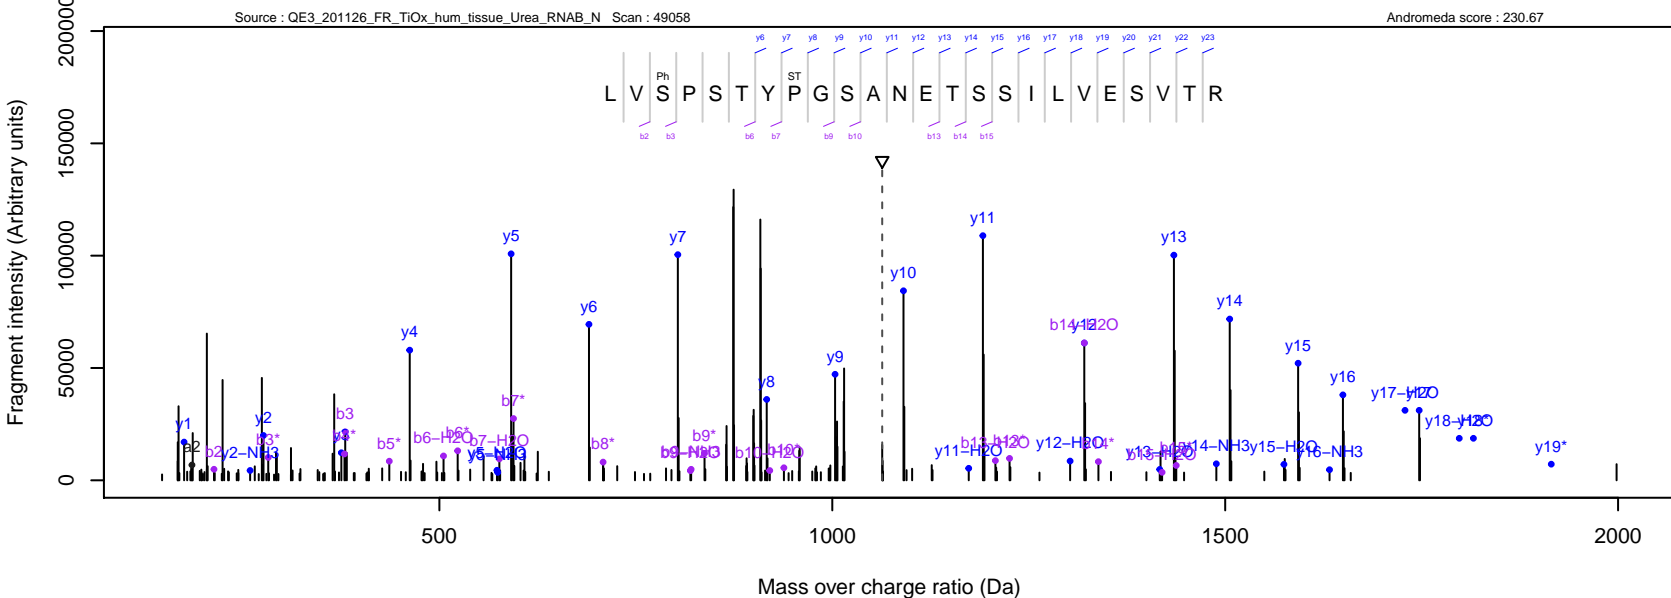

AVSPPHLDGPPS(Phospho (STY))PRS(Phospho (STY))PVIGSEVFLPNSNHVASGAGEAER-4+

Source : QE3\_201126\_FR\_TiOx\_hum\_tissue\_Urea\_RNAB\_N Scan : 40078

Andromeda score : 230.44

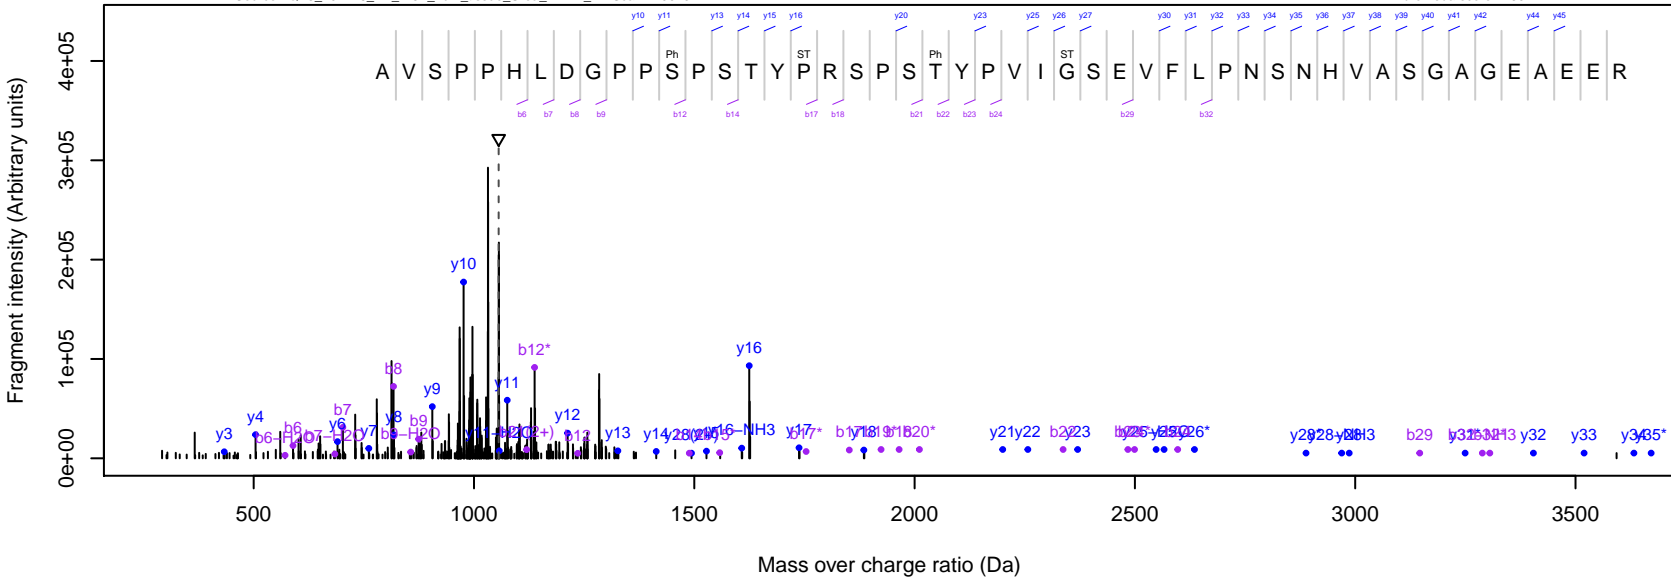



M(Oxidation (M))NEISS(Phospho (STY))DSESESLAPR-2+

Source : QE3\_201126\_FR\_TiOx\_hum\_tissue\_Urea\_RNAB\_H Scan : 20983

Andromeda score : 230.38

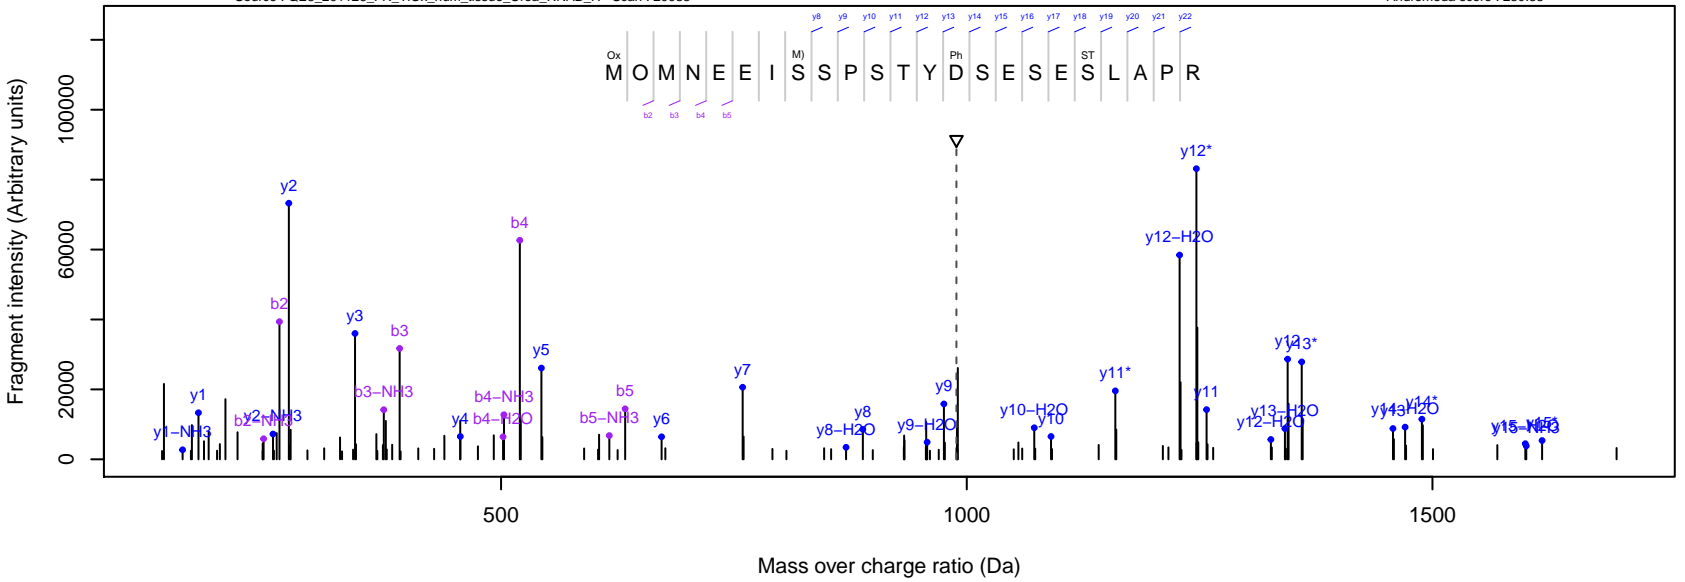

KTSFDQDS(Phospho (STY))DVDIFPSDFPTEPPSLPR-3+

Source : QE3\_201126\_FR\_TiOx\_hum\_tissue\_Urea\_RNAB\_H Scan : 54379

Andromeda score : 230.36

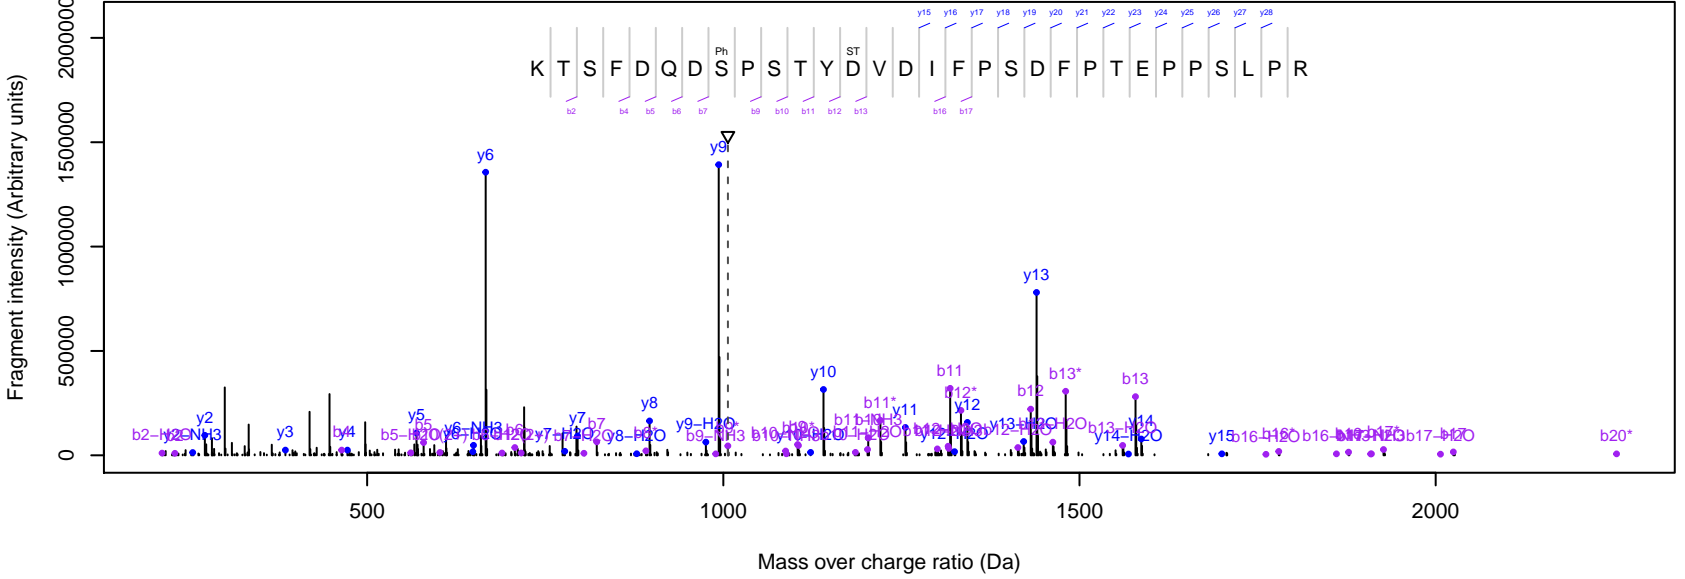

IAKEEES(Phospho (STY))EDES(Phospho (STY))NEEEEEEEDES(Phospho (STY))ESEAK-3+

Source : QE3\_201126\_FR\_TiOx\_hum\_tissue\_Urea\_RNAB\_N Scan : 18502

Andromeda score : 230.34

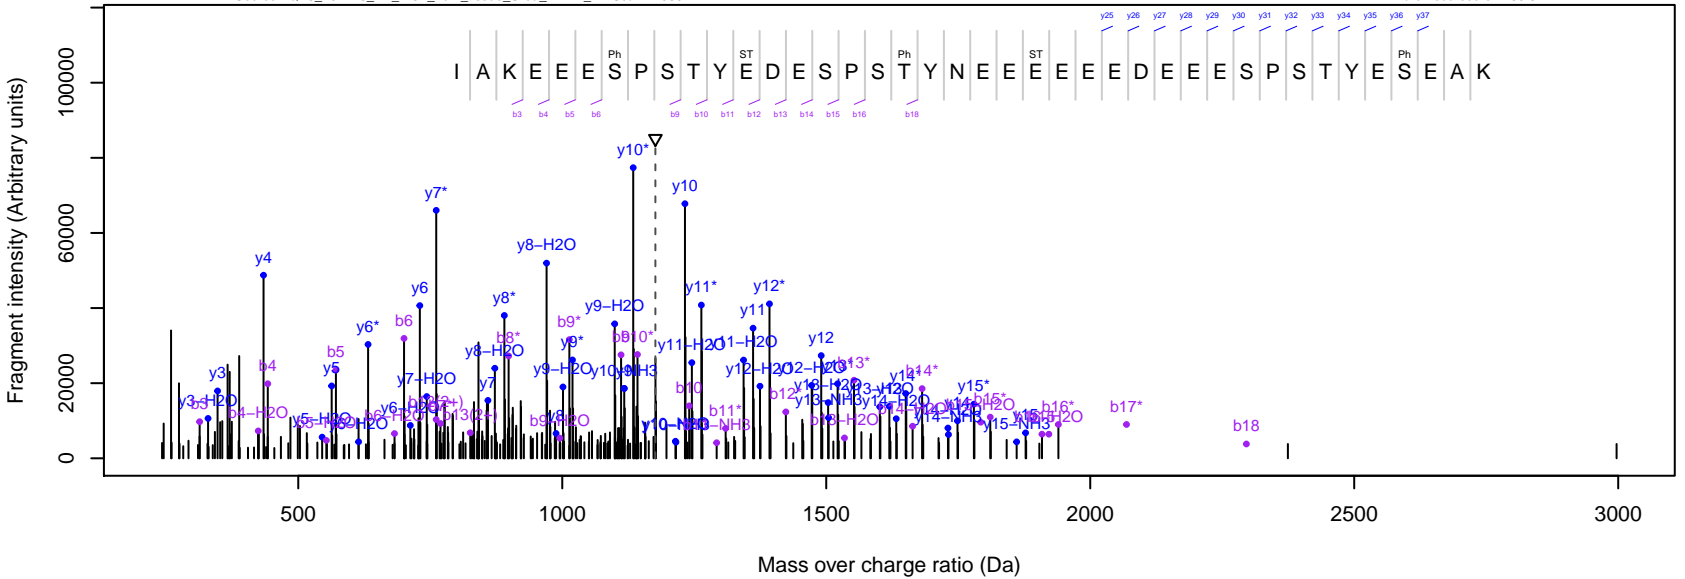

EYIPGQPPLSQSSDSS(Phospho (STY))PTRNSEPAGLETPEAK-3+

Source : QE3\_201126\_FR\_TiOx\_hum\_tissue\_Urea\_RNAB\_B Scan : 32318

Andromeda score : 230.21

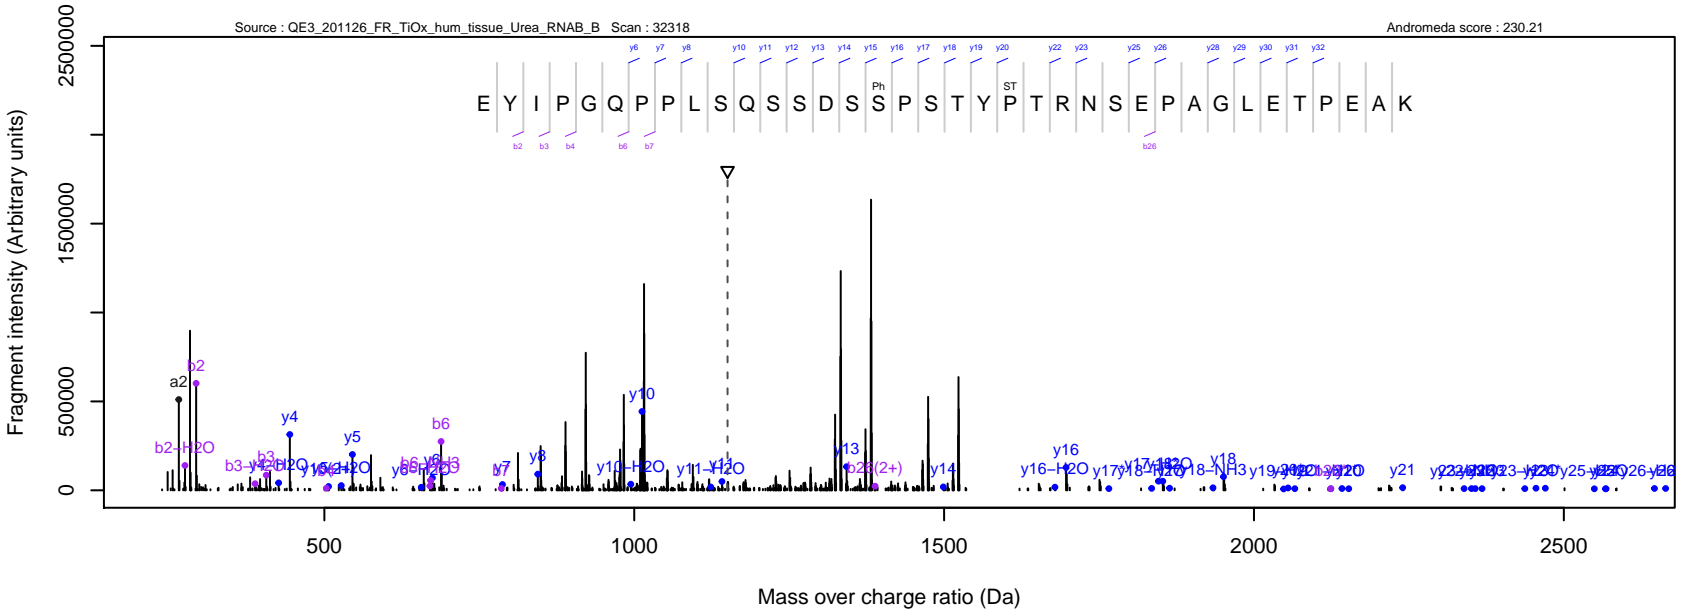

SLPGES(Phospho (STY))EEMMEEVDQVTLYSYK-2+

Source : QE3\_201126\_FR\_TiOx\_hum\_tissue\_Urea\_RNAB\_B Scan : 58556

Andromeda score : 230.06

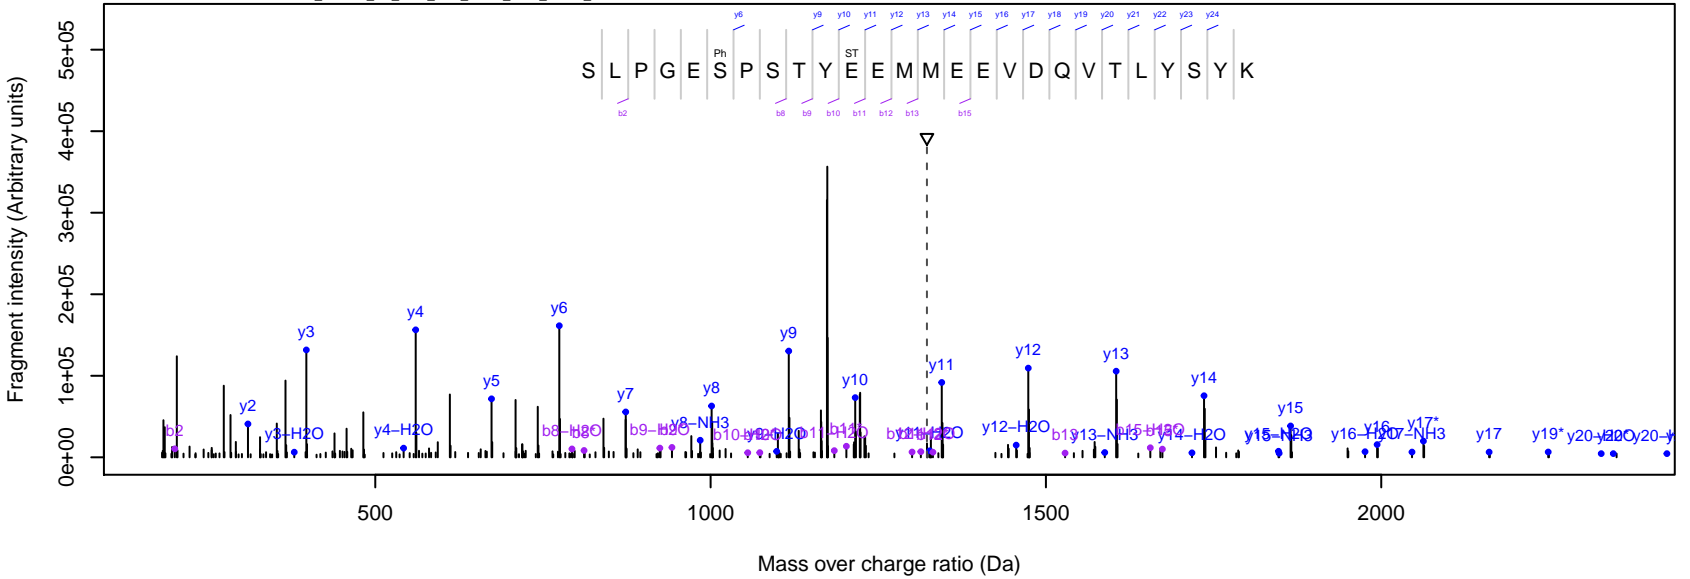

AAS(Phospho (STY))PAKPSLSDLVPLPK-2+

Source : QE3\_201126\_FR\_TiOx\_hum\_tissue\_Urea\_RNAB\_B Scan : 36121

Andromeda score : 229.96

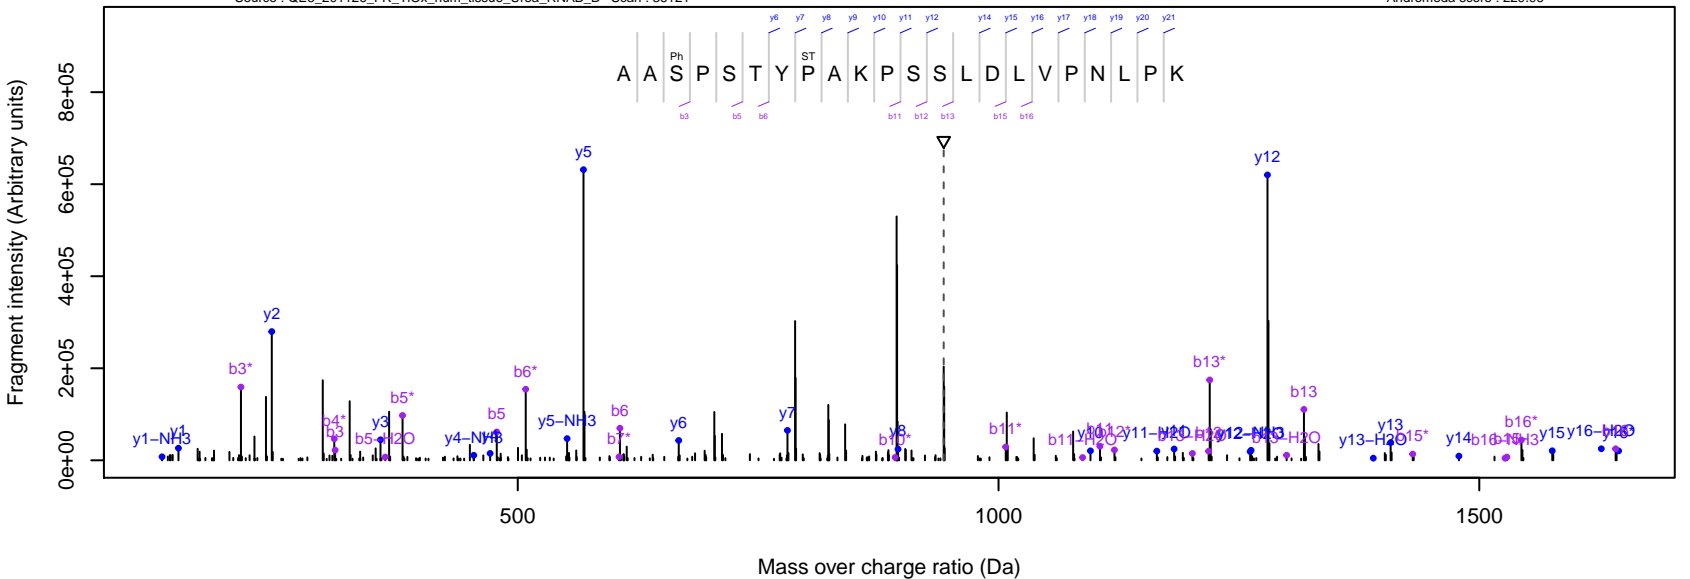

NNTAAETEDES(Phospho (STY))DGEDRGGTSGVR-3+

Source : QE3\_201126\_FR\_TIOx\_hum\_tissue\_Urea\_RNAB\_H Scan : 8213

Andromeda score : 229.95

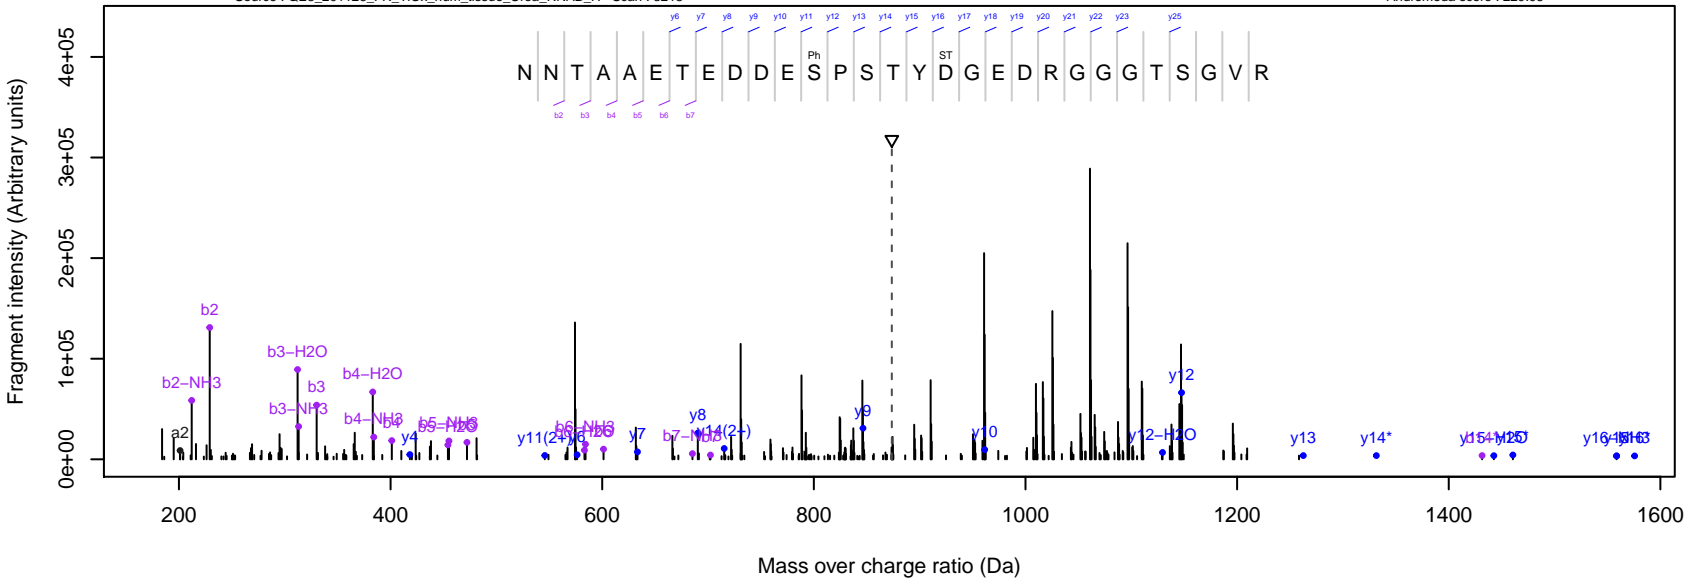

KGS(Phospho (STY))PTPGFSTR-2+

Source : QE3\_201126\_FR\_TIOx\_hum\_tissue\_Urea\_RNAB\_H Scan : 8747

Andromeda score : 229.89

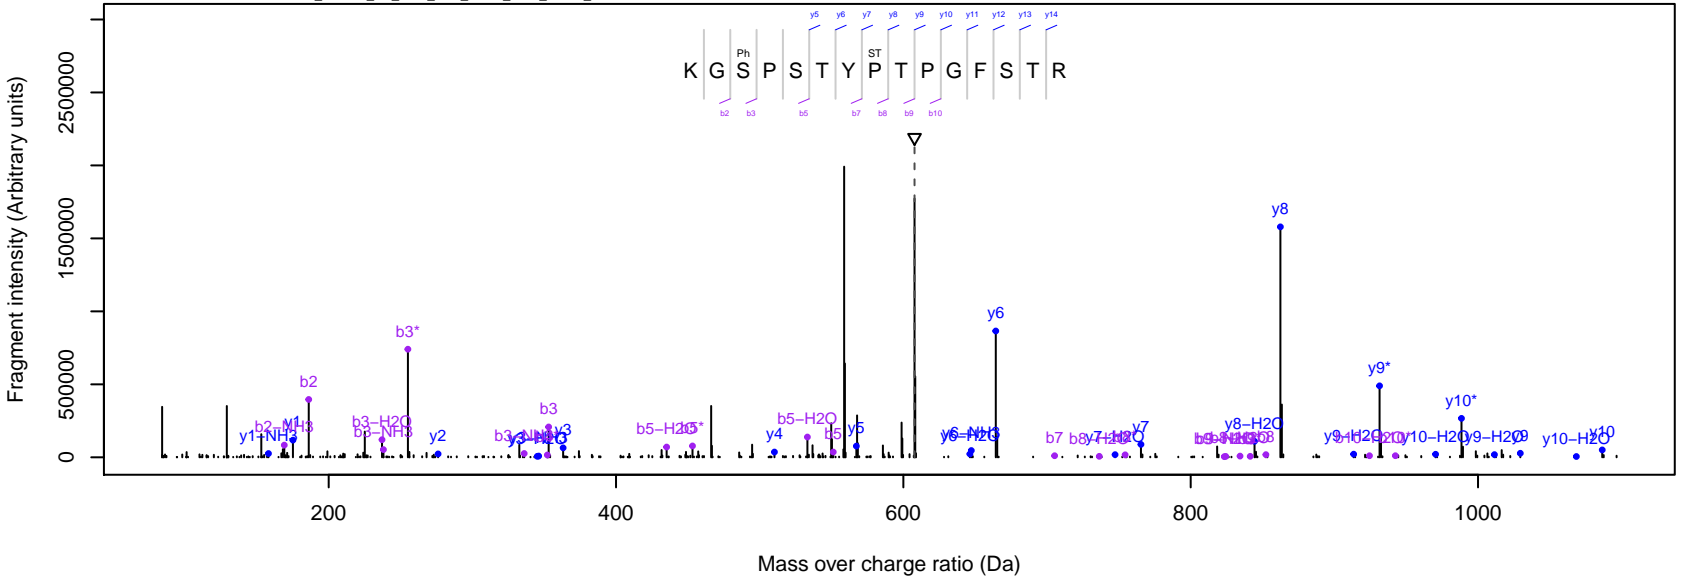

AKTQT(Phospho (STY))PPVSPAPQPTTEERLPS(Phospho (STY))SPVYEDAASFK-3+

Source : QE3\_201126\_FR\_TIOx\_hum\_tissue\_Urea\_RNAB\_H Scan : 35844

Andromeda score : 229.81

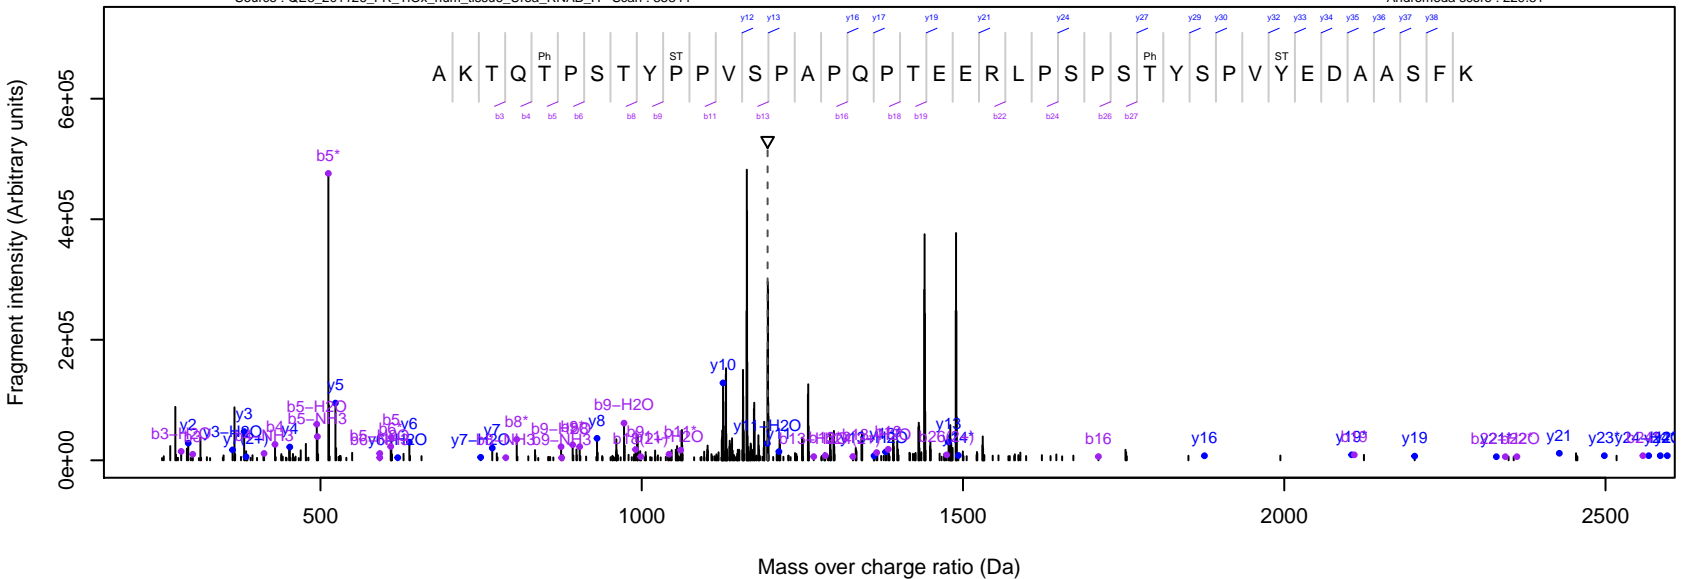

KDS(Phospho (STY))IPQVLLPEEEKLIIEETR-3+

Source : QE3\_201126\_FR\_TIOx\_hum\_tissue\_Urea\_RNAB\_H Scan : 50151

Andromeda score : 229.7

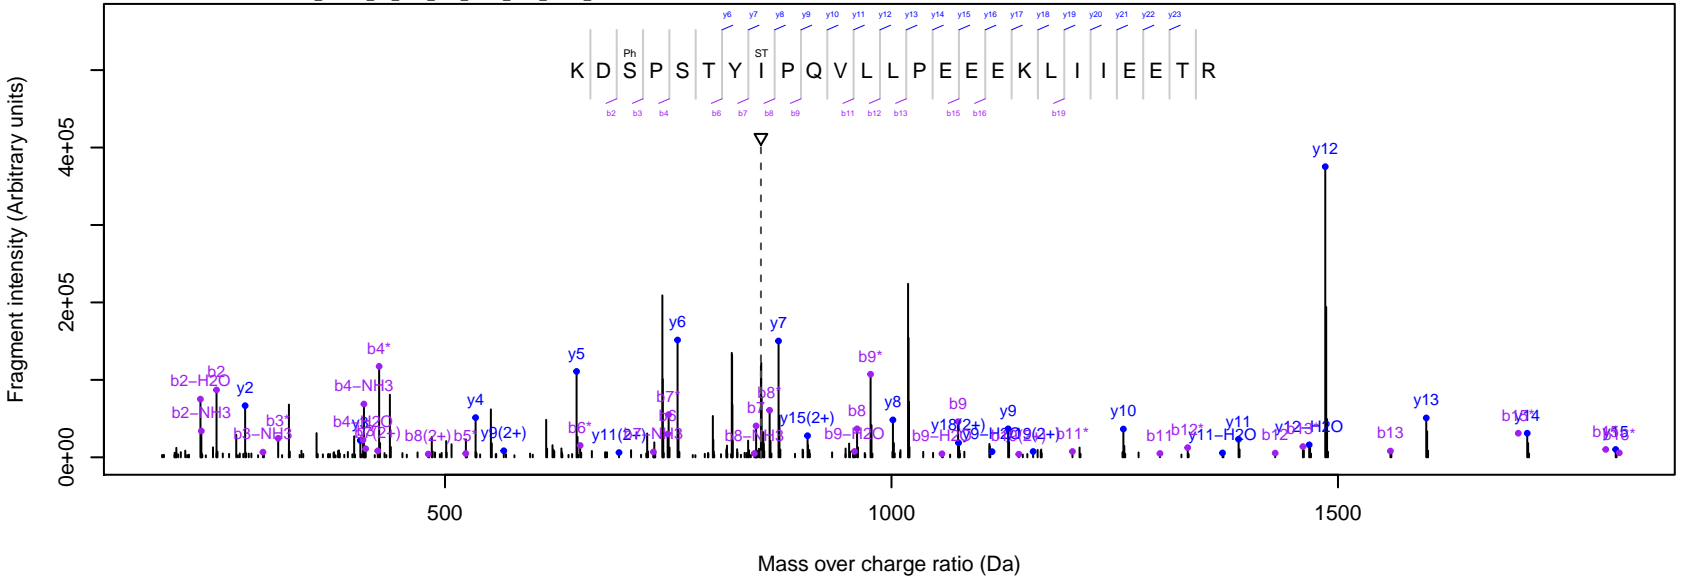

ERRT(Phospho (STY))PS(Phospho (STY))DDEEDNLFAPPK-3+

Source : QE3\_201126\_FR\_TIOx\_hum\_tissue\_Urea\_RNAB\_N Scan : 25964

Andromeda score : 229.66

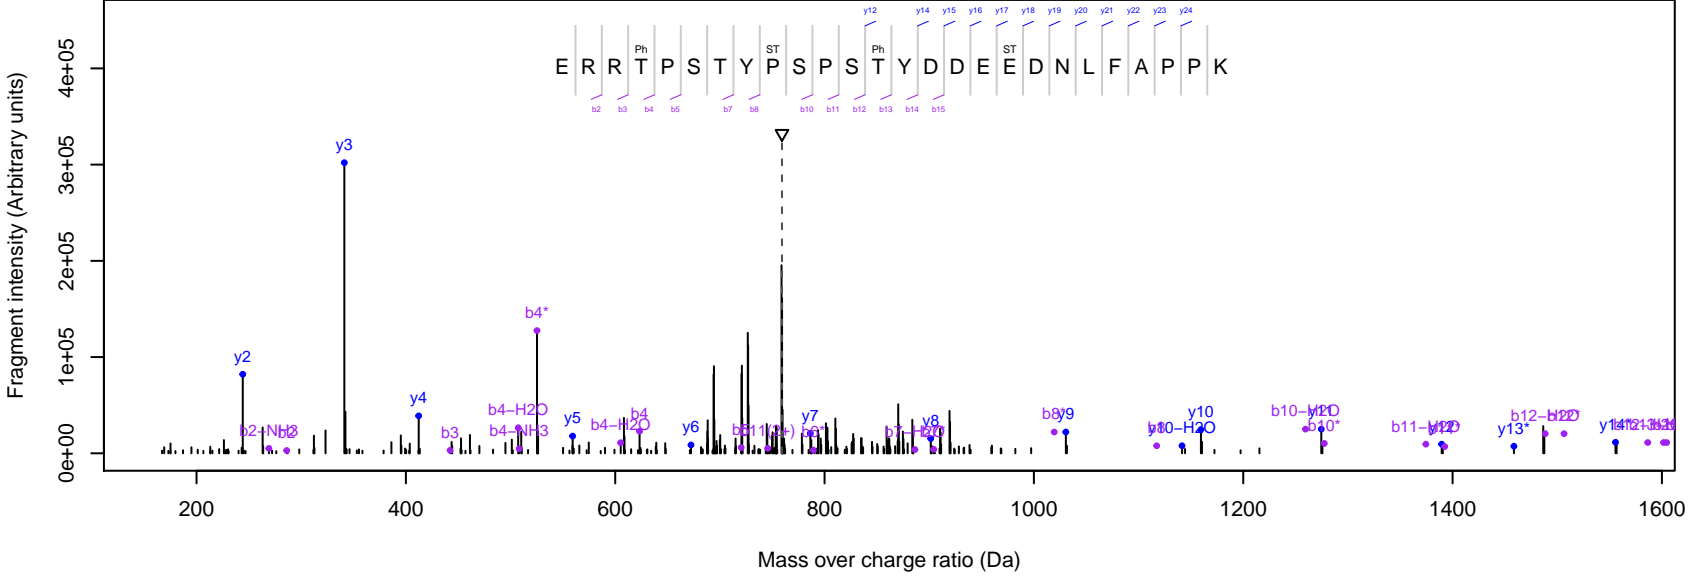

ELEEEENS(Phospho (STY))DEDELDSHTM(Oxidation (M))VK-2+

Source : QE3\_201126\_FR\_TIOx\_hum\_tissue\_Urea\_RNAB\_B Scan : 20703

Andromeda score : 229.48

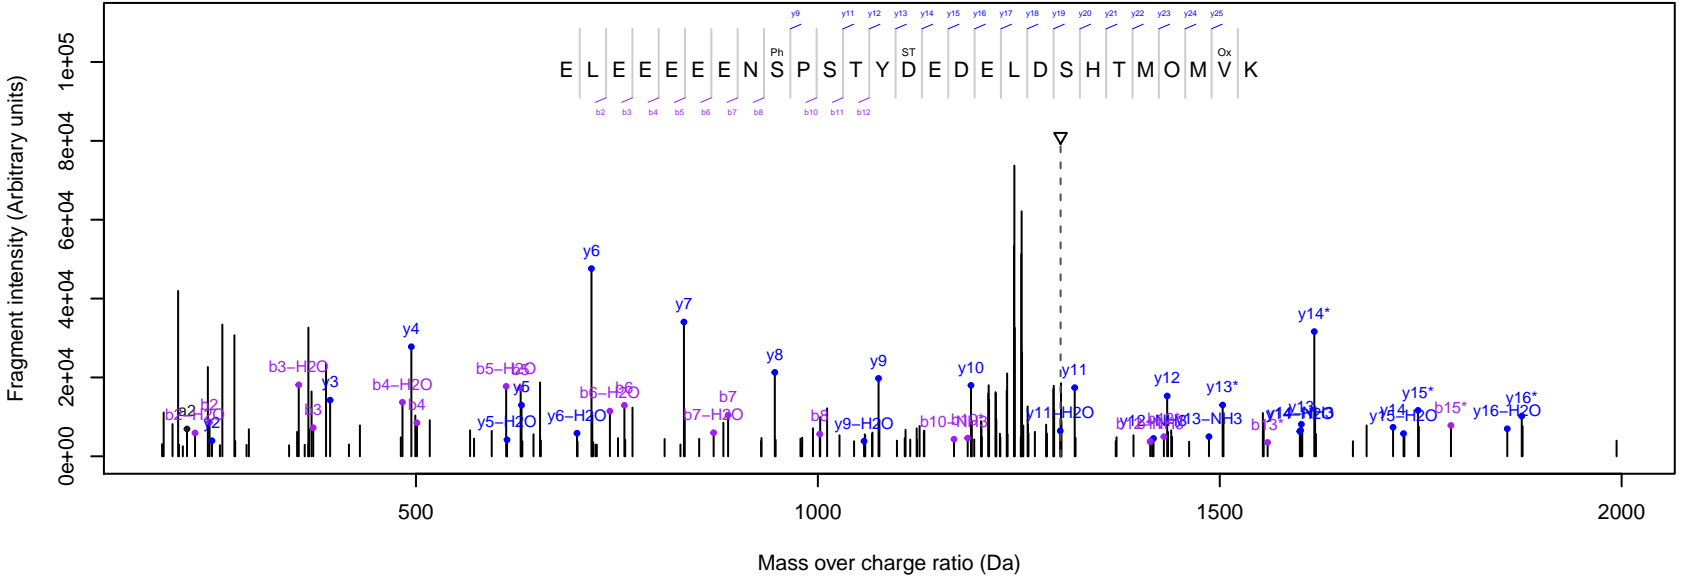

SST(Phospho (STY))PLPTISSAENTR-2+

Source : QE3\_201126\_FR\_TiOx\_hum\_tissue\_Urea\_RNAB\_H Scan : 22795

Andromeda score : 229.39

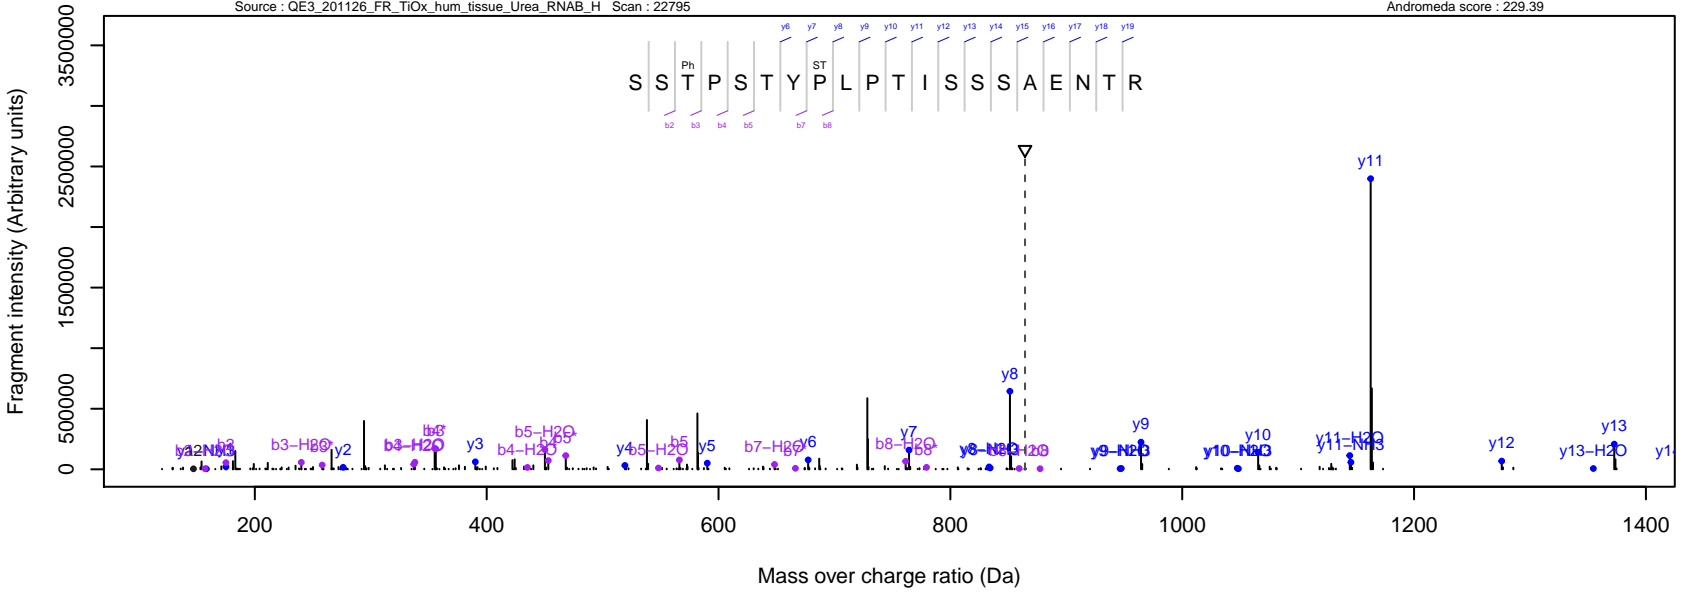

SRT(Phospho (STY))AGSSVTSLDGTR-2+

Source : QE3\_201126\_FR\_TiOx\_hum\_tissue\_Urea\_RNAB\_B Scan : 10849

Andromeda score : 228.94

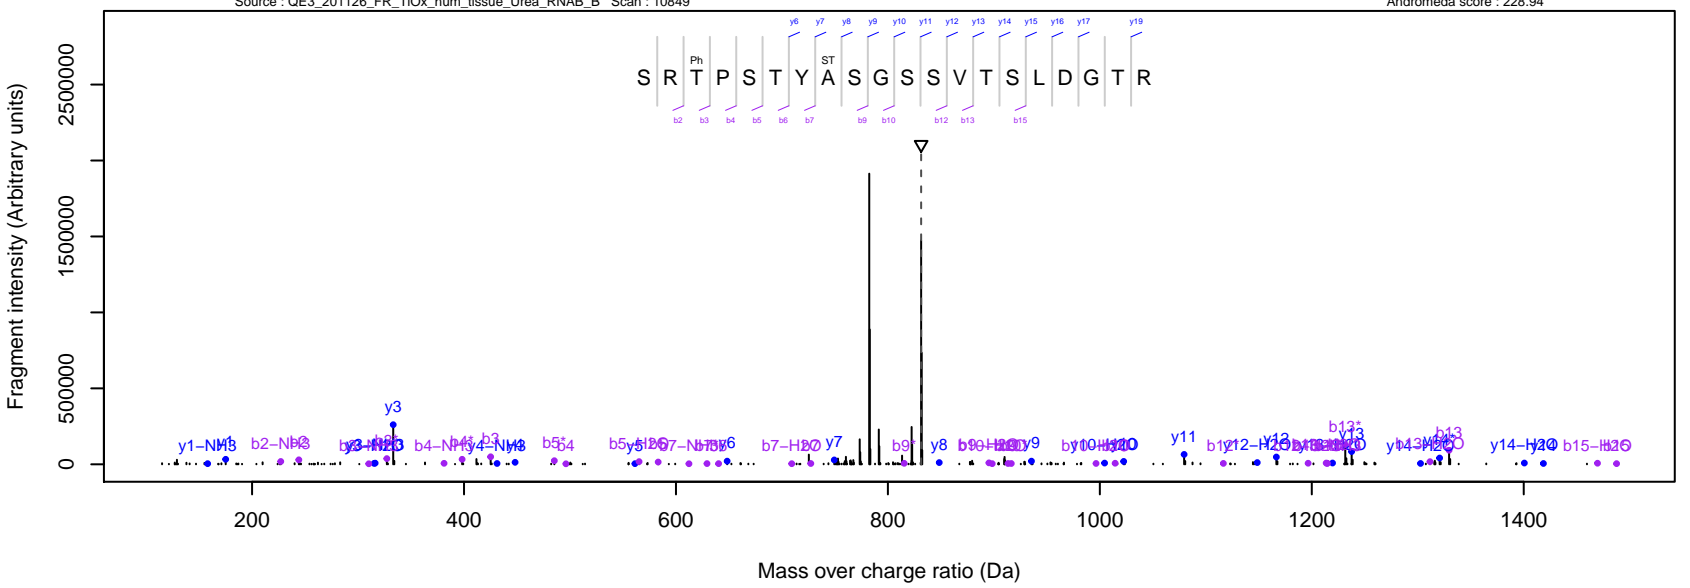

NLTEQNS(Phospho (STY))YSNIPHEGK-2+

Source : QE3\_201126\_FR\_TiOx\_hum\_tissue\_Urea\_RNAB\_H Scan : 16373

Andromeda score : 228.9

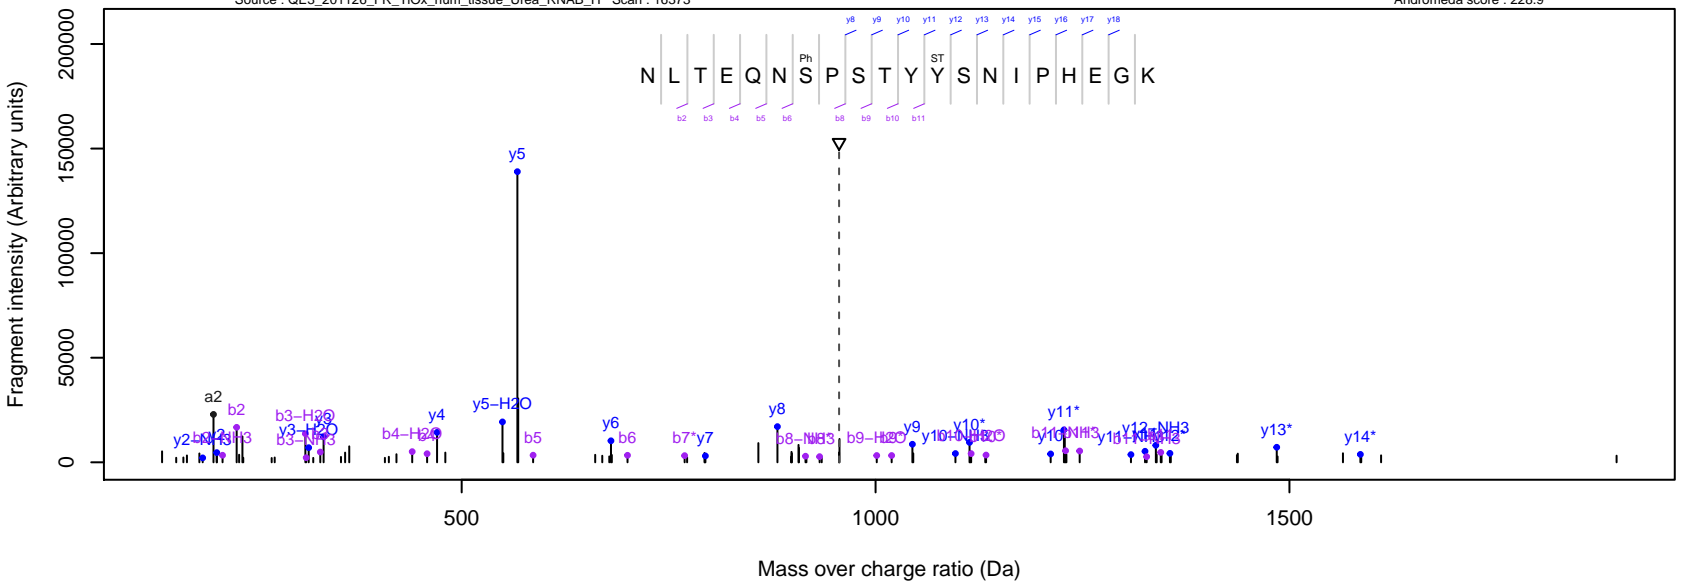

SES(Phospho (STY))GYGFNVR-2+

Source : QE3\_201126\_FR\_TiOx\_hum\_tissue\_Urea\_RNAB\_H Scan : 24699

Andromeda score : 228.84

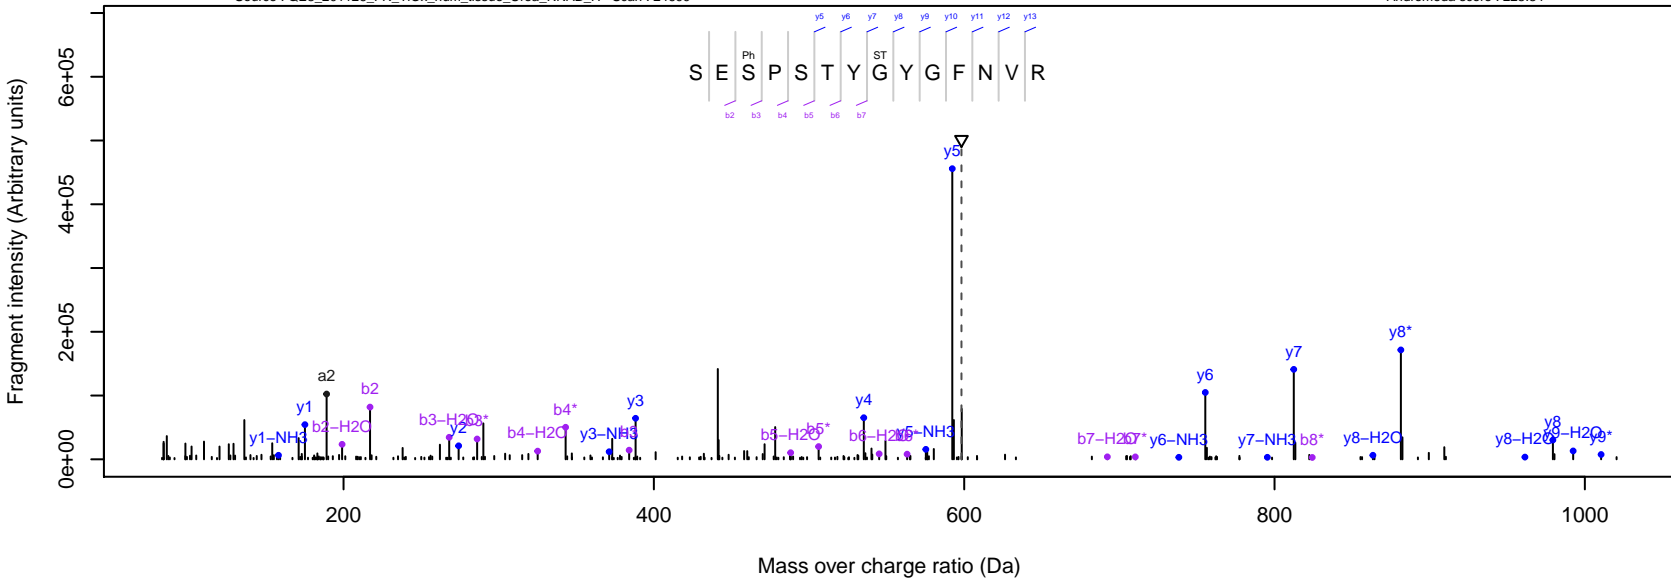

TSLDIEEYS(Phospho (STY))DTEVQK-2+

Source : QE3\_201126\_FR\_TiOx\_hum\_tissue\_Urea\_RNAB\_N Scan : 30133

Andromeda score : 228.73

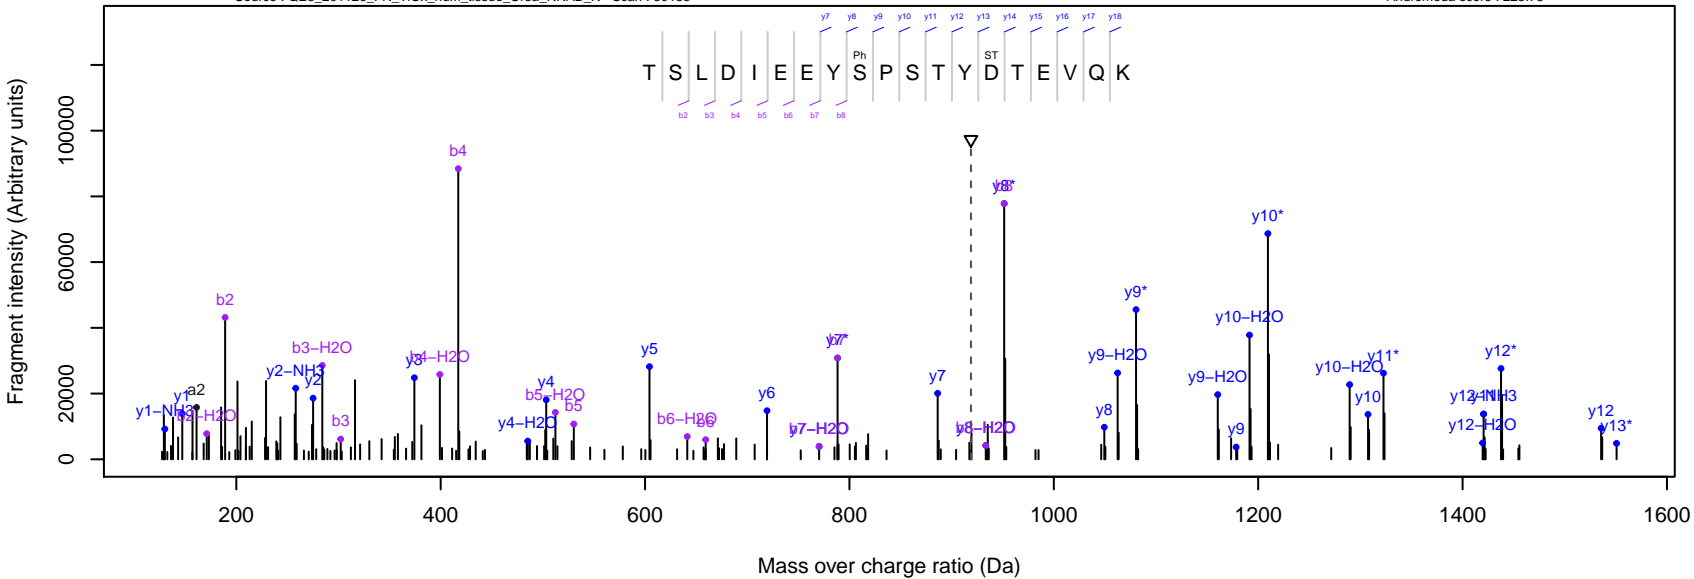

RAS(Phospho (STY))VCAEAYNPDEEEDDAESR-2+

Source : QE3\_201126\_FR\_TiOx\_hum\_tissue\_Urea\_RNAB\_N Scan : 17747

Andromeda score : 228.48

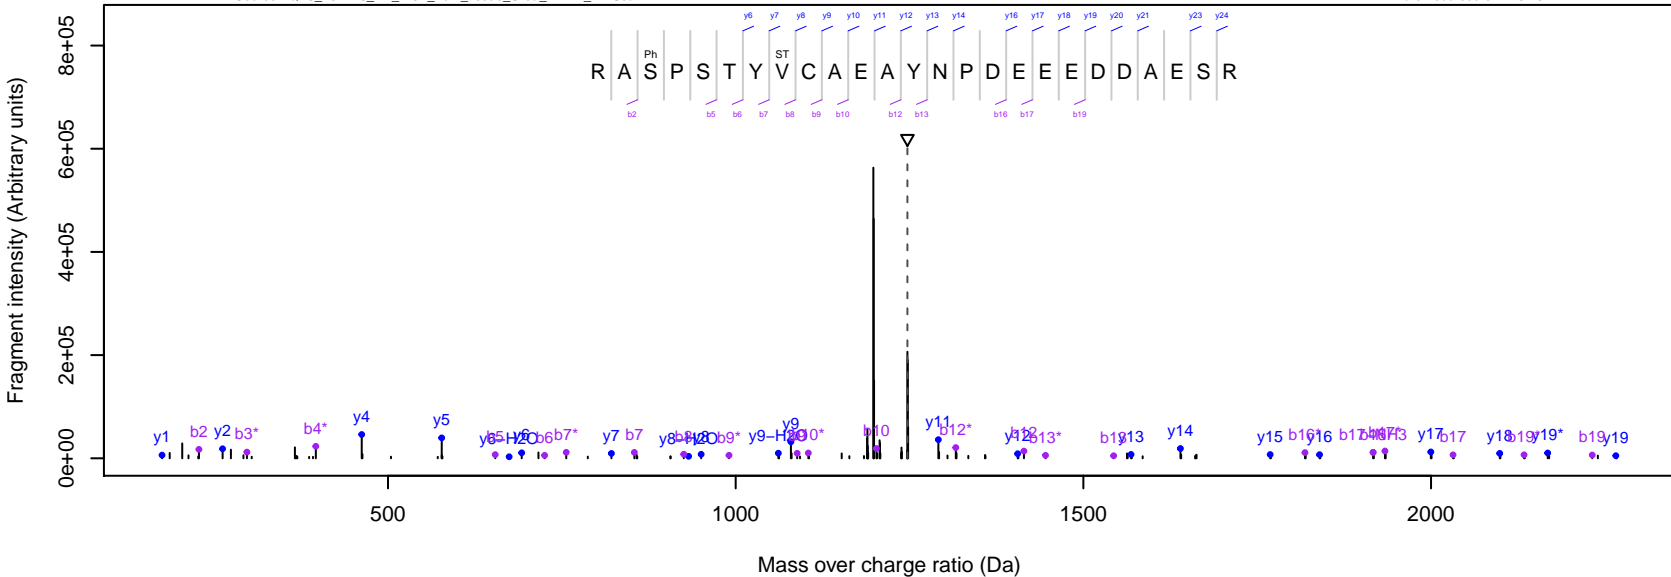

TSS(Phospho (STY))KESSIPSTDRK-2+

Source : QE3\_201126\_FR\_TIOx\_hum\_tissue\_Urea\_RNAB\_N Scan : 8565

Andromeda score : 228.46

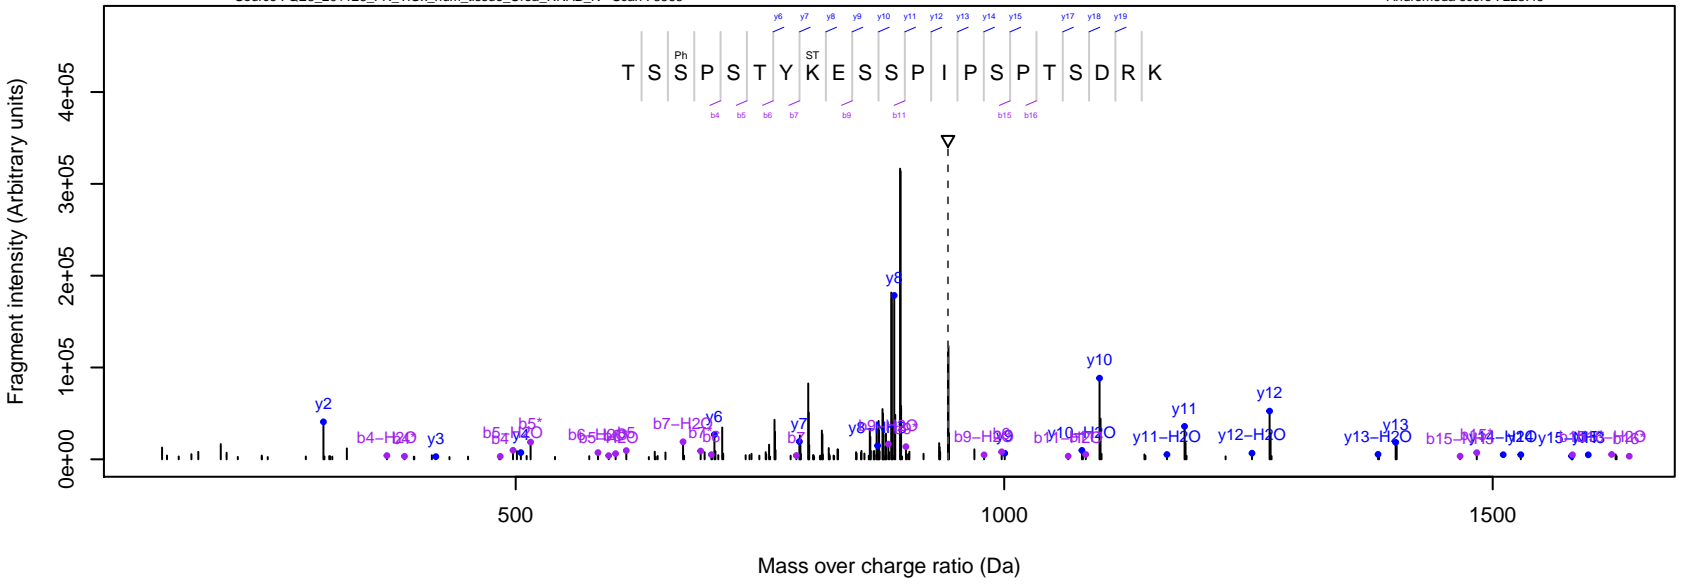

QAEDLGWSSSEFESYSEDS(Phospho (STY))GEEAKPEVEVEPAK-3+

Source : QE3\_201126\_FR\_TIOx\_hum\_tissue\_Urea\_RNAB\_H Scan : 42836

Andromeda score : 228.42

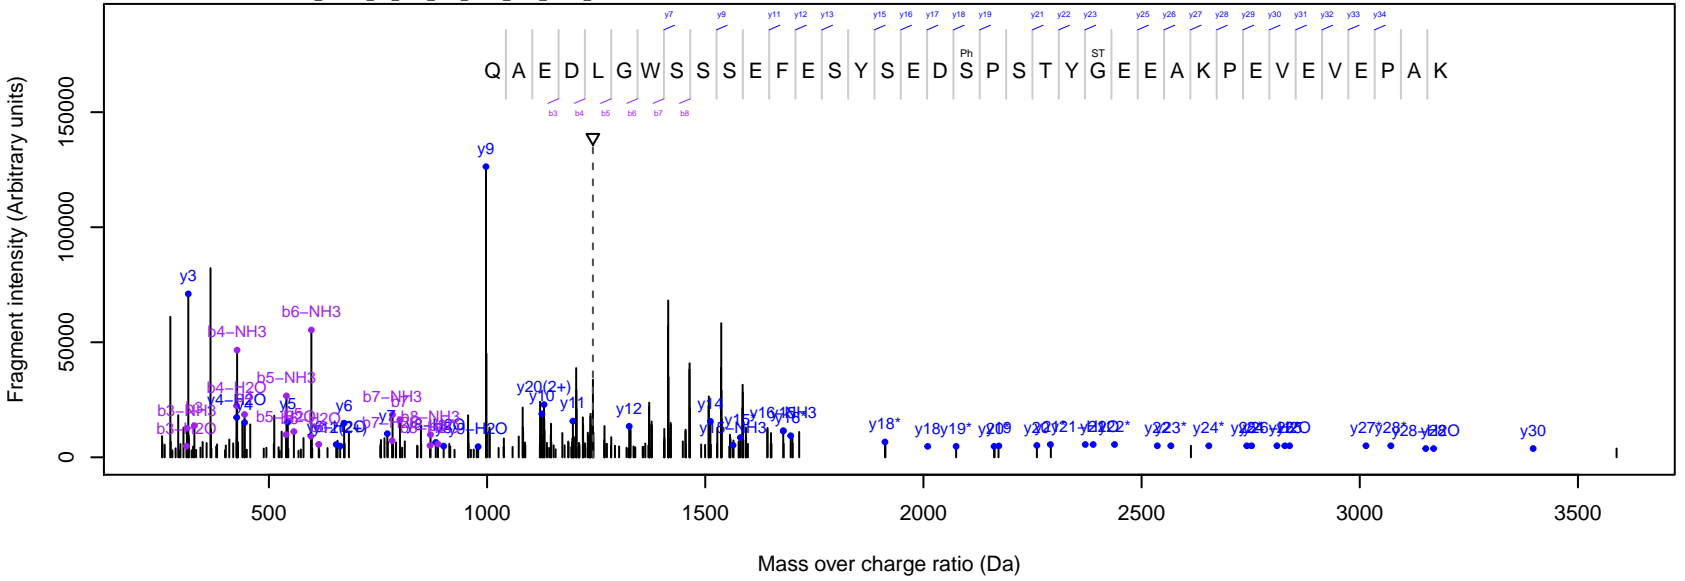

VSDQNSPSTY(Phospho (STY))PVLPKK-2+

Source : QE3\_201126\_FR\_TIOx\_hum\_tissue\_Urea\_RNAB\_H Scan : 8161

Andromeda score : 228.33

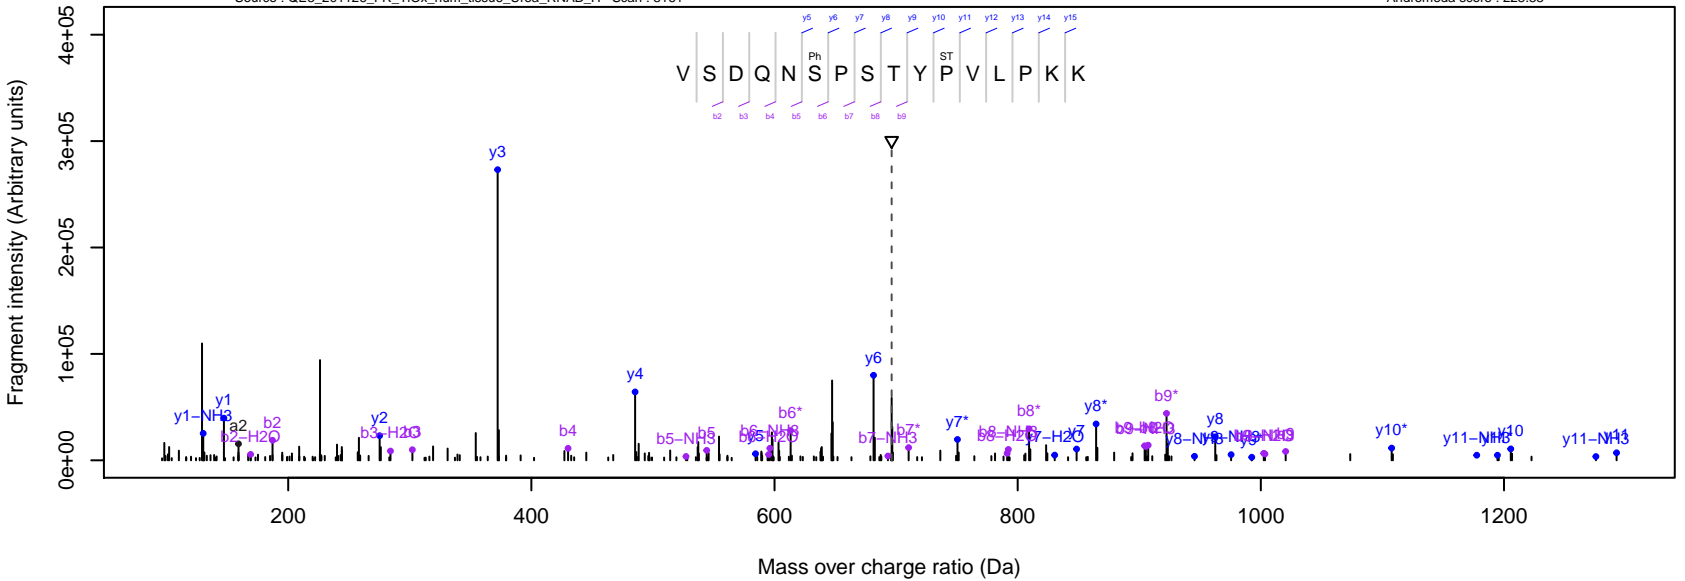

EGEPTVYS(Phospho (STY))DEEPPKDESARK-2+

Source : QE3\_201126\_FR\_TIOx\_hum\_tissue\_Urea\_RNAB\_B Scan : 11637

Andromeda score : 228.3

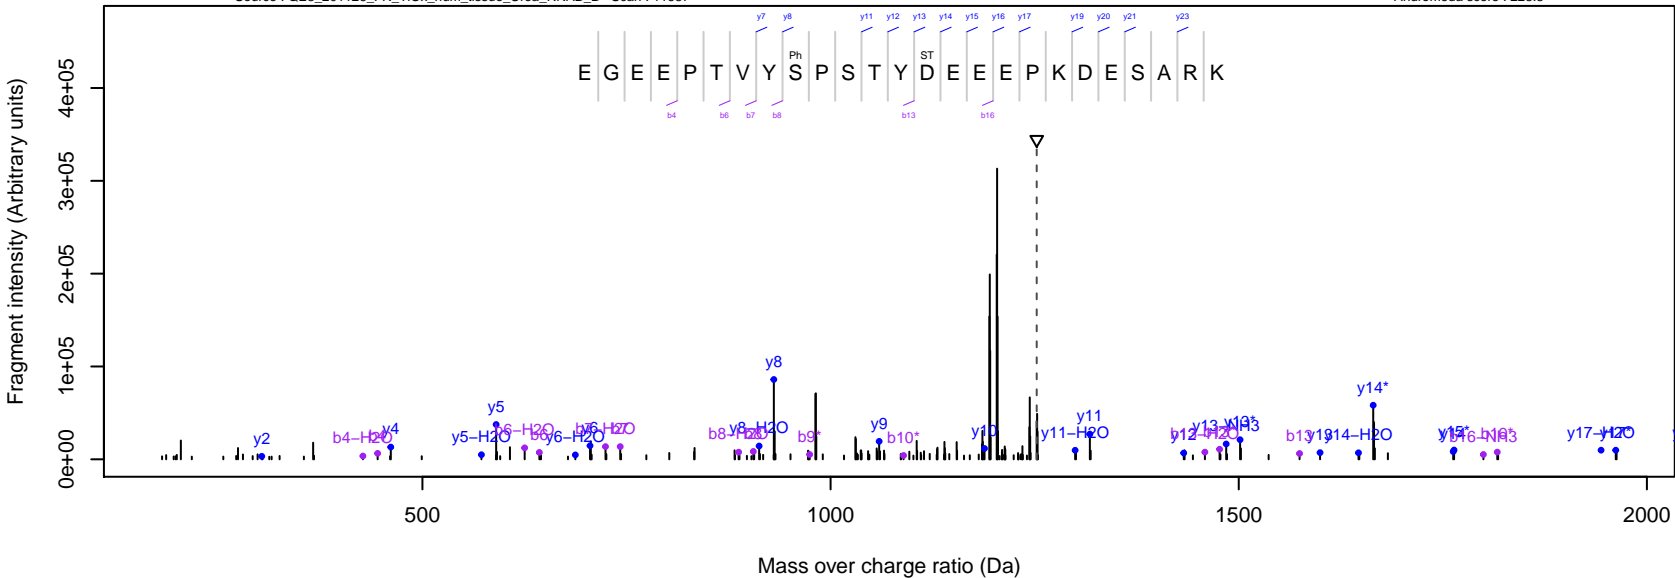

TAS(Phospho (STY))LTSAAASVDGNR-2+

Source : QE3\_201126\_FR\_TIOx\_hum\_tissue\_Urea\_RNAB\_B Scan : 17992

Andromeda score : 228.17

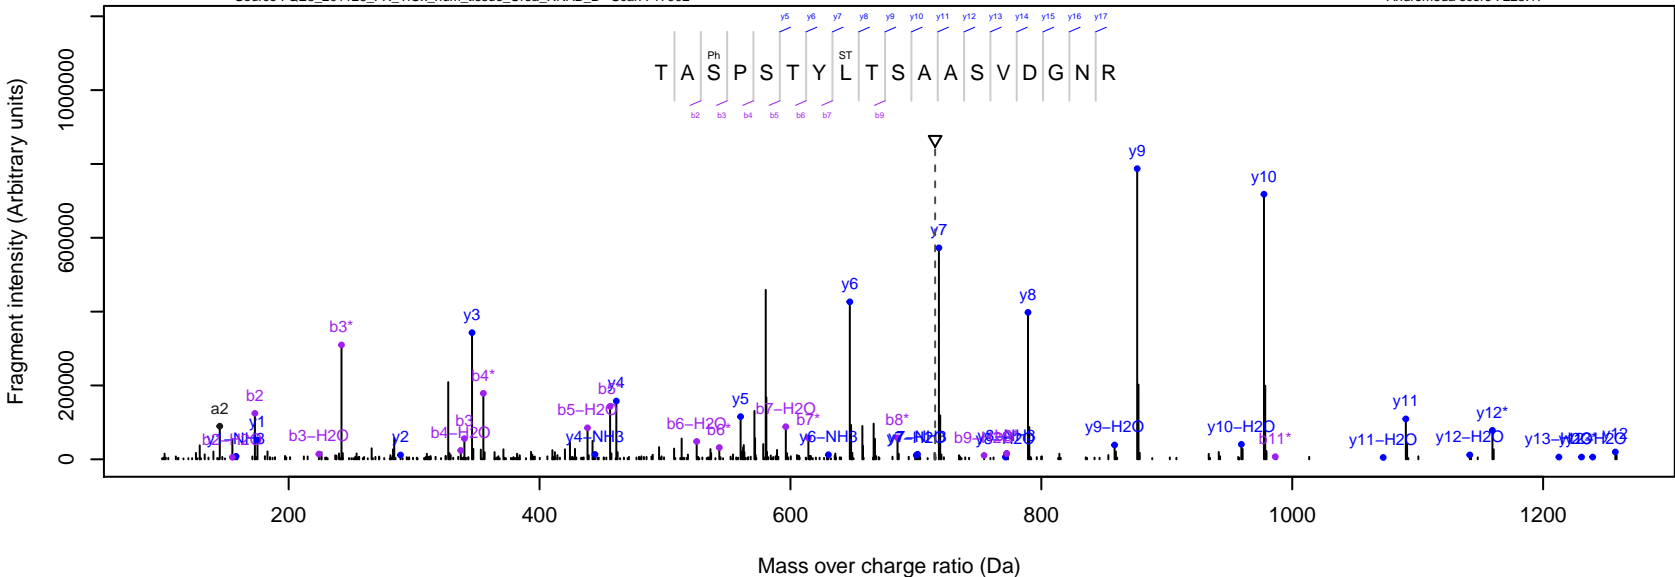

ASNLENSTYDLYTIPIKDA(Phospho (STY))QNPDAPEGK-3+

Source : QE3\_201126\_FR\_TIOx\_hum\_tissue\_Urea\_RNAB\_N Scan : 35951

Andromeda score : 228.1

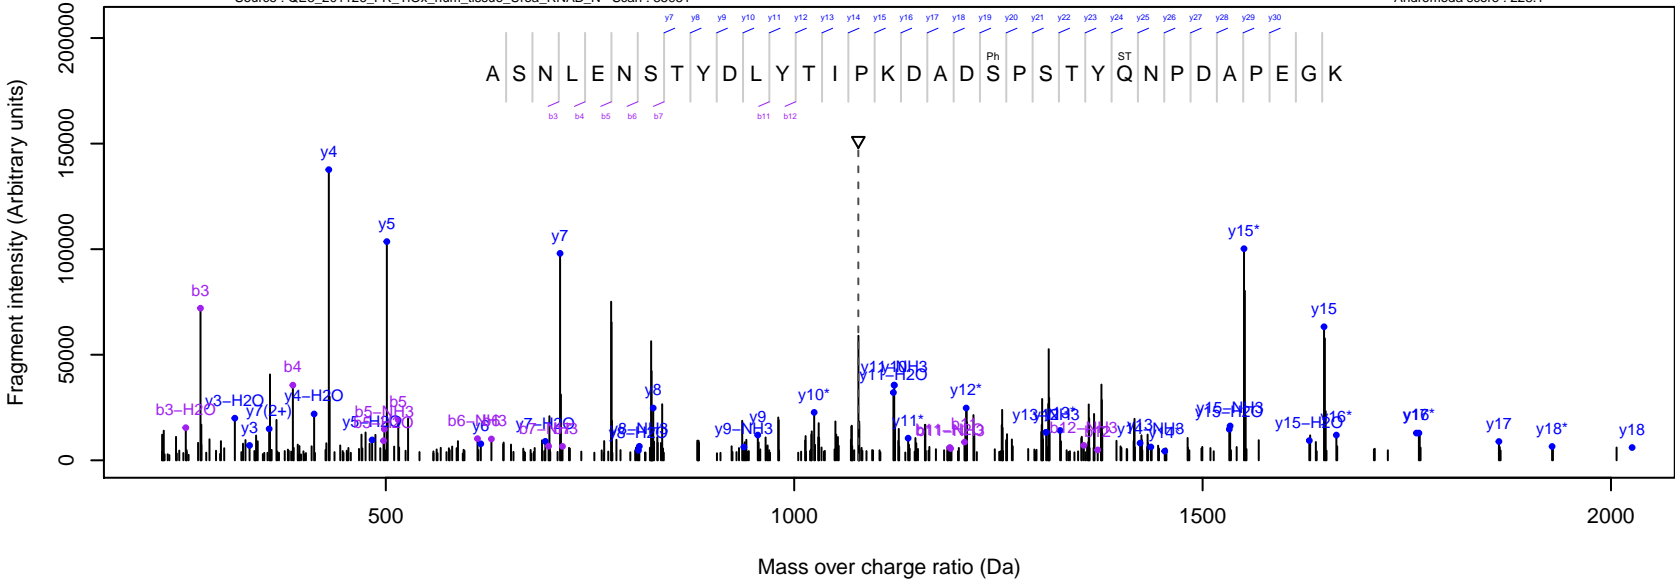



AASADS(Phospho (STY))TTEGTPADGFTVLSTK-2+

Source : QE3\_201126\_FR\_TiOx\_hum\_tissue\_Urea\_RNAB\_N Scan : 38642

Andromeda score : 228.08

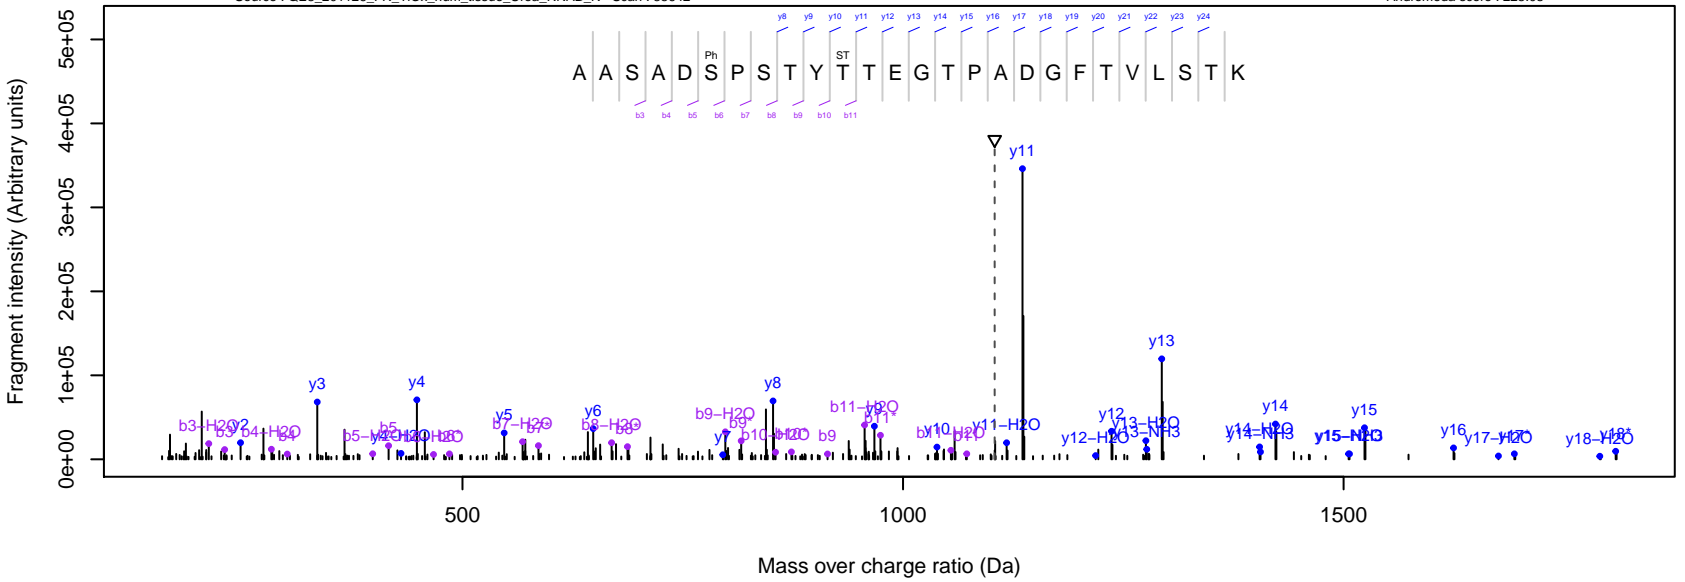

IALESEGRPEEQMES(Phospho (STY))DNCS(Phospho (STY))GGDDWTHLS(Phospho (STY))SK-3+

Source : QE3\_201126\_FR\_TiOx\_hum\_tissue\_Urea\_RNAB\_H Scan : 39420

Andromeda score : 228.06

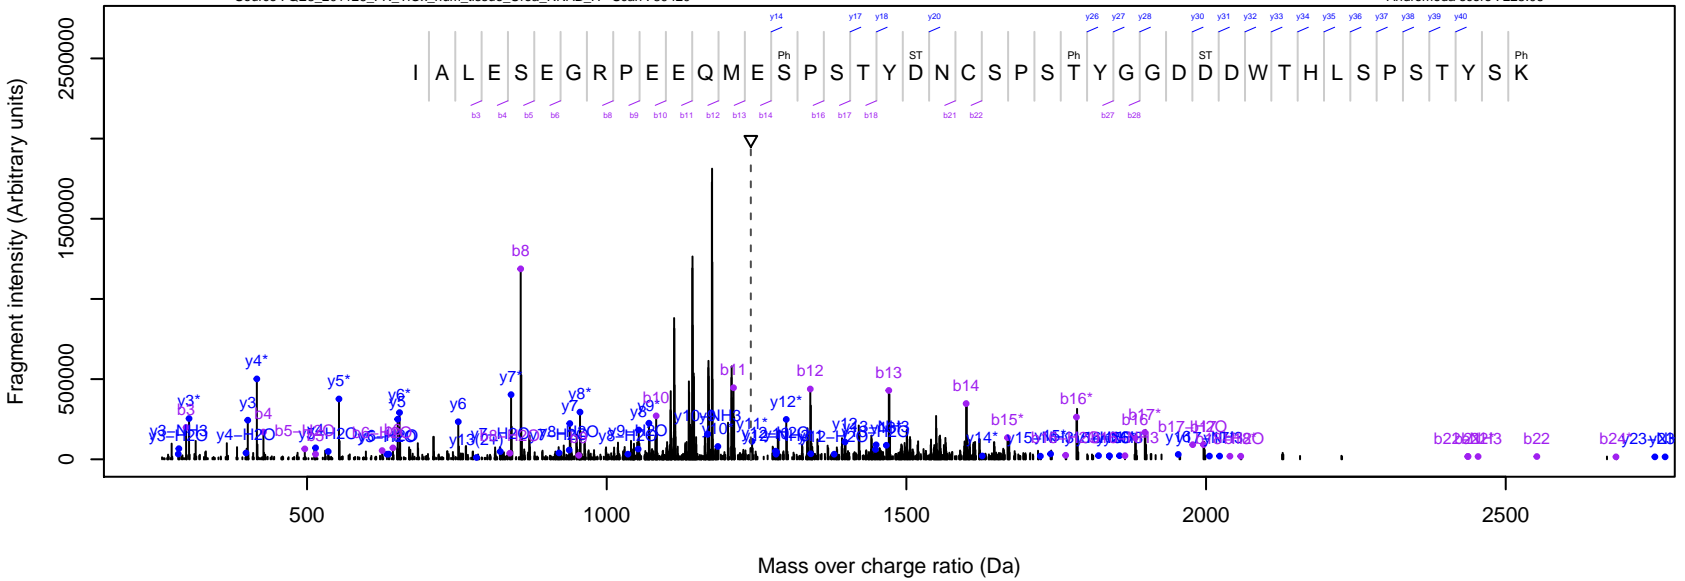

NGS(Phospho (STY))EADIDEGLYSR-2+

Source : QE3\_201126\_FR\_TiOx\_hum\_tissue\_Urea\_RNAB\_B Scan : 27134

Andromeda score : 228.03

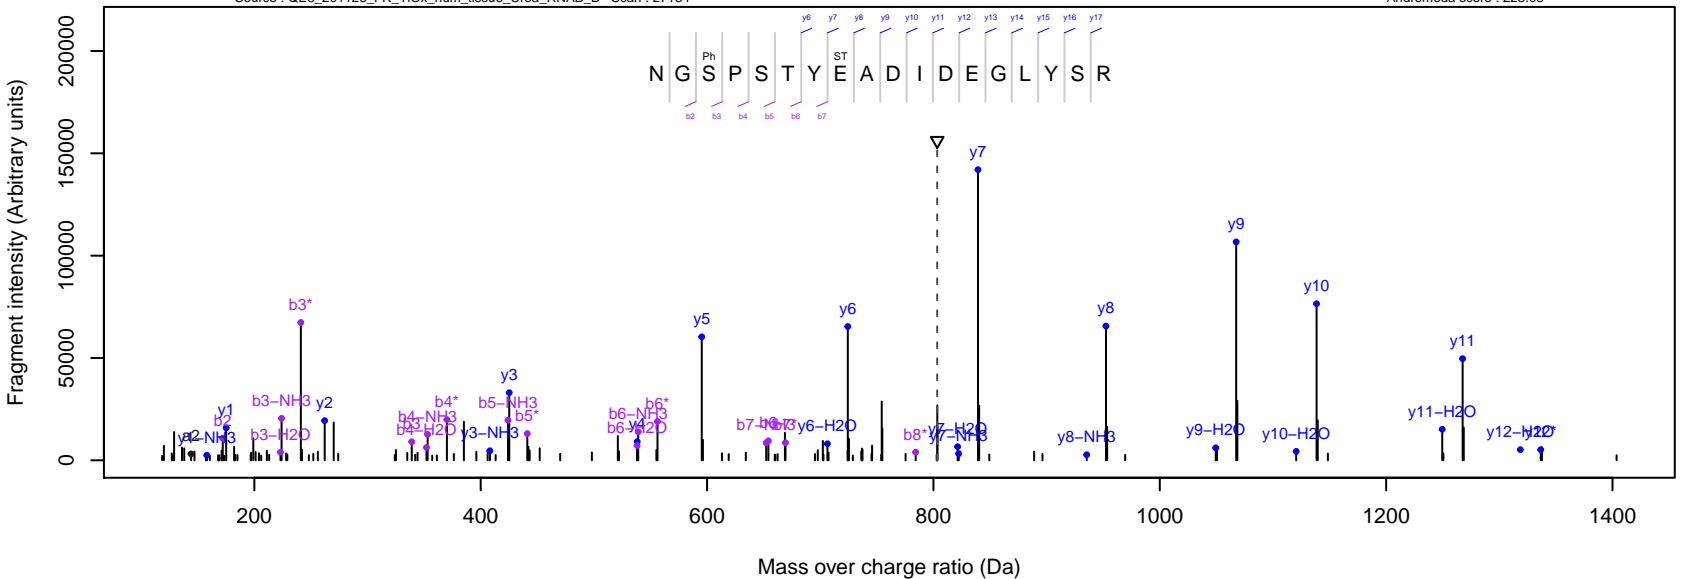

TRS(Phospho (STY))PDVISSASTALSQDIPEIASEALSR-3+

Source : QE3\_201126\_FR\_TiOx\_hum\_tissue\_Urea\_RNAB\_H Scan : 59168

Andromeda score : 228.03

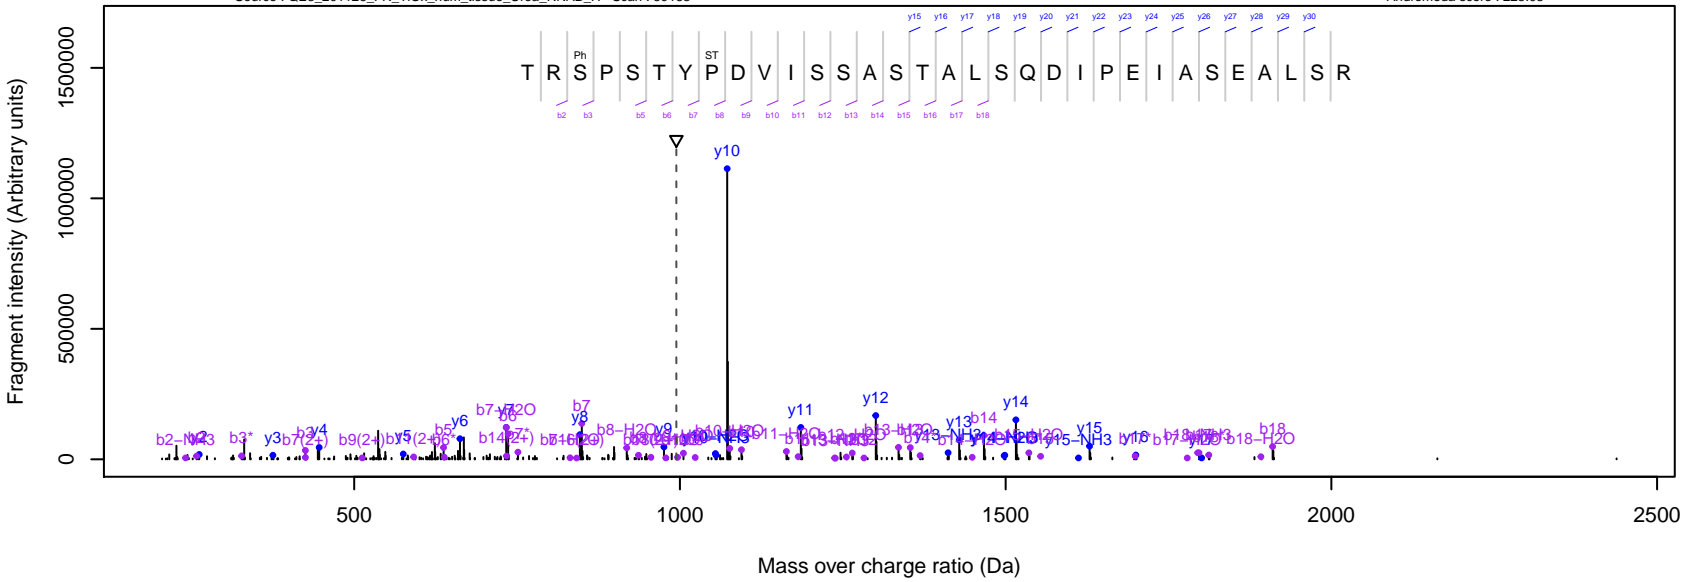

QGS(Phospho (STY))FSEDVISHK-2+

Source : QE3\_201126\_FR\_TiOx\_hum\_tissue\_Urea\_RNAB\_B Scan : 18169

Andromeda score : 228.02

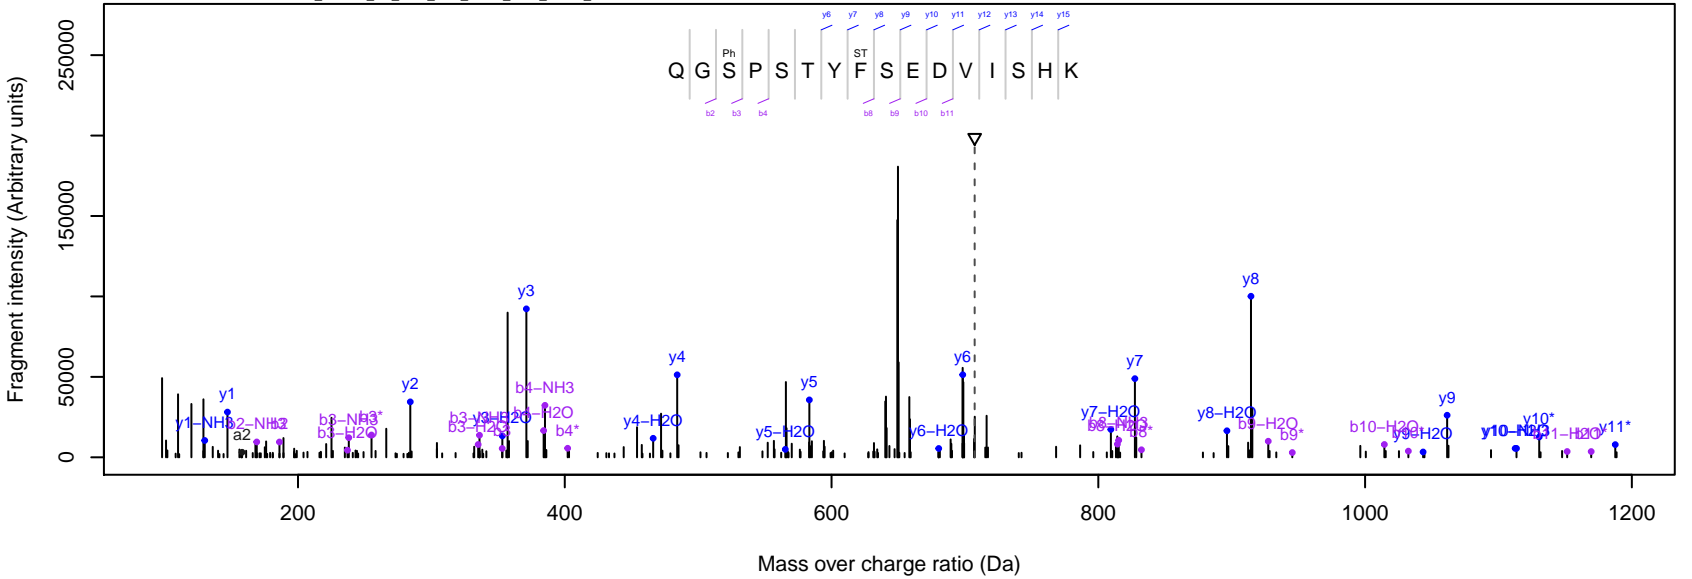

SPVQEASSATDNTN(Phospho (STY))QEDPADTASVSSLSLSTGHTK-3+

Source : QE3\_201126\_FR\_TiOx\_hum\_tissue\_Urea\_RNAB\_H Scan : 30371

Andromeda score : 228.01

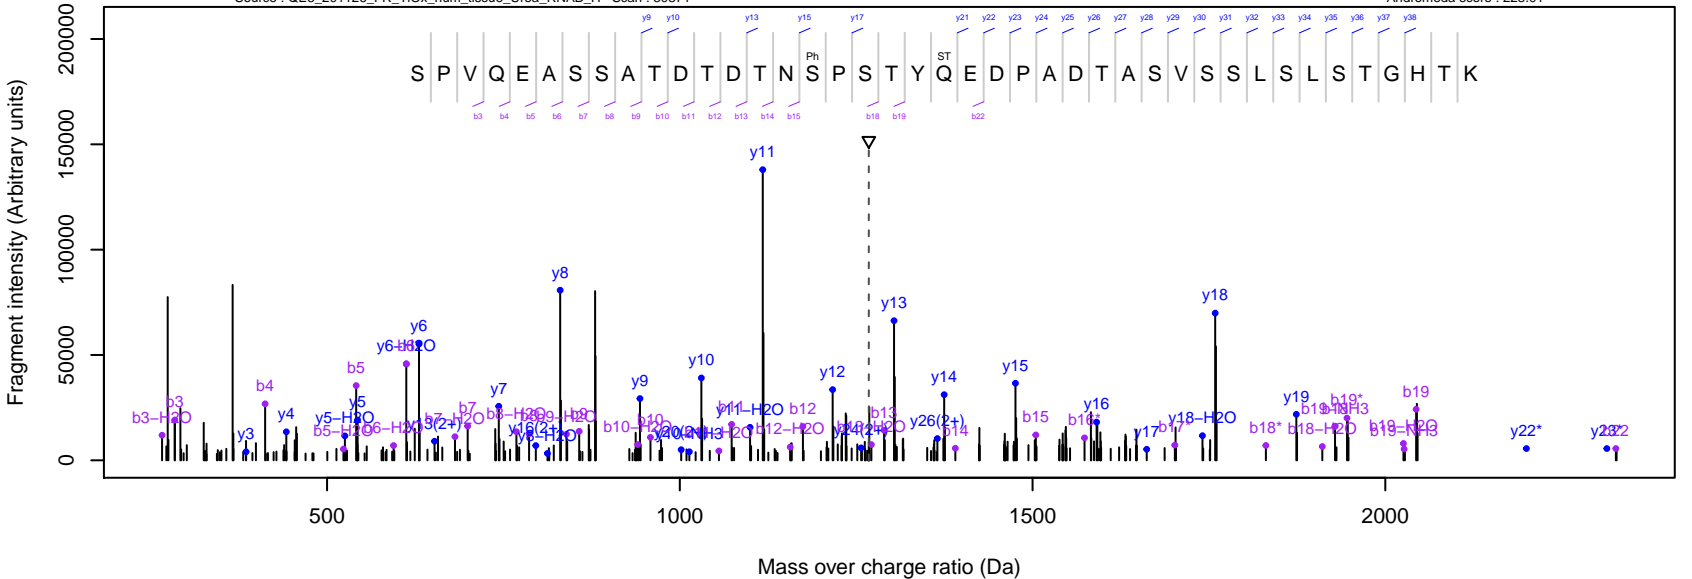

S(Phospho (STY))QAELETLVLSR-2+

Source : QE3\_201126\_FR\_TiOx\_hum\_tissue\_Urea\_RNAB\_B Scan : 45475

Andromeda score : 227.63

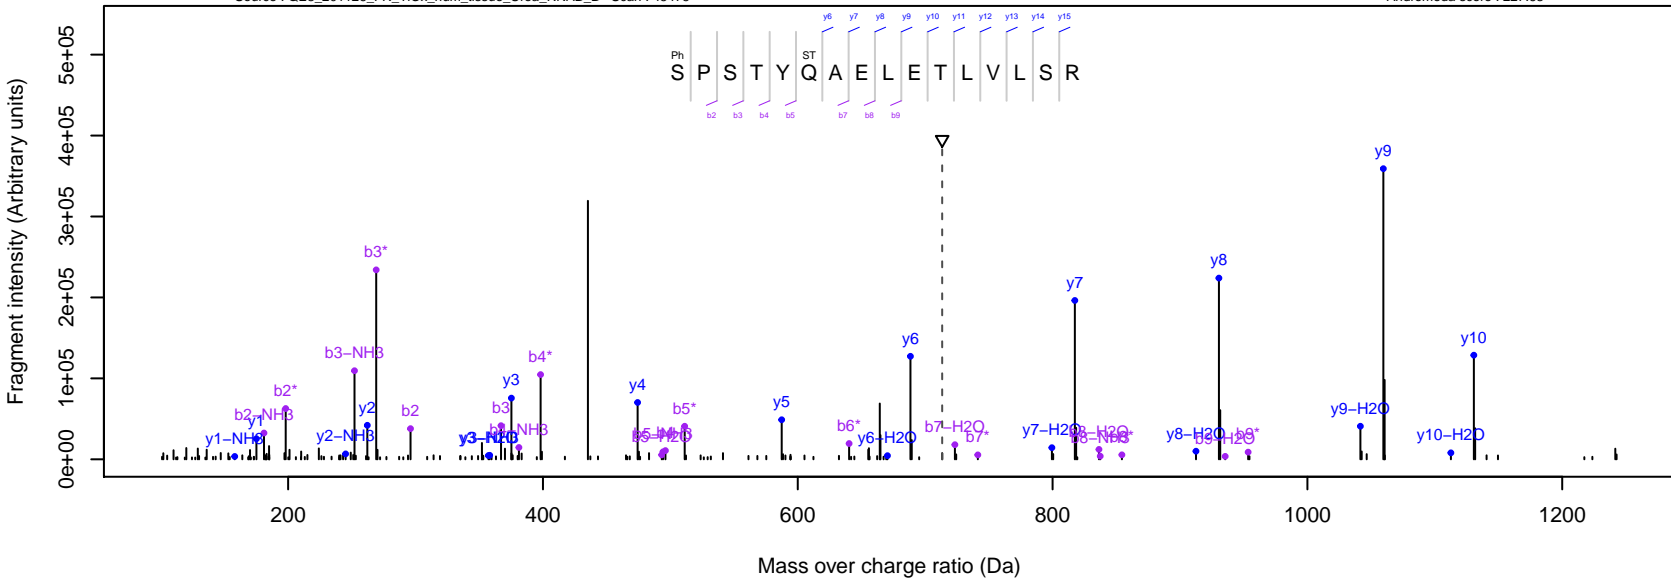

ADAPDAGAQS(Phospho (STY))DSELPYHQNDVSLDR-3+

Source : QE3\_201126\_FR\_TiOx\_hum\_tissue\_Urea\_RNAB\_B Scan : 27213

Andromeda score : 227.57

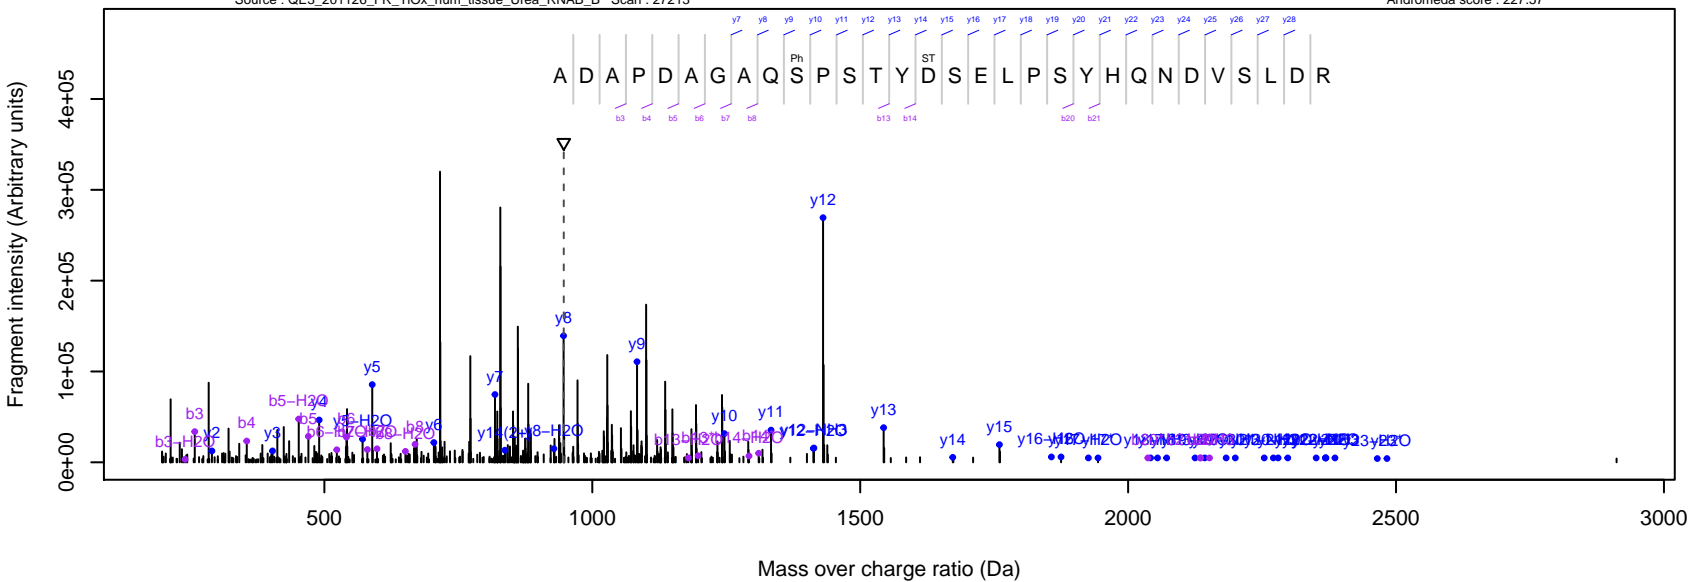

GTGAGGDS(Phospho (STY))GPEEDYLSLGAECNFMQSSSAK-3+

Source : QE3\_201126\_FR\_TiOx\_hum\_tissue\_Urea\_RNAB\_N Scan : 57921

Andromeda score : 227.49

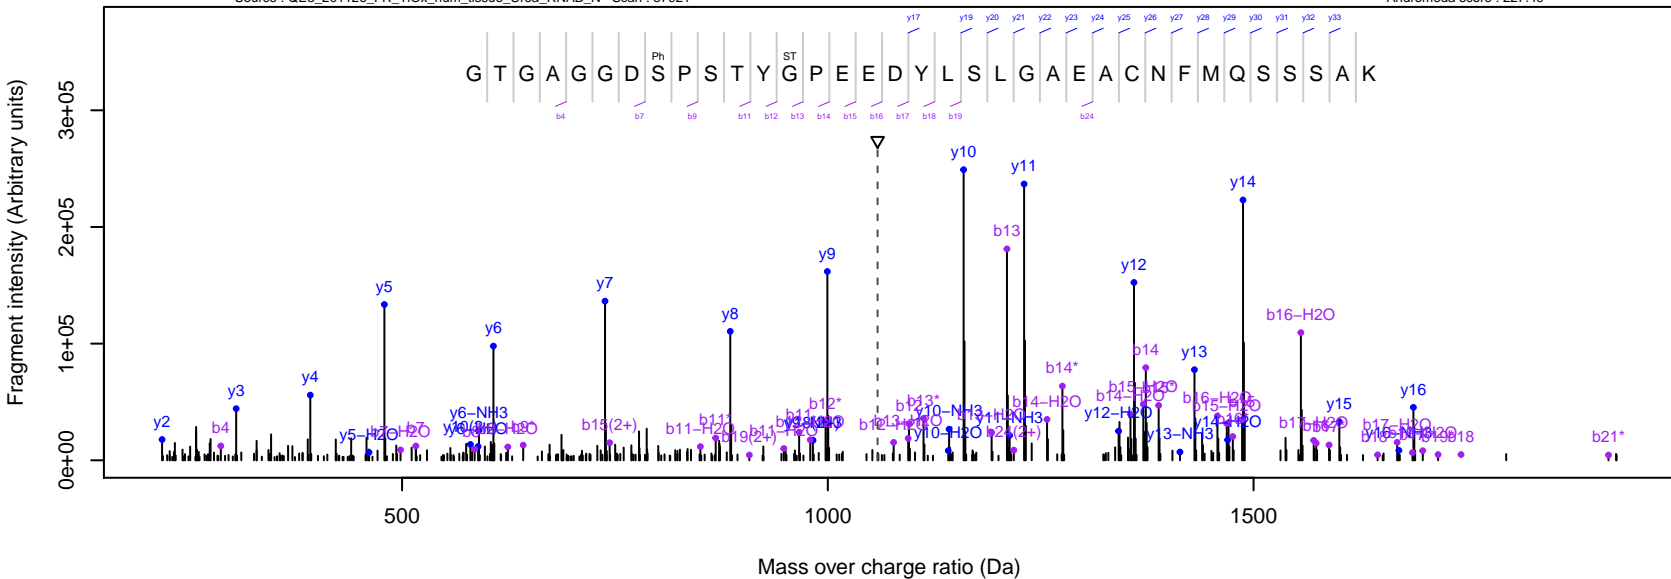

SKEGHSLEM(Oxidation (M))ENENLVENGADS(Phospho (STY))DEDDNSFLK-3+

Source : QE3\_201126\_FR\_TIOx\_hum\_tissue\_Urea\_RNAB\_N Scan : 29181

Andromeda score : 227.25

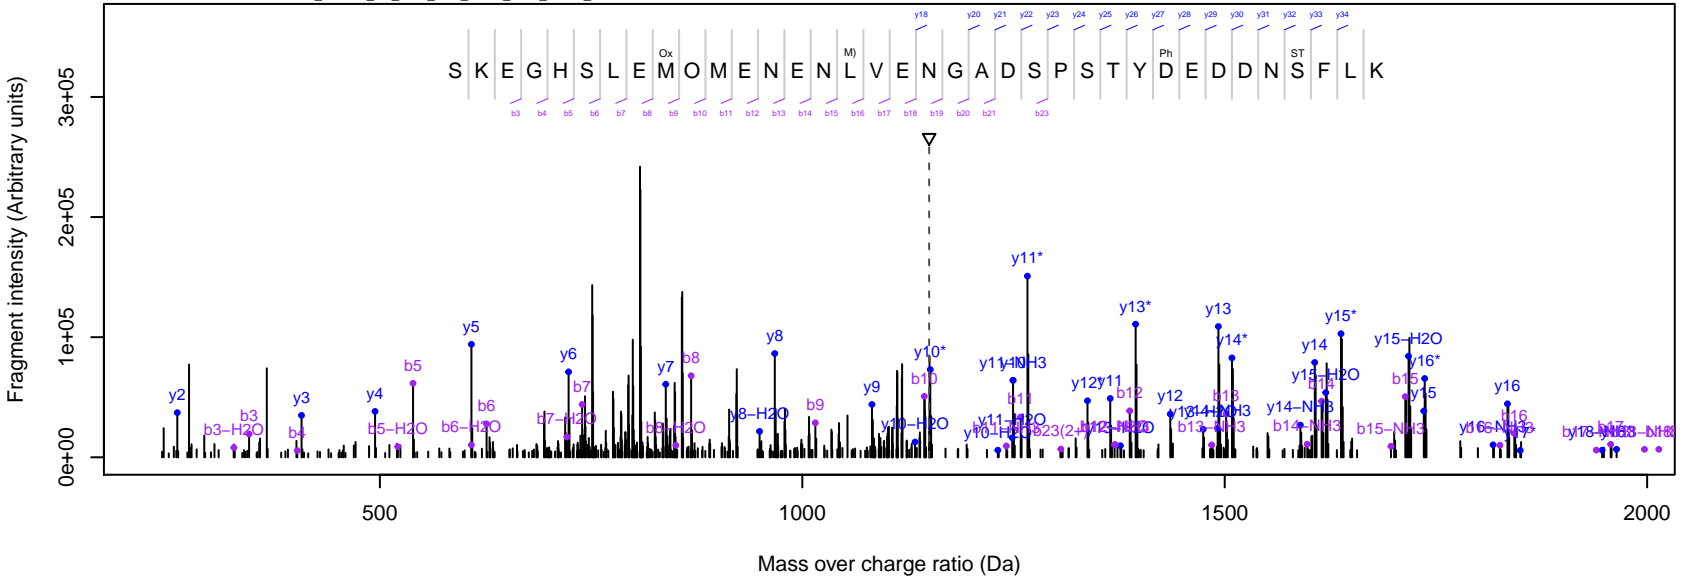

FFTTGS(Phospho (STY))DSESESSLGSEELVTKPVGNGYK-3+

Source : QE3\_201126\_FR\_TIOx\_hum\_tissue\_Urea\_RNAB\_H Scan : 40117

Andromeda score : 227.15

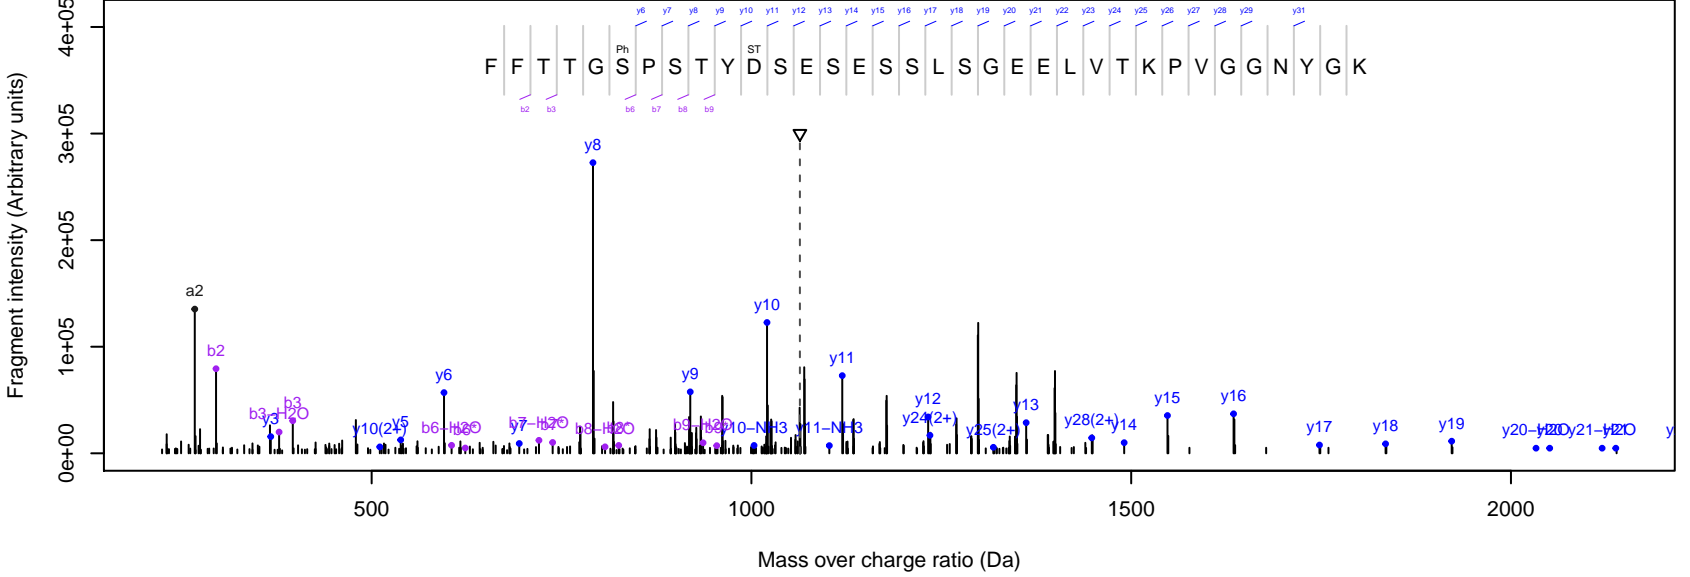

SAS(Phospho (STY))QSS(Phospho (STY))LDKLDQELKEQQK-3+

Source : QE3\_201126\_FR\_TIOx\_hum\_tissue\_Urea\_RNAB\_N Scan : 27219

Andromeda score : 227.15

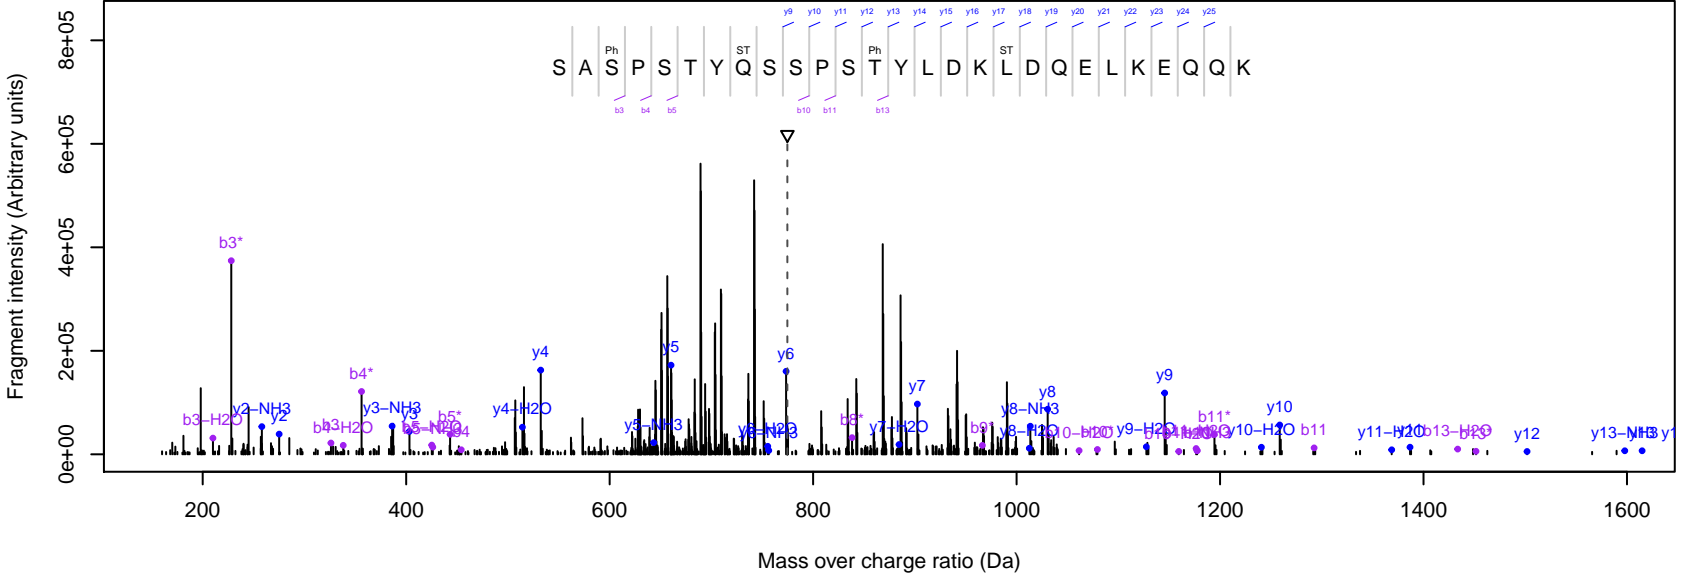

RSS(Phospho (STY))GREEDDELLR-3+

Source : QE3\_201126\_FR\_TiOx\_hum\_tissue\_Urea\_RNAB\_H Scan : 11192

Andromeda score : 227.09

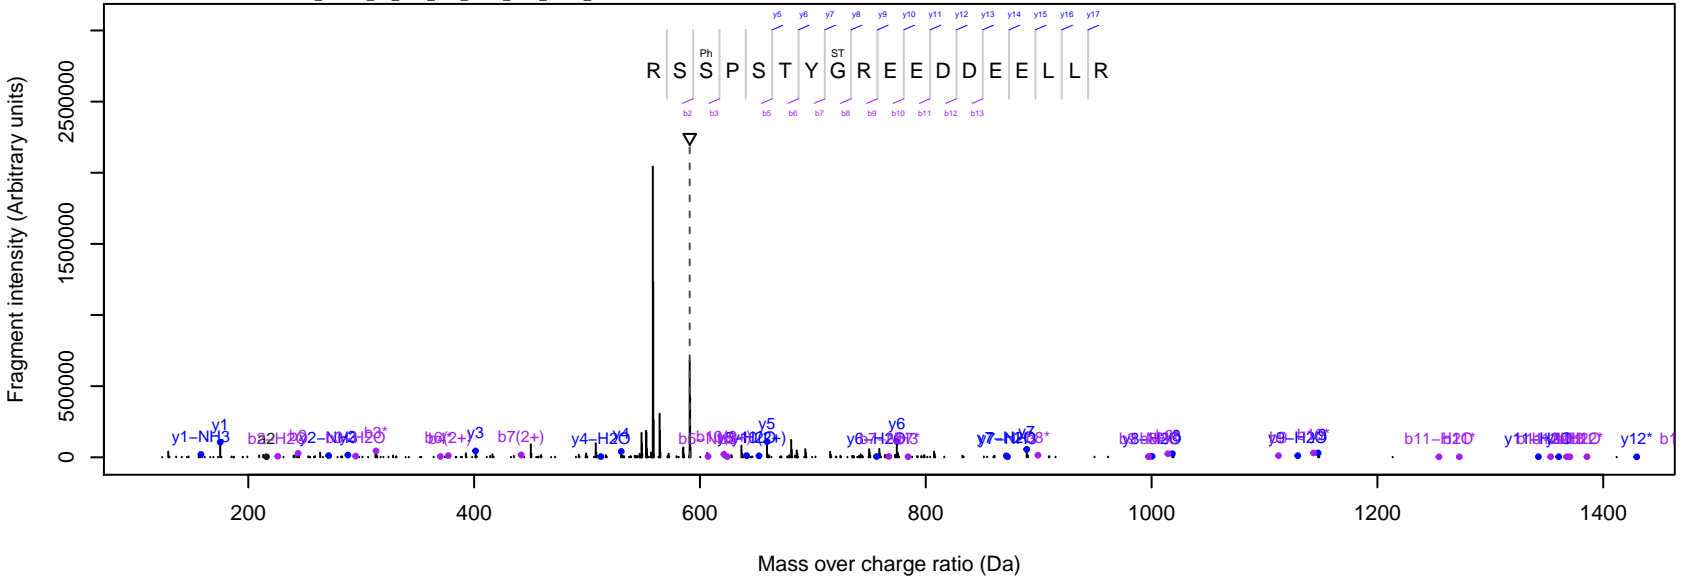

KGNEAVAS(Phospho (STY))RDLSENNDQR-3+

Source : QE3\_201126\_FR\_TiOx\_hum\_tissue\_Urea\_RNAB\_H Scan : 6613

Andromeda score : 226.81

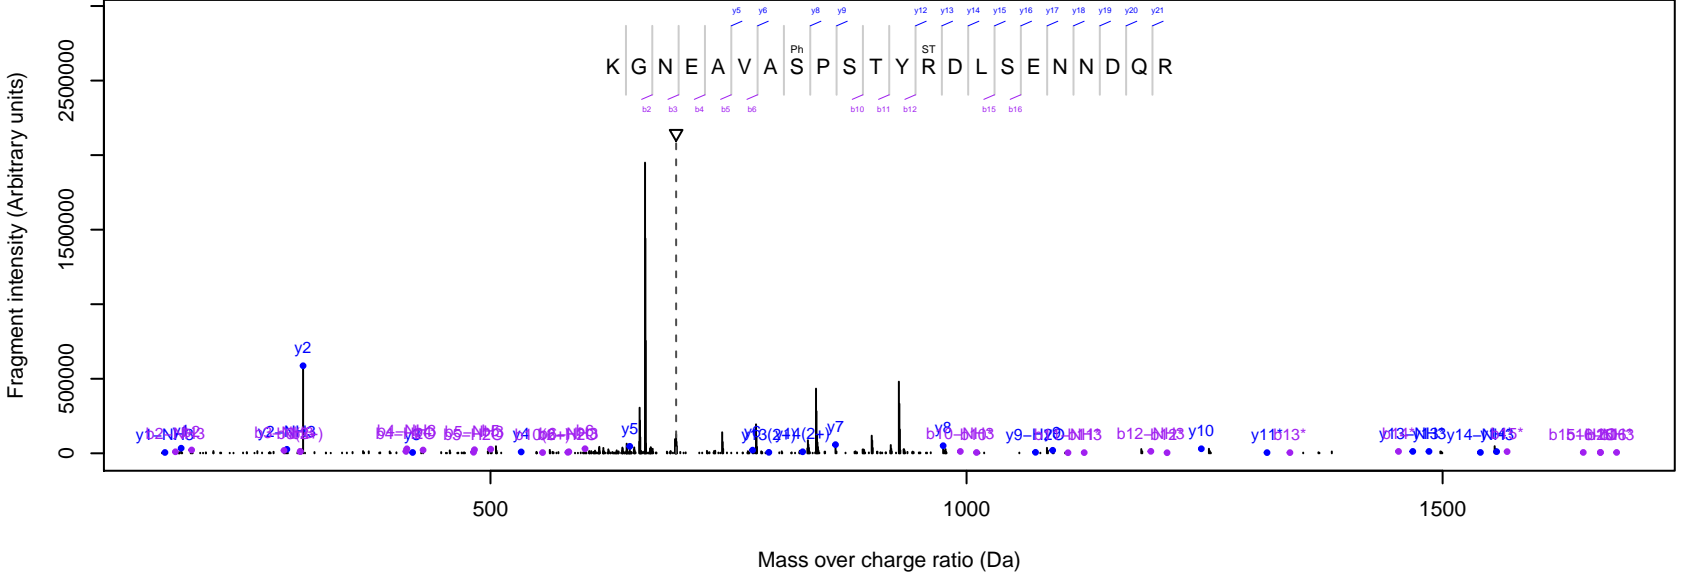

RNS(Phospho (STY))SEASSGDFLDLK-2+

Source : QE3\_201126\_FR\_TiOx\_hum\_tissue\_Urea\_RNAB\_B Scan : 27223

Andromeda score : 226.44

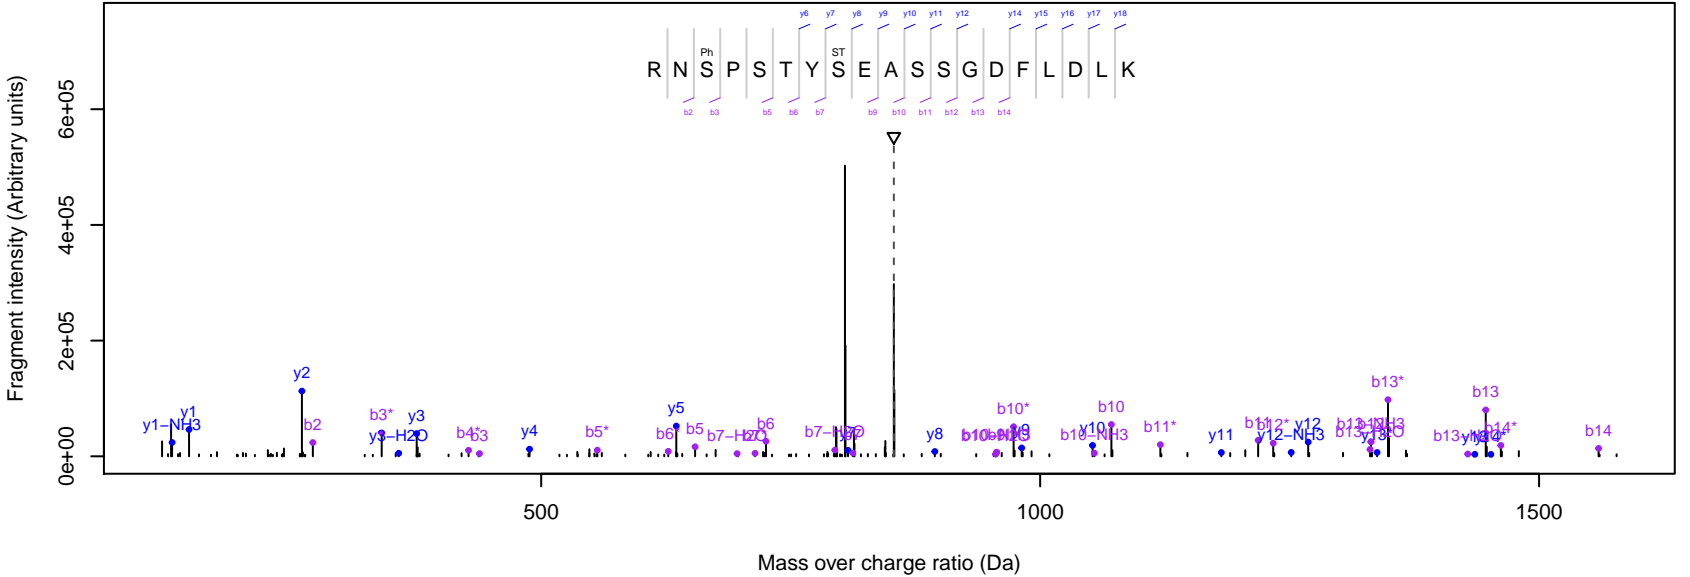

LGGLRPES(Pospho (STY))PELTSVSR-3+

Source : QE3\_201126\_FR\_TiOx\_hum\_tissue\_Urea\_RNAB\_N Scan : 27452

Andromeda score : 226.29

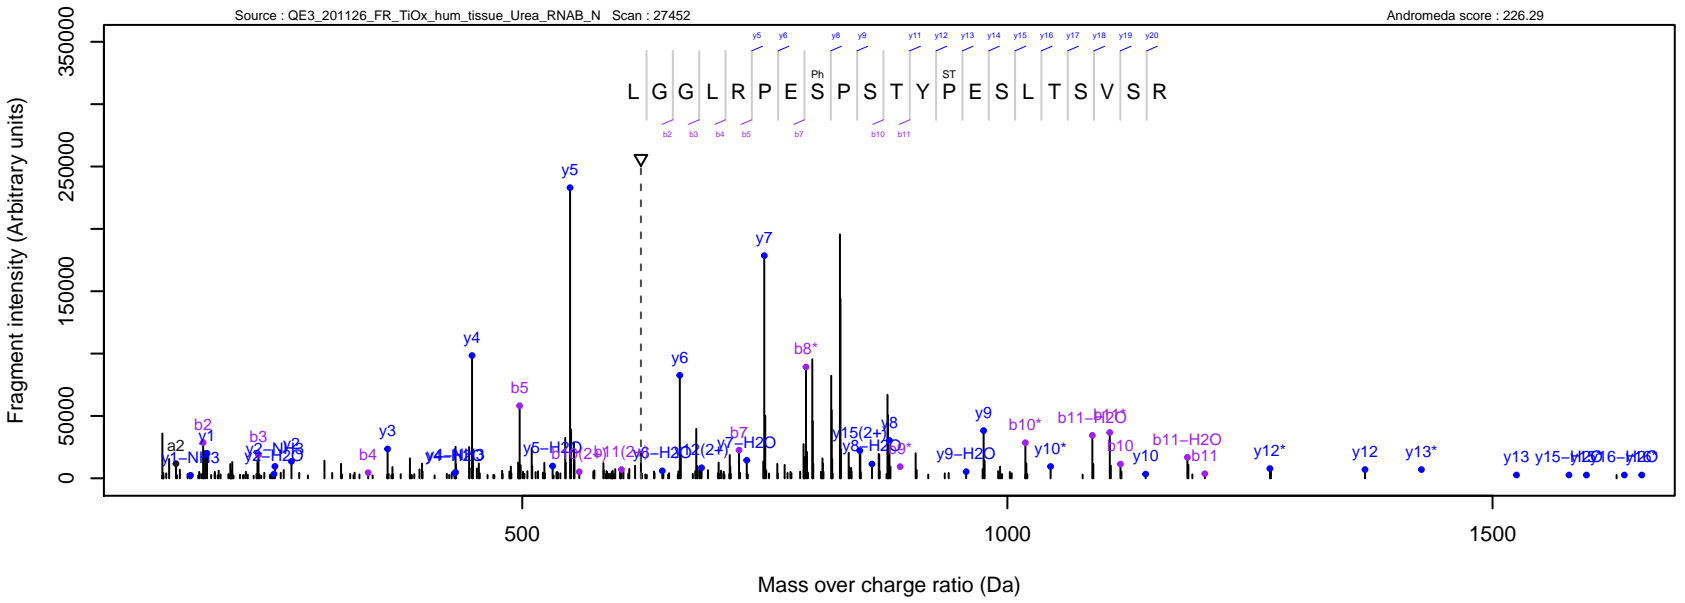

SRS(Phospho (STY))PLELEPEAK-2+

Source : QE3\_201126\_FR\_TiOx\_hum\_tissue\_Urea\_RNAB\_B Scan : 16020

Andromeda score : 226.14

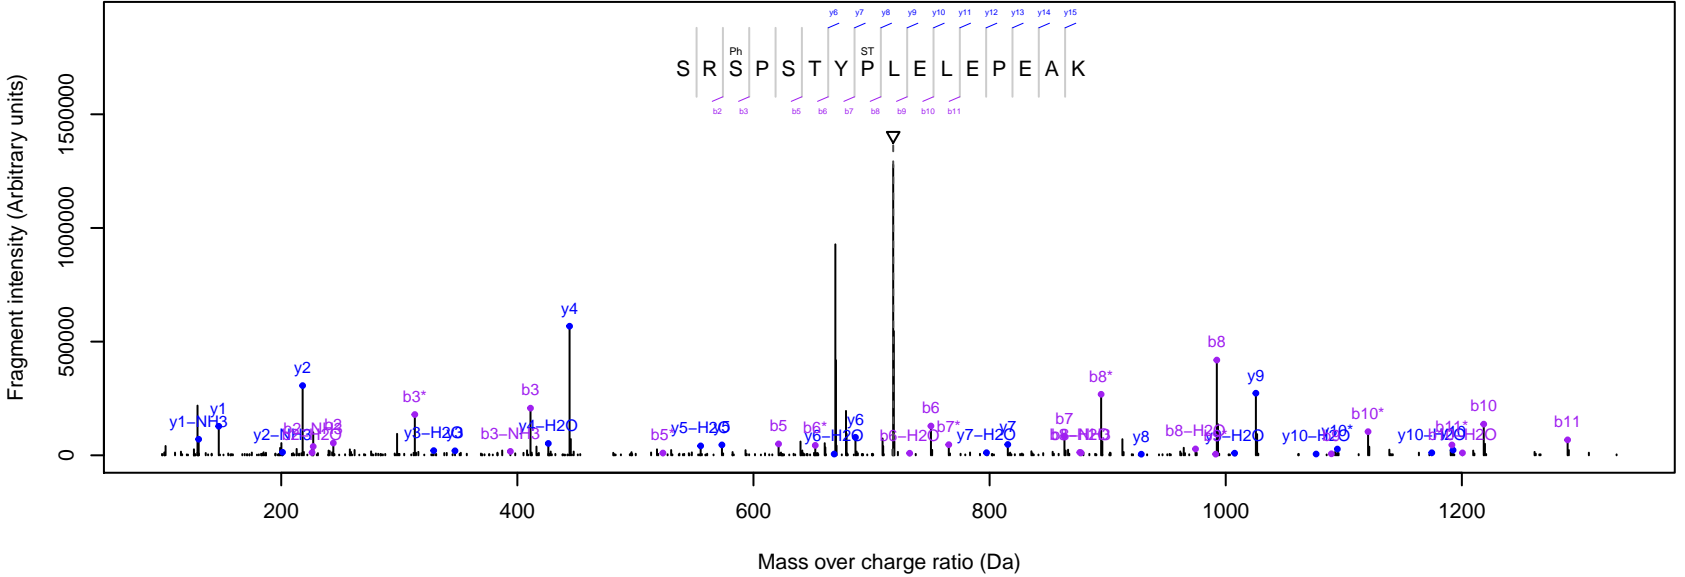

(Acetyl (Protein N-term))S(Phospho (STY))QKQEEENPAEETGEEKQDTEK-3+

Source : QE3\_201126\_FR\_TiOx\_hum\_tissue\_Urea\_RNAB\_H Scan : 9942

Andromeda score : 226.07

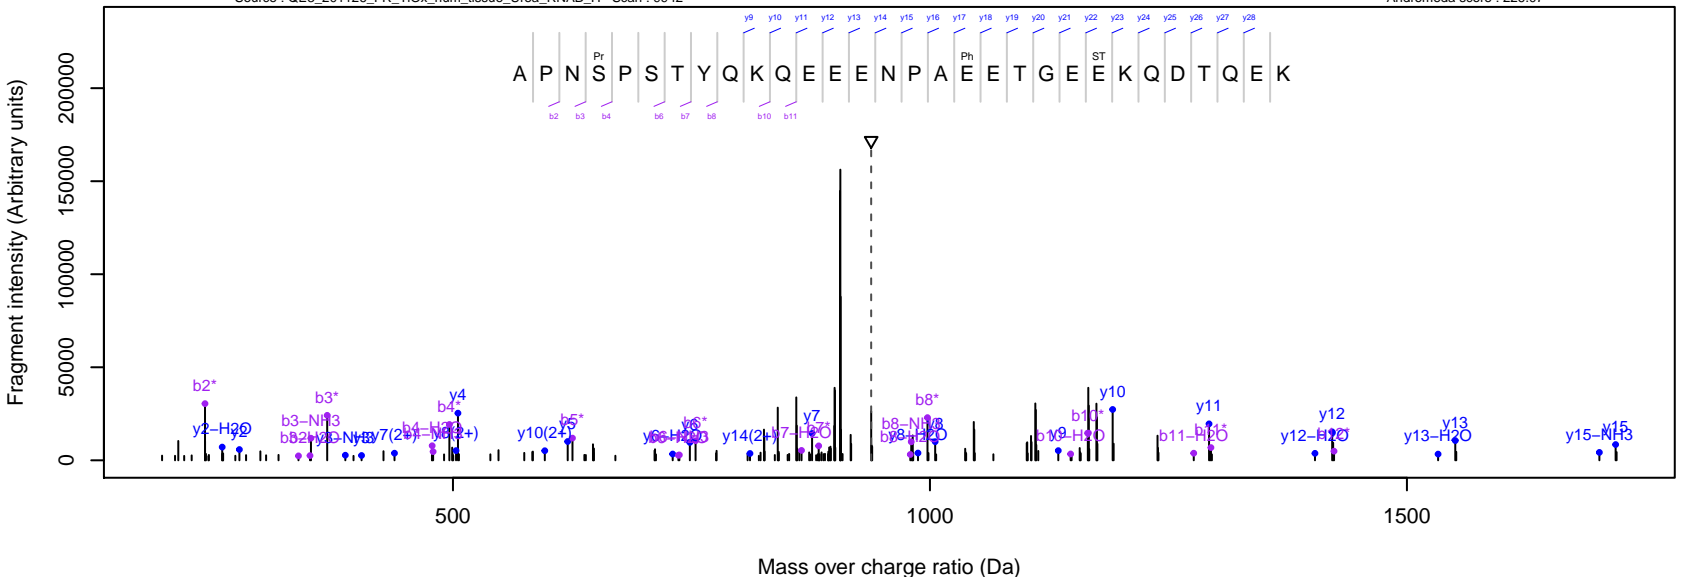

RGS(Phospho (STY))PVPPVPER-2+

Source : QE3\_201126\_FR\_TiOx\_hum\_tissue\_Urea\_RNAB\_B Scan : 11262

Andromeda score : 225.92

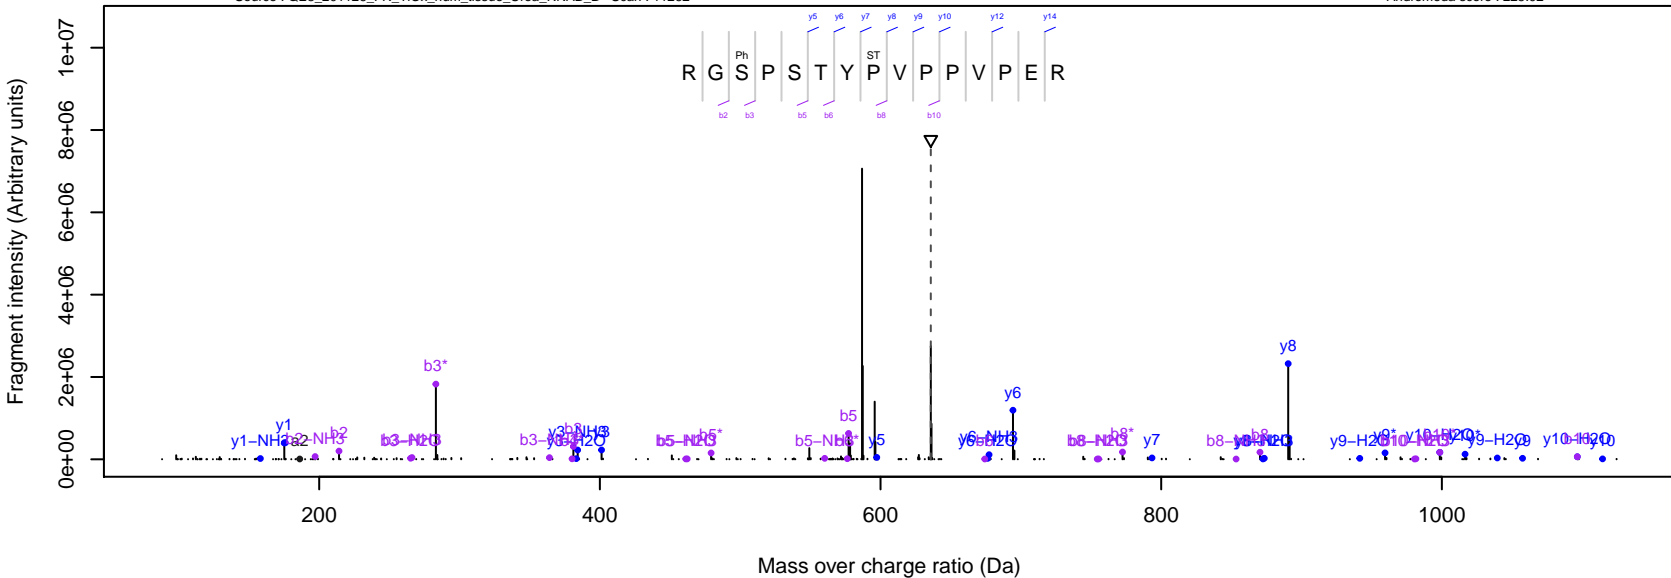

SLYAS(Phospho (STY))SPGGVYATR-2+

Source : QE3\_201126\_FR\_TiOx\_hum\_tissue\_Urea\_RNAB\_B Scan : 25995

Andromeda score : 225.86

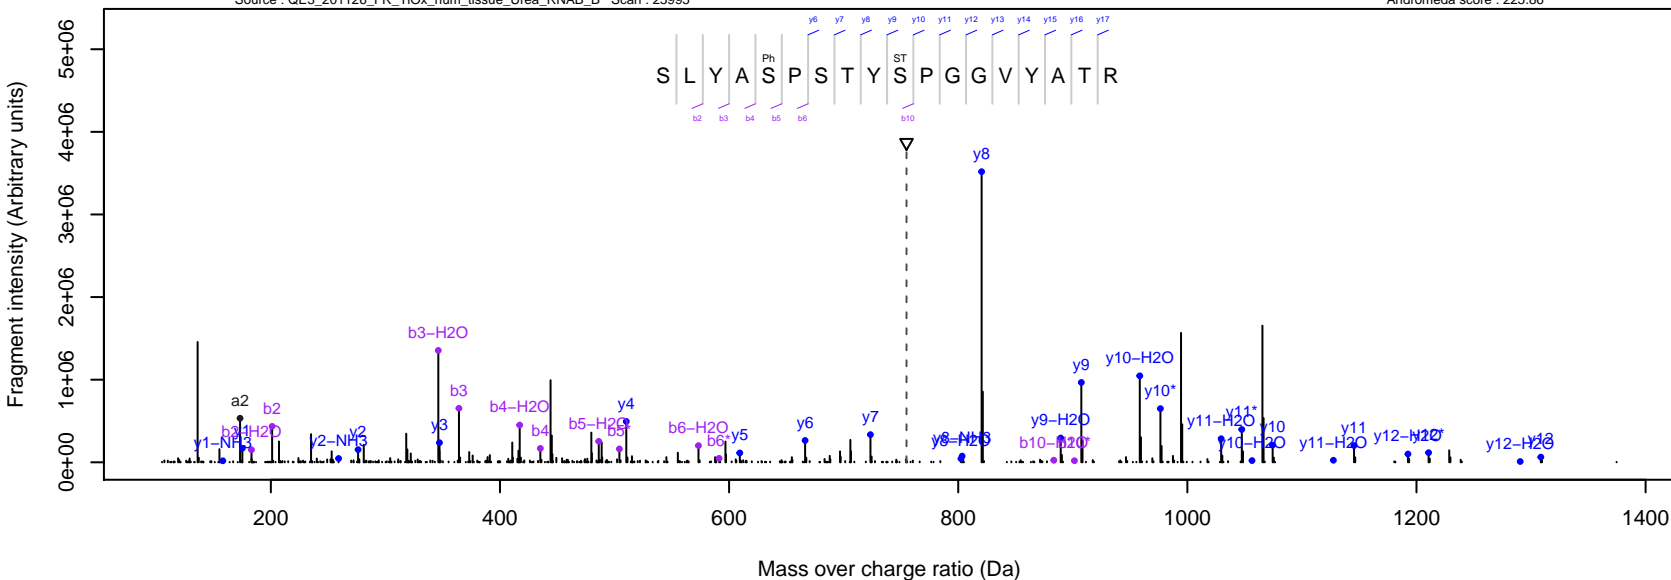

LTFDSSF(SPhospho (STY))PNTGKK-3+

Source : QE3\_201126\_FR\_TiOx\_hum\_tissue\_Urea\_RNAB\_N Scan : 24245

Andromeda score : 225.7

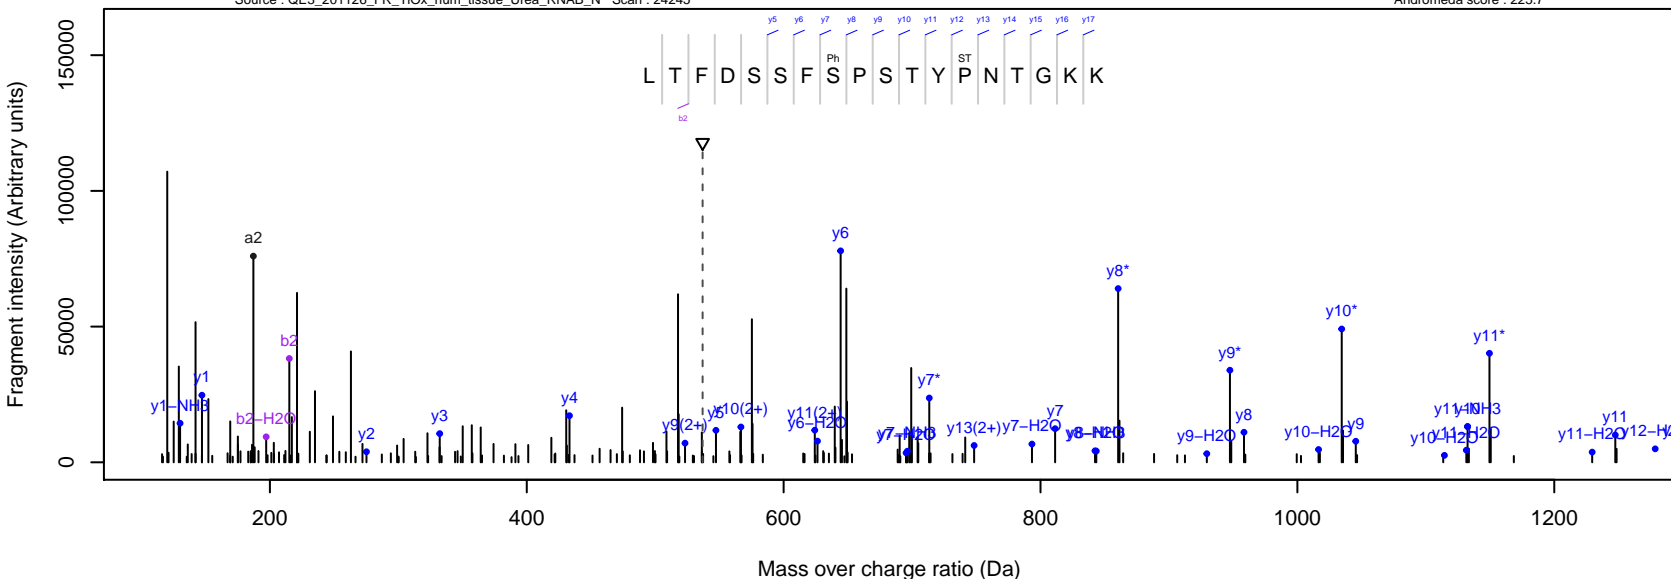

ENYSDS(Phospho (STY))EEEDDDVASSR-2+

Source : QE3\_201126\_FR\_TIOx\_hum\_tissue\_Urea\_RNAB\_H Scan : 15403

Andromeda score : 225.69

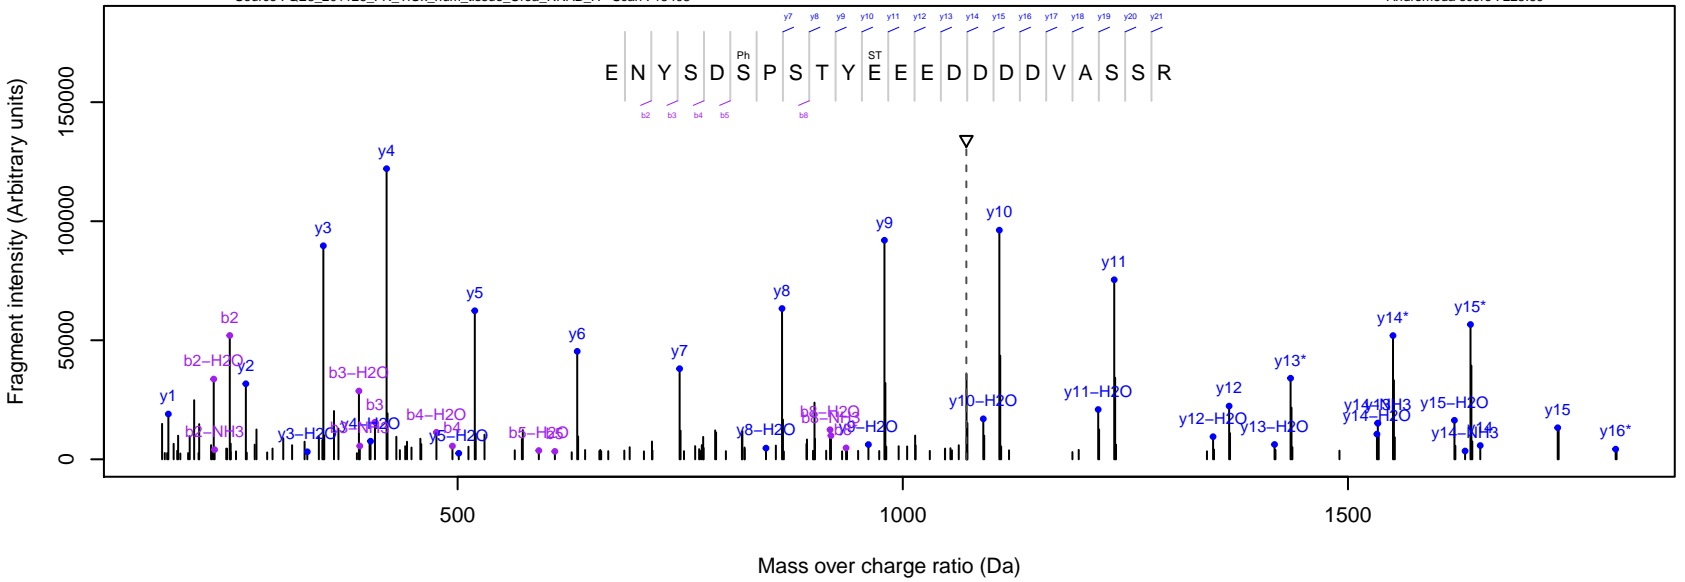

(Acetyl (Protein N-term))MDS(Phospho (STY))DDEMVEEAVEGHLDDGLPHGFCTVYSSSTR-3+

Source : QE3\_201126\_FR\_TIOx\_hum\_tissue\_Urea\_RNAB\_H Scan : 58926

Andromeda score : 225.61

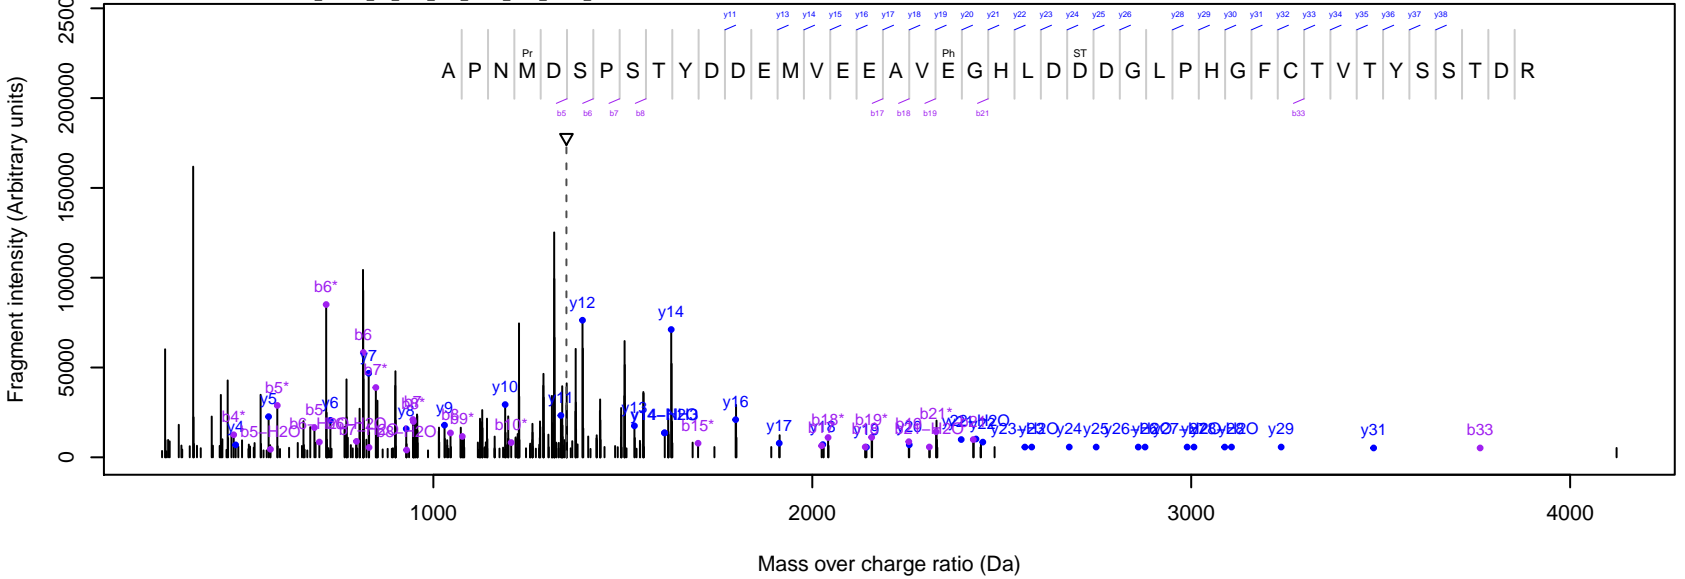

SHVEDGDIAGAPASS(Phospho (STY))PEAPPAEQDPVQLK-3+

Source : QE3\_201126\_FR\_TIOx\_hum\_tissue\_Urea\_RNAB\_H Scan : 28816

Andromeda score : 225.23

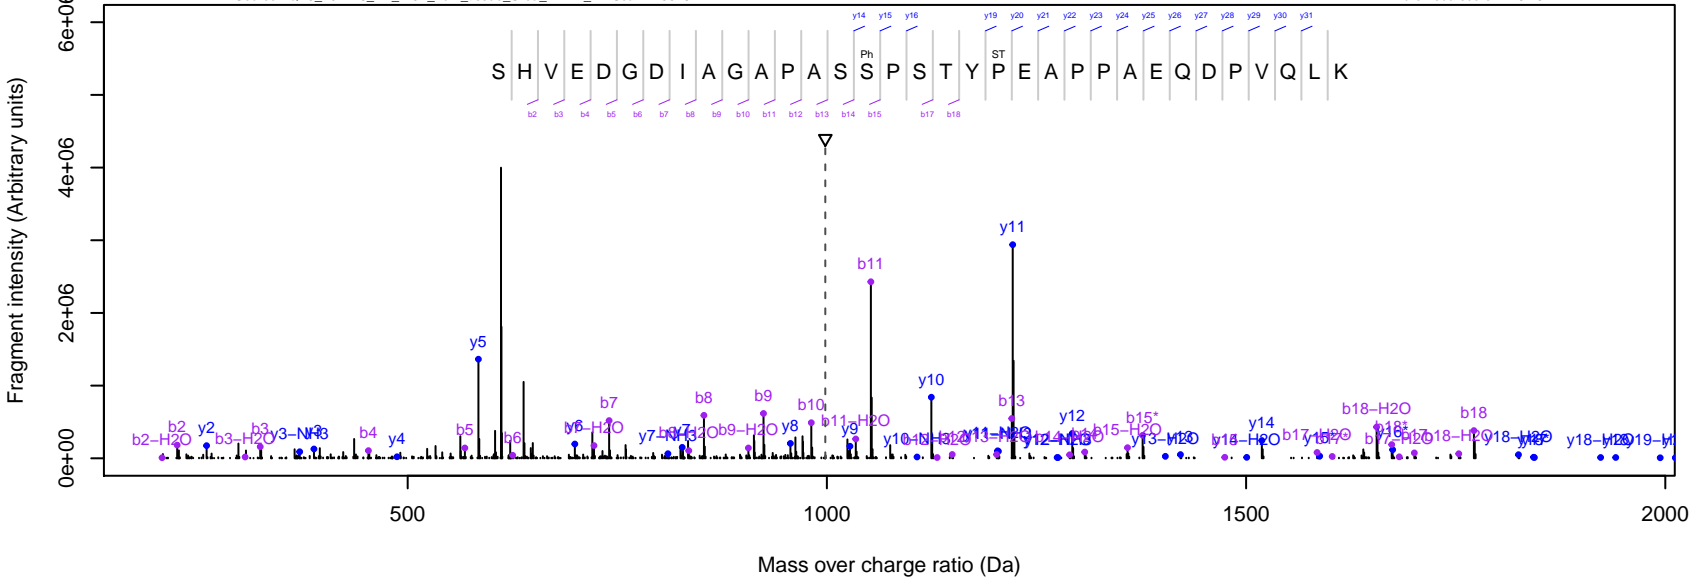



QRS(Phospho (STY))PIALPVKQEPPIQIDAVK-3+

Source : QE3\_201126\_FR\_TIOx\_hum\_tissue\_Urea\_RNAB\_B Scan : 25790

Andromeda score : 225.17

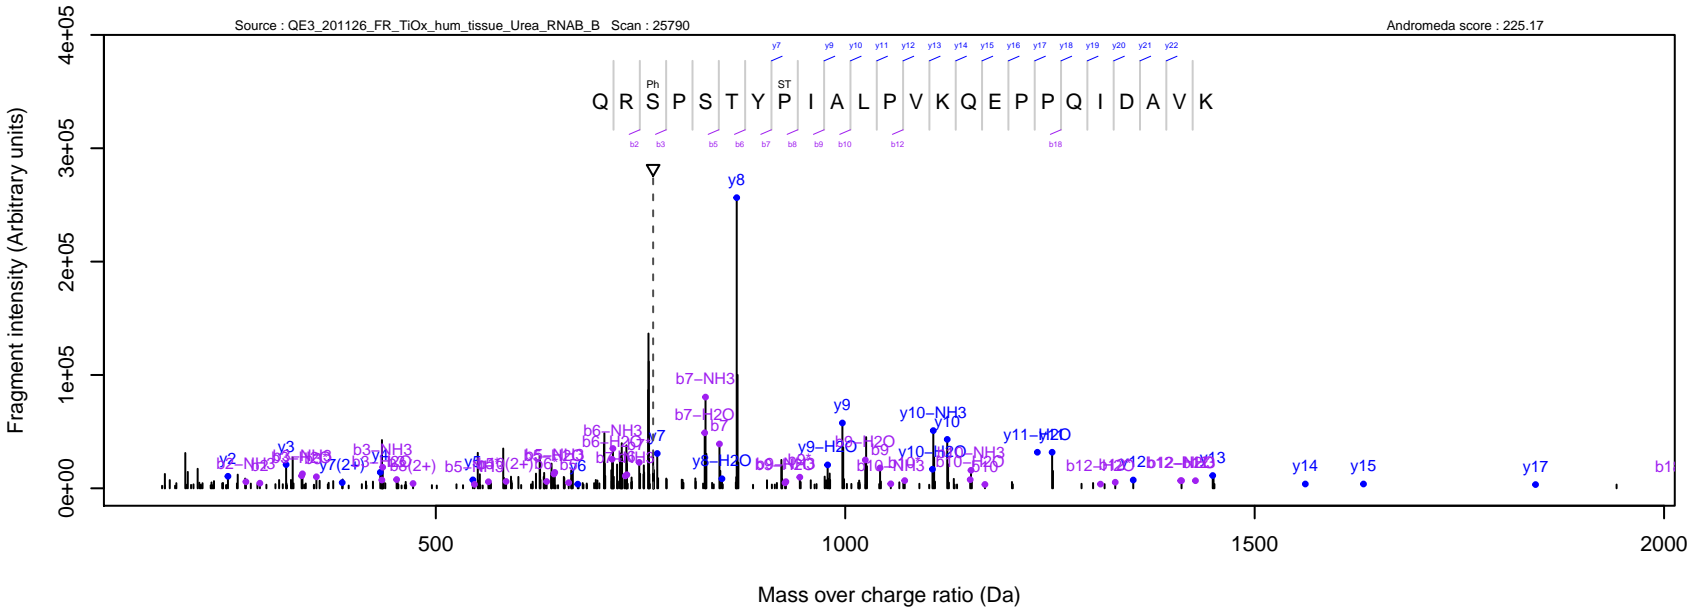

ATAPQTQHVS(Phospho (STY))PM(Oxidation (M))R-2+

Source : QE3\_201126\_FR\_TIOx\_hum\_tissue\_Urea\_RNAB\_H Scan : 5867

Andromeda score : 224.97

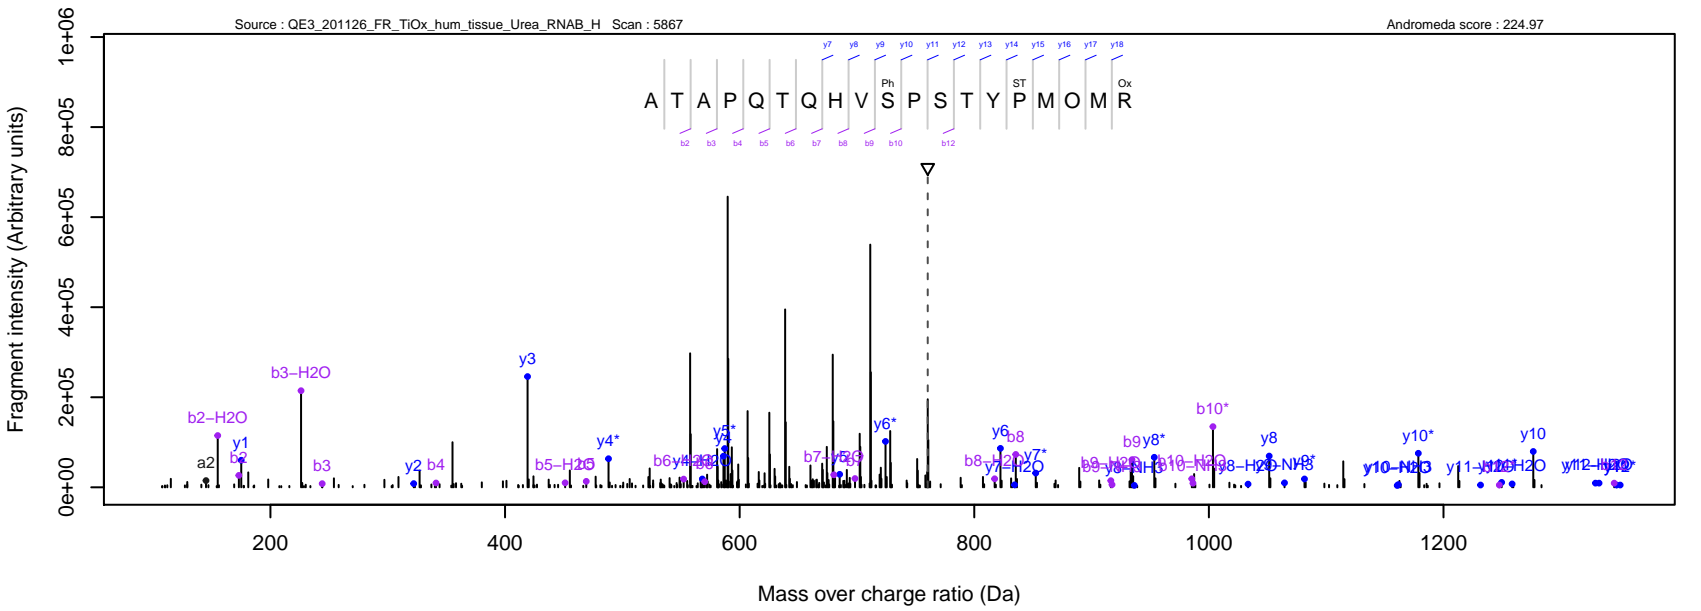

GYTS(Phospho (STY))DSEVYTDHGRPGK-2+

Source : QE3\_201126\_FR\_TIOx\_hum\_tissue\_Urea\_RNAB\_H Scan : 11961

Andromeda score : 224.97

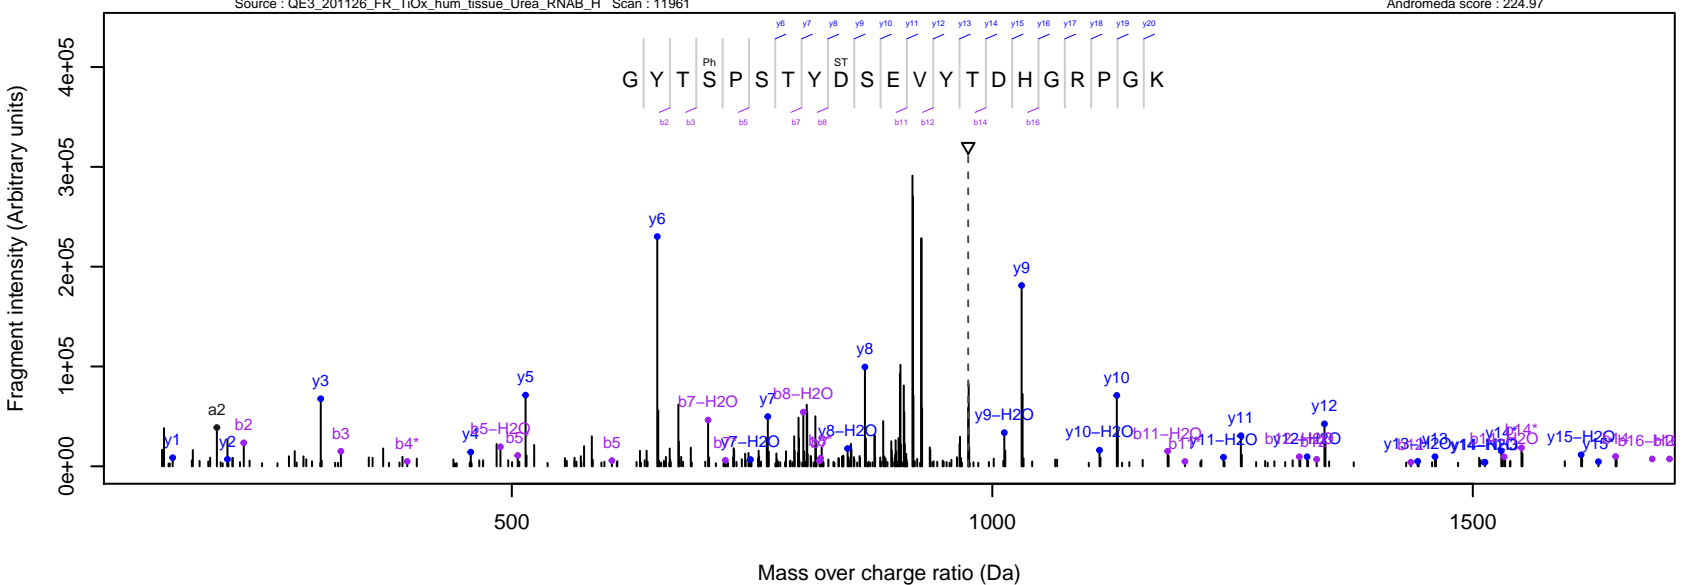

RLS(Phospho (STY))QPESAEK-2+

Source : QE3\_201126\_FR\_TIOx\_hum\_tissue\_Urea\_RNAB\_H Scan : 5356

Andromeda score : 224.8

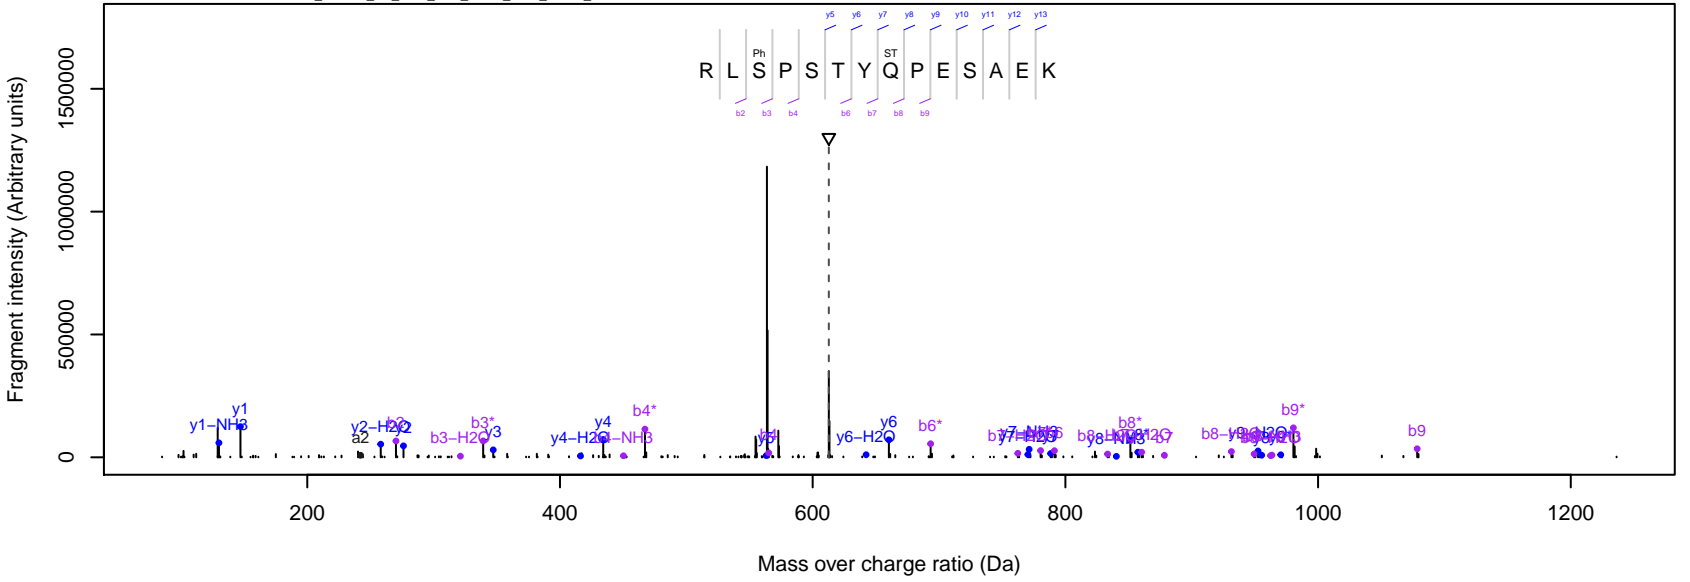

QEEEQDLGEGKPSSEGEPEEEDGEGFYSK(Phospho (STY))PGK-3+

Source : QE3\_201126\_FR\_TIOx\_hum\_tissue\_Urea\_RNAB\_N Scan : 30878

Andromeda score : 224.64

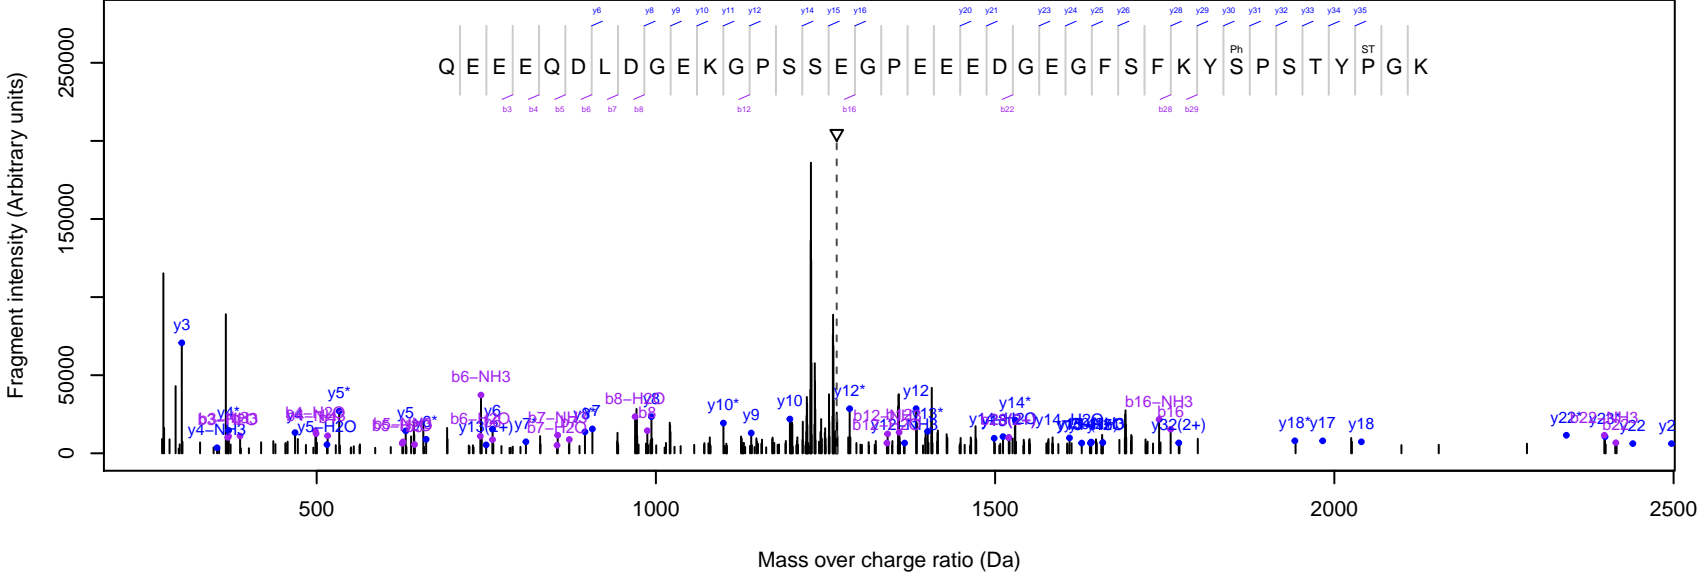

IHQDSES(Phospho (STY))GDELSSSSTEQIR-2+

Source : QE3\_201126\_FR\_TIOx\_hum\_tissue\_Urea\_RNAB\_N Scan : 15235

Andromeda score : 224.49

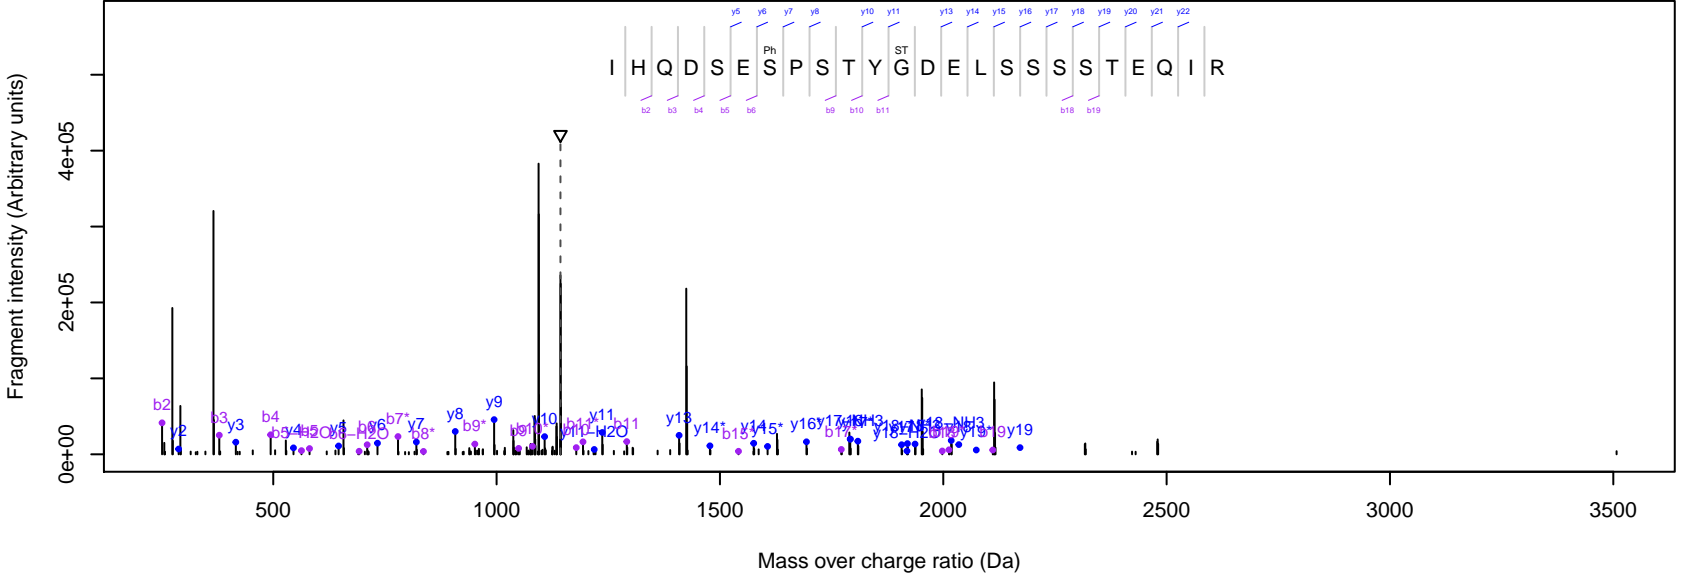

TGS(Phospho (STY))TSSKEDDYESDAATIVQK-2+

Source : QE3\_201126\_FR\_TiOx\_hum\_tissue\_Urea\_RNAB\_H Scan : 23110

Andromeda score : 224.49

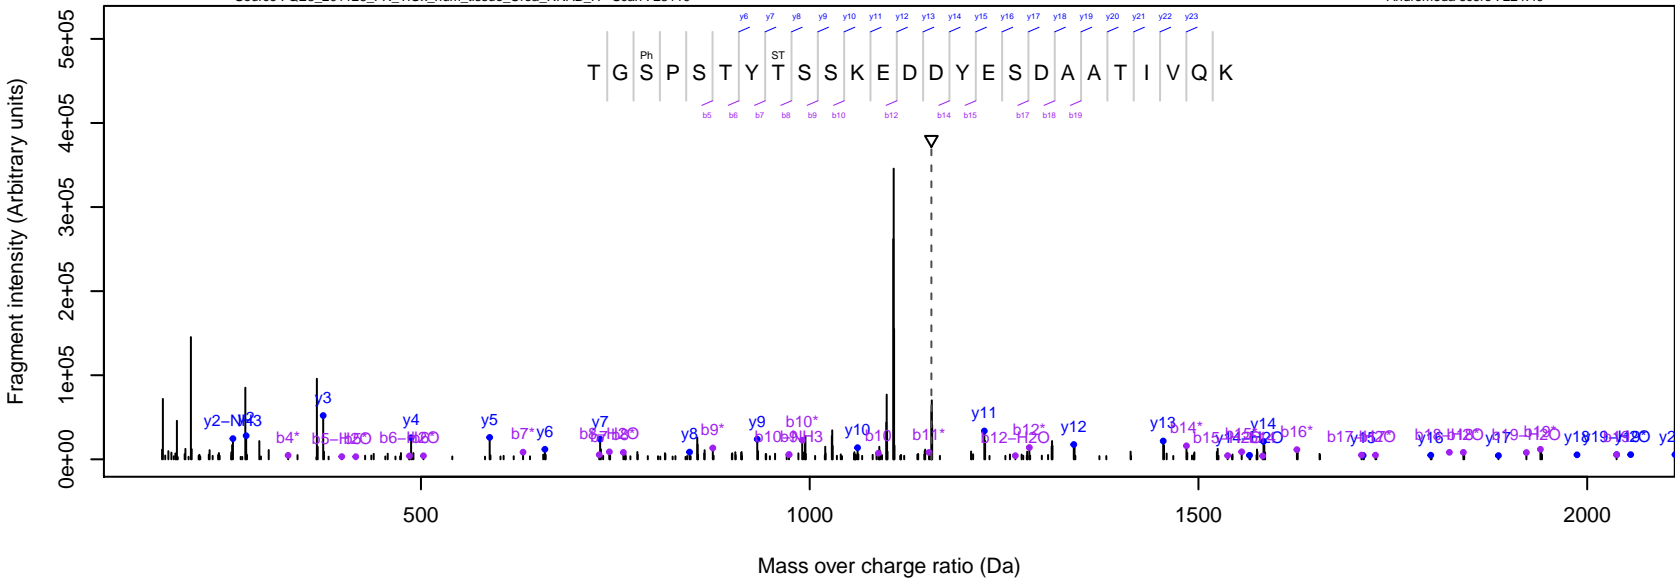

GPVS(Phospho (STY))PSVSFQPLAR-2+

Source : QE3\_201126\_FR\_TiOx\_hum\_tissue\_Urea\_RNAB\_H Scan : 39545

Andromeda score : 224.42

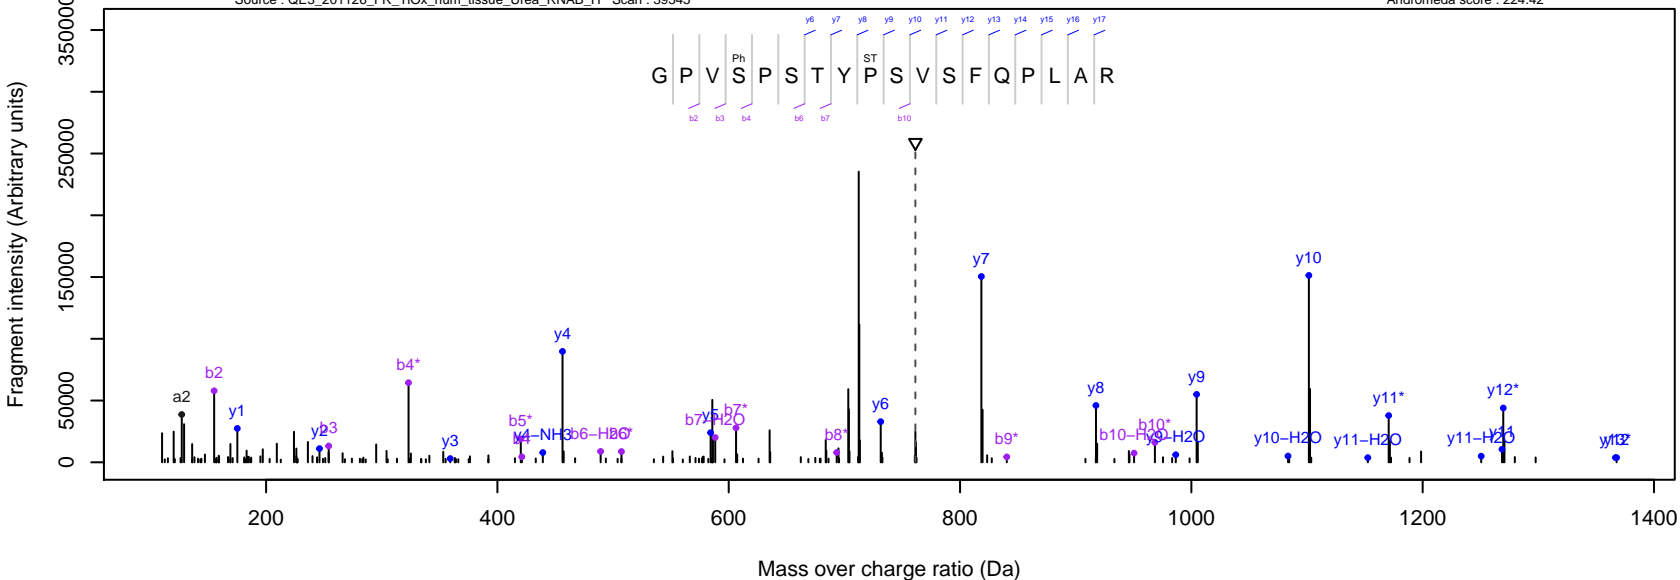

S(Phospho (STY))FTAADSKDEEVK-2+

Source : QE3\_201126\_FR\_TiOx\_hum\_tissue\_Urea\_RNAB\_B Scan : 10628

Andromeda score : 224.34

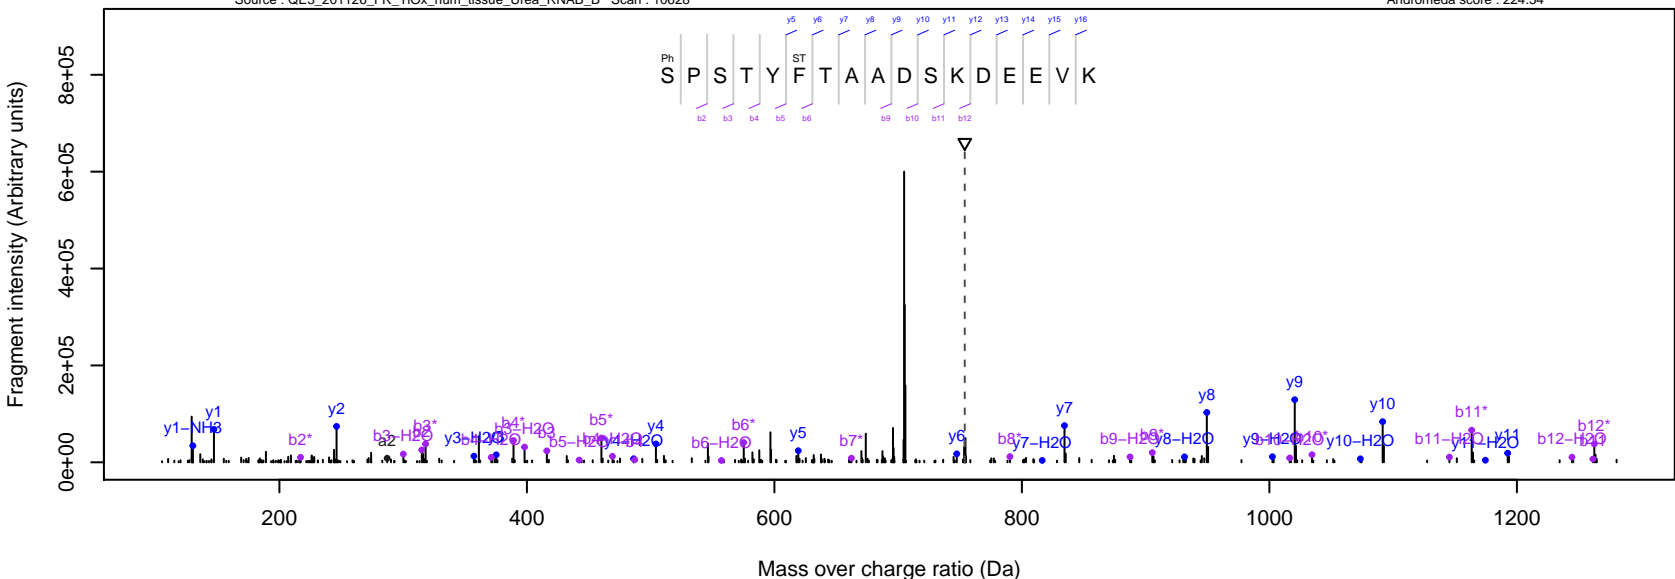

VHDFNGIVEGLM(Oxidation (M))TTVHAITAT(Phospho (STY))QK-3+

Source : QE3\_201126\_FR\_TiOx\_hum\_tissue\_Urea\_RNAB\_H Scan : 50166

Andromeda score : 224.27

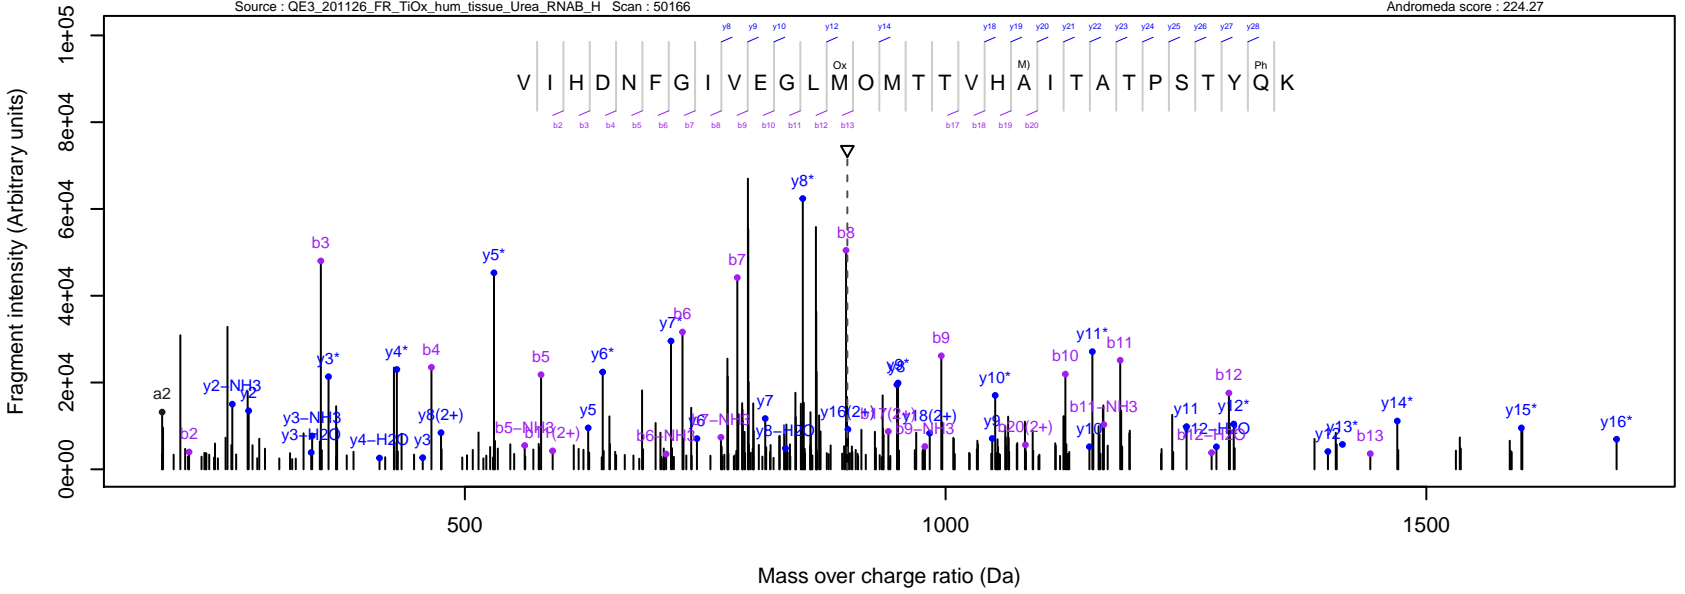

VQETGDIVISNAYVDLAPTSGTSAKT(Phospho (STY))PSEGGK-3+

Source : QE3\_201126\_FR\_TiOx\_hum\_tissue\_Urea\_RNAB\_N Scan : 41509

Andromeda score : 224.23

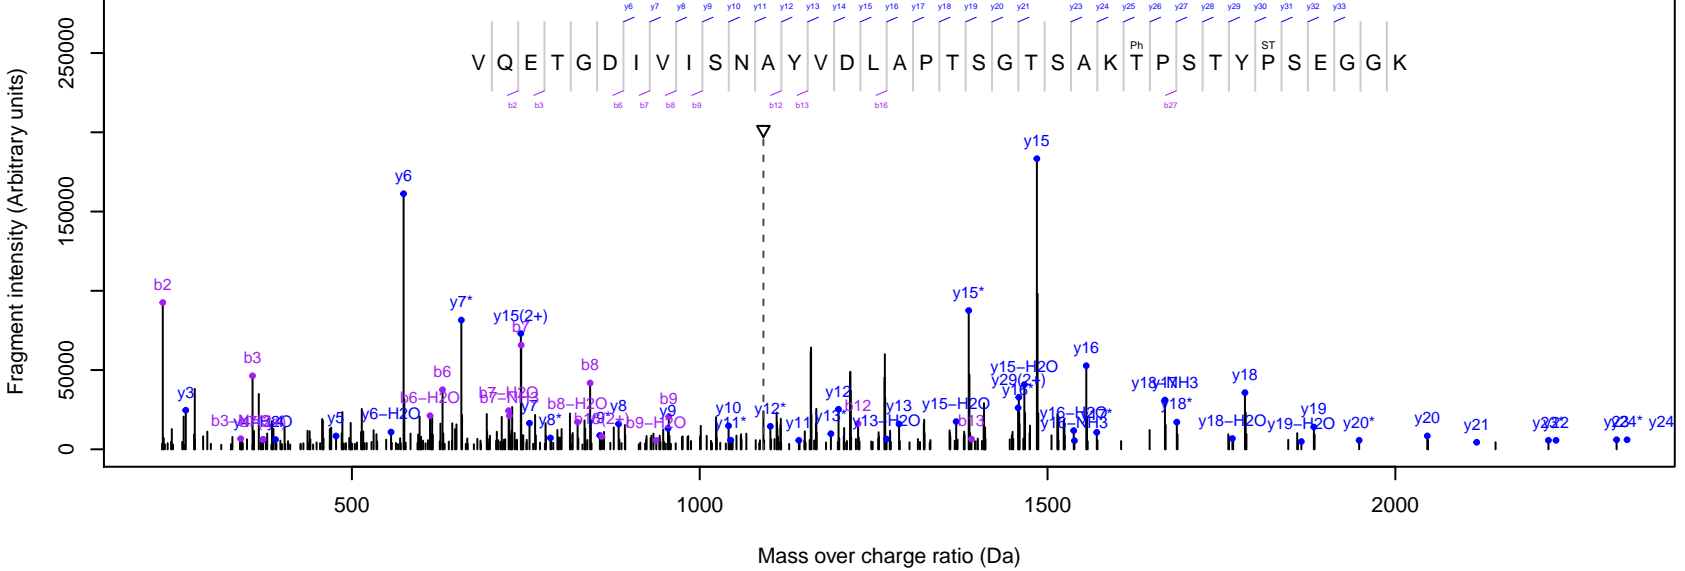

STVTGERQS(Phospho (STY))GDGQESTEPVENK-3+

Source : QE3\_201126\_FR\_TiOx\_hum\_tissue\_Urea\_RNAB\_B Scan : 8249

Andromeda score : 224.21

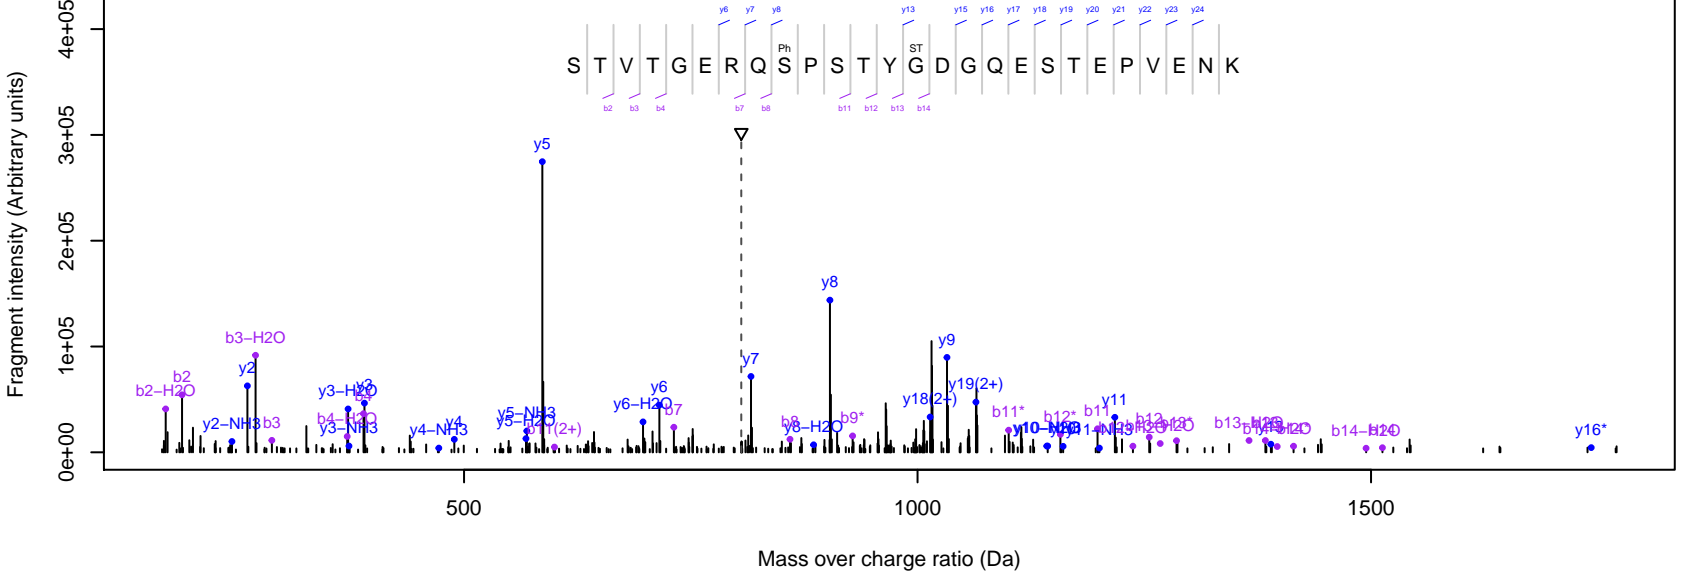

LCDDGPKLPTS(Phospho (STY))PR-2+

Source : QE3\_201126\_FR\_TiOx\_hum\_tissue\_Urea\_RNAB\_H Scan : 24043

Andromeda score : 224.13

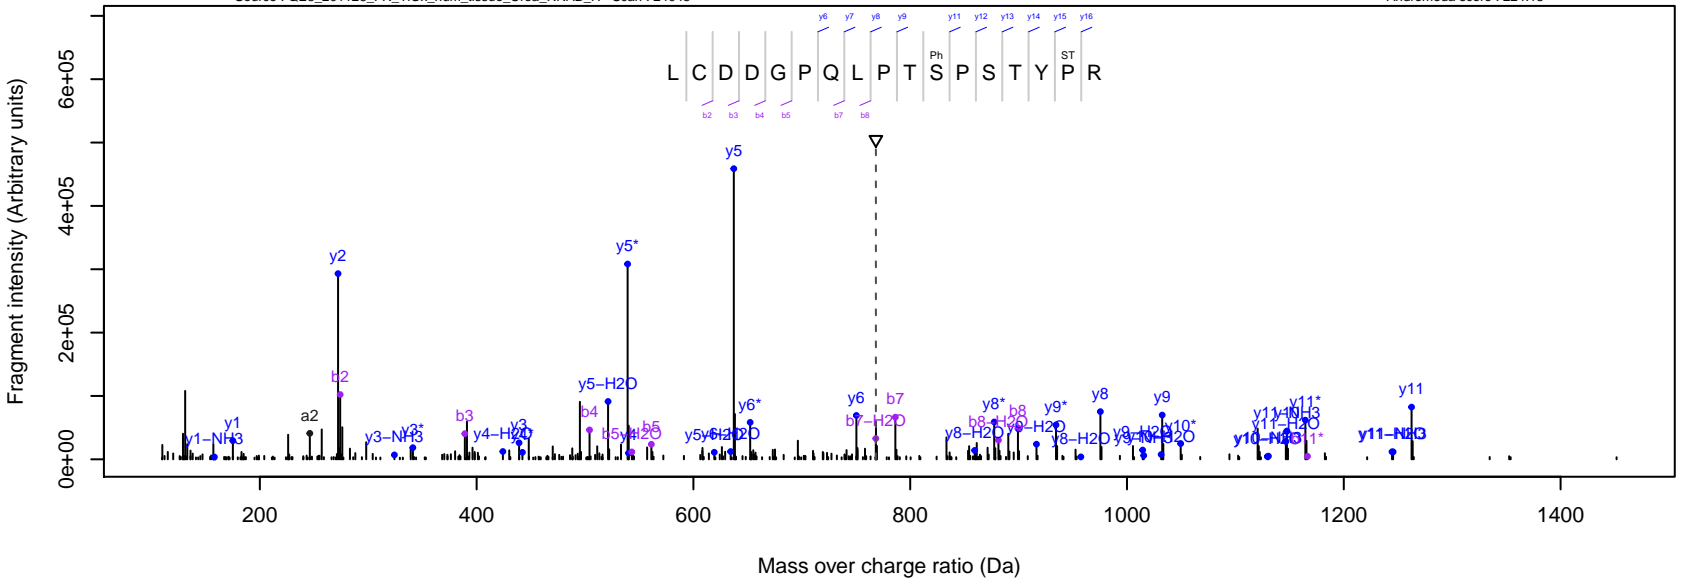

IPEISIQDMTAQVTS(Phospho (STY))PSGK-2+

Source : QE3\_201126\_FR\_TiOx\_hum\_tissue\_Urea\_RNAB\_N Scan : 49982

Andromeda score : 224.03

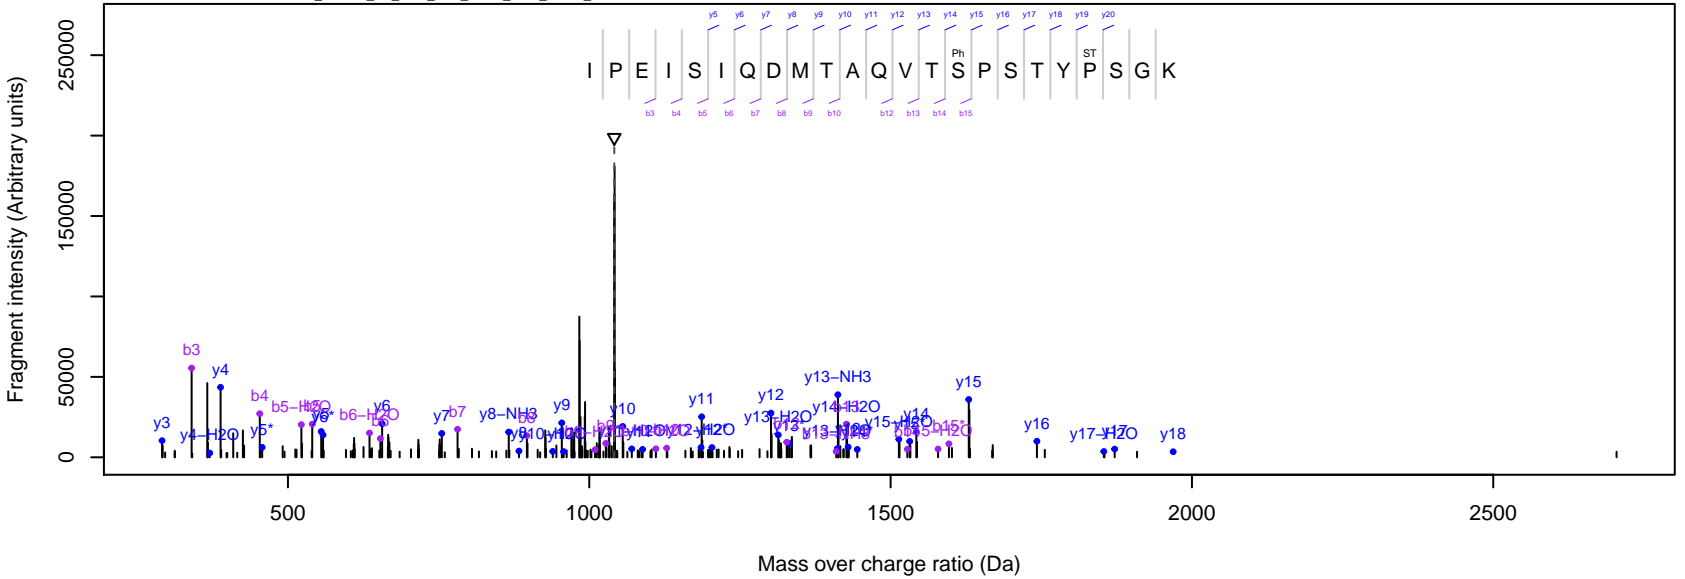

SQS(Phospho (STY))VPGAWPGASPLSSQPLSGSSR-2+

Source : QE3\_201126\_FR\_TiOx\_hum\_tissue\_Urea\_RNAB\_B Scan : 44917

Andromeda score : 223.97

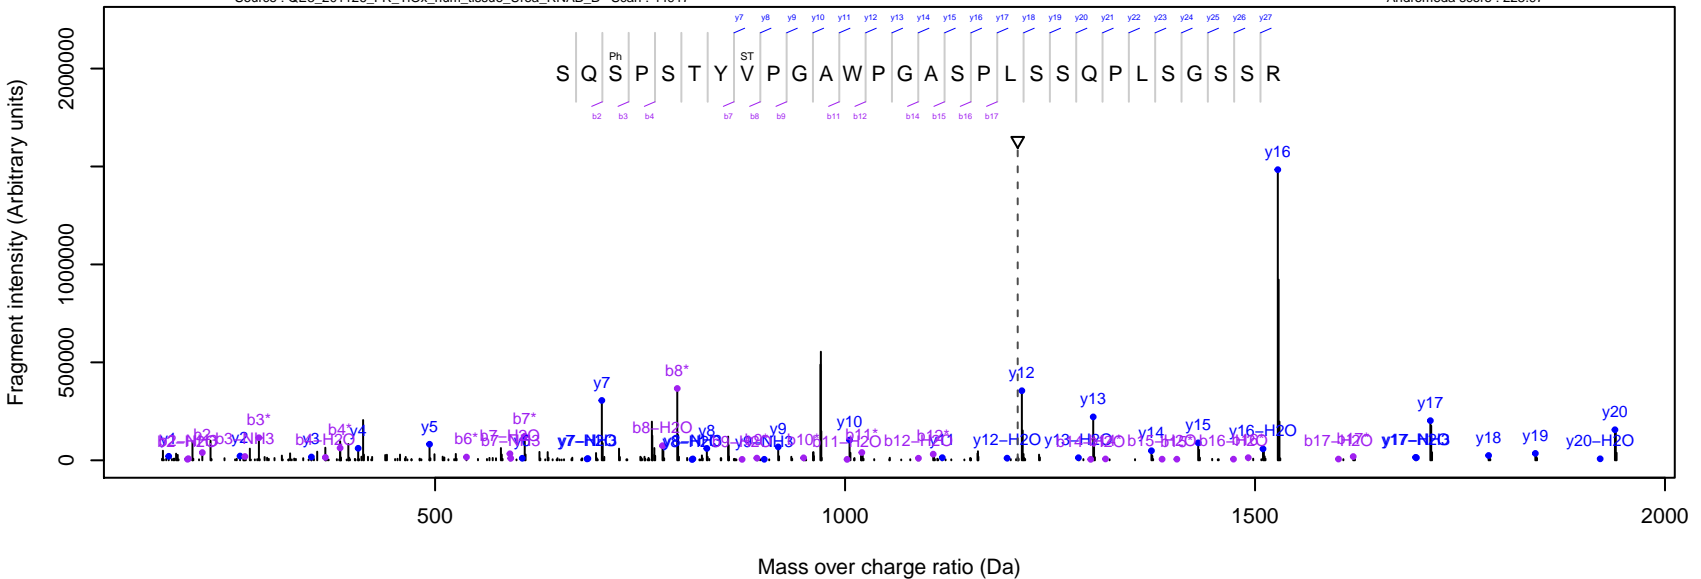

**KNS(Phospho (STY))ITEISDNEDDLLEYHRR-4+**

Source : QE3\_201126\_FR\_TIOx\_hum\_tissue\_Urea\_RNAB\_N Scan : 25750

Andromeda score : 223.75

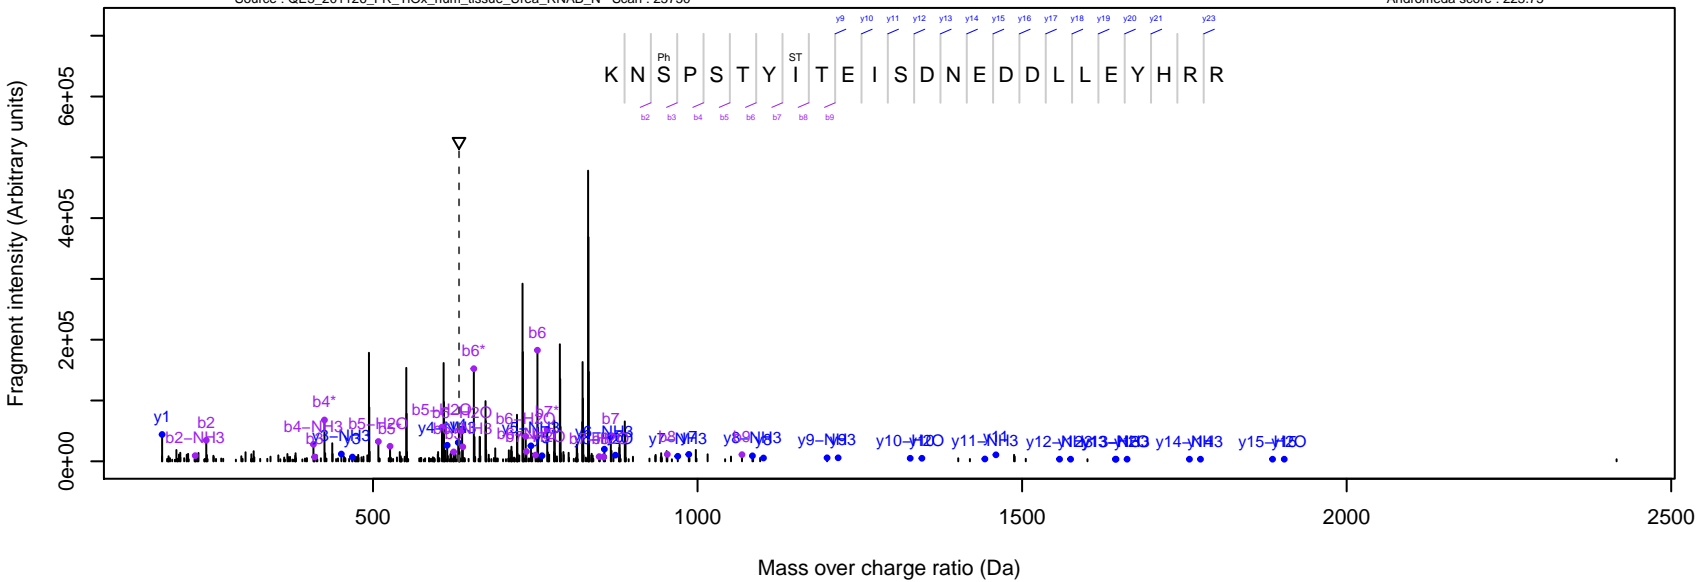

**SES(Phospho (STY))PKEPEQLRK-2+**

Source : QE3\_201126\_FR\_TIOx\_hum\_tissue\_Urea\_RNAB\_B Scan : 5942

Andromeda score : 223.58

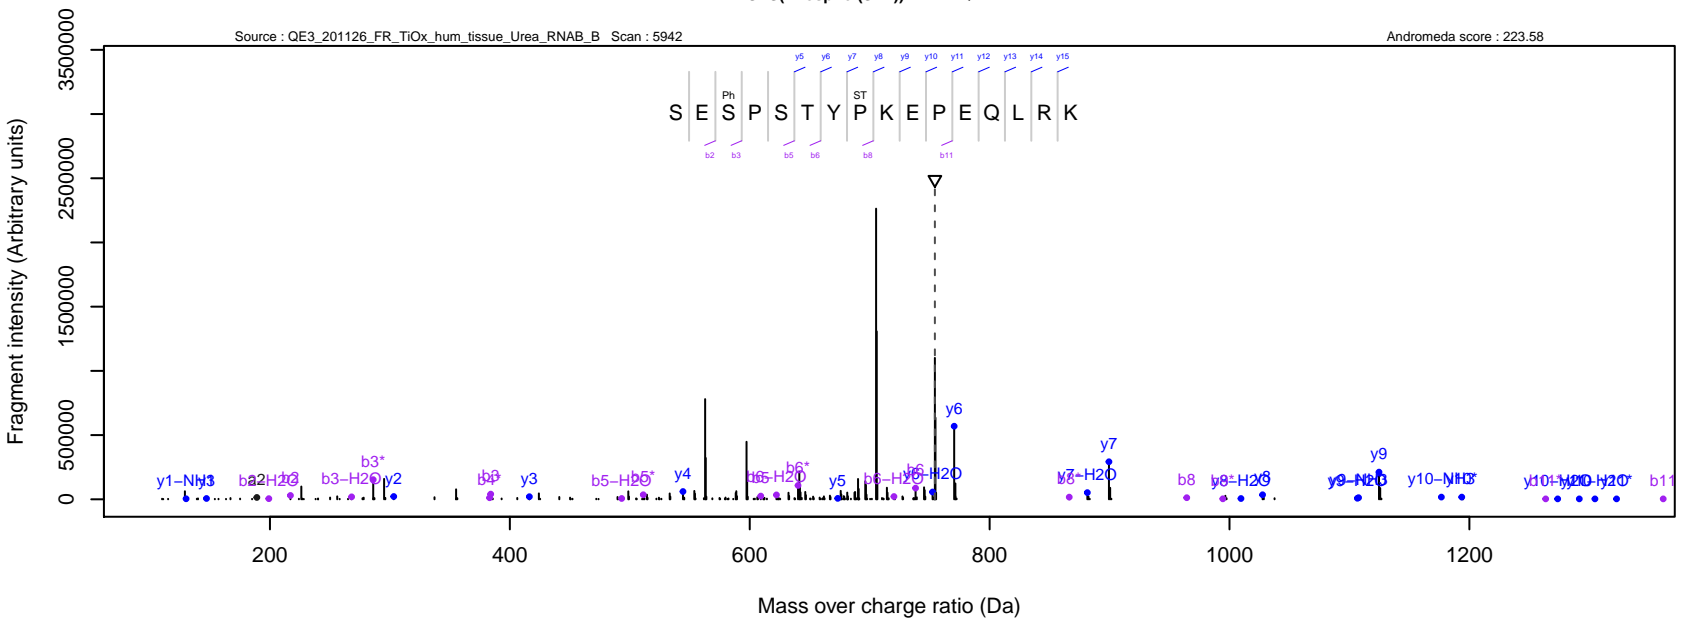

**(Acetyl (Protein N-term))M(Oxidation (M))EVAEPSS(Phospho (STY))PTEEEEEEEHSAEPRPR-3+**

Source : QE3\_201126\_FR\_TIOx\_hum\_tissue\_Urea\_RNAB\_H Scan : 21154

Andromeda score : 223.56

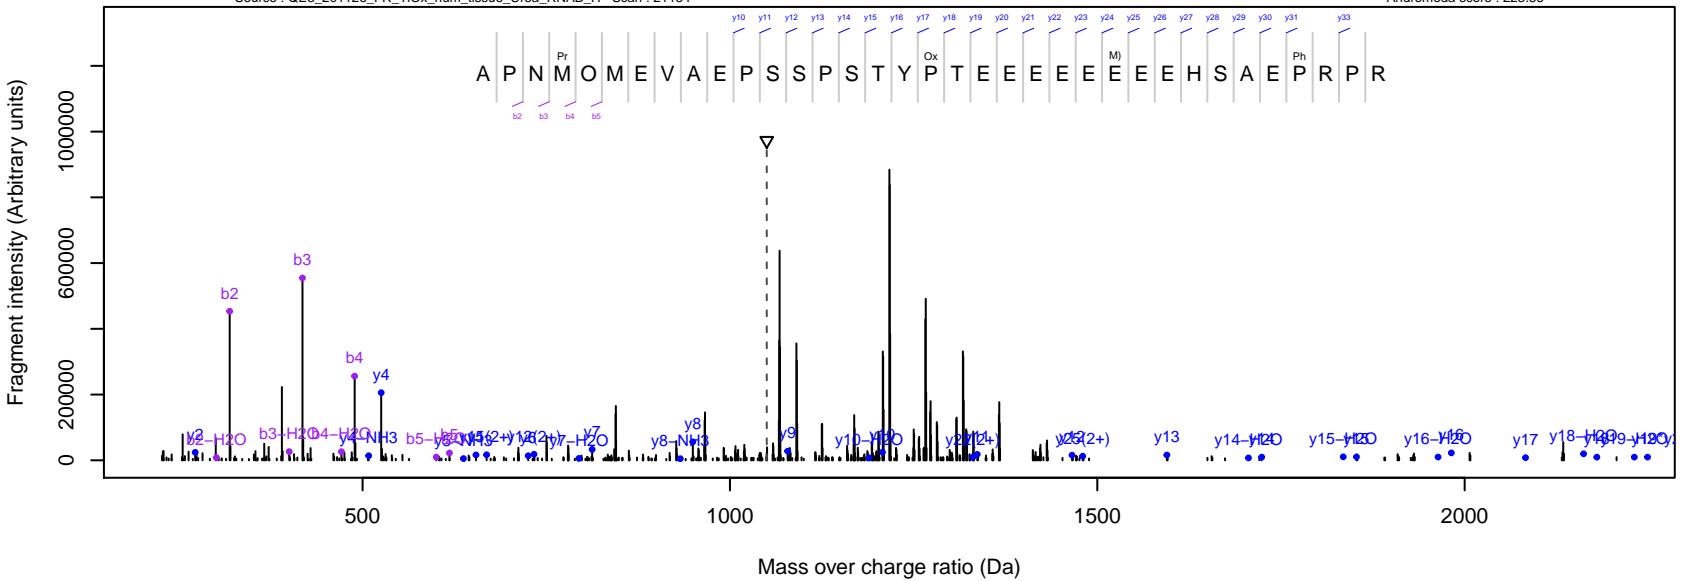

AEIKEMLAS(Phospho (STY))DDEEDVSSK-2+

Source : QE3\_201126\_FR\_TiOx\_hum\_tissue\_Urea\_RNAB\_N Scan : 22418

Andromeda score : 223.51

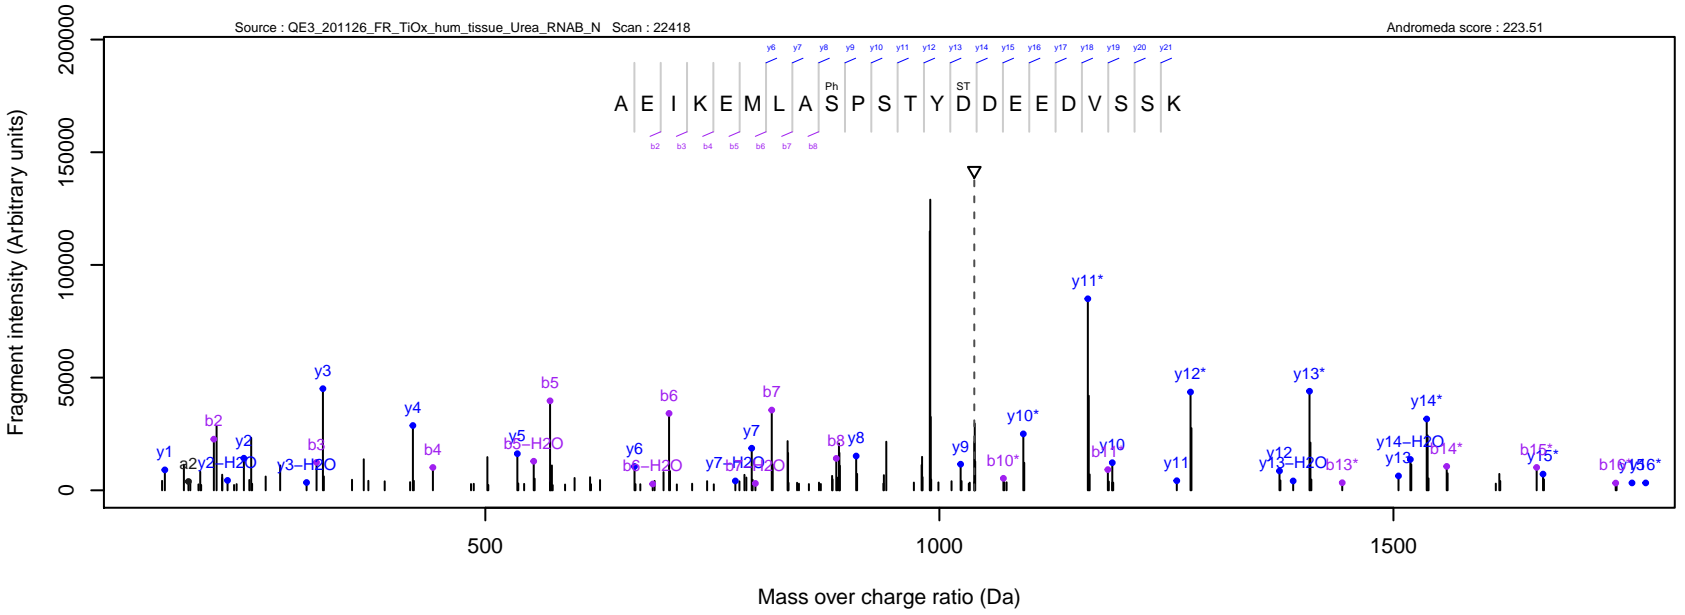

AGEEDEGEEDS(Phospho (STY))DS(Phospho (STY))DYEISAK-2+

Source : QE3\_201126\_FR\_TiOx\_hum\_tissue\_Urea\_RNAB\_N Scan : 25582

Andromeda score : 223.36

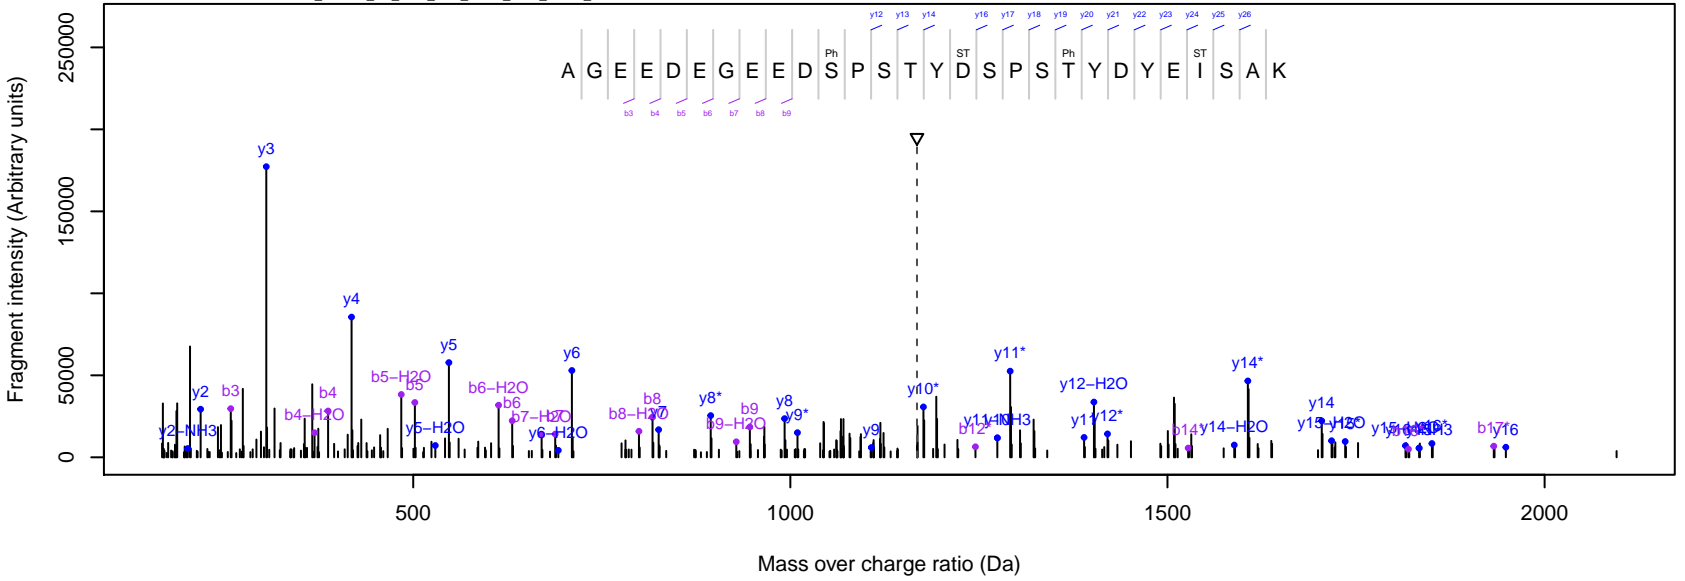

LTPSPDIIVLSDNEAS(Phospho (STY))SPR-2+

Source : QE3\_201126\_FR\_TiOx\_hum\_tissue\_Urea\_RNAB\_H Scan : 45599

Andromeda score : 223.18

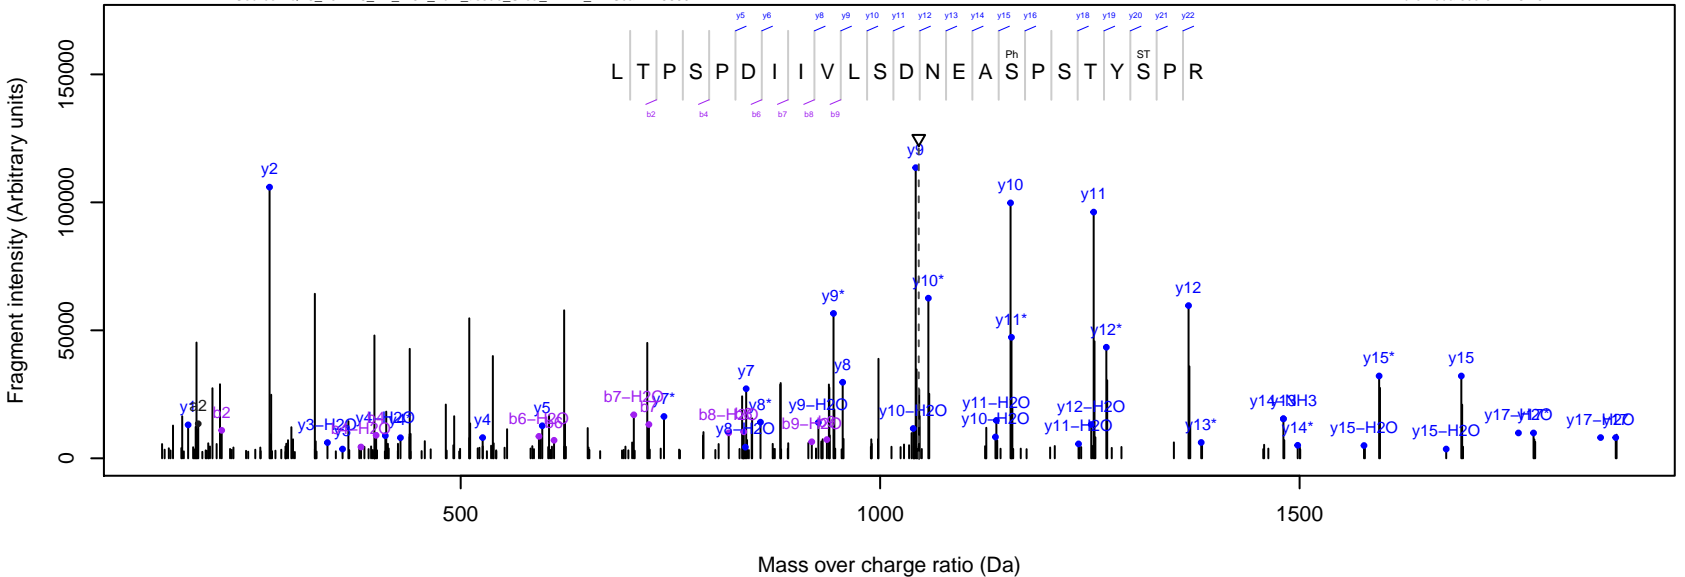

SSYSSPTSLS(Phospho (STY))PR--2+

Source : QE3\_201126\_FR\_TiOx\_hum\_tissue\_Urea\_RNAB\_N Scan : 17306

Andromeda score : 222.74

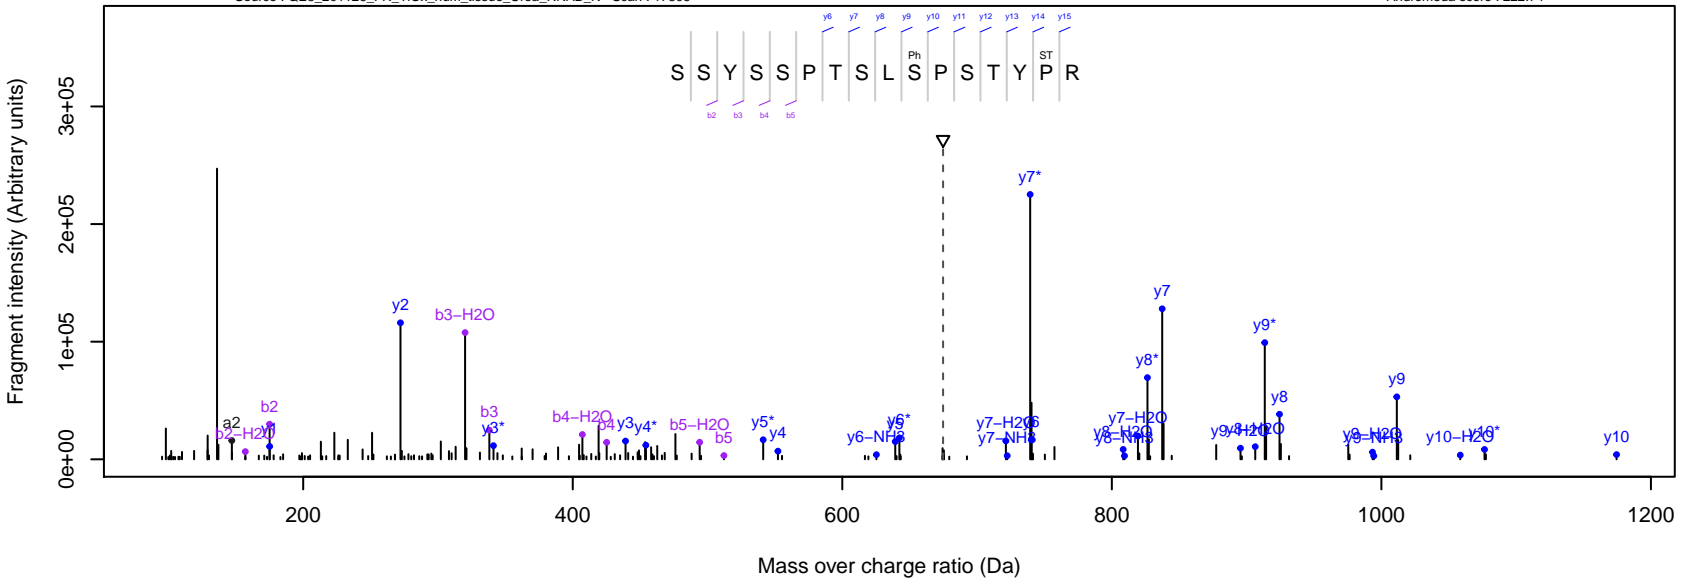

GS(Phospho (STY))DSPAADVEIEYVTEEP E I Y E P N F I F F K+3+

Source : QE3\_201126\_FR\_TiOx\_hum\_tissue\_Urea\_RNAB\_H Scan : 62570

Andromeda score : 222.57

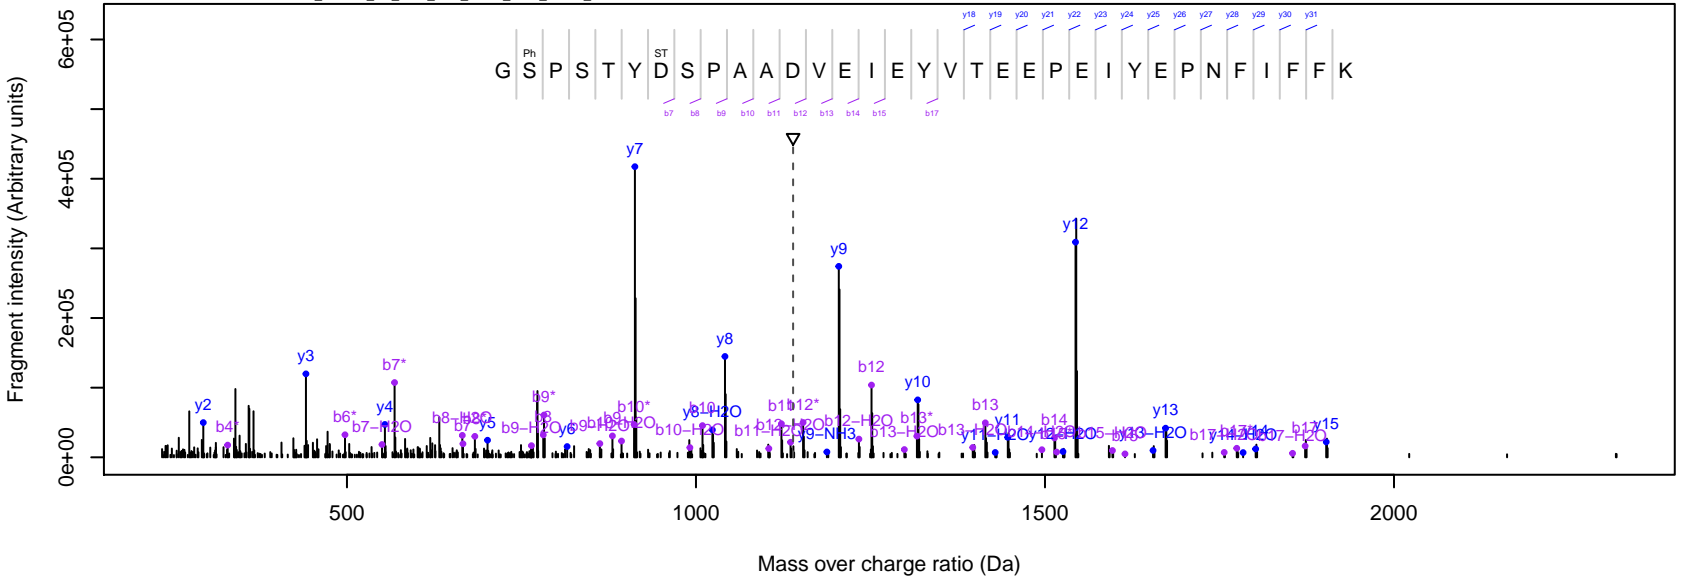

SHS(Phospho (STY))SPASLQLGTGAGAGSPAQQHAHLR-4+

Source : QE3\_201126\_FR\_TiOx\_hum\_tissue\_Urea\_RNAB\_B Scan : 15665

Andromeda score : 222.47

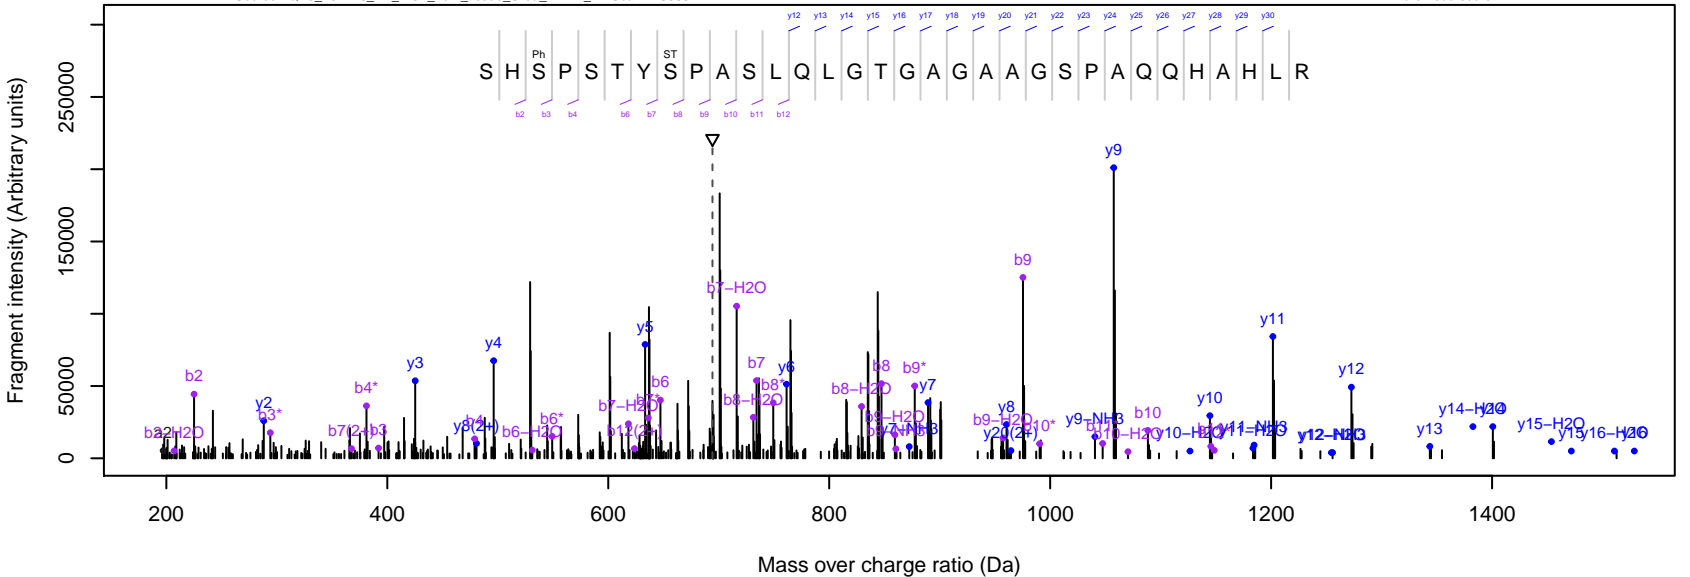



RIPYAPS(Phospho (STY))GEIPK-2+

Source : QE3\_201126\_FR\_TIOx\_hum\_tissue\_Urea\_RNAB\_B Scan : 23938

Andromeda score : 222.07

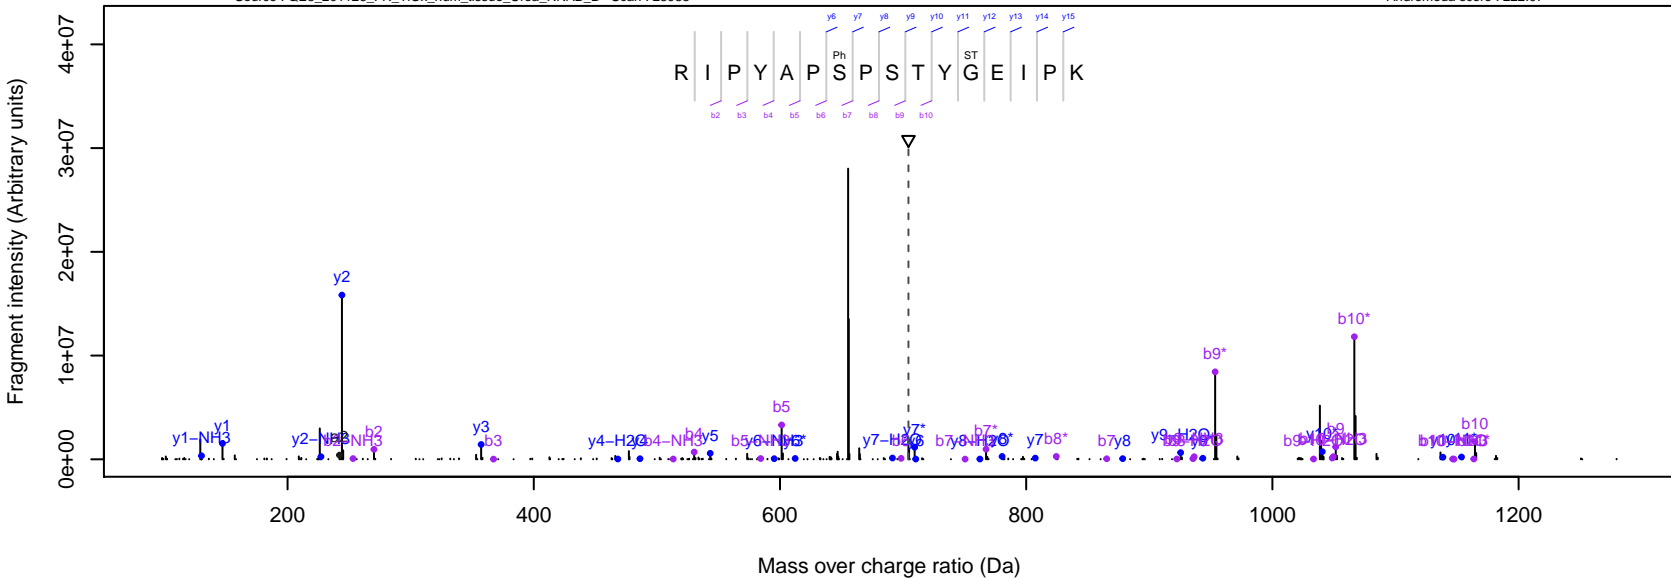

NASPAGEDSS(Phospho (STY))DSPDSEETPR-2+

Source : QE3\_201126\_FR\_TIOx\_hum\_tissue\_Urea\_RNAB\_N Scan : 12426

Andromeda score : 222.06

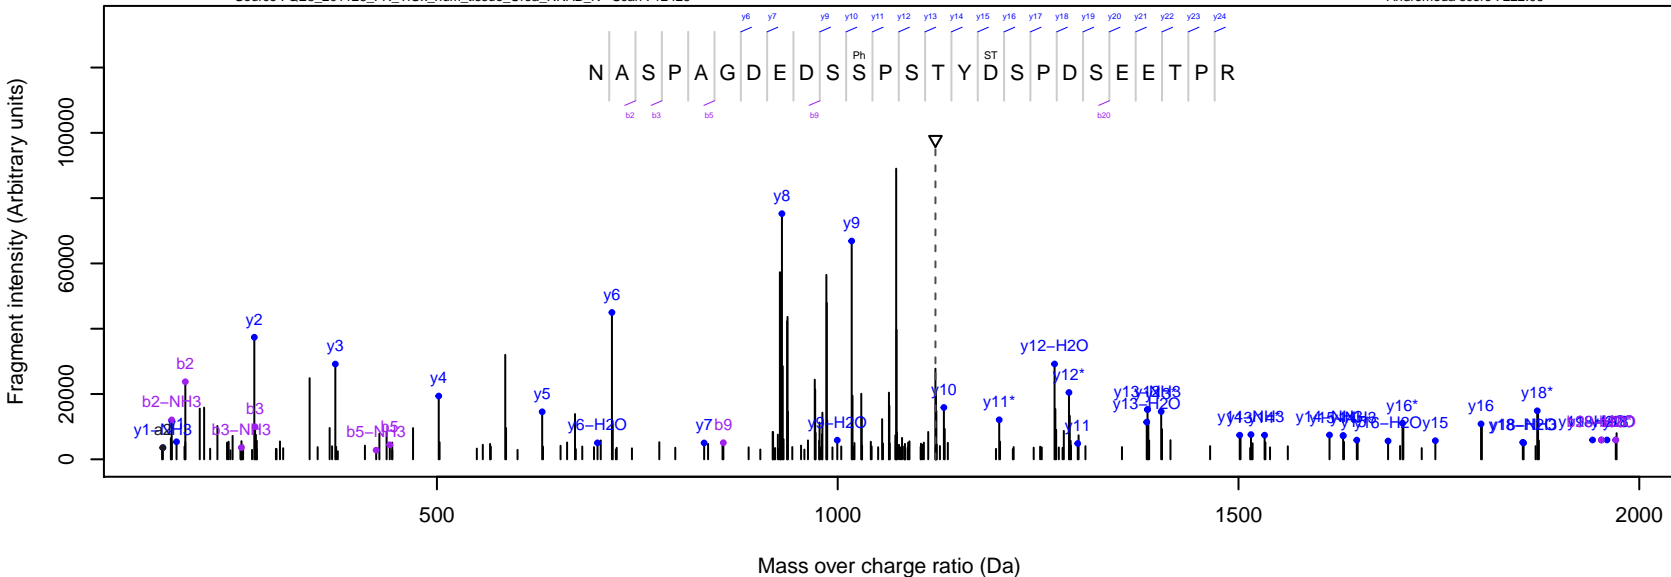

RGS(Phospho (STY))IGENQVEVMVEEK-2+

Source : QE3\_201126\_FR\_TIOx\_hum\_tissue\_Urea\_RNAB\_N Scan : 28063

Andromeda score : 221.92

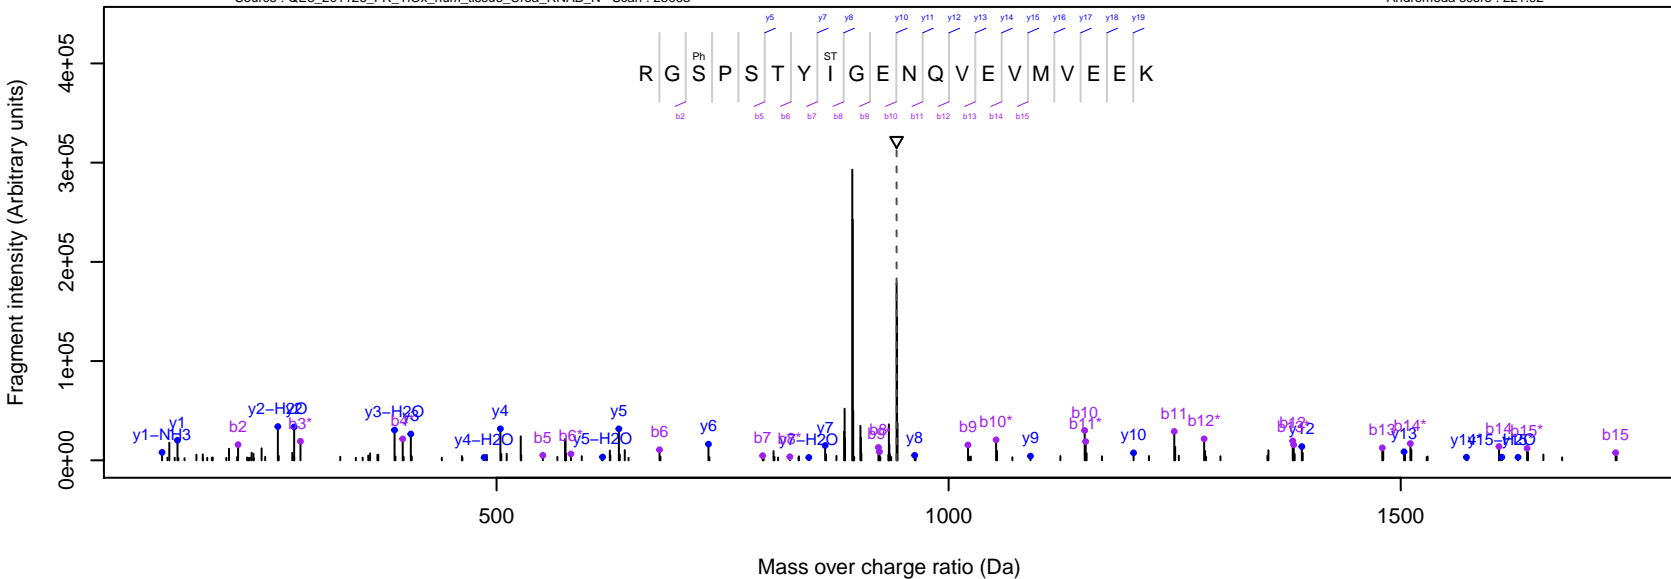

GLMAGGRPEGQYS(Phospho (STY))EDED(Phospho (STY))DTDEYKEAK-3+

Source : QE3\_201126\_FR\_TIOx\_hum\_tissue\_Urea\_RNAB\_N Scan : 20739

Andromeda score : 221.91

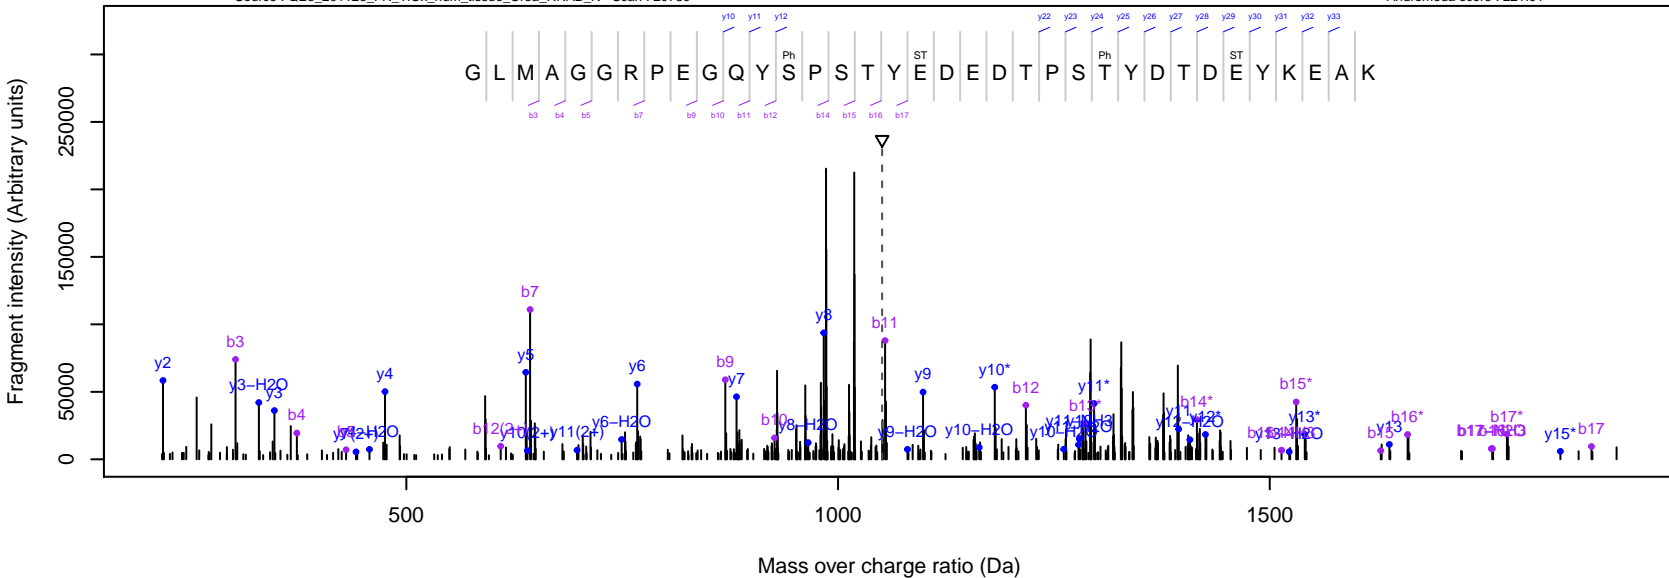

(Acetyl (Protein N-term))S(Phospho (STY))ETAPAETATPAPVEK-2+

Source : QE3\_201126\_FR\_TIOx\_hum\_tissue\_Urea\_RNAB\_B Scan : 25655

Andromeda score : 221.85

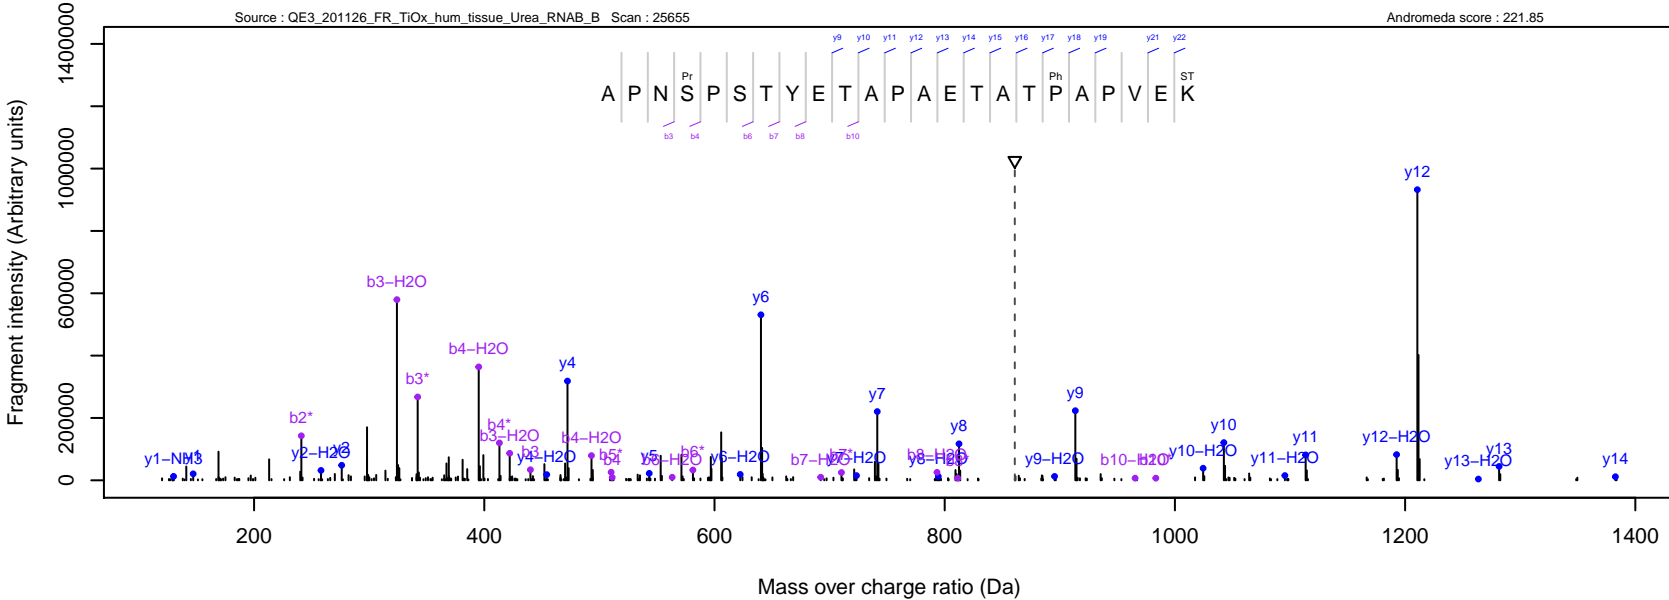

RVS(Phospho (STY))SS(Phospho (STY))SELDLPSGDHCEAGLLQLDVP LLR-3+

Source : QE3\_201126\_FR\_TIOx\_hum\_tissue\_Urea\_RNAB\_H Scan : 57545

Andromeda score : 221.68

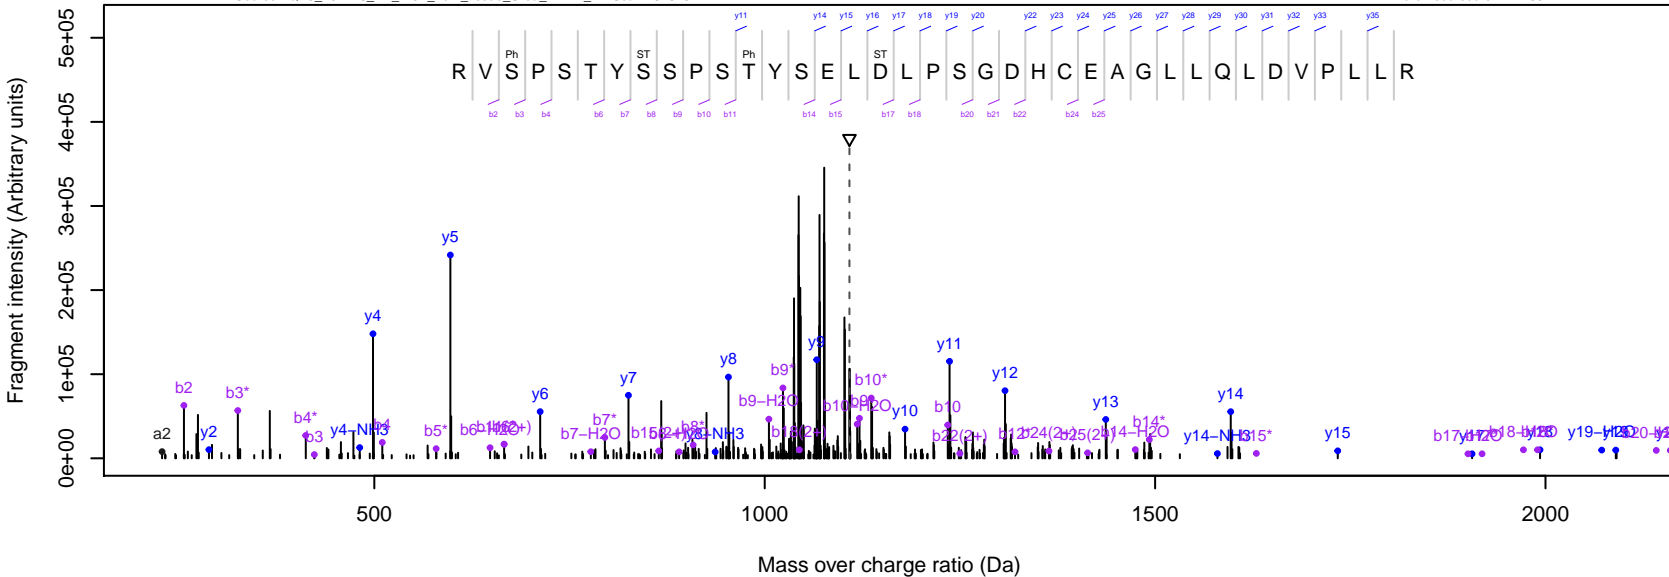

EALNIIGDISTVSTVPPVDDTLWQSASSHS(Phospho (STY))PTPQR-4+

Source : QE3\_201126\_FR\_TIOx\_hum\_tissue\_Urea\_RNAB\_H Scan : 57483

Andromeda score : 221.66

Fragment intensity (Arbitrary units)

E A L N I I G D I S T S T V S T P V P P P V D D T W L Q S A S S H S P S T Y P T P Q R

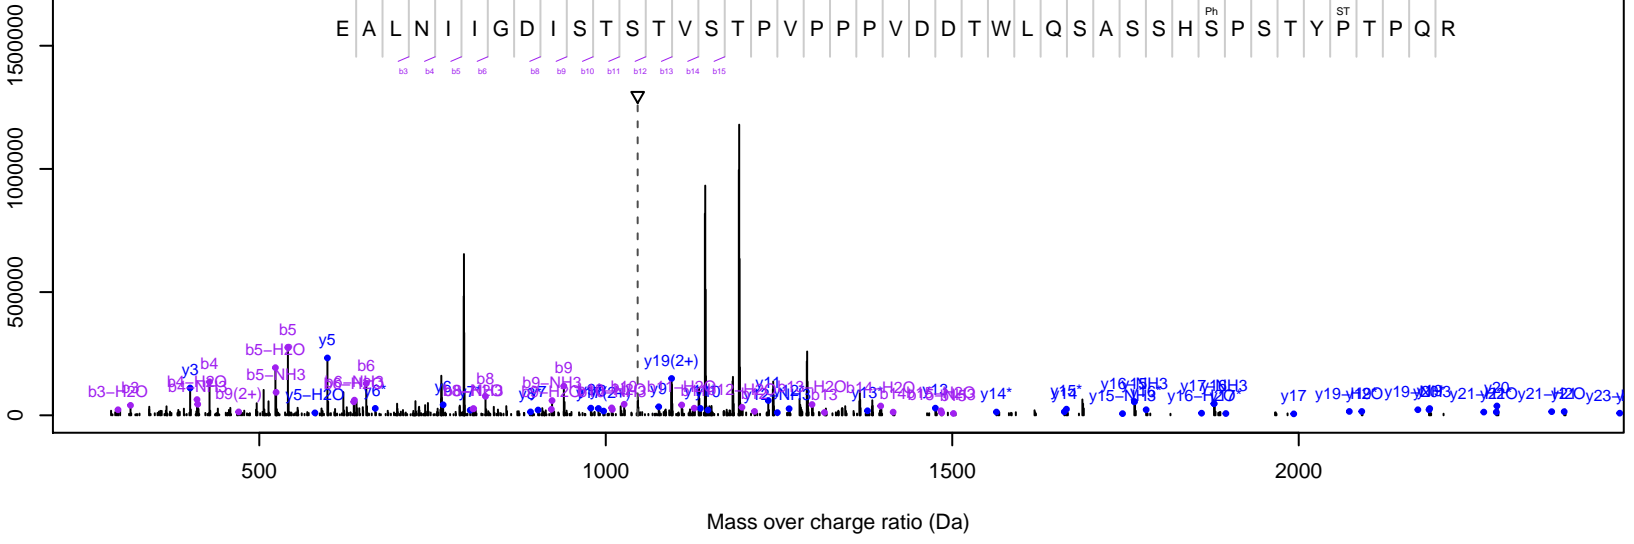

NDS(Phospho (STY))LVTPSPQQR-2+

Source : QE3\_201126\_FR\_TIOx\_hum\_tissue\_Urea\_RNAB\_B Scan : 18022

Andromeda score : 221.66

Fragment intensity (Arbitrary units)

N D S P S T Y L V T P S P Q Q A R

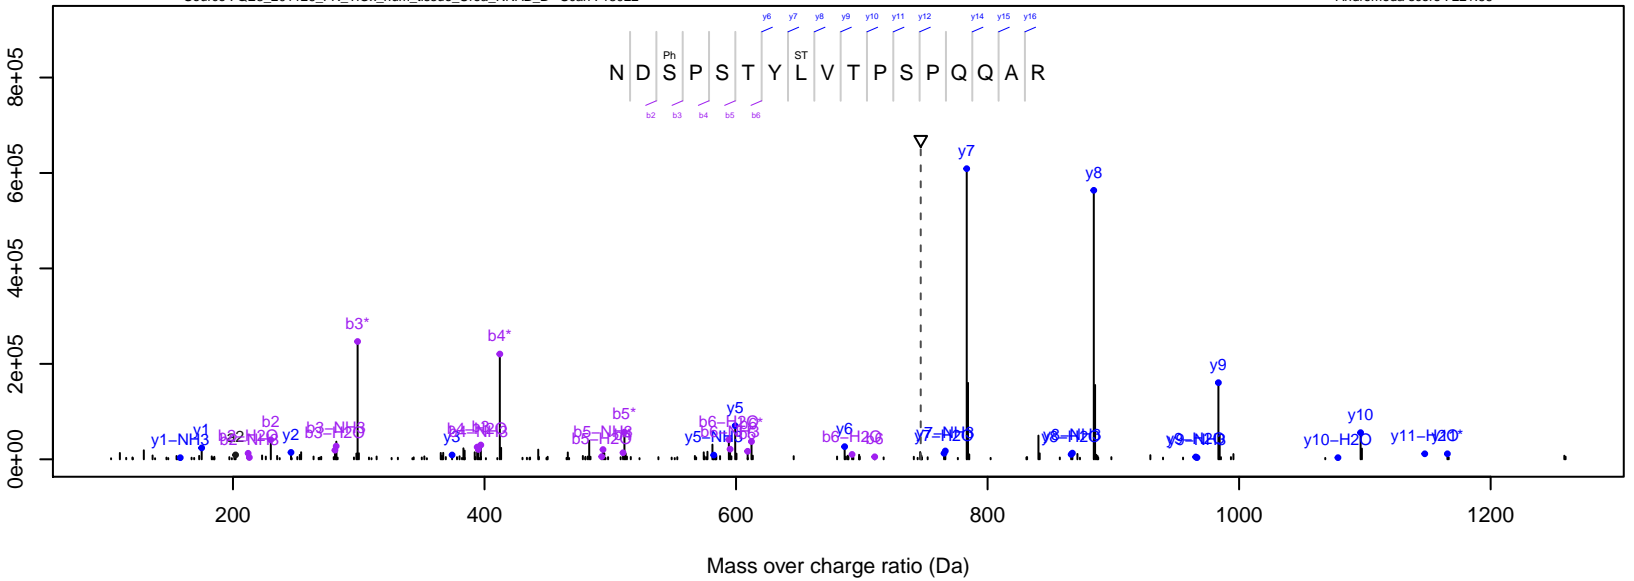

NFLS(Phospho (STY))TPQFLYR-2+

Source : QE3\_201126\_FR\_TIOx\_hum\_tissue\_Urea\_RNAB\_H Scan : 55152

Andromeda score : 221.6

Fragment intensity (Arbitrary units)

N F L S P S T Y T P Q F L Y R

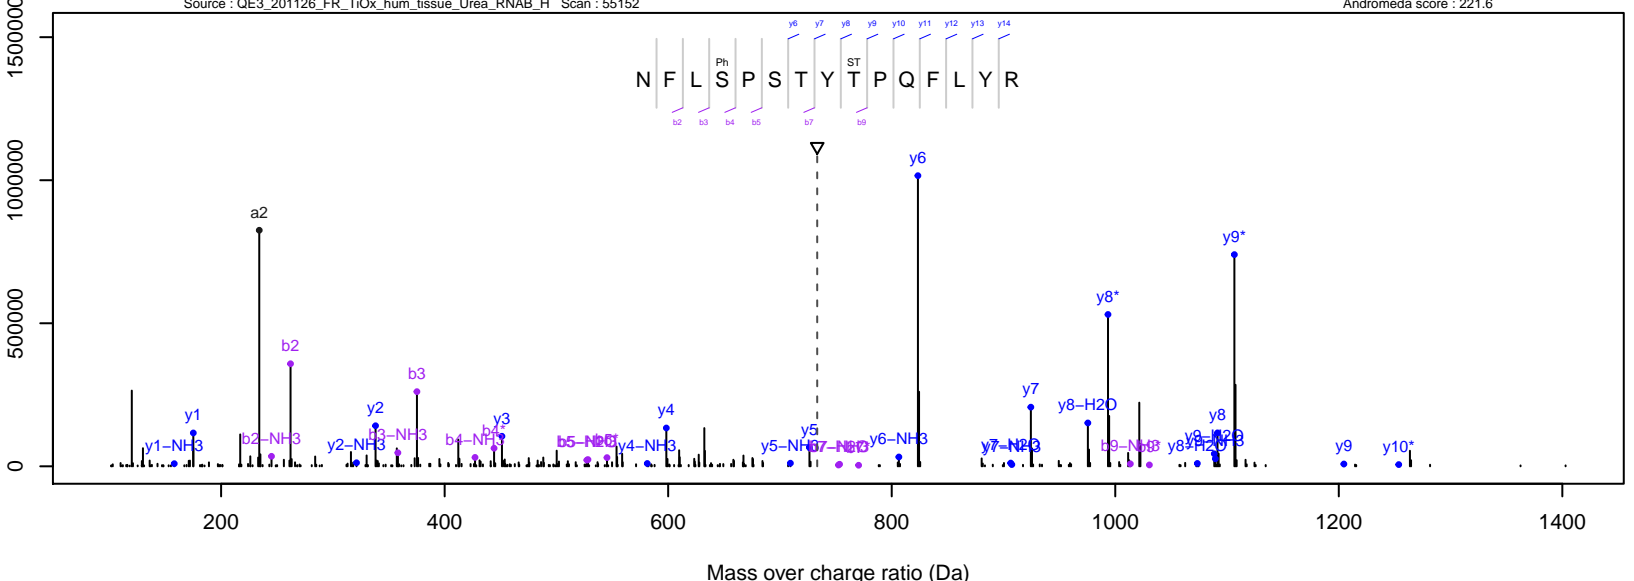

QFIAAQNGLGPASGHGTPASSPSSSS(Phospho (STY))LPSPMS(Phospho (STY))PTPR-3+

Source : QE3\_201126\_FR\_TIOx\_hum\_tissue\_Urea\_RNAB\_H Scan : 40755

Andromeda score : 221.6

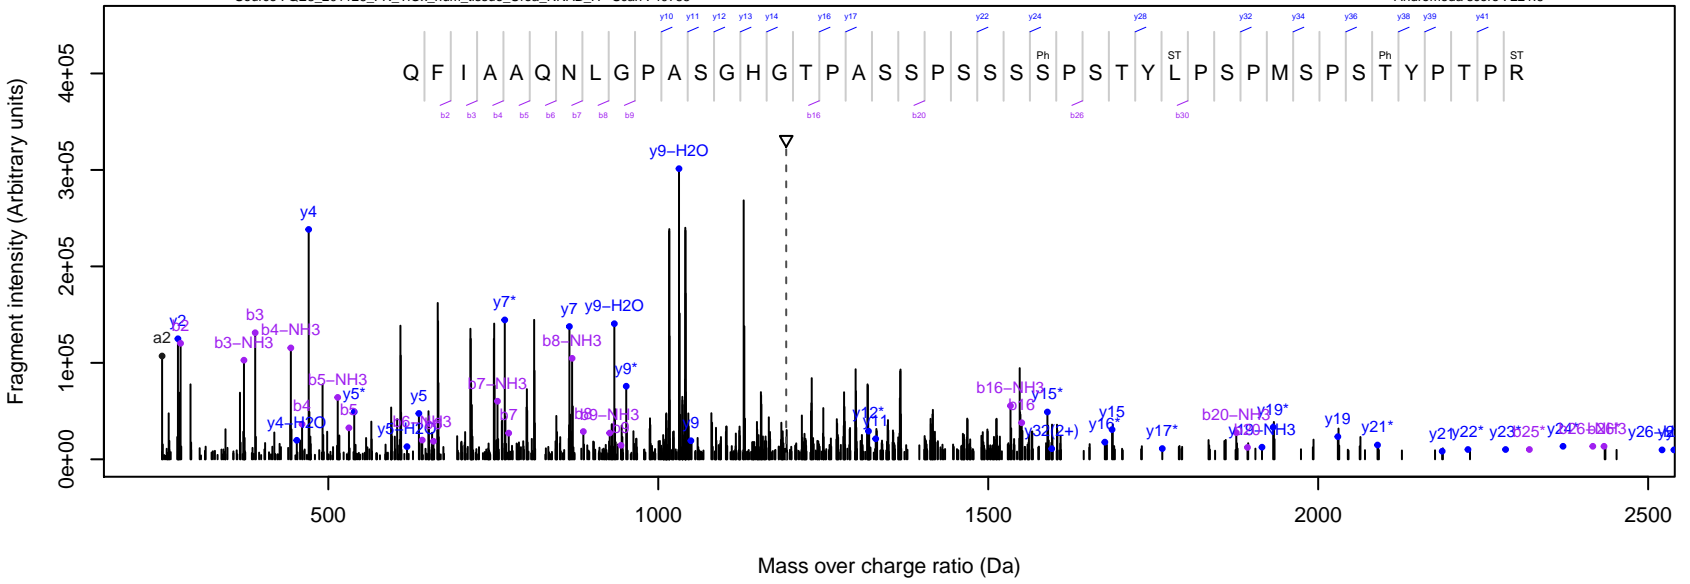

KGESGQS(Phospho (STY))WPR-2+

Source : QE3\_201126\_FR\_TIOx\_hum\_tissue\_Urea\_RNAB\_H Scan : 8619

Andromeda score : 221.56

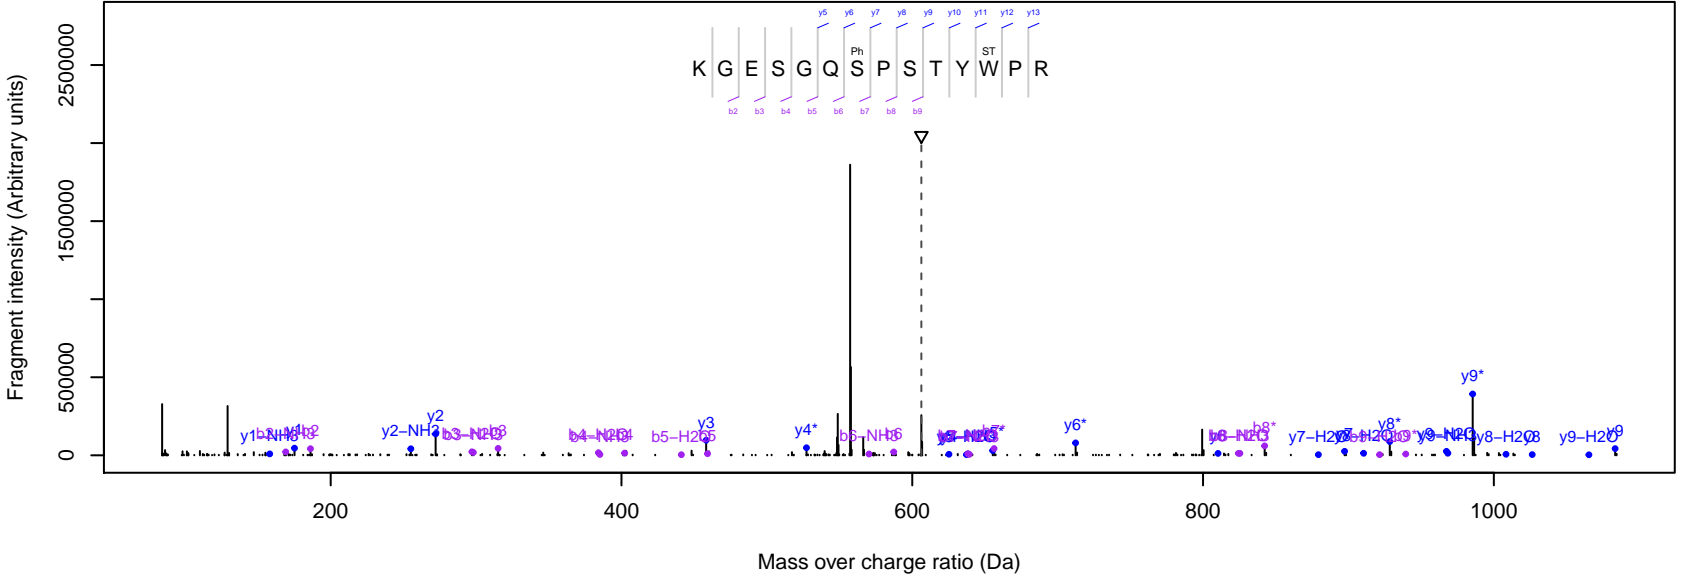

RHS(Phospho (STY))FATEGAGAVENFAAAR-3+

Source : QE3\_201126\_FR\_TIOx\_hum\_tissue\_Urea\_RNAB\_B Scan : 25868

Andromeda score : 221.21

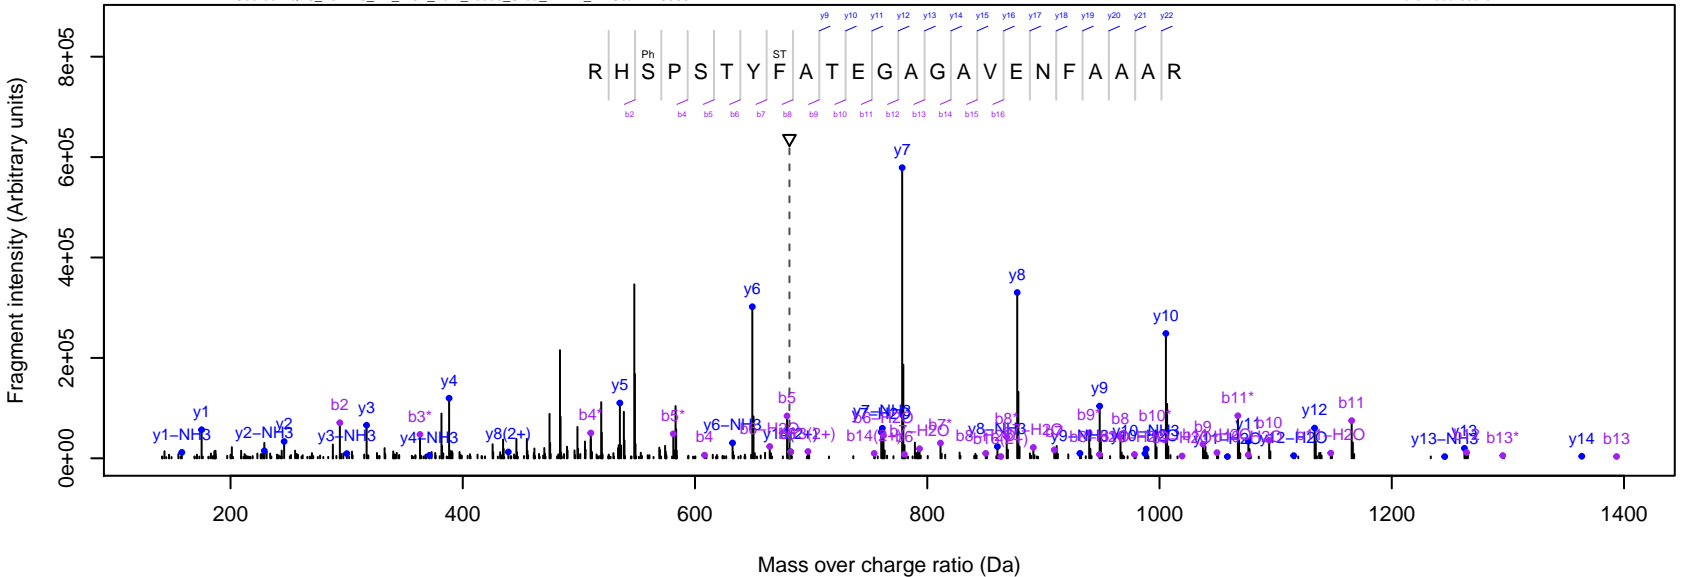

NTETSKS(Phospho (STY))PEKDVPM(Oxidation (M))VEK-3+

Source : QE3\_201126\_FR\_TIOx\_hum\_tissue\_Urea\_RNAB\_H Scan : 9436

Andromeda score : 220.79

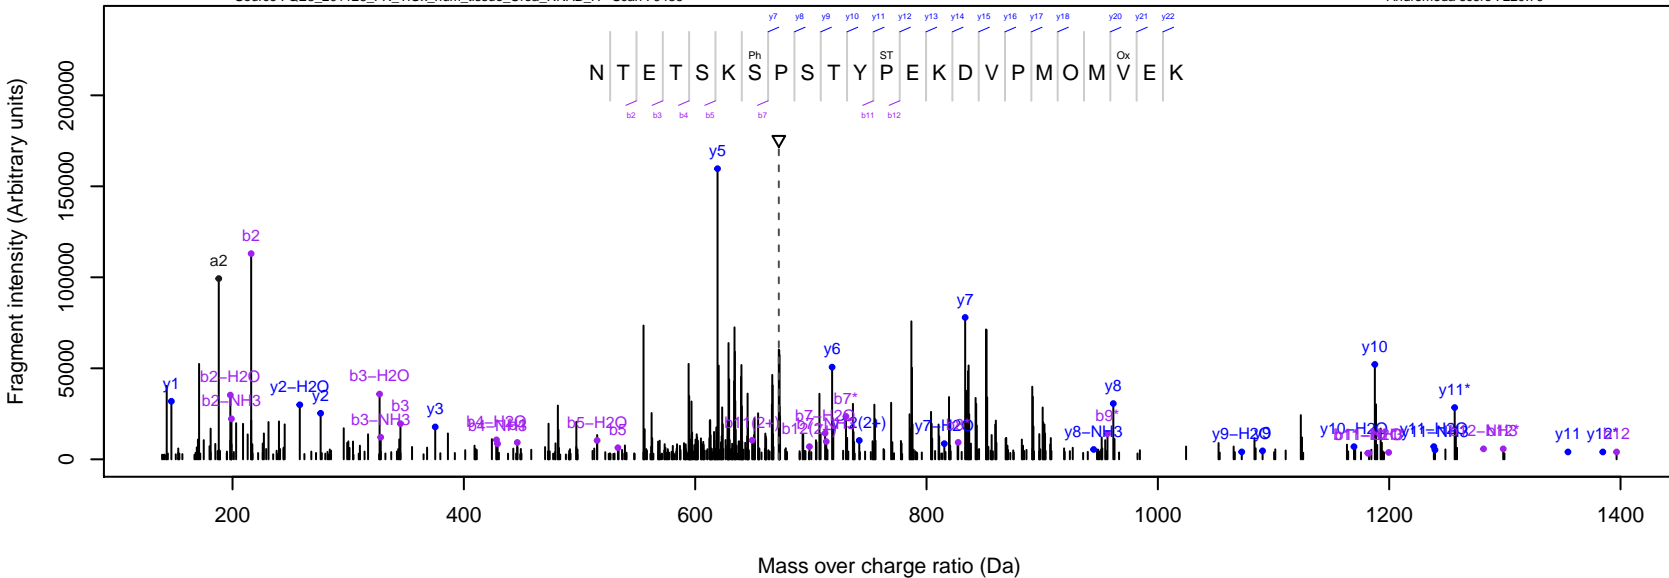

SKS(Phospho (STY))EEAHAEDSVM(Oxidation (M))DHHFR-4+

Source : QE3\_201126\_FR\_TIOx\_hum\_tissue\_Urea\_RNAB\_N Scan : 8736

Andromeda score : 220.69

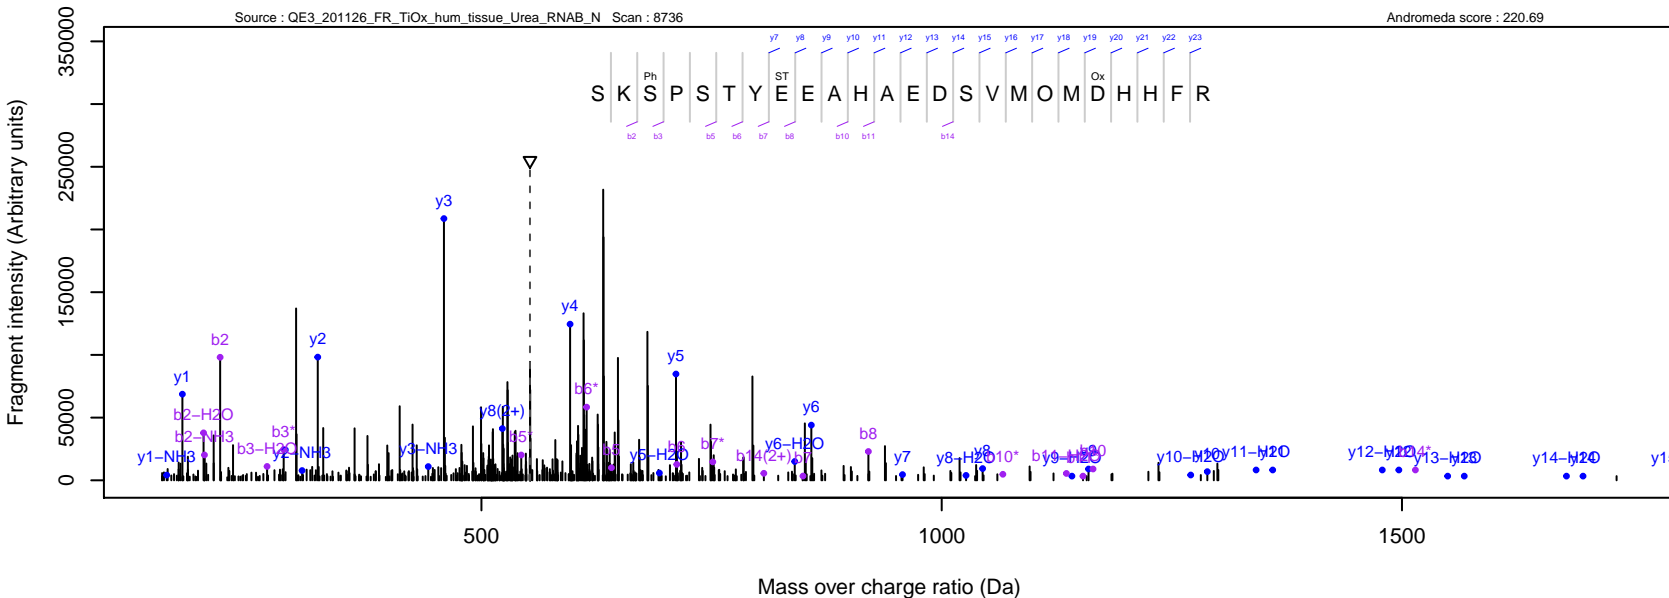

DGES(Phospho (STY))DGFADEEES(Phospho (STY))GEEGEDQEEGREPGAGR-3+

Source : QE3\_201126\_FR\_TIOx\_hum\_tissue\_Urea\_RNAB\_H Scan : 24485

Andromeda score : 220.68

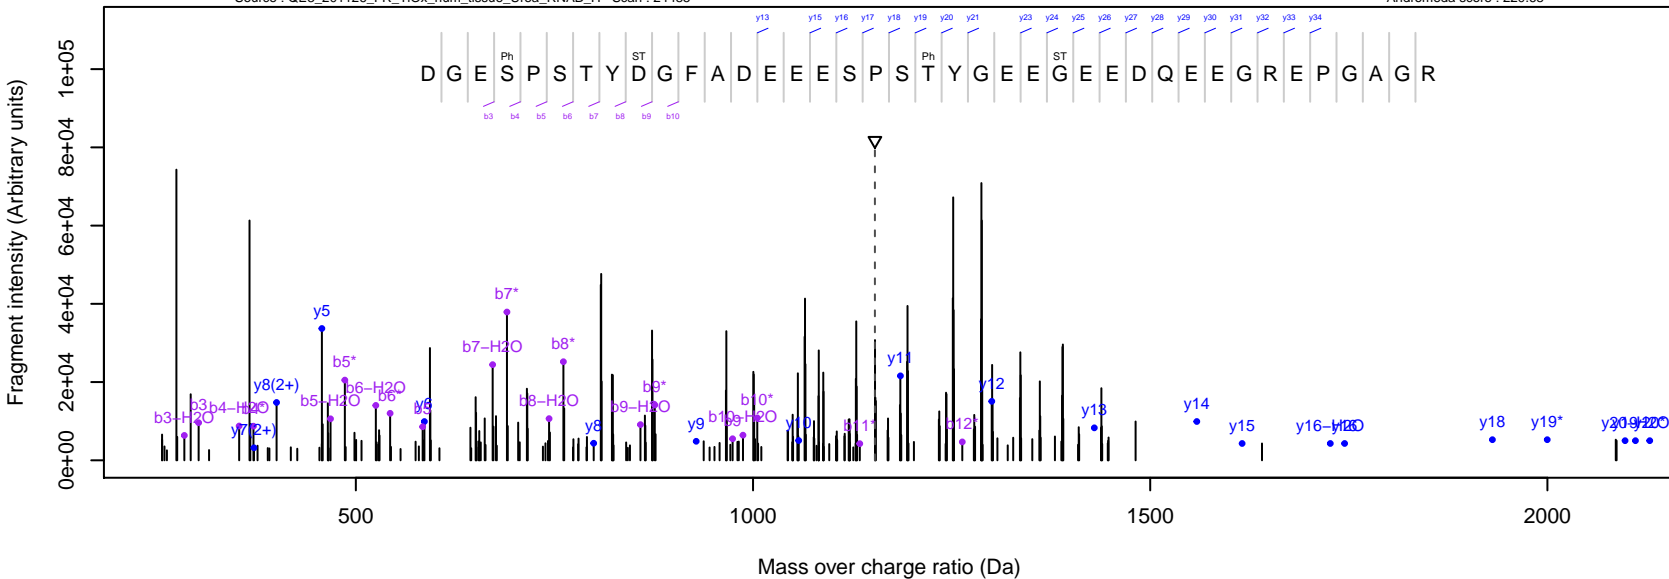

RGAE E E E E E D D D S P S T Y G E E M O M K-2+

Source : QE3\_201126\_FR\_TiOx\_hum\_tissue\_Urea\_RNAB\_H Scan : 5798

Andromeda score : 220.62

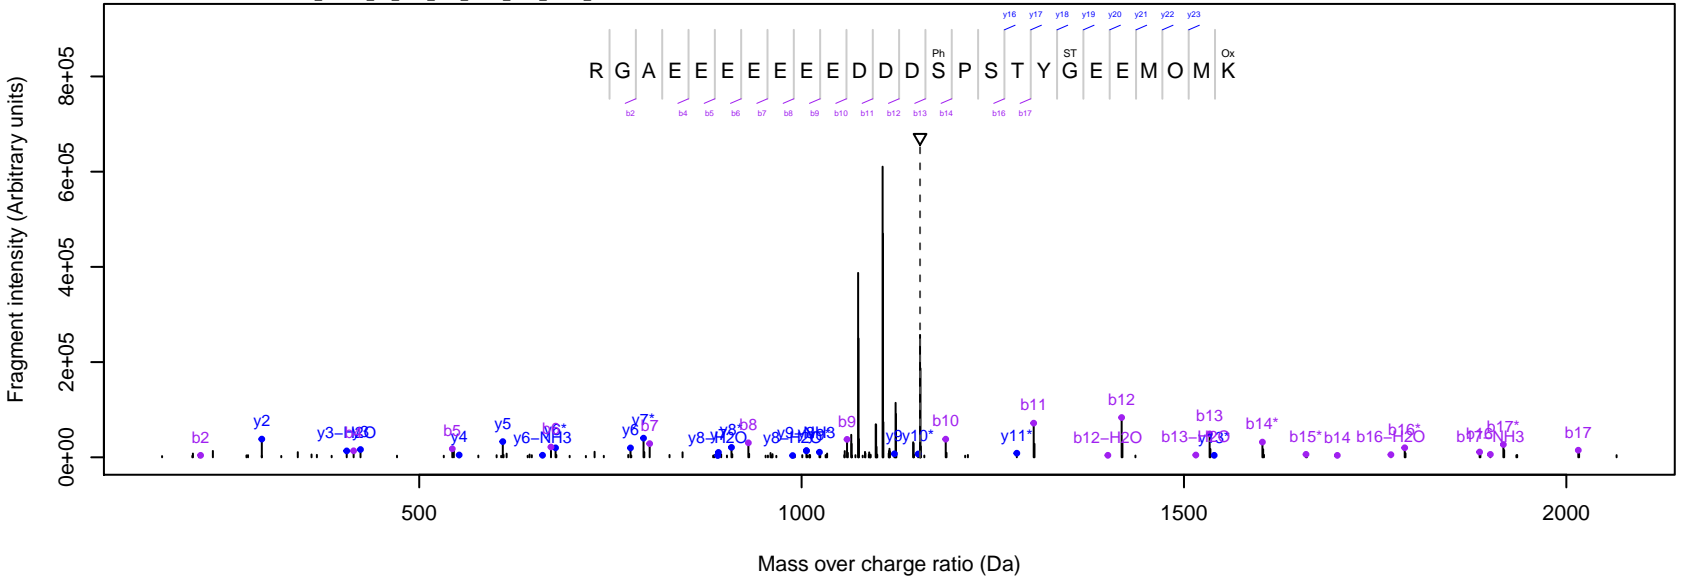

S(Phospho (STY))LNLVDSPQLLEK-2+

Source : QE3\_201126\_FR\_TiOx\_hum\_tissue\_Urea\_RNAB\_H Scan : 46606

Andromeda score : 220.59

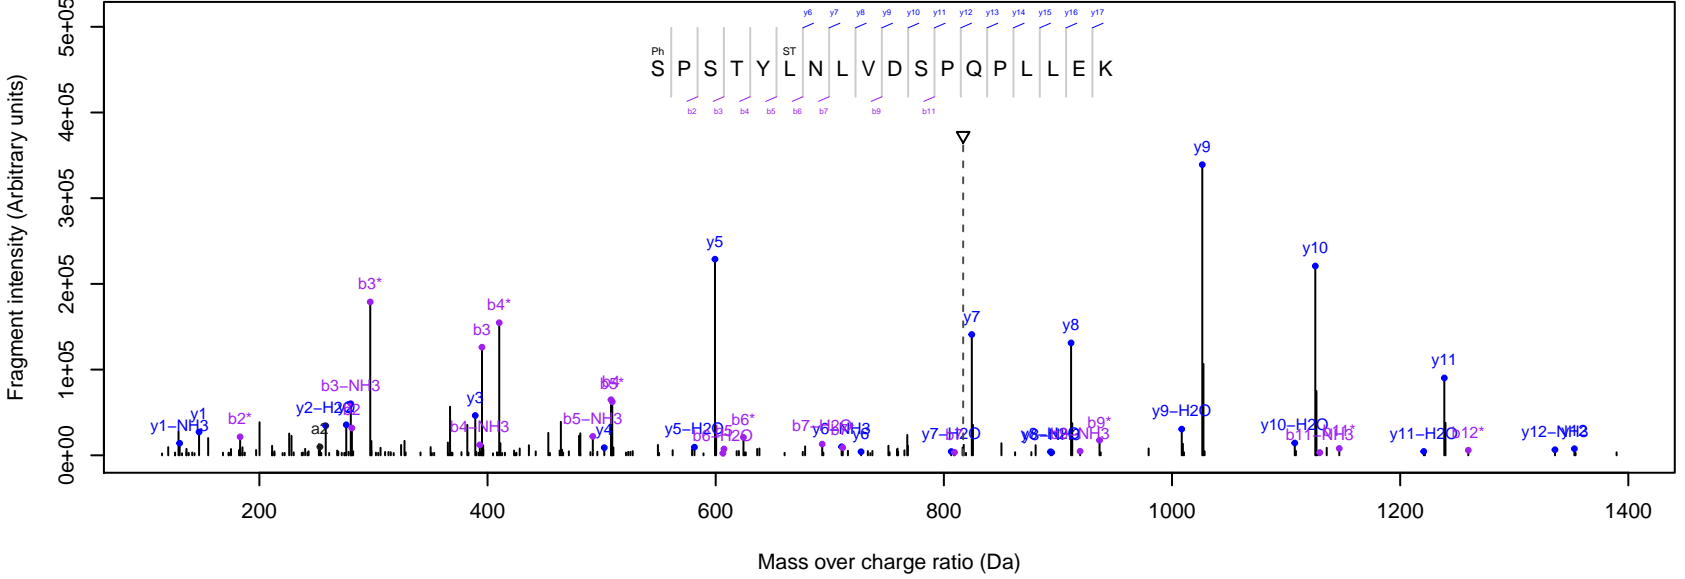

LGASNS(Phospho (STY))PGQPNSVK-2+

Source : QE3\_201126\_FR\_TiOx\_hum\_tissue\_Urea\_RNAB\_H Scan : 9042

Andromeda score : 220.52

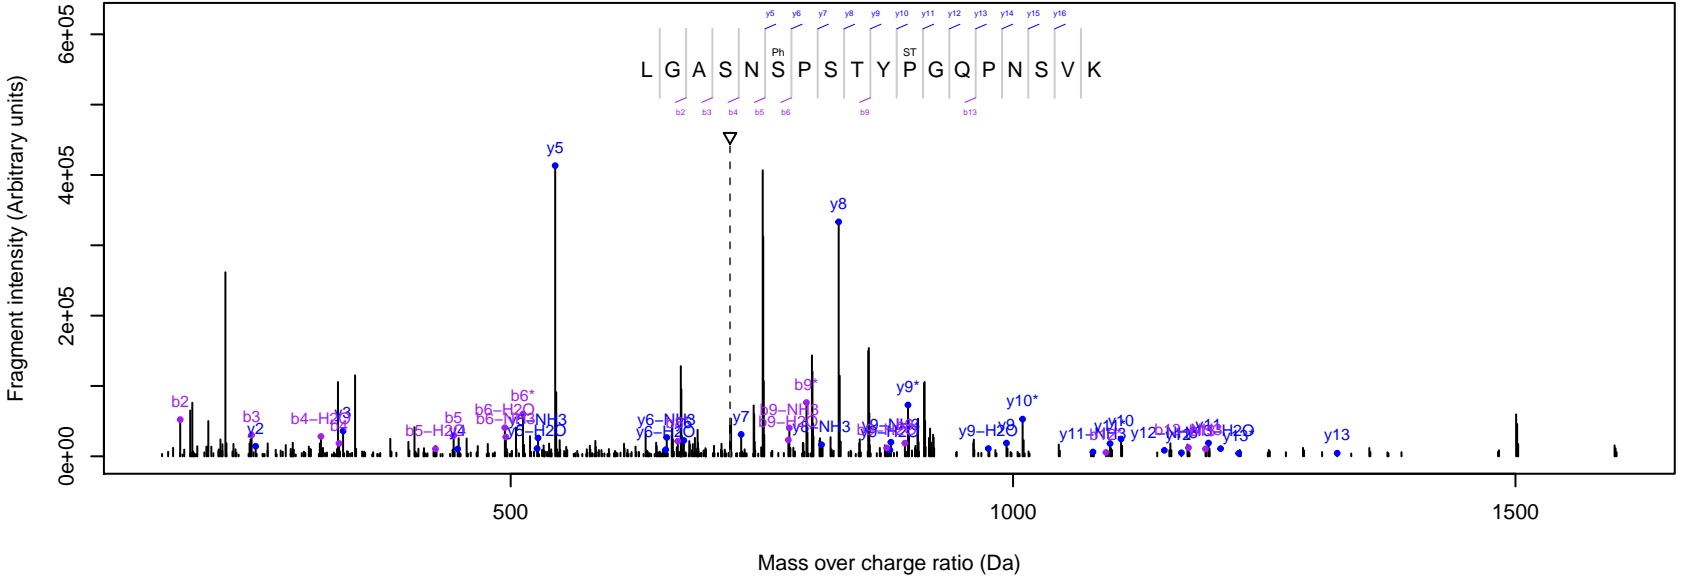

**GM(Oxidation (M))SHS(Phospho (STY))PSVALR-2+**

Source : QE3\_201126\_FR\_TiOx\_hum\_tissue\_Urea\_RNAB\_N Scan : 8563

Andromeda score : 220.45

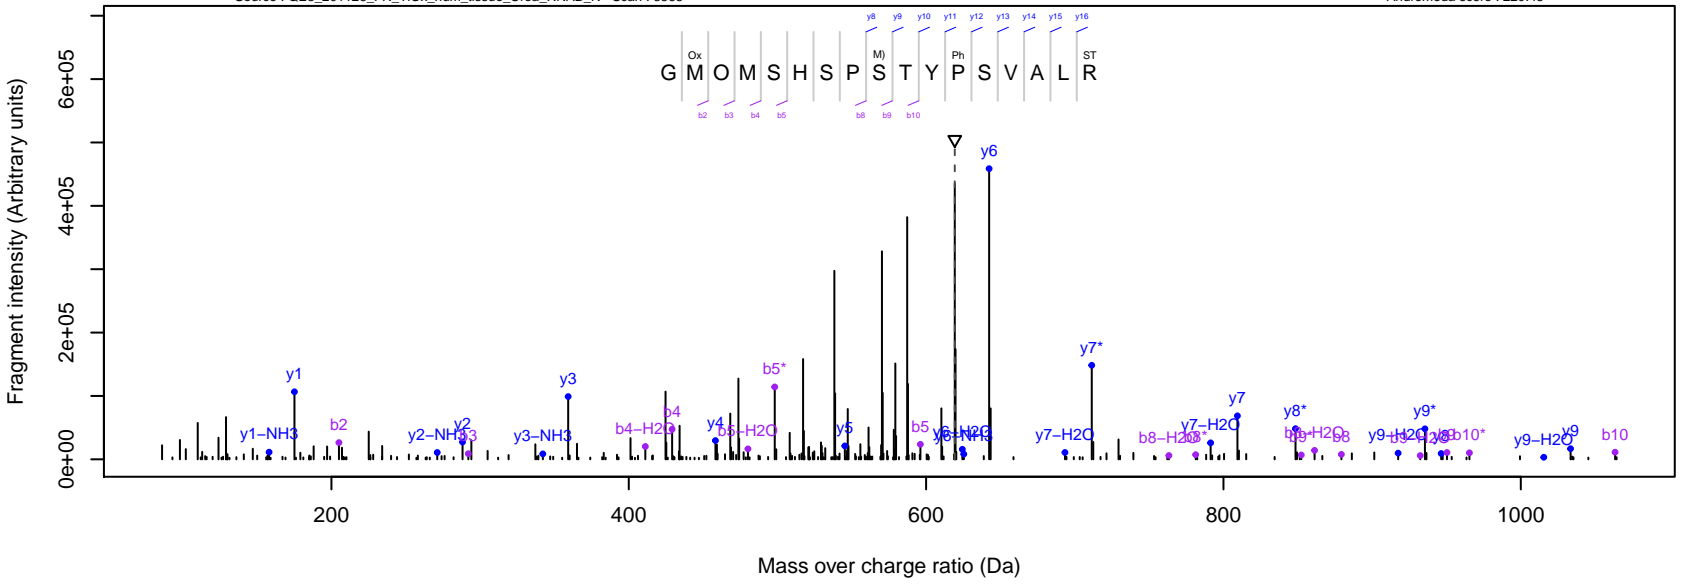

**SSS(Phospho (STY))ESYTSQSFQSR-2+**

Source : QE3\_201126\_FR\_TiOx\_hum\_tissue\_Urea\_RNAB\_B Scan : 18886

Andromeda score : 220.31

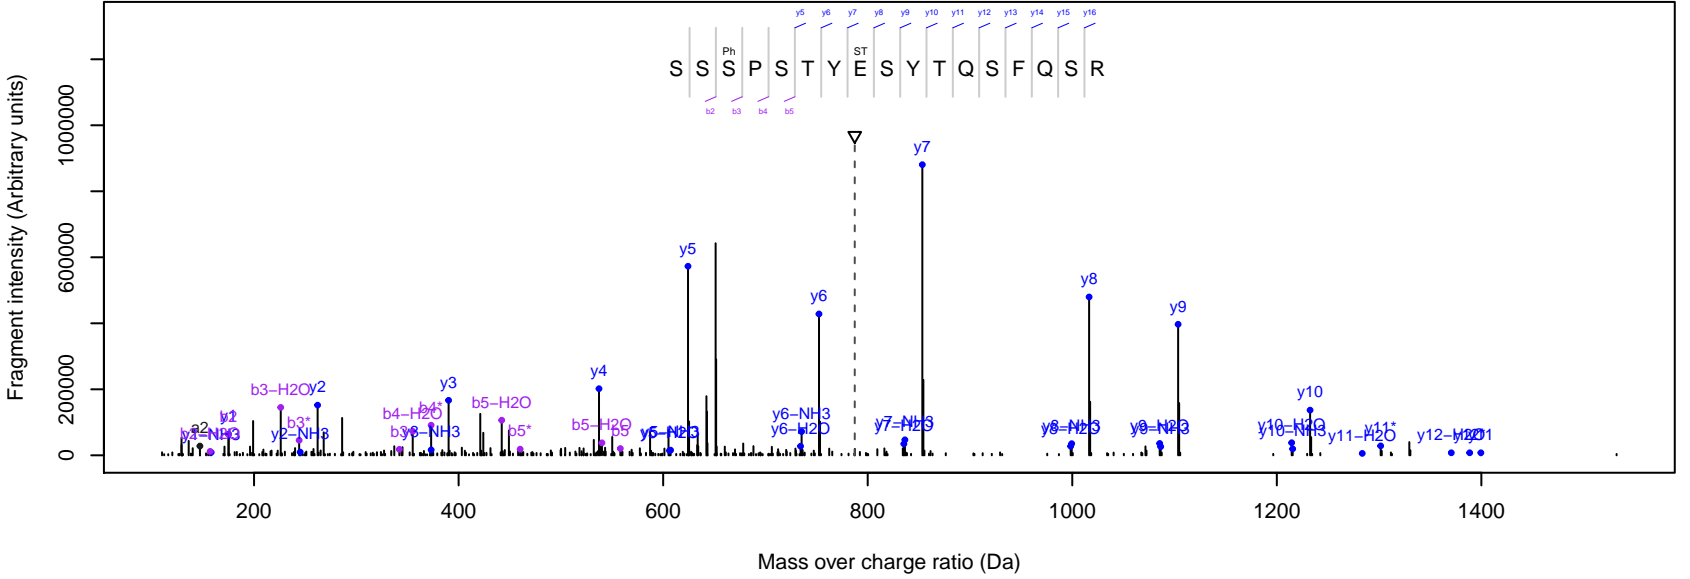

**IYLTADNLVNLQLDESFTGRGSPSTYD SLIK-3+**

Source : QE3\_201126\_FR\_TiOx\_hum\_tissue\_Urea\_RNAB\_N Scan : 58154

Andromeda score : 220.26

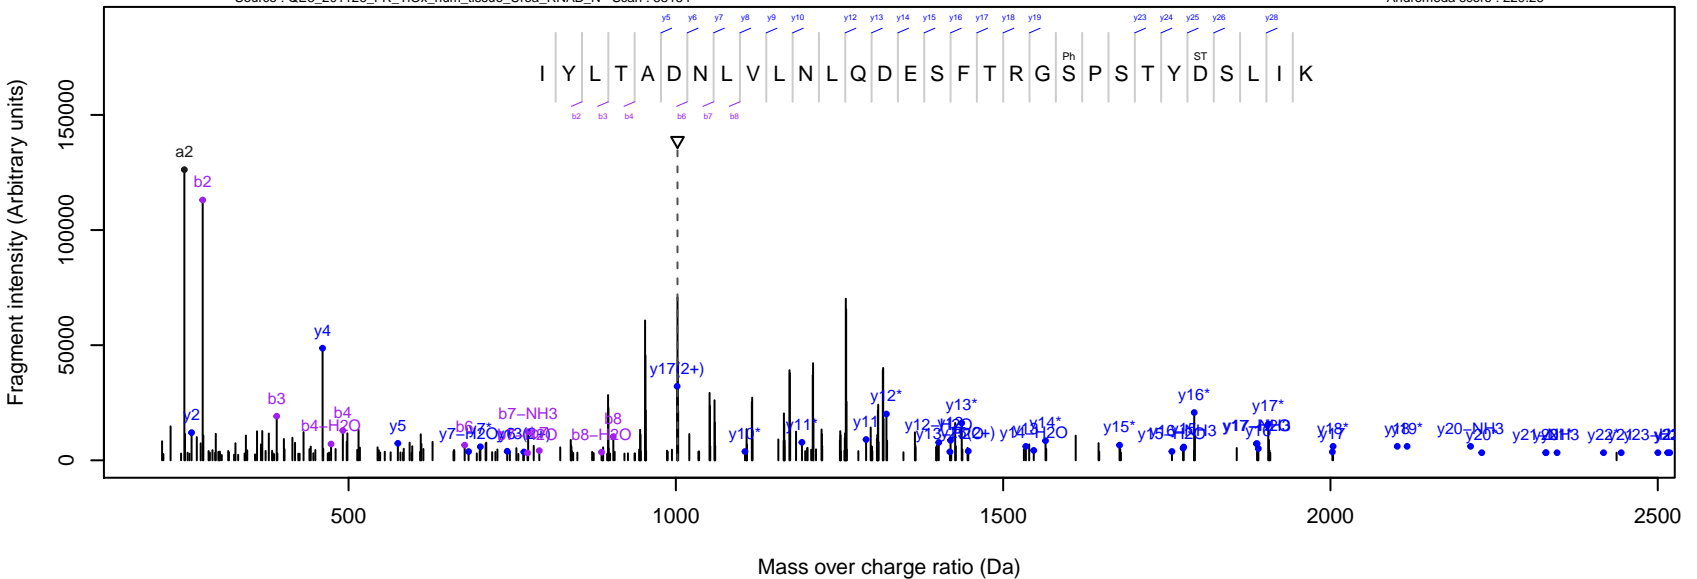

**TNLSGRQS(Phospho (STY))PSFK-2+**

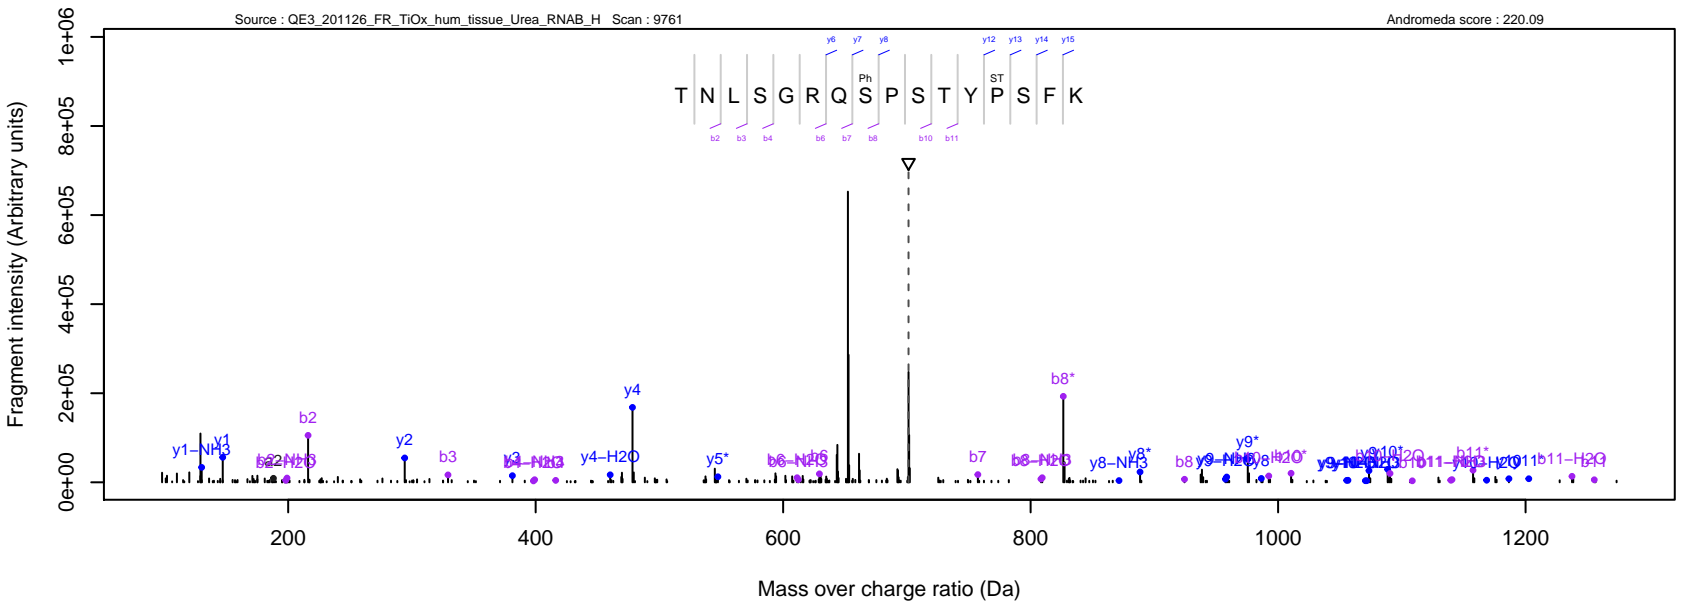

**RLS(Phospho (STY))LGQGDSTEATERGPR-3+**

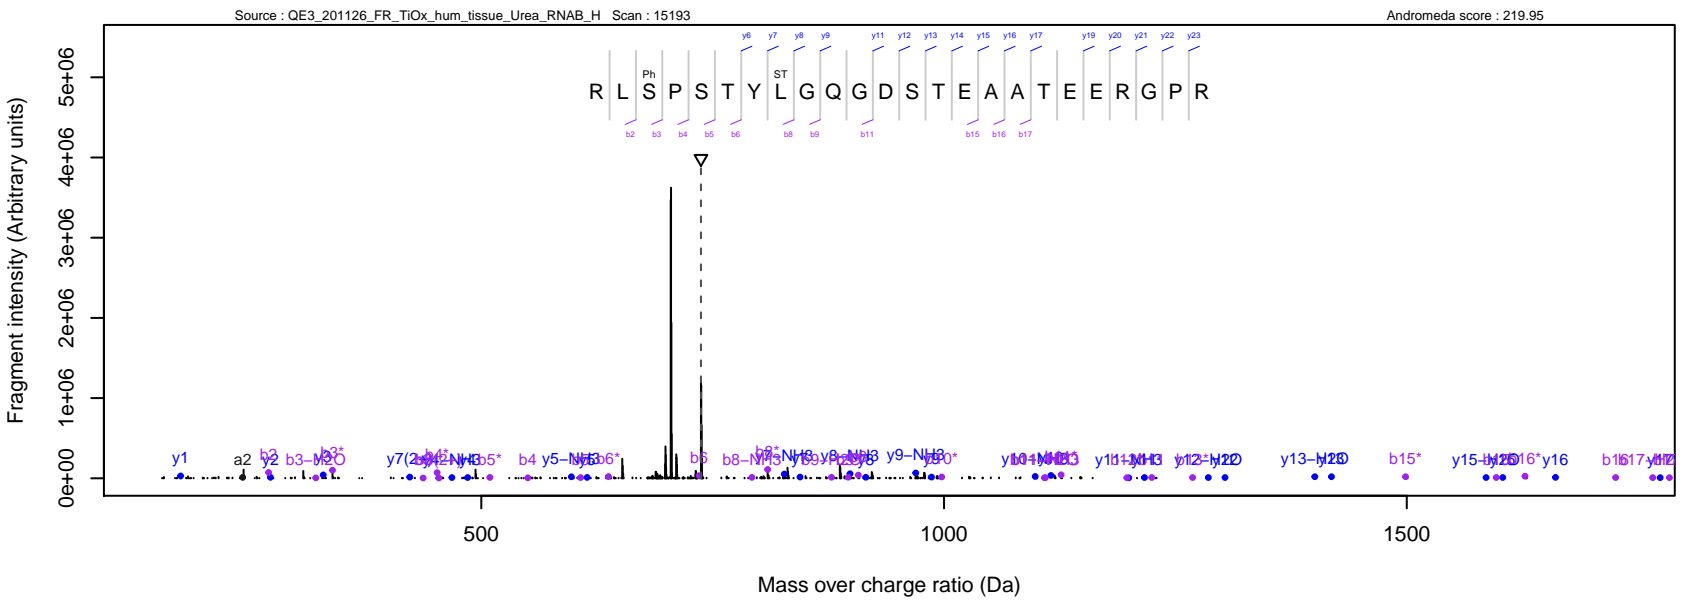

**(Acetyl (Protein N-term))AS(Phospho (STY))GVAUSDGVK-1+**

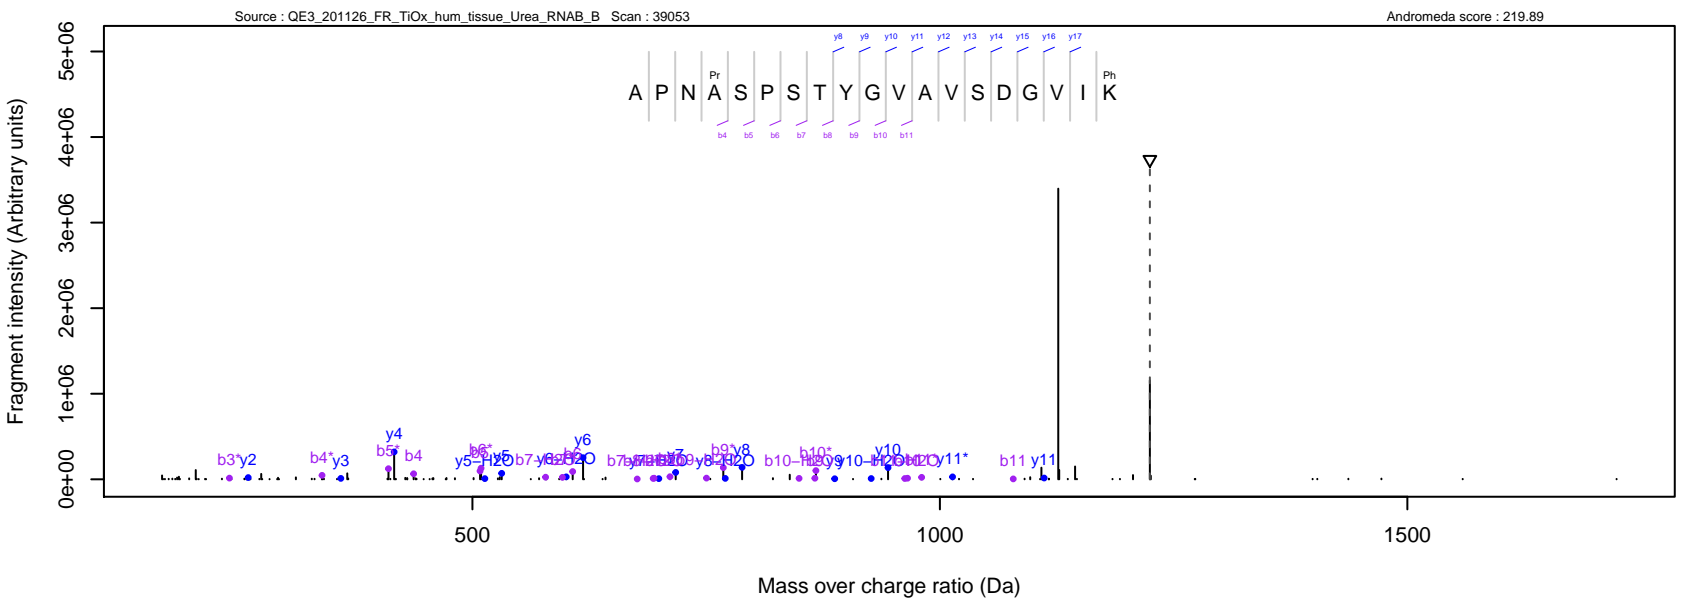



(Acetyl (Protein N-term))M(Oxidation (M))EDS(Phospho (STY))MDMDMSPLRPQNYLFGCELK-3+

Source : QE3\_201126\_FR\_TIOx\_hum\_tissue\_Urea\_RNAB\_N Scan : 61096

Andromeda score : 219.65

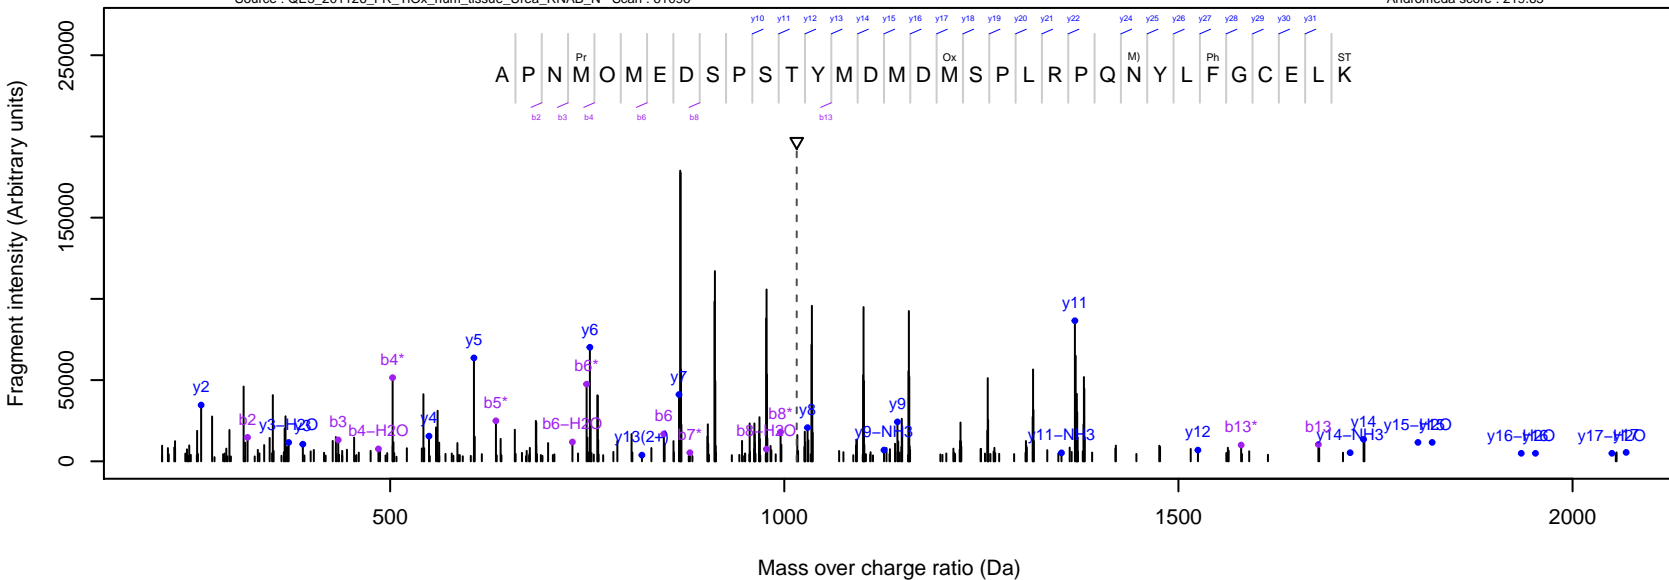

RLLEDGEDFNLDALDS(Phospho (STY))SNS(Phospho (STY))MQTIQK-3+

Source : QE3\_201126\_FR\_TIOx\_hum\_tissue\_Urea\_RNAB\_H Scan : 53417

Andromeda score : 219.52

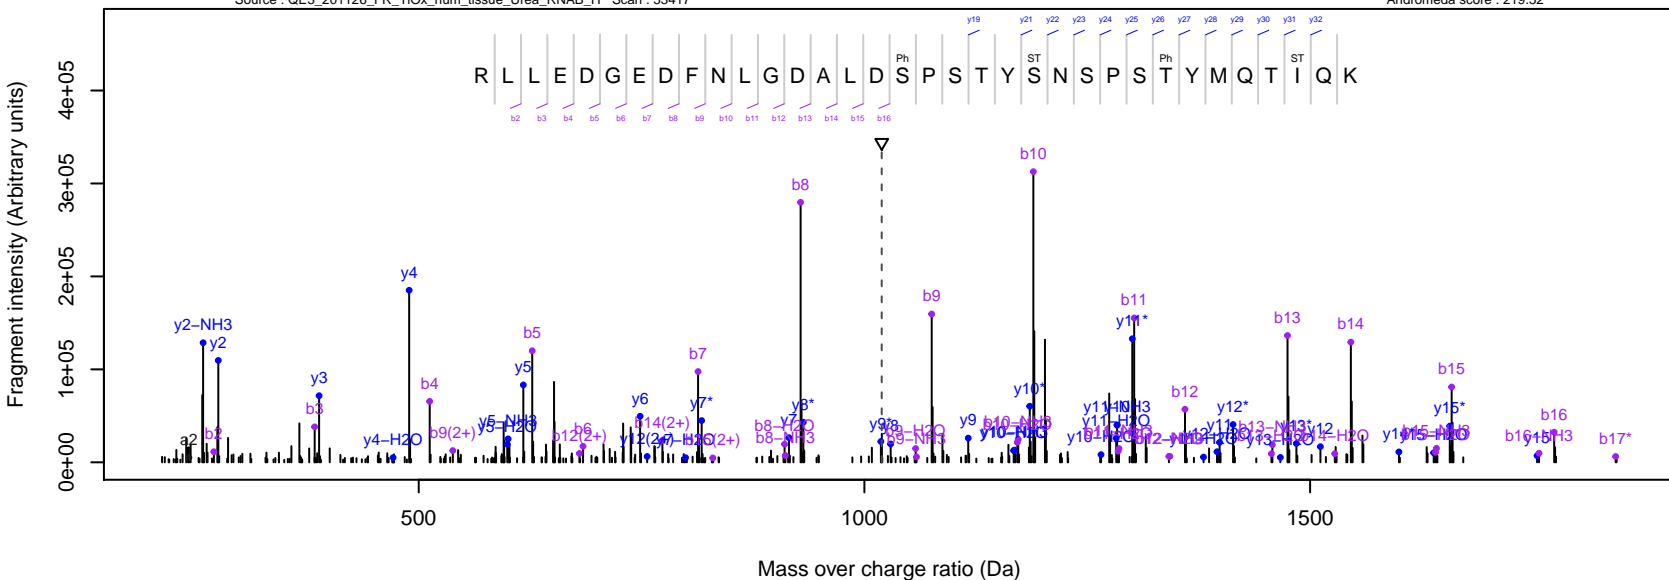

HGES(Phospho (STY))AWNLENR-2+

Source : QE3\_201126\_FR\_TIOx\_hum\_tissue\_Urea\_RNAB\_N Scan : 18346

Andromeda score : 219.35

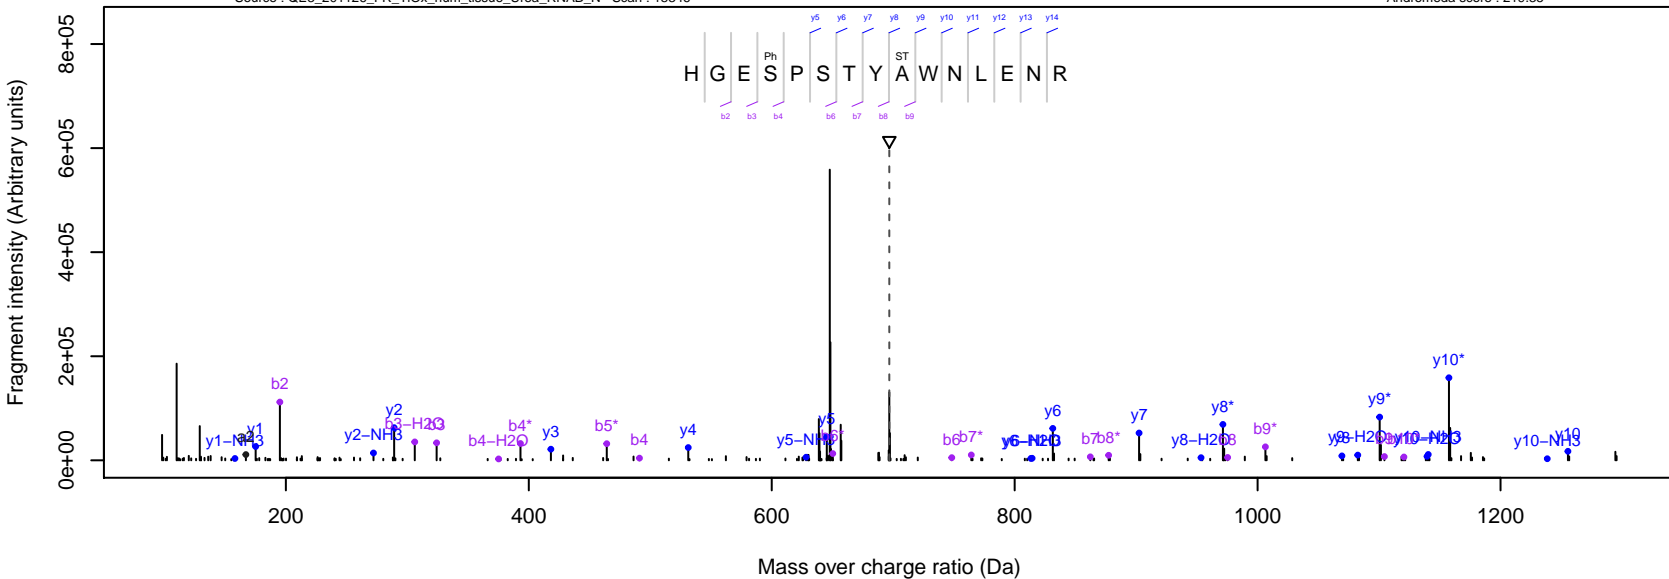

VSDQNS(Phospho (STY))PVLPK-2+

Source : QE3\_201126\_FR\_TiOx\_hum\_tissue\_Urea\_RNAB\_H Scan : 14720

Andromeda score : 219.26

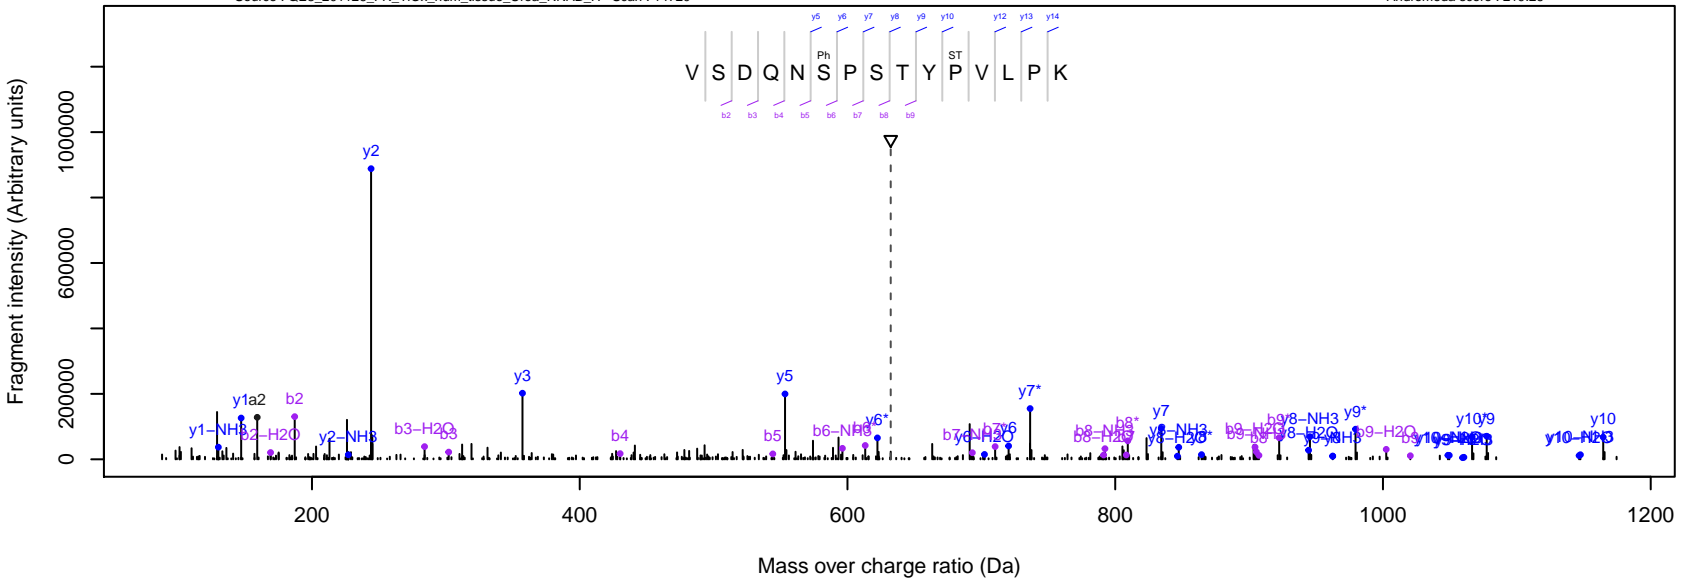

QES(Phospho (STY))DPEDDVKKPALQSSVVATSK-3+

Source : QE3\_201126\_FR\_TiOx\_hum\_tissue\_Urea\_RNAB\_N Scan : 16825

Andromeda score : 219.09

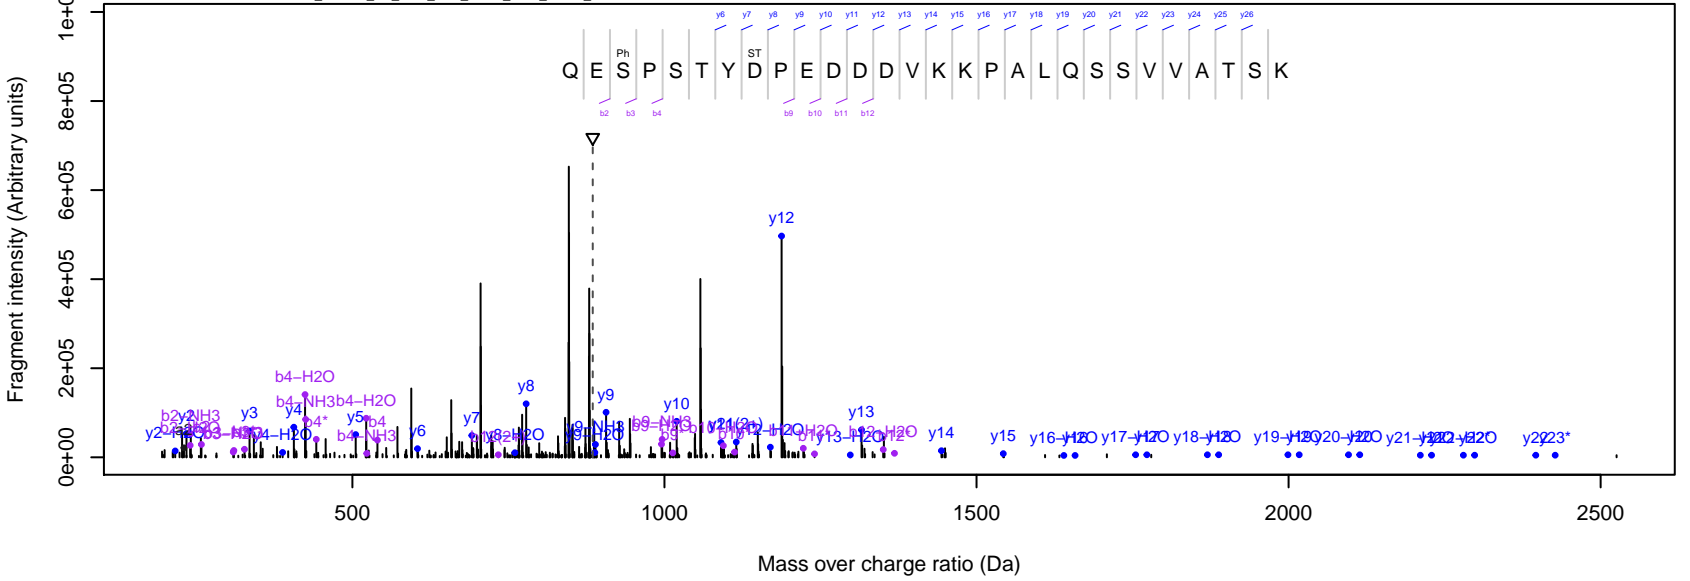

SEPVKEESELEQPFADTSPSTYSVGPDRK-3+

Source : QE3\_201126\_FR\_TiOx\_hum\_tissue\_Urea\_RNAB\_N Scan : 24133

Andromeda score : 218.93

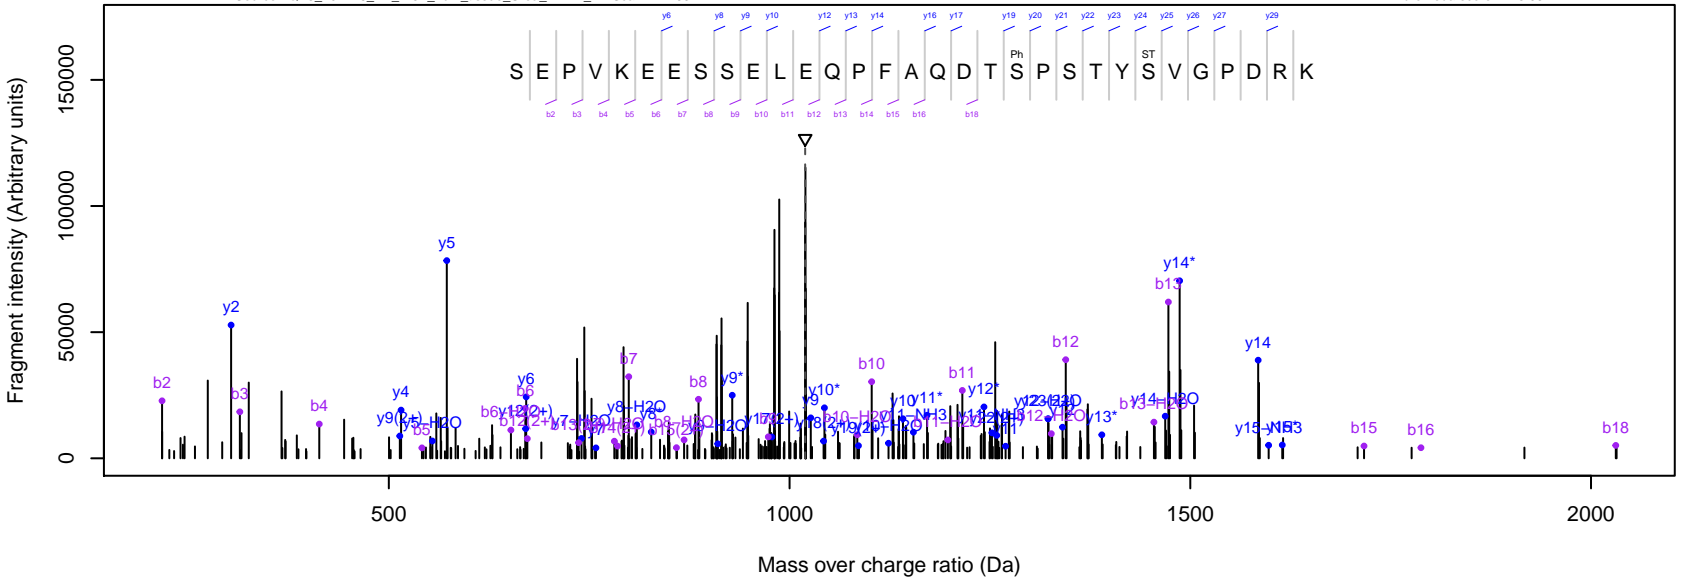

DLTHSDS(Phospho (STY))ESSLHMSDR-3+

Source : QE3\_201126\_FR\_TiOx\_hum\_tissue\_Urea\_RNAB\_B Scan : 14438

Andromeda score : 218.79

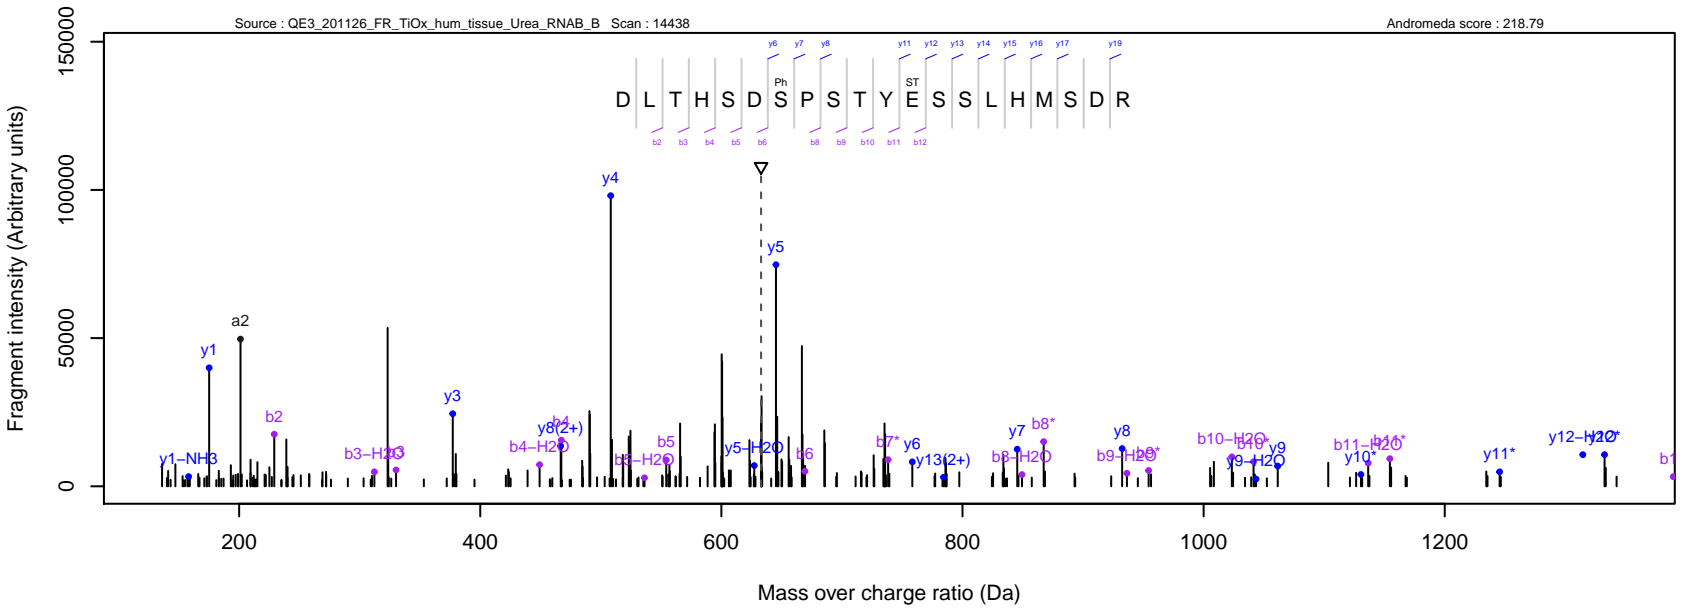

RRPS(Phospho (STY))DENTIAPSEVQK-3+

Source : QE3\_201126\_FR\_TiOx\_hum\_tissue\_Urea\_RNAB\_B Scan : 8695

Andromeda score : 218.74

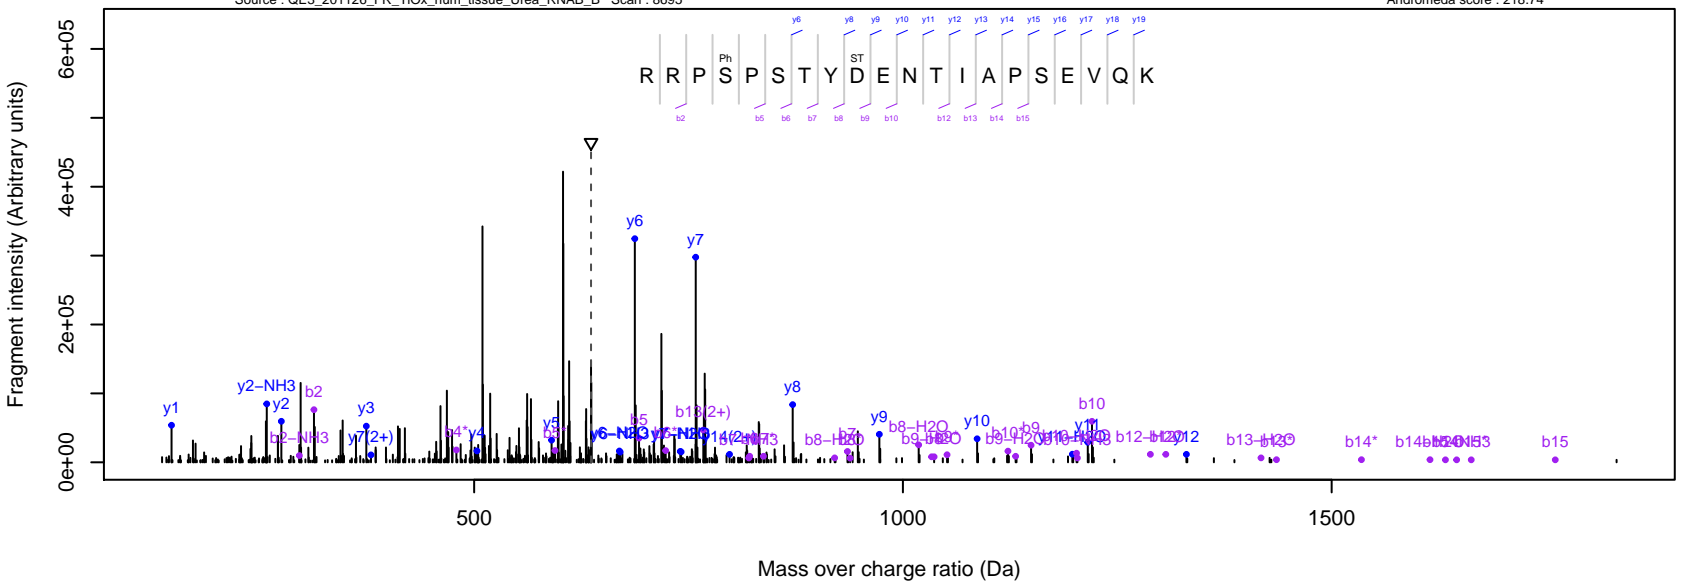

QFIAAQLGPASGHGTPASSPSSSSLPSPMS(Phospho (STY))PTPR-3+

Source : QE3\_201126\_FR\_TiOx\_hum\_tissue\_Urea\_RNAB\_B Scan : 36772

Andromeda score : 218.53

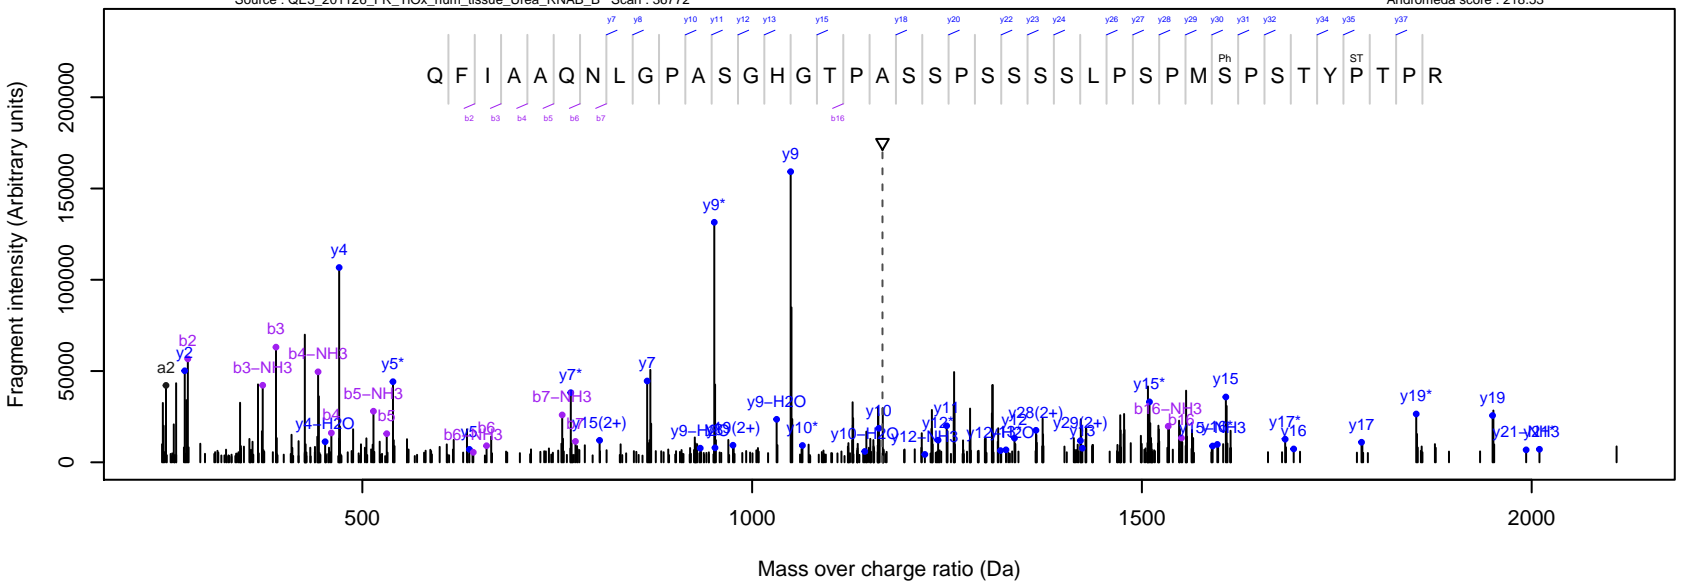

TQT(Phospho (STY))PPVSPAPQPTTEERLPSSPVYEDAASFK-3+

Source : QE3\_201126\_FR\_TIOx\_hum\_tissue\_Urea\_RNAB\_N Scan : 38930

Andromeda score : 218.49

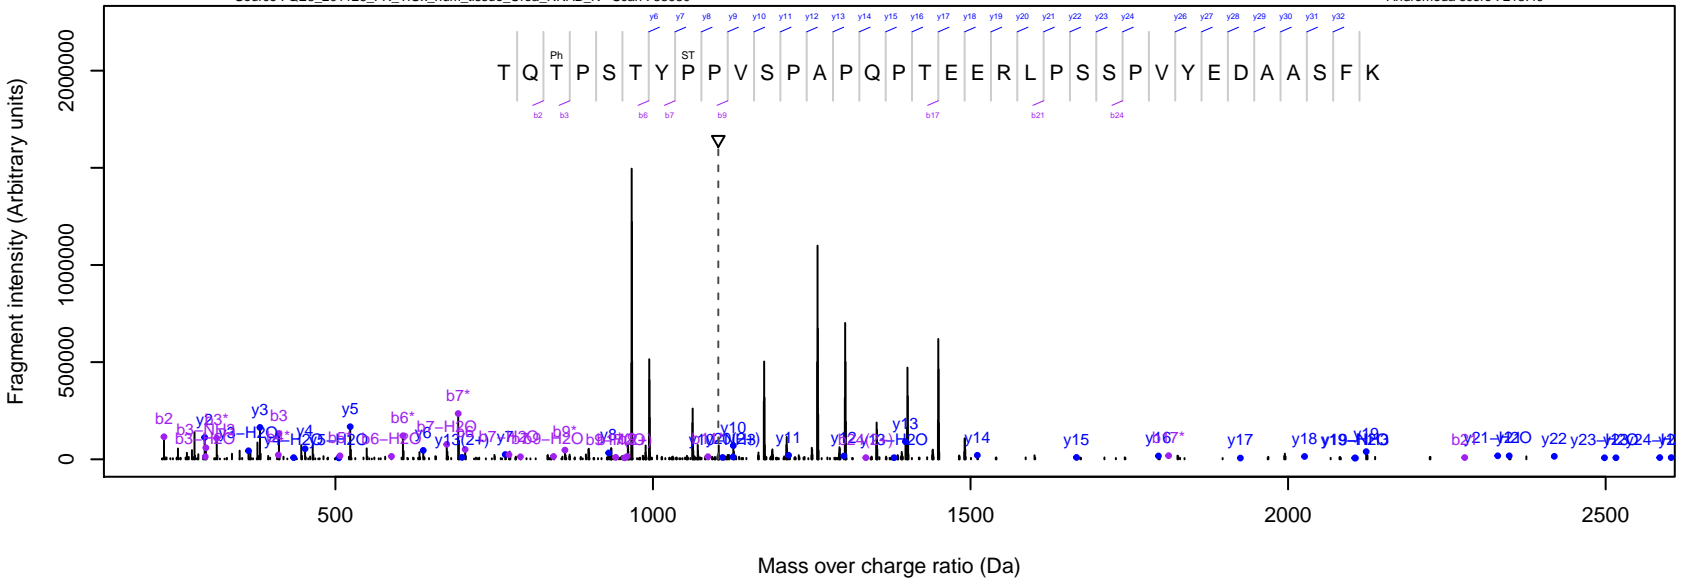

SPSGGAAGPLLT(Phospho (STY))PSQS(Phospho (STY))LDGSRR-3+

Source : QE3\_201126\_FR\_TIOx\_hum\_tissue\_Urea\_RNAB\_N Scan : 28081

Andromeda score : 218.48

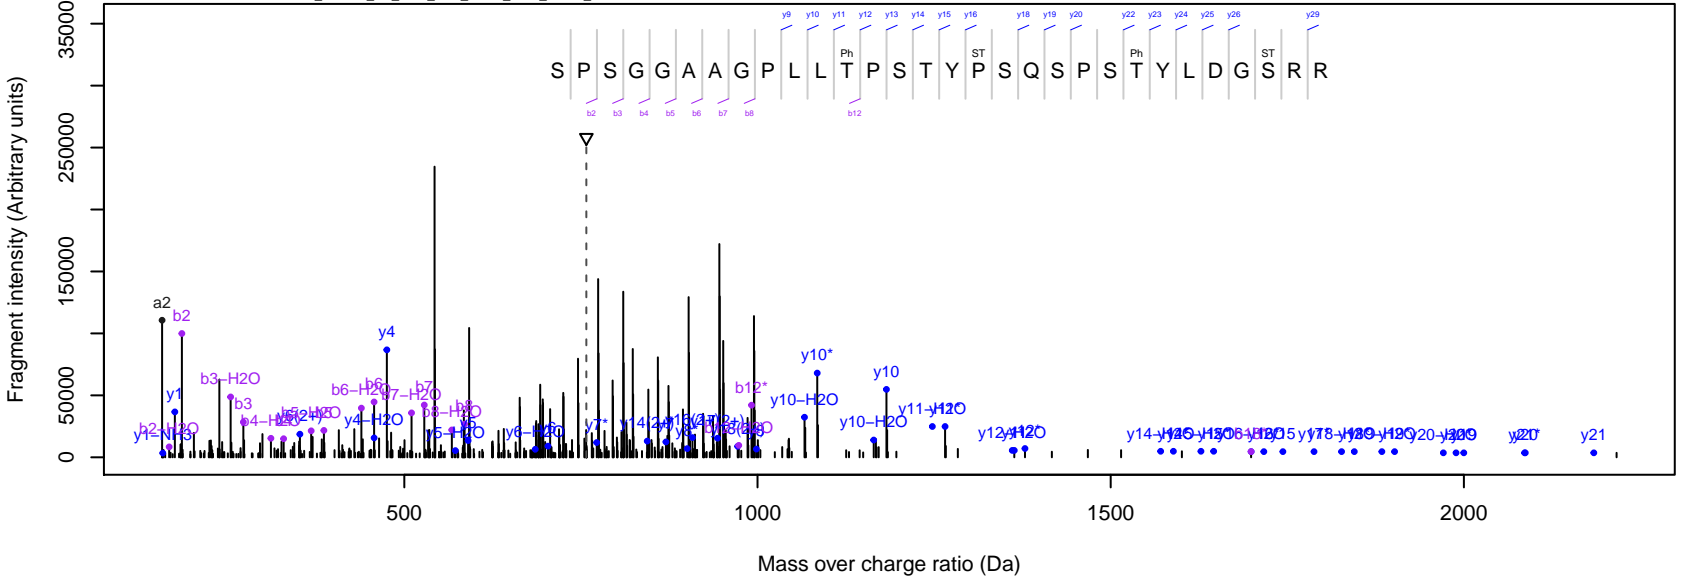

GDLS(Phospho (STY))DVEEEEEEMDVEATGAVKK-3+

Source : QE3\_201126\_FR\_TIOx\_hum\_tissue\_Urea\_RNAB\_N Scan : 41750

Andromeda score : 218.19

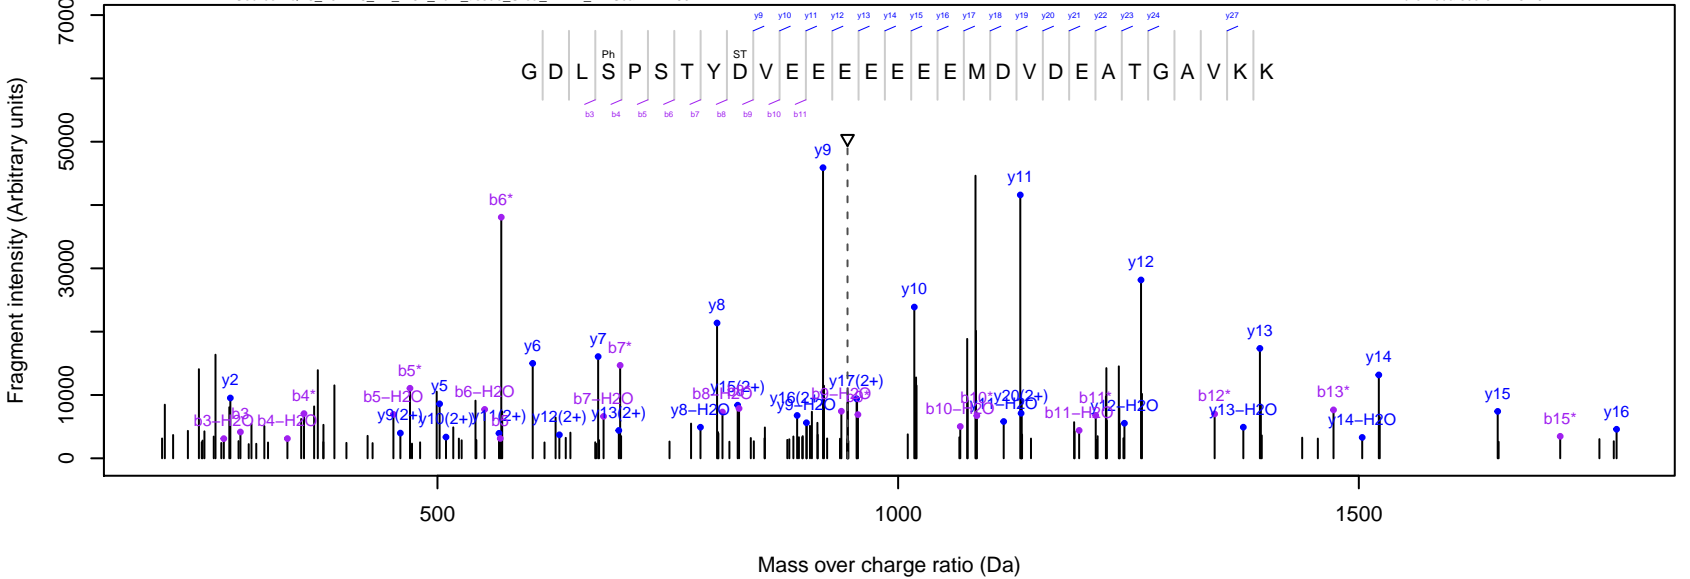

RLS(Phospho (STY))ESQLSFR-2+

Source : QE3\_201126\_FR\_TIOx\_hum\_tissue\_Urea\_RNAB\_H Scan : 21354

Andromeda score : 218.01

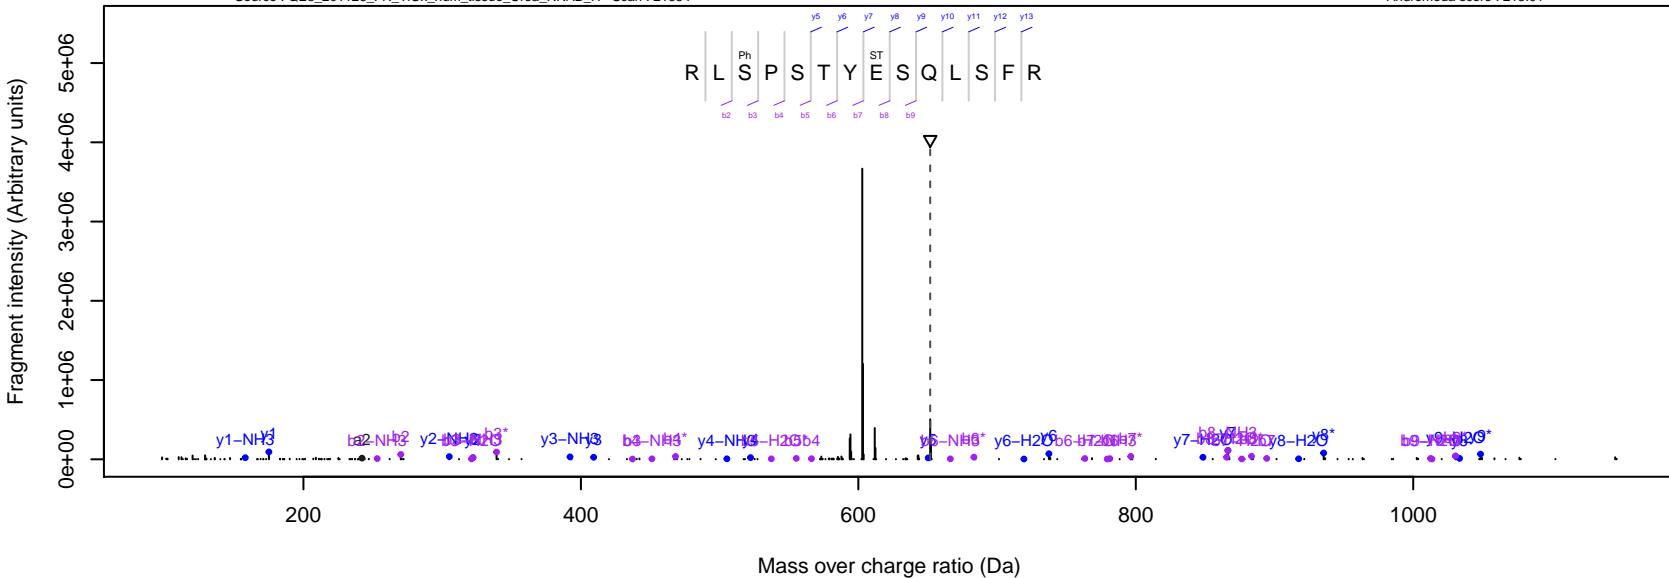

QEASTGQSPEDHASLAPPLS(Phospho (STY))PDHSSLEAK-3+

Source : QE3\_201126\_FR\_TIOx\_hum\_tissue\_Urea\_RNAB\_N Scan : 22986

Andromeda score : 217.8

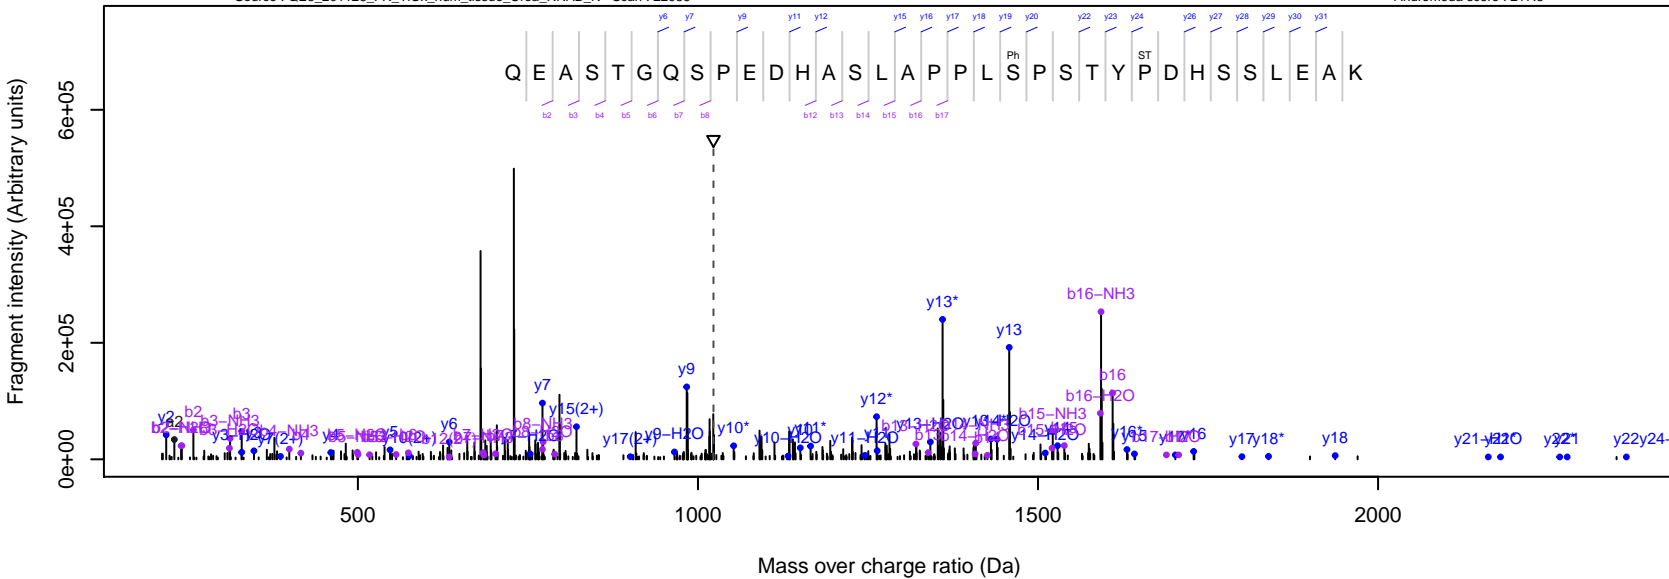

LDSQPQETS(Phospho (STY))PELPR-2+

Source : QE3\_201126\_FR\_TIOx\_hum\_tissue\_Urea\_RNAB\_H Scan : 21210

Andromeda score : 217.79

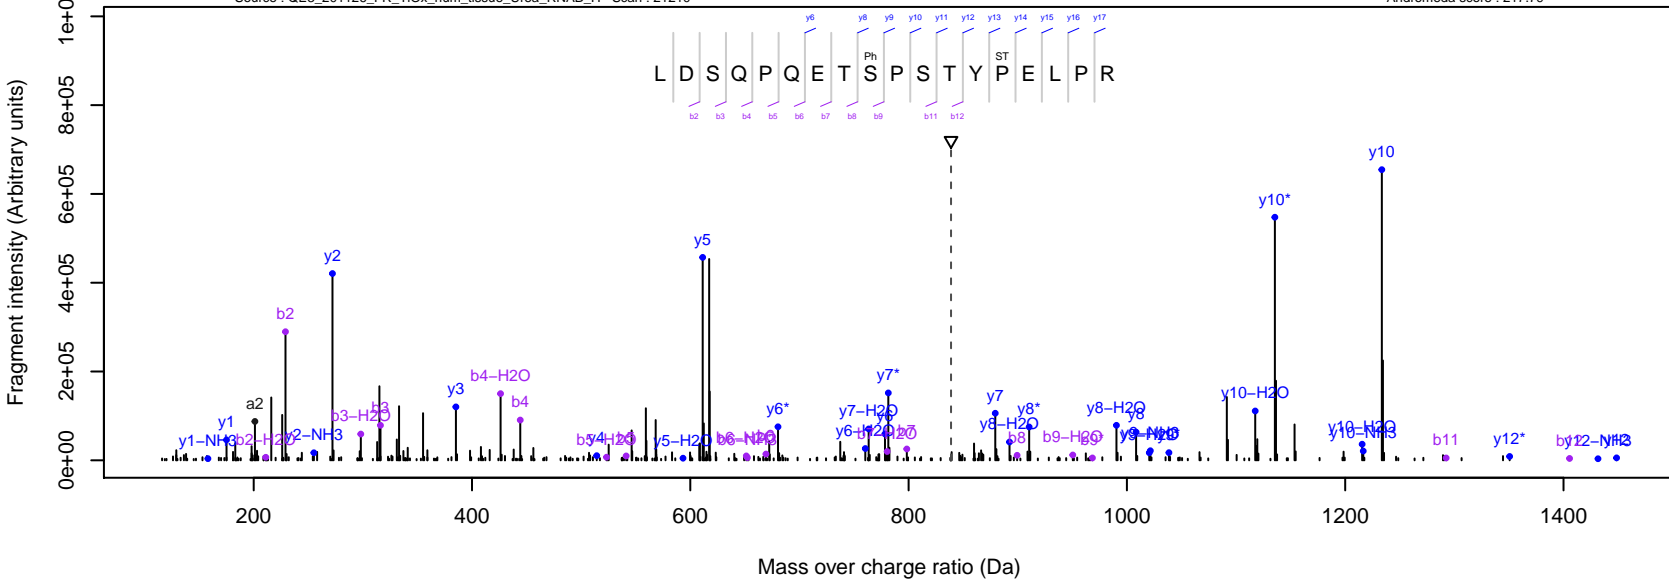

VAGEAAET(Phospho (STY))DS(Phospho (STY))EPEPEPEPTAAPR-2+

Source : QE3\_201126\_FR\_TiOx\_hum\_tissue\_Urea\_RNAB\_H Scan : 24902

Andromeda score : 217.42

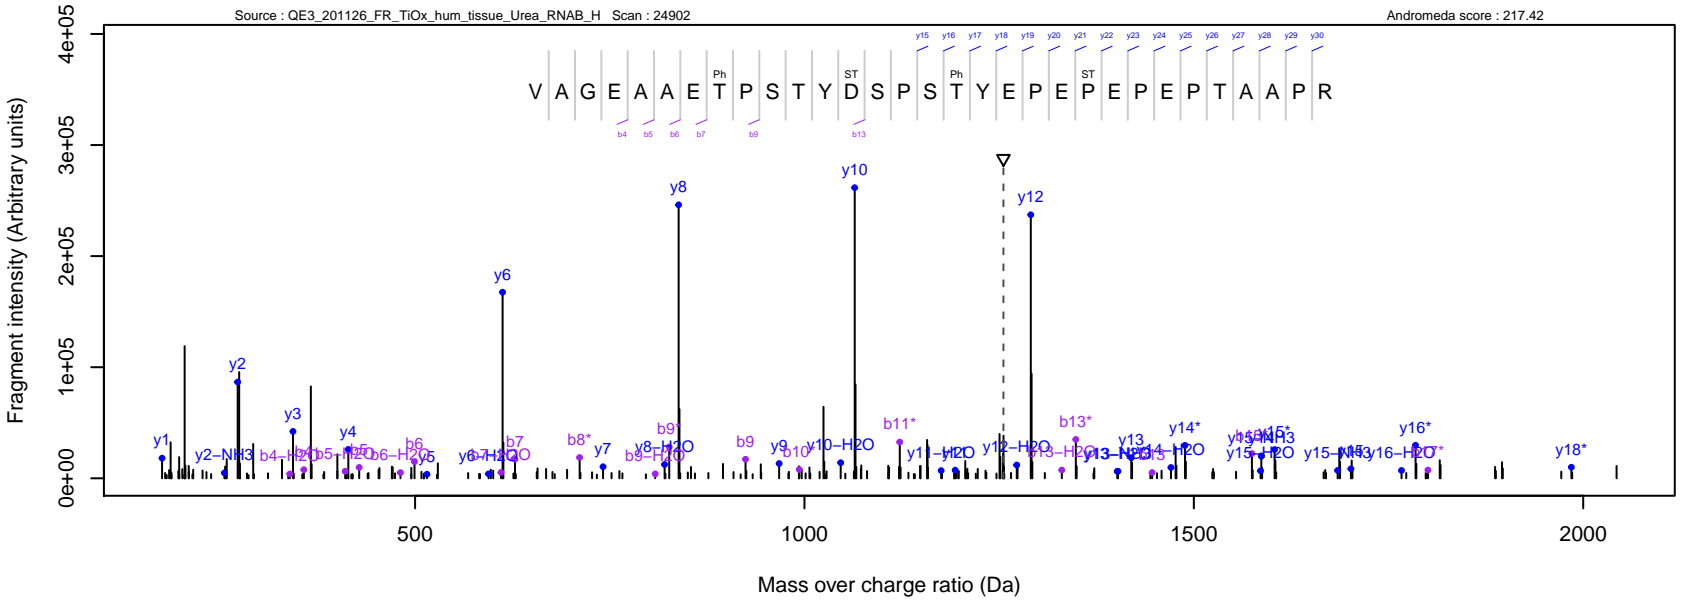

RPDIQYPDATDEDITSHMES(Phospho (STY))EELNGAYK-3+

Source : QE3\_201126\_FR\_TiOx\_hum\_tissue\_Urea\_RNAB\_N Scan : 38012

Andromeda score : 217.37

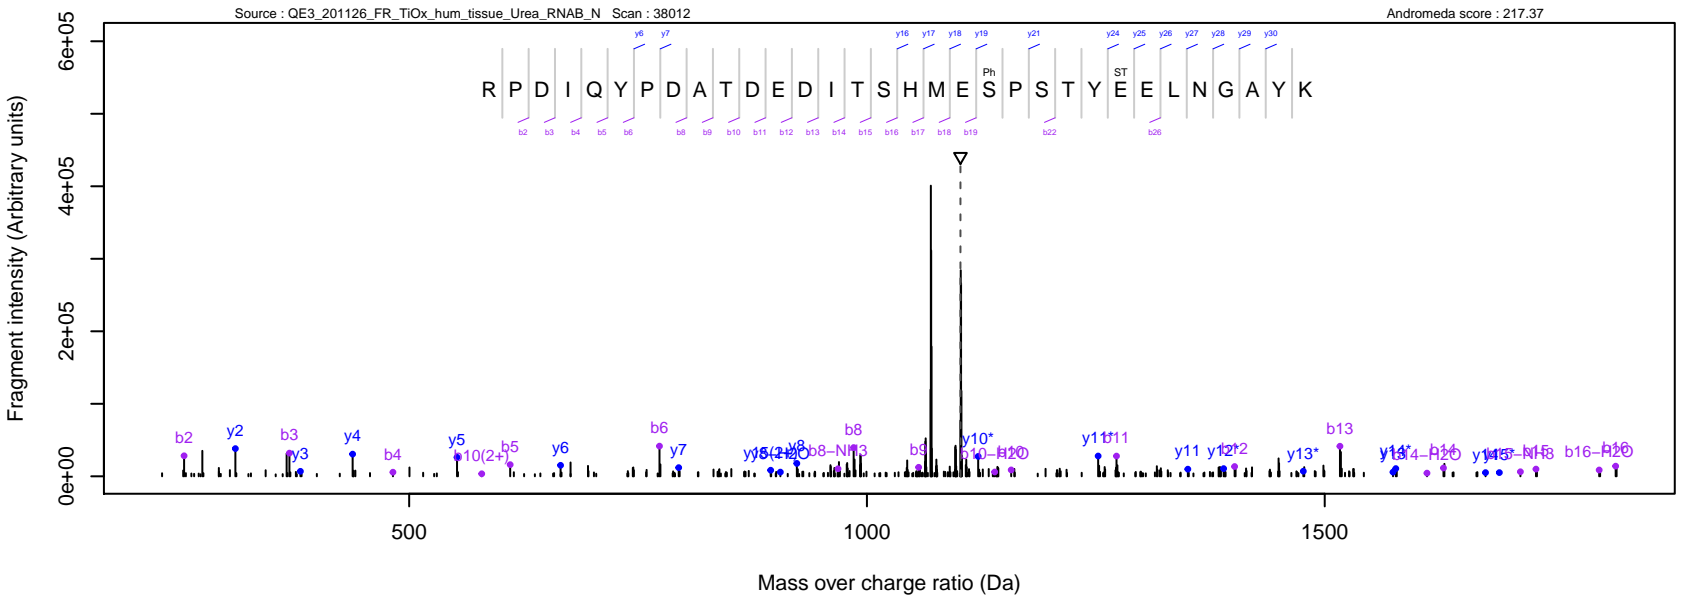

KIVEPEVVGES(Phospho (STY))DS(Phospho (STY))EVEGD AWR-2+

Source : QE3\_201126\_FR\_TiOx\_hum\_tissue\_Urea\_RNAB\_N Scan : 41332

Andromeda score : 217.26

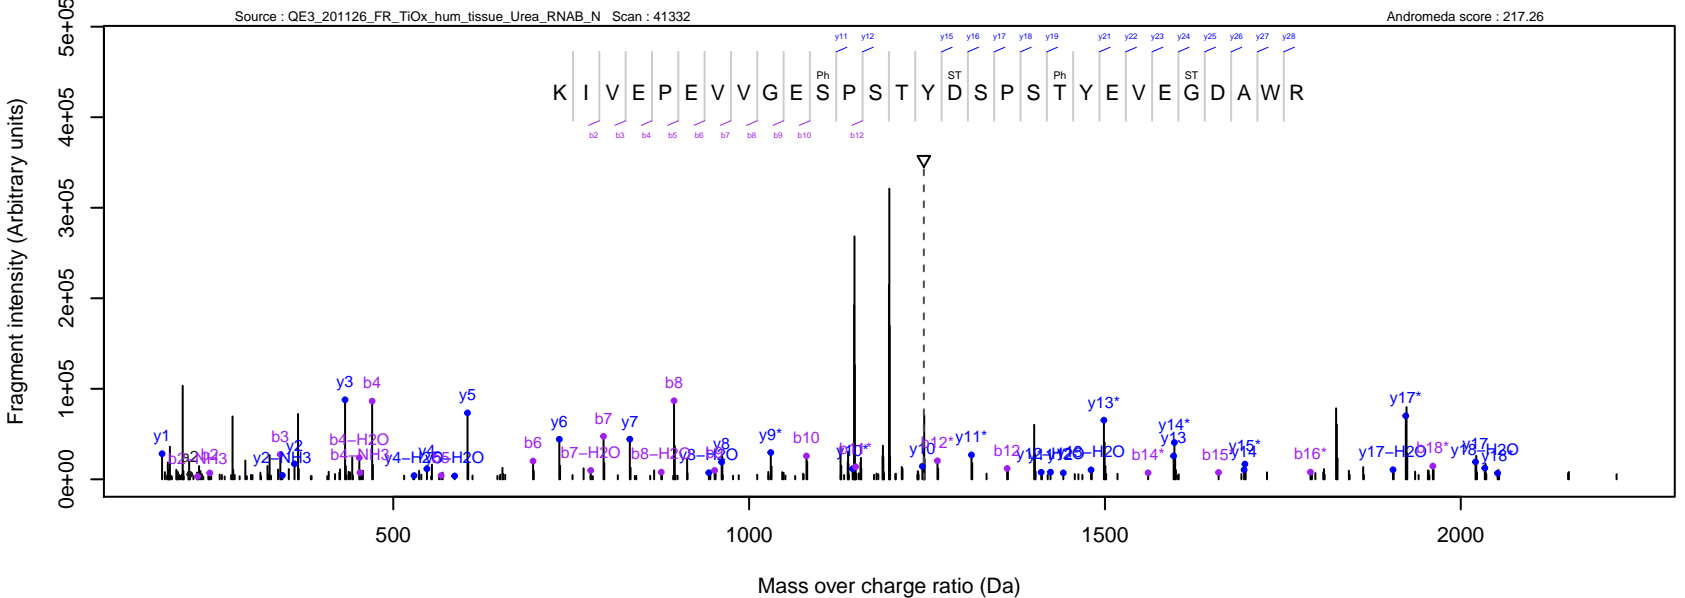

SS(Phospho (STY))PQLDPLRKS(Phospho (STY))PTMEQAVQTASAHLPAAPAVGR-4+

Source : QE3\_201126\_FR\_TiOx\_hum\_tissue\_Urea\_RNAB\_H Scan : 43837

Andromeda score : 217.01

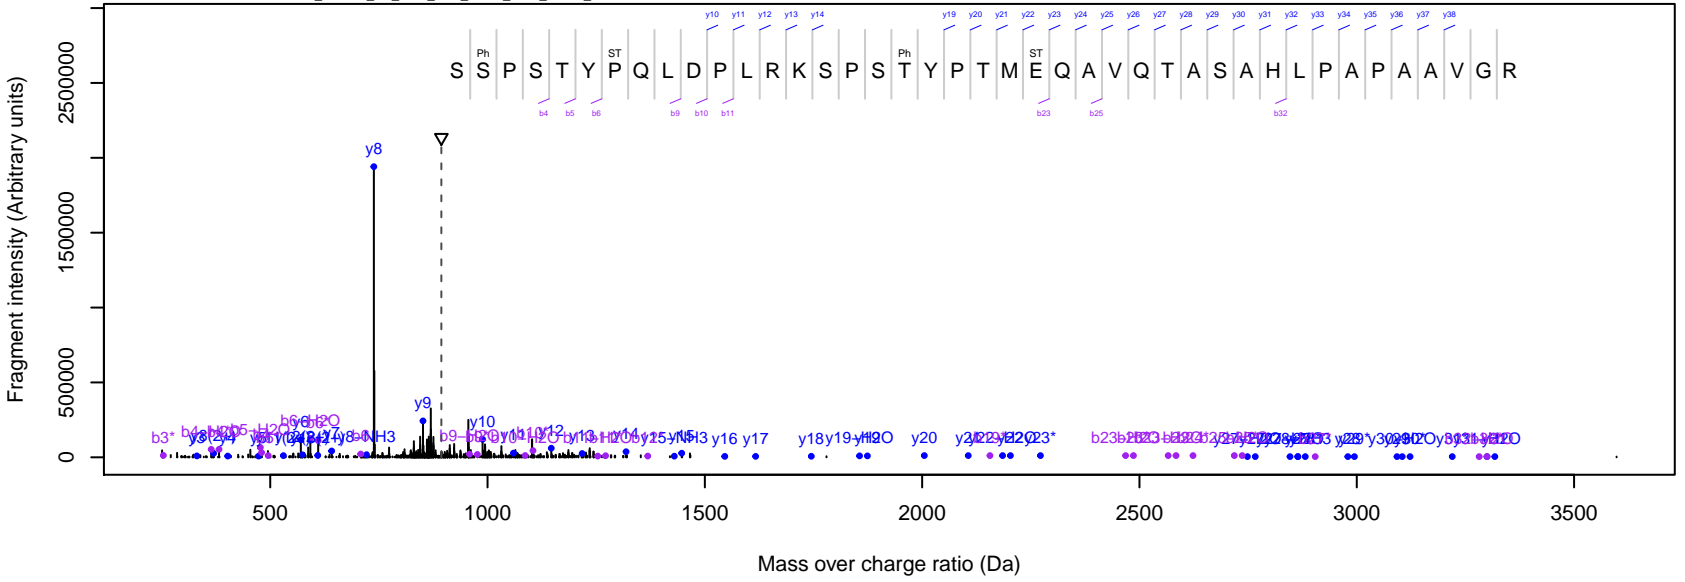

HPGAHQGNLASGLHSNAIASPGSPSTYPSLGR-4+

Source : QE3\_201126\_FR\_TiOx\_hum\_tissue\_Urea\_RNAB\_B Scan : 18200

Andromeda score : 216.89

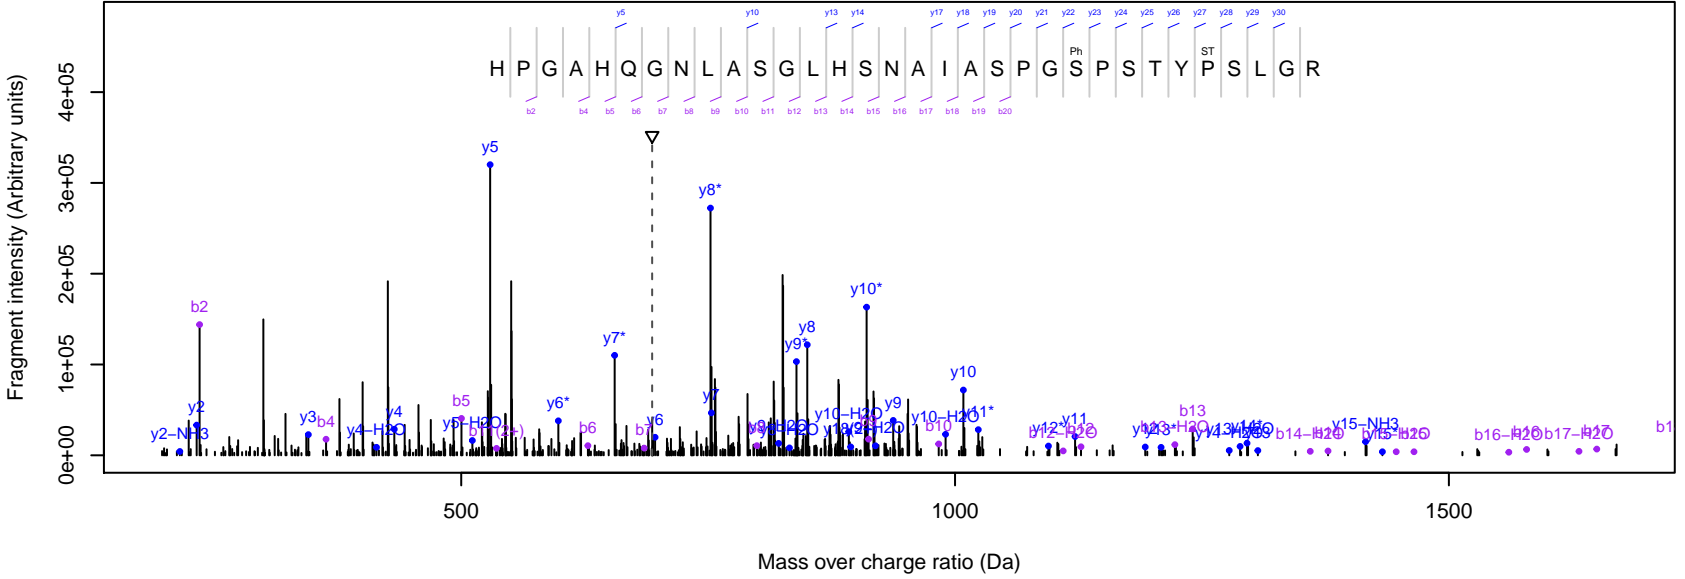

RAGDLEDS(Phospho (STY))PK-2+

Source : QE3\_201126\_FR\_TiOx\_hum\_tissue\_Urea\_RNAB\_B Scan : 13477

Andromeda score : 216.83

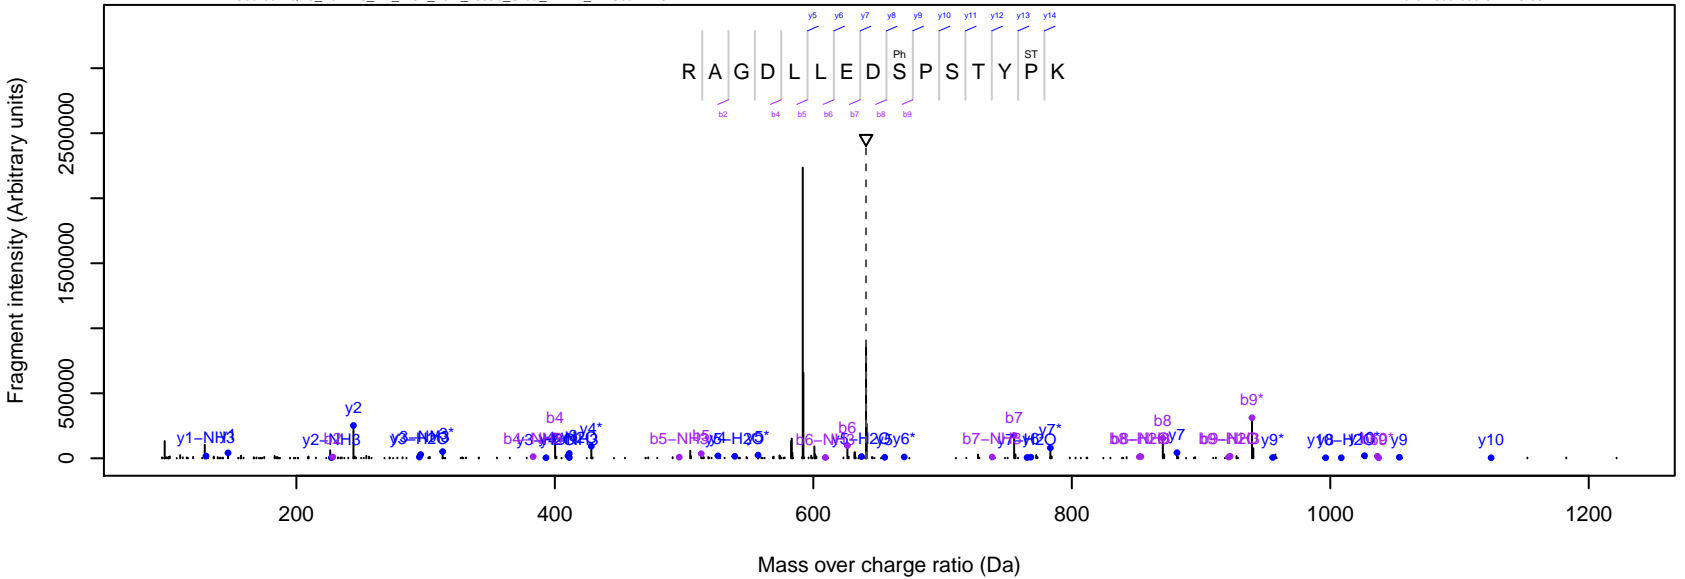

GLSAS(Phospho (STY))LPDLSENWIEVK-2+

Source : QE3\_201126\_FR\_TiOx\_hum\_tissue\_Urea\_RNAB\_H Scan : 57120

Andromeda score : 216.72

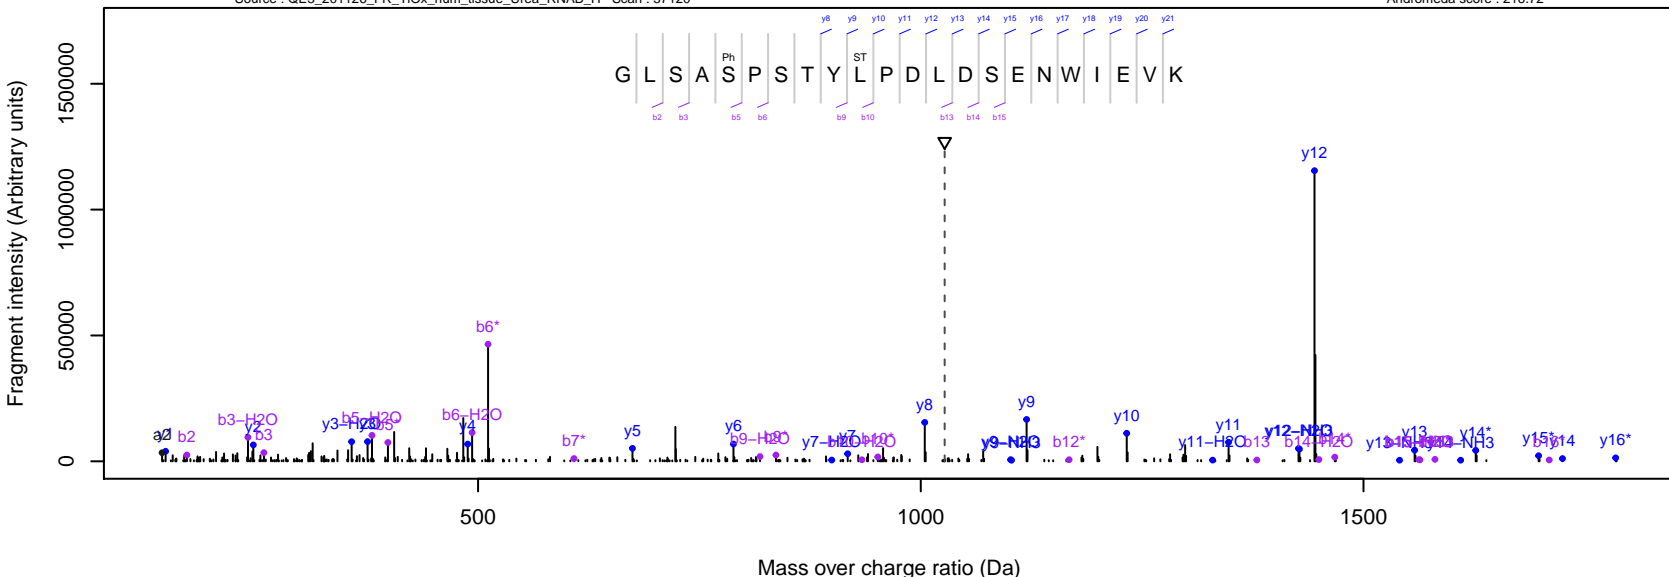

SPVNEQNQDGVTHSDGAGNLDEEQDS(Phospho (STY))EGETYEDIAASK-3+

Source : QE3\_201126\_FR\_TiOx\_hum\_tissue\_Urea\_RNAB\_H Scan : 28236

Andromeda score : 216.56

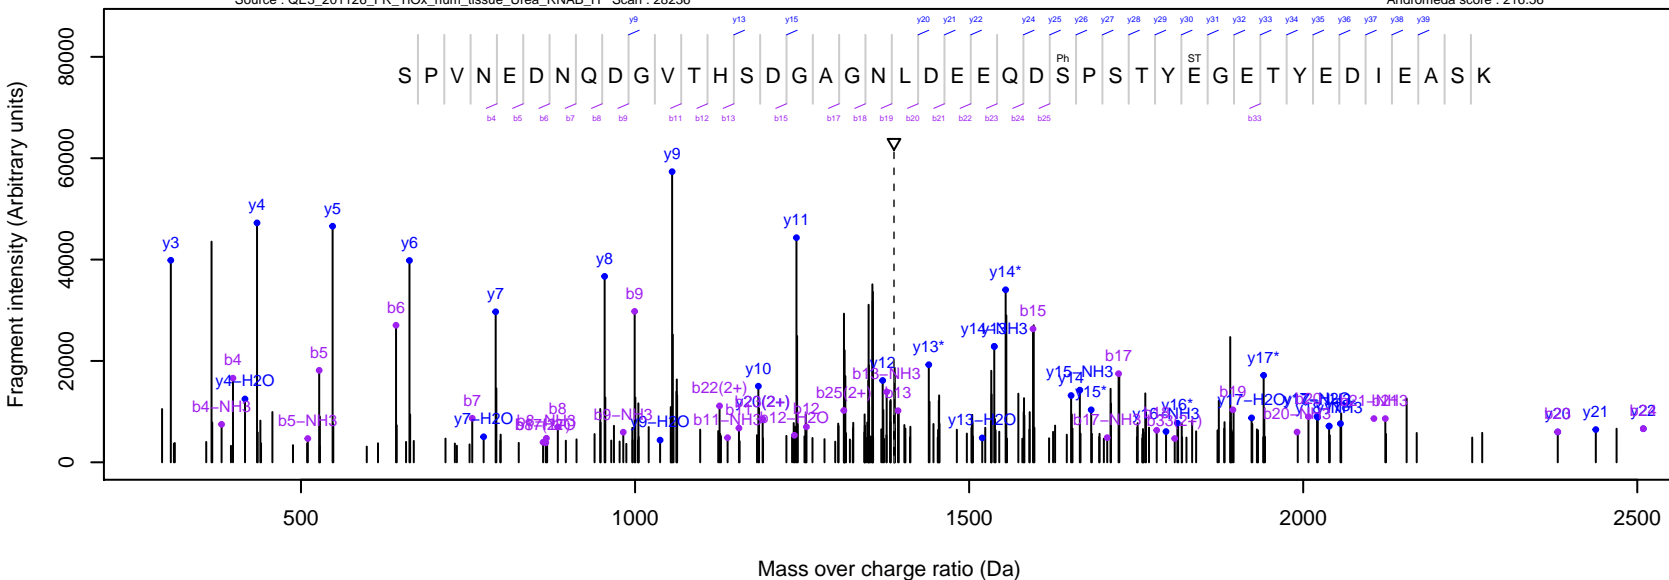

KETTSGTSTEPVKNSS(Phospho (STY))PAPPQPAPGK-3+

Source : QE3\_201126\_FR\_TiOx\_hum\_tissue\_Urea\_RNAB\_H Scan : 8008

Andromeda score : 216.52

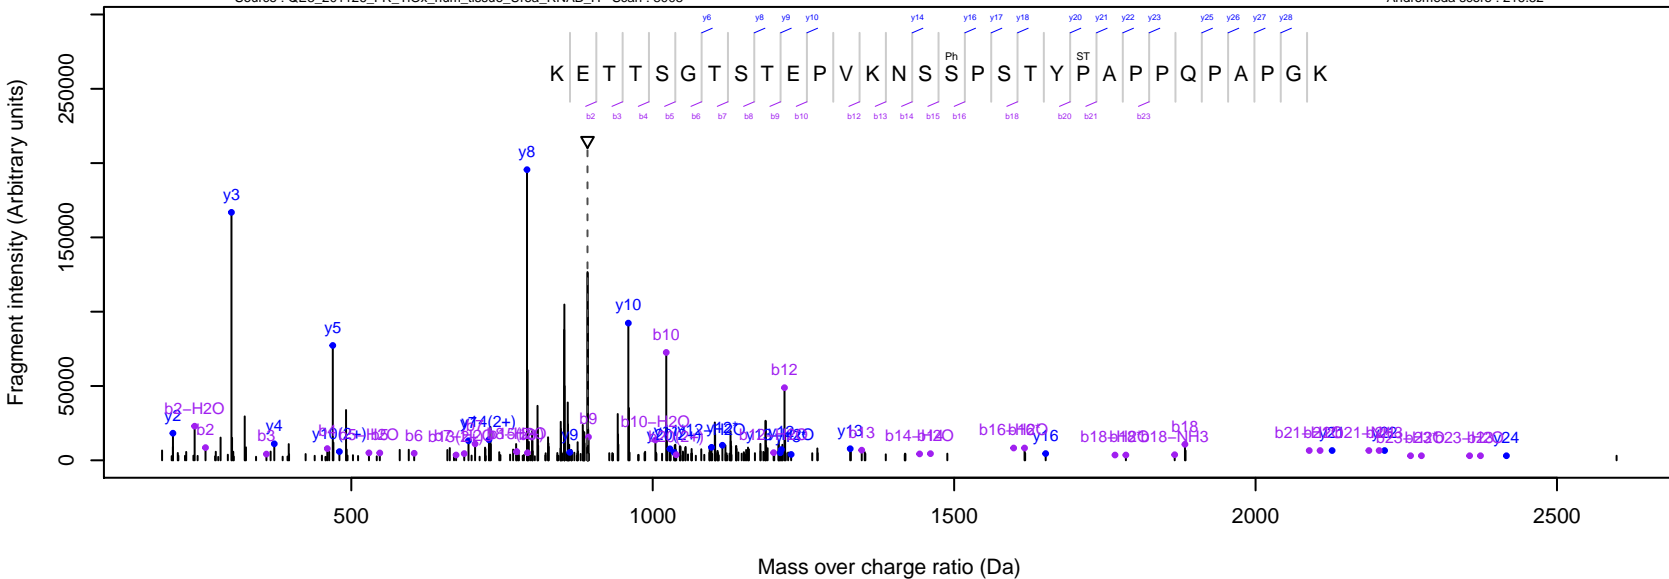



PGPTSGTNGVSSGRS(Phospho (STY))PSKAAAR-3+

Source : QE3\_201126\_FR\_TiOx\_hum\_tissue\_Urea\_RNAB\_N Scan : 9328

Andromeda score : 216.49

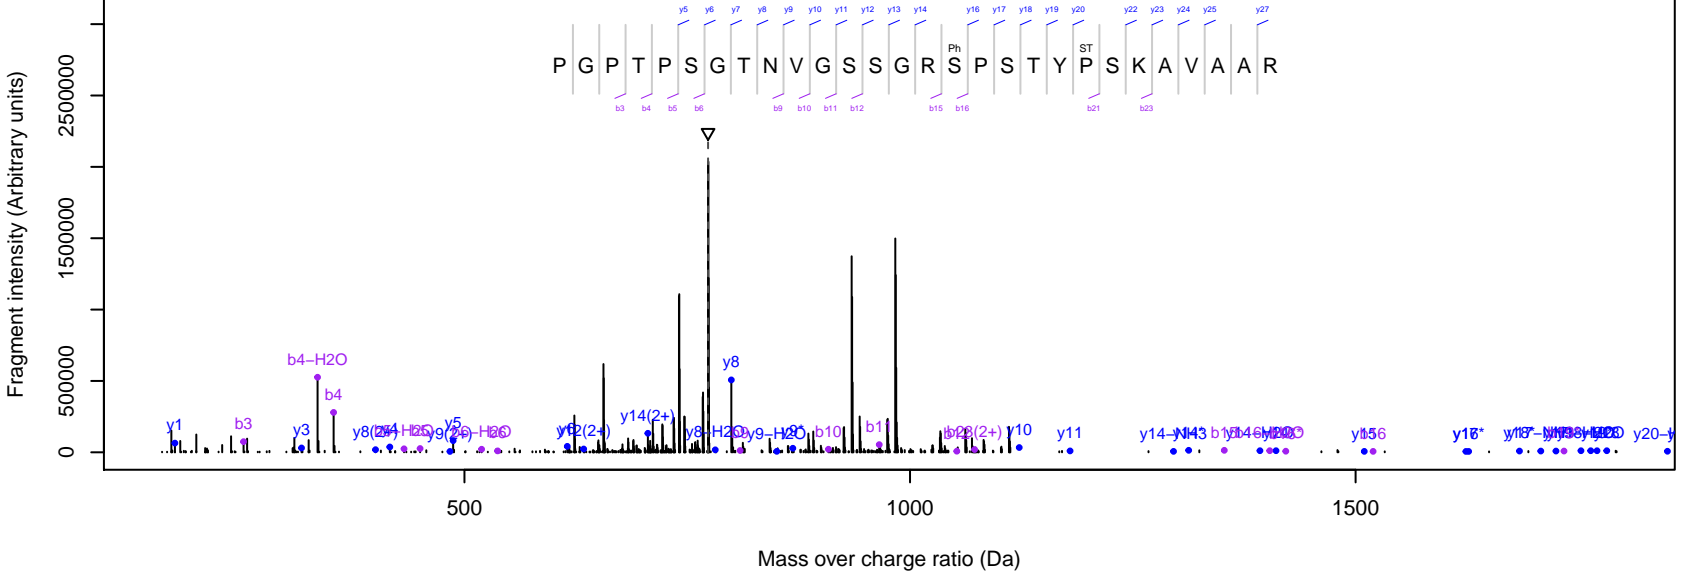

KFLQPGS(Phospho (STY))PR-2+

Source : QE3\_201126\_FR\_TiOx\_hum\_tissue\_Urea\_RNAB\_B Scan : 11438

Andromeda score : 216.35

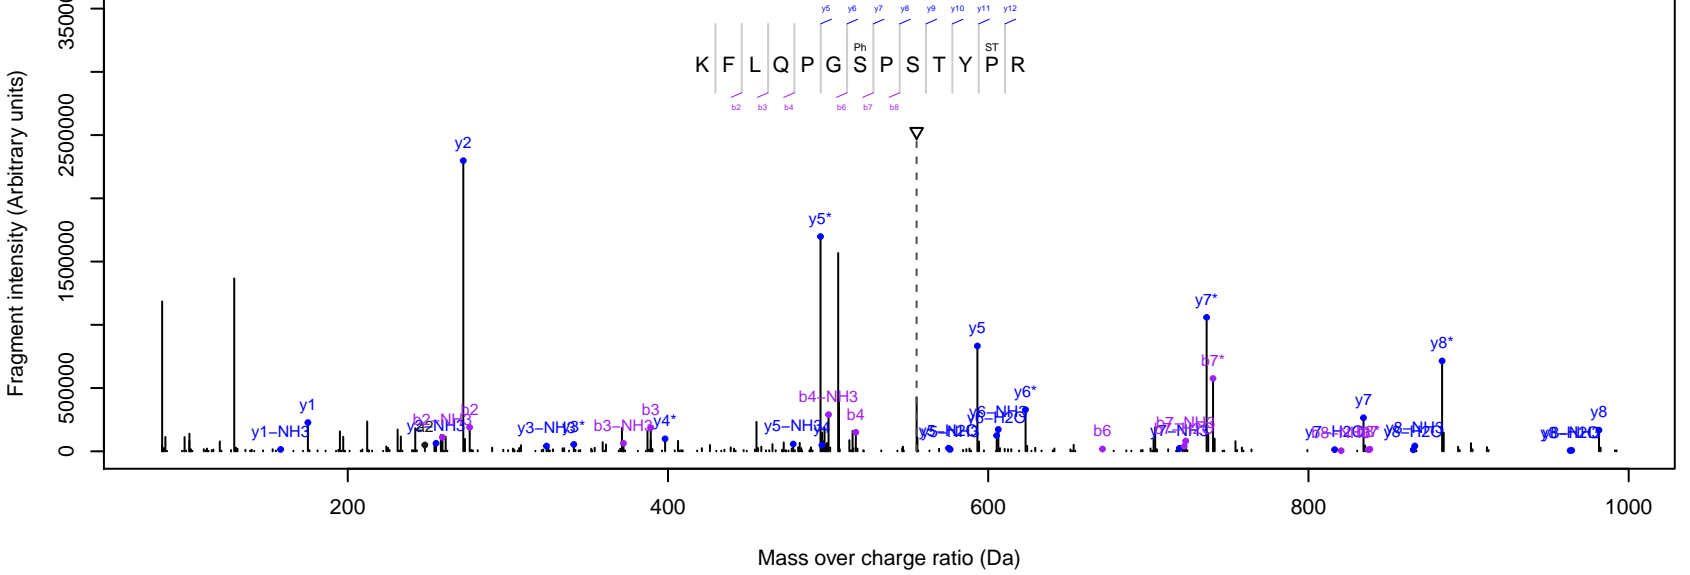

AQLGGPEAAKS(Phospho (STY))DETAAK-2+

Source : QE3\_201126\_FR\_TiOx\_hum\_tissue\_Urea\_RNAB\_N Scan : 8699

Andromeda score : 216.32

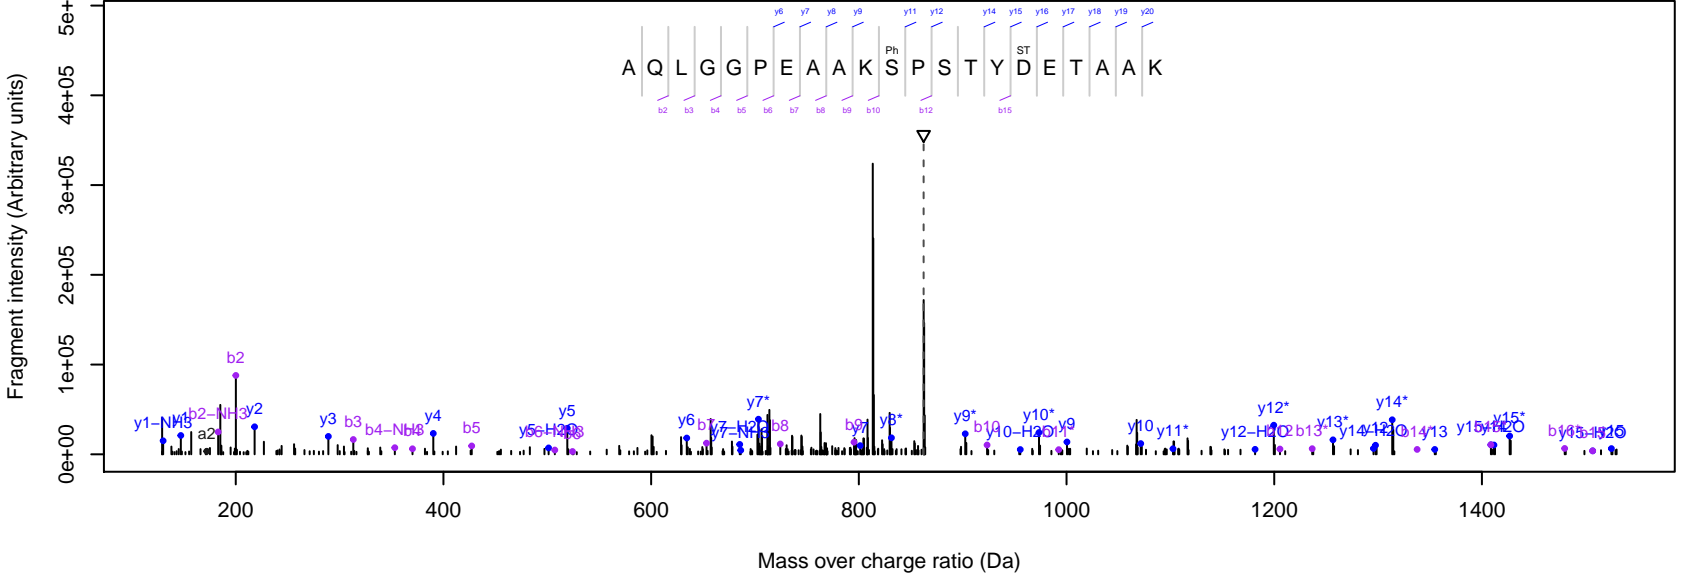

VEAKES(Phospho (STY))EES(Phospho (STY))DEDM(Oxidation (M))GFGLFD-2+

Source : QE3\_201126\_FR\_TiOx\_hum\_tissue\_Urea\_RNAB\_B Scan : 59012

Andromeda score : 216.32

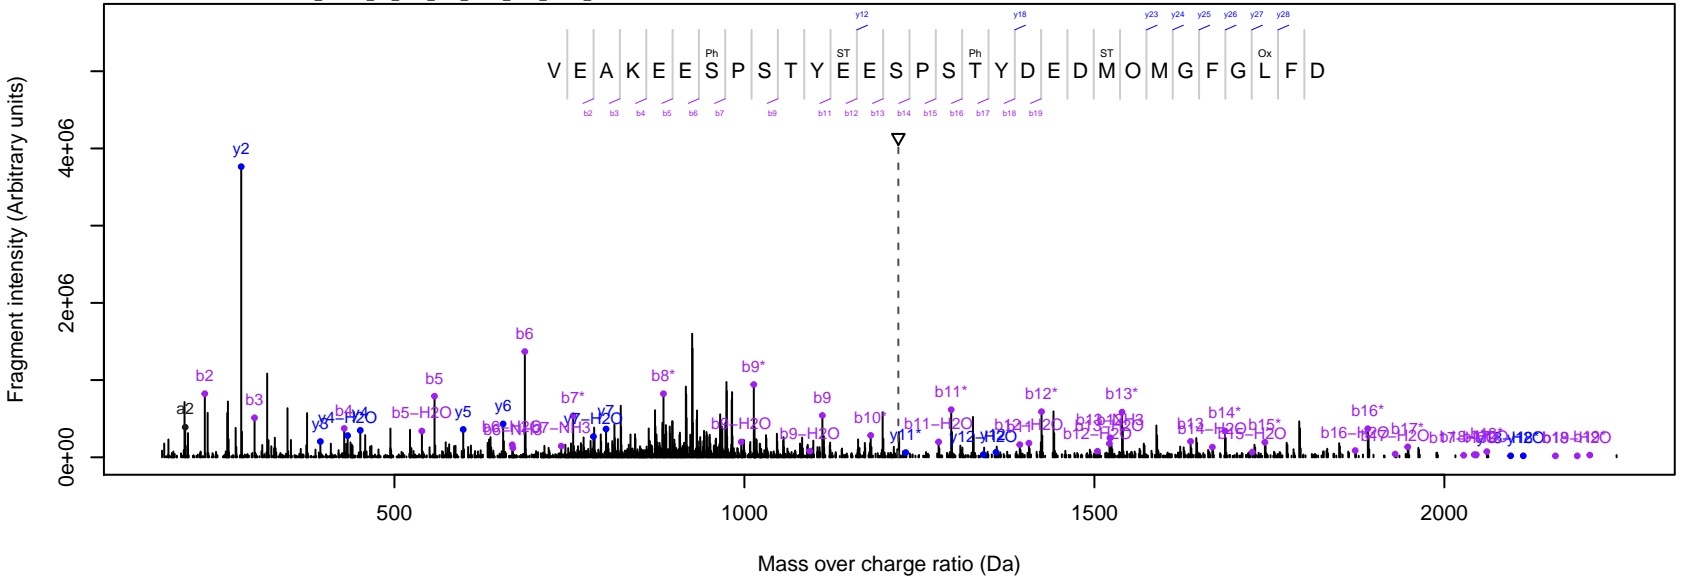

NPVDYM(Oxidation (M))DLPFSSS(Phospho (STY))PSR-2+

Source : QE3\_201126\_FR\_TiOx\_hum\_tissue\_Urea\_RNAB\_B Scan : 41878

Andromeda score : 216.29

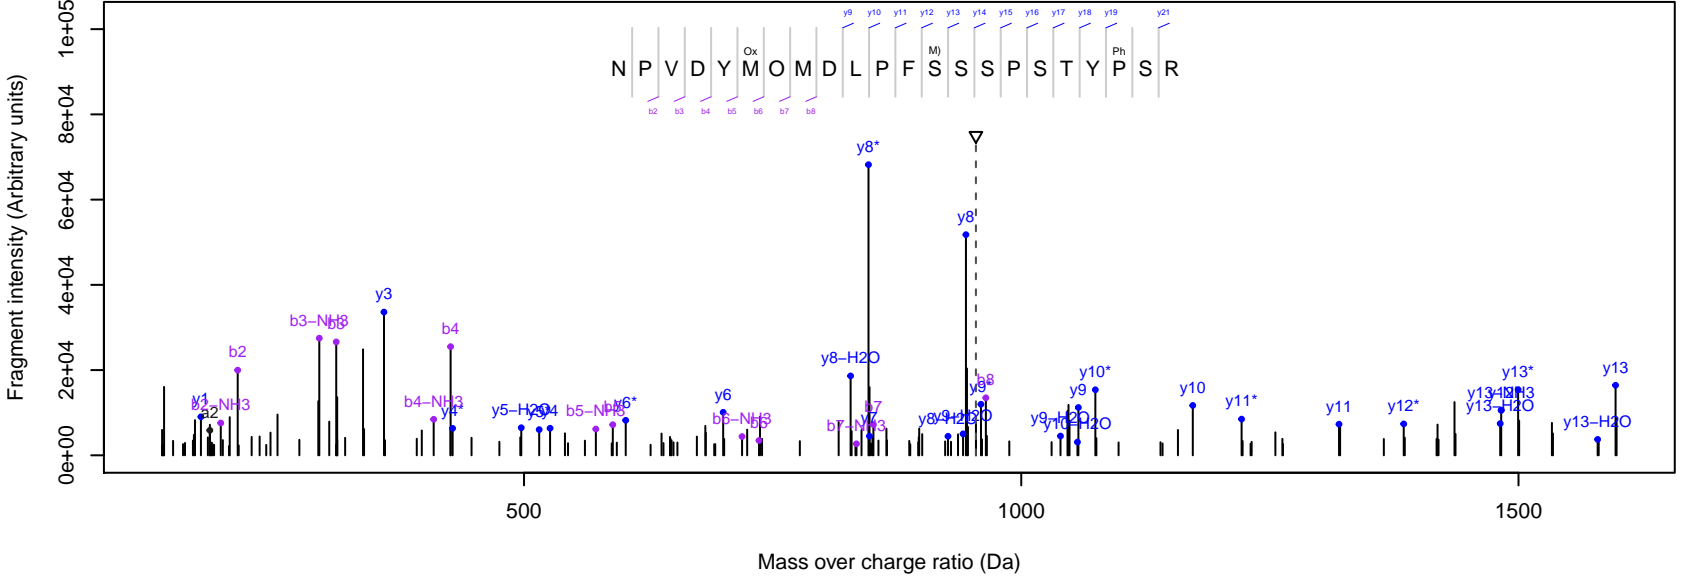

IDIS(Phospho (STY))PSTFR-2+

Source : QE3\_201126\_FR\_TiOx\_hum\_tissue\_Urea\_RNAB\_N Scan : 34924

Andromeda score : 216.26

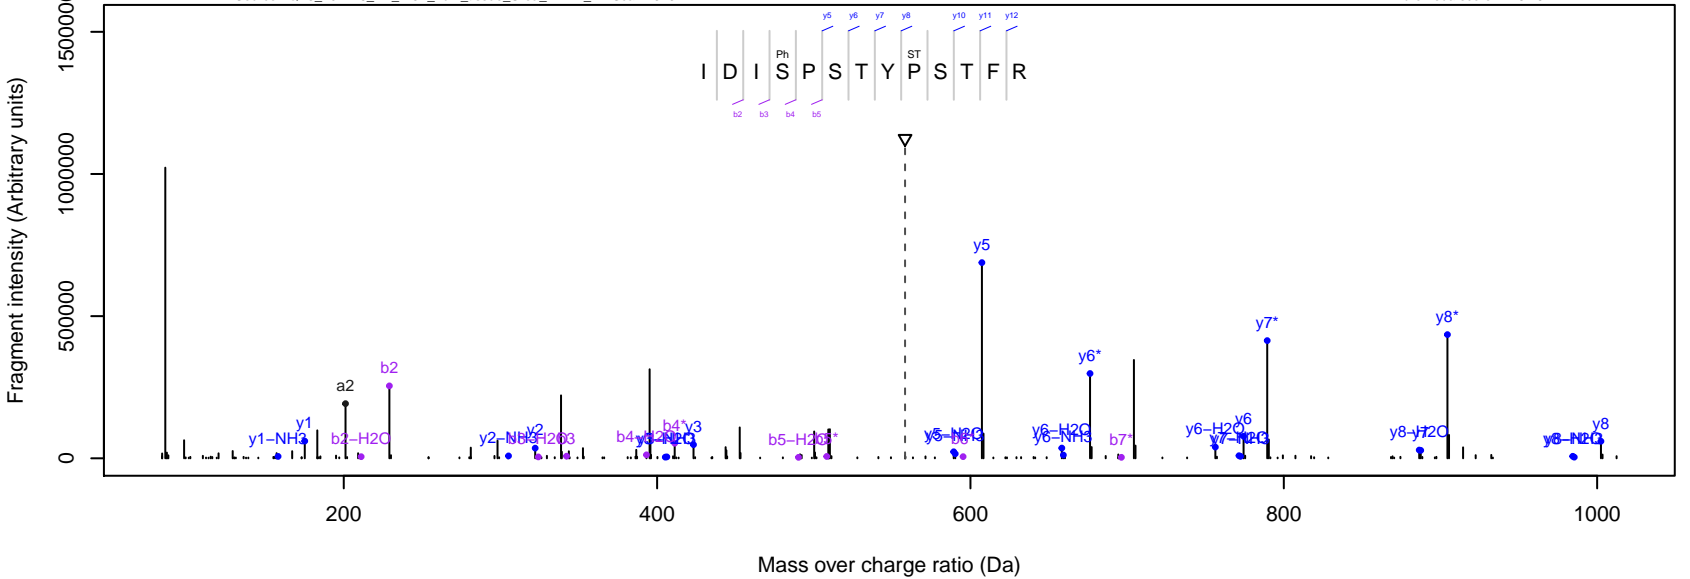

**EIQNGNLHES(Phospho (STY))DSESVPR-3+**

Source : QE3\_201126\_FR\_TiOx\_hum\_tissue\_Urea\_RNAB\_B Scan : 14662

Andromeda score : 215.98

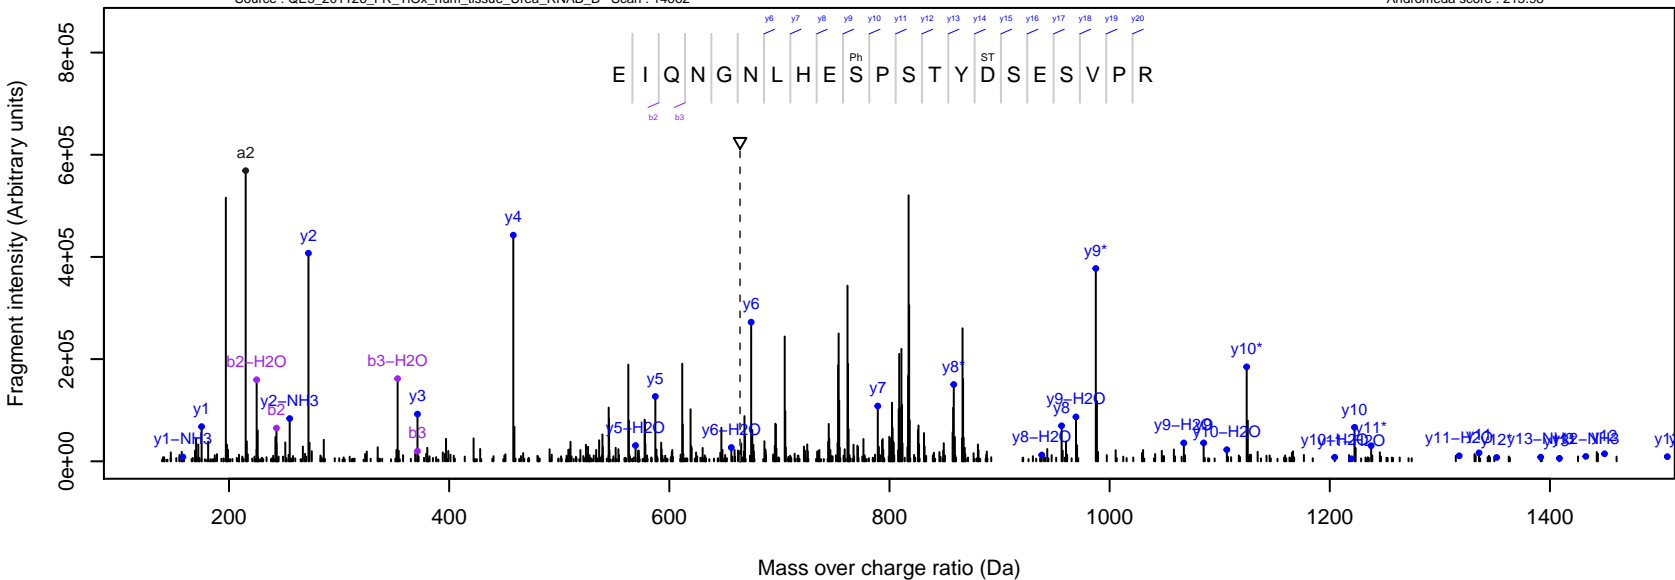

**GDHAS(Phospho (STY))LENEKPGTGDVCSAPAGR-3+**

Source : QE3\_201126\_FR\_TiOx\_hum\_tissue\_Urea\_RNAB\_H Scan : 12042

Andromeda score : 215.93

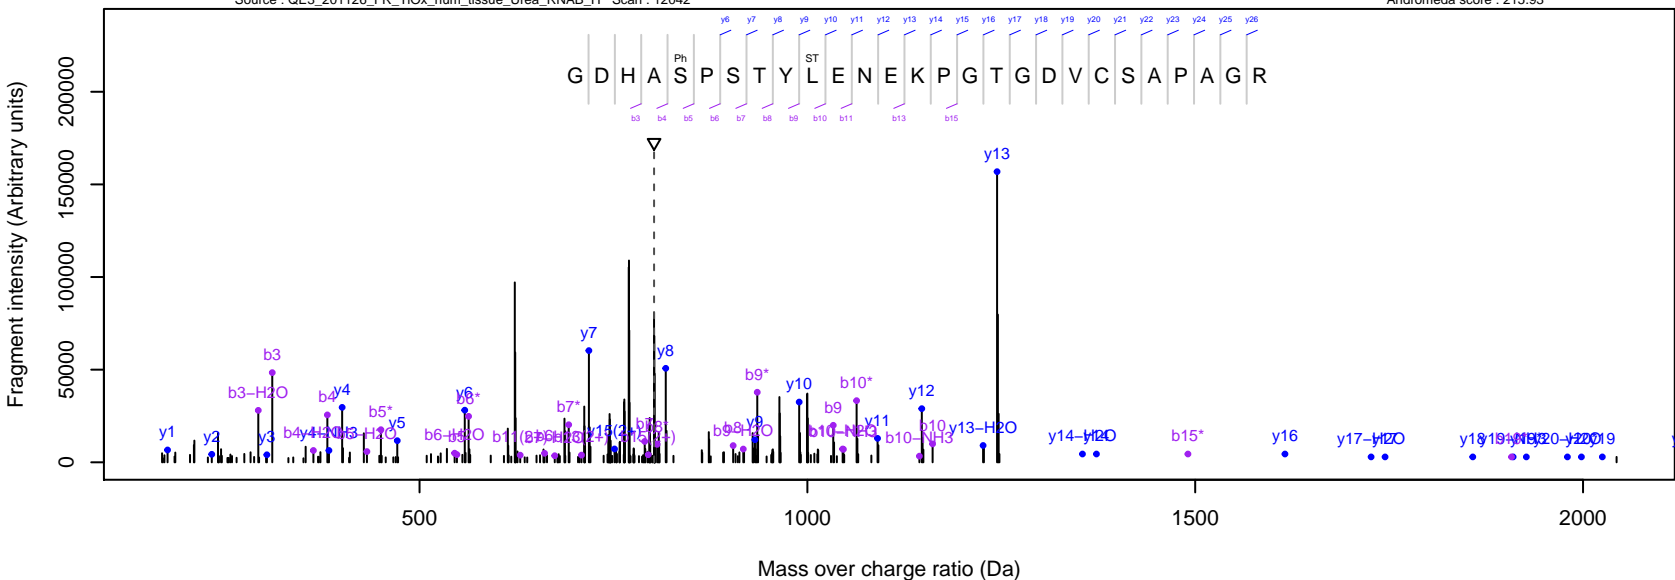

**KAVAEEDNGSIGEETDSS(Phospho (STY))PGRK-3+**

Source : QE3\_201126\_FR\_TiOx\_hum\_tissue\_Urea\_RNAB\_N Scan : 7834

Andromeda score : 215.93

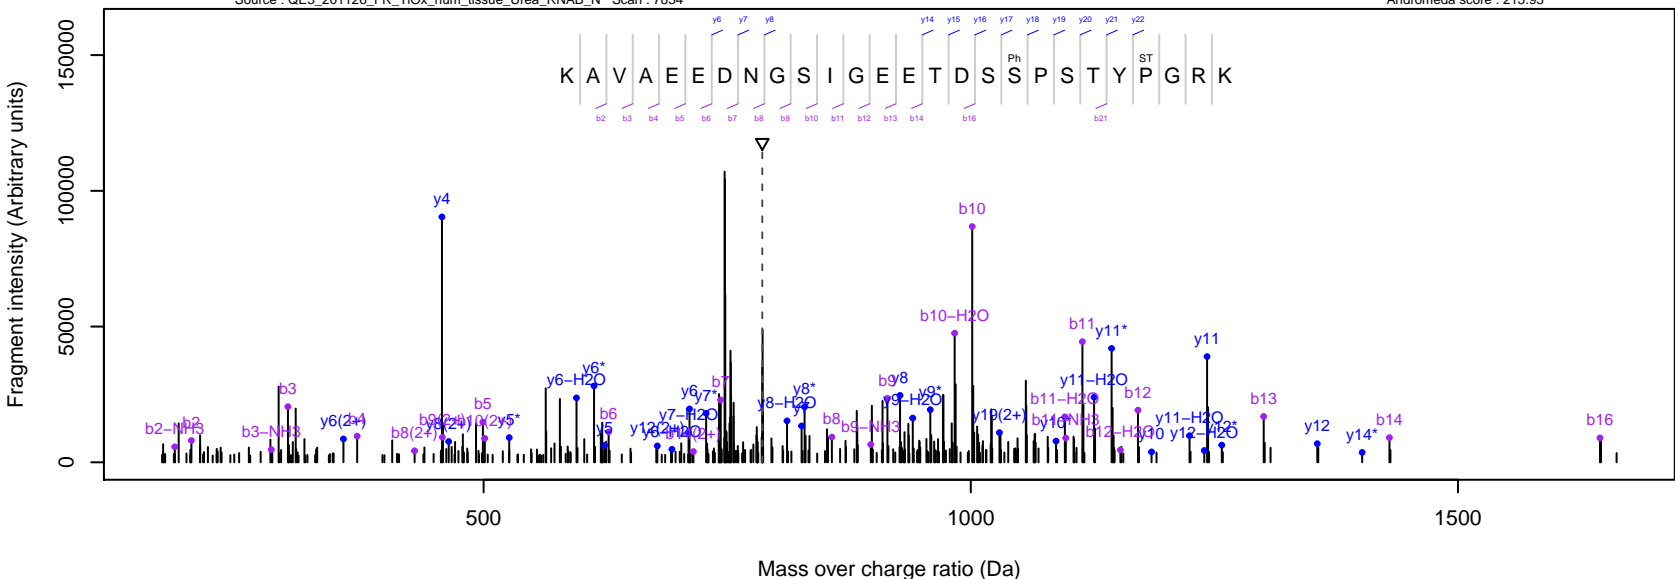

SLS(Phospho (STY))PGGAALGYR-2+

Source : QE3\_201126\_FR\_TIOx\_hum\_tissue\_Urea\_RNAB\_H Scan : 26624

Andromeda score : 215.71

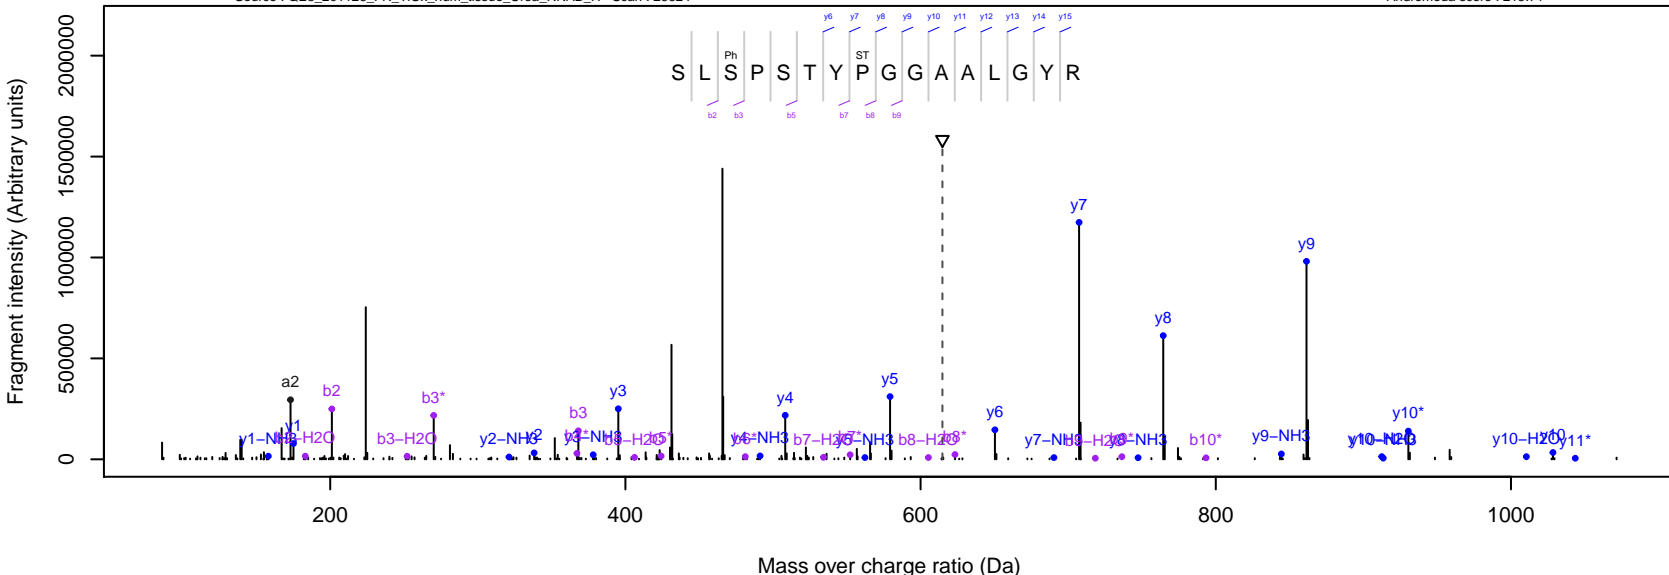

KEDS(Phospho (STY))DEEEDDS(Phospho (STY))EEDEDEDEDEDEDEIEPAAM(Oxidation (M))K-4+

Source : QE3\_201126\_FR\_TIOx\_hum\_tissue\_Urea\_RNAB\_H Scan : 25183

Andromeda score : 215.58

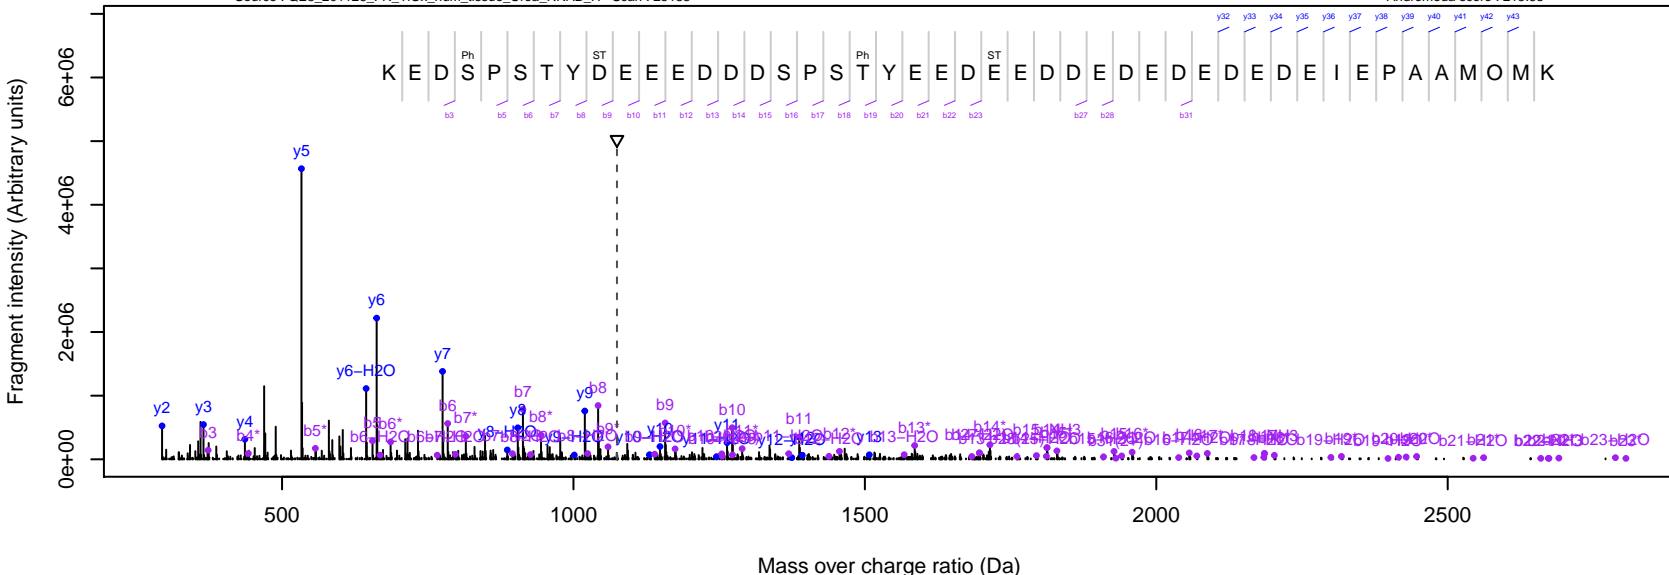

EGHSLEM(Oxidation (M))ENENLVENGADS(Phospho (STY))DEDDNSFLK-3+

Source : QE3\_201126\_FR\_TIOx\_hum\_tissue\_Urea\_RNAB\_N Scan : 34841

Andromeda score : 215.57

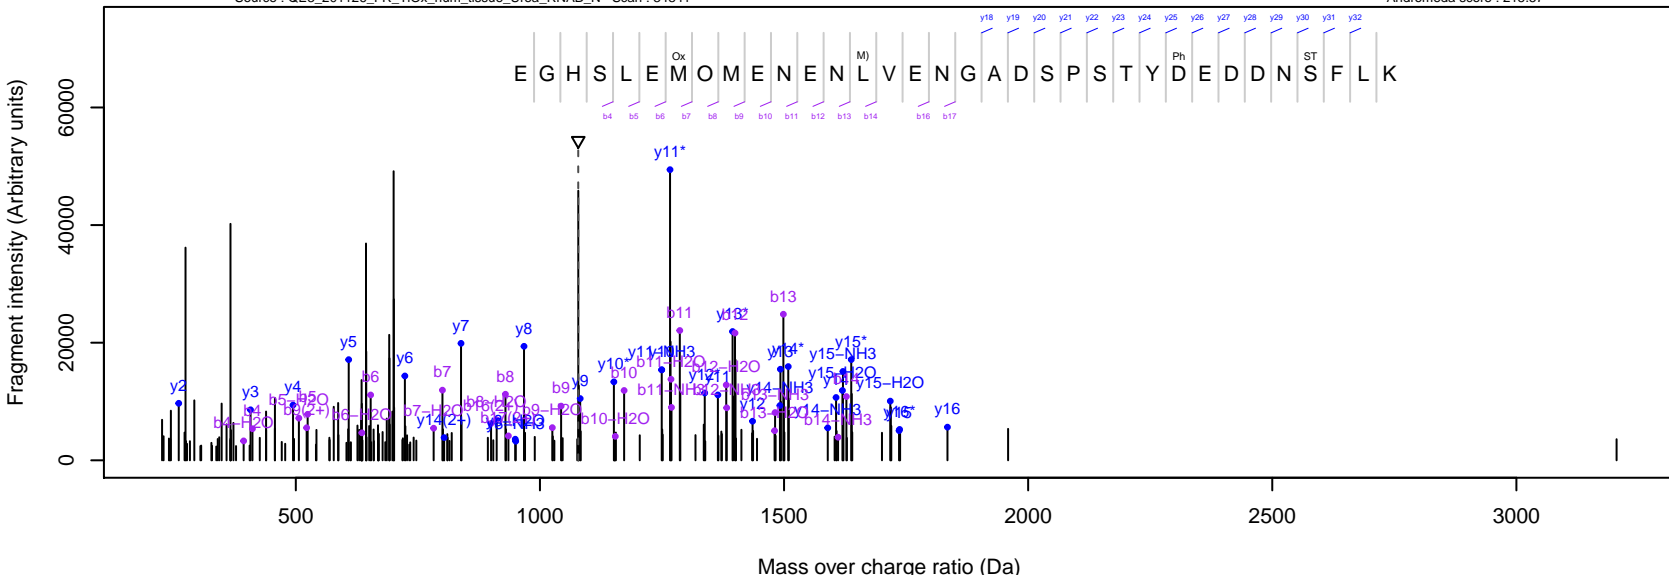

**QVQS(Phospho (STY))LTCEVDALKGTNESLER-3+**

Source : QE3\_201126\_FR\_TiOx\_hum\_tissue\_Urea\_RNAB\_N Scan : 37824

Andromeda score : 215.42

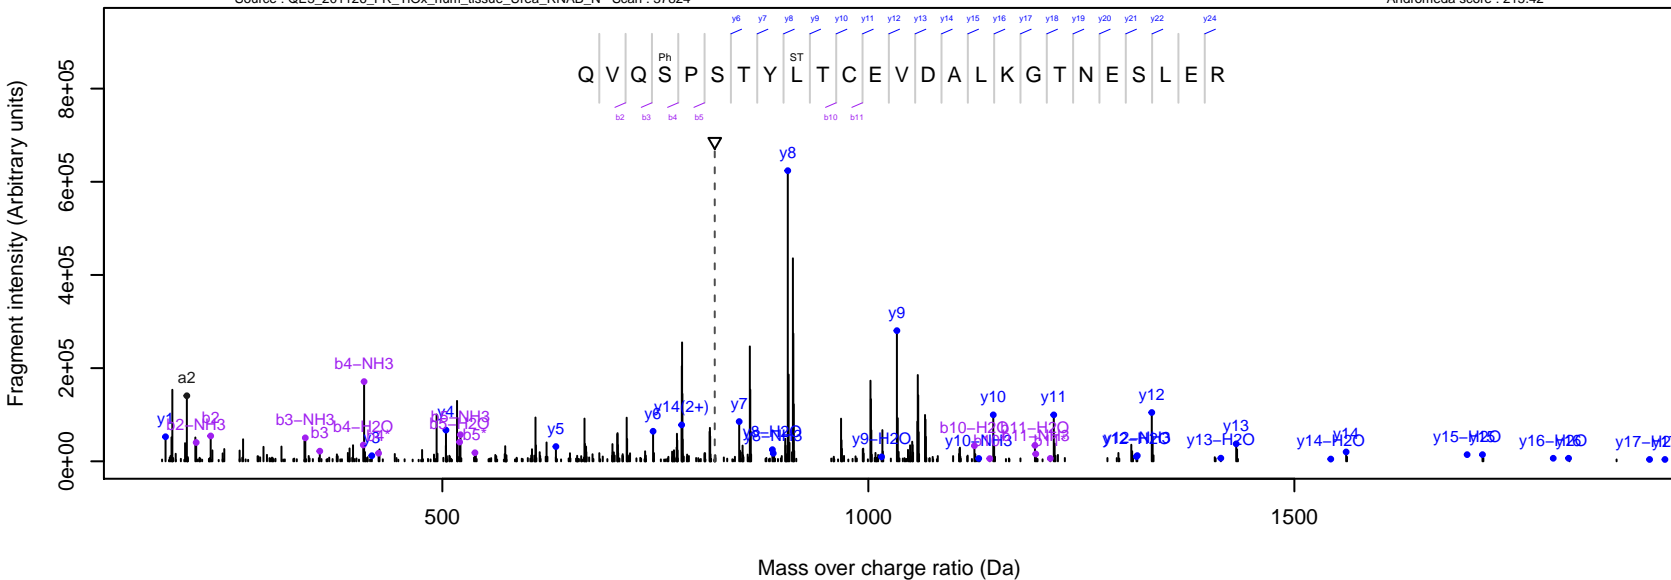

**SVSEINS(Phospho (STY))DDELSGK-2+**

Source : QE3\_201126\_FR\_TiOx\_hum\_tissue\_Urea\_RNAB\_H Scan : 19070

Andromeda score : 215.23

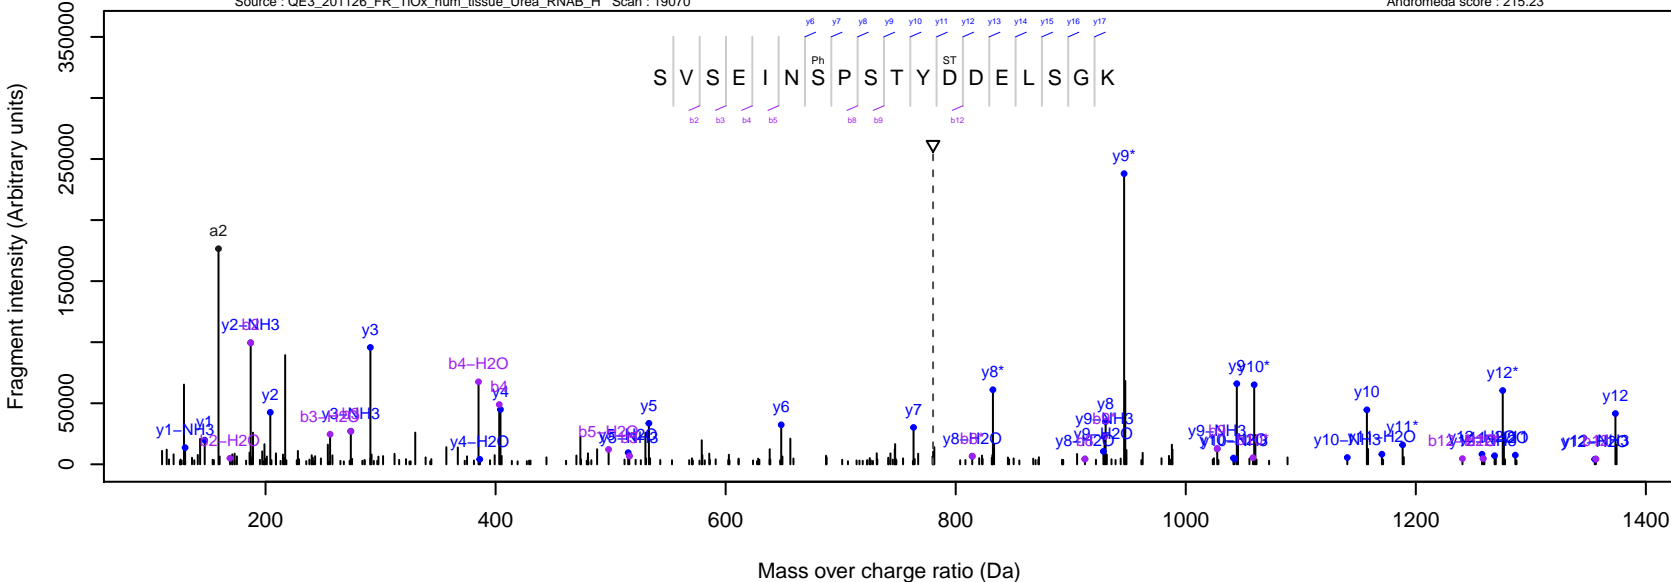

**FFDS(Phospho (STY))EDEDFEILSL-2+**

Source : QE3\_201126\_FR\_TiOx\_hum\_tissue\_Urea\_RNAB\_N Scan : 63602

Andromeda score : 215.08

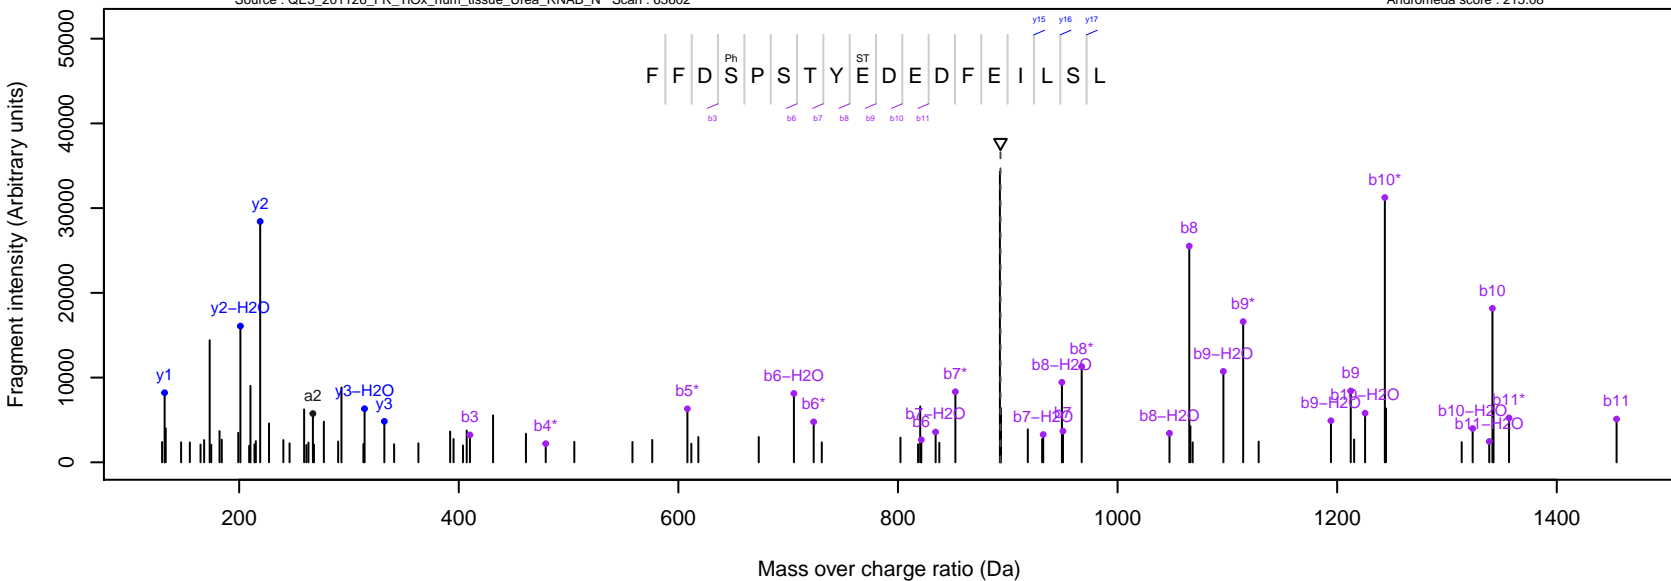

**KNS(Phospho (STY))AIPSELNEKQLVYTNK-3+**

Source : QE3\_201126\_FR\_TiOx\_hum\_tissue\_Urea\_RNAB\_B Scan : 21733

Andromeda score : 215.08

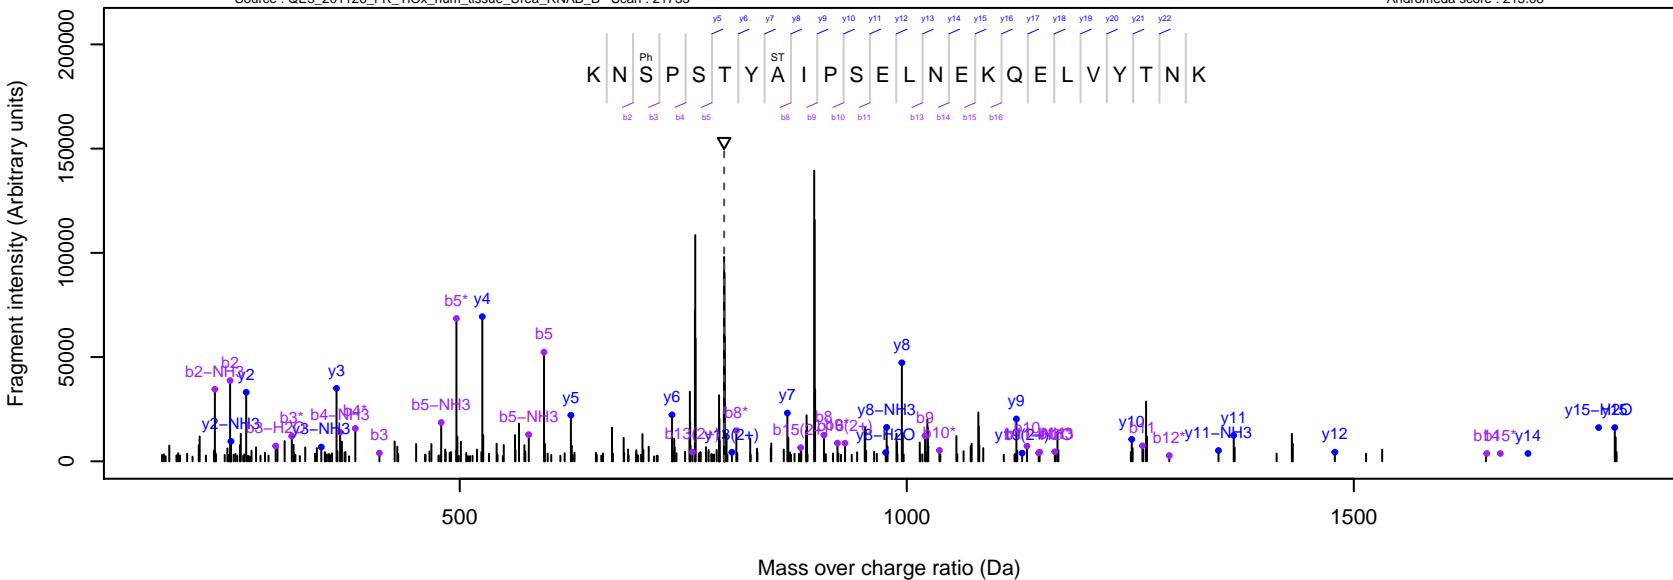

**KPS(Phospho (STY))EEEEYIRK-3+**

Source : QE3\_201126\_FR\_TiOx\_hum\_tissue\_Urea\_RNAB\_H Scan : 9468

Andromeda score : 215.04

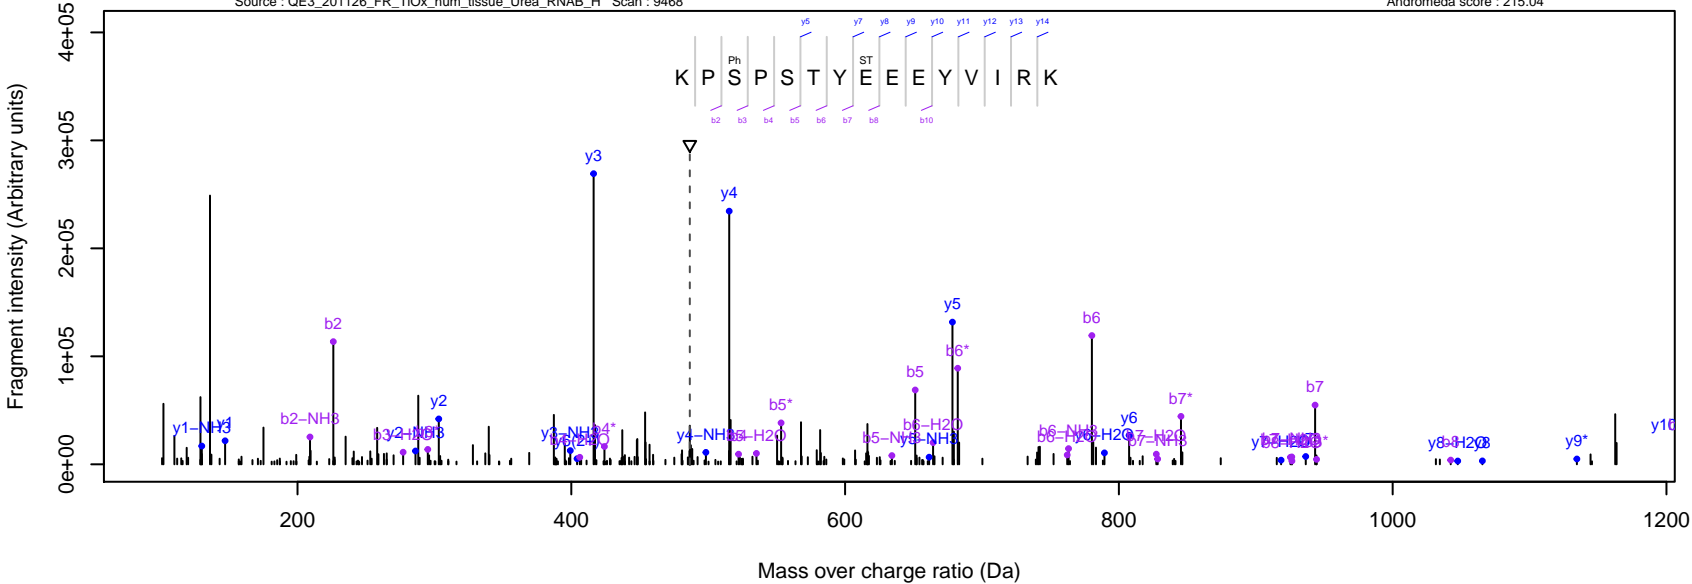

**VSAGEPGSHPS(Phospho (STY))PAPR-2+**

Source : QE3\_201126\_FR\_TiOx\_hum\_tissue\_Urea\_RNAB\_B Scan : 6968

Andromeda score : 214.82

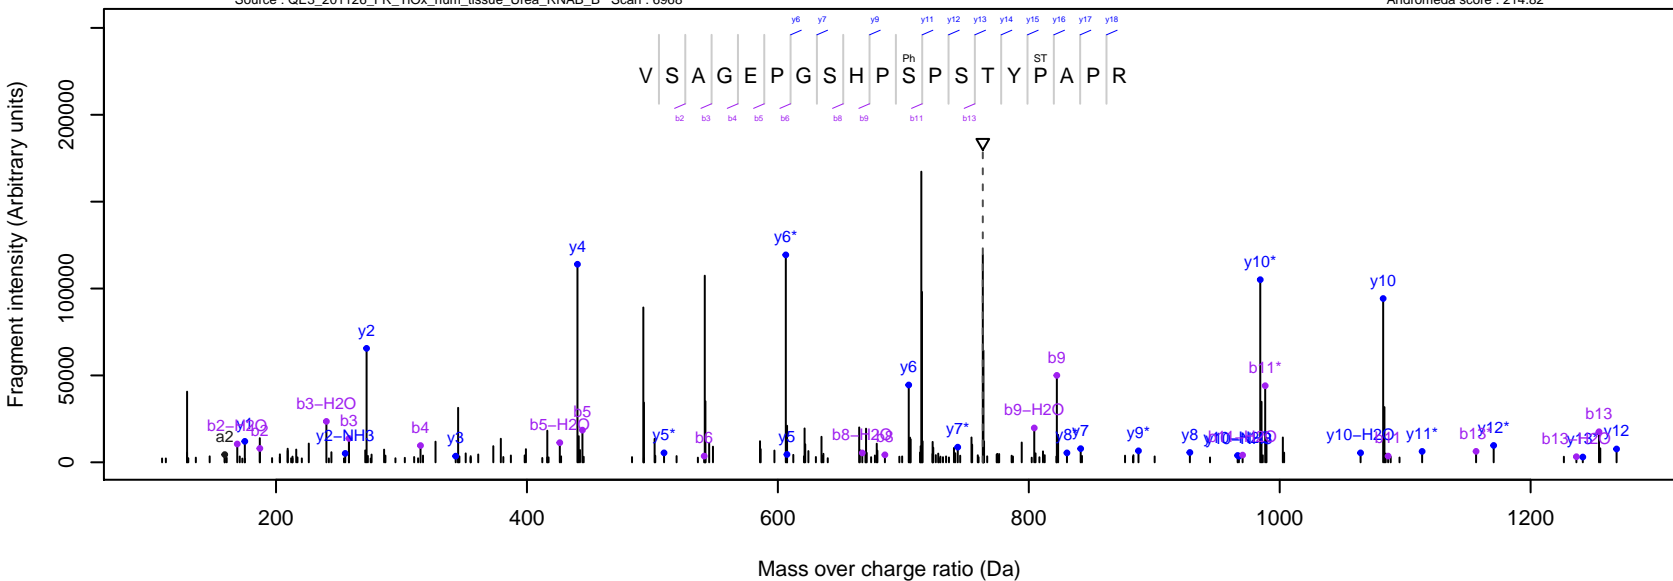

ELSNS(Phospho (STY))PLENSFGSPLEFR-3+

Source : QE3\_201126\_FR\_TIOx\_hum\_tissue\_Urea\_RNAB\_B Scan : 42508

Andromeda score : 214.65

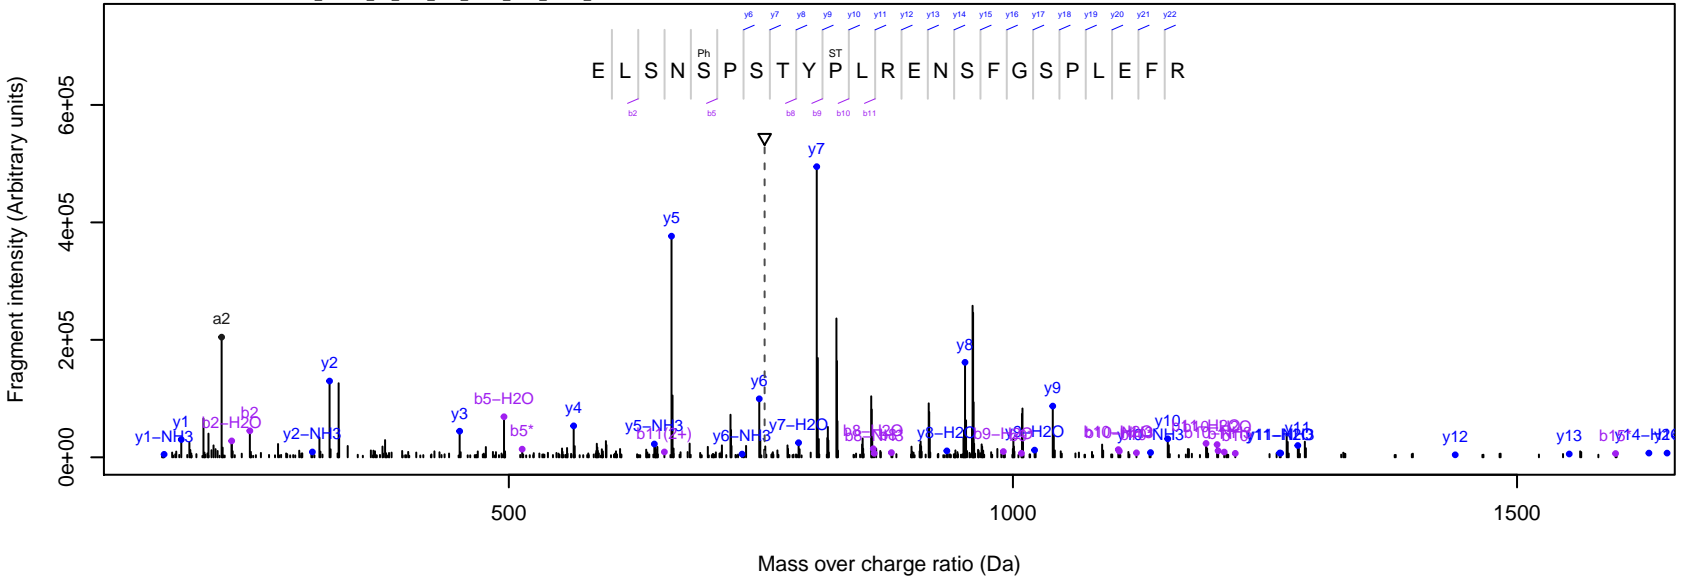

LKS(Phospho (STY))EDEL RPEVDEHTQK-3+

Source : QE3\_201126\_FR\_TIOx\_hum\_tissue\_Urea\_RNAB\_H Scan : 10269

Andromeda score : 214.65

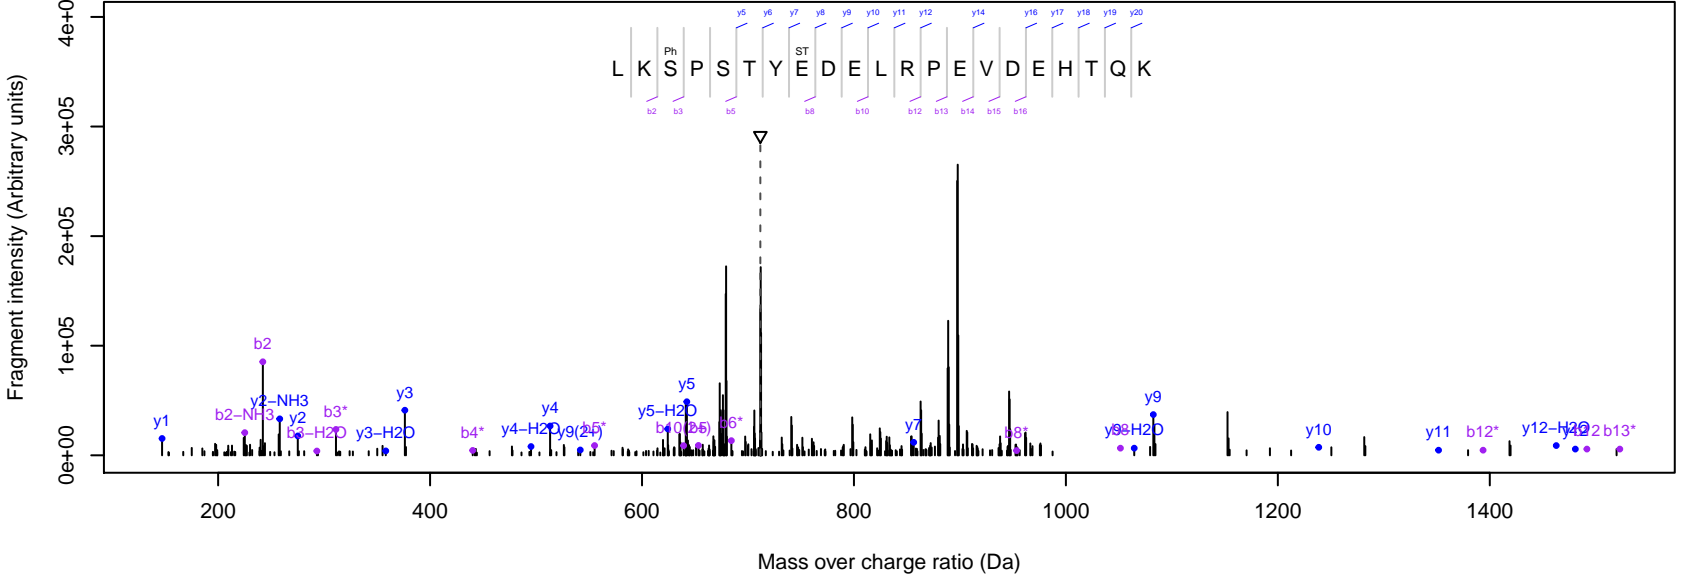

SHS(Phospho (STY))QAS(Phospho (STY))LAGPGVPDPSNR-2+

Source : QE3\_201126\_FR\_TIOx\_hum\_tissue\_Urea\_RNAB\_N Scan : 18881

Andromeda score : 214.52

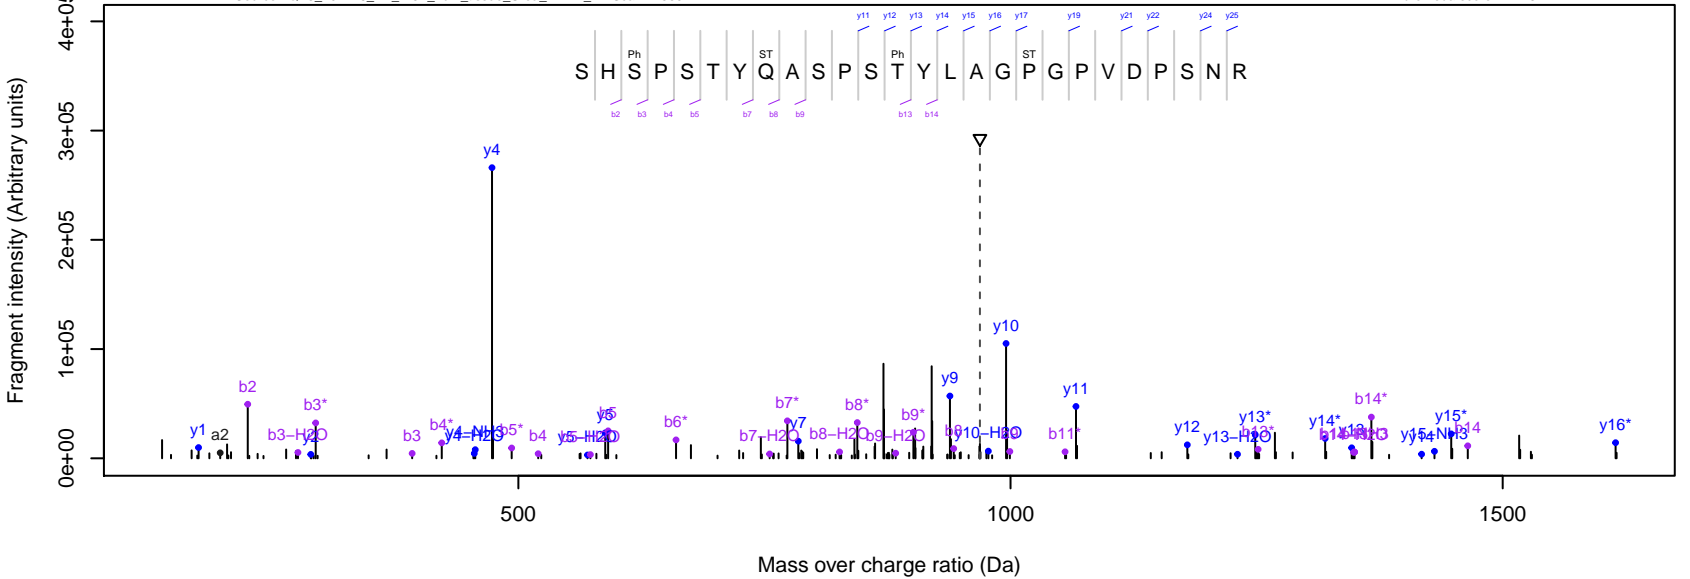

GKAS(Phospho (STY))PFEEQNRDLK-3+

Source : QE3\_201126\_FR\_TiOx\_hum\_tissue\_Urea\_RNAB\_H Scan : 9743

Andromeda score : 214.3

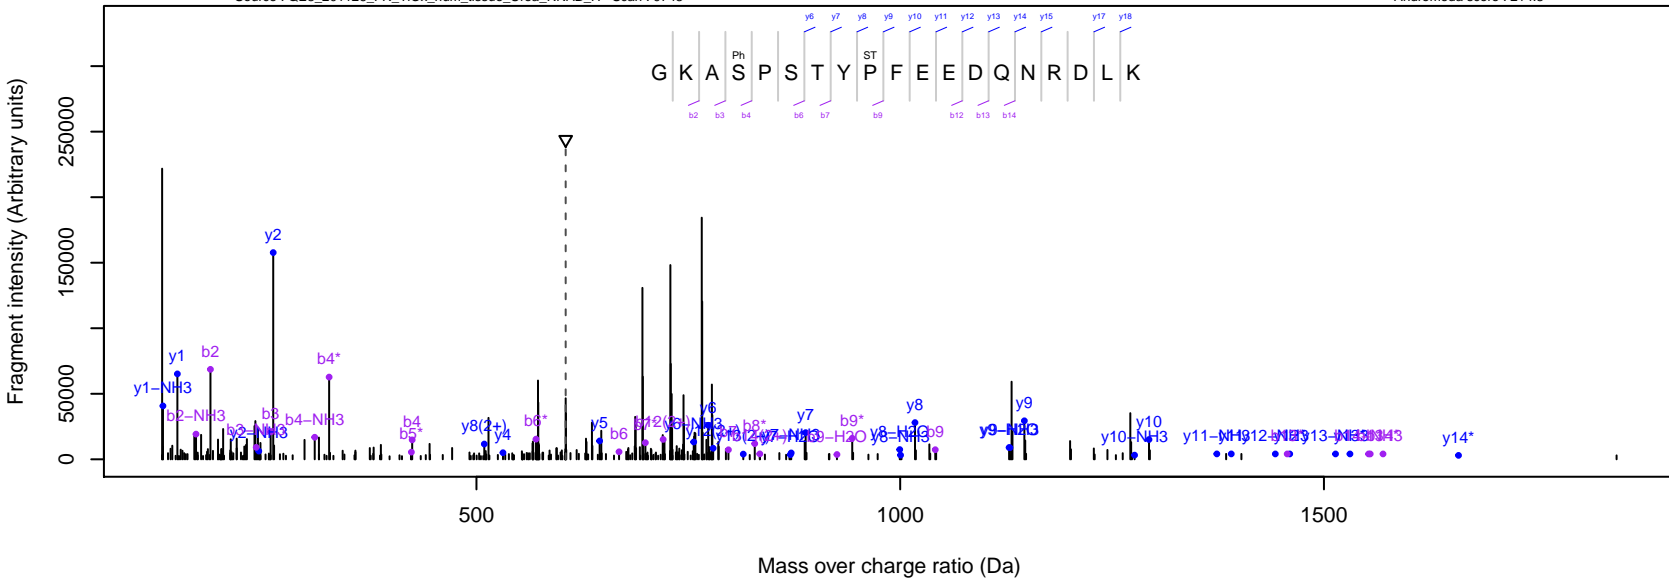

HLGGSGSVVPGS(Phospho (STY))PCLDR-2+

Source : QE3\_201126\_FR\_TiOx\_hum\_tissue\_Urea\_RNAB\_H Scan : 21679

Andromeda score : 214.28

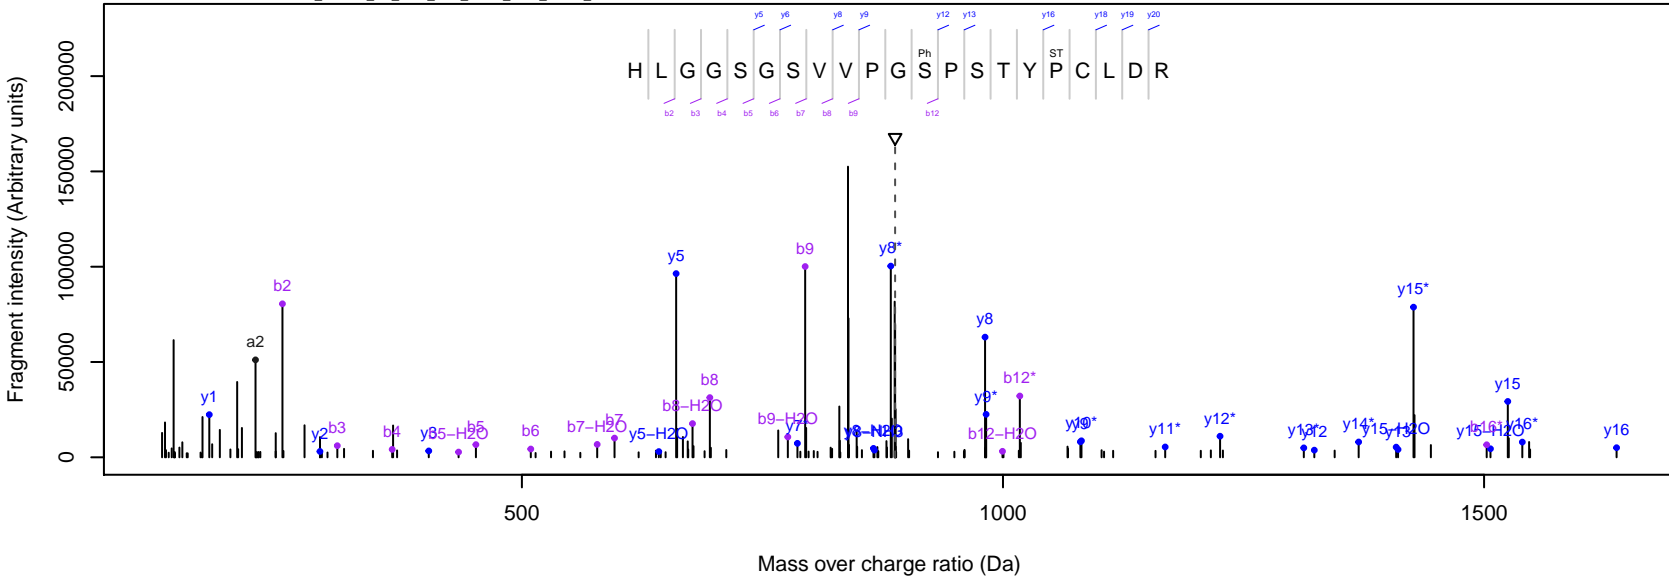

STVLTPM(Oxidation (M))FVETQAS(Phospho (STY))QGTLQTR-3+

Source : QE3\_201126\_FR\_TiOx\_hum\_tissue\_Urea\_RNAB\_H Scan : 41436

Andromeda score : 214.16

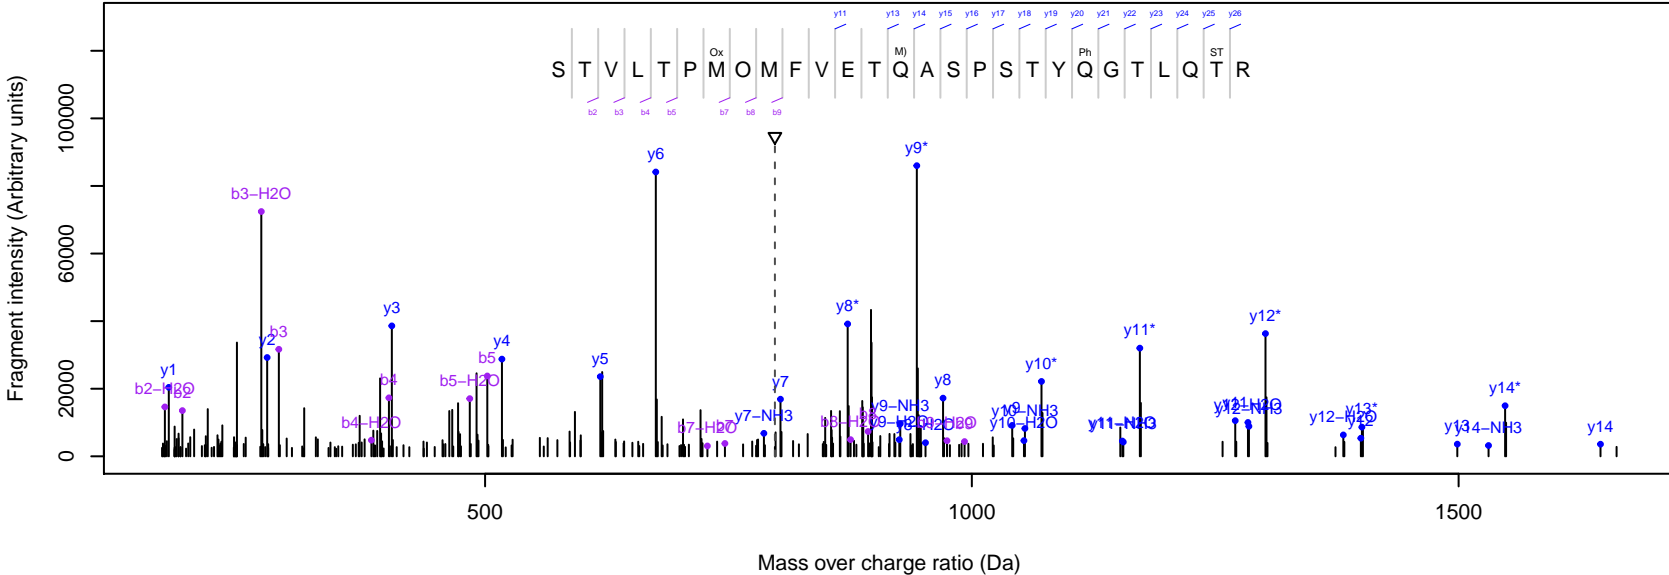



ATEDEGS(Phospho (STY))EQKIPEATNR-3+

Source : QE3\_201126\_FR\_TIOx\_hum\_tissue\_Urea\_RNAB\_B Scan : 10353

Andromeda score : 214.14

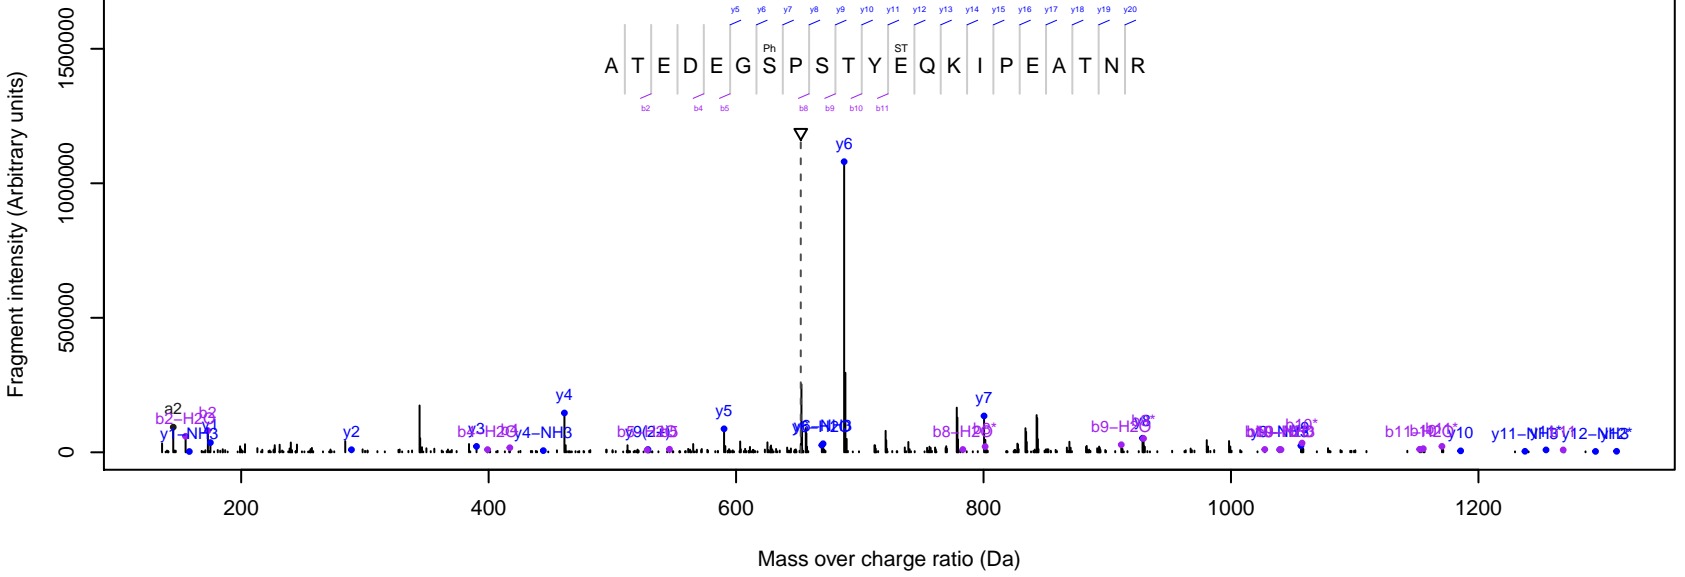

SGS(Phospho (STY))AAQAEGLCK-2+

Source : QE3\_201126\_FR\_TIOx\_hum\_tissue\_Urea\_RNAB\_H Scan : 9938

Andromeda score : 213.99

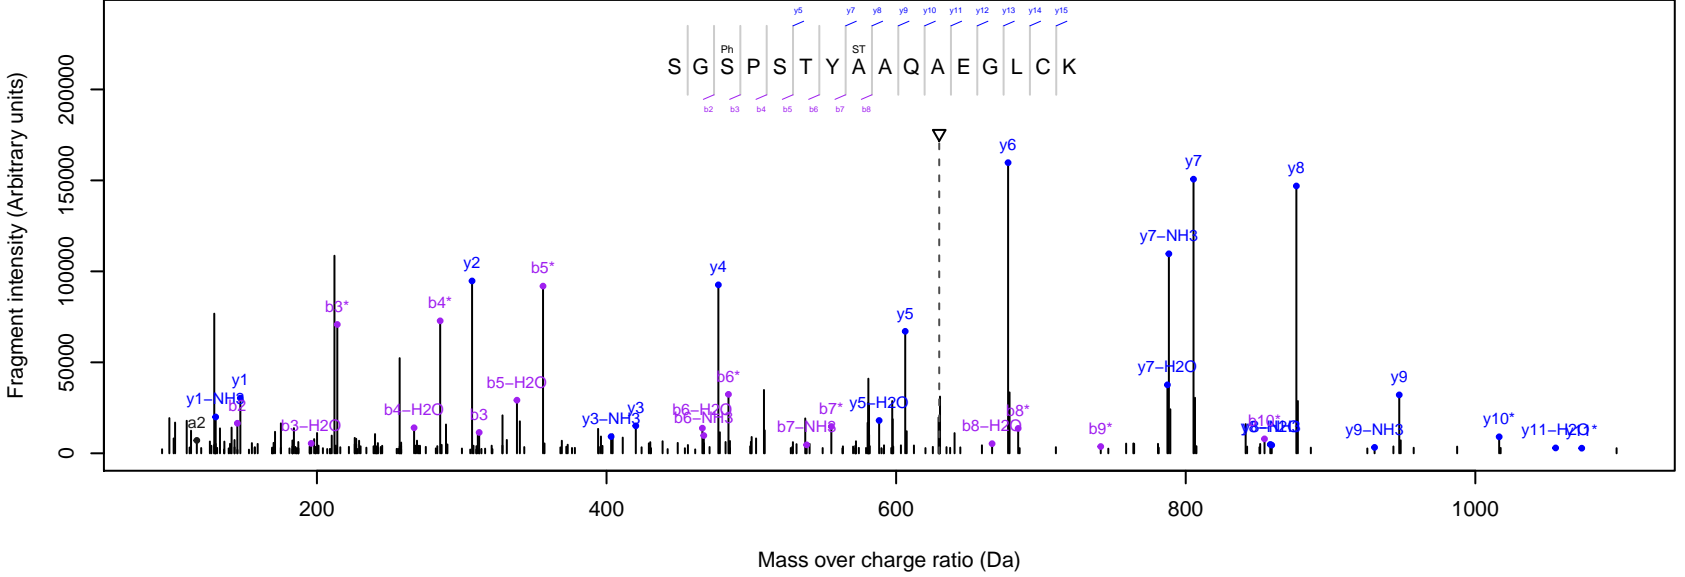

GQPGNAYDGAGQPSAAYLSMSQGAVANANST(Phospho (STY))PPPYER-3+

Source : QE3\_201126\_FR\_TIOx\_hum\_tissue\_Urea\_RNAB\_N Scan : 43796

Andromeda score : 213.94

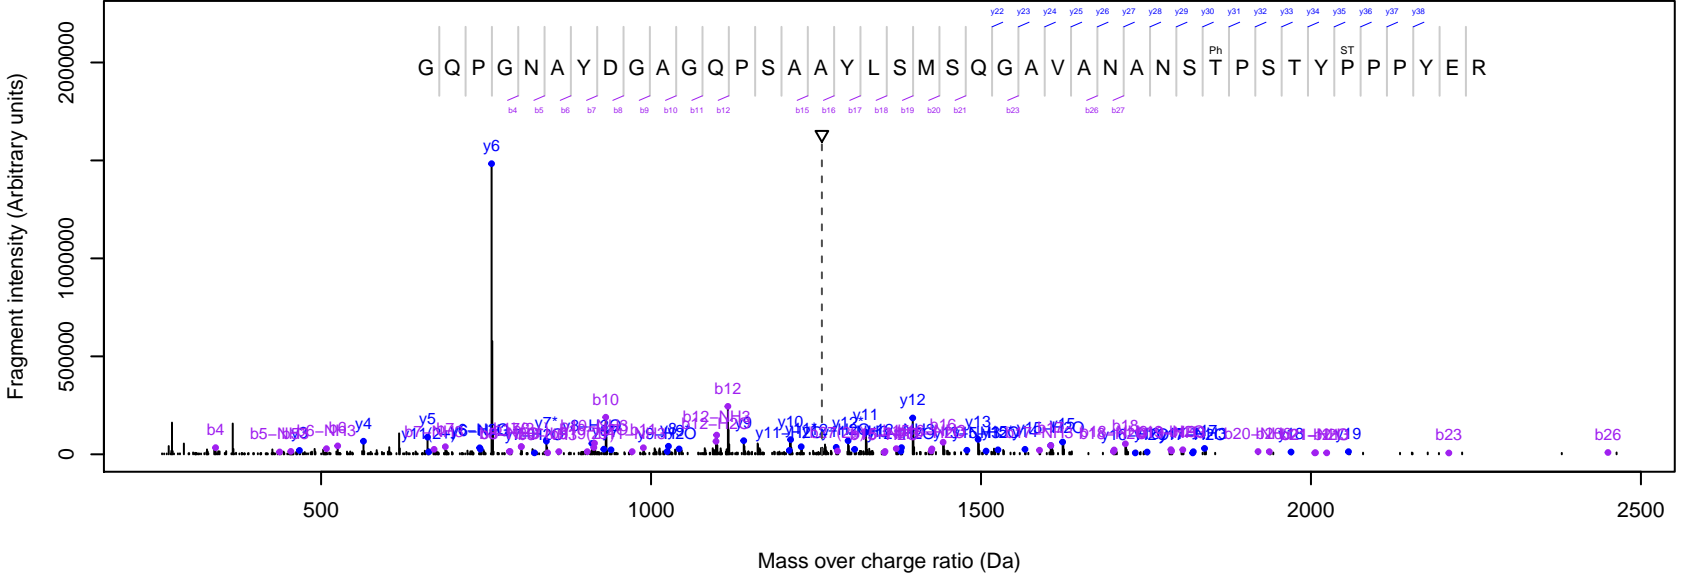

KSEAGHASS(Phospho (STY))PDSEVTSLCQK-3+

Source : QE3\_201126\_FR\_TiOx\_hum\_tissue\_Urea\_RNAB\_N Scan : 11904

Andromeda score : 213.88

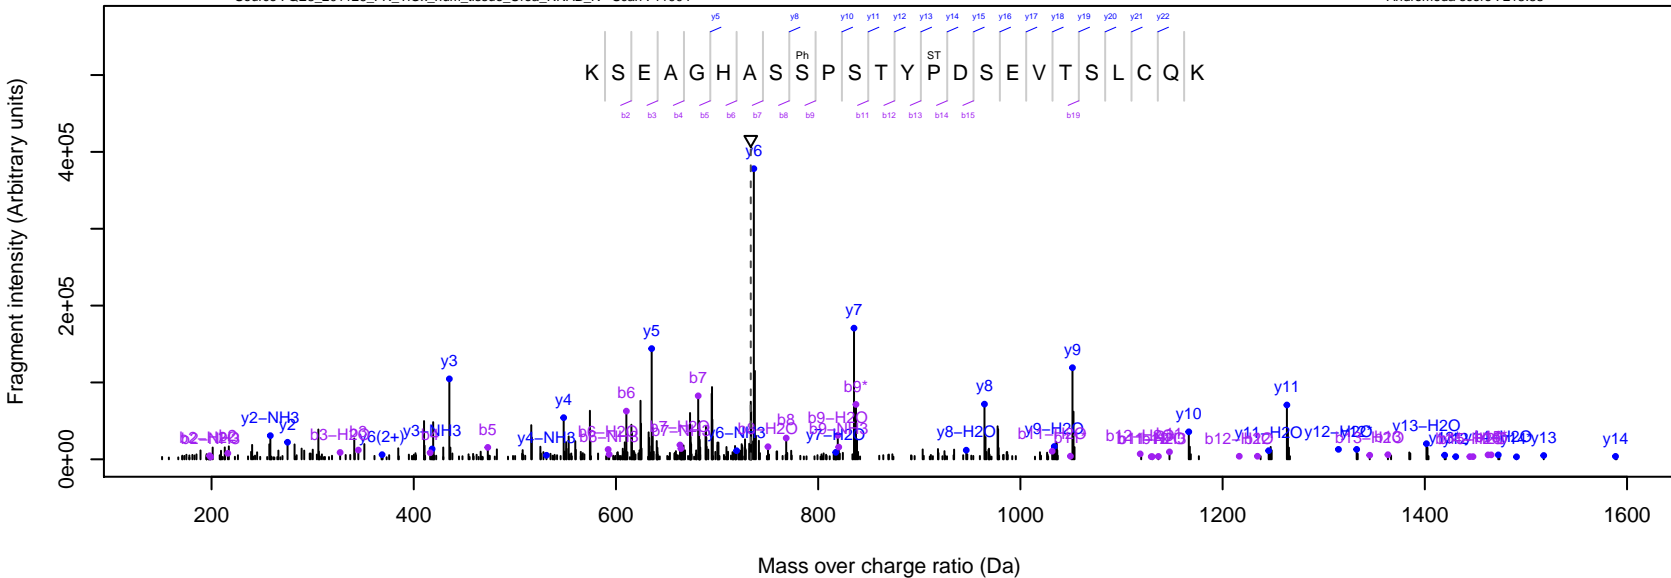

VNVTVDIRPAS(Phospho (STY))PATETVPAFSER-3+

Source : QE3\_201126\_FR\_TiOx\_hum\_tissue\_Urea\_RNAB\_B Scan : 41667

Andromeda score : 213.77

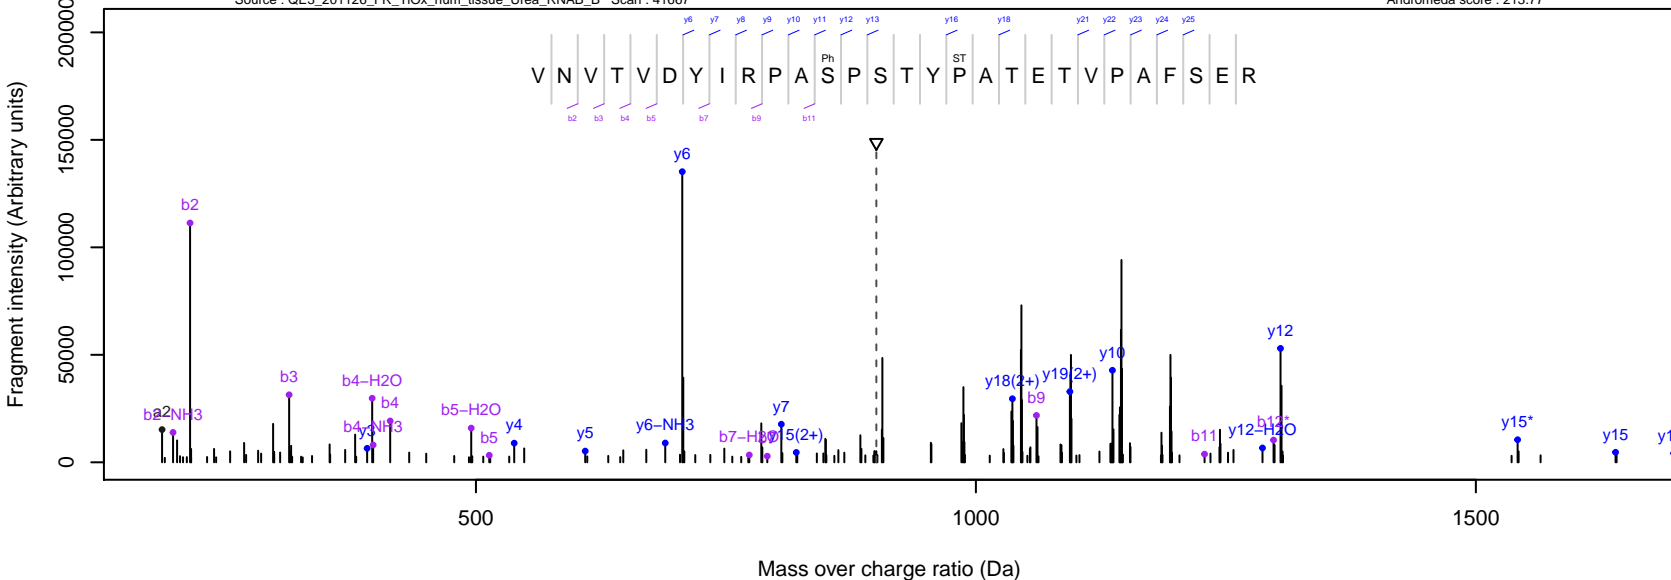

KIS(Phospho (STY))GTTALQEALK-2+

Source : QE3\_201126\_FR\_TiOx\_hum\_tissue\_Urea\_RNAB\_B Scan : 25798

Andromeda score : 213.71

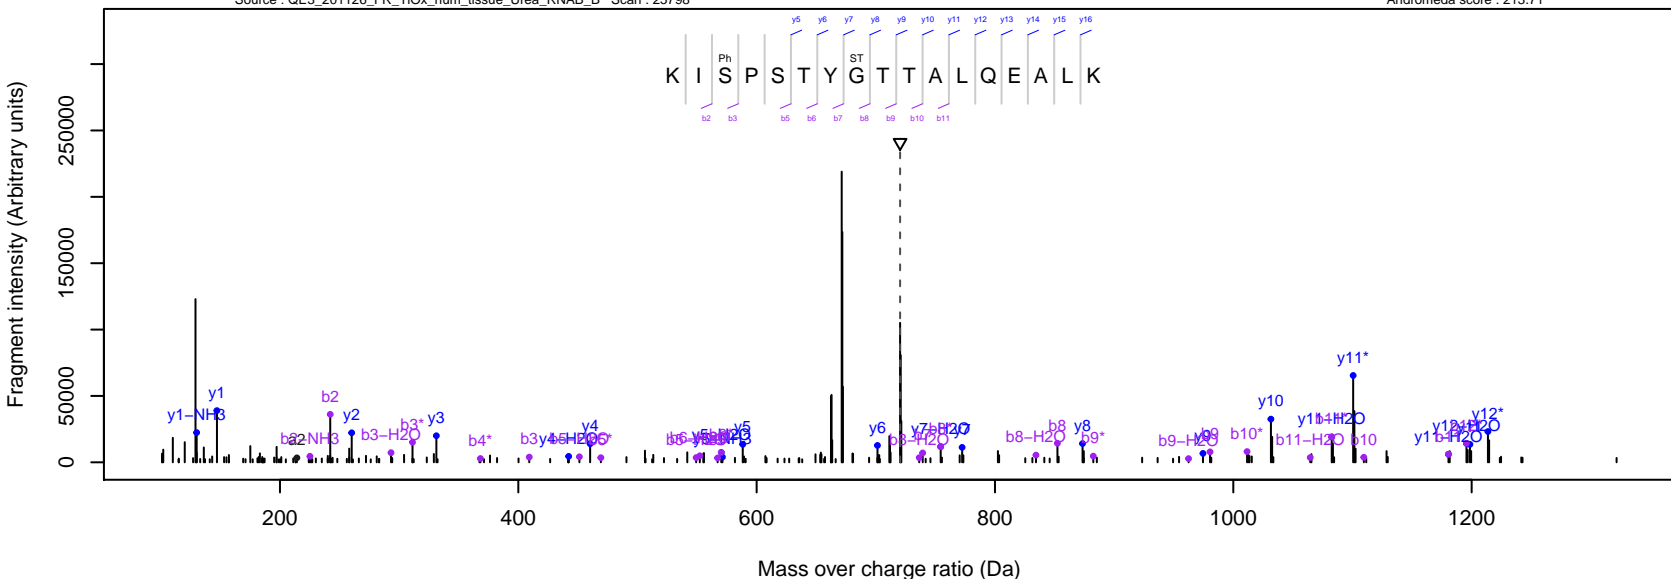

LKEQECVDYGDLPFADIPNDSPSTYPFQIVK-3+

Source : QE3\_201126\_FR\_TIOx\_hum\_tissue\_Urea\_RNAB\_N Scan : 52732

Andromeda score : 213.51

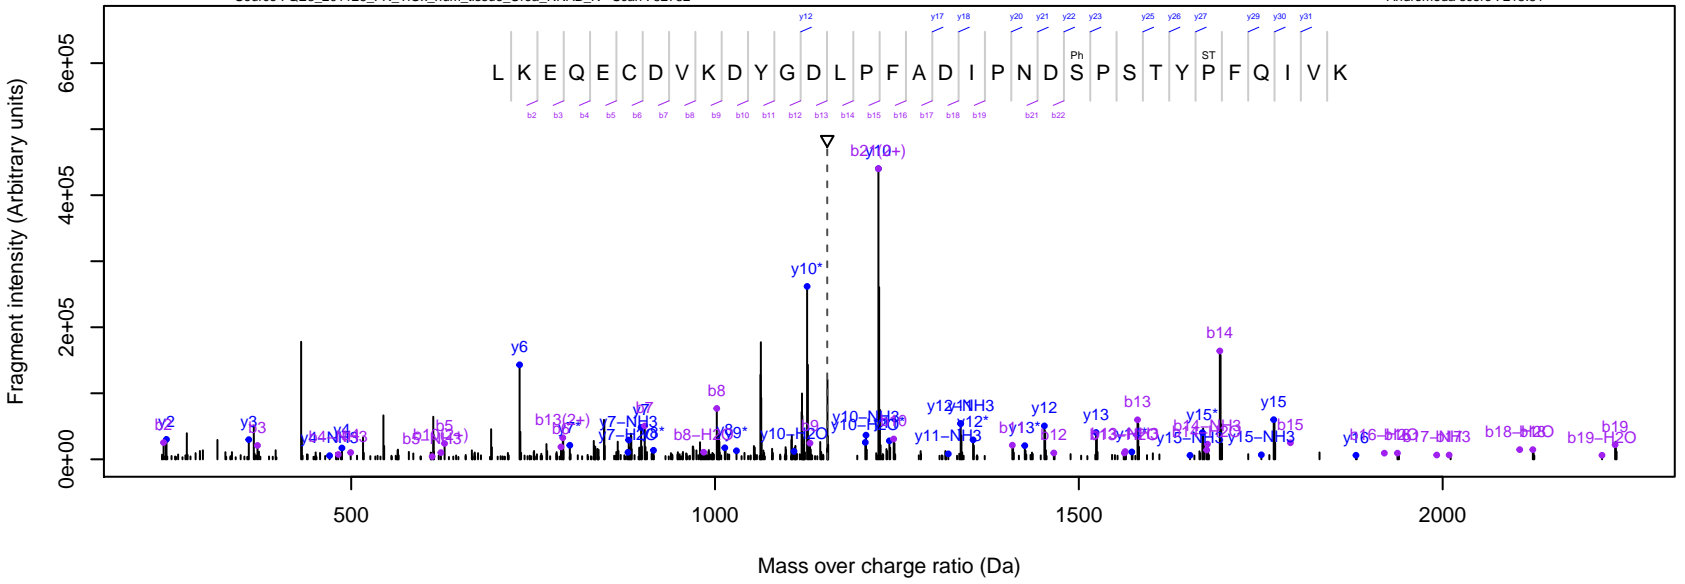

RQDS(Phospho (STY))AGPVLGDGAR-2+

Source : QE3\_201126\_FR\_TIOx\_hum\_tissue\_Urea\_RNAB\_H Scan : 11363

Andromeda score : 213.51

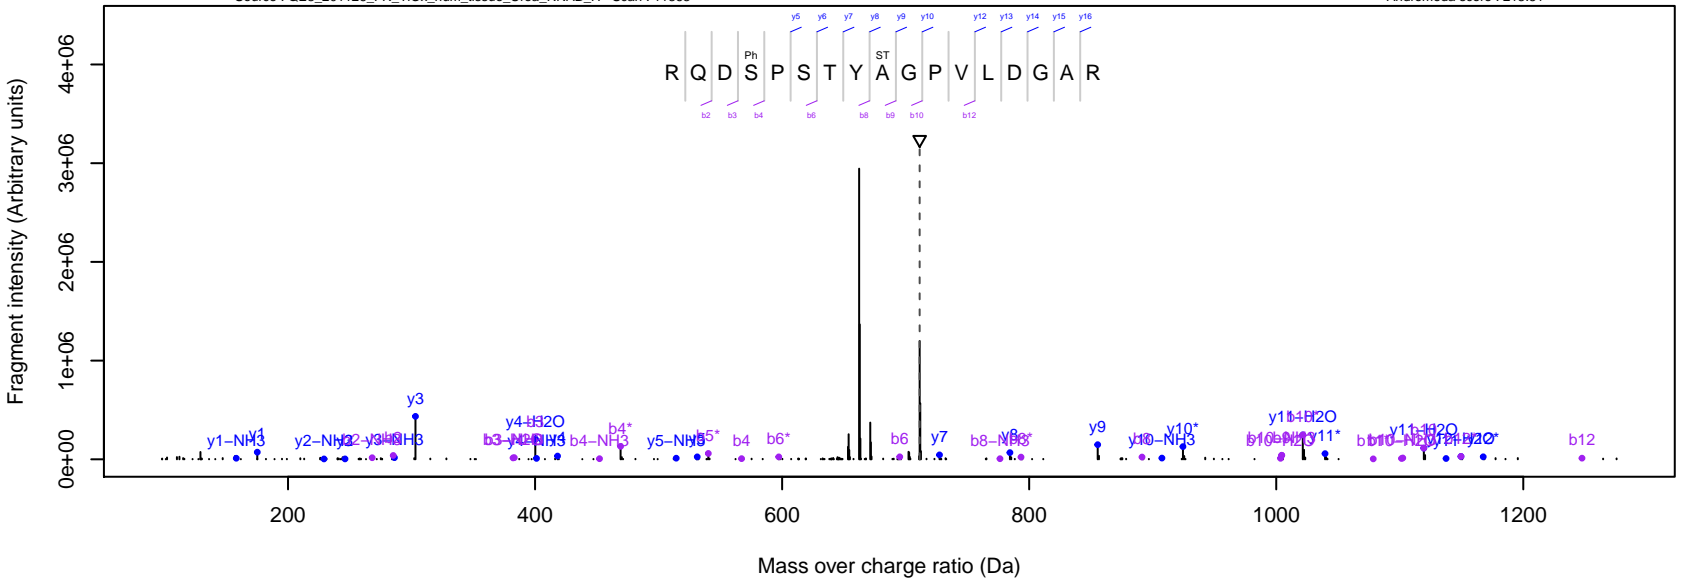

ALES(Phospho (STY))PERPFLAILGGAK-3+

Source : QE3\_201126\_FR\_TIOx\_hum\_tissue\_Urea\_RNAB\_H Scan : 53401

Andromeda score : 213.45

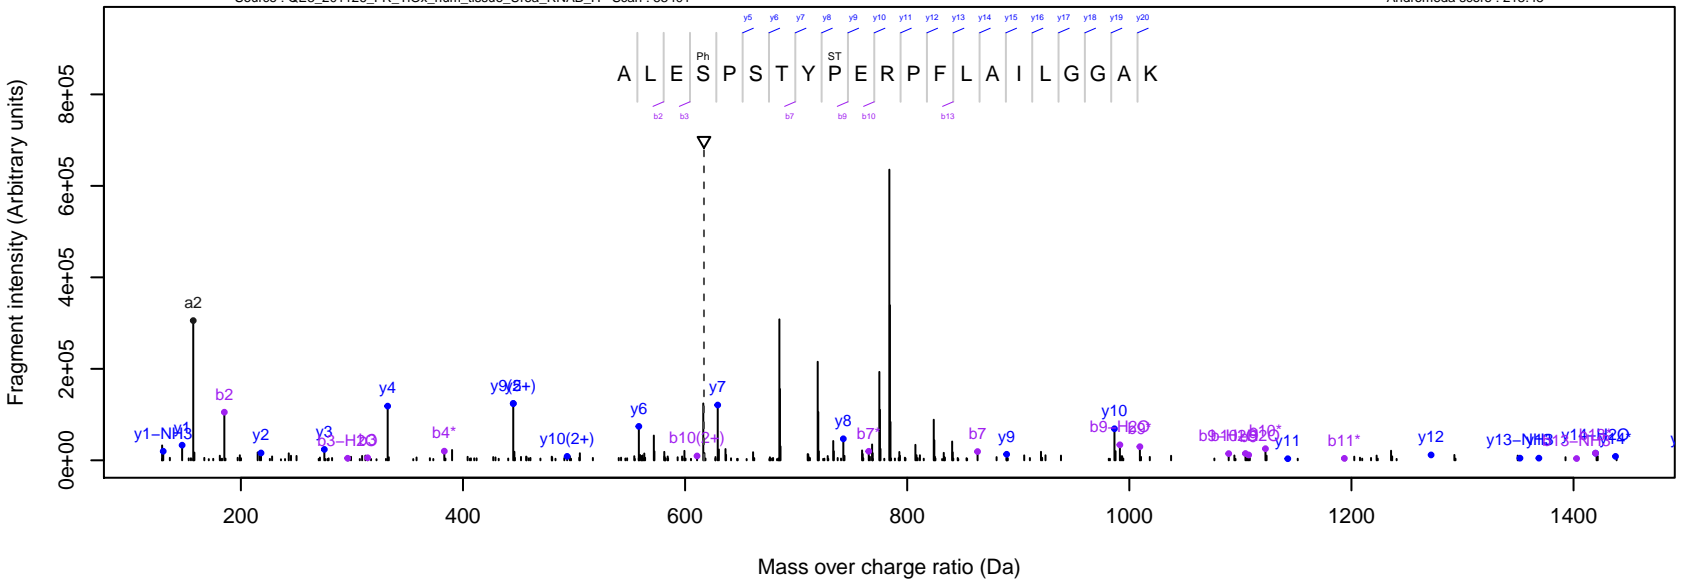

LGPLSAEGTTGLAPAGQT(Phospho (STY))SEESRPR-3+

Source : QE3\_201126\_FR\_TiOx\_hum\_tissue\_Urea\_RNAB\_H Scan : 27696

Andromeda score : 213.44

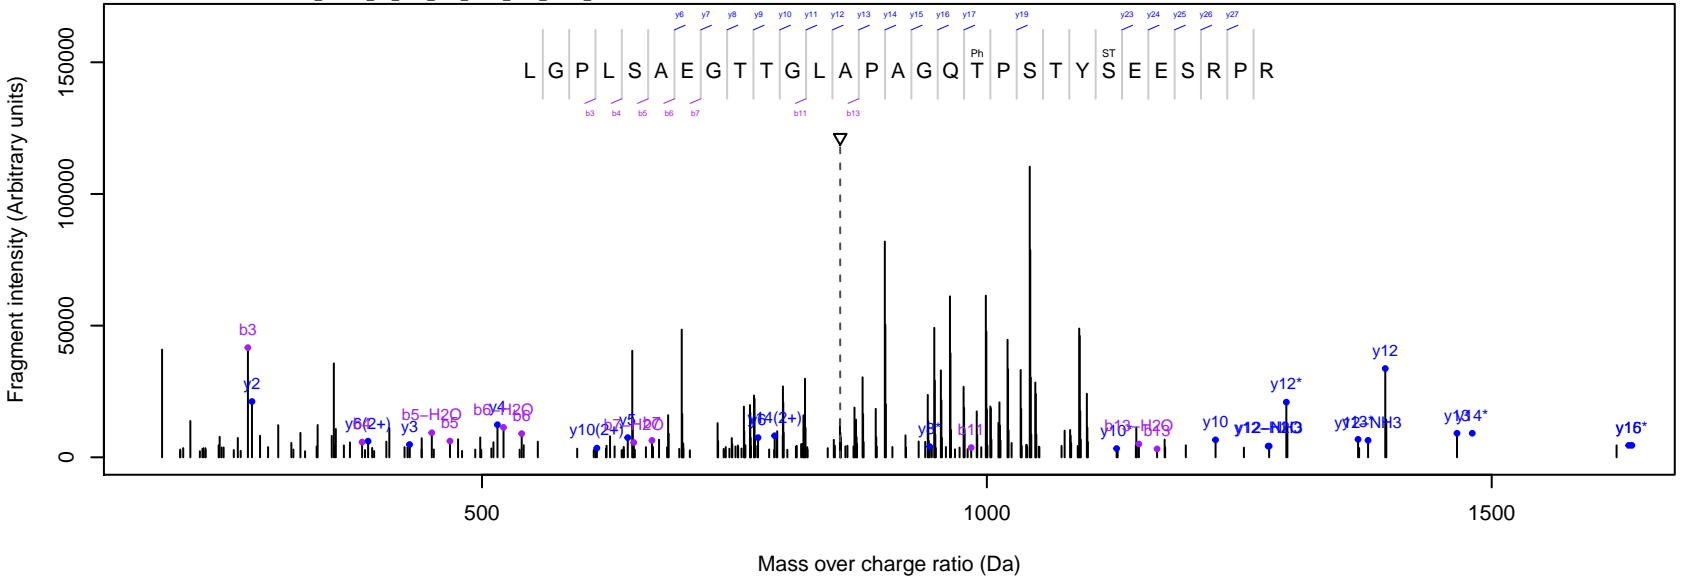

SHVTEEEEEES(Phospho (STY))DS-2+

Source : QE3\_201126\_FR\_TiOx\_hum\_tissue\_Urea\_RNAB\_N Scan : 11321

Andromeda score : 213.18

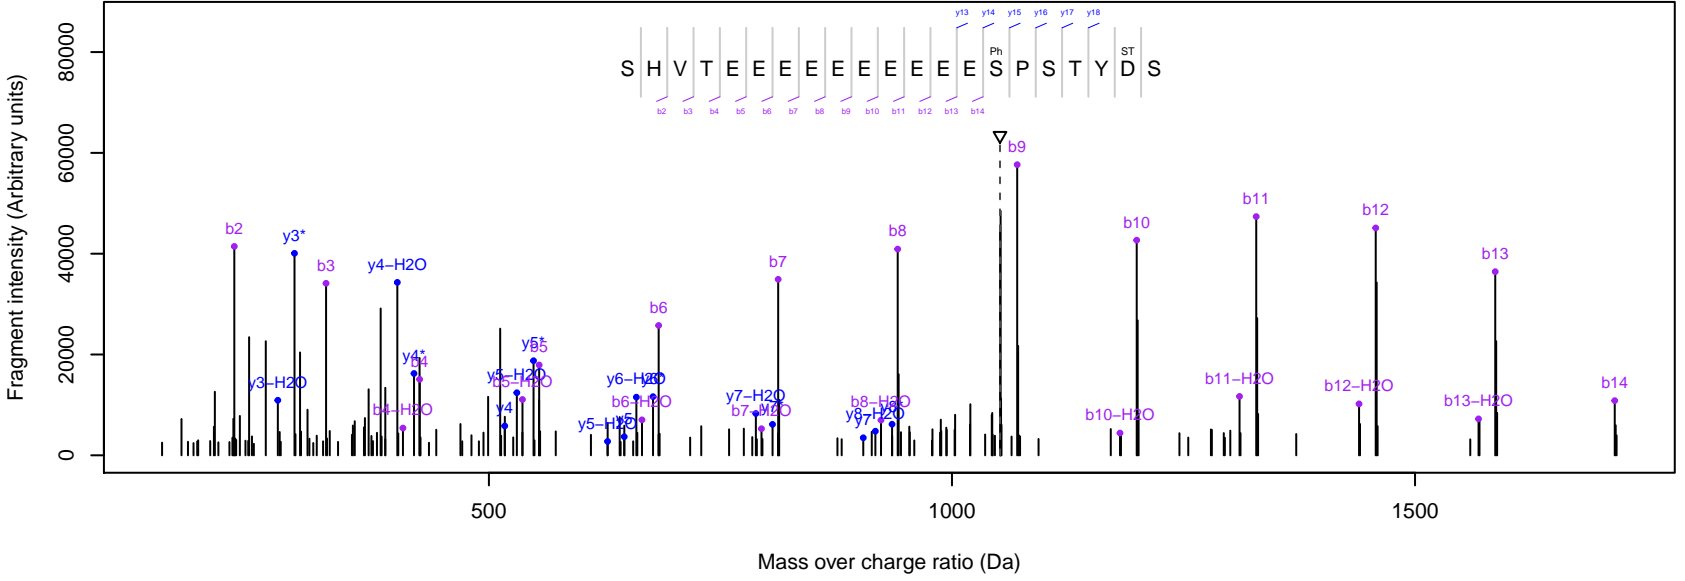

DSGNWDTSGSELS(Phospho (STY))EGELEKR-3+

Source : QE3\_201126\_FR\_TiOx\_hum\_tissue\_Urea\_RNAB\_N Scan : 29113

Andromeda score : 213.16

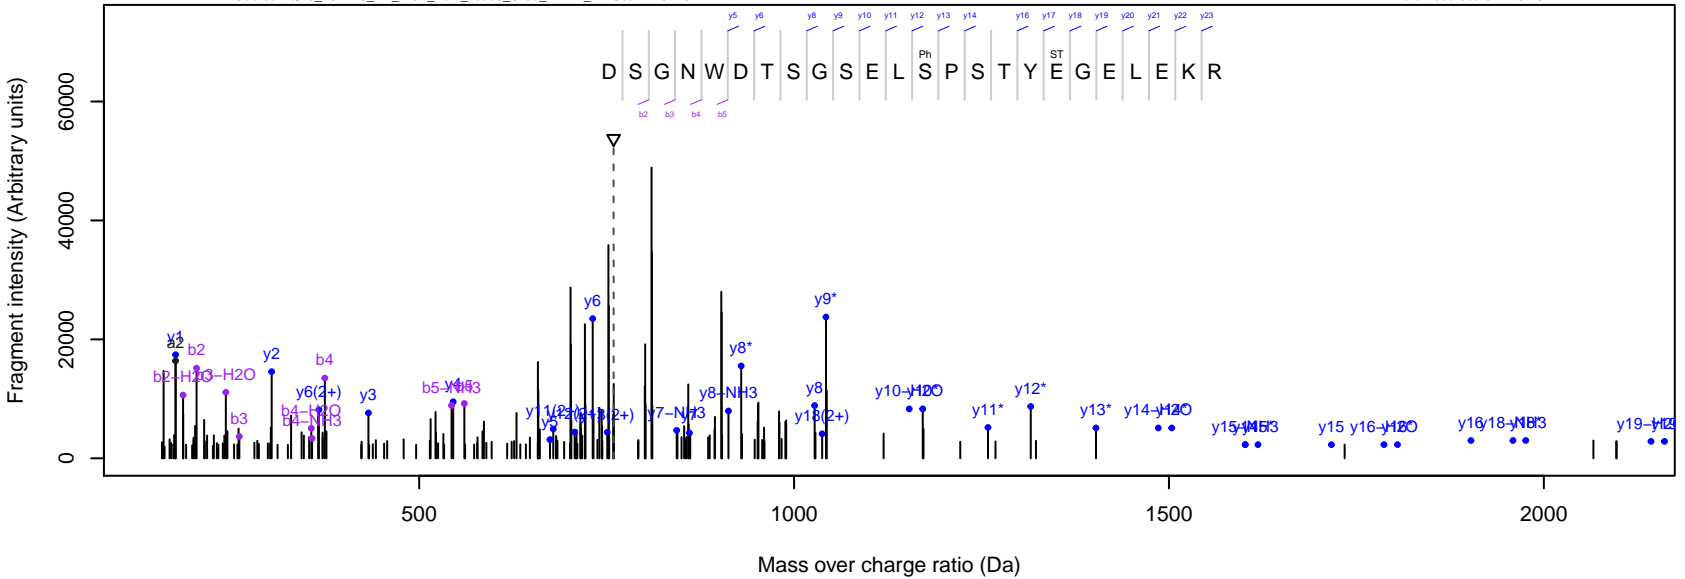

AEEEFVNDIESSPSTYPGTEWER-2+

Source : QE3\_201126\_FR\_TIOx\_hum\_tissue\_Urea\_RNAB\_H Scan : 45070

Andromeda score : 213.15

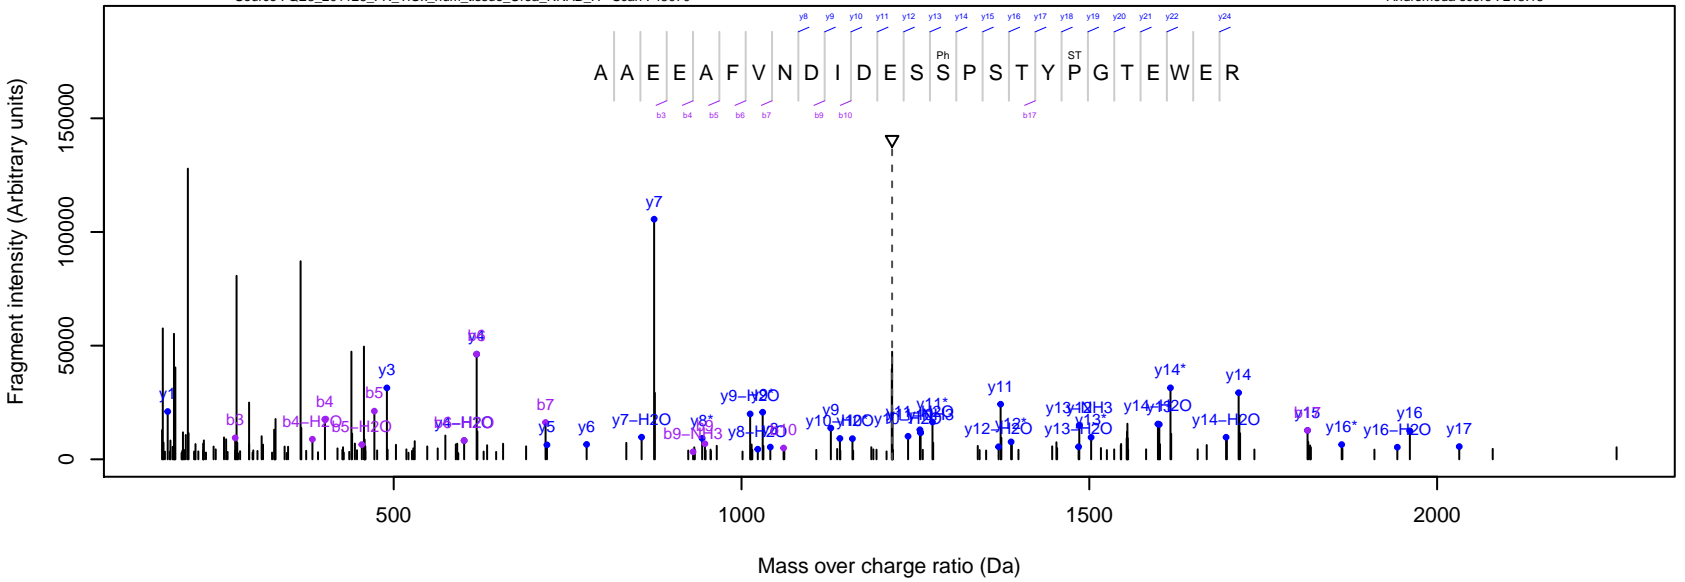

(Acetyl (Protein N-term))AETLSGLDSGAAGAALSSASS(Phospho (STY))ETGTR-3+

Source : QE3\_201126\_FR\_TIOx\_hum\_tissue\_Urea\_RNAB\_N Scan : 53895

Andromeda score : 213.15

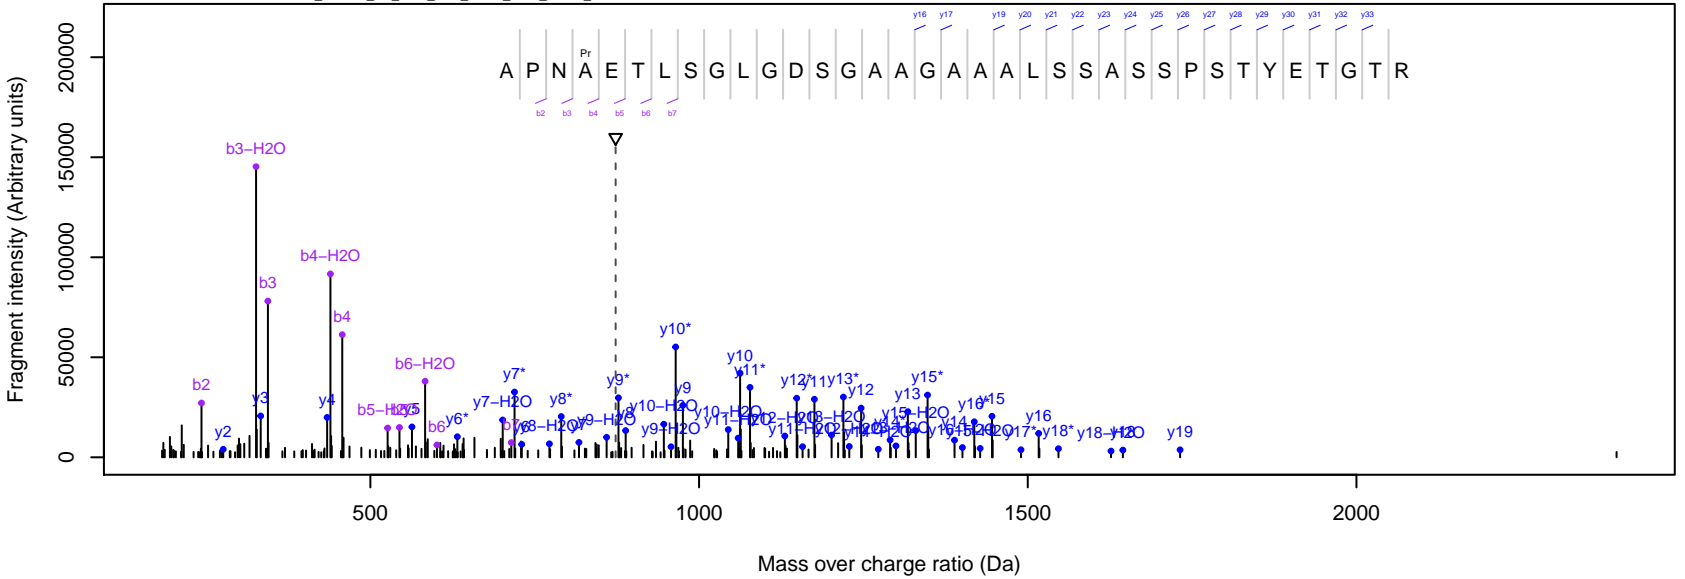

EKS(Phospho (STY))PVREPVNDLSPEER-3+

Source : QE3\_201126\_FR\_TIOx\_hum\_tissue\_Urea\_RNAB\_N Scan : 14005

Andromeda score : 213.13

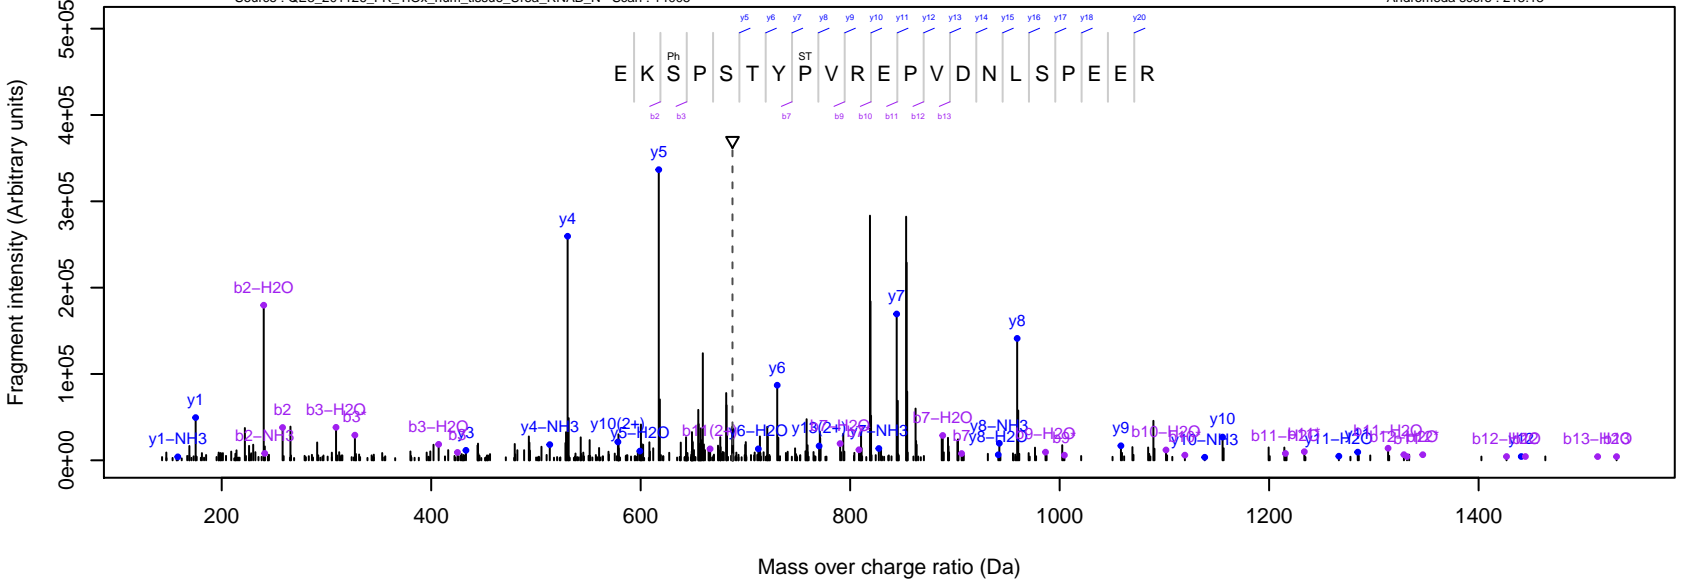

YGPADVEDTTGSGATDSKDDDDIDLFGS(Phospho (STY))DDEESEEAKR-4+

Source : QE3\_201126\_FR\_TIOx\_hum\_tissue\_Urea\_RNAB\_H Scan : 35033

Andromeda score : 213.06

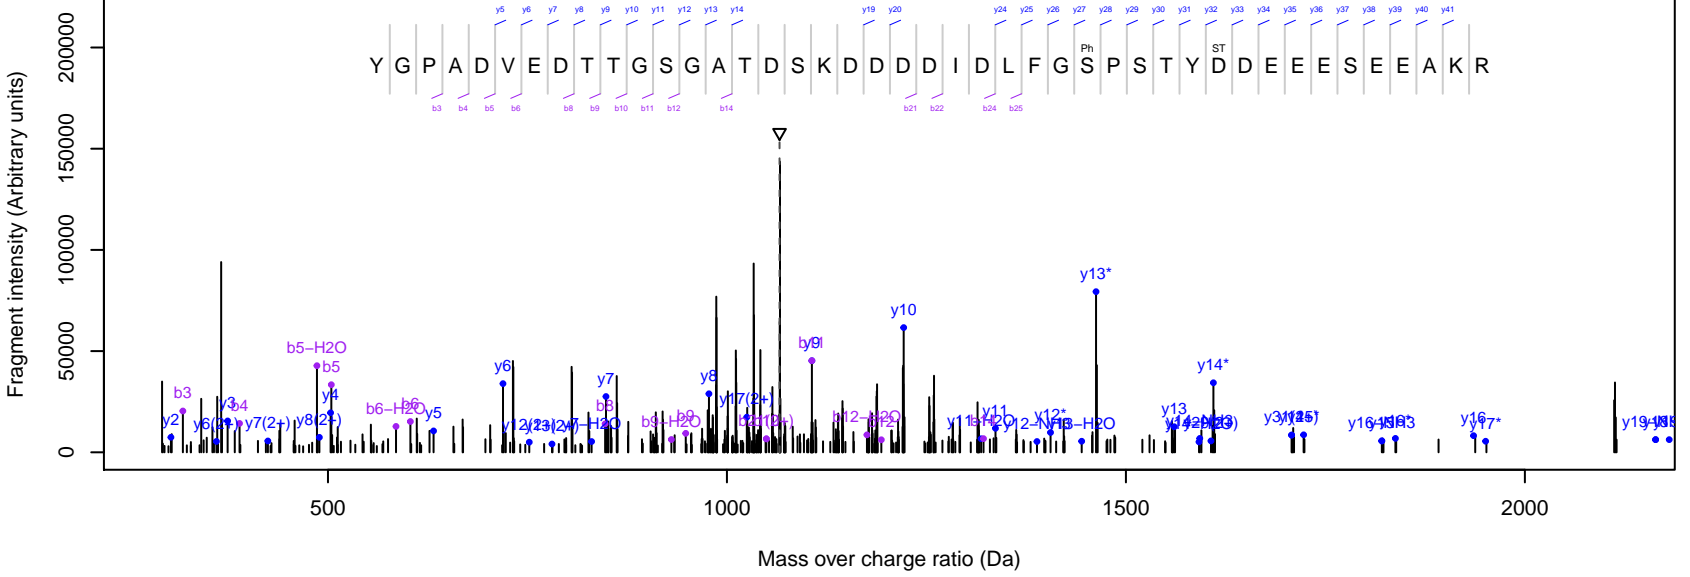

EESREPPAS(Phospho (STY))PAPAGVEIR-2+

Source : QE3\_201126\_FR\_TIOx\_hum\_tissue\_Urea\_RNAB\_N Scan : 18801

Andromeda score : 213.03

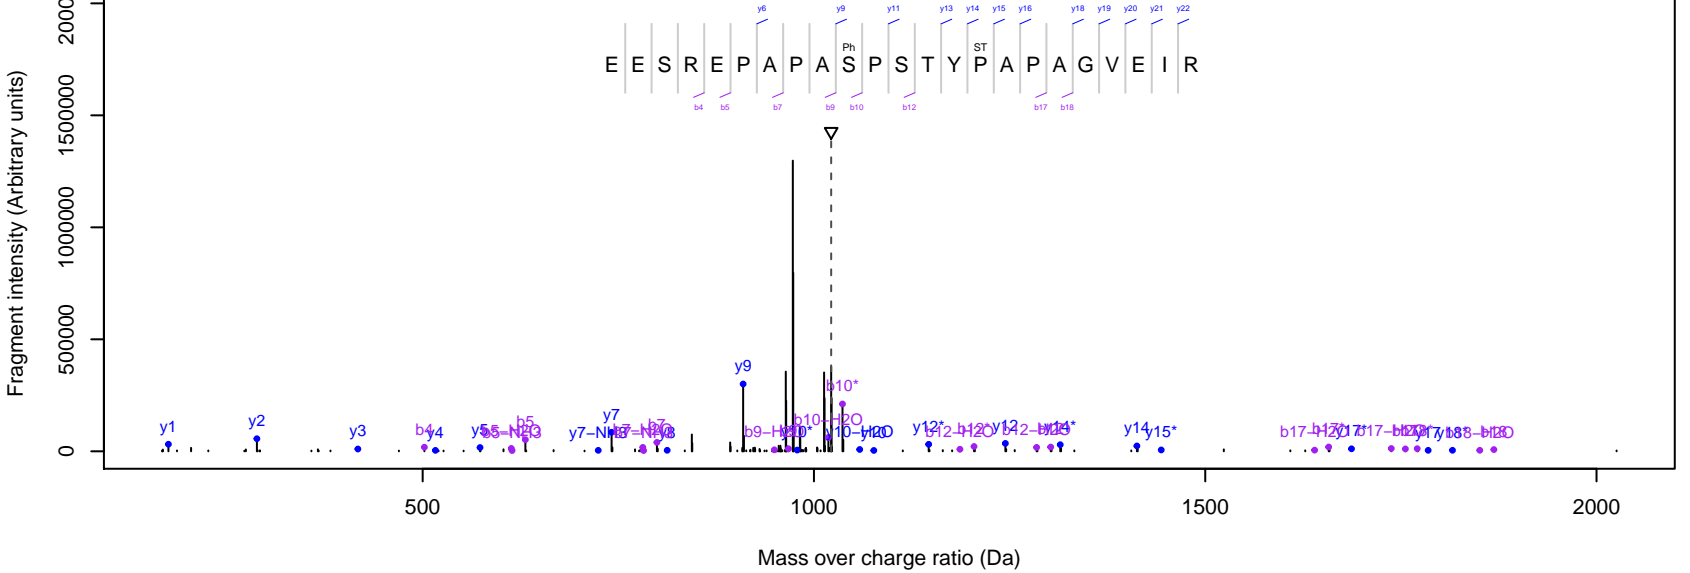

S(Phospho (STY))LEDVTAEYIHK-2+

Source : QE3\_201126\_FR\_TIOx\_hum\_tissue\_Urea\_RNAB\_H Scan : 29960

Andromeda score : 212.9

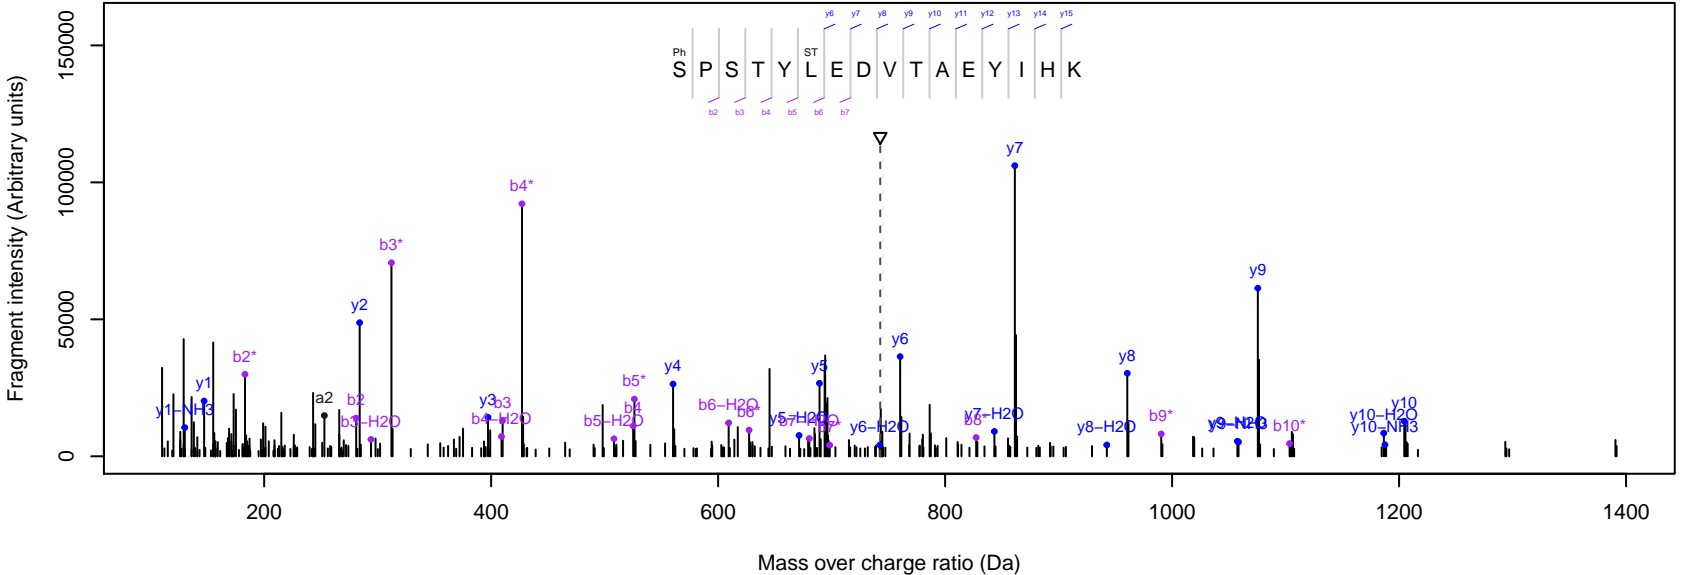

STFSTNYRS(Phospho (STY))LGS(Phospho (STY))VQAPSYGAR-3+

Source : QE3\_201126\_FR\_TiOx\_hum\_tissue\_Urea\_RNAB\_H Scan : 35651

Andromeda score : 212.86

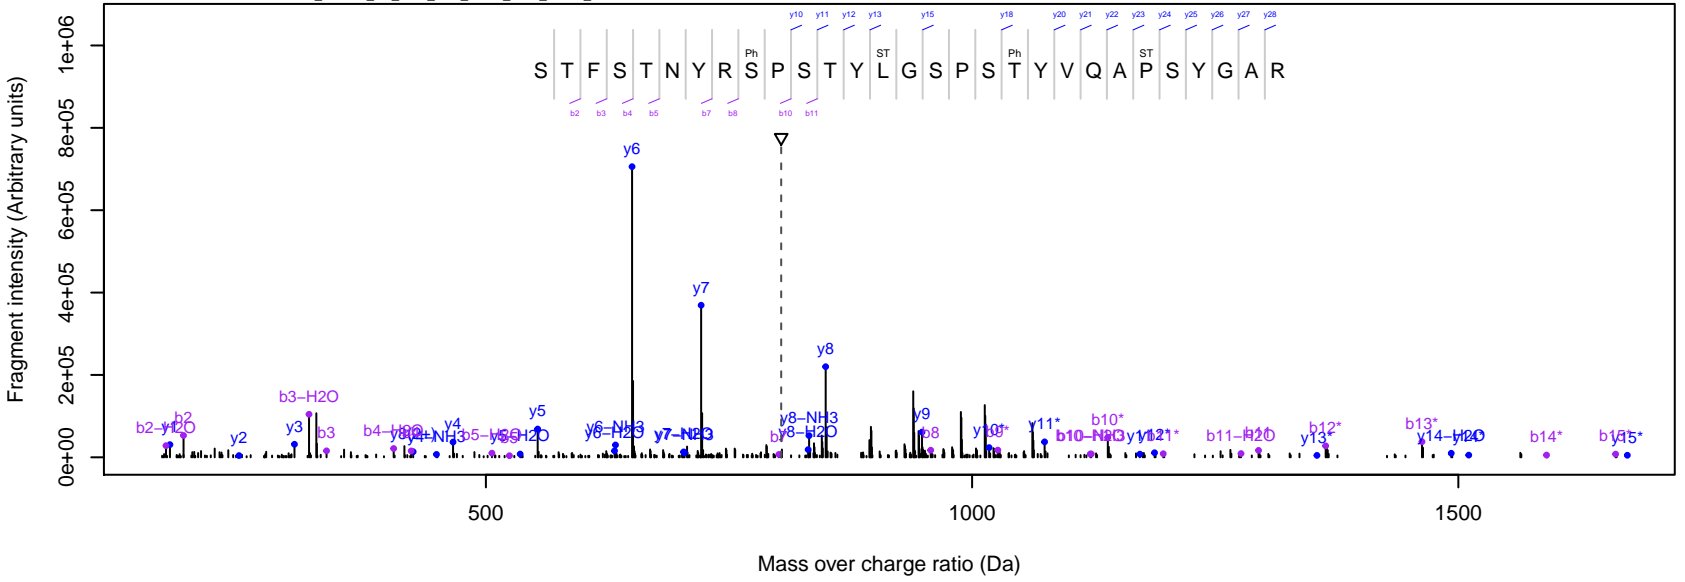

SKS(Phospho (STY))EEAHAEDSVMDDHFR-4+

Source : QE3\_201126\_FR\_TiOx\_hum\_tissue\_Urea\_RNAB\_H Scan : 12303

Andromeda score : 212.82

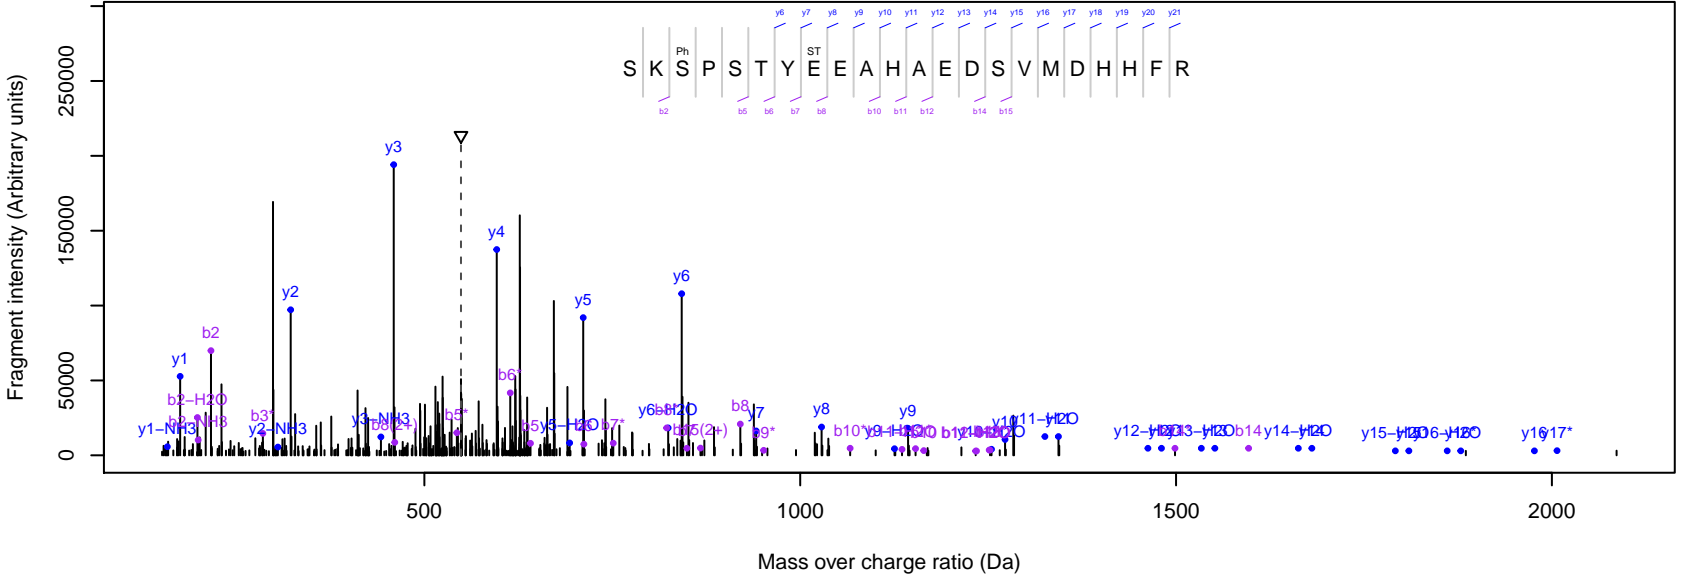

VHLTPEEK(Phospho (STY))AVTALWGK-3+

Source : QE3\_201126\_FR\_TiOx\_hum\_tissue\_Urea\_RNAB\_B Scan : 33469

Andromeda score : 212.79

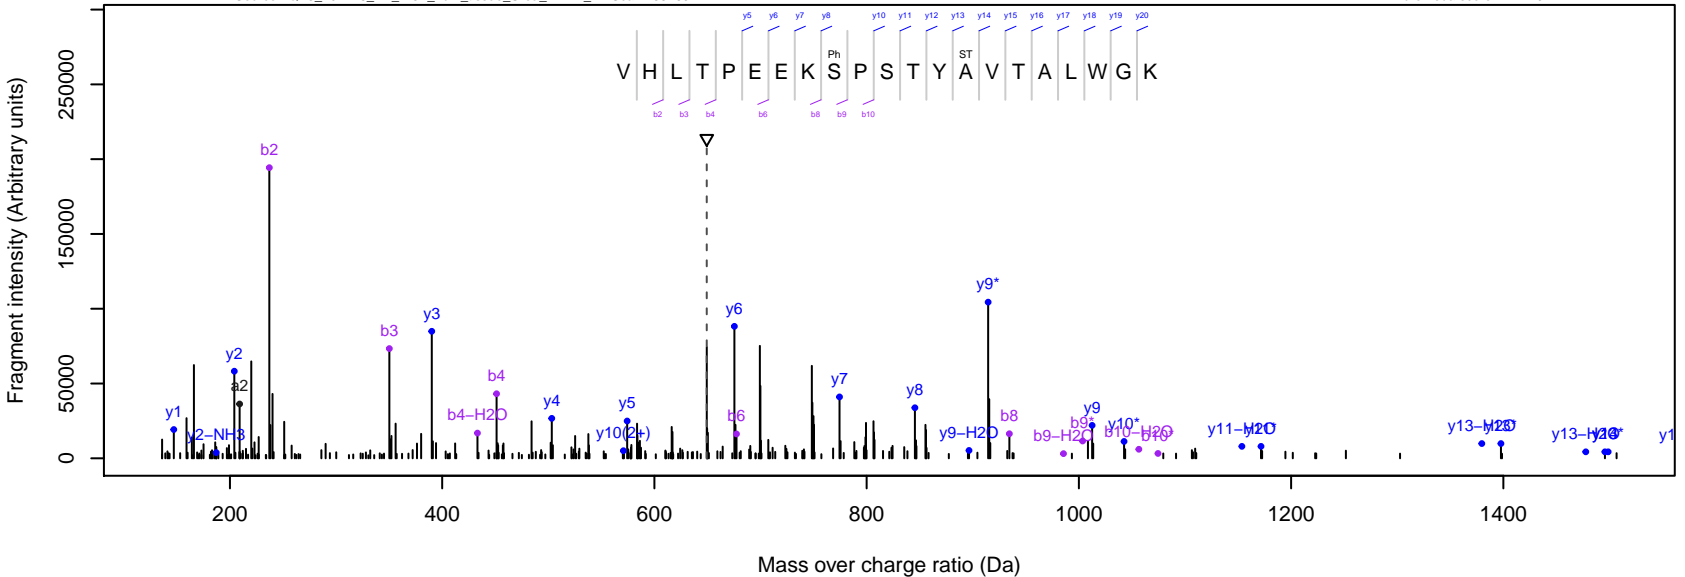

NSSTETDQQPHS(Phospho (STY))PDSSSSVHSIR-3+

Source : QE3\_201126\_FR\_TiOx\_hum\_tissue\_Urea\_RNAB\_B Scan : 8077

Andromeda score : 212.77

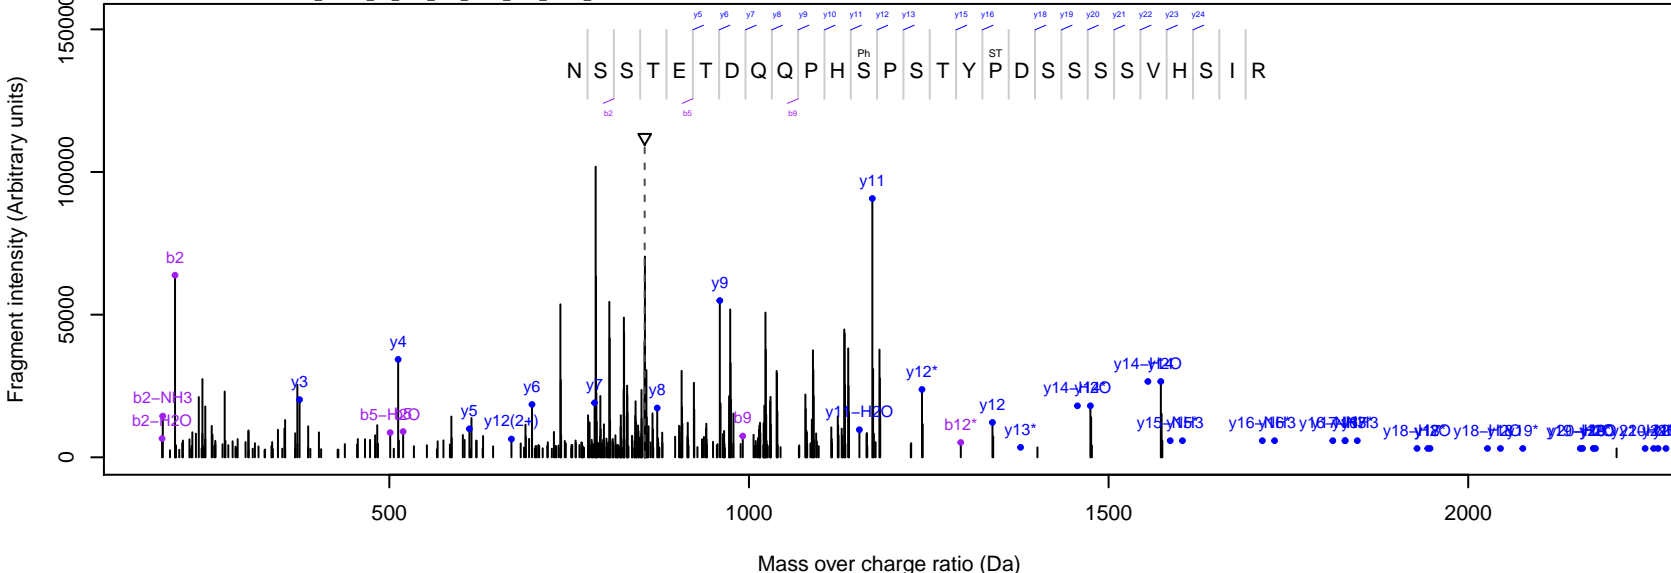

YTDFDS(Phospho (STY))EEEDDDDDDDNDLLELK-3+

Source : QE3\_201126\_FR\_TiOx\_hum\_tissue\_Urea\_RNAB\_N Scan : 53563

Andromeda score : 212.77

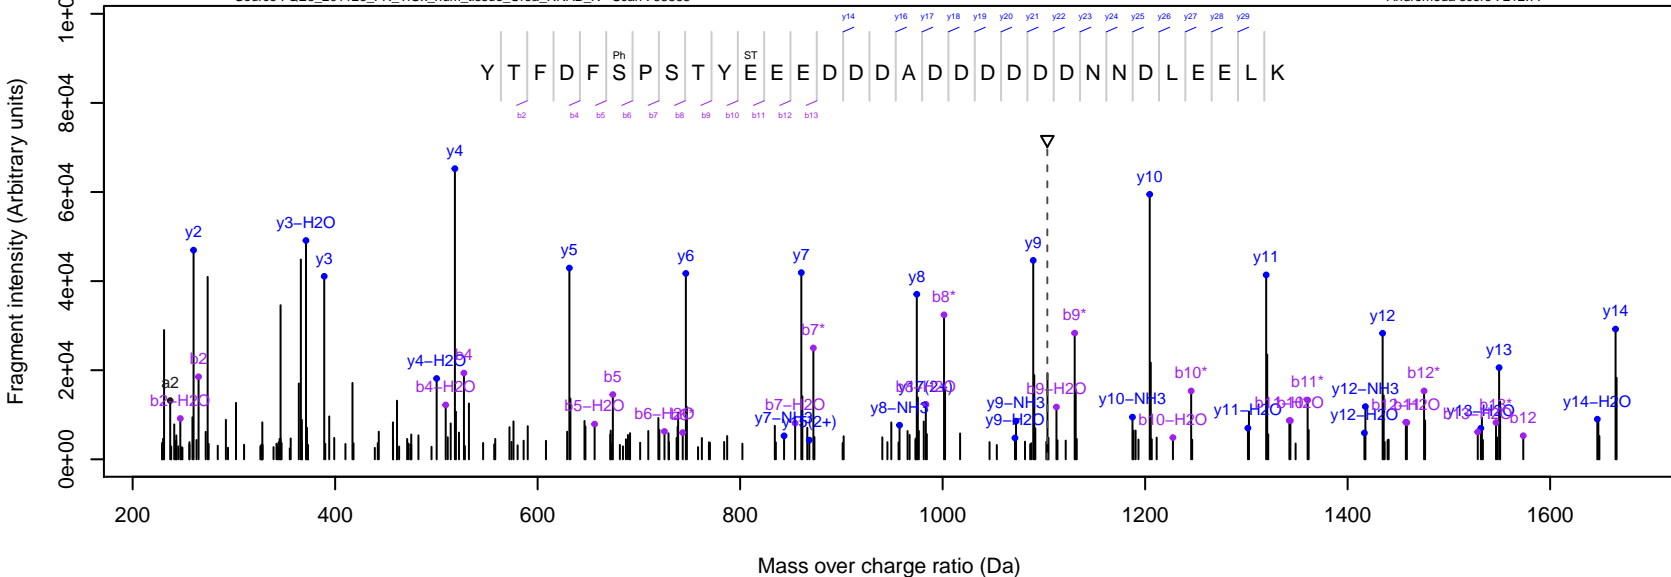

SRDS(Phospho (STY))GDENEPIQR-2+

Source : QE3\_201126\_FR\_TiOx\_hum\_tissue\_Urea\_RNAB\_N Scan : 7190

Andromeda score : 212.72

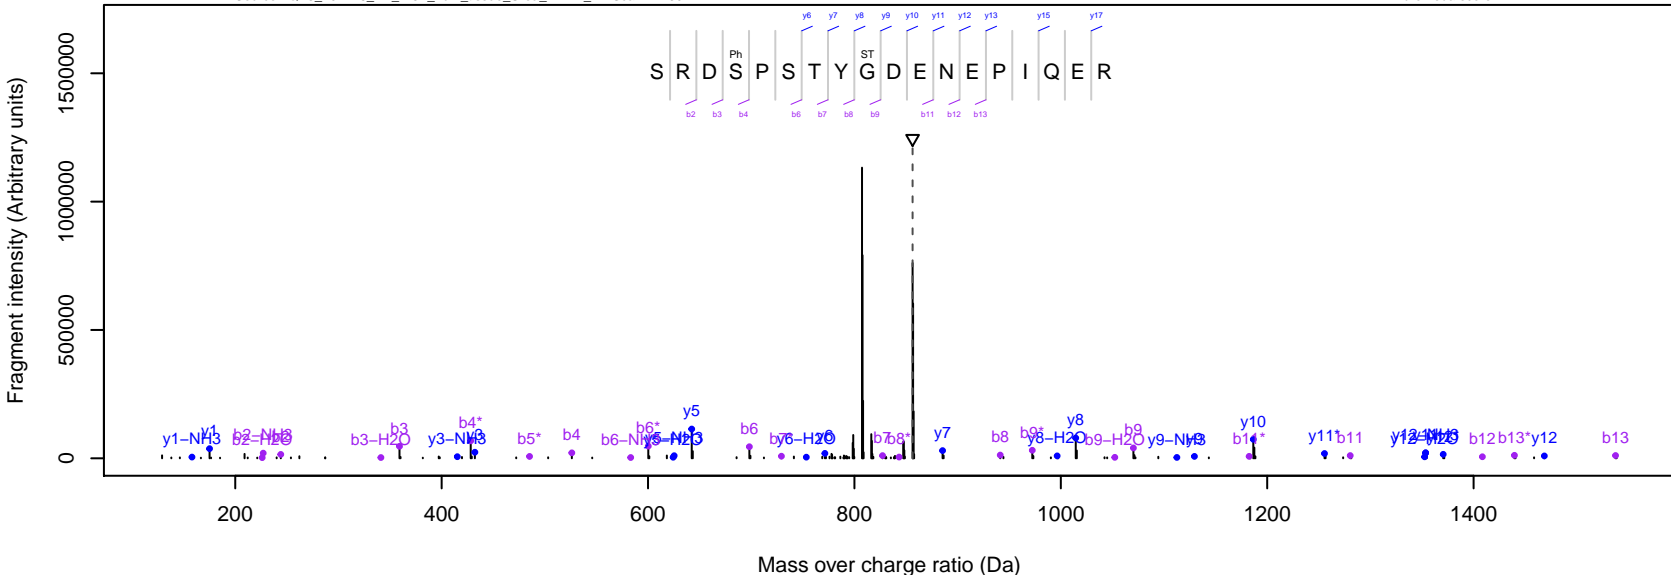



GDS(Phospho (STY))ESEEDEDLEVPVPSR-2+

Source : QE3\_201126\_FR\_TIOx\_hum\_tissue\_Urea\_RNAB\_N Scan : 38330

Andromeda score : 212.7

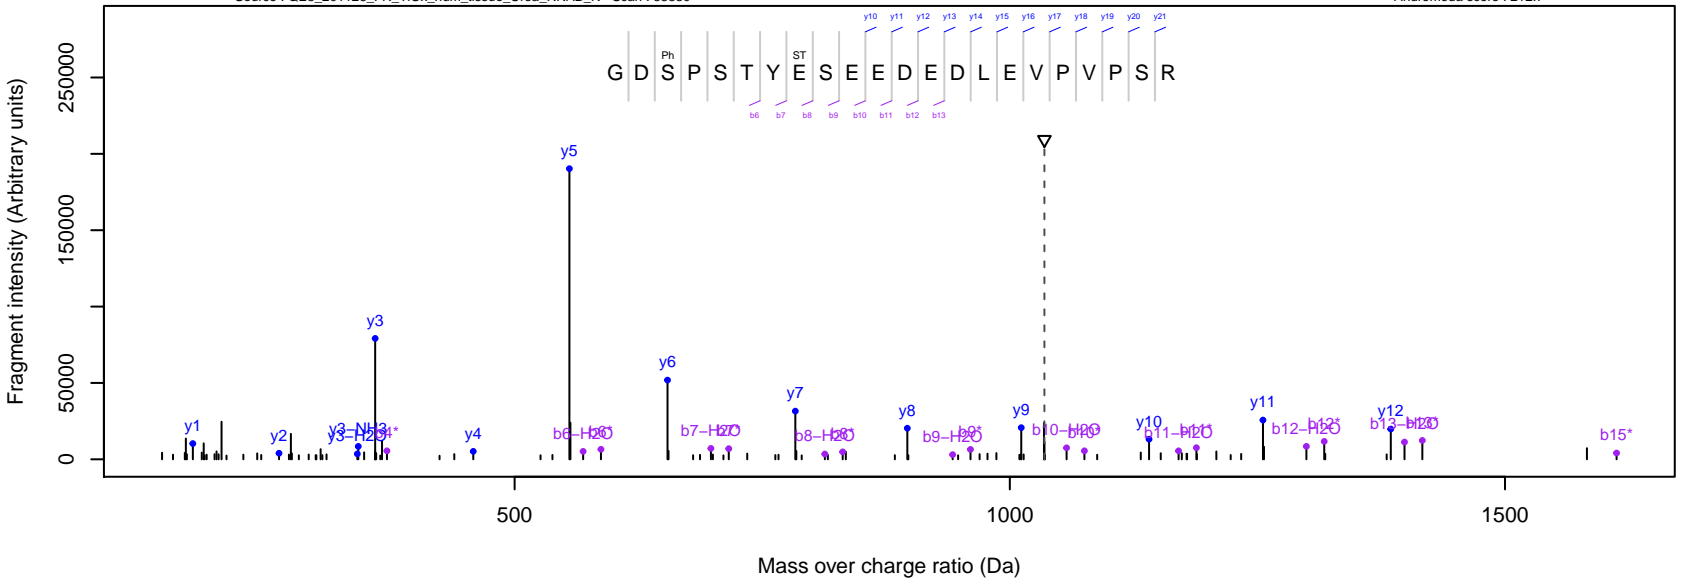

EM(Oxidation (M))DESLANLS(Phospho (STY))EDEYYSEER-2+

Source : QE3\_201126\_FR\_TIOx\_hum\_tissue\_Urea\_RNAB\_H Scan : 38127

Andromeda score : 212.69

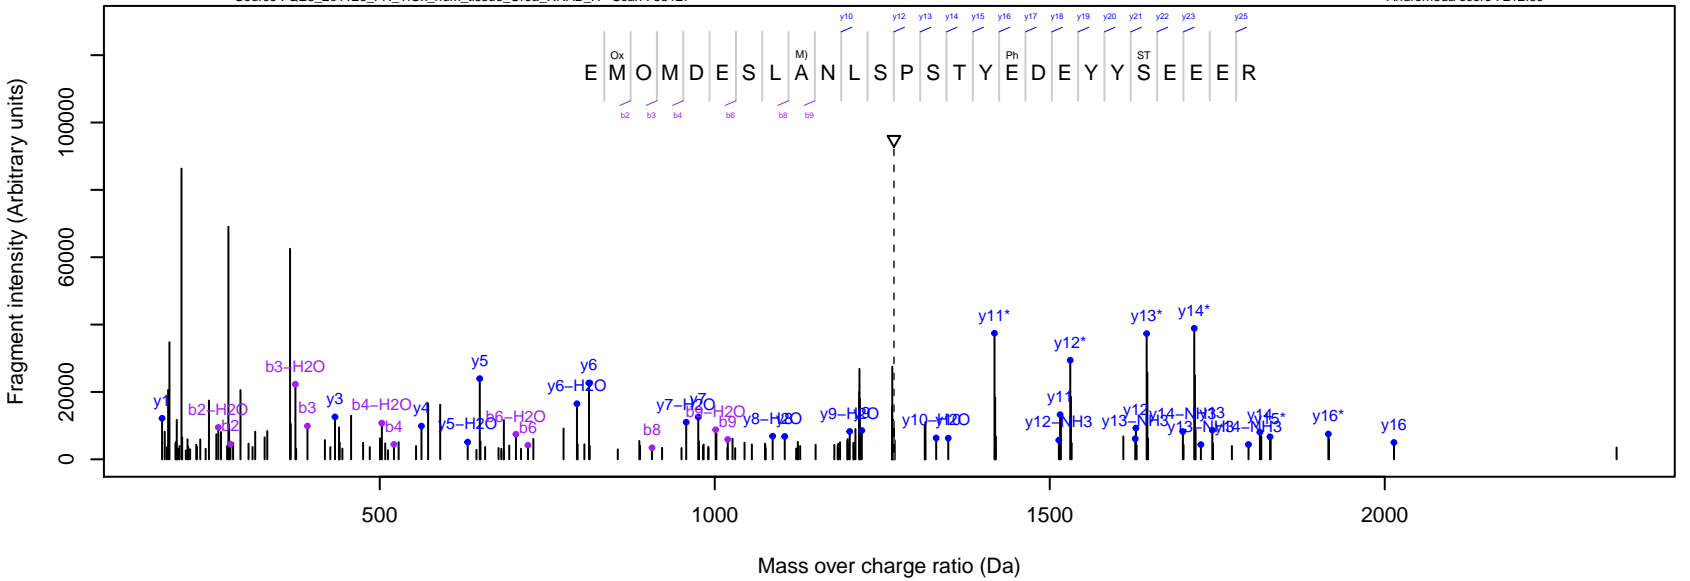

INHTVLDPPDPPDLLIPDRS(Phospho (STY))PEPTREQLDSGR-4+

Source : QE3\_201126\_FR\_TIOx\_hum\_tissue\_Urea\_RNAB\_H Scan : 49828

Andromeda score : 212.6

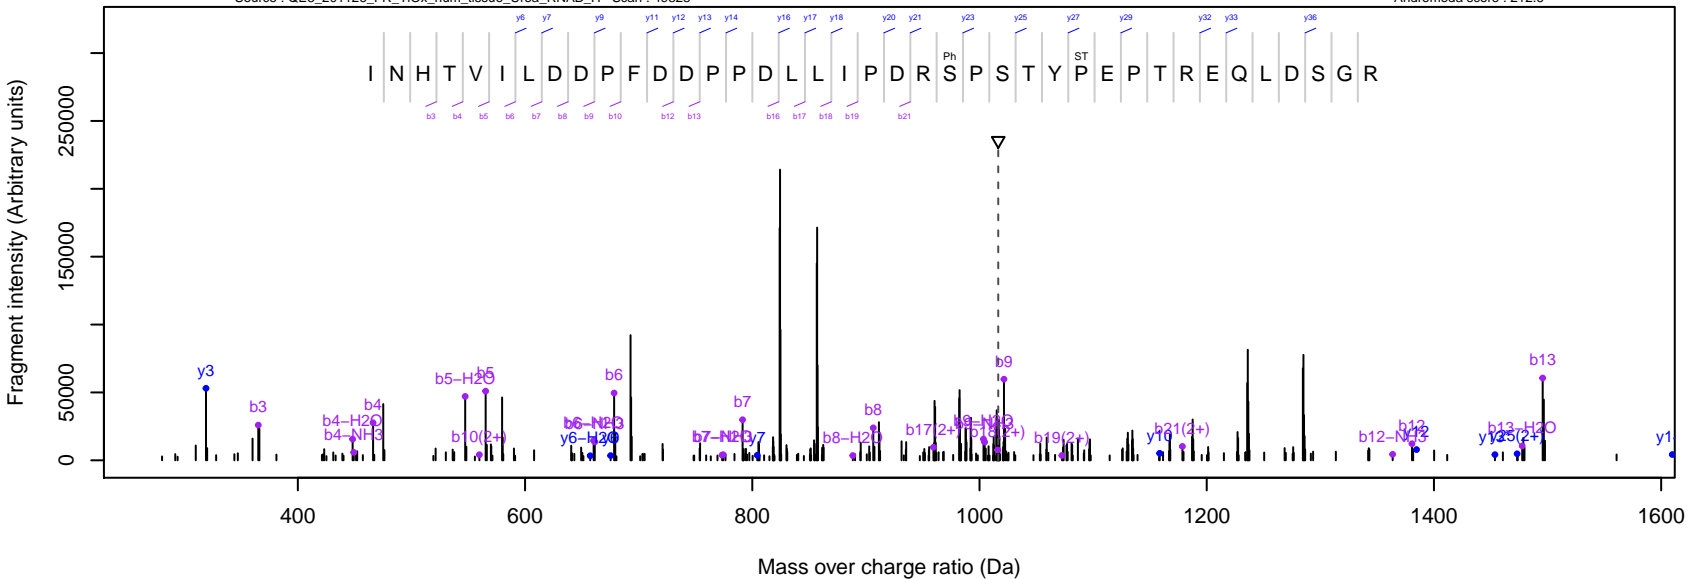

EGS(Phospho (STY))PIPHDPEFGSK-2+

Source : QE3\_201126\_FR\_TIOx\_hum\_tissue\_Urea\_RNAB\_H Scan : 19630

Andromeda score : 212.55

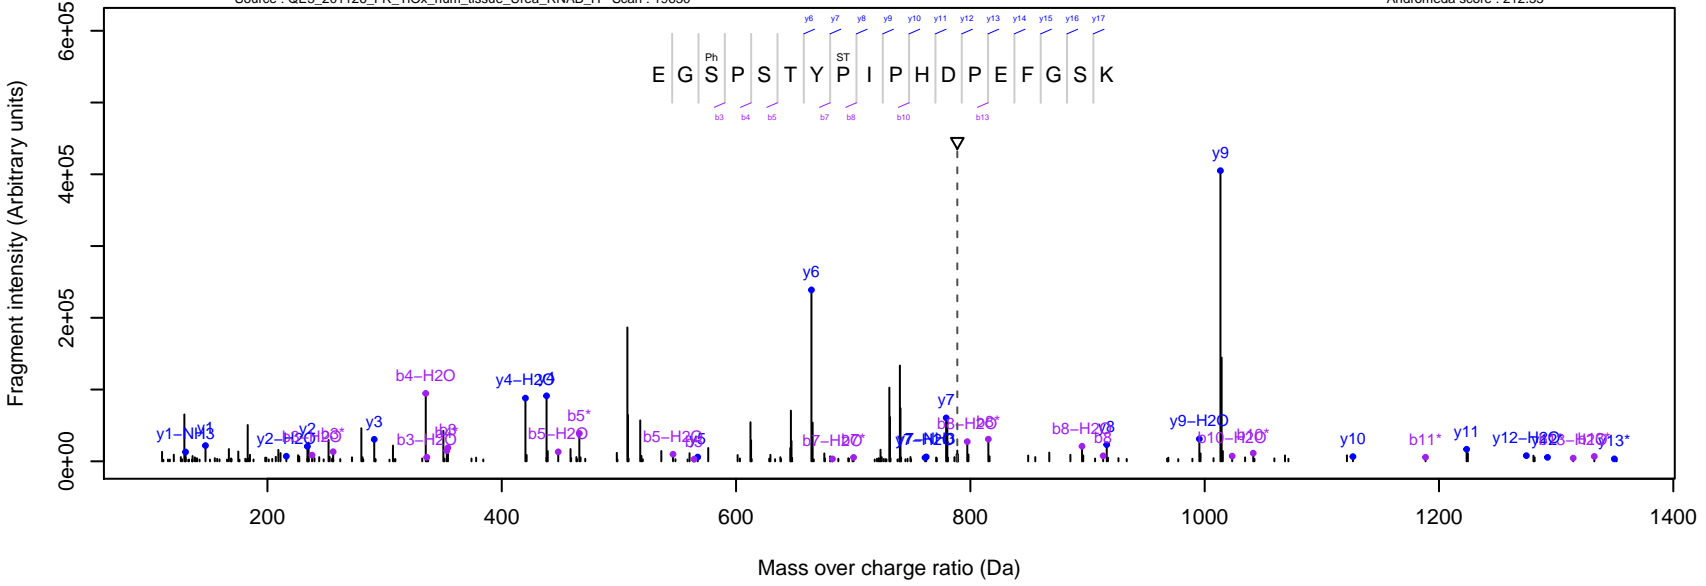

LEEGVAS(Phospho (STY))DEEEAAEQPGSGPSPEPEGSPPAHPQ-3+

Source : QE3\_201126\_FR\_TIOx\_hum\_tissue\_Urea\_RNAB\_B Scan : 26091

Andromeda score : 212.4

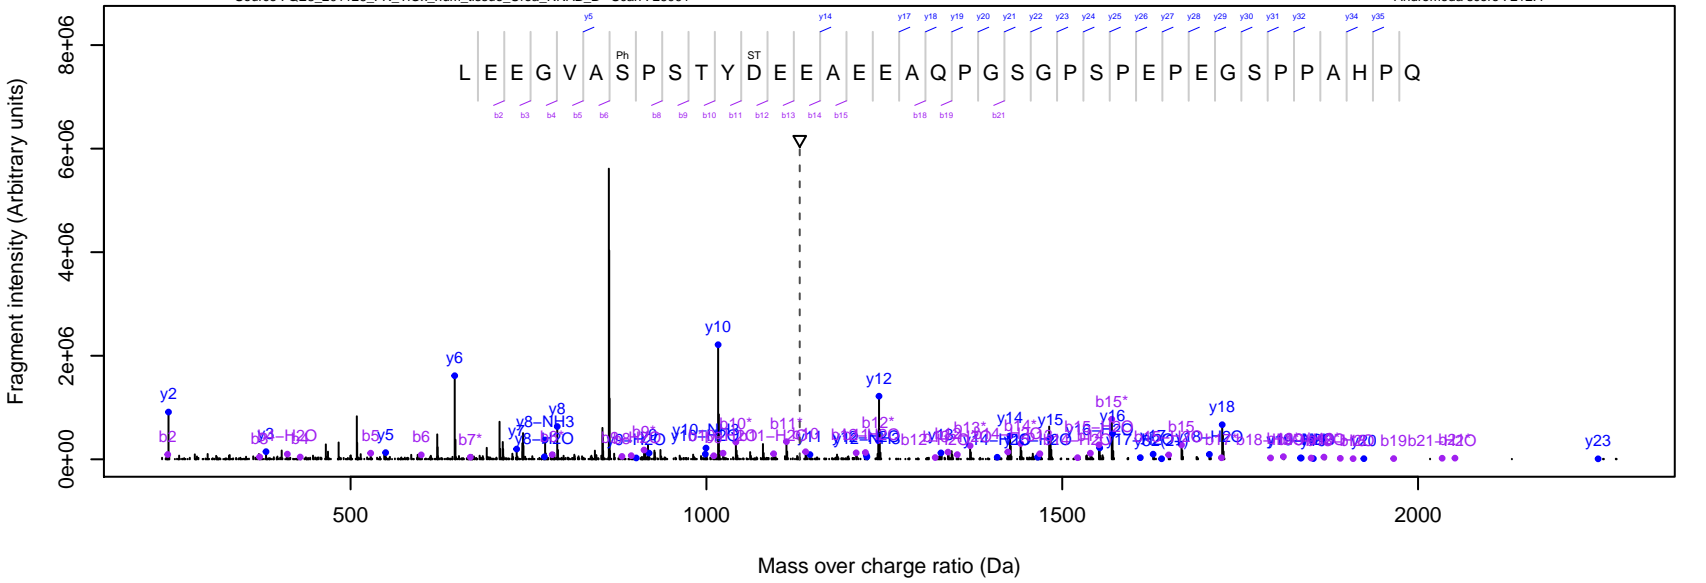

LSM(Oxidation (M))EDSKS(Phospho (STY))PPPKATEEK-3+

Source : QE3\_201126\_FR\_TIOx\_hum\_tissue\_Urea\_RNAB\_N Scan : 3224

Andromeda score : 212.18

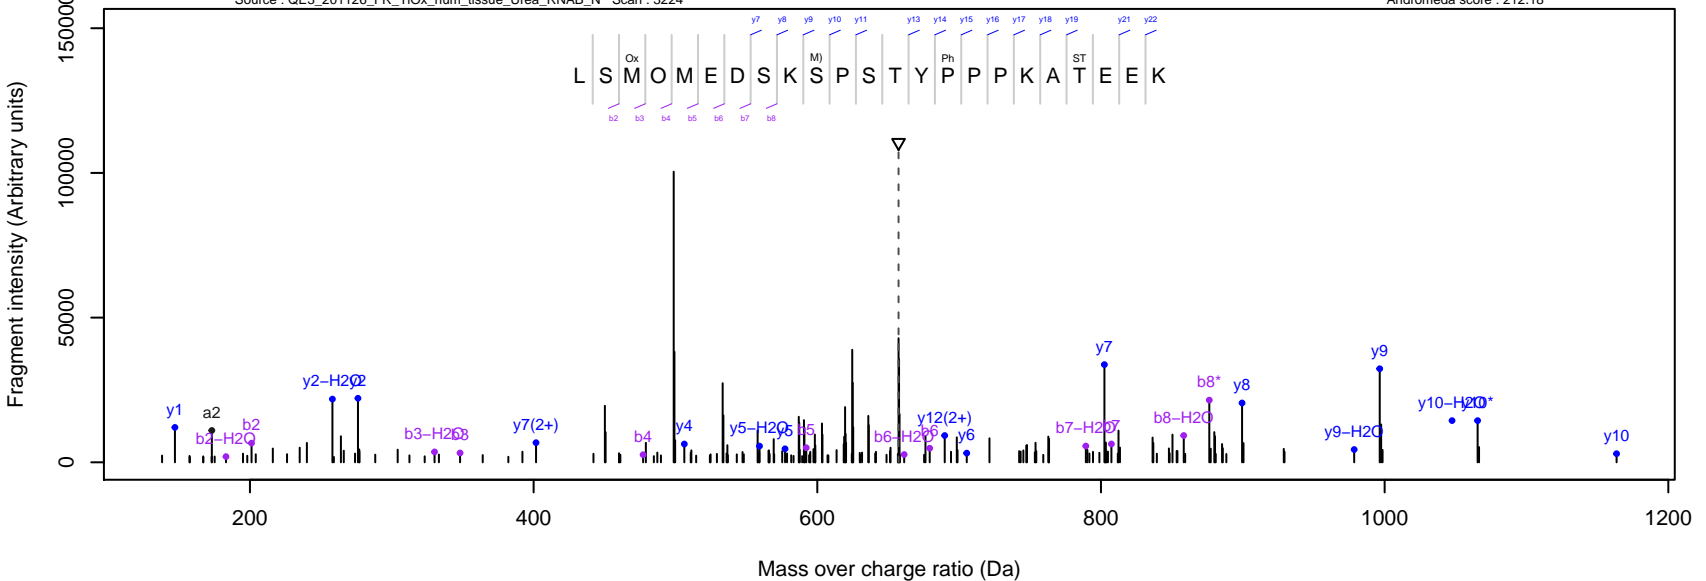

EDAEGVAEEEGEGDS(Phospho (STY))GEQETGATDARPR-3+

Source : QE3\_201126\_FR\_TIOx\_hum\_tissue\_Urea\_RNAB\_N Scan : 17538

Andromeda score : 212.17

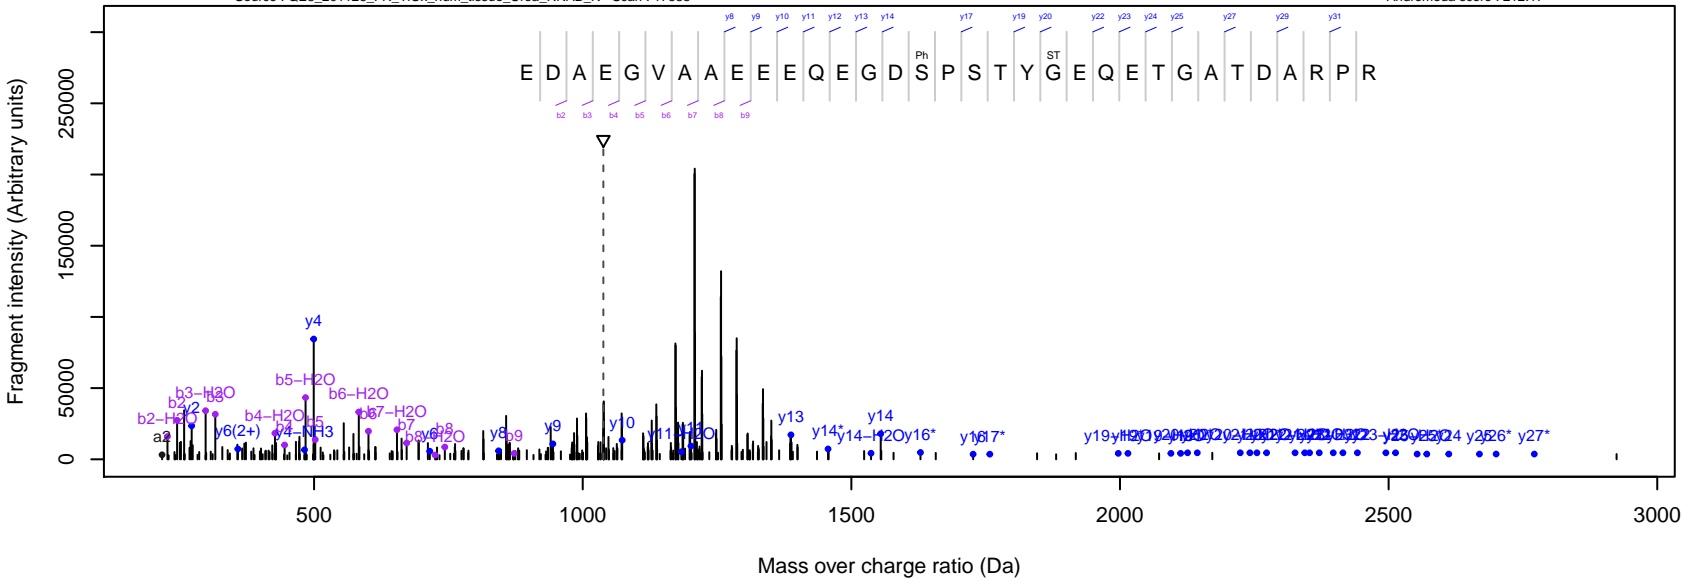

LTPVS(Phospho (STY))PESSSTEK-2+

Source : QE3\_201126\_FR\_TIOx\_hum\_tissue\_Urea\_RNAB\_N Scan : 14313

Andromeda score : 212.17

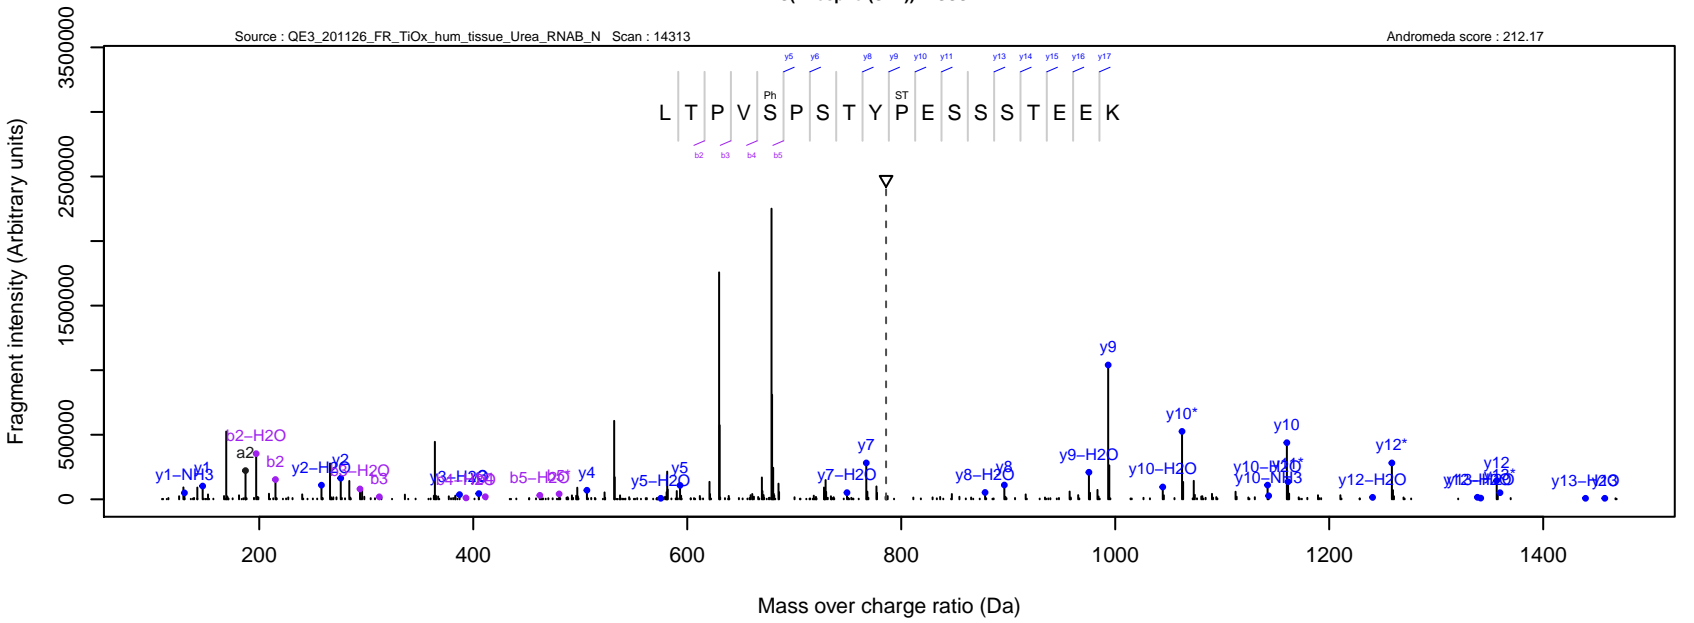

SAS(Phospho (STY))DINLKGEAQAASPGPSLR-2+

Source : QE3\_201126\_FR\_TIOx\_hum\_tissue\_Urea\_RNAB\_H Scan : 23175

Andromeda score : 212.05

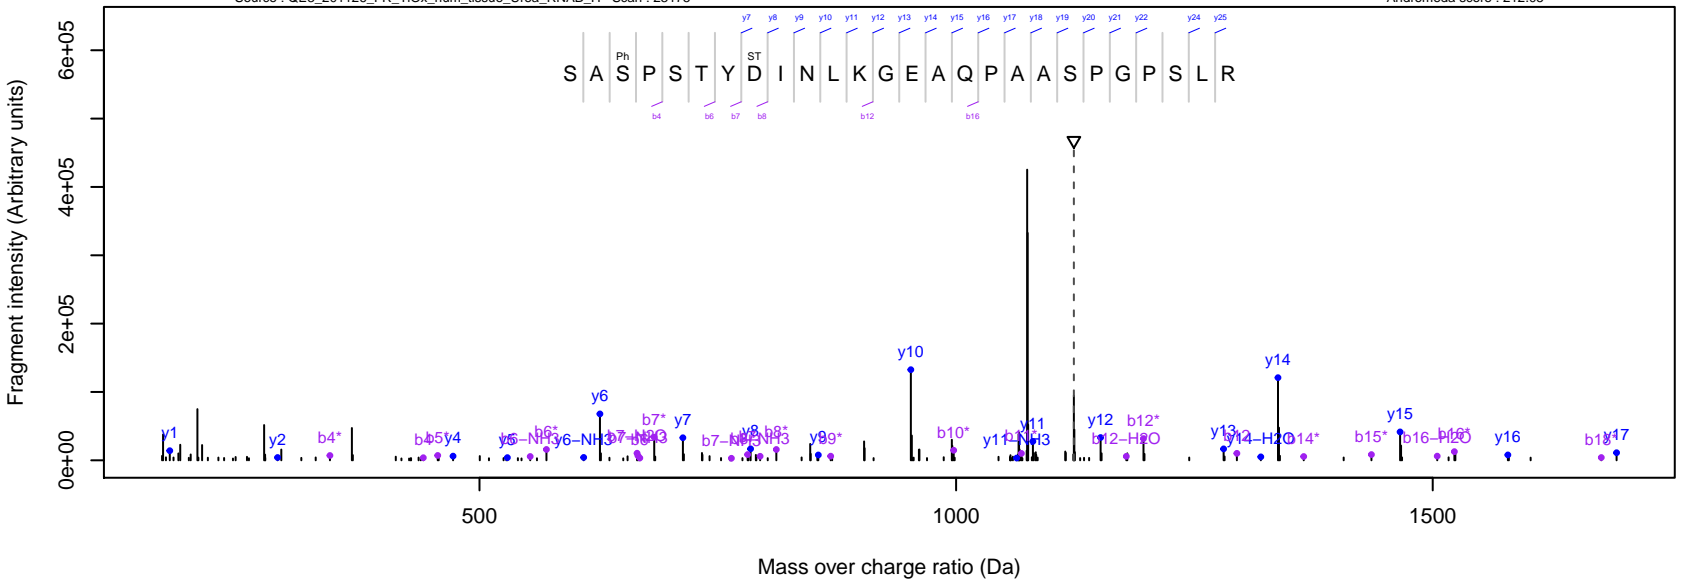

GLSDHVS(Phospho (STY))LDGQELGTR-3+

Source : QE3\_201126\_FR\_TiOx\_hum\_tissue\_Urea\_RNAB\_H Scan : 27476

Andromeda score : 211.89

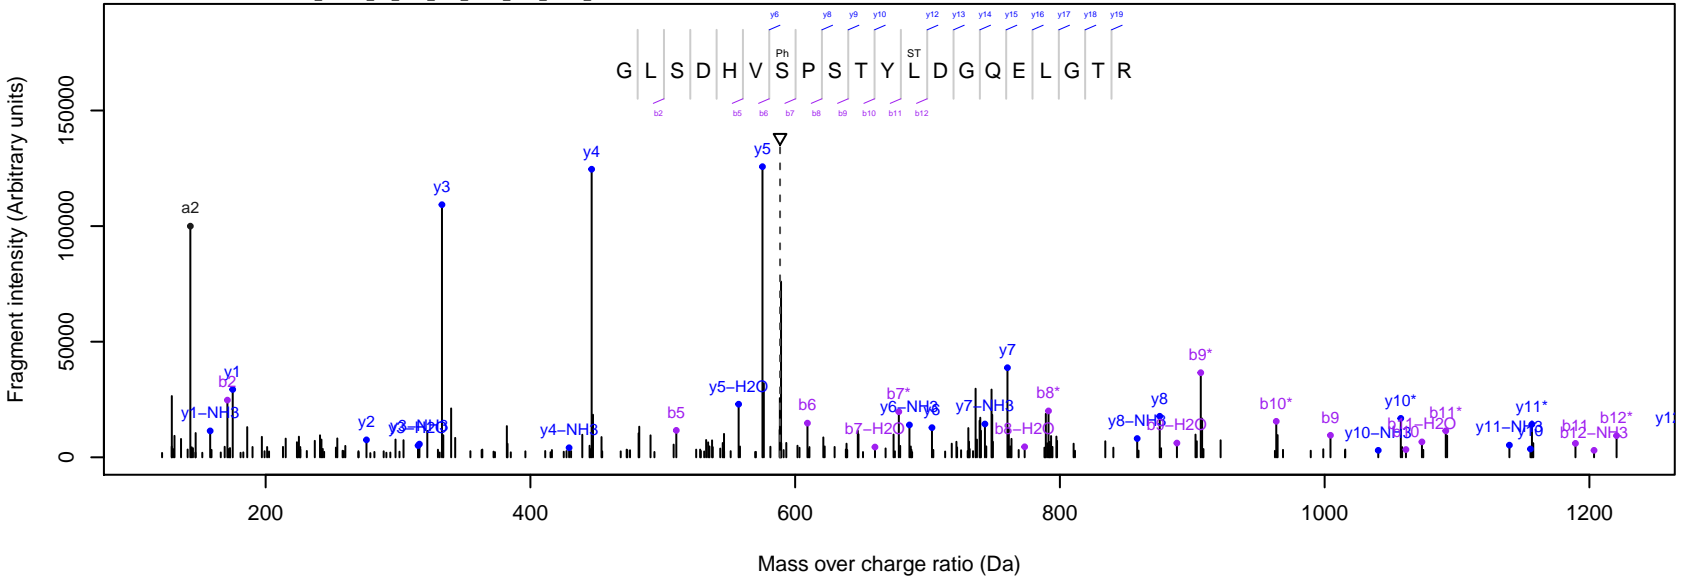

KVS(Phospho (STY))KQEEASGGPTAPK-3+

Source : QE3\_201126\_FR\_TiOx\_hum\_tissue\_Urea\_RNAB\_H Scan : 4001

Andromeda score : 211.87

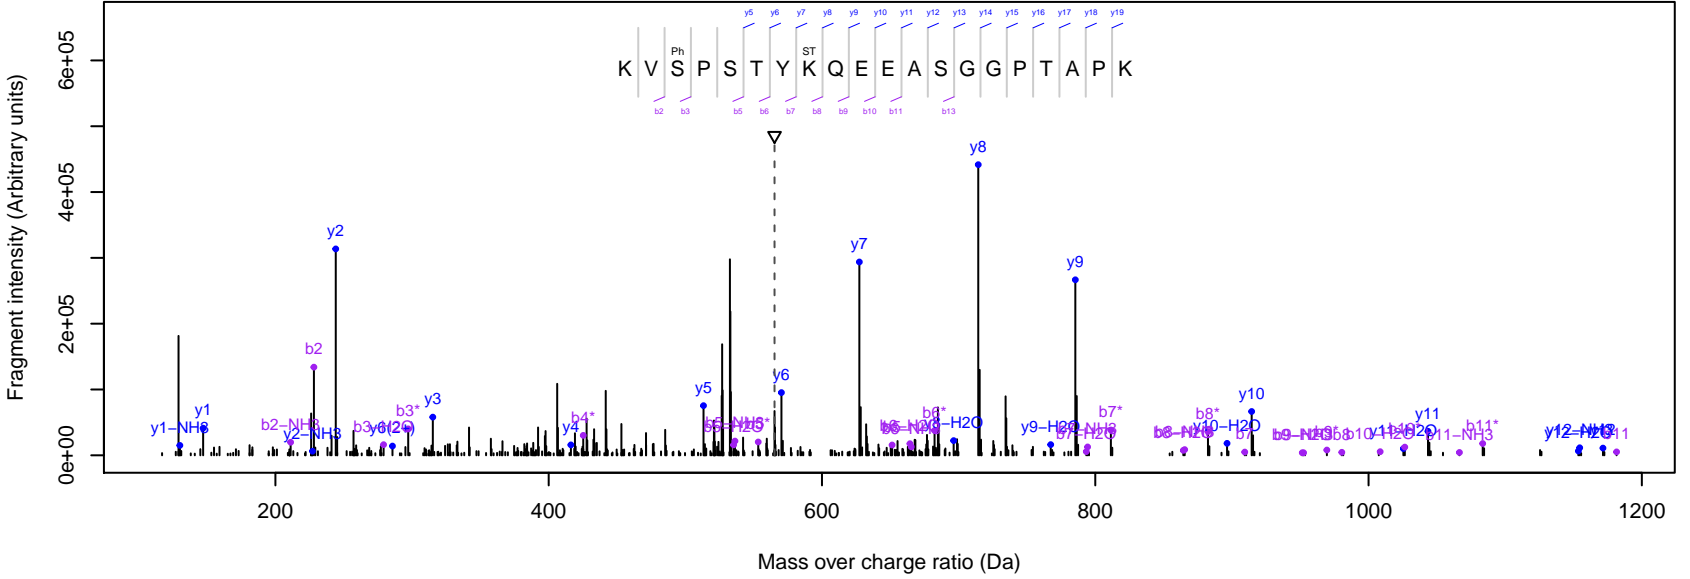

SQS(Phospho (STY))NPILGSPFFSHFDGQDSYAAAVR-3+

Source : QE3\_201126\_FR\_TiOx\_hum\_tissue\_Urea\_RNAB\_N Scan : 55805

Andromeda score : 211.87

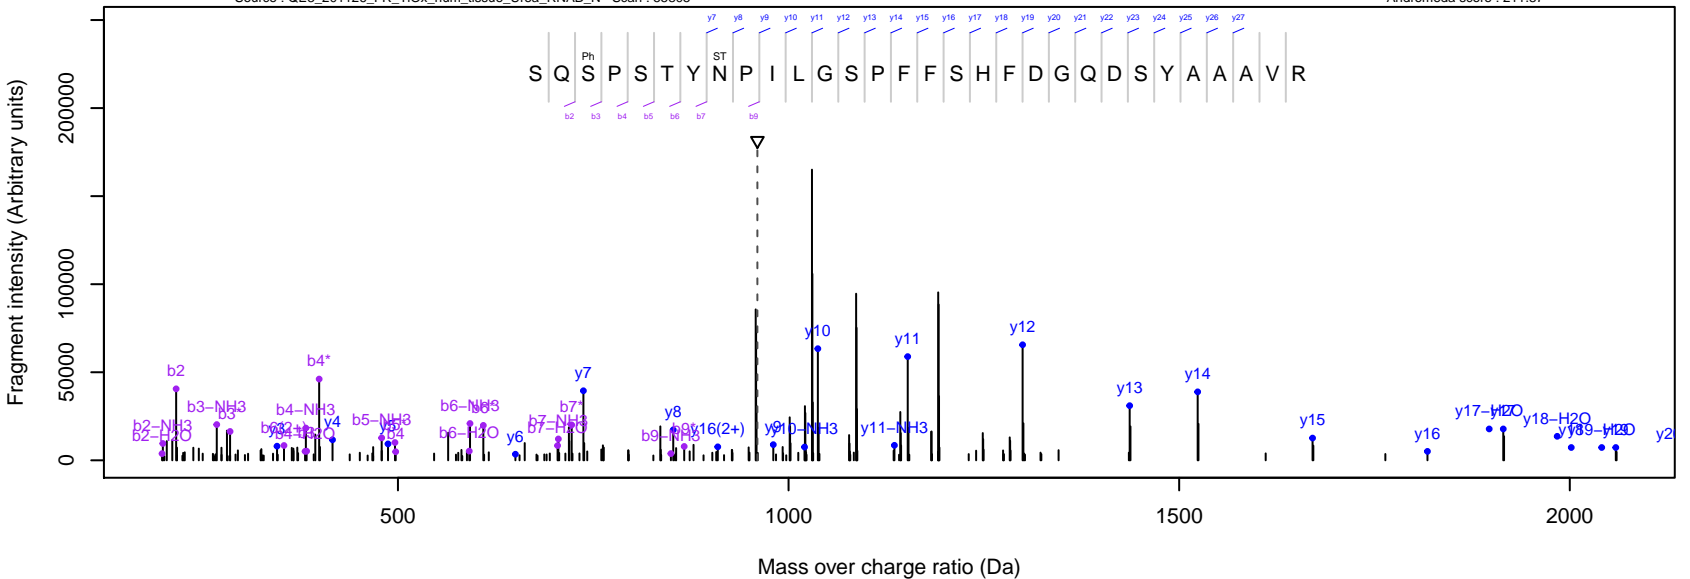

IYDS(Phospho (STY))DS(Phospho (STY))ESEETLQVK-2+

Source : QE3\_201126\_FR\_TIOx\_hum\_tissue\_Urea\_RNAB\_N Scan : 39966

Andromeda score : 211.57

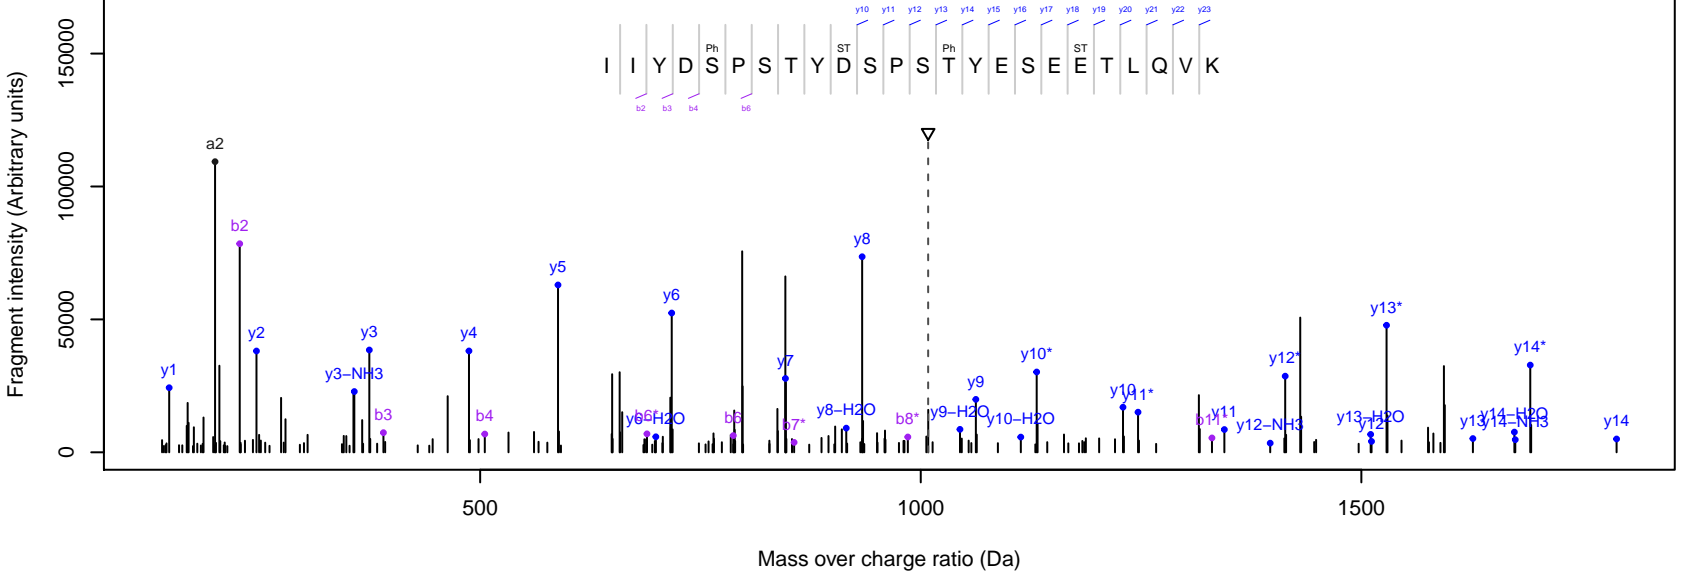

LDS(Phospho (STY))PPPS(Phospho (STY))PITEASEAAEAAEAGNLAVSSR-3+

Source : QE3\_201126\_FR\_TIOx\_hum\_tissue\_Urea\_RNAB\_N Scan : 62109

Andromeda score : 211.5

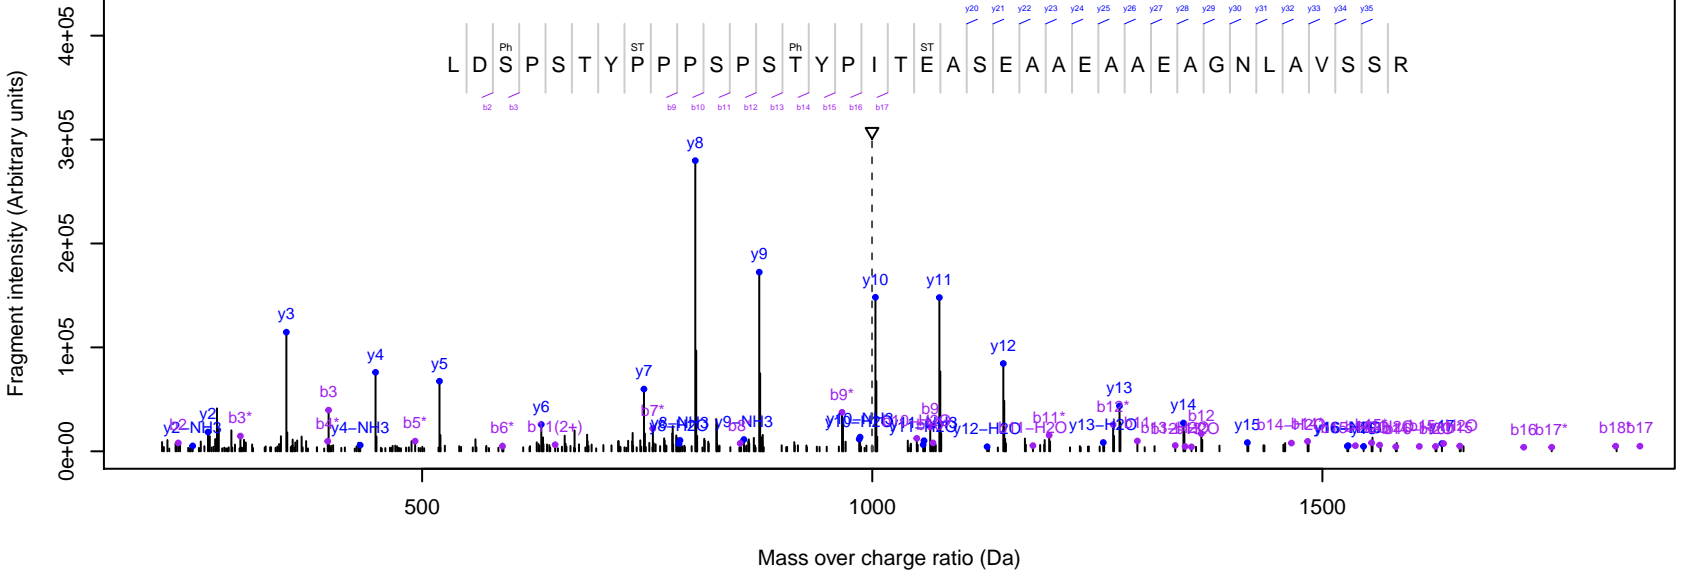

ASVSPM(Oxidation (M))DEVPDSESPSTYPIEK-2+

Source : QE3\_201126\_FR\_TIOx\_hum\_tissue\_Urea\_RNAB\_B Scan : 23788

Andromeda score : 211.29

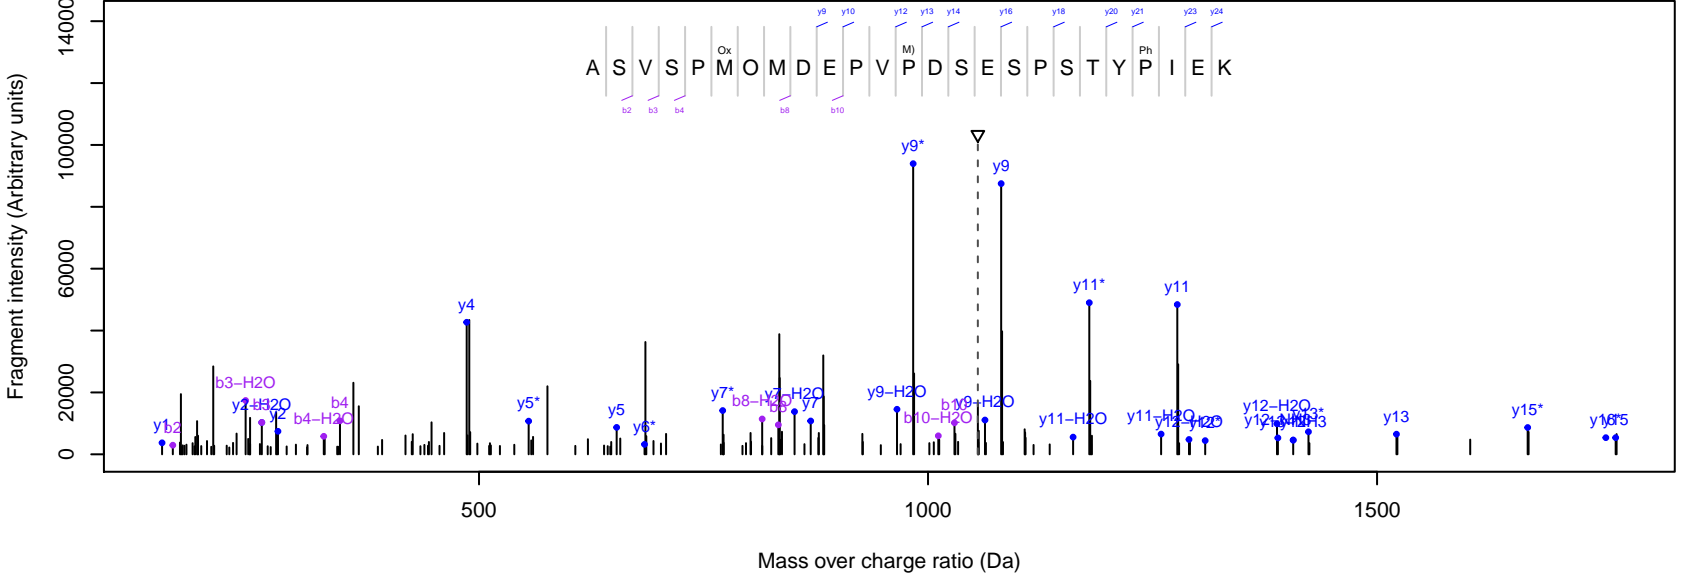

RLAS(Phospho (STY))TSDIEEKENR-3+

Source : QE3\_201126\_FR\_TiOx\_hum\_tissue\_Urea\_RNAB\_N Scan : 8884

Andromeda score : 211.16

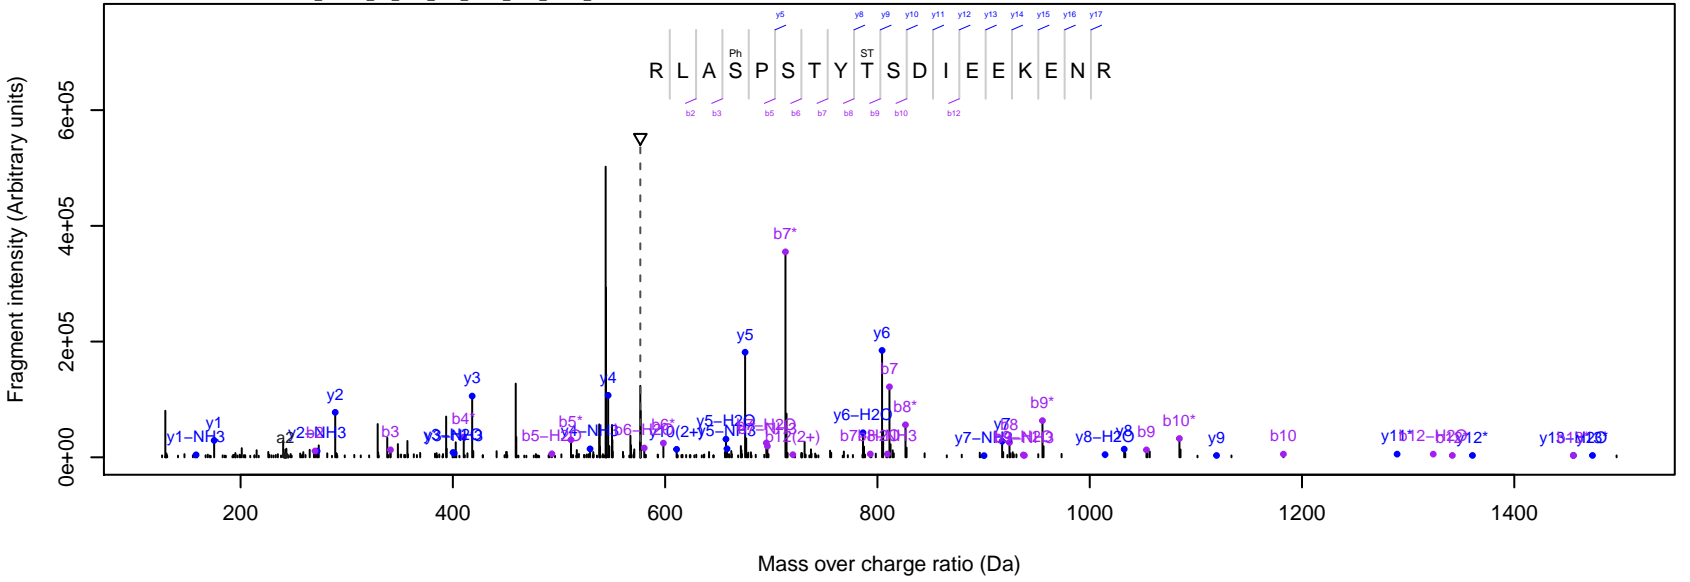

GSGSS(Phospho (STY))FEQSFNFDDLFK-2+

Source : QE3\_201126\_FR\_TiOx\_hum\_tissue\_Urea\_RNAB\_N Scan : 62600

Andromeda score : 211.13

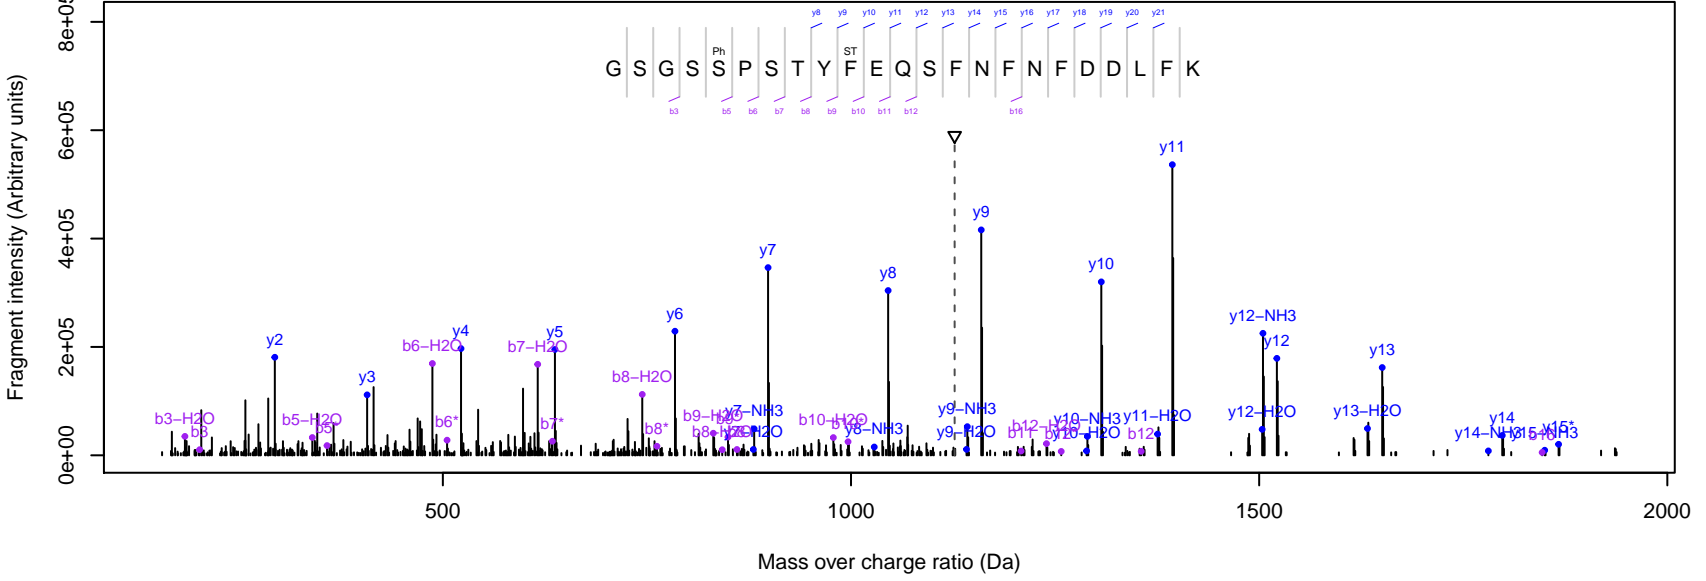

RVIENADGS(Phospho (STY))EEETDTR-2+

Source : QE3\_201126\_FR\_TiOx\_hum\_tissue\_Urea\_RNAB\_N Scan : 8506

Andromeda score : 211.13

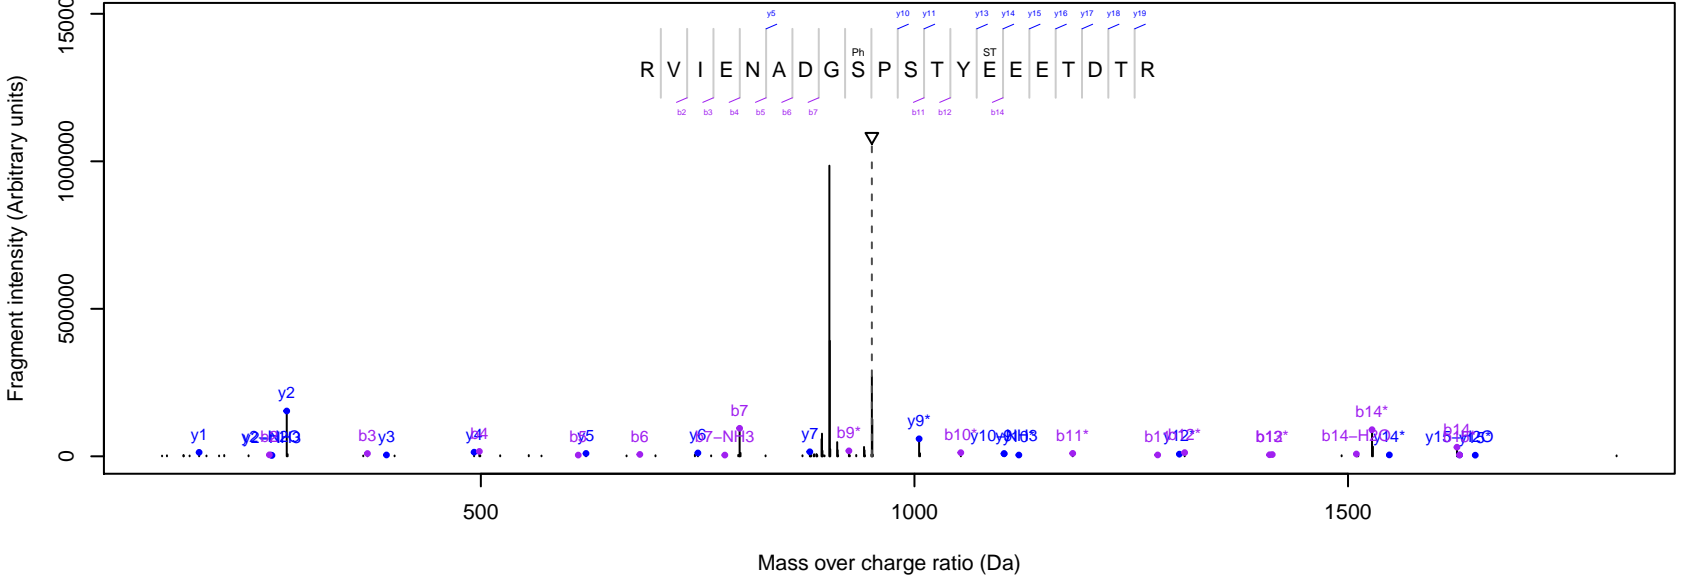

S(Phospho (STY))PVPDVEDPATEEPGESFCDK-2+

Source : QE3\_201126\_FR\_TiOx\_hum\_tissue\_Urea\_RNAB\_H Scan : 35363

Andromeda score : 211.13

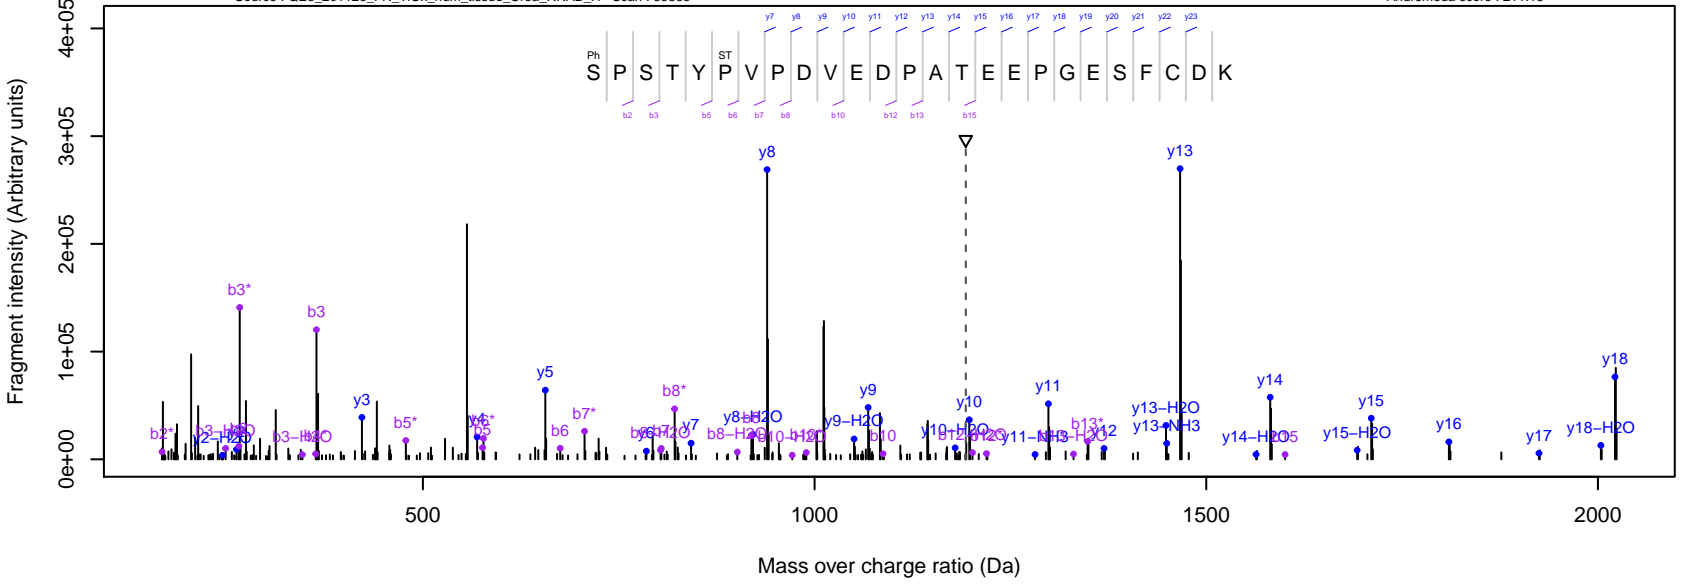

SST(Phospho (STY))PPGESYFGVSSLQLK-2+

Source : QE3\_201126\_FR\_TiOx\_hum\_tissue\_Urea\_RNAB\_N Scan : 49848

Andromeda score : 211.12

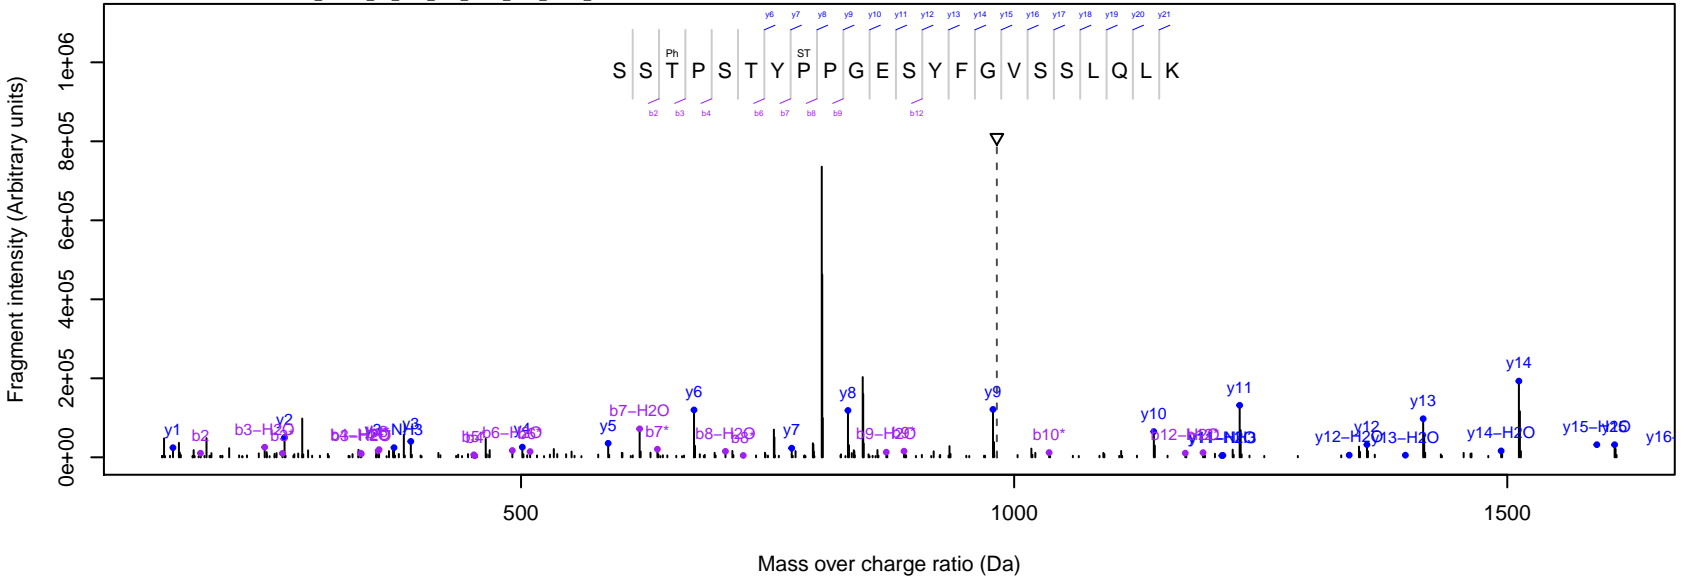

TSS(Phospho (STY))KESS(Phospho (STY))PIPSPTSDRK-2+

Source : QE3\_201126\_FR\_TiOx\_hum\_tissue\_Urea\_RNAB\_N Scan : 9338

Andromeda score : 211.09

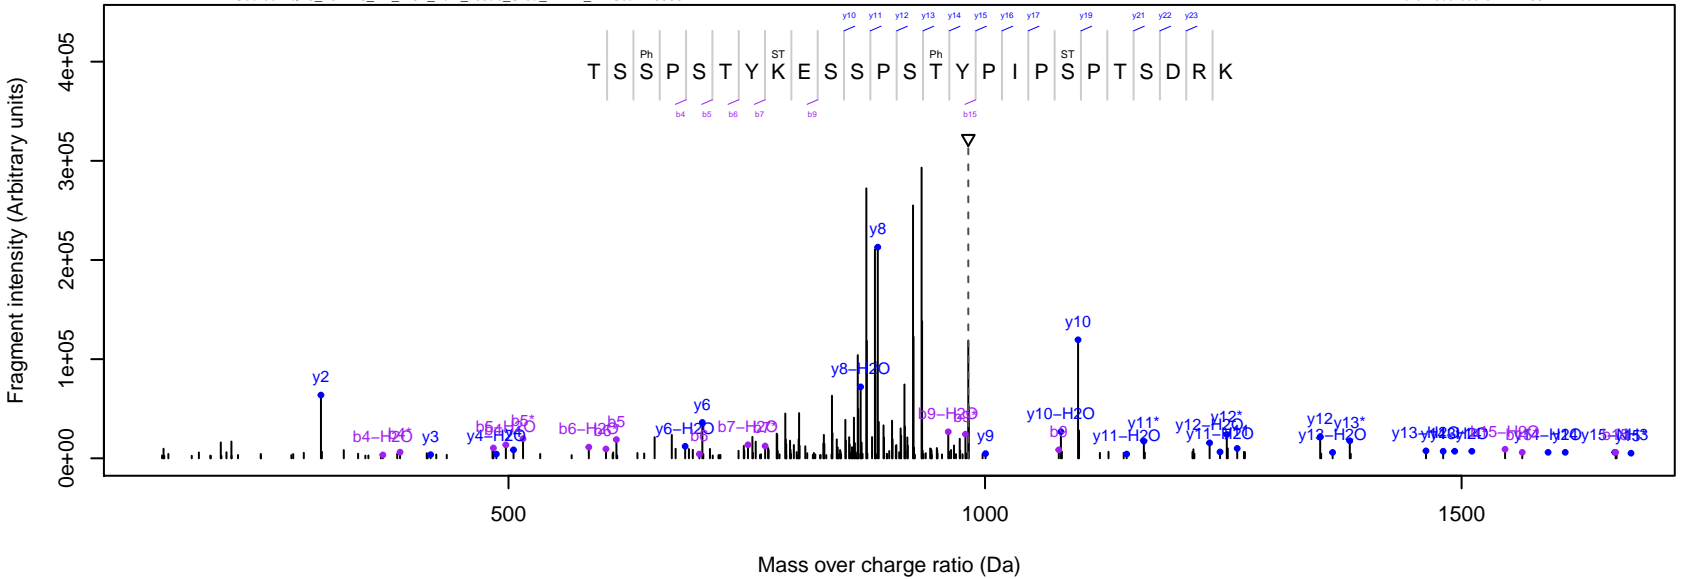

DLFDLNSS(Phospho (STY))EEDDTGFSER-2+

Source : QE3\_201126\_FR\_TiOx\_hum\_tissue\_Urea\_RNAB\_N Scan : 56484

Andromeda score : 211.06

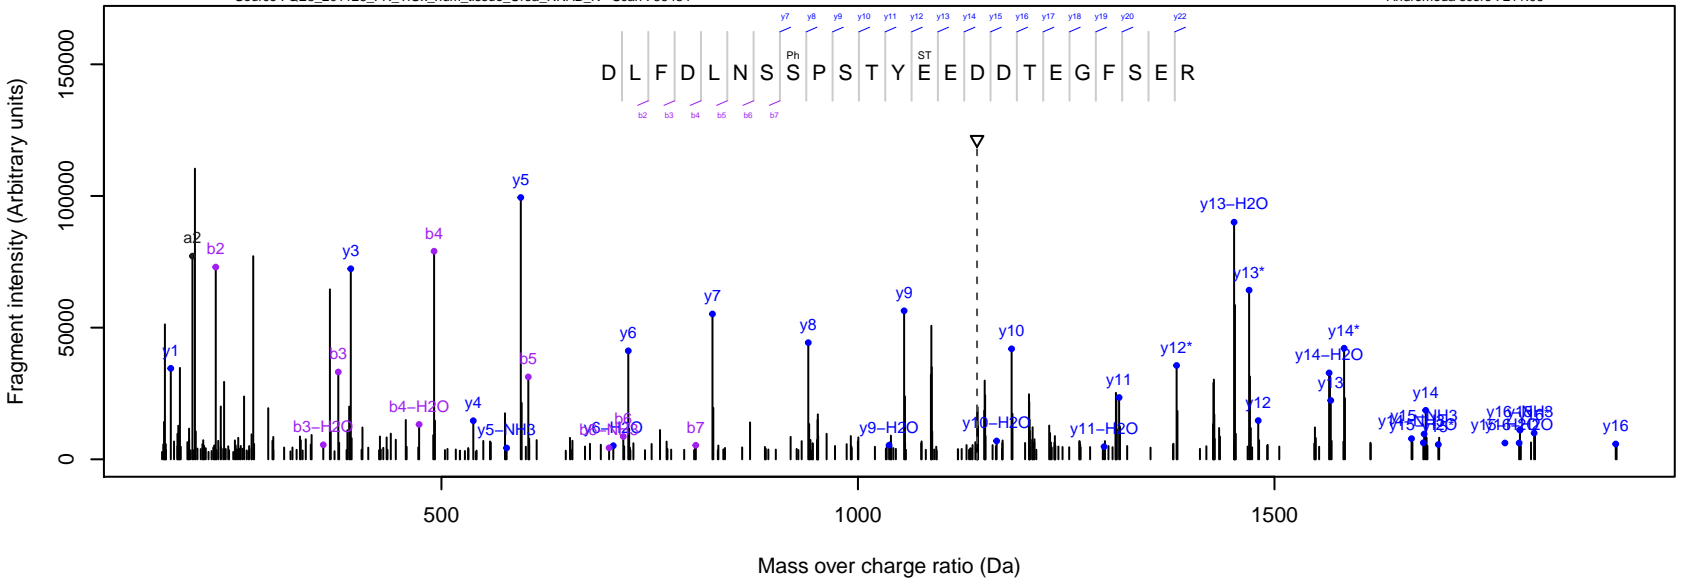

IADGSPSTYVKREDIFYSK-2+

Source : QE3\_201126\_FR\_TiOx\_hum\_tissue\_Urea\_RNAB\_B Scan : 19189

Andromeda score : 211.06

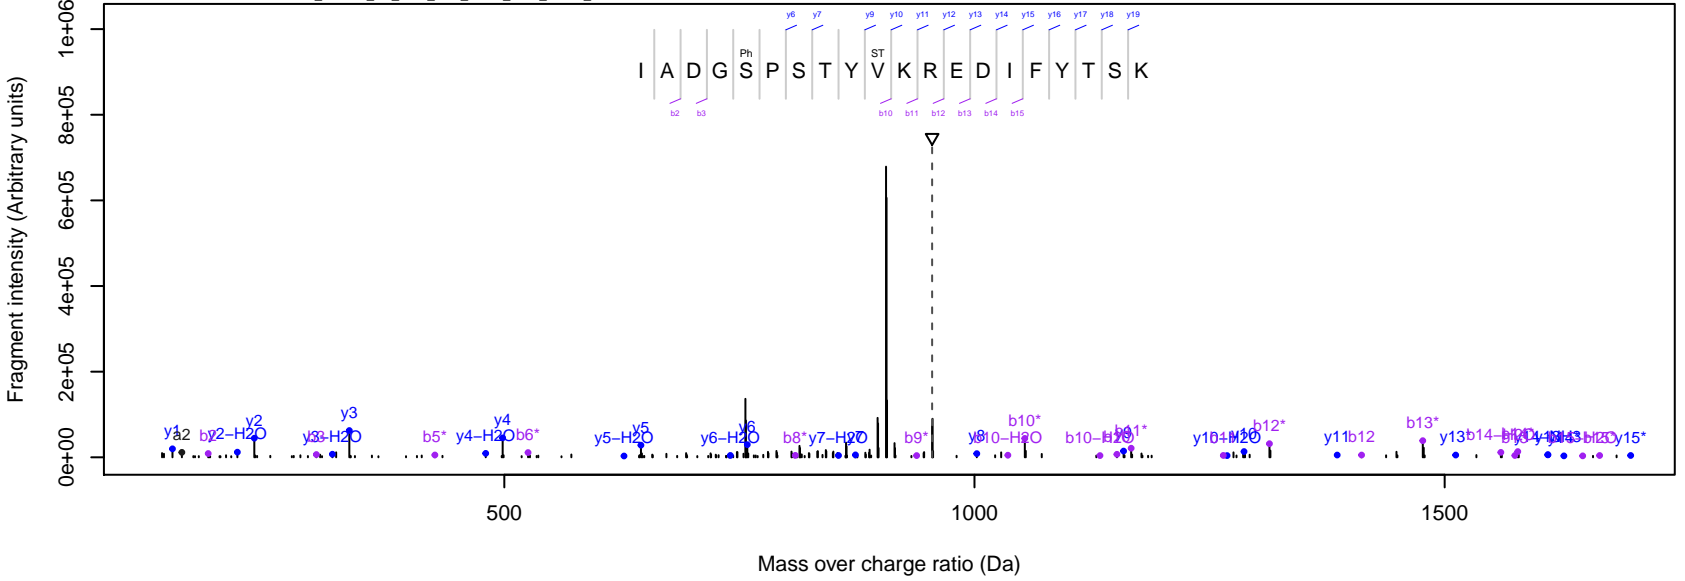

KEKPELSEPSHLNGPSSPSTYDPEAAFLSR-4+

Source : QE3\_201126\_FR\_TiOx\_hum\_tissue\_Urea\_RNAB\_B Scan : 26342

Andromeda score : 211.02

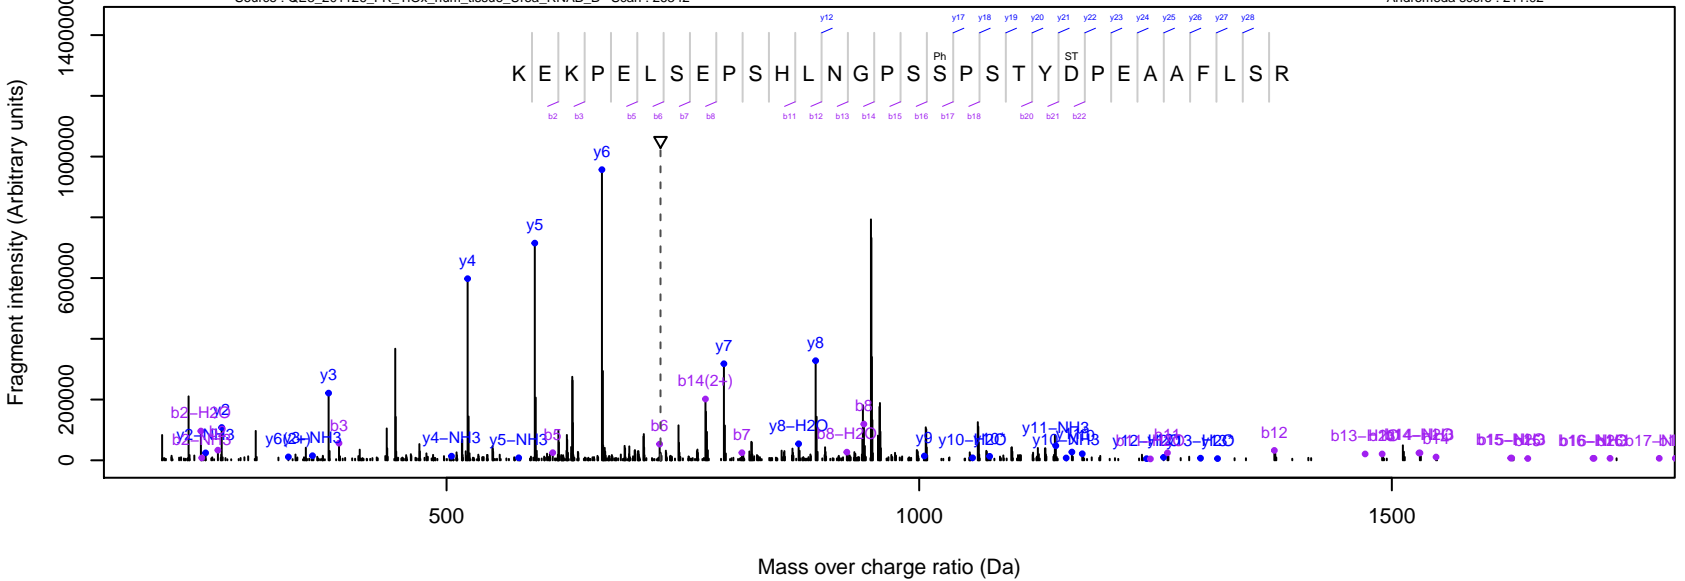



S(Phospho (STY))SEEVDGQHPAQEEVPEPQTSGPEAENR-3+

Source : QE3\_201126\_FR\_TiOx\_hum\_tissue\_Urea\_RNAB\_H Scan : 18216

Andromeda score : 210.81

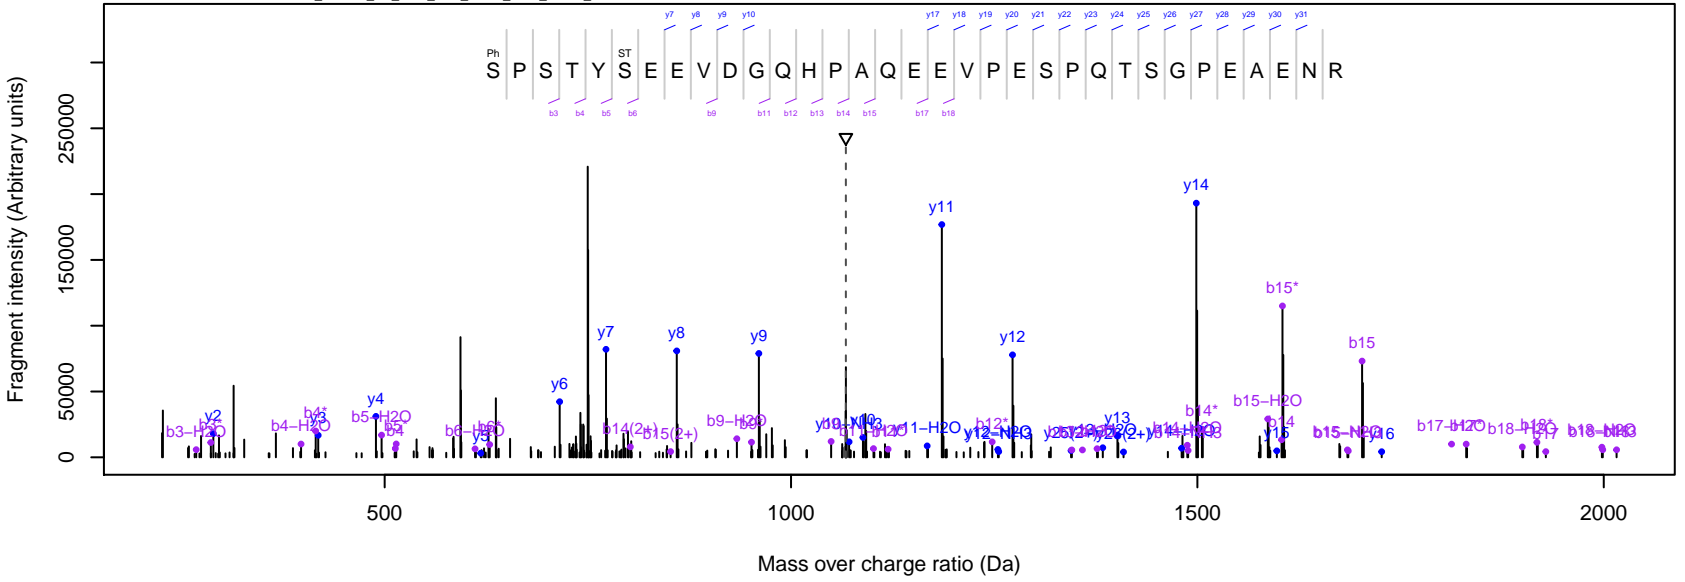

S(Phospho (STY))TSFRGGM(Oxidation (M))GSGGLATGIAGLAGMOMGGIQNEK-3+

Source : QE3\_201126\_FR\_TiOx\_hum\_tissue\_Urea\_RNAB\_H Scan : 34041

Andromeda score : 210.74

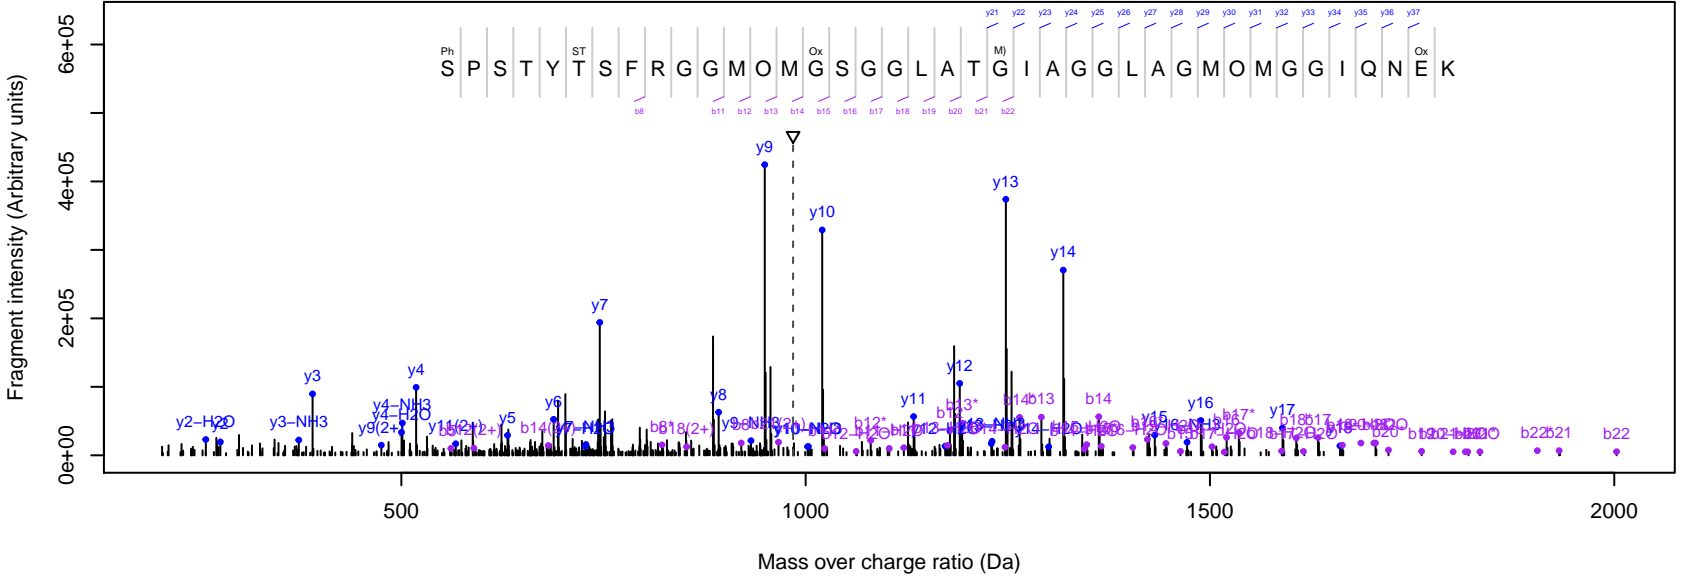

RRPGAQLPPPPPSQS(Phospho (STY))PEPTEPHPR-4+

Source : QE3\_201126\_FR\_TiOx\_hum\_tissue\_Urea\_RNAB\_N Scan : 14057

Andromeda score : 210.7

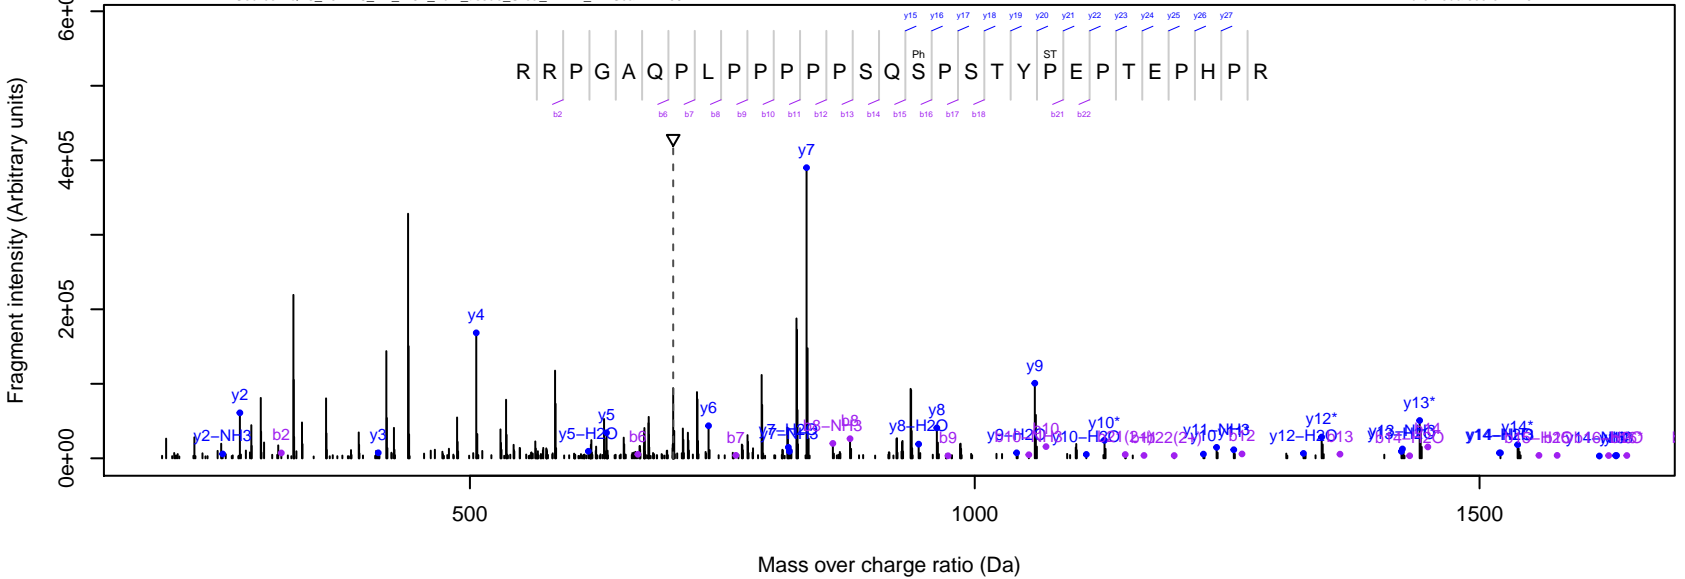

KVS(Phospho (STY))VSESNVLLDEEVLTPK-2+

Source : QE3\_201126\_FR\_TiOx\_hum\_tissue\_Urea\_RNAB\_H Scan : 43182

Andromeda score : 210.66

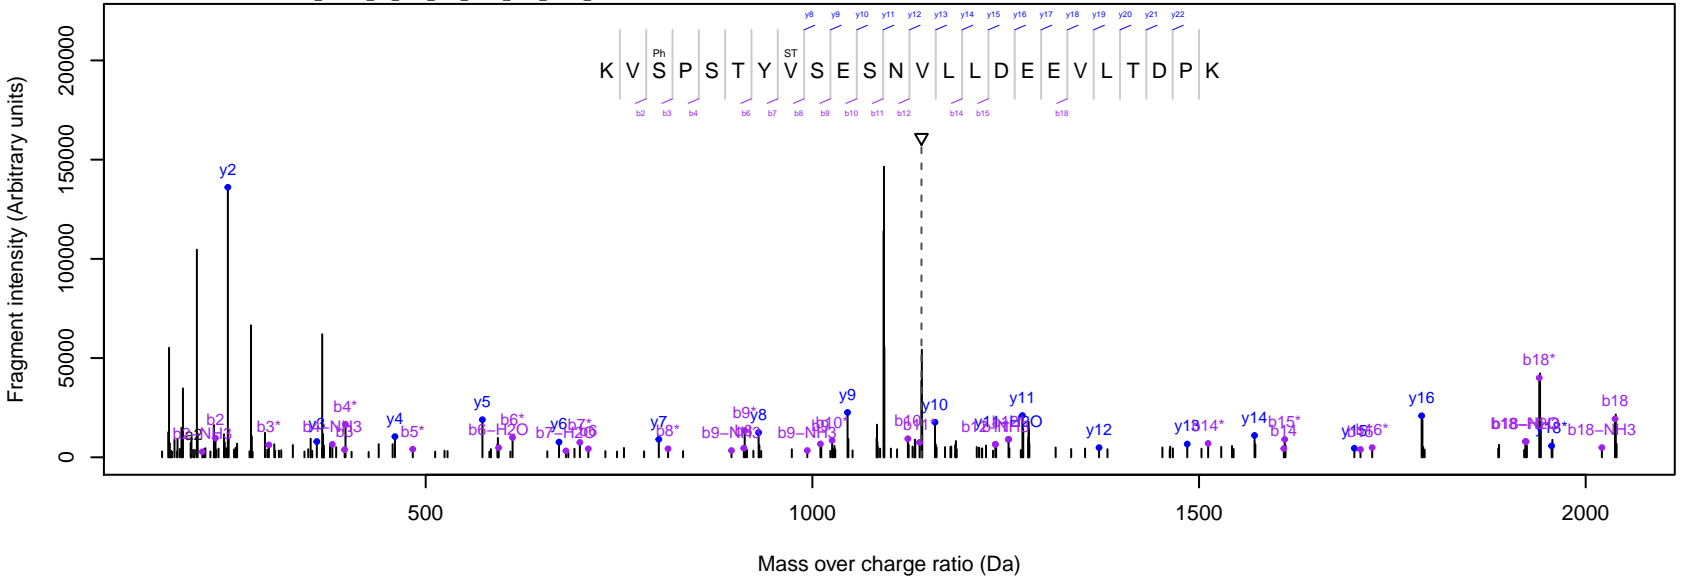

IYQFPDCDS(Phospho (STY))DEDEDFKLQDQALK-3+

Source : QE3\_201126\_FR\_TiOx\_hum\_tissue\_Urea\_RNAB\_H Scan : 43762

Andromeda score : 210.5

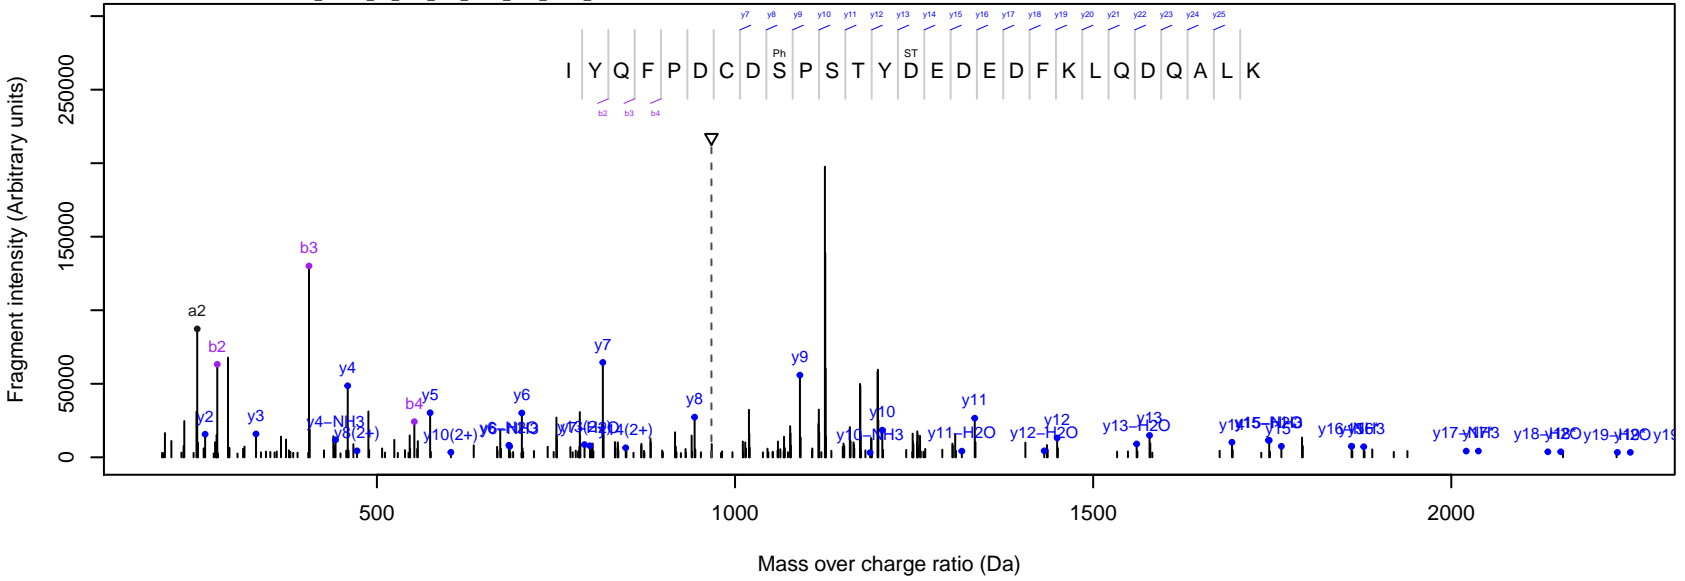

GGMGS(Phospho (STY))GGLATGIAGGLAGMGGIQNEKETMQS(Phospho (STY))LNDR-3+

Source : QE3\_201126\_FR\_TiOx\_hum\_tissue\_Urea\_RNAB\_N Scan : 54756

Andromeda score : 210.4

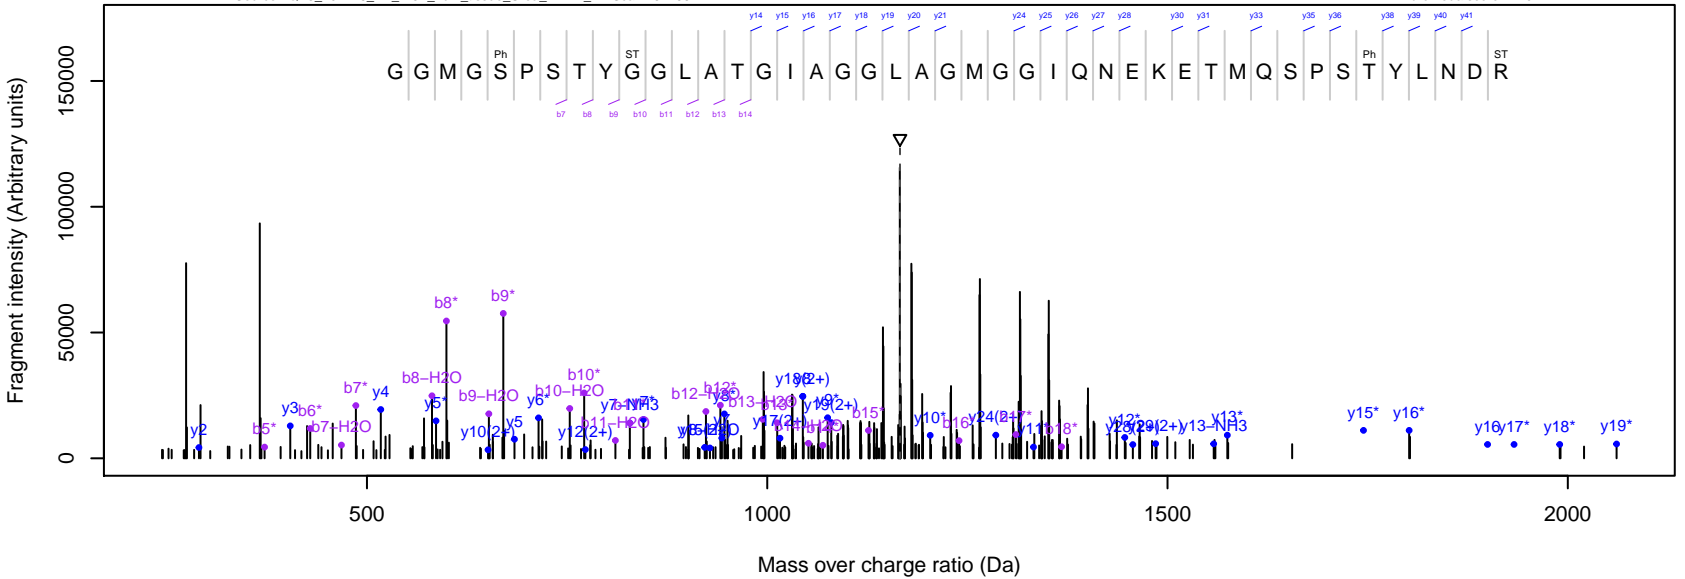

DKAPVQPQQS(Phospho (STY))PAAAPGGTDEKPSGK-3+

Source : QE3\_201126\_FR\_TiOx\_hum\_tissue\_Urea\_RNAB\_H Scan : 8779

Andromeda score : 210.36

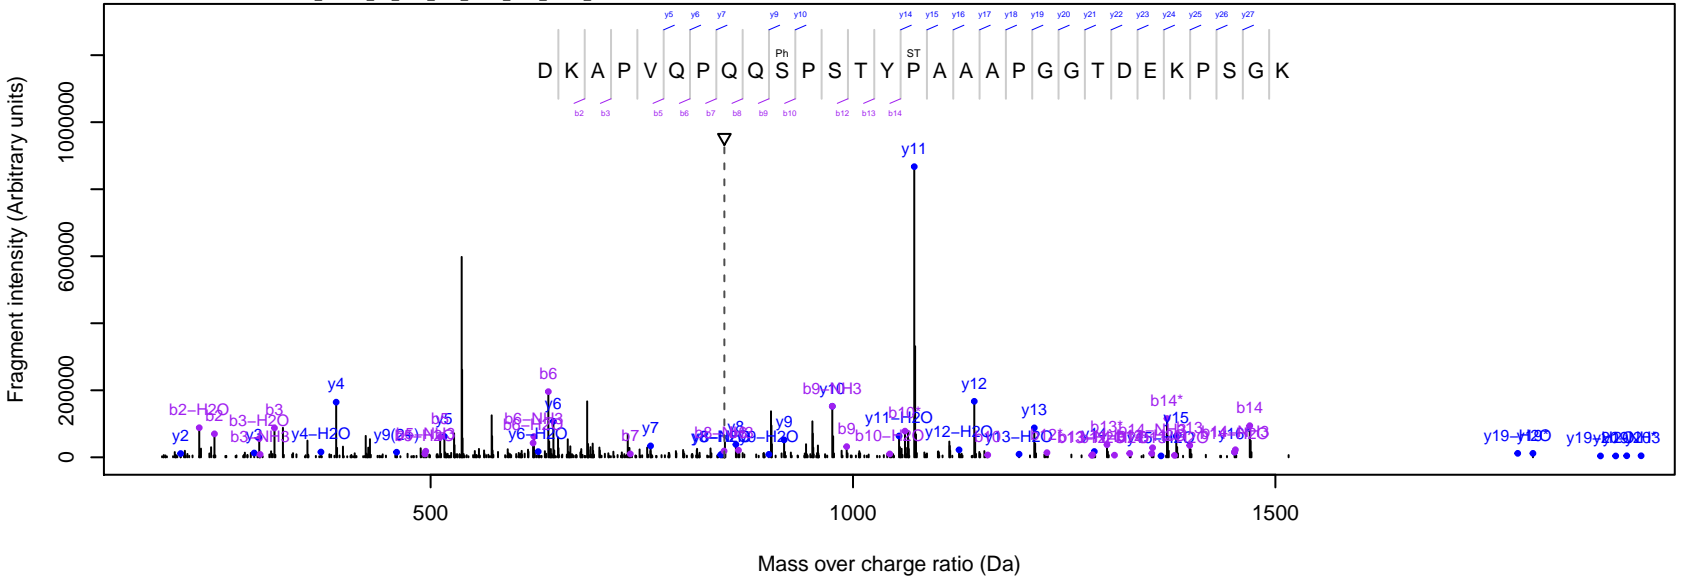

NYS(Phospho (STY))REQHGVAASCLEDLR-3+

Source : QE3\_201126\_FR\_TiOx\_hum\_tissue\_Urea\_RNAB\_N Scan : 21016

Andromeda score : 210.32

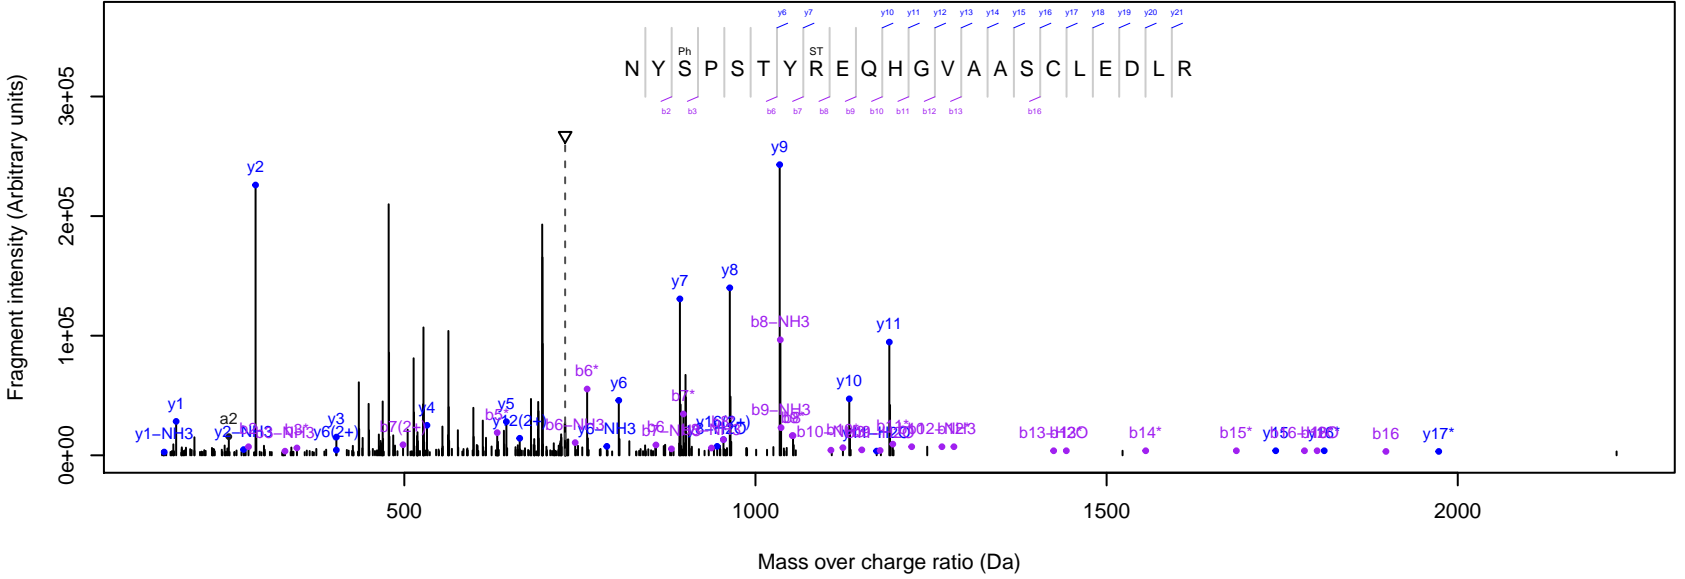

AEQGS(Phospho (STY))EEEEGEEEEEGGESKADDPYAHLSKK-3+

Source : QE3\_201126\_FR\_TiOx\_hum\_tissue\_Urea\_RNAB\_H Scan : 14554

Andromeda score : 210.06

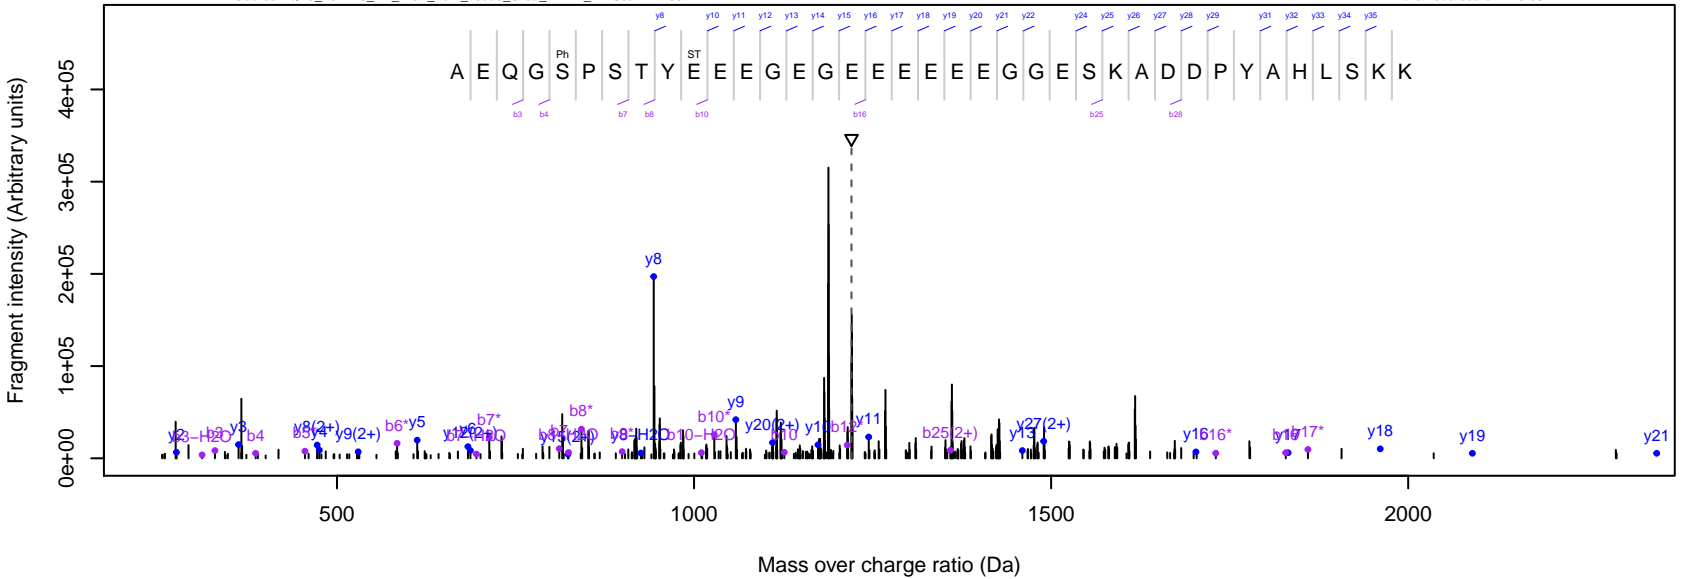

YKDIIRQPS(Phospho (STY))EEEIHK-3+

Source : QE3\_201126\_FR\_TIOx\_hum\_tissue\_Urea\_RNAB\_H Scan : 23418

Andromeda score : 210.02

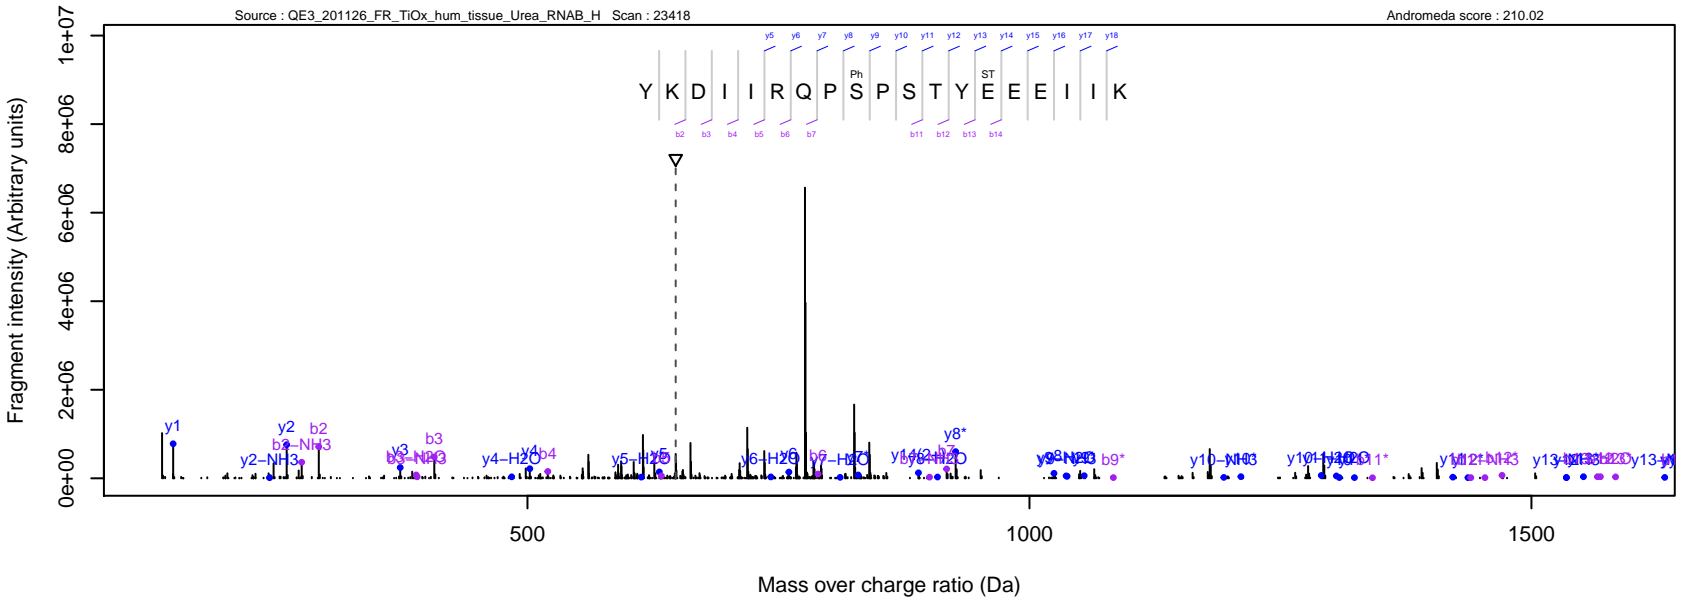

GDLSPSTYDVEEEEEEMDVDEATGAVK-2+

Source : QE3\_201126\_FR\_TIOx\_hum\_tissue\_Urea\_RNAB\_H Scan : 50255

Andromeda score : 209.9

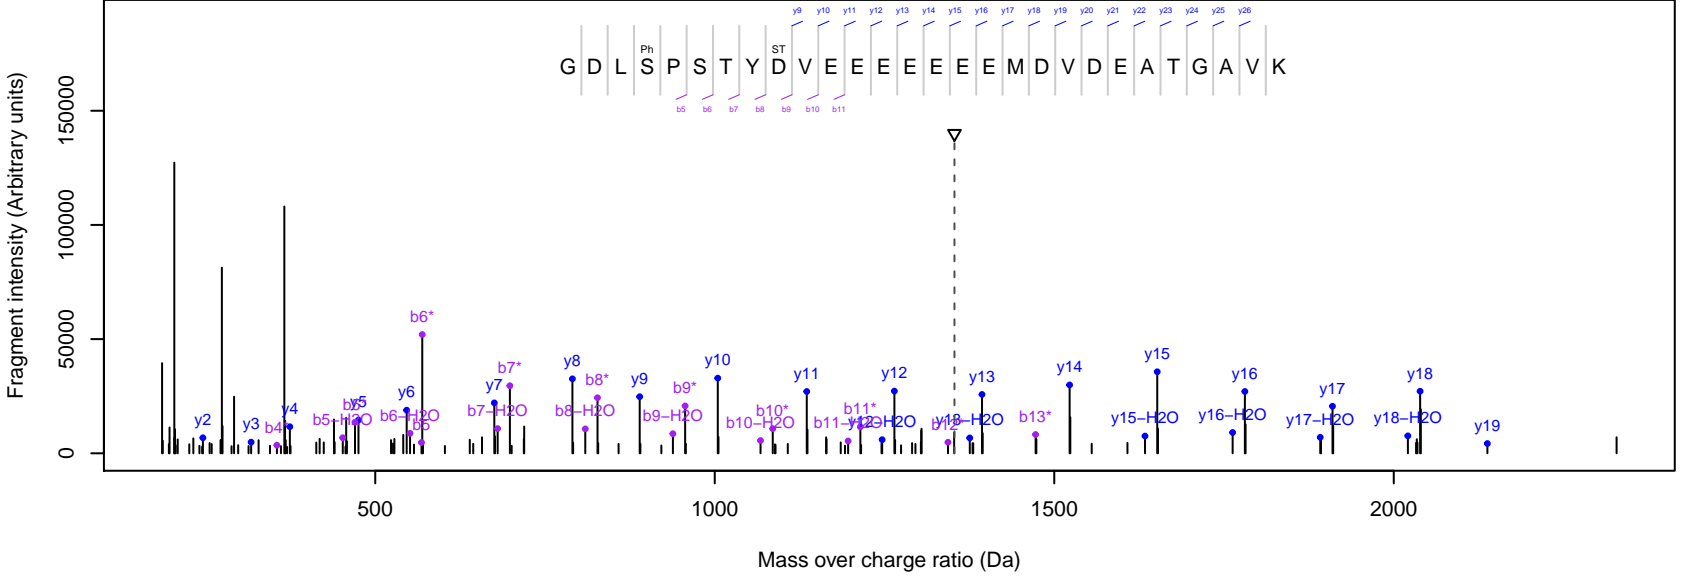

DHS(Phospho (STY))PTPSVFN(Phospho (STY))DEERYR-3+

Source : QE3\_201126\_FR\_TIOx\_hum\_tissue\_Urea\_RNAB\_B Scan : 24009

Andromeda score : 209.71

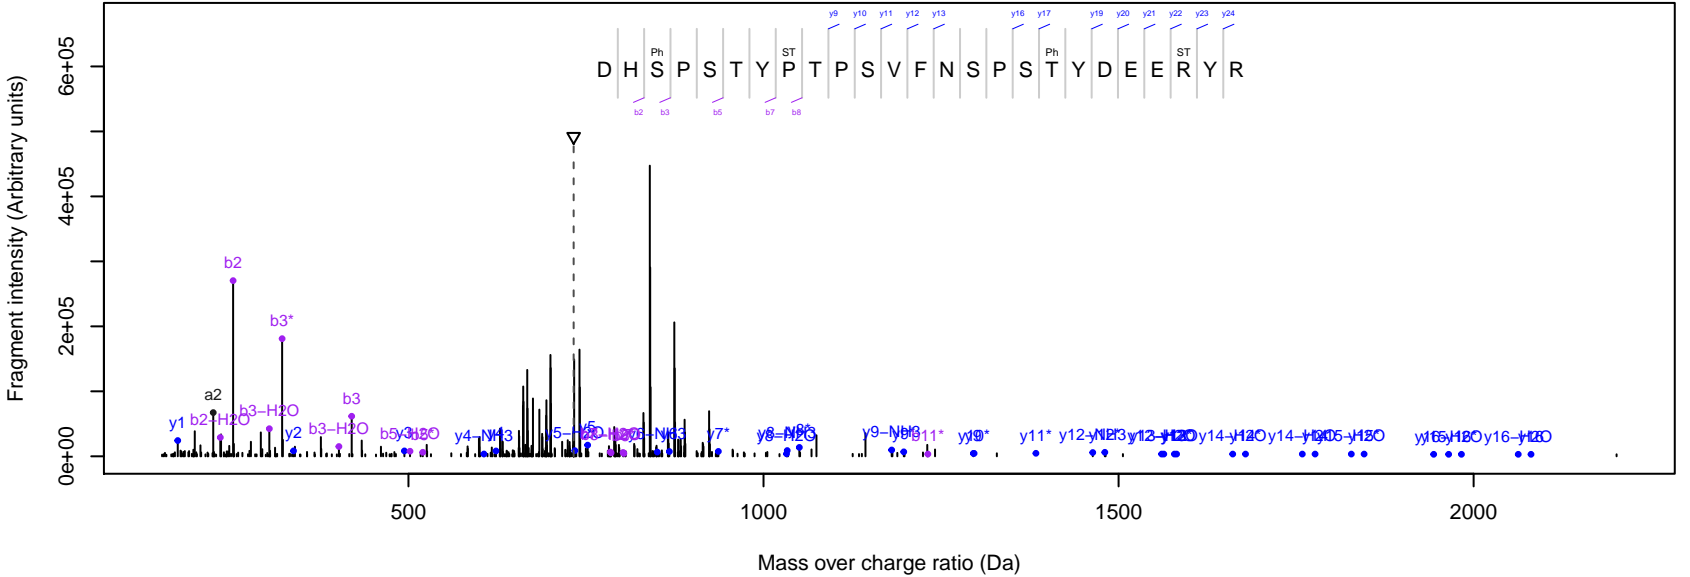

KAEGEPQES(Phospho (STY))PLK-2+

Source : QE3\_201126\_FR\_TIOx\_hum\_tissue\_Urea\_RNAB\_N Scan : 7809

Andromeda score : 209.6

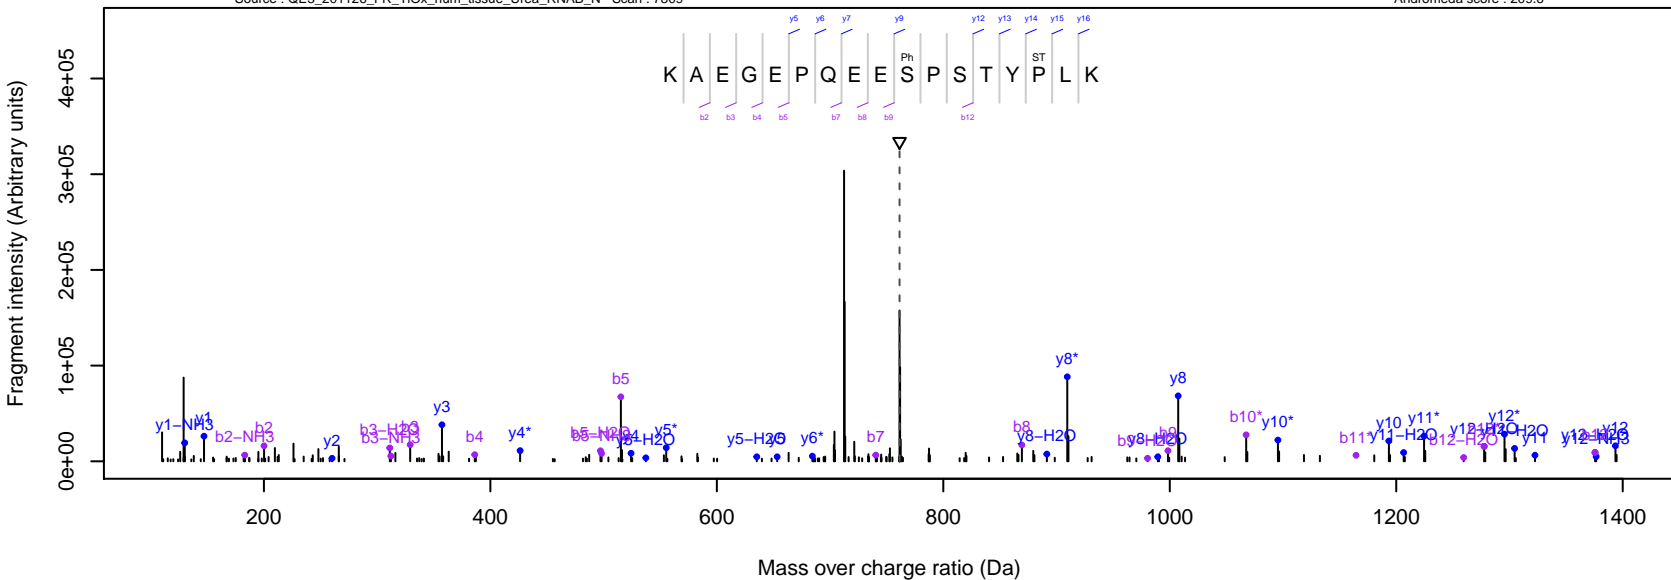

GLMAGGRPEGQYS(Phospho (STY))EDEDTDDEYKEAK-3+

Source : QE3\_201126\_FR\_TIOx\_hum\_tissue\_Urea\_RNAB\_N Scan : 18772

Andromeda score : 209.47

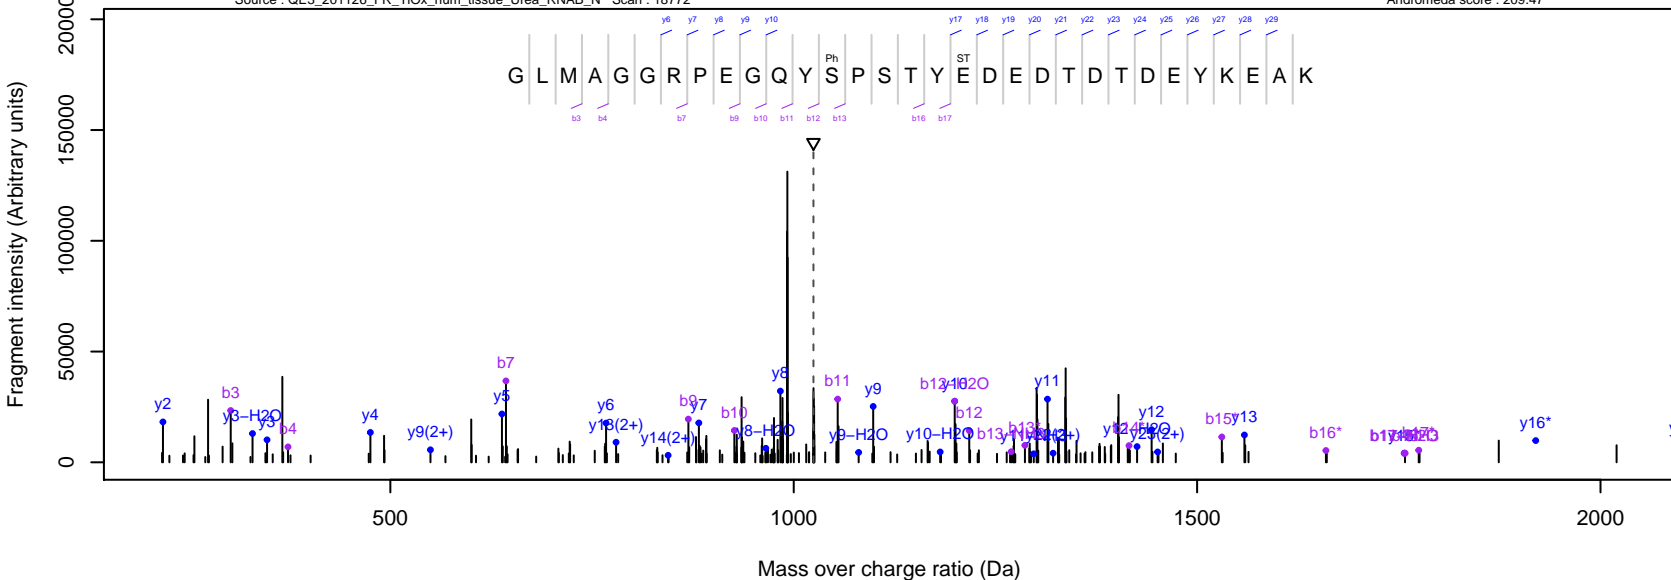

SEDDSAKFDS(Phospho (STY))NEEDSASVFSFGLK-3+

Source : QE3\_201126\_FR\_TIOx\_hum\_tissue\_Urea\_RNAB\_N Scan : 47128

Andromeda score : 209.46

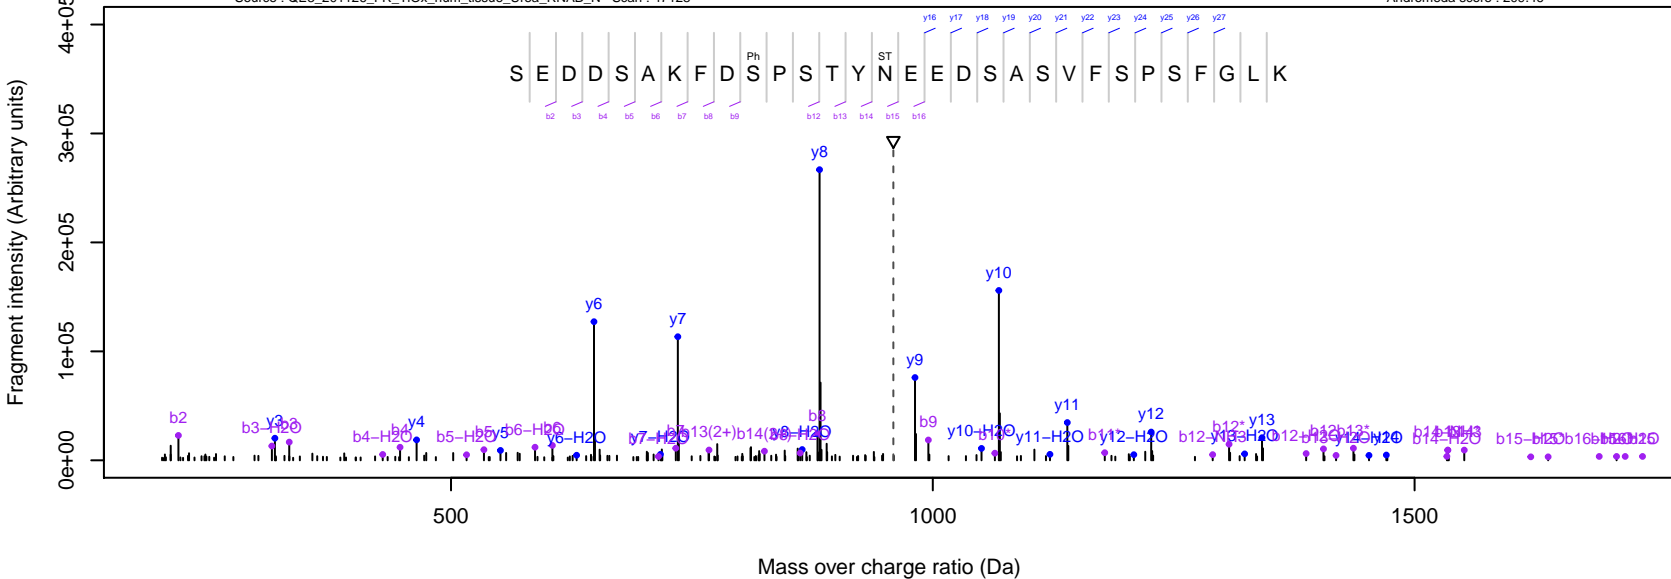

TKFAS(Phospho (STY))DDEHDEHDENGATGPVK-4+

Source : QE3\_201126\_FR\_TiOx\_hum\_tissue\_Urea\_RNAB\_H Scan : 7838

Andromeda score : 209.46

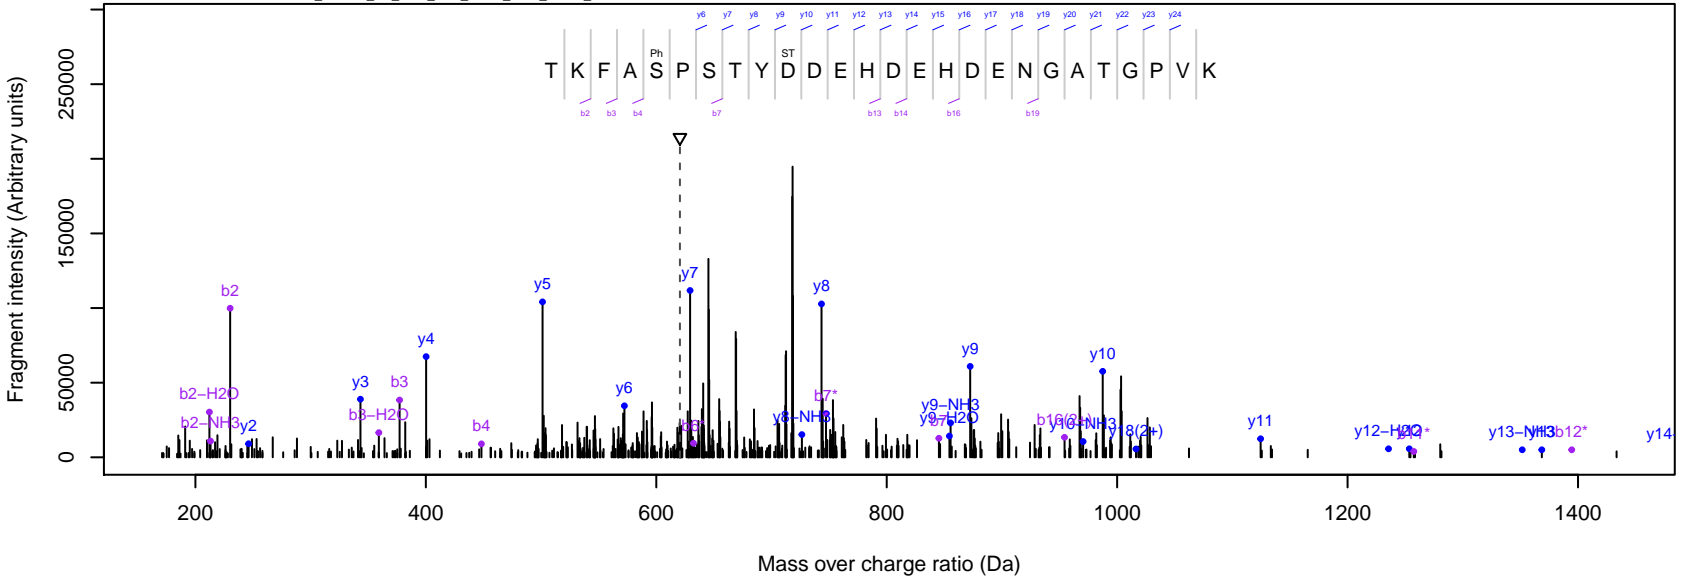

PKIEDVGS(Phospho (STY))DEEDDSGKDK-3+

Source : QE3\_201126\_FR\_TiOx\_hum\_tissue\_Urea\_RNAB\_N Scan : 8795

Andromeda score : 209.45

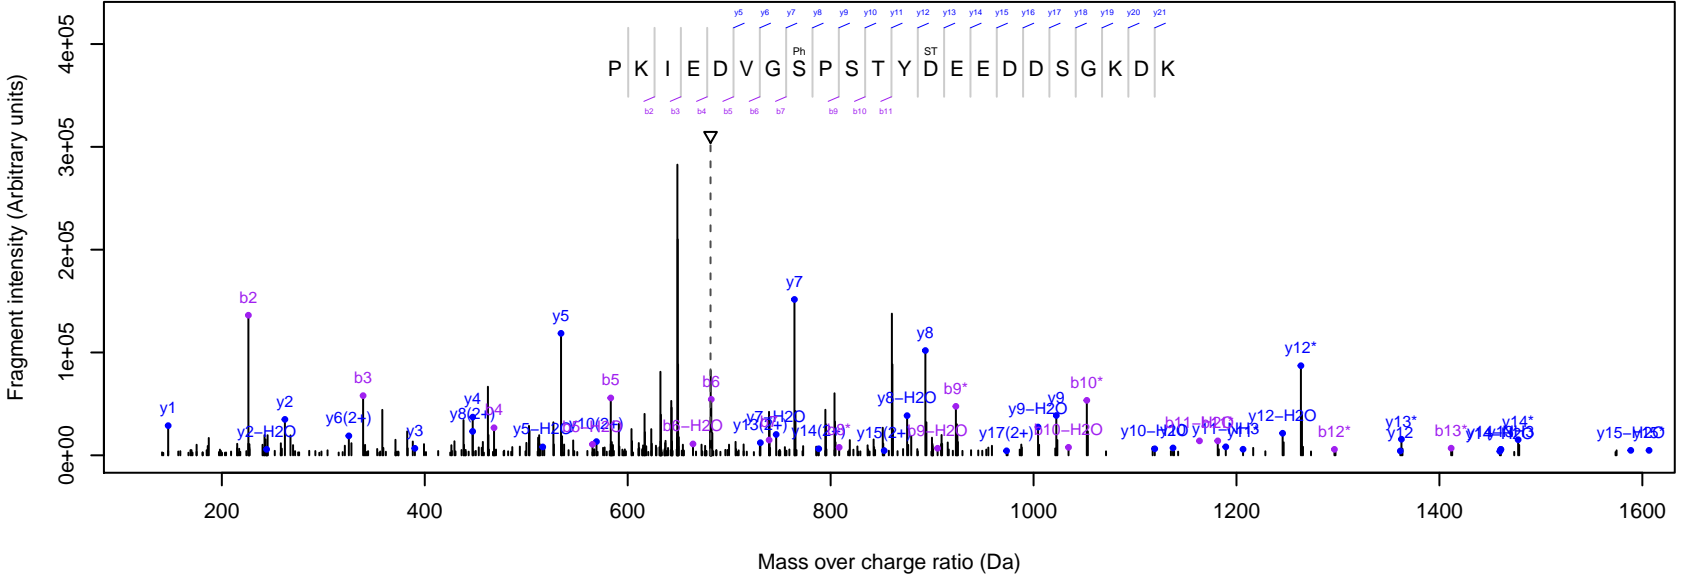

GSEGYLAATYPTVGQT(Phospho (STY))SPR-2+

Source : QE3\_201126\_FR\_TiOx\_hum\_tissue\_Urea\_RNAB\_H Scan : 34637

Andromeda score : 209.25

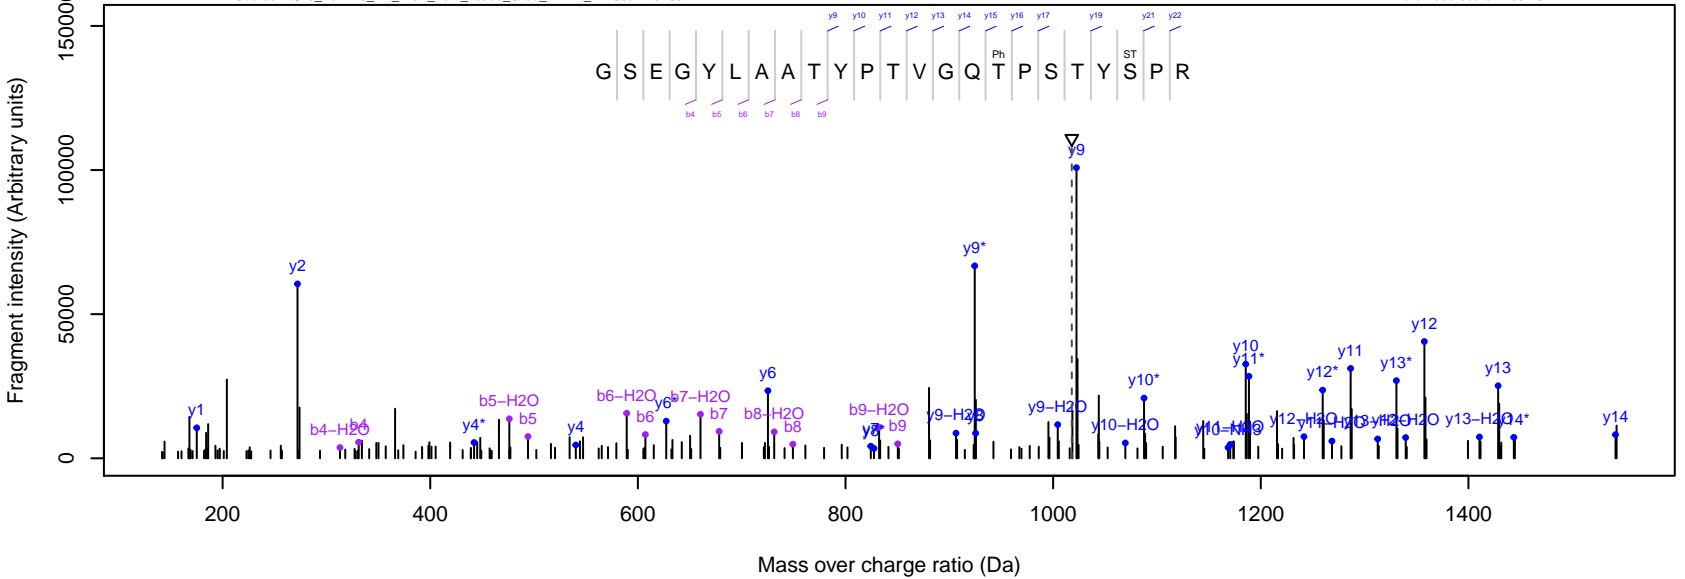

LLQDS(Phospho (STY))VDFSLADAINTEFK-2+

Source : QE3\_201126\_FR\_TiOx\_hum\_tissue\_Urea\_RNAB\_B Scan : 61985

Andromeda score : 209.25

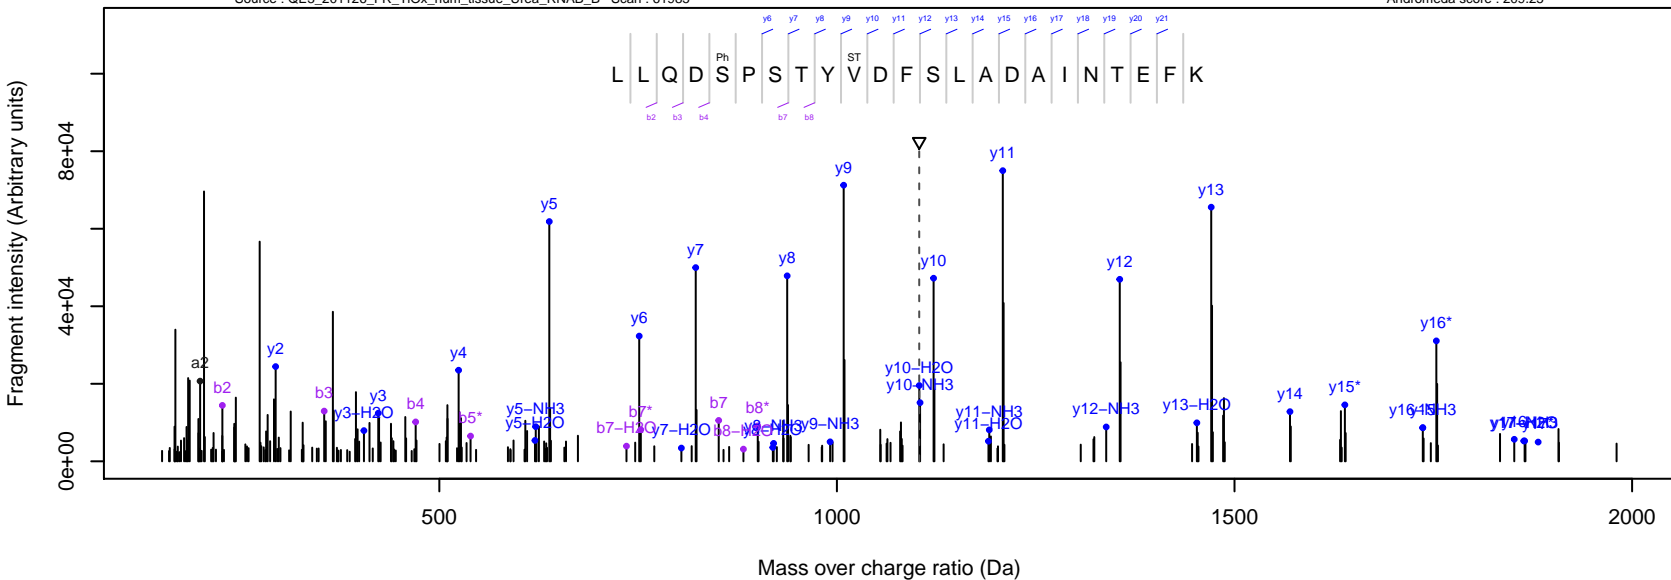

FFTT(Phospho (STY))GSDSESSLS(Phospho (STY))GEELVTKPVGNGYK-3+

Source : QE3\_201126\_FR\_TiOx\_hum\_tissue\_Urea\_RNAB\_H Scan : 45475

Andromeda score : 209.24

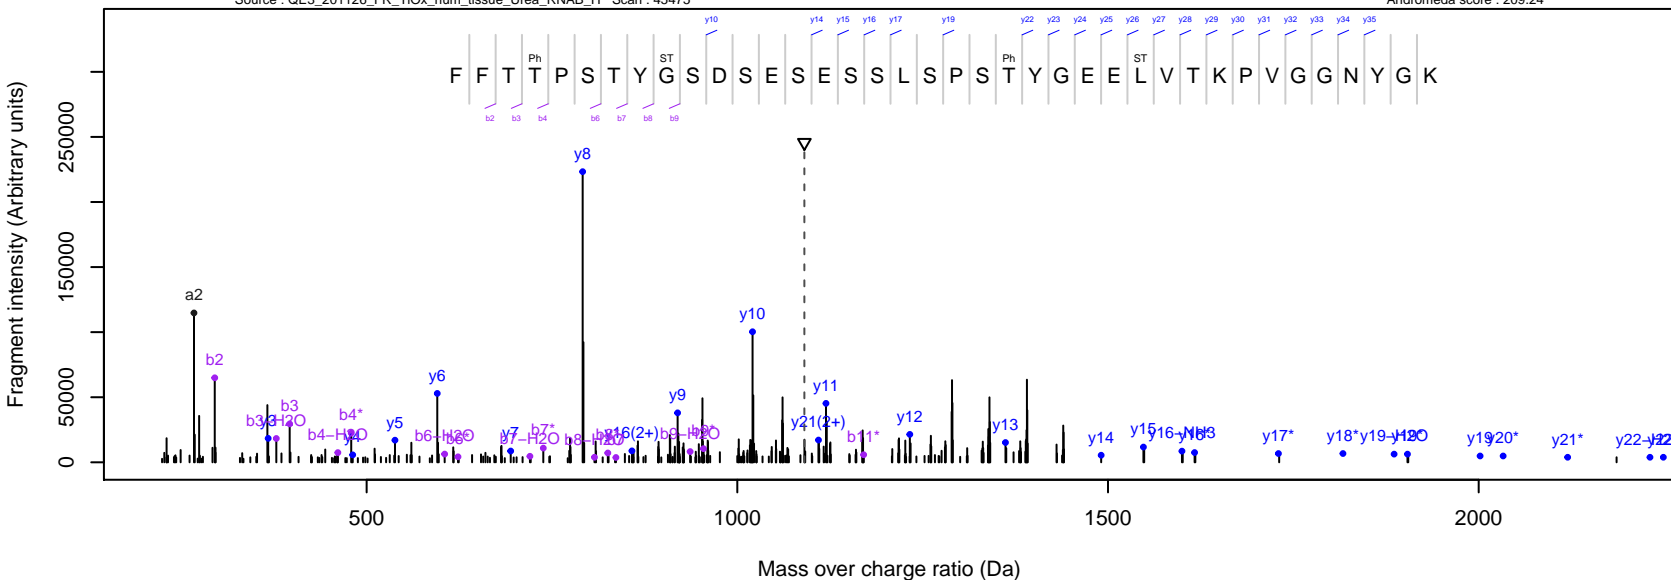

SGS(Phospho (STY))IVELIAGGGSSCS(Phospho (STY))PVLSR-2+

Source : QE3\_201126\_FR\_TiOx\_hum\_tissue\_Urea\_RNAB\_B Scan : 58813

Andromeda score : 209.24

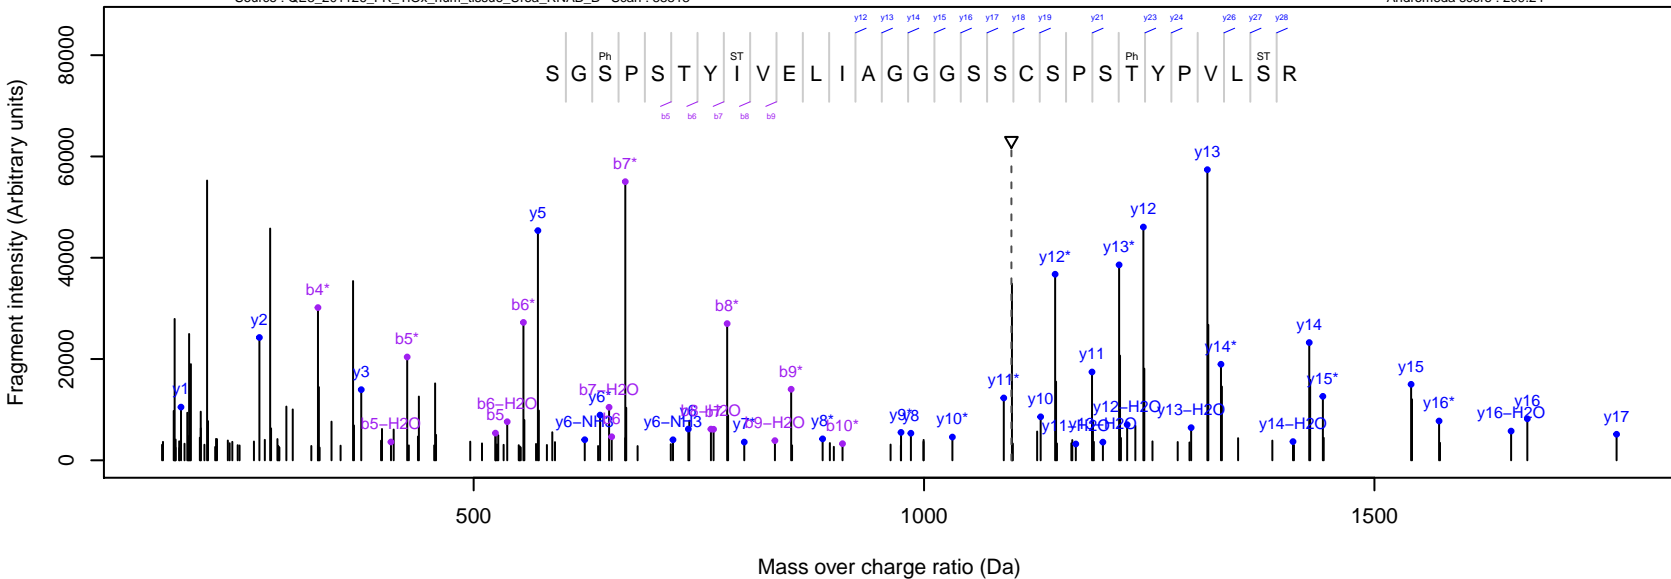

ALVEFESNPEETREPGSPSTYPPSVQR-3+

Source : QE3\_201126\_FR\_TiOx\_hum\_tissue\_Urea\_RNAB\_B Scan : 29270

Andromeda score : 209.16

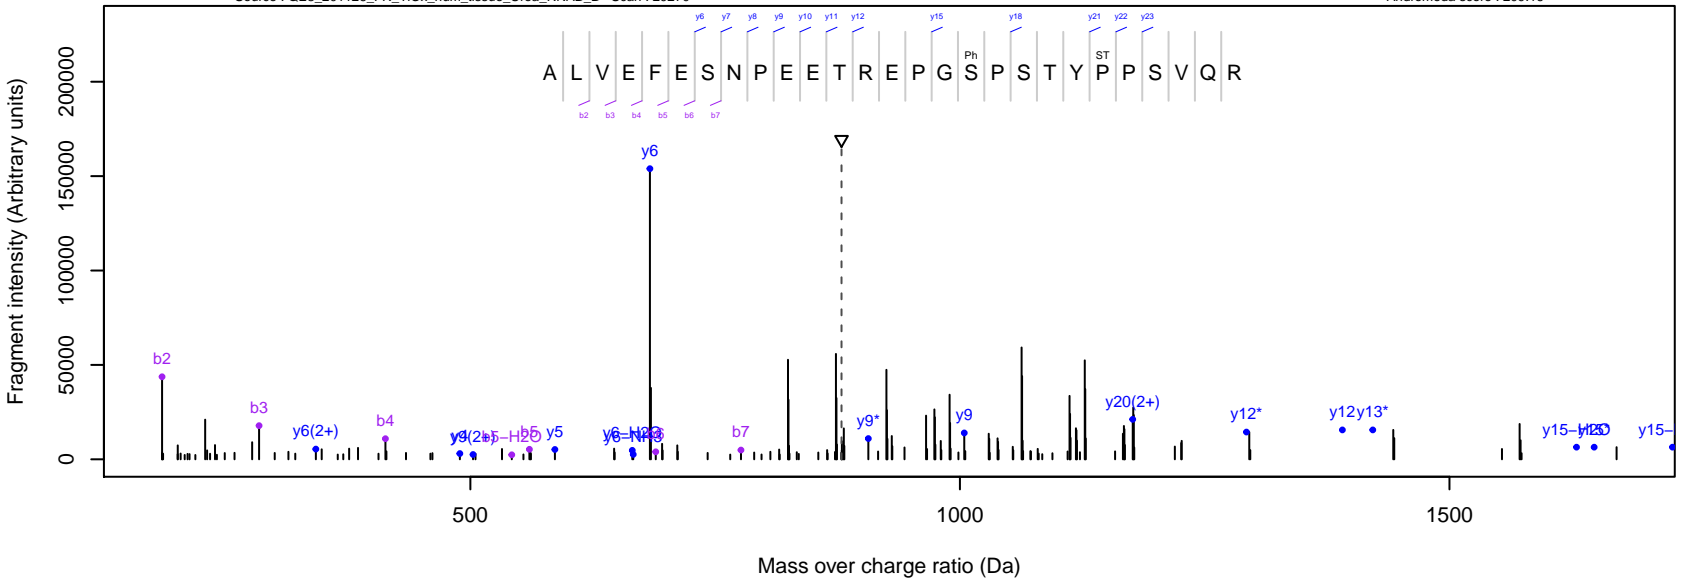

RDS(Phospho (STY))LTGSSDLYKR-3+

Source : QE3\_201126\_FR\_TiOx\_hum\_tissue\_Urea\_RNAB\_B Scan : 11710

Andromeda score : 209.12

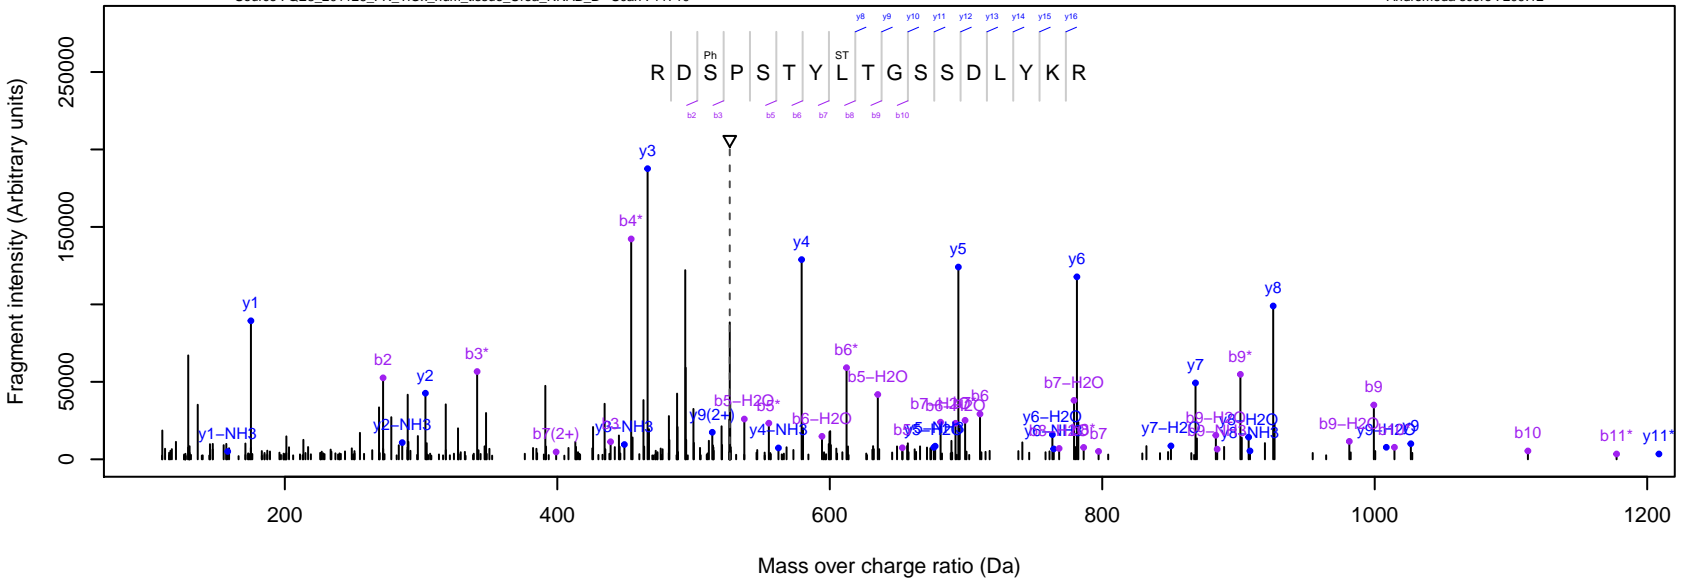

KQDDS(Phospho (STY))PPRPIIGPALPPGFIK-3+

Source : QE3\_201126\_FR\_TiOx\_hum\_tissue\_Urea\_RNAB\_N Scan : 41122

Andromeda score : 208.97

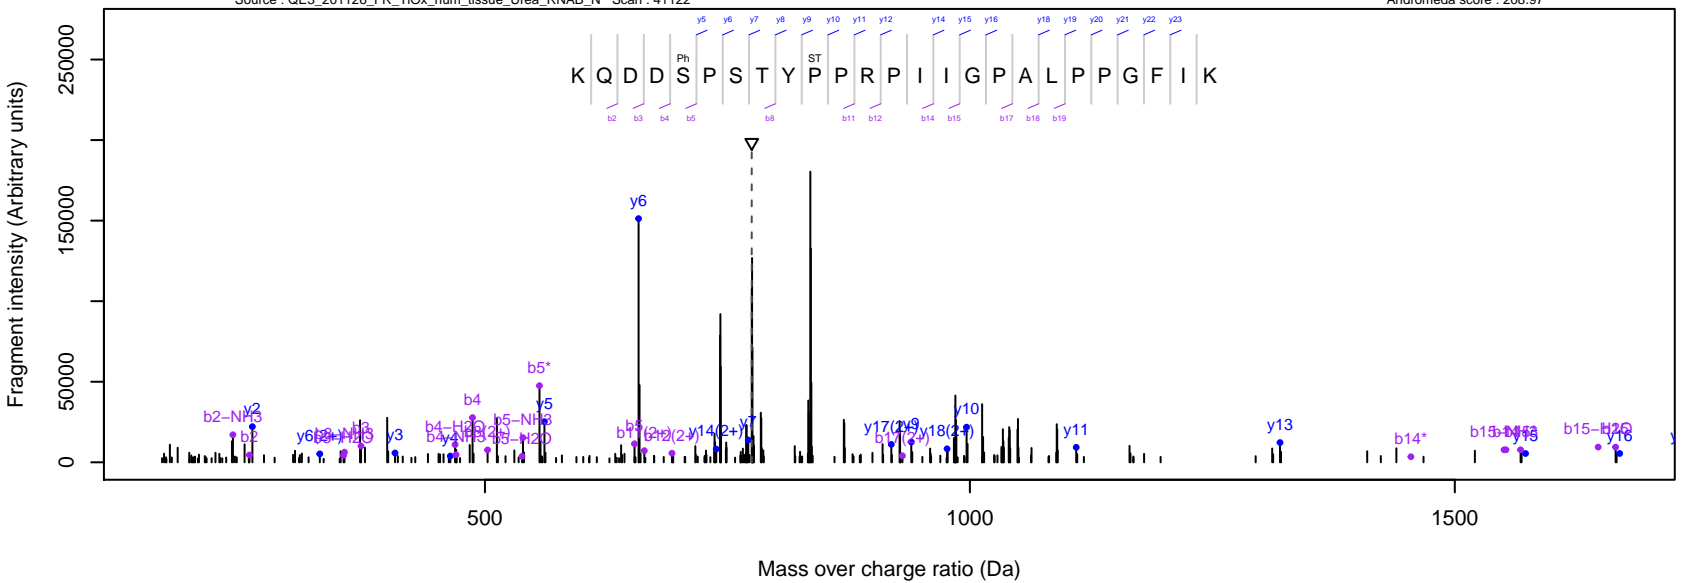





QAVEM(Oxidation (M))KNDKS(Phospho (STY))EEEQSSSSVK-3+

Source : QE3\_201126\_FR\_TIOx\_hum\_tissue\_Urea\_RNAB\_H Scan : 3989

Andromeda score : 208.89

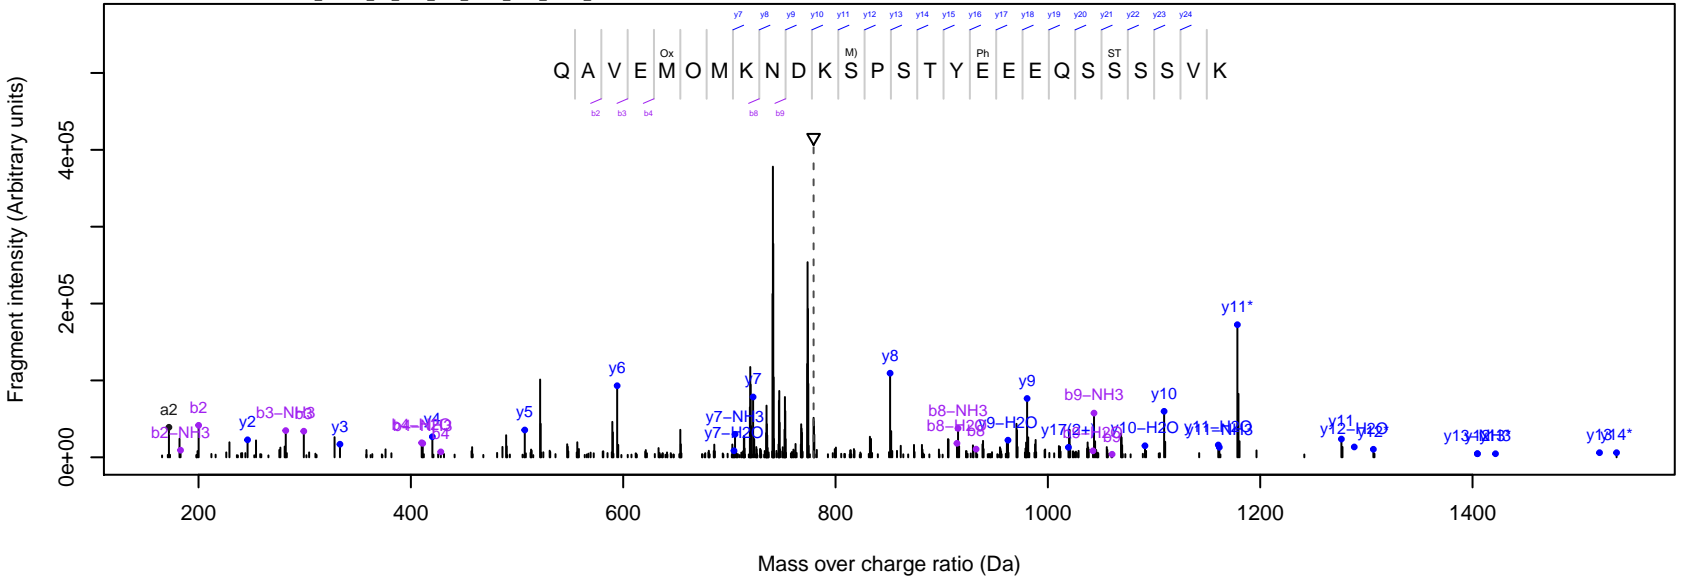

RKT(Phospho (STY))SDANETEDHLES LICK-3+

Source : QE3\_201126\_FR\_TIOx\_hum\_tissue\_Urea\_RNAB\_H Scan : 23214

Andromeda score : 208.89

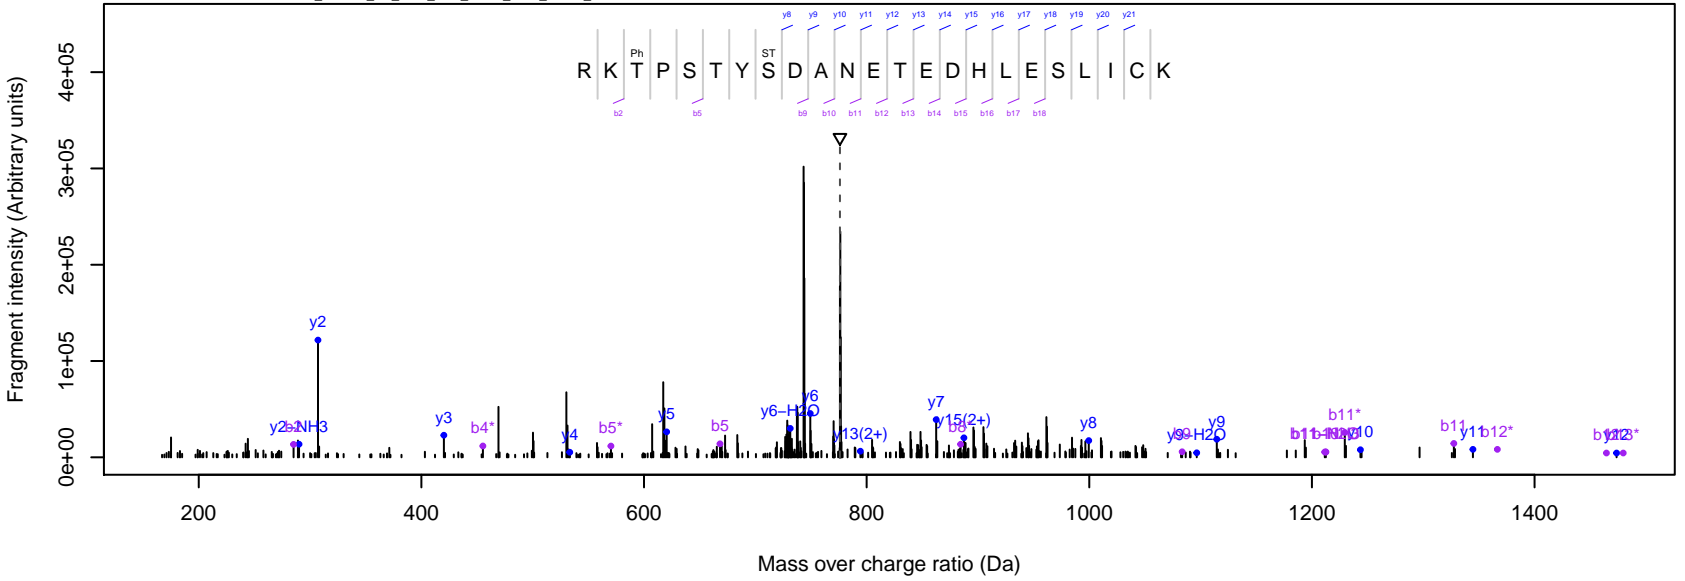

RNS(Phospho (STY))RDG DPLPSSLSCK-3+

Source : QE3\_201126\_FR\_TIOx\_hum\_tissue\_Urea\_RNAB\_N Scan : 13833

Andromeda score : 208.89

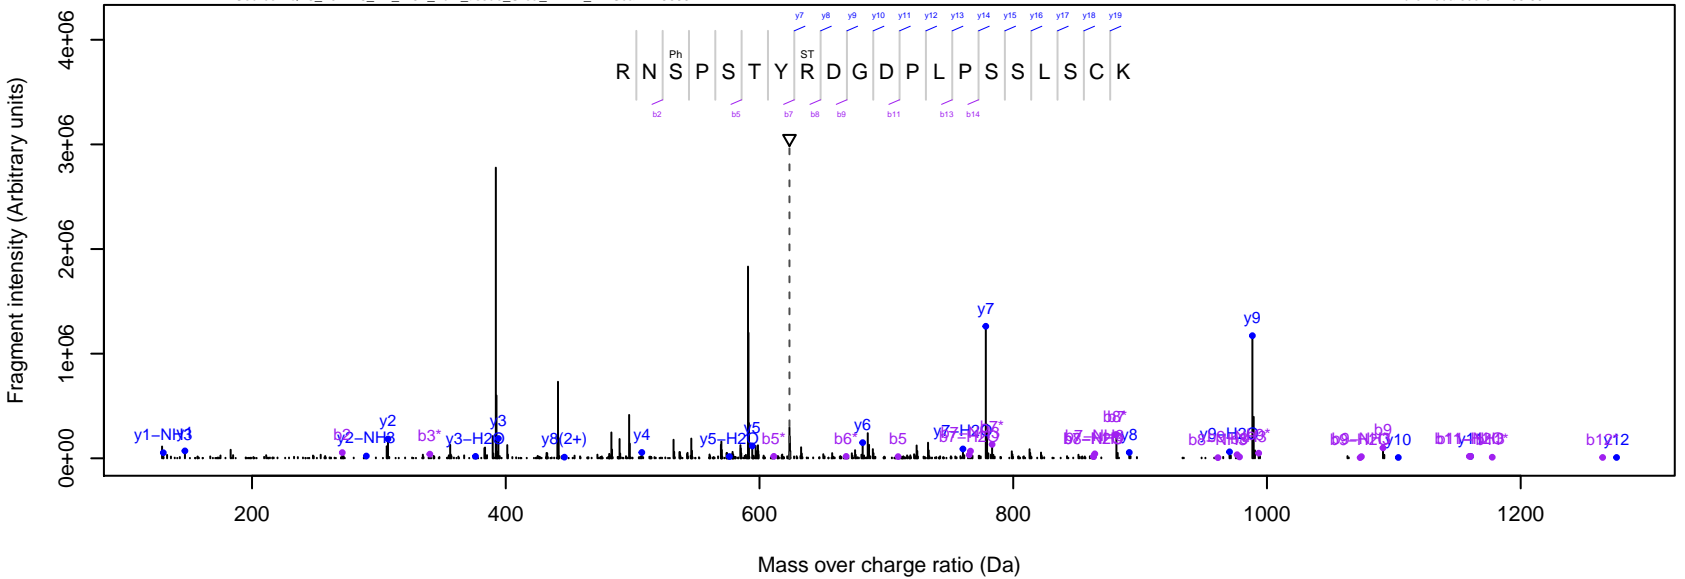

TDS(Phospho (STY))DSDLQLYKEGEGQGR-3+

Source : QE3\_201126\_FR\_TiOx\_hum\_tissue\_Urea\_RNAB\_N Scan : 20670

Andromeda score : 208.88

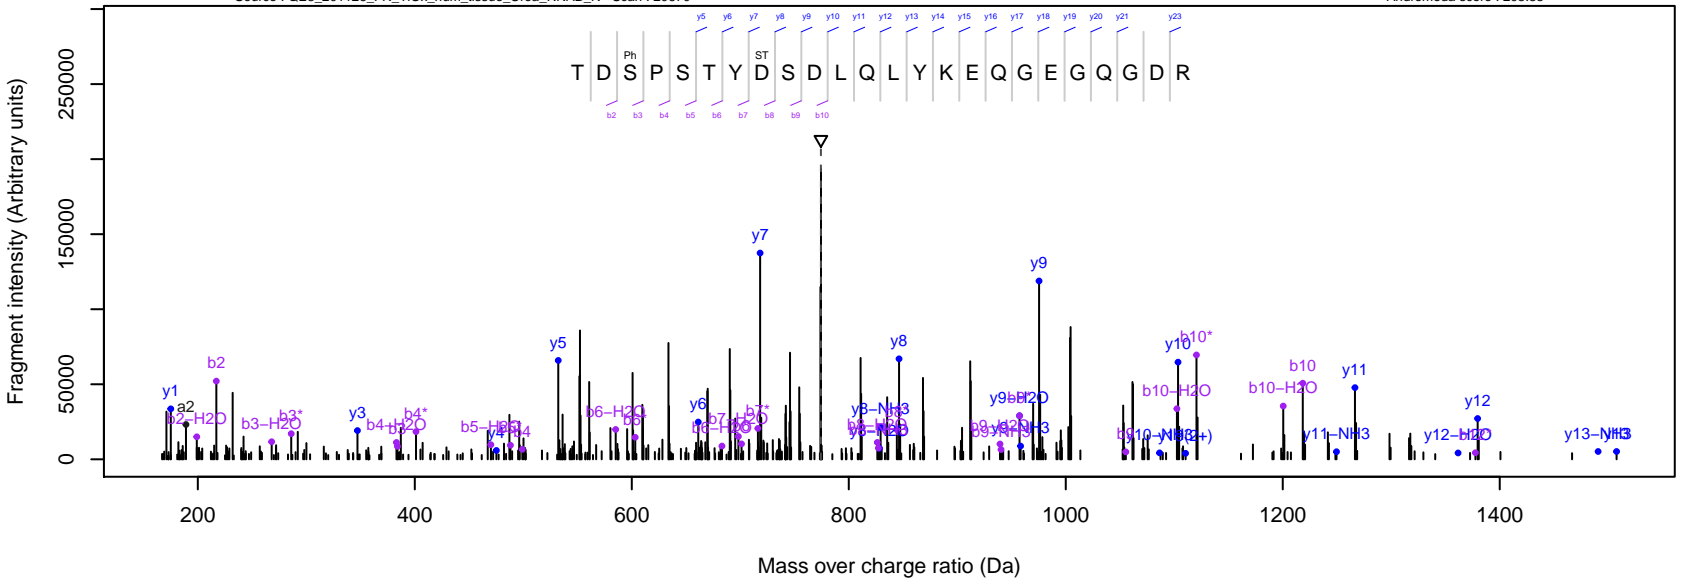

KGPGQPSS(Phospho (STY))PQRLLDR-3+

Source : QE3\_201126\_FR\_TiOx\_hum\_tissue\_Urea\_RNAB\_B Scan : 5158

Andromeda score : 208.82

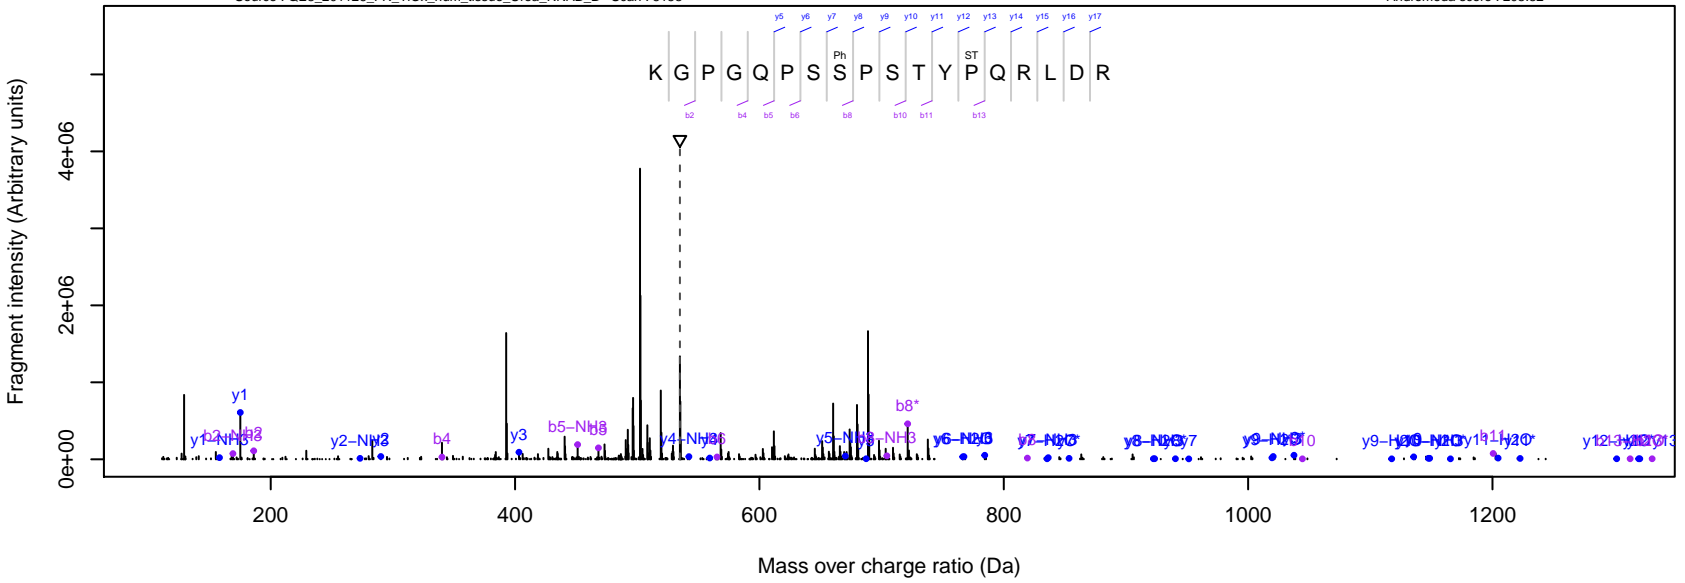

NNTAETEDDES(Phospho (STY))DGEDRGGTSGSLRR-3+

Source : QE3\_201126\_FR\_TiOx\_hum\_tissue\_Urea\_RNAB\_N Scan : 7803

Andromeda score : 208.82

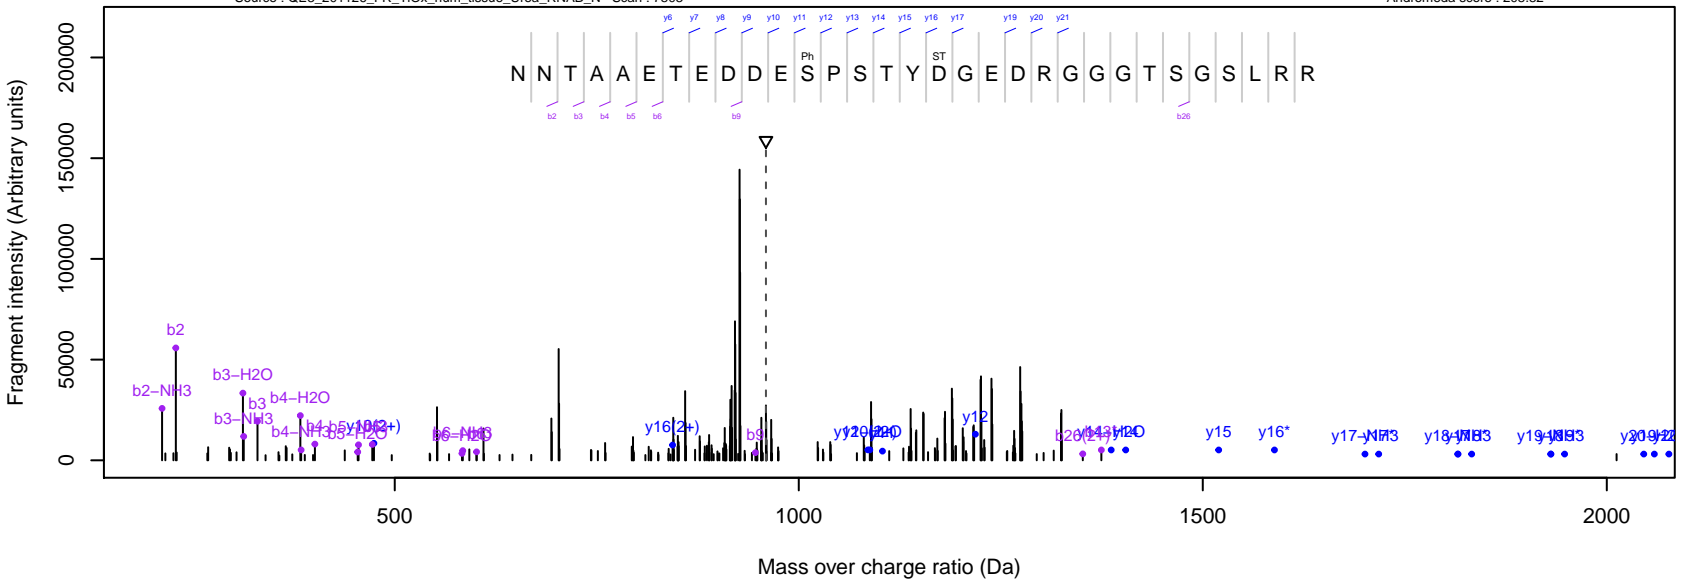

SKS(Phospho (STY))PPKSPEEEGAVSS-2+

Source : QE3\_201126\_FR\_TiOx\_hum\_tissue\_Urea\_RNAB\_H Scan : 7535

Andromeda score : 208.52

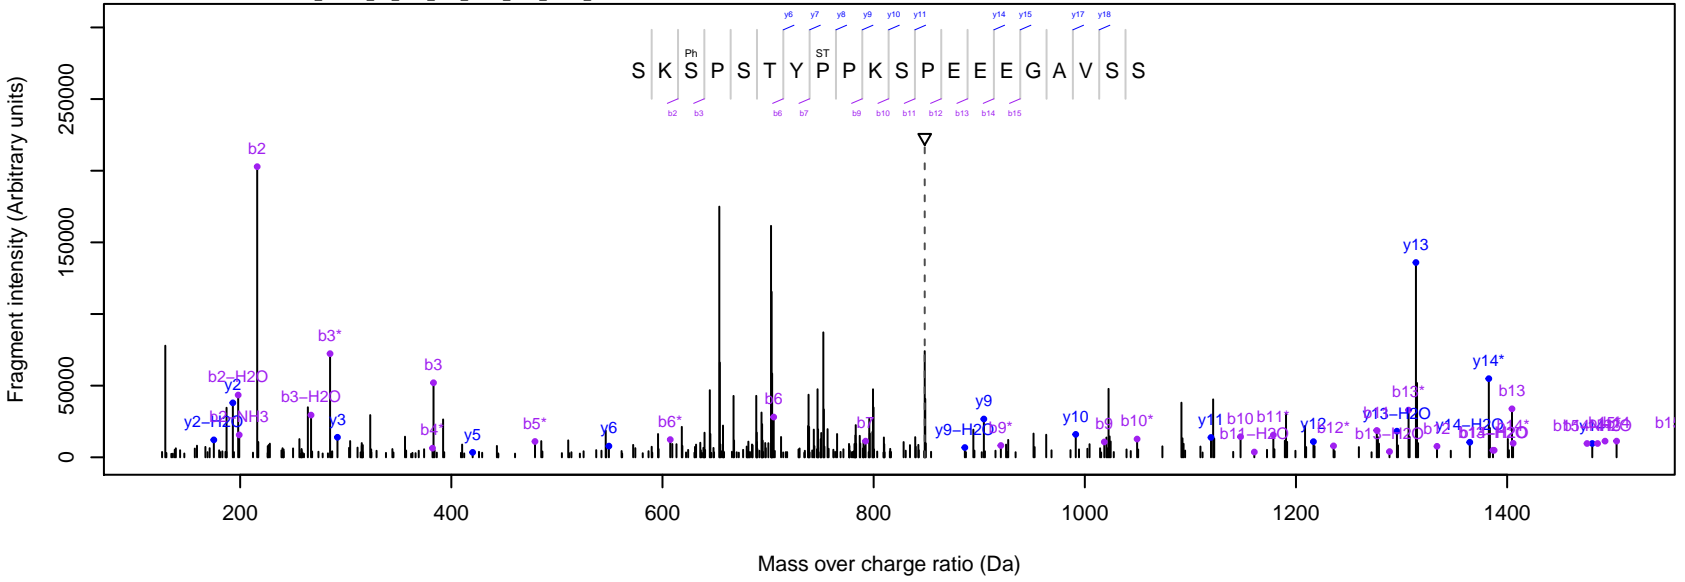

SFTSSPSS(Phospho (STY))PSR-2+

Source : QE3\_201126\_FR\_TiOx\_hum\_tissue\_Urea\_RNAB\_N Scan : 9763

Andromeda score : 208.51

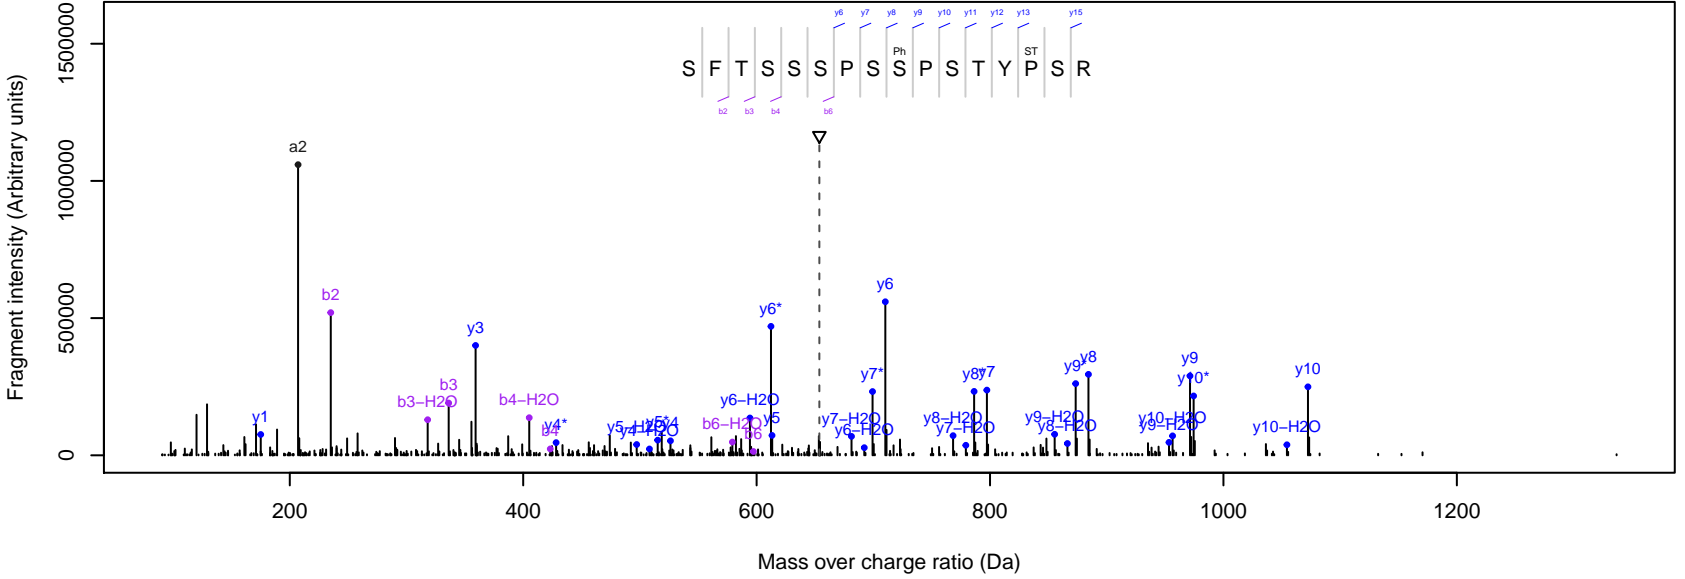

LCAGIMITAS(Phospho (STY))HNPQDNGYK-3+

Source : QE3\_201126\_FR\_TiOx\_hum\_tissue\_Urea\_RNAB\_B Scan : 19493

Andromeda score : 208.46

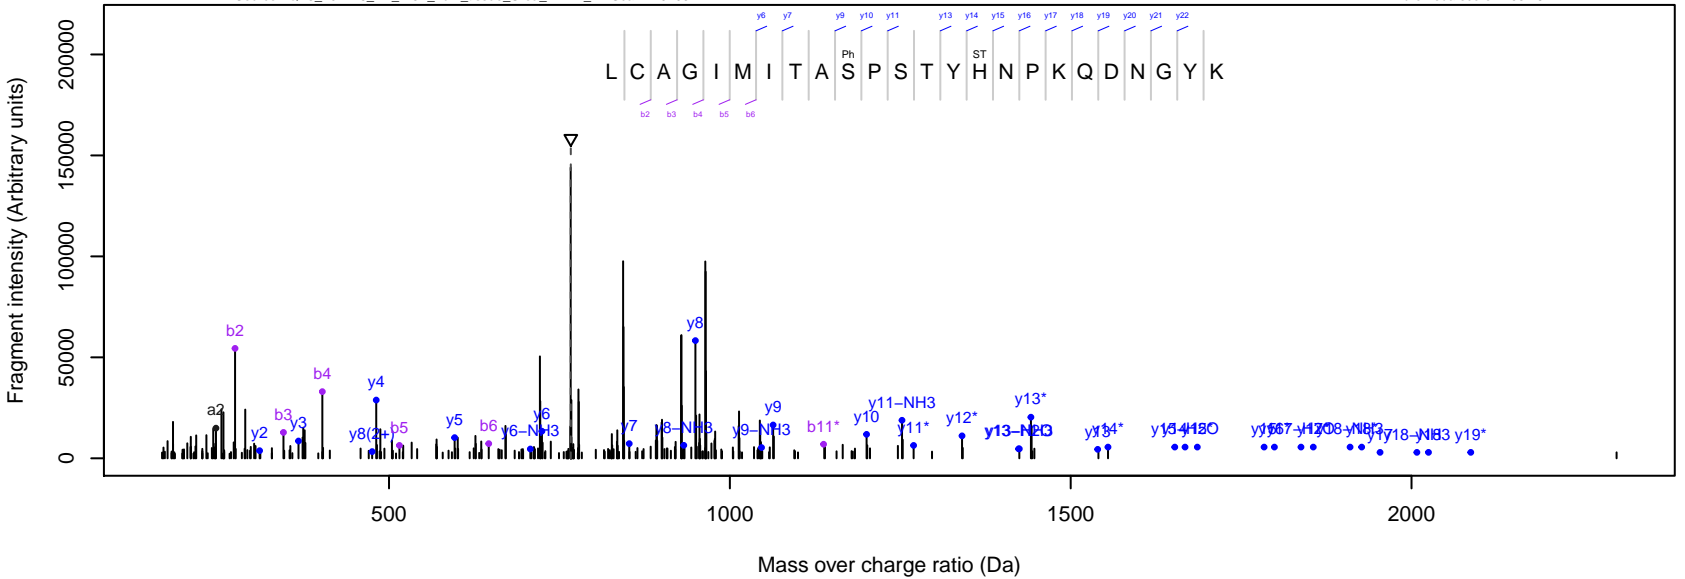

NTETSKS(Phospho (STY))PEKDVPMVEK-3+

Source : QE3\_201126\_FR\_TiOx\_hum\_tissue\_Urea\_RNAB\_N Scan : 11810

Andromeda score : 208.46

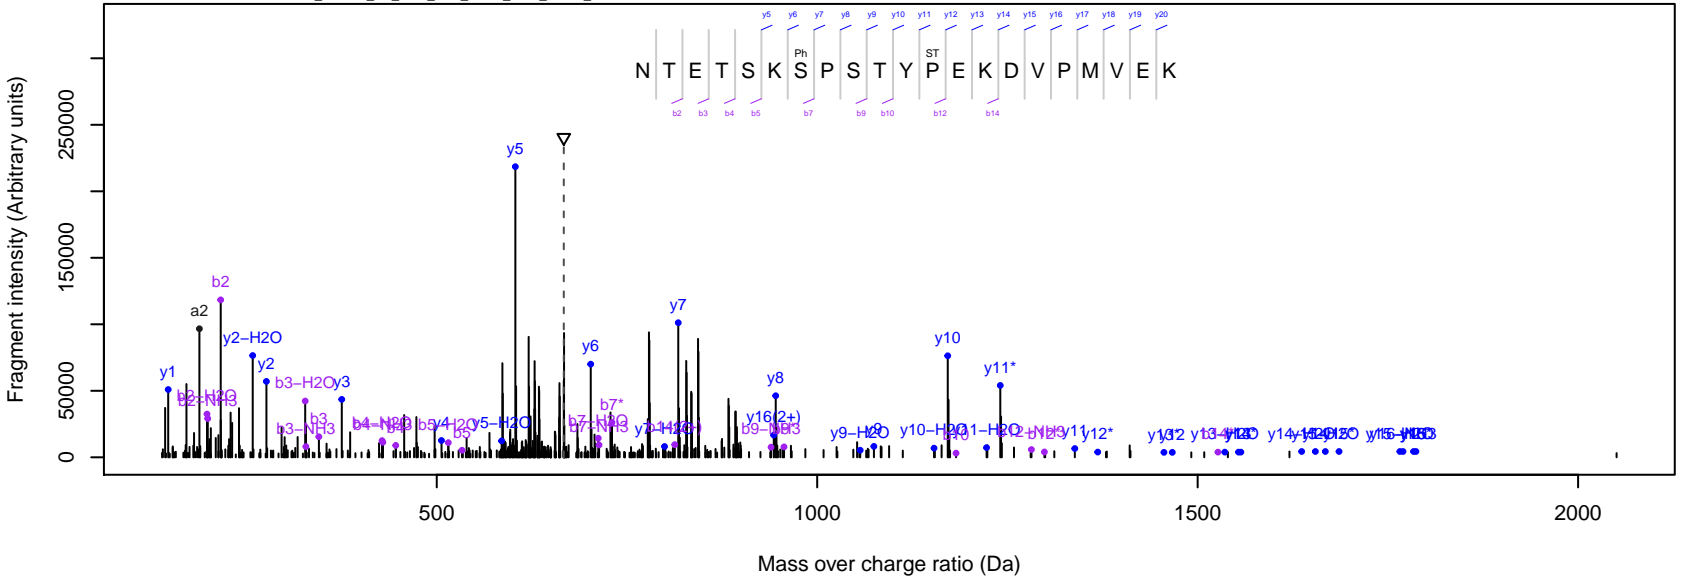

GLGS(Phospho (STY))SPDLELLLR-2+

Source : QE3\_201126\_FR\_TiOx\_hum\_tissue\_Urea\_RNAB\_B Scan : 57820

Andromeda score : 208.28

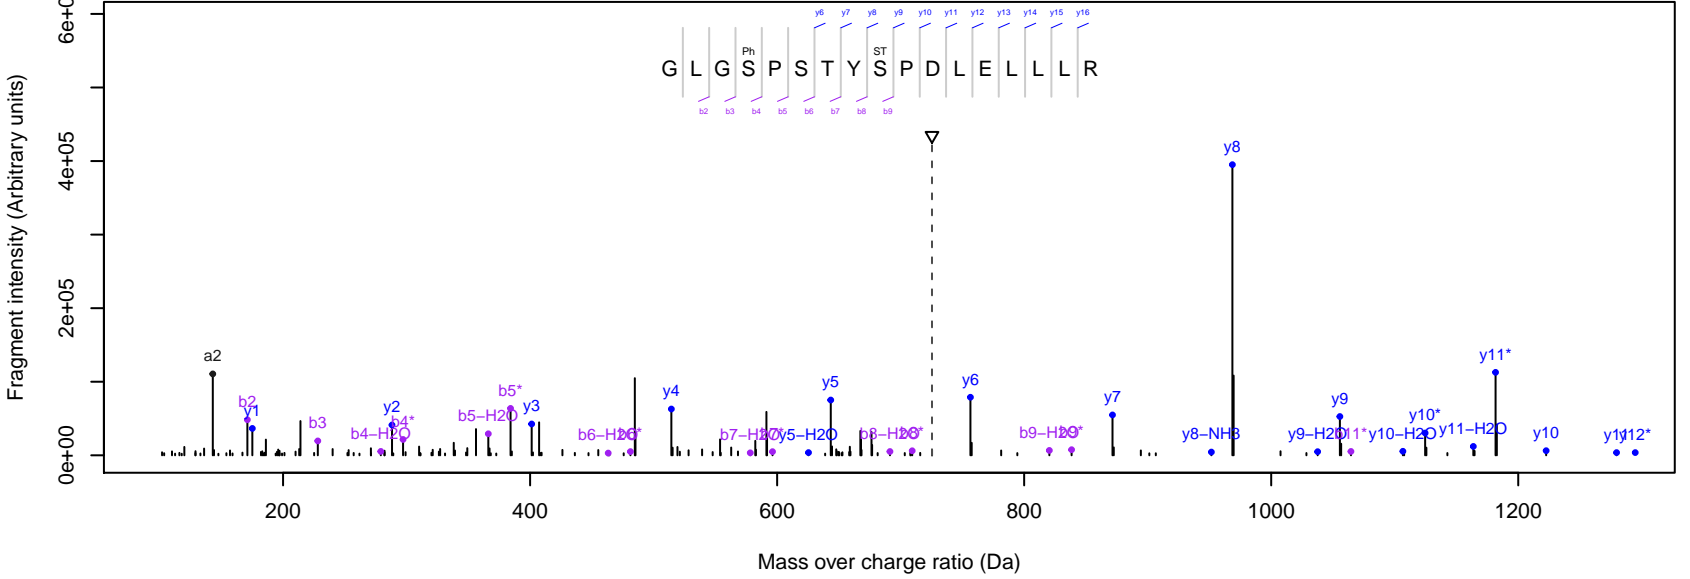

AQS(Phospho (STY))PTPS(Phospho (STY))LPASWK-2+

Source : QE3\_201126\_FR\_TiOx\_hum\_tissue\_Urea\_RNAB\_N Scan : 41052

Andromeda score : 208.24

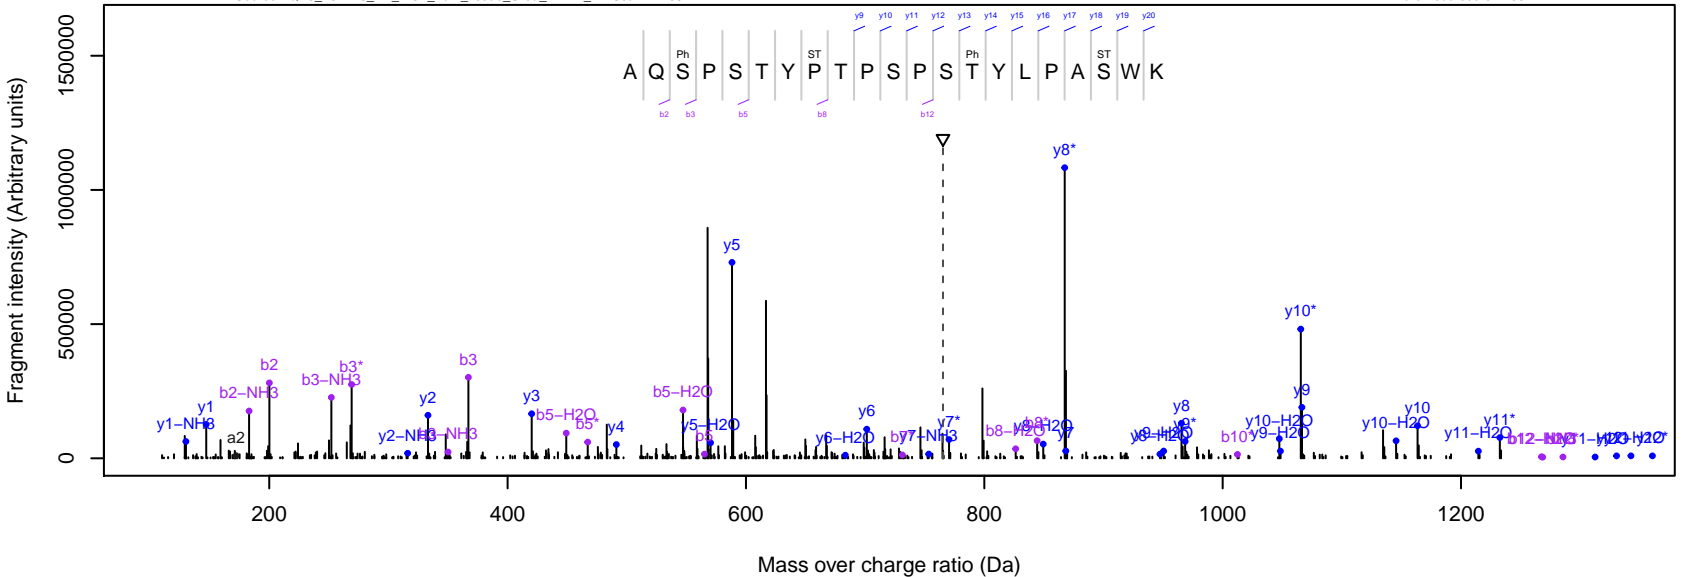





VKAS(Phospho (STY))PITNDGEDEFVPSDGLDKDEYTFSPGK-3+

Source : QE3\_201126\_FR\_TiOx\_hum\_tissue\_Urea\_RNAB\_H Scan : 38539

Andromeda score : 207.94

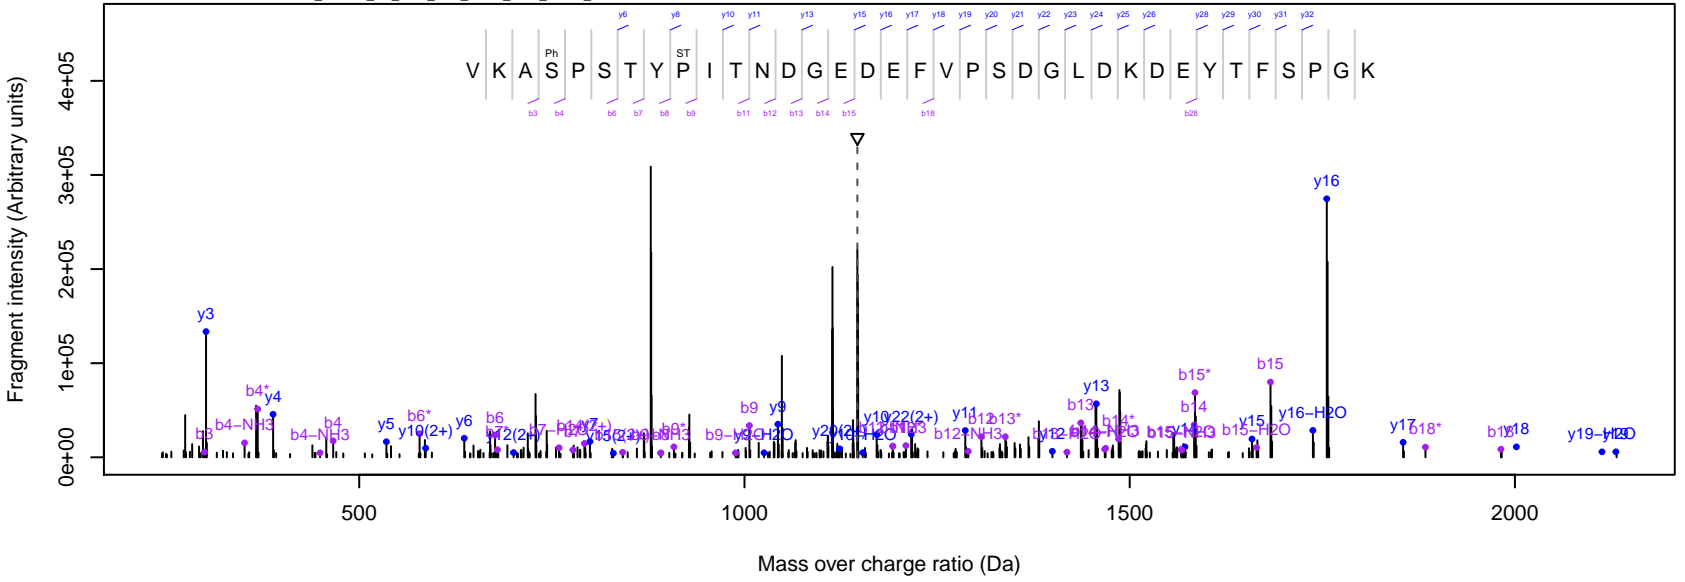

ERS(Phospho (STY))PSPLR-2+

Source : QE3\_201126\_FR\_TiOx\_hum\_tissue\_Urea\_RNAB\_H Scan : 5771

Andromeda score : 207.6

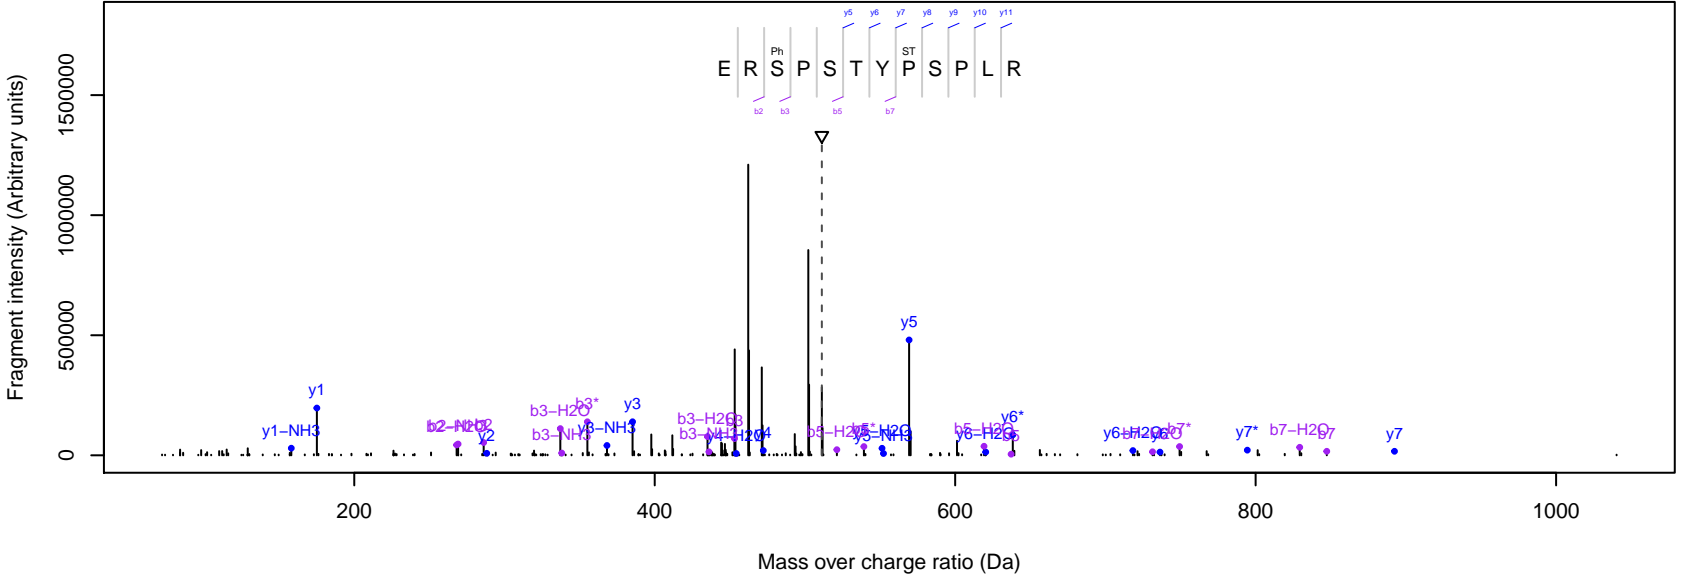

LATNTS(Phospho (STY))APDLK-2+

Source : QE3\_201126\_FR\_TiOx\_hum\_tissue\_Urea\_RNAB\_H Scan : 16028

Andromeda score : 207.47

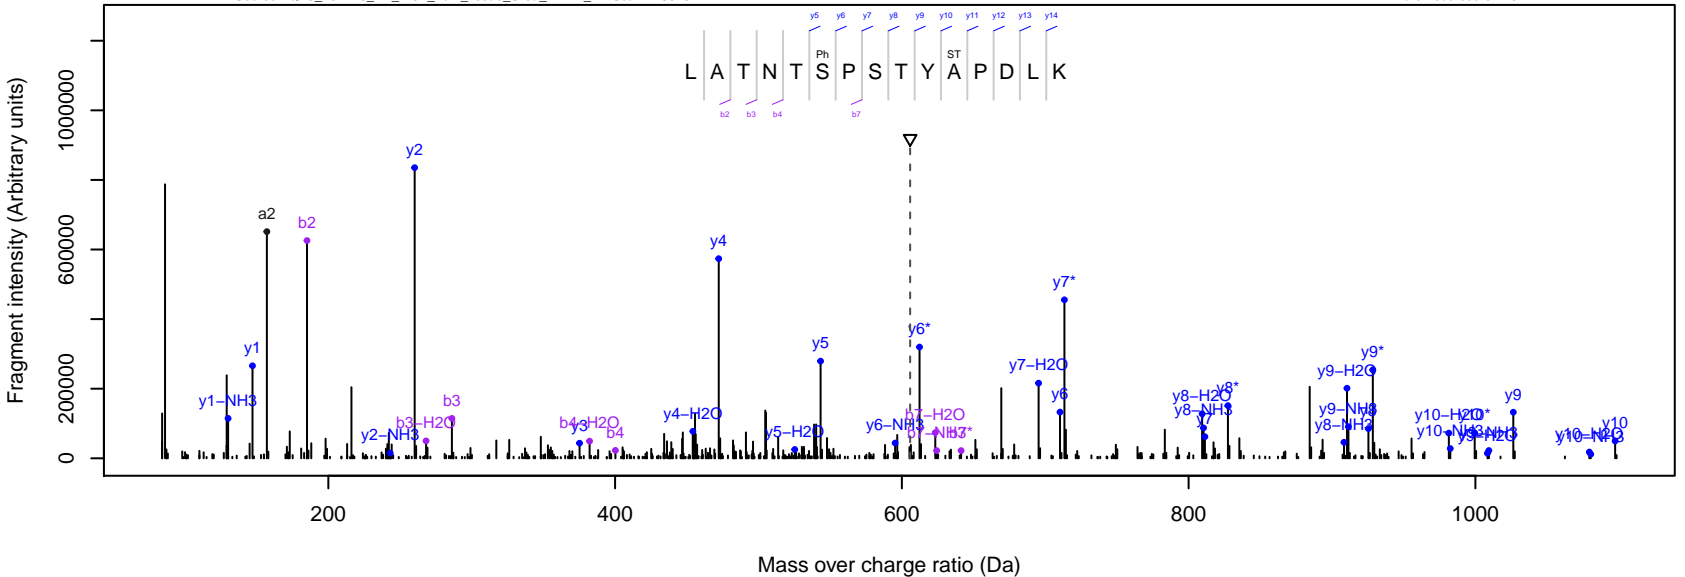



AM(Oxidation (M))ADELS(Phospho (STY))EKQVYDAHTK-3+

Source : QE3\_201126\_FR\_TiOx\_hum\_tissue\_Urea\_RNAB\_N Scan : 12938

Andromeda score : 207.43

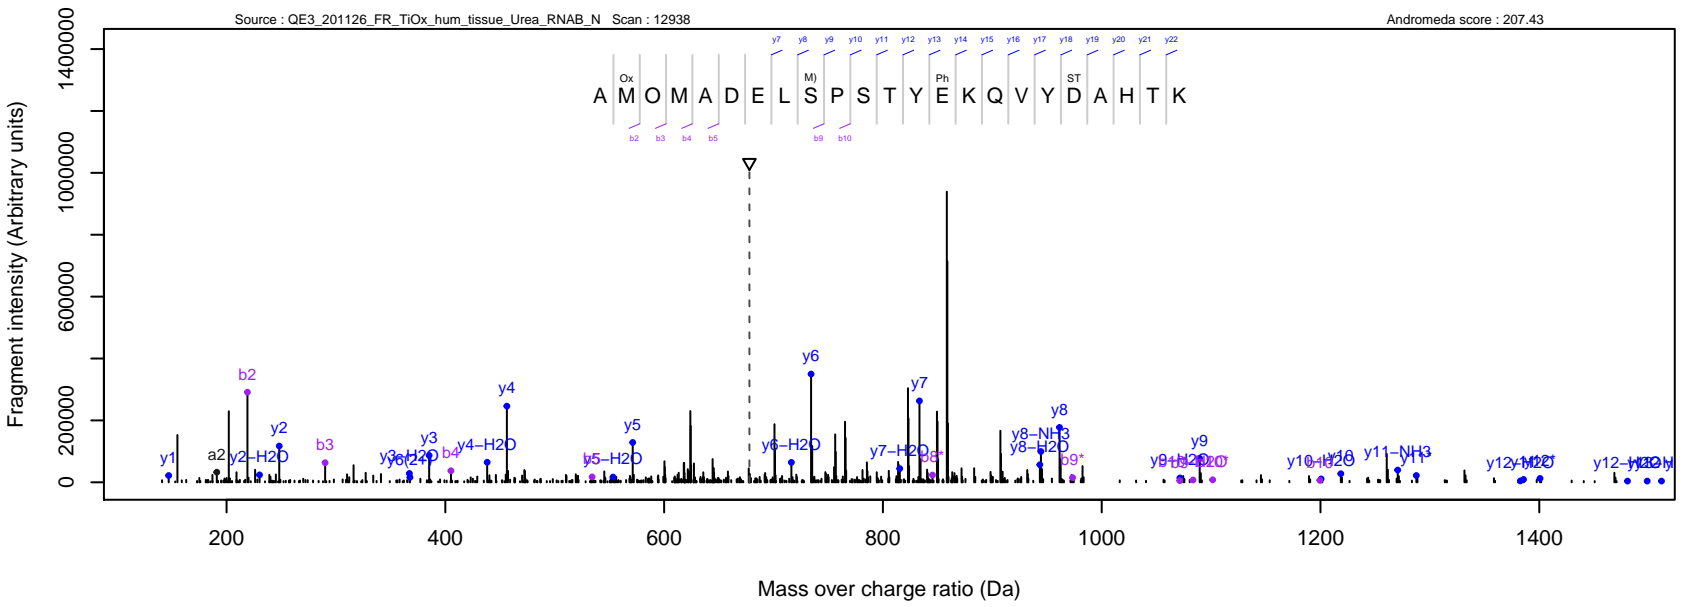

SAS(Phospho (STY))TEELRNPDFQK-2+

Source : QE3\_201126\_FR\_TiOx\_hum\_tissue\_Urea\_RNAB\_N Scan : 16157

Andromeda score : 207.4

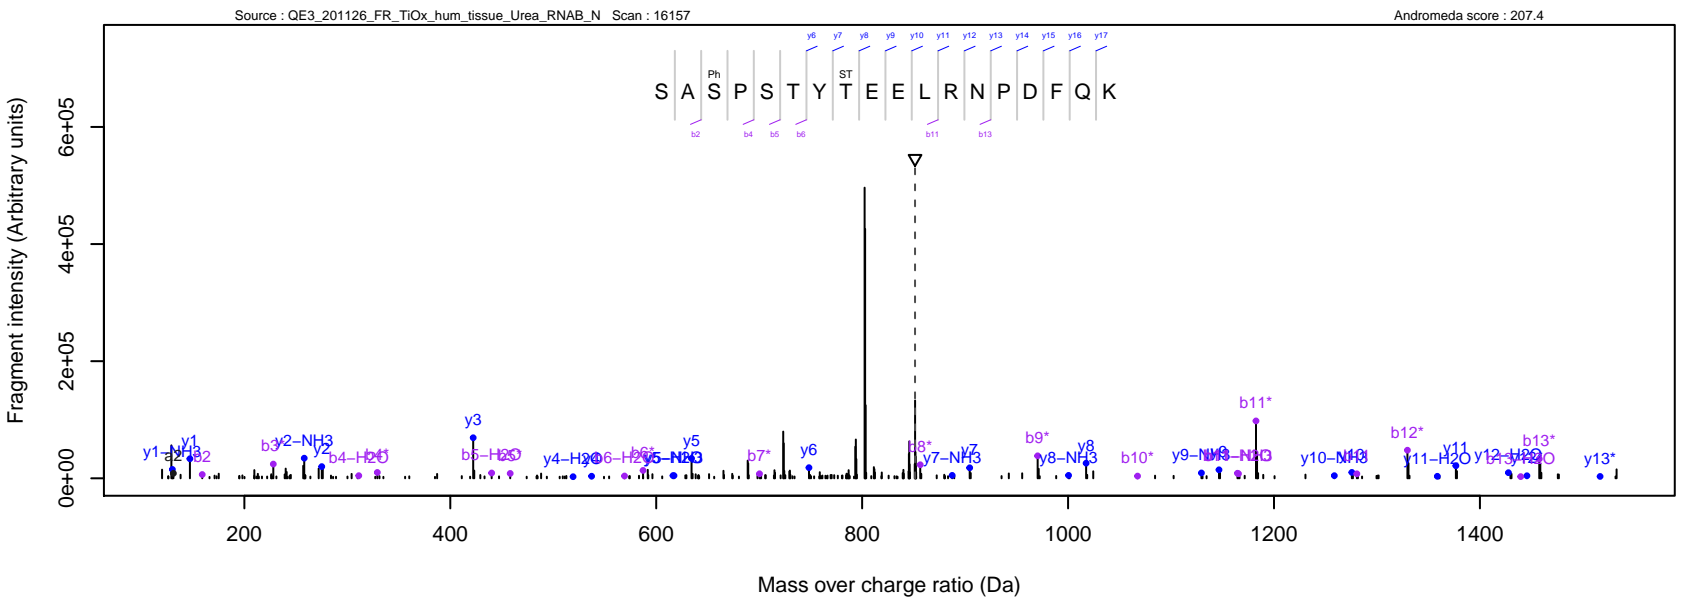

SAT(Phospho (STY))DADVNSGWLVVGK-2+

Source : QE3\_201126\_FR\_TiOx\_hum\_tissue\_Urea\_RNAB\_H Scan : 50670

Andromeda score : 207.39

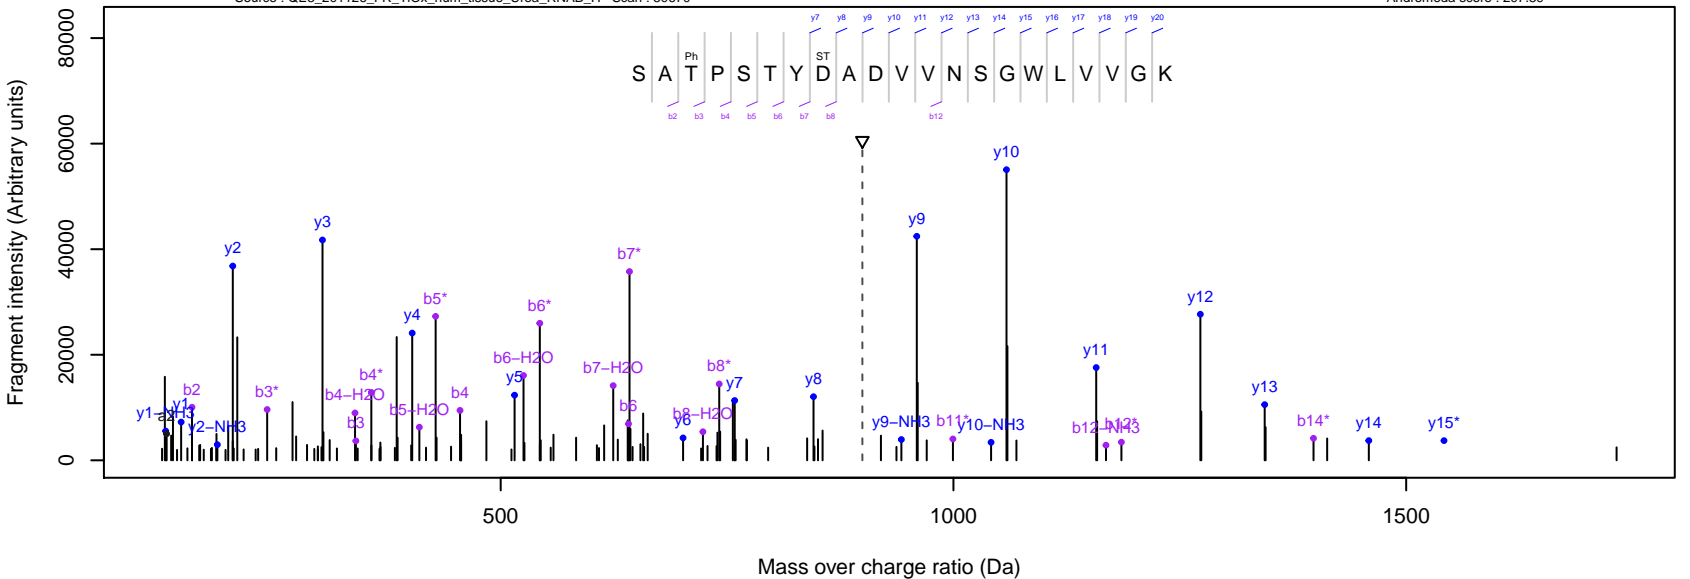

GGM(Oxidation (M))GS(Phospho (STY))GGLATGIAGGLAGM(Oxidation (M))GGIQNEK-2+

Source : QE3\_201126\_FR\_TiOx\_hum\_tissue\_Urea\_RNAB\_N Scan : 38179

Andromeda score : 207.34

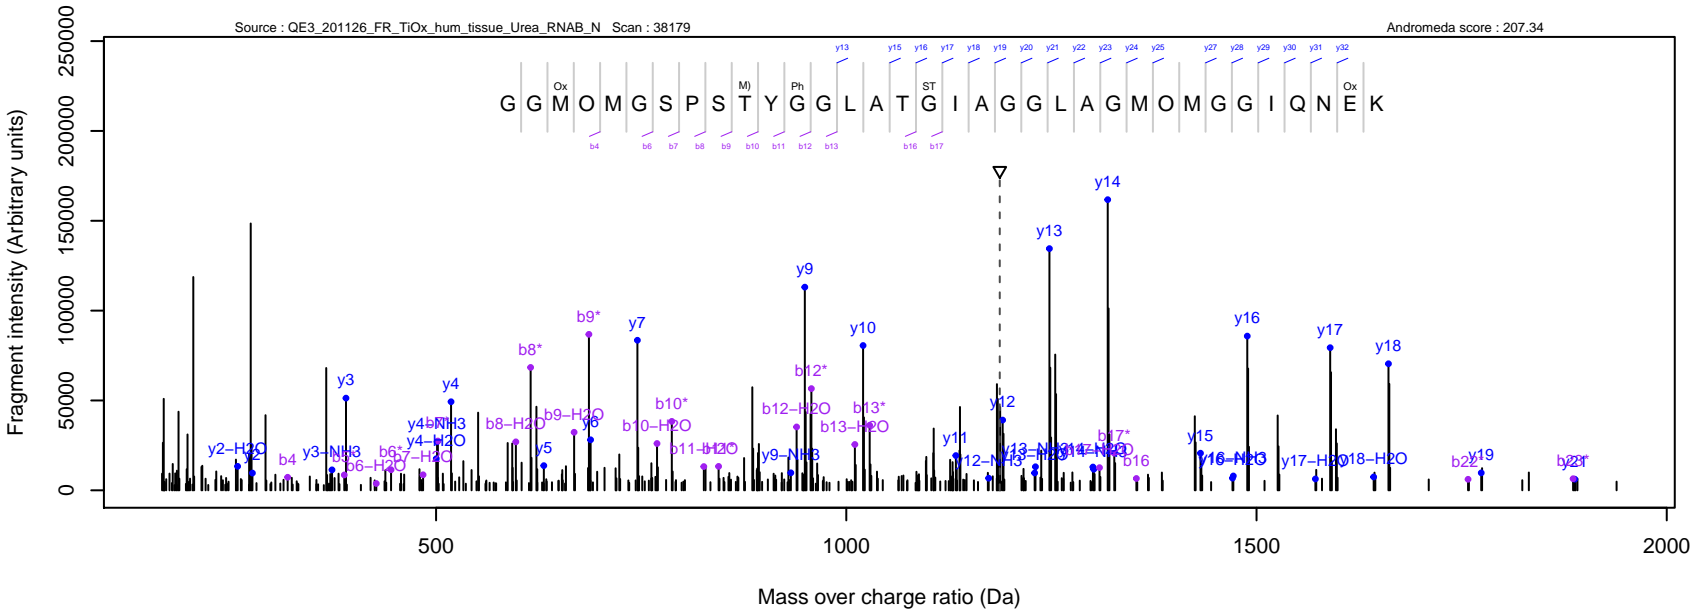

FHQWQDNRGS(Phospho (STY))PQPQEQPR-3+

Source : QE3\_201126\_FR\_TiOx\_hum\_tissue\_Urea\_RNAB\_B Scan : 11155

Andromeda score : 207.24

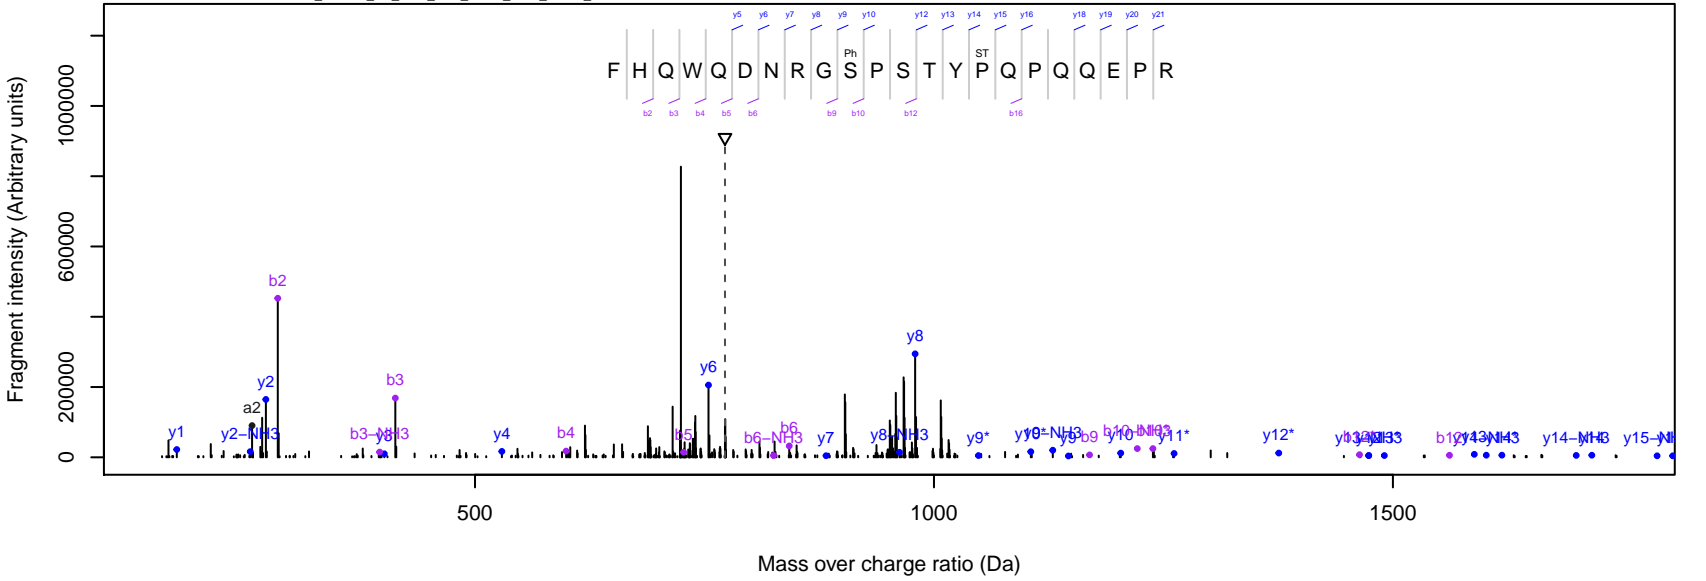

RIS(Phospho (STY))GLIYEETR-2+

Source : QE3\_201126\_FR\_TiOx\_hum\_tissue\_Urea\_RNAB\_B Scan : 26391

Andromeda score : 207.08

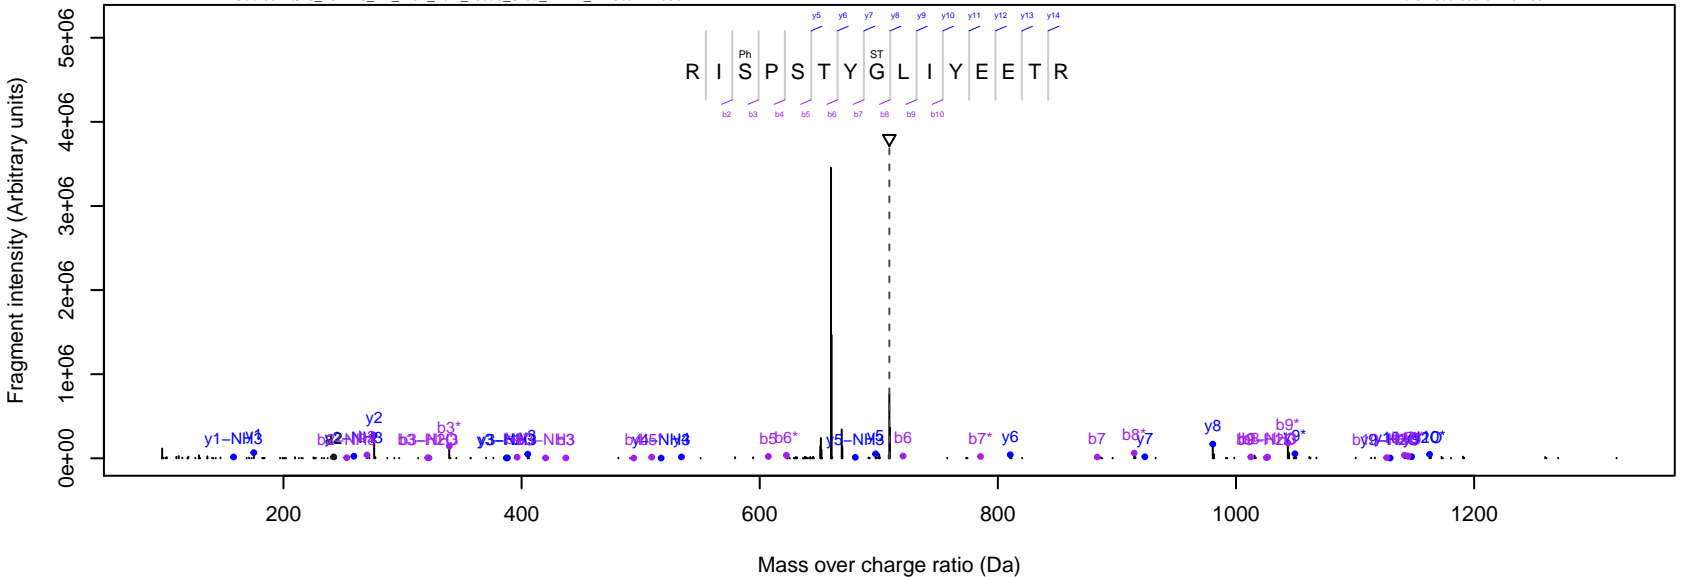

KEDS(Phospho (STY))DEEEDDDSEEEDEDEDEDEDEIEPAAM(Oxidation (M))K-4+

Source : QE3\_201126\_FR\_TiOx\_hum\_tissue\_Urea\_RNAB\_H Scan : 21408

Andromeda score : 207.02

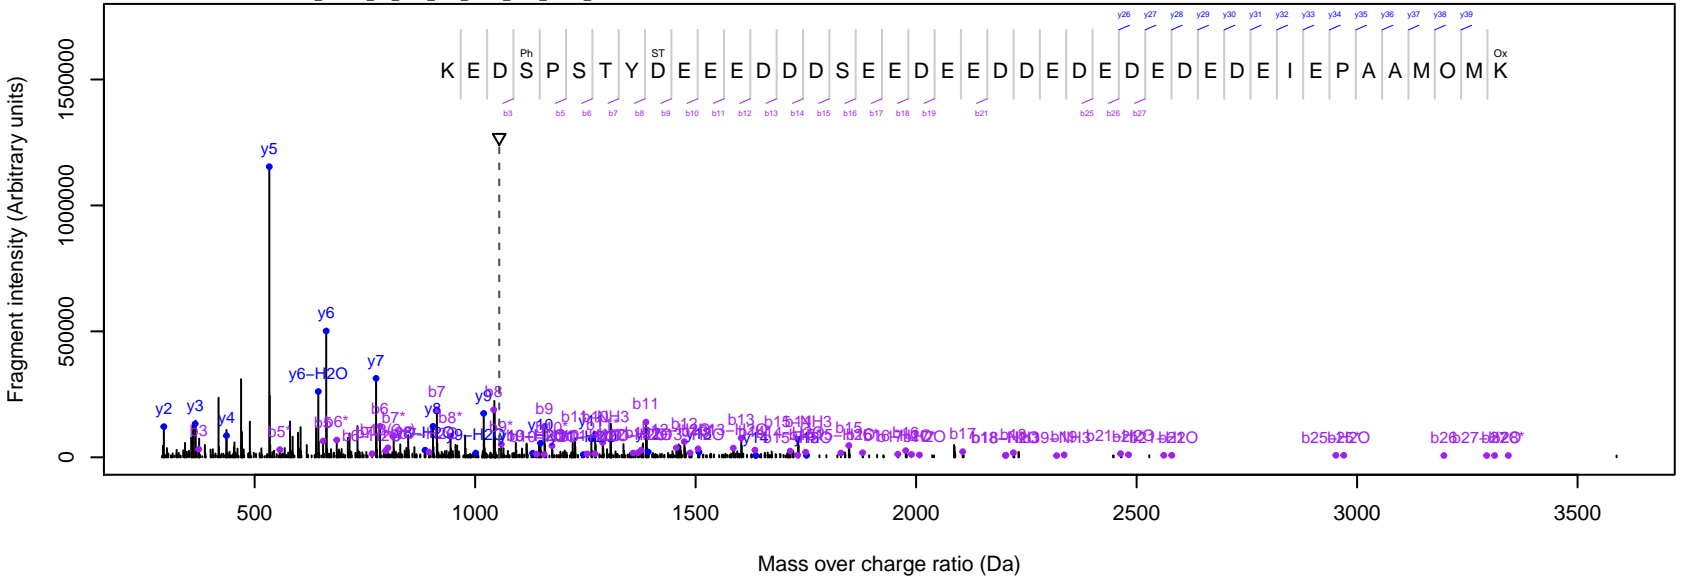

S(Phospho (STY))RS(Phospho (STY))RDSGDENEPIQER-3+

Source : QE3\_201126\_FR\_TiOx\_hum\_tissue\_Urea\_RNAB\_H Scan : 7628

Andromeda score : 206.95

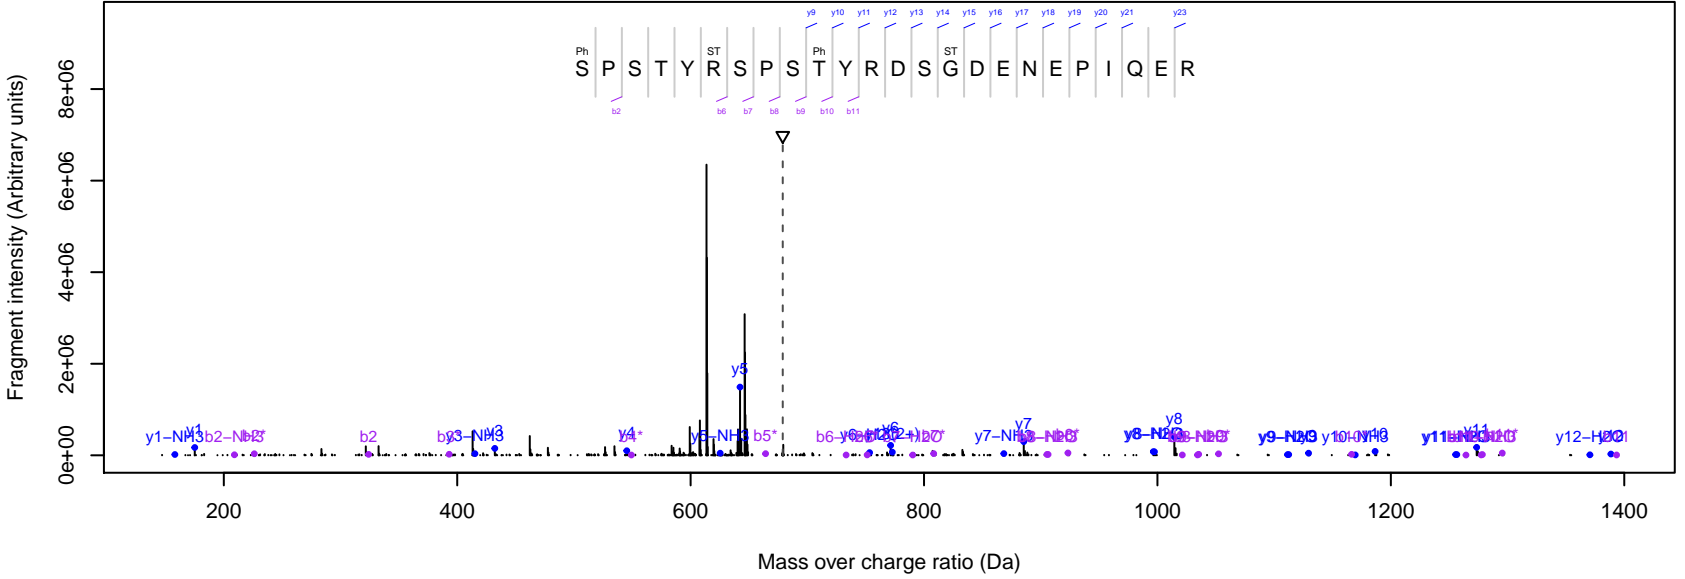

SQEPIPDQKVS(Phospho (STY))DDDKEK-3+

Source : QE3\_201126\_FR\_TiOx\_hum\_tissue\_Urea\_RNAB\_B Scan : 9203

Andromeda score : 206.85

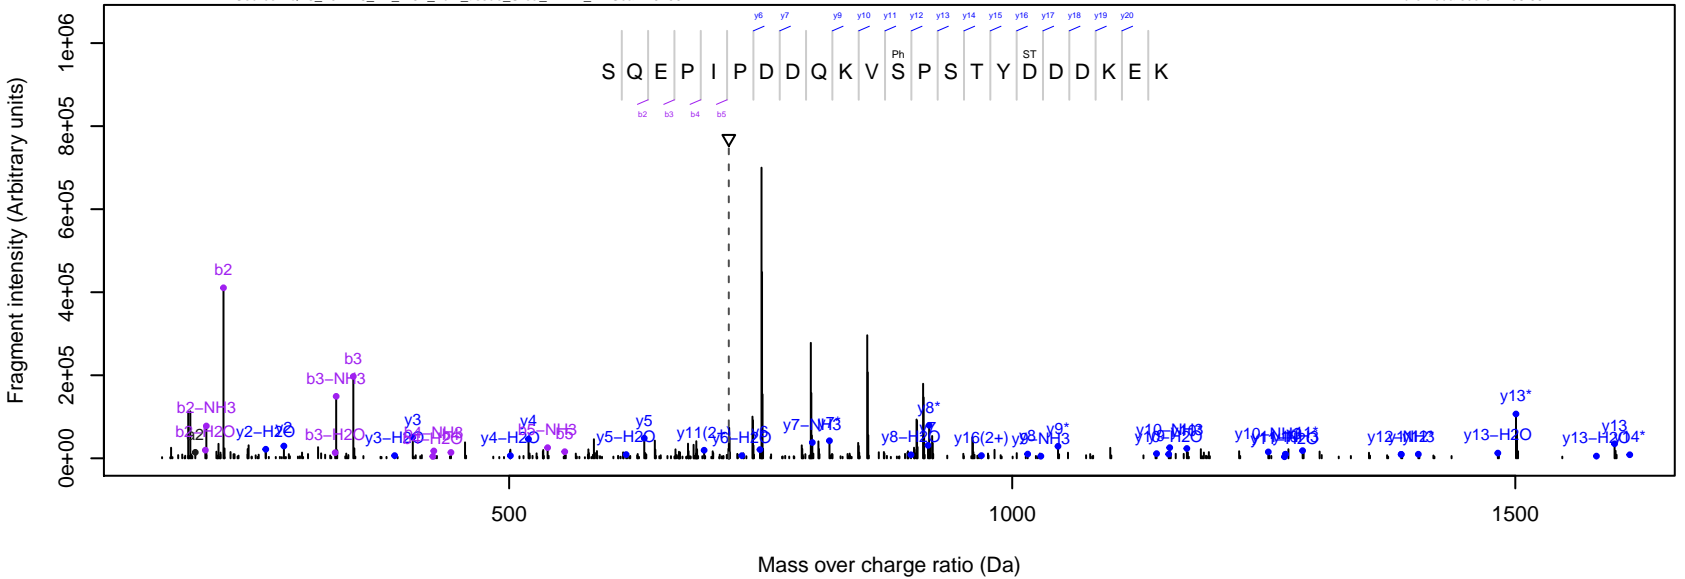

TLVHSSS(Phospho (STY))DGHIDPQHAAGK-3+

Source : QE3\_201126\_FR\_TIOx\_hum\_tissue\_Urea\_RNAB\_H Scan : 8291

Andromeda score : 206.85

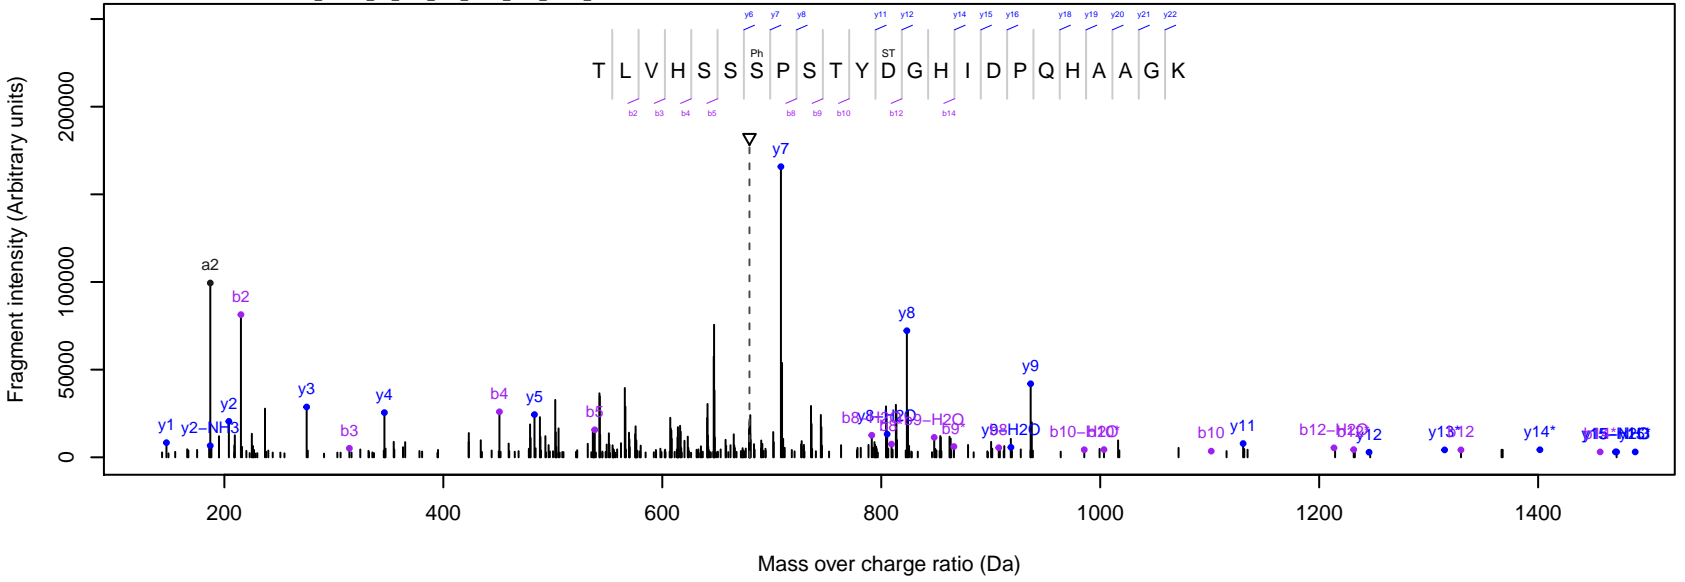

GGSPSTYDDSSKDPIDVNYEK-2+

Source : QE3\_201126\_FR\_TIOx\_hum\_tissue\_Urea\_RNAB\_H Scan : 18722

Andromeda score : 206.8

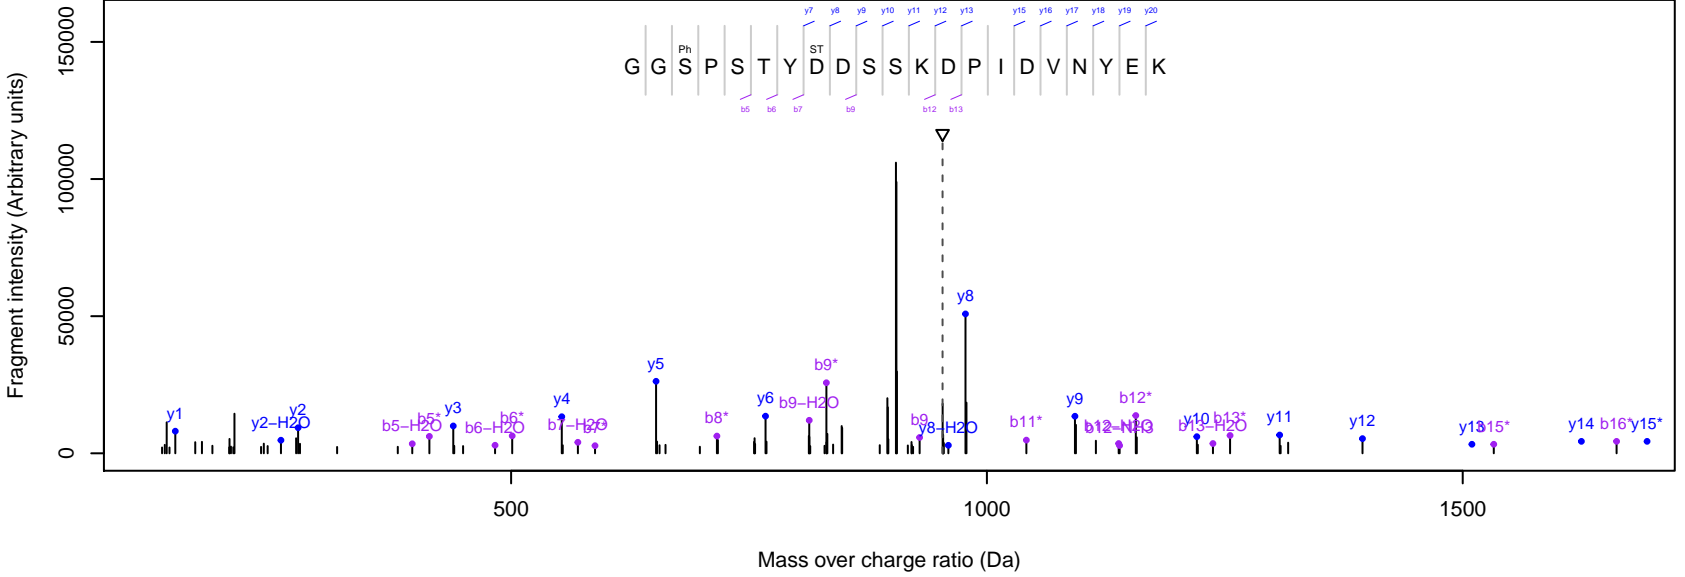

LAEAPSPAPTPTVE D LGPQTSTSPGR LSPSTY P D F A E E L R-4+

Source : QE3\_201126\_FR\_TIOx\_hum\_tissue\_Urea\_RNAB\_H Scan : 49434

Andromeda score : 206.77

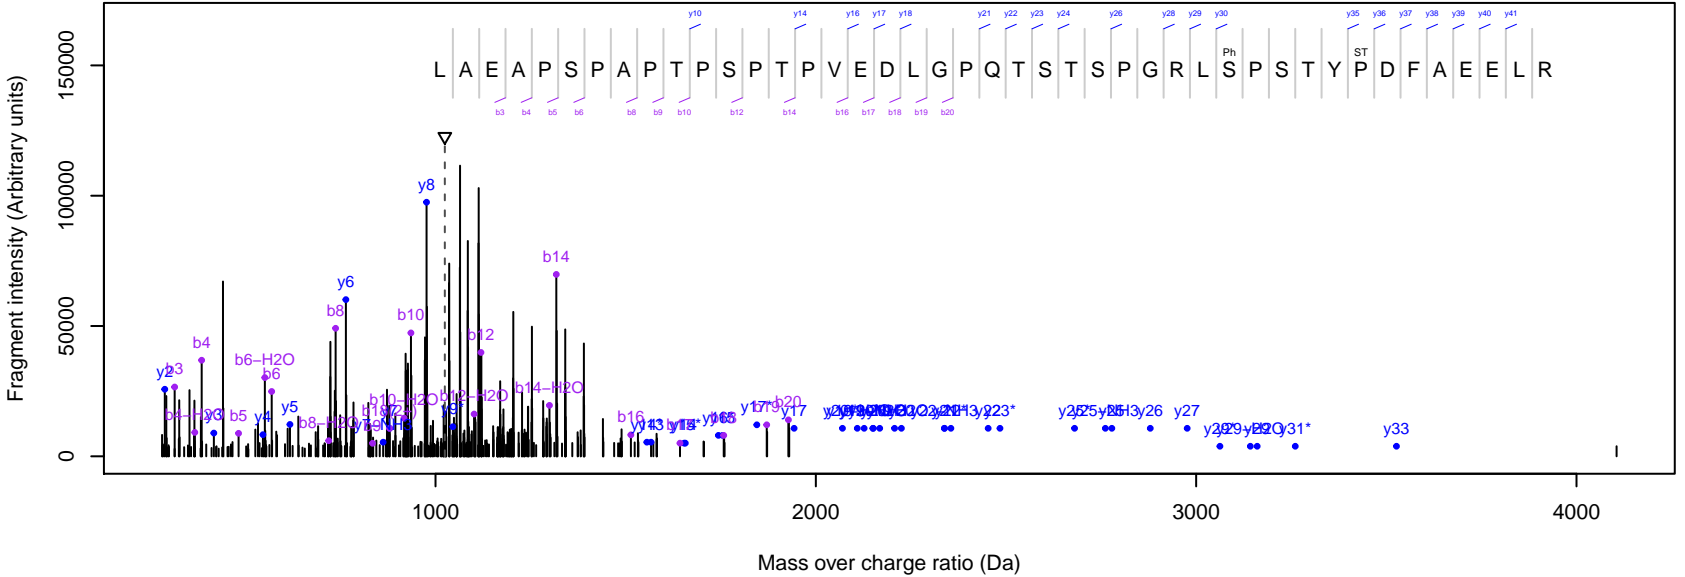

SGSSFVHQAS(Phospho (STY))FK-2+

Source : QE3\_201126\_FR\_TIOx\_hum\_tissue\_Urea\_RNAB\_H Scan : 14758

Andromeda score : 206.66

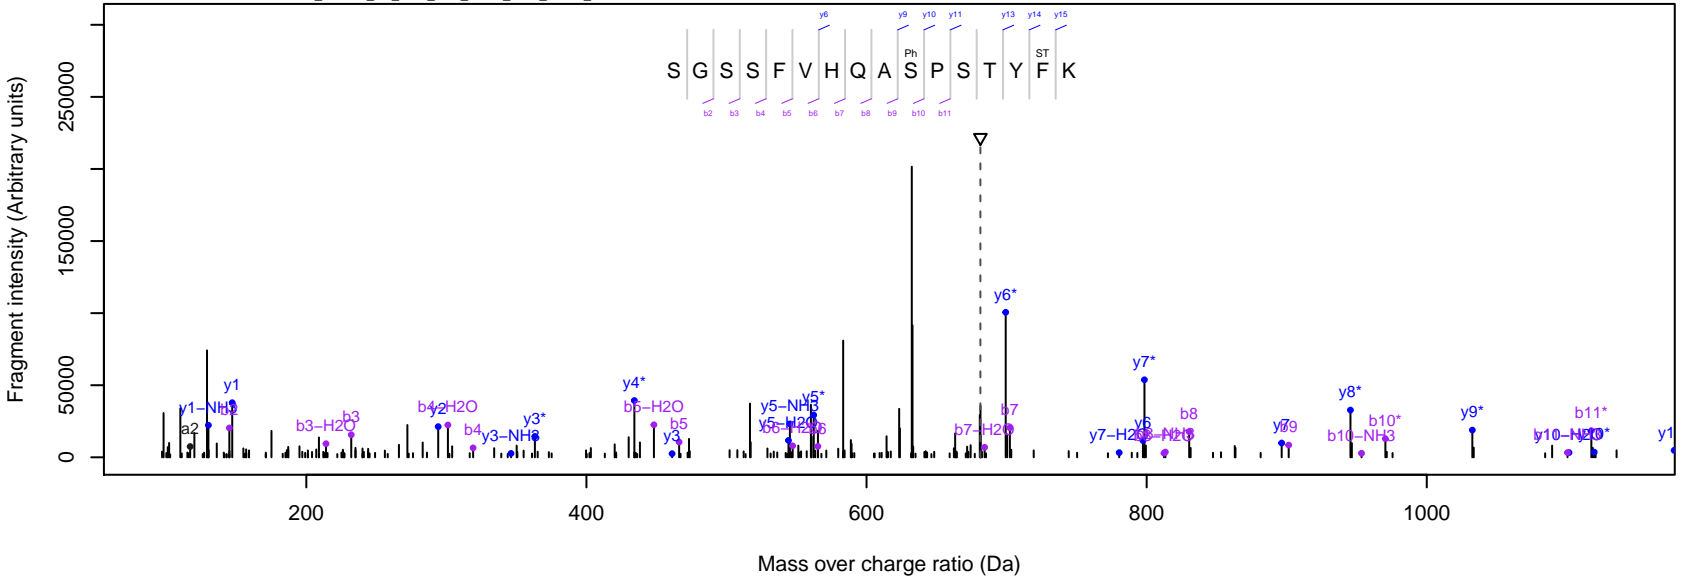

EYIPGQPPLSQSSDSSPSTYPTR-2+

Source : QE3\_201126\_FR\_TIOx\_hum\_tissue\_Urea\_RNAB\_H Scan : 29151

Andromeda score : 206.6

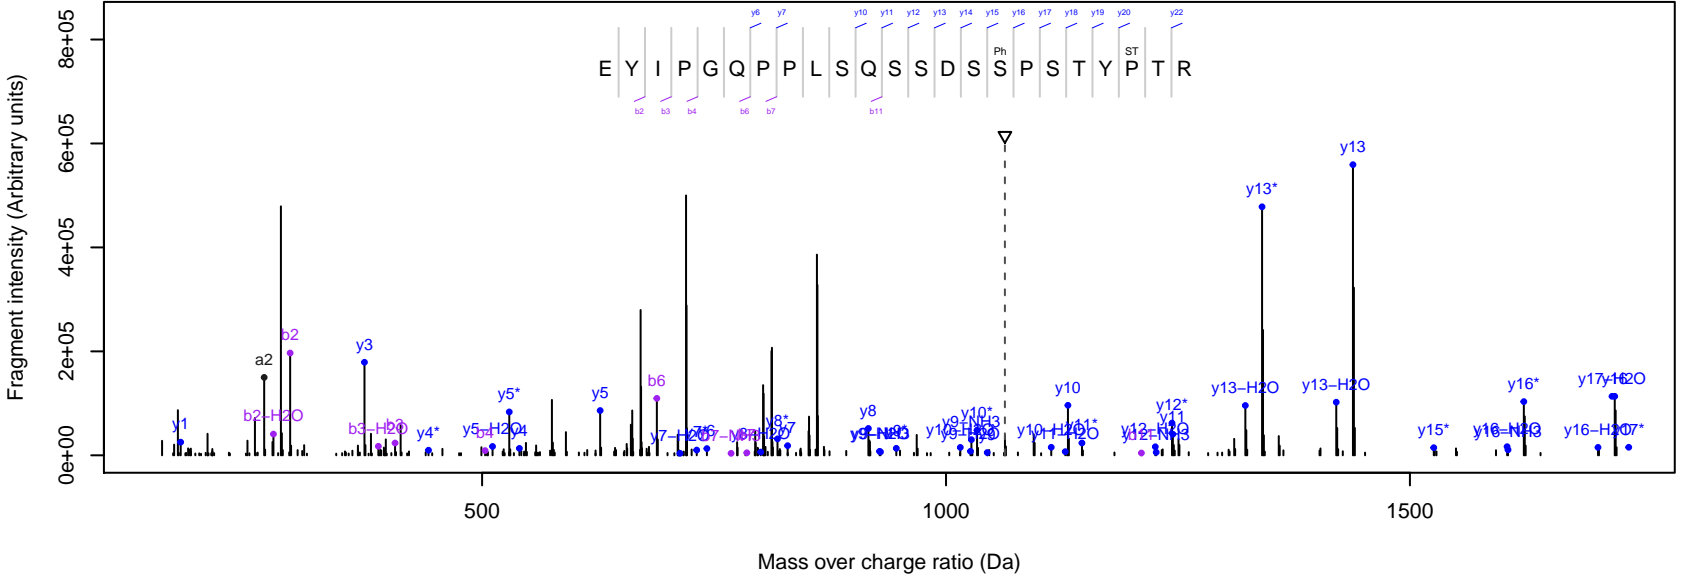

QVLTAPGSAGQPRSPSTYEDSDSPSTYLEEAGSPAPGPCPR-3+

Source : QE3\_201126\_FR\_TIOx\_hum\_tissue\_Urea\_RNAB\_N Scan : 30804

Andromeda score : 206.53

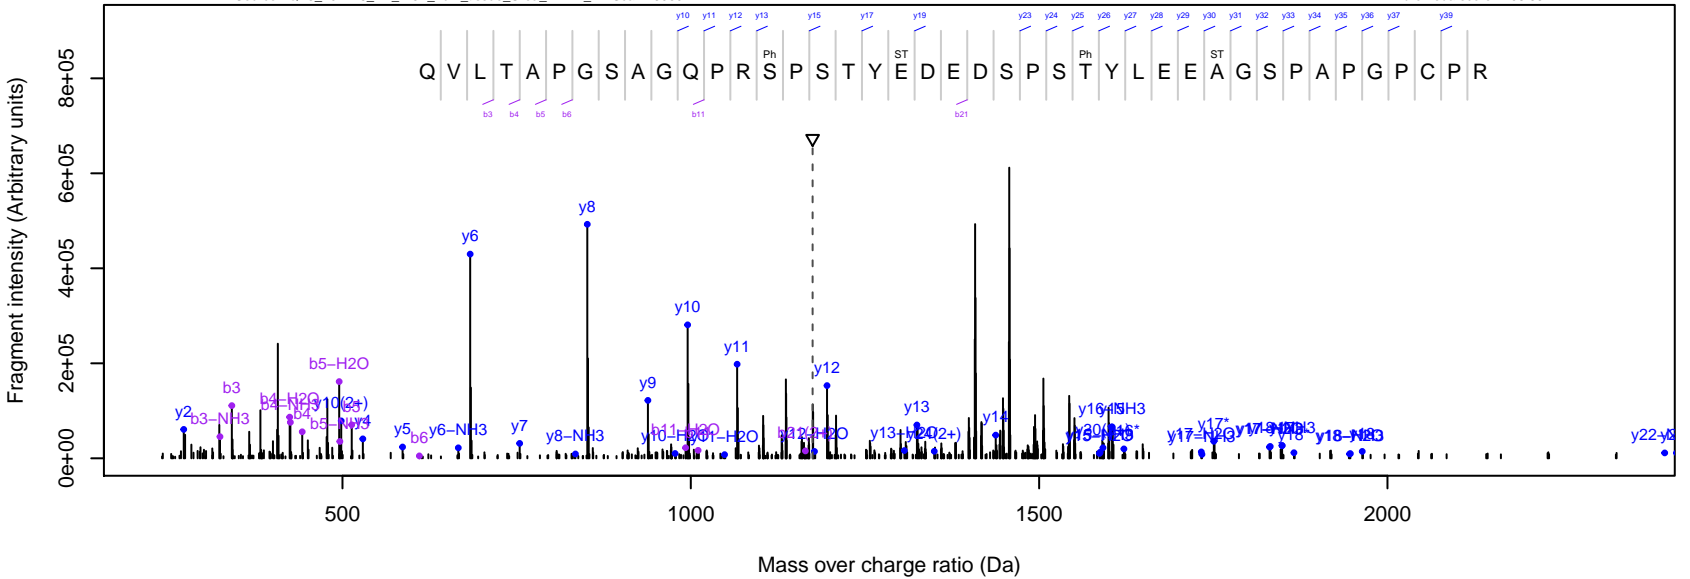

RTEGYAAFQEDS(Phospho (STY))S(Phospho (STY))GDEAESPK-2+

Source : QE3\_201126\_FR\_TiOx\_hum\_tissue\_Urea\_RNAB\_N Scan : 24174

Andromeda score : 206.49

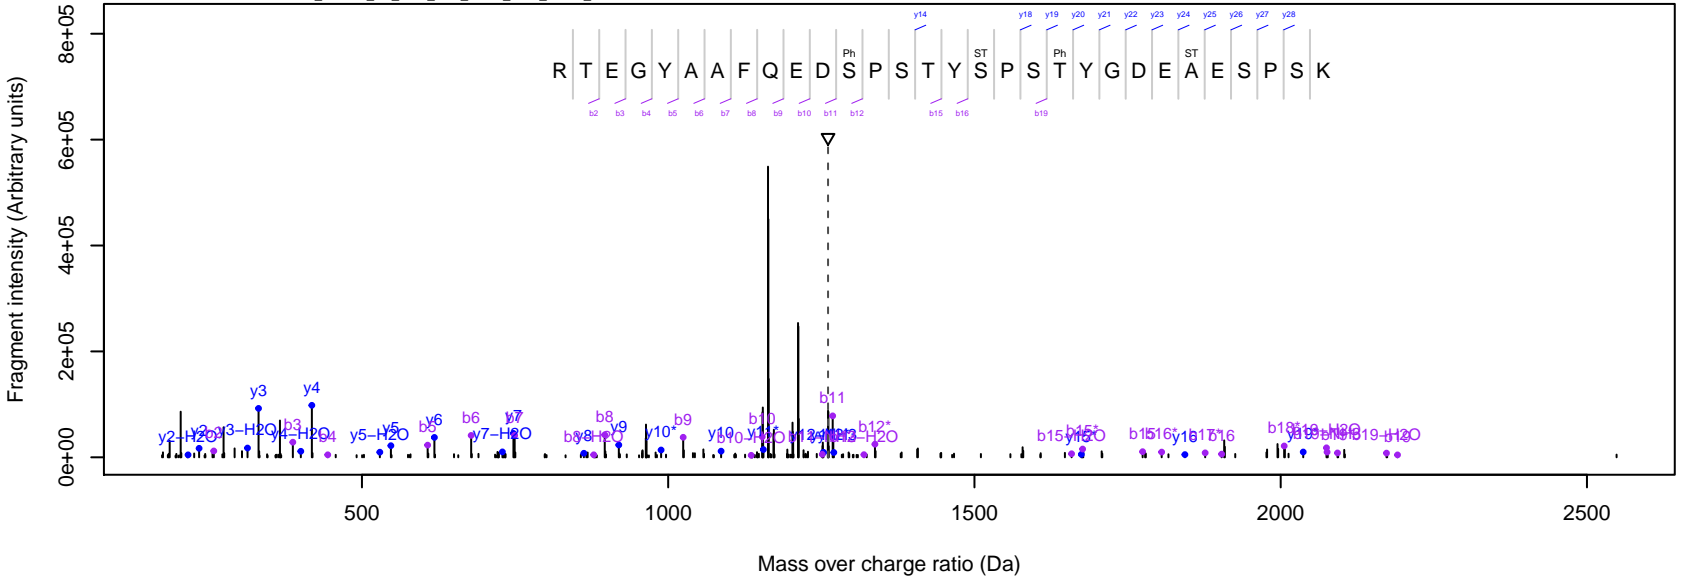

S(Phospho (STY))VEDVRPHHTDANNQSACFEAPDQK-4+

Source : QE3\_201126\_FR\_TiOx\_hum\_tissue\_Urea\_RNAB\_H Scan : 13125

Andromeda score : 206.49

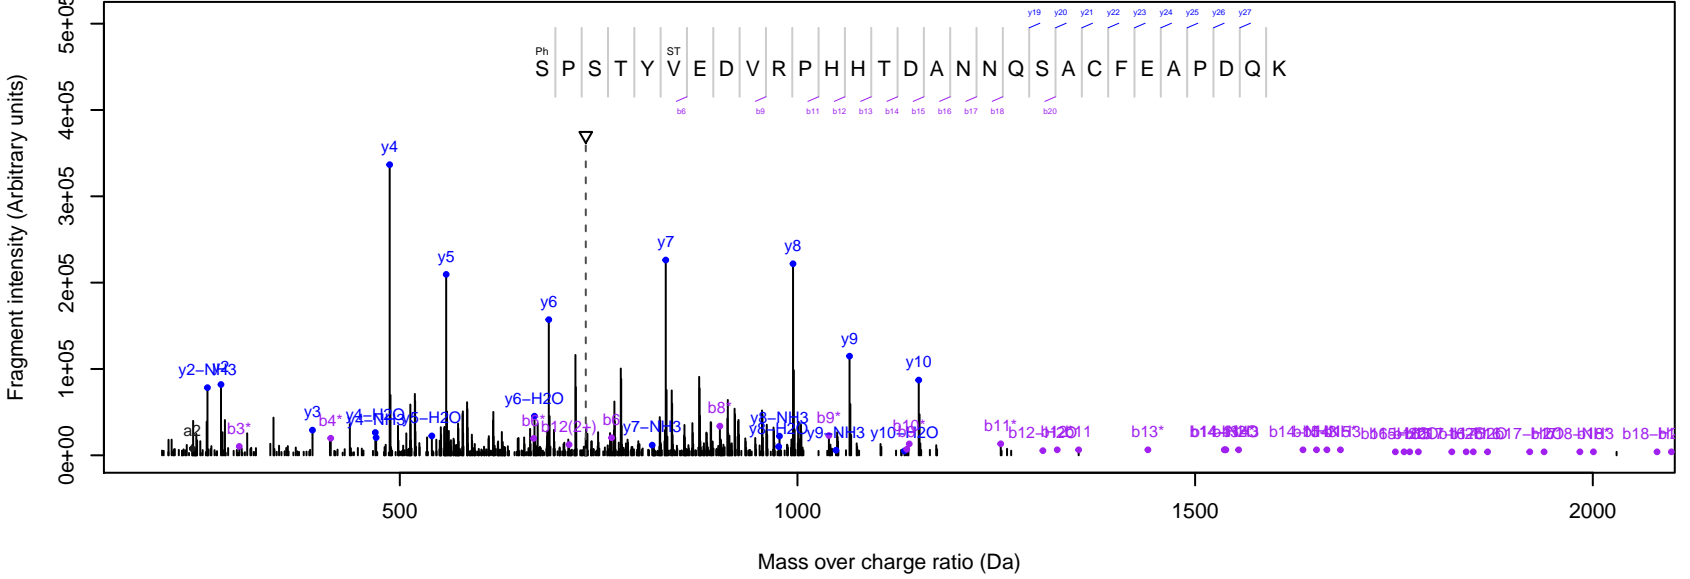

SNS(Phospho (STY))FSDEREFSGPST(Phospho (STY))PTGTLEFEGGEVSLGGK-3+

Source : QE3\_201126\_FR\_TiOx\_hum\_tissue\_Urea\_RNAB\_N Scan : 51940

Andromeda score : 206.48

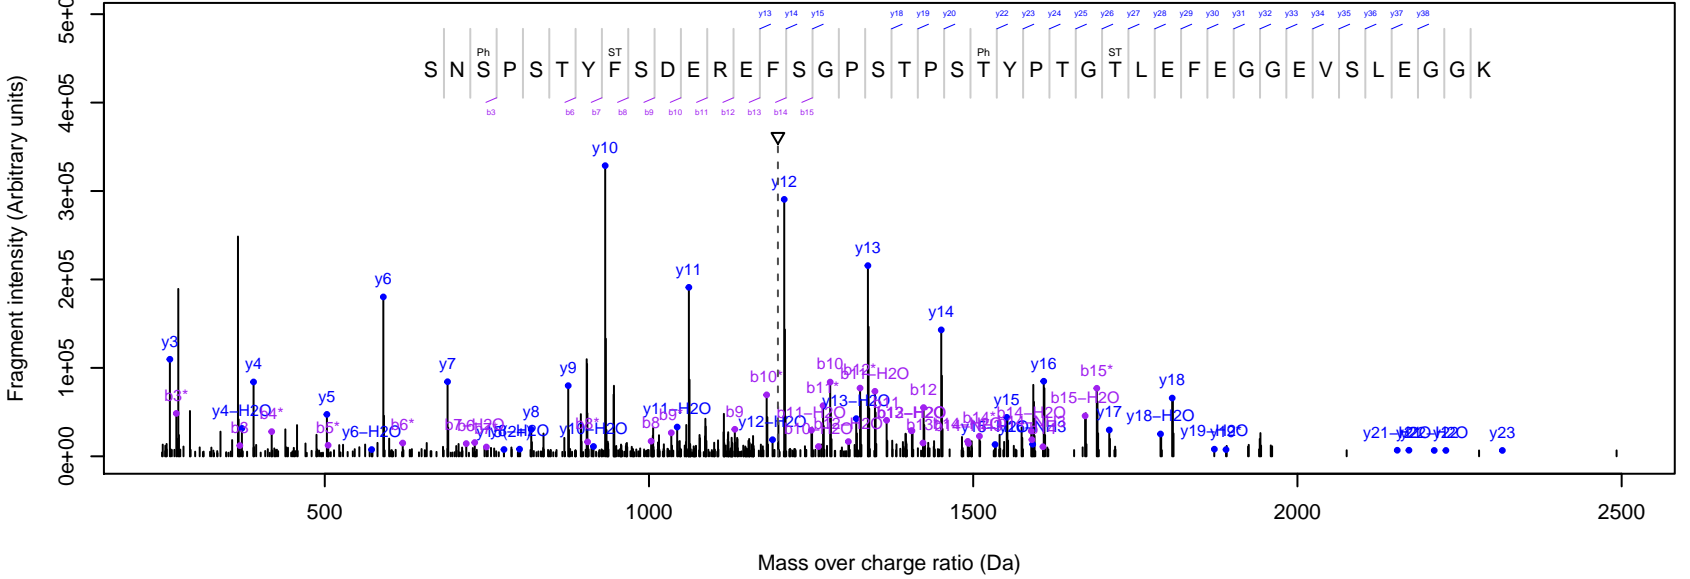

SQLDDHPES(Phospho (STY))DDEENFIDANDDEDMEKFTDADKETEIVK-4+

Source : QE3\_201126\_FR\_TiOx\_hum\_tissue\_Urea\_RNAB\_H Scan : 40710

Andromeda score : 206.4

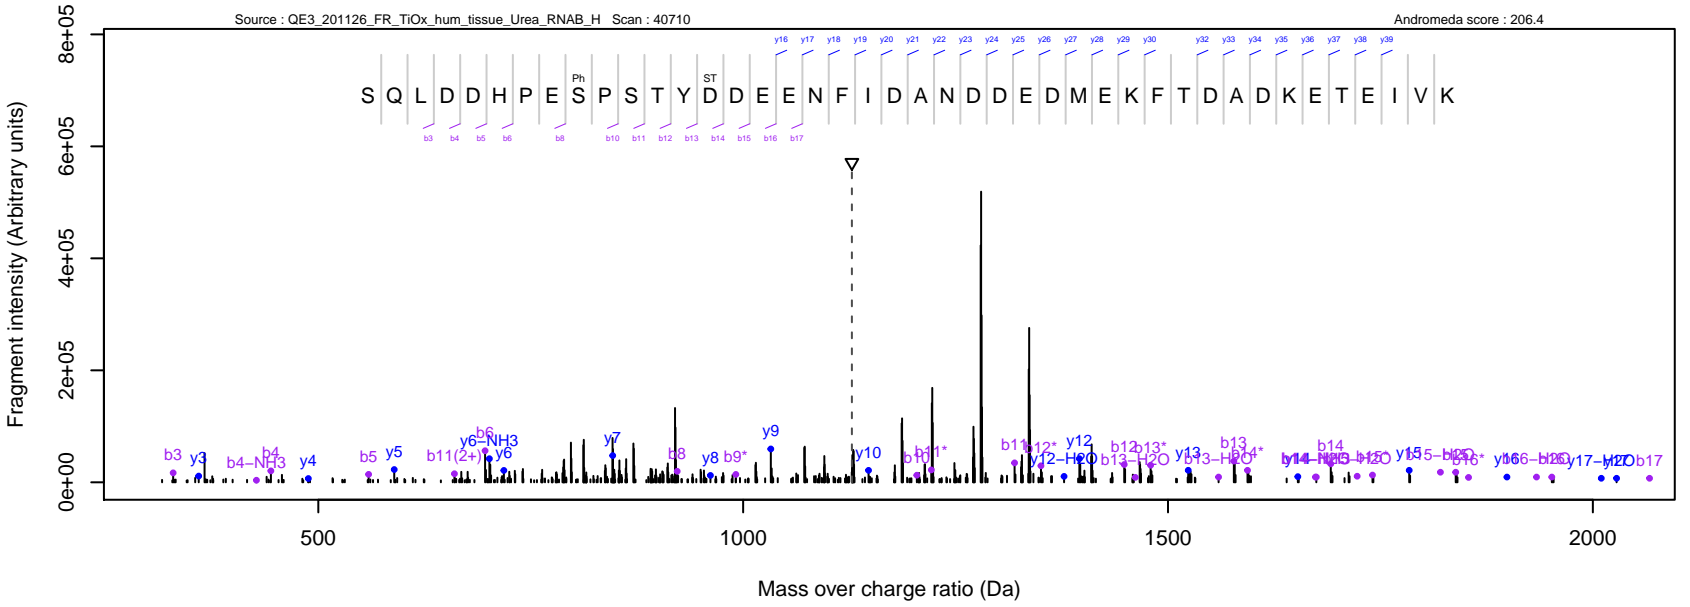

SES(Phospho (STY))FRFQENLKR-3+

Source : QE3\_201126\_FR\_TiOx\_hum\_tissue\_Urea\_RNAB\_B Scan : 15914

Andromeda score : 206.13

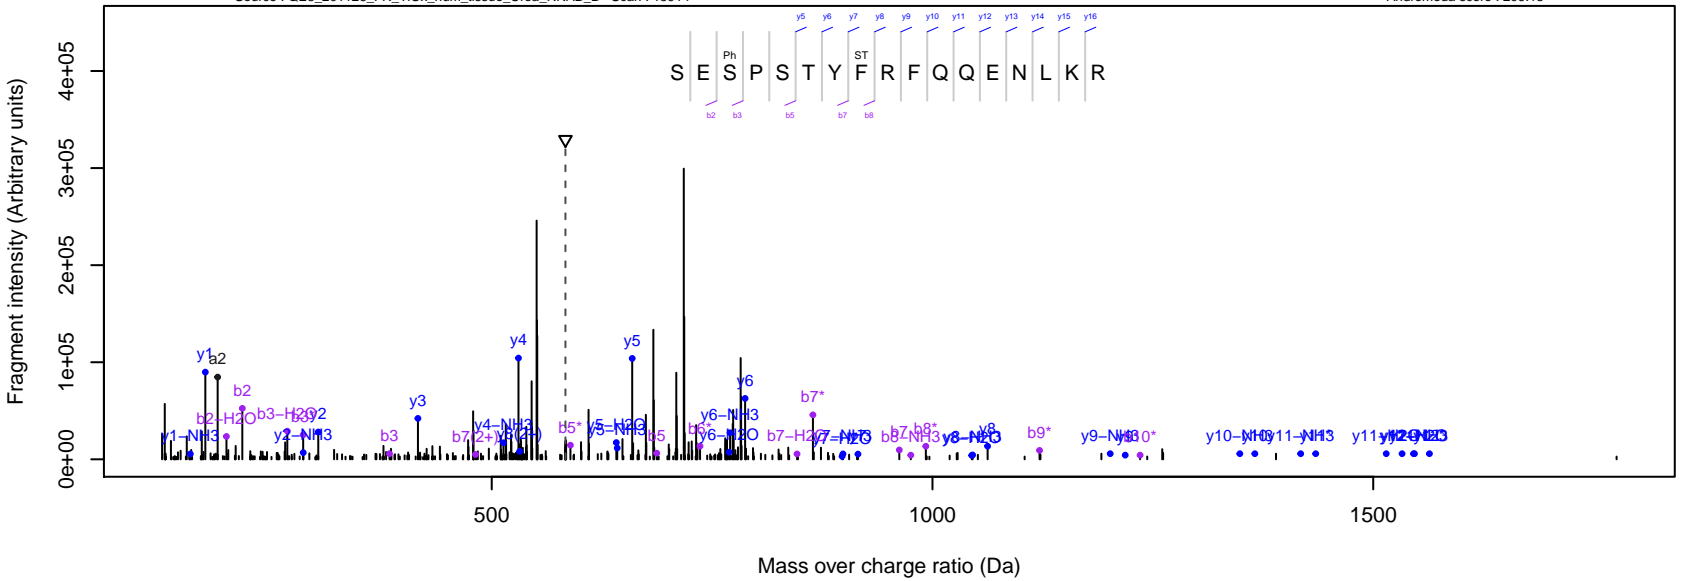

KEES(Phospho (STY))DEETASKAER-3+

Source : QE3\_201126\_FR\_TiOx\_hum\_tissue\_Urea\_RNAB\_H Scan : 4785

Andromeda score : 206.11

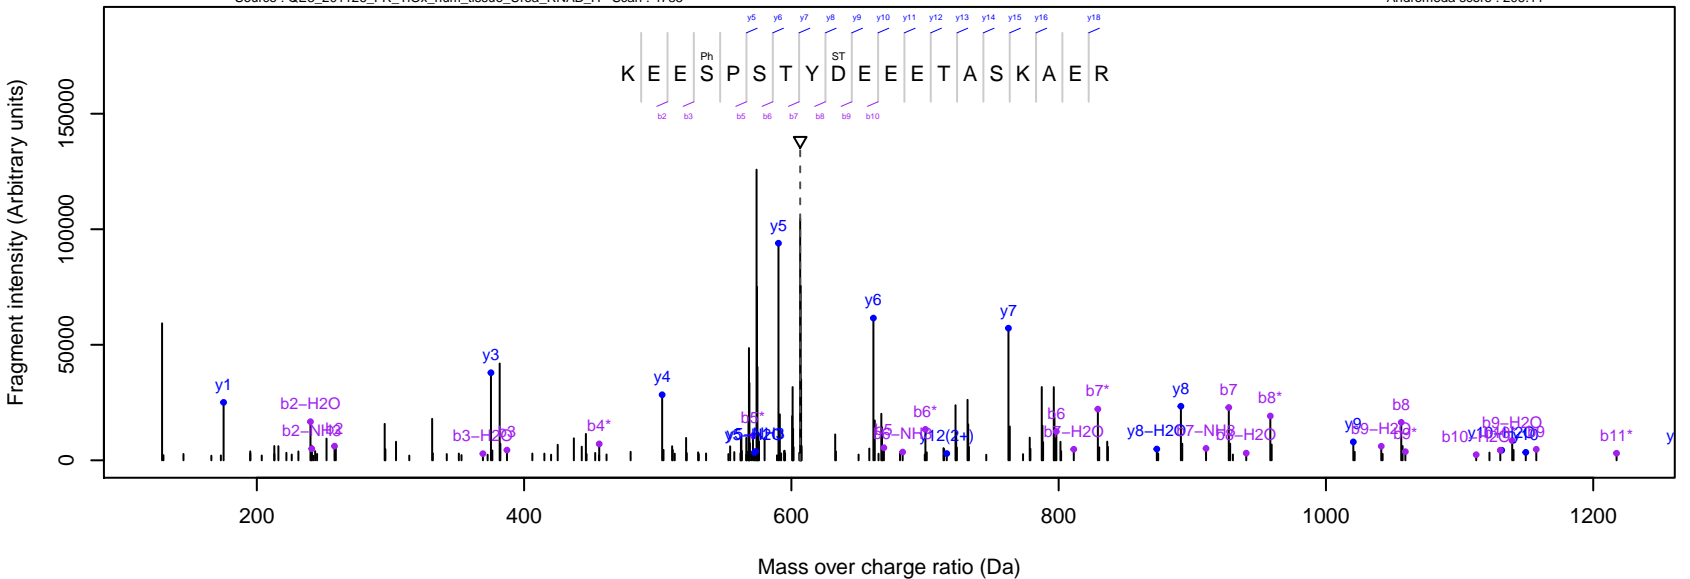

VLS(Phospho (STY))PADKTNVK-2+

Source : QE3\_201126\_FR\_TIOx\_hum\_tissue\_Urea\_RNAB\_B Scan : 8917

Andromeda score : 206.03

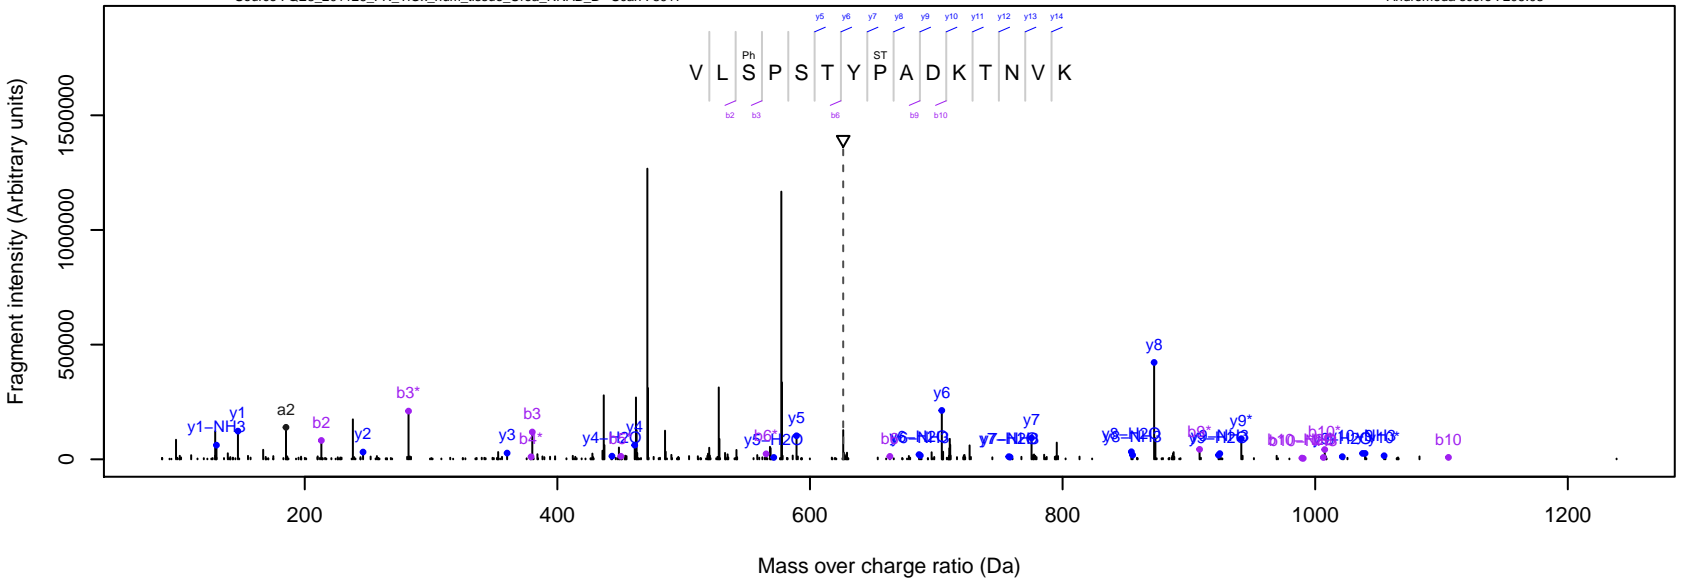

NKS(Phospho (STY))NEDQSM(Oxidation (M))GNWQIKR-3+

Source : QE3\_201126\_FR\_TIOx\_hum\_tissue\_Urea\_RNAB\_N Scan : 9740

Andromeda score : 205.92

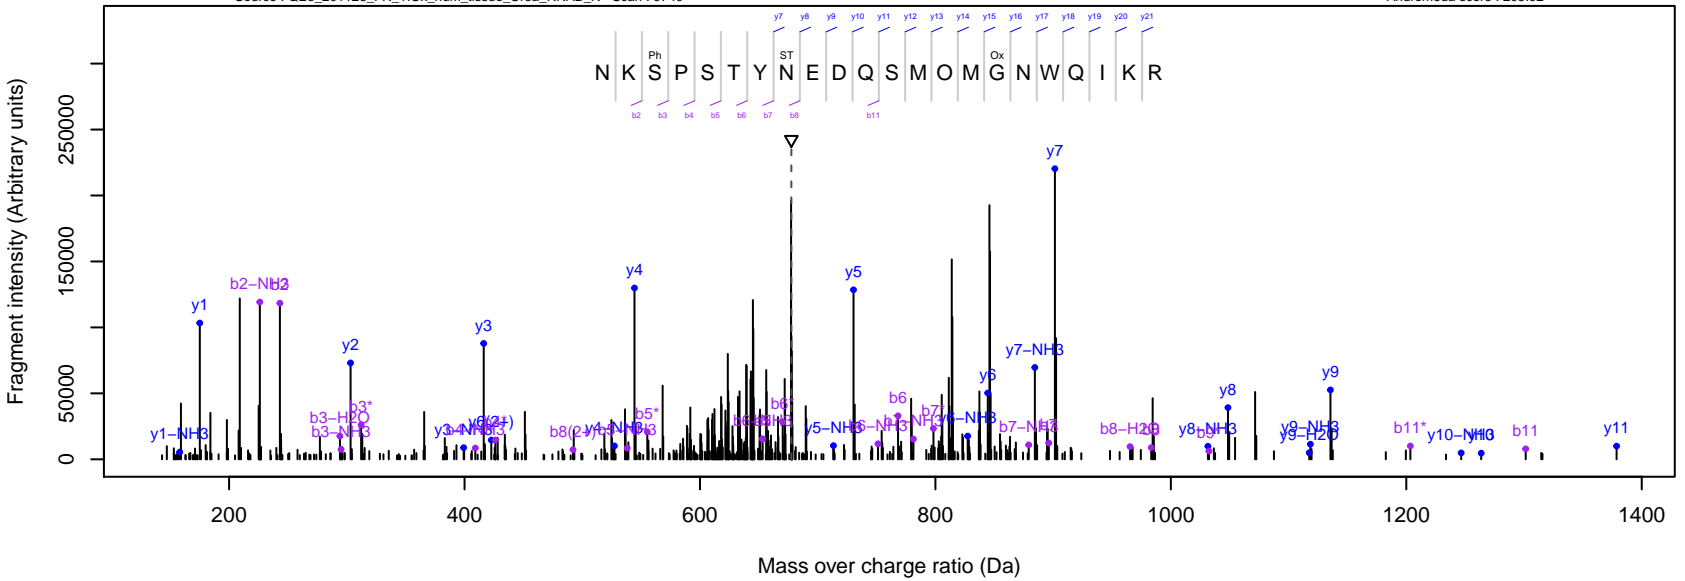

SSLGQS(Phospho (STY))AS(Phospho (STY))ETEEDTVSVSKK-3+

Source : QE3\_201126\_FR\_TIOx\_hum\_tissue\_Urea\_RNAB\_N Scan : 19018

Andromeda score : 205.9

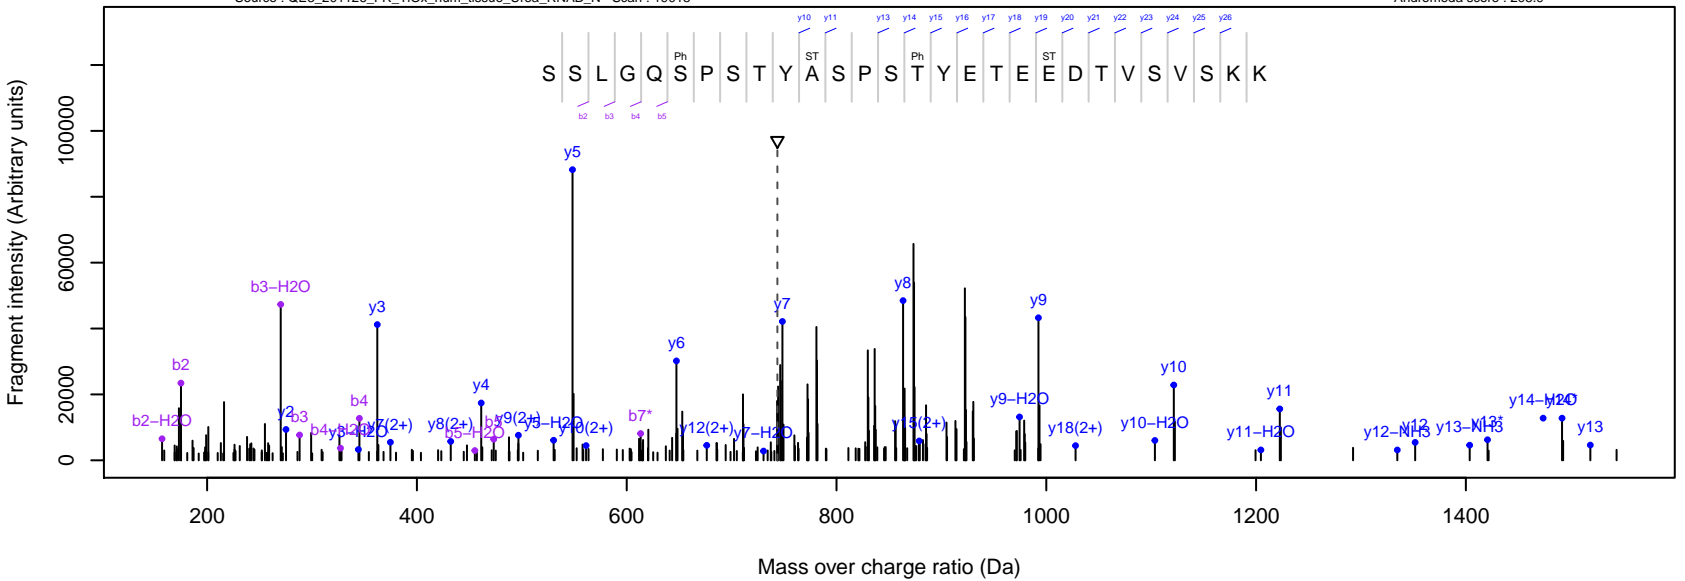





VPS(Phospho (STY))S(Phospho (STY))DEEVVEEPQSR-2+

Source : QE3\_201126\_FR\_TiOx\_hum\_tissue\_Urea\_RNAB\_H Scan : 25535

Andromeda score : 205.52

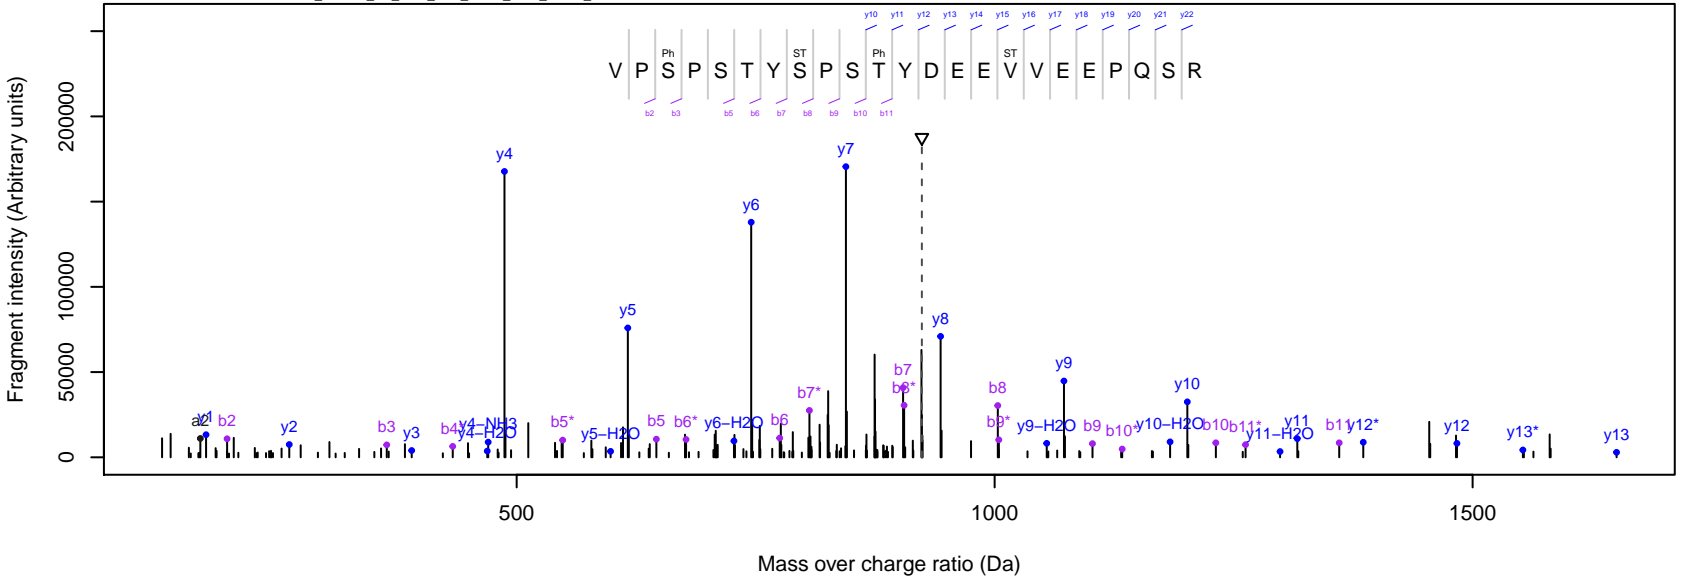

AMADELS(Phospho (STY))EKQVYDAHTK-3+

Source : QE3\_201126\_FR\_TiOx\_hum\_tissue\_Urea\_RNAB\_N Scan : 16572

Andromeda score : 205.24

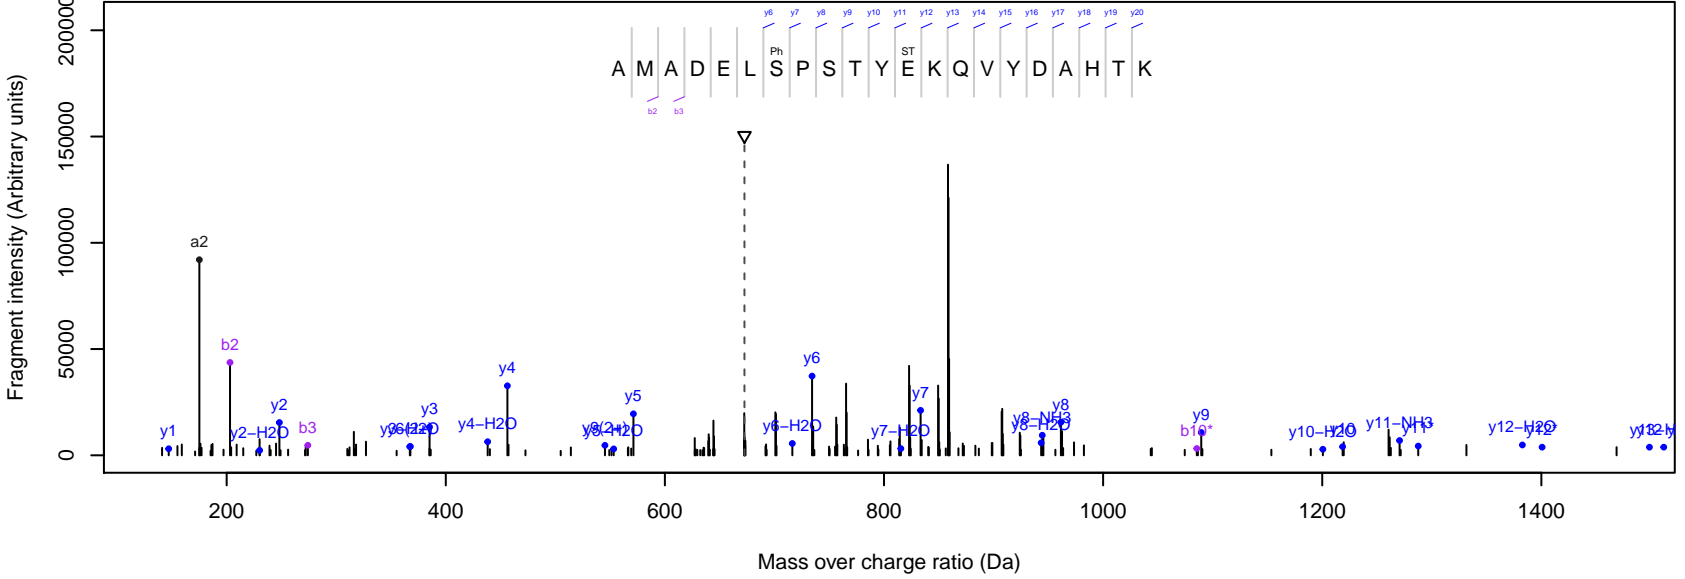

RSS(Phospho (STY))S(Phospho (STY))PEDPERDEEVLNHVLR-4+

Source : QE3\_201126\_FR\_TiOx\_hum\_tissue\_Urea\_RNAB\_H Scan : 31174

Andromeda score : 205.13

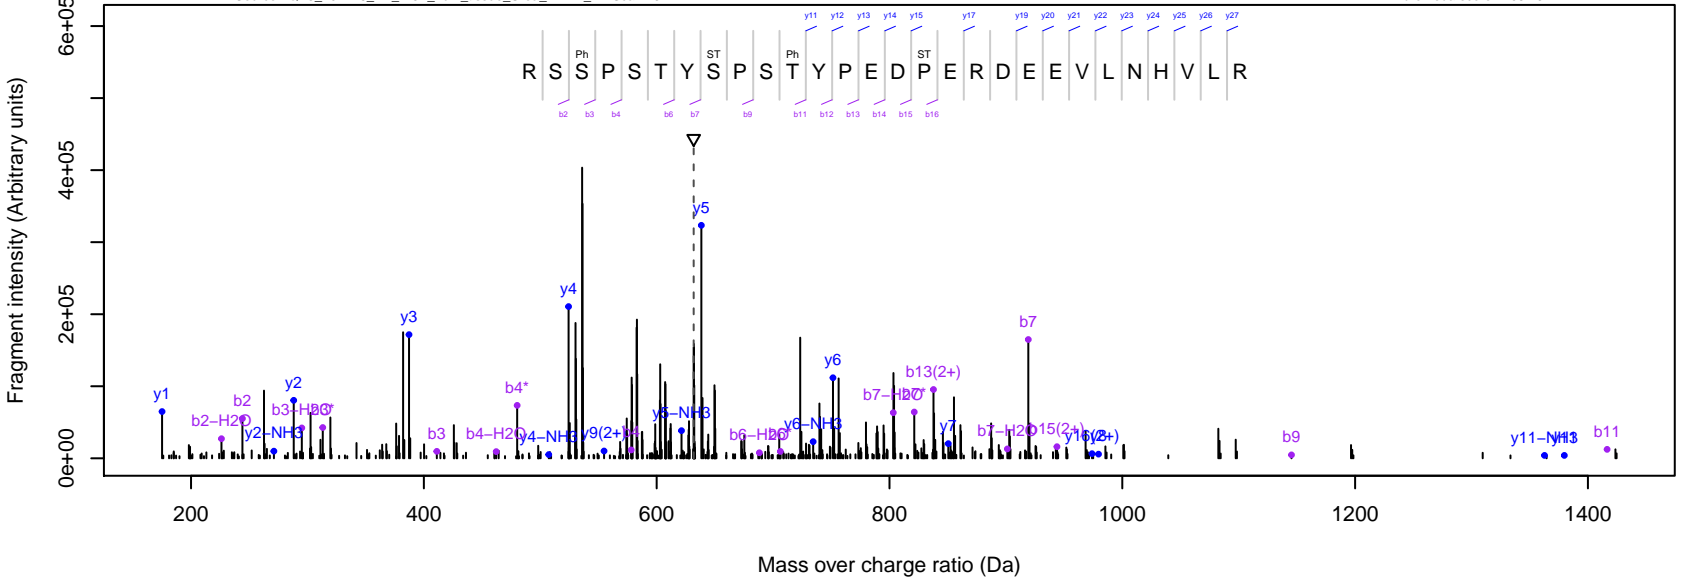

AGM(Oxidation (M))SSNQSISS(Phospho (STY))PVLDAVPR-2+

Source : QE3\_201126\_FR\_TIOx\_hum\_tissue\_Urea\_RNAB\_B Scan : 35364

Andromeda score : 205.06

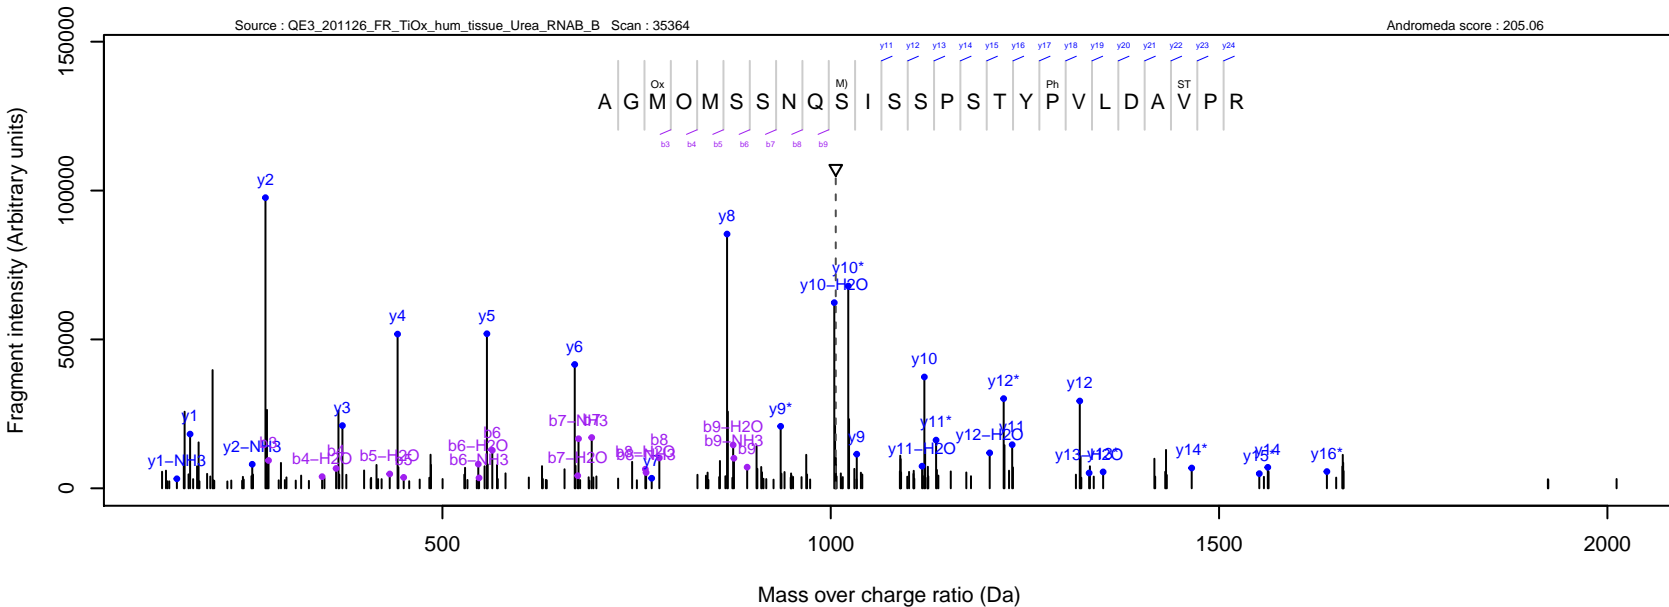

TQPDGTSVPGEPAS(Phospho (STY))PISQR-2+

Source : QE3\_201126\_FR\_TIOx\_hum\_tissue\_Urea\_RNAB\_N Scan : 21498

Andromeda score : 205

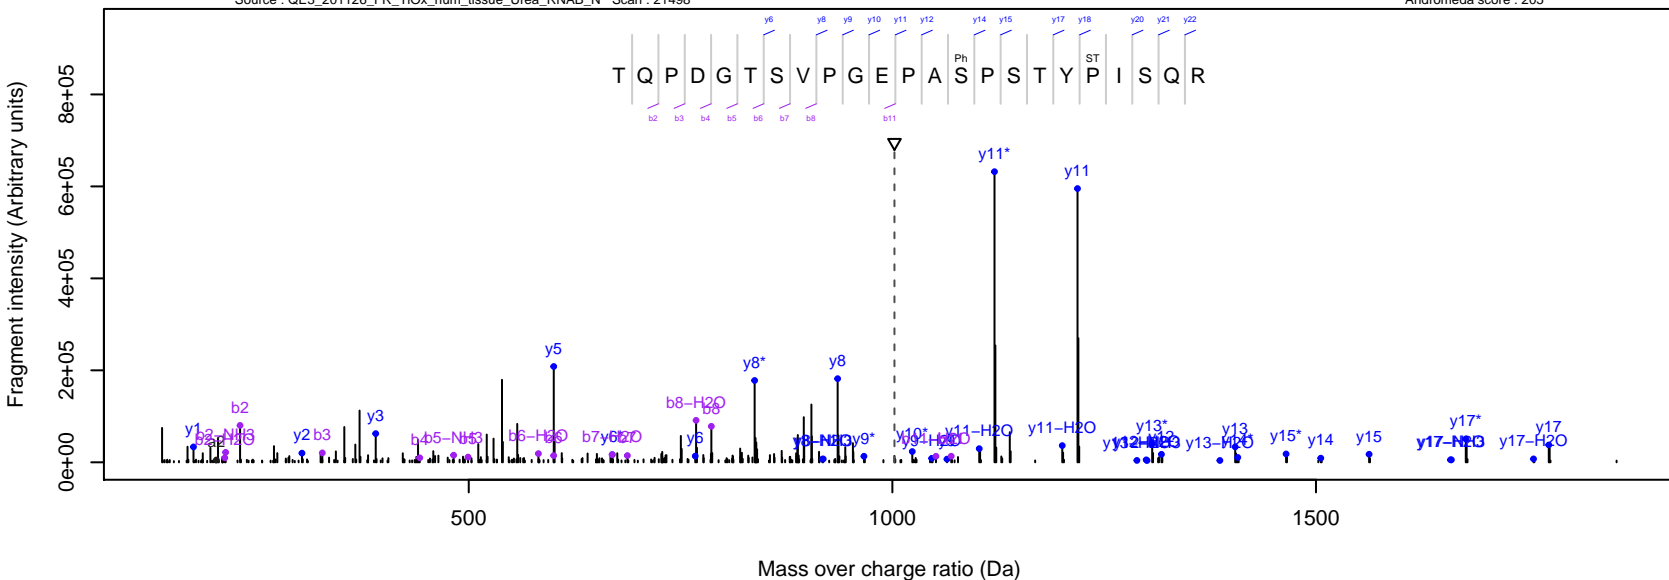

REEQTDTSPSTYDGESVTHHIR-3+

Source : QE3\_201126\_FR\_TIOx\_hum\_tissue\_Urea\_RNAB\_N Scan : 7293

Andromeda score : 204.96

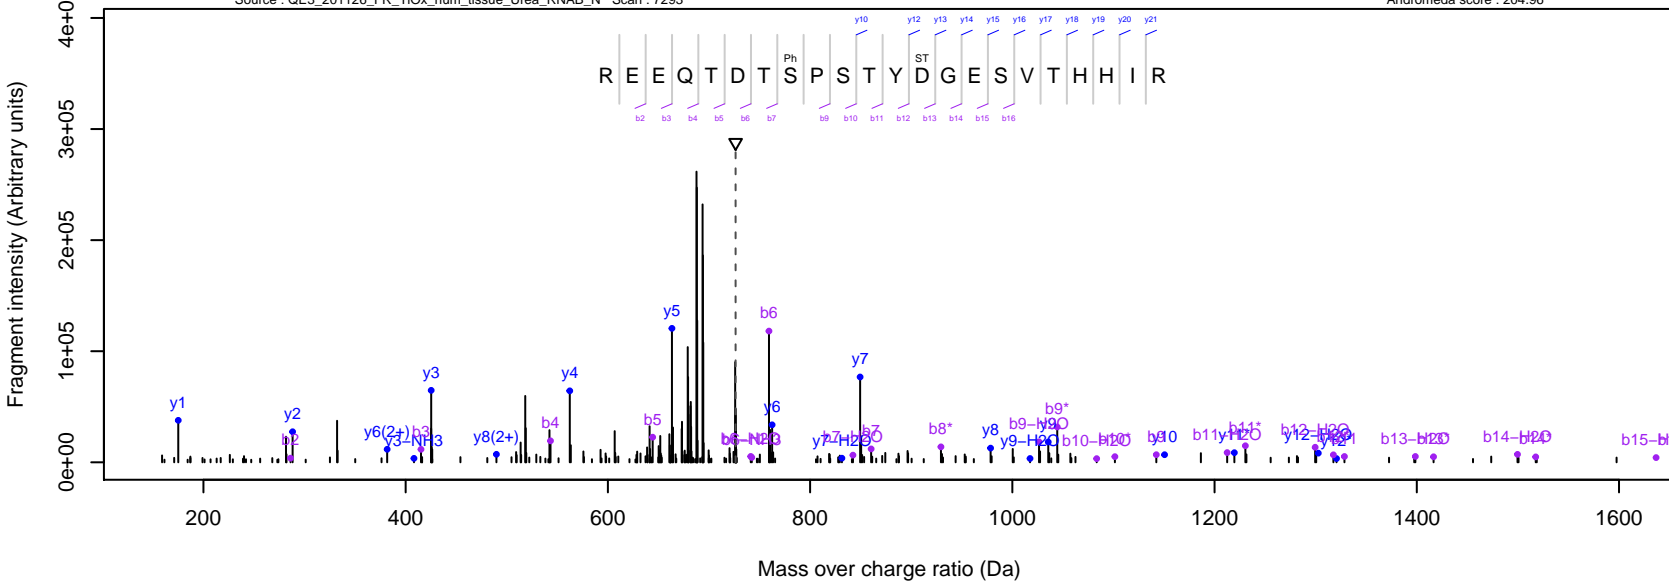

DLSSS(Phospho (STY))PPGPYGQEM(Oxidation (M))YAFR-3+

Source : QE3\_201126\_FR\_TiOx\_hum\_tissue\_Urea\_RNAB\_H Scan : 41545

Andromeda score : 204.94

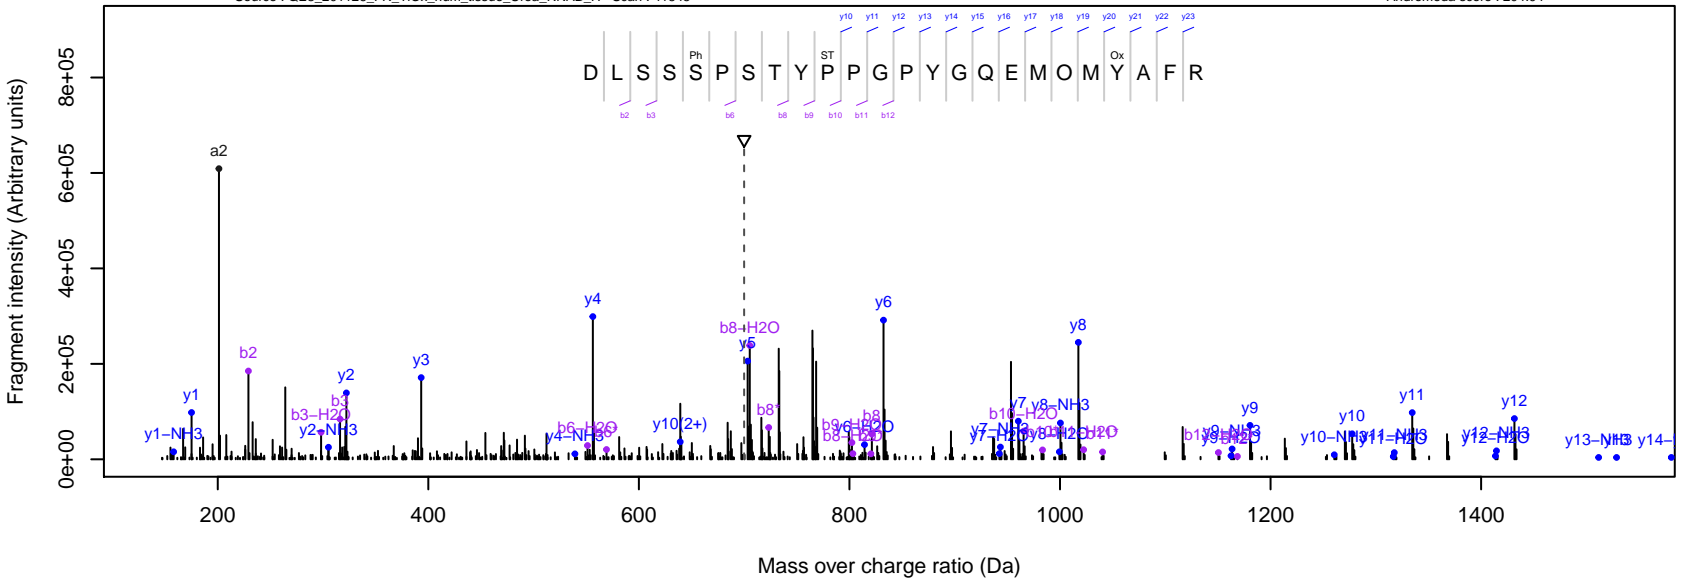

ERGDES(Phospho (STY))PLGAEGAK-2+

Source : QE3\_201126\_FR\_TiOx\_hum\_tissue\_Urea\_RNAB\_N Scan : 8249

Andromeda score : 204.81

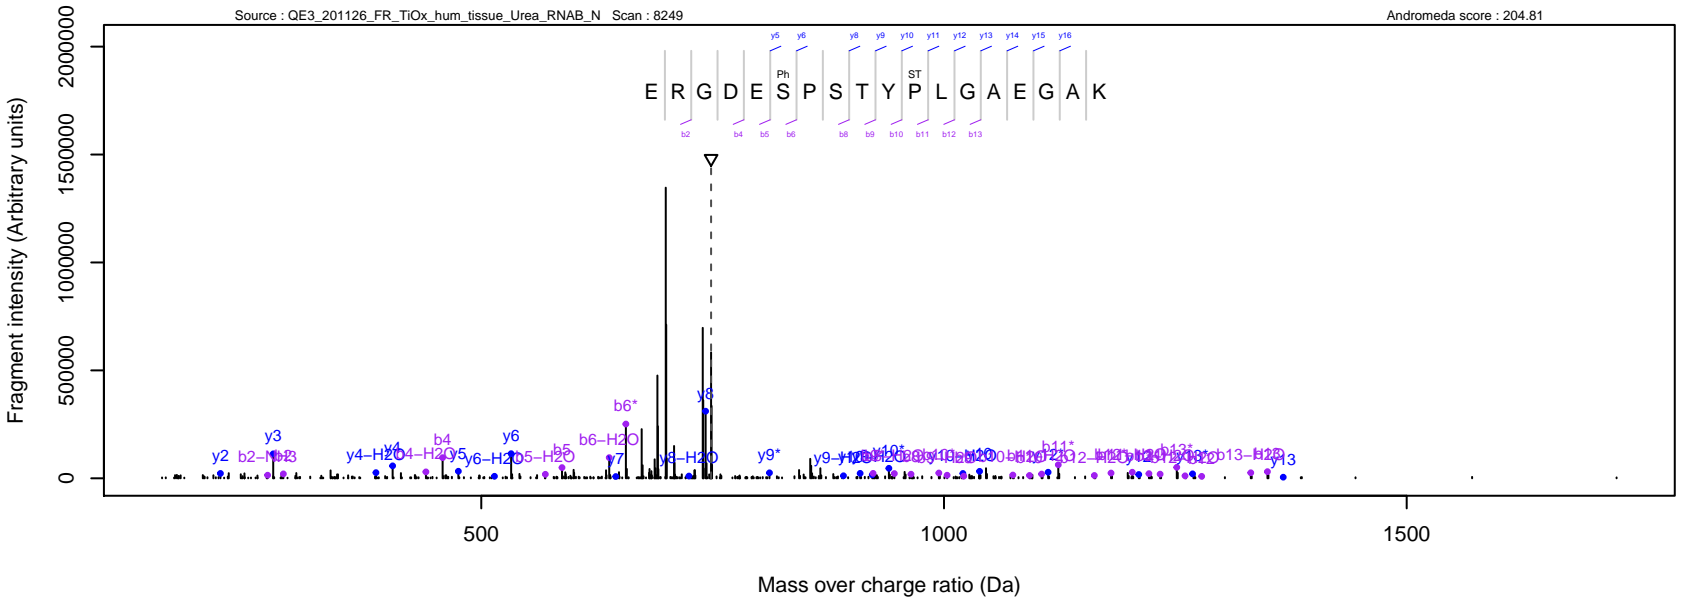

AT(Phospho (STY))S(Phospho (STY))NVFAMFDQSQIQEFK-2+

Source : QE3\_201126\_FR\_TiOx\_hum\_tissue\_Urea\_RNAB\_B Scan : 63189

Andromeda score : 204.78

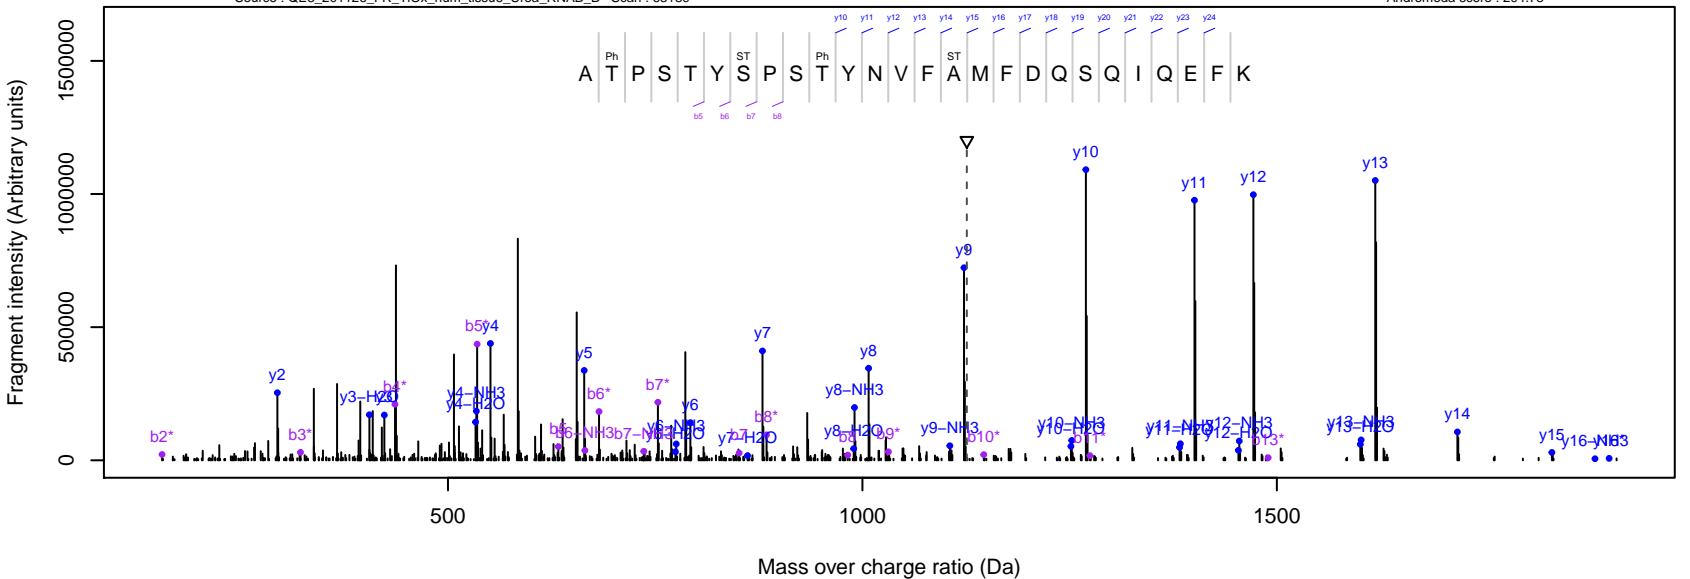





CTELNQAWSS(Phospho (STY))LGK-2+

Source : QE3\_201126\_FR\_TiOx\_hum\_tissue\_Urea\_RNAB\_B Scan : 33624

Andromeda score : 204.35

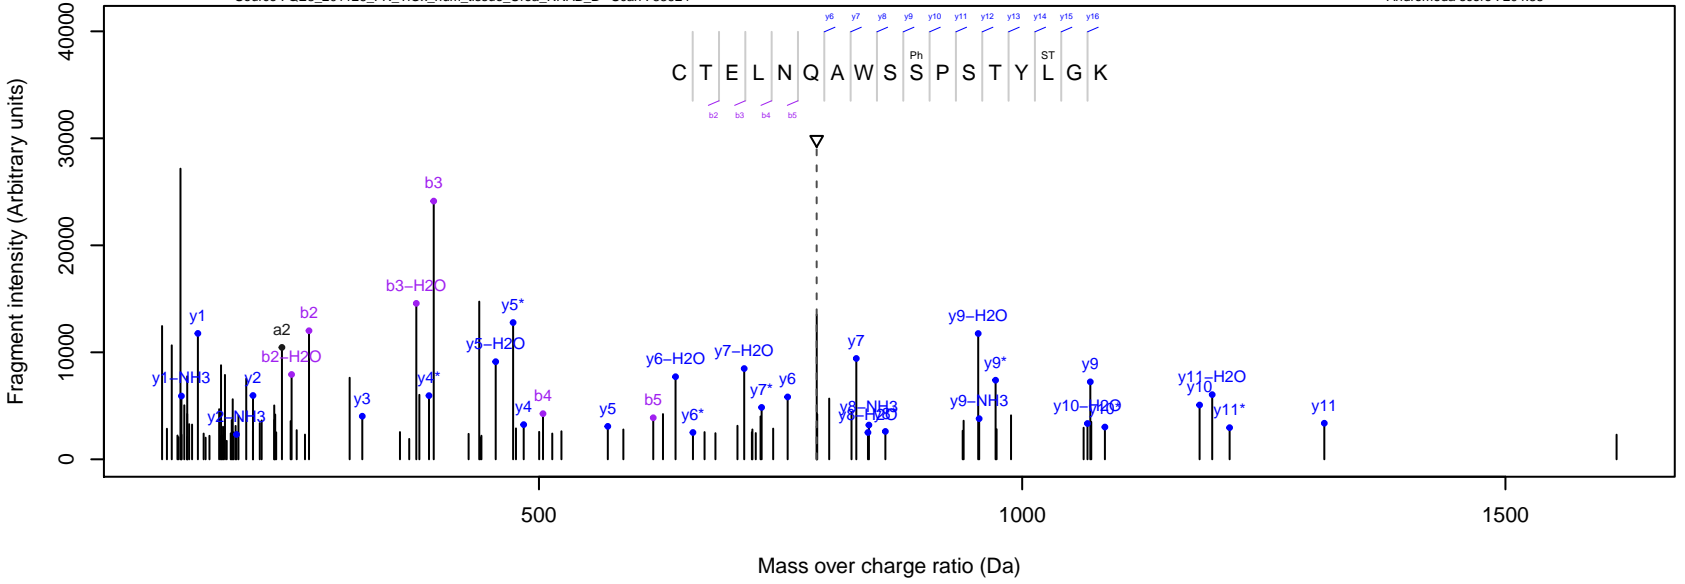

HKS(Phospho (STY))DNETNLQQVWVWGNR-3+

Source : QE3\_201126\_FR\_TiOx\_hum\_tissue\_Urea\_RNAB\_N Scan : 20337

Andromeda score : 204.31

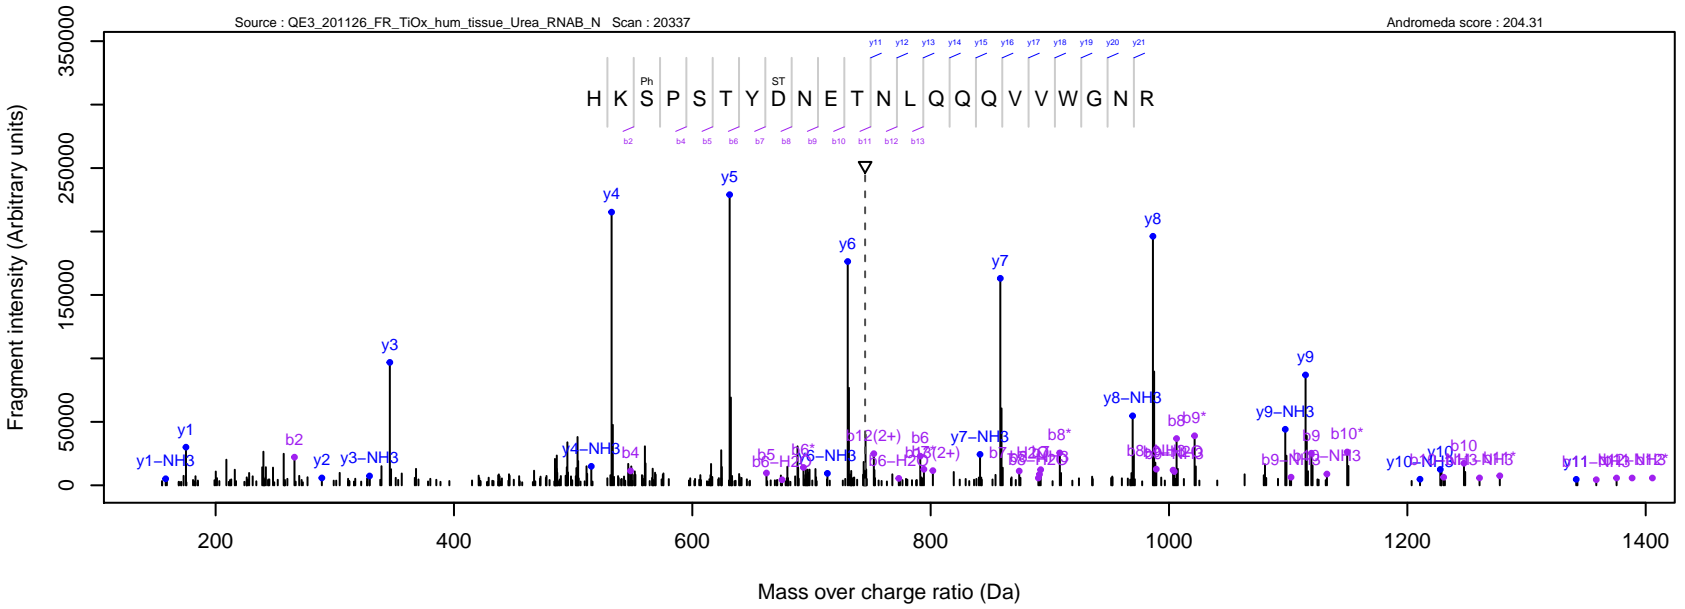

GILAADES(Phospho (STY))VGTMGNR-2+

Source : QE3\_201126\_FR\_TiOx\_hum\_tissue\_Urea\_RNAB\_H Scan : 29864

Andromeda score : 204.28

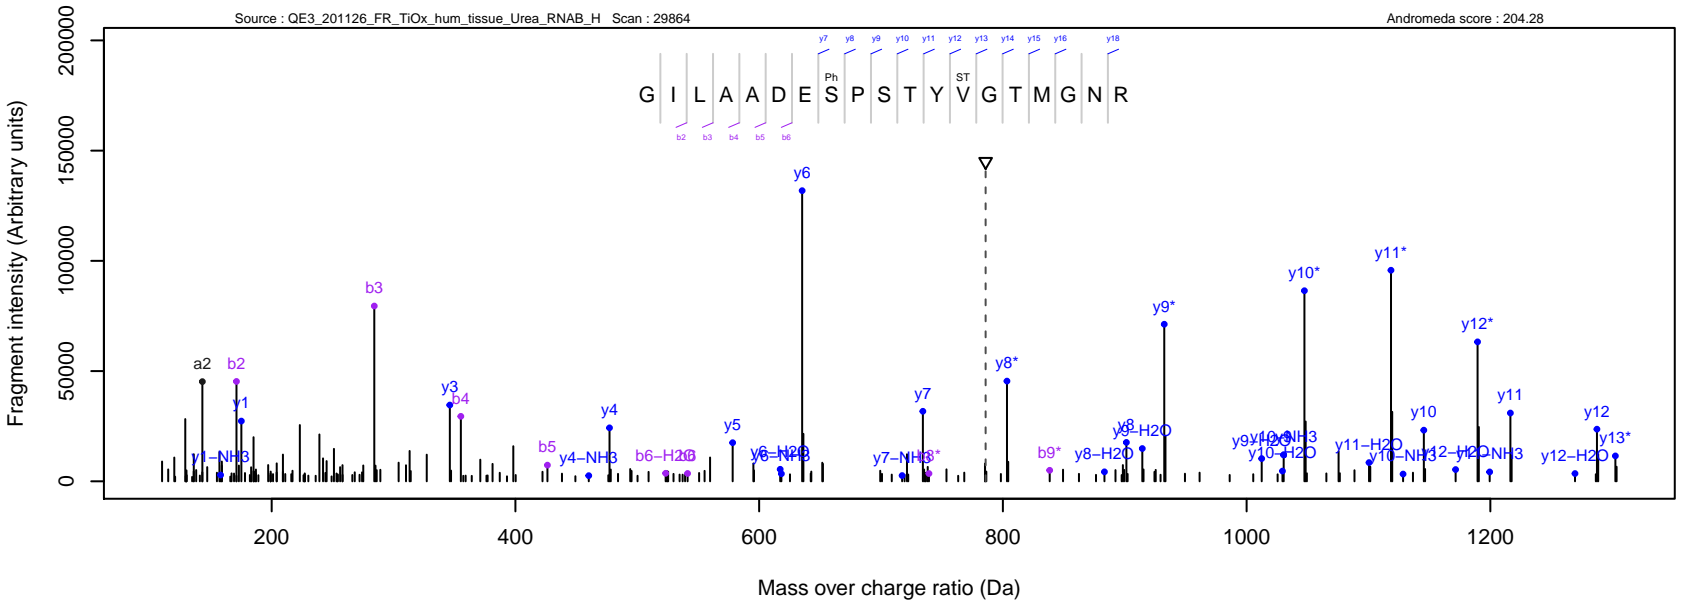

RSS(Phospho (STY))TSSEPTTVK-2+

Source : QE3\_201126\_FR\_TiOx\_hum\_tissue\_Urea\_RNAB\_H Scan : 5997

Andromeda score : 204.28

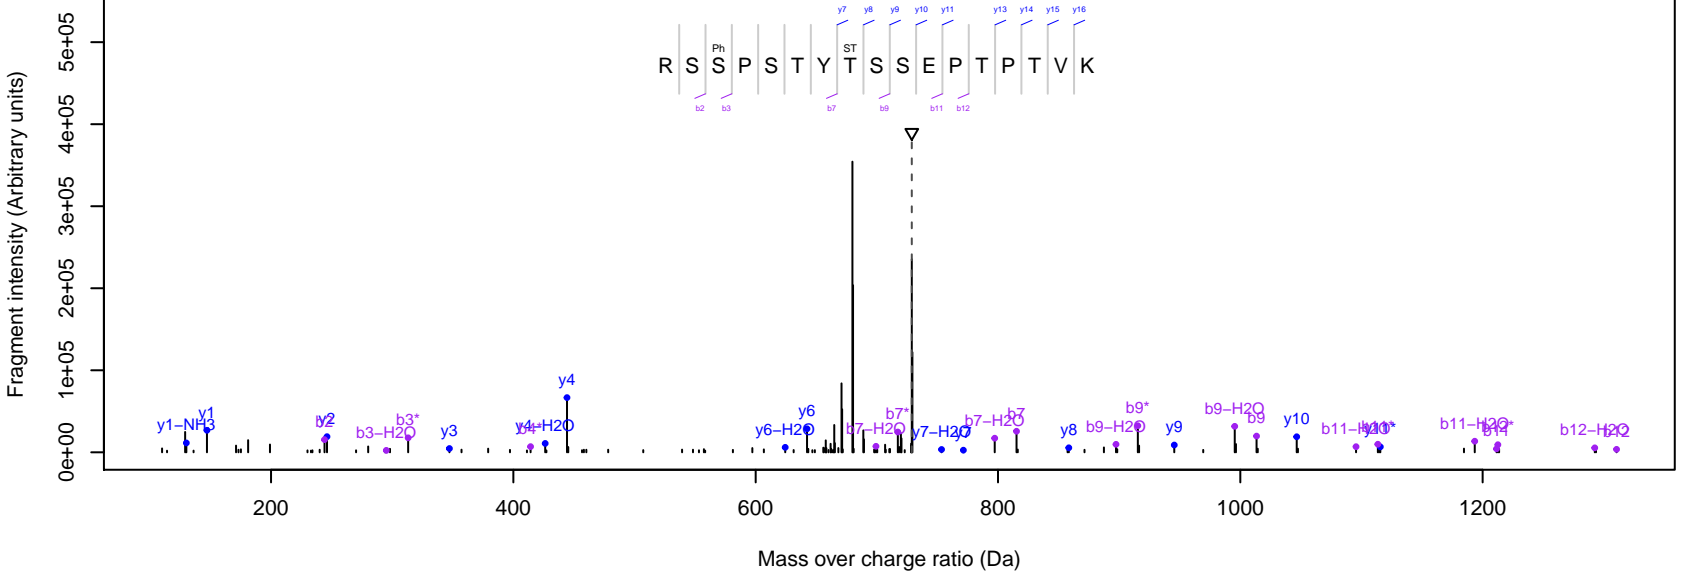

VNFSEEGET(Phospho (STY))EEDDQDSSHSSVTTVK-3+

Source : QE3\_201126\_FR\_TiOx\_hum\_tissue\_Urea\_RNAB\_N Scan : 19069

Andromeda score : 204.25

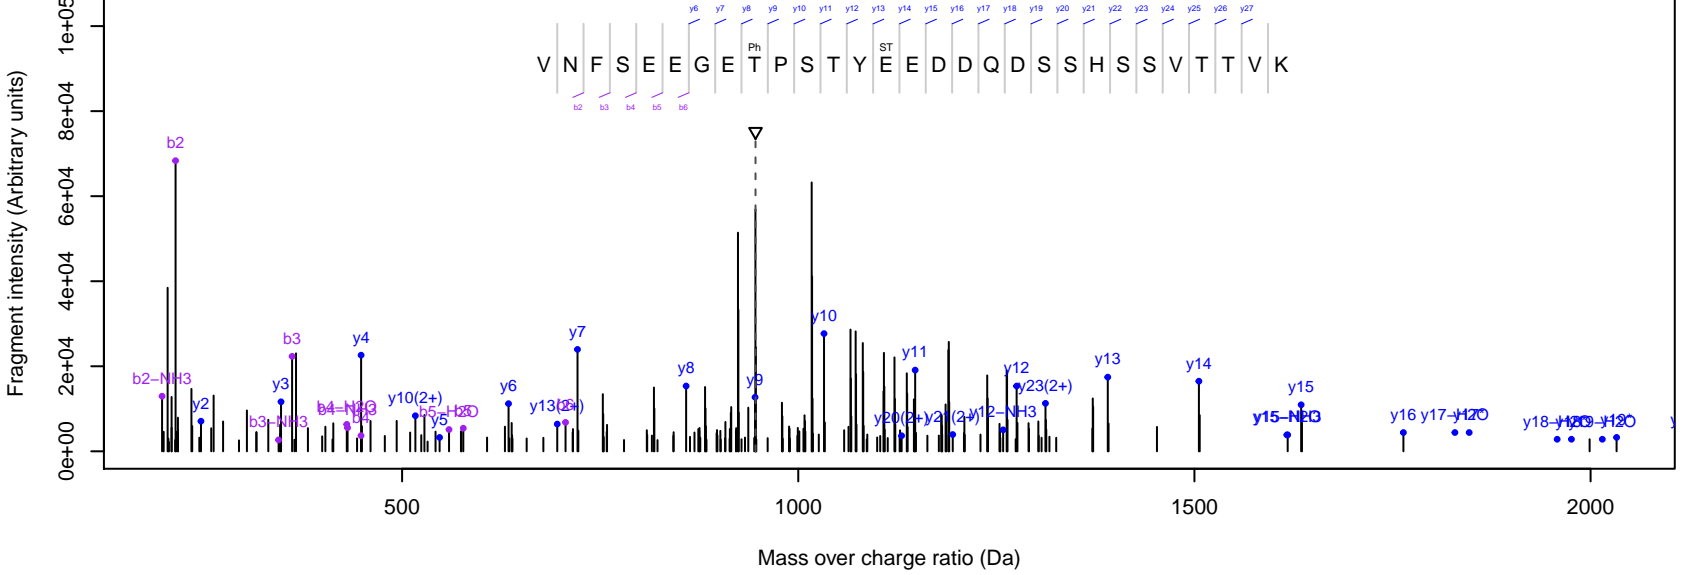

HAIMRS(Phospho (STY))PQMVSIVR-3+

Source : QE3\_201126\_FR\_TiOx\_hum\_tissue\_Urea\_RNAB\_N Scan : 24694

Andromeda score : 204.23

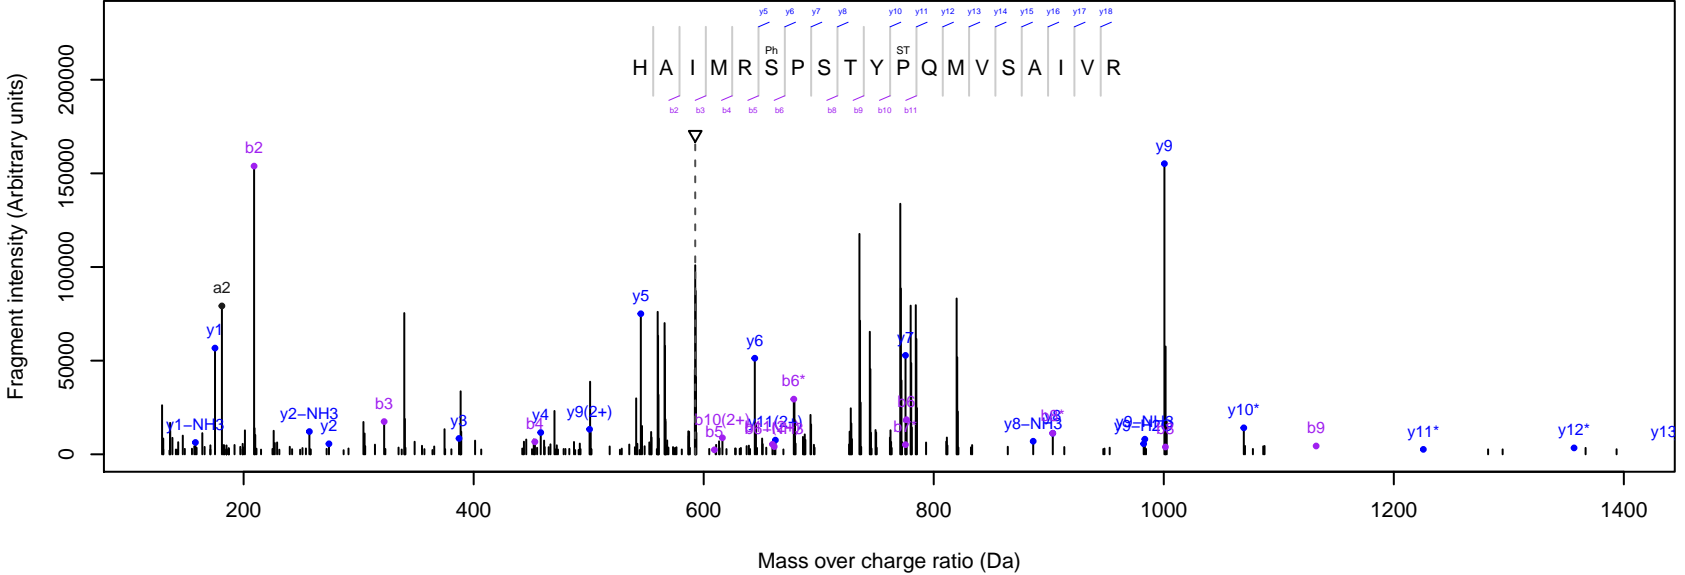



TNS(Phospho (STY))SDSERSPDLGHSTQIPR-3+

Source : QE3\_201126\_FR\_TiOx\_hum\_tissue\_Urea\_RNAB\_N Scan : 13738

Andromeda score : 204.23

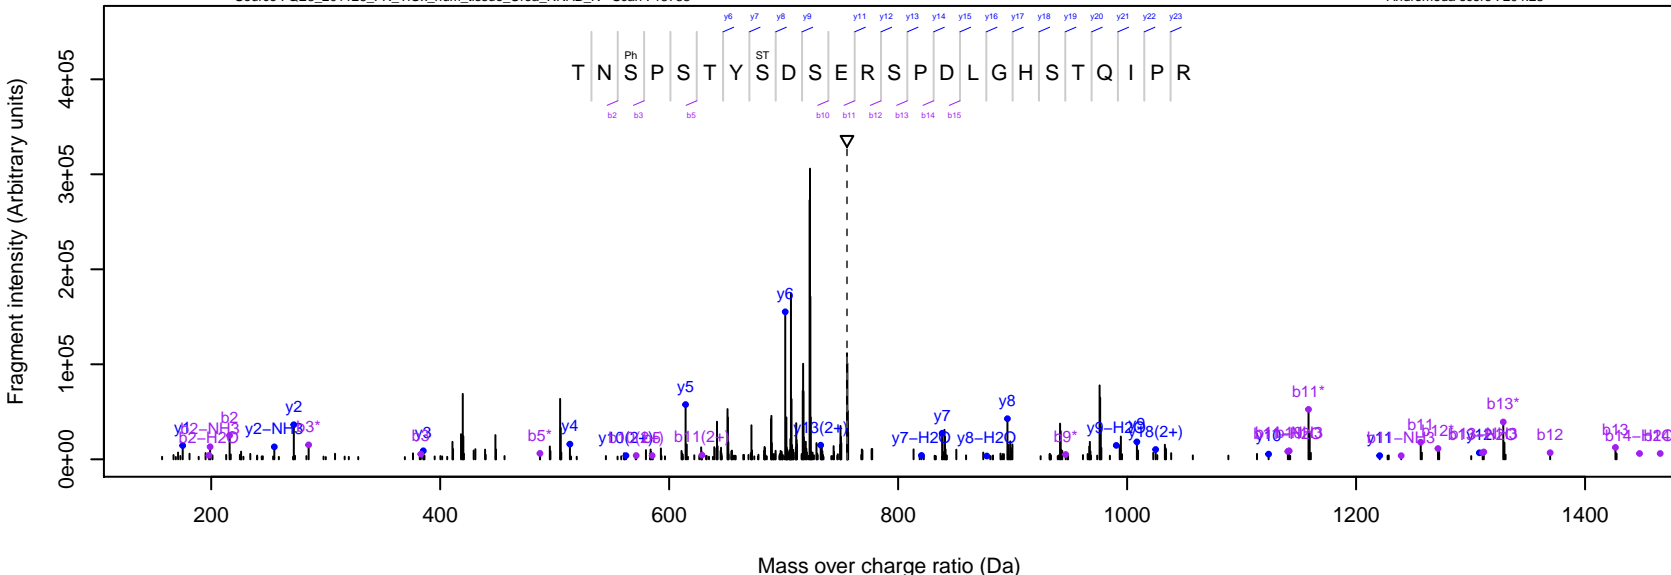

GADS(Phospho (STY))GEEKEGINREDK-3+

Source : QE3\_201126\_FR\_TiOx\_hum\_tissue\_Urea\_RNAB\_B Scan : 5029

Andromeda score : 204.21

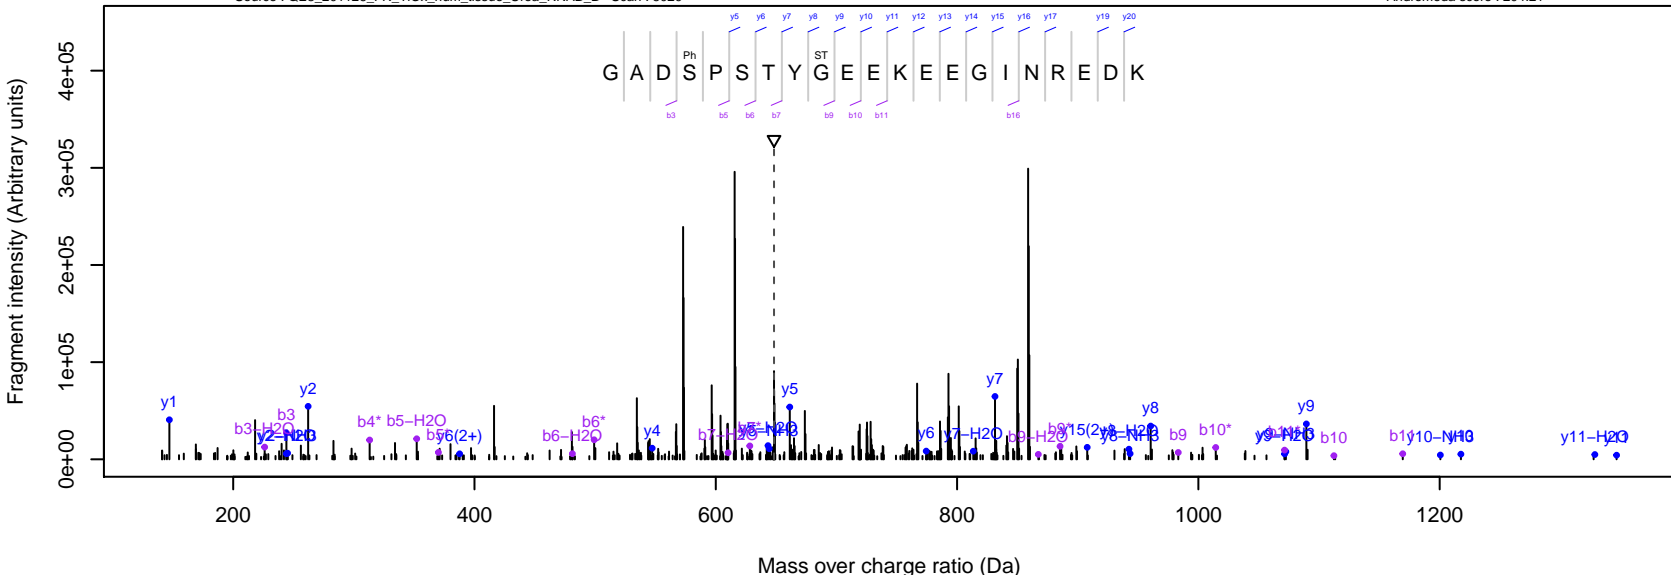

YFAES(Phospho (STY))DEEEDVDVDFAM(Oxidation (M))FN-2+

Source : QE3\_201126\_FR\_TiOx\_hum\_tissue\_Urea\_RNAB\_B Scan : 60775

Andromeda score : 204.18

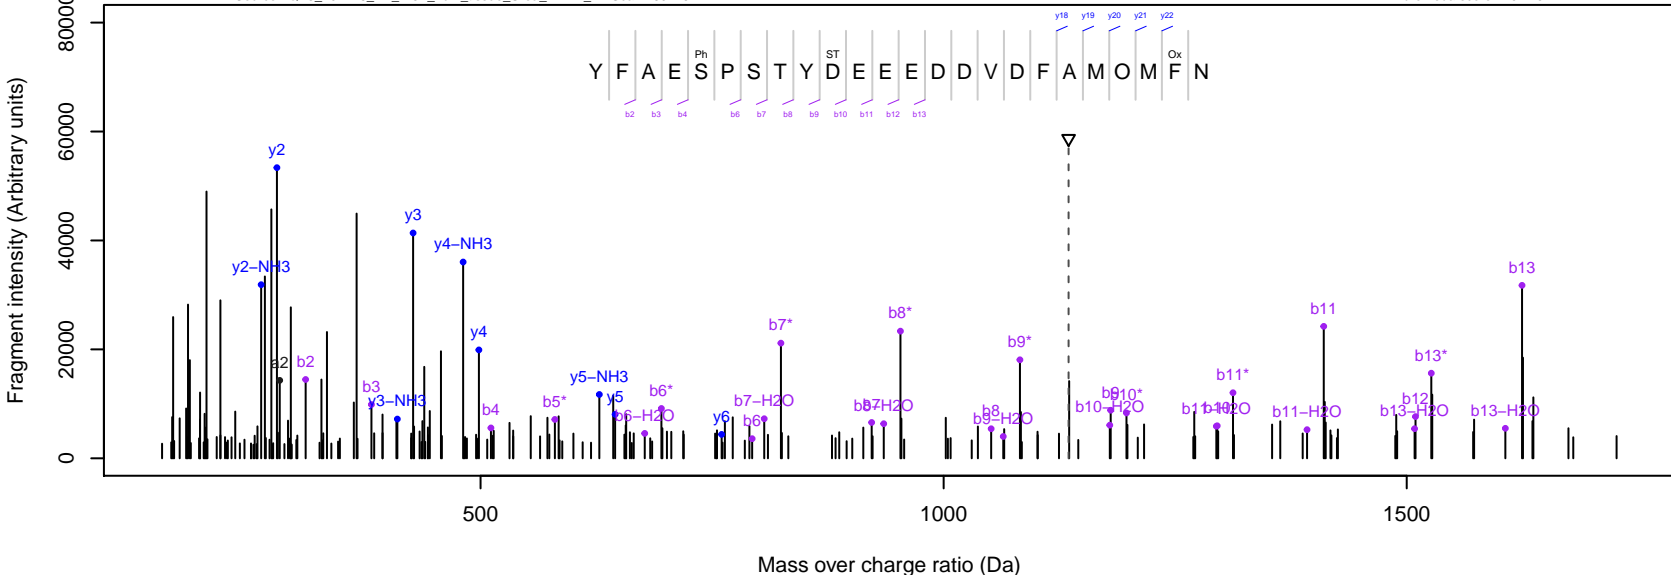

FFES(Phospho (STY))FGDLSTPDAVMGNPK-2+

Source : QE3\_201126\_FR\_TIOx\_hum\_tissue\_Urea\_RNAB\_N Scan : 56932

Andromeda score : 204.13

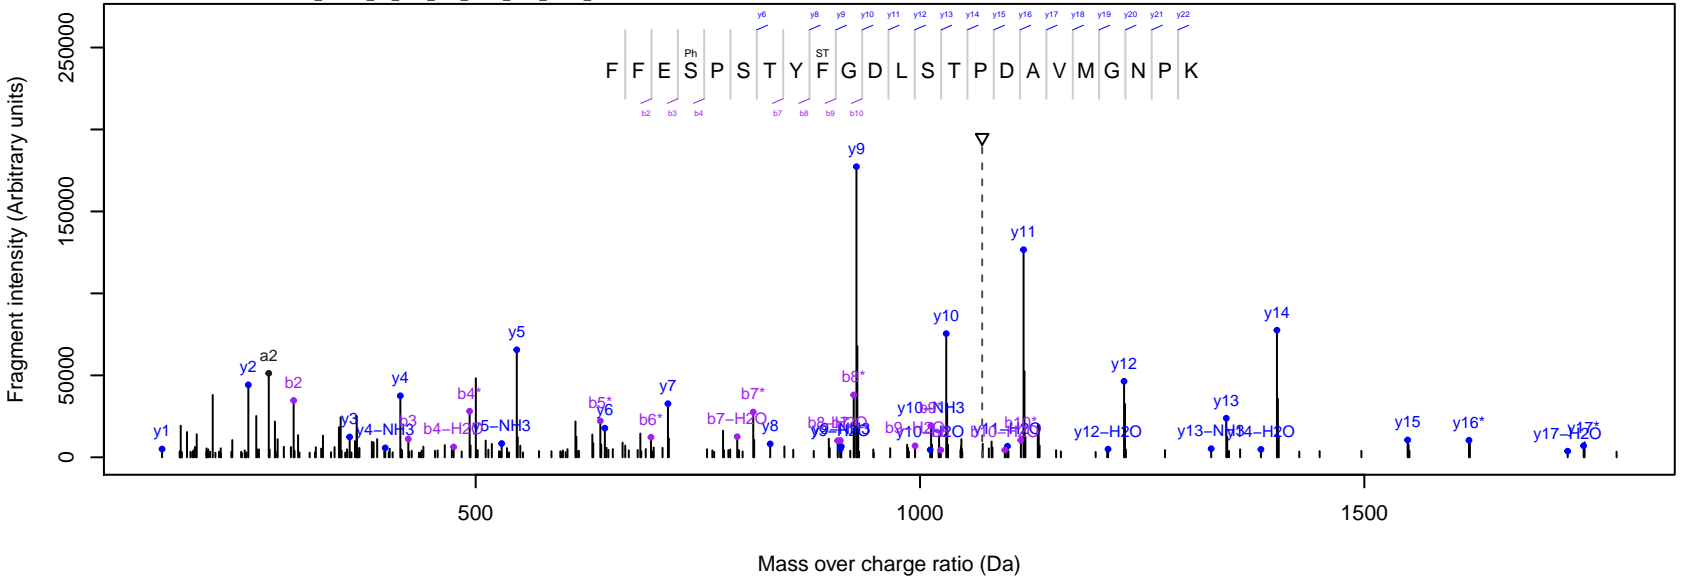

TCNS(Phospho (STY))PQNSTDSVSDIVPDSPPFGALGSDTR-3+

Source : QE3\_201126\_FR\_TIOx\_hum\_tissue\_Urea\_RNAB\_N Scan : 53254

Andromeda score : 204.09

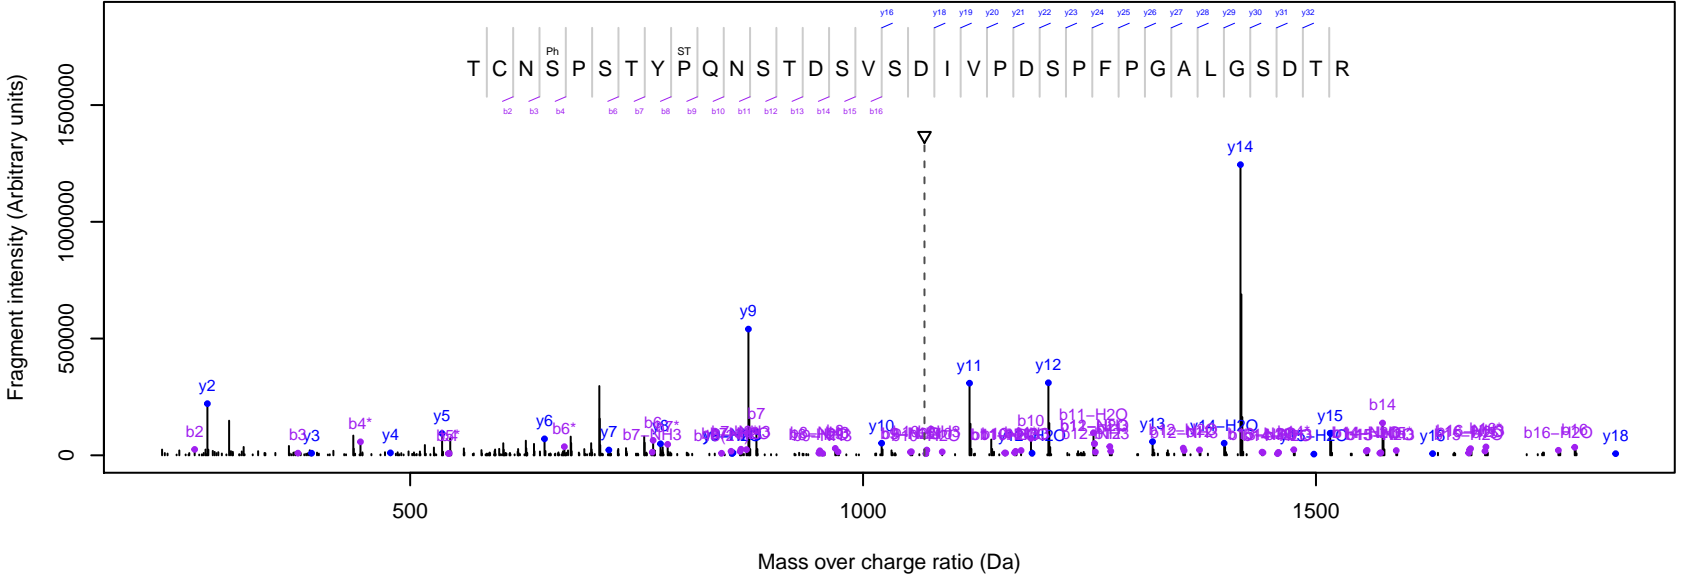

EYGS(Phospho (STY))PLKAYT(Phospho (STY))PVVVTLWYR-2+

Source : QE3\_201126\_FR\_TIOx\_hum\_tissue\_Urea\_RNAB\_N Scan : 61001

Andromeda score : 204.05

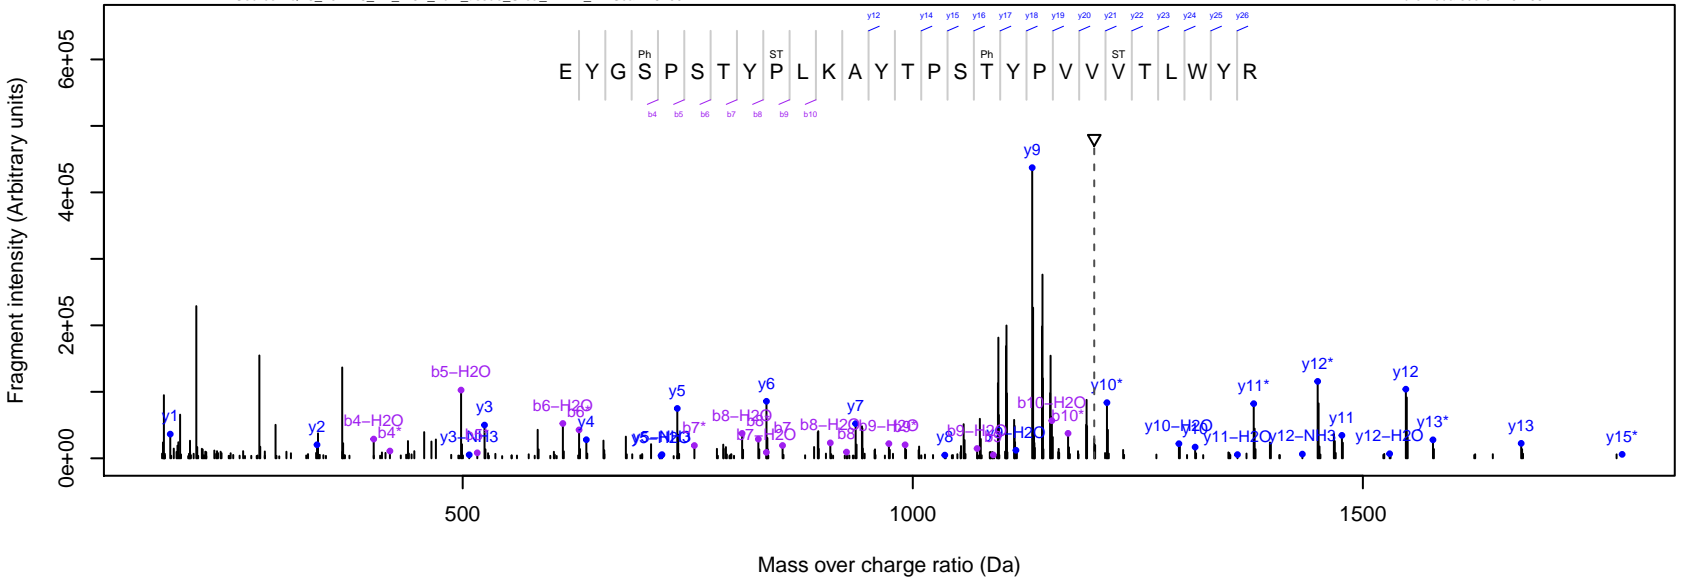

WLDES(Phospho (STY))DAEMELR-2+

Source : QE3\_201126\_FR\_TiOx\_hum\_tissue\_Urea\_RNAB\_B Scan : 45447

Andromeda score : 203.88

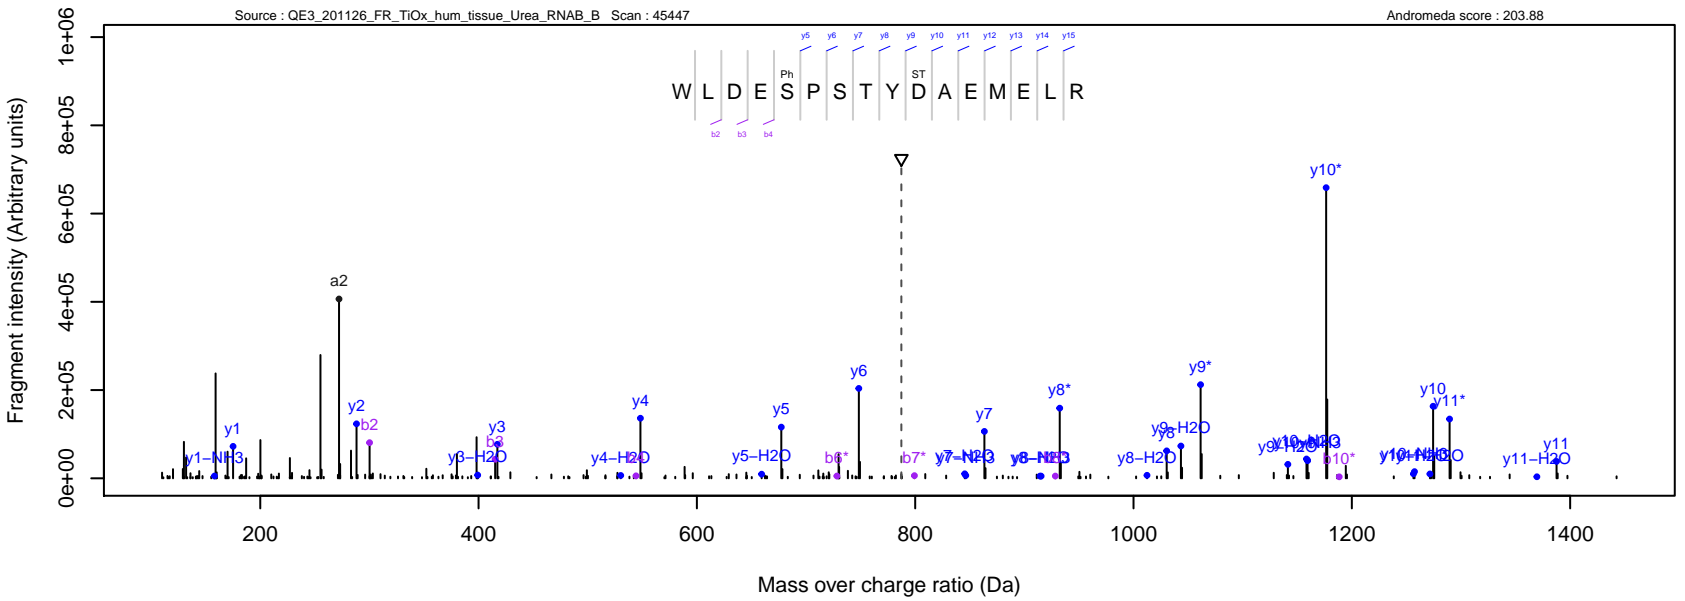

EMLAS(Phospho (STY))DDEEDVSSKVEK-3+

Source : QE3\_201126\_FR\_TiOx\_hum\_tissue\_Urea\_RNAB\_H Scan : 20511

Andromeda score : 203.81

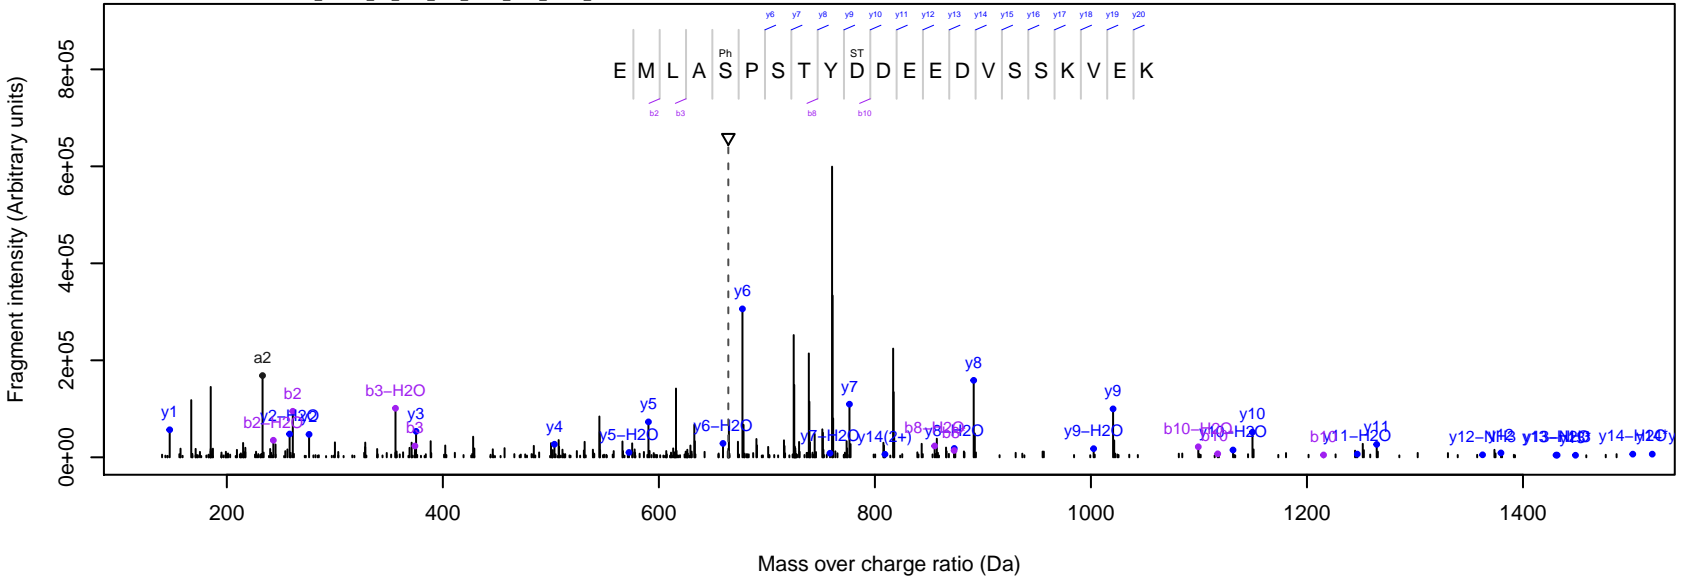

KSLDS(Phospho (STY))DESEEDDYQQR-3+

Source : QE3\_201126\_FR\_TiOx\_hum\_tissue\_Urea\_RNAB\_N Scan : 9796

Andromeda score : 203.79

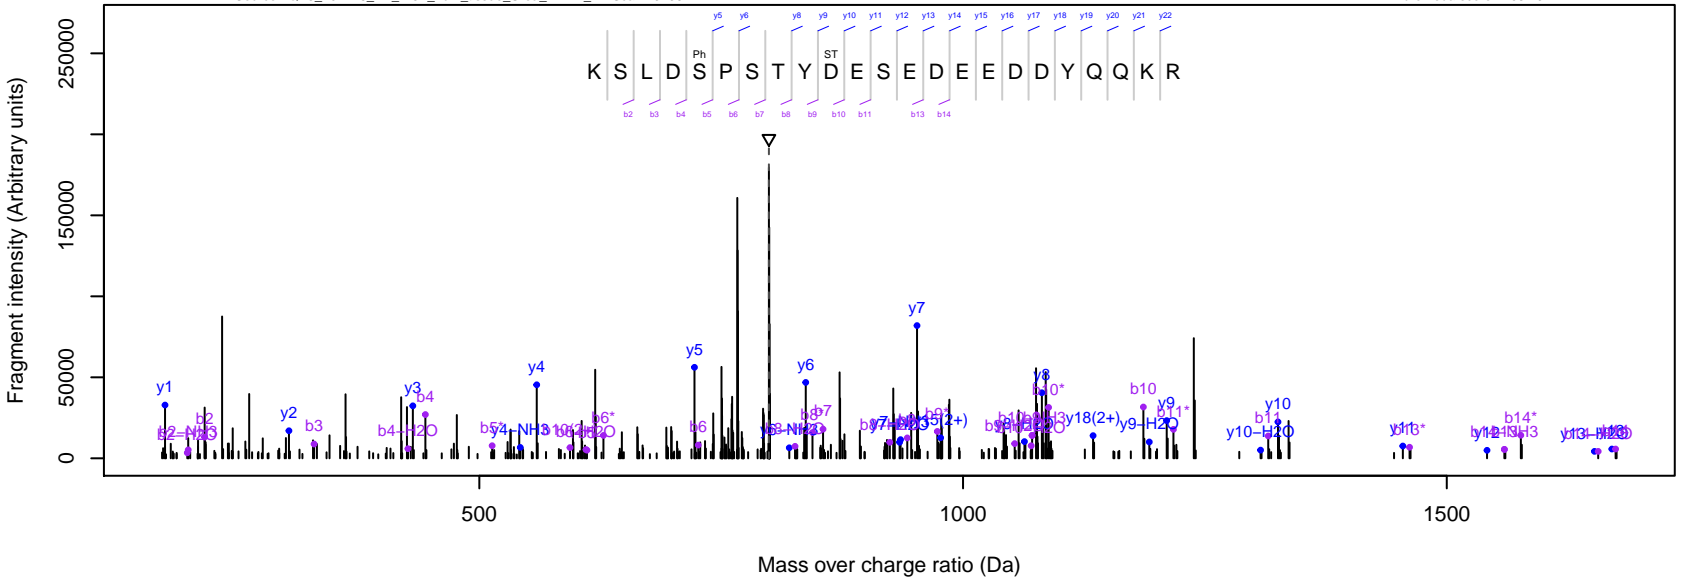

GPGQVPTATSALSLELQVEPLGLPQAS(Phospho (STY))PSR-3+

Source : QE3\_201126\_FR\_TIOx\_hum\_tissue\_Urea\_RNAB\_H Scan : 60018

Andromeda score : 203.71

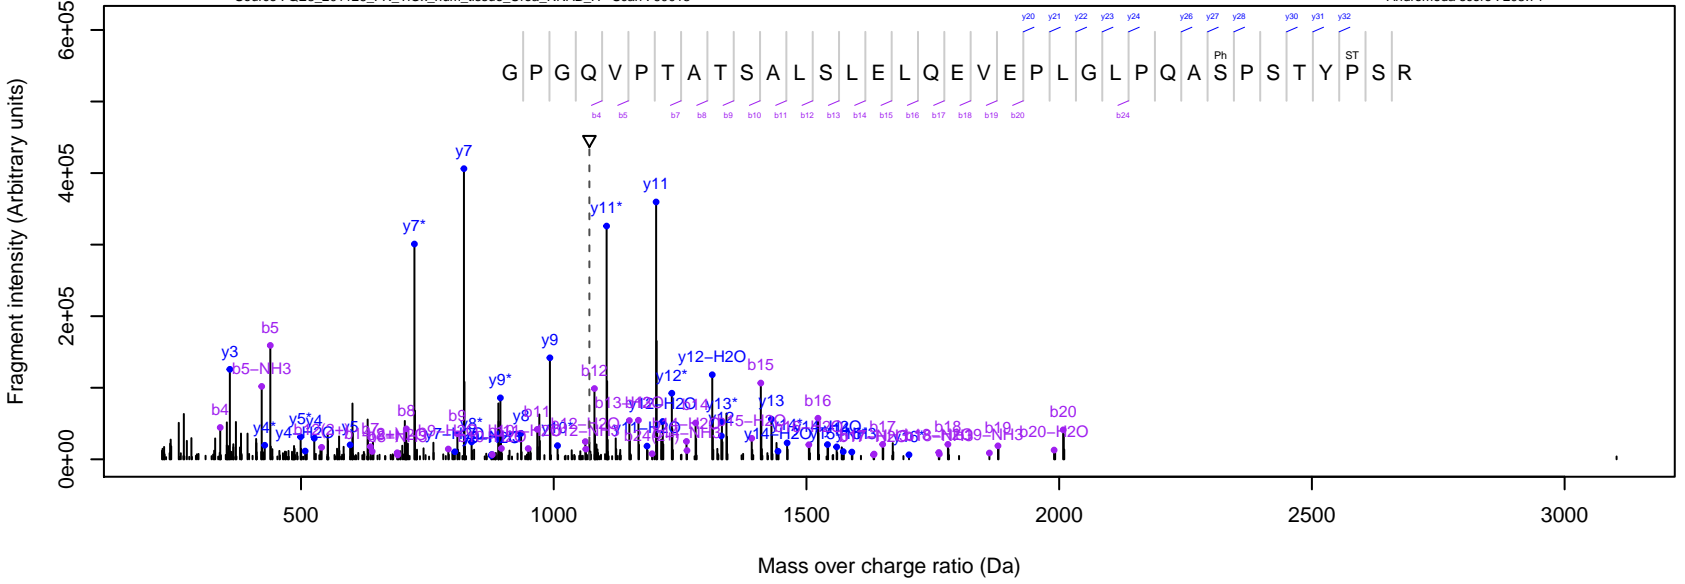

VKAS(Phospho (STY))PITNDGEDEFVPS(Phospho (STY))DGLDKDEYTFSPGK-3+

Source : QE3\_201126\_FR\_TIOx\_hum\_tissue\_Urea\_RNAB\_N Scan : 43078

Andromeda score : 203.44

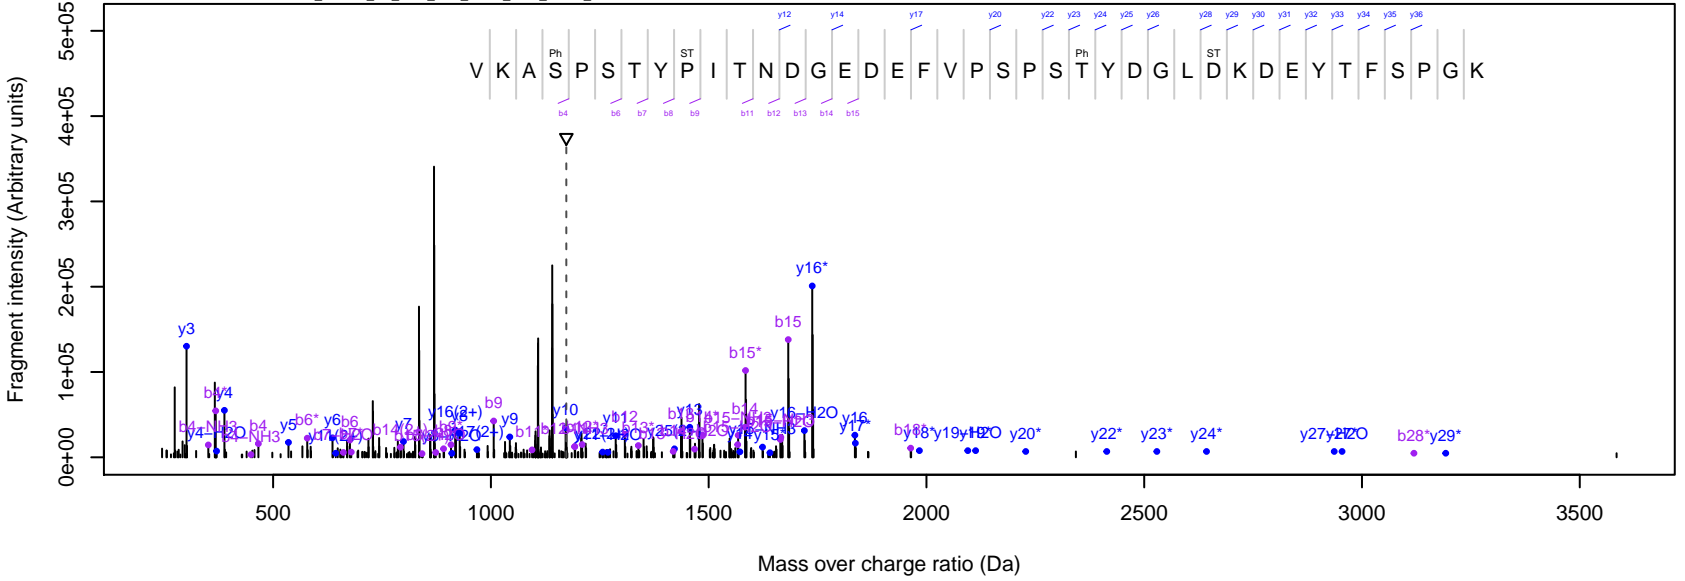

LLKPGEEPSEY(Phospho (STY))DEEDTKDHNK-4+

Source : QE3\_201126\_FR\_TIOx\_hum\_tissue\_Urea\_RNAB\_B Scan : 11702

Andromeda score : 203.25

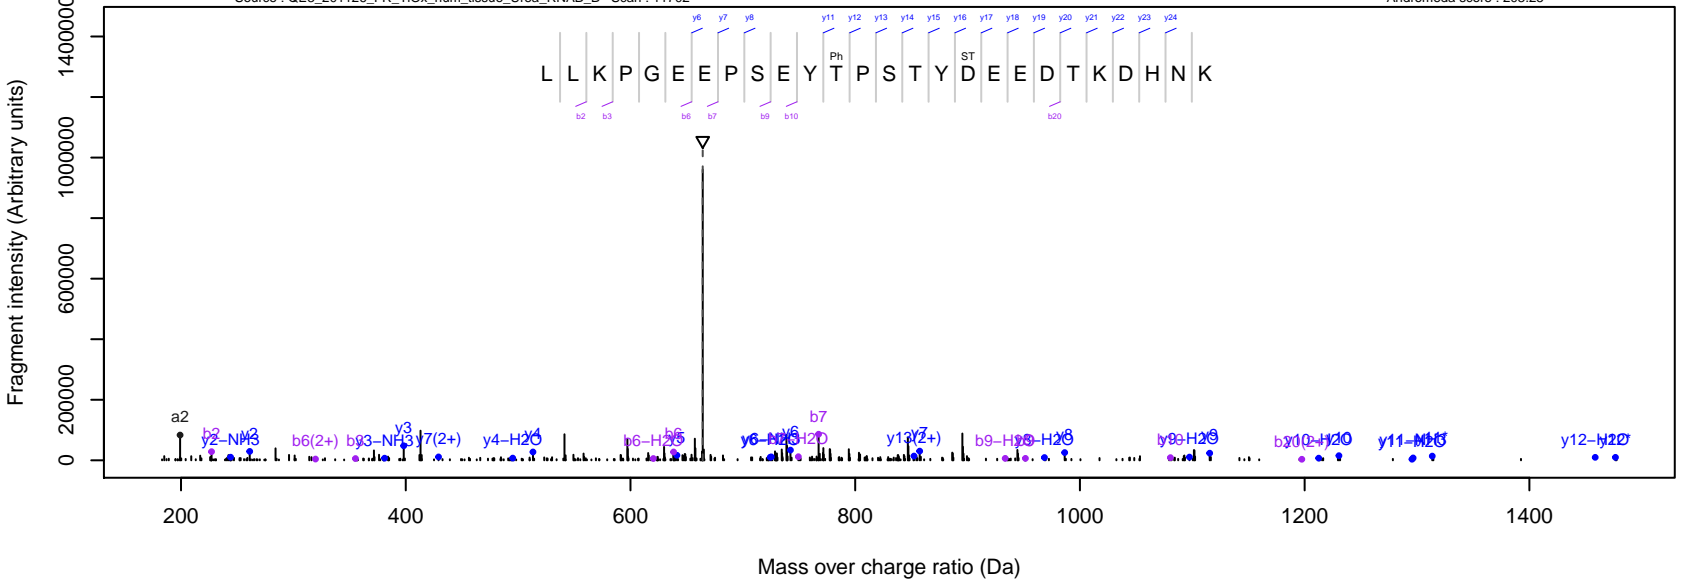

LLSEQDGS(Phospho (STY))LKDILR-2+

Source : QE3\_201126\_FR\_TiOx\_hum\_tissue\_Urea\_RNAB\_N Scan : 35470

Andromeda score : 203.2

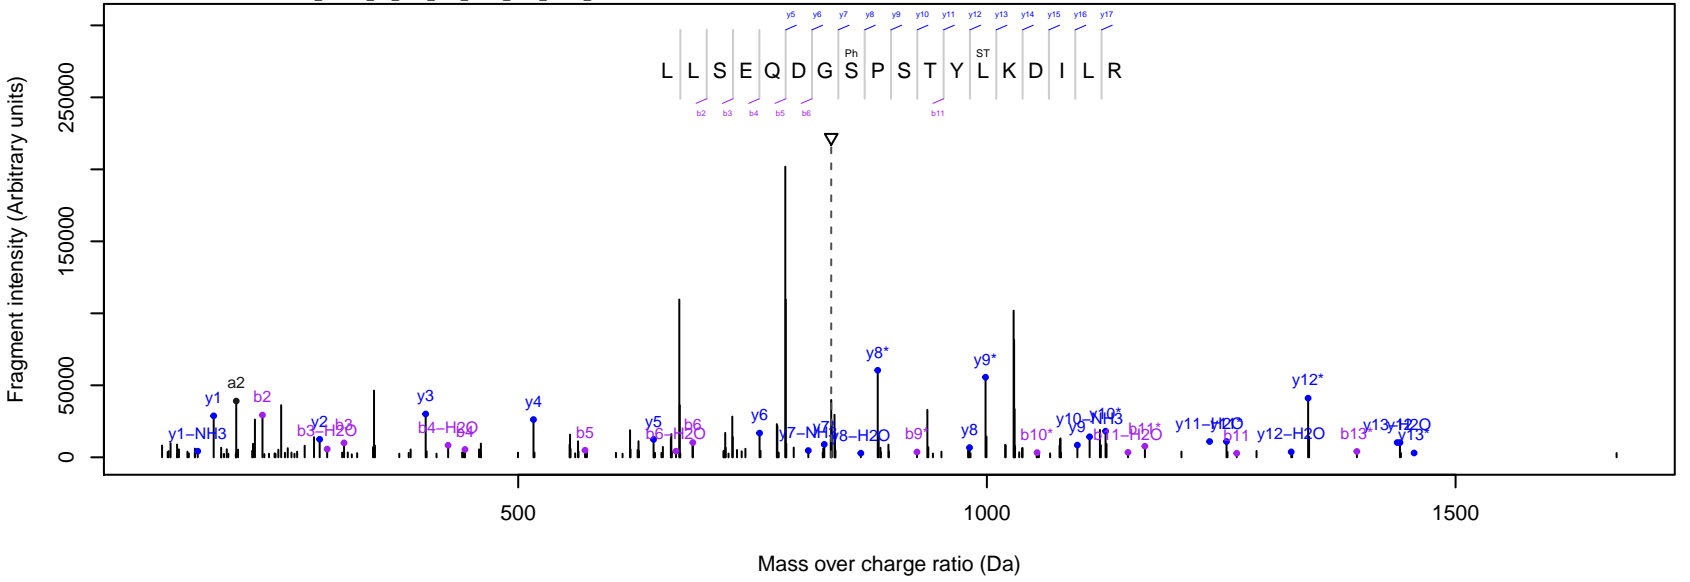

LCAGIMITAS(Phospho (STY))HNPK-2+

Source : QE3\_201126\_FR\_TiOx\_hum\_tissue\_Urea\_RNAB\_N Scan : 22069

Andromeda score : 203.11

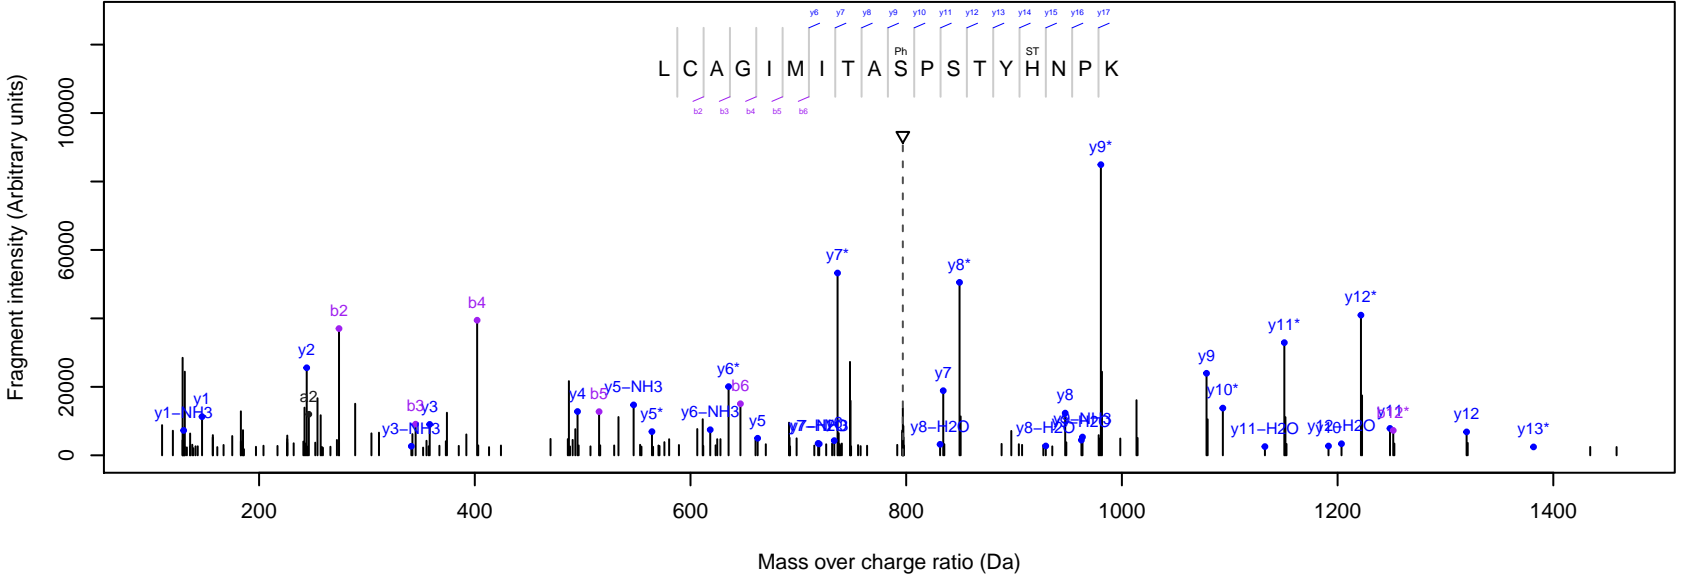

EREVDEDS(Phospho (STY))EPEREVR-3+

Source : QE3\_201126\_FR\_TiOx\_hum\_tissue\_Urea\_RNAB\_B Scan : 8405

Andromeda score : 203.06

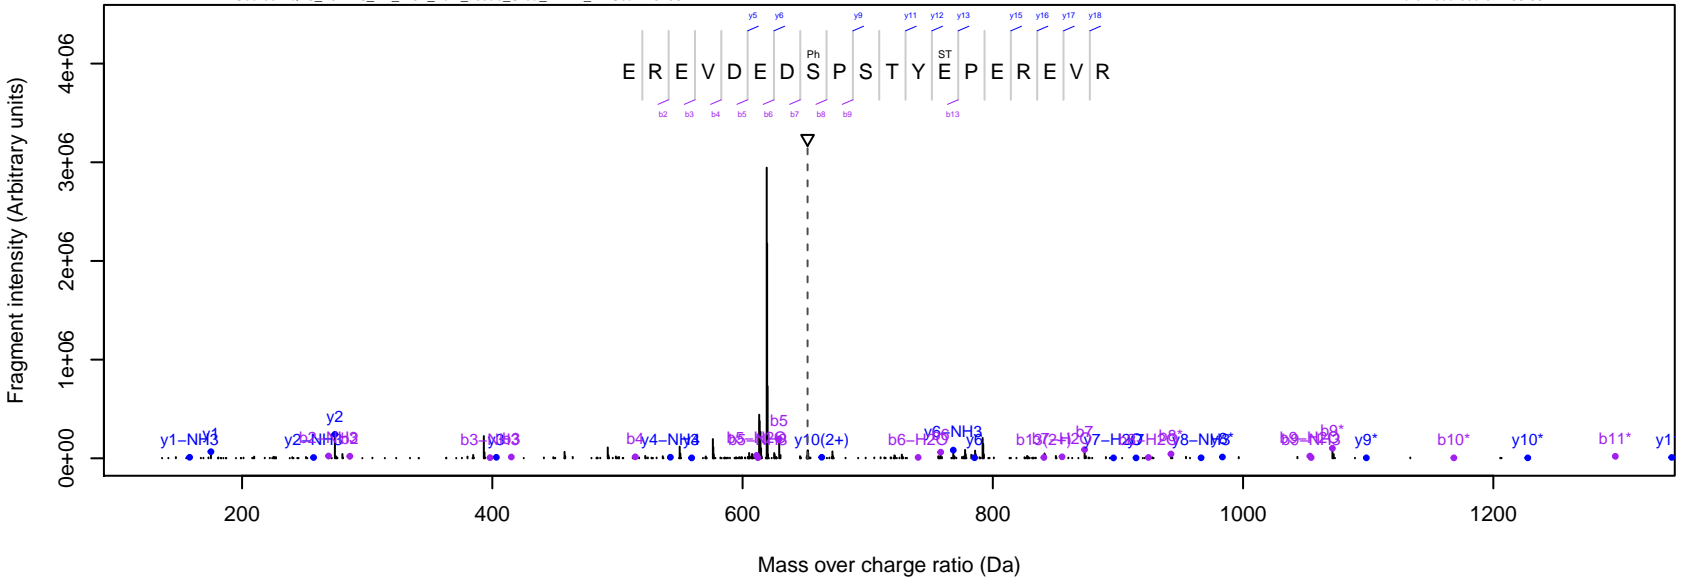

KPS(Phospho (STY))VSEEVQATPNK-2+

Source : QE3\_201126\_FR\_TIOx\_hum\_tissue\_Urea\_RNAB\_N Scan : 9894

Andromeda score : 203.04

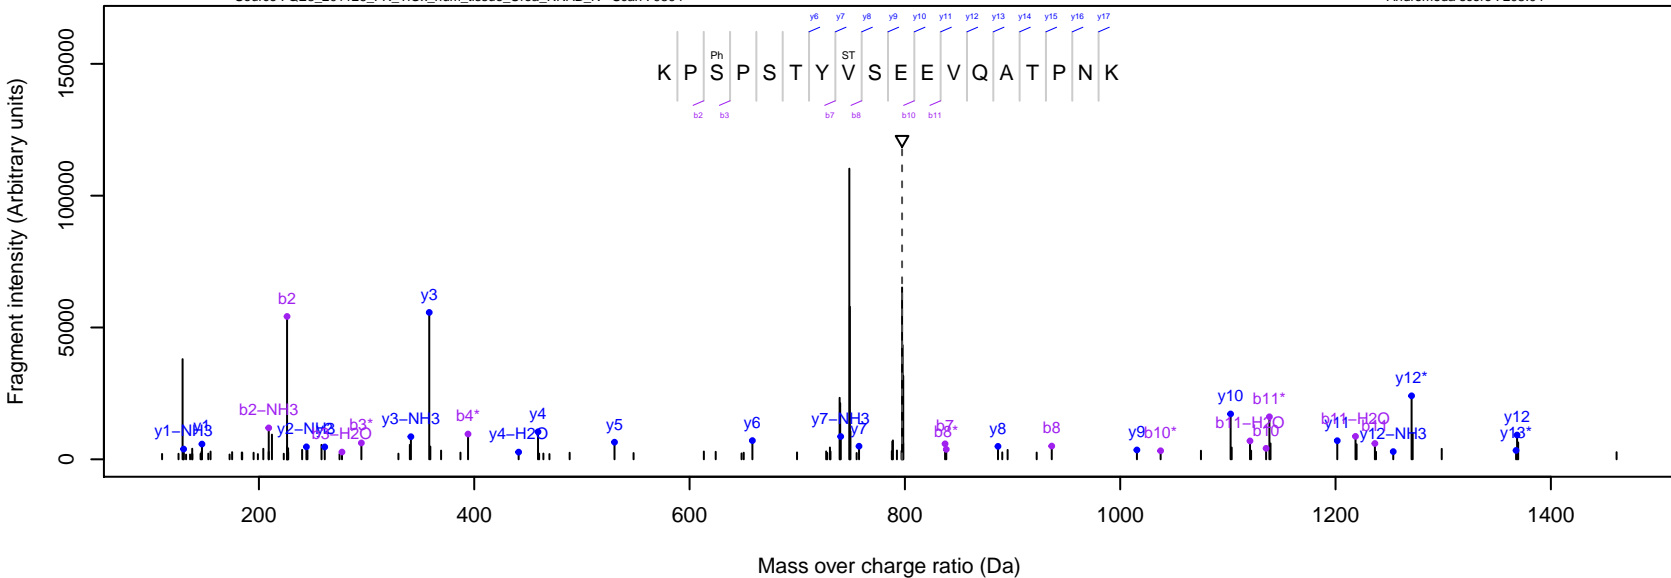

SPFSVAVSPS(Phospho (STY))LDLSK-2+

Source : QE3\_201126\_FR\_TIOx\_hum\_tissue\_Urea\_RNAB\_N Scan : 48318

Andromeda score : 203.04

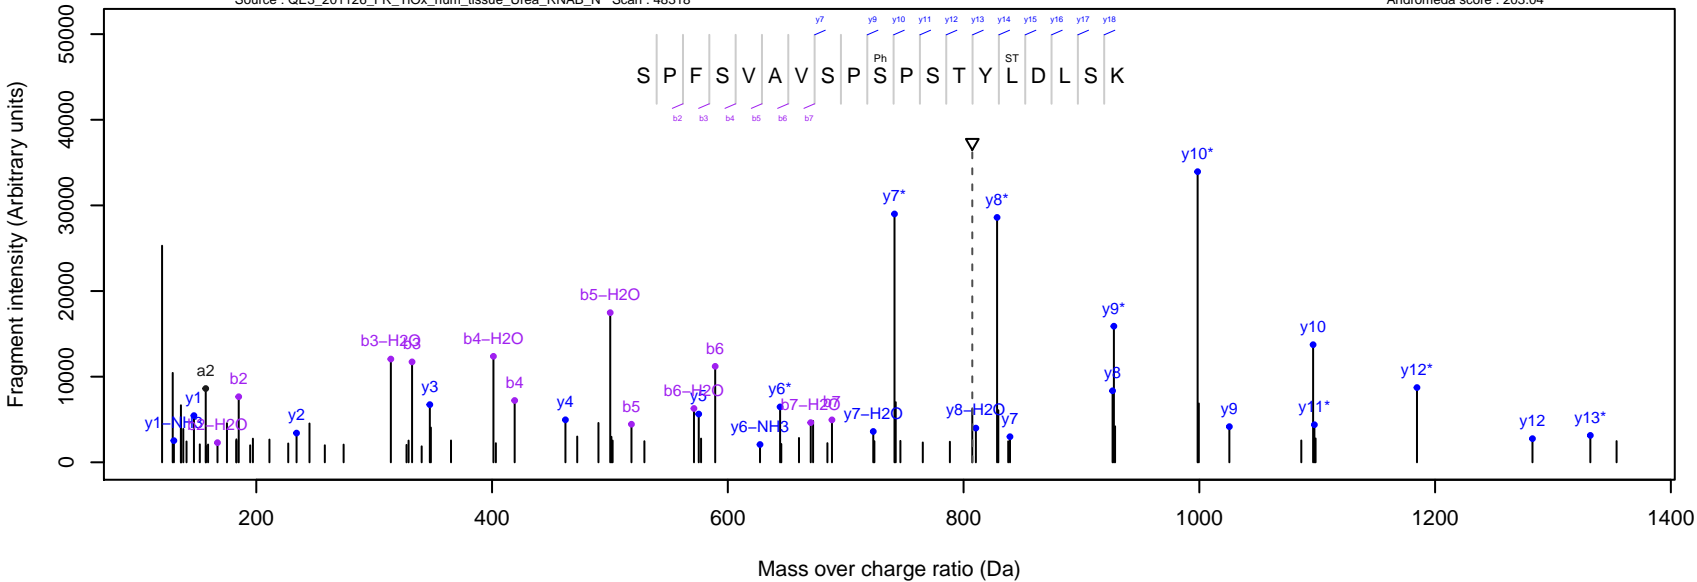

RPYTGNPQYTYNNWS(Phospho (STY))PPVQSNETSNGYFLER-3+

Source : QE3\_201126\_FR\_TIOx\_hum\_tissue\_Urea\_RNAB\_N Scan : 44077

Andromeda score : 202.88

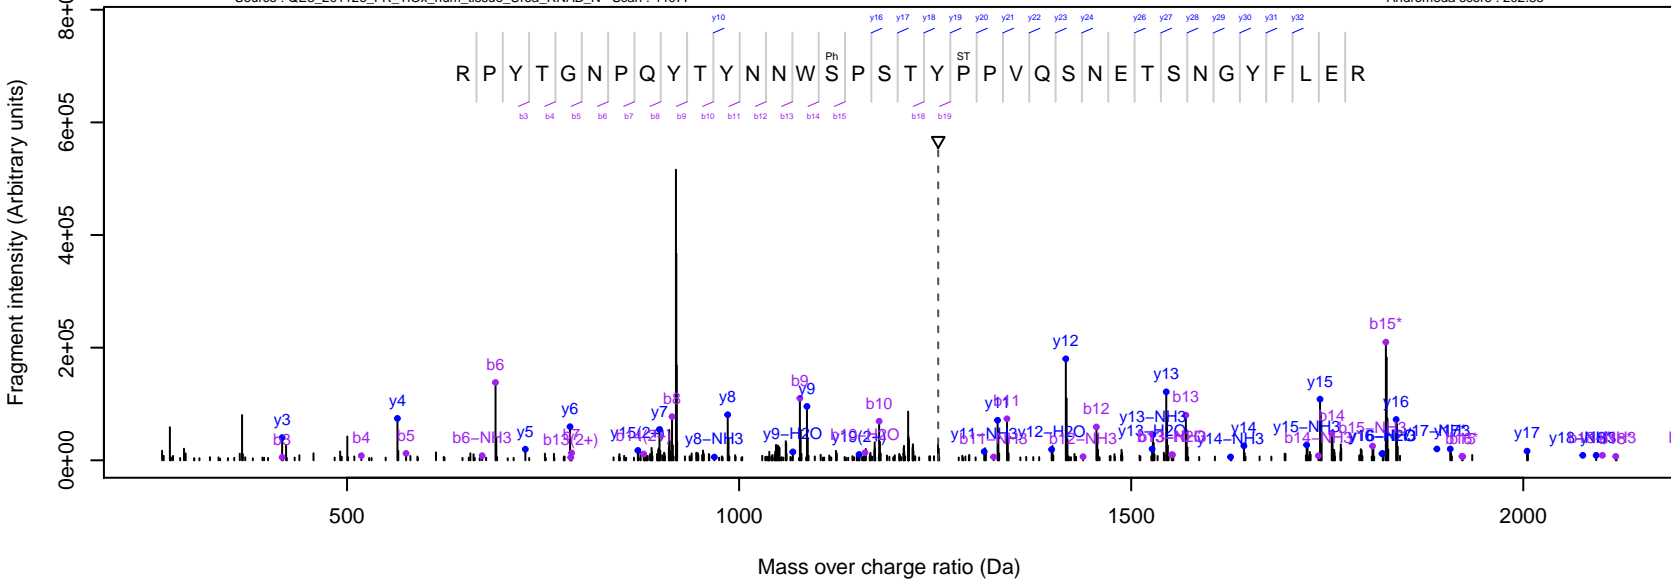

KVNVTVDYIRPAS(Phospho (STY))PATETVPFASER-3+

Source : QE3\_201126\_FR\_TiOx\_hum\_tissue\_Urea\_RNAB\_H Scan : 34858

Andromeda score : 202.85

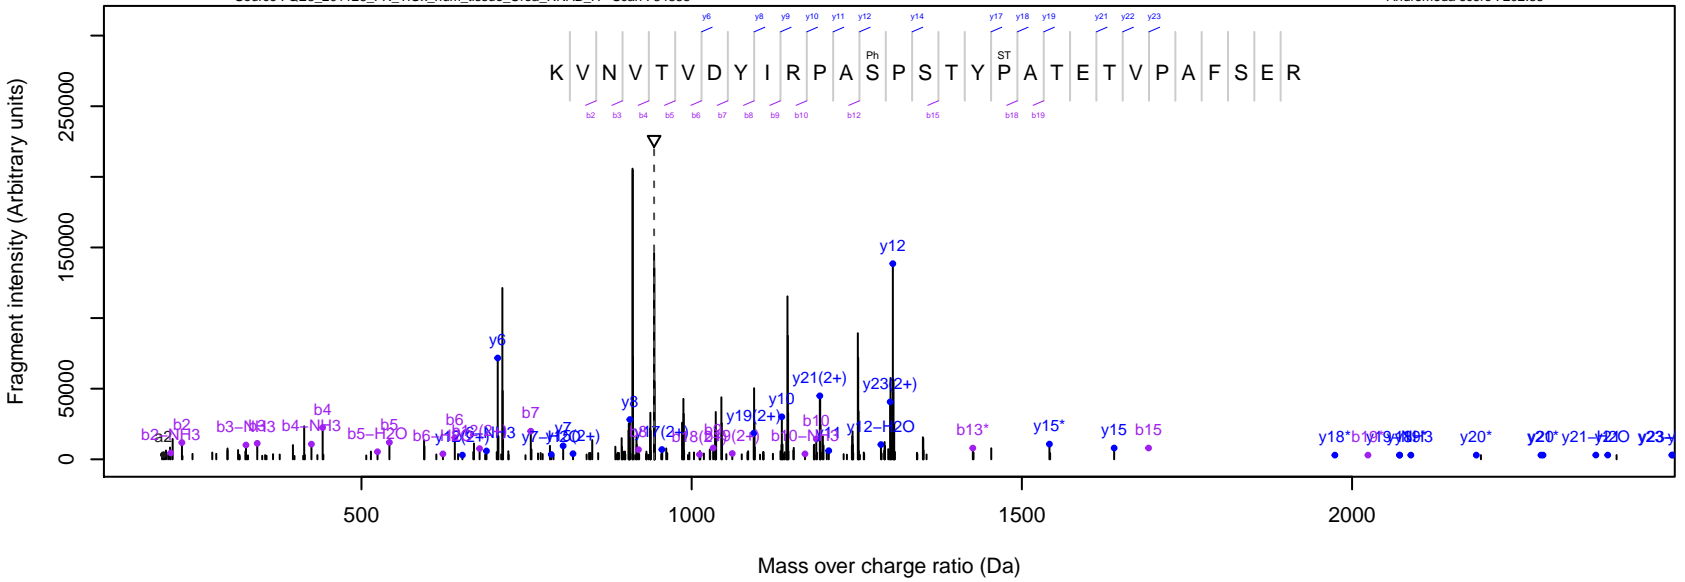

RGGSGGGEEES(Phospho (STY))EGEEVDEED-2+

Source : QE3\_201126\_FR\_TiOx\_hum\_tissue\_Urea\_RNAB\_H Scan : 8932

Andromeda score : 202.81

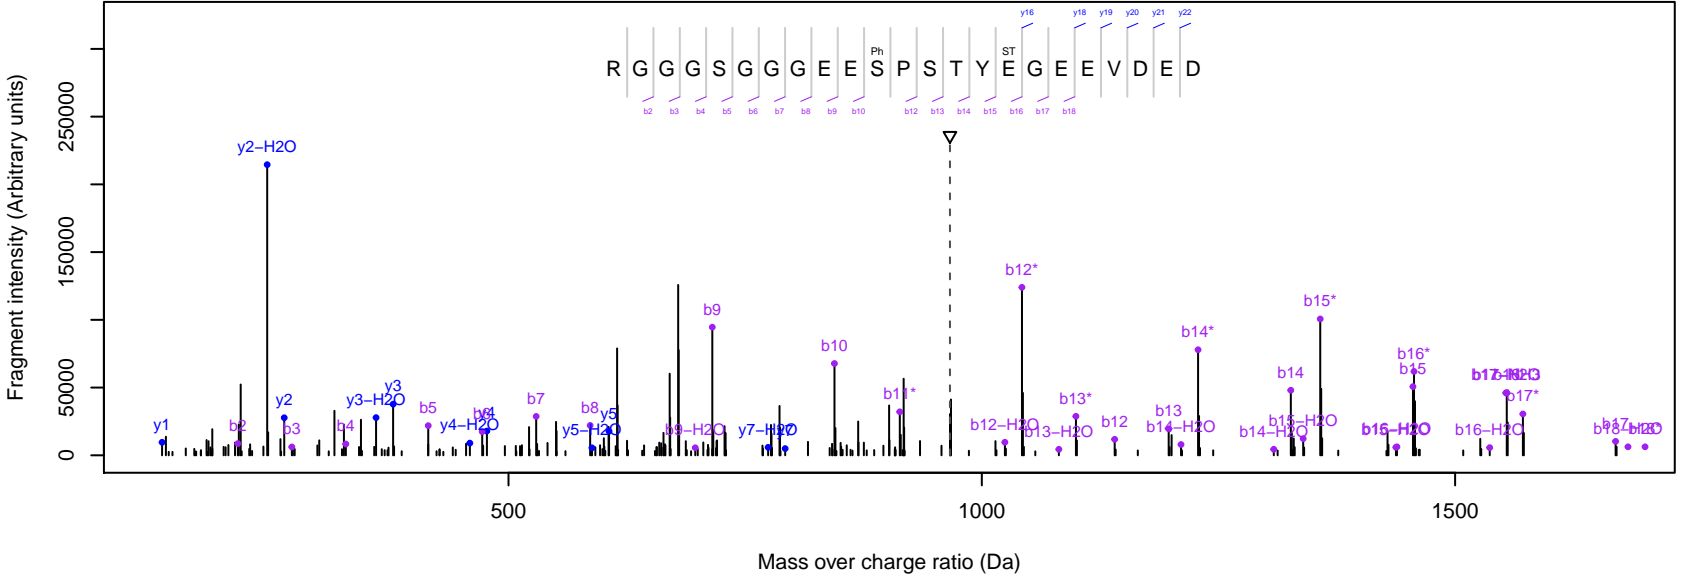

LHHVS(Phospho (STY))SLAWLDEHTLVTTSHDASVK-4+

Source : QE3\_201126\_FR\_TiOx\_hum\_tissue\_Urea\_RNAB\_N Scan : 34468

Andromeda score : 202.69

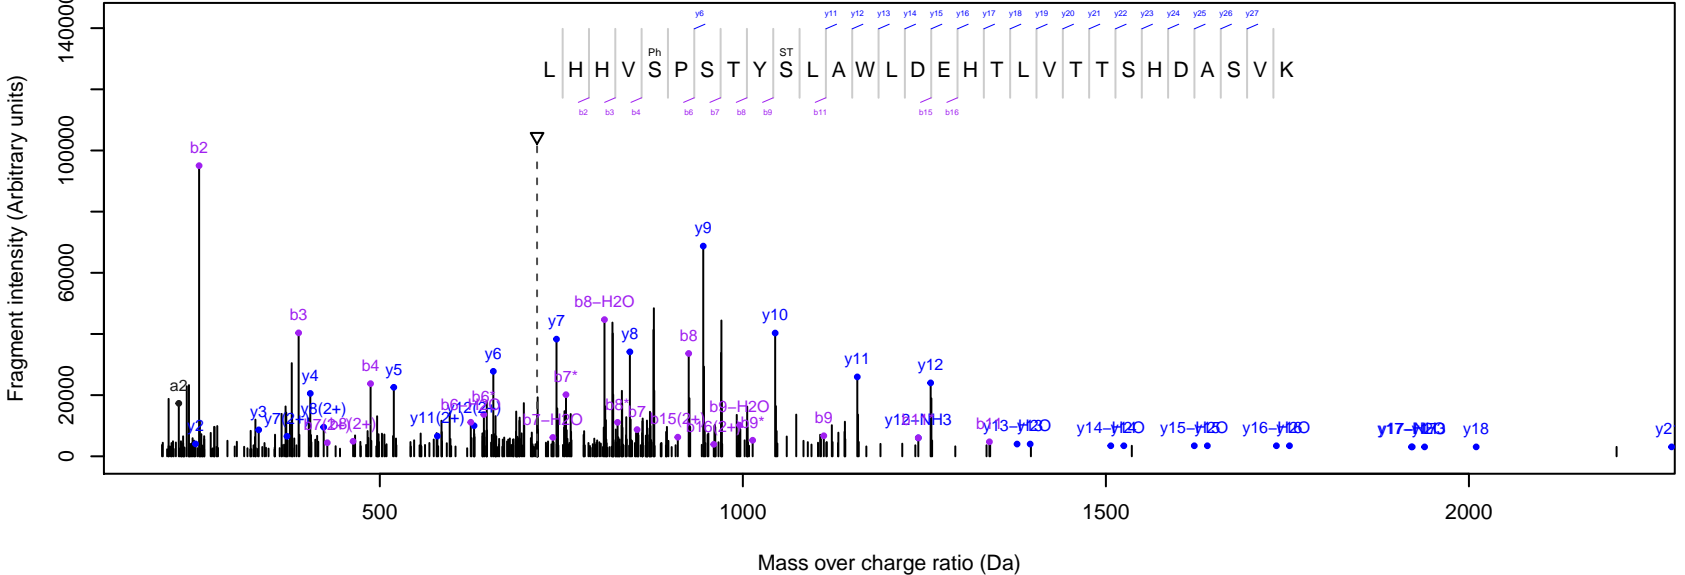

CAPSAGS(Phospho (STY))PAAAVGRES(Phospho (STY))PGAAATSSSGPQAQQR-3+

Source : QE3\_201126\_FR\_TiOx\_hum\_tissue\_Urea\_RNAB\_H Scan : 15499

Andromeda score : 202.68

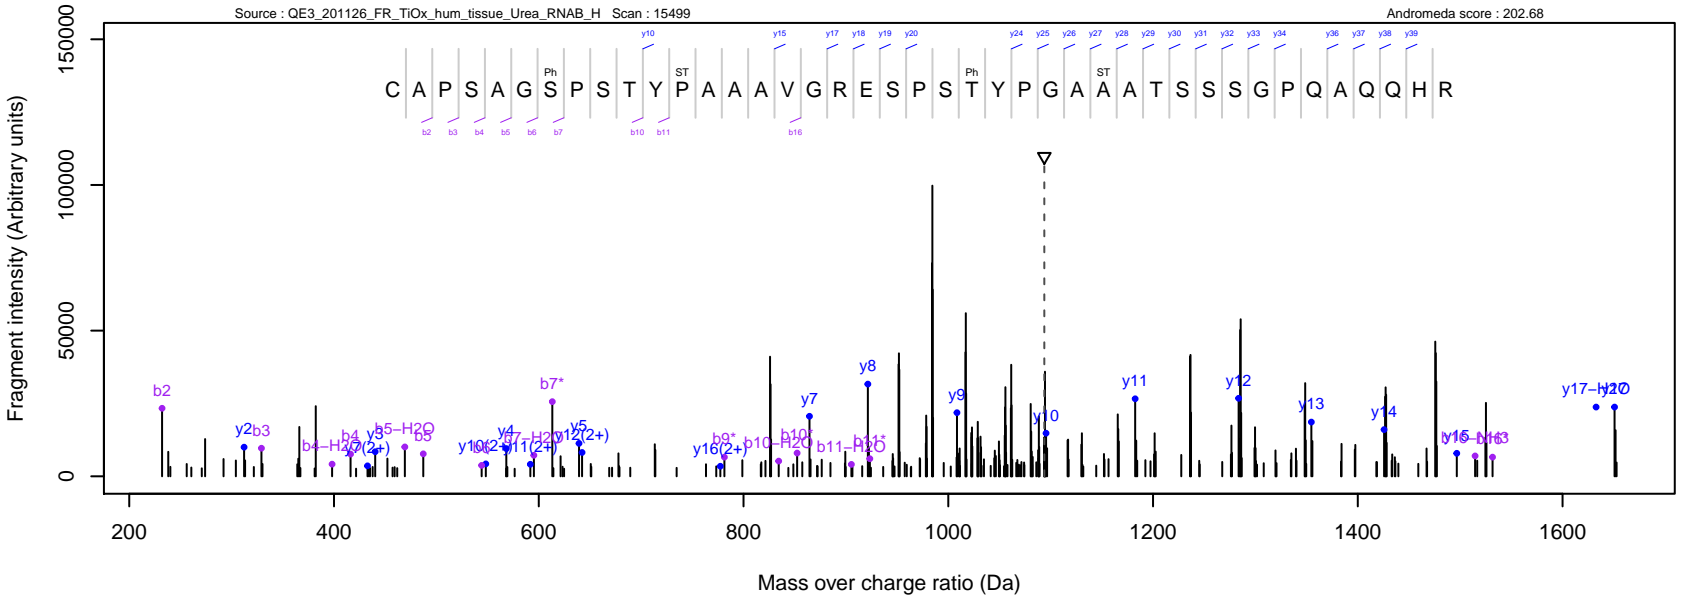

VGGS(Phospho (STY))SVDLHR-2+

Source : QE3\_201126\_FR\_TiOx\_hum\_tissue\_Urea\_RNAB\_B Scan : 9783

Andromeda score : 202.68

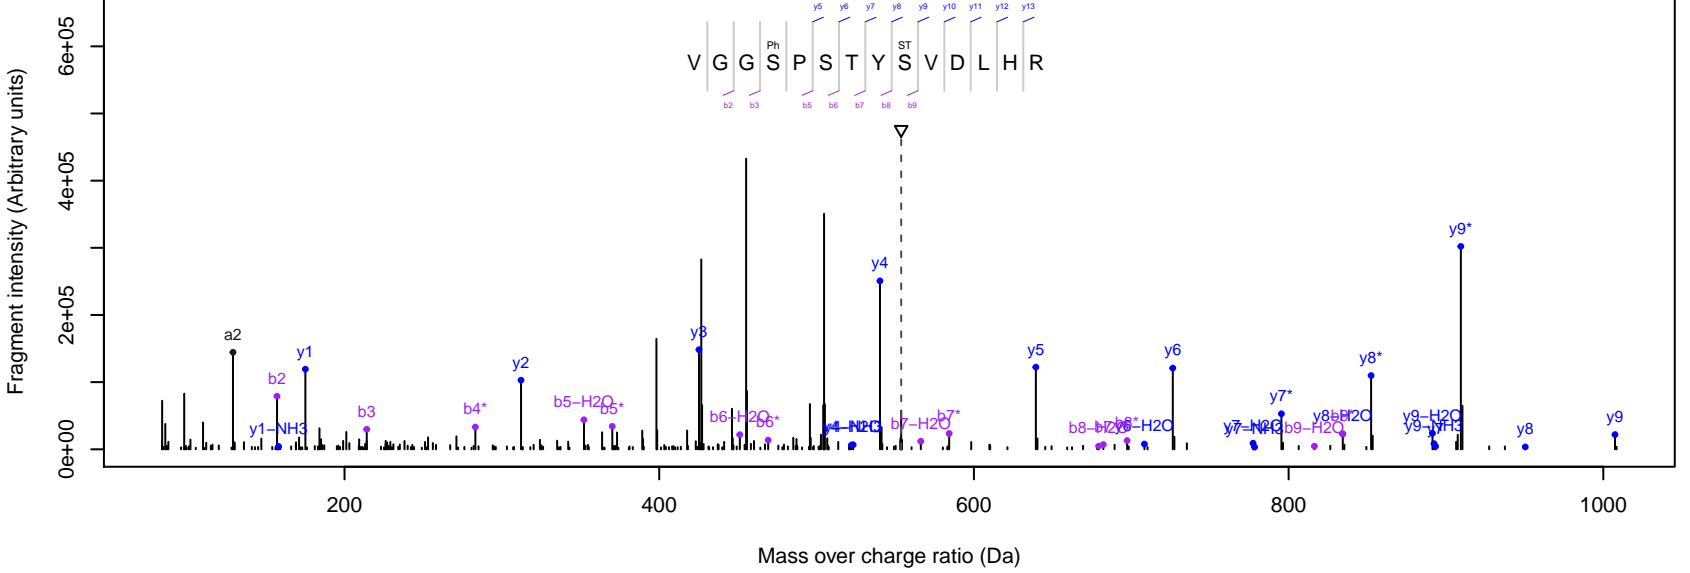

TINNHSVESQDNDQPDYDSVA(Phospho (STY))DEDTLETTASK-3+

Source : QE3\_201126\_FR\_TiOx\_hum\_tissue\_Urea\_RNAB\_H Scan : 26055

Andromeda score : 202.52

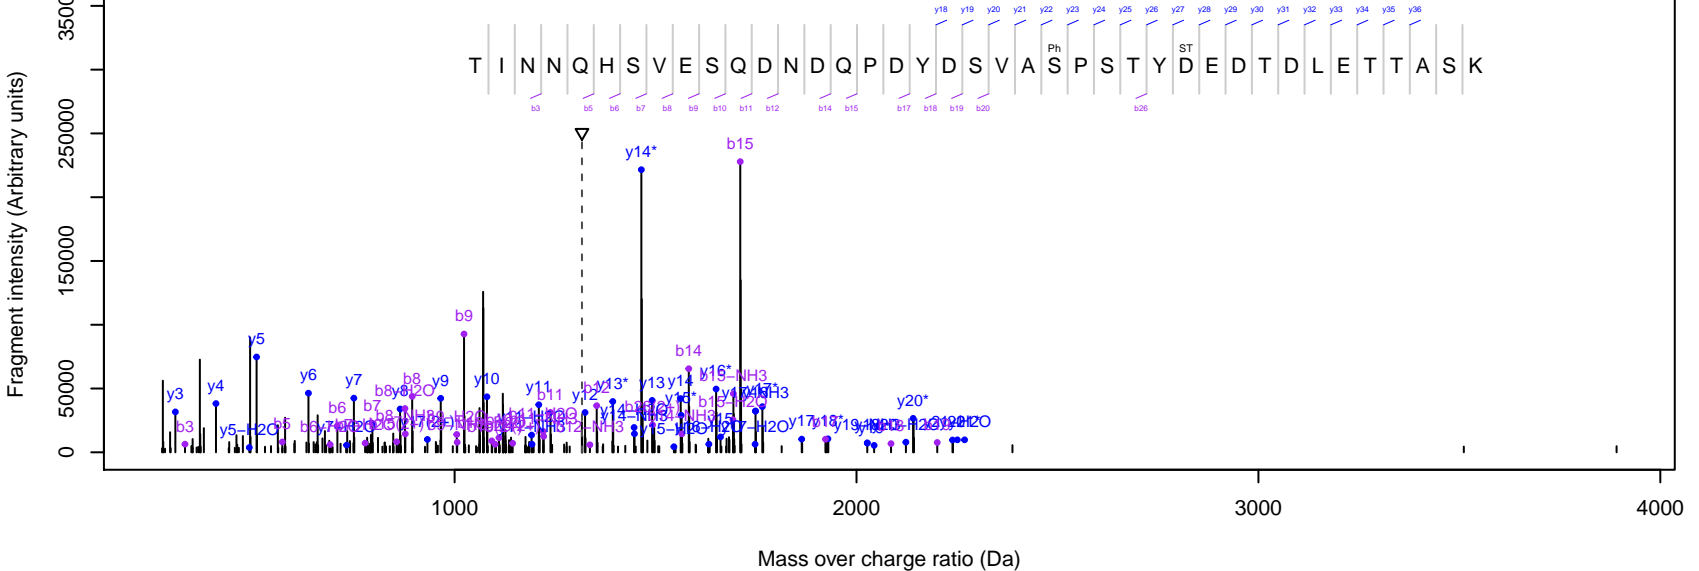



TQLAS(Phospho (STY))WSDPTEETGPVAGILDTEETLEK-3+

Source : QE3\_201126\_FR\_TiOx\_hum\_tissue\_Urea\_RNAB\_H Scan : 58874

Andromeda score : 202.47

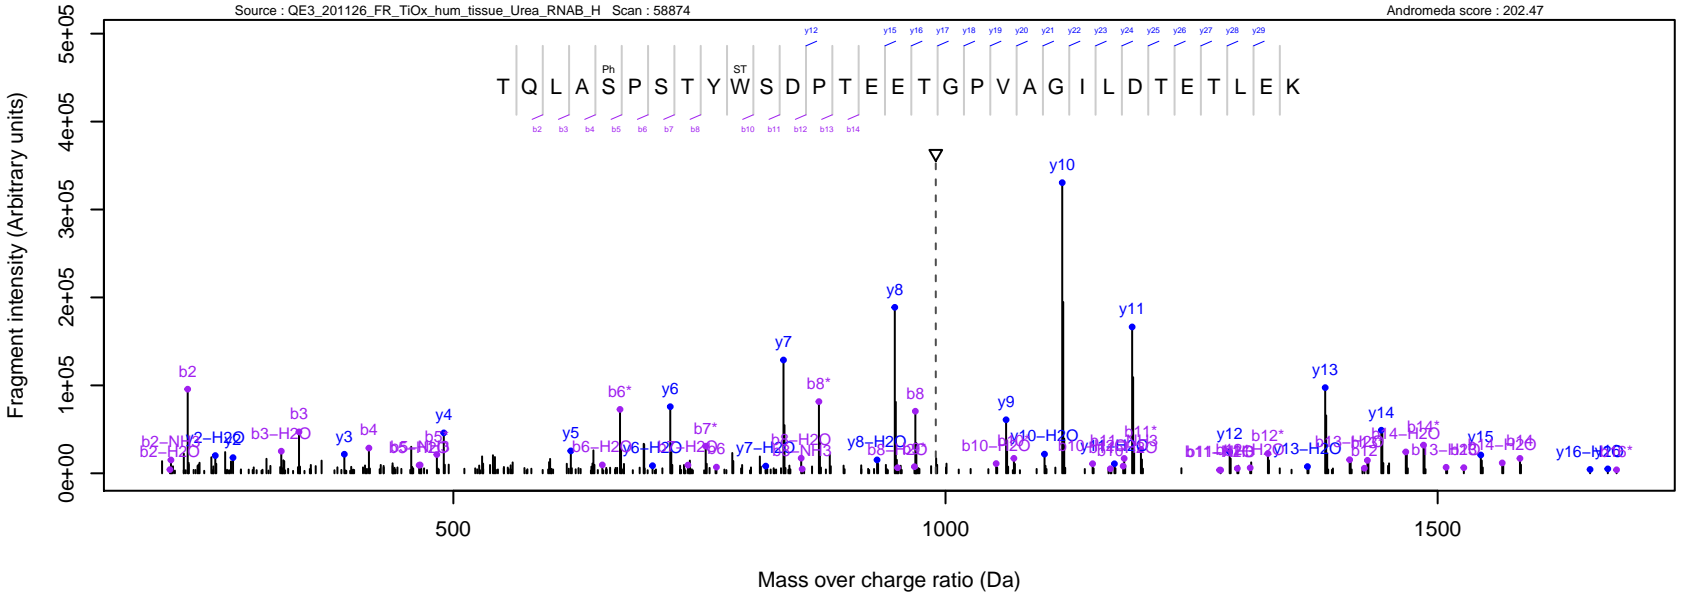

GGAPDPSPGATATPGAPAQPSS(Phospho (STY))PDAR-2+

Source : QE3\_201126\_FR\_TiOx\_hum\_tissue\_Urea\_RNAB\_N Scan : 18897

Andromeda score : 202.41

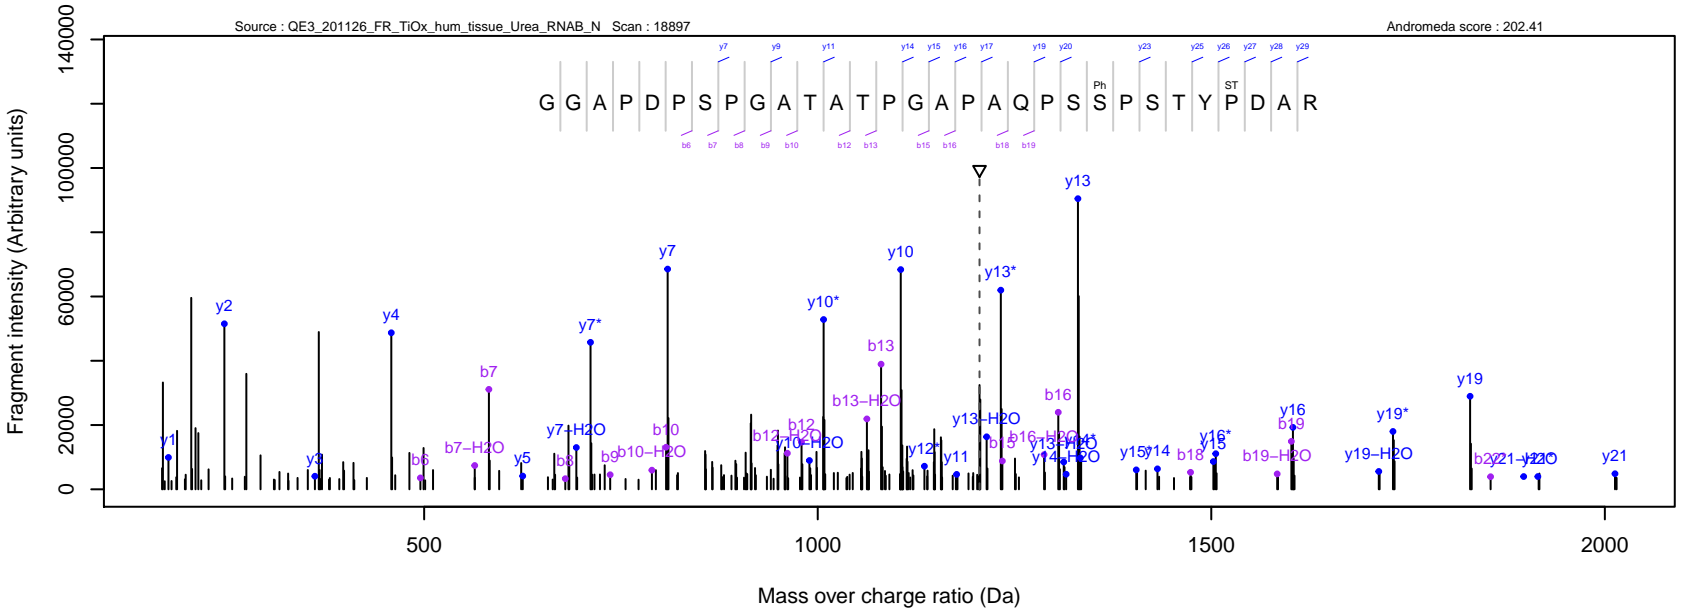

SVS(Phospho (STY))HAVDVLEK-2+

Source : QE3\_201126\_FR\_TiOx\_hum\_tissue\_Urea\_RNAB\_H Scan : 28212

Andromeda score : 202.25

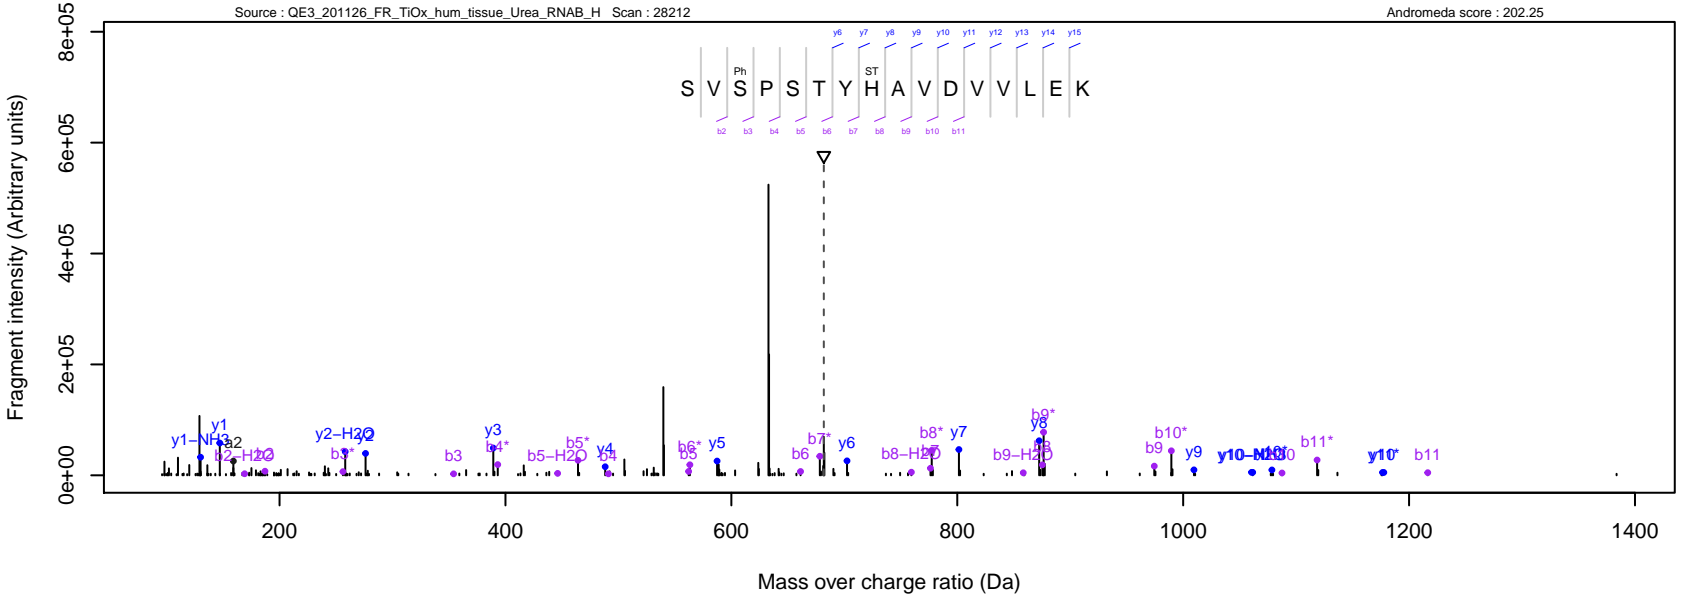

VQIS(Phospho (STY))PDSGGLPER-2+

Source : QE3\_201126\_FR\_TiOx\_hum\_tissue\_Urea\_RNAB\_B Scan : 23282

Andromeda score : 202.25

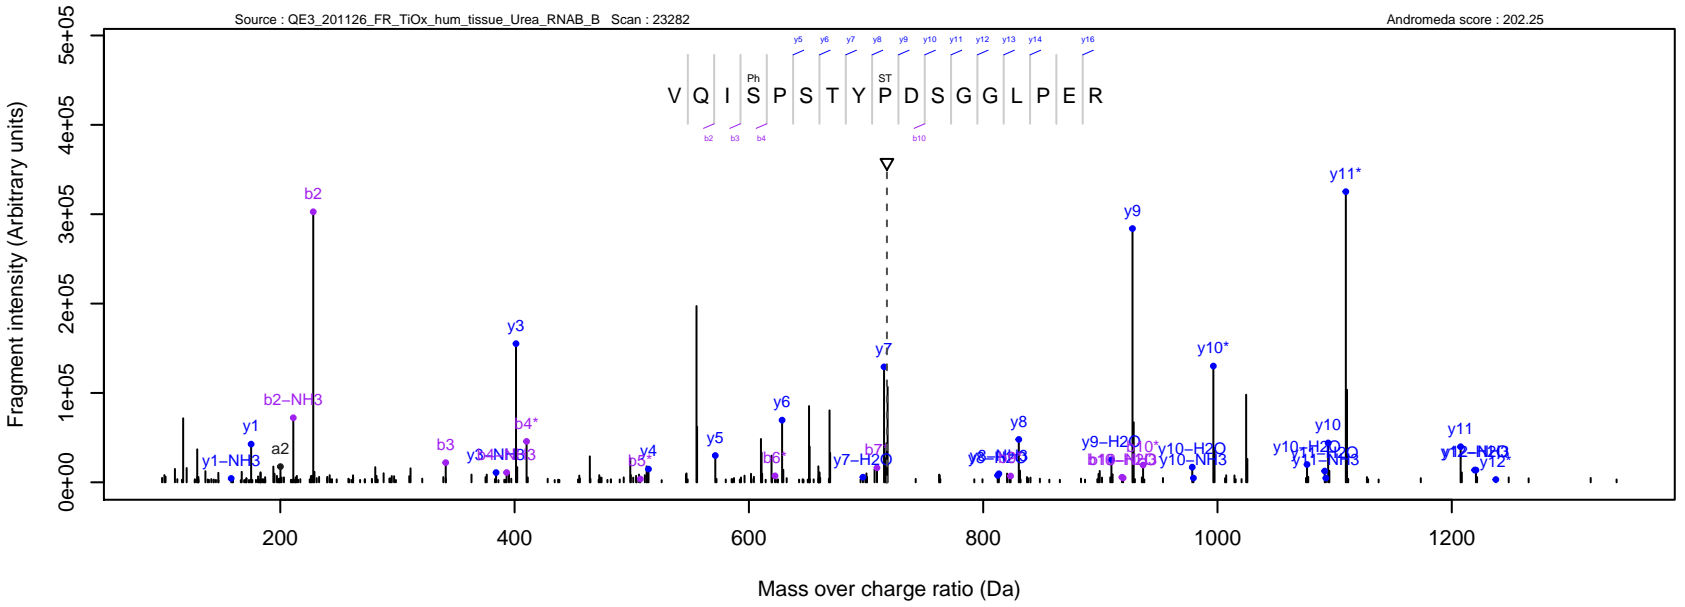

KAS(Phospho (STY))PEAASTRPDPIDVLDVSNNTTAAQK-3+

Source : QE3\_201126\_FR\_TiOx\_hum\_tissue\_Urea\_RNAB\_N Scan : 27951

Andromeda score : 202.1

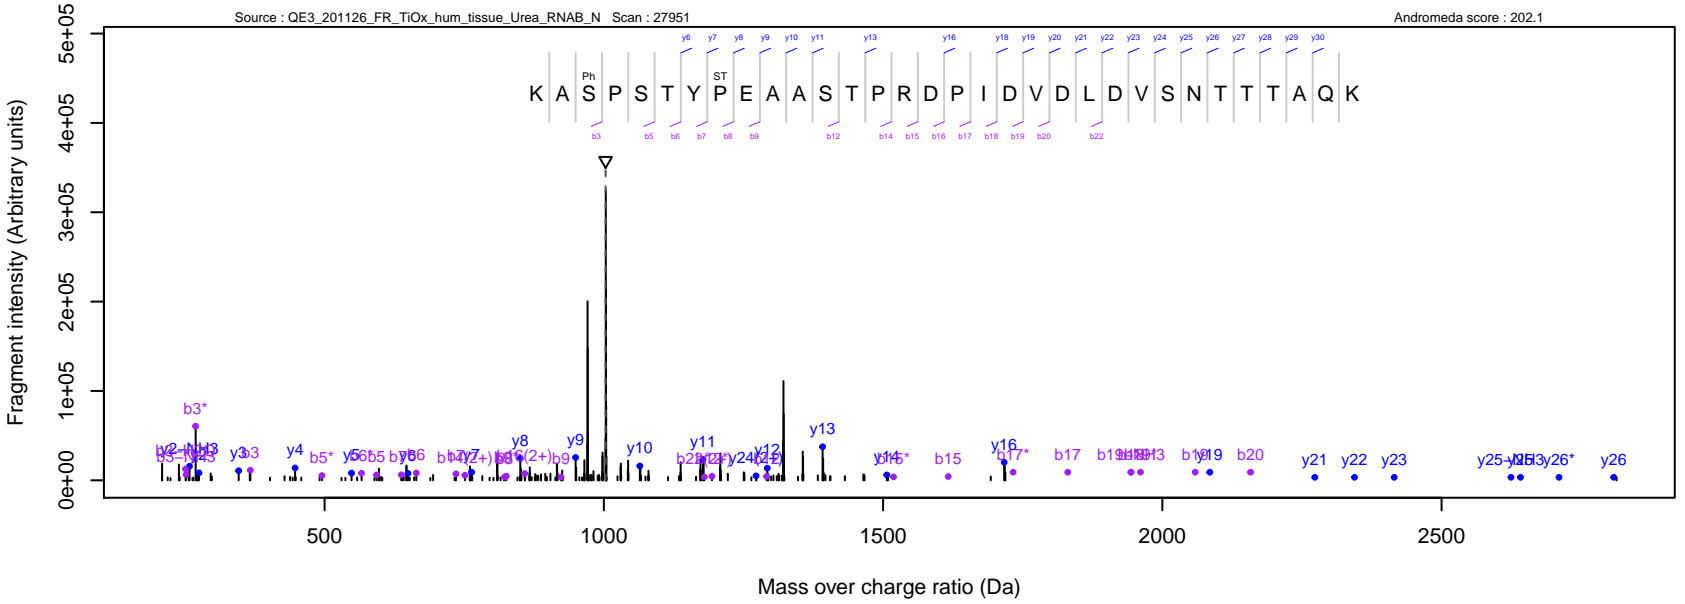

RFS(Phospho (STY))ADEQFFSVGQAASSAHSSK-3+

Source : QE3\_201126\_FR\_TiOx\_hum\_tissue\_Urea\_RNAB\_B Scan : 29839

Andromeda score : 202.05

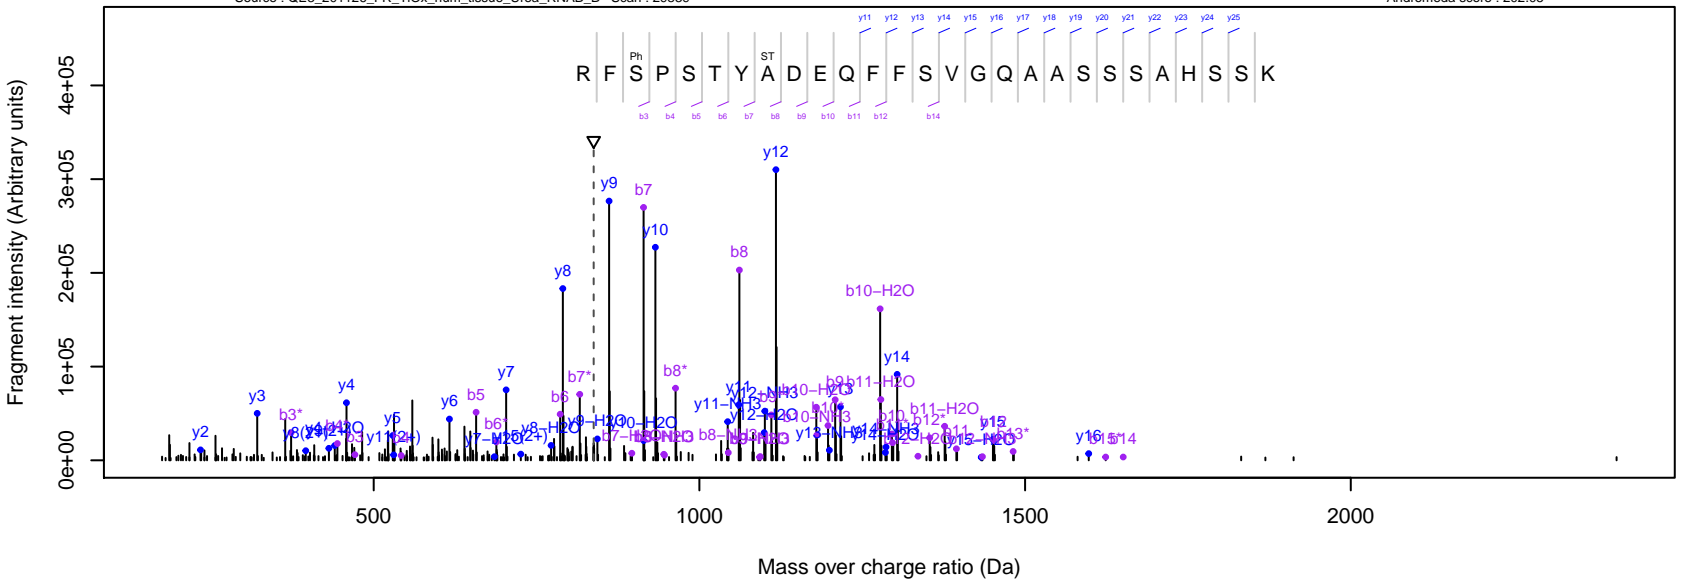

SVT(Phospho (STY))VVEDEDEDGDDLLHHHHSVSGSR-4+

Source : QE3\_201126\_FR\_TIOx\_hum\_tissue\_Urea\_RNAB\_H Scan : 19542

Andromeda score : 202.04

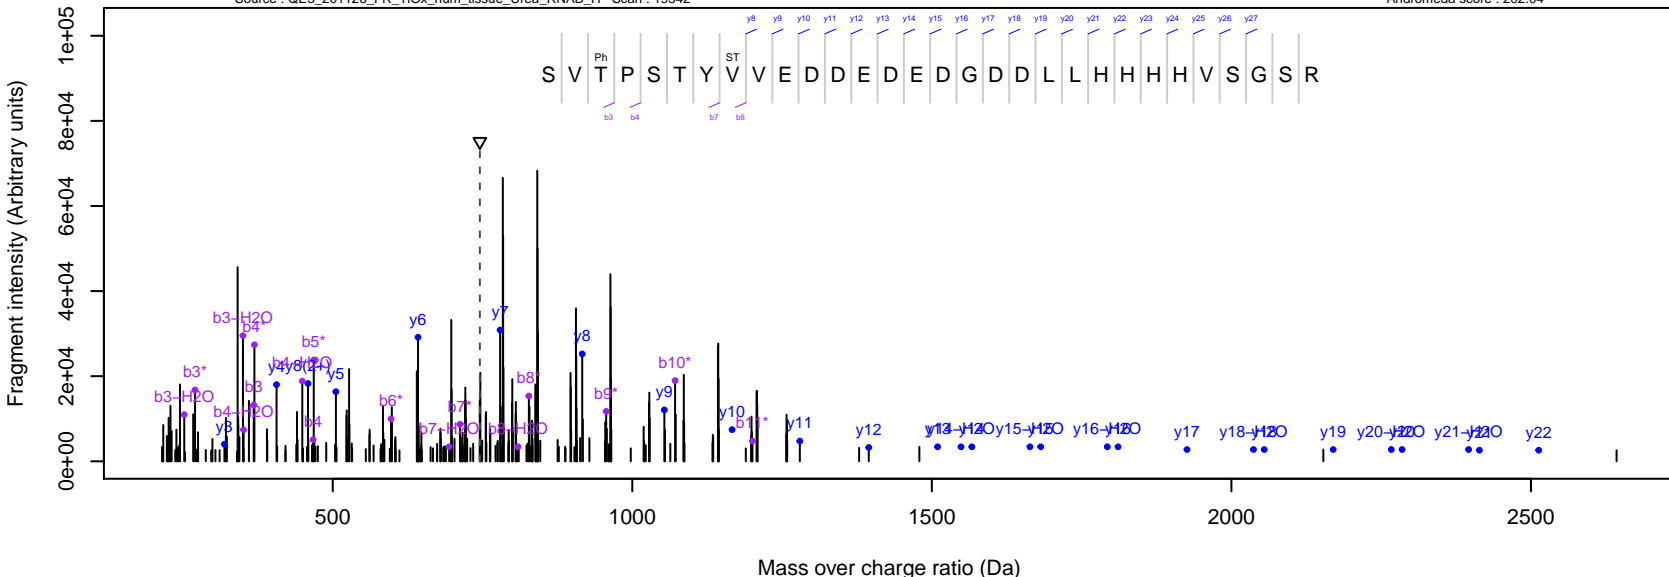

IGHHS(Phospho (STY))TSSDDSSAYRS(Phospho (STY))VDEVNYWDKQDHPISR-4+

Source : QE3\_201126\_FR\_TIOx\_hum\_tissue\_Urea\_RNAB\_H Scan : 21457

Andromeda score : 201.93

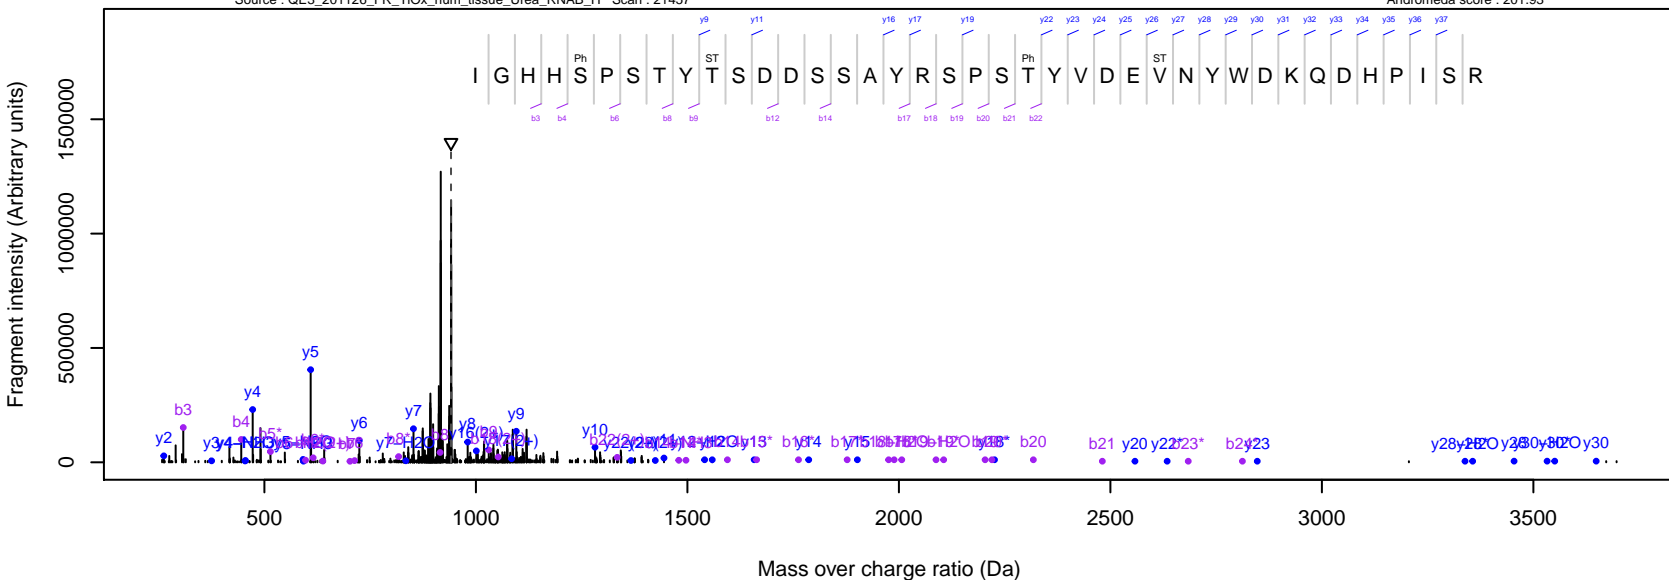

VKVDGPRS(Phospho (STY))PSYGR-2+

Source : QE3\_201126\_FR\_TIOx\_hum\_tissue\_Urea\_RNAB\_B Scan : 7671

Andromeda score : 201.7

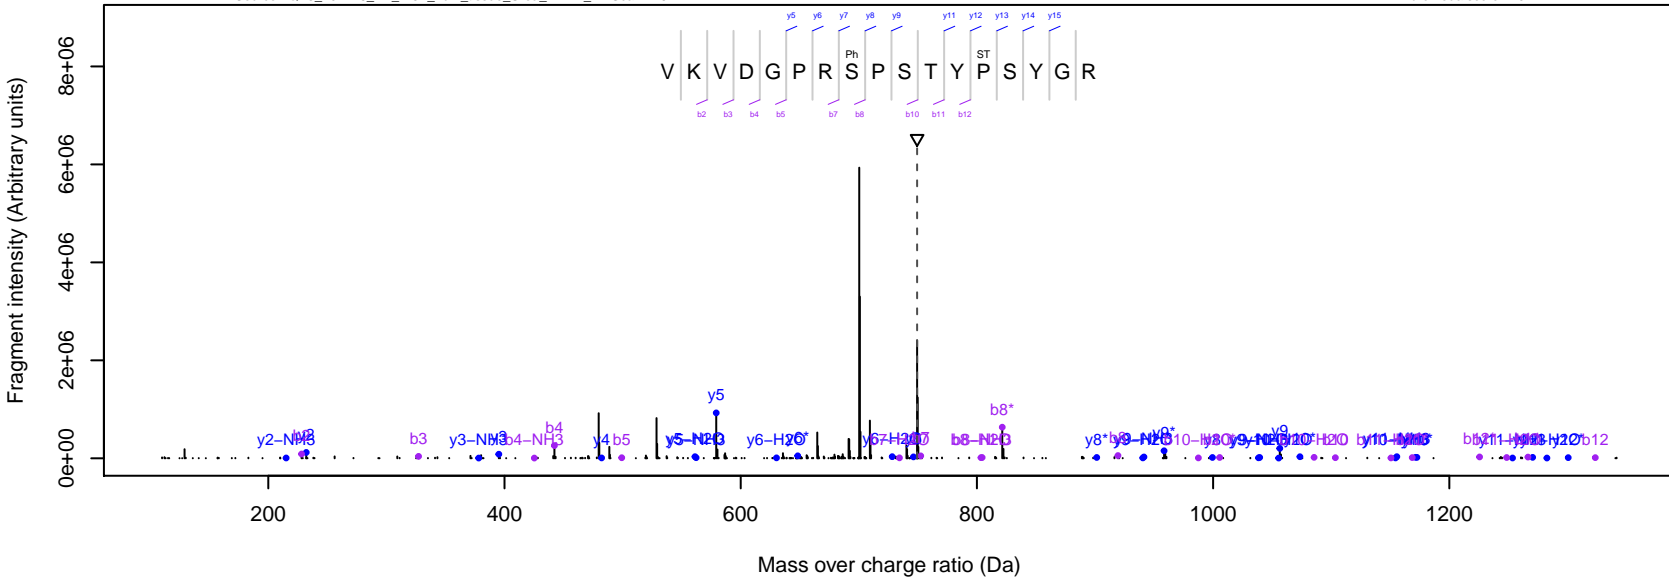

KFSGFSAKPNNNGEAPSS(Phospho (STY))PTPK-3+

Source : QE3\_201126\_FR\_TiOx\_hum\_tissue\_Urea\_RNAB\_B Scan : 12729

Andromeda score : 201.6

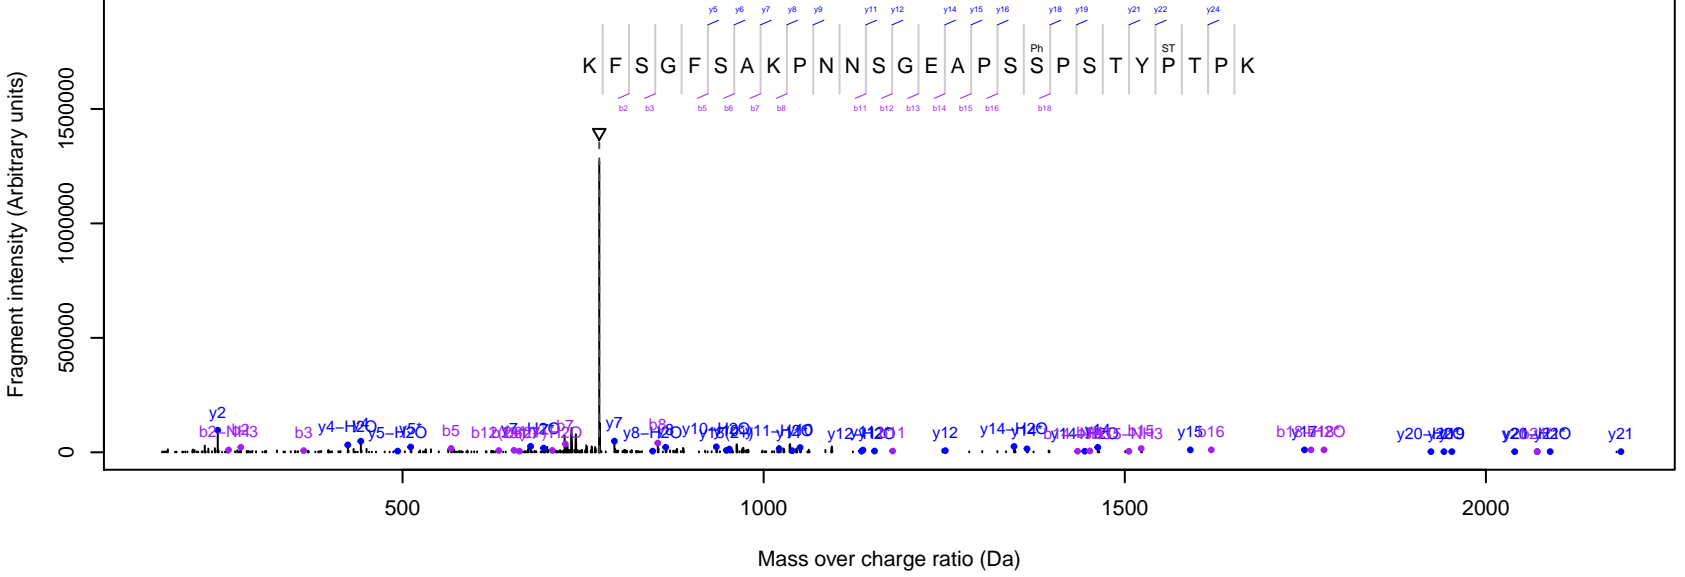

EKTSPKKEEDEEPES(Phospho (STY))PPEK-3+

Source : QE3\_201126\_FR\_TiOx\_hum\_tissue\_Urea\_RNAB\_N Scan : 7972

Andromeda score : 201.58

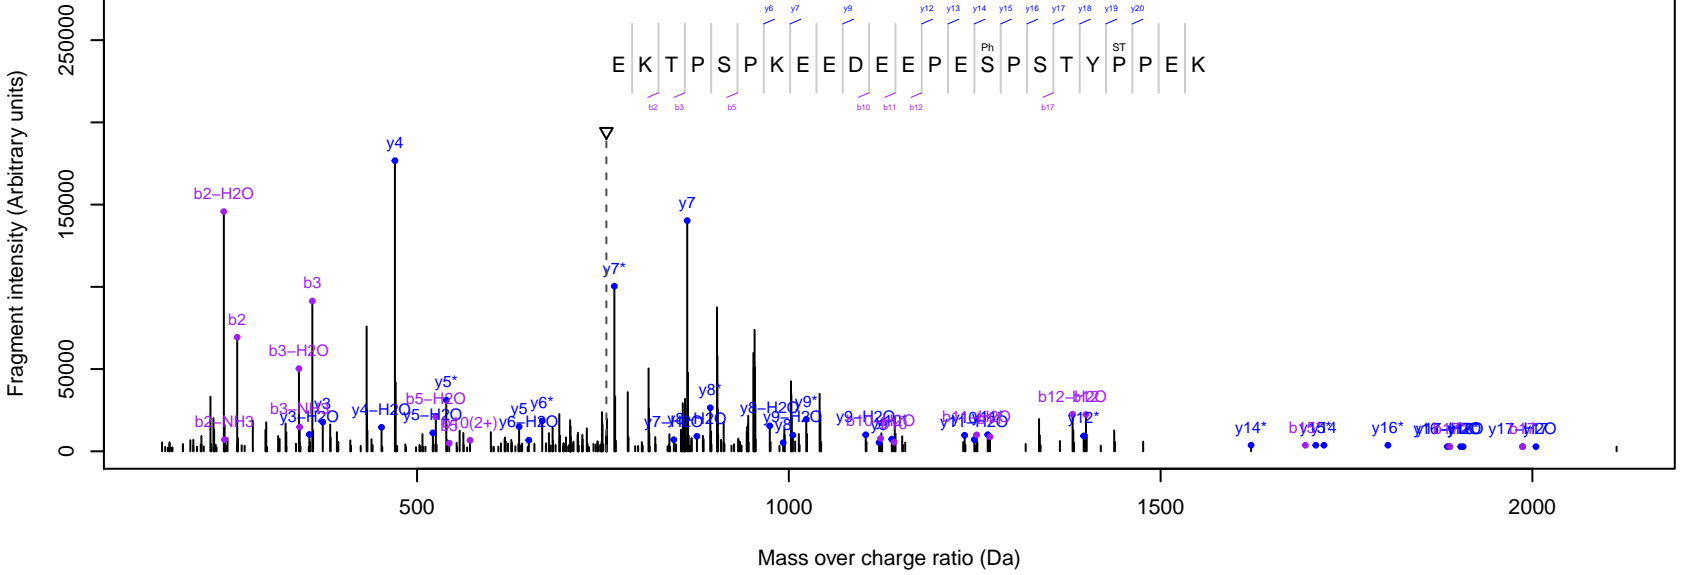

ELVSSSSGSDS(Phospho (STY))DS(Phospho (STY))EVDK-2+

Source : QE3\_201126\_FR\_TiOx\_hum\_tissue\_Urea\_RNAB\_H Scan : 11917

Andromeda score : 201.48

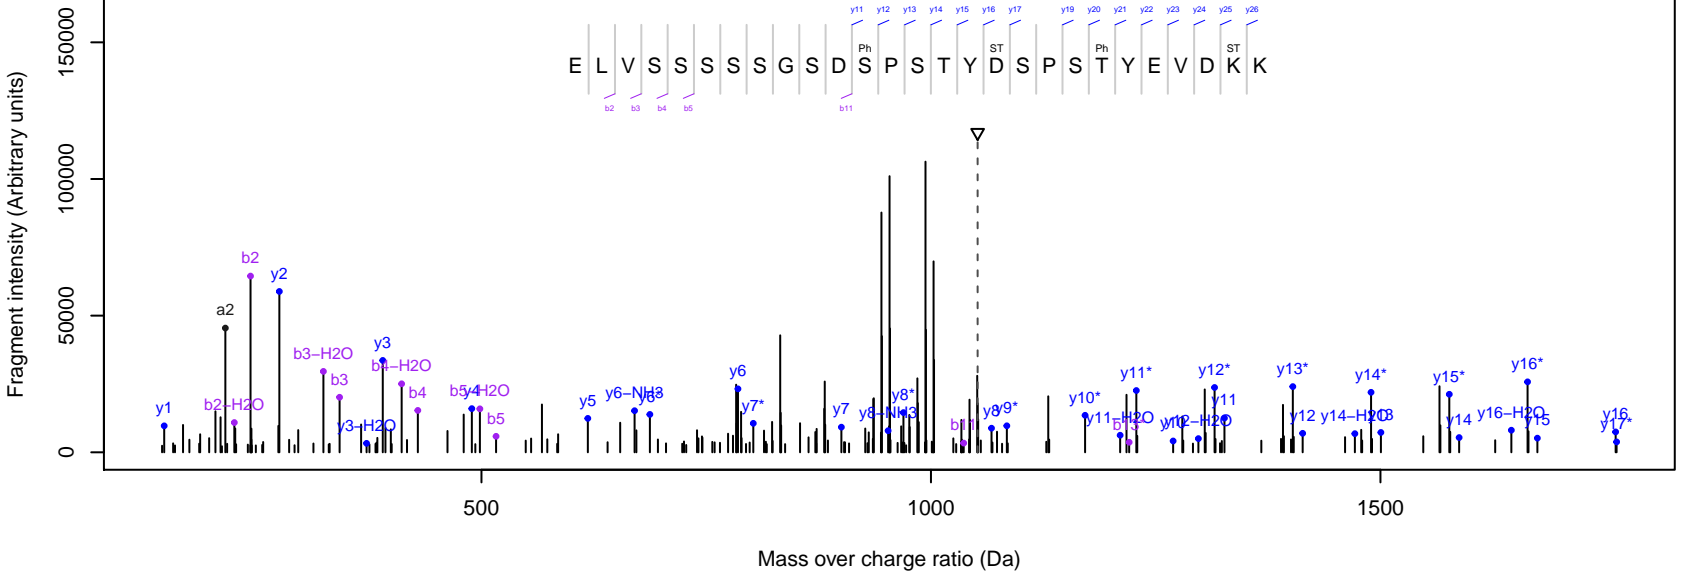

GS(Phospho (STY))PEELPLPAFEK-2+

Source : QE3\_201126\_FR\_TIOx\_hum\_tissue\_Urea\_RNAB\_B Scan : 48329

Andromeda score : 201.48

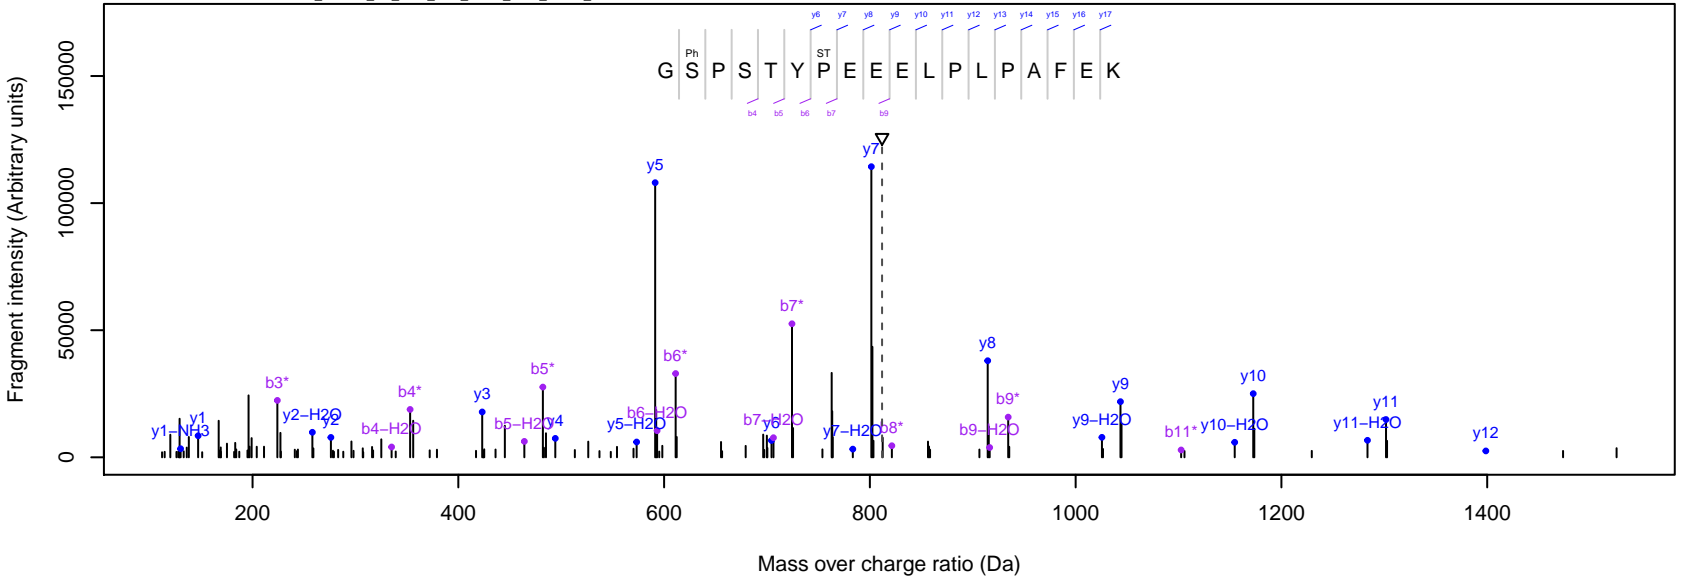

GTDDS(Phospho (STY))PKDSQEDLQER-2+

Source : QE3\_201126\_FR\_TIOx\_hum\_tissue\_Urea\_RNAB\_N Scan : 8945

Andromeda score : 201.48

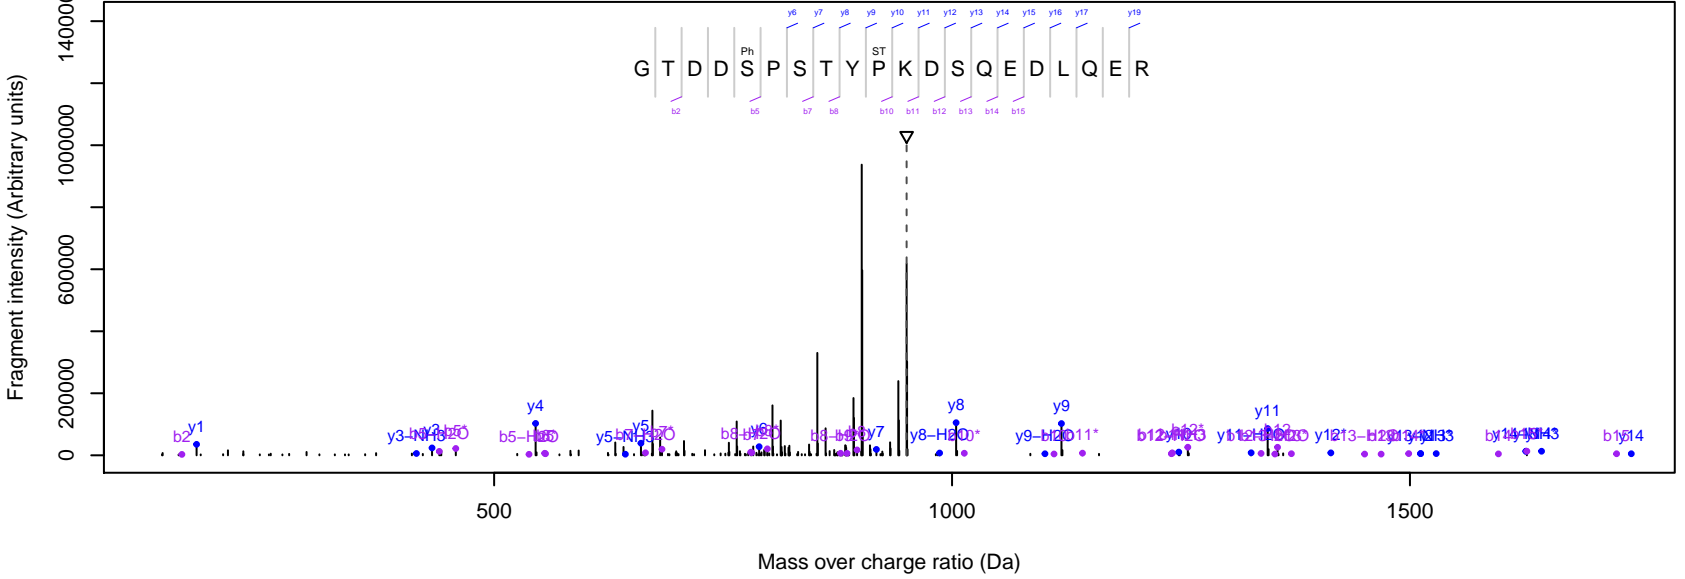

GSFS(Phospho (STY))DTGLGDGK-2+

Source : QE3\_201126\_FR\_TIOx\_hum\_tissue\_Urea\_RNAB\_N Scan : 20215

Andromeda score : 201.38

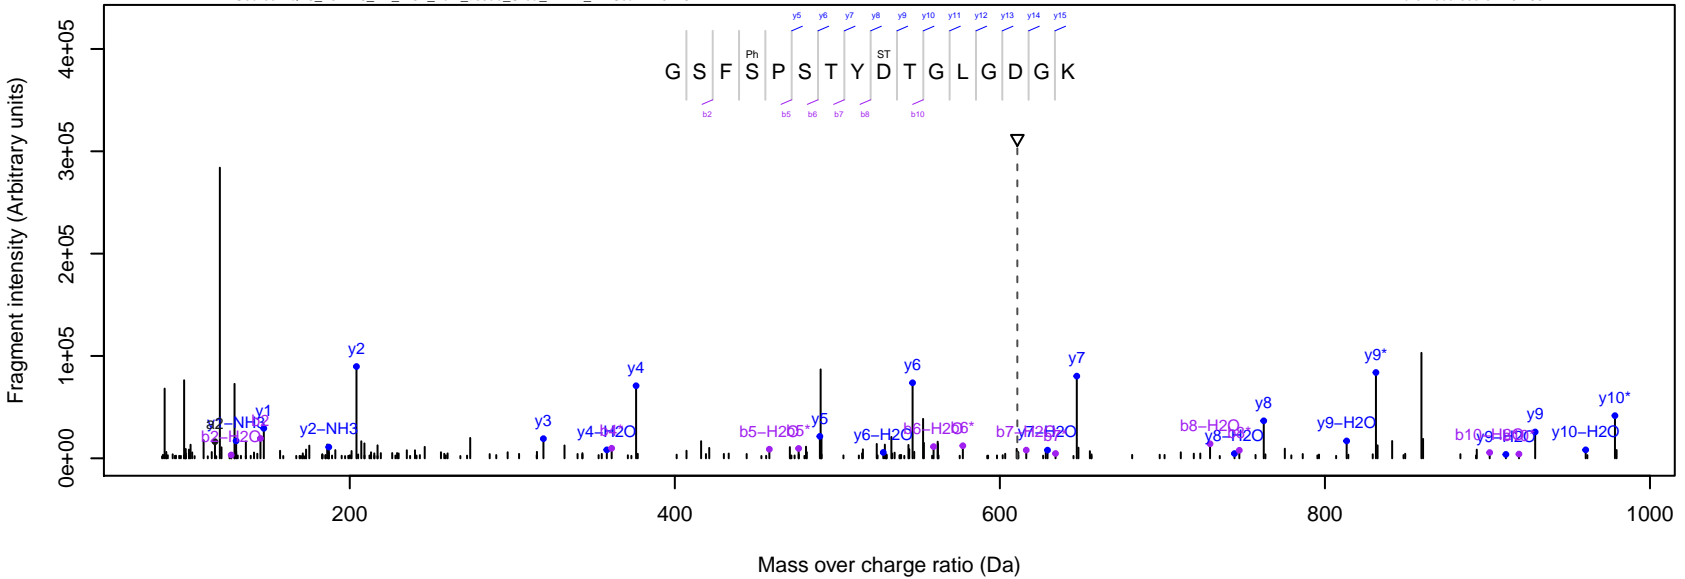

DGQDAIQS(Phospho (STY))PEKESKDYEMNANHK-4+

Source : QE3\_201126\_FR\_TIOx\_hum\_tissue\_Urea\_RNAB\_B Scan : 13831

Andromeda score : 201.35

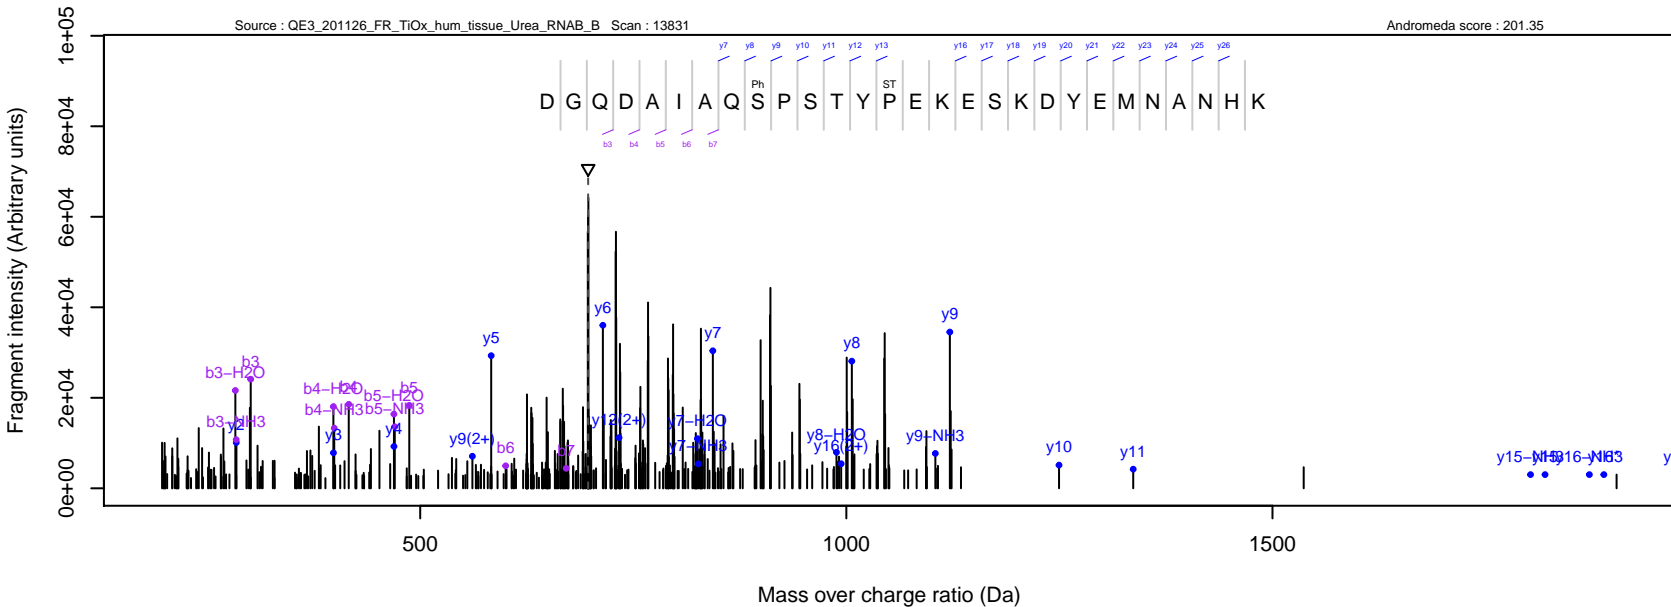

VTTEIQLPSQS(Phospho (STY))PVEEQSPASLSSLR-2+

Source : QE3\_201126\_FR\_TIOx\_hum\_tissue\_Urea\_RNAB\_N Scan : 46907

Andromeda score : 201.31

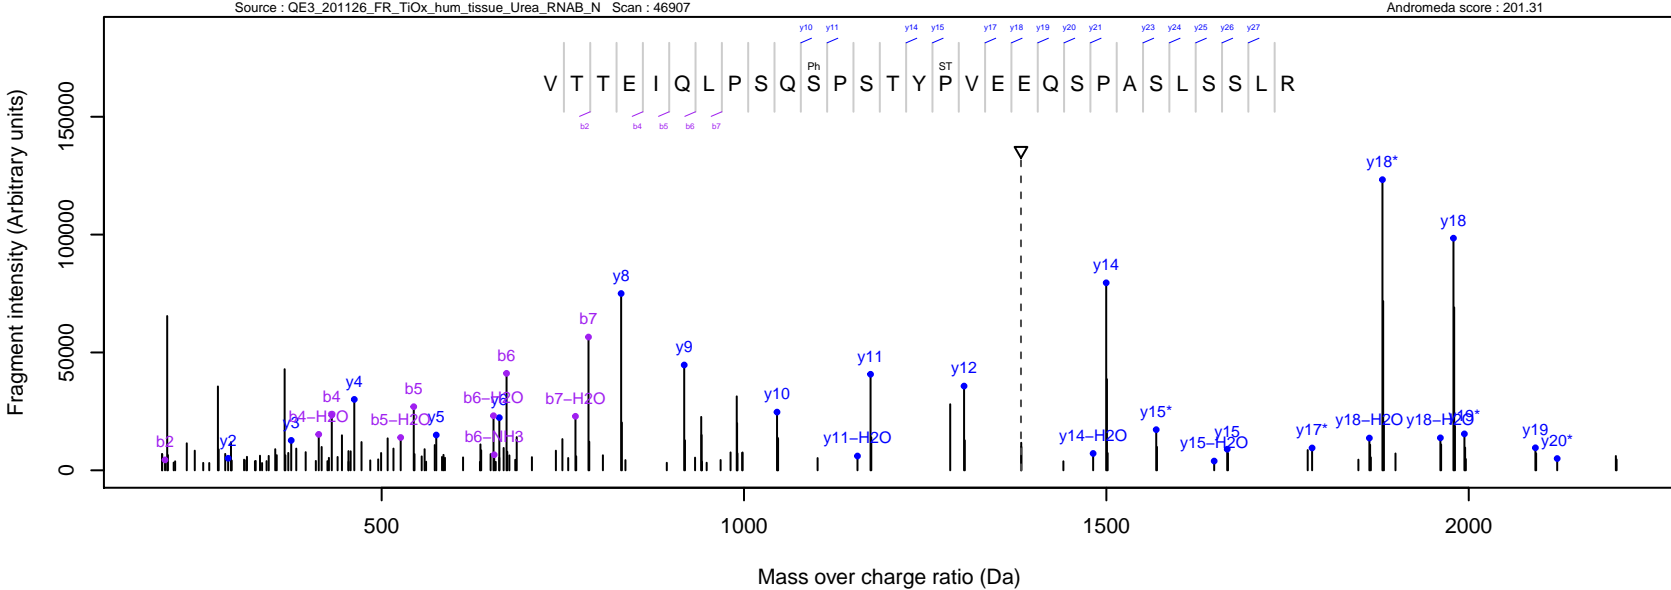

NRPDYVS(Phospho (STY))EEEEDEDFETAVKK-3+

Source : QE3\_201126\_FR\_TIOx\_hum\_tissue\_Urea\_RNAB\_N Scan : 25480

Andromeda score : 201.21

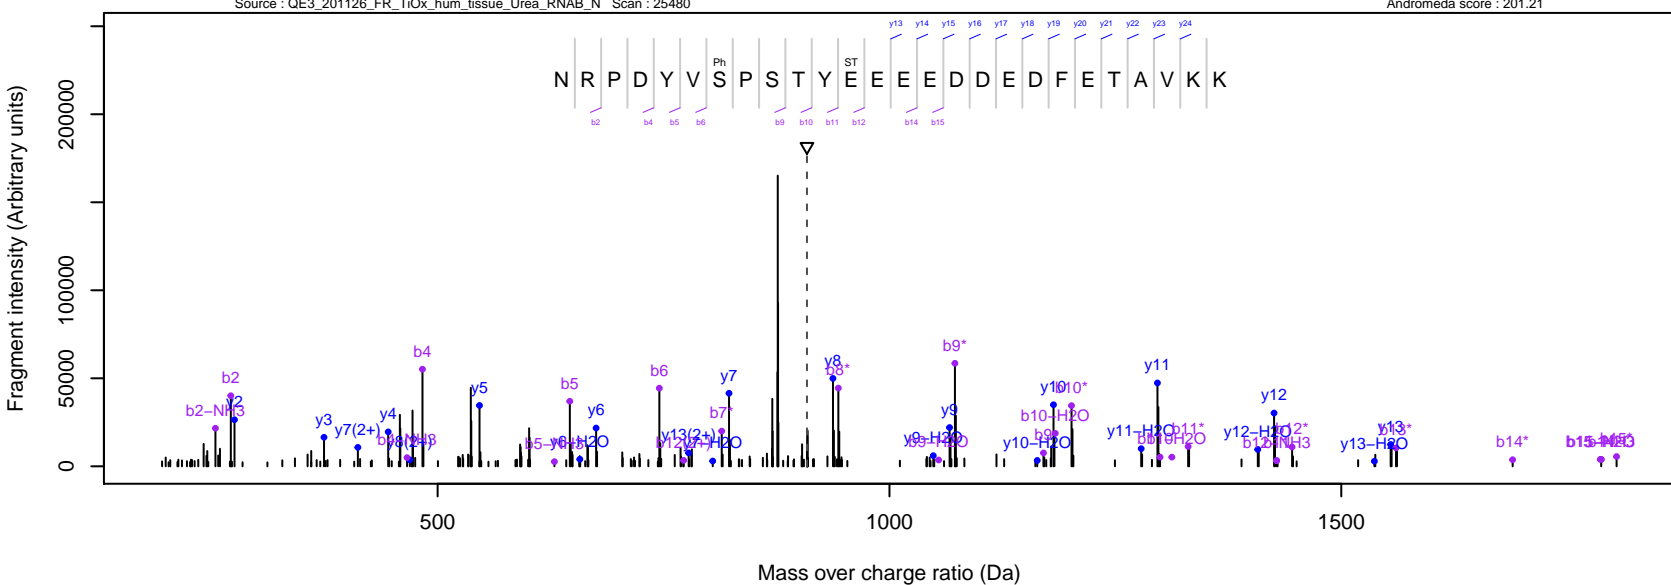

GLGTDEDS(Phospho (STY))LEIICSR-2+

Source : QE3\_201126\_FR\_TiOx\_hum\_tissue\_Urea\_RNAB\_B Scan : 56799

Andromeda score : 201.16

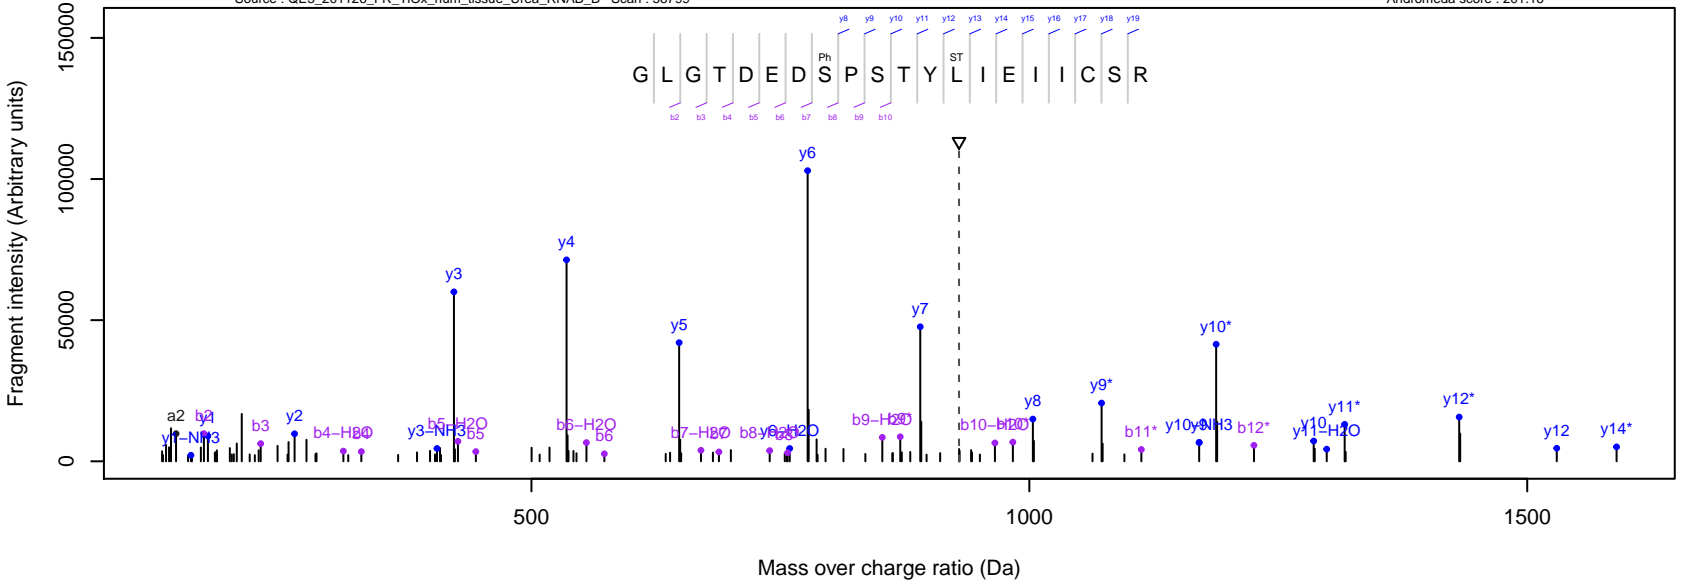

IAAPELHKGDS(Phospho (STY))DSEDEPTK-3+

Source : QE3\_201126\_FR\_TiOx\_hum\_tissue\_Urea\_RNAB\_H Scan : 12024

Andromeda score : 201.15

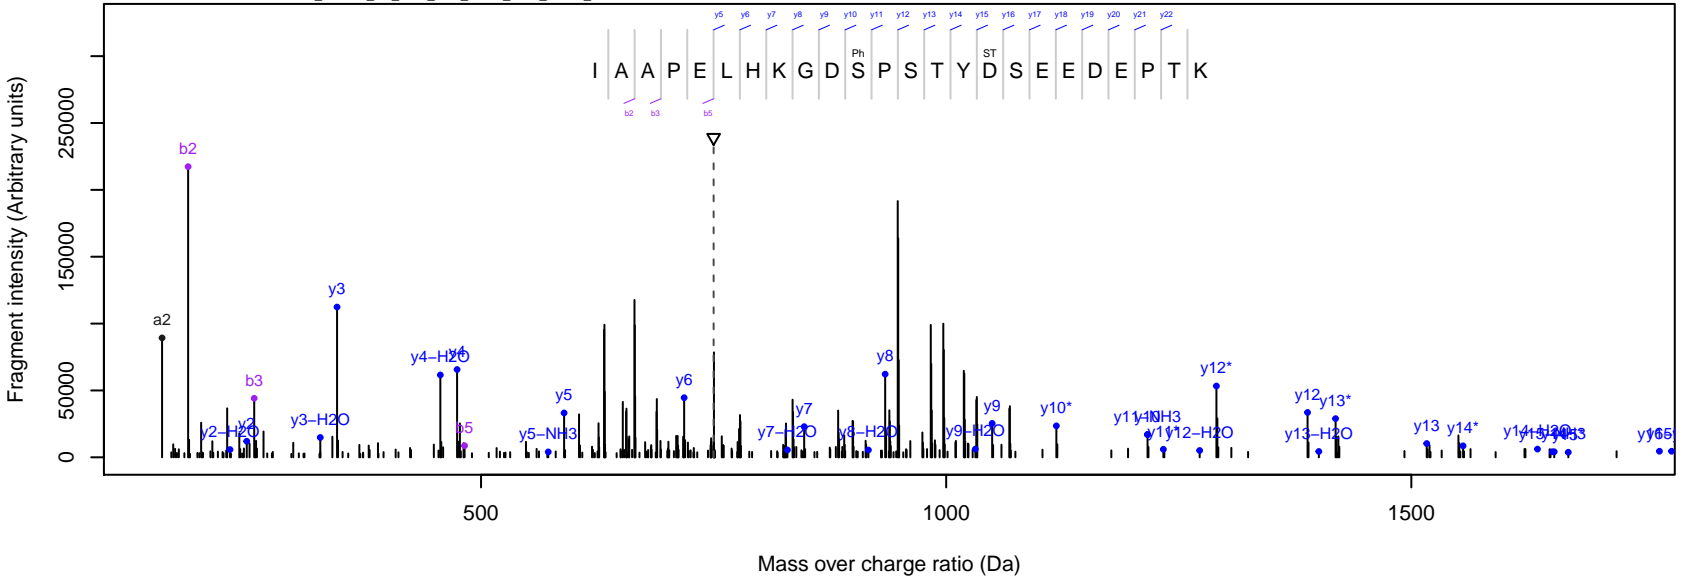

SCFESS(Phospho (STY))PDEPELK-2+

Source : QE3\_201126\_FR\_TiOx\_hum\_tissue\_Urea\_RNAB\_N Scan : 22325

Andromeda score : 201.09

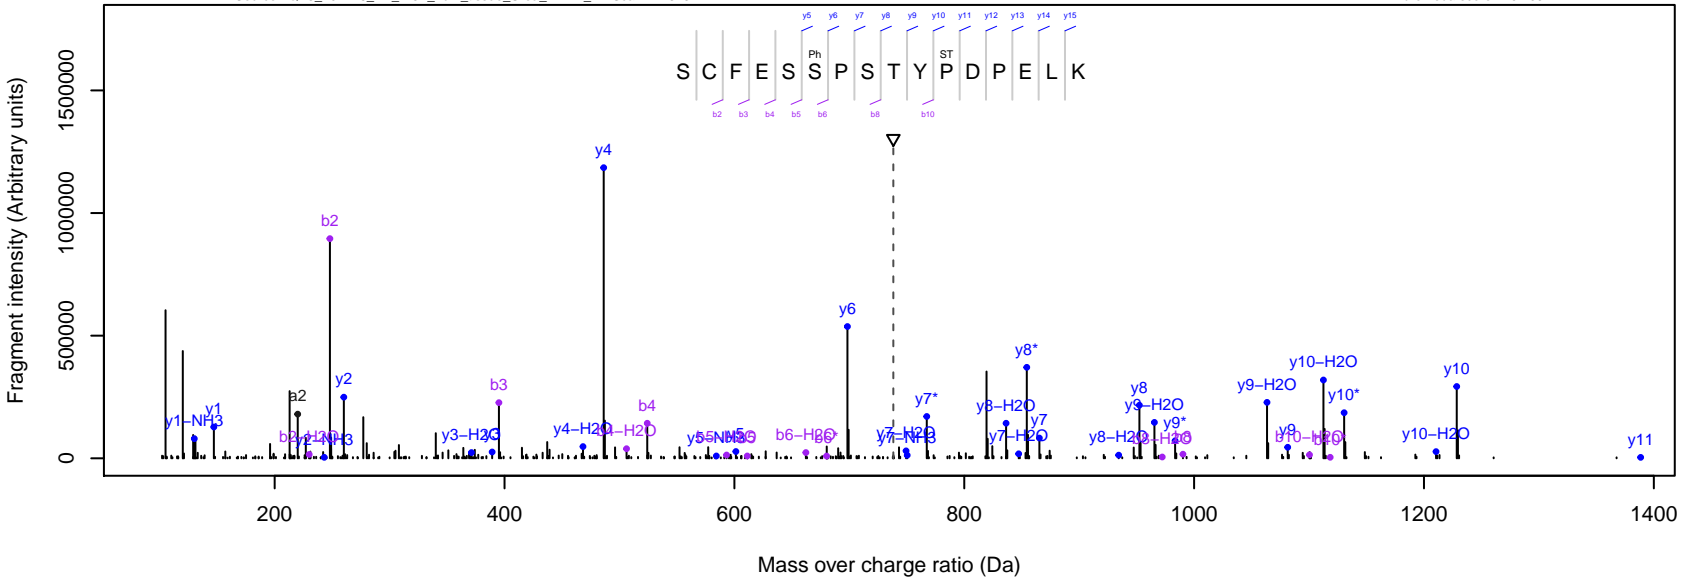

ALS(Phospho (STY))SDSILSPAPDAR-2+

Source : QE3\_201126\_FR\_TiOx\_hum\_tissue\_Urea\_RNAB\_N Scan : 34502

Andromeda score : 201.06

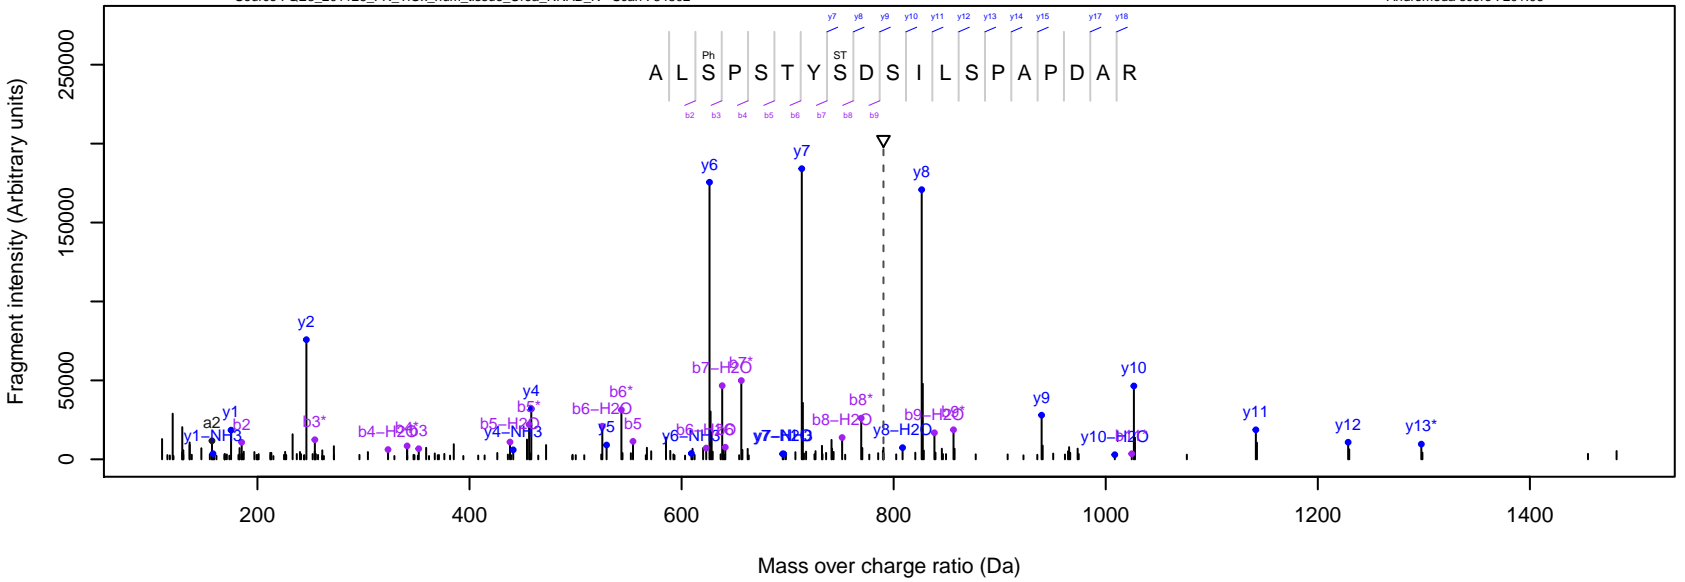

ELVSSSSGSDS(Phospho (STY))DSEVDK-2+

Source : QE3\_201126\_FR\_TiOx\_hum\_tissue\_Urea\_RNAB\_B Scan : 13639

Andromeda score : 200.99

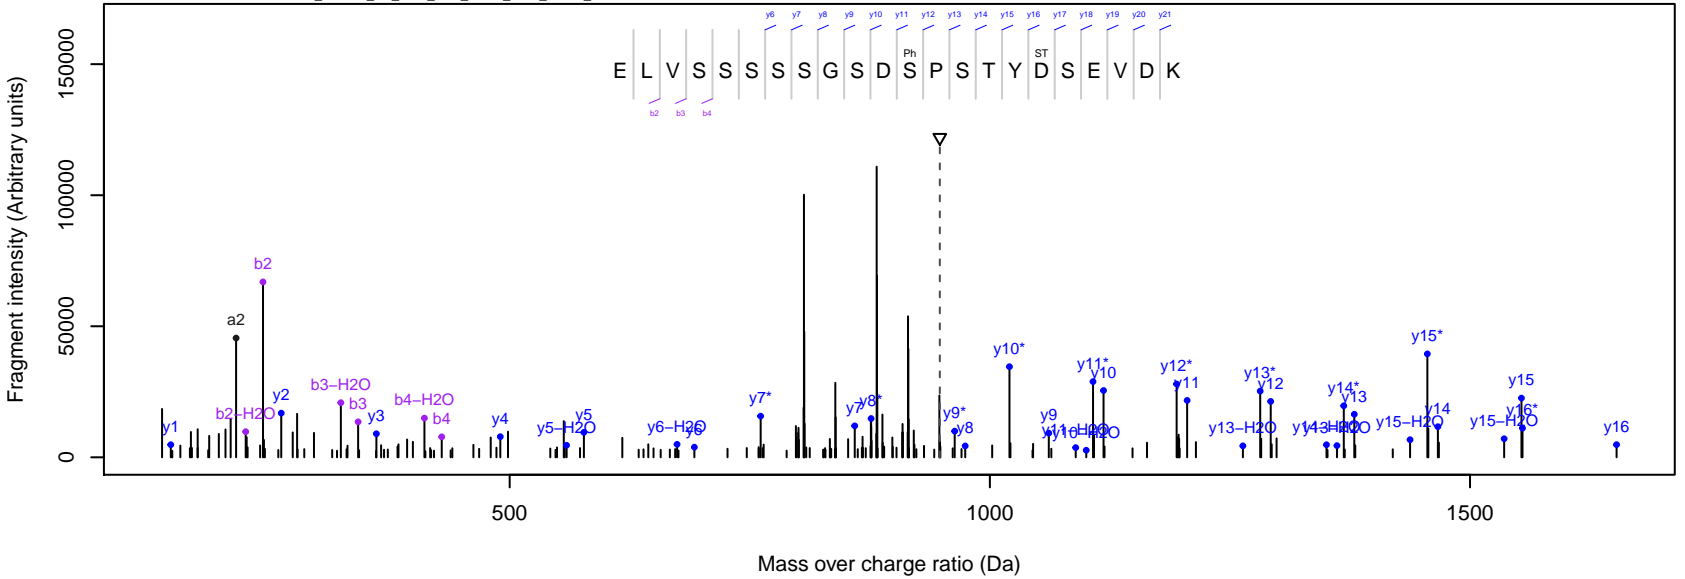

S(Phospho (STY))LGS(Phospho (STY))VQAPSYGAR-2+

Source : QE3\_201126\_FR\_TiOx\_hum\_tissue\_Urea\_RNAB\_B Scan : 31118

Andromeda score : 200.9

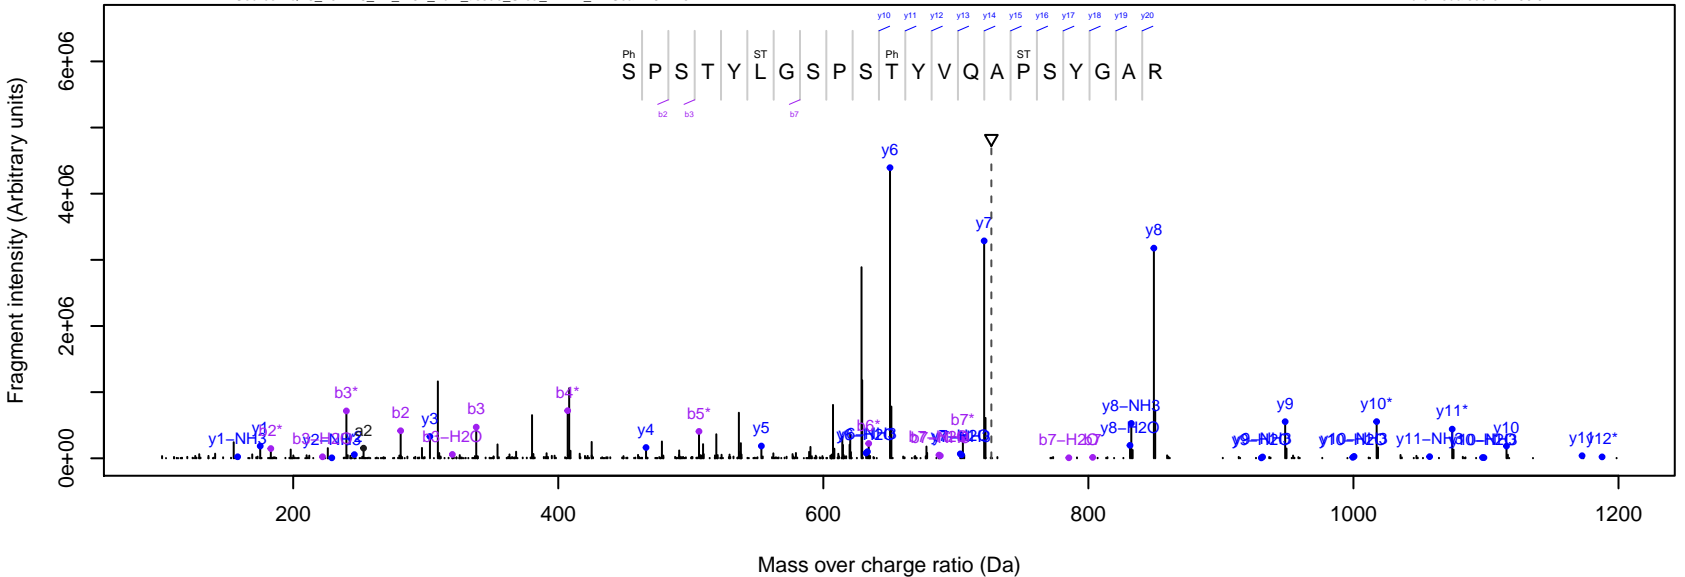



AGHDGDS(Phospho (STY))DGDS(Phospho (STY))DDEEGYFICPITDDPSSNQNVNSK-3+

Source : QE3\_201126\_FR\_TIOx\_hum\_tissue\_Urea\_RNAB\_H Scan : 46009

Andromeda score : 200.79

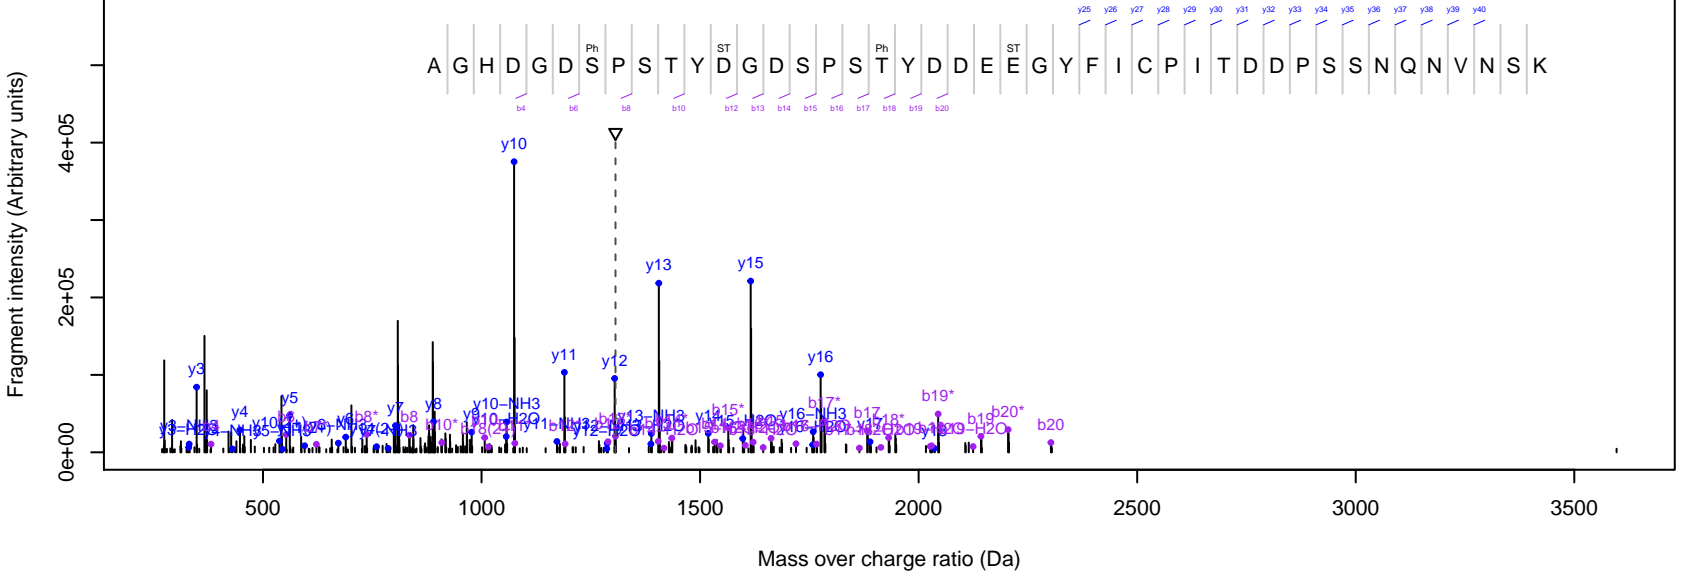

RGPLSQNGSFGPSPVSGGEC(Phospho (STY))PPLTVEPPVRLSATLNR-4+

Source : QE3\_201126\_FR\_TIOx\_hum\_tissue\_Urea\_RNAB\_N Scan : 44683

Andromeda score : 200.77

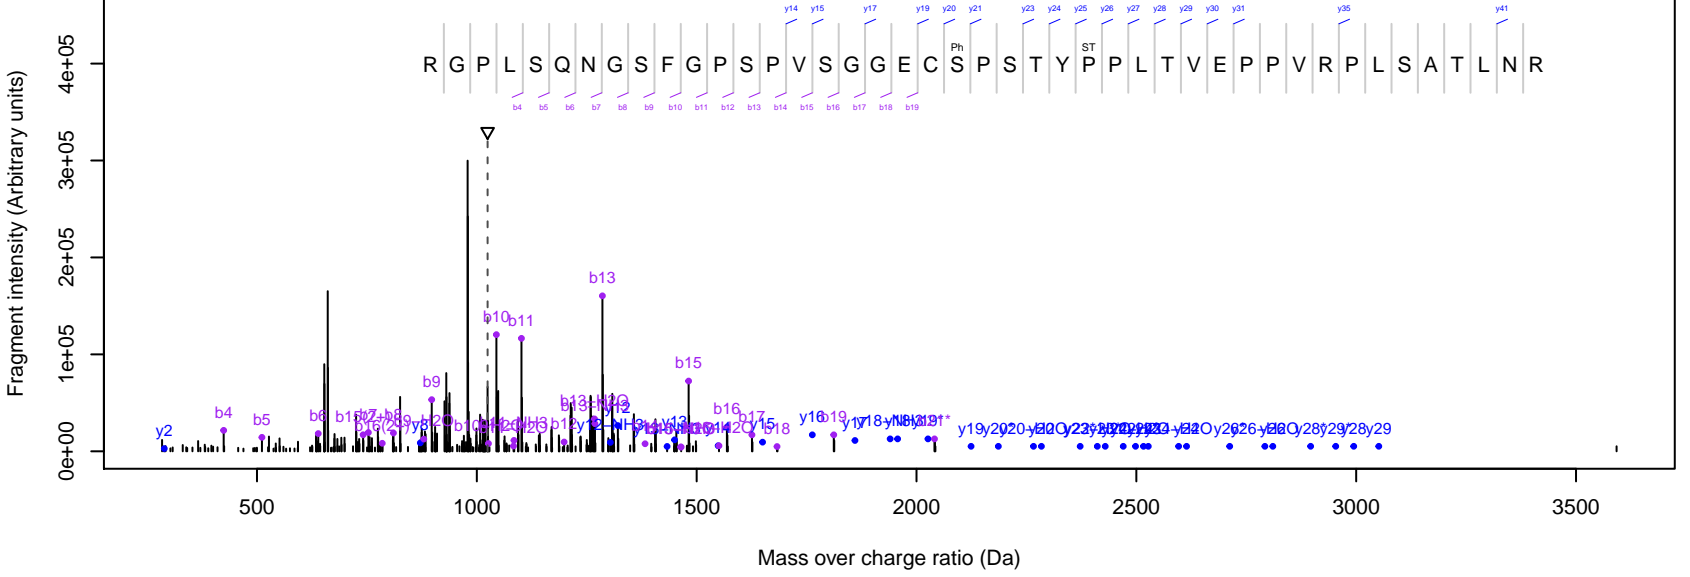

GPVGTVS(Phospho (STY))EAQLAR-2+

Source : QE3\_201126\_FR\_TIOx\_hum\_tissue\_Urea\_RNAB\_N Scan : 22879

Andromeda score : 200.76

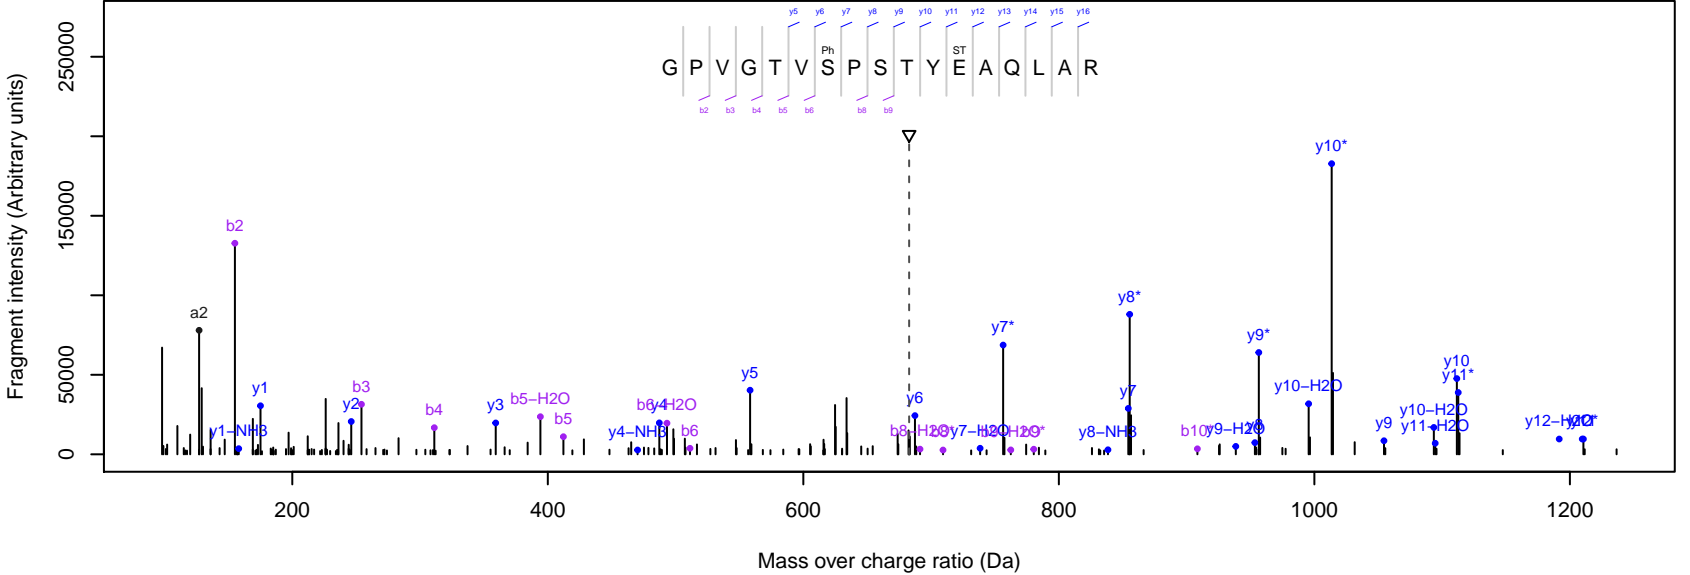

SPS(Phospho (STY))FASEWDEIEK-2+

Source : QE3\_201126\_FR\_TiOx\_hum\_tissue\_Urea\_RNAB\_H Scan : 47104

Andromeda score : 200.76

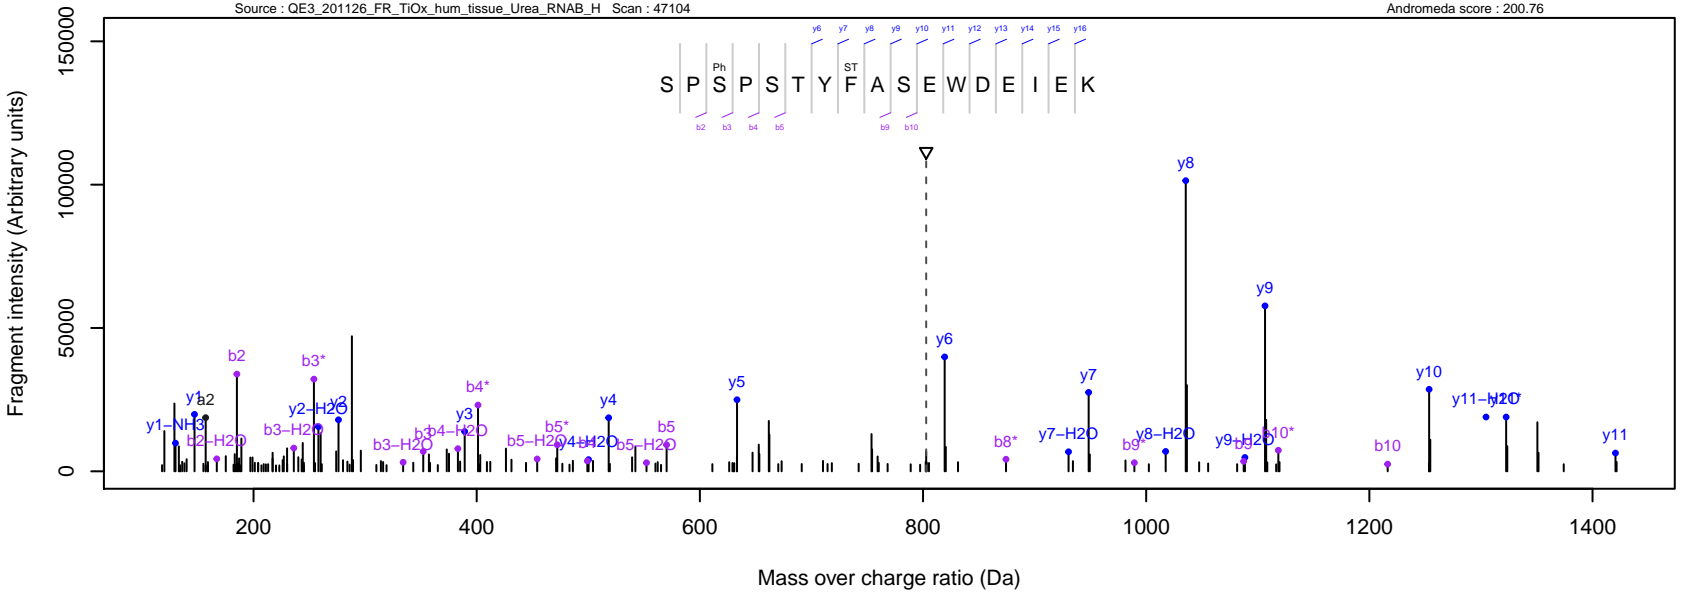

SSS(Phospho (STY))VGS(Phospho (STY))SSYPISPAVSR-2+

Source : QE3\_201126\_FR\_TiOx\_hum\_tissue\_Urea\_RNAB\_N Scan : 34269

Andromeda score : 200.71

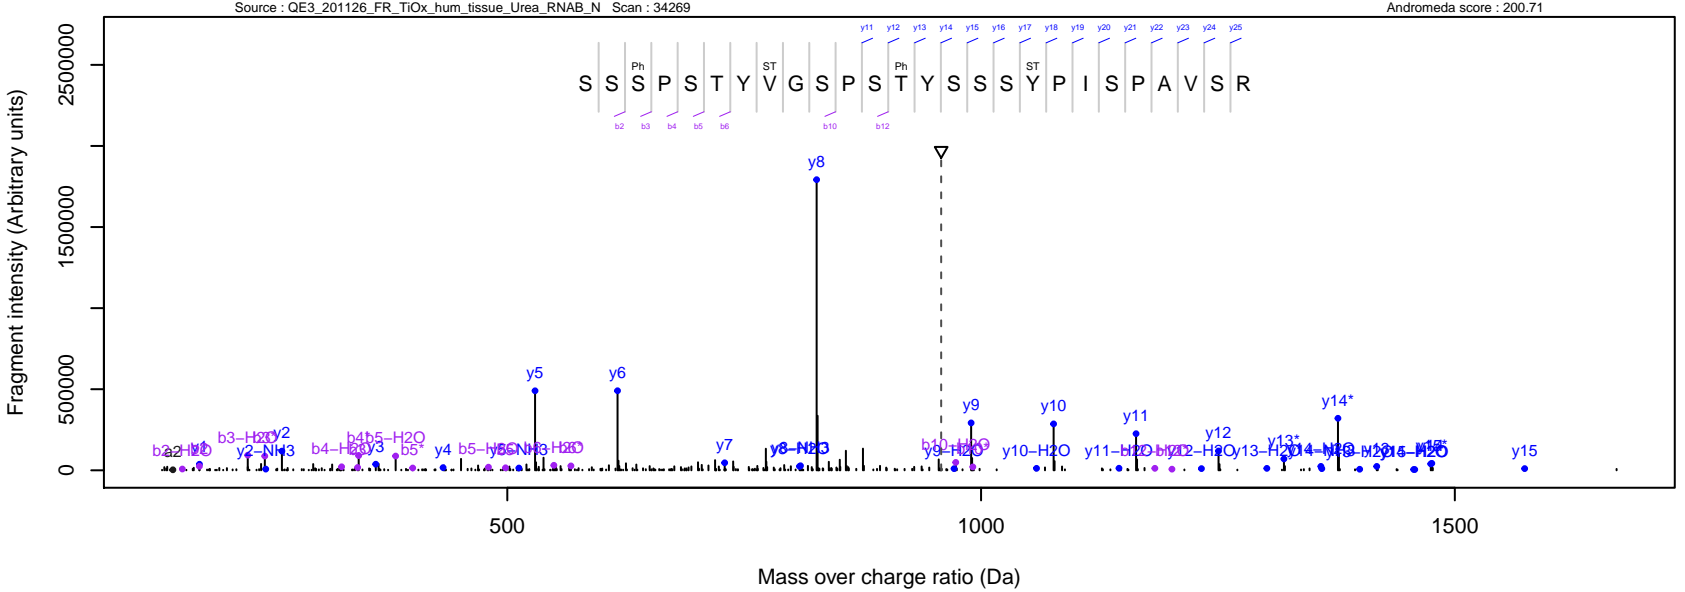

RPTPNDLDEGVGLVHSNIATEHIPS(Phospho (STY))PAKK-4+

Source : QE3\_201126\_FR\_TiOx\_hum\_tissue\_Urea\_RNAB\_H Scan : 28385

Andromeda score : 200.63

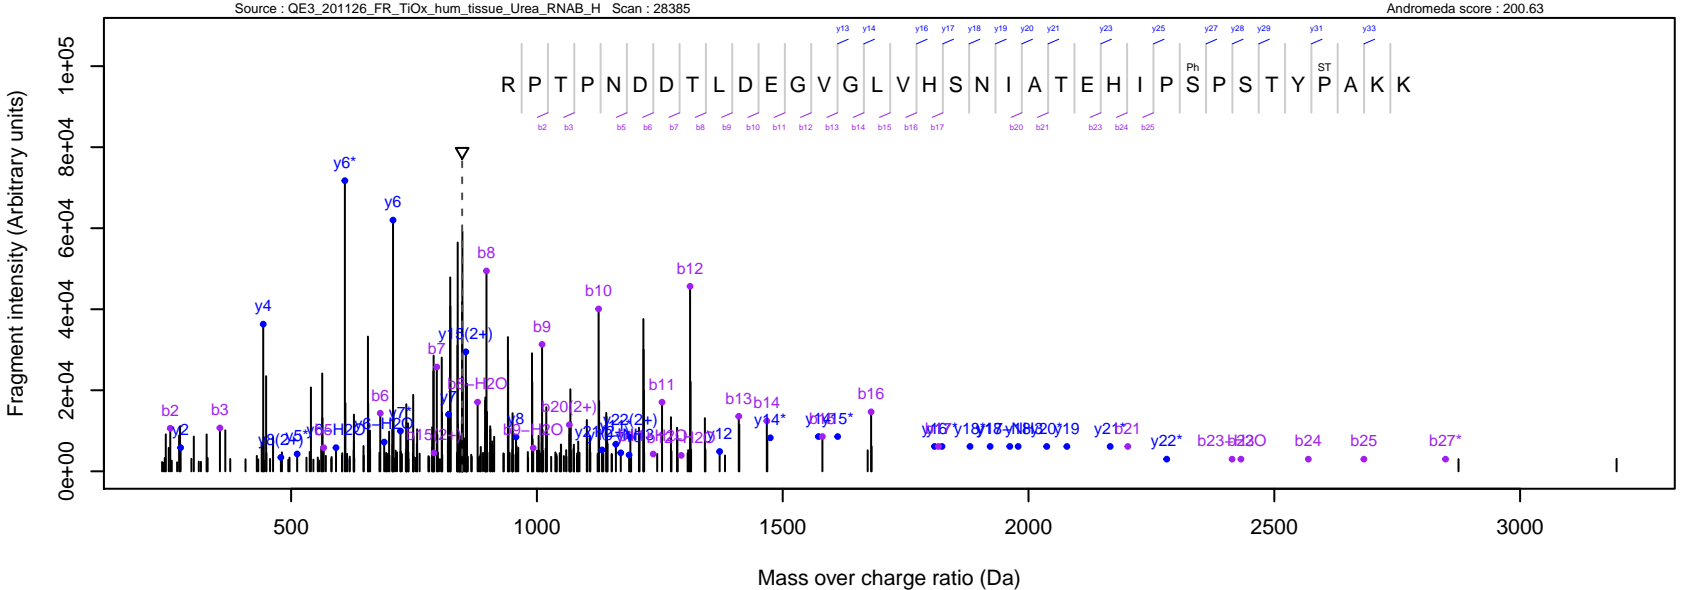

GEDAPFSEPGTTSTQRPSS(Phospho (STY))PETATK-3+

Source : QE3\_2011126\_FR\_TiOx\_hum\_tissue\_Urea\_RNAB\_B Scan : 18764

Andromeda score : 200.4

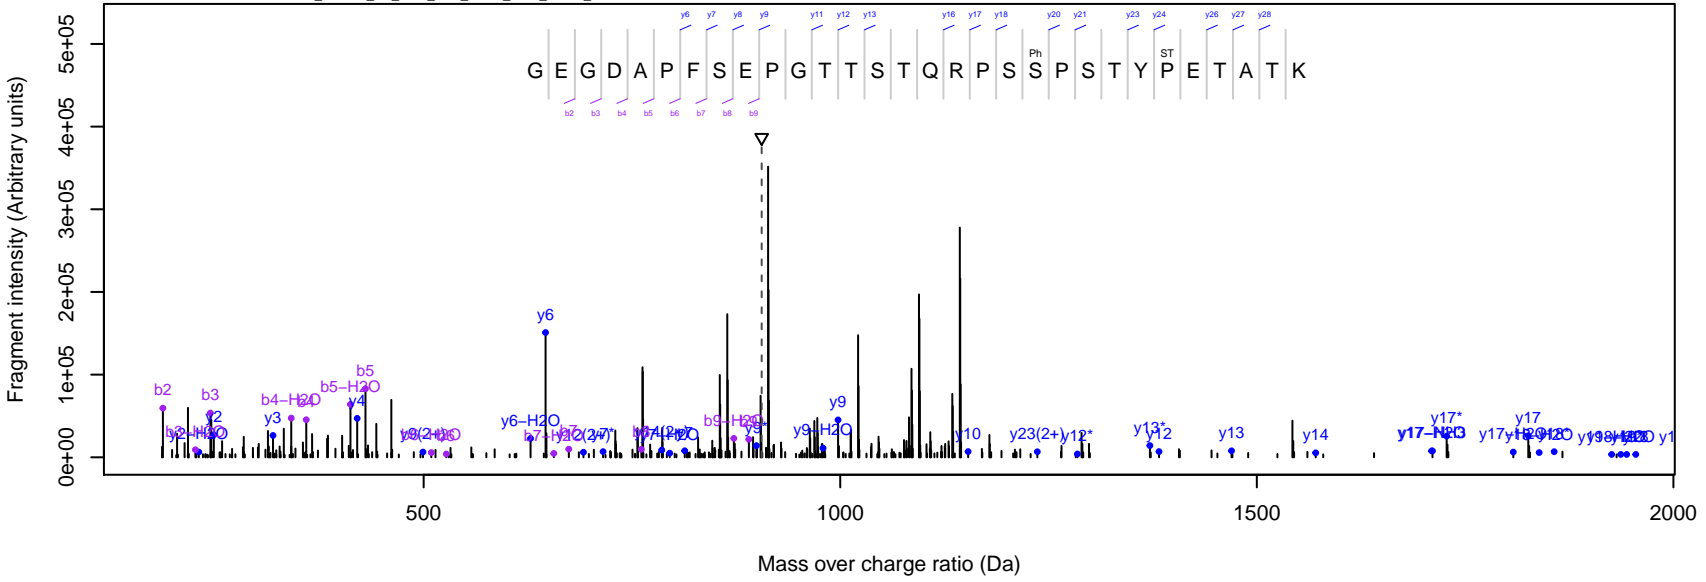

IES(Phospho (STY))DEEEDFENVGK-2+

Source : QE3\_2011126\_FR\_TiOx\_hum\_tissue\_Urea\_RNAB\_B Scan : 28520

Andromeda score : 200.19

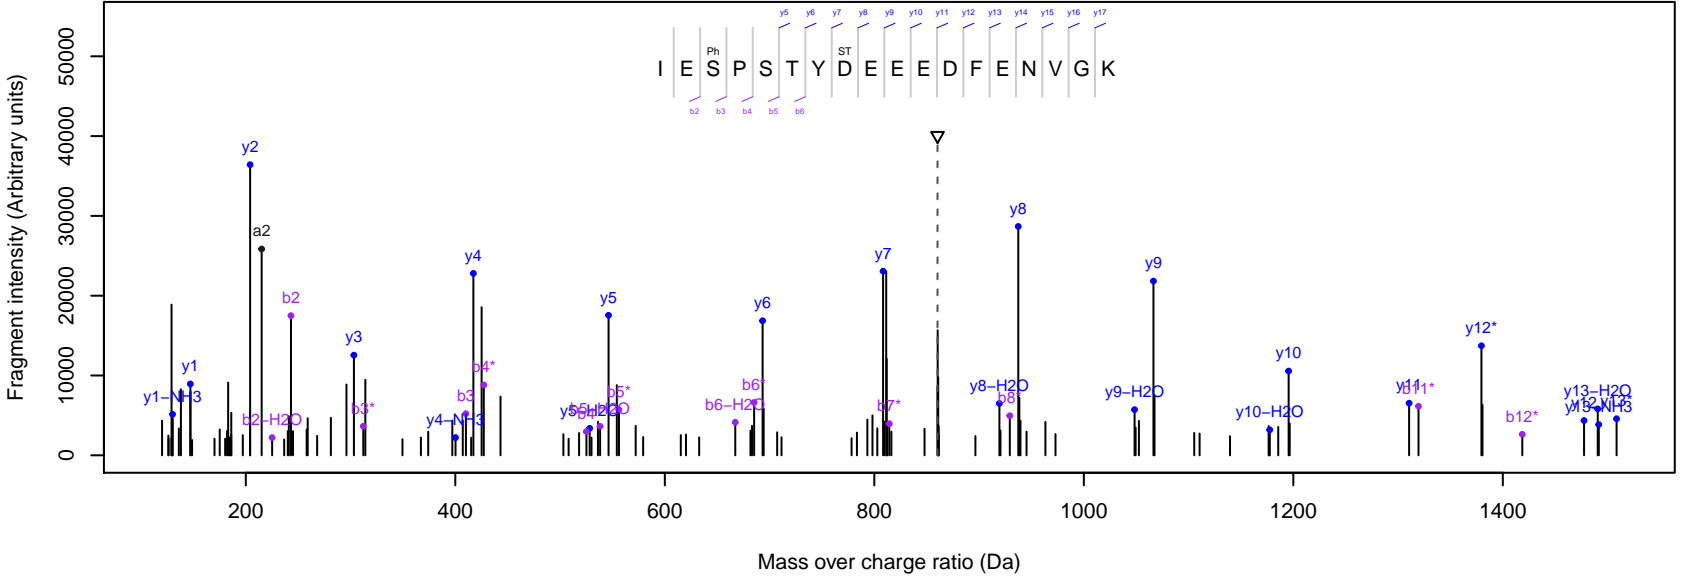

KLSVPTS(Phospho (STY))DEEDEVPAKPR-3+

Source : QE3\_2011126\_FR\_TiOx\_hum\_tissue\_Urea\_RNAB\_H Scan : 18973

Andromeda score : 200.1

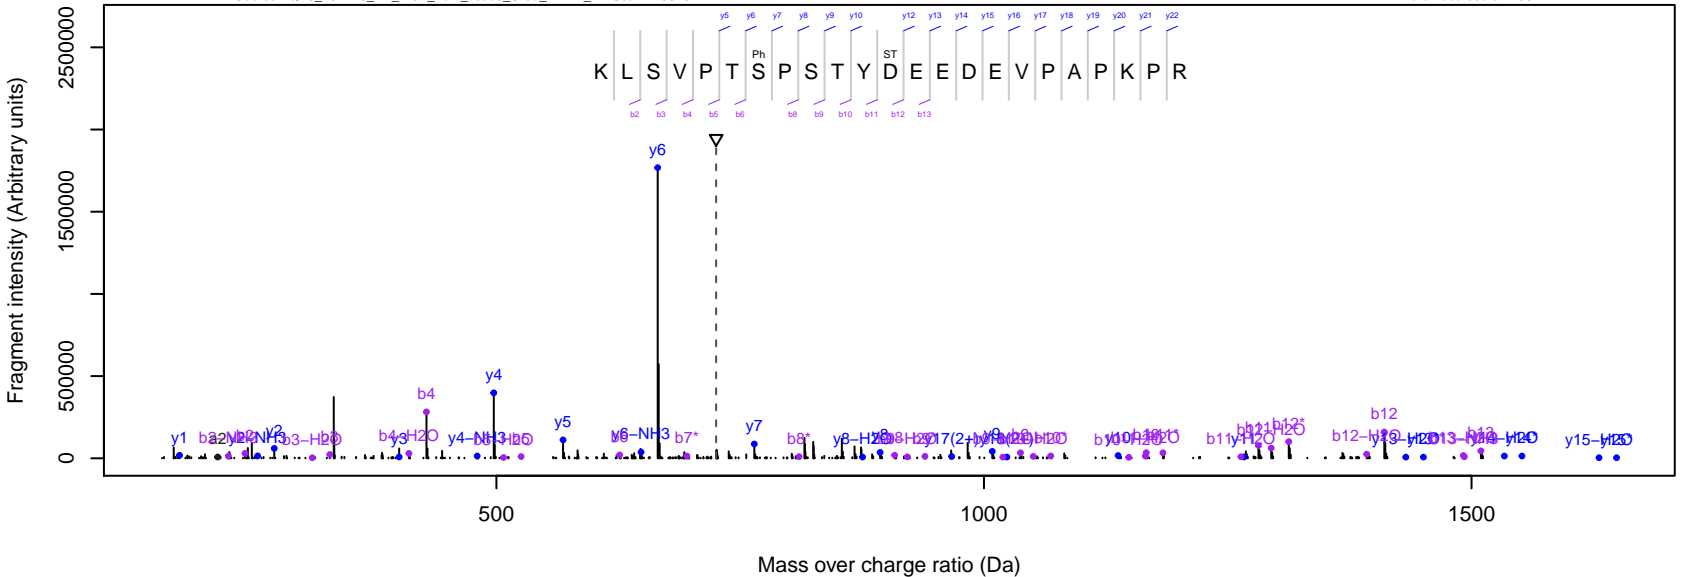

KREEEEEEGS(Phospho (STY))IMNGSTAEDEEQTR-3+

Source : QE3\_201126\_FR\_TiOx\_hum\_tissue\_Urea\_RNAB\_N Scan : 14961

Andromeda score : 200.06

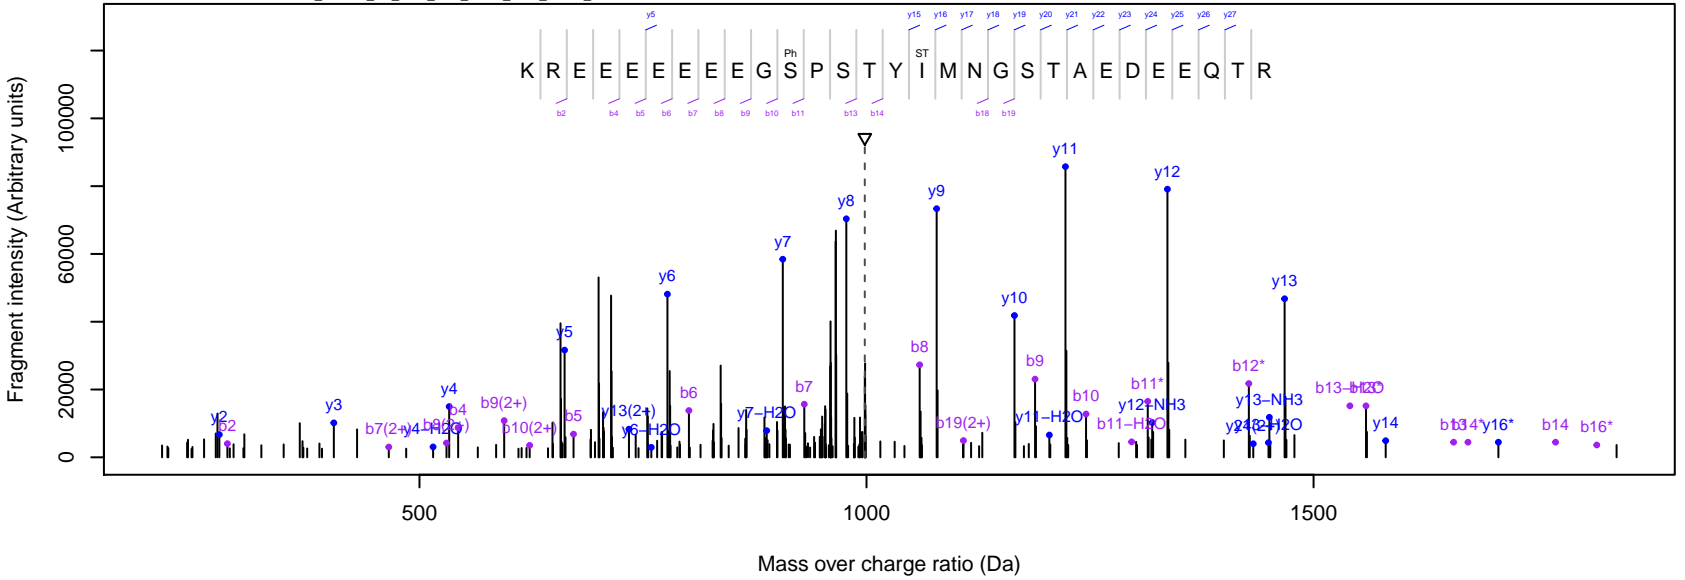

SAS(Phospho (STY))YTVSTISDGPYSHDCPSEHLNGK-3+

Source : QE3\_201126\_FR\_TiOx\_hum\_tissue\_Urea\_RNAB\_N Scan : 22681

Andromeda score : 200.06

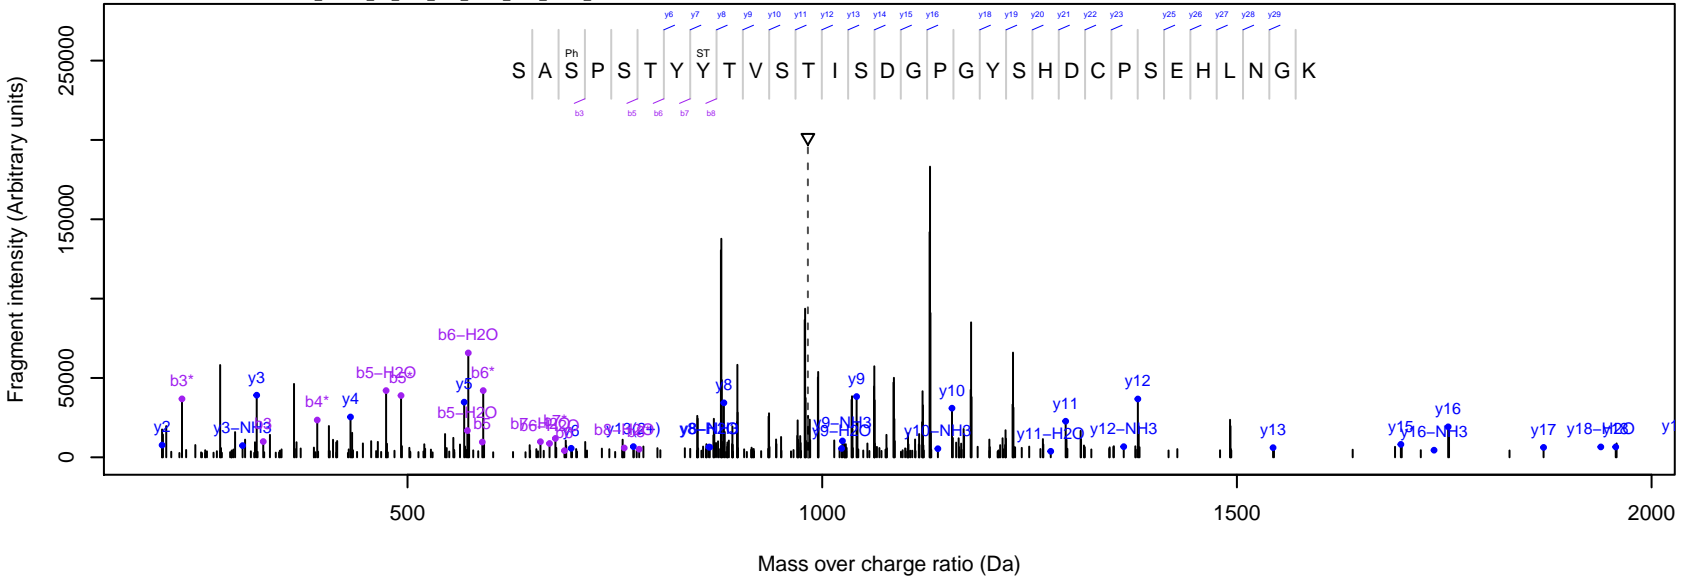

EKLQEEGGG(Phospho (STY))DEEETGSPSE DGM(Oxidation (M))QSAR-3+

Source : QE3\_201126\_FR\_TiOx\_hum\_tissue\_Urea\_RNAB\_N Scan : 10800

Andromeda score : 200.01

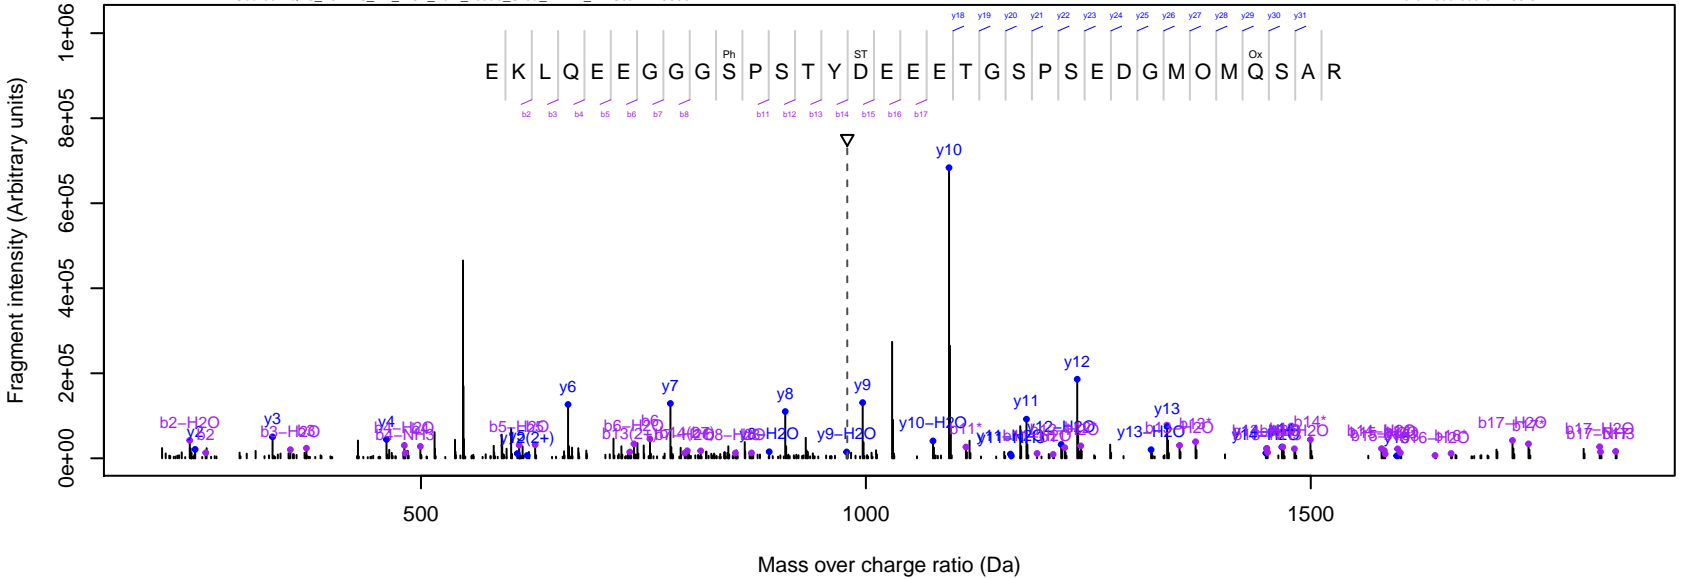

VSEEQTPPS(Phospho (STY))PAGAGMSTAMGR-2+

Source : QE3\_201126\_FR\_TiOx\_hum\_tissue\_Urea\_RNAB\_H Scan : 25592

Andromeda score : 199.97

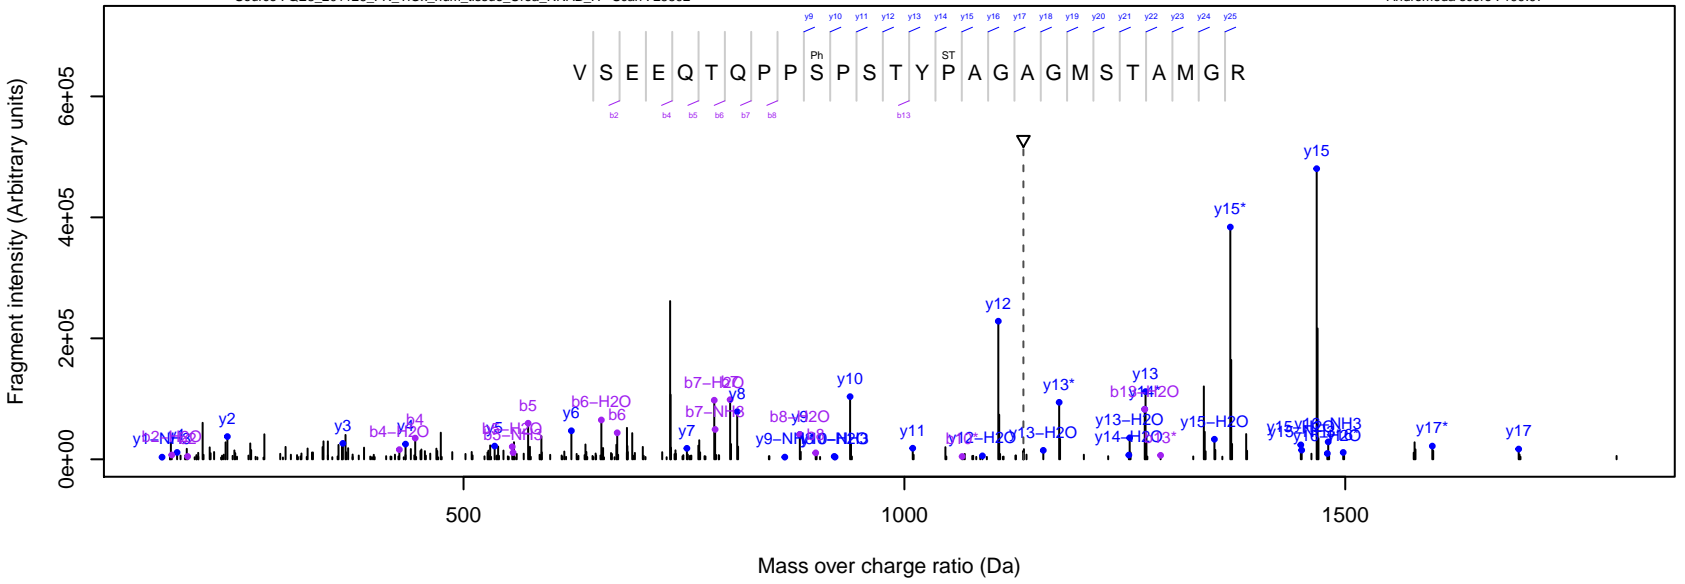

KGS(Phospho (STY))FSALVGR-2+

Source : QE3\_201126\_FR\_TiOx\_hum\_tissue\_Urea\_RNAB\_N Scan : 20024

Andromeda score : 199.96

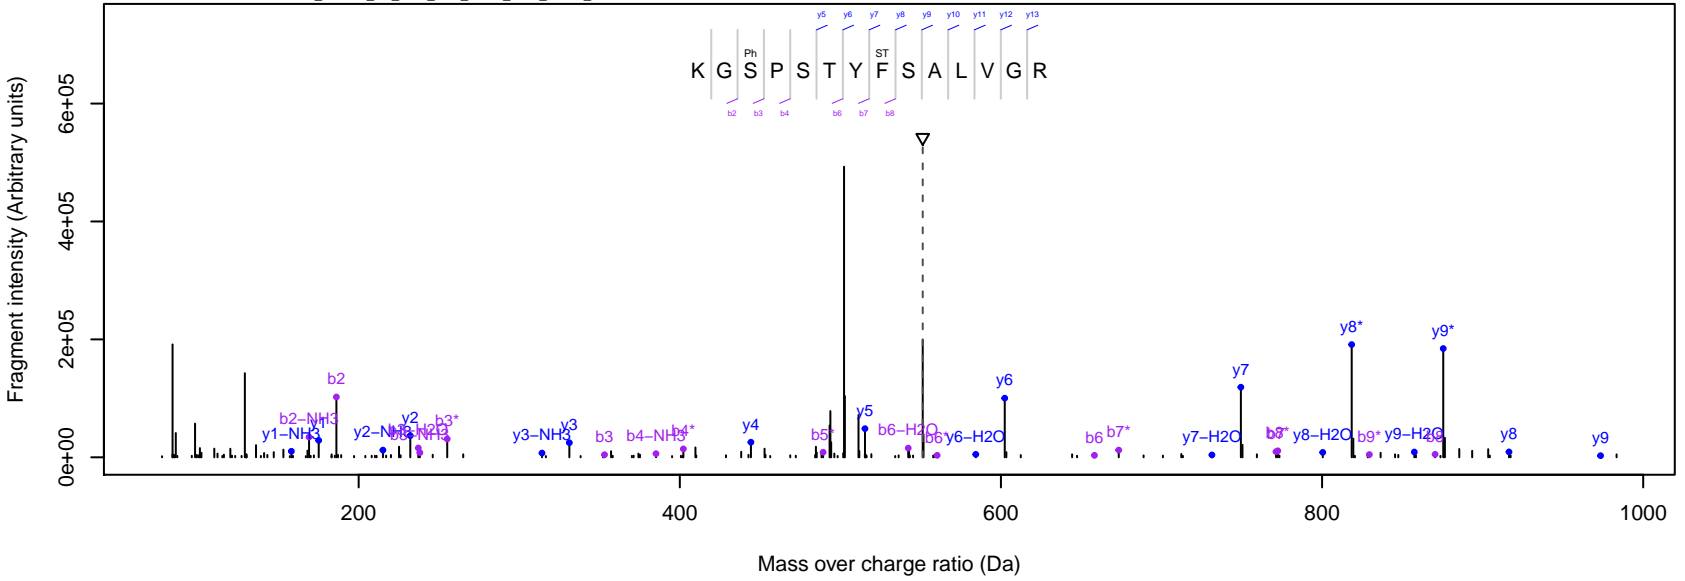

RVTQHES(Phospho (STY))DNENEIQINK-3+

Source : QE3\_201126\_FR\_TiOx\_hum\_tissue\_Urea\_RNAB\_N Scan : 9166

Andromeda score : 199.89

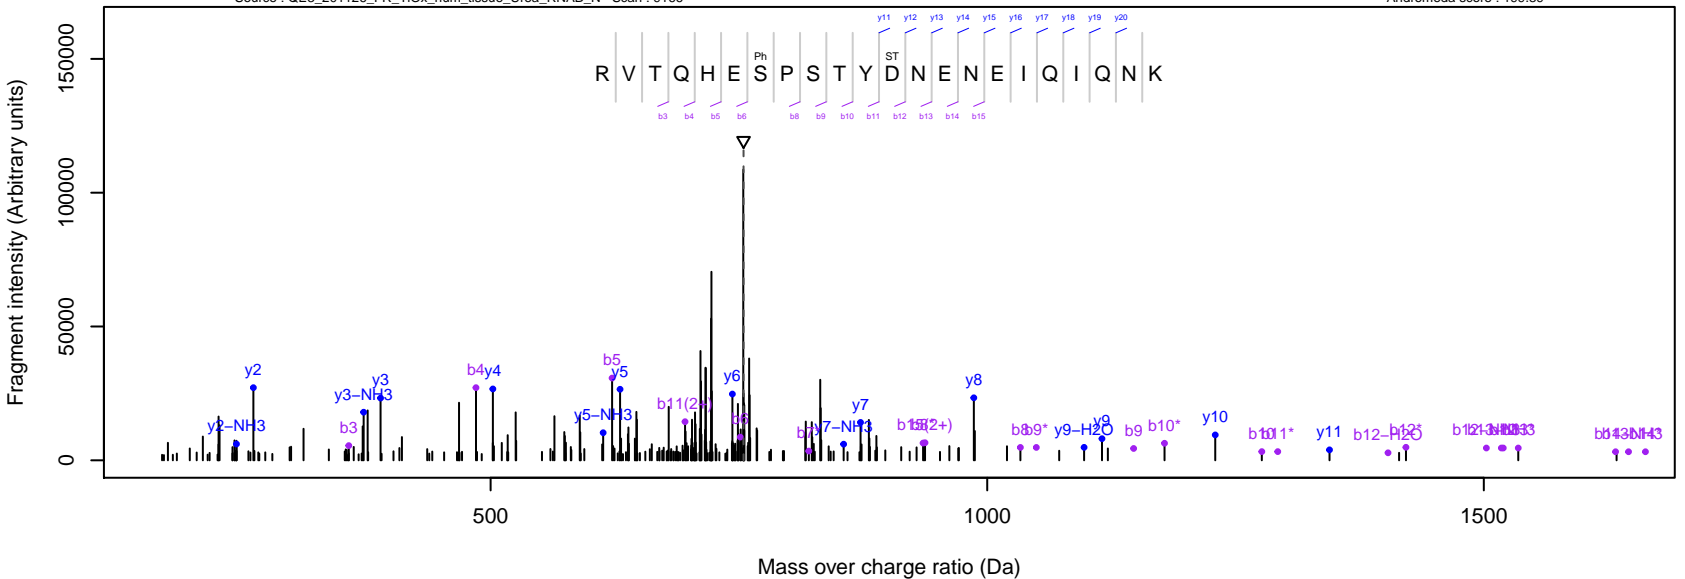

KSS(Phospho (STY))LLSEEQQETSTLVETIR-3+

Source : QE3\_201126\_FR\_TiOx\_hum\_tissue\_Urea\_RNAB\_B Scan : 45119

Andromeda score : 199.85

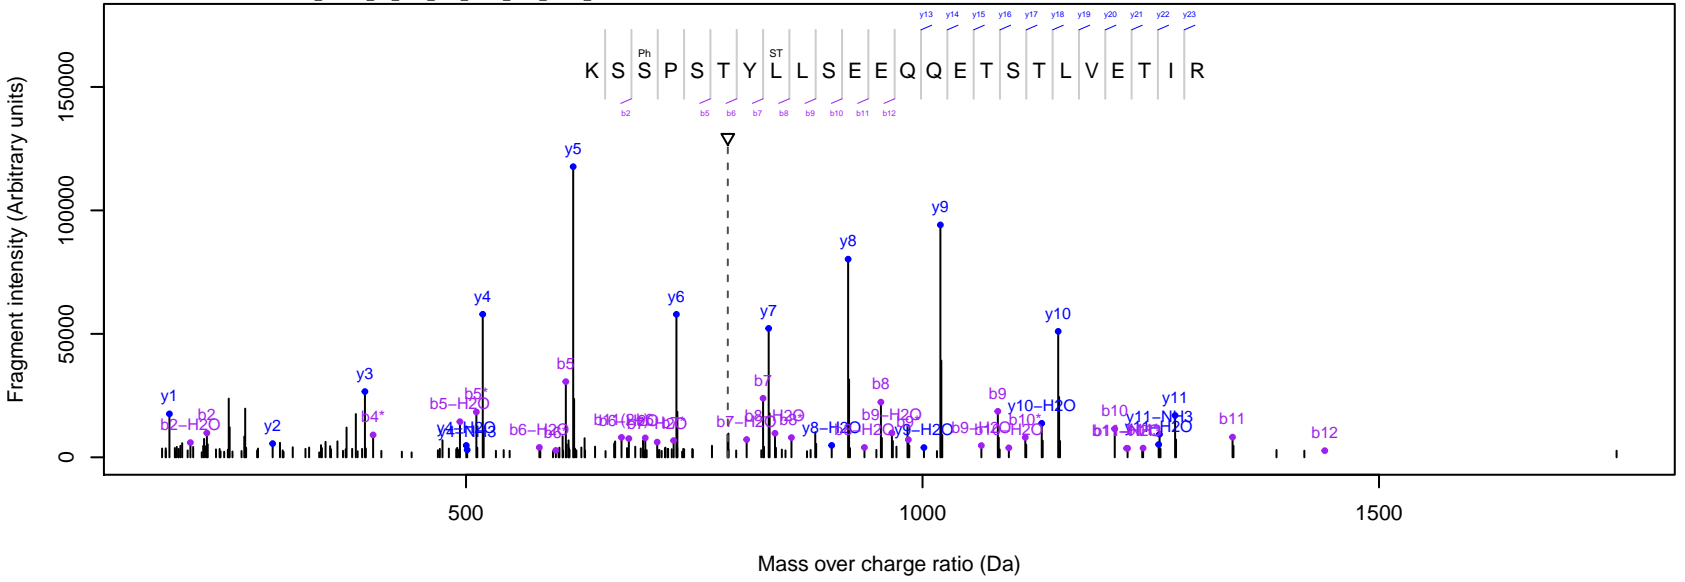

AVQQHQHGYDS(Phospho (STY))DEEVDSSELGTWEHQLR-4+

Source : QE3\_201126\_FR\_TiOx\_hum\_tissue\_Urea\_RNAB\_H Scan : 33039

Andromeda score : 199.8

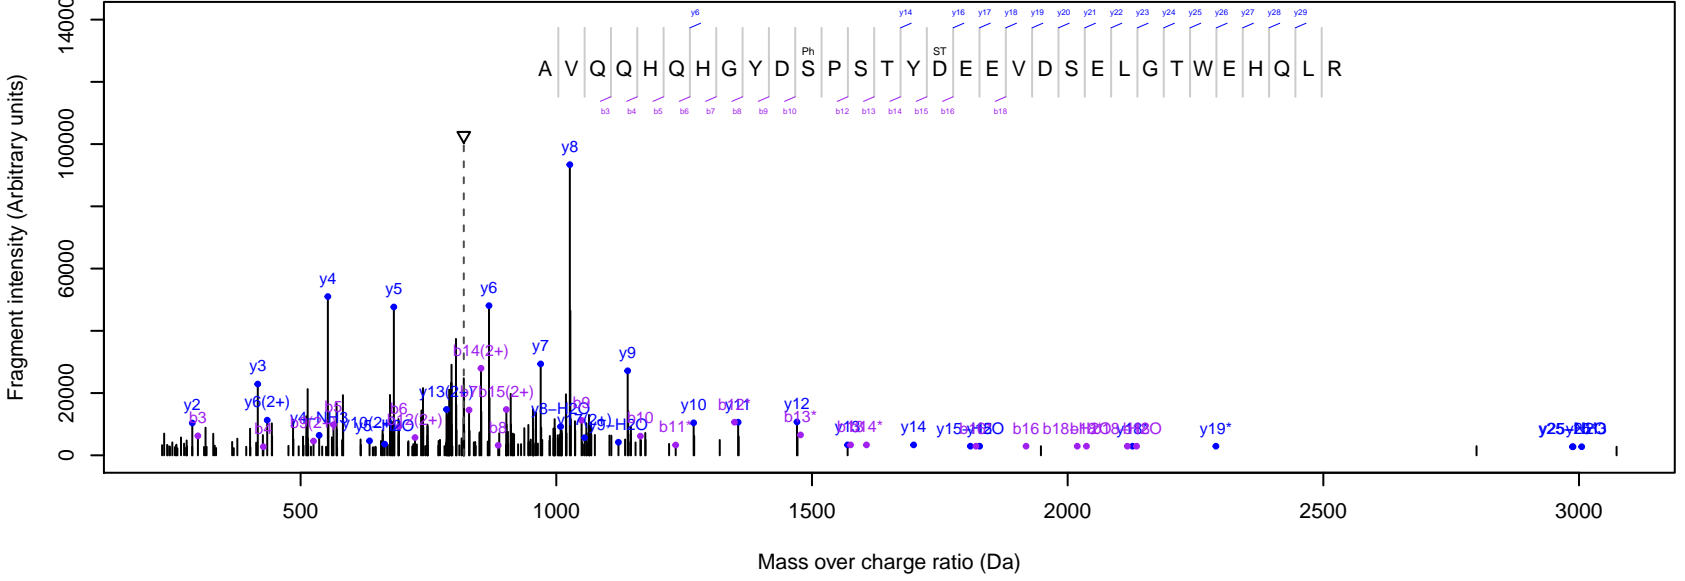

M(Oxidation (M))LPHAPGVQMQAIPEDAVHEHDS(Phospho (STY))GDEGEDPKR-3+

Source : QE3\_201126\_FR\_TiOx\_hum\_tissue\_Urea\_RNAB\_N Scan : 27622

Andromeda score : 199.78

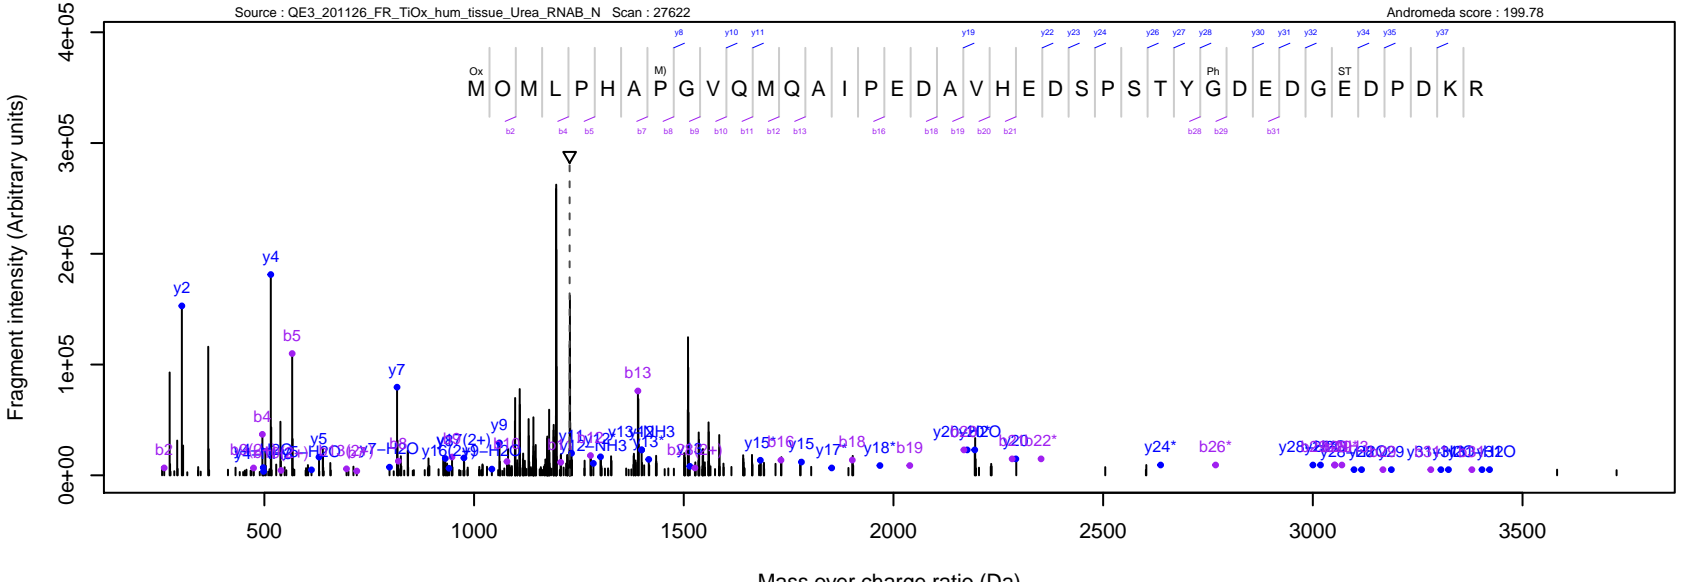

TFQQIQEEEDDDYPGSSYS(Phospho (STY))PQDPSAGPLLTEELIK-3+

Source : QE3\_201126\_FR\_TIOx\_hum\_tissue\_Urea\_RNAB\_N Scan : 58346

Andromeda score : 199.78

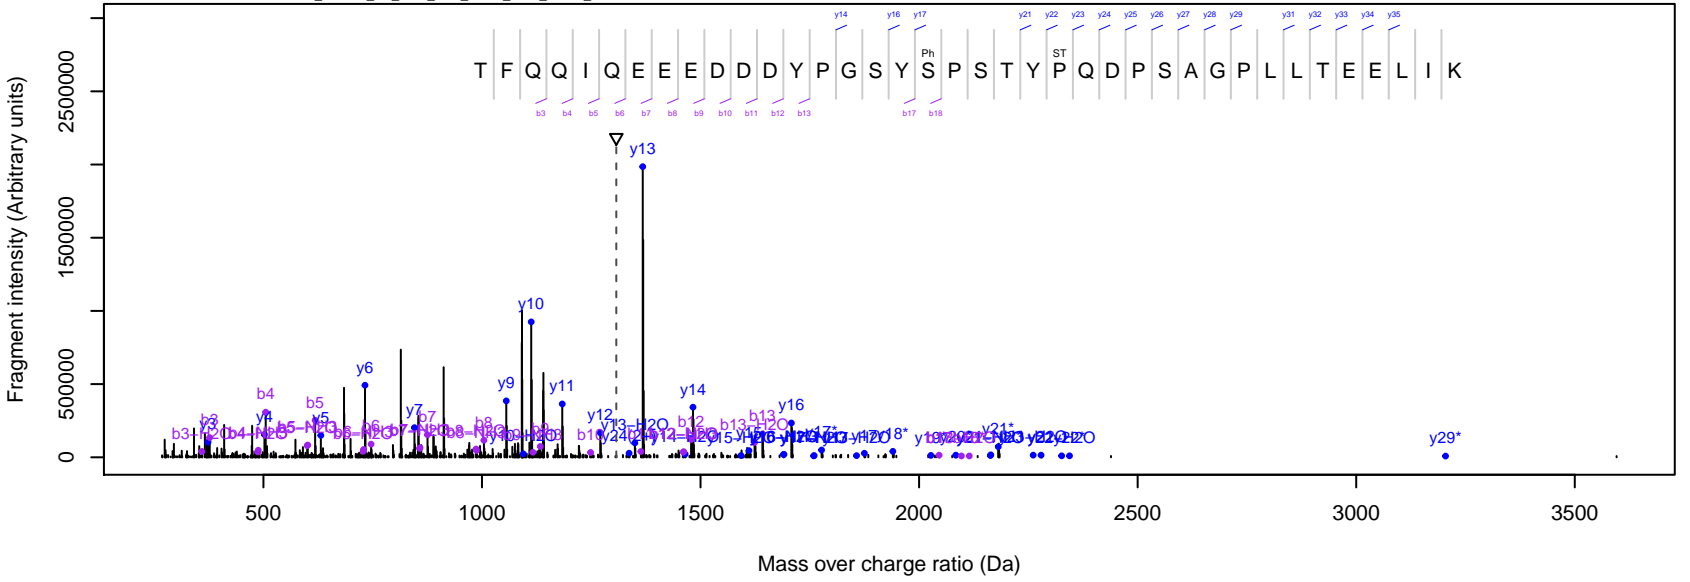

DSHS(Phospho (STY))SEEDASSQTDLSTISK-2+

Source : QE3\_201126\_FR\_TIOx\_hum\_tissue\_Urea\_RNAB\_H Scan : 20009

Andromeda score : 199.7

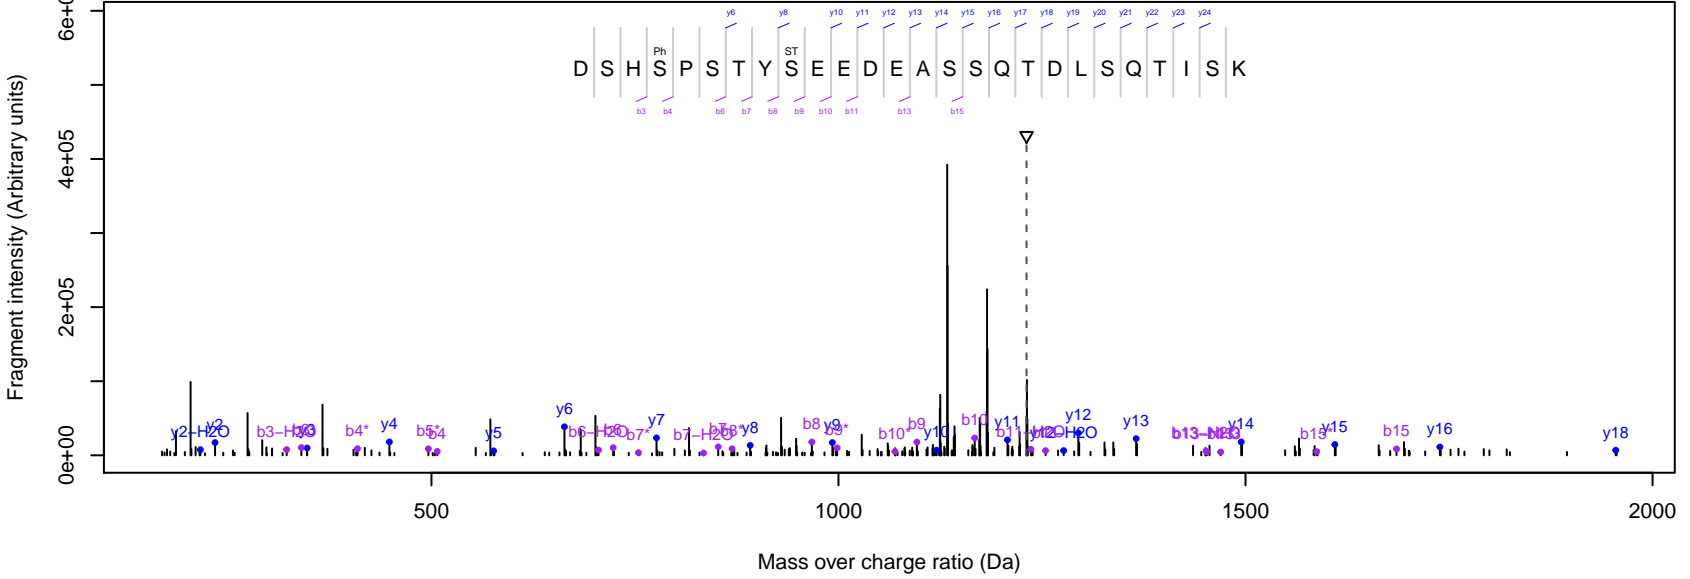

YHGHS(Phospho (STY))MSDPGVS(Phospho (STY))YR-2+

Source : QE3\_201126\_FR\_TIOx\_hum\_tissue\_Urea\_RNAB\_H Scan : 13293

Andromeda score : 199.65

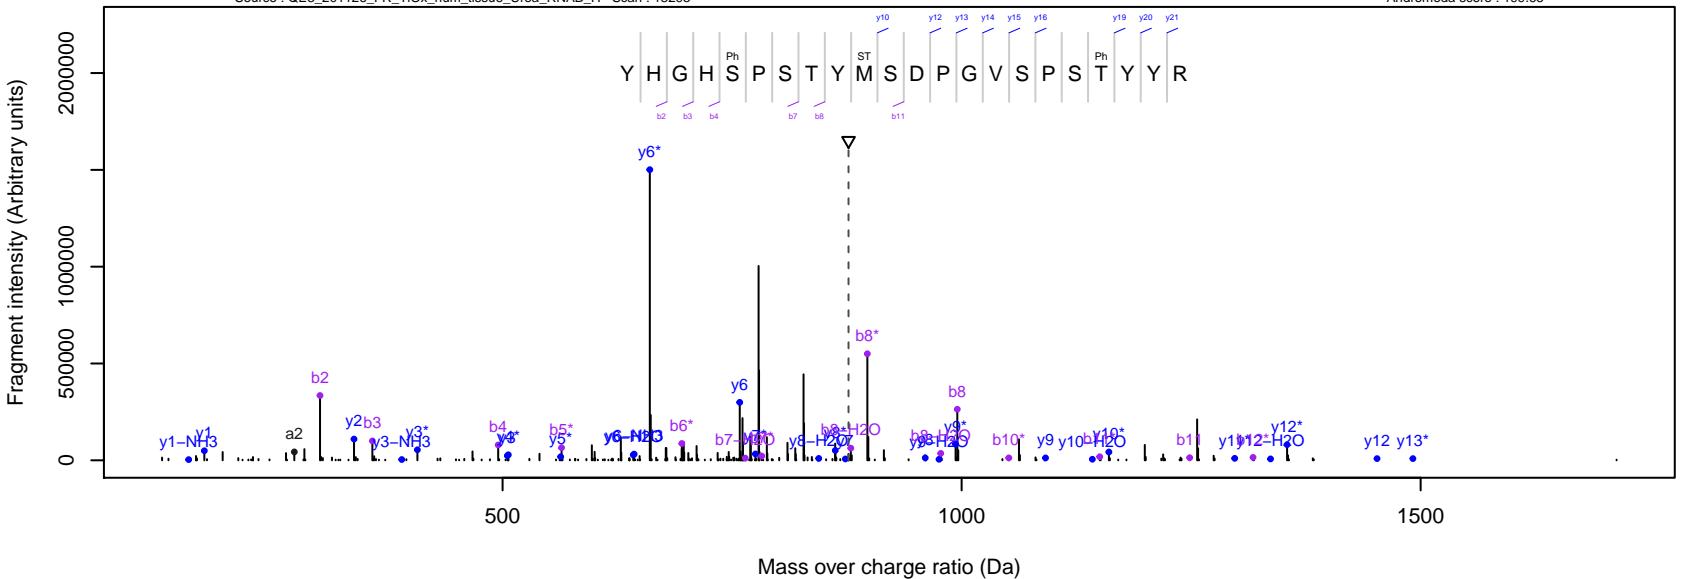

APEPLGPADQSELGPEQLAEVGES(Phospho (STY))S(Phospho (STY))DEEPVESR-3+

Source : QE3\_201126\_FR\_TiOx\_hum\_tissue\_Urea\_RNAB\_N Scan : 55340

Andromeda score : 199.53

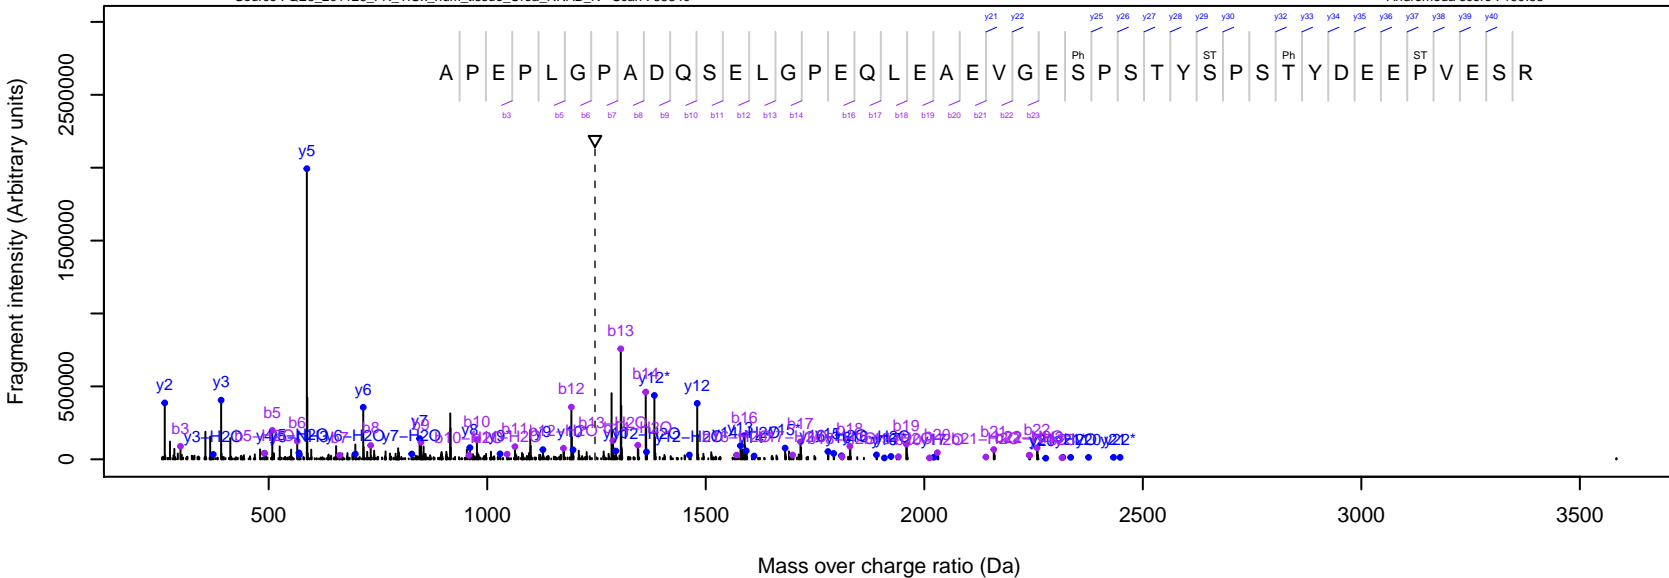

ETNLDS(Phospho (STY))LPLVDTHSKR-2+

Source : QE3\_201126\_FR\_TiOx\_hum\_tissue\_Urea\_RNAB\_N Scan : 26524

Andromeda score : 199.49

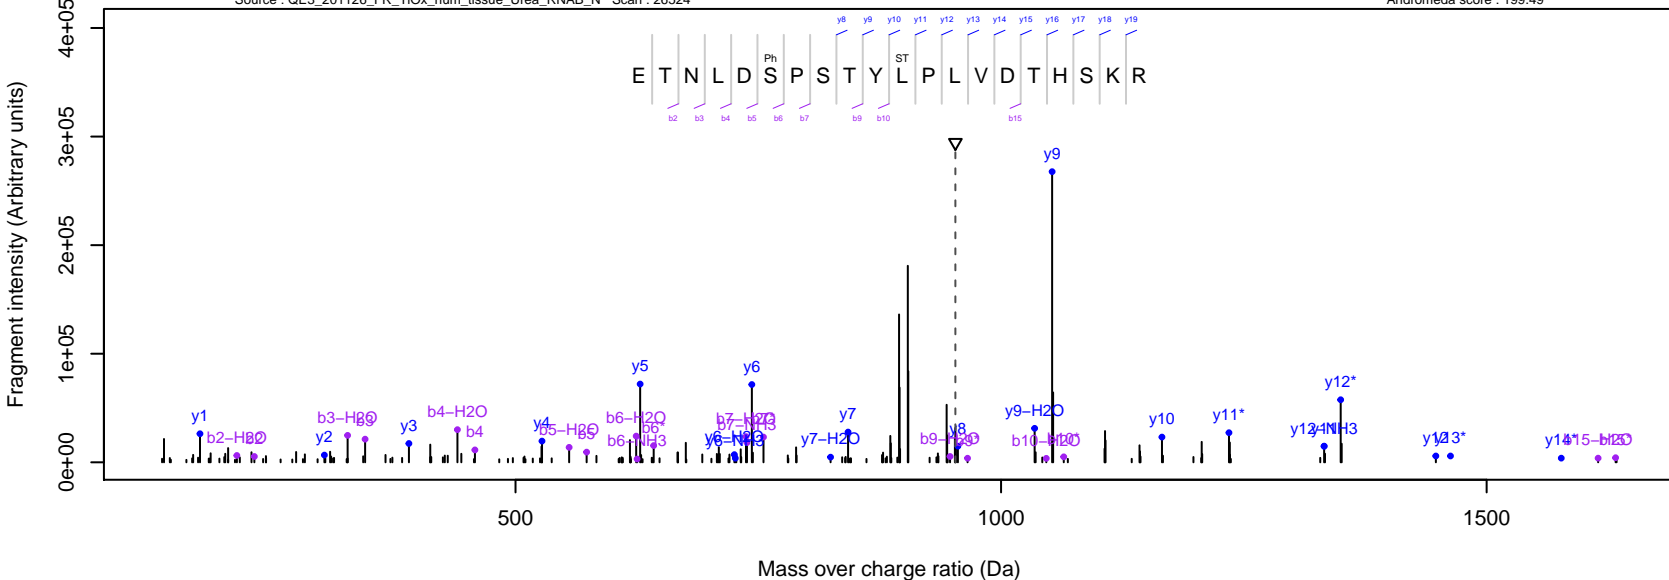

QFIAAQLNPASGHGTPASSPSSSS(Phospho (STY))LPSPM(Oxidation (M))SPTPR-3+

Source : QE3\_201126\_FR\_TiOx\_hum\_tissue\_Urea\_RNAB\_H Scan : 31719

Andromeda score : 199.47

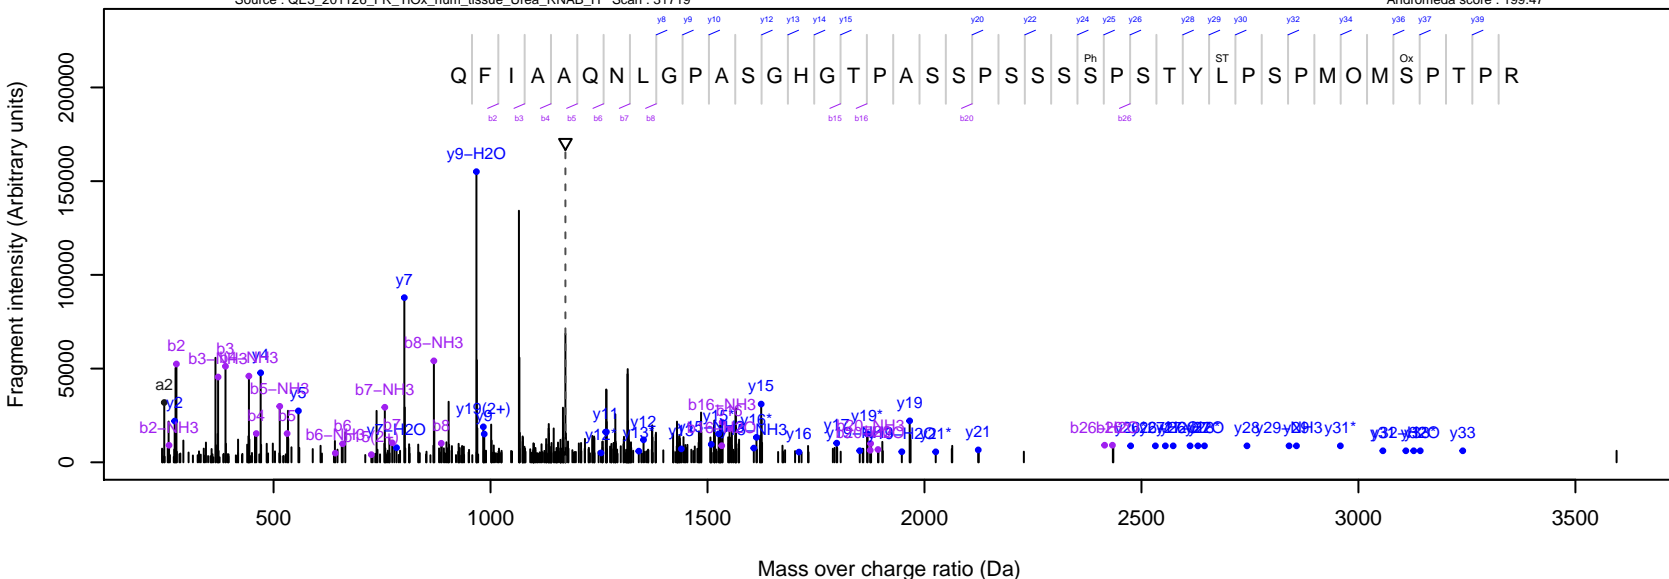



KYIEIDS(Phospho (STY))DEEPRGELLSLR-3+

Source : QE3\_201126\_FR\_TiOx\_hum\_tissue\_Urea\_RNAB\_N Scan : 36940

Andromeda score : 199.46

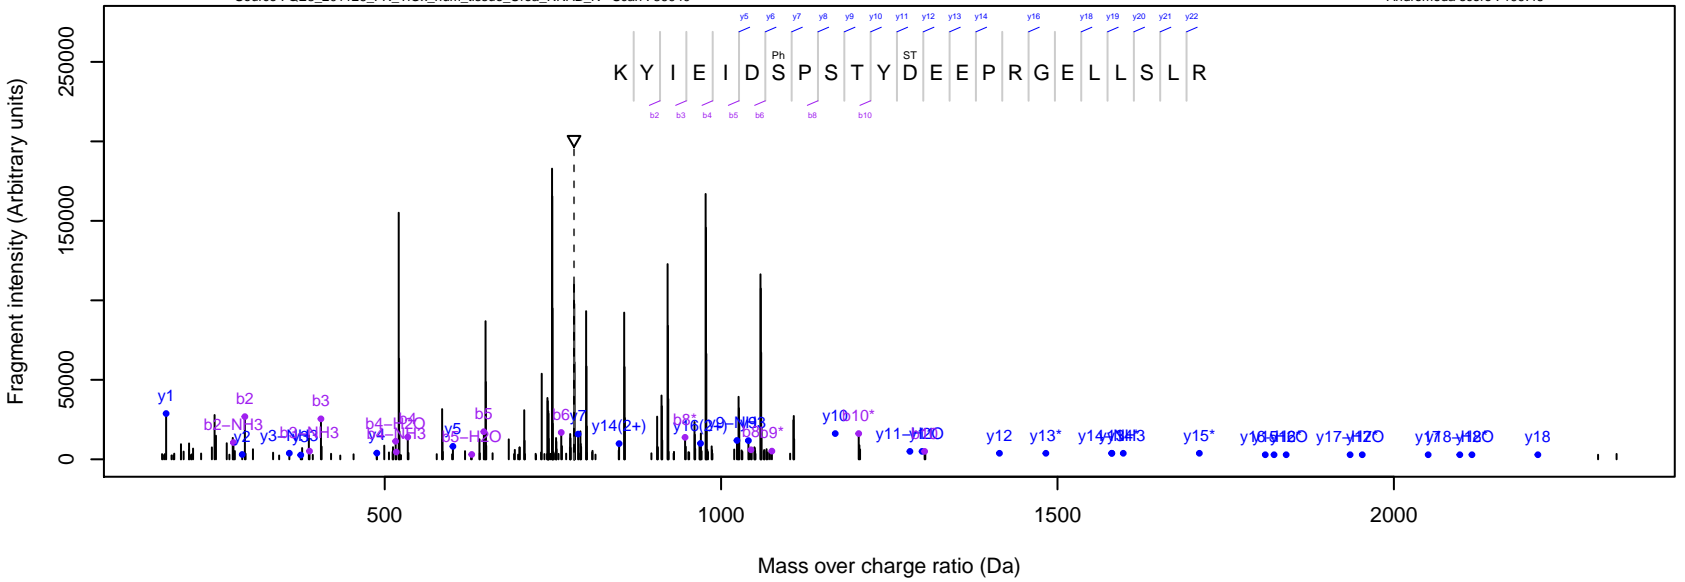

RIS(Phospho (STY))IVENCFGAAGQLTIPGR-3+

Source : QE3\_201126\_FR\_TiOx\_hum\_tissue\_Urea\_RNAB\_N Scan : 44698

Andromeda score : 199.31

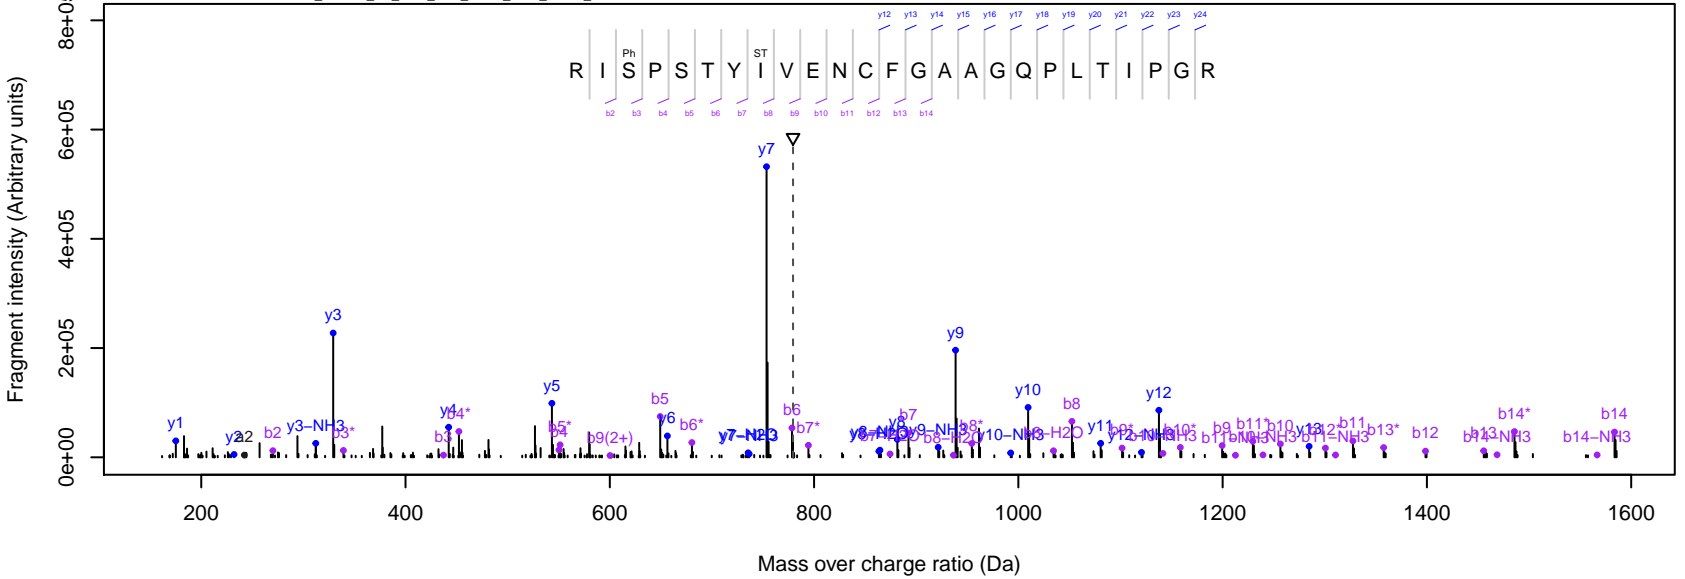

EPWDGRDGLPVEDDIDLS(Phospho (STY))DVELDDLKDEL-3+

Source : QE3\_201126\_FR\_TiOx\_hum\_tissue\_Urea\_RNAB\_N Scan : 60895

Andromeda score : 199.26

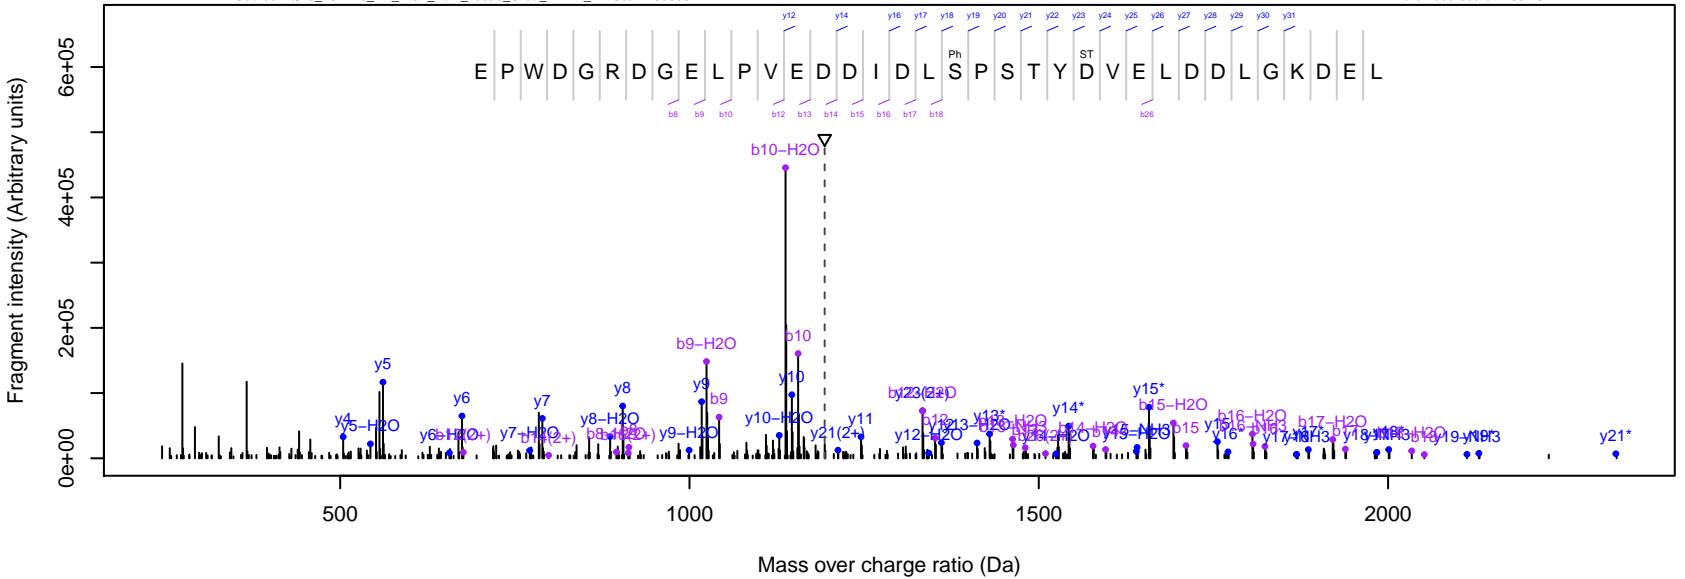

KSPSDVKPLPSPD TDVPLSS(Phospho (STY))VEIENPETS DQ-3+

Source : QE3\_201126\_FR\_TiOx\_hum\_tissue\_Urea\_RNAB\_N Scan : 41133

Andromeda score : 199.21

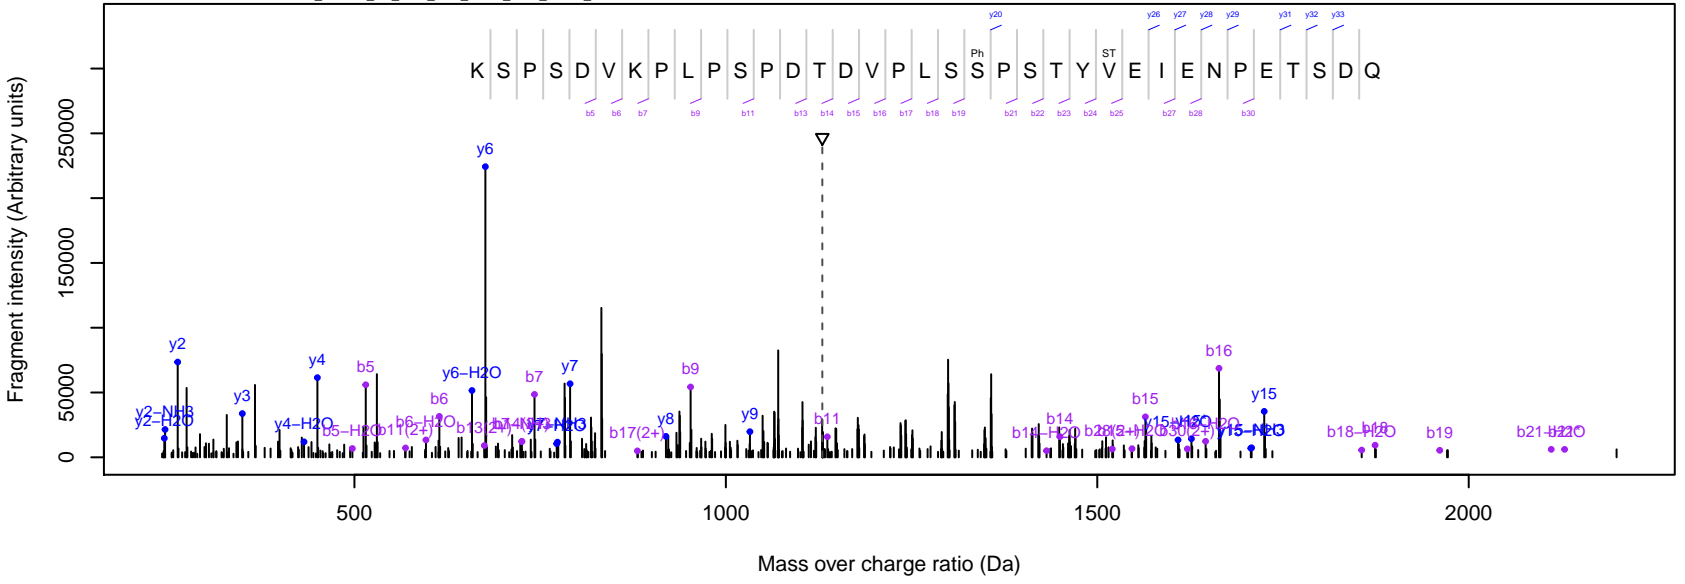

SSS(Phospho (STY))PVTELASRS(Phospho (STY))PIRQDR-3+

Source : QE3\_201126\_FR\_TiOx\_hum\_tissue\_Urea\_RNAB\_H Scan : 20187

Andromeda score : 199.17

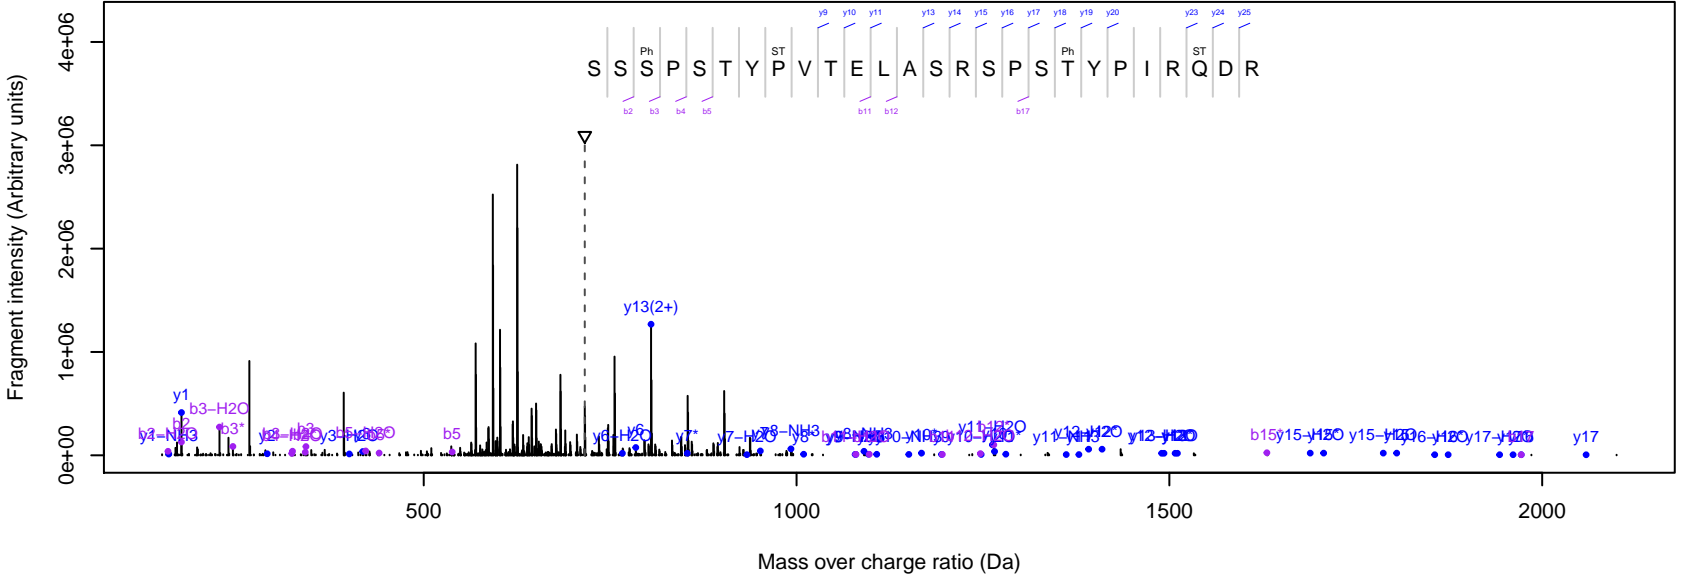

FSFRS(Phospho (STY))QEDLNEPIKR-3+

Source : QE3\_201126\_FR\_TiOx\_hum\_tissue\_Urea\_RNAB\_N Scan : 23182

Andromeda score : 199.12

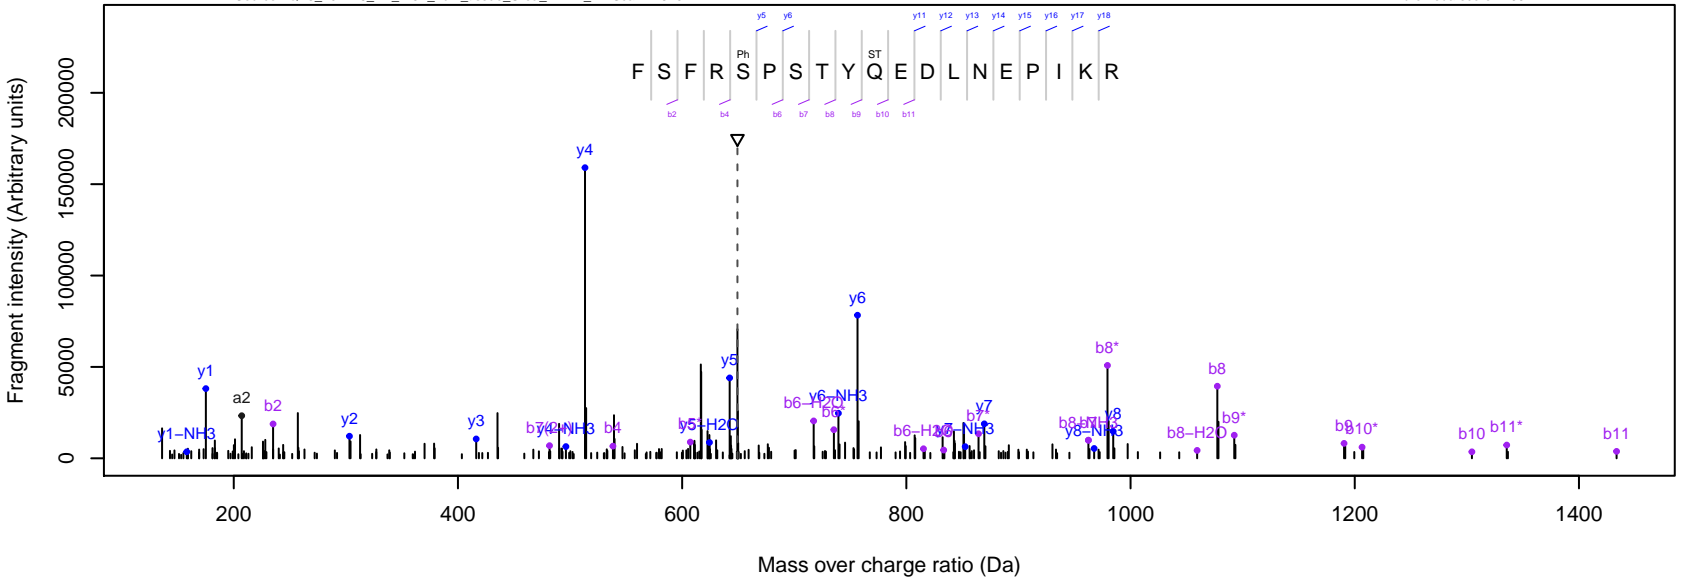

AKTQT(Phospho (STY))PPVS(Phospho (STY))PAPQPTEERLPS(Phospho (STY))SPVYEDAASF<sup>3+</sup>

Source : QE3\_201126\_FR\_TIOx\_hum\_tissue\_Urea\_RNAB\_H Scan : 39851

Andromeda score : 199.1

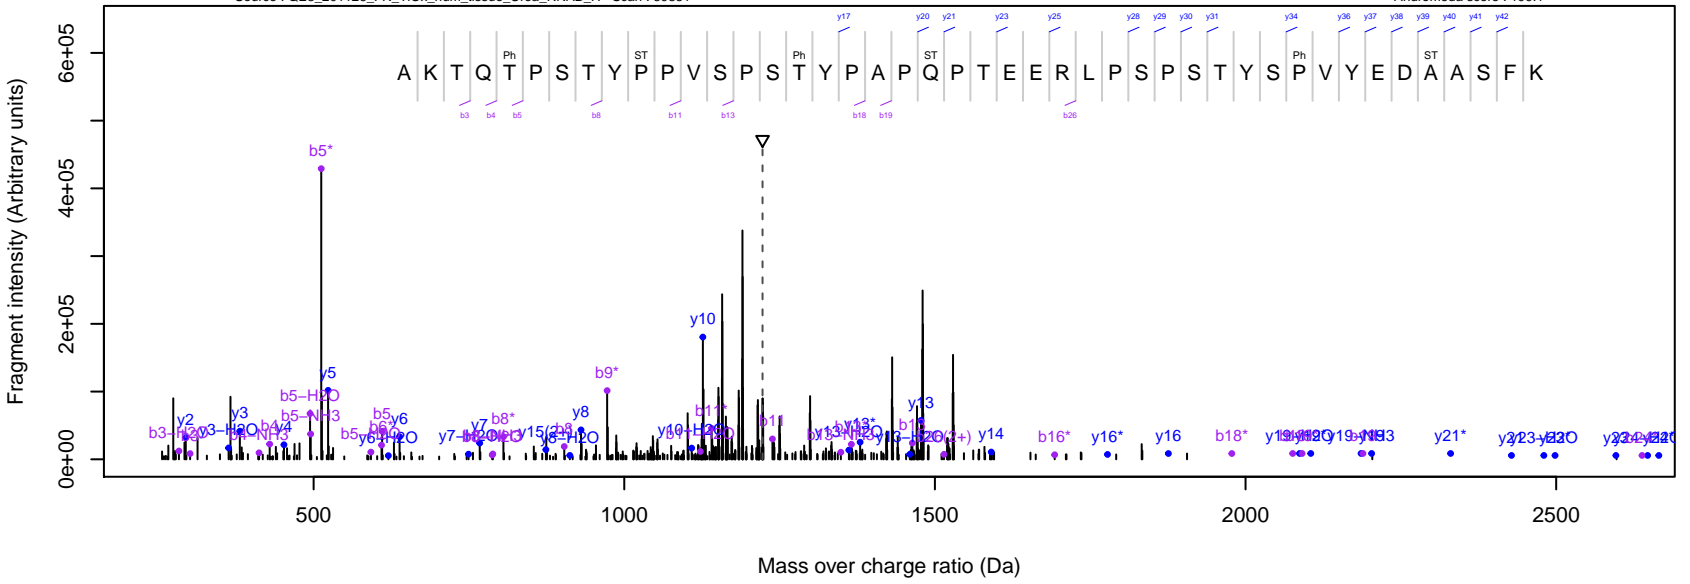

IHQDS(Phospho (STY))ES(Phospho (STY))GDELSSSSTEQIR<sup>2+</sup>

Source : QE3\_201126\_FR\_TIOx\_hum\_tissue\_Urea\_RNAB\_H Scan : 19300

Andromeda score : 199.04

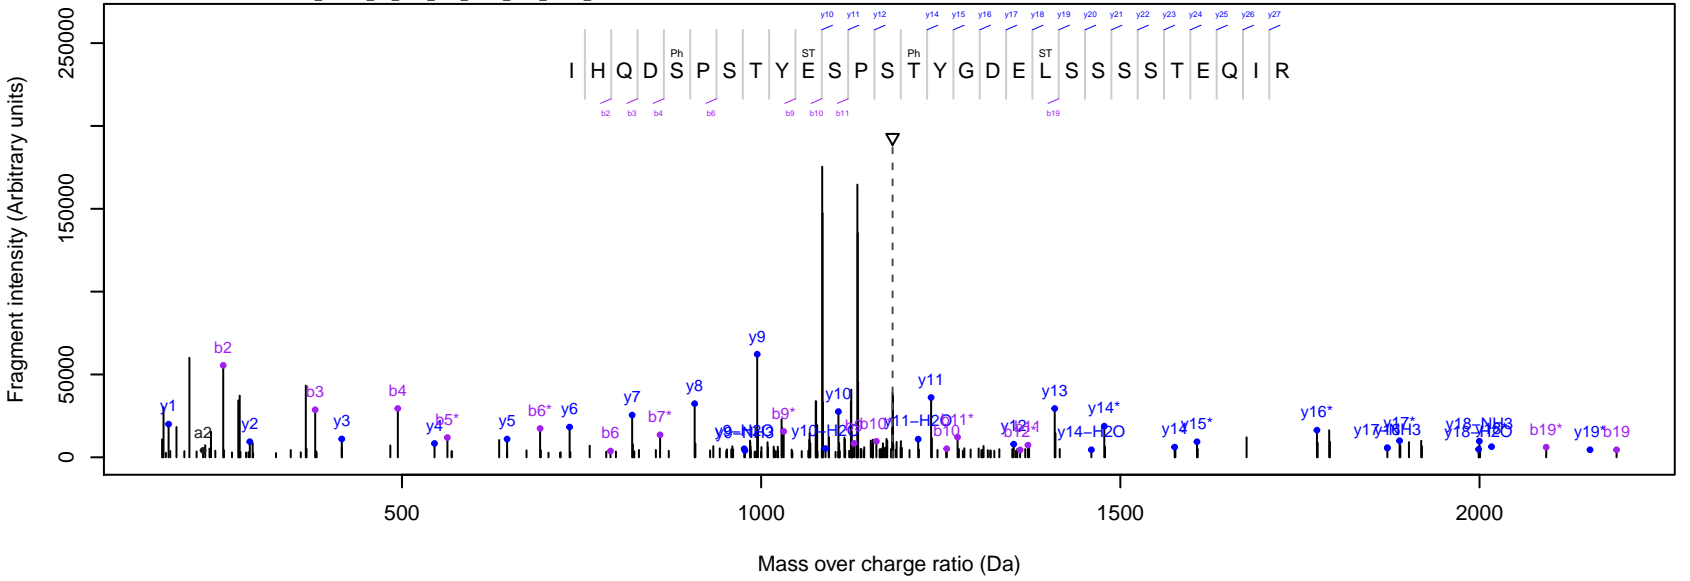

NS(Phospho (STY))RDGDPLPSSLCK<sup>2+</sup>

Source : QE3\_201126\_FR\_TIOx\_hum\_tissue\_Urea\_RNAB\_H Scan : 19457

Andromeda score : 198.95

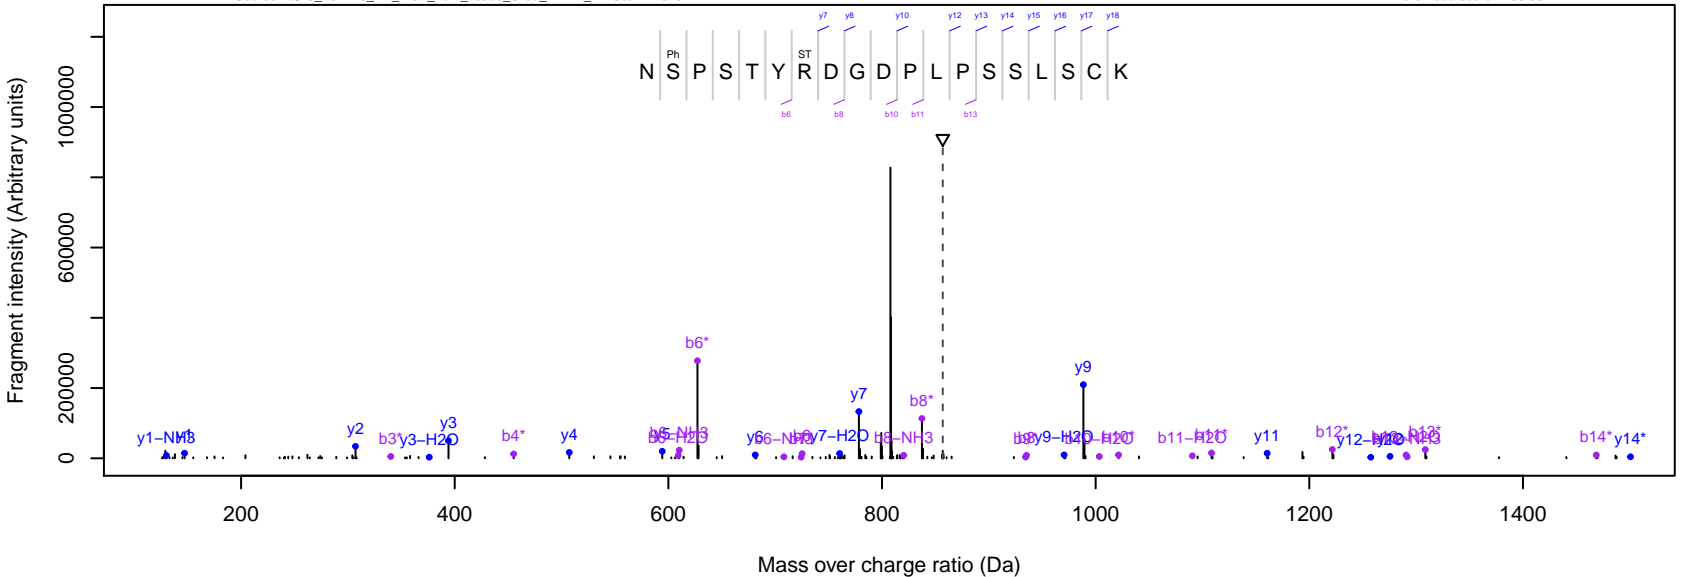

VGS(Phospho (STY))LDNVGHLPAAGGAVK-2+

Source : QE3\_201126\_FR\_TiOx\_hum\_tissue\_Urea\_RNAB\_H Scan : 23964

Andromeda score : 198.85

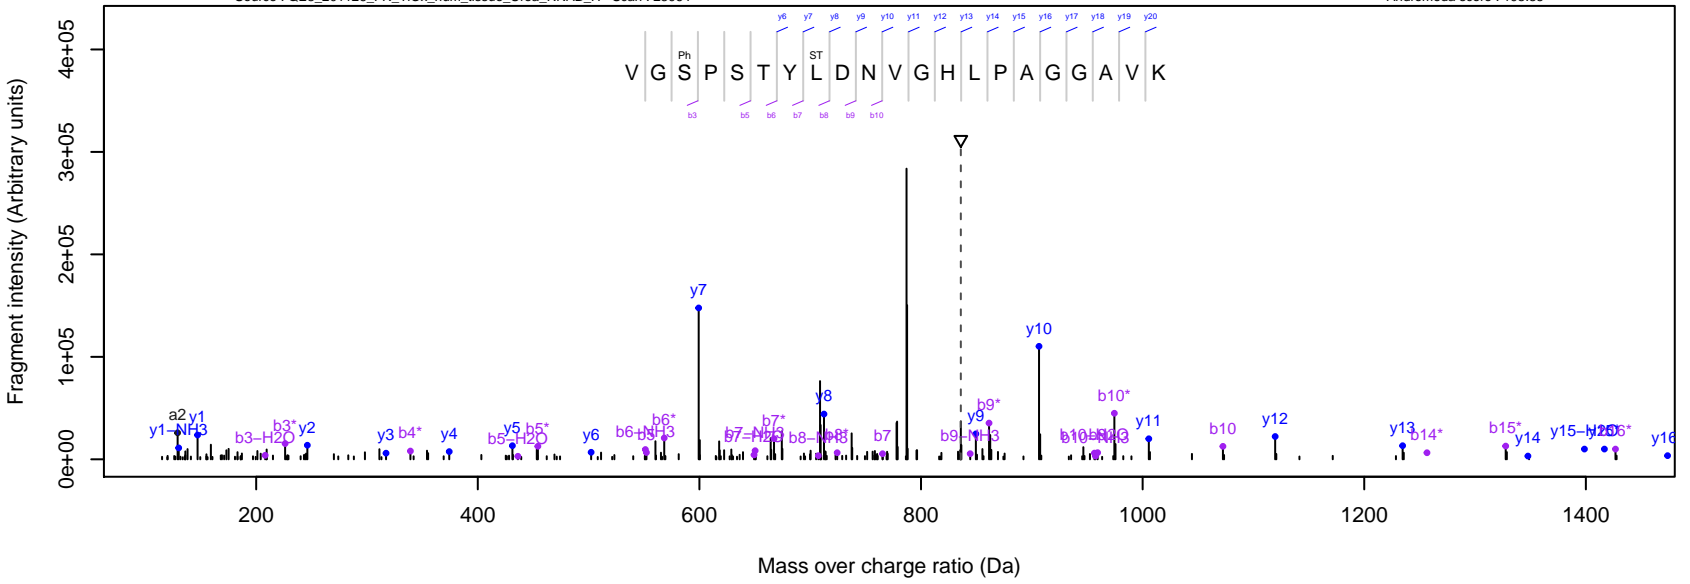

SFLQS(Phospho (STY))LECLR-2+

Source : QE3\_201126\_FR\_TiOx\_hum\_tissue\_Urea\_RNAB\_H Scan : 52403

Andromeda score : 198.81

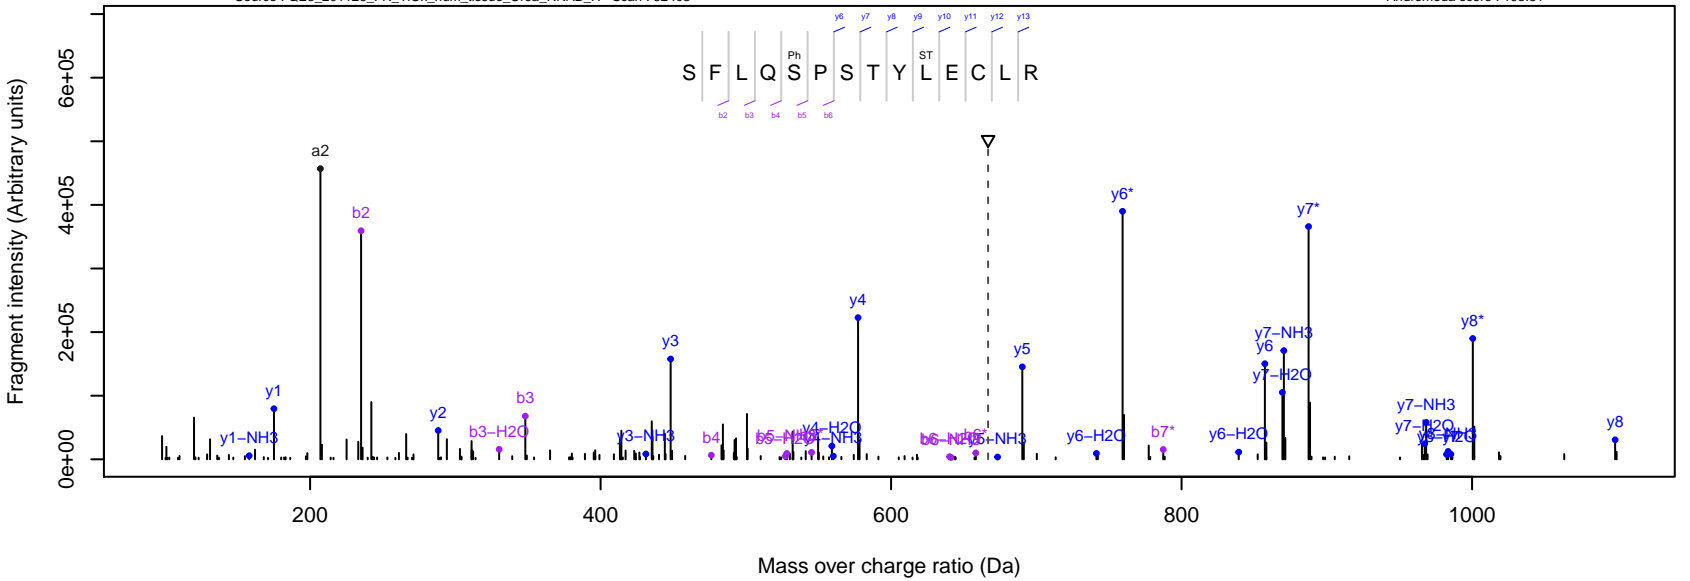

T(Phospho (STY))STSPPEKSGDEGESEAPSGED-2+

Source : QE3\_201126\_FR\_TiOx\_hum\_tissue\_Urea\_RNAB\_N Scan : 11756

Andromeda score : 198.76

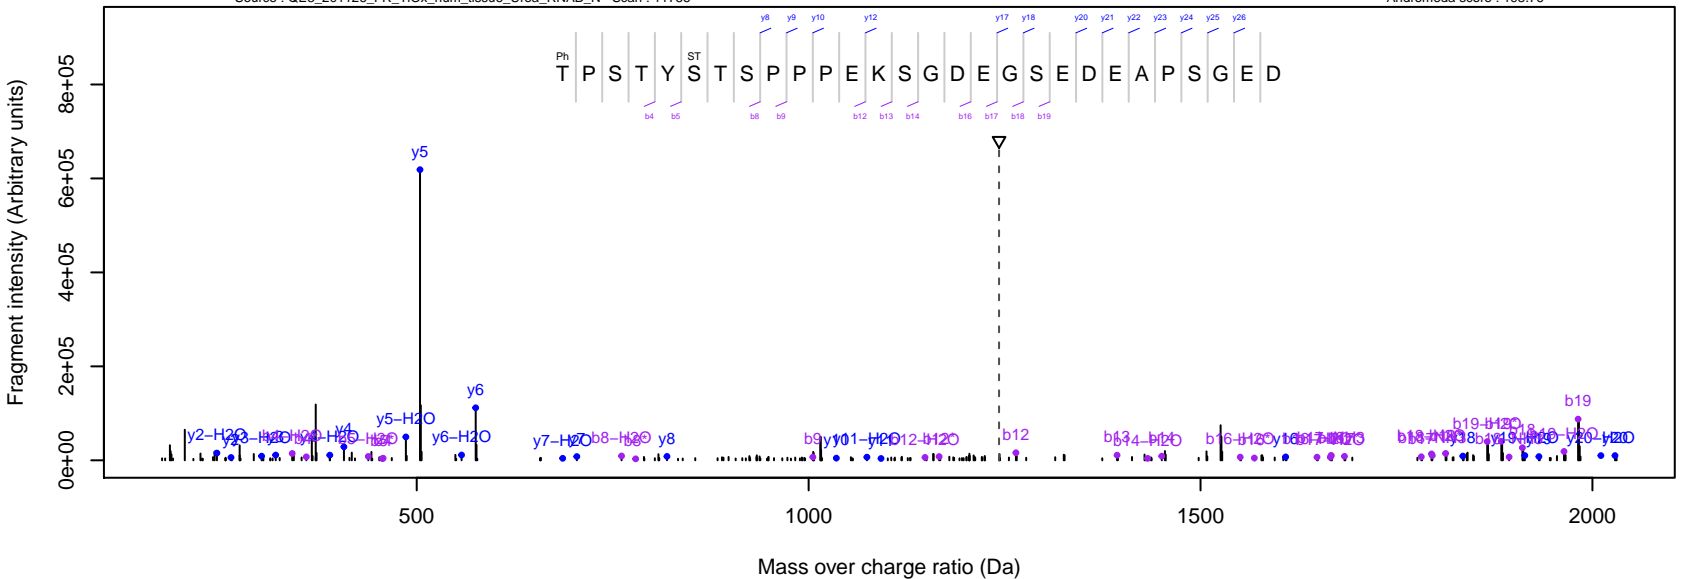



SDEEEDS(Phospho (STY))DFGEEQRDCYLK-3+

Source : QE3\_201126\_FR\_TiOx\_hum\_tissue\_Urea\_RNAB\_N Scan : 25079

Andromeda score : 198.64

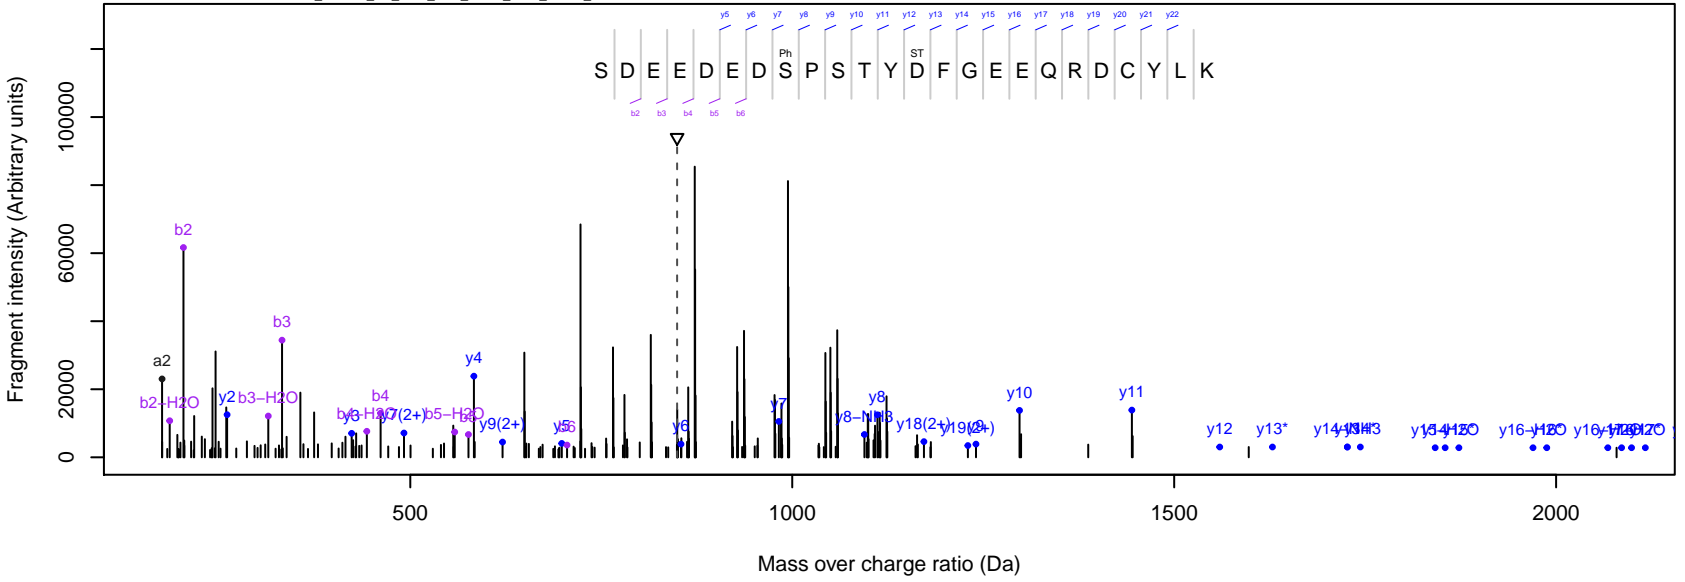

AKEVELVS(Phospho (STY))E-2+

Source : QE3\_201126\_FR\_TiOx\_hum\_tissue\_Urea\_RNAB\_H Scan : 17820

Andromeda score : 198.62

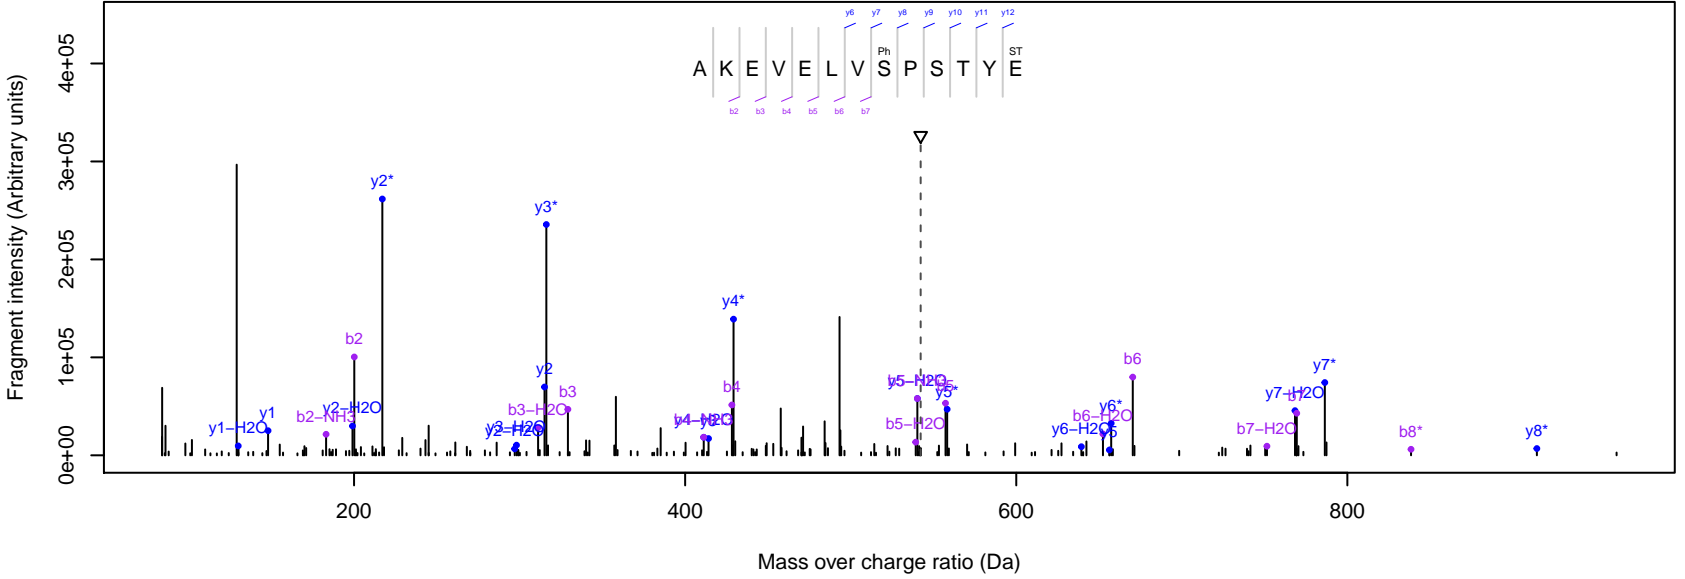

GS(Phospho (STY))VSDEEMELR-2+

Source : QE3\_201126\_FR\_TiOx\_hum\_tissue\_Urea\_RNAB\_N Scan : 32348

Andromeda score : 198.57

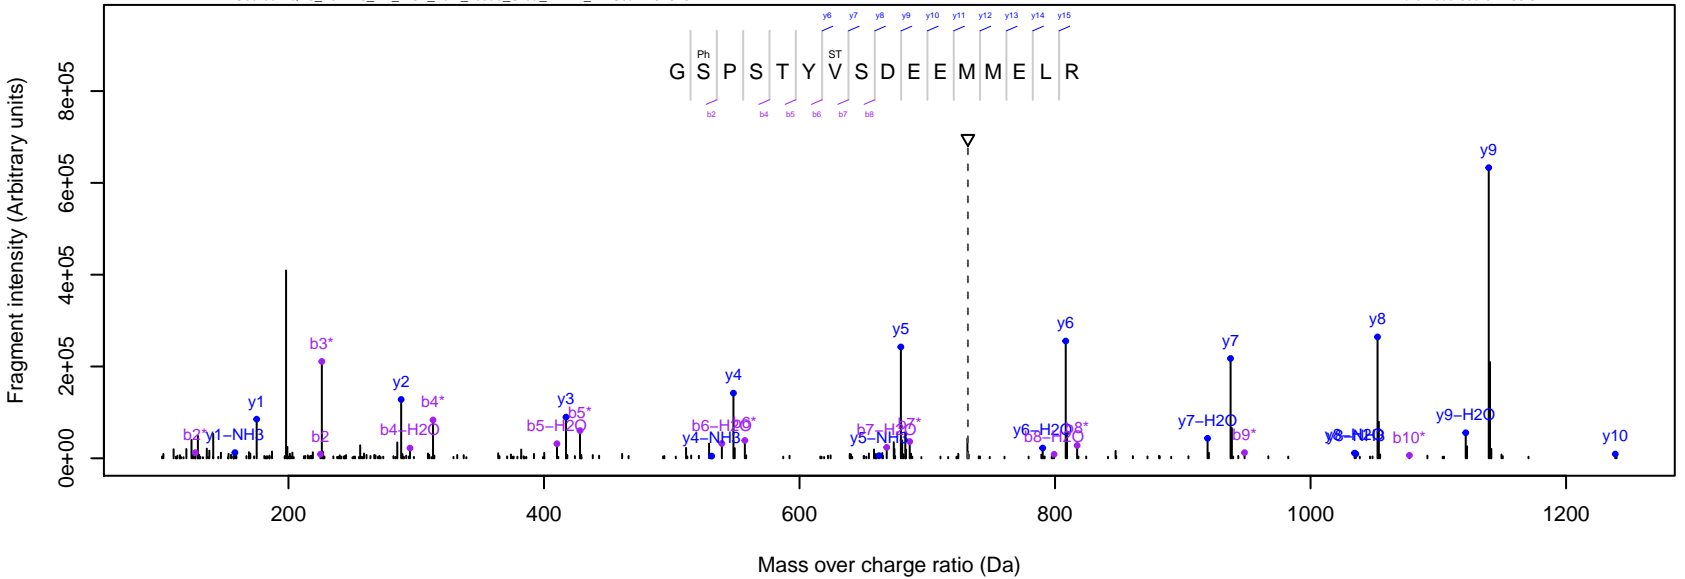

M(Oxidation (M))GGAGGEGS(Phospho (STY))DDDTSLT-2+

Source : QE3\_201126\_FR\_TiOx\_hum\_tissue\_Urea\_RNAB\_N Scan : 18728

Andromeda score : 198.57

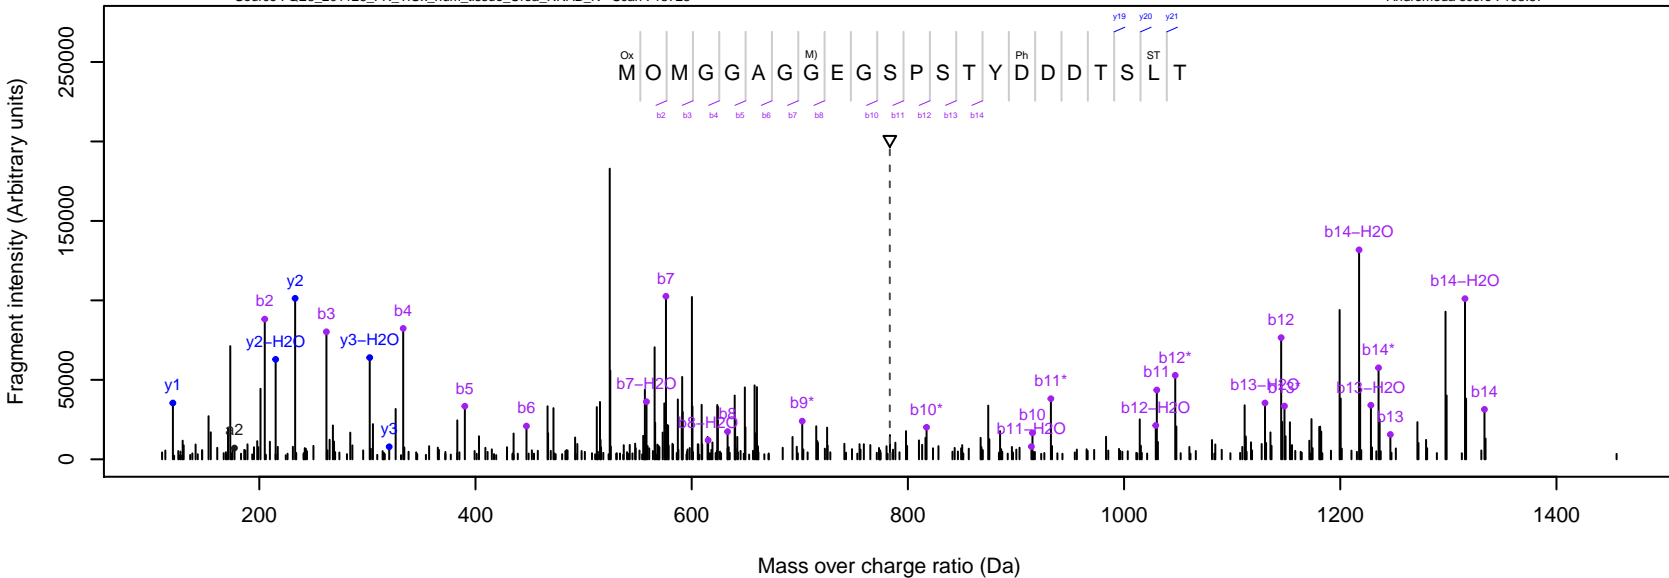

YNTEGRVS(Phospho (STY))PSPSQESLSSK-3+

Source : QE3\_201126\_FR\_TiOx\_hum\_tissue\_Urea\_RNAB\_H Scan : 13426

Andromeda score : 198.56

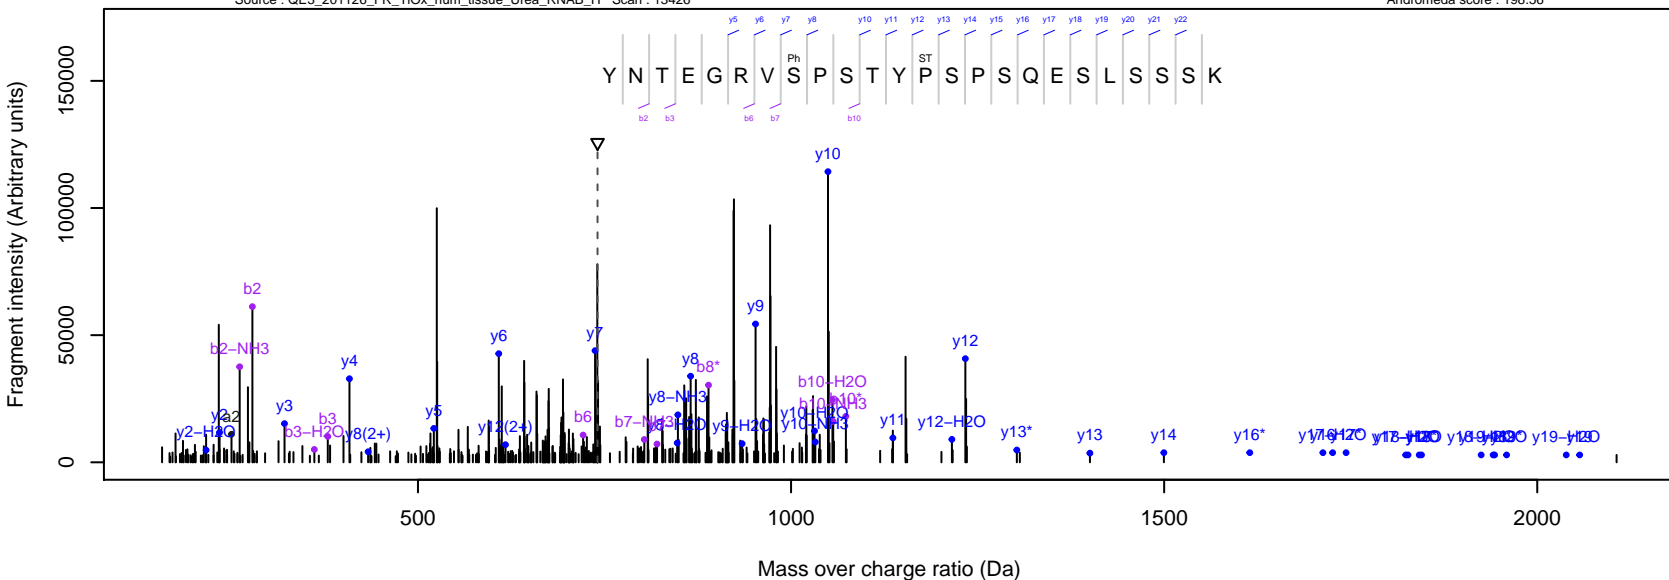

ADPGEDDLGGTVDIVES(Phospho (STY))EPENDHGVELLQNSSIR-3+

Source : QE3\_201126\_FR\_TiOx\_hum\_tissue\_Urea\_RNAB\_H Scan : 48176

Andromeda score : 198.52

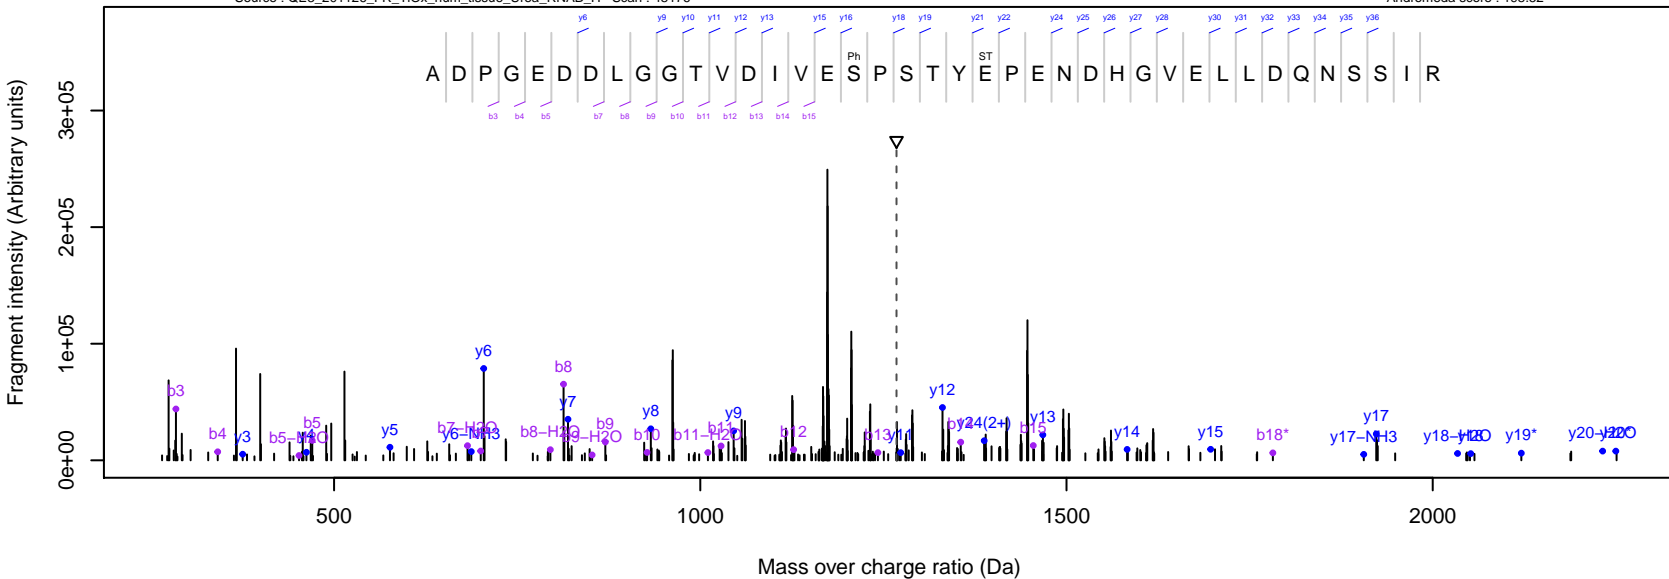

QAS(Phospho (STY))LEQANSFPR-2+

Source : QE3\_201126\_FR\_TiOx\_hum\_tissue\_Urea\_RNAB\_B Scan : 22807

Andromeda score : 198.52

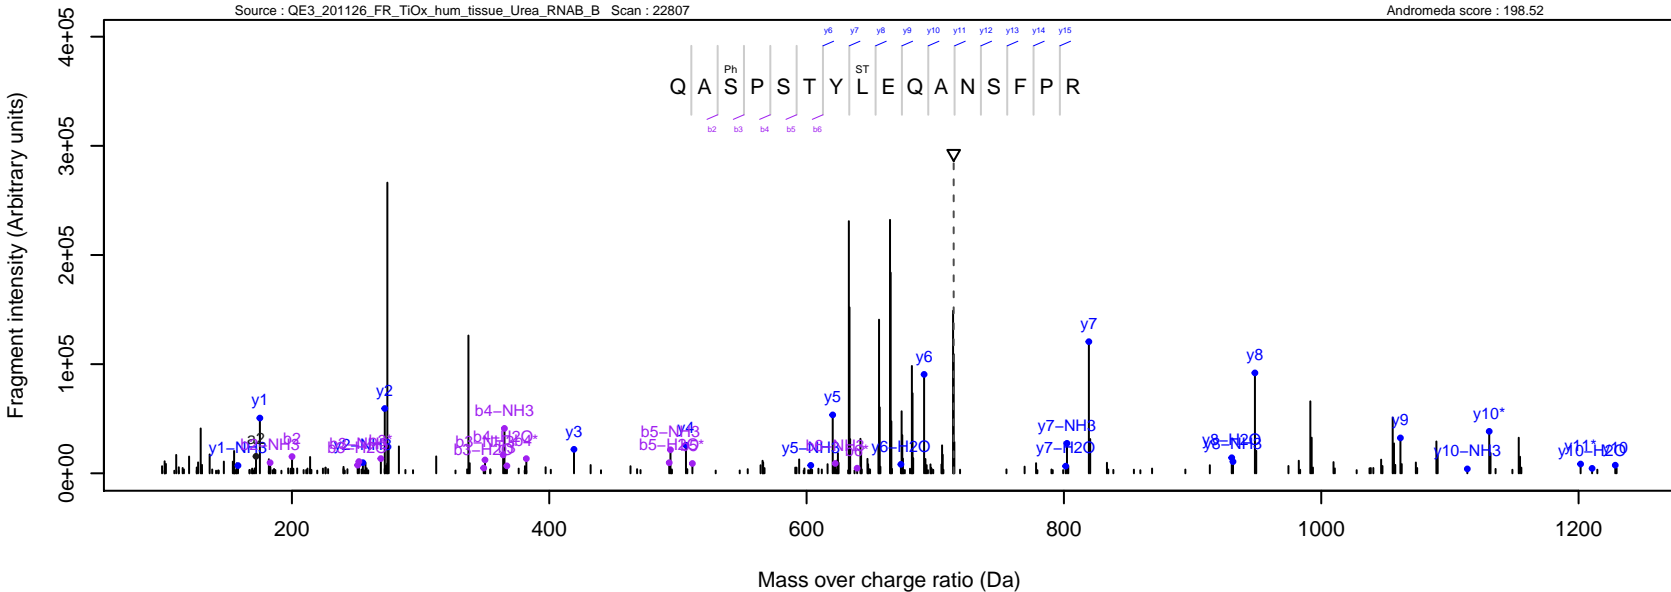

RPPS(Phospho (STY))PEPSTK-2+

Source : QE3\_201126\_FR\_TiOx\_hum\_tissue\_Urea\_RNAB\_H Scan : 3838

Andromeda score : 198.52

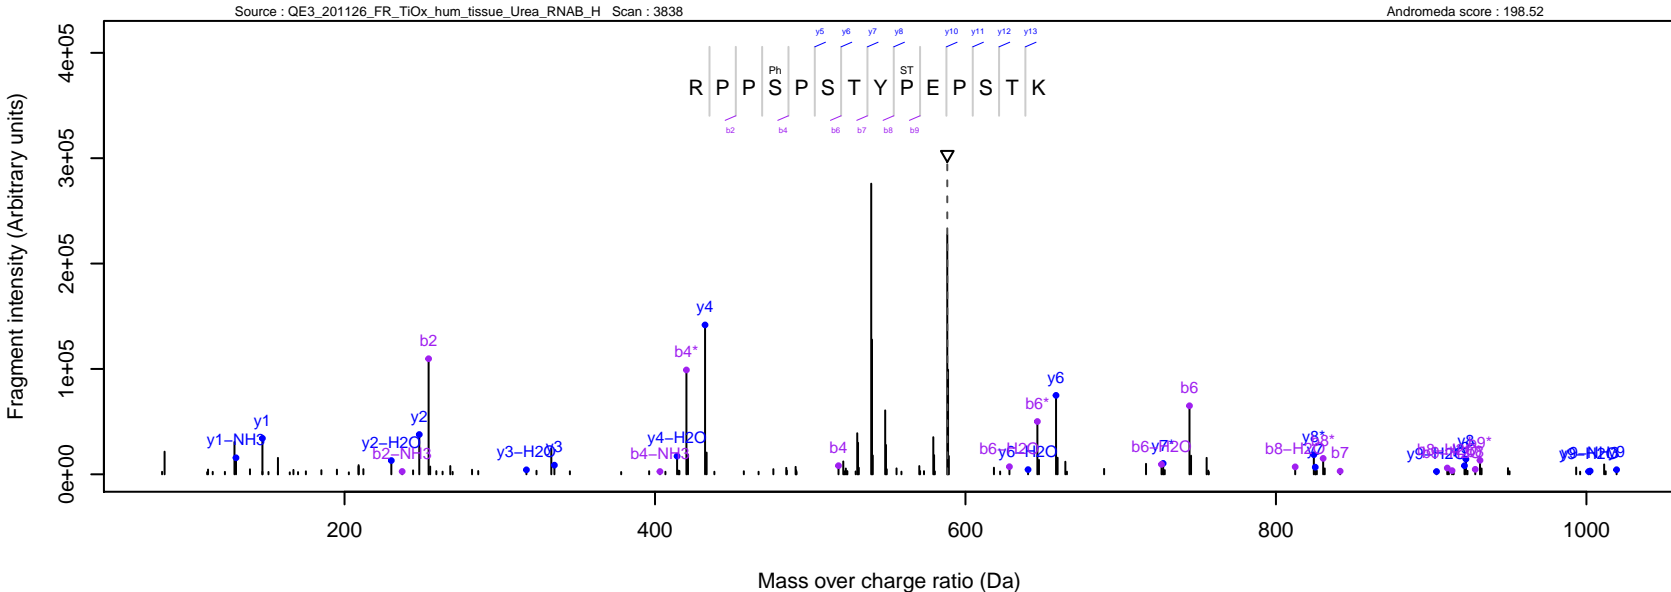

AKT(Phospho (STY))QTPPV(Phospho (STY))PAPQTEER-2+

Source : QE3\_201126\_FR\_TiOx\_hum\_tissue\_Urea\_RNAB\_N Scan : 13136

Andromeda score : 198.49

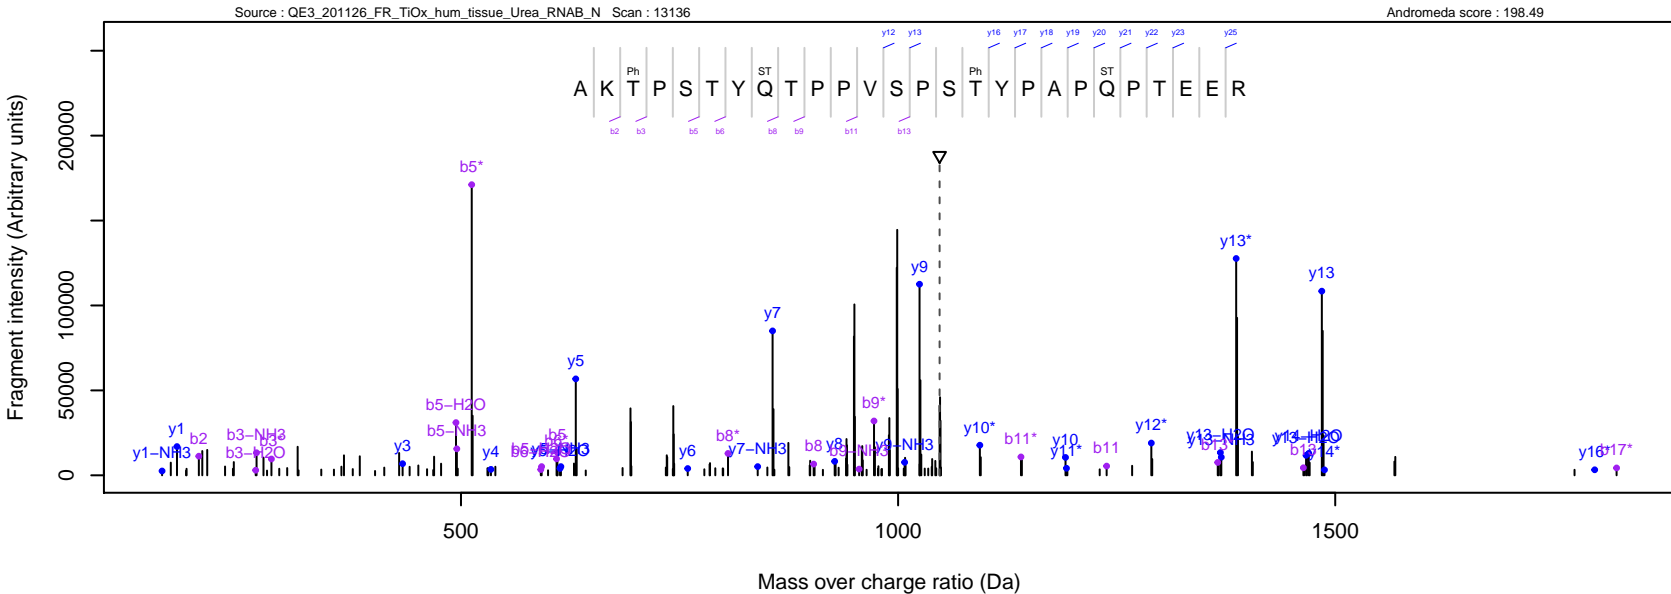



LGAPENSGISTPSTYLER-2+

Source : QE3\_201126\_FR\_TiOx\_hum\_tissue\_Urea\_RNAB\_B Scan : 24403

Andromeda score : 198.38

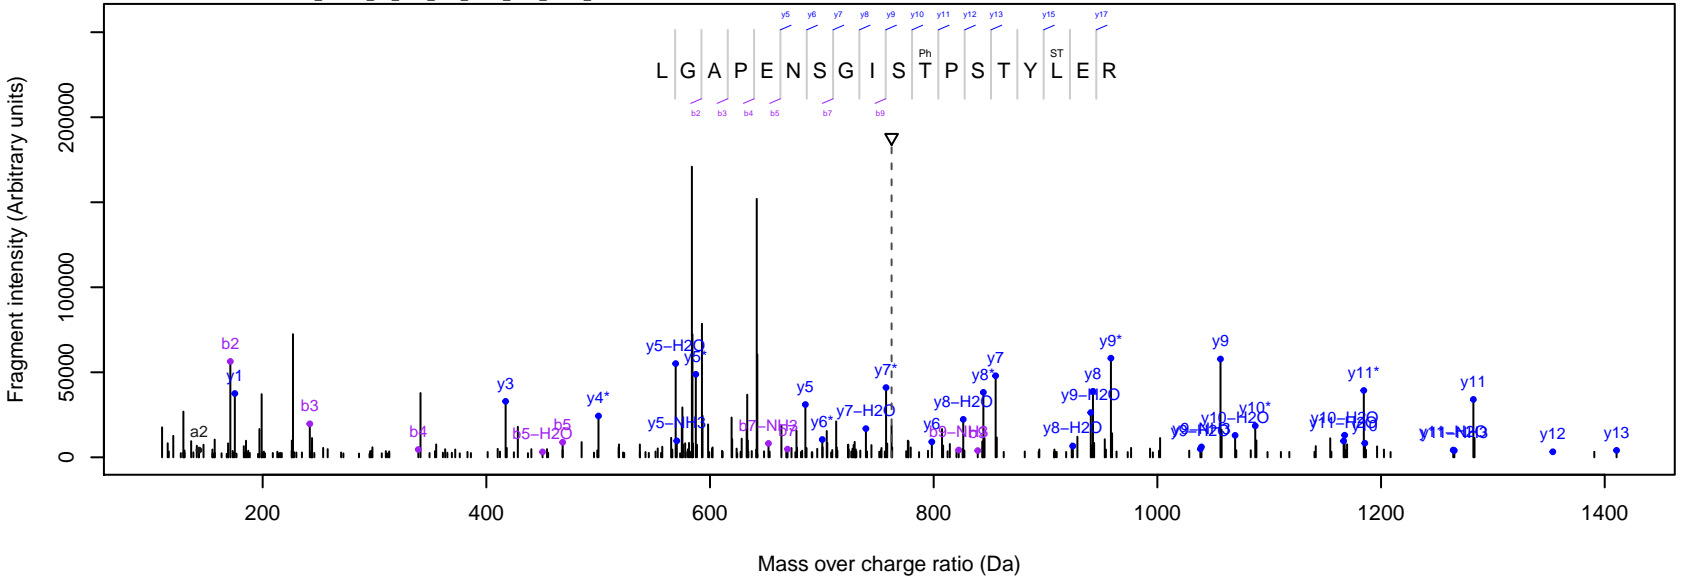

LRSS(Phospho (STY))VPGVR-2+

Source : QE3\_201126\_FR\_TiOx\_hum\_tissue\_Urea\_RNAB\_B Scan : 10144

Andromeda score : 198.33

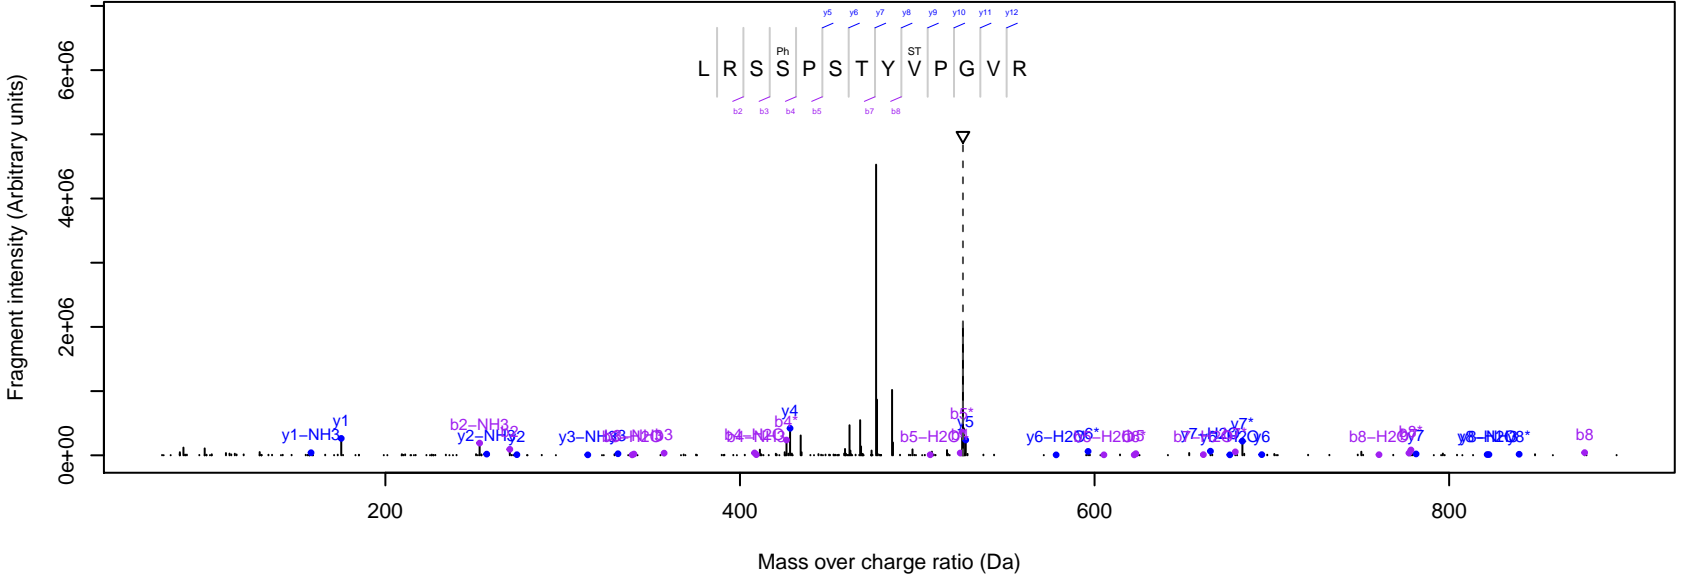

KRES(Phospho (STY))ES(Phospho (STY))ES(Phospho (STY))DETPPAAPQLIK-2+

Source : QE3\_201126\_FR\_TiOx\_hum\_tissue\_Urea\_RNAB\_H Scan : 27056

Andromeda score : 198.31

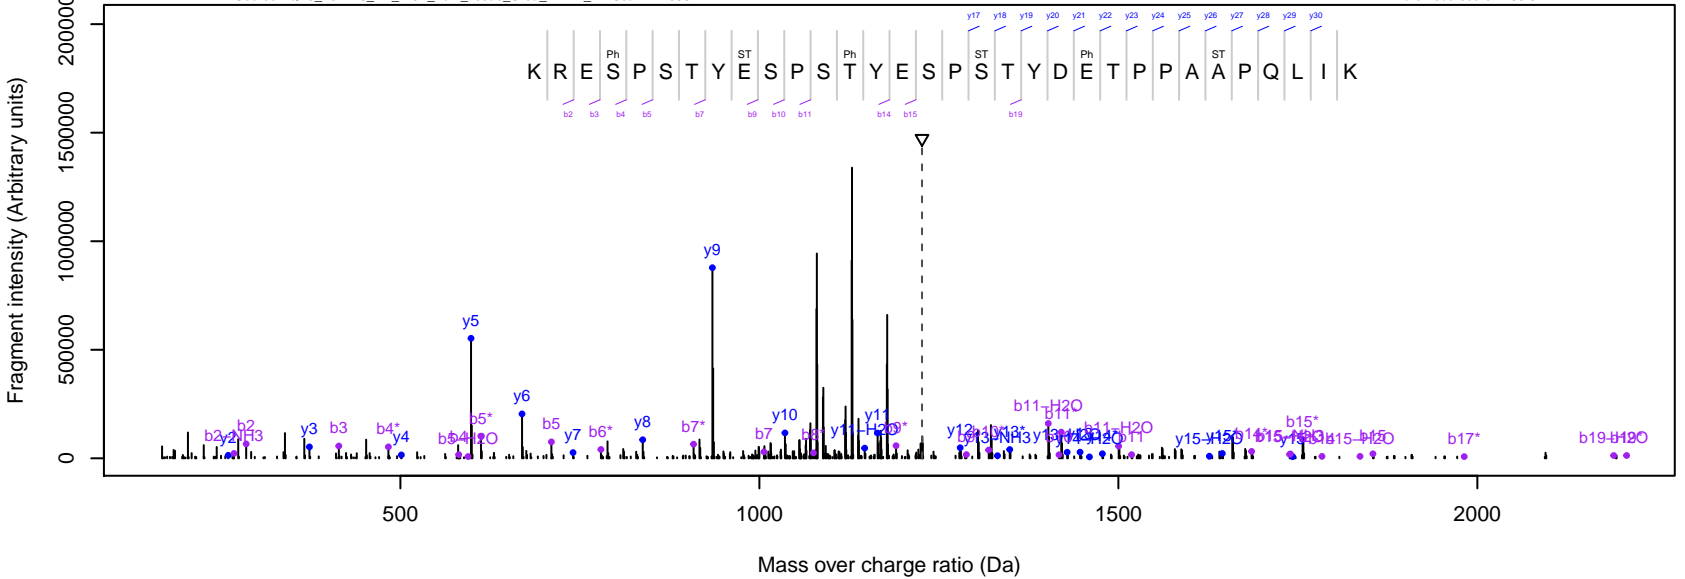

AAGGILTAS(Phospho (STY))HCPGGPGGEFGVK-2+

Source : QE3\_201126\_FR\_TIOx\_hum\_tissue\_Urea\_RNAB\_B Scan : 33854

Andromeda score : 198.24

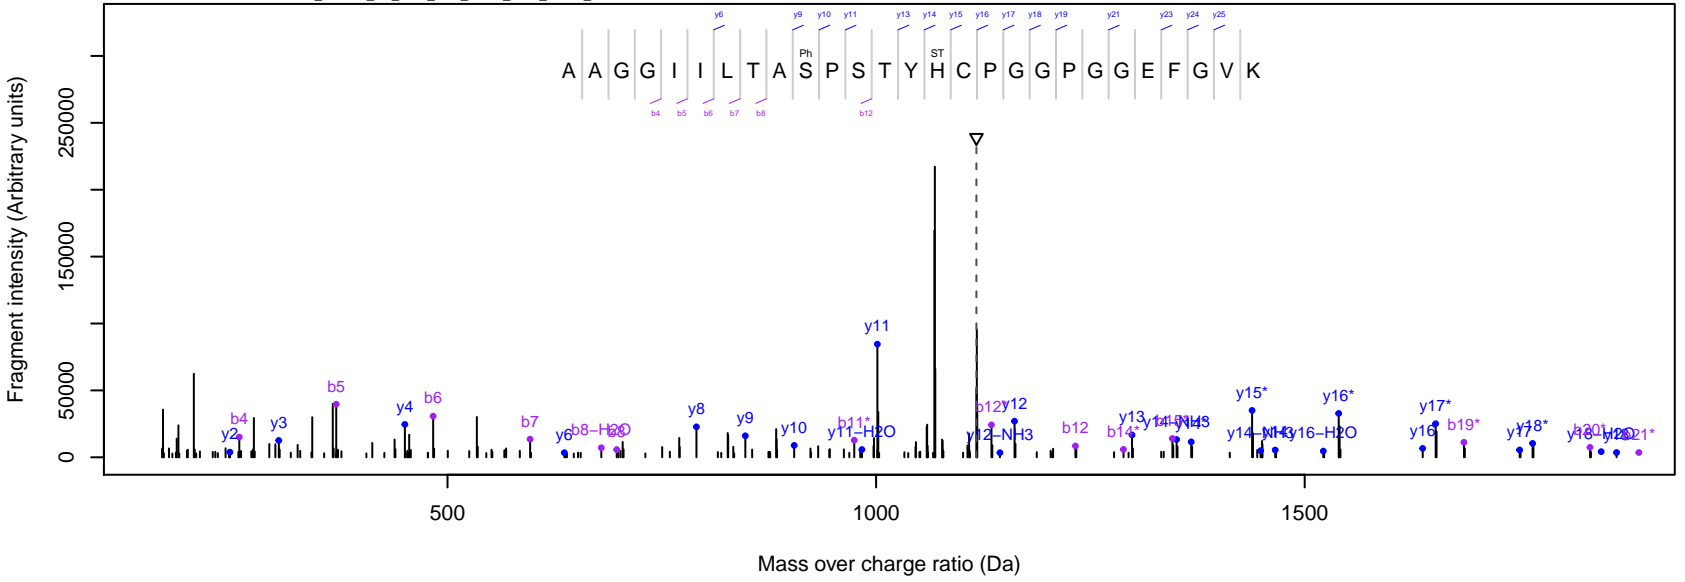

RLS(Phospho (STY))QSDDEDVIR-2+

Source : QE3\_201126\_FR\_TIOx\_hum\_tissue\_Urea\_RNAB\_H Scan : 13455

Andromeda score : 198.1

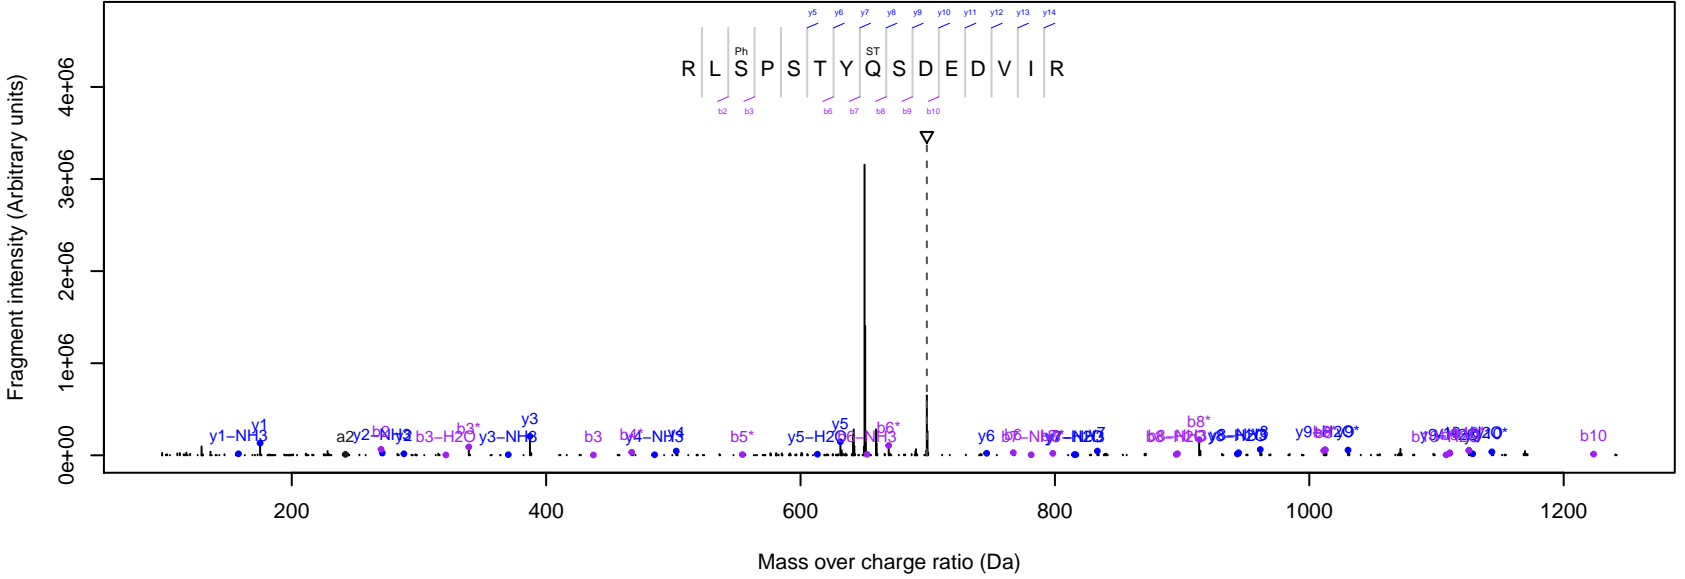

RRS(Phospho (STY))IQDLTGTGTEPGQVSSR-3+

Source : QE3\_201126\_FR\_TIOx\_hum\_tissue\_Urea\_RNAB\_H Scan : 18084

Andromeda score : 197.99

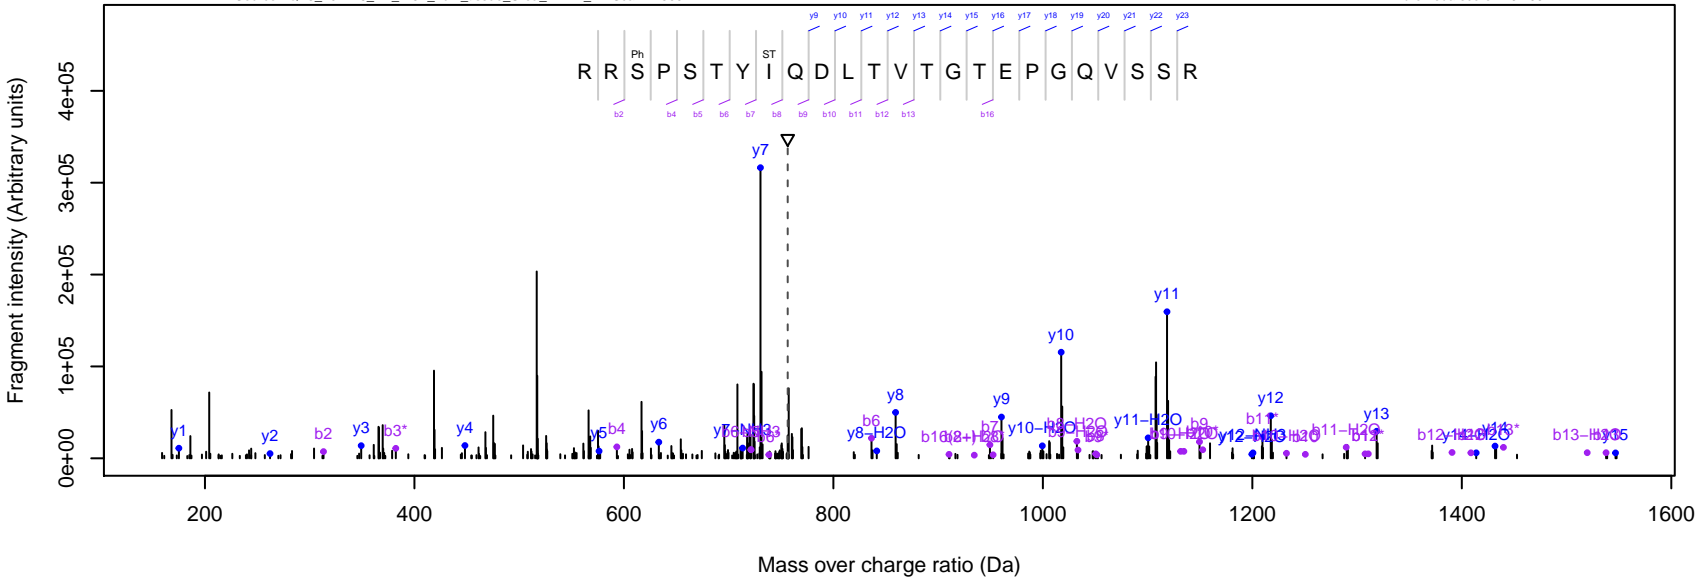

IPSKKEEADM(Oxidation (M))SS(Phospho (STY))PTQR-3+

Source : QE3\_201126\_FR\_TiOx\_hum\_tissue\_Urea\_RNAB\_N Scan : 6241

Andromeda score : 197.88

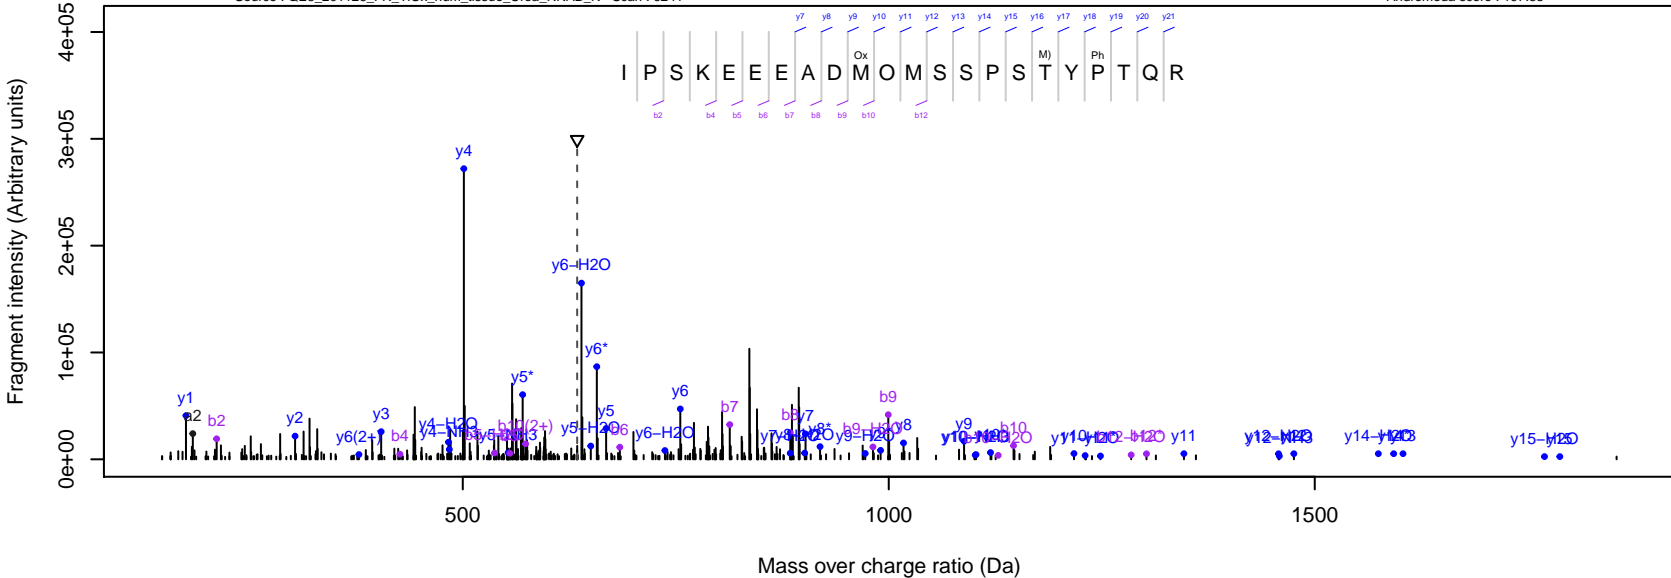

TQSS(Phospho (STY))SCEDLPSTTQPK-2+

Source : QE3\_201126\_FR\_TiOx\_hum\_tissue\_Urea\_RNAB\_H Scan : 14127

Andromeda score : 197.88

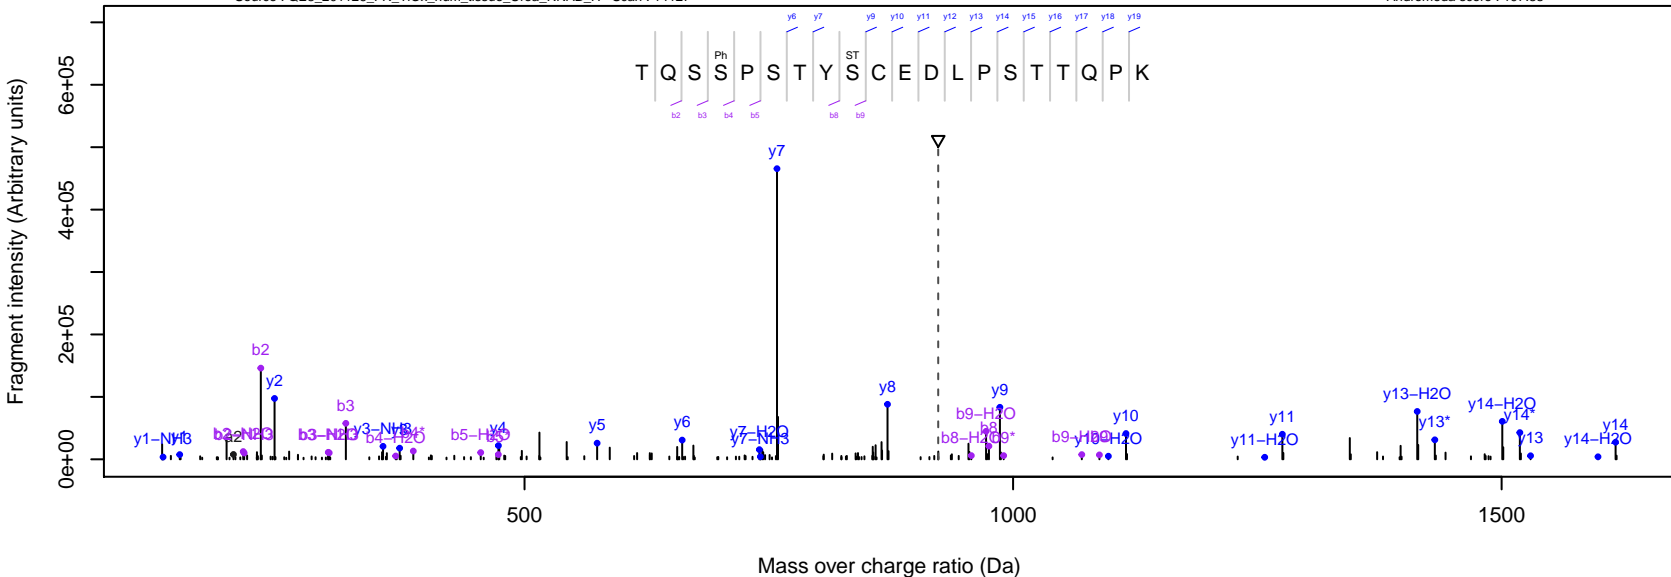

ATGGLLLGAYADS(Phospho (STY))DDDDNDVSEK-2+

Source : QE3\_201126\_FR\_TiOx\_hum\_tissue\_Urea\_RNAB\_B Scan : 47726

Andromeda score : 197.85

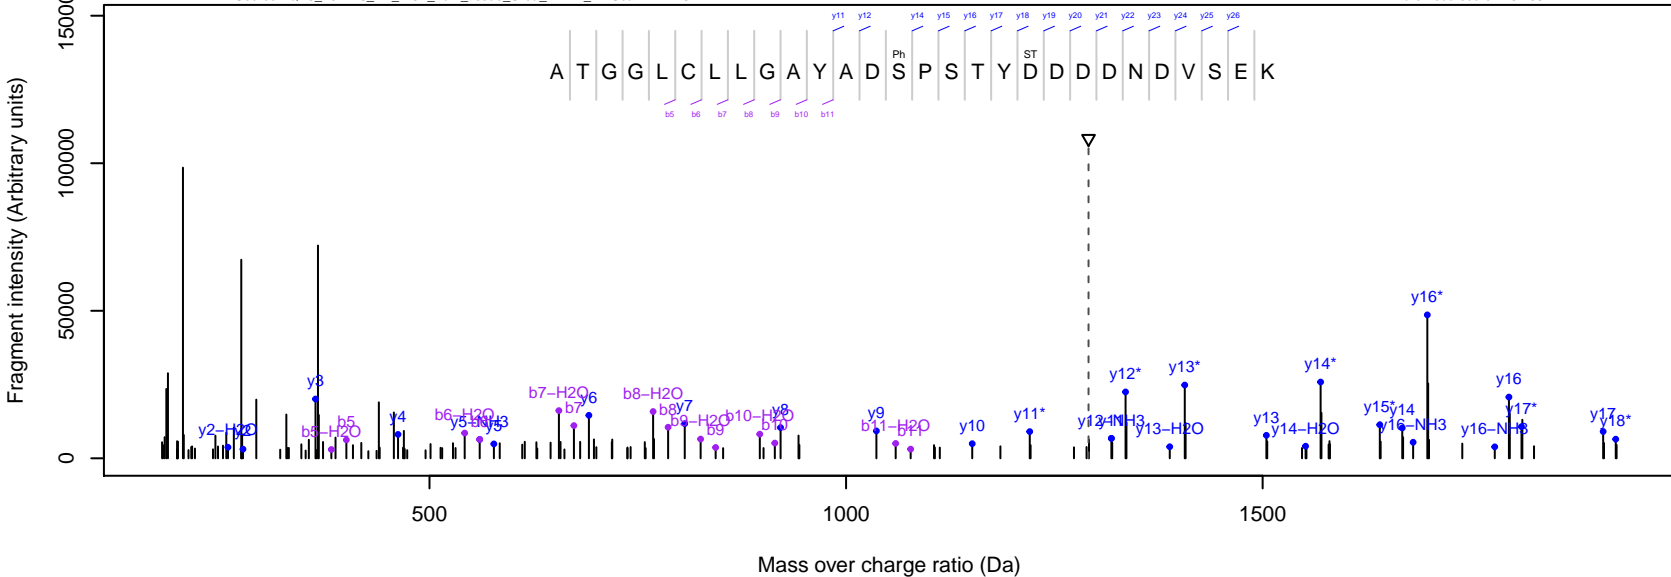

KNS(Phospho (STY))EPGSPHSLEALR-3+

Source : QE3\_201126\_FR\_TiOx\_hum\_tissue\_Urea\_RNAB\_H Scan : 13181

Andromeda score : 197.84

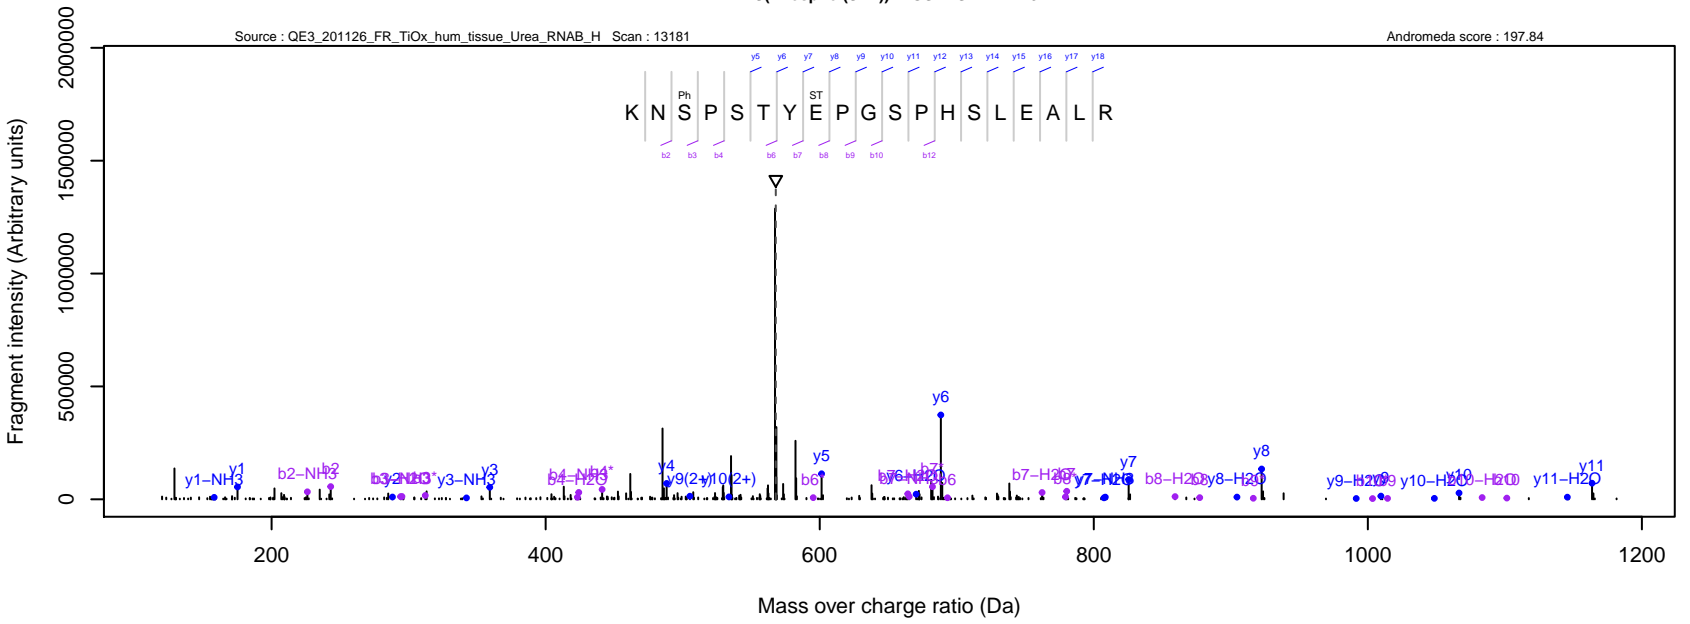

RSS(Phospho (STY))LSSHSHQSQIYR-3+

Source : QE3\_201126\_FR\_TiOx\_hum\_tissue\_Urea\_RNAB\_H Scan : 6134

Andromeda score : 197.84

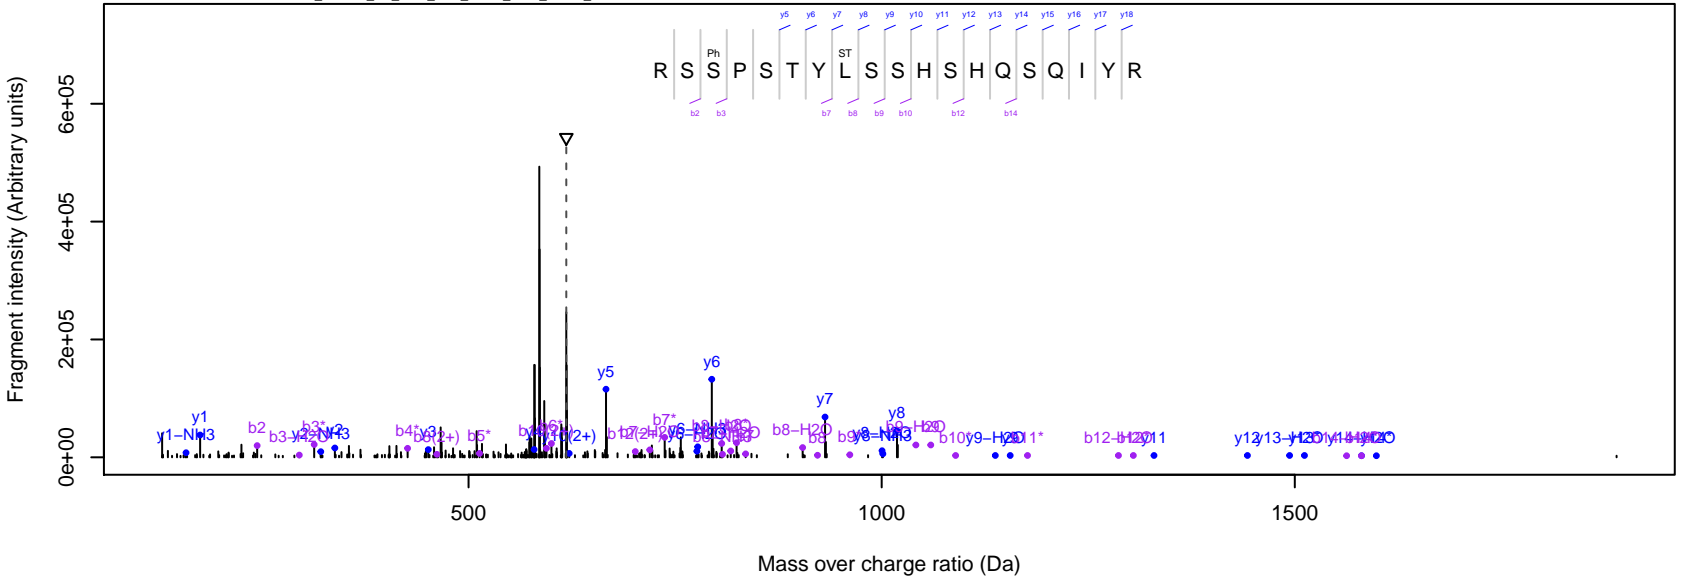

RIS(Phospho (STY))DPQVFSK-2+

Source : QE3\_201126\_FR\_TiOx\_hum\_tissue\_Urea\_RNAB\_N Scan : 15886

Andromeda score : 197.79

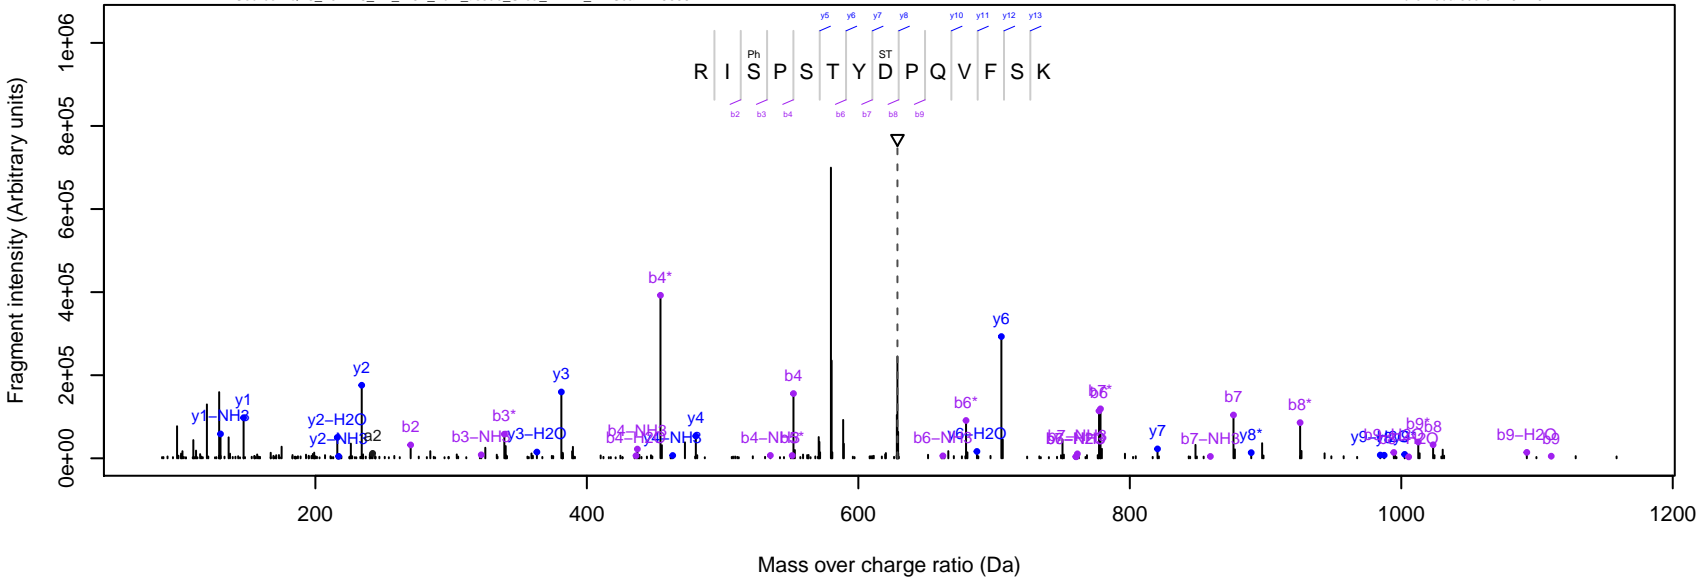

VATLNS(Phospho (STY))EEESDPPTYK-2+

Source : QE3\_201126\_FR\_TiOx\_hum\_tissue\_Urea\_RNAB\_H Scan : 21174

Andromeda score : 197.75

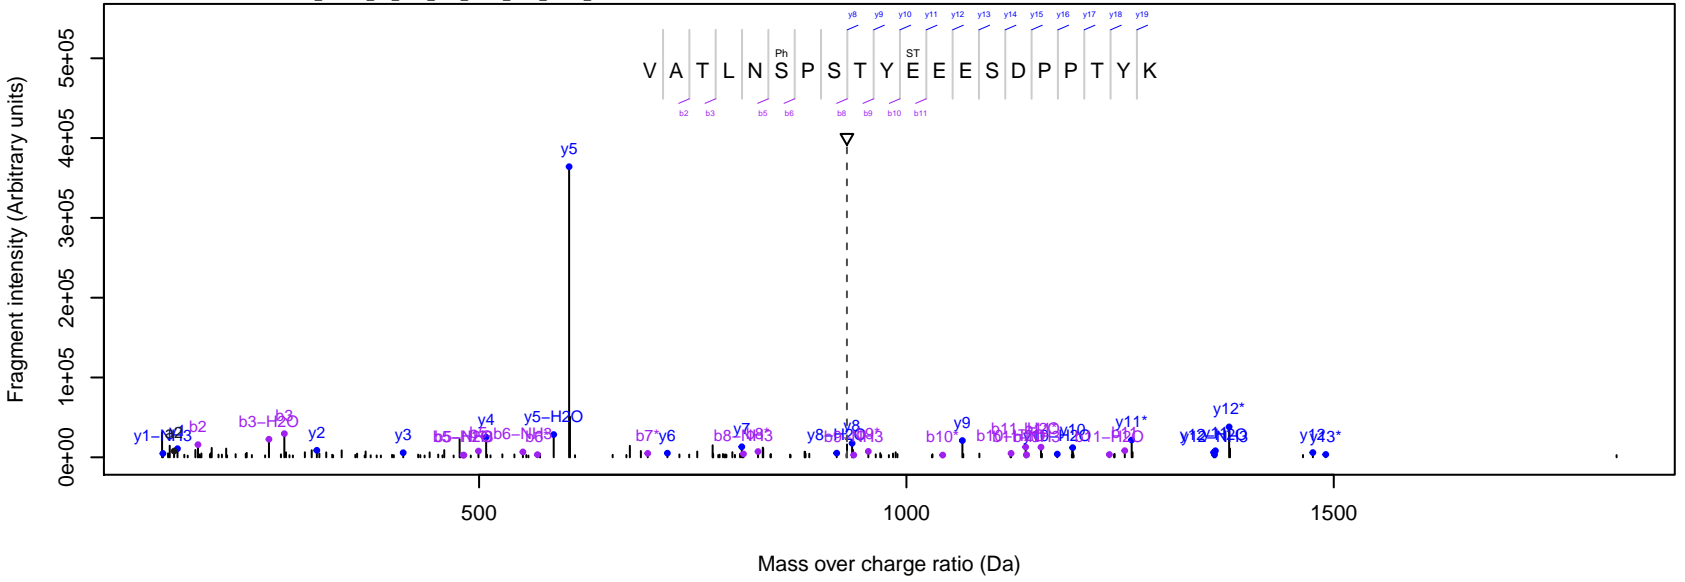

RKPS(Phospho (STY))PEPEGEVGPVK-3+

Source : QE3\_201126\_FR\_TiOx\_hum\_tissue\_Urea\_RNAB\_N Scan : 7537

Andromeda score : 197.6

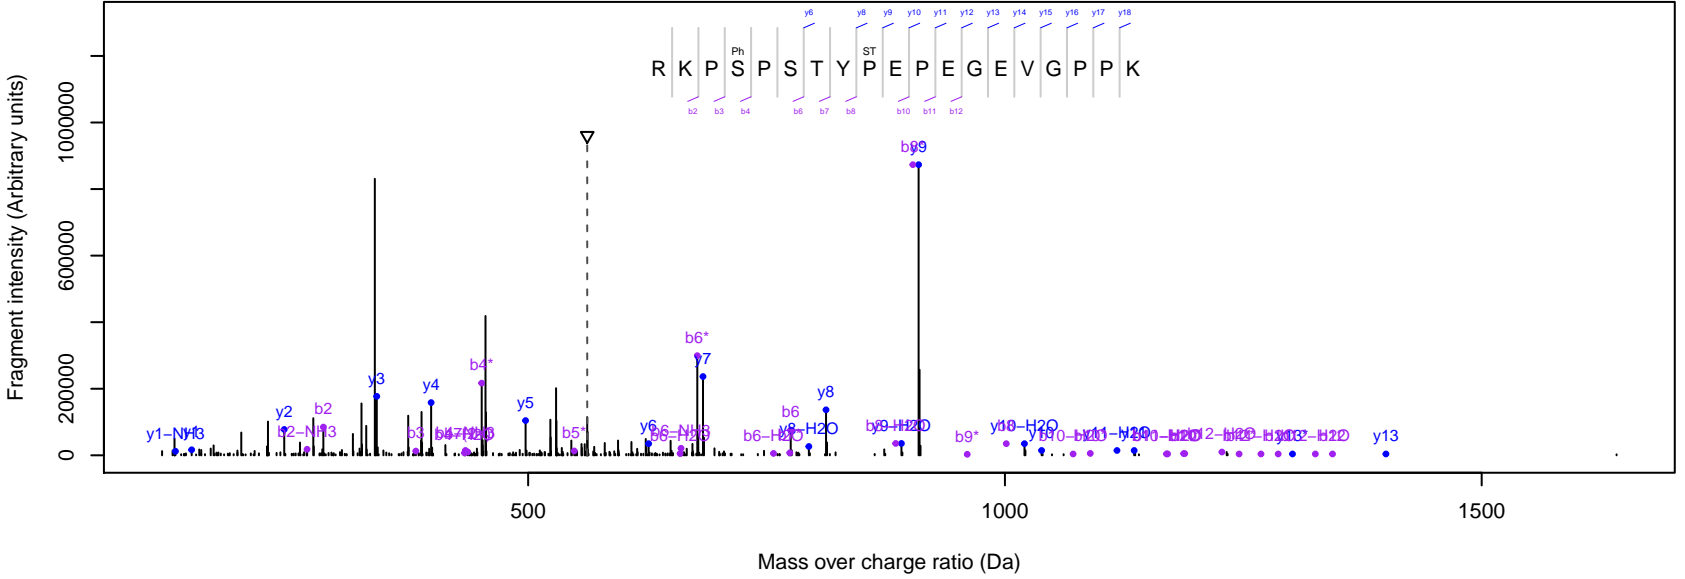

NWTEDEGGIS(Phospho (STY))SPVKK-2+

Source : QE3\_201126\_FR\_TiOx\_hum\_tissue\_Urea\_RNAB\_H Scan : 26953

Andromeda score : 197.47

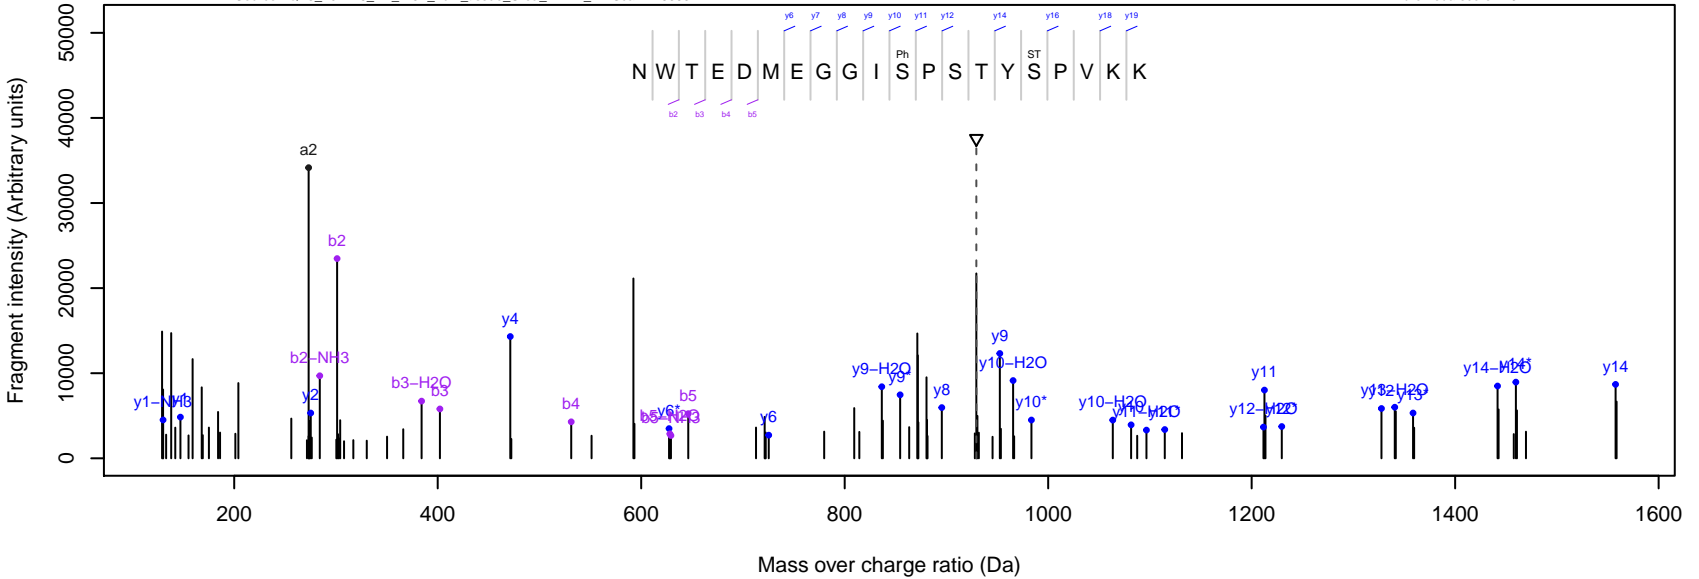

SEPSDHS(Phospho (STY))RHSPQQPSNGSLR-4+

Source : QE3\_201126\_FR\_TIOx\_hum\_tissue\_Urea\_RNAB\_N Scan : 4021

Andromeda score : 197.4

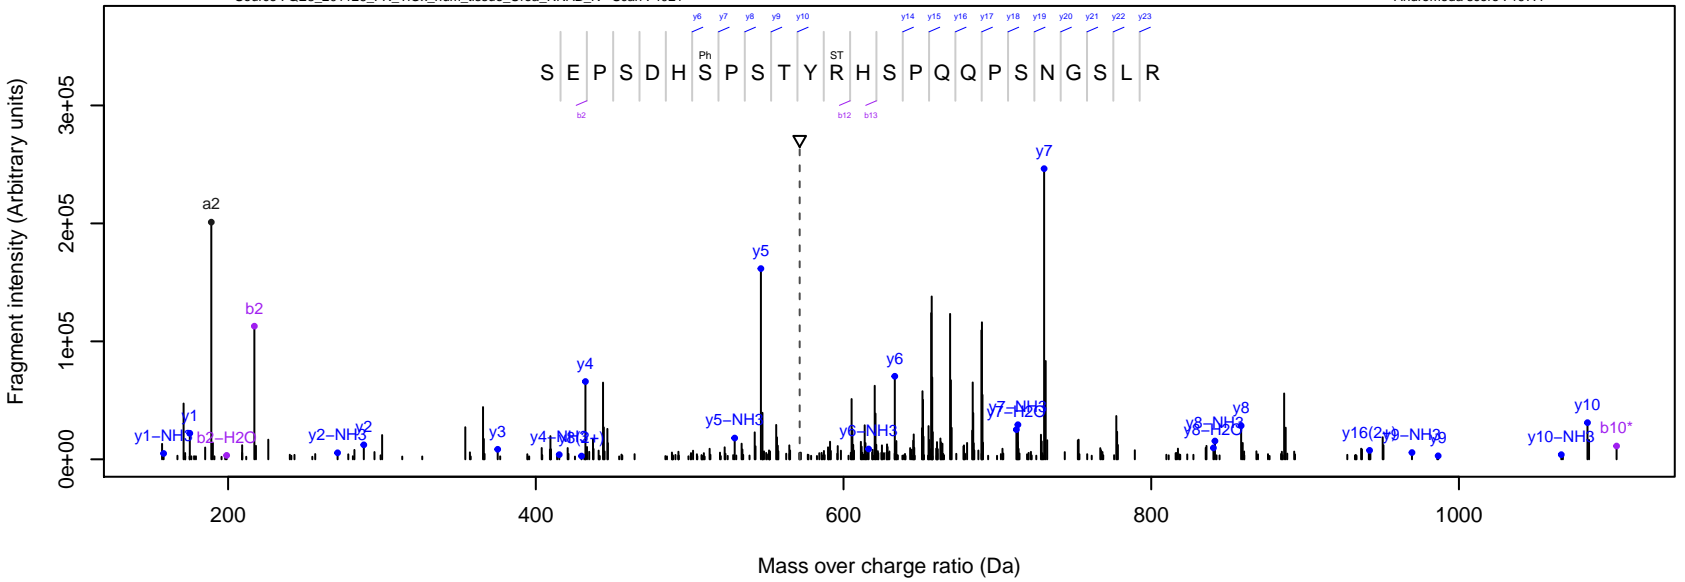

GTAMPGEEVLES(Phospho (STY))SQEALHVTET-3+

Source : QE3\_201126\_FR\_TIOx\_hum\_tissue\_Urea\_RNAB\_H Scan : 33497

Andromeda score : 197.37

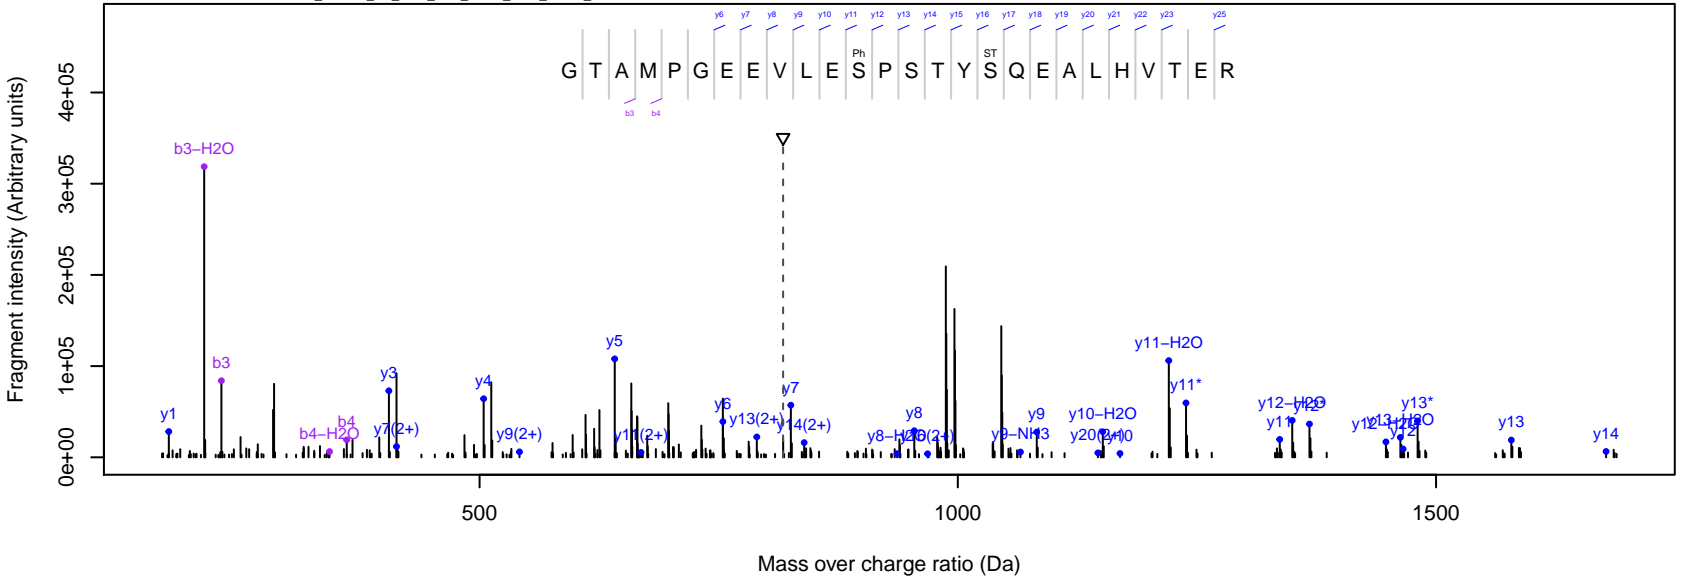

RSS(Phospho (STY))SPEDPERDEEVLNHVLR-4+

Source : QE3\_201126\_FR\_TIOx\_hum\_tissue\_Urea\_RNAB\_N Scan : 26469

Andromeda score : 197.37

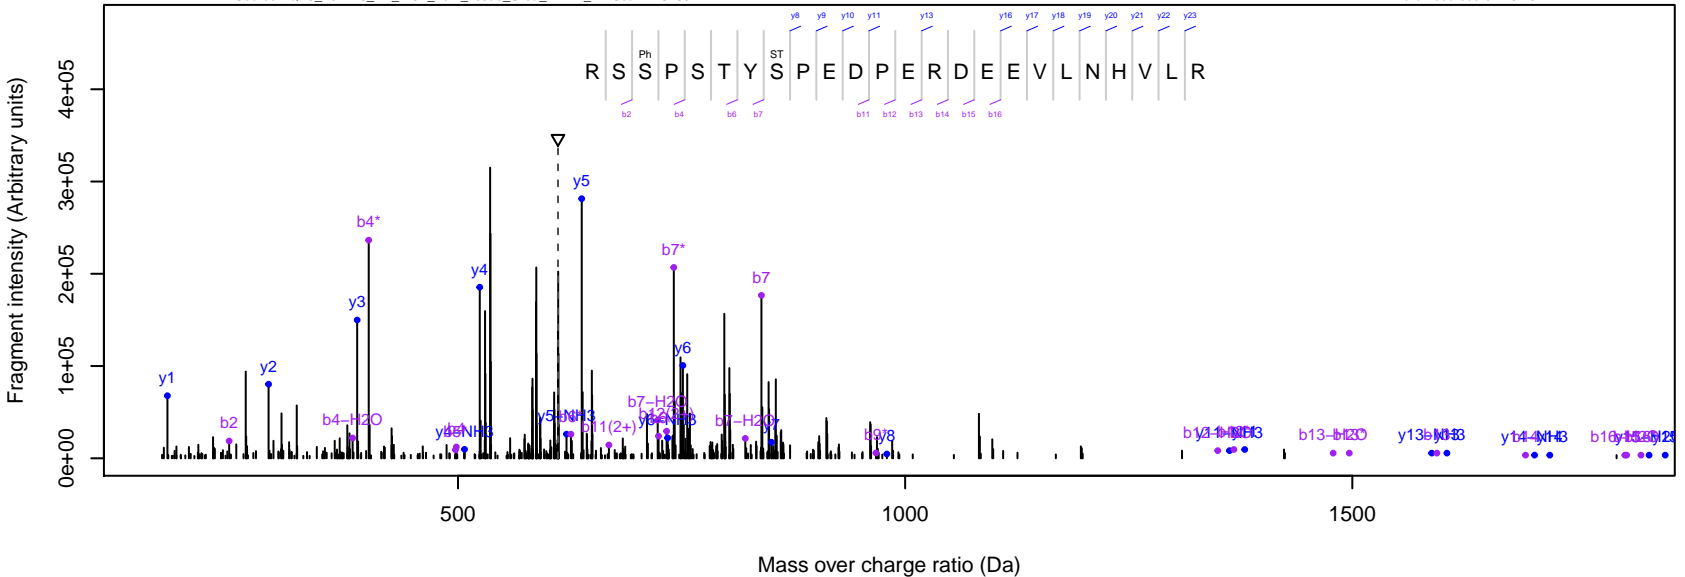

M(Oxidation (M))GQAPSQLLPAPQDQPR(Phospho (STY))PVPSAFSDQSR-3+

Source : QE3\_201126\_FR\_TiOx\_hum\_tissue\_Urea\_RNAB\_H Scan : 34074

Andromeda score : 197.26

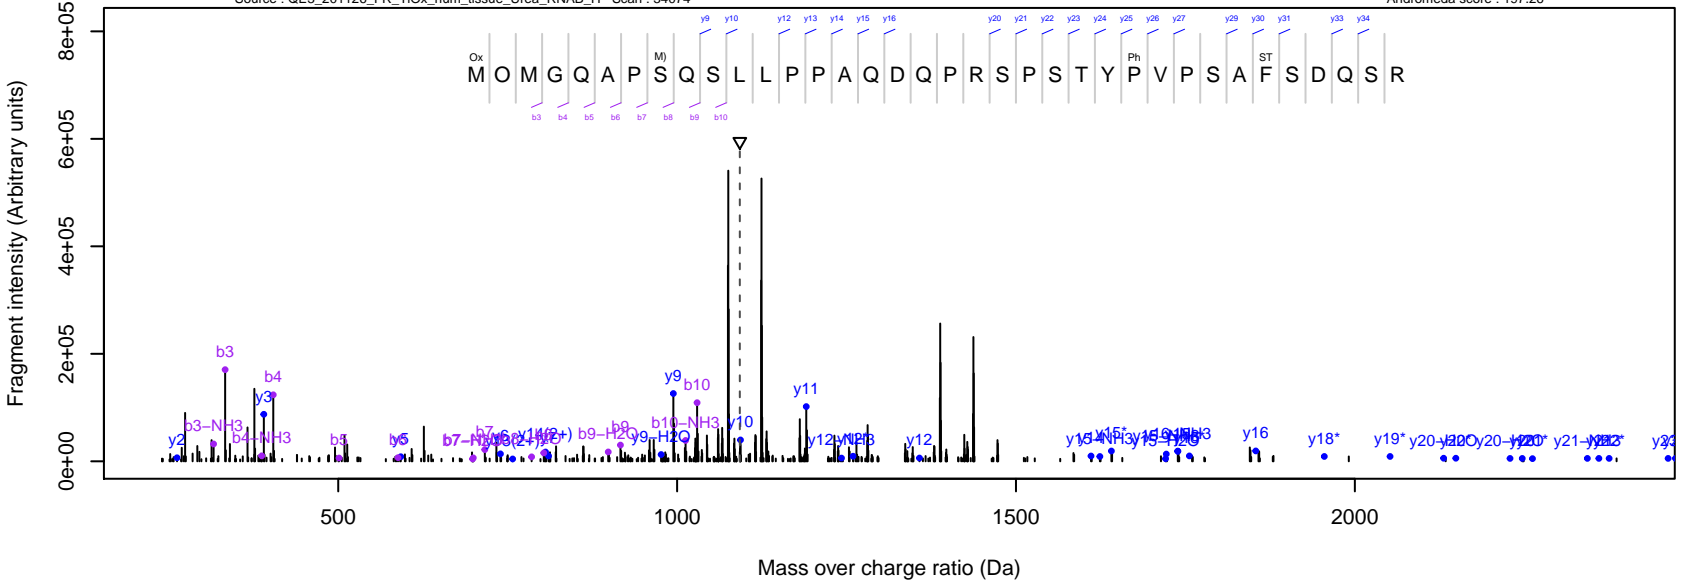

AKS(Phospho (STY))LDGVTNDR-2+

Source : QE3\_201126\_FR\_TiOx\_hum\_tissue\_Urea\_RNAB\_H Scan : 7967

Andromeda score : 197.19

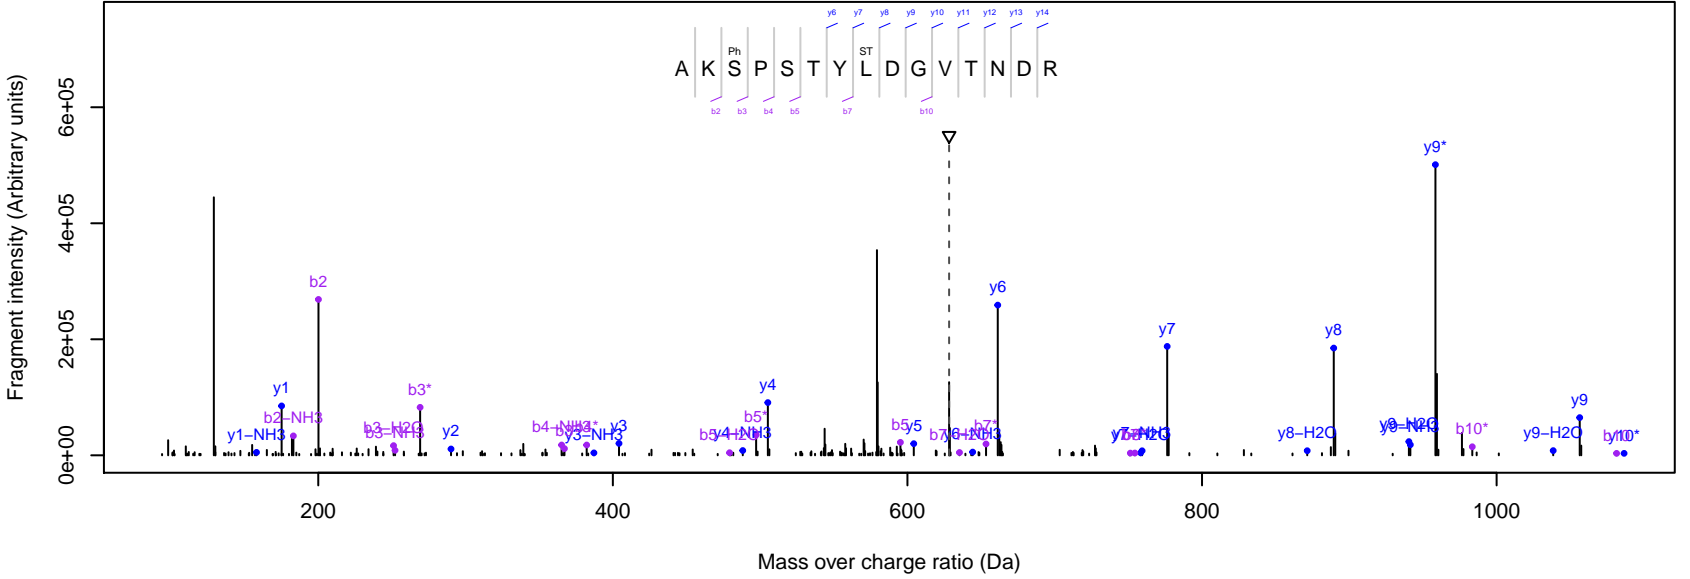

YGLQDS(Phospho (STY))DEEEEHPSK-2+

Source : QE3\_201126\_FR\_TiOx\_hum\_tissue\_Urea\_RNAB\_B Scan : 13424

Andromeda score : 197.15

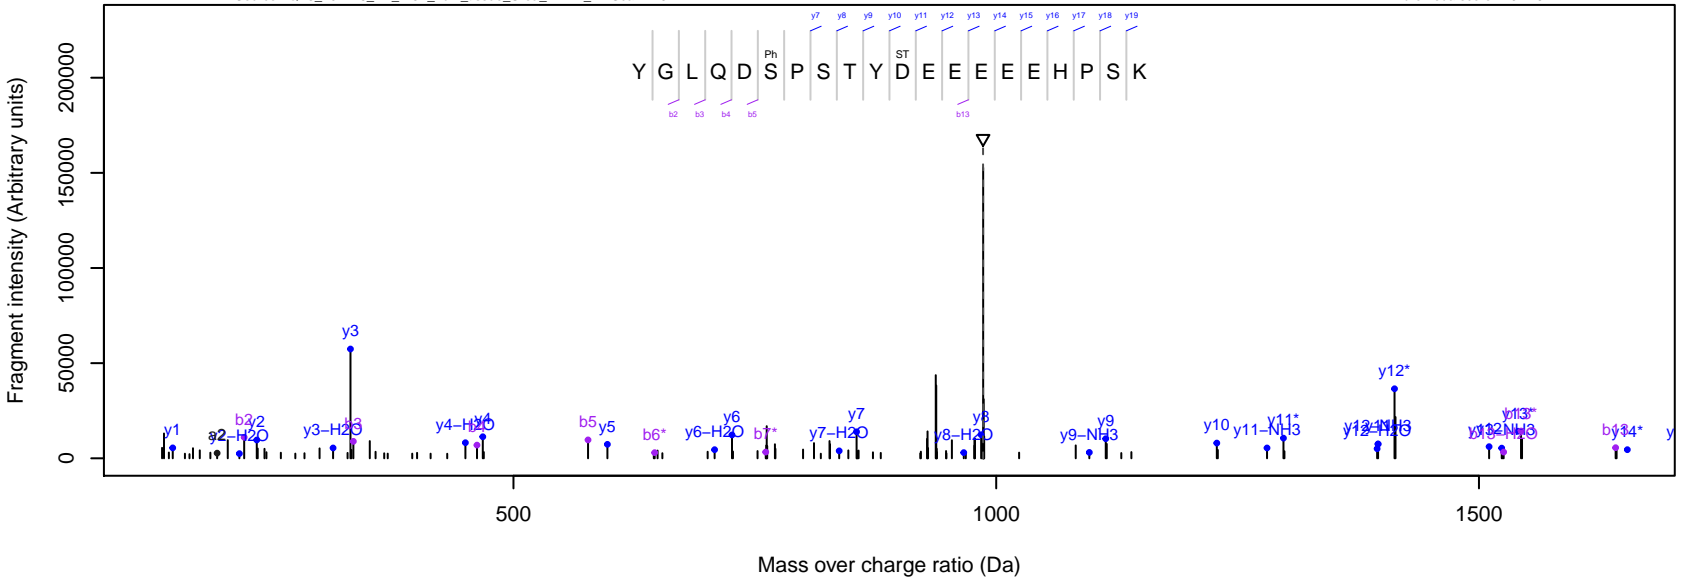

ISAAAS(Phospho (STY))DSGVESFDEGSSH-2+

Source : QE3\_201126\_FR\_TiOx\_hum\_tissue\_Urea\_RNAB\_B Scan : 26064

Andromeda score : 197.14

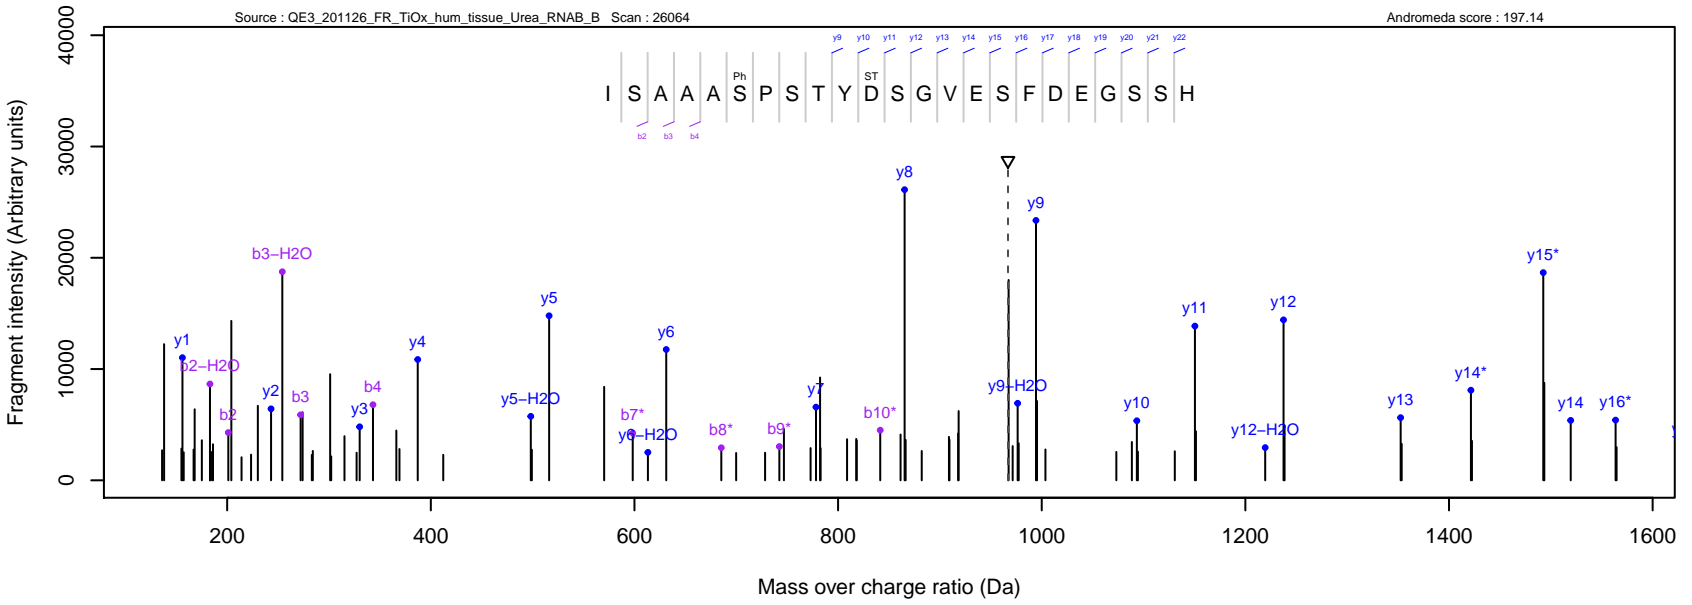

GGVTGSPEASISGS(Phospho (STY))KGLDK-2+

Source : QE3\_201126\_FR\_TiOx\_hum\_tissue\_Urea\_RNAB\_H Scan : 15412

Andromeda score : 197.1

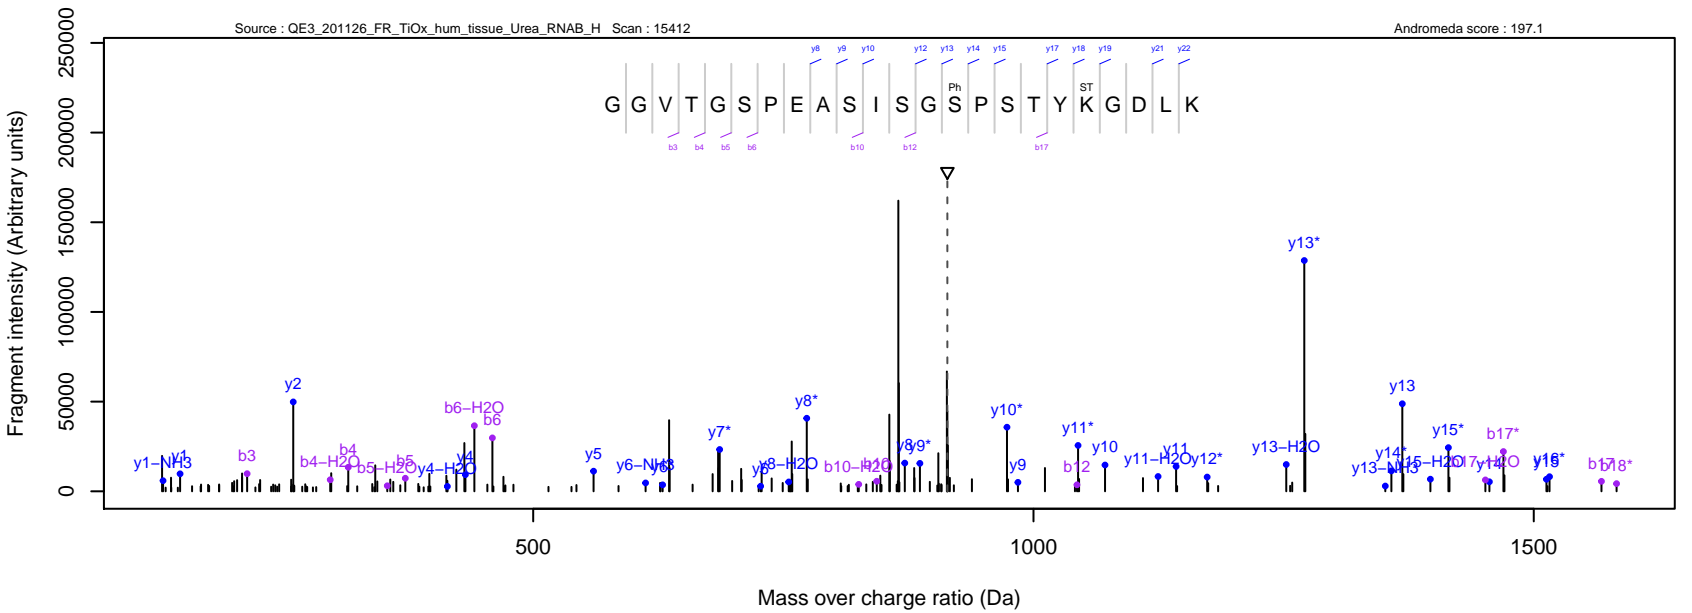

VEMYS(Phospho (STY))GS(Phospho (STY))DDDDFNKLPK-2+

Source : QE3\_201126\_FR\_TiOx\_hum\_tissue\_Urea\_RNAB\_H Scan : 36614

Andromeda score : 197.1

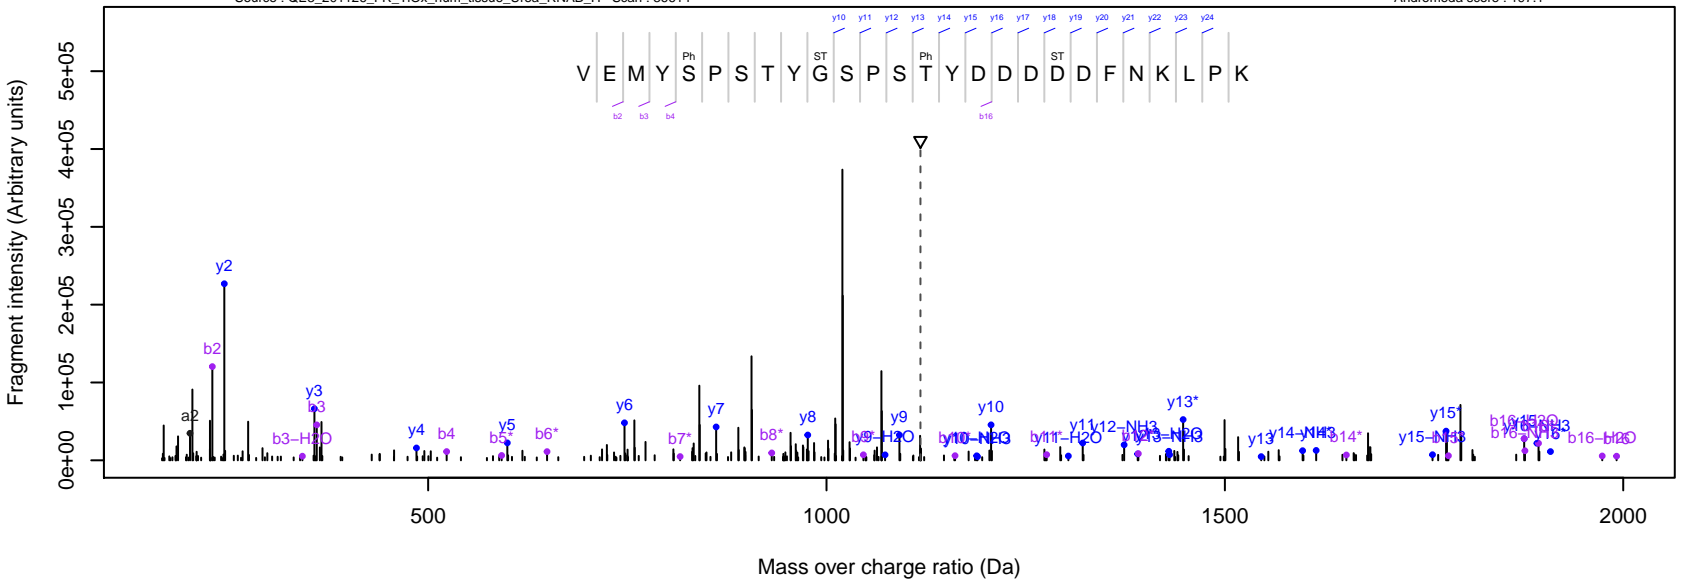



PVSSAASVYAGAGGS(Phospho (STY))GSRISVSR-3+

Source : QE3\_201126\_FR\_TiOx\_hum\_tissue\_Urea\_RNAB\_N Scan : 21406

Andromeda score : 197.08

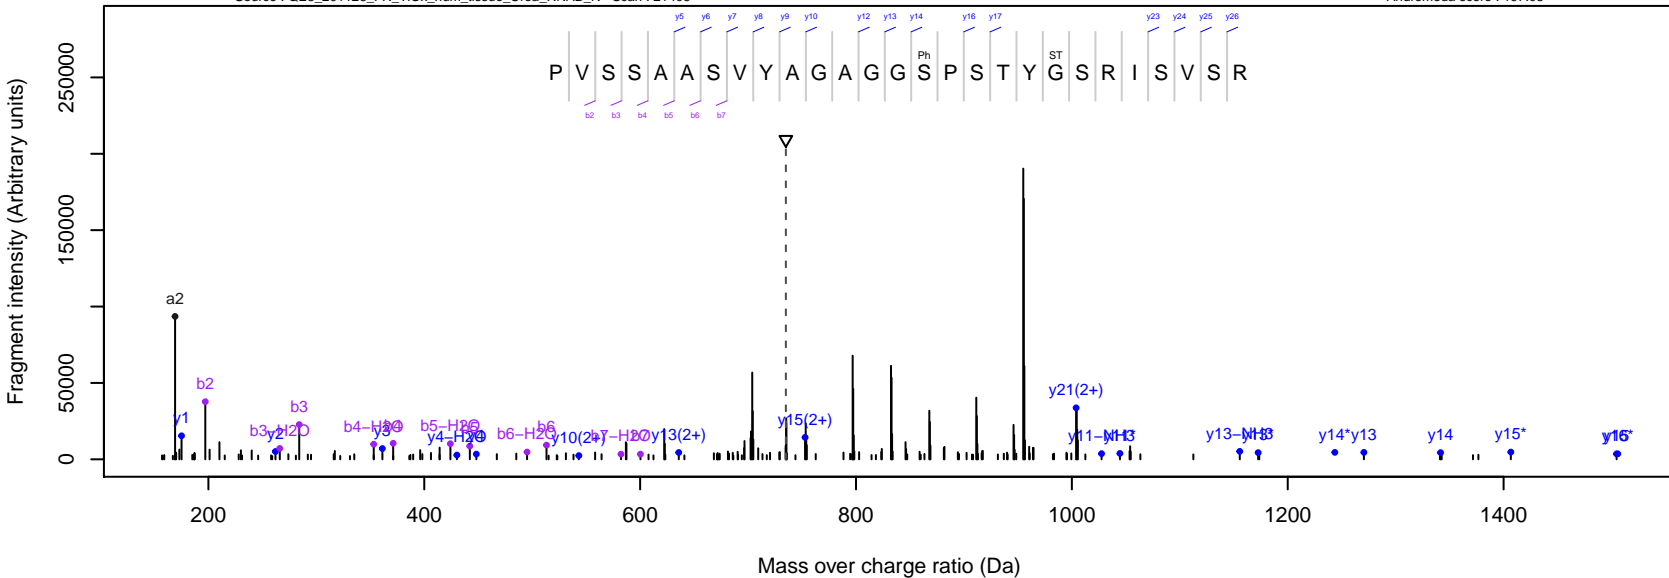

AS(Phospho (STY))PITNDGEDEFVPSDGLDKDEYTFSPGK-3+

Source : QE3\_201126\_FR\_TiOx\_hum\_tissue\_Urea\_RNAB\_N Scan : 44717

Andromeda score : 197

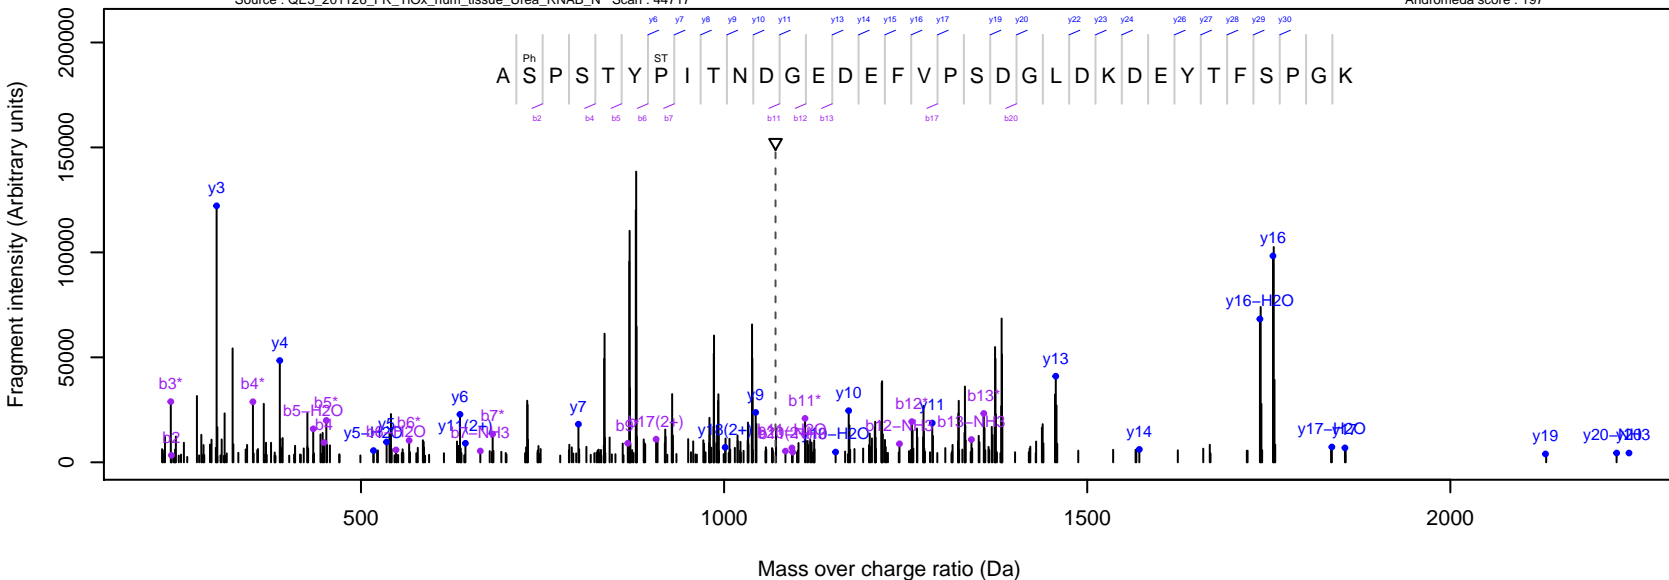

LQALVNSLCAGQS(Phospho (STY))P-2+

Source : QE3\_201126\_FR\_TiOx\_hum\_tissue\_Urea\_RNAB\_H Scan : 45897

Andromeda score : 196.95

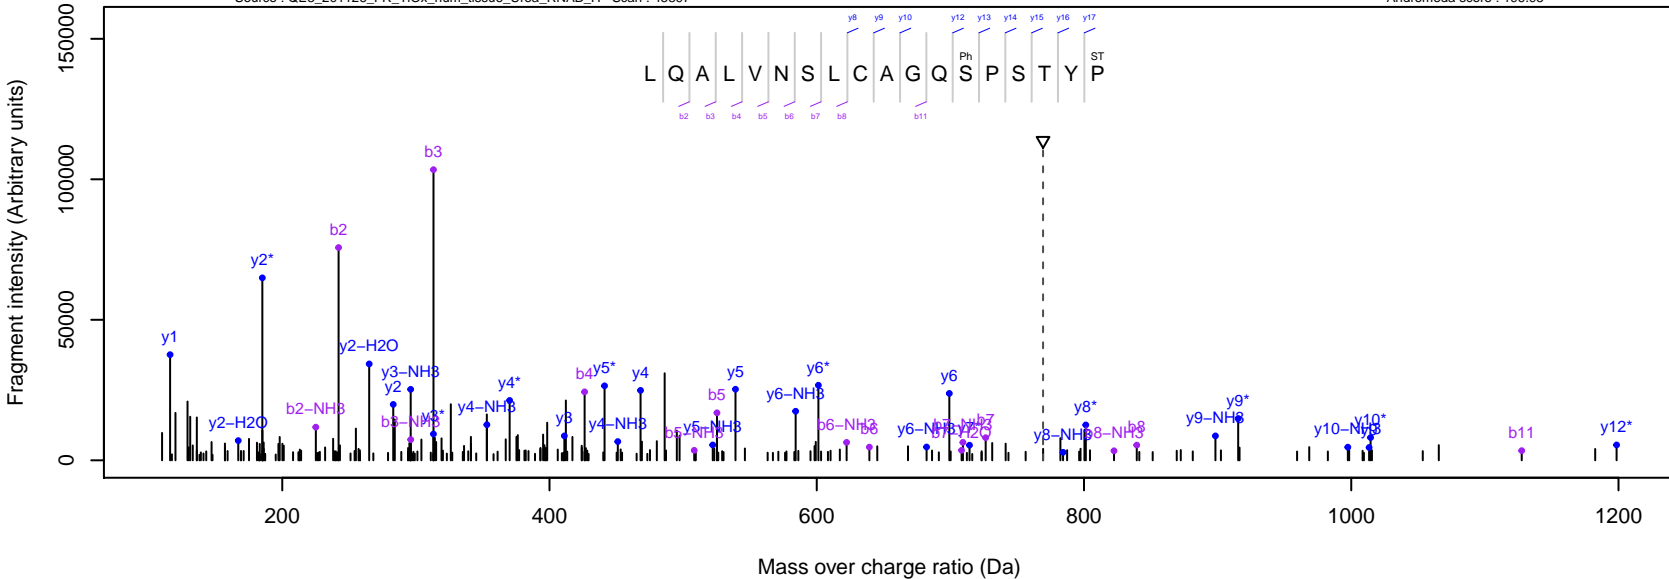

SLYASSPGGVYATRS(Phospho (STY))SAVR-3+

Source : QE3\_201126\_FR\_TiOx\_hum\_tissue\_Urea\_RNAB\_H Scan : 20970

Andromeda score : 196.95

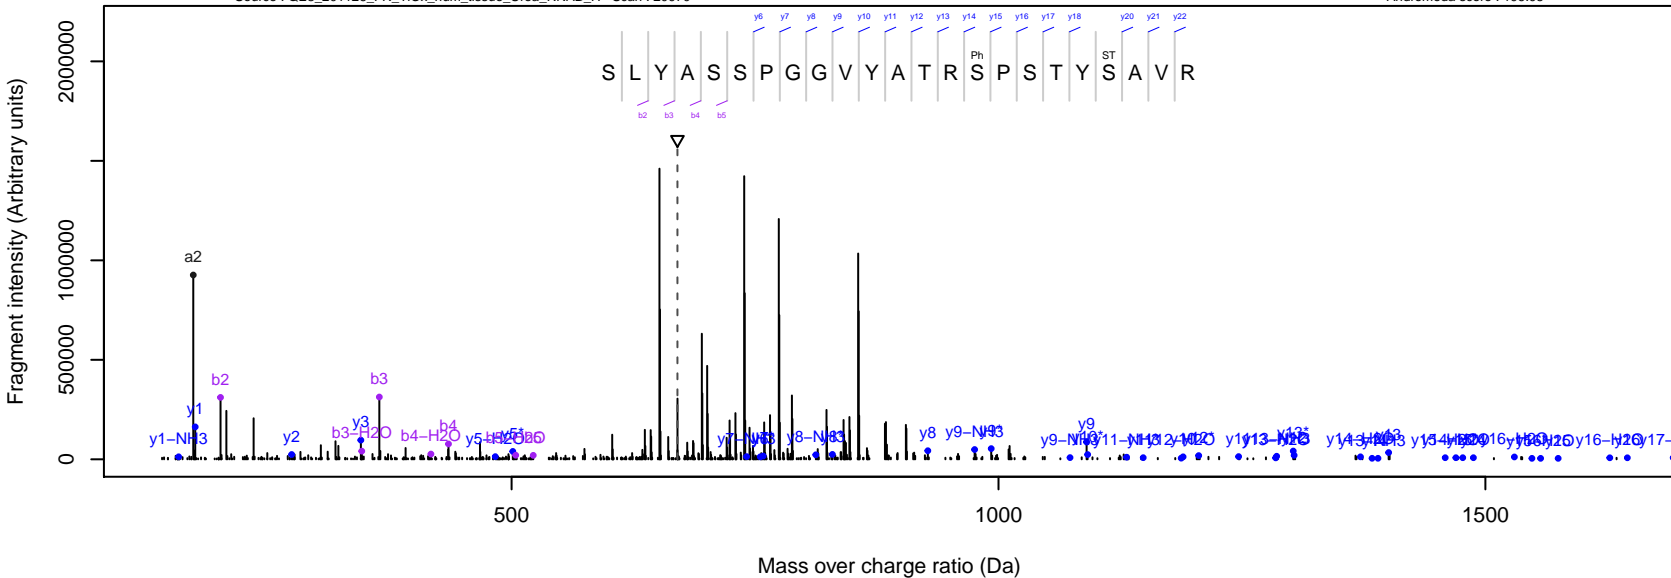

IVS(Phospho (STY))AQLAEDDVE-2+

Source : QE3\_201126\_FR\_TiOx\_hum\_tissue\_Urea\_RNAB\_B Scan : 40702

Andromeda score : 196.84

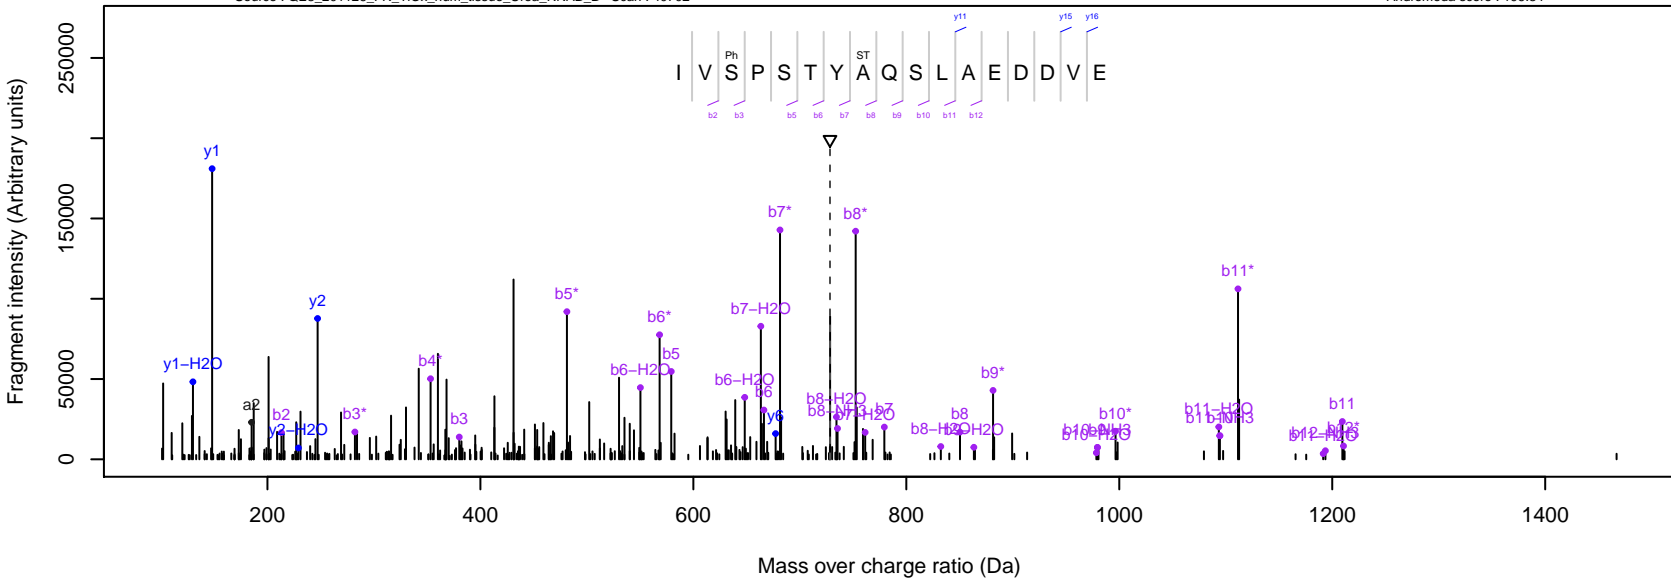

ISHELDSAS(Phospho (STY))SEVN-2+

Source : QE3\_201126\_FR\_TiOx\_hum\_tissue\_Urea\_RNAB\_H Scan : 14935

Andromeda score : 196.78

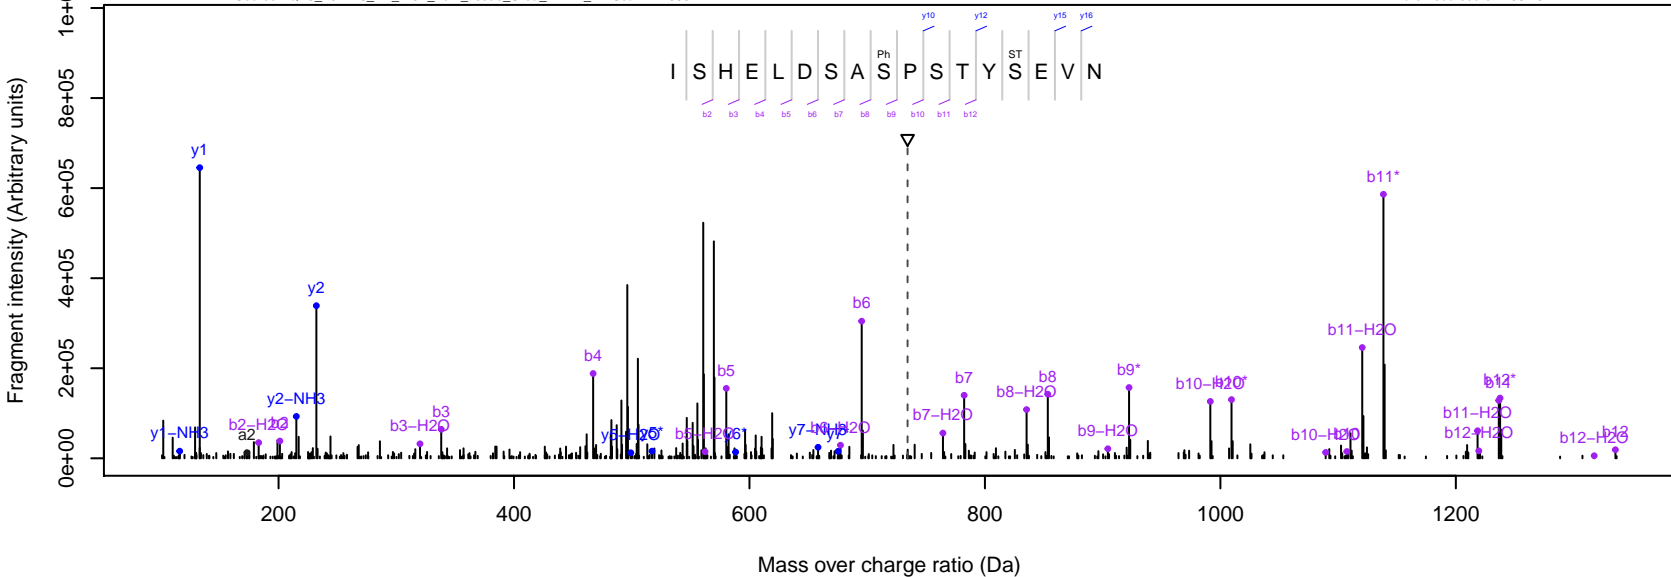

RIDIS(Phospho (STY))PSTLR-2+

Source : QE3\_201126\_FR\_TiOx\_hum\_tissue\_Urea\_RNAB\_H Scan : 22410

Andromeda score : 196.75

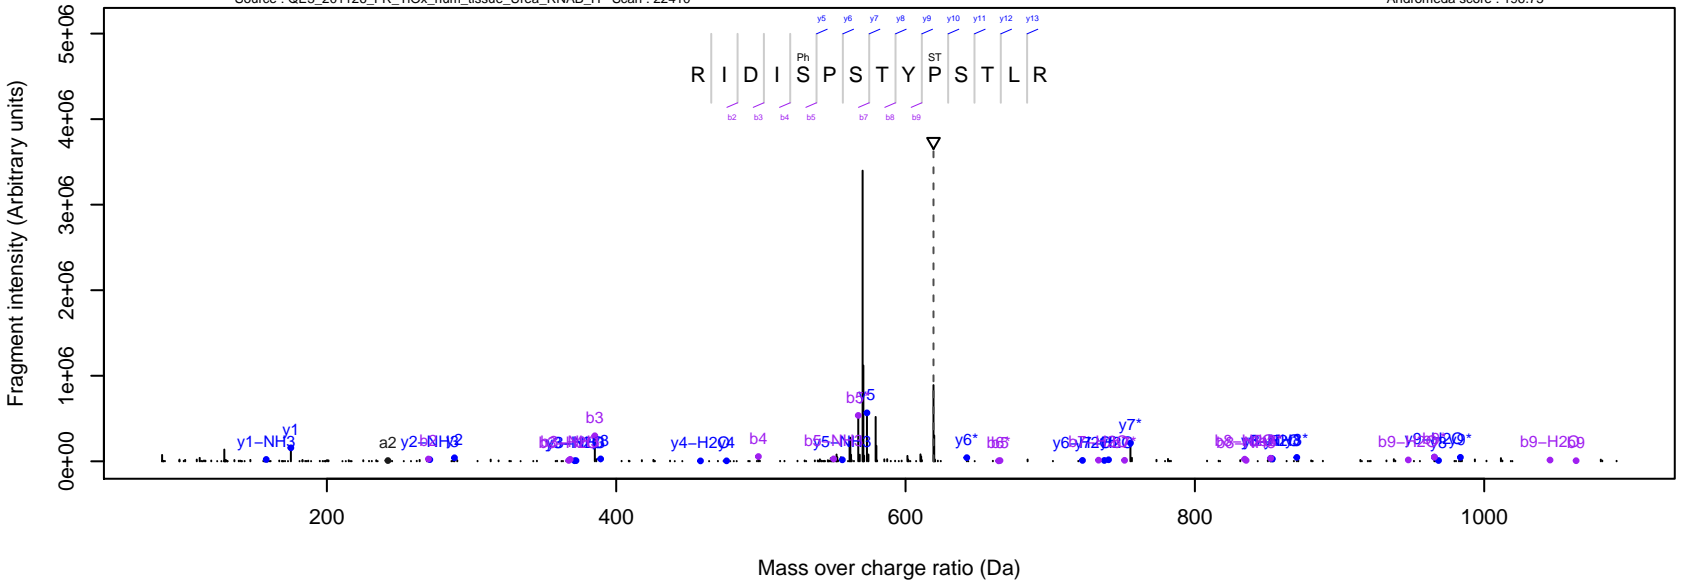

RPGTQGHLGPEKEEEE(Phospho (STY))DGEPEDSSTS-3+

Source : QE3\_201126\_FR\_TiOx\_hum\_tissue\_Urea\_RNAB\_H Scan : 9694

Andromeda score : 196.68

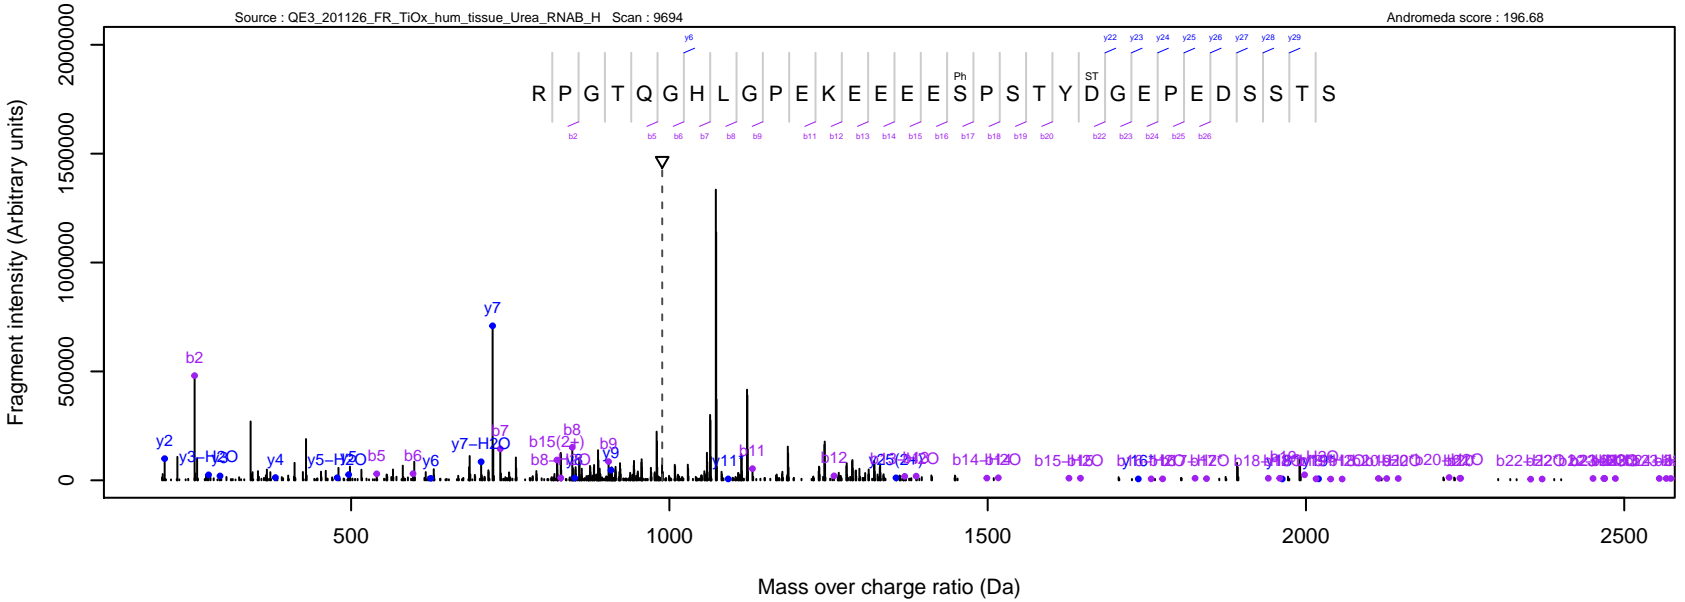

(Acetyl (Protein N-term))S(Phospho (STY))DVEENNFEGR-2+

Source : QE3\_201126\_FR\_TiOx\_hum\_tissue\_Urea\_RNAB\_N Scan : 26908

Andromeda score : 196.67

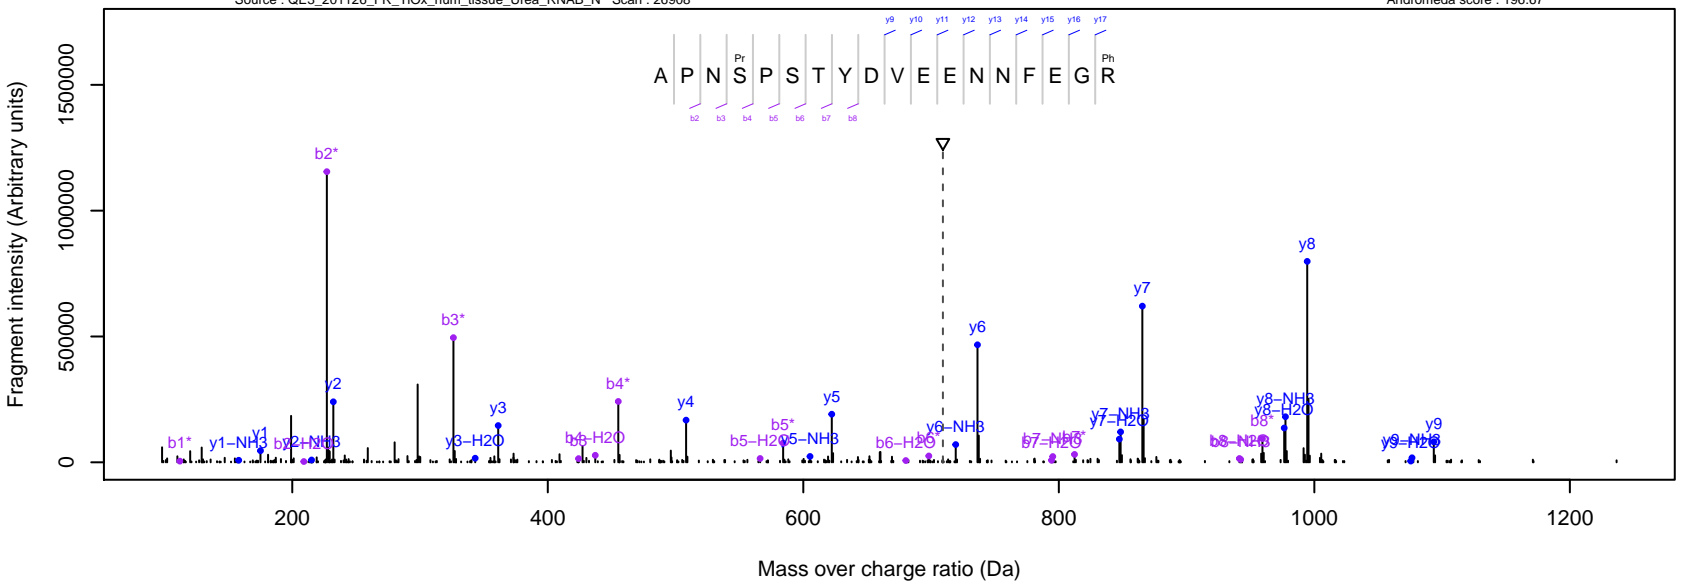

AGGAS(Phospho (STY))PAASSTAQPPTQHR-2+

Source : QE3\_201126\_FR\_TiOx\_hum\_tissue\_Urea\_RNAB\_N Scan : 6632

Andromeda score : 196.66

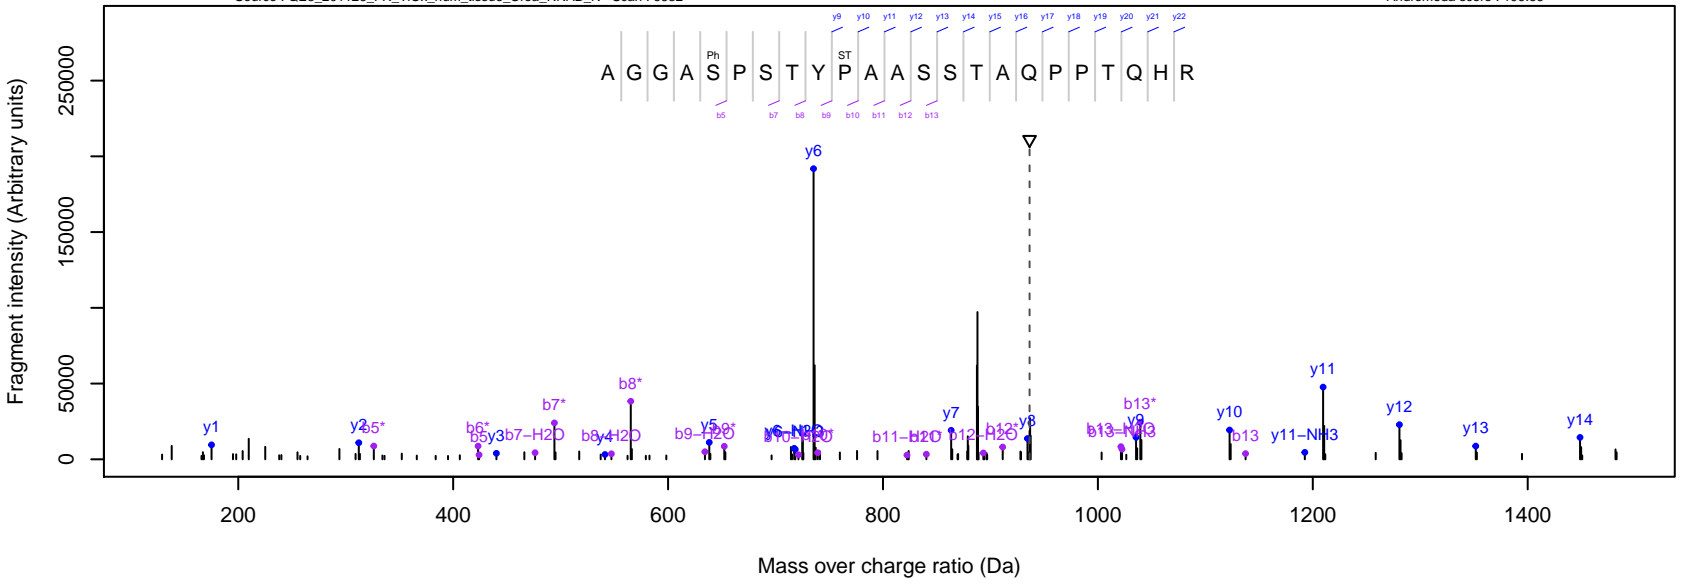

VDSEGD(Phospho (STY))ENDDAAGDFR-2+

Source : QE3\_201126\_FR\_TiOx\_hum\_tissue\_Urea\_RNAB\_B Scan : 29667

Andromeda score : 196.66

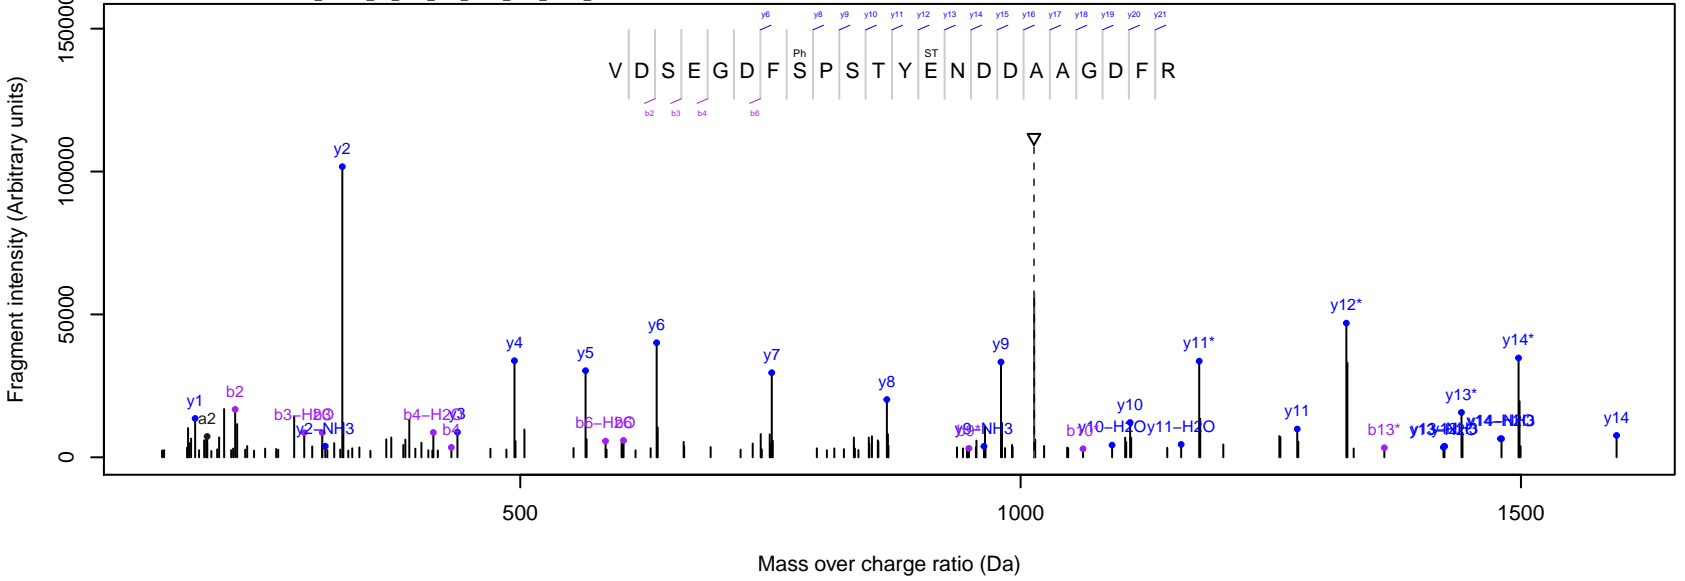

KPS(Phospho (STY))PAQAAETPALELPLPVPAPAPL-2+

Source : QE3\_201126\_FR\_TiOx\_hum\_tissue\_Urea\_RNAB\_H Scan : 60772

Andromeda score : 196.55

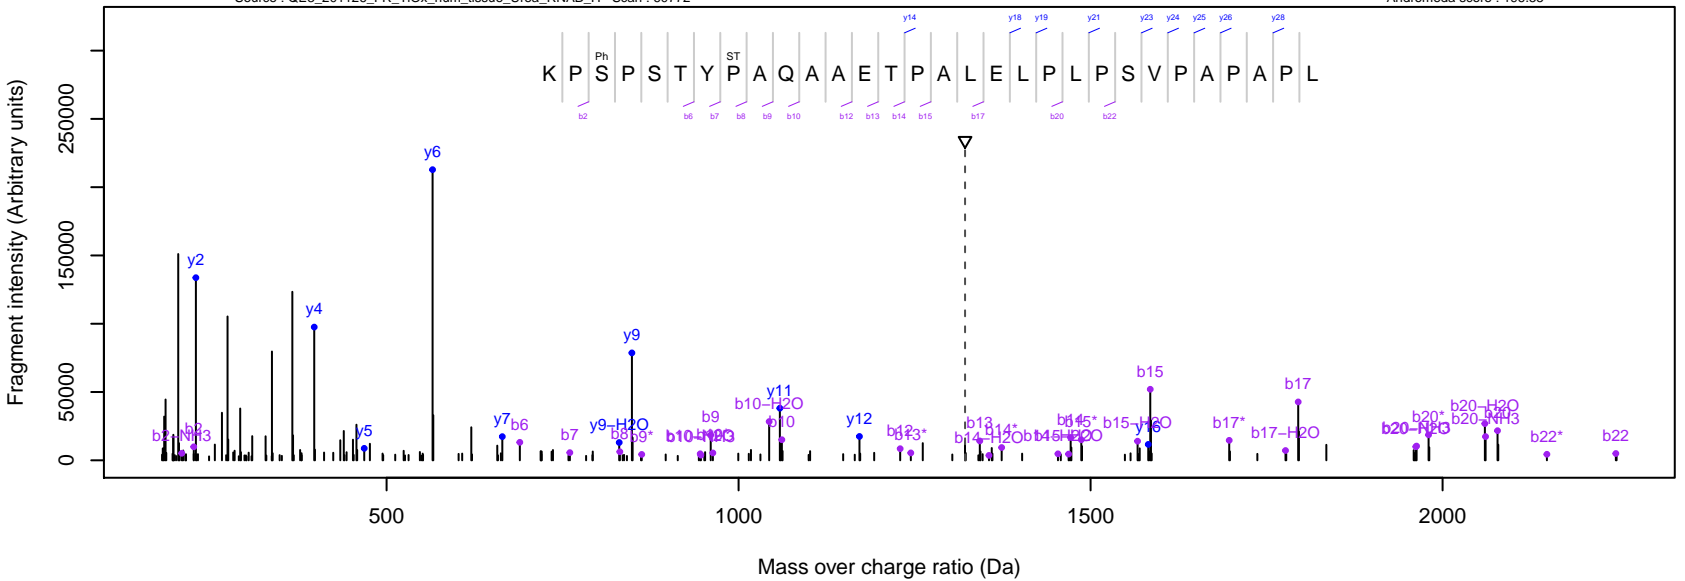

HNGSLS(Phospho (STY))PGLEAR-2+

Source : QE3\_201126\_FR\_TiOx\_hum\_tissue\_Urea\_RNAB\_H Scan : 11894

Andromeda score : 196.48

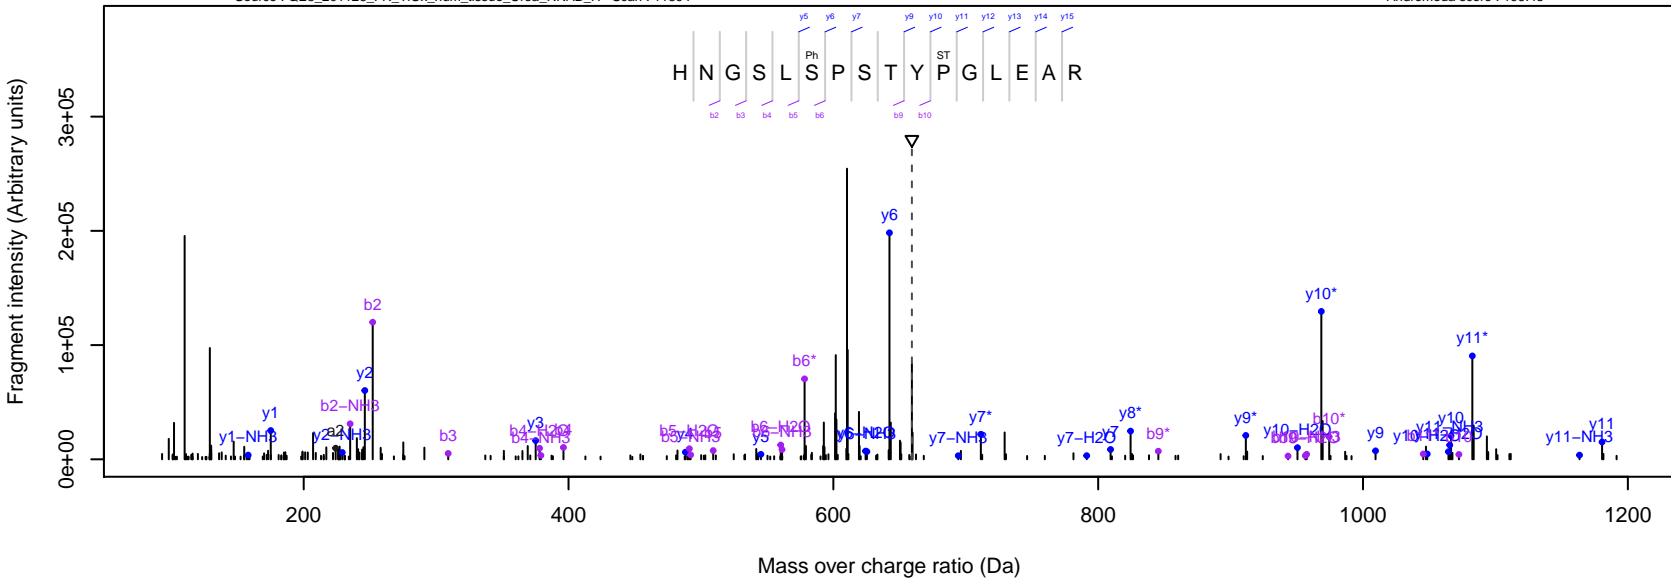

KVPVPEGLDLDAWINEPLS(Phospho (STY))DS(Phospho (STY))ESEDERPR-3+

Source : QE3\_201126\_FR\_TiOx\_hum\_tissue\_Urea\_RNAB\_N Scan : 56681

Andromeda score : 196.27

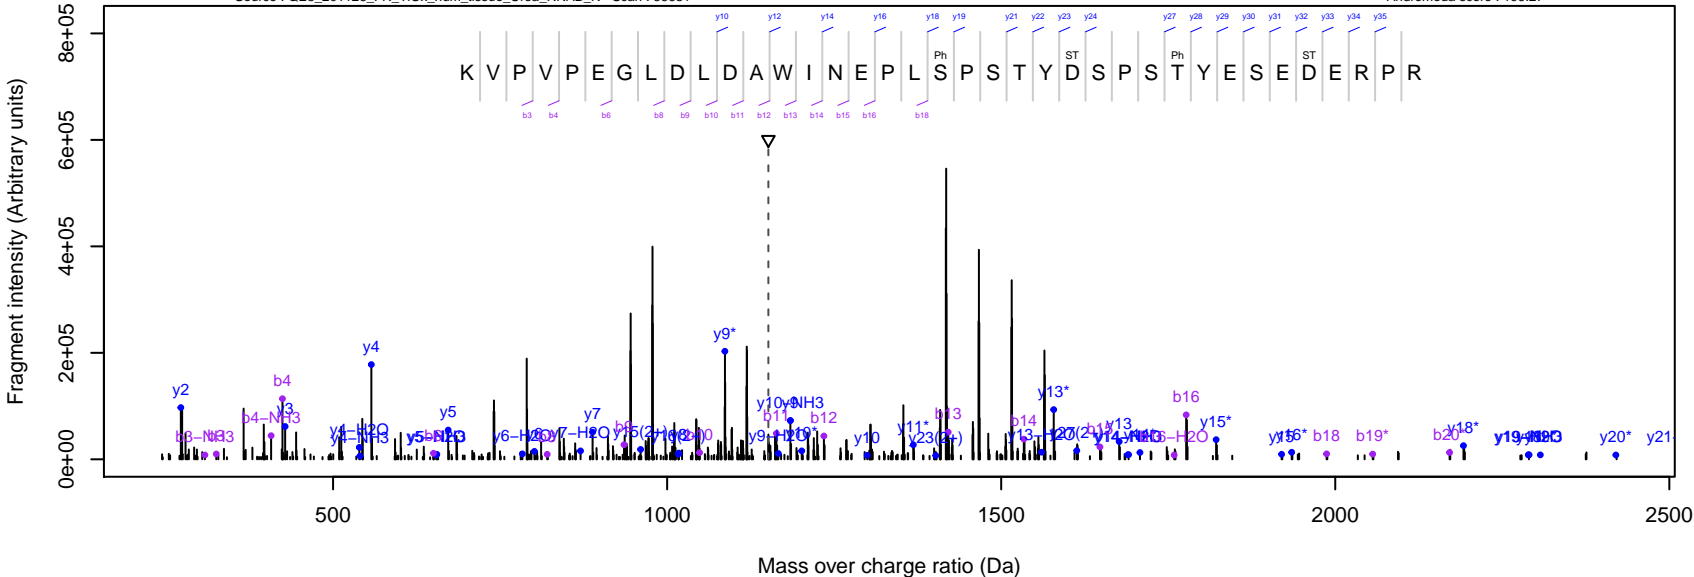

LPAKLS(Phospho (STY))ISK-2+

Source : QE3\_201126\_FR\_TiOx\_hum\_tissue\_Urea\_RNAB\_N Scan : 15739

Andromeda score : 196.24

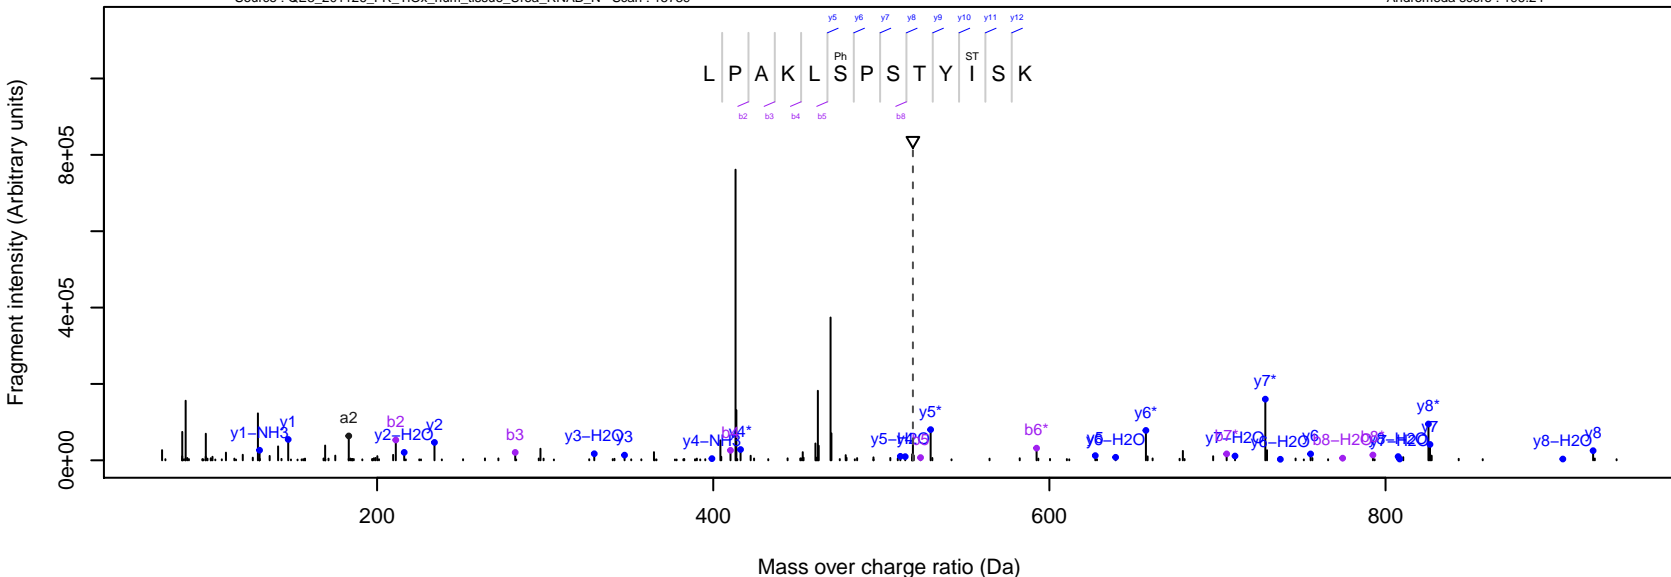

LGAGEGEASVS(Phospho (STY))PEKTTTSK-3+

Source : QE3\_201126\_FR\_TiOx\_hum\_tissue\_Urea\_RNAB\_N Scan : 10233

Andromeda score : 196.22

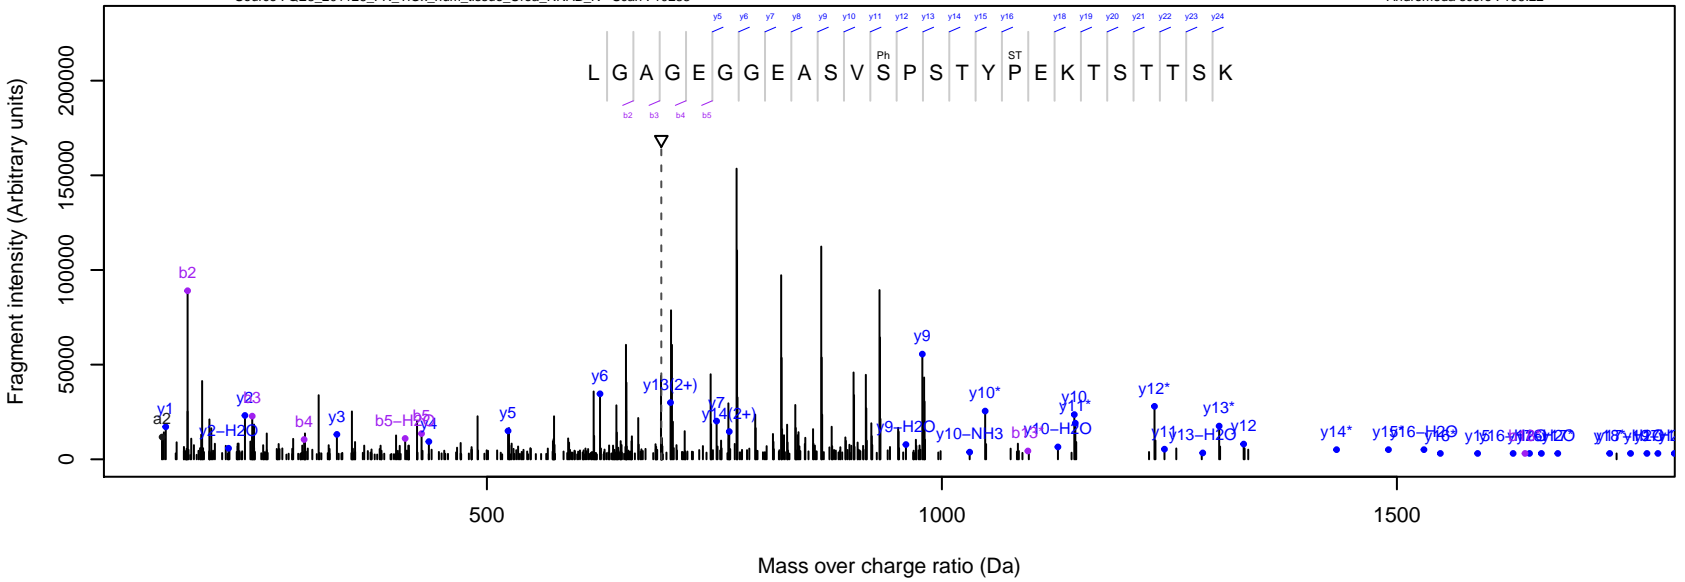

APLKYPVVS(Phospho (STY))PSDKVLIQEK-3+

Source : QE3\_201126\_FR\_TiOx\_hum\_tissue\_Urea\_RNAB\_H Scan : 25984

Andromeda score : 196.2

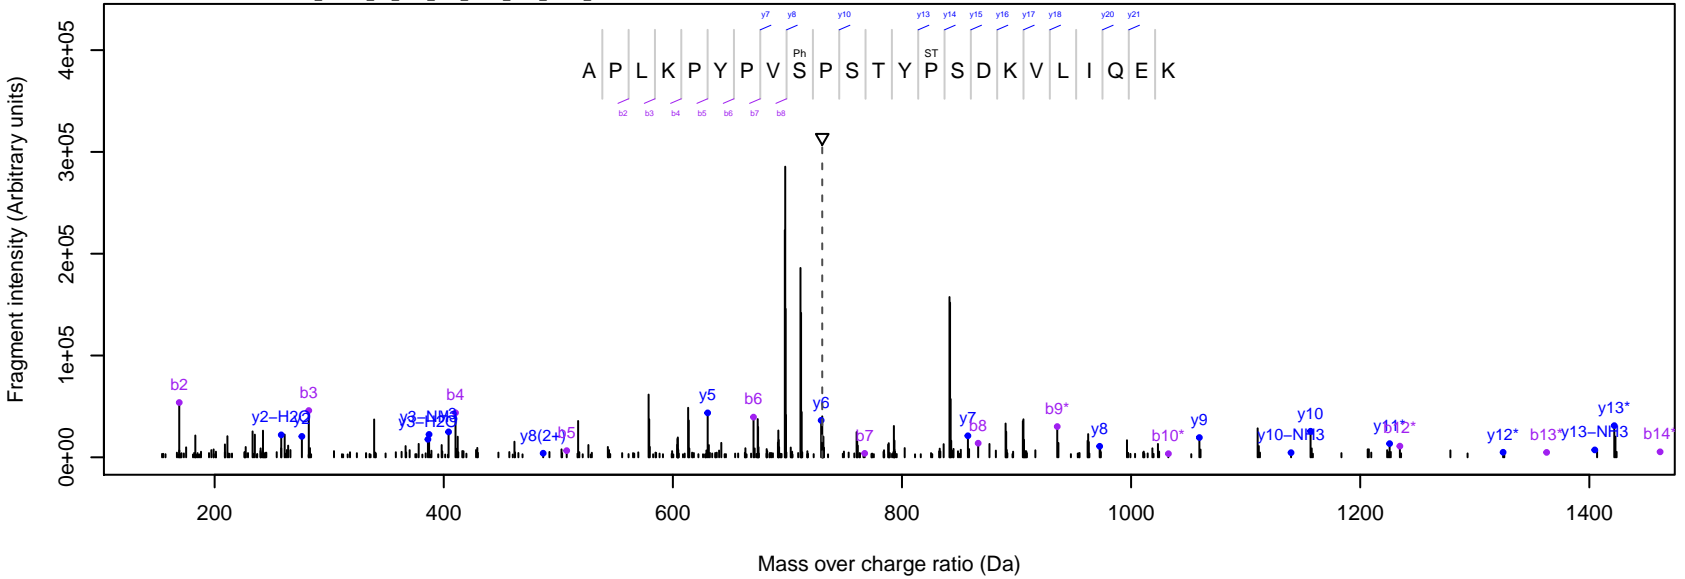

M(Oxidation (M))FSFSGFDS(Phospho (STY))TNQHTVQTENR-3+

Source : QE3\_201126\_FR\_TiOx\_hum\_tissue\_Urea\_RNAB\_B Scan : 31927

Andromeda score : 196.18

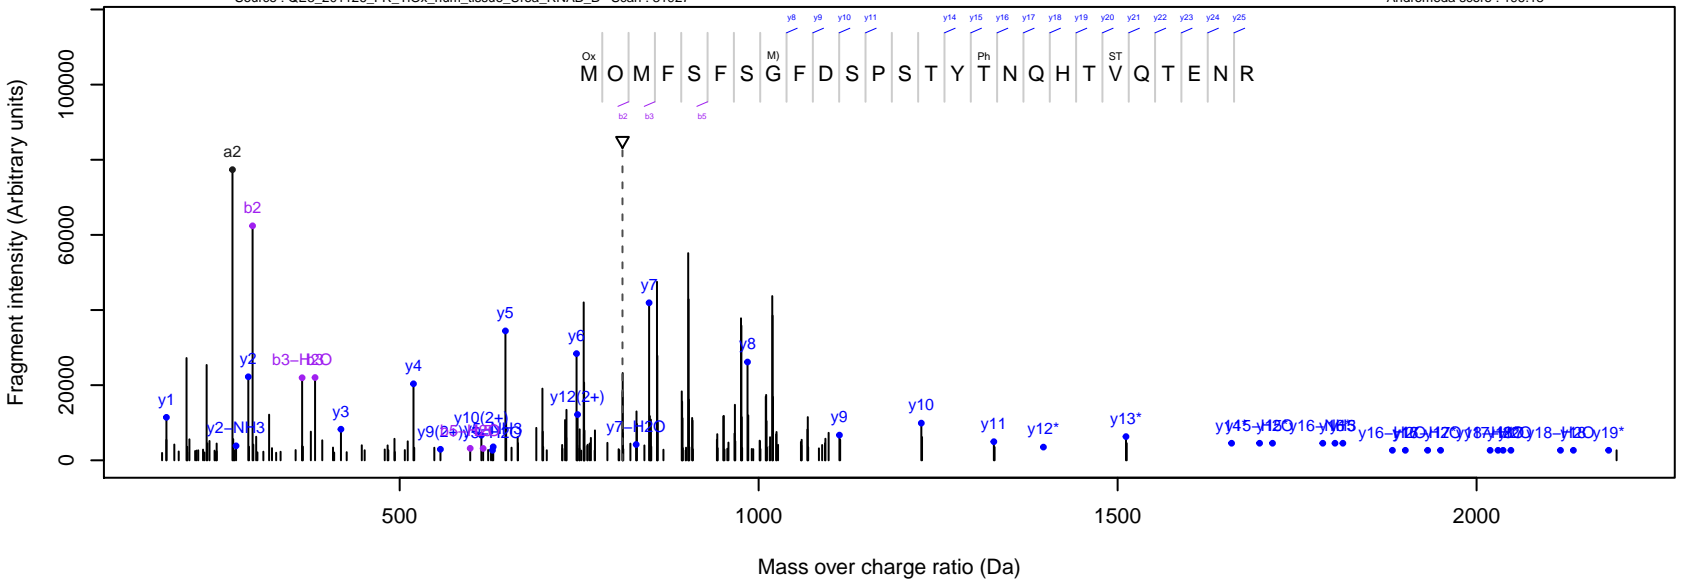

AQS(Phospho (STY))EAEKLAK-2+

Source : QE3\_201126\_FR\_TIOx\_hum\_tissue\_Urea\_RNAB\_H Scan : 6605

Andromeda score : 196.15

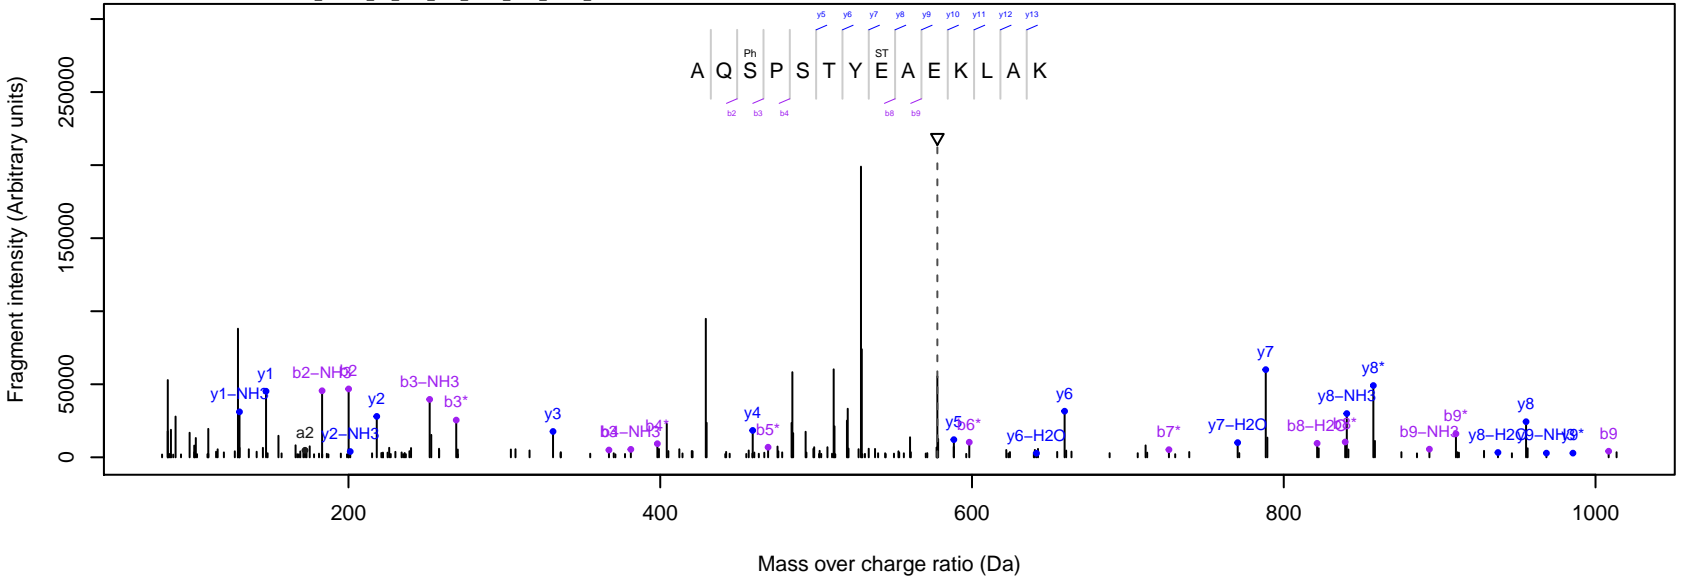

HVTLPSS(Phospho (STY))PR-2+

Source : QE3\_201126\_FR\_TIOx\_hum\_tissue\_Urea\_RNAB\_N Scan : 10177

Andromeda score : 196.11

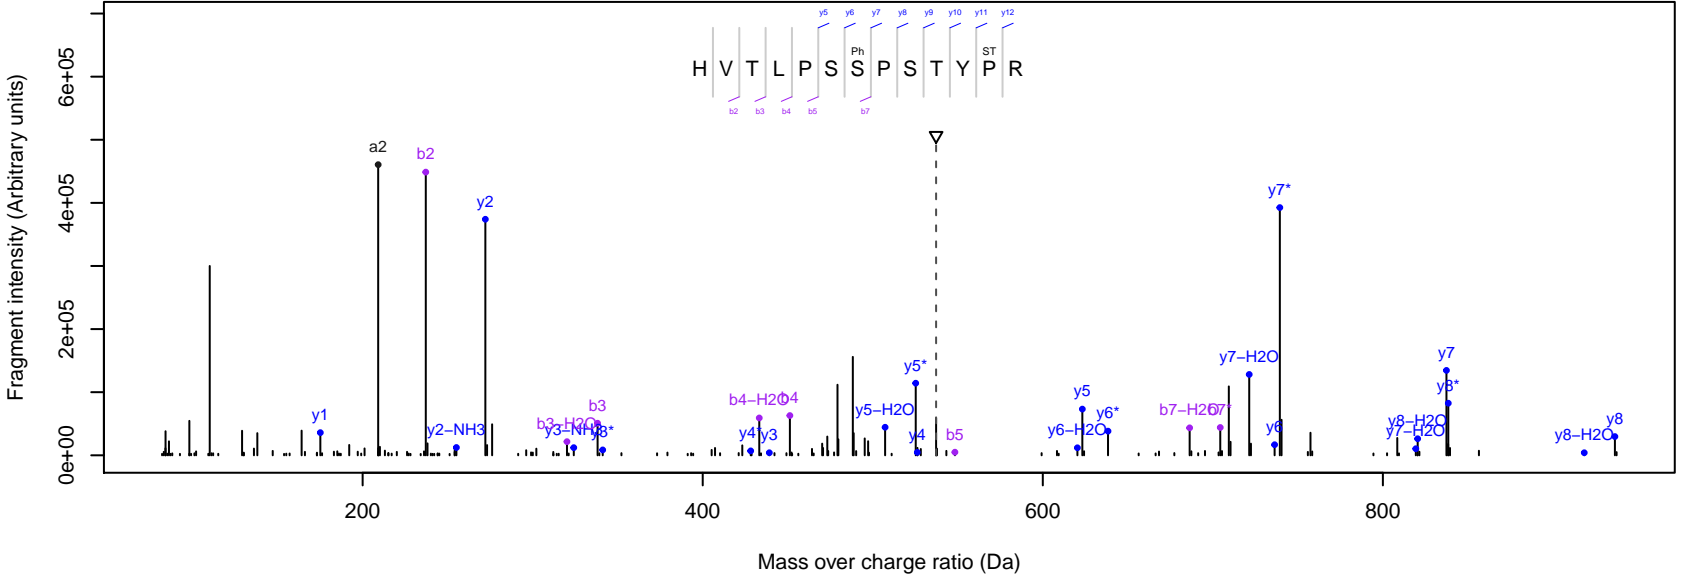

RLS(Phospho (STY))LGQGDSTEATEER-3+

Source : QE3\_201126\_FR\_TIOx\_hum\_tissue\_Urea\_RNAB\_H Scan : 16969

Andromeda score : 196.11

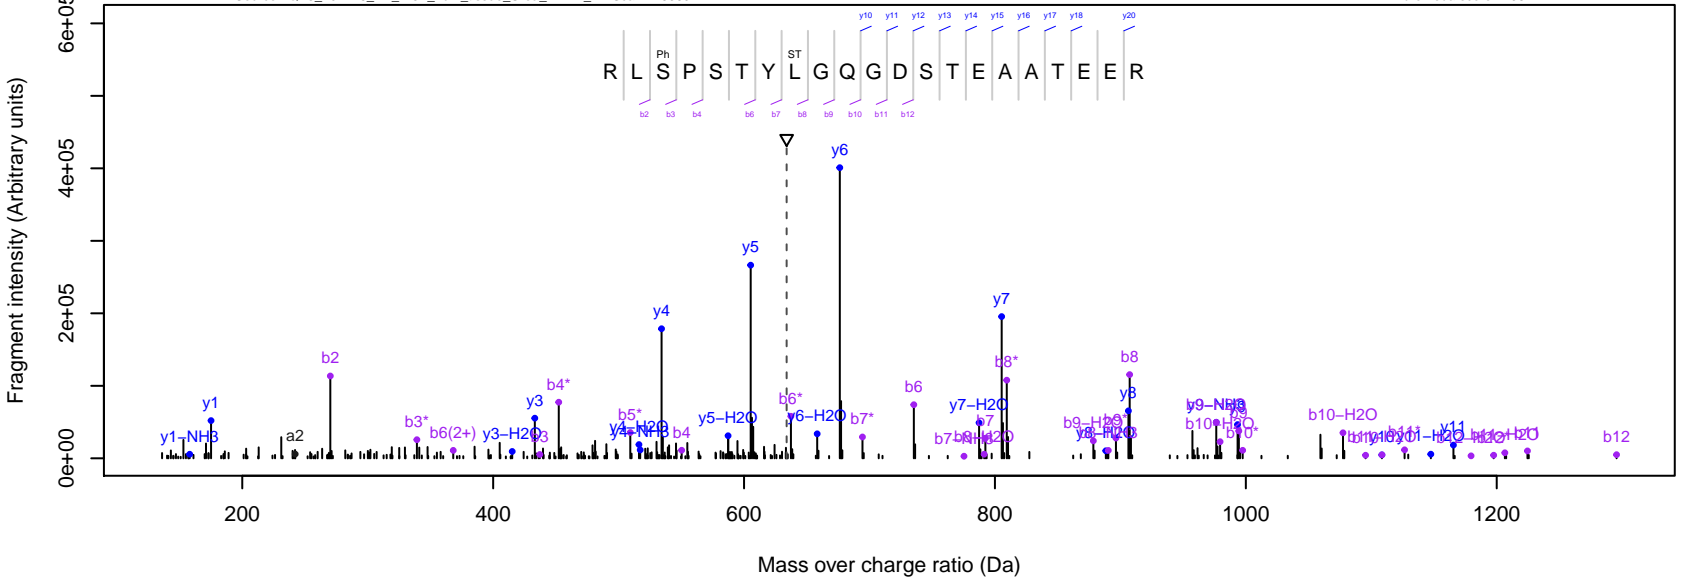

KTES(Phospho (STY))FQNAQAGSNPK-2+

Source : QE3\_201126\_FR\_TiOx\_hum\_tissue\_Urea\_RNAB\_H Scan : 6465

Andromeda score : 195.97

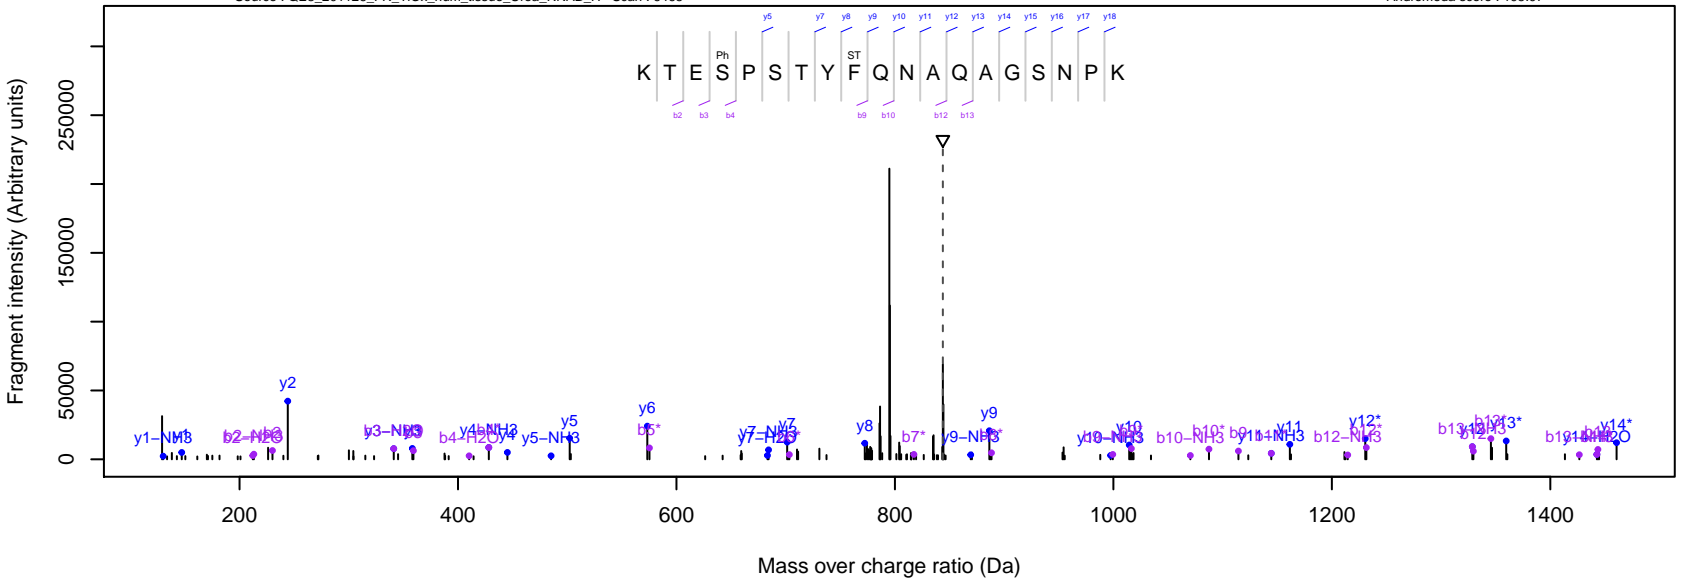

HNIAGTTHSGAEKDVSEDS(Phospho (STY))PPPLPER-4+

Source : QE3\_201126\_FR\_TiOx\_hum\_tissue\_Urea\_RNAB\_N Scan : 18219

Andromeda score : 195.96

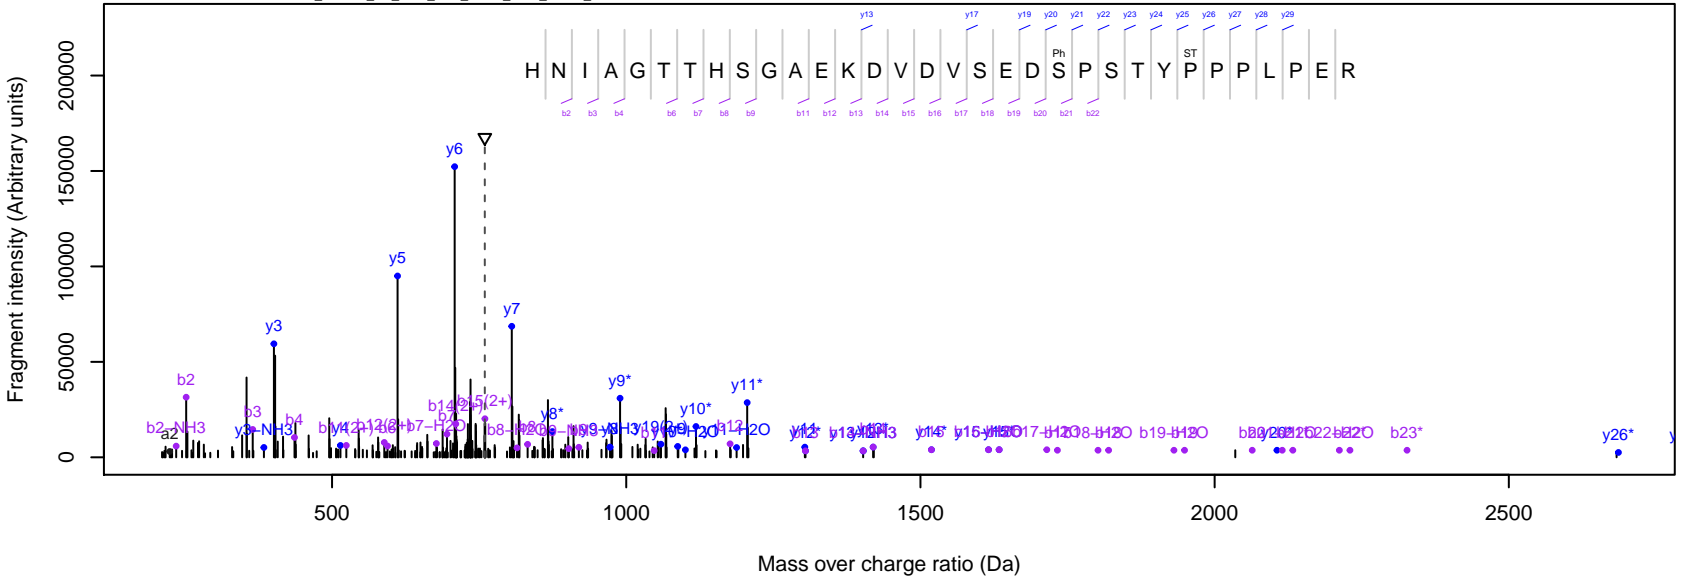

SRLT(Phospho (STY))PVS(Phospho (STY))PES(Phospho (STY))SSTEEK-2+

Source : QE3\_201126\_FR\_TiOx\_hum\_tissue\_Urea\_RNAB\_N Scan : 17712

Andromeda score : 195.96

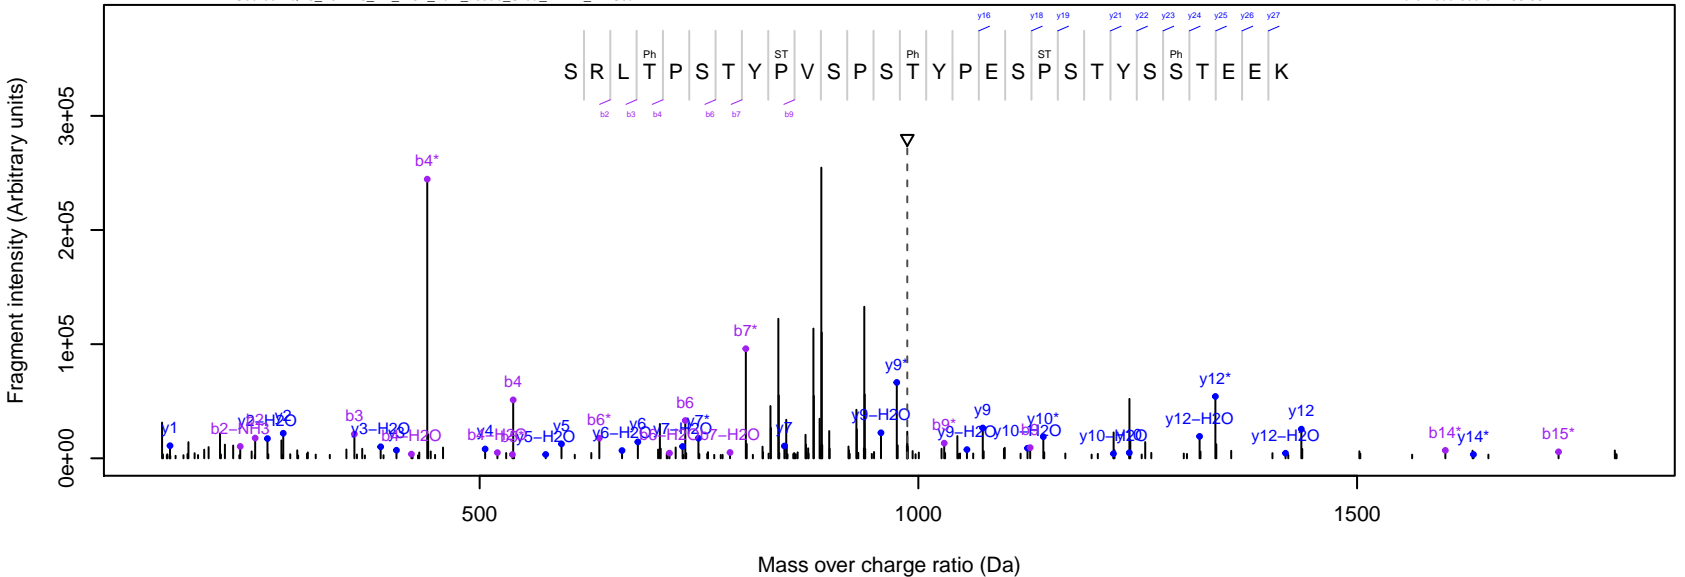



TLNAET(Phospho (STY))PKSS(Phospho (STY))PLPAK-2+

Source : QE3\_201126\_FR\_TiOx\_hum\_tissue\_Urea\_RNAB\_N Scan : 15565

Andromeda score : 195.89

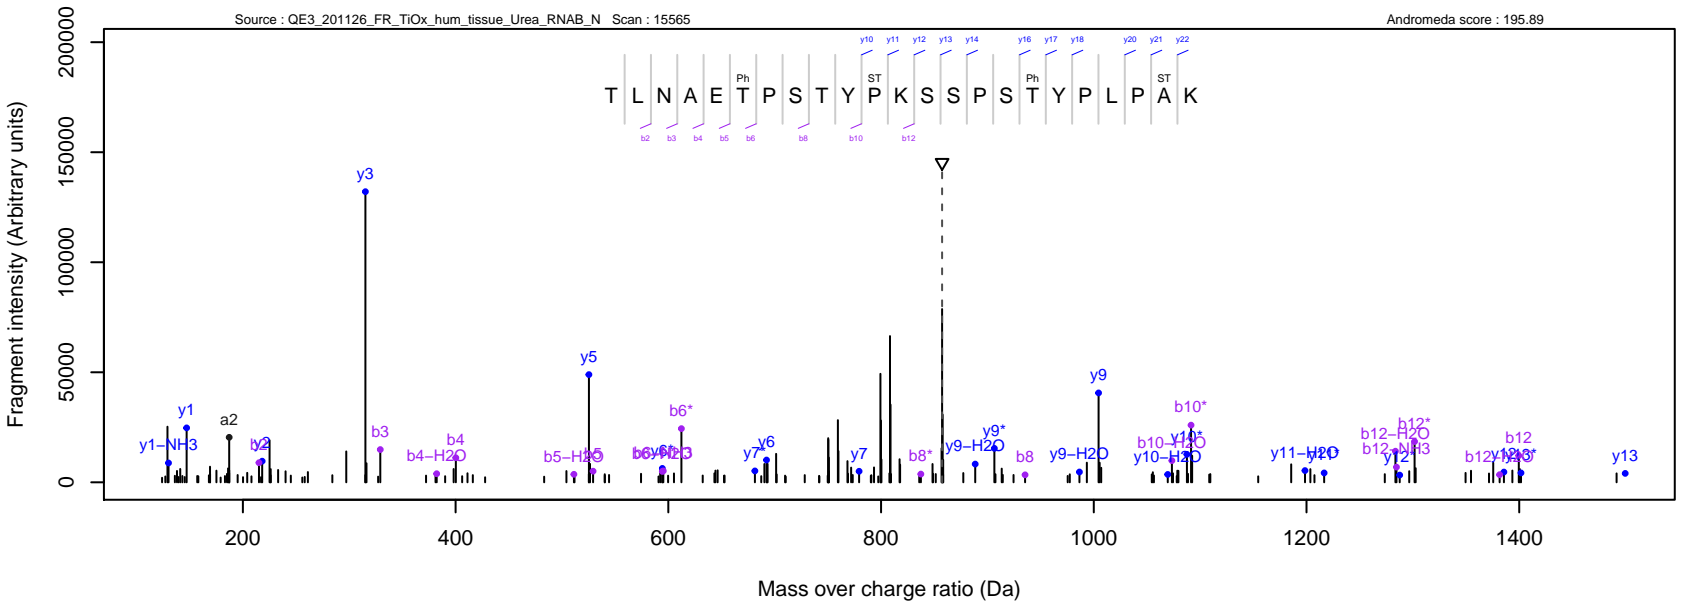

DDDDIDLFGS(Phospho (STY))DDEEESEAKR-3+

Source : QE3\_201126\_FR\_TiOx\_hum\_tissue\_Urea\_RNAB\_H Scan : 37189

Andromeda score : 195.71

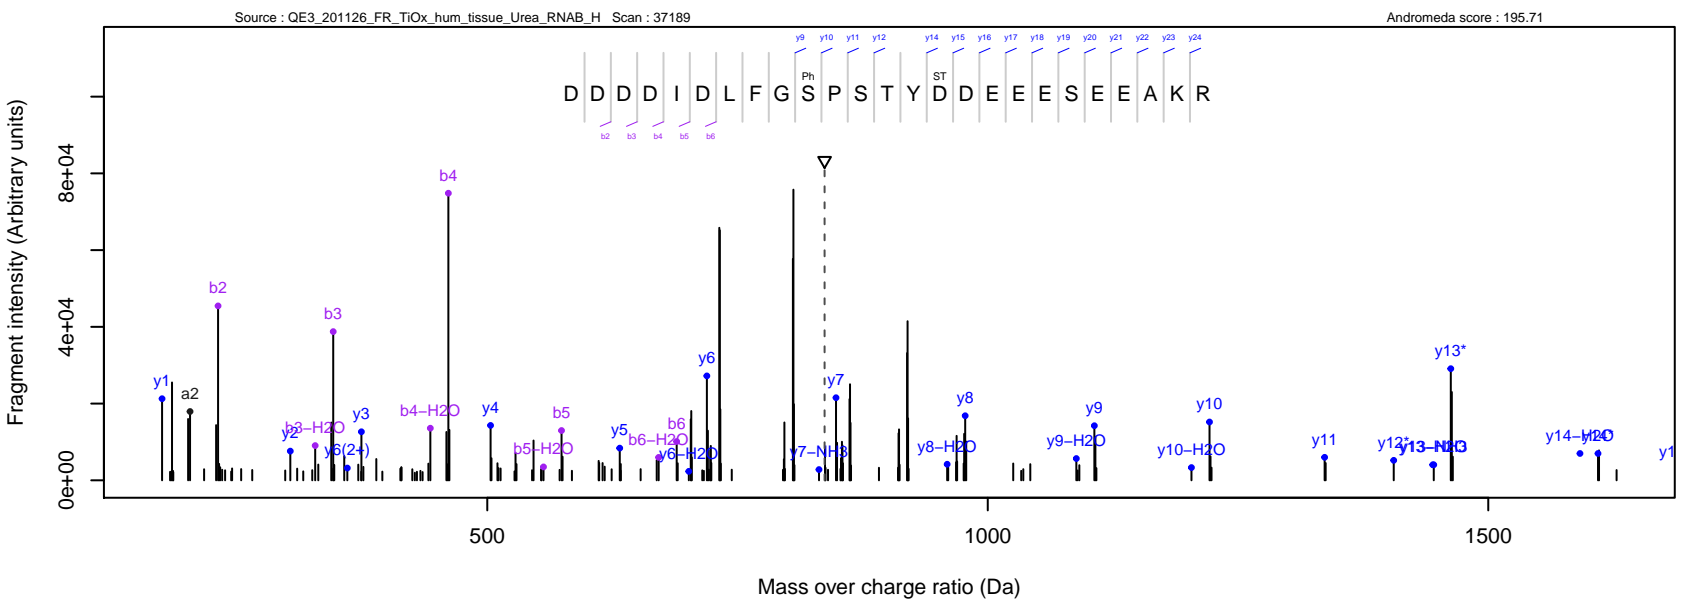

AFGESSTES(Phospho (STY))DEEEEGCGHTHCVR-3+

Source : QE3\_201126\_FR\_TiOx\_hum\_tissue\_Urea\_RNAB\_H Scan : 11781

Andromeda score : 195.63

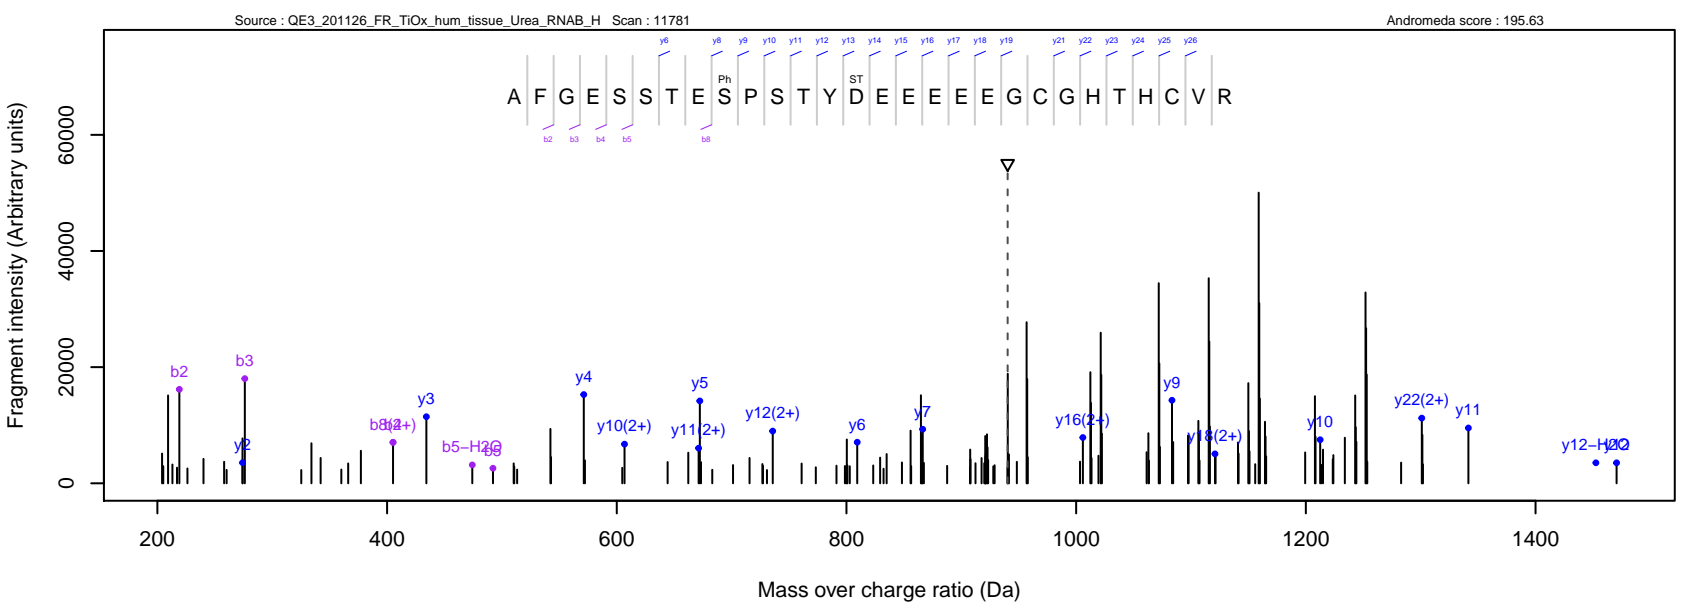

ELVLS(Phospho (STY))S(Phospho (STY))PEDLTQDFEEMKR-3+

Source : QE3\_201126\_FR\_TIOx\_hum\_tissue\_Urea\_RNAB\_B Scan : 57467

Andromeda score : 195.39

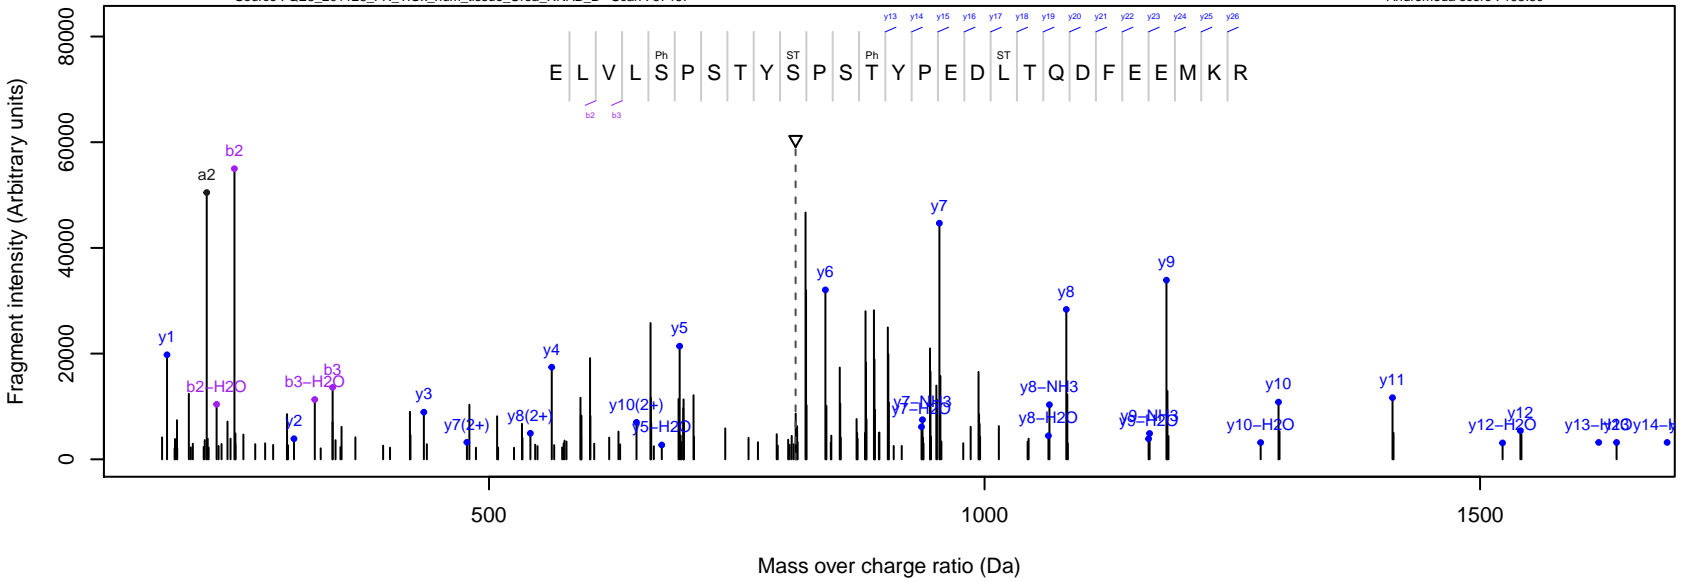

GAS(Phospho (STY))PYGS(Phospho (STY))LNNIADGLSSLTEHFSDLTSEAR-3+

Source : QE3\_201126\_FR\_TIOx\_hum\_tissue\_Urea\_RNAB\_N Scan : 62930

Andromeda score : 195.38

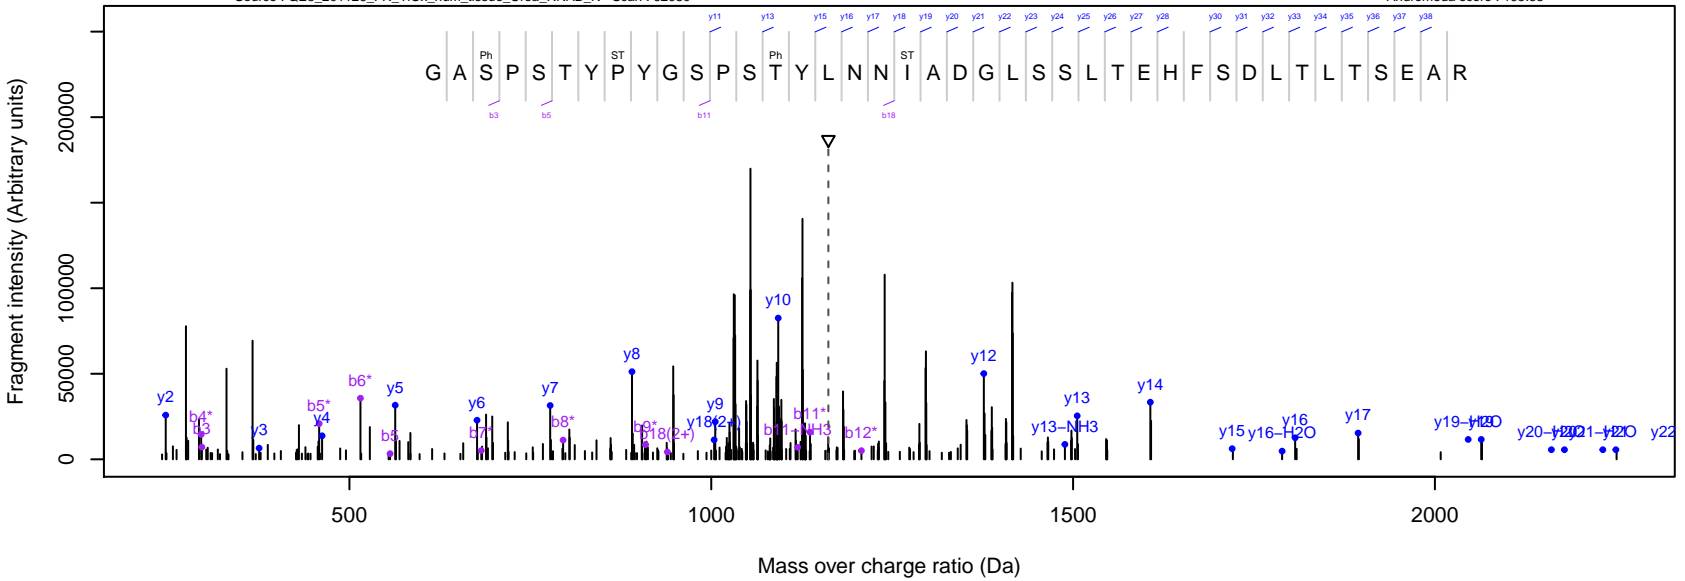

DSGS(Phospho (STY))DEDFLM(Oxidation (M))EDDDDS(Phospho (STY))DYGSISK-2+

Source : QE3\_201126\_FR\_TIOx\_hum\_tissue\_Urea\_RNAB\_H Scan : 44426

Andromeda score : 195.36

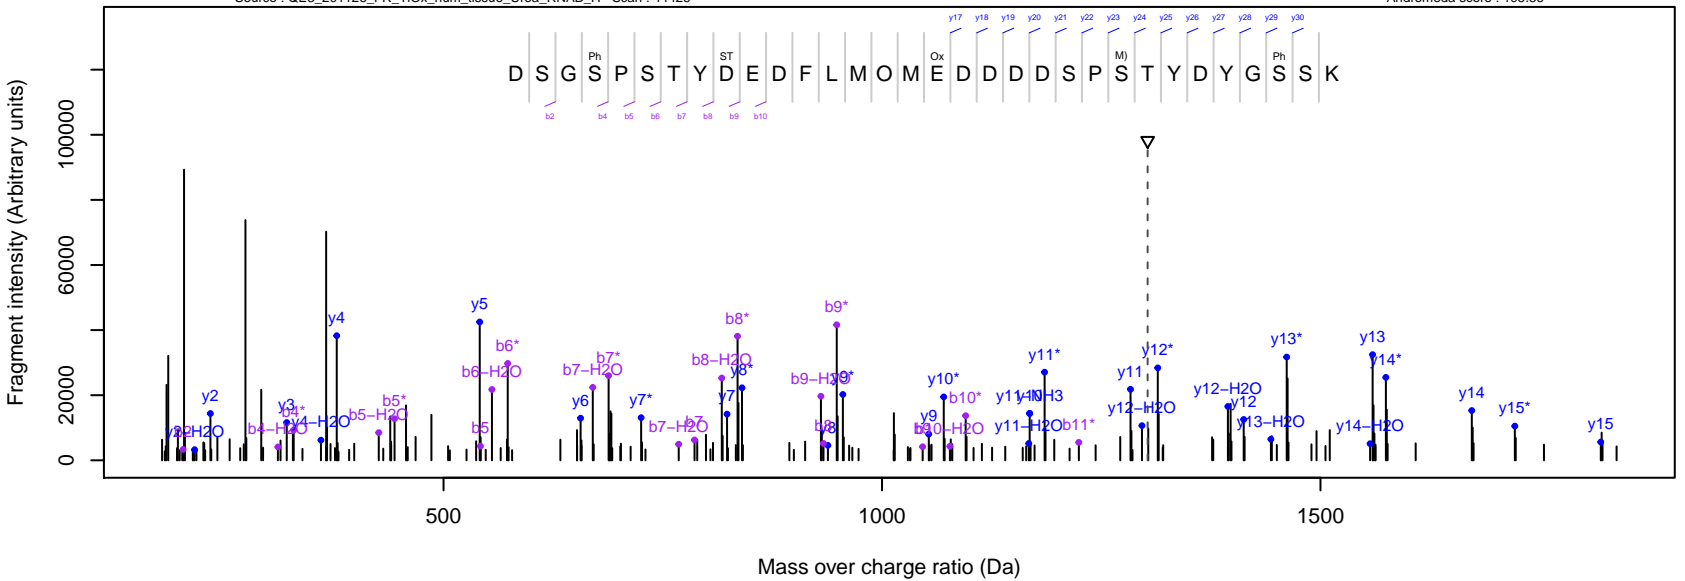

NLS(Phospho (STY))LSSSTPPLPSPGR-2+

Source : QE3\_201126\_FR\_TiOx\_hum\_tissue\_Urea\_RNAB\_H Scan : 38440

Andromeda score : 195.23

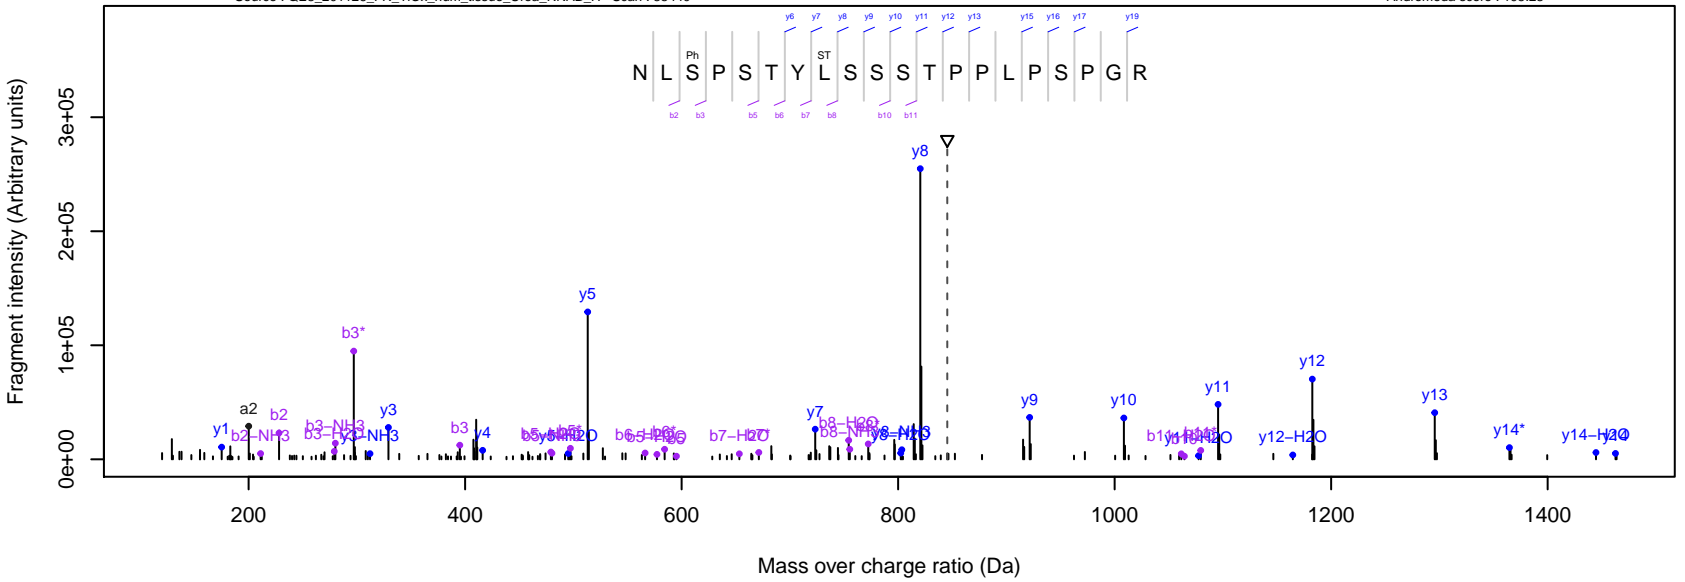

SPS(Phospho (STY))DLLDAVAVSATS R-2+

Source : QE3\_201126\_FR\_TiOx\_hum\_tissue\_Urea\_RNAB\_B Scan : 37832

Andromeda score : 195.23

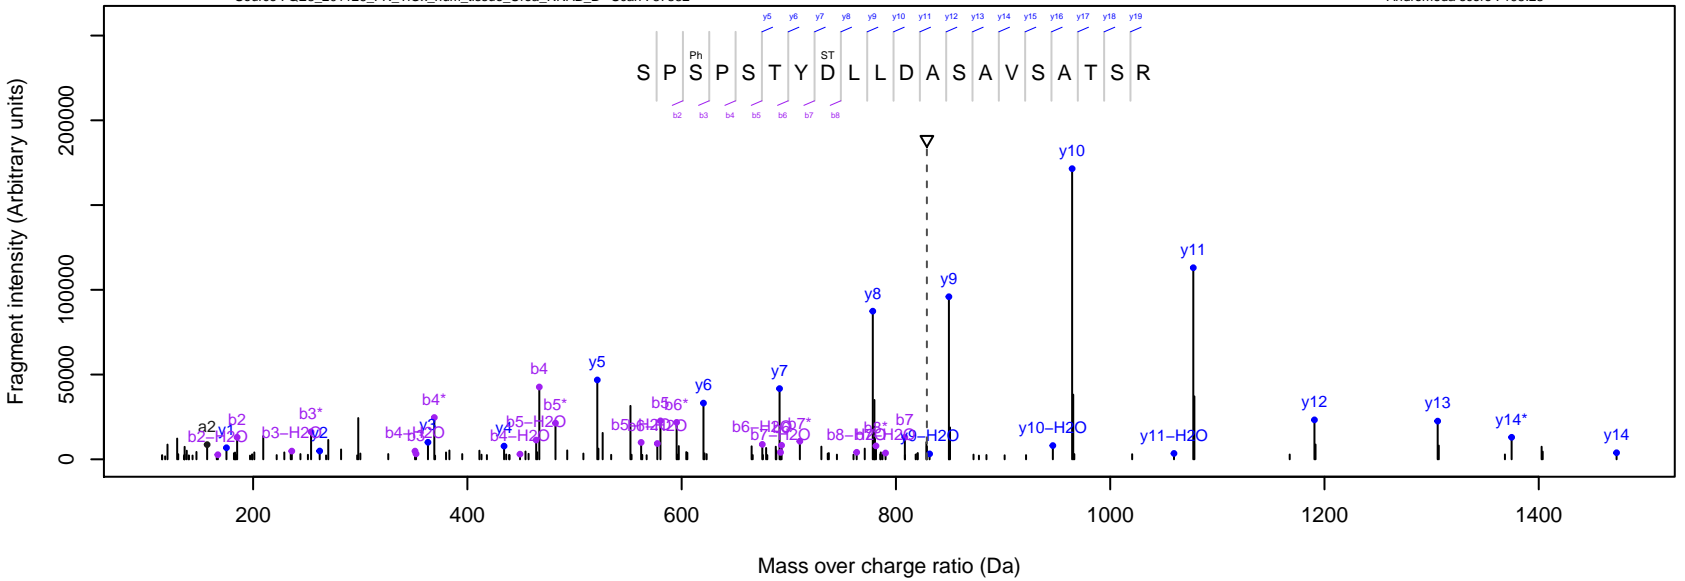

VEM(Oxidation (M))YS(Phospho (STY))GS(Phospho (STY))DDDDFNKLPK-2+

Source : QE3\_201126\_FR\_TiOx\_hum\_tissue\_Urea\_RNAB\_N Scan : 30340

Andromeda score : 195.17

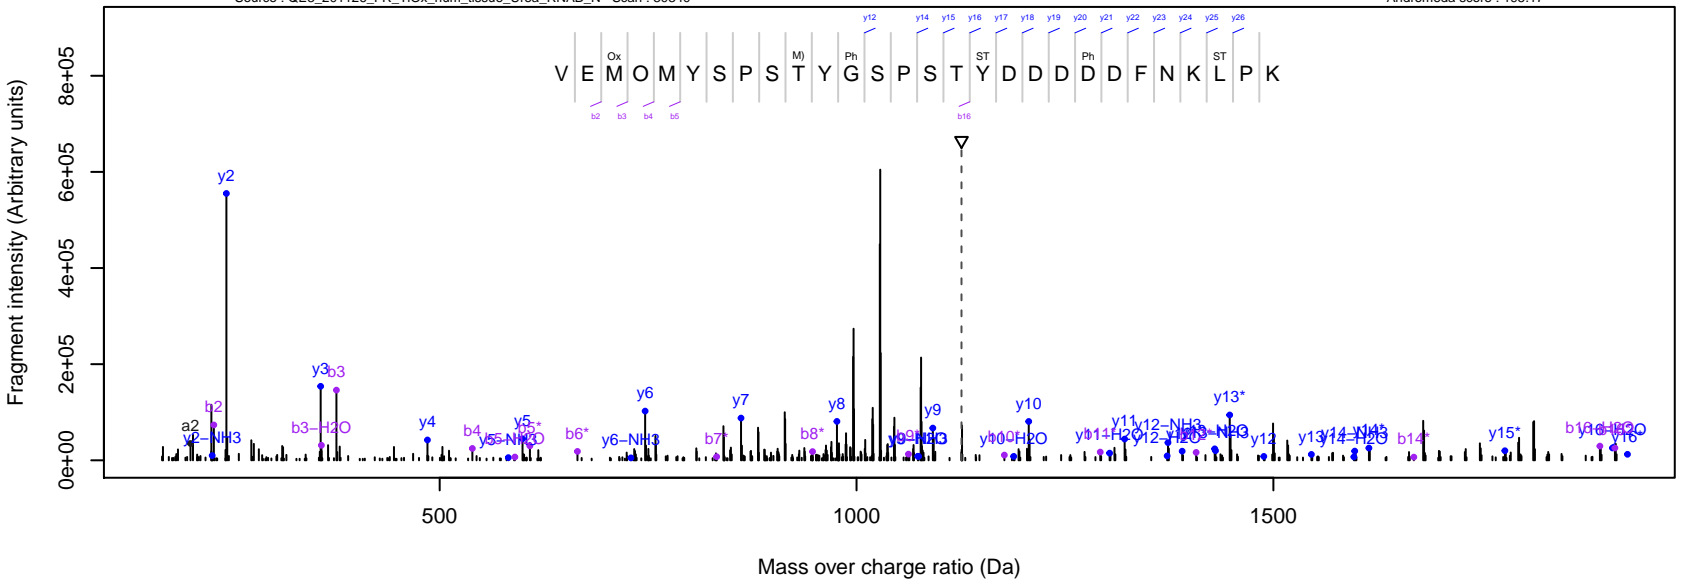

HASSSPES(Phospho (STY))PKPAPAPGSHR-3+

Source : QE3\_201126\_FR\_TiOx\_hum\_tissue\_Urea\_RNAB\_H Scan : 3868

Andromeda score : 195.13

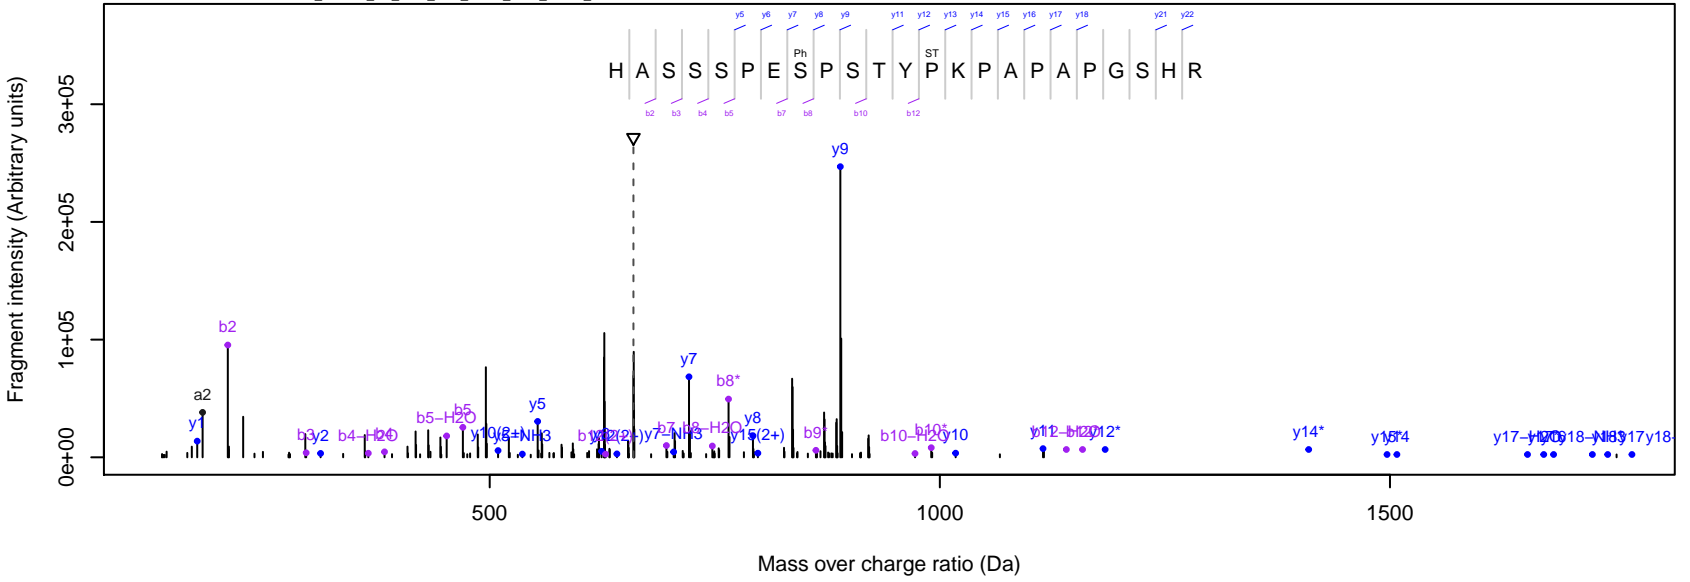

ATS(Phospho (STY))NVFAM(Oxidation (M))FDQSQIQEFKEAFNMIDQNR-3+

Source : QE3\_201126\_FR\_TiOx\_hum\_tissue\_Urea\_RNAB\_H Scan : 61918

Andromeda score : 195.08

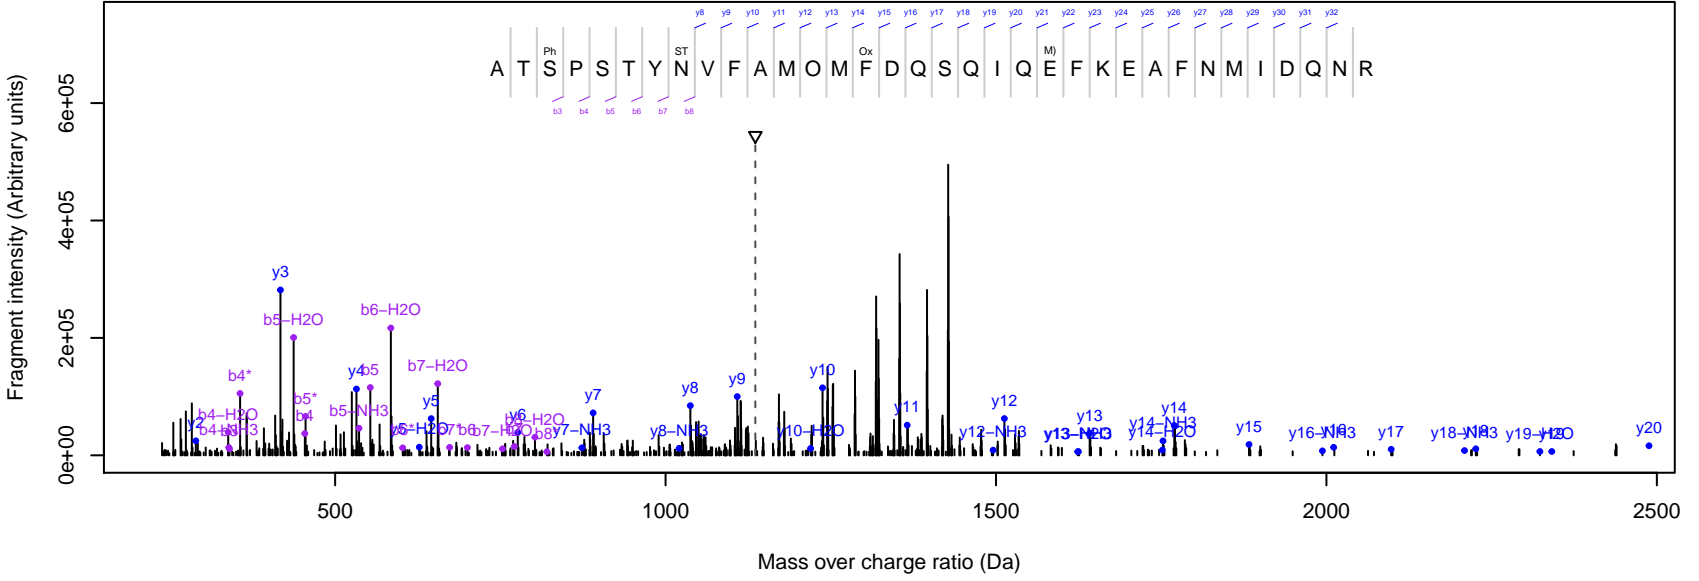

YRGS(Phospho (STY))IHDFPGFDPNQDAEALYTAMK-3+

Source : QE3\_201126\_FR\_TiOx\_hum\_tissue\_Urea\_RNAB\_N Scan : 51957

Andromeda score : 195.08

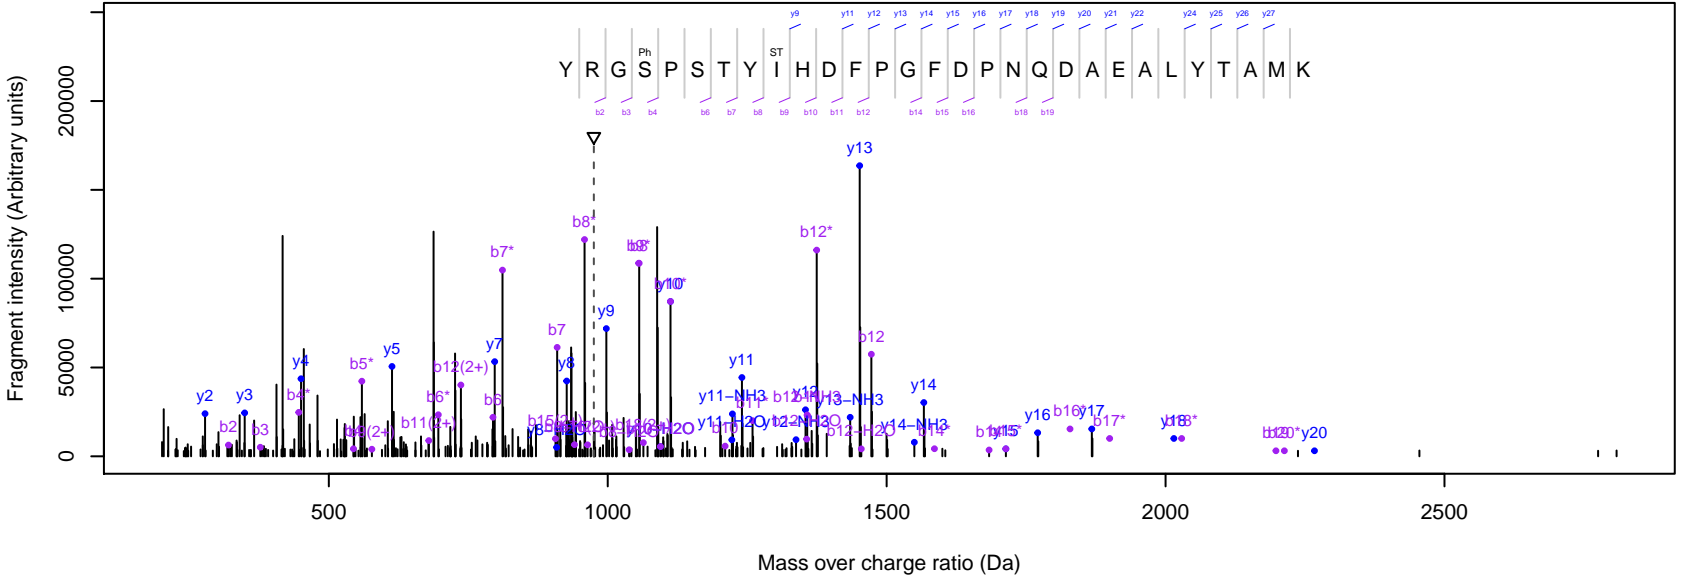

WLKEAEEES(Phospho (STY))S(Phospho (STY))GEEEDENIEVVYSK-3+

Source : QE3\_201126\_FR\_TiOx\_hum\_tissue\_Urea\_RNAB\_H Scan : 42147

Andromeda score : 195.05

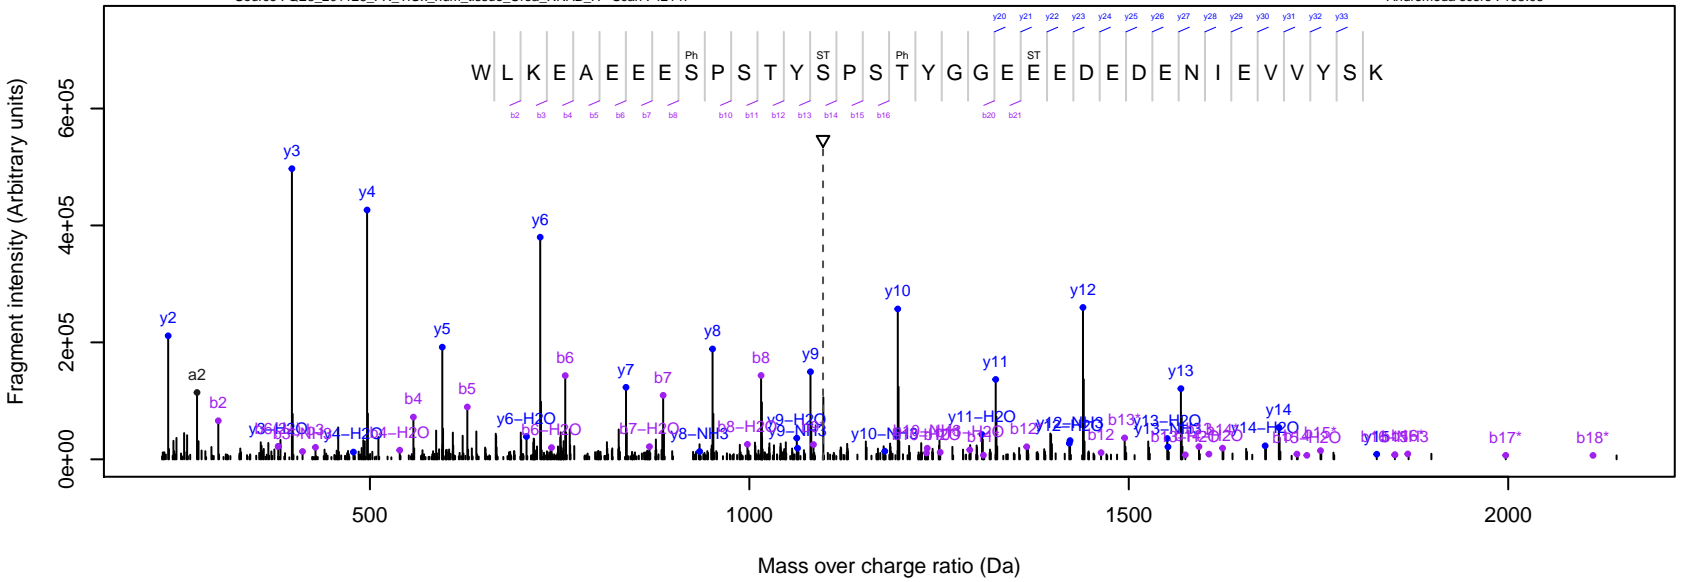

ARS(Phospho (STY))VDALDLPSTAESGSR-2+

Source : QE3\_201126\_FR\_TiOx\_hum\_tissue\_Urea\_RNAB\_B Scan : 28469

Andromeda score : 194.97

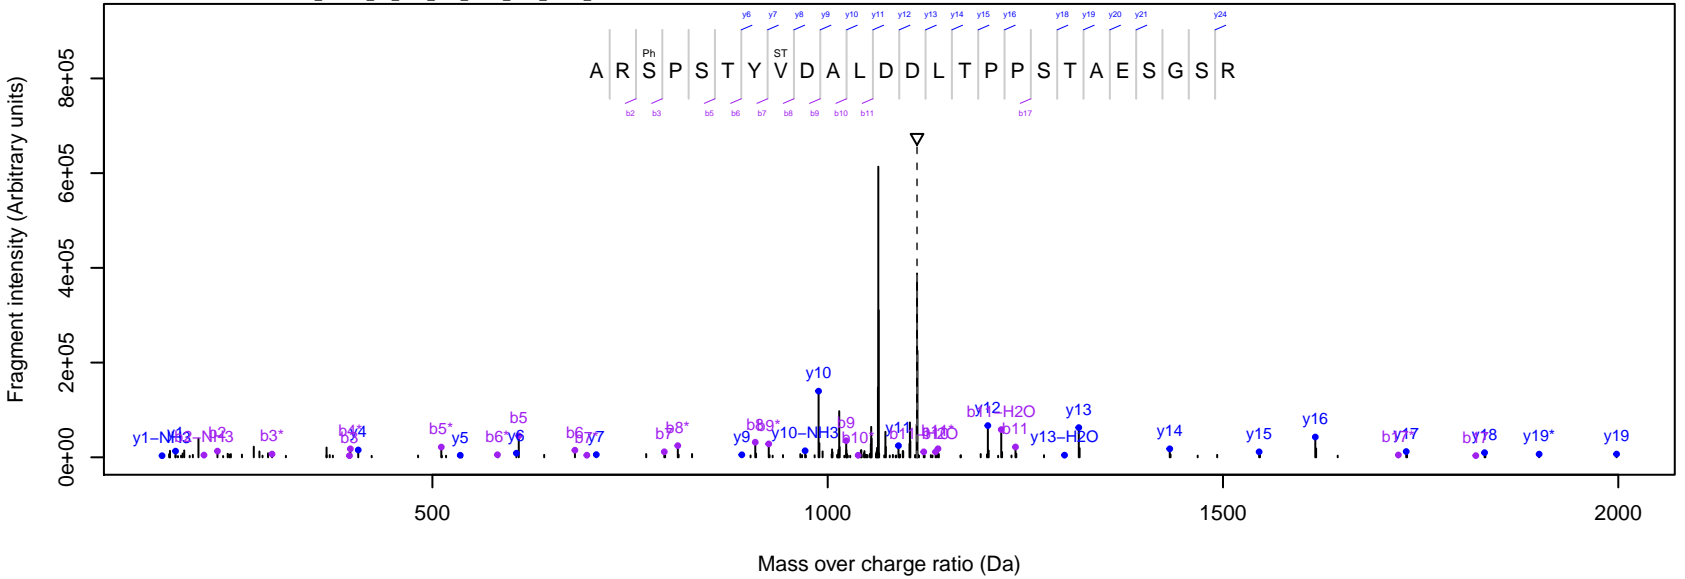

HTFM(Oxidation (M))GVVSLGSPS(Phospho (STY))GEVSHPR-3+

Source : QE3\_201126\_FR\_TiOx\_hum\_tissue\_Urea\_RNAB\_N Scan : 23622

Andromeda score : 194.97

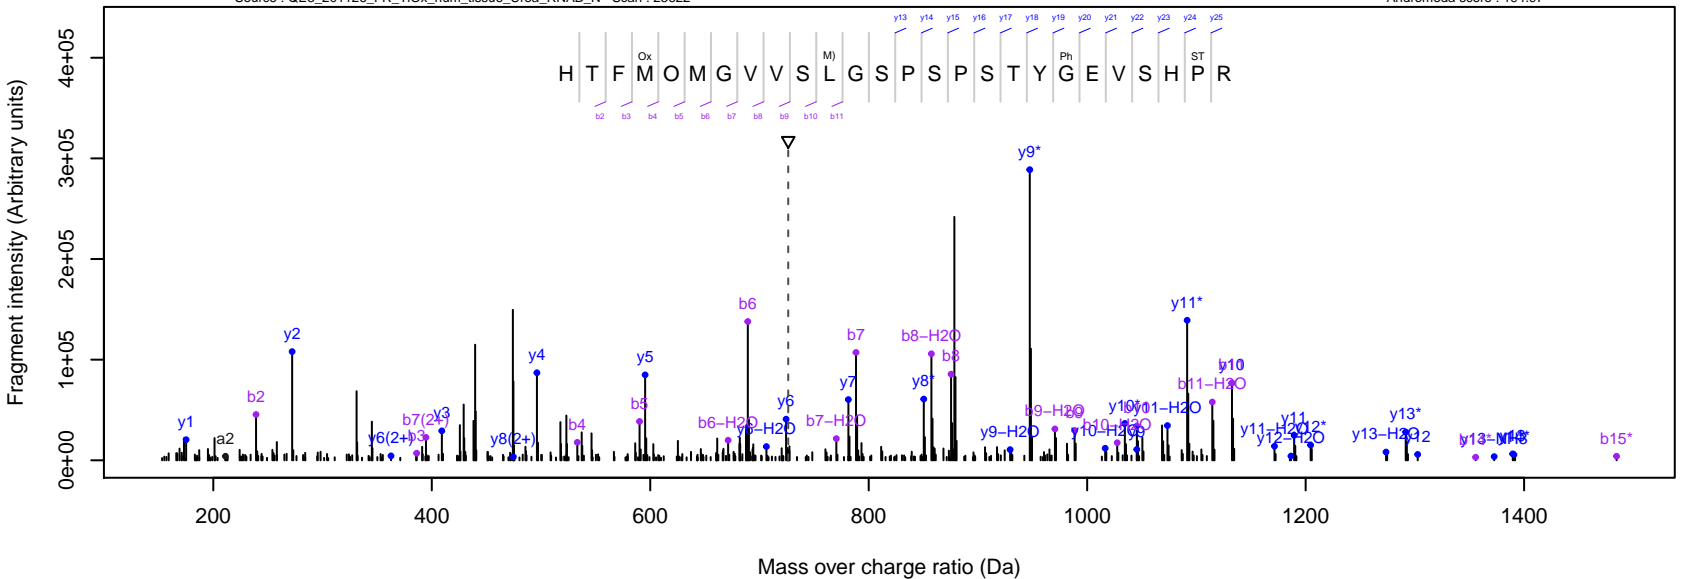

RTS(Phospho (STY))STLDSEGTFSYRK-3+

Source : QE3\_201126\_FR\_TIOx\_hum\_tissue\_Urea\_RNAB\_N Scan : 14350

Andromeda score : 194.94

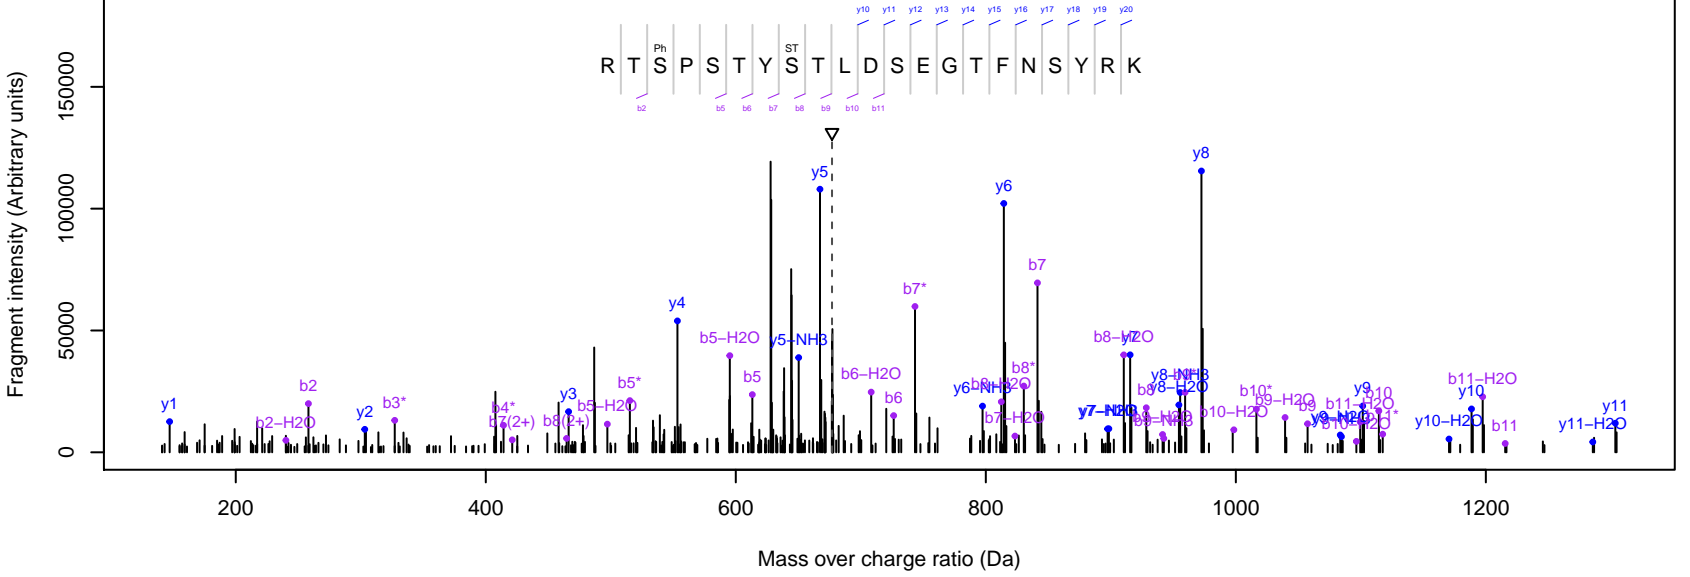

NGILAIEGTGSDVDDMS(Phospho (STY))GDEKQDNESVDPR-3+

Source : QE3\_201126\_FR\_TIOx\_hum\_tissue\_Urea\_RNAB\_N Scan : 35615

Andromeda score : 194.88

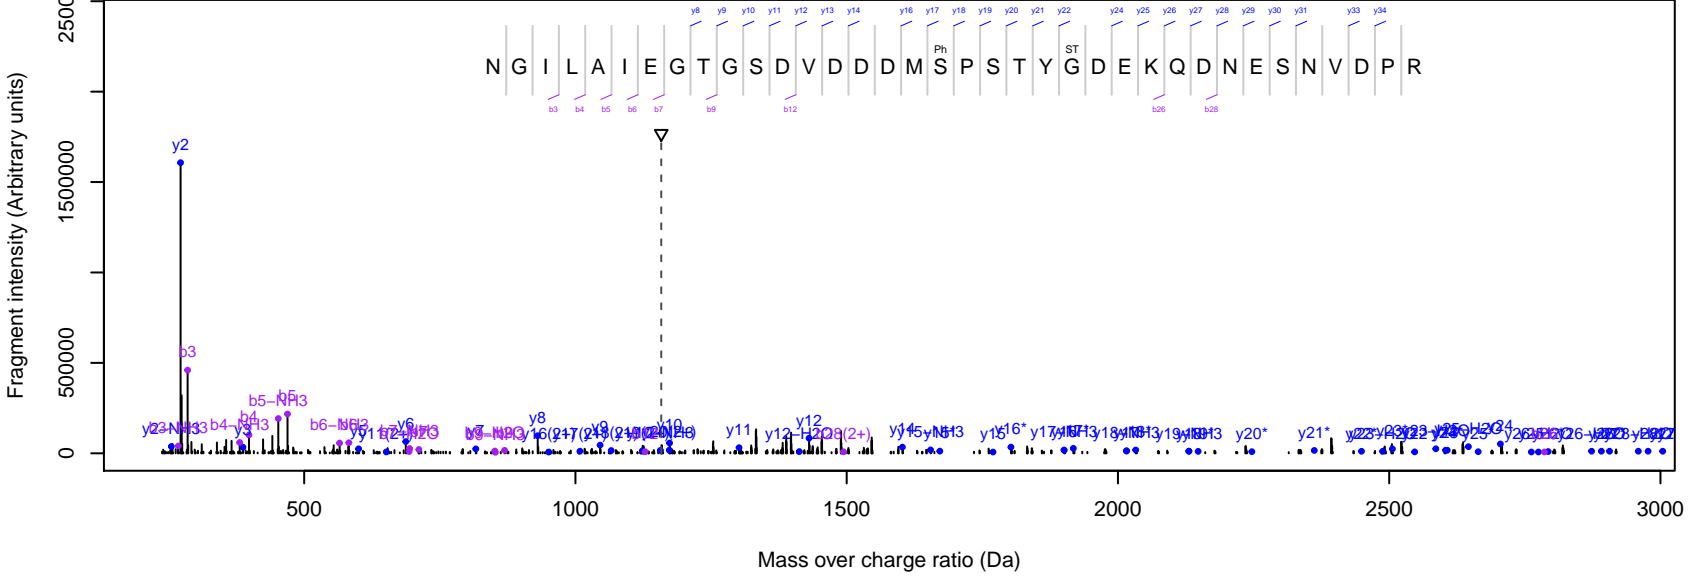

DEILPTT(Phospho (STY))PISEQK-2+

Source : QE3\_201126\_FR\_TIOx\_hum\_tissue\_Urea\_RNAB\_H Scan : 32457

Andromeda score : 194.86

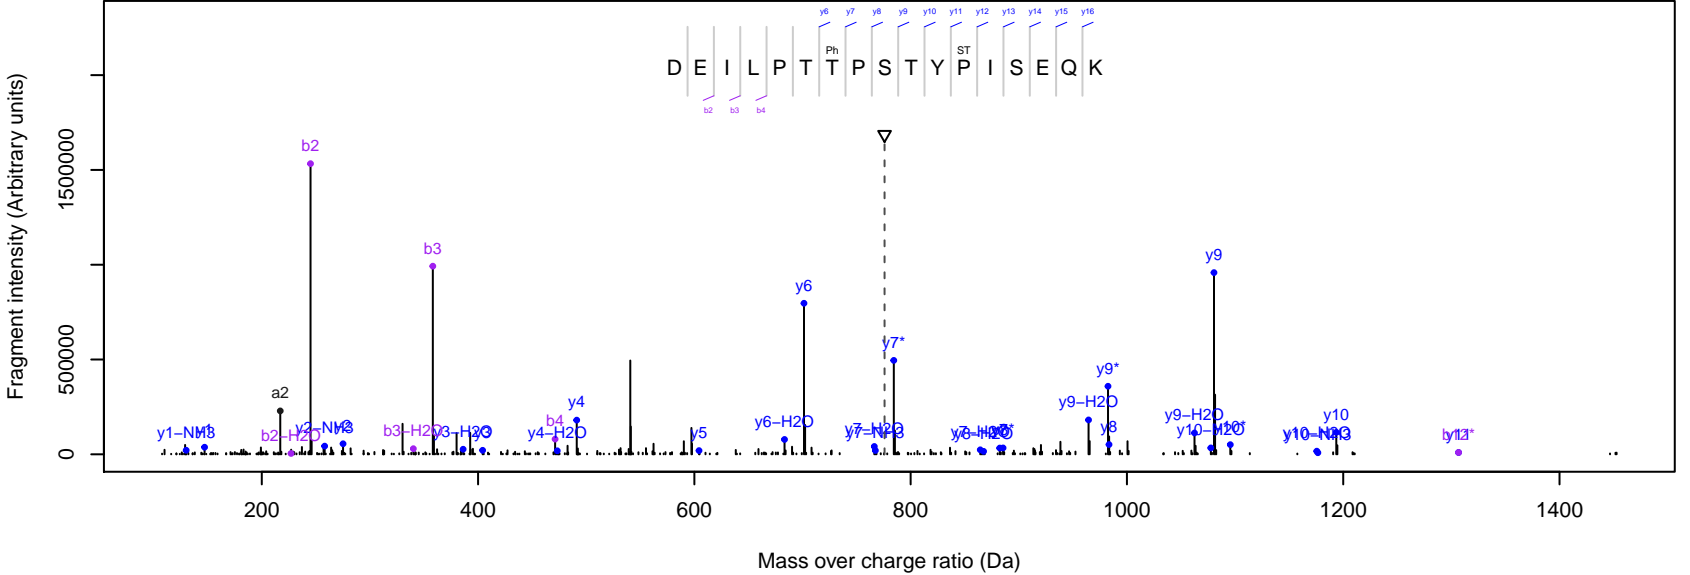

RTS(Phospho (STY))MGGTQQQFVEGVR-3+

Source : QE3\_201126\_FR\_TiOx\_hum\_tissue\_Urea\_RNAB\_N Scan : 19769

Andromeda score : 194.7

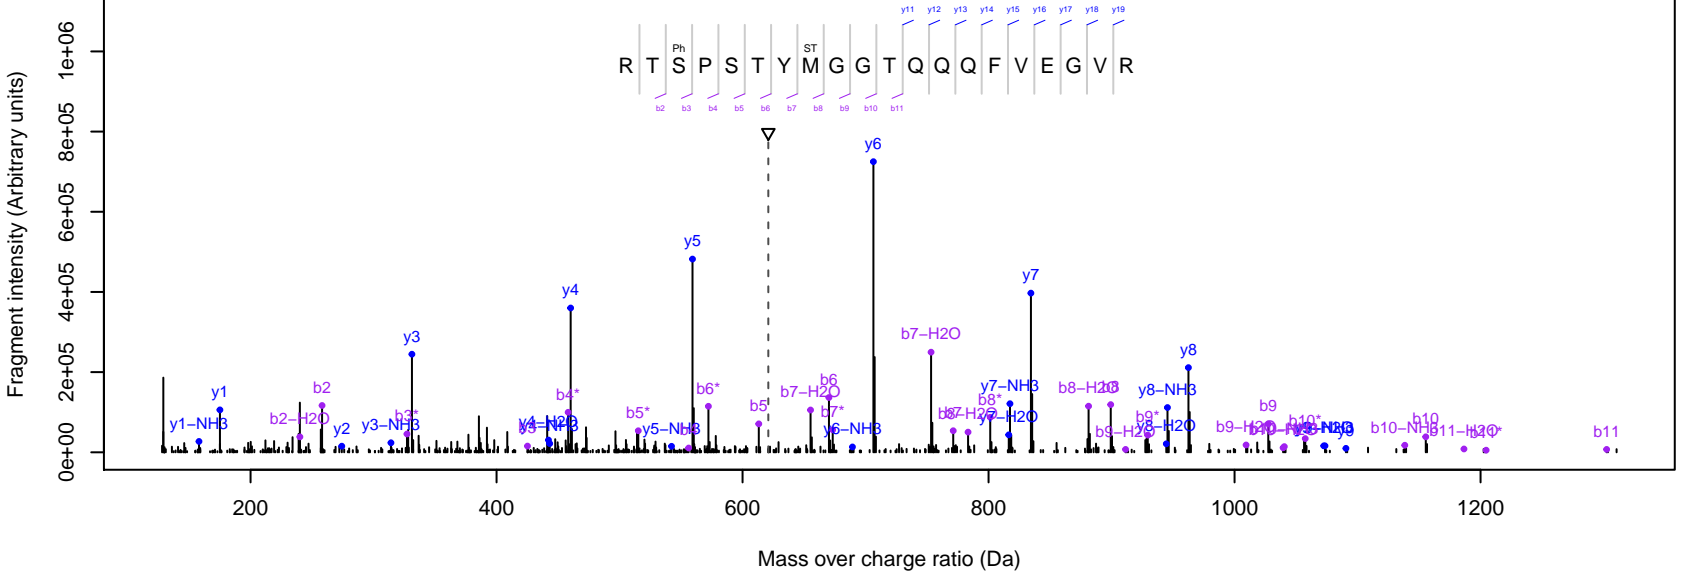

EKVSS(Phospho (STY))IDLEISLSSLLDDMTKNDPFK-3+

Source : QE3\_201126\_FR\_TiOx\_hum\_tissue\_Urea\_RNAB\_H Scan : 62245

Andromeda score : 194.67

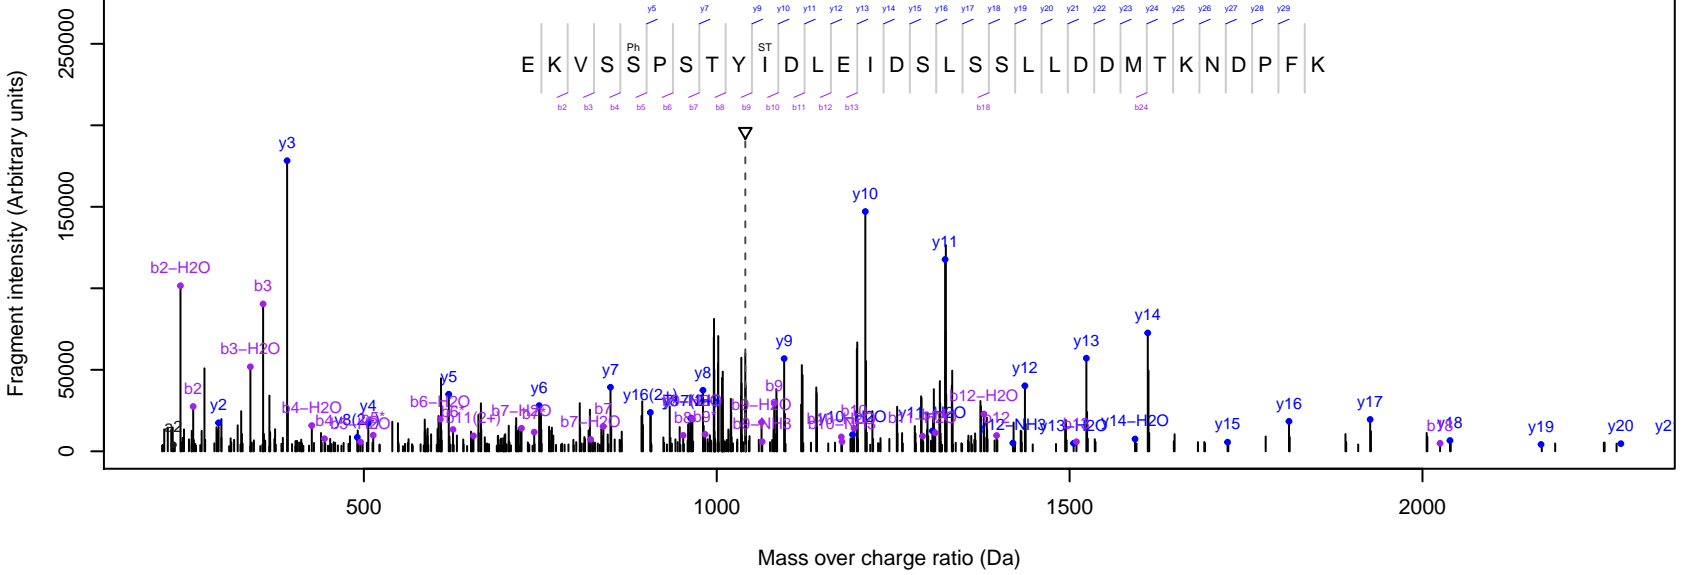

KAS(Phospho (STY))PEPPDSAEGALK-2+

Source : QE3\_201126\_FR\_TiOx\_hum\_tissue\_Urea\_RNAB\_H Scan : 12114

Andromeda score : 194.67

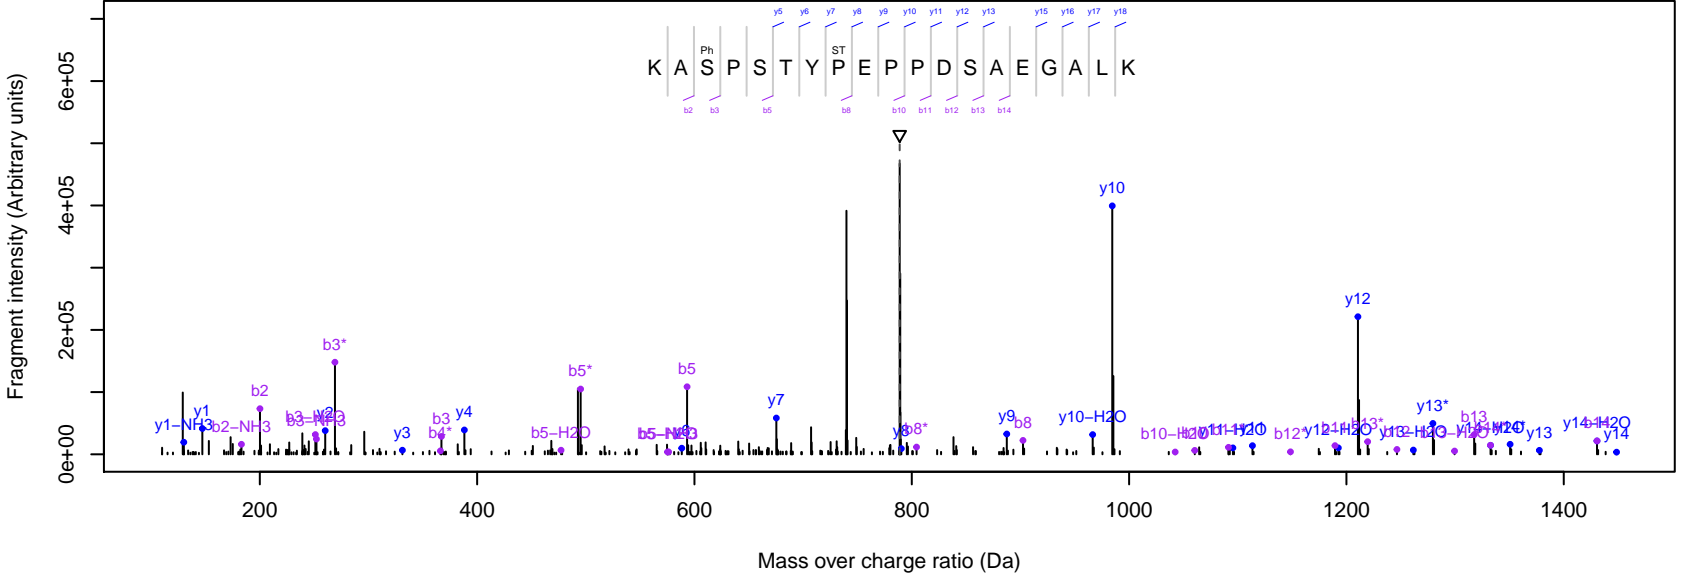

SSS(Phospho (STY))QPSS(Phospho (STY))CCS(Phospho (STY))DPSKPGGNVEGATQSLAEQMR-3+

Source : QE3\_201126\_FR\_TiOx\_hum\_tissue\_Urea\_RNAB\_H Scan : 42625

Andromeda score : 194.65

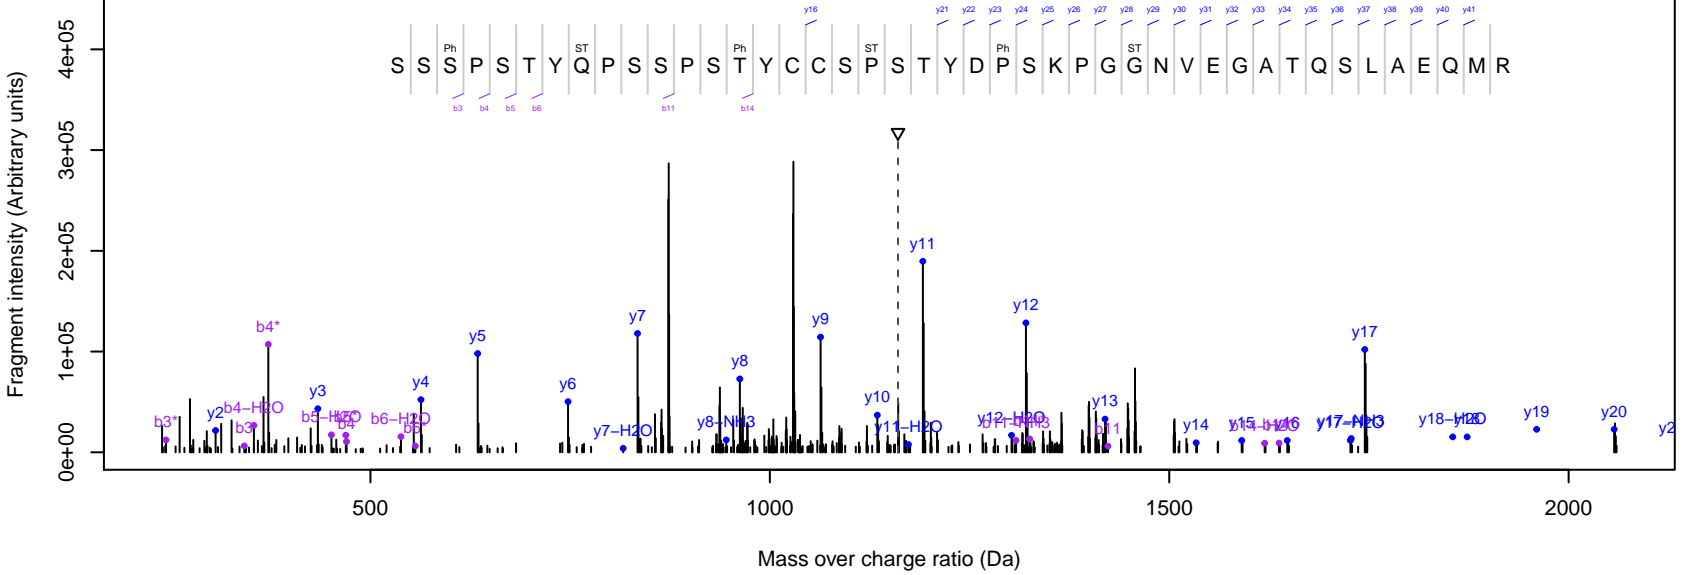

GPAGEAGAS(Phospho (STY))PPVRR-2+

Source : QE3\_201126\_FR\_TiOx\_hum\_tissue\_Urea\_RNAB\_N Scan : 7938

Andromeda score : 194.59

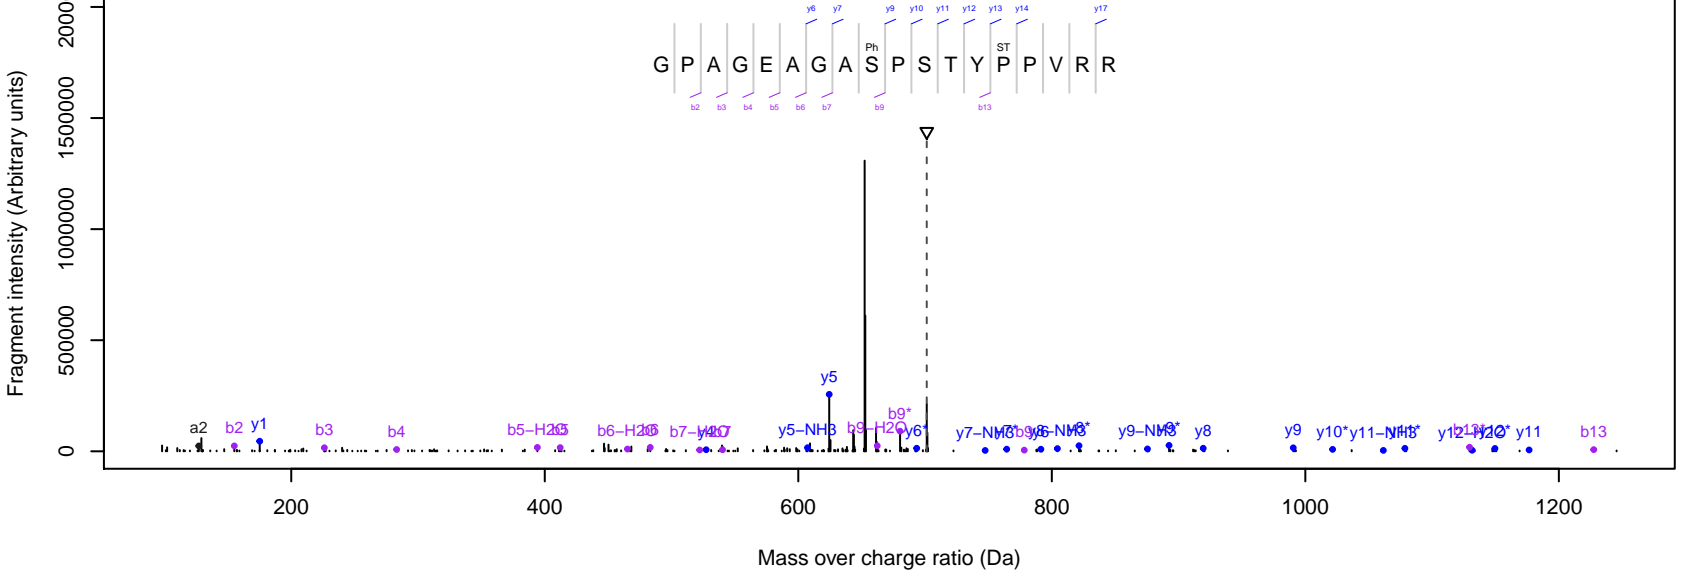

T(Phospho (STY))TPVDLCLLEESVGSLEGSR-2+

Source : QE3\_201126\_FR\_TiOx\_hum\_tissue\_Urea\_RNAB\_B Scan : 62001

Andromeda score : 194.49

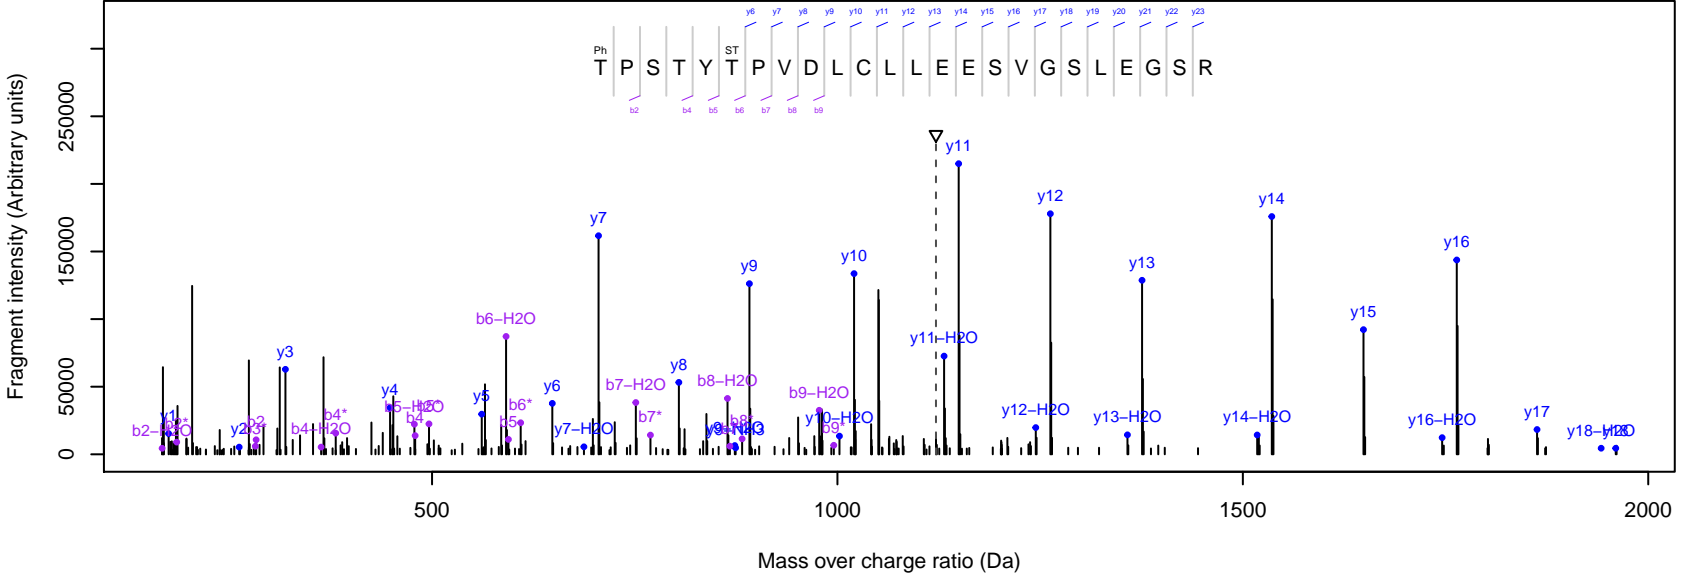



QKS(Phospho (STY))YTLVVAK-2+

Source : QE3\_201126\_FR\_TiOx\_hum\_tissue\_Urea\_RNAB\_B Scan : 14276

Andromeda score : 194.48

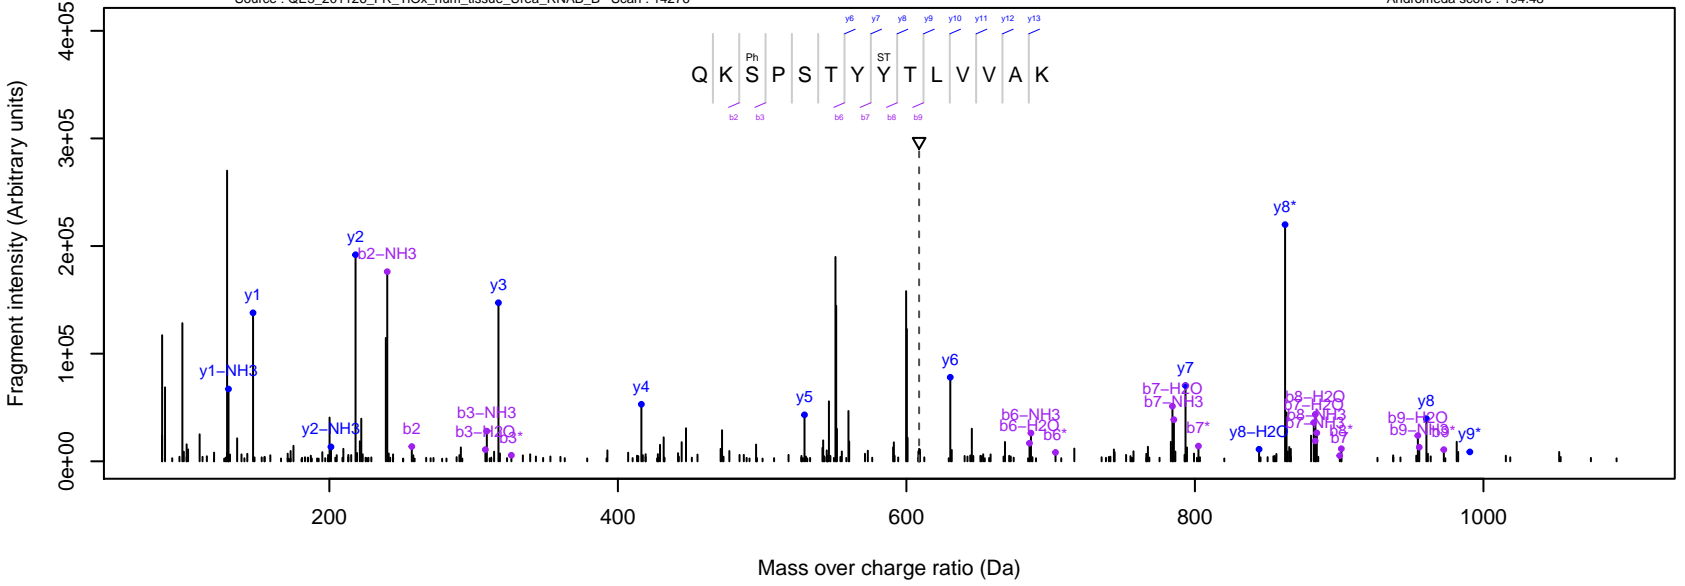

SM(Oxidation (M))S(Phospho (STY))APVIFDR-2+

Source : QE3\_201126\_FR\_TiOx\_hum\_tissue\_Urea\_RNAB\_N Scan : 29485

Andromeda score : 194.43

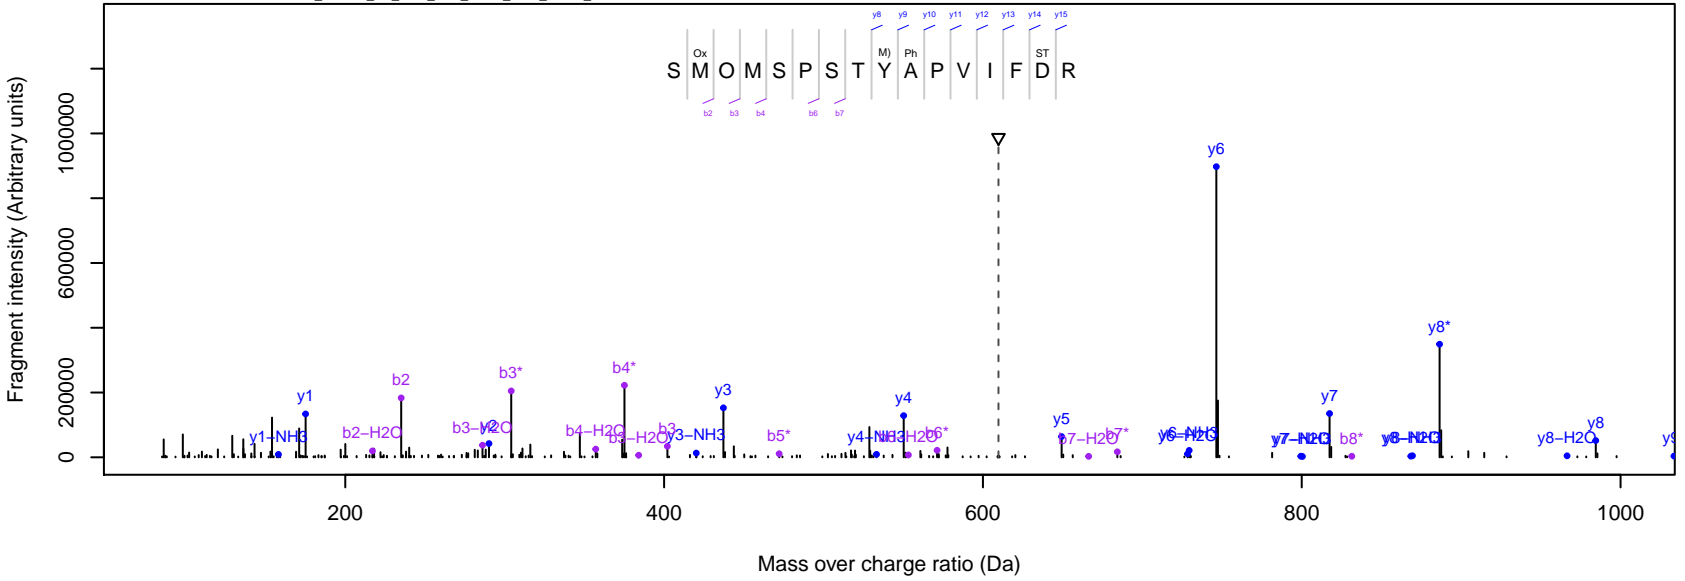

NFS(Phospho (STY))YVSPQLP-2+

Source : QE3\_201126\_FR\_TiOx\_hum\_tissue\_Urea\_RNAB\_N Scan : 53522

Andromeda score : 194.39

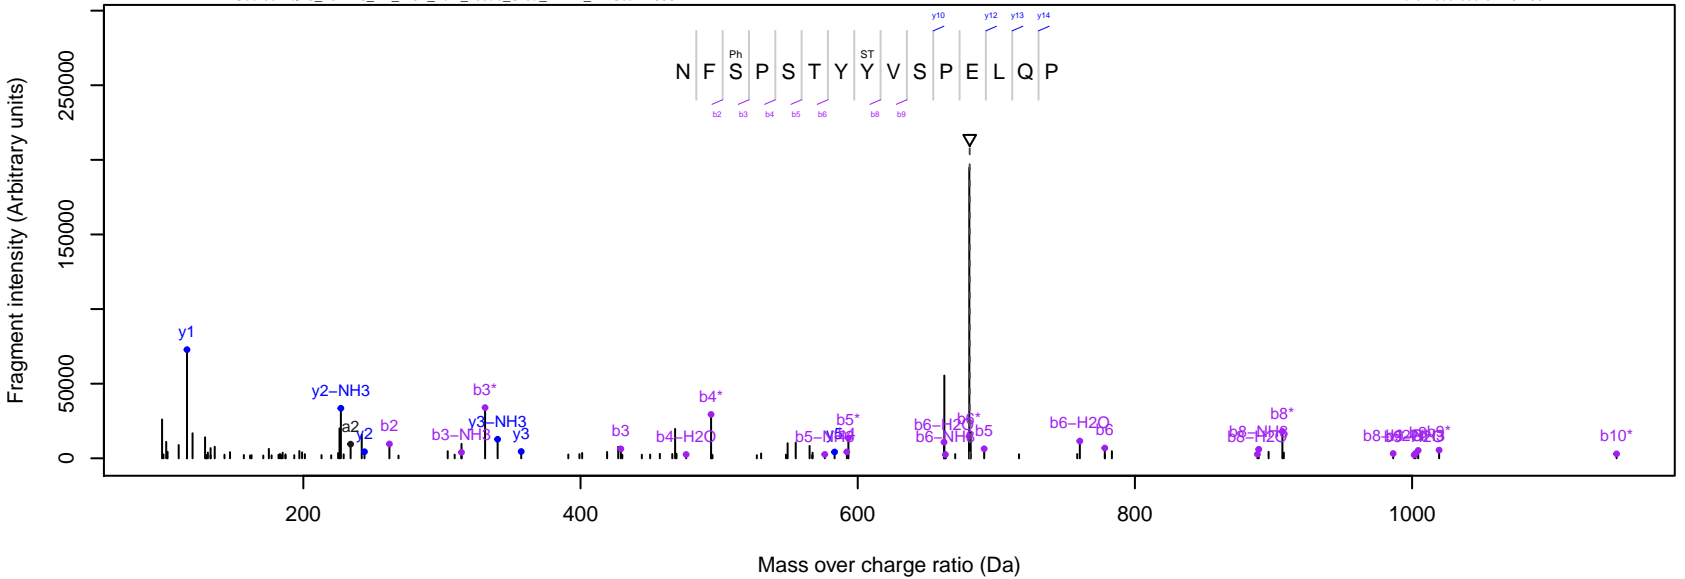

TTESGS(Phospho (STY))DSESKPDQEAEPQEAAGAQR-3+

Source : QE3\_201126\_FR\_TiOx\_hum\_tissue\_Urea\_RNAB\_N Scan : 9755

Andromeda score : 194.34

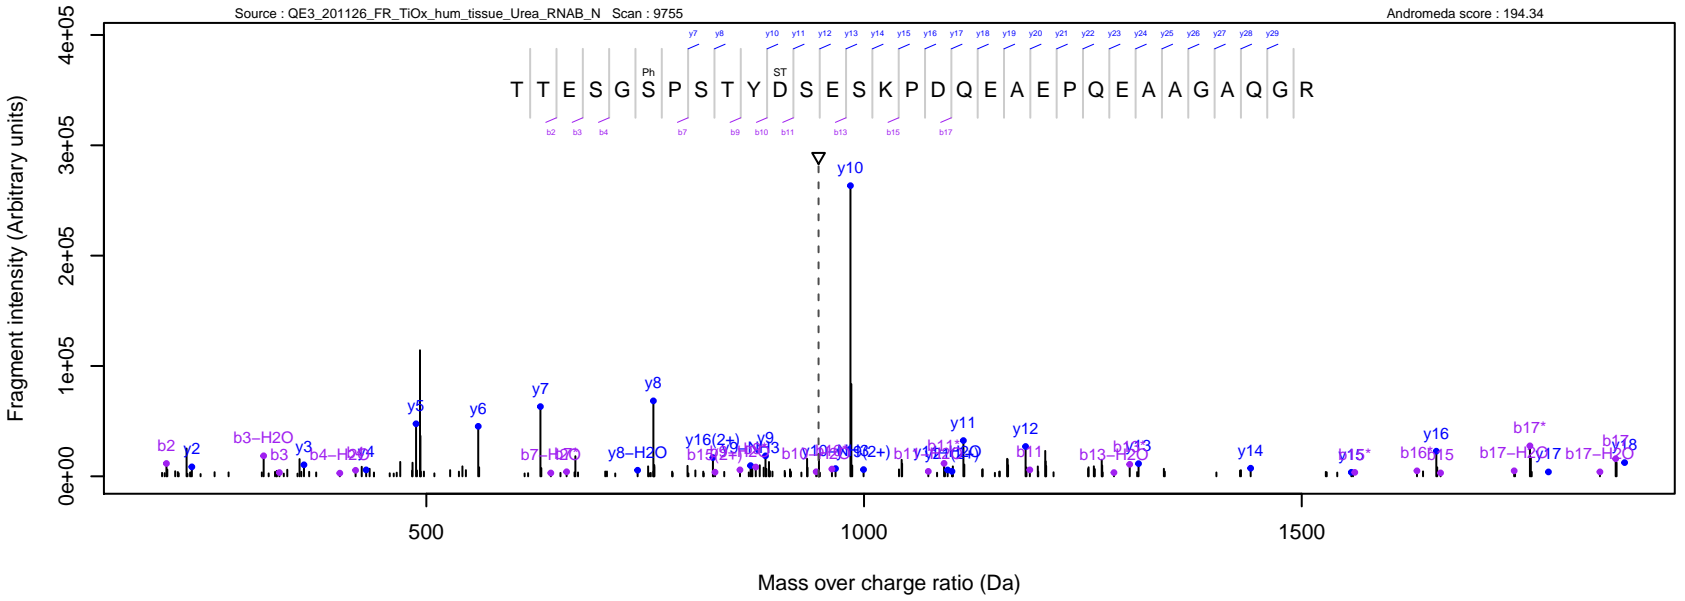

S(Phospho (STY))PPYTAFLGNLPYDVTEESIKEFFR-3+

Source : QE3\_201126\_FR\_TiOx\_hum\_tissue\_Urea\_RNAB\_H Scan : 62493

Andromeda score : 194.27

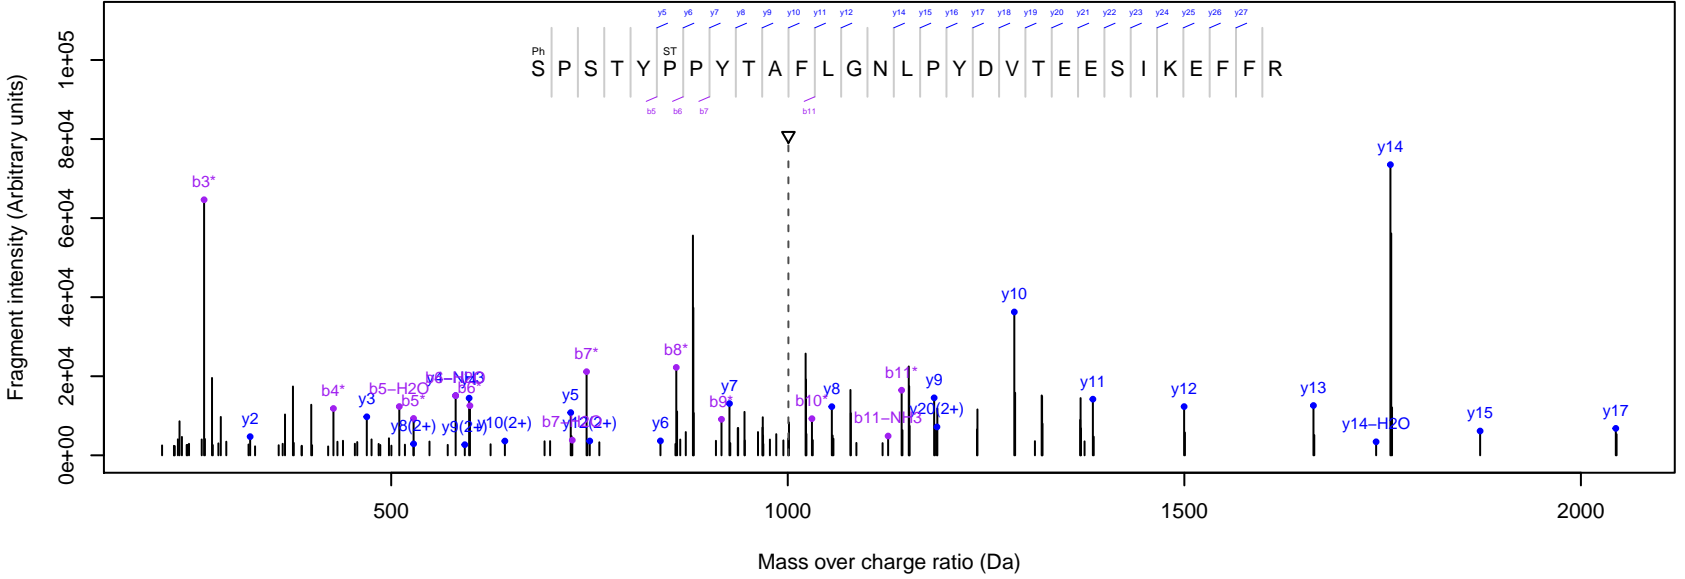

ATEDEGS(Phospho (STY))EQKIPEATNRR-3+

Source : QE3\_201126\_FR\_TiOx\_hum\_tissue\_Urea\_RNAB\_H Scan : 7816

Andromeda score : 194.25

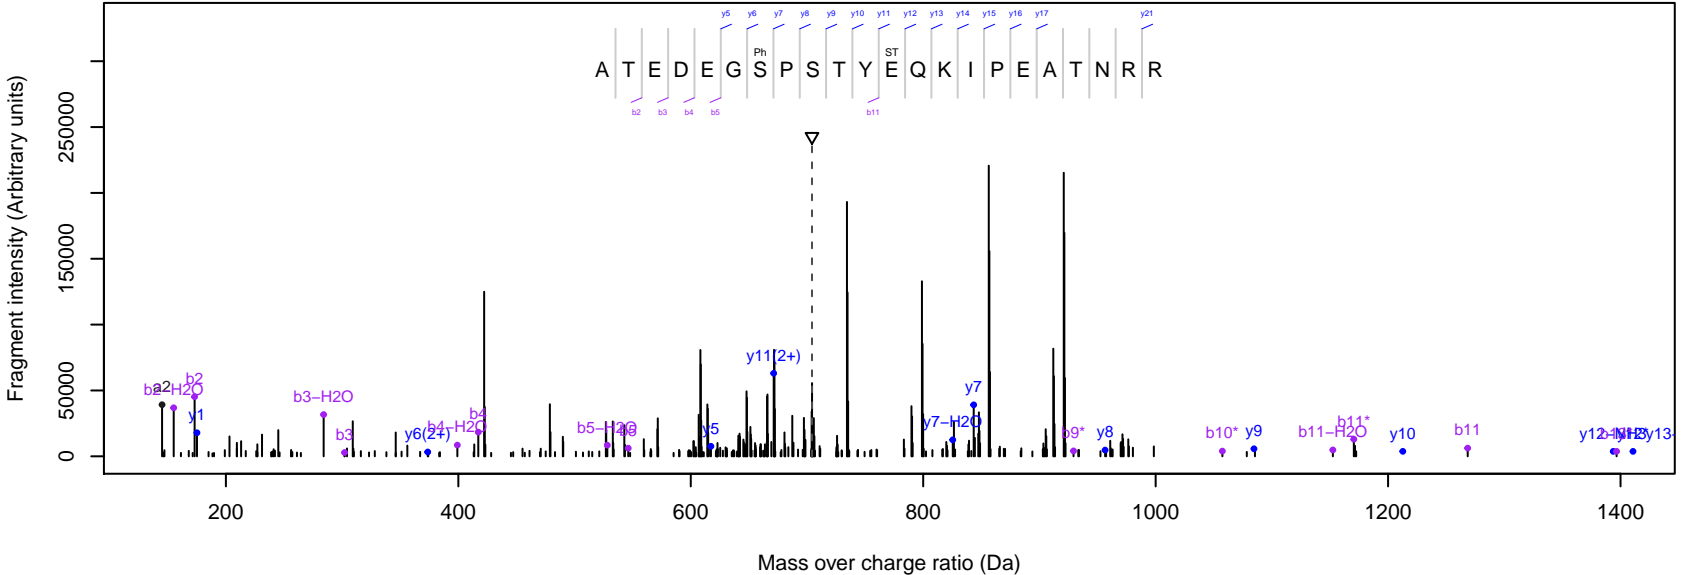

S(Phospho (STY))VDEVNYWDKQDHPISR-3+

Source : QE3\_201126\_FR\_TiOx\_hum\_tissue\_Urea\_RNAB\_H Scan : 22734

Andromeda score : 194.24

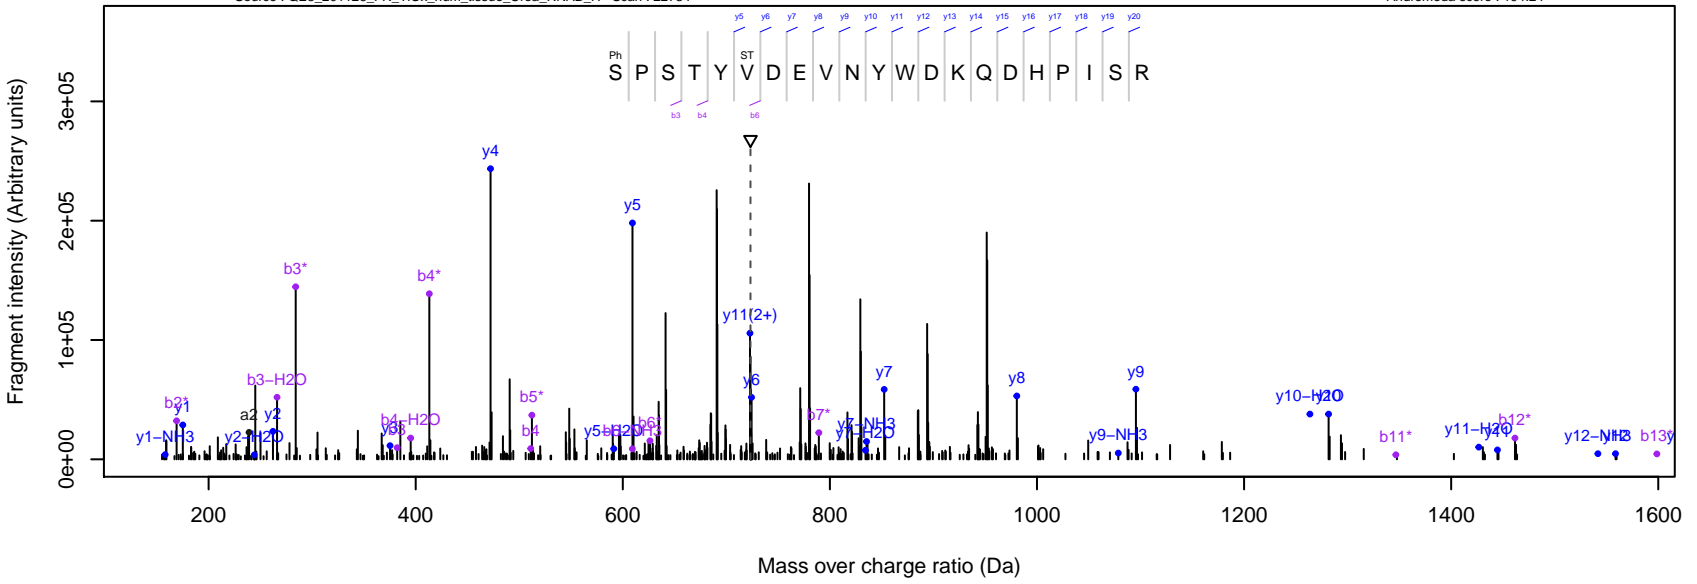

RLEISPDSS(Phospho (STY))PER-2+

Source : QE3\_201126\_FR\_TiOx\_hum\_tissue\_Urea\_RNAB\_B Scan : 14309

Andromeda score : 194.23

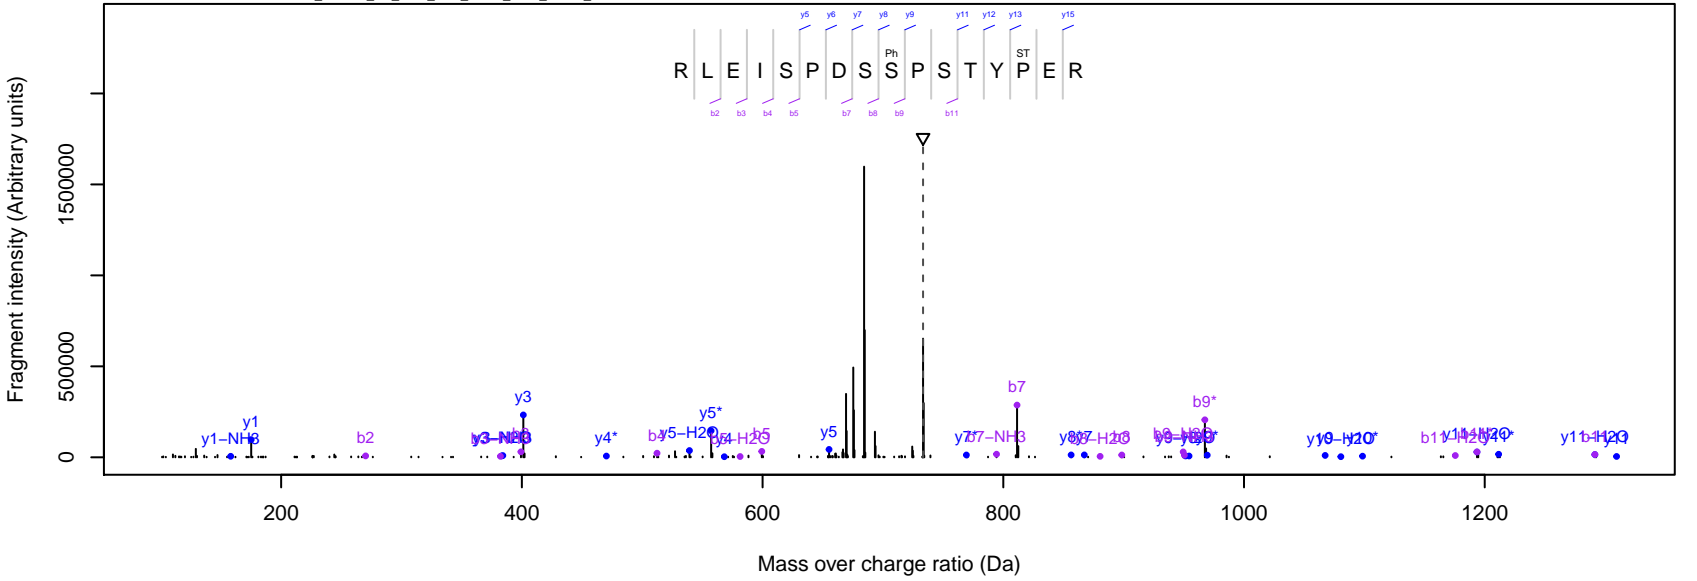

ENPPVEDS(Phospho (STY))SDEDDKRNQGNYDK-3+

Source : QE3\_201126\_FR\_TiOx\_hum\_tissue\_Urea\_RNAB\_H Scan : 11923

Andromeda score : 194.21

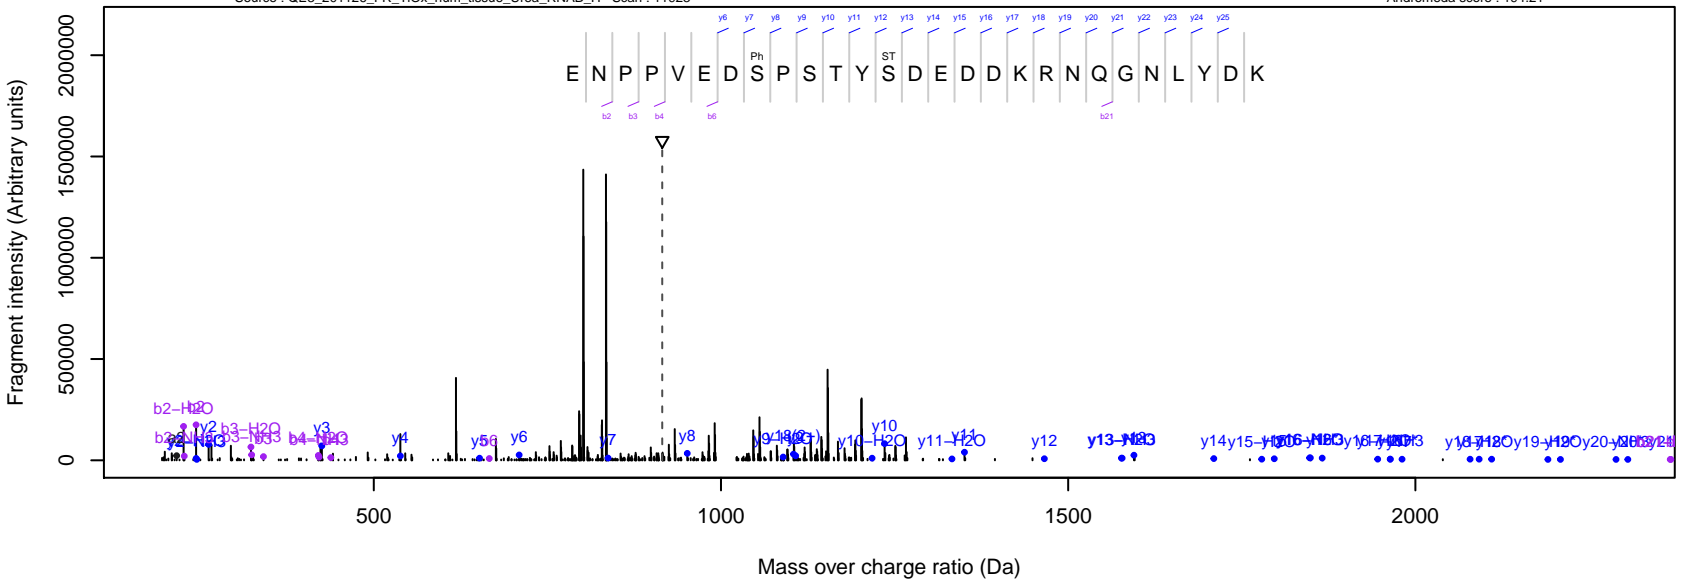

HGHFGWPGWEMGPPGNWS(Phospho (STY))PRPPR-4+

Source : QE3\_201126\_FR\_TiOx\_hum\_tissue\_Urea\_RNAB\_H Scan : 46052

Andromeda score : 194.19

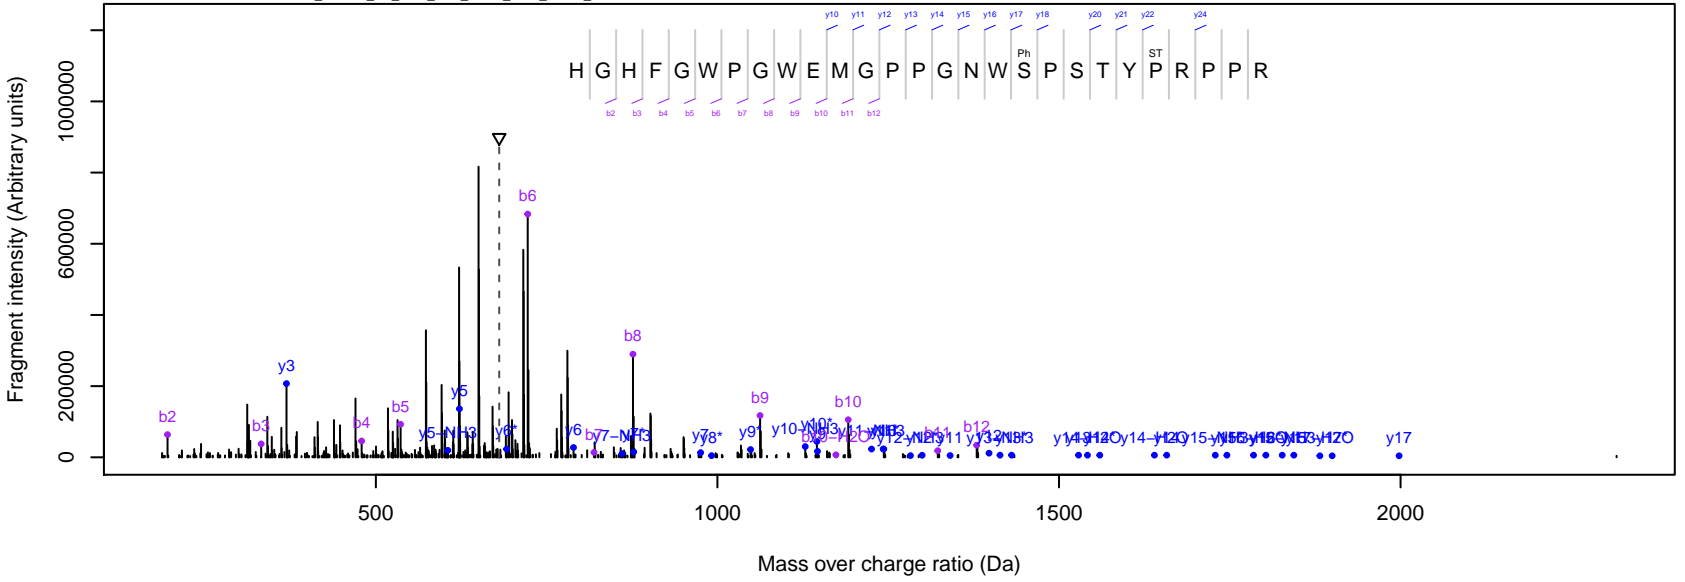

VTAEADSS(Phospho (STY))SPTGILATSESK-2+

Source : QE3\_201126\_FR\_TiOx\_hum\_tissue\_Urea\_RNAB\_H Scan : 27618

Andromeda score : 194.19

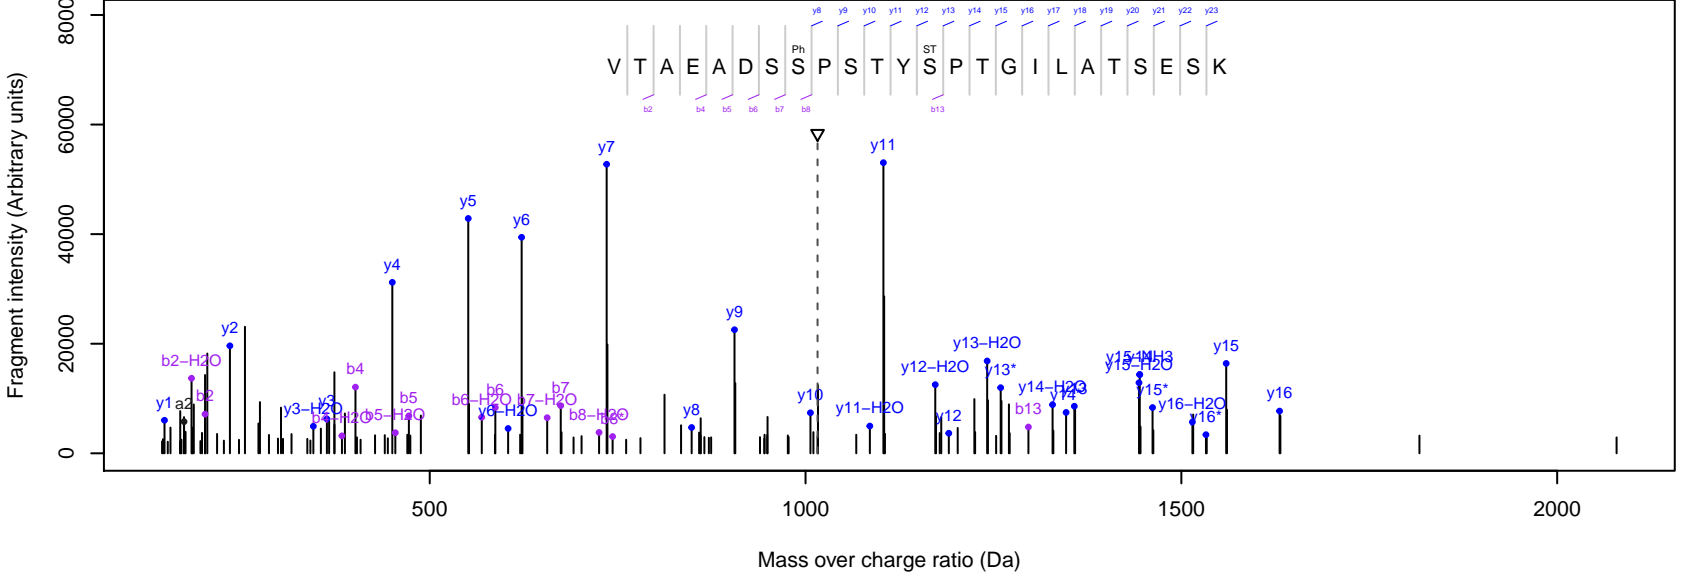

T(Phospho (STY))ELSPSFINPNLEWFASEEPTTEESEKPLTQSGAPPPPGGK-4+

Source : QE3\_201126\_FR\_TiOx\_hum\_tissue\_Urea\_RNAB\_N Scan : 60719

Andromeda score : 194.04

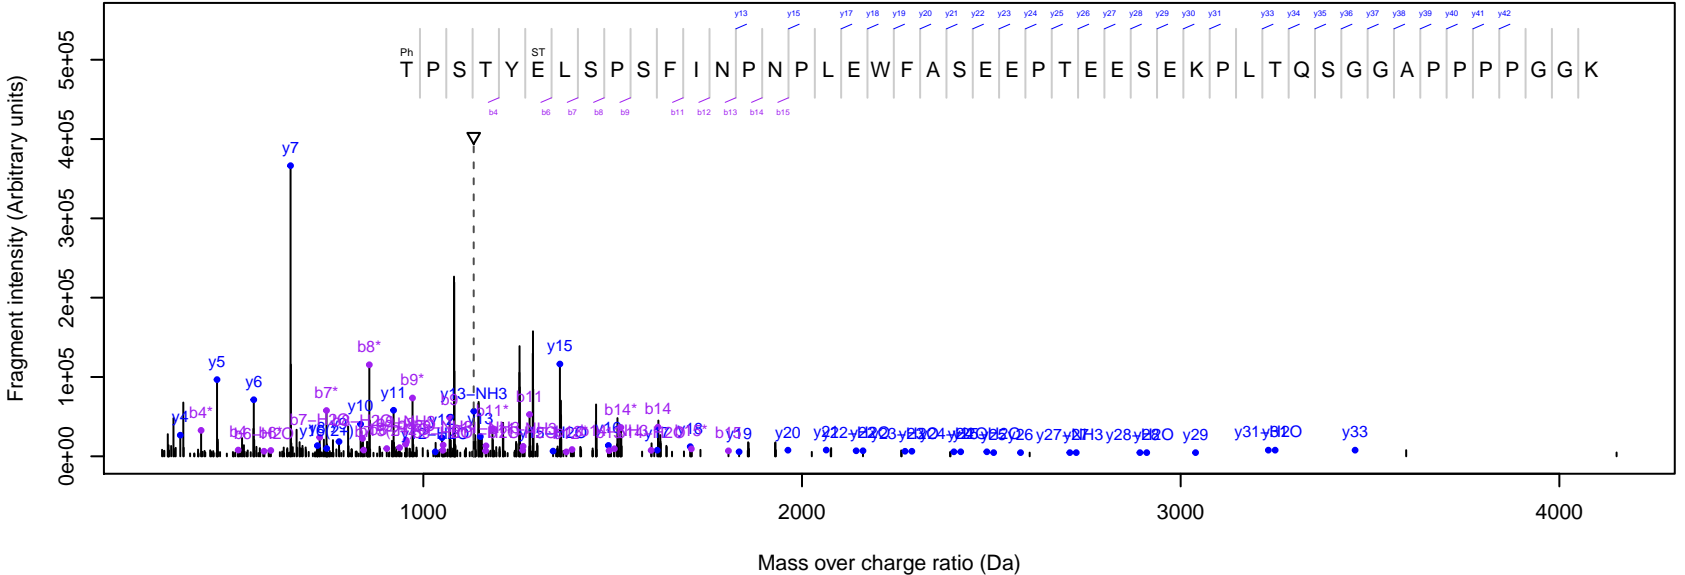

NEEPS(Phospho (STY))EEEEIDAPKPK-2+

Source : QE3\_201126\_FR\_TIOx\_hum\_tissue\_Urea\_RNAB\_B Scan : 13062

Andromeda score : 194.01

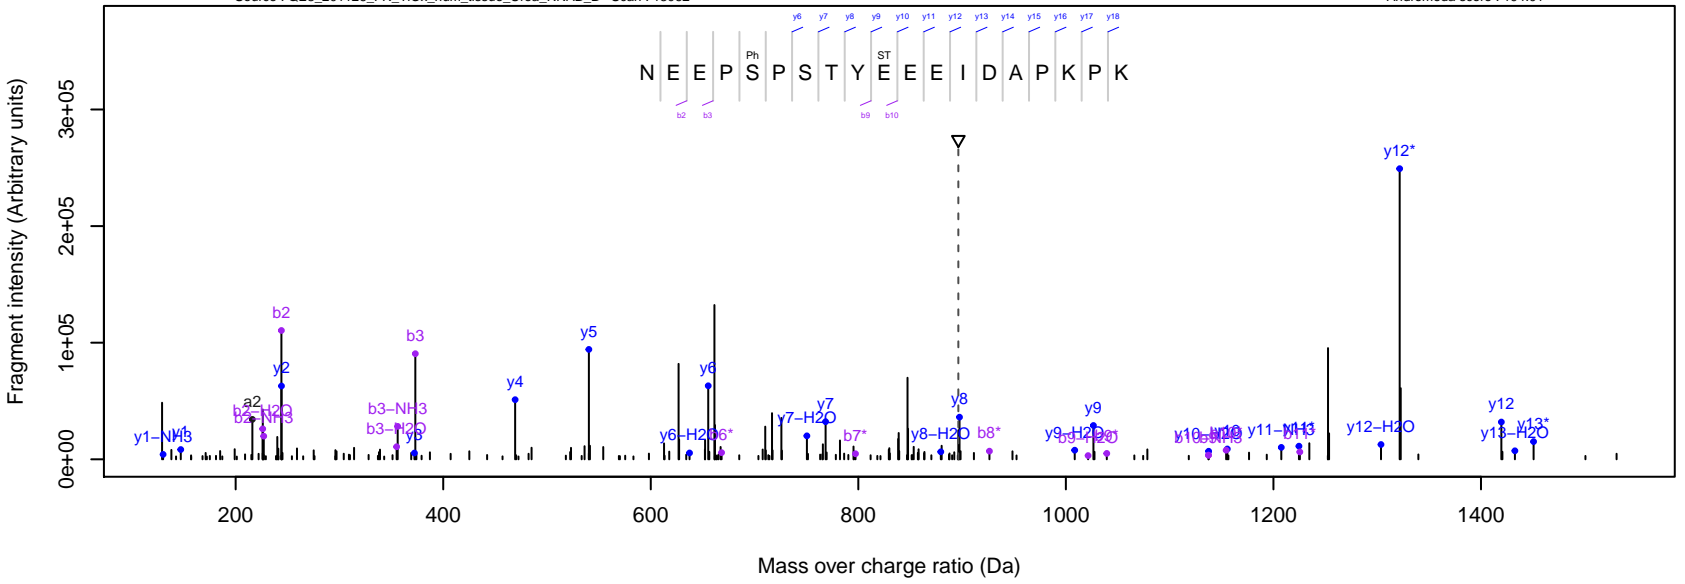

GLLAQLRPES(Phospho (STY))PPPAGLLNGAPAGESPQPK-3+

Source : QE3\_201126\_FR\_TIOx\_hum\_tissue\_Urea\_RNAB\_H Scan : 42071

Andromeda score : 193.89

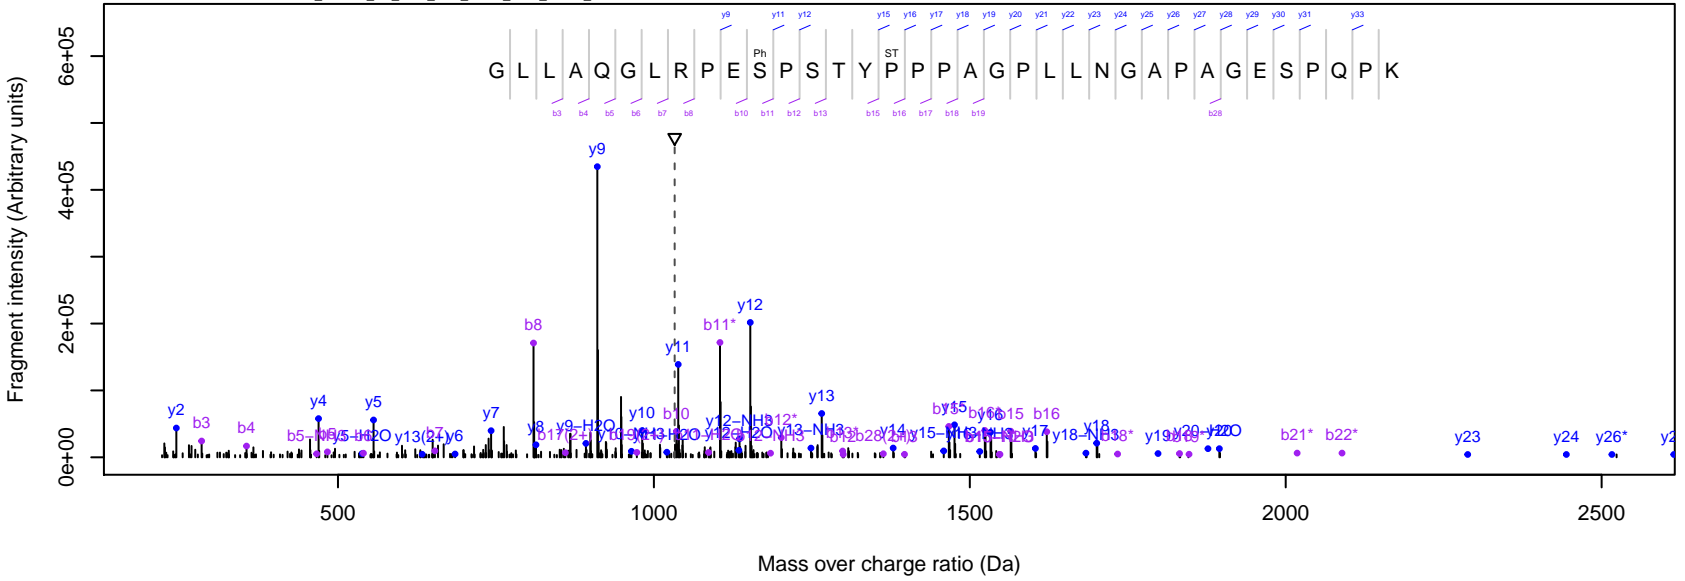

GQSQTS(Phospho (STY))PDHRSDTSSPEVR-3+

Source : QE3\_201126\_FR\_TIOx\_hum\_tissue\_Urea\_RNAB\_B Scan : 4454

Andromeda score : 193.87

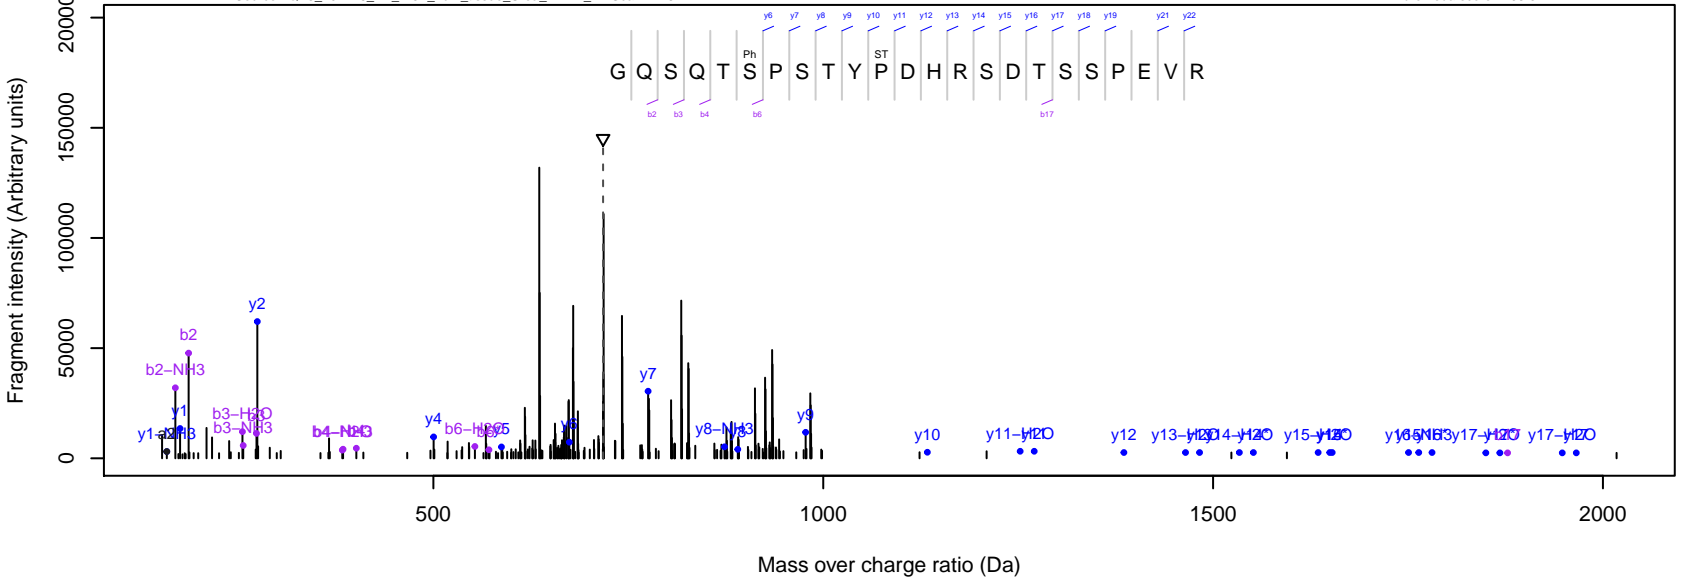

EFDELNPS(Phospho (STY))AQR-2+

Source : QE3\_201126\_FR\_TIOx\_hum\_tissue\_Urea\_RNAB\_H Scan : 23260

Andromeda score : 193.81

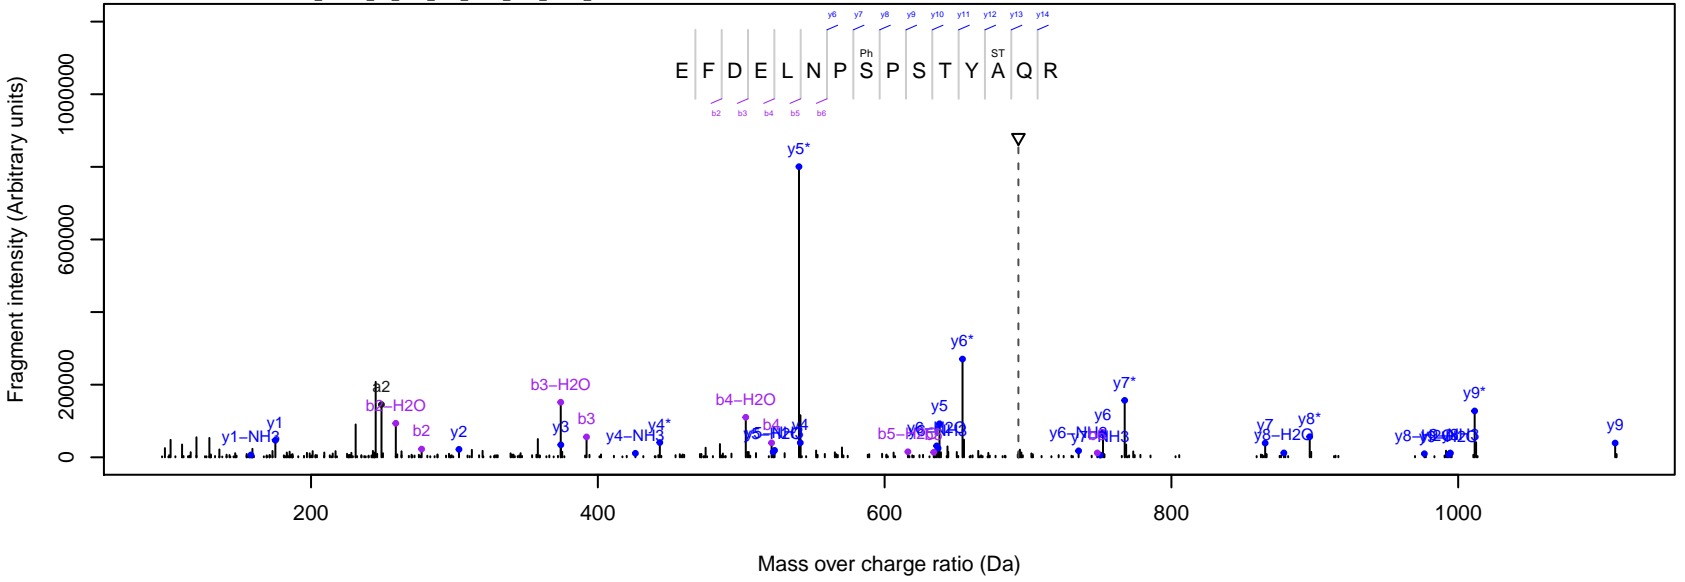

(Acetyl (Protein N-term))S(Phospho (STY))EGESQTVLSSGSDPK-2+

Source : QE3\_201126\_FR\_TIOx\_hum\_tissue\_Urea\_RNAB\_N Scan : 26611

Andromeda score : 193.77

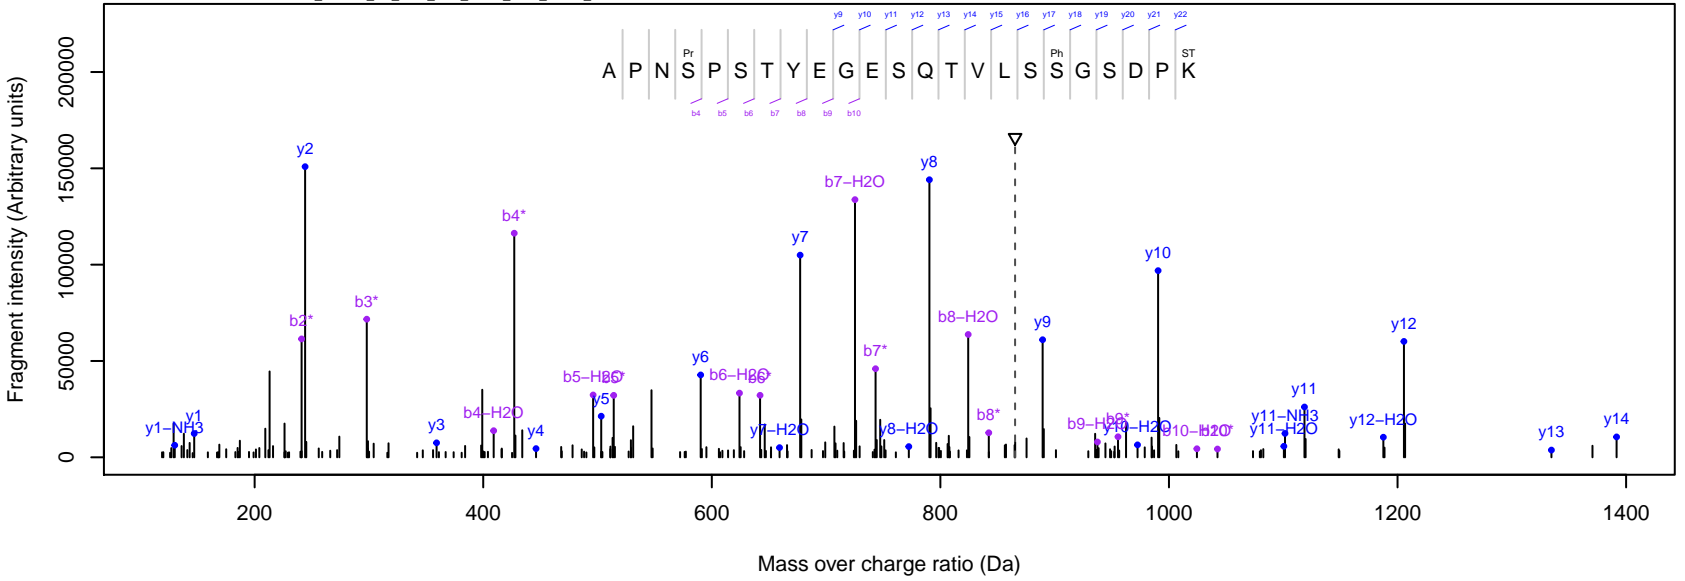

GAEASAASEEEAGPQATEP(Phospho (STY))TPSGPESGPTPASAQNE-3+

Source : QE3\_201126\_FR\_TIOx\_hum\_tissue\_Urea\_RNAB\_B Scan : 28647

Andromeda score : 193.76

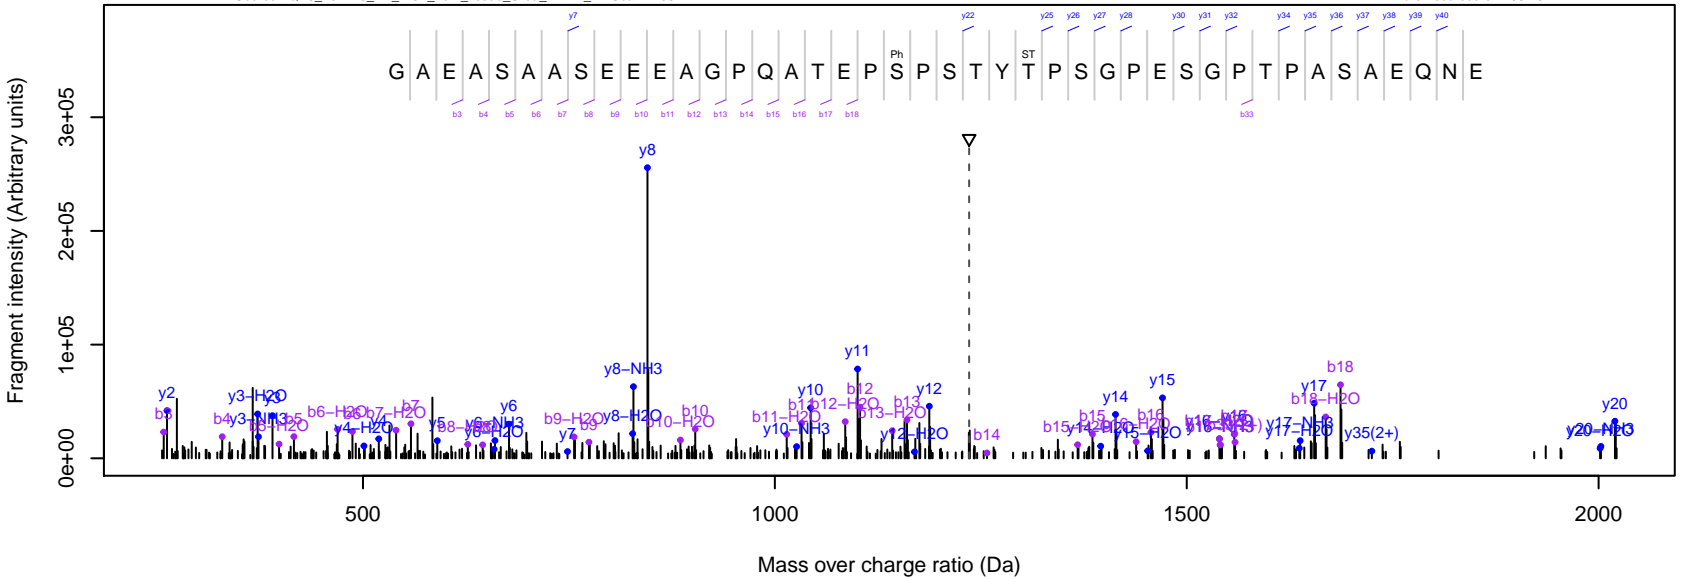

### RPS(Phospho (STY))QNAISFFNVGHSK-3+

Source : QE3\_201126\_FR\_TiOx\_hum\_tissue\_Urea\_RNAB\_N Scan : 27053

Andromeda score : 193.63

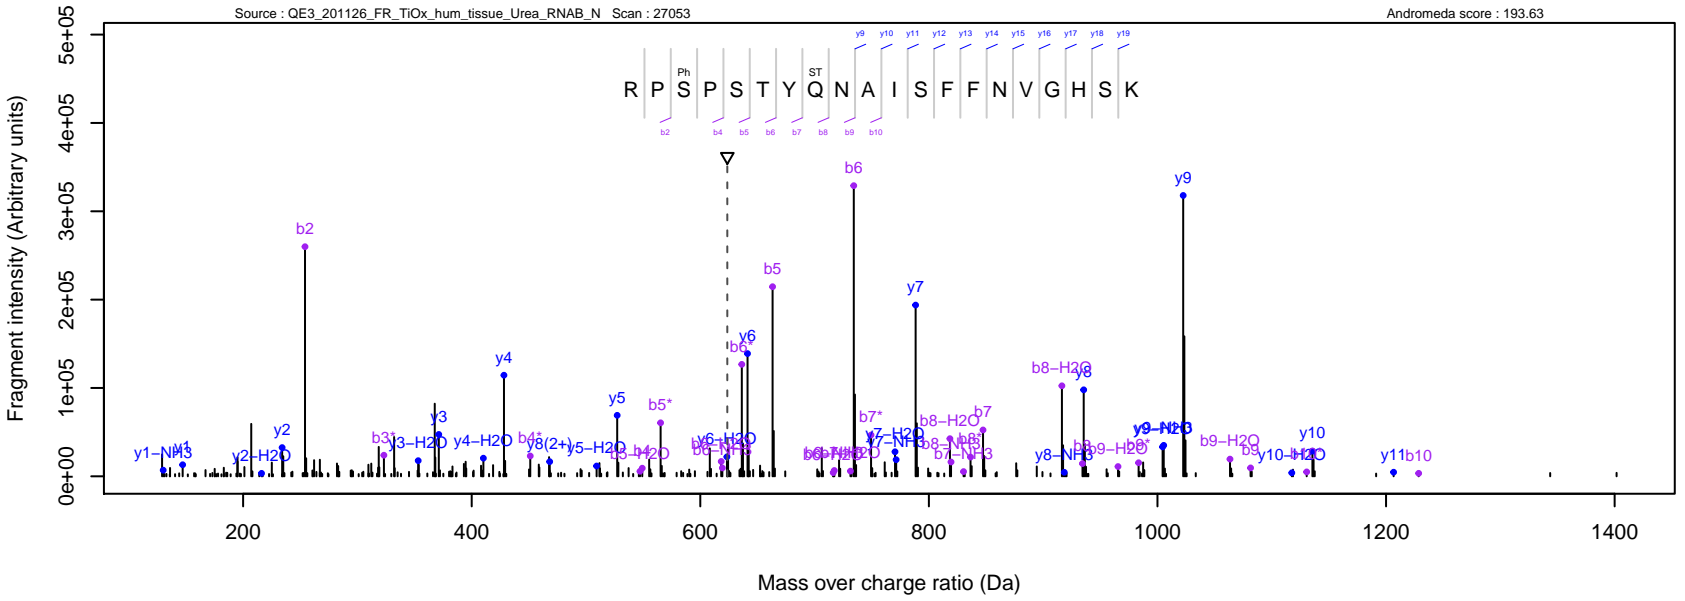

### QLLEEEENFSRPQIDENPLDDNS(Phospho (STY))EEMEDAPK-3+

Source : QE3\_201126\_FR\_TiOx\_hum\_tissue\_Urea\_RNAB\_H Scan : 40745

Andromeda score : 193.6

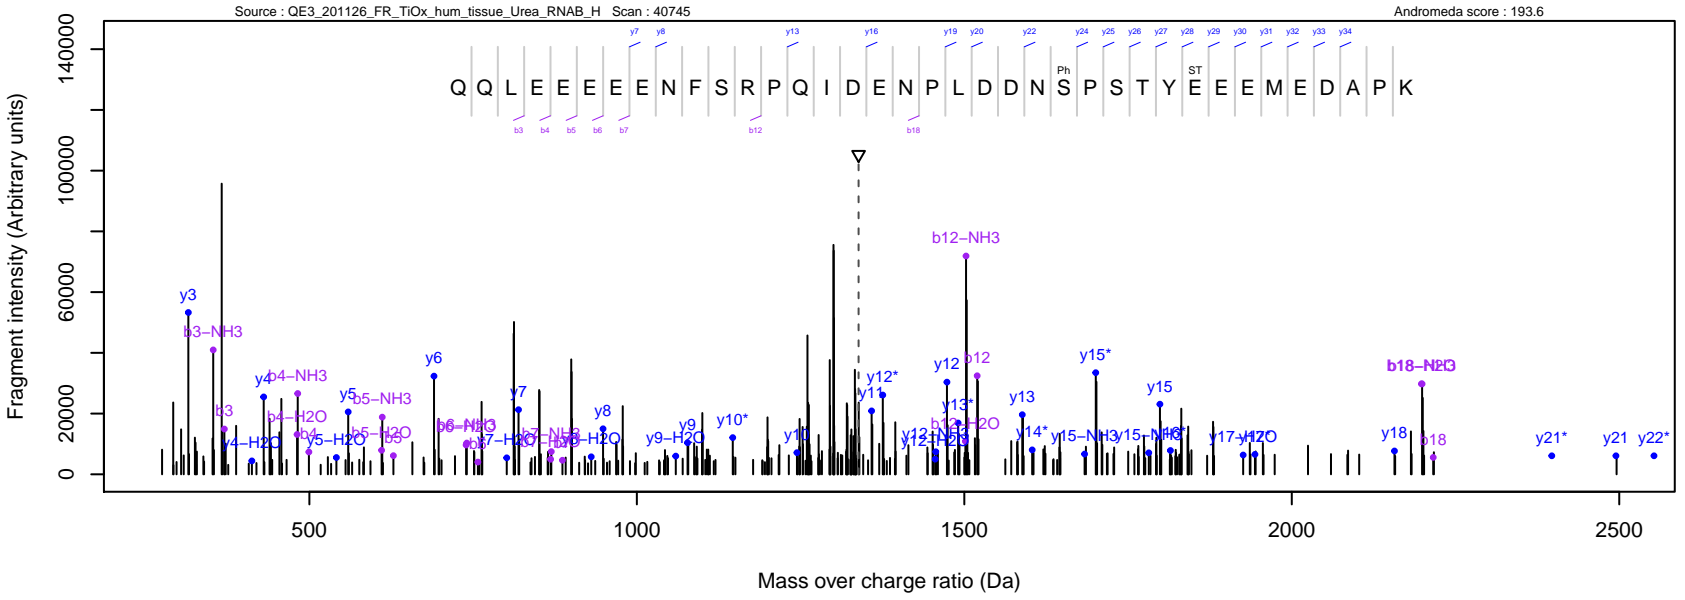

### KES(Phospho (STY))KEETPEVTK-3+

Source : QE3\_201126\_FR\_TiOx\_hum\_tissue\_Urea\_RNAB\_H Scan : 3983

Andromeda score : 193.54

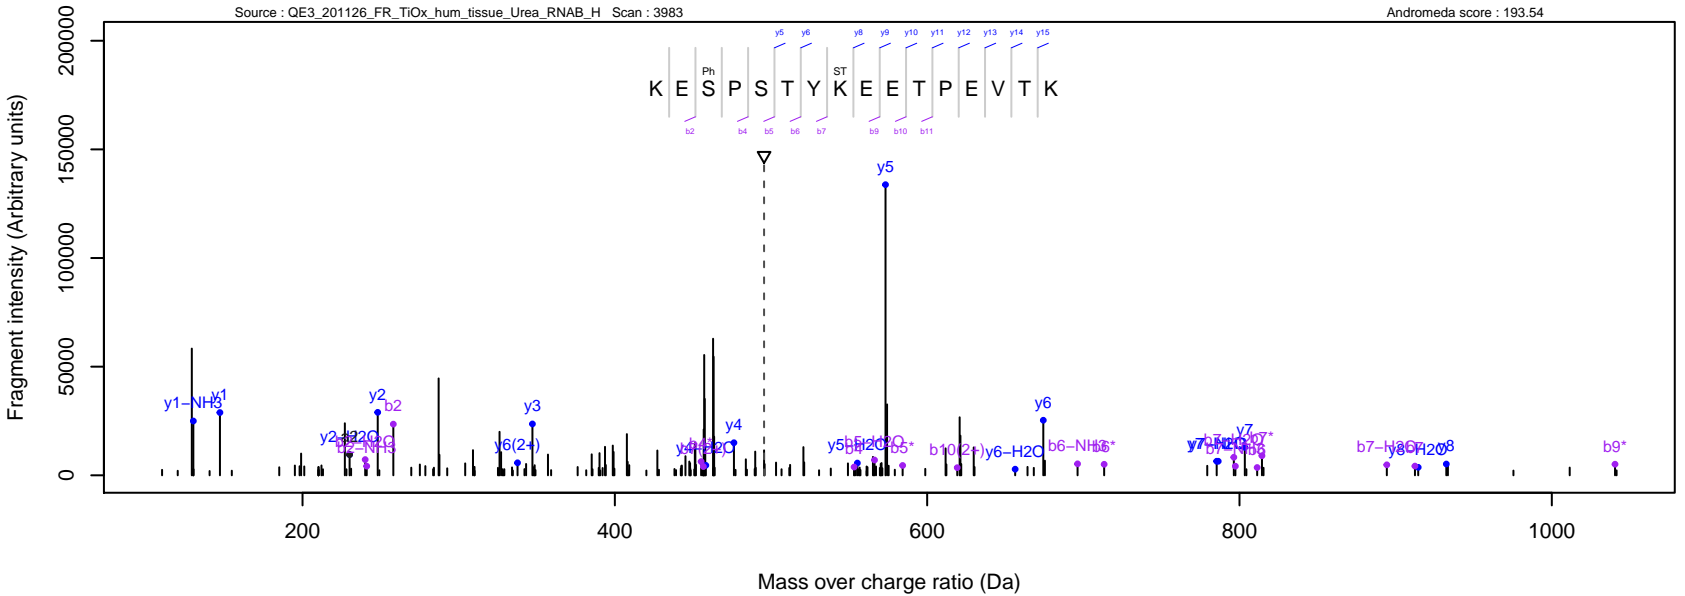





SSS(Phospho (STY))PRGEASSLNGESH-2+

Source : QE3\_201126\_FR\_TiOx\_hum\_tissue\_Urea\_RNAB\_N Scan : 8953

Andromeda score : 193.3

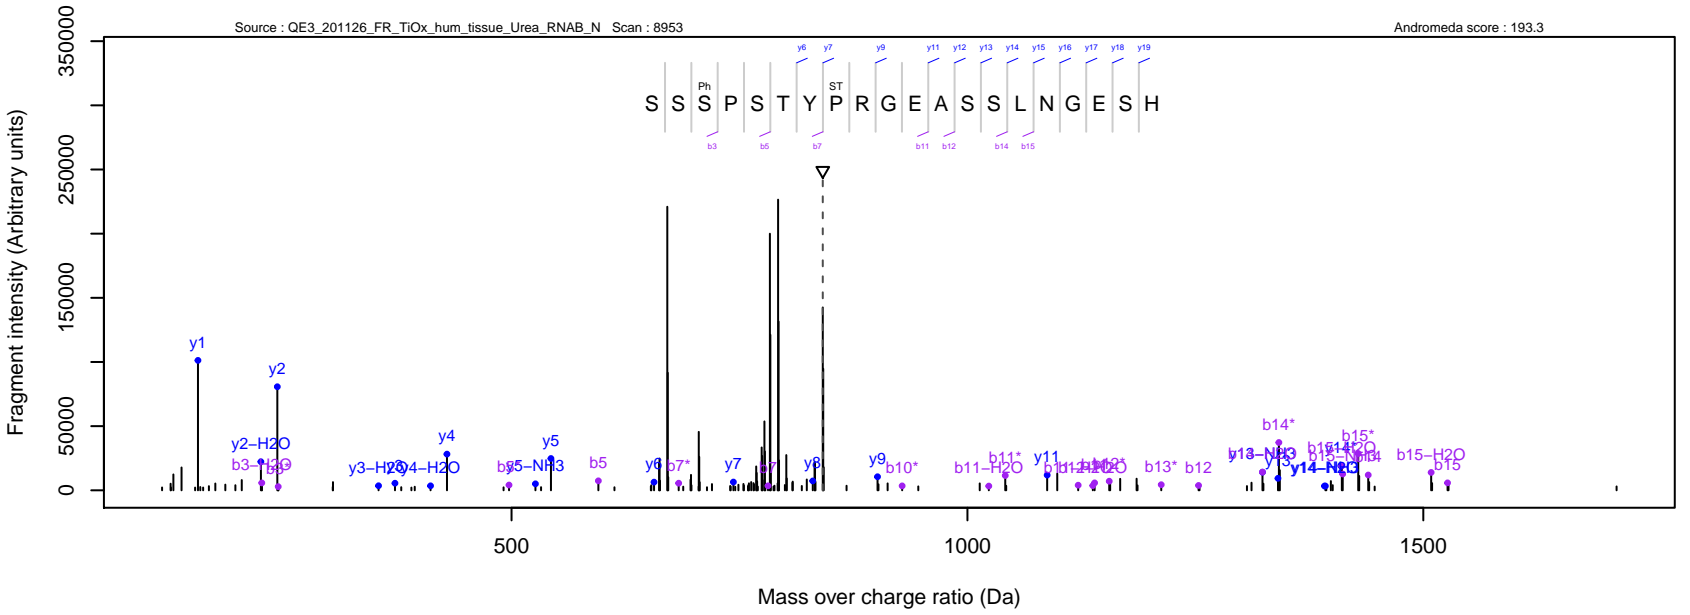

IQEQESS(Phospho (STY))GEEDSLSP EER-2+

Source : QE3\_201126\_FR\_TiOx\_hum\_tissue\_Urea\_RNAB\_B Scan : 18051

Andromeda score : 193.19

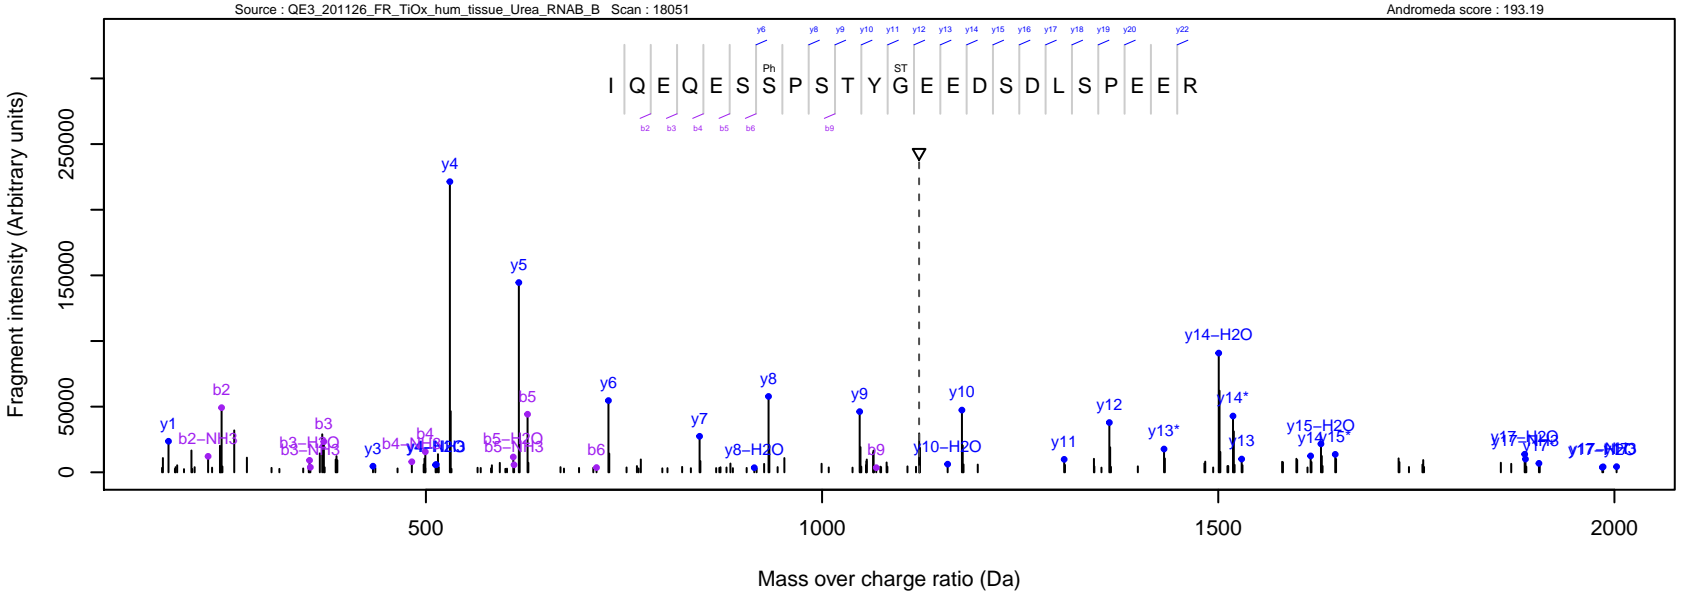

KQS(Phospho (STY))QQLELLESELRK-3+

Source : QE3\_201126\_FR\_TiOx\_hum\_tissue\_Urea\_RNAB\_B Scan : 30462

Andromeda score : 193.07

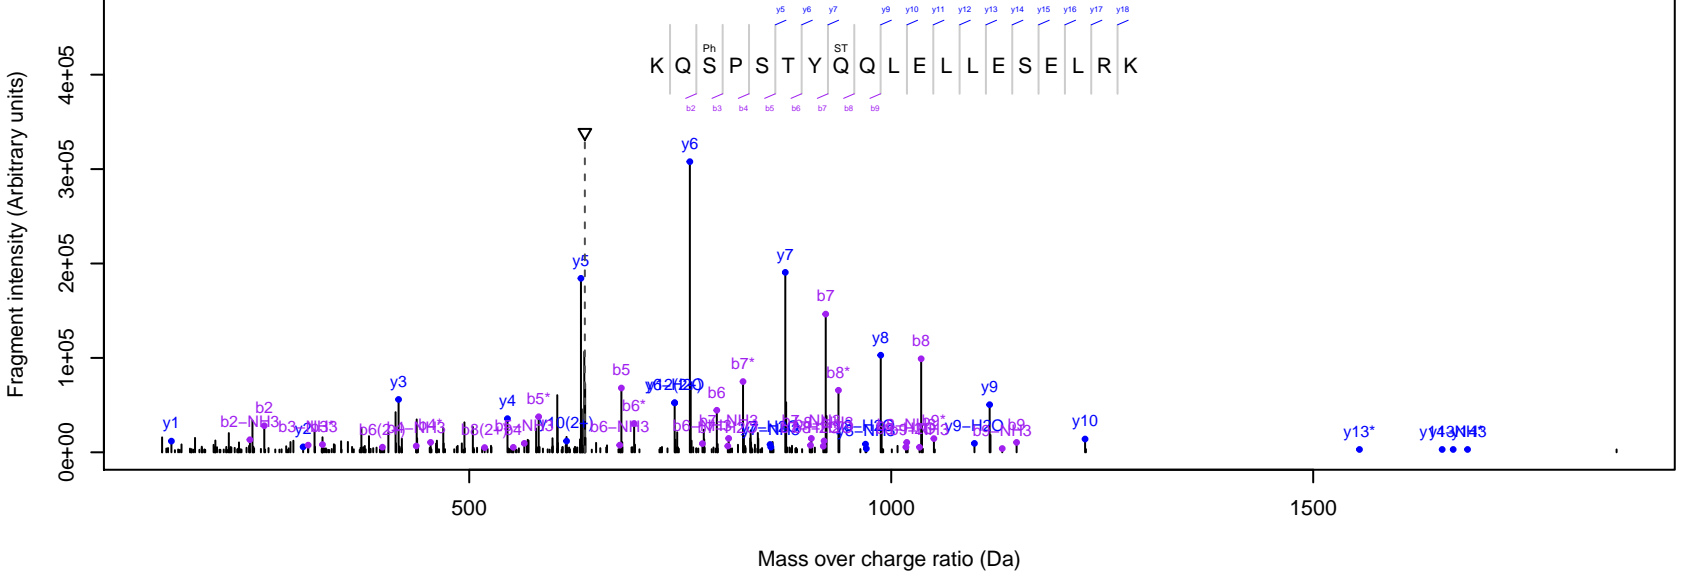

RRGS(Phospho (STY))SGS(Phospho (STY))VDETLFALPAASEPVIR-3+

Source : QE3\_201126\_FR\_TiOx\_hum\_tissue\_Urea\_RNAB\_H Scan : 48731

Andromeda score : 193.05

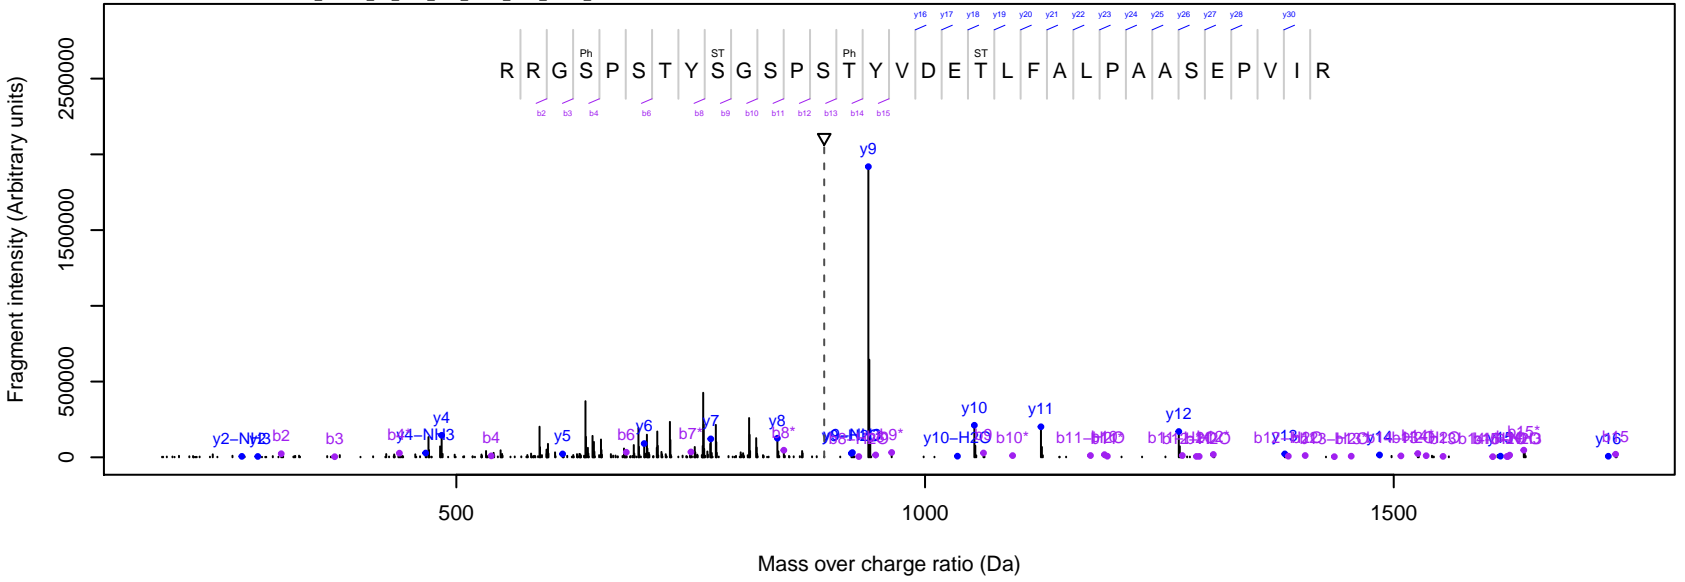

CSGPGLS(Phospho (STY))PGMVR-2+

Source : QE3\_201126\_FR\_TiOx\_hum\_tissue\_Urea\_RNAB\_N Scan : 24822

Andromeda score : 193

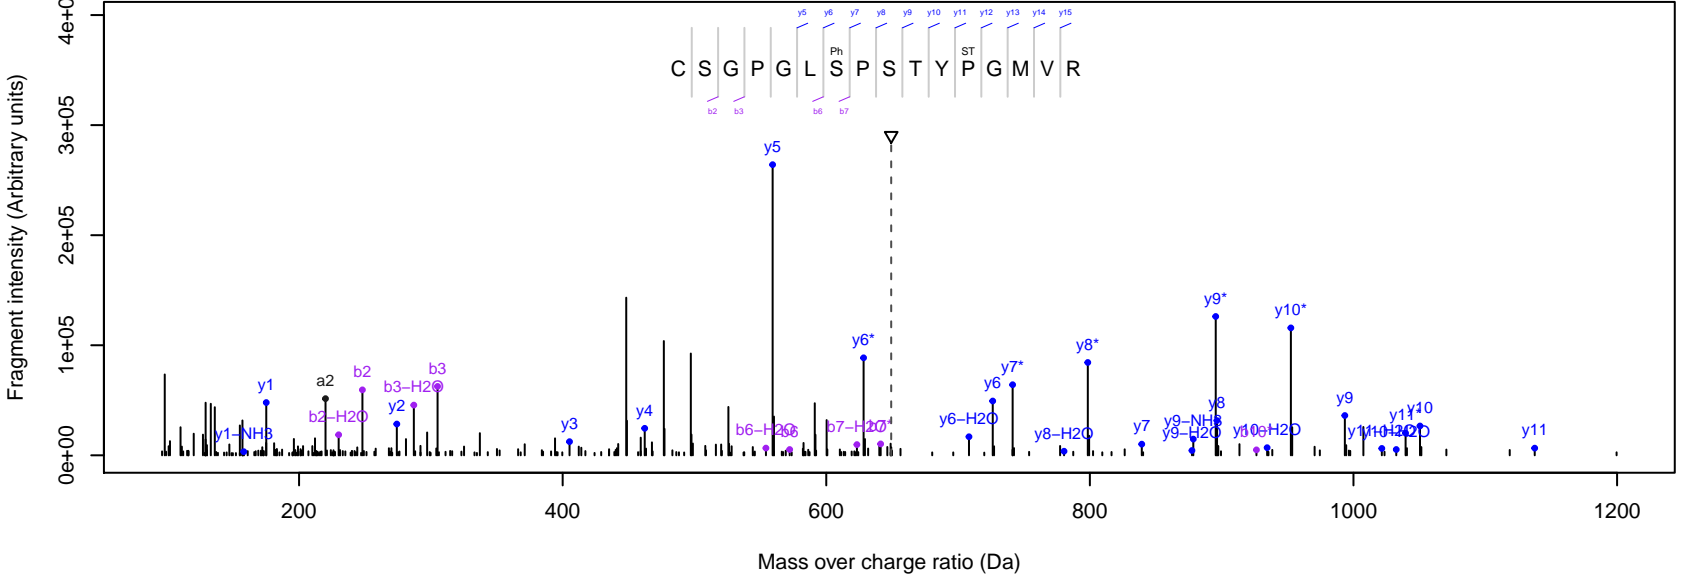

AKNWEDEDFYDS(Phospho (STY))DDDTFLDR-2+

Source : QE3\_201126\_FR\_TiOx\_hum\_tissue\_Urea\_RNAB\_B Scan : 45807

Andromeda score : 192.98

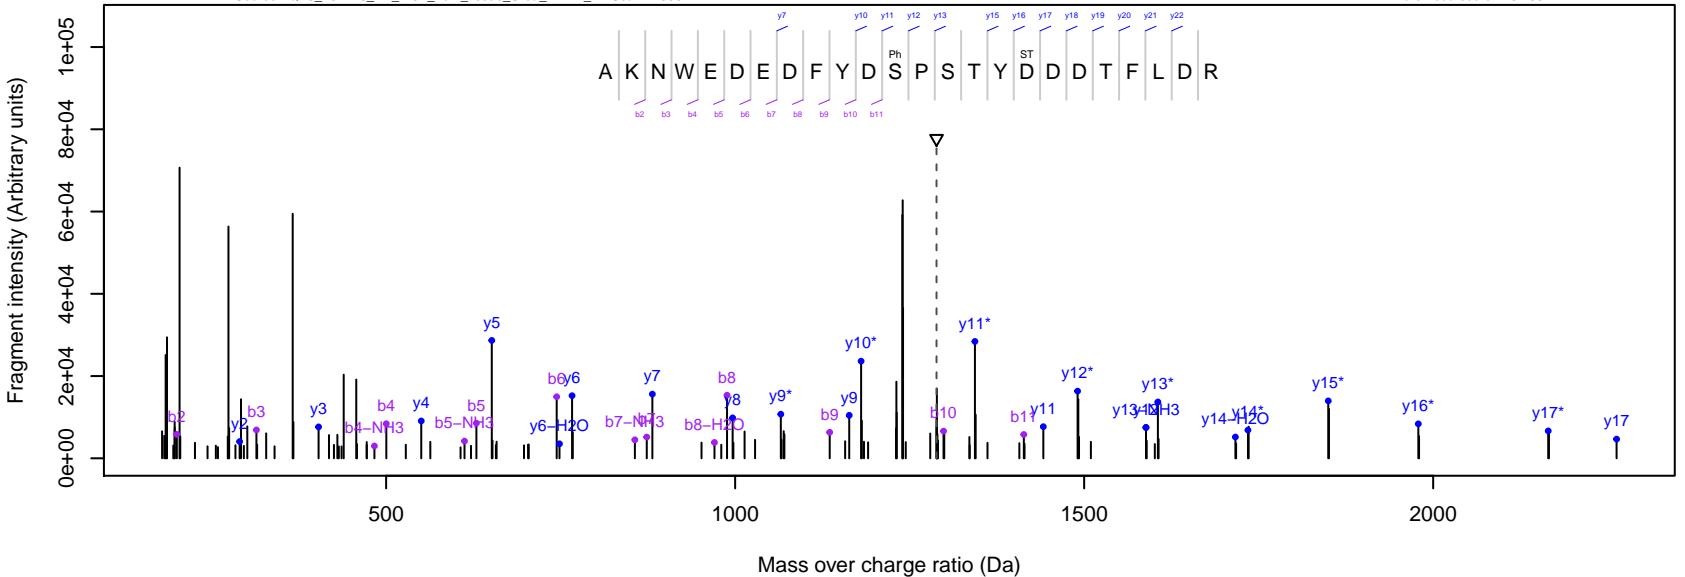

AEVGAPLSPDHS(Phospho (STY))EEEEEEEGLEEDPR-3+

Source : QE3\_201126\_FR\_TIOx\_hum\_tissue\_Urea\_RNAB\_H Scan : 31627

Andromeda score : 192.87

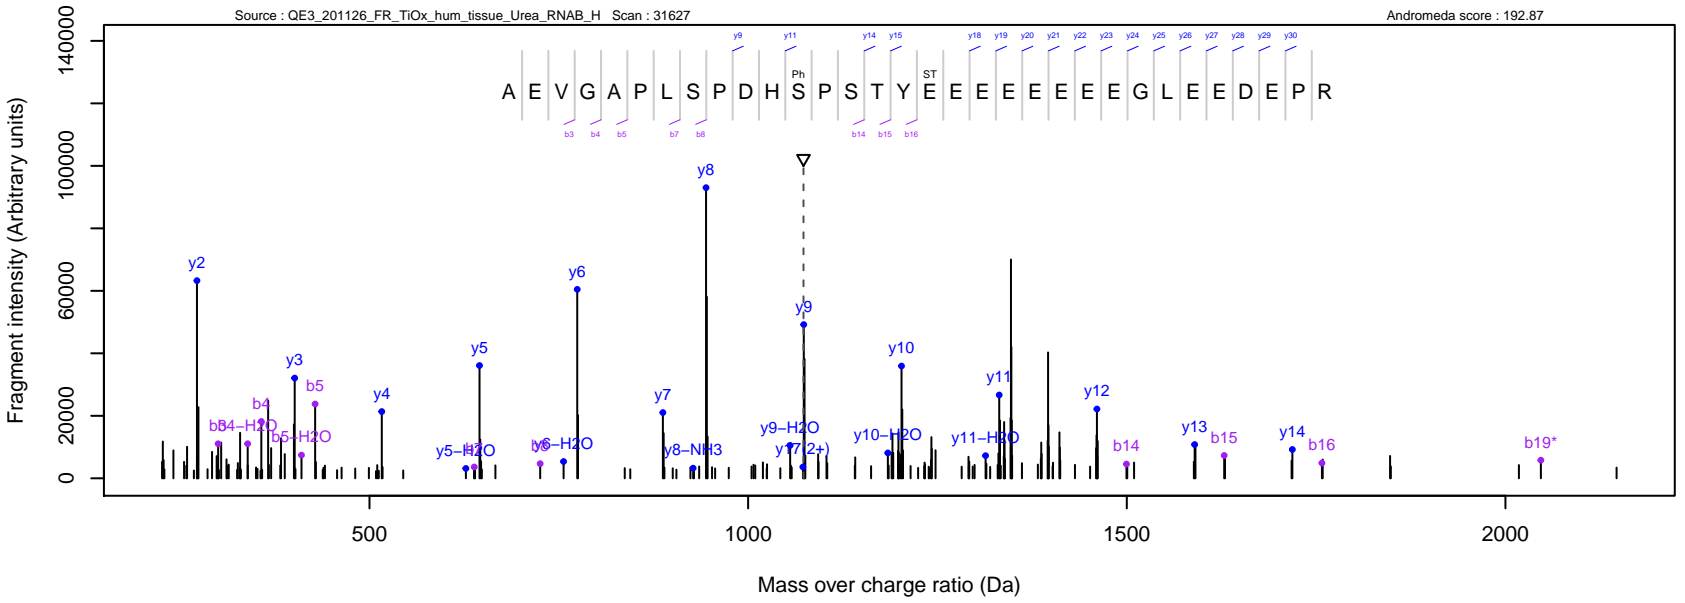

SSS(Phospho (STY))PGKLLGSYGGLTGSSR-3+

Source : QE3\_201126\_FR\_TIOx\_hum\_tissue\_Urea\_RNAB\_H Scan : 28769

Andromeda score : 192.87

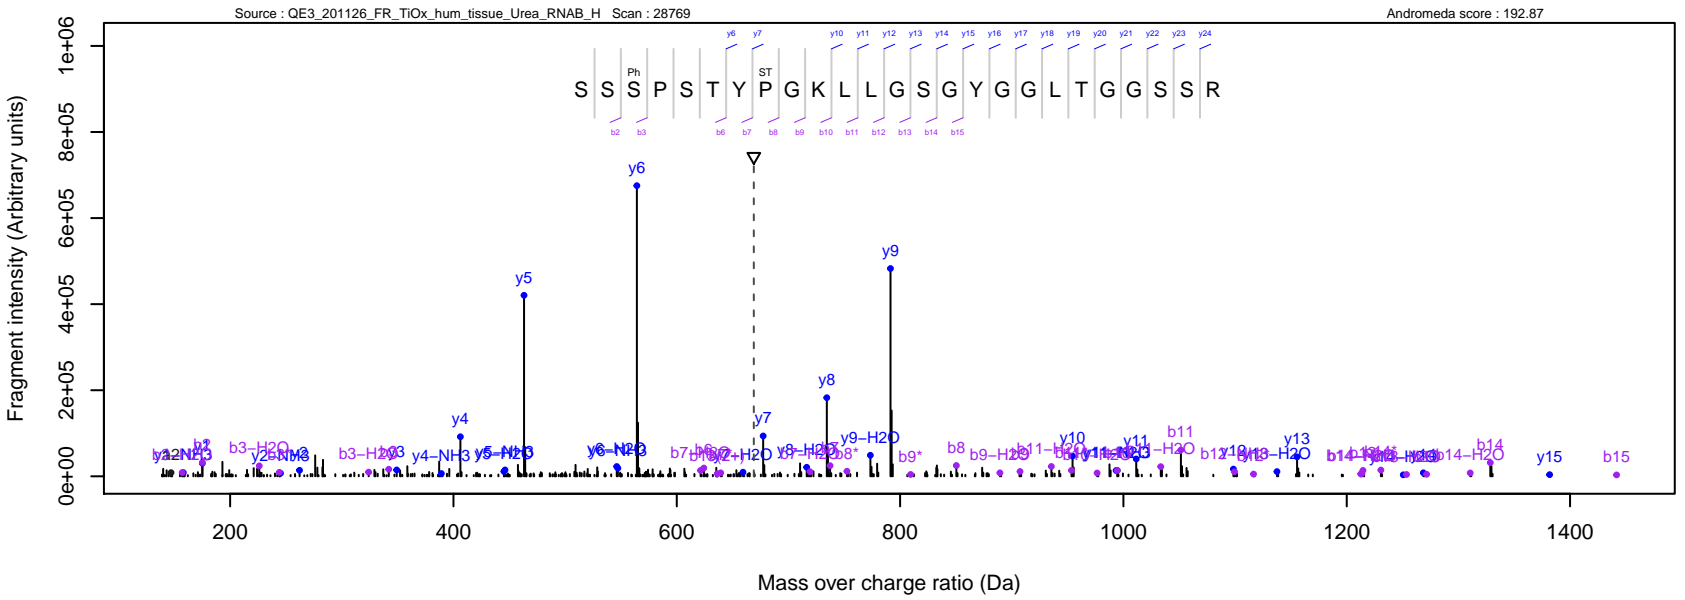

EGALSRVS(Phospho (STY))DELSK-2+

Source : QE3\_201126\_FR\_TIOx\_hum\_tissue\_Urea\_RNAB\_N Scan : 14807

Andromeda score : 192.78

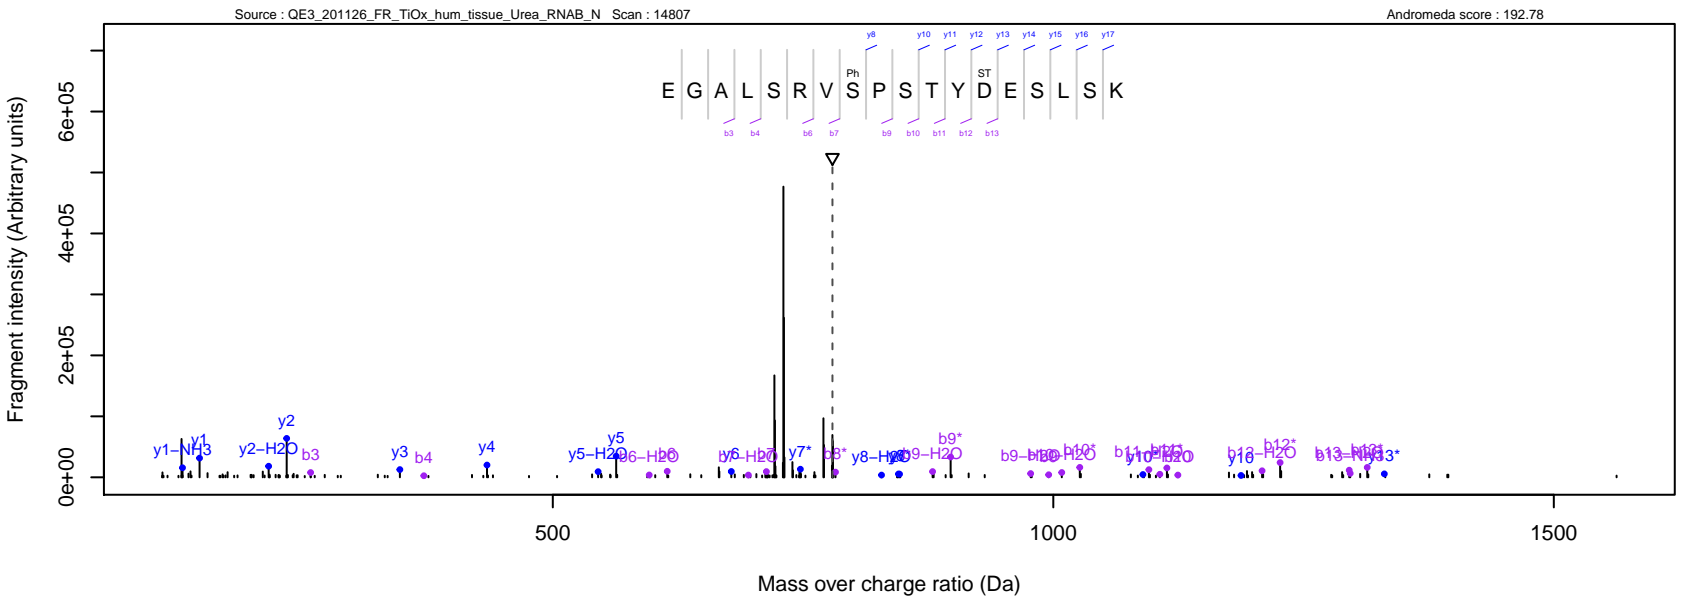

### SRS(Phospho (STY))APPNLWAAQR-2+

Source : QE3\_201126\_FR\_TiOx\_hum\_tissue\_Urea\_RNAB\_H Scan : 20716

Andromeda score : 192.78

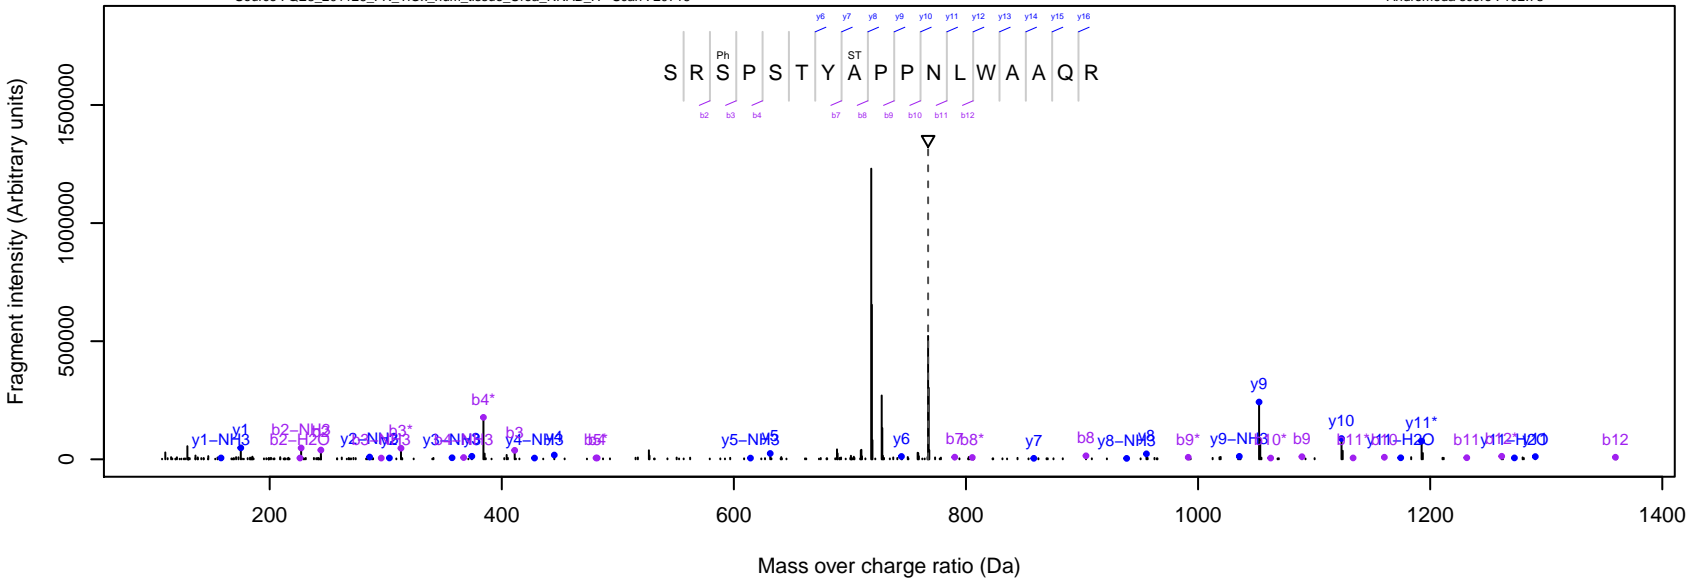

### ESESALM(Oxidation (M))EDRDES(Phospho (STY))EVS(Phospho (STY))DEGGSPISSEGEQEP-3+

Source : QE3\_201126\_FR\_TiOx\_hum\_tissue\_Urea\_RNAB\_H Scan : 25618

Andromeda score : 192.75

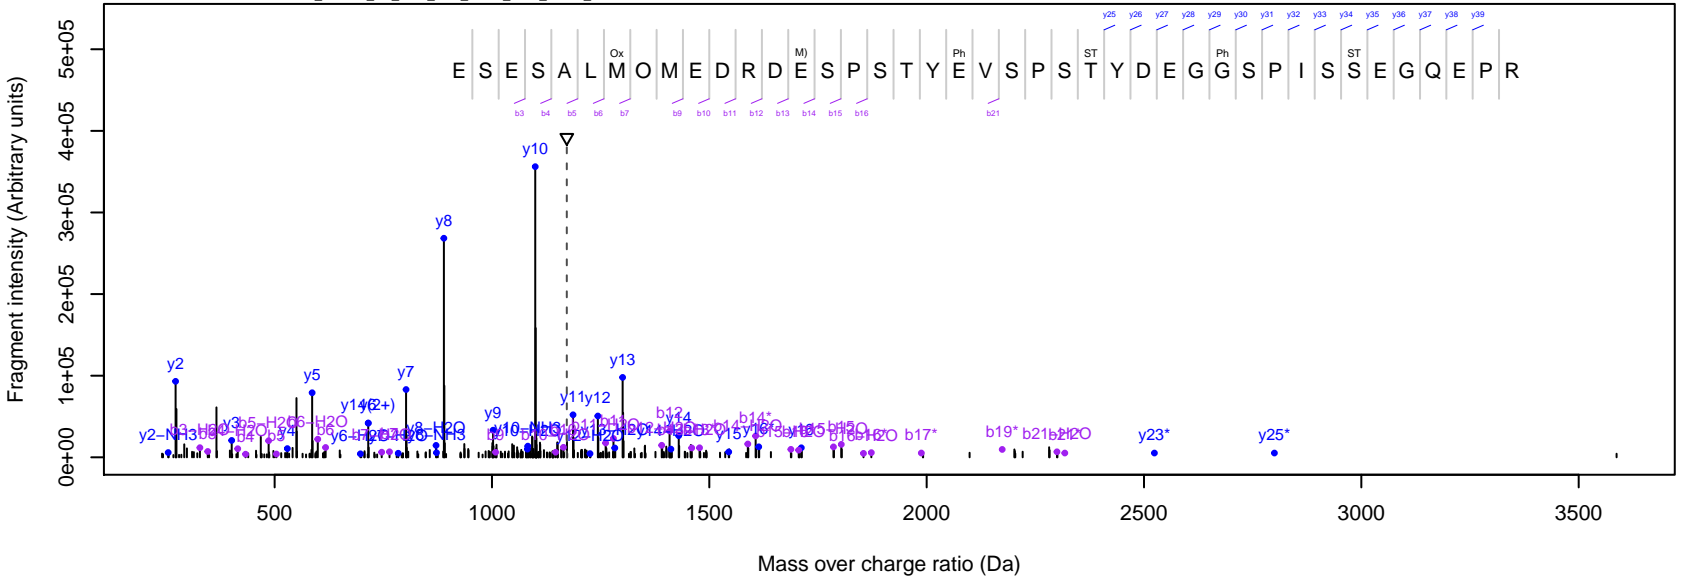

### VM(Oxidation (M))IYQDEVKLPALKS(Phospho (STY))ISK-3+

Source : QE3\_201126\_FR\_TiOx\_hum\_tissue\_Urea\_RNAB\_N Scan : 33996

Andromeda score : 192.75

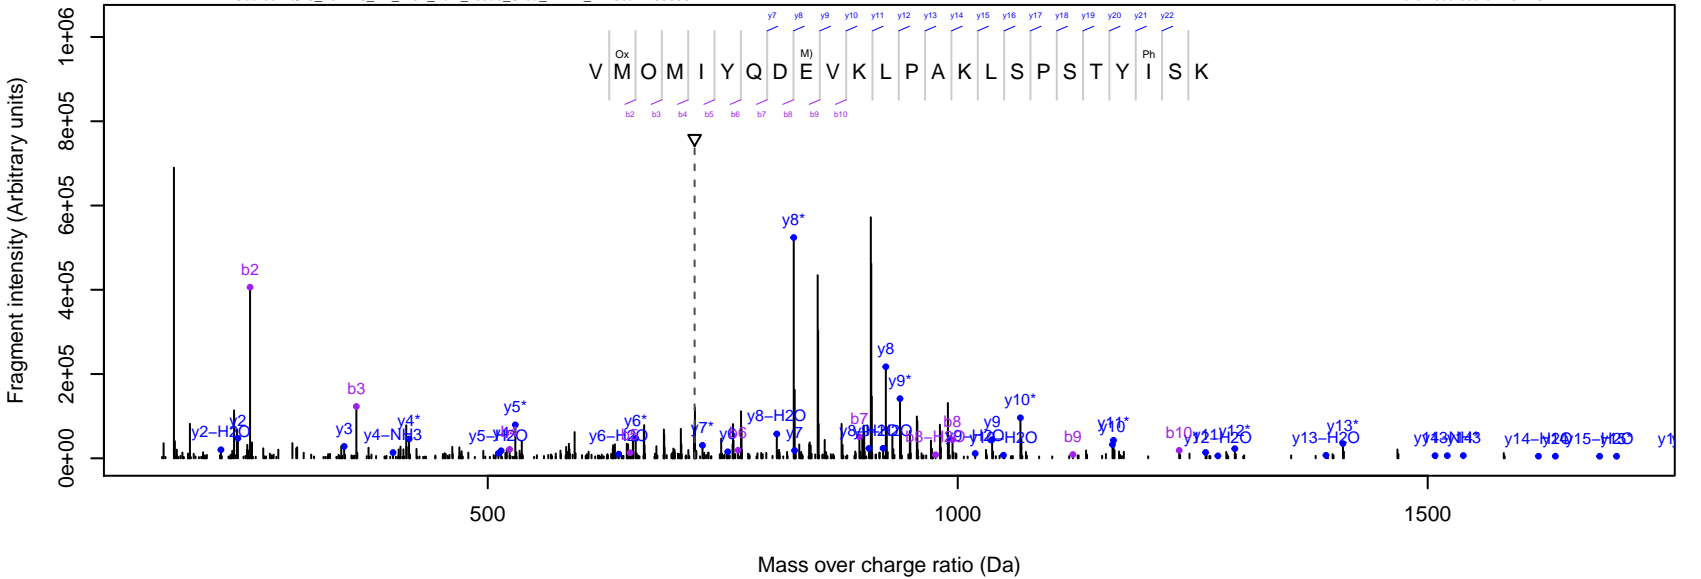

RGS(Phospho (STY))DELTVP-2+

Source : QE3\_201126\_FR\_TiOx\_hum\_tissue\_Urea\_RNAB\_H Scan : 12928

Andromeda score : 192.65

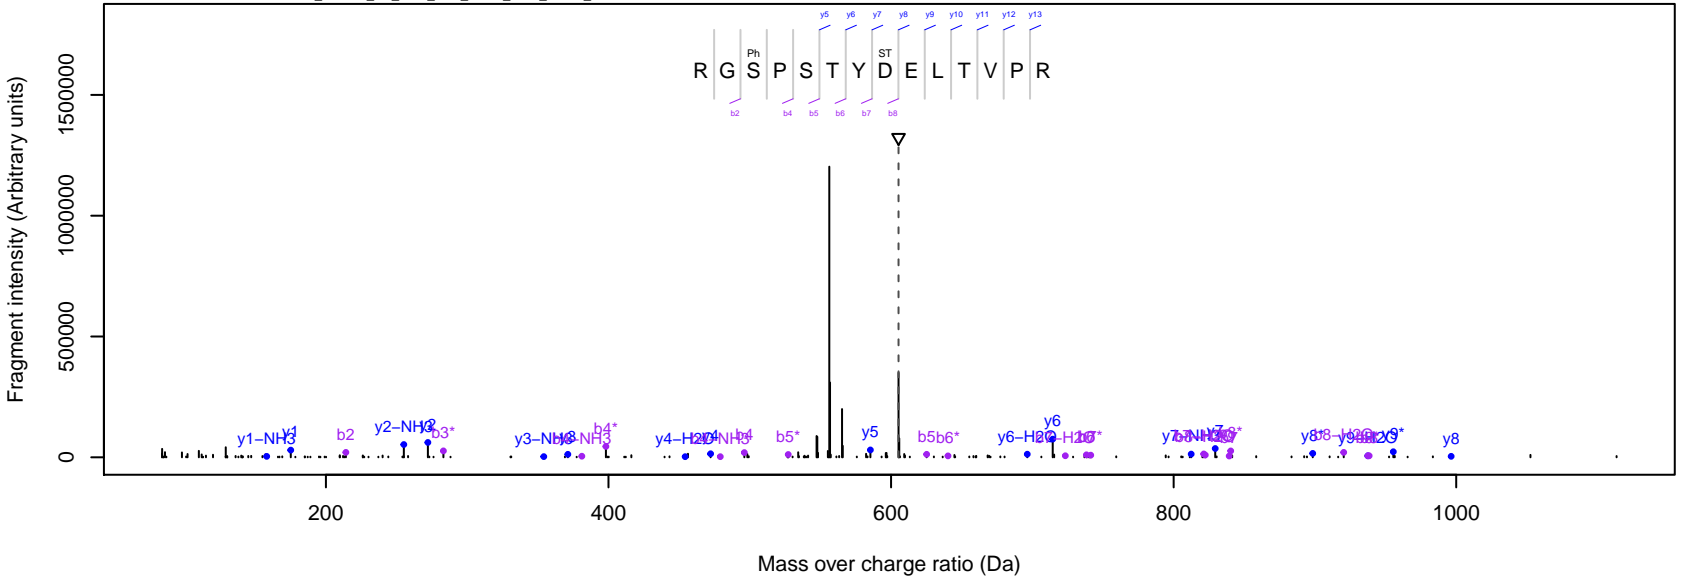

VGS(Phospho (STY))SGDIALHINPR-2+

Source : QE3\_201126\_FR\_TiOx\_hum\_tissue\_Urea\_RNAB\_H Scan : 24126

Andromeda score : 192.65

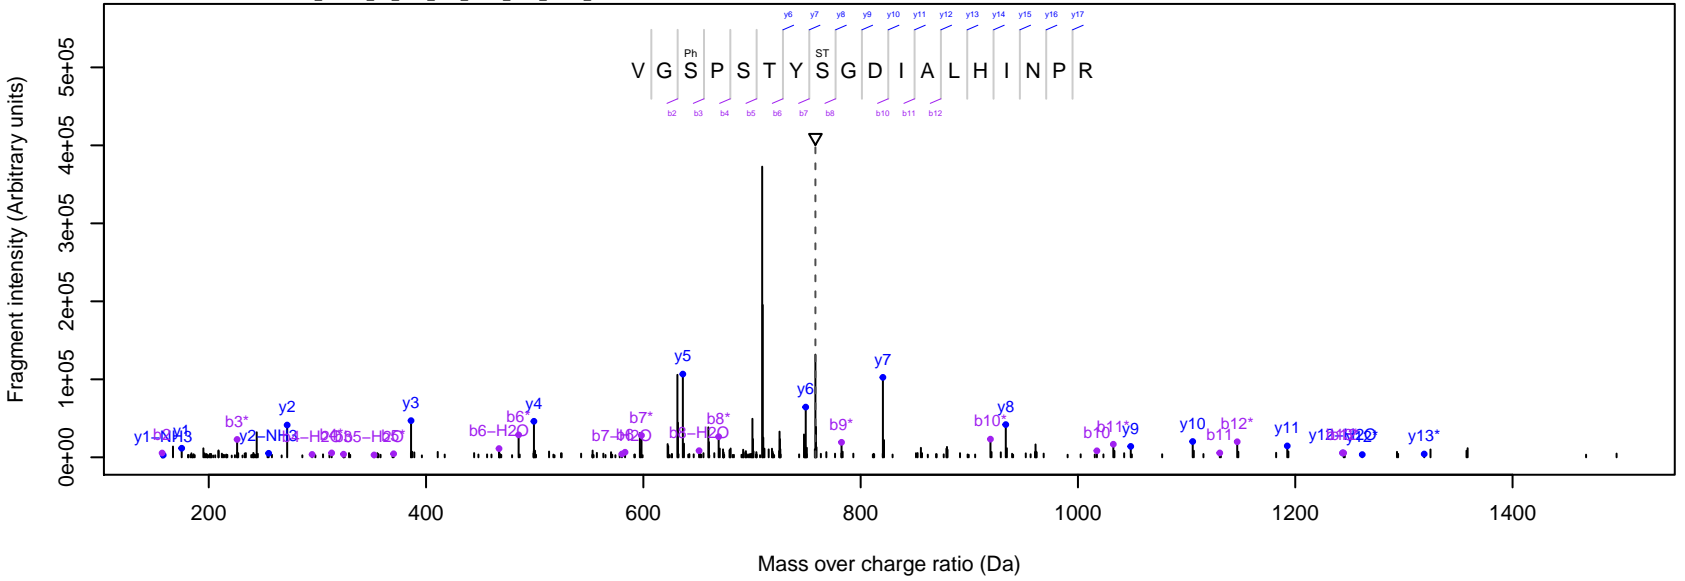

SQS(Phospho (STY))TTFNPDDMSEPEFKR-3+

Source : QE3\_201126\_FR\_TiOx\_hum\_tissue\_Urea\_RNAB\_N Scan : 30021

Andromeda score : 192.63

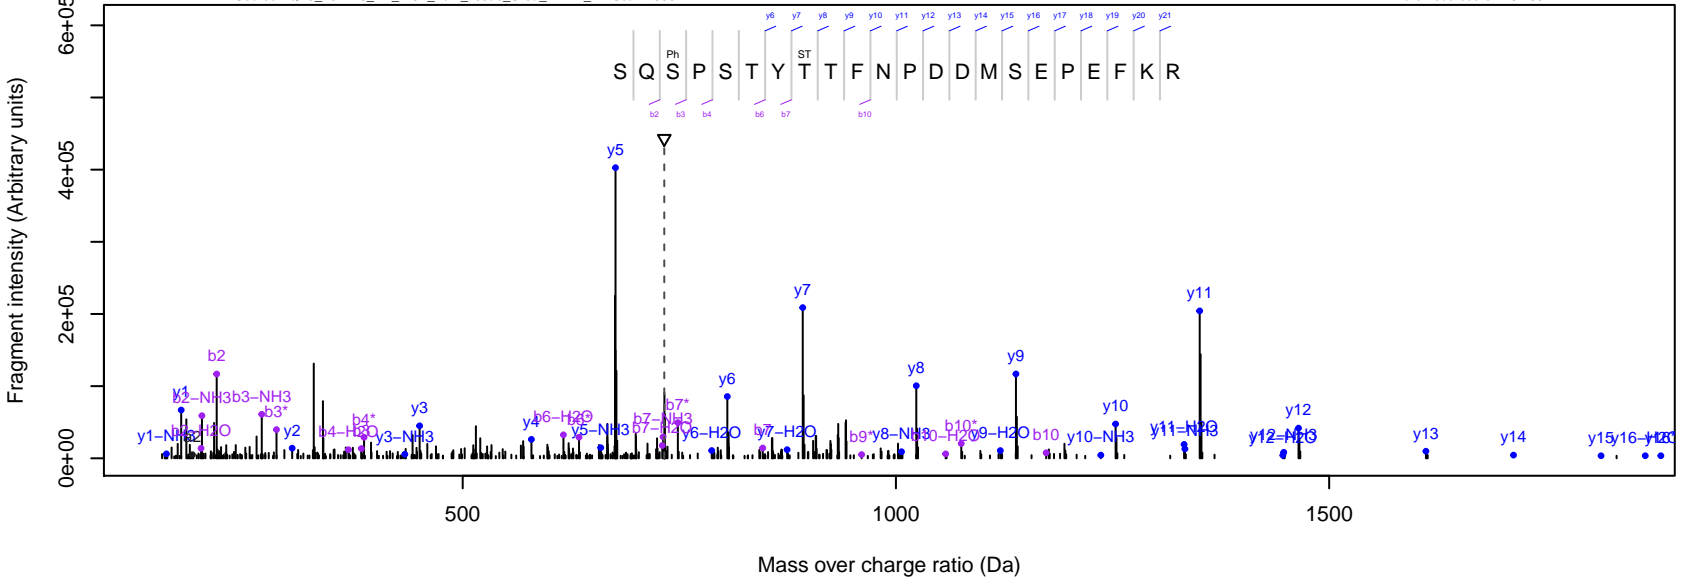

GILAADES(Phospho (STY))TGSIAK-2+

Source : QE3\_201126\_FR\_TiOx\_hum\_tissue\_Urea\_RNAB\_H Scan : 26191

Andromeda score : 192.39

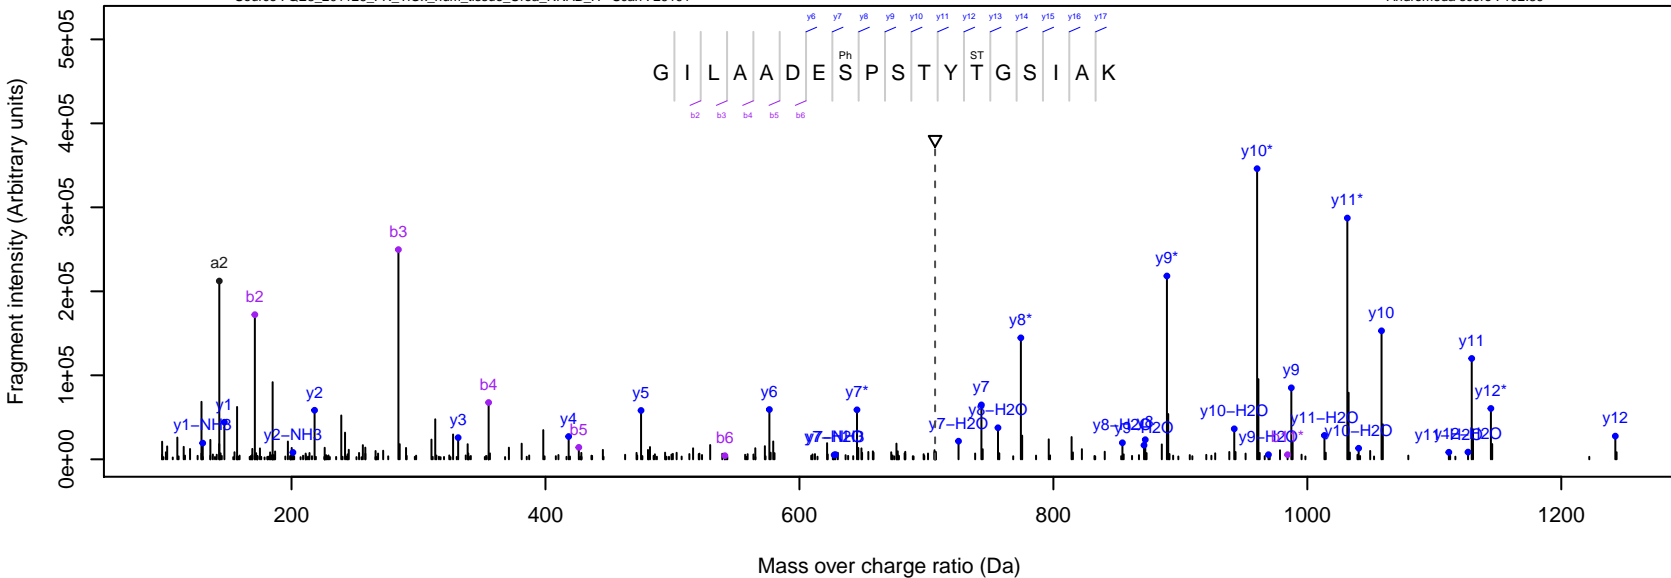

QITQEEDS(Phospho (STY))DEEVAPENFFSLPEK-3+

Source : QE3\_201126\_FR\_TiOx\_hum\_tissue\_Urea\_RNAB\_H Scan : 55300

Andromeda score : 192.35

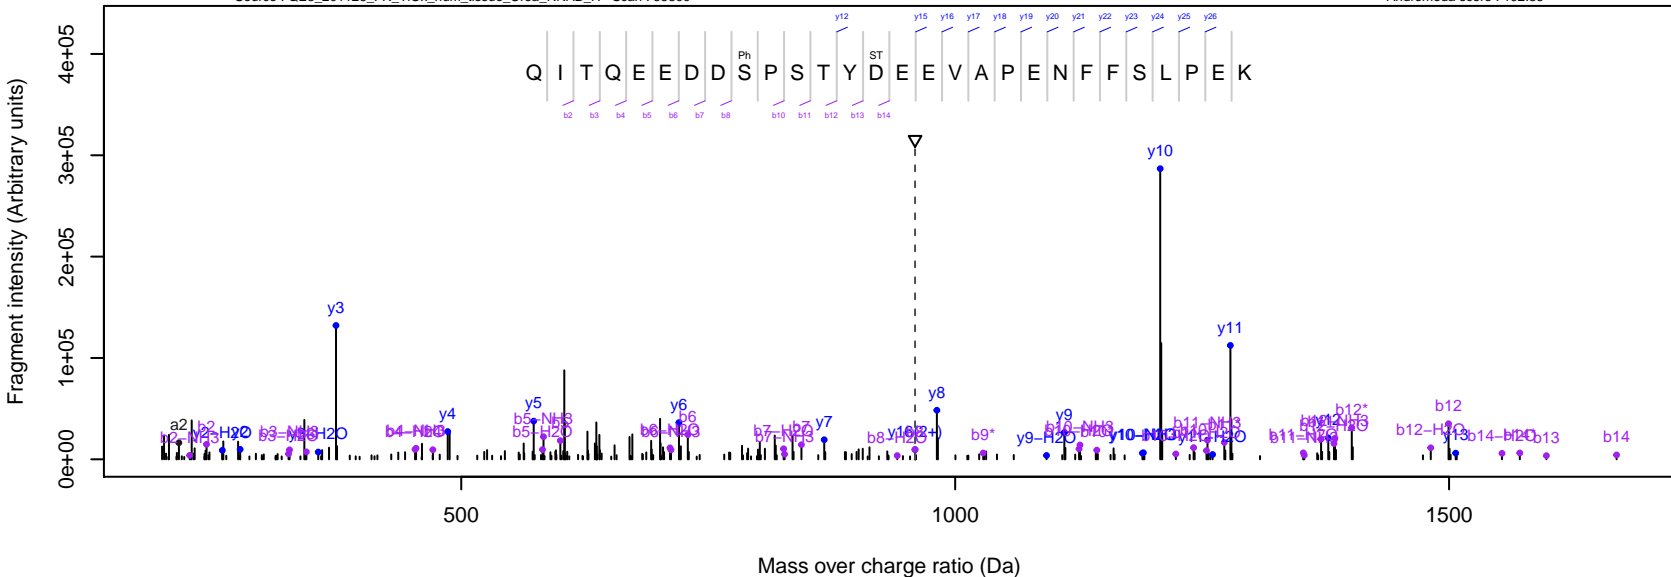

AQS(Phospho (STY))SPAAPASLSAPEPASQAR-2+

Source : QE3\_201126\_FR\_TiOx\_hum\_tissue\_Urea\_RNAB\_H Scan : 22805

Andromeda score : 192.19

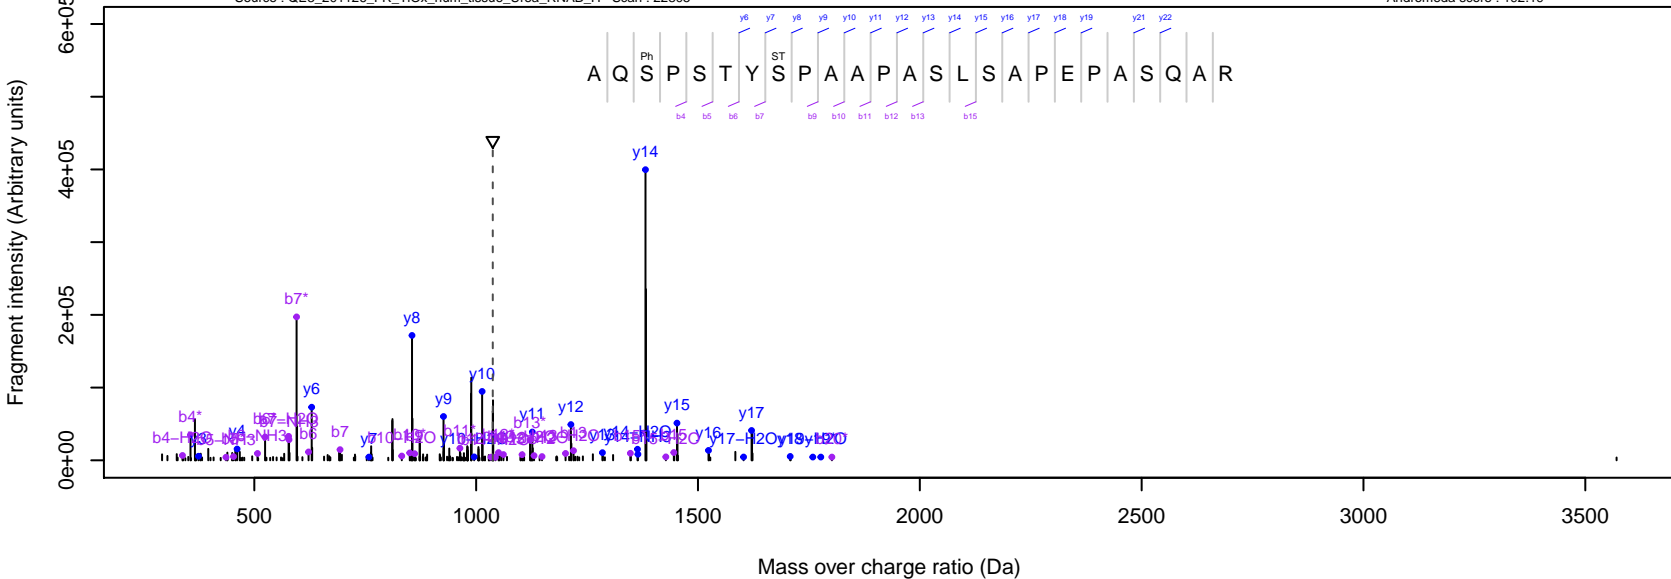

TVEDEDQDS(Phospho (STY))EEEKNDNSYIKER-3+

Source : QE3\_201126\_FR\_TiOx\_hum\_tissue\_Urea\_RNAB\_N Scan : 12894

Andromeda score : 192.18

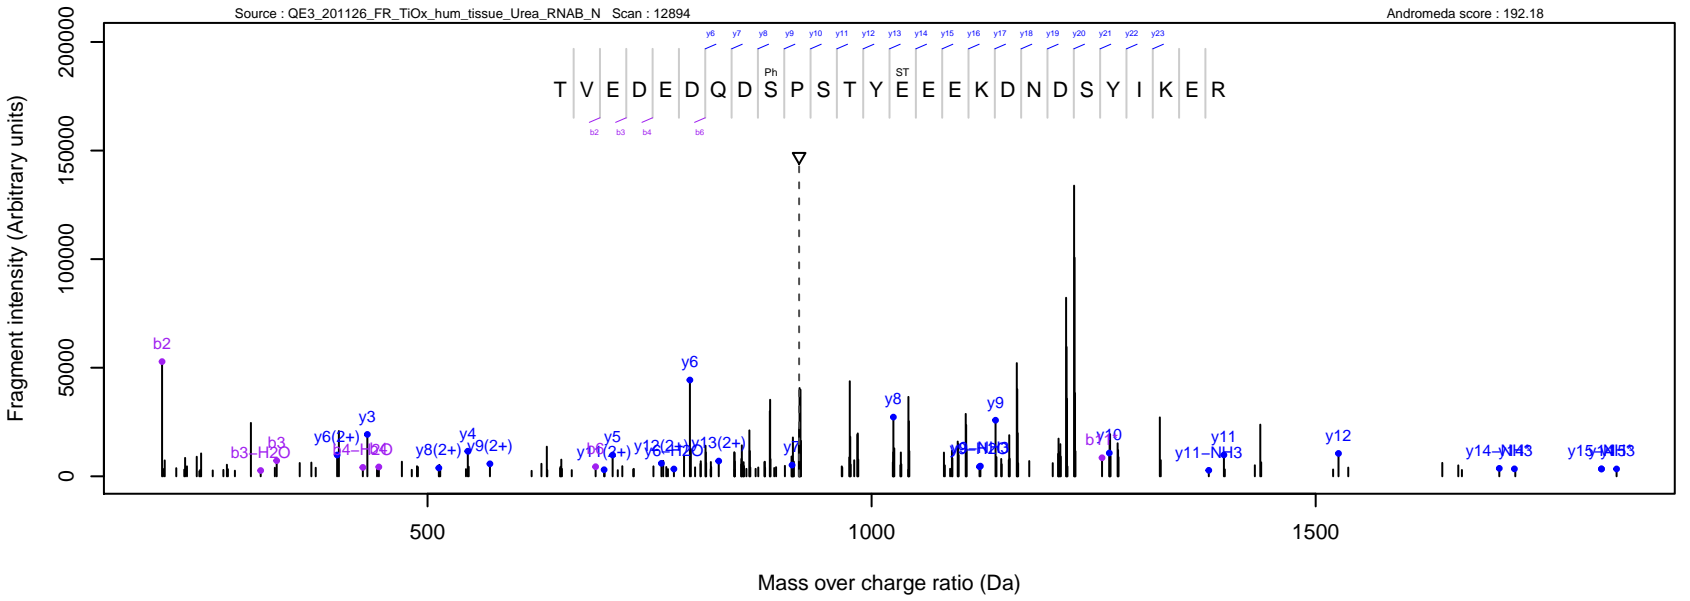

DLSQESSTAPGSEVTIKQEPVSPSTYPK-3+

Source : QE3\_201126\_FR\_TiOx\_hum\_tissue\_Urea\_RNAB\_B Scan : 23508

Andromeda score : 192.07

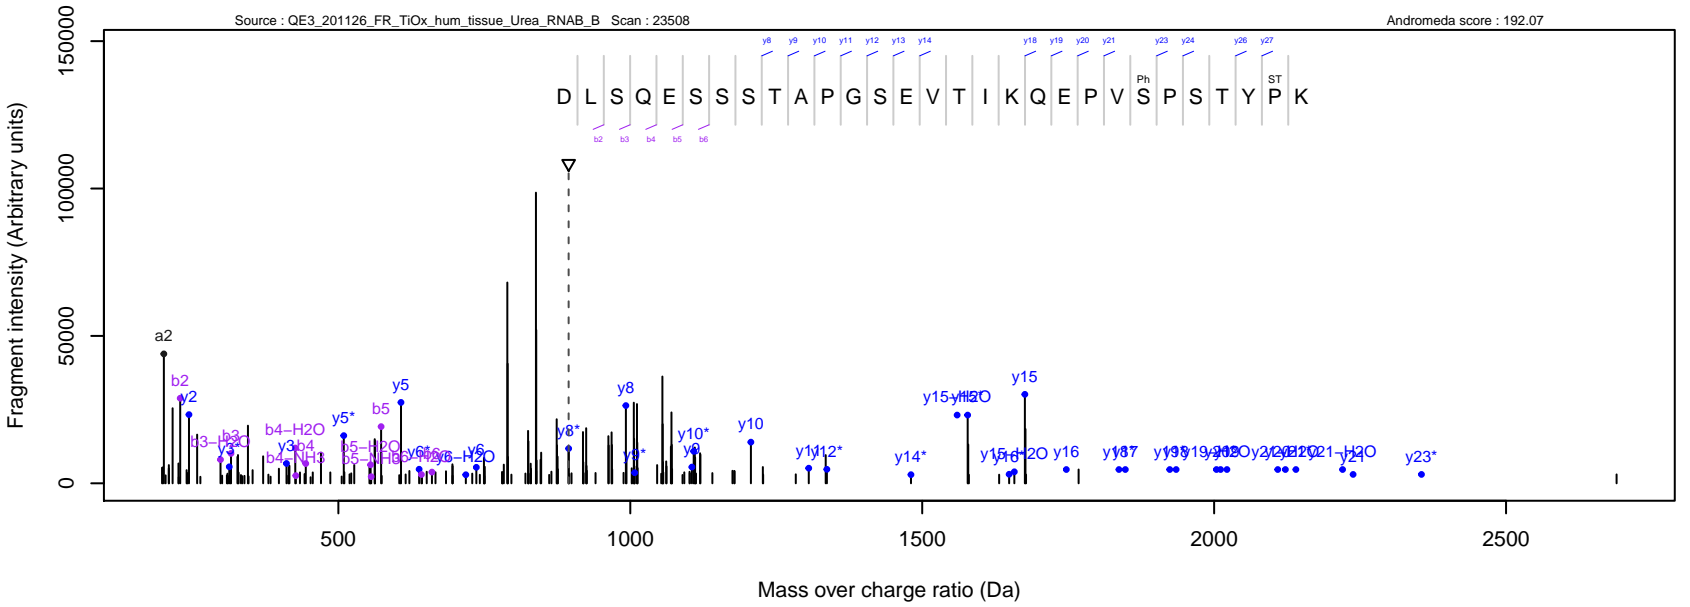

KVELS(Phospho (STY))ESEEDKGGK-3+

Source : QE3\_201126\_FR\_TiOx\_hum\_tissue\_Urea\_RNAB\_H Scan : 5853

Andromeda score : 192.04

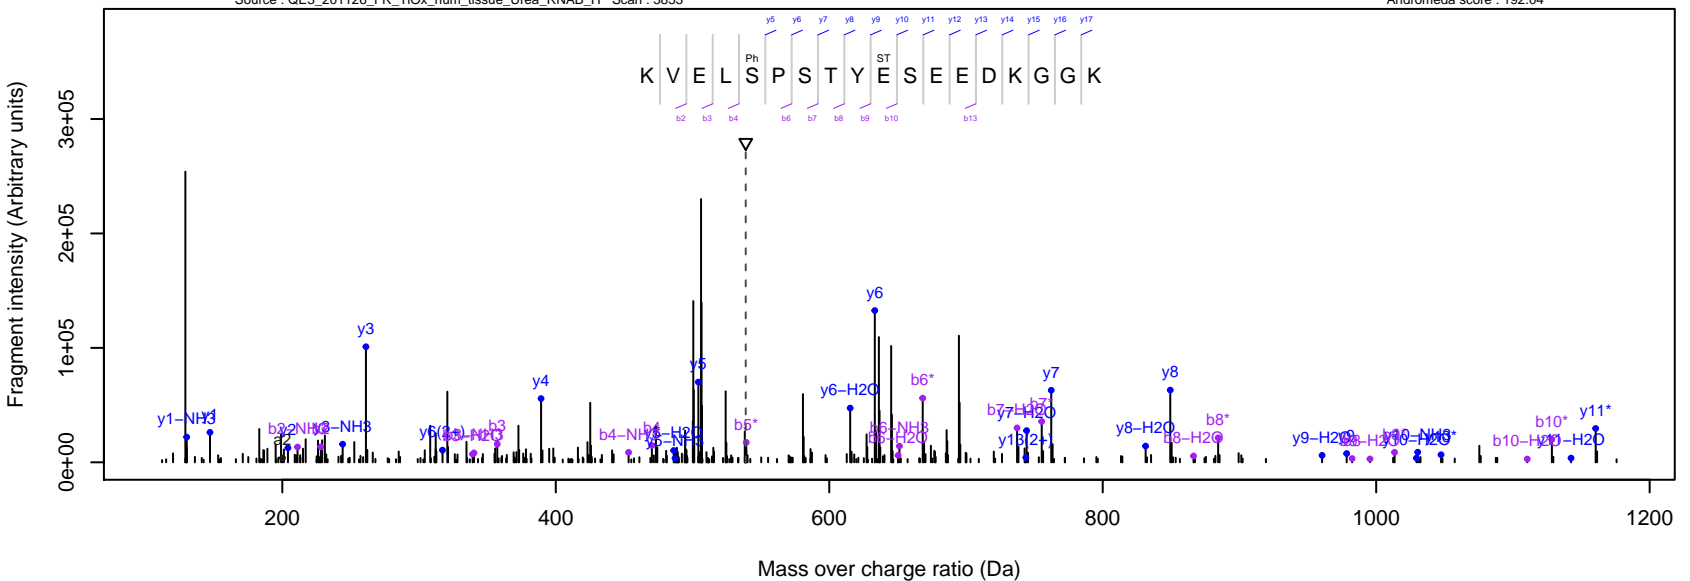

AS(Phospho (STY))PAPGSGHPEPGAHLDM(Oxidation (M))NSLDR-3+

Source : QE3\_201126\_FR\_TiOx\_hum\_tissue\_Urea\_RNAB\_H Scan : 14842

Andromeda score : 191.98

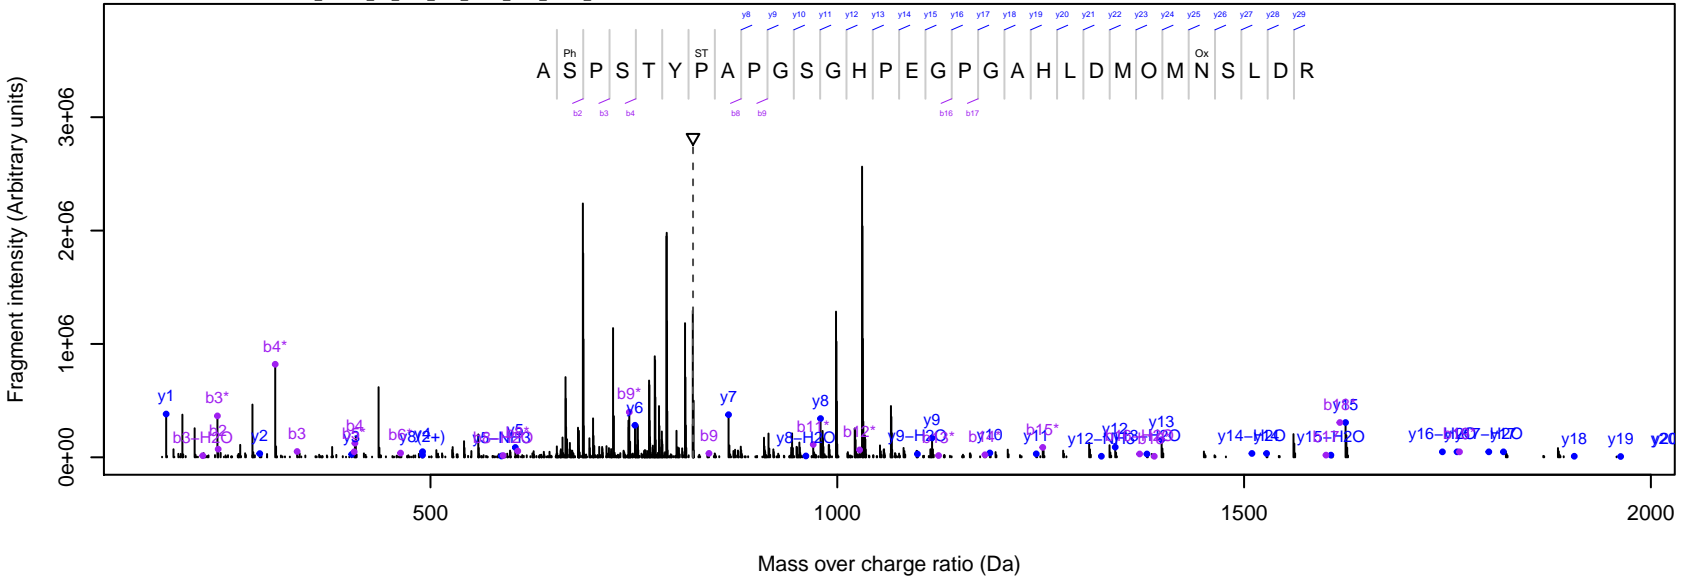

GDS(Phospho (STY))ES(Phospho (STY))EEDLEVPVPSR-2+

Source : QE3\_201126\_FR\_TiOx\_hum\_tissue\_Urea\_RNAB\_B Scan : 43557

Andromeda score : 191.93

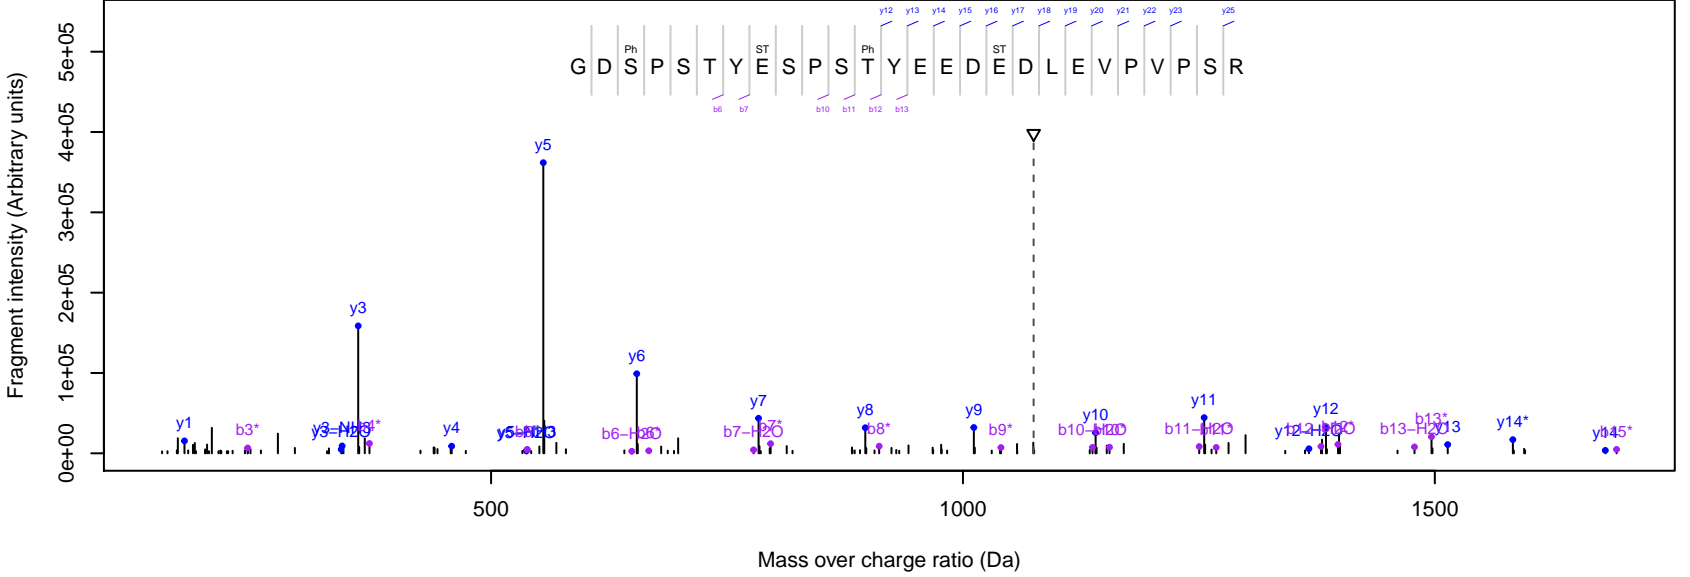

(Acetyl (Protein N-term))S(Phospho (STY))KSES(Phospho (STY))PKEPEQLR-2+

Source : QE3\_201126\_FR\_TiOx\_hum\_tissue\_Urea\_RNAB\_N Scan : 13945

Andromeda score : 191.91

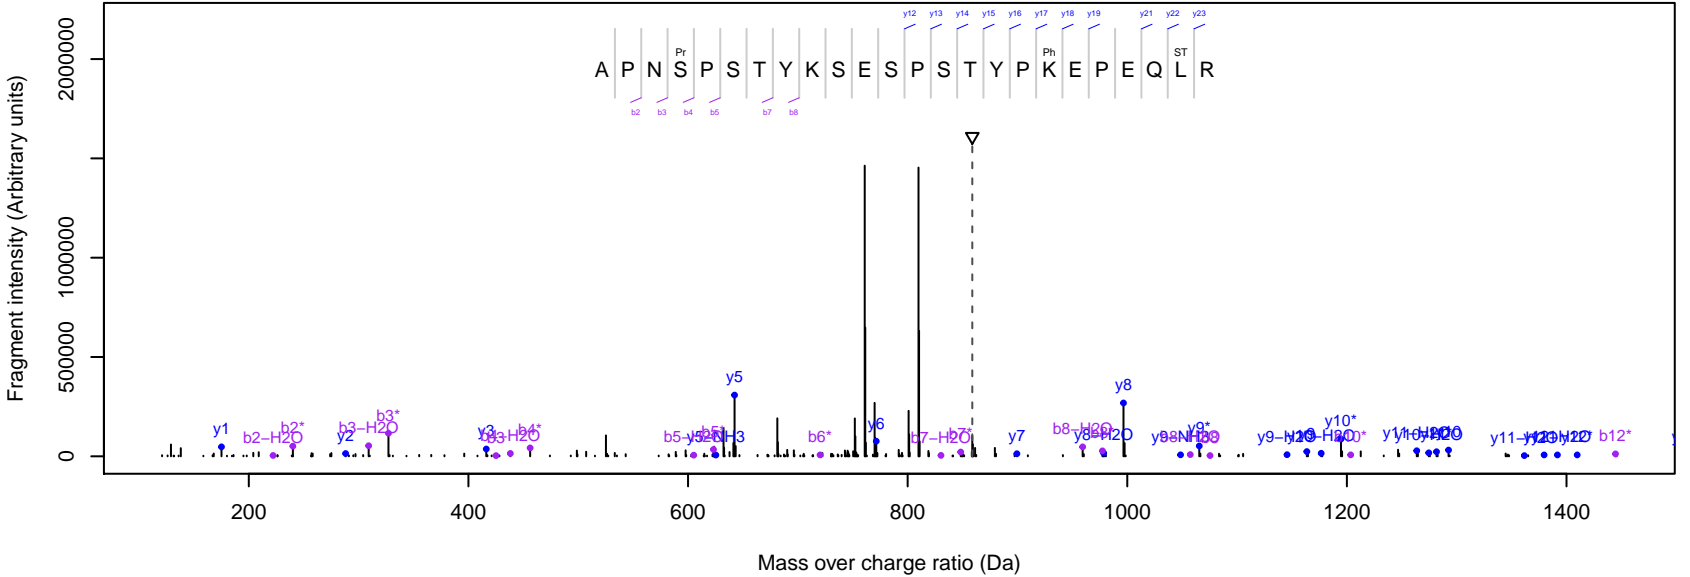



EFTES(Phospho (STY))QLQEGK-2+

Source : QE3\_201126\_FR\_TiOx\_hum\_tissue\_Urea\_RNAB\_H Scan : 21398

Andromeda score : 191.79

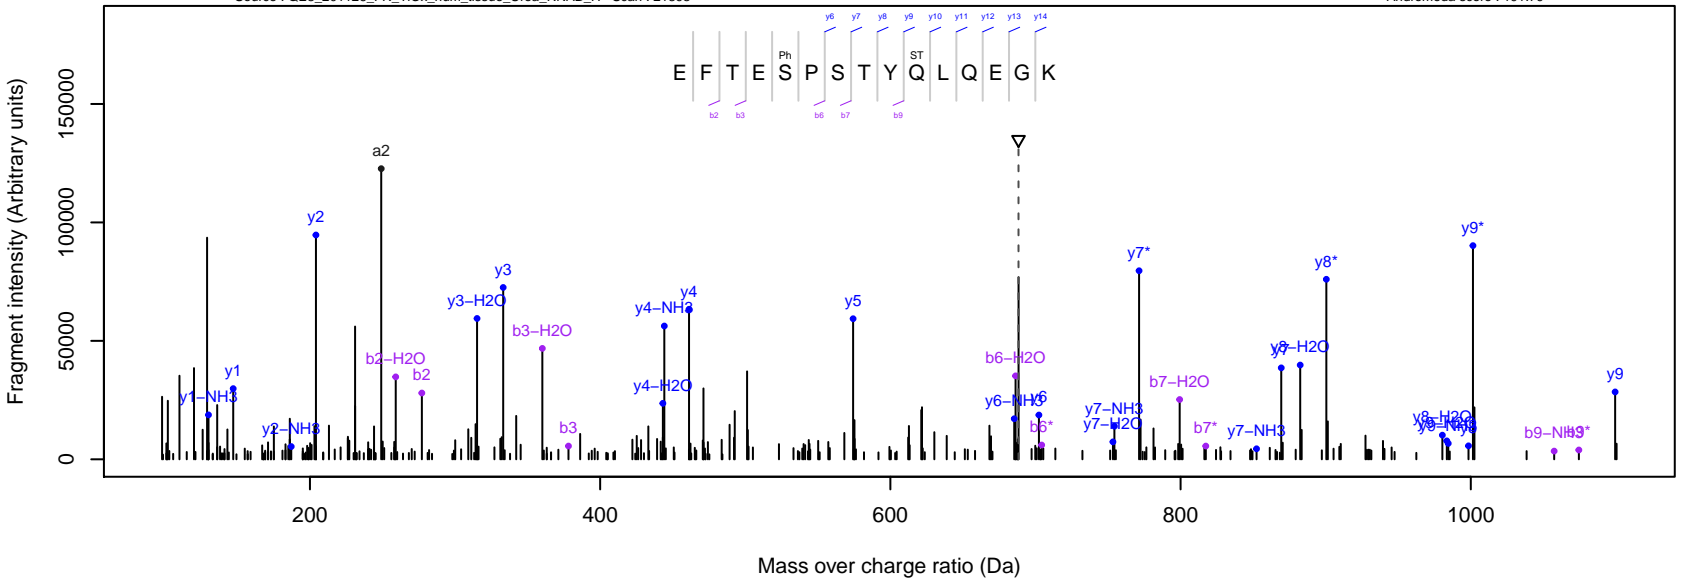

EKVS(Phospho (STY))SIDLEIDSLSSLLDDMTK-2+

Source : QE3\_201126\_FR\_TiOx\_hum\_tissue\_Urea\_RNAB\_N Scan : 62569

Andromeda score : 191.65

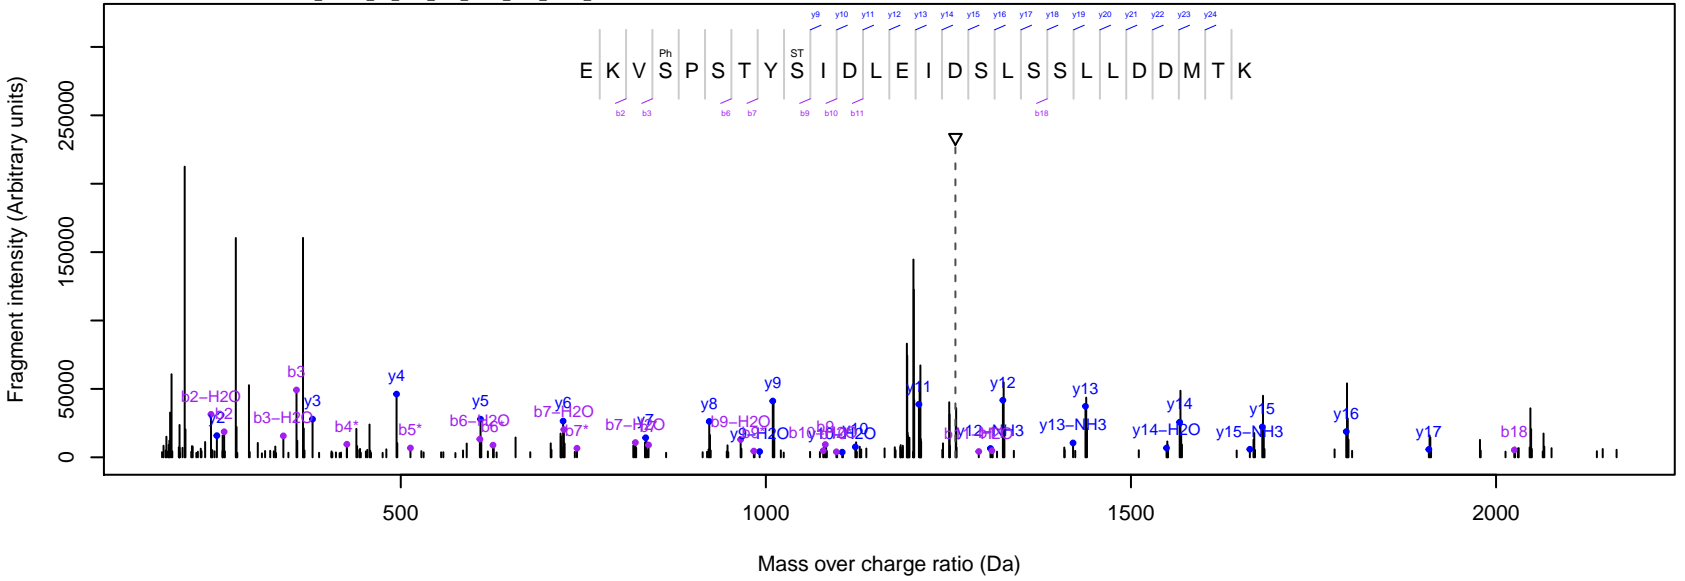

SSSQPSSCS(Phospho (STY))DPSKPGGNGVEGATQSLAEQM(Oxidation (M))R-3+

Source : QE3\_201126\_FR\_TiOx\_hum\_tissue\_Urea\_RNAB\_H Scan : 19773

Andromeda score : 191.59

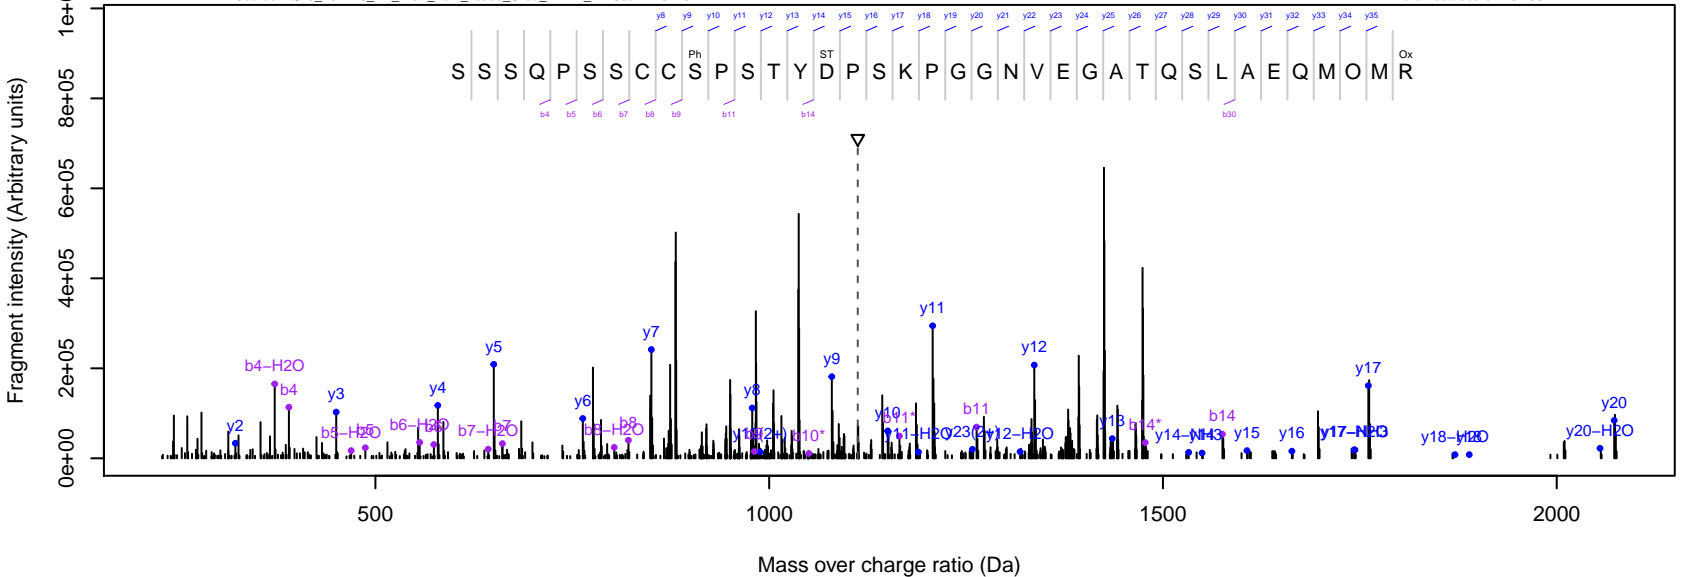

KIIPGLEGLQLPS(Phospho (STY))PTATSQLPLESDAVECLNYQHVK-4+

Source : QE3\_201126\_FR\_TIOx\_hum\_tissue\_Urea\_RNAB\_N Scan : 55431

Andromeda score : 191.56

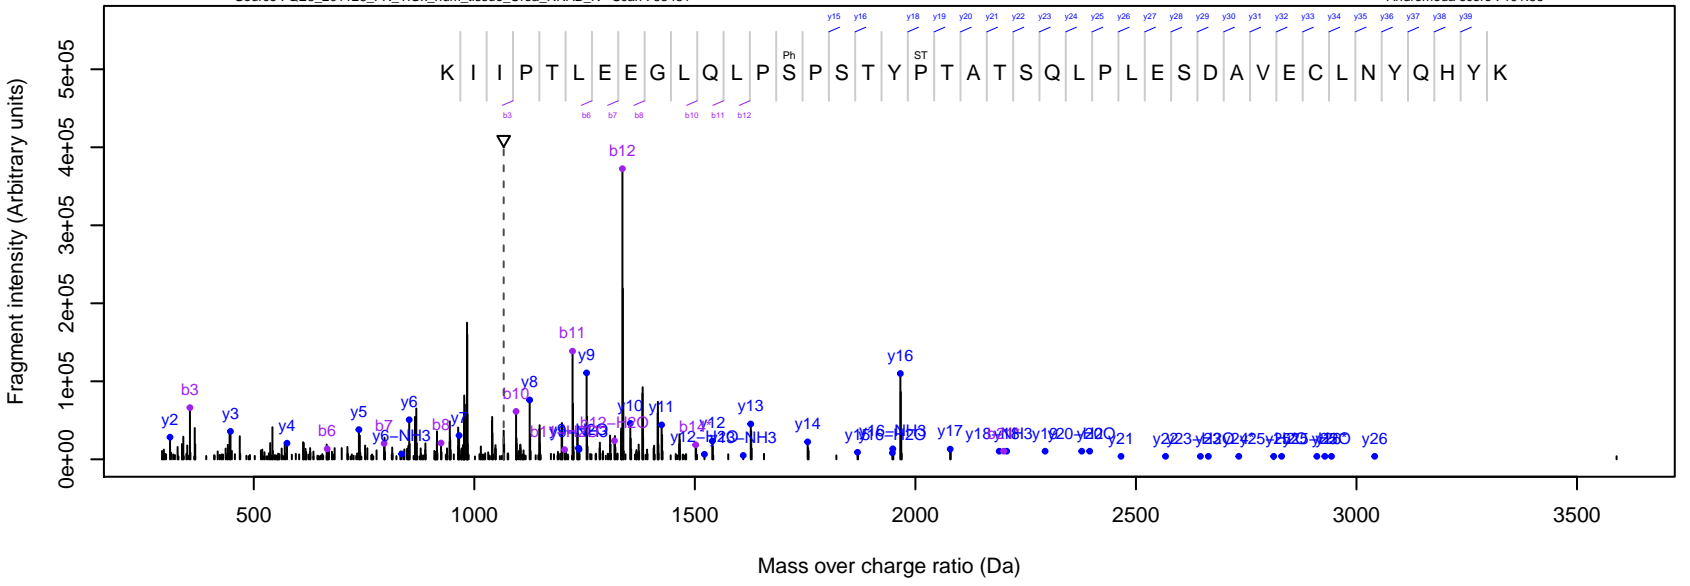

SGYHDDS(Phospho (STY))DEDLLE-2+

Source : QE3\_201126\_FR\_TIOx\_hum\_tissue\_Urea\_RNAB\_H Scan : 27536

Andromeda score : 191.53

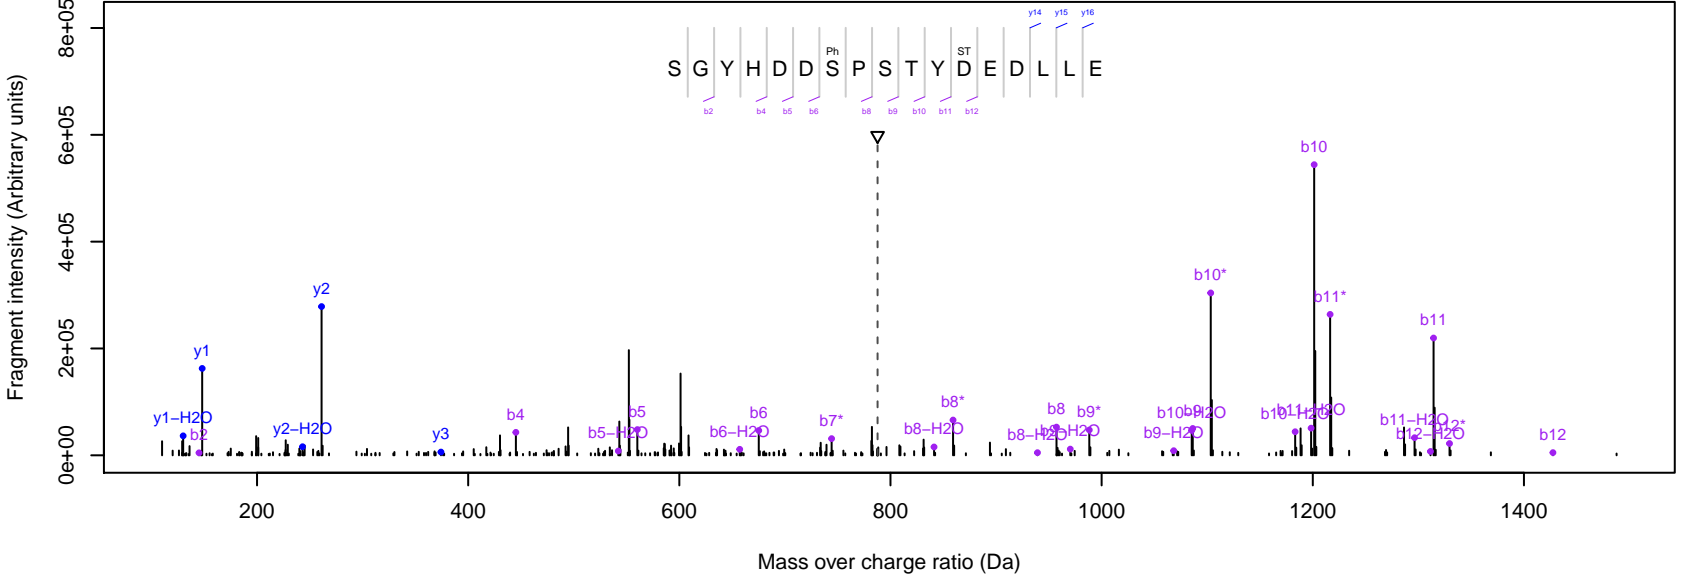

GPPQS(Phospho (STY))PVFEGVYNSR-2+

Source : QE3\_201126\_FR\_TIOx\_hum\_tissue\_Urea\_RNAB\_N Scan : 32431

Andromeda score : 191.51

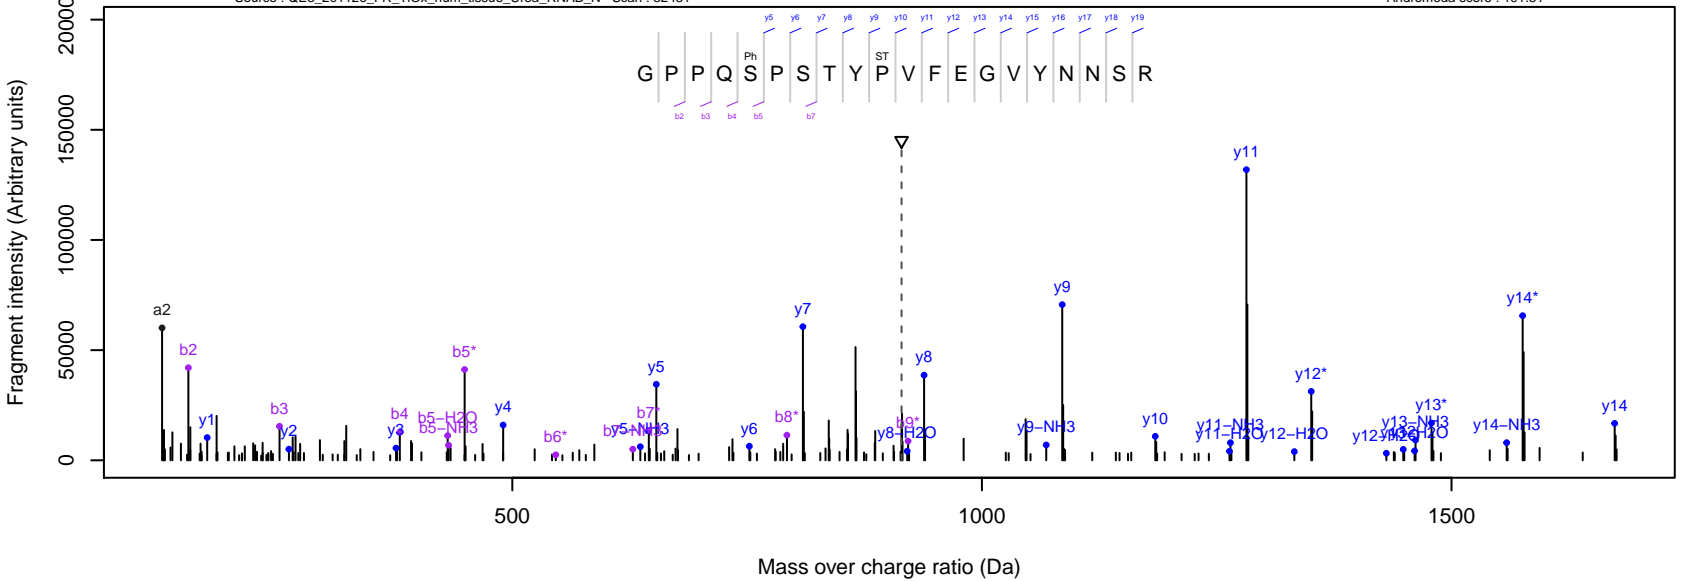

TSS(Phospho (STY))KES(Phospho (STY))PIPSPTSDR-2+

Source : QE3\_201126\_FR\_TIOx\_hum\_tissue\_Urea\_RNAB\_H Scan : 14560

Andromeda score : 191.47

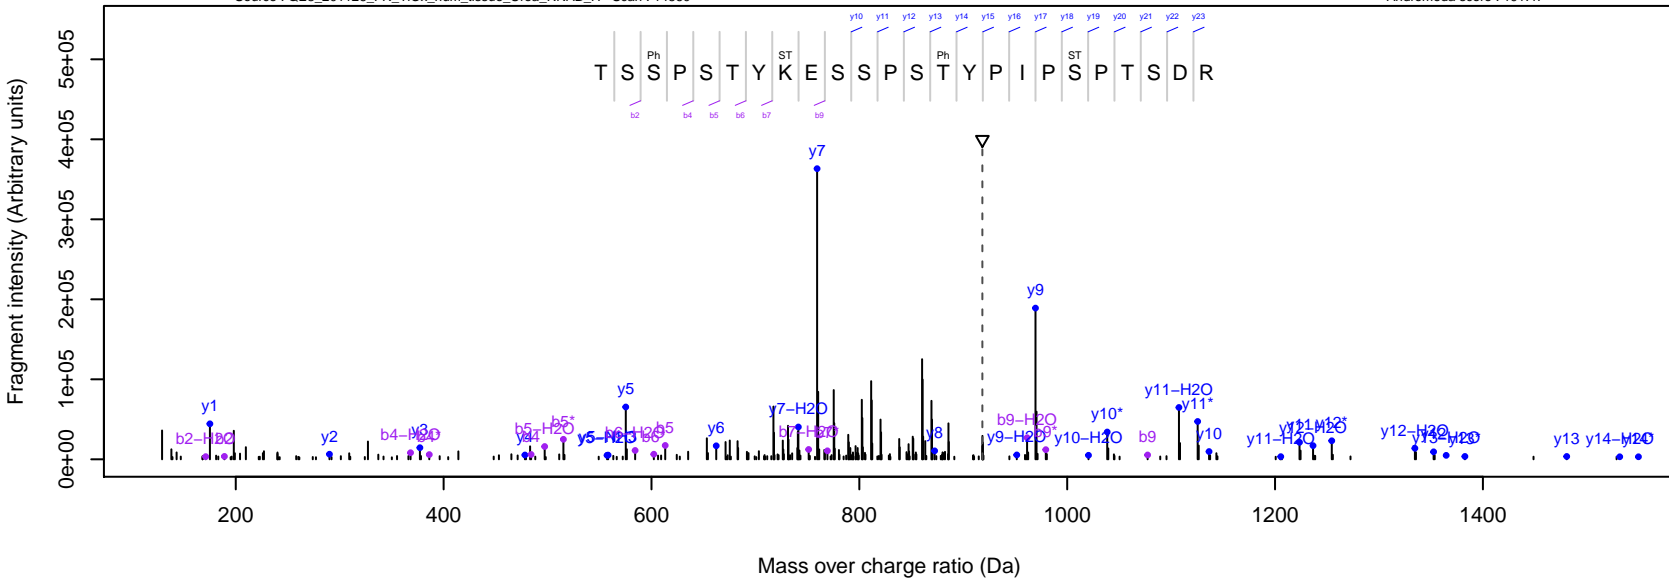

EELQQT(Phospho (STY))DGDCEEEEEENDGETPK-3+

Source : QE3\_201126\_FR\_TIOx\_hum\_tissue\_Urea\_RNAB\_N Scan : 18148

Andromeda score : 191.46

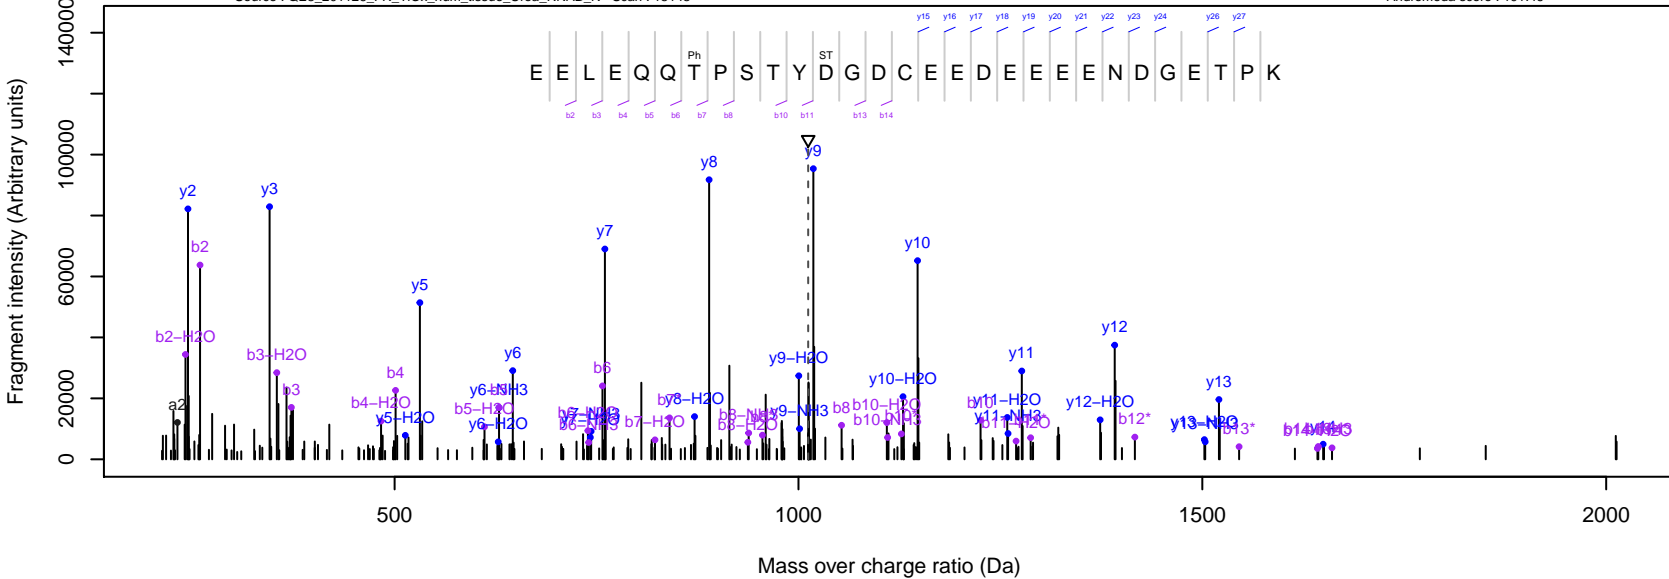

SEDES(Phospho (STY))ET(Phospho (STY))EDEEEKSQEDQEQR-3+

Source : QE3\_201126\_FR\_TIOx\_hum\_tissue\_Urea\_RNAB\_N Scan : 7016

Andromeda score : 191.41

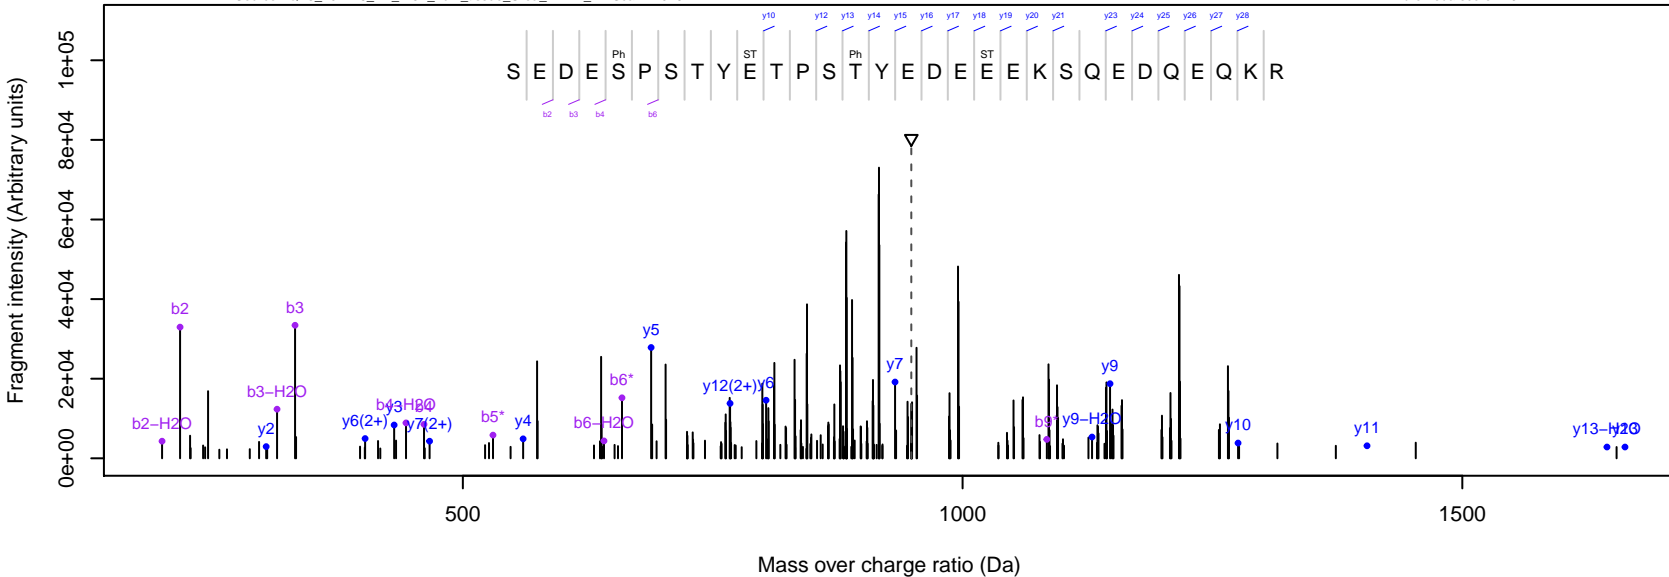

VPAAFPTKVPVPGPGS(Phospho (STY))GGNGPER-3+

Source : QE3\_201126\_FR\_TIOx\_hum\_tissue\_Urea\_RNAB\_H Scan : 31449

Andromeda score : 191.4

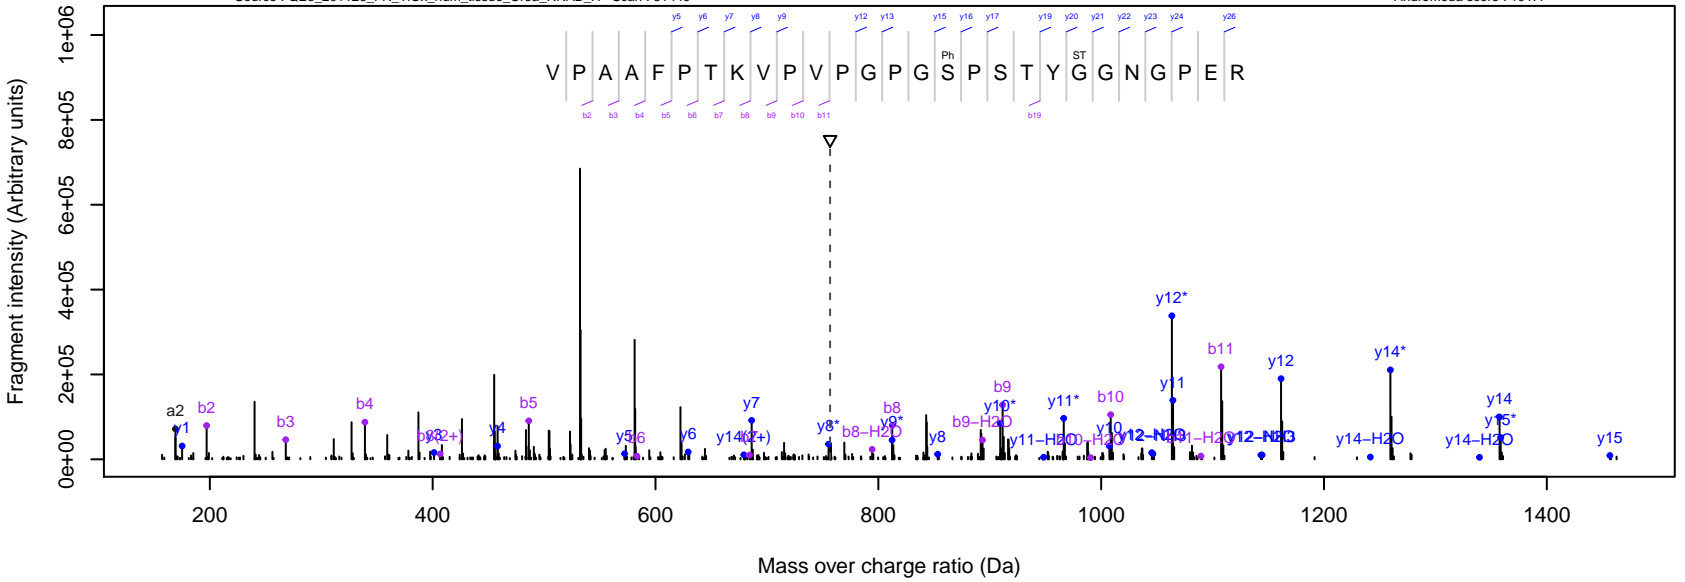

DGSNKS(Phospho (STY))GAEEQGPI D G P S K

Source : QE3\_201126\_FR\_TIOx\_hum\_tissue\_Urea\_RNAB\_B Scan : 9494

Andromeda score : 191.35

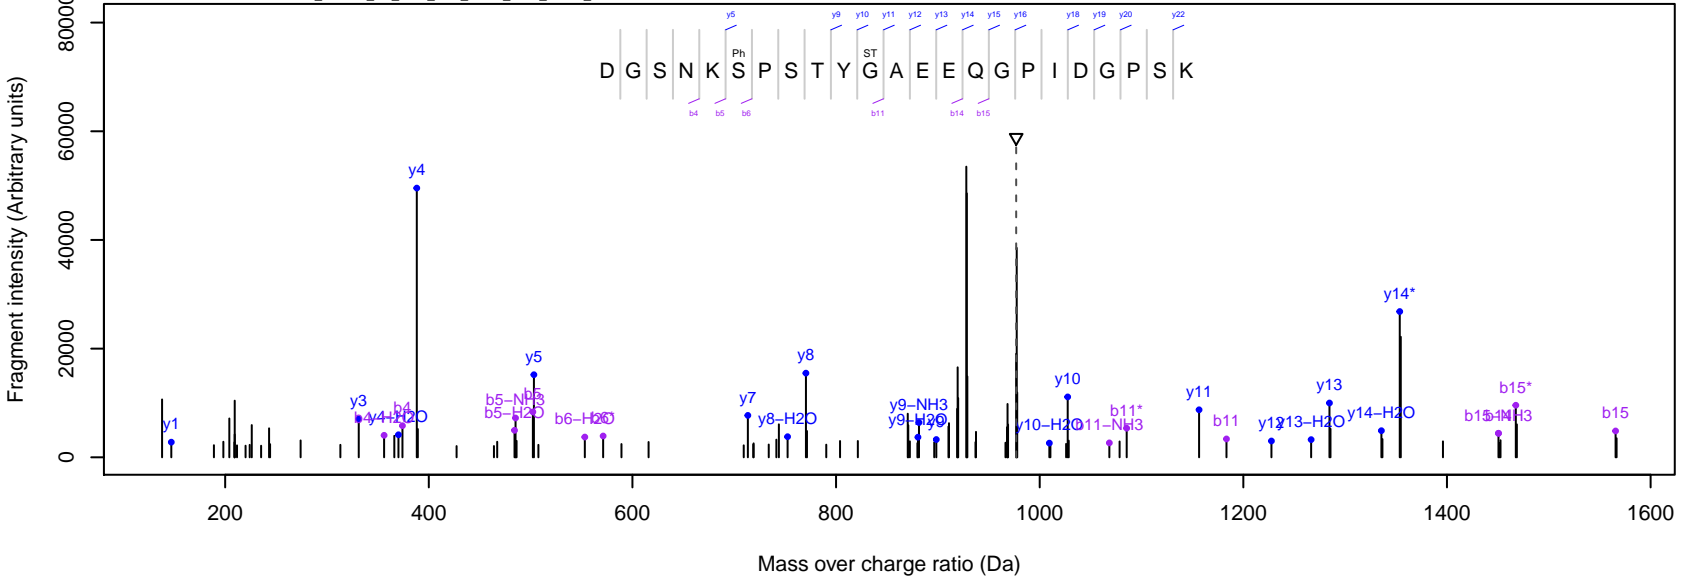

FLESAAADFS(Phospho (STY))DEDEDDVDGREK-3+

Source : QE3\_201126\_FR\_TIOx\_hum\_tissue\_Urea\_RNAB\_N Scan : 30533

Andromeda score : 191.18

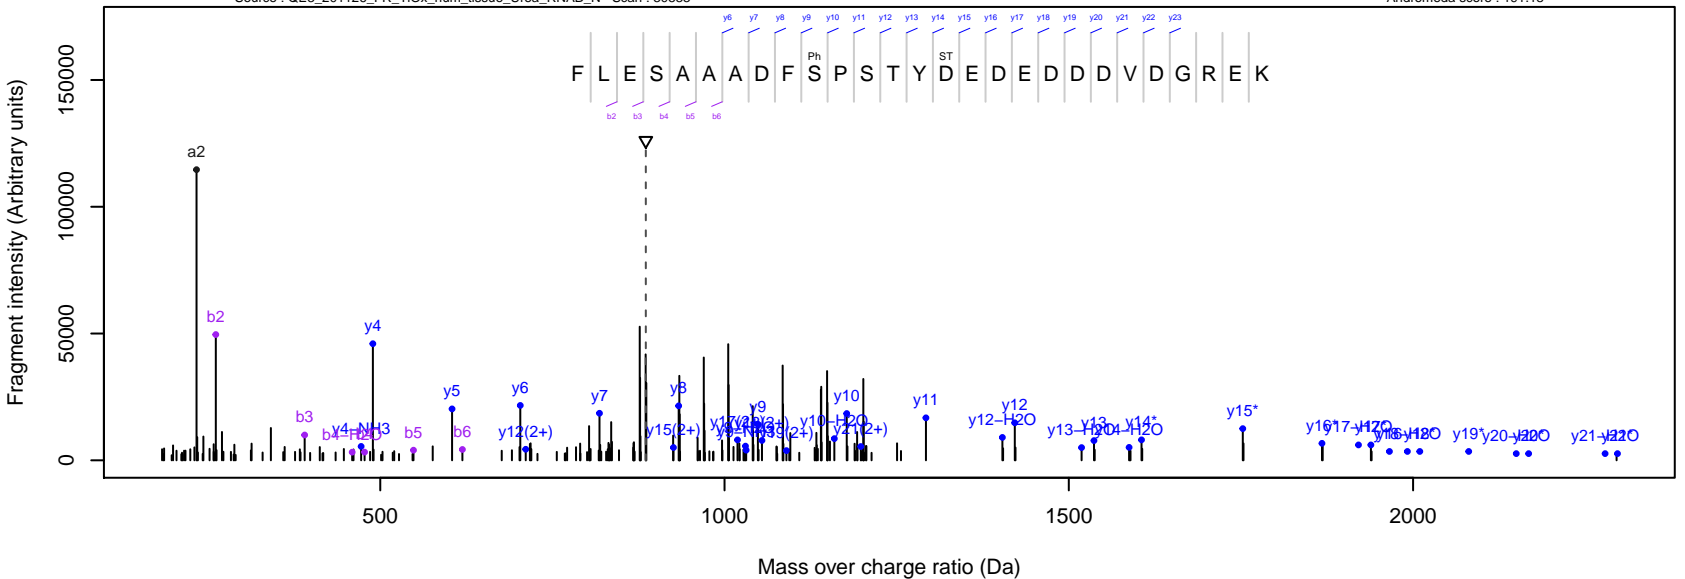

DKKS(Phospho (STY))PLIESTANM(Oxidation (M))DNNQSQK-3+

Source : QE3\_201126\_FR\_TiOx\_hum\_tissue\_Urea\_RNAB\_H Scan : 8168

Andromeda score : 191.09

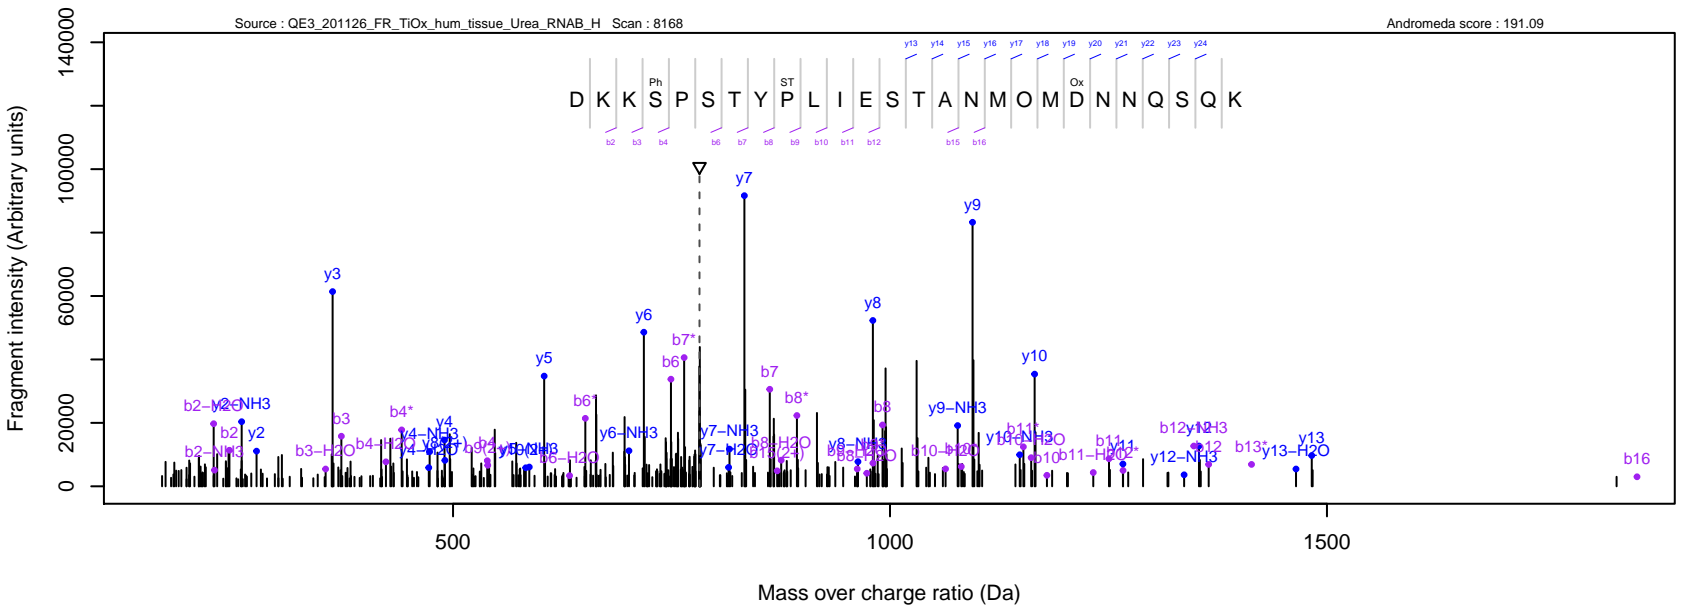

YYDDIYFDS(Phospho (STY))DS(Phospho (STY))EDEDRAVQVTK-3+

Source : QE3\_201126\_FR\_TiOx\_hum\_tissue\_Urea\_RNAB\_N Scan : 44443

Andromeda score : 191.09

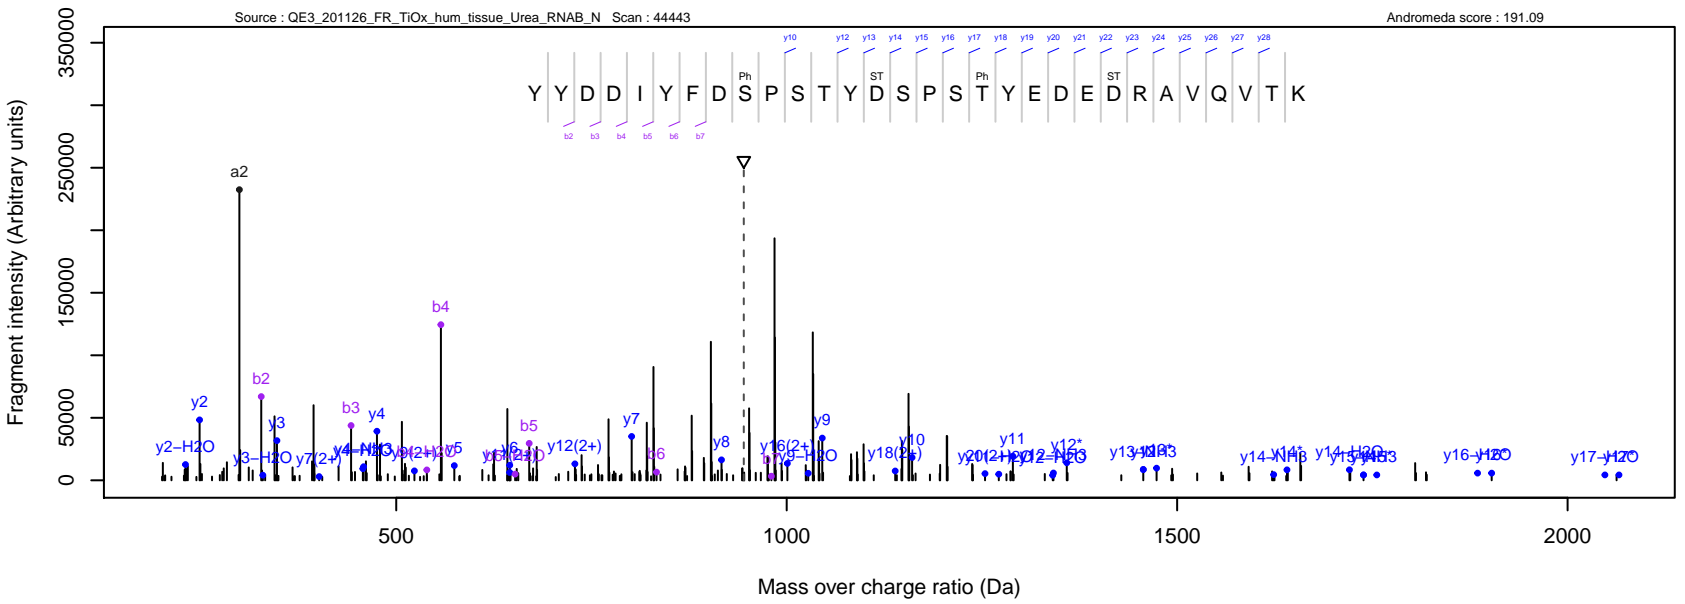

RKAEDS(Phospho (STY))DS(Phospho (STY))EPEPEDNVR-2+

Source : QE3\_201126\_FR\_TiOx\_hum\_tissue\_Urea\_RNAB\_B Scan : 8034

Andromeda score : 191.07

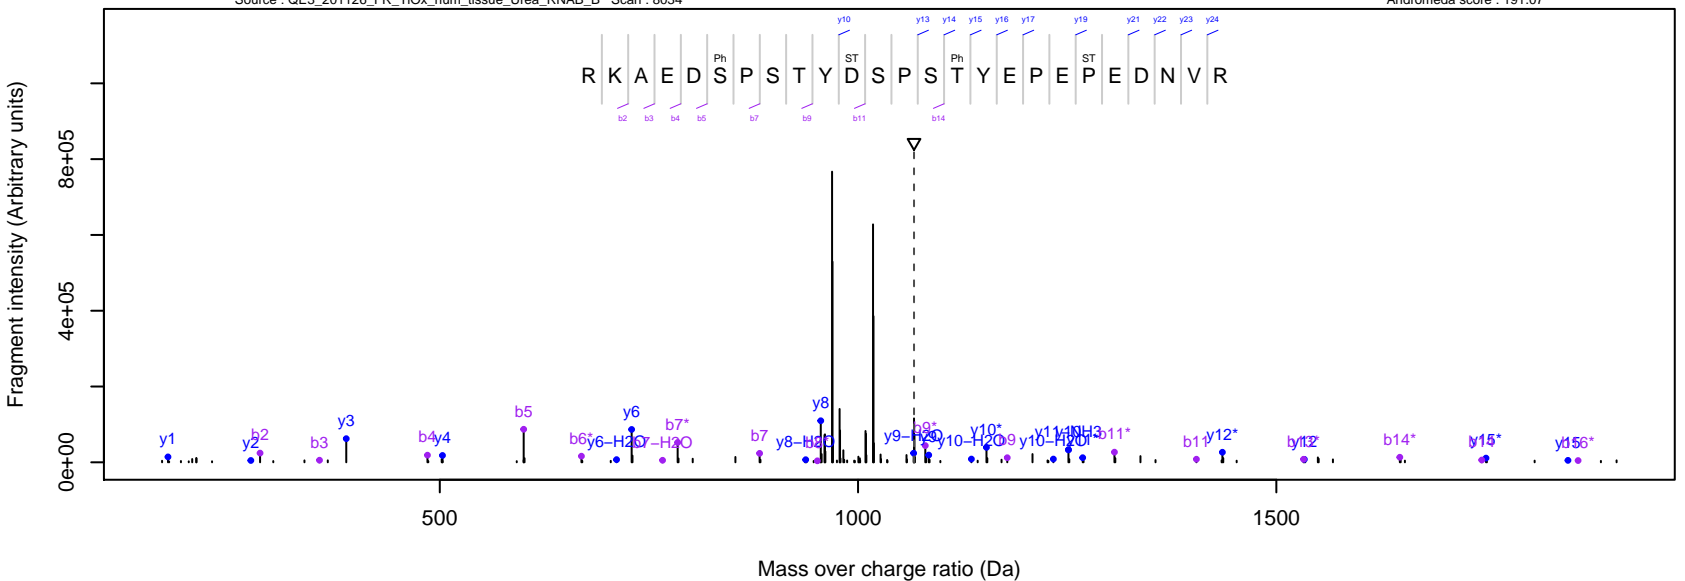

GSVILDSGHLSTASS(Phospho (STY))SDDLKGEESFR-3+

Source : QE3\_201126\_FR\_TIOx\_hum\_tissue\_Urea\_RNAB\_H Scan : 28993

Andromeda score : 191.04

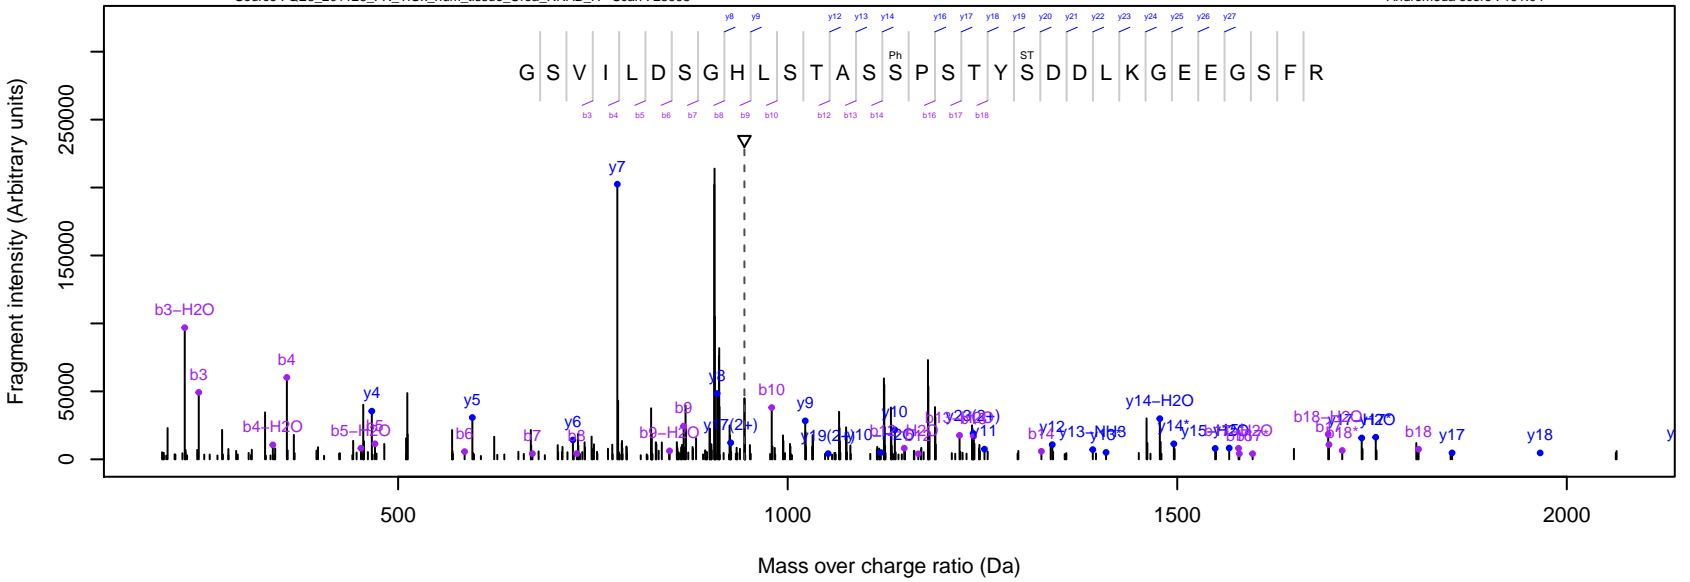

AAS(Phospho (STY))LNYLNQPSAAPLQVSR-2+

Source : QE3\_201126\_FR\_TIOx\_hum\_tissue\_Urea\_RNAB\_B Scan : 41088

Andromeda score : 190.96

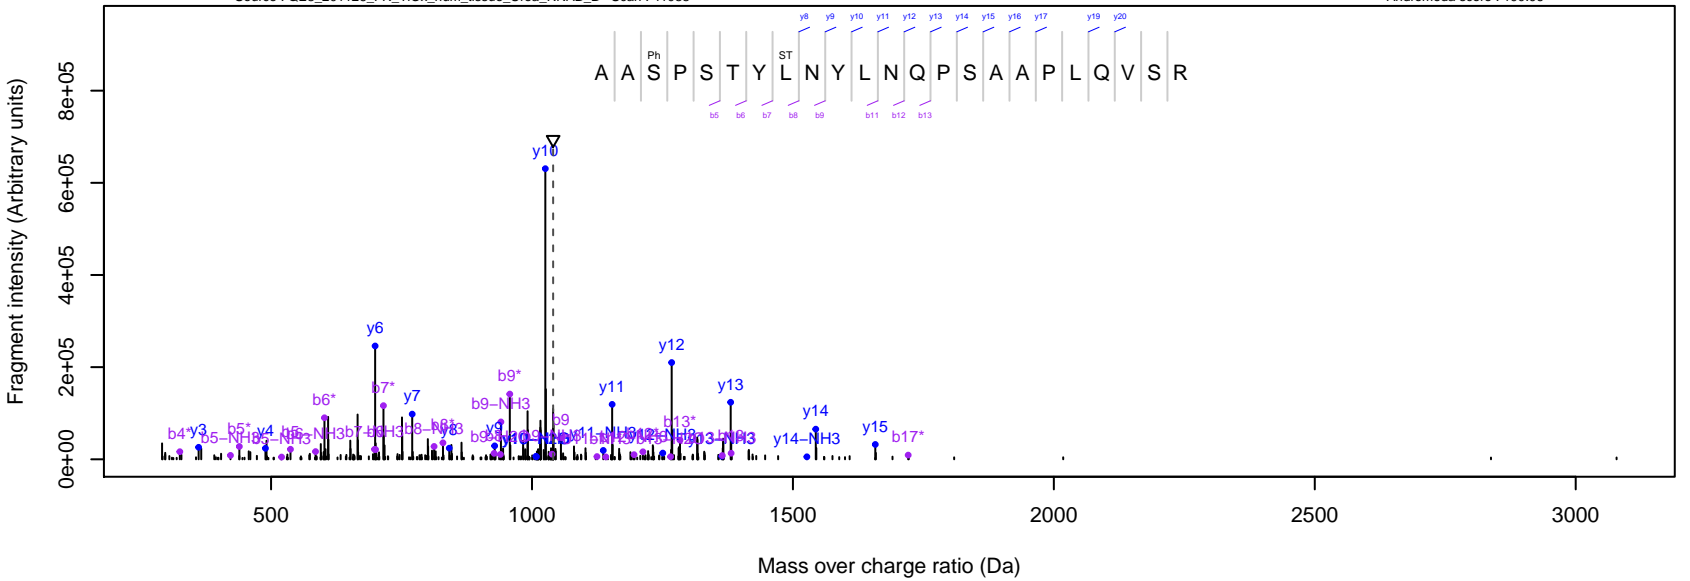

SRPFTVAASFQSTSVK(Phospho (STY))PK-3+

Source : QE3\_201126\_FR\_TIOx\_hum\_tissue\_Urea\_RNAB\_H Scan : 21242

Andromeda score : 190.93

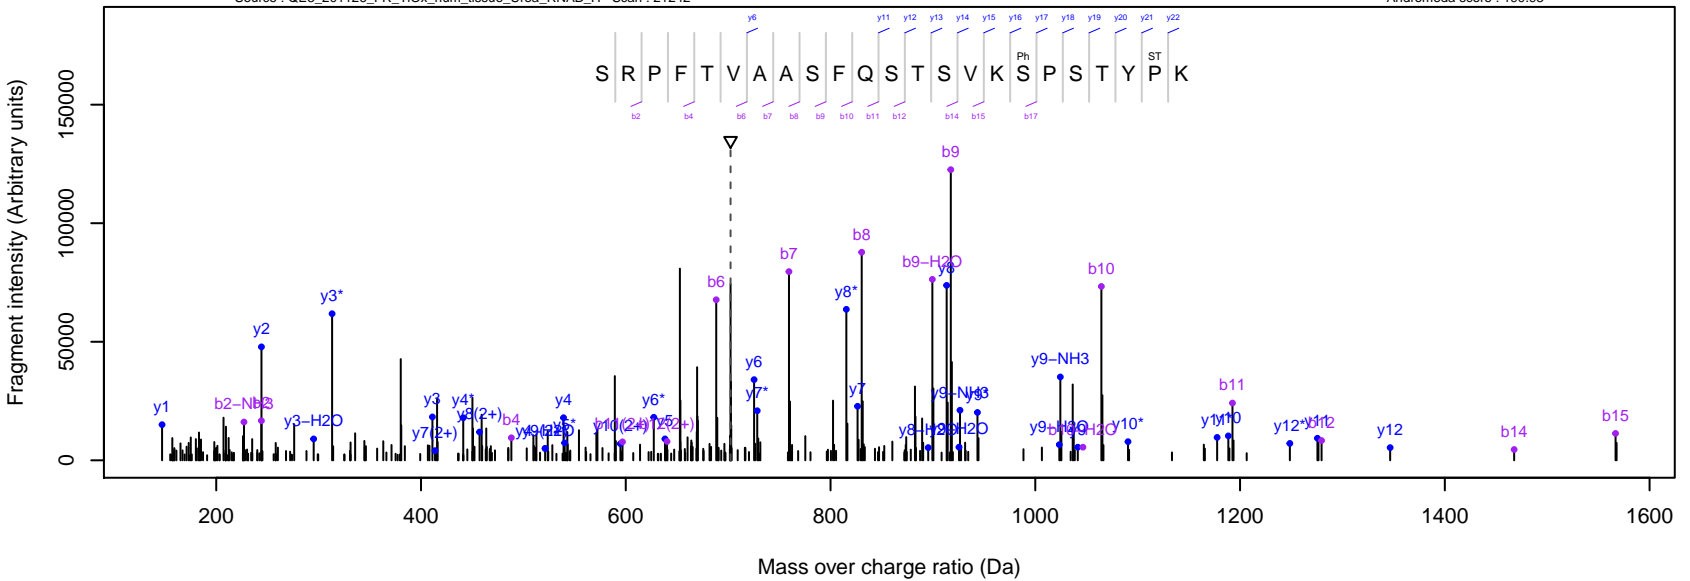

AQS(Phospho (STY))PTPSLPASWK-2+

Source : QE3\_201126\_FR\_TiOx\_hum\_tissue\_Urea\_RNAB\_B Scan : 32173

Andromeda score : 190.86

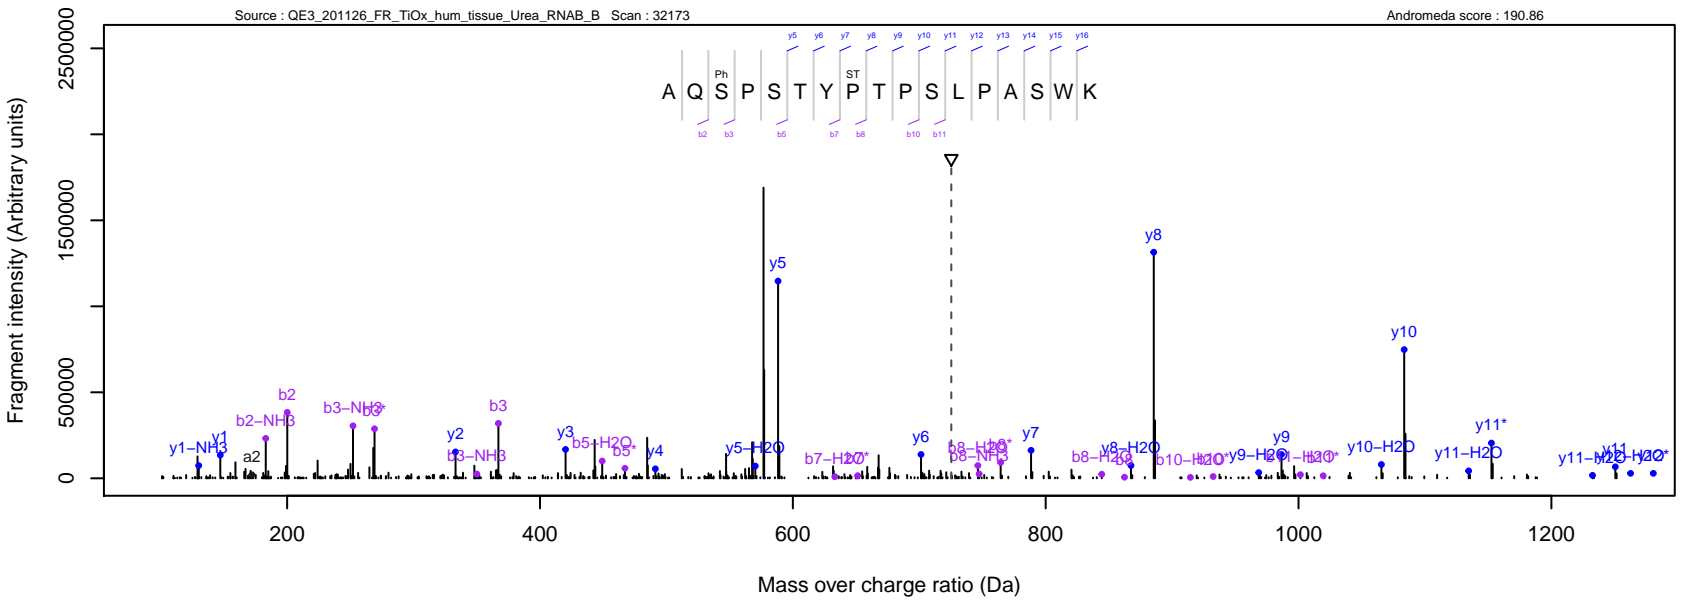

AGS(Phospho (STY))PFSPPPSSSLTGEAAISR-2+

Source : QE3\_201126\_FR\_TiOx\_hum\_tissue\_Urea\_RNAB\_N Scan : 36716

Andromeda score : 190.83

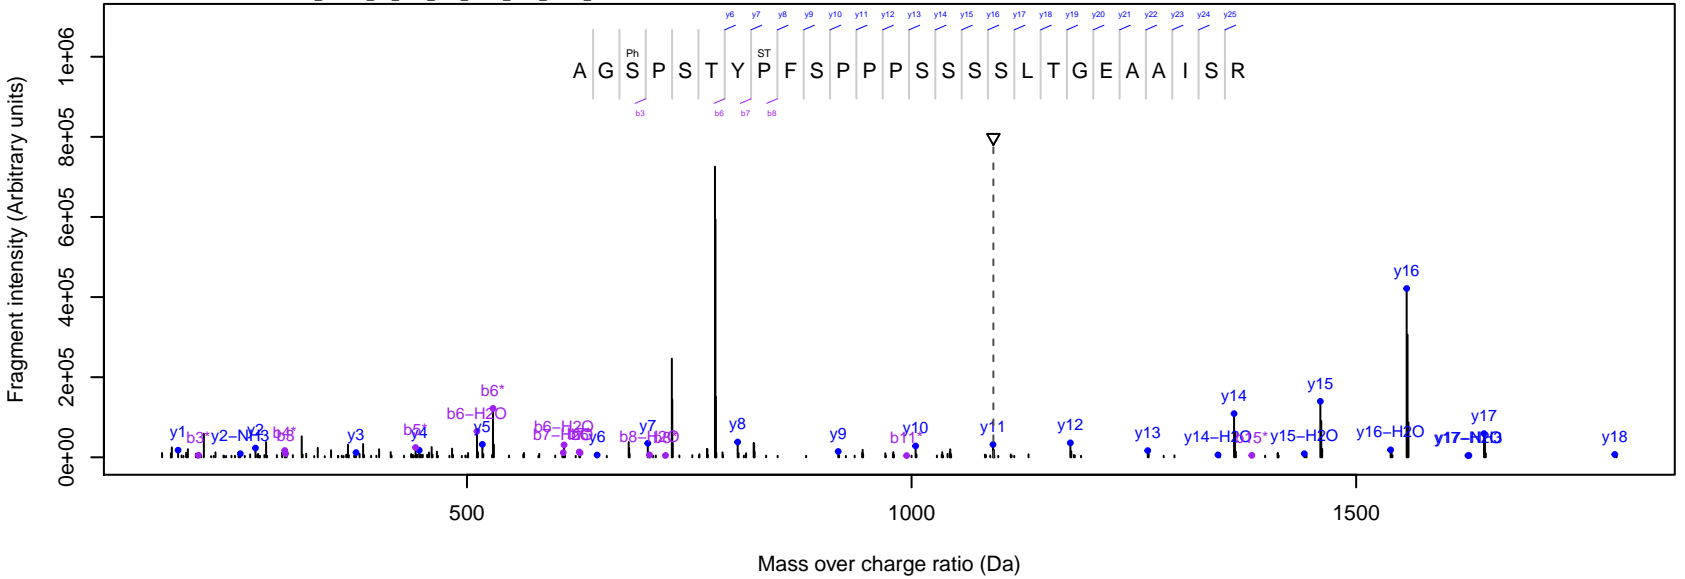

M(Oxidation (M))SCFSRPSMS(Phospho (STY))PTPLDR-3+

Source : QE3\_201126\_FR\_TiOx\_hum\_tissue\_Urea\_RNAB\_N Scan : 24070

Andromeda score : 190.83

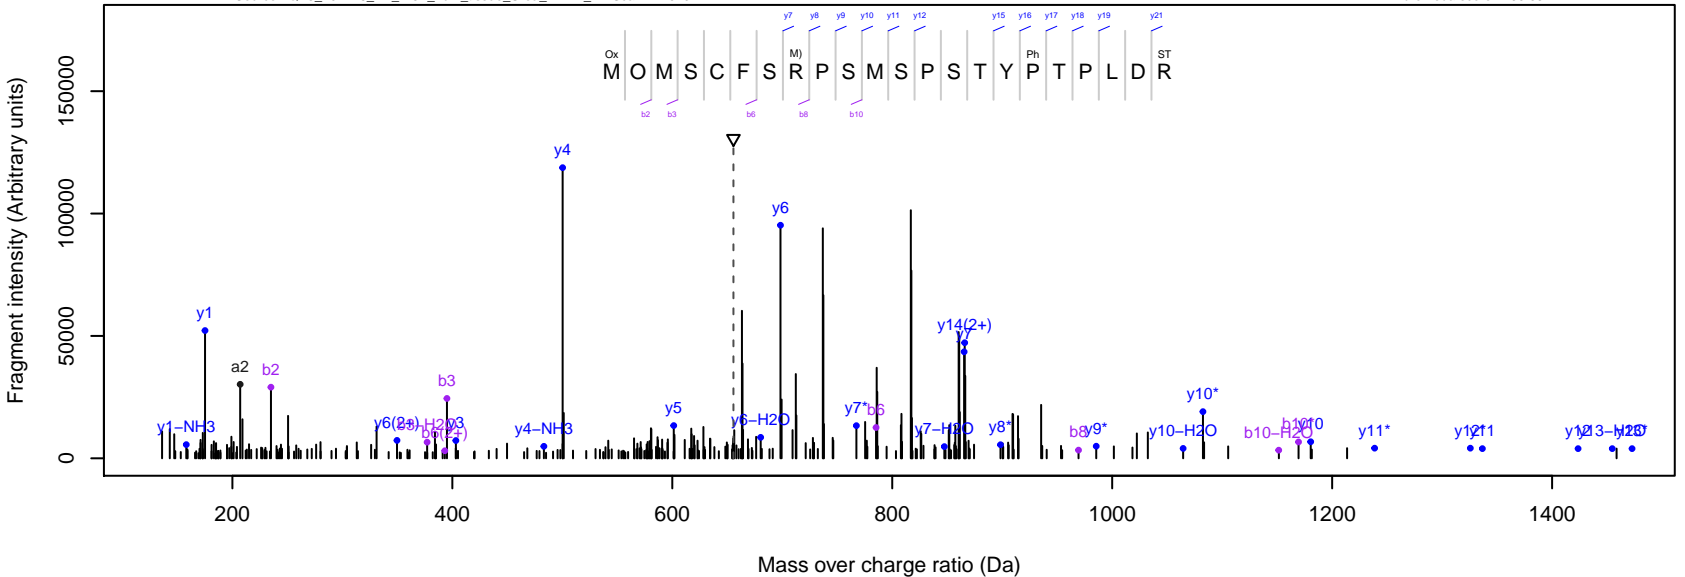

SPLHSS(Phospho (STY))PEKEAPSPEK-3+

Source : QE3\_201126\_FR\_TiOx\_hum\_tissue\_Urea\_RNAB\_N Scan : 8600

Andromeda score : 190.83

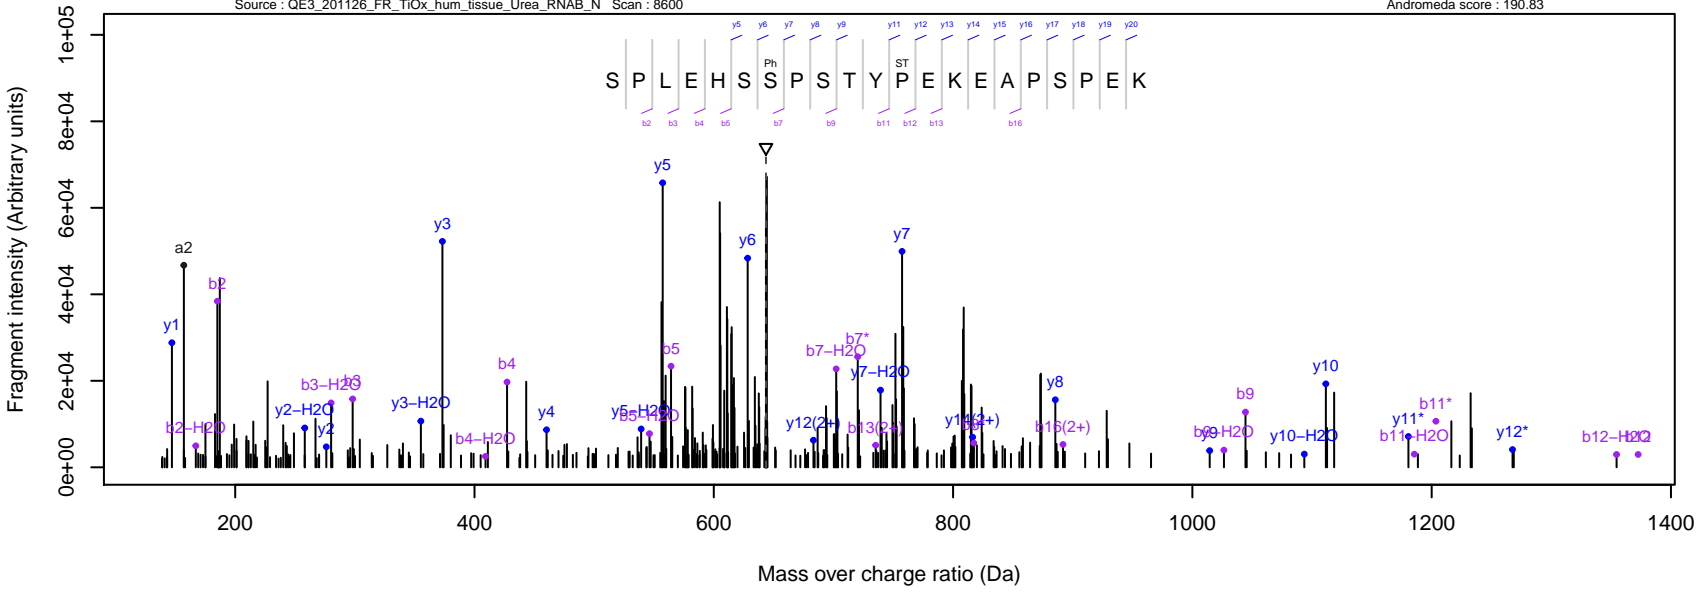

KFSKEEPVSS(Phospho (STY))GPEEAVGK-3+

Source : QE3\_201126\_FR\_TiOx\_hum\_tissue\_Urea\_RNAB\_B Scan : 12051

Andromeda score : 190.8

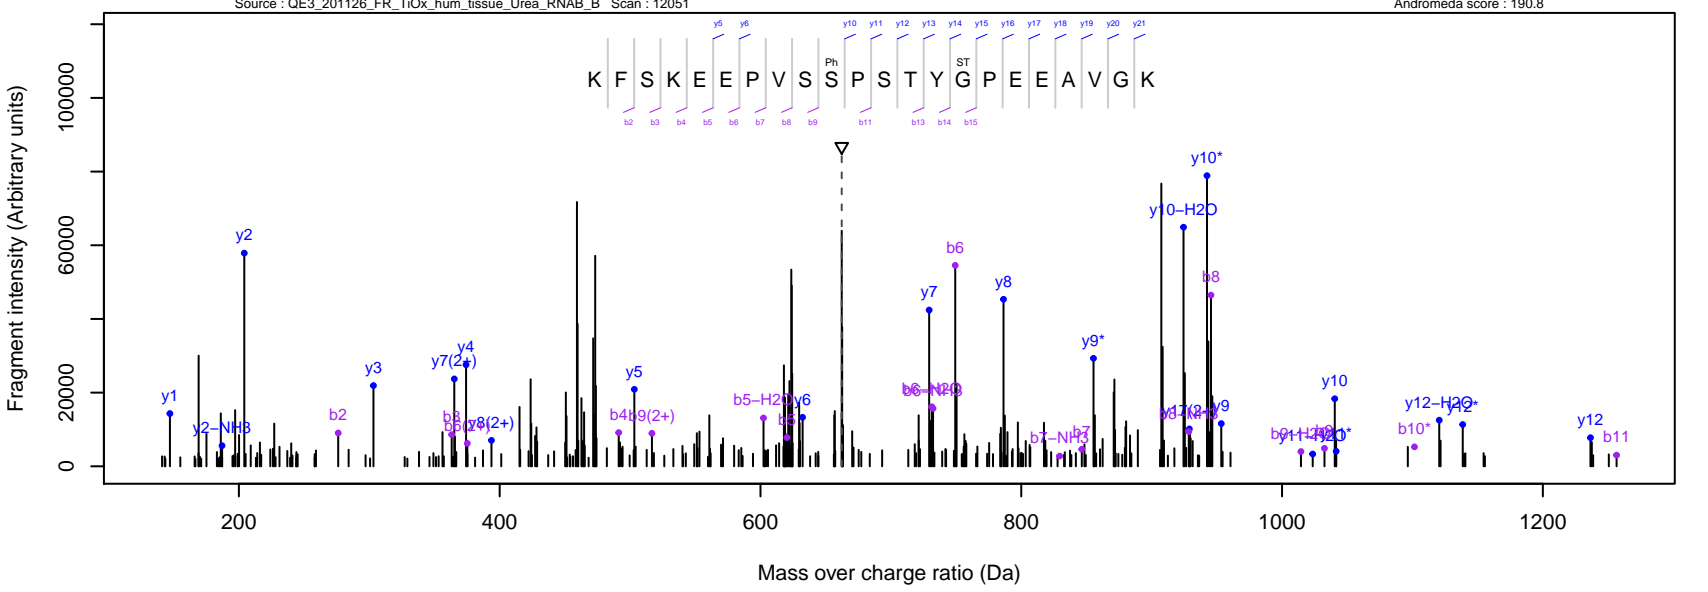

ENPPVEDS(Phospho (STY))S(Phospho (STY))DEDDKRNQGNLYDK-3+

Source : QE3\_201126\_FR\_TiOx\_hum\_tissue\_Urea\_RNAB\_H Scan : 14661

Andromeda score : 190.74

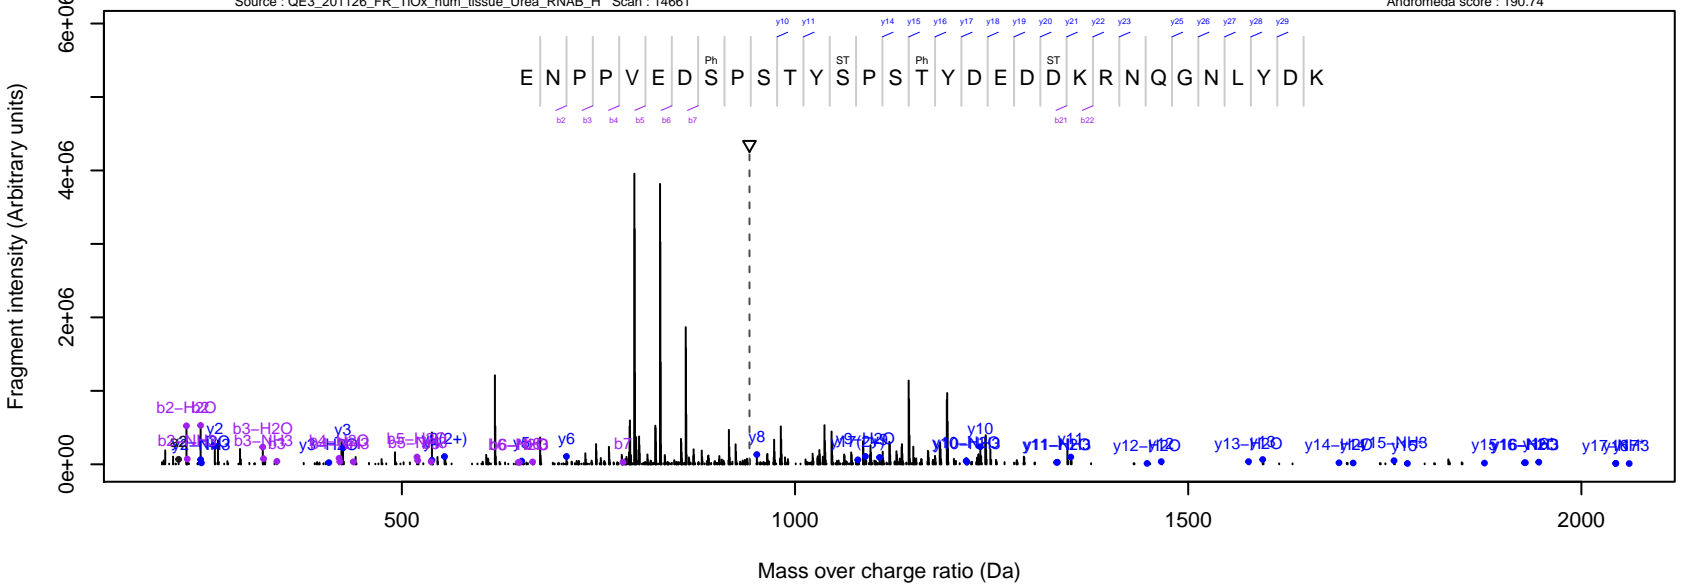



ASLPAGLVGT(Phospho (STY))PPESPSTY(Phospho (STY))PSEPREDLVGLPGPR-3+

Source : QE3\_201126\_FR\_TIOx\_hum\_tissue\_Urea\_RNAB\_B Scan : 60424

Andromeda score : 190.73

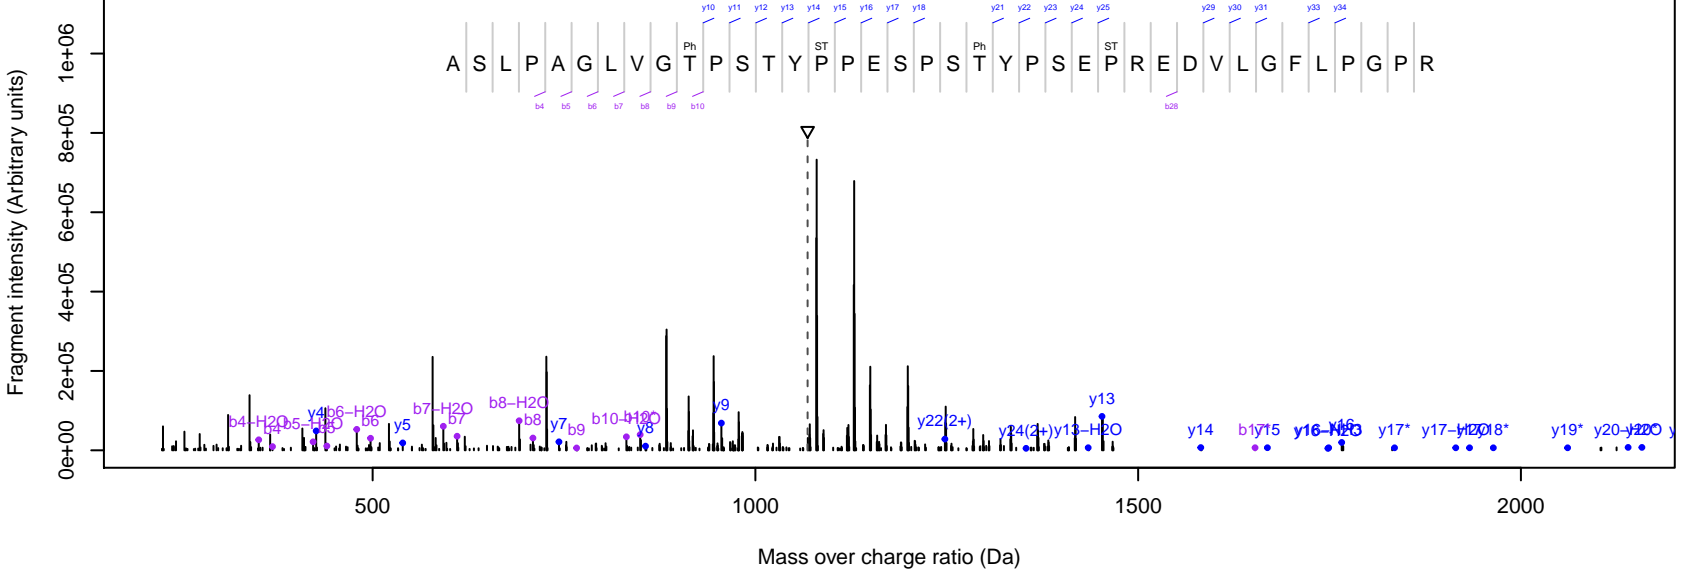

RGT(Phospho (STY))GQSDSDIWDITALIK-2+

Source : QE3\_201126\_FR\_TIOx\_hum\_tissue\_Urea\_RNAB\_H Scan : 41363

Andromeda score : 190.63

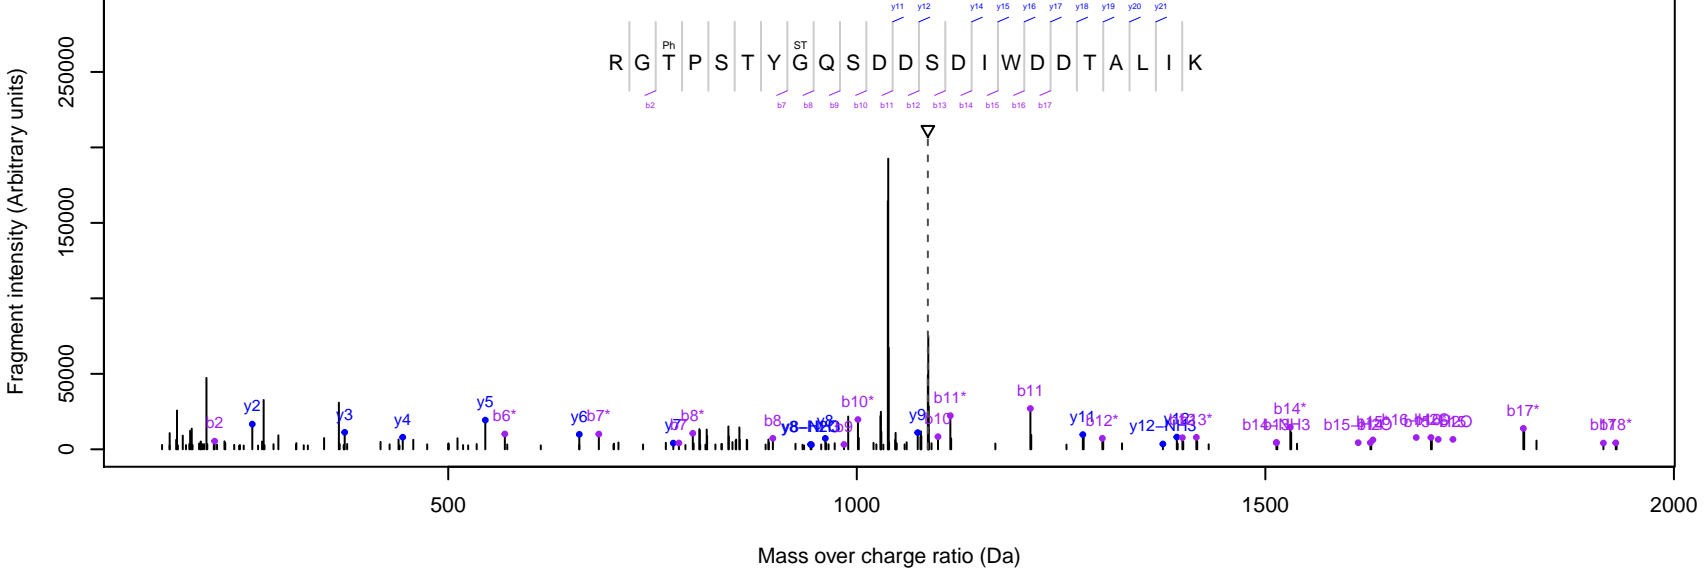

YIEIDS(Phospho (STY))DEEPRGELLSLR-3+

Source : QE3\_201126\_FR\_TIOx\_hum\_tissue\_Urea\_RNAB\_H Scan : 43130

Andromeda score : 190.63

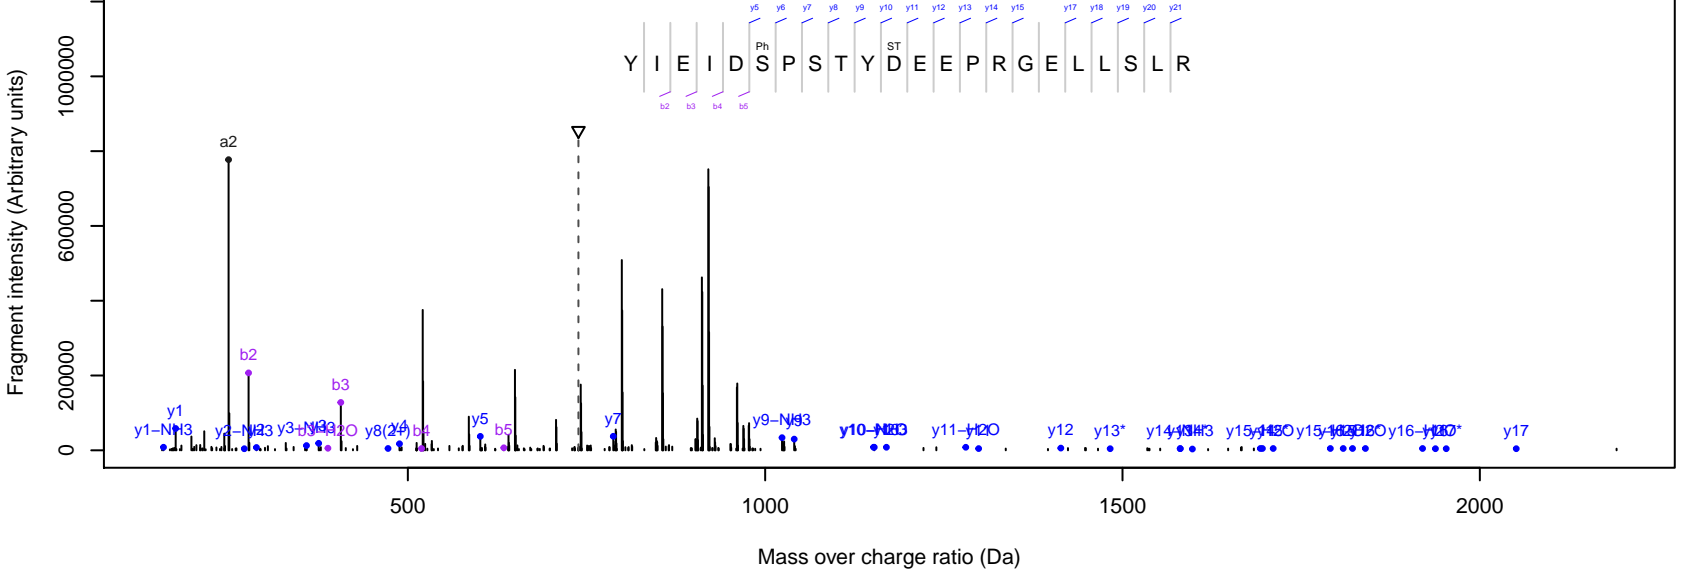

YQEDS(Phospho (STY))DPERSDYEEQLQKEEAR-3+

Source : QE3\_201126\_FR\_TIOx\_hum\_tissue\_Urea\_RNAB\_H Scan : 19712

Andromeda score : 190.6

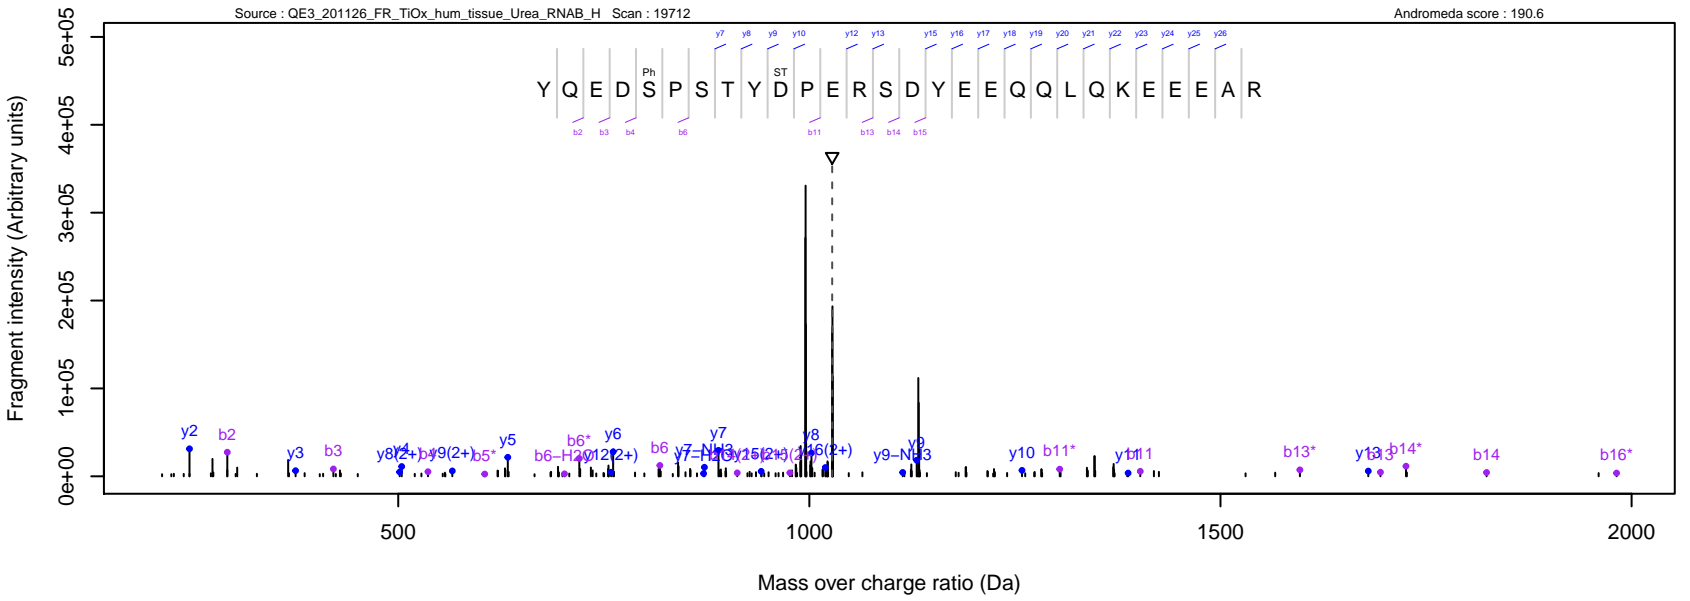

AVPM(Oxidation (M))APAPAS(Phospho (STY))PGSSNDSSAR-2+

Source : QE3\_201126\_FR\_TIOx\_hum\_tissue\_Urea\_RNAB\_B Scan : 15553

Andromeda score : 190.55

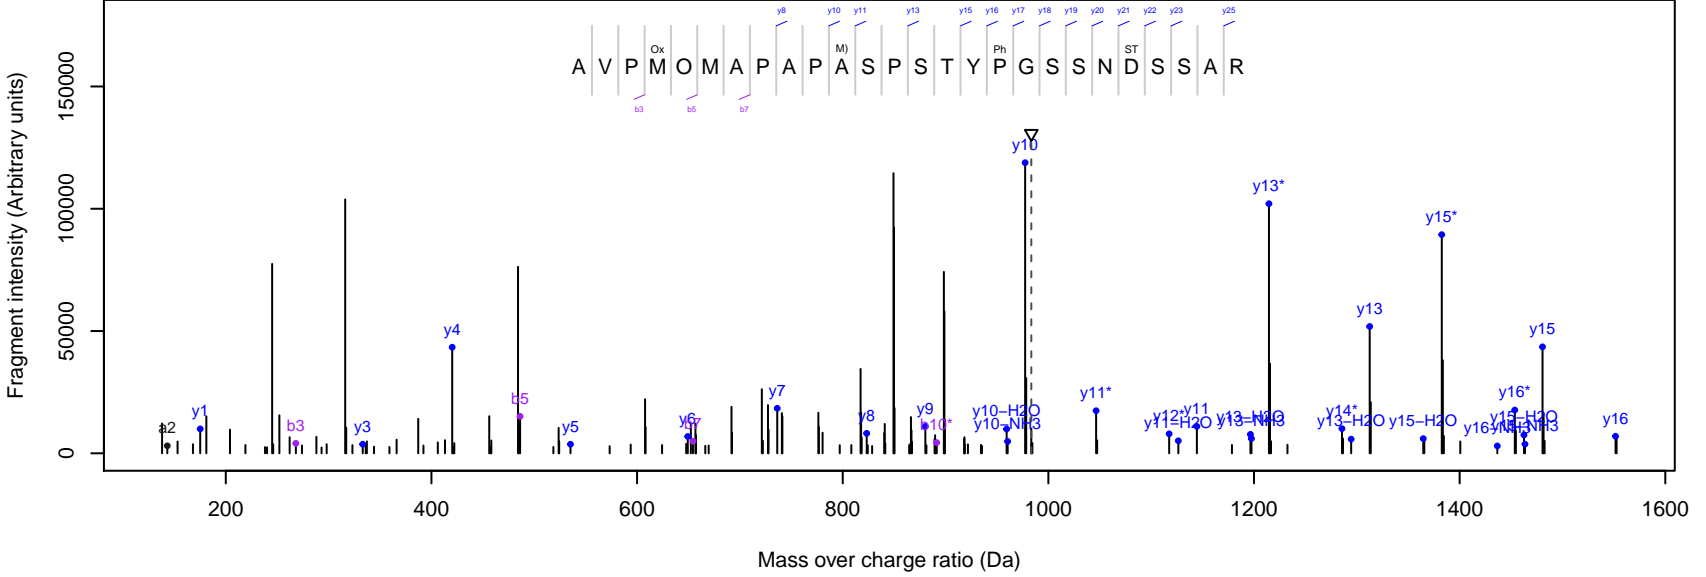

TAS(Phospho (STY))APNLAETEKETAEHLDLAGASSRPK-4+

Source : QE3\_201126\_FR\_TIOx\_hum\_tissue\_Urea\_RNAB\_N Scan : 31427

Andromeda score : 190.44

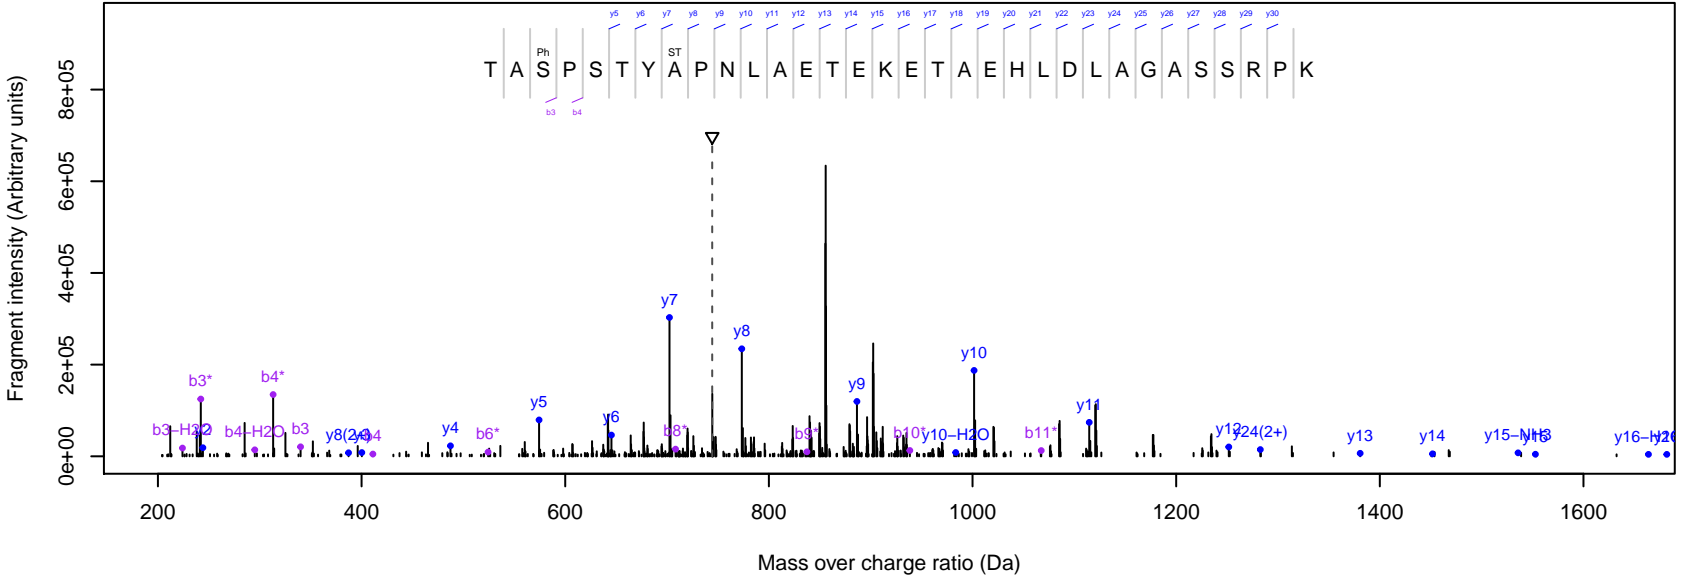

ANDESNEHSVIDS(Phospho (STY))QELSK-3+

Source : QE3\_201126\_FR\_TiOx\_hum\_tissue\_Urea\_RNAB\_N Scan : 16073

Andromeda score : 190.37

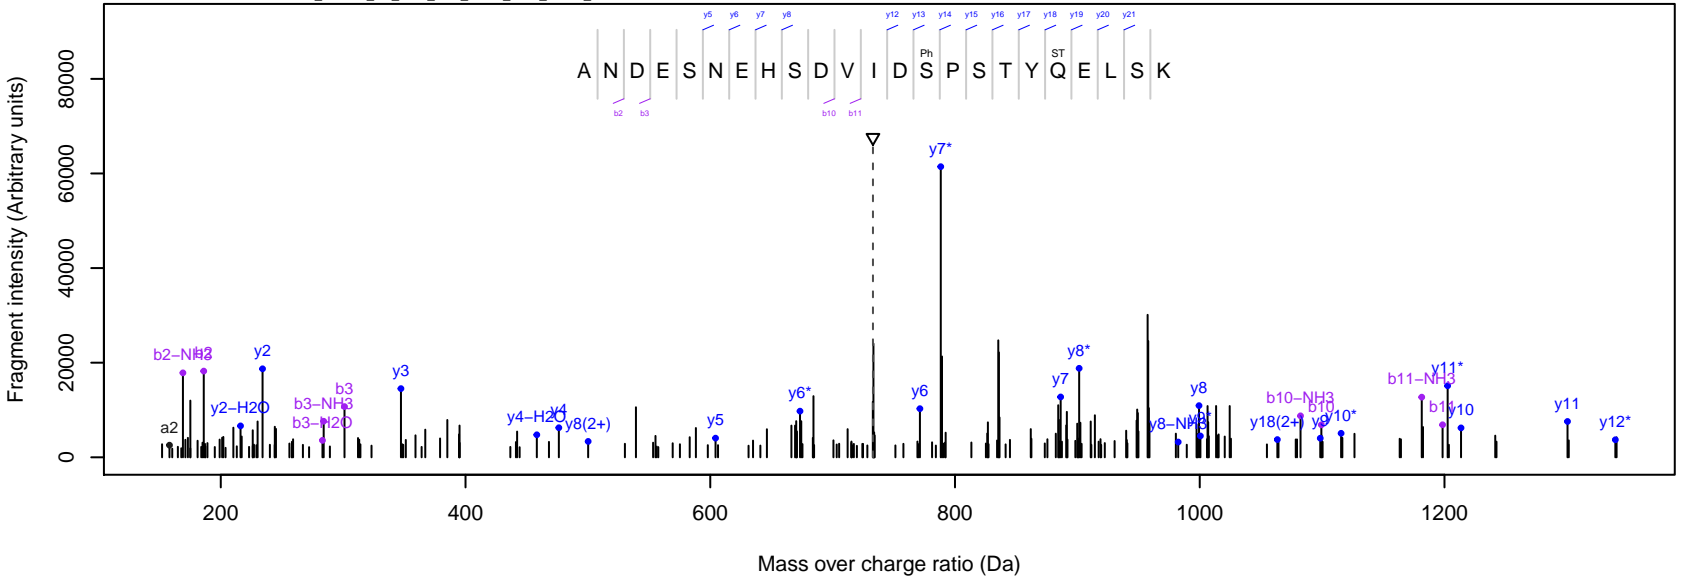

WLDES(Phospho (STY))DAEM(Oxidation (M))ELR-2+

Source : QE3\_201126\_FR\_TiOx\_hum\_tissue\_Urea\_RNAB\_B Scan : 40815

Andromeda score : 190.34

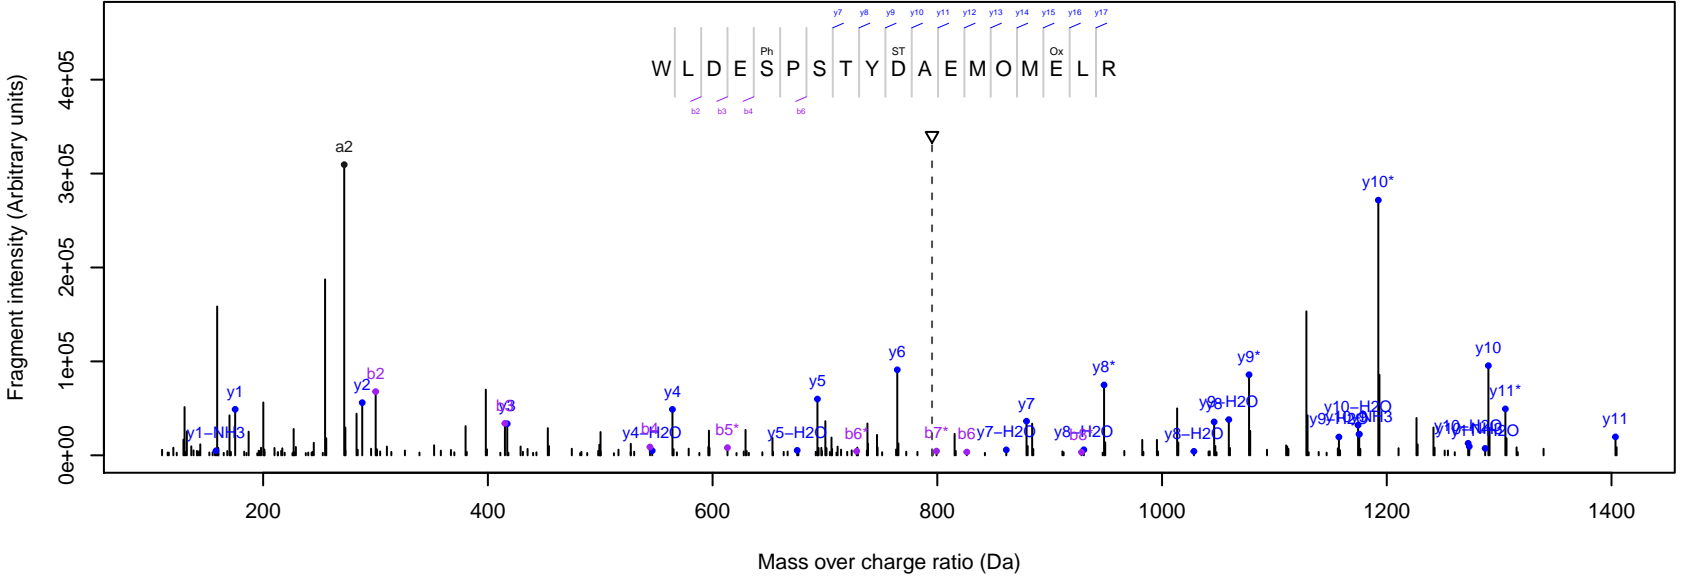

GRAEGEWEDQEALDYFSPSTYDKESGK-3+

Source : QE3\_201126\_FR\_TiOx\_hum\_tissue\_Urea\_RNAB\_H Scan : 32363

Andromeda score : 190.31

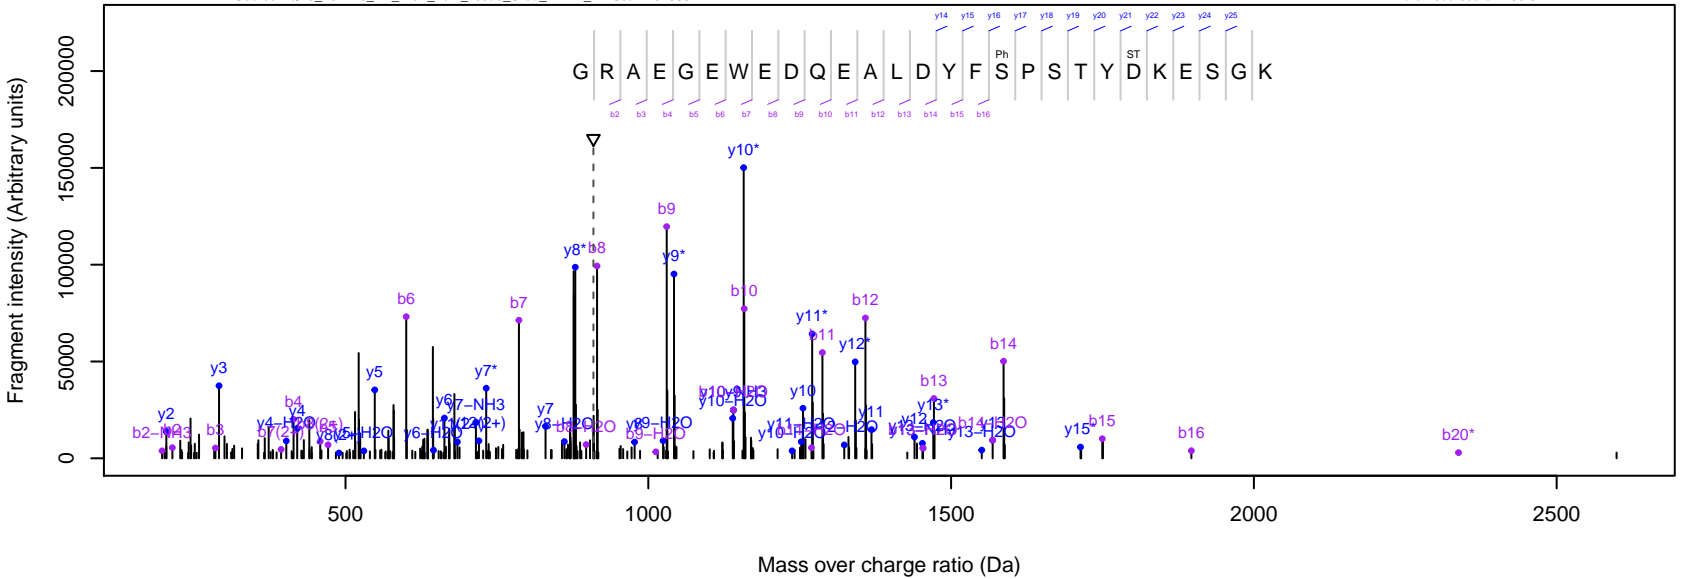

(Acetyl (Protein N-term))S(Phospho (STY))QDGASQFQEVIR-2+

Source : QE3\_201126\_FR\_TiOx\_hum\_tissue\_Urea\_RNAB\_N Scan : 45833

Andromeda score : 190.27

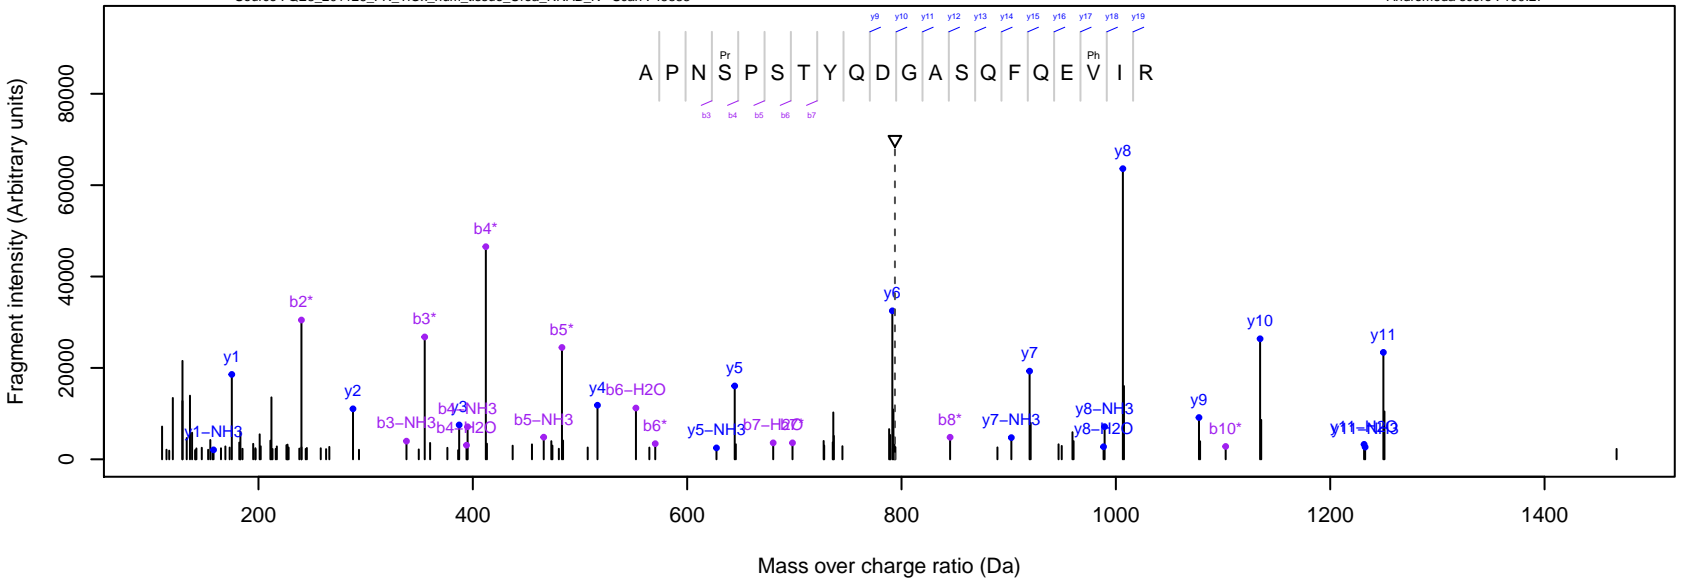

TVIIEQSWGSPSTYPK-2+

Source : QE3\_201126\_FR\_TiOx\_hum\_tissue\_Urea\_RNAB\_N Scan : 33308

Andromeda score : 190.27

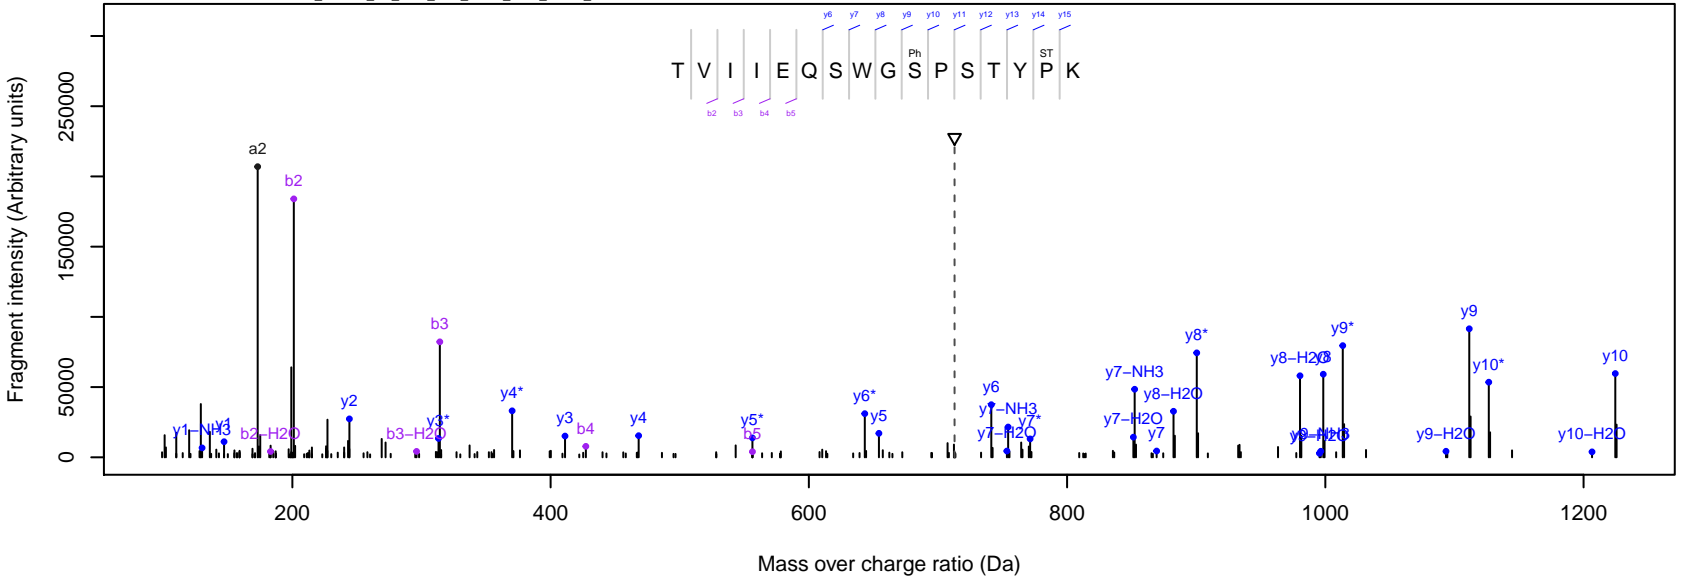

DSCIS(Phospho (STY))PSEPETK-2+

Source : QE3\_201126\_FR\_TiOx\_hum\_tissue\_Urea\_RNAB\_H Scan : 12976

Andromeda score : 190.26

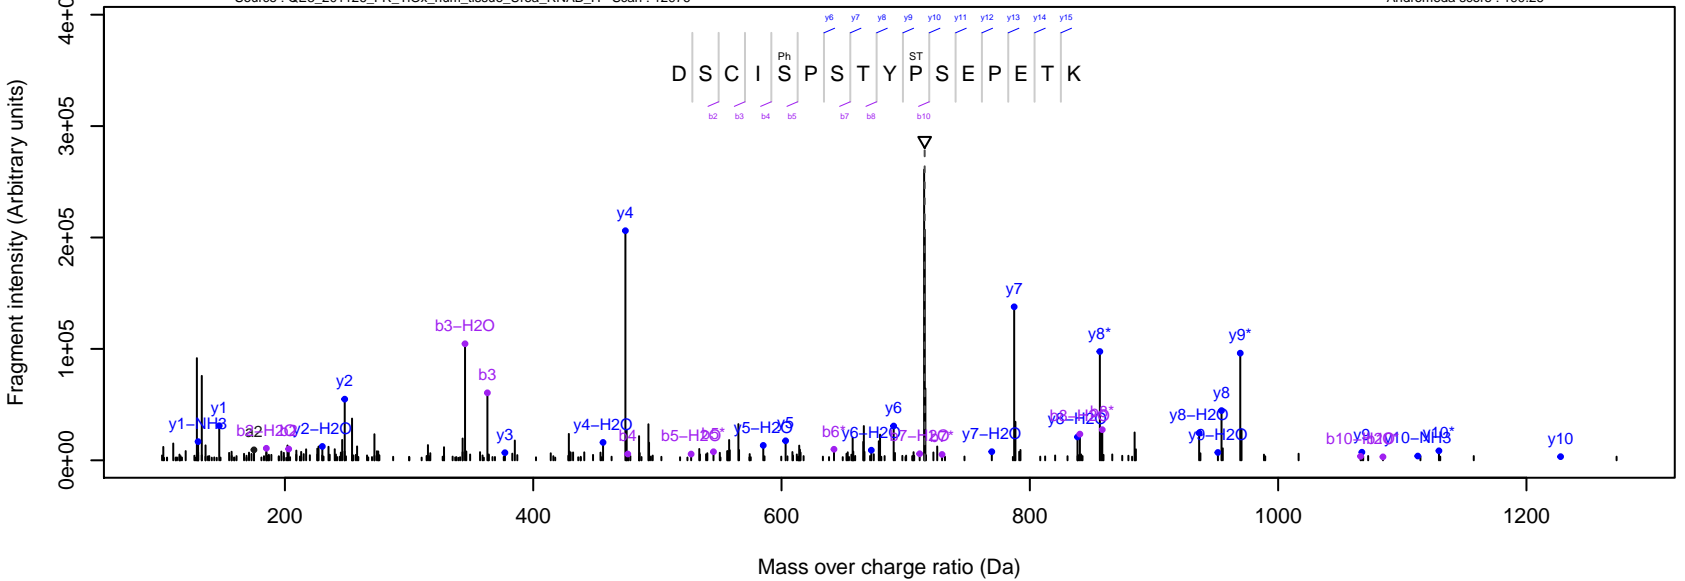

## DLTHS(Phospho (STY))DSES(Phospho (STY))SLHM(Oxidation (M))SDR-3+

Source : QE3\_201126\_FR\_TiOx\_hum\_tissue\_Urea\_RNAB\_B Scan : 10790

Andromeda score : 190.25

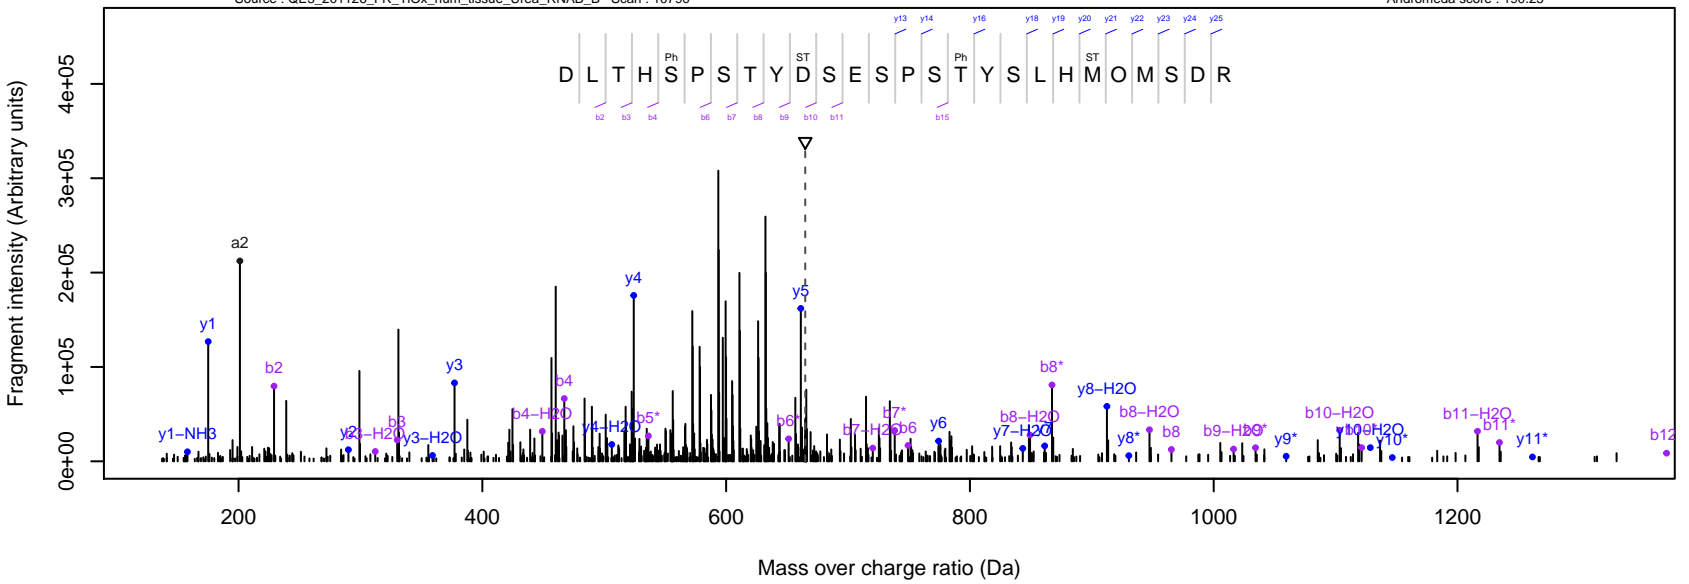

## DRS(Phospho (STY))SPPPGYIPDELHQVAR-3+

Source : QE3\_201126\_FR\_TiOx\_hum\_tissue\_Urea\_RNAB\_H Scan : 27372

Andromeda score : 190.24

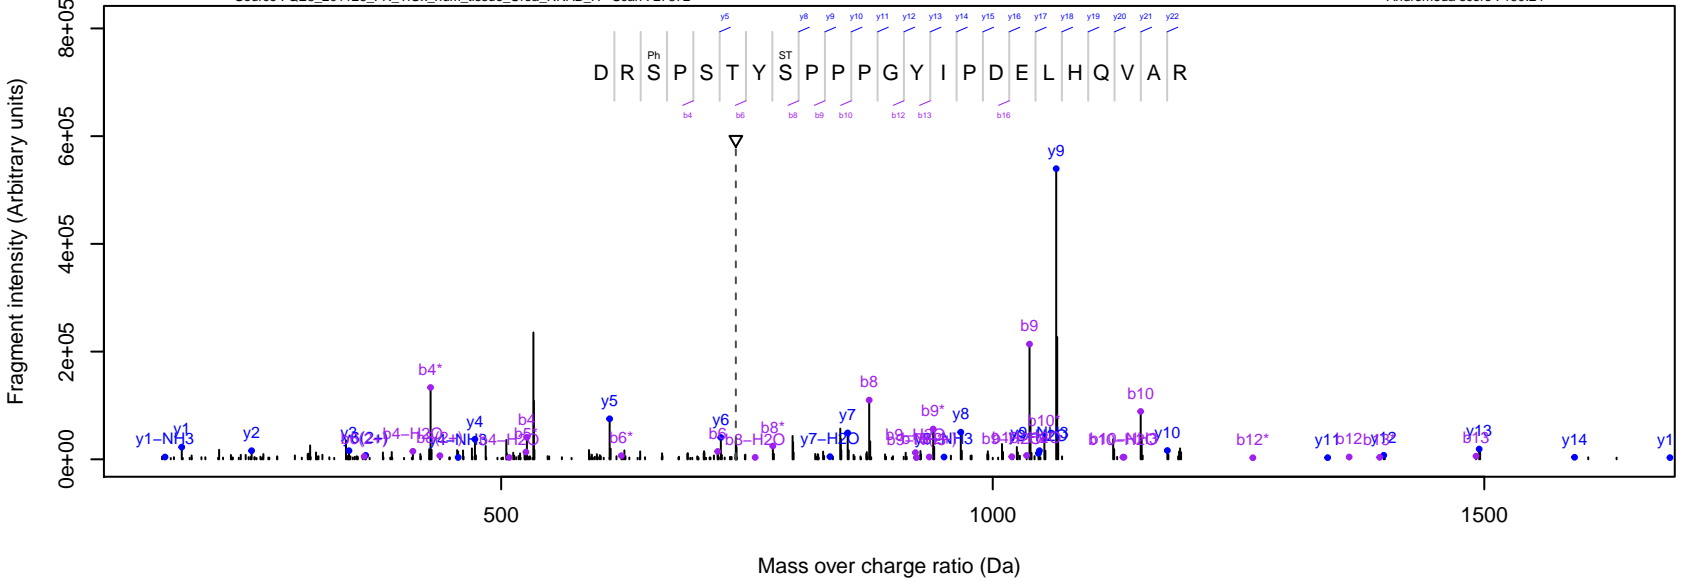

## DAS(Phospho (STY))PTPSTDAEYPANGSGADR-2+

Source : QE3\_201126\_FR\_TiOx\_hum\_tissue\_Urea\_RNAB\_N Scan : 17582

Andromeda score : 190.23

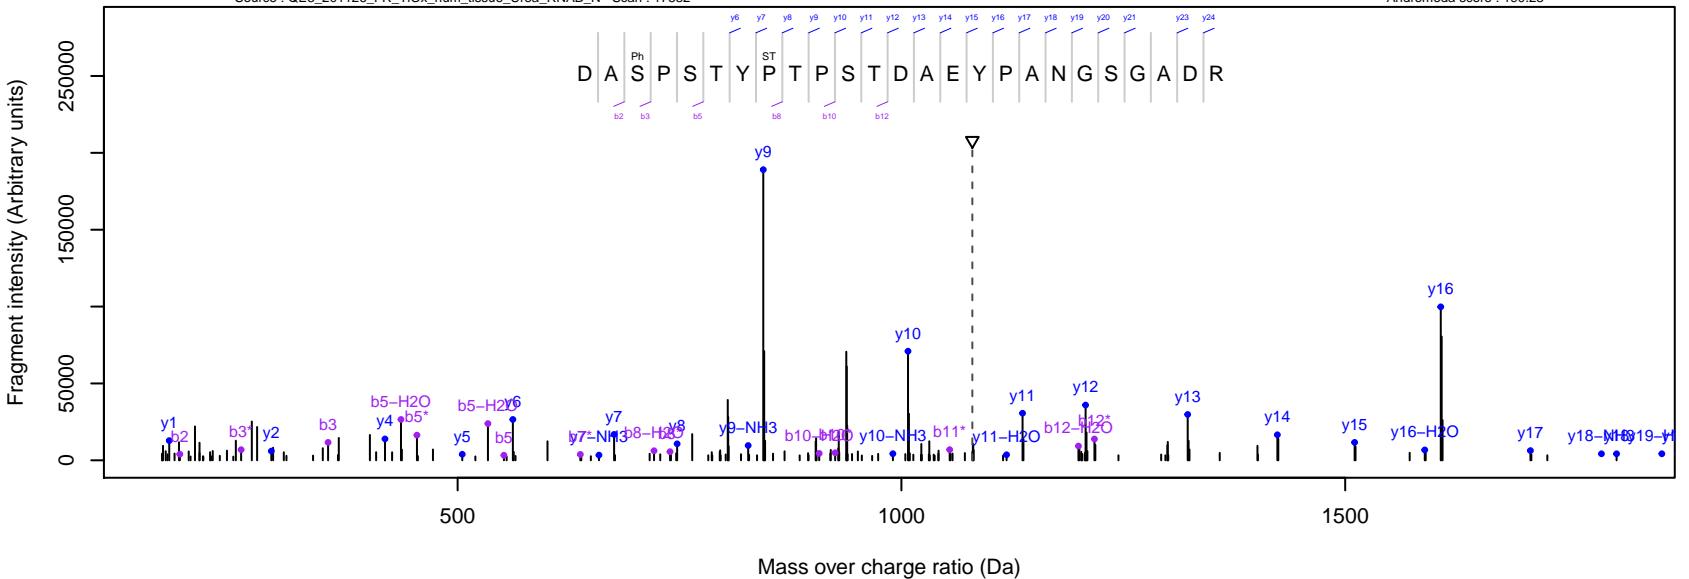

DGGNPF AEPSELDNPFQDPAVIQHRPS(Phospho (STY))R-3+

Source : QE3\_201126\_FR\_TiOx\_hum\_tissue\_Urea\_RNAB\_H Scan : 46528

Andromeda score : 190.22

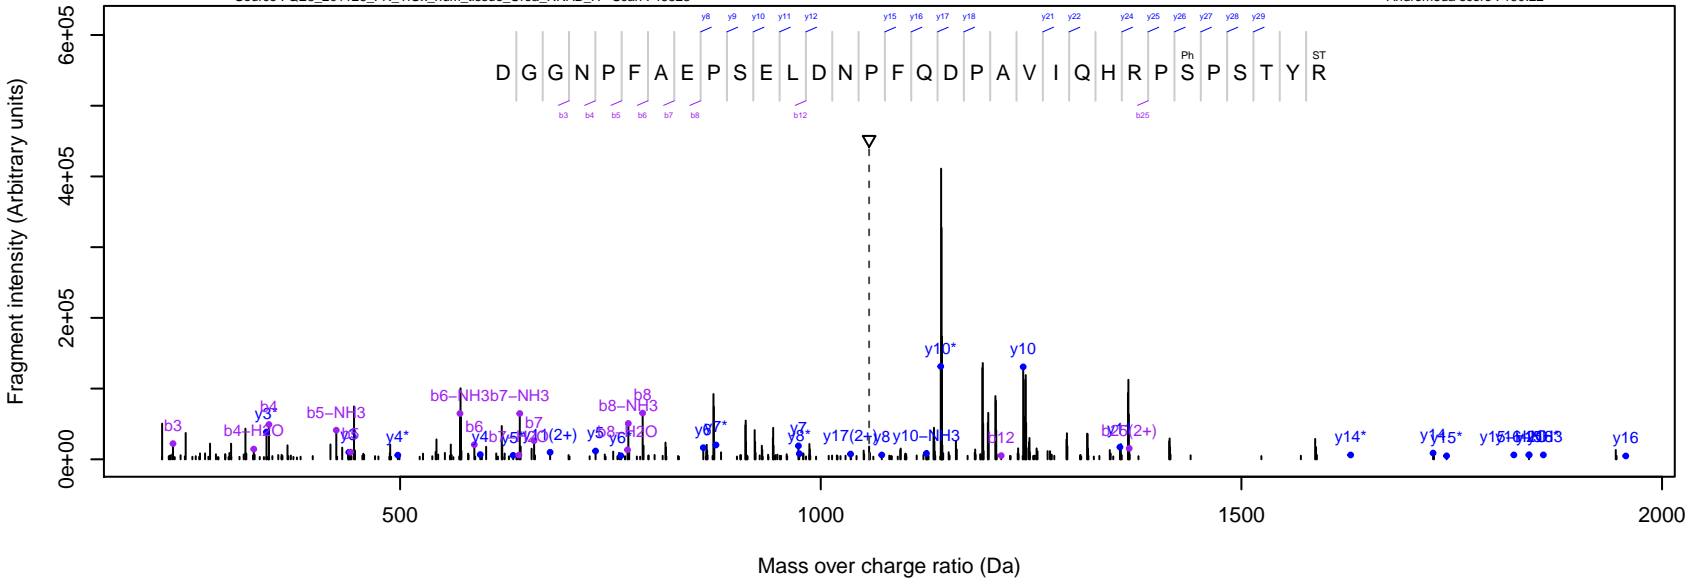

KLHVS(Phospho (STY))TINLQK-3+

Source : QE3\_201126\_FR\_TiOx\_hum\_tissue\_Urea\_RNAB\_H Scan : 15404

Andromeda score : 190.03

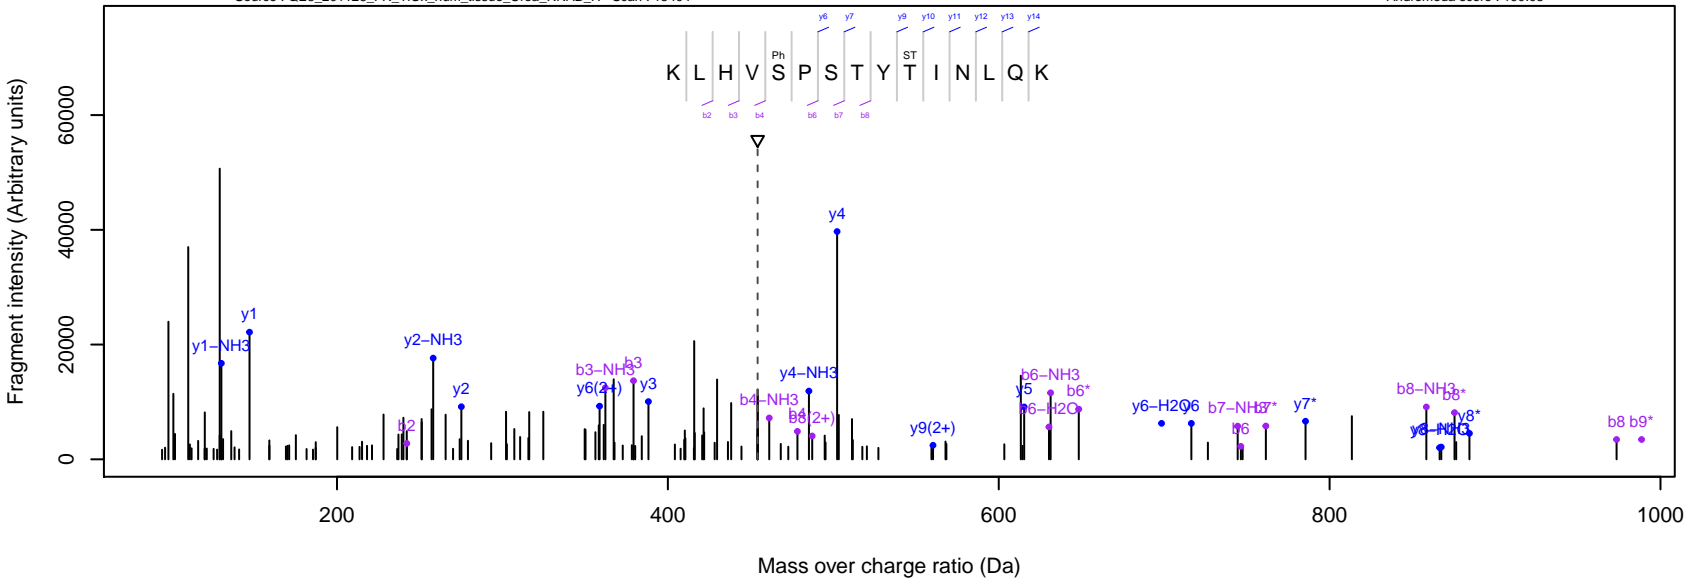

ELEHNAEETPSTY YGENDENTDDKNNDEEVE R-3+

Source : QE3\_201126\_FR\_TiOx\_hum\_tissue\_Urea\_RNAB\_N Scan : 13686

Andromeda score : 189.91

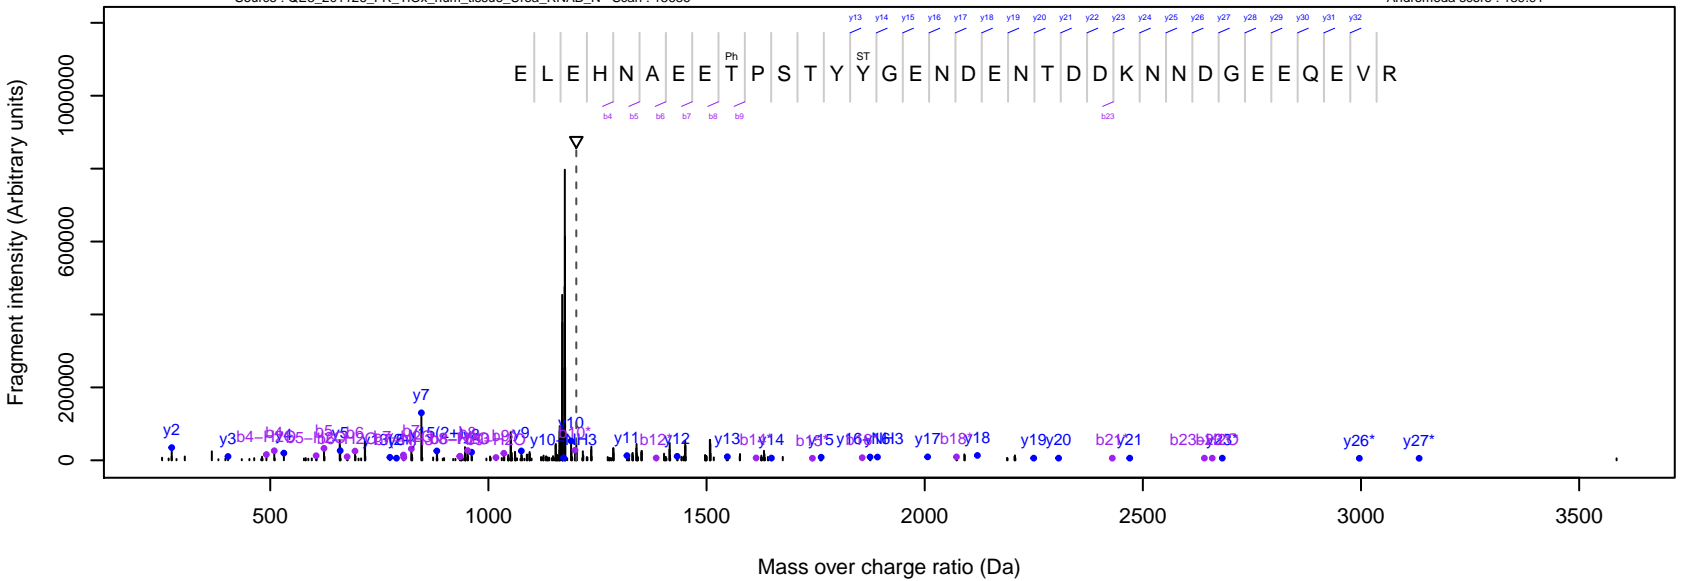

NLS(Phospho (STY))NEELTK-2+

Source : QE3\_201126\_FR\_TIOx\_hum\_tissue\_Urea\_RNAB\_H Scan : 14686

Andromeda score : 189.87

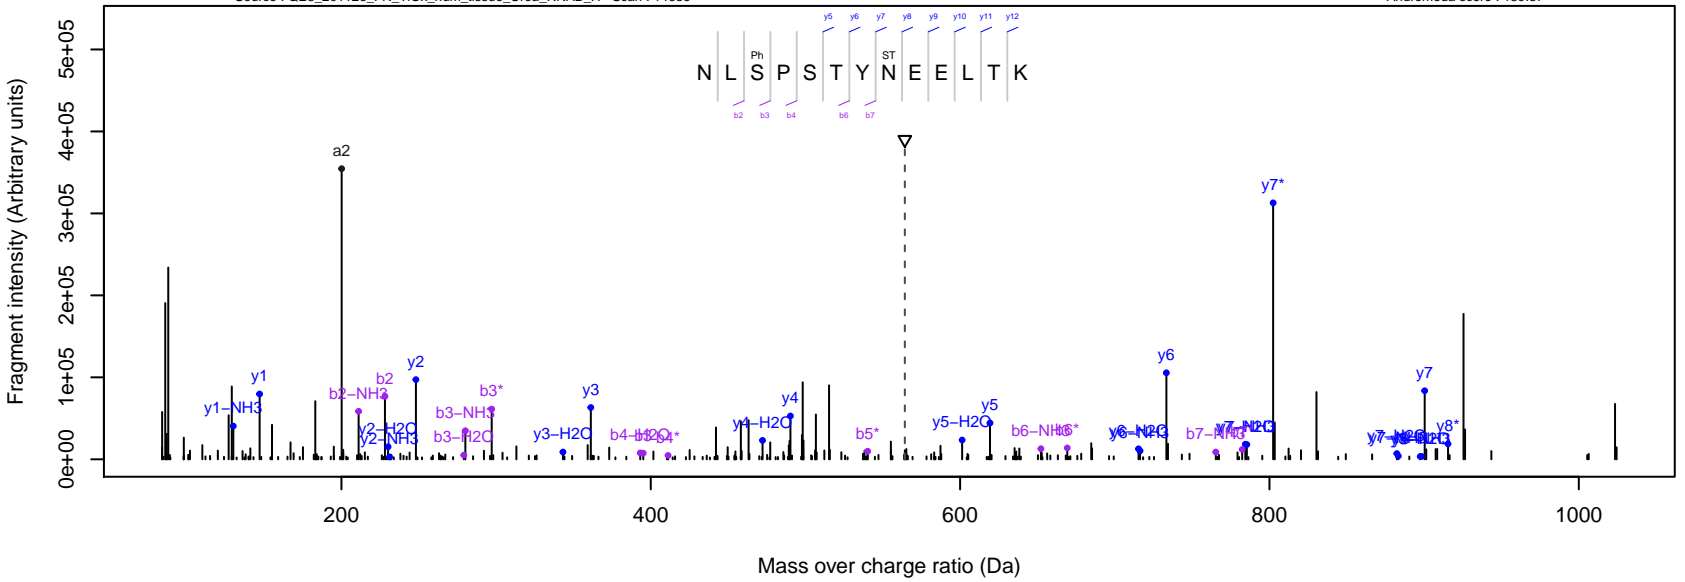

KLDDQS(Phospho (STY))EDEALELEGLITPGSGSIYSSPGLYSK-3+

Source : QE3\_201126\_FR\_TIOx\_hum\_tissue\_Urea\_RNAB\_N Scan : 54860

Andromeda score : 189.72

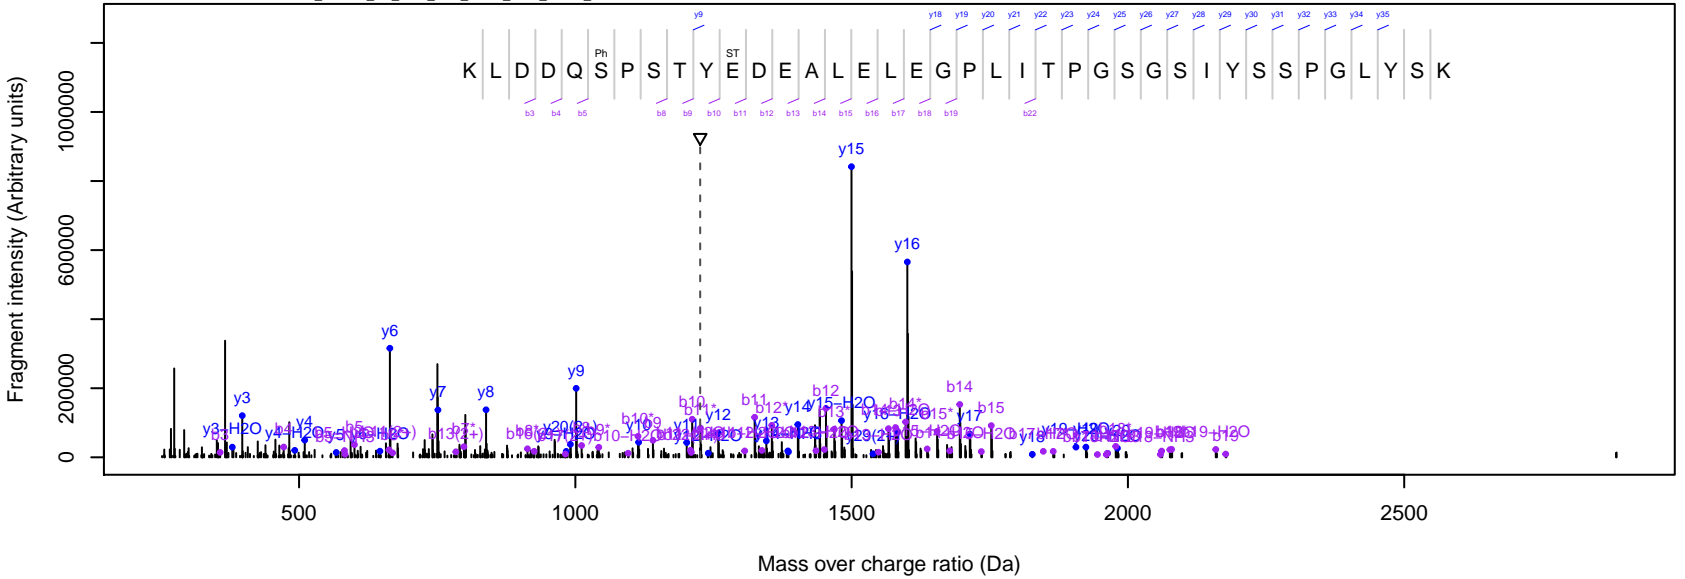

FKT(Phospho (STY))QPVTFDEIQVEEEGVSPM(Oxidation (M))EEEK-3+

Source : QE3\_201126\_FR\_TIOx\_hum\_tissue\_Urea\_RNAB\_H Scan : 45472

Andromeda score : 189.61

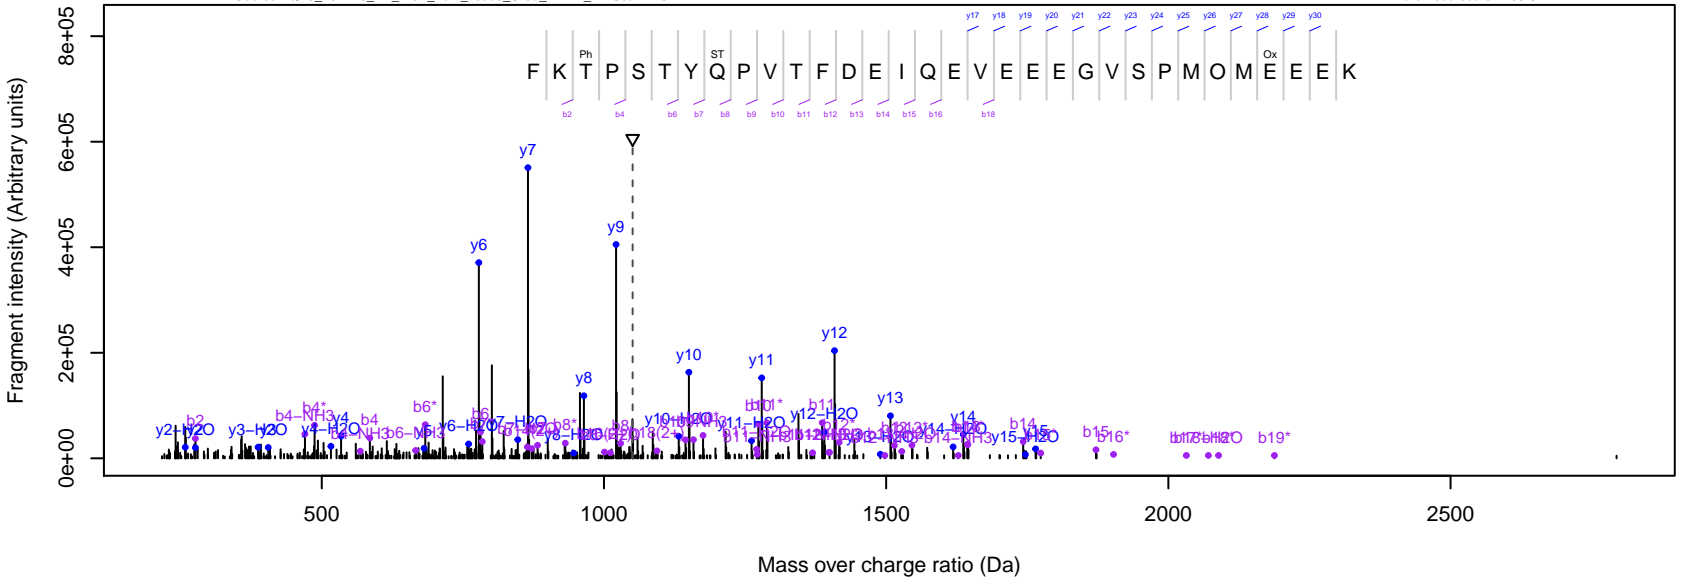

YHGHS(Phospho (STY))M(Oxidation (M))SDPGVSYR-3+

Source : QE3\_201126\_FR\_TIOx\_hum\_tissue\_Urea\_RNAB\_H Scan : 7275

Andromeda score : 189.59

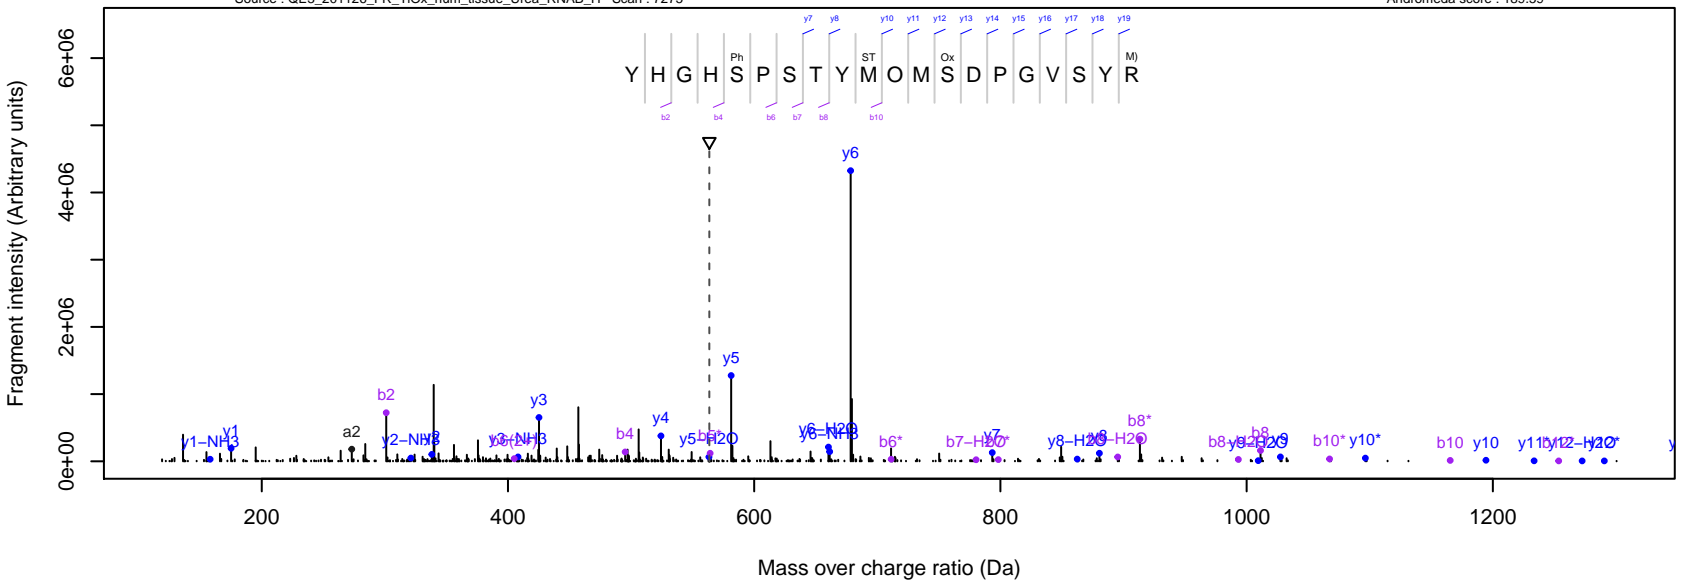

SGS(Phospho (STY))YSYLEER-2+

Source : QE3\_201126\_FR\_TIOx\_hum\_tissue\_Urea\_RNAB\_N Scan : 23332

Andromeda score : 189.57

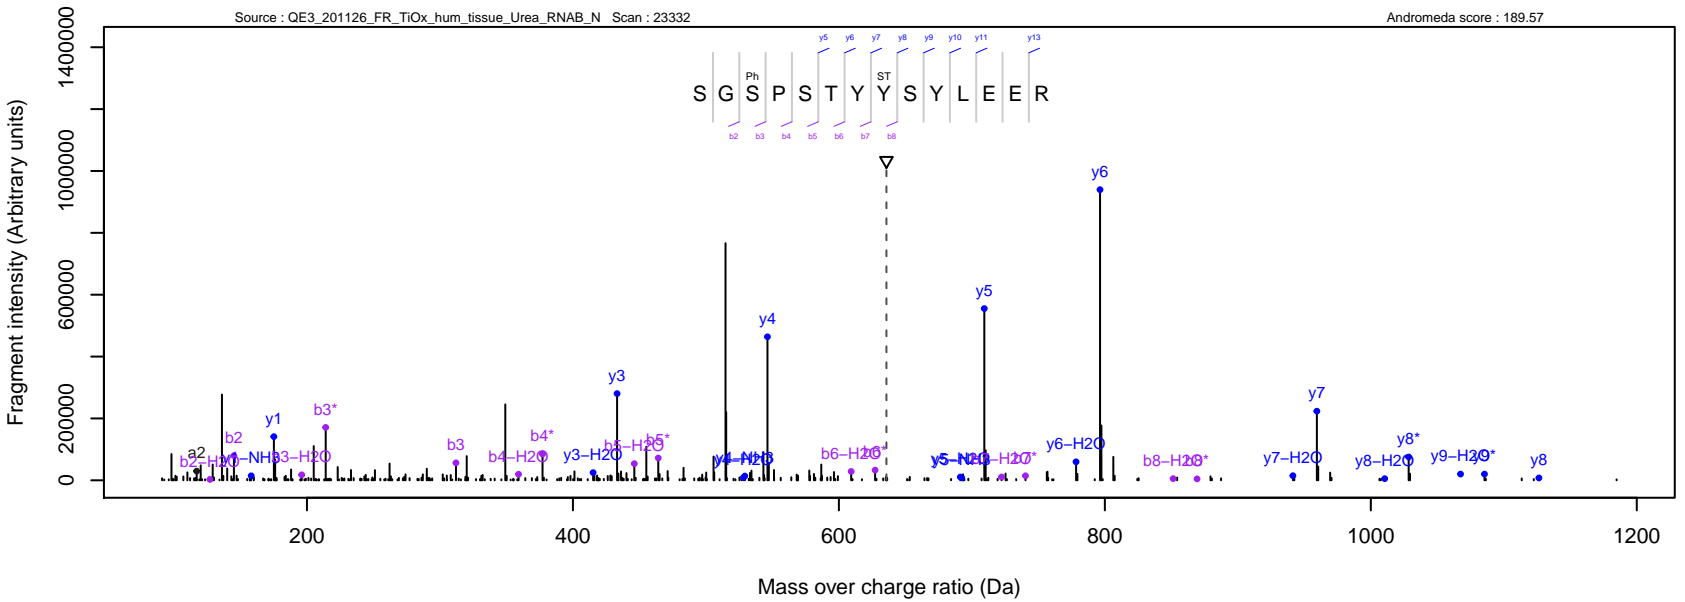

SHHAPM(Oxidation (M))S(Phospho (STY))PGSSGGGQPLAR-3+

Source : QE3\_201126\_FR\_TIOx\_hum\_tissue\_Urea\_RNAB\_B Scan : 5959

Andromeda score : 189.57

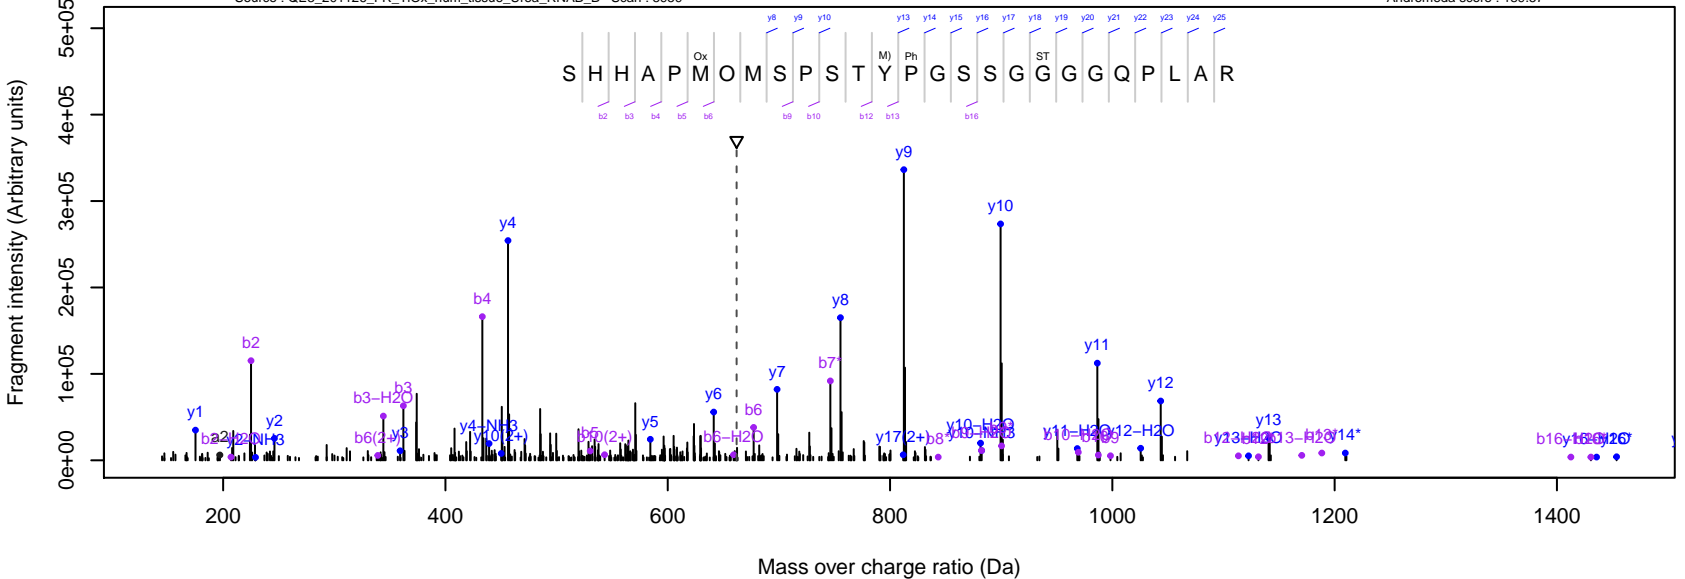



SQS(Phospho (STY))TTFNPDDMSEPEFK-2+

Source : QE3\_201126\_FR\_TiOx\_hum\_tissue\_Urea\_RNAB\_N Scan : 38986

Andromeda score : 189.42

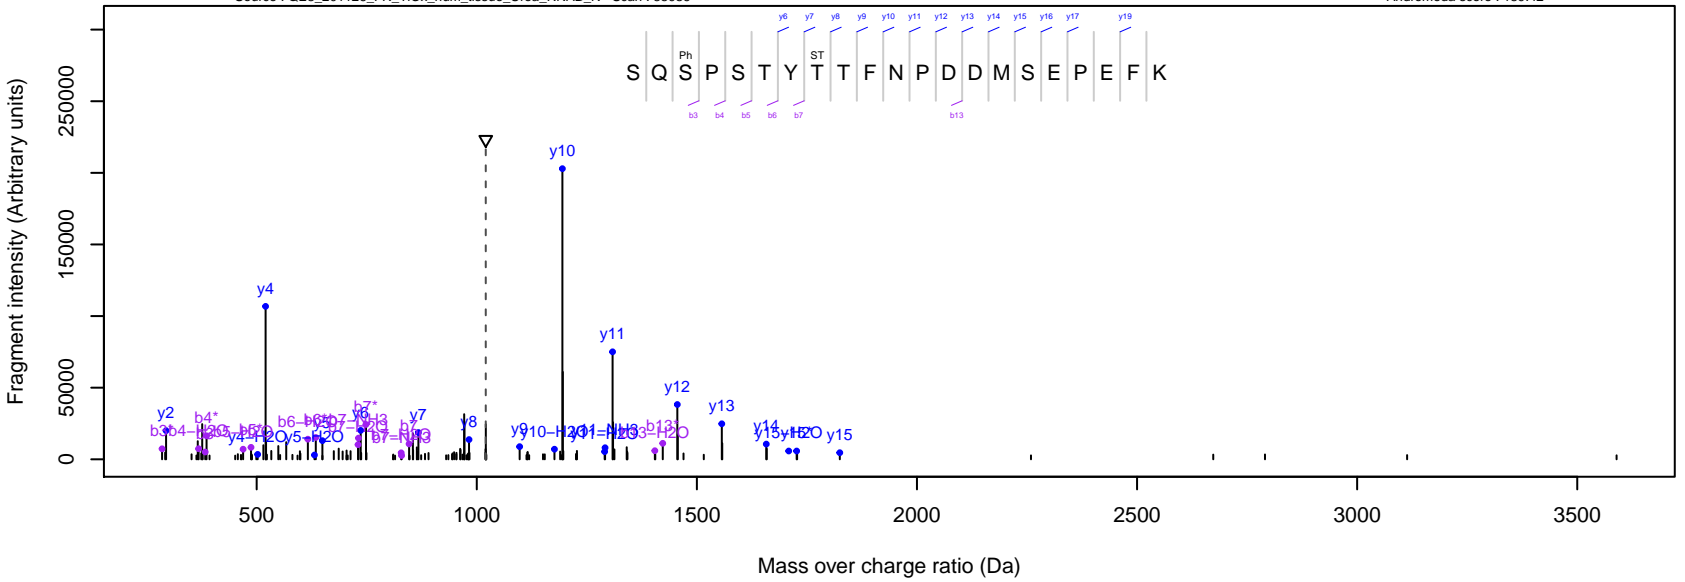

EREREDES(Phospho (STY))EEDSDILEESPCGR-3+

Source : QE3\_201126\_FR\_TiOx\_hum\_tissue\_Urea\_RNAB\_N Scan : 20577

Andromeda score : 189.34

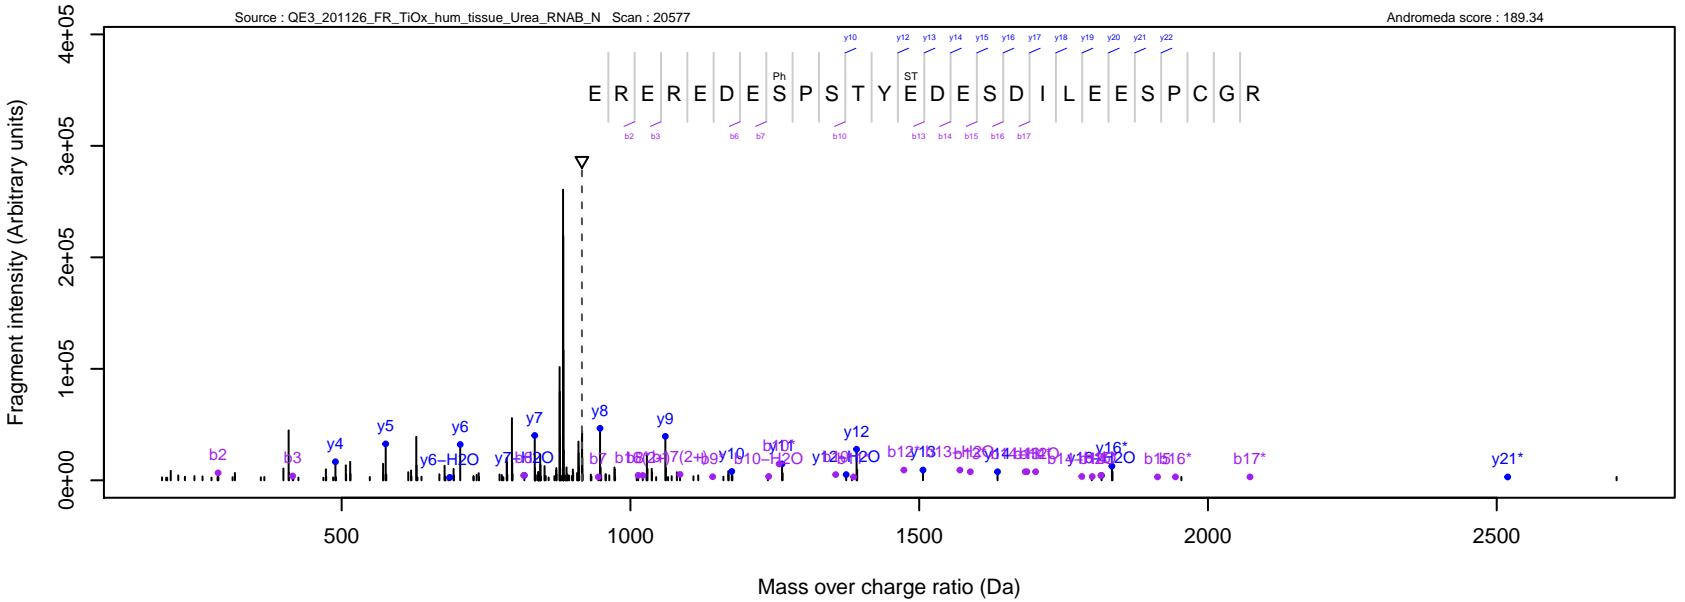

TRS(Phospho (STY))PS(Phospho (STY))PDDILER-2+

Source : QE3\_201126\_FR\_TiOx\_hum\_tissue\_Urea\_RNAB\_H Scan : 25358

Andromeda score : 189.31

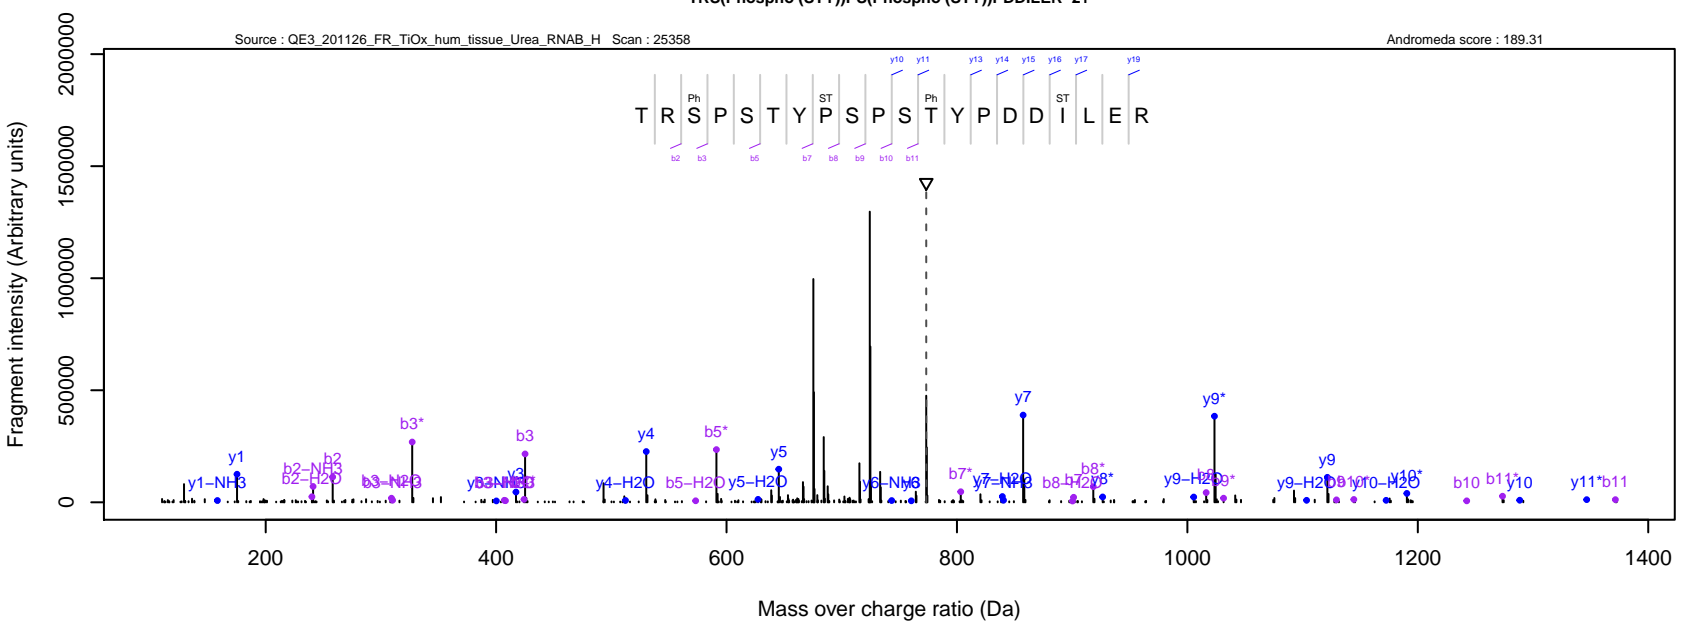

(Acetyl (Protein N-term))S(Phospho (STY))GDEM(Oxidation (M))IFDPTM(Oxidation (M))SK-2+

Source : QE3\_201126\_FR\_TIOx\_hum\_tissue\_Urea\_RNAB\_H Scan : 43066

Andromeda score : 189.3

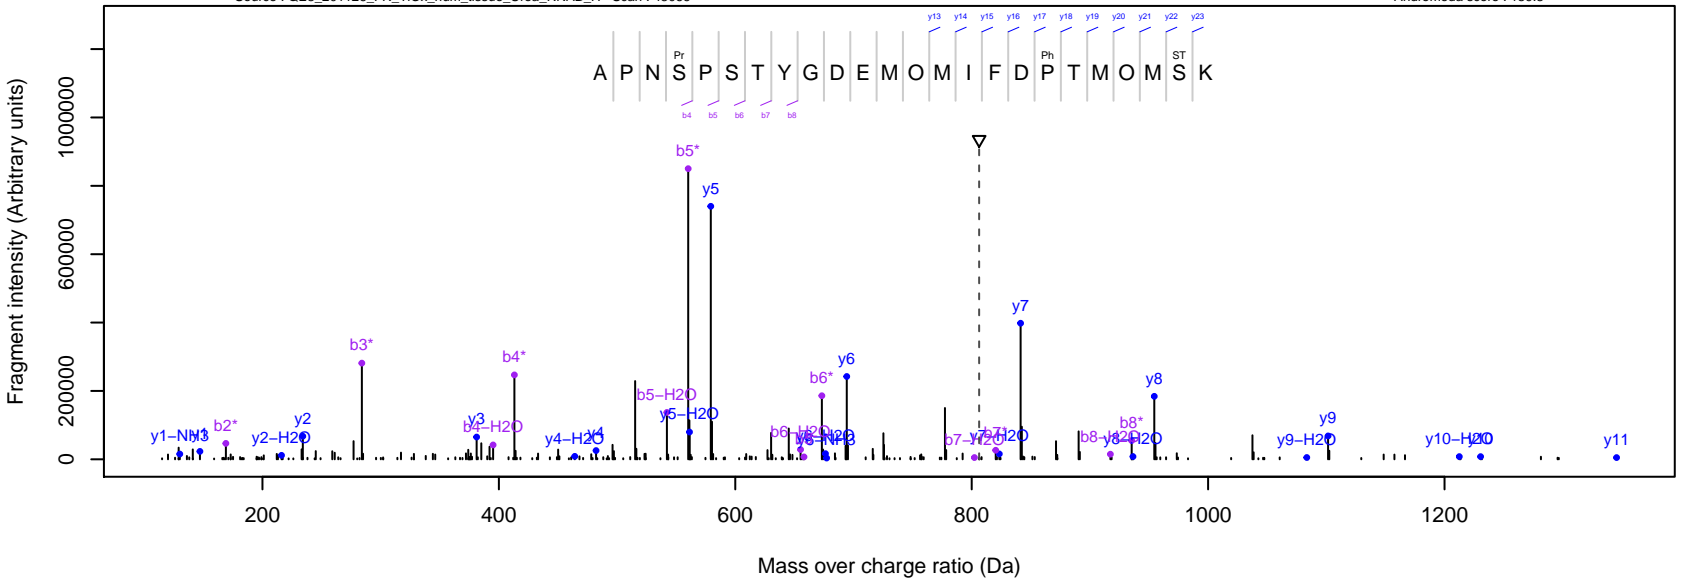

VASGPSPGEGIS(Phospho (STY))PQSAQAPQAPGDNHVVPVLR-3+

Source : QE3\_201126\_FR\_TIOx\_hum\_tissue\_Urea\_RNAB\_H Scan : 33050

Andromeda score : 189.21

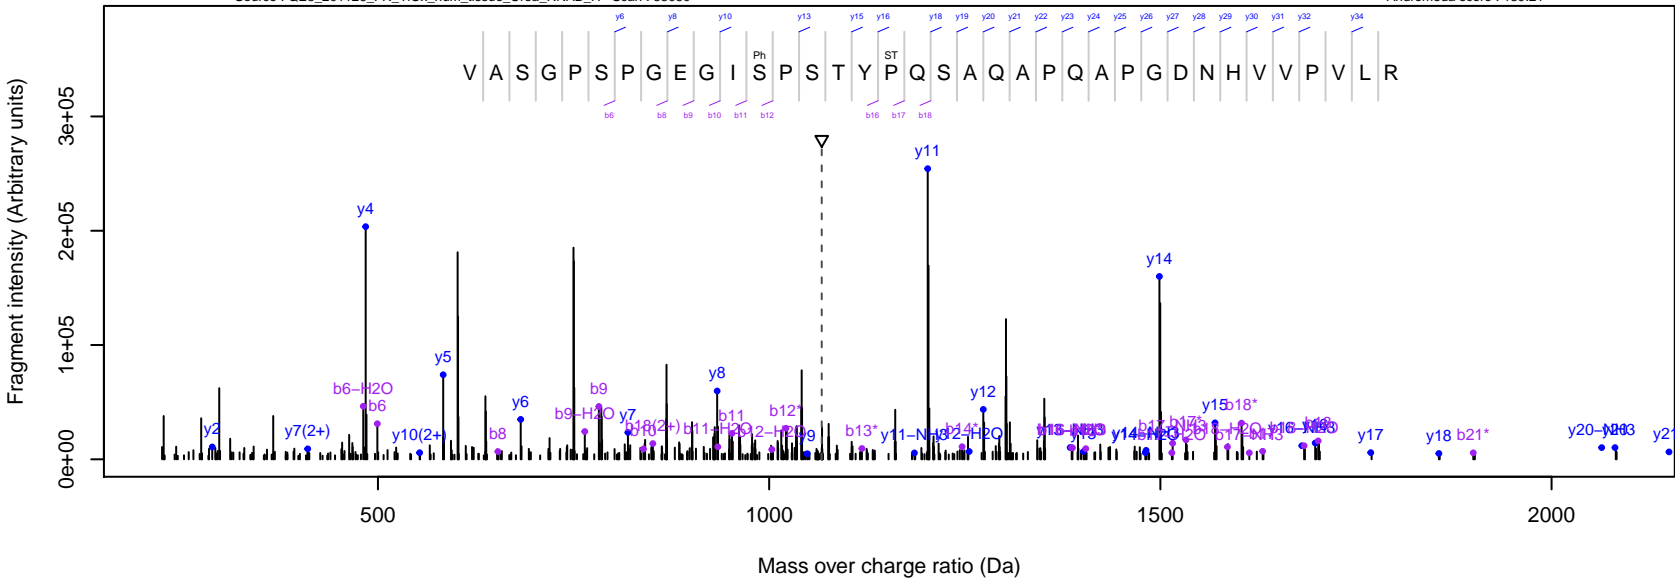

NGILAIEGTGSDVDDM(Oxidation (M))S(Phospho (STY))GDEKQDNESNVDP-3+

Source : QE3\_201126\_FR\_TIOx\_hum\_tissue\_Urea\_RNAB\_H Scan : 31927

Andromeda score : 189.18

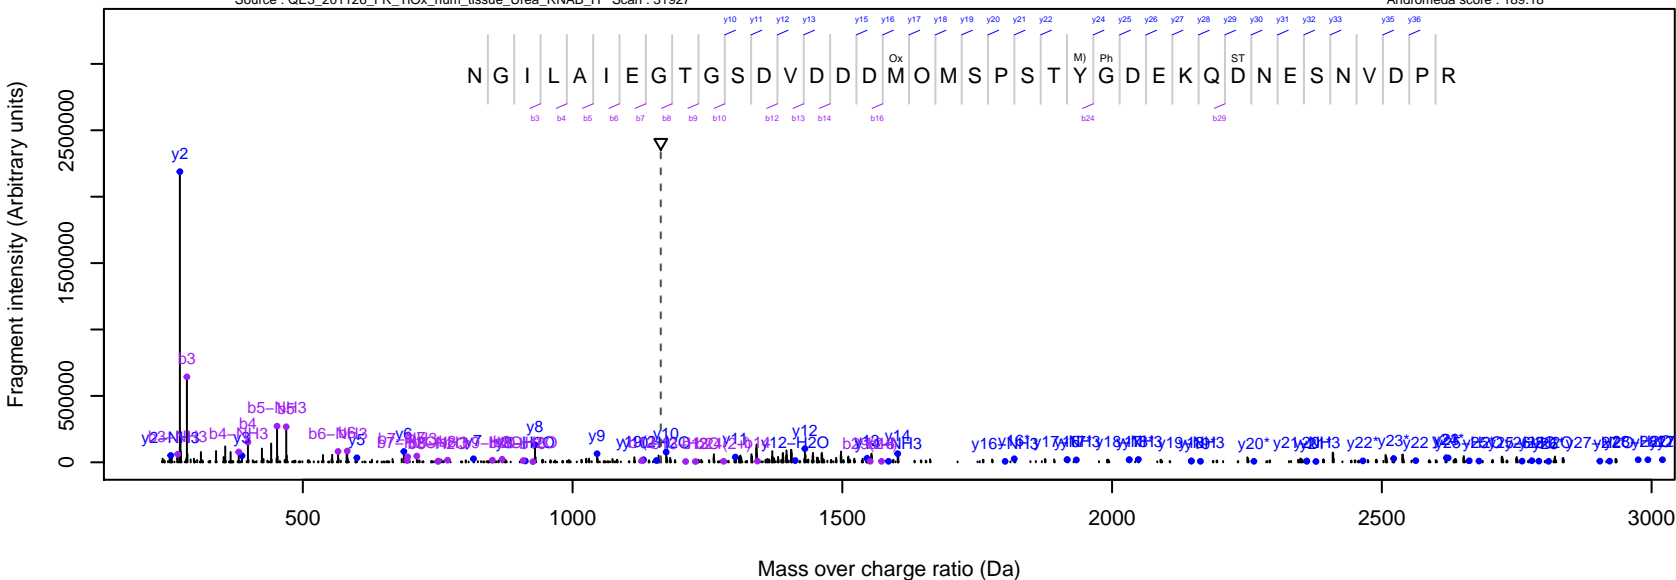

QLTACPELPHNVQEILGLAPPAEPHS(Phospho (STY))PS(Phospho (STY))PTASPLPLSPTR-4+

Source : QE3\_201126\_FR\_TIOx\_hum\_tissue\_Urea\_RNAB\_H Scan : 59218

Andromeda score : 189.14

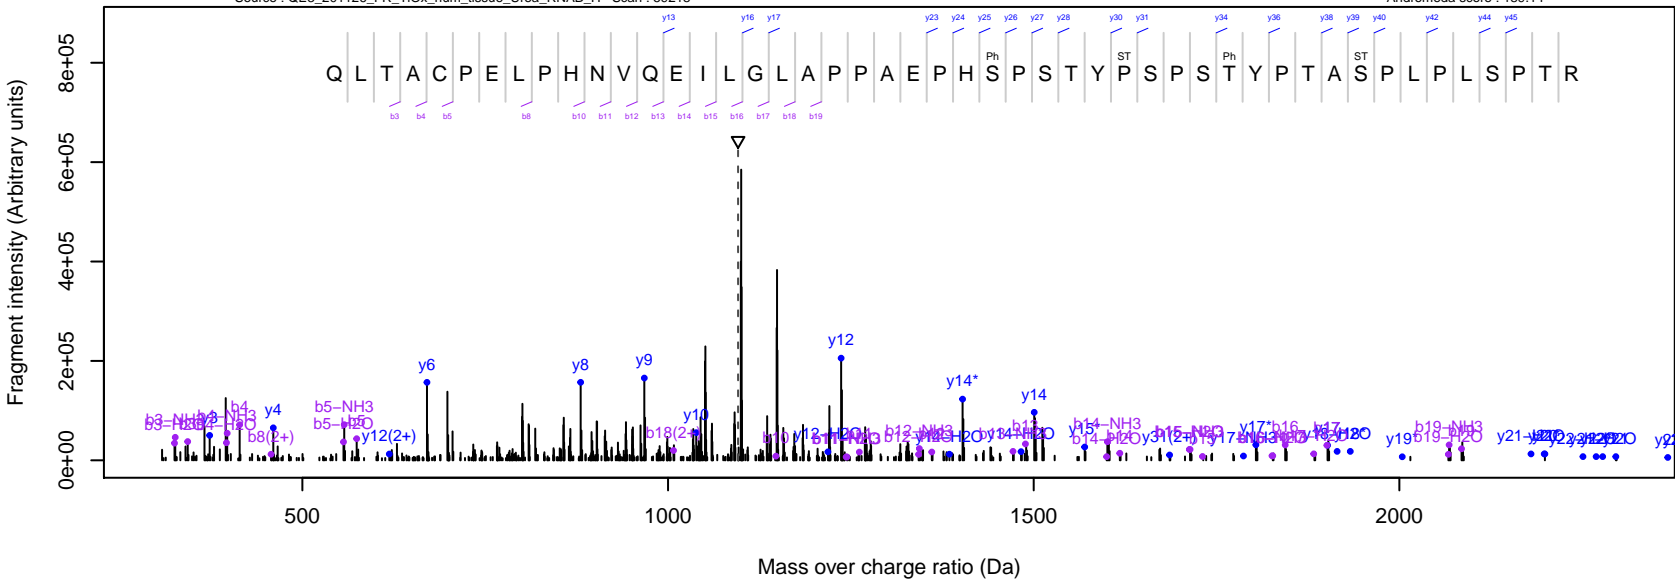

(Acetyl (Protein N-term))S(Phospho (STY))EKSVEAAAELSAK-2+

Source : QE3\_201126\_FR\_TIOx\_hum\_tissue\_Urea\_RNAB\_N Scan : 28417

Andromeda score : 189.1

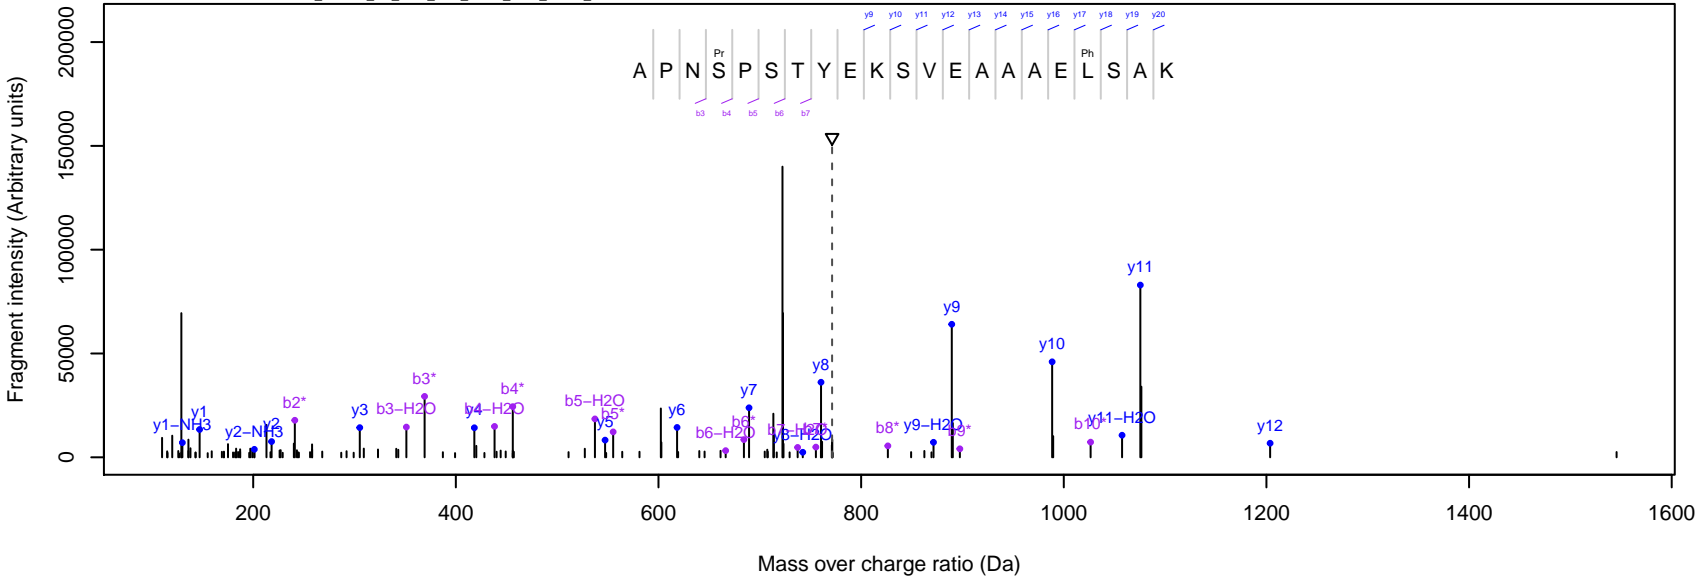

LRLS(Phospho (STY))PS(Phospho (STY))PTSQR-2+

Source : QE3\_201126\_FR\_TIOx\_hum\_tissue\_Urea\_RNAB\_H Scan : 16455

Andromeda score : 189.07

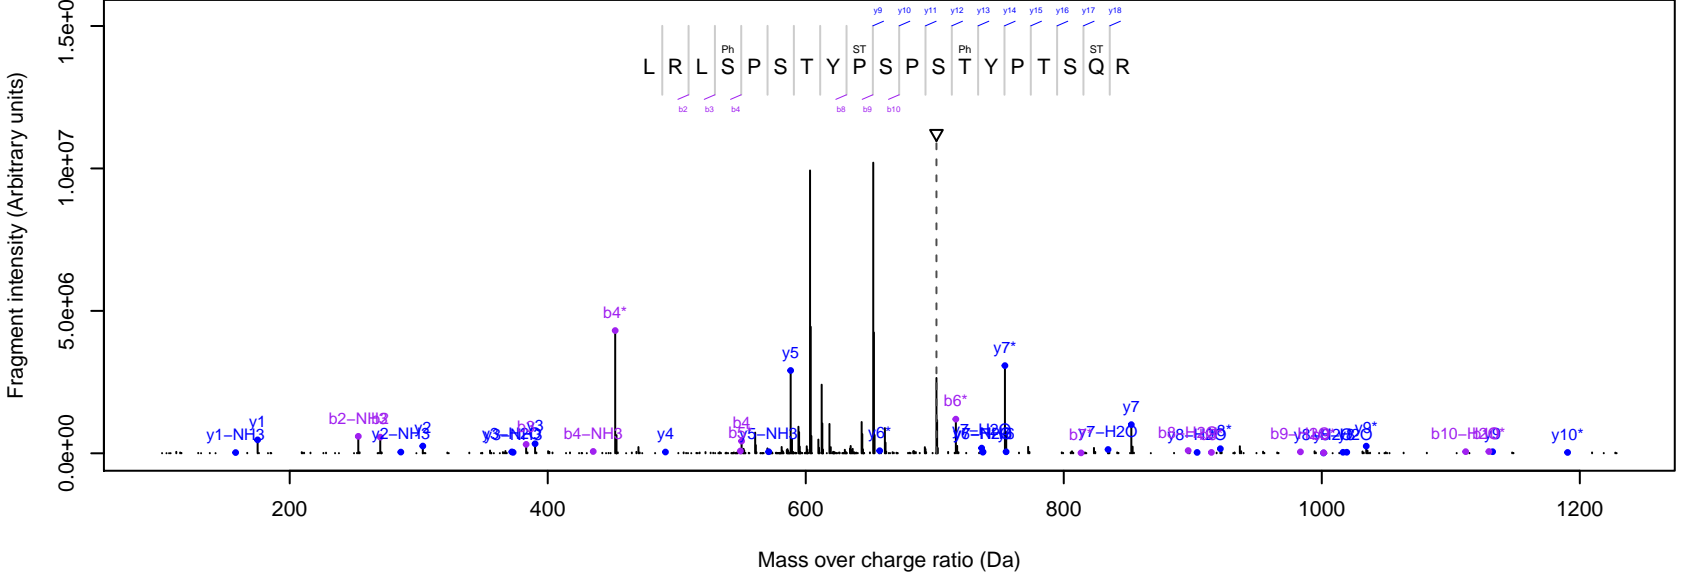

SQHVNGGVMNGLEQSEEVGQGMPLVSEGDRGS(Phospho (STY))PFQEEEGSALK-4+

Source : QE3\_201126\_FR\_TIOx\_hum\_tissue\_Urea\_RNAB\_N Scan : 43749

Andromeda score : 188.94

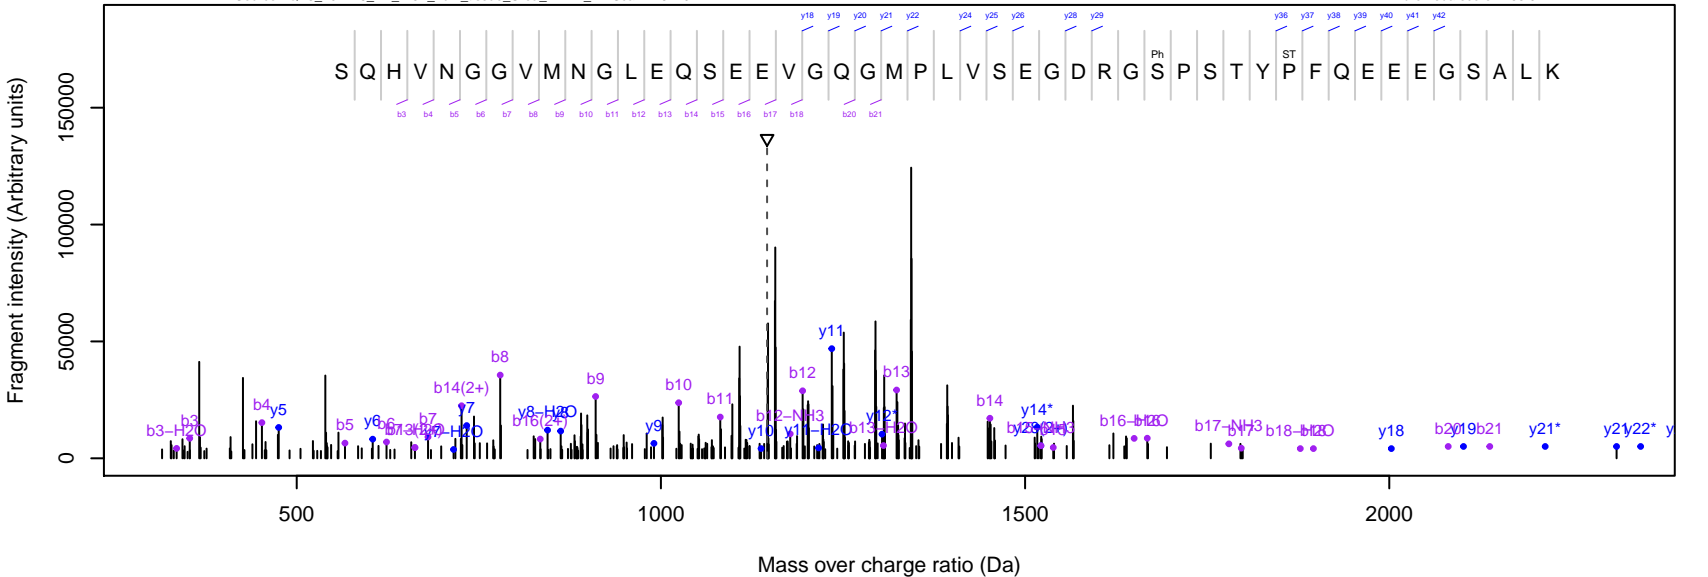

**EVQTPQYLNPFDPEPEAFVTKDS(Phospho (STY))PPQSTK-3+**

Source : QE3\_201126\_FR\_TiOx\_hum\_tissue\_Urea\_RNAB\_B Scan : 54325

Andromeda score : 188.64

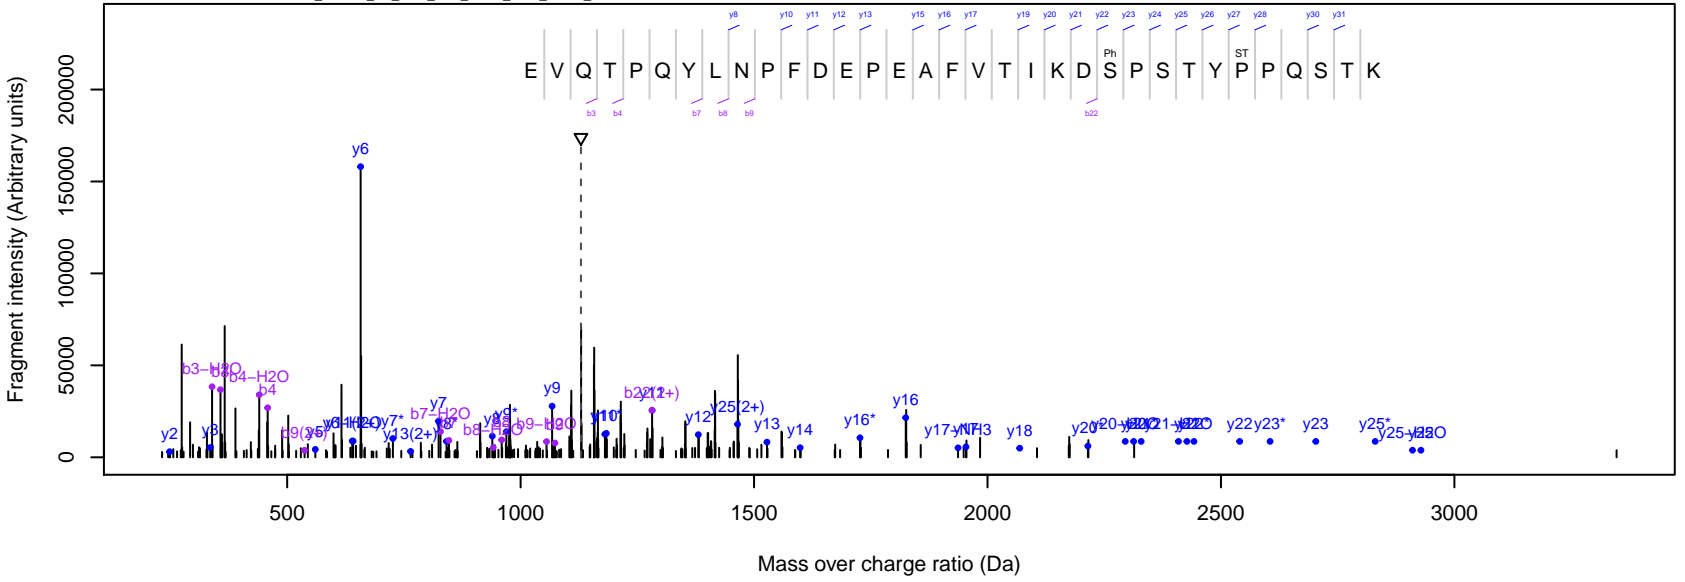

**YQT(Phospho (STY))QPVTLGEVEQVQSGK-2+**

Source : QE3\_201126\_FR\_TiOx\_hum\_tissue\_Urea\_RNAB\_N Scan : 35505

Andromeda score : 188.6

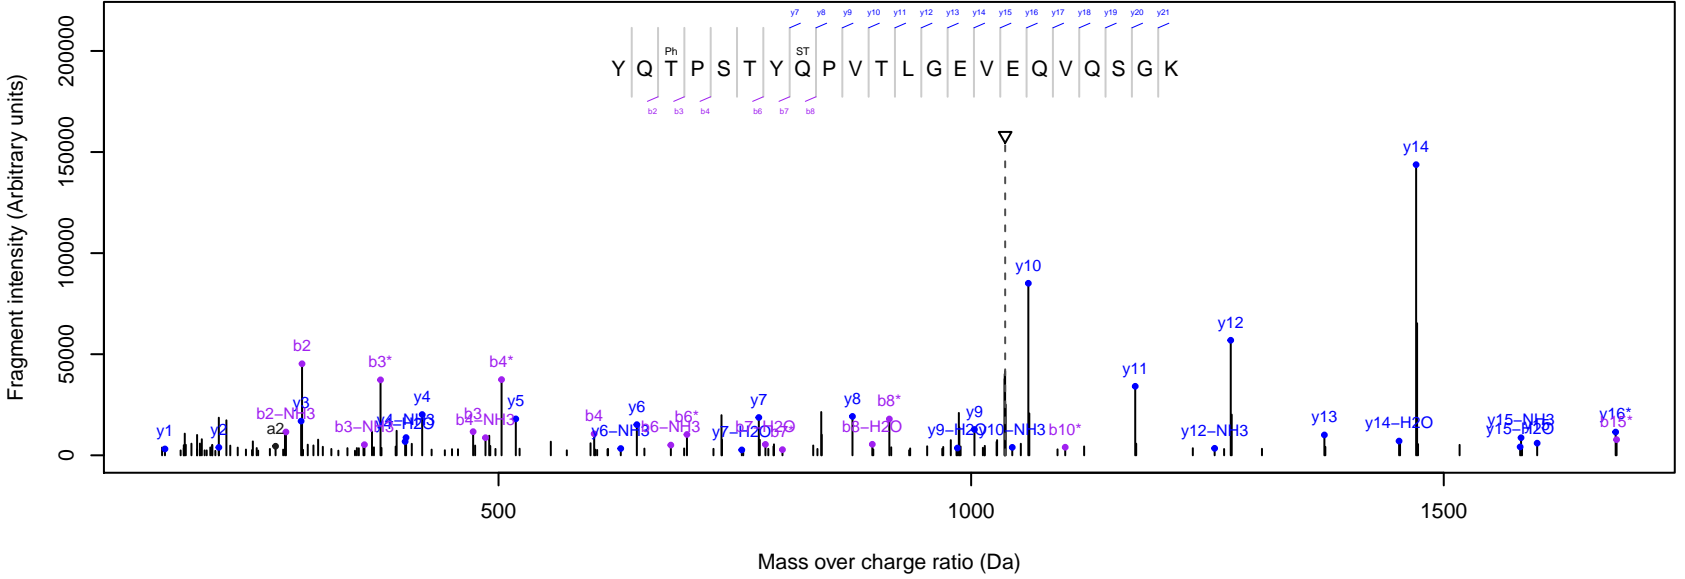

**IDIS(Phospho (STY))PSTLR-2+**

Source : QE3\_201126\_FR\_TiOx\_hum\_tissue\_Urea\_RNAB\_H Scan : 29926

Andromeda score : 188.49

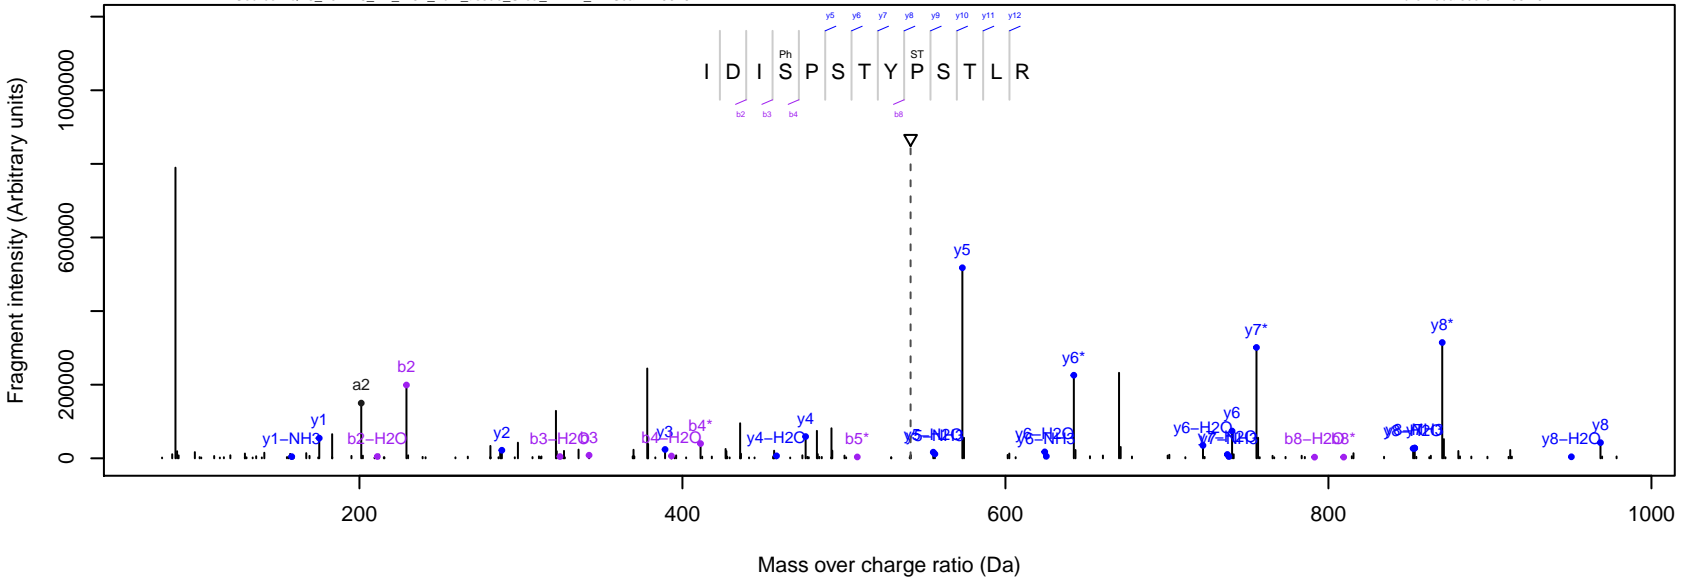





FGIHVYQFPECDS(Phospho (STY))DEDEDFKQQR-4+

Source : QE3\_201126\_FR\_TIOx\_hum\_tissue\_Urea\_RNAB\_H Scan : 38025

Andromeda score : 188.22

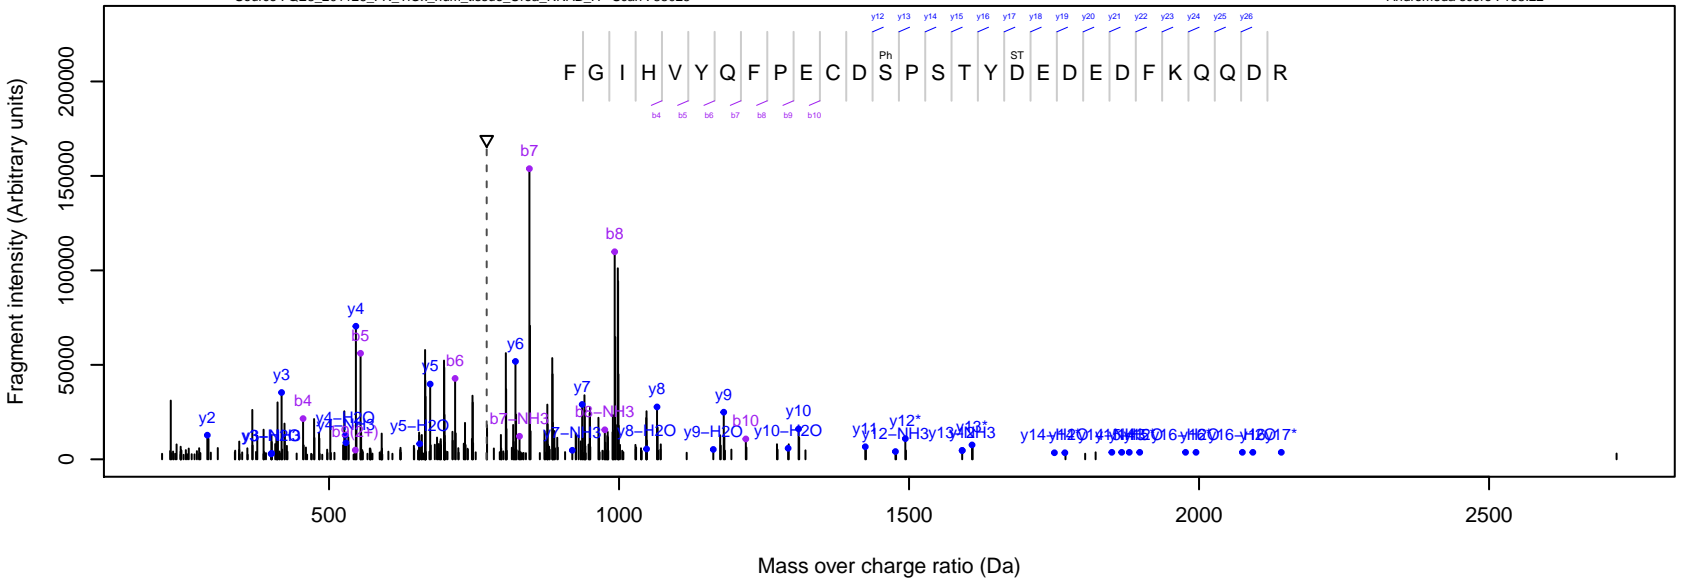

(Acetyl (Protein N-term))MEDS(Phospho (STY))MDMDMSPLRPQNYLFGCELK-3+

Source : QE3\_201126\_FR\_TIOx\_hum\_tissue\_Urea\_RNAB\_N Scan : 62265

Andromeda score : 188.17

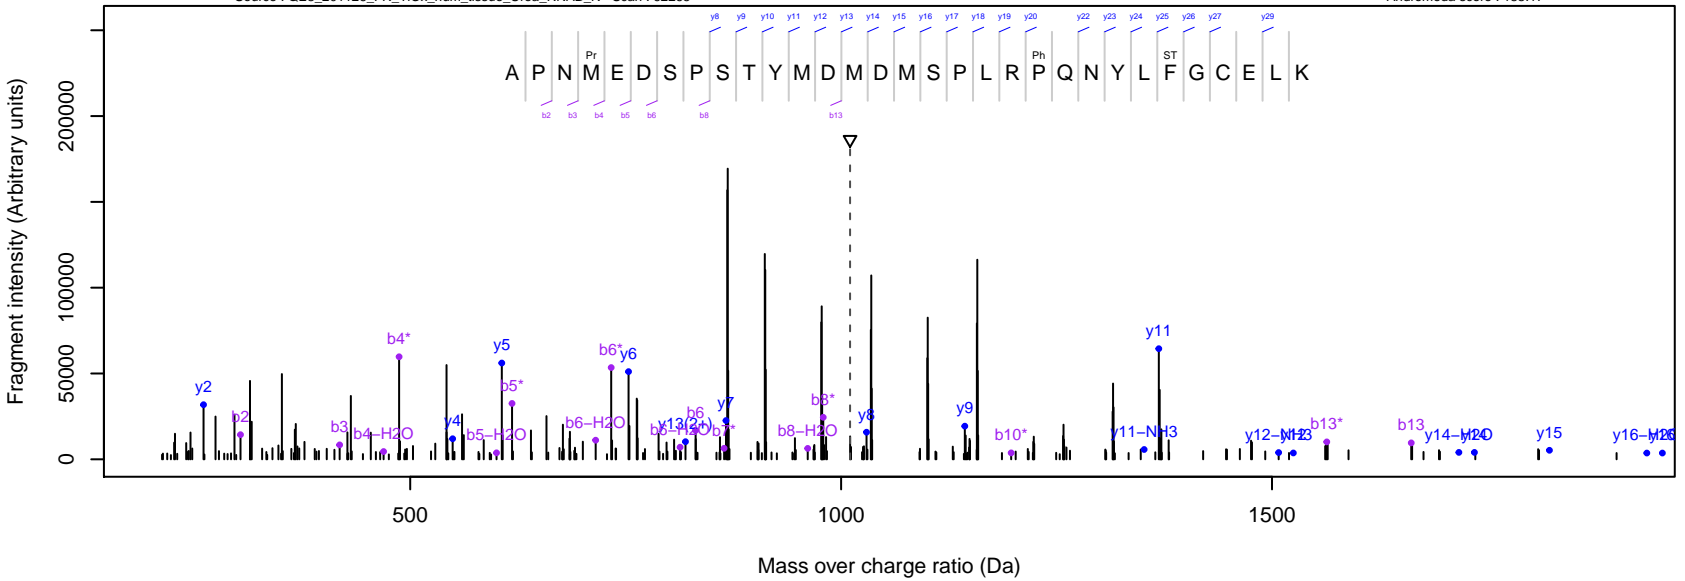

AVAGVMITAS(Phospho (STY))HNR-2+

Source : QE3\_201126\_FR\_TIOx\_hum\_tissue\_Urea\_RNAB\_H Scan : 14821

Andromeda score : 188.13

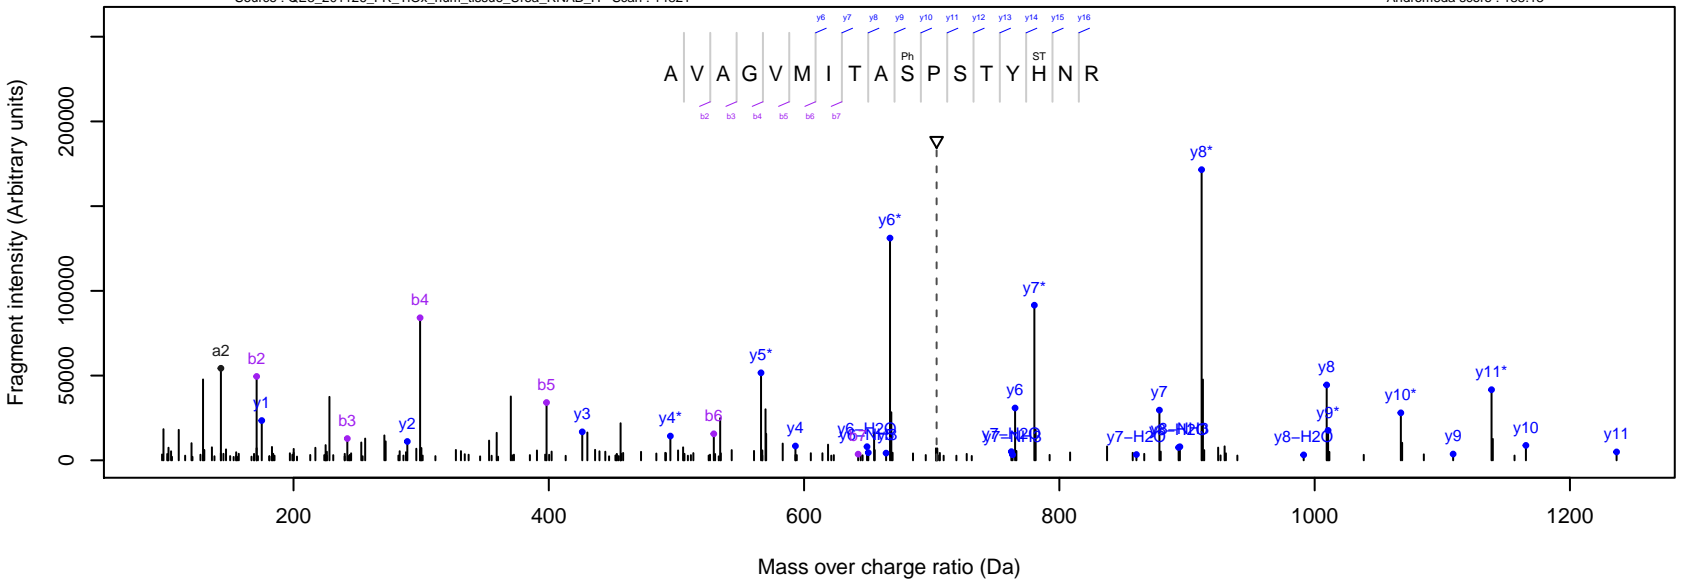



TQS(Phospho (STY))GNFYDTLGMAEFR-2+

Source : QE3\_201126\_FR\_TiOx\_hum\_tissue\_Urea\_RNAB\_N Scan : 55370

Andromeda score : 188.04

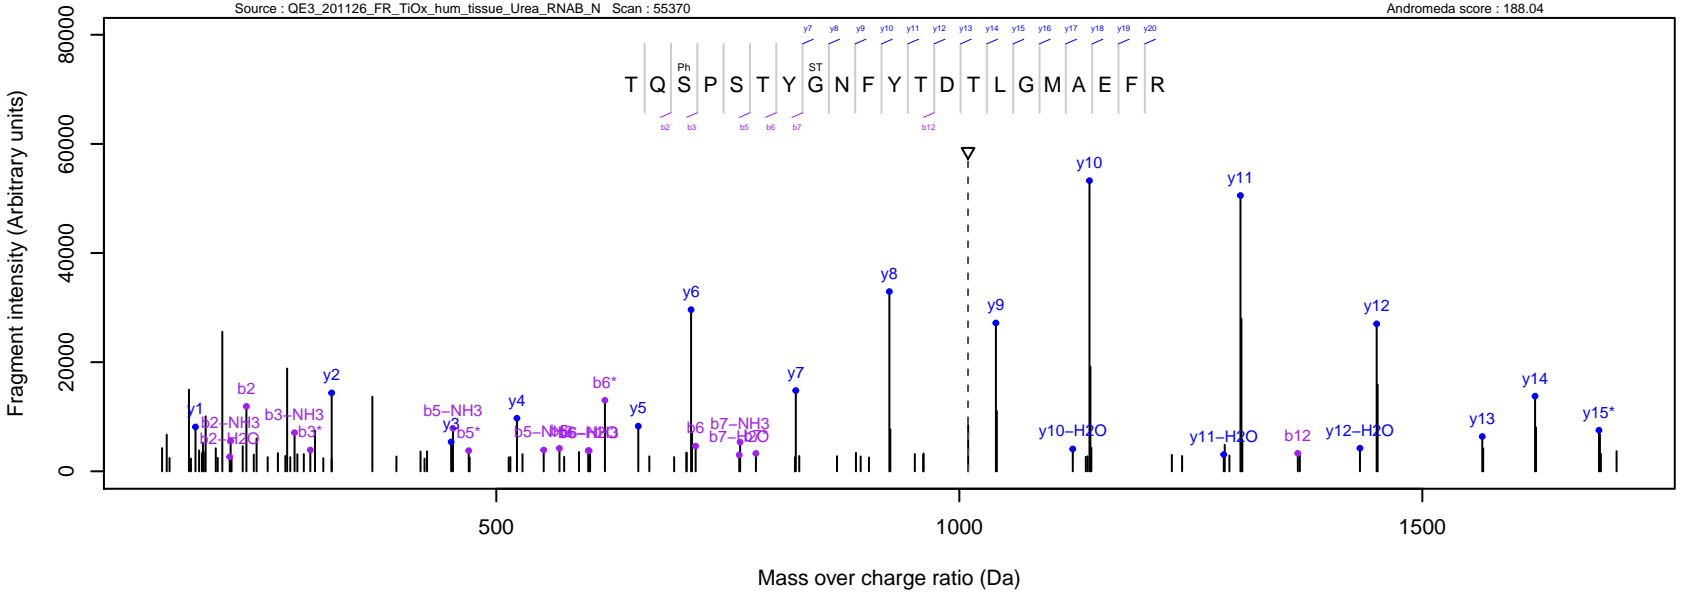

VEMYSGS(Phospho (STY))DDDDDFNKLPK-2+

Source : QE3\_201126\_FR\_TiOx\_hum\_tissue\_Urea\_RNAB\_B Scan : 30522

Andromeda score : 188.04

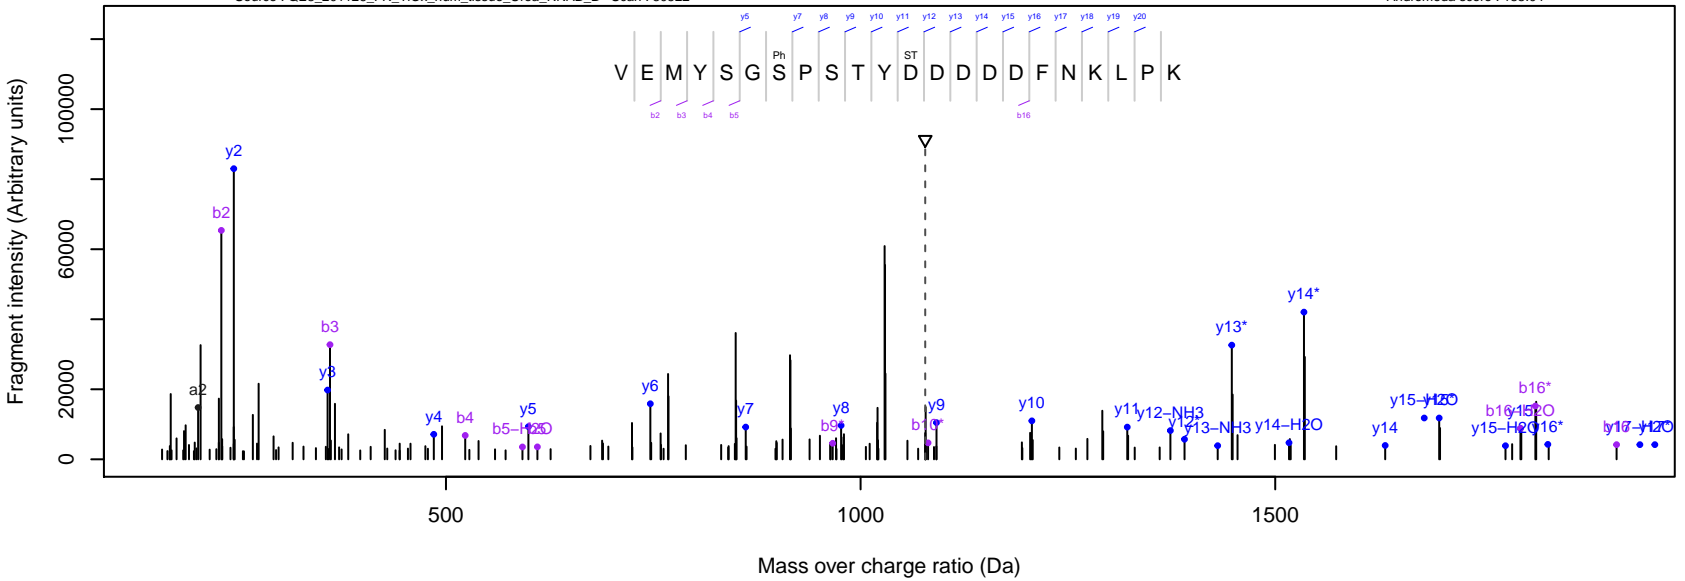

GPSQEEEDNHS(Phospho (STY))DEEDRASEPK-3+

Source : QE3\_201126\_FR\_TiOx\_hum\_tissue\_Urea\_RNAB\_B Scan : 5297

Andromeda score : 187.95

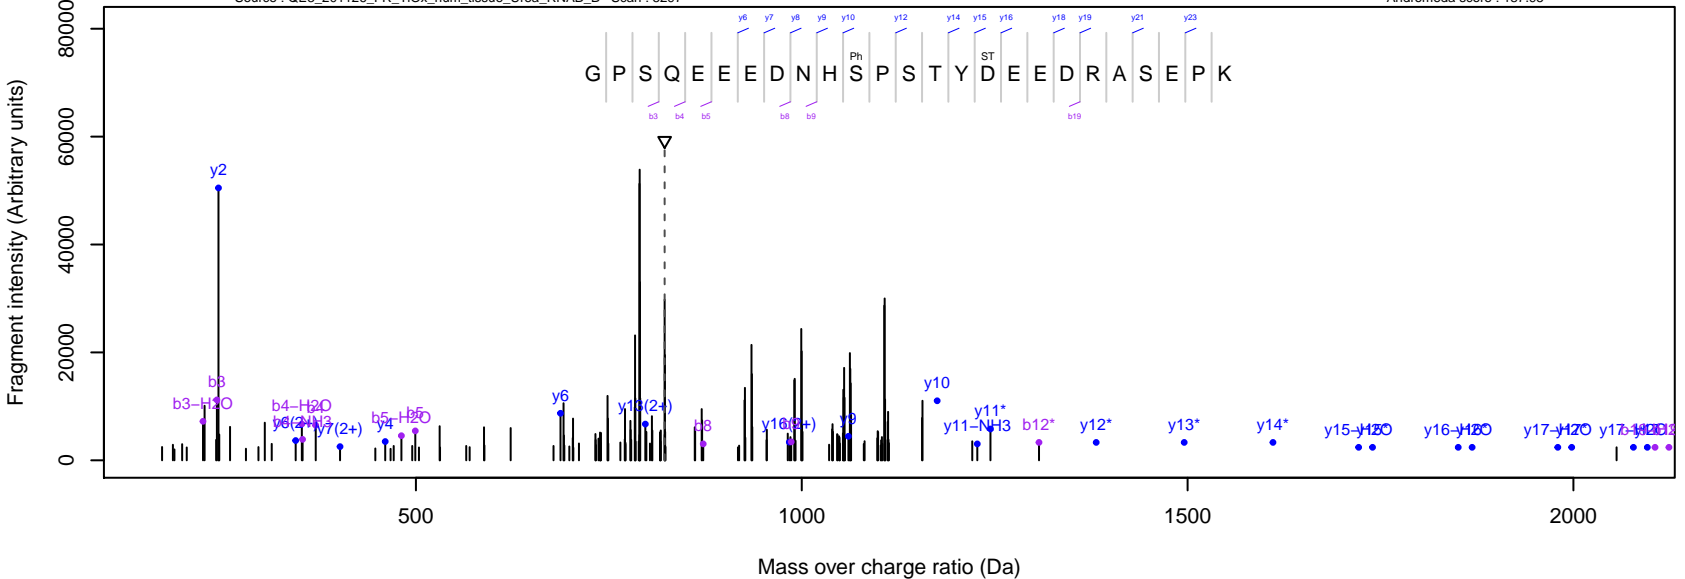

(Acetyl (Protein N-term))ASHLRPPS(Phospho (STY))PLLVR-3+

Source : QE3\_201126\_FR\_TiOx\_hum\_tissue\_Urea\_RNAB\_H Scan : 31987

Andromeda score : 187.78

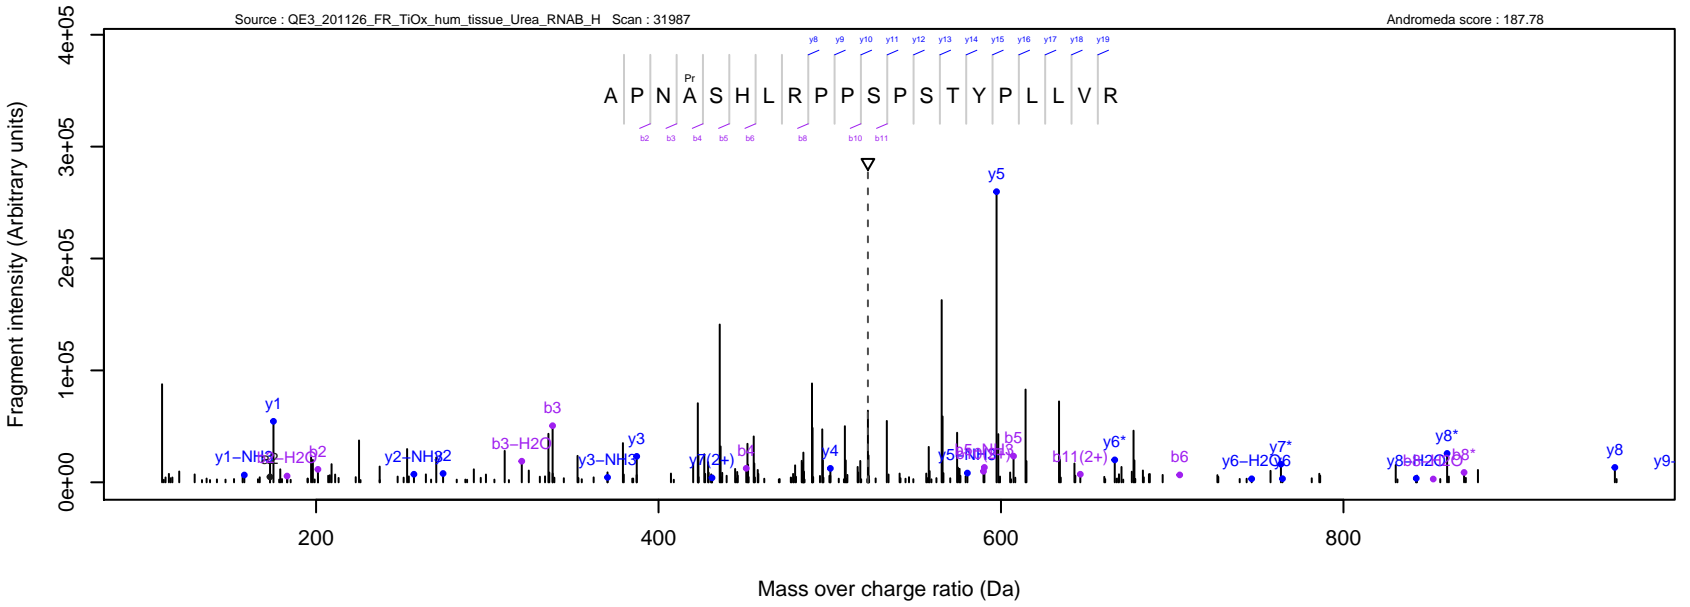

RLS(Phospho (STY))PSAS(Phospho (STY))PPR-2+

Source : QE3\_201126\_FR\_TiOx\_hum\_tissue\_Urea\_RNAB\_H Scan : 11224

Andromeda score : 187.77

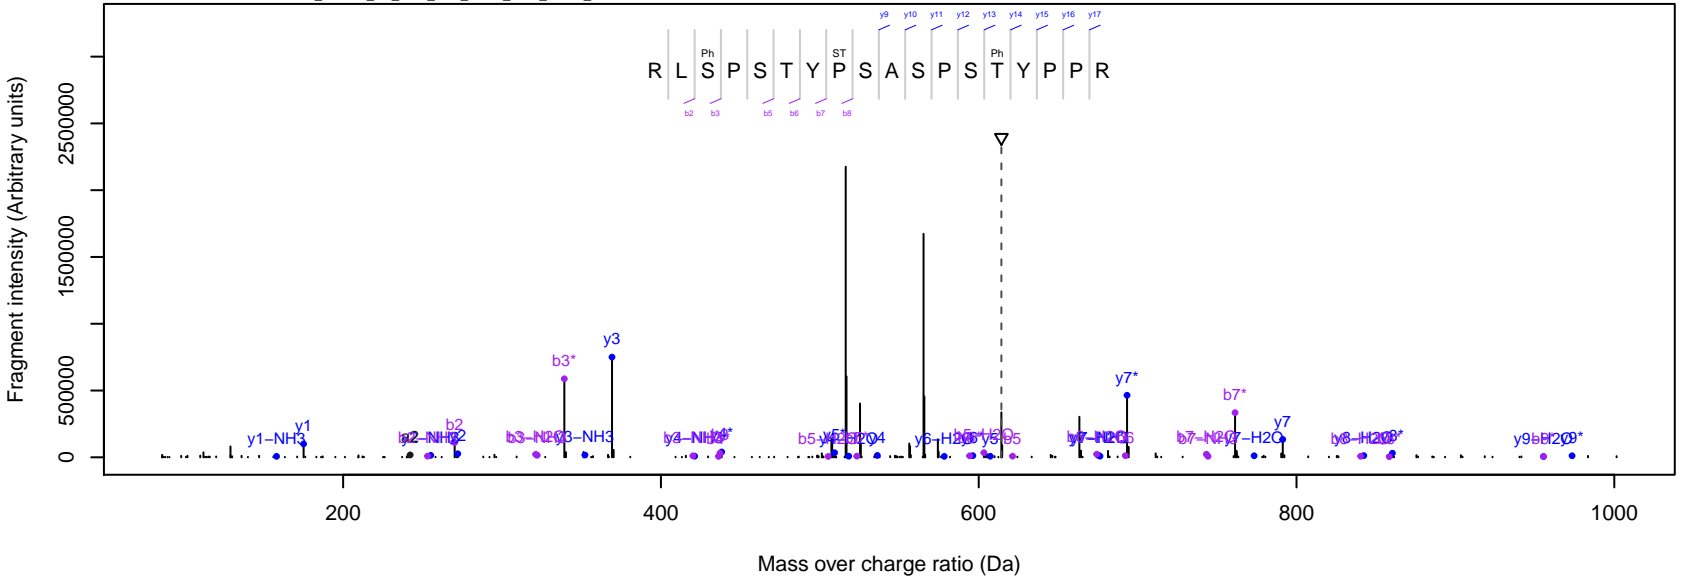

SAS(Phospho (STY))PHDVLCLVSPCEFEHR-3+

Source : QE3\_201126\_FR\_TiOx\_hum\_tissue\_Urea\_RNAB\_N Scan : 36443

Andromeda score : 187.76

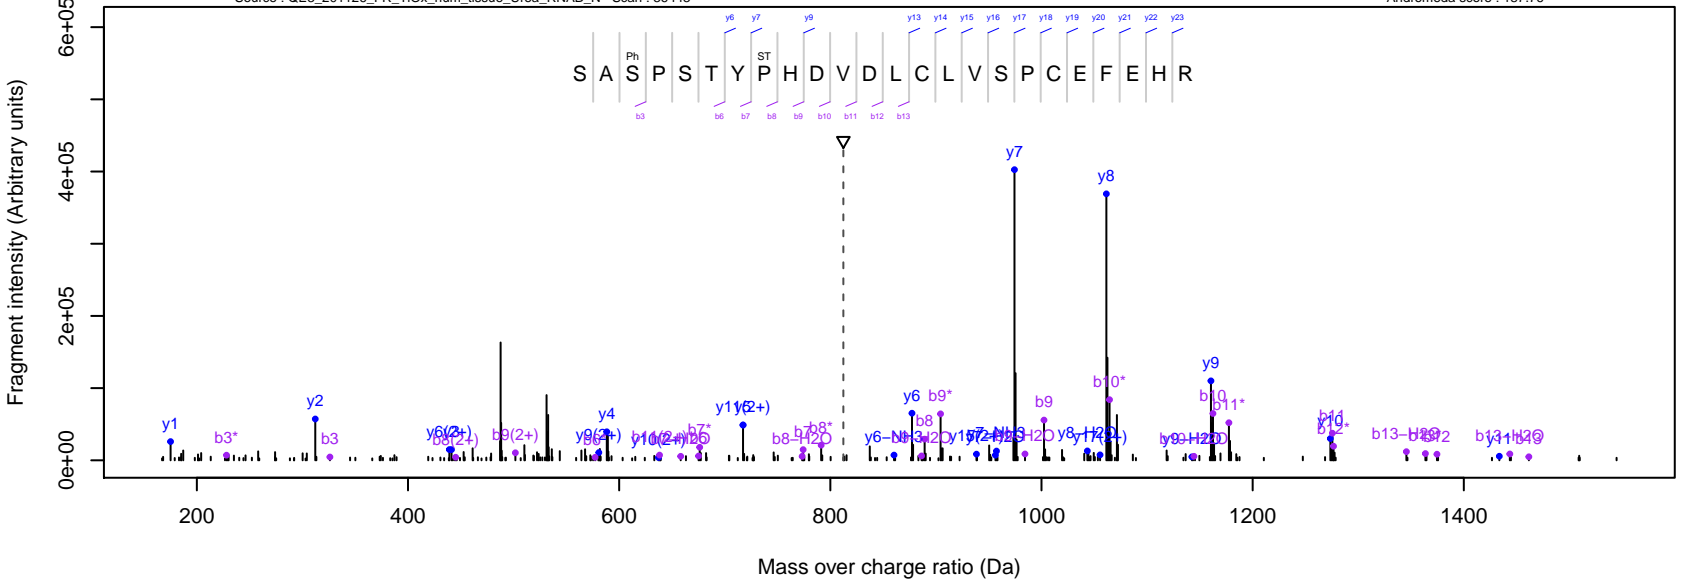

**QKFNDS(Phospho (STY))EGDDEETEDYR-3+**

Source : QE3\_201126\_FR\_TiOx\_hum\_tissue\_Urea\_RNAB\_N Scan : 14331

Andromeda score : 187.57

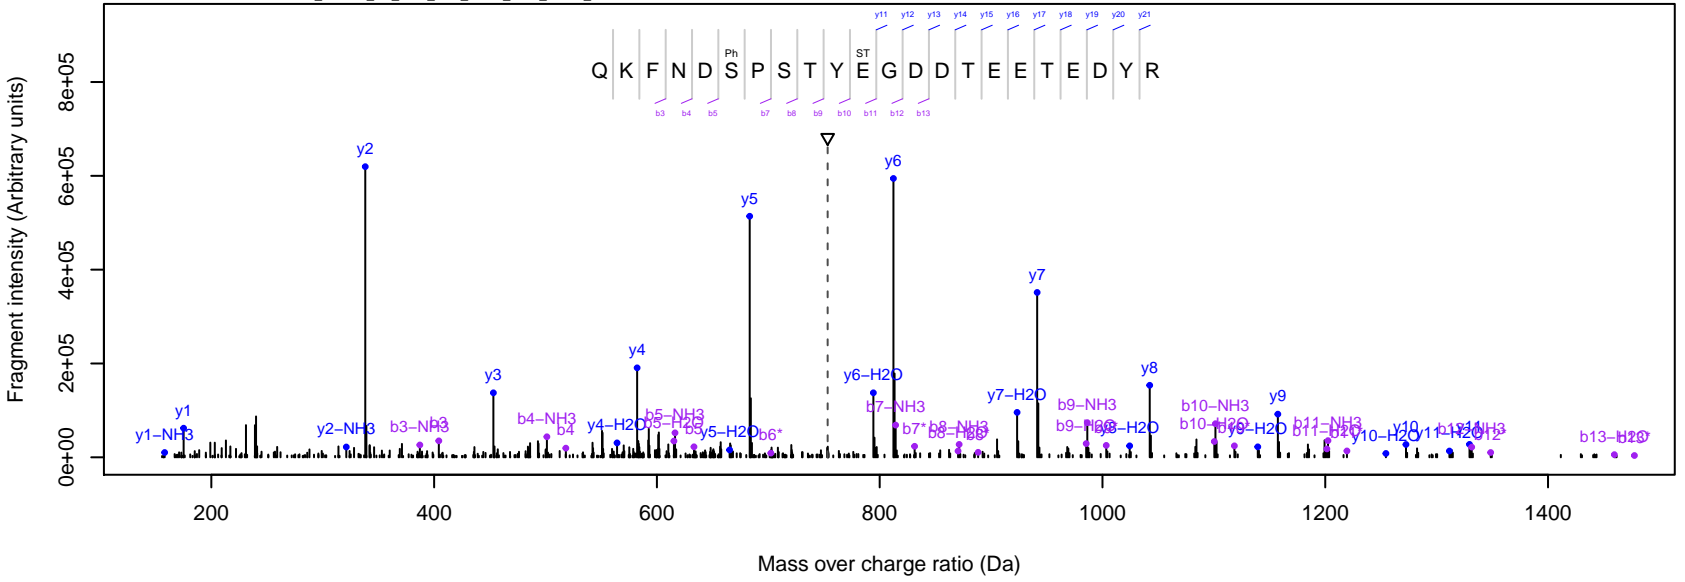

**KIALESEGRPEEQM(oxidation (M))ES(Phospho (STY))DNCS(Phospho (STY))GGDDWTHLS(Phospho (STY))SK-3+**

Source : QE3\_201126\_FR\_TiOx\_hum\_tissue\_Urea\_RNAB\_H Scan : 30278

Andromeda score : 187.54

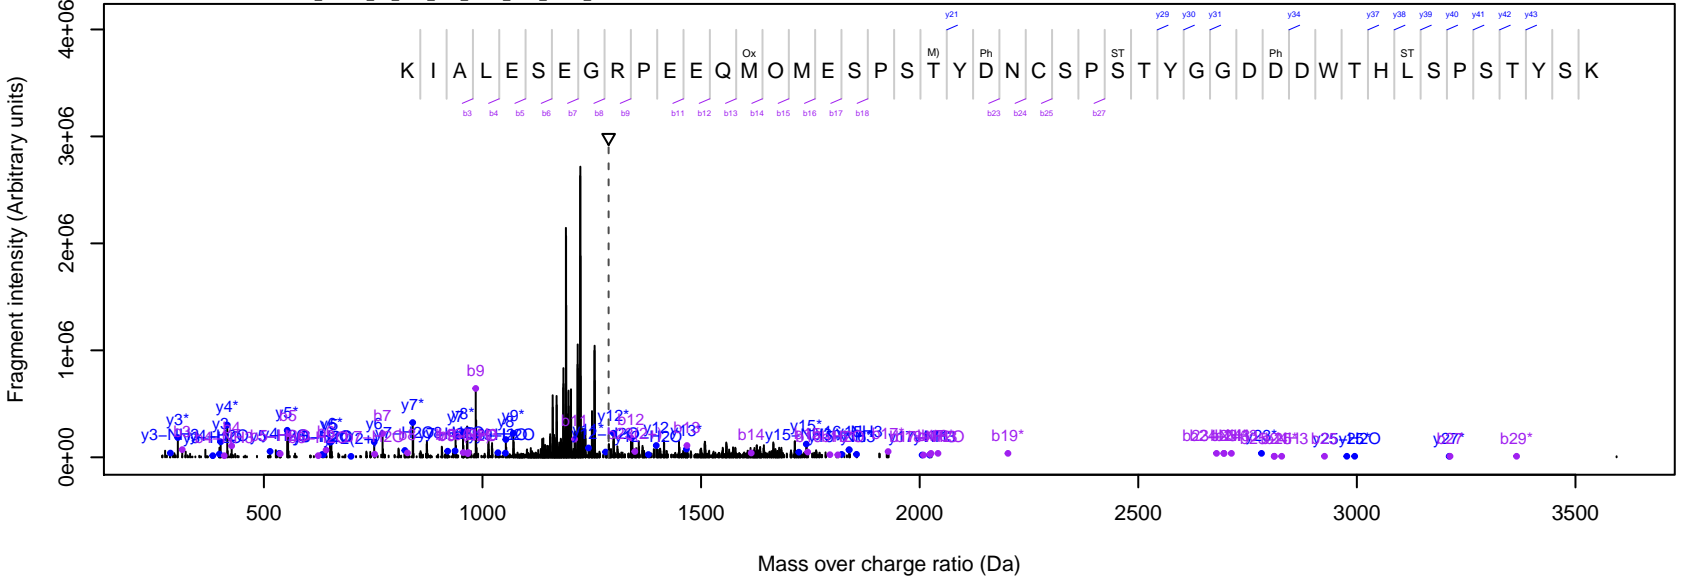

**IPYAPS(Phospho (STY))GEIPK-2+**

Source : QE3\_201126\_FR\_TiOx\_hum\_tissue\_Urea\_RNAB\_B Scan : 28993

Andromeda score : 187.51

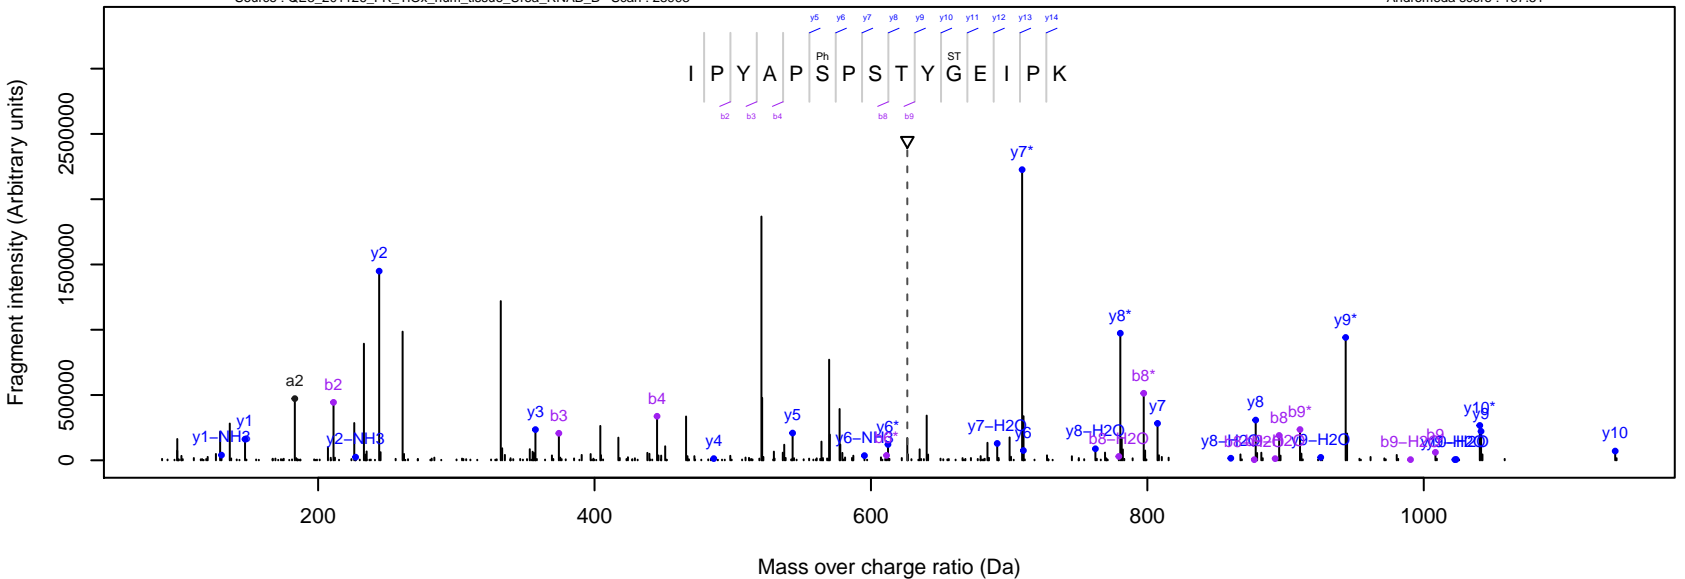

SSDITSDLGNVLTST(Phospho (STY))PNAK-2+

Source : QE3\_201126\_FR\_TiOx\_hum\_tissue\_Urea\_RNAB\_N Scan : 41887

Andromeda score : 187.39

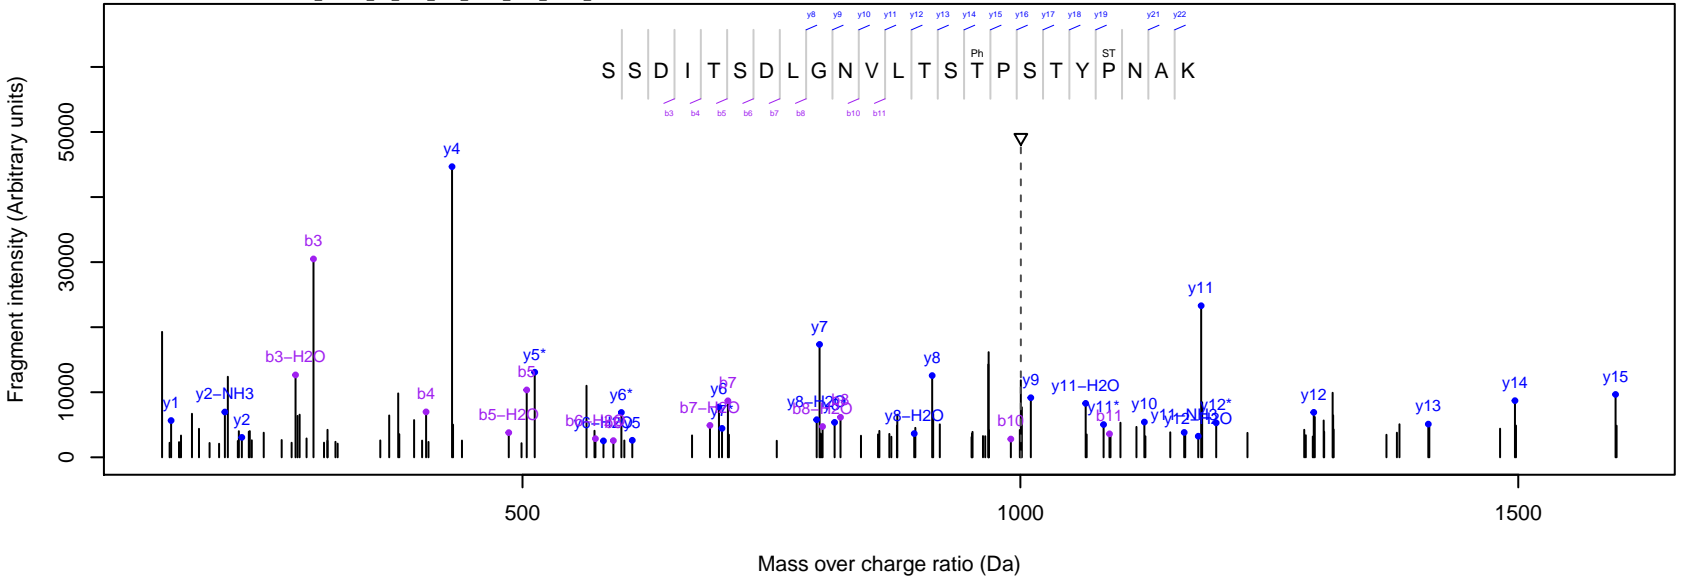

SSLQGSAS(Phospho (STY))ETEEDTVSVSK-2+

Source : QE3\_201126\_FR\_TiOx\_hum\_tissue\_Urea\_RNAB\_B Scan : 21578

Andromeda score : 187.39

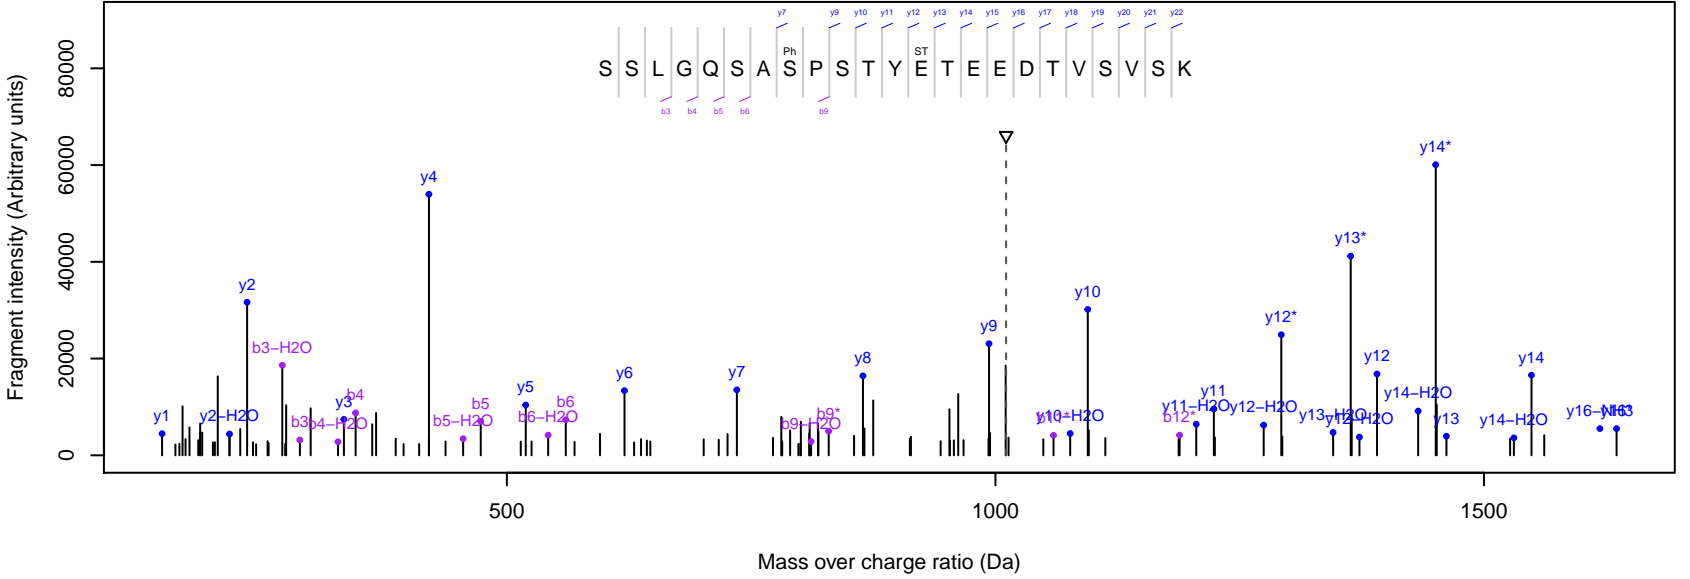

YGS(Phospho (STY))IVDDERLSAEEMDER-2+

Source : QE3\_201126\_FR\_TiOx\_hum\_tissue\_Urea\_RNAB\_H Scan : 31896

Andromeda score : 187.39

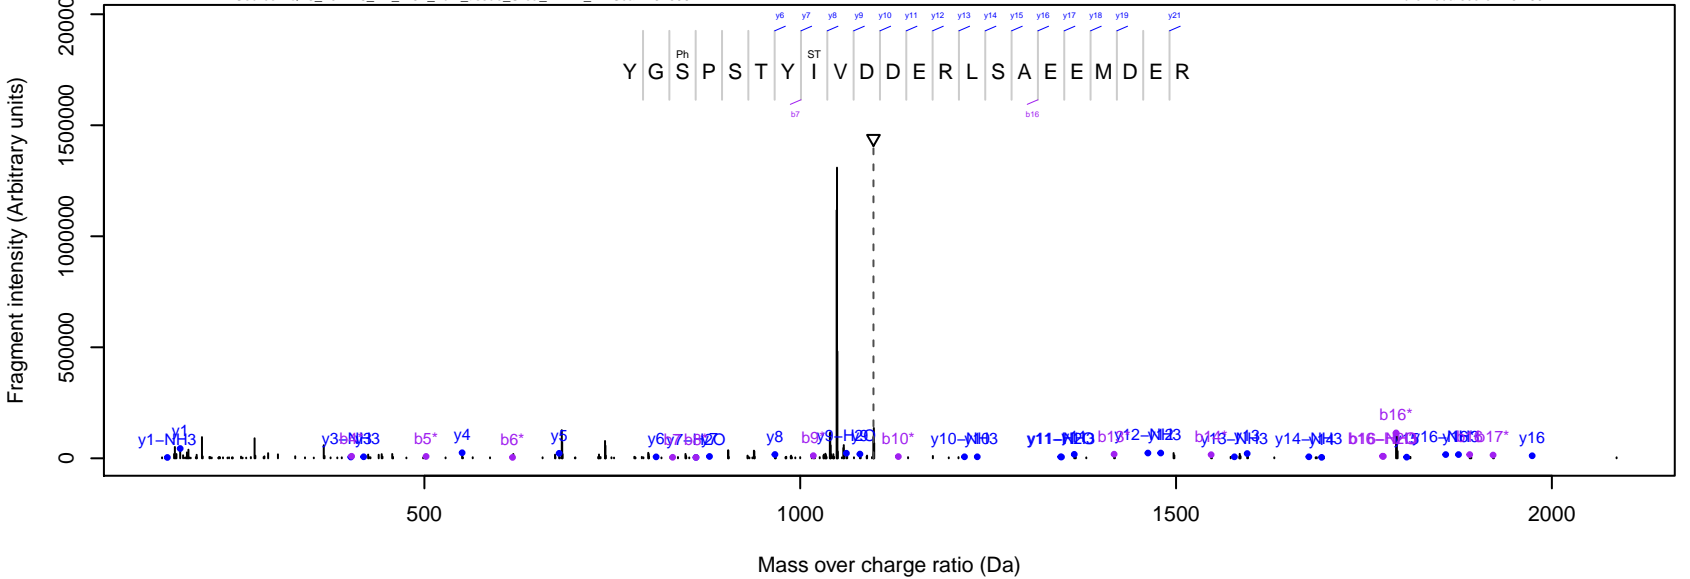

EGETQGVAFEHE SPAD FQNSQSPSTY P V Q D Q D K

Source : QE3\_201126\_FR\_TiOx\_hum\_tissue\_Urea\_RNAB\_B Scan : 28093

Andromeda score : 187.32

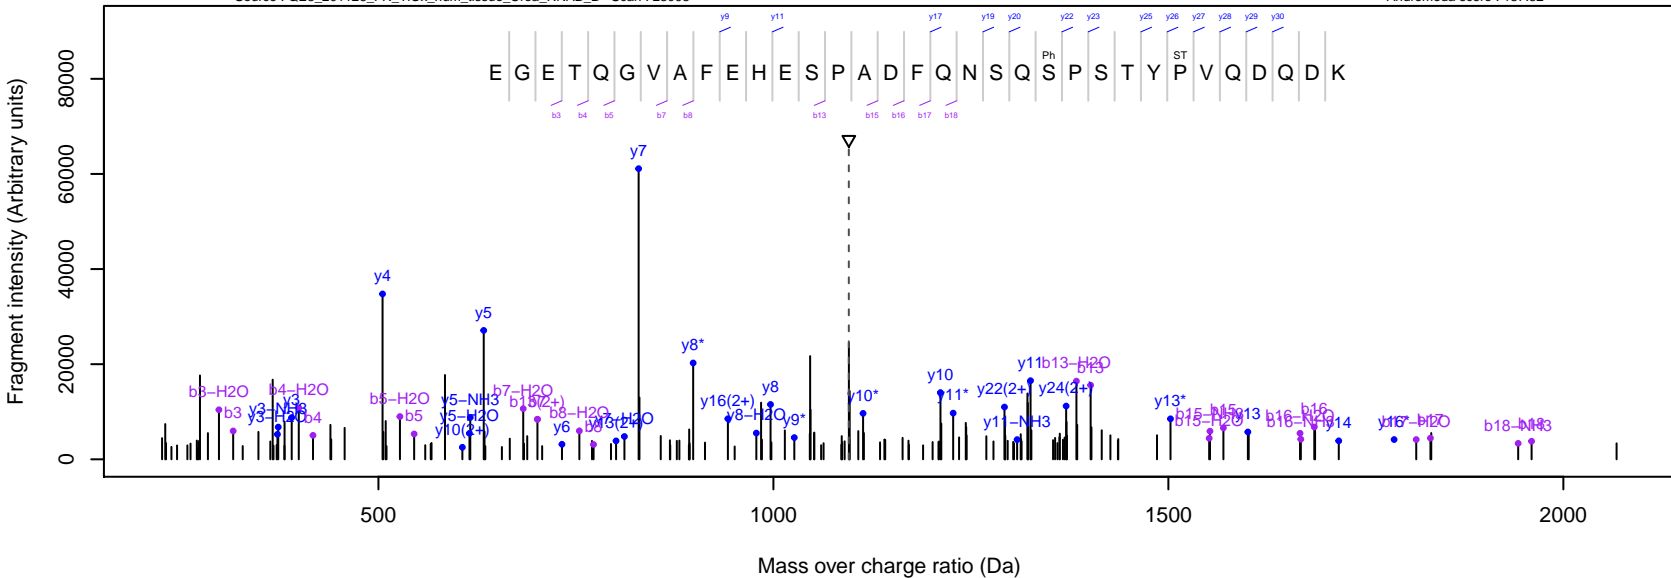

ESKEEETS(Phospho (STY))IDVAGK PNEVT K

Source : QE3\_201126\_FR\_TiOx\_hum\_tissue\_Urea\_RNAB\_B Scan : 12344

Andromeda score : 187.29

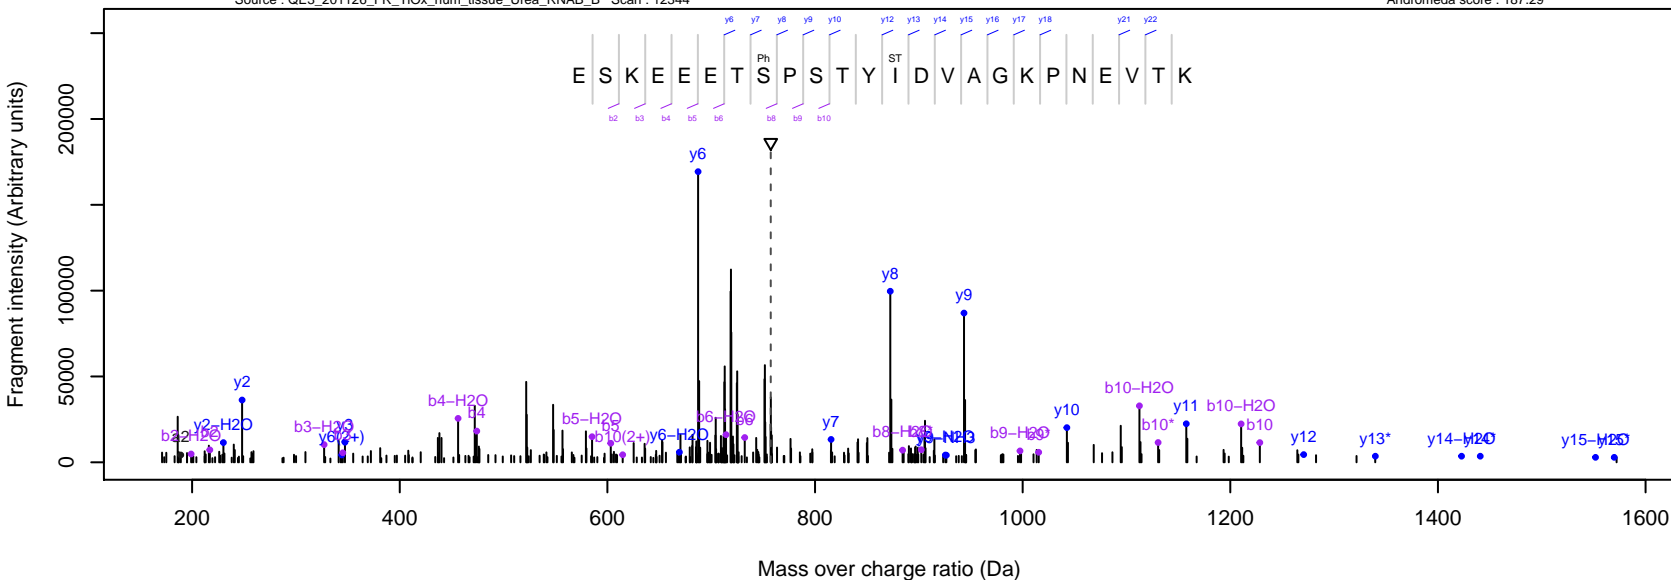

GM(Oxidation (M))KDDKEEEDGTGS(Phospho (STY))PQLNRR-3+

Source : QE3\_201126\_FR\_TiOx\_hum\_tissue\_Urea\_RNAB\_N Scan : 6346

Andromeda score : 187.26

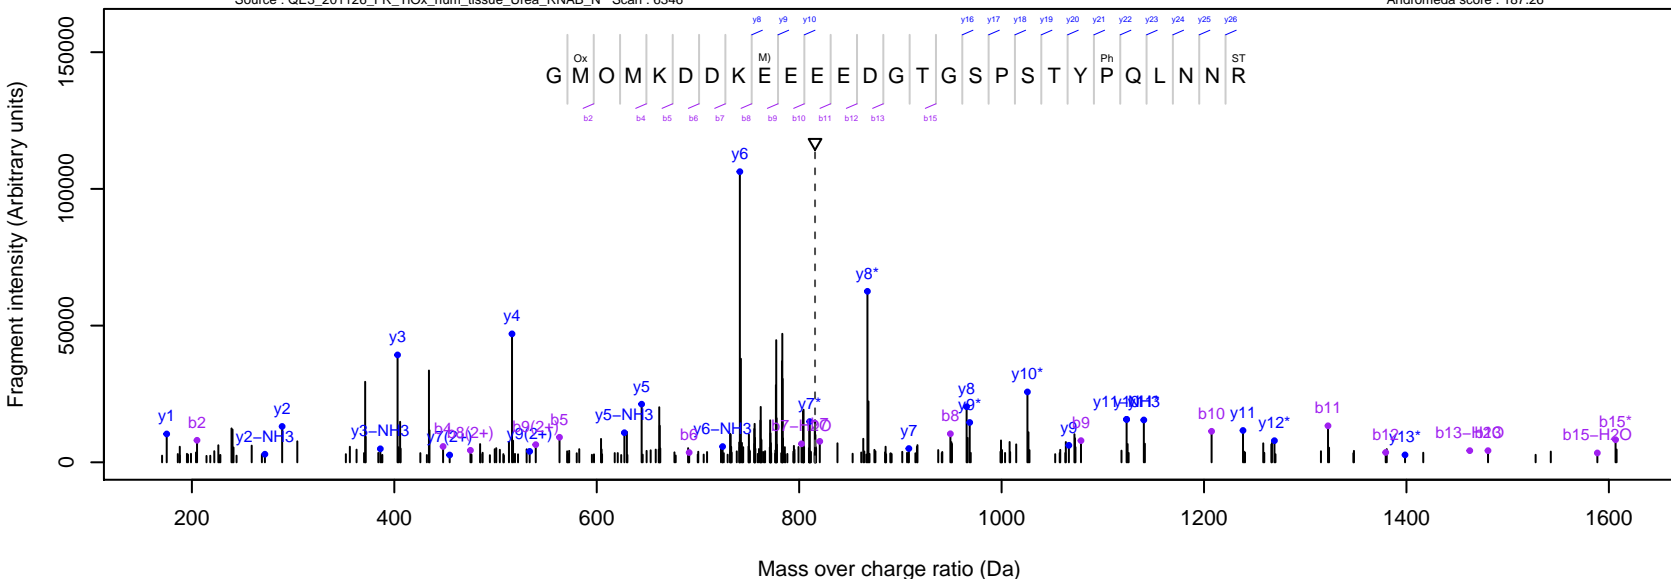

VMIYQDEVKLPKLS(Phospho (STY))ISK-3+

Source : QE3\_201126\_FR\_TiOx\_hum\_tissue\_Urea\_RNAB\_H Scan : 36691

Andromeda score : 187.17

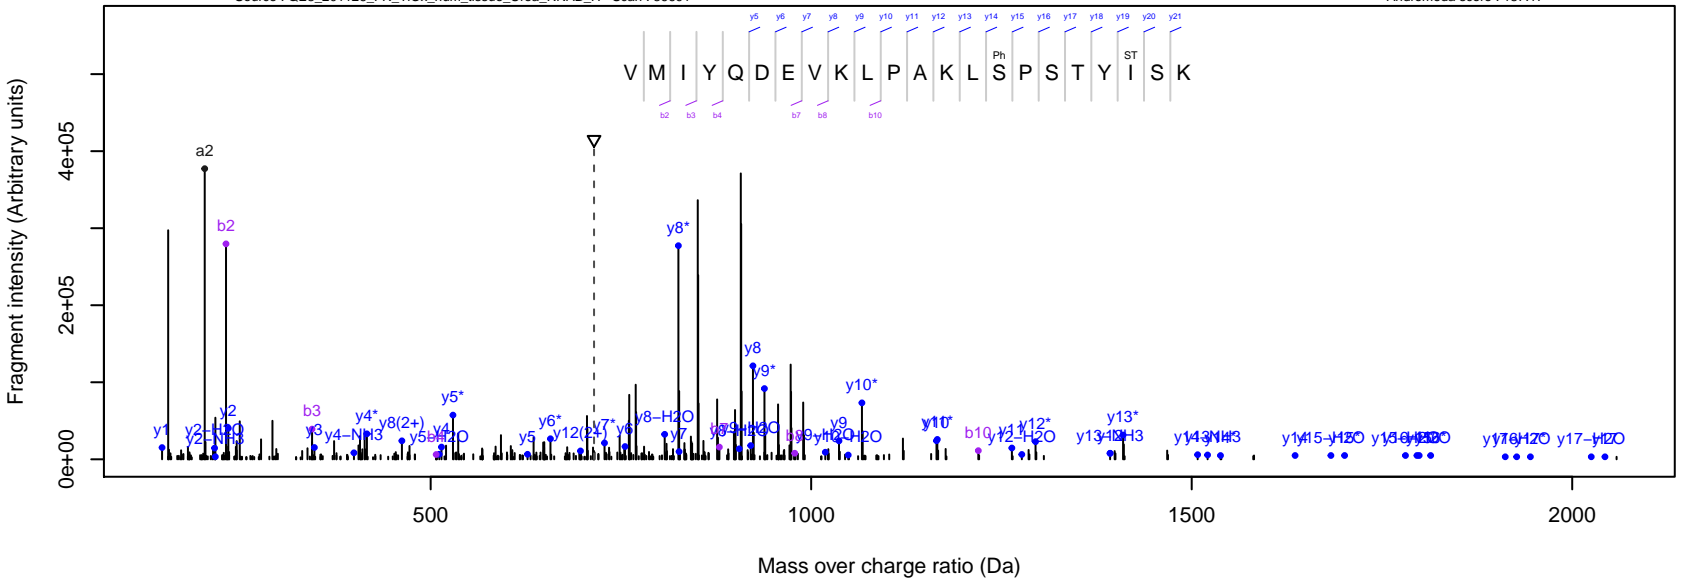

AGS(Phospho (STY))FTGTSDPEAAPAR-2+

Source : QE3\_201126\_FR\_TiOx\_hum\_tissue\_Urea\_RNAB\_H Scan : 17338

Andromeda score : 187.16

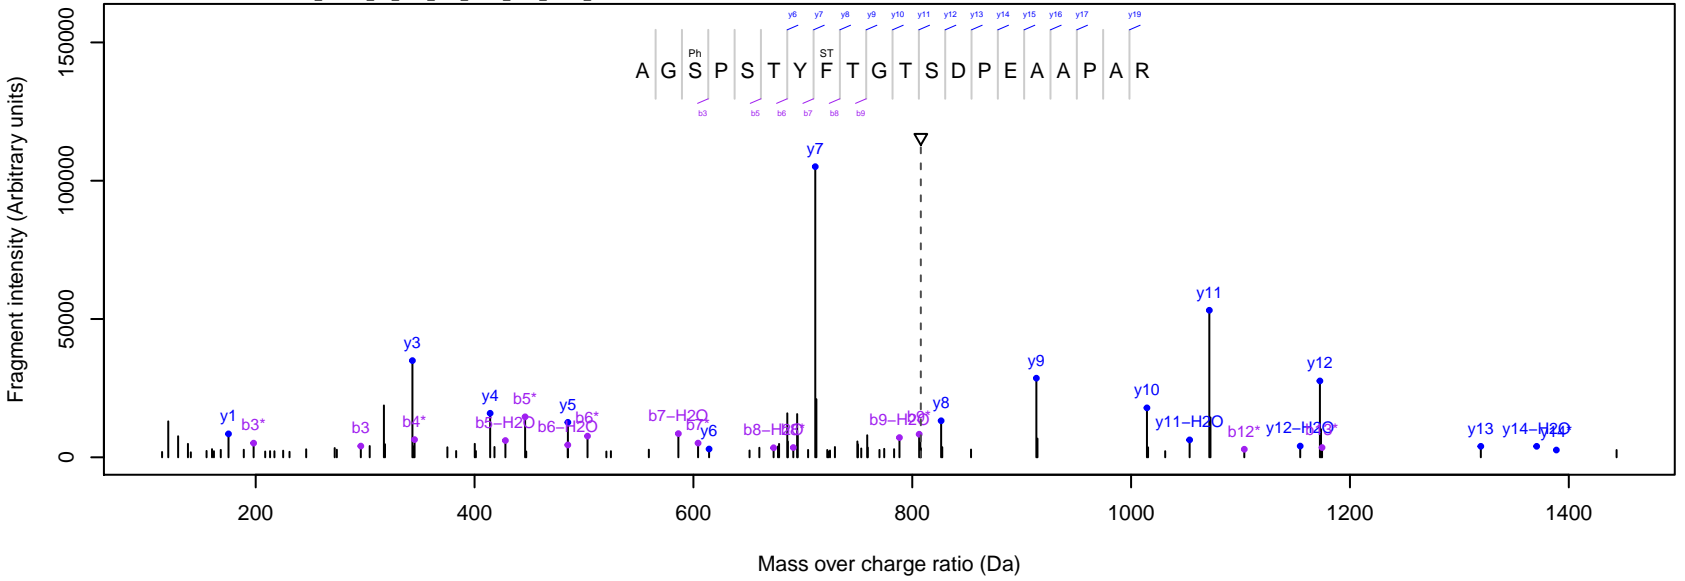

KRES(Phospho (STY))ESEDETTPAAPQLIK-2+

Source : QE3\_201126\_FR\_TiOx\_hum\_tissue\_Urea\_RNAB\_H Scan : 17689

Andromeda score : 187.06

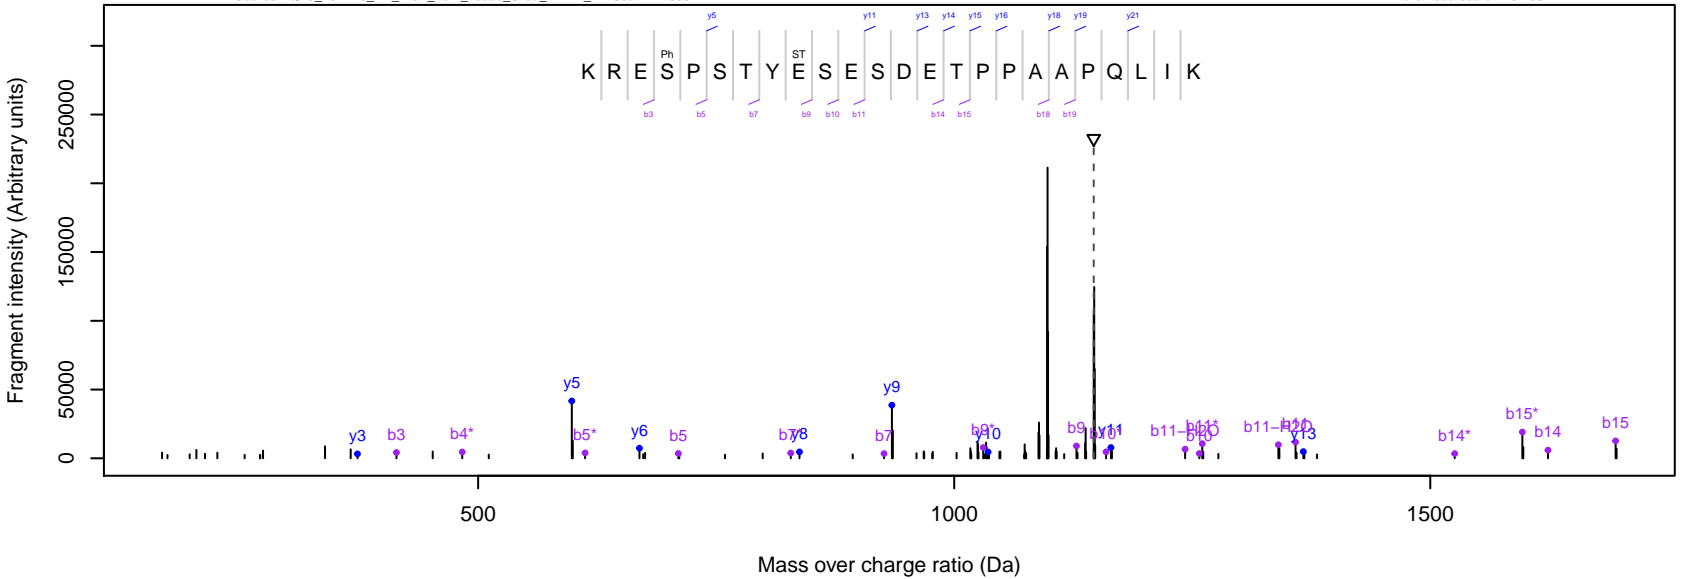

DRS(Phospho (STY))VPNLTEGSLHEPGR-3+

Source : QE3\_201126\_FR\_TiOx\_hum\_tissue\_Urea\_RNAB\_H Scan : 19961

Andromeda score : 186.96

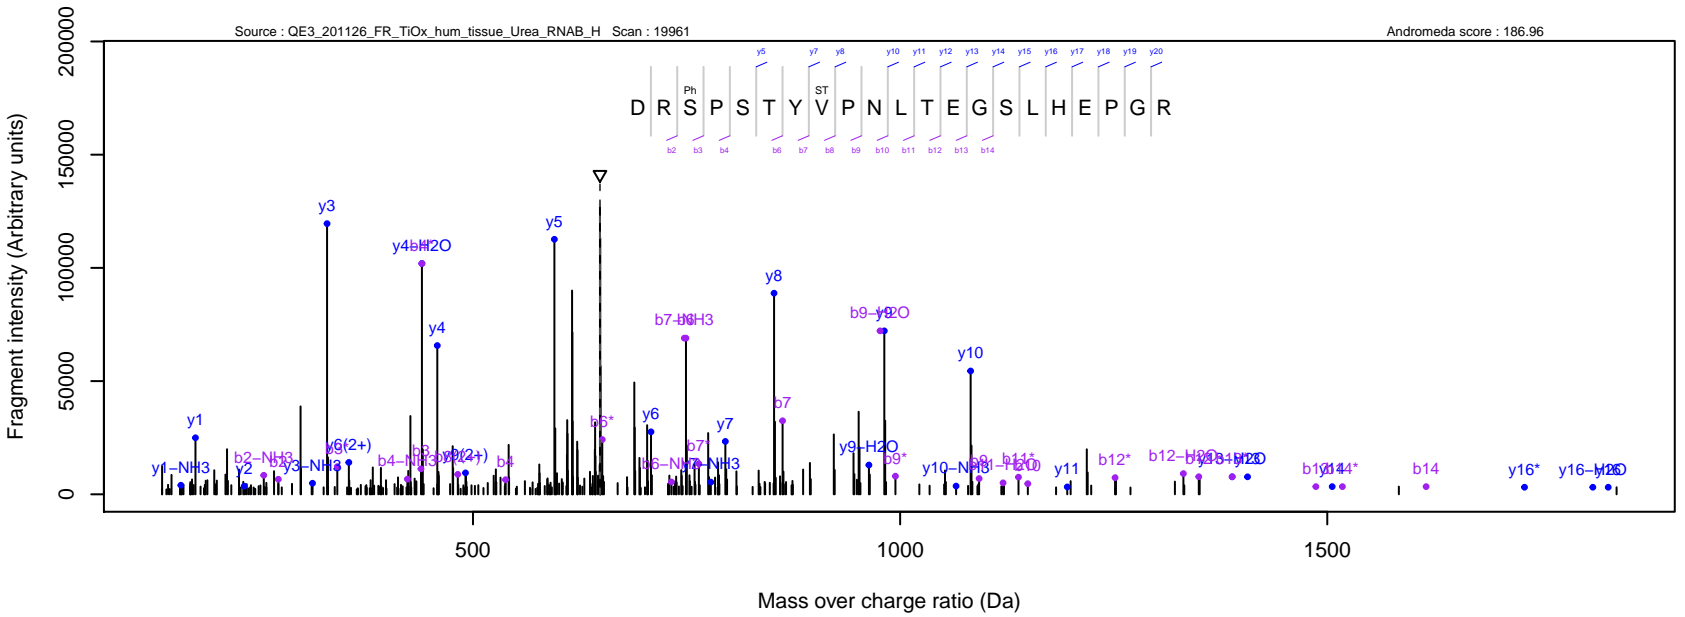

EDKS(Phospho (STY))PSEESAPTTSPESVSGSVPSGSSGR-3+

Source : QE3\_201126\_FR\_TiOx\_hum\_tissue\_Urea\_RNAB\_B Scan : 17357

Andromeda score : 186.93

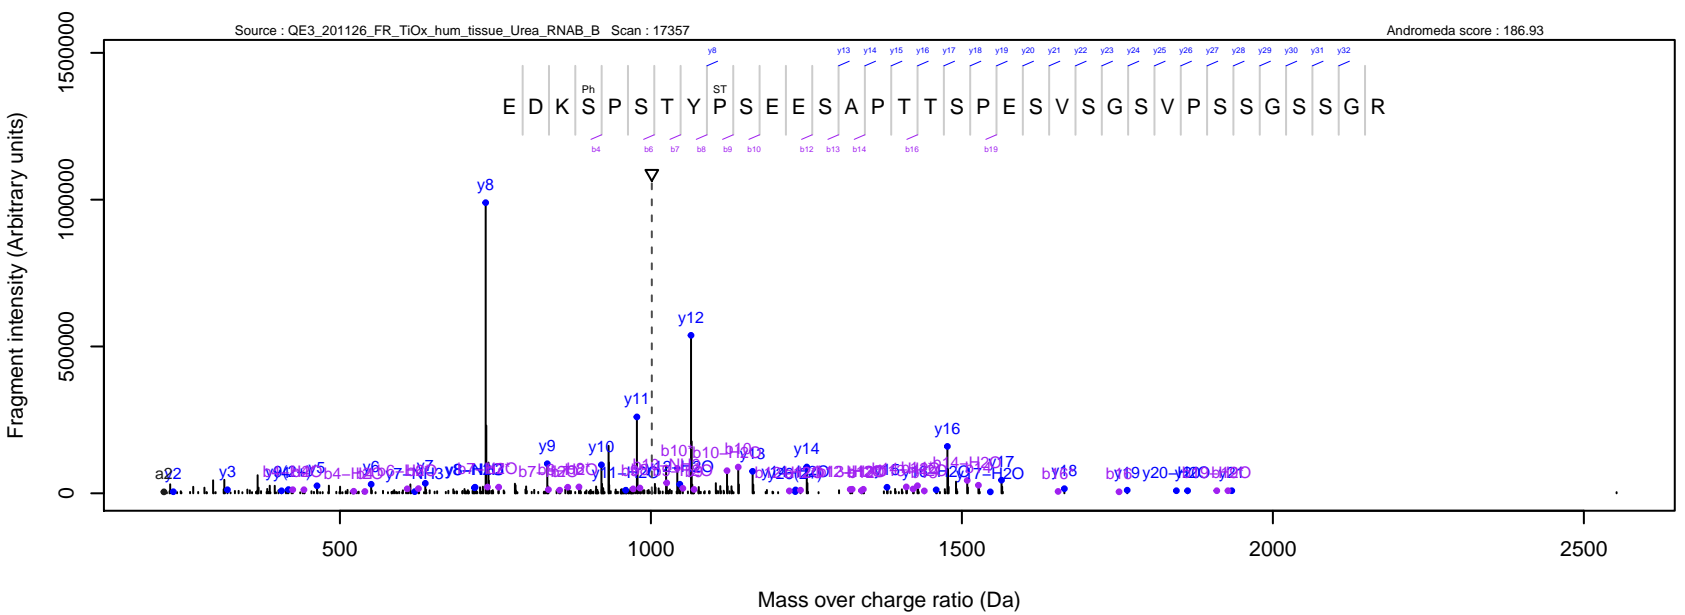

(Acetyl (Protein N-term))S(Phospho (STY))DDSRASTSSSSSSSSNQTEKETNTPK-3+

Source : QE3\_201126\_FR\_TiOx\_hum\_tissue\_Urea\_RNAB\_B Scan : 5933

Andromeda score : 186.92

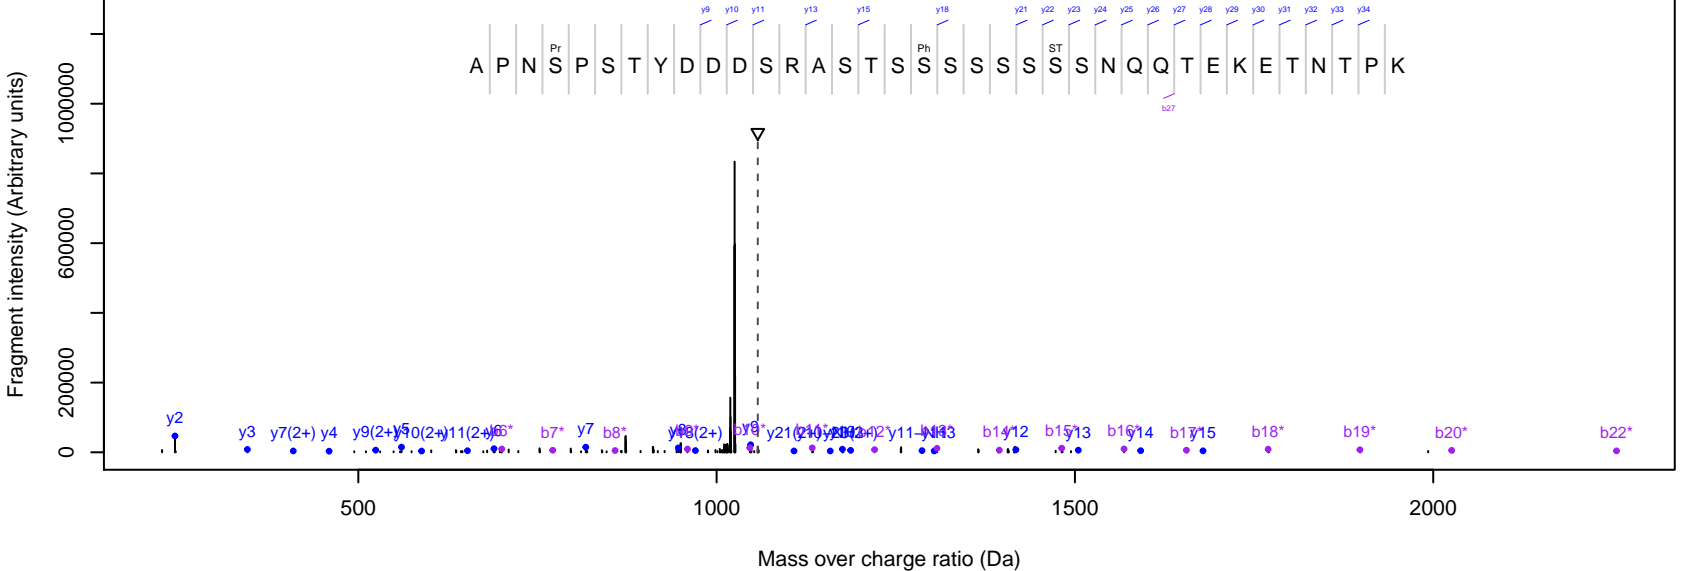

SQS(Phospho (STY))LPHSATVTLGGTSDPSTLSSALSER-3+

Source : QE3\_201126\_FR\_TIOx\_hum\_tissue\_Urea\_RNAB\_B Scan : 35669

Andromeda score : 186.9

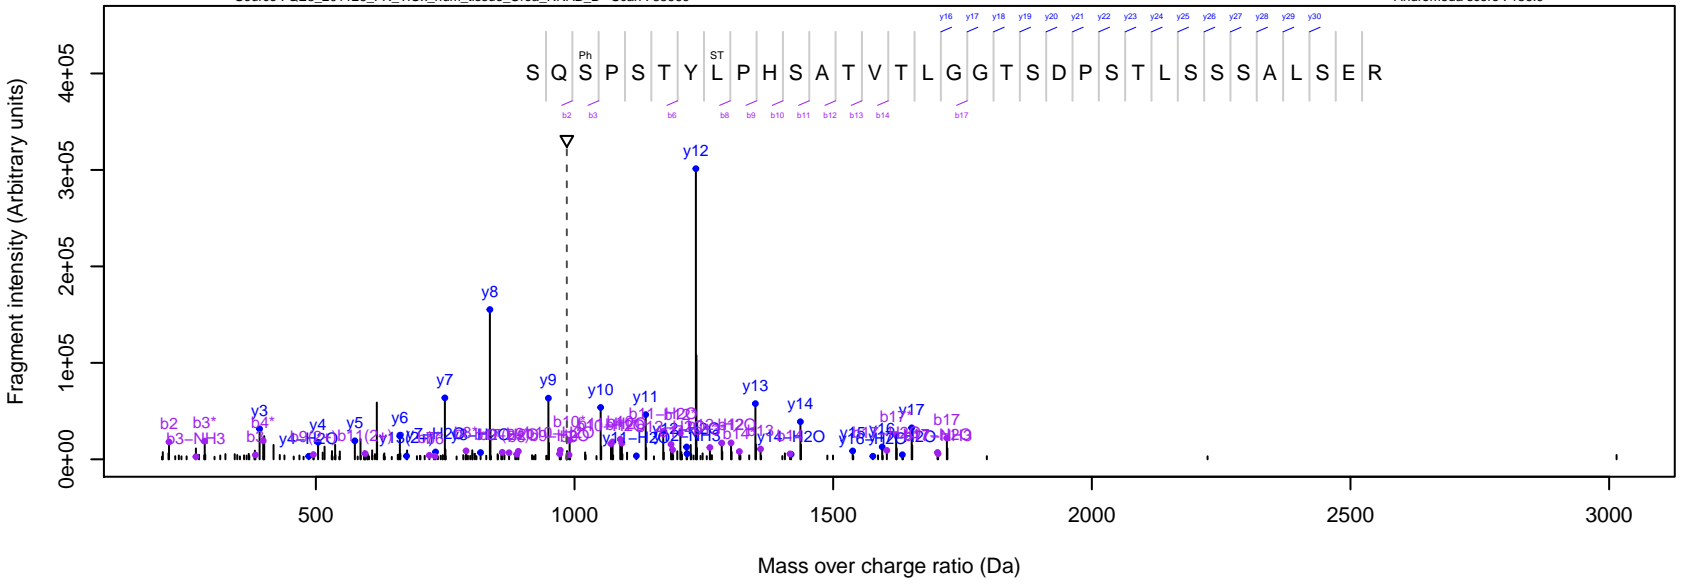

SRPTS(Phospho (STY))EGS(Phospho (STY))DIESTEPQK-2+

Source : QE3\_201126\_FR\_TIOx\_hum\_tissue\_Urea\_RNAB\_N Scan : 12812

Andromeda score : 186.89

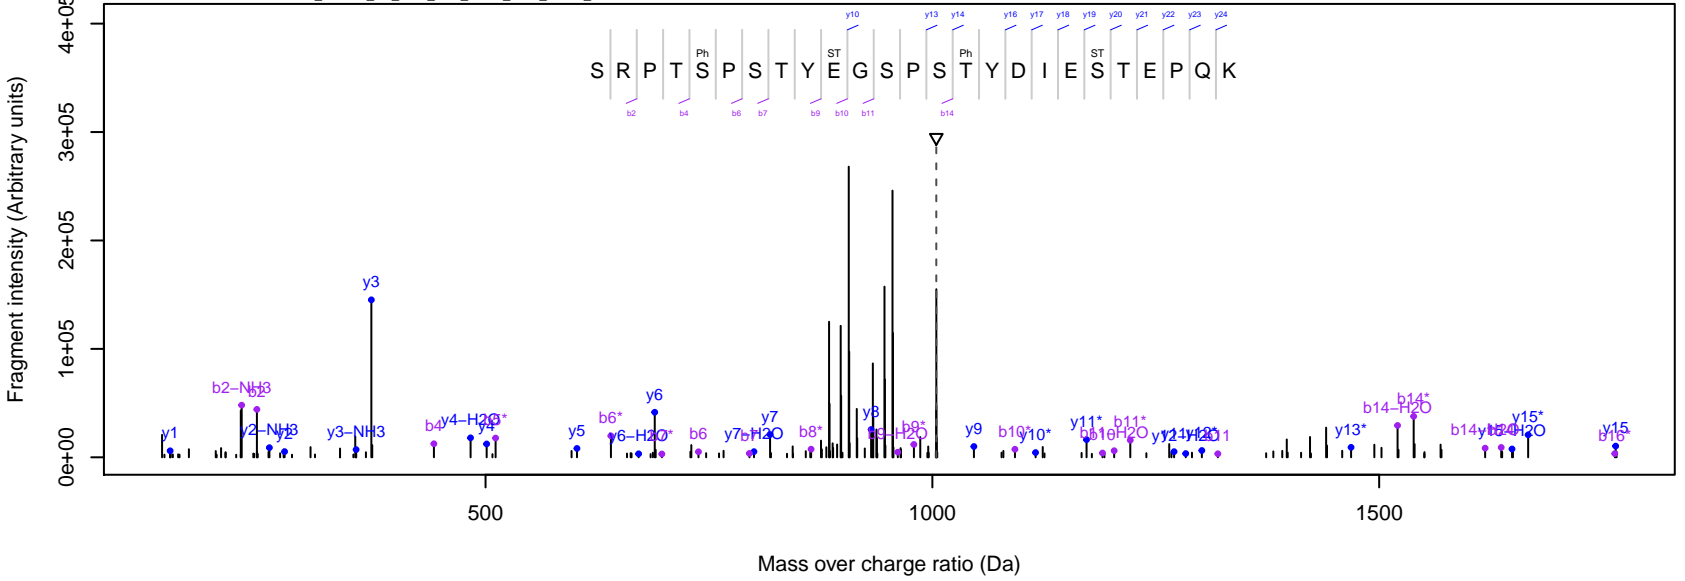

SLLGDSAPTLHLNKGTPSTYPSQS(Phospho (STY))PVVGR-3+

Source : QE3\_201126\_FR\_TIOx\_hum\_tissue\_Urea\_RNAB\_H Scan : 35379

Andromeda score : 186.86

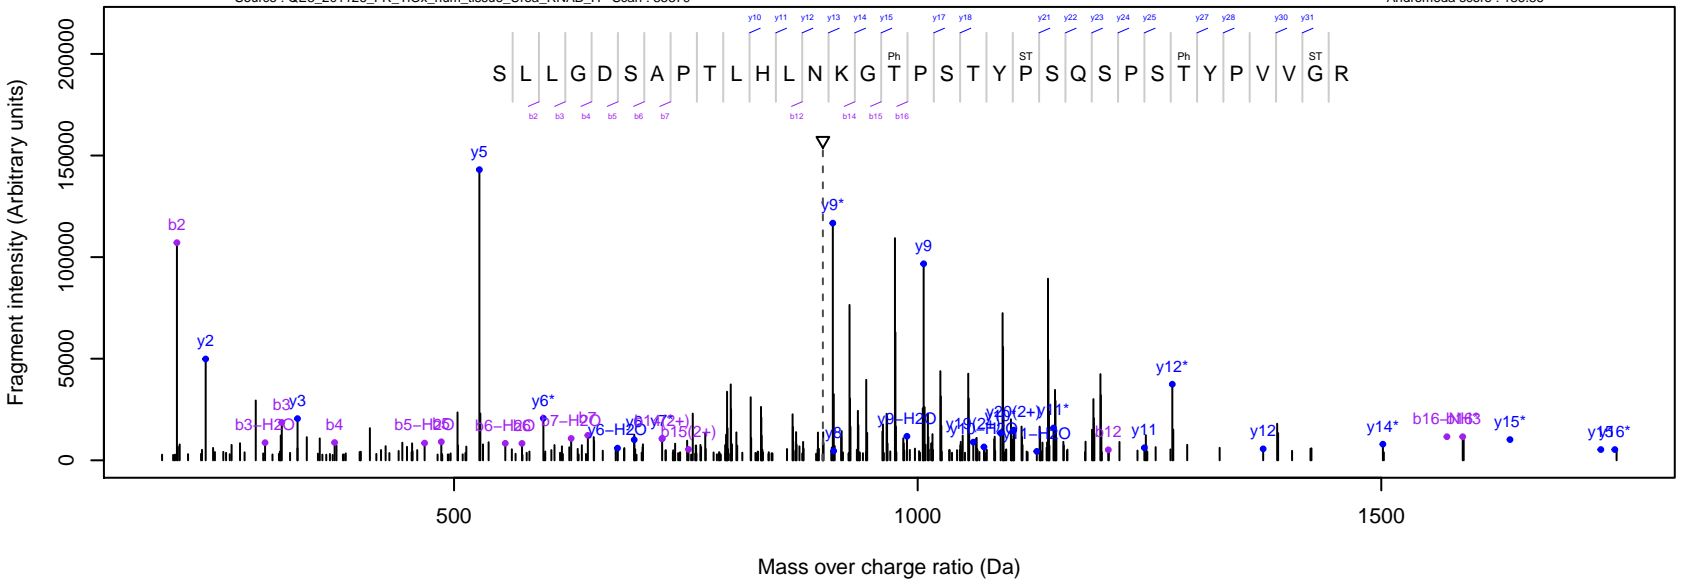



ASALLFSS(Phospho (STY))DEEDQWNIPASQTHLASDSR-3+

Source : QE3\_201126\_FR\_TIOx\_hum\_tissue\_Urea\_RNAB\_N Scan : 50235

Andromeda score : 186.85

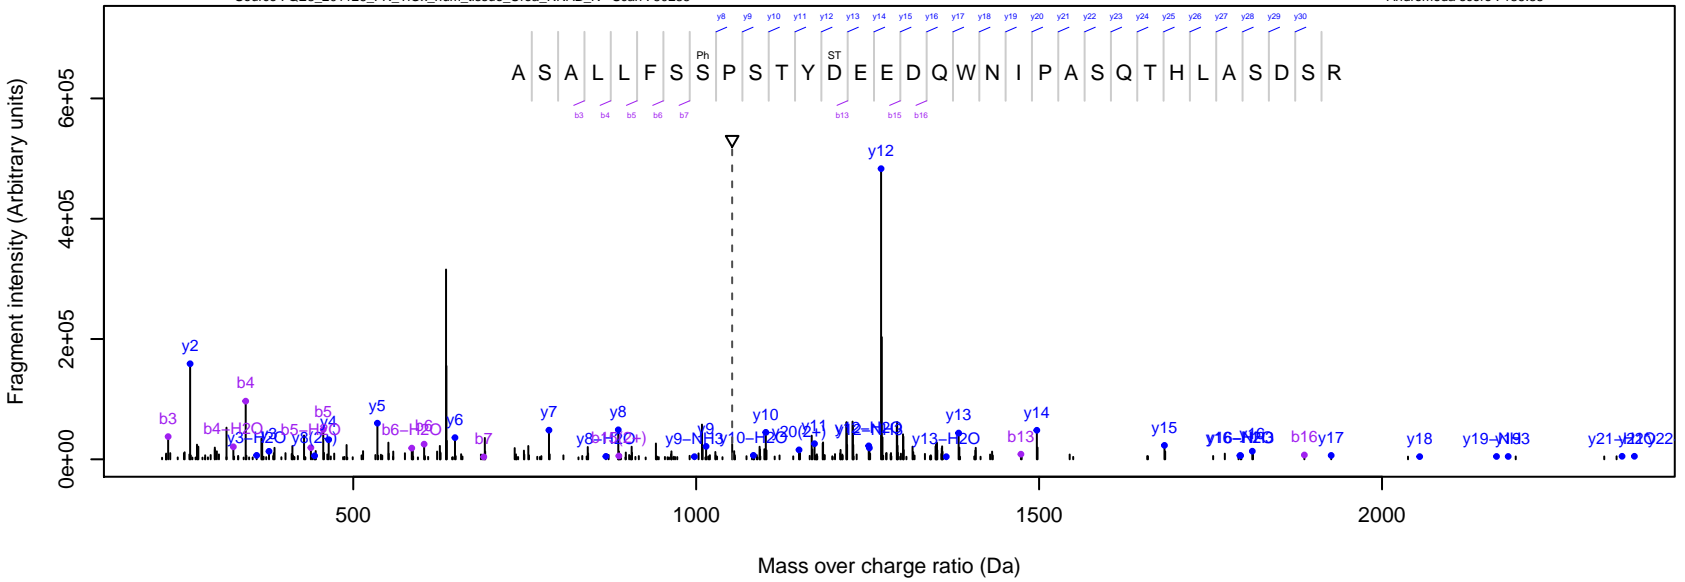

THAVSVSETDDY(Phospho (STY))AEIIDEEDTYTMPSTR-3+

Source : QE3\_201126\_FR\_TIOx\_hum\_tissue\_Urea\_RNAB\_B Scan : 40290

Andromeda score : 186.82

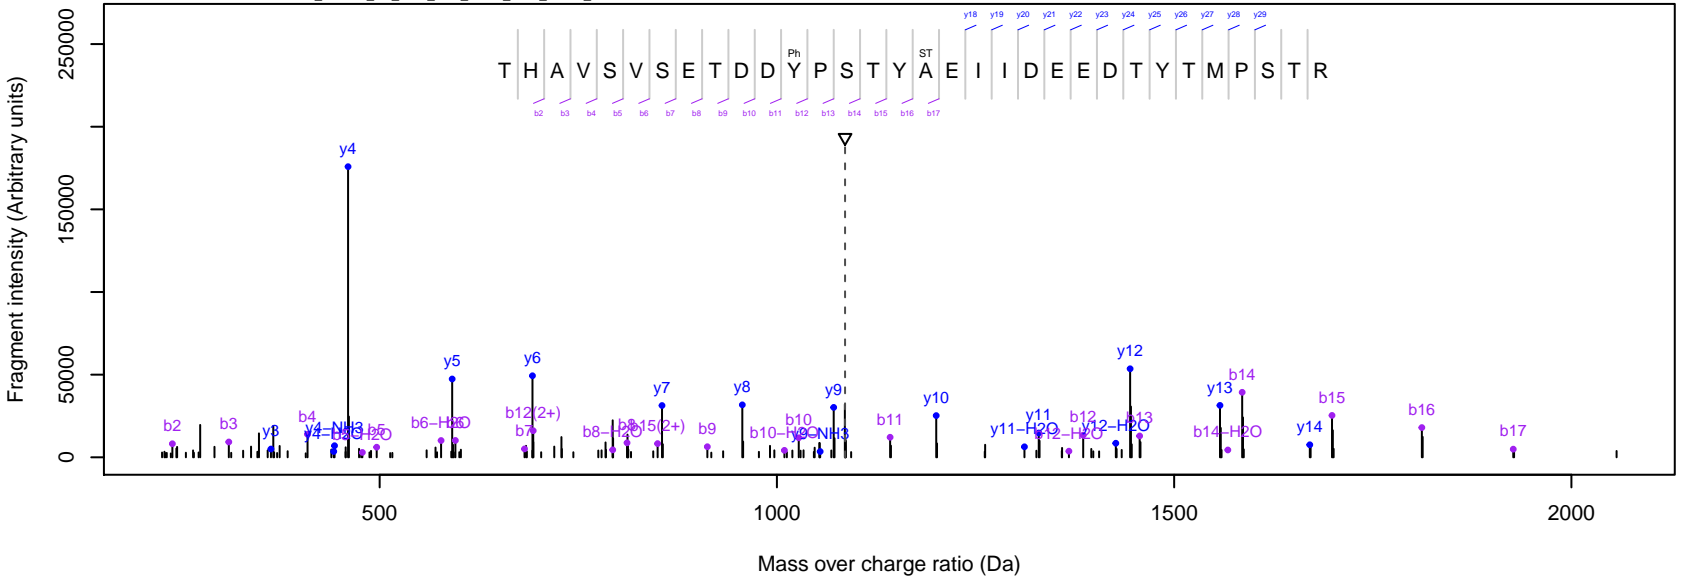

AYS(Phospho (STY))FCGTVEYMOAPEVVNR-2+

Source : QE3\_201126\_FR\_TIOx\_hum\_tissue\_Urea\_RNAB\_B Scan : 43091

Andromeda score : 186.77

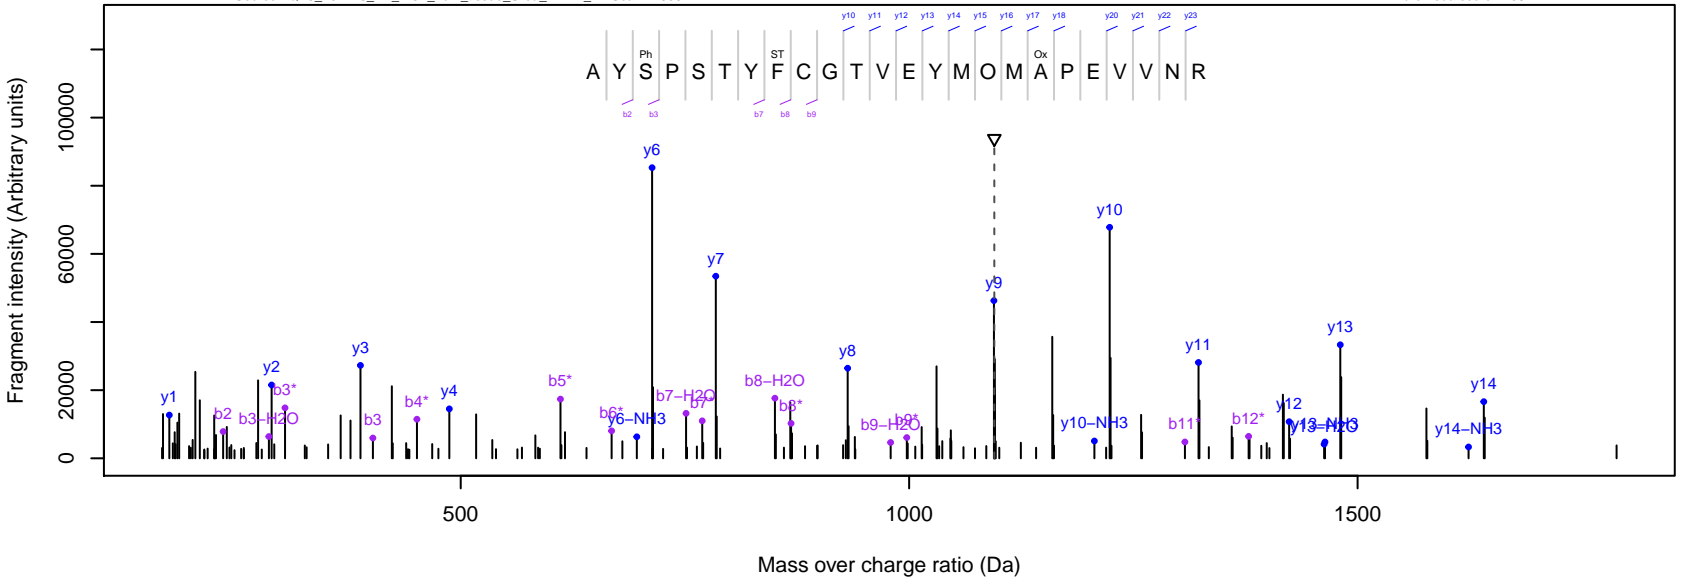

KIS(Phospho (STY))GT TALQEALKEK-3+

Source : QE3\_201126\_FR\_TIOx\_hum\_tissue\_Urea\_RNAB\_N Scan : 23988

Andromeda score : 186.74

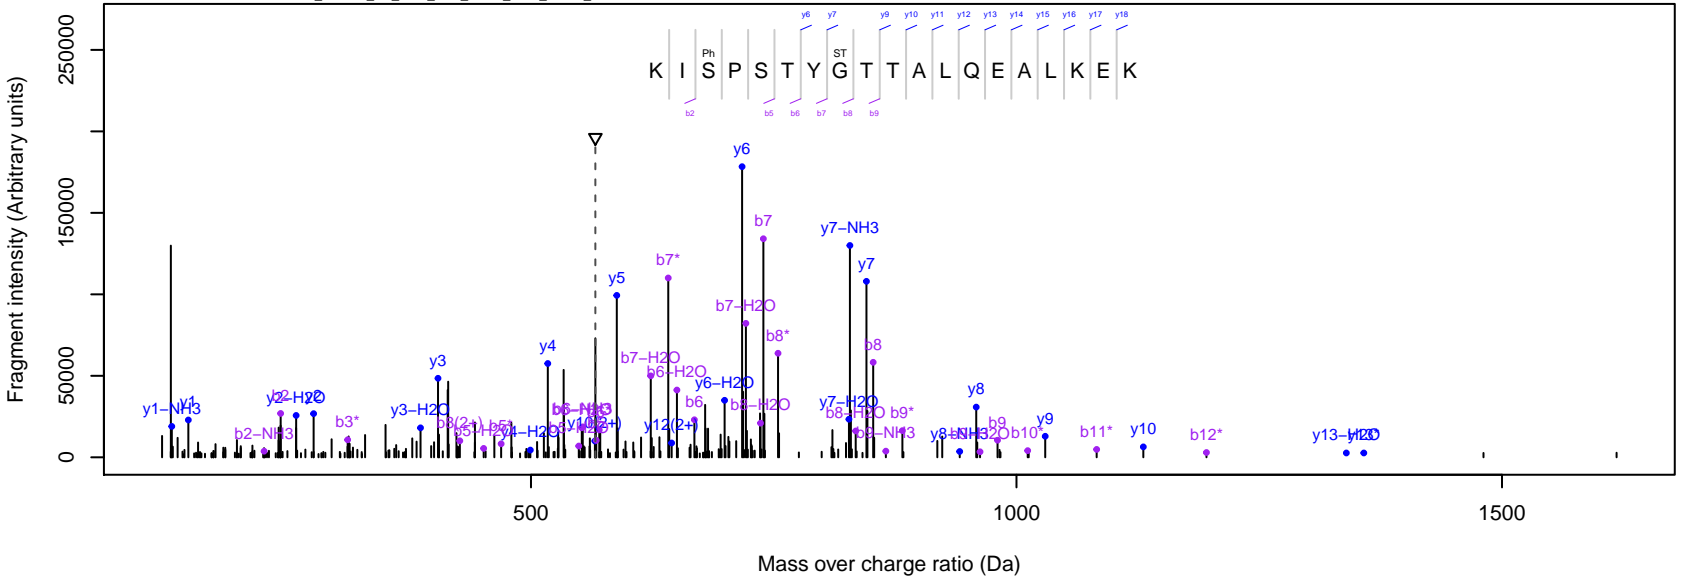

S(Phospho (STY))FDHLISDTK-2+

Source : QE3\_201126\_FR\_TIOx\_hum\_tissue\_Urea\_RNAB\_H Scan : 23884

Andromeda score : 186.74

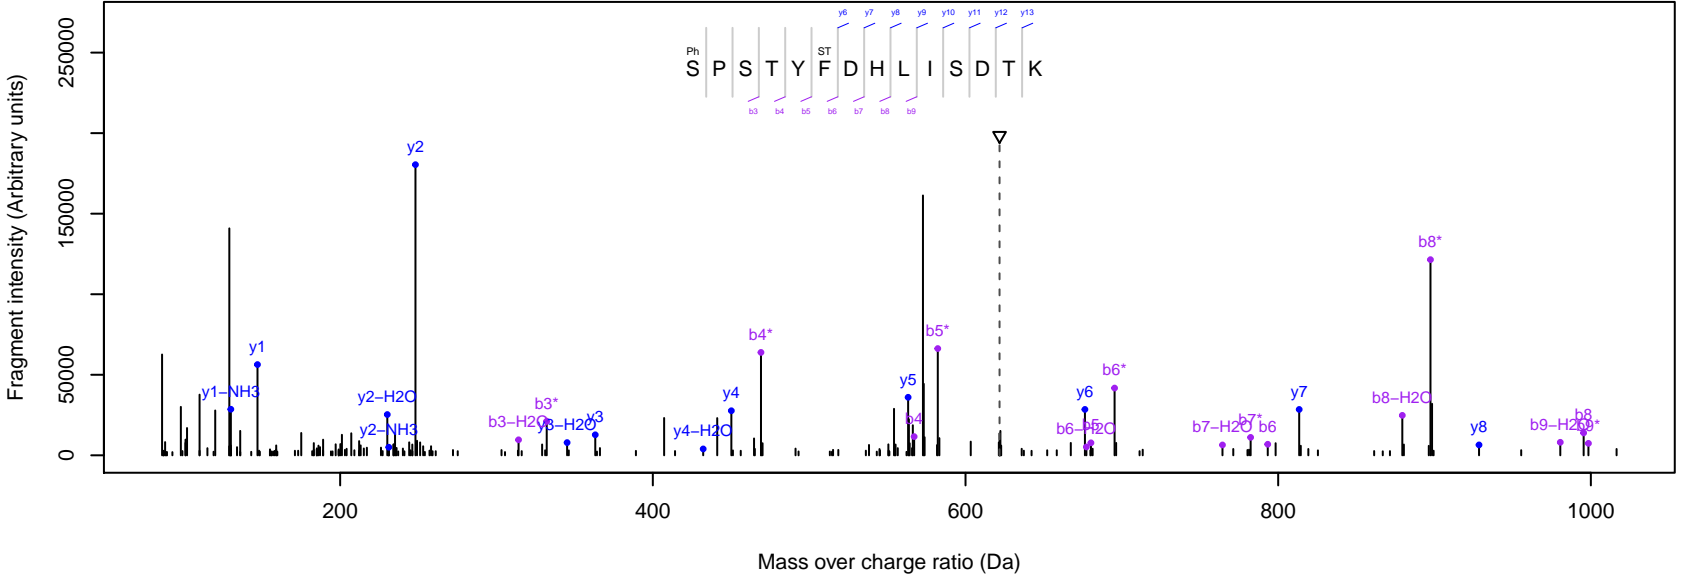

NVAETLSTS(Phospho (STY))VLGQR-2+

Source : QE3\_201126\_FR\_TIOx\_hum\_tissue\_Urea\_RNAB\_H Scan : 32502

Andromeda score : 186.72

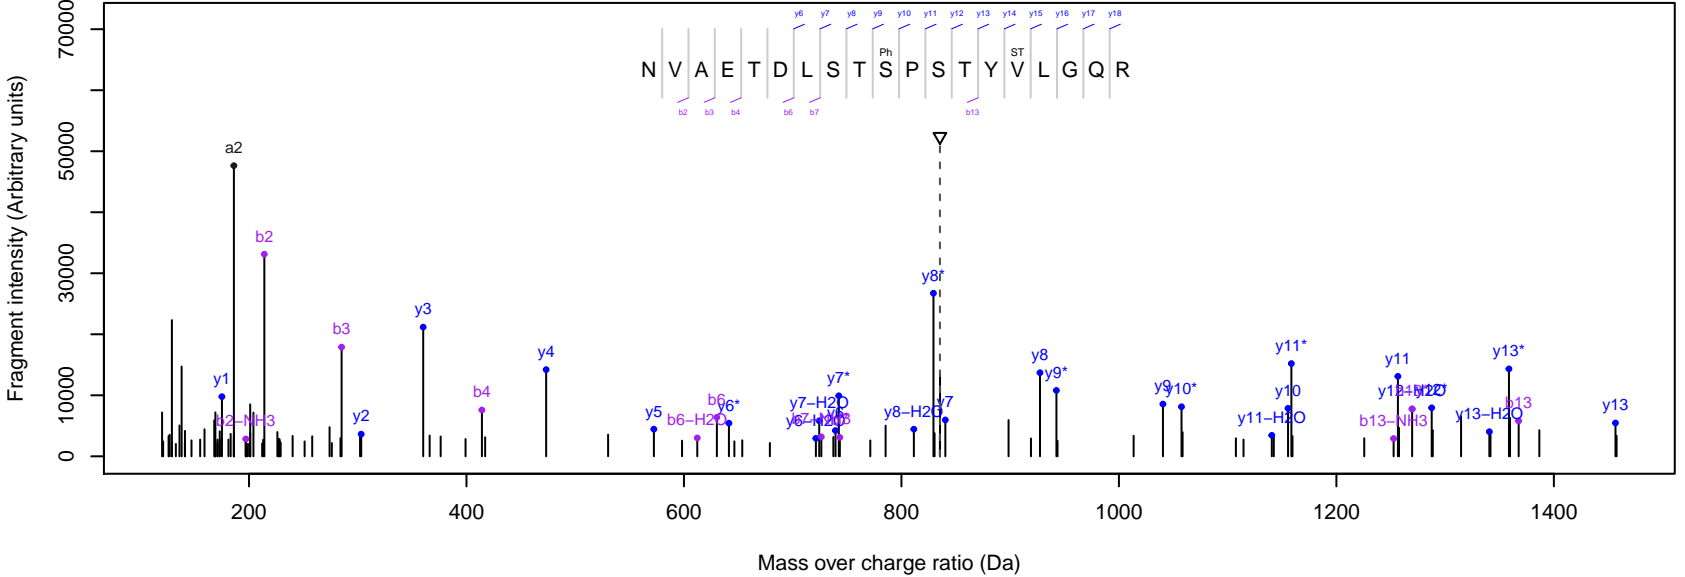

TSAACAVTDLSDS(Phospho (STY))DFDEKAK-3+

Source : QE3\_201126\_FR\_TiOx\_hum\_tissue\_Urea\_RNAB\_H Scan : 28309

Andromeda score : 186.71

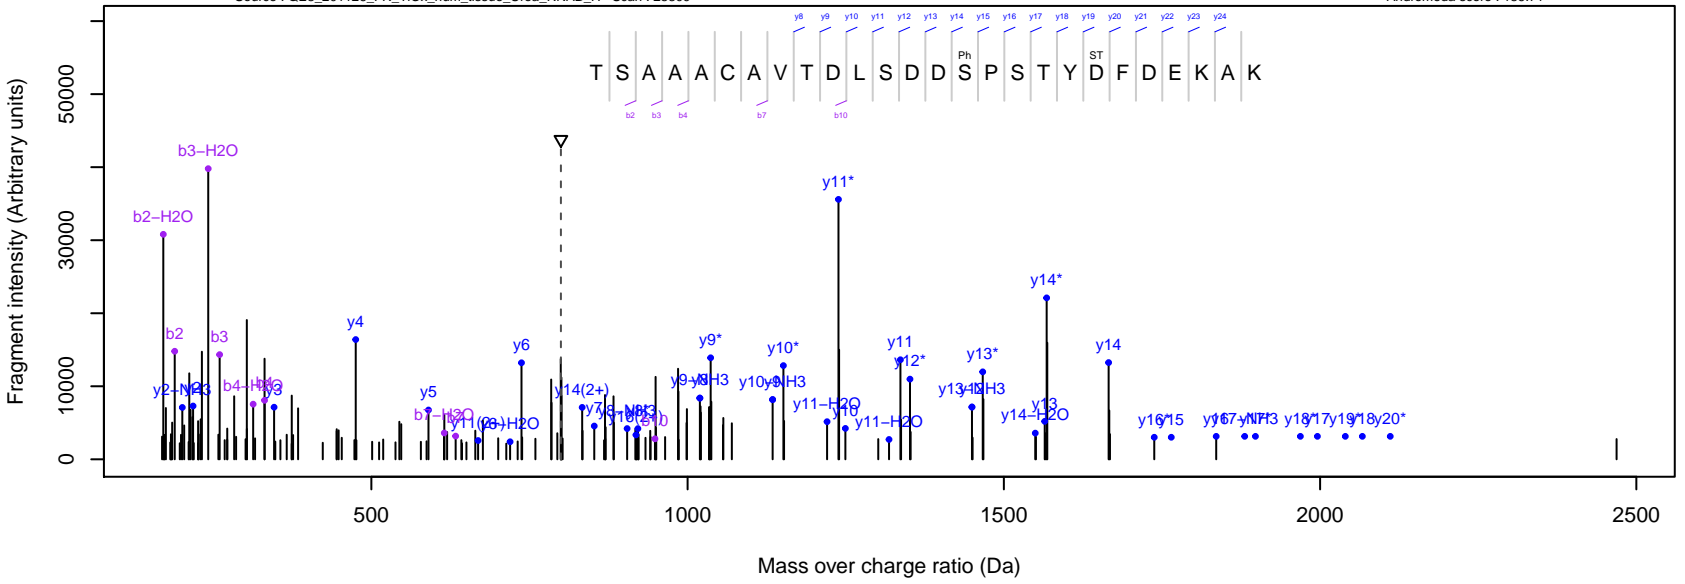

SLQKVEEDS(Phospho (STY))DEESHDEMS(Phospho (STY))EQEELEDPTVVK-4+

Source : QE3\_201126\_FR\_TiOx\_hum\_tissue\_Urea\_RNAB\_H Scan : 28389

Andromeda score : 186.63

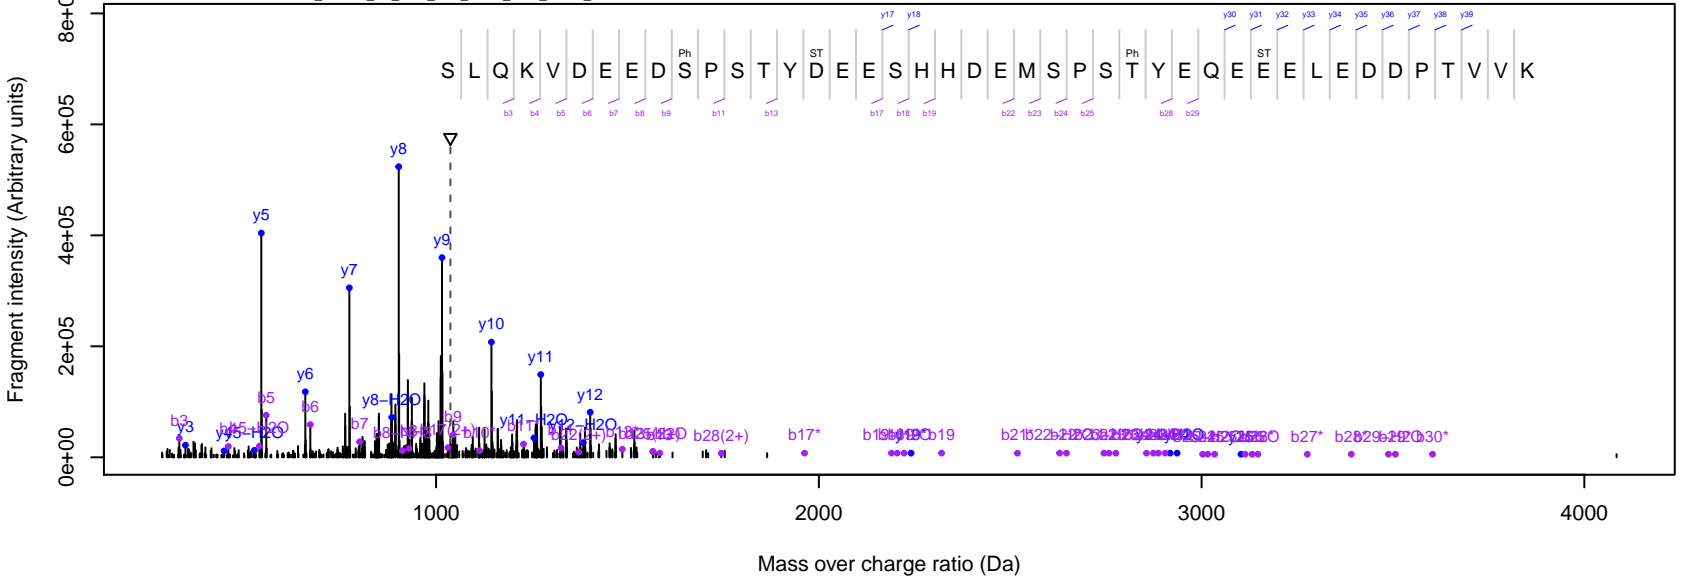

S(Phospho (STY))TSFRGGMGSGGLATGIAGGLAGMOMGGIQNEKETMOMQSLNDR-4+

Source : QE3\_201126\_FR\_TiOx\_hum\_tissue\_Urea\_RNAB\_H Scan : 36499

Andromeda score : 186.57

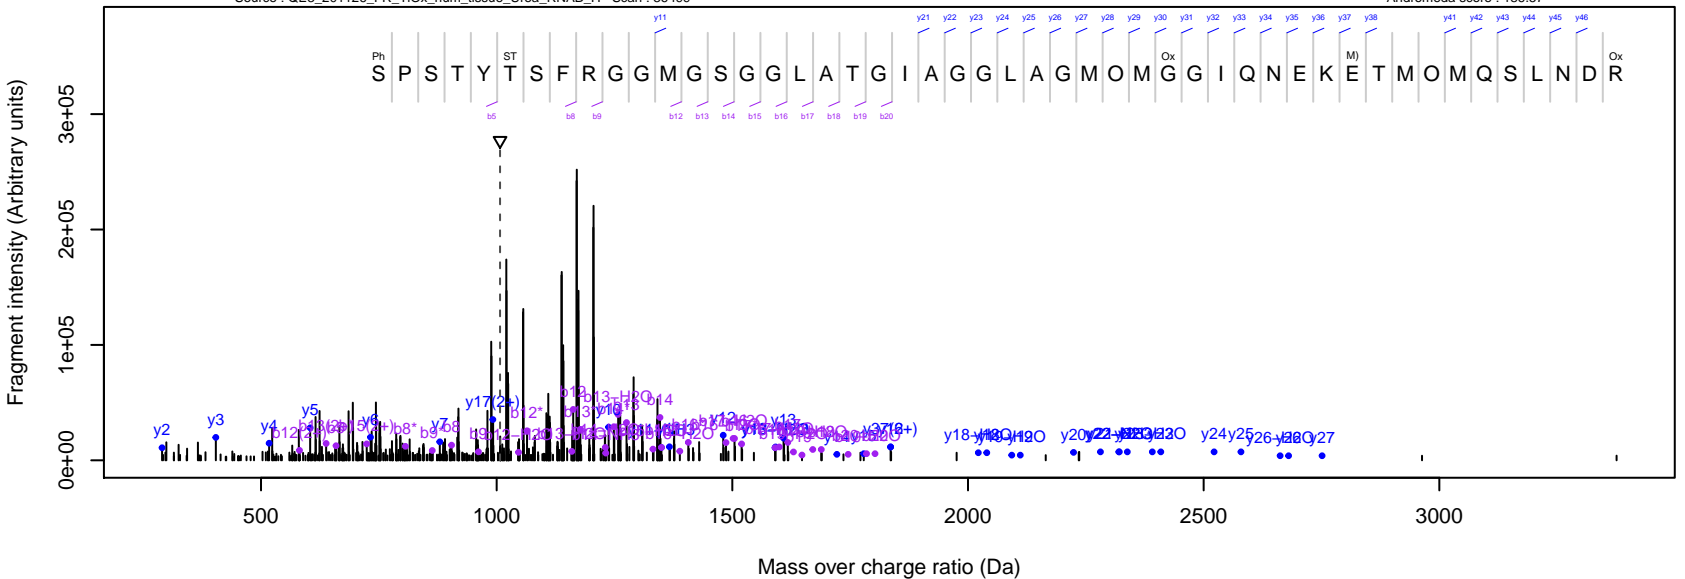

RSS(Phospho (STY))PSARPPDVPGQQPQAAK-3+

Source : QE3\_201126\_FR\_TiOx\_hum\_tissue\_Urea\_RNAB\_H Scan : 9324

Andromeda score : 186.44

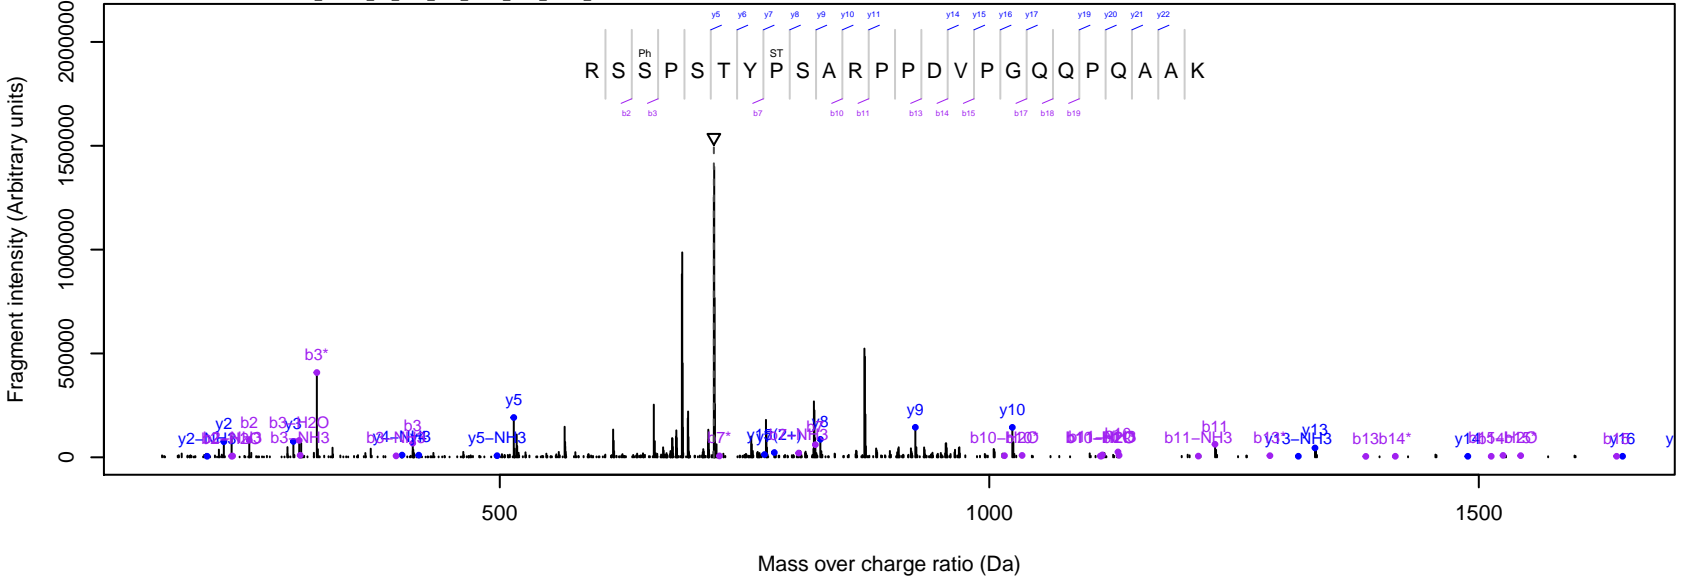

TGSSS(Phospho (STY))PPGGPPKPGSQLDSMLGLSQSDLNK-3+

Source : QE3\_201126\_FR\_TiOx\_hum\_tissue\_Urea\_RNAB\_H Scan : 51940

Andromeda score : 186.39

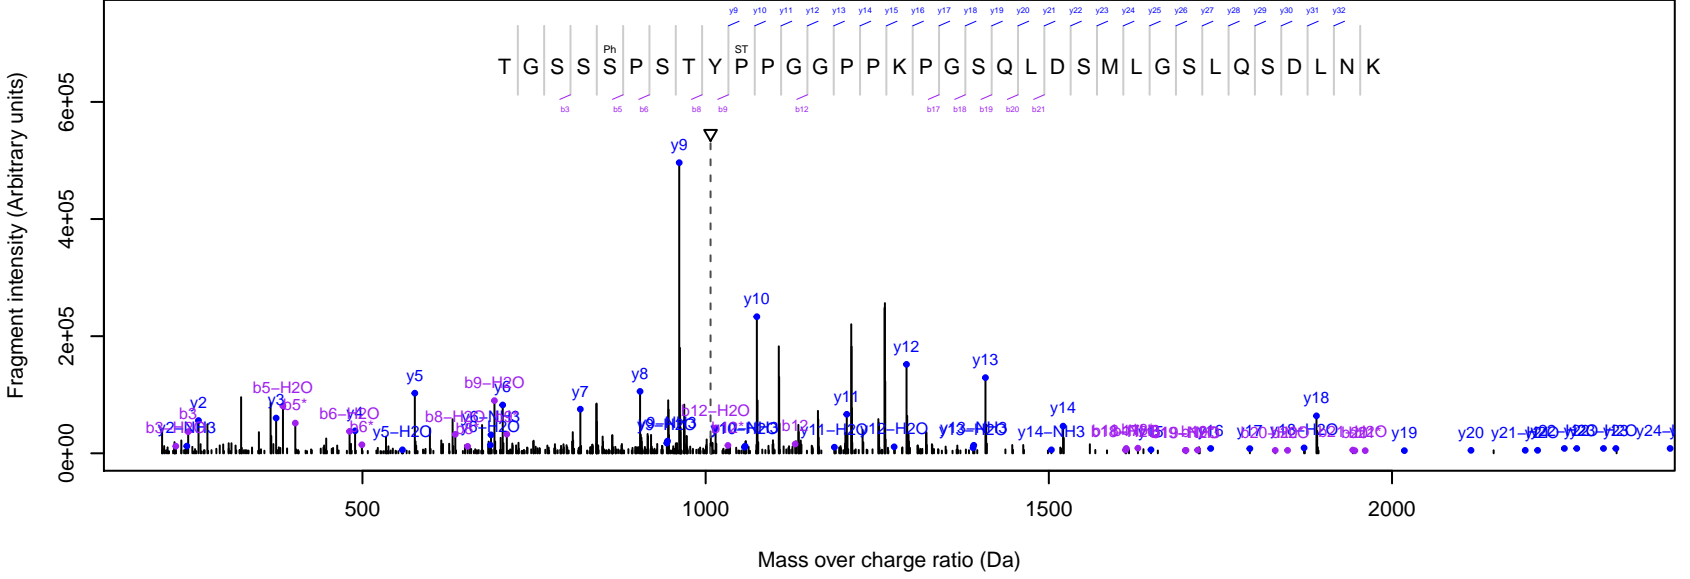

DGQDAIQS(Phospho (STY))PEKESKYEM(Oxidation (M))NANHK-4+

Source : QE3\_201126\_FR\_TiOx\_hum\_tissue\_Urea\_RNAB\_H Scan : 11751

Andromeda score : 186.34

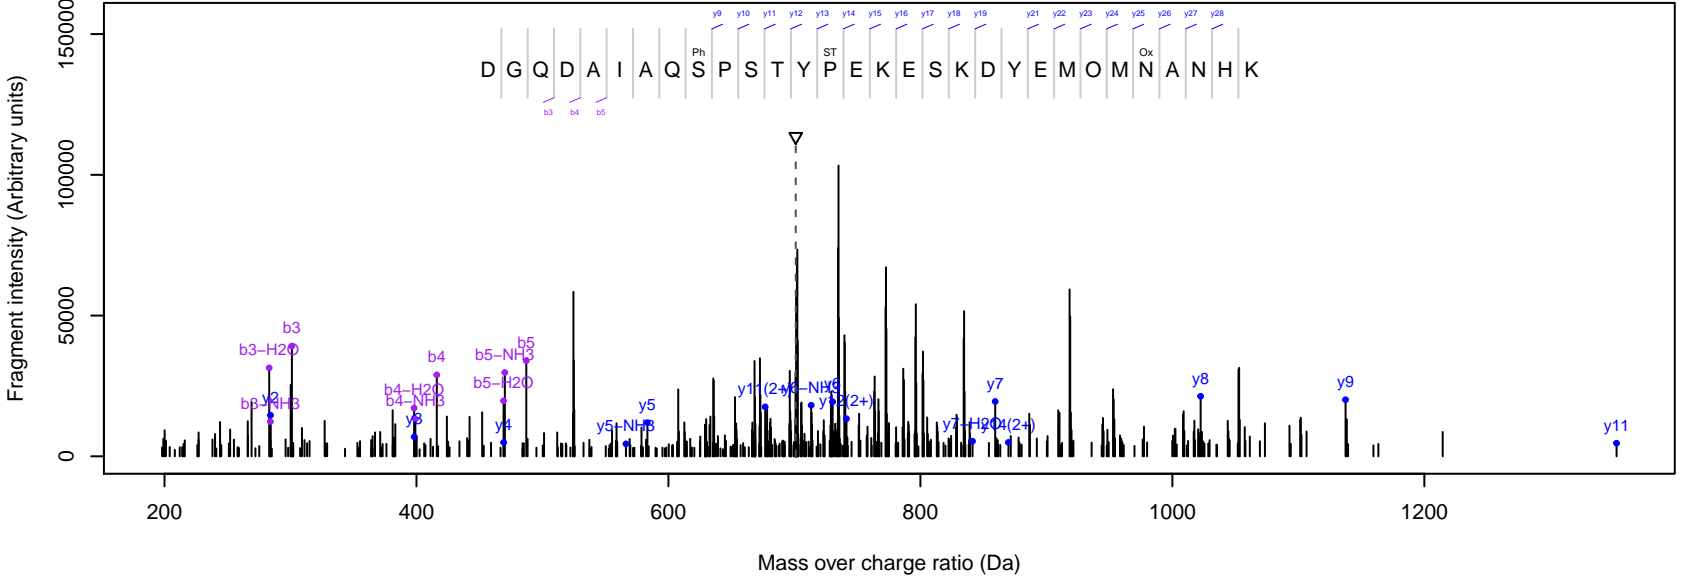

SLMS(Phospho (STY))S(Phospho (STY))PEDLTKEFEELKAEVDVTK-3+

Source : QE3\_201126\_FR\_TiOx\_hum\_tissue\_Urea\_RNAB\_N Scan : 60933

Andromeda score : 186.33

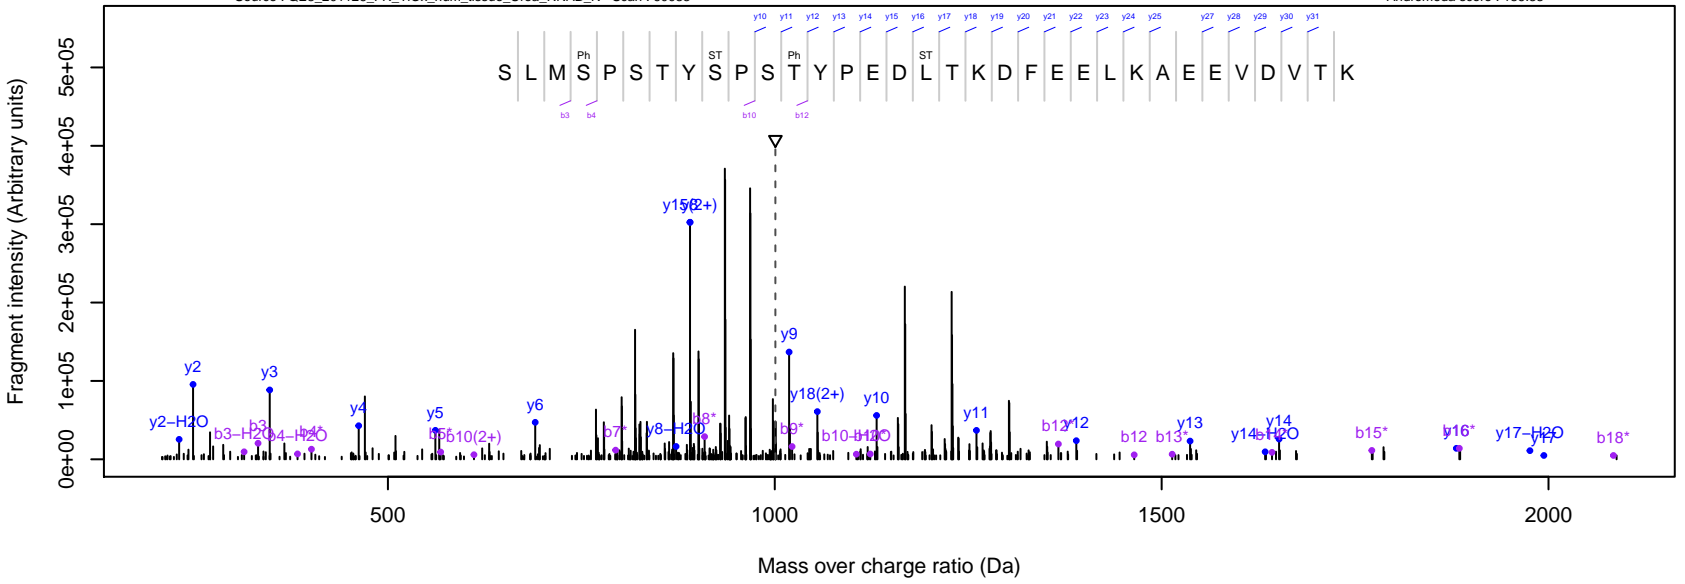

(Acetyl (Protein N-term))S(Phospho (STY))DFDEFER-2+

Source : QE3\_201126\_FR\_TiOx\_hum\_tissue\_Urea\_RNAB\_H Scan : 46572

Andromeda score : 186.16

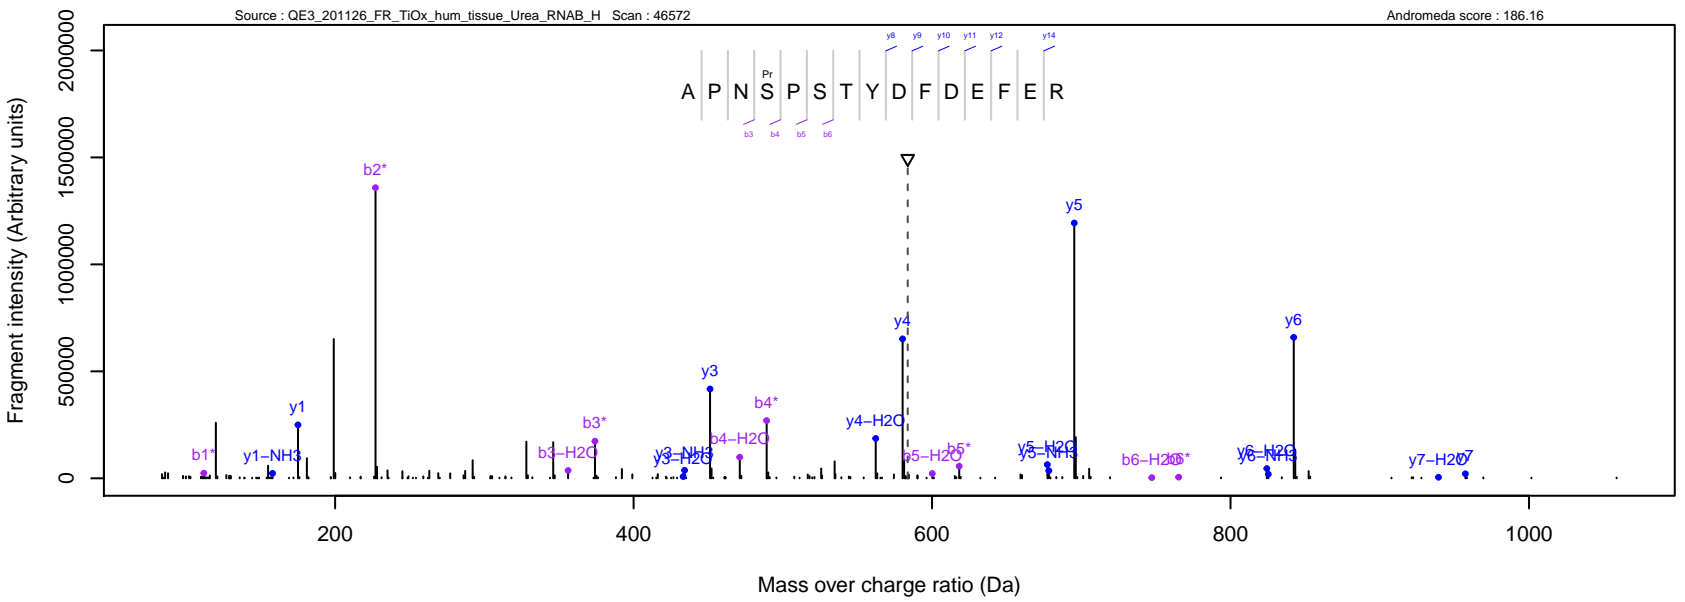

SSPNVANQPPS(Phospho (STY))PGGK-2+

Source : QE3\_201126\_FR\_TiOx\_hum\_tissue\_Urea\_RNAB\_N Scan : 9856

Andromeda score : 186.16

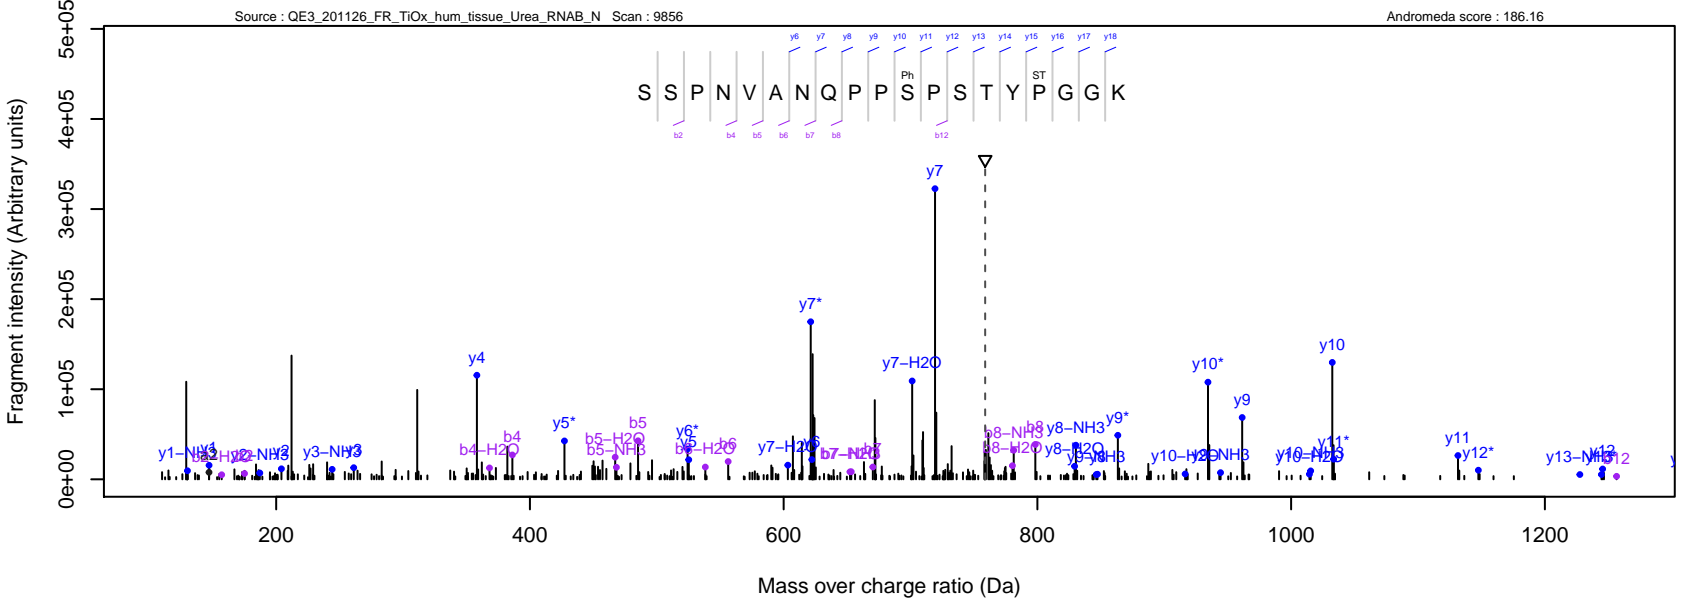

SSATSGDIWPLSAYDNS(Phospho (STY))PR-2+

Source : QE3\_201126\_FR\_TiOx\_hum\_tissue\_Urea\_RNAB\_H Scan : 48413

Andromeda score : 186.15

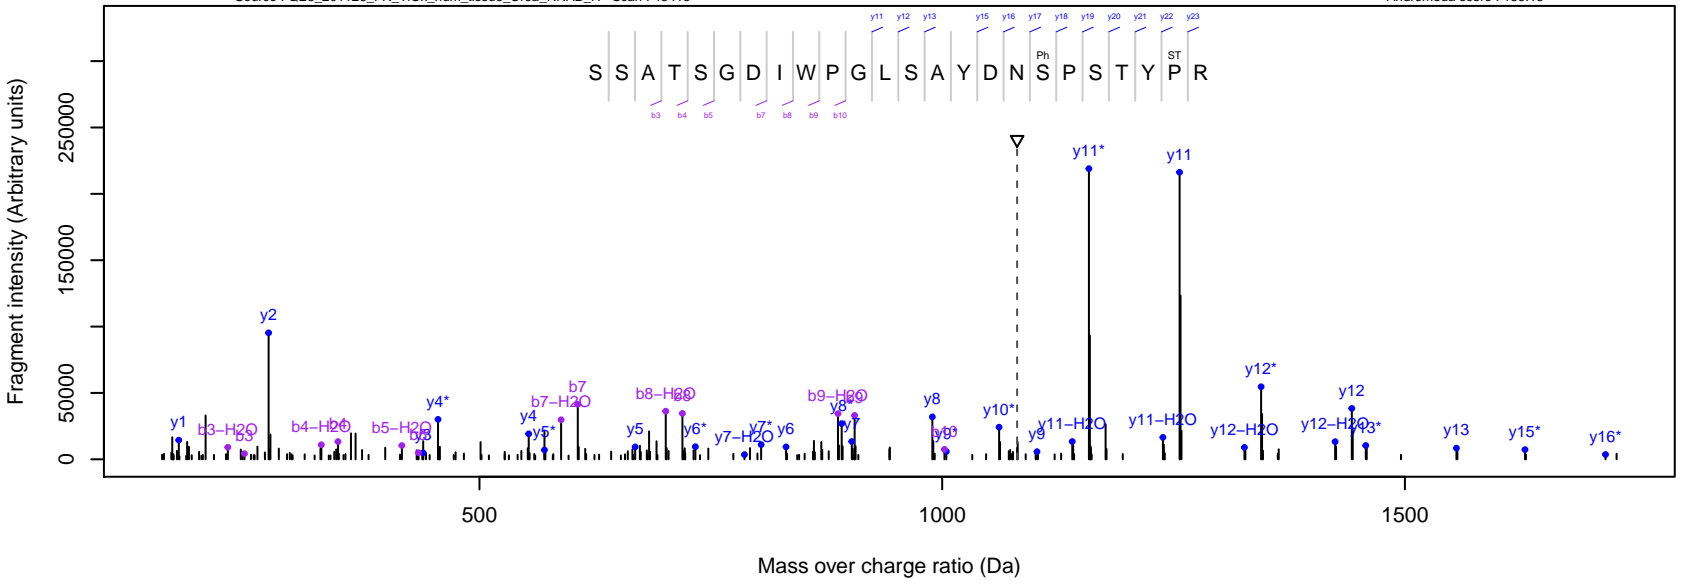

AEDGATPSPNET(Phospho (STY))PKKK-3+

Source : QE3\_201126\_FR\_TiOx\_hum\_tissue\_Urea\_RNAB\_H Scan : 3136

Andromeda score : 186.06

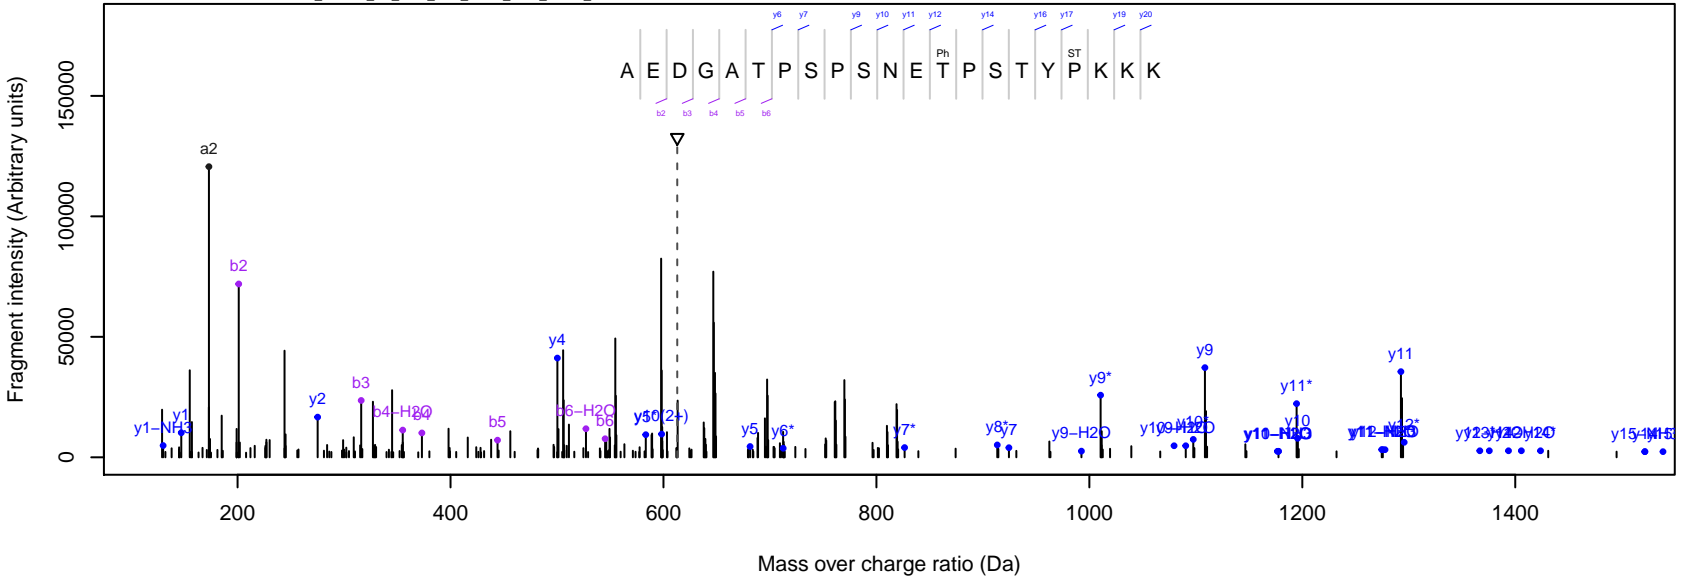

DMSPLSETEMALGKDVTPSTYPPPETEVVLIK-3+

Source : QE3\_201126\_FR\_TiOx\_hum\_tissue\_Urea\_RNAB\_N Scan : 57122

Andromeda score : 186.05

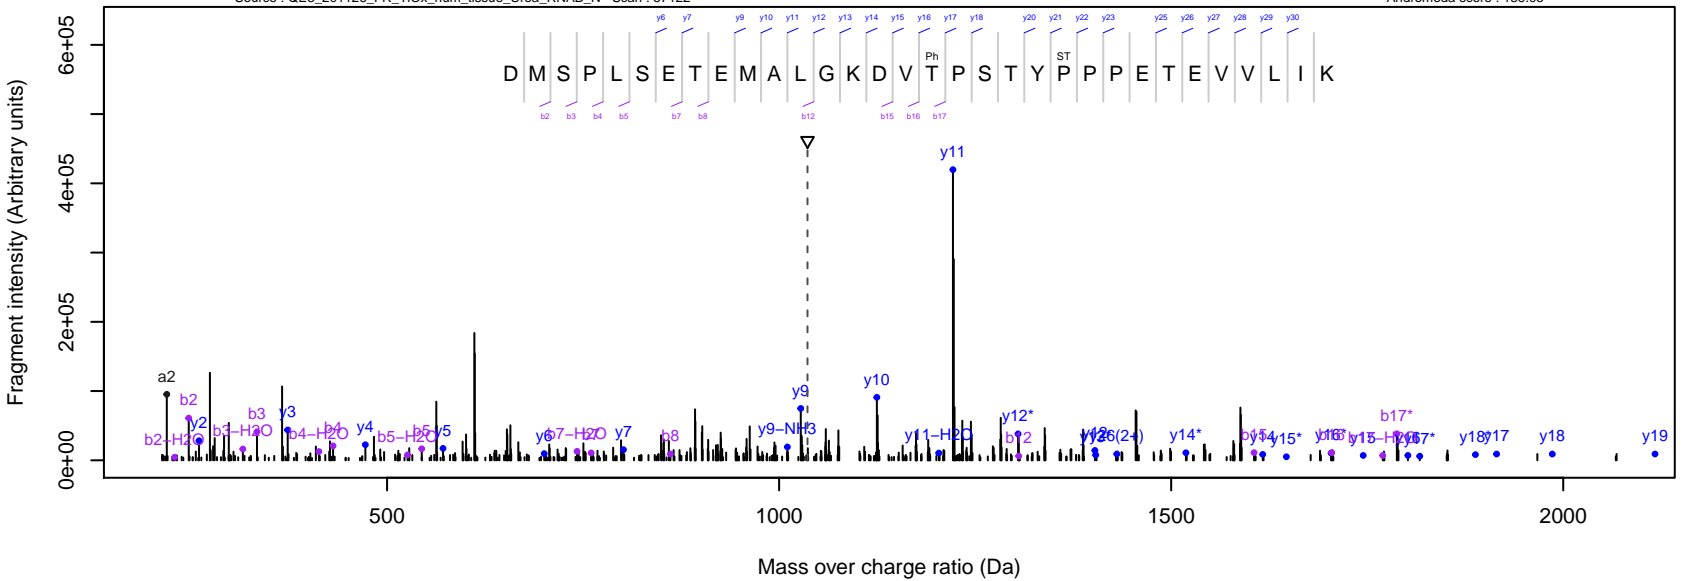

FICVTPTCSNTIDLPMSPSTYPR-2+

Source : QE3\_201126\_FR\_TiOx\_hum\_tissue\_Urea\_RNAB\_N Scan : 49913

Andromeda score : 186.05

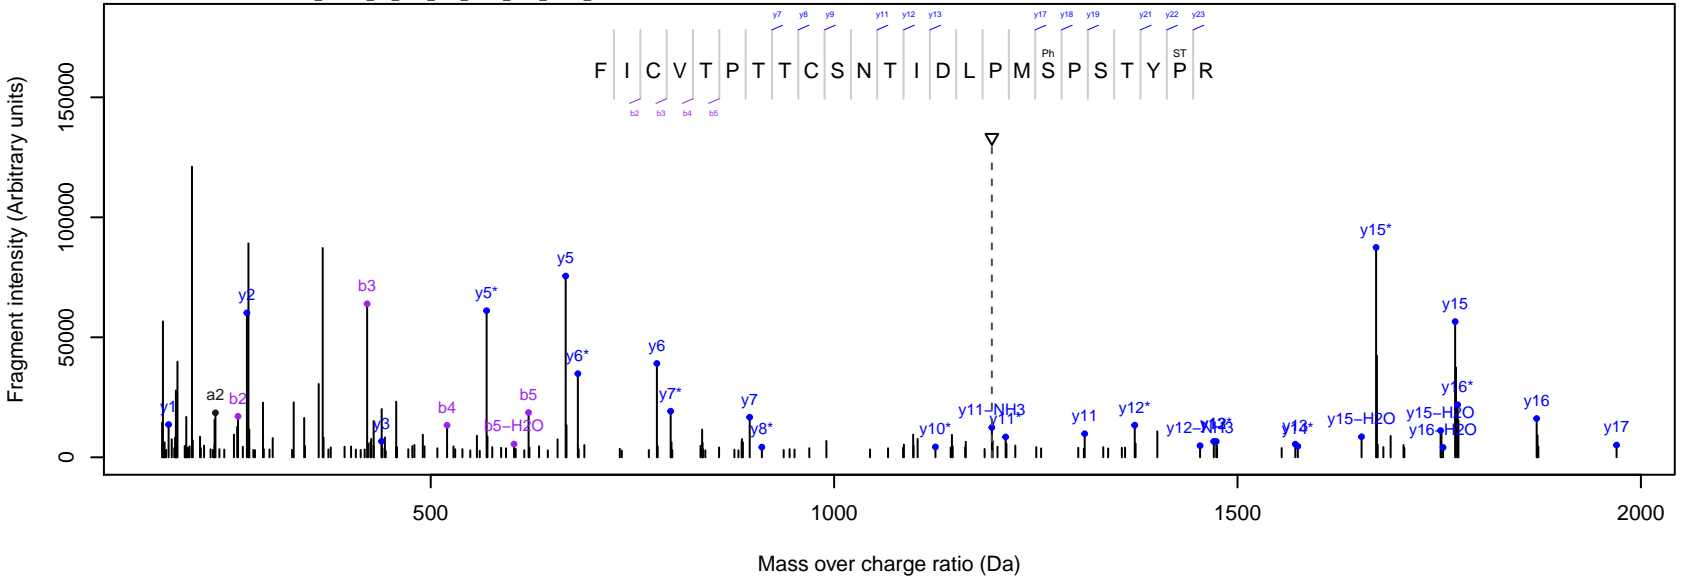

EFHS(Phospho (STY))HEFHS(Phospho (STY))HEDMLVVDPK-4+

Source : QE3\_201126\_FR\_TiOx\_hum\_tissue\_Urea\_RNAB\_B Scan : 21058

Andromeda score : 186.01

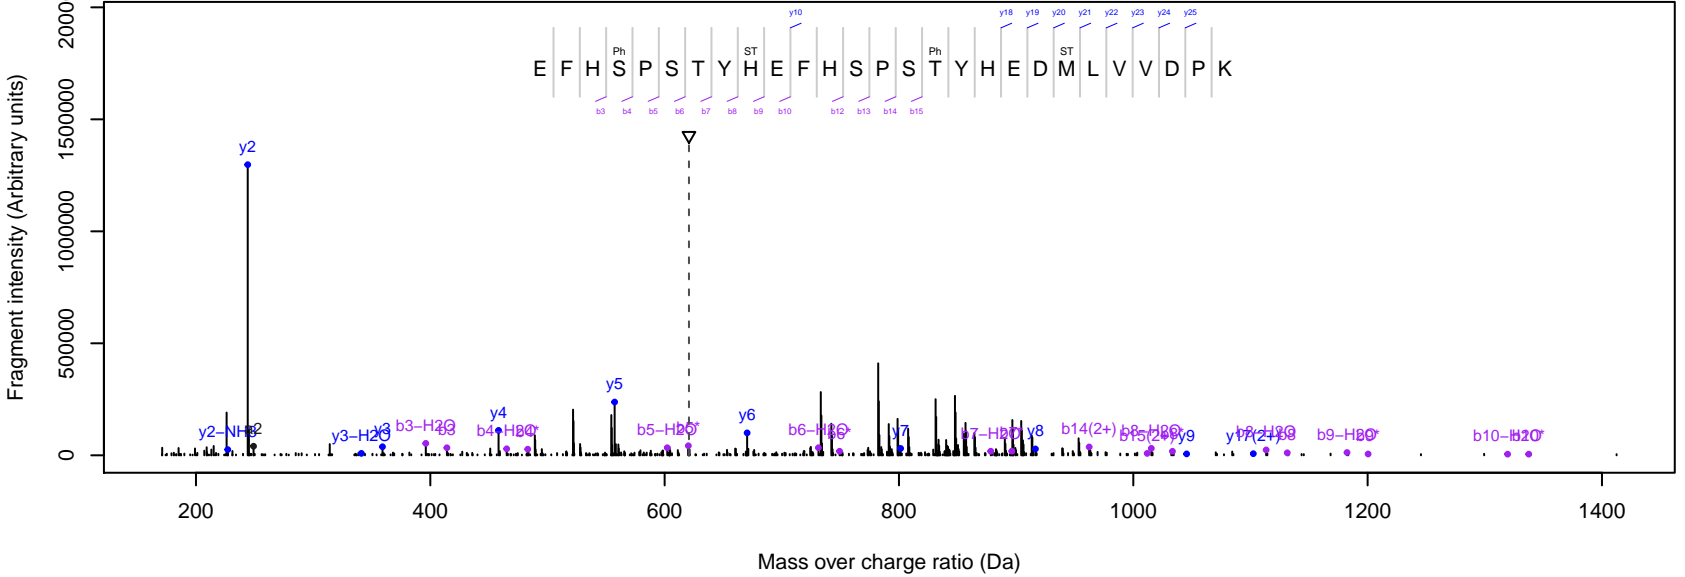

GIPLATGDTSPSTYPEPELPGAPLPPK-2+

Source : QE3\_201126\_FR\_TiOx\_hum\_tissue\_Urea\_RNAB\_N Scan : 55290

Andromeda score : 186.01

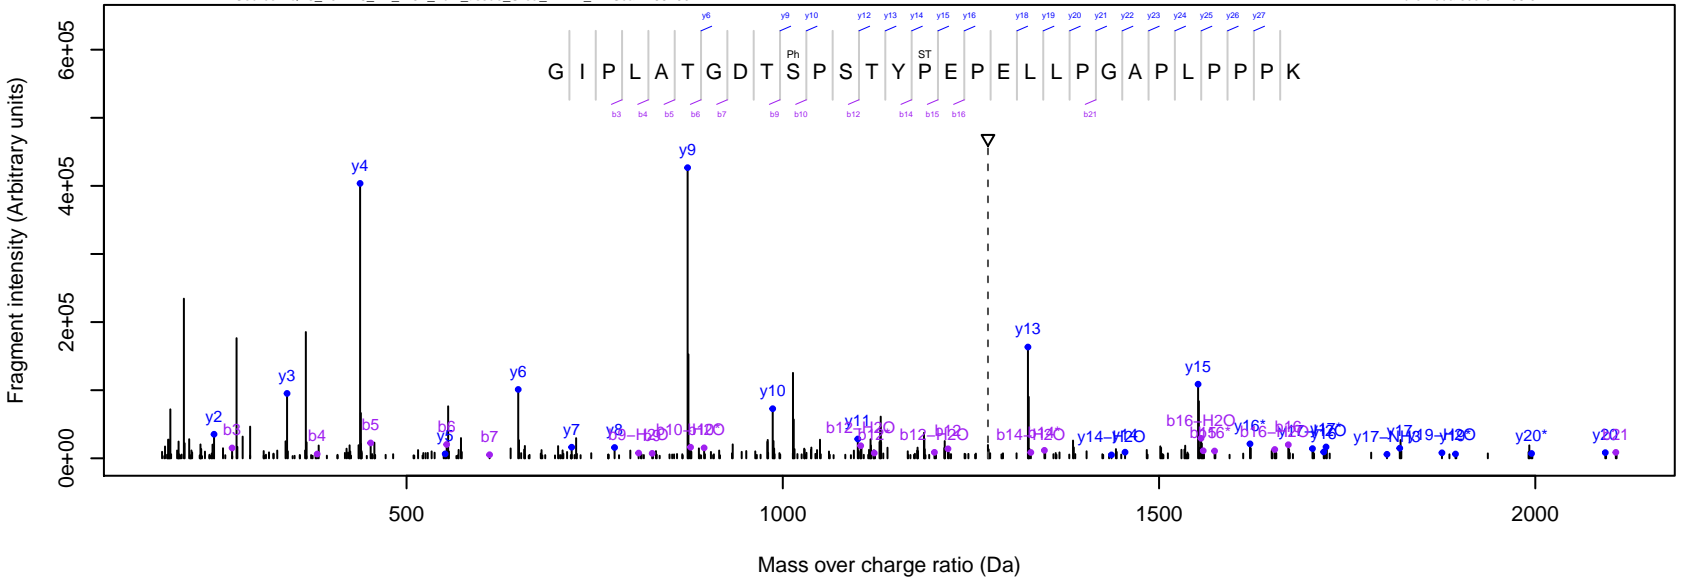

S(Phospho (STY))PGSISYLPSTFK-2+

Source : QE3\_201126\_FR\_TiOx\_hum\_tissue\_Urea\_RNAB\_H Scan : 57387

Andromeda score : 185.95

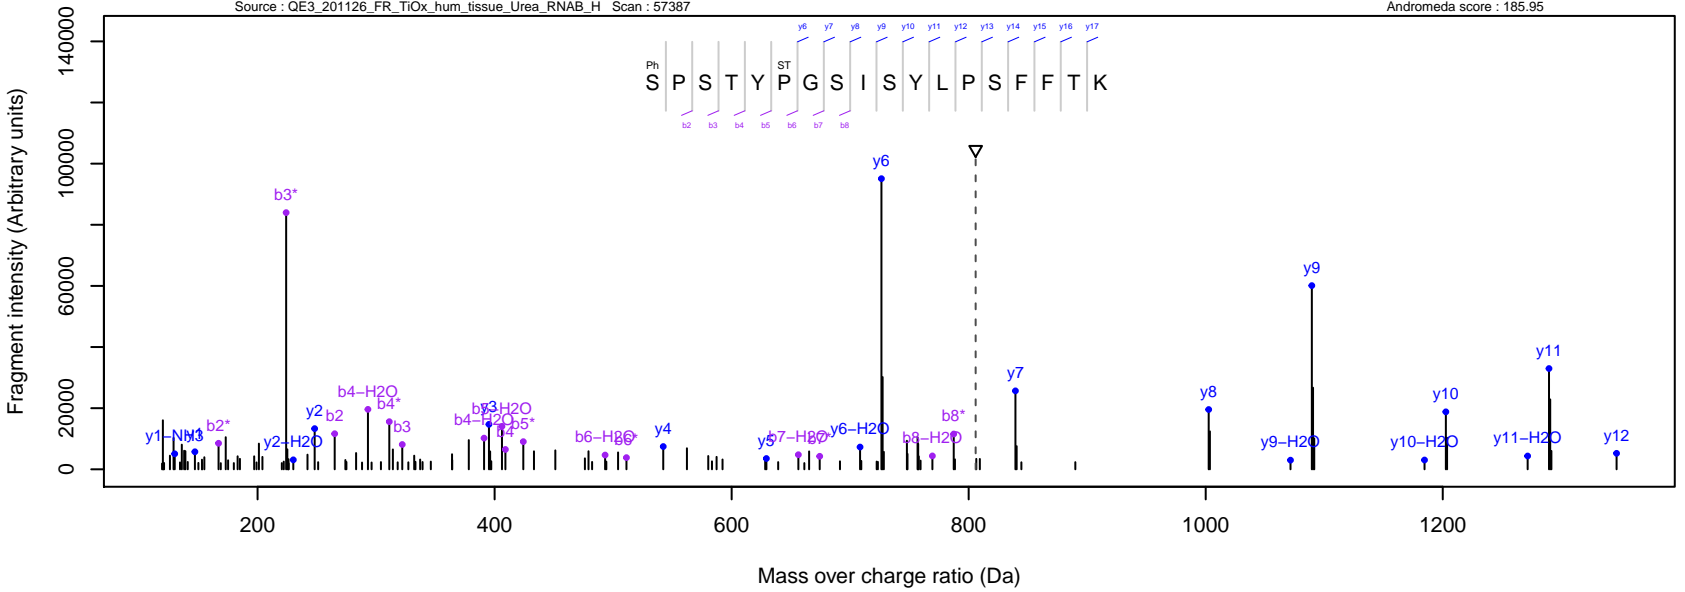

SVS(Phospho (STY))PTFLNPSDENLK-2+

Source : QE3\_201126\_FR\_TiOx\_hum\_tissue\_Urea\_RNAB\_B Scan : 38101

Andromeda score : 185.95

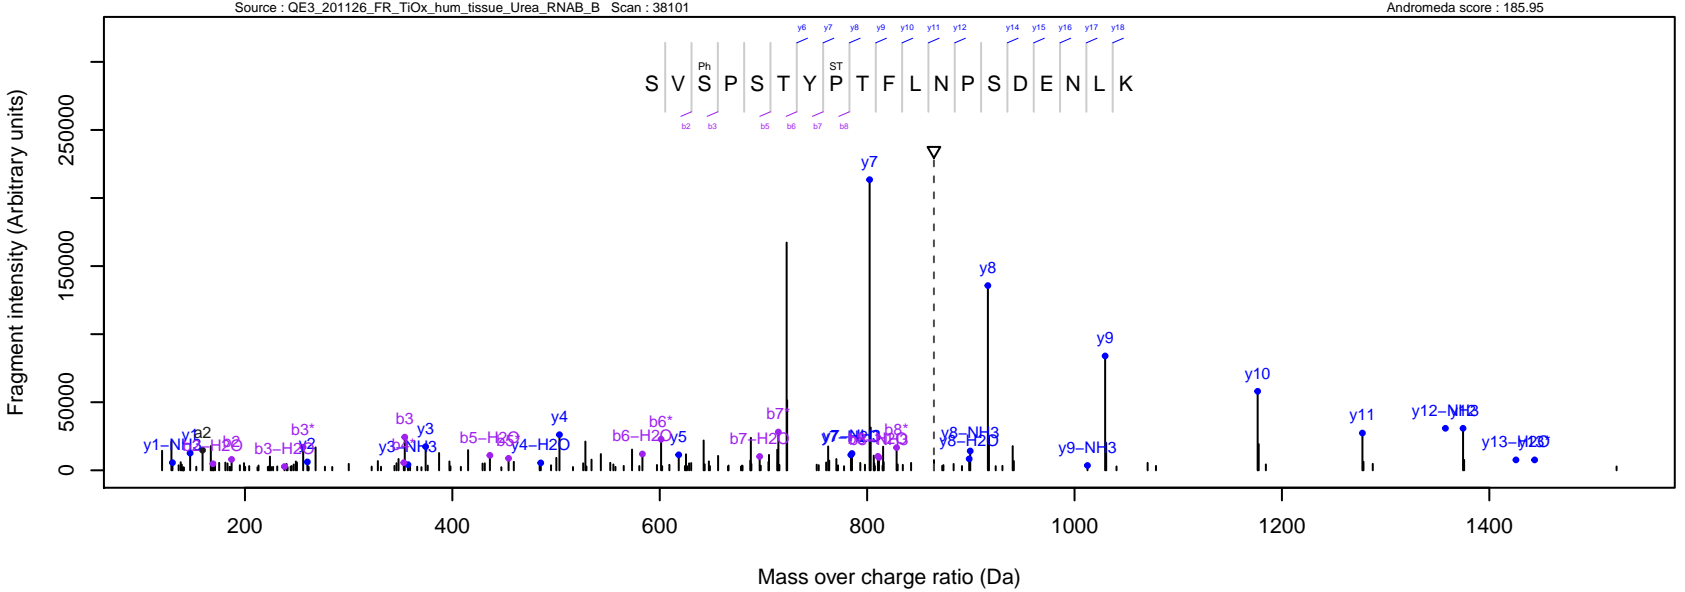

HRPS(Phospho (STY))EADEEELAR-3+

Source : QE3\_201126\_FR\_TiOx\_hum\_tissue\_Urea\_RNAB\_H Scan : 8070

Andromeda score : 185.85

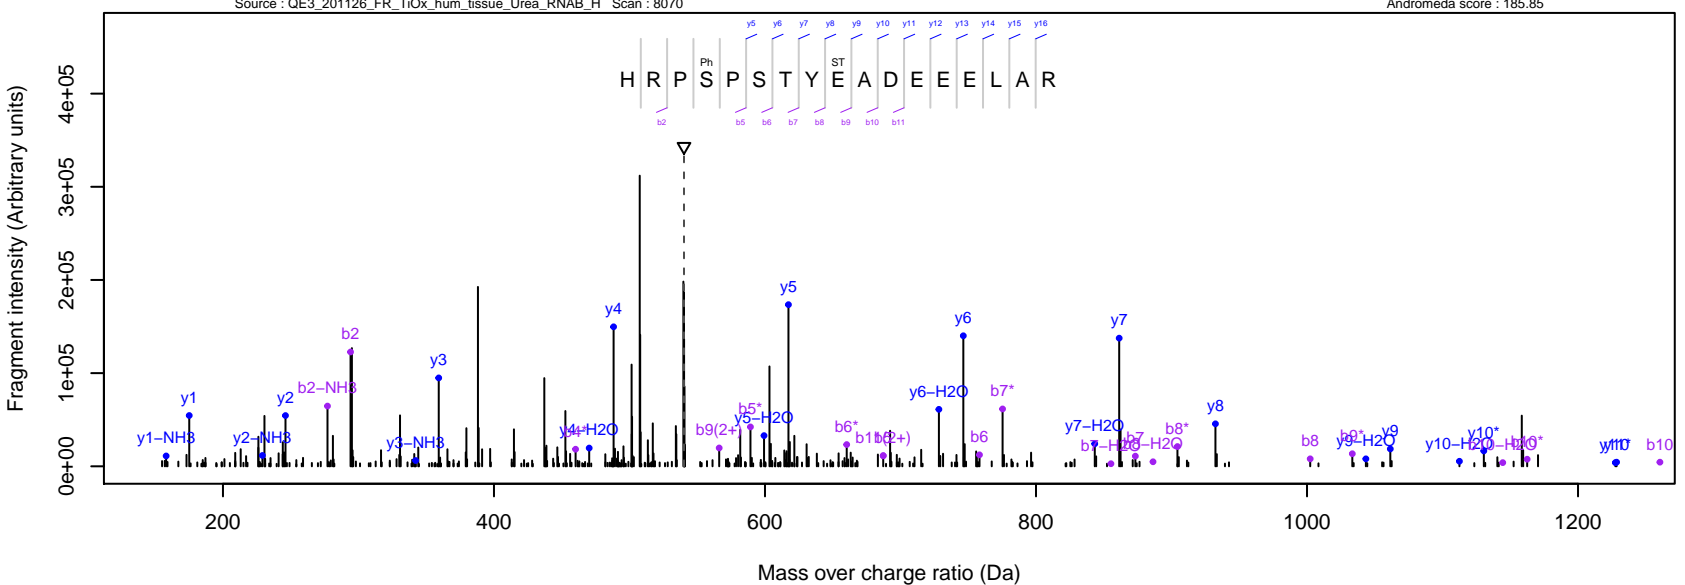



RGS(Phospho (STY))GDTSSLIDPDTLSLSELRDIYDLK-3+

Source : QE3\_201126\_FR\_TiOx\_hum\_tissue\_Urea\_RNAB\_N Scan : 54480

Andromeda score : 185.7

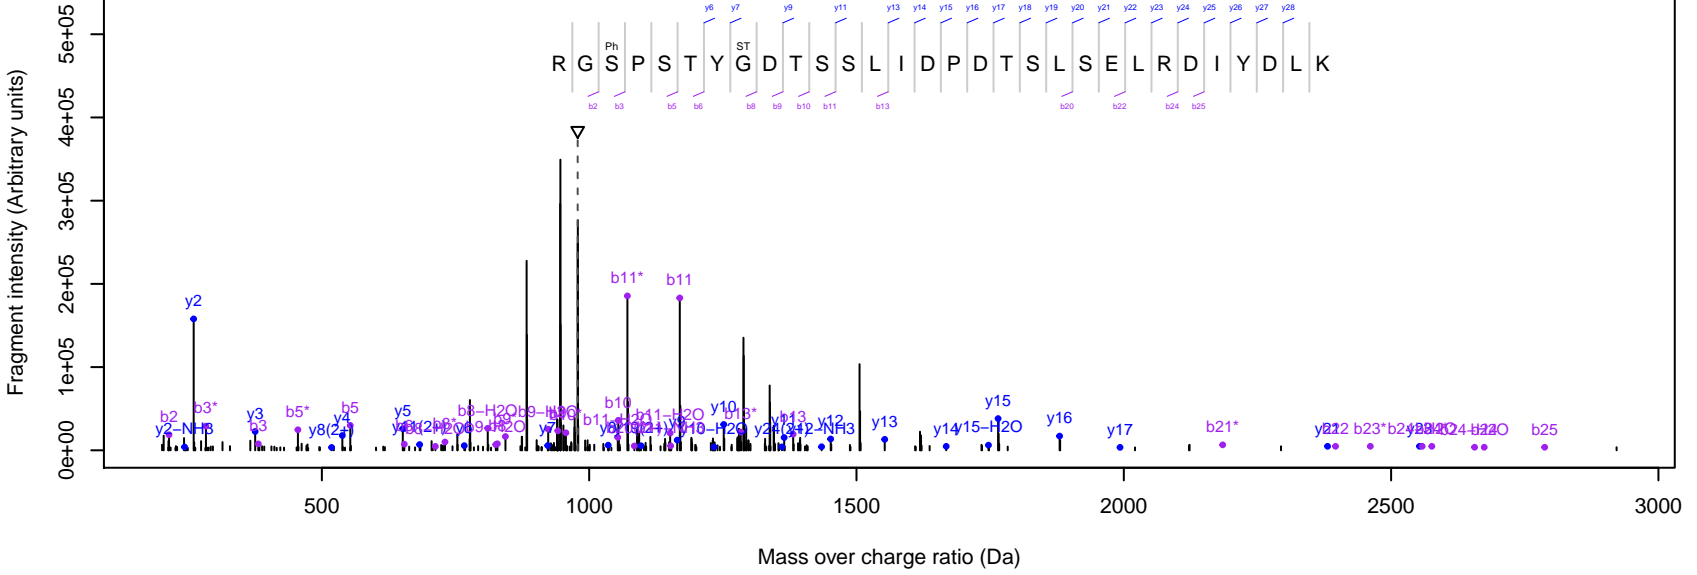

ALASQLQDS(Phospho (STY))LKDLK-2+

Source : QE3\_201126\_FR\_TiOx\_hum\_tissue\_Urea\_RNAB\_N Scan : 26262

Andromeda score : 185.67

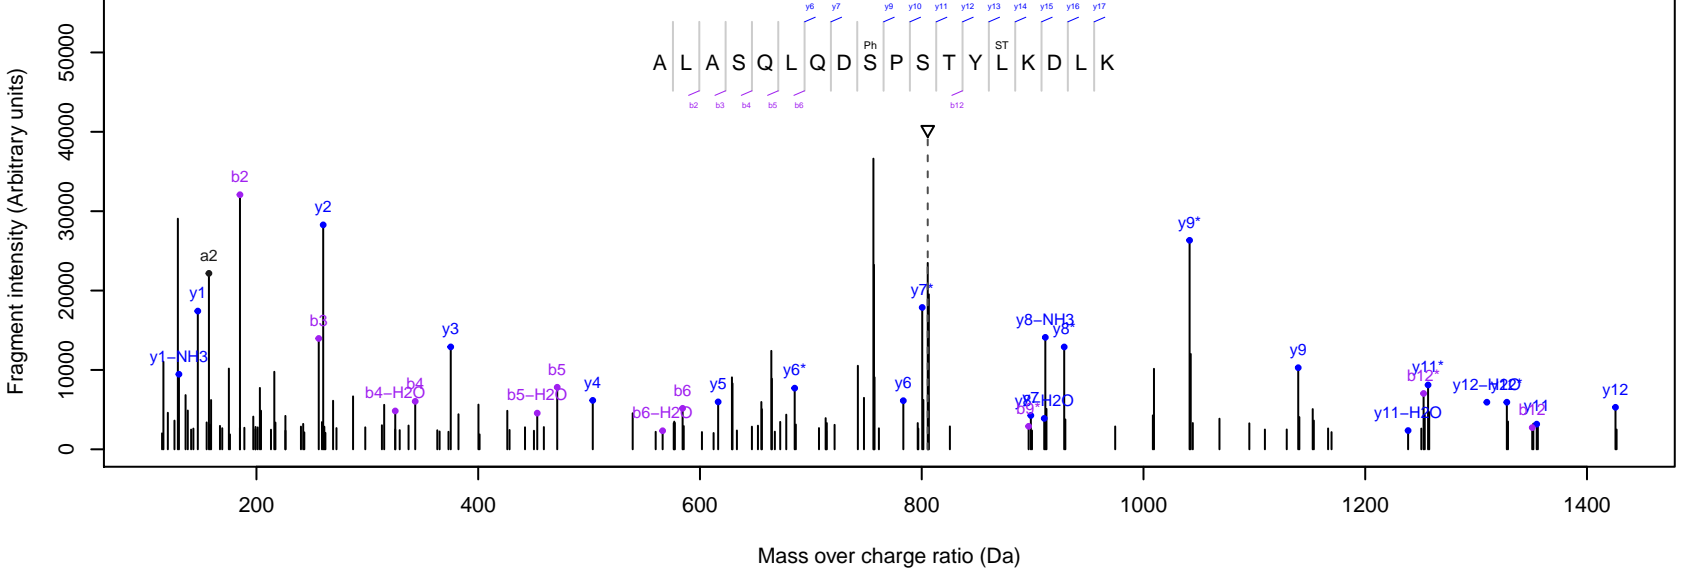

WLNSGRGDEASEEGQNGSS(Phospho (STY))PK-2+

Source : QE3\_201126\_FR\_TiOx\_hum\_tissue\_Urea\_RNAB\_H Scan : 12631

Andromeda score : 185.61

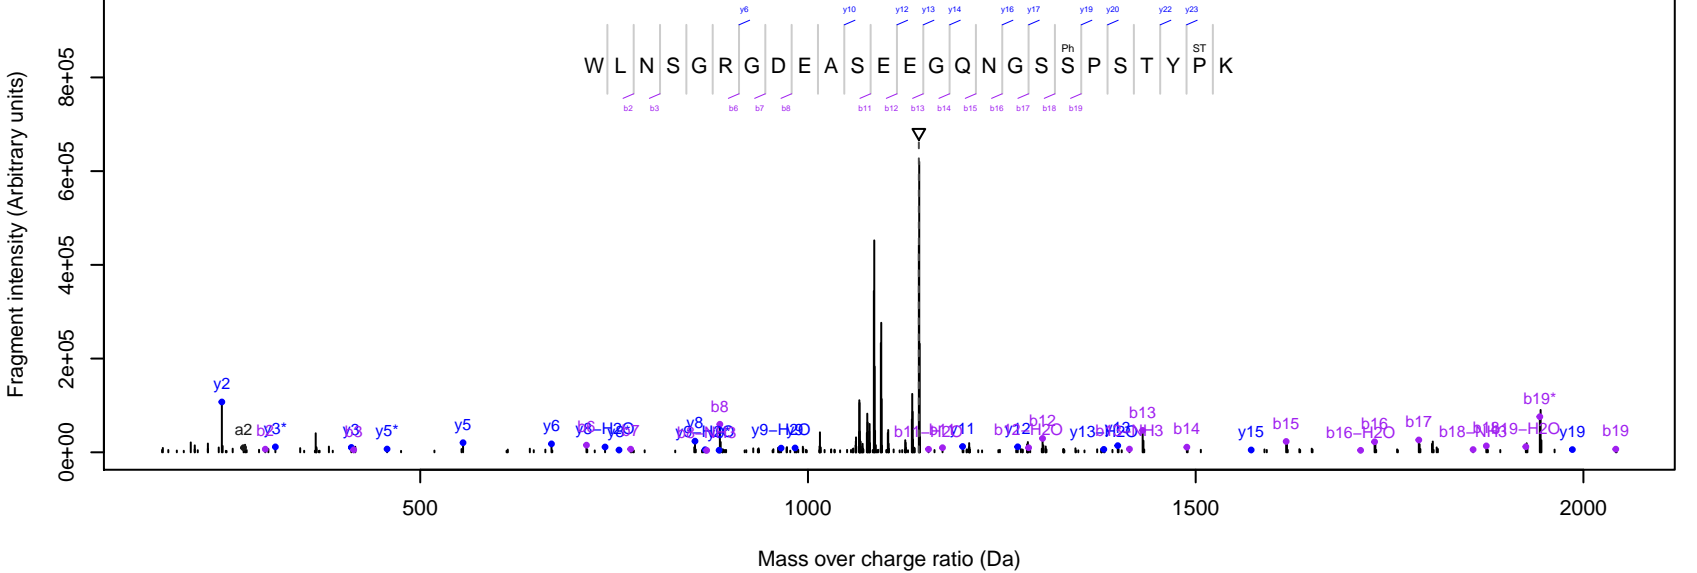

(Acetyl (Protein N-term))S(Phospho (STY))TVHEILCK-2+

Source : QE3\_201126\_FR\_TIOx\_hum\_tissue\_Urea\_RNAB\_H Scan : 30134

Andromeda score : 185.6

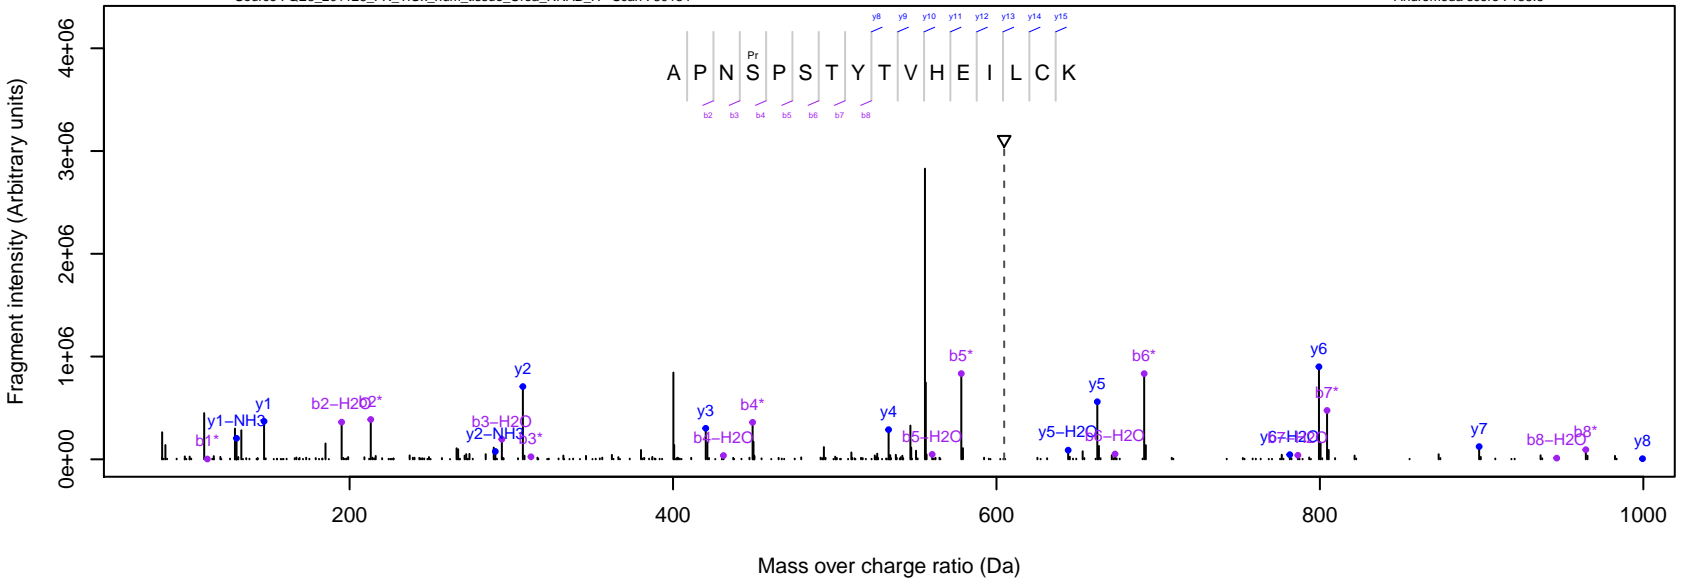

QIS(Phospho (STY))QDVKLEPDILLR-3+

Source : QE3\_201126\_FR\_TIOx\_hum\_tissue\_Urea\_RNAB\_H Scan : 44786

Andromeda score : 185.55

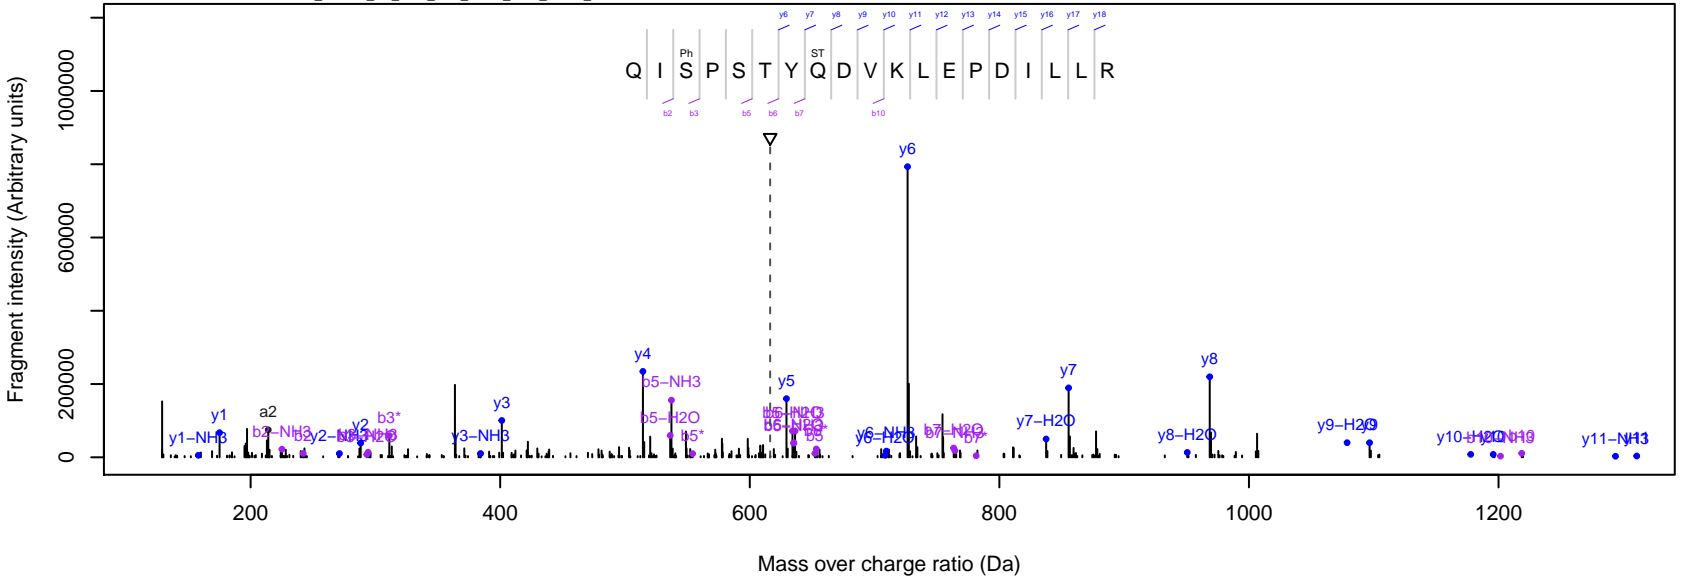

GAKEEHGLIRS(Phospho (STY))PR-3+

Source : QE3\_201126\_FR\_TIOx\_hum\_tissue\_Urea\_RNAB\_H Scan : 6012

Andromeda score : 185.53

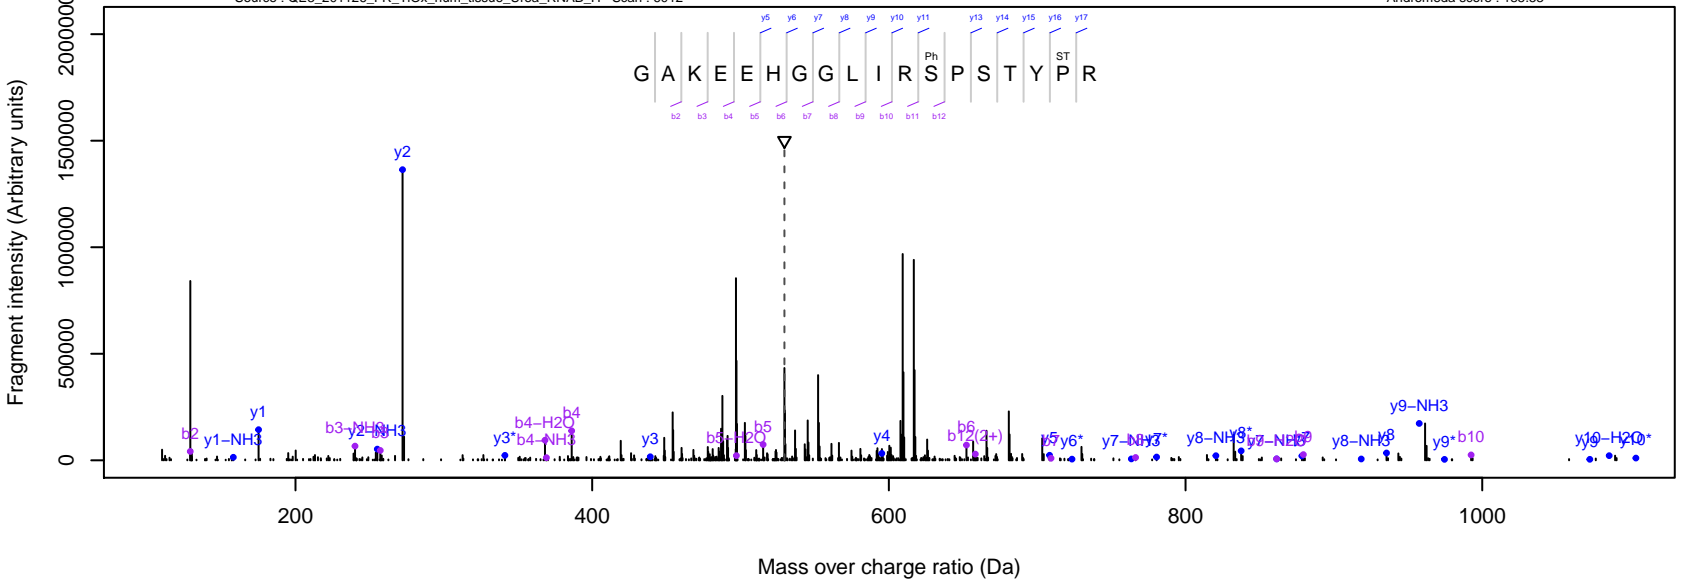

SAS(Phospho (STY))PDDDLGSSNWEAADLGNEERK-3+

Source : QE3\_201126\_FR\_TiOx\_hum\_tissue\_Urea\_RNAB\_H Scan : 31961

Andromeda score : 185.48

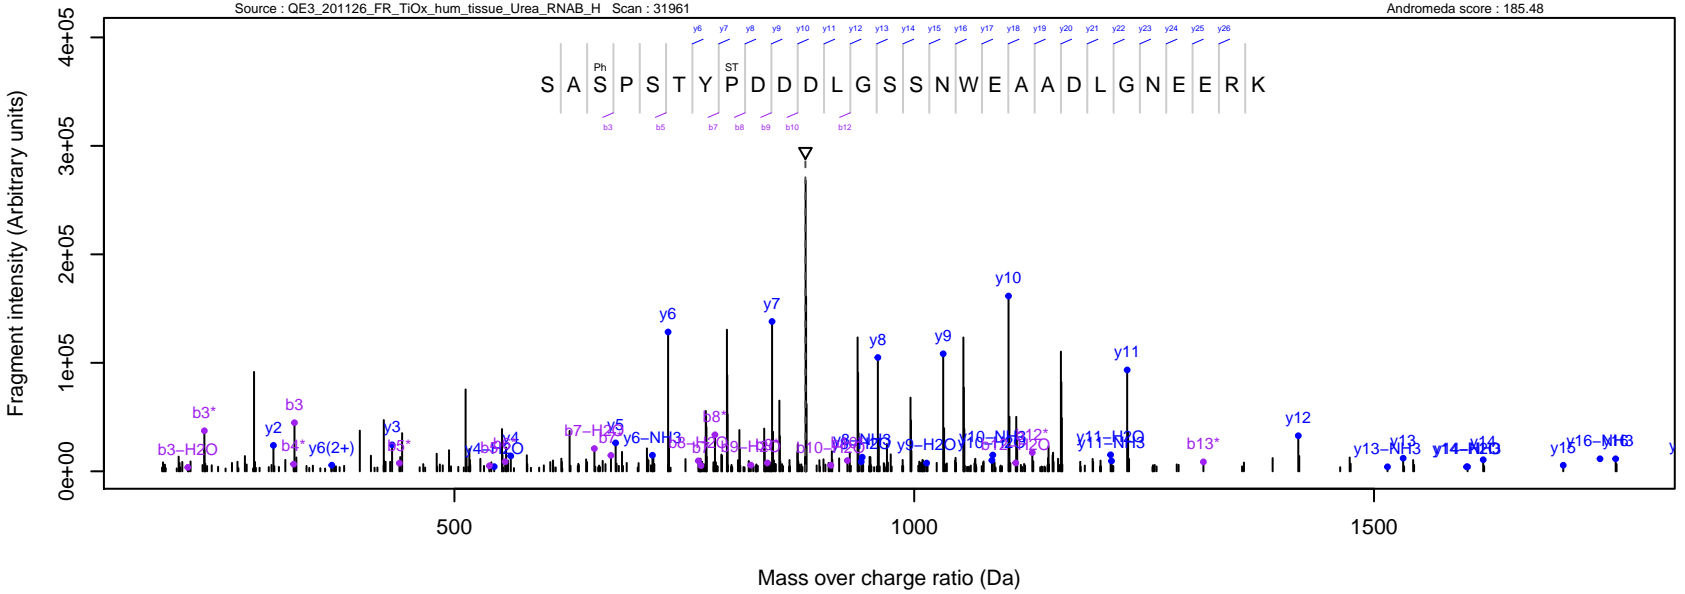

AKTQT(Phospho (STY))PPVSPAPQPTTEERLPSSPVYEDAASFK-3+

Source : QE3\_201126\_FR\_TiOx\_hum\_tissue\_Urea\_RNAB\_H Scan : 32540

Andromeda score : 185.43

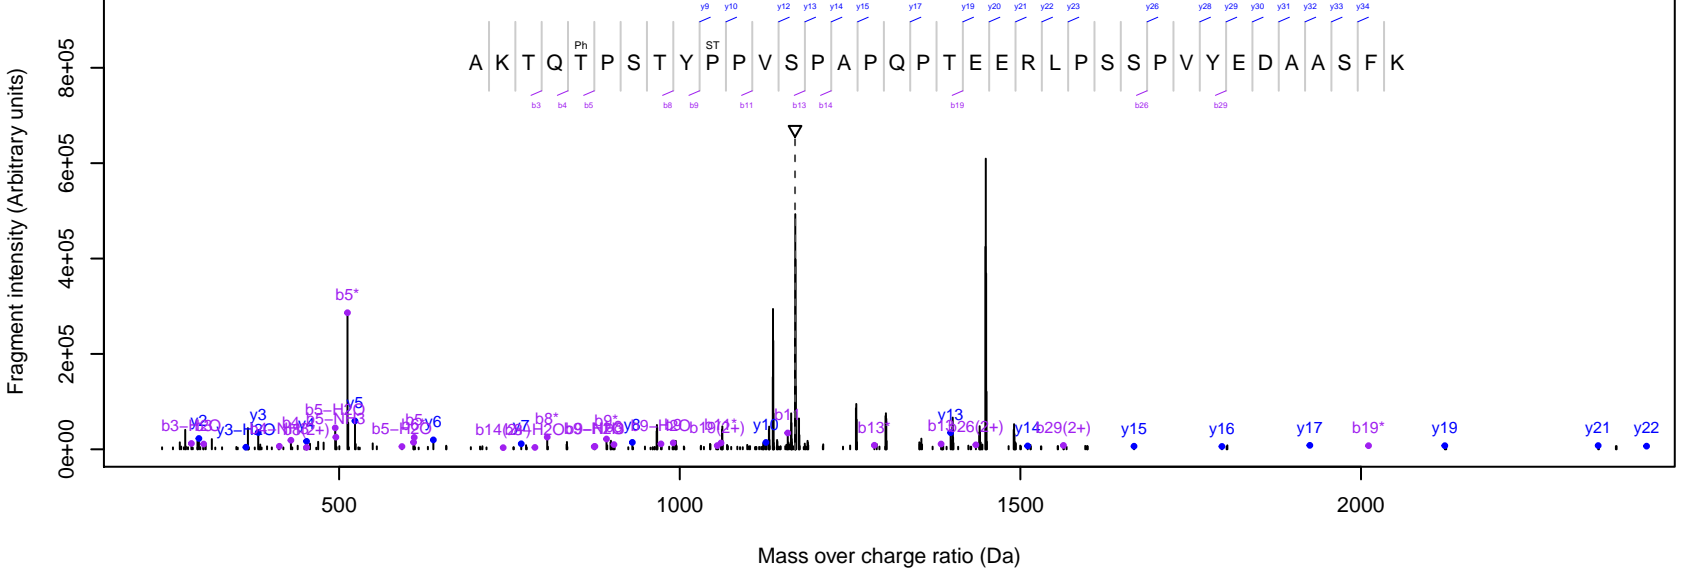

APPQTHLPSGASSGTGSASATHGGGS(Phospho (STY))PPGTR-4+

Source : QE3\_201126\_FR\_TiOx\_hum\_tissue\_Urea\_RNAB\_H Scan : 10836

Andromeda score : 185.43

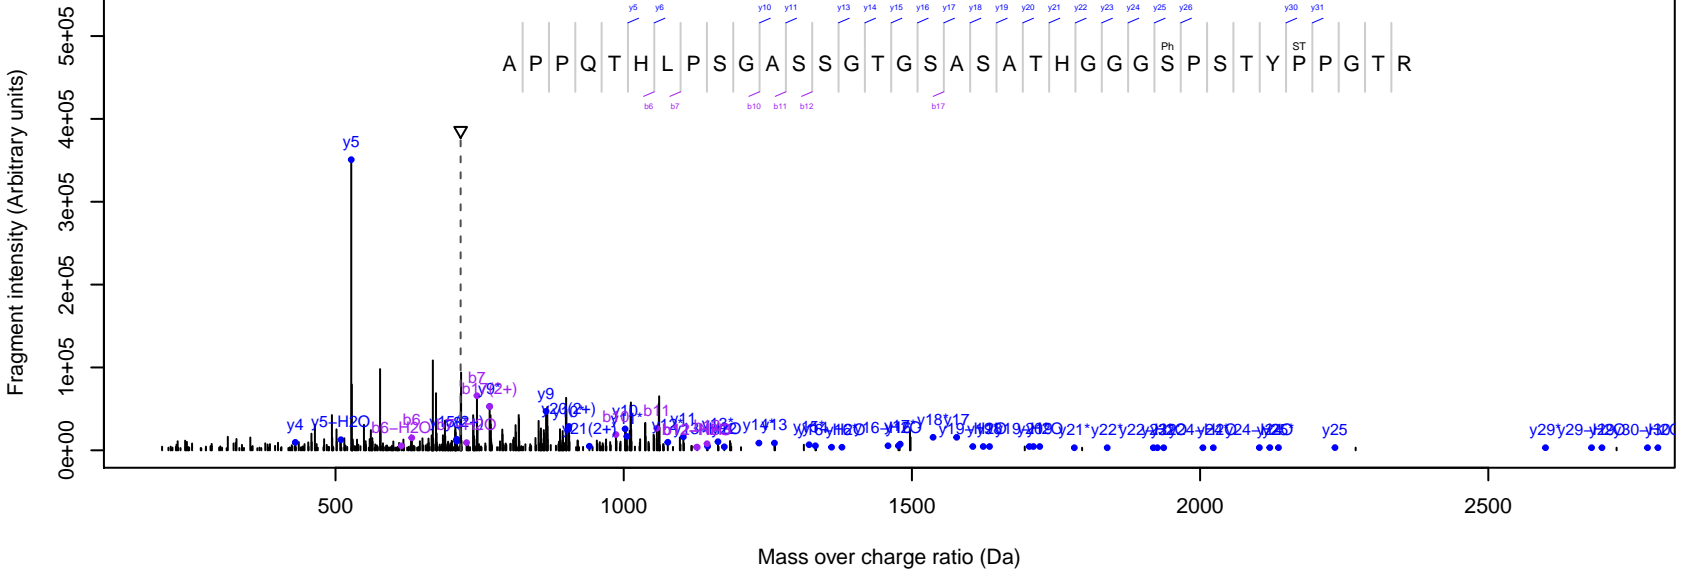

TPGDFSAYQKPEET(Phospho (STY))TRSPDEEDYDYESYEK-3+

Source : QE3\_201126\_FR\_TIOx\_hum\_tissue\_Urea\_RNAB\_B Scan : 31668

Andromeda score : 185.43

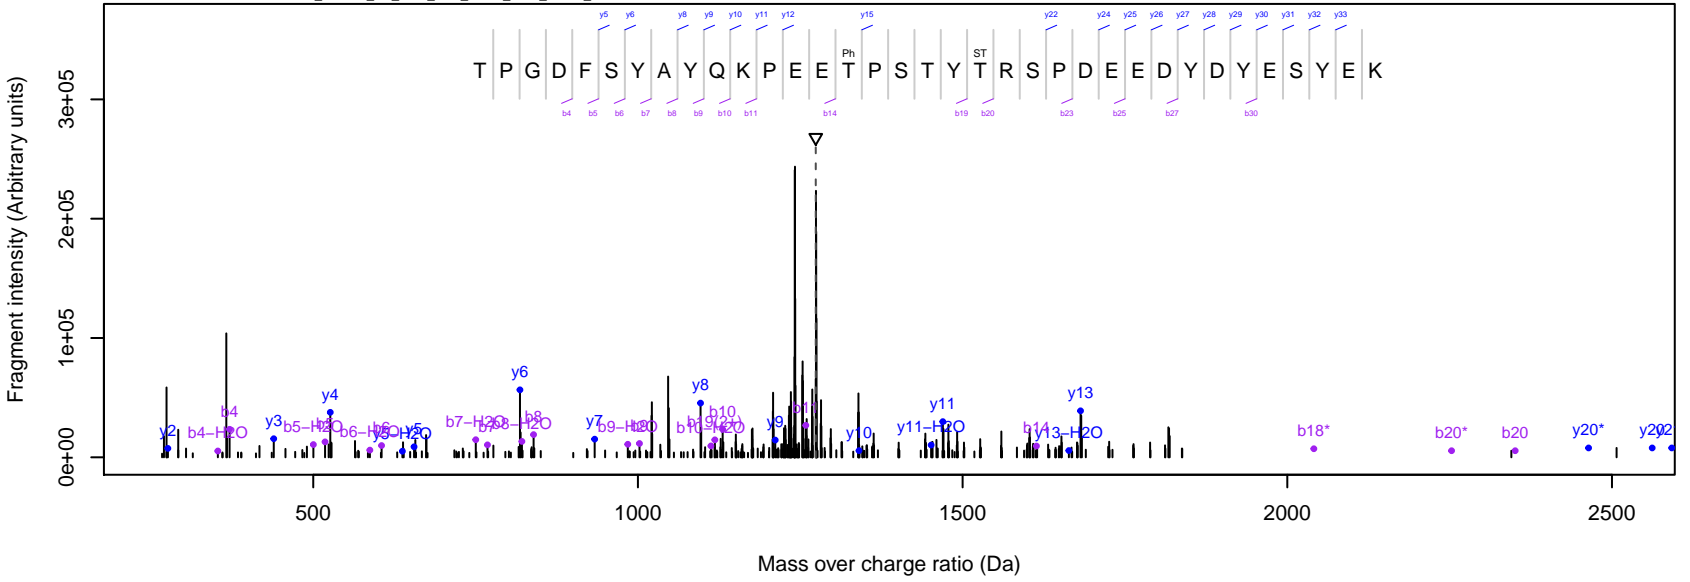

KAS(Phospho (STY))PEPPDSAEGALKLGEEQQR-3+

Source : QE3\_201126\_FR\_TIOx\_hum\_tissue\_Urea\_RNAB\_B Scan : 20982

Andromeda score : 185.35

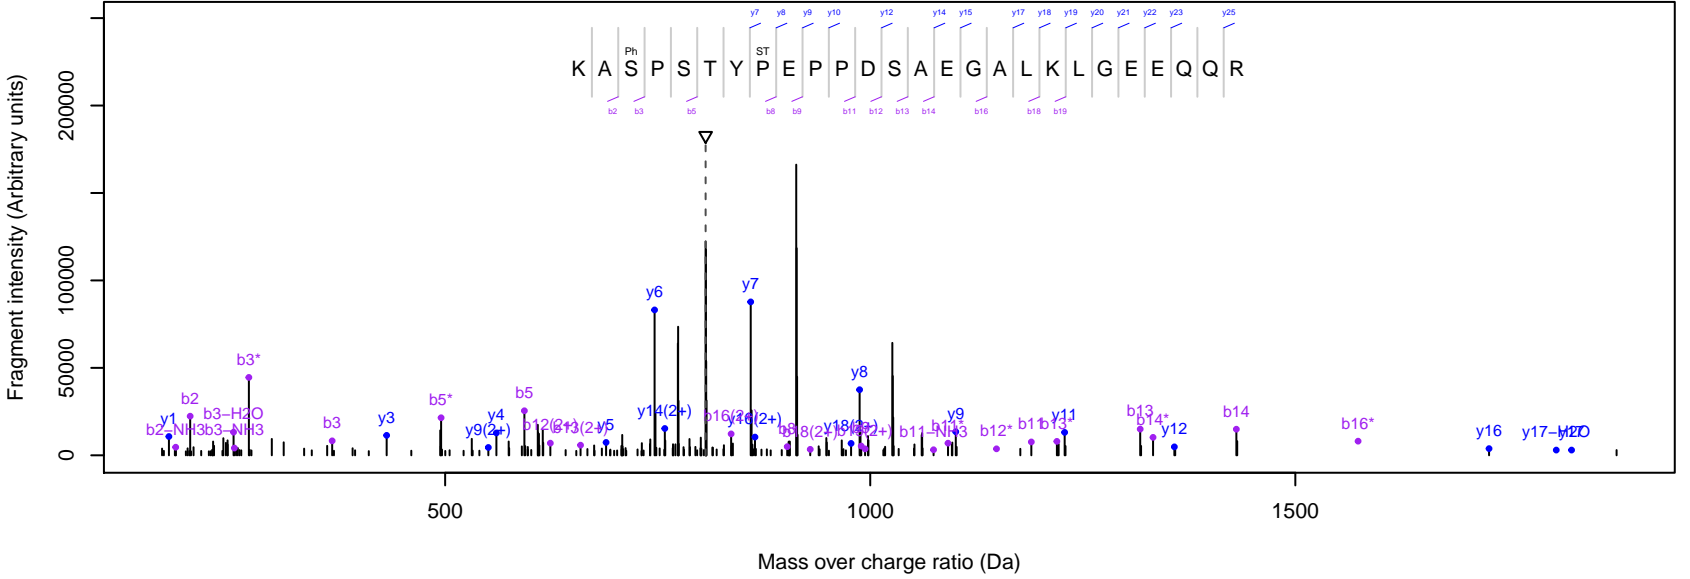

AT(Phospho (STY))S(Phospho (STY))NVFAM(Oxidation (M))FDQSQIQEFK-2+

Source : QE3\_201126\_FR\_TIOx\_hum\_tissue\_Urea\_RNAB\_N Scan : 60237

Andromeda score : 185.33

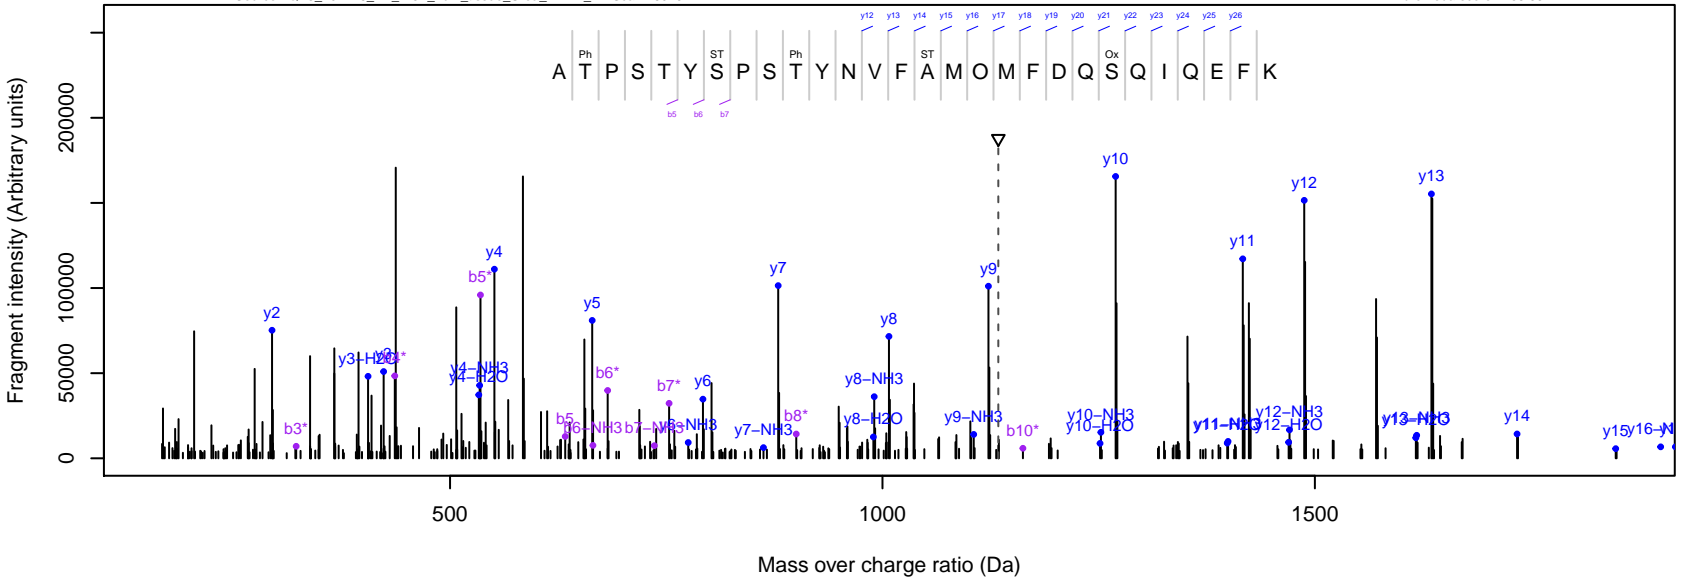

**NSLLNGS(Phospho (STY))WGSEEK-2+**

Source : QE3\_201126\_FR\_TiOx\_hum\_tissue\_Urea\_RNAB\_N Scan : 33999

Andromeda score : 185.32

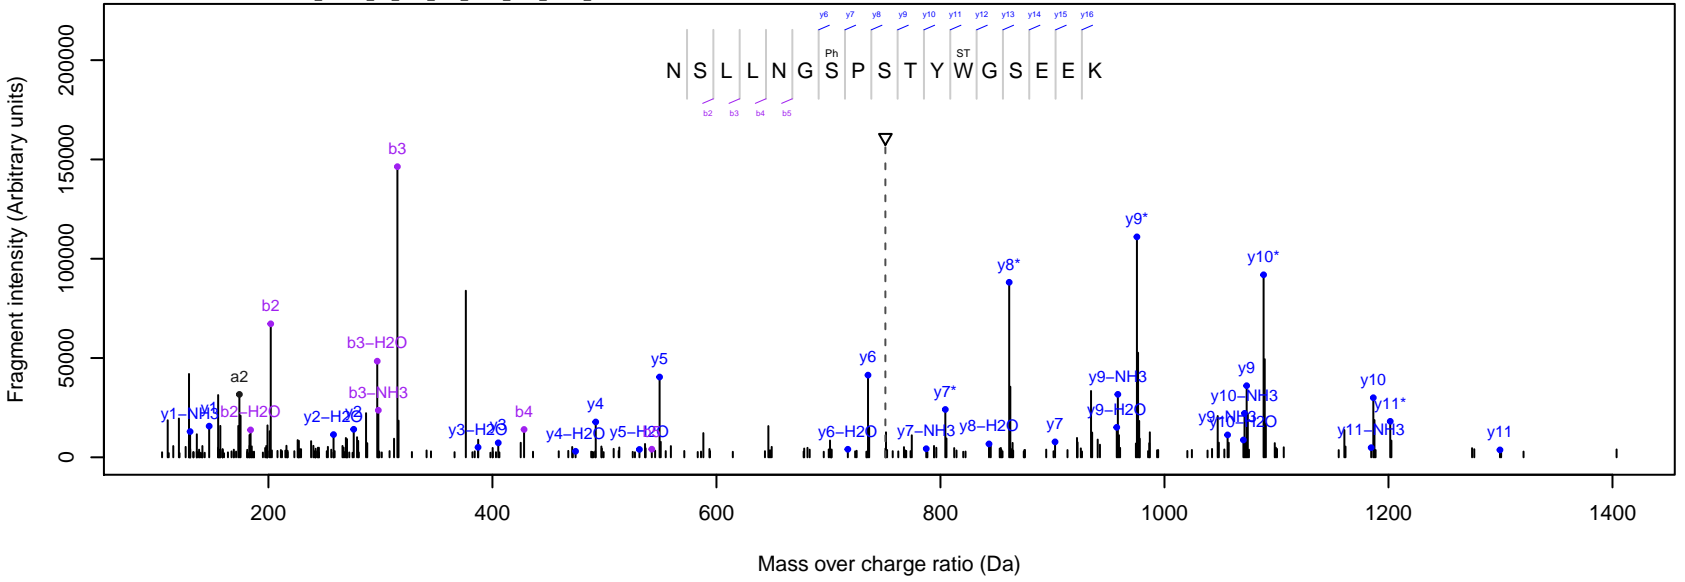

**DQDSS(Phospho (STY))DDEALERLEDWVSSSETSALPRPR-4+**

Source : QE3\_201126\_FR\_TiOx\_hum\_tissue\_Urea\_RNAB\_N Scan : 55692

Andromeda score : 185.3

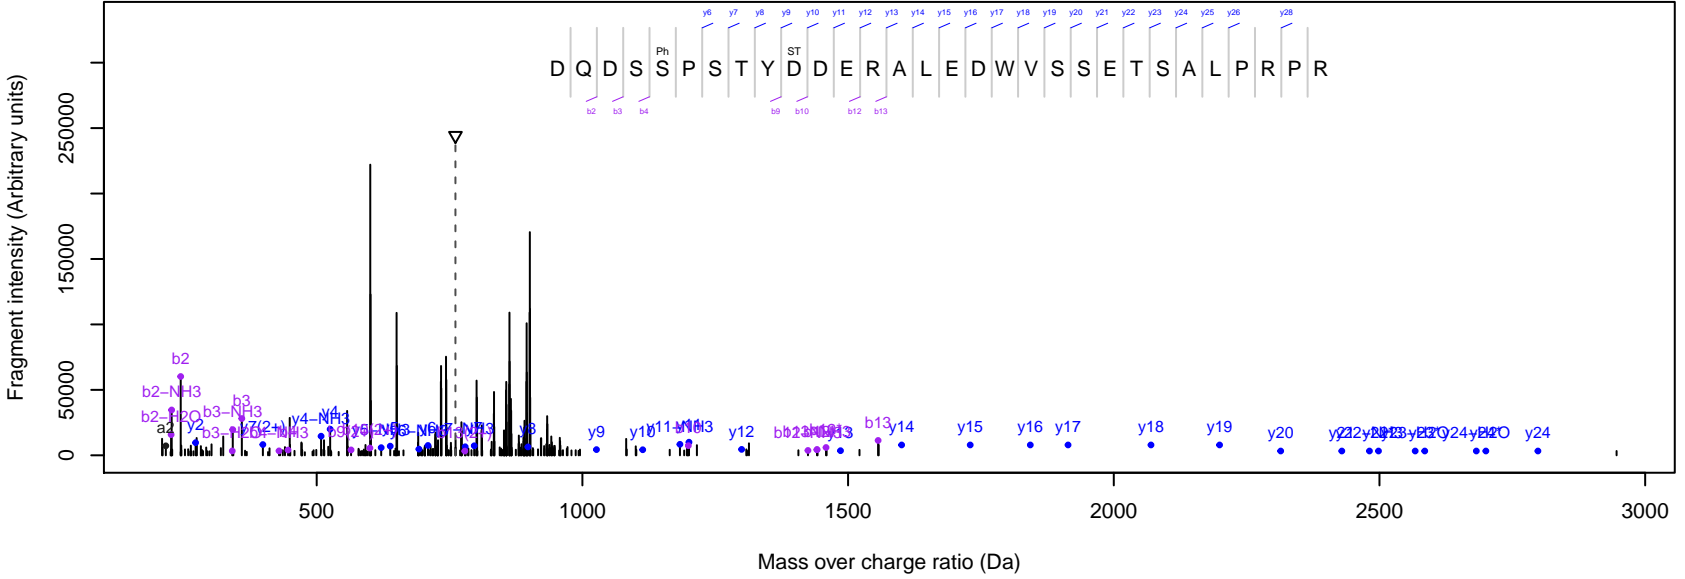

**TES(Phospho (STY))GEETDISPPQEEVK-2+**

Source : QE3\_201126\_FR\_TiOx\_hum\_tissue\_Urea\_RNAB\_N Scan : 32023

Andromeda score : 185.14

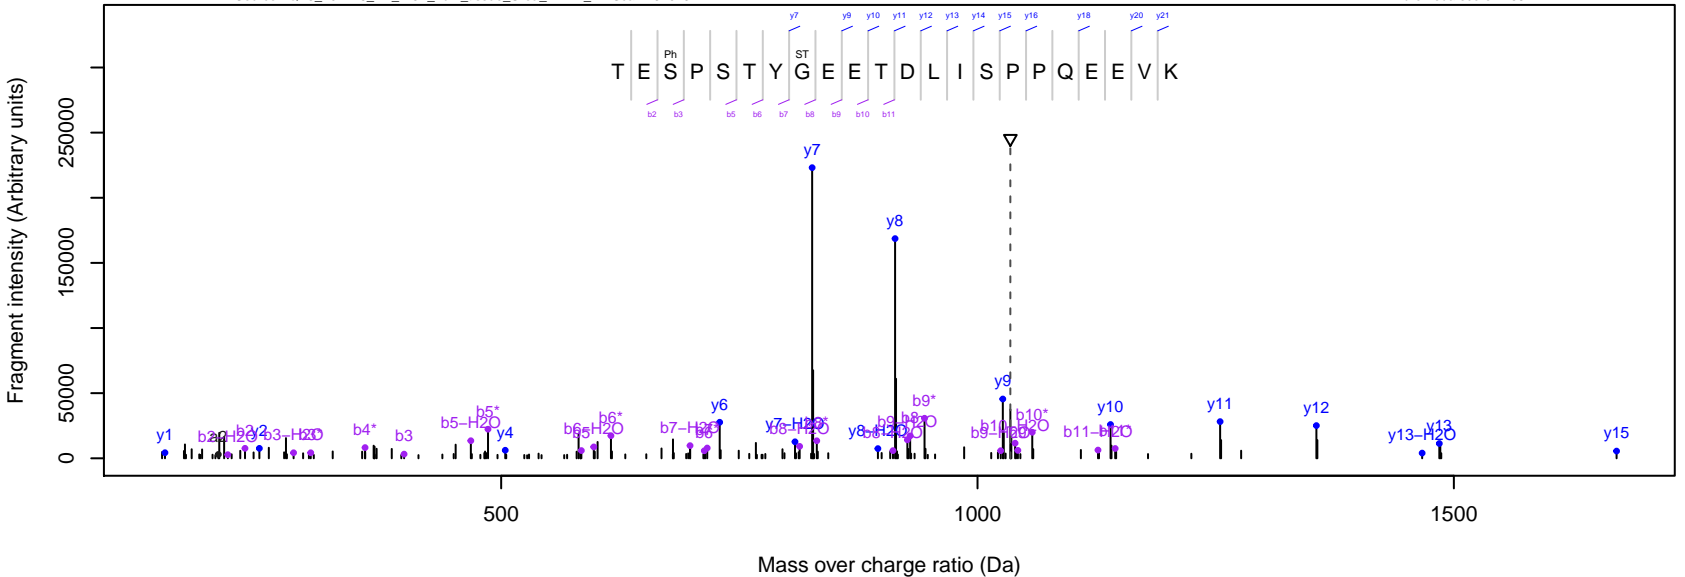

TLS(Phospho (STY))SSAQEDIIR-2+

Source : QE3\_201126\_FR\_TiOx\_hum\_tissue\_Urea\_RNAB\_N Scan : 26713

Andromeda score : 184.96

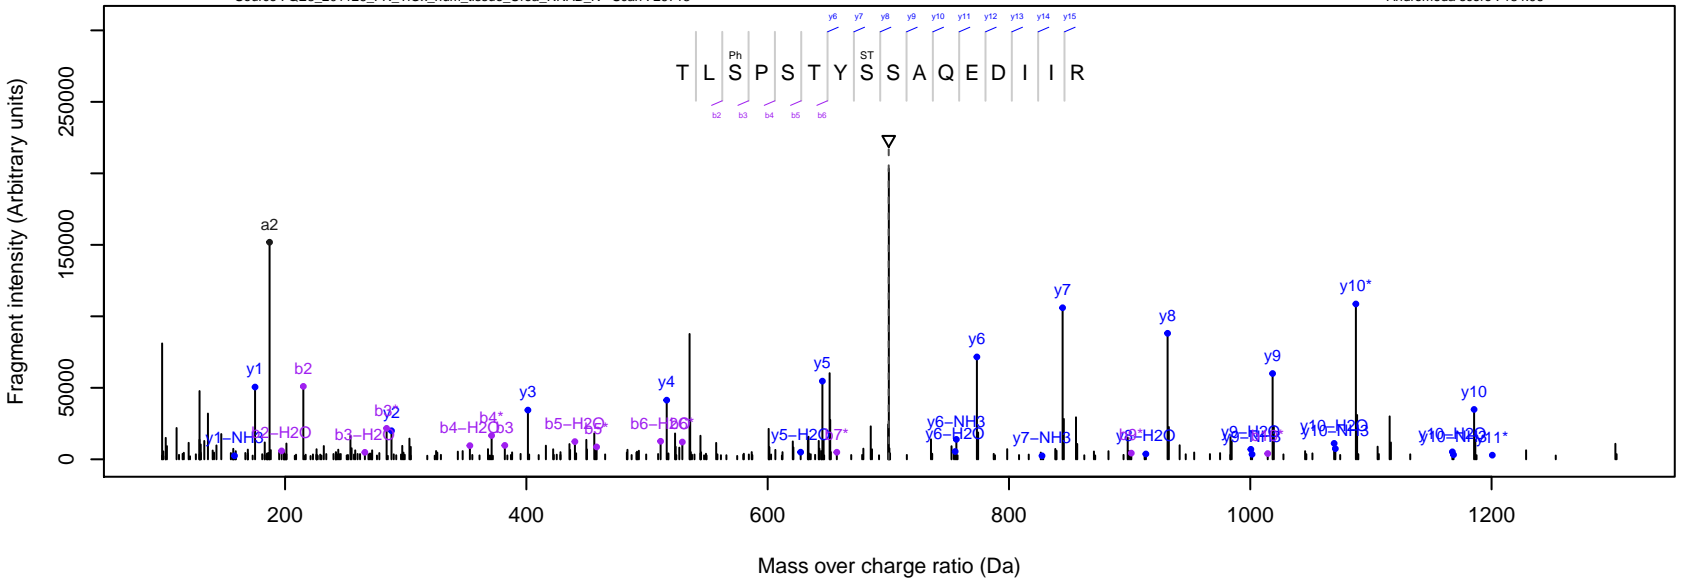

EGPYISVLYGDEEVPR(Phospho (STY))PFK-3+

Source : QE3\_201126\_FR\_TiOx\_hum\_tissue\_Urea\_RNAB\_H Scan : 48203

Andromeda score : 184.88

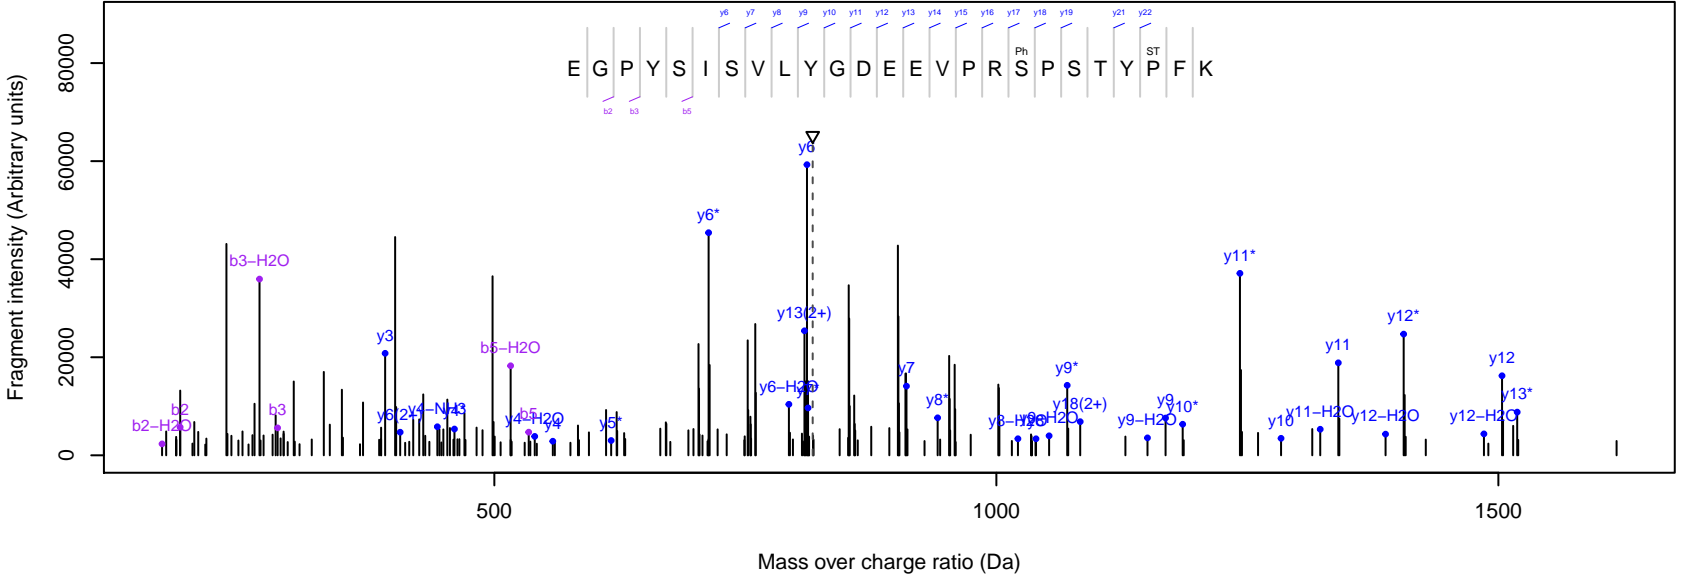

SPSFGDPQLS(Phospho (STY))PEARPR-3+

Source : QE3\_201126\_FR\_TiOx\_hum\_tissue\_Urea\_RNAB\_H Scan : 22266

Andromeda score : 184.7

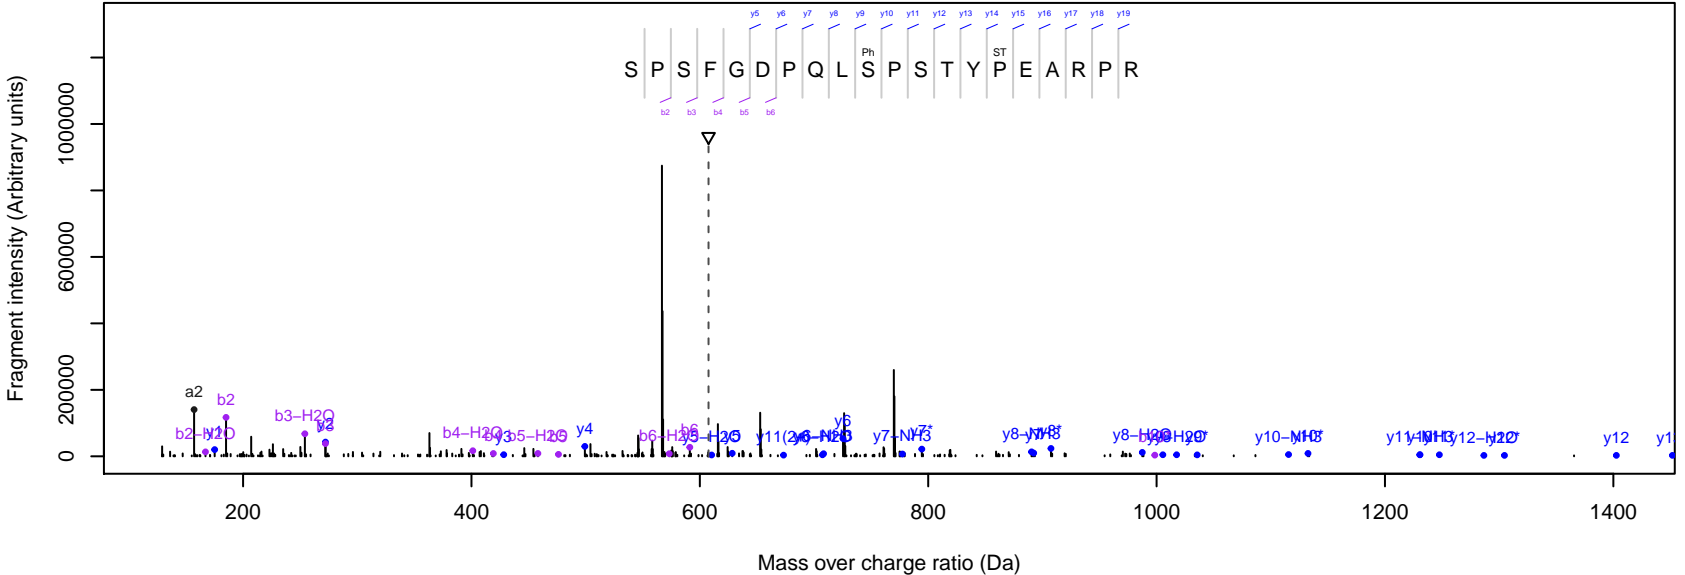

TEAPASSTPQEPWPGTAPS(Phospho (STY))PTSRPPWAVDPFAER-3+

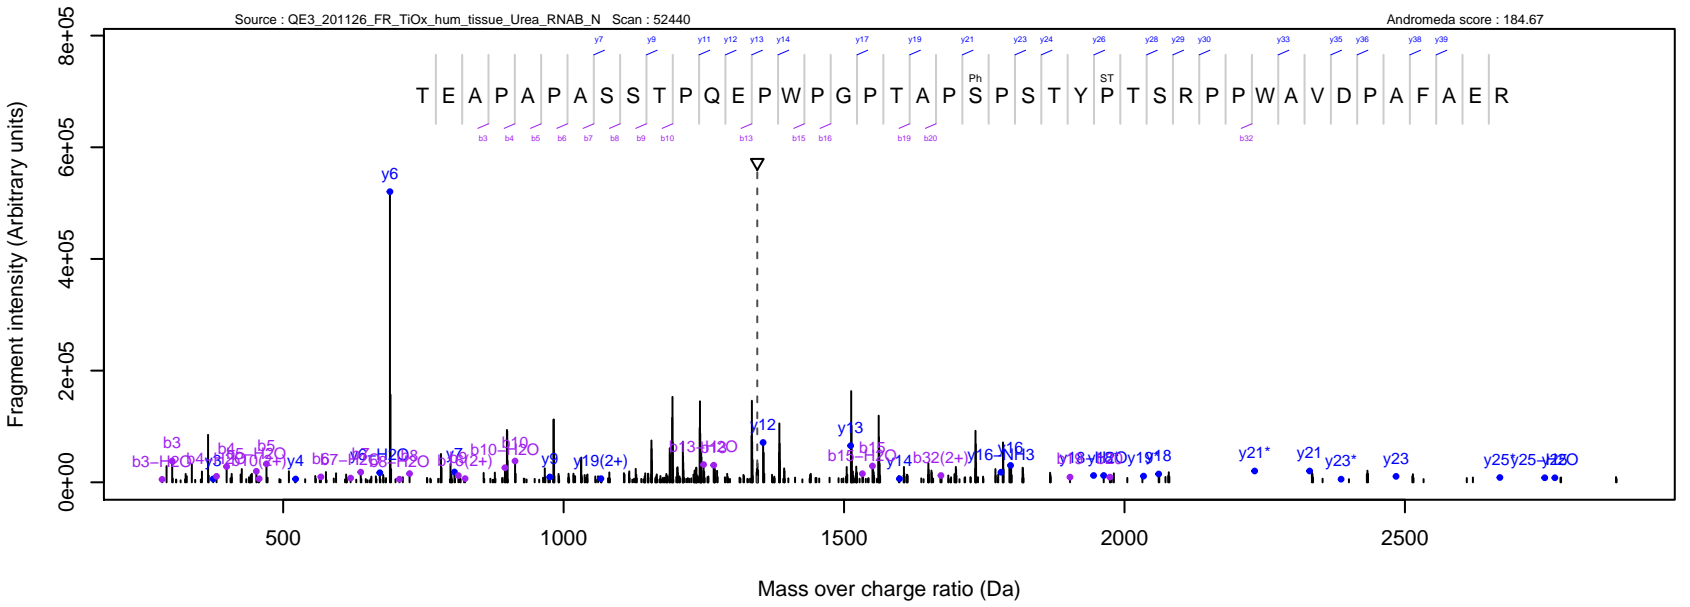

GSLAS(Phospho (STY))LDS(Phospho (STY))LRK-2+

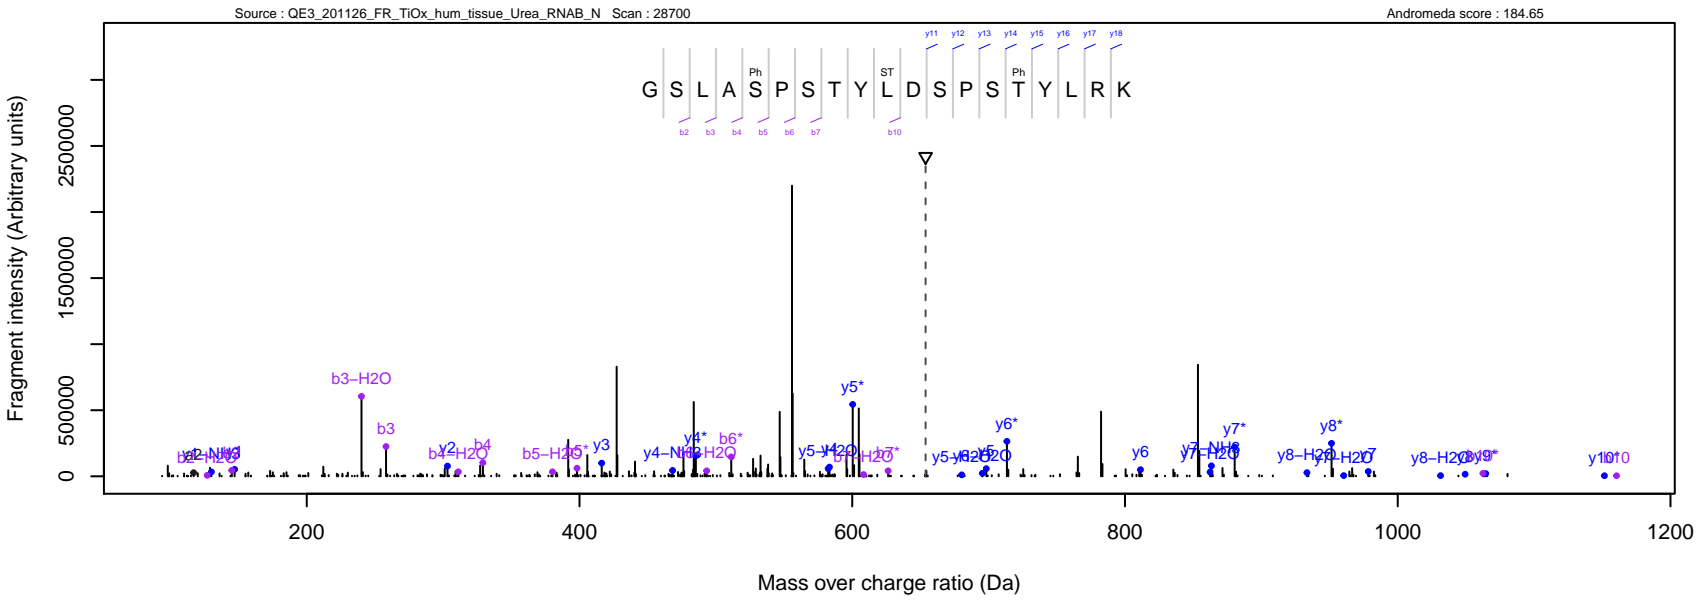

SSS(Phospho (STY))PELVTHLK-2+

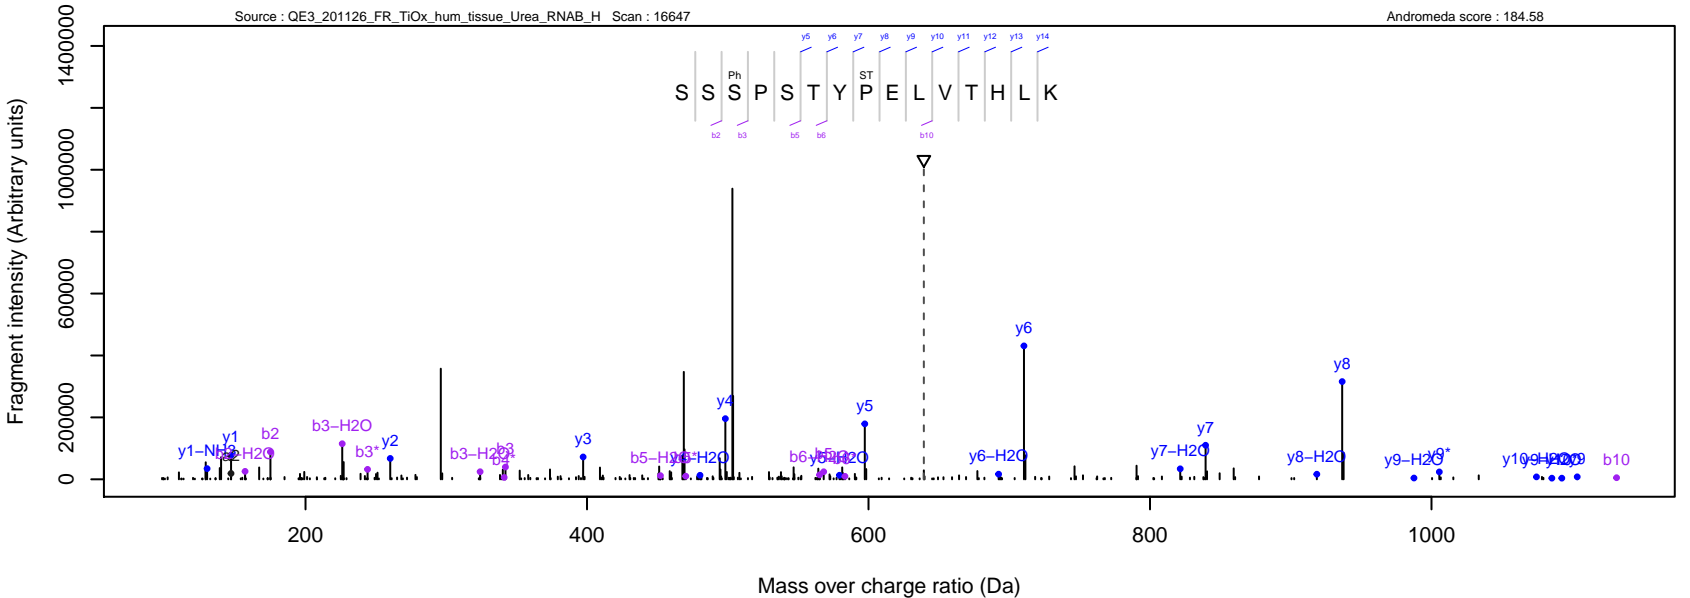

HFKDEDEDVAS(Phospho (STY))PDGLGR-3+

Source : QE3\_201126\_FR\_TIOx\_hum\_tissue\_Urea\_RNAB\_H Scan : 17160

Andromeda score : 184.47

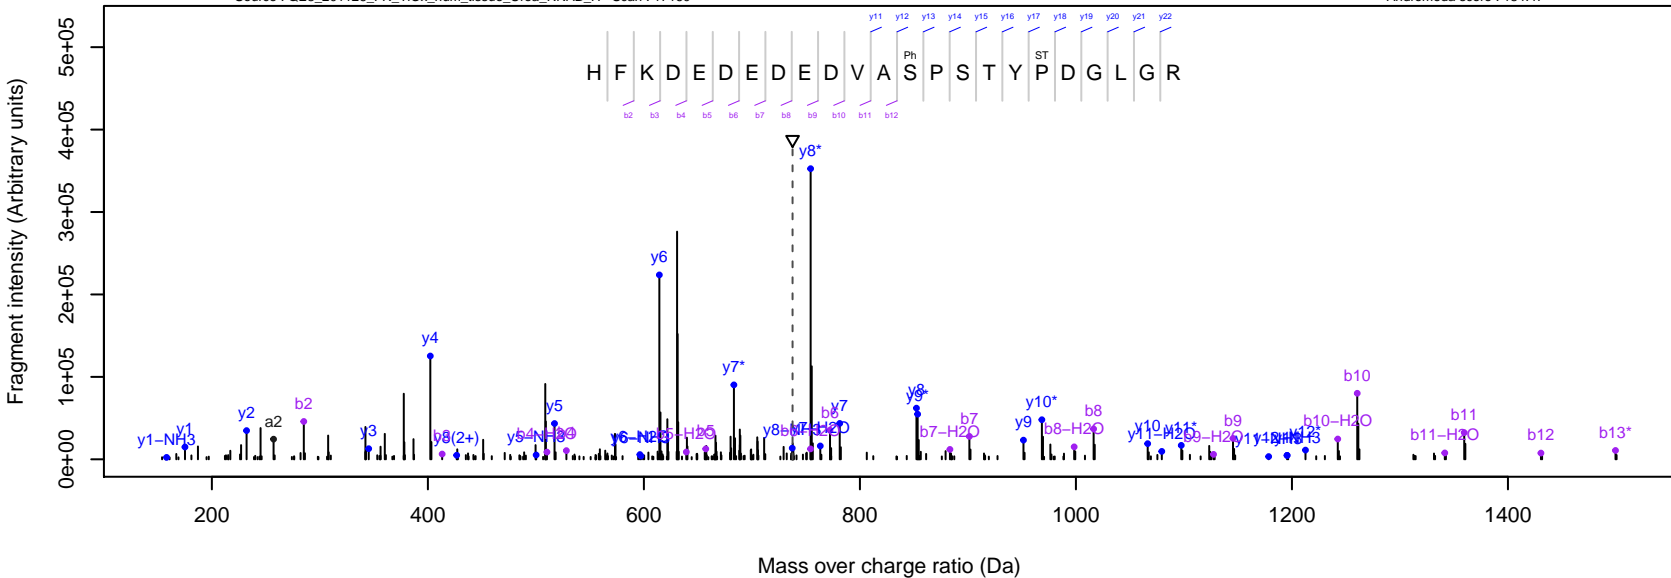

KDDVS(Phospho (STY))PVMQFSSK-2+

Source : QE3\_201126\_FR\_TIOx\_hum\_tissue\_Urea\_RNAB\_N Scan : 22064

Andromeda score : 184.37

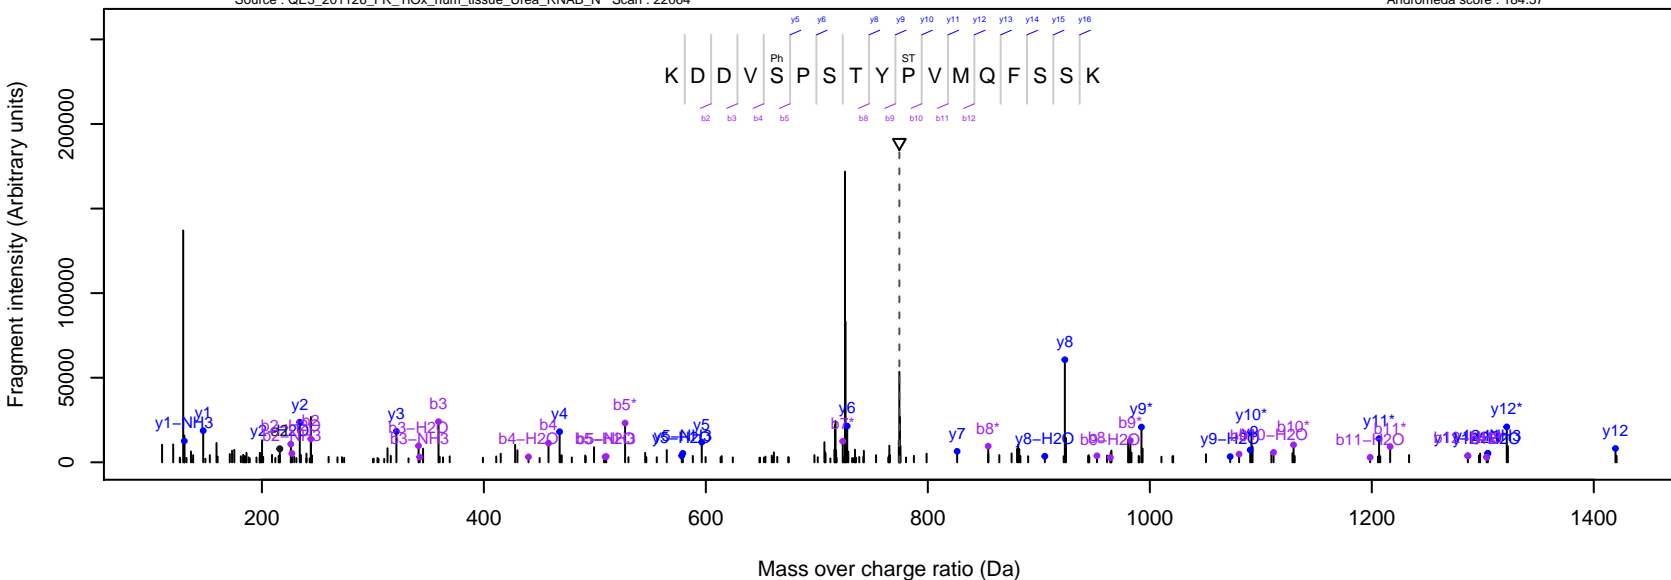

LVEDERS(Phospho (STY))DREETES(Phospho (STY))S(Phospho (STY))EGEEAAAGGAK-3+

Source : QE3\_201126\_FR\_TIOx\_hum\_tissue\_Urea\_RNAB\_B Scan : 14794

Andromeda score : 184.35

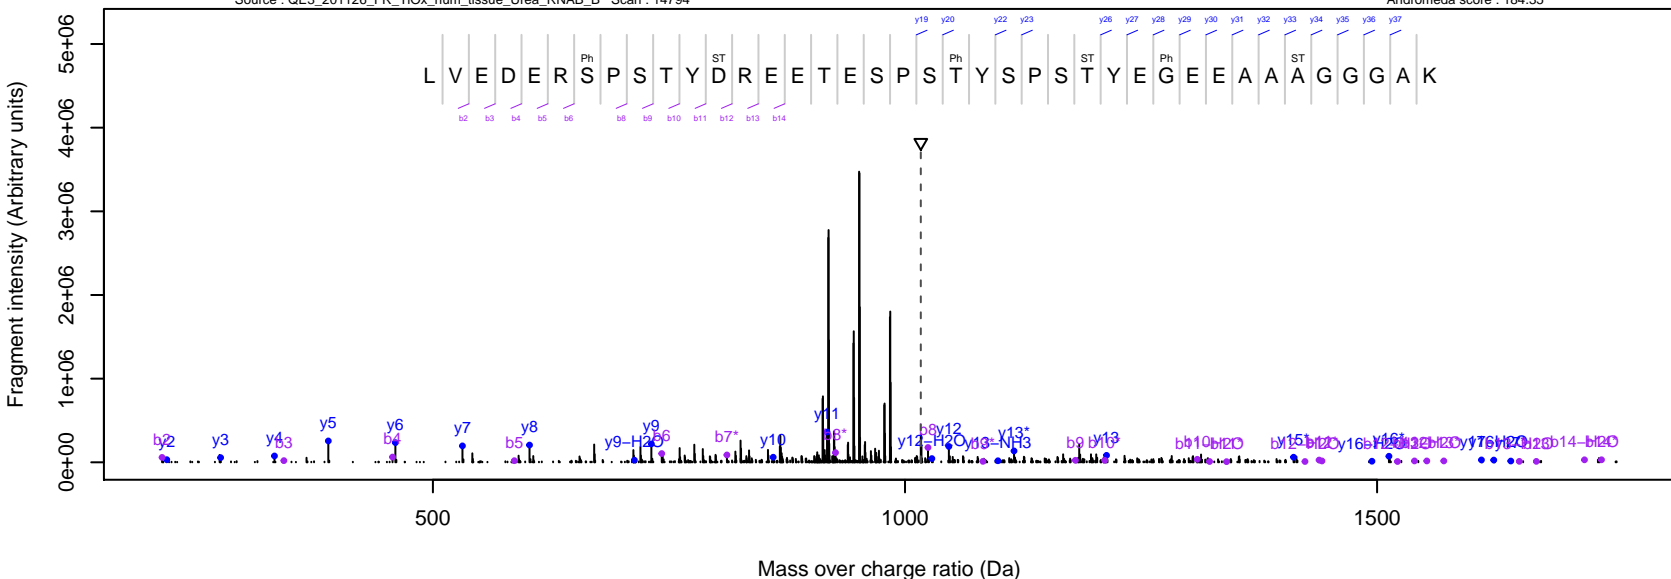



VRLS(Phospho (STY))PEPWTPEETGLVTD A F K-2+

Source : QE3\_201126\_FR\_TiOx\_hum\_tissue\_Urea\_RNAB\_H Scan : 52579

Andromeda score : 184.35

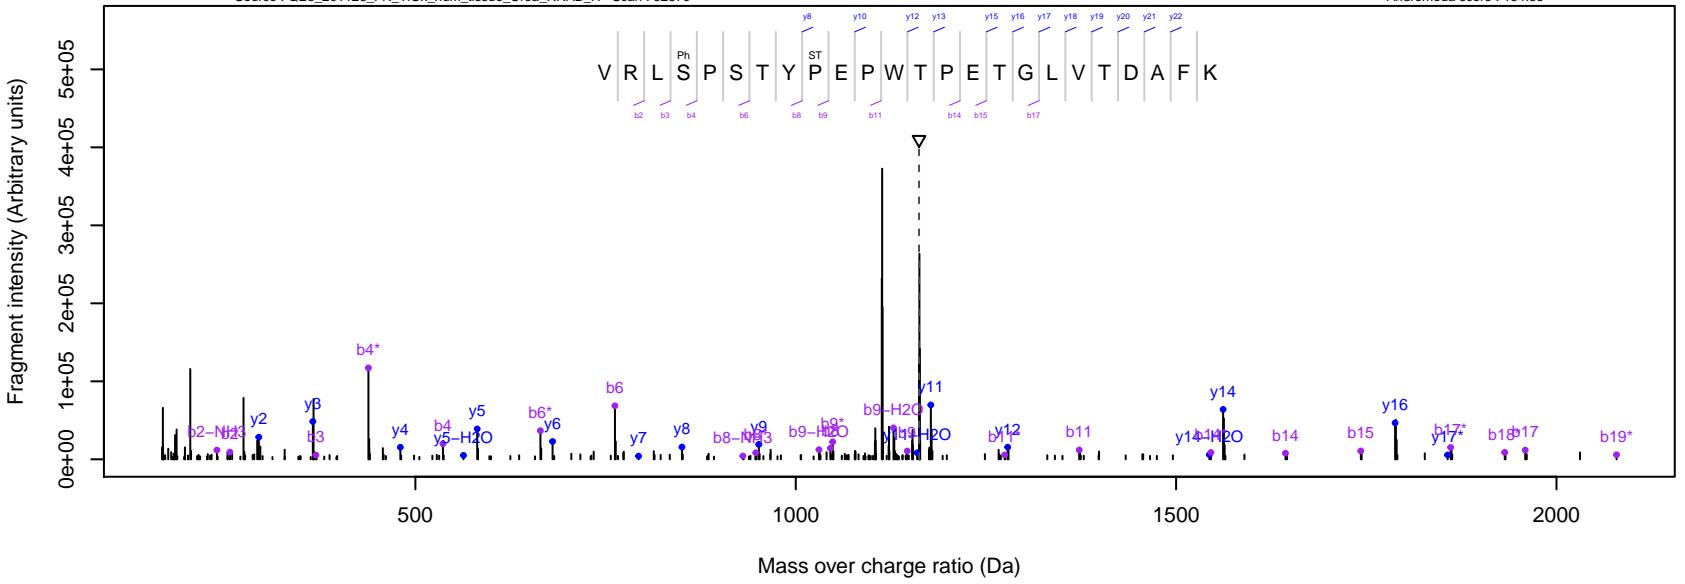

S(Phospho (STY))RSPGPPQVDGPTMSLERPPR-4+

Source : QE3\_201126\_FR\_TiOx\_hum\_tissue\_Urea\_RNAB\_N Scan : 22012

Andromeda score : 184.29

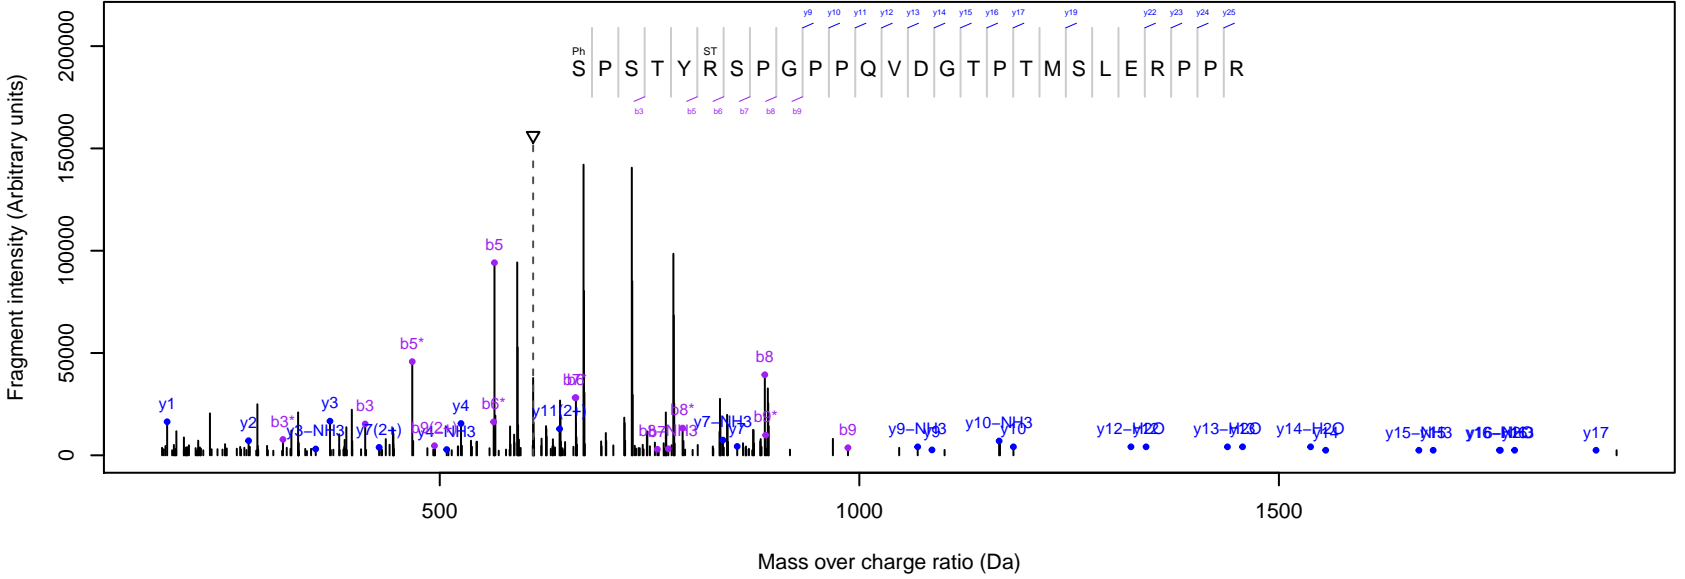

TAS(Phospho (STY))ELLLDRR-2+

Source : QE3\_201126\_FR\_TiOx\_hum\_tissue\_Urea\_RNAB\_B Scan : 22901

Andromeda score : 184.24

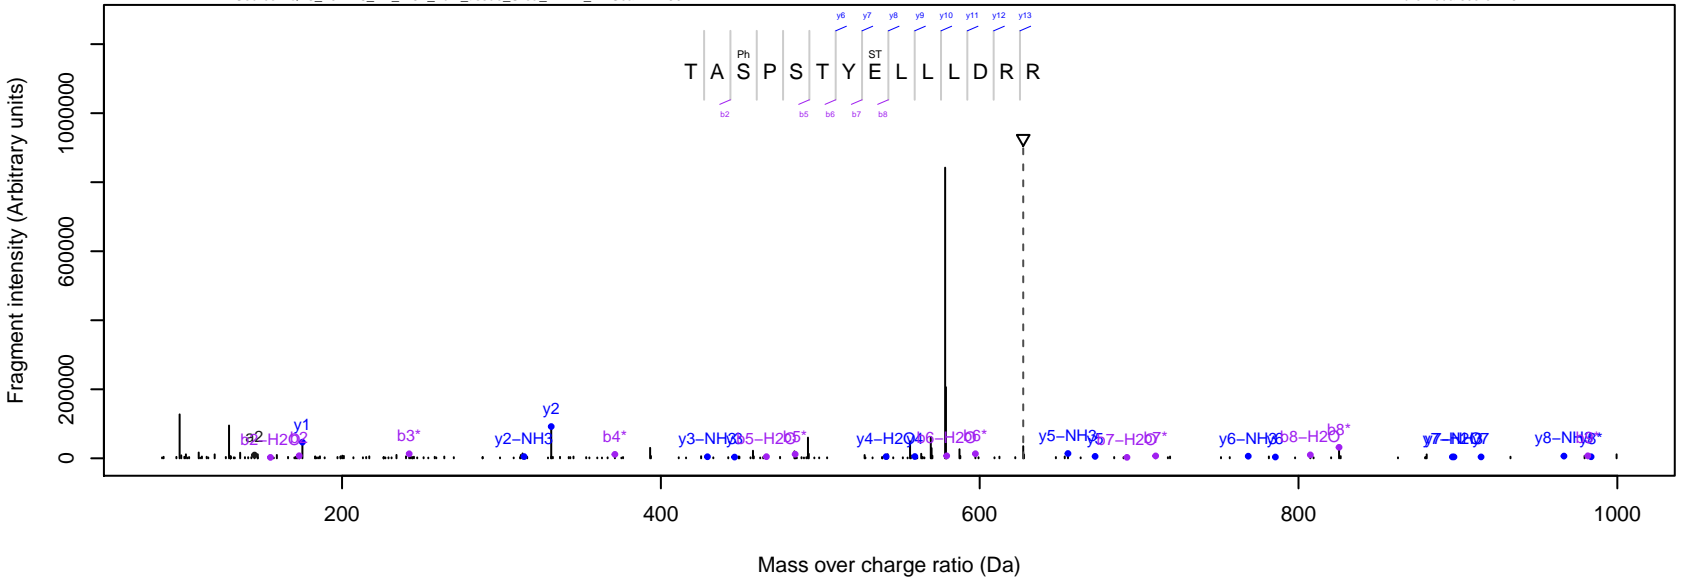

REEDEPEERS(Phospho (STY))GDETPGSEVPGDK-3+

Source : QE3\_201126\_FR\_TIOx\_hum\_tissue\_Urea\_RNAB\_N Scan : 10530

Andromeda score : 183.86

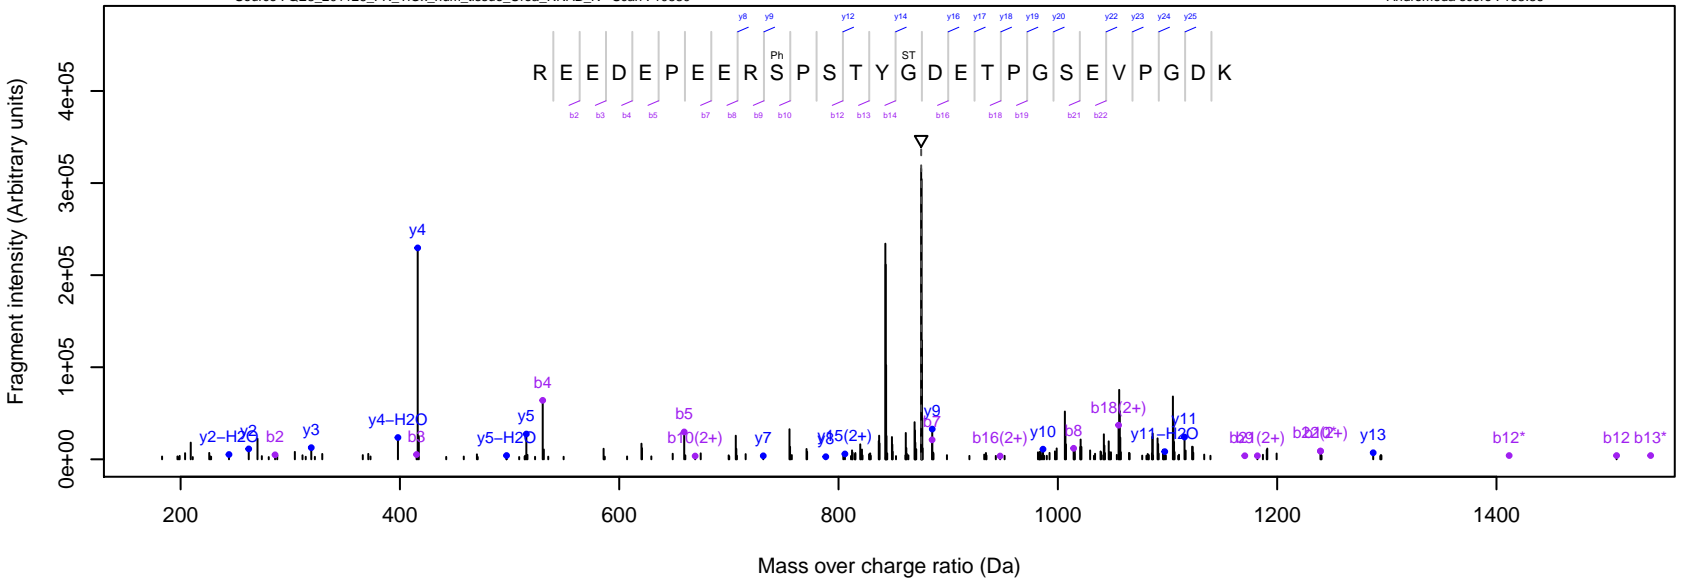

SS(Phospho (STY))SQPSSCCS(Phospho (STY))DPSKPGGNVEGATQSLAEQM(Oxidation (M))R-3+

Source : QE3\_201126\_FR\_TIOx\_hum\_tissue\_Urea\_RNAB\_B Scan : 24404

Andromeda score : 183.52

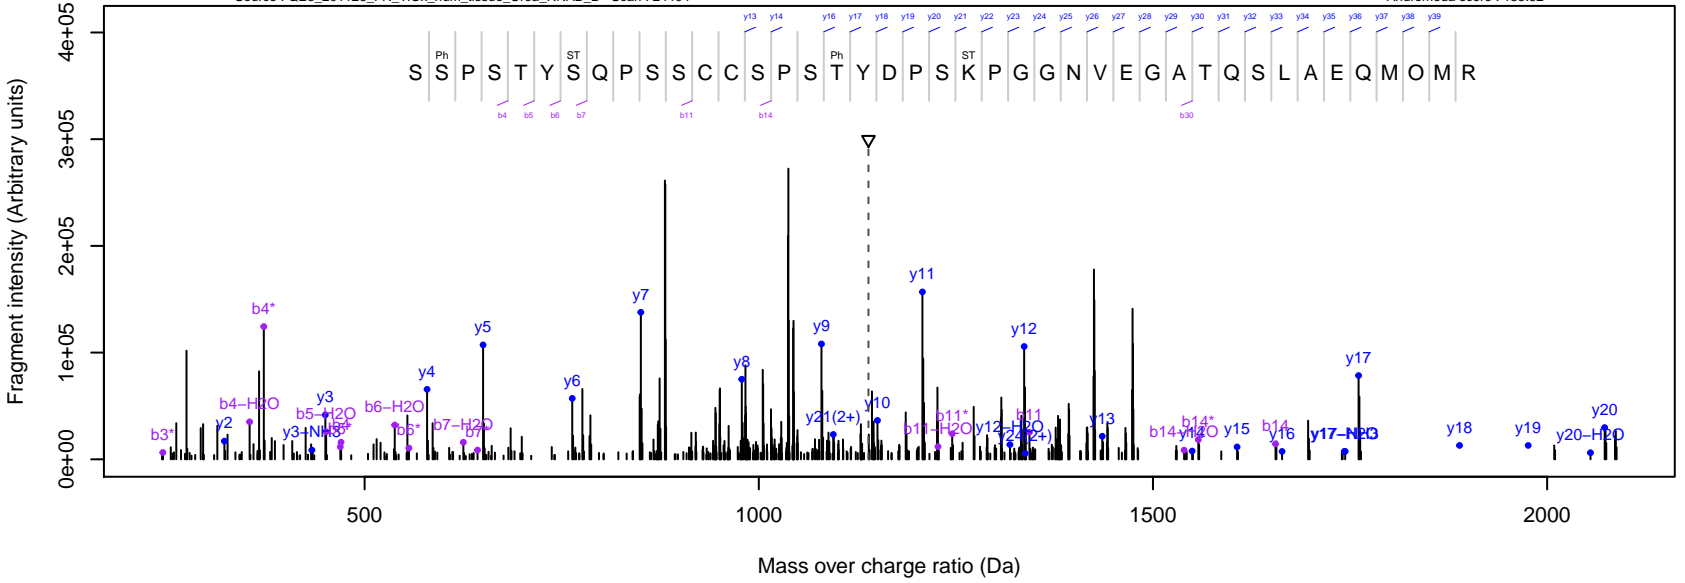

QKIEKEDDS(Phospho (STY))EGEES(Phospho (STY))EEEEEEEEEGS(Phospho (STY))EESER-3+

Source : QE3\_201126\_FR\_TIOx\_hum\_tissue\_Urea\_RNAB\_N Scan : 13696

Andromeda score : 183.48

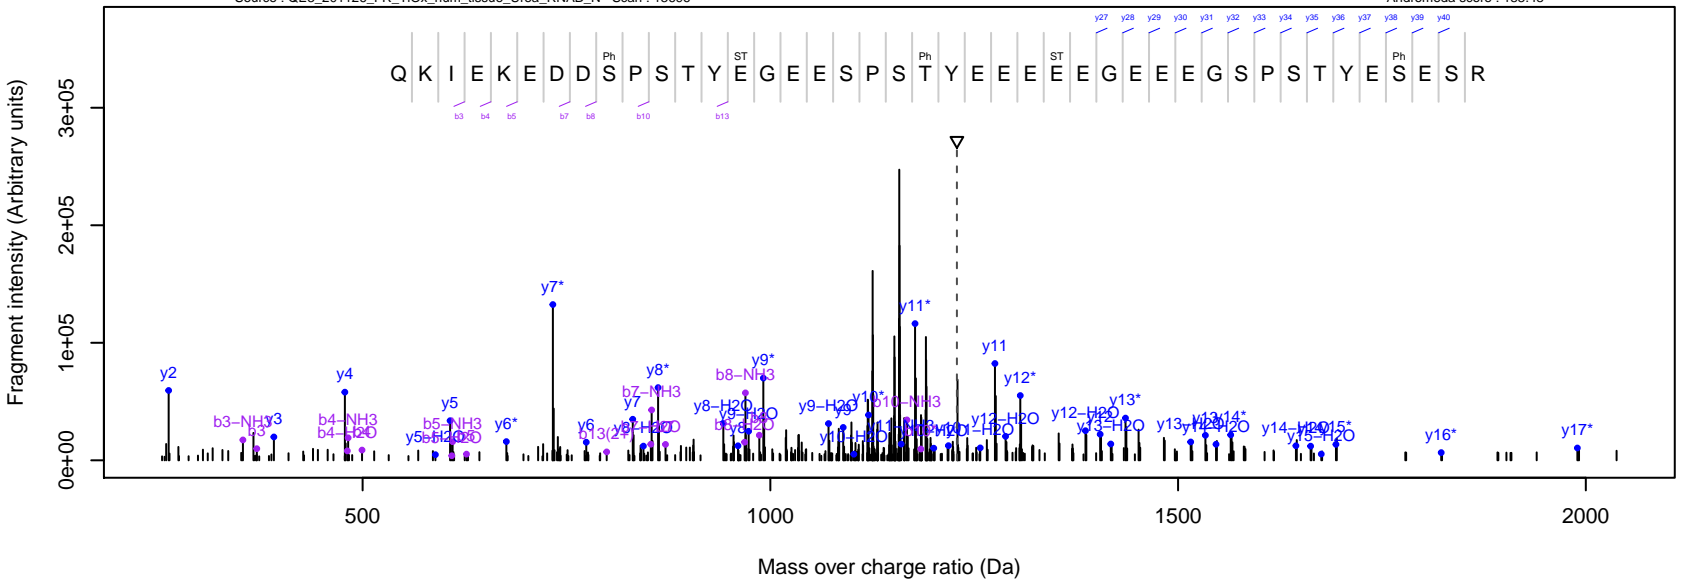

KDDVS(Phospho (STY))PVM(Oxidation (M))QFSSK-2+

Source : QE3\_201126\_FR\_TIOx\_hum\_tissue\_Urea\_RNAB\_H Scan : 14697

Andromeda score : 183.36

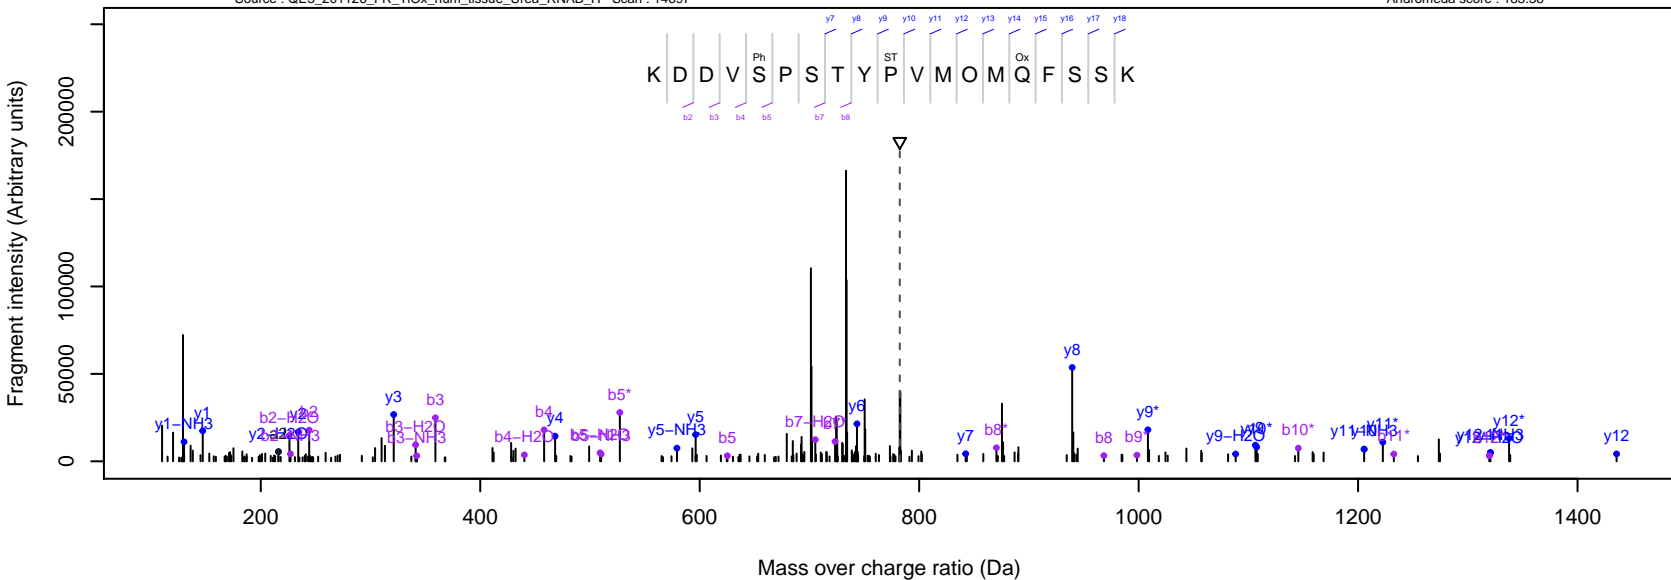

SPSPVKS(Phospho (STY))PTPKS(Phospho (STY))PPSR-3+

Source : QE3\_201126\_FR\_TIOx\_hum\_tissue\_Urea\_RNAB\_N Scan : 9481

Andromeda score : 183.27

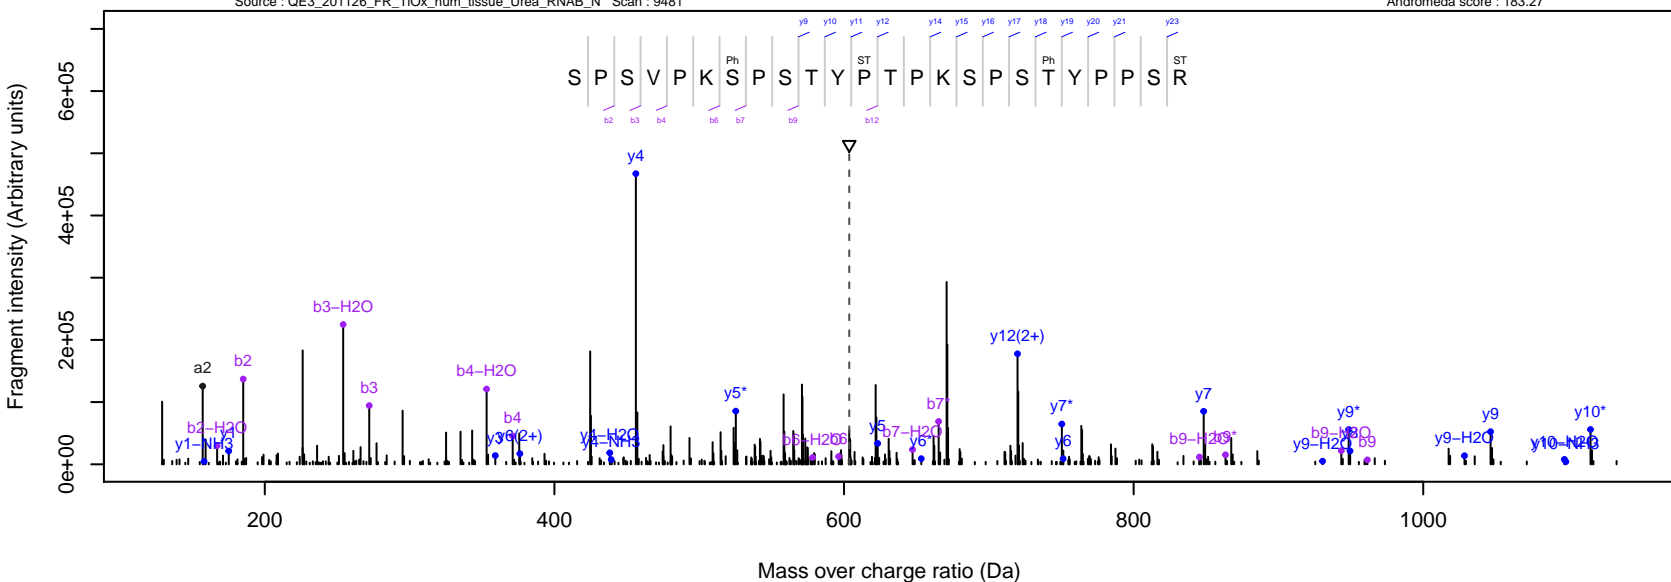

FTDKDQQPS(Phospho (STY))GS(Phospho (STY))EGEDDDAEALKK-2+

Source : QE3\_201126\_FR\_TIOx\_hum\_tissue\_Urea\_RNAB\_H Scan : 16768

Andromeda score : 183.25

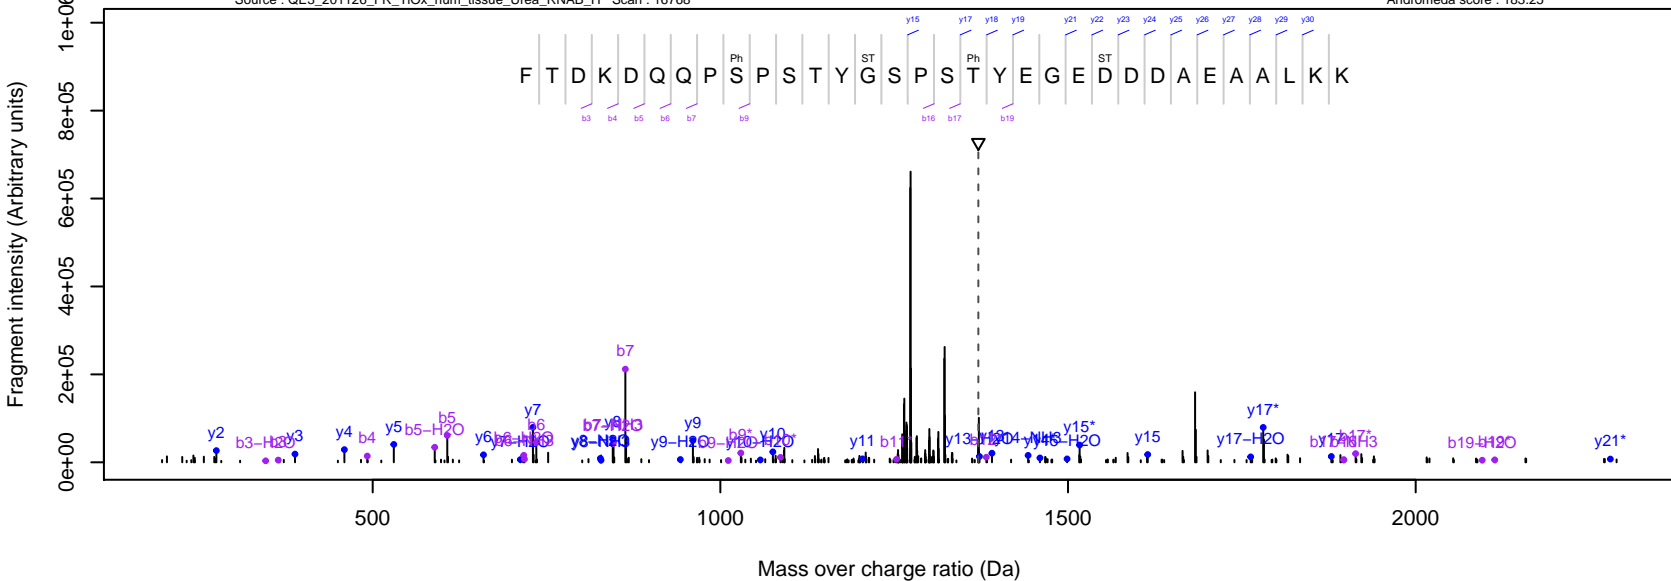



SKETSSPGTDDVFTPA P S D S P S T Y P S S Q R

Source : QE3\_201126\_FR\_TiOx\_hum\_tissue\_Urea\_RNAB\_N Scan : 20287

Andromeda score : 183.15

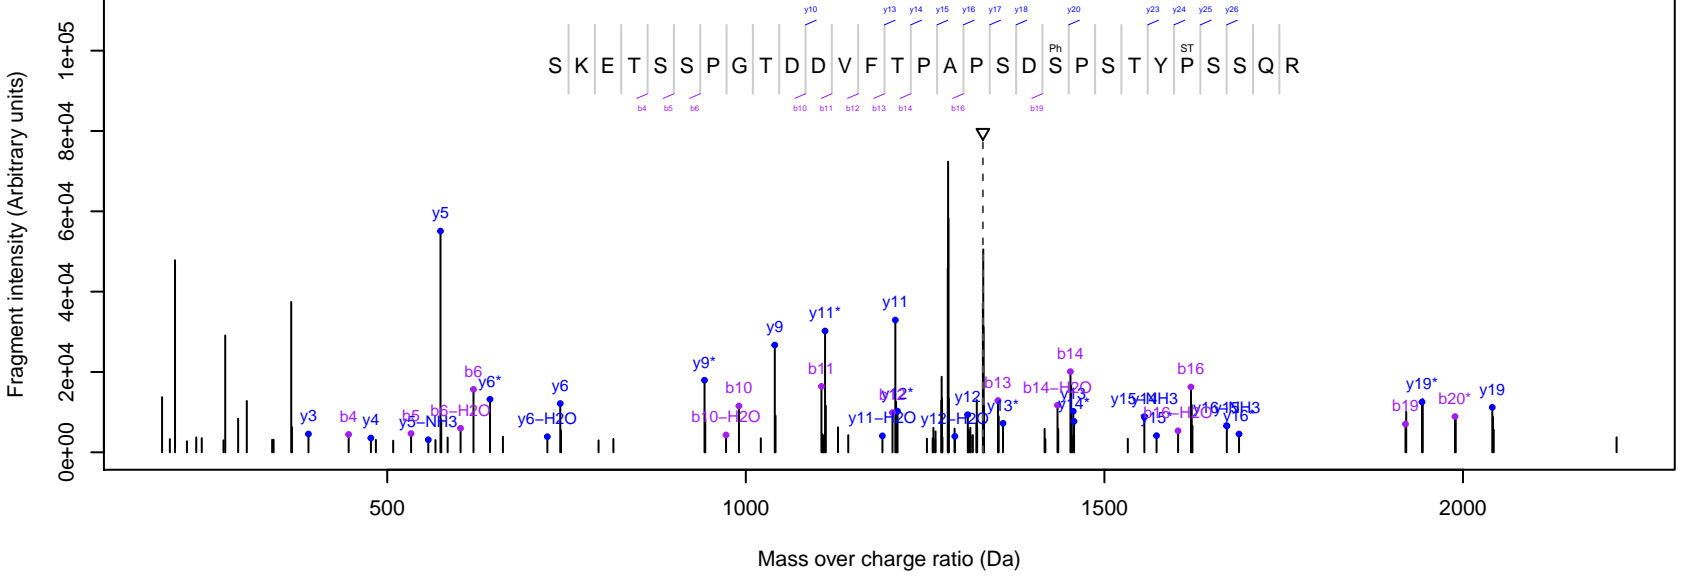

RYS(Phospho (STY))PPIQR-2+

Source : QE3\_201126\_FR\_TiOx\_hum\_tissue\_Urea\_RNAB\_B Scan : 9986

Andromeda score : 183.08

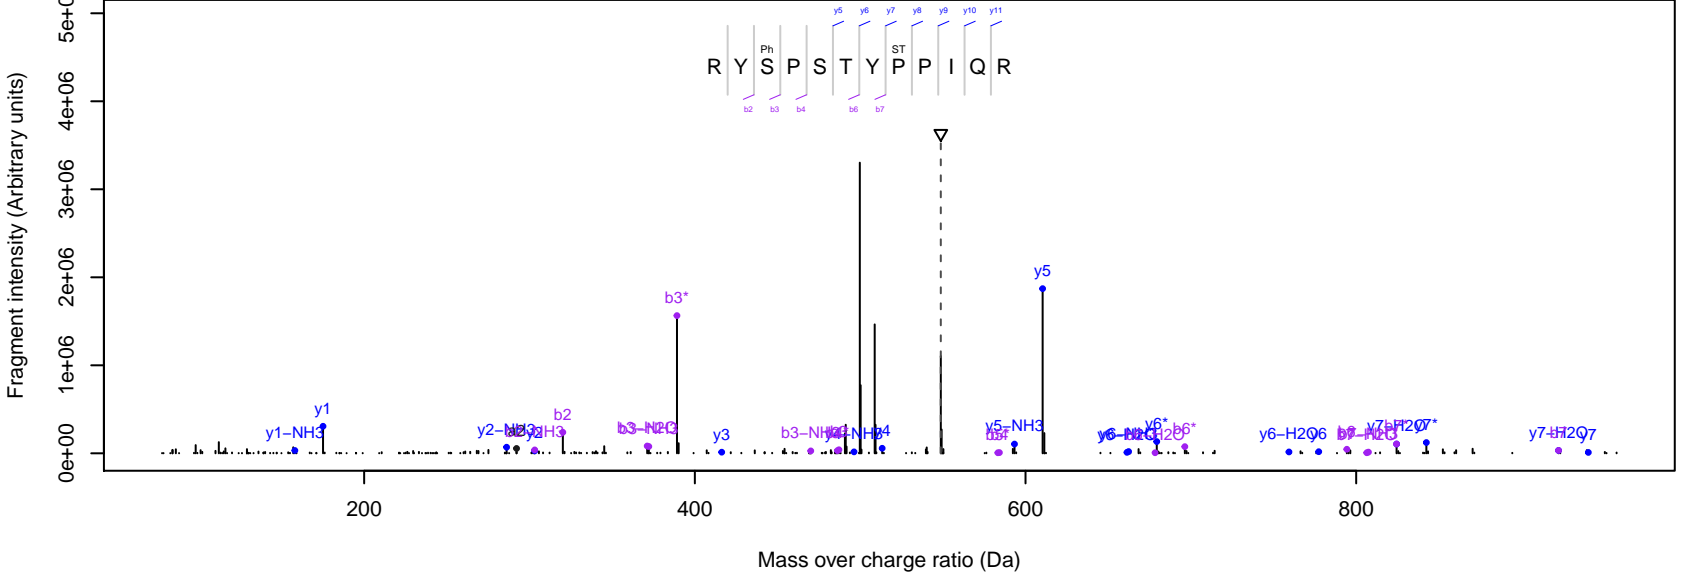

AETSEGSAPAVPEAS(Phospho (STY))PK-2+

Source : QE3\_201126\_FR\_TiOx\_hum\_tissue\_Urea\_RNAB\_N Scan : 16021

Andromeda score : 183.07

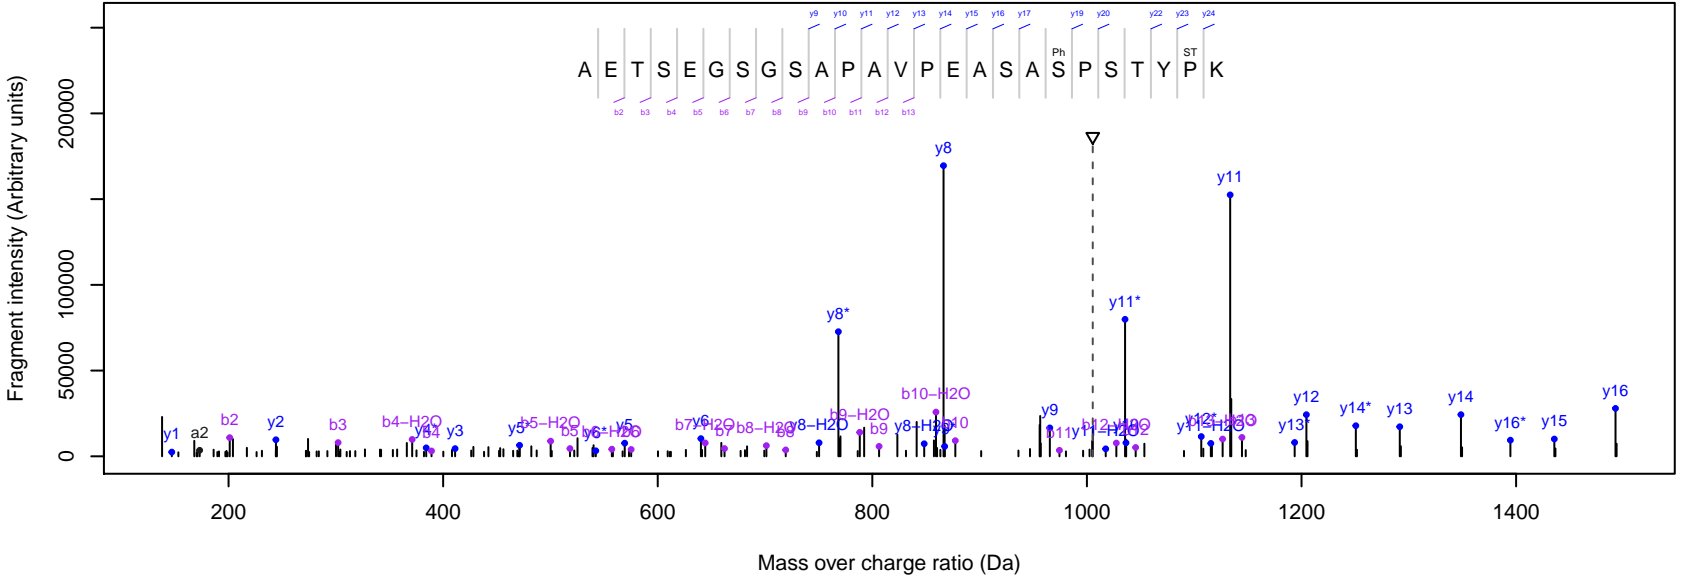

WLREAEES(Phospho (STY))DHN-2+

Source : QE3\_201126\_FR\_TiOx\_hum\_tissue\_Urea\_RNAB\_N Scan : 12954

Andromeda score : 183.06

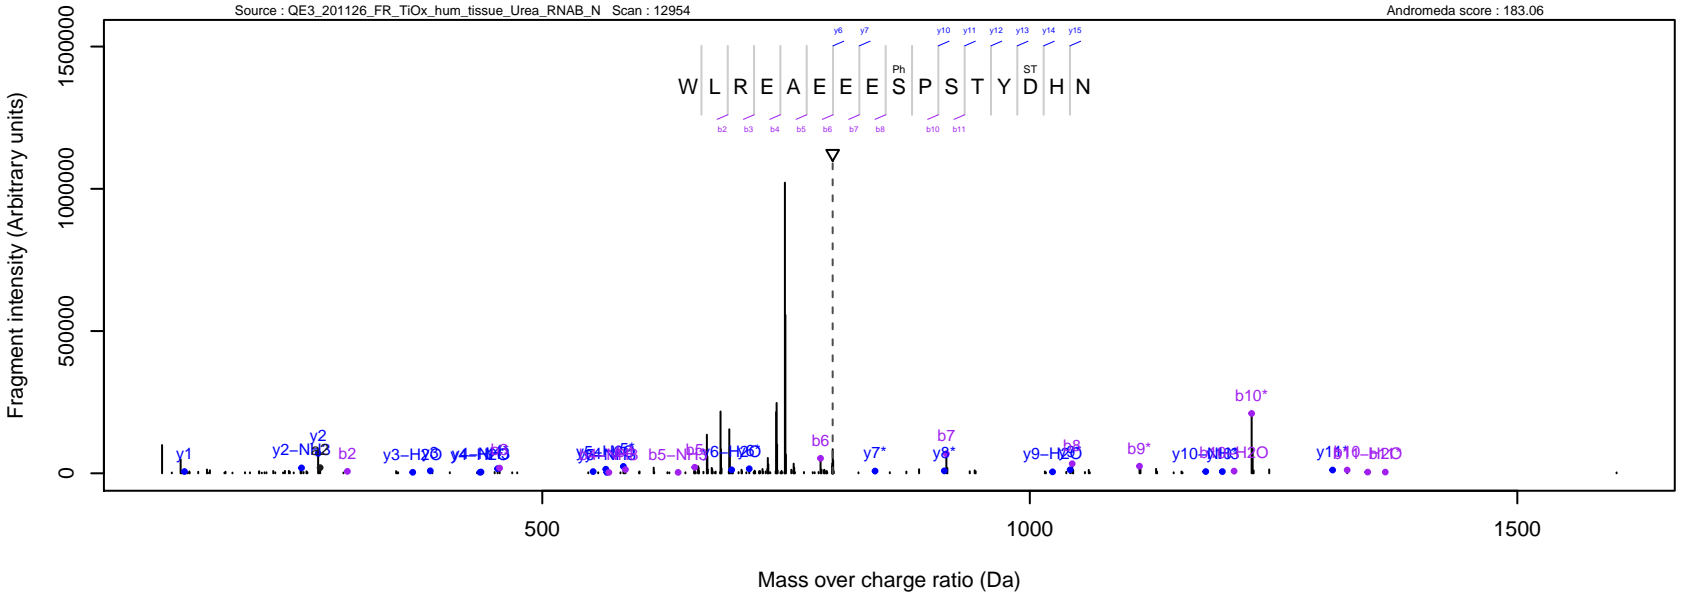

M(Oxidation (M))S(Phospho (STY))GFIYQGK-2+

Source : QE3\_201126\_FR\_TiOx\_hum\_tissue\_Urea\_RNAB\_N Scan : 21640

Andromeda score : 183

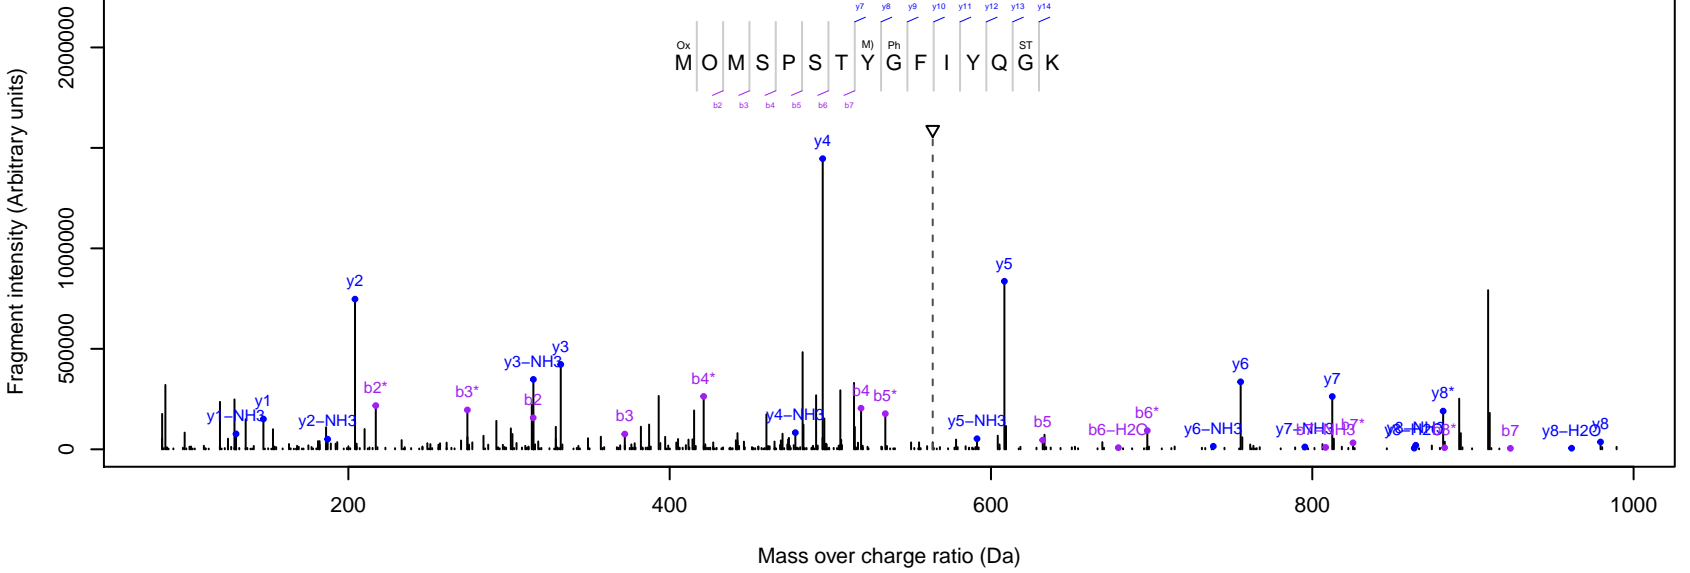

VQIPVSRPDEPESPSTYDNEEDSPSTYYDEEIHDP-3+

Source : QE3\_201126\_FR\_TiOx\_hum\_tissue\_Urea\_RNAB\_N Scan : 32416

Andromeda score : 182.92

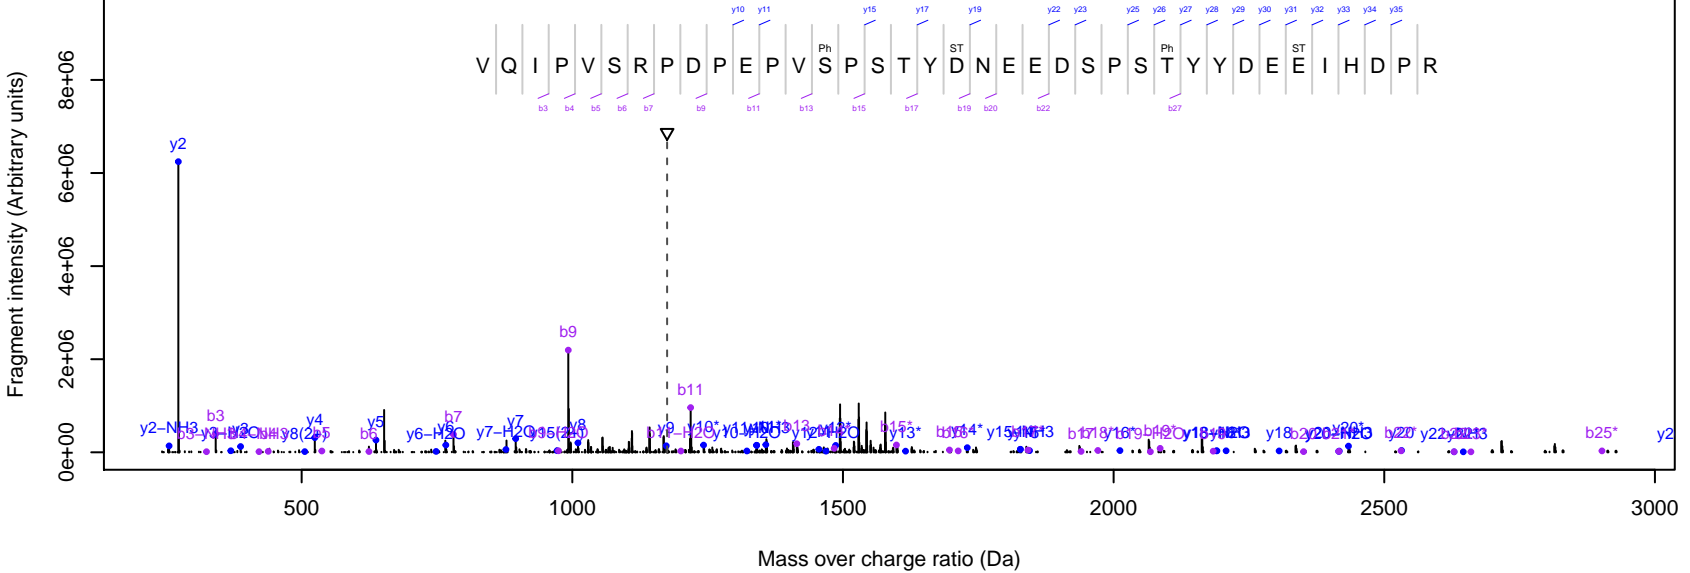

S(Phospho (STY))KELVSSSSSSGSDS(Phospho (STY))DSEVDKK-3+

Source : QE3\_201126\_FR\_TiOx\_hum\_tissue\_Urea\_RNAB\_N Scan : 8465

Andromeda score : 182.9

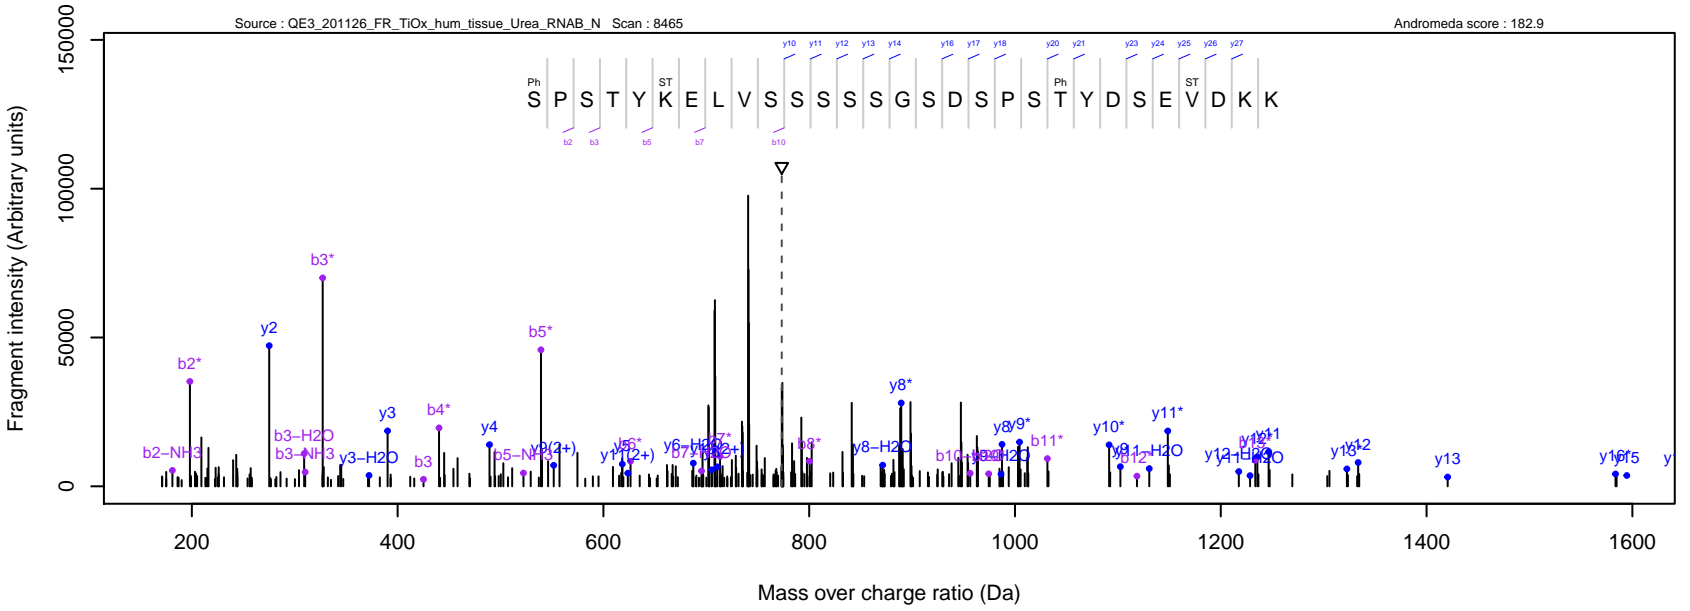

NSSLGSPSNLCGS(Phospho (STY))PPGSIR-2+

Source : QE3\_201126\_FR\_TiOx\_hum\_tissue\_Urea\_RNAB\_H Scan : 27220

Andromeda score : 182.82

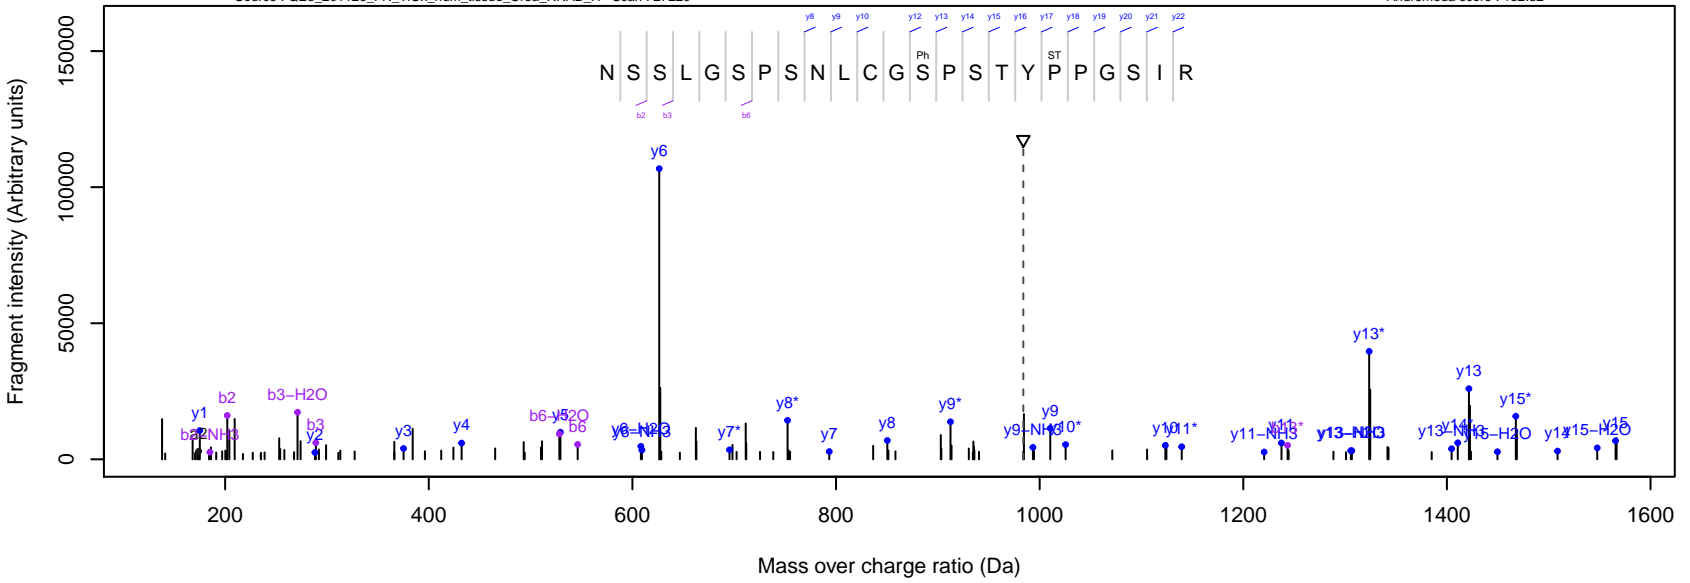

SALVTSSS(Phospho (STY))SLPSFPSTLSWSR-2+

Source : QE3\_201126\_FR\_TiOx\_hum\_tissue\_Urea\_RNAB\_H Scan : 56454

Andromeda score : 182.82

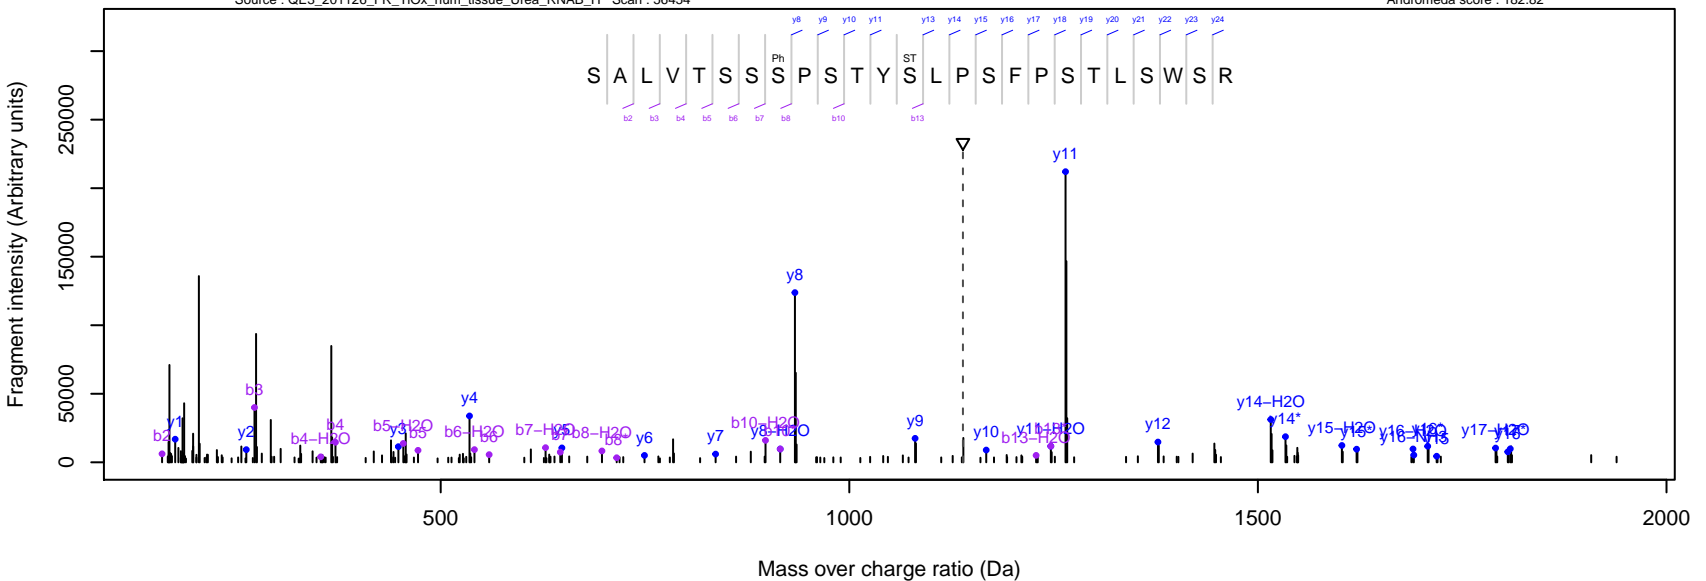

VEAKEES(Phospho (STY))EESDED(M)GFLFD-2+

Source : QE3\_201126\_FR\_TIOx\_hum\_tissue\_Urea\_RNAB\_B Scan : 48820

Andromeda score : 182.82

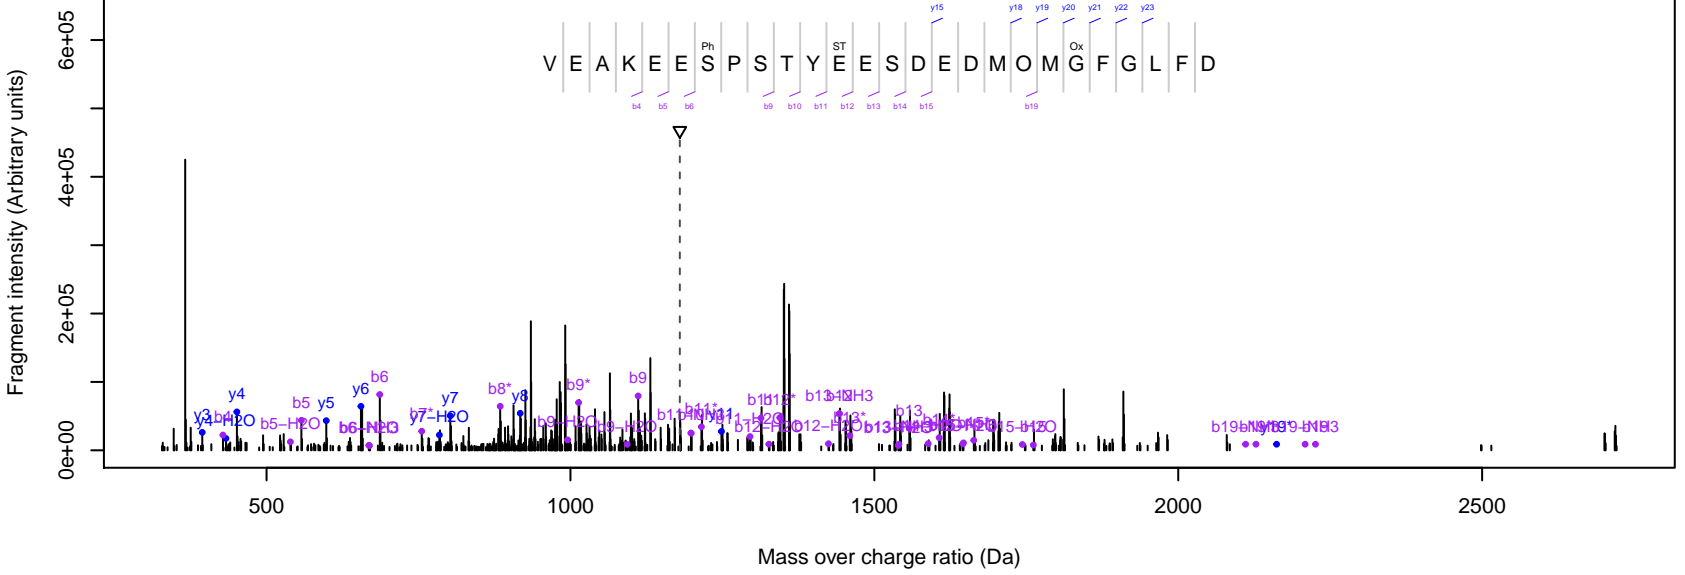

QVLQSTQS(Phospho (STY))PR-2+

Source : QE3\_201126\_FR\_TIOx\_hum\_tissue\_Urea\_RNAB\_H Scan : 8845

Andromeda score : 182.71

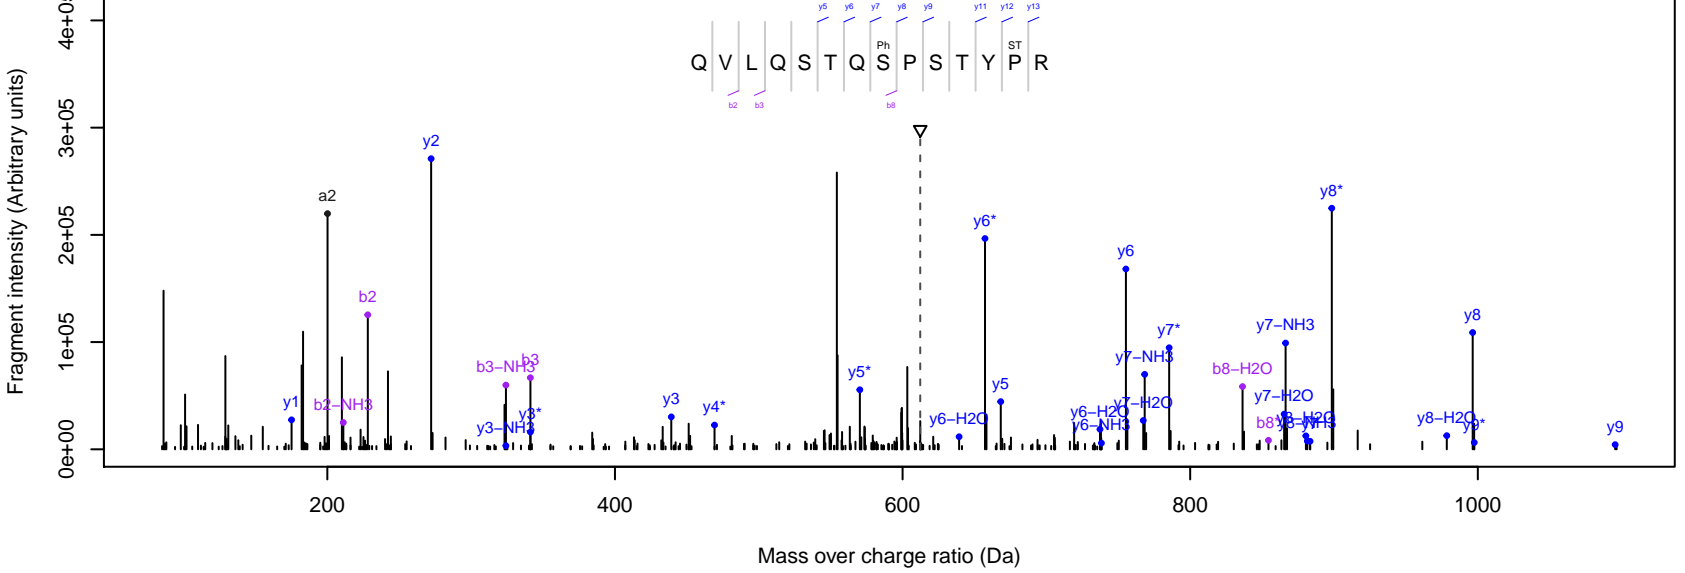

SPS(Phospho (STY))SLLIANLHLQ-2+

Source : QE3\_201126\_FR\_TIOx\_hum\_tissue\_Urea\_RNAB\_N Scan : 56111

Andromeda score : 182.71

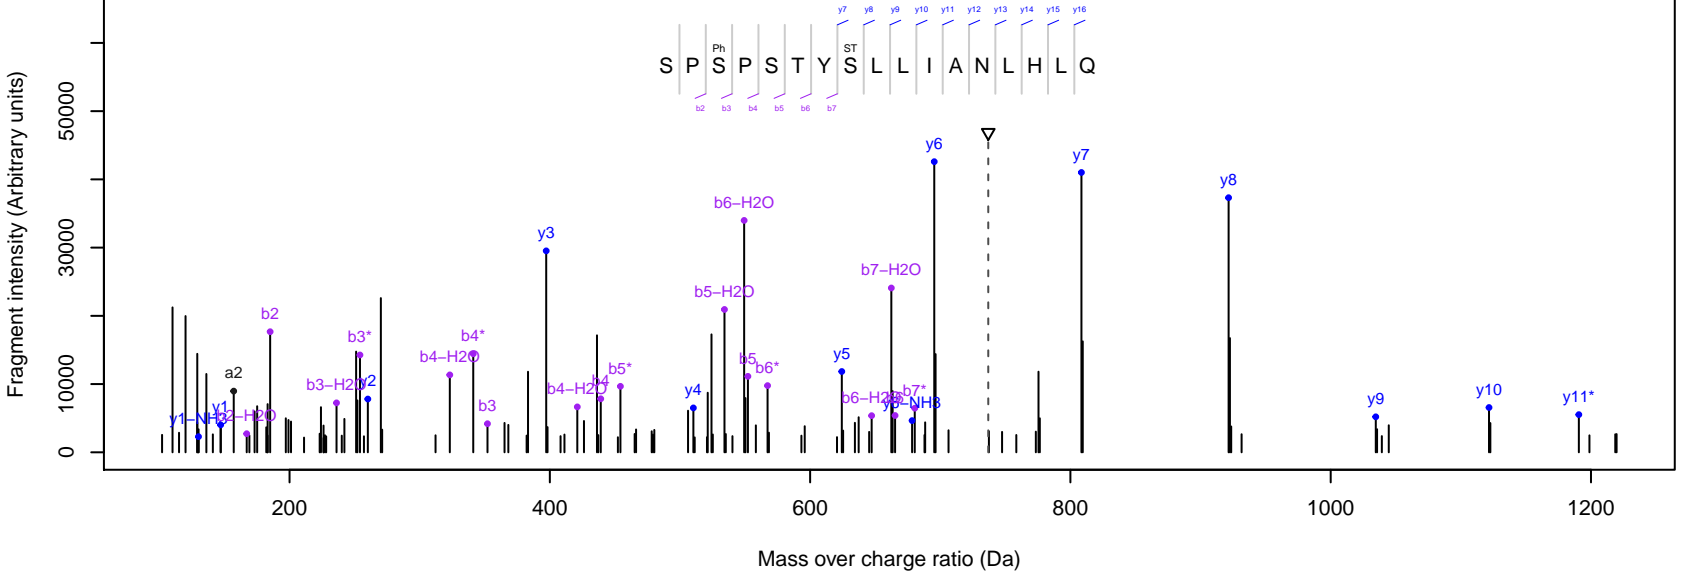



IHVS(Phospho (STY))DQLQSANASVDDSRLEELK-3+

Source : QE3\_201126\_FR\_TiOx\_hum\_tissue\_Urea\_RNAB\_N Scan : 30999

Andromeda score : 182.56

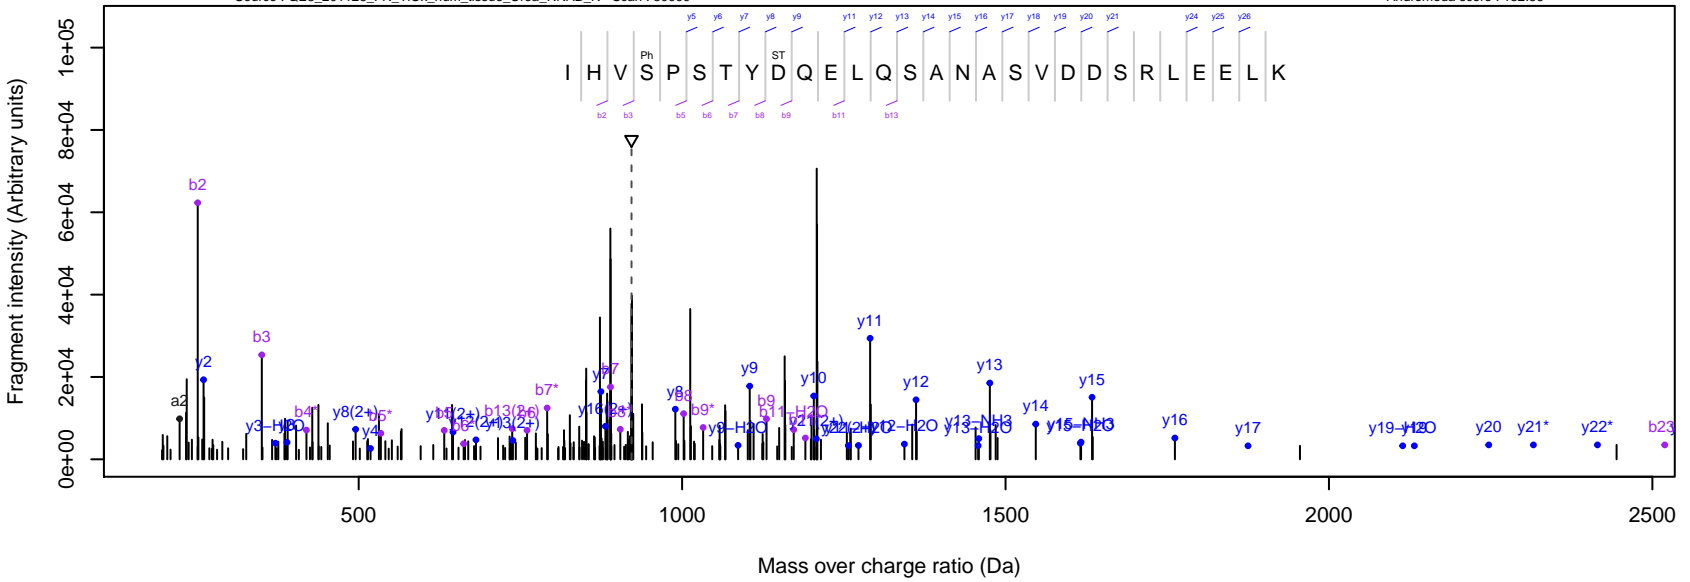

HGHFGWPGWEM(Oxidation (M))GPPGNWS(Phospho (STY))PRPPR-4+

Source : QE3\_201126\_FR\_TiOx\_hum\_tissue\_Urea\_RNAB\_H Scan : 39816

Andromeda score : 182.41

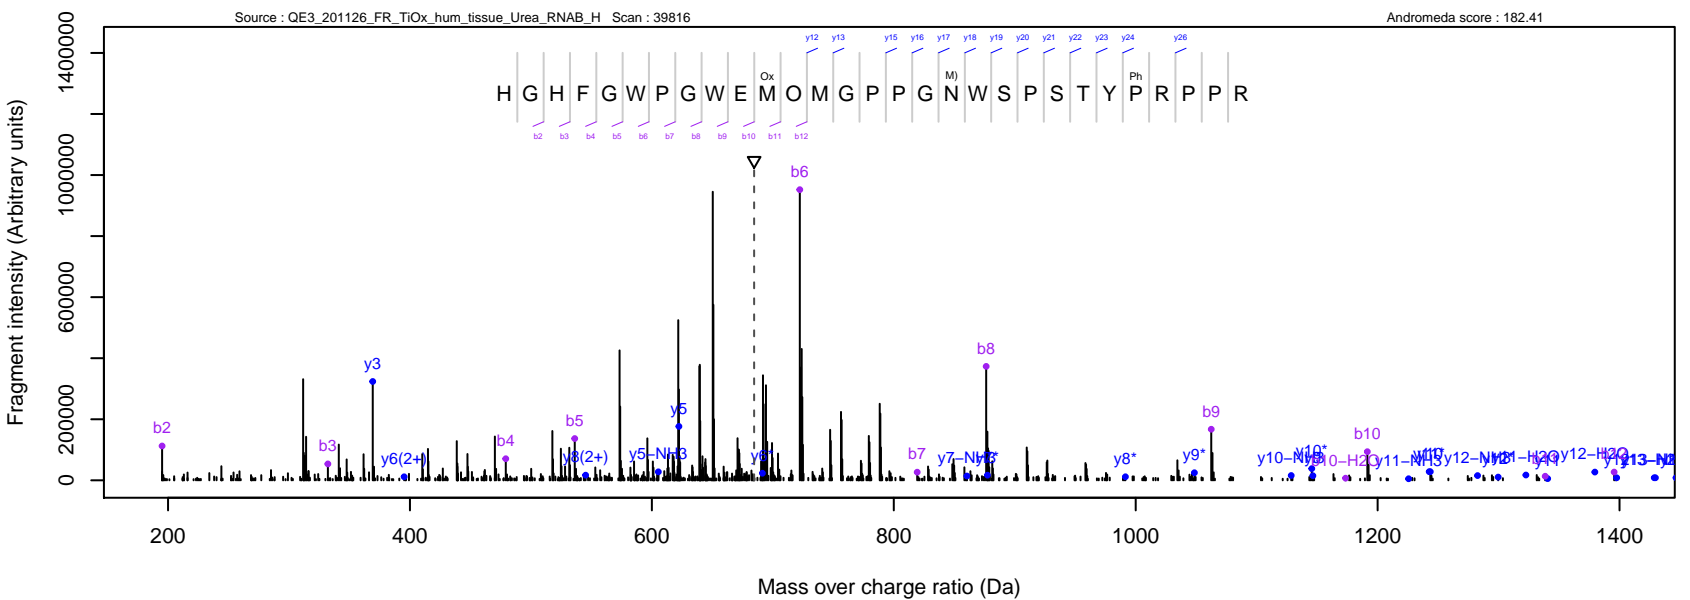

NS(Phospho (STY))WDSPAFSDVIR-2+

Source : QE3\_201126\_FR\_TiOx\_hum\_tissue\_Urea\_RNAB\_B Scan : 43867

Andromeda score : 182.35

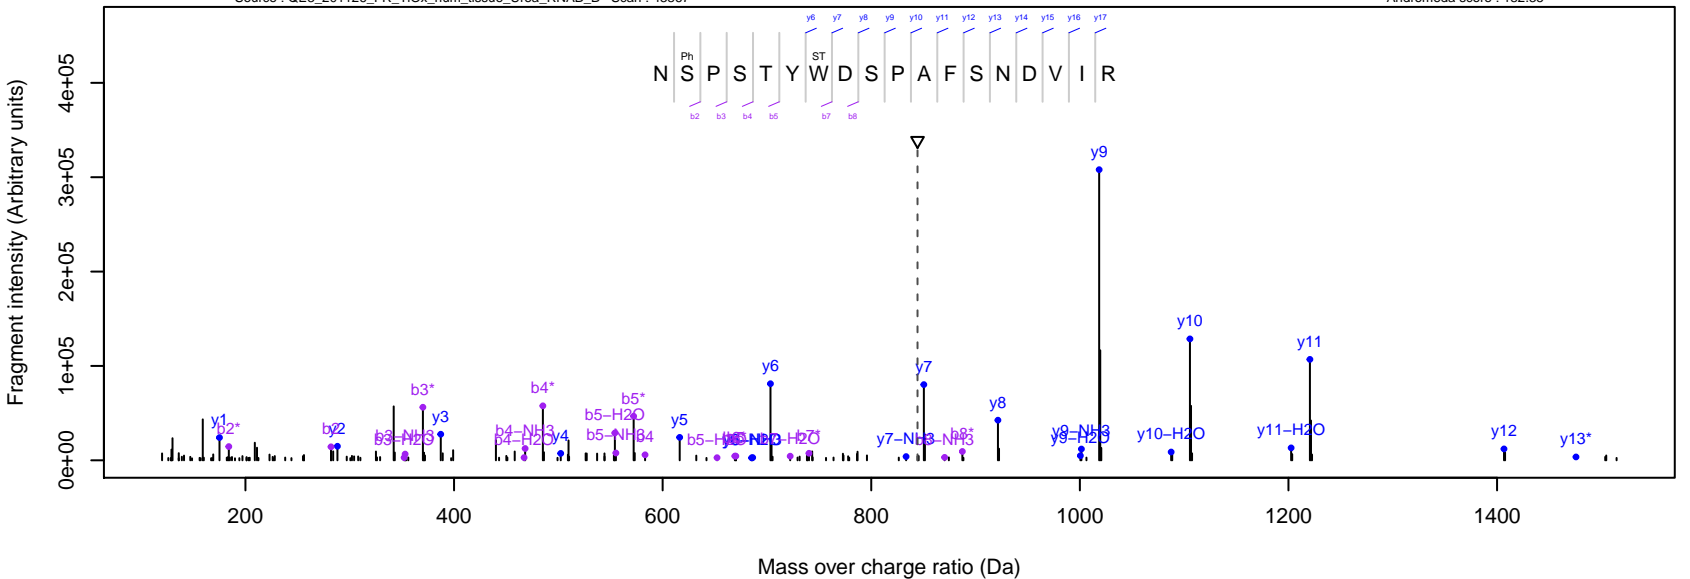

KQS(Phospho (STY))LPATSIPTPA SFK

Source : QE3\_201126\_FR\_TiOx\_hum\_tissue\_Urea\_RNAB\_B Scan : 30992

Andromeda score : 182.18

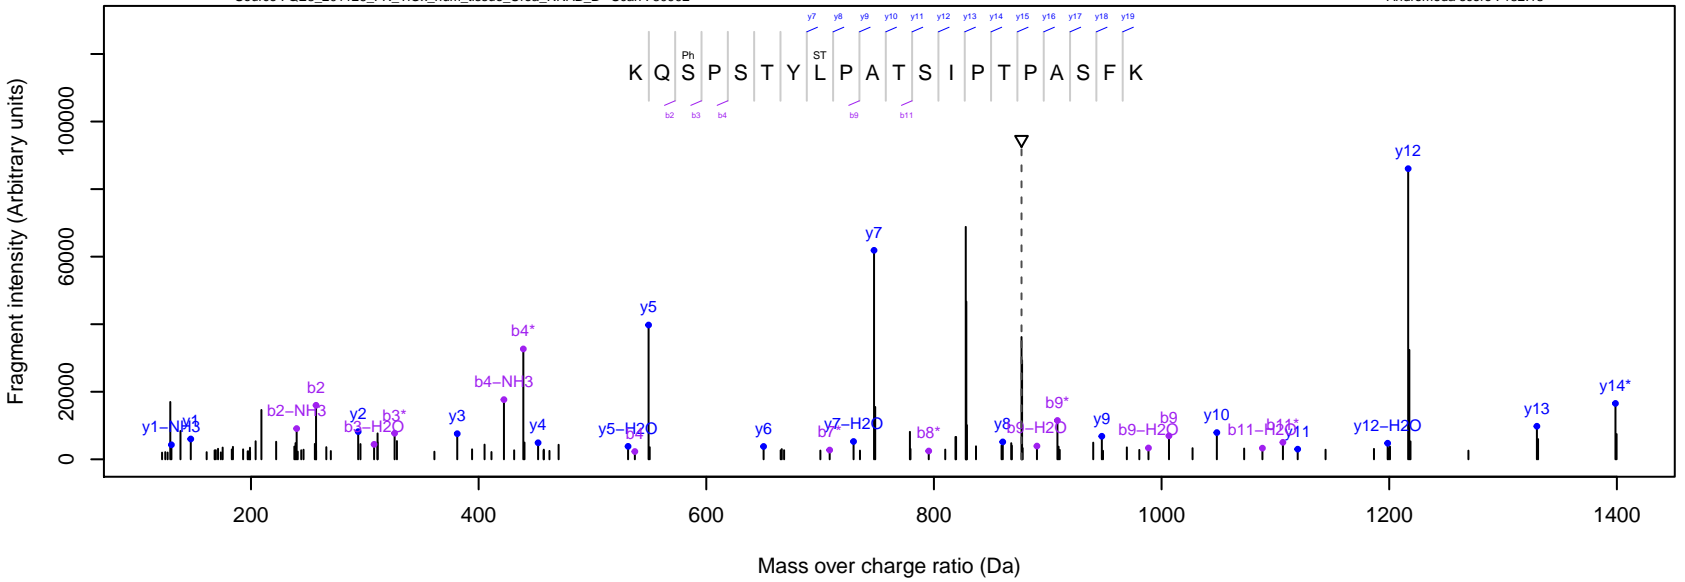

VFDKDGNGY(Phospho (STY))ISAAELR

Source : QE3\_201126\_FR\_TiOx\_hum\_tissue\_Urea\_RNAB\_N Scan : 26053

Andromeda score : 182.18

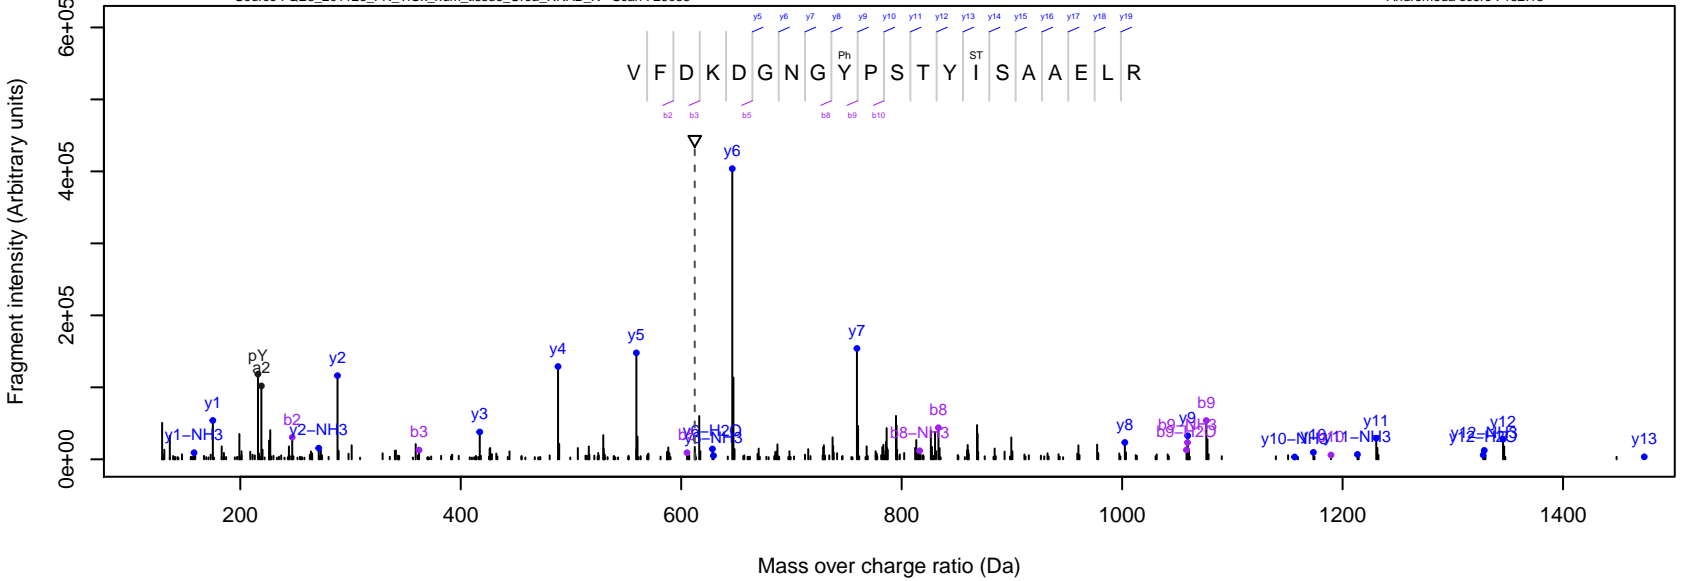

SLDSDL(Phospho (STY))DGPVTVQEFMEVK

Source : QE3\_201126\_FR\_TiOx\_hum\_tissue\_Urea\_RNAB\_H Scan : 58198

Andromeda score : 182.17

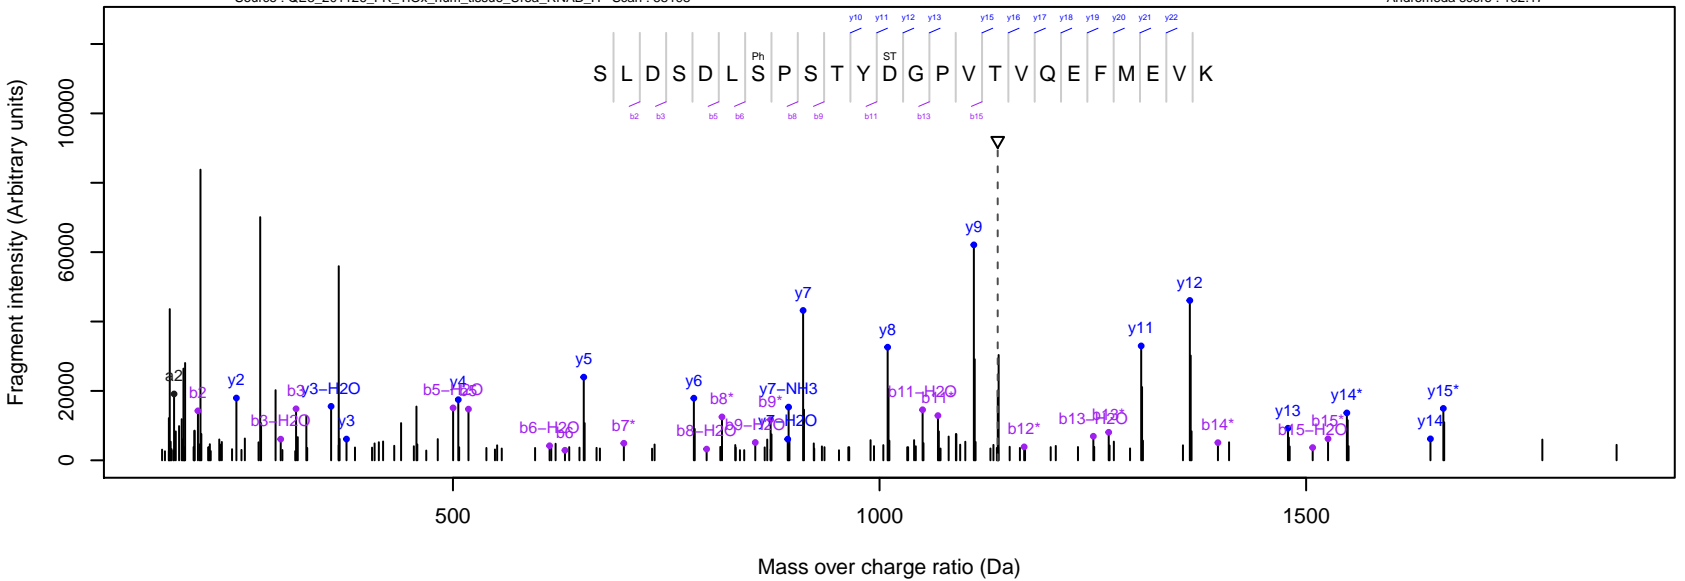

SSLAETLDSTGS(Phospho (STY))LDPQR-2+

Source : QE3\_201126\_FR\_TiOx\_hum\_tissue\_Urea\_RNAB\_N Scan : 35416

Andromeda score : 182.15

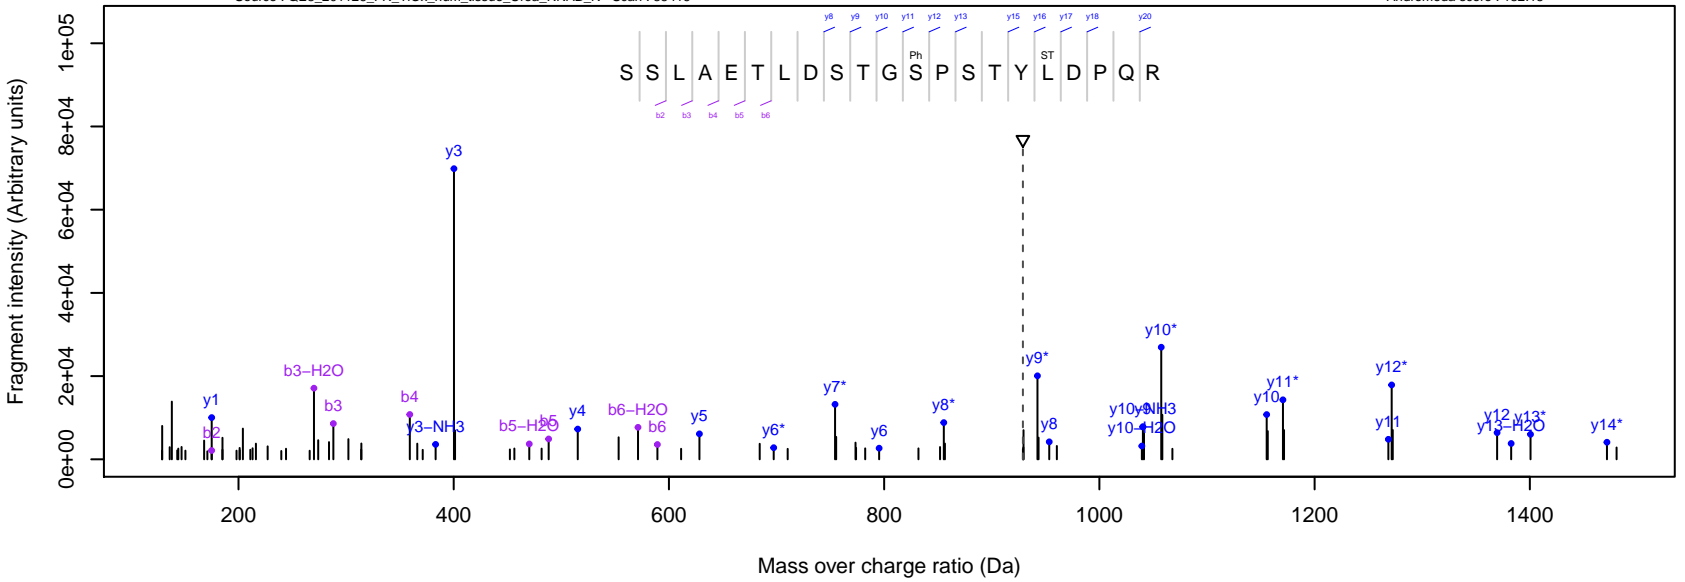

S(Phospho (STY))AGALEEGTSEGQLCGR-2+

Source : QE3\_201126\_FR\_TiOx\_hum\_tissue\_Urea\_RNAB\_N Scan : 21708

Andromeda score : 182.1

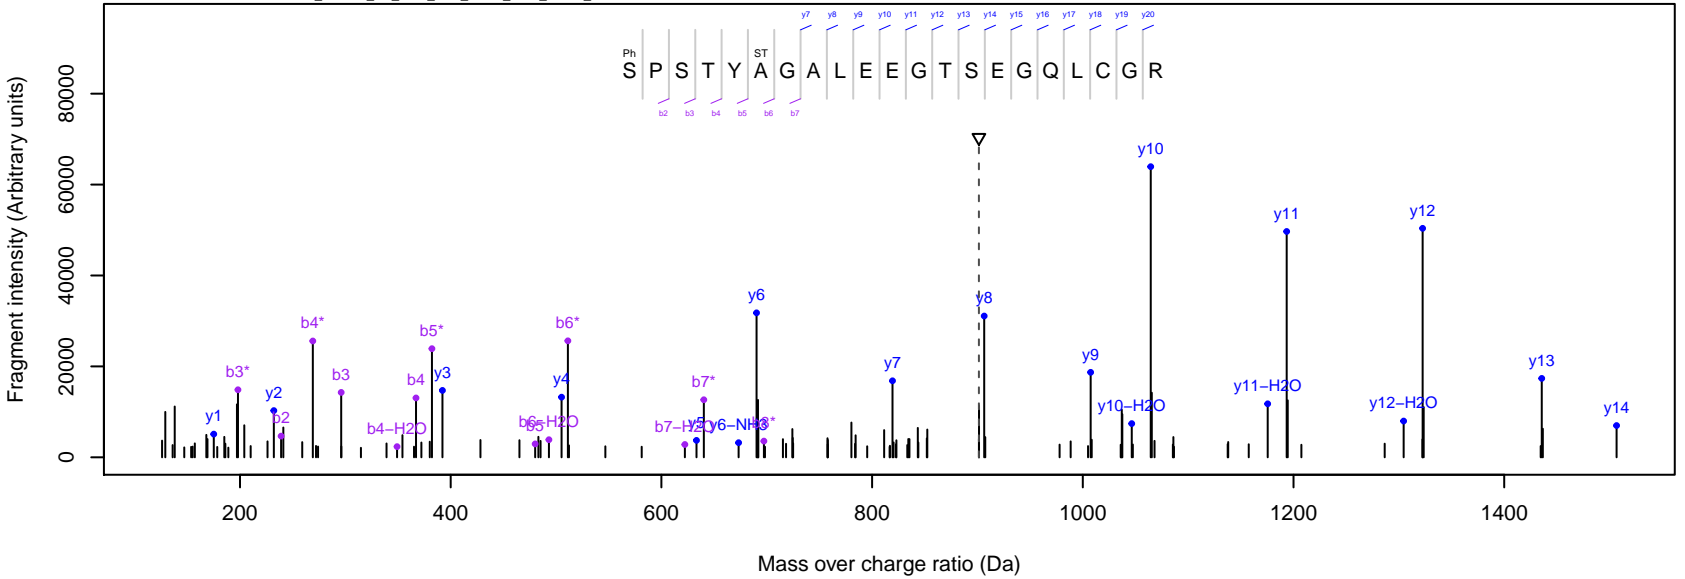

SLS(Phospho (STY))SPTVLSAPLEGA K-2+

Source : QE3\_201126\_FR\_TiOx\_hum\_tissue\_Urea\_RNAB\_H Scan : 41437

Andromeda score : 182.1

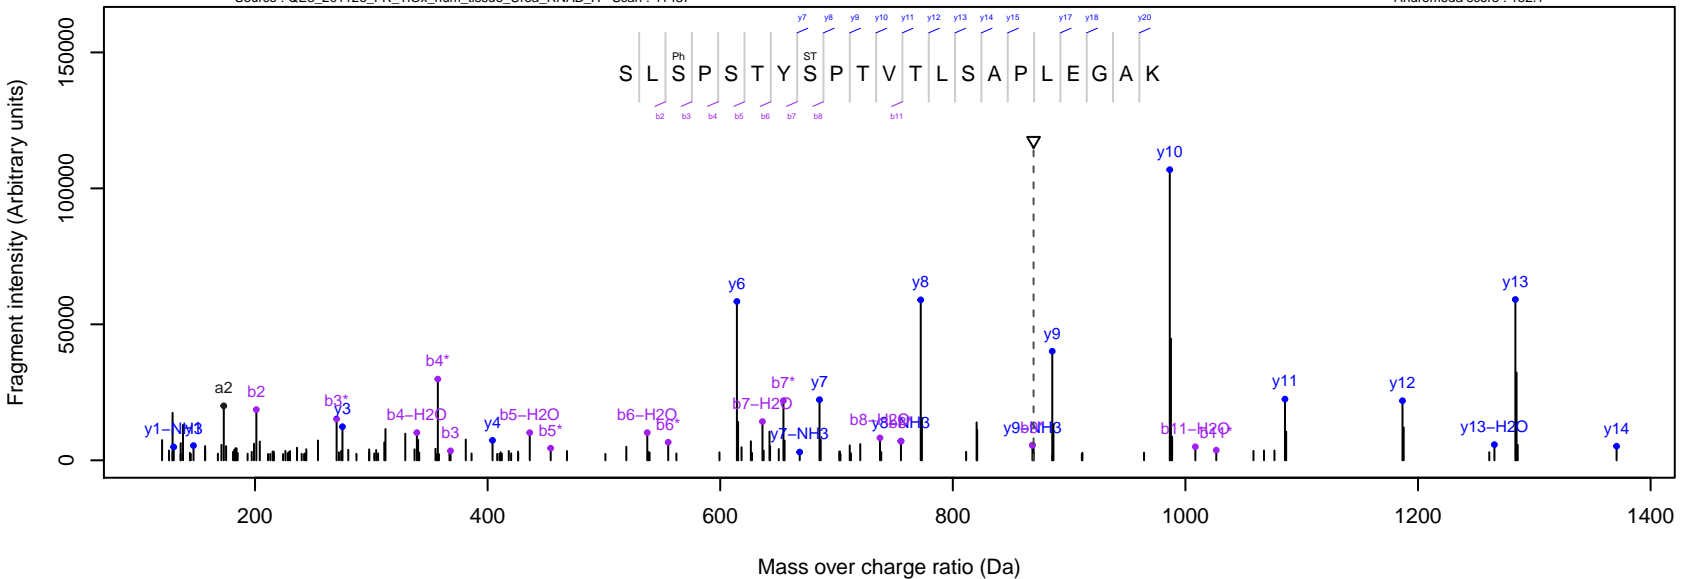

VQS(Phospho (STY))SPNLLAAGR-2+

Source : QE3\_201126\_FR\_TIOx\_hum\_tissue\_Urea\_RNAB\_B Scan : 24229

Andromeda score : 181.98

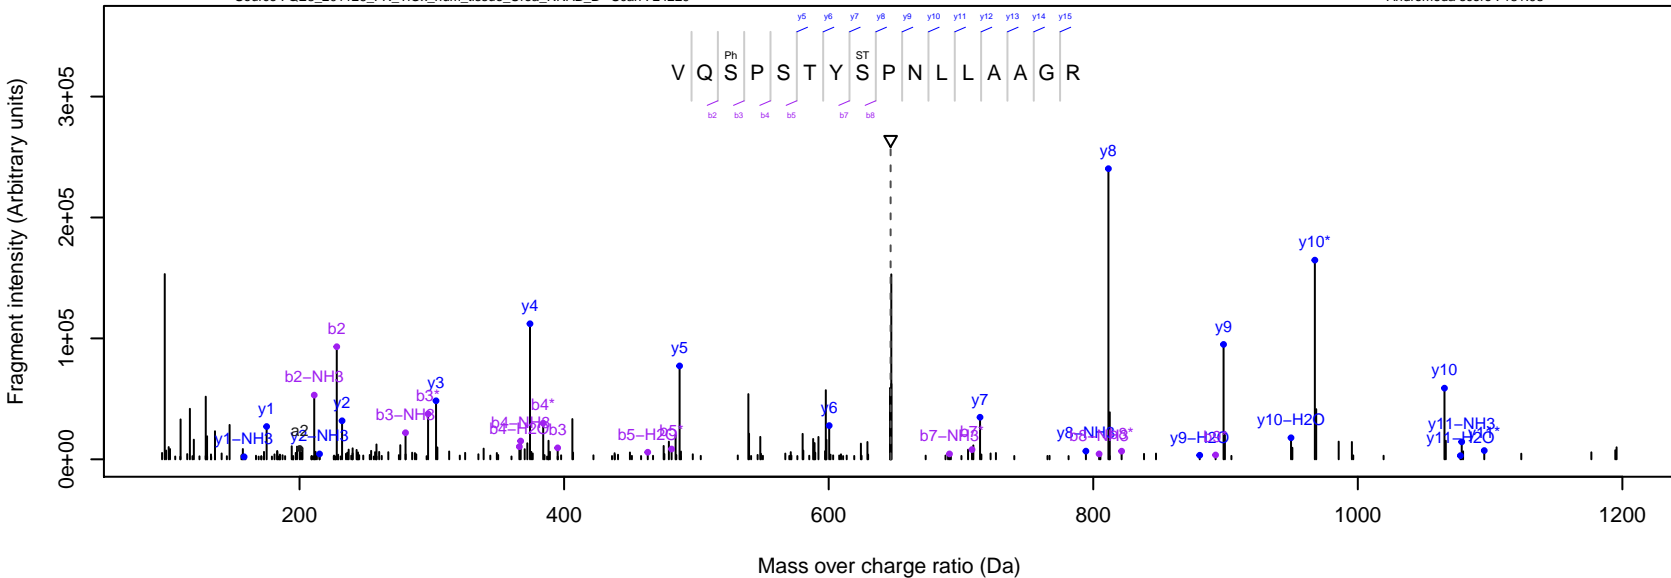

EPALPLEPDSGGNTS(Phospho (STY))PGVTANGEAR-2+

Source : QE3\_201126\_FR\_TIOx\_hum\_tissue\_Urea\_RNAB\_N Scan : 35782

Andromeda score : 181.87

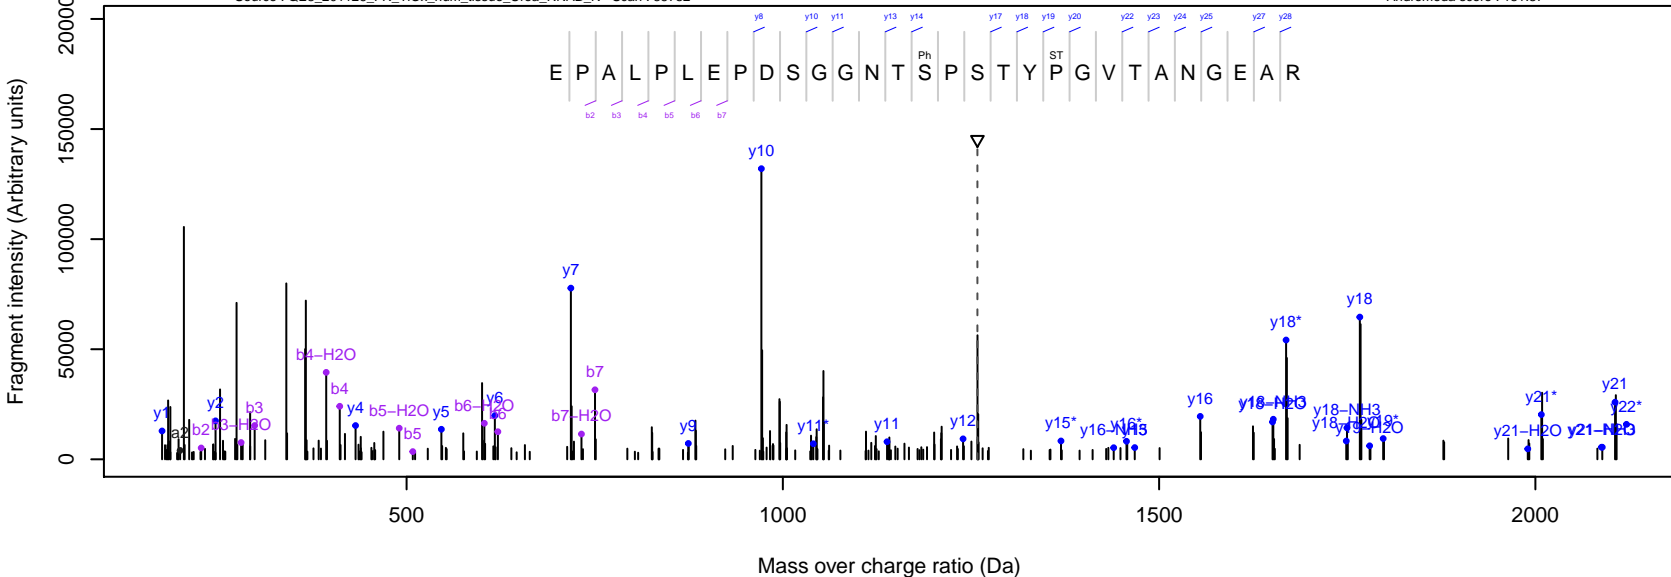

IACEEFS(Phospho (STY))DS(Phospho (STY))EEEGEGR-2+

Source : QE3\_201126\_FR\_TIOx\_hum\_tissue\_Urea\_RNAB\_B Scan : 24907

Andromeda score : 181.86

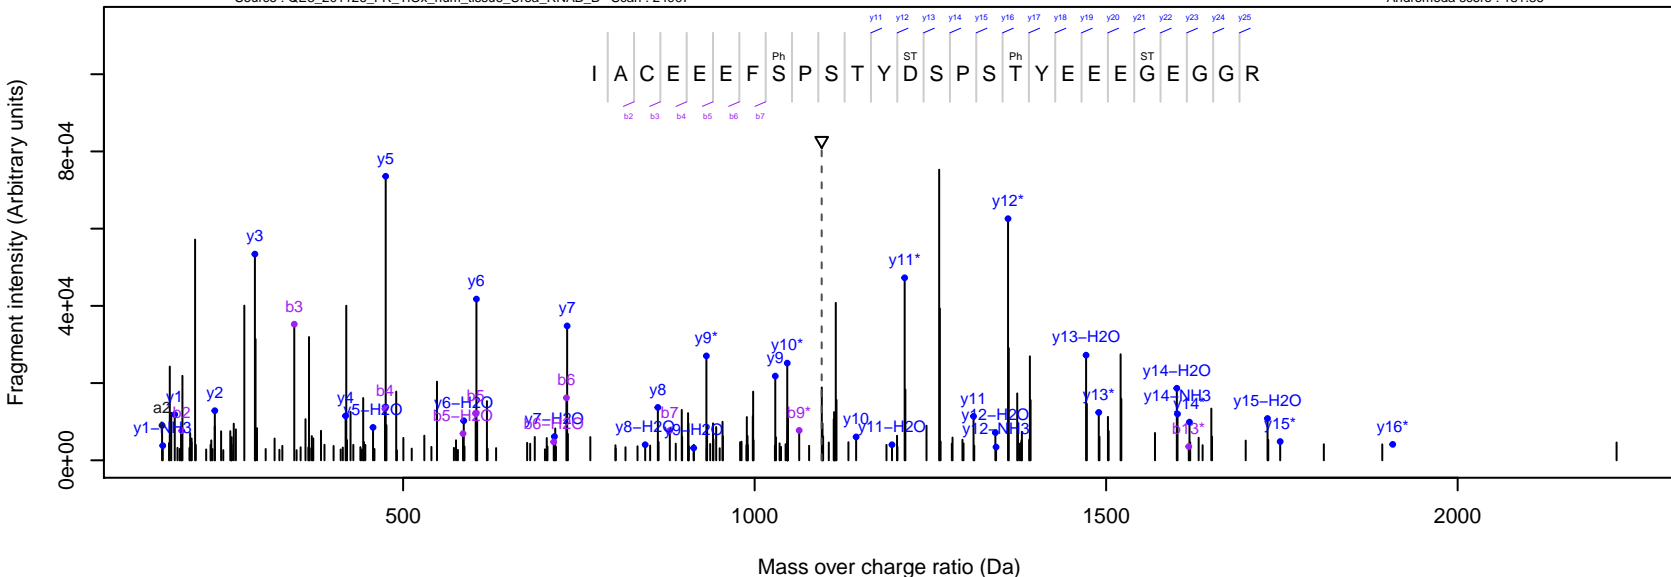

FLNRS(Phospho (STY))PEES(Phospho (STY))FDIKEVK-3+

Source : QE3\_201126\_FR\_TiOx\_hum\_tissue\_Urea\_RNAB\_H Scan : 30649

Andromeda score : 181.85

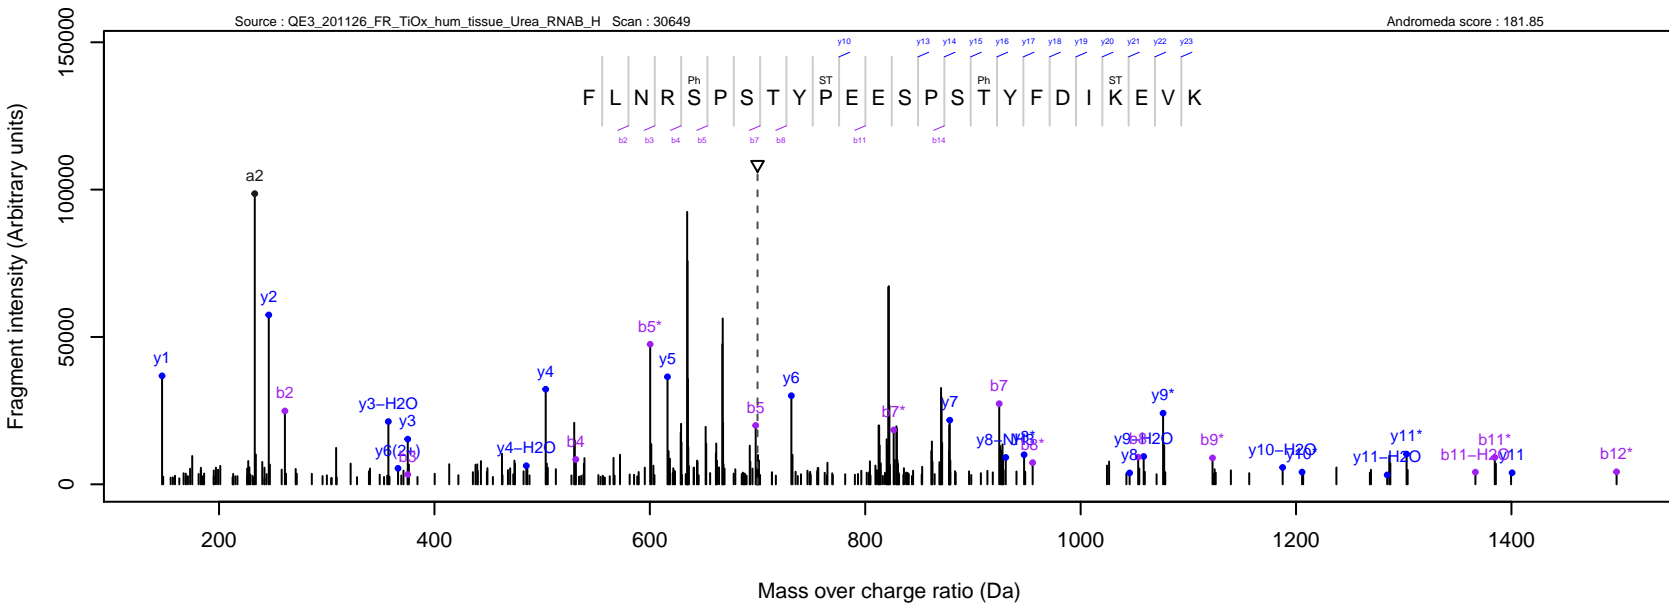

YSDVEVPASVTGYSFASDGDGSCPLRHS(Phospho (STY))FQK-4+

Source : QE3\_201126\_FR\_TiOx\_hum\_tissue\_Urea\_RNAB\_N Scan : 38739

Andromeda score : 181.78

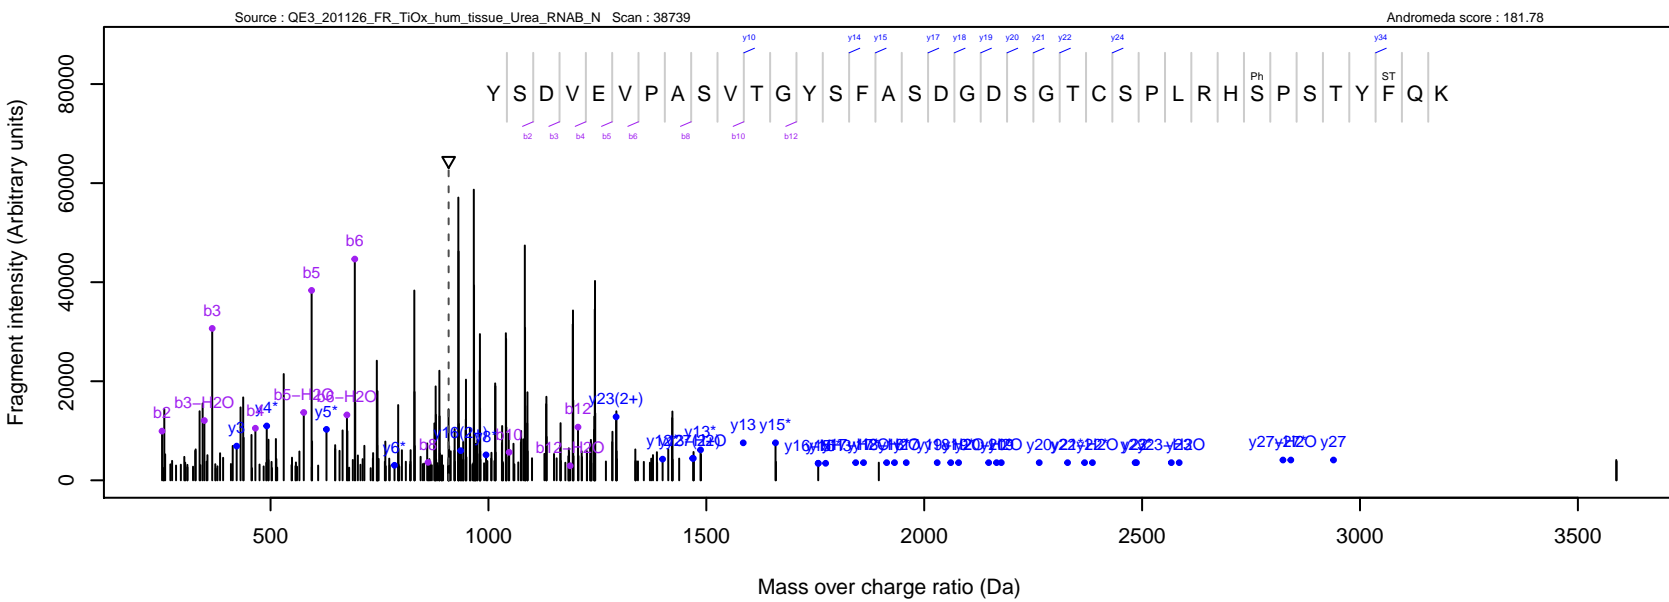

LAIQGPEDSPSTYPSR-2+

Source : QE3\_201126\_FR\_TiOx\_hum\_tissue\_Urea\_RNAB\_H Scan : 19019

Andromeda score : 181.71

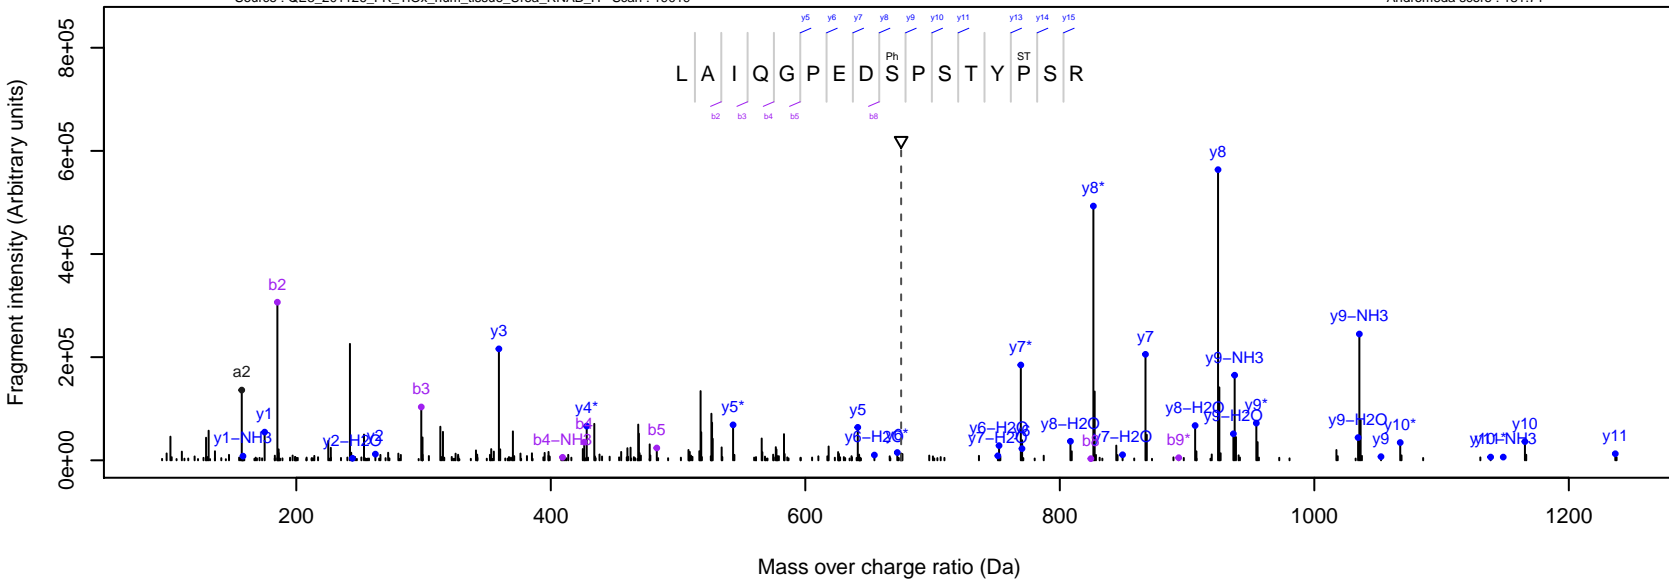

FLSHS(Phospho (STY))TDSLNK-2+

Source : QE3\_201126\_FR\_TiOx\_hum\_tissue\_Urea\_RNAB\_N Scan : 12253

Andromeda score : 181.67

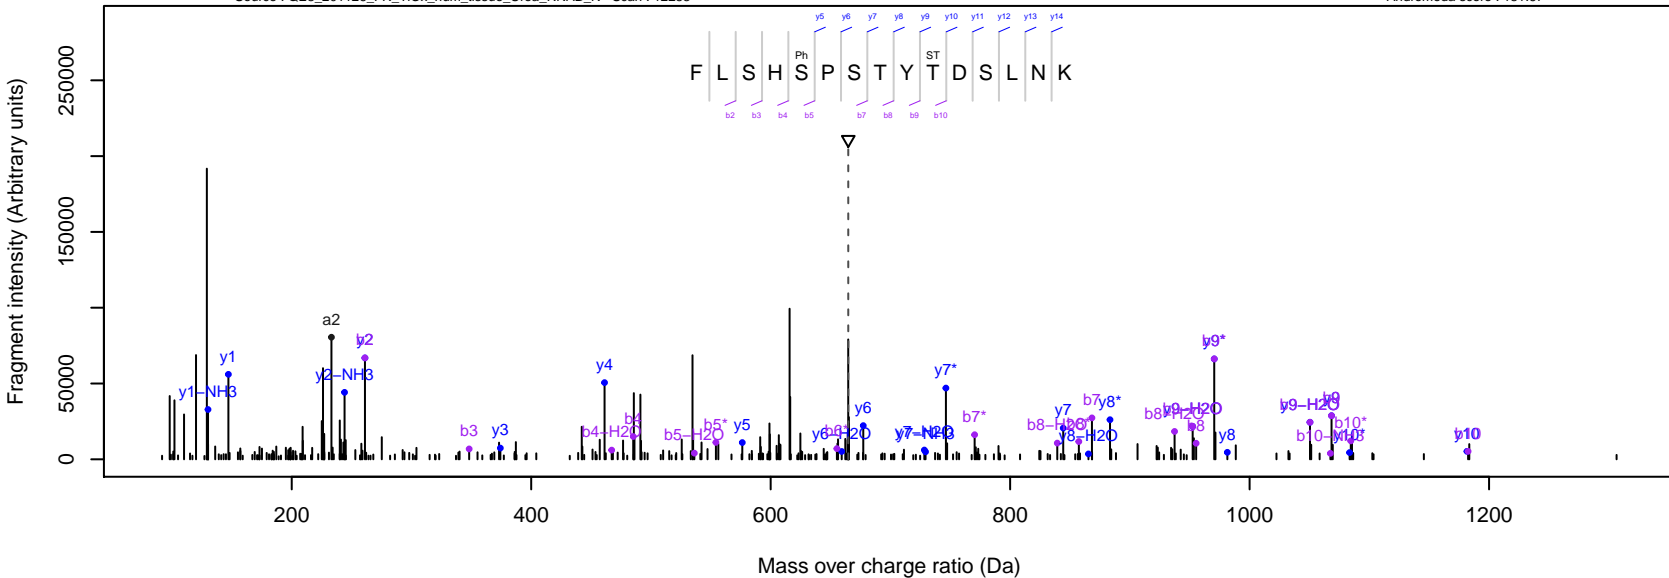

M(Oxidation (M))ESEGADDS(Phospho (STY))AEEGDLDDDDNEDRGDDQLELIK-3+

Source : QE3\_201126\_FR\_TiOx\_hum\_tissue\_Urea\_RNAB\_H Scan : 44155

Andromeda score : 181.62

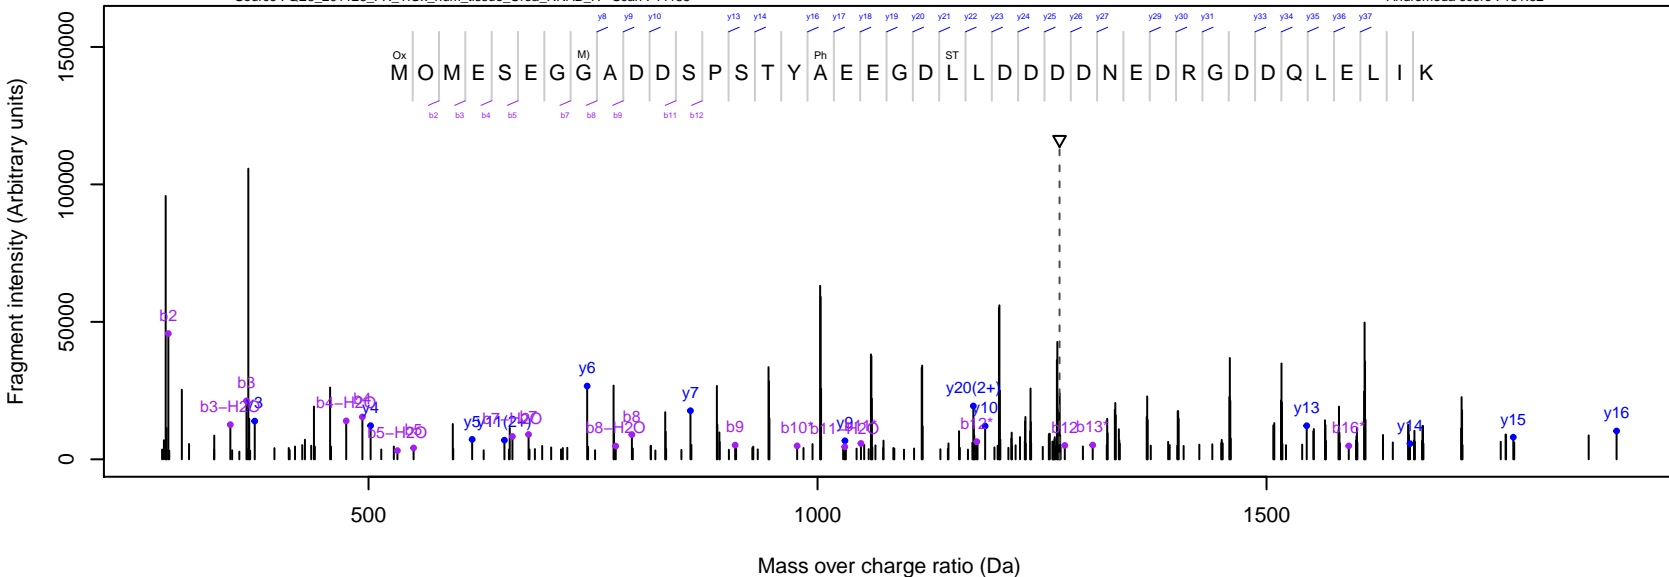

KIS(Phospho (STY))ENSYSLDDLEIGPGQLSSSTFDSEKNESR-3+

Source : QE3\_201126\_FR\_TiOx\_hum\_tissue\_Urea\_RNAB\_N Scan : 44387

Andromeda score : 181.61

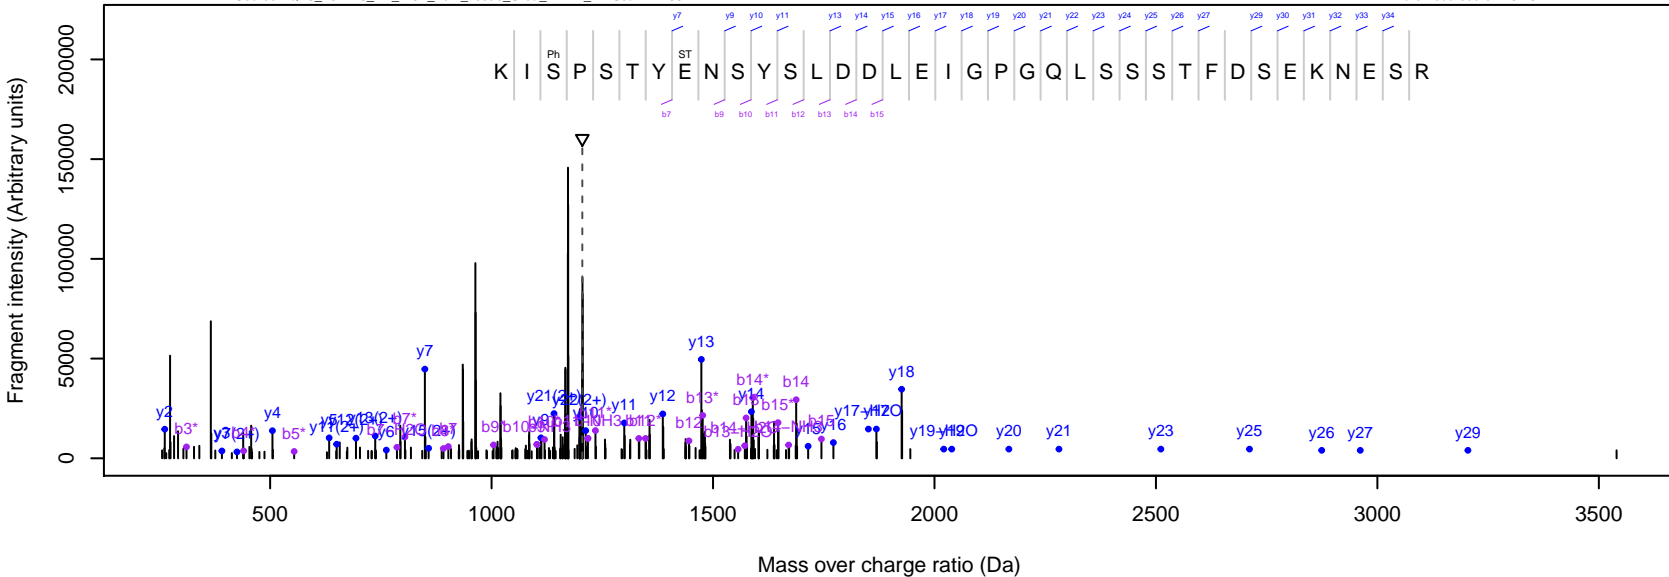

**THS(Phospho (STY))FENVSCHLPDSR-3+**

Source : QE3\_201126\_FR\_TiOx\_hum\_tissue\_Urea\_RNAB\_N Scan : 16700

Andromeda score : 181.54

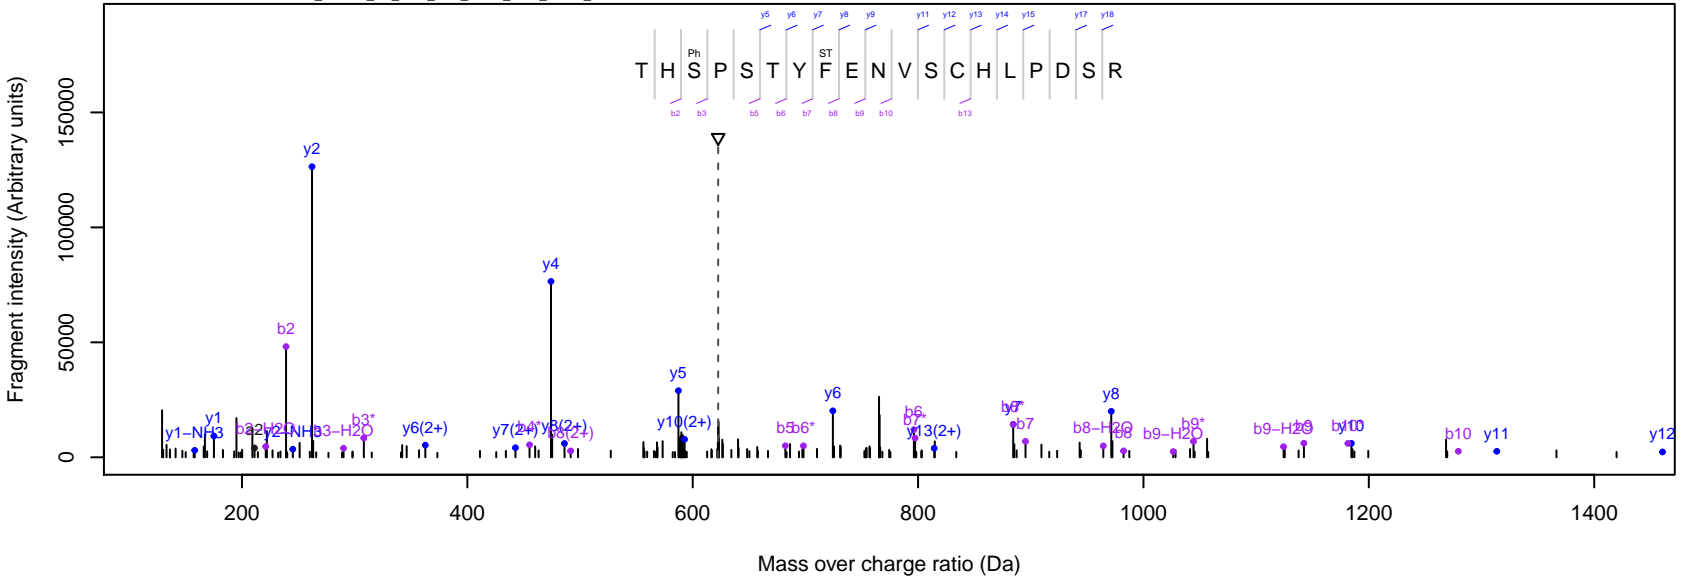

**SLS(Phospho (STY))PSSNSAFSR-2+**

Source : QE3\_201126\_FR\_TiOx\_hum\_tissue\_Urea\_RNAB\_N Scan : 18808

Andromeda score : 181.44

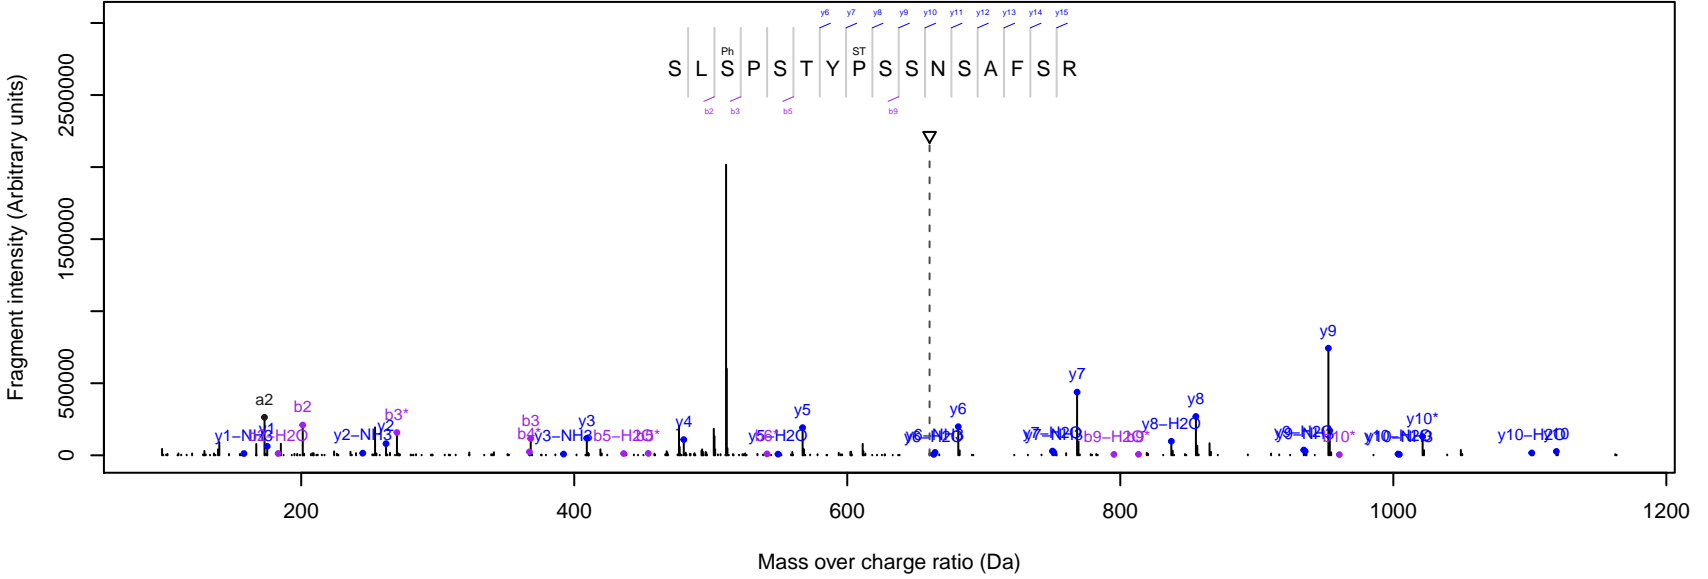

**EEAS(Phospho (STY))DDDM(Oxidation (M))EGDEAVVR-2+**

Source : QE3\_201126\_FR\_TiOx\_hum\_tissue\_Urea\_RNAB\_H Scan : 15714

Andromeda score : 181.26

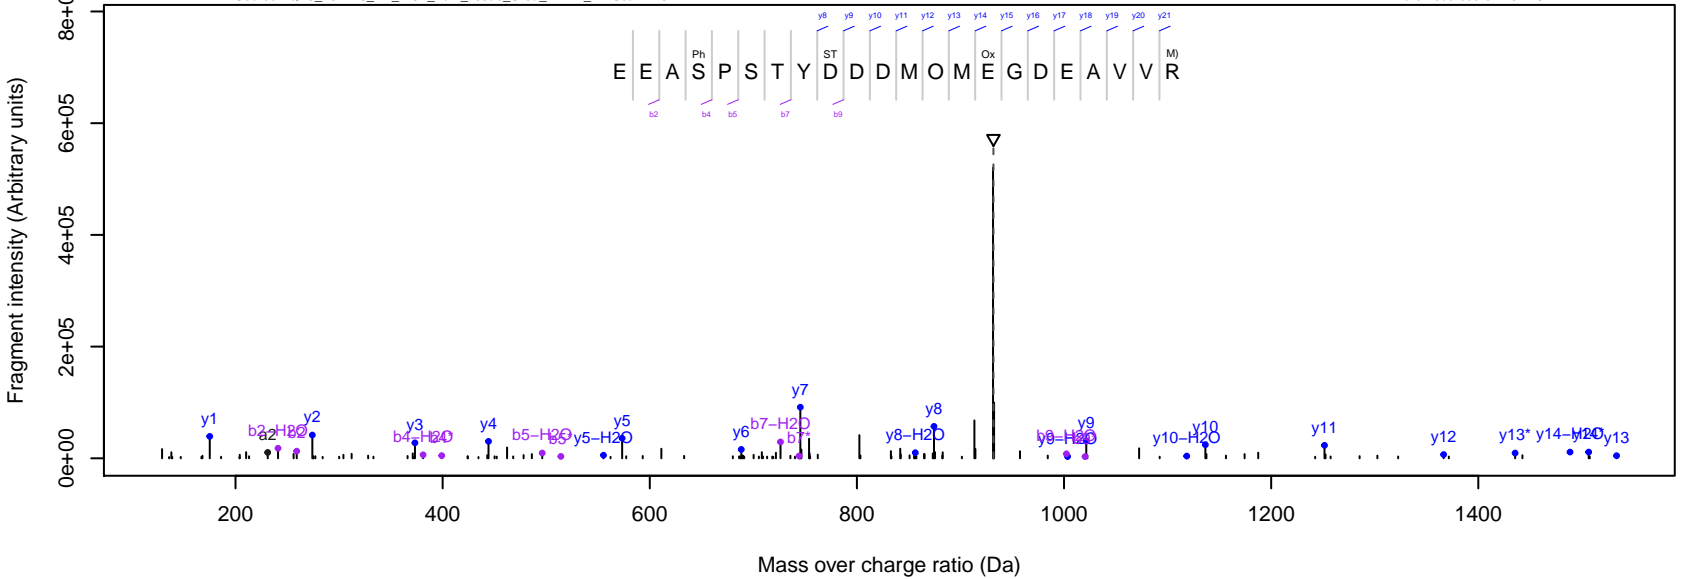

KLGAGEGGEASVS(Phospho (STY))PEKTSTTSK-3+

Source : QE3\_201126\_FR\_TIOx\_hum\_tissue\_Urea\_RNAB\_H Scan : 7821

Andromeda score : 181.21

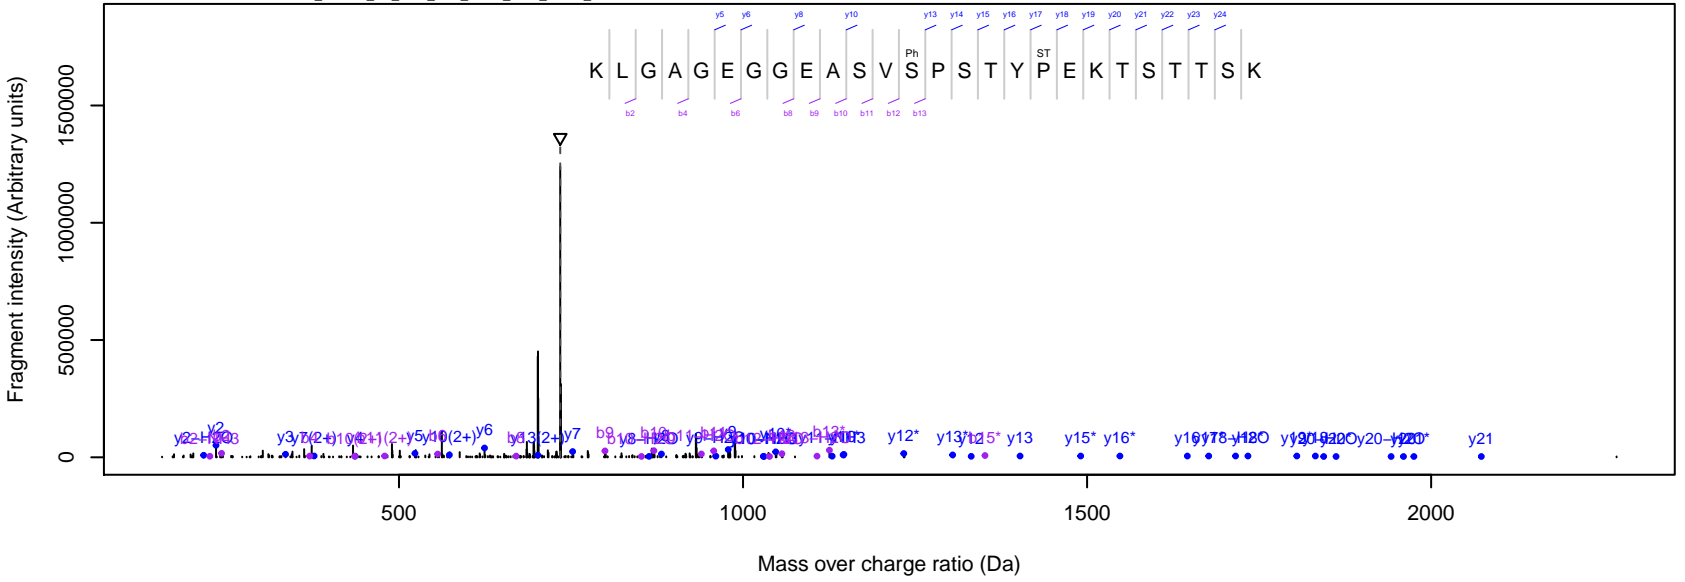

VSGRTS(Phospho (STY))PPLLDR-2+

Source : QE3\_201126\_FR\_TIOx\_hum\_tissue\_Urea\_RNAB\_B Scan : 14596

Andromeda score : 181.19

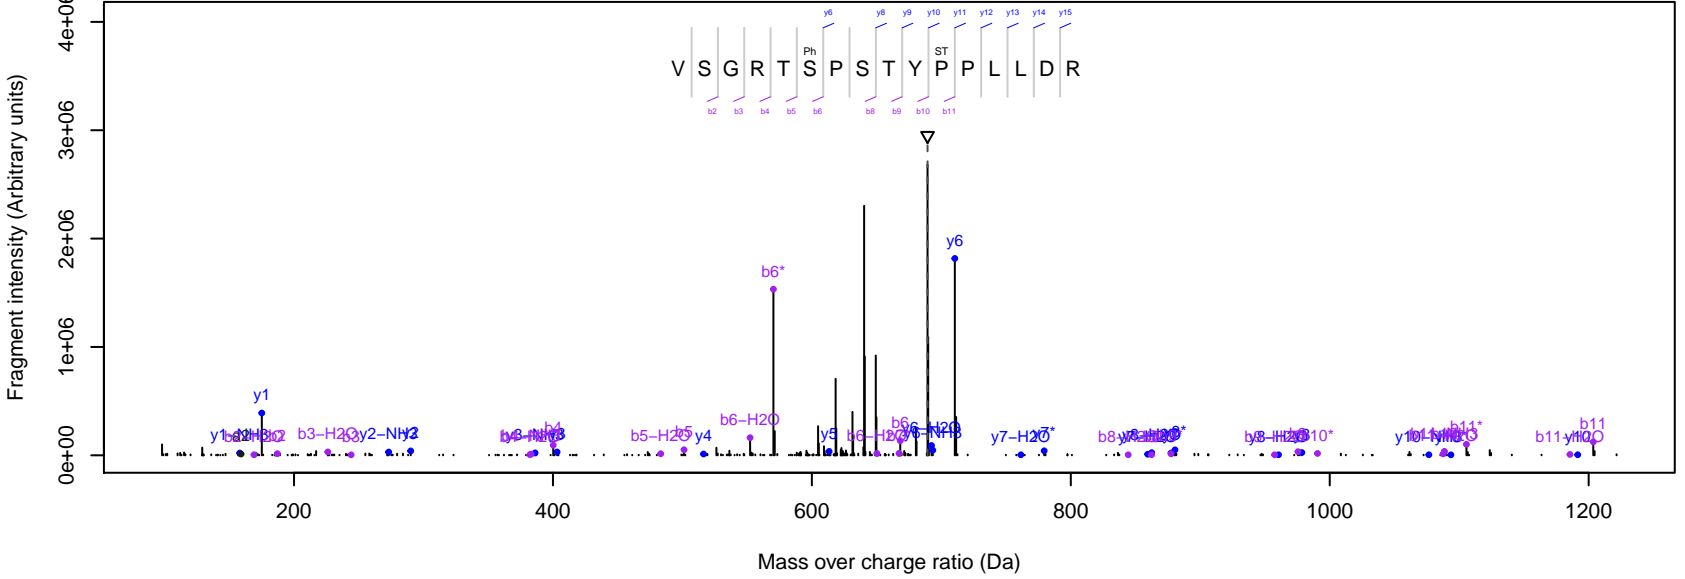

IAAPELHKGDS(Phospho (STY))DS(Phospho (STY))EEDEPTK-3+

Source : QE3\_201126\_FR\_TIOx\_hum\_tissue\_Urea\_RNAB\_H Scan : 15078

Andromeda score : 181.11

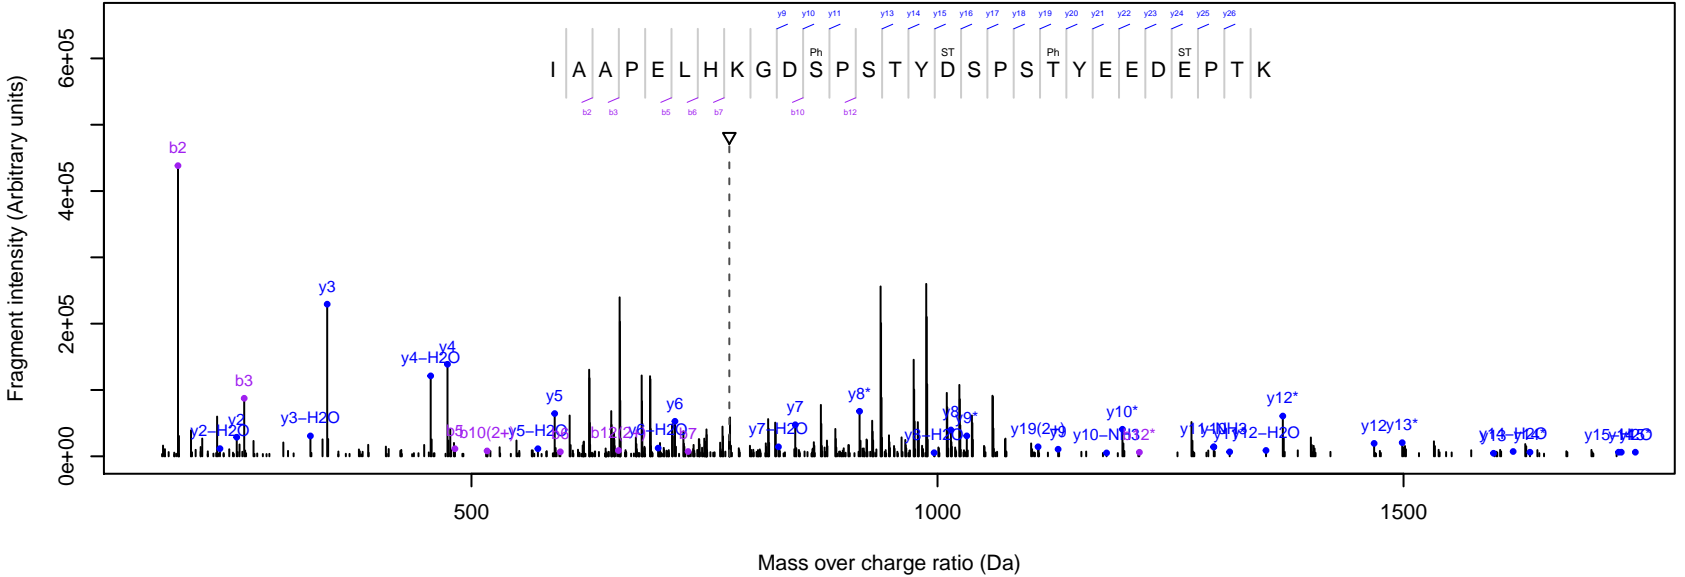



SLGSVQAPSYGARPVSSAASVYAGAGGS(Phospho (STY))GSRIS(Phospho (STY))VSR-3+

Source : QE3\_201126\_FR\_TiOx\_hum\_tissue\_Urea\_RNAB\_B Scan : 33311

Andromeda score : 181.03

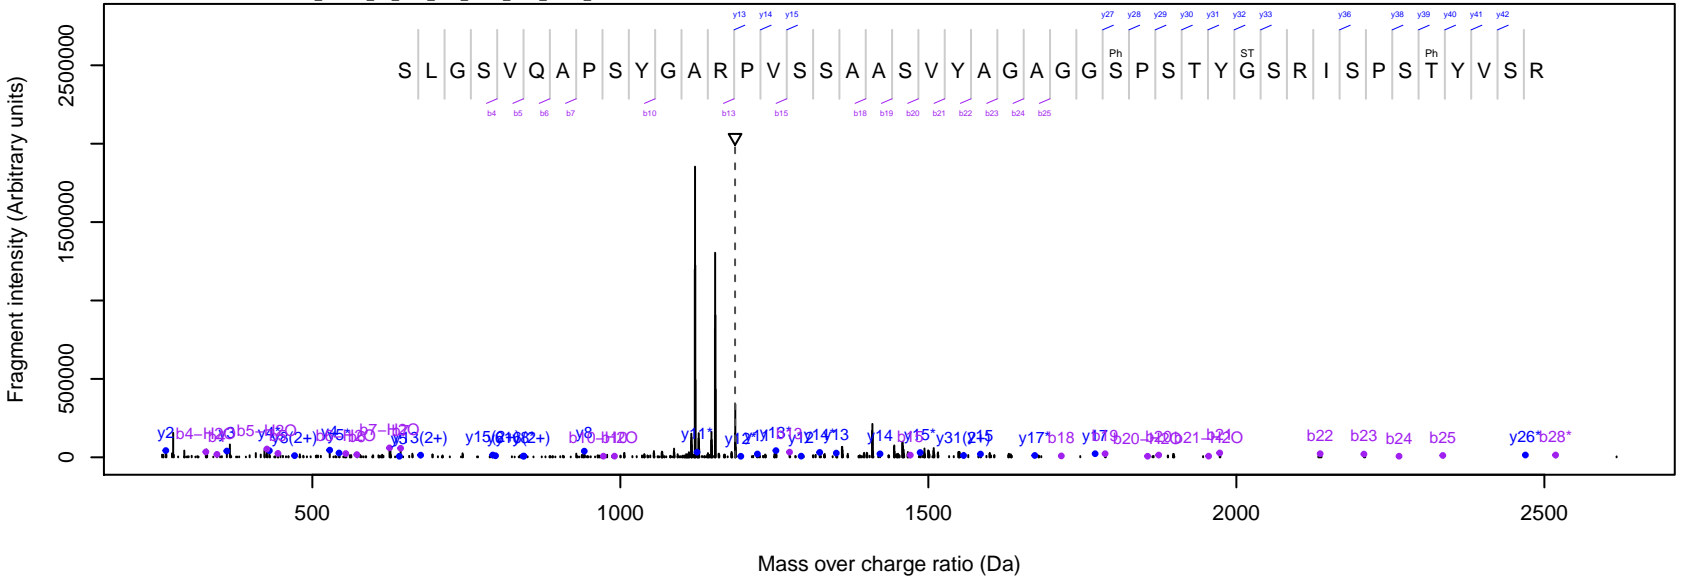

S(Phospho (STY))TSFRGGM(Oxidation (M))GSGGLATGIAGGLAGM(Oxidation (M))GGIQNEKETM(Oxidation (M))QSLNDR-4+

Source : QE3\_201126\_FR\_TiOx\_hum\_tissue\_Urea\_RNAB\_B Scan : 32046

Andromeda score : 181.01

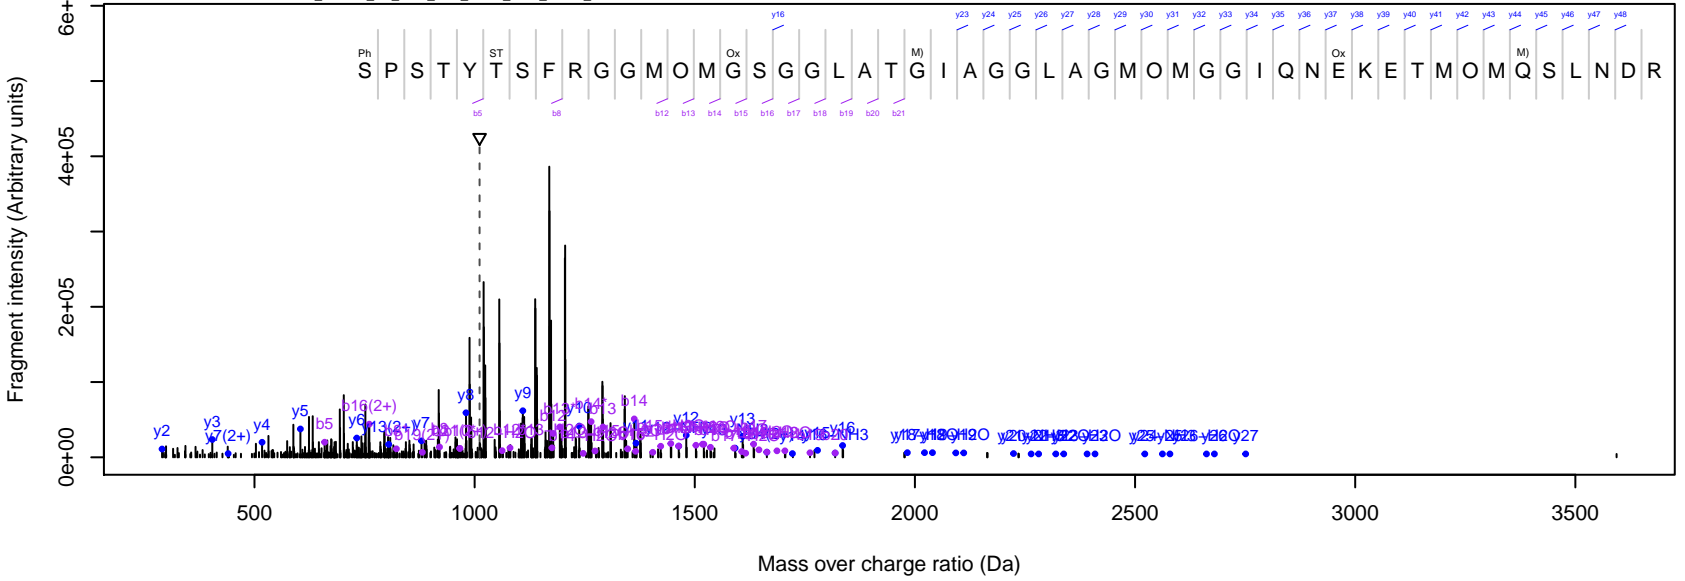

SSHYGGS(Phospho (STY))LPNVNQISGLAEFQSPLHSPLDSSR-4+

Source : QE3\_201126\_FR\_TiOx\_hum\_tissue\_Urea\_RNAB\_N Scan : 51370

Andromeda score : 180.97

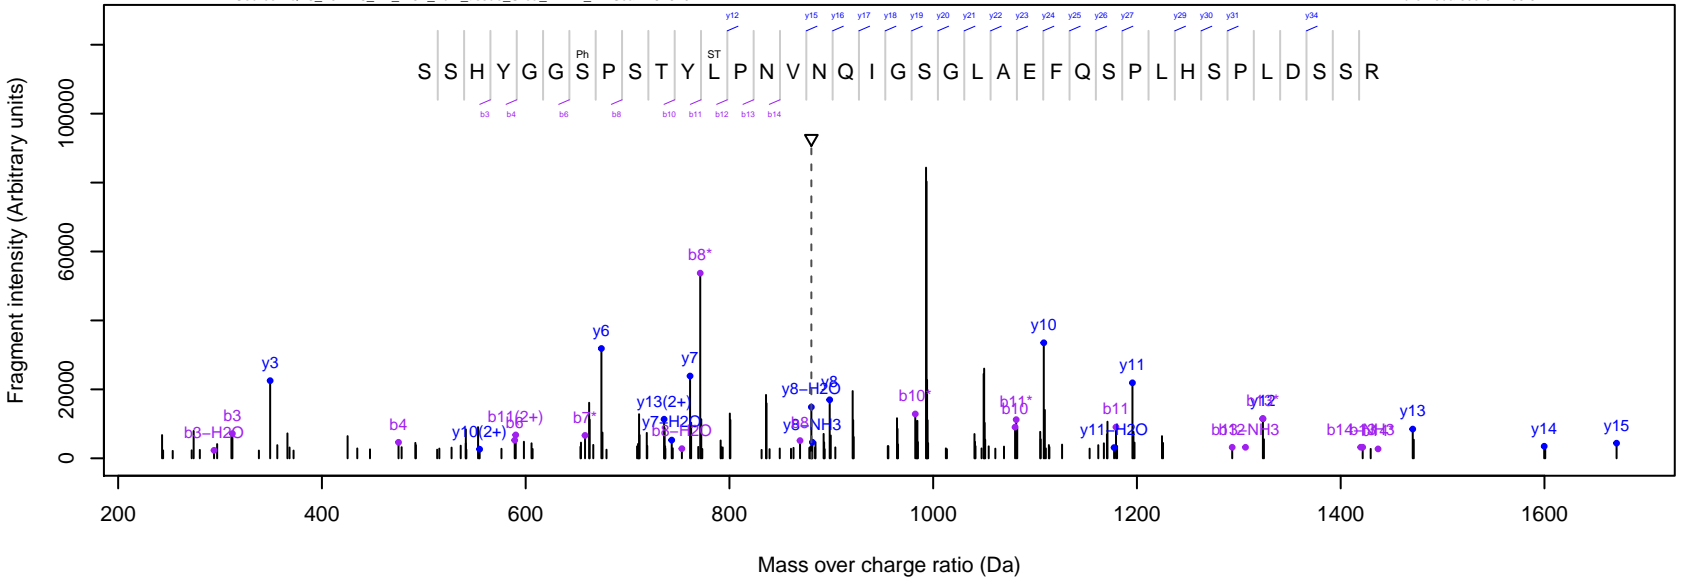

LEGLGS(Phospho (STY))SEADQDGLASTVR-2+

Source : QE3\_201126\_FR\_TiOx\_hum\_tissue\_Urea\_RNAB\_H Scan : 35191

Andromeda score : 180.88

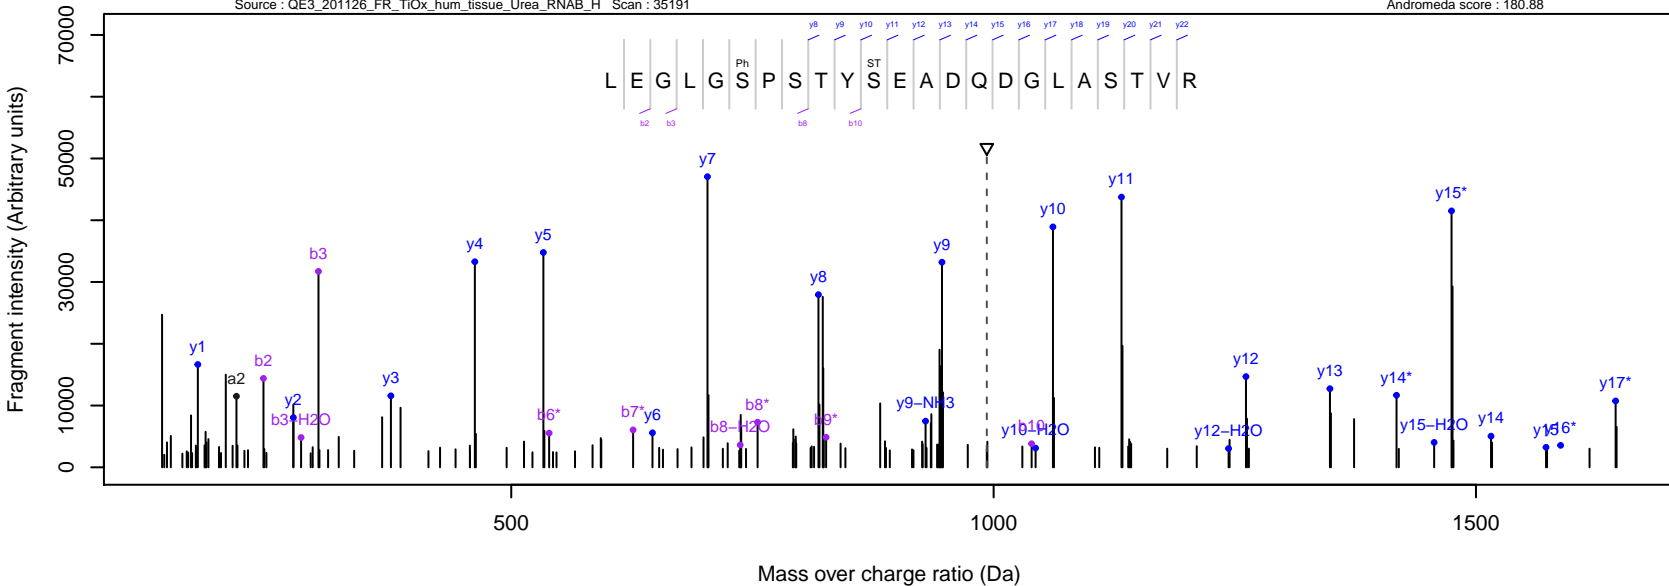

AVAGVM(Oxidation (M))ITAS(Phospho (STY))HNR-2+

Source : QE3\_201126\_FR\_TiOx\_hum\_tissue\_Urea\_RNAB\_N Scan : 11872

Andromeda score : 180.84

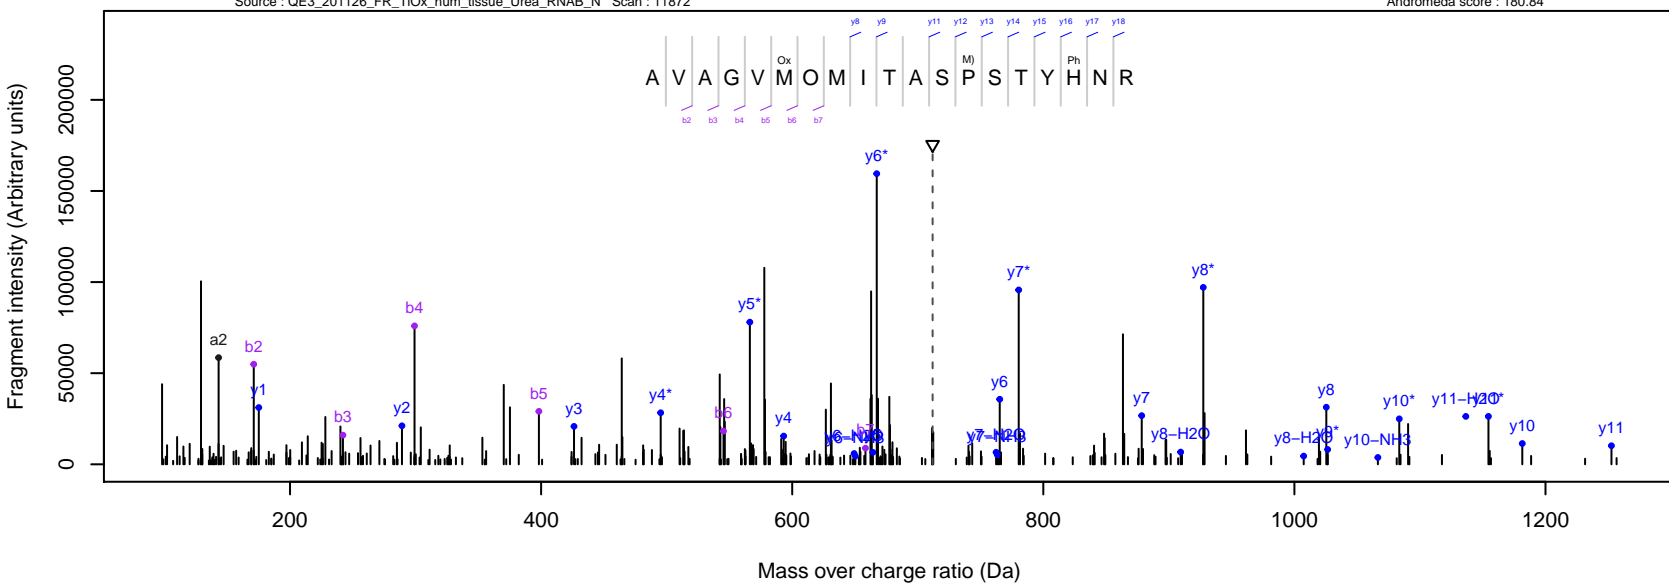

RNSRT(Phospho (STY))EEPTVASESEVENGHR-4+

Source : QE3\_201126\_FR\_TiOx\_hum\_tissue\_Urea\_RNAB\_N Scan : 7400

Andromeda score : 180.84

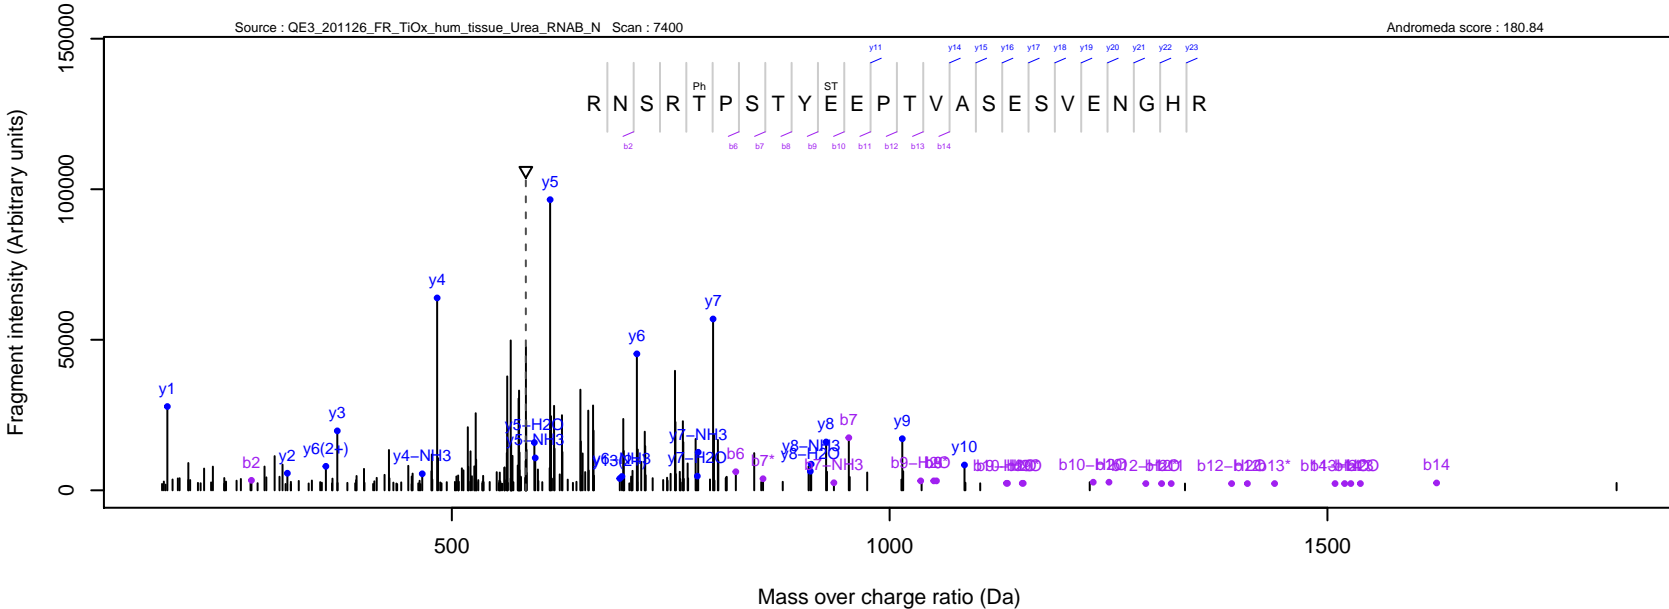

NVMSAFLTDDQVSGPPS(Phospho (STY))APAEDR-2+

Source : QE3\_201126\_FR\_TiOx\_hum\_tissue\_Urea\_RNAB\_N Scan : 50953

Andromeda score : 180.83

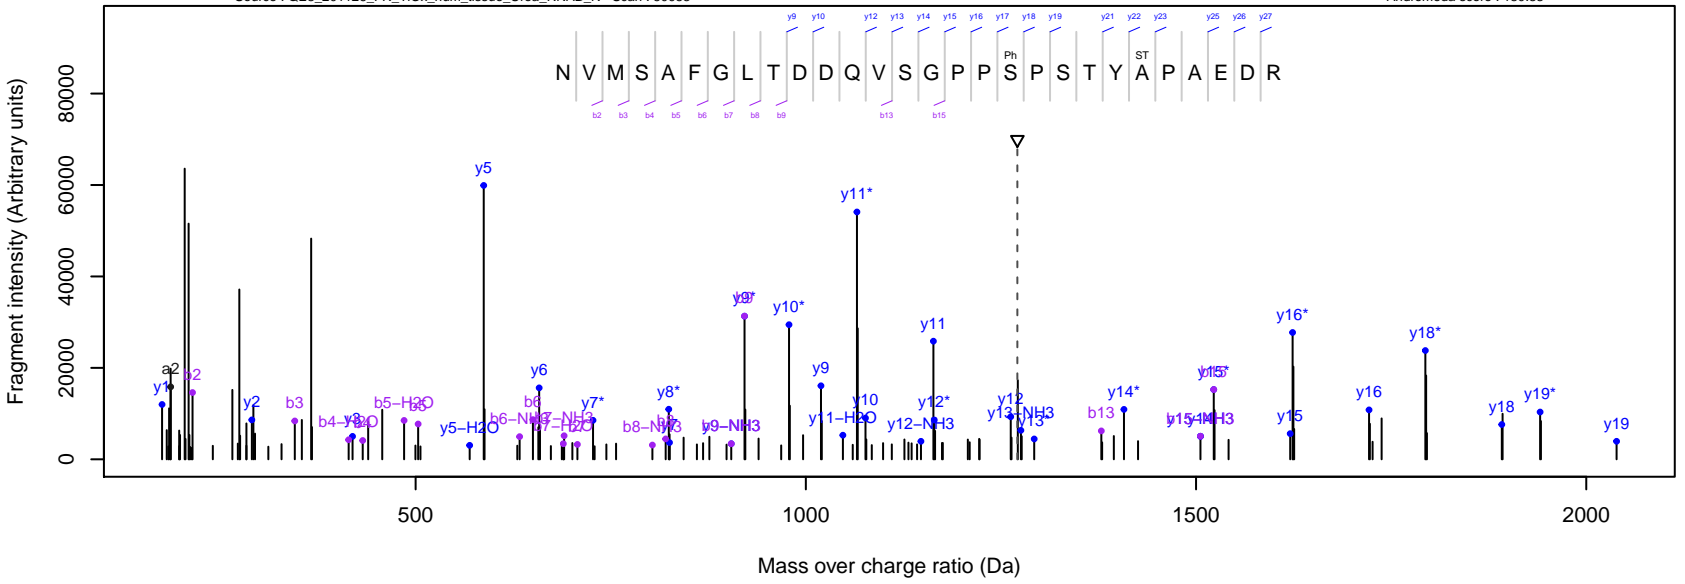

KVVEAVNS(Phospho (STY))DS(Phospho (STY))DSEFGIPK-2+

Source : QE3\_201126\_FR\_TiOx\_hum\_tissue\_Urea\_RNAB\_N Scan : 34738

Andromeda score : 180.8

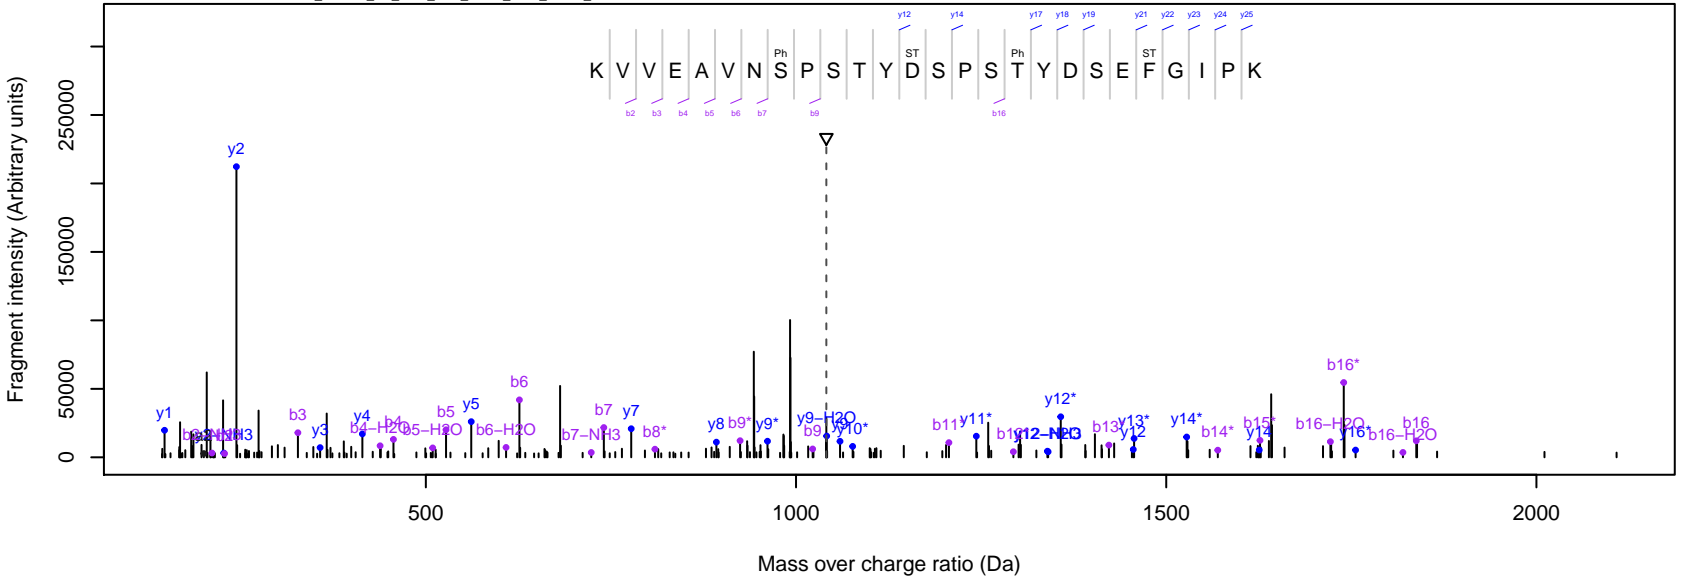

SNS(Phospho (STY))APLIHGLSDTSPVFQAEAPSAR-3+

Source : QE3\_201126\_FR\_TiOx\_hum\_tissue\_Urea\_RNAB\_B Scan : 43444

Andromeda score : 180.71

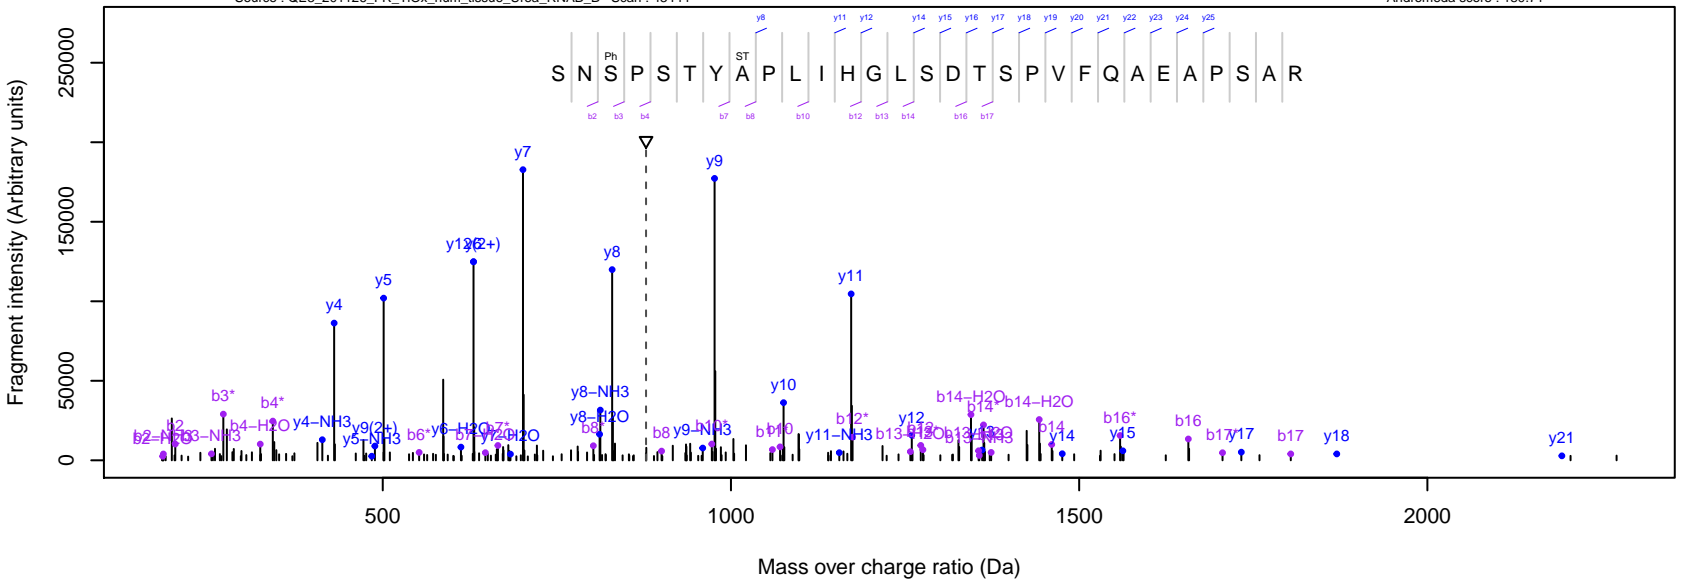

AGDSAVLVLPSPSTYPGPR-2+

Source : QE3\_201126\_FR\_TiOx\_hum\_tissue\_Urea\_RNAB\_B Scan : 37239

Andromeda score : 180.7

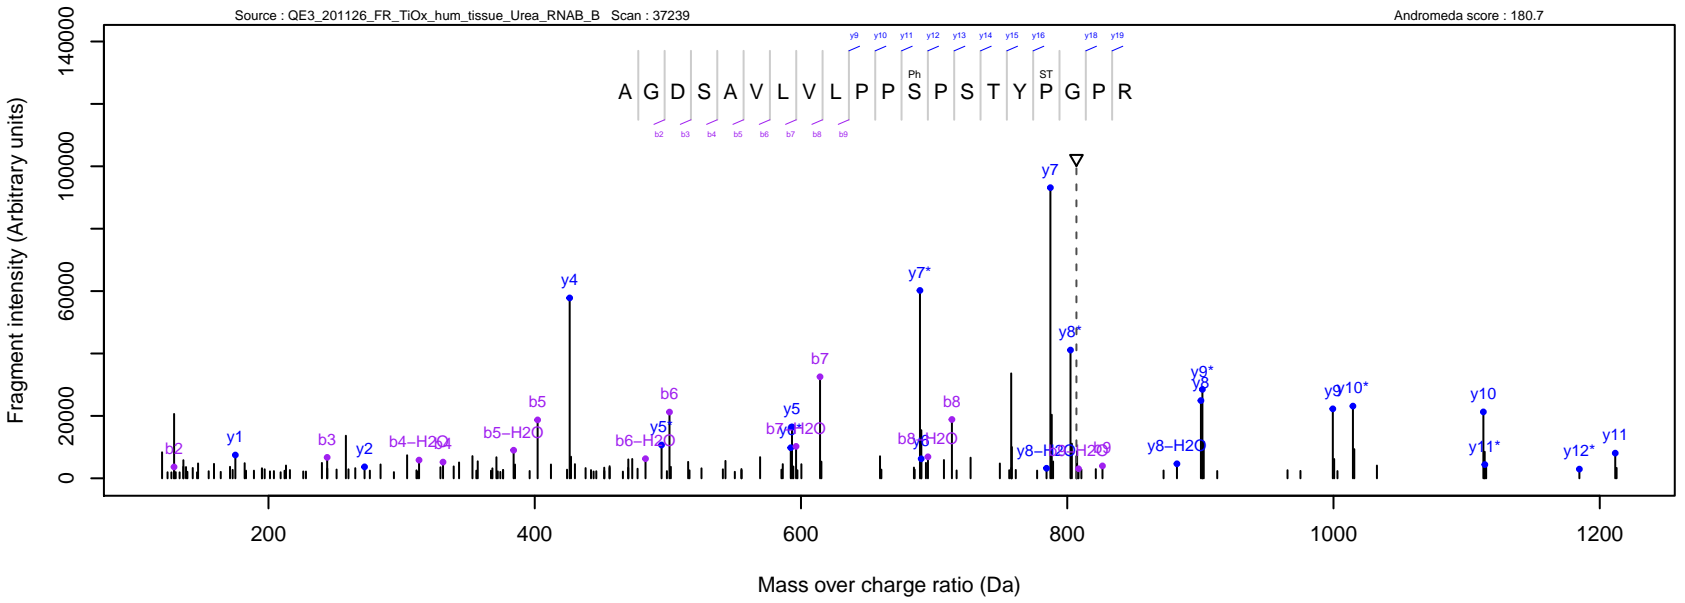

LLDAQLS(Phospho (STY))TGGIVDPSK-2+

Source : QE3\_201126\_FR\_TiOx\_hum\_tissue\_Urea\_RNAB\_N Scan : 41313

Andromeda score : 180.64

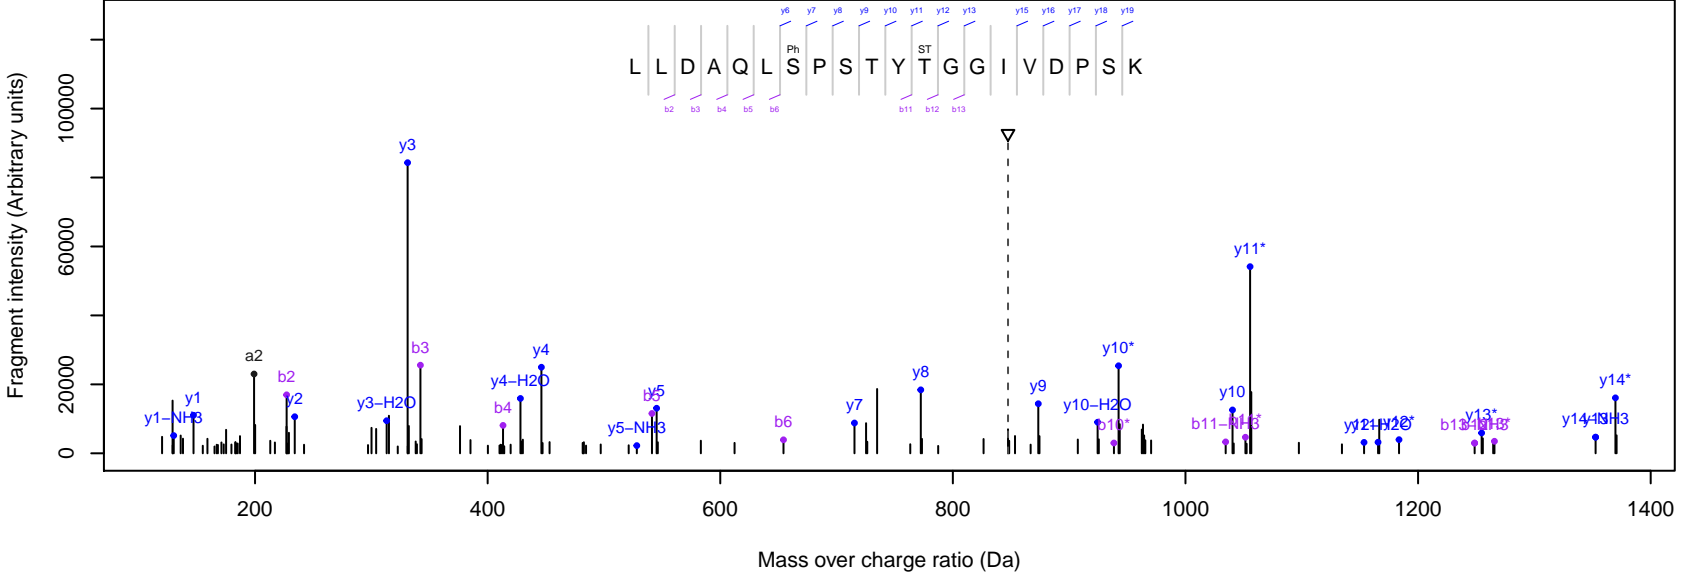

STT(Phospho (STY))PPPAEPVSLPQEPKPR-3+

Source : QE3\_201126\_FR\_TiOx\_hum\_tissue\_Urea\_RNAB\_H Scan : 24394

Andromeda score : 180.64

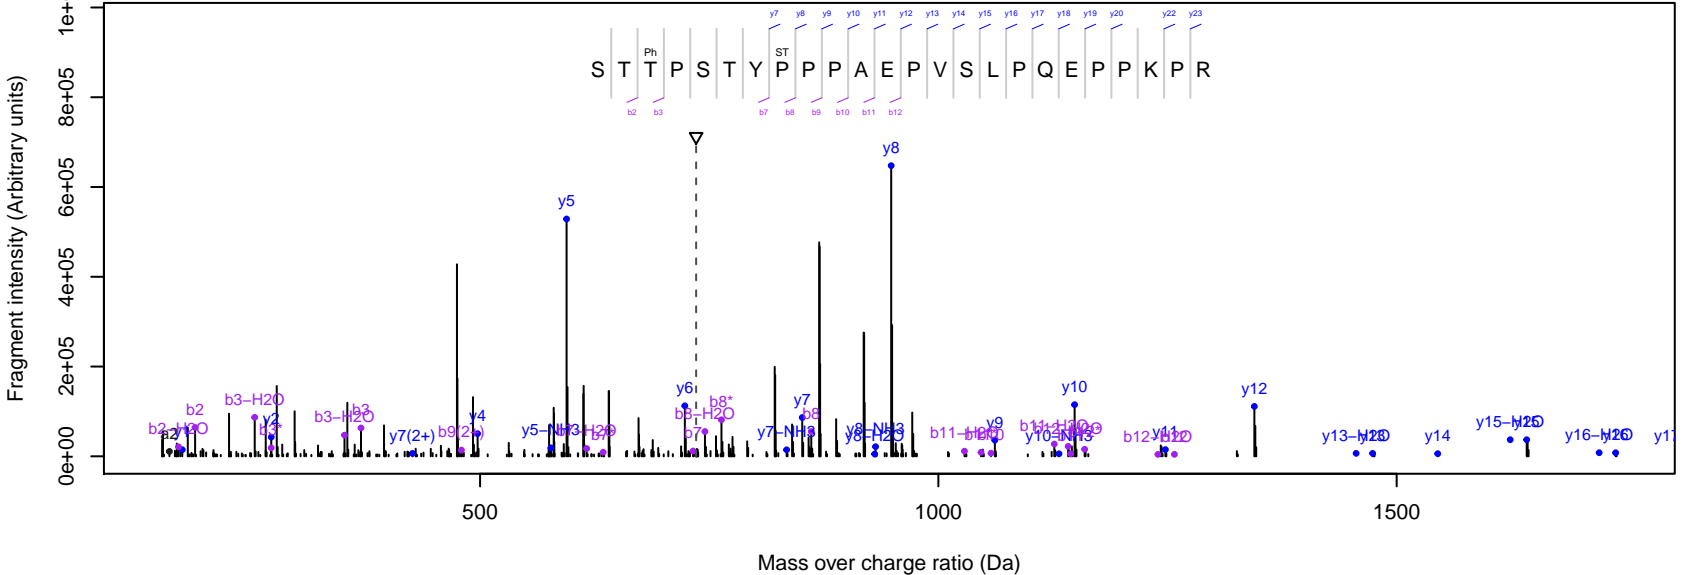

FLQEHGSDS(Phospho (STY))FLAEHK-3+

Source : QE3\_201126\_FR\_TiOx\_hum\_tissue\_Urea\_RNAB\_N Scan : 20590

Andromeda score : 180.62

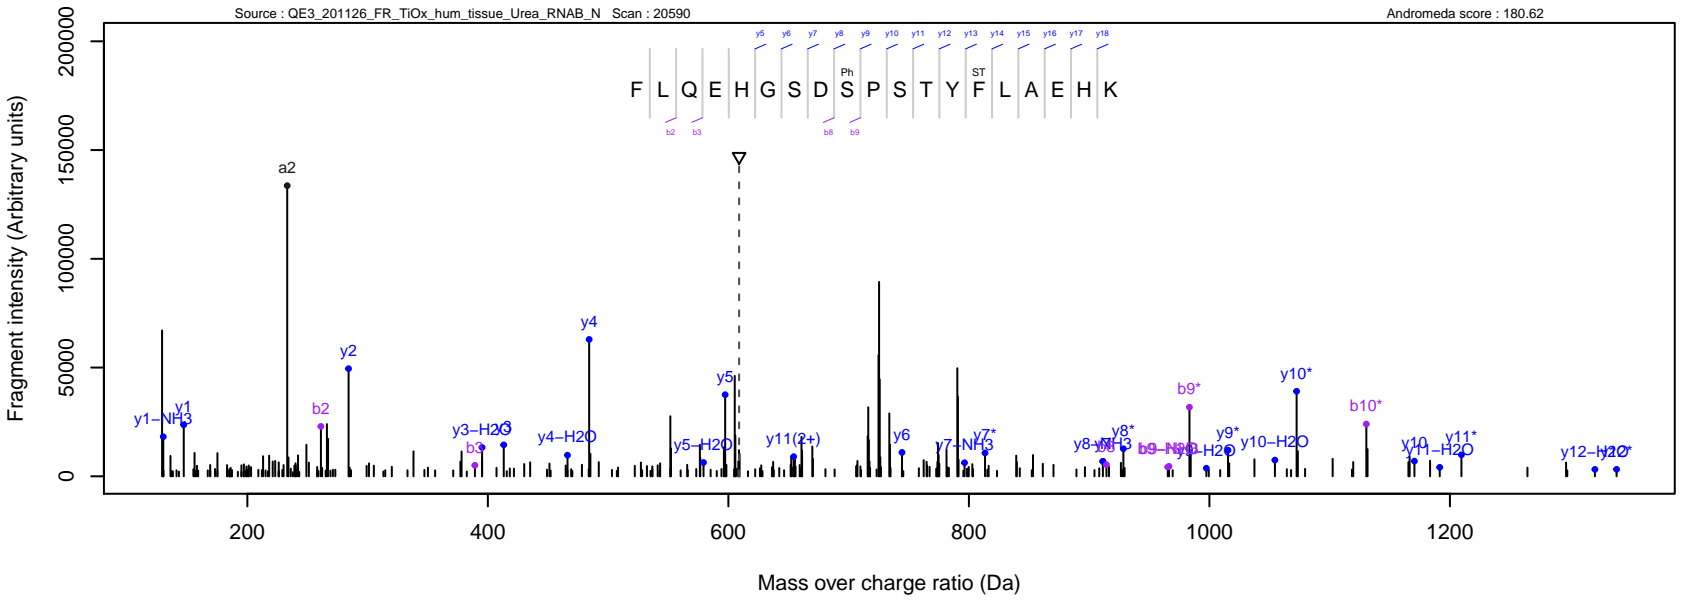

FVAFSGEGQS(Phospho (STY))LR-2+

Source : QE3\_201126\_FR\_TiOx\_hum\_tissue\_Urea\_RNAB\_H Scan : 31931

Andromeda score : 180.61

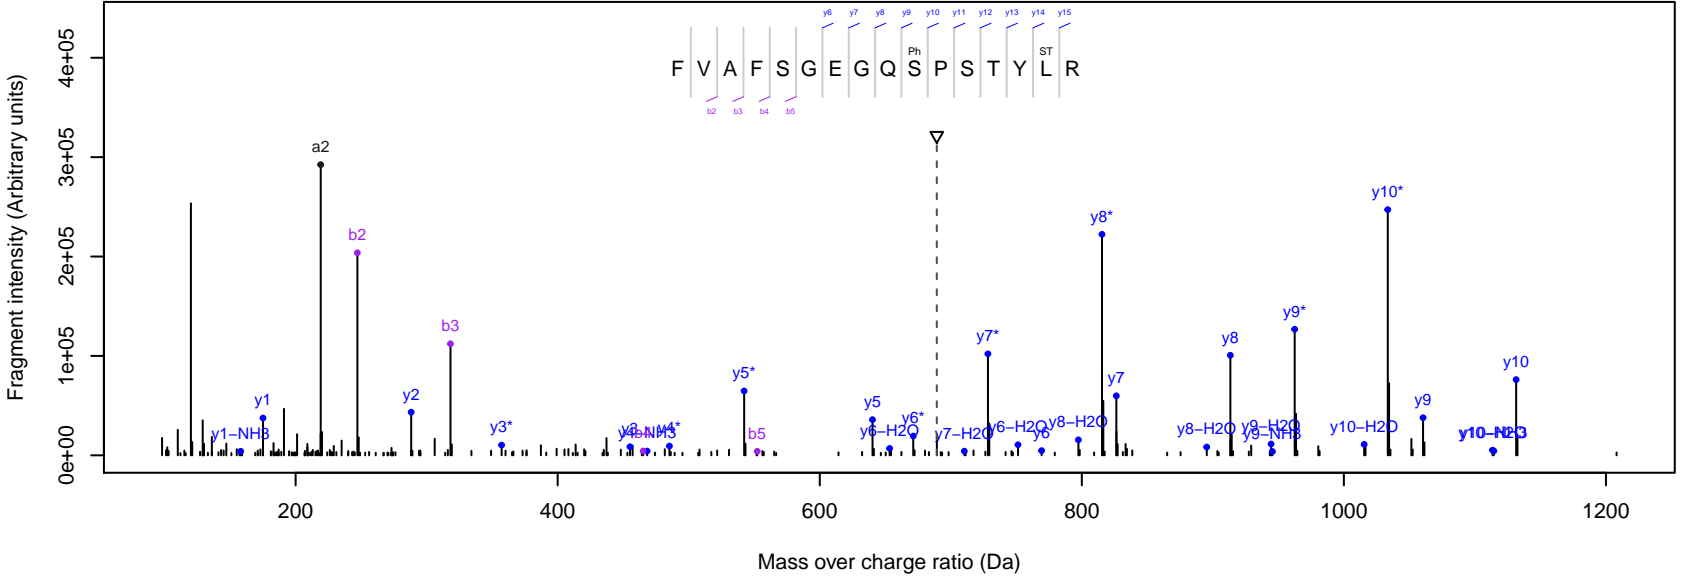

KQITPSTYMEELVR-2+

Source : QE3\_201126\_FR\_TiOx\_hum\_tissue\_Urea\_RNAB\_N Scan : 23942

Andromeda score : 180.61

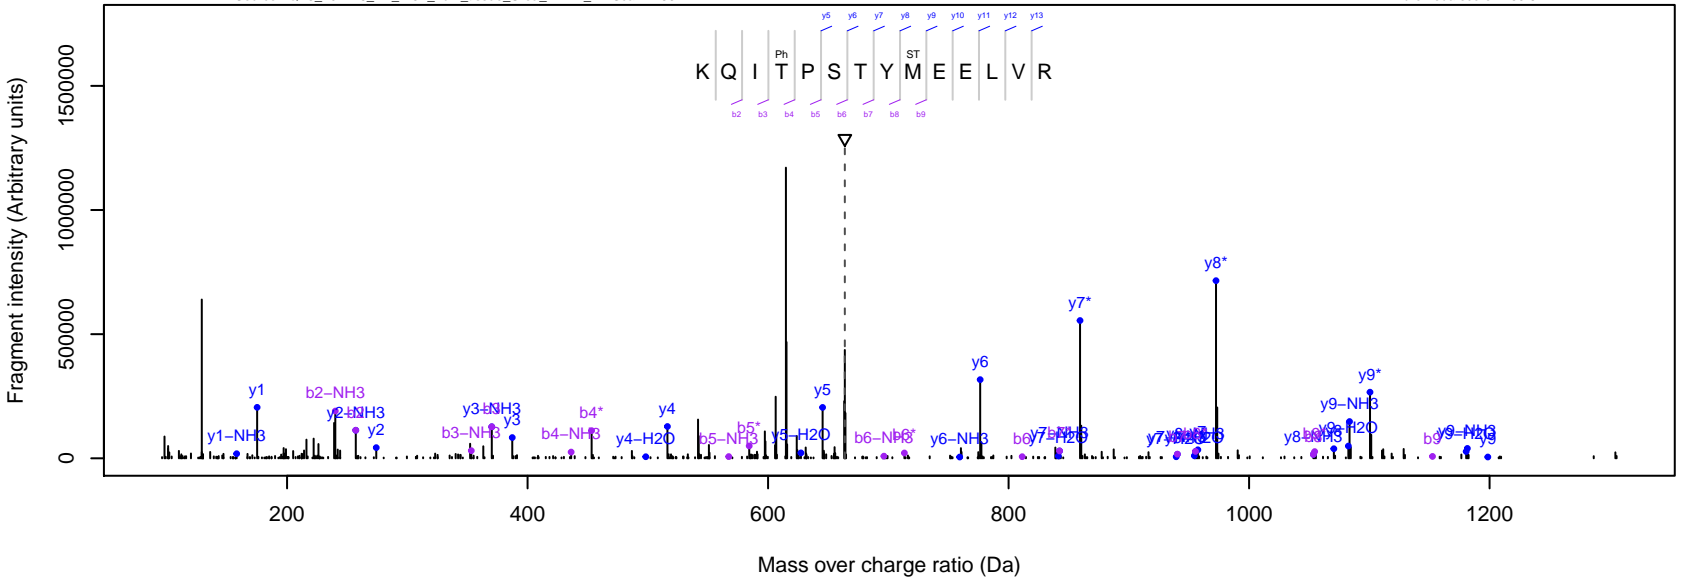

KIS(Phospho (STY))VVSATK-2+

Source : QE3\_201126\_FR\_TiOx\_hum\_tissue\_Urea\_RNAB\_H Scan : 8542

Andromeda score : 180.47

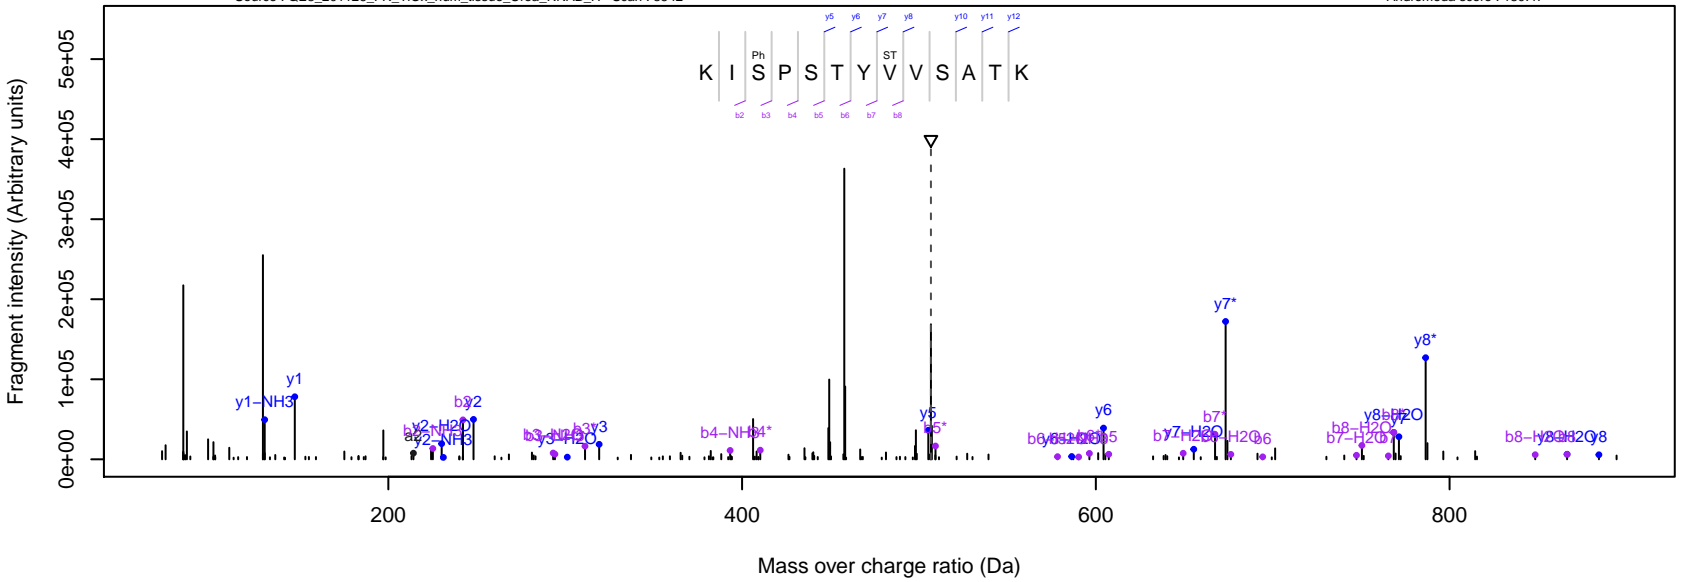

EVDPSTGELQS(Phospho (STY))LQM(Oxidation (M))PES(Phospho (STY))EGPSS(Phospho (STY))LDPSQEGPTGLK-3+

Source : QE3\_201126\_FR\_TiOx\_hum\_tissue\_Urea\_RNAB\_B Scan : 57577

Andromeda score : 180.38

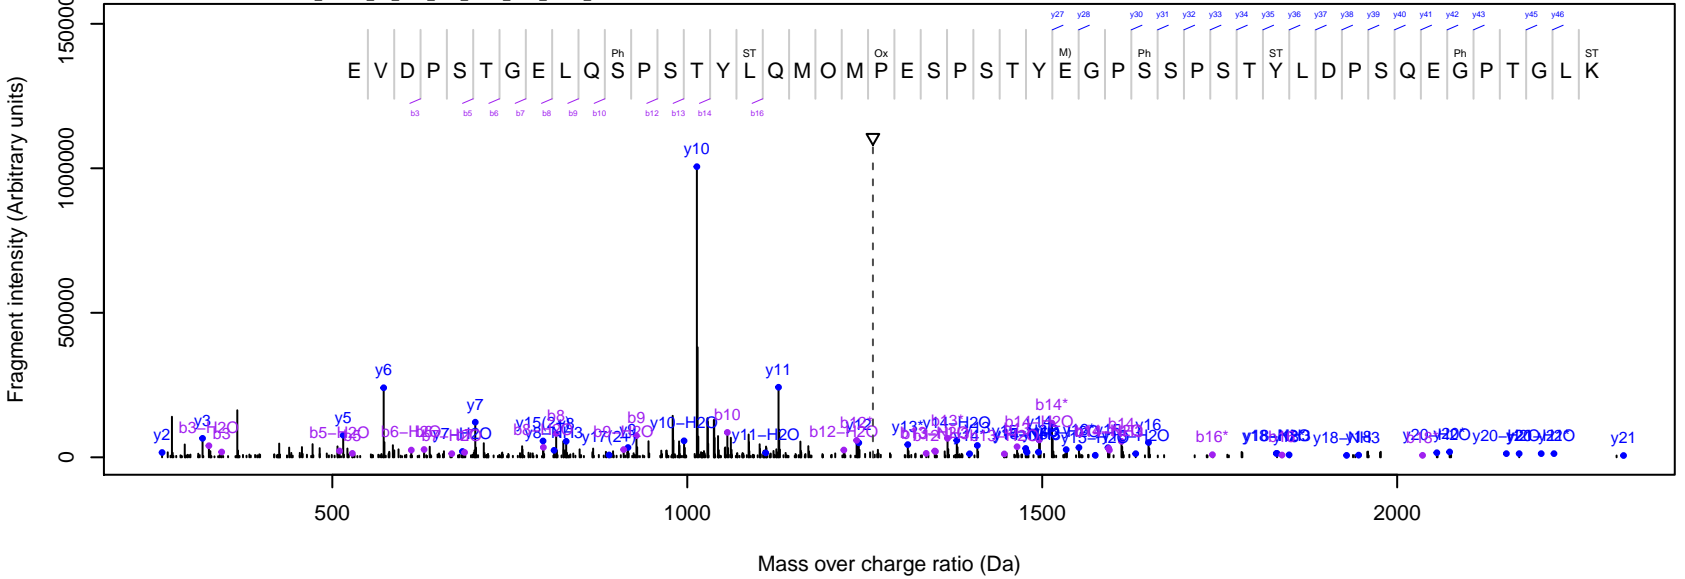

GQPGNAYDGAGQPSAAYLSM(Oxidation (M))SQGAVANANST(Phospho (STY))PPPYER-3+

Source : QE3\_201126\_FR\_TiOx\_hum\_tissue\_Urea\_RNAB\_N Scan : 36881

Andromeda score : 180.33

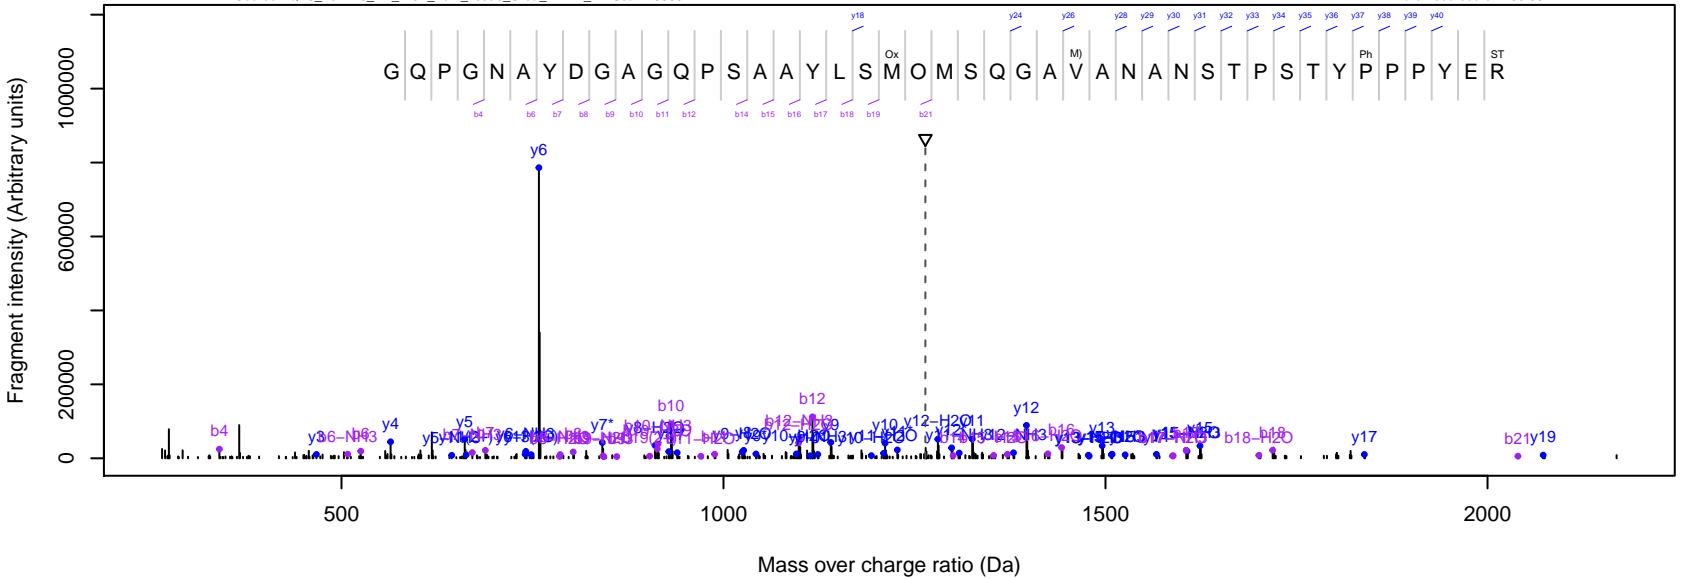

NIKS(Phospho (STY))VTELNGLDIITNTMTLGLDIVFK-3+

Source : QE3\_201126\_FR\_TIOx\_hum\_tissue\_Urea\_RNAB\_H Scan : 61594

Andromeda score : 180.11

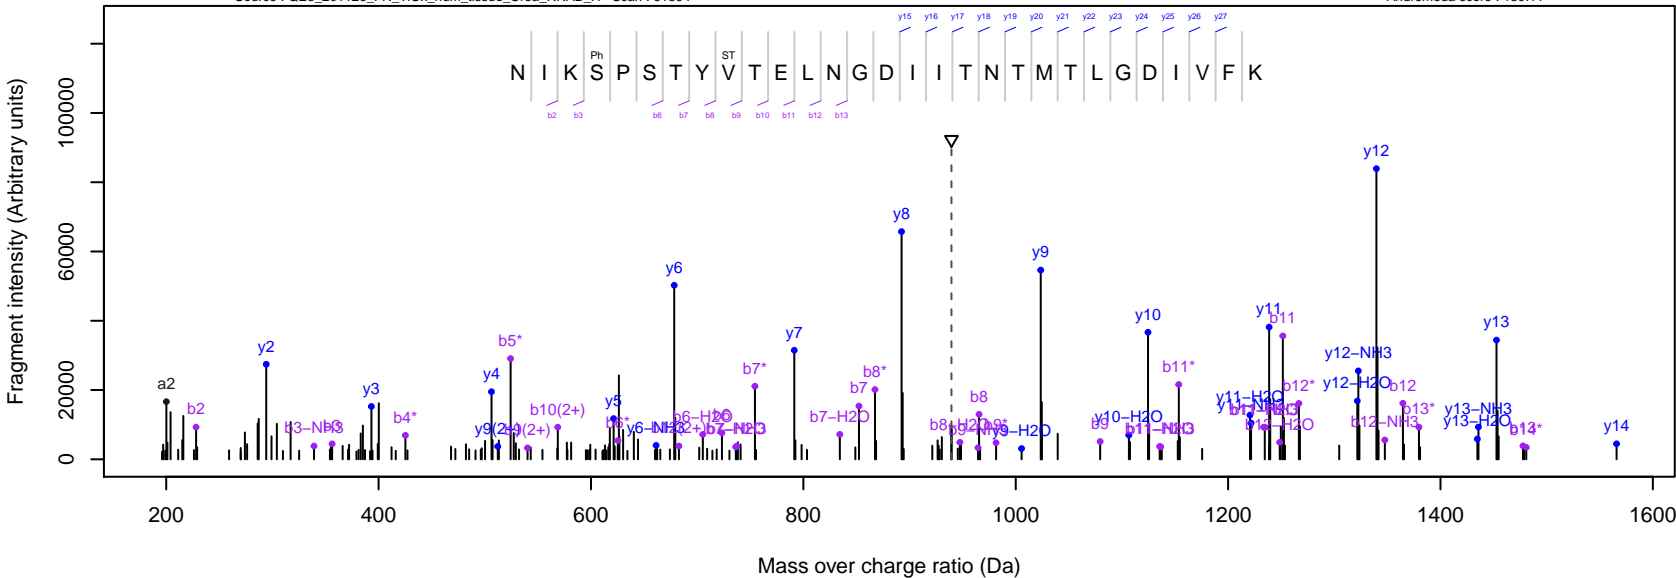

NQWQLS(Phospho (STY))ADDLKK-2+

Source : QE3\_201126\_FR\_TIOx\_hum\_tissue\_Urea\_RNAB\_H Scan : 24763

Andromeda score : 180.09

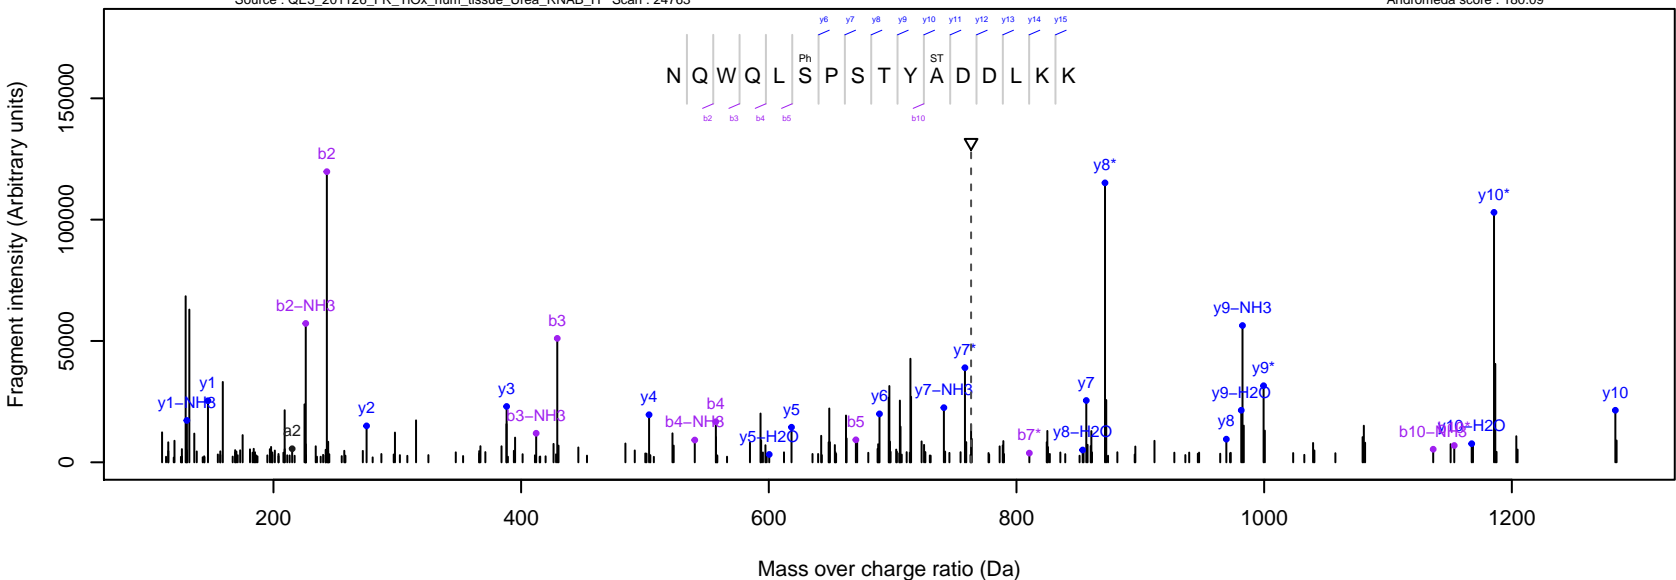

ESPRQLPGAEGPAIS(Phospho (STY))DGEEGGEGPAGGGAAGAAGARR-4+

Source : QE3\_201126\_FR\_TIOx\_hum\_tissue\_Urea\_RNAB\_H Scan : 28690

Andromeda score : 180.08

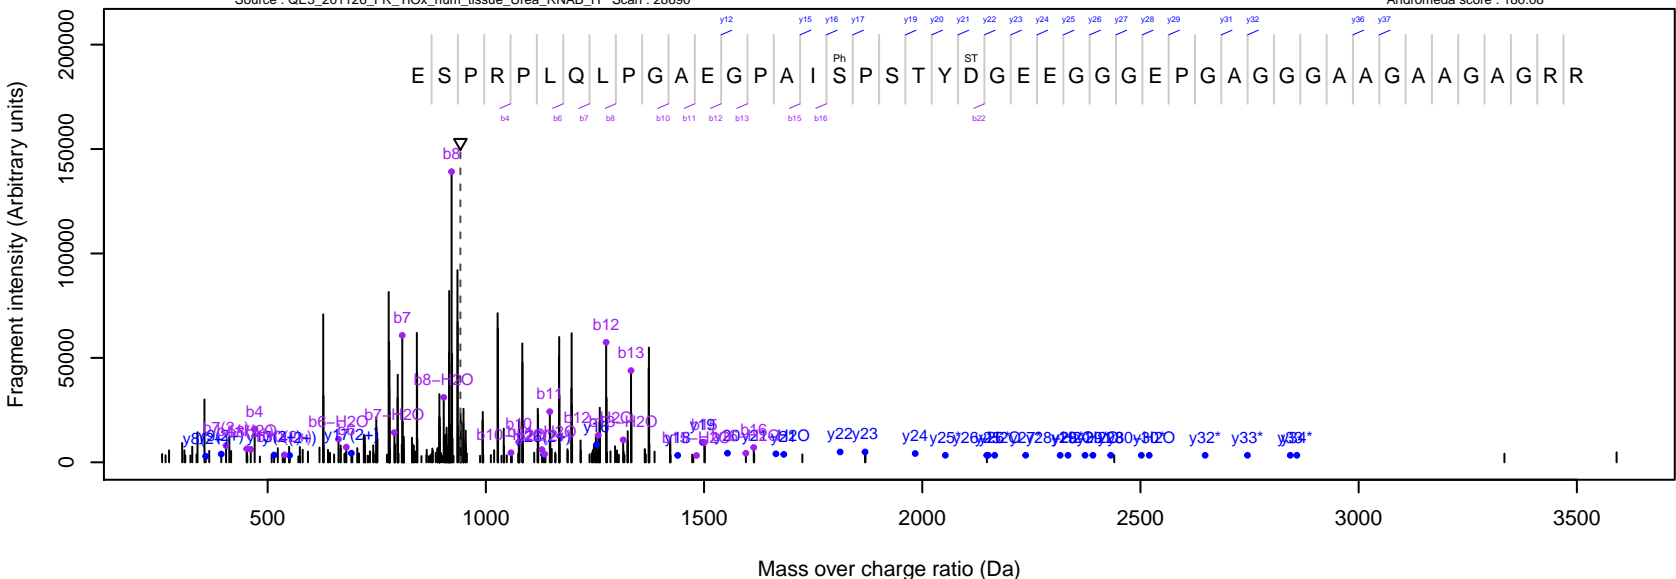

CQQPRT(Phospho (STY))PS(Phospho (STY))PLVLEGTIEQSSPPLSPPTTK-3+

Source : QE3\_201126\_FR\_TiOx\_hum\_tissue\_Urea\_RNAB\_H Scan : 47862

Andromeda score : 180.05

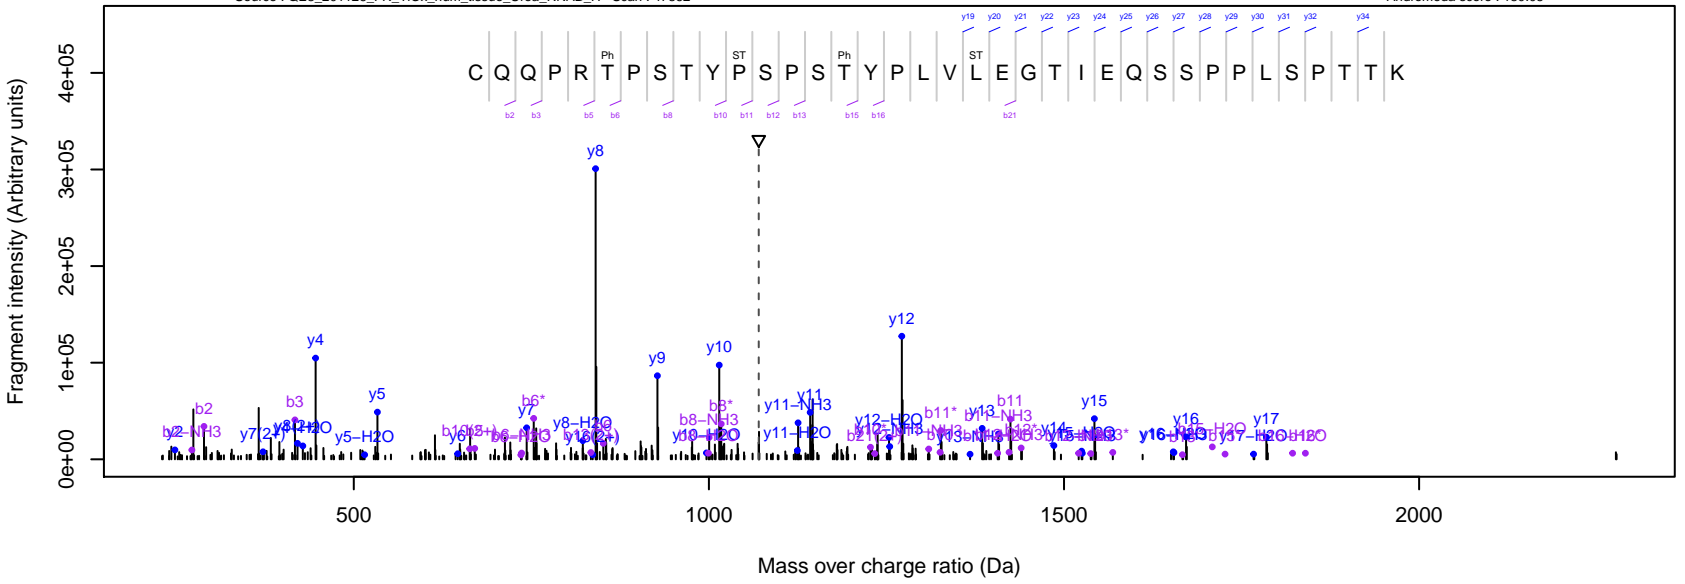

LIDSSGSASVLTHSS(Phospho (STY))SGNSLK-3+

Source : QE3\_201126\_FR\_TiOx\_hum\_tissue\_Urea\_RNAB\_B Scan : 21941

Andromeda score : 179.99

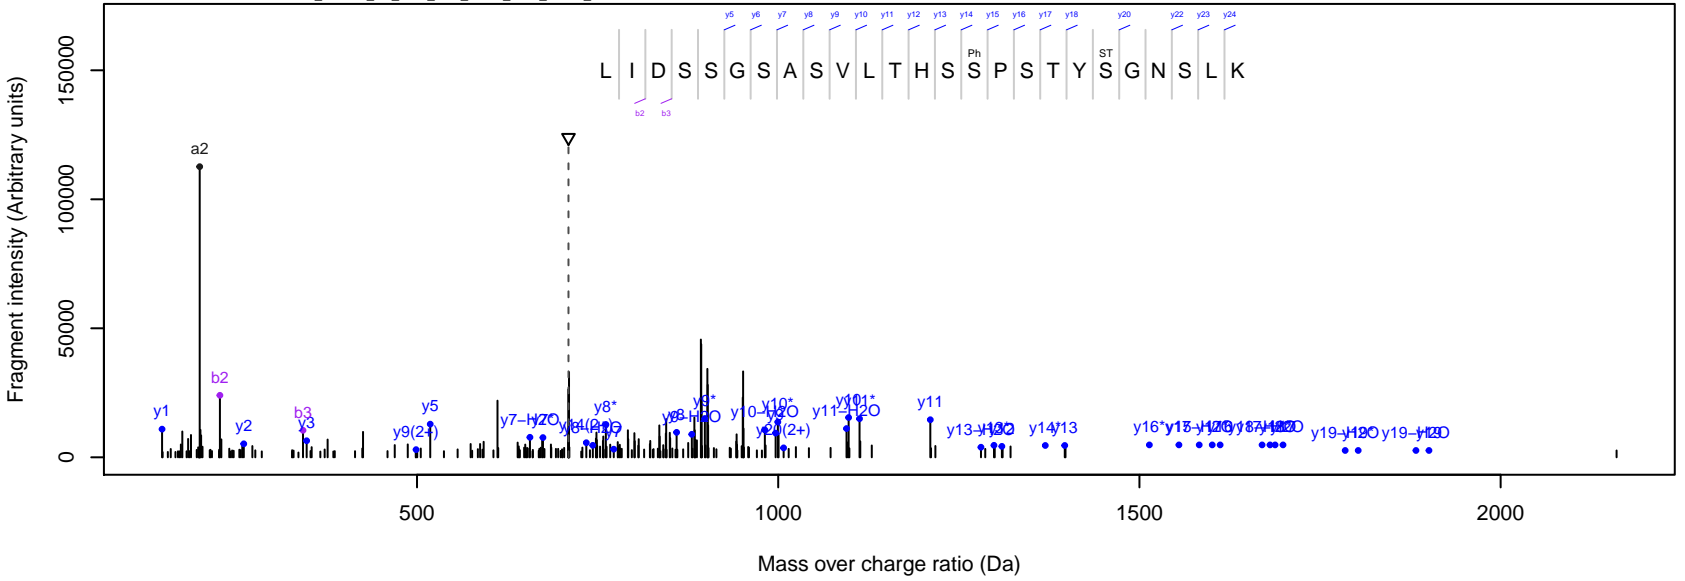

SHS(Phospho (STY))ITNM(Oxidation (M))EIGGLK-2+

Source : QE3\_201126\_FR\_TiOx\_hum\_tissue\_Urea\_RNAB\_H Scan : 15923

Andromeda score : 179.94

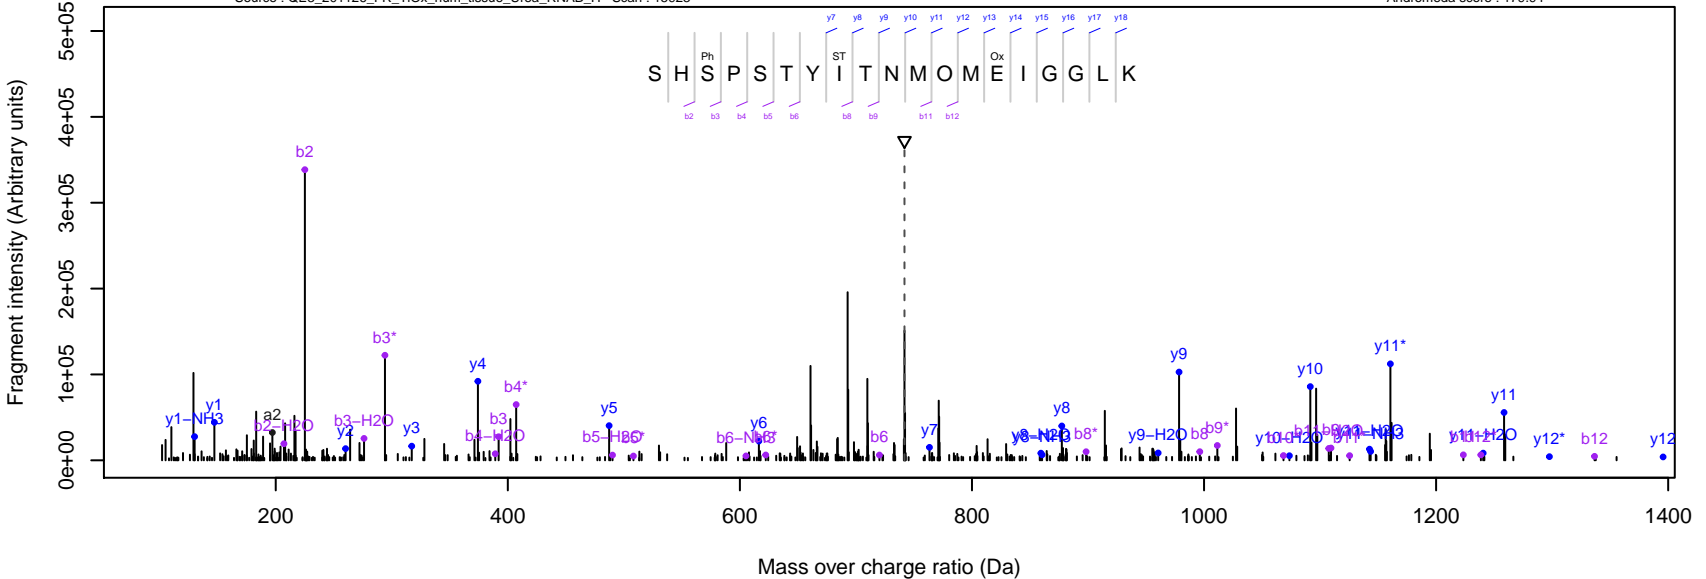



QLHLEGAS(Phospho (STY))LELS(Phospho (STY))DDDTESK-2+

Source : QE3\_201126\_FR\_TiOx\_hum\_tissue\_Urea\_RNAB\_H Scan : 39306

Andromeda score : 179.87

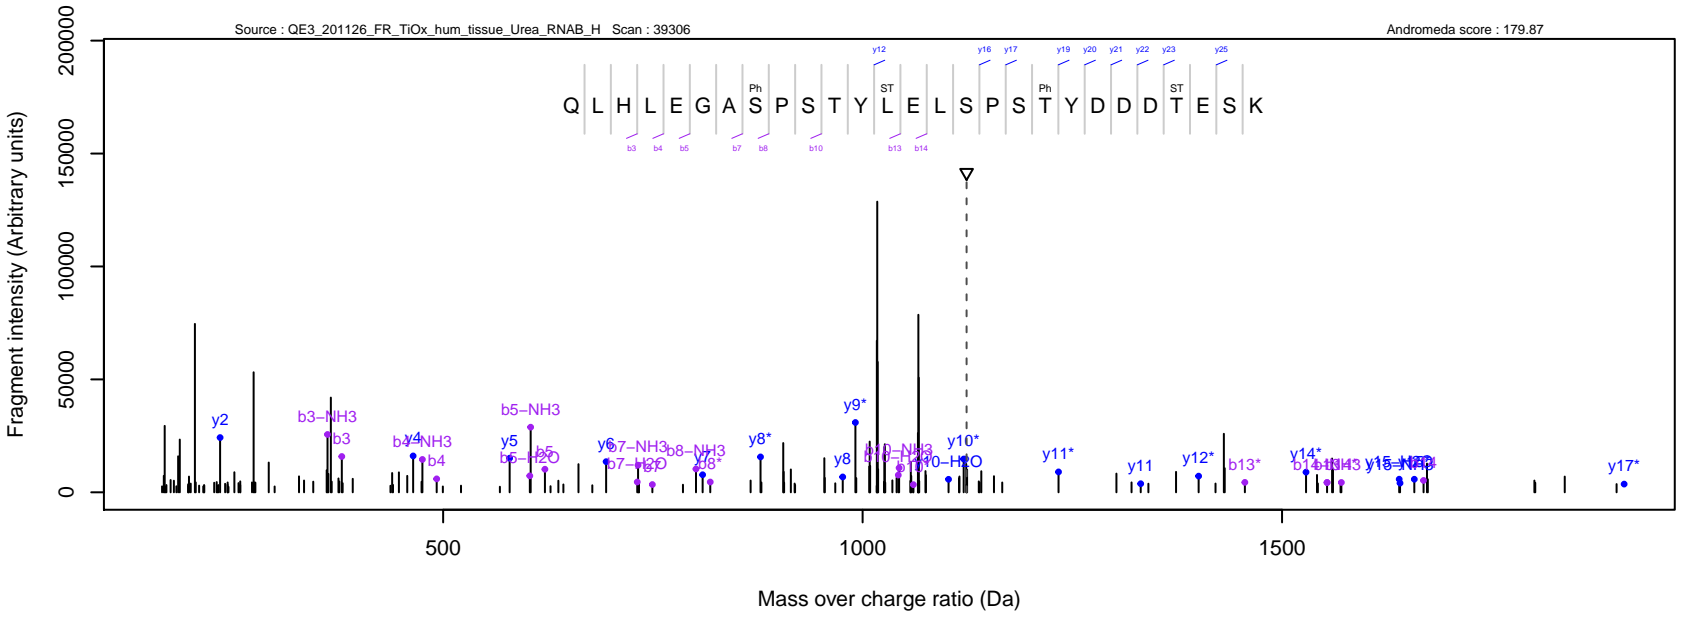

DSLLDGHFVLATLSDTDSHSQDLGS(Phospho (STY))PER-3+

Source : QE3\_201126\_FR\_TiOx\_hum\_tissue\_Urea\_RNAB\_H Scan : 53067

Andromeda score : 179.85

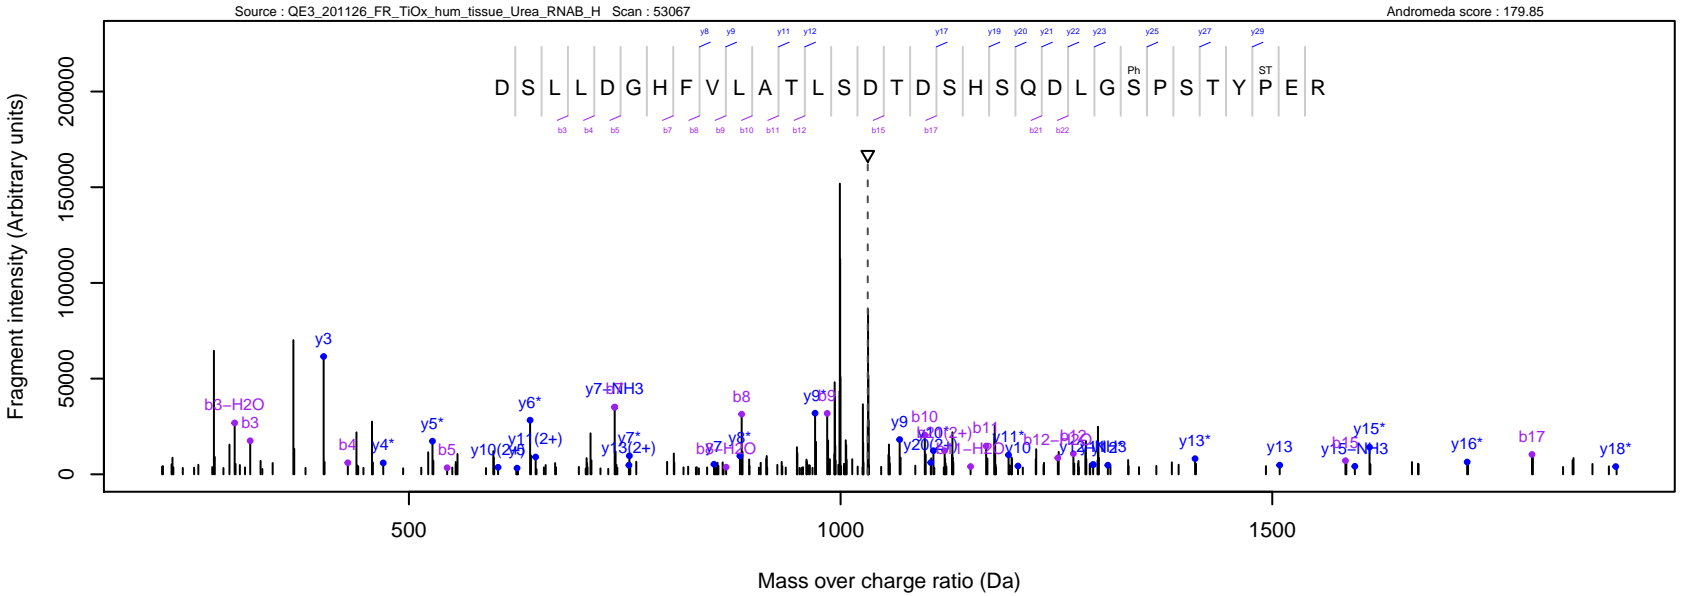

(Acetyl (Protein N-term))MDTDLYDEFGNYIGPELDS(Phospho (STY))DEDDDELGR-3+

Source : QE3\_201126\_FR\_TiOx\_hum\_tissue\_Urea\_RNAB\_H Scan : 64205

Andromeda score : 179.85

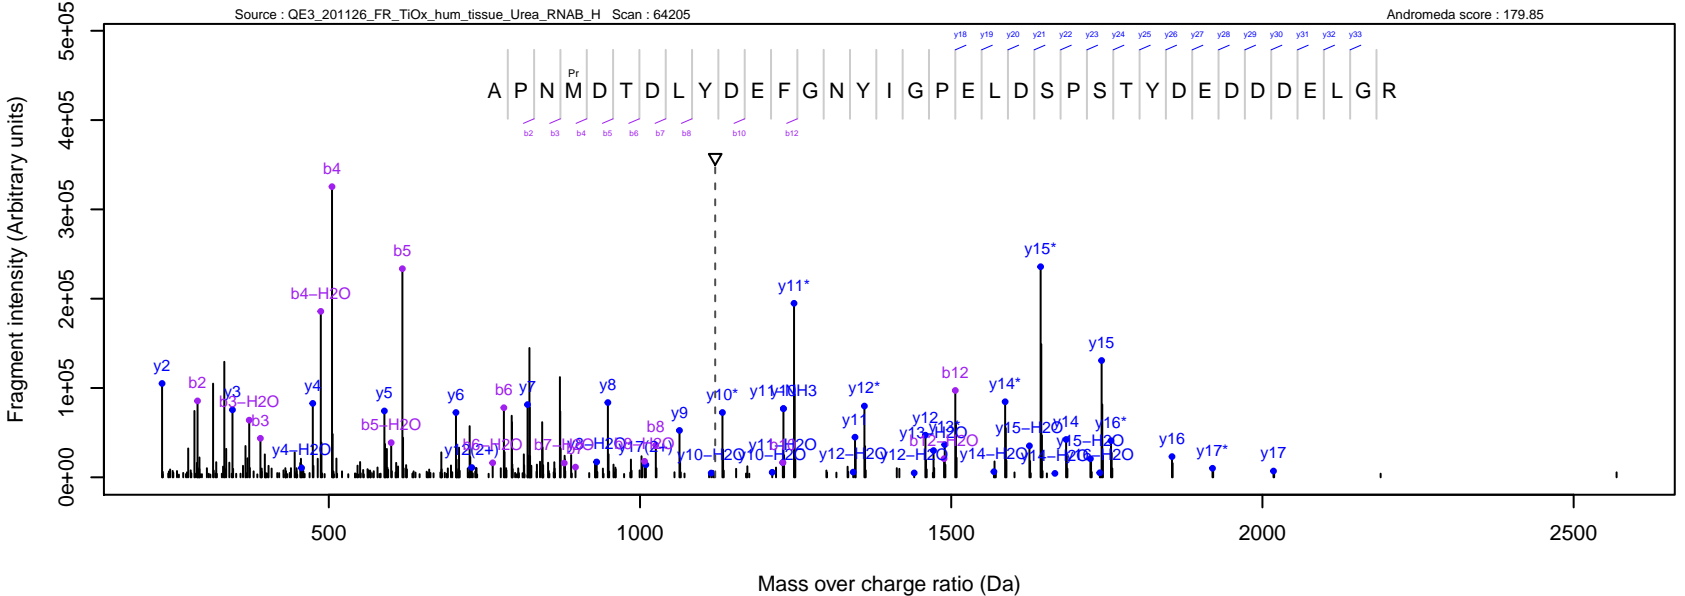

TNPS(Phospho (STY))PTNPFSSDLQK-2+

Source : QE3\_201126\_FR\_TiOx\_hum\_tissue\_Urea\_RNAB\_H Scan : 31480

Andromeda score : 179.79

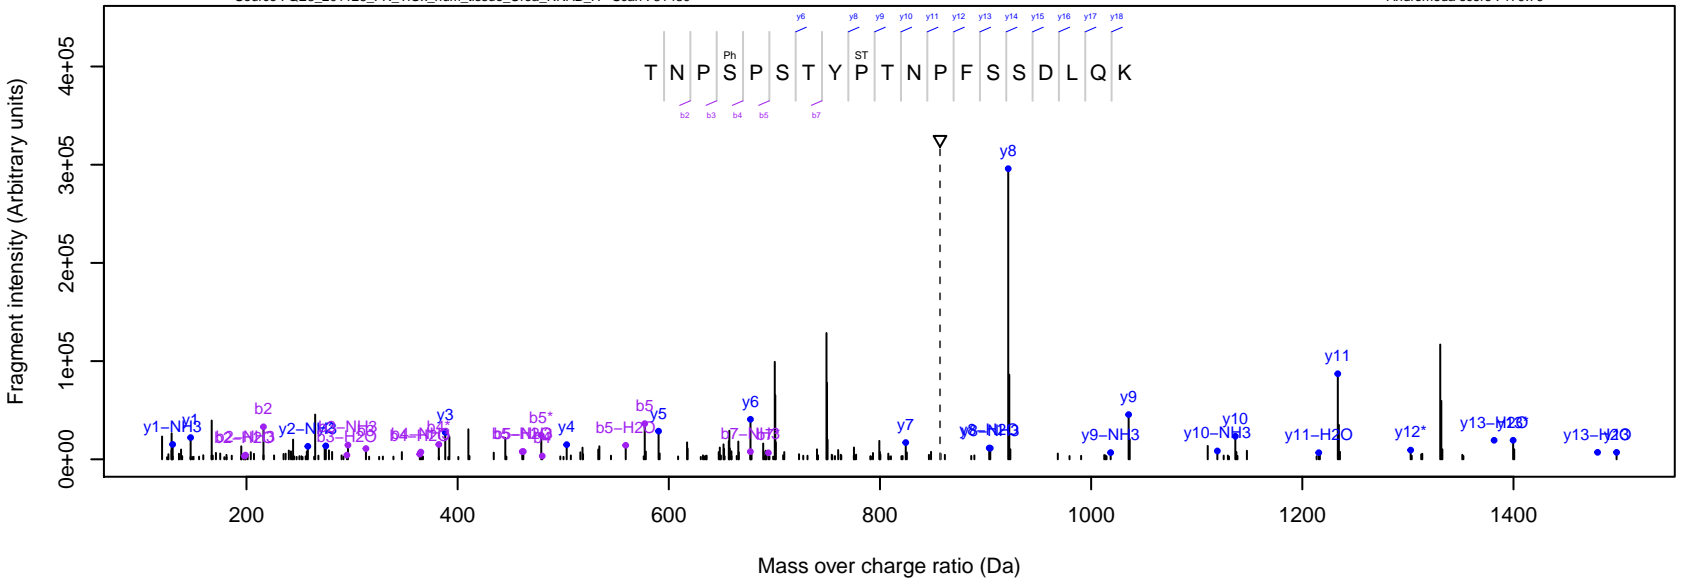

RAS(Phospho (STY))AILPGVLGSETLSNEVFQSEEEKQPEVPSLAK-4+

Source : QE3\_201126\_FR\_TiOx\_hum\_tissue\_Urea\_RNAB\_H Scan : 51829

Andromeda score : 179.78

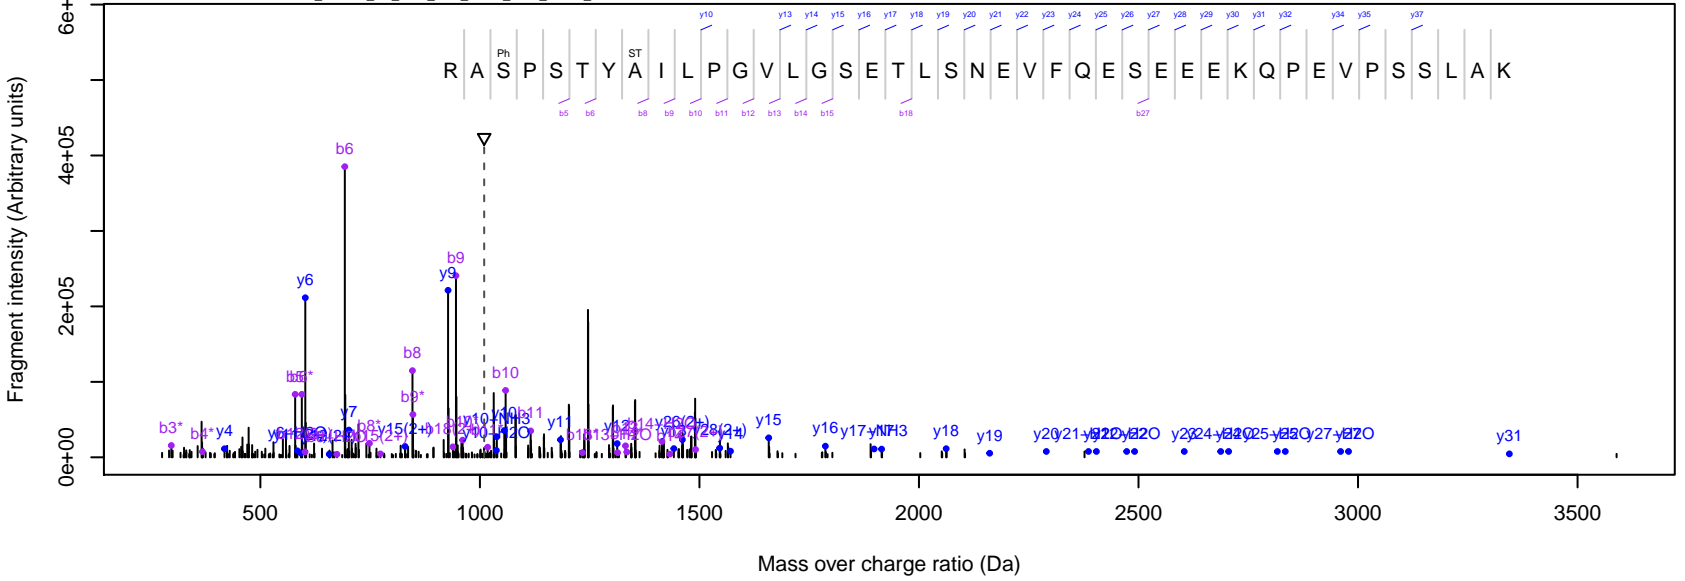

RQDEDYDEQVEES(Phospho (STY))LQDEDDNDVYILTK-3+

Source : QE3\_201126\_FR\_TiOx\_hum\_tissue\_Urea\_RNAB\_H Scan : 43052

Andromeda score : 179.78

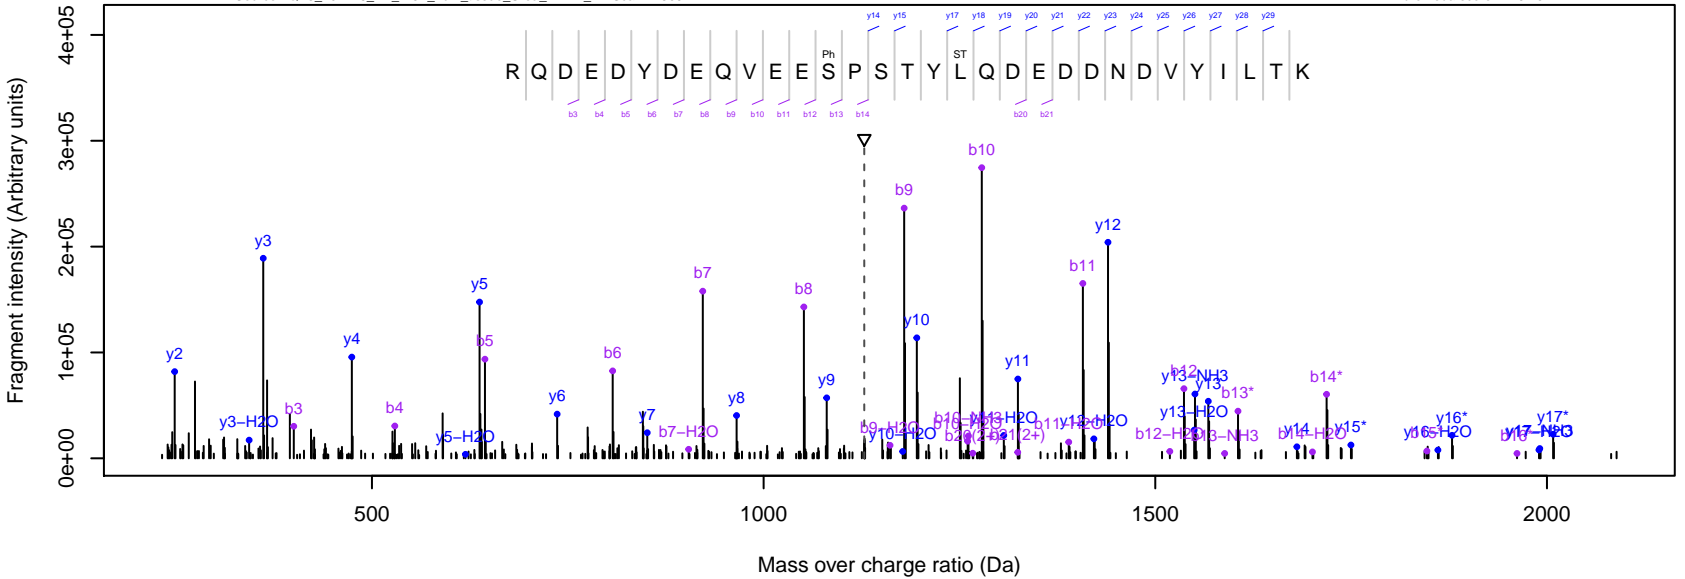

HAS(Phospho (STY))S(Phospho (STY))S(Phospho (STY))PES(Phospho (STY))PKPAPAPGSHR-2+

Source : QE3\_201126\_FR\_TiOx\_hum\_tissue\_Urea\_RNAB\_N Scan : 7427

Andromeda score : 179.75

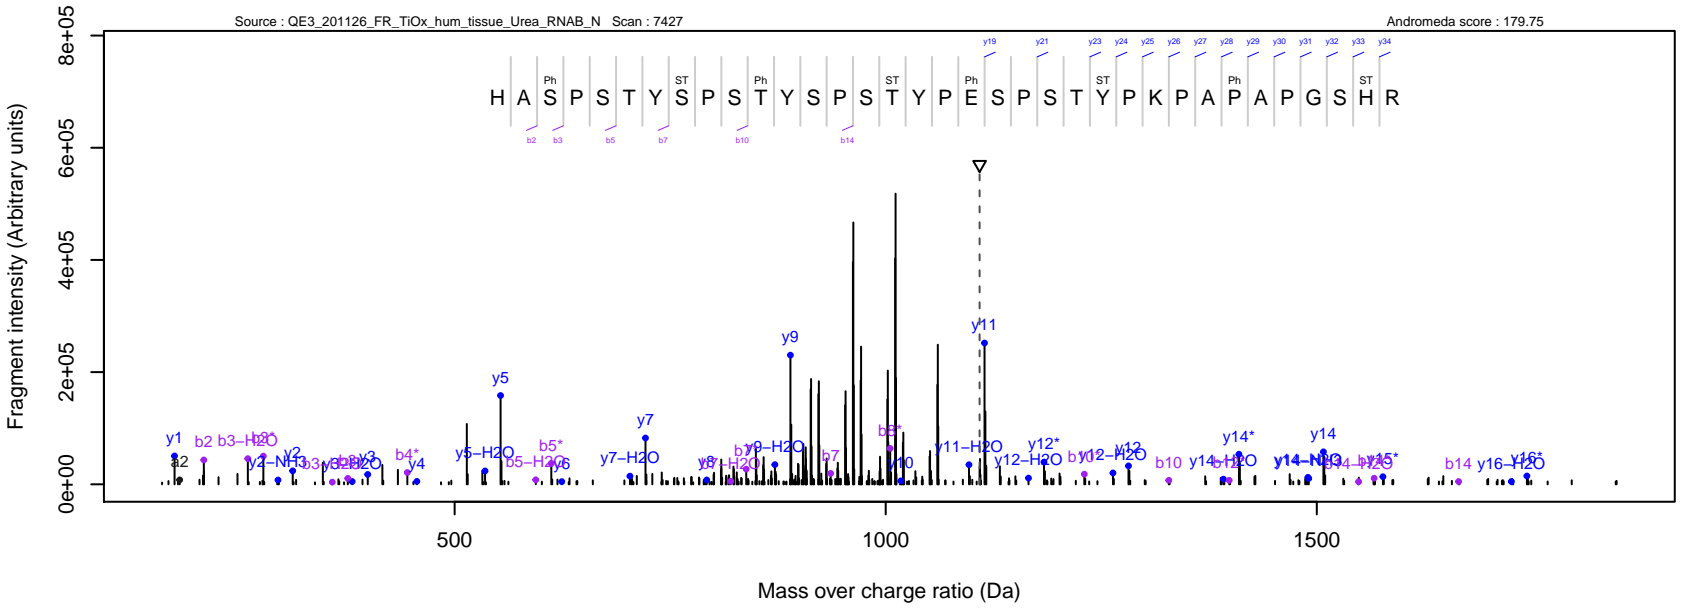

SLSSS(Phospho (STY))LDDTEVKK-2+

Source : QE3\_201126\_FR\_TiOx\_hum\_tissue\_Urea\_RNAB\_H Scan : 12758

Andromeda score : 179.67

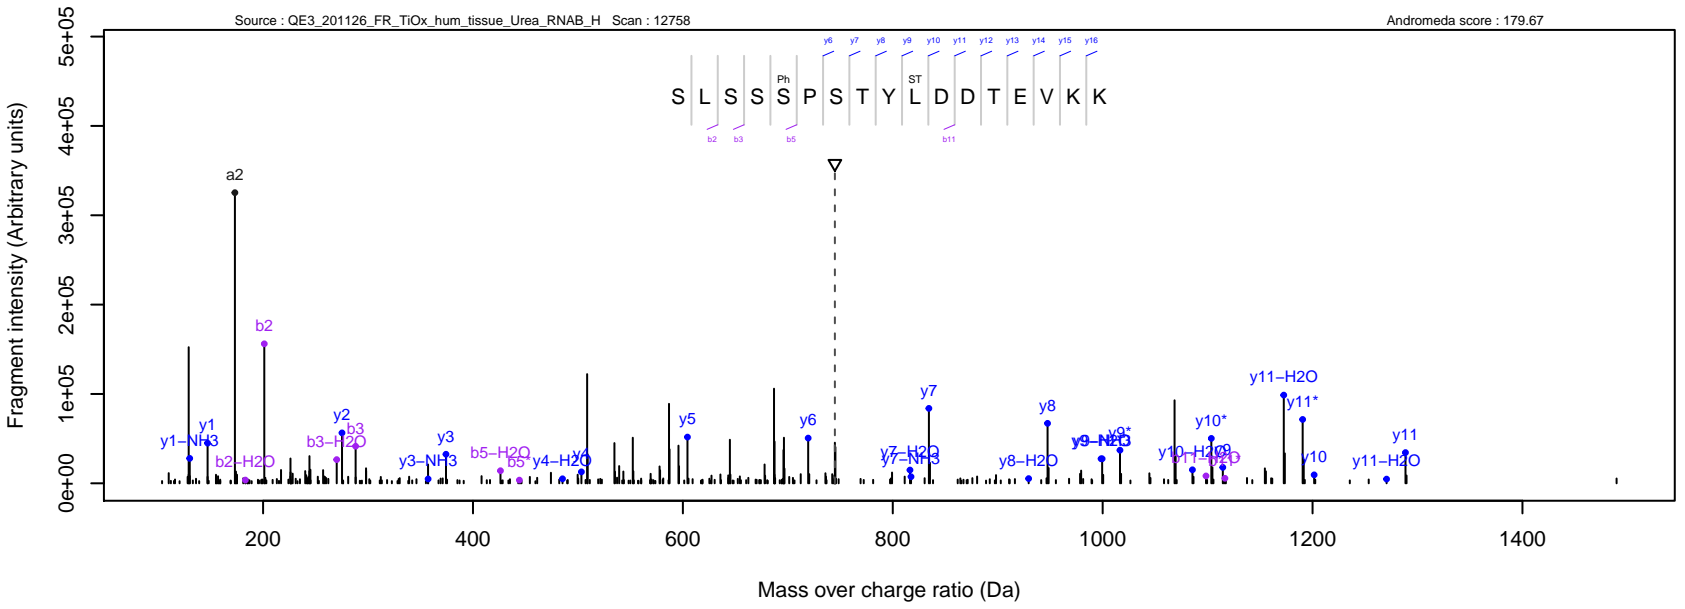

QNLLAPQNAVS(Phospho (STY))S(Phospho (STY))EETNDFKQETLPSK-3+

Source : QE3\_201126\_FR\_TiOx\_hum\_tissue\_Urea\_RNAB\_H Scan : 40753

Andromeda score : 179.64

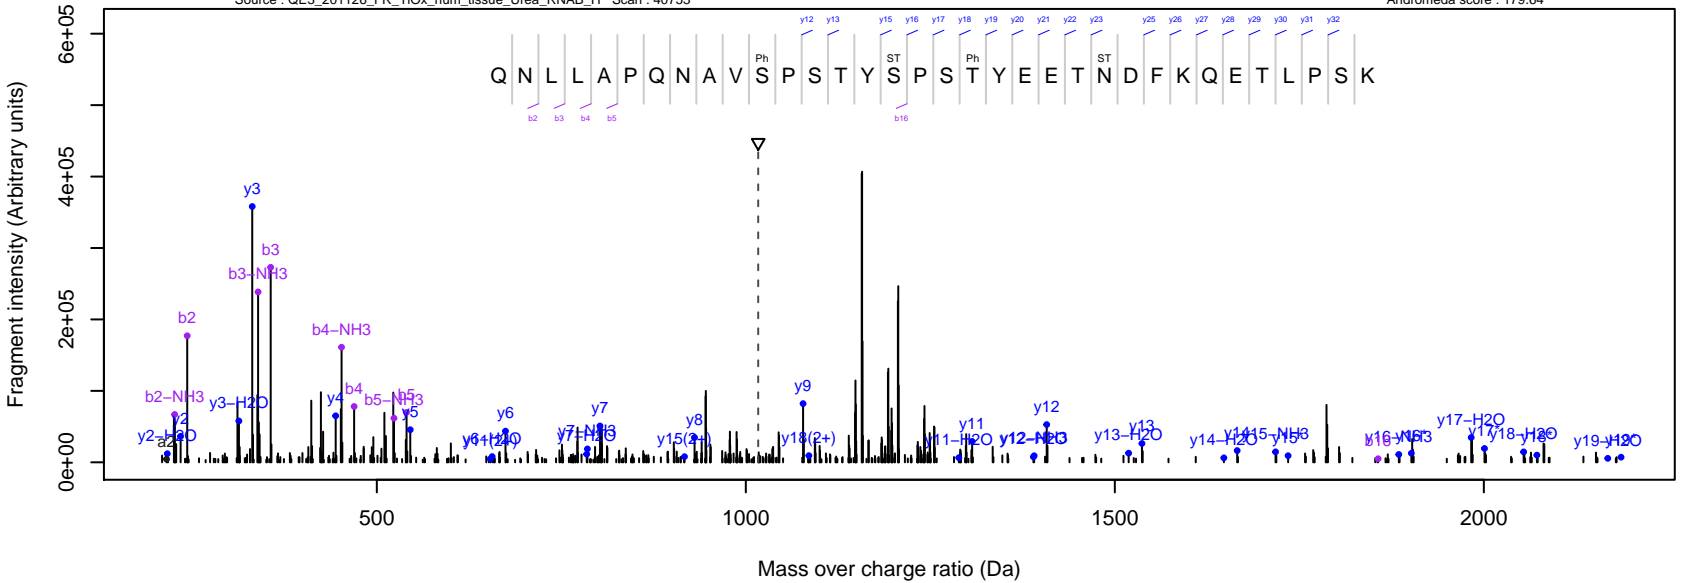

ITFITSFGGS(Phospho (STY))DEEAAAAAAAAASGVTTGKPPAPPQGGPAPGR-4+

Source : QE3\_201126\_FR\_TIOx\_hum\_tissue\_Urea\_RNAB\_N Scan : 57283

Andromeda score : 179.58

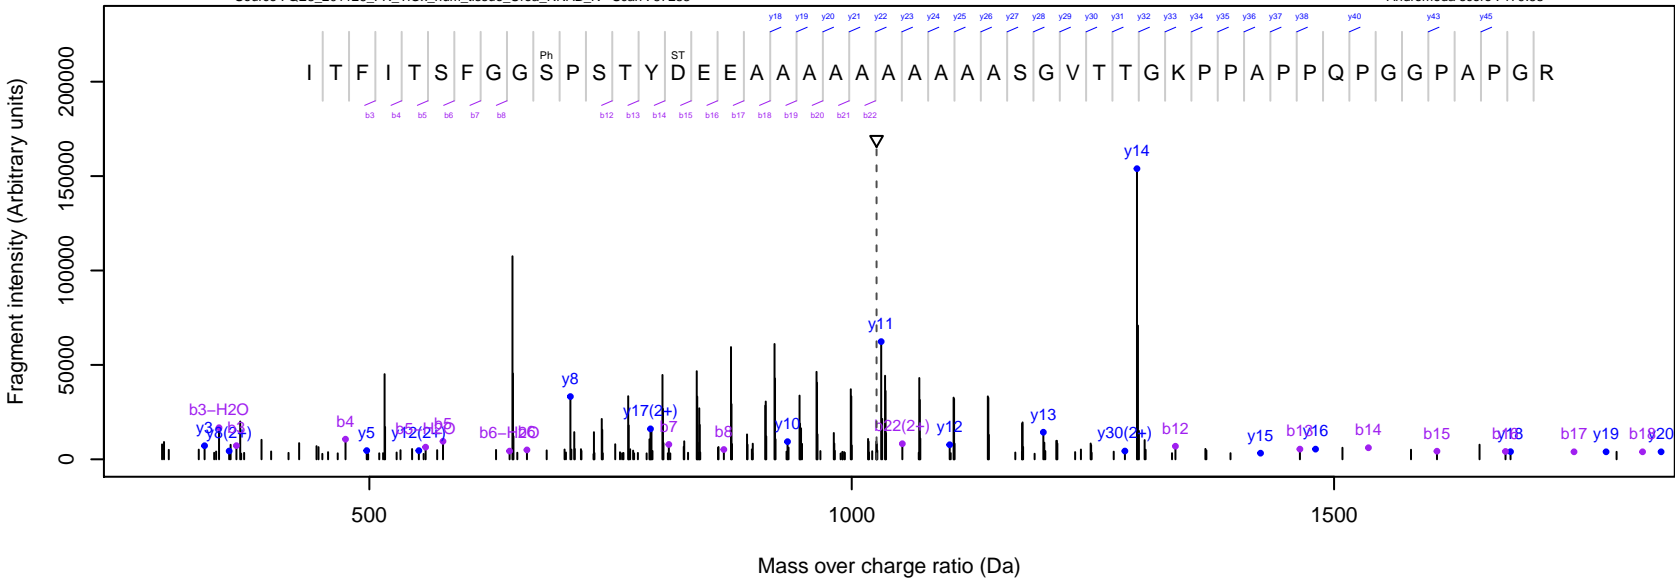

SPS(Phospho (STY))WQRPNQGVPTSTR-3+

Source : QE3\_201126\_FR\_TIOx\_hum\_tissue\_Urea\_RNAB\_H Scan : 15971

Andromeda score : 179.58

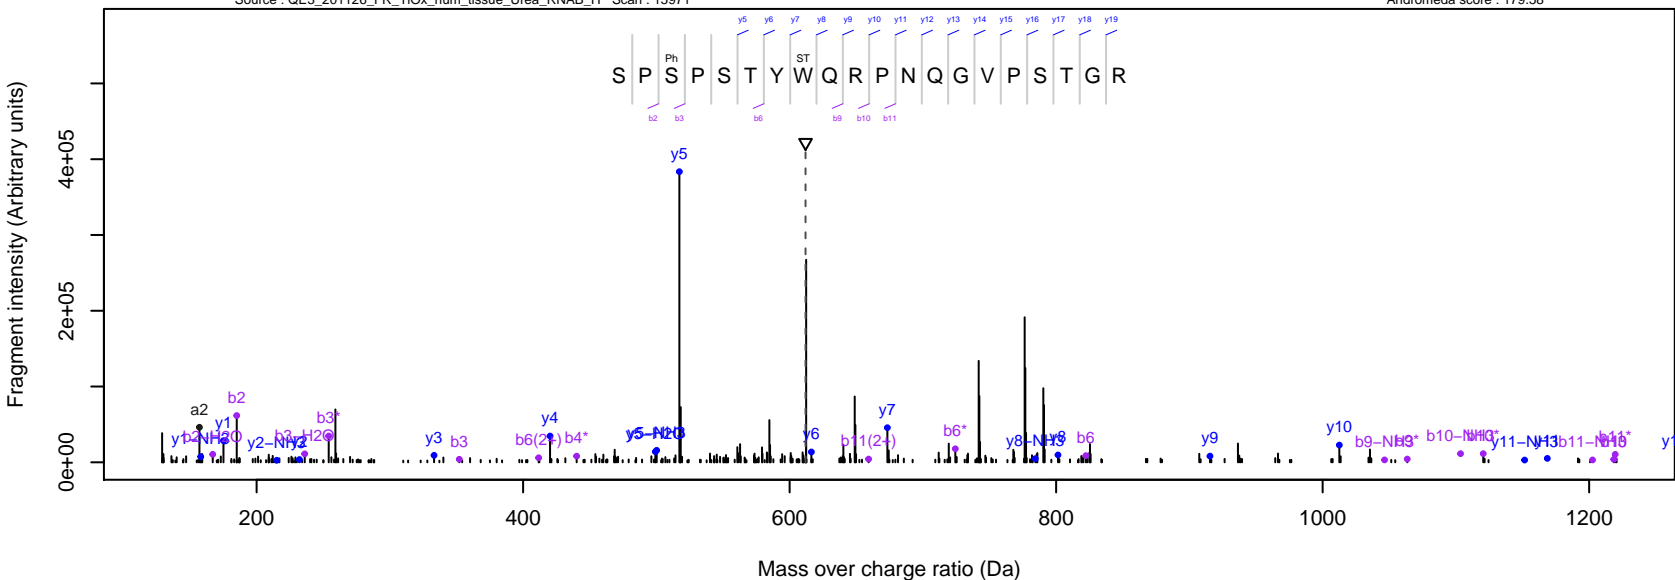

SALLTQNGT(Phospho (STY))GSLPR-2+

Source : QE3\_201126\_FR\_TIOx\_hum\_tissue\_Urea\_RNAB\_H Scan : 26354

Andromeda score : 179.56

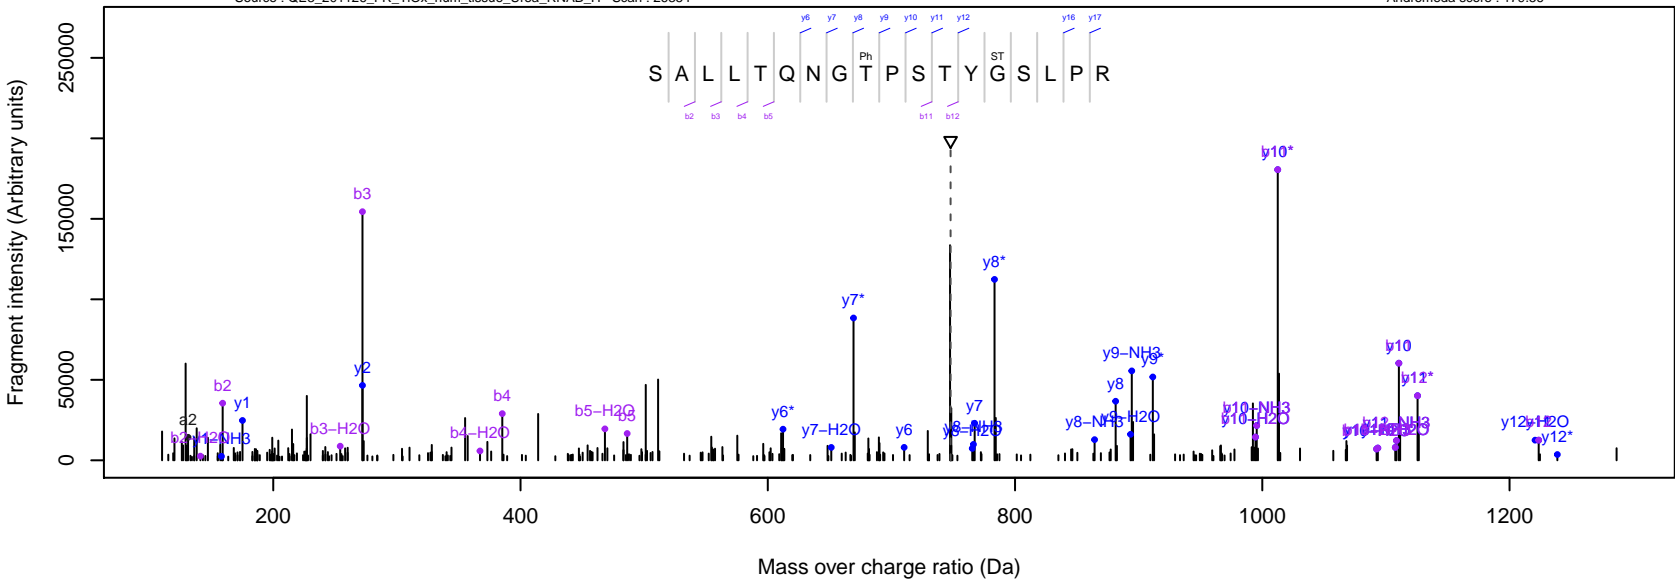

APEPLG PADQSELGPEQLAEVGE S S P S T Y D E E P V E S R

Source : QE3\_201126\_FR\_TiOx\_hum\_tissue\_Urea\_RNAB\_N Scan : 50761

Andromeda score : 179.54

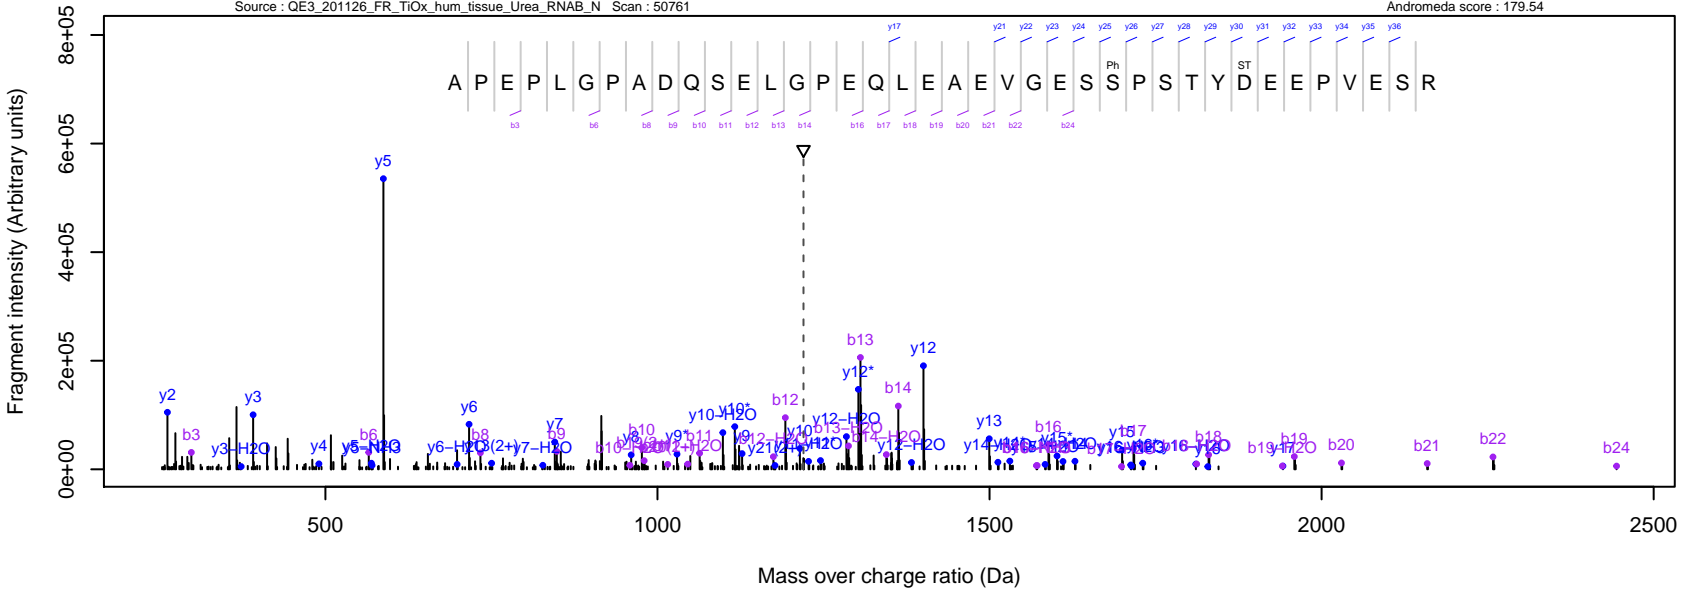

NVAELGHS(Phospho (STY))PKDPGGGGPVR-3+

Source : QE3\_201126\_FR\_TiOx\_hum\_tissue\_Urea\_RNAB\_B Scan : 13508

Andromeda score : 179.54

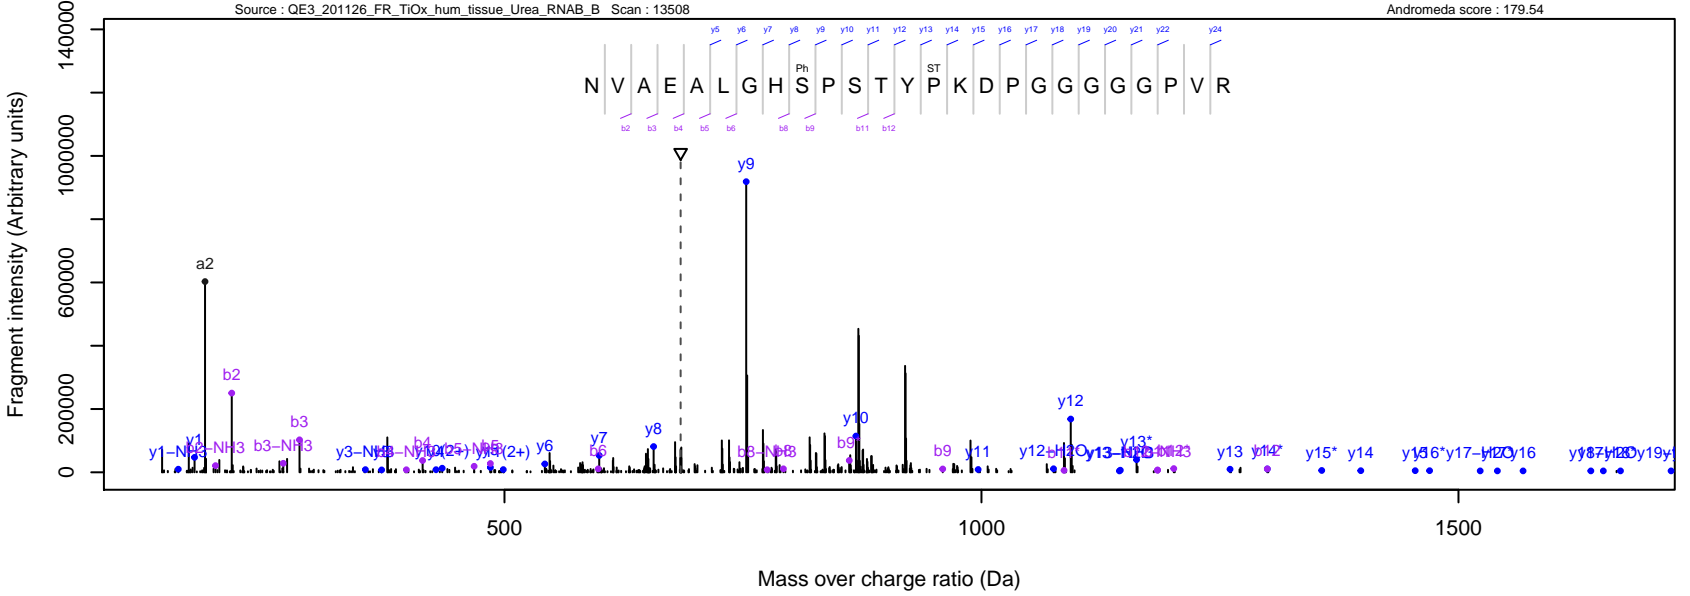

S(Phospho (STY))IEVENDFLPVEK-2+

Source : QE3\_201126\_FR\_TiOx\_hum\_tissue\_Urea\_RNAB\_H Scan : 47277

Andromeda score : 179.5

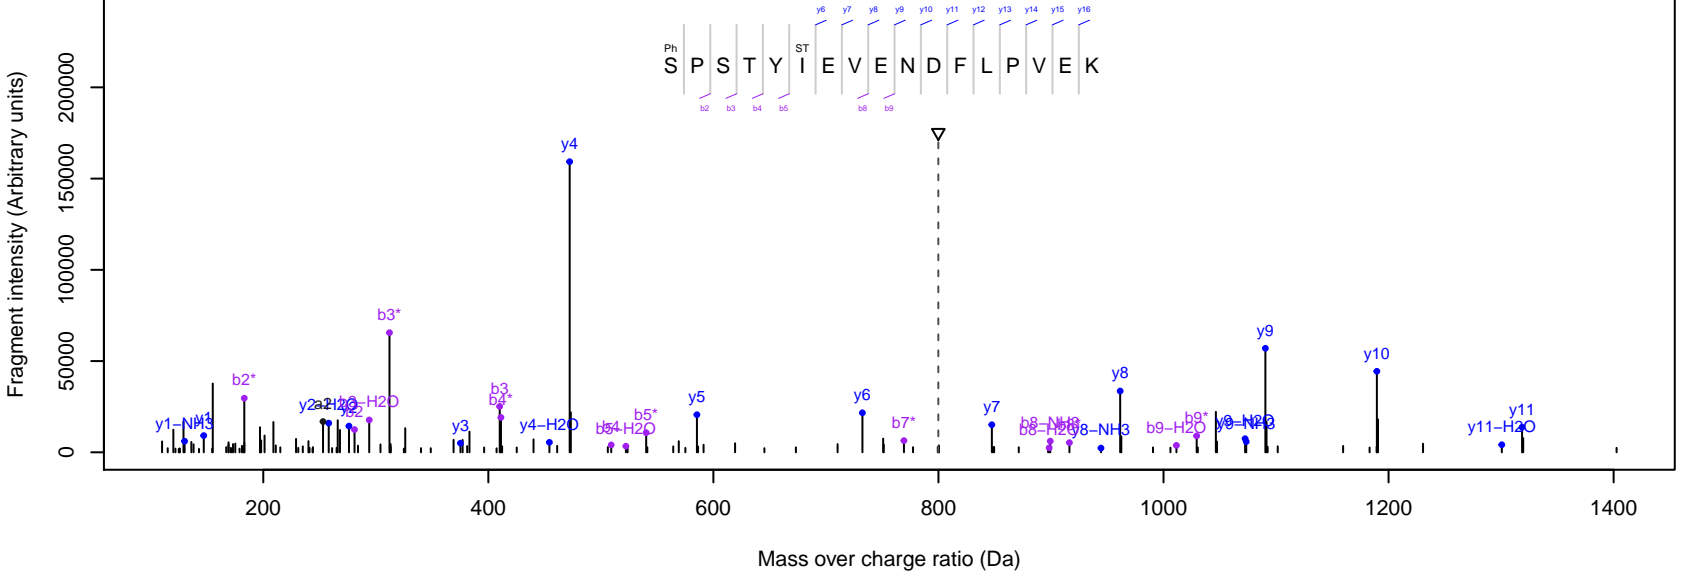

THTTALAGRS(Phospho (STY))PS(Phospho (STY))PASGRR-3+

Source : QE3\_201126\_FR\_TiOx\_hum\_tissue\_Urea\_RNAB\_N Scan : 5143

Andromeda score : 179.5

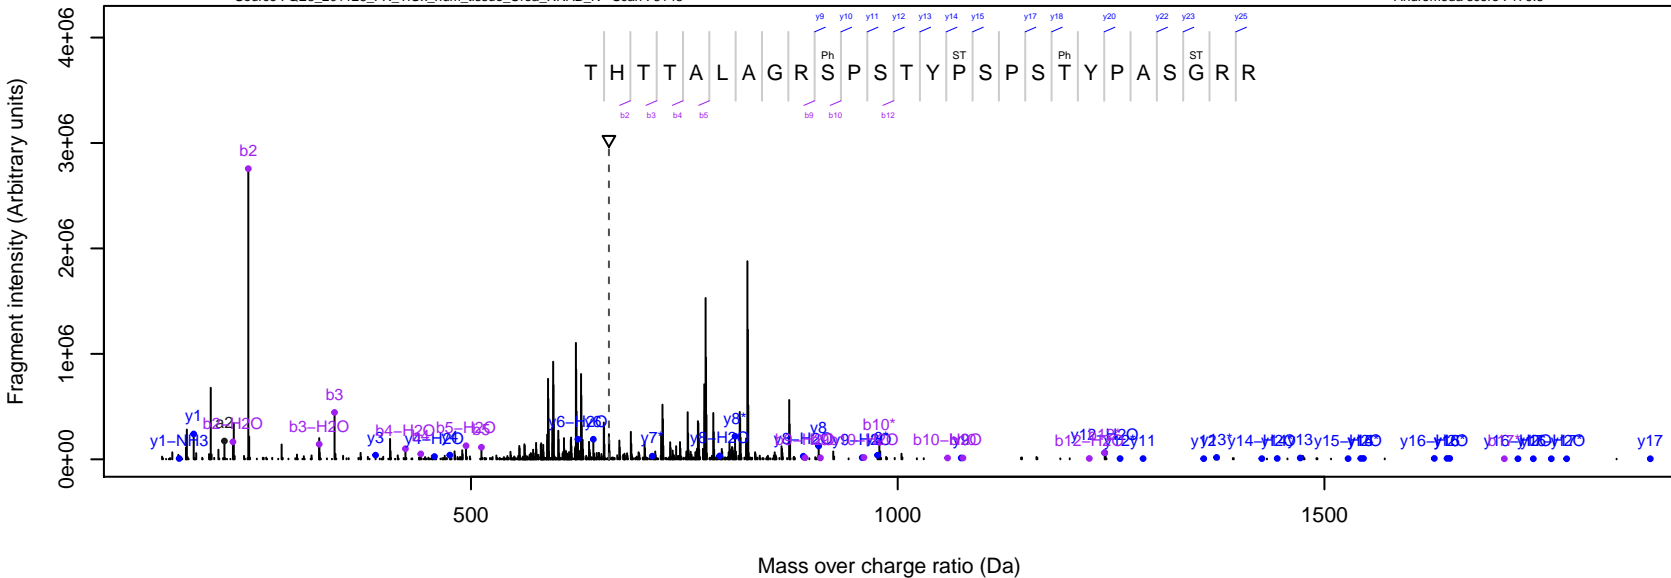

TRPGS(Phospho (STY))FQSLSDALSDTPAK-3+

Source : QE3\_201126\_FR\_TiOx\_hum\_tissue\_Urea\_RNAB\_H Scan : 35159

Andromeda score : 179.5

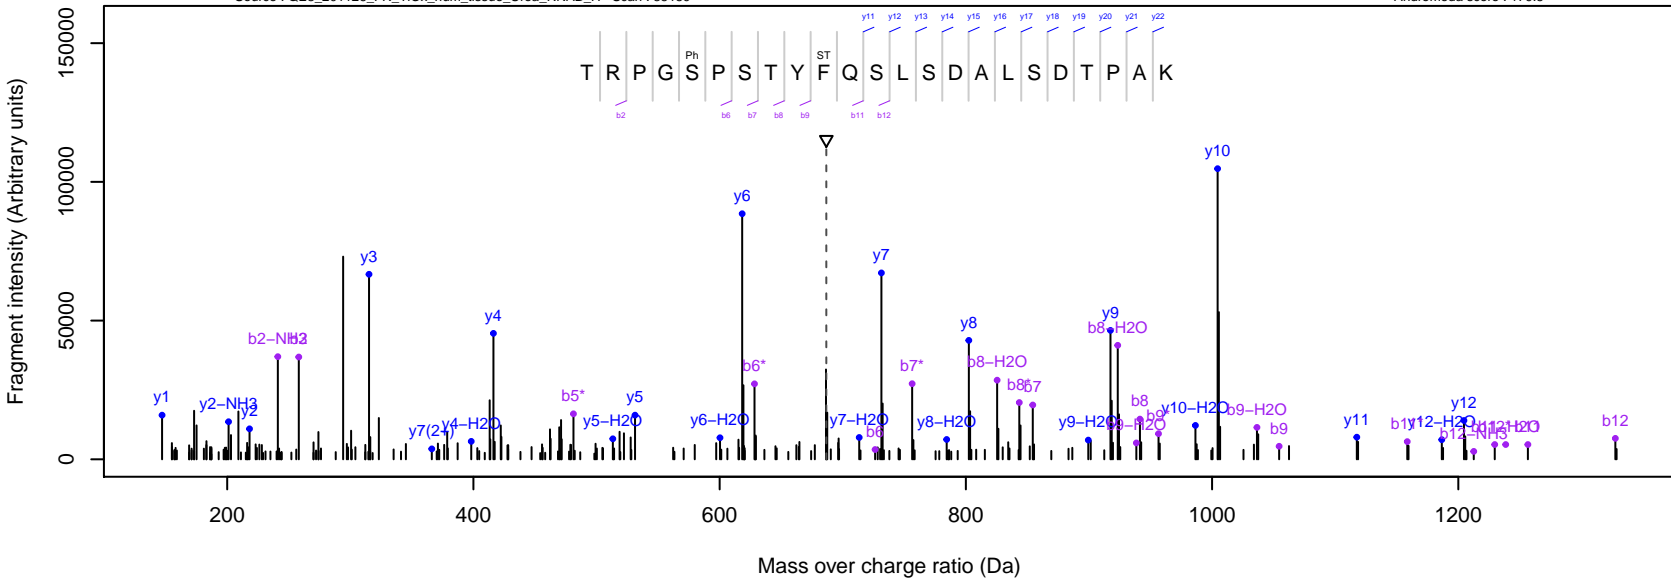

VGVEASEETPQTSSSSARPGT(Phospho (STY))PSDHQSQEASQFER-4+

Source : QE3\_201126\_FR\_TiOx\_hum\_tissue\_Urea\_RNAB\_N Scan : 17076

Andromeda score : 179.5

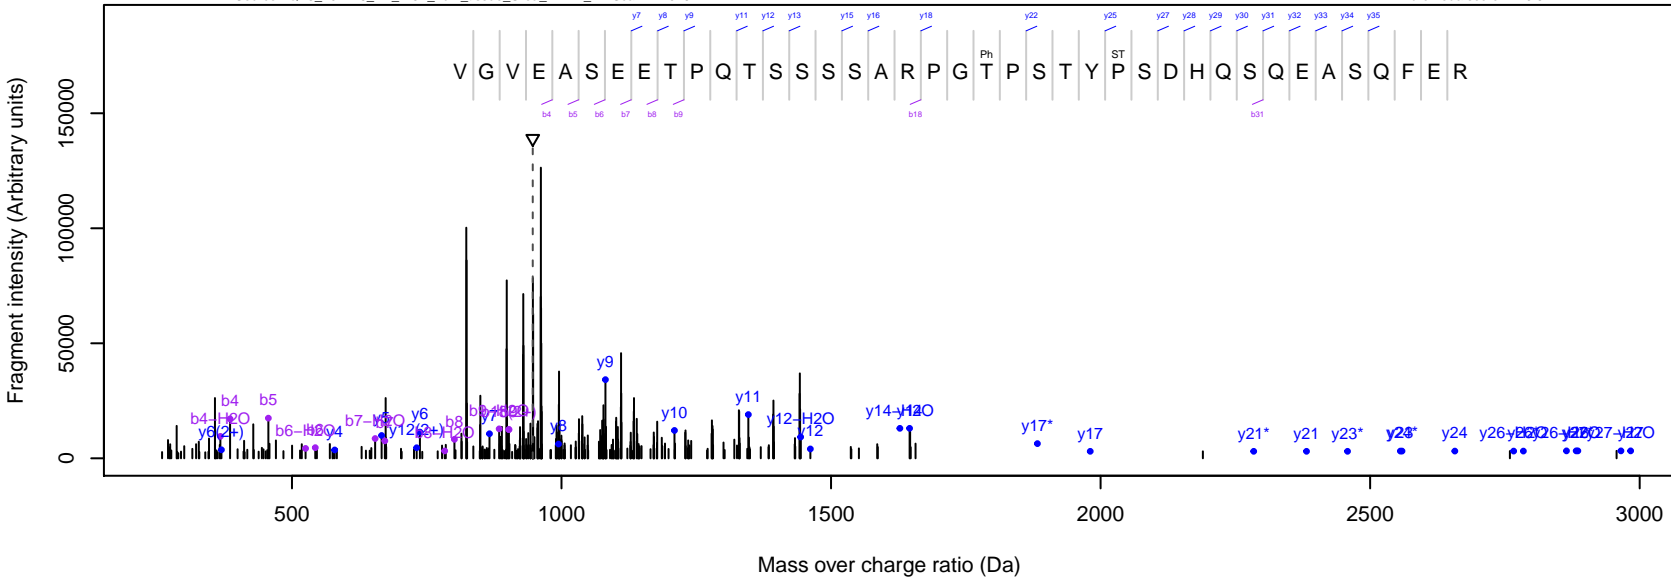

APEPHVEEDDDELDS(Phospho (STY))KLNYKPPPQK-4+

Source : QE3\_201126\_FR\_TiOx\_hum\_tissue\_Urea\_RNAB\_B Scan : 21165

Andromeda score : 179.49

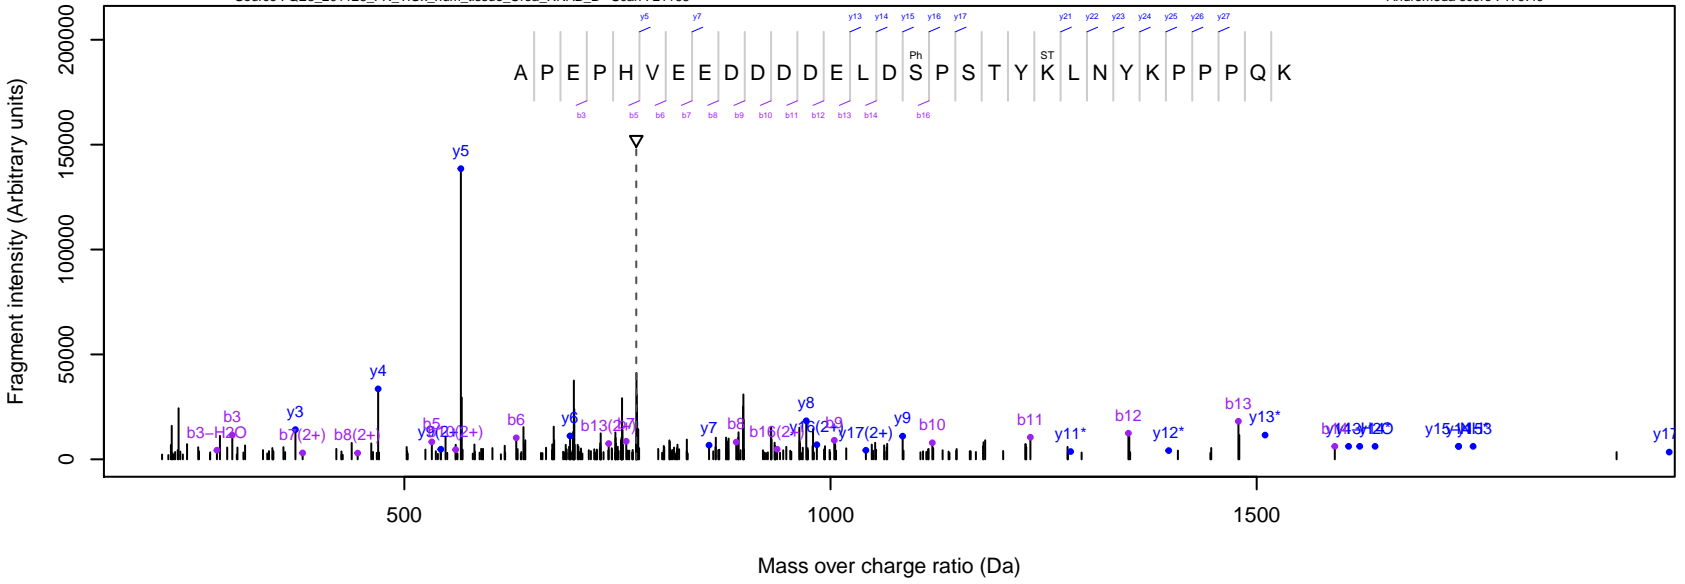

GEDAEES(Phospho (STY))LEEEALDPLGIMR-2+

Source : QE3\_201126\_FR\_TiOx\_hum\_tissue\_Urea\_RNAB\_B Scan : 60040

Andromeda score : 179.46

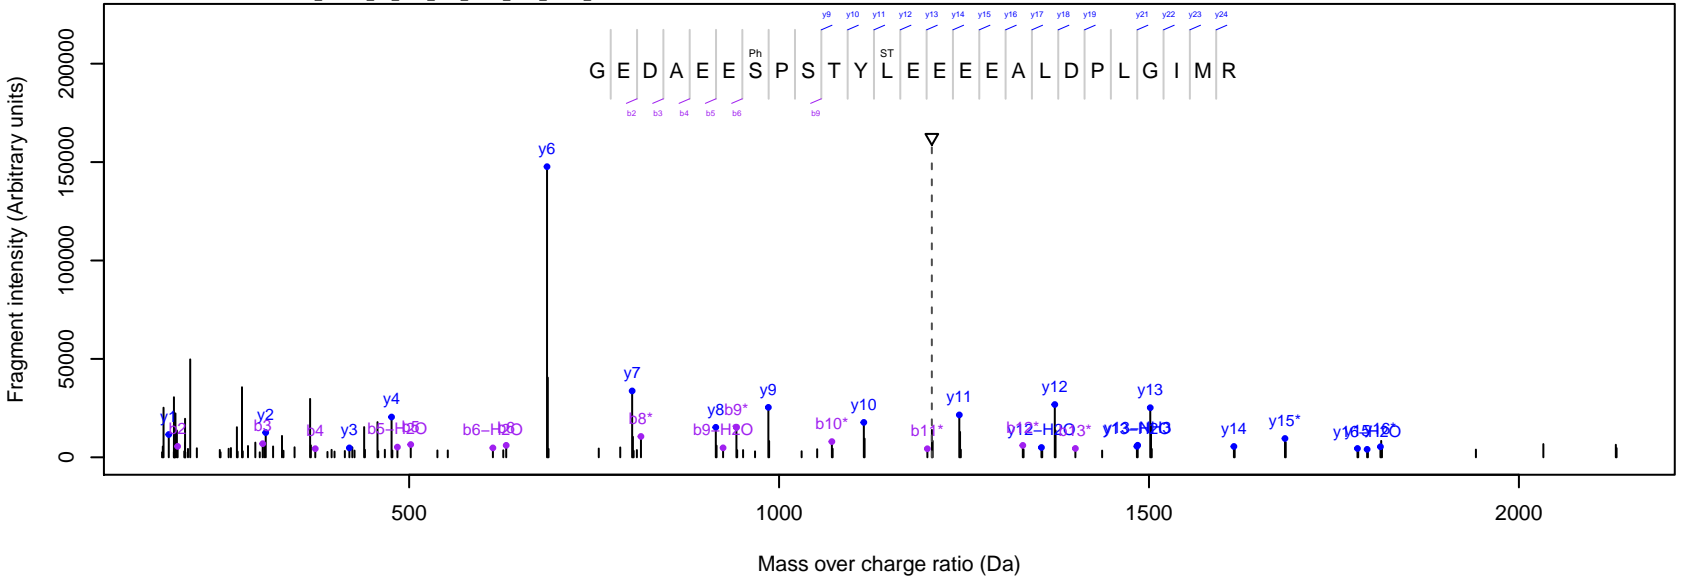

AEASS(Phospho (STY))VPYLSPETNPASSTSAVNHNVNLTNVR-3+

Source : QE3\_201126\_FR\_TiOx\_hum\_tissue\_Urea\_RNAB\_N Scan : 37857

Andromeda score : 179.43

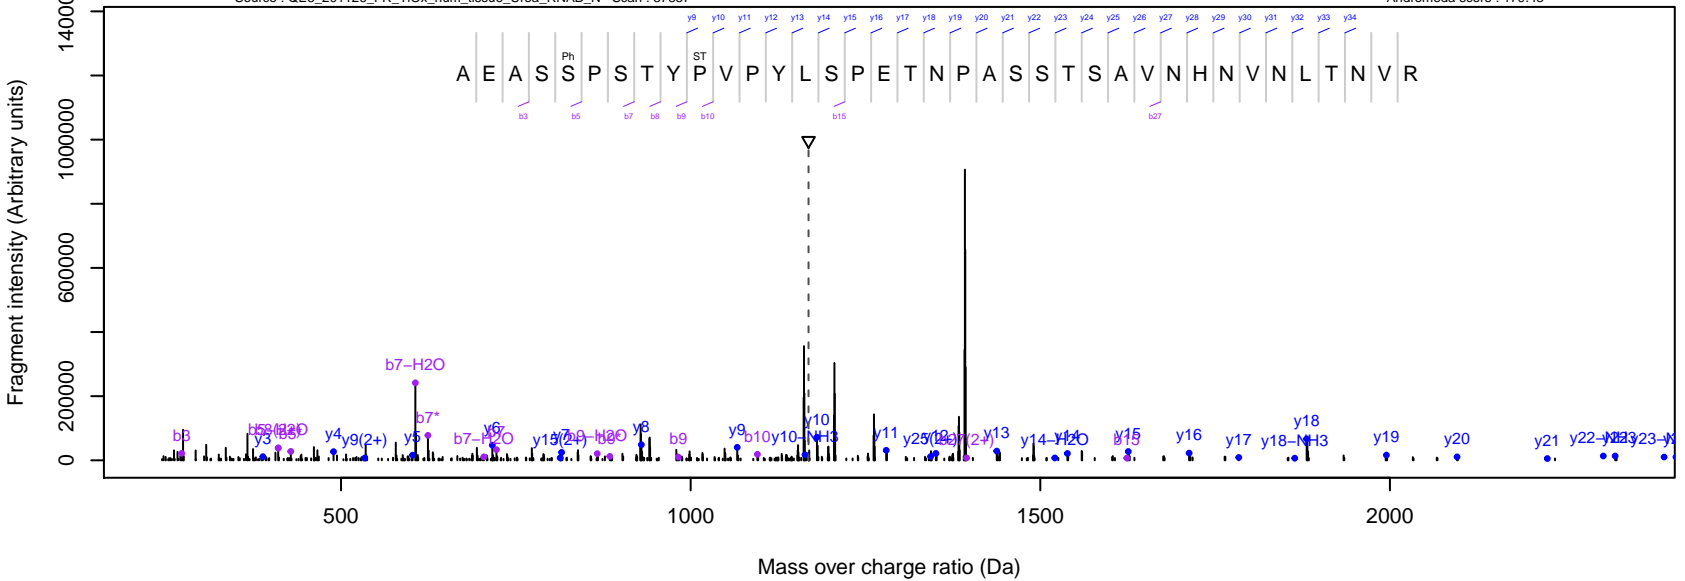

KPS(Phospho (STY))EEEEYVIR-2+

Source : QE3\_201126\_FR\_TiOx\_hum\_tissue\_Urea\_RNAB\_N Scan : 15030

Andromeda score : 179.41

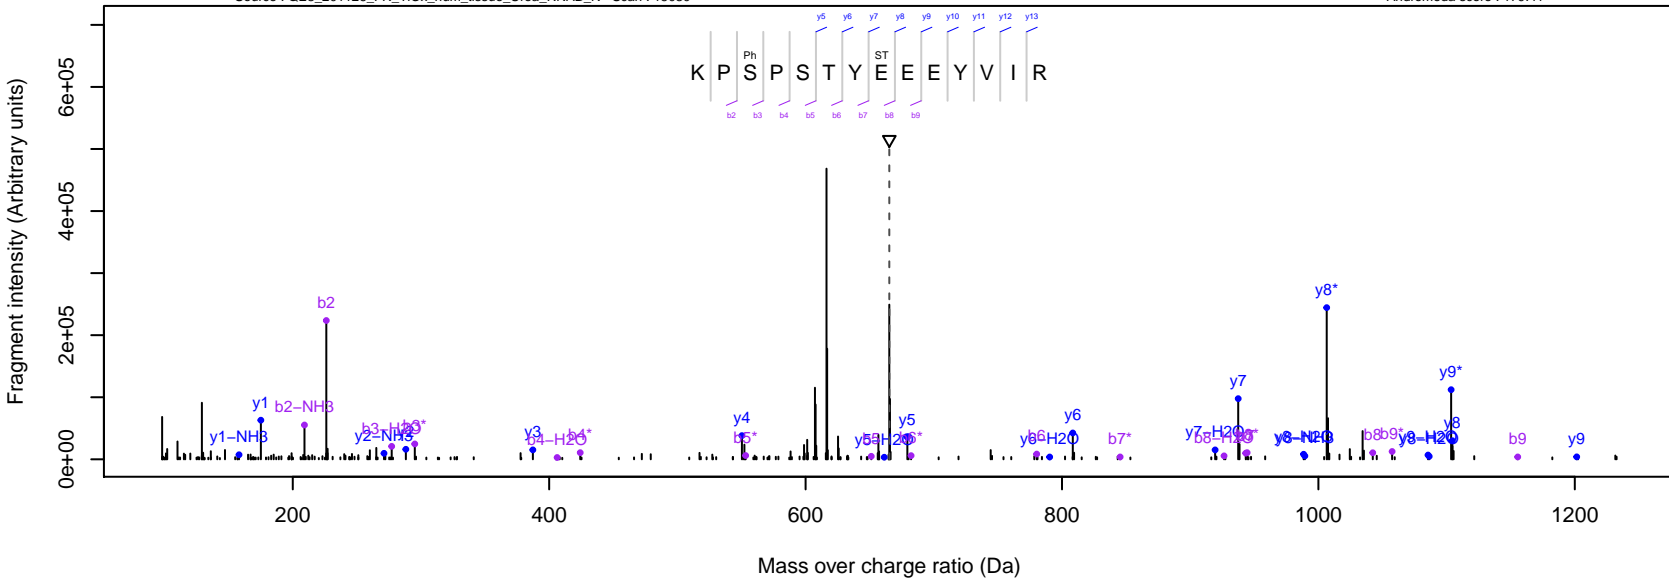

SRS(Phospho (STY))GEGEVSLM(Oxidation (M))R-2+

Source : QE3\_201126\_FR\_TiOx\_hum\_tissue\_Urea\_RNAB\_B Scan : 9601

Andromeda score : 179.27

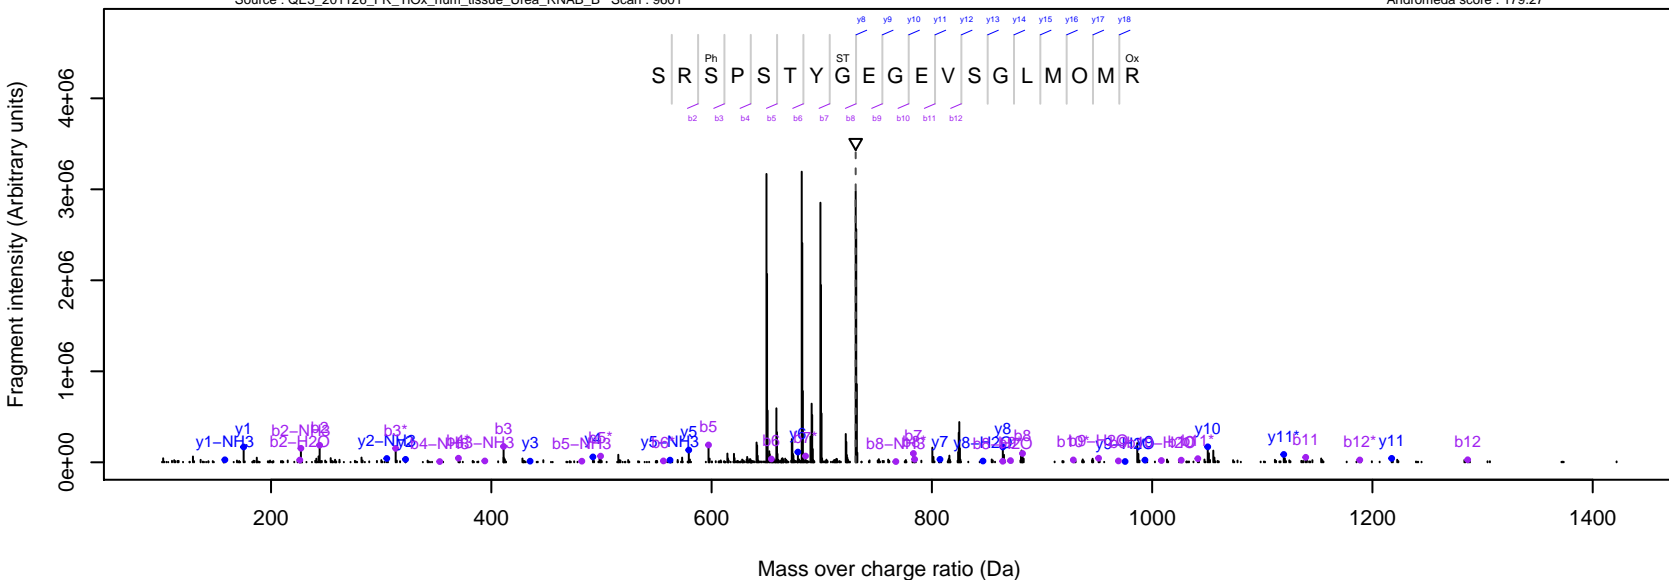

ETENTAYKVGNES(Phospho (STY))PVQELK-3+

Source : QE3\_201126\_FR\_TiOx\_hum\_tissue\_Urea\_RNAB\_H Scan : 20967

Andromeda score : 179.17

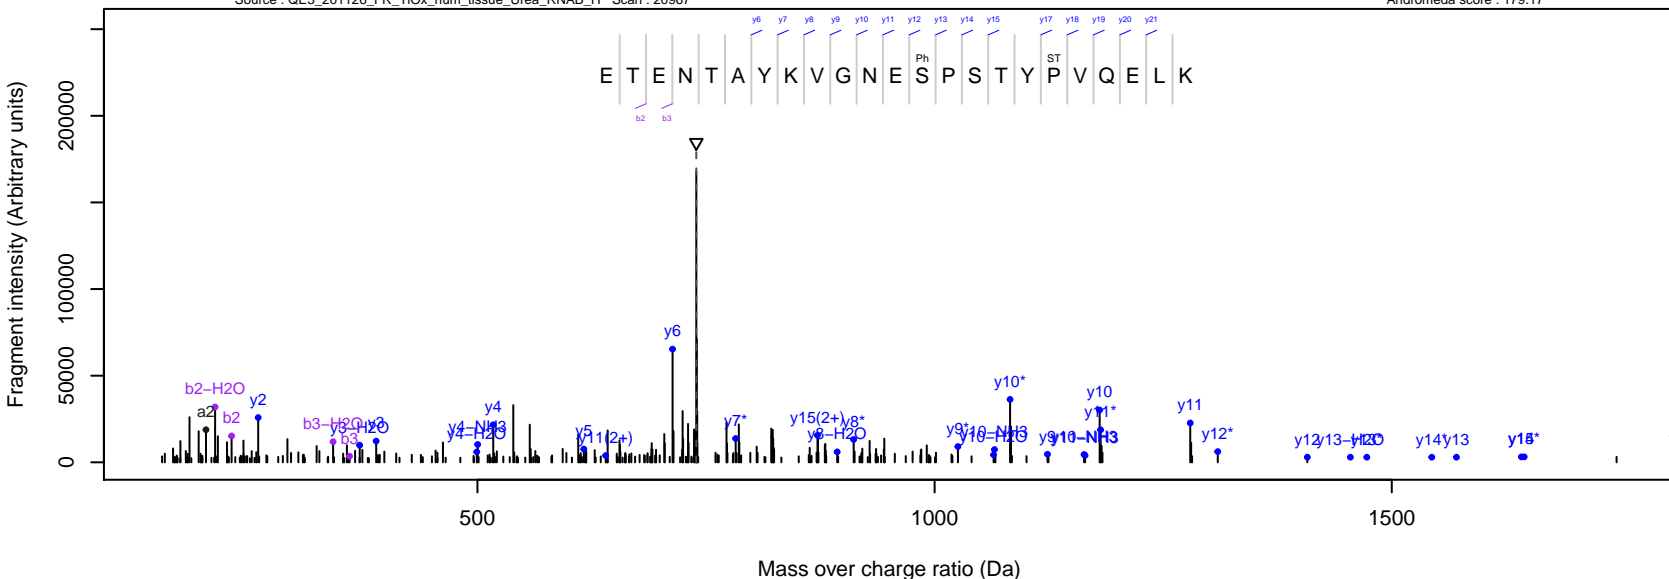



### S(Phospho (STY))HGLESVPVLPGSGEAGVDFLPAQADTLHSANK-3+

Source : QE3\_201126\_FR\_TiOx\_hum\_tissue\_Urea\_RNAB\_N Scan : 47184

Andromeda score : 179.15

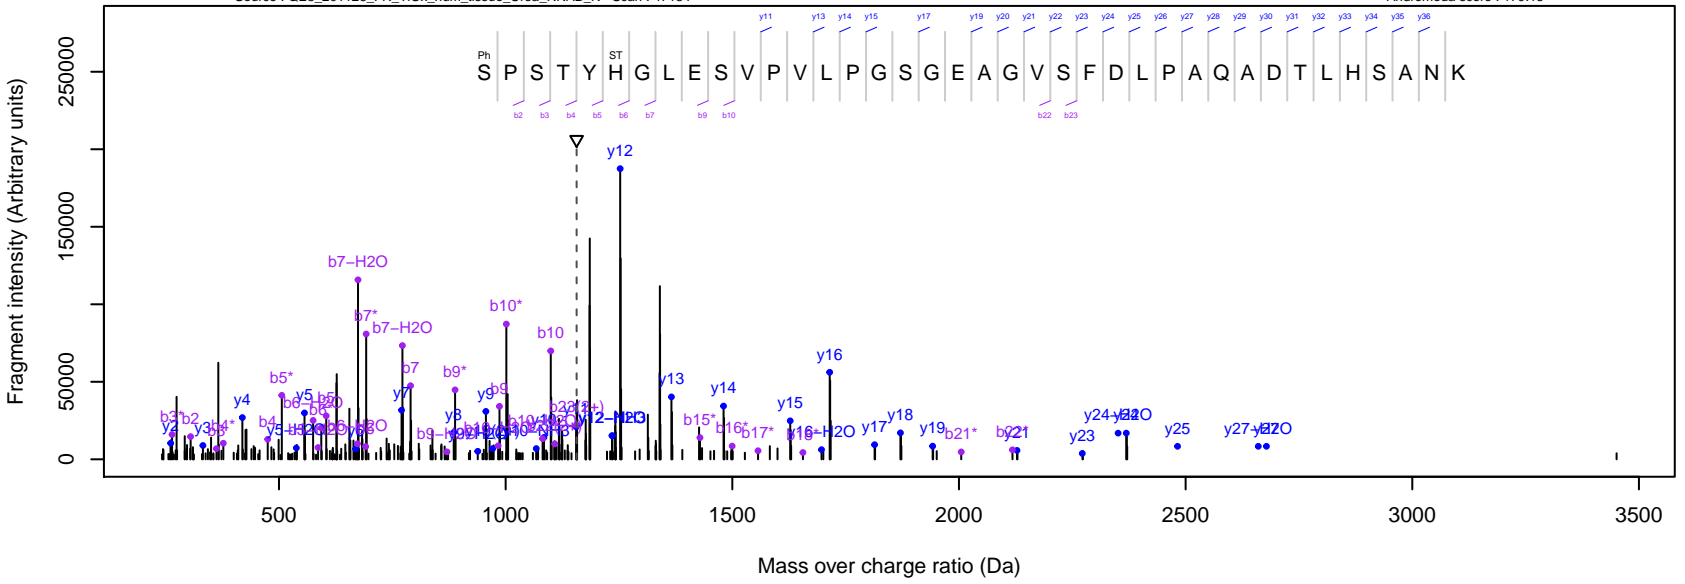

### ALVVPEPEPDS(Phospho (STY))NQR-2+

Source : QE3\_201126\_FR\_TiOx\_hum\_tissue\_Urea\_RNAB\_H Scan : 27826

Andromeda score : 179.14

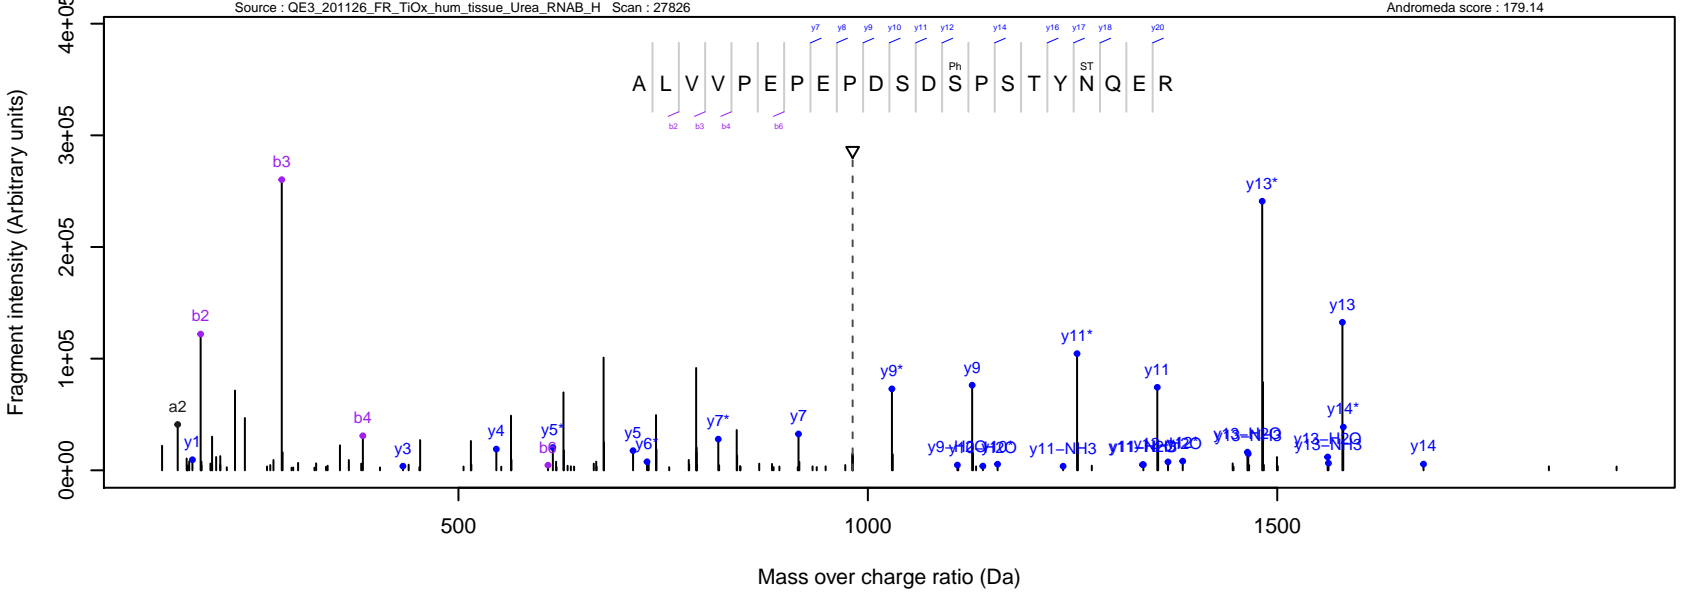

### HLPS(Phospho (STY))PPTLDSIITEYL R-3+

Source : QE3\_201126\_FR\_TiOx\_hum\_tissue\_Urea\_RNAB\_H Scan : 61155

Andromeda score : 179.1

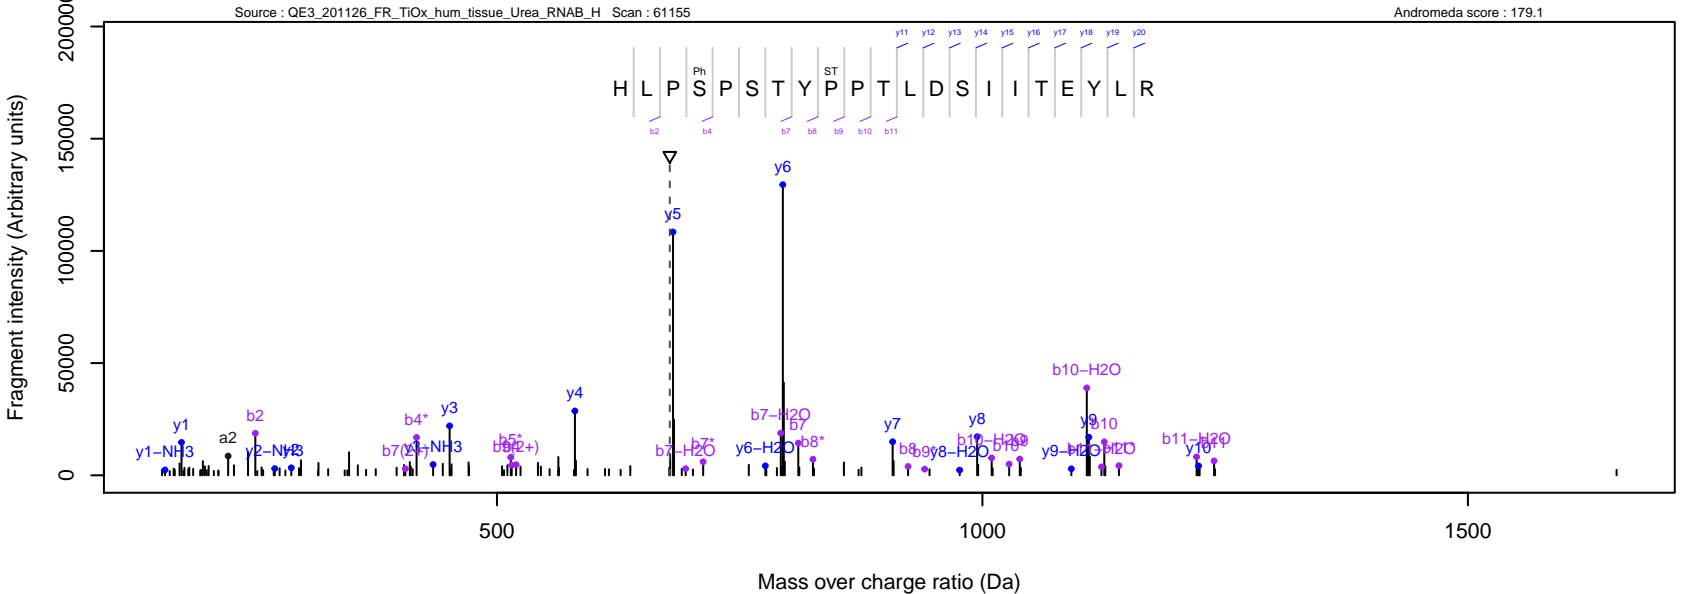

KREEEEEEGS(Phospho (STY))IM(Oxidation (M))NGSTAEEDEEQTR-3+

Source : QE3\_201126\_FR\_TIOx\_hum\_tissue\_Urea\_RNAB\_B Scan : 9839

Andromeda score : 179.01

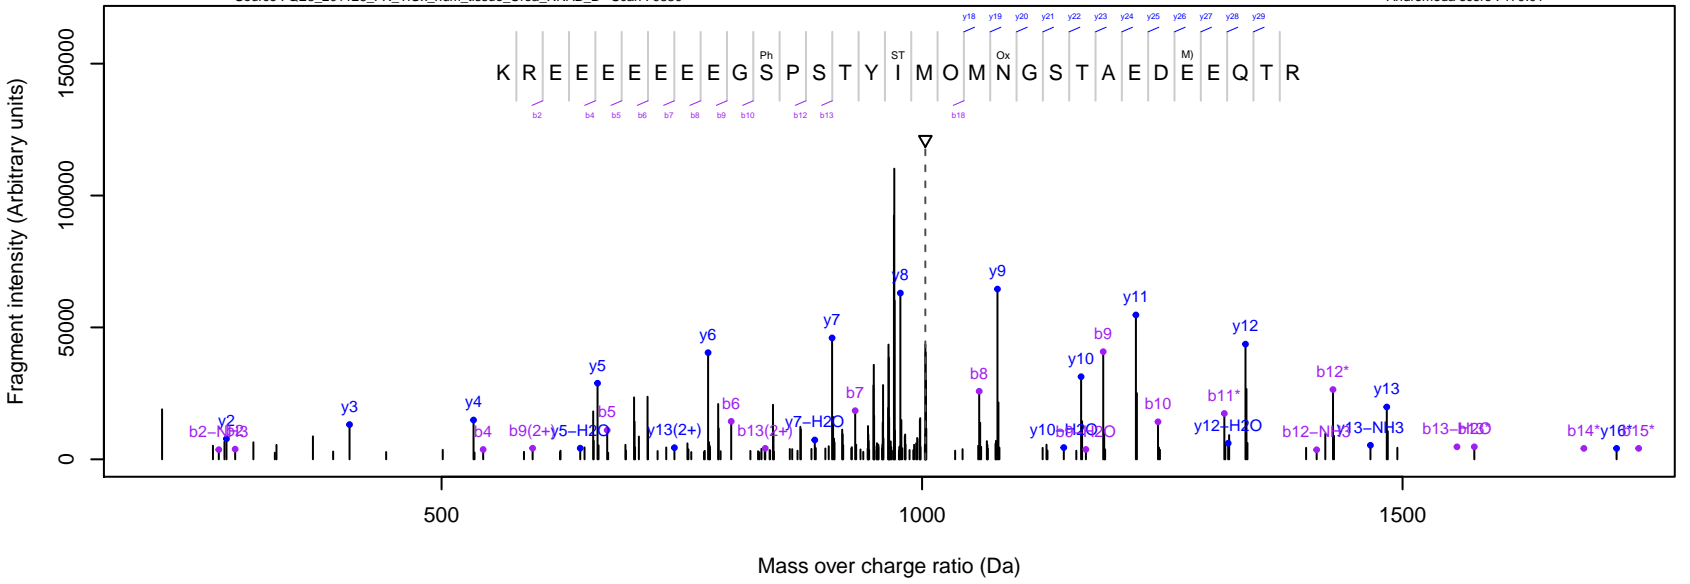

SEAAAPHTDAGGLS(Phospho (STY))S(Phospho (STY))DEEETSSQAEAR-3+

Source : QE3\_201126\_FR\_TIOx\_hum\_tissue\_Urea\_RNAB\_H Scan : 18499

Andromeda score : 179.01

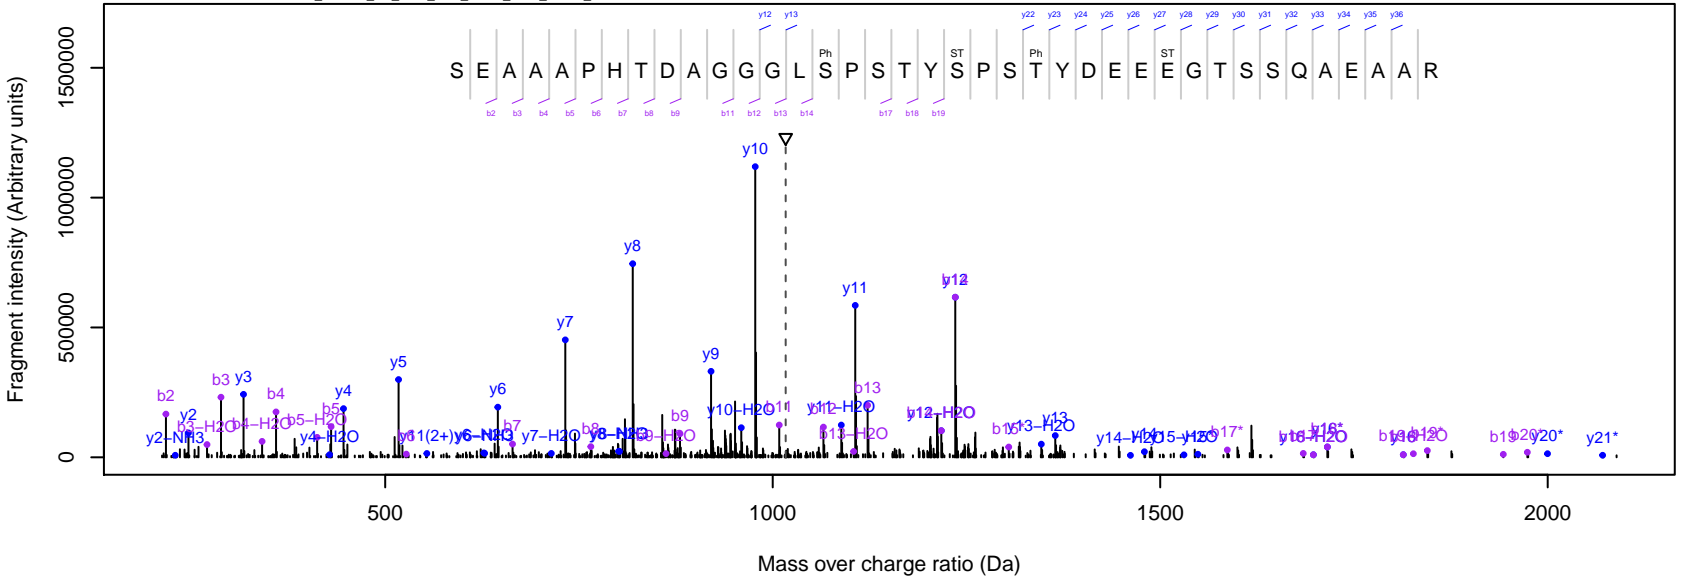

YLEEDNS(Phospho (STY))DESDAEGEHGDGAEIEAPPAGPRPGPEPAGLGR-4+

Source : QE3\_201126\_FR\_TIOx\_hum\_tissue\_Urea\_RNAB\_N Scan : 24904

Andromeda score : 178.98

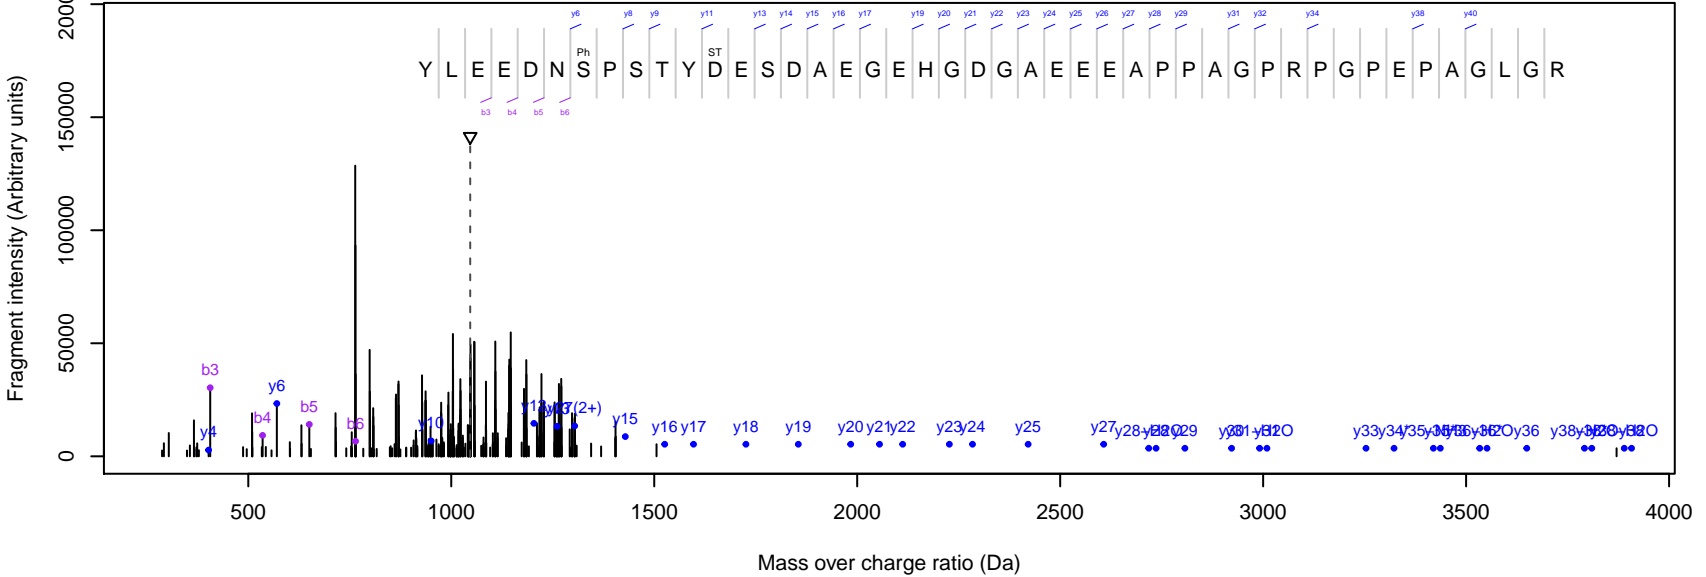

RAPS(Phospho (STY))VANVGSCHCDLSLKIPEISIQDMOMTAQVTSPSGK-4+

Source : QE3\_201126\_FR\_TIOx\_hum\_tissue\_Urea\_RNAB\_B Scan : 39034

Andromeda score : 178.89

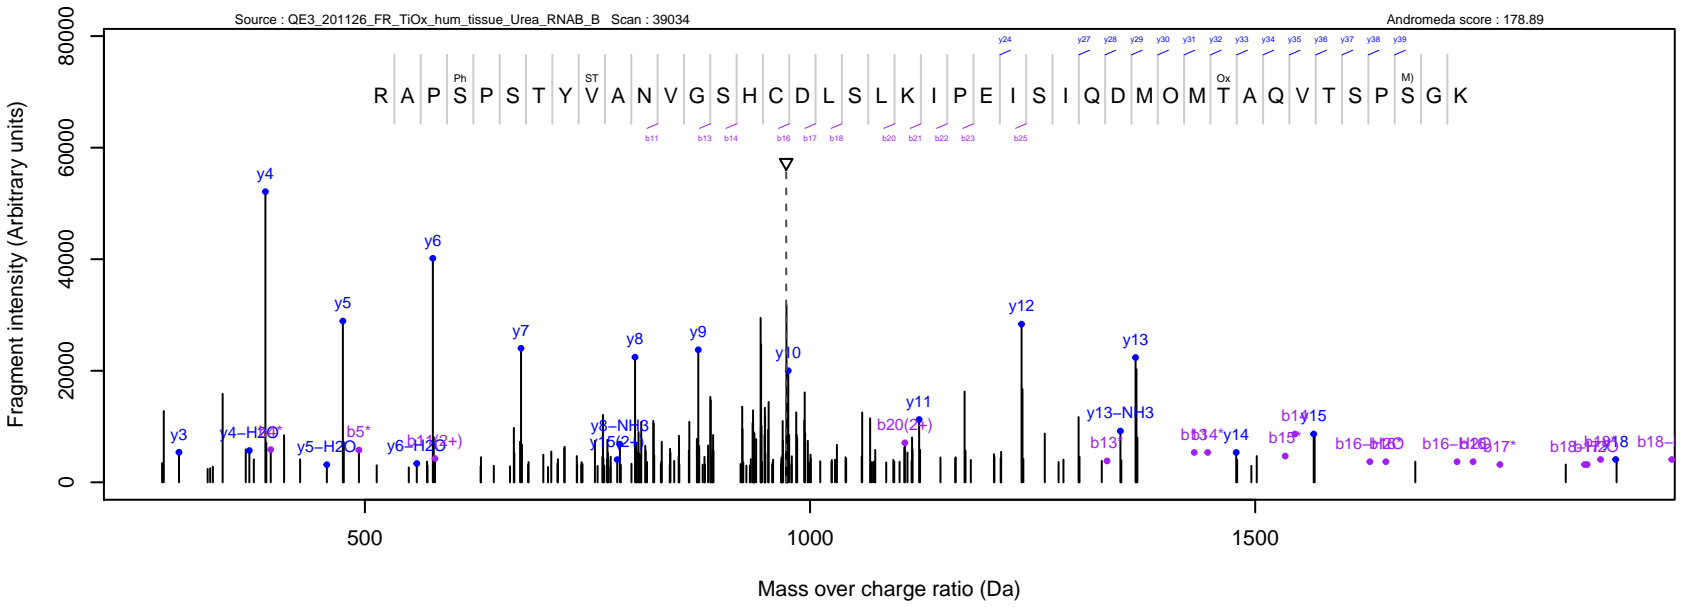

SGPKPFSAPKQTS(Phospho (STY))PS(Phospho (STY))PK-2+

Source : QE3\_201126\_FR\_TIOx\_hum\_tissue\_Urea\_RNAB\_H Scan : 13363

Andromeda score : 178.88

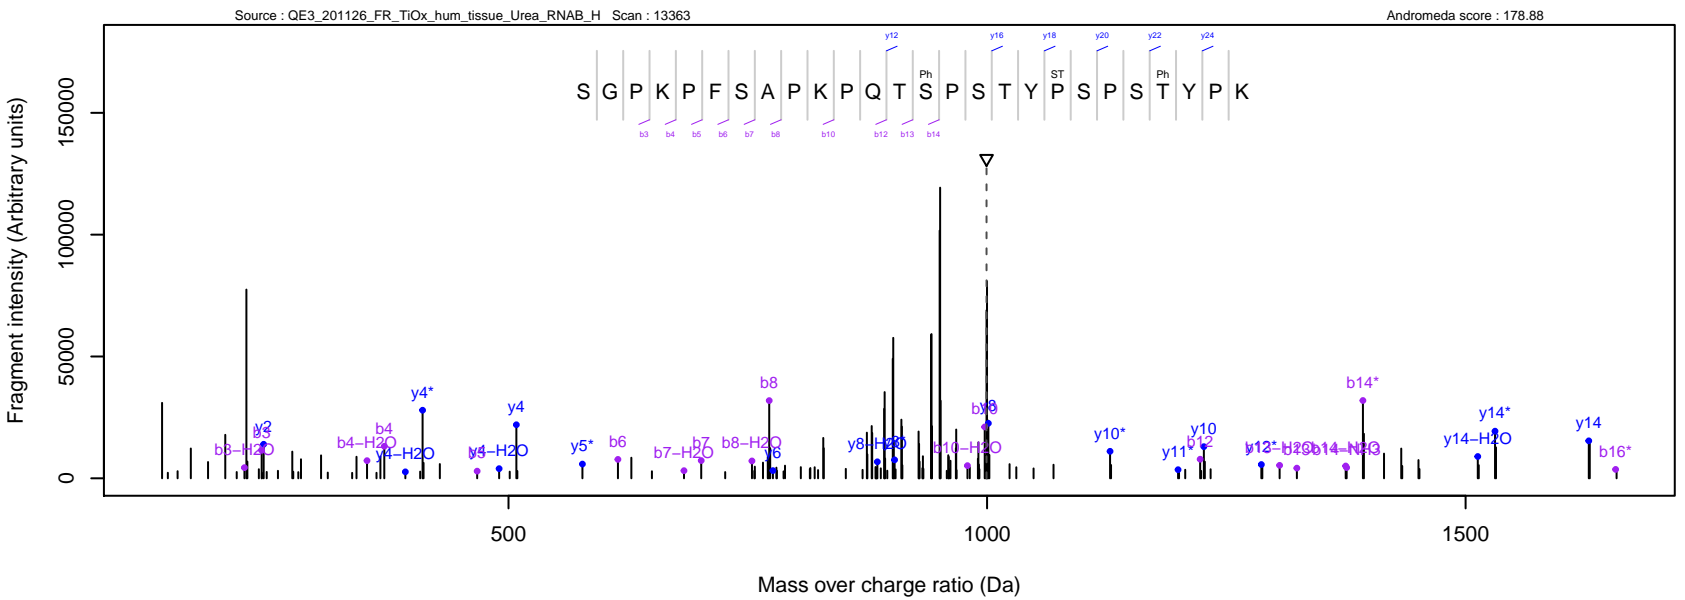

CRGNRS(Phospho (STY))PVPDVEDPATEEPGESFCDK-3+

Source : QE3\_201126\_FR\_TIOx\_hum\_tissue\_Urea\_RNAB\_H Scan : 22512

Andromeda score : 178.85

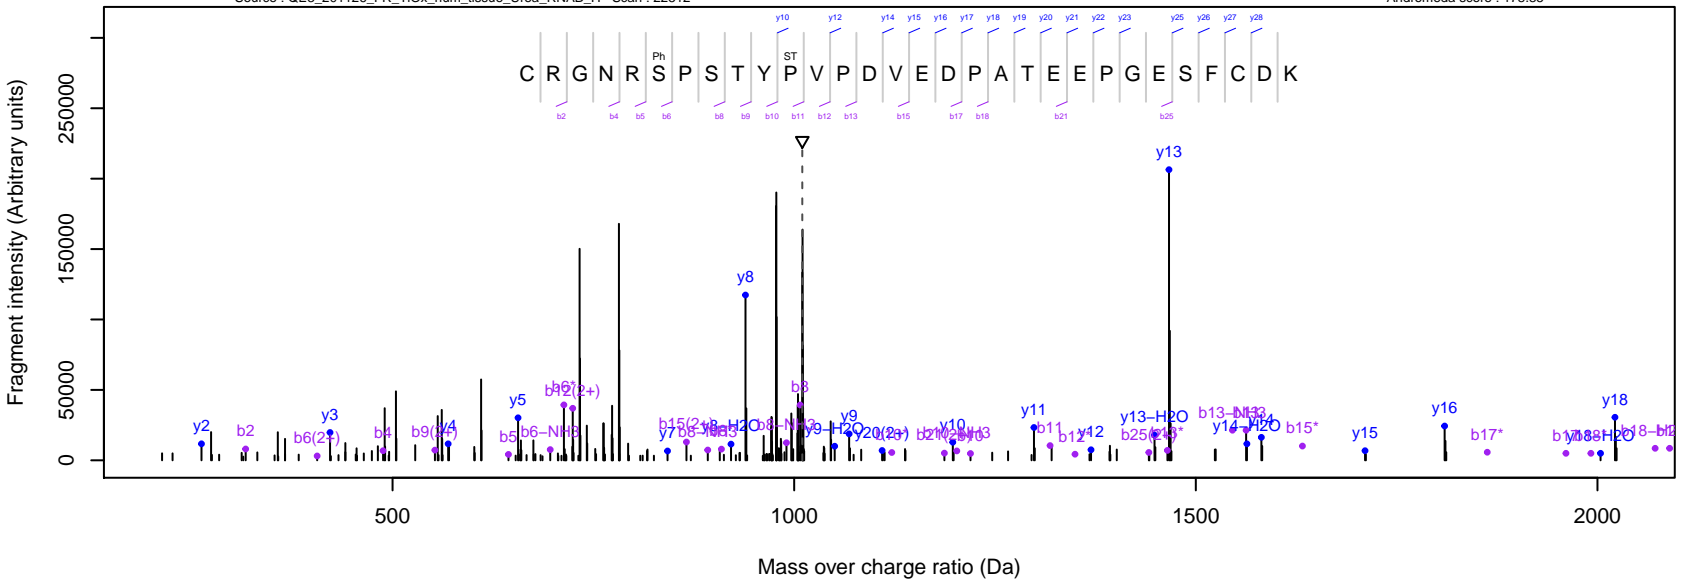

SIS(Phospho (STY))ENSLVAM(Oxidation (M))DFSGQK-2+

Source : QE3\_201126\_FR\_TIOx\_hum\_tissue\_Urea\_RNAB\_B Scan : 36332

Andromeda score : 178.85

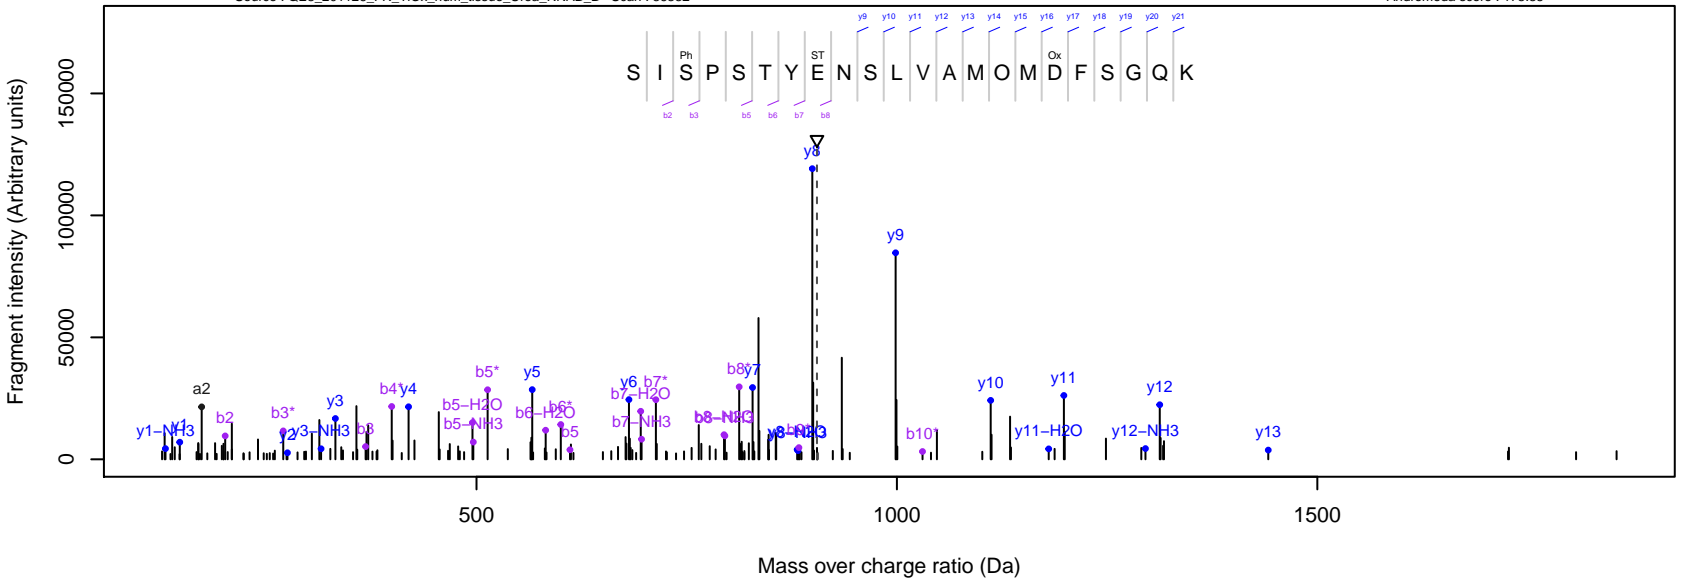

IDASKNEEDEGHS(Phospho (STY))NSS(Phospho (STY))PRHSEATAQR-4+

Source : QE3\_201126\_FR\_TIOx\_hum\_tissue\_Urea\_RNAB\_N Scan : 4521

Andromeda score : 178.78

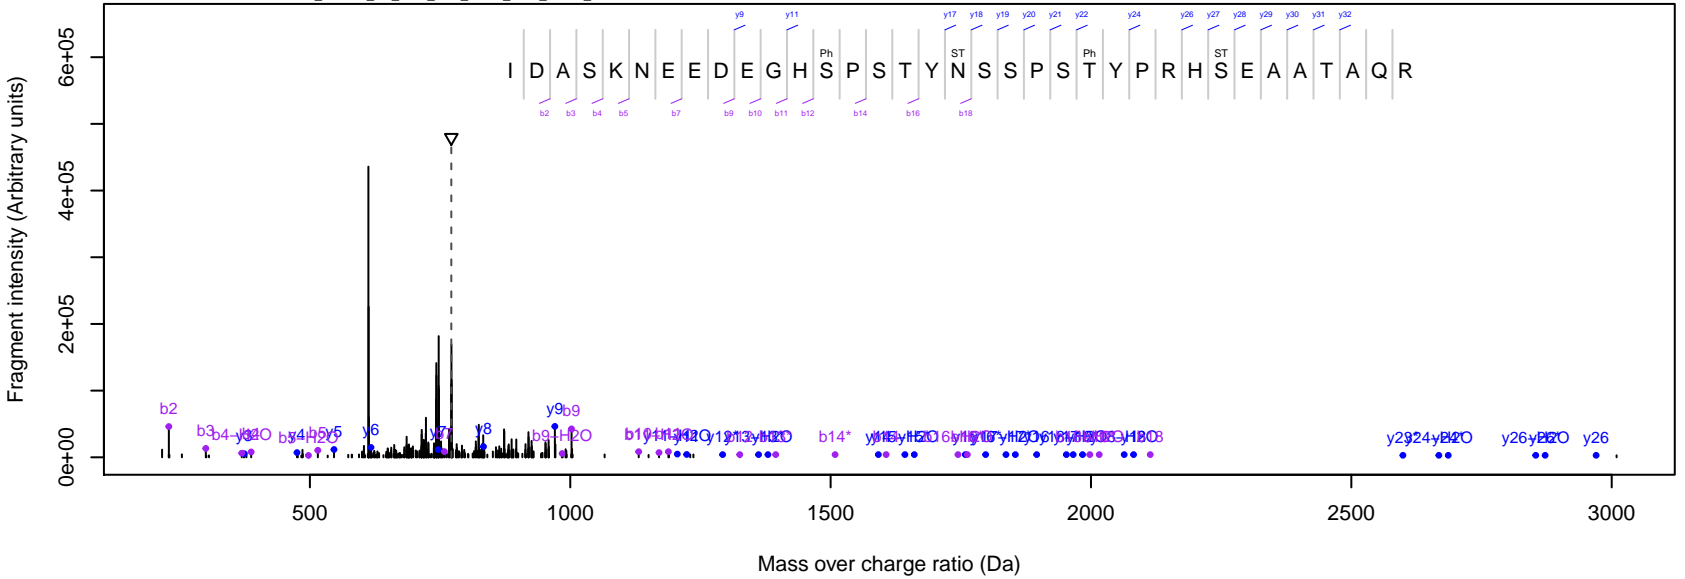

SYS(Phospho (STY))PYDYQPCLAGPNQDFHSK-2+

Source : QE3\_201126\_FR\_TIOx\_hum\_tissue\_Urea\_RNAB\_N Scan : 33897

Andromeda score : 178.77

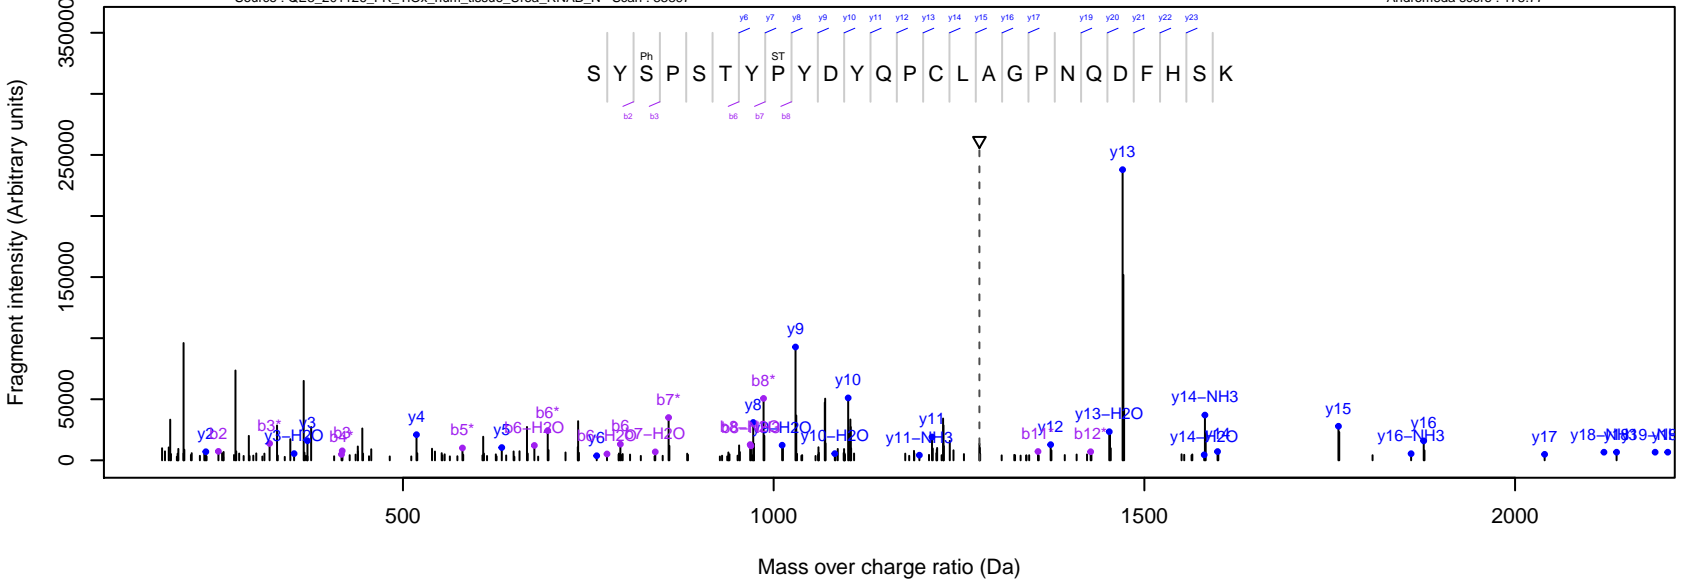

GSVSPST(Phospho (STY))PS(Phospho (STY))PPKPTGIFQTSANSSFEVVK-3+

Source : QE3\_201126\_FR\_TIOx\_hum\_tissue\_Urea\_RNAB\_N Scan : 45045

Andromeda score : 178.76

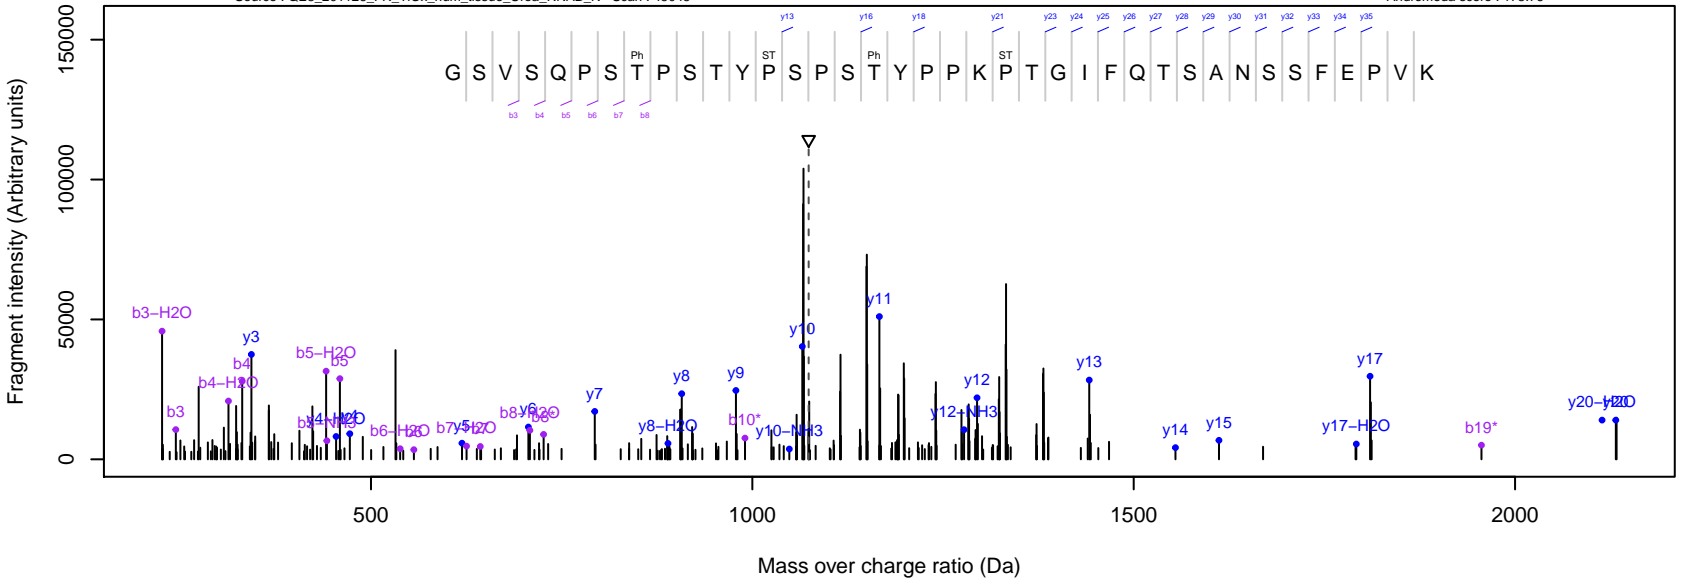

VSTLAGPSS(Phospho (STY))DDENEESKPEKEDEPQEDAK-3+

Source : QE3\_201126\_FR\_TIOx\_hum\_tissue\_Urea\_RNAB\_H Scan : 13405

Andromeda score : 178.76

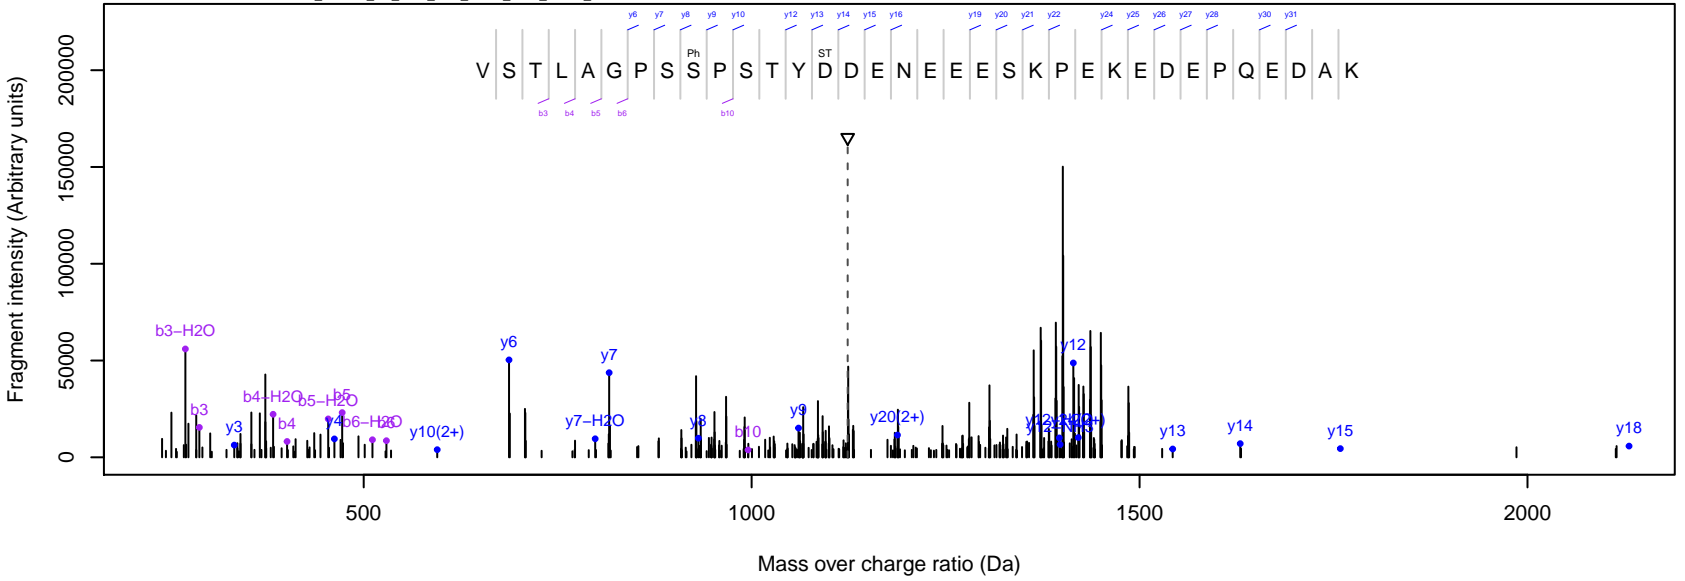

VDNLTyrTS(Phospho (STY))PDTLRR-3+

Source : QE3\_201126\_FR\_TIOx\_hum\_tissue\_Urea\_RNAB\_N Scan : 15707

Andromeda score : 178.71

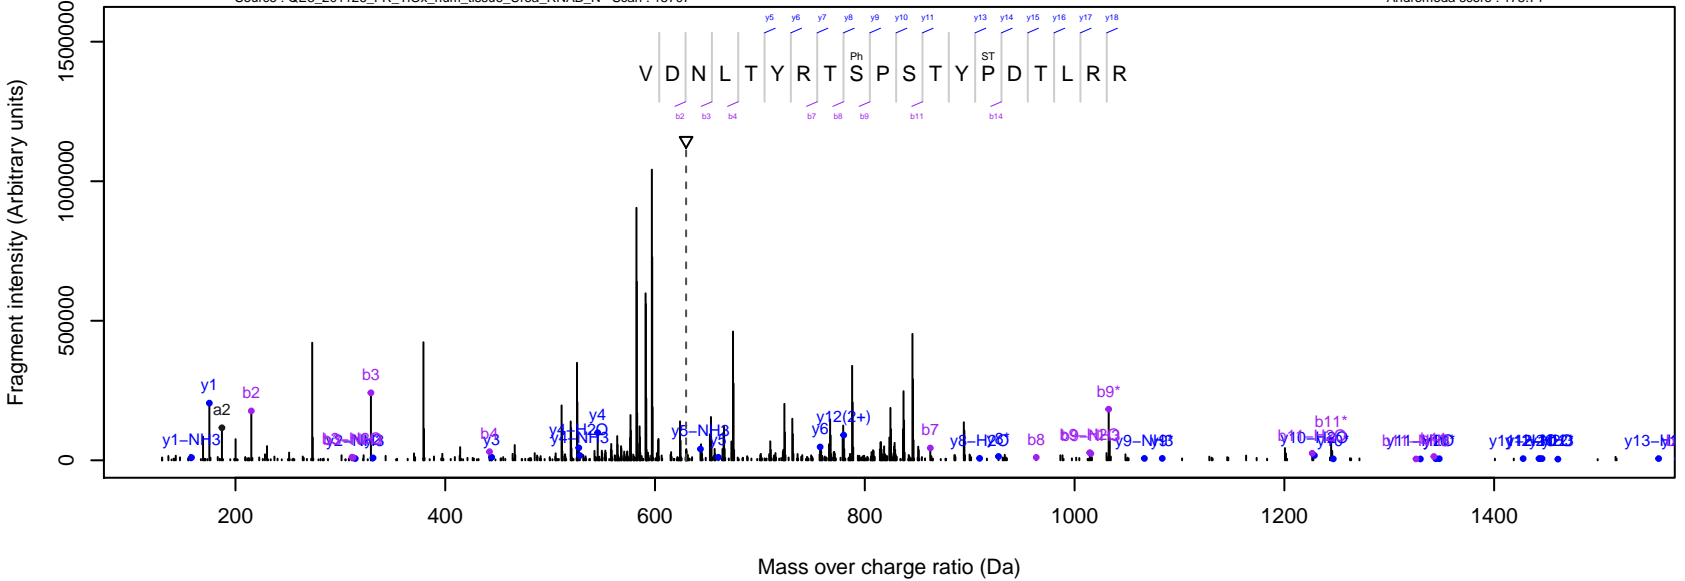

SSM(Oxidation (M))S(Phospho (STY))GLHLVK-2+

Source : QE3\_201126\_FR\_TiOx\_hum\_tissue\_Urea\_RNAB\_N Scan : 12669

Andromeda score : 178.7

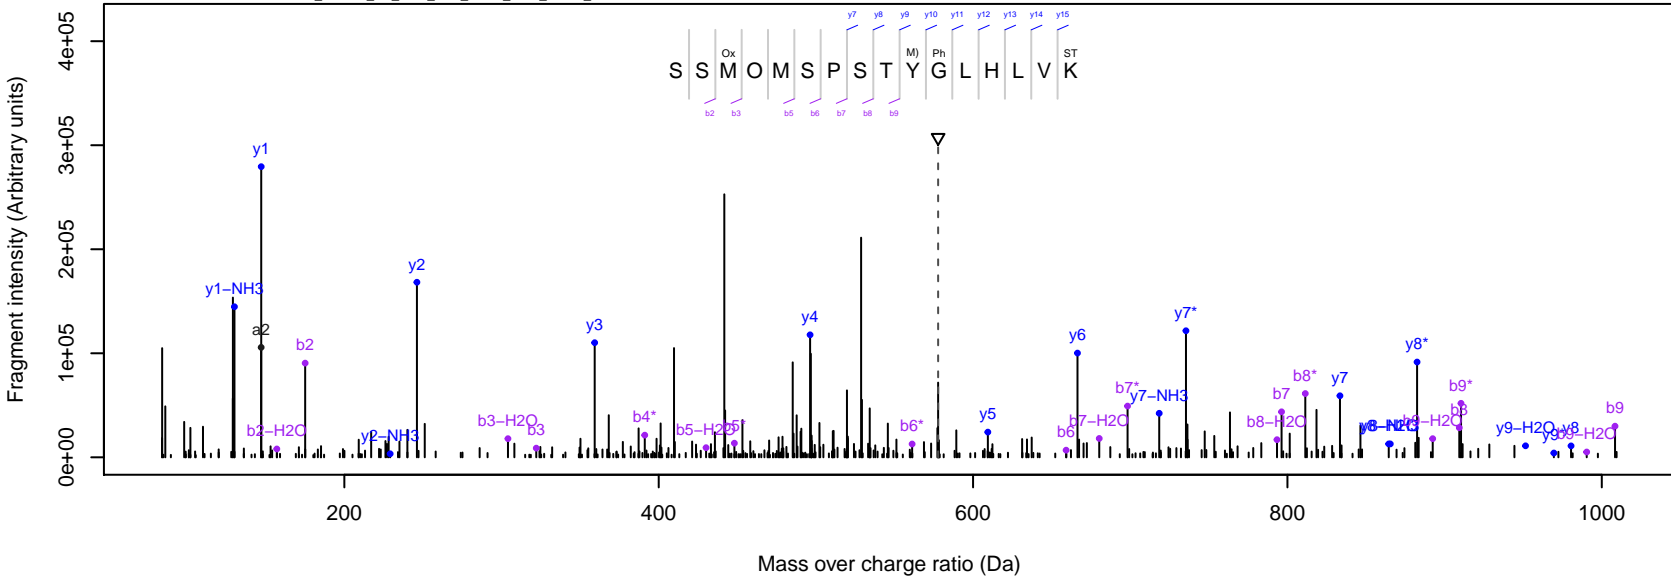

QFST(Phospho (STY))ASDHEQPGVSG-2+

Source : QE3\_201126\_FR\_TiOx\_hum\_tissue\_Urea\_RNAB\_H Scan : 15112

Andromeda score : 178.51

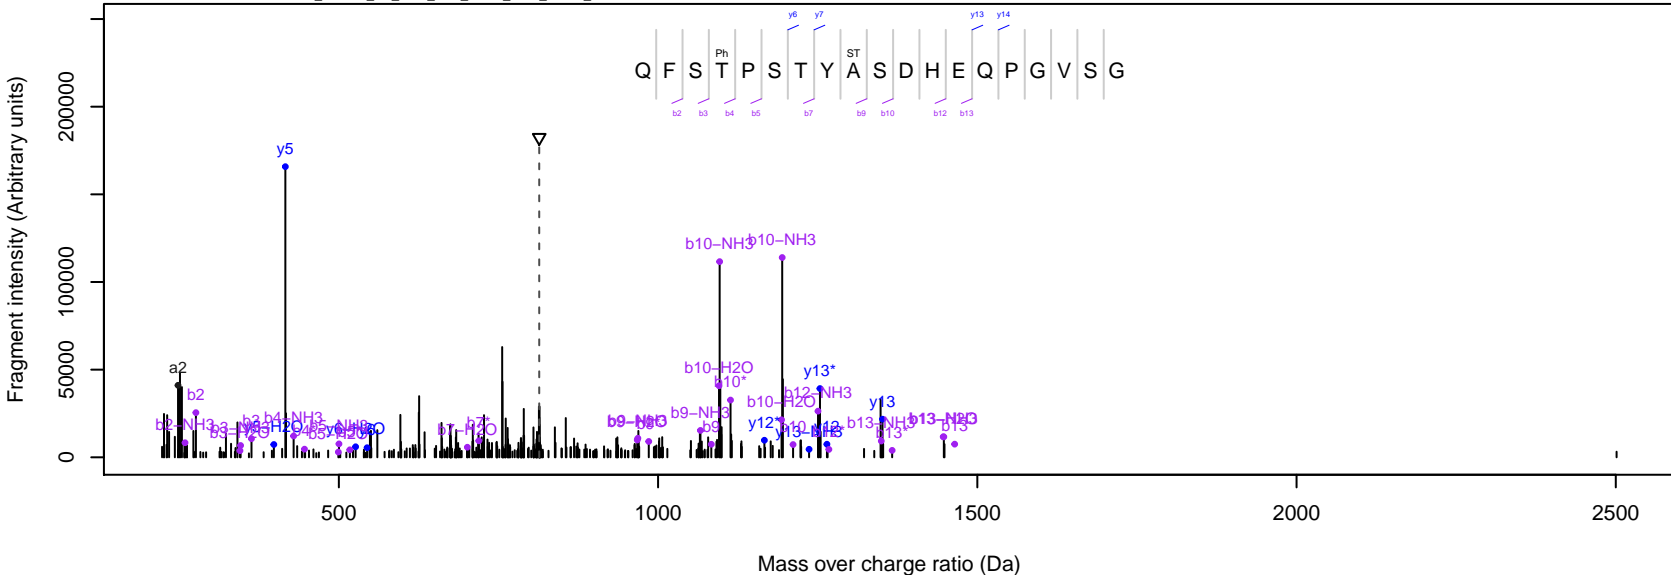

VQRPKEESS(Phospho (STY))EDENEVSNILR-3+

Source : QE3\_201126\_FR\_TiOx\_hum\_tissue\_Urea\_RNAB\_H Scan : 21649

Andromeda score : 178.35

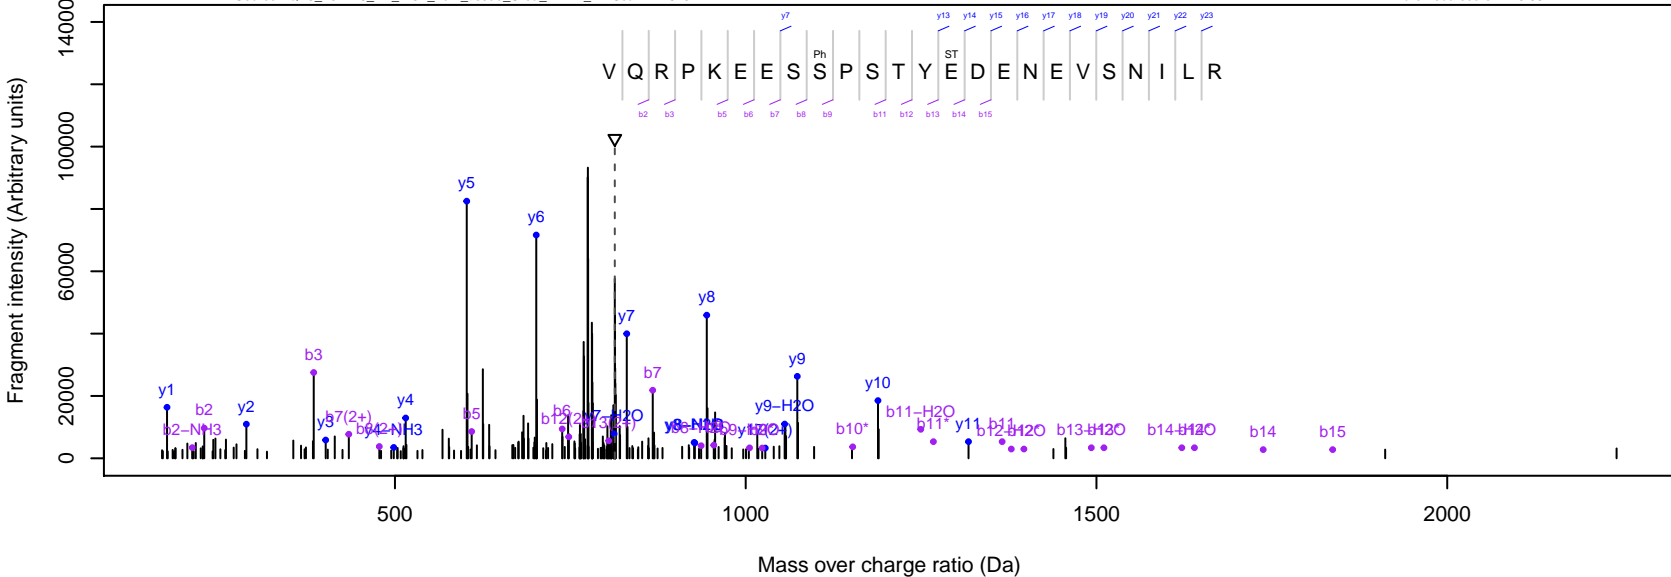

IGHHS(Phospho (STY))TSDSSAYR-3+

Source : QE3\_201126\_FR\_TiOx\_hum\_tissue\_Urea\_RNAB\_H Scan : 4733

Andromeda score : 178.34

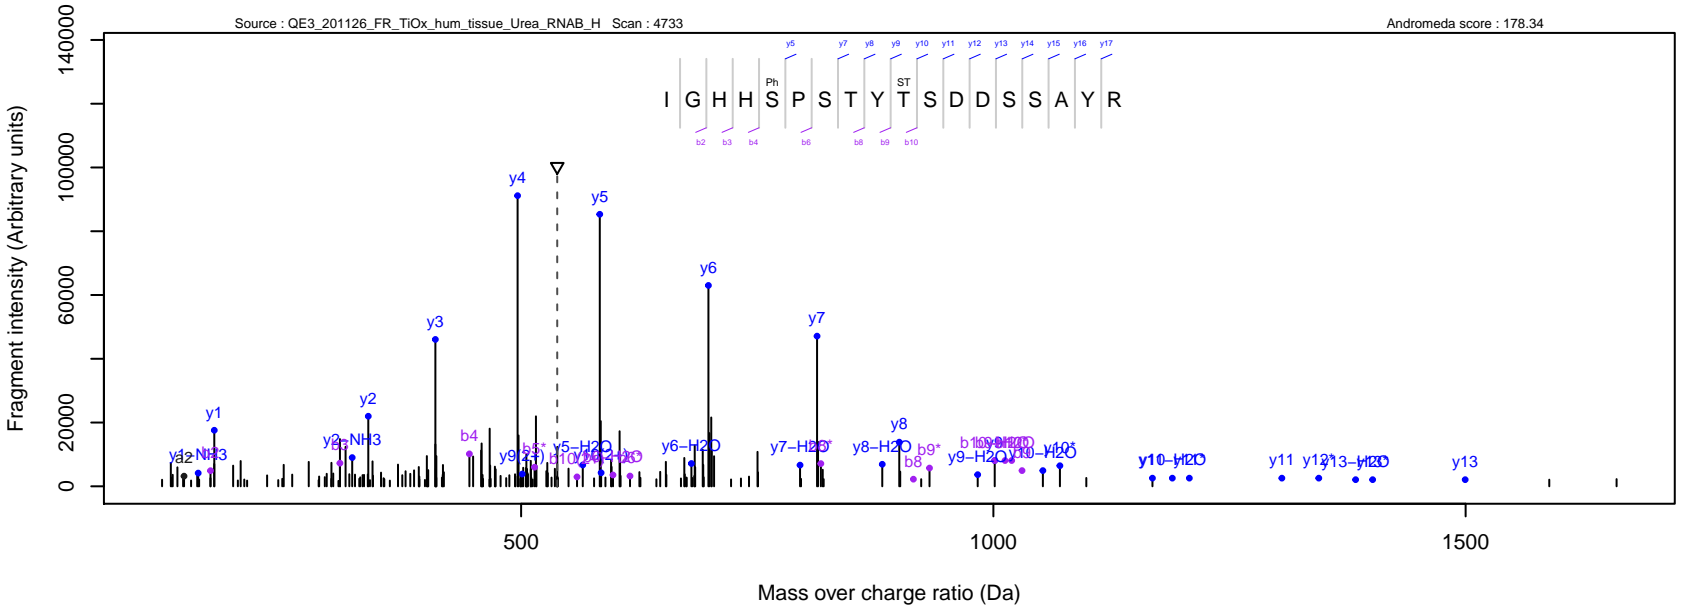

EYVLLHESSTSEIDRKDEDEEEEEV(Phospho (STY))DS-3+

Source : QE3\_201126\_FR\_TiOx\_hum\_tissue\_Urea\_RNAB\_H Scan : 28520

Andromeda score : 178.33

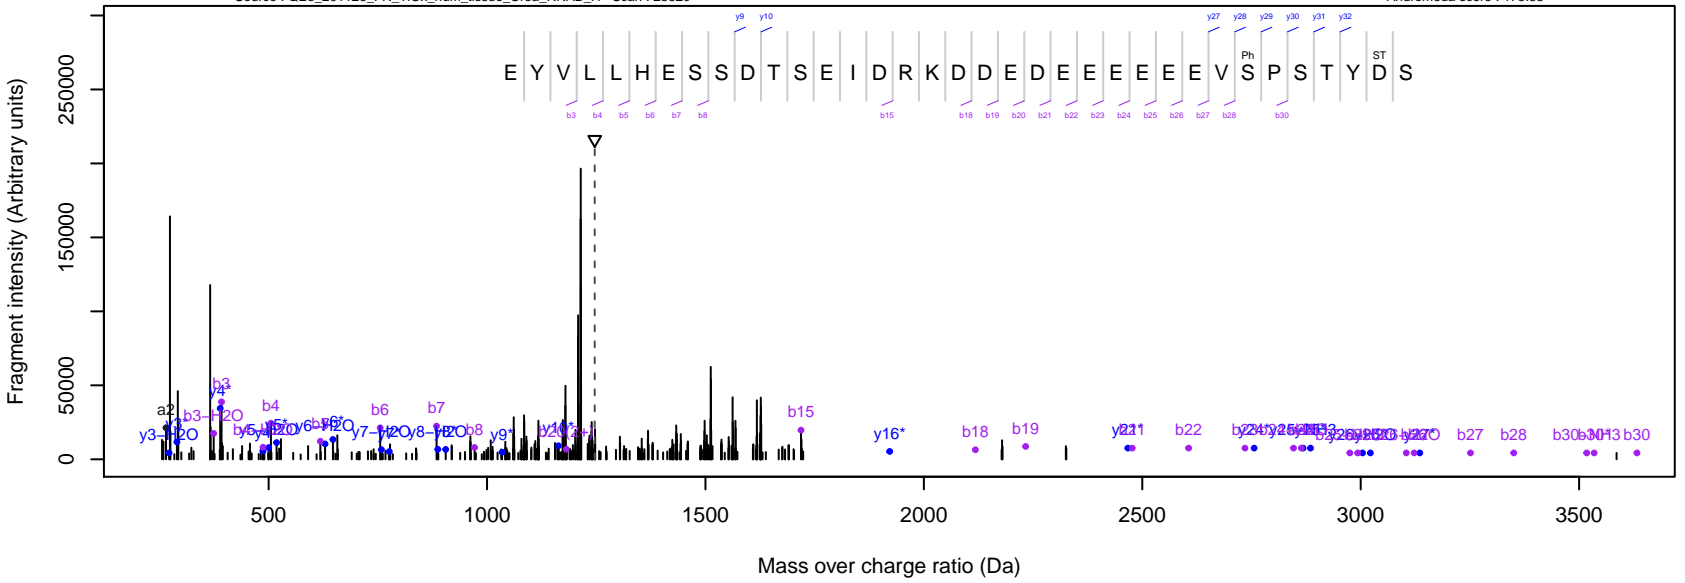

RLLEDGFNLGDALDS(Phospho (STY))SNS(Phospho (STY))M(Oxidation (M))QTIQK-3+

Source : QE3\_201126\_FR\_TiOx\_hum\_tissue\_Urea\_RNAB\_N Scan : 51192

Andromeda score : 178.33

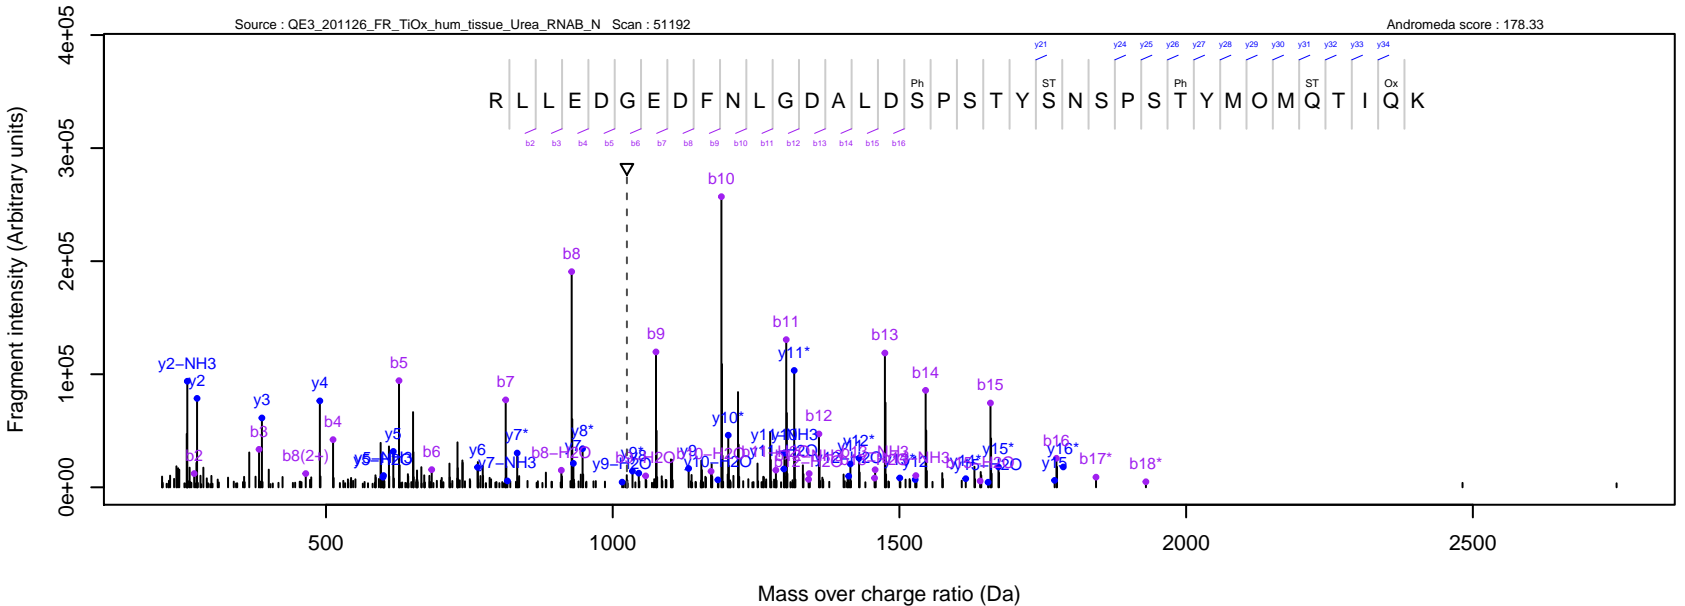

NSPTFKS(Phospho (STY))FEEKVENLK-3+

Source : QE3\_201126\_FR\_TiOx\_hum\_tissue\_Urea\_RNAB\_N Scan : 37952

Andromeda score : 178.32

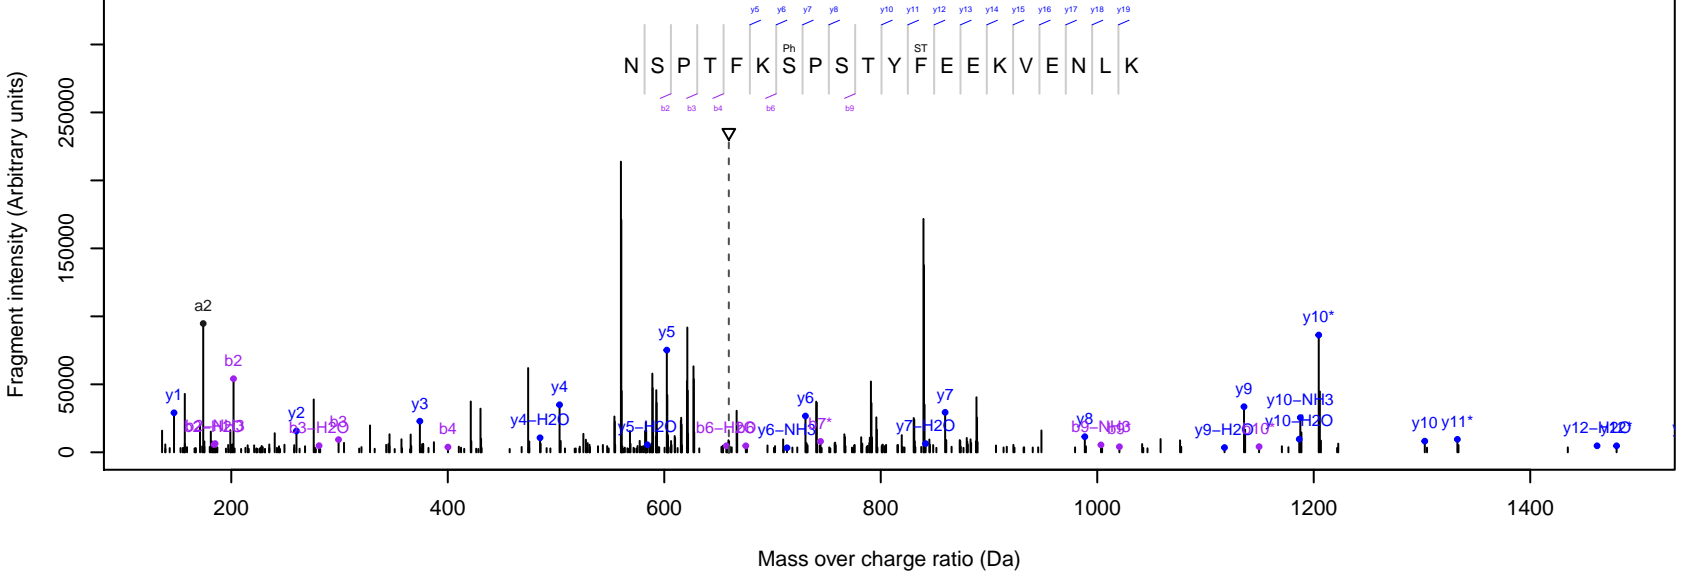

ASS(Phospho (STY))LNENVDHSALLK-2+

Source : QE3\_201126\_FR\_TiOx\_hum\_tissue\_Urea\_RNAB\_H Scan : 20398

Andromeda score : 178.23

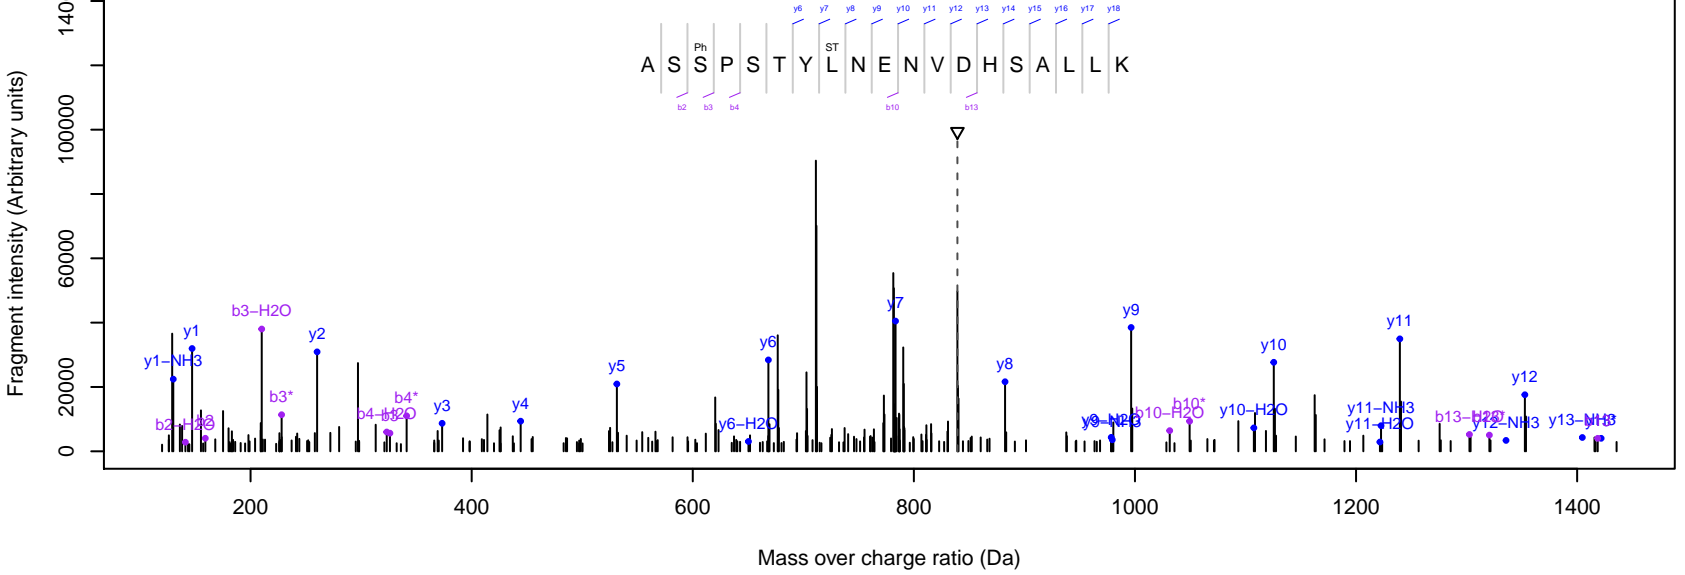

T(Phospho (STY))SSISGPLSPAYTGQVPYNYNQLEGR-3+

Source : QE3\_201126\_FR\_TiOx\_hum\_tissue\_Urea\_RNAB\_H Scan : 49519

Andromeda score : 178.23

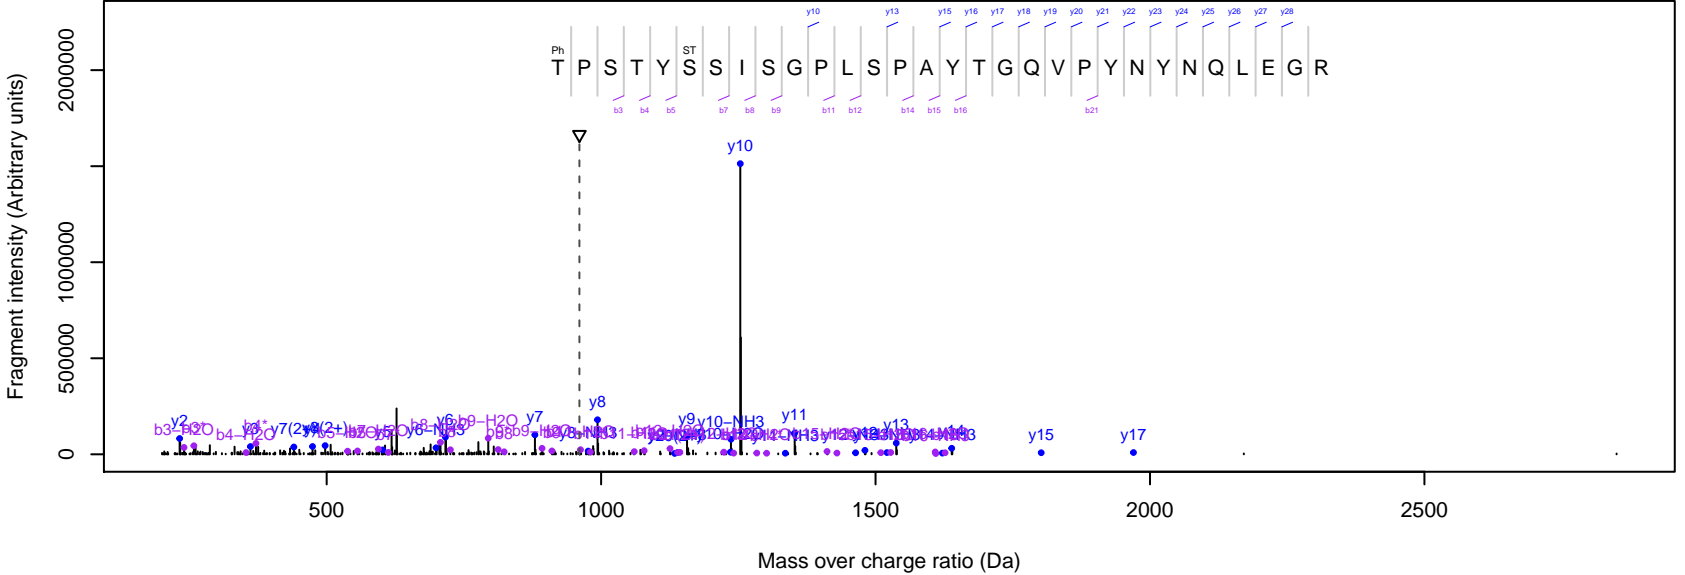



M(Oxidation (M))LPHAPGVQM(Oxidation (M))QAIPEDAIP(EES(Phospho (STY))GDEDEDDPKR-3+

Source : QE3\_201126\_FR\_TIOx\_hum\_tissue\_Urea\_RNAB\_H Scan : 30007

Andromeda score : 178.2

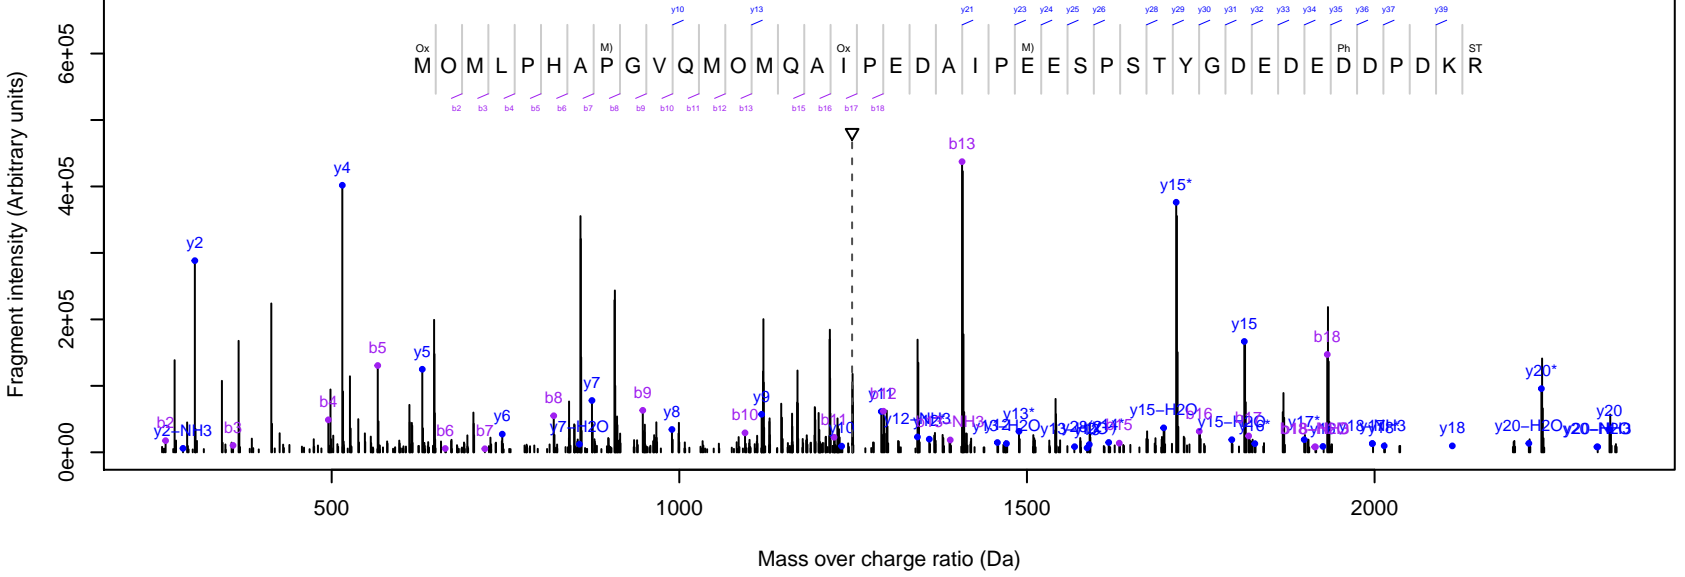

S(Phospho (STY))TSFRGGMGSGGLATGIAGGLAGM(Oxidation (M))GGIQNEK-3+

Source : QE3\_201126\_FR\_TIOx\_hum\_tissue\_Urea\_RNAB\_N Scan : 39488

Andromeda score : 178.17

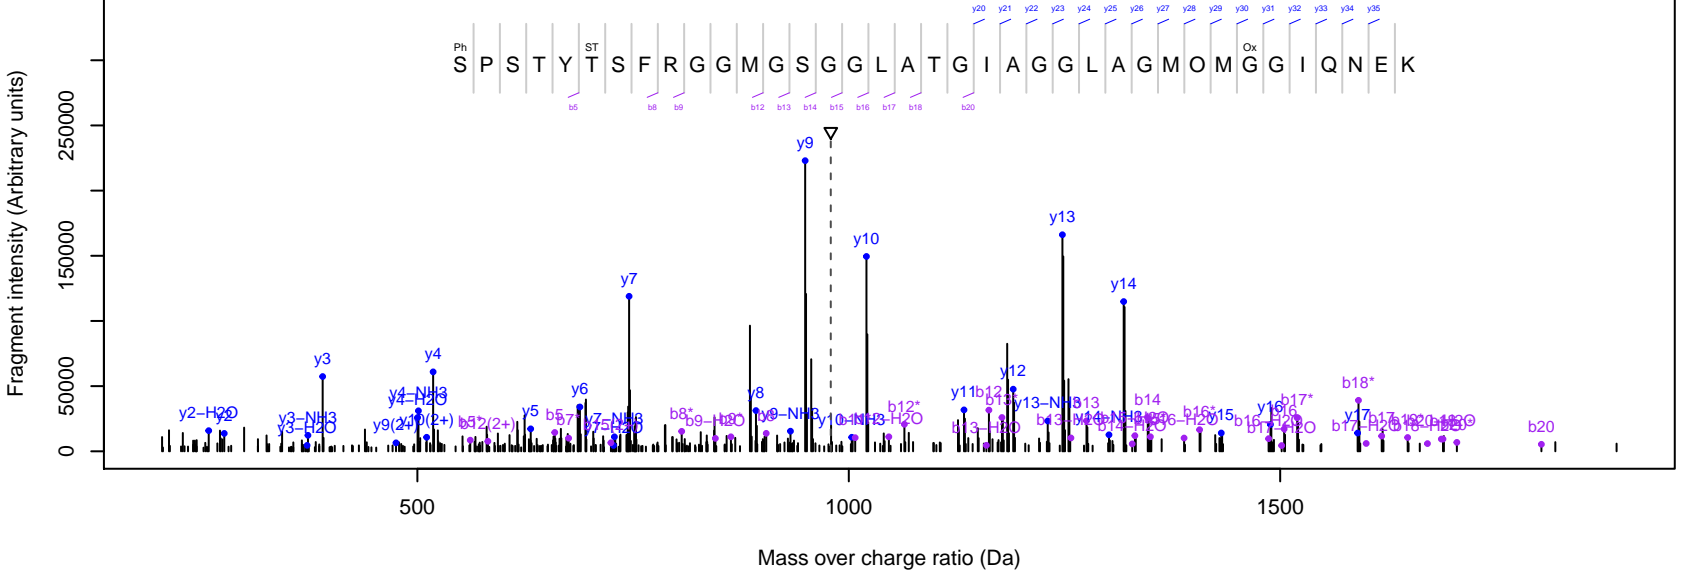

VAAAAGSGPS(Phospho (STY))PPGSPGHDRER-3+

Source : QE3\_201126\_FR\_TIOx\_hum\_tissue\_Urea\_RNAB\_N Scan : 7460

Andromeda score : 178.11

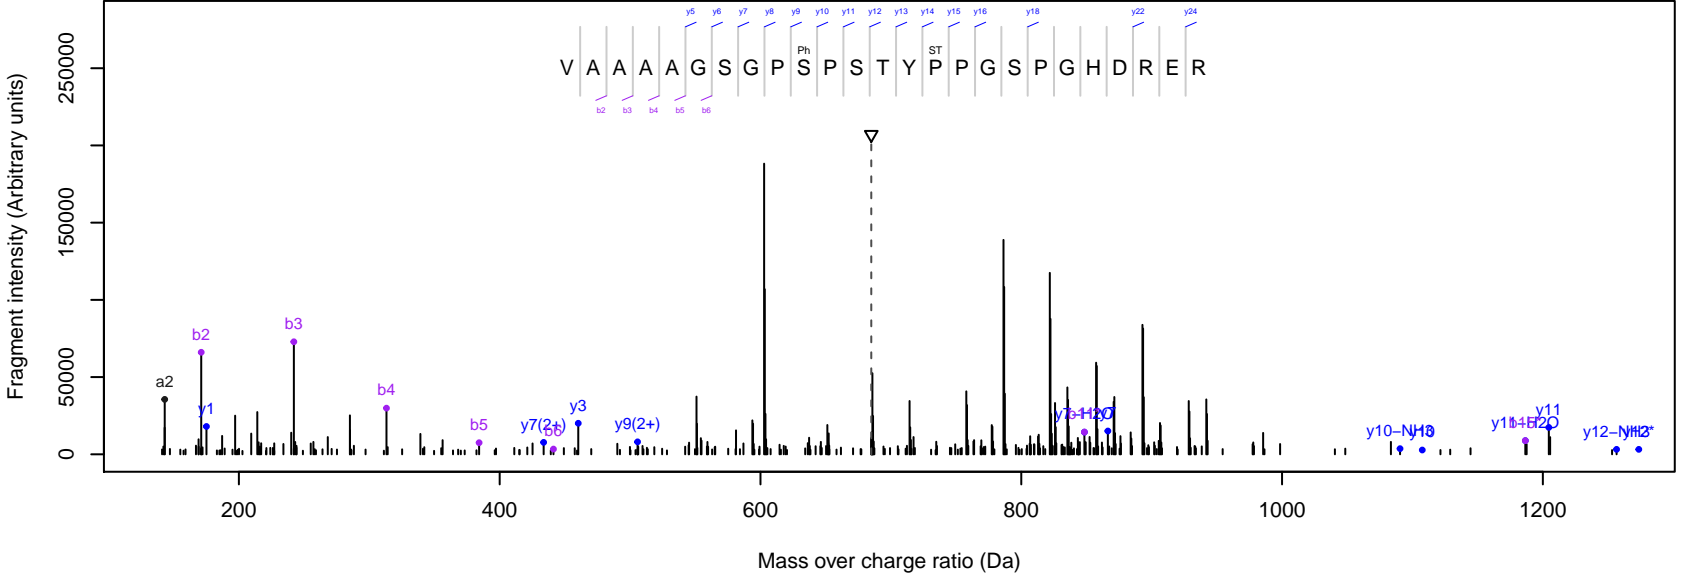

NKDQSEQETSDADQHVTSNAS(Phospho (STY))DSESSYR-3+

Source : QE3\_201126\_FR\_TIOx\_hum\_tissue\_Urea\_RNAB\_N Scan : 9752

Andromeda score : 178.07

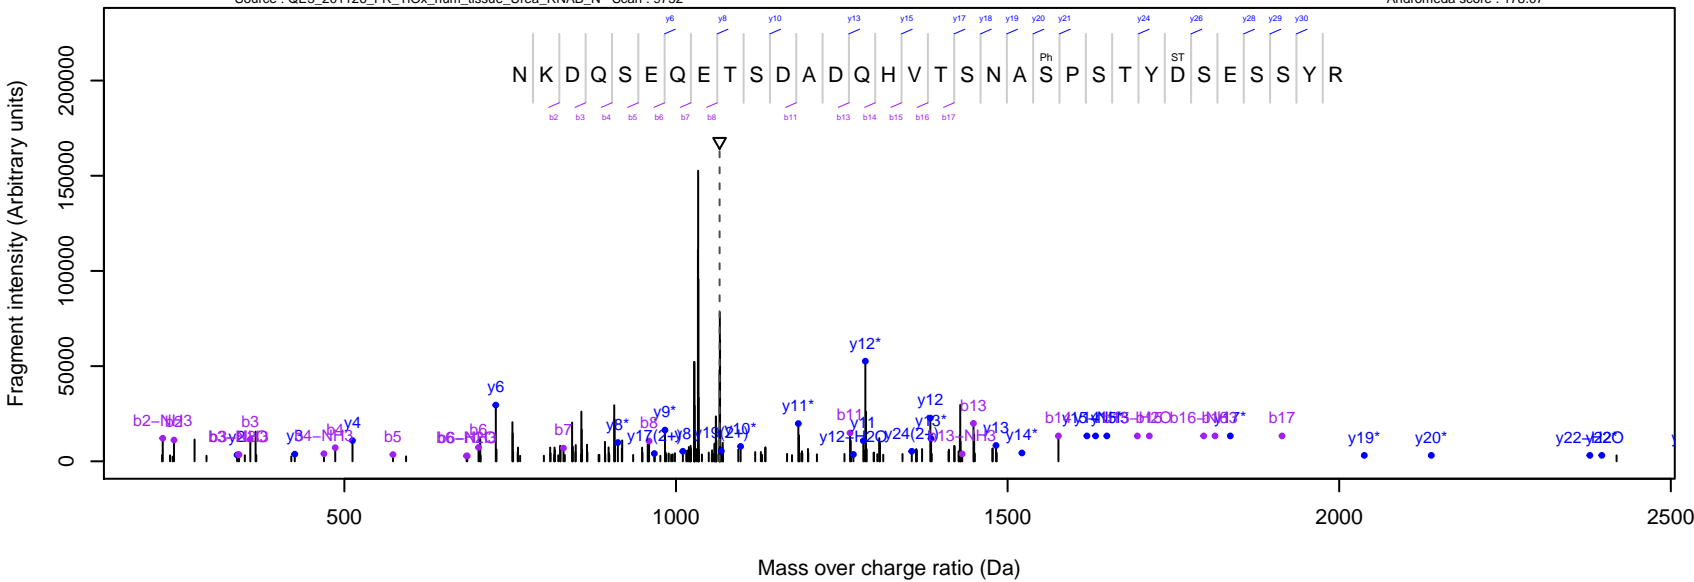

RPAEATSSPTS(Phospho (STY))PERPR-3+

Source : QE3\_201126\_FR\_TIOx\_hum\_tissue\_Urea\_RNAB\_B Scan : 4876

Andromeda score : 178.07

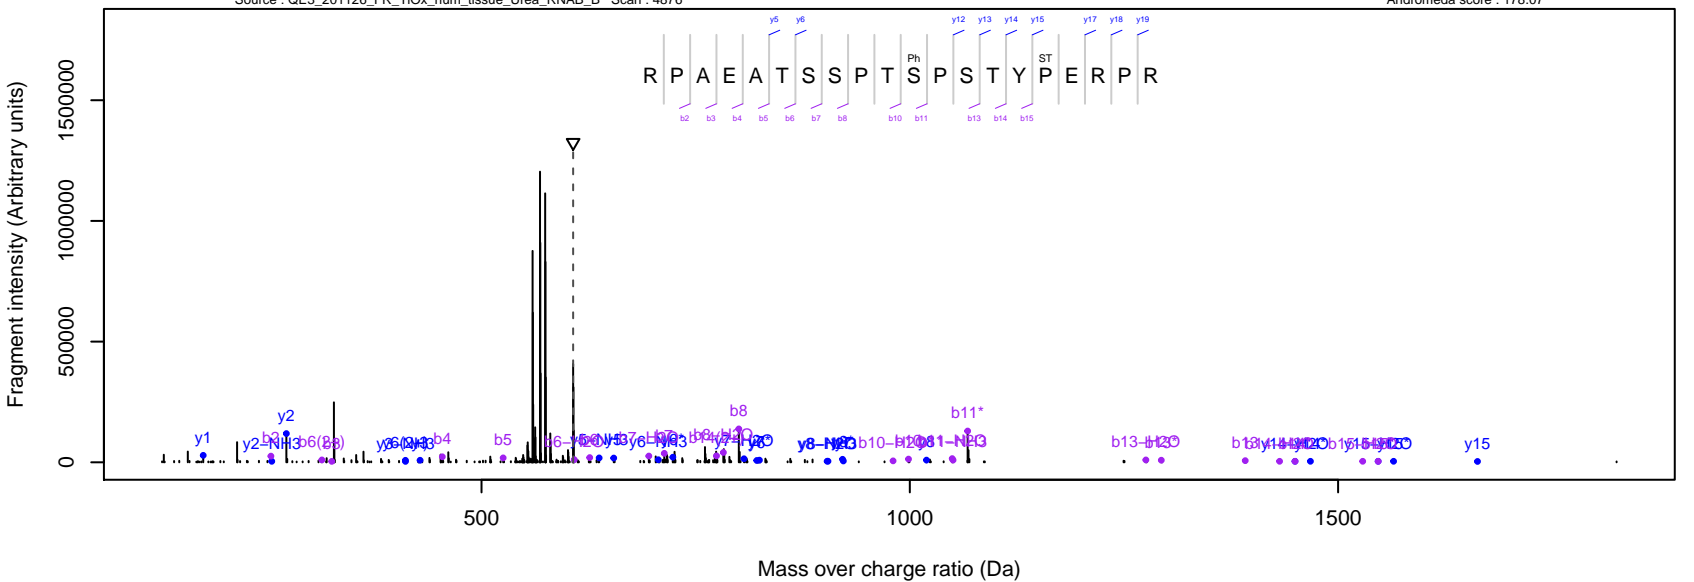

VQSLEGEKLS(Phospho (STY))PK-2+

Source : QE3\_201126\_FR\_TIOx\_hum\_tissue\_Urea\_RNAB\_N Scan : 13563

Andromeda score : 178.03

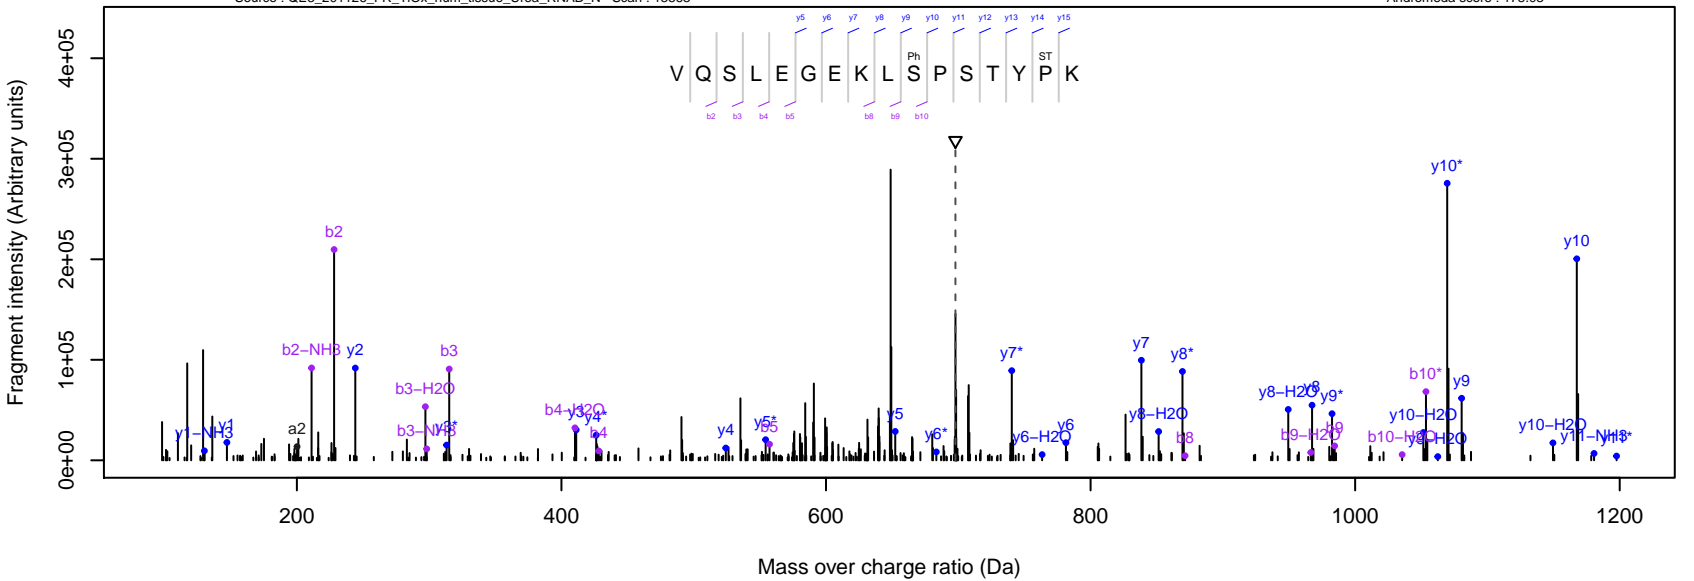

SRS(Phospho (STY))PESQVIGENTK-2+

Source : QE3\_201126\_FR\_TiOx\_hum\_tissue\_Urea\_RNAB\_N Scan : 10421

Andromeda score : 178

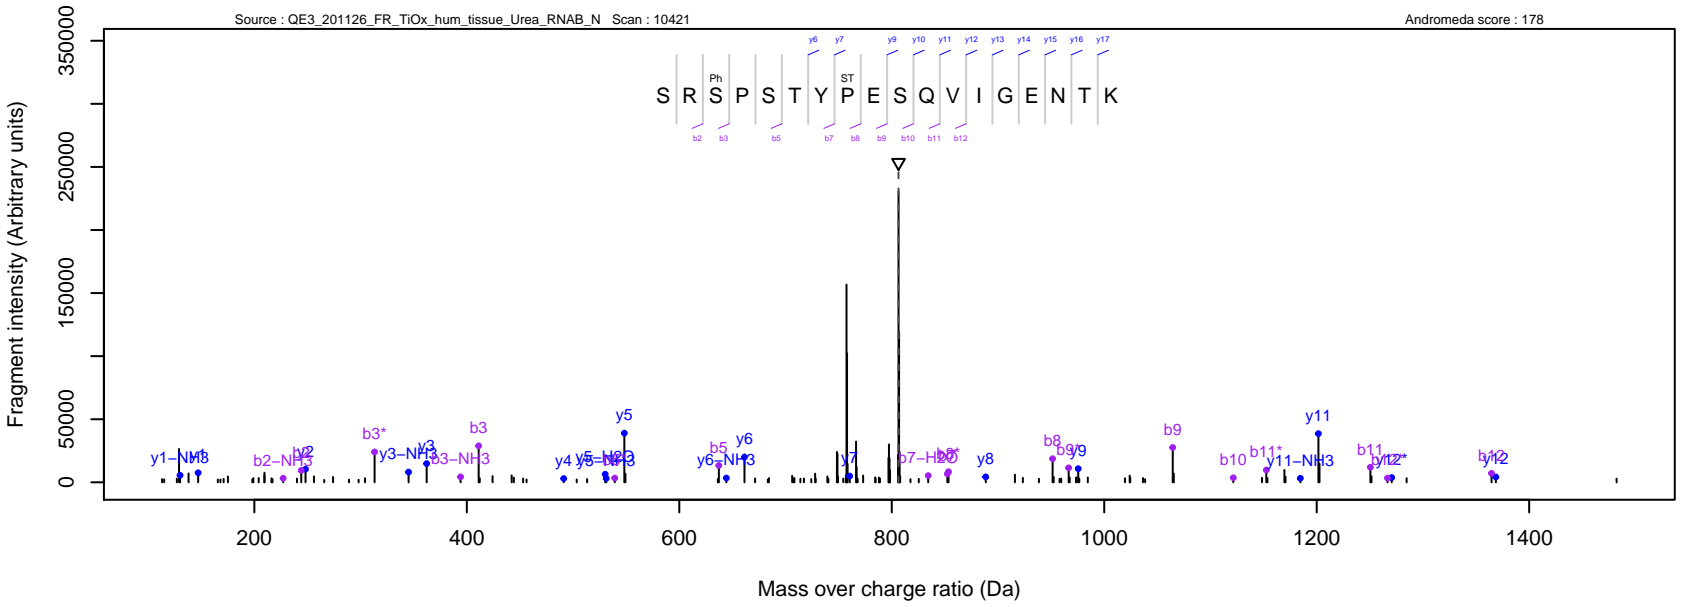

DQDS(Phospho (STY))S(Phospho (STY))DDERALEDWVSSETSALPRPR-4+

Source : QE3\_201126\_FR\_TiOx\_hum\_tissue\_Urea\_RNAB\_H Scan : 58127

Andromeda score : 177.79

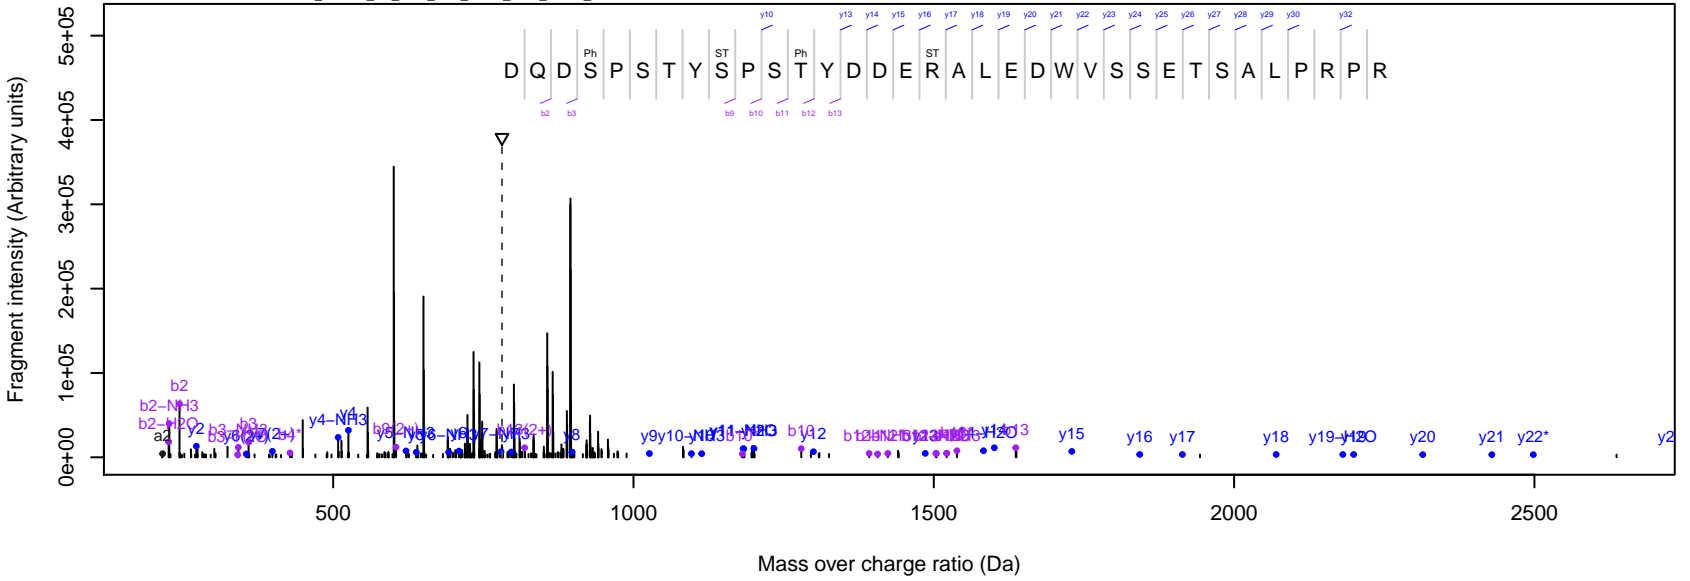

M(Oxidation (M))DS(Phospho (STY))DEDEKEGEEKVAK-3+

Source : QE3\_201126\_FR\_TiOx\_hum\_tissue\_Urea\_RNAB\_N Scan : 5238

Andromeda score : 177.61

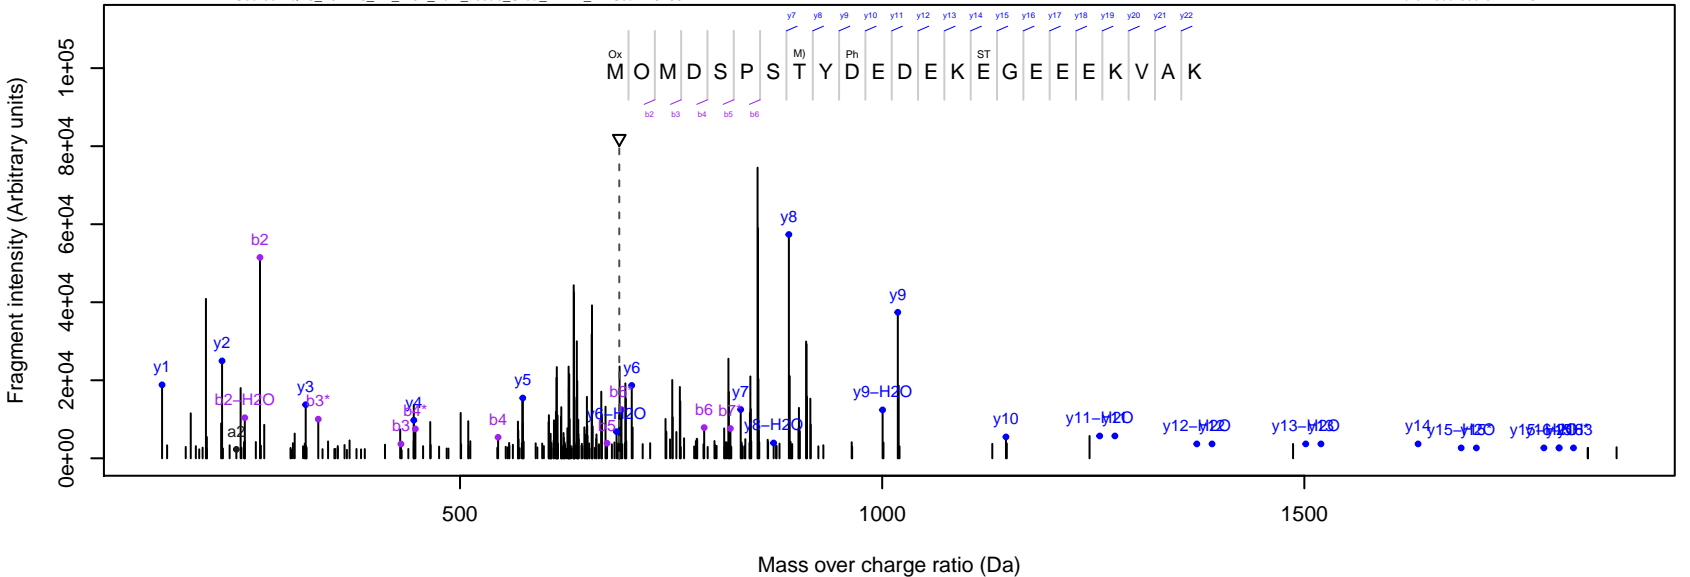

EKPDS(Phospho (STY))DDDLIASLVTAK-2+

Source : QE3\_201126\_FR\_TIOx\_hum\_tissue\_Urea\_RNAB\_N Scan : 44020

Andromeda score : 177.6

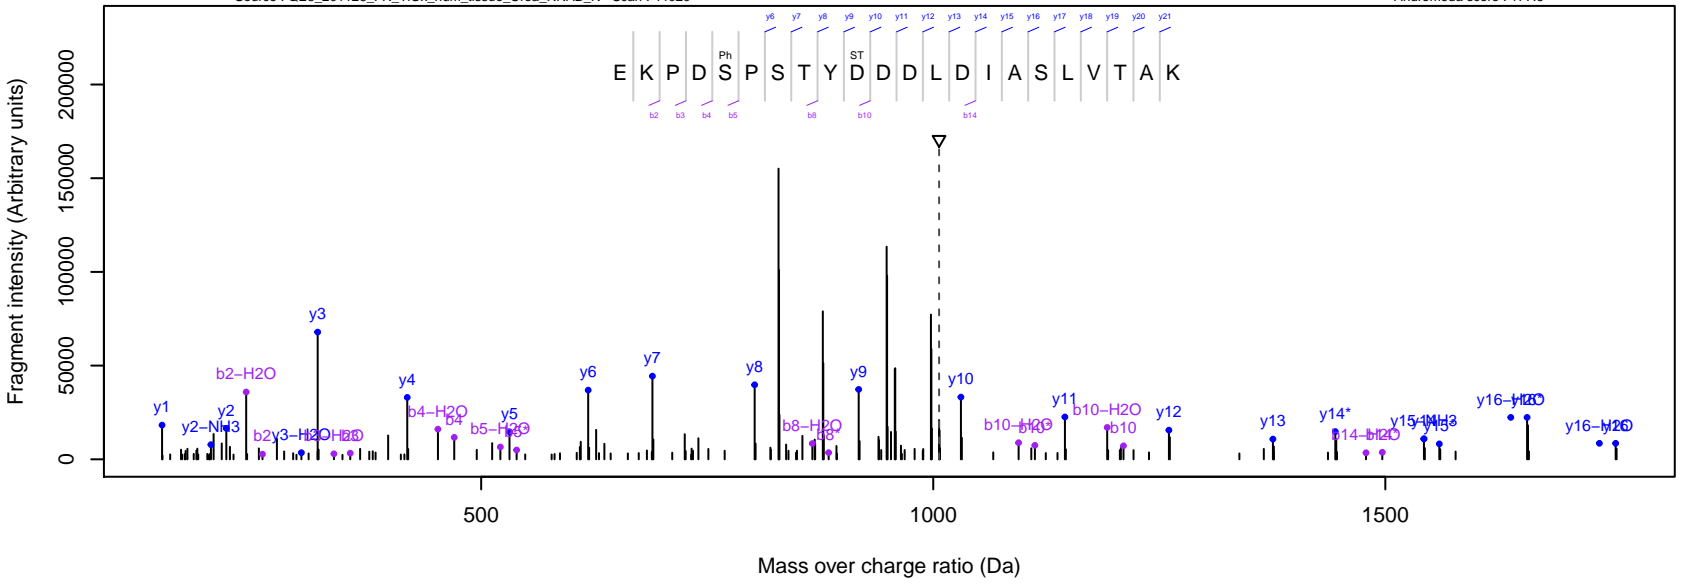

TDGSIS(Phospho (STY))GDRQPVTVA DYISR-3+

Source : QE3\_201126\_FR\_TIOx\_hum\_tissue\_Urea\_RNAB\_N Scan : 32837

Andromeda score : 177.6

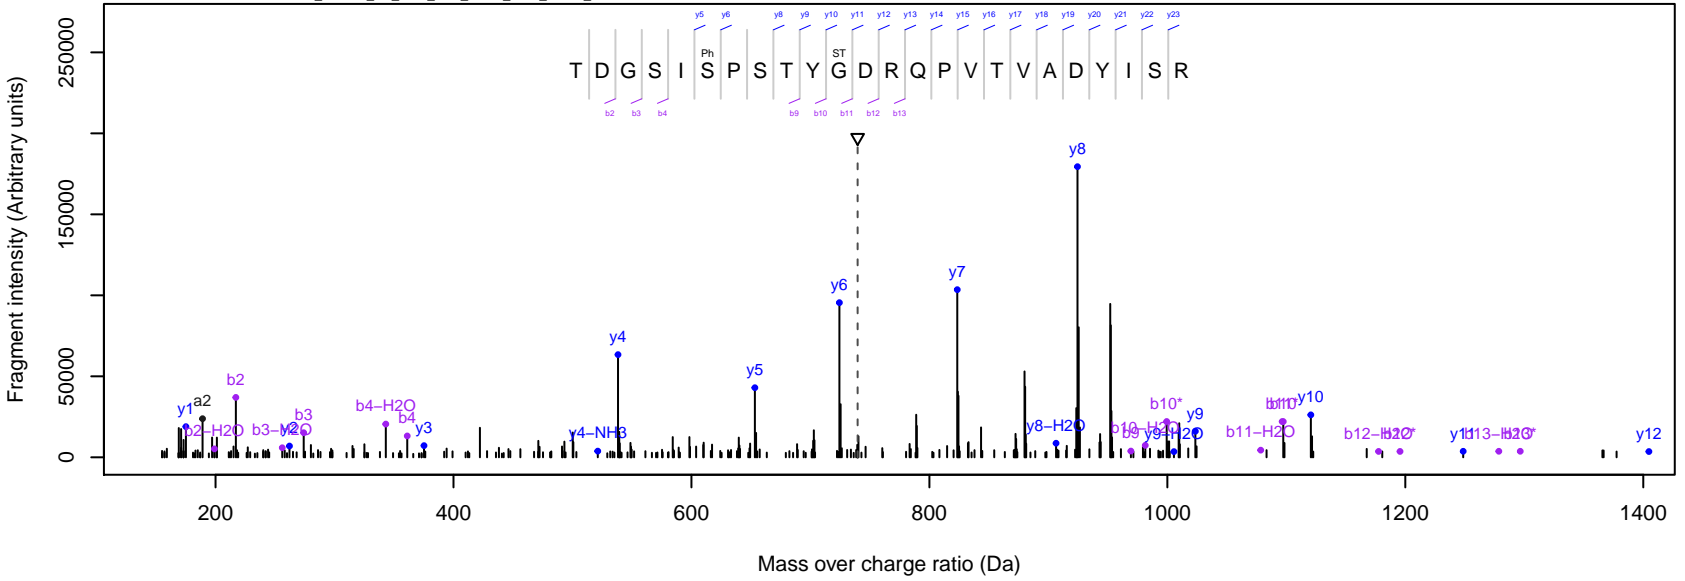

SWS(Phospho (STY))DRSIFS(Phospho (STY))GIGSTAEPV SQTSDYQWDVSR-3+

Source : QE3\_201126\_FR\_TIOx\_hum\_tissue\_Urea\_RNAB\_H Scan : 56989

Andromeda score : 177.58

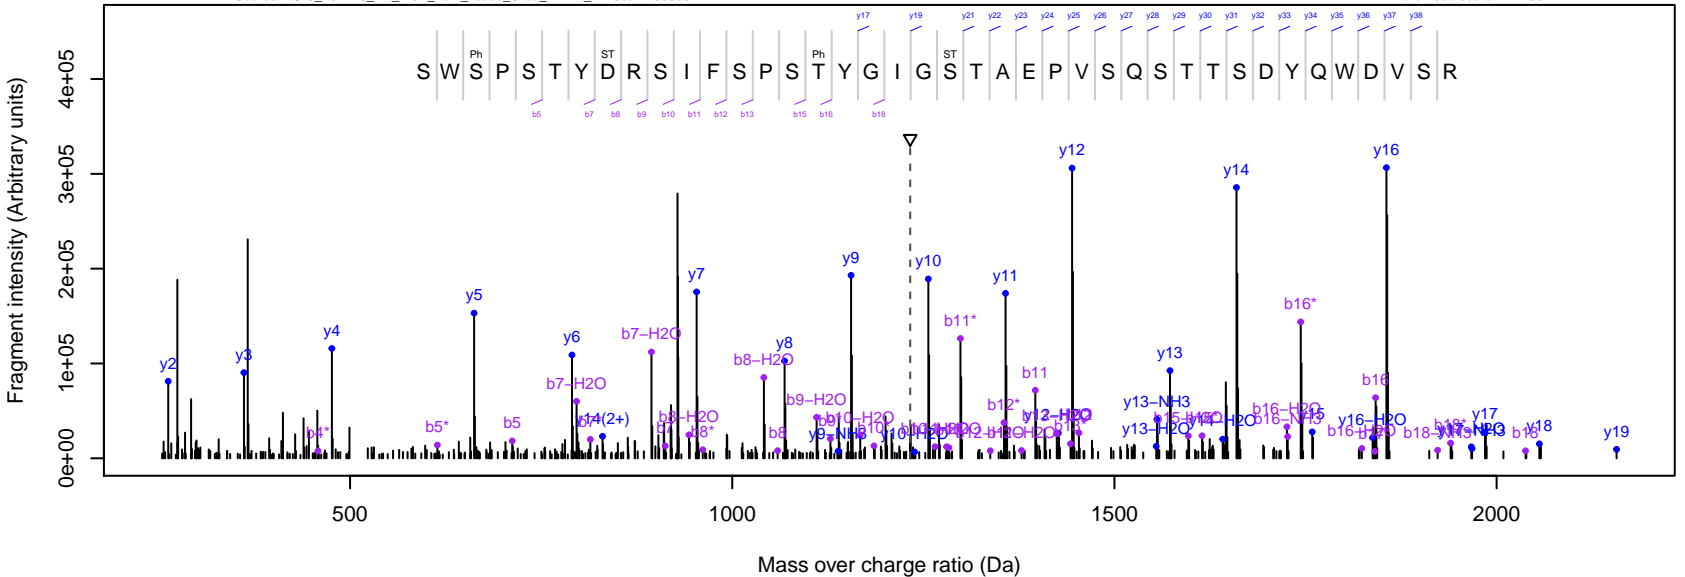

SWS(Phospho (STY))PPPEVSR-2+

Source : QE3\_201126\_FR\_TIOx\_hum\_tissue\_Urea\_RNAB\_H Scan : 25231

Andromeda score : 177.57

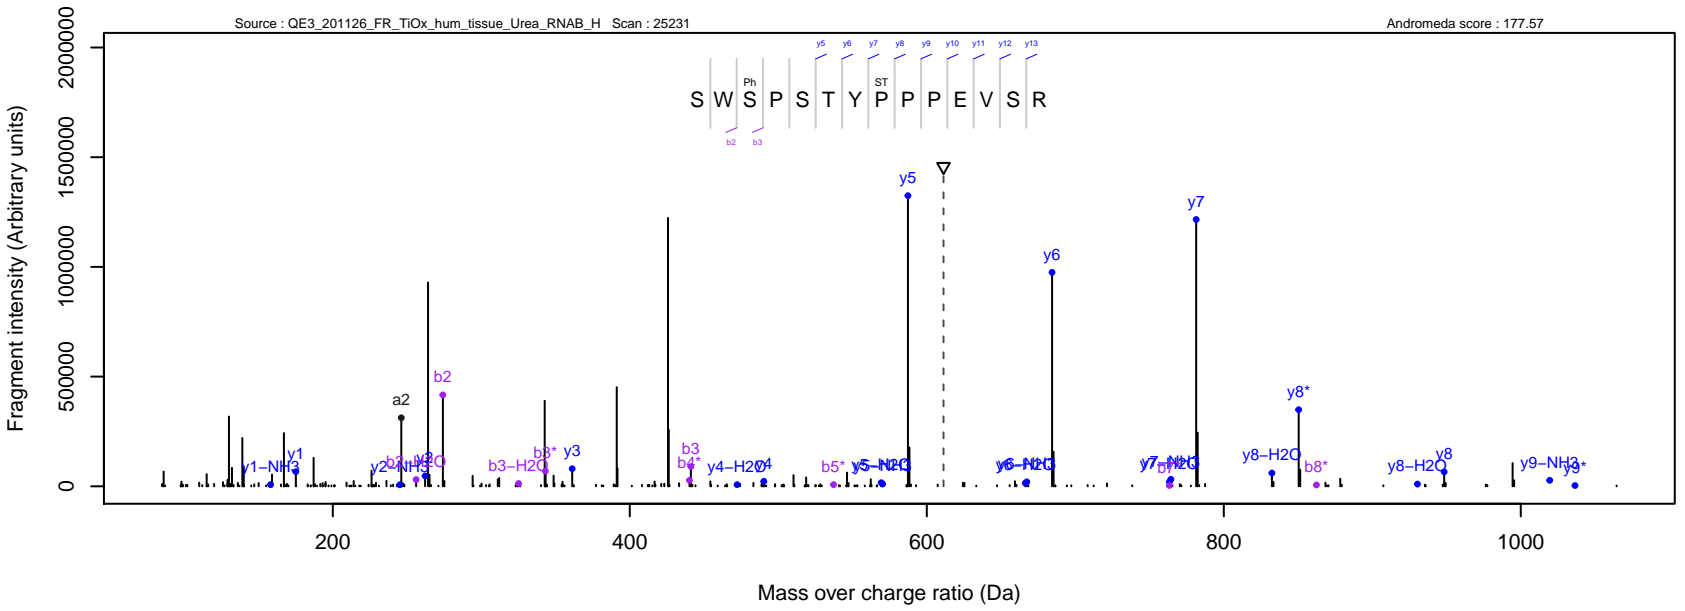

VTLQDYRLPDS(Phospho (STY))DDDEDEETAQR-3+

Source : QE3\_201126\_FR\_TIOx\_hum\_tissue\_Urea\_RNAB\_N Scan : 36236

Andromeda score : 177.52

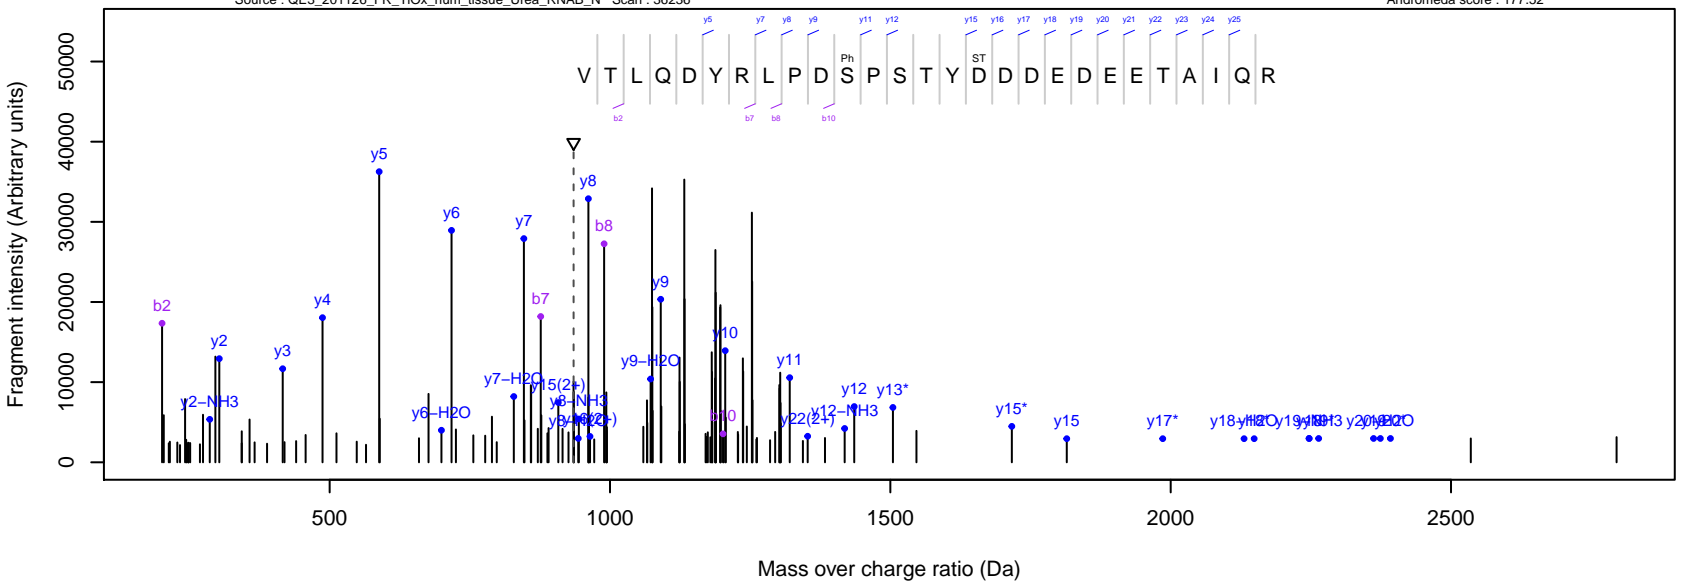

TEMKSPFNSPS(Phospho (STY))PQDSPR-3+

Source : QE3\_201126\_FR\_TIOx\_hum\_tissue\_Urea\_RNAB\_H Scan : 19984

Andromeda score : 177.5

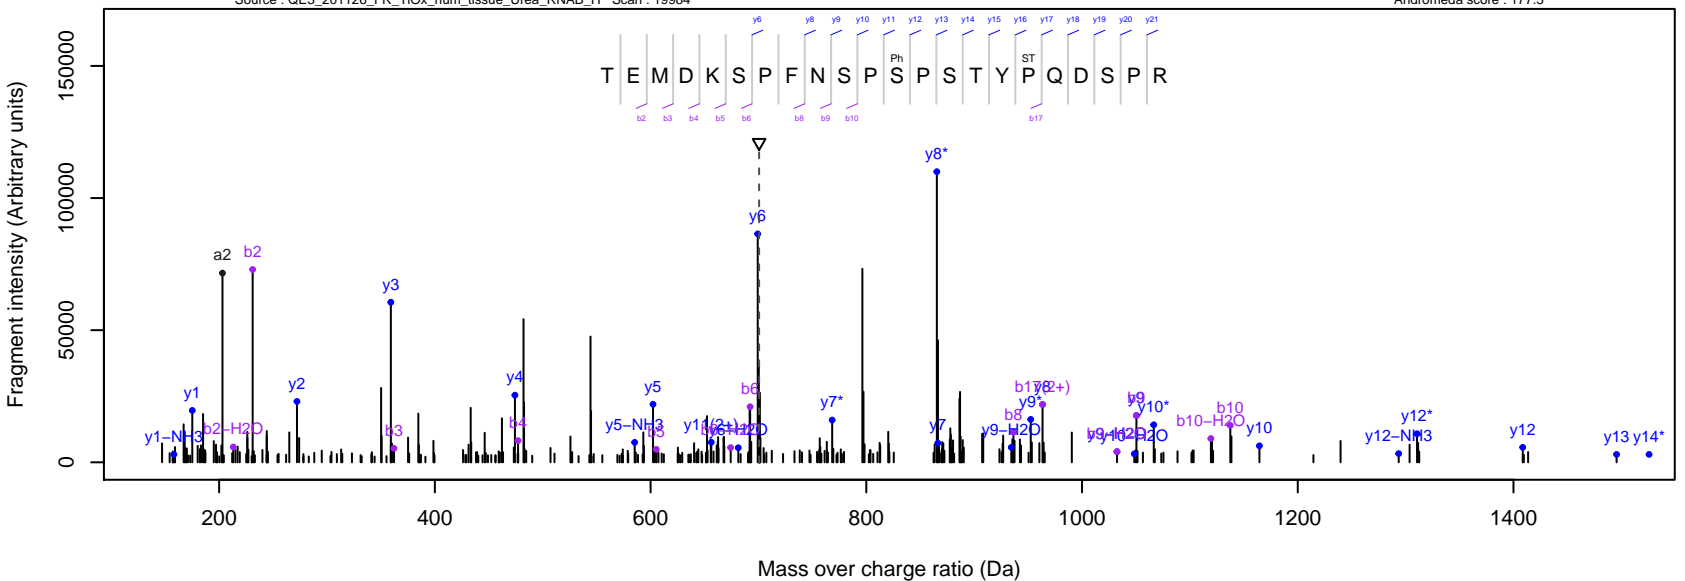

GRLS(Phospho (STY))PVPVPR-2+

Source : QE3\_201126\_FR\_TiOx\_hum\_tissue\_Urea\_RNAB\_H Scan : 16503

Andromeda score : 177.41

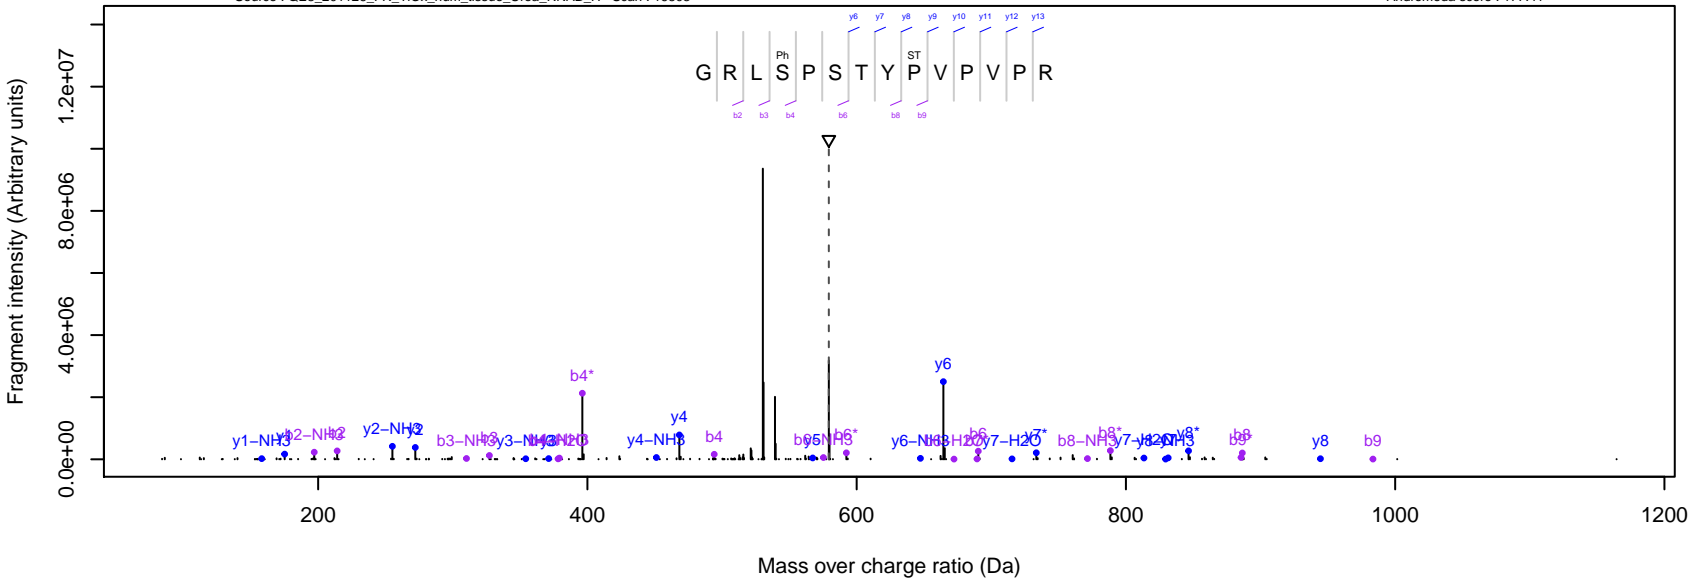

AITSLGGGS(Phospho (STY))PK-2+

Source : QE3\_201126\_FR\_TiOx\_hum\_tissue\_Urea\_RNAB\_H Scan : 32602

Andromeda score : 177.38

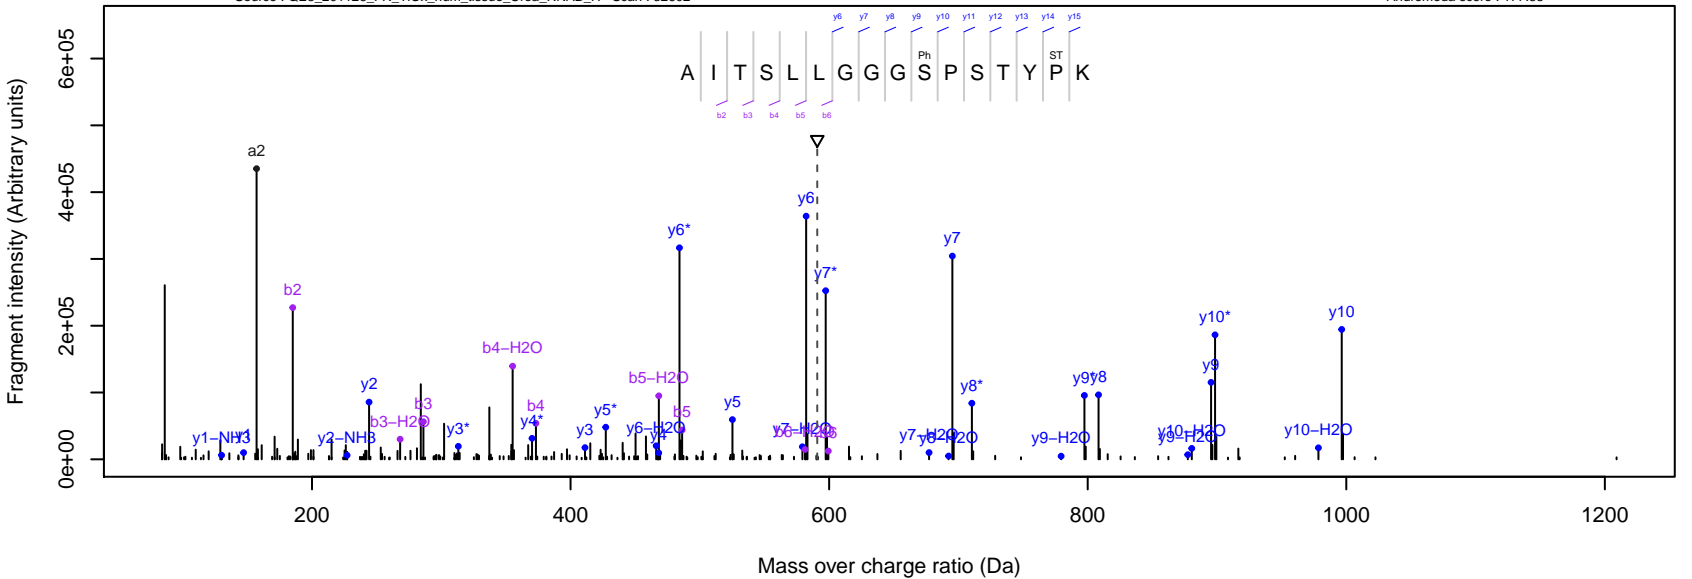

KGNAEGS(Phospho (STY))S(Phospho (STY))DEEGKLVIDEPAK-3+

Source : QE3\_201126\_FR\_TiOx\_hum\_tissue\_Urea\_RNAB\_H Scan : 19248

Andromeda score : 177.35

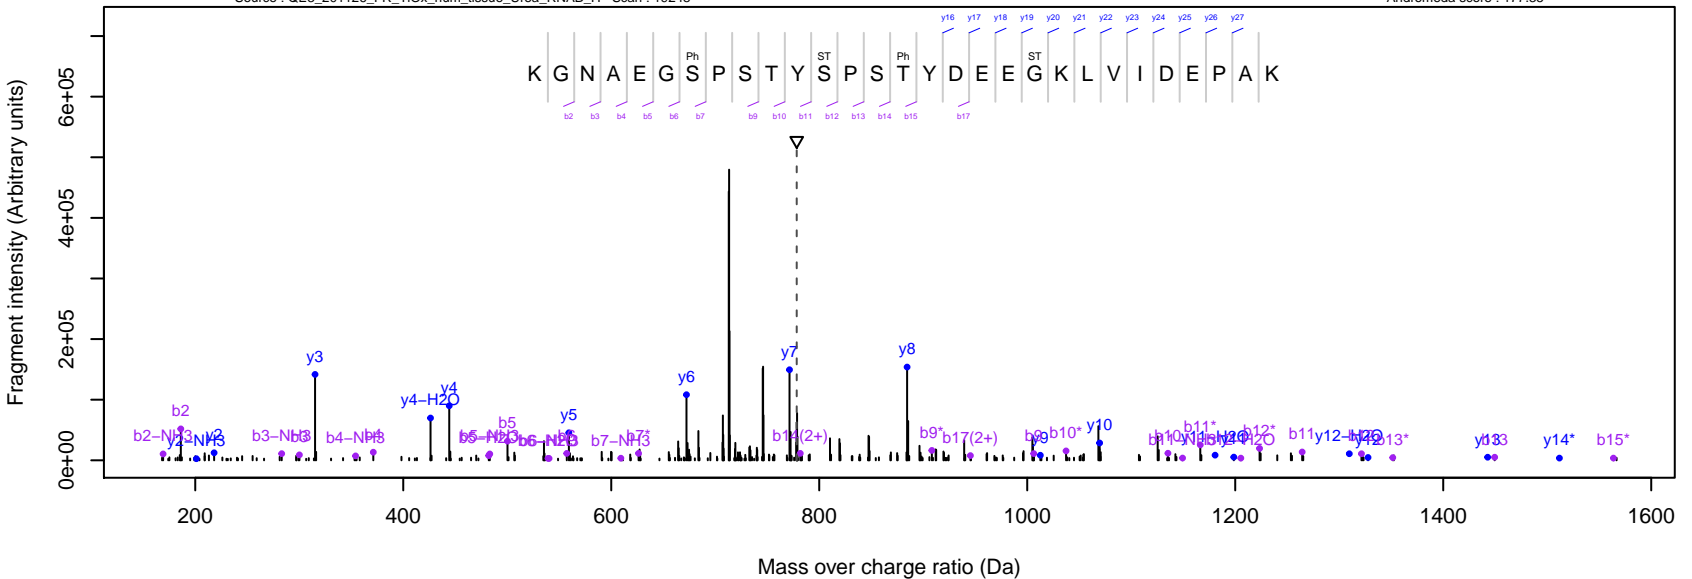

TVIRLPSGSGAAS(Phospho (STY))PTGSAVDIR-3+

Source : QE3\_201126\_FR\_TiOx\_hum\_tissue\_Urea\_RNAB\_N Scan : 31515

Andromeda score : 177.35

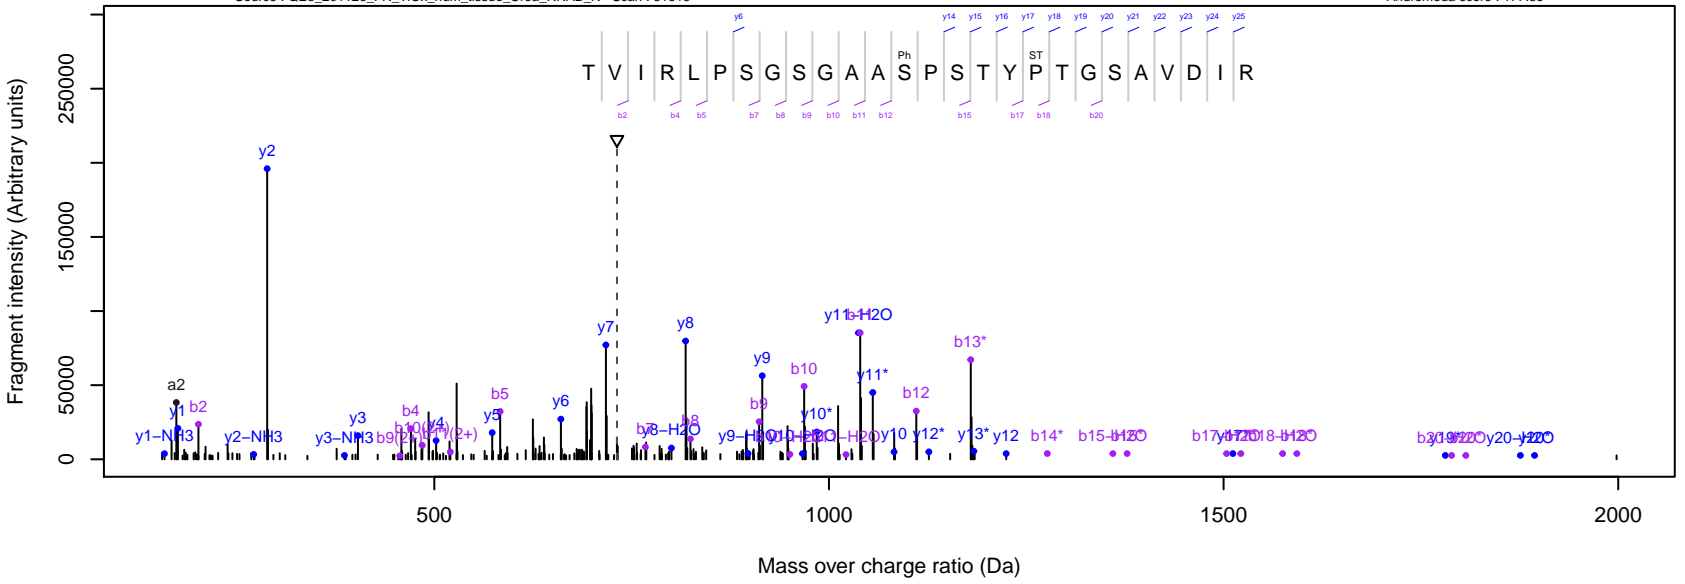

SRSS(Phospho (STY))S(Phospho (STY))VGS(Phospho (STY))SSSYPIPAVSR-2+

Source : QE3\_201126\_FR\_TiOx\_hum\_tissue\_Urea\_RNAB\_B Scan : 32405

Andromeda score : 177.32

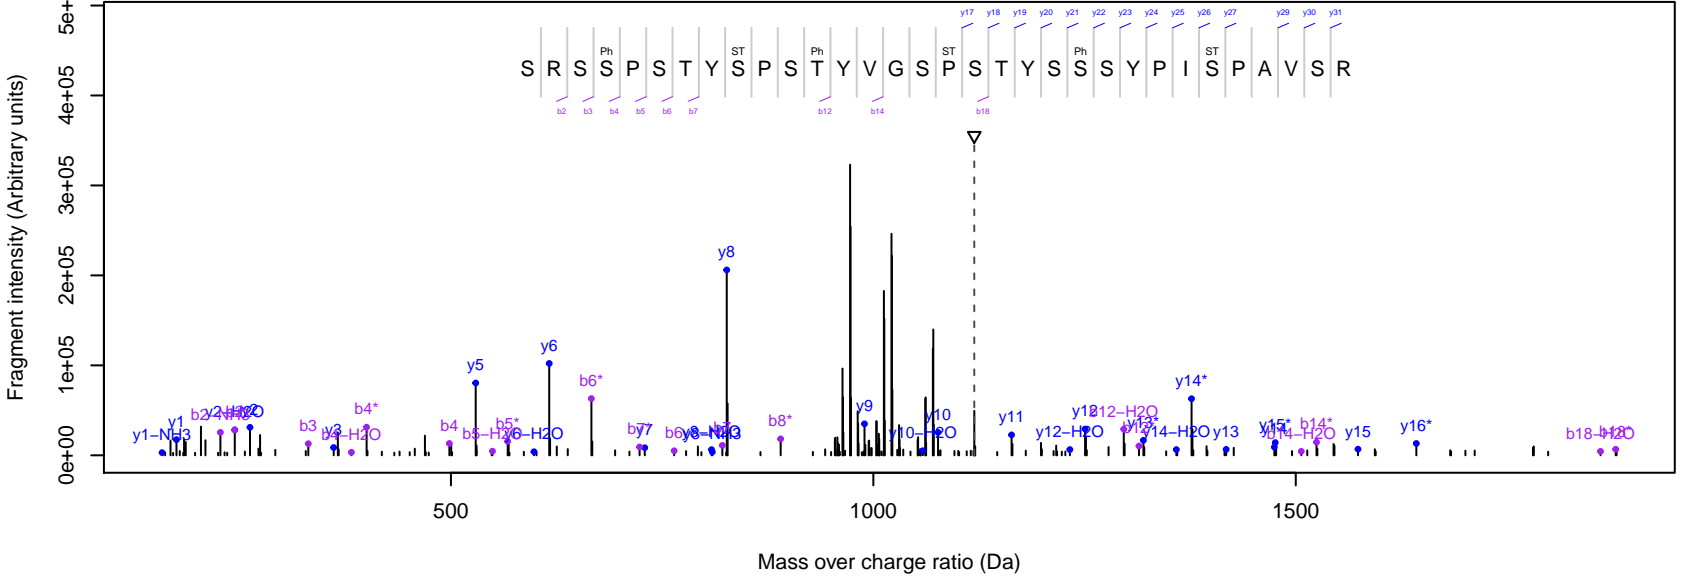

VADPDHDHTGFLT(Phospho (STY))EY(Phospho (STY))VATR-3+

Source : QE3\_201126\_FR\_TiOx\_hum\_tissue\_Urea\_RNAB\_H Scan : 30728

Andromeda score : 177.22

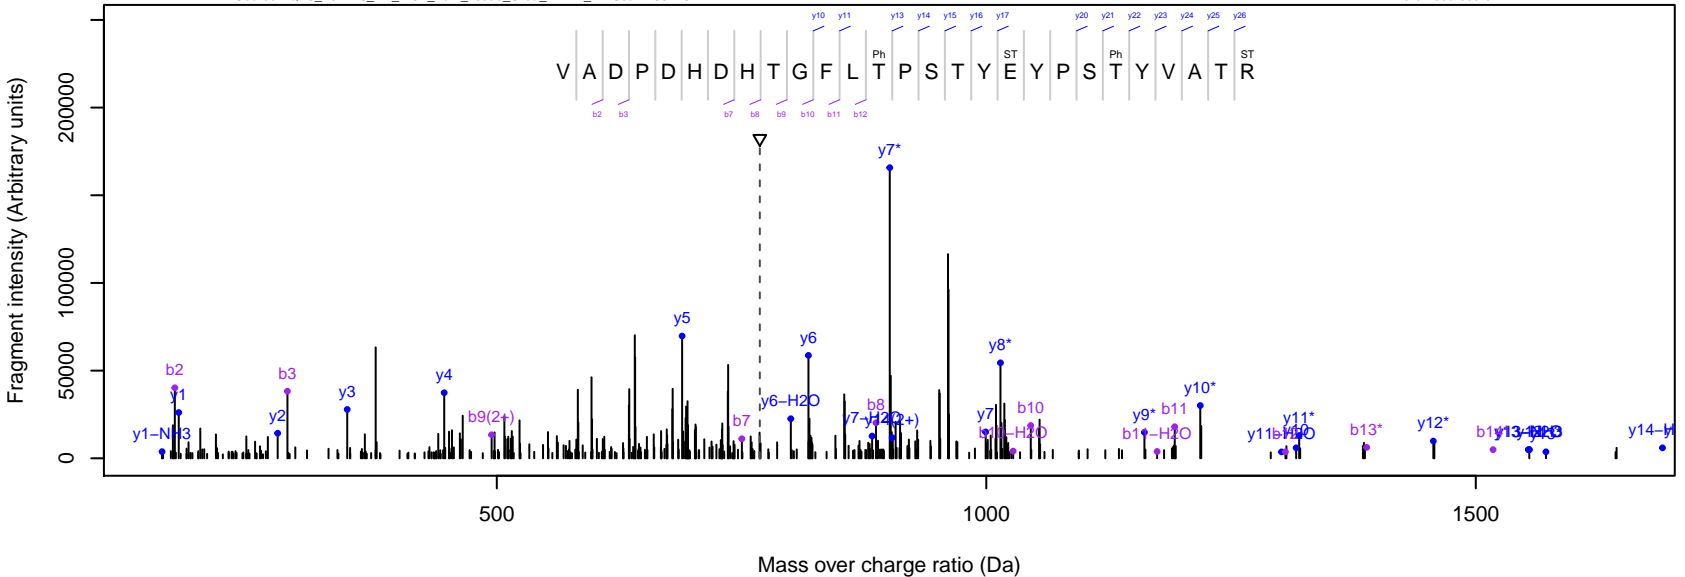

VYEDSGIPLPAESPSTYPKKGPK-3+

Source : QE3\_201126\_FR\_TiOx\_hum\_tissue\_Urea\_RNAB\_H Scan : 19549

Andromeda score : 177.22

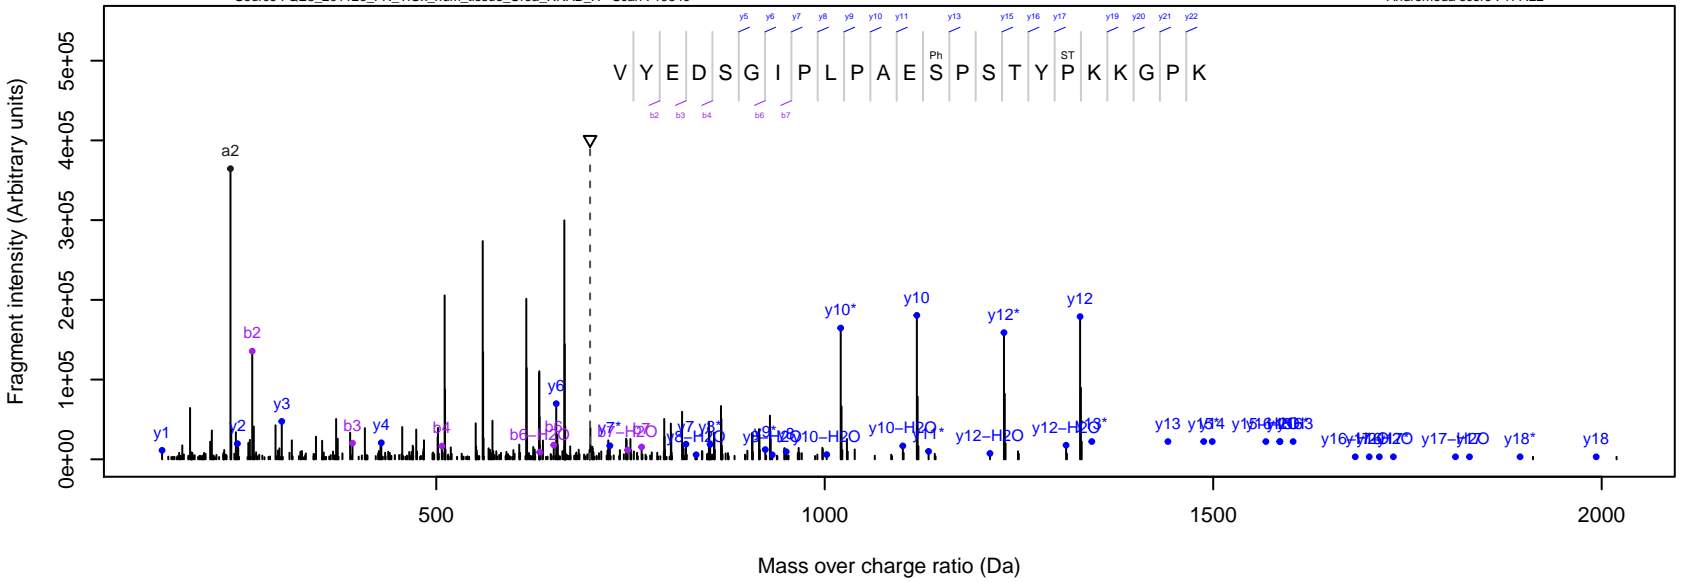

S(Phospho (STY))LLDASEEAIKK-2+

Source : QE3\_201126\_FR\_TiOx\_hum\_tissue\_Urea\_RNAB\_N Scan : 23190

Andromeda score : 177.16

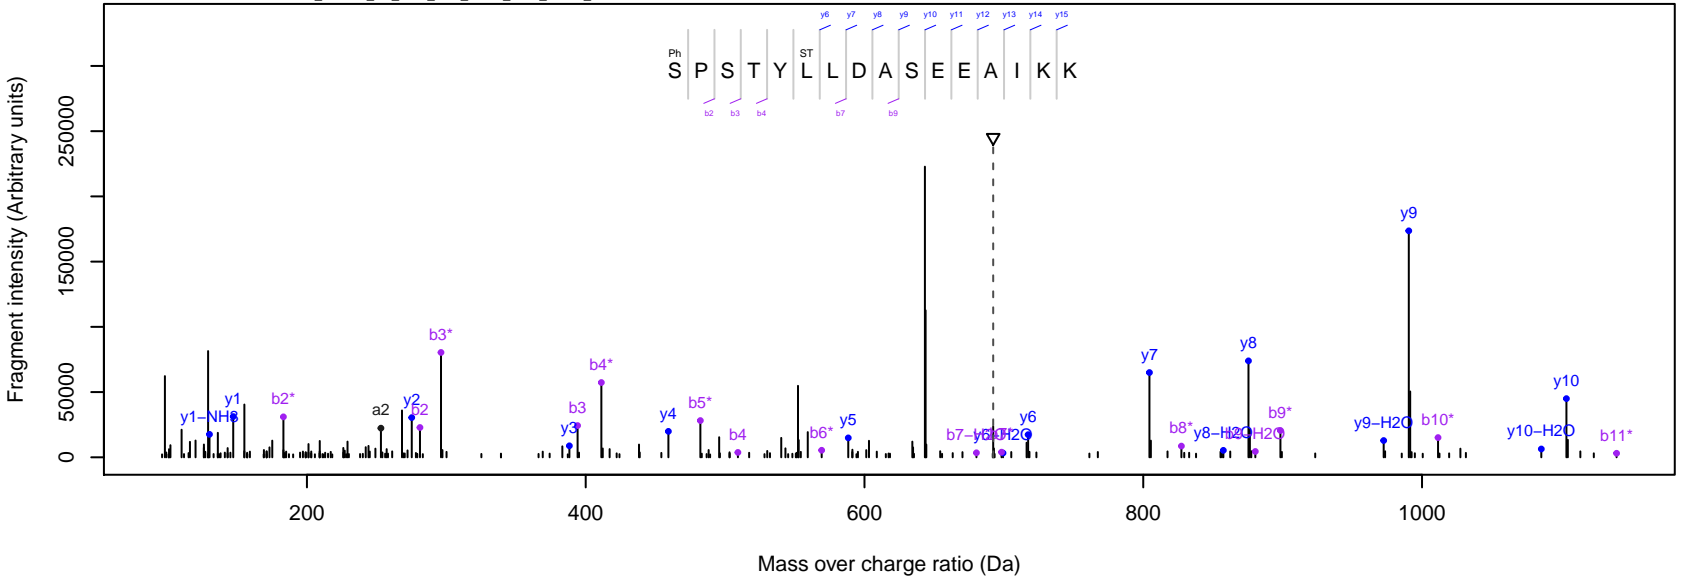

EEQSQITSQVTPSTYQGWR-2+

Source : QE3\_201126\_FR\_TiOx\_hum\_tissue\_Urea\_RNAB\_N Scan : 36599

Andromeda score : 177.04

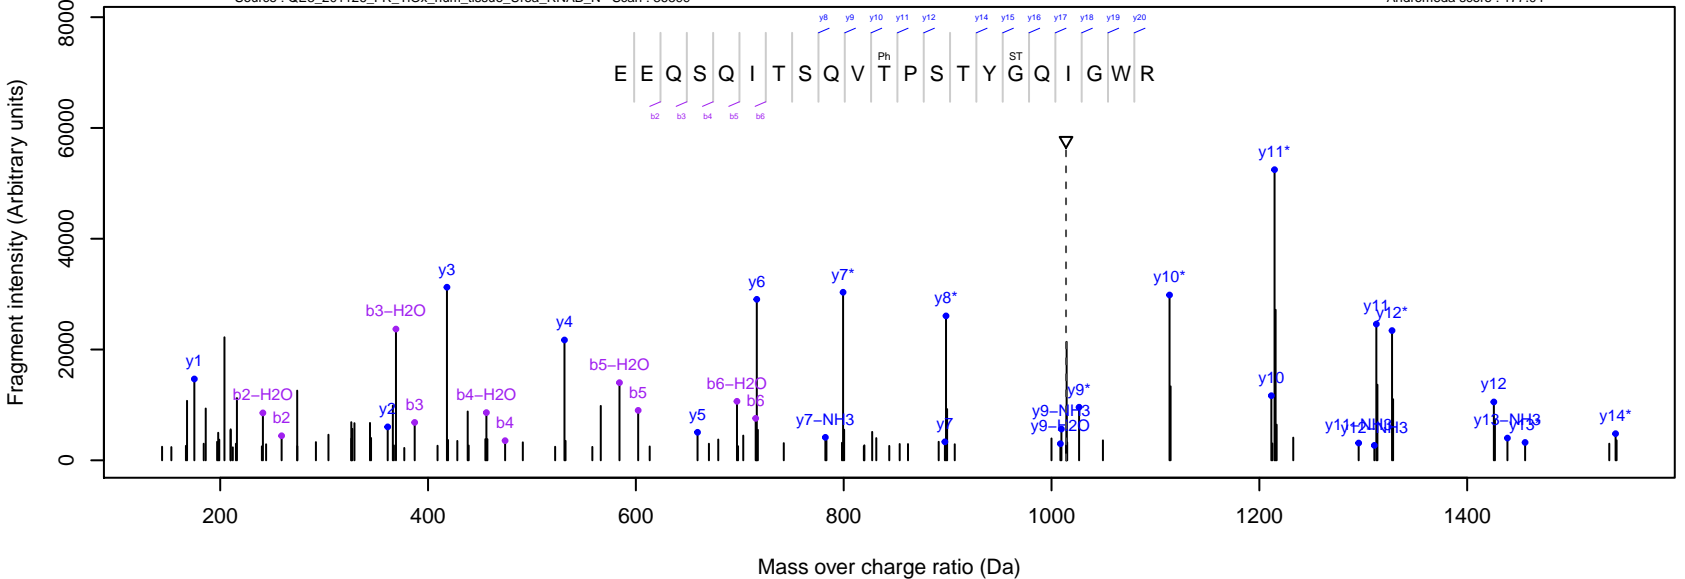



SVGGG(Phospho (STY))GGGSGDNLVTR-2+

Source : QE3\_201126\_FR\_TIOx\_hum\_tissue\_Urea\_RNAB\_N Scan : 29437

Andromeda score : 177.04

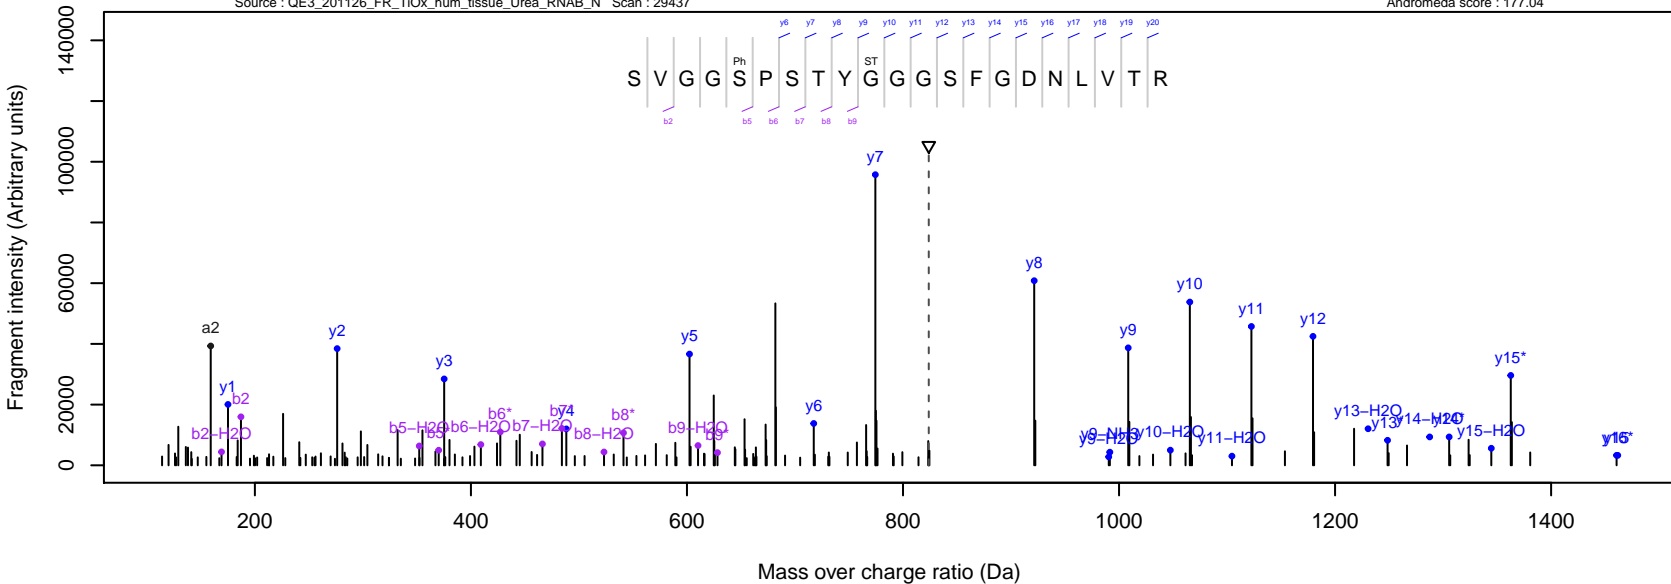

EGIQWEAKEDNS(Phospho (STY))EGEEILEEVGGDLEEDDHHM(Oxidation (M))EFCR-4+

Source : QE3\_201126\_FR\_TIOx\_hum\_tissue\_Urea\_RNAB\_H Scan : 52455

Andromeda score : 176.95

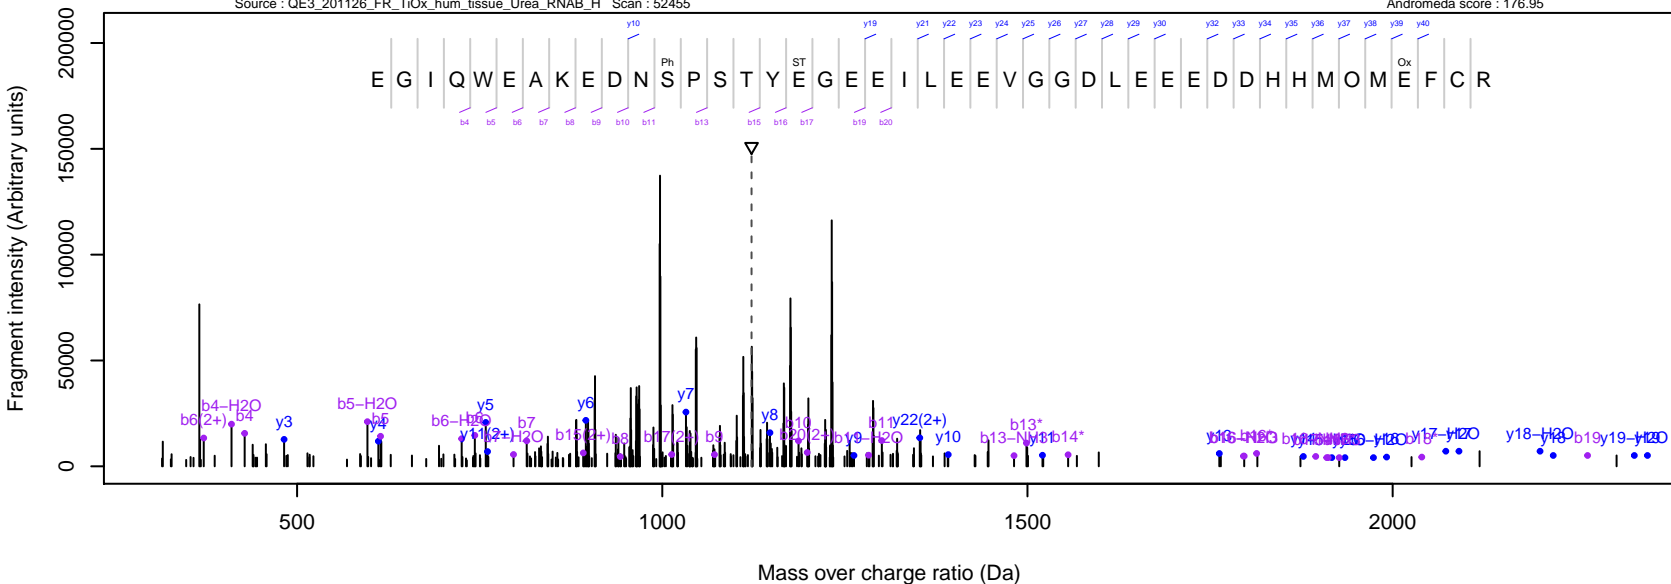

S(Phospho (STY))FEVEEVETPNSTPPR-2+

Source : QE3\_201126\_FR\_TIOx\_hum\_tissue\_Urea\_RNAB\_B Scan : 32295

Andromeda score : 176.89

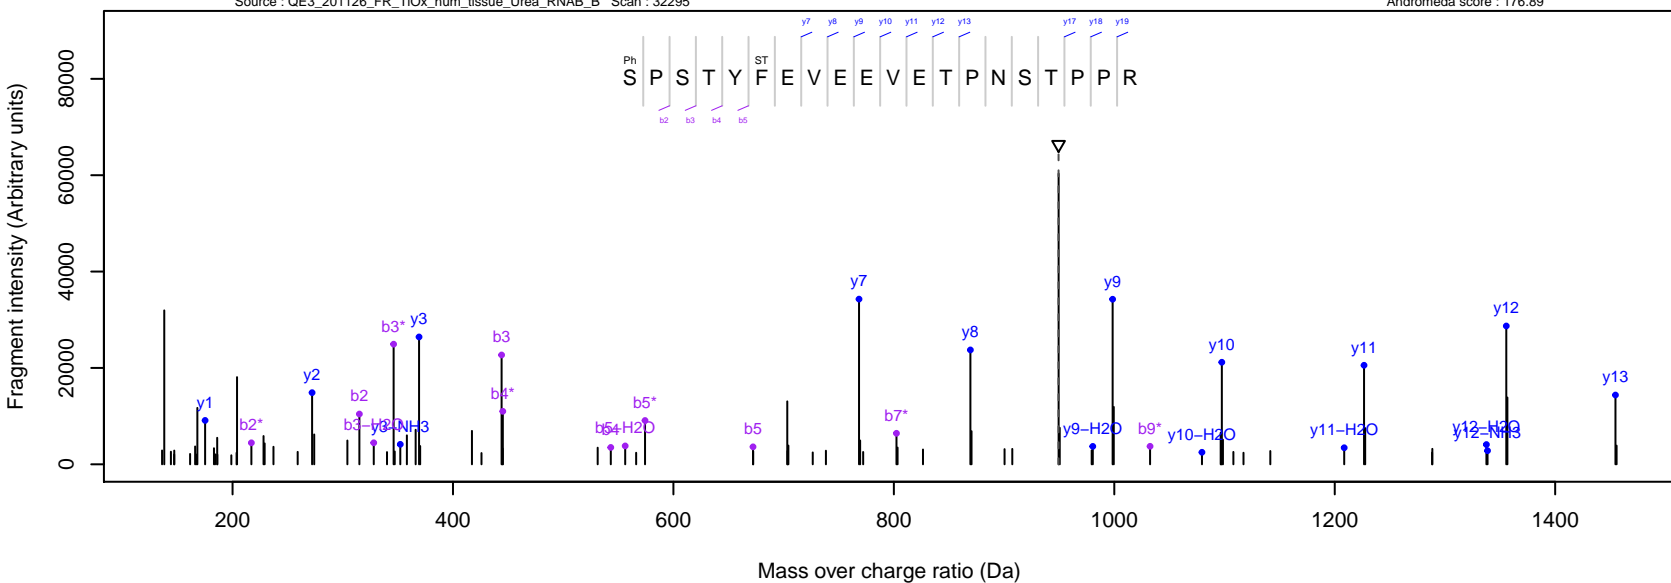

AADRLPNLSS(Phospho (STY))PSAEGPPGPPSPAPR-3+

Source : QE3\_201126\_FR\_TiOx\_hum\_tissue\_Urea\_RNAB\_N Scan : 29180

Andromeda score : 176.87

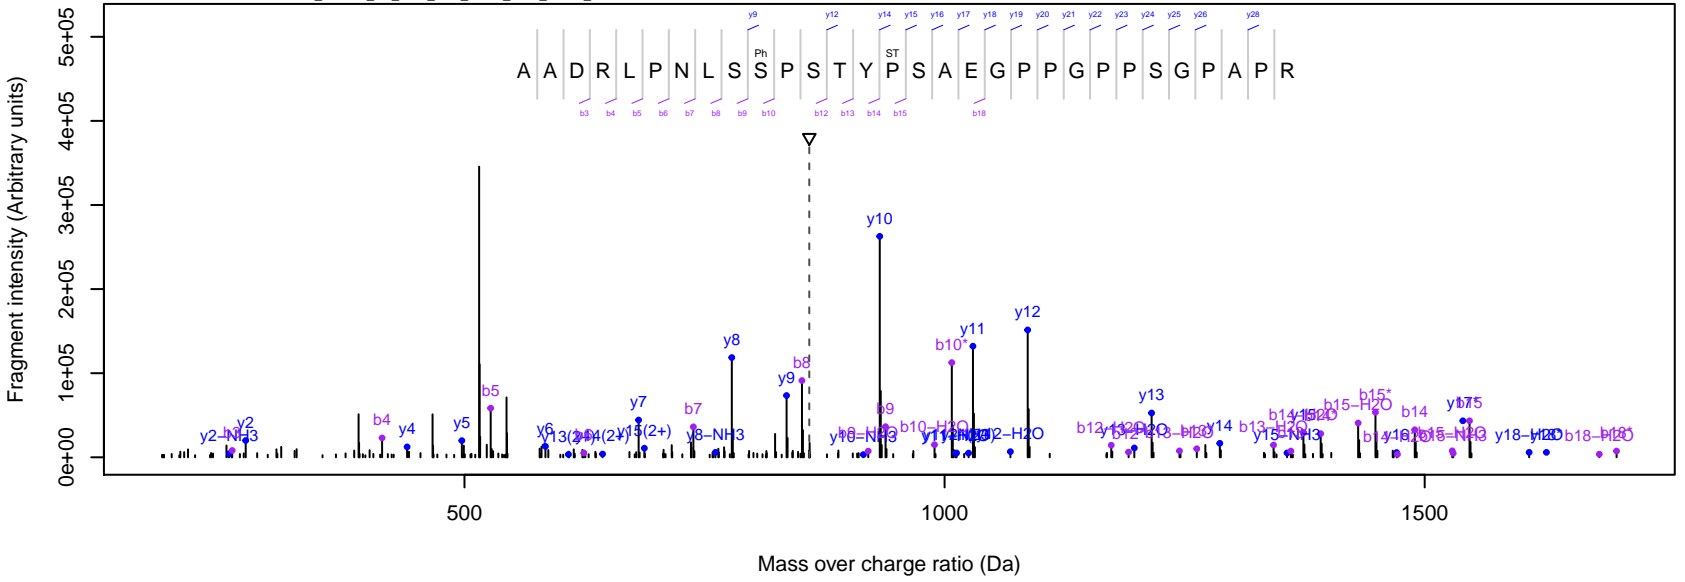

GPAGEAGAS(Phospho (STY))PPVR-2+

Source : QE3\_201126\_FR\_TiOx\_hum\_tissue\_Urea\_RNAB\_H Scan : 11974

Andromeda score : 176.87

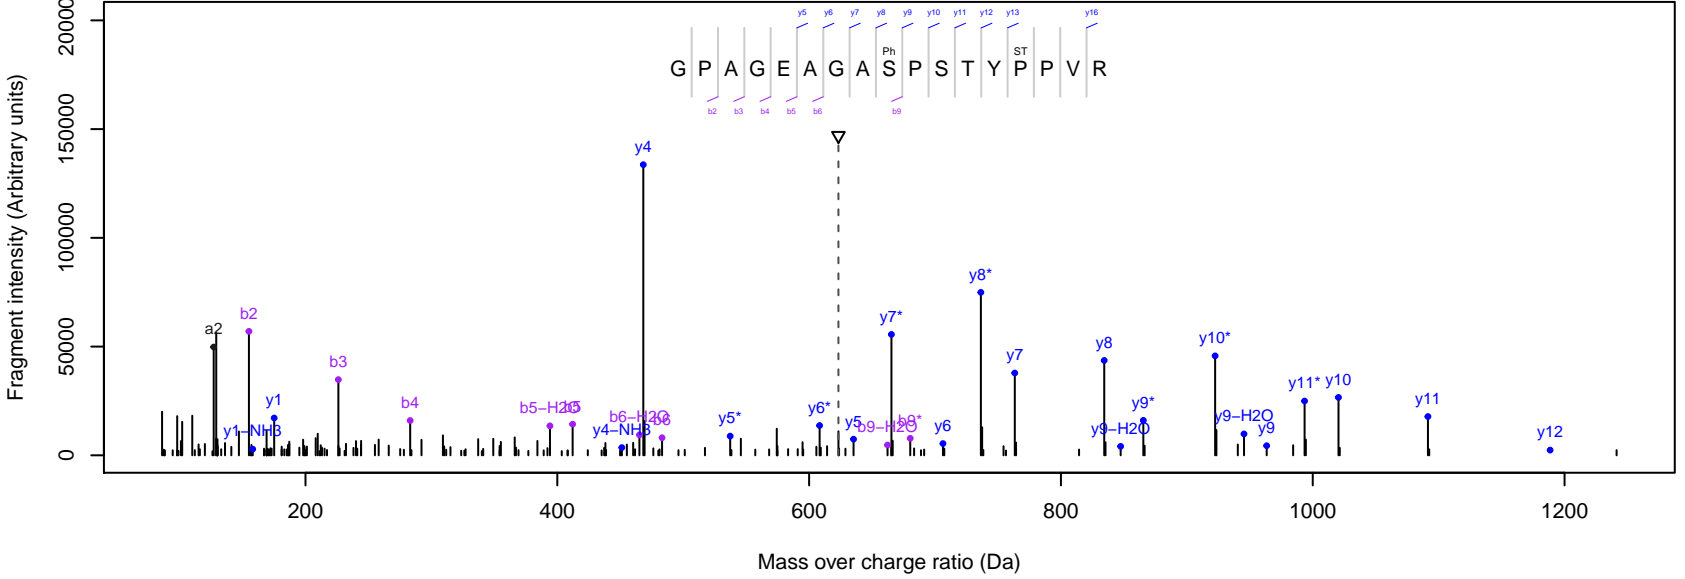

SGVSS(Phospho (STY))DNEDDDEEDGNYLHPSLFASK-3+

Source : QE3\_201126\_FR\_TiOx\_hum\_tissue\_Urea\_RNAB\_H Scan : 38599

Andromeda score : 176.87

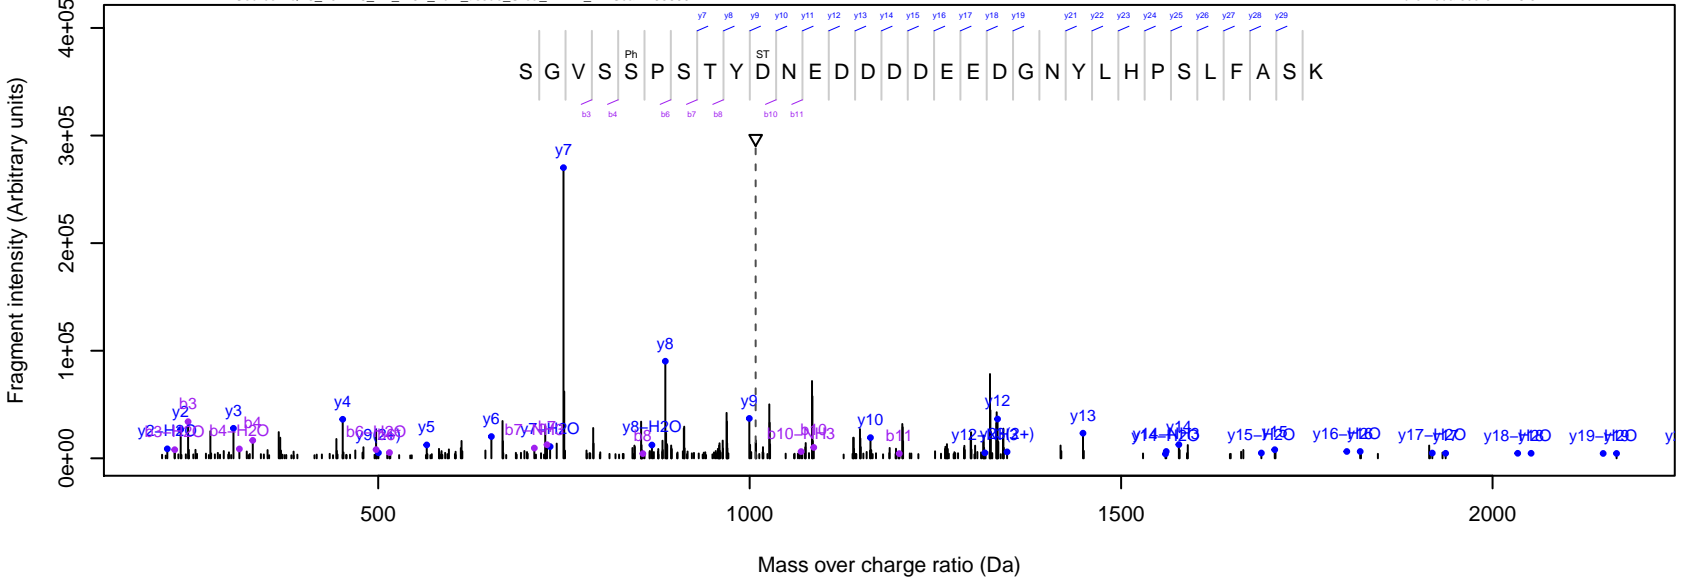

AES(Phospho (STY))SDS(Phospho (STY))GAES(Phospho (STY))EEEEAQEEVKGAEQSDNDKK-3+

Source : QE3\_201126\_FR\_TiOx\_hum\_tissue\_Urea\_RNAB\_N Scan : 27340

Andromeda score : 176.86

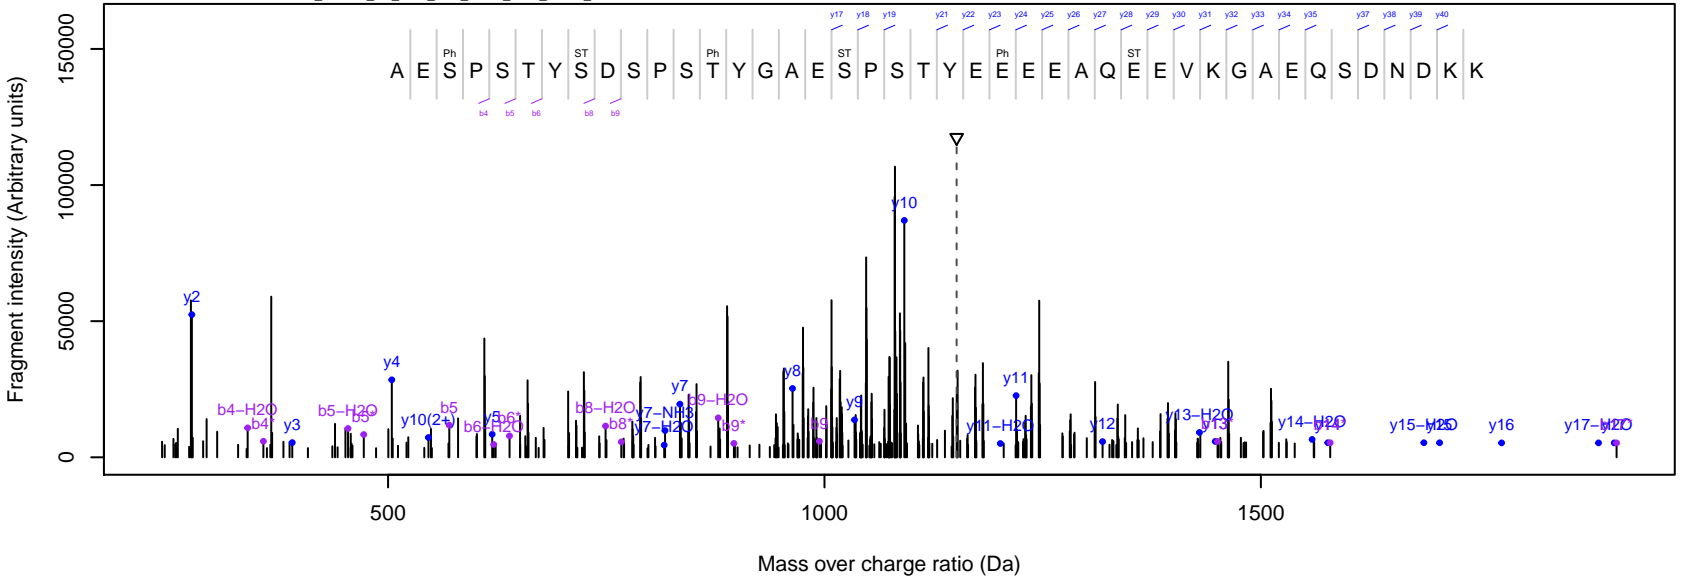

GGTPAGSARGS(Phospho (STY))PTRPNPPVR-3+

Source : QE3\_201126\_FR\_TiOx\_hum\_tissue\_Urea\_RNAB\_H Scan : 7742

Andromeda score : 176.86

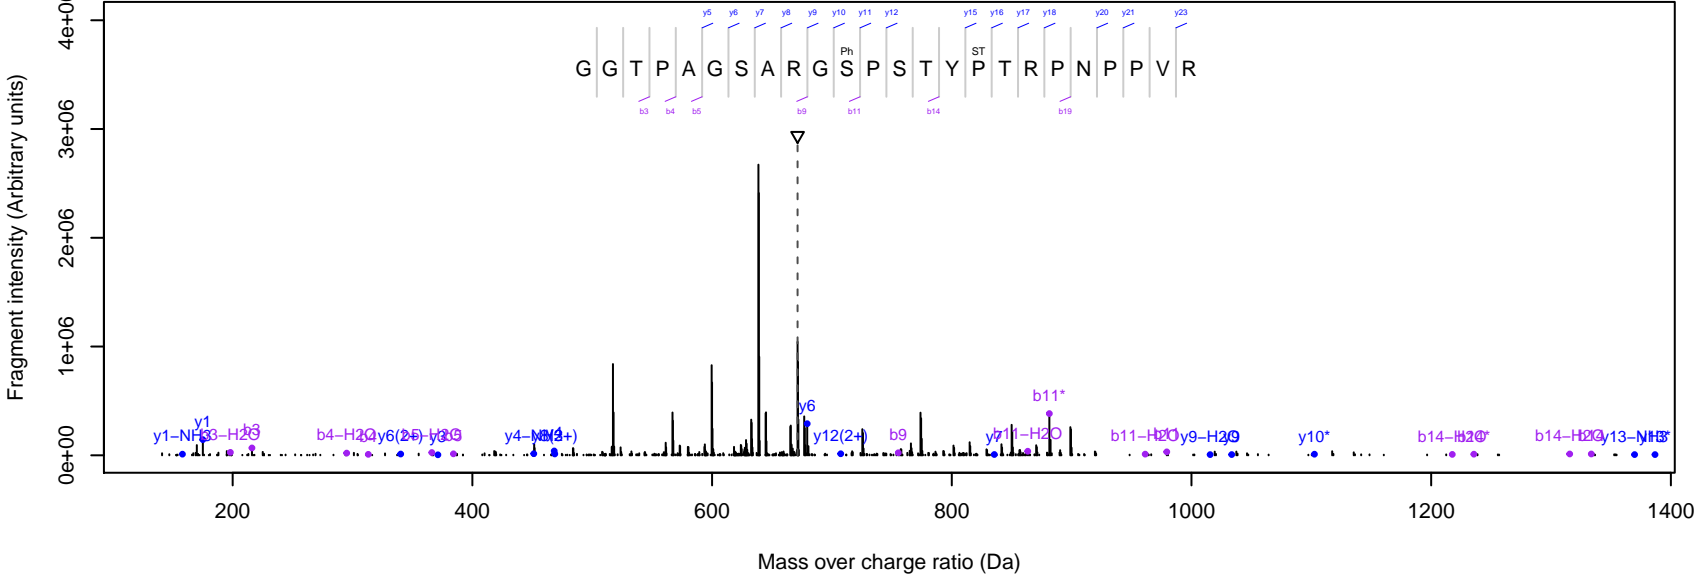

SNS(Phospho (STY))GRELTDEEILASVMIK-3+

Source : QE3\_201126\_FR\_TiOx\_hum\_tissue\_Urea\_RNAB\_N Scan : 52756

Andromeda score : 176.86

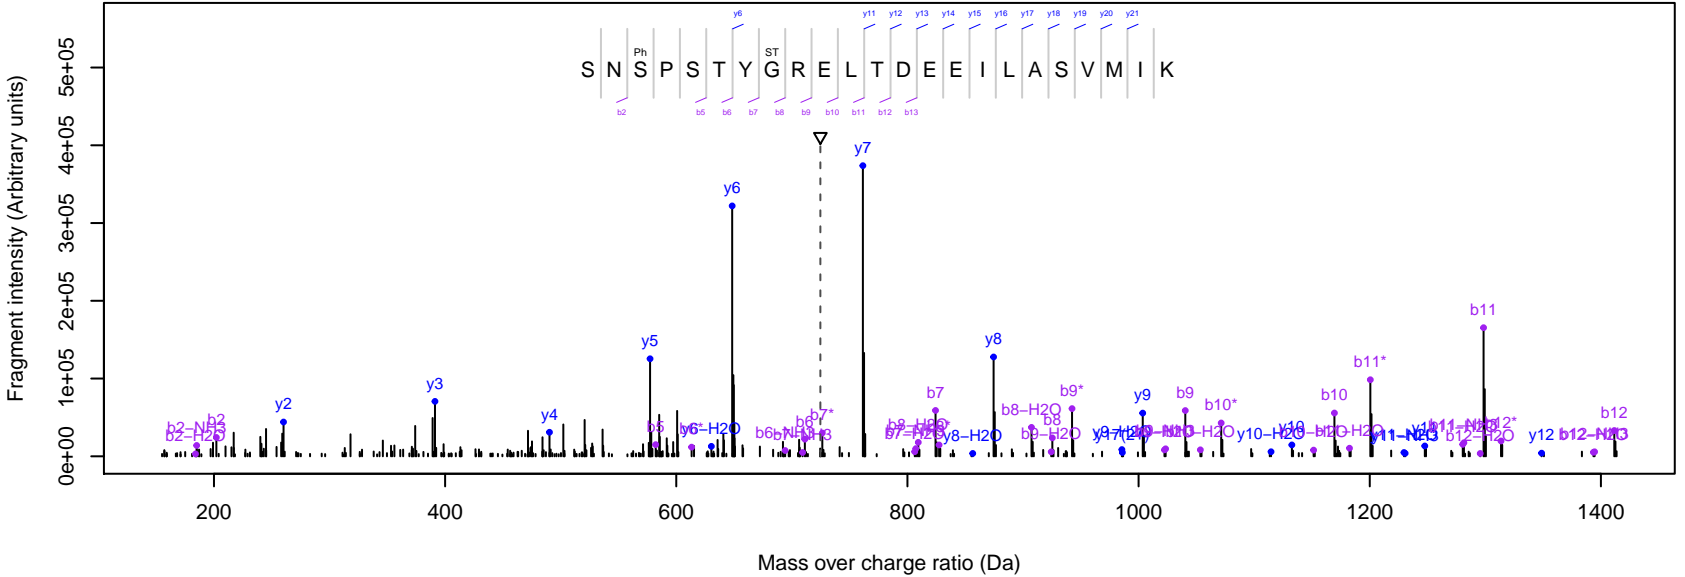

ASPS(Phospho (STY))PQPSSQLQIHR-3+

Source : QE3\_201126\_FR\_TiOx\_hum\_tissue\_Urea\_RNAB\_H Scan : 15875

Andromeda score : 176.85

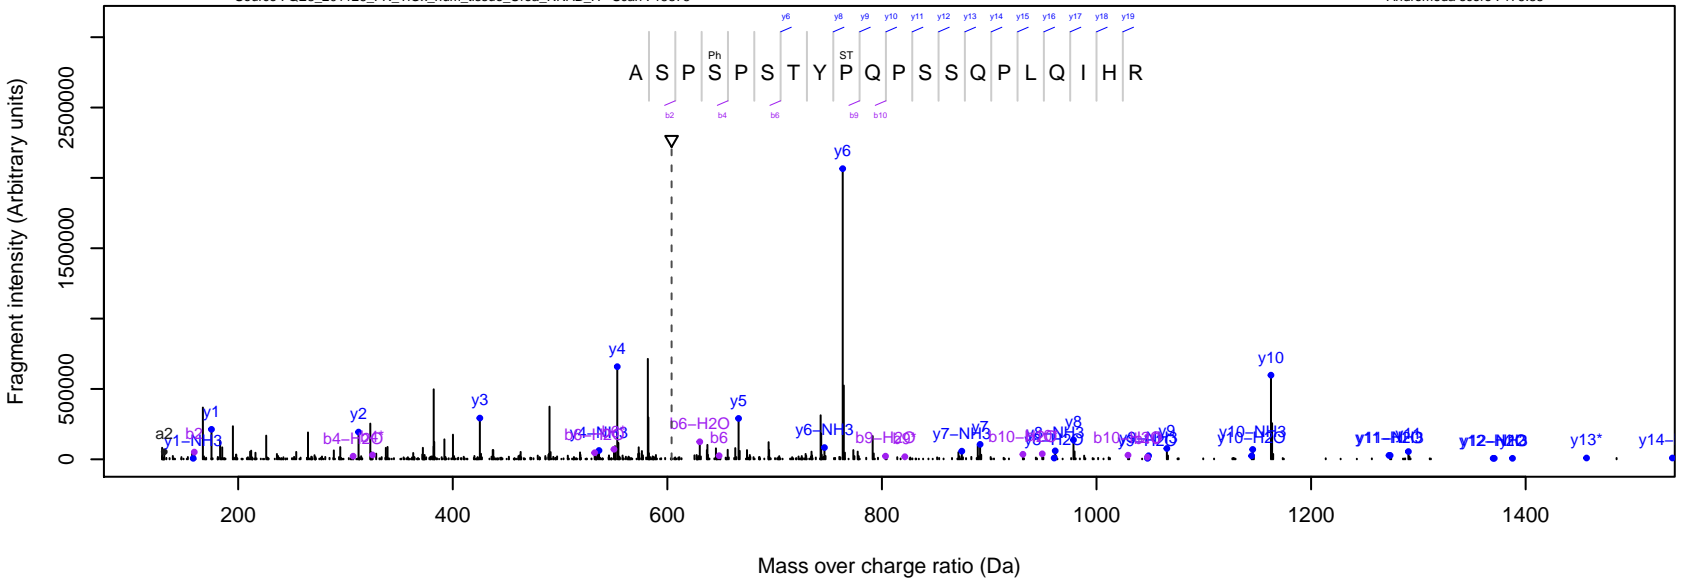

LQQGAGLESPQGQPEPGAAS(Phospho (STY))PQRQQLHLESPQR-3+

Source : QE3\_201126\_FR\_TiOx\_hum\_tissue\_Urea\_RNAB\_H Scan : 22502

Andromeda score : 176.71

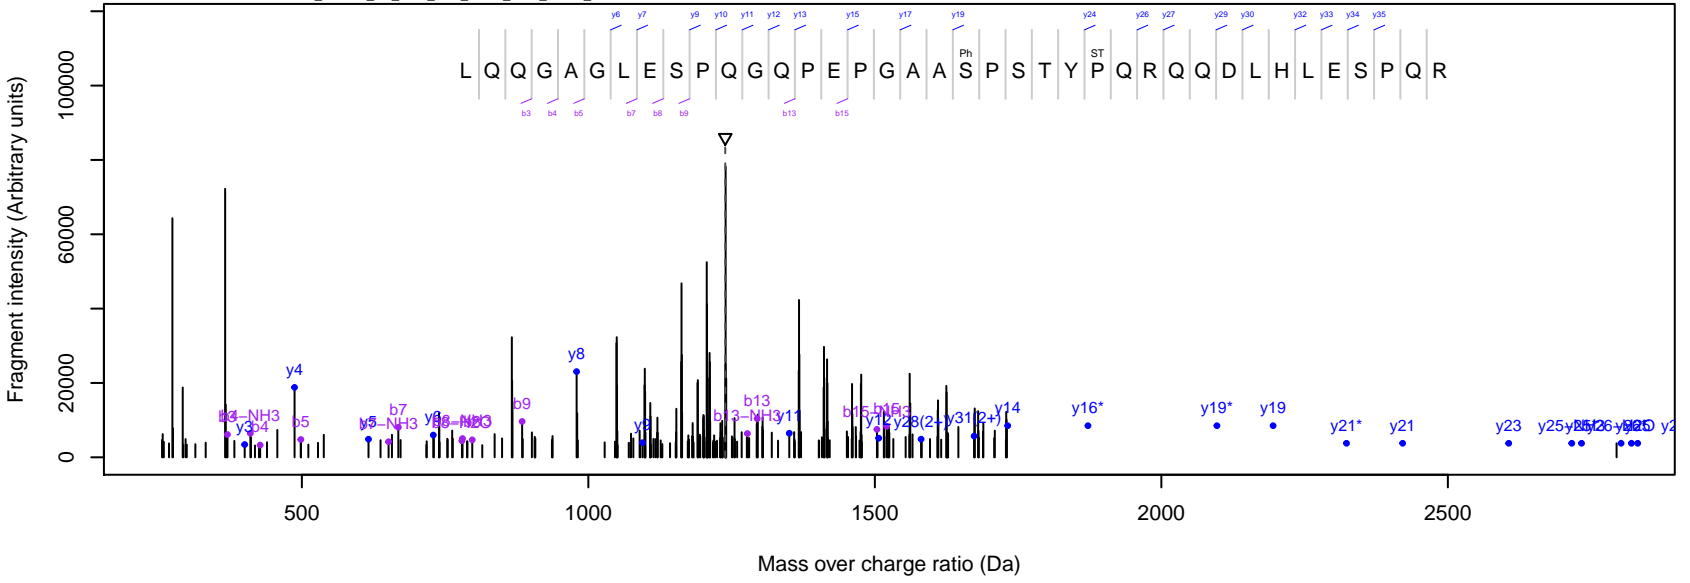

RS(Phospho (STY))QSTTFNPDDMSEPEFKR-3+

Source : QE3\_201126\_FR\_TiOx\_hum\_tissue\_Urea\_RNAB\_H Scan : 23316

Andromeda score : 176.65

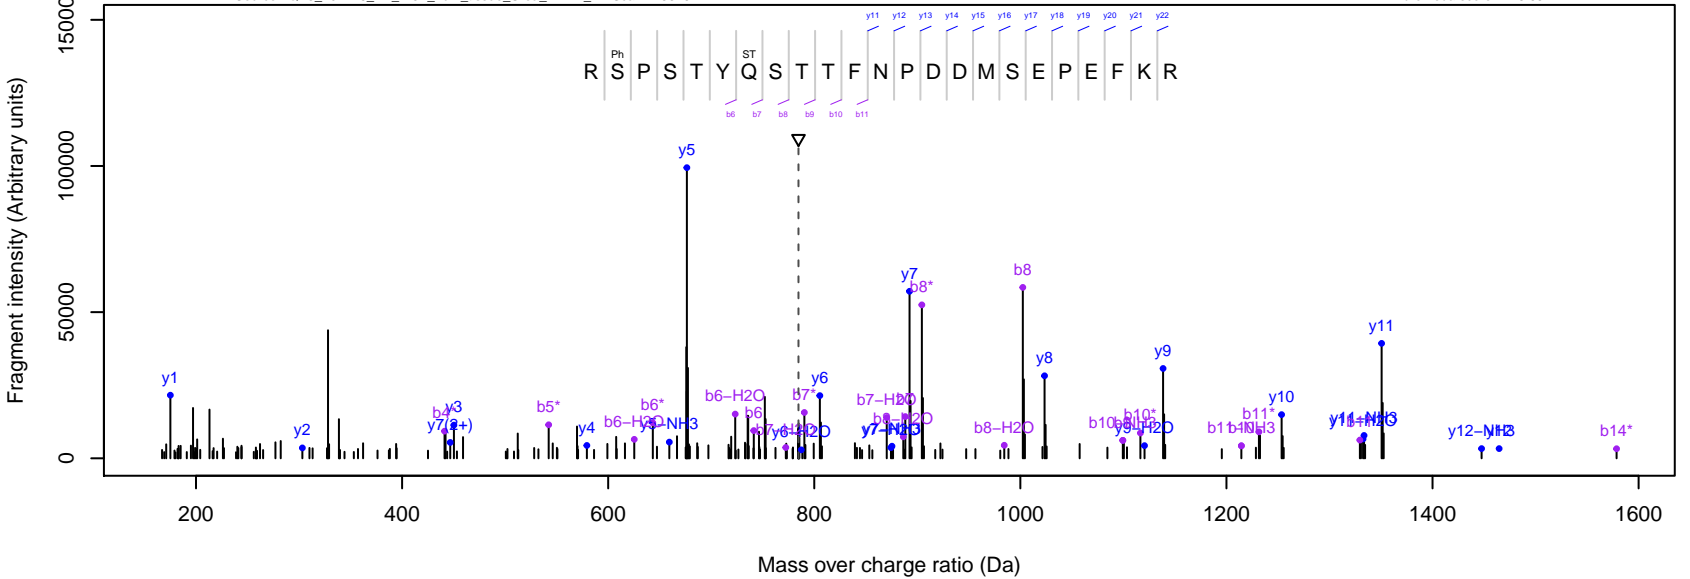



YQSSPAKPDS(Phospho (STY))SFYK-2+

Source : QE3\_201126\_FR\_TiOx\_hum\_tissue\_Urea\_RNAB\_B Scan : 16299

Andromeda score : 176.29

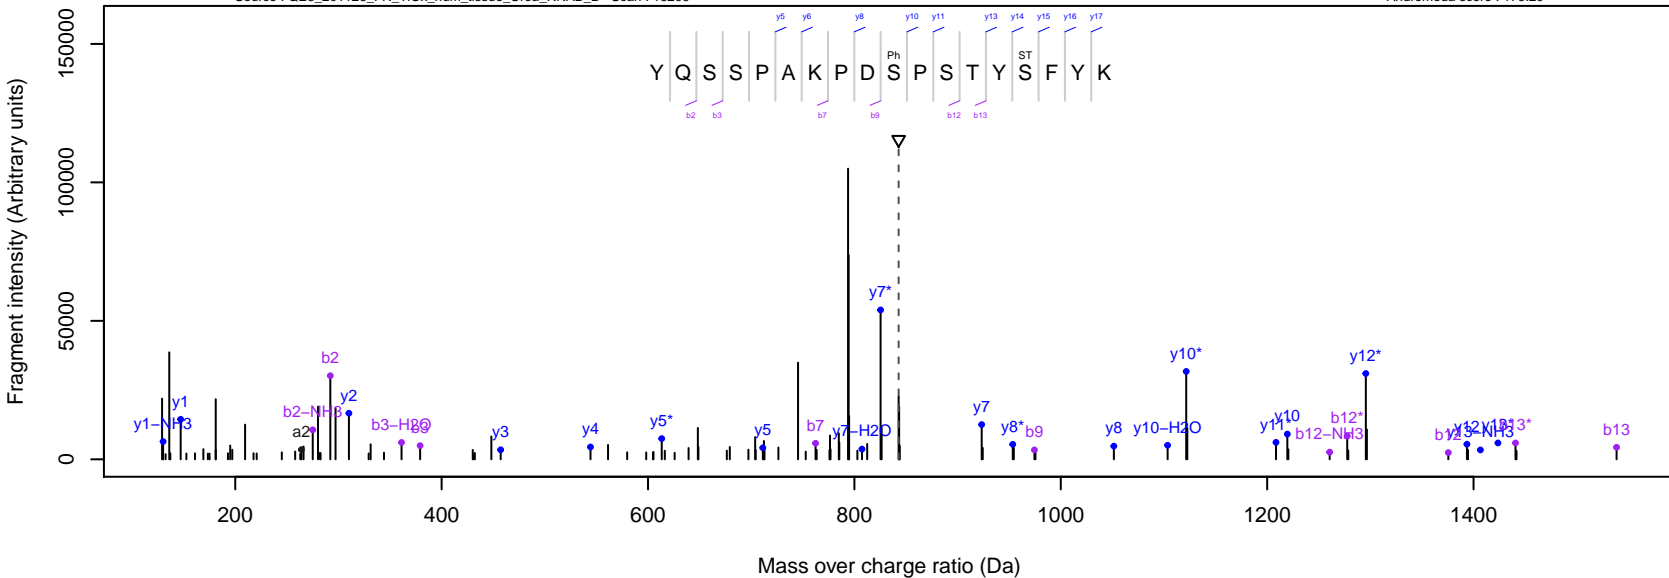

SM(Oxidation (M))GTGDTPGLEVPSSPSTYPLRK-3+

Source : QE3\_201126\_FR\_TiOx\_hum\_tissue\_Urea\_RNAB\_H Scan : 24029

Andromeda score : 176.27

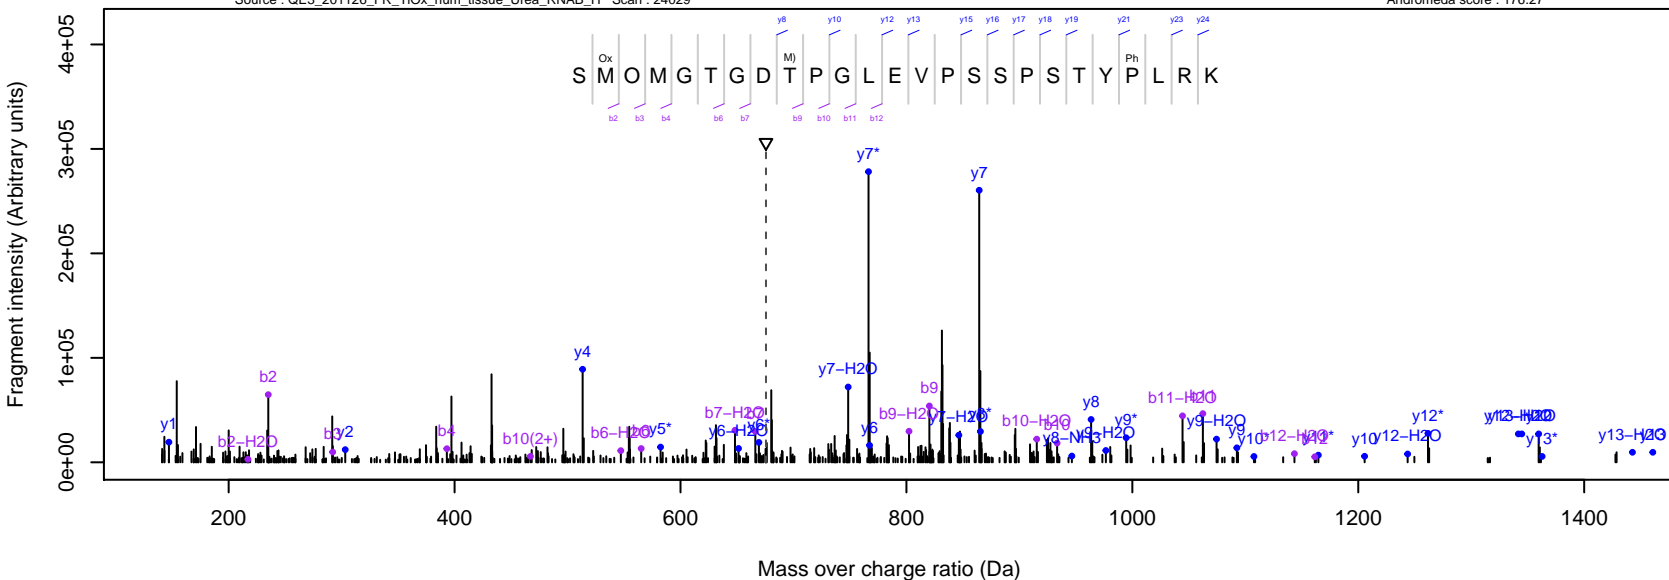

RGES(Phospho (STY))LDNLDSPR-2+

Source : QE3\_201126\_FR\_TiOx\_hum\_tissue\_Urea\_RNAB\_N Scan : 14465

Andromeda score : 176.19

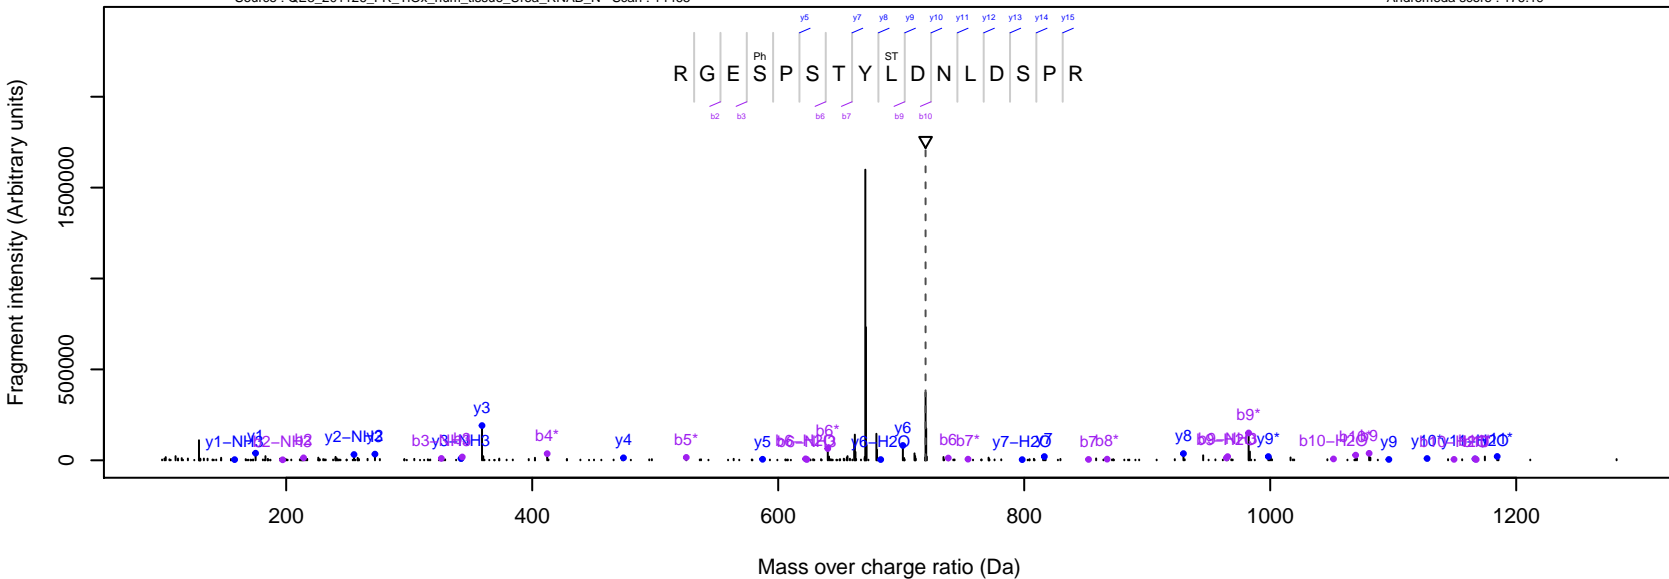

GVPHPEDDHSQVEGPEESPSTYLR-3+

Source : QE3\_201126\_FR\_TIOx\_hum\_tissue\_Urea\_RNAB\_N Scan : 15615

Andromeda score : 176.14

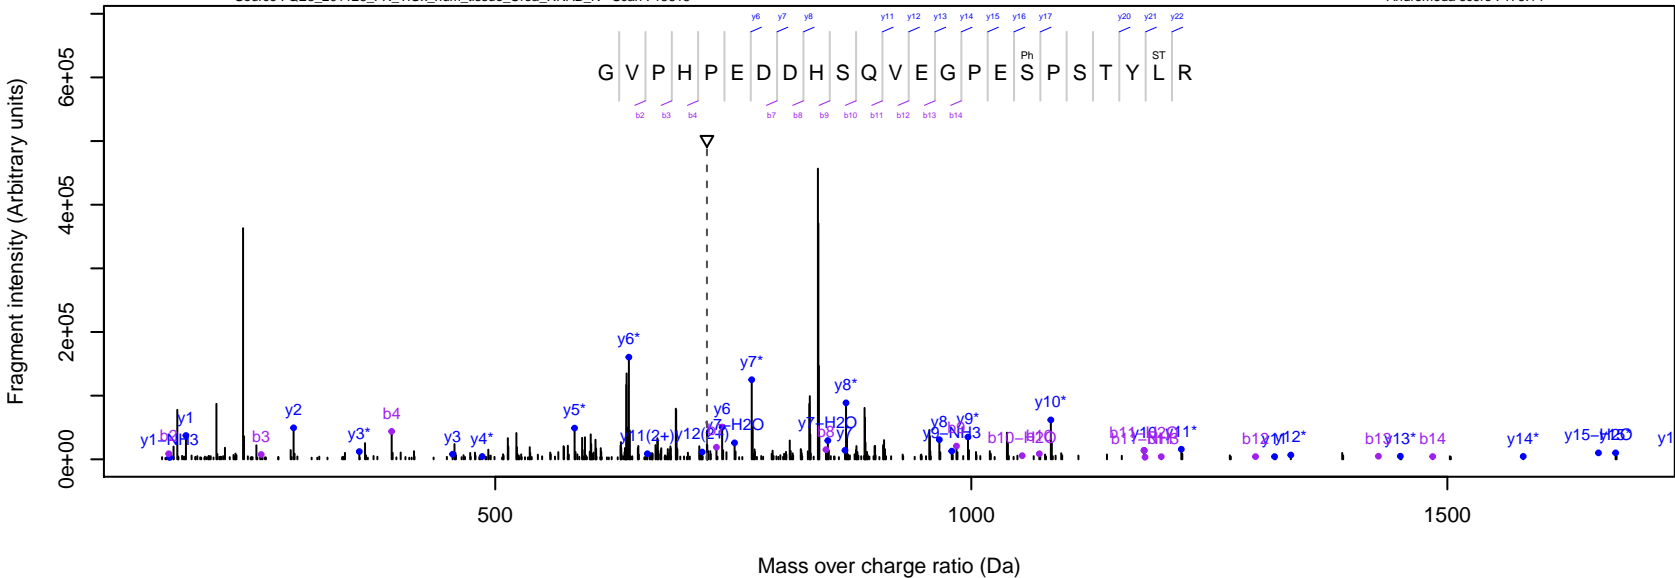

SKAPGS(Phospho (STY))PLSSEGAAGEGVR-2+

Source : QE3\_201126\_FR\_TIOx\_hum\_tissue\_Urea\_RNAB\_B Scan : 13359

Andromeda score : 176.11

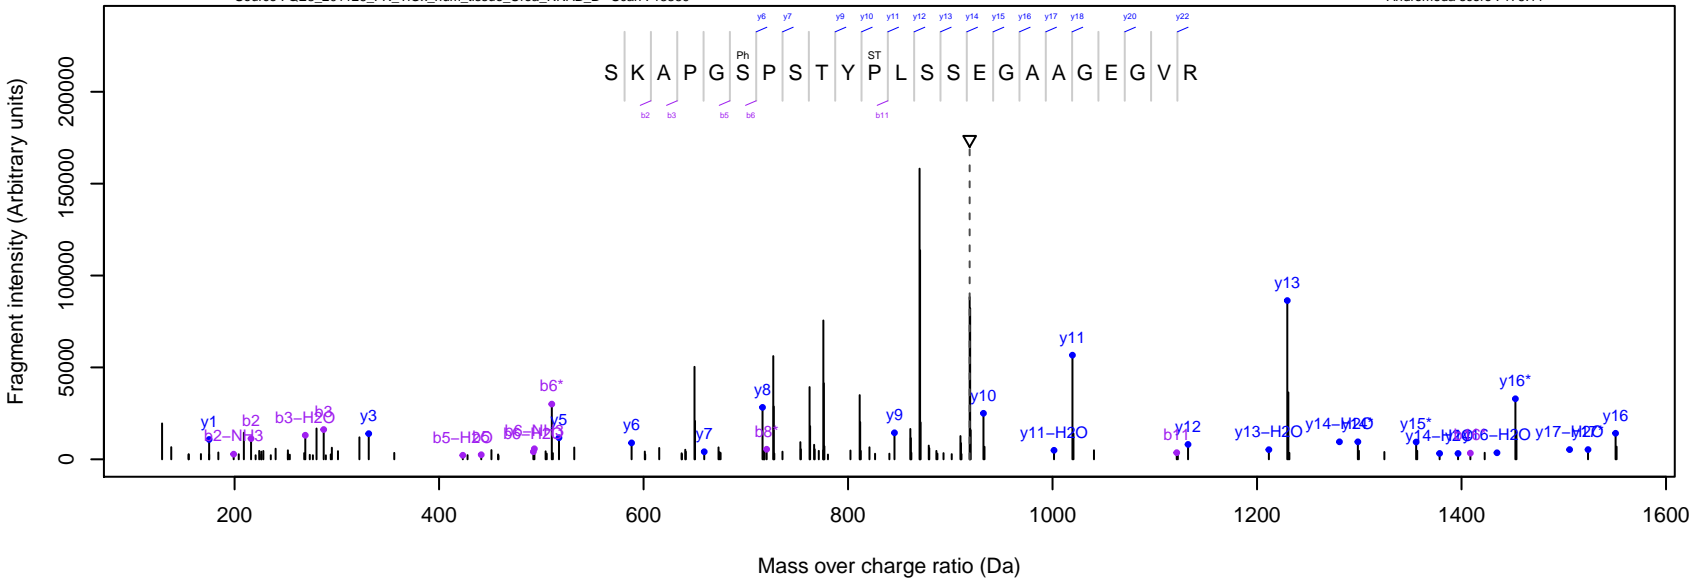

TNTM(Oxidation (M))NGSKS(Phospho (STY))PVISR-3+

Source : QE3\_201126\_FR\_TIOx\_hum\_tissue\_Urea\_RNAB\_H Scan : 5517

Andromeda score : 176.11

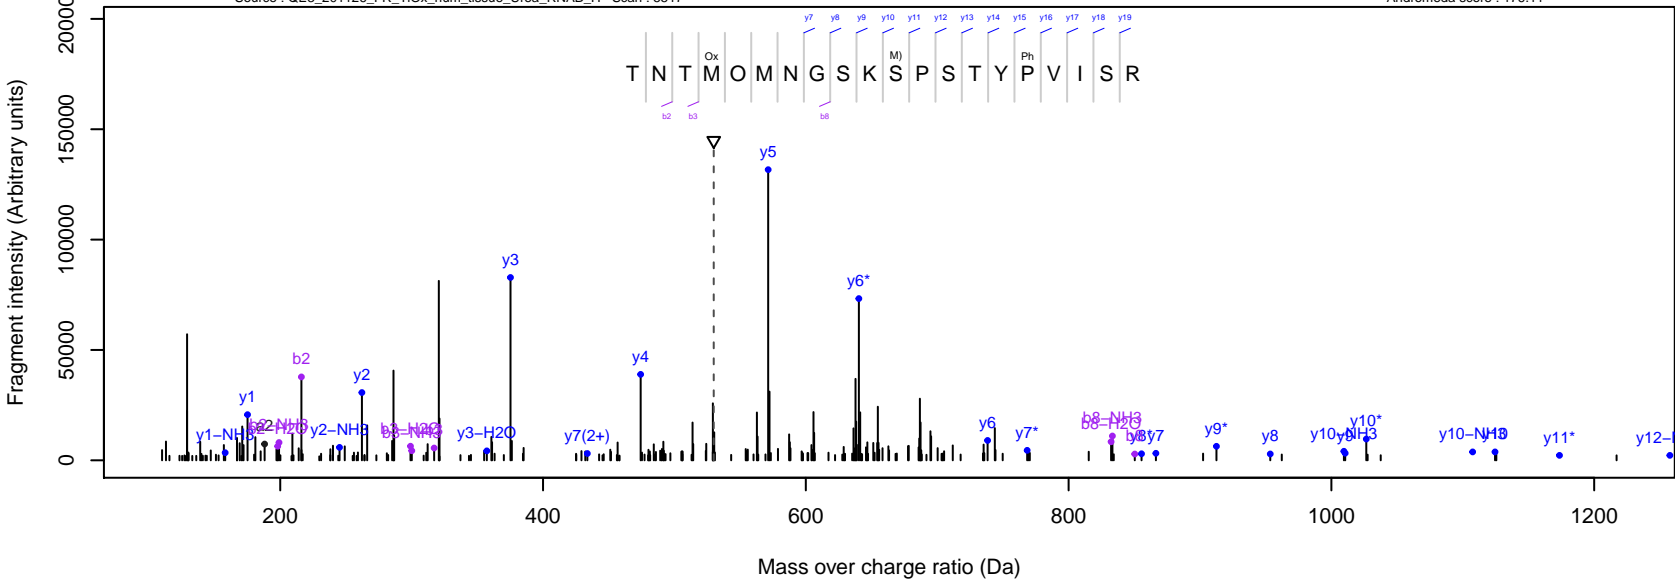

GSETDTDSEIHESAS(Phospho (STY))DKDSLK-3+

Source : QE3\_201126\_FR\_TiOx\_hum\_tissue\_Urea\_RNAB\_N Scan : 10334

Andromeda score : 176.09

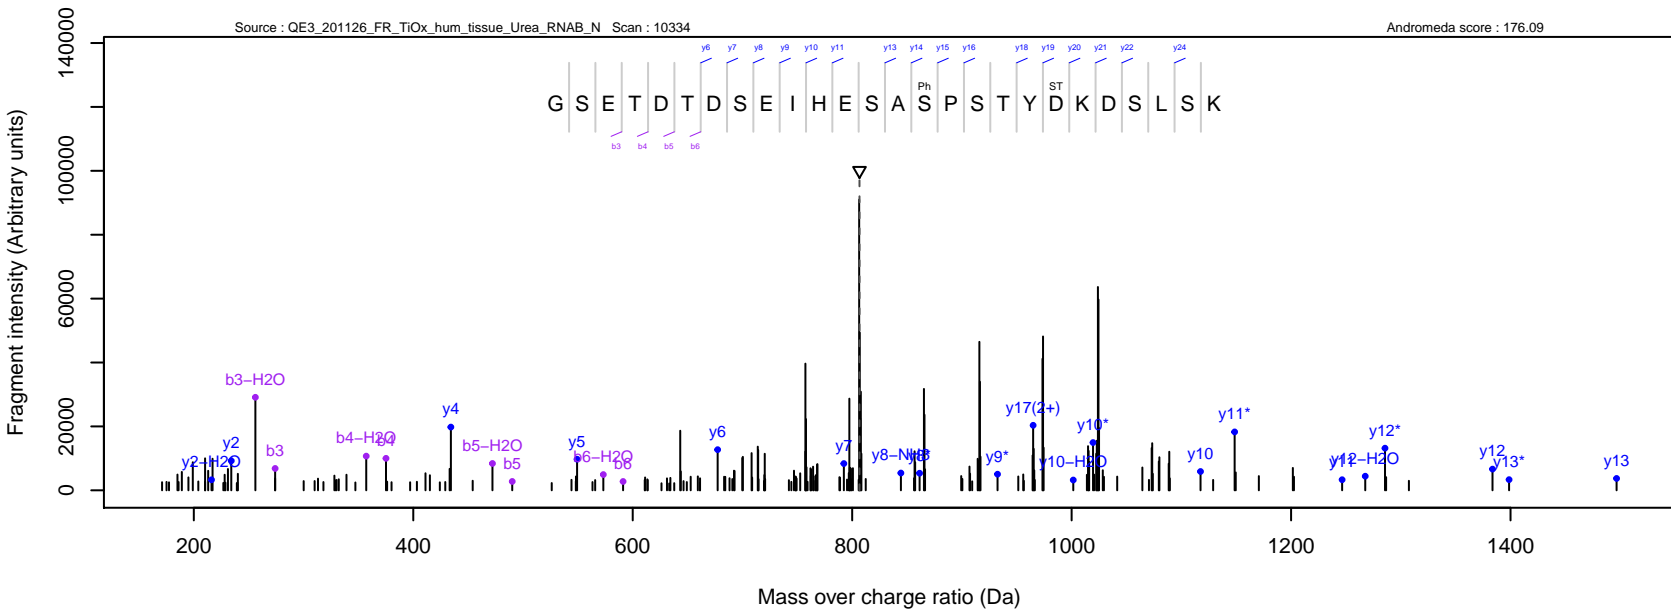

TPAAAAM(Oxidation (M))NLAS(Phospho (STY))PR-2+

Source : QE3\_201126\_FR\_TiOx\_hum\_tissue\_Urea\_RNAB\_B Scan : 16986

Andromeda score : 176.04

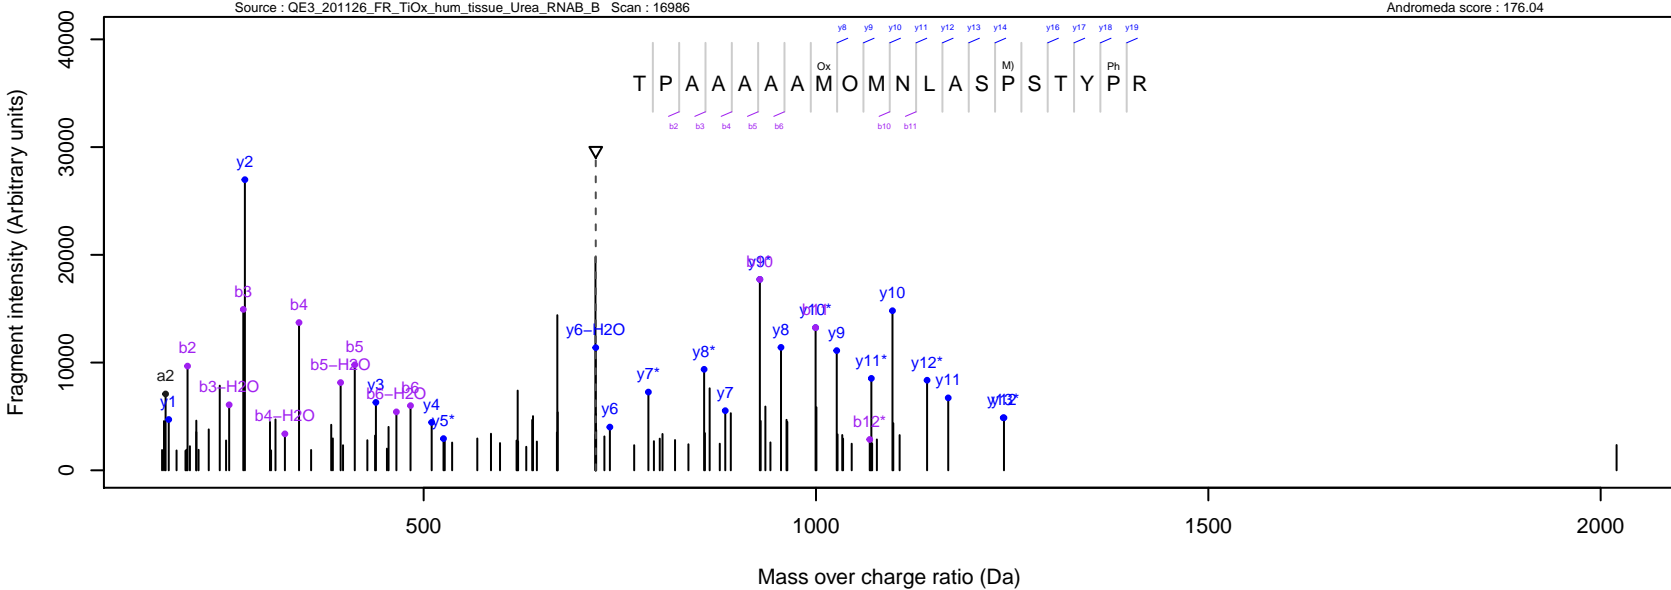

YAALS(Phospho (STY))VDGEDENEGDYAE-2+

Source : QE3\_201126\_FR\_TiOx\_hum\_tissue\_Urea\_RNAB\_B Scan : 41492

Andromeda score : 176.04

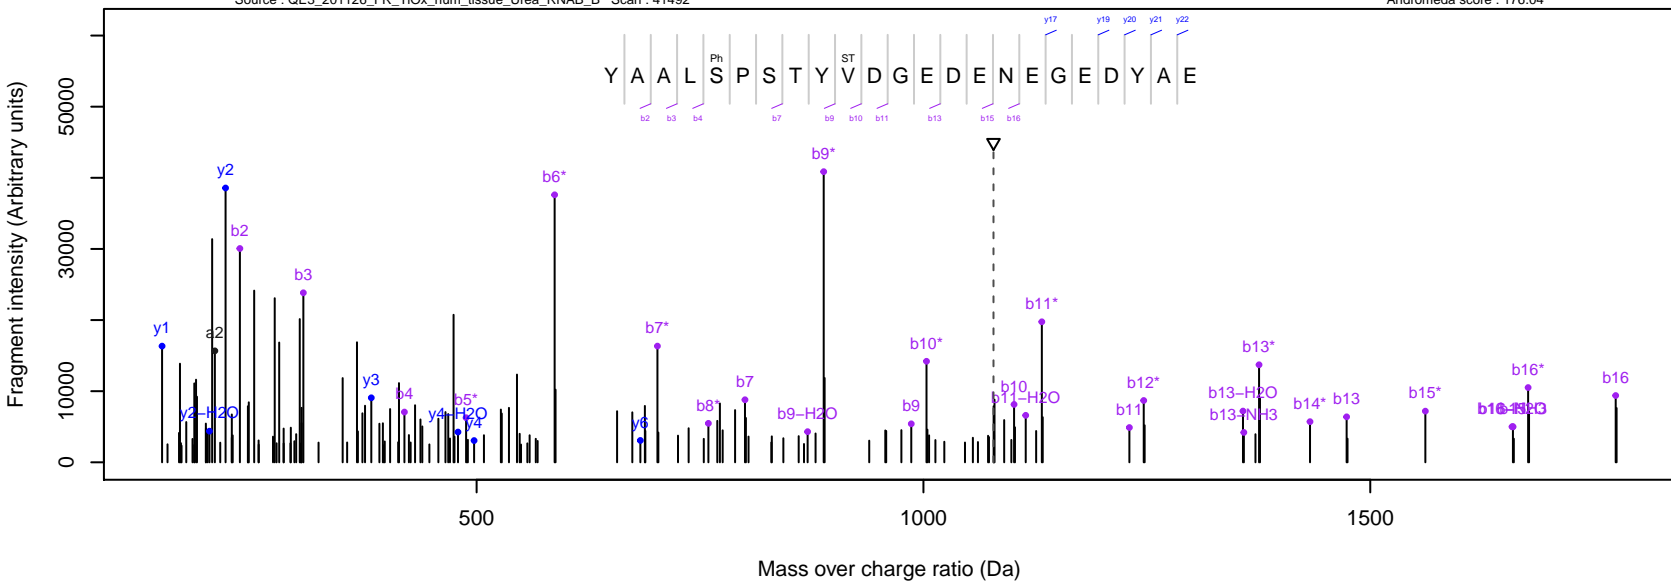



ASLGS(Phospho (STY))LEGAEAEASS(Phospho (STY))PKGK-3+

Source : QE3\_201126\_FR\_TiOx\_hum\_tissue\_Urea\_RNAB\_B Scan : 36828

Andromeda score : 175.99

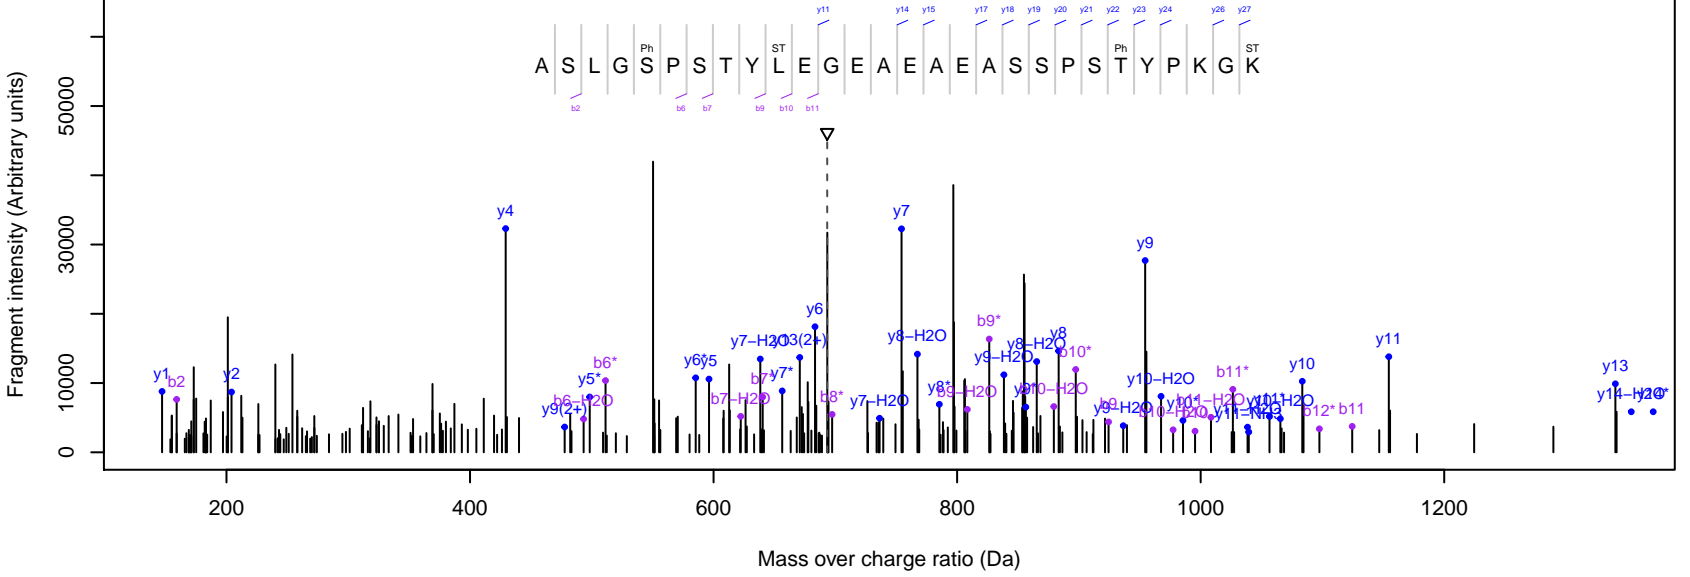

ALDISL(Phospho (STY))S(Phospho (STY))GEEDEGDEEDSTAGTTK-2+

Source : QE3\_201126\_FR\_TiOx\_hum\_tissue\_Urea\_RNAB\_H Scan : 42297

Andromeda score : 175.86

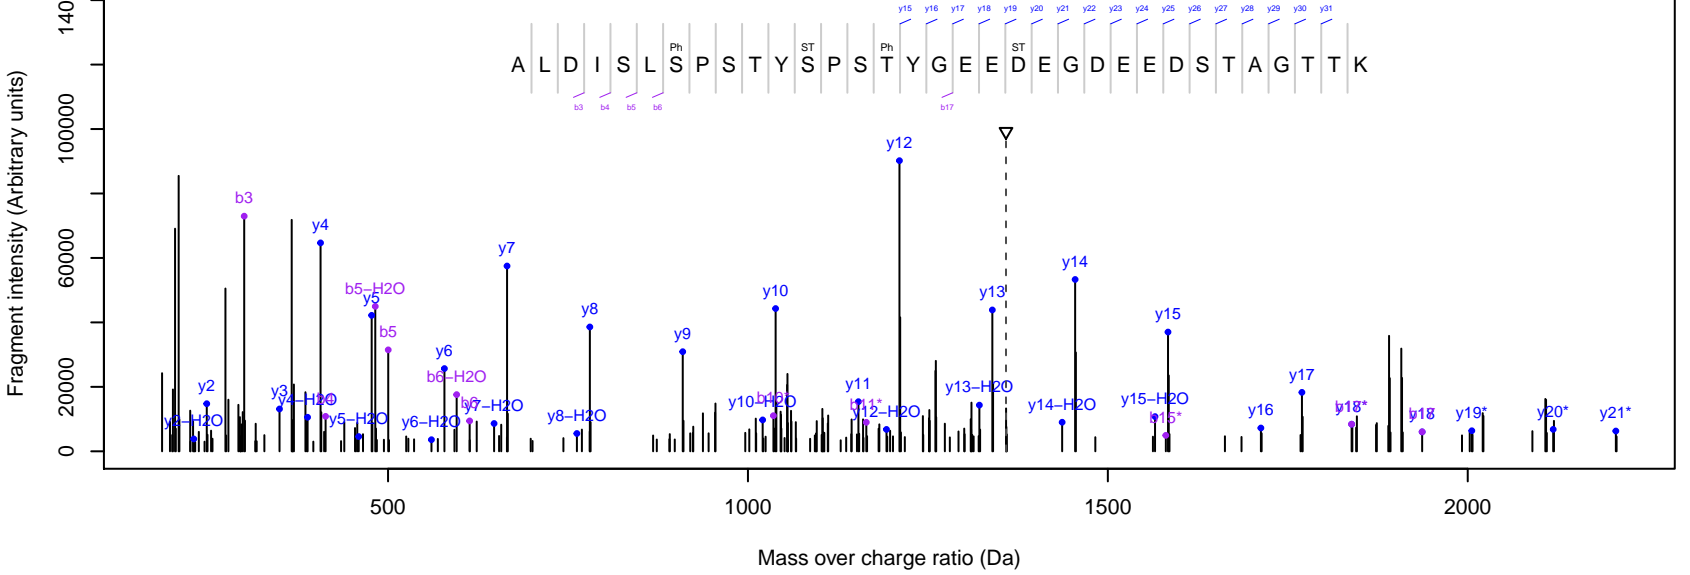

AKS(Phospho (STY))PTPESSTIASYVTLR-3+

Source : QE3\_201126\_FR\_TiOx\_hum\_tissue\_Urea\_RNAB\_N Scan : 34572

Andromeda score : 175.79

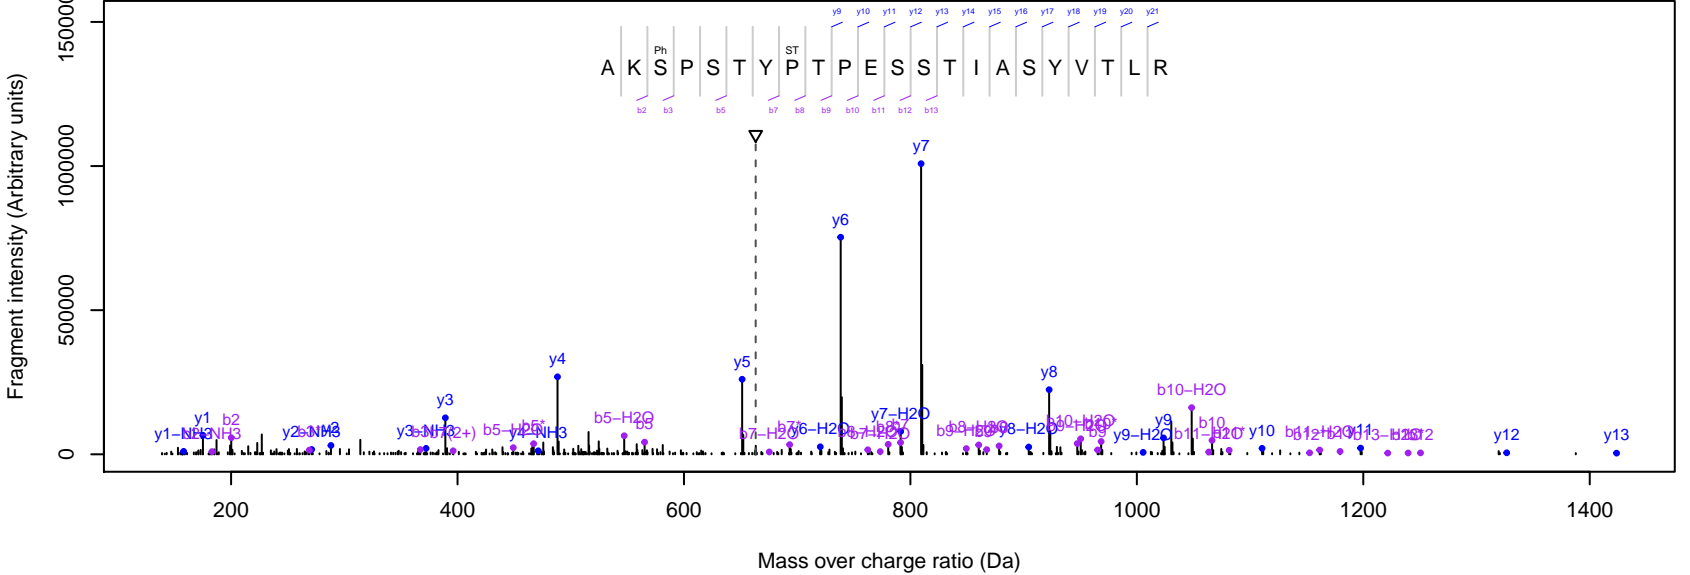





T(Phospho (STY))TSEDNEVFGEADANQNNGTSSQDTAVTDSKR-3+

Source : QE3\_201126\_FR\_TiOx\_hum\_tissue\_Urea\_RNAB\_H Scan : 21844

Andromeda score : 175.28

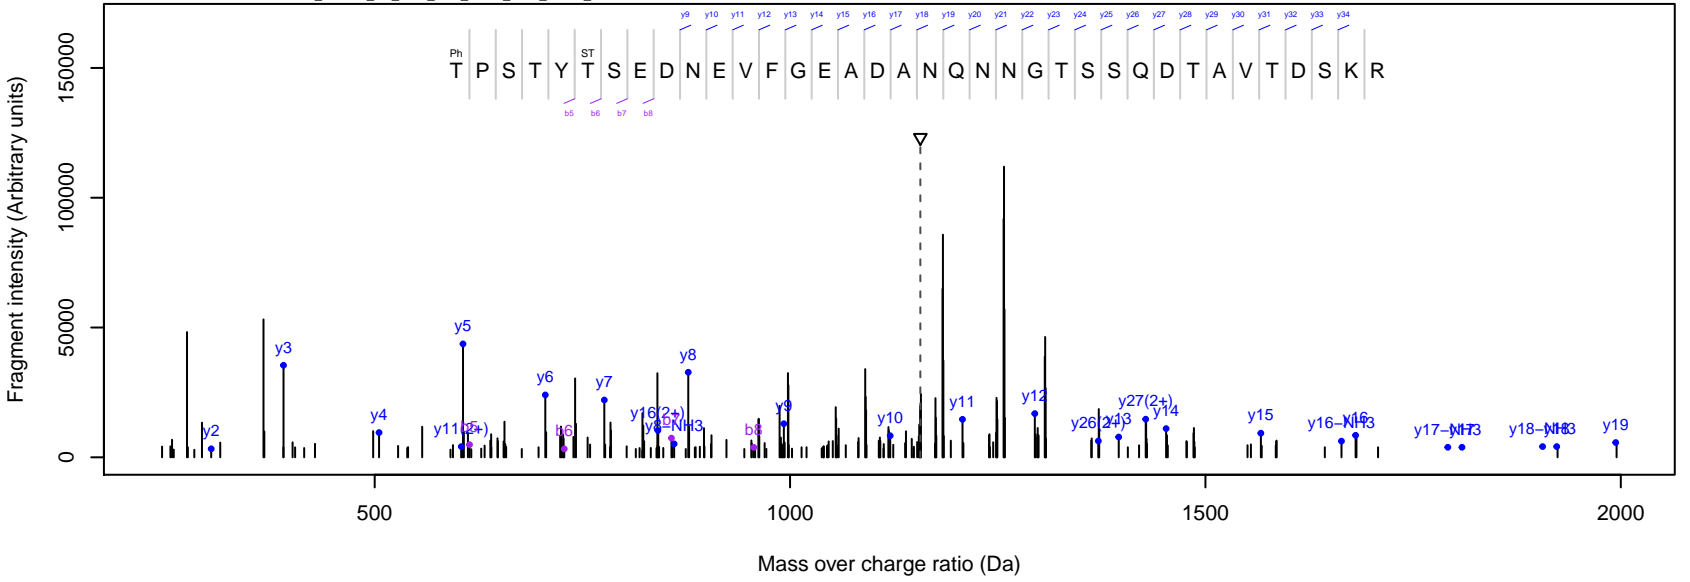

ELLAKPIGPDDAIDALSSDFTCGS(Phospho (STY))PTAAGK-3+

Source : QE3\_201126\_FR\_TiOx\_hum\_tissue\_Urea\_RNAB\_N Scan : 55142

Andromeda score : 175.11

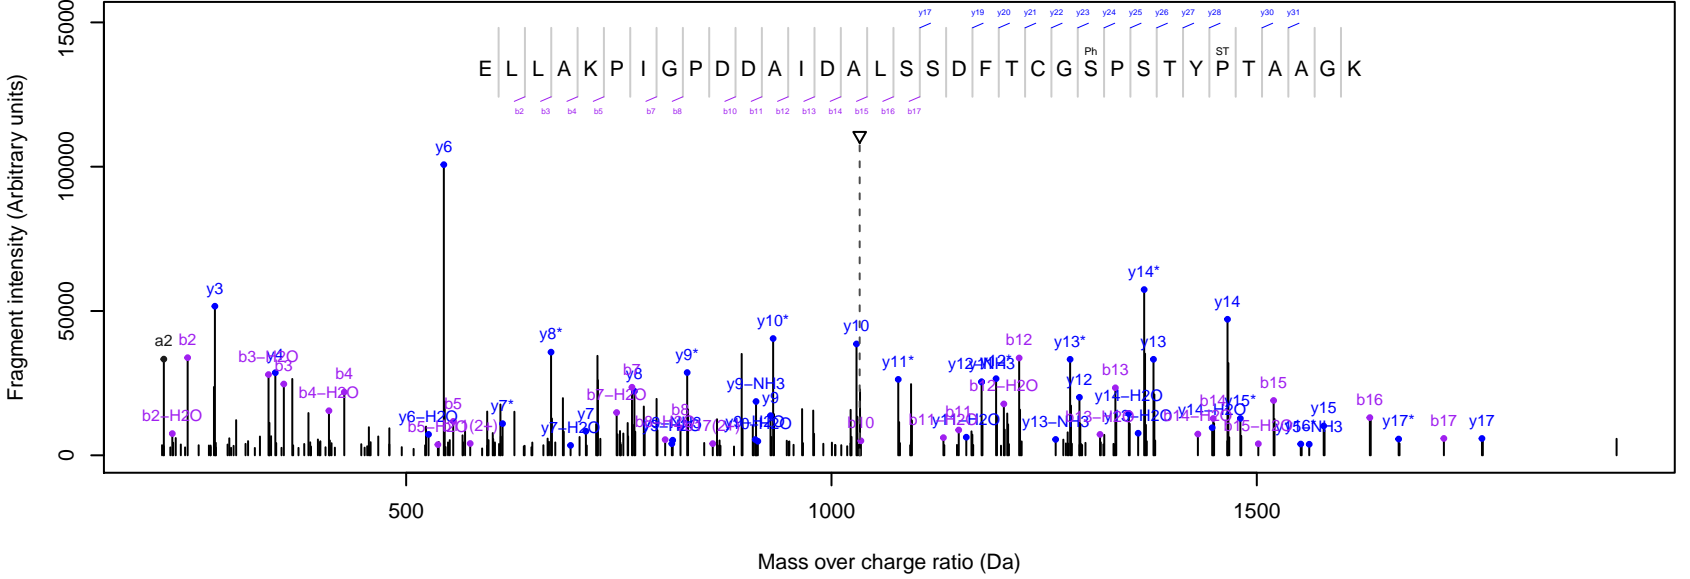

AEGAATEEGT(Phospho (STY))PKESEPQAAAEPAEK-3+

Source : QE3\_201126\_FR\_TiOx\_hum\_tissue\_Urea\_RNAB\_H Scan : 12743

Andromeda score : 174.93

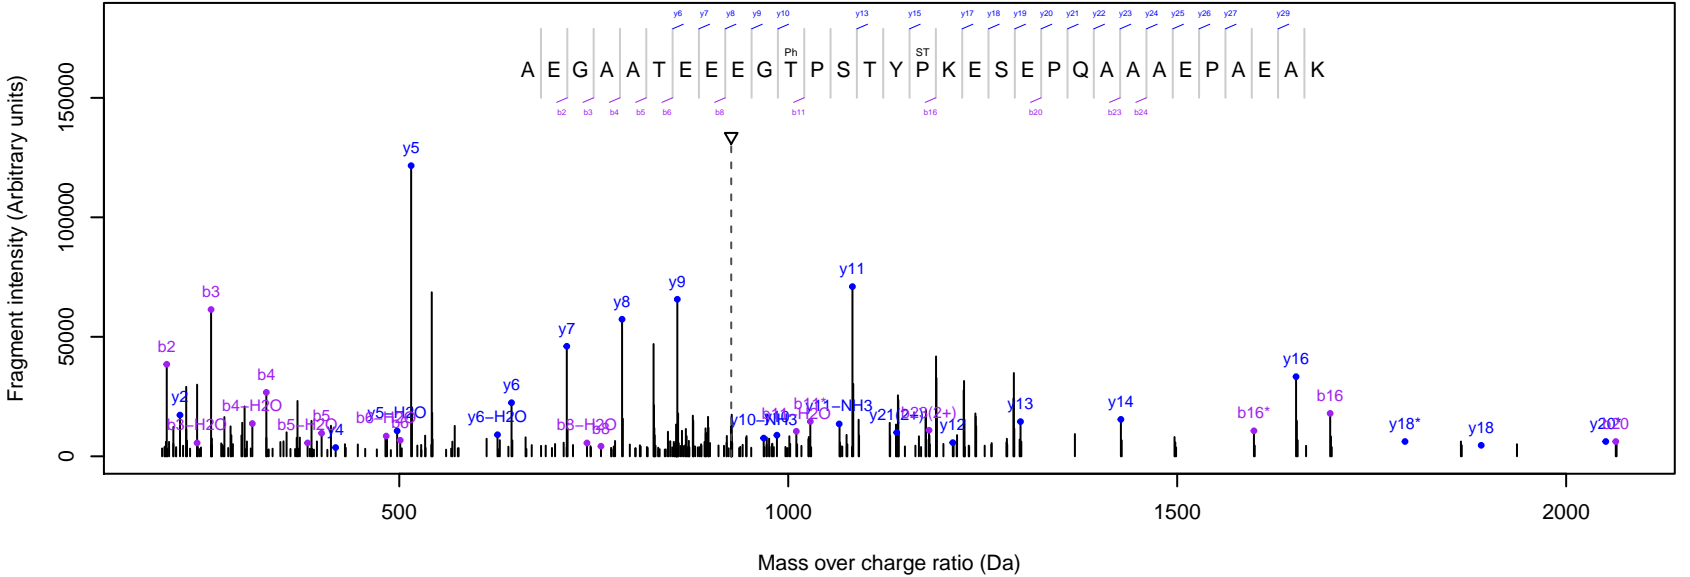

TWDDDS(Phospho (STY))DPESETDPDAQAK-2+

Source : QE3\_201126\_FR\_TIOx\_hum\_tissue\_Urea\_RNAB\_H Scan : 22261

Andromeda score : 174.78

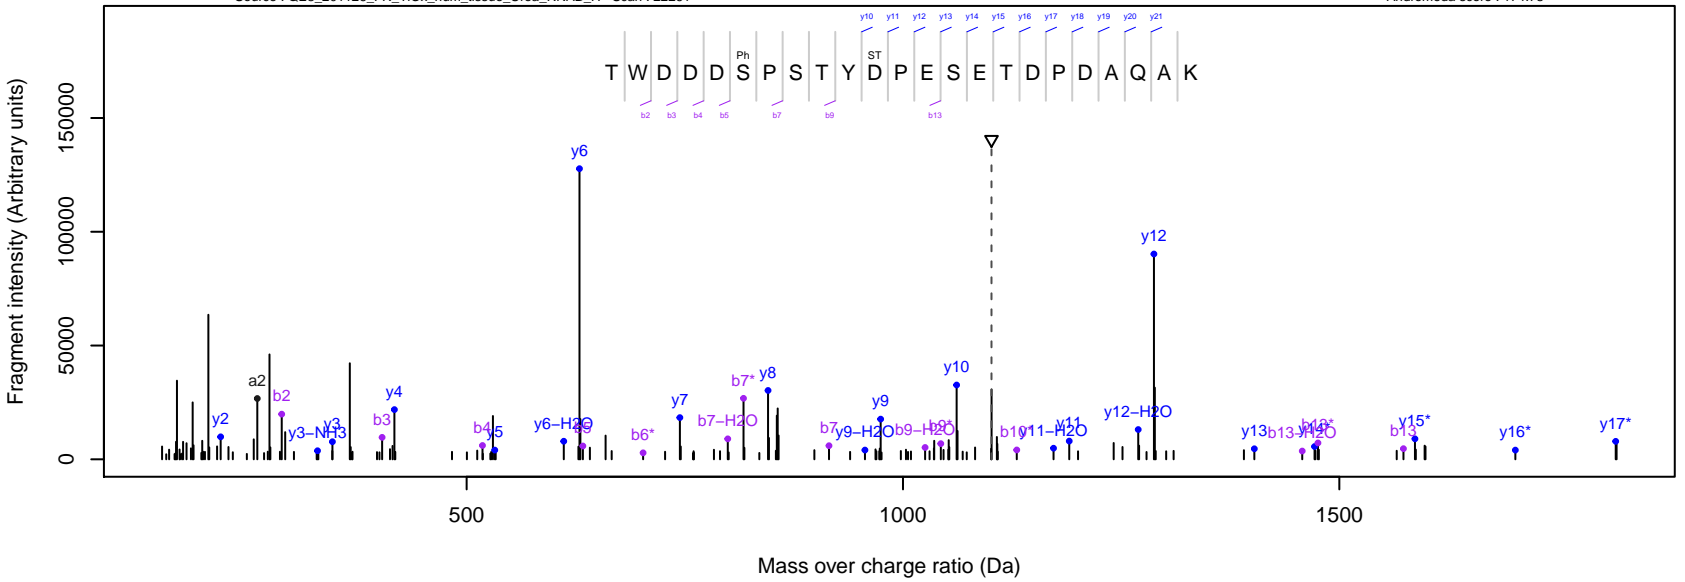

EVDPST(Phospho (STY))GELQSLQMPES(Phospho (STY))EGPSS(Phospho (STY))LDPSQEGPTGLK-3+

Source : QE3\_201126\_FR\_TIOx\_hum\_tissue\_Urea\_RNAB\_H Scan : 61738

Andromeda score : 174.73

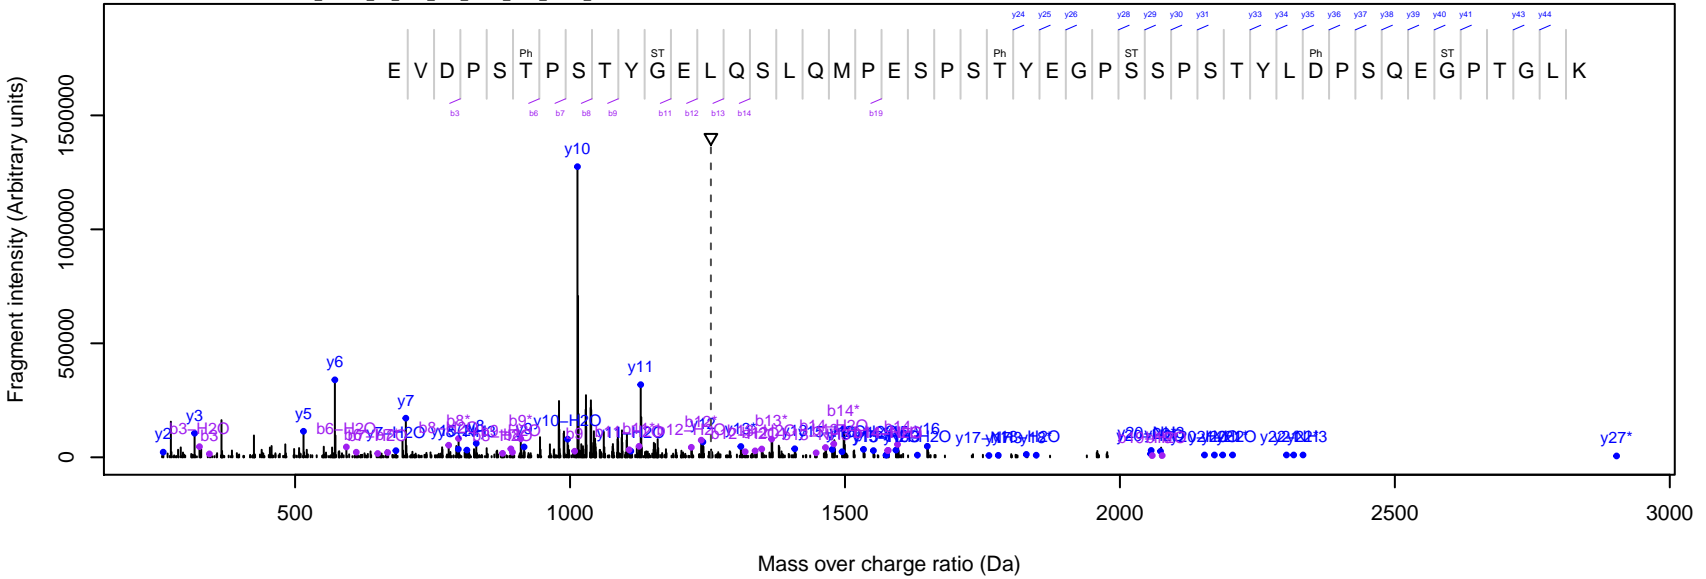

ENPPVEDS(Phospho (STY))SDEDDK-3+

Source : QE3\_201126\_FR\_TIOx\_hum\_tissue\_Urea\_RNAB\_N Scan : 6547

Andromeda score : 174.68

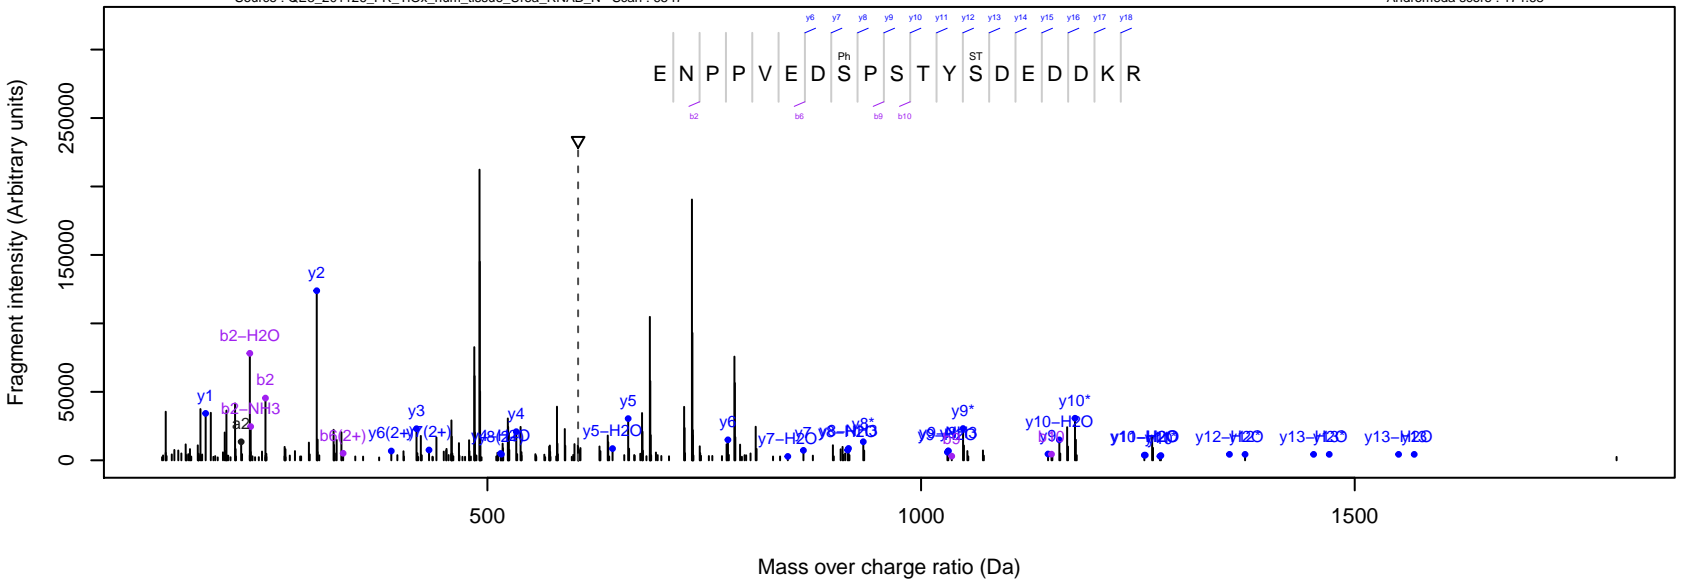

RNLEEDS(Phospho (STY))DEEDFFLR-2+

Source : QE3\_201126\_FR\_TiOx\_hum\_tissue\_Urea\_RNAB\_H Scan : 51058

Andromeda score : 174.65

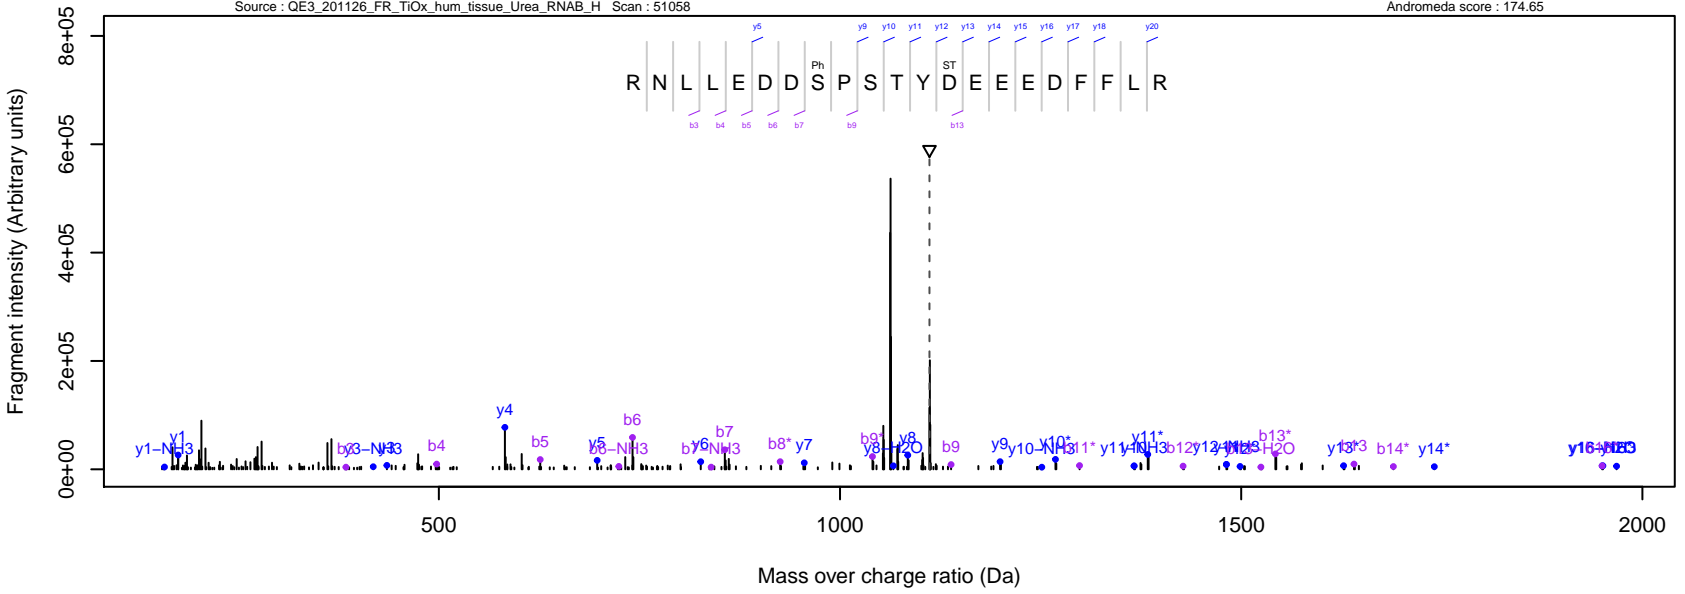

GALQNIIPAS(Phospho (STY))TGAAK-2+

Source : QE3\_201126\_FR\_TiOx\_hum\_tissue\_Urea\_RNAB\_B Scan : 32637

Andromeda score : 174.59

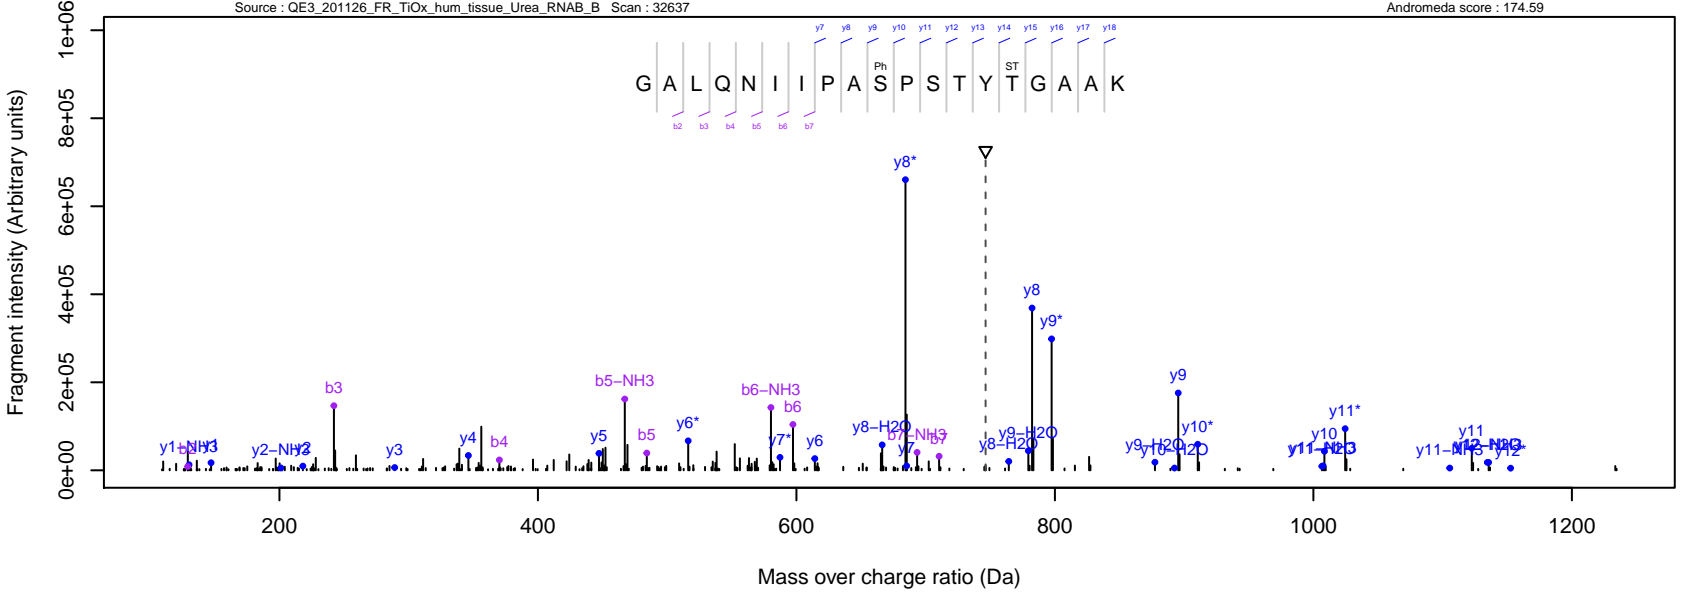

RFS(Phospho (STY))DGAASIQAFK-2+

Source : QE3\_201126\_FR\_TiOx\_hum\_tissue\_Urea\_RNAB\_B Scan : 26047

Andromeda score : 174.59

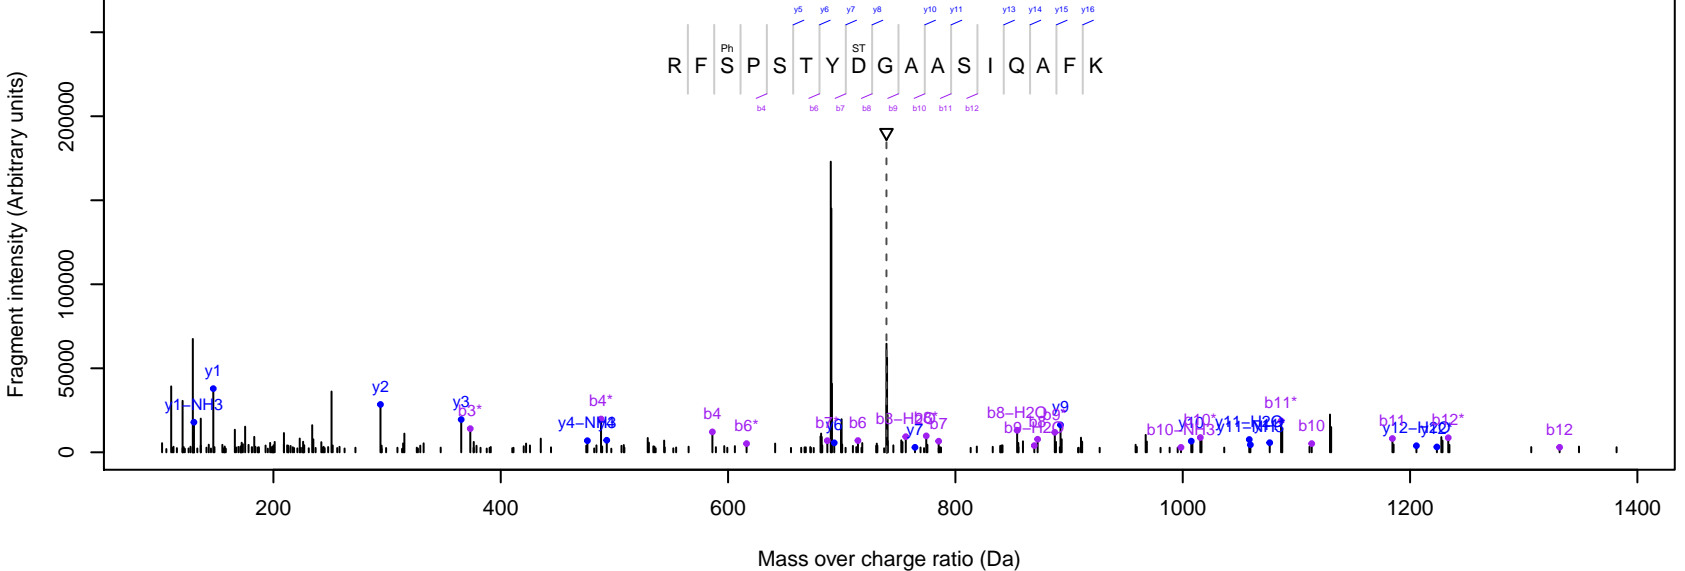

GTAM(Oxidation (M))PGEEVLESSPSTYQEALHVTERT-3+

Source : QE3\_201126\_FR\_TiOx\_hum\_tissue\_Urea\_RNAB\_B Scan : 27175

Andromeda score : 174.53

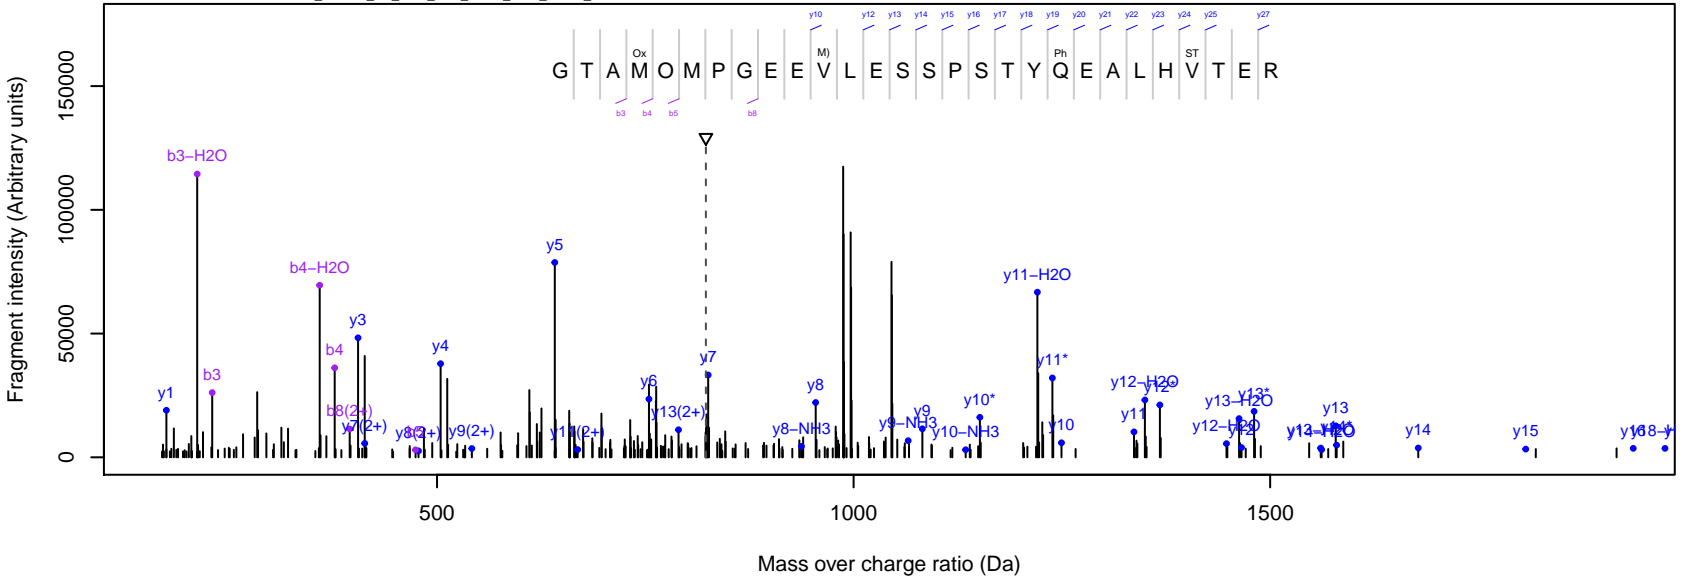

NVGERS(Phospho (STY))PDQSEHTDGHSTVQSVIEK-4+

Source : QE3\_201126\_FR\_TiOx\_hum\_tissue\_Urea\_RNAB\_N Scan : 12070

Andromeda score : 174.46

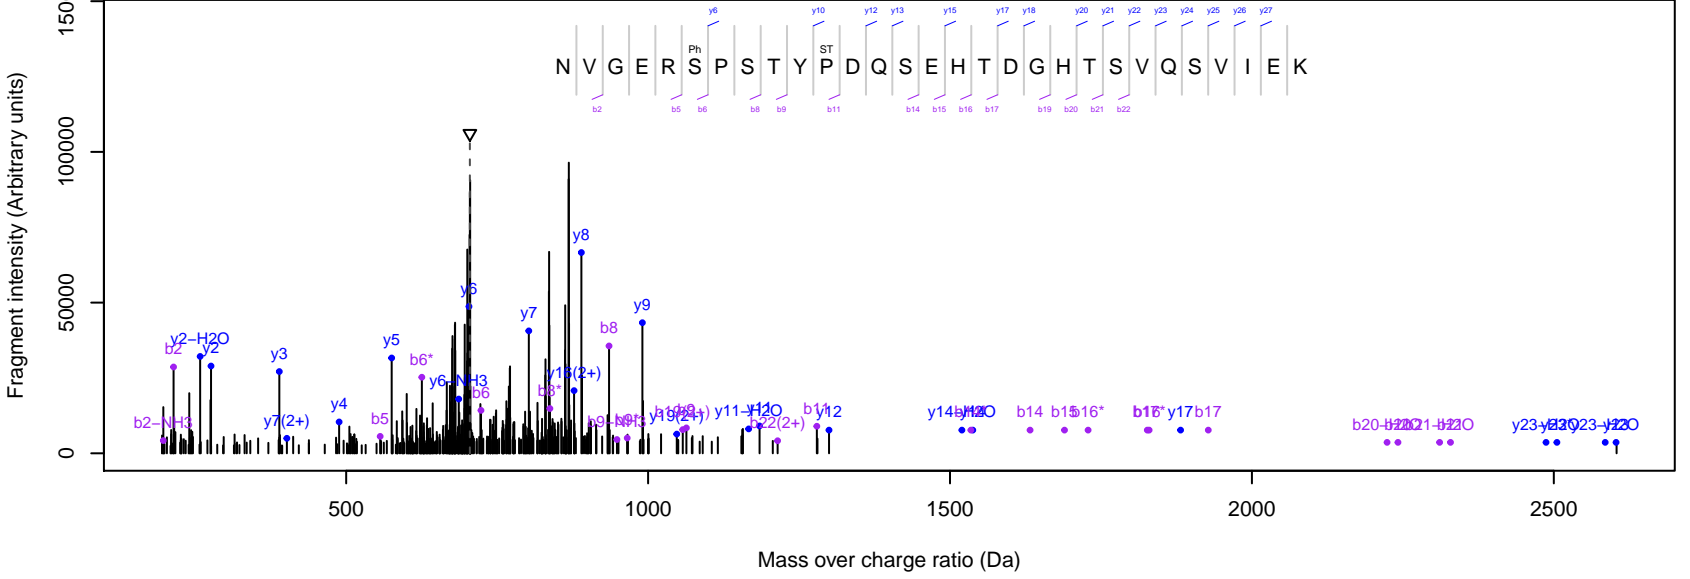

DIEIS(Phospho (STY))T(Phospho (STY))EEEKDTGLKDSLLK-3+

Source : QE3\_201126\_FR\_TiOx\_hum\_tissue\_Urea\_RNAB\_H Scan : 38456

Andromeda score : 174.4

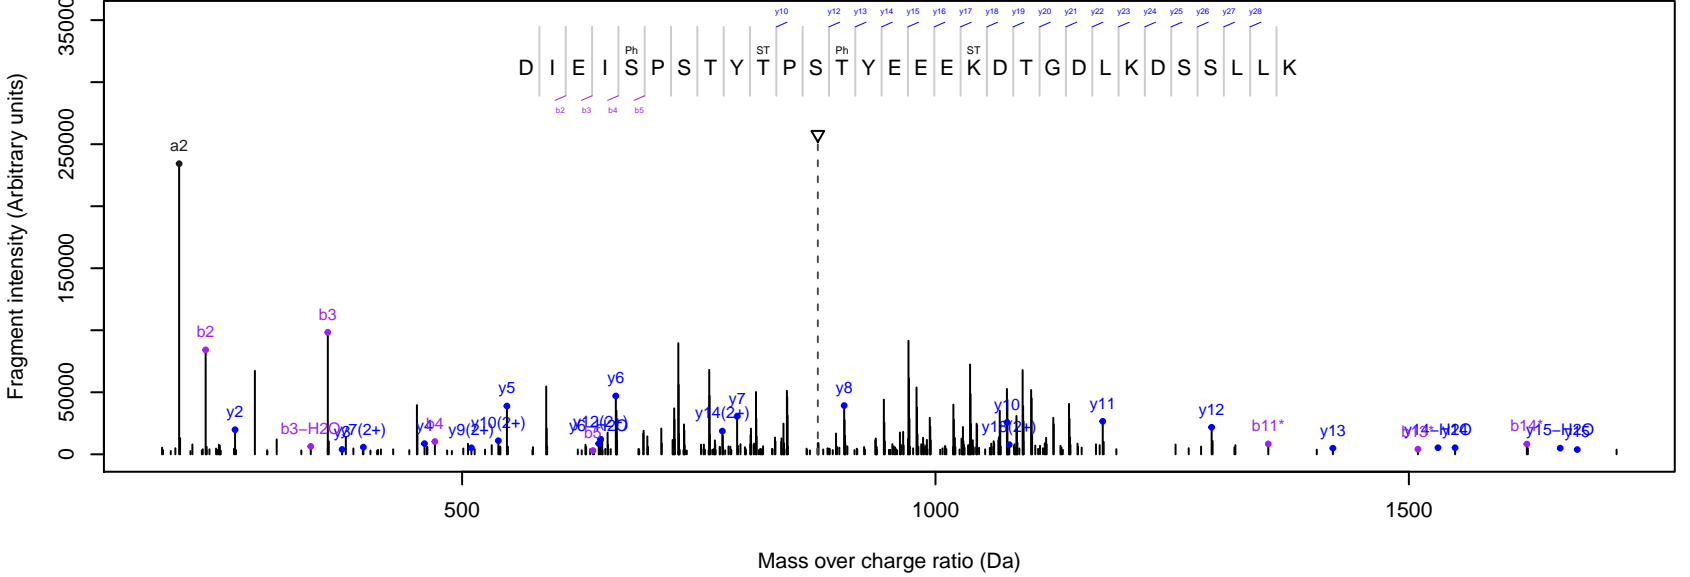

SRS(Phospho (STY))FTLDDESLK-2+

Source : QE3\_201126\_FR\_TiOx\_hum\_tissue\_Urea\_RNAB\_B Scan : 22795

Andromeda score : 174.39

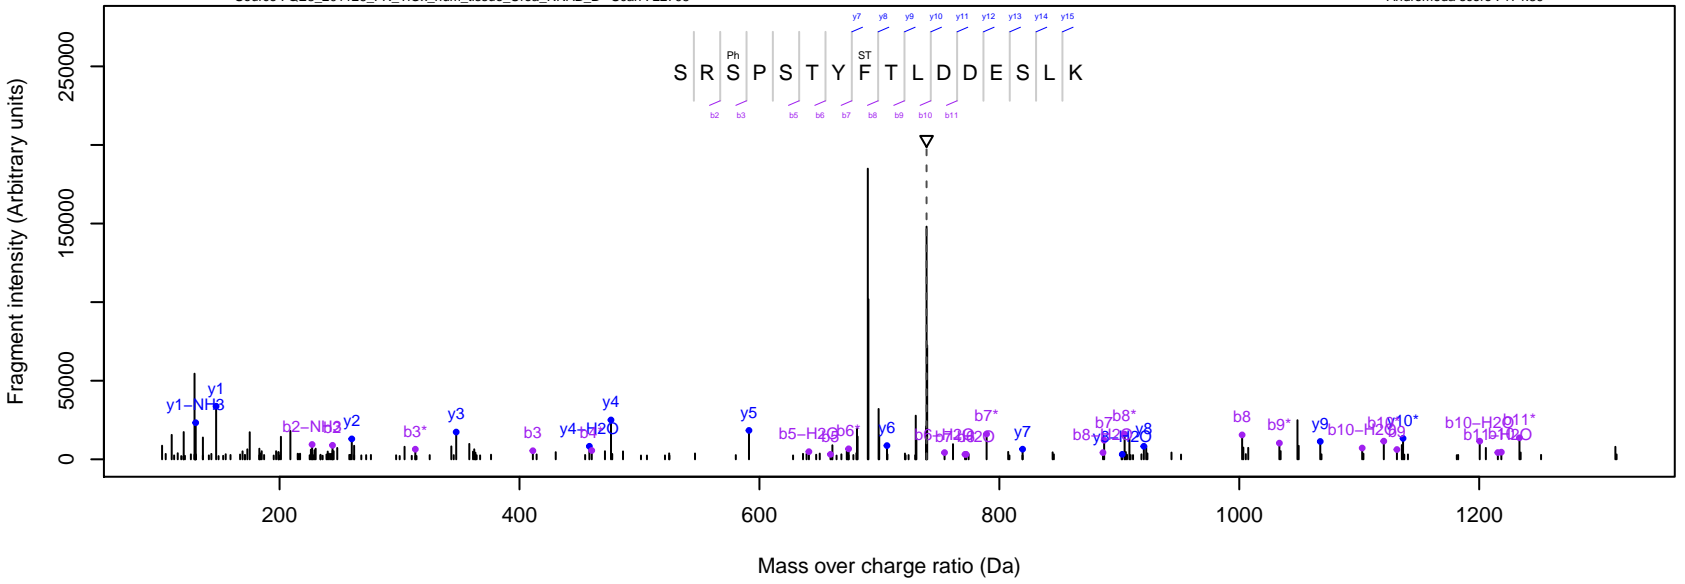

AEYVLIVDS(Phospho (STY))EGEDEAASR-2+

Source : QE3\_201126\_FR\_TiOx\_hum\_tissue\_Urea\_RNAB\_B Scan : 39340

Andromeda score : 174.23

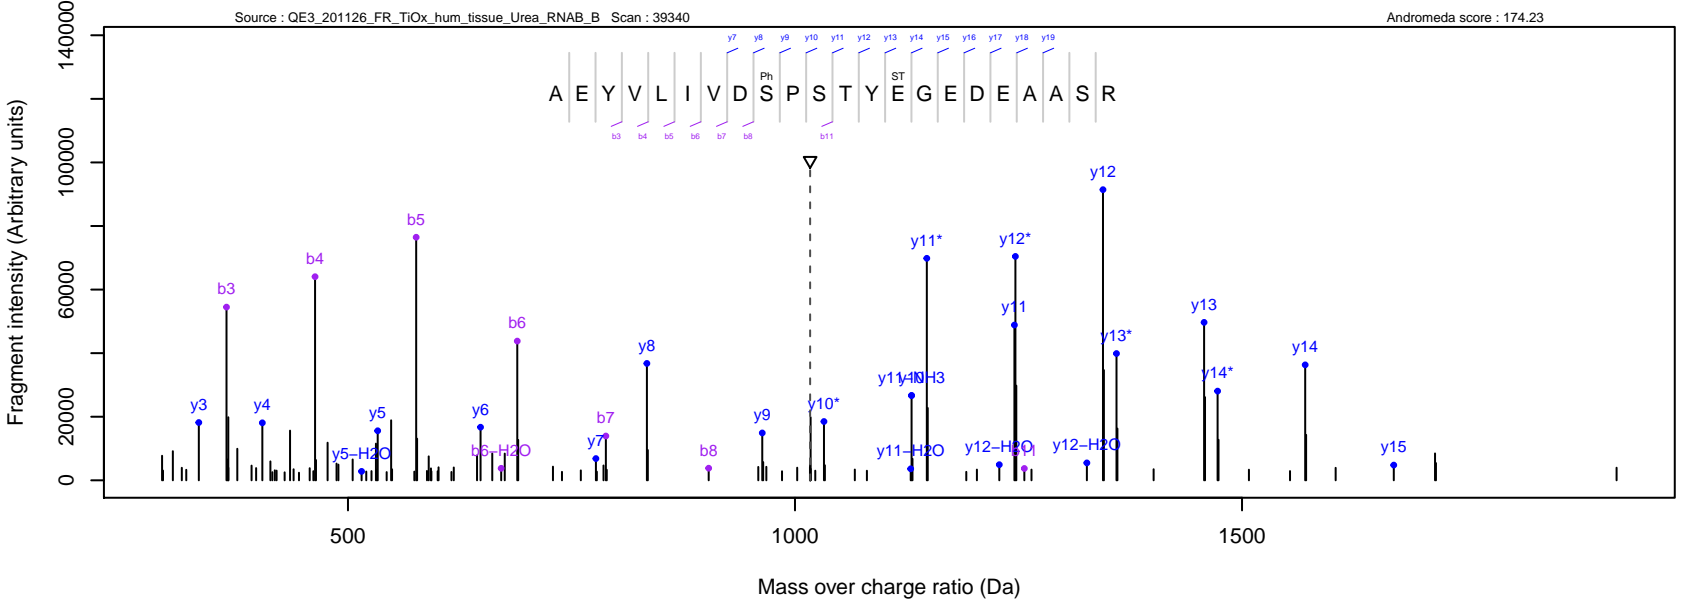

S(Phospho (STY))LSEEVESSESGELPEVDVK-2+

Source : QE3\_201126\_FR\_TiOx\_hum\_tissue\_Urea\_RNAB\_B Scan : 44874

Andromeda score : 174.23

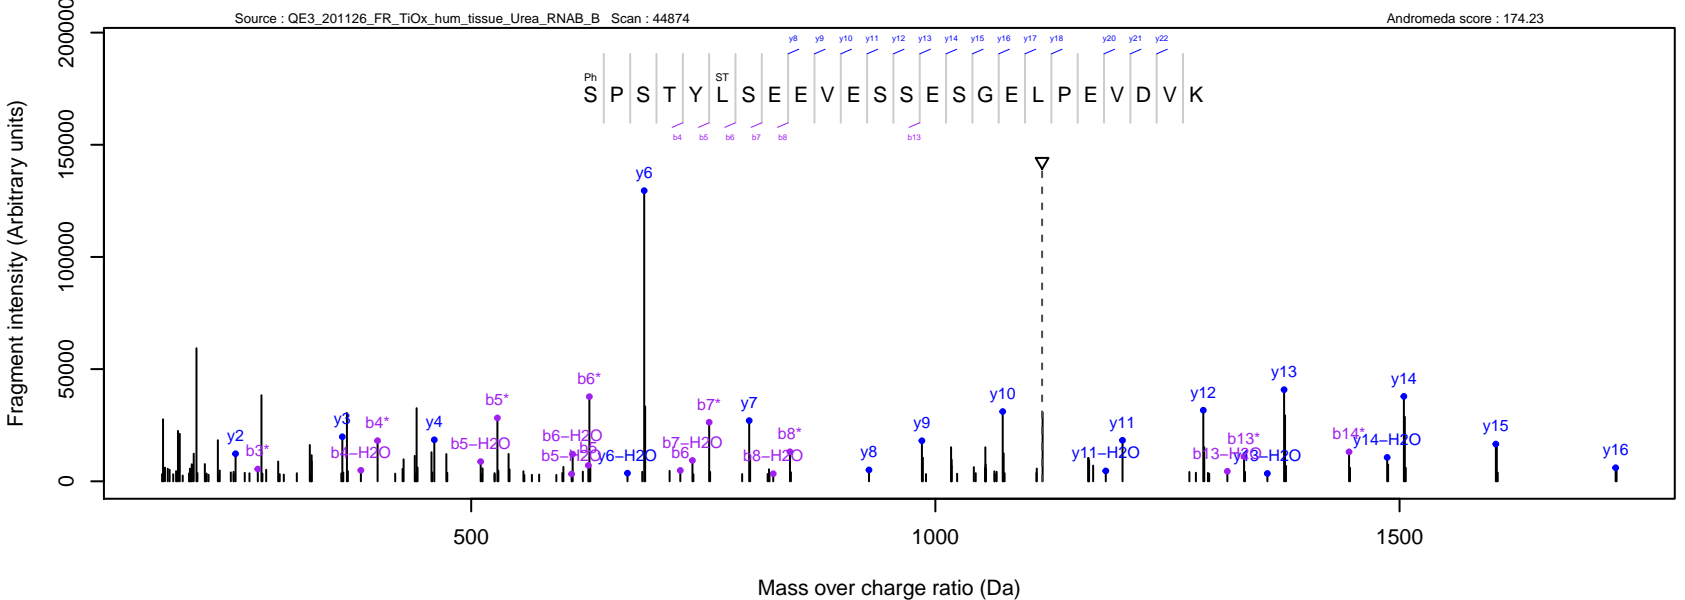



### SPS(Phospho (STY))PAHLDDDPK-2+

Source : QE3\_201126\_FR\_TiOx\_hum\_tissue\_Urea\_RNAB\_B Scan : 12160

Andromeda score : 174.21

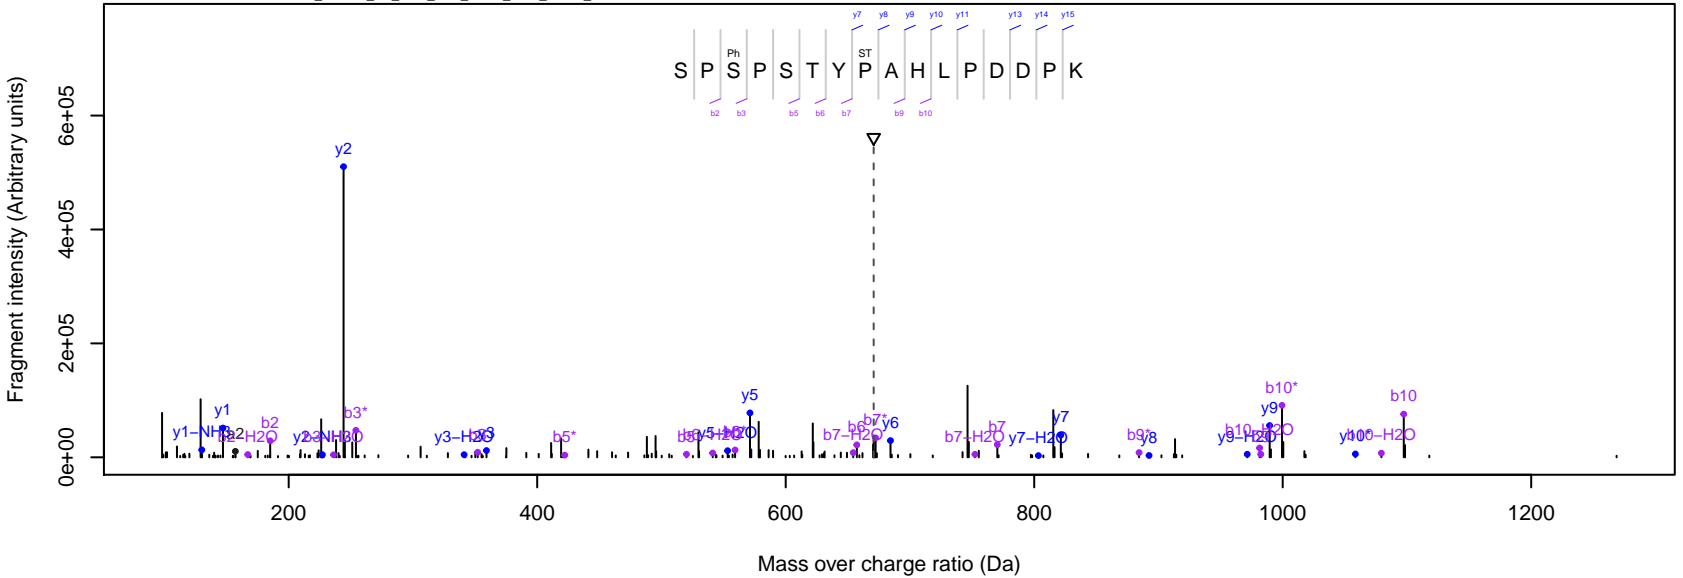

### ASAPS(Phospho (STY))PNAQVACDHCLK-3+

Source : QE3\_201126\_FR\_TiOx\_hum\_tissue\_Urea\_RNAB\_N Scan : 13513

Andromeda score : 174.2

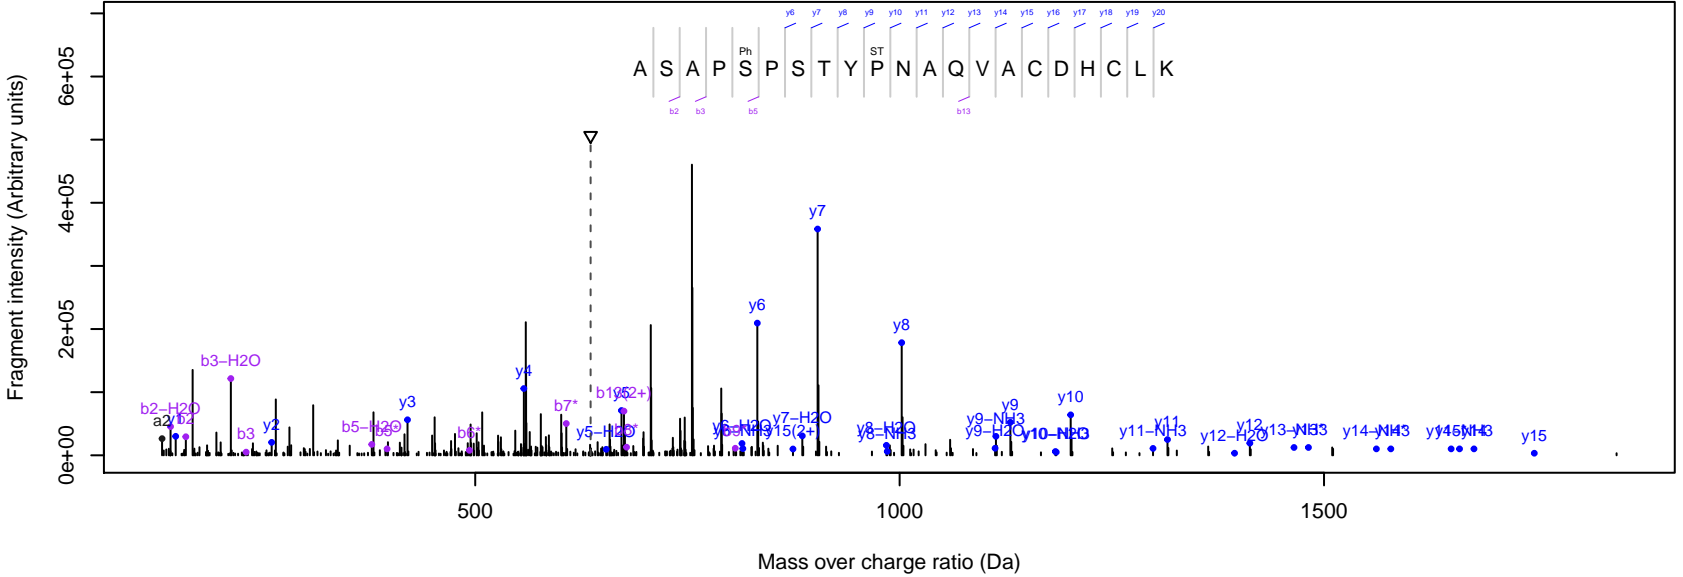

### RLS(Phospho (STY))TSPDVIGHQPR-3+

Source : QE3\_201126\_FR\_TiOx\_hum\_tissue\_Urea\_RNAB\_B Scan : 12565

Andromeda score : 174.15

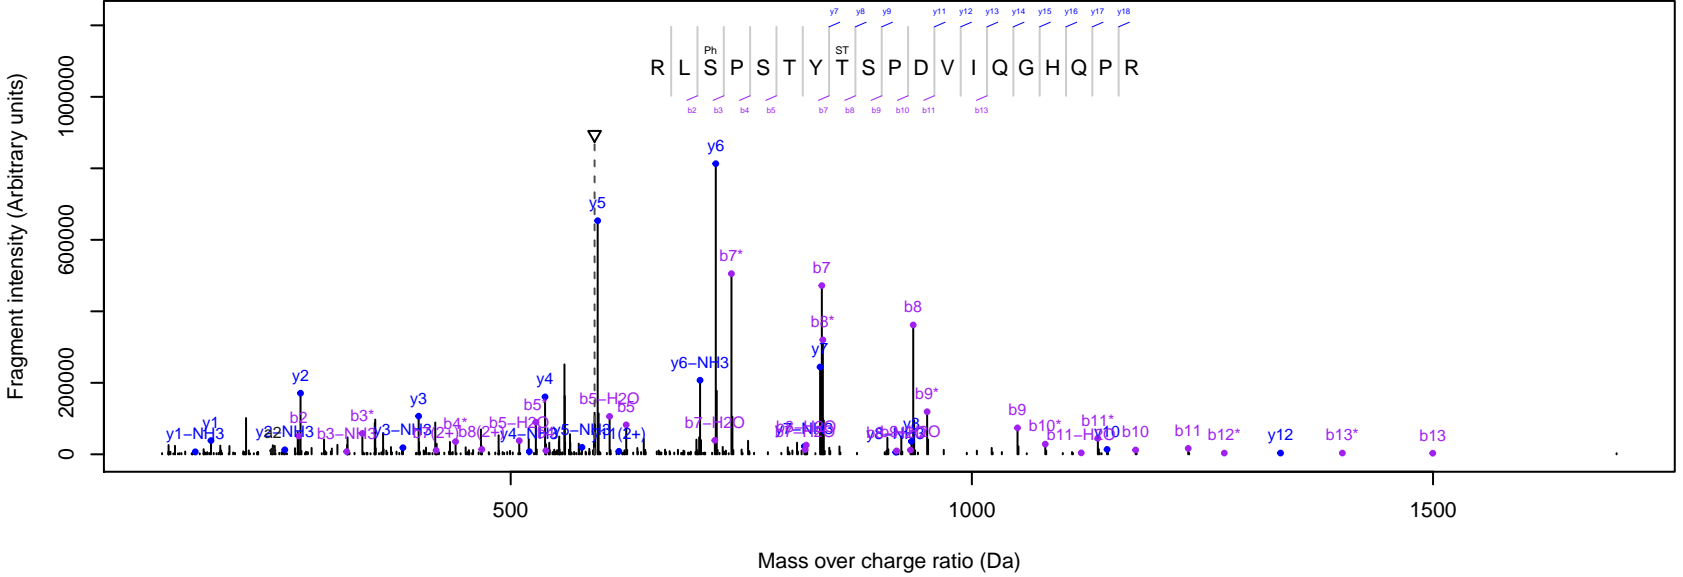

GLAEVQQDGEAEEGAT(Phospho (STY))SDGEKKR-3+

Source : QE3\_201126\_FR\_TiOx\_hum\_tissue\_Urea\_RNAB\_H Scan : 11706

Andromeda score : 174.06

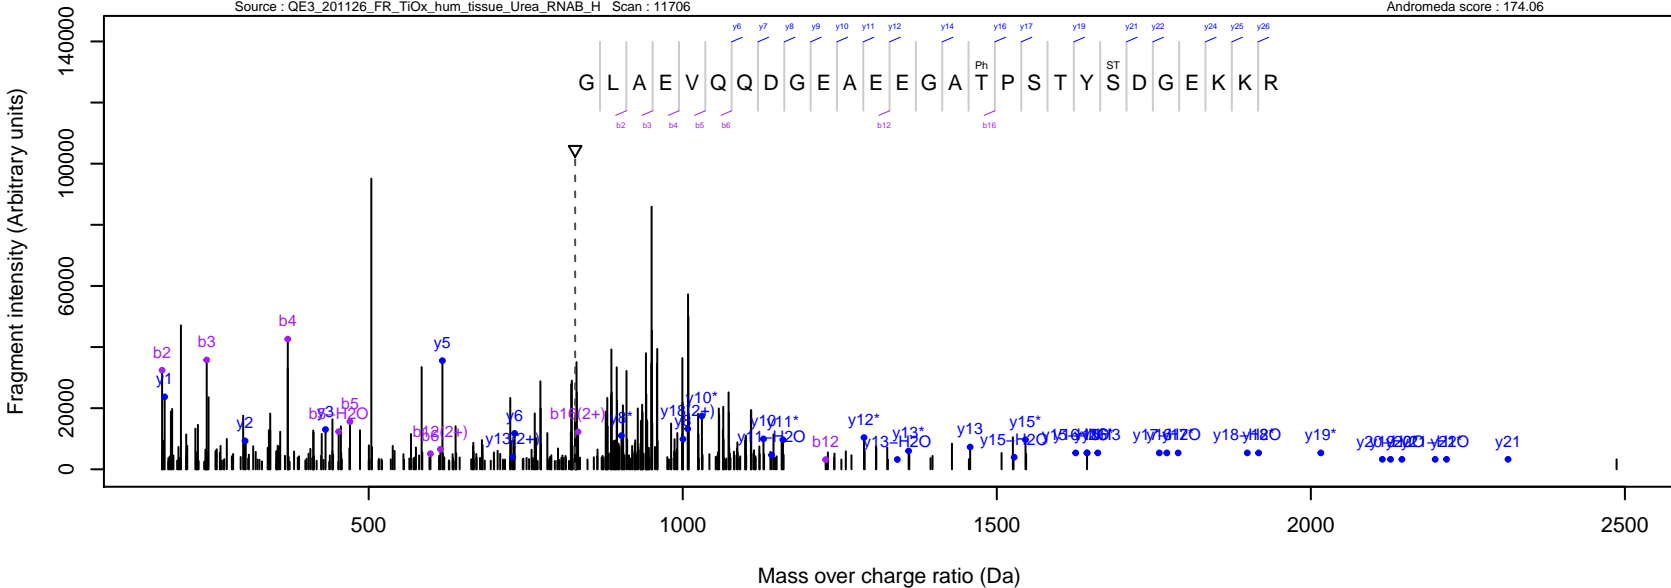

ATT(Phospho (STY))PADGEEPAPEAEALAAAR-2+

Source : QE3\_201126\_FR\_TiOx\_hum\_tissue\_Urea\_RNAB\_H Scan : 33622

Andromeda score : 173.98

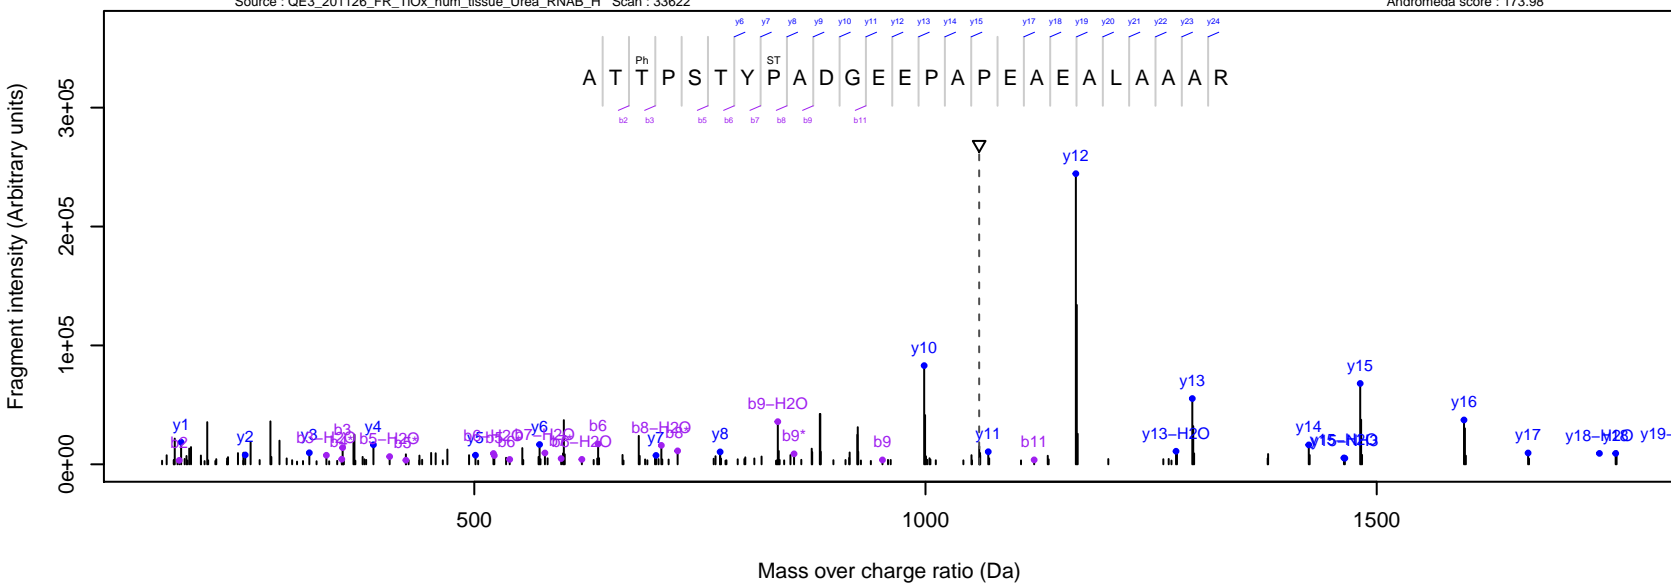

GSQAQPD(Phospho (STY))PSAQLALIAASQSF LQPGGK-3+

Source : QE3\_201126\_FR\_TiOx\_hum\_tissue\_Urea\_RNAB\_H Scan : 59985

Andromeda score : 173.98

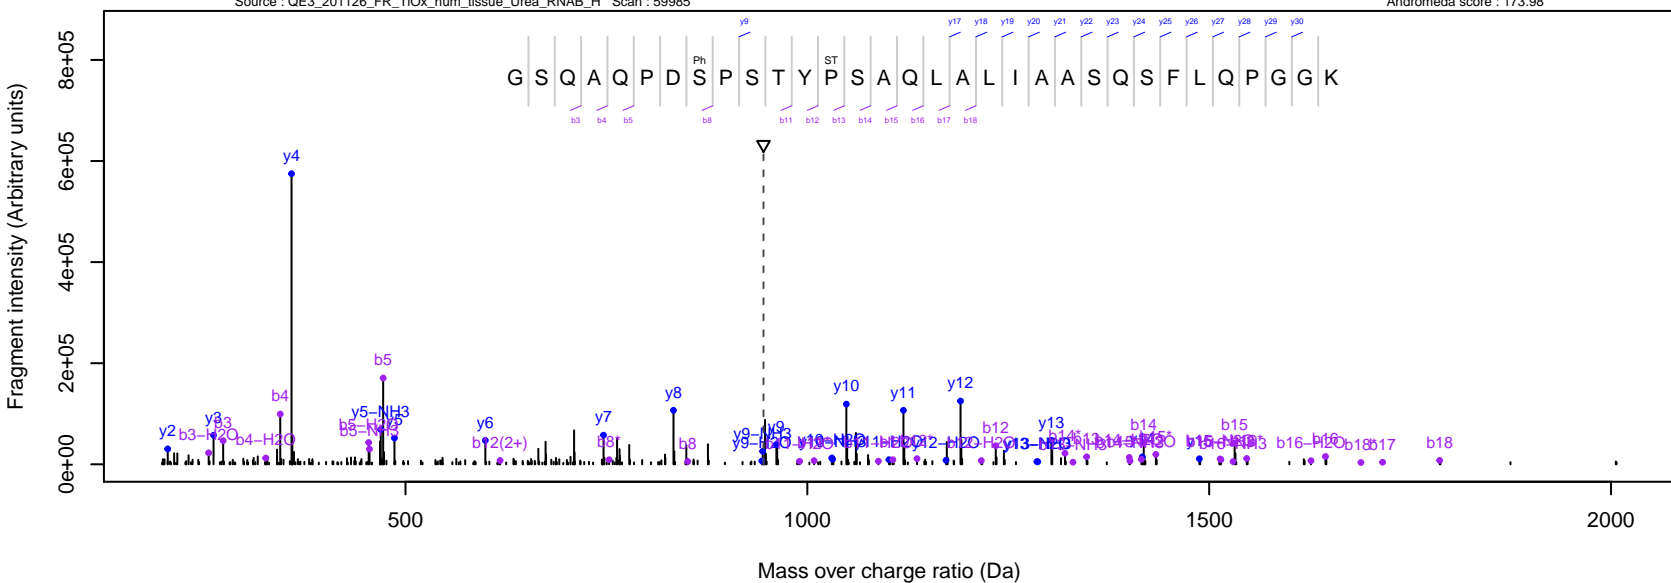

S(Phospho (STY))PQPPAEEDDDFDLVAIDTYNCDLHFK-3+

Source : QE3\_201126\_FR\_TiOx\_hum\_tissue\_Urea\_RNAB\_B Scan : 57821

Andromeda score : 173.95

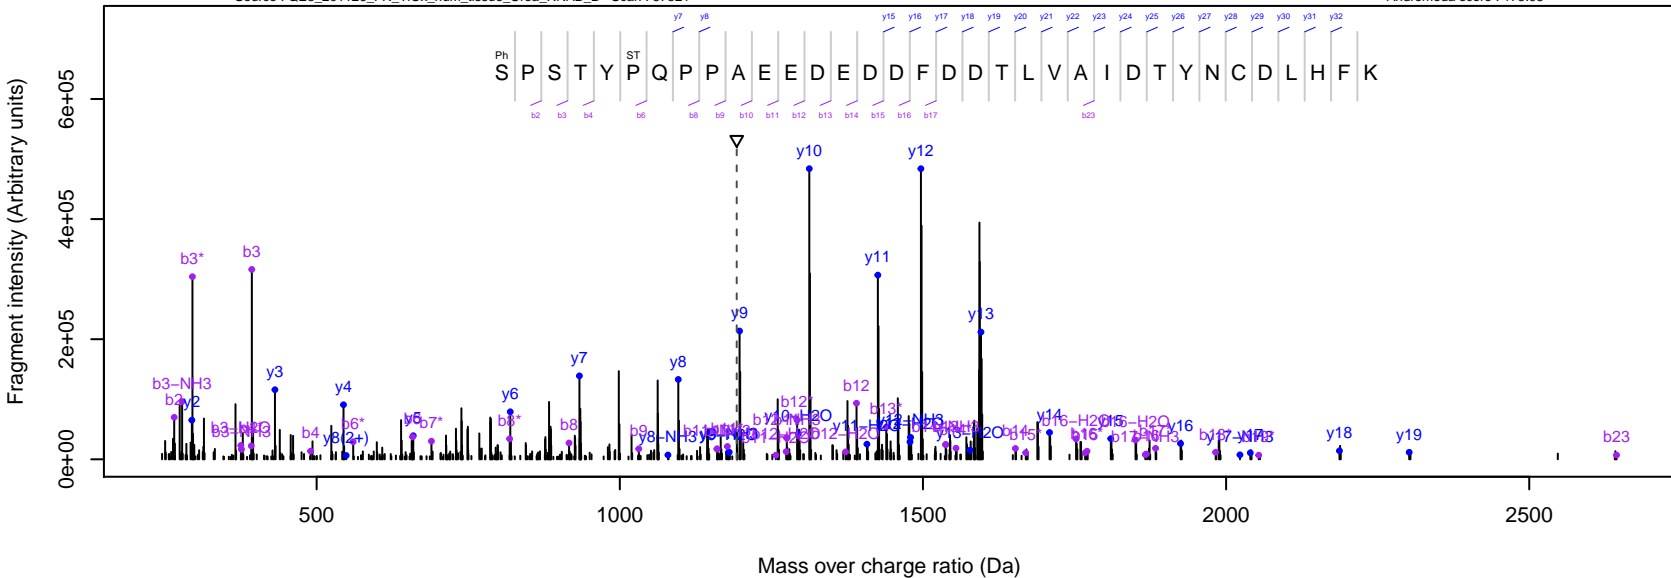

EEGAQTLEEDRAQT(Phospho (STY))PHEDGGPQPHR-4+

Source : QE3\_201126\_FR\_TiOx\_hum\_tissue\_Urea\_RNAB\_B Scan : 10291

Andromeda score : 173.92

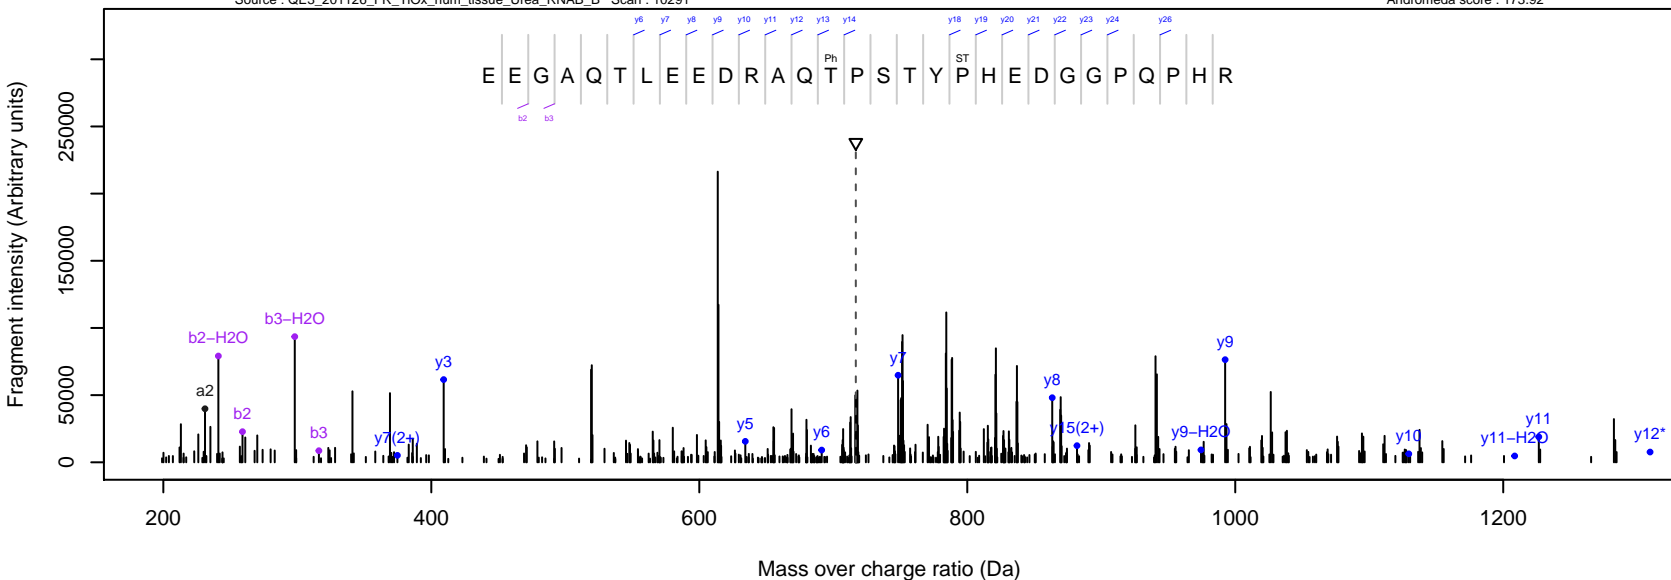

SFLQS(Phospho (STY))LECLRR-2+

Source : QE3\_201126\_FR\_TiOx\_hum\_tissue\_Urea\_RNAB\_B Scan : 39789

Andromeda score : 173.76

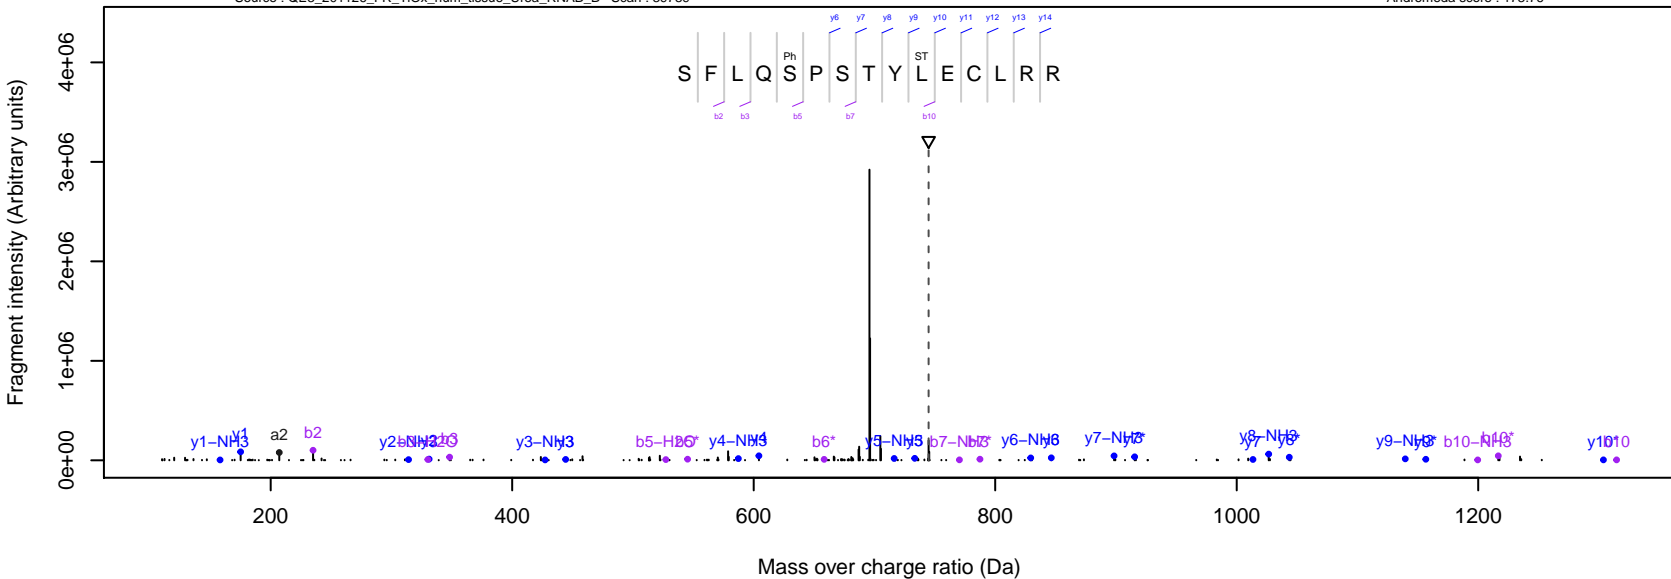

DSRPLS(Phospho (STY))PILHIVKDESPA K-3+

Source : QE3\_201126\_FR\_TiOx\_hum\_tissue\_Urea\_RNAB\_H Scan : 39067

Andromeda score : 173.59

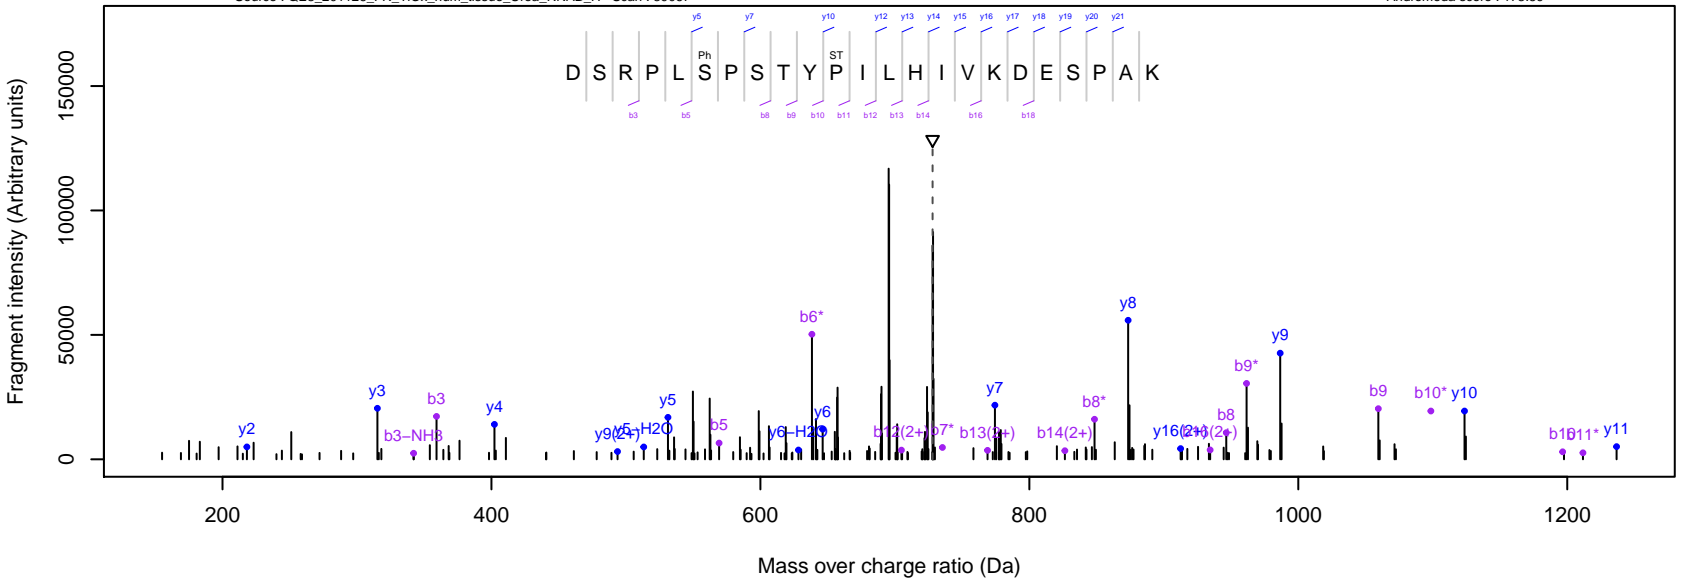

VFDDES(Phospho (STY))DEKEDEEYADEK-3+

Source : QE3\_201126\_FR\_TiOx\_hum\_tissue\_Urea\_RNAB\_H Scan : 18927

Andromeda score : 173.56

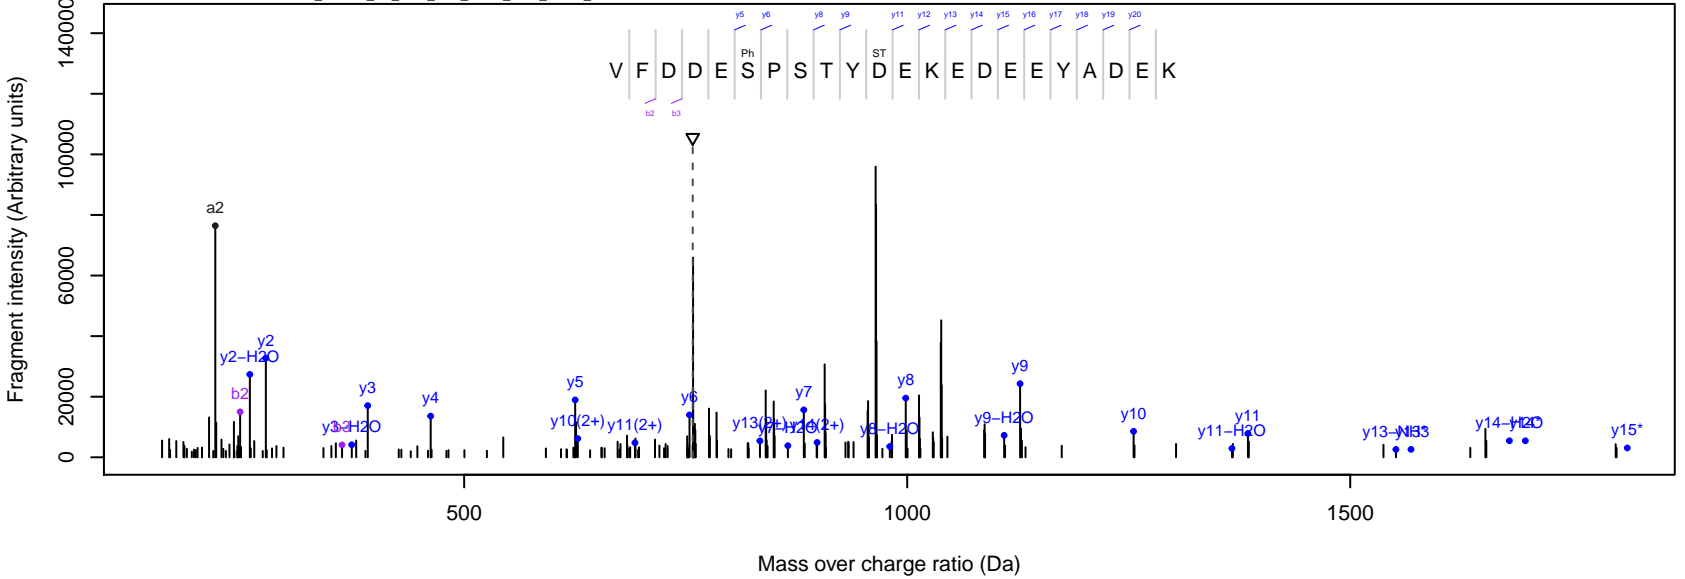

DFQEYVEPGEDFPAS(Phospho (STY))PQRR-3+

Source : QE3\_201126\_FR\_TiOx\_hum\_tissue\_Urea\_RNAB\_N Scan : 37132

Andromeda score : 173.47

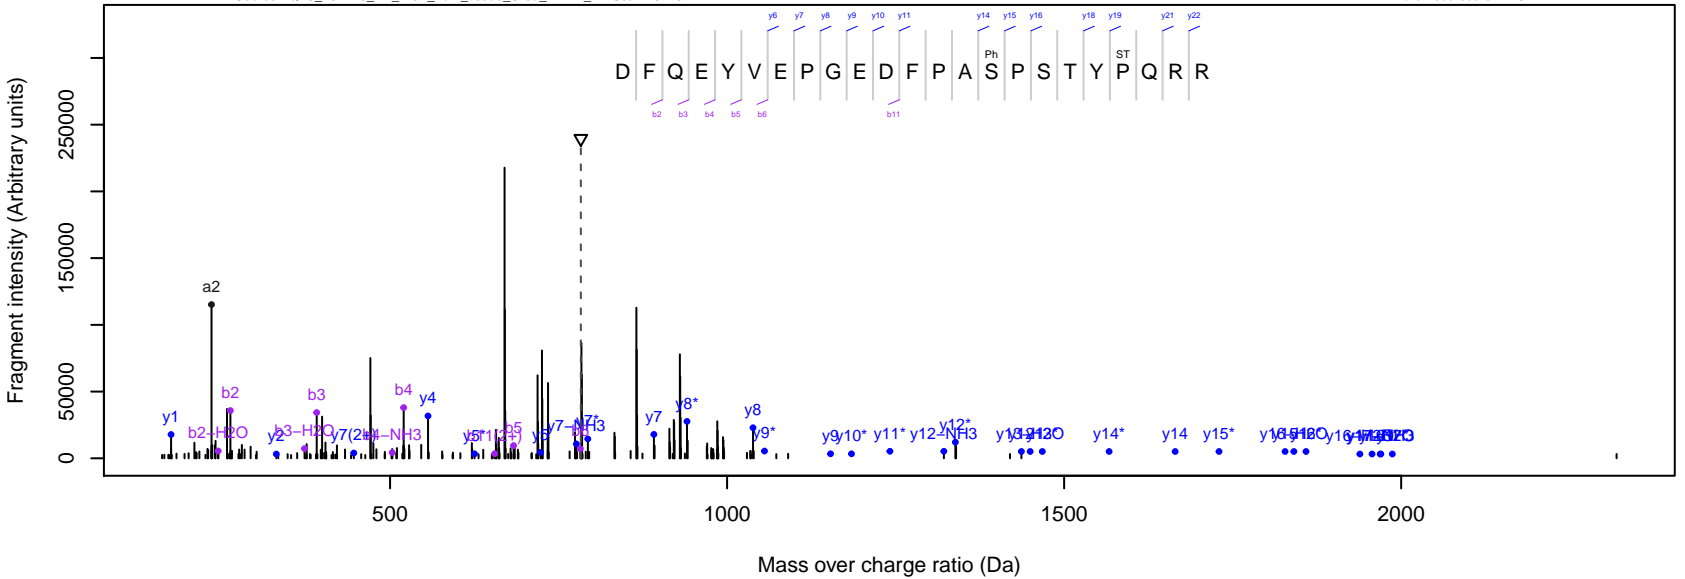

**TSFSVGS(Phospho (STY))DDELGPIR-2+**

Source : QE3\_201126\_FR\_TIOx\_hum\_tissue\_Urea\_RNAB\_N Scan : 41165

Andromeda score : 173.44

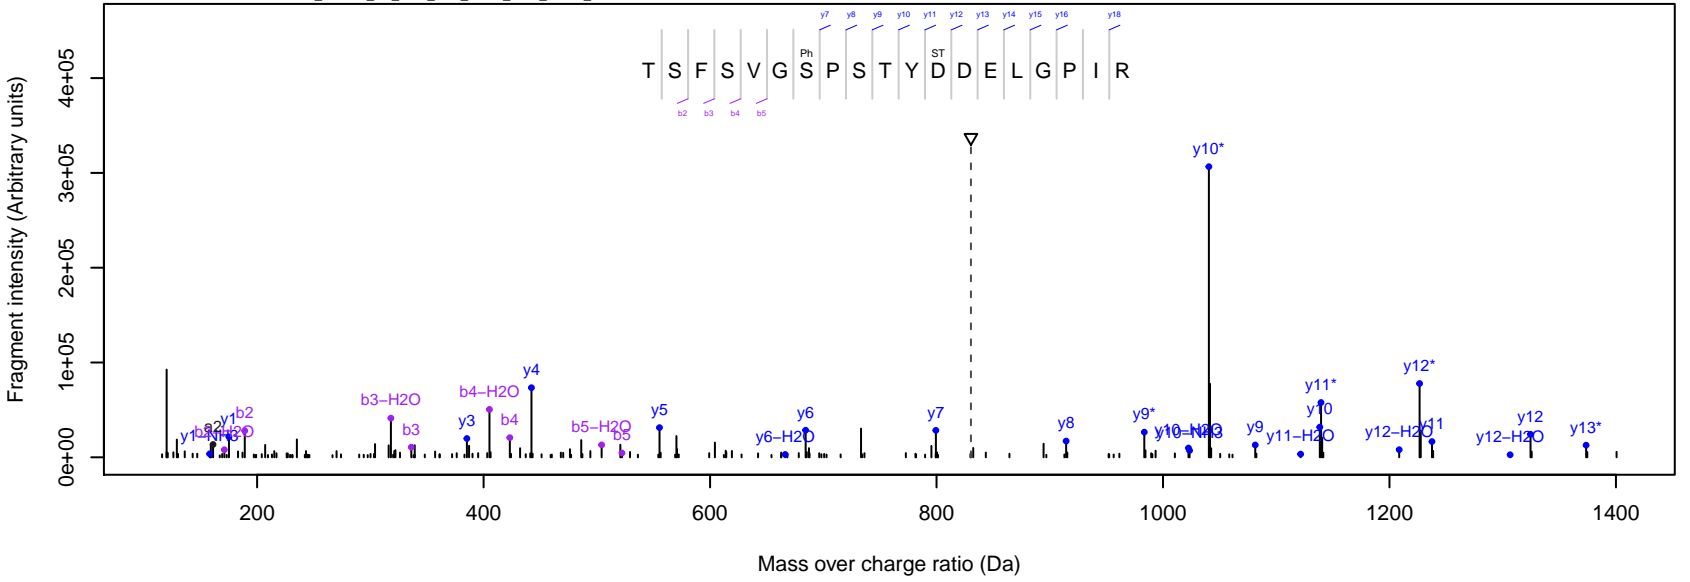

**VSAGEPGSHPSAPRRS(Phospho (STY))PAGNK-4+**

Source : QE3\_201126\_FR\_TIOx\_hum\_tissue\_Urea\_RNAB\_N Scan : 4132

Andromeda score : 173.36

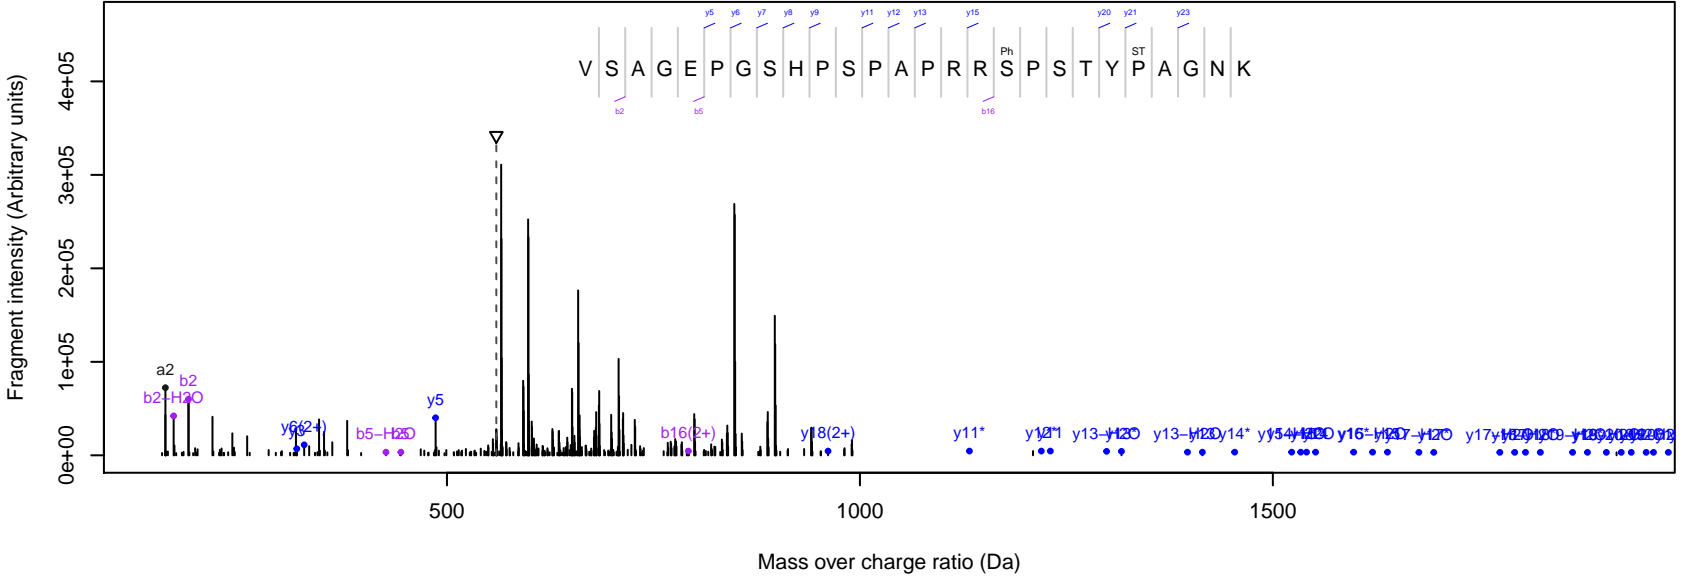

**TIAS(Phospho (STY))DS(Phospho (STY))EEEAGKELSDK-2+**

Source : QE3\_201126\_FR\_TIOx\_hum\_tissue\_Urea\_RNAB\_N Scan : 19596

Andromeda score : 173.28

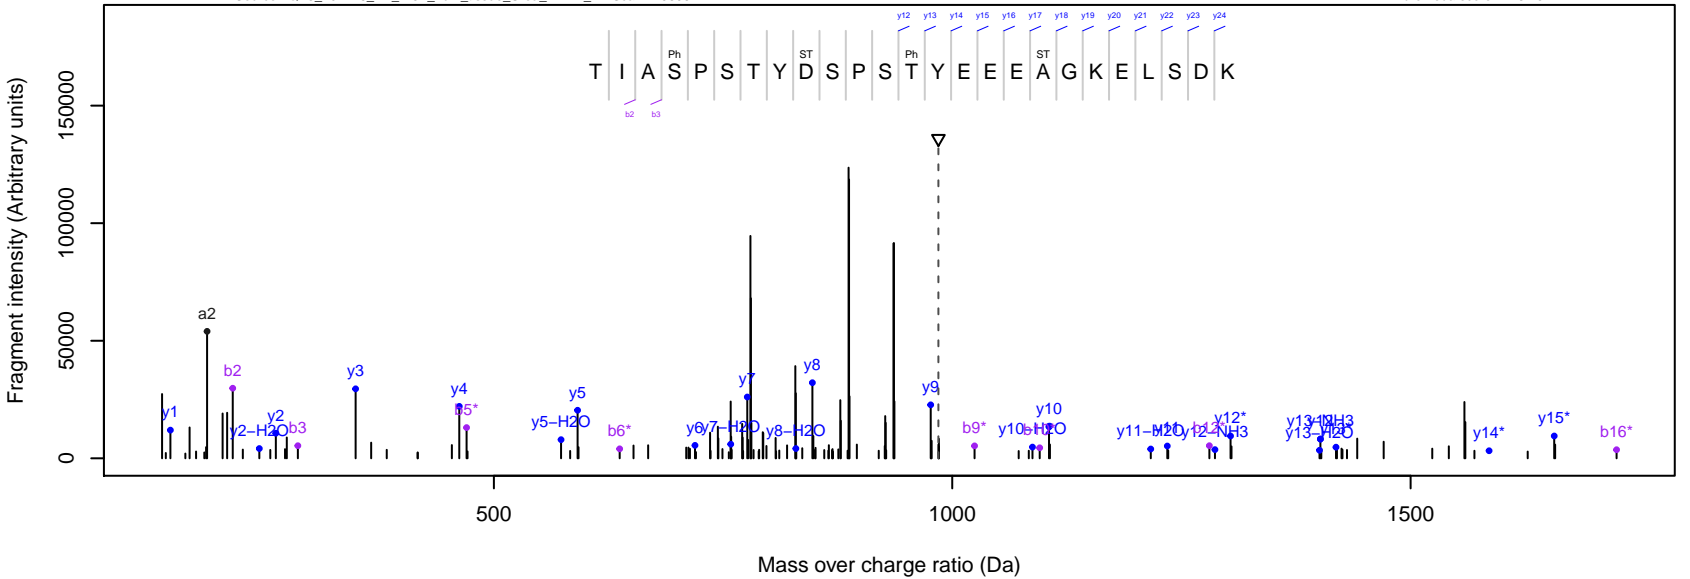

SGS(Phospho (STY))LLYLHDTLEDIK-3+

Source : QE3\_201126\_FR\_TiOx\_hum\_tissue\_Urea\_RNAB\_H Scan : 37961

Andromeda score : 173.27

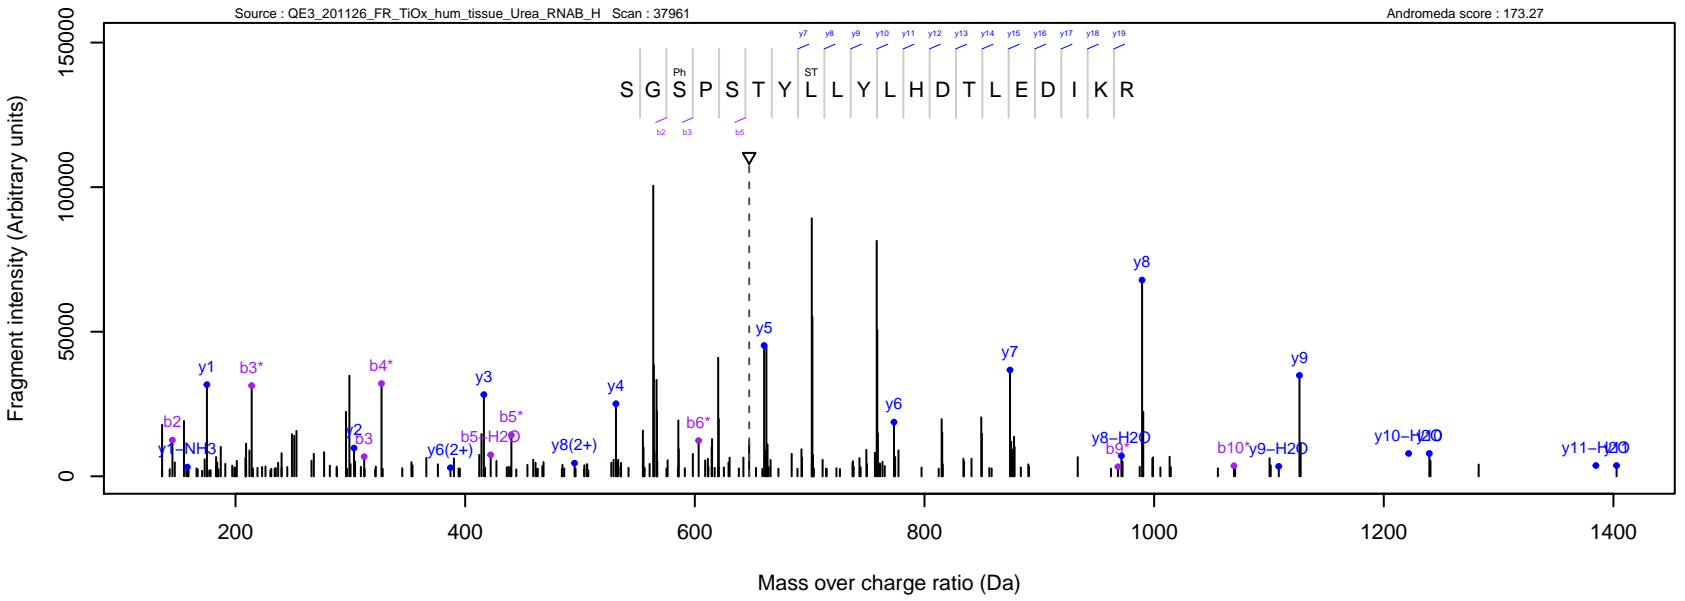

DLQS(Phospho (STY))PDFTTGFHSDKIEAK-2+

Source : QE3\_201126\_FR\_TiOx\_hum\_tissue\_Urea\_RNAB\_B Scan : 28066

Andromeda score : 173.21

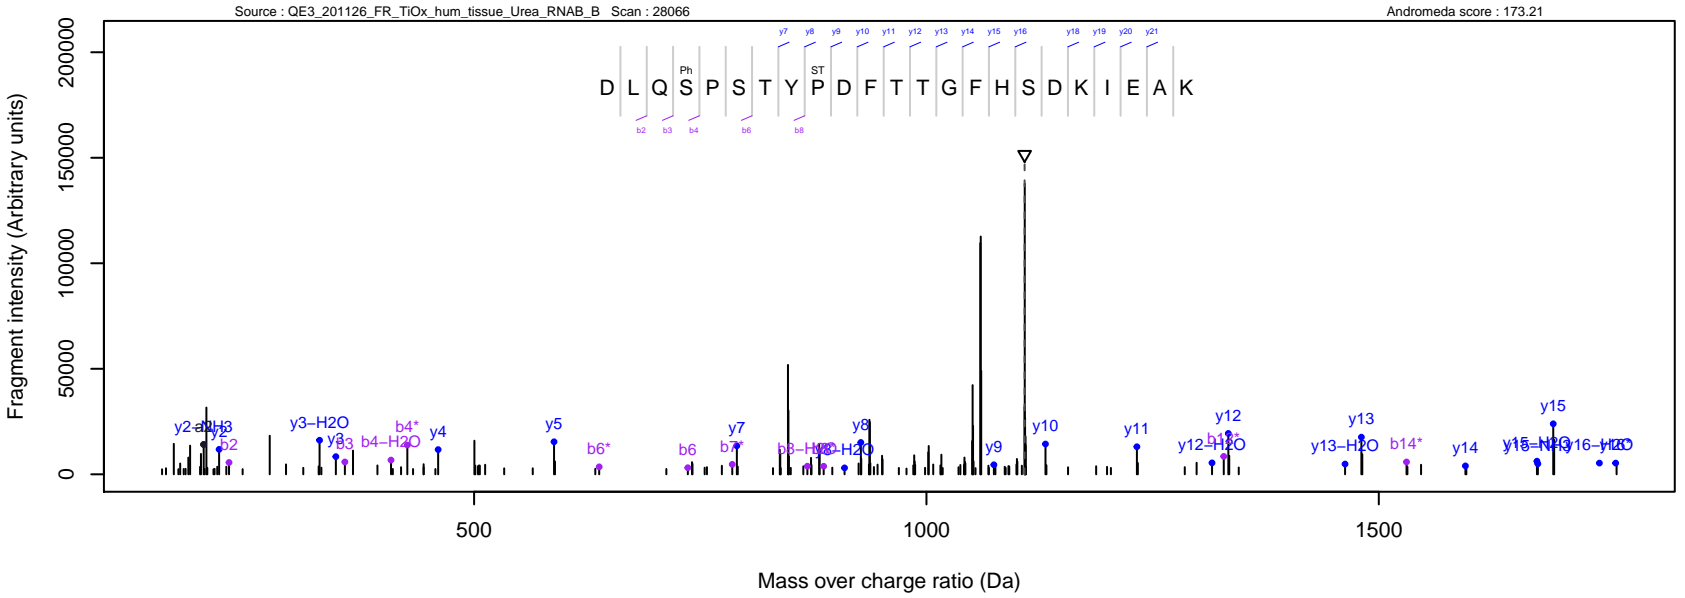

GPDEAMEDGEEG(Phospho (STY))DDEAEWVTKDK-3+

Source : QE3\_201126\_FR\_TiOx\_hum\_tissue\_Urea\_RNAB\_N Scan : 31663

Andromeda score : 173.07

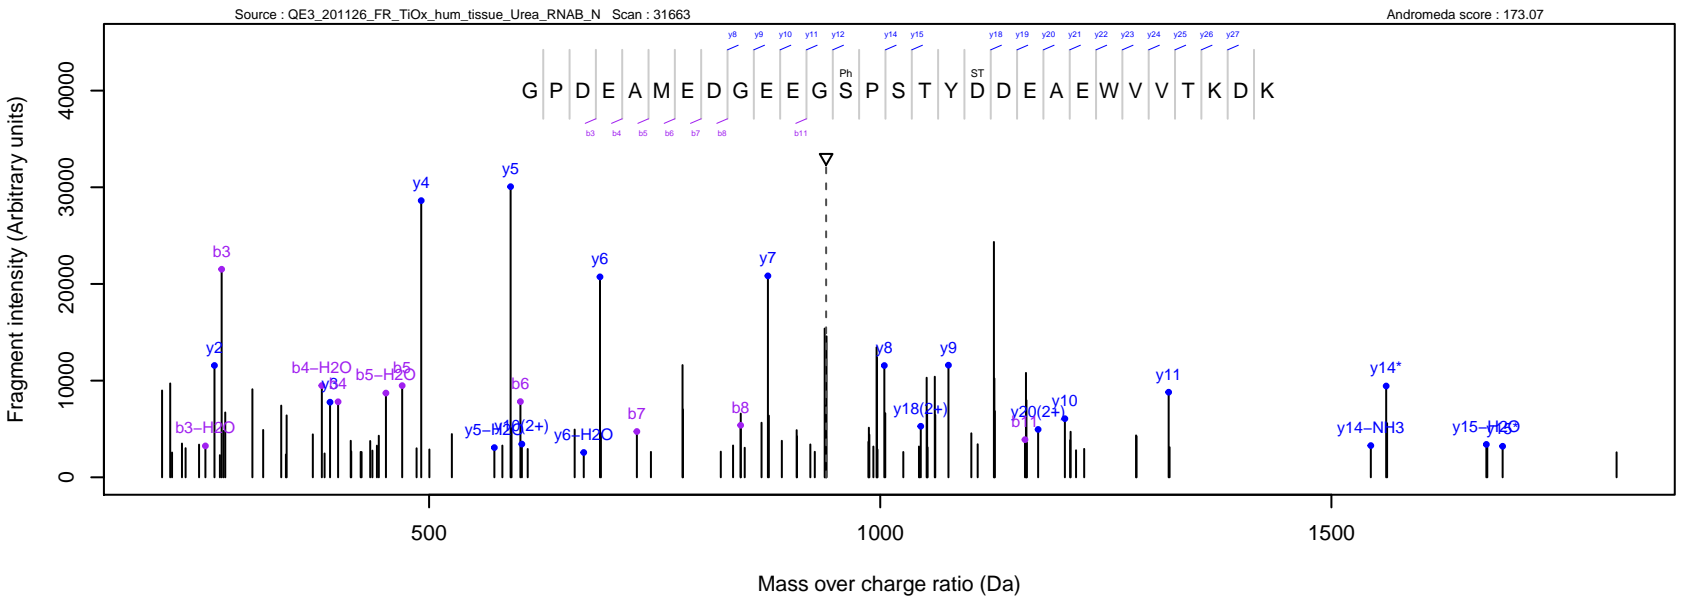

ASS(Phospho (STY))LGEIDESSLR-2+

Source : QE3\_201126\_FR\_TiOx\_hum\_tissue\_Urea\_RNAB\_H Scan : 28880

Andromeda score : 173.06

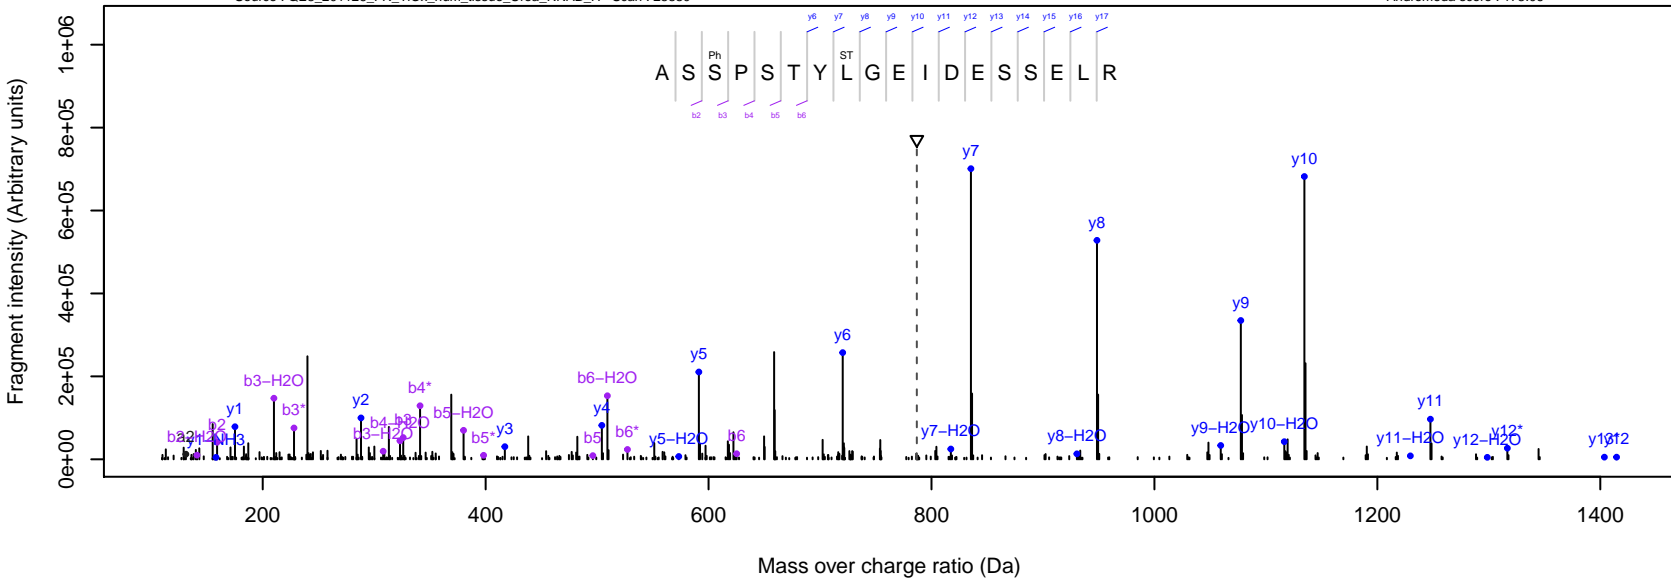

RSS(Phospho (STY))VVFADK-2+

Source : QE3\_201126\_FR\_TiOx\_hum\_tissue\_Urea\_RNAB\_H Scan : 10574

Andromeda score : 173.06

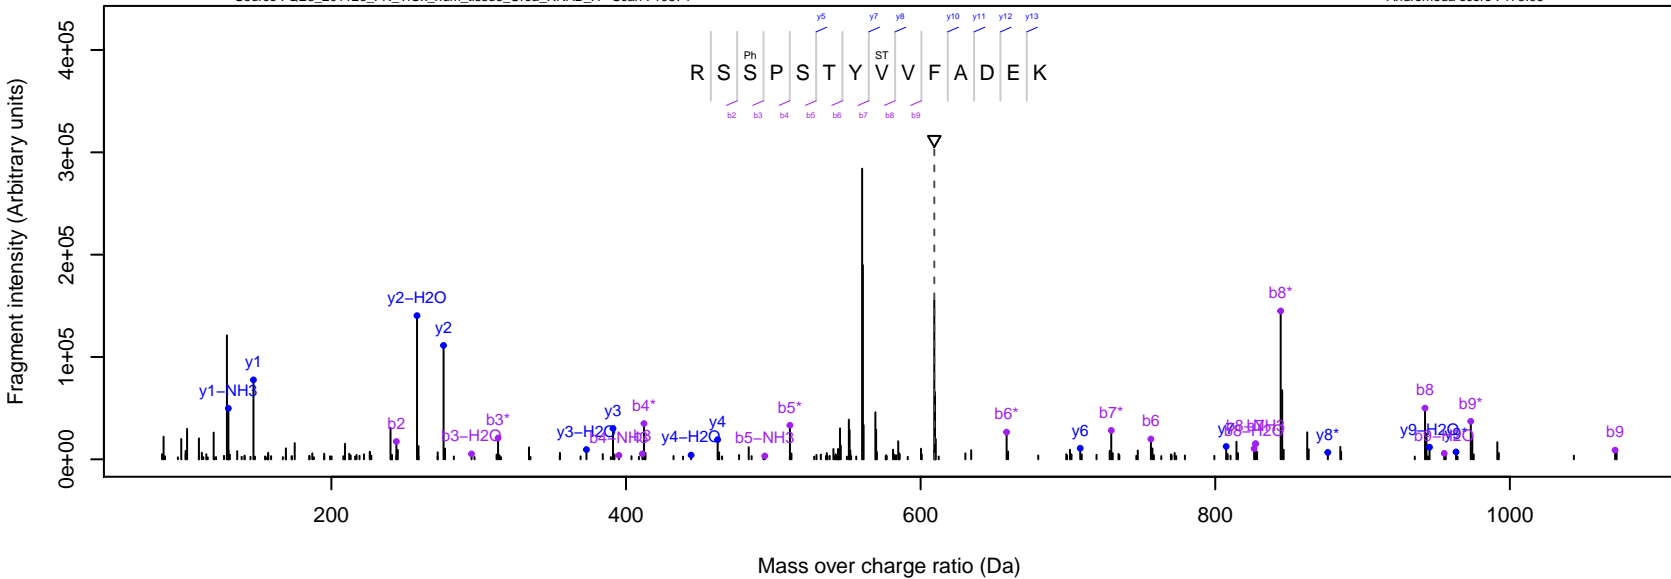

APS(Phospho (STY))PAPSSVPLGSEKPSNVSQDR-3+

Source : QE3\_201126\_FR\_TiOx\_hum\_tissue\_Urea\_RNAB\_N Scan : 18818

Andromeda score : 173.05

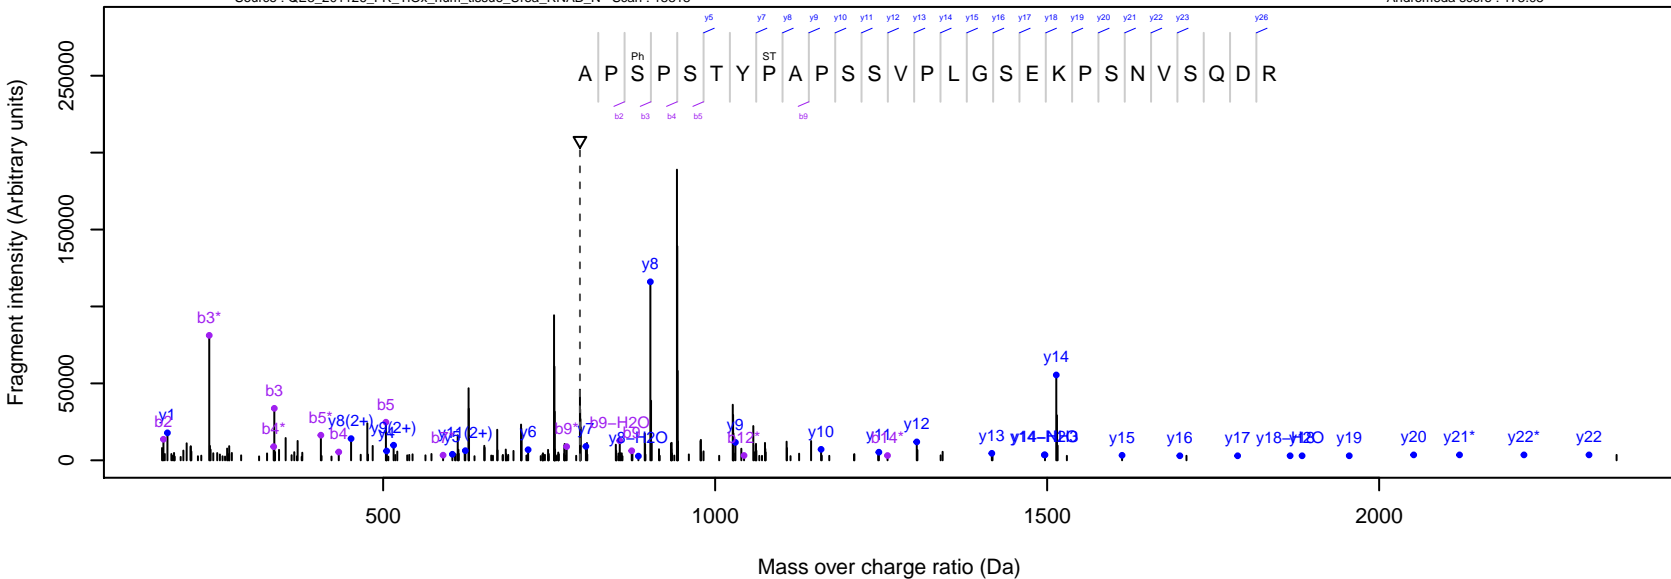

FRRPDIQYPDATDEDITSHMES(Phospho (STY))EELNGAYK-4+

Source : QE3\_201126\_FR\_TiOx\_hum\_tissue\_Urea\_RNAB\_N Scan : 38298

Andromeda score : 173.05

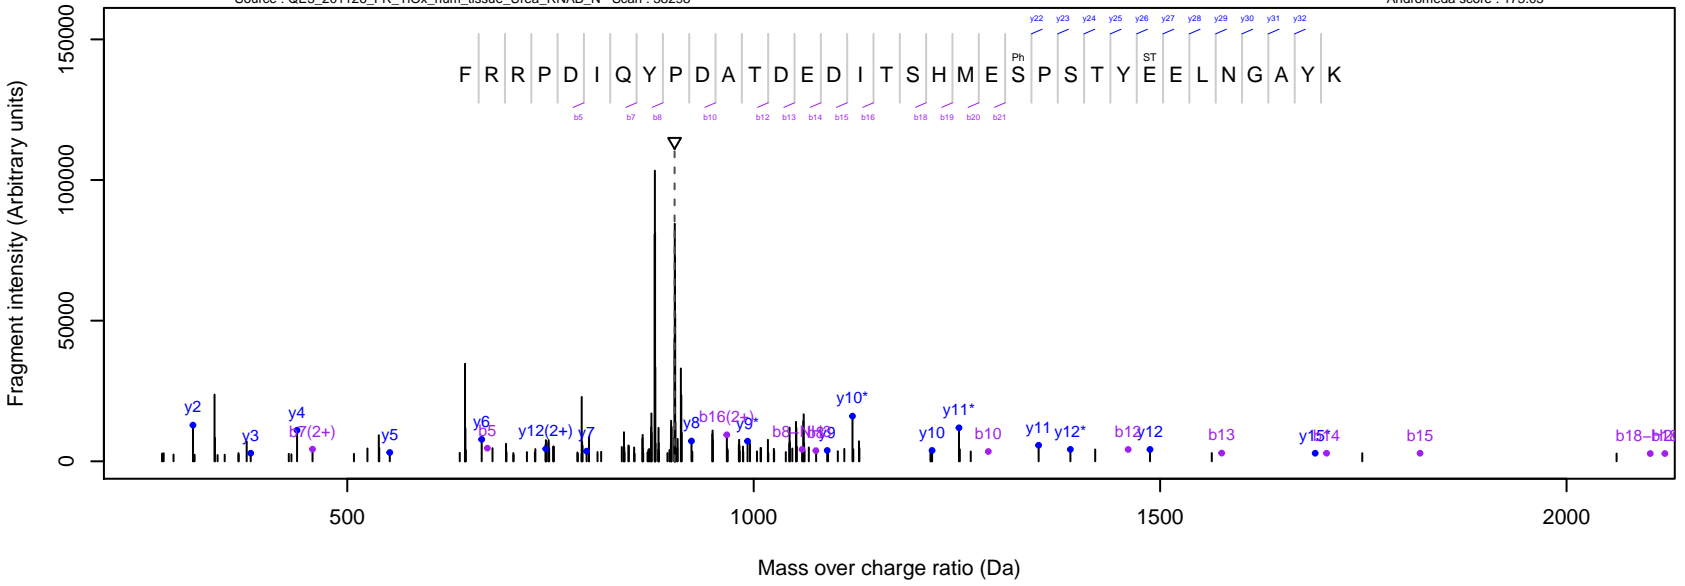

NRTPS(Phospho (STY))DVKELVDNSR-3+

Source : QE3\_201126\_FR\_TiOx\_hum\_tissue\_Urea\_RNAB\_H Scan : 24332

Andromeda score : 173.03

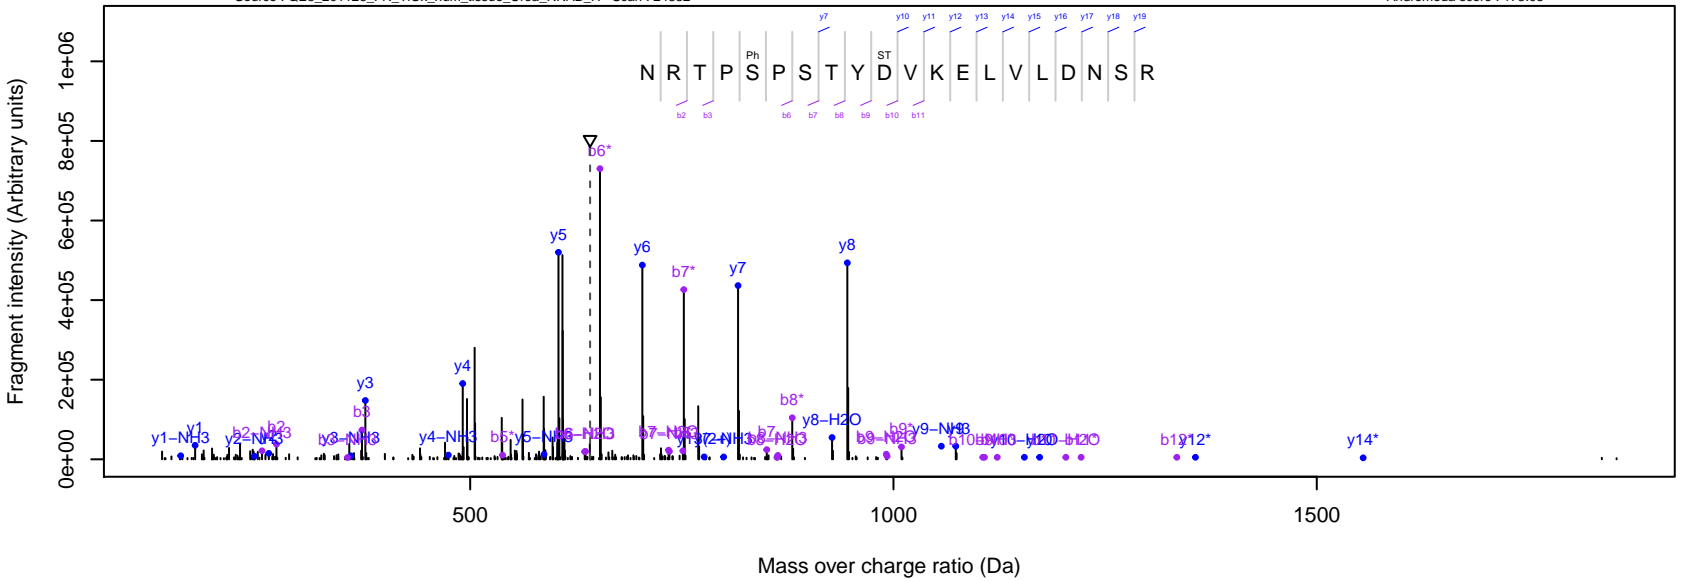

RFS(Phospho (STY))DSEGEETVPEPR-2+

Source : QE3\_201126\_FR\_TiOx\_hum\_tissue\_Urea\_RNAB\_N Scan : 16938

Andromeda score : 173.03

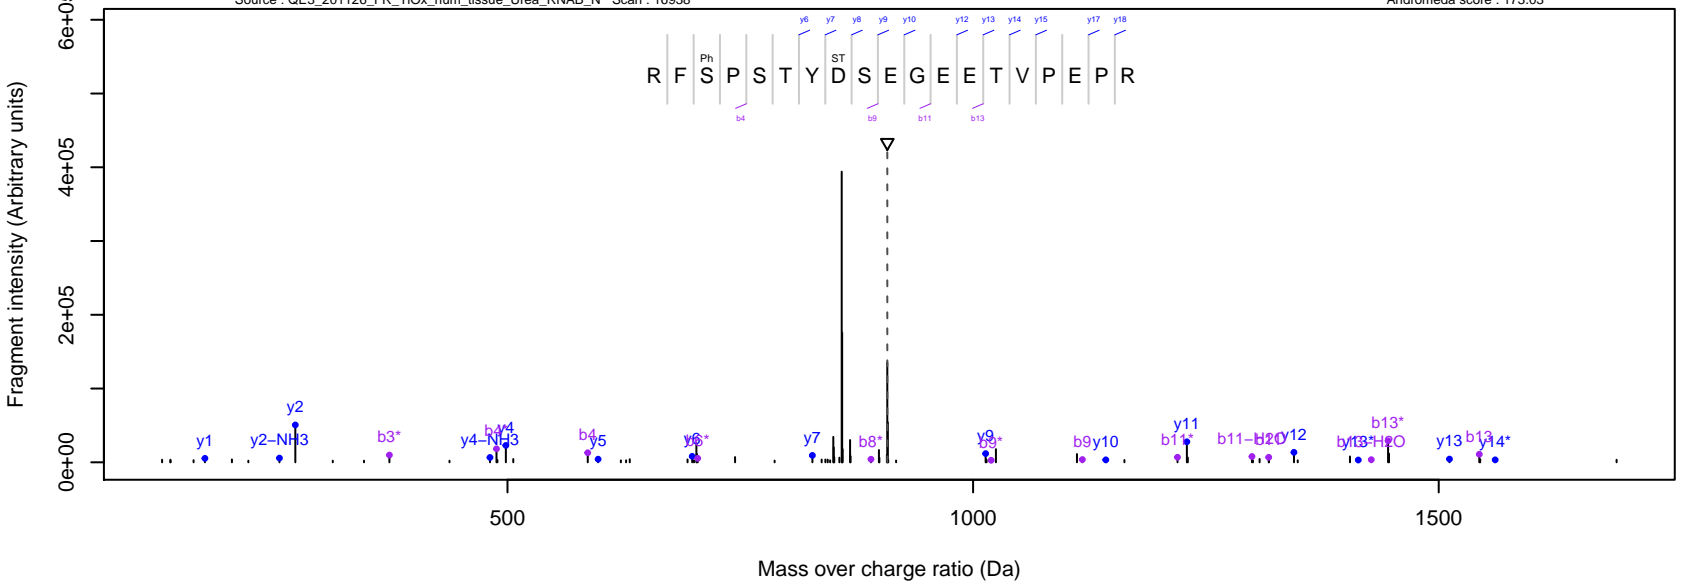



S(Phospho (STY))TQAATQVVLNVPETR-2+

Source : QE3\_201126\_FR\_TIOx\_hum\_tissue\_Urea\_RNAB\_N Scan : 33554

Andromeda score : 173.03

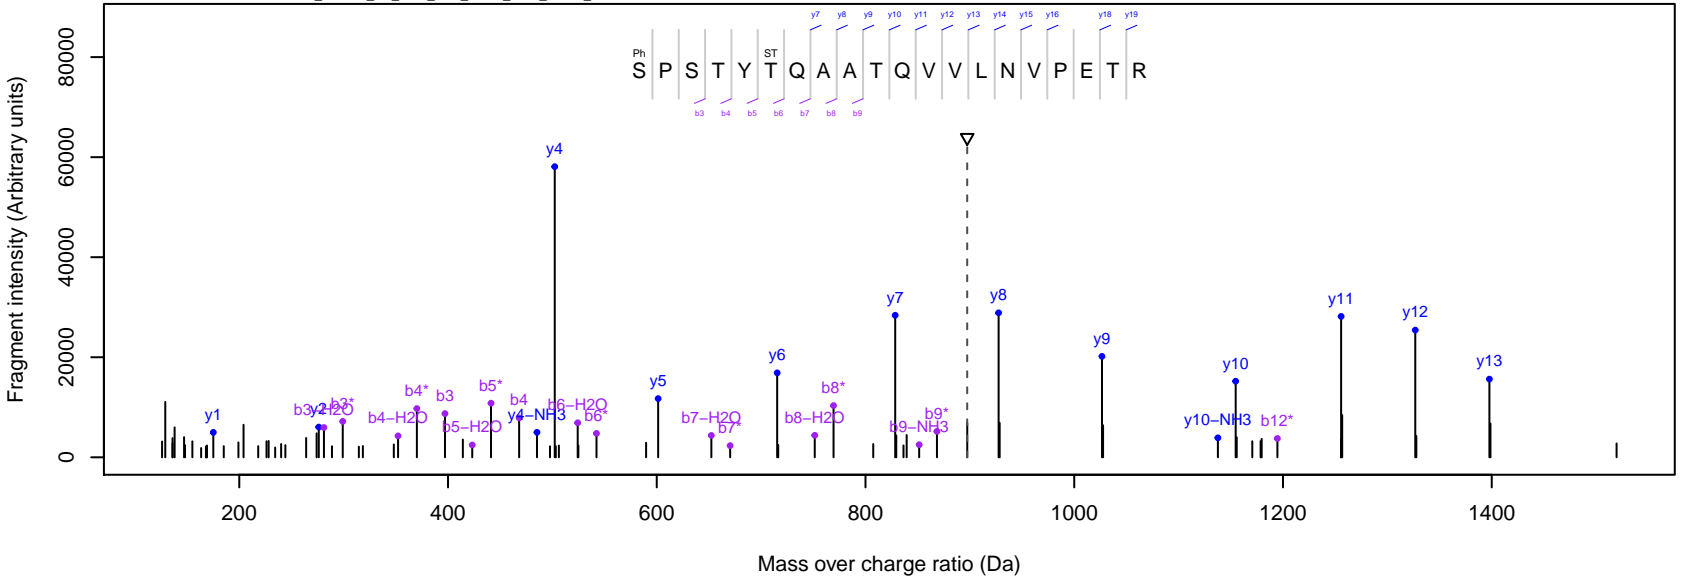

YHGHS(Phospho (STY))MSDPGVSYR-3+

Source : QE3\_201126\_FR\_TIOx\_hum\_tissue\_Urea\_RNAB\_H Scan : 10325

Andromeda score : 173.03

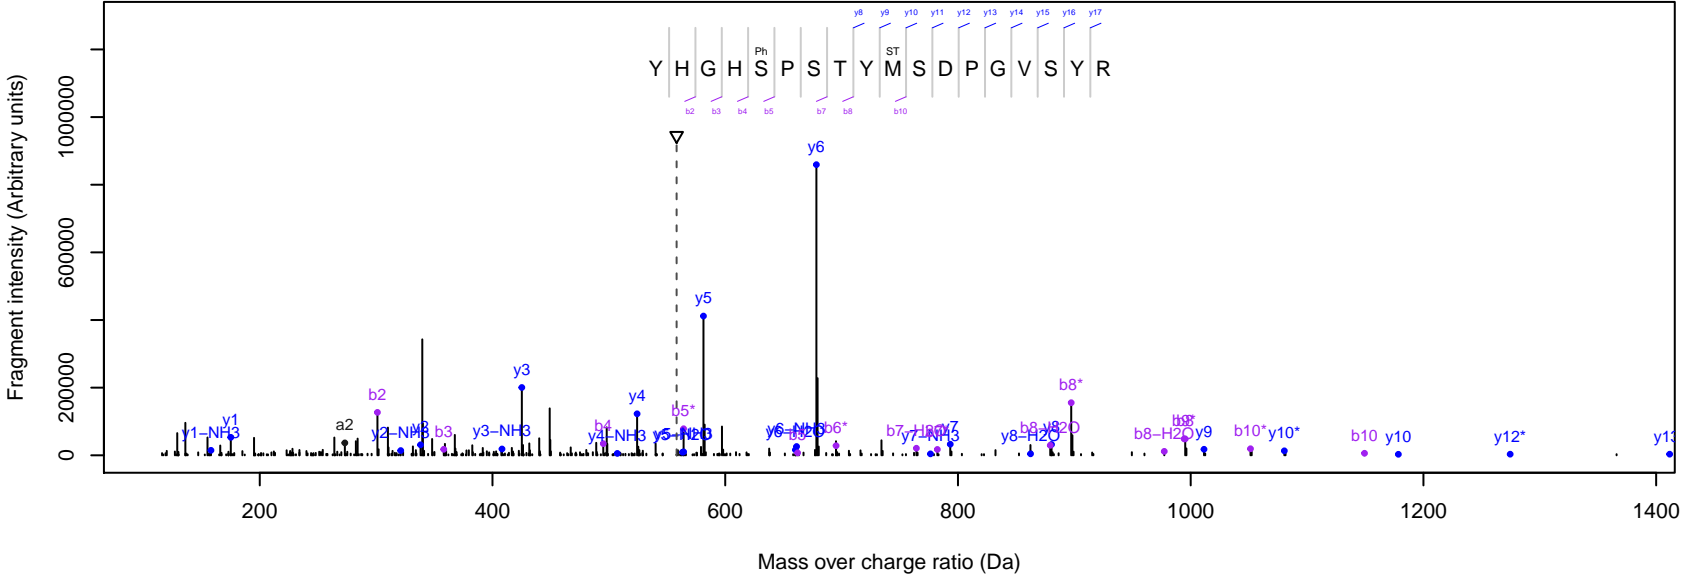

(Acetyl (Protein N-term))MEVAEPSS(Phospho (STY))PTEEEEEEEHSAEPRR-3+

Source : QE3\_201126\_FR\_TIOx\_hum\_tissue\_Urea\_RNAB\_H Scan : 27169

Andromeda score : 172.95

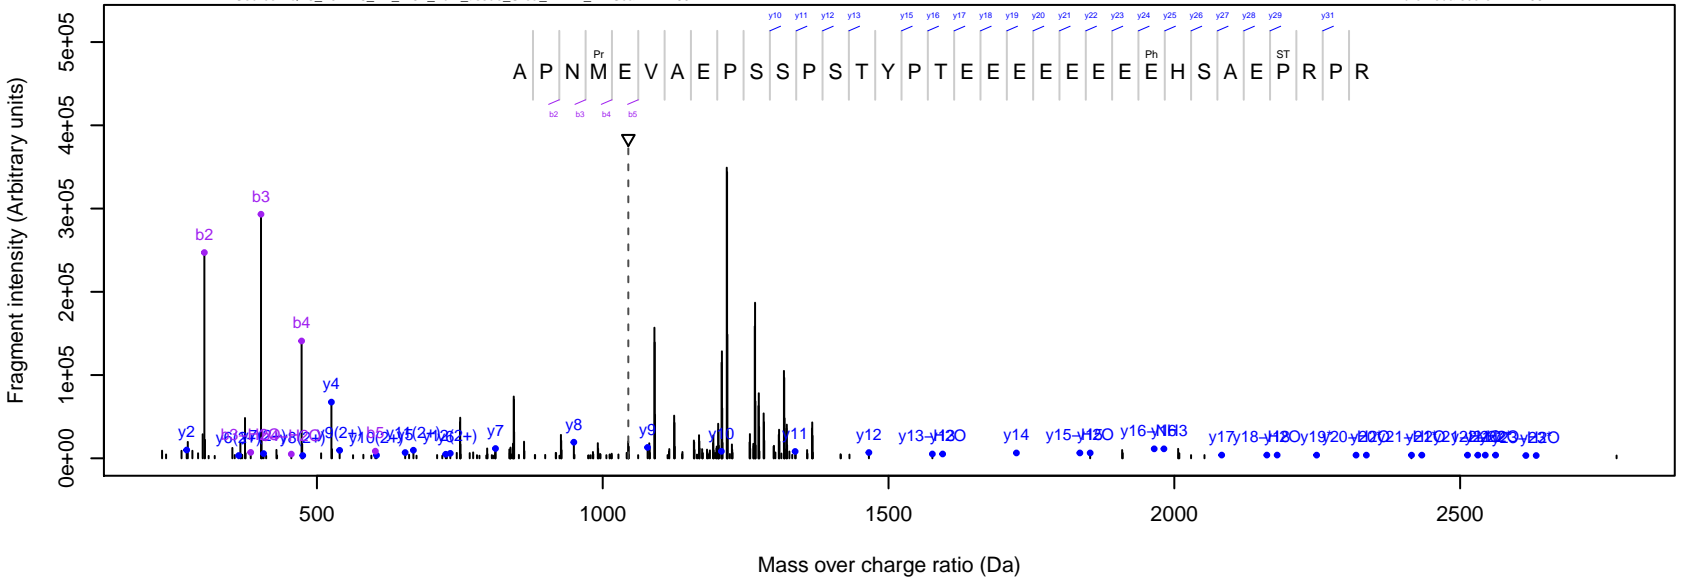

### RGS(Phospho (STY))LSNAGDPEIVK-2+

Source : QE3\_201126\_FR\_TIOx\_hum\_tissue\_Urea\_RNAB\_H Scan : 14240

Andromeda score : 172.95

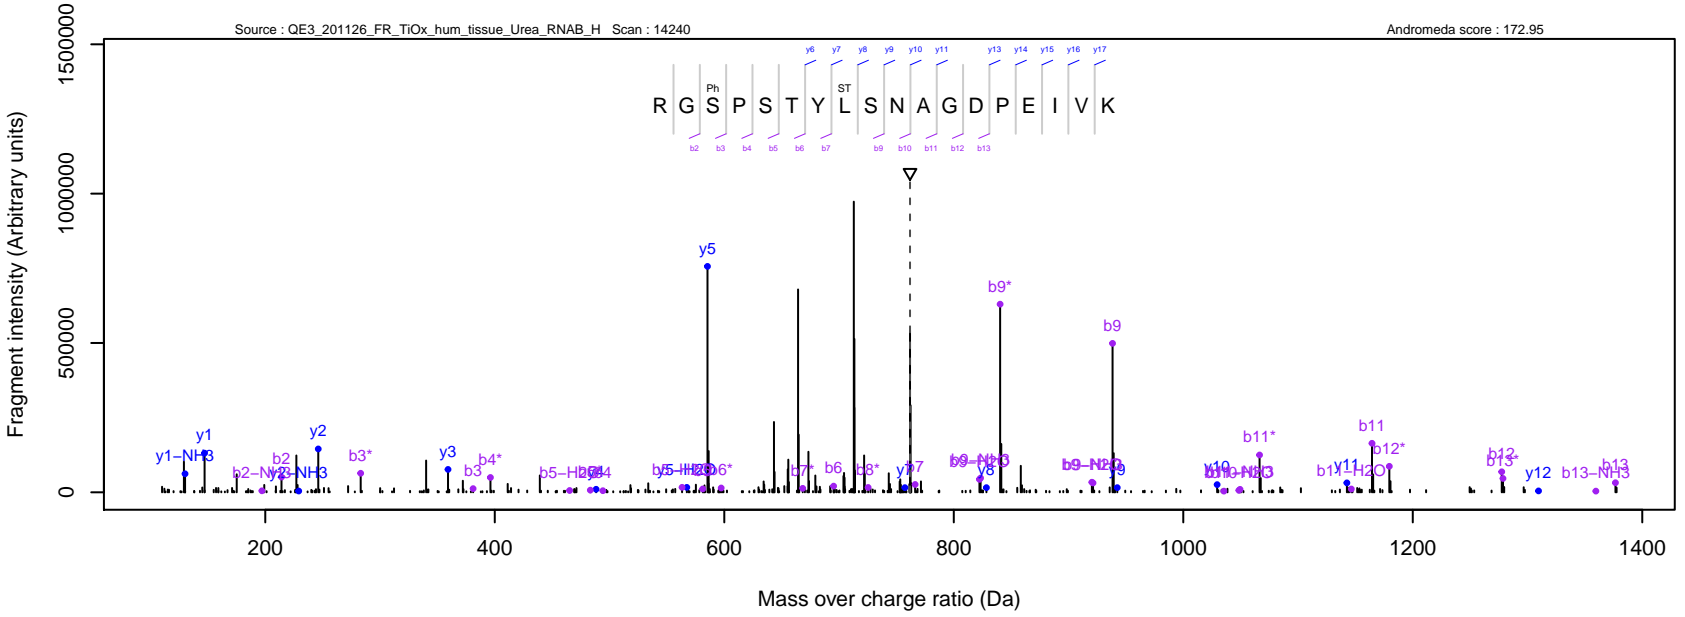

### S(Phospho (STY))TFSTNYR-2+

Source : QE3\_201126\_FR\_TIOx\_hum\_tissue\_Urea\_RNAB\_N Scan : 15805

Andromeda score : 172.94

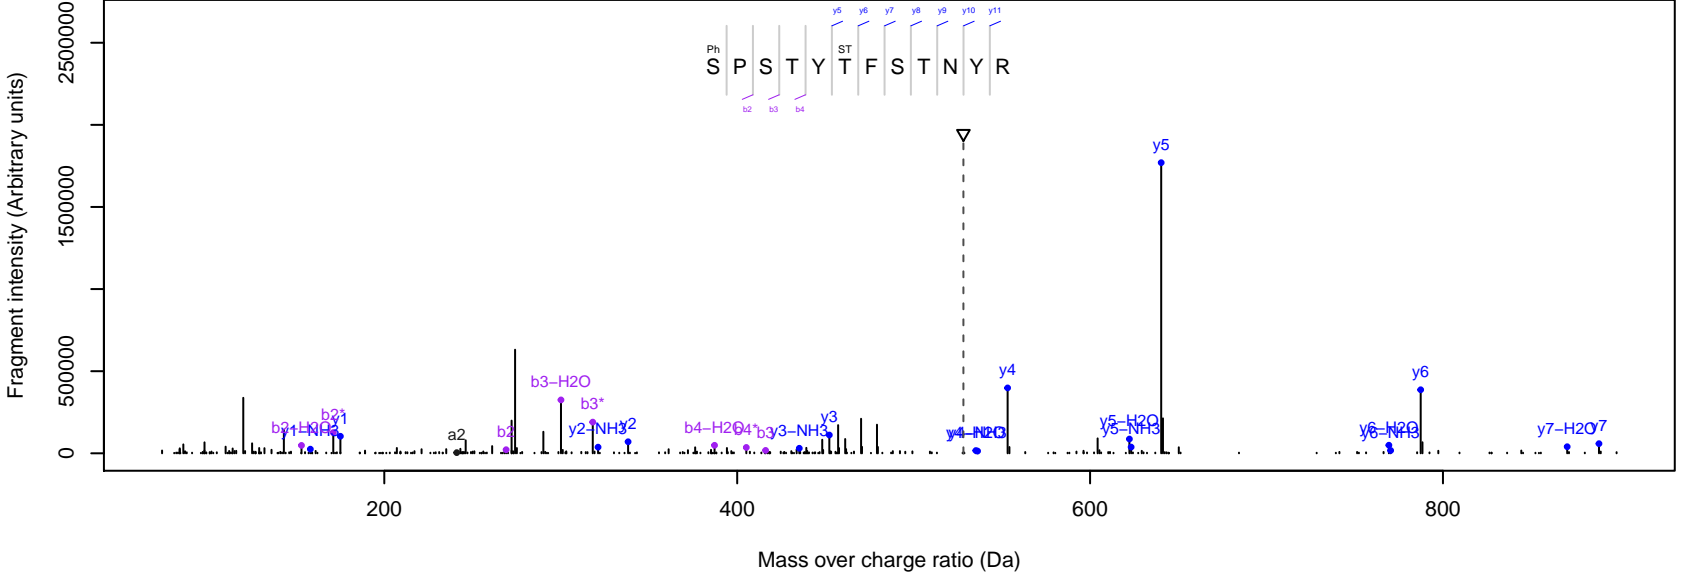

### VLVHPPQDGEPTLVQKEPVEAAPAEPVAST(Phospho (STY))-3+

Source : QE3\_201126\_FR\_TIOx\_hum\_tissue\_Urea\_RNAB\_N Scan : 36527

Andromeda score : 172.92

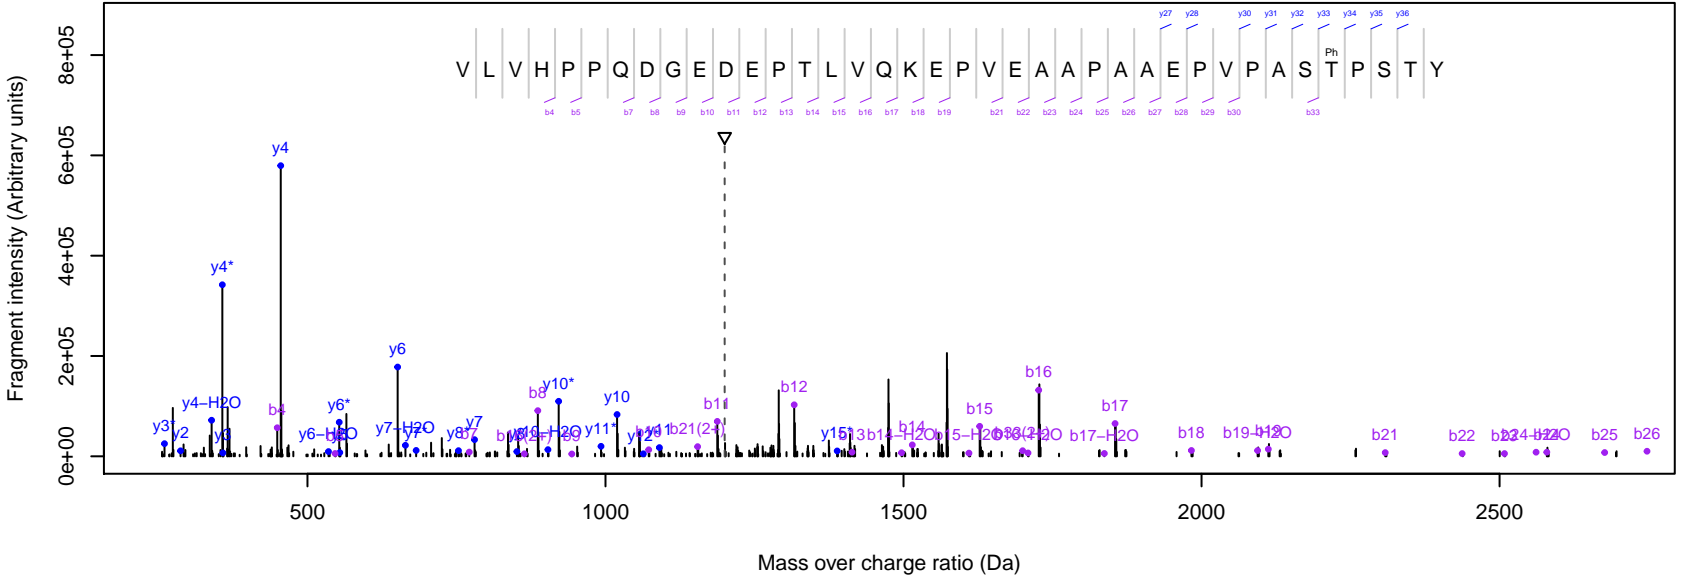

SQS(Phospho (STY))LPTLLSPVR-2+

Source : QE3\_201126\_FR\_TIOx\_hum\_tissue\_Urea\_RNAB\_N Scan : 44298

Andromeda score : 172.85

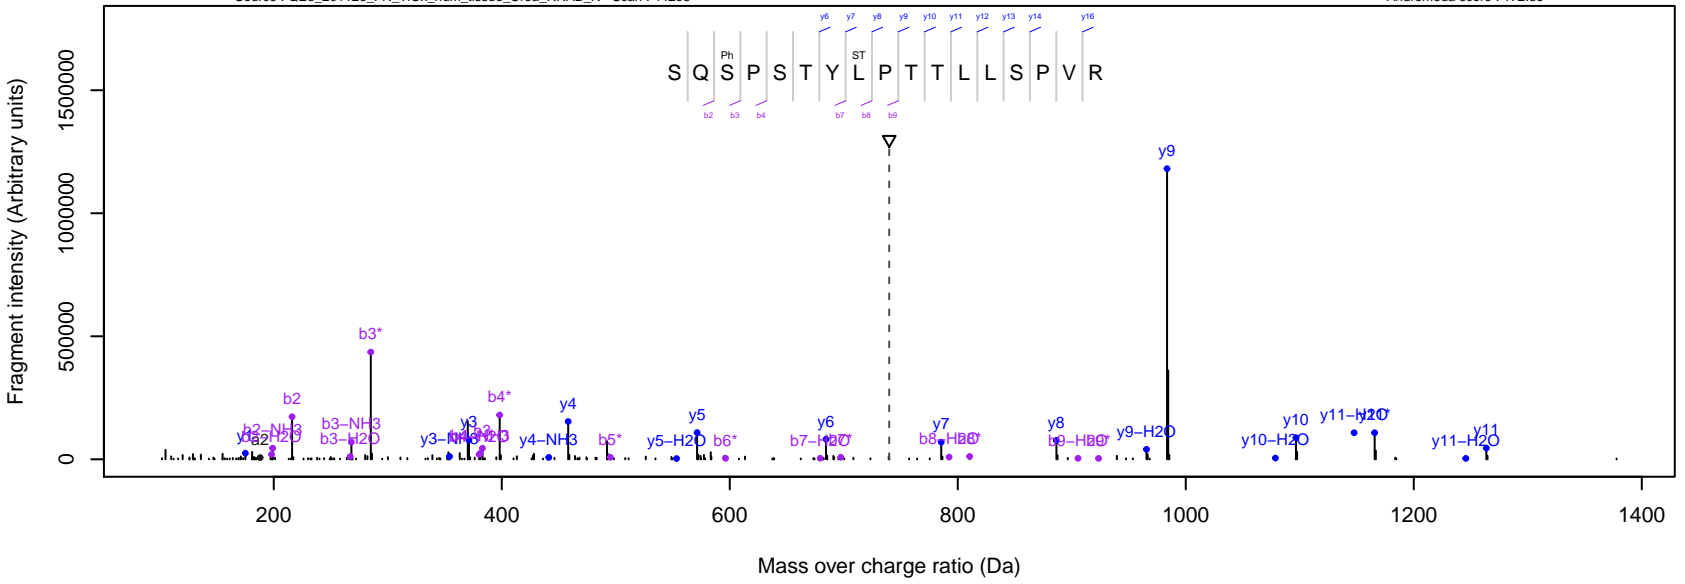

SQDADS(Phospho (STY))PGSSGAPENLTFK-2+

Source : QE3\_201126\_FR\_TIOx\_hum\_tissue\_Urea\_RNAB\_N Scan : 27968

Andromeda score : 172.84

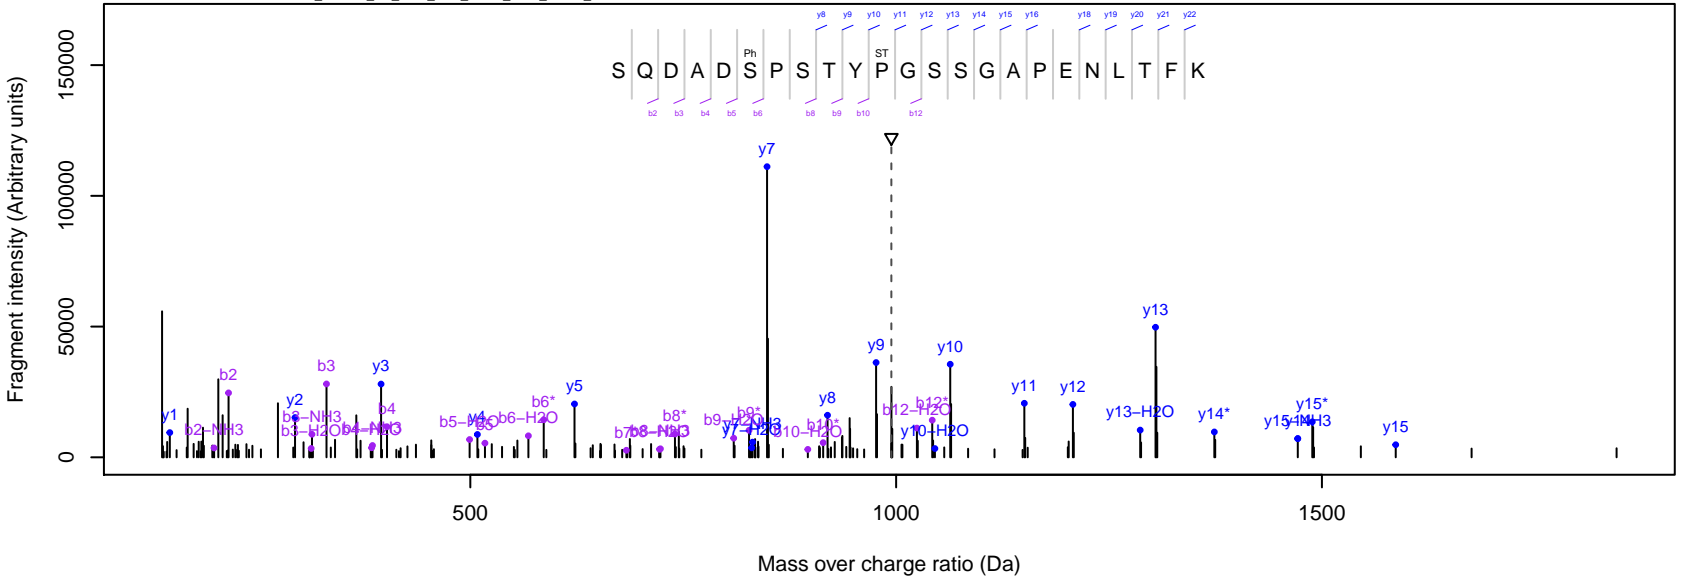

YLS(Phospho (STY))FTPPEKDGFPSPALNAK-2+

Source : QE3\_201126\_FR\_TIOx\_hum\_tissue\_Urea\_RNAB\_B Scan : 43415

Andromeda score : 172.83

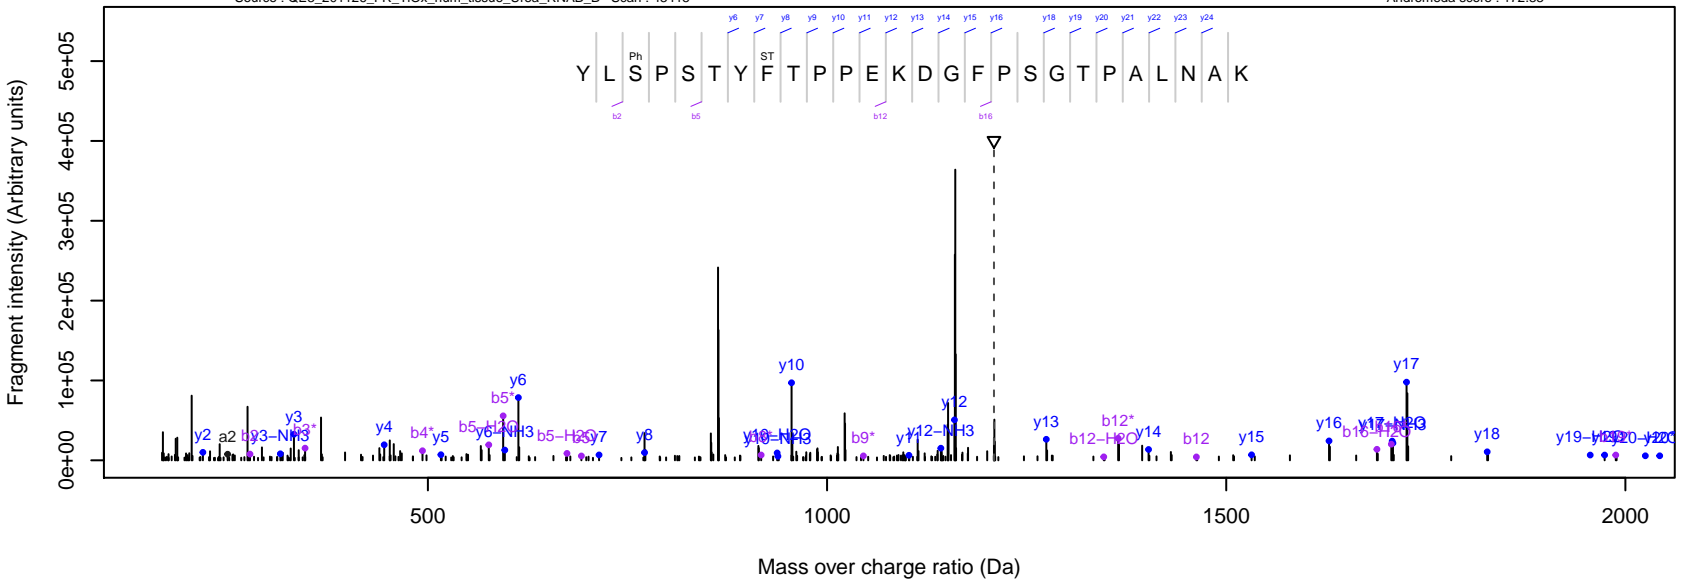

SVS(Phospho (STY))ESHTSCPAESASDAAPLQR-3+

Source : QE3\_201126\_FR\_TiOx\_hum\_tissue\_Urea\_RNAB\_N Scan : 15686

Andromeda score : 172.79

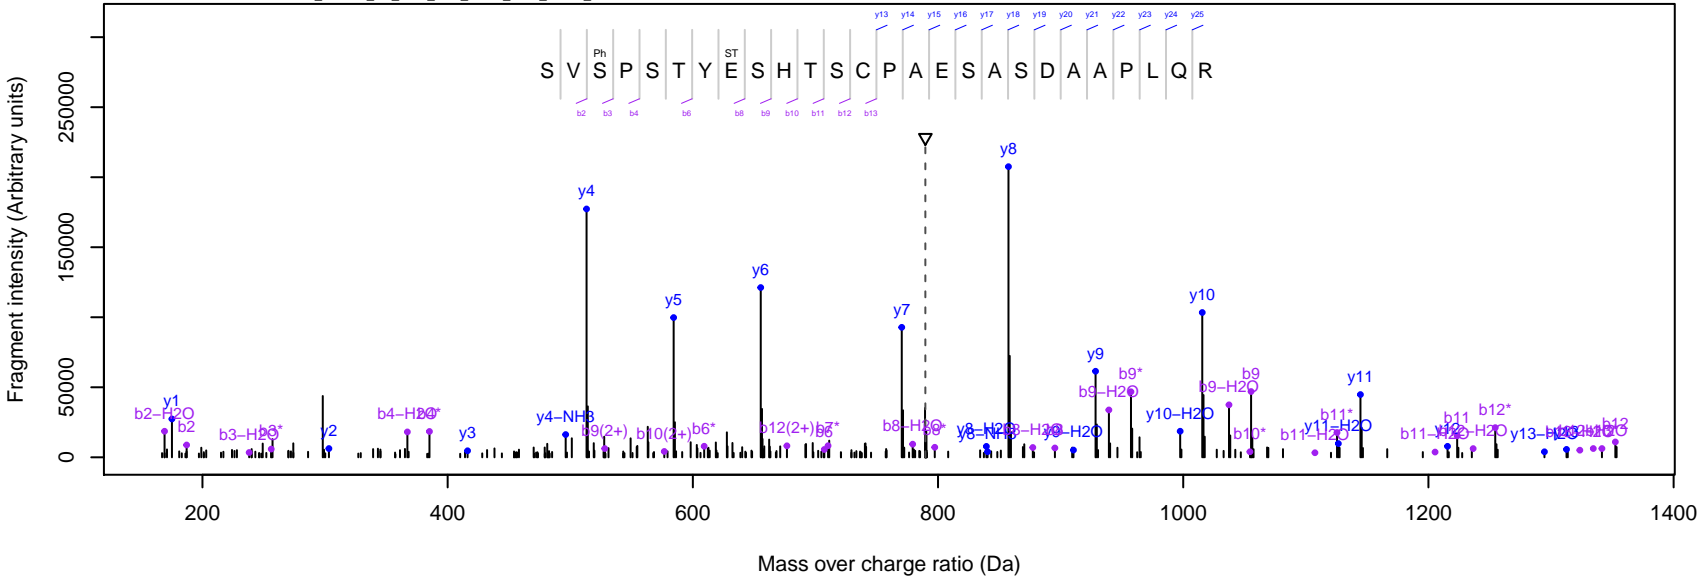

LGAGGGS(Phospho (STY))PEKS(Phospho (STY))PSAQELK-2+

Source : QE3\_201126\_FR\_TiOx\_hum\_tissue\_Urea\_RNAB\_H Scan : 15196

Andromeda score : 172.66

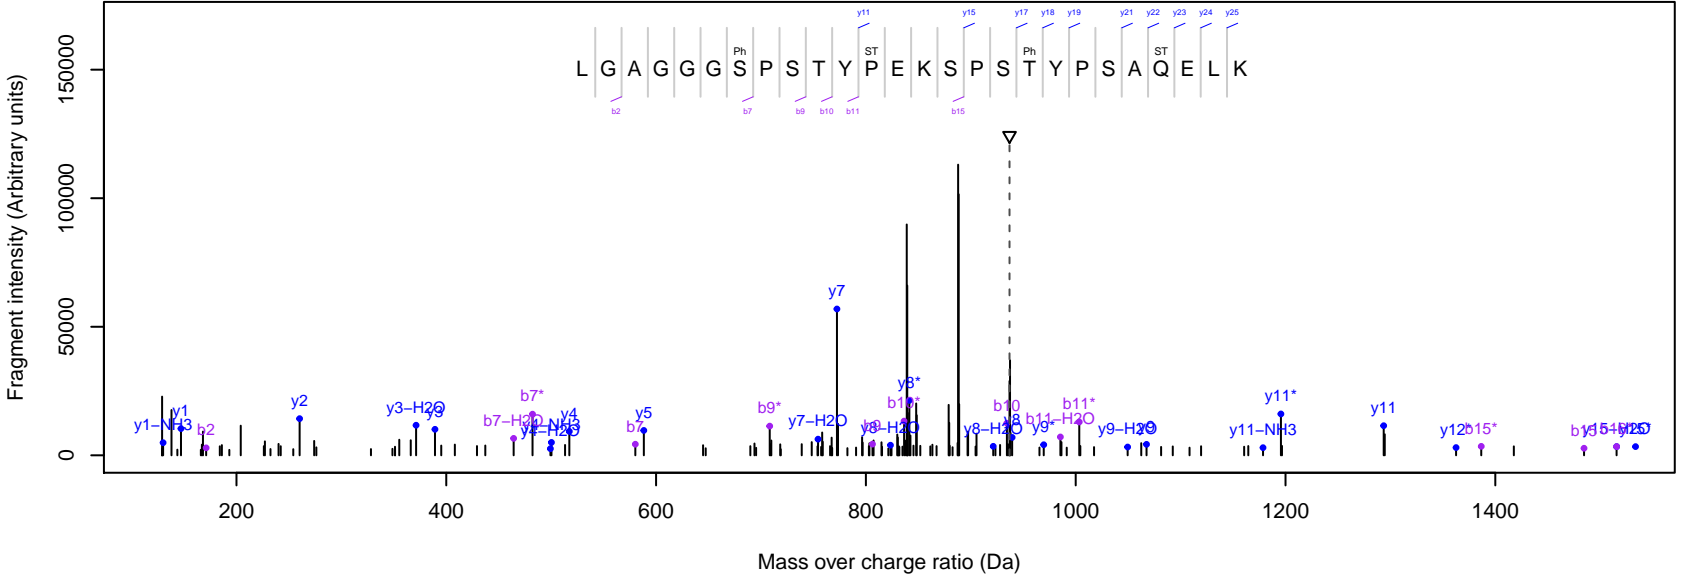

TKECS(Phospho (STY))VEKGTGDSLRL-3+

Source : QE3\_201126\_FR\_TiOx\_hum\_tissue\_Urea\_RNAB\_N Scan : 6240

Andromeda score : 172.66

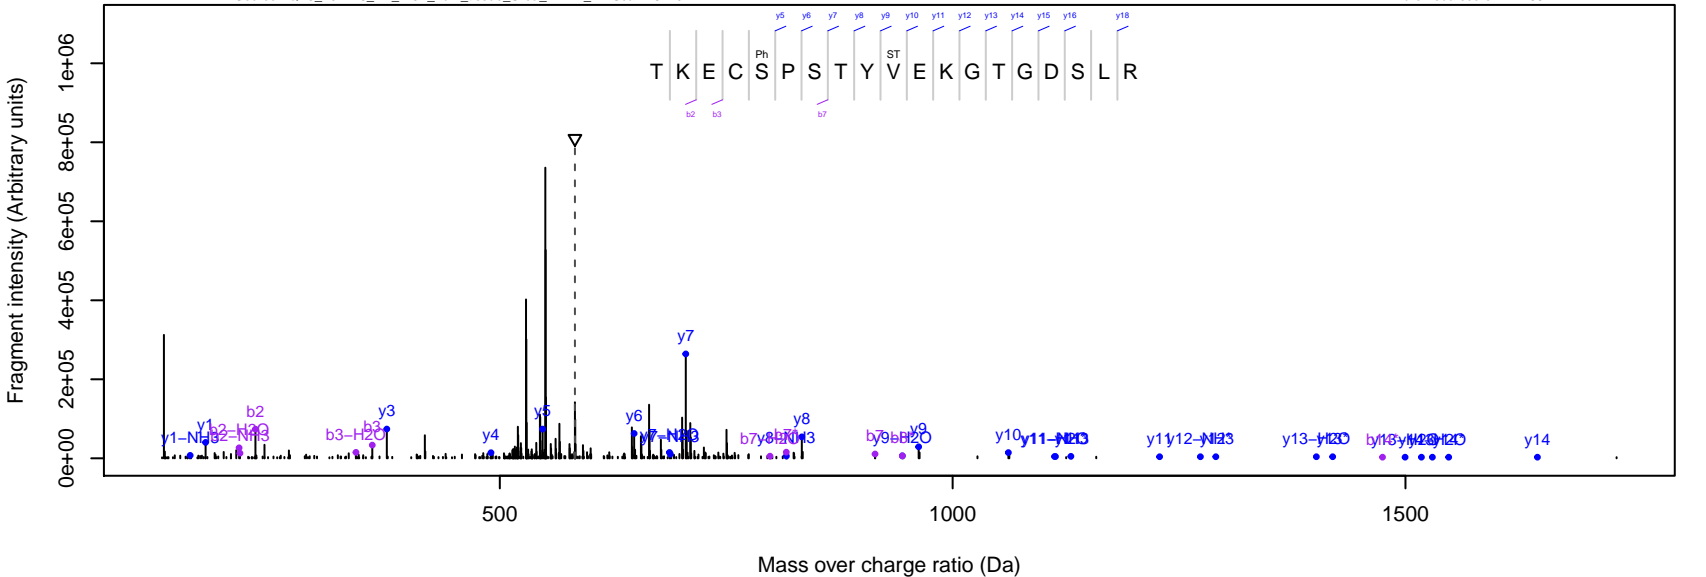

VDPSLMEDS(Phospho (STY))DDGPSLPTK-2+

Source : QE3\_201126\_FR\_TiOx\_hum\_tissue\_Urea\_RNAB\_H Scan : 36214

Andromeda score : 172.6

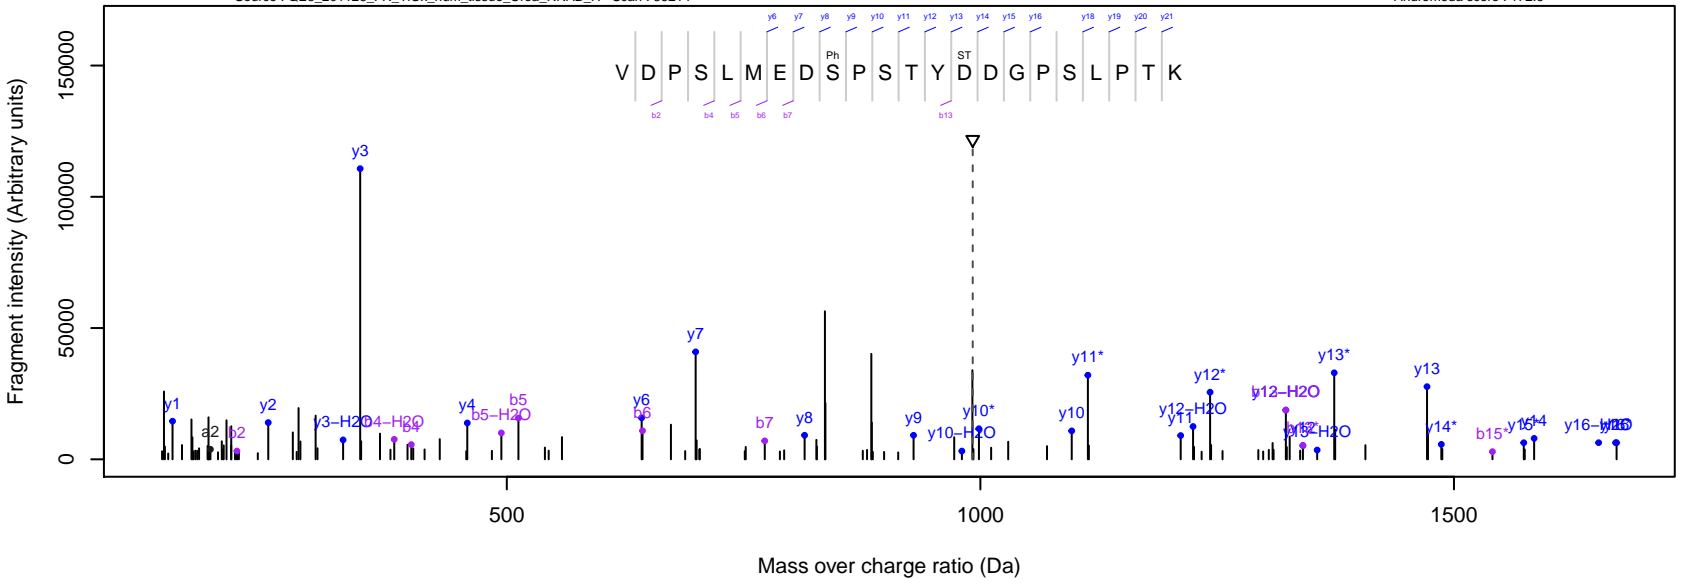

KRDFS(Phospho (STY))LEQLR-2+

Source : QE3\_201126\_FR\_TiOx\_hum\_tissue\_Urea\_RNAB\_N Scan : 19497

Andromeda score : 172.58

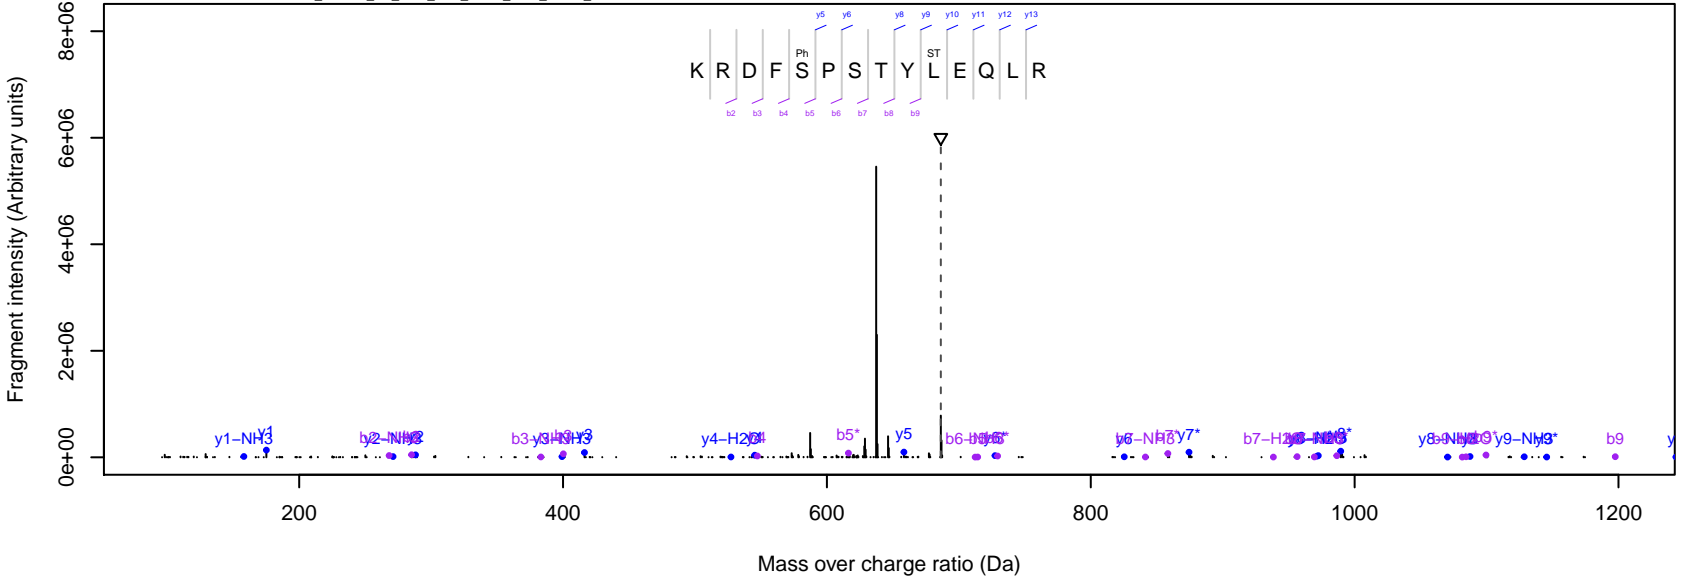

ATS(Phospho (STY))TATSGFAGAIGQK-2+

Source : QE3\_201126\_FR\_TiOx\_hum\_tissue\_Urea\_RNAB\_N Scan : 24863

Andromeda score : 172.57

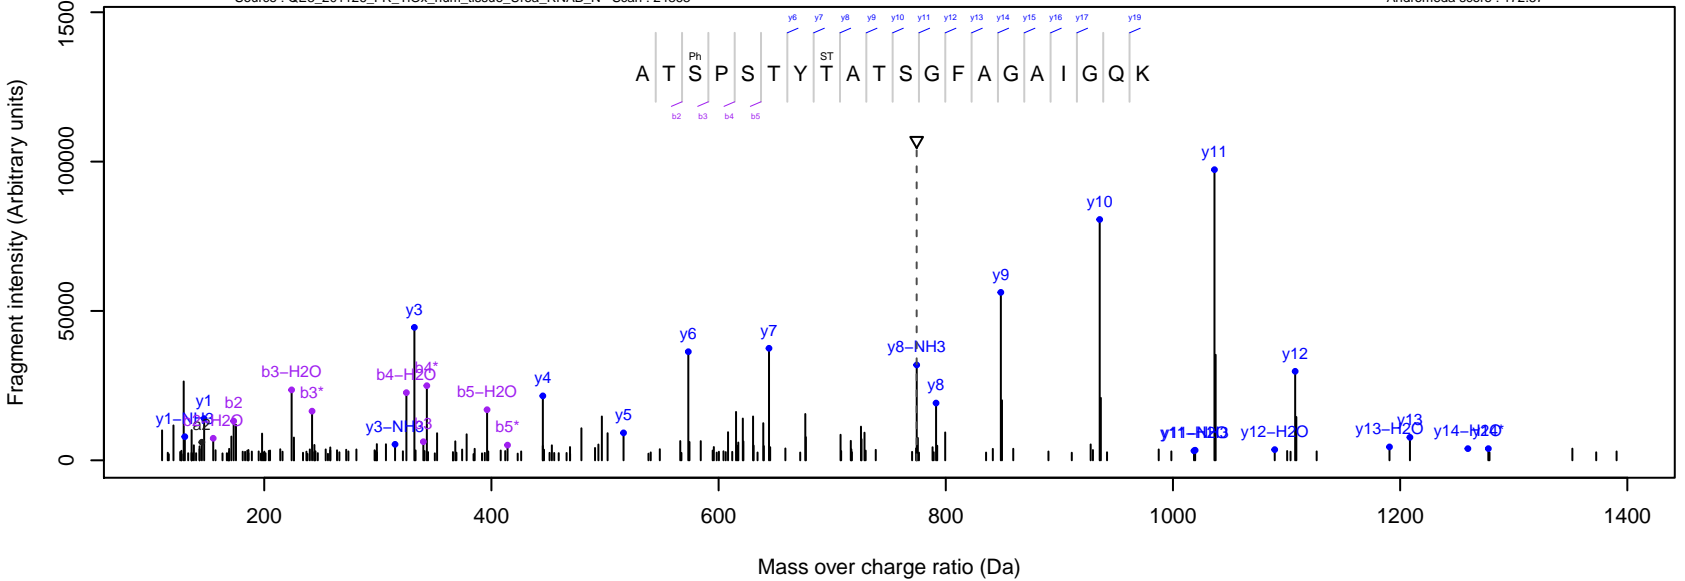

(Acetyl (Protein N-term))M(Oxidation (M))LQQDS(Phospho (STY))NDDTEDVSLFDAEEETTNRPR-3+

Source : QE3\_201126\_FR\_TIOx\_hum\_tissue\_Urea\_RNAB\_B Scan : 48058

Andromeda score : 172.52

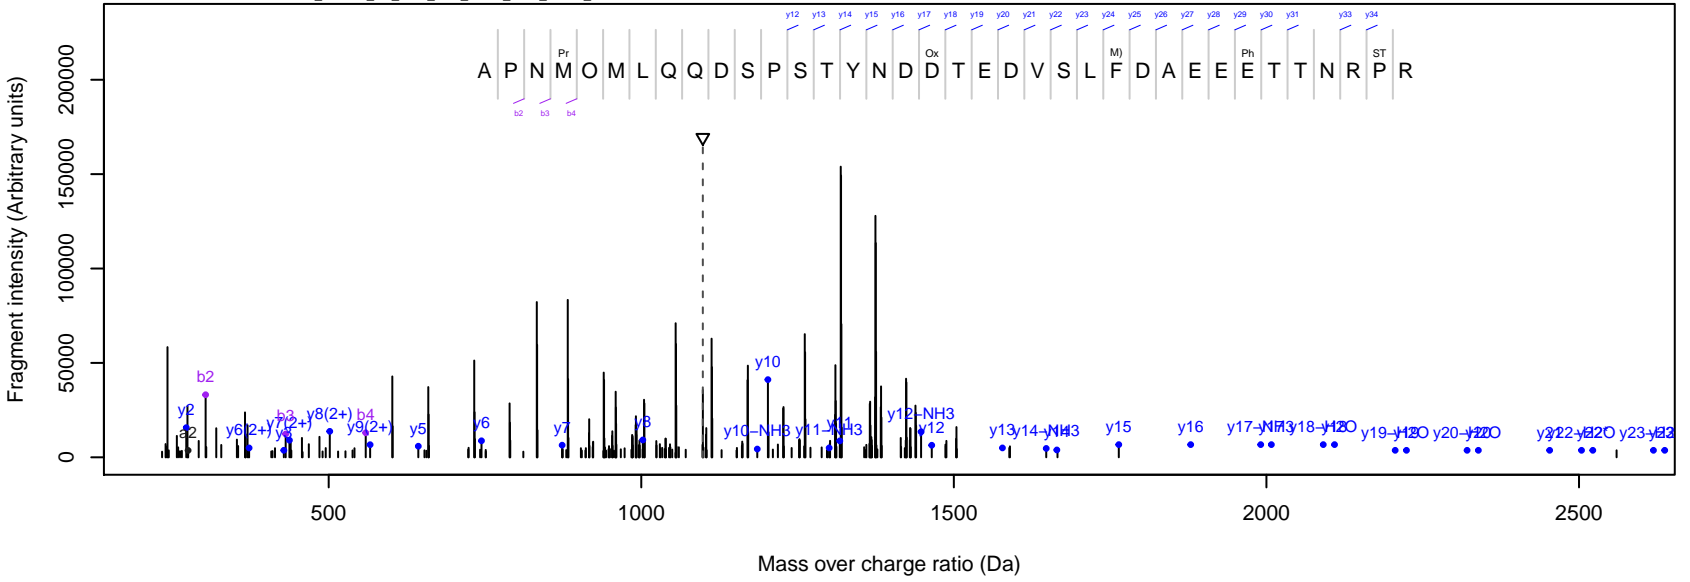

SNS(Phospho (STY))AWQIYLR-2+

Source : QE3\_201126\_FR\_TIOx\_hum\_tissue\_Urea\_RNAB\_H Scan : 44120

Andromeda score : 172.51

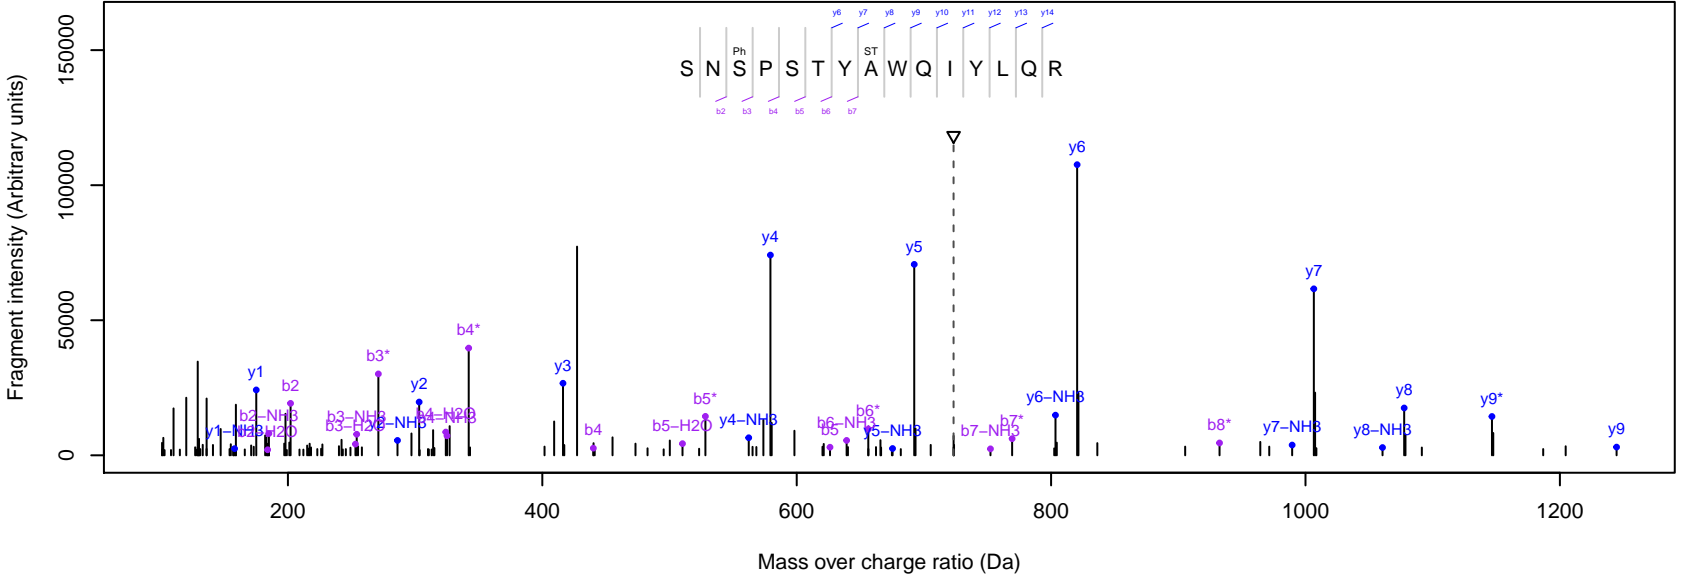

VTDALPEPPGAMAAS(Phospho (STY))EDEEEEEALEAMQSR-3+

Source : QE3\_201126\_FR\_TIOx\_hum\_tissue\_Urea\_RNAB\_N Scan : 55908

Andromeda score : 172.51

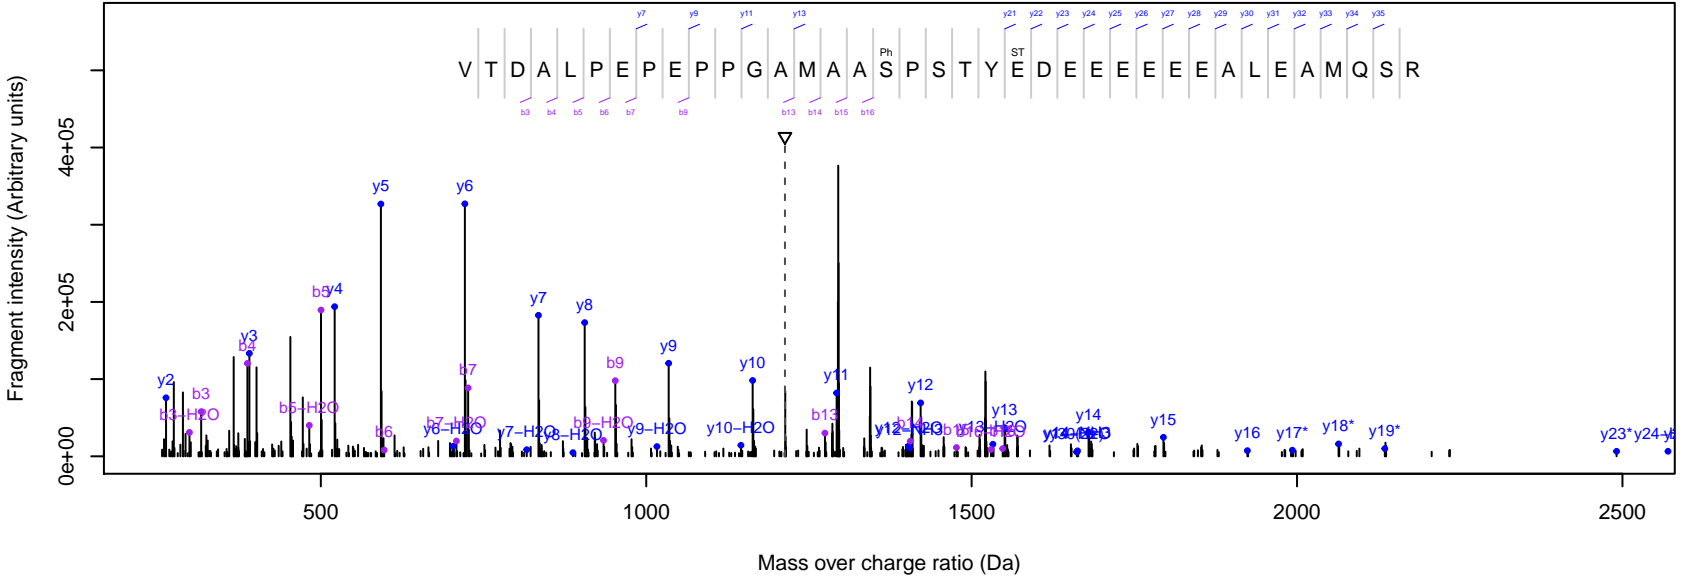

LLDFGS(Phospho (STY))LSNLQVTQPTVGM(Oxidation (M))NFK-2+

Source : QE3\_201126\_FR\_TiOx\_hum\_tissue\_Urea\_RNAB\_B Scan : 58565

Andromeda score : 172.5

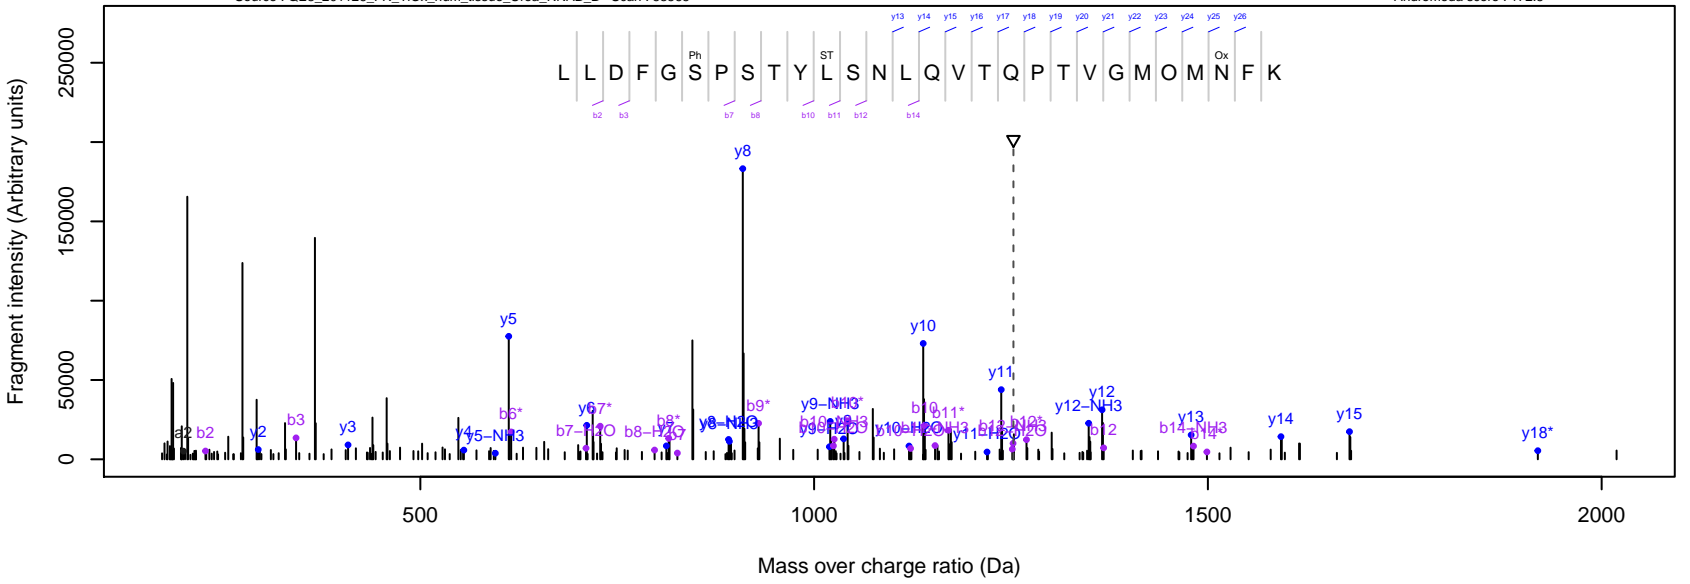

HATRHS(Phospho (STY))PQQEENTIFK-3+

Source : QE3\_201126\_FR\_TiOx\_hum\_tissue\_Urea\_RNAB\_B Scan : 9503

Andromeda score : 172.42

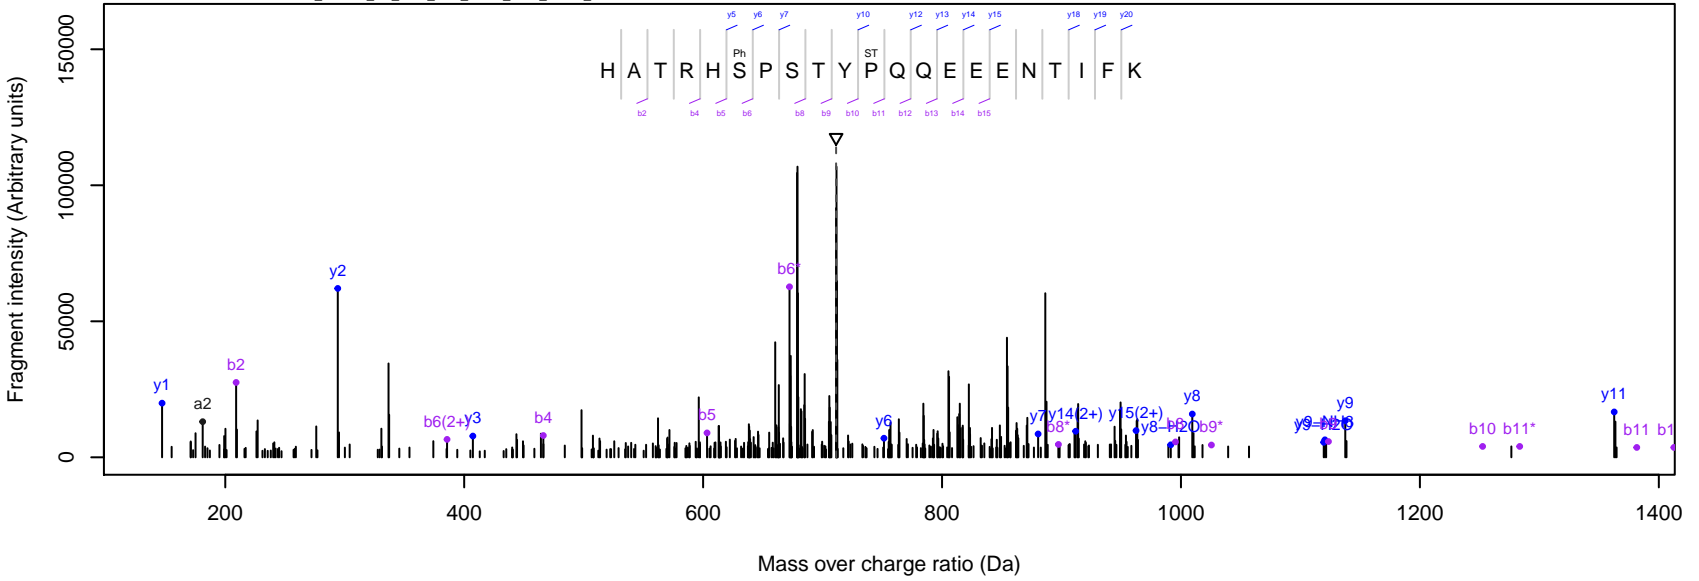

VGS(Phospho (STY))HPEGASWLSTAANFLSR-3+

Source : QE3\_201126\_FR\_TiOx\_hum\_tissue\_Urea\_RNAB\_H Scan : 56370

Andromeda score : 172.37

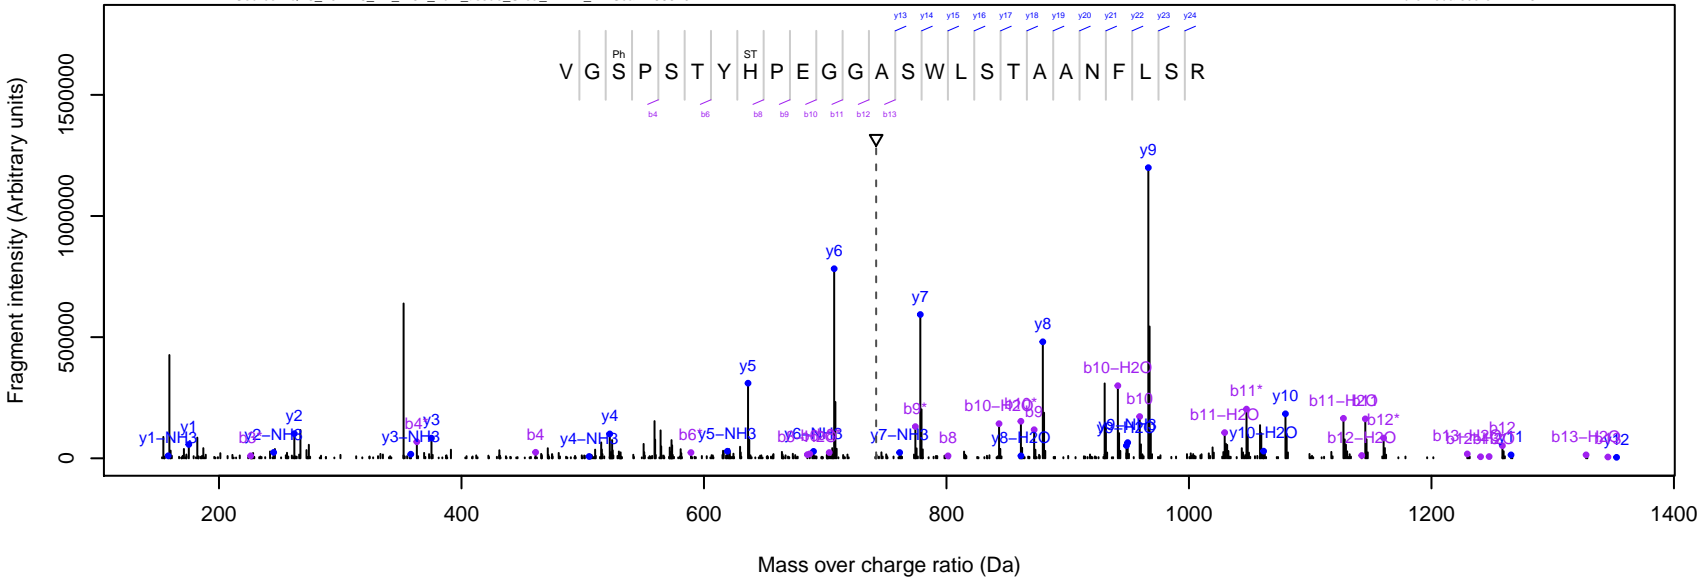

DLKHS(Phospho (STY))LP SGLGLSETQITSHGFDNTK-4+

Source : QE3\_201126\_FR\_TiOx\_hum\_tissue\_Urea\_RNAB\_H Scan : 34907

Andromeda score : 172.36

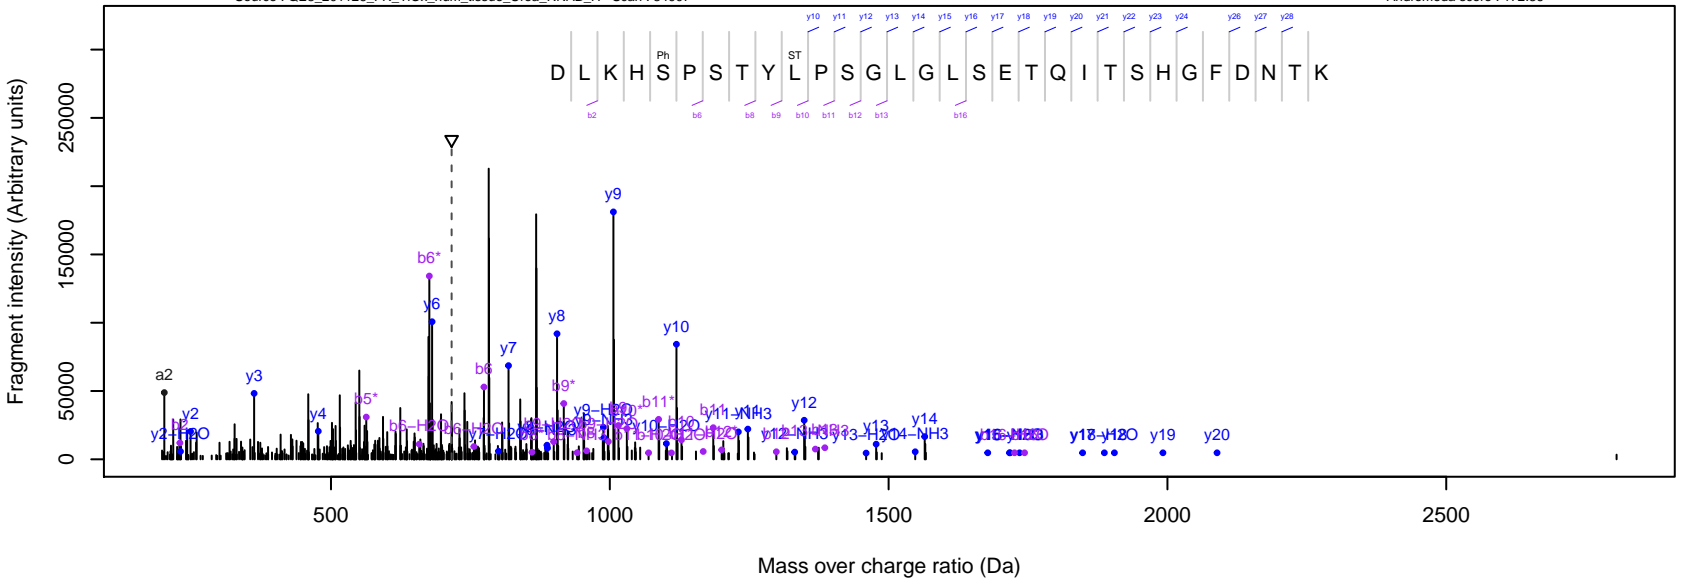

NSPVTK(Phospho (STY))PPRDLPTIPGV TSPSSDEPPMEASQSHLR-4+

Source : QE3\_201126\_FR\_TiOx\_hum\_tissue\_Urea\_RNAB\_H Scan : 33114

Andromeda score : 172.35

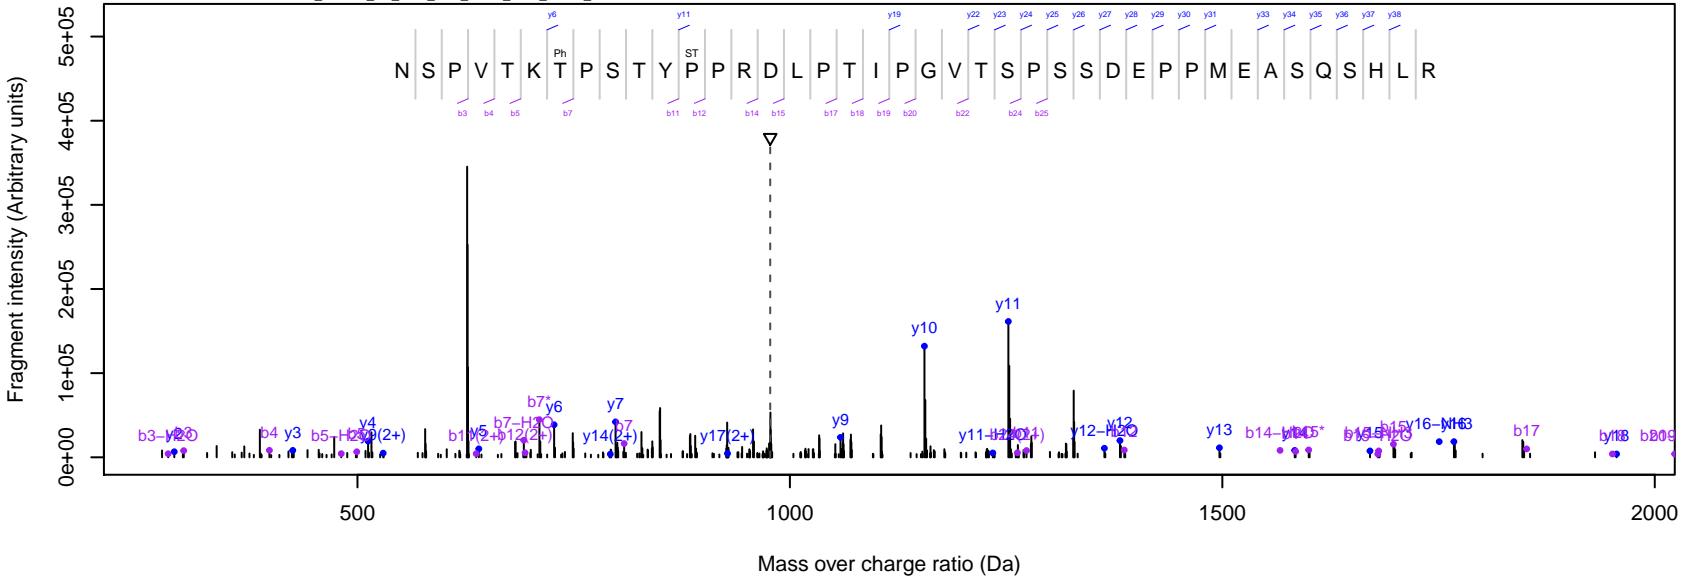

CQQPRT(Phospho (STY))PS(Phospho (STY))PLVLEGTIEQSSP(Phospho (STY))PPLS(Phospho (STY))PTTK-3+

Source : QE3\_201126\_FR\_TiOx\_hum\_tissue\_Urea\_RNAB\_H Scan : 57185

Andromeda score : 172.32

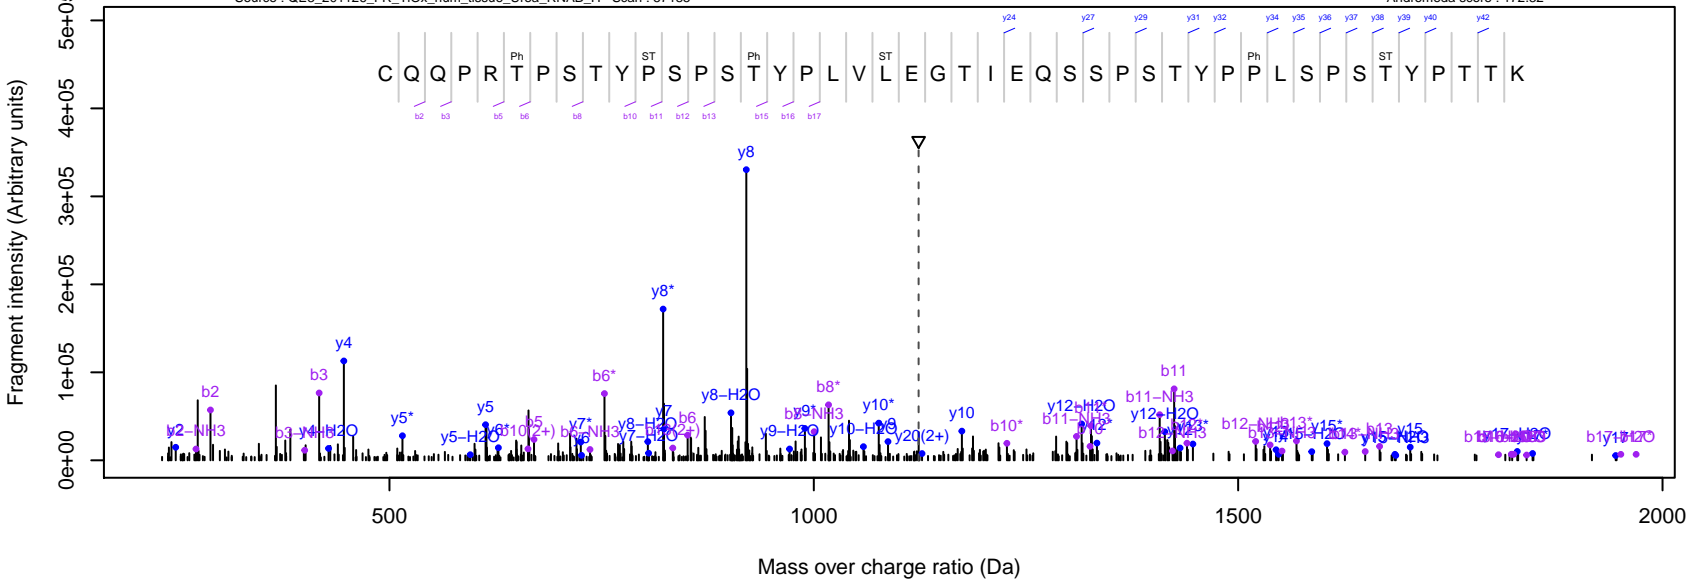



E E A T Y G V W A E R D S P S T Y D D E R P S F G G K

Source : QE3\_201126\_FR\_TiOx\_hum\_tissue\_Urea\_RNAB\_H Scan : 28507

Andromeda score : 172.32

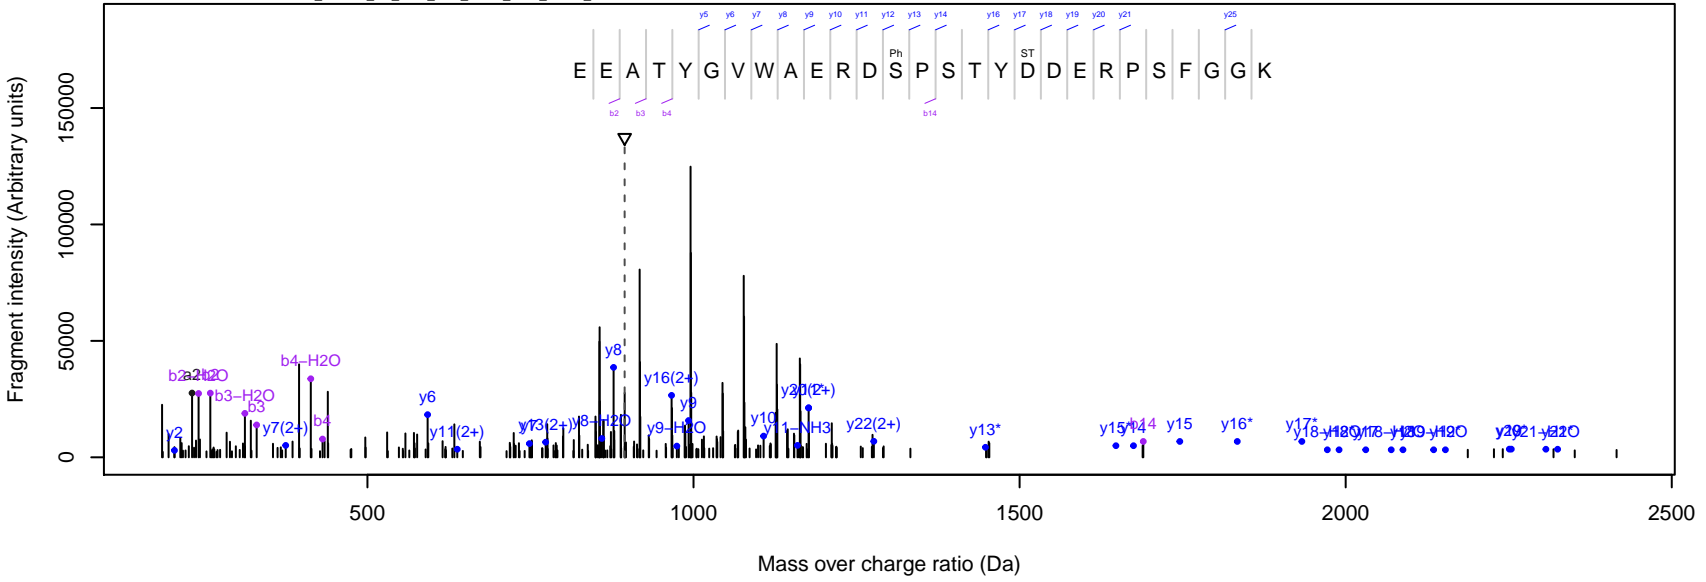

M R S P S T Y P Q P A R P G S A A V P G A A F A P I P R

Source : QE3\_201126\_FR\_TiOx\_hum\_tissue\_Urea\_RNAB\_H Scan : 27776

Andromeda score : 172.32

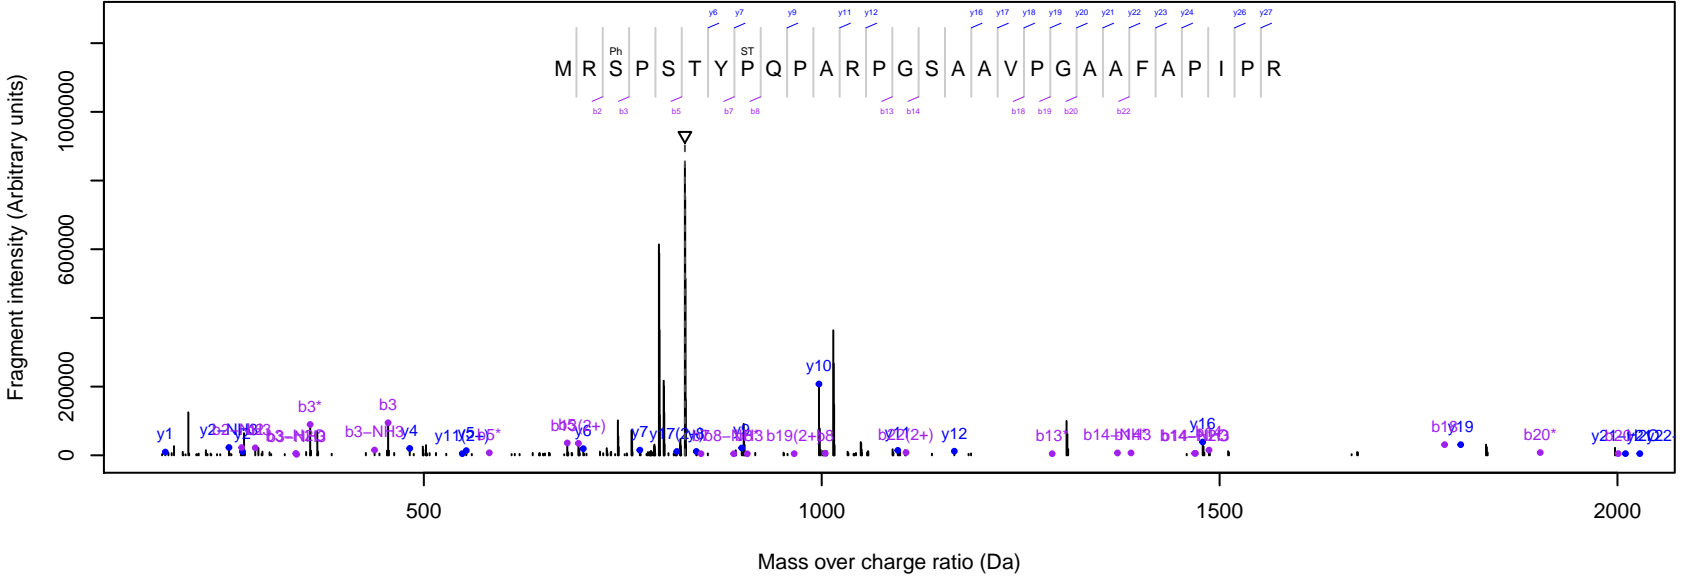

V E S P S T Y E E S P S T Y G D E E G K K H S S G I V A D L S E Q S L K

Source : QE3\_201126\_FR\_TiOx\_hum\_tissue\_Urea\_RNAB\_N Scan : 25538

Andromeda score : 172.26

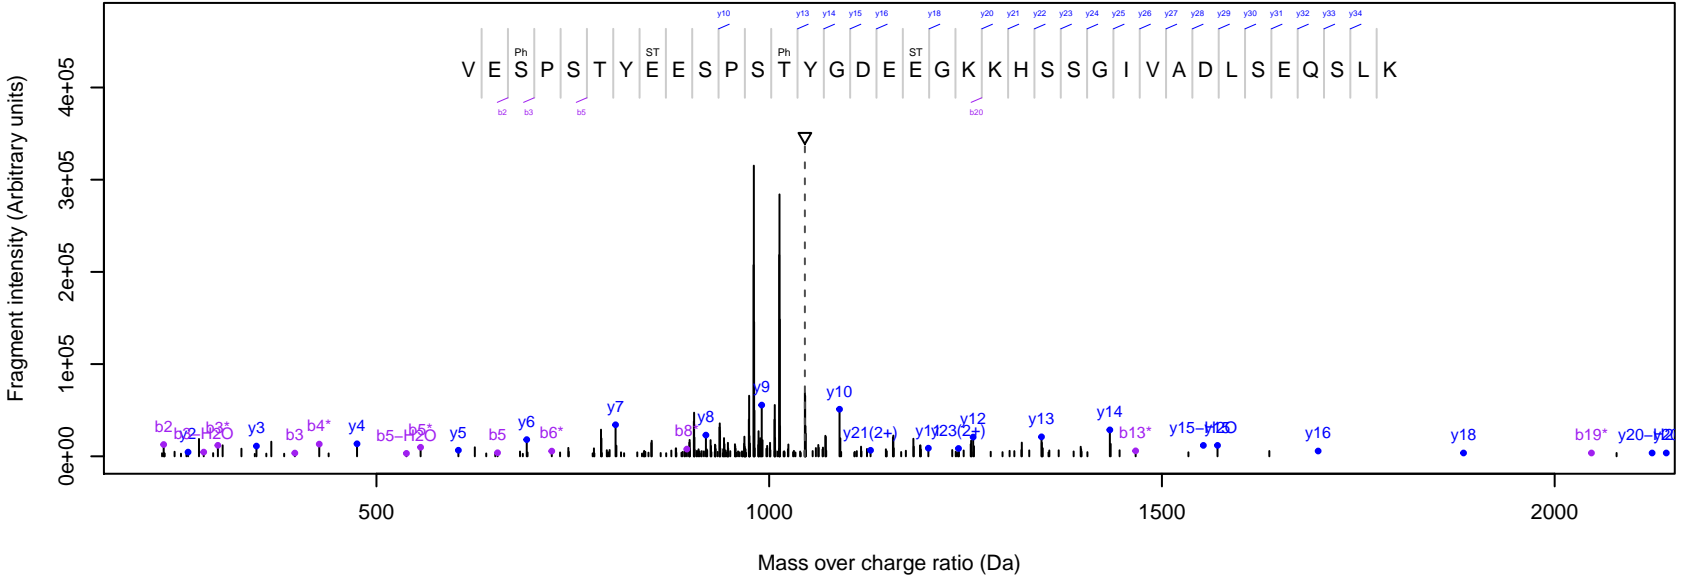

RTPS(Phospho (STY))DDEEDNLFAPPK-2+

Source : QE3\_201126\_FR\_TIOx\_hum\_tissue\_Urea\_RNAB\_H Scan : 26521

Andromeda score : 172.24

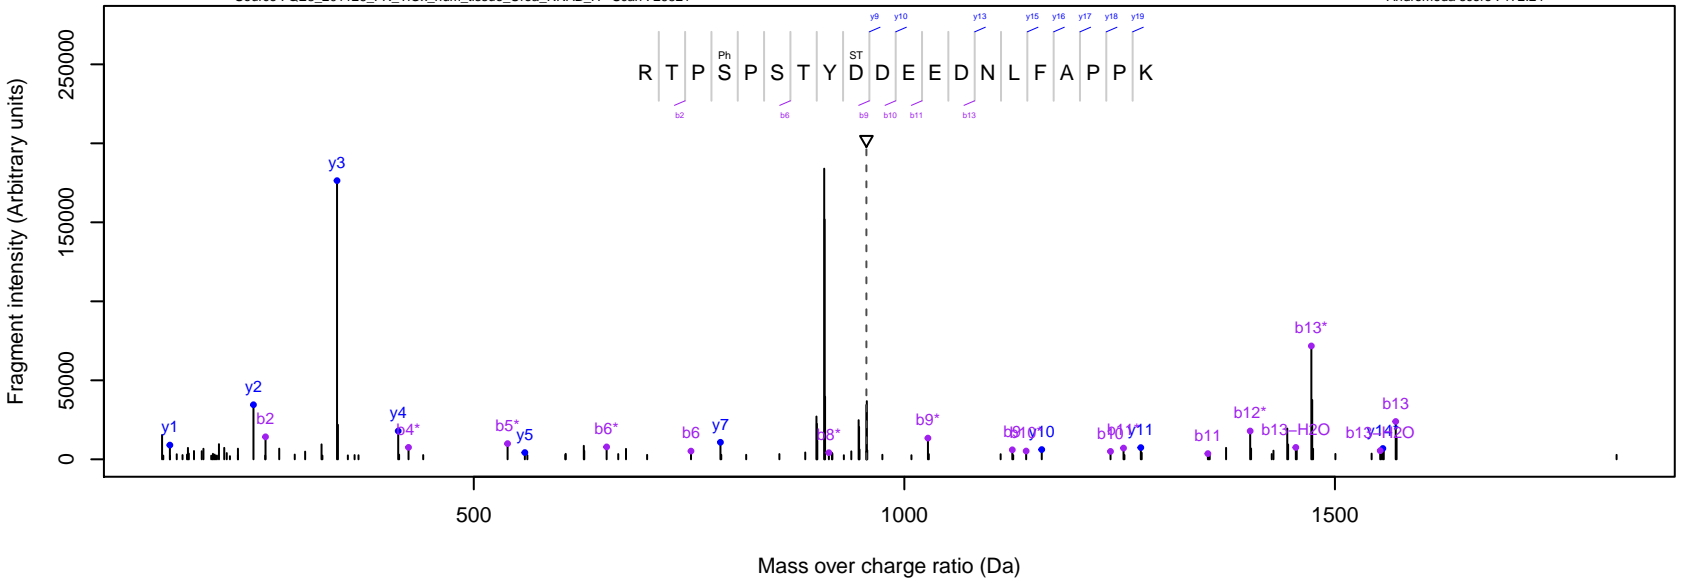

KRS(Phospho (STY))SSEDAESLAPR-3+

Source : QE3\_201126\_FR\_TIOx\_hum\_tissue\_Urea\_RNAB\_N Scan : 7634

Andromeda score : 172.2

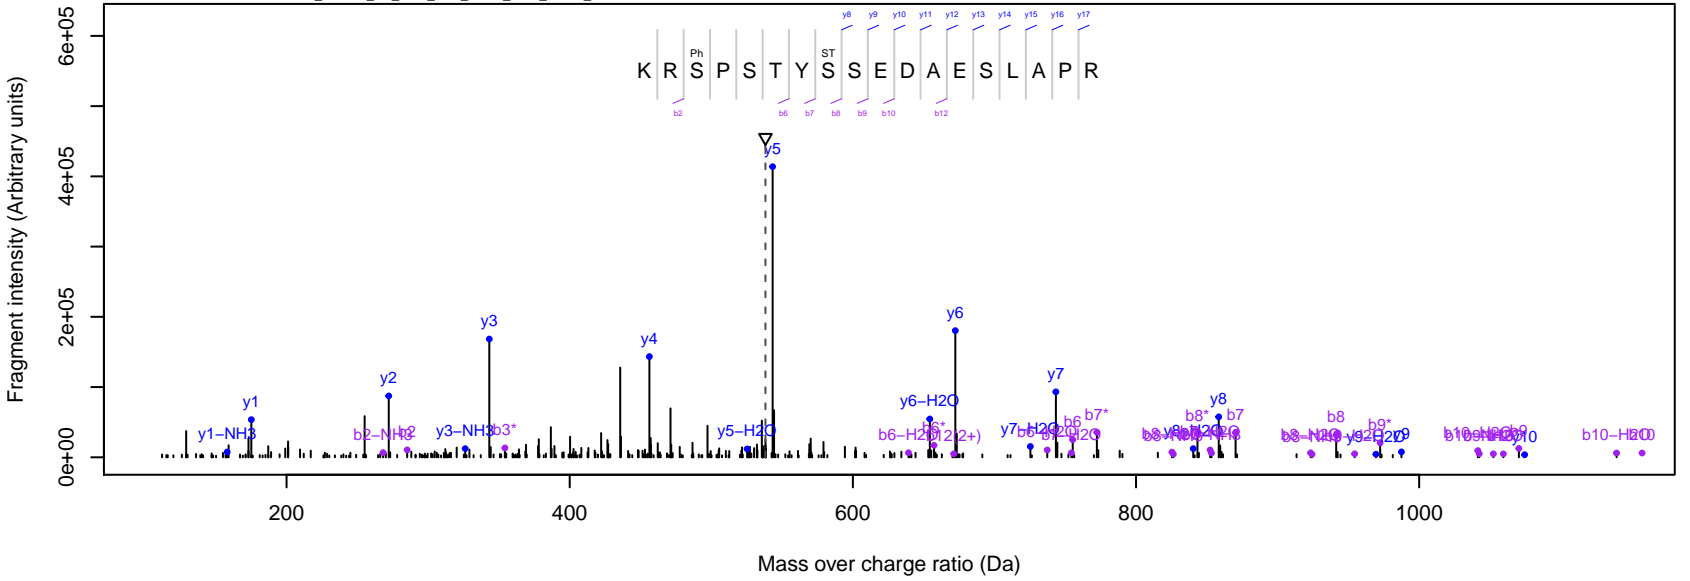

DLEDES(Phospho (STY))TPIVK-2+

Source : QE3\_201126\_FR\_TIOx\_hum\_tissue\_Urea\_RNAB\_H Scan : 26029

Andromeda score : 172.13

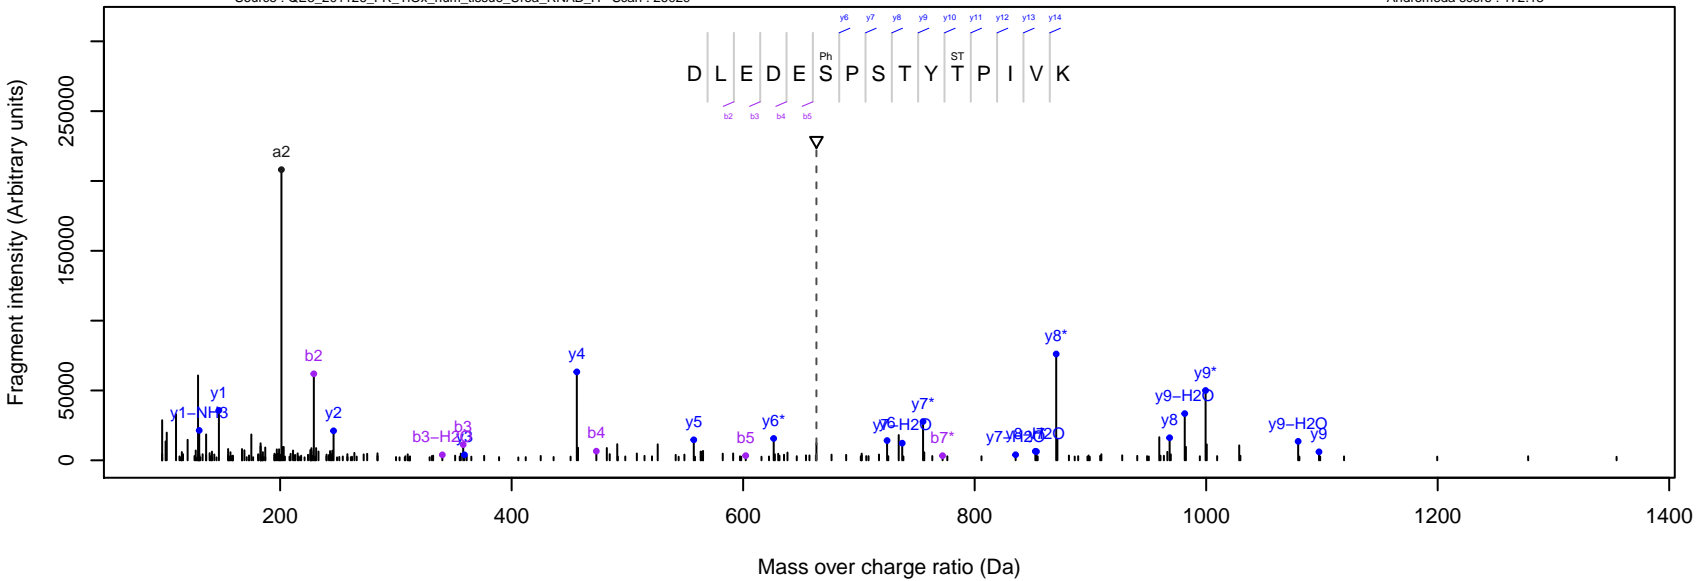

EAAEPLSEPKEDQEA AELLS(Phospho (STY))EPEEESER-3+

Source : QE3\_201126\_FR\_TiOx\_hum\_tissue\_Urea\_RNAB\_H Scan : 35556

Andromeda score : 172.06

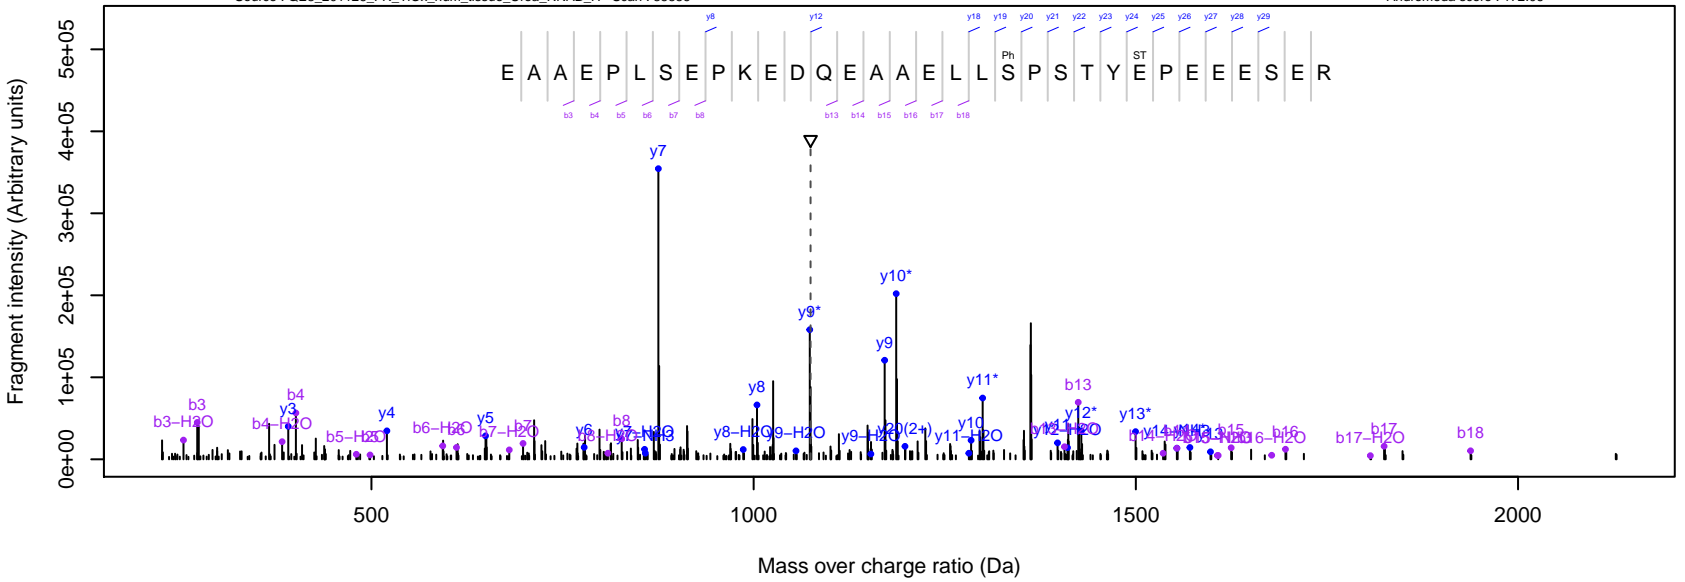

SVRPIHSSTS(Phospho (STY))SPTISIEVGHGTGVTK-4+

Source : QE3\_201126\_FR\_TiOx\_hum\_tissue\_Urea\_RNAB\_H Scan : 15208

Andromeda score : 171.93

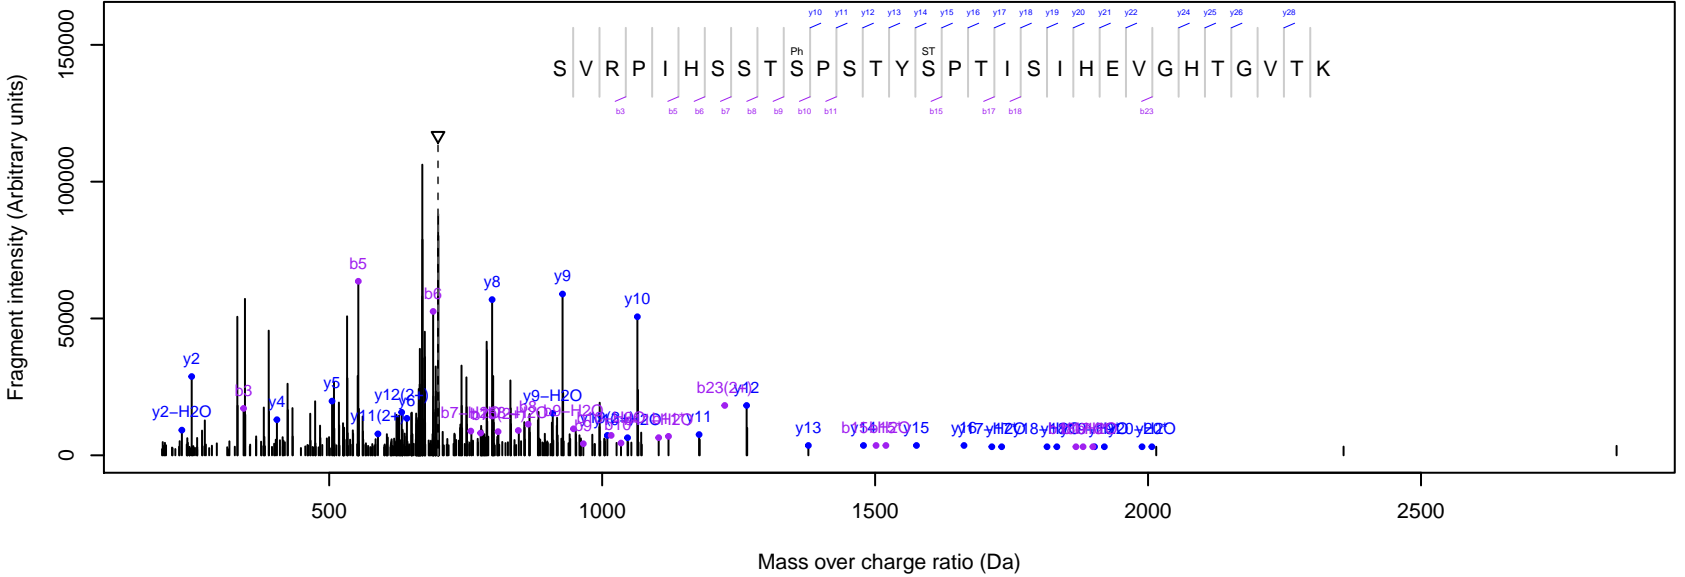

EGQPSPADEKGNDS(Phospho (STY))DGEGESDDEPKK-3+

Source : QE3\_201126\_FR\_TiOx\_hum\_tissue\_Urea\_RNAB\_H Scan : 6493

Andromeda score : 171.87

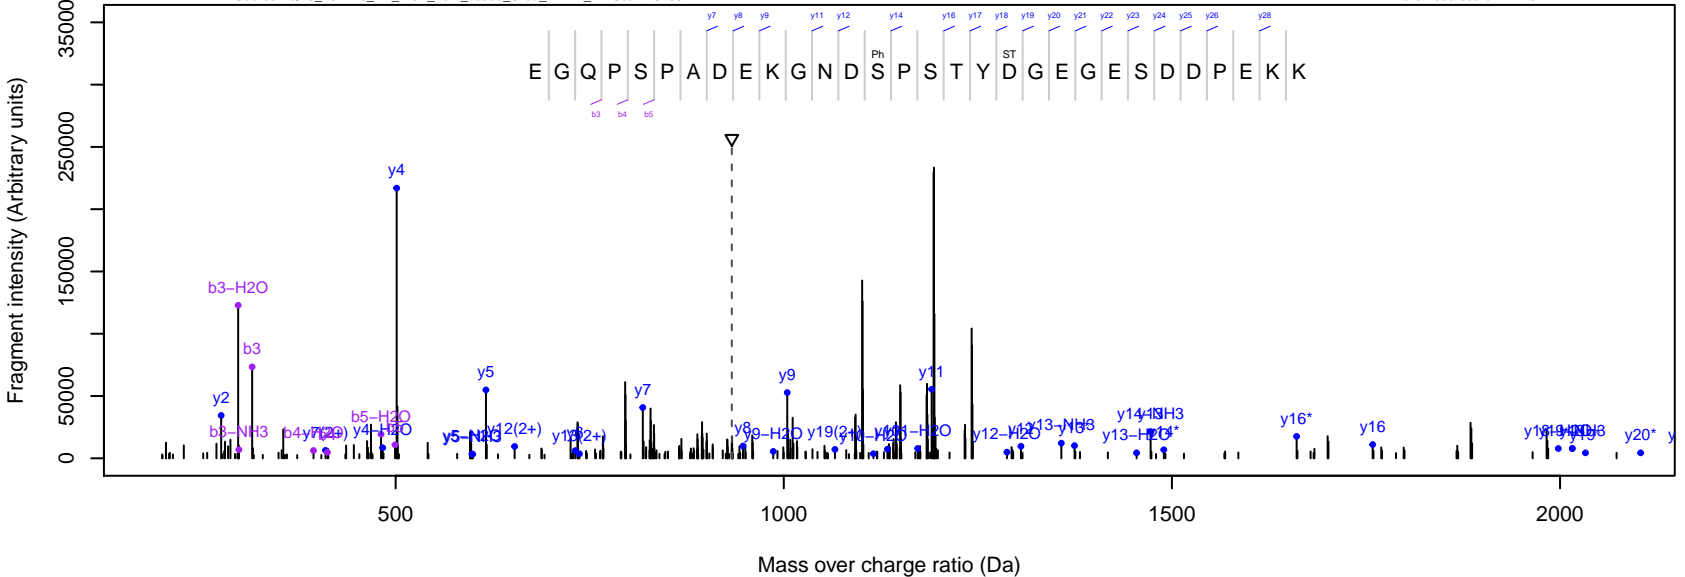

CRS(Phospho (STY))PGMLEPLGSSR-2+

Source : QE3\_201126\_FR\_TiOx\_hum\_tissue\_Urea\_RNAB\_H Scan : 21262

Andromeda score : 171.76

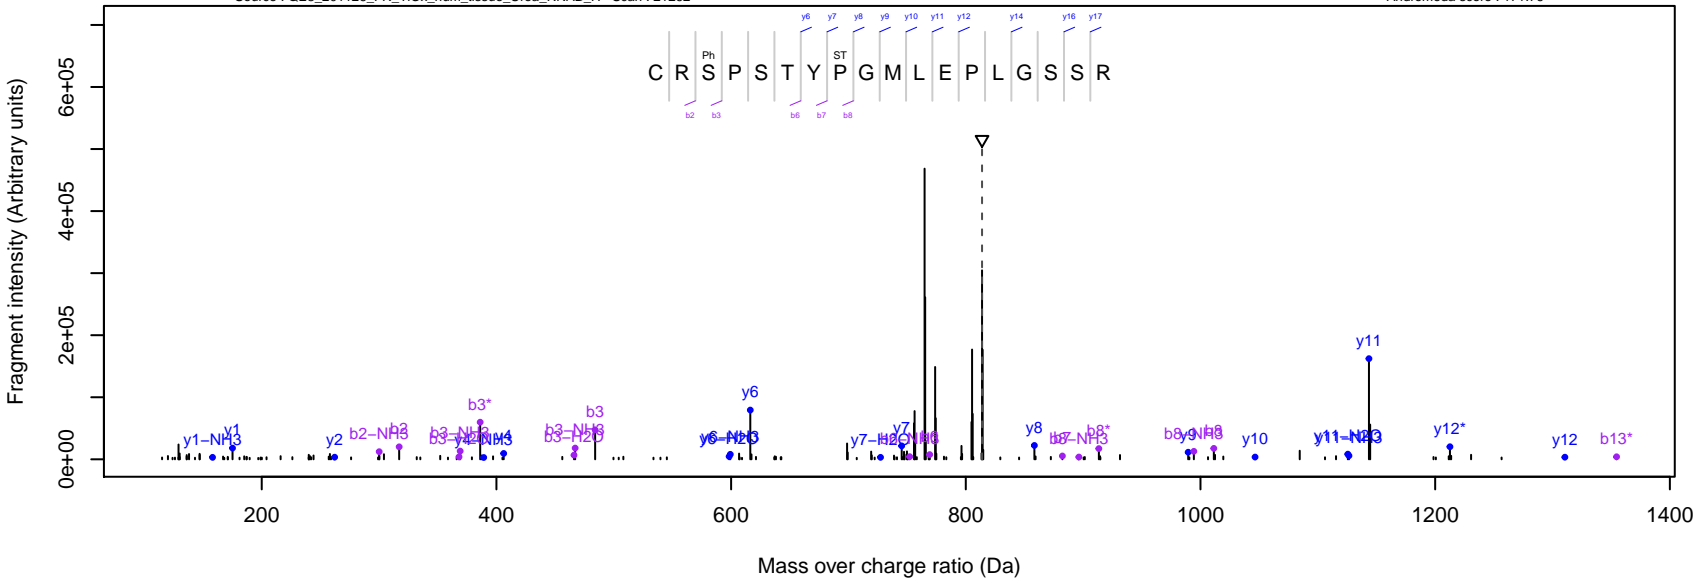

DRT(Phospho (STY))PPLLIR-2+

Source : QE3\_201126\_FR\_TiOx\_hum\_tissue\_Urea\_RNAB\_N Scan : 22804

Andromeda score : 171.74

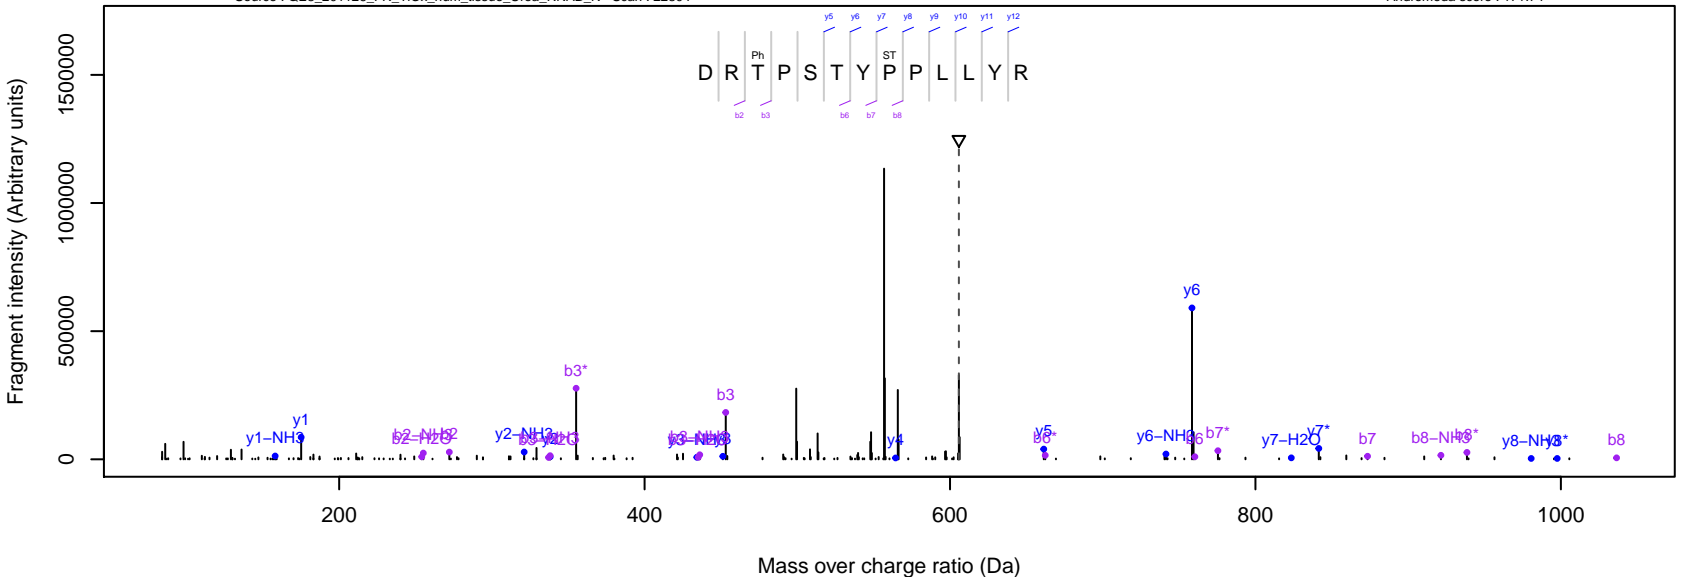

(Acetyl (Protein N-term))AEQLS(Phospho (STY))PGKAVDQVCTFLFK-3+

Source : QE3\_201126\_FR\_TiOx\_hum\_tissue\_Urea\_RNAB\_H Scan : 62101

Andromeda score : 171.72

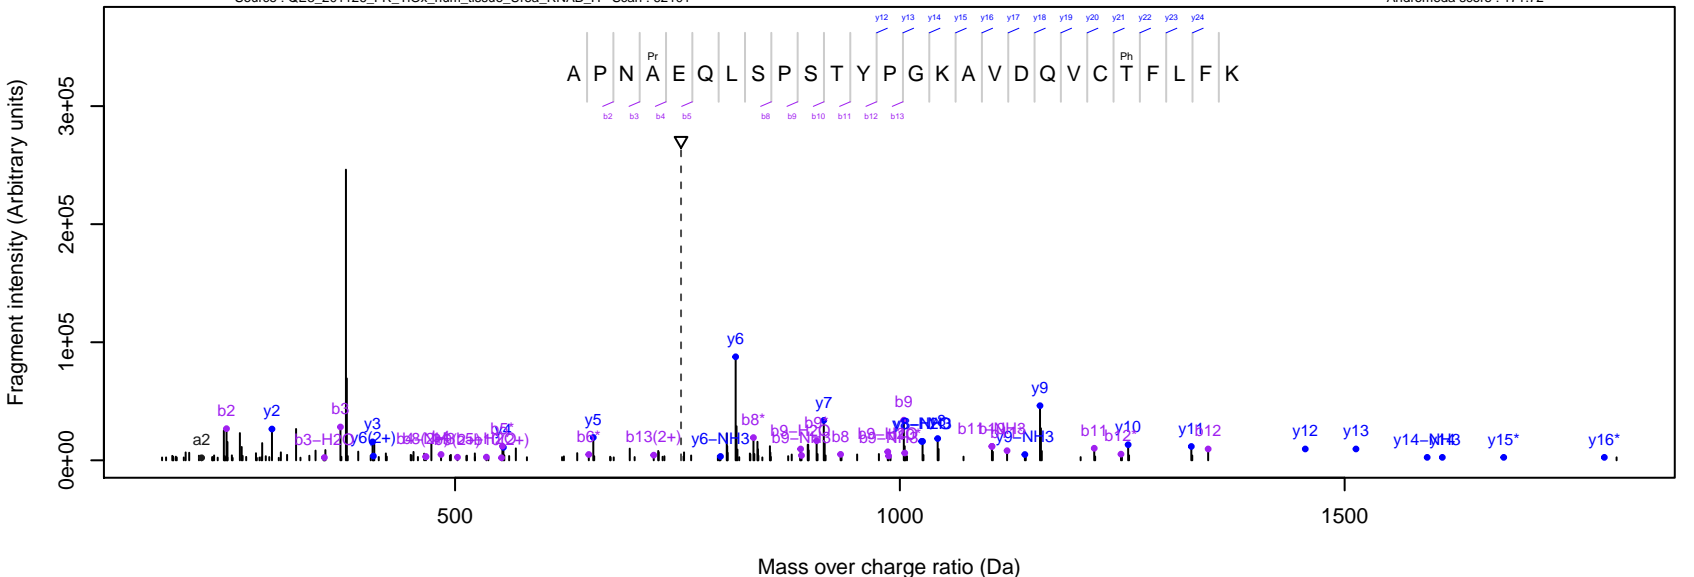

ESTESNTT(Phospho (STY))IEDVDVKAR-2+

Source : QE3\_201126\_FR\_TiOx\_hum\_tissue\_Urea\_RNAB\_B Scan : 11366

Andromeda score : 171.71

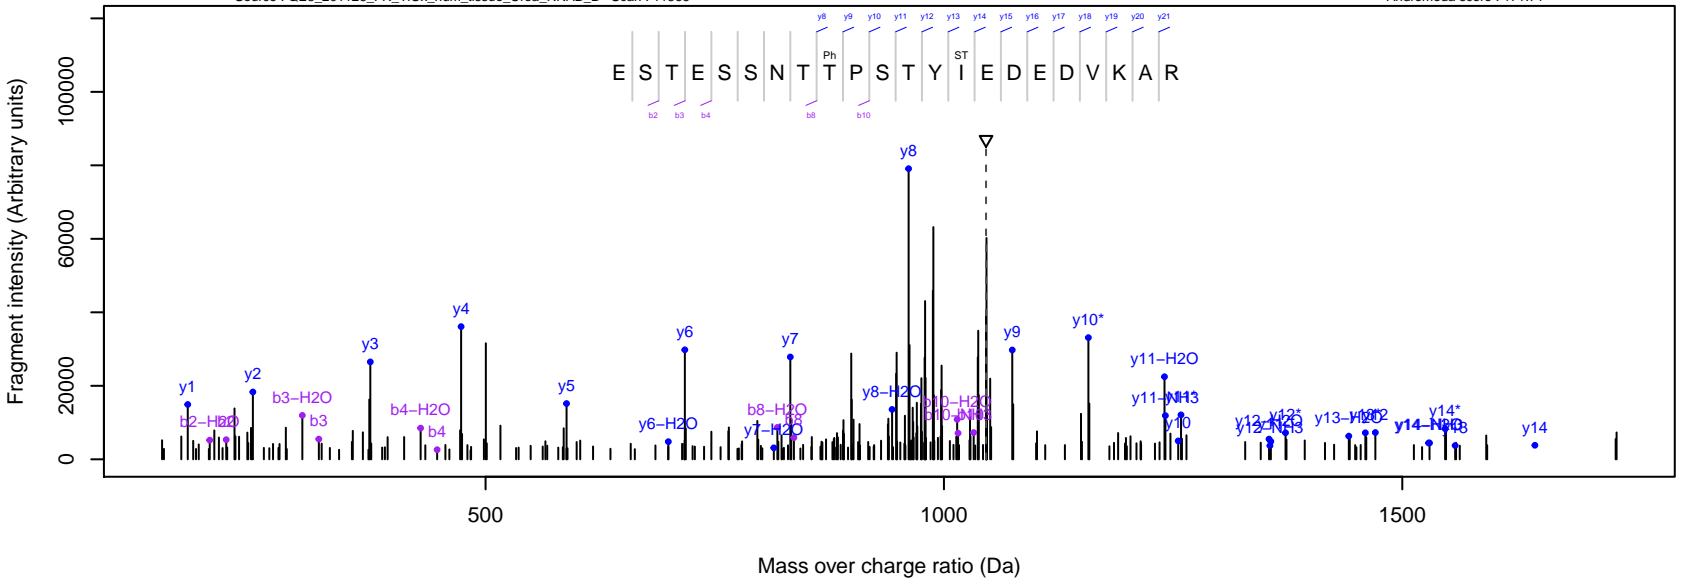

GEKEEEEEEEINIYAVTEES(Phospho (STY))DEEGSQEKGGDSQQK-4+

Source : QE3\_201126\_FR\_TiOx\_hum\_tissue\_Urea\_RNAB\_B Scan : 33597

Andromeda score : 171.71

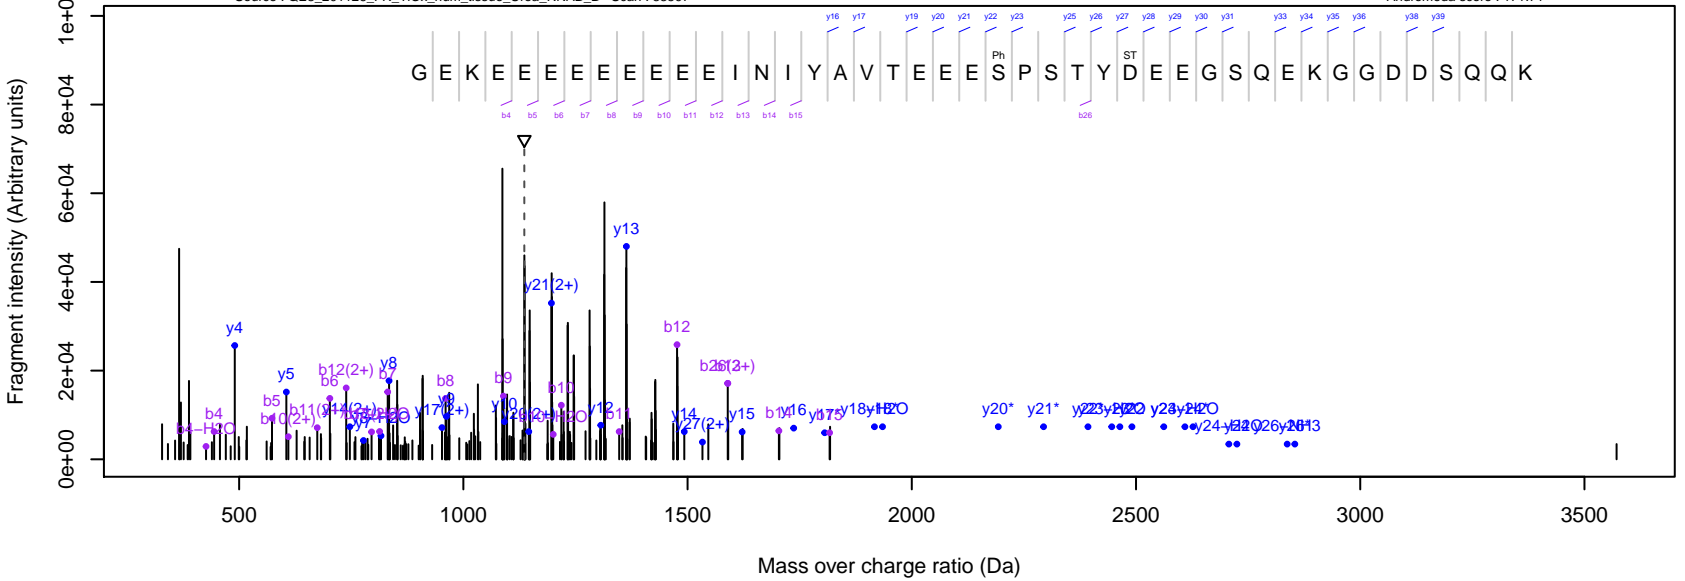

LPQLVGVSTPLQGGSNSAAAIQSS(Phospho (STY))GELR-3+

Source : QE3\_201126\_FR\_TiOx\_hum\_tissue\_Urea\_RNAB\_N Scan : 50169

Andromeda score : 171.57

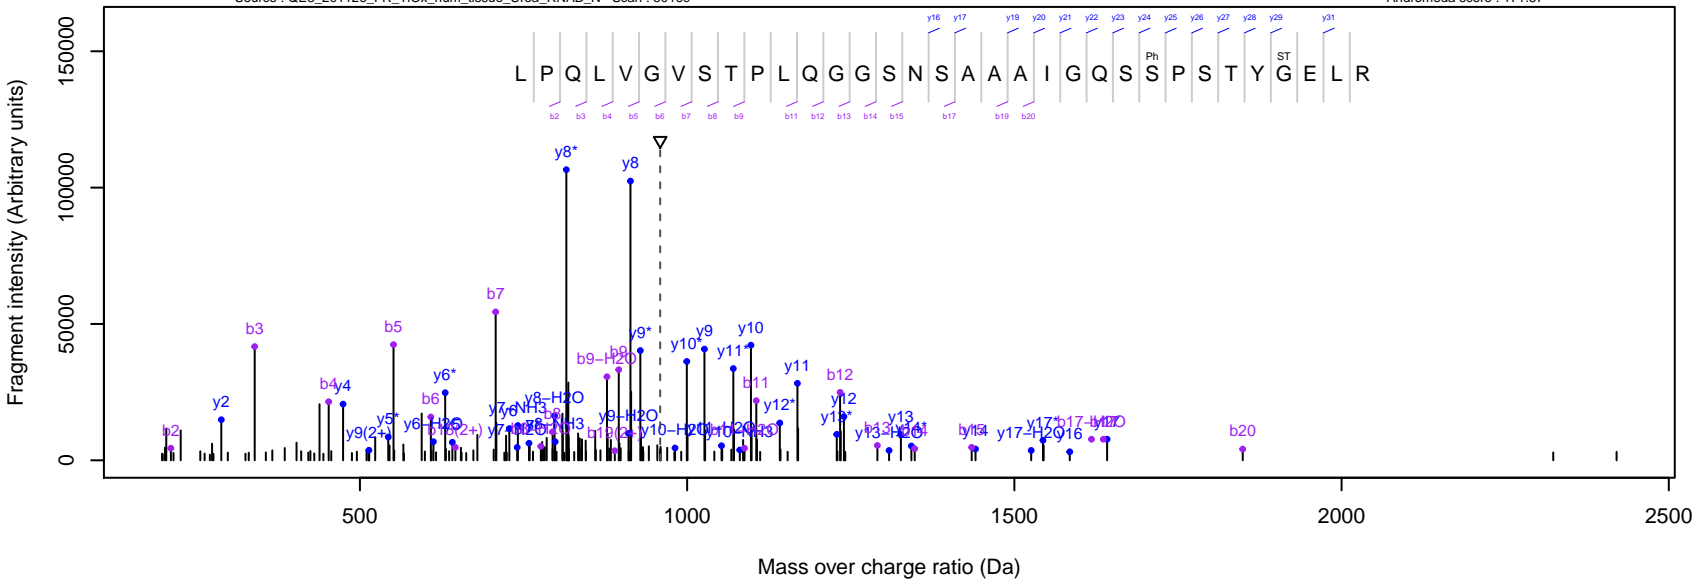

APGS(Phospho (STY))PLSSEGAAGEGVR-2+

Source : QE3\_201126\_FR\_TIOx\_hum\_tissue\_Urea\_RNAB\_N Scan : 19162

Andromeda score : 171.56

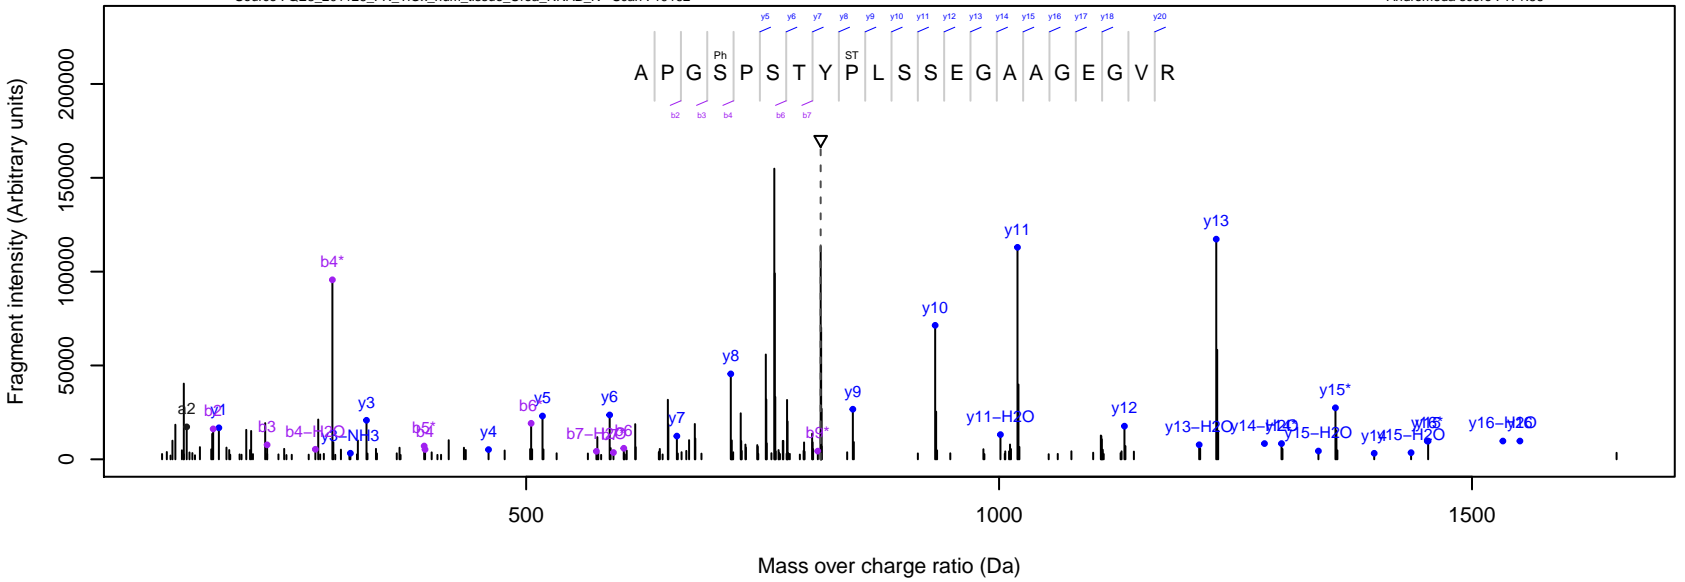

KAEAGAGS(Phospho (STY))ATEFQFR-2+

Source : QE3\_201126\_FR\_TIOx\_hum\_tissue\_Urea\_RNAB\_H Scan : 20608

Andromeda score : 171.56

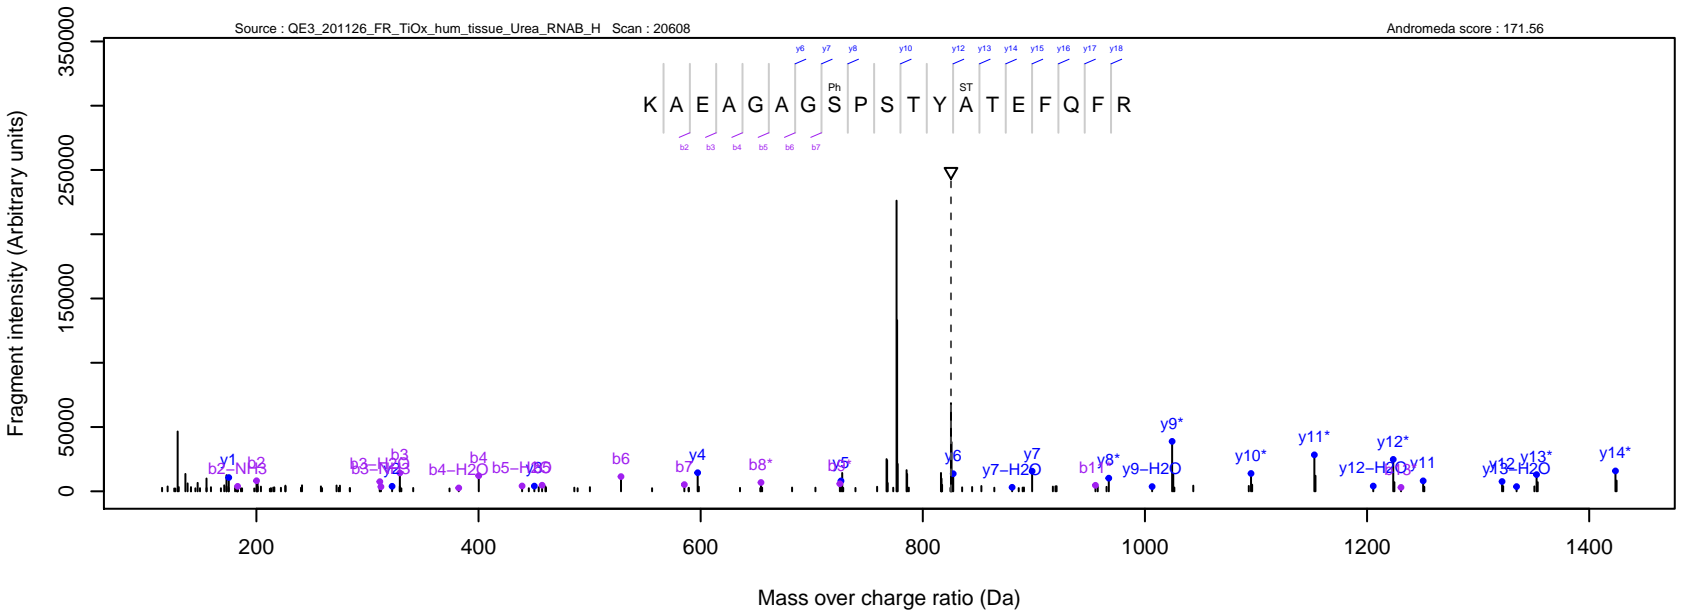

TPAAAAAMNLA(Phospho (STY))PR-2+

Source : QE3\_201126\_FR\_TIOx\_hum\_tissue\_Urea\_RNAB\_B Scan : 25357

Andromeda score : 171.56

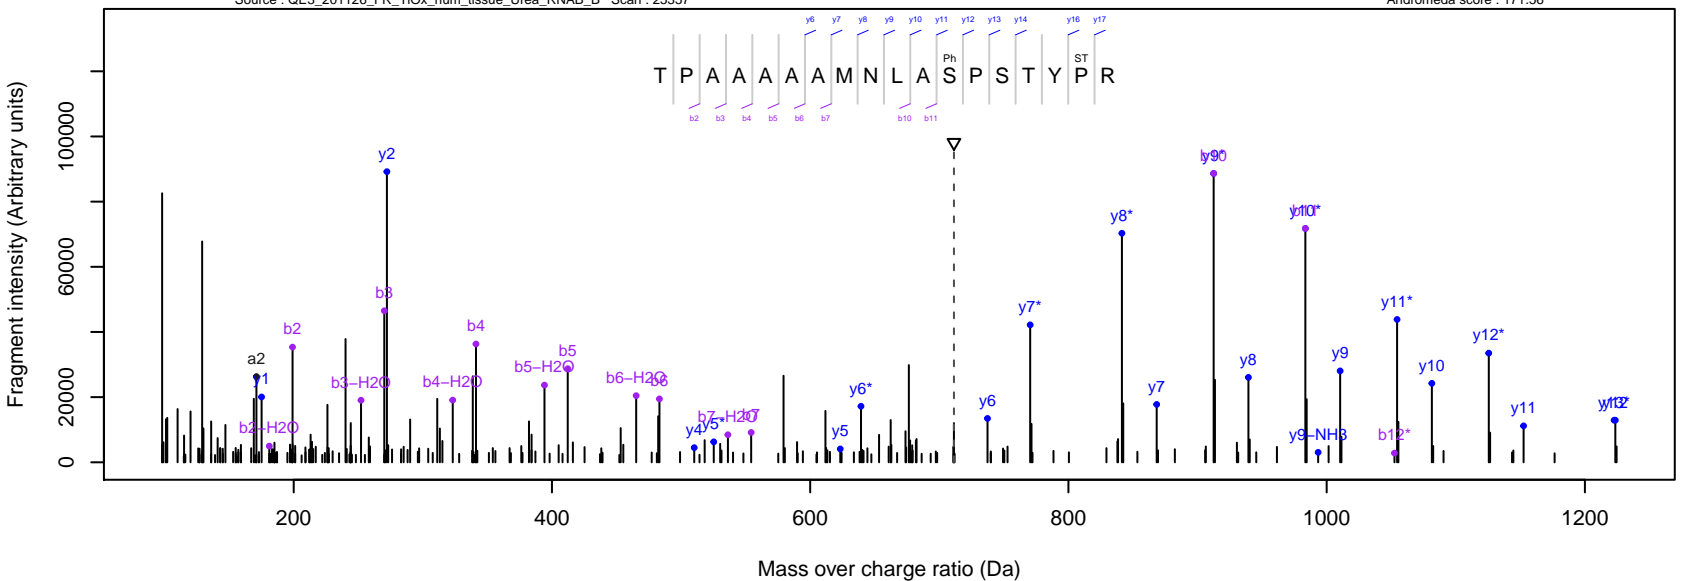

GGDHVPVS(Phospho (STY))HEQPRGGEDA AVQEP R-4+

Source : QE3\_201126\_FR\_TiOx\_hum\_tissue\_Urea\_RNAB\_N Scan : 9940

Andromeda score : 171.49

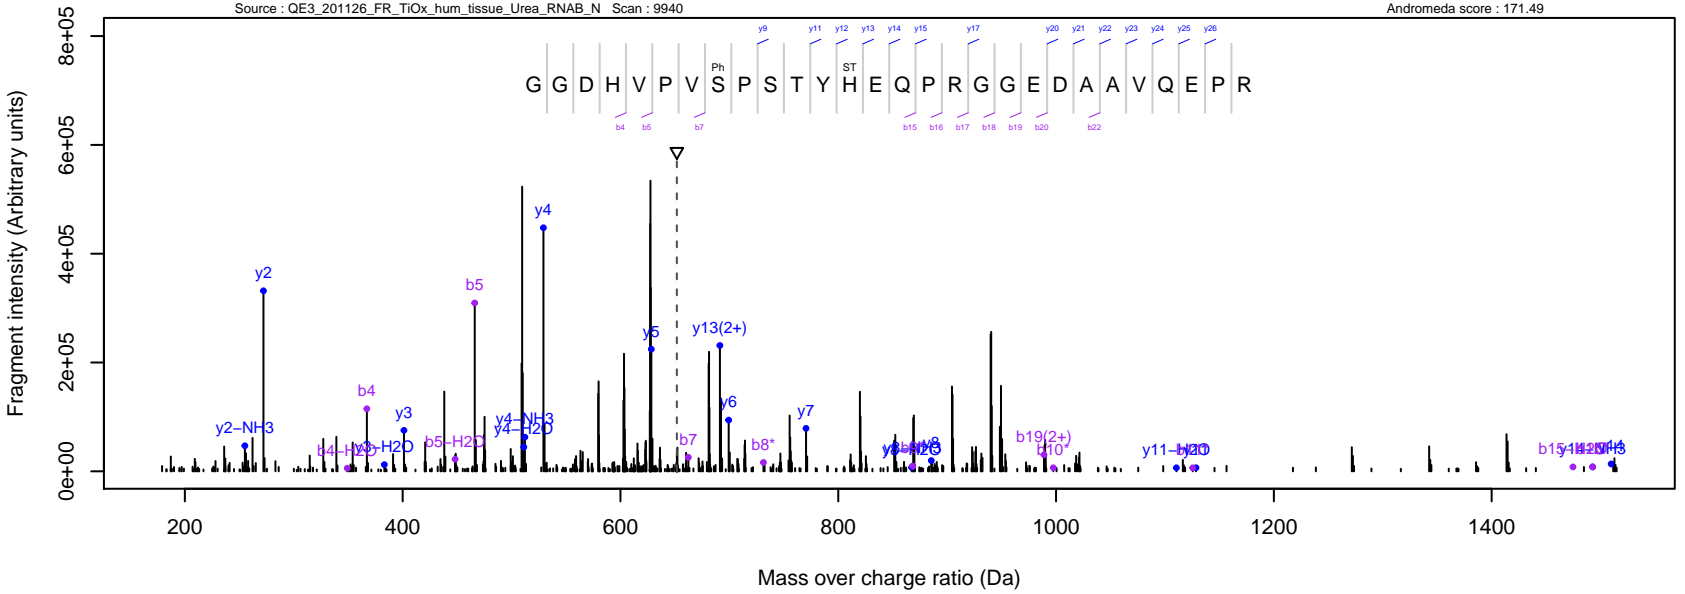

S(Phospho (STY))PGTGAGLAEK-2+

Source : QE3\_201126\_FR\_TiOx\_hum\_tissue\_Urea\_RNAB\_H Scan : 9063

Andromeda score : 171.49

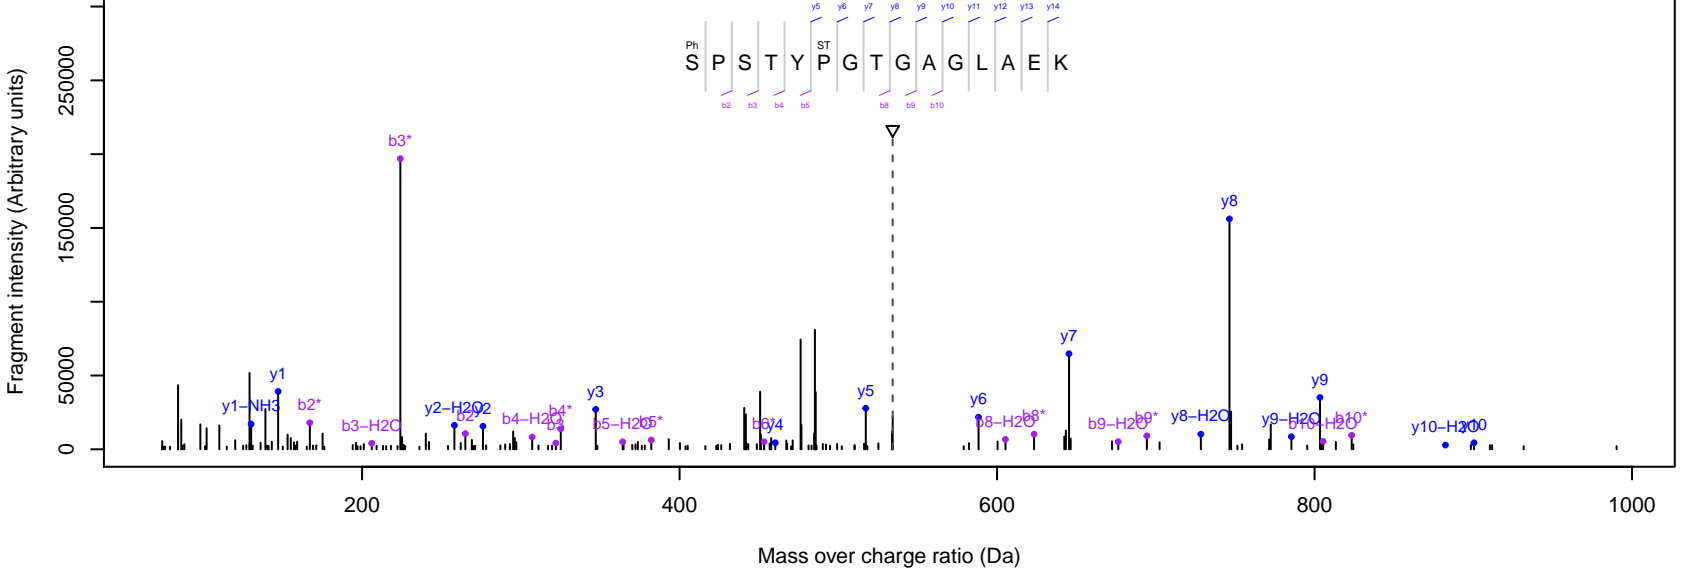

SVS(Phospho (STY))VATGLNMOMMOMK-2+

Source : QE3\_201126\_FR\_TiOx\_hum\_tissue\_Urea\_RNAB\_H Scan : 18125

Andromeda score : 171.49

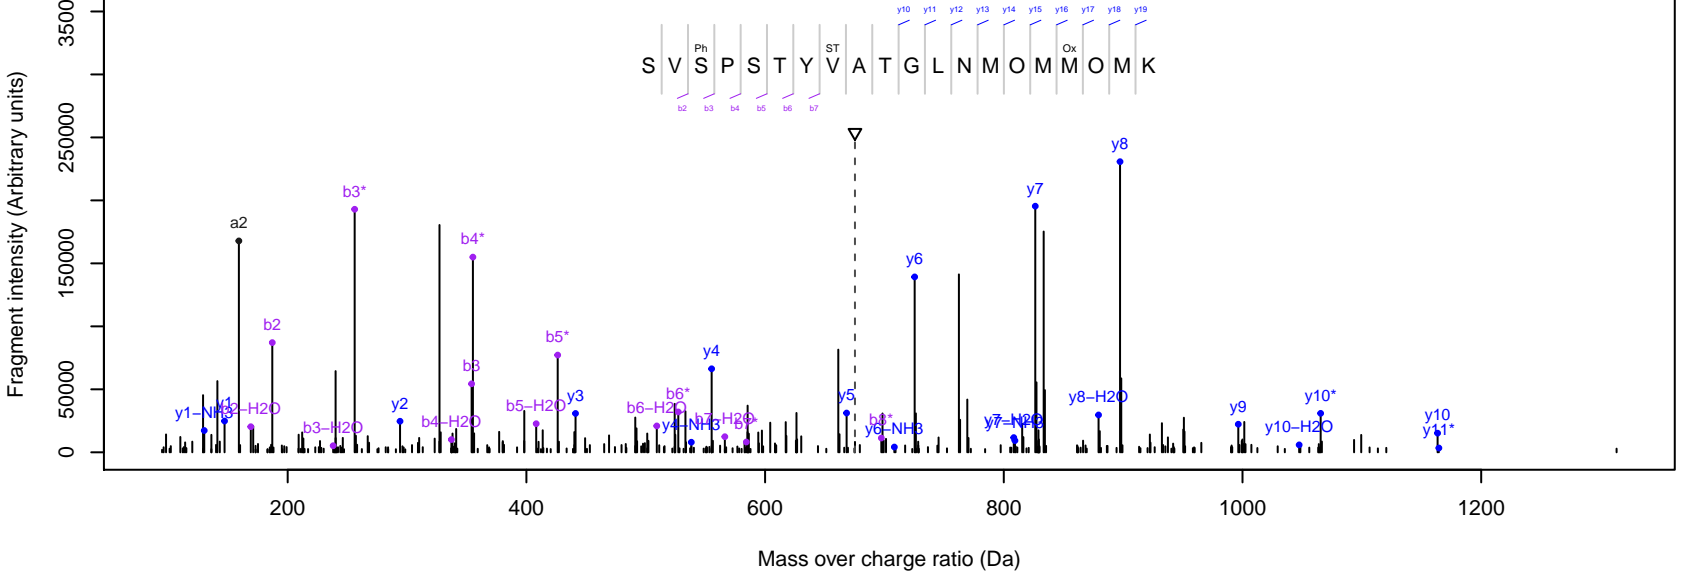

M(Oxidation (M))SPNETLFLES(Phospho (STY))TNK-2+

Source : QE3\_201126\_FR\_TIOx\_hum\_tissue\_Urea\_RNAB\_H Scan : 32859

Andromeda score : 171.46

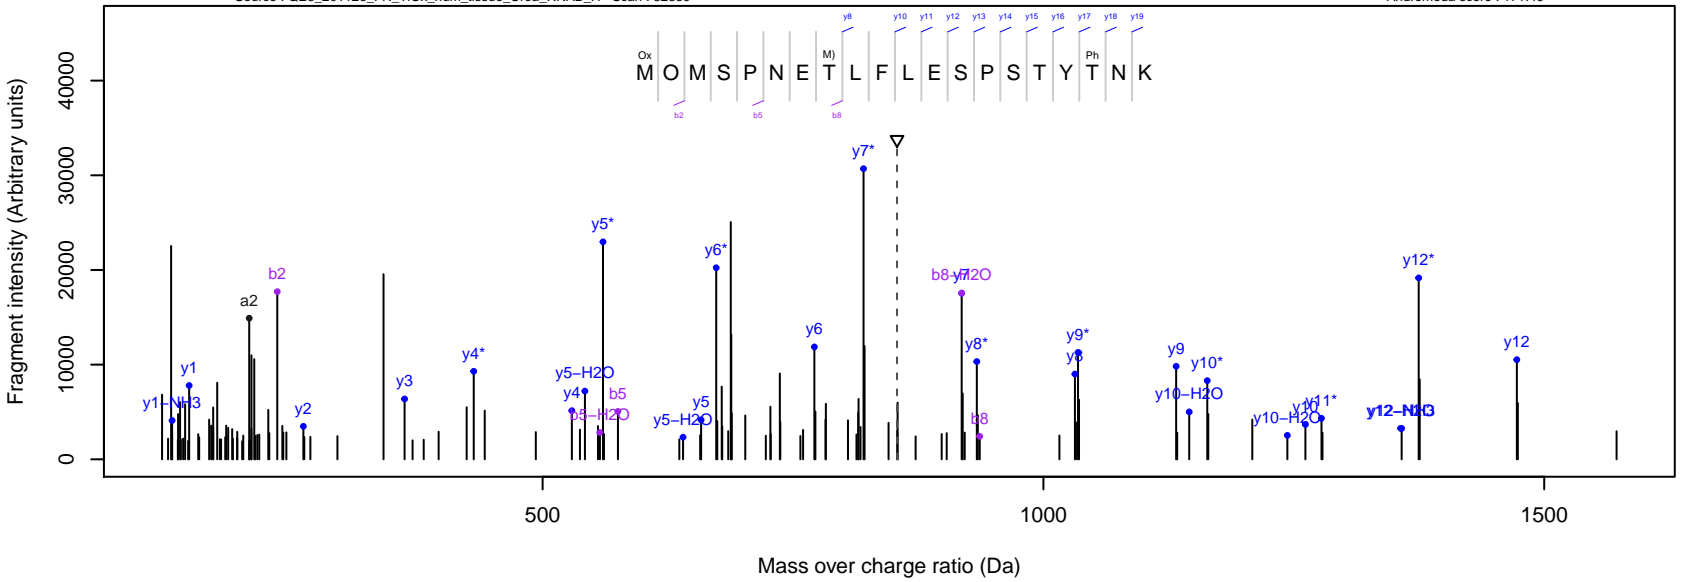

VREDEDS(Phospho (STY))DDDGS(Phospho (STY))DEEIDESLAAQLNSGNVR-3+

Source : QE3\_201126\_FR\_TIOx\_hum\_tissue\_Urea\_RNAB\_B Scan : 60088

Andromeda score : 171.45

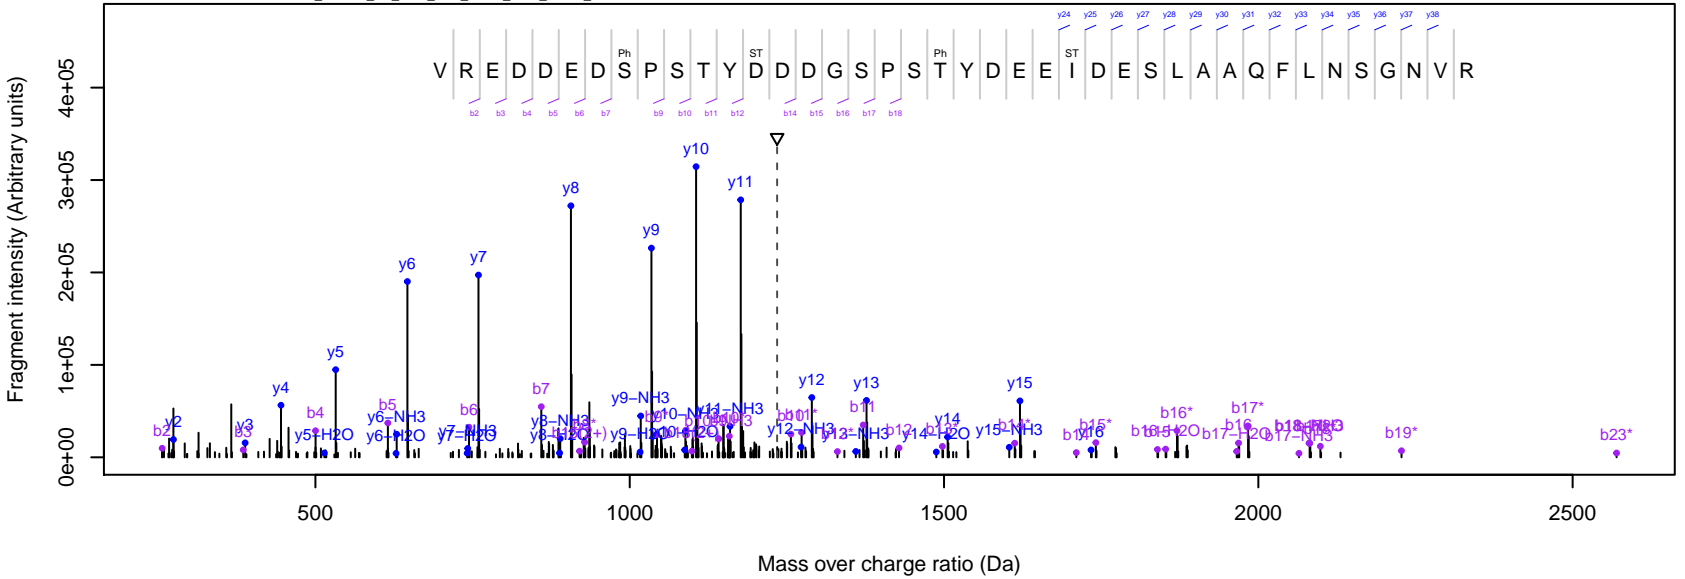

NGES(Phospho (STY))SELDLQGIR-2+

Source : QE3\_201126\_FR\_TIOx\_hum\_tissue\_Urea\_RNAB\_B Scan : 32194

Andromeda score : 171.36

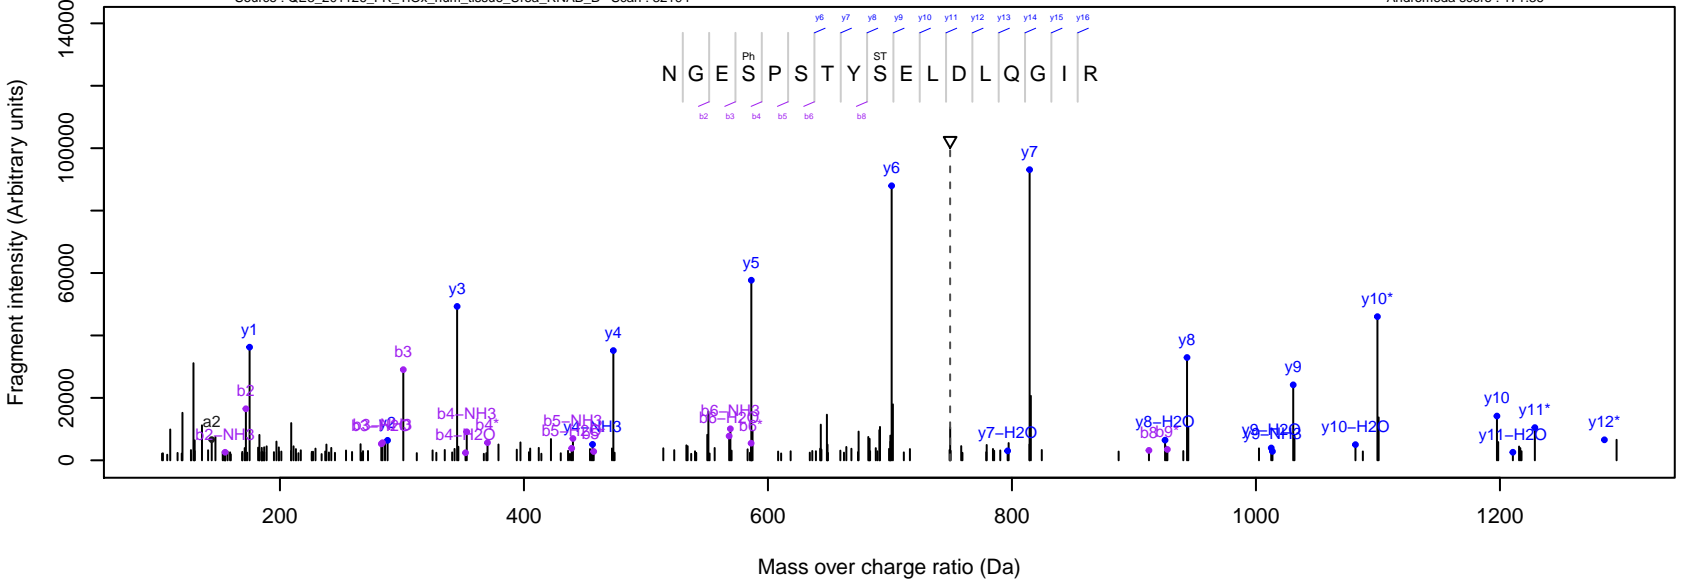



WDEQTSNTKGDDDEES(Phospho (STY))DEEAVKK-3+

Source : QE3\_201126\_FR\_TIOx\_hum\_tissue\_Urea\_RNAB\_N Scan : 10156

Andromeda score : 171.31

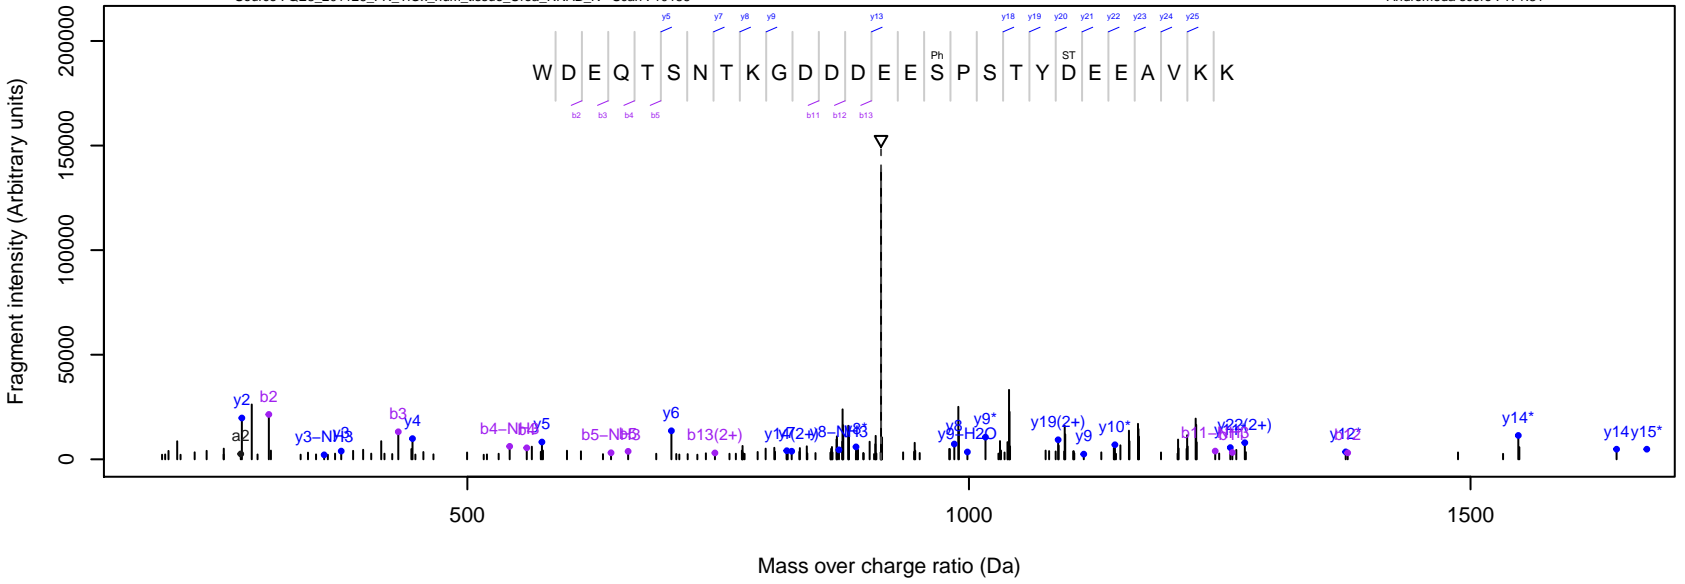

EGKPEIEGKPE(Phospho (STY))EGEPGSETR-3+

Source : QE3\_201126\_FR\_TIOx\_hum\_tissue\_Urea\_RNAB\_N Scan : 8957

Andromeda score : 171.29

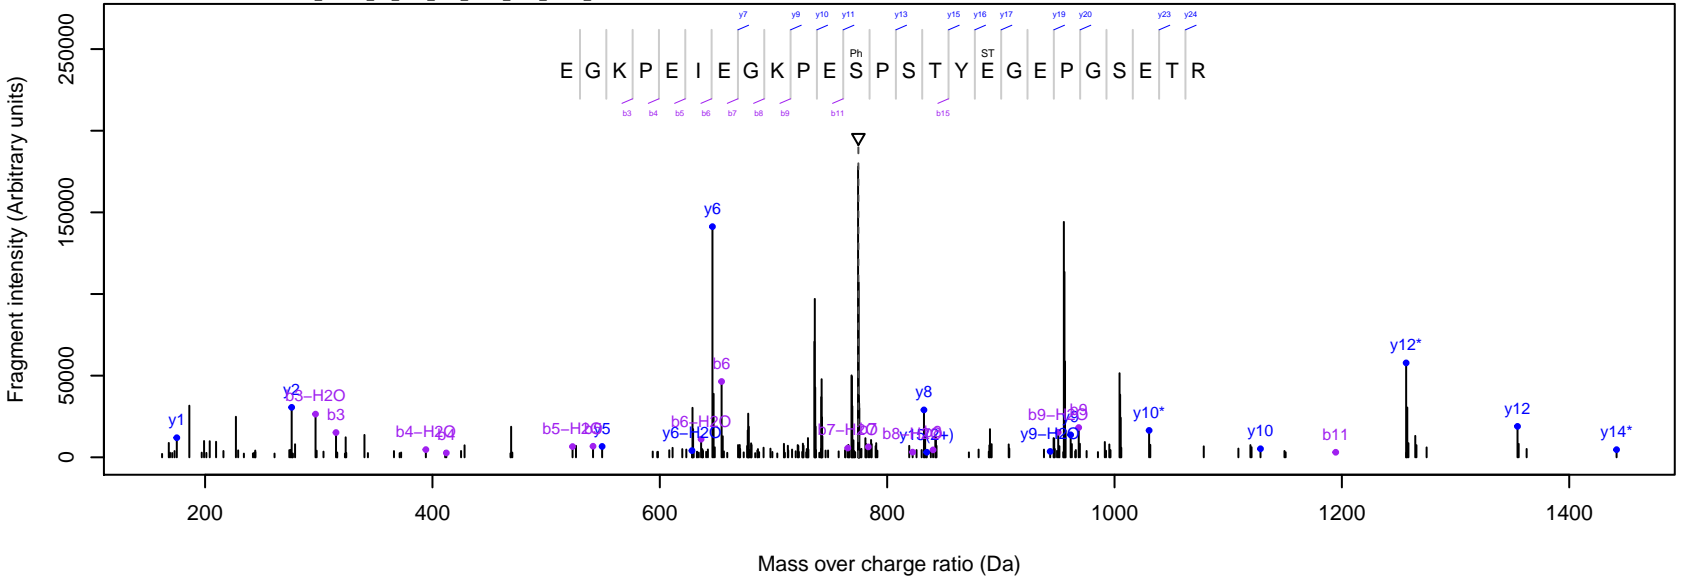

KKTEFLDLDNSPLSP(Phospho (STY))PR-3+

Source : QE3\_201126\_FR\_TIOx\_hum\_tissue\_Urea\_RNAB\_B Scan : 35768

Andromeda score : 171.29

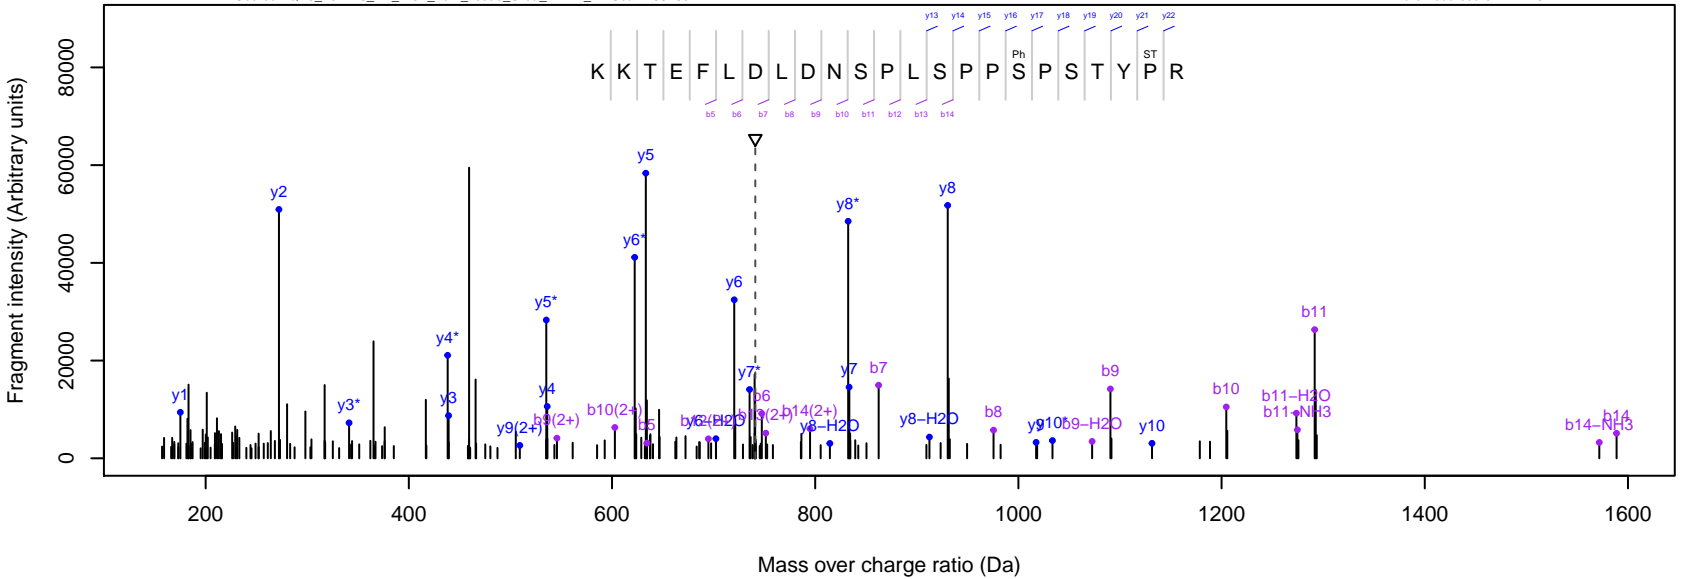

SATRPS(Phospho (STY))PS(Phospho (STY))PERSS(Phospho (STY))TGPEPPAPTPLLAER-3+

Source : QE3\_201126\_FR\_TiOx\_hum\_tissue\_Urea\_RNAB\_H Scan : 35172

Andromeda score : 171.29

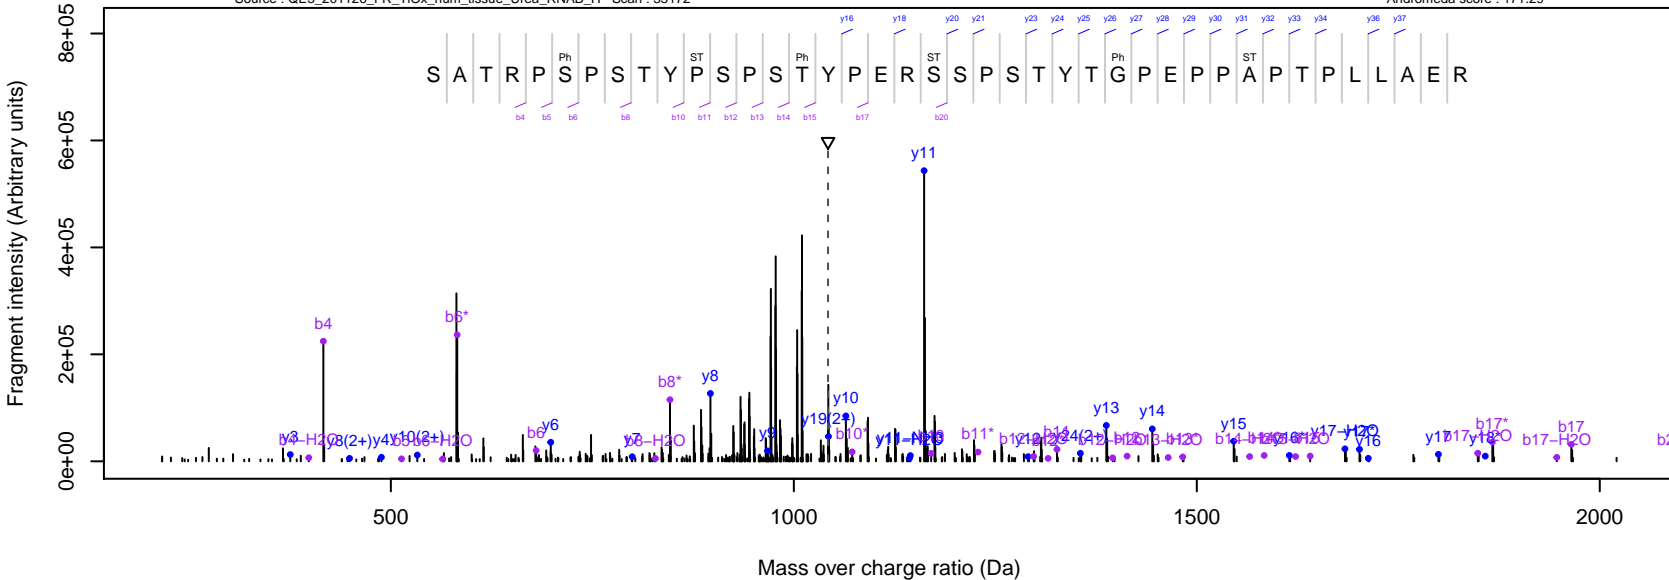

LGSSGLG(Phospho (STY))ASS(Phospho (STY))IQAAVR-2+

Source : QE3\_201126\_FR\_TiOx\_hum\_tissue\_Urea\_RNAB\_H Scan : 38072

Andromeda score : 171.26

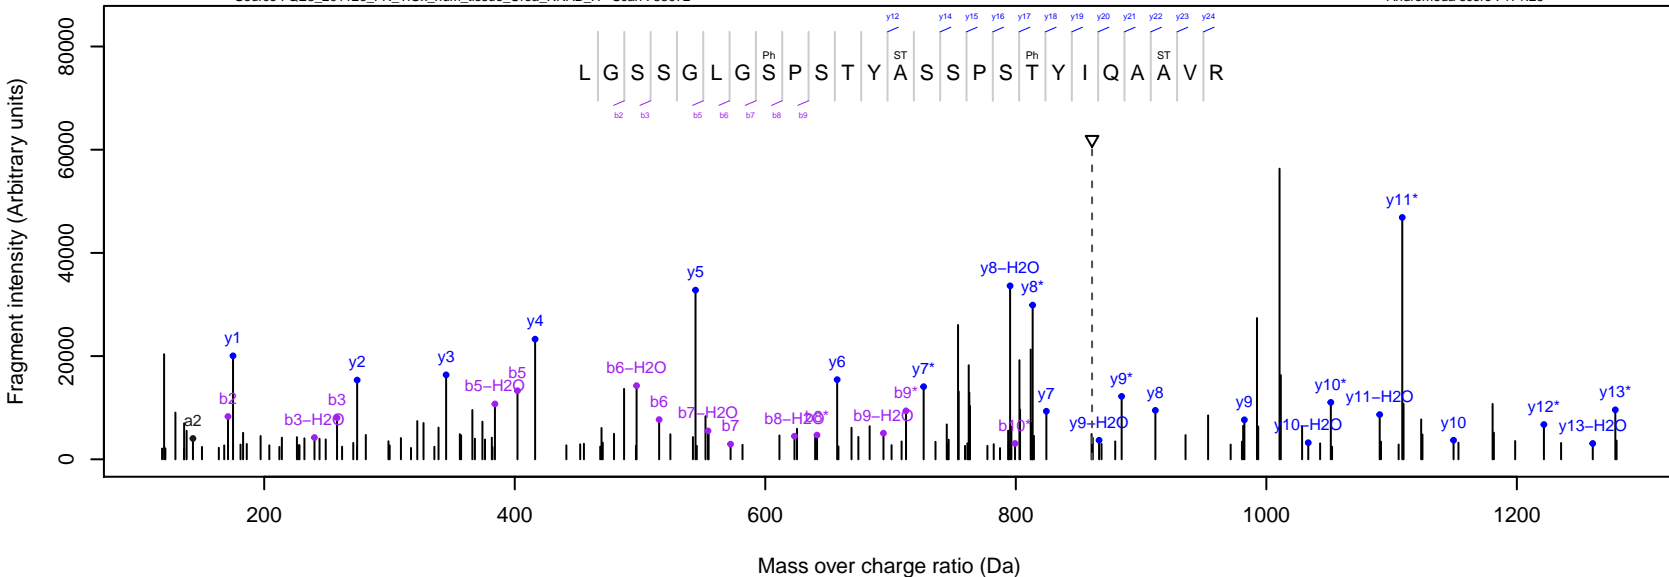

QVS(Phospho (STY))ASELHTSGILGPETLR-2+

Source : QE3\_201126\_FR\_TiOx\_hum\_tissue\_Urea\_RNAB\_N Scan : 36012

Andromeda score : 171.25

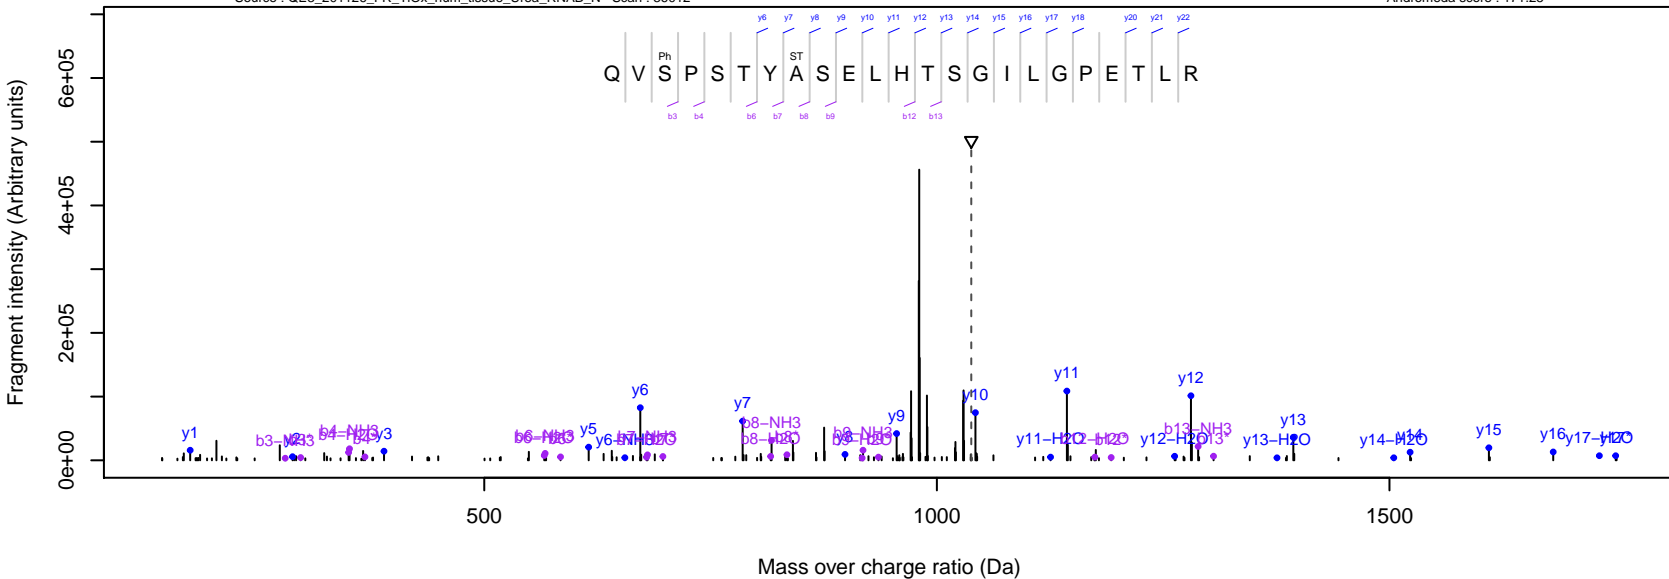

TQT(Phospho (STY))PPVS(Phospho (STY))PAPQPTEERLPS(Phospho (STY))SPVYEDAASKF-3+

Source : QE3\_201126\_FR\_TIOx\_hum\_tissue\_Urea\_RNAB\_B Scan : 49319

Andromeda score : 171.16

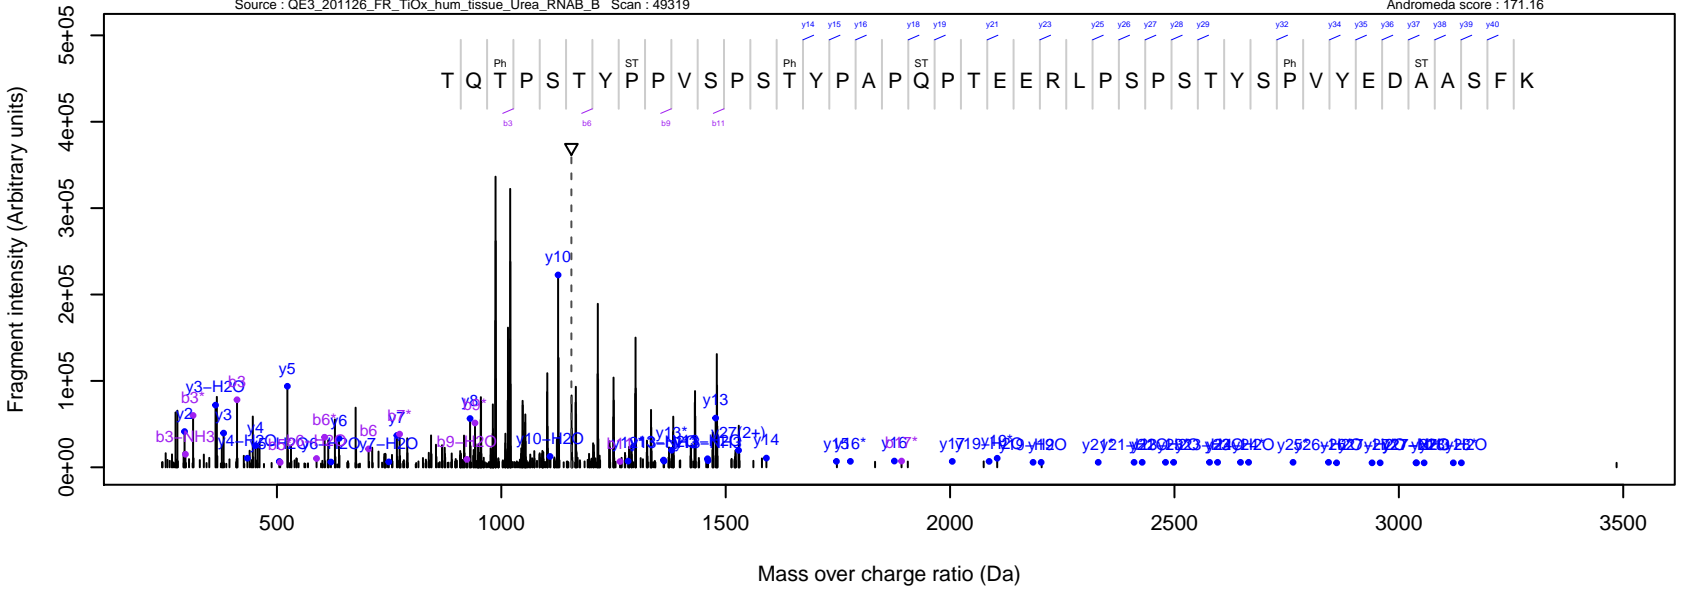

NLNLVSS(Phospho (STY))TASIKDLADVDLR-3+

Source : QE3\_201126\_FR\_TIOx\_hum\_tissue\_Urea\_RNAB\_B Scan : 50224

Andromeda score : 171.15

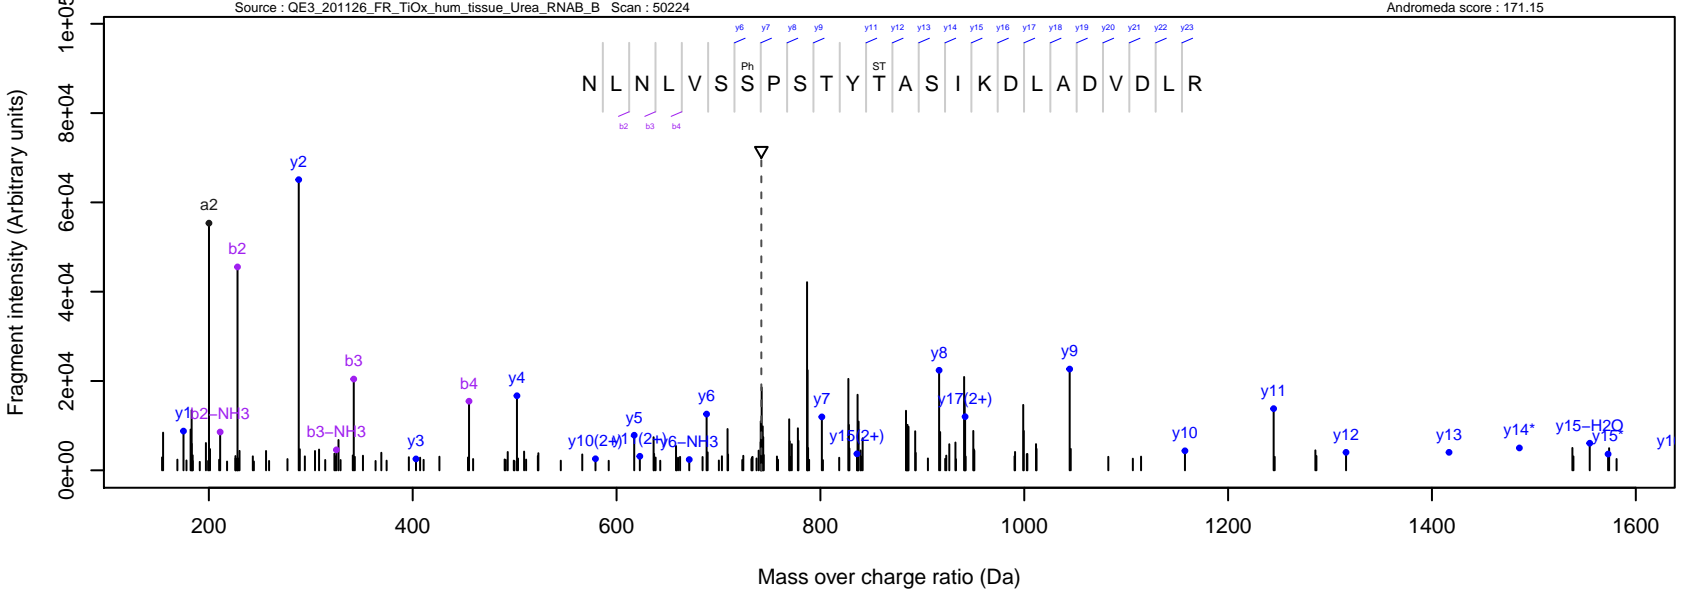

LPQTS(Phospho (STY))DDEKKDF-2+

Source : QE3\_201126\_FR\_TIOx\_hum\_tissue\_Urea\_RNAB\_B Scan : 13487

Andromeda score : 171.14

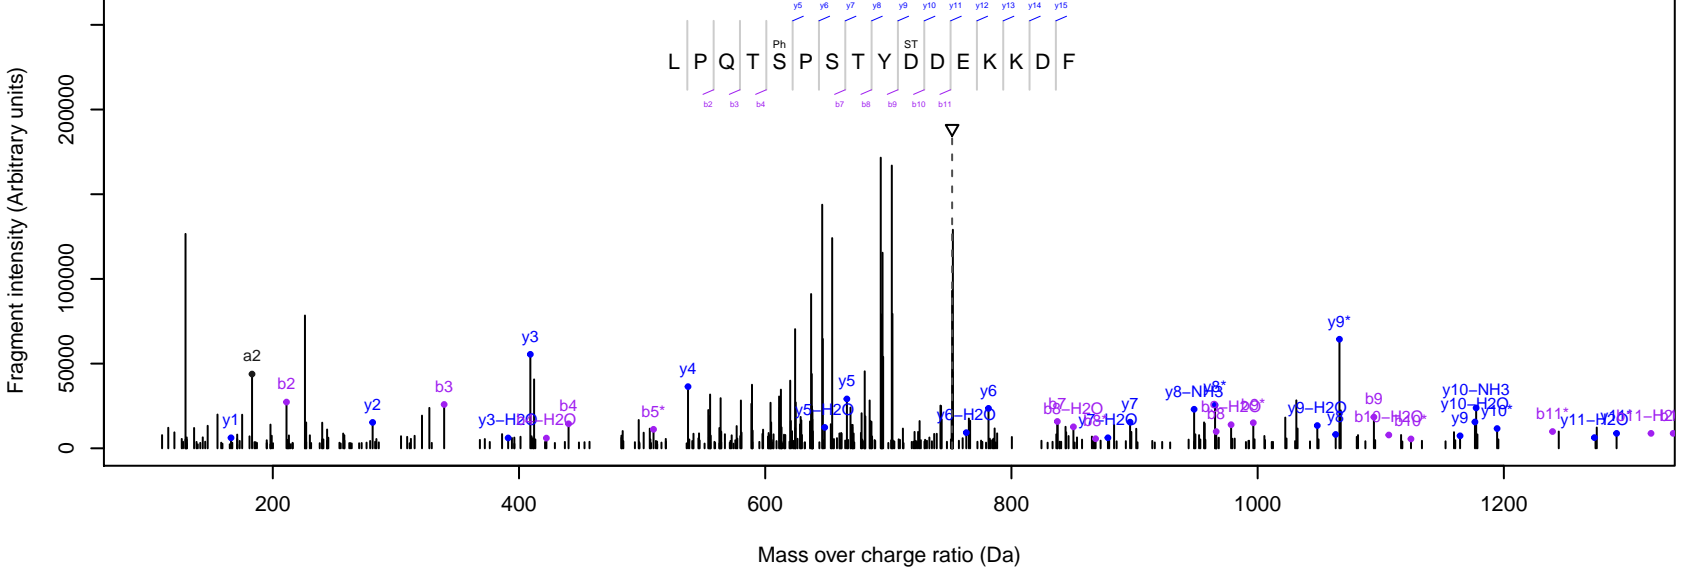

SSLGQSAS(Phospho (STY))ETEEDTVSVSKK-3+

Source : QE3\_201126\_FR\_TiOx\_hum\_tissue\_Urea\_RNAB\_N Scan : 16254

Andromeda score : 171.08

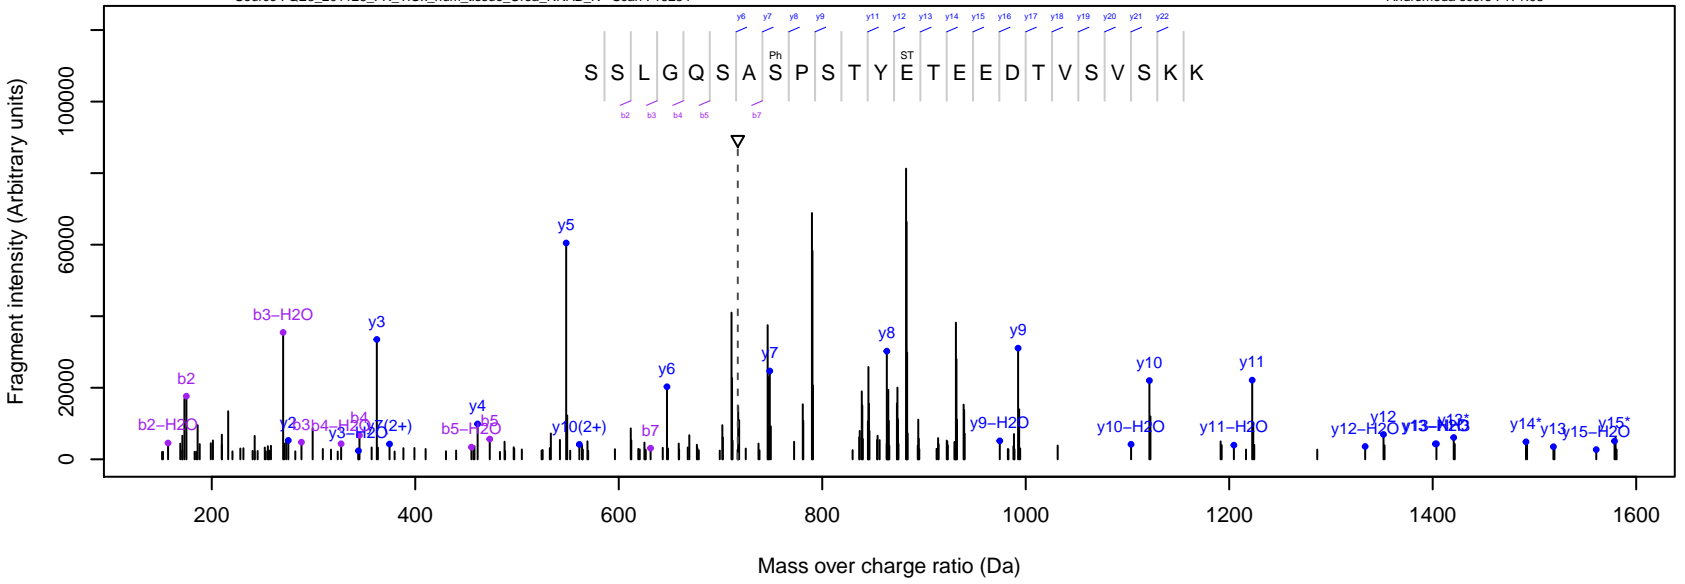

IAEFTTNLTEEEEEKSKS(Phospho (STY))LAK-3+

Source : QE3\_201126\_FR\_TiOx\_hum\_tissue\_Urea\_RNAB\_N Scan : 26374

Andromeda score : 171.05

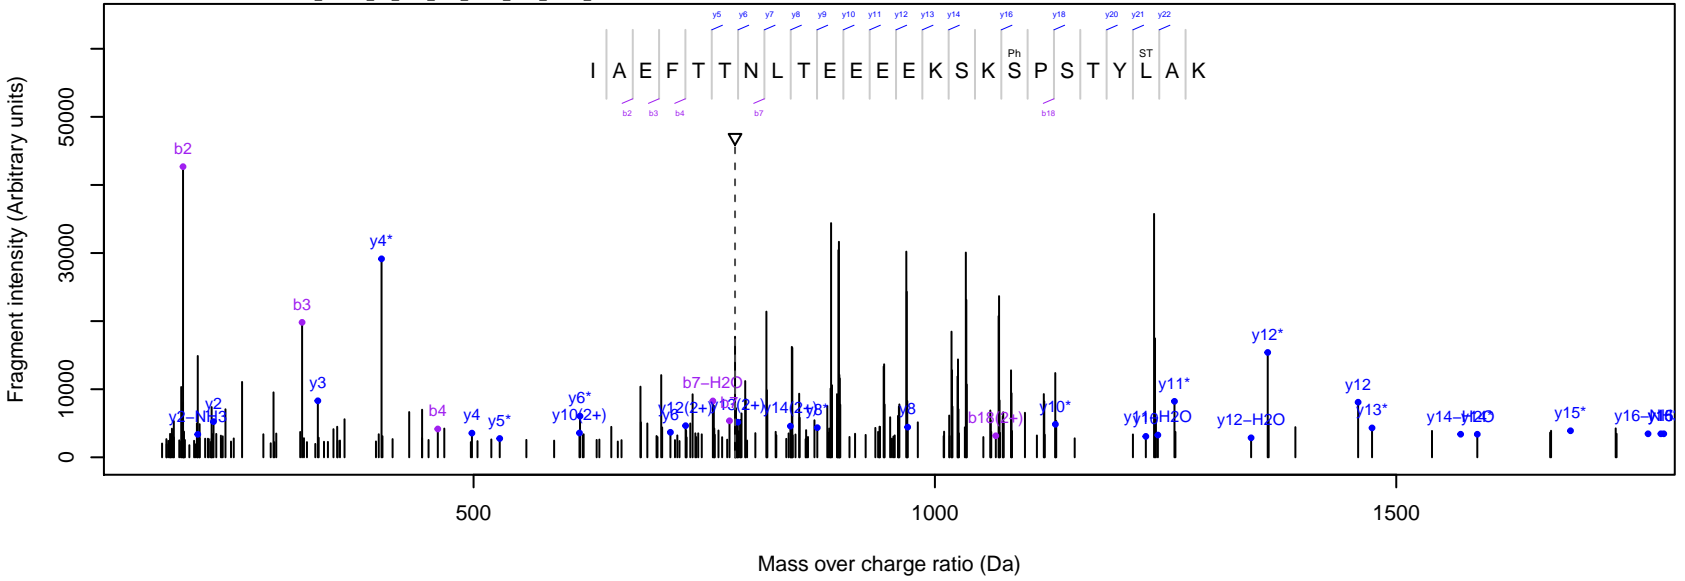

VSALEEDM(Oxidation (M))DDVES(Phospho (STY))S(Phospho (STY))EEEEEEDEKLER-3+

Source : QE3\_201126\_FR\_TiOx\_hum\_tissue\_Urea\_RNAB\_N Scan : 29408

Andromeda score : 171.02

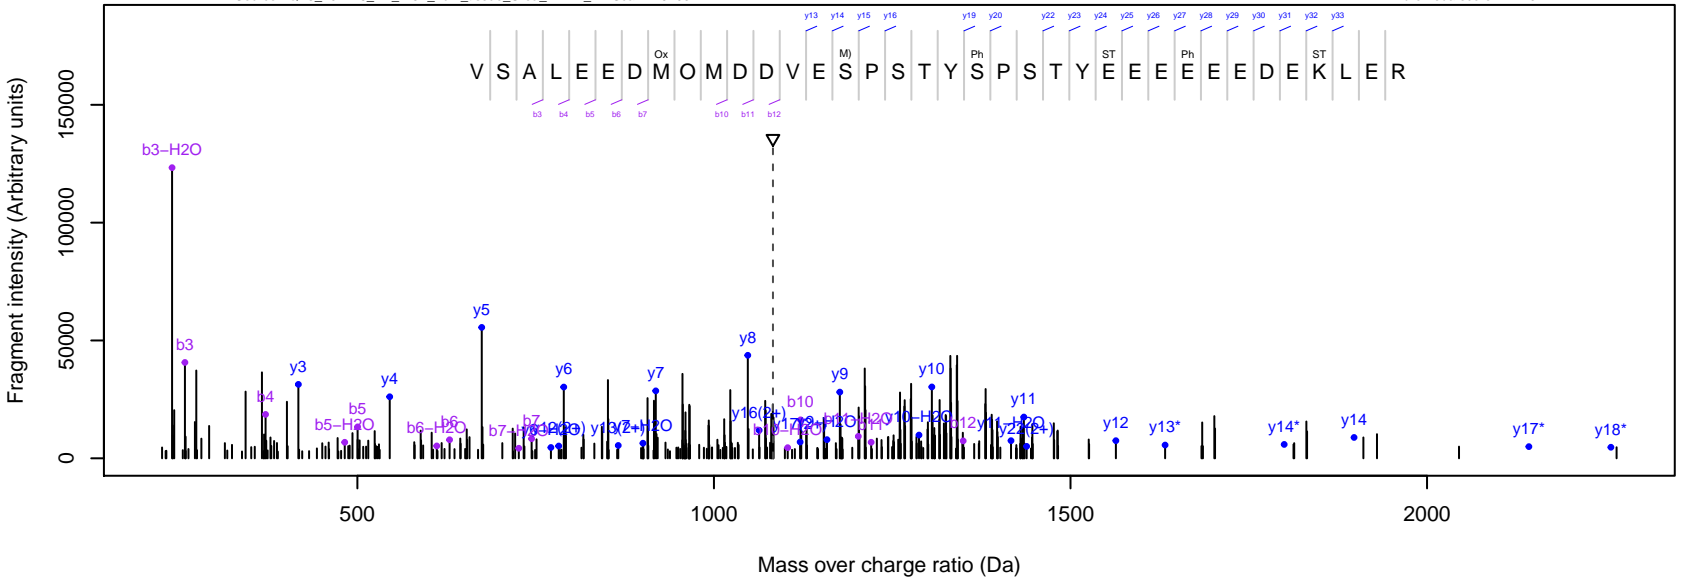

(Acetyl (Protein N-term))AS(Phospho (STY))GVTNDEVIK-2+

Source : QE3\_201126\_FR\_TIOx\_hum\_tissue\_Urea\_RNAB\_H Scan : 38102

Andromeda score : 170.95

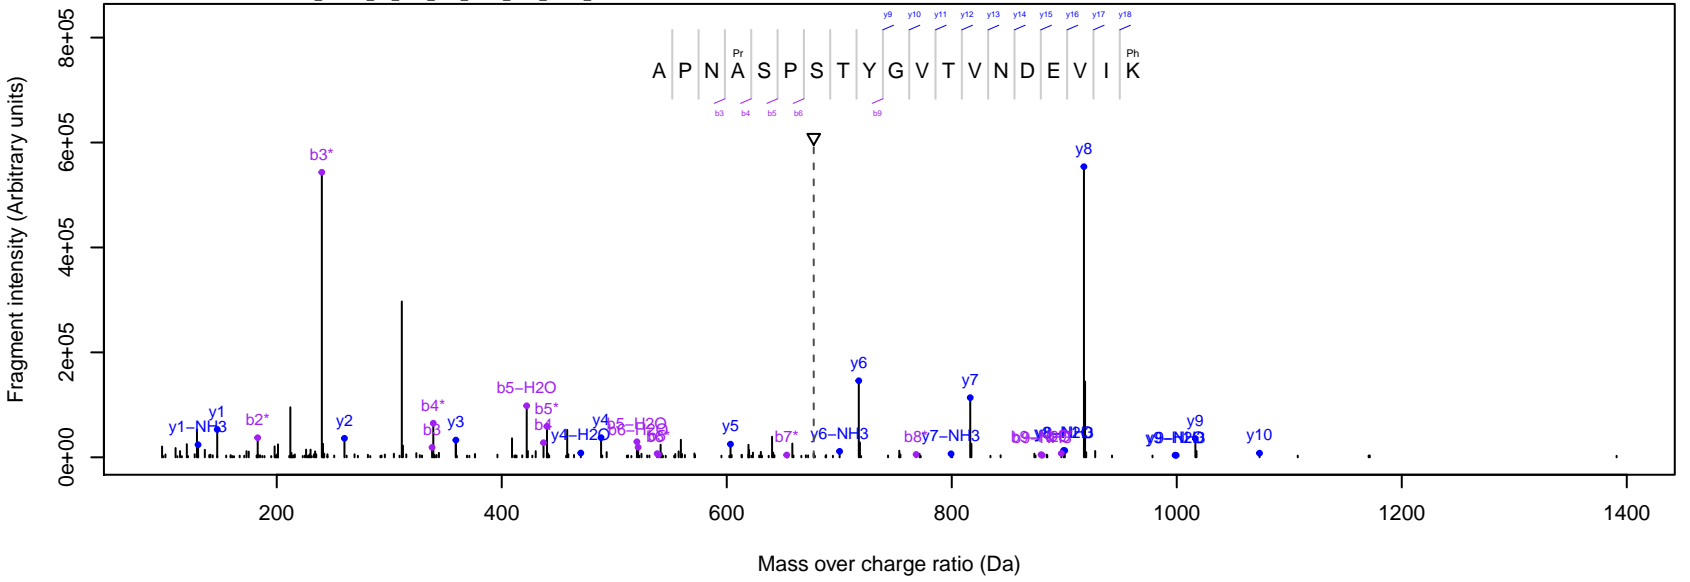

GGG(Phospho (STY))SKDLLDNQSQEEQR-3+

Source : QE3\_201126\_FR\_TIOx\_hum\_tissue\_Urea\_RNAB\_H Scan : 9293

Andromeda score : 170.91

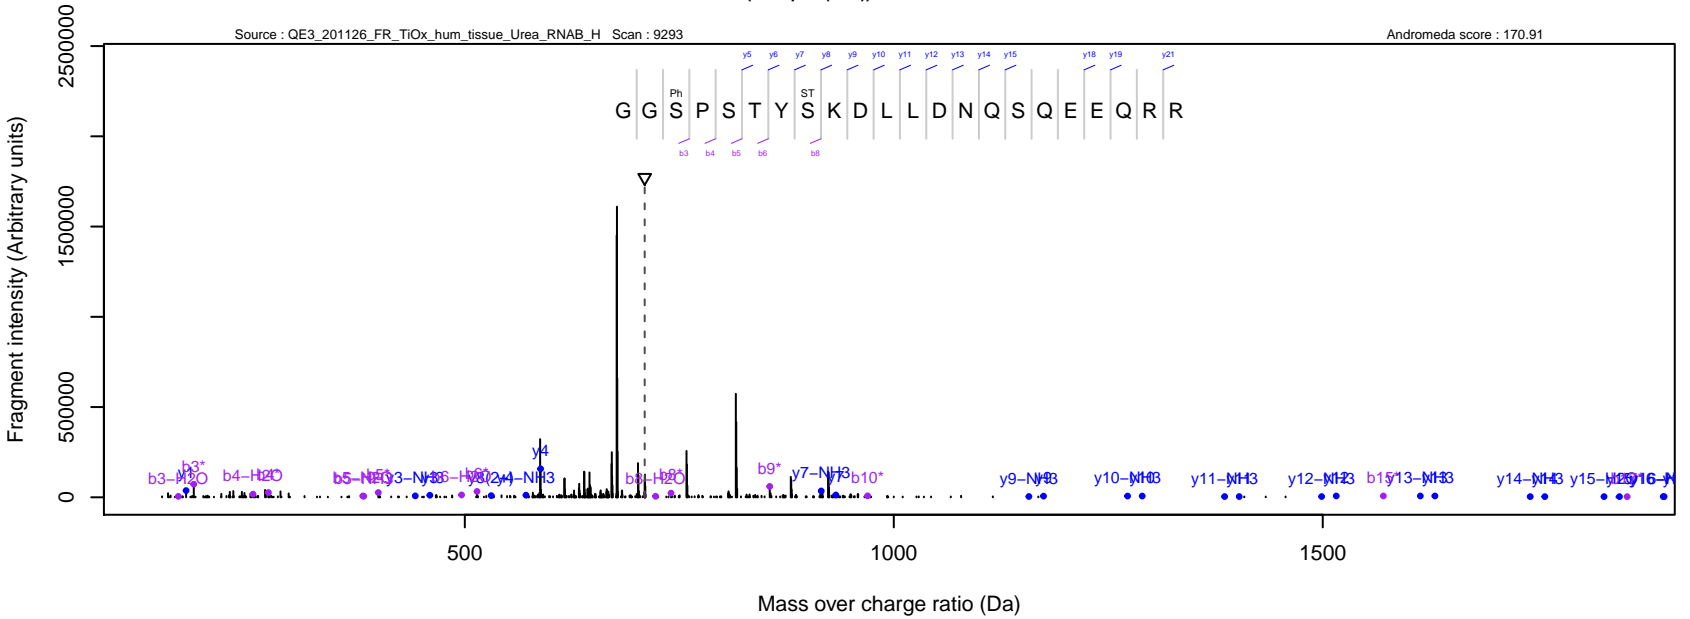

(Acetyl (Protein N-term))S(Phospho (STY))ETAPAAPAAPAEKTPVK-2+

Source : QE3\_201126\_FR\_TIOx\_hum\_tissue\_Urea\_RNAB\_H Scan : 20677

Andromeda score : 170.89

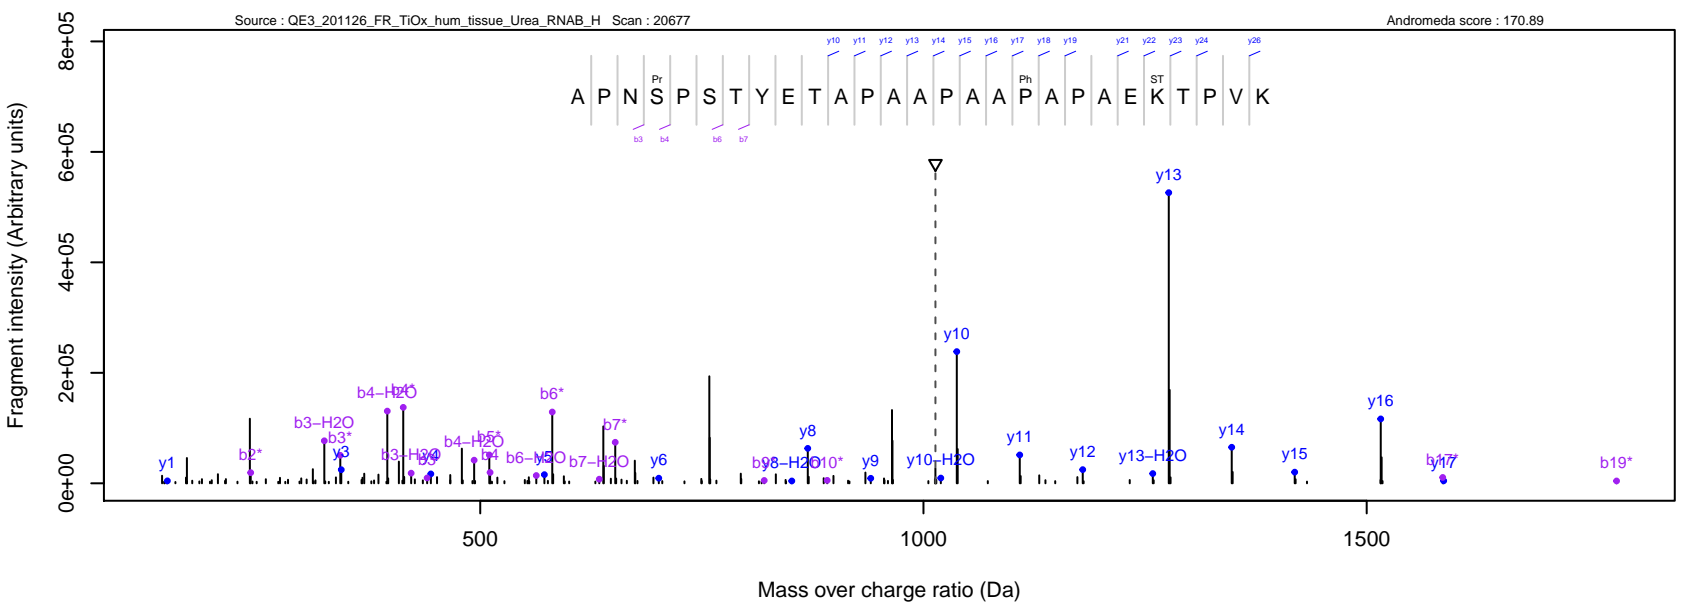

RPTPNDLDEGVGLVHSNIATEHIPSPSTYPAK

Source : QE3\_201126\_FR\_TiOx\_hum\_tissue\_Urea\_RNAB\_N Scan : 32945

Andromeda score : 170.7

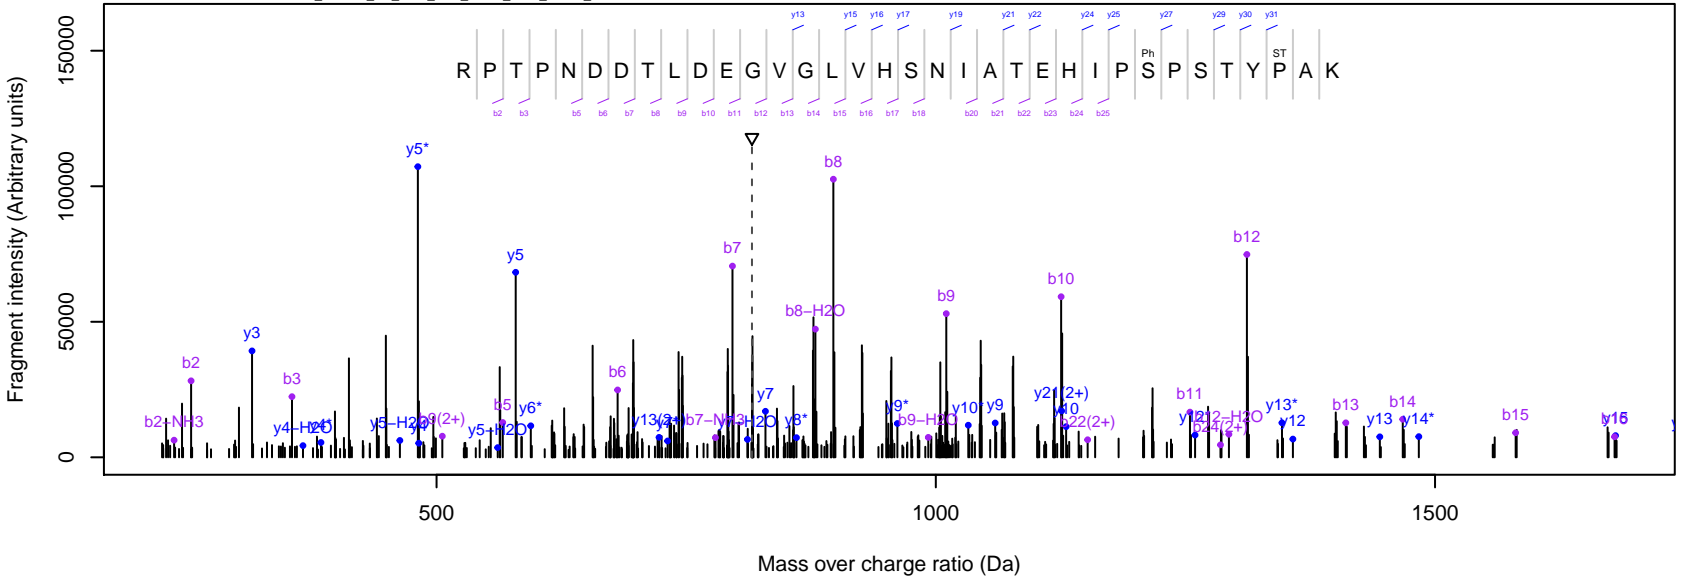

S(Phospho (STY))LEELLLDANQLR

Source : QE3\_201126\_FR\_TiOx\_hum\_tissue\_Urea\_RNAB\_H Scan : 58479

Andromeda score : 170.66

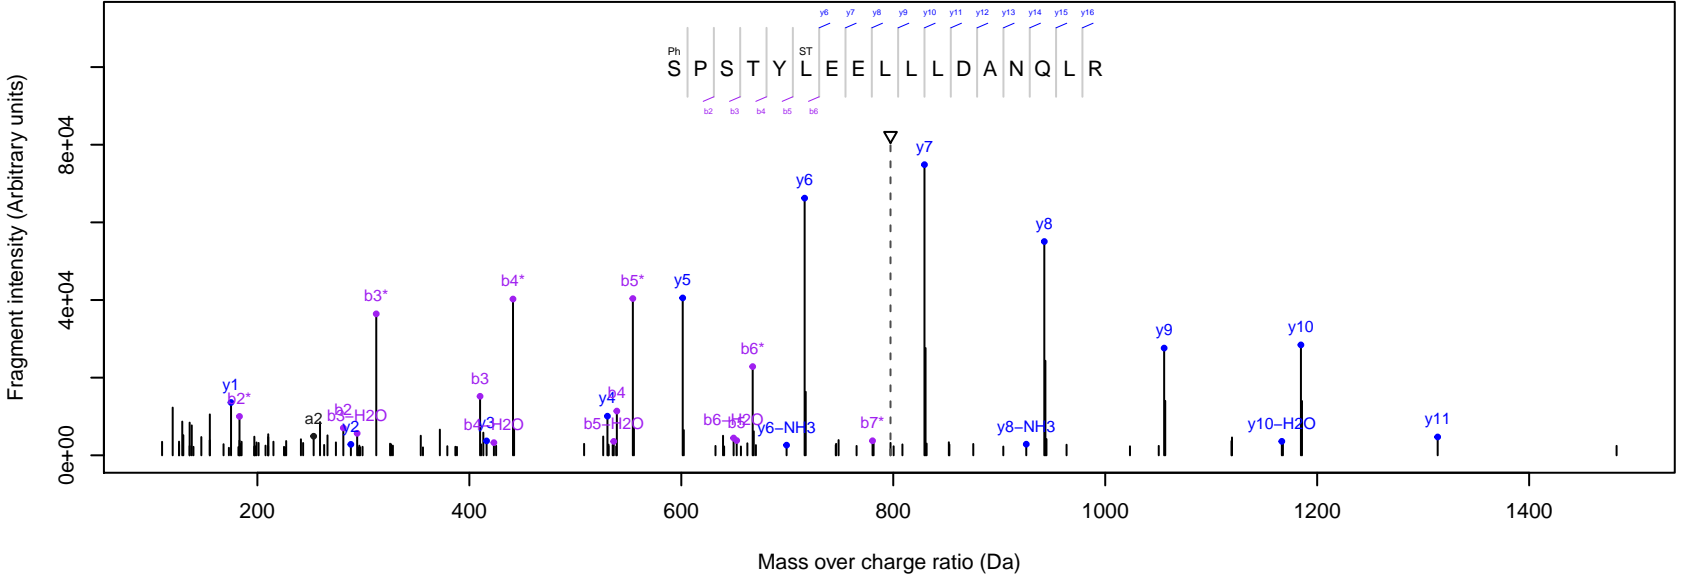

ALGGEDSPSTYENEEELGDEAMMALDQSLASLFAEQK

Source : QE3\_201126\_FR\_TiOx\_hum\_tissue\_Urea\_RNAB\_H Scan : 63021

Andromeda score : 170.6

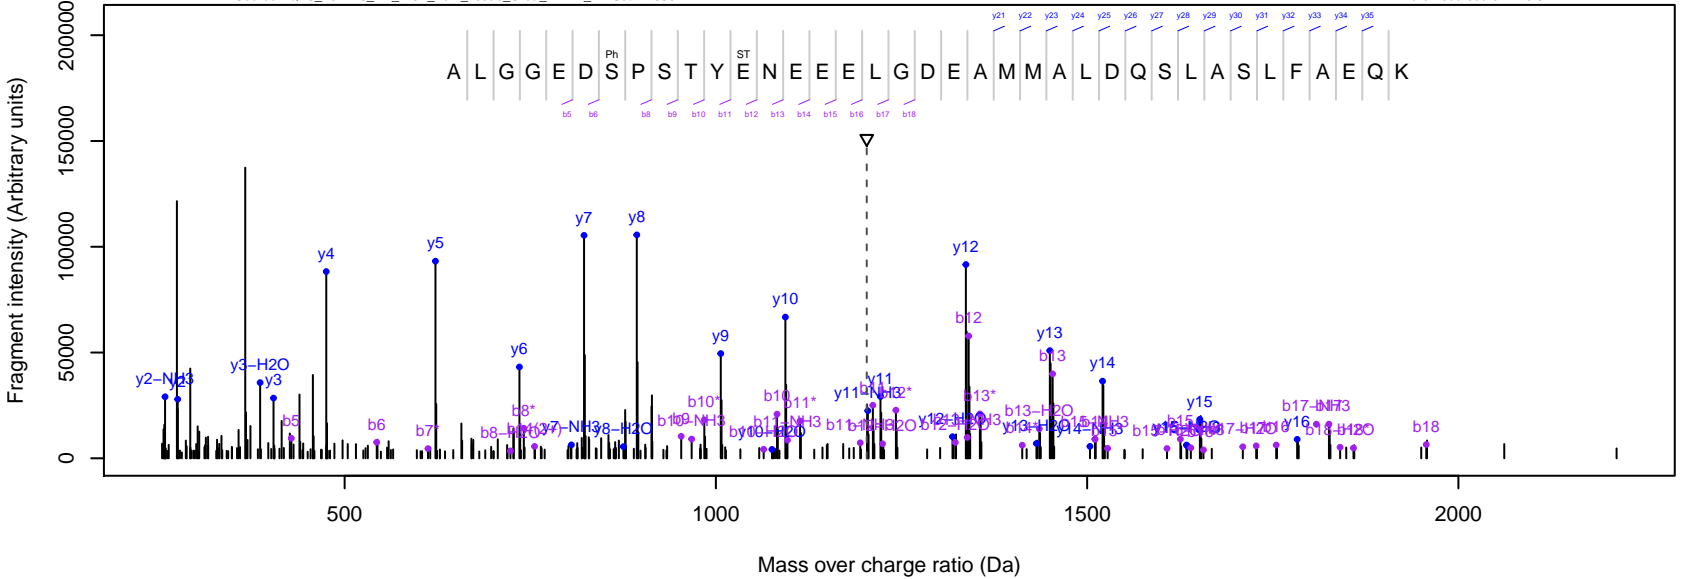

AKS(Phospho (STY))PTPESSTIASYVTLRK-3+

Source : QE3\_201126\_FR\_TiOx\_hum\_tissue\_Urea\_RNAB\_H Scan : 25711

Andromeda score : 170.58

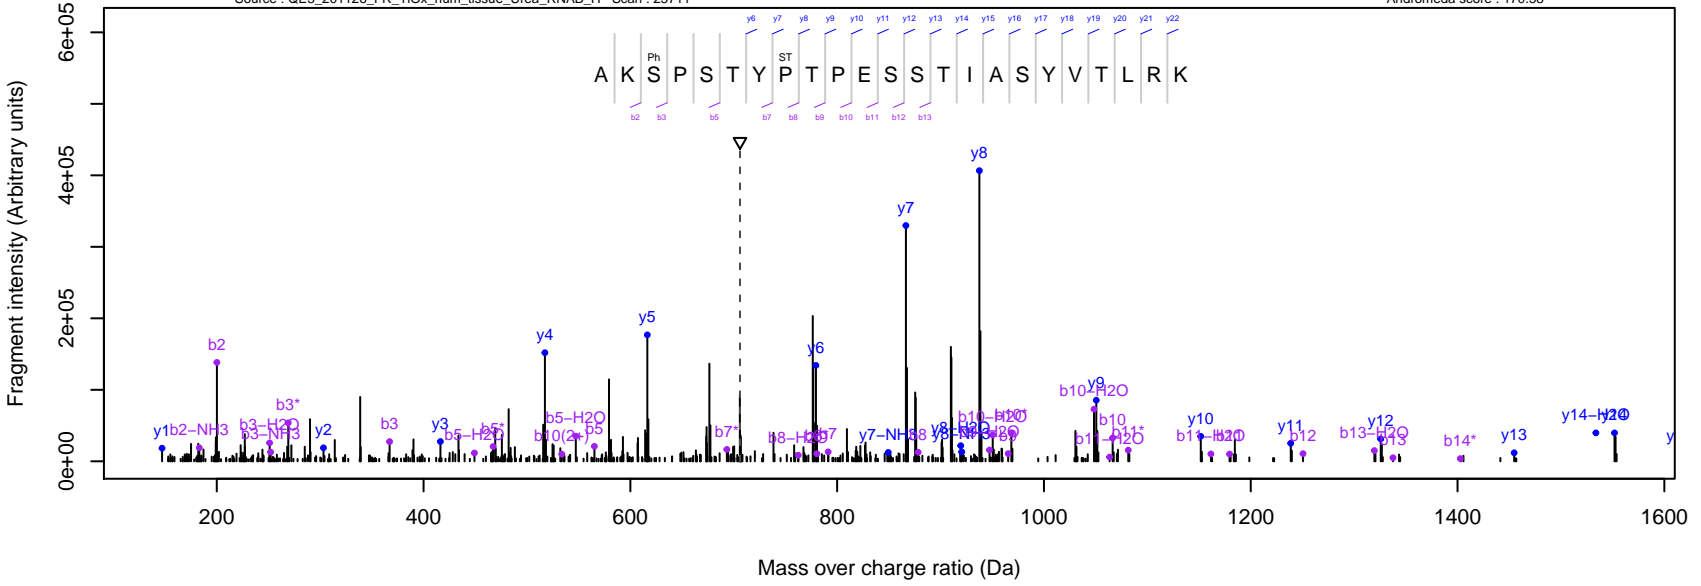

DLLSDLQDIS(Phospho (STY))DSER-2+

Source : QE3\_201126\_FR\_TiOx\_hum\_tissue\_Urea\_RNAB\_H Scan : 54424

Andromeda score : 170.56

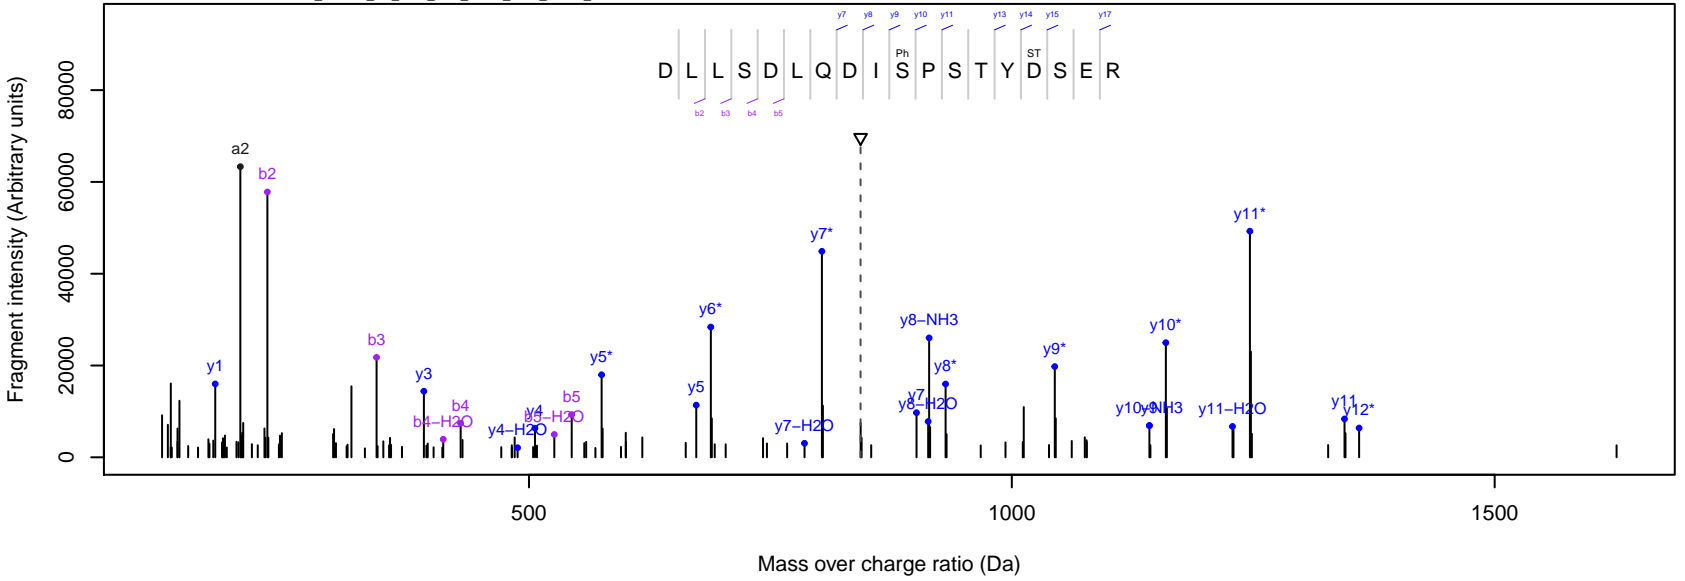

LKTEEGEIDYS(Phospho (STY))AEEGENR-3+

Source : QE3\_201126\_FR\_TiOx\_hum\_tissue\_Urea\_RNAB\_N Scan : 14764

Andromeda score : 170.56

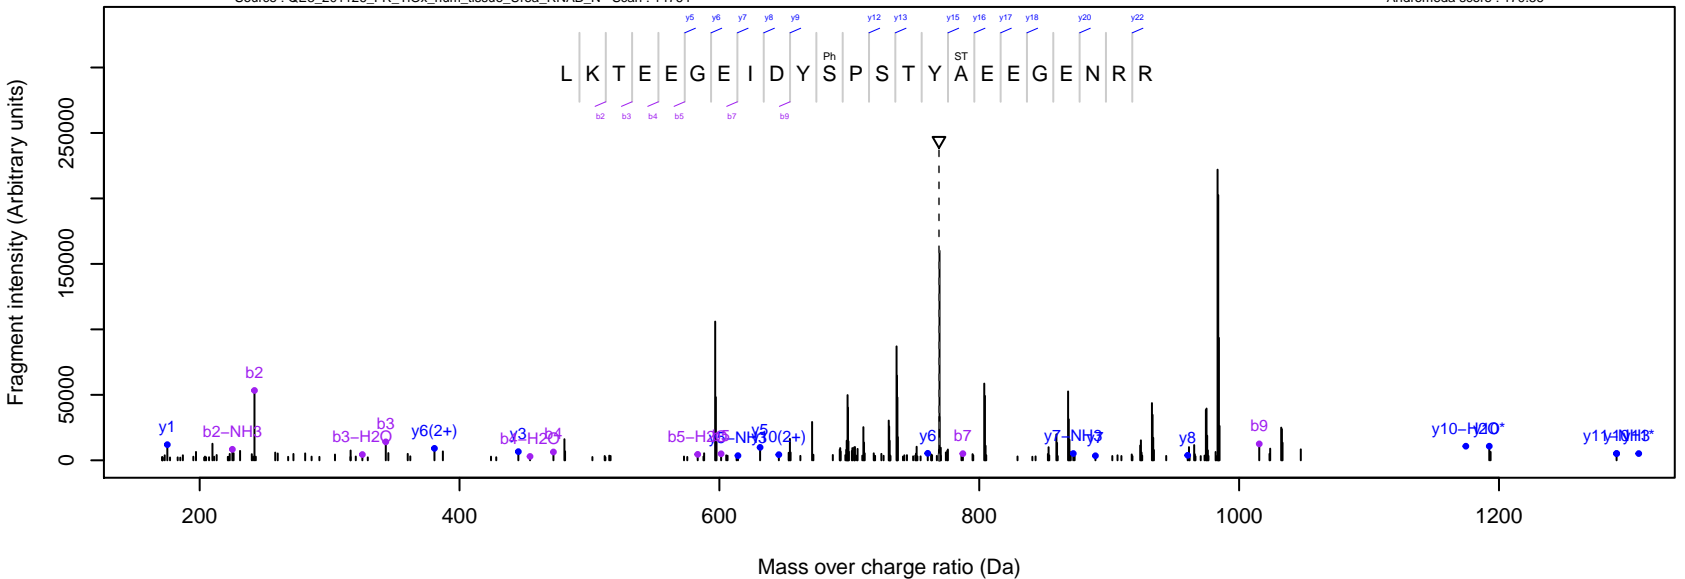

ASVS(Phospho (STY))PMDEPVPDSESPIEK-2+

Source : QE3\_201126\_FR\_TiOx\_hum\_tissue\_Urea\_RNAB\_H Scan : 31200

Andromeda score : 170.5

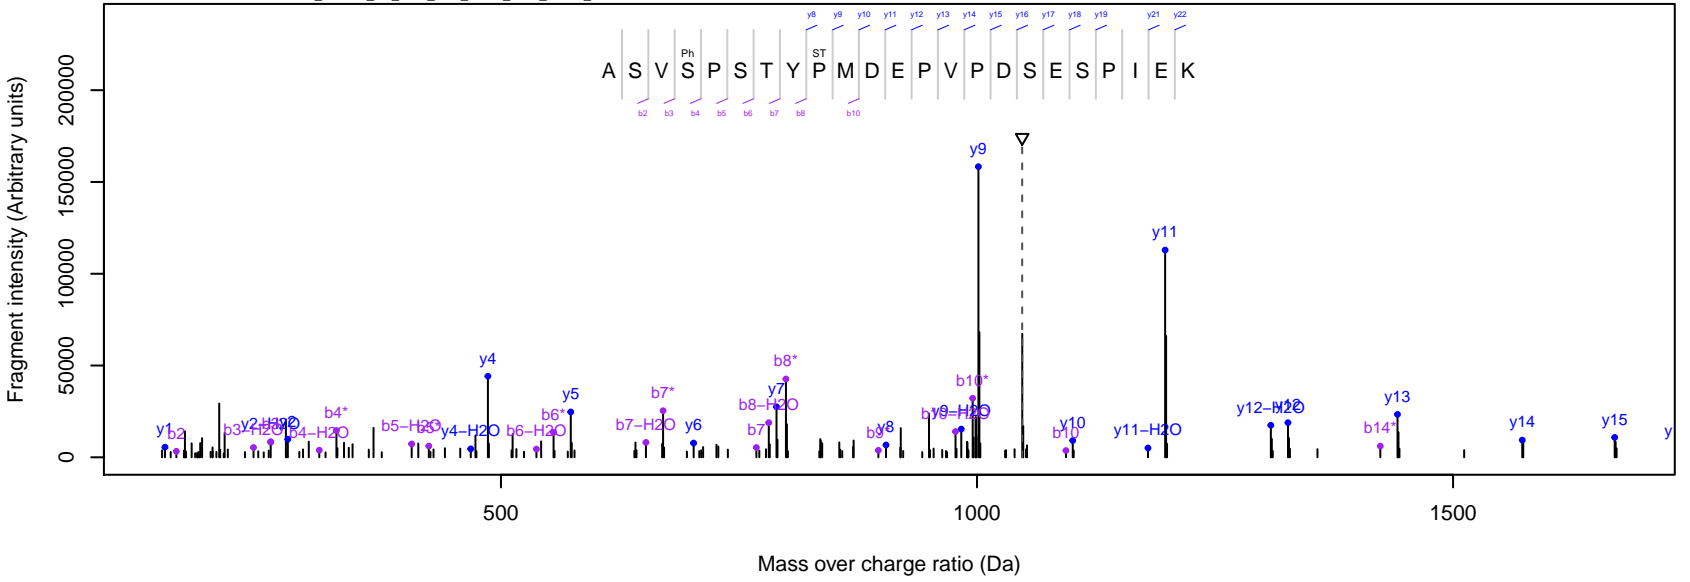

KEKT(Phospho (STY))PELPEPSVK-3+

Source : QE3\_201126\_FR\_TiOx\_hum\_tissue\_Urea\_RNAB\_B Scan : 12427

Andromeda score : 170.48

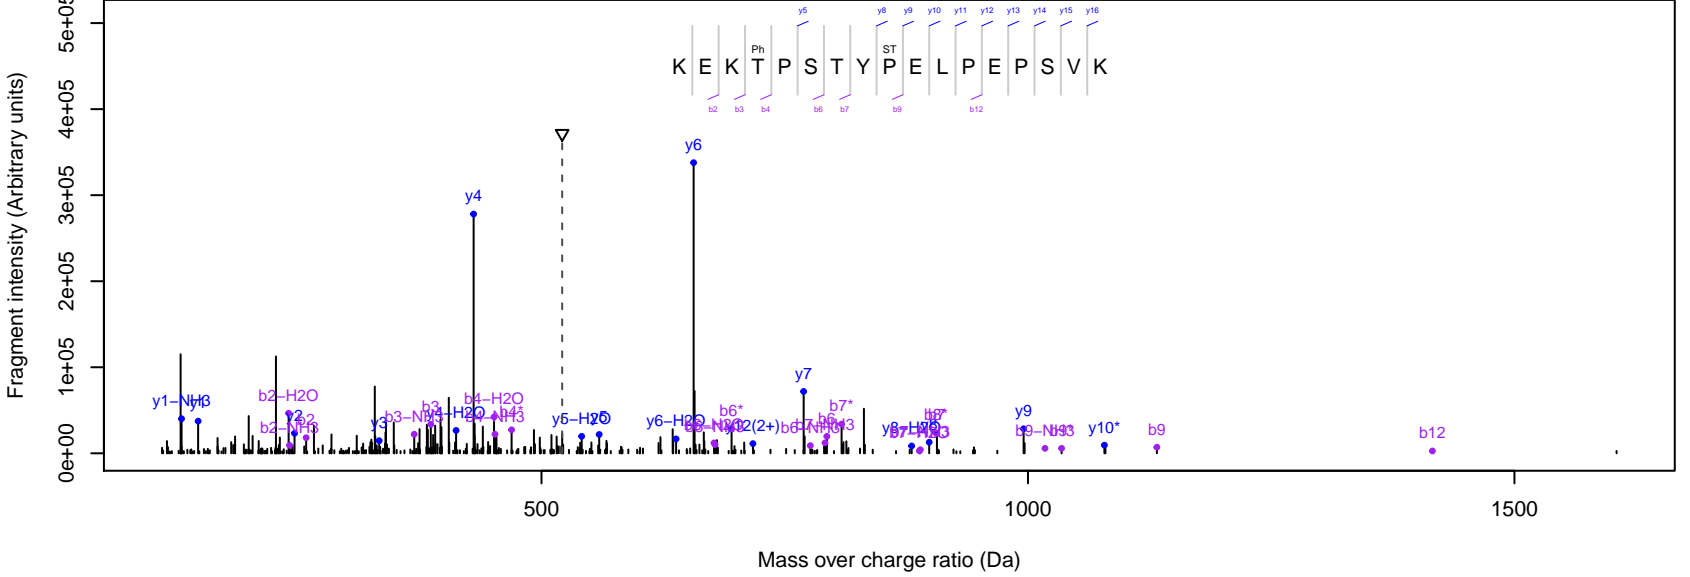

GYSSPEPDIQDS(Phospho (STY))SGSEASVKPSTR-3+

Source : QE3\_201126\_FR\_TiOx\_hum\_tissue\_Urea\_RNAB\_B Scan : 18649

Andromeda score : 170.44

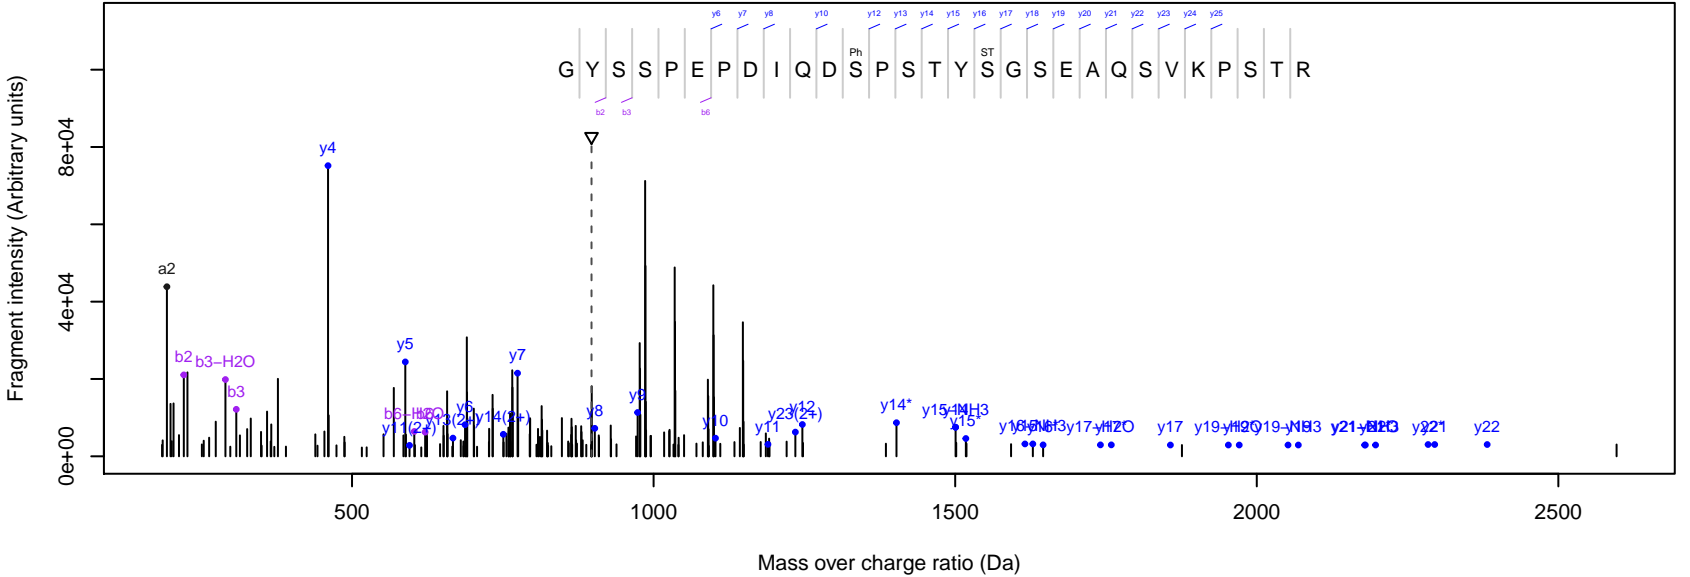



EREKEIS(Pospho (STY))DDEAEEEEK-3+

Source : QE3\_201126\_FR\_TiOx\_hum\_tissue\_Urea\_RNAB\_B Scan : 5887

Andromeda score : 170.19

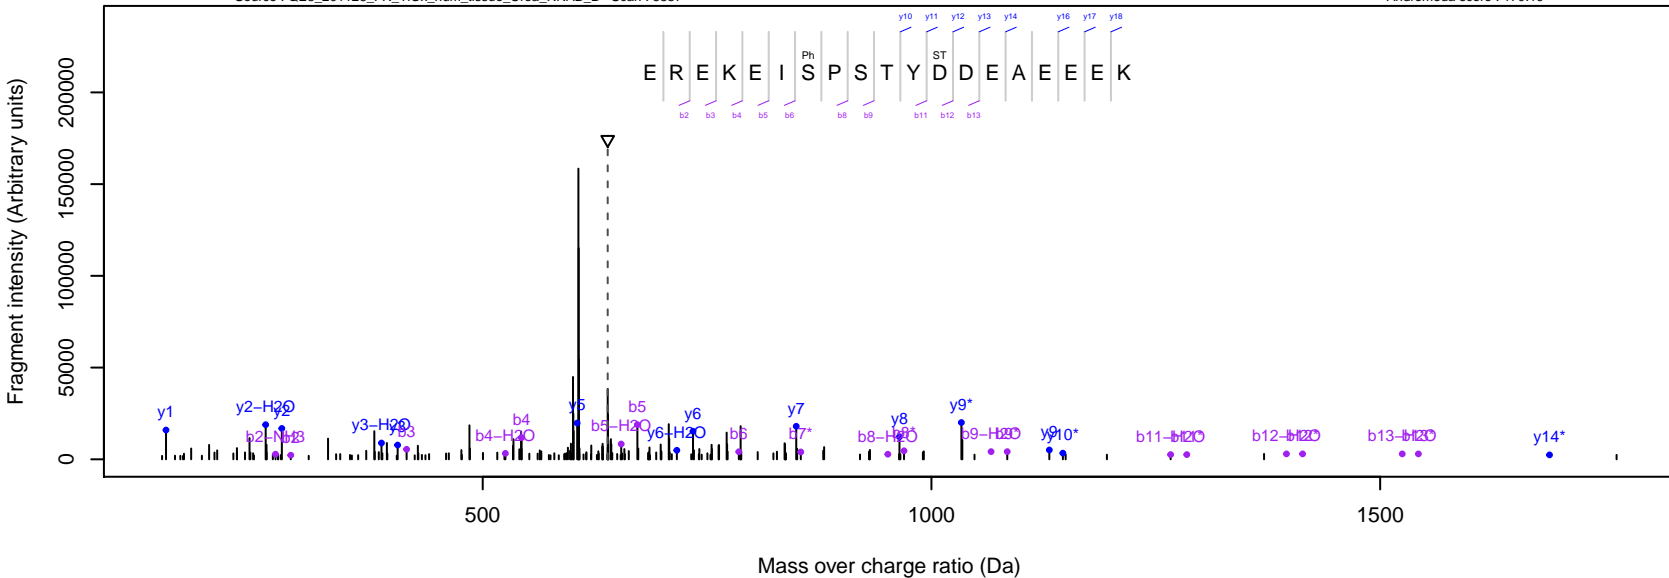

RGLRDS(Phospho (STY))HS(Phospho (STY))S(Phospho (STY))EEDEASSQTDLSTISK-3+

Source : QE3\_201126\_FR\_TiOx\_hum\_tissue\_Urea\_RNAB\_N Scan : 20799

Andromeda score : 170.18

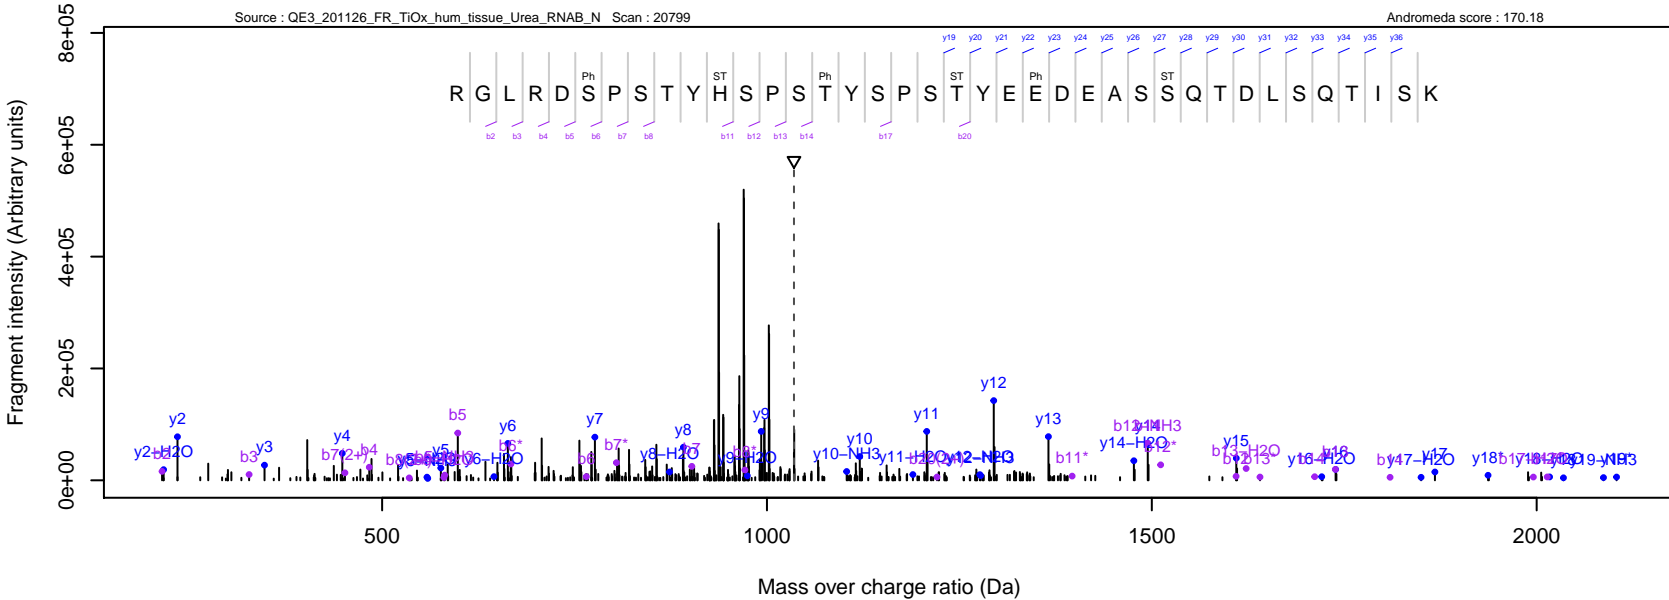

KKEEPSQNDIS(Phospho (STY))PK-3+

Source : QE3\_201126\_FR\_TiOx\_hum\_tissue\_Urea\_RNAB\_H Scan : 4594

Andromeda score : 170.16

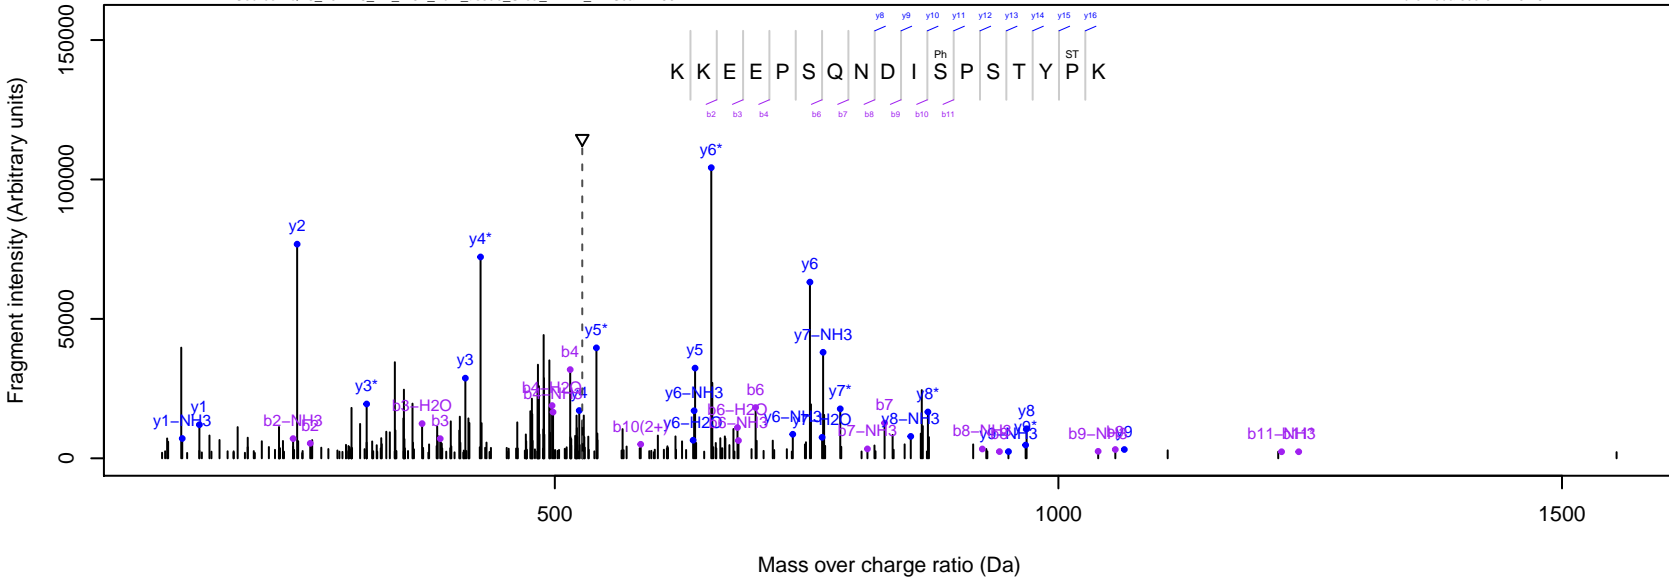

SAGGSPEGGEDS(Phospho (STY))DREDGNYCPPVKR-3+

Source : QE3\_201126\_FR\_TIOx\_hum\_tissue\_Urea\_RNAB\_N Scan : 10632

Andromeda score : 170.11

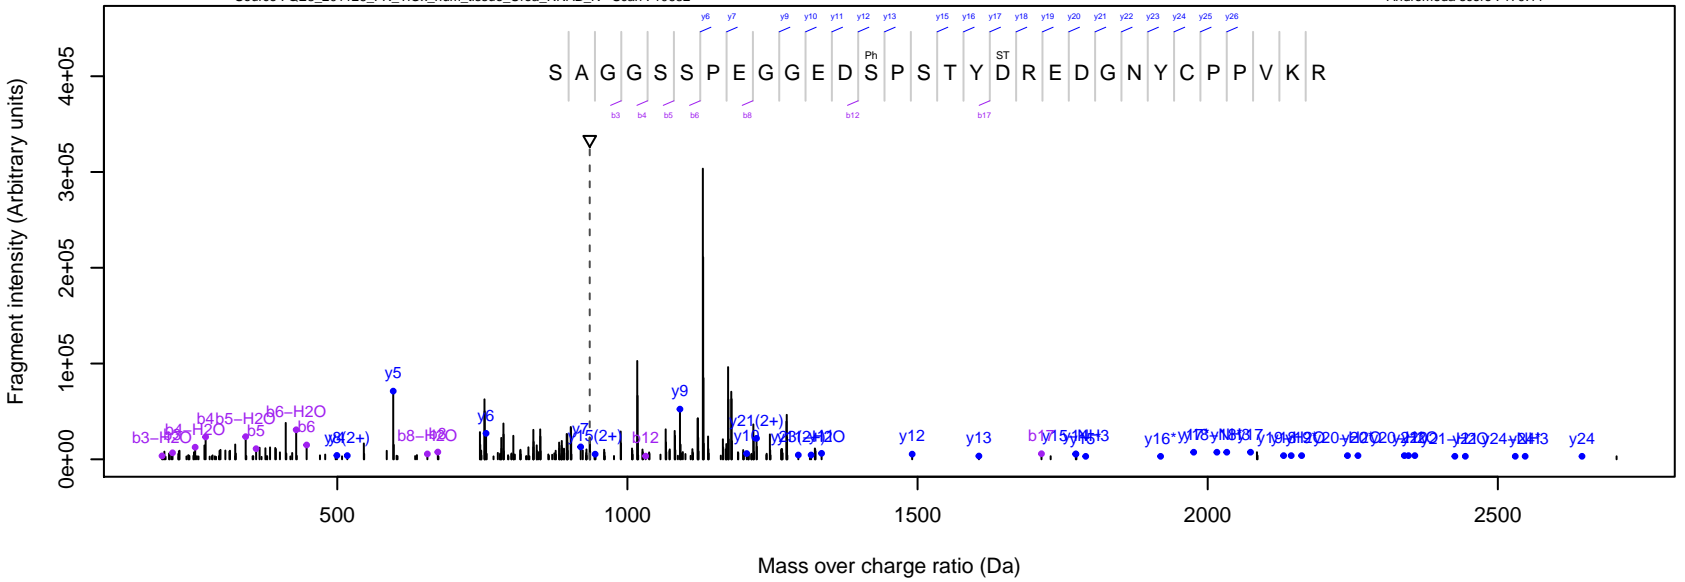

S(Phospho (STY))LTPAVPVEKPKPSGK-3+

Source : QE3\_201126\_FR\_TIOx\_hum\_tissue\_Urea\_RNAB\_N Scan : 14460

Andromeda score : 170.11

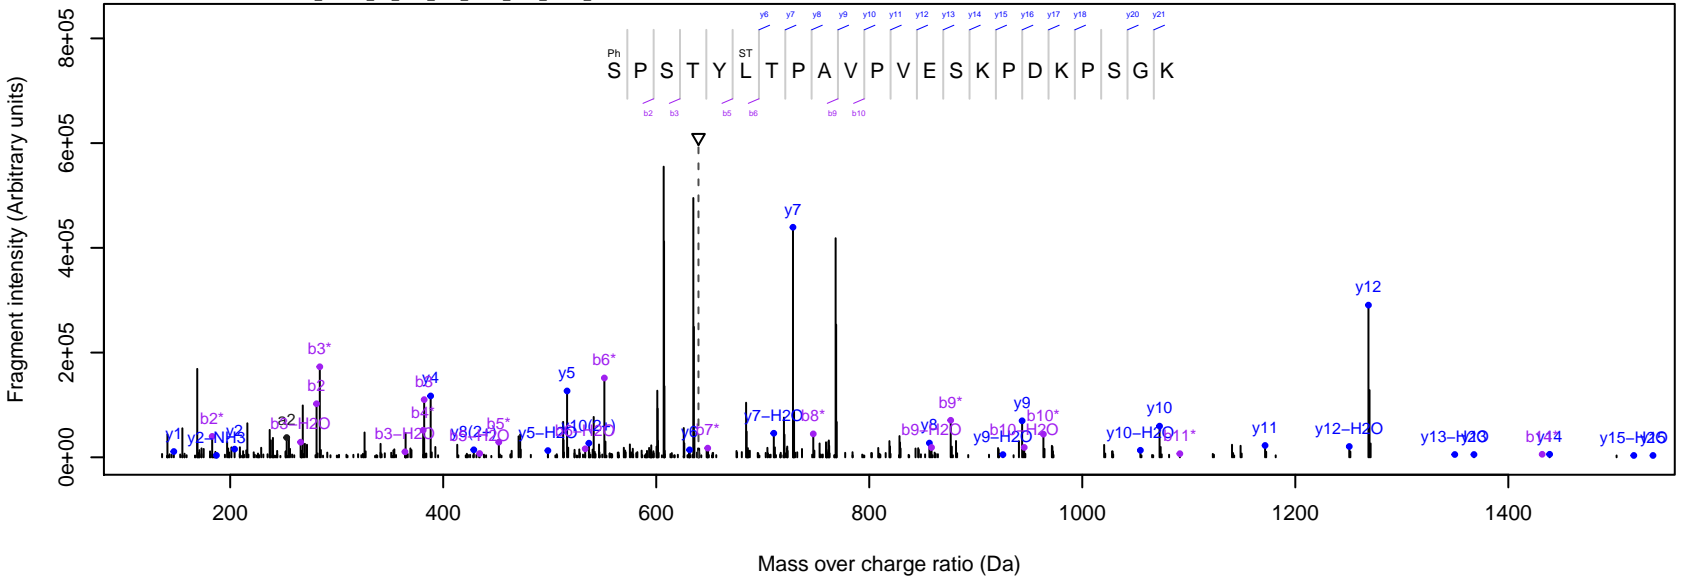

(Acetyl (Protein N-term))SETAPAETATPAPVEKS(Phospho (STY))PAKK-3+

Source : QE3\_201126\_FR\_TIOx\_hum\_tissue\_Urea\_RNAB\_H Scan : 13295

Andromeda score : 170.1

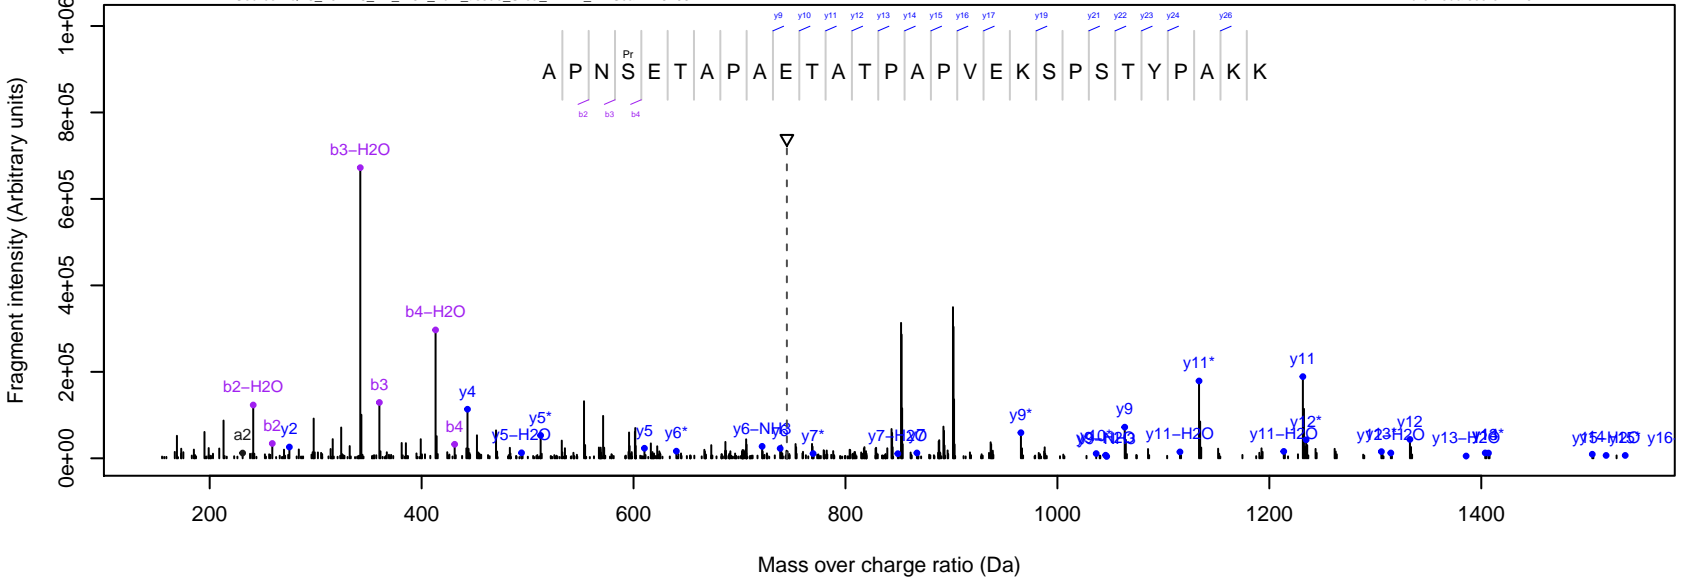

HLS(Phospho (STY))AEDFSR-2+

Source : QE3\_2011126\_FR\_TiOx\_hum\_tissue\_Urea\_RNAB\_B Scan : 14246

Andromeda score : 170.02

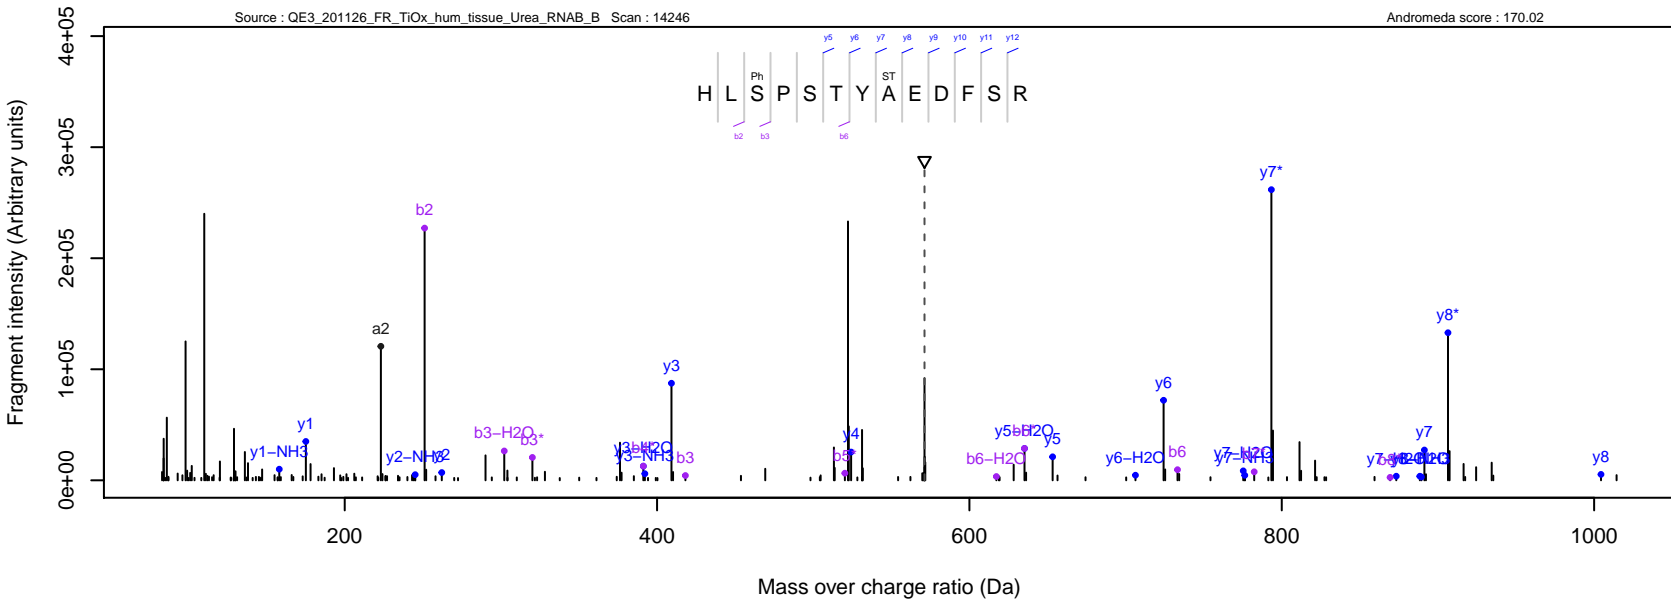

TAS(Phospho (STY))GSS(Phospho (STY))VTSLDGTR-2+

Source : QE3\_2011126\_FR\_TiOx\_hum\_tissue\_Urea\_RNAB\_B Scan : 22339

Andromeda score : 169.98

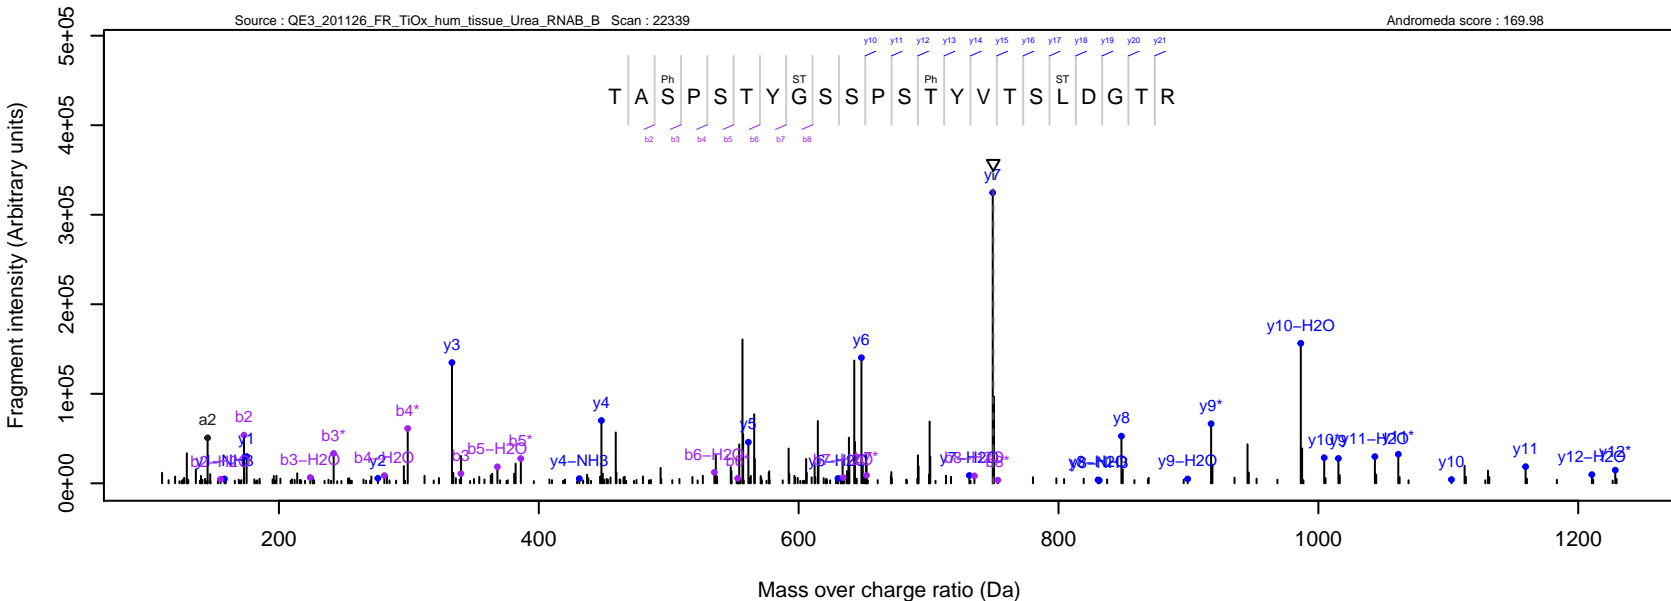

SSS(Phospho (STY))ADFGTFNTSQSHQTASAVSK-3+

Source : QE3\_2011126\_FR\_TiOx\_hum\_tissue\_Urea\_RNAB\_N Scan : 20418

Andromeda score : 169.91

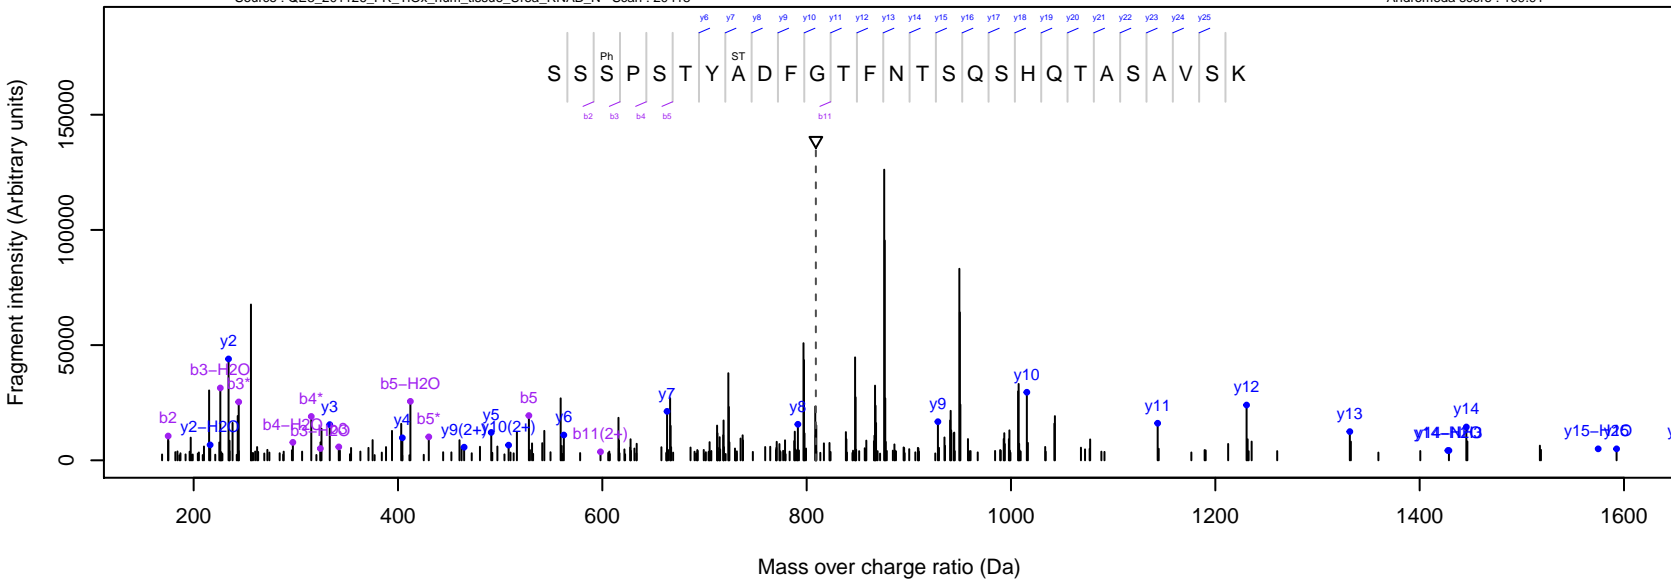

ASVRGS(Phospho (STY))SEEDARTPDR-3+

Source : QE3\_201126\_FR\_TiOx\_hum\_tissue\_Urea\_RNAB\_H Scan : 5751

Andromeda score : 169.9

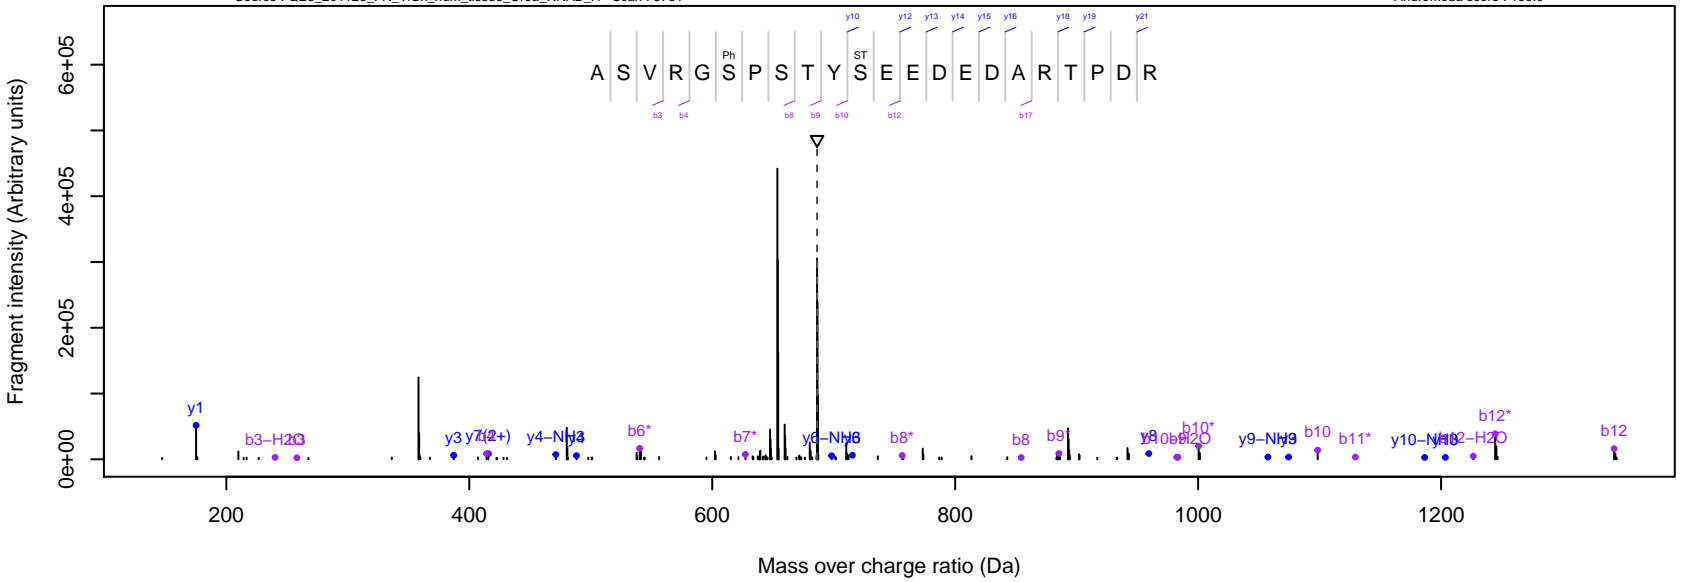

KRGHTAS(Phospho (STY))ESDEQQWPEEK-3+

Source : QE3\_201126\_FR\_TiOx\_hum\_tissue\_Urea\_RNAB\_H Scan : 7730

Andromeda score : 169.9

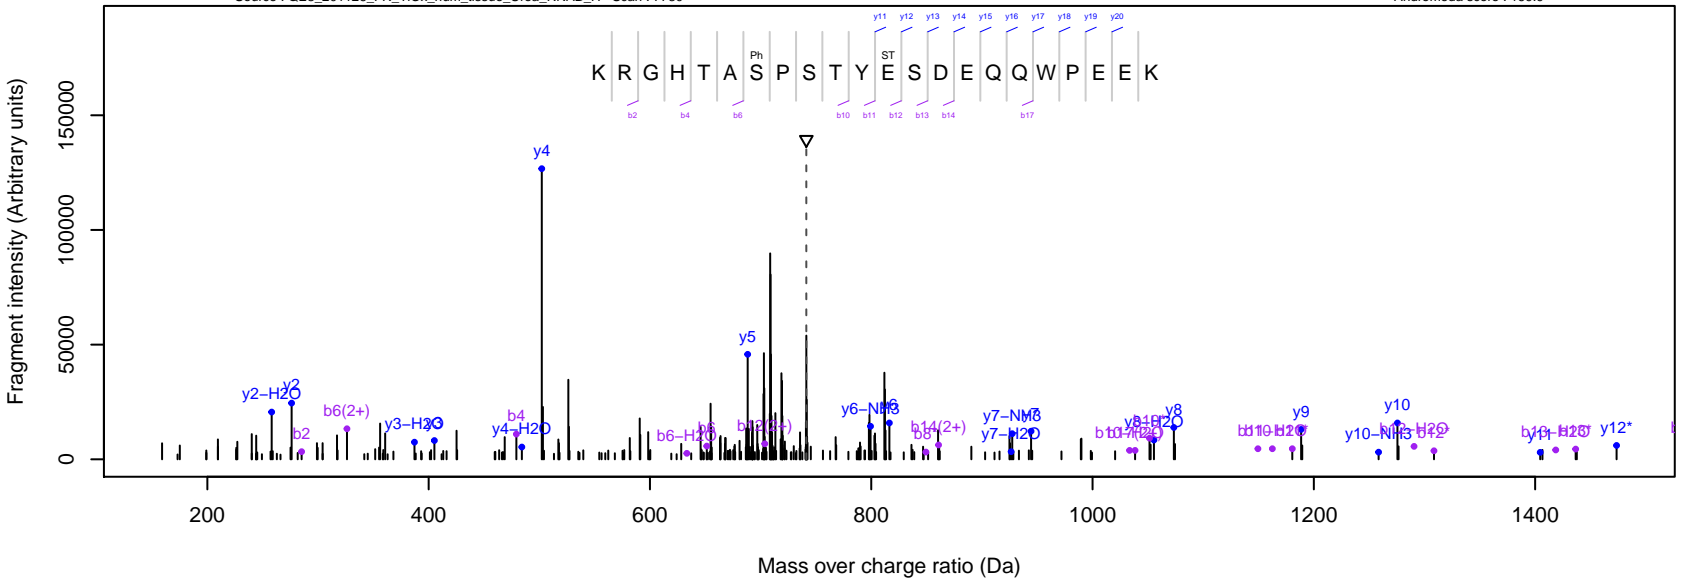

(Acetyl (Protein N-term))ADGGS(Phospho (STY))PFLGRR-2+

Source : QE3\_201126\_FR\_TiOx\_hum\_tissue\_Urea\_RNAB\_H Scan : 25758

Andromeda score : 169.89

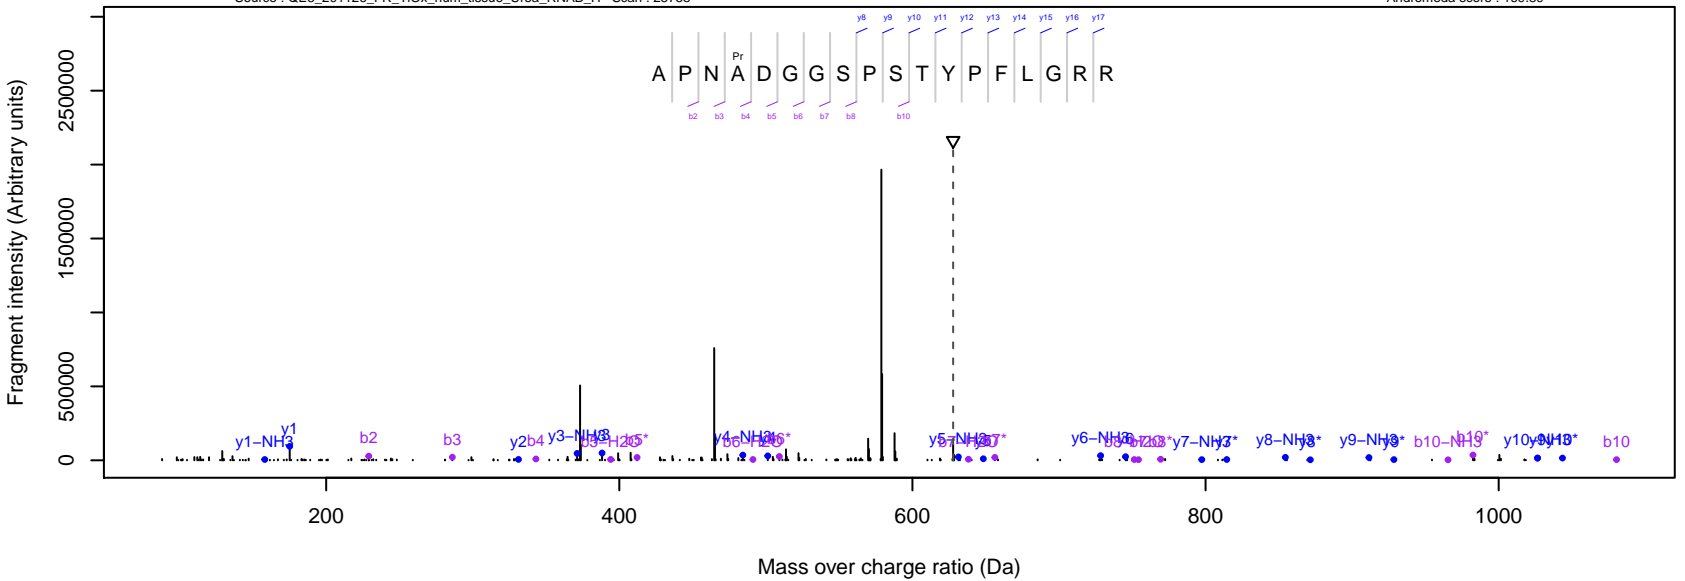

TS(Phospho (STY))DSDQAYLVQR-2+

Source : QE3\_201126\_FR\_TiOx\_hum\_tissue\_Urea\_RNAB\_B Scan : 20754

Andromeda score : 169.89

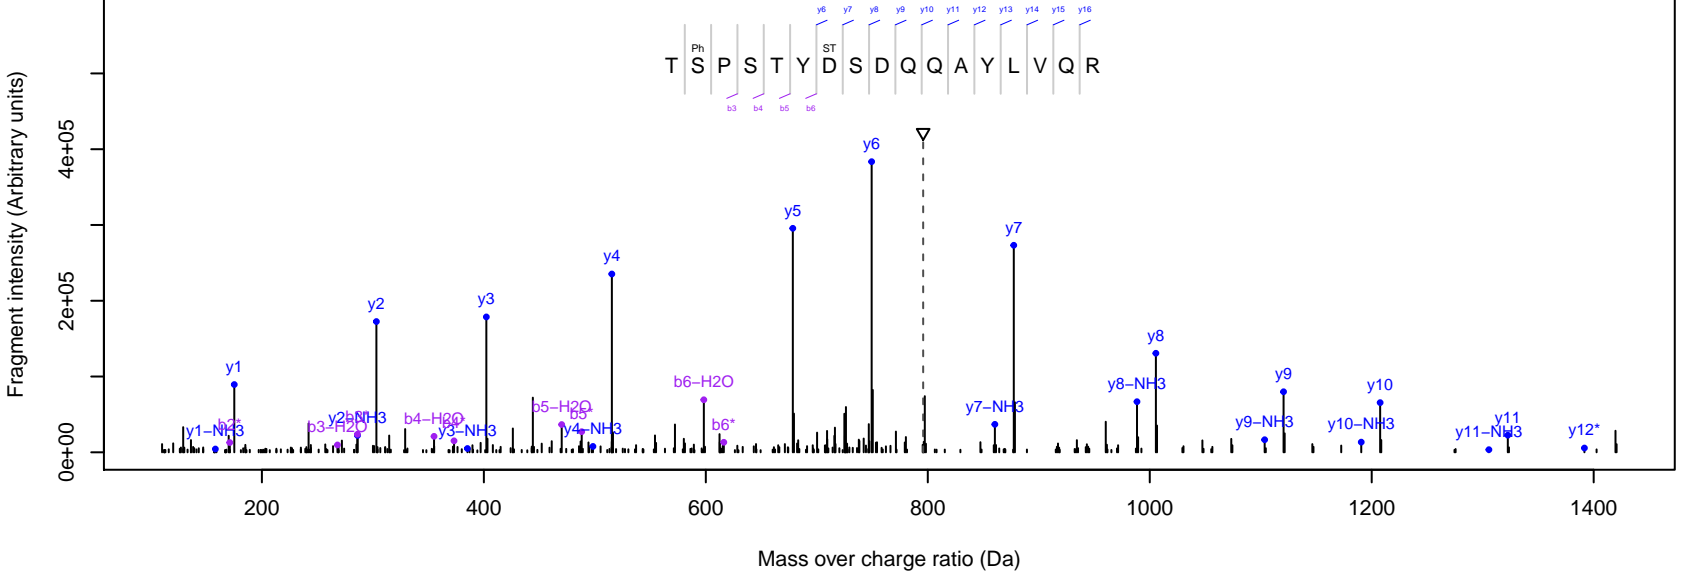

NAIHTFVQS(Phospho (STY))GSHLAAR-3+

Source : QE3\_201126\_FR\_TiOx\_hum\_tissue\_Urea\_RNAB\_H Scan : 18162

Andromeda score : 169.85

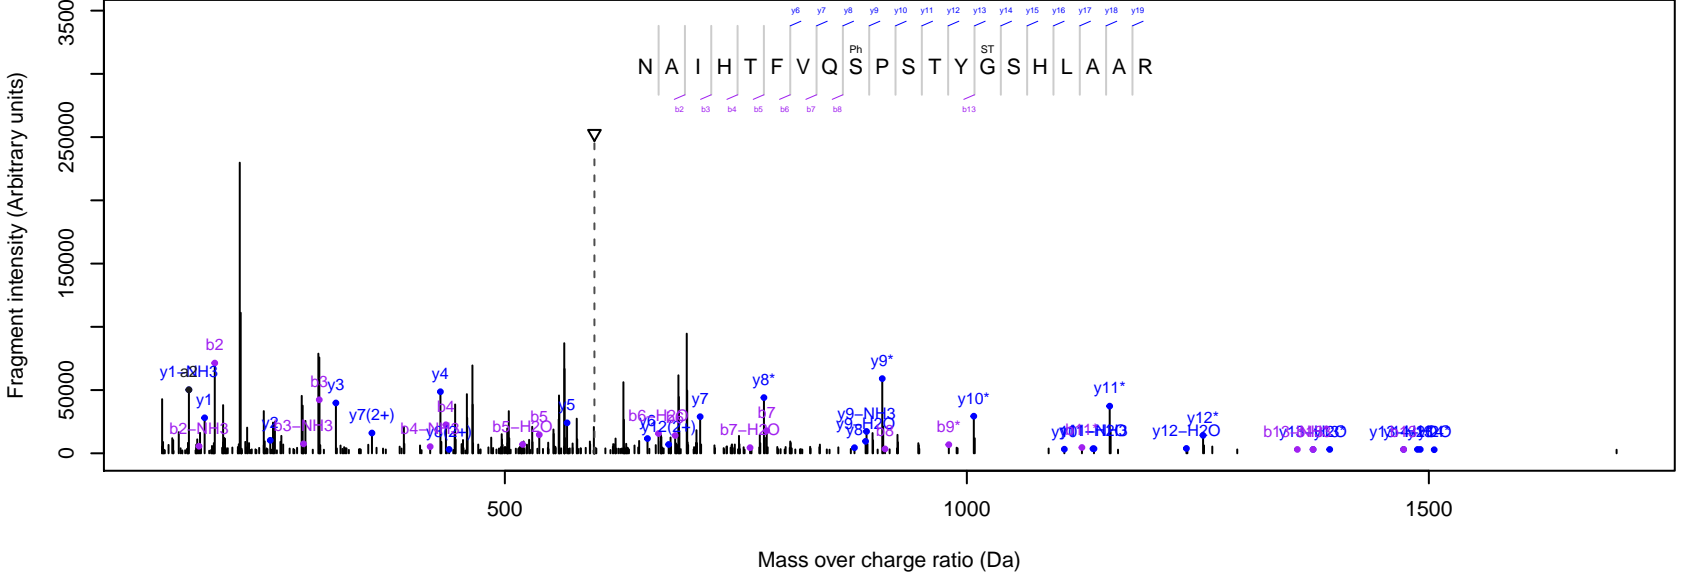

HNGS(Phospho (STY))LS(Phospho (STY))PGLEARDPLEAR-3+

Source : QE3\_201126\_FR\_TiOx\_hum\_tissue\_Urea\_RNAB\_H Scan : 27284

Andromeda score : 169.84

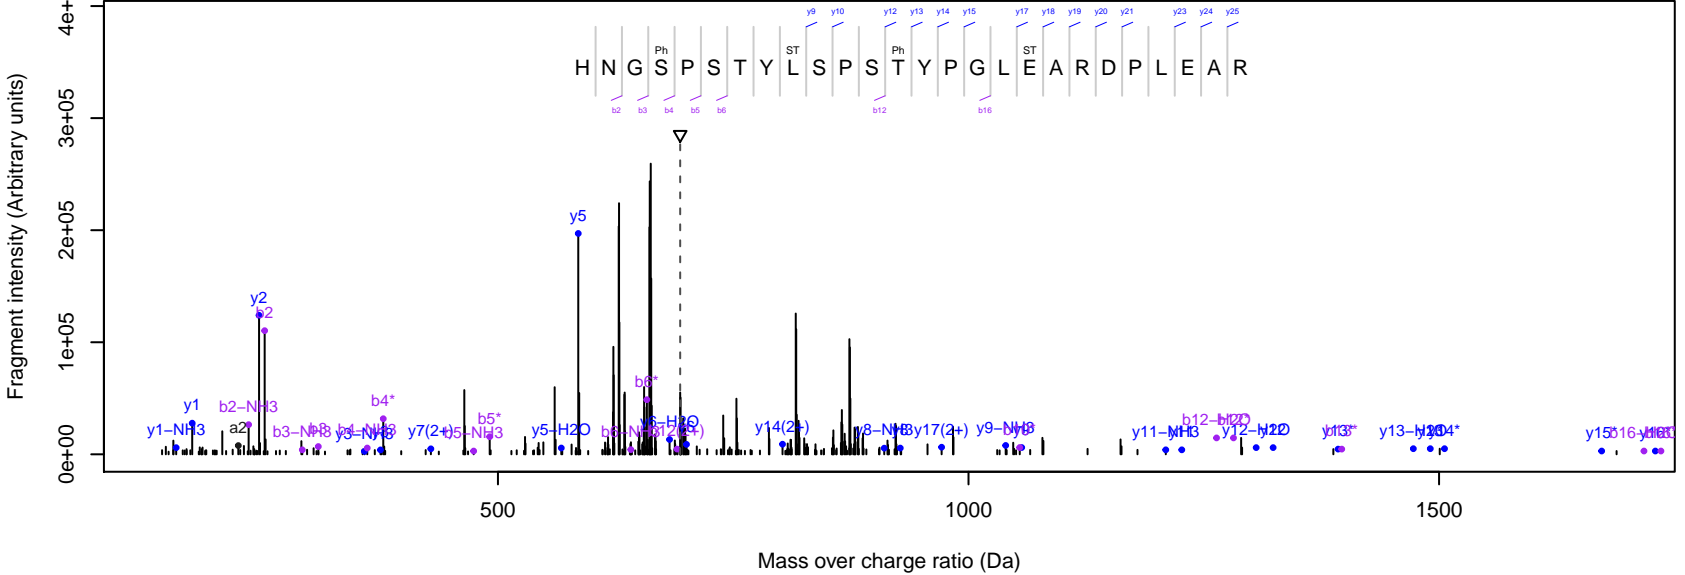

CSS(Phospho (STY))LGDLLGEGPR-2+

Source : QE3\_201126\_FR\_TIOx\_hum\_tissue\_Urea\_RNAB\_B Scan : 41909

Andromeda score : 169.82

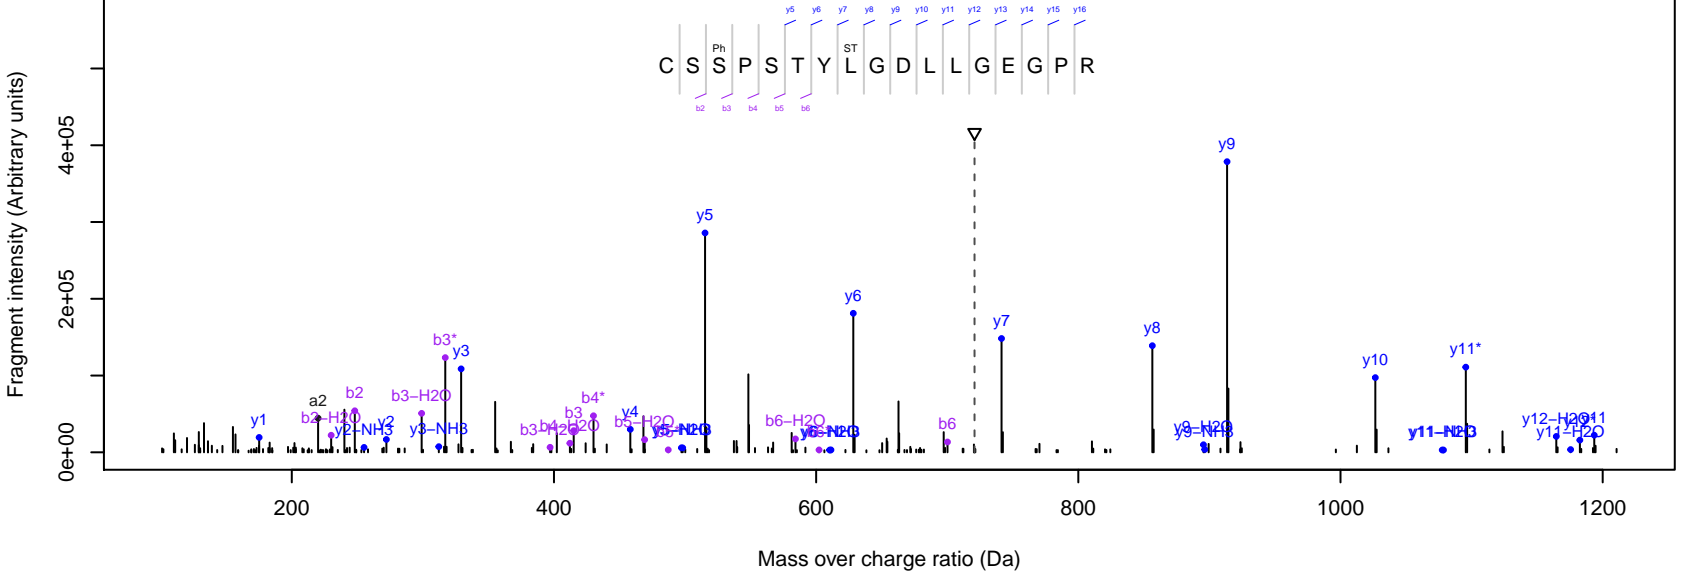

VLS(Phospho (STY))PLRS(Phospho (STY))PPLIGSESAYESFLSADDKASGR-3+

Source : QE3\_201126\_FR\_TIOx\_hum\_tissue\_Urea\_RNAB\_N Scan : 56248

Andromeda score : 169.7

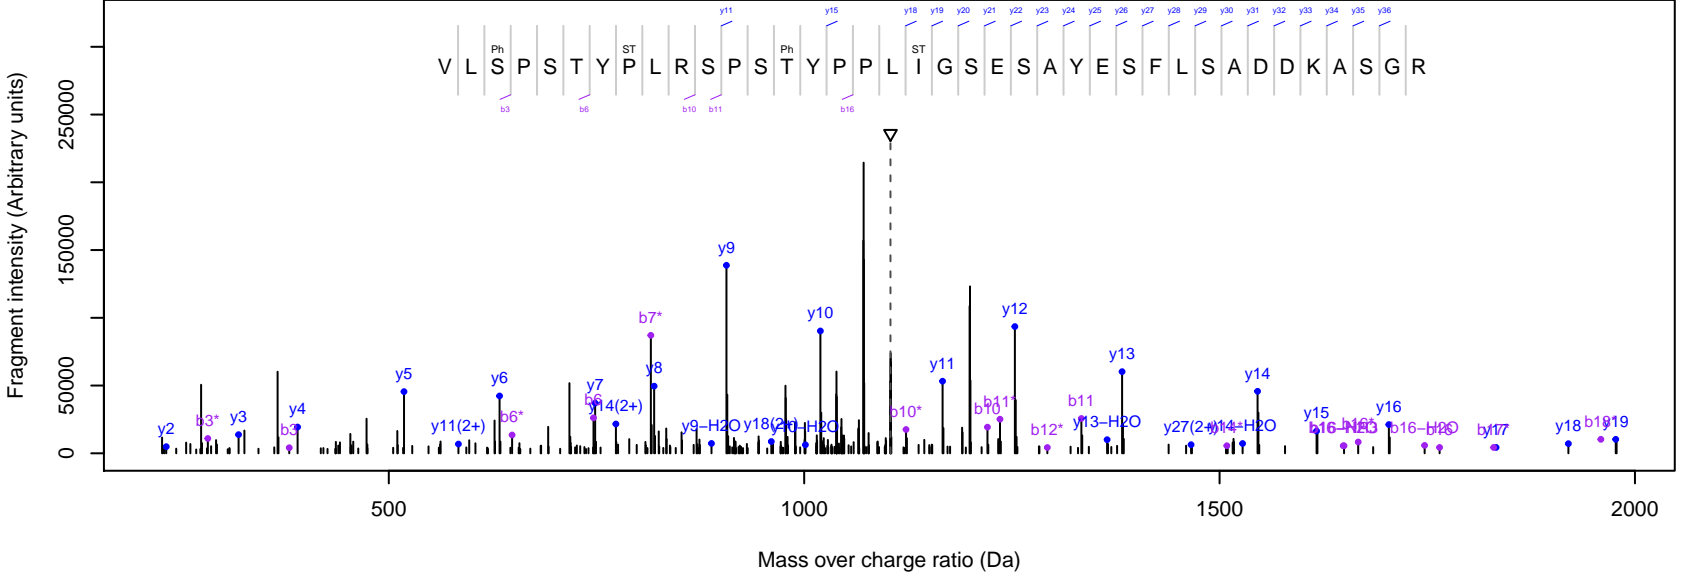

LQEQLKAEDGSS(Phospho (STY))SKEGTSV-3+

Source : QE3\_201126\_FR\_TIOx\_hum\_tissue\_Urea\_RNAB\_B Scan : 15634

Andromeda score : 169.6

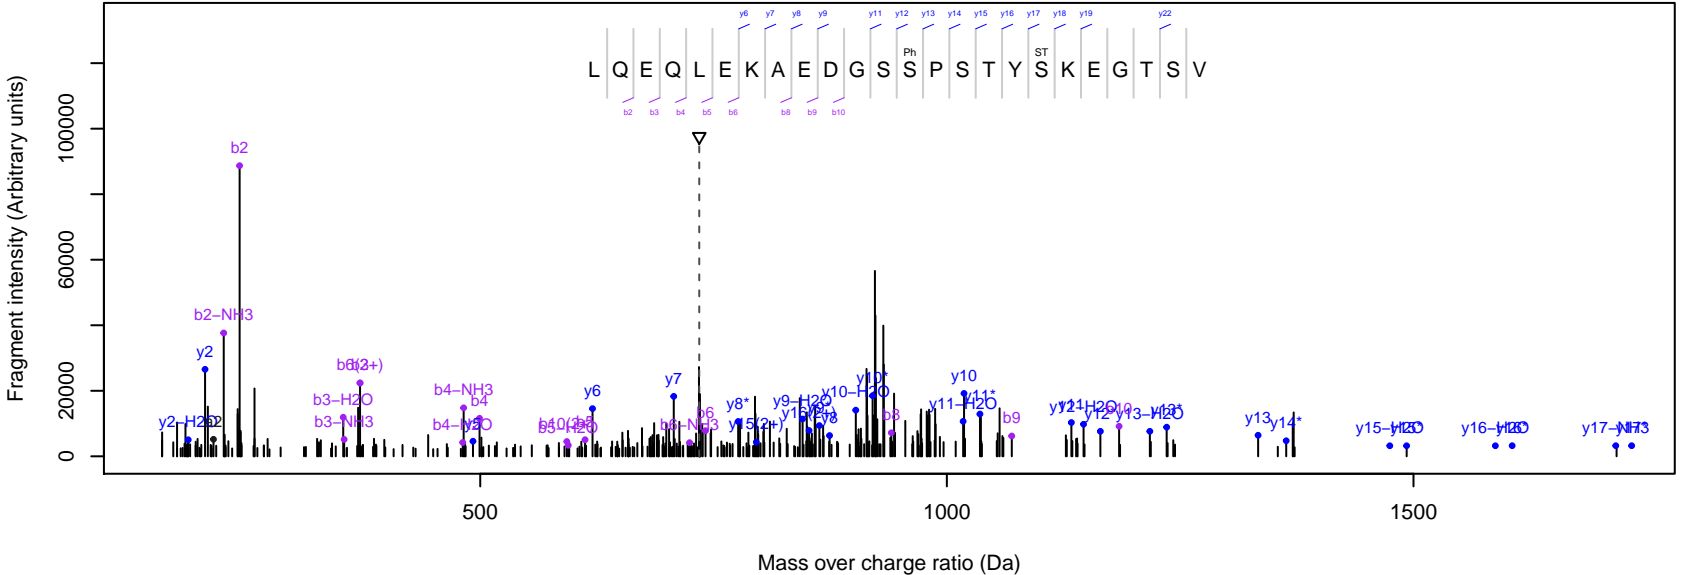

(Acetyl (Protein N-term))S(Phospho (STY))DPAVNAQLDGIISDFEALKR-3+

Source : QE3\_201126\_FR\_TIOx\_hum\_tissue\_Urea\_RNAB\_H Scan : 62560

Andromeda score : 169.6

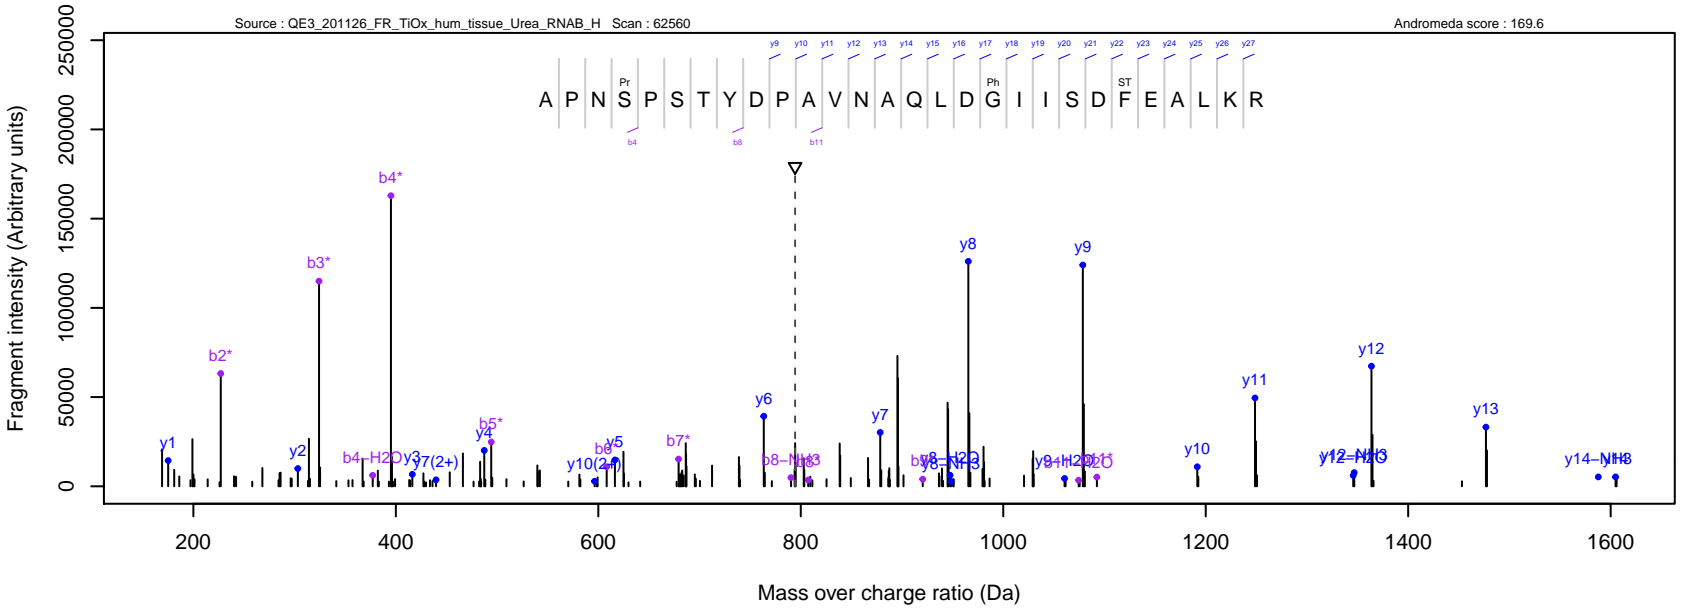

SNS(Phospho (STY))VGIQDAFNDGSDSTFQKR-3+

Source : QE3\_201126\_FR\_TIOx\_hum\_tissue\_Urea\_RNAB\_H Scan : 31008

Andromeda score : 169.6

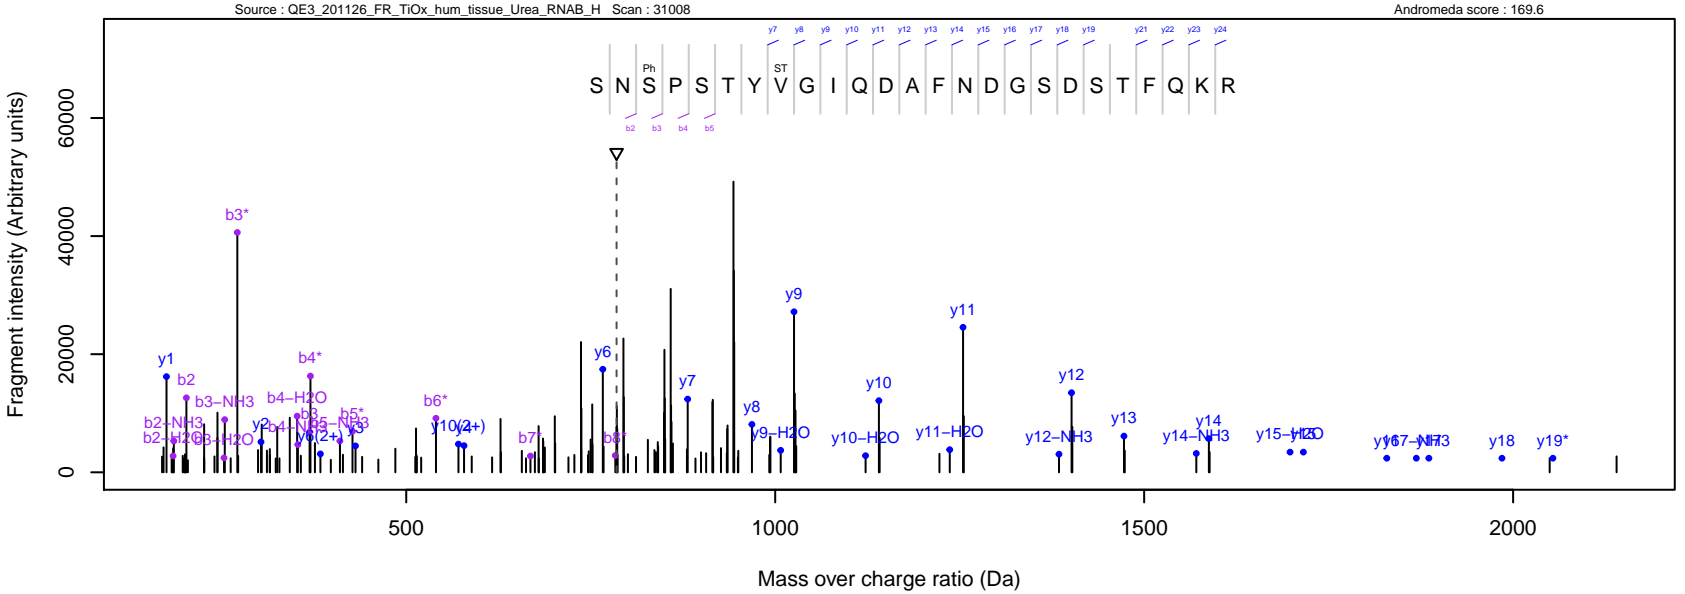

NNS(Phospho (STY))FTAPSTVGKR-2+

Source : QE3\_201126\_FR\_TIOx\_hum\_tissue\_Urea\_RNAB\_H Scan : 11900

Andromeda score : 169.58

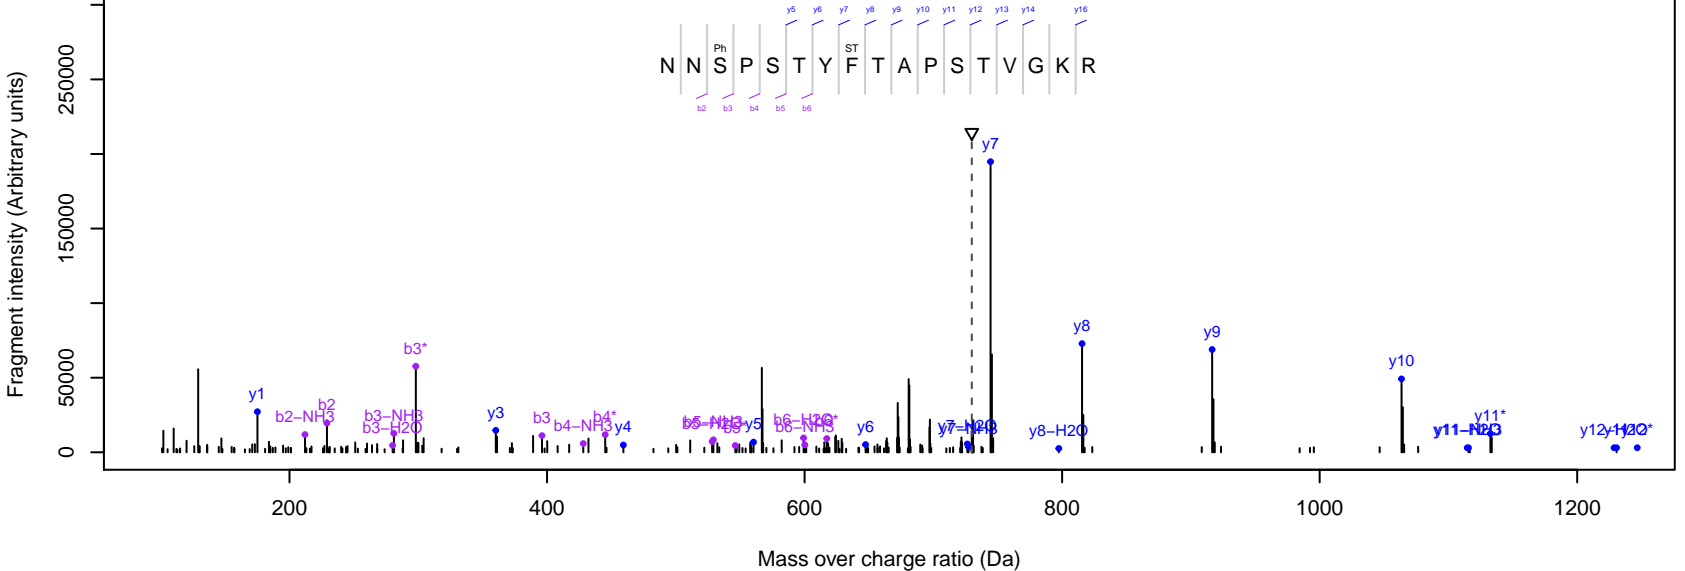

KES(Phospho (STY))IKSEGELLER-3+

Source : QE3\_201126\_FR\_TiOx\_hum\_tissue\_Urea\_RNAB\_H Scan : 21621

Andromeda score : 169.28

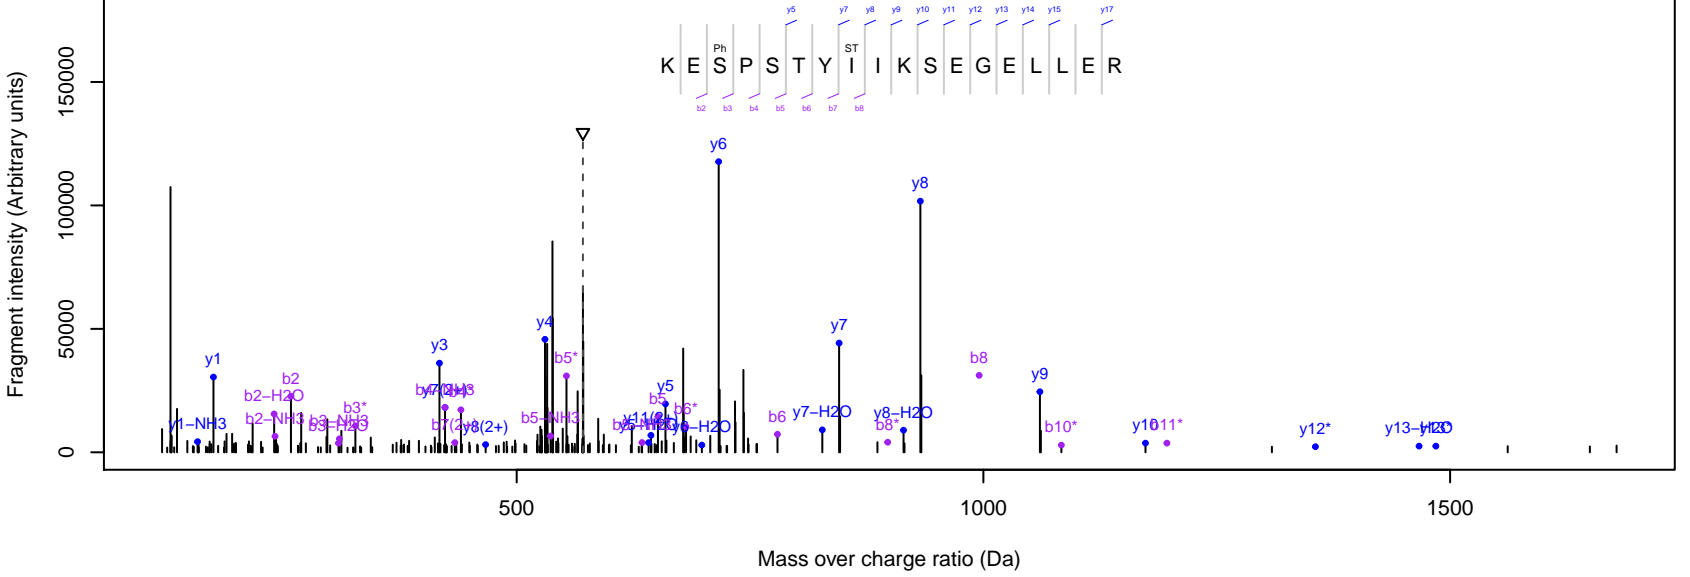

KNS(Phospho (STY))NVDSSYLESLYQSCPR-3+

Source : QE3\_201126\_FR\_TiOx\_hum\_tissue\_Urea\_RNAB\_H Scan : 36874

Andromeda score : 169.28

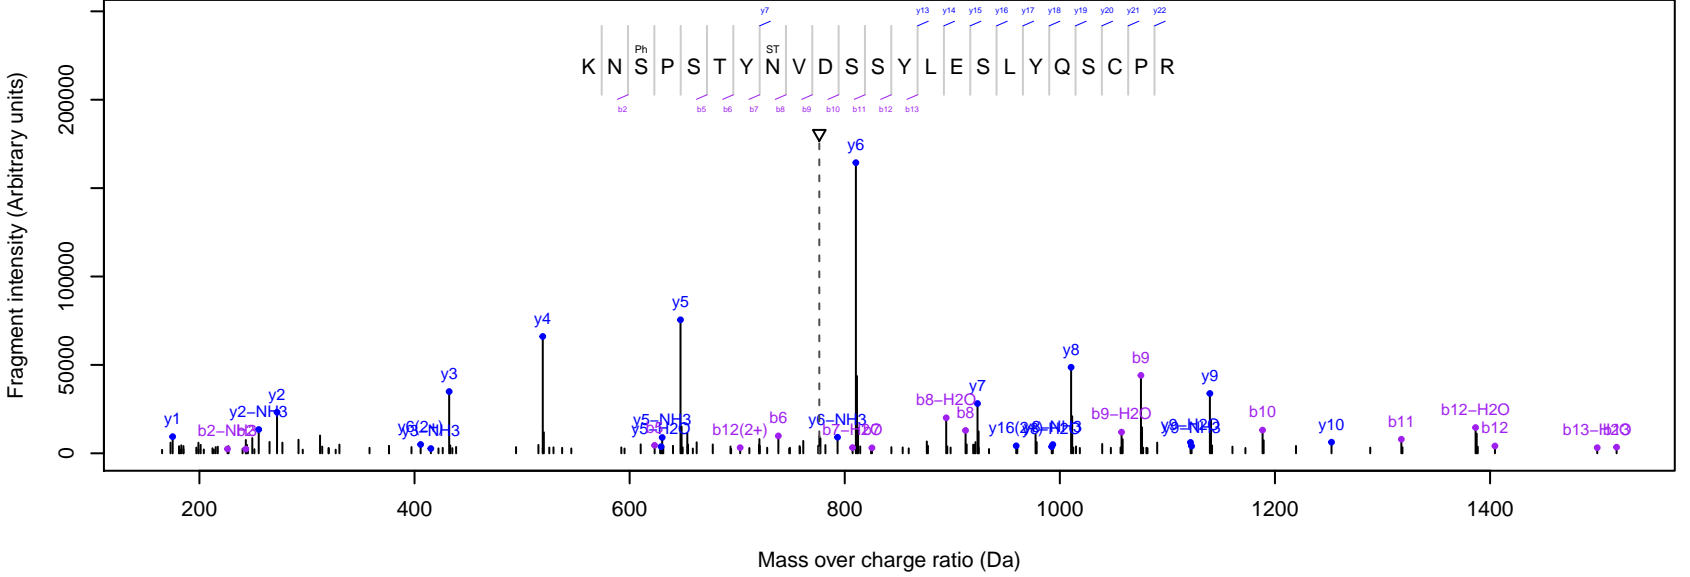

FSFKK(Phospho (STY))FK-3+

Source : QE3\_201126\_FR\_TiOx\_hum\_tissue\_Urea\_RNAB\_N Scan : 13947

Andromeda score : 169.21

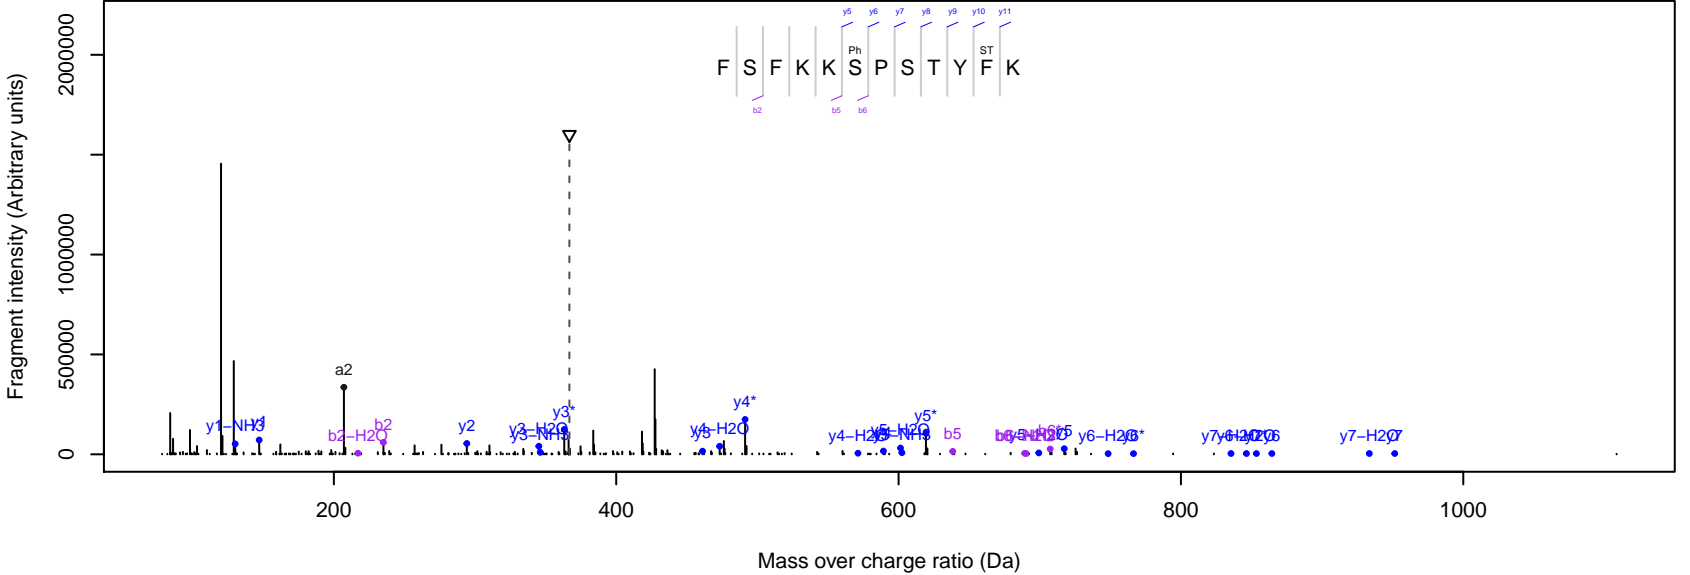



ERS(Phospho (STY))PS(Phospho (STY))PLRGNVVPS(Phospho (STY))PLPTR-3+

Source : QE3\_201126\_FR\_TiOx\_hum\_tissue\_Urea\_RNAB\_N Scan : 32083

Andromeda score : 169.13

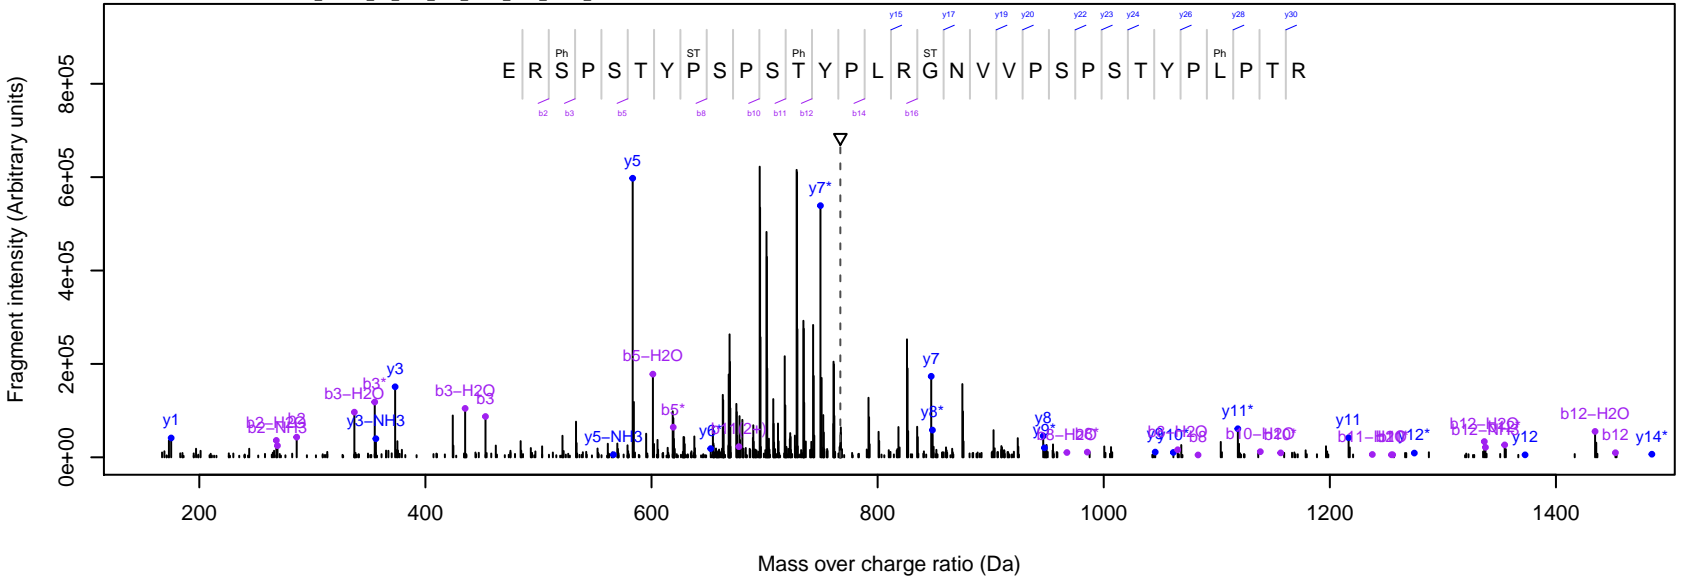

TQS(Phospho (STY))SSNLAELR-2+

Source : QE3\_201126\_FR\_TiOx\_hum\_tissue\_Urea\_RNAB\_B Scan : 19364

Andromeda score : 169.09

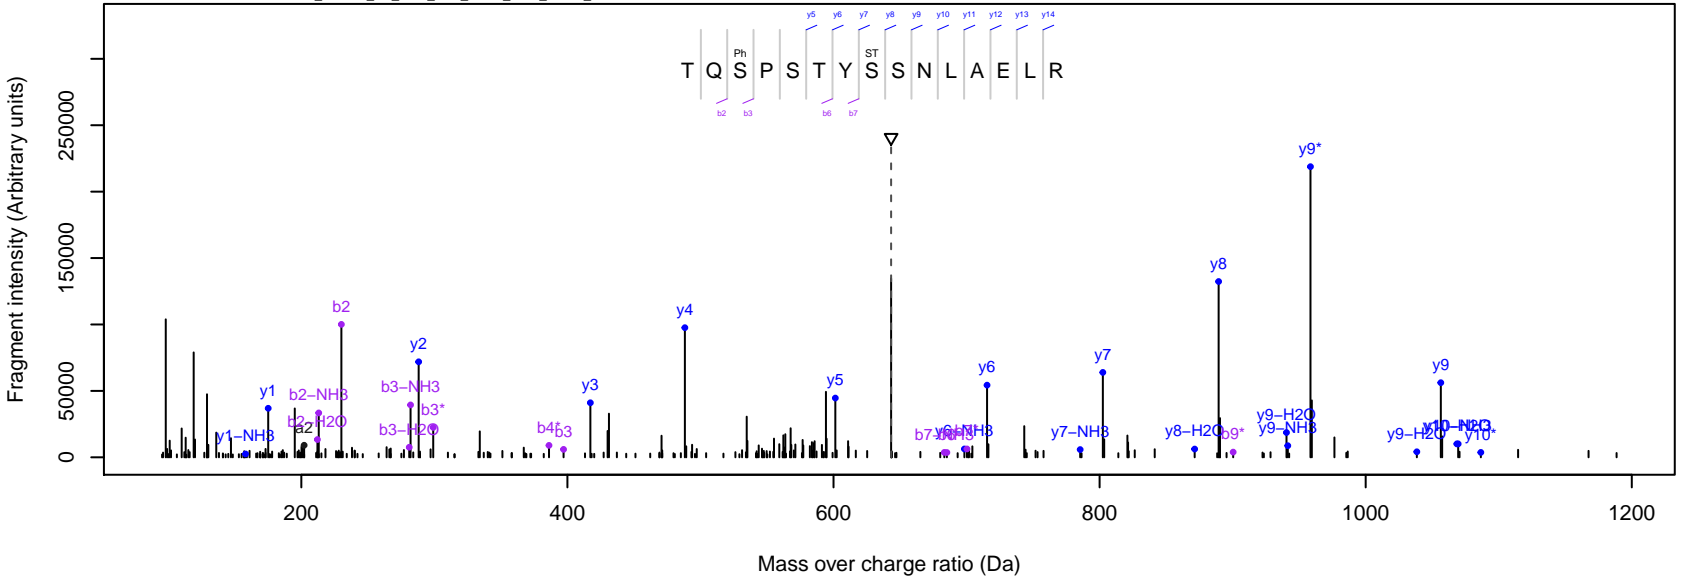

RRGDS(Phospho (STY))ES(Phospho (STY))EEDEQDSEEV-3+

Source : QE3\_201126\_FR\_TiOx\_hum\_tissue\_Urea\_RNAB\_N Scan : 6780

Andromeda score : 169.08

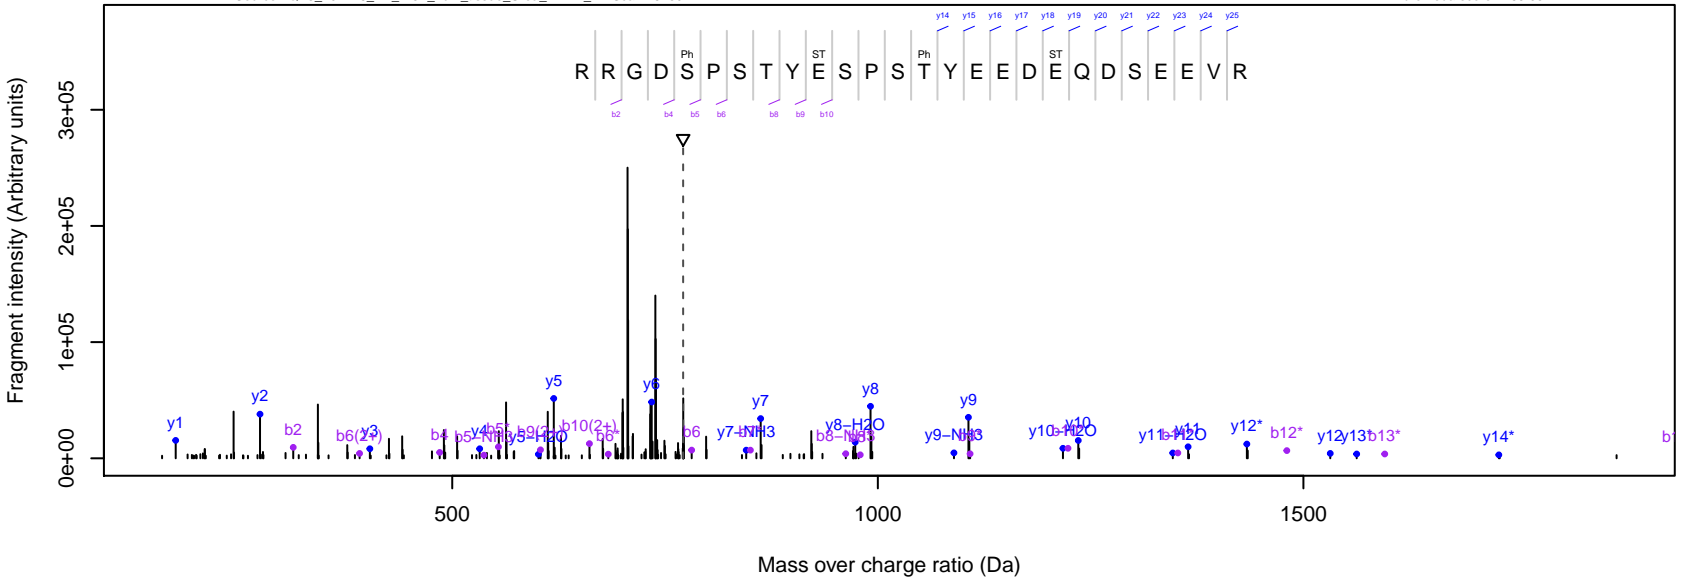

AAGDS(Phospho (STY))GEDS(Phospho (STY))DDSDYENLIDPTEPSNSEYSHSK-3+

Source : QE3\_201126\_FR\_TIOx\_hum\_tissue\_Urea\_RNAB\_N Scan : 41808

Andromeda score : 169.05

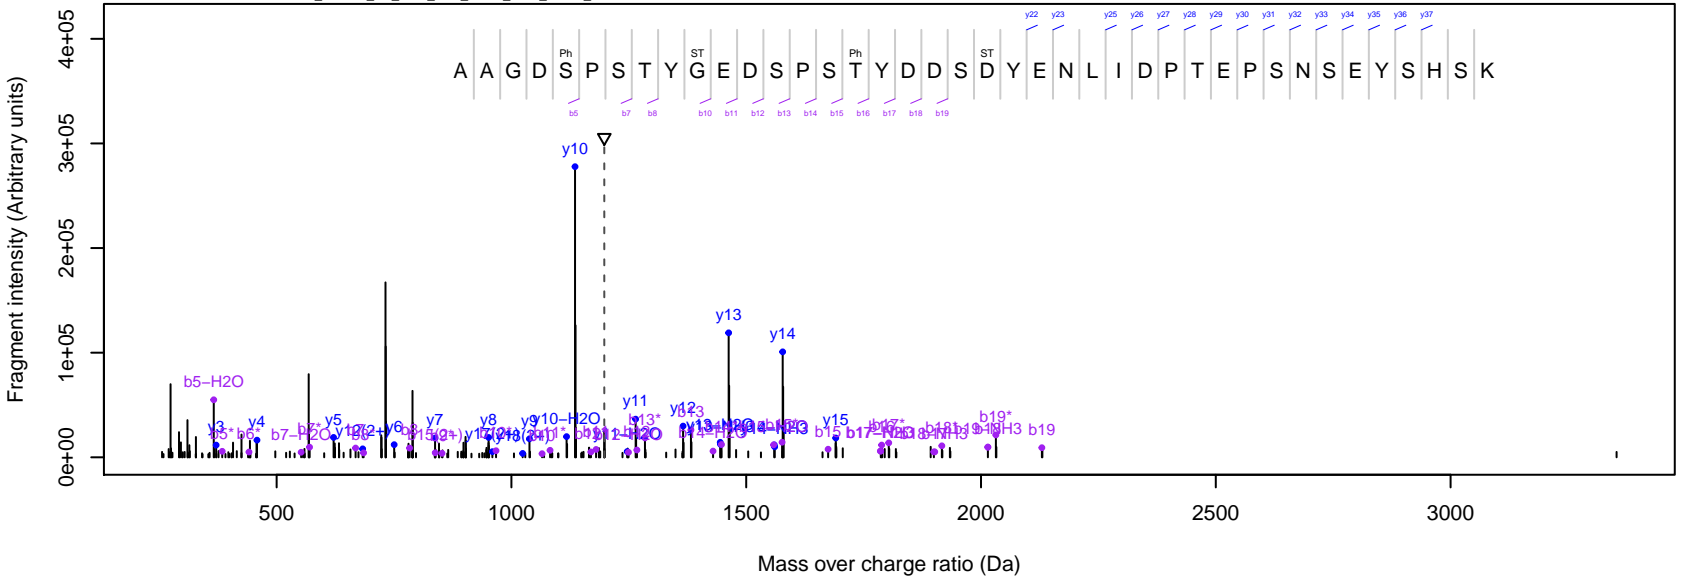

APQTSSS(Phospho (STY))PPVRR-3+

Source : QE3\_201126\_FR\_TIOx\_hum\_tissue\_Urea\_RNAB\_B Scan : 6136

Andromeda score : 169.04

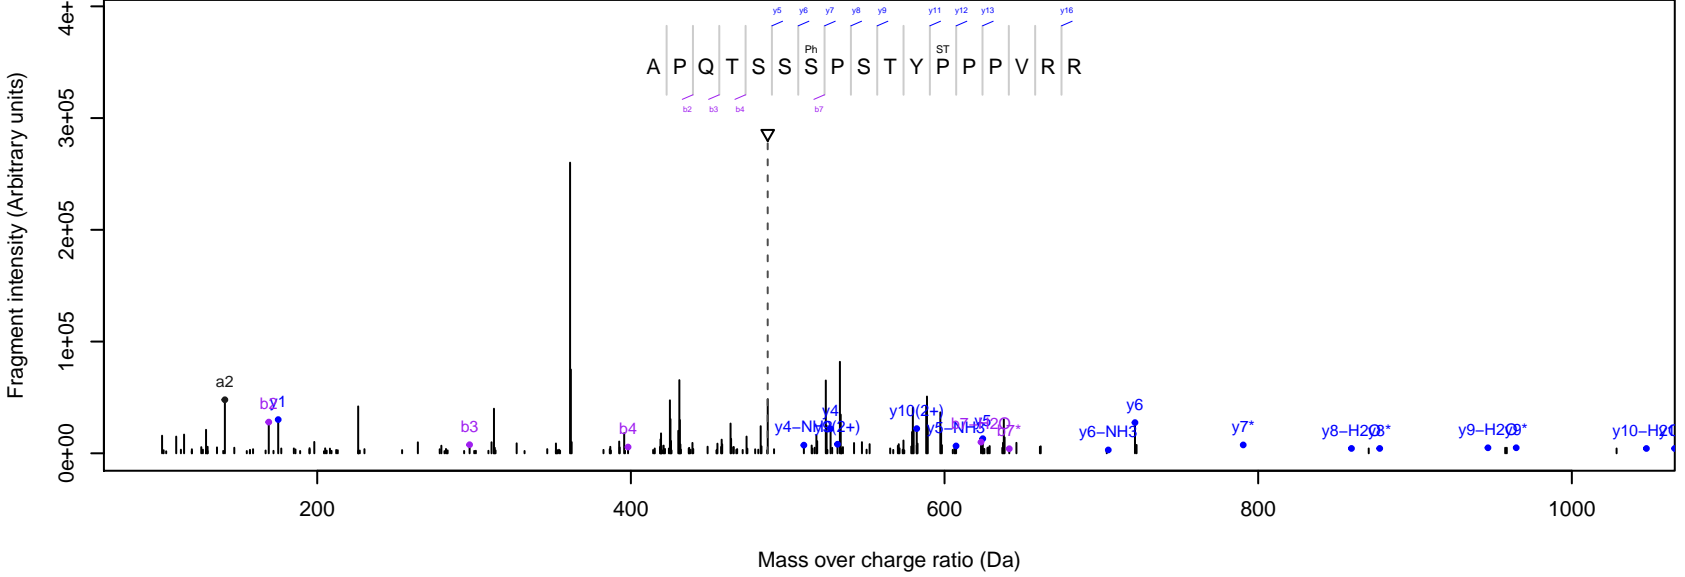

VAS(Phospho (STY))PGSTIDTAPLSSVDSLIN KFD S Q L G G Q A R

Source : QE3\_201126\_FR\_TIOx\_hum\_tissue\_Urea\_RNAB\_N Scan : 61673

Andromeda score : 169.03

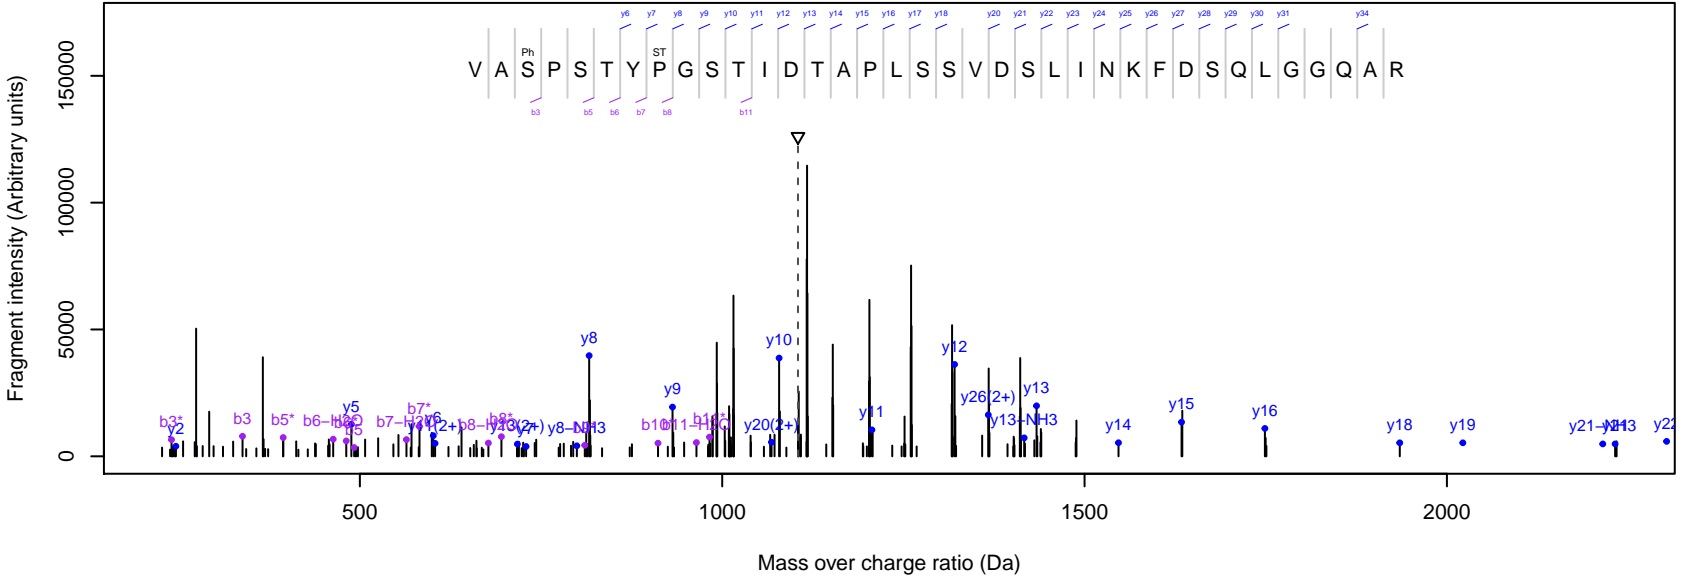

SVS(Phospho (STY))PLRPETEARPPSR-3+

Source : QE3\_201126\_FR\_TiOx\_hum\_tissue\_Urea\_RNAB\_N Scan : 12969

Andromeda score : 168.99

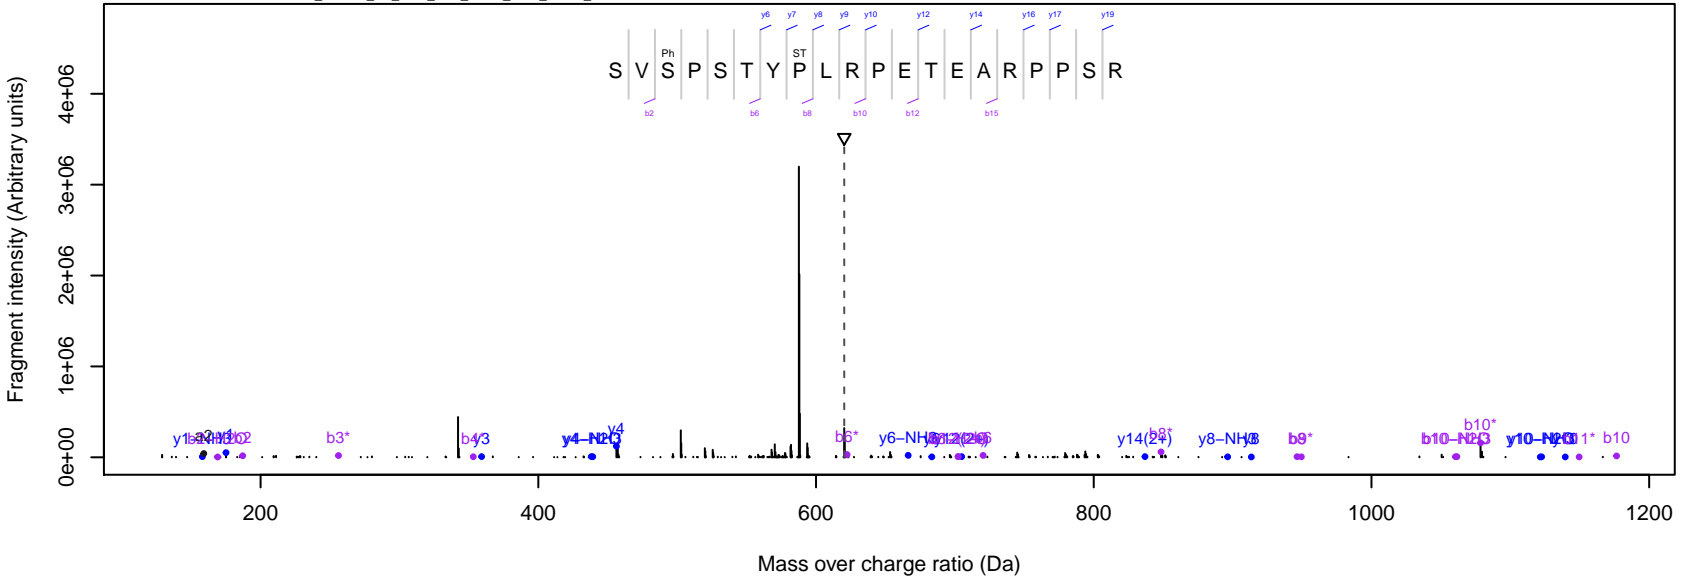

TSHS(Phospho (STY))DSSIYLR-2+

Source : QE3\_201126\_FR\_TiOx\_hum\_tissue\_Urea\_RNAB\_B Scan : 13095

Andromeda score : 168.98

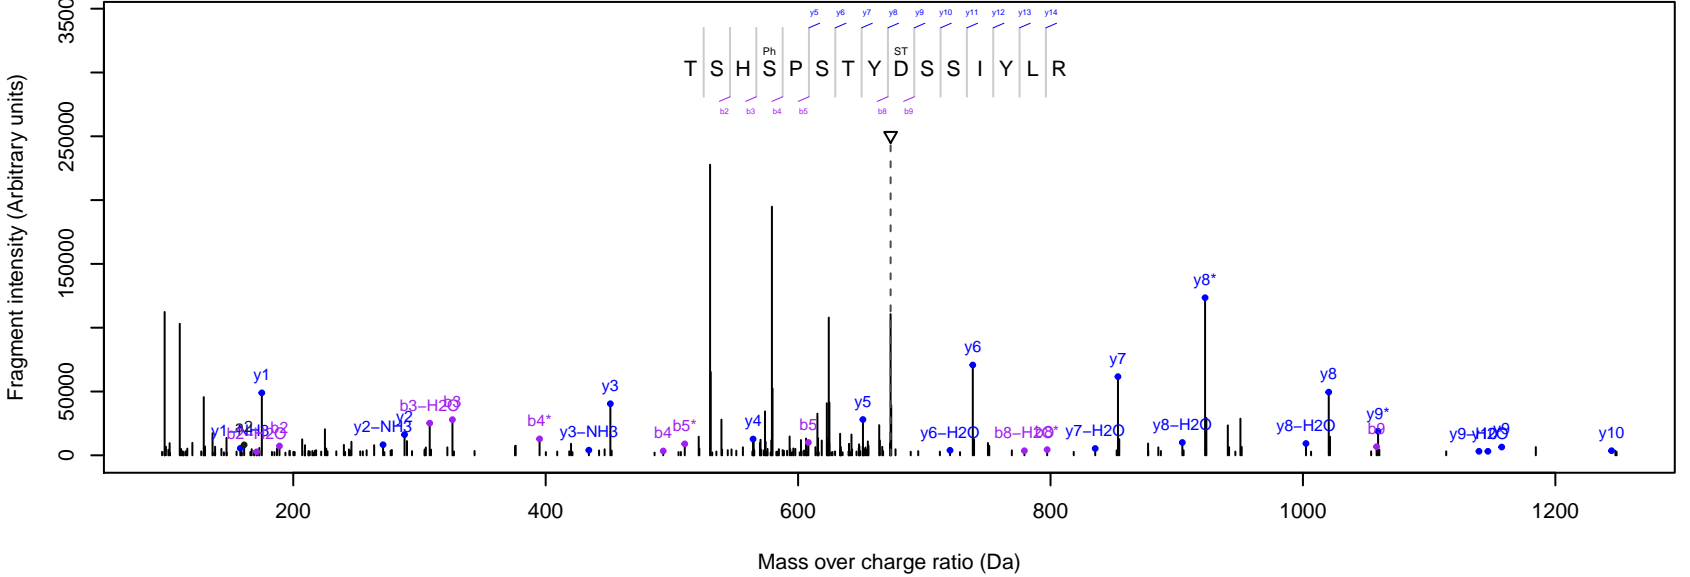

QVVSVQDEEVGLPFEASPEPPAS(Phospho (STY))PDGVTEIR-3+

Source : QE3\_201126\_FR\_TiOx\_hum\_tissue\_Urea\_RNAB\_N Scan : 56436

Andromeda score : 168.89

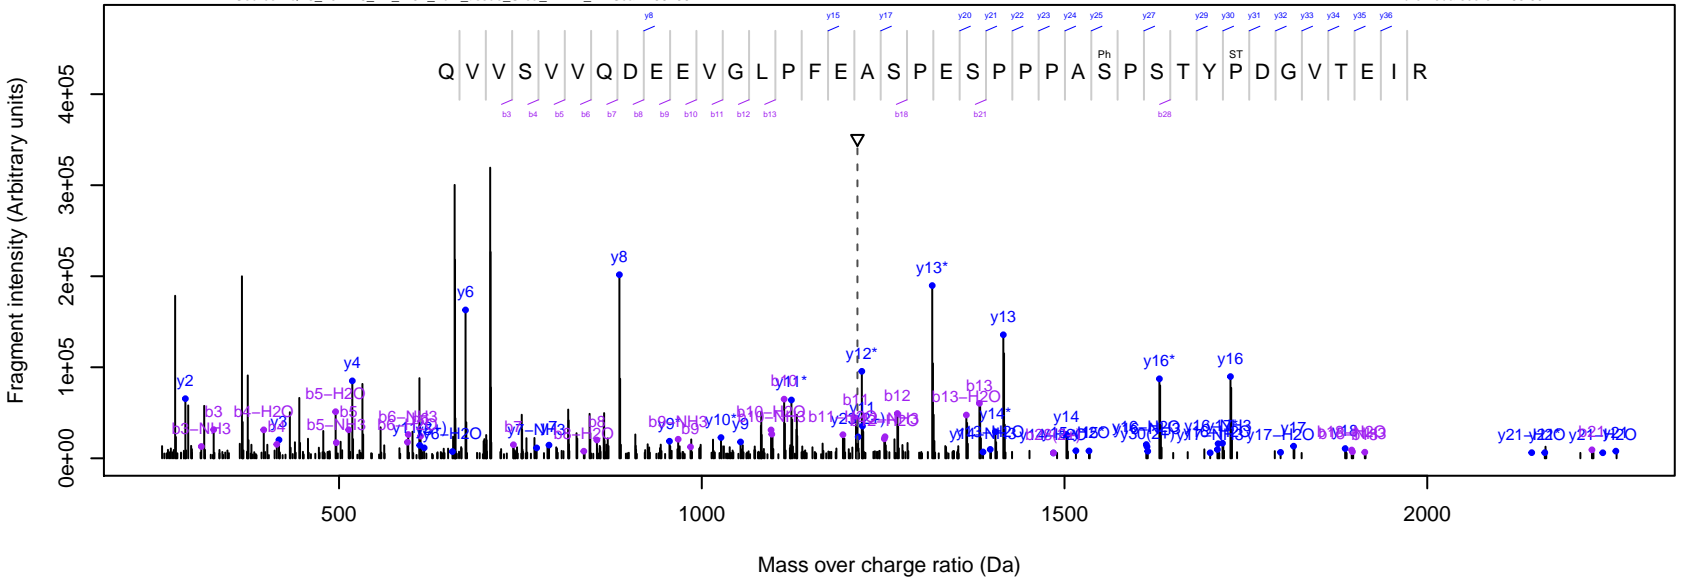

RSS(Phospho (STY))DSWEVWGSASTNR-2+

Source : QE3\_201126\_FR\_TiOx\_hum\_tissue\_Urea\_RNAB\_B Scan : 30114

Andromeda score : 168.89

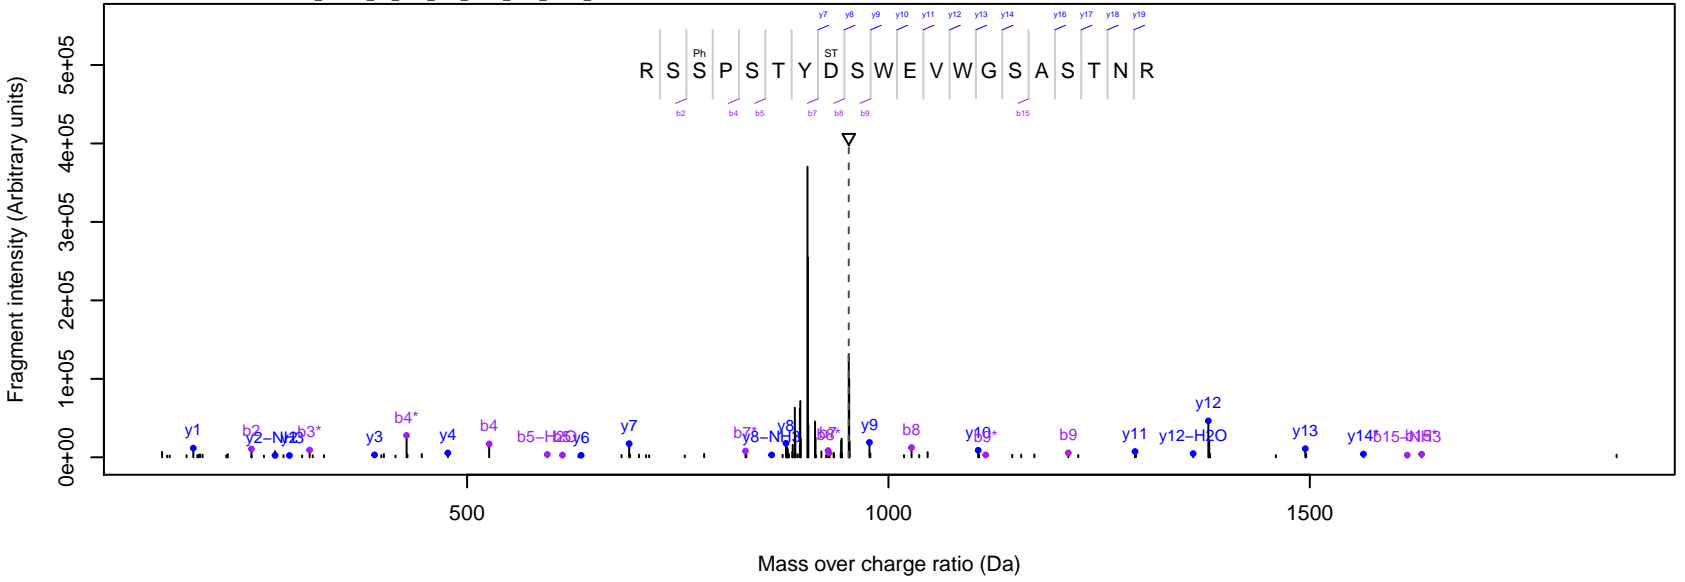

QGS(Phospho (STY))LAMEELK-2+

Source : QE3\_201126\_FR\_TiOx\_hum\_tissue\_Urea\_RNAB\_N Scan : 26680

Andromeda score : 168.85

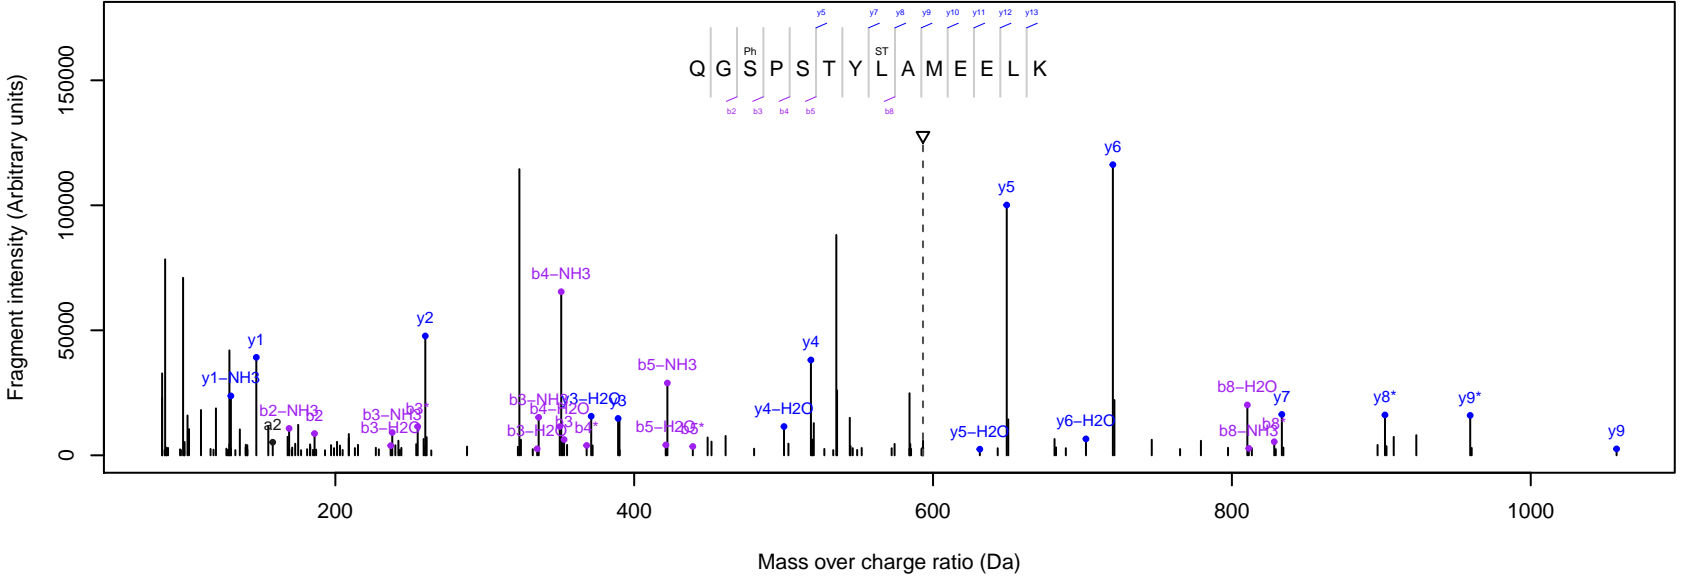

SPVDES(Phospho (STY))GDEVQYGDVPVENGMAPPFFEMK-3+

Source : QE3\_201126\_FR\_TiOx\_hum\_tissue\_Urea\_RNAB\_H Scan : 60373

Andromeda score : 168.89

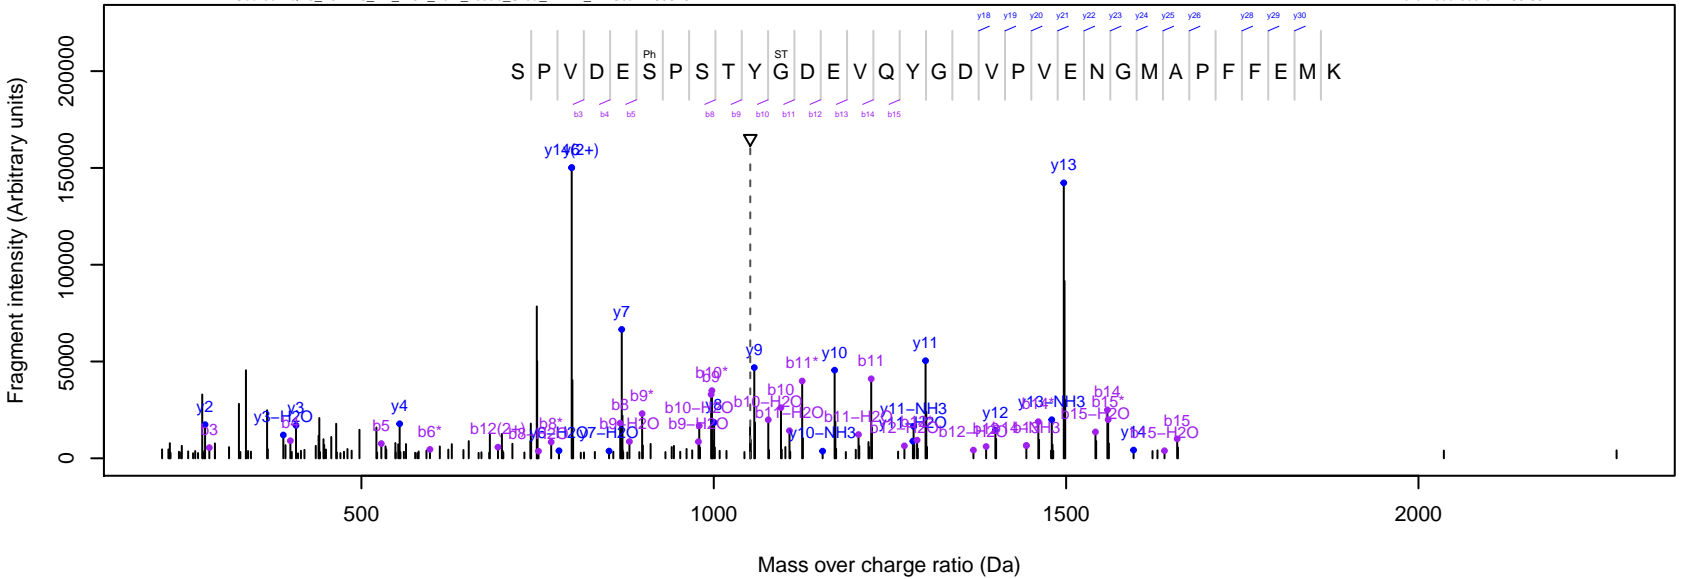

AVPIVADEGES(Phospho (STY))ESEDLLKPR-3+

Source : QE3\_201126\_FR\_TiOx\_hum\_tissue\_Urea\_RNAB\_B Scan : 27454

Andromeda score : 168.65

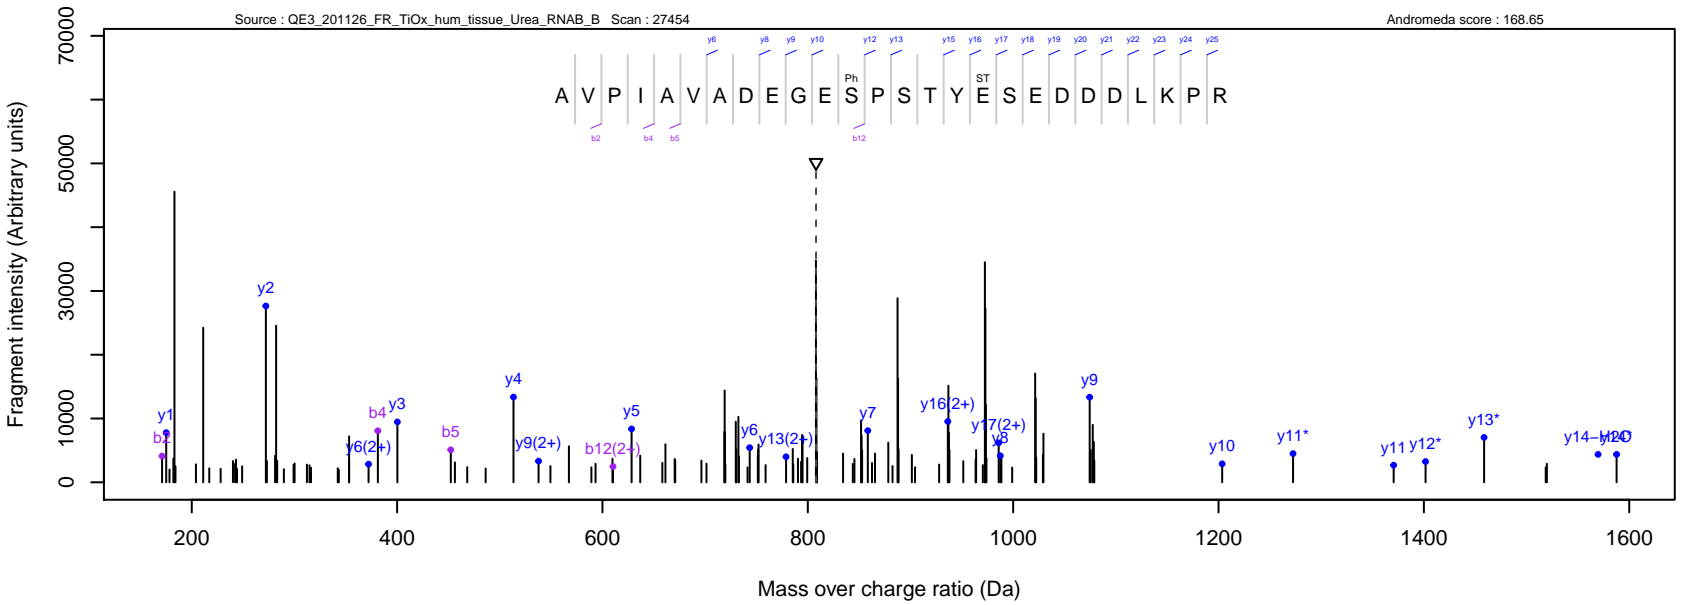

EKGPTTGEALDLSDVHS(Phospho (STY))PPKS(Phospho (STY))PEGK-4+

Source : QE3\_201126\_FR\_TiOx\_hum\_tissue\_Urea\_RNAB\_N Scan : 20255

Andromeda score : 168.57

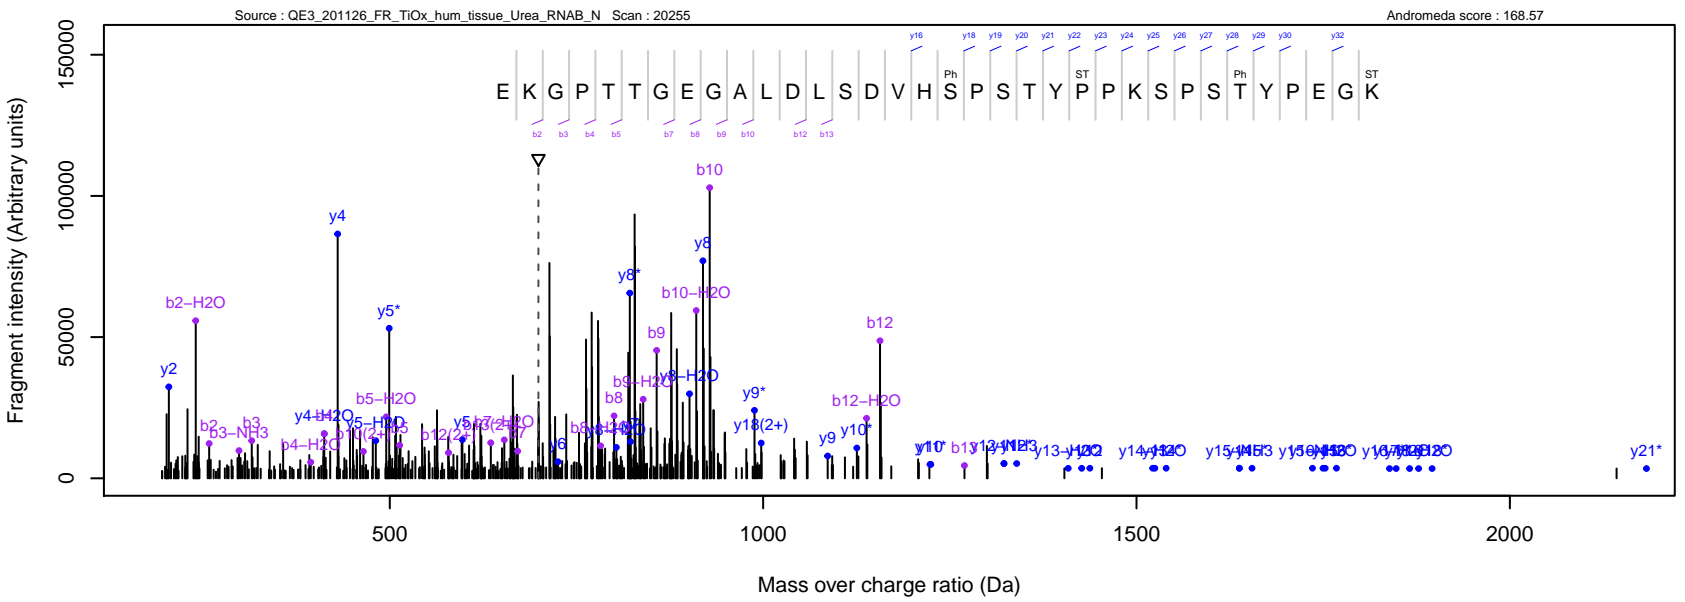

RQS(Phospho (STY))TDLPTGWEEAYTFEGAR-3+

Source : QE3\_201126\_FR\_TiOx\_hum\_tissue\_Urea\_RNAB\_B Scan : 44318

Andromeda score : 168.55

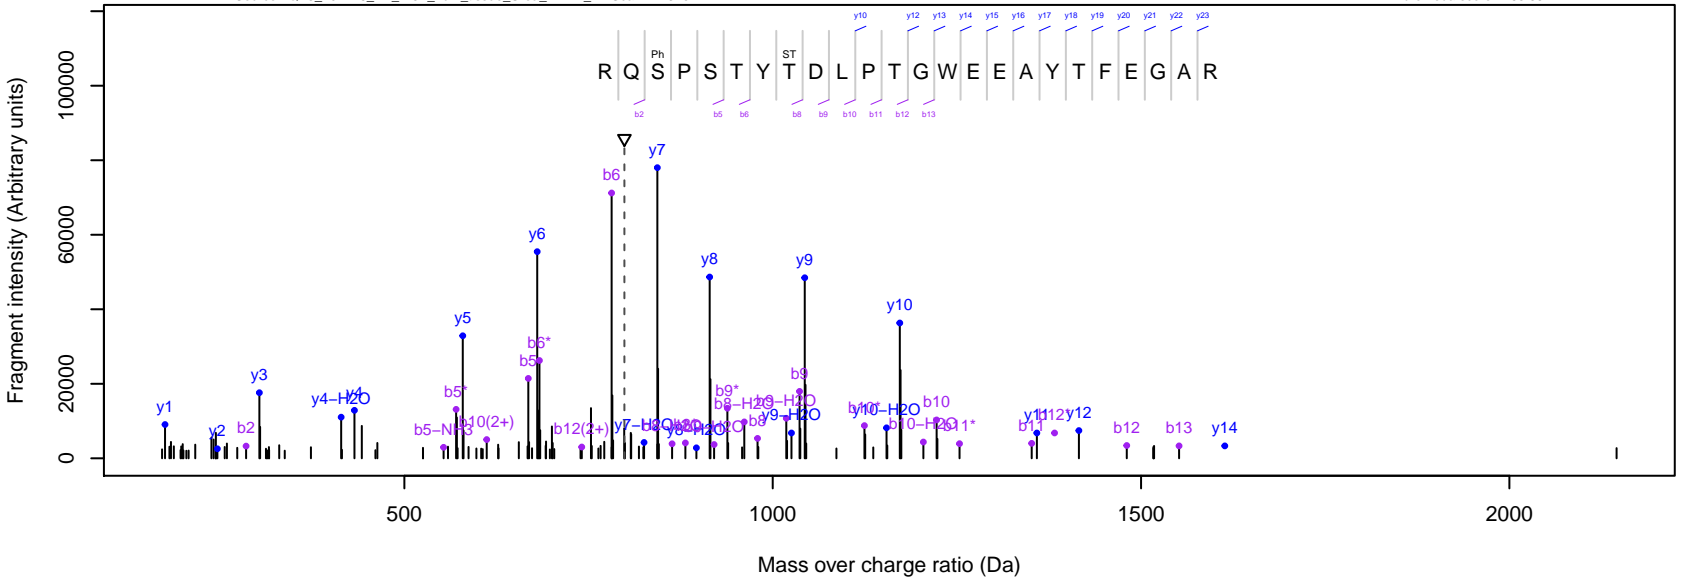

**KTS(Phospho (STY))PASLDFPESQK-2+**

Source : QE3\_201126\_FR\_TiOx\_hum\_tissue\_Urea\_RNAB\_H Scan : 18817

Andromeda score : 168.5

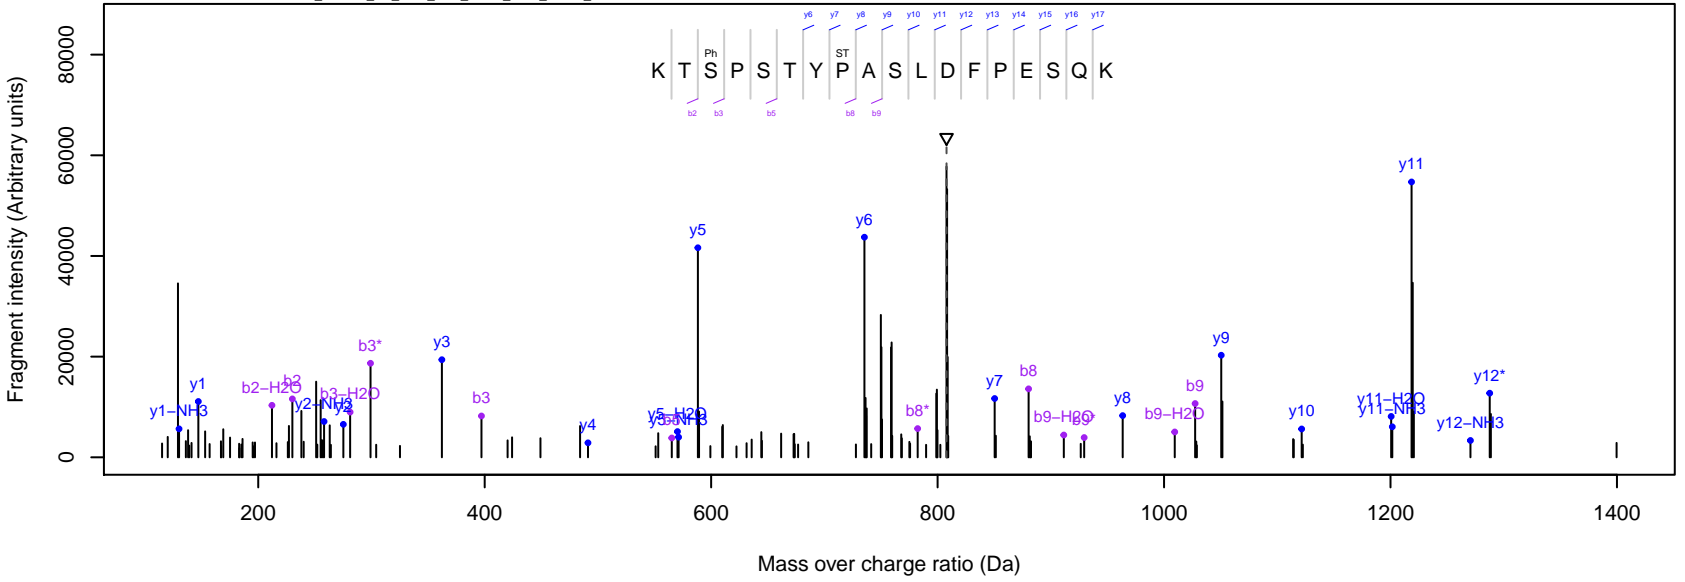

**RLS(Phospho (STY))VELTSSLFR-2+**

Source : QE3\_201126\_FR\_TiOx\_hum\_tissue\_Urea\_RNAB\_H Scan : 43194

Andromeda score : 168.5

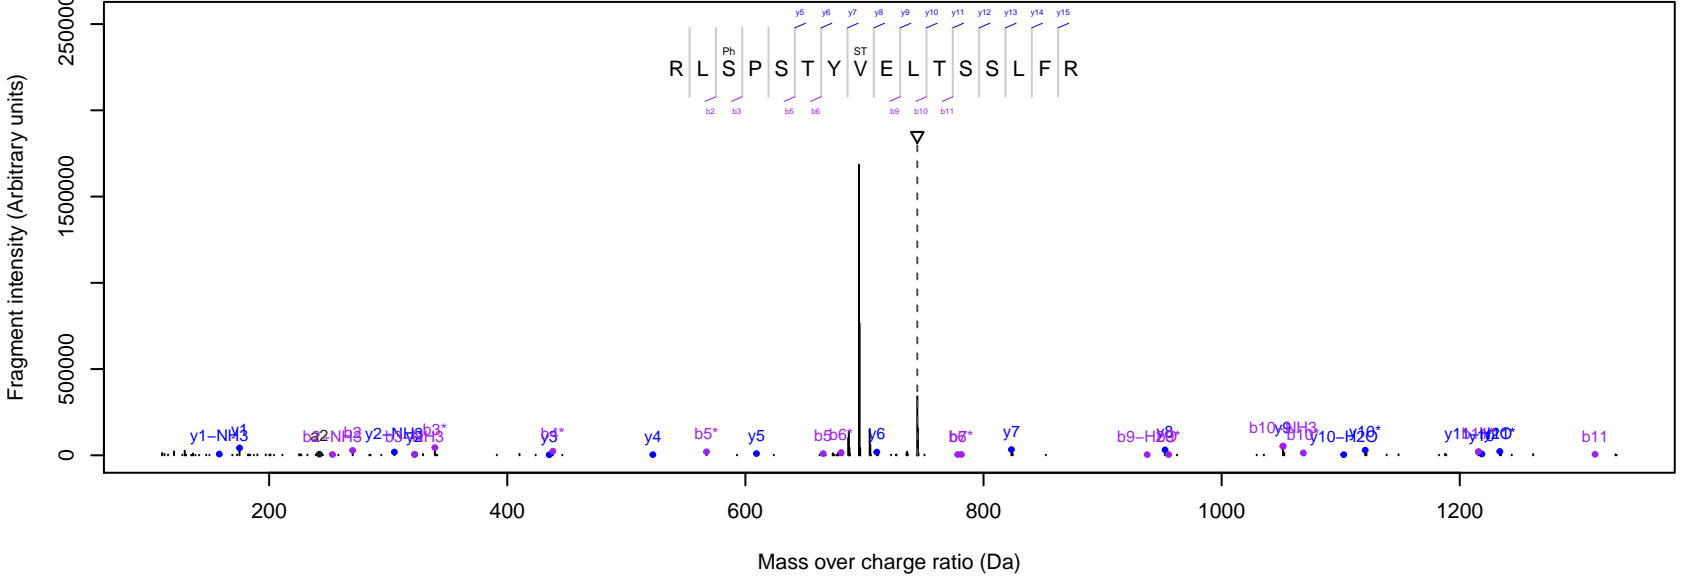

**(Acetyl (Protein N-term))ADIDNKEQS(Phospho (STY))ELDQDLDDVEEVEEETGEETKLK-3+**

Source : QE3\_201126\_FR\_TiOx\_hum\_tissue\_Urea\_RNAB\_N Scan : 57082

Andromeda score : 168.49

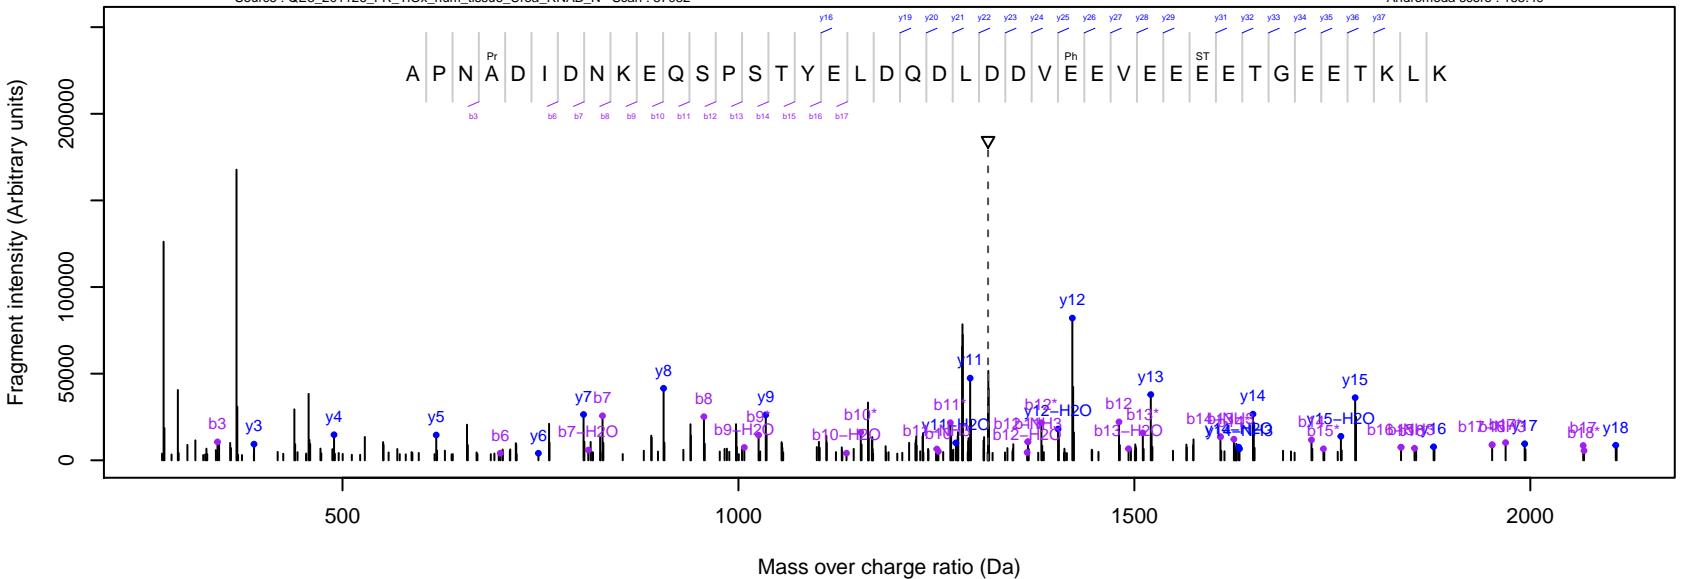



QFKDLFLNS(Phospho (STY))S(Phospho (STY))EEDDTGFSER-3+

Source : QE3\_201126\_FR\_TiOx\_hum\_tissue\_Urea\_RNAB\_B Scan : 57290

Andromeda score : 168.25

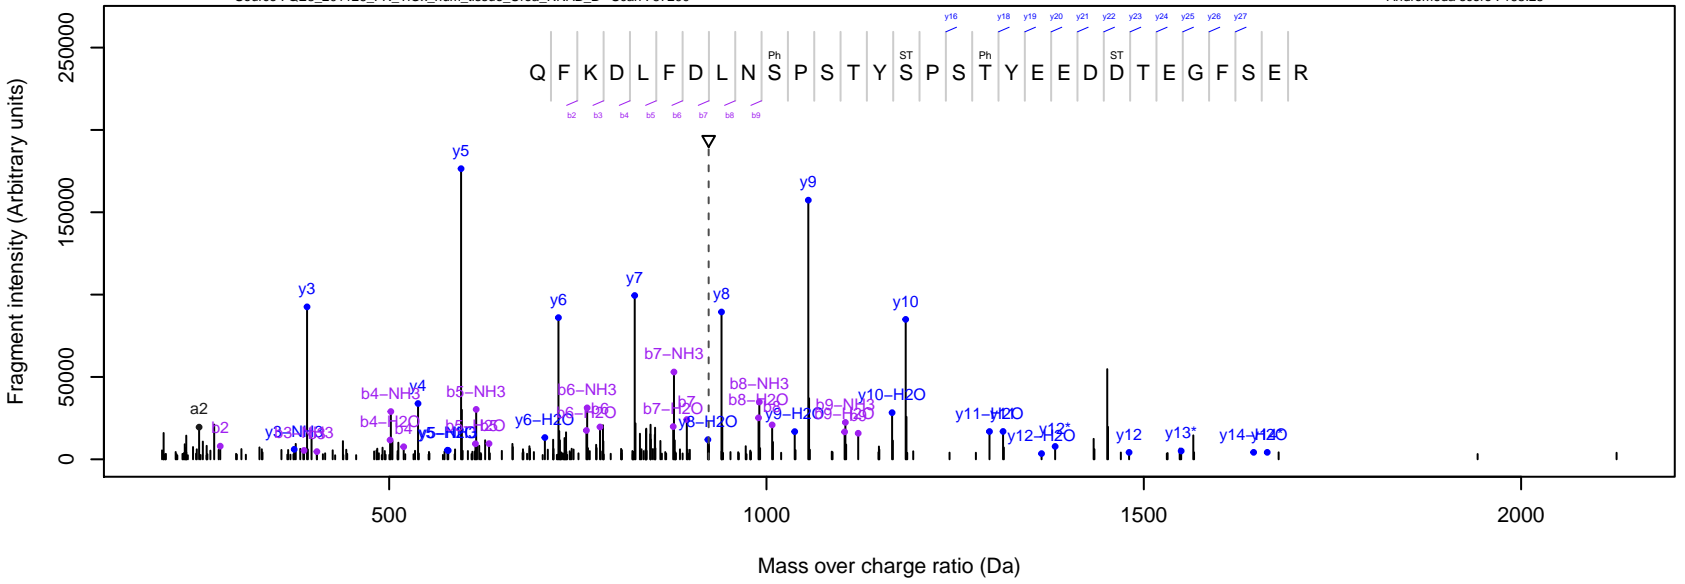

APVSSSTESVIQSNTP(Phospho (STY))PPPSQPLNETAEEESR-3+

Source : QE3\_201126\_FR\_TiOx\_hum\_tissue\_Urea\_RNAB\_N Scan : 34128

Andromeda score : 168.18

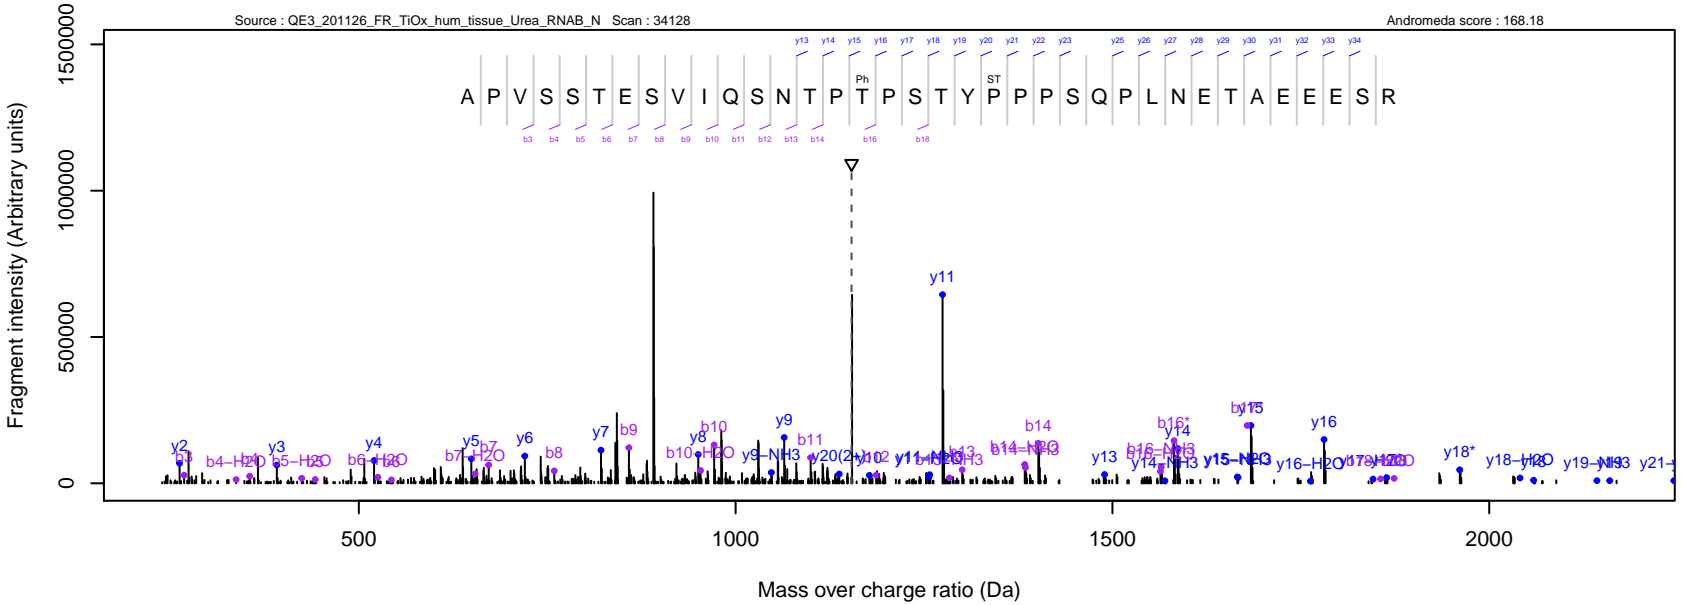

KKS(Phospho (STY))EPDDELLFDLNSSQK-3+

Source : QE3\_201126\_FR\_TiOx\_hum\_tissue\_Urea\_RNAB\_N Scan : 51736

Andromeda score : 168.12

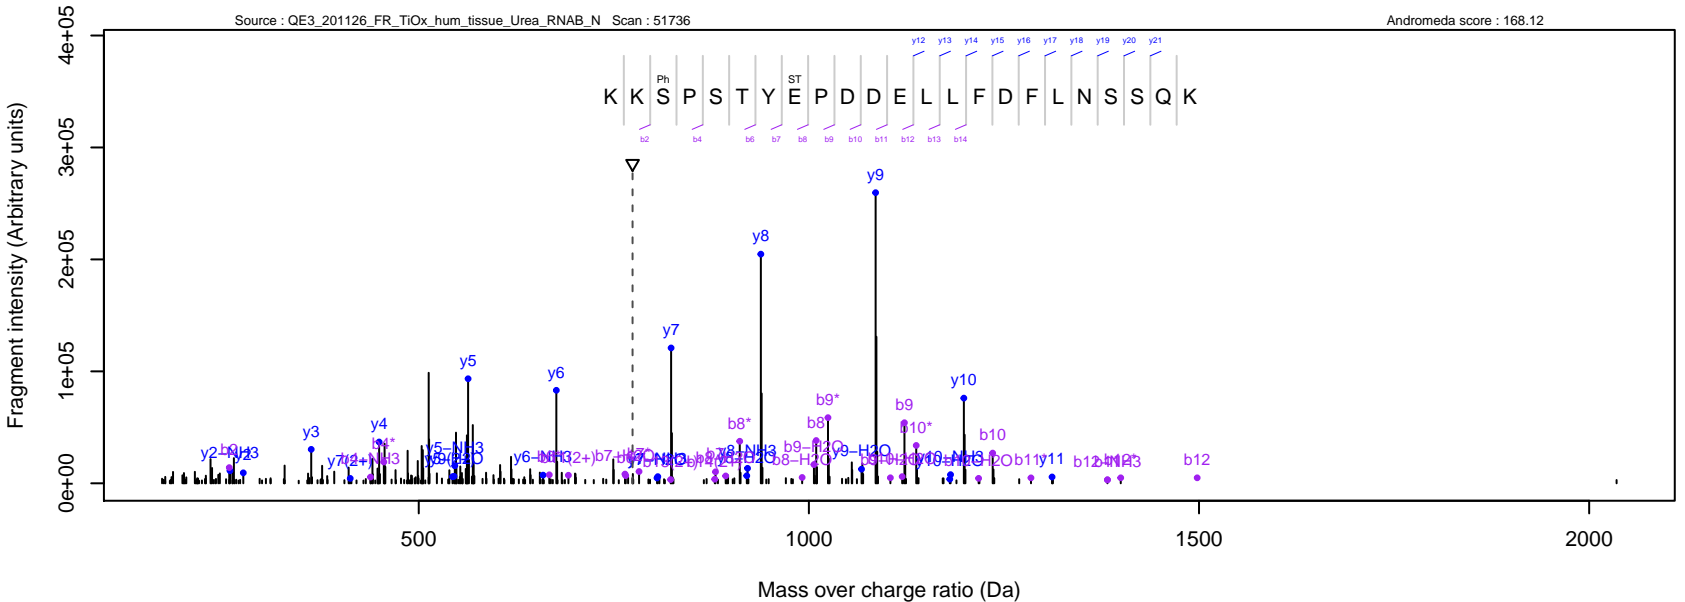



AM(Oxidation (M))DNHS(Phospho (STY))DS(Phospho (STY))EEELAAFCPQLDDSTVAR-3+

Source : QE3\_201126\_FR\_TiOx\_hum\_tissue\_Urea\_RNAB\_B Scan : 48123

Andromeda score : 168.11

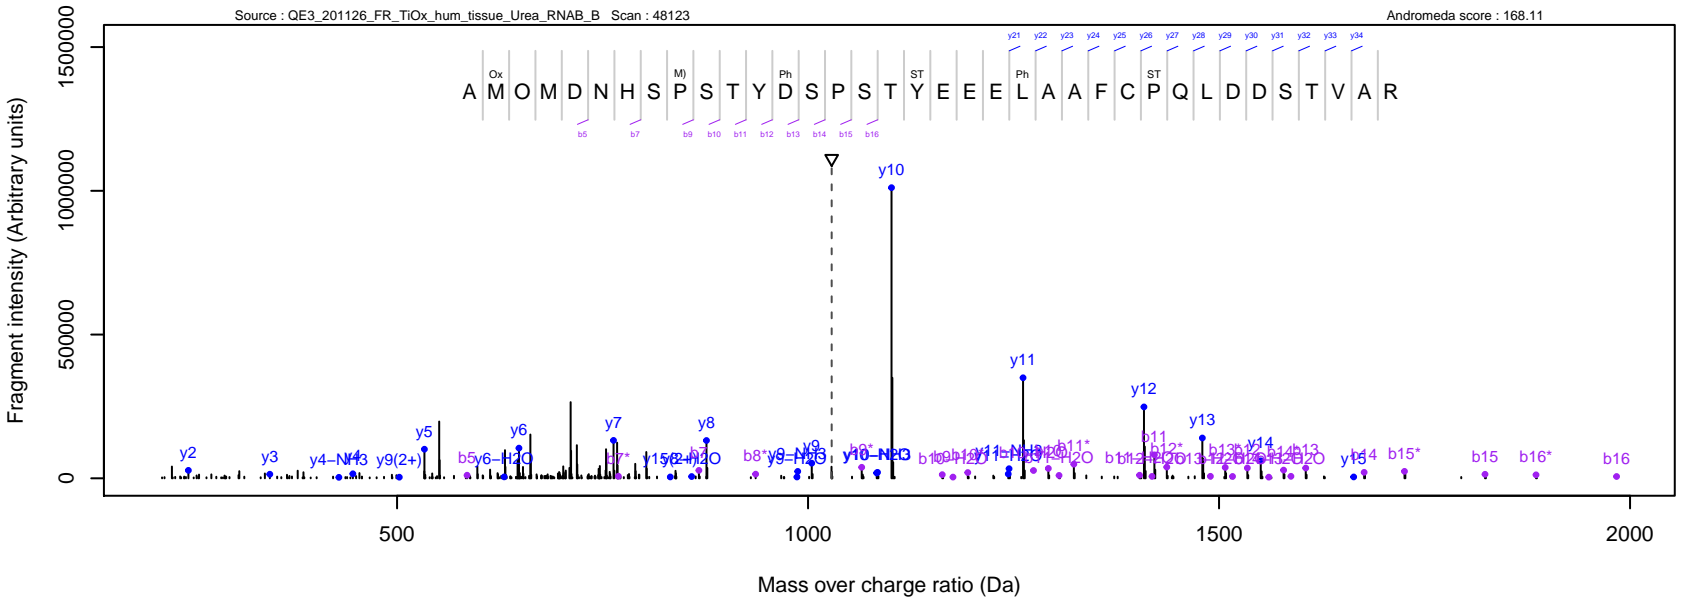

LSSQIS(Phospho (STY))AGEEKWNSVSPASAGKR-3+

Source : QE3\_201126\_FR\_TiOx\_hum\_tissue\_Urea\_RNAB\_B Scan : 21844

Andromeda score : 168.11

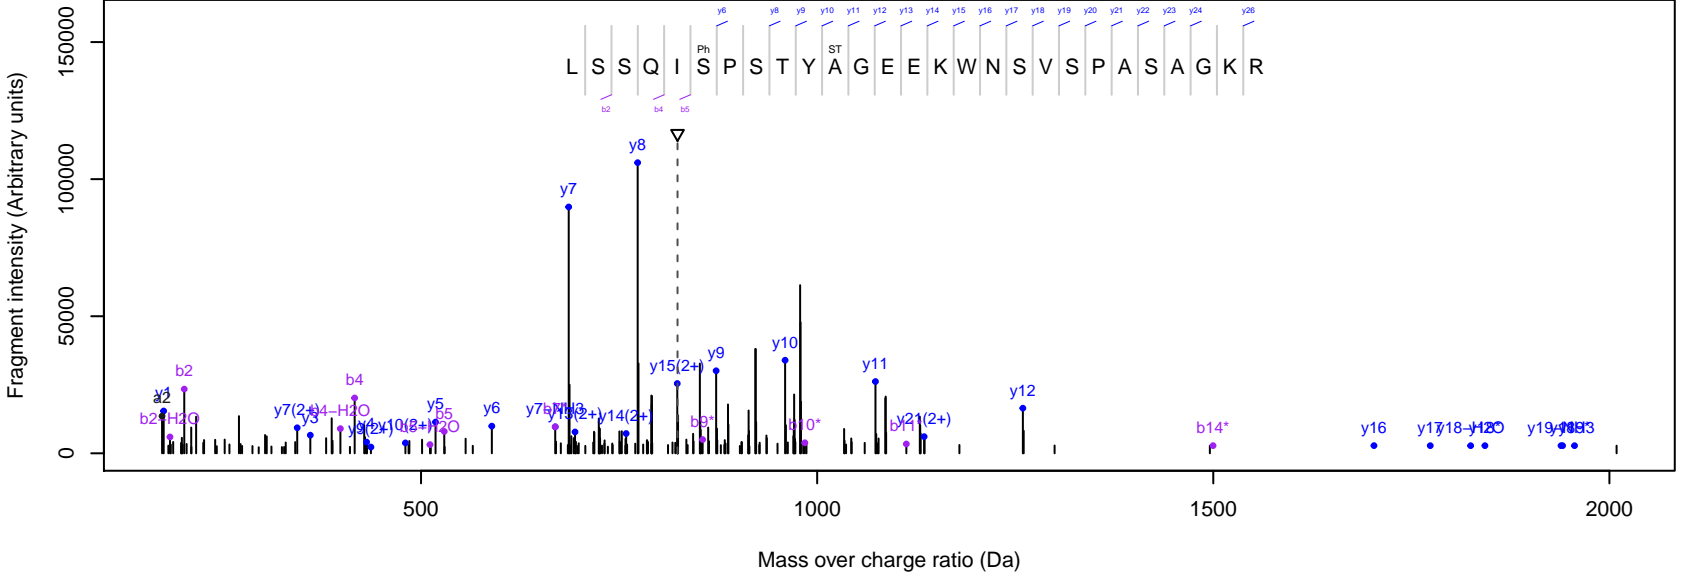

SLS(Phospho (STY))PNHNTLQTLK-2+

Source : QE3\_201126\_FR\_TiOx\_hum\_tissue\_Urea\_RNAB\_H Scan : 16473

Andromeda score : 168.1

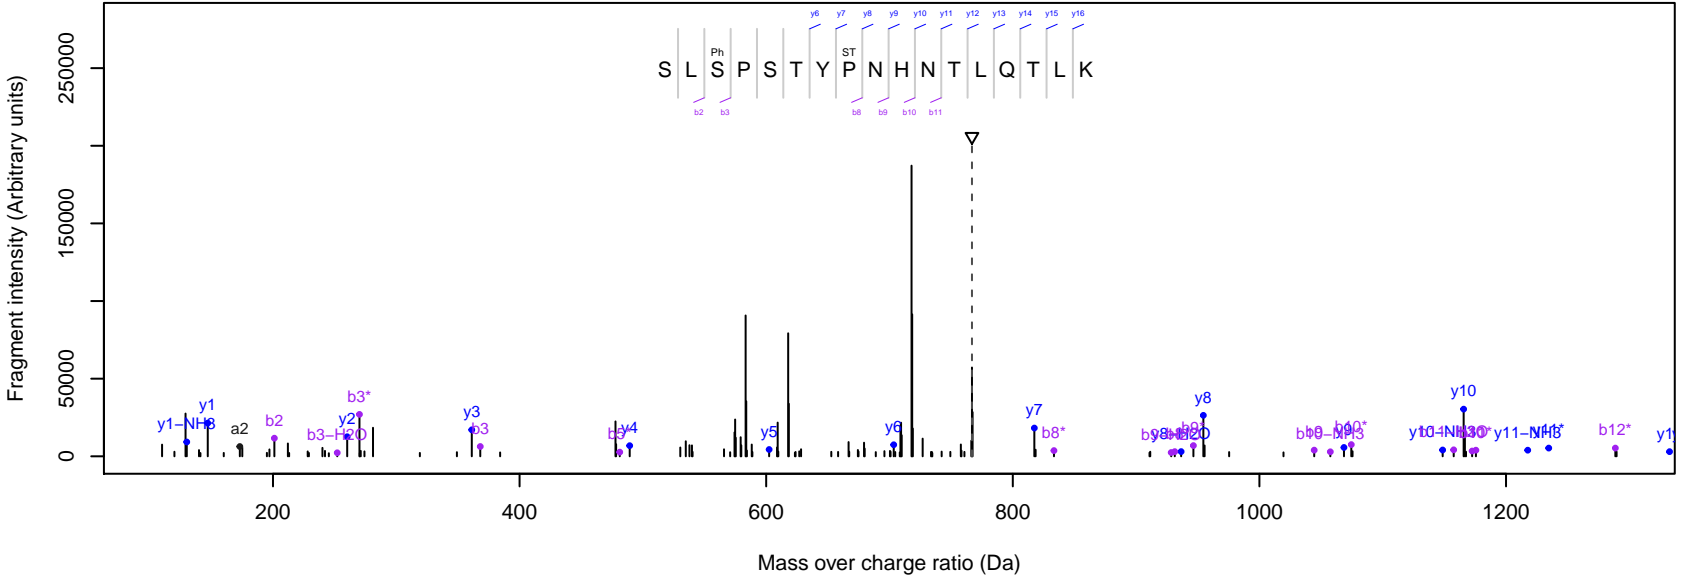

QEEQRGS(Phospho (STY))PPLRAEGK-3+

Source : QE3\_201126\_FR\_TIOx\_hum\_tissue\_Urea\_RNAB\_N Scan : 5301

Andromeda score : 168.08

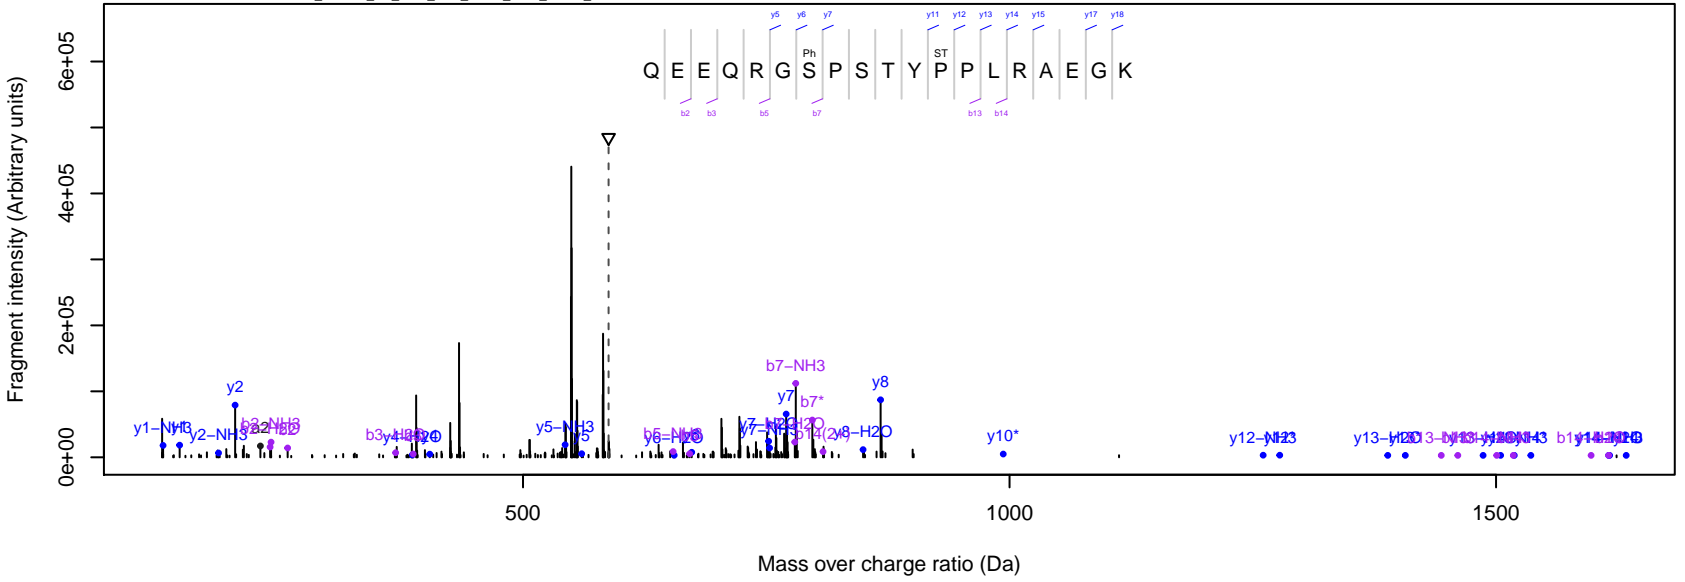

HSGSDRSS(Phospho (STY))FSHYGLK-3+

Source : QE3\_201126\_FR\_TIOx\_hum\_tissue\_Urea\_RNAB\_H Scan : 9567

Andromeda score : 168.05

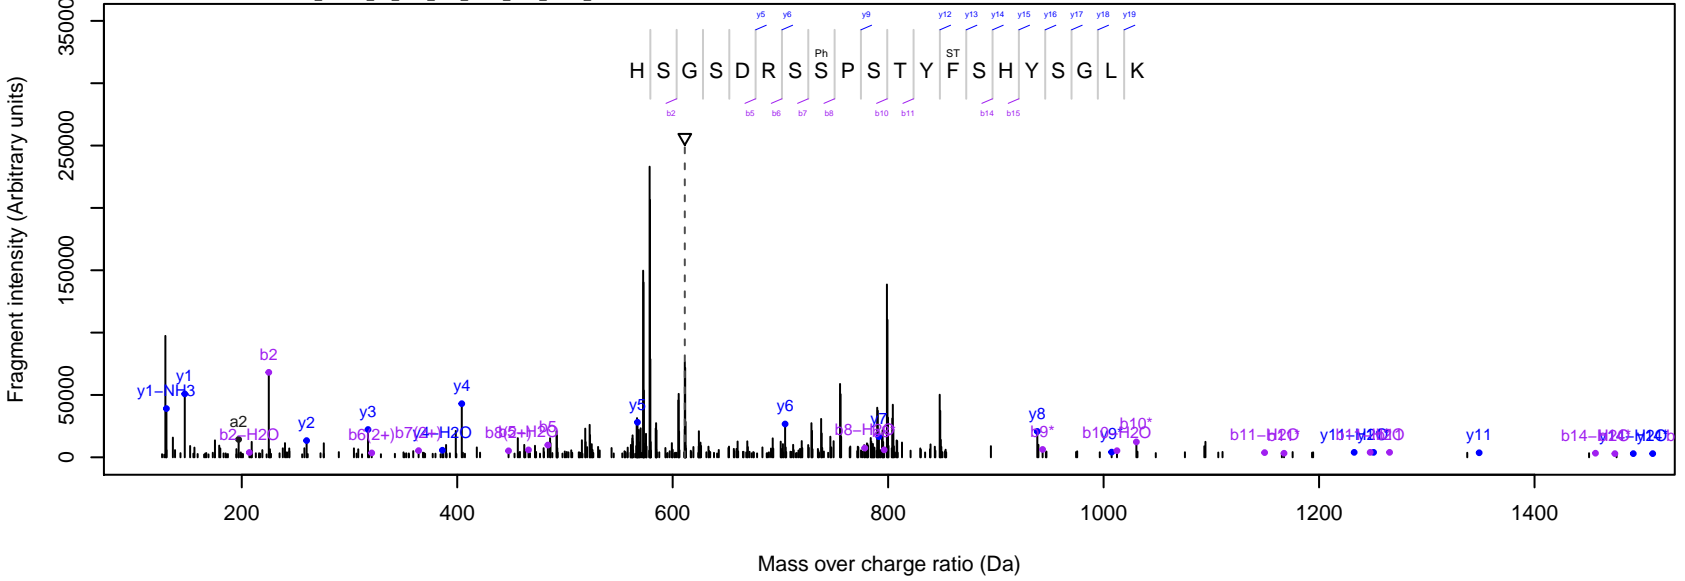

QS(Phospho (STY))STPSAPELGQQPDVNISEWK-2+

Source : QE3\_201126\_FR\_TIOx\_hum\_tissue\_Urea\_RNAB\_N Scan : 45389

Andromeda score : 168.05

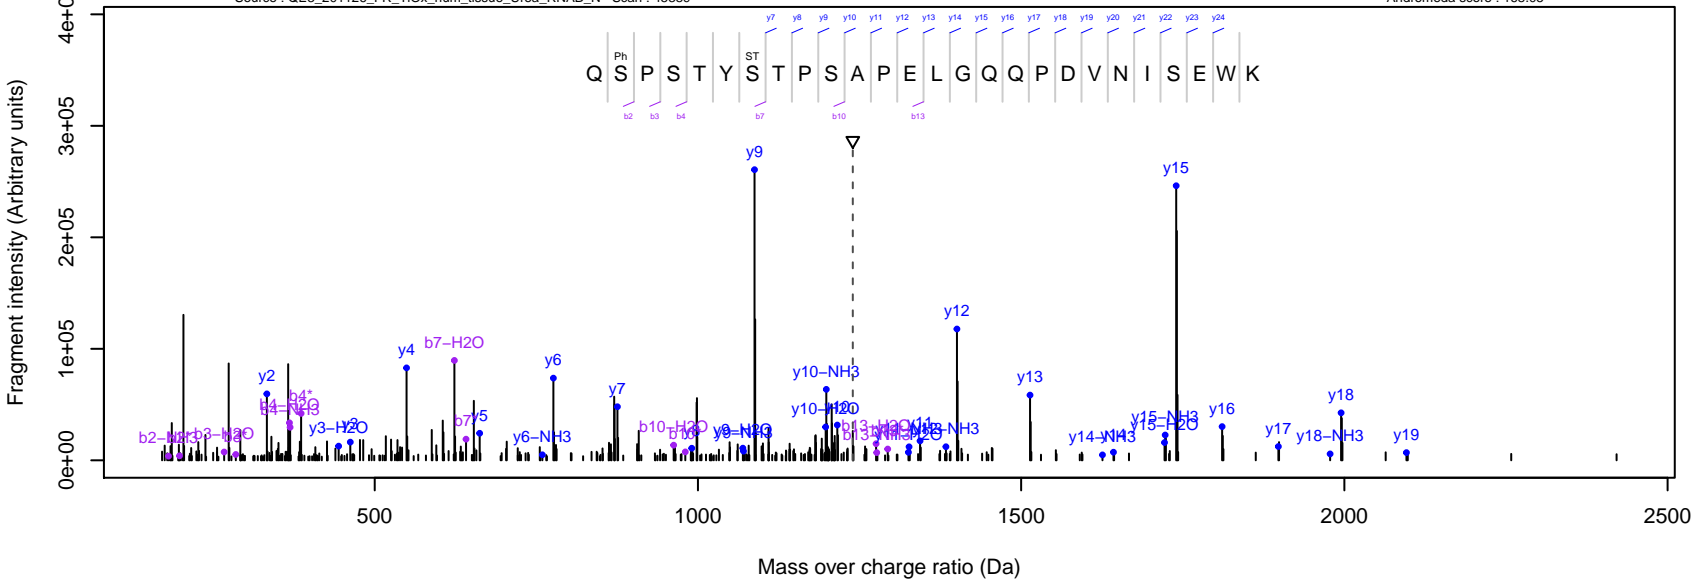



SNS(Phospho (STY))NSSSVITTEDNK-2+

Source : QE3\_201126\_FR\_TIOx\_hum\_tissue\_Urea\_RNAB\_H Scan : 11540

Andromeda score : 167.92

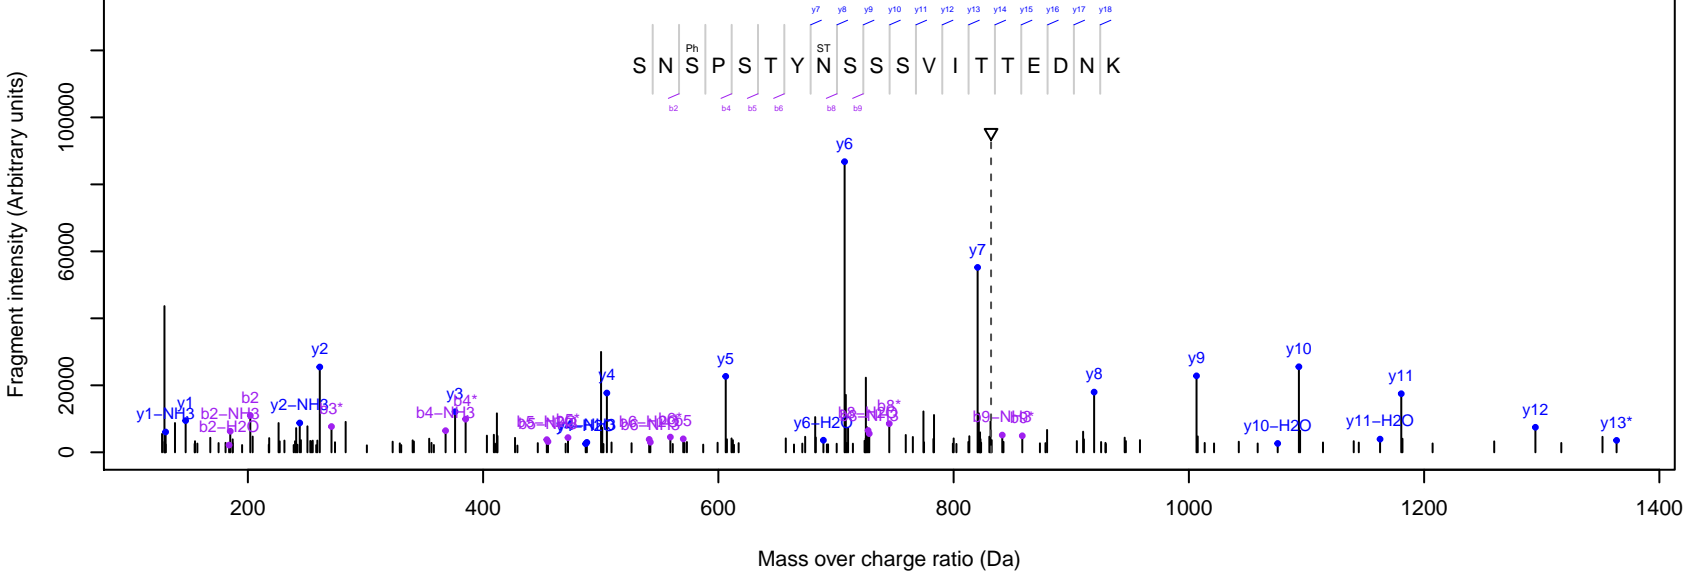

TRDDGDEGLLTHS(Phospho (STY))EEEEHS(Phospho (STY))QDT(Phospho (STY))DADDGALQ-3+

Source : QE3\_201126\_FR\_TIOx\_hum\_tissue\_Urea\_RNAB\_N Scan : 38072

Andromeda score : 167.82

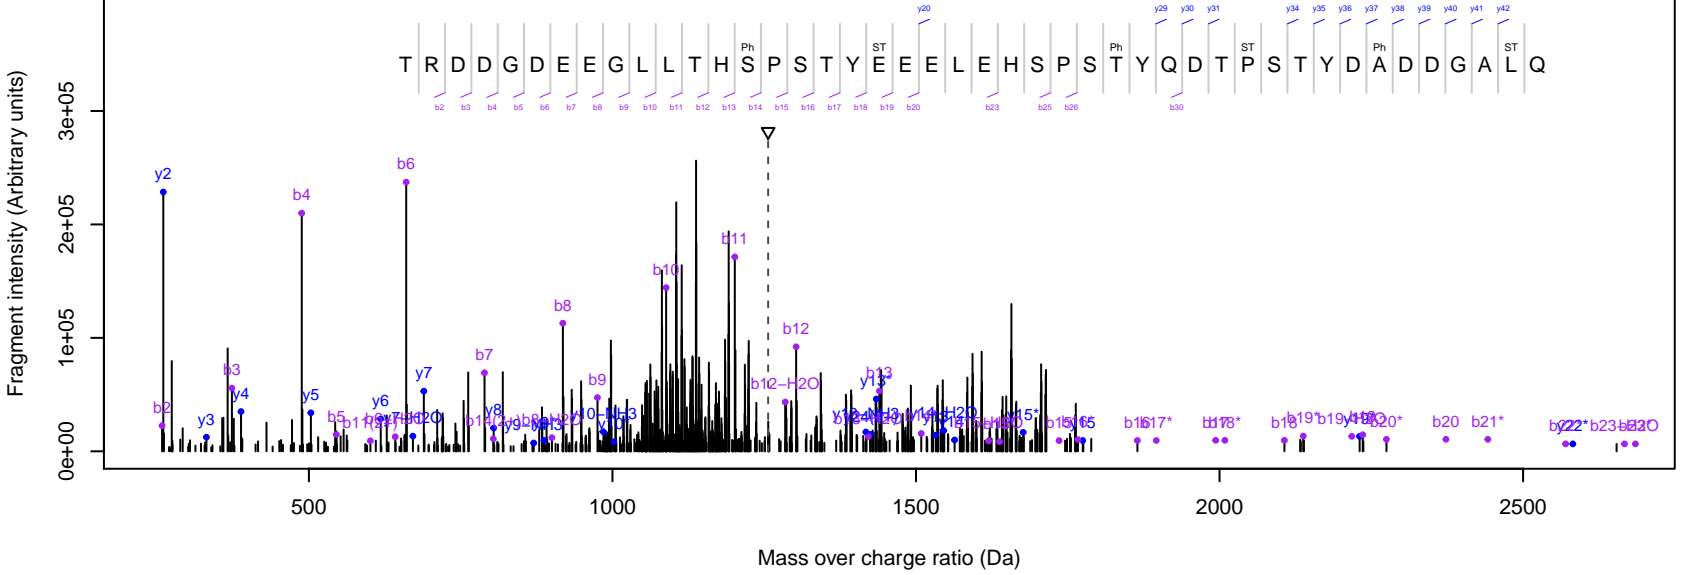

AAS(Phospho (STY))QQEIEQS(Phospho (STY))IETLNLMLDLEPASAAAPLHK-3+

Source : QE3\_201126\_FR\_TIOx\_hum\_tissue\_Urea\_RNAB\_H Scan : 62540

Andromeda score : 167.77

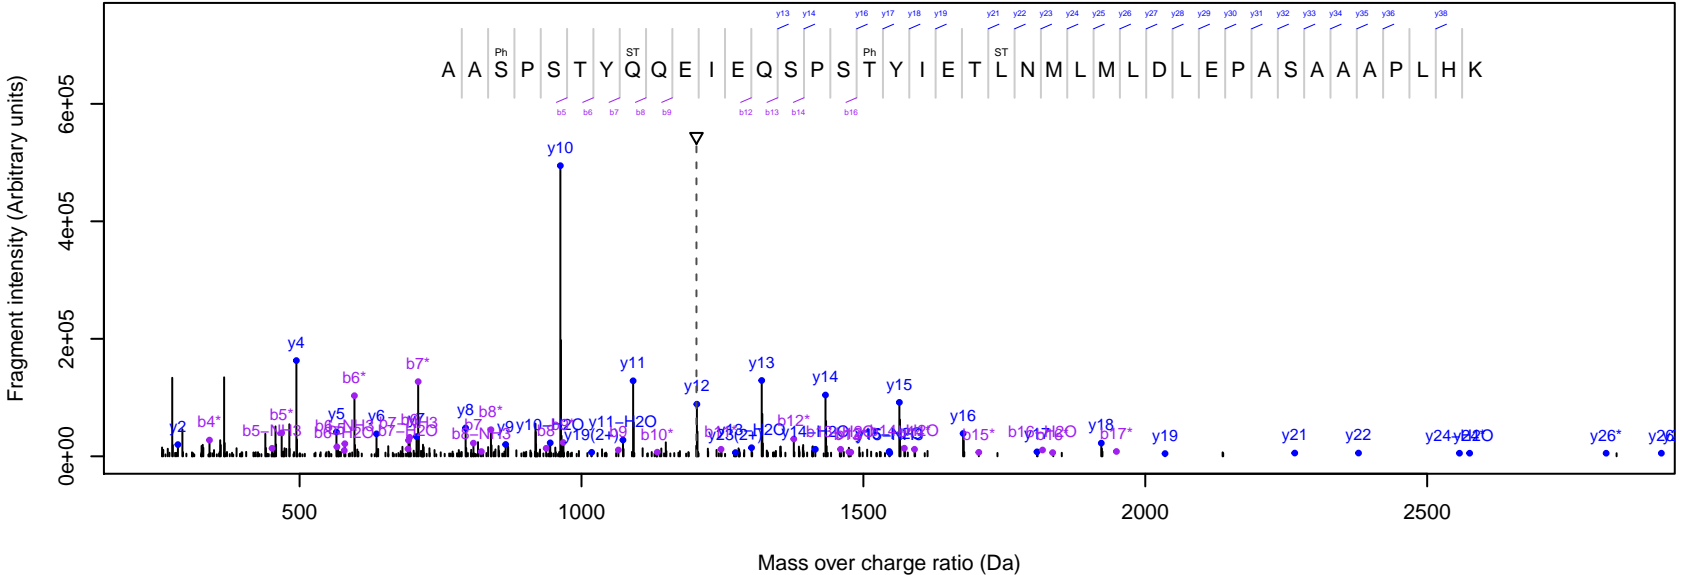

SNS(Phospho (STY))PLPVPPSK-2+

Source : QE3\_201126\_FR\_TIOx\_hum\_tissue\_Urea\_RNAB\_N Scan : 18251

Andromeda score : 167.73

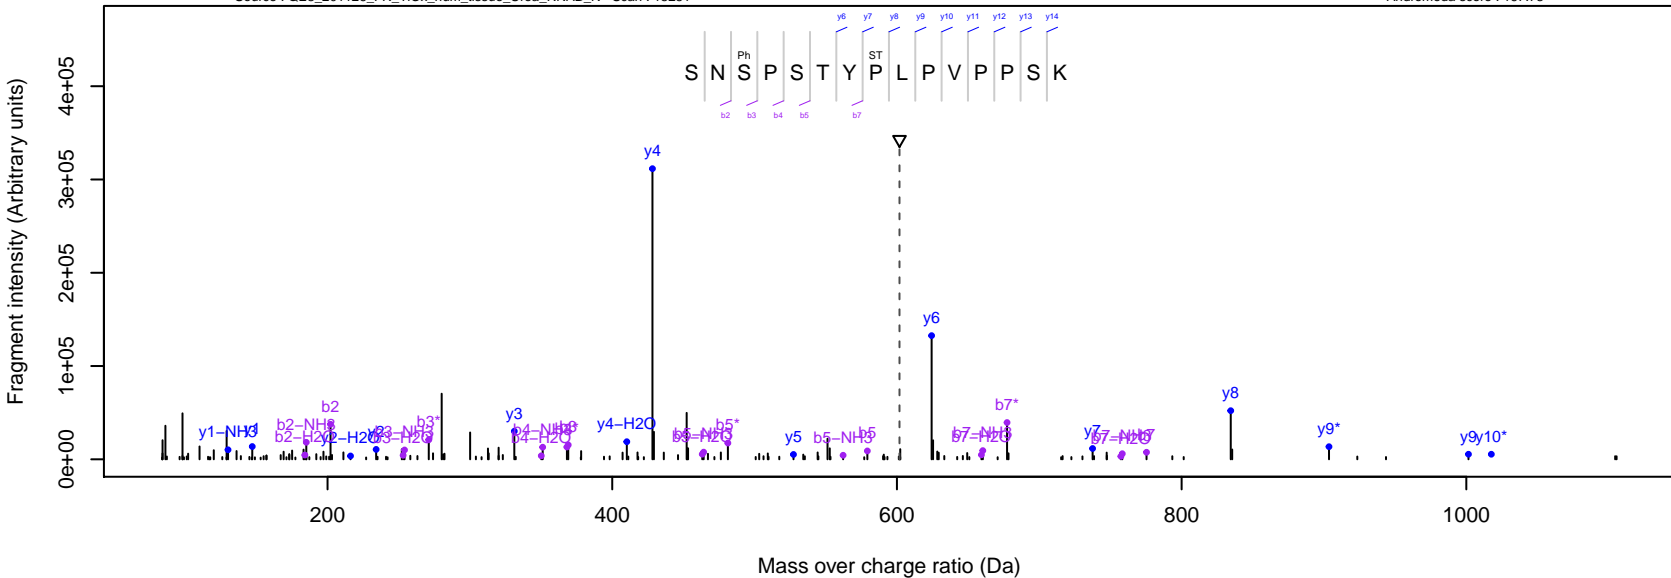

DIEIS(Phospho (STY))TEEEKDTGDLKDSLLK-3+

Source : QE3\_201126\_FR\_TIOx\_hum\_tissue\_Urea\_RNAB\_N Scan : 32812

Andromeda score : 167.72

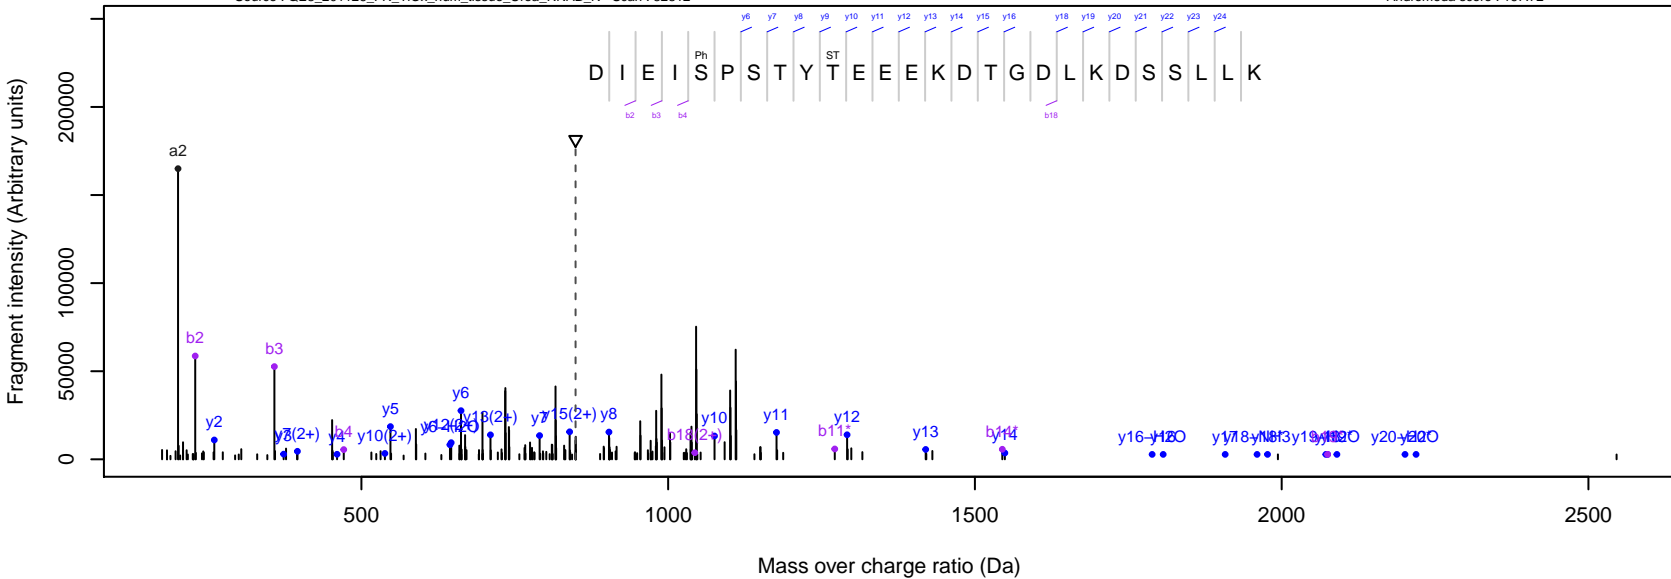

SSS(Phospho (STY))EDAESLAPR-2+

Source : QE3\_201126\_FR\_TIOx\_hum\_tissue\_Urea\_RNAB\_B Scan : 16974

Andromeda score : 167.71

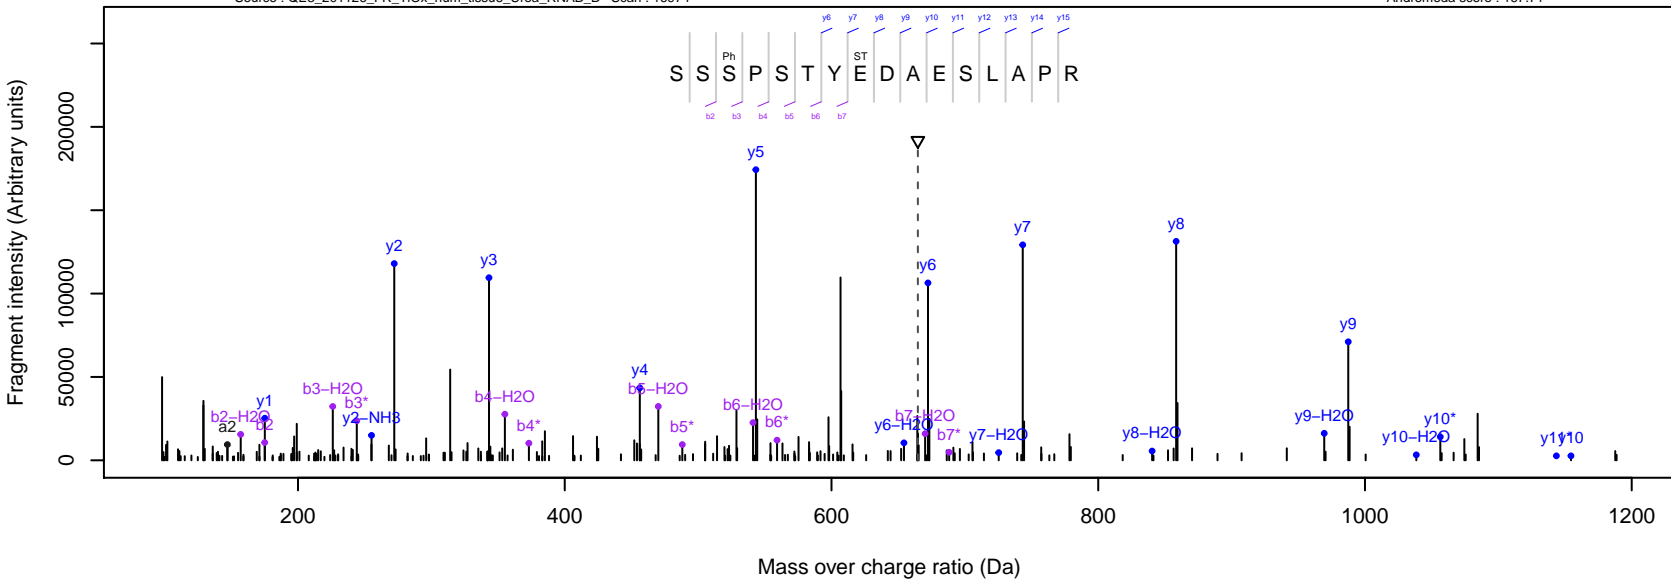

SPS(Phospho (STY))PPDGSPAATPEIR-2+

Source : QE3\_201126\_FR\_TiOx\_hum\_tissue\_Urea\_RNAB\_N Scan : 22262

Andromeda score : 167.69

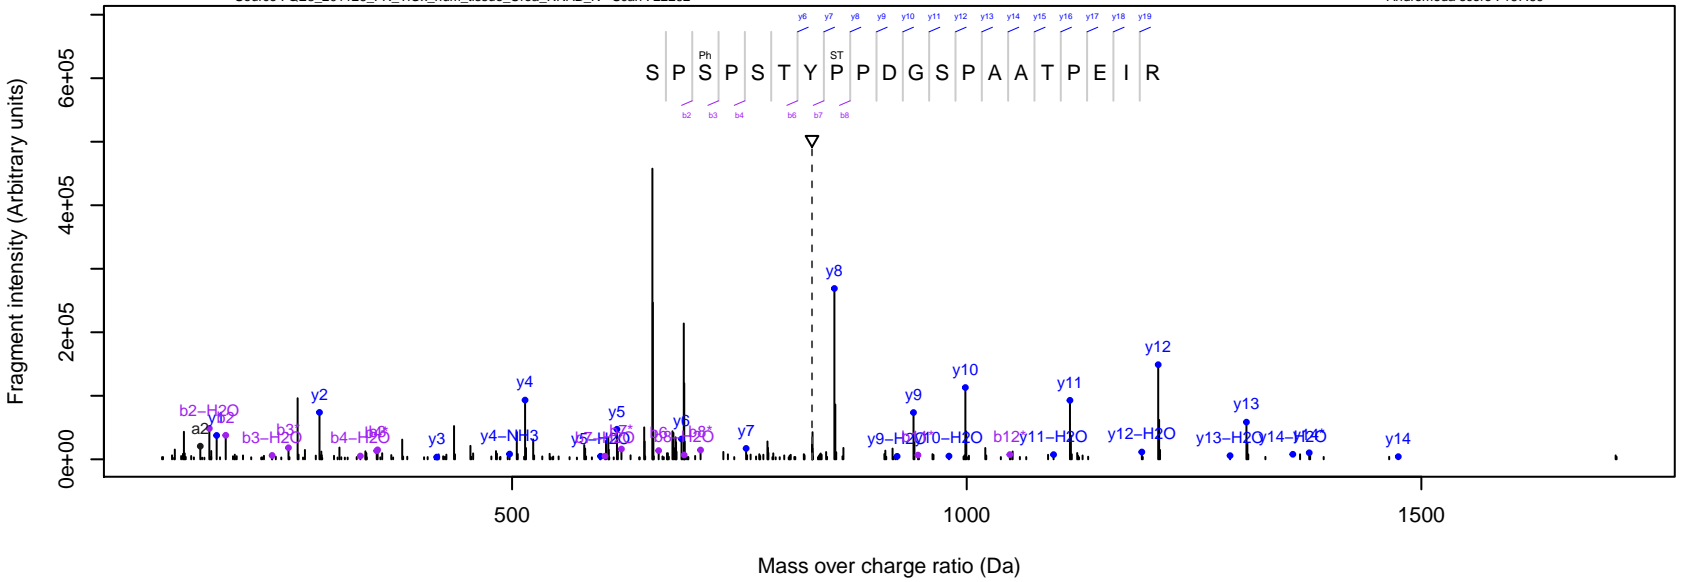

GPS(Phospho (STY))PVSLGNQDTLPVAVALTESVNA YFK-3+

Source : QE3\_201126\_FR\_TiOx\_hum\_tissue\_Urea\_RNAB\_H Scan : 62798

Andromeda score : 167.65

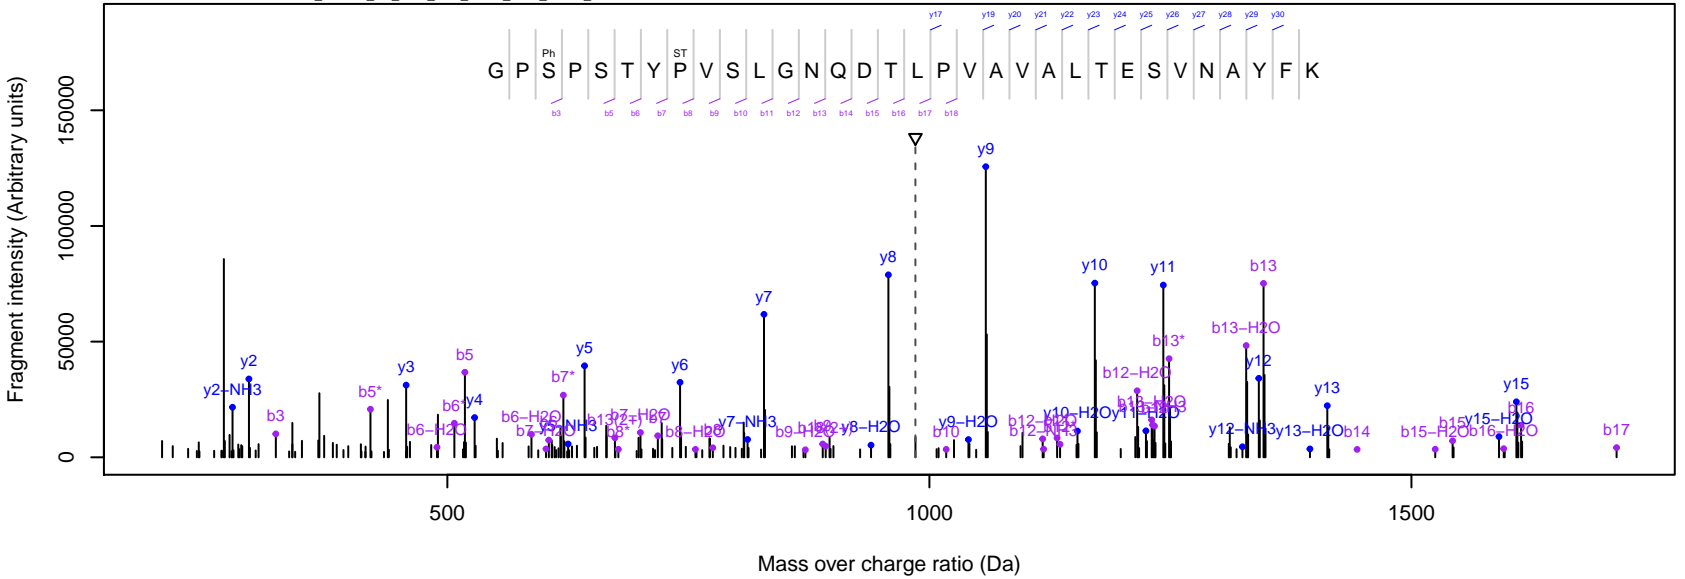

MDS(Phospho (STY))DEDEKEGEEK VAK-3+

Source : QE3\_201126\_FR\_TiOx\_hum\_tissue\_Urea\_RNAB\_N Scan : 6563

Andromeda score : 167.63

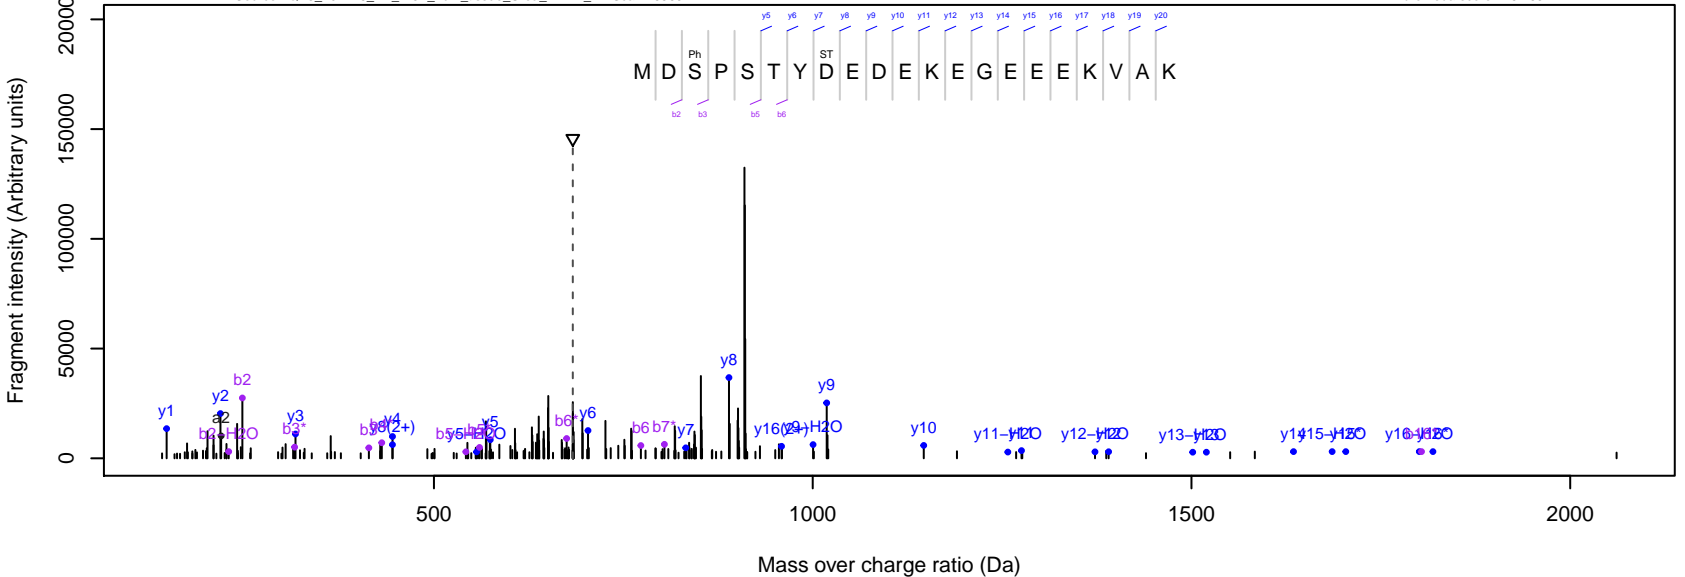

ISSKS(Phospho (STY))PGHM(Oxidation (M))VILDQTK-3+

Source : QE3\_201126\_FR\_TiOx\_hum\_tissue\_Urea\_RNAB\_B Scan : 10642

Andromeda score : 167.61

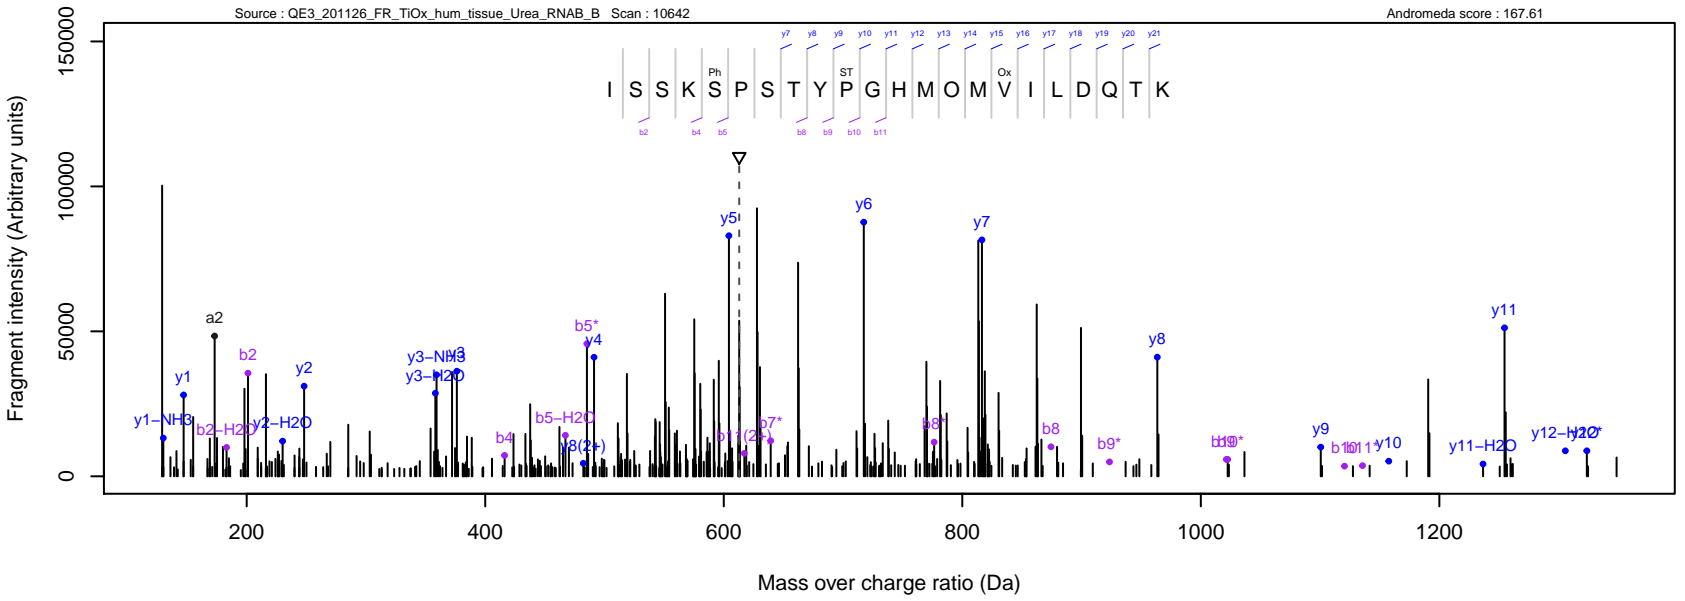

(Acetyl (Protein N-term))VSHGS(Phospho (STY))SPSLEALSSDFLACK-3+

Source : QE3\_201126\_FR\_TiOx\_hum\_tissue\_Urea\_RNAB\_N Scan : 62764

Andromeda score : 167.61

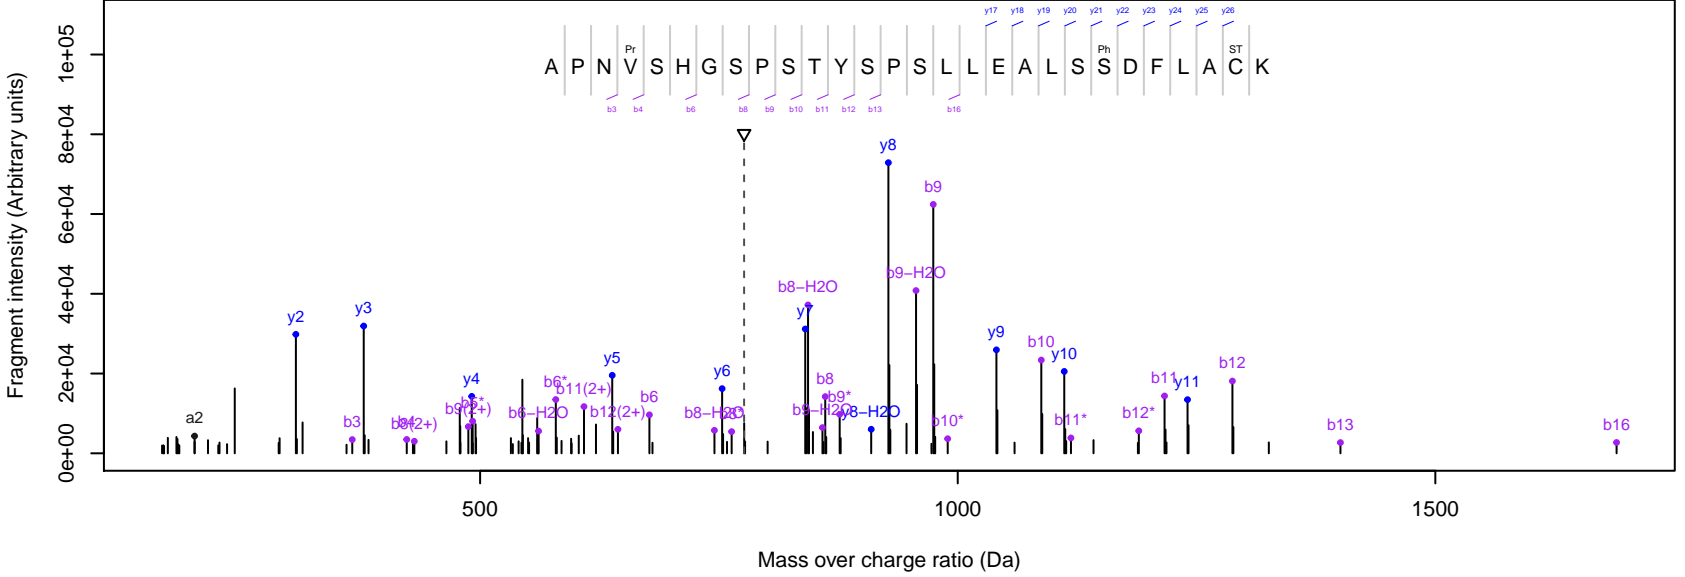

HEEQRELEEEEEENS(Phospho (STY))DEDELDSTMTVK-4+

Source : QE3\_201126\_FR\_TiOx\_hum\_tissue\_Urea\_RNAB\_H Scan : 19366

Andromeda score : 167.56

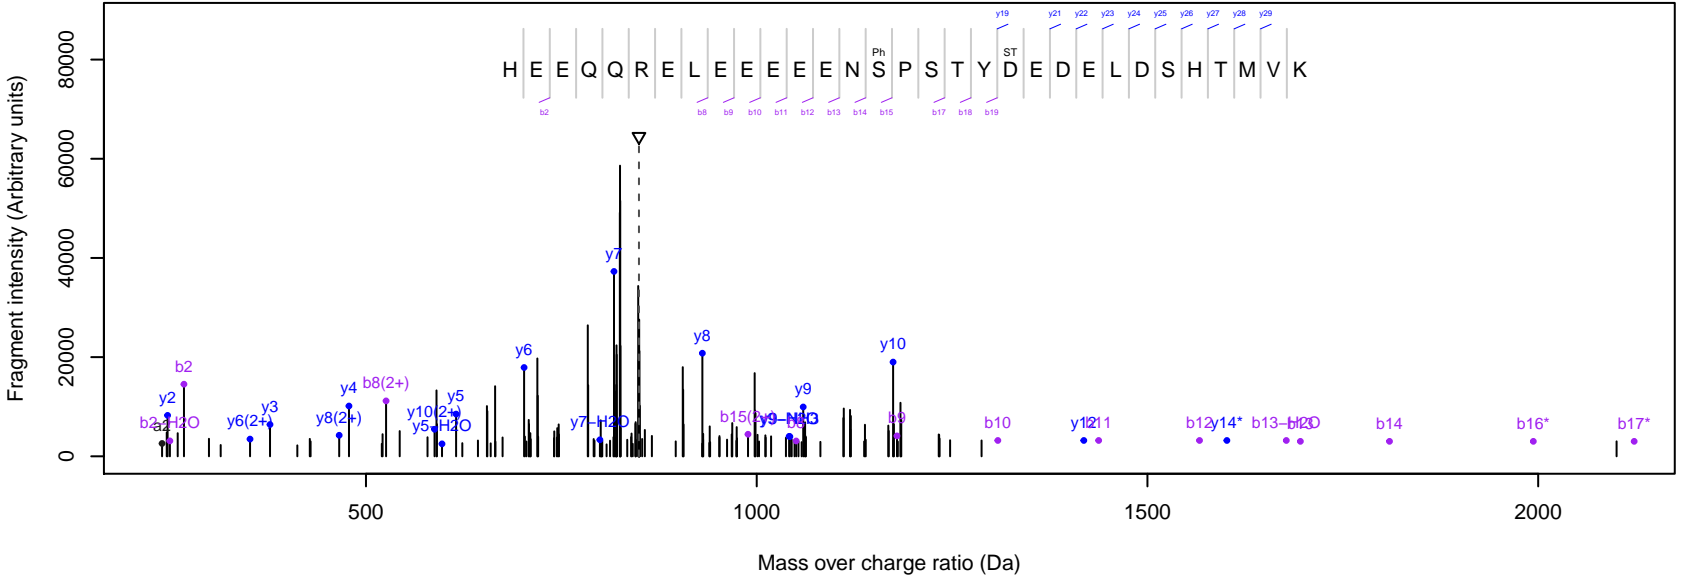

KGSPVSEIGWETPPPEESPSTYPR-2+

Source : QE3\_201126\_FR\_TIOx\_hum\_tissue\_Urea\_RNAB\_N Scan : 29617

Andromeda score : 167.51

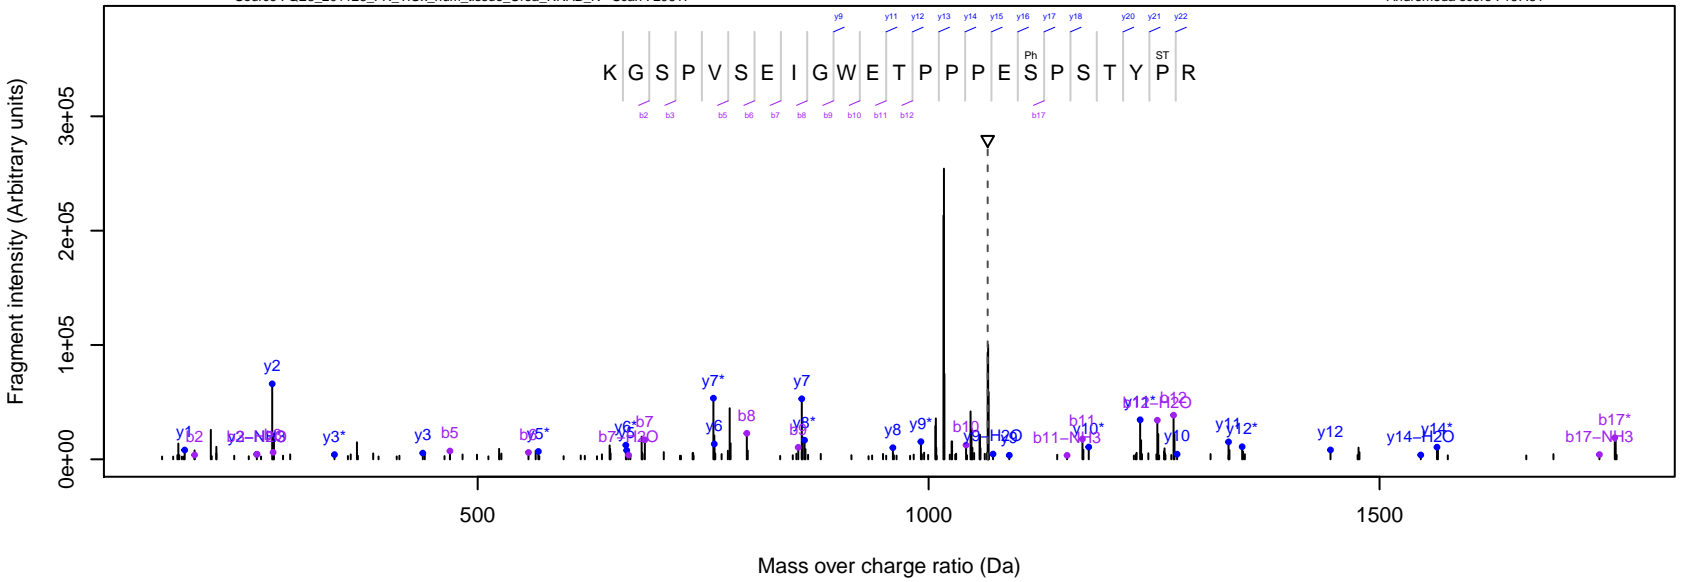

M(Oxidation (M))RS(Phospho (STY))PQPAPGSAAVPGAFAPIPR-3+

Source : QE3\_201126\_FR\_TIOx\_hum\_tissue\_Urea\_RNAB\_B Scan : 25788

Andromeda score : 167.48

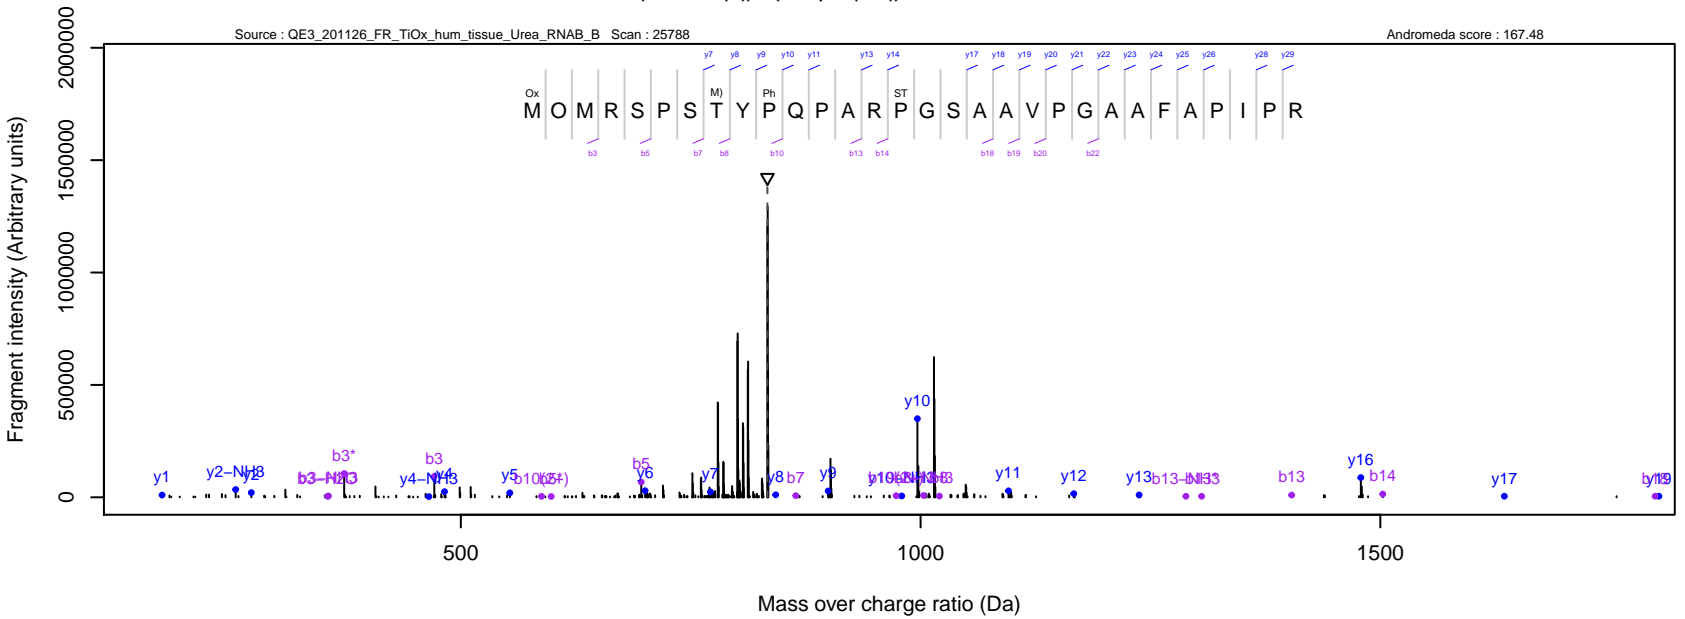

TSS(Phospho (STY))VVTLEVAK-2+

Source : QE3\_201126\_FR\_TIOx\_hum\_tissue\_Urea\_RNAB\_H Scan : 24829

Andromeda score : 167.2

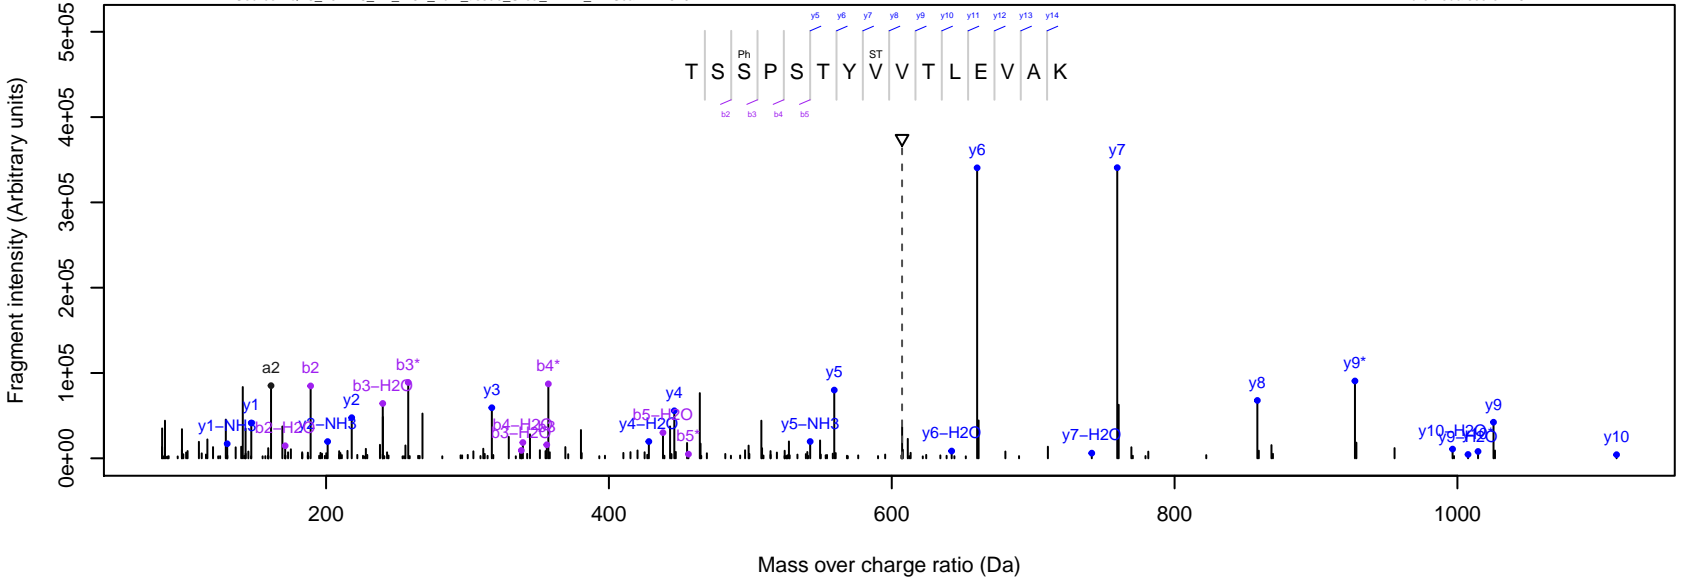



REPGGWGAGASAPVEDDSPSTYDAET YGEE NDEQGNYSK-3+

Source : QE3\_201126\_FR\_TiOx\_hum\_tissue\_Urea\_RNAB\_H Scan : 28133

Andromeda score : 167.17

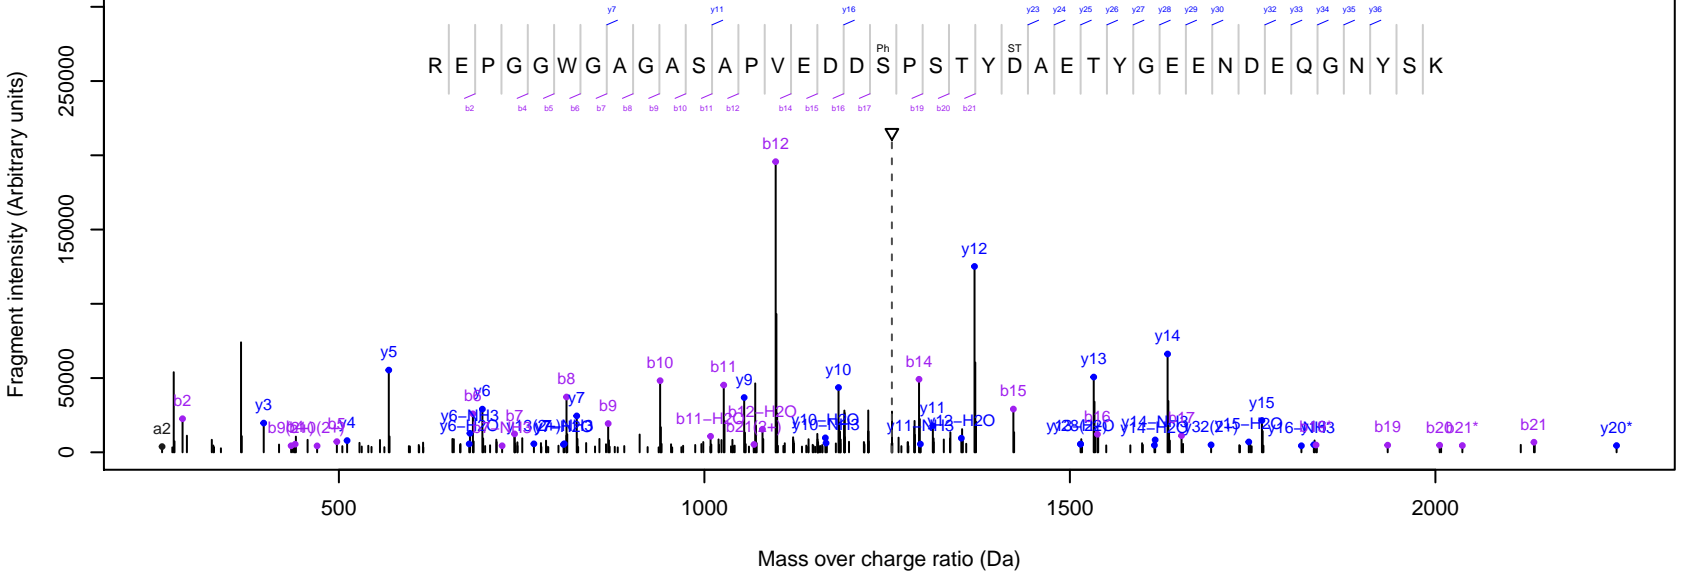

ISSLPVSRPIS(Phospho (STY))PSPSAILER-3+

Source : QE3\_201126\_FR\_TiOx\_hum\_tissue\_Urea\_RNAB\_B Scan : 39039

Andromeda score : 167.1

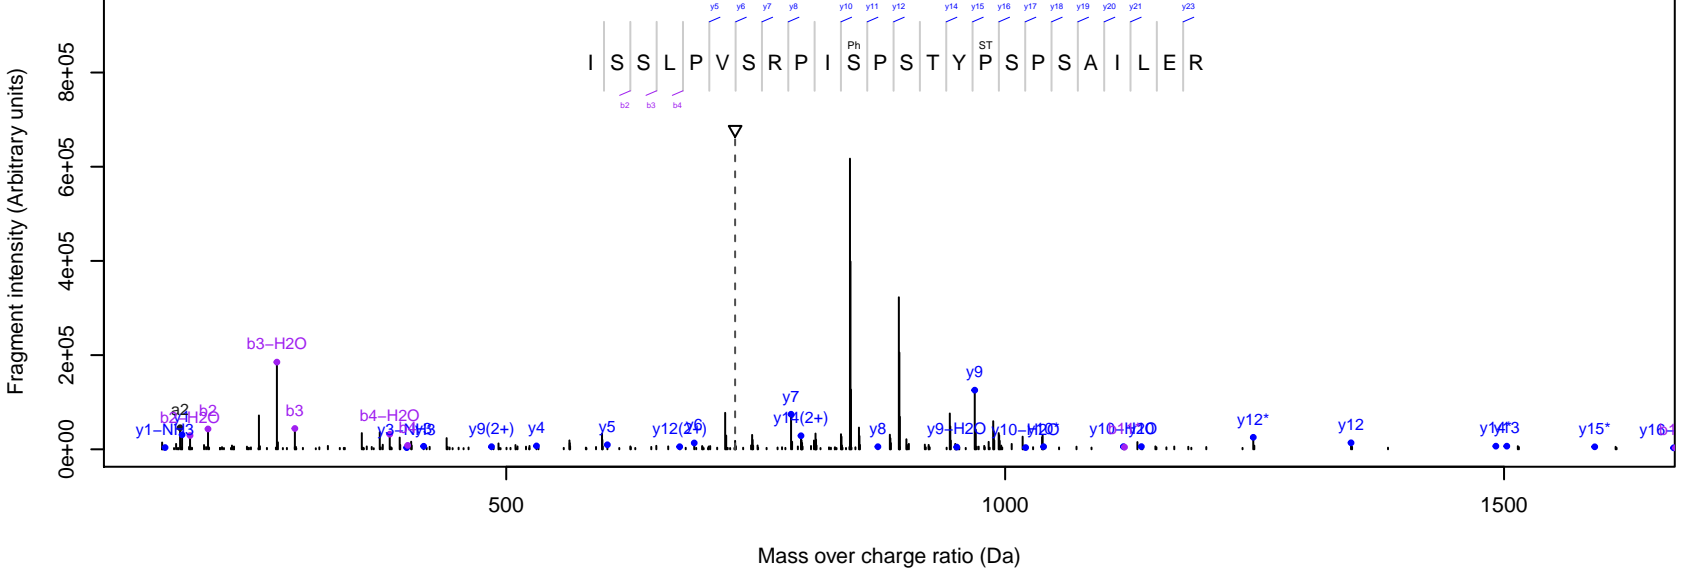

SQNIVTSS(Phospho (STY))SLSAEAIR-2+

Source : QE3\_201126\_FR\_TiOx\_hum\_tissue\_Urea\_RNAB\_N Scan : 31918

Andromeda score : 167.05

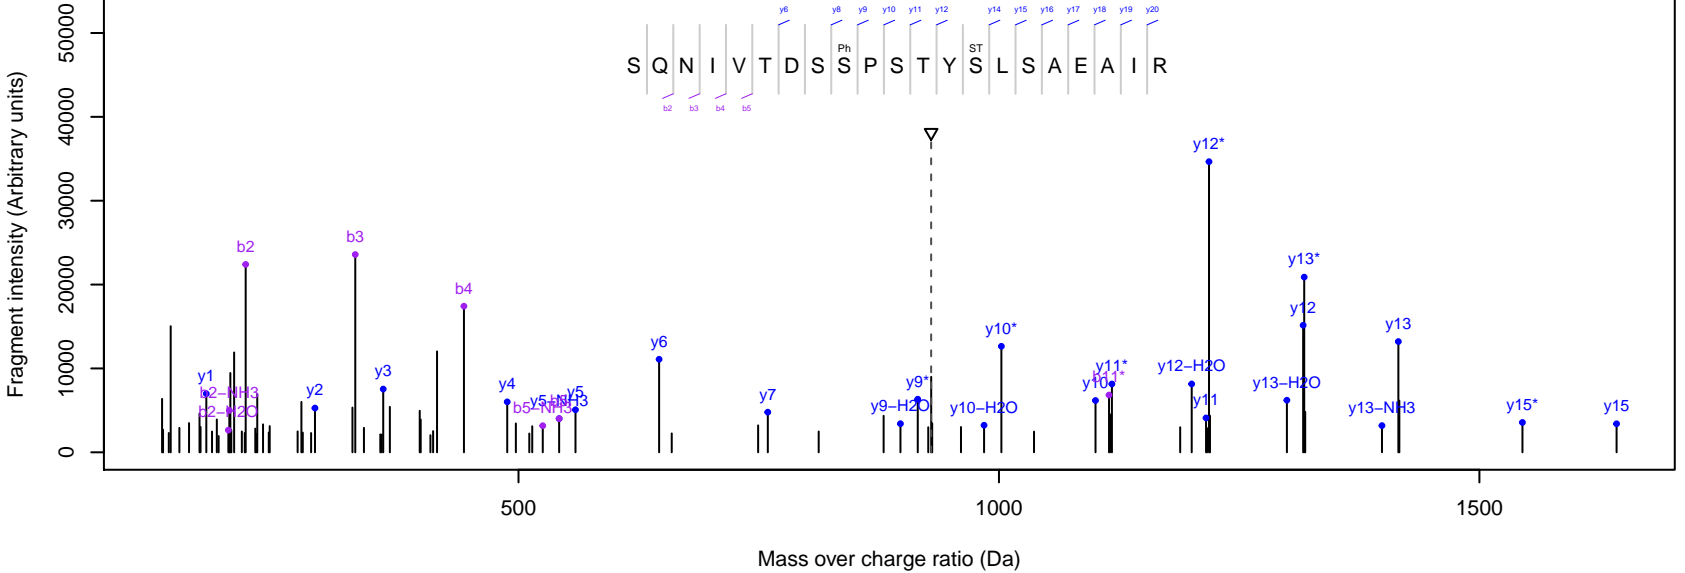

TGSNISGASS(Phospho (STY))DISLDEQYKHQLLEETKK-4+

Source : QE3\_201126\_FR\_TiOx\_hum\_tissue\_Urea\_RNAB\_B Scan : 21502

Andromeda score : 167.02

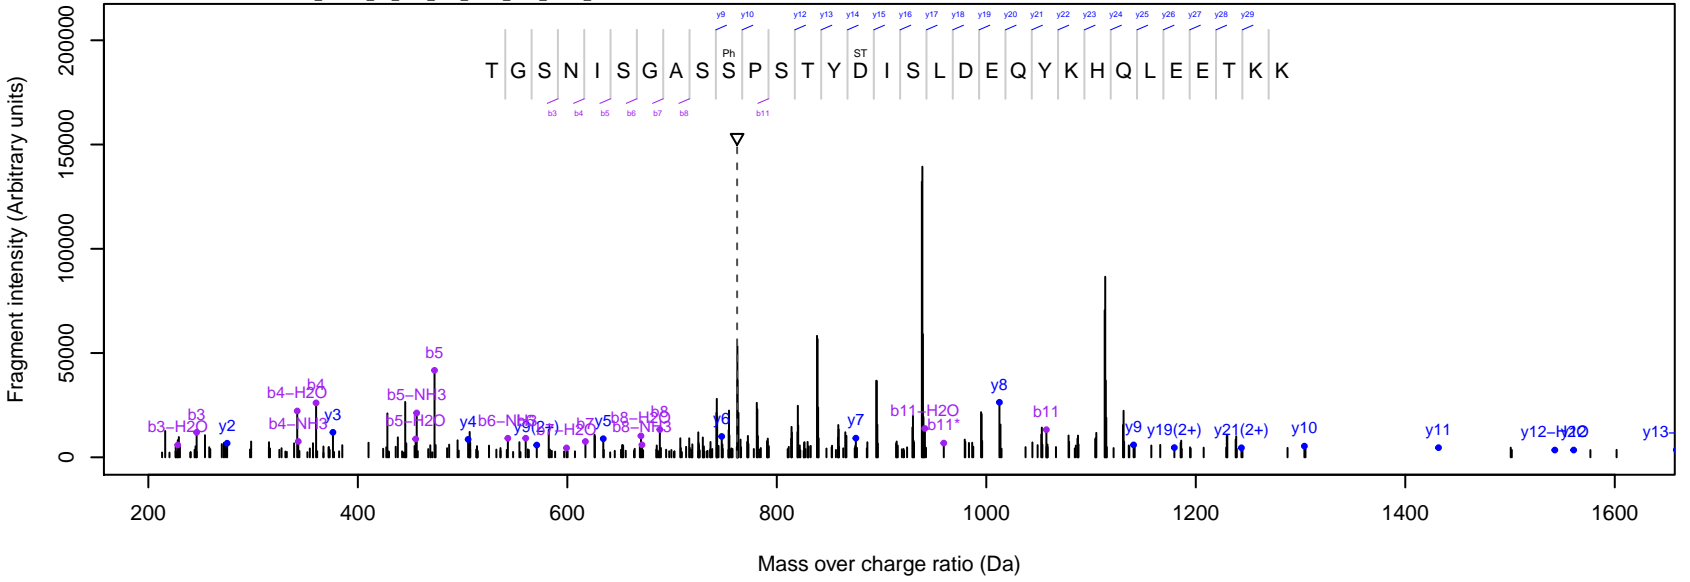

S(Phospho (STY))AHEEEEDDDDDQGEDKKSPWQK-4+

Source : QE3\_201126\_FR\_TiOx\_hum\_tissue\_Urea\_RNAB\_N Scan : 9246

Andromeda score : 167

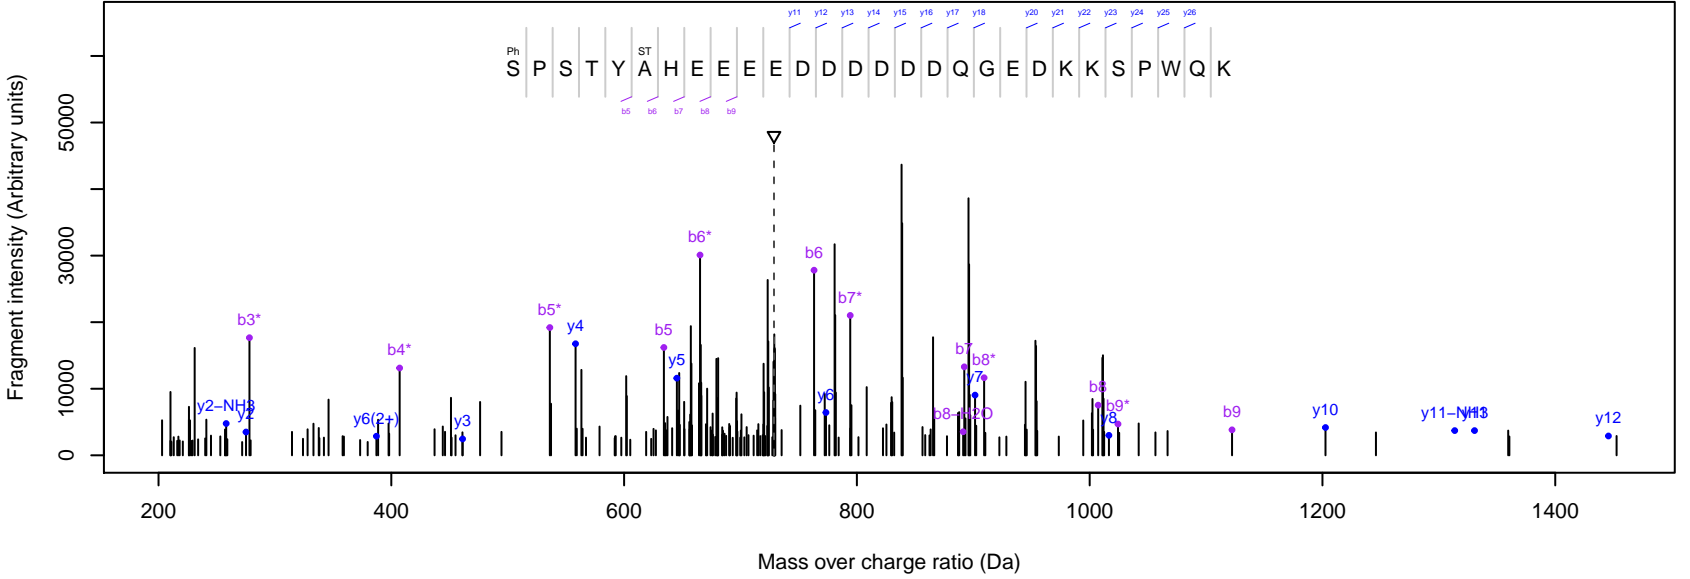

SPS(Phospho (STY))PPTQHTGQP PGQP S A P S Q L S A P R-3+

Source : QE3\_201126\_FR\_TiOx\_hum\_tissue\_Urea\_RNAB\_N Scan : 19351

Andromeda score : 166.89

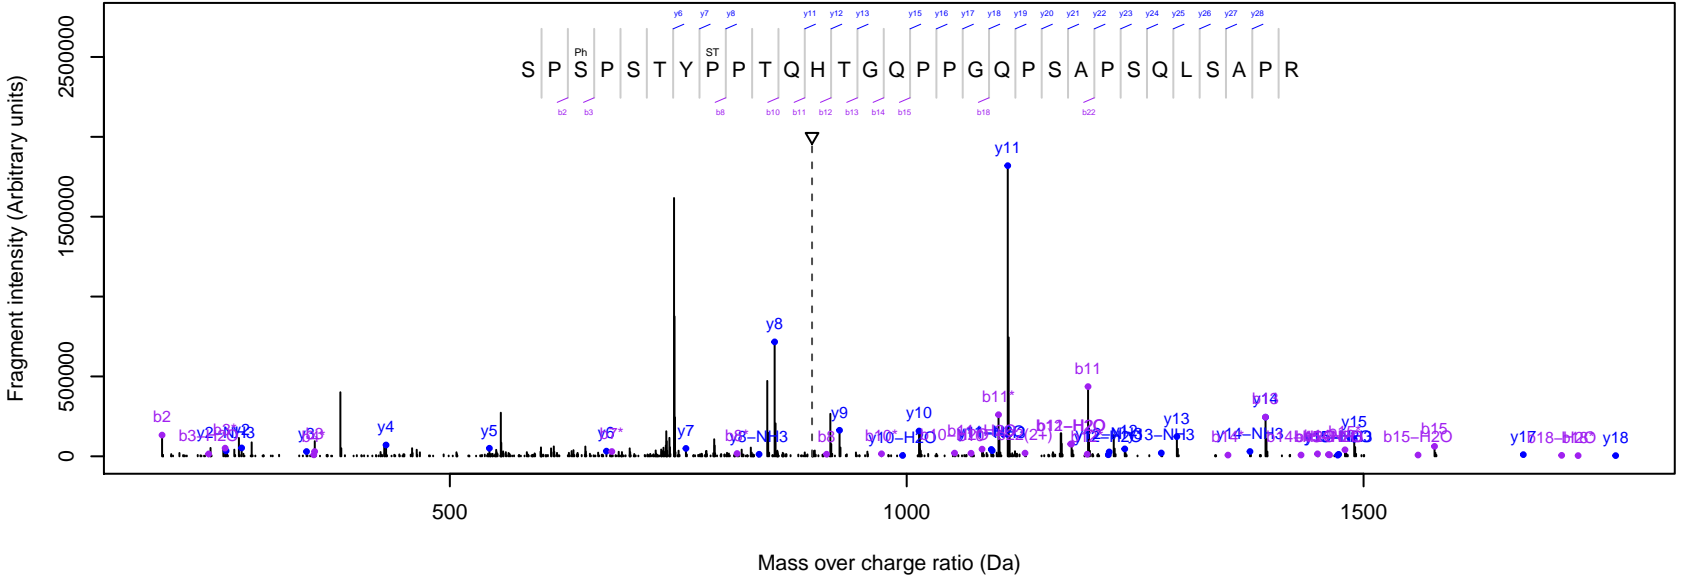

(Acetyl (Protein N-term))ARGS(Phospho (STY))VSDEEM(Oxidation (M))M(Oxidation (M))ELR-2+

Source : QE3\_201126\_FR\_TIOx\_hum\_tissue\_Urea\_RNAB\_B Scan : 18758

Andromeda score : 166.77

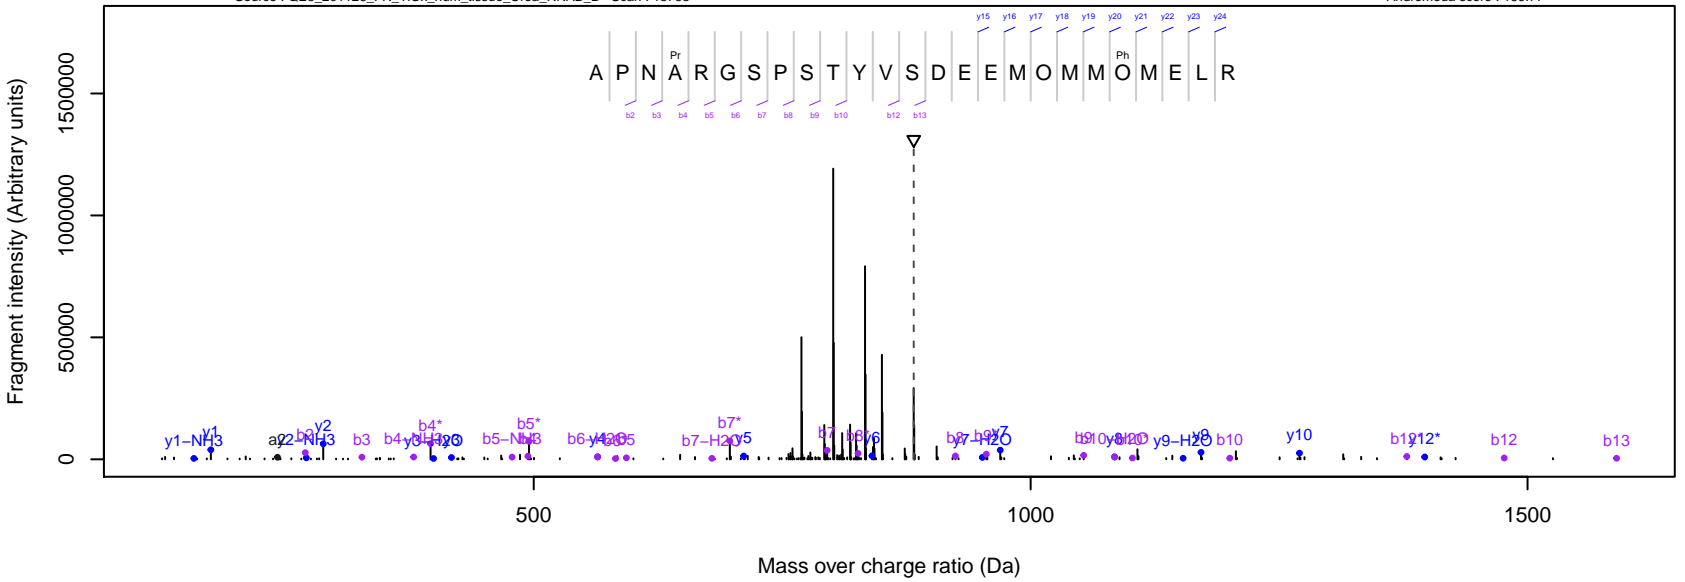

(Acetyl (Protein N-term))AQES(Phospho (STY))PKNSAAEIPVTSNGEVDDSDREHSFNR-3+

Source : QE3\_201126\_FR\_TIOx\_hum\_tissue\_Urea\_RNAB\_N Scan : 22894

Andromeda score : 166.74

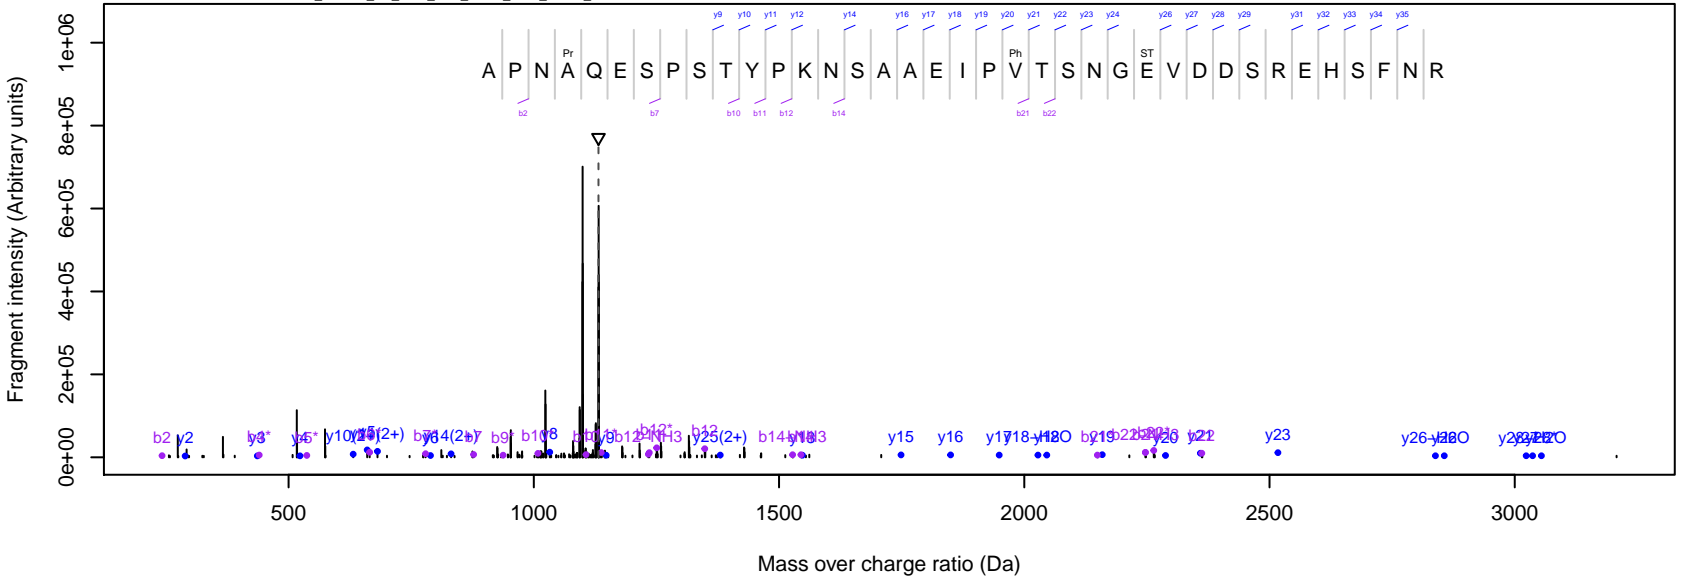

TSS(Phospho (STY))EDNLYLAVLR-2+

Source : QE3\_201126\_FR\_TIOx\_hum\_tissue\_Urea\_RNAB\_H Scan : 52428

Andromeda score : 166.7

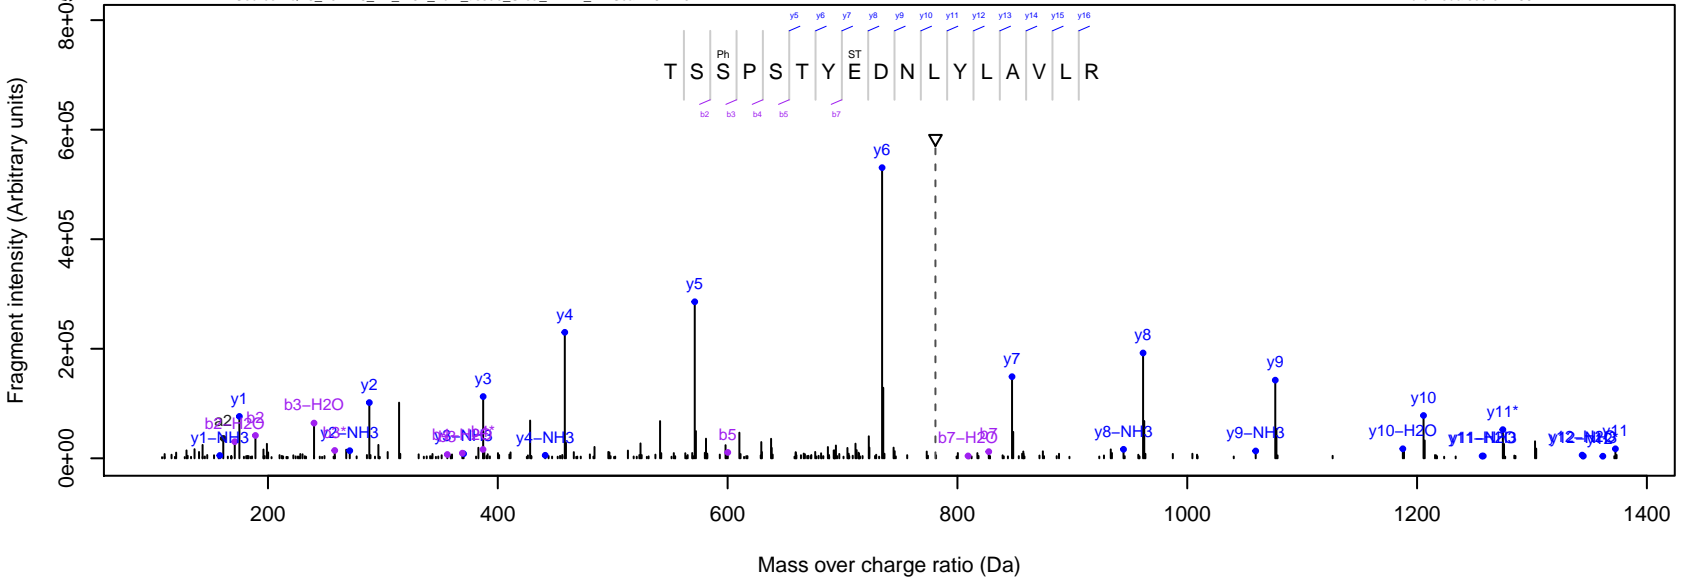

RTS(Phospho (STY))FSFQK-2+

Source : QE3\_201126\_FR\_TiOx\_hum\_tissue\_Urea\_RNAB\_H Scan : 13151

Andromeda score : 166.69

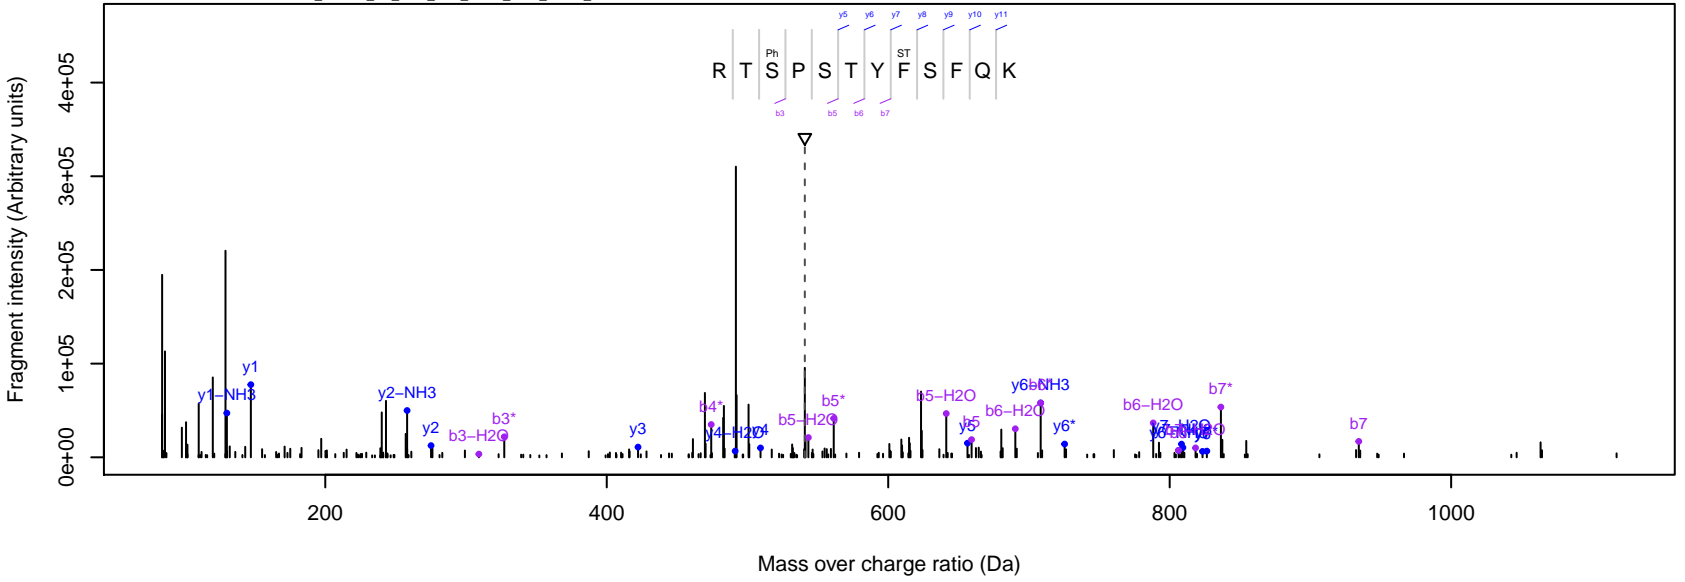

HGART(Phospho (STY))SDSDQQAYLVQR-3+

Source : QE3\_201126\_FR\_TiOx\_hum\_tissue\_Urea\_RNAB\_H Scan : 10312

Andromeda score : 166.59

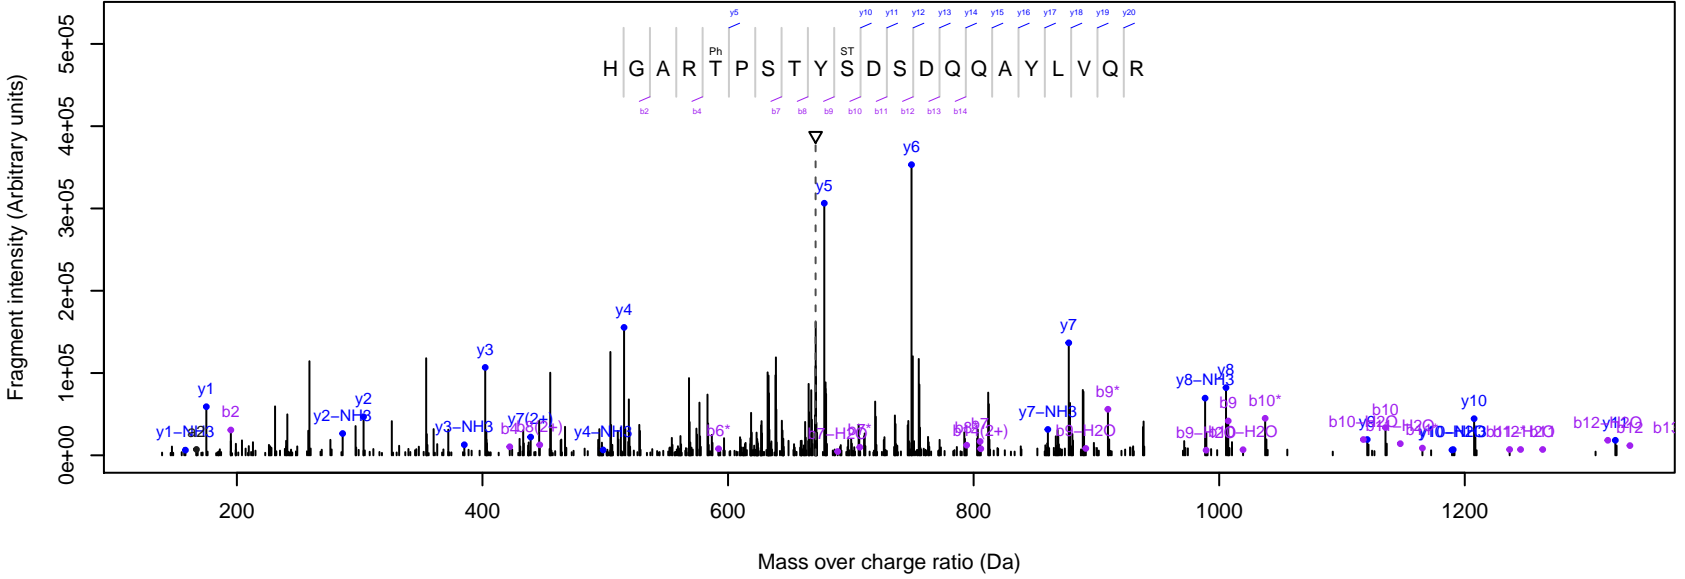

ENQEPLRS(Phospho (STY))PEVGDEELRPLTK-3+

Source : QE3\_201126\_FR\_TiOx\_hum\_tissue\_Urea\_RNAB\_H Scan : 26394

Andromeda score : 166.49

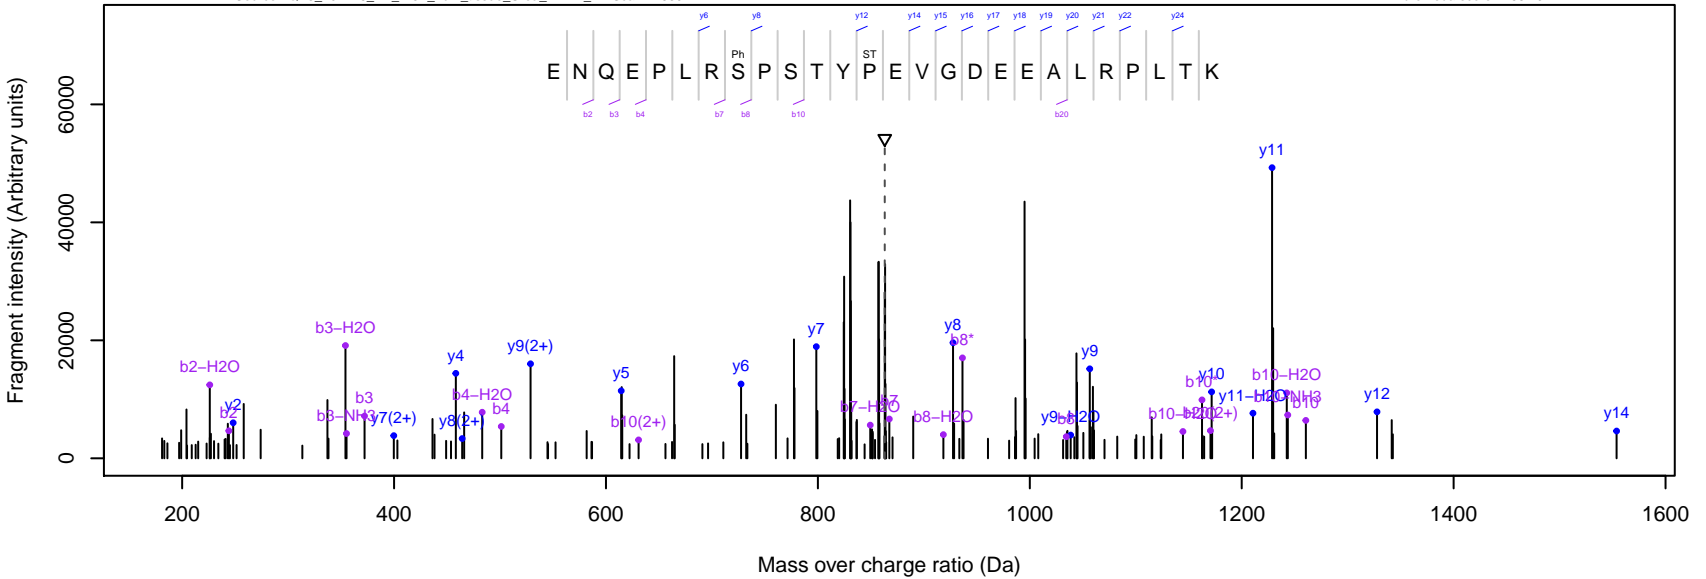

AAS(Phospho (STY))PPASADLIEQQK-2+

Source : QE3\_201126\_FR\_TiOx\_hum\_tissue\_Urea\_RNAB\_B Scan : 27033

Andromeda score : 166.35

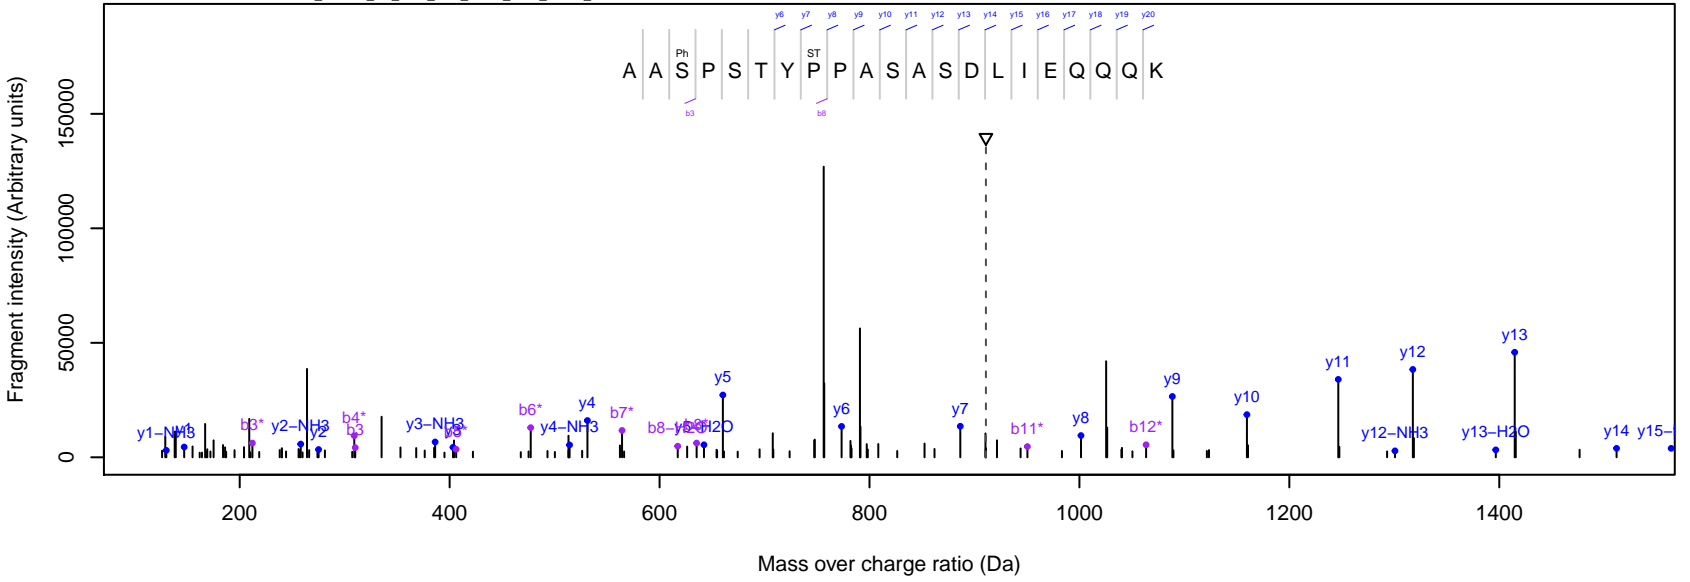

NESEDNKFS(Phospho (STY))DDSPSTYDDDFVQPR-2+

Source : QE3\_201126\_FR\_TiOx\_hum\_tissue\_Urea\_RNAB\_H Scan : 28120

Andromeda score : 166.35

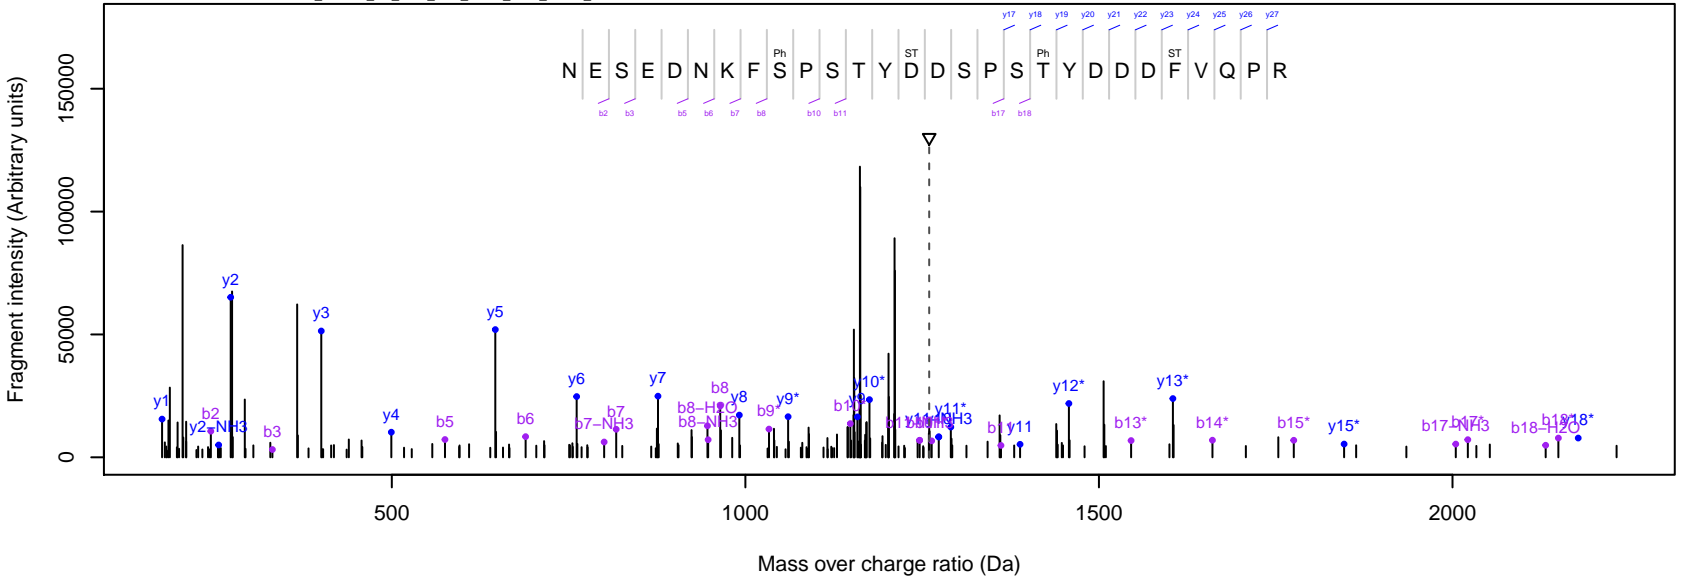

DGSLASNPS(Phospho (STY))GDLTK-2+

Source : QE3\_201126\_FR\_TiOx\_hum\_tissue\_Urea\_RNAB\_N Scan : 29036

Andromeda score : 166.3

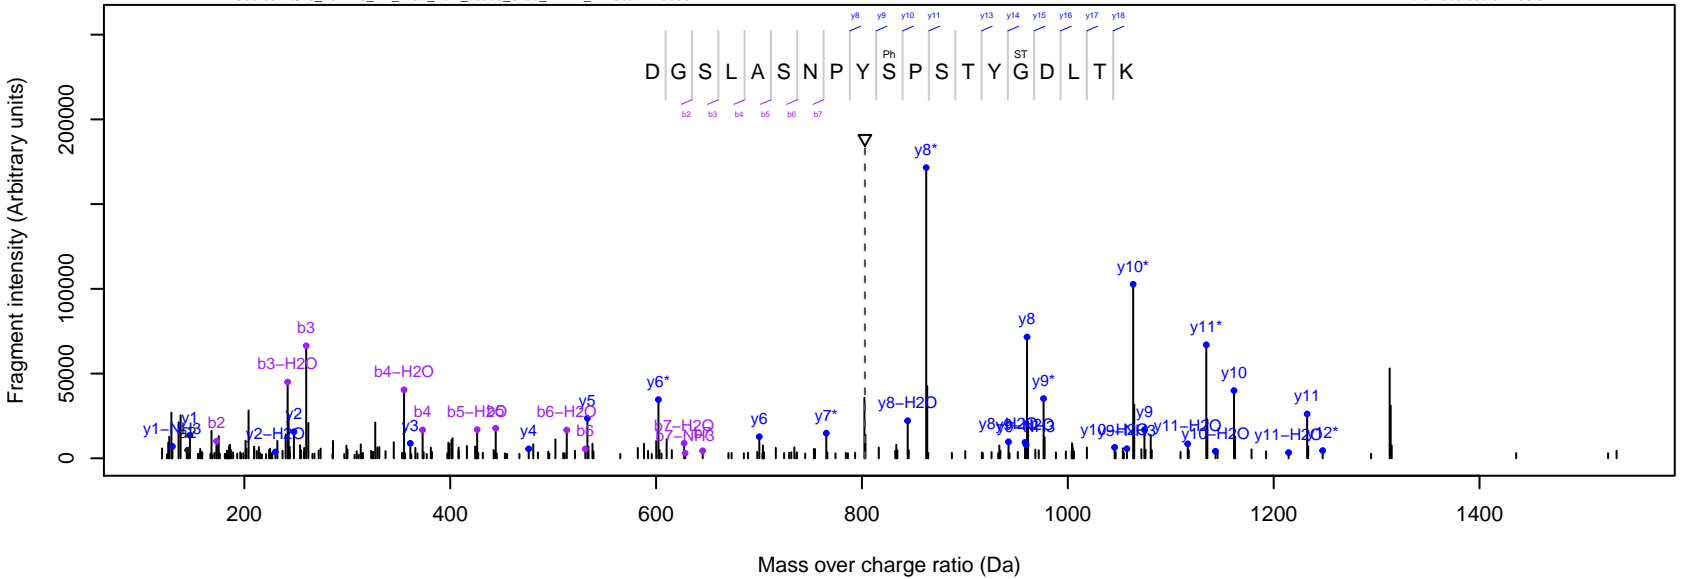

NTPSQHSHSIQHS(Phospho (STY))PER-4+

Source : QE3\_201126\_FR\_TiOx\_hum\_tissue\_Urea\_RNAB\_H Scan : 3145

Andromeda score : 166.29

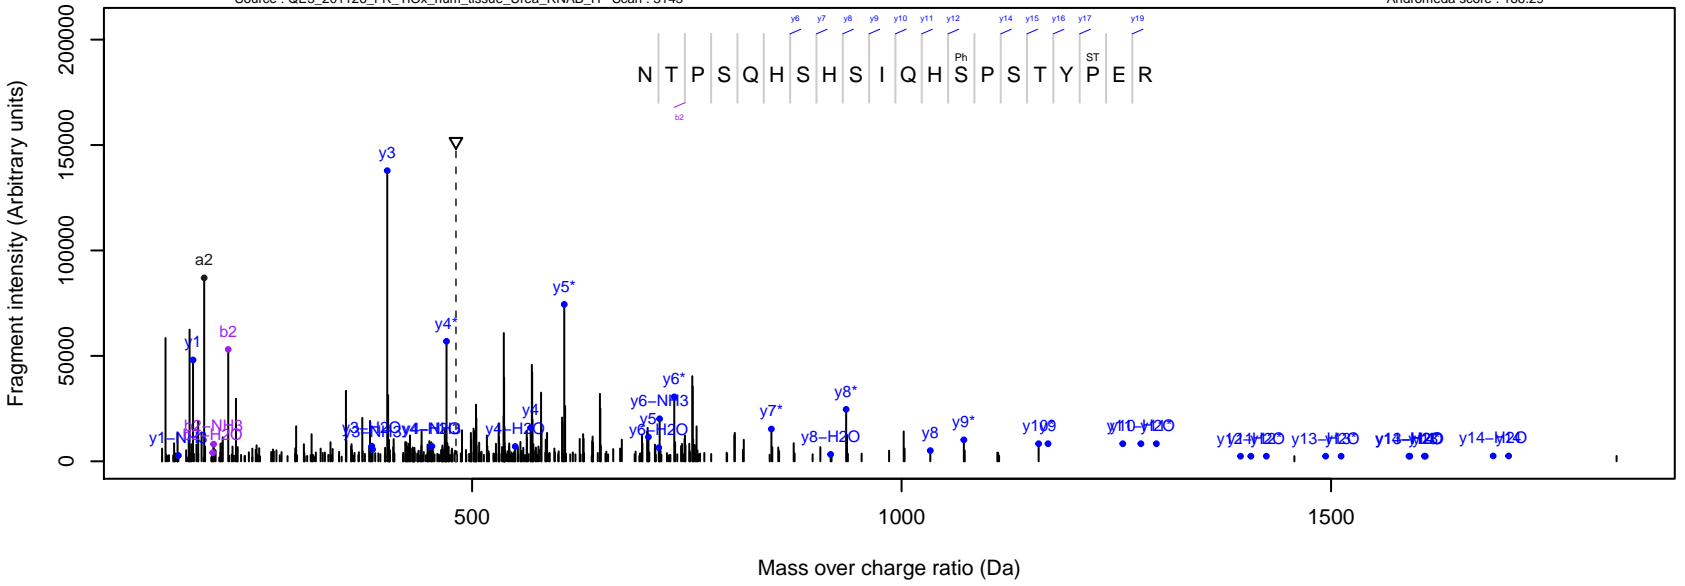

VPAEDETQS(Phospho (STY))IDS(Phospho (STY))EDSFVPGR-2+

Source : QE3\_201126\_FR\_TiOx\_hum\_tissue\_Urea\_RNAB\_H Scan : 41493

Andromeda score : 166.28

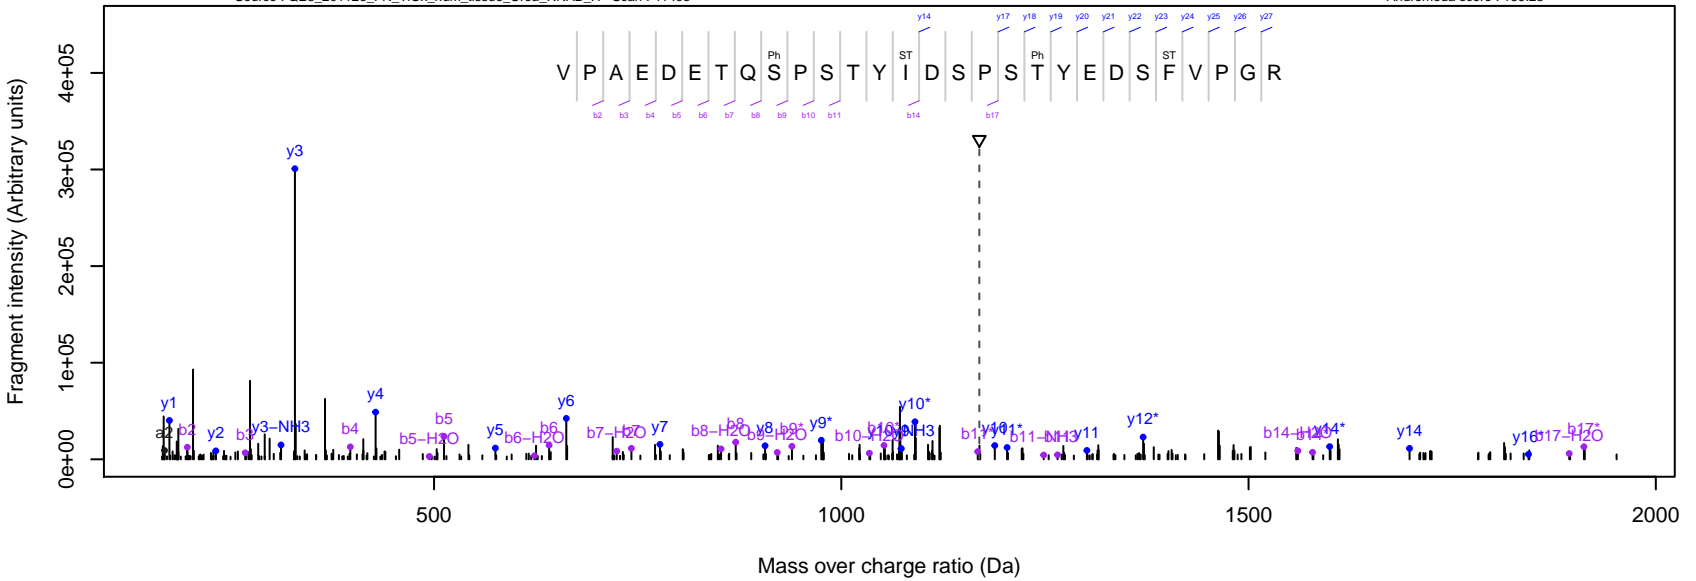

EHISAENMSLETLRNS(Phospho (STY))S(Phospho (STY))PEDLFDEI-3+

Source : QE3\_201126\_FR\_TiOx\_hum\_tissue\_Urea\_RNAB\_H Scan : 60466

Andromeda score : 166.21

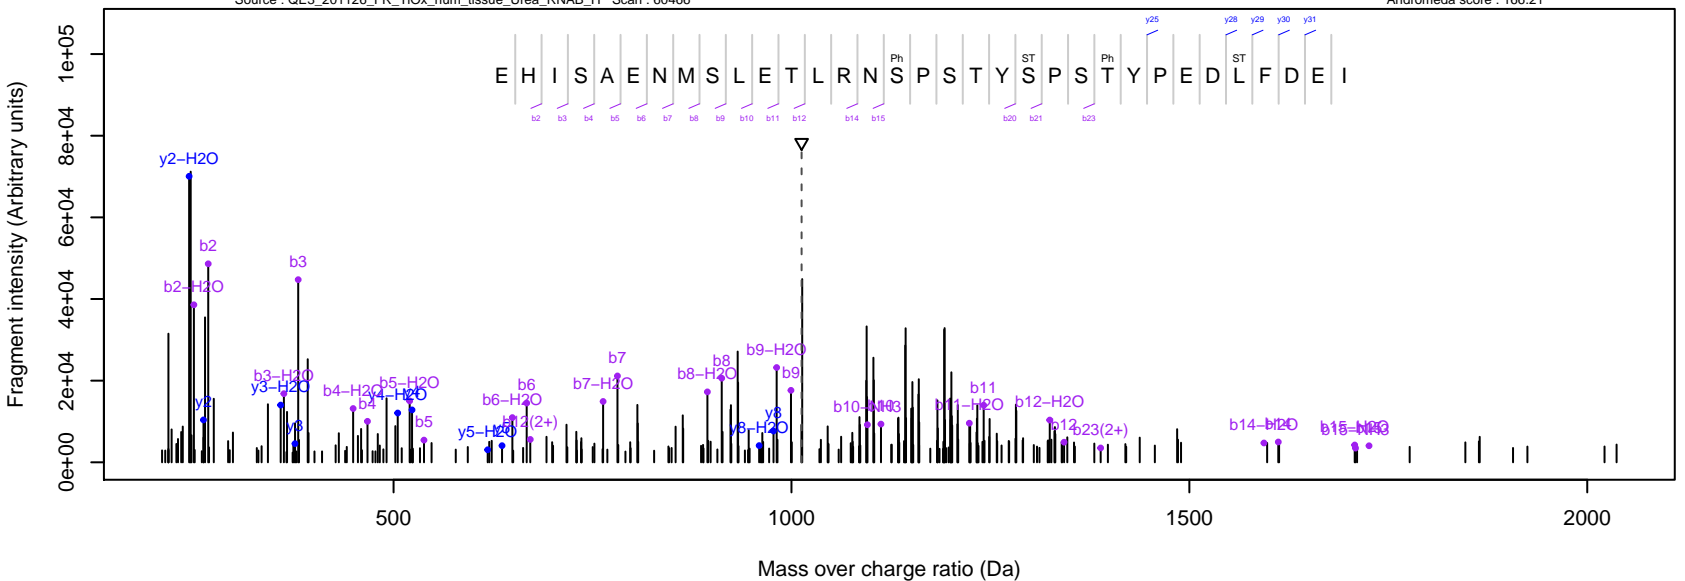

RLS(Phospho (STY))PPSSSAASSYFSDLNSTR-3+

Source : QE3\_201126\_FR\_TiOx\_hum\_tissue\_Urea\_RNAB\_H Scan : 31805

Andromeda score : 166.21

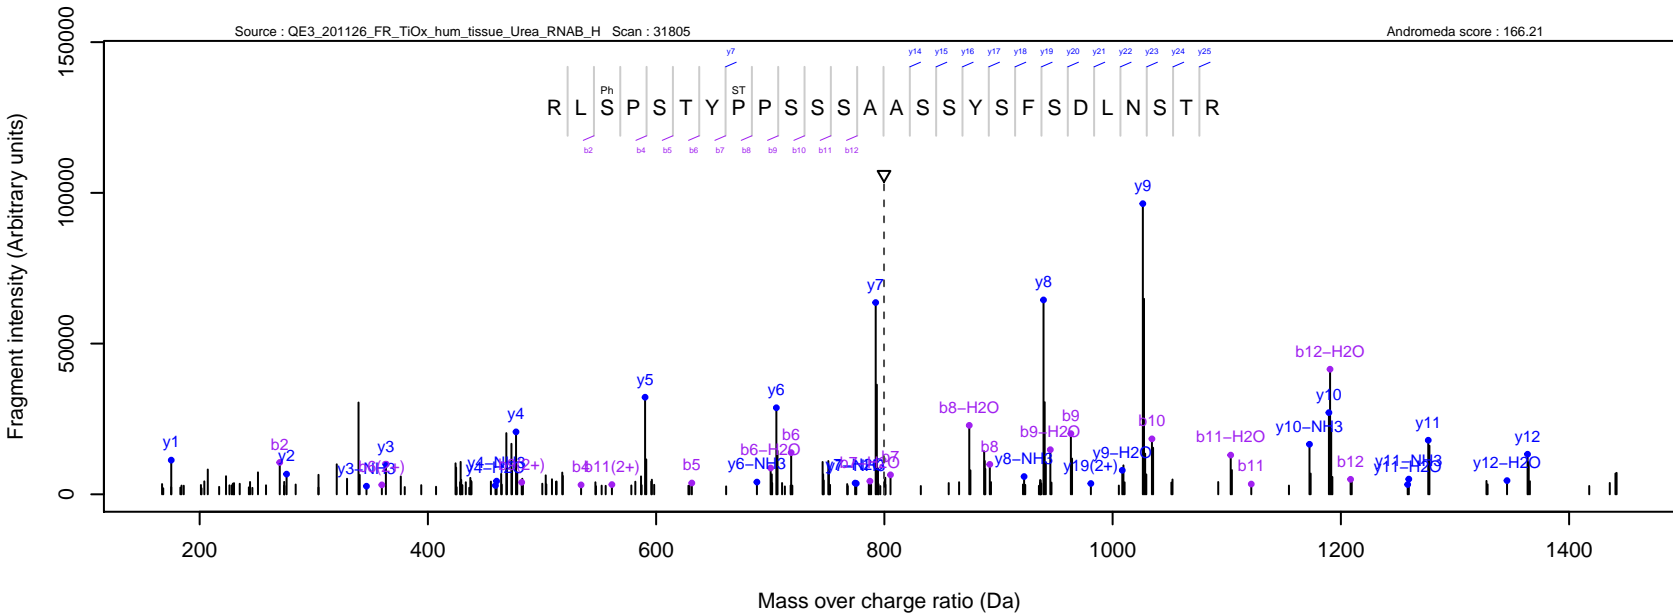

ARS(Phospho (STY))PSVAAMASPLCR-3+

Source : QE3\_201126\_FR\_TiOx\_hum\_tissue\_Urea\_RNAB\_H Scan : 21677

Andromeda score : 166.11

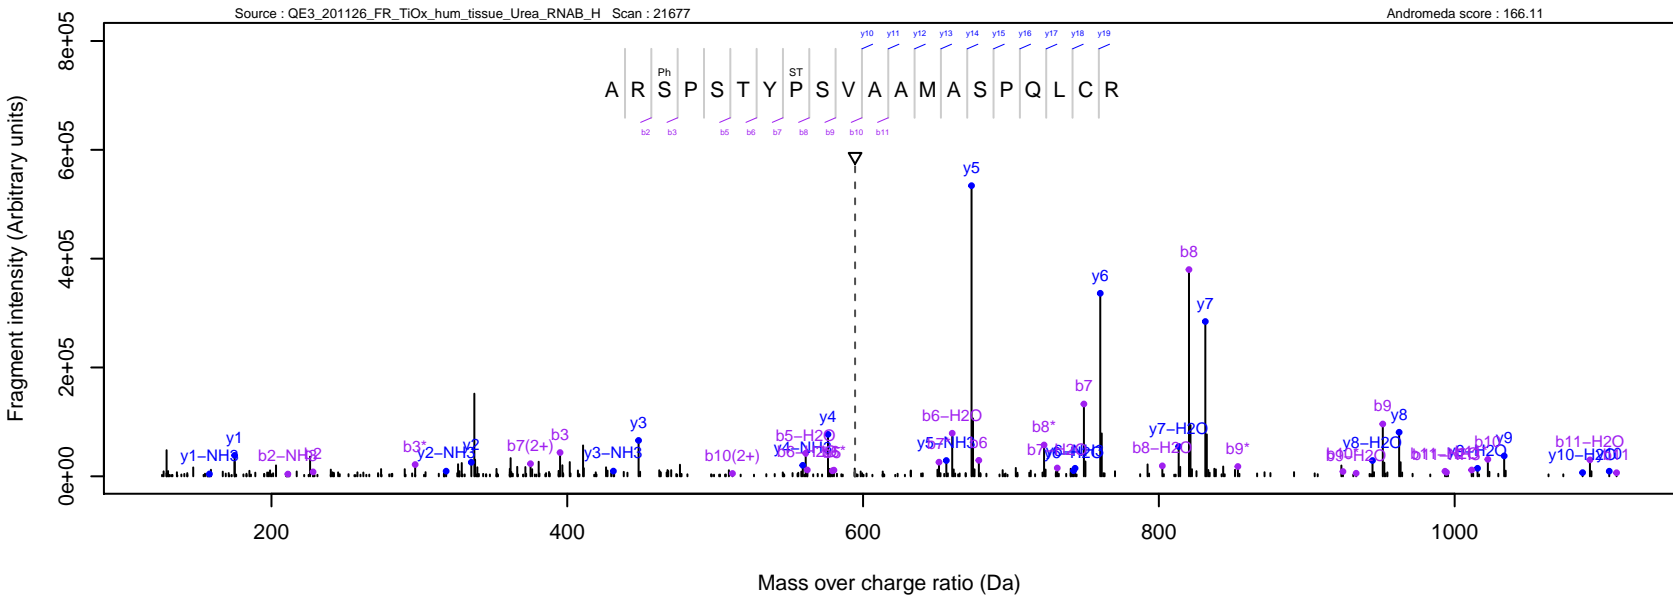

(Acetyl (Protein N-term))ATVVVEATEPEPSGSIANPAASTS(Phospho (STY))PSLSHR-3+

Source : QE3\_201126\_FR\_TiOx\_hum\_tissue\_Urea\_RNAB\_H Scan : 45787

Andromeda score : 166.07

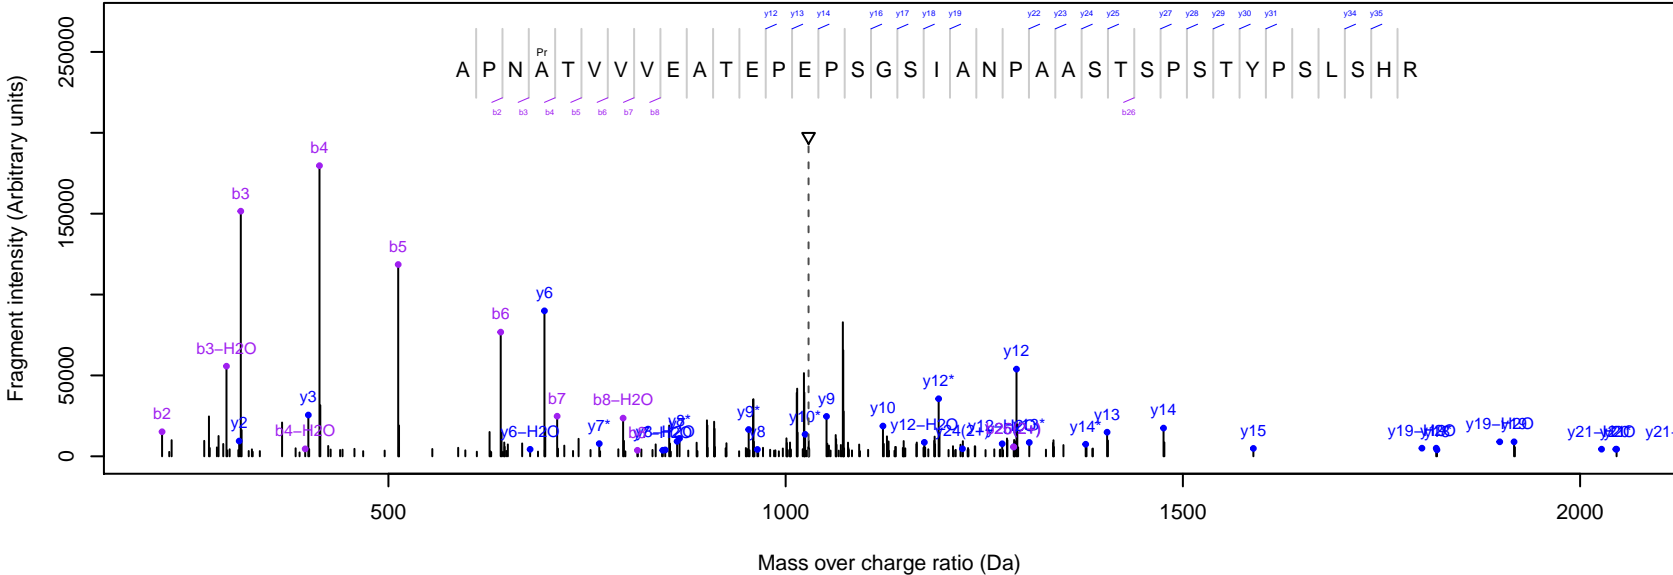

SVNEILGLAES(Phospho (STY))SPNEPK-2+

Source : QE3\_201126\_FR\_TiOx\_hum\_tissue\_Urea\_RNAB\_H Scan : 42826

Andromeda score : 166.04

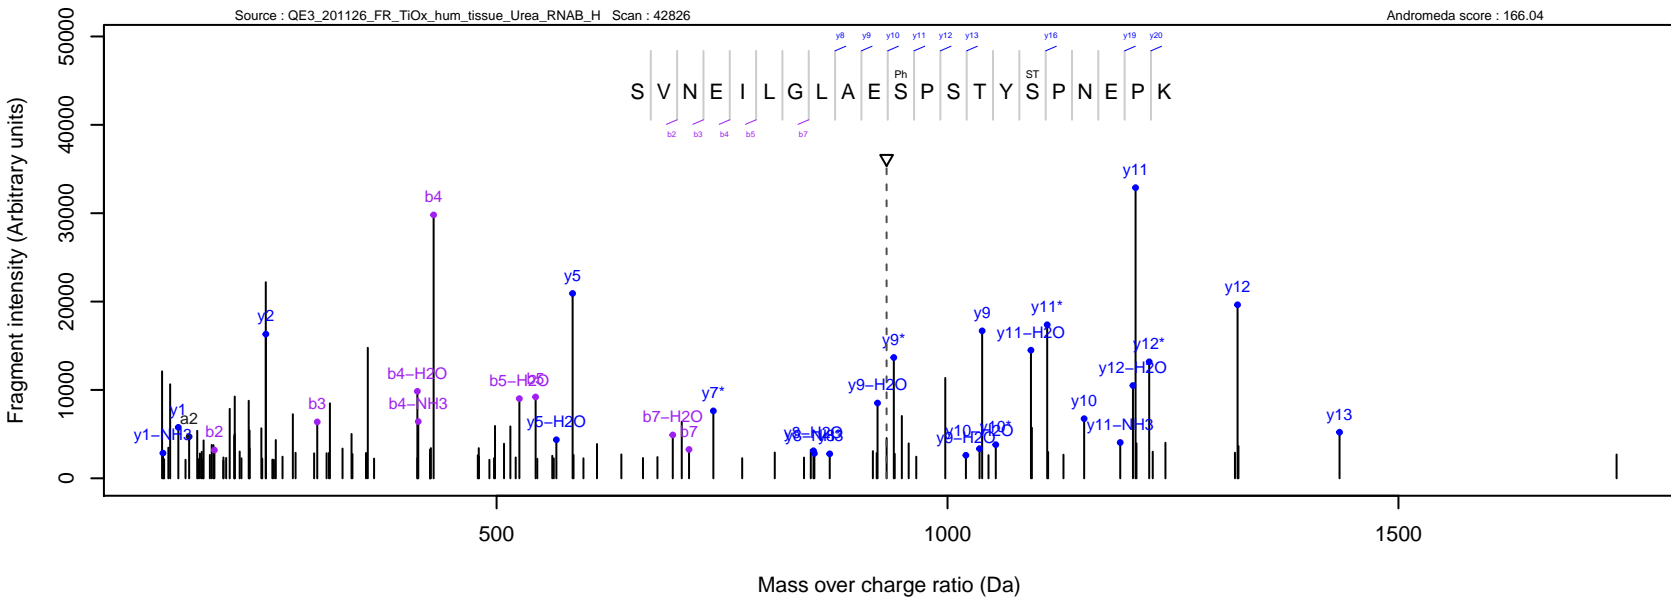

ELS(Phospho (STY))GTIKEILGTAQSVGCVNDGR-3+

Source : QE3\_201126\_FR\_TiOx\_hum\_tissue\_Urea\_RNAB\_N Scan : 58279

Andromeda score : 165.92

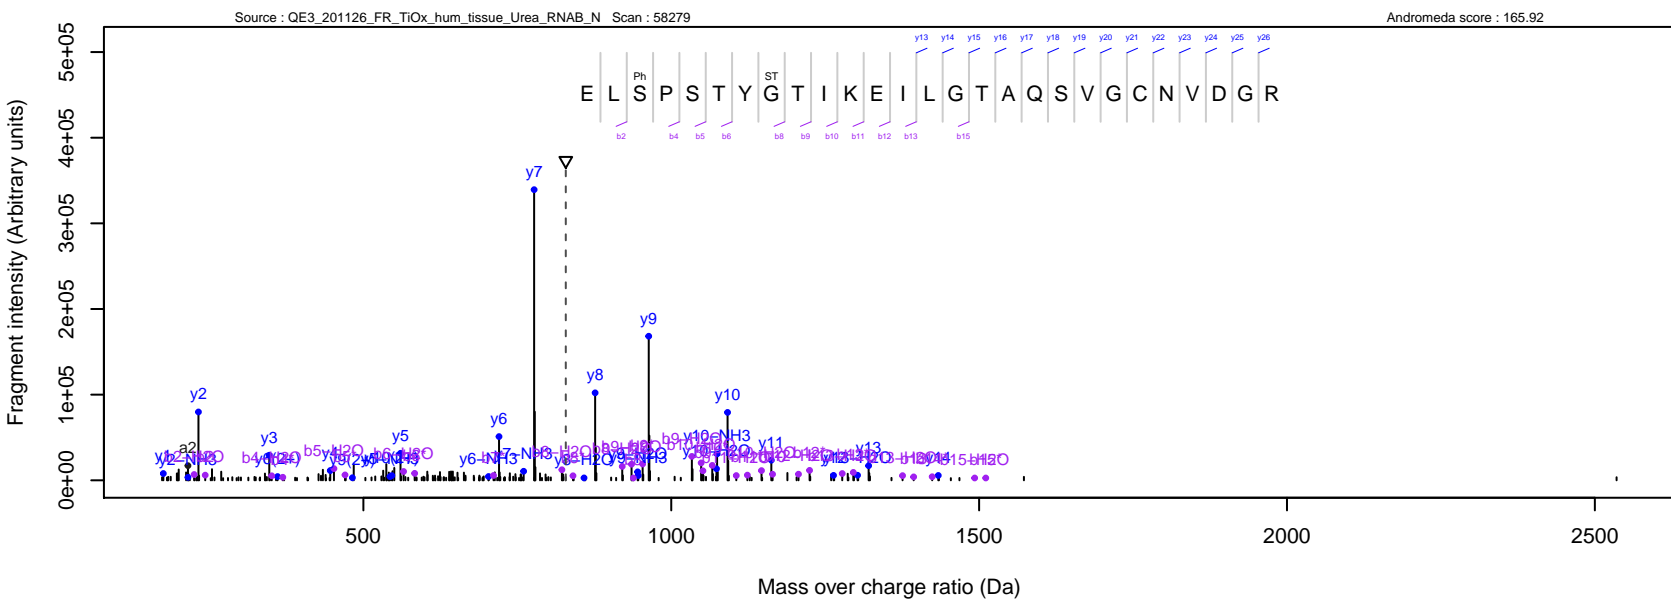

TKS(Phospho (STY))PTDDEVTPSAVVR-2+

Source : QE3\_201126\_FR\_TiOx\_hum\_tissue\_Urea\_RNAB\_H Scan : 16174

Andromeda score : 165.9

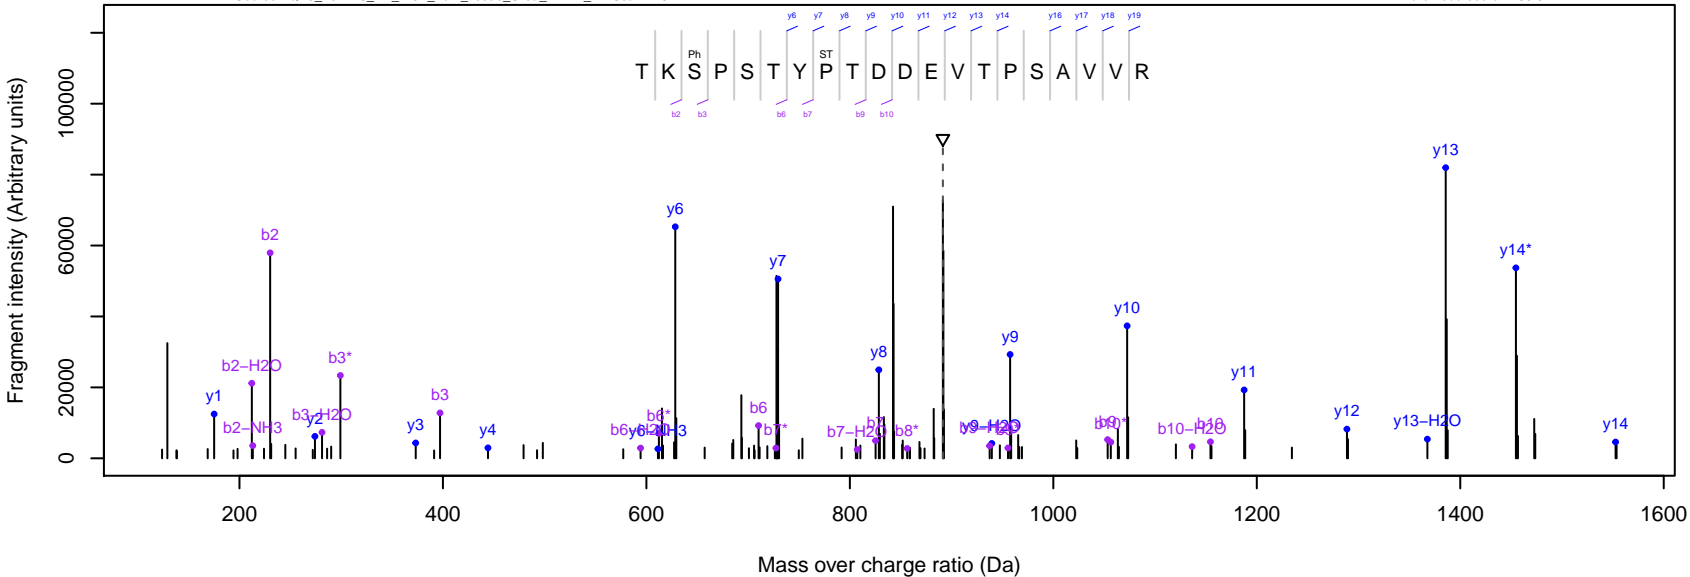



GVHIHQAGGS(Phospho (STY))PPASSTSSSLTNDVAK-3+

Source : QE3\_201126\_FR\_TIOx\_hum\_tissue\_Urea\_RNAB\_N Scan : 15299

Andromeda score : 165.87

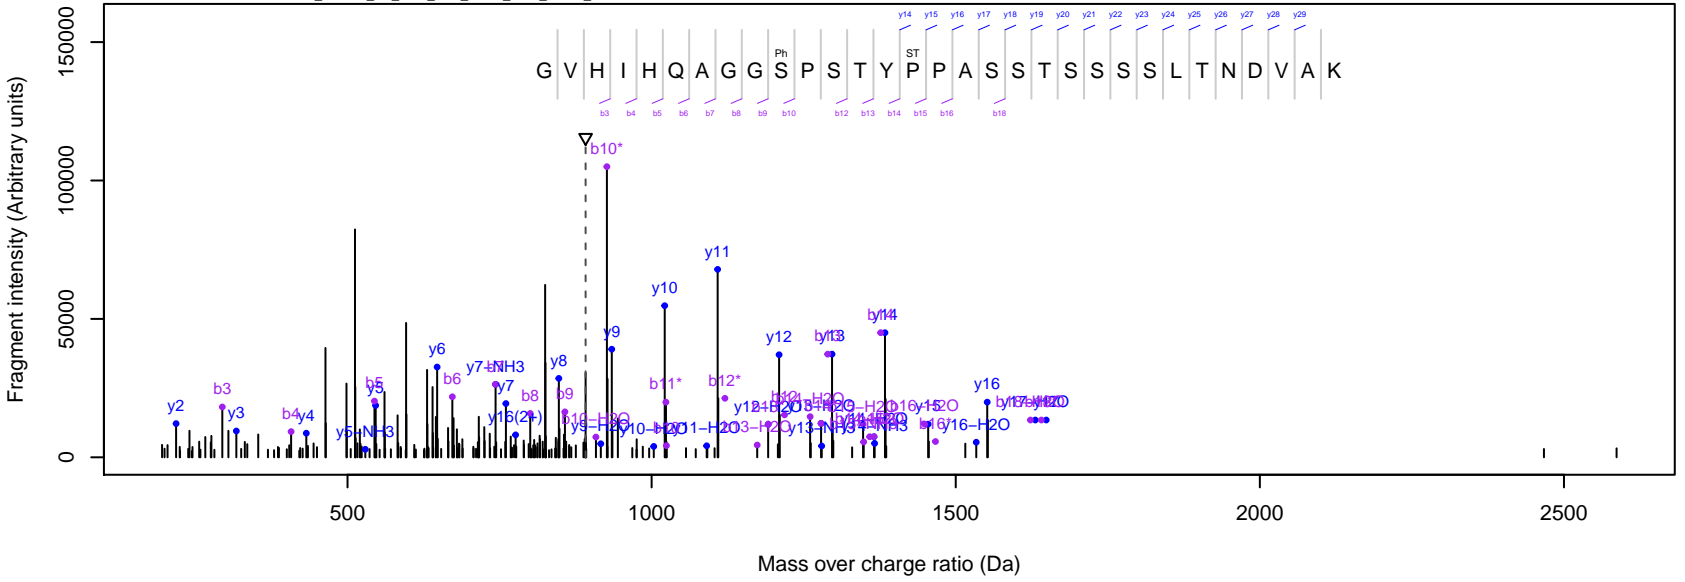

SES(Phospho (STY))TSEFKPGYSLHDTSAVK-3+

Source : QE3\_201126\_FR\_TIOx\_hum\_tissue\_Urea\_RNAB\_N Scan : 22770

Andromeda score : 165.85

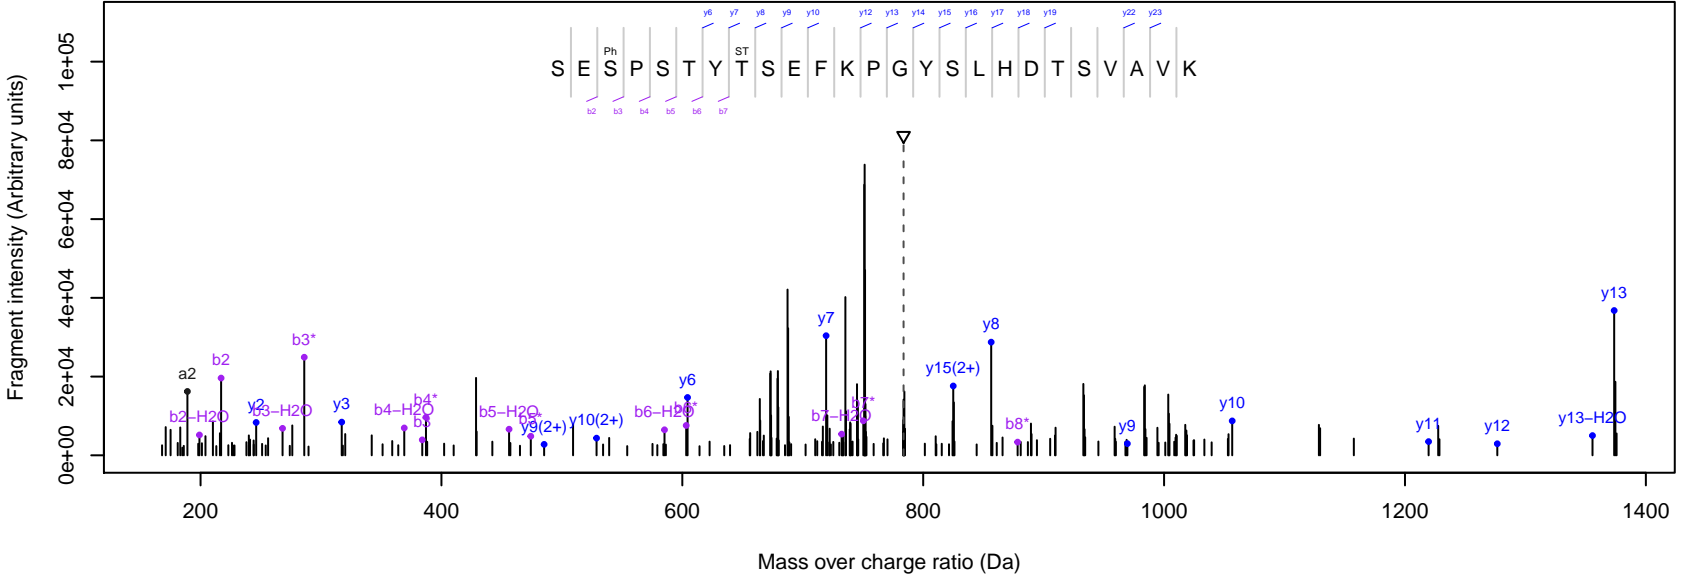

EAAAEAGADTPGKGEPPAPKSPSTYPPK(Phospho (STY))PPK-3+

Source : QE3\_201126\_FR\_TIOx\_hum\_tissue\_Urea\_RNAB\_H Scan : 9983

Andromeda score : 165.79

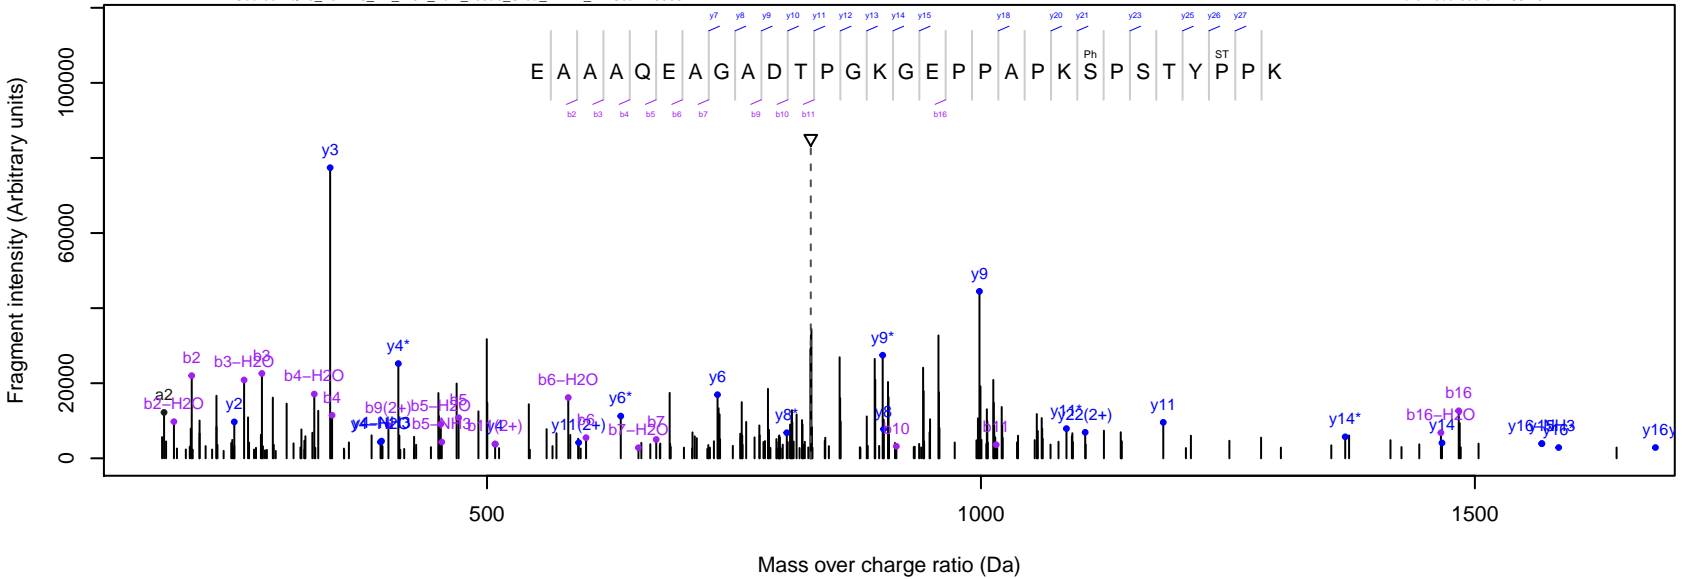

RSDS(Phospho (STY))LLSFR-2+

Source : QE3\_201126\_FR\_TiOx\_hum\_tissue\_Urea\_RNAB\_H Scan : 24999

Andromeda score : 165.78

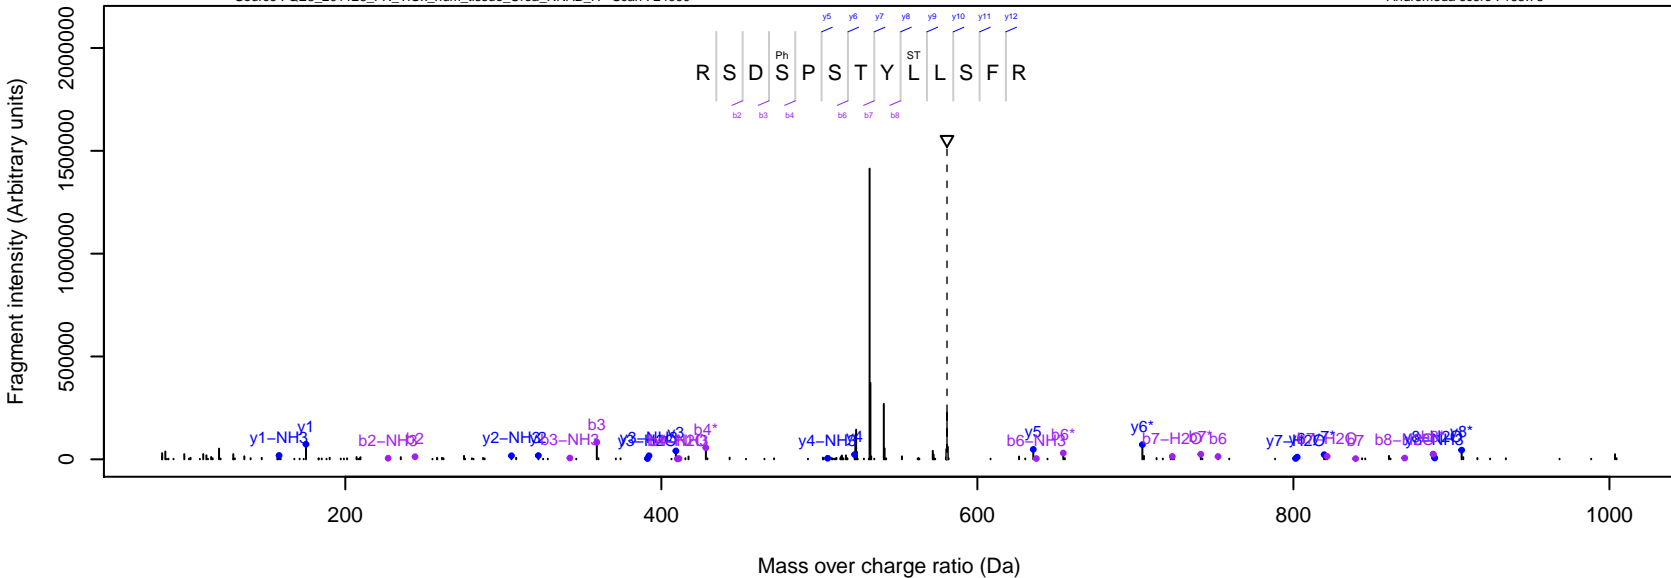

RGS(Phospho (STY))S(Phospho (STY))PDVHALLEITEESDAVLVDKSDS(Phospho (STY))D-3+

Source : QE3\_201126\_FR\_TiOx\_hum\_tissue\_Urea\_RNAB\_N Scan : 61561

Andromeda score : 165.74

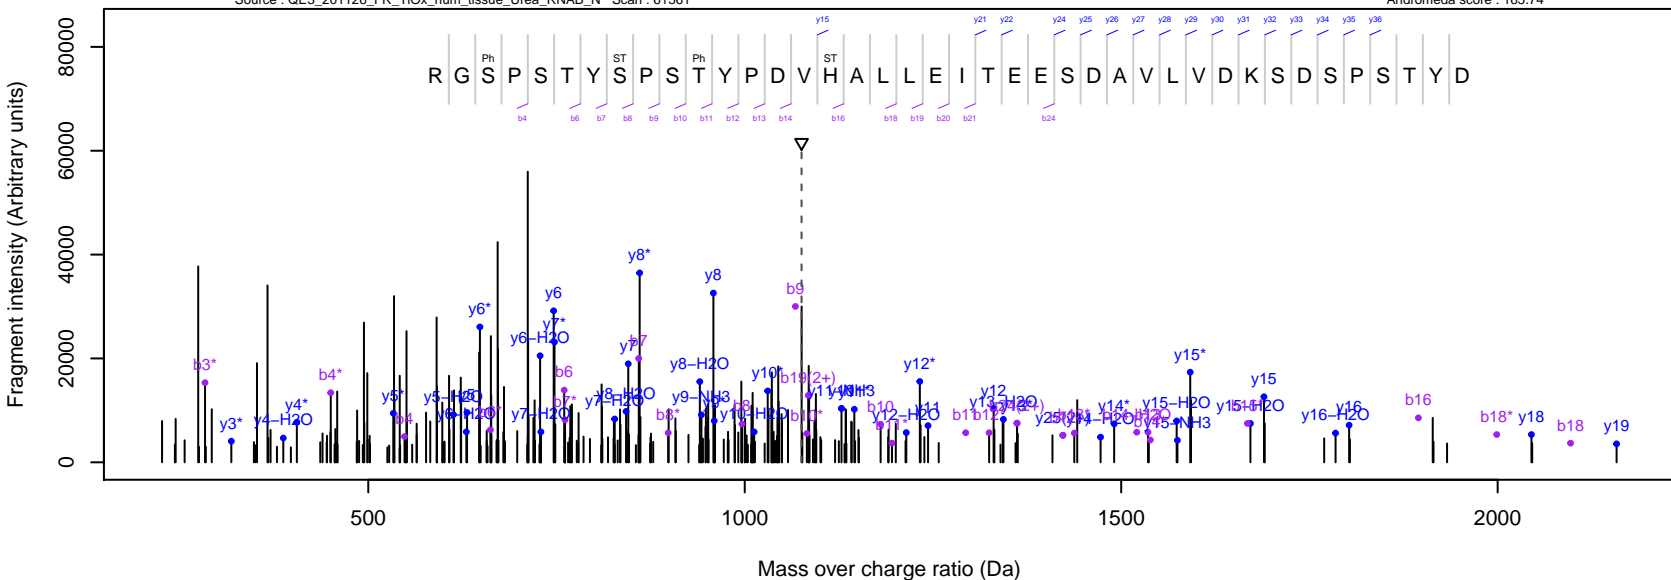

DAEYIYPSLES(Phospho (STY))DDDDPALK-2+

Source : QE3\_201126\_FR\_TiOx\_hum\_tissue\_Urea\_RNAB\_H Scan : 49260

Andromeda score : 165.66

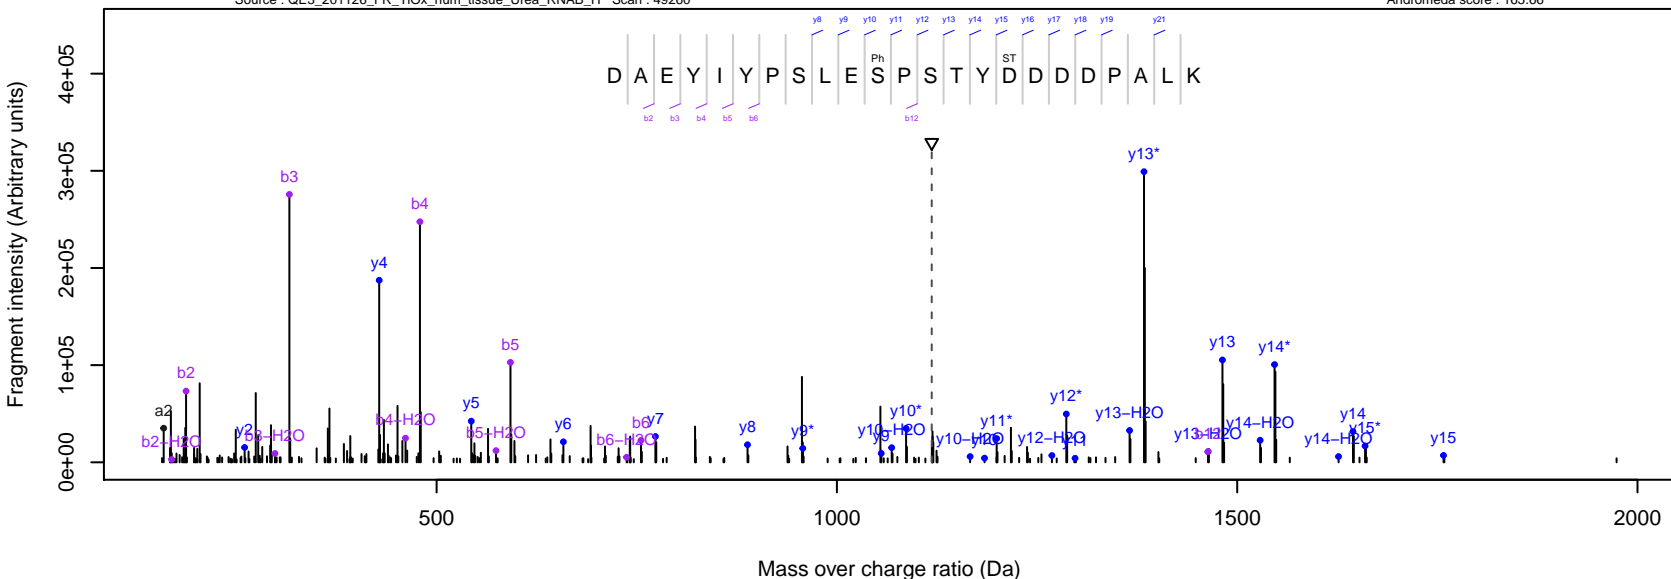

LAS(Phospho (STY))DTEDEALAEILQANDNLTVINLYK-3+

Source : QE3\_201126\_FR\_TiOx\_hum\_tissue\_Urea\_RNAB\_B Scan : 63232

Andromeda score : 165.58

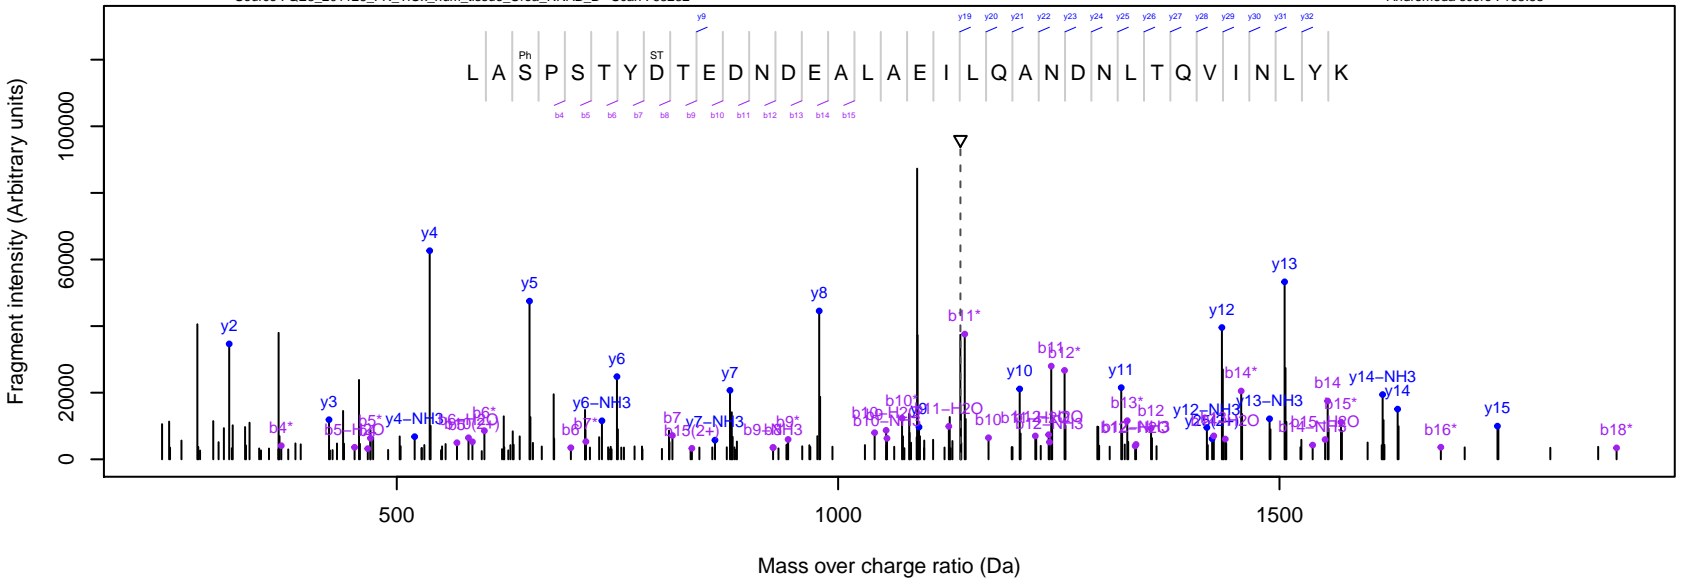

QEEAEEQGAGS(Phospho (STY))PGQPAHLAR-3+

Source : QE3\_201126\_FR\_TiOx\_hum\_tissue\_Urea\_RNAB\_H Scan : 11200

Andromeda score : 165.58

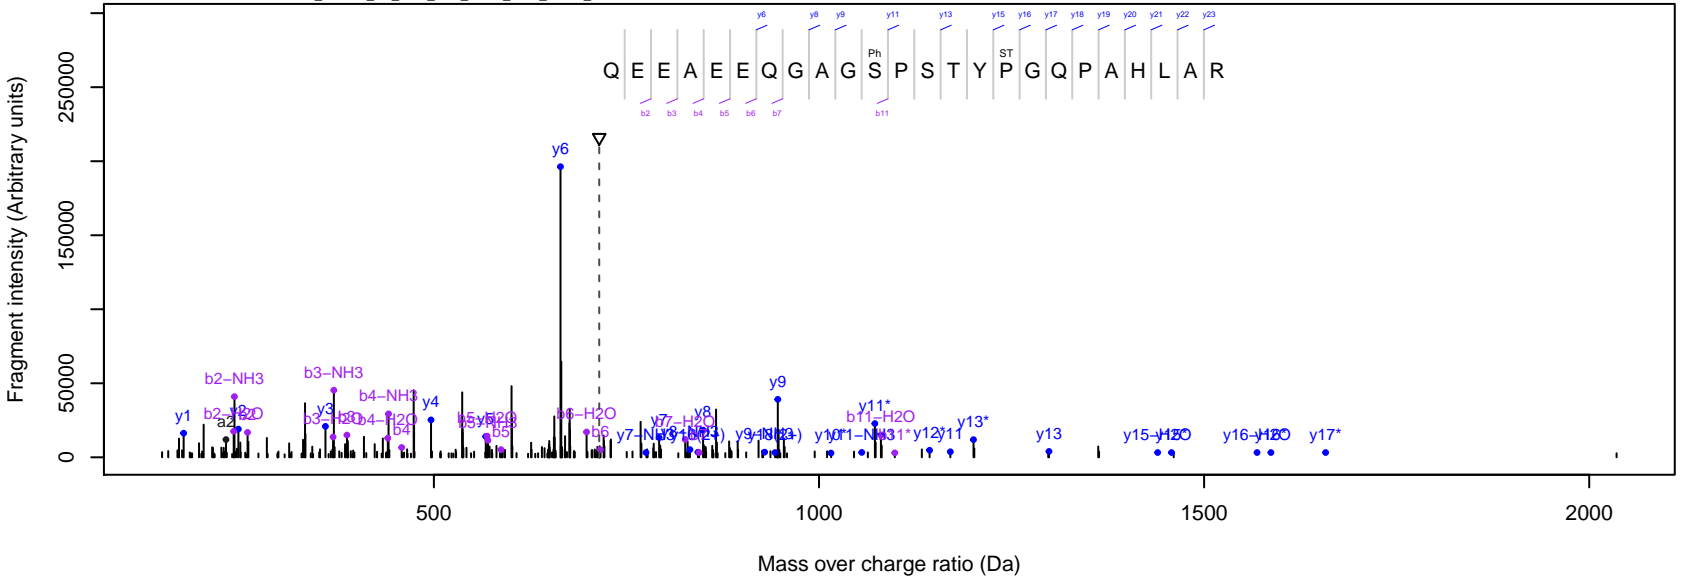

DAGRPERGS(Phospho (STY))GGLFSPSTAHVPDGLGQR-4+

Source : QE3\_201126\_FR\_TiOx\_hum\_tissue\_Urea\_RNAB\_H Scan : 26705

Andromeda score : 165.49

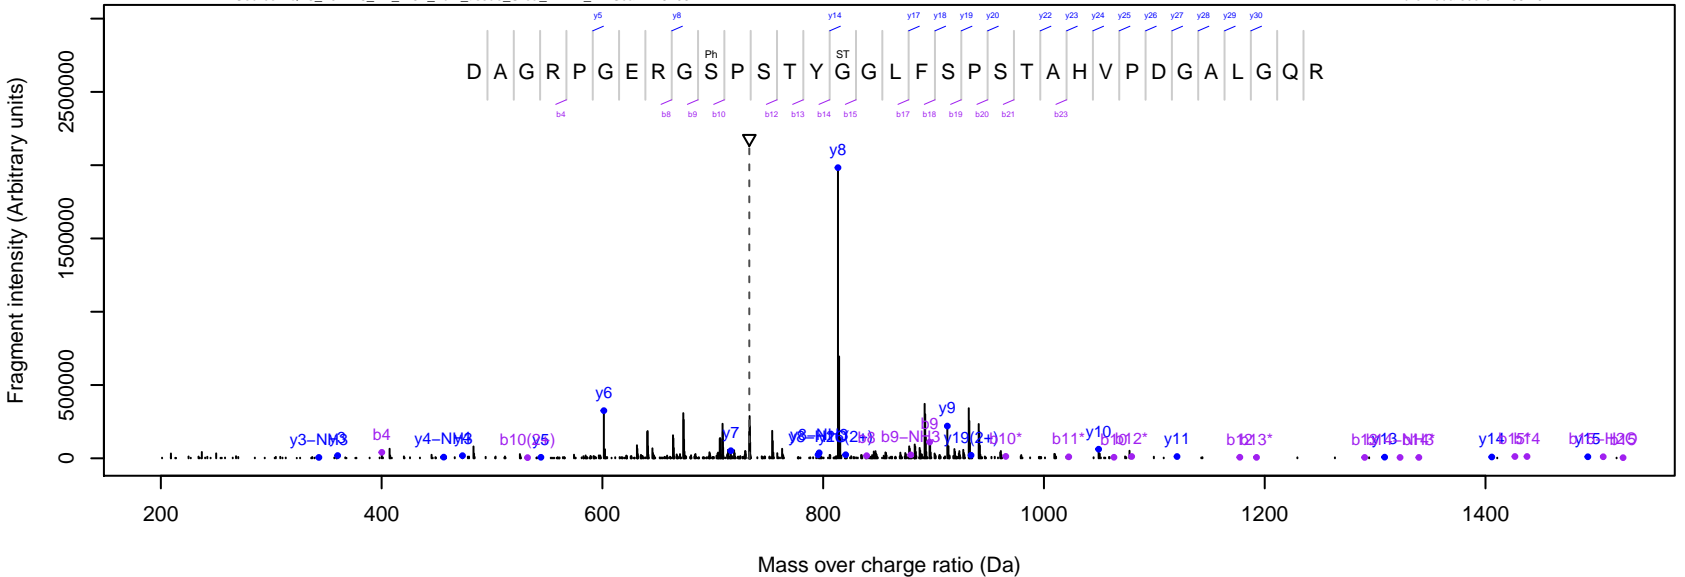

HIPTALPVSGTLSS(Phospho (STY))SNPDLQLSHHR-4+

Source : QE3\_201126\_FR\_TiOx\_hum\_tissue\_Urea\_RNAB\_H Scan : 30416

Andromeda score : 165.48

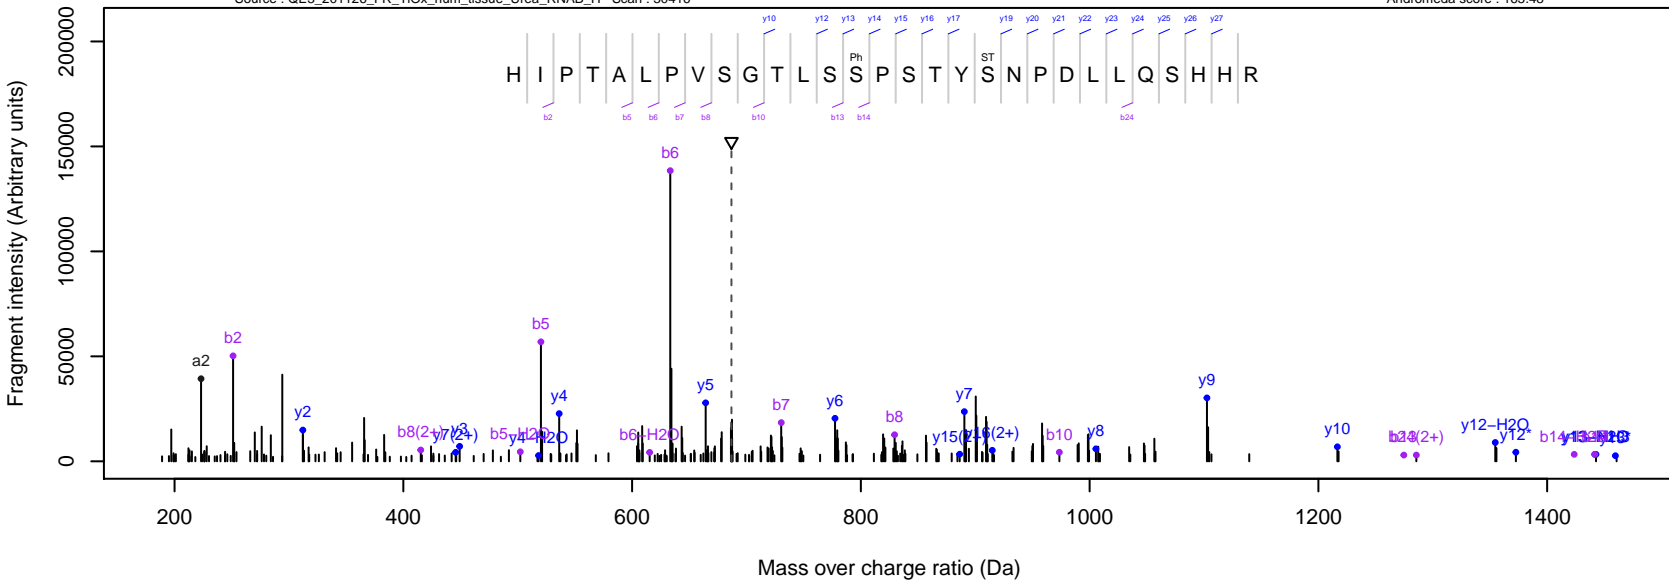

RPDYAPMES(Phospho (STY))S(Phospho (STY))DEEDEFQFIKK-3+

Source : QE3\_201126\_FR\_TiOx\_hum\_tissue\_Urea\_RNAB\_H Scan : 41099

Andromeda score : 165.47

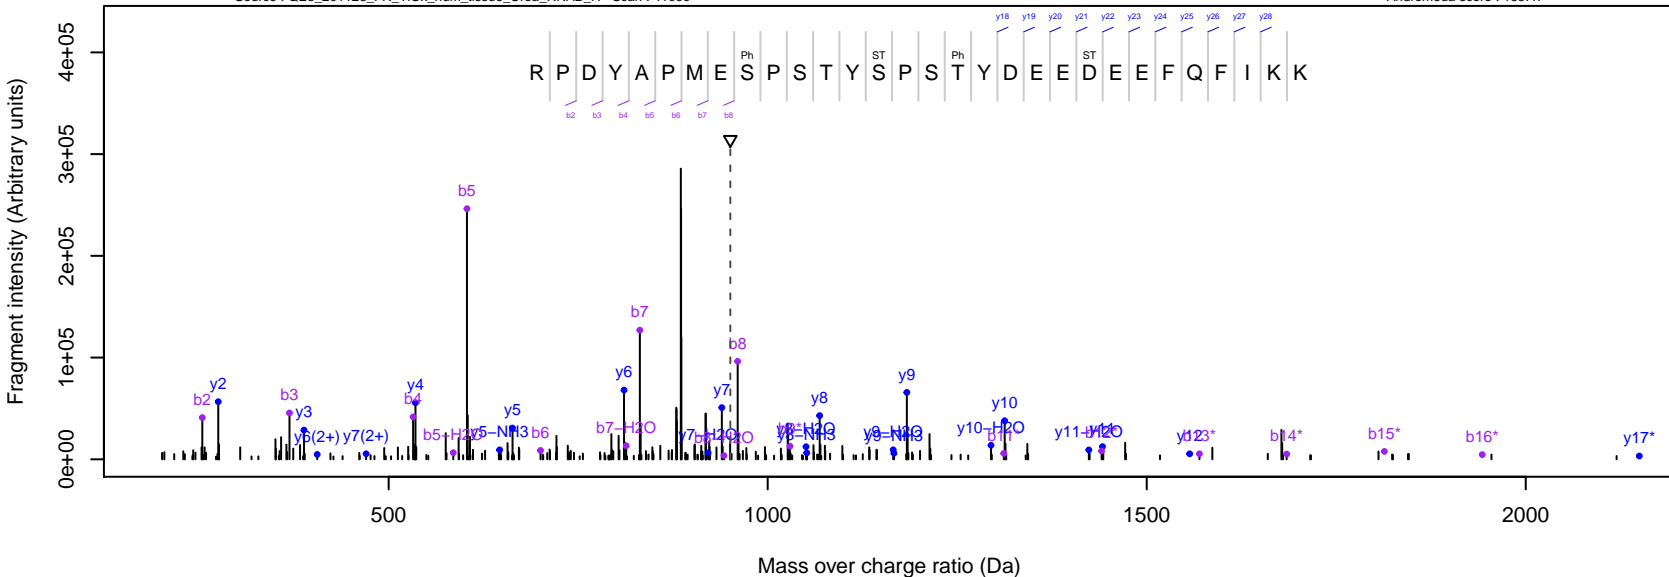

S(Phospho (STY))YEDLTESEDAASGDSHKEGTR-3+

Source : QE3\_201126\_FR\_TiOx\_hum\_tissue\_Urea\_RNAB\_N Scan : 13296

Andromeda score : 165.46

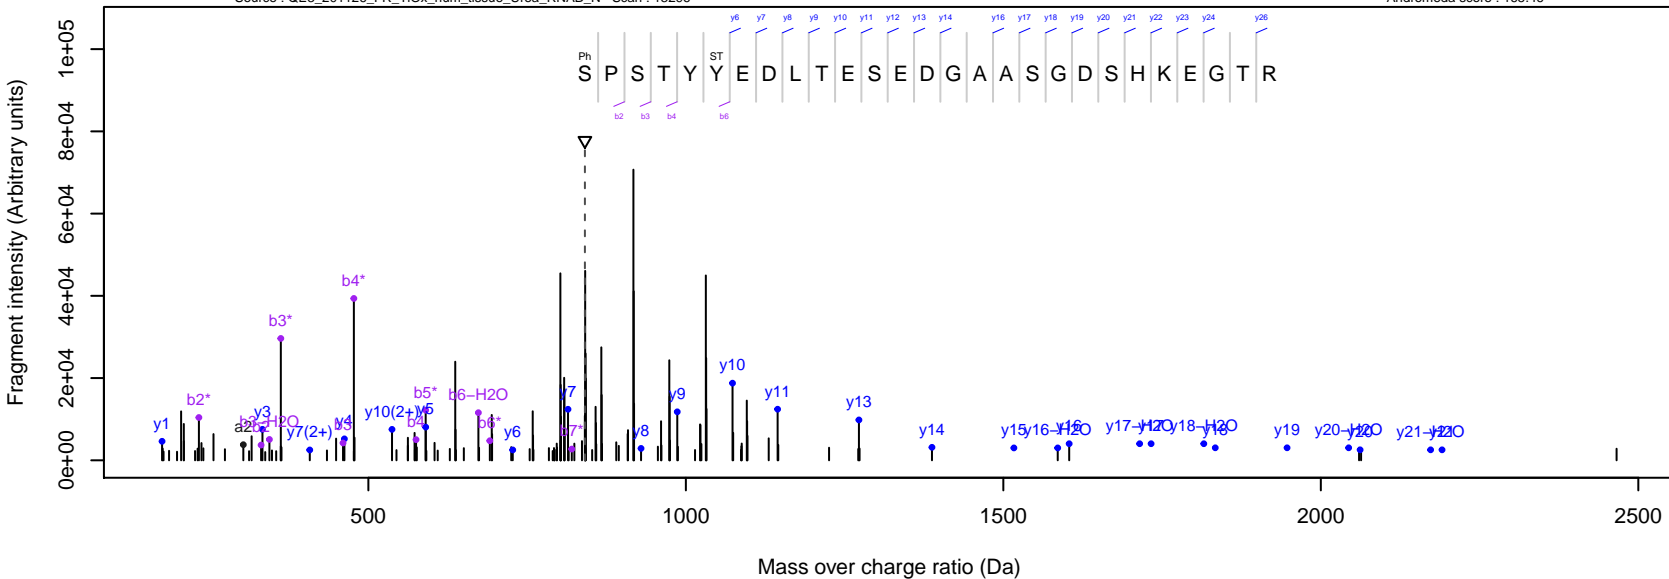

IFDEVMGCFSDS(Phospho (STY))PPQS(Phospho (STY))PTFPEAGHTSLYDEDKVPR-4+

Source : QE3\_201126\_FR\_TiOx\_hum\_tissue\_Urea\_RNAB\_H Scan : 53523

Andromeda score : 165.34

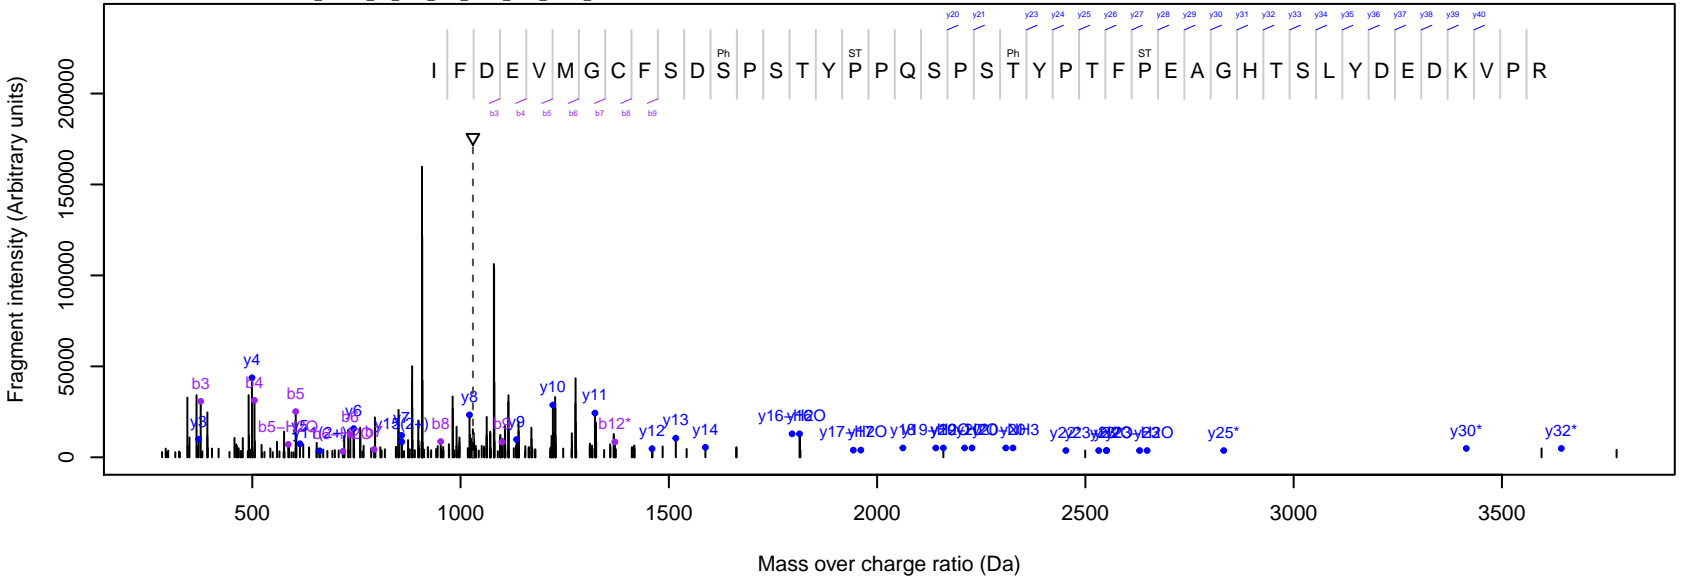

AAPEASS(Phospho (STY))PPAS(Phospho (STY))PLQHLLPGK-2+

Source : QE3\_201126\_FR\_TiOx\_hum\_tissue\_Urea\_RNAB\_N Scan : 43793

Andromeda score : 165.17

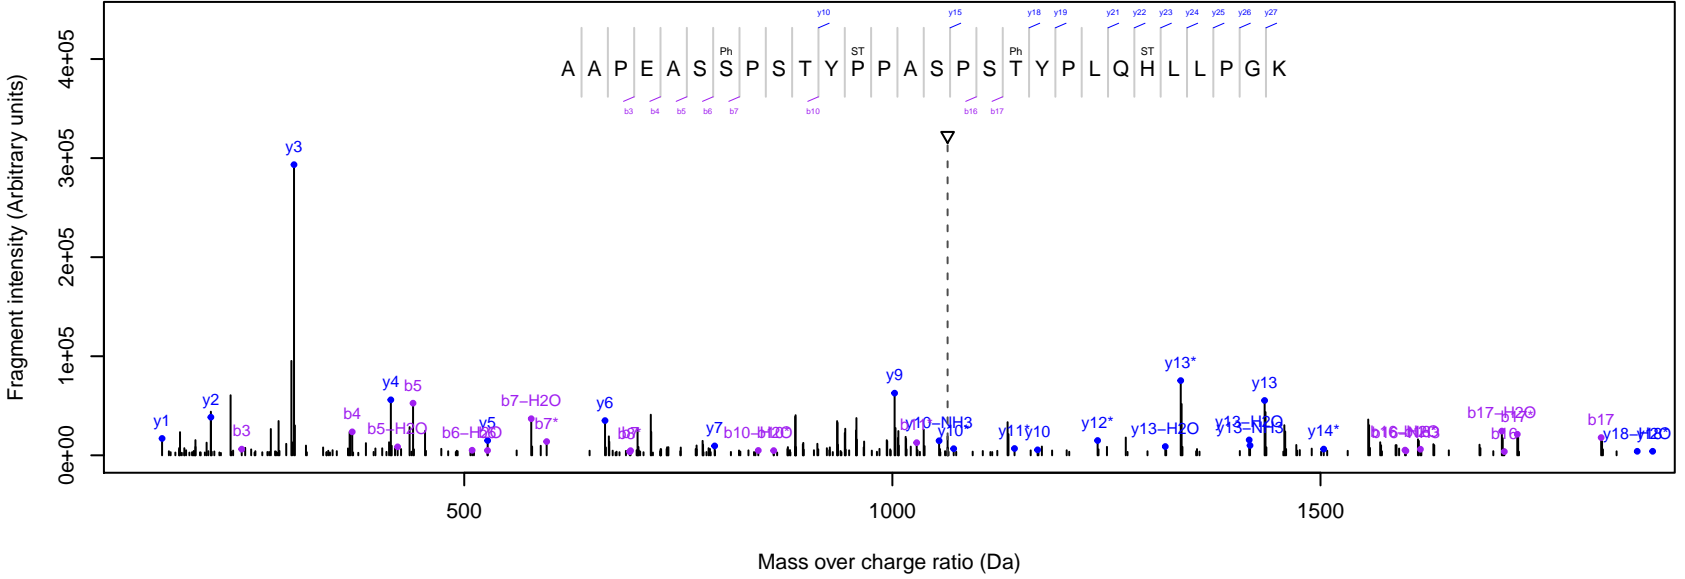

PKS(Phospho (STY))KELVSSSSSGSDSEVDK-3+

Source : QE3\_201126\_FR\_TiOx\_hum\_tissue\_Urea\_RNAB\_H Scan : 7011

Andromeda score : 165.17

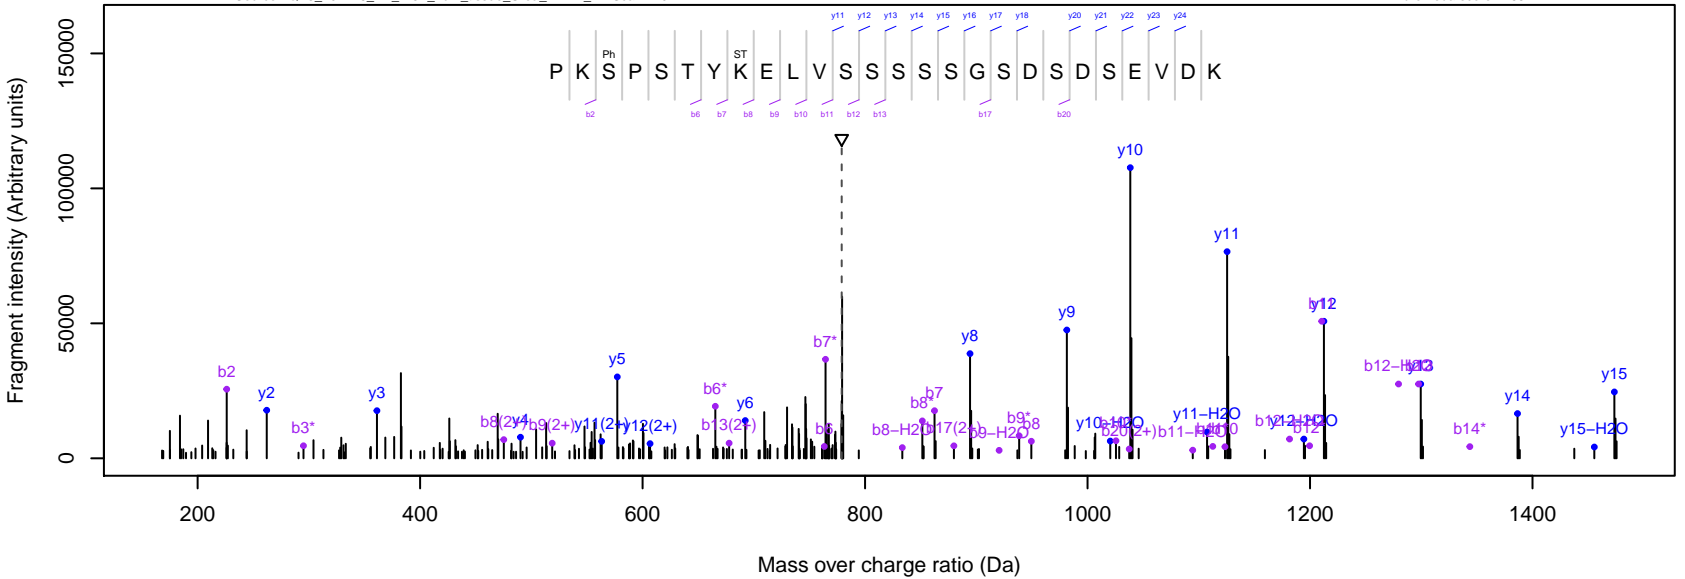

SKS(Phospho (STY))VKEDSNLTLQEK-3+

Source : QE3\_201126\_FR\_TiOx\_hum\_tissue\_Urea\_RNAB\_B Scan : 9008

Andromeda score : 165.17

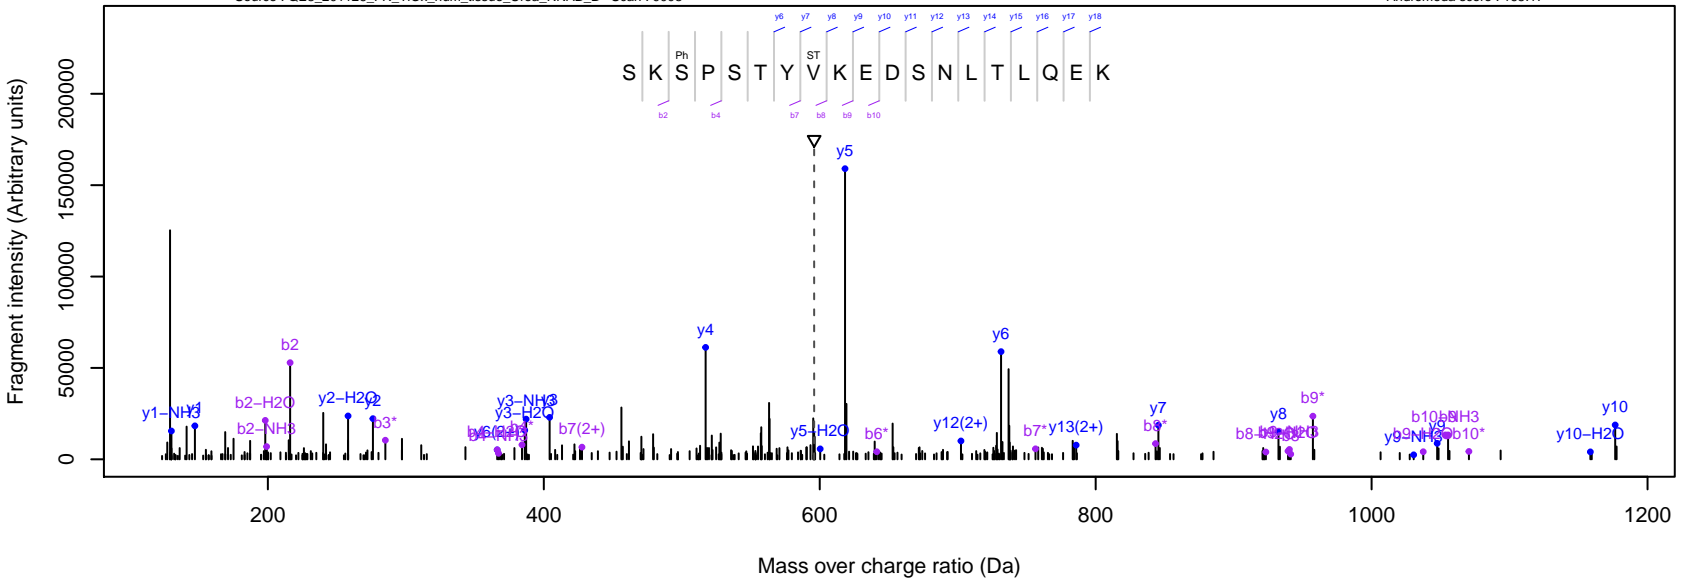

AELVLIDEDEKS(Phospho (STY))LREK-3+

Source : QE3\_201126\_FR\_TiOx\_hum\_tissue\_Urea\_RNAB\_B Scan : 25237

Andromeda score : 165.1

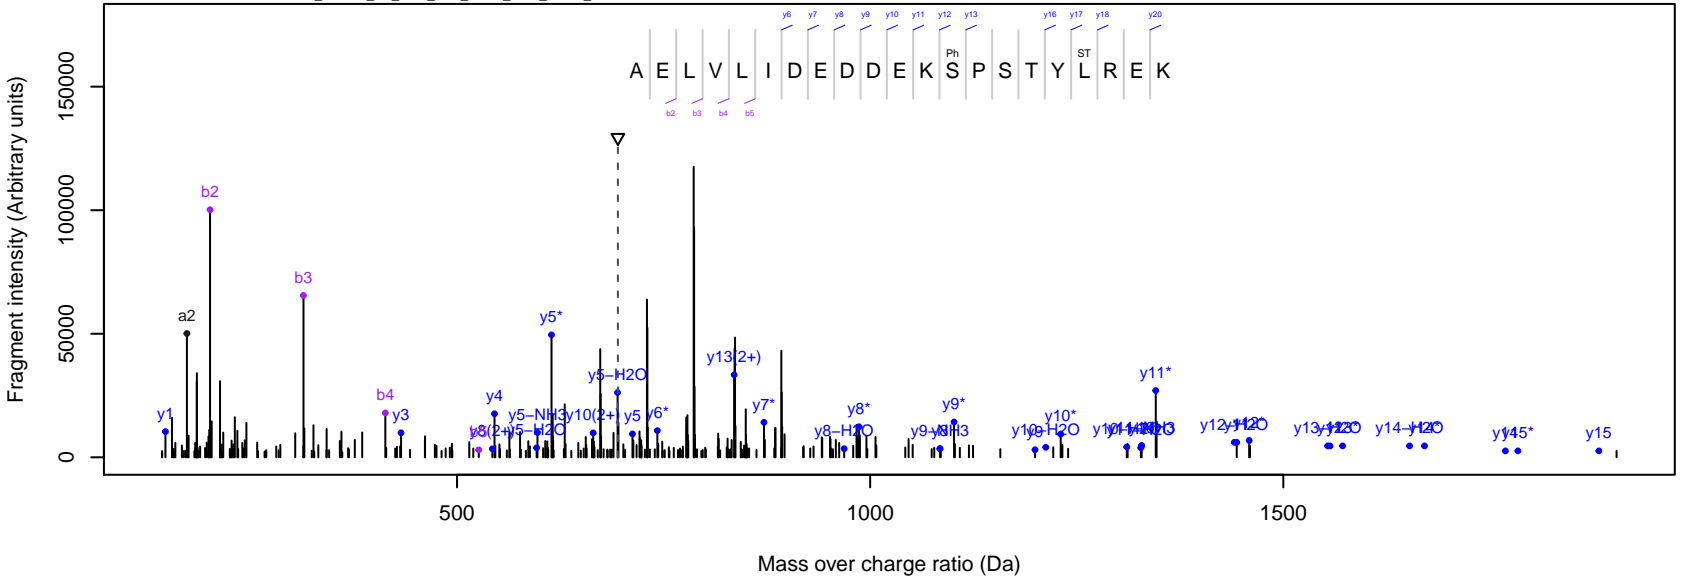

VMTIPYQPMPASS(Phospho (STY))PVICAGGQDR-2+

Source : QE3\_201126\_FR\_TiOx\_hum\_tissue\_Urea\_RNAB\_H Scan : 47313

Andromeda score : 165.06

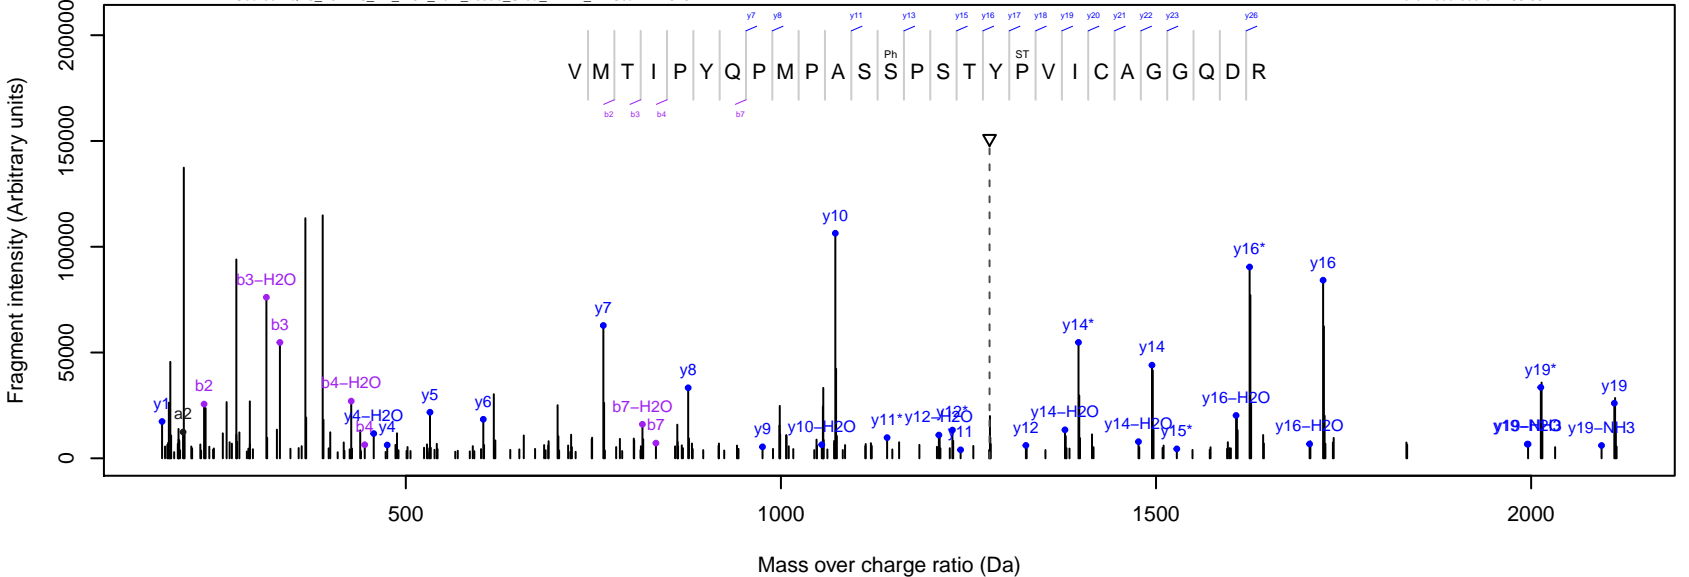

S(Phospho (STY))LGYAVNFQQPADAER-2+

Source : QE3\_201126\_FR\_TiOx\_hum\_tissue\_Urea\_RNAB\_B Scan : 43364

Andromeda score : 165.02

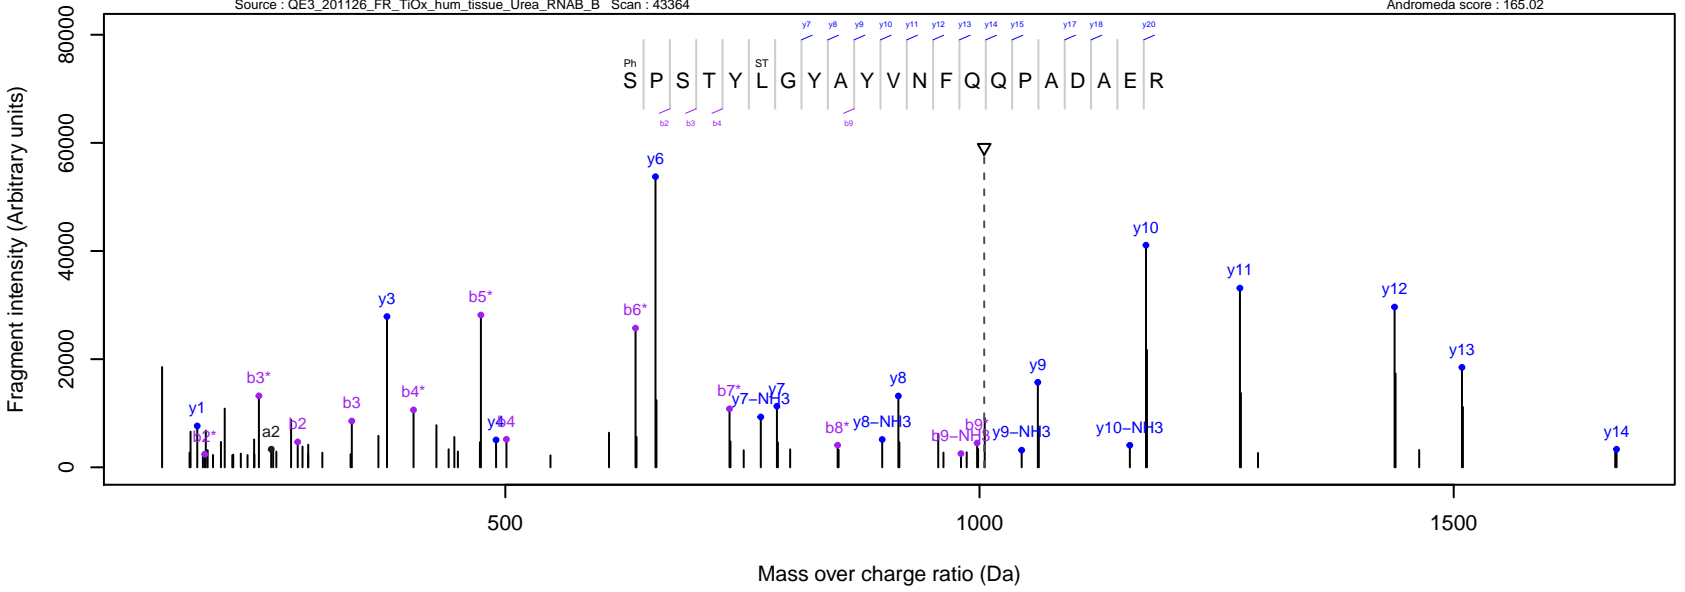

GLRDSHS(Phospho (STY))S(Phospho (STY))EEDASSQTDLSQTISK-3+

Source : QE3\_201126\_FR\_TiOx\_hum\_tissue\_Urea\_RNAB\_H Scan : 20635

Andromeda score : 165

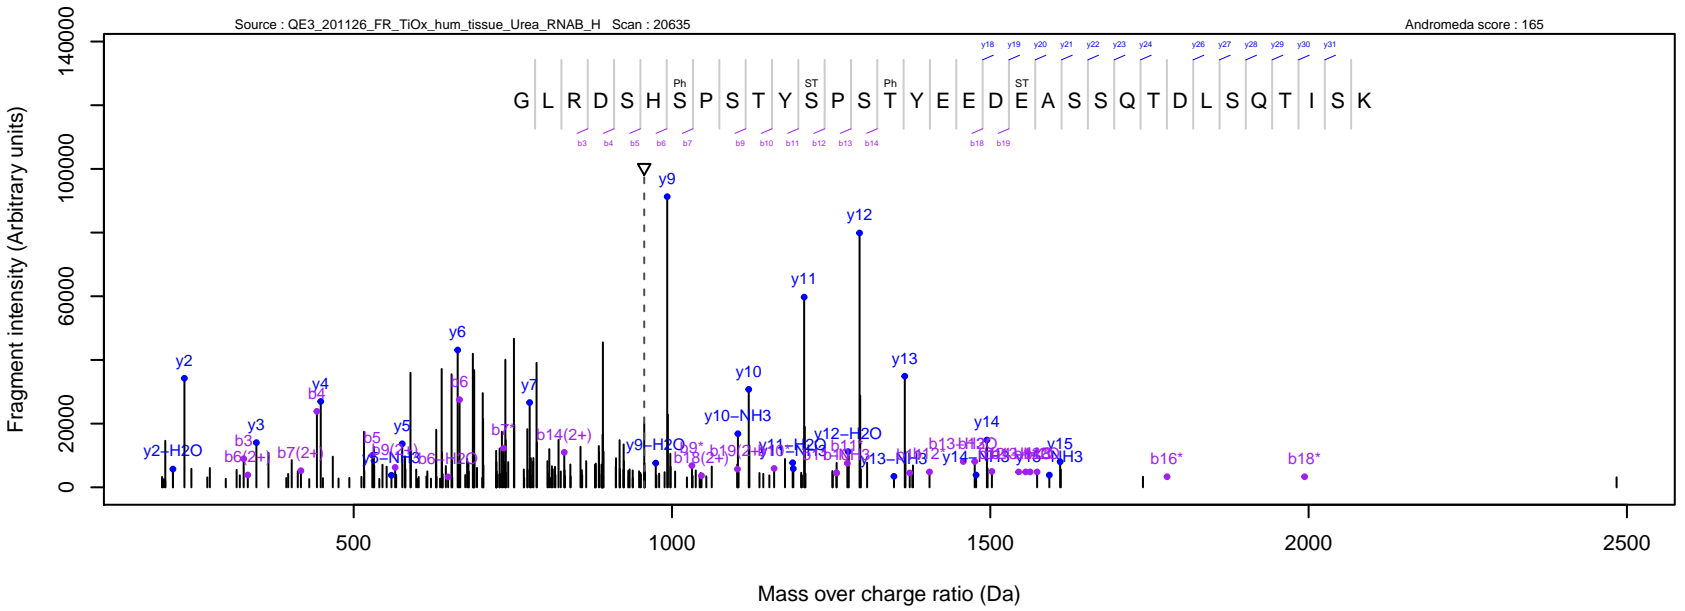

LTDPHRAPSDTGS(Phospho (STY))LSPPWDQDRR-4+

Source : QE3\_201126\_FR\_TiOx\_hum\_tissue\_Urea\_RNAB\_B Scan : 21243

Andromeda score : 164.96

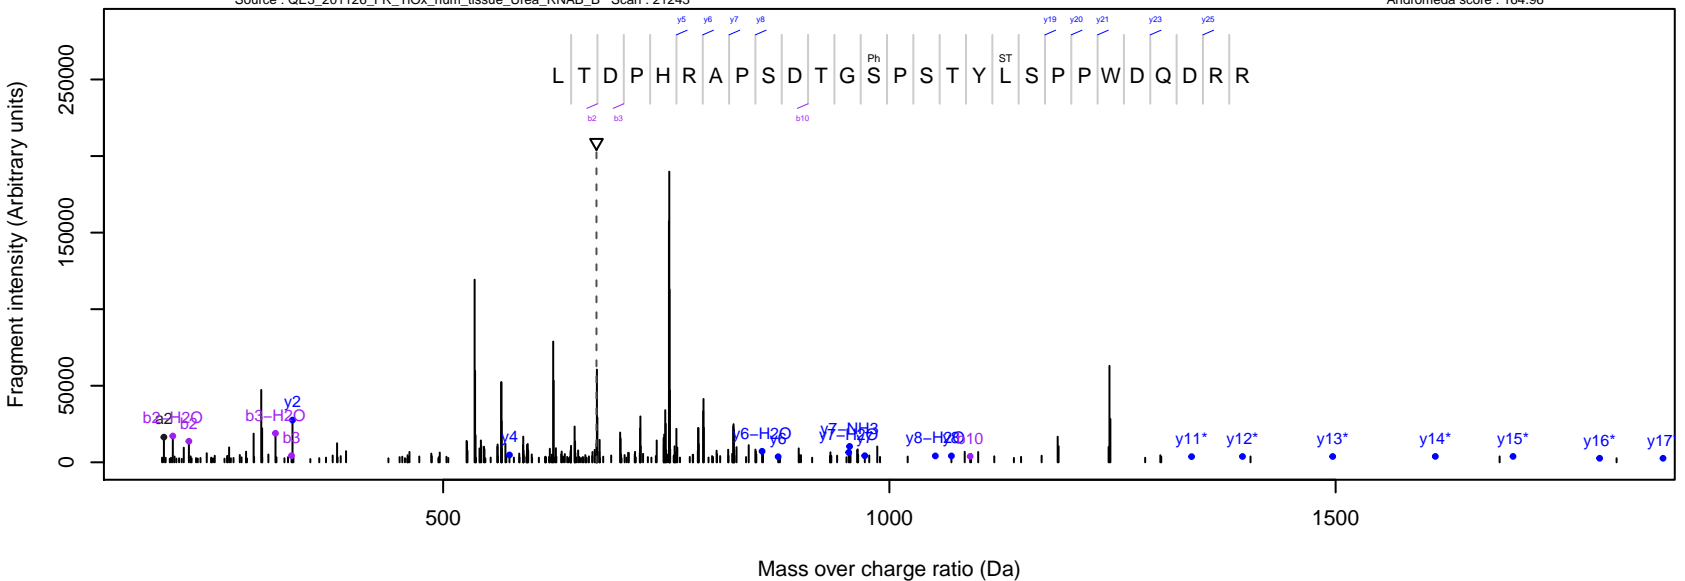

KLEDVKNS(Phospho (STY))PTFK-3+

Source : QE3\_201126\_FR\_TIOx\_hum\_tissue\_Urea\_RNAB\_N Scan : 9726

Andromeda score : 164.93

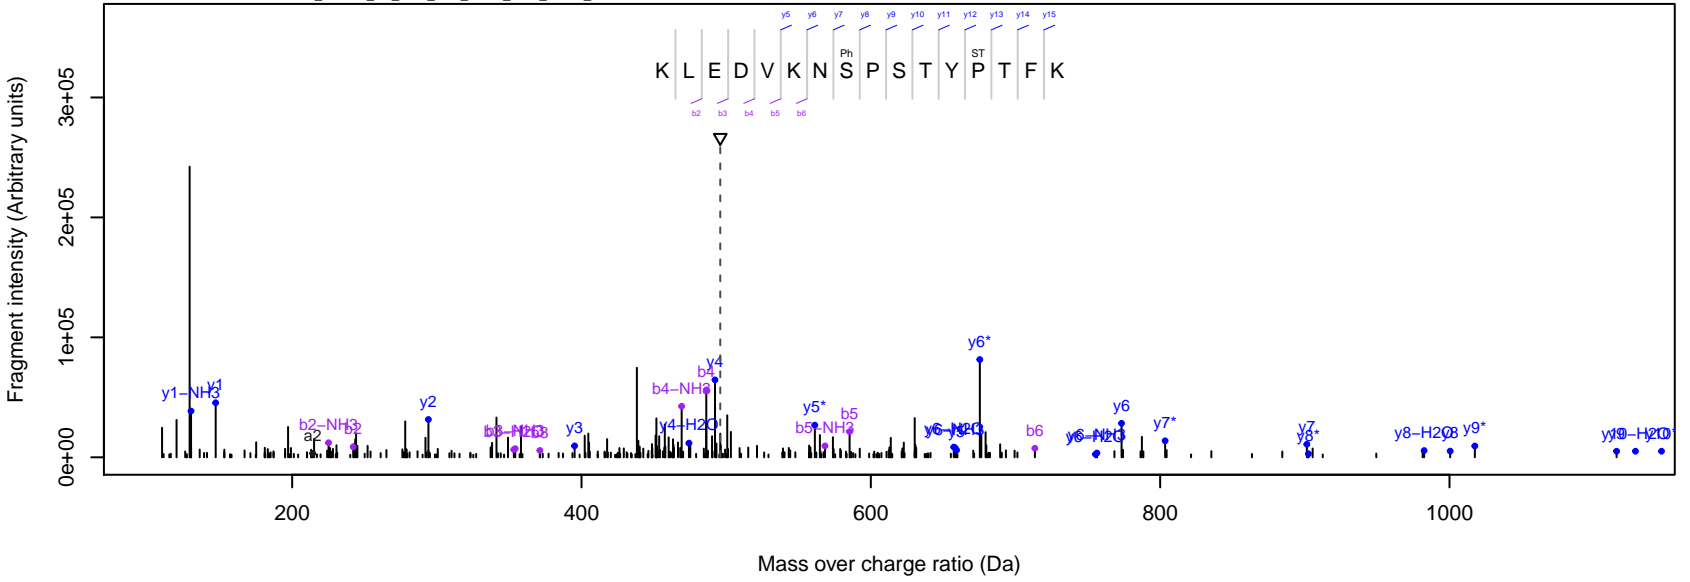

SS(Phospho (STY))LS(Phospho (STY))GDEEDELFGKATLK-2+

Source : QE3\_201126\_FR\_TIOx\_hum\_tissue\_Urea\_RNAB\_B Scan : 45255

Andromeda score : 164.93

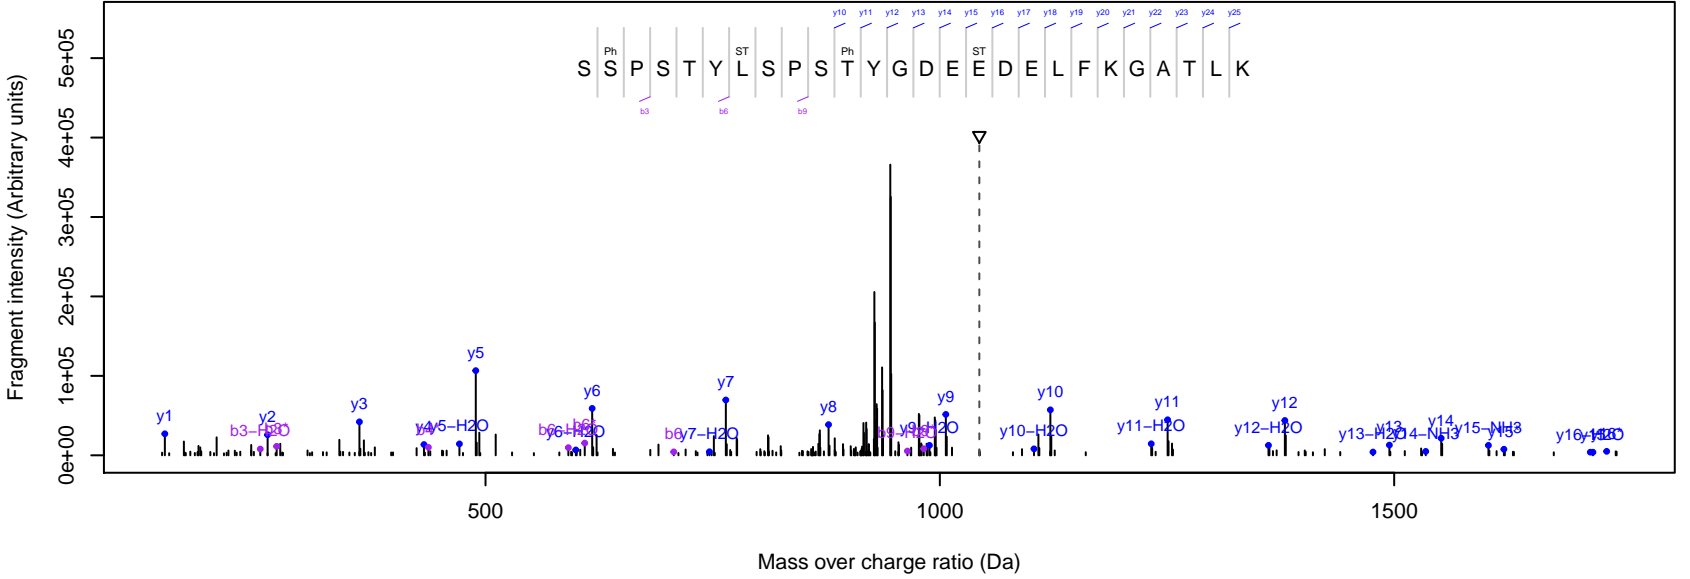

SFLSEPS(Phospho (STY))SPGR-2+

Source : QE3\_201126\_FR\_TIOx\_hum\_tissue\_Urea\_RNAB\_N Scan : 23764

Andromeda score : 164.9

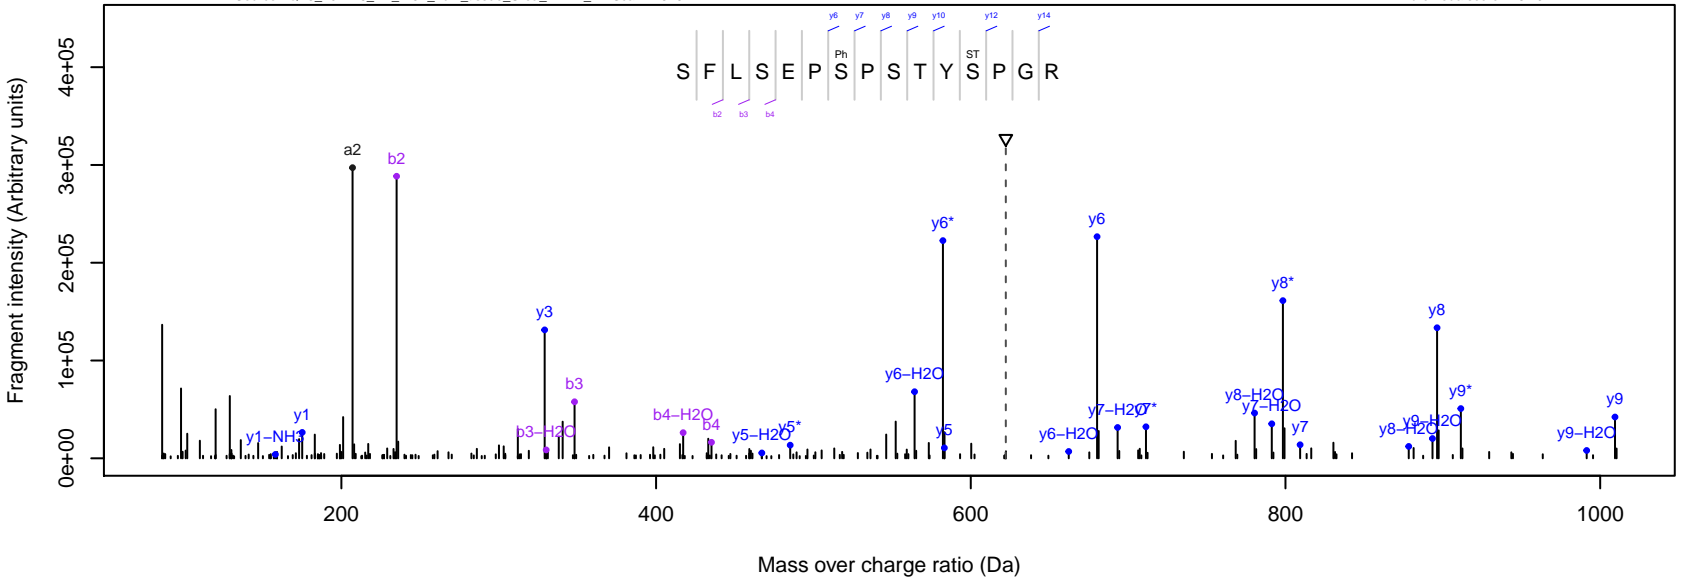



IPGTPGAGGRLS(Phospho (STY))PENNVLTk-3+

Source : QE3\_201126\_FR\_TiOx\_hum\_tissue\_Urea\_RNAB\_H Scan : 22685

Andromeda score : 164.83

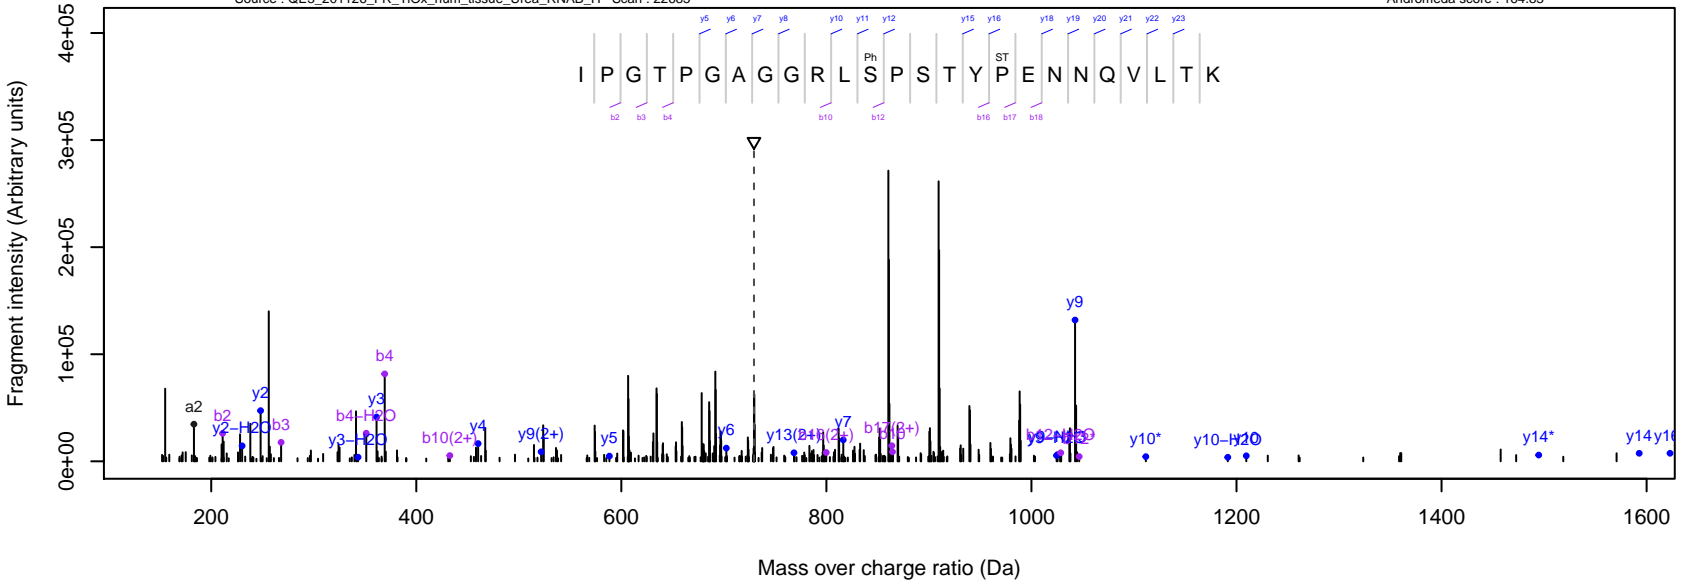

TWSTDDFFAGLREEGEDSMAQEEKEETGDDS(Phospho (STY))D-3+

Source : QE3\_201126\_FR\_TiOx\_hum\_tissue\_Urea\_RNAB\_H Scan : 57158

Andromeda score : 164.8

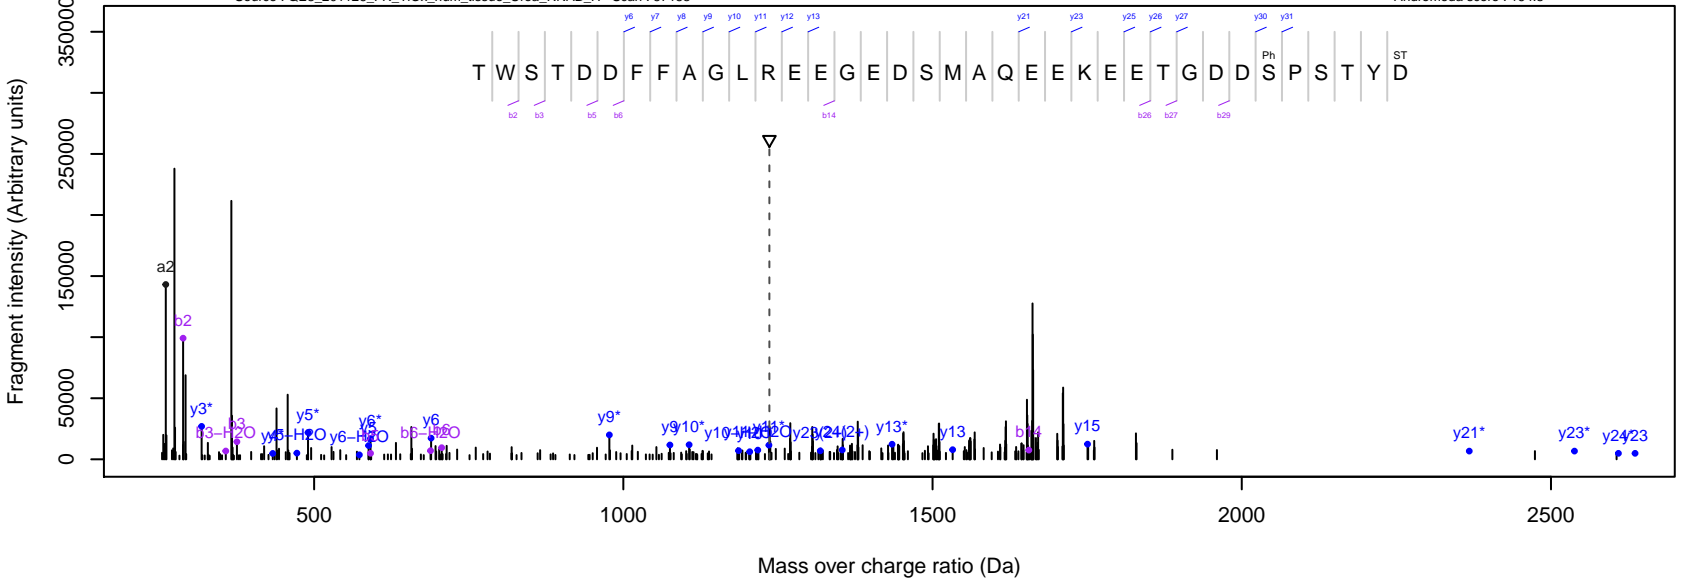

AKTQT(Phospho (STY))PPVSPAPQTEER-3+

Source : QE3\_201126\_FR\_TiOx\_hum\_tissue\_Urea\_RNAB\_B Scan : 11840

Andromeda score : 164.69

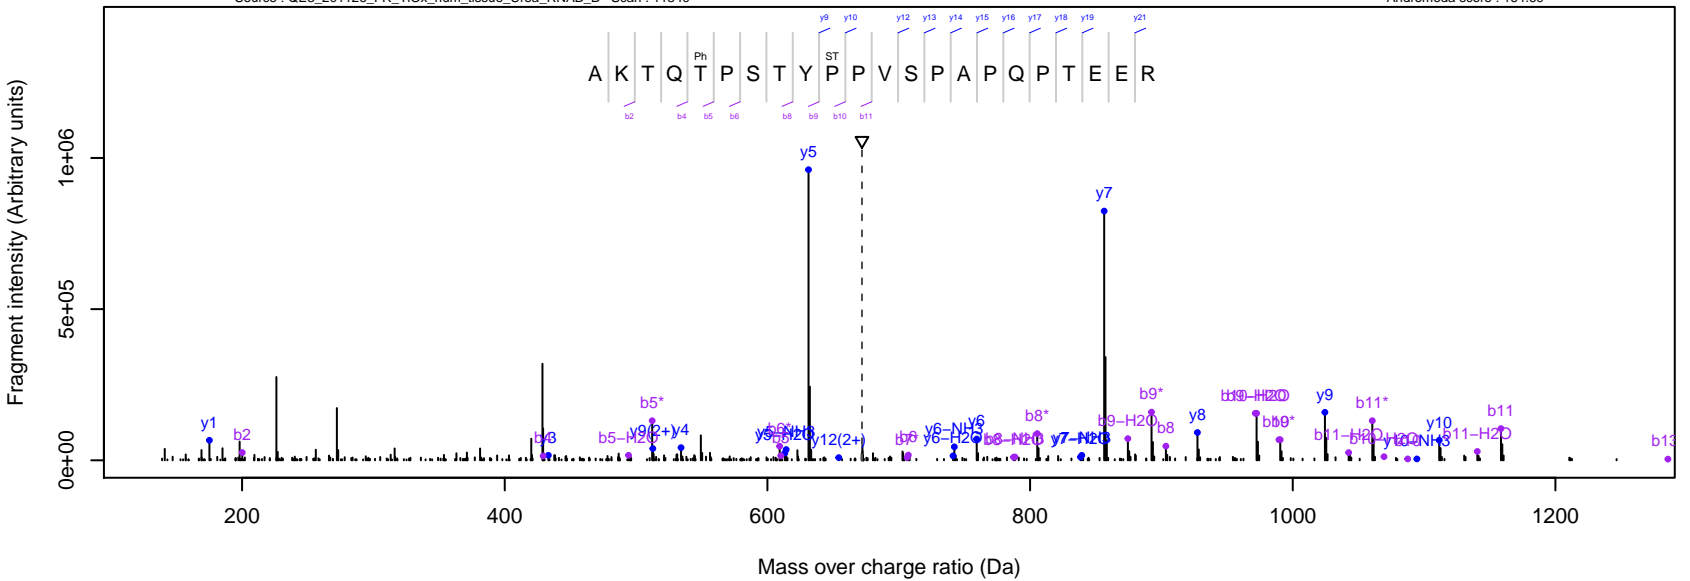

(Acetyl (Protein N-term))S(Phospho (STY))GDEMIFDPTMSK-2+

Source : QE3\_201126\_FR\_TiOx\_hum\_tissue\_Urea\_RNAB\_H Scan : 57864

Andromeda score : 164.68

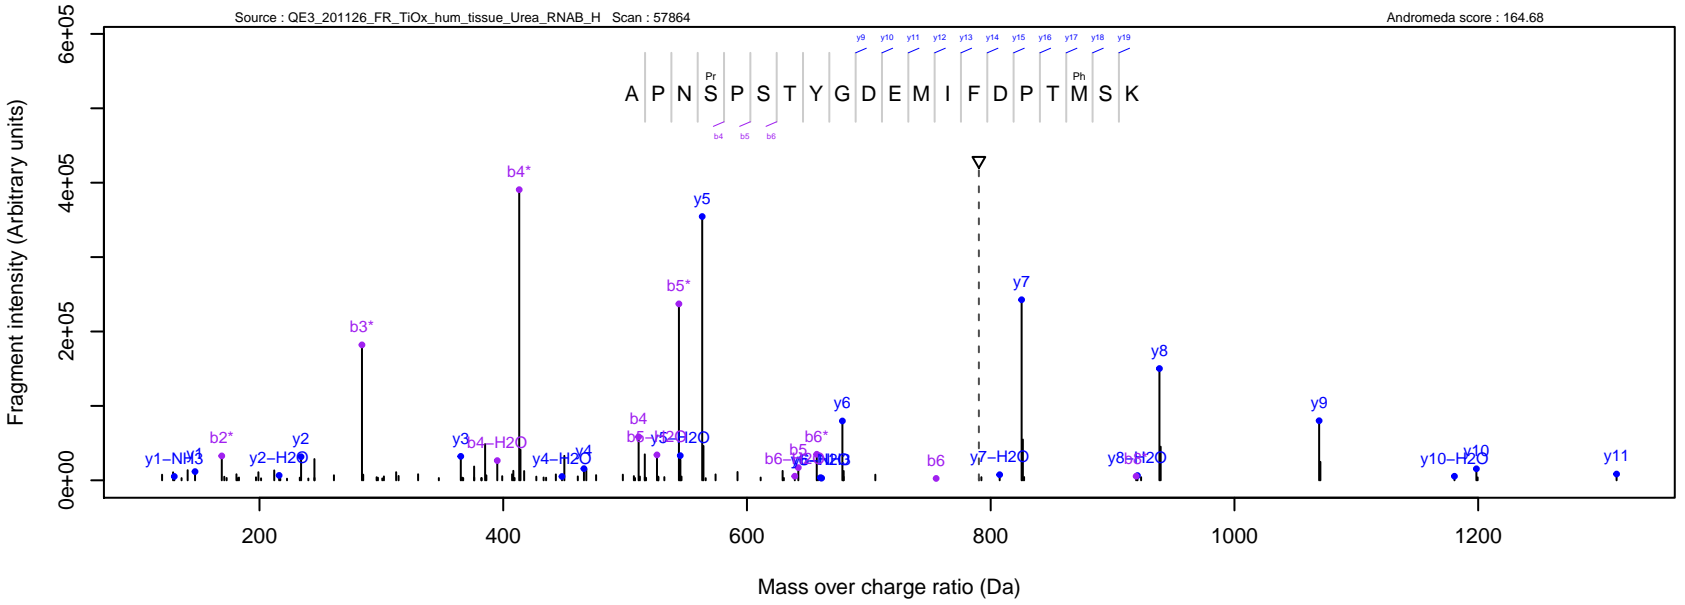

SNDS(Phospho (STY))GEEAEKEFIV-2+

Source : QE3\_201126\_FR\_TiOx\_hum\_tissue\_Urea\_RNAB\_N Scan : 53282

Andromeda score : 164.66

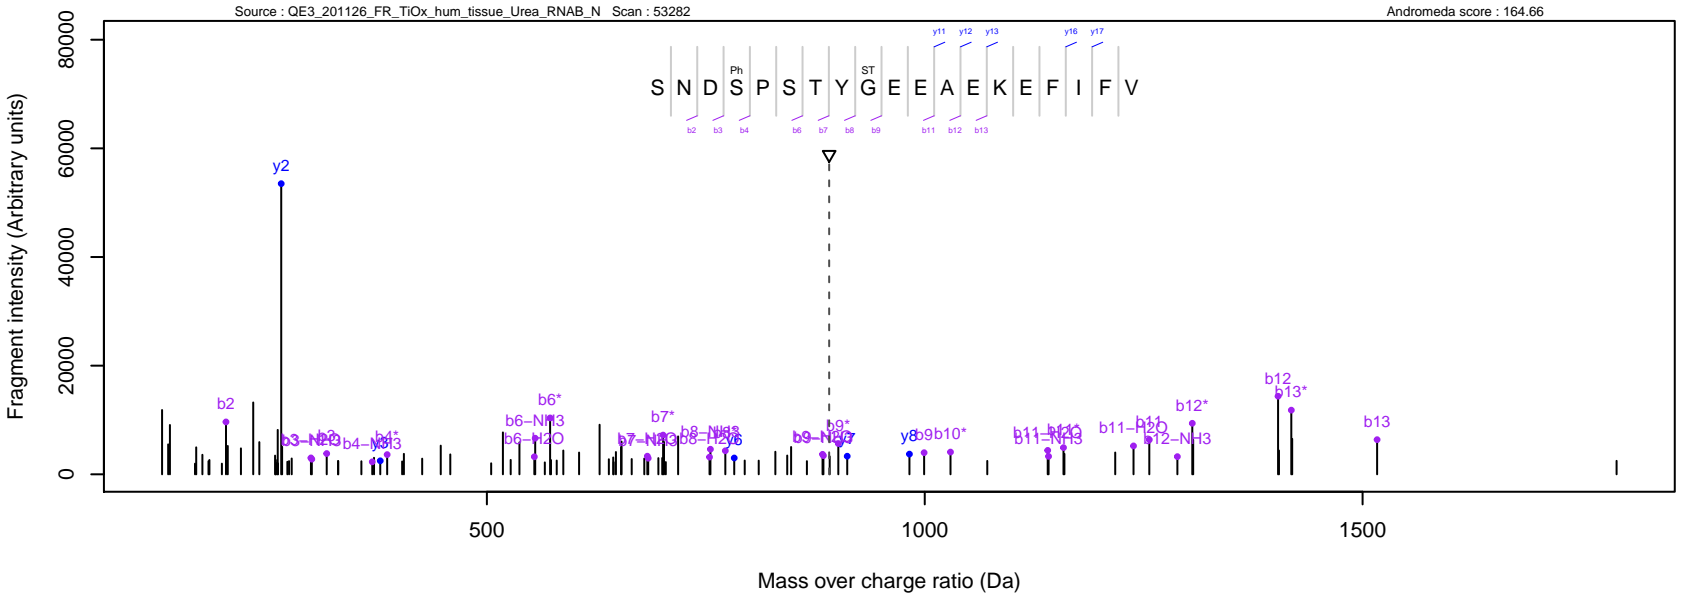

SSEPVKETVQTTS(Phospho (STY))PTPVEK-3+

Source : QE3\_201126\_FR\_TiOx\_hum\_tissue\_Urea\_RNAB\_H Scan : 12651

Andromeda score : 164.66

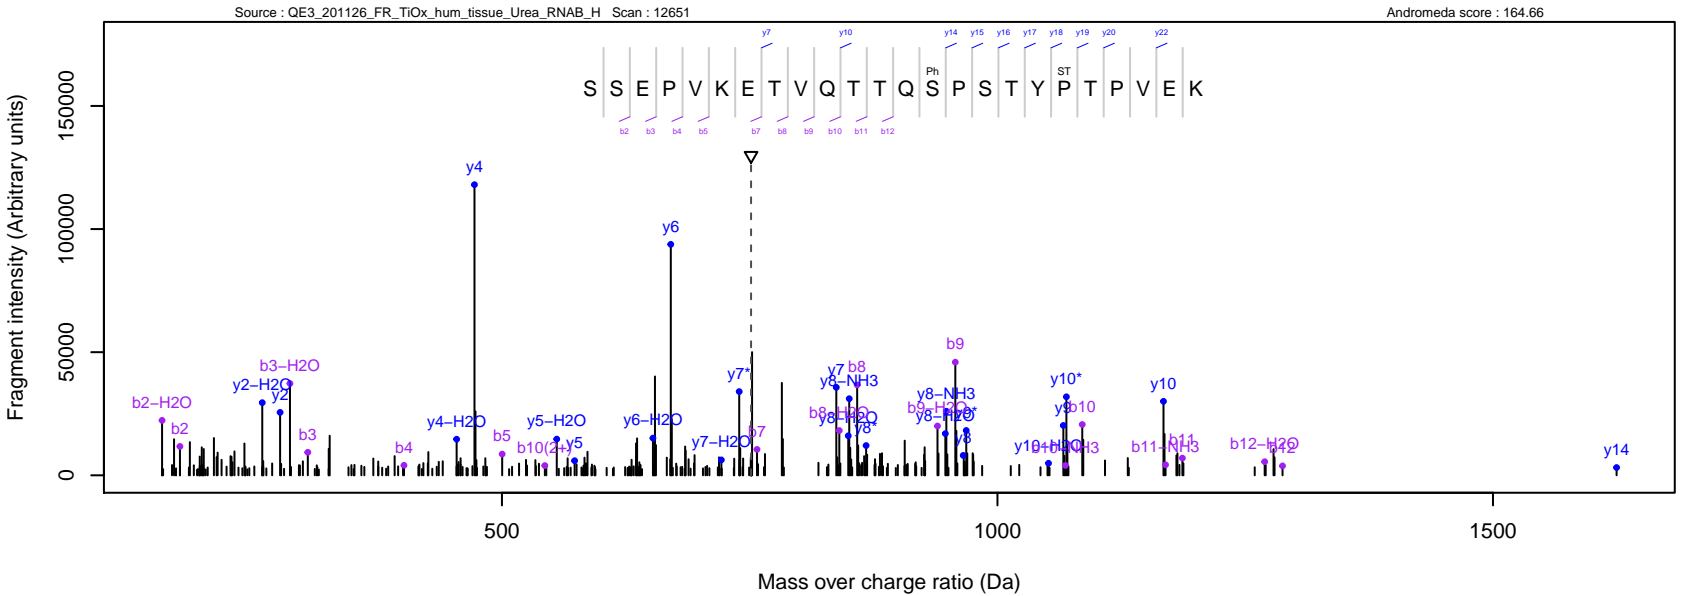

SRSHT(Phospho (STY))SEGAHLDTIPNSGAAGNSAGPK-4+

Source : QE3\_201126\_FR\_TiOx\_hum\_tissue\_Urea\_RNAB\_N Scan : 11065

Andromeda score : 164.65

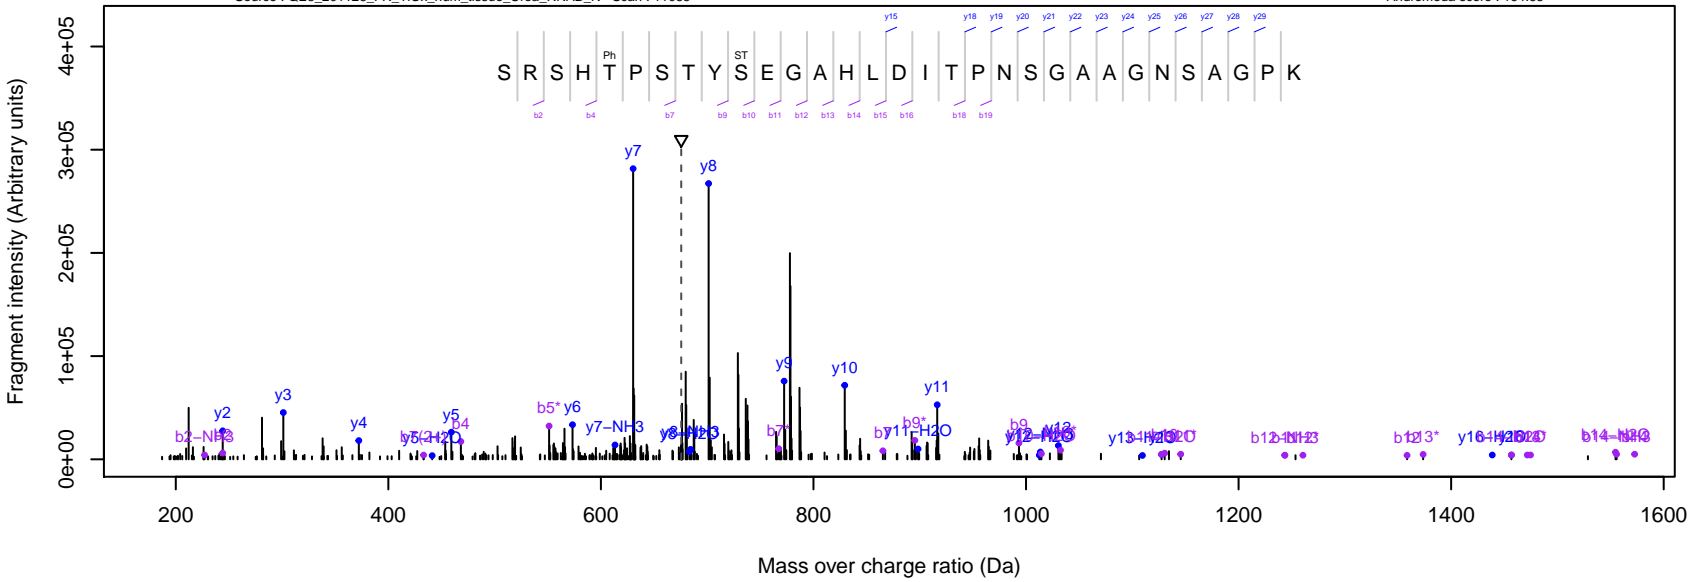

STYFSDEEELS(Phospho (STY))D-2+

Source : QE3\_201126\_FR\_TiOx\_hum\_tissue\_Urea\_RNAB\_H Scan : 39439

Andromeda score : 164.65

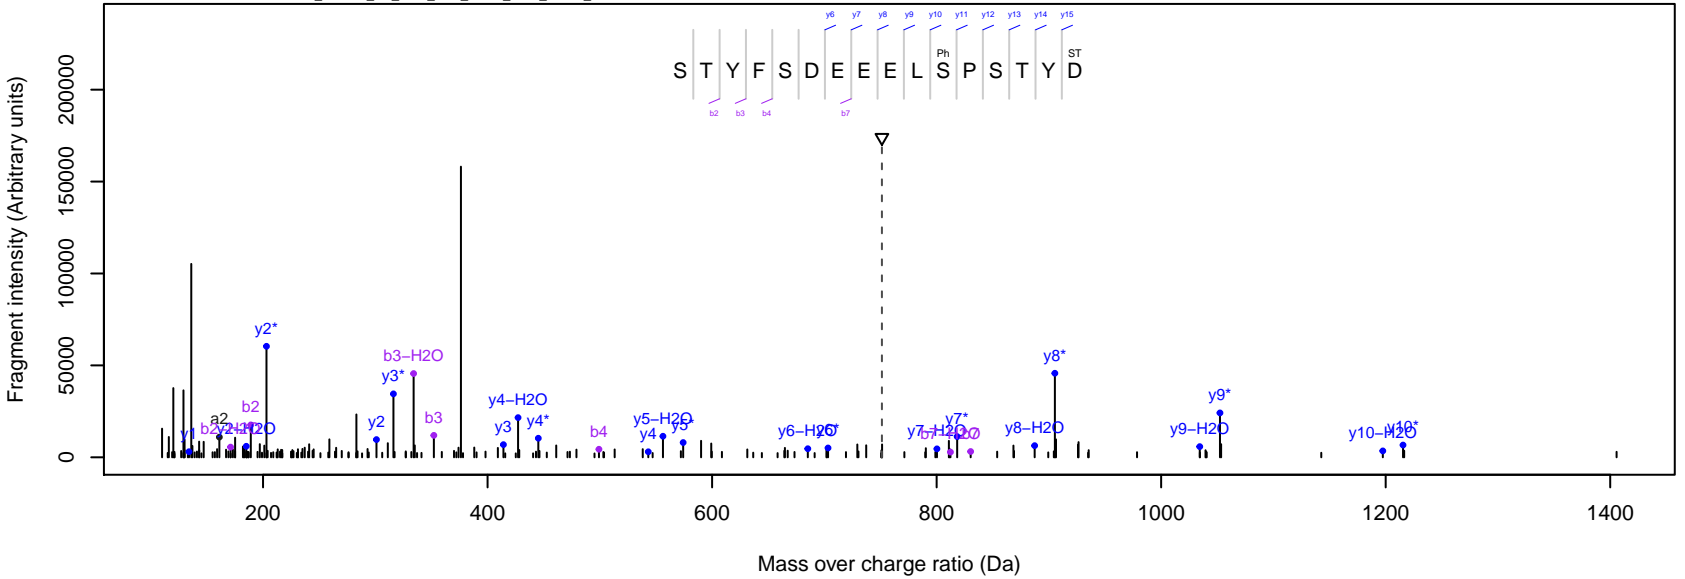

DIDISS(Phospho (STY))PEFK-2+

Source : QE3\_201126\_FR\_TiOx\_hum\_tissue\_Urea\_RNAB\_N Scan : 34892

Andromeda score : 164.64

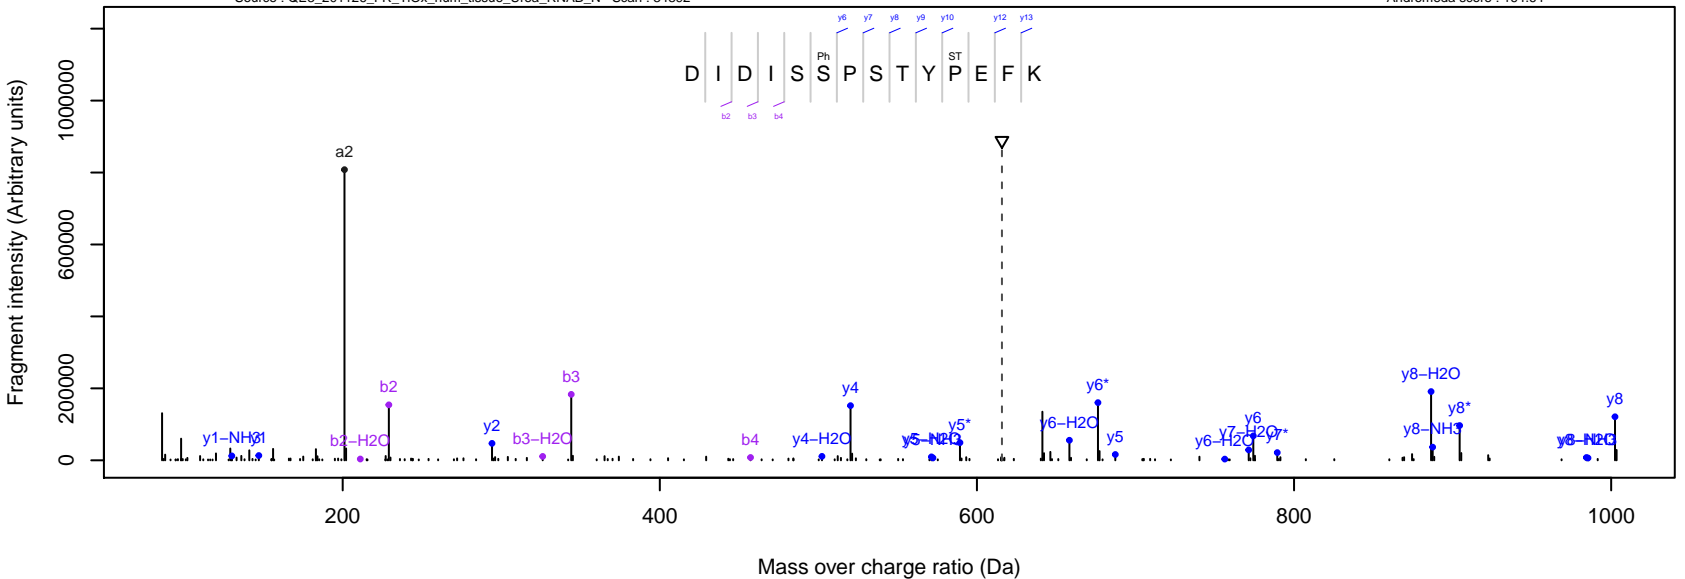

KGELMENDQDAM(Oxidation (M))EYS(Phospho (STY))S(Phospho (STY))EEEEVDLQALTGYQTK-3+

Source : QE3\_201126\_FR\_TIOx\_hum\_tissue\_Urea\_RNAB\_N Scan : 53054

Andromeda score : 164.64

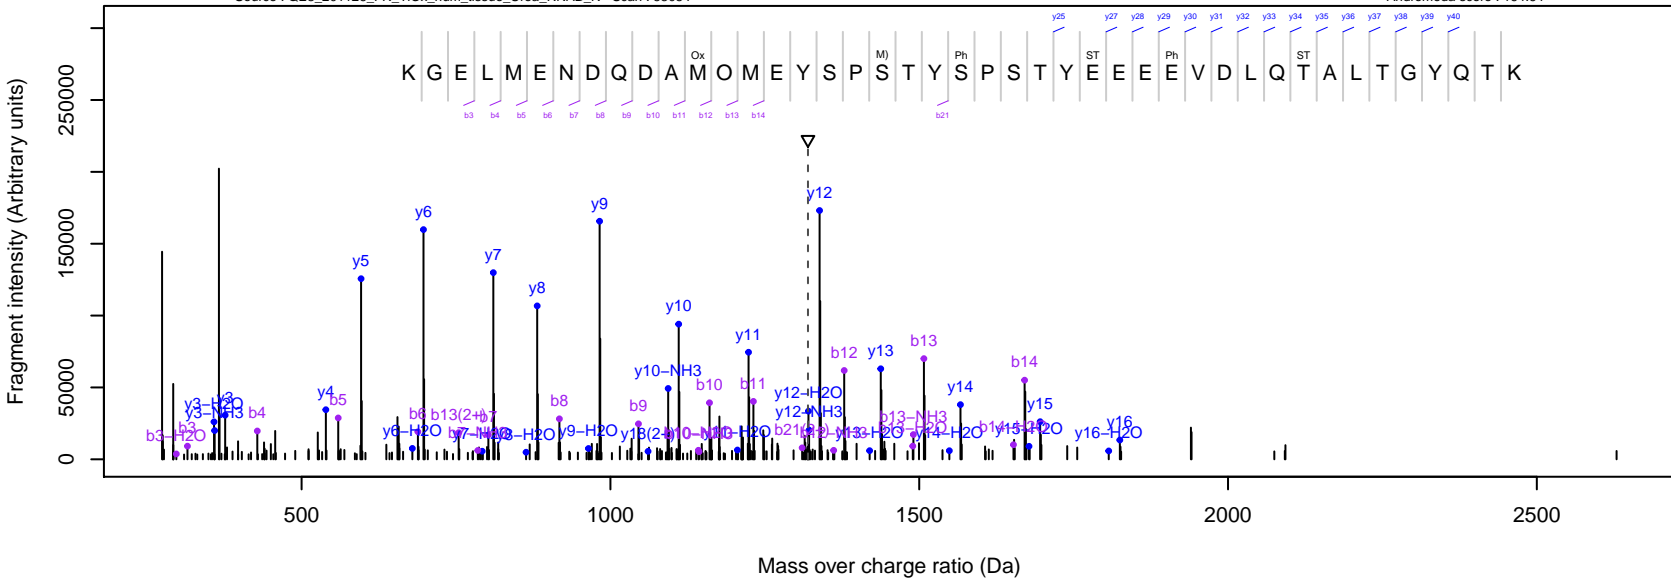

VNDAEPGS(Phospho (STY))PEAPQGK-2+

Source : QE3\_201126\_FR\_TIOx\_hum\_tissue\_Urea\_RNAB\_H Scan : 9517

Andromeda score : 164.63

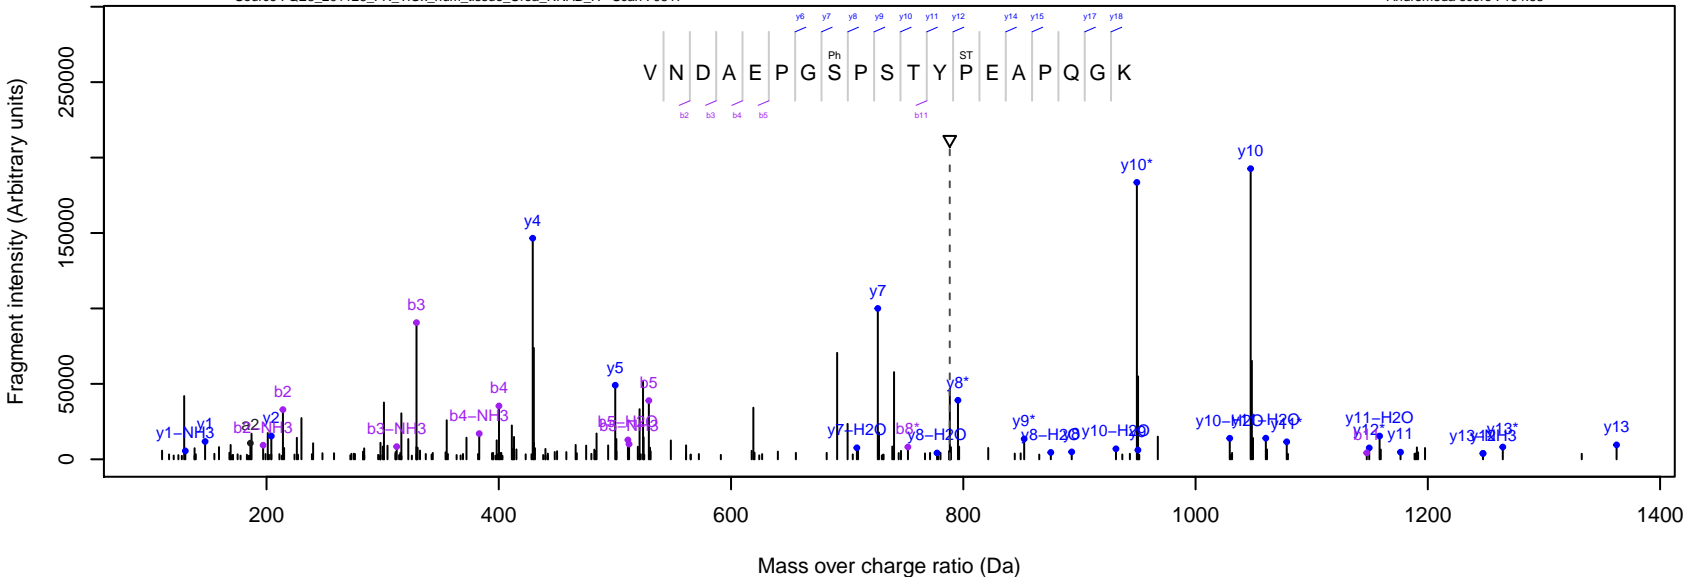

DQGSRHDS(Phospho (STY))EQDNSDNTIFVQGLGENVTIESVADYFK-4+

Source : QE3\_201126\_FR\_TIOx\_hum\_tissue\_Urea\_RNAB\_H Scan : 59248

Andromeda score : 164.58

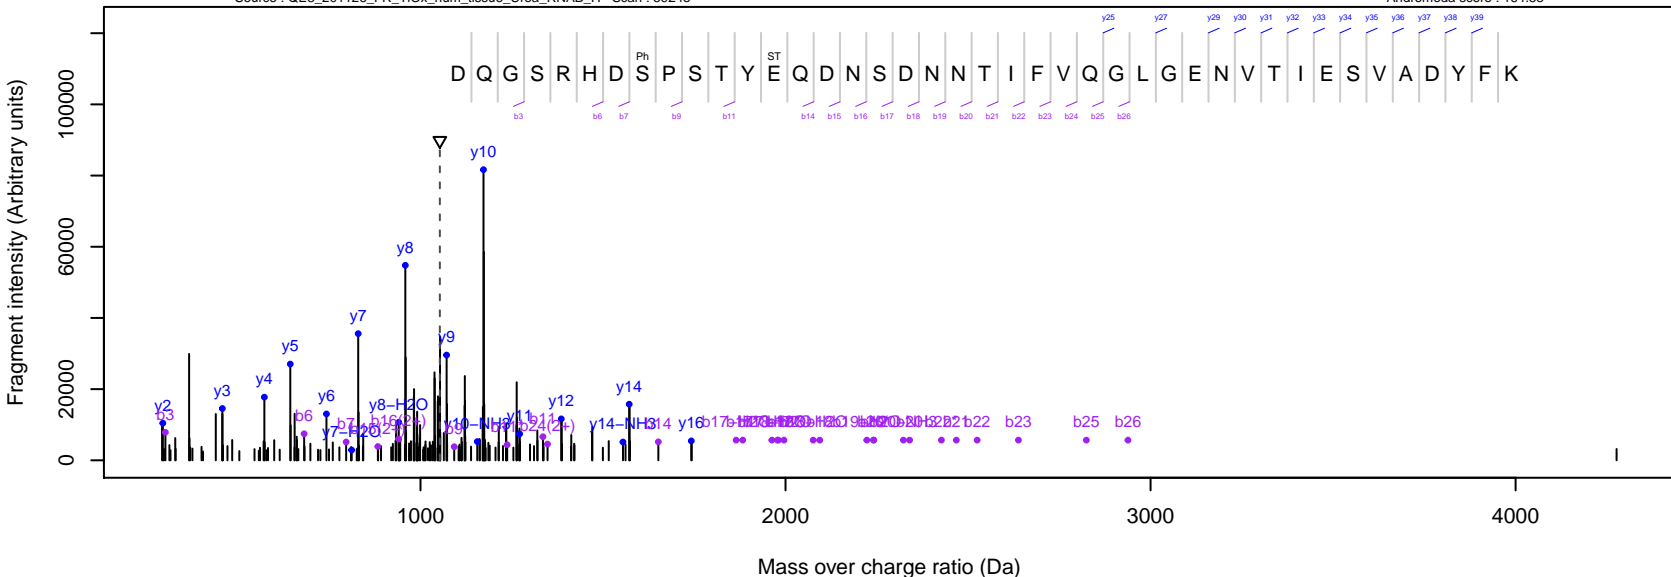

**ALEQQEAES(Phospho (STY))DSS(Phospho (STY))DTEEKDDDDDDDEEDVGKR-3+**

Source : QE3\_201126\_FR\_TIOx\_hum\_tissue\_Urea\_RNAB\_N Scan : 14102

Andromeda score : 164.46

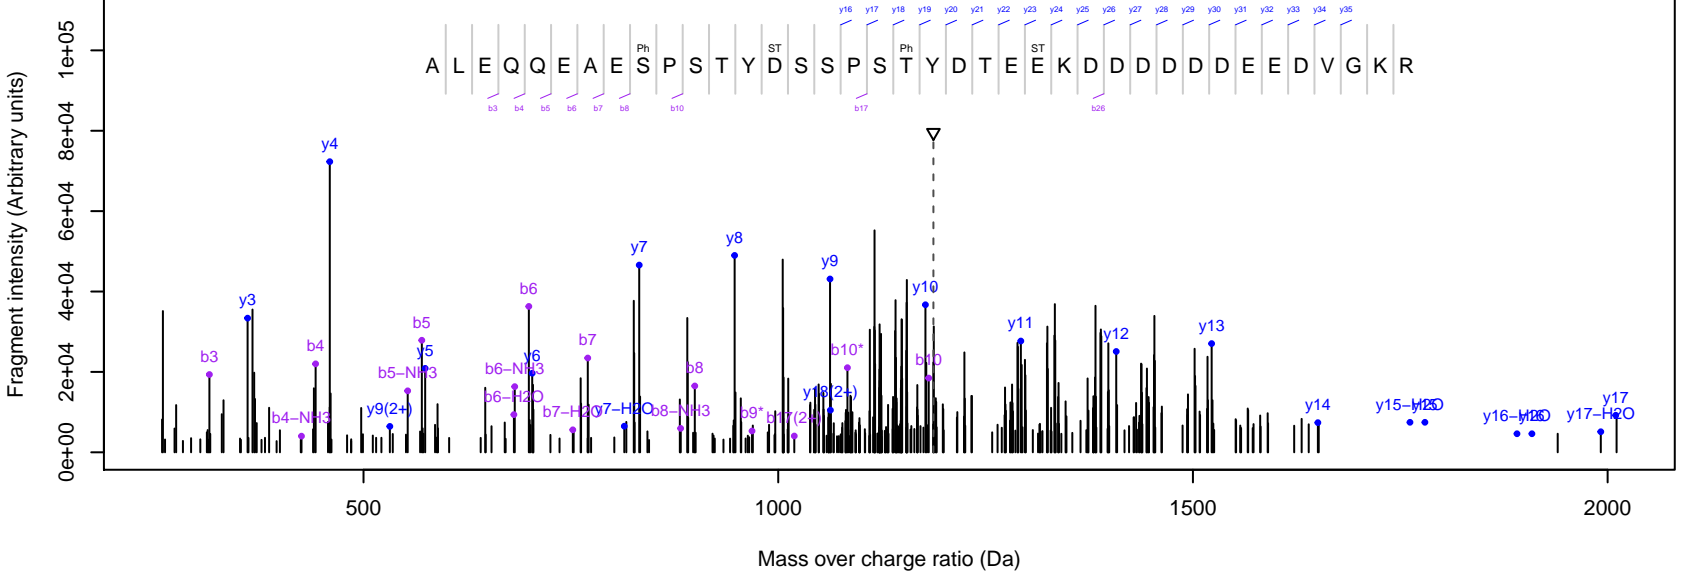

**GSKS(Phospho (STY))PAKVSDGGSSSTDFK-3+**

Source : QE3\_201126\_FR\_TIOx\_hum\_tissue\_Urea\_RNAB\_N Scan : 6089

Andromeda score : 164.46

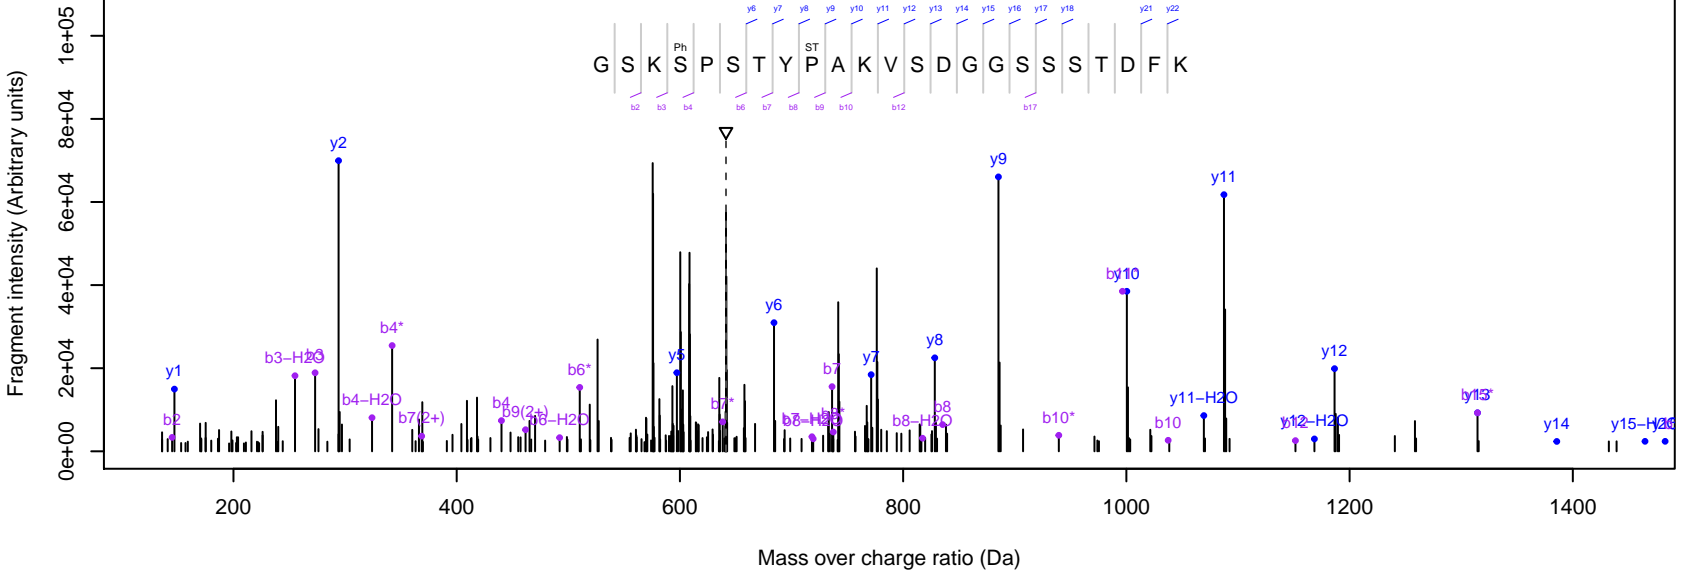

**RASS(Phospho (STY))LNLVNGGK-2+**

Source : QE3\_201126\_FR\_TIOx\_hum\_tissue\_Urea\_RNAB\_H Scan : 21678

Andromeda score : 164.41

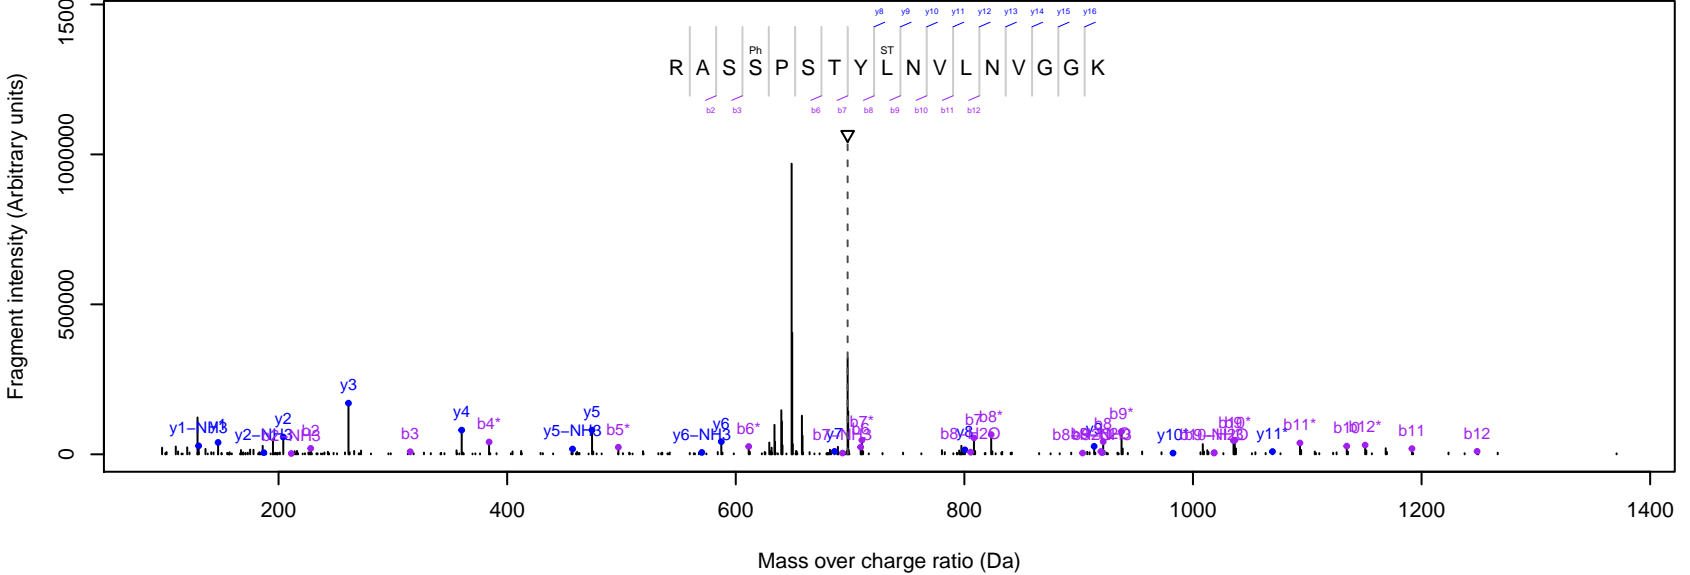

**TVYLQSLSSSTS(Phospho (STY))AEKFPSPHPSPAK-3+**

Source : QE3\_201126\_FR\_TiOx\_hum\_tissue\_Urea\_RNAB\_H Scan : 29136

Andromeda score : 164.41

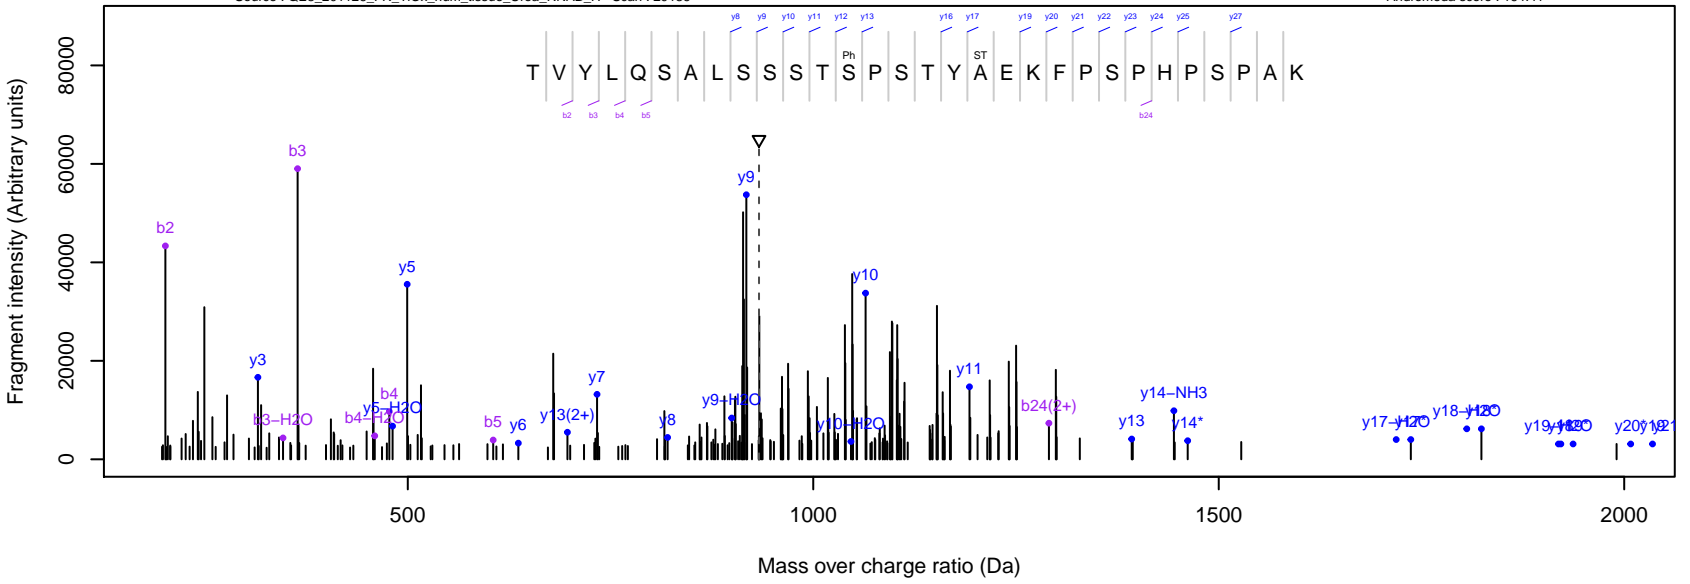

**SRGSDS(Phospho (STY))PAADVEIEYVTEEPEIYEPNFIFFK-3+**

Source : QE3\_201126\_FR\_TiOx\_hum\_tissue\_Urea\_RNAB\_H Scan : 60878

Andromeda score : 164.4

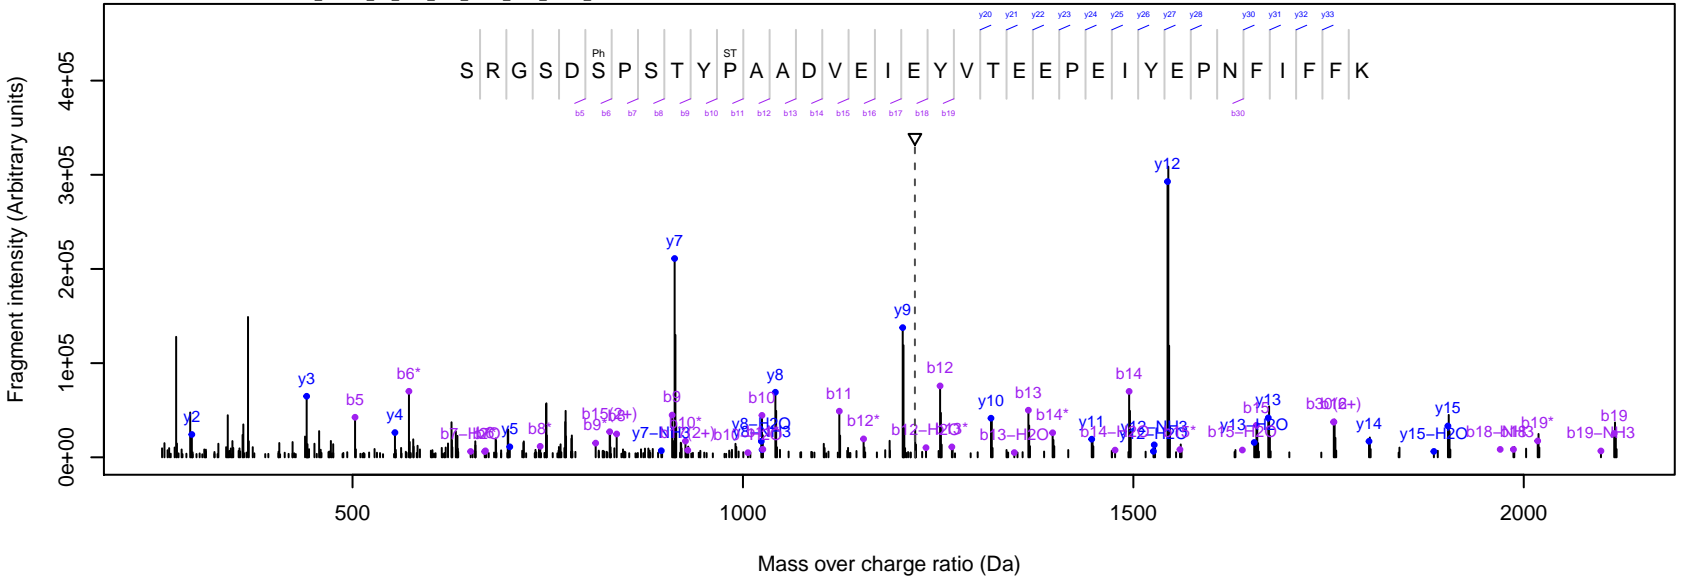

**TPEELDDS(Phospho (STY))DFETEDFVRS(Phospho (STY))R-3+**

Source : QE3\_201126\_FR\_TiOx\_hum\_tissue\_Urea\_RNAB\_B Scan : 44250

Andromeda score : 164.35

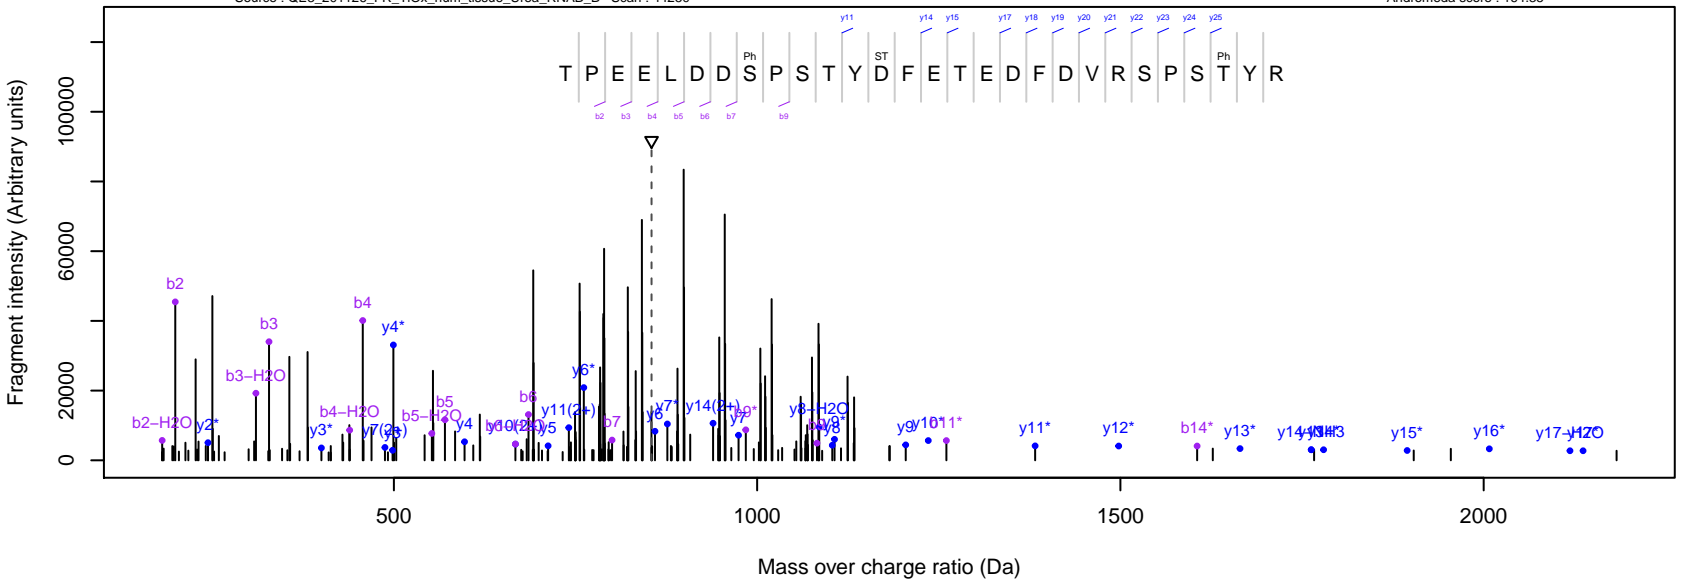

AT(Phospho (STY))S(Phospho (STY))NVFAMFDQSQIQEFKEAFNMIDQNR-3+

Source : QE3\_201126\_FR\_TIOx\_hum\_tissue\_Urea\_RNAB\_B Scan : 63292

Andromeda score : 164.29

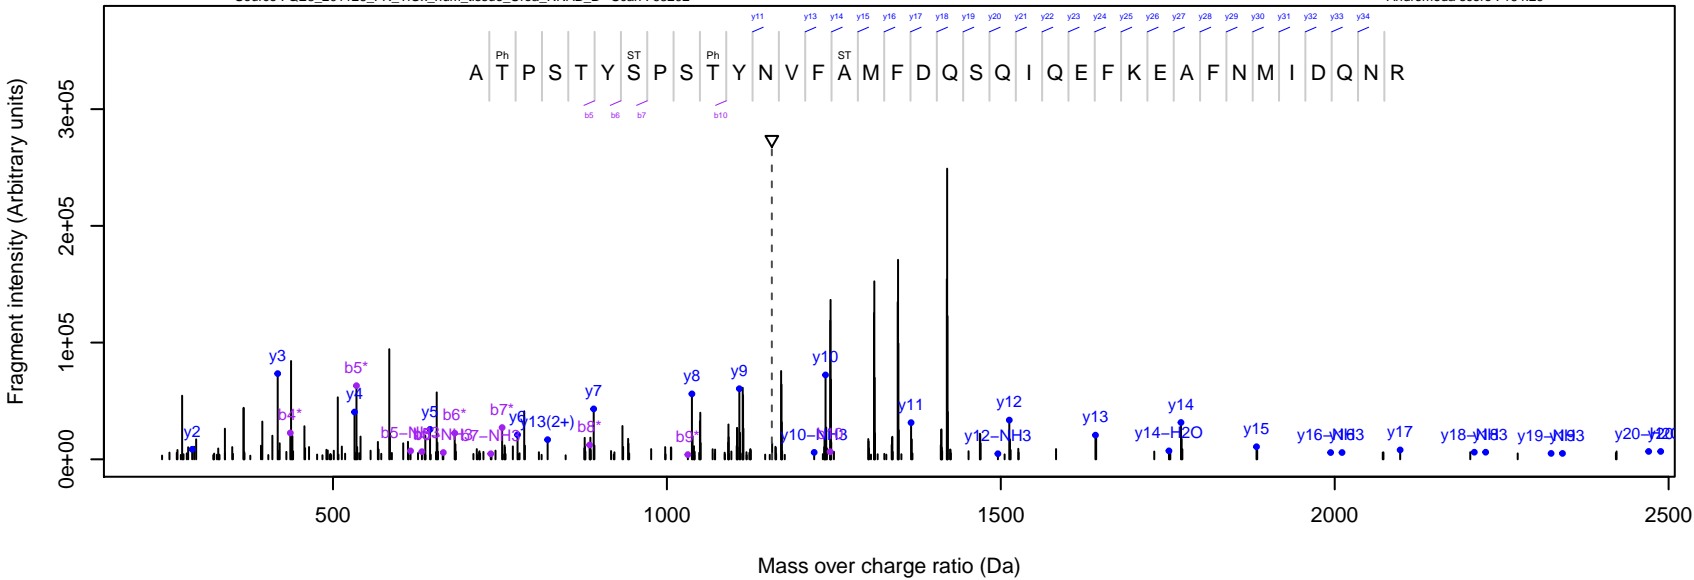

KDSNELSDS(Phospho (STY))AGEEDSADLKR-3+

Source : QE3\_201126\_FR\_TIOx\_hum\_tissue\_Urea\_RNAB\_B Scan : 11573

Andromeda score : 164.27

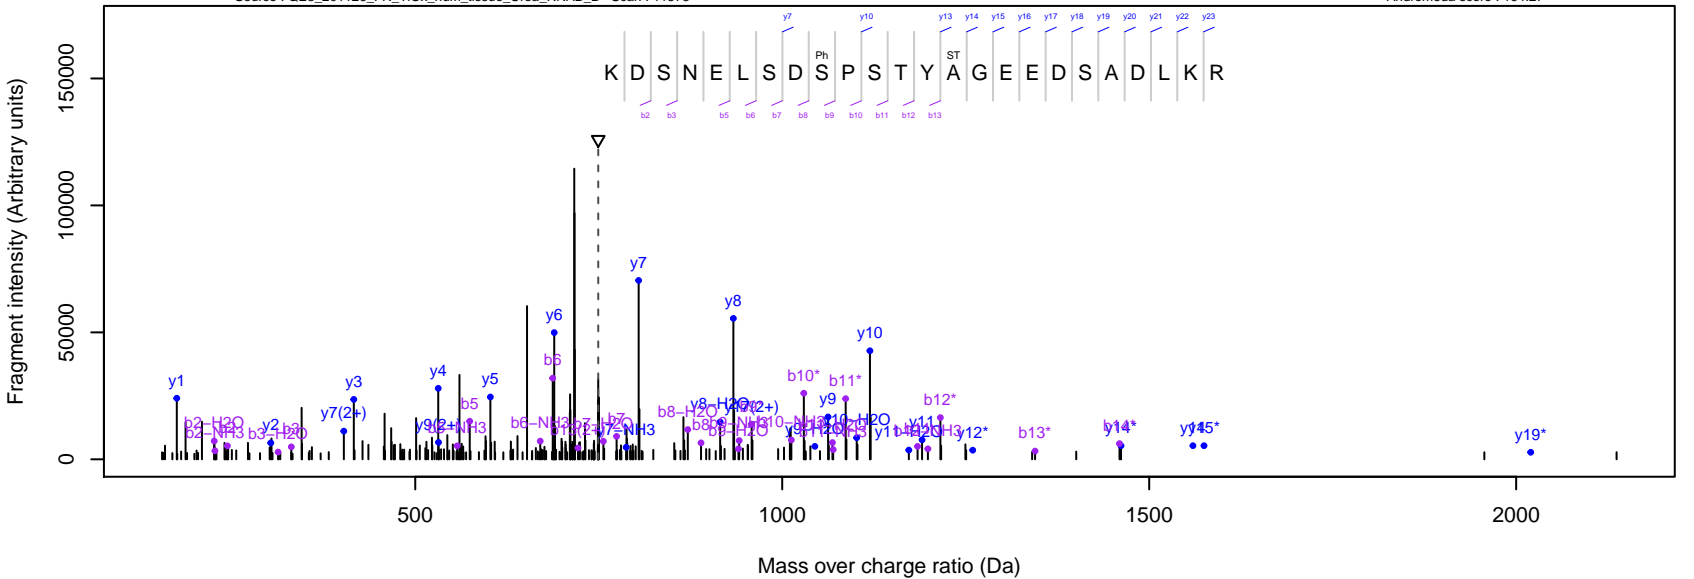

VAAAAGSGP(Phospho (STY))PPGS(Phospho (STY))PGHDRER-3+

Source : QE3\_201126\_FR\_TIOx\_hum\_tissue\_Urea\_RNAB\_H Scan : 8797

Andromeda score : 164.26

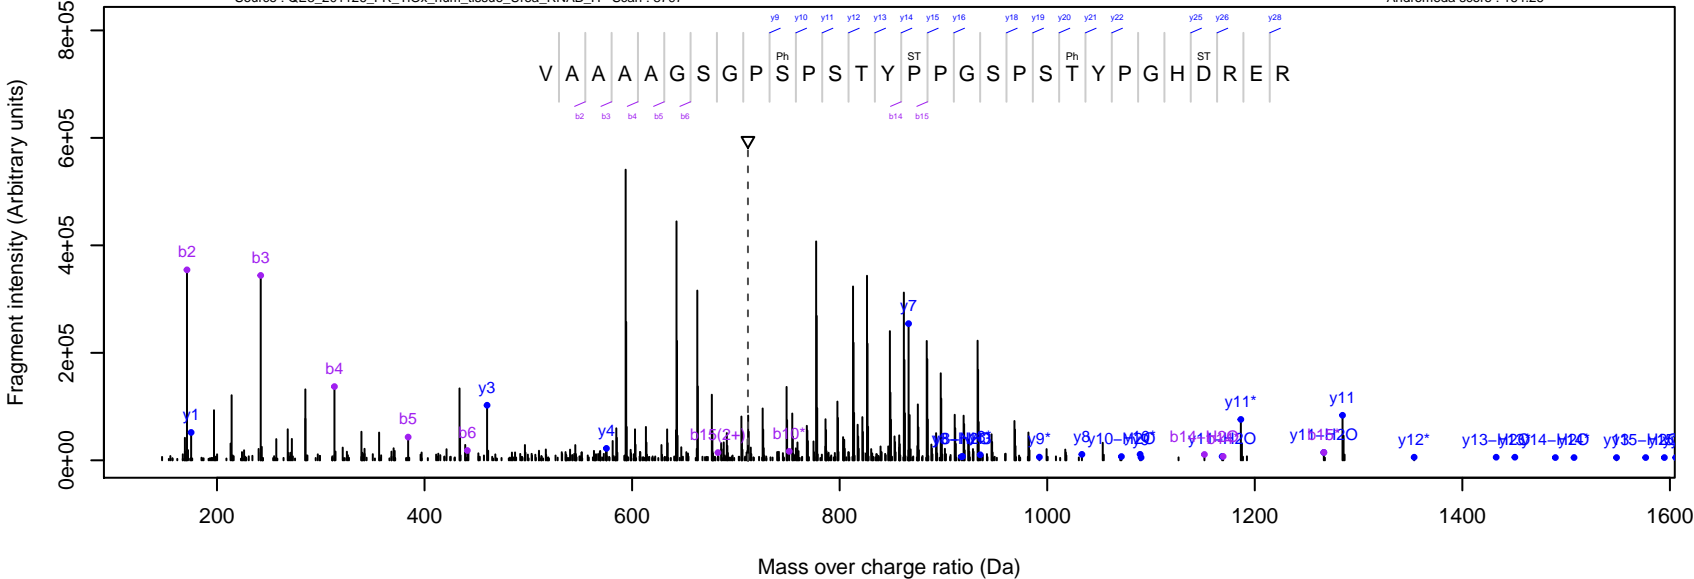

LPSS(Phospho (STY))PVYEDAASFK-2+

Source : QE3\_201126\_FR\_TiOx\_hum\_tissue\_Urea\_RNAB\_B Scan : 35011

Andromeda score : 164.2

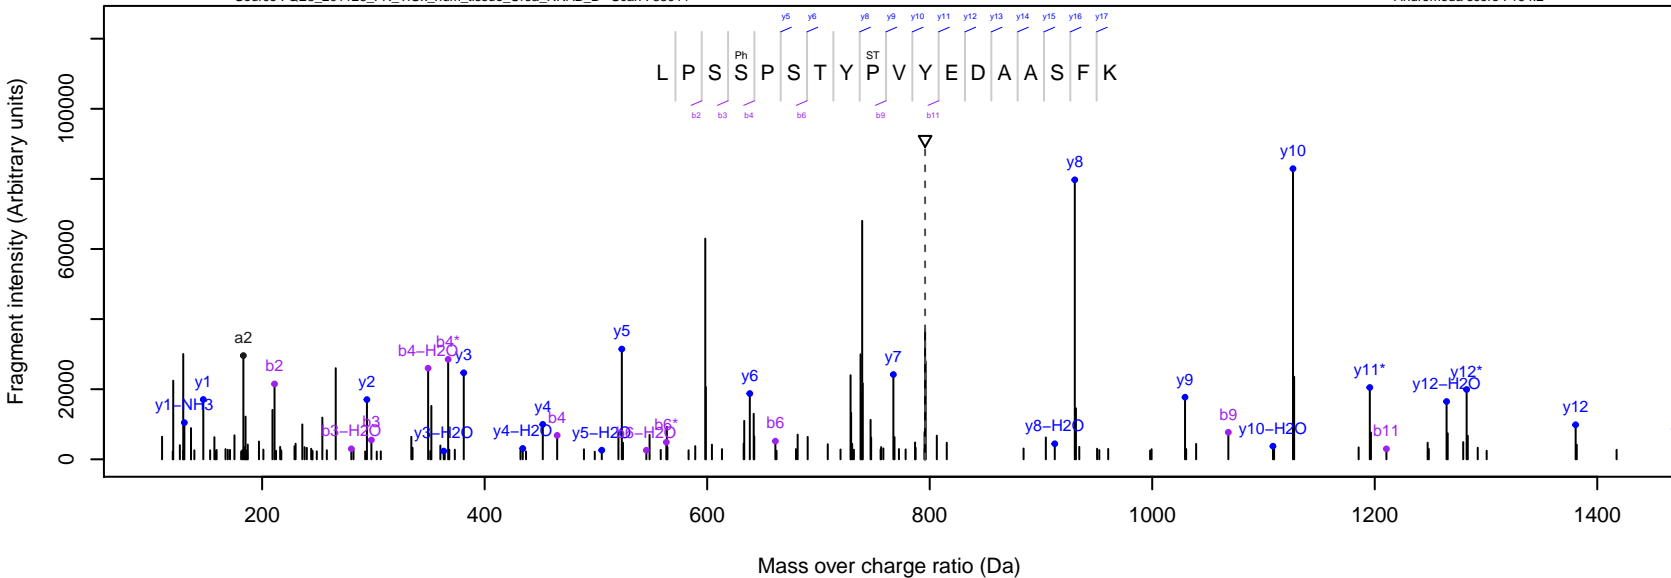

EKLQEEGGGS(Phospho (STY))DEETGSPSEDGMQSAR-3+

Source : QE3\_201126\_FR\_TiOx\_hum\_tissue\_Urea\_RNAB\_N Scan : 14803

Andromeda score : 164.16

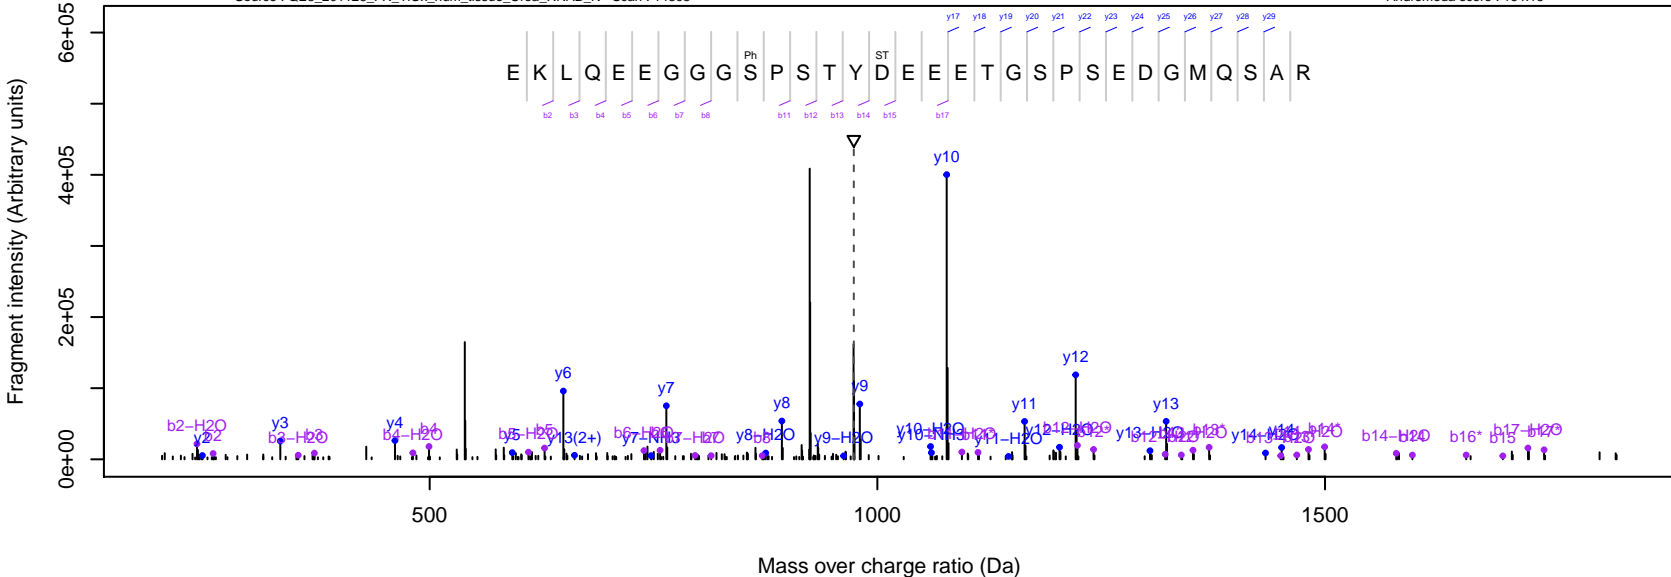

RSS(Phospho (STY))QPSPTAVPASDPSPTKQEVK-3+

Source : QE3\_201126\_FR\_TiOx\_hum\_tissue\_Urea\_RNAB\_N Scan : 10977

Andromeda score : 164.13

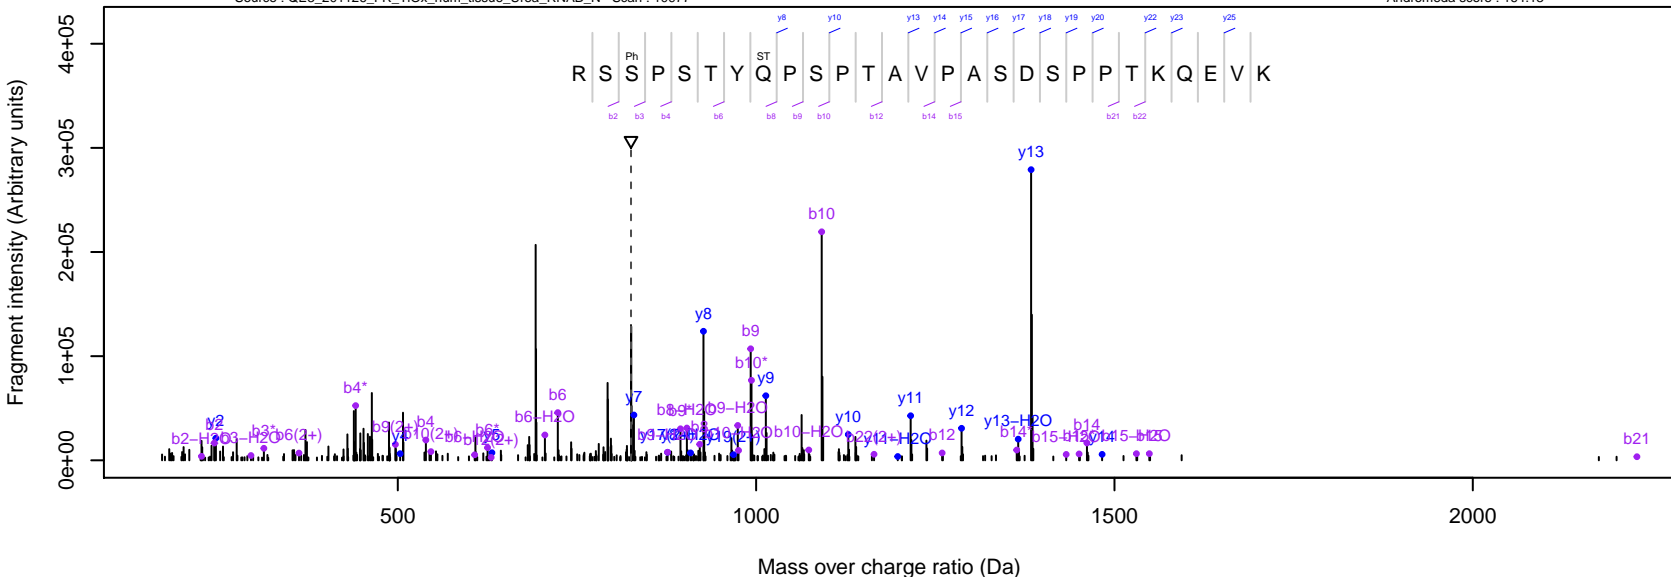



**KTQQLHPVLQKPSVFGNDS(Phospho (STY))DDDETSVSESLQR-4+**

Source : QE3\_201126\_FR\_TiOx\_hum\_tissue\_Urea\_RNAB\_N Scan : 30830

Andromeda score : 164.11

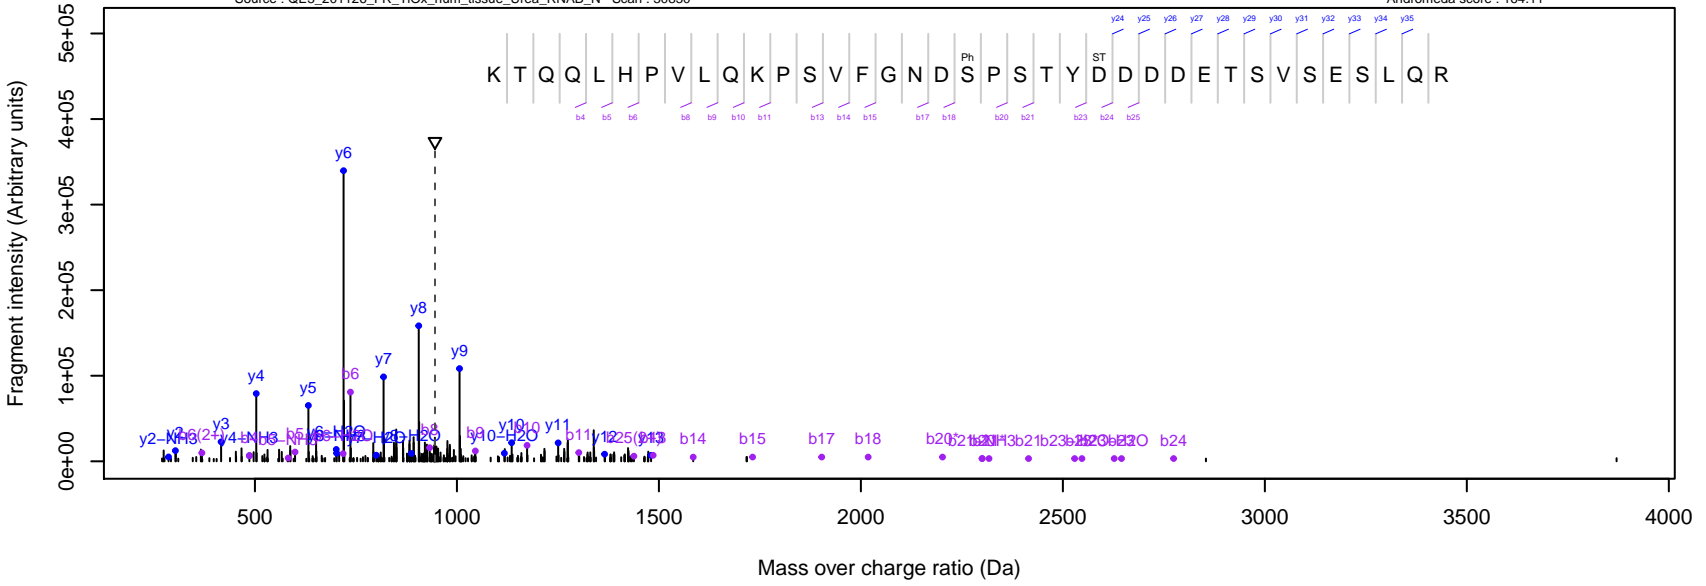

**SGTSTPTTGSTAITPGT(Phospho (STY))PPSYSSR-2+**

Source : QE3\_201126\_FR\_TiOx\_hum\_tissue\_Urea\_RNAB\_H Scan : 26296

Andromeda score : 164.06

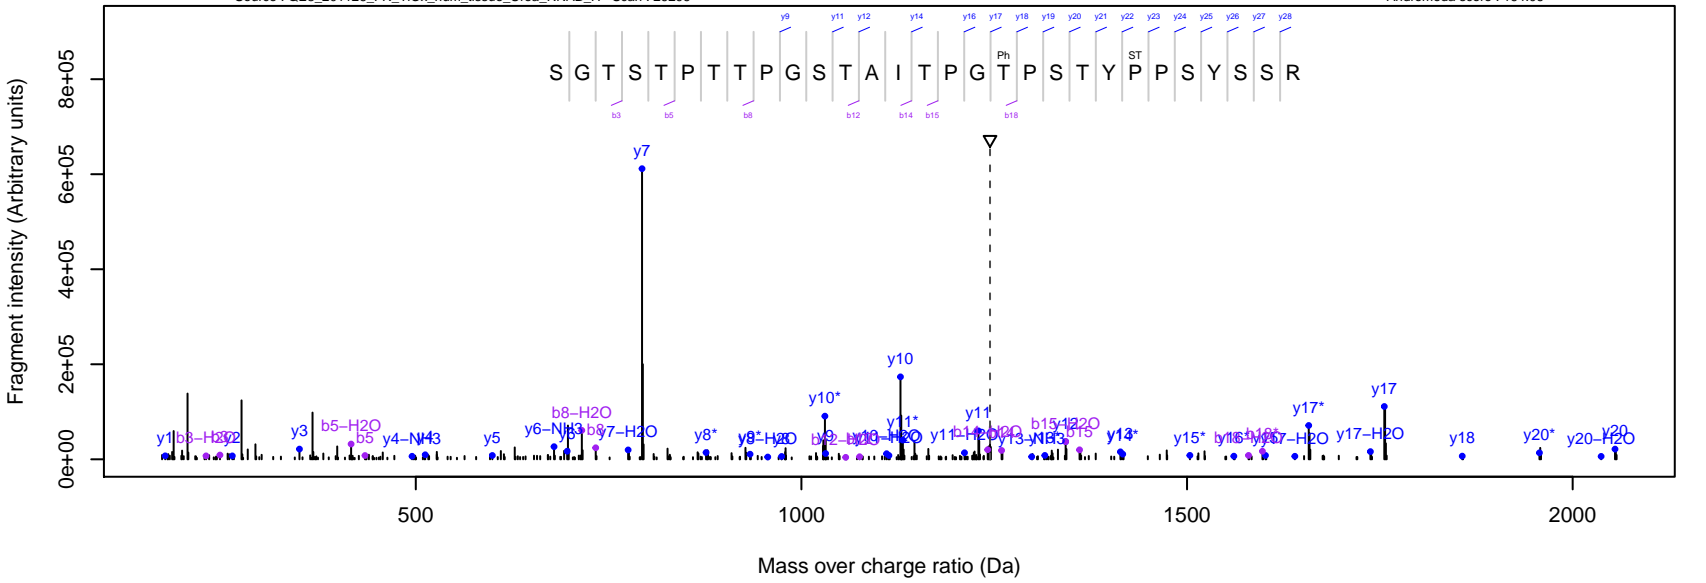

**HAS(Phospho (STY))SSPES(Phospho (STY))PKPAPAPGSHR-3+**

Source : QE3\_201126\_FR\_TiOx\_hum\_tissue\_Urea\_RNAB\_H Scan : 4708

Andromeda score : 164.05

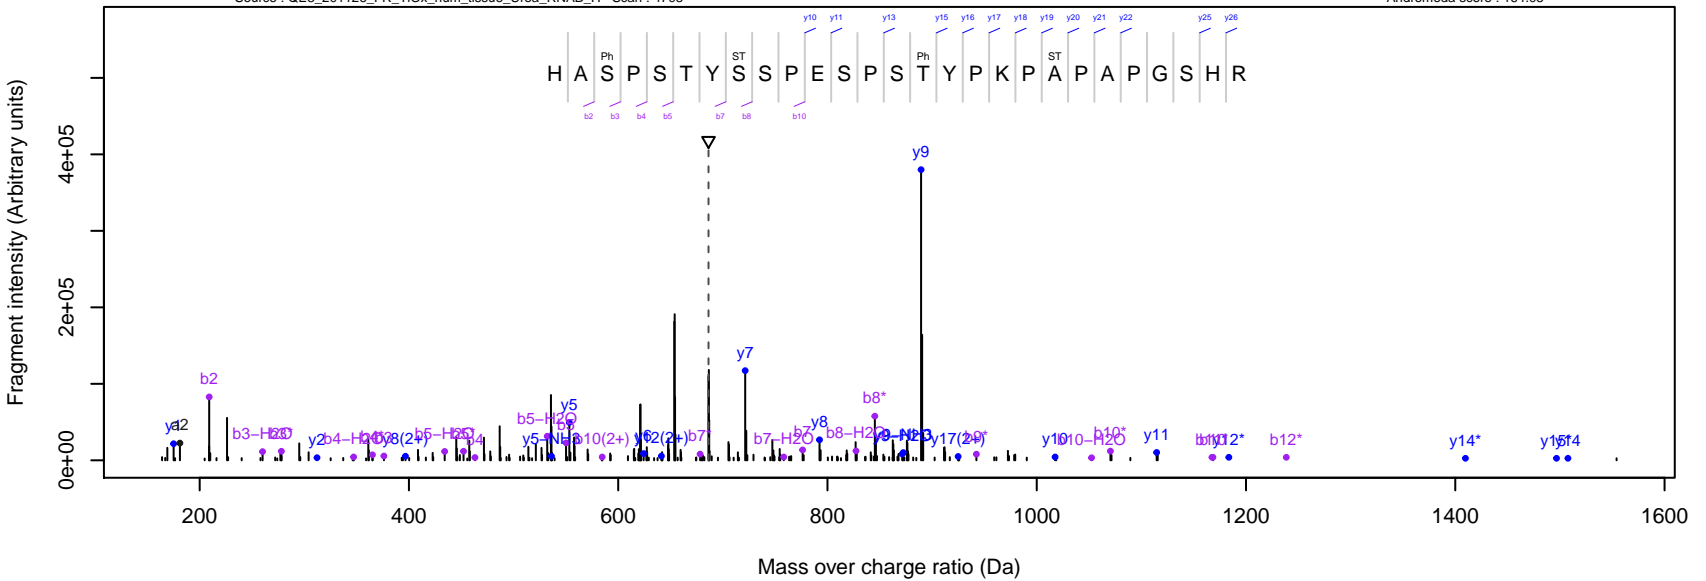

NKLEGDS(Phospho (STY))DVNSELEDRVGVK-3+

Source : QE3\_201126\_FR\_TiOx\_hum\_tissue\_Urea\_RNAB\_B Scan : 26603

Andromeda score : 164.05

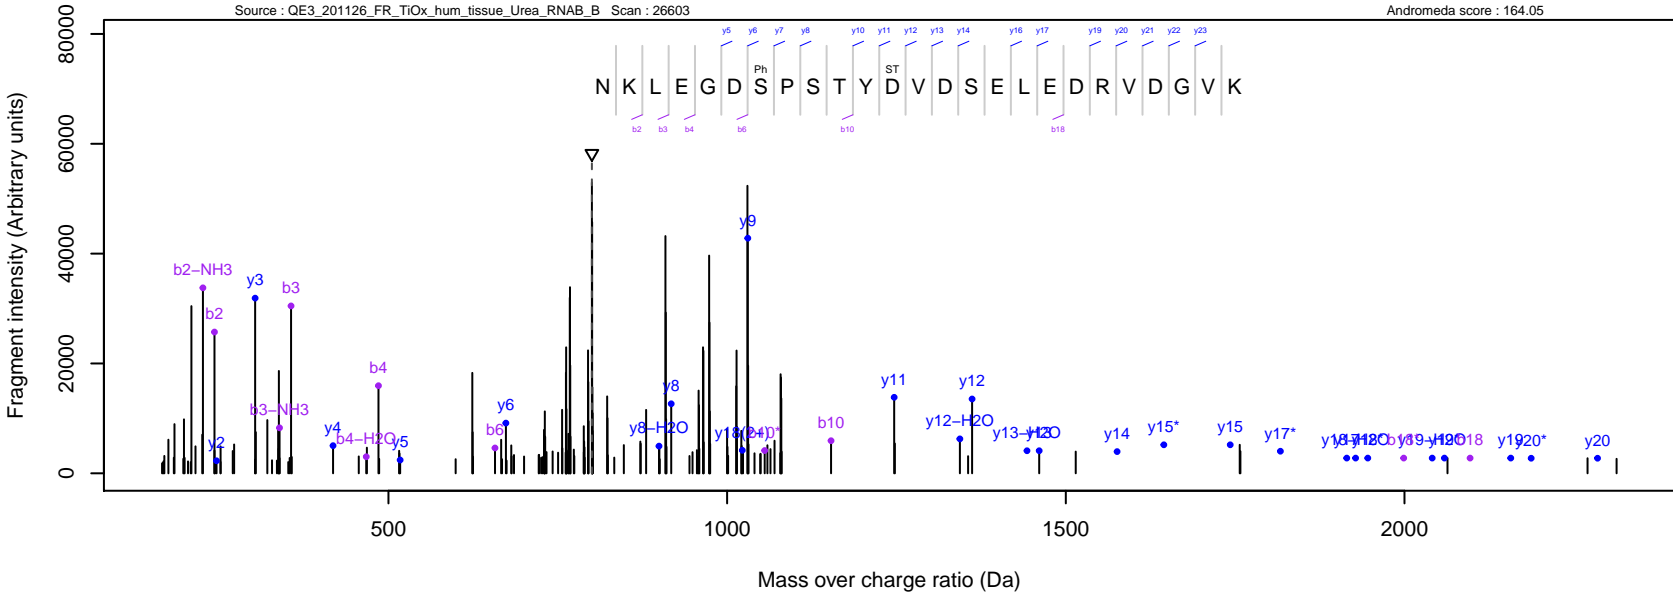

EGQPSPADEKGNDS(Phospho (STY))DGESEDDPEK-3+

Source : QE3\_201126\_FR\_TiOx\_hum\_tissue\_Urea\_RNAB\_B Scan : 8798

Andromeda score : 164.03

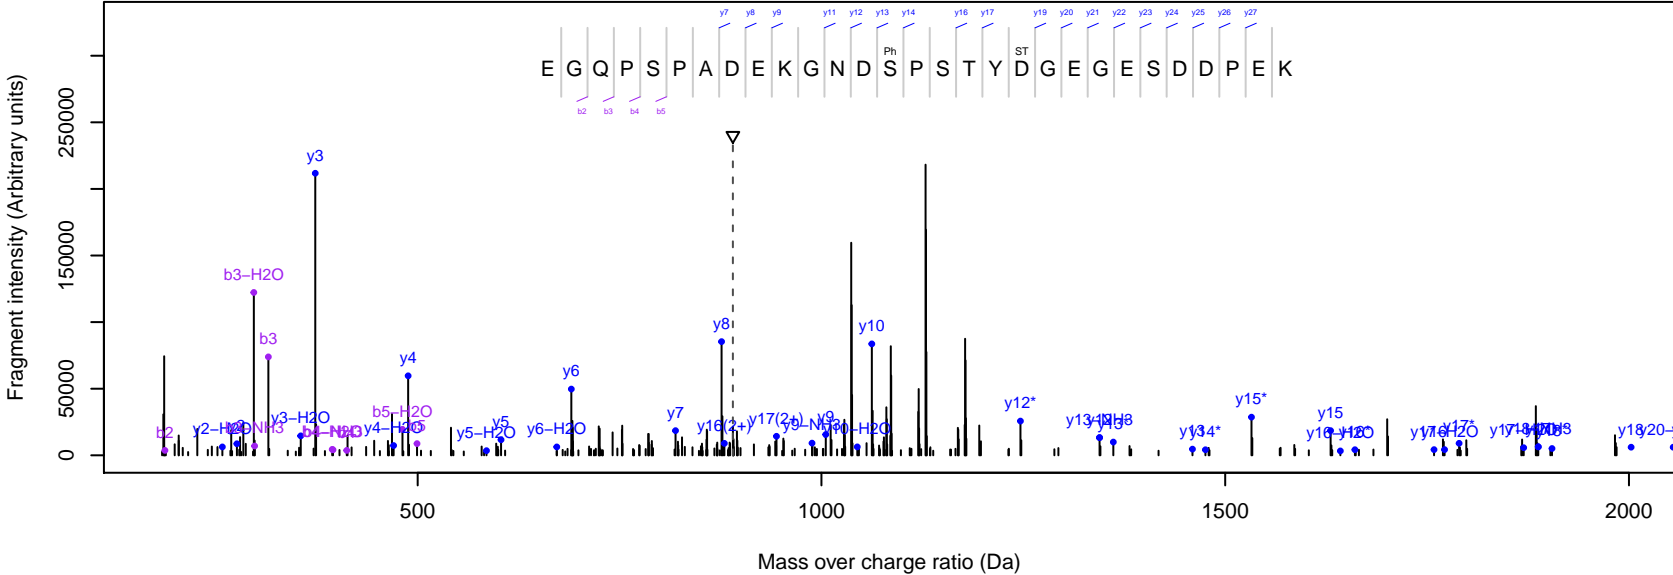

GPS(Phospho (STY))WDPFR-2+

Source : QE3\_201126\_FR\_TiOx\_hum\_tissue\_Urea\_RNAB\_N Scan : 44635

Andromeda score : 163.94

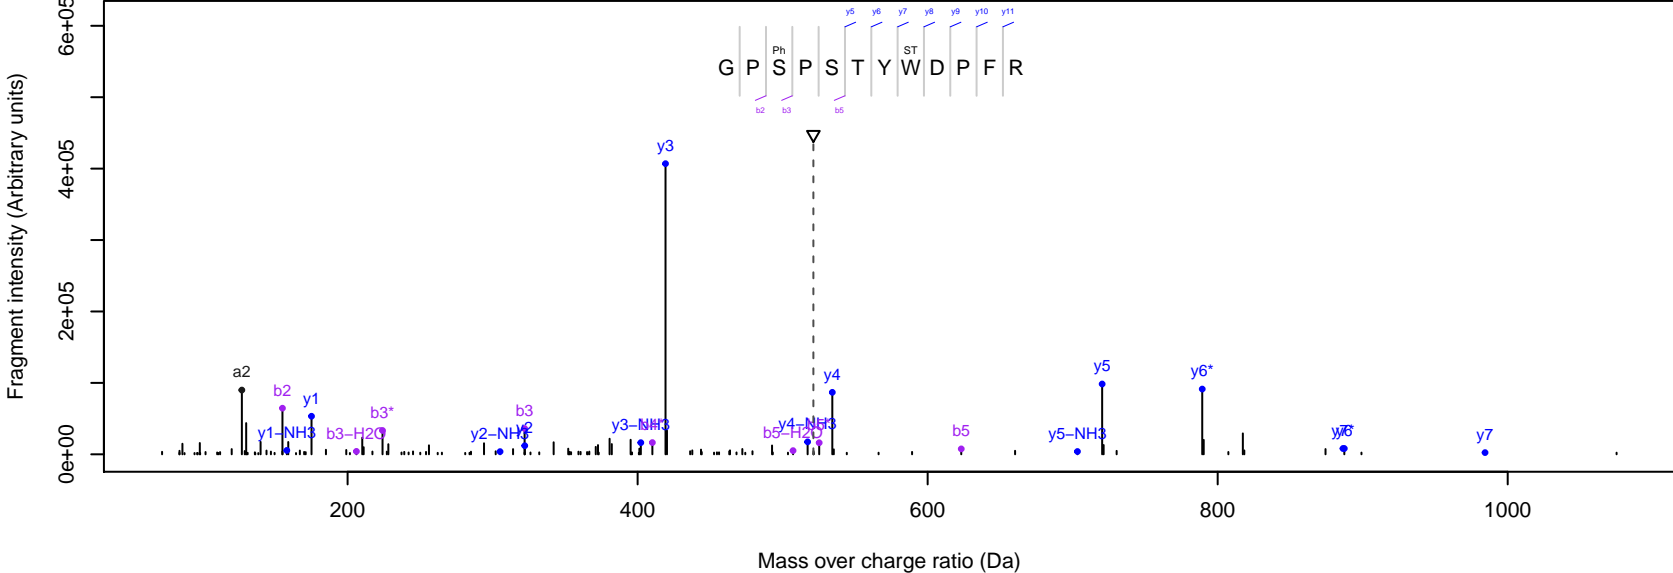

KVELS(Phospho (STY))ES(Phospho (STY))EEDKGGK-2+

Source : QE3\_201126\_FR\_TiOx\_hum\_tissue\_Urea\_RNAB\_H Scan : 7309

Andromeda score : 163.9

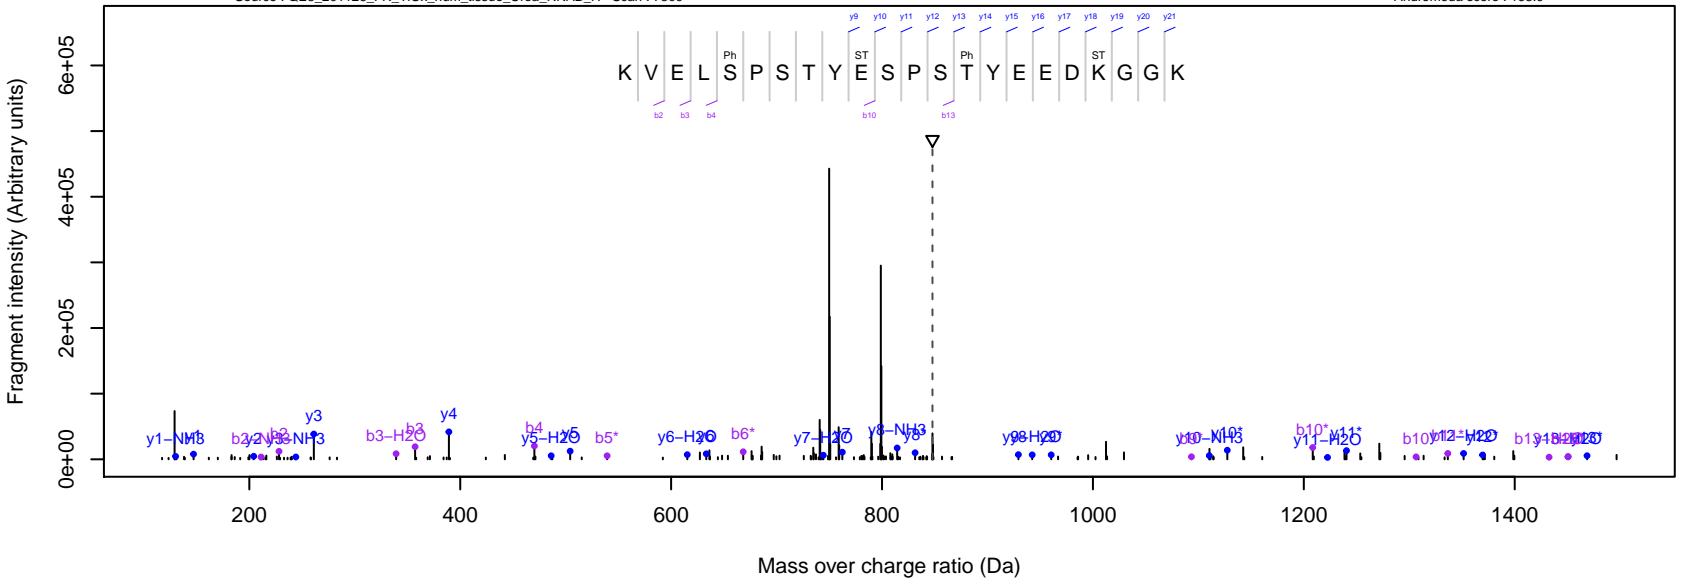

SASQSS(Phospho (STY))LDKLDQELK-2+

Source : QE3\_201126\_FR\_TiOx\_hum\_tissue\_Urea\_RNAB\_B Scan : 23604

Andromeda score : 163.9

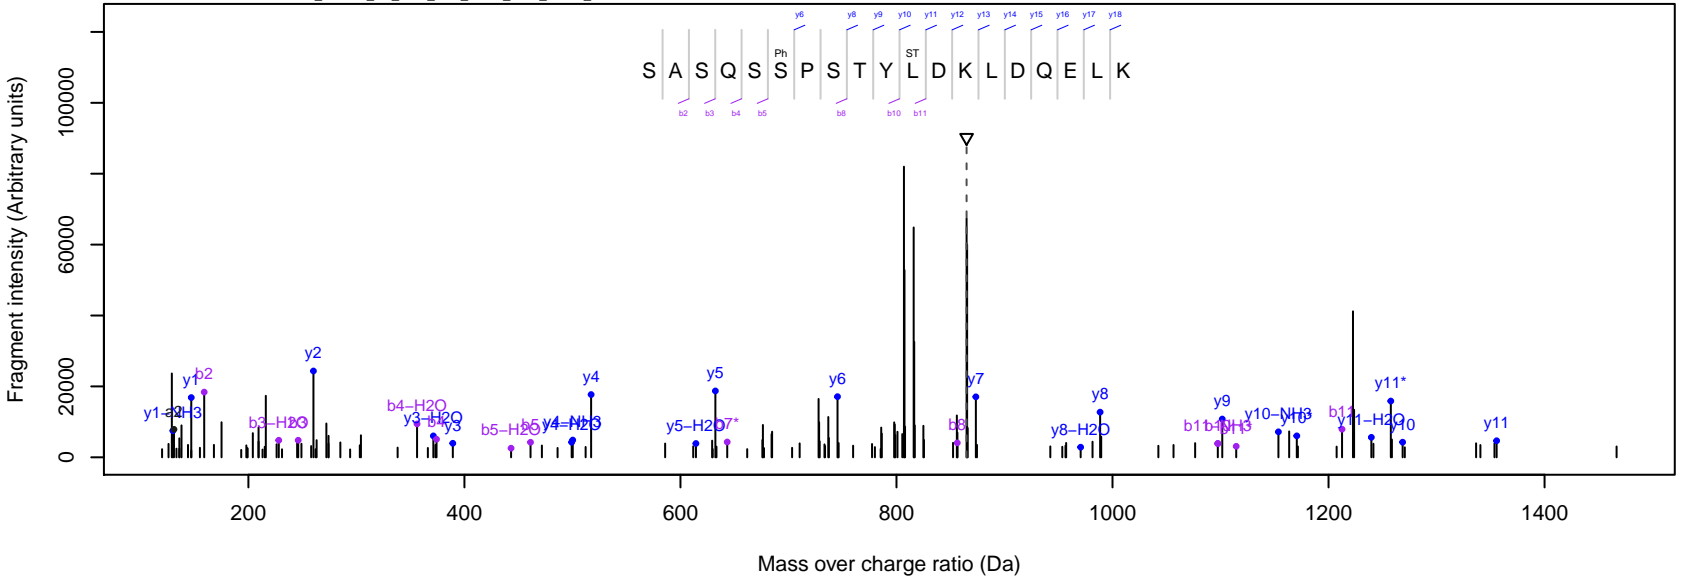

KAYS(Phospho (STY))FCGTVEYMAPEVNVNR-2+

Source : QE3\_201126\_FR\_TiOx\_hum\_tissue\_Urea\_RNAB\_H Scan : 42736

Andromeda score : 163.85

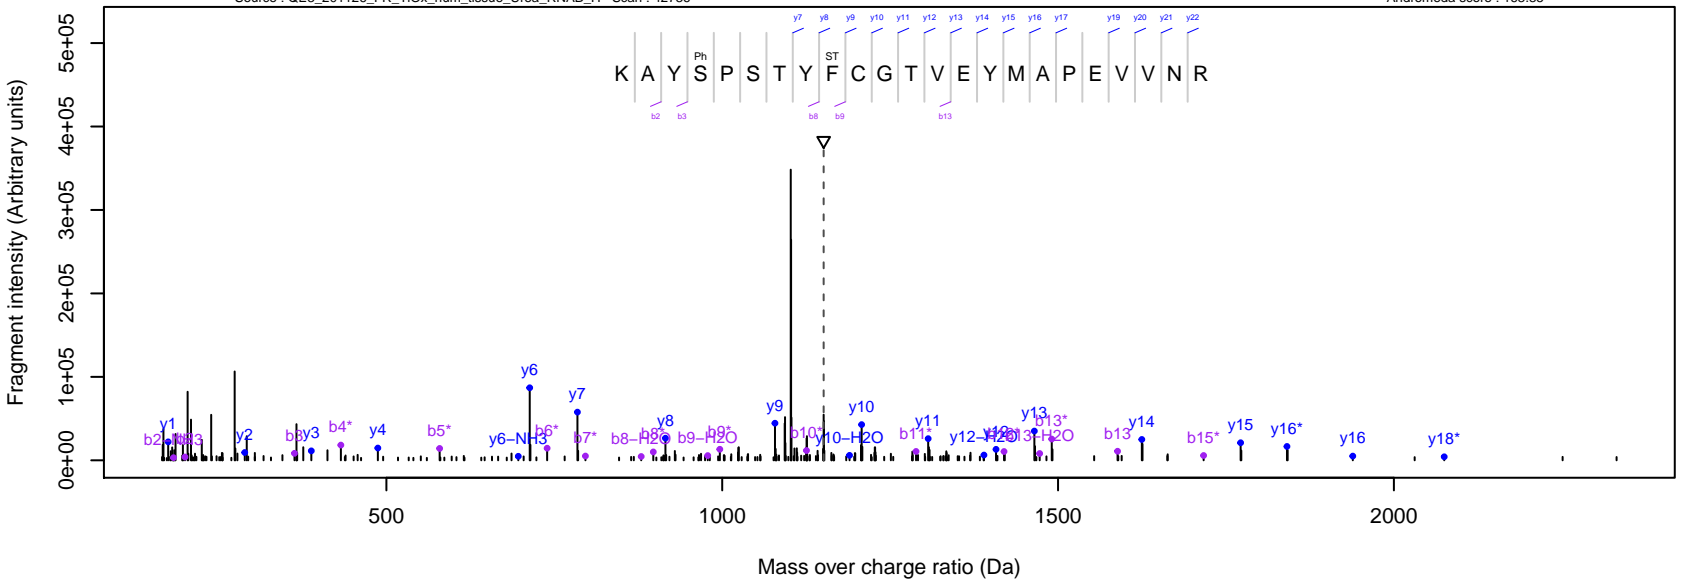



ADRLEGRSEGS(Phospho (STY))GQENENEDEE-3+

Source : QE3\_201126\_FR\_TiOx\_hum\_tissue\_Urea\_RNAB\_N Scan : 8581

Andromeda score : 163.46

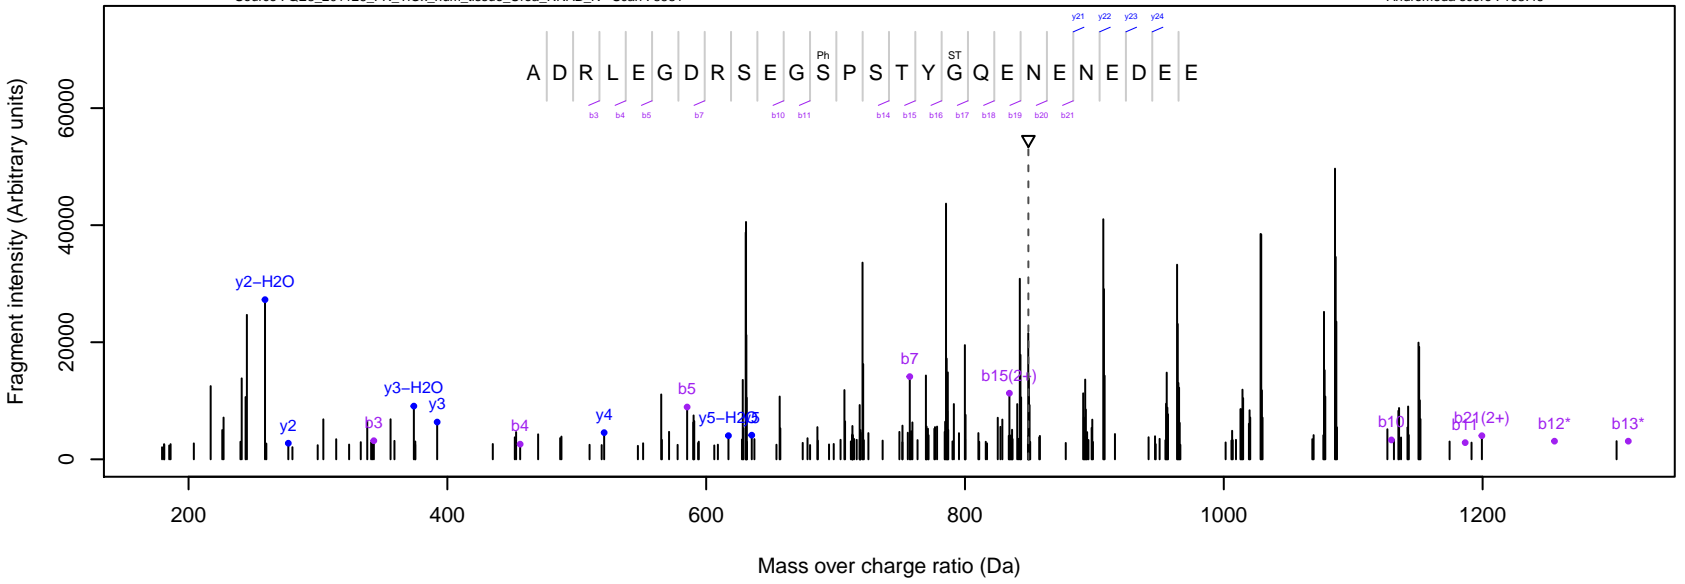

VEQEEPIISPSTYPGSTLPEVK-2+

Source : QE3\_201126\_FR\_TiOx\_hum\_tissue\_Urea\_RNAB\_H Scan : 34012

Andromeda score : 163.41

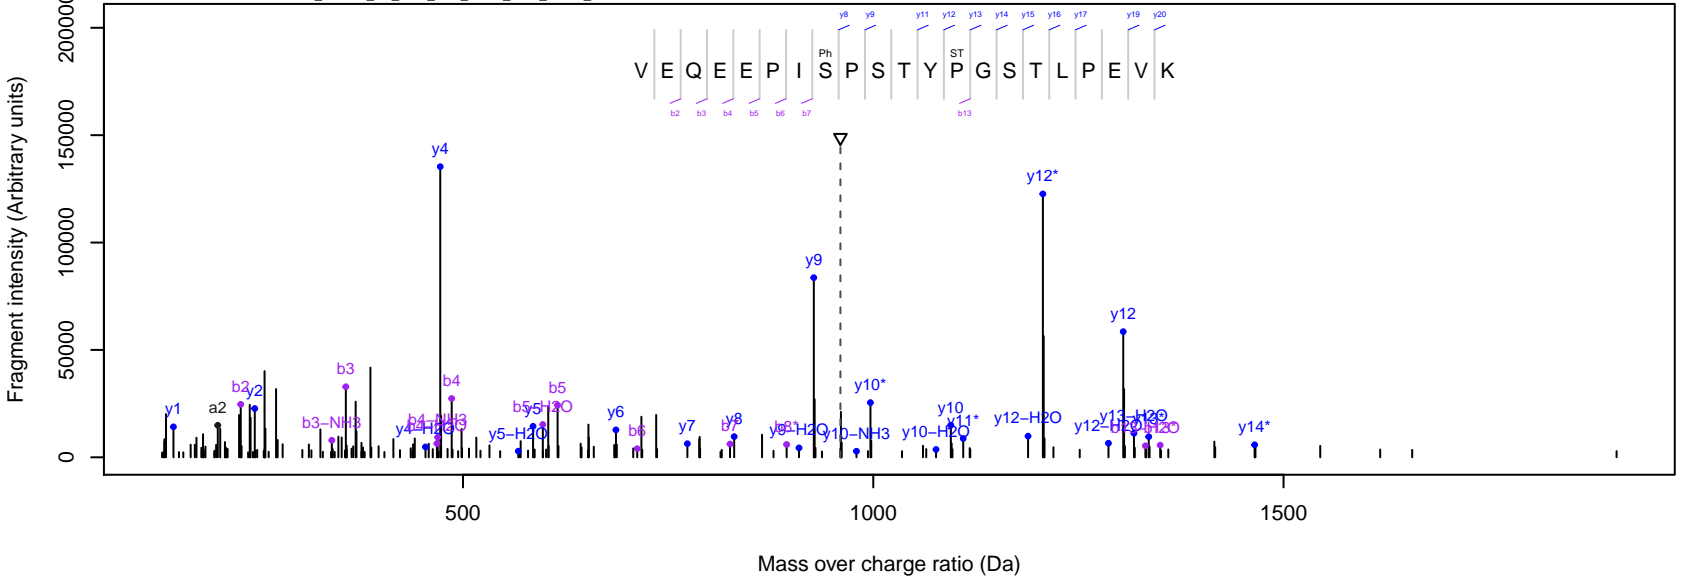

SHS(Phospho (STY))RQAS(Phospho (STY))TDAGTAGALTPQHVR-3+

Source : QE3\_201126\_FR\_TiOx\_hum\_tissue\_Urea\_RNAB\_N Scan : 10622

Andromeda score : 163.38

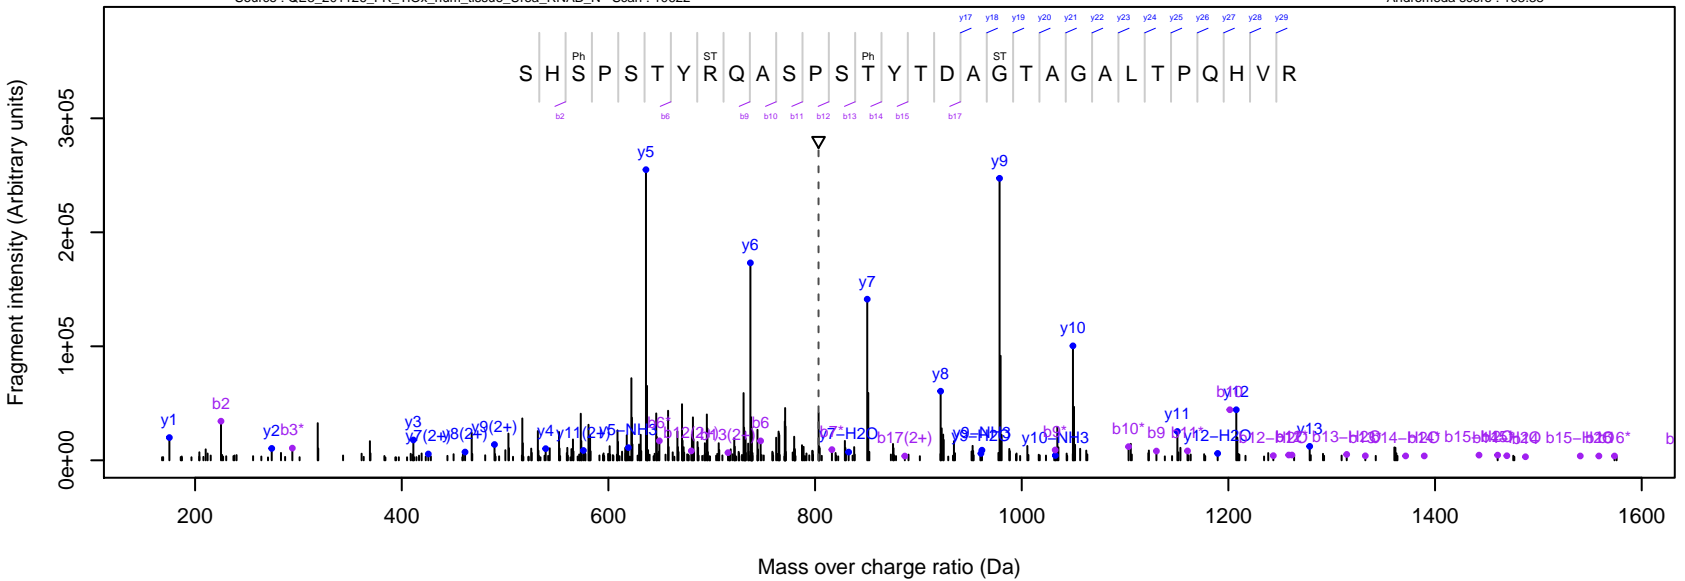

SLS(Phospho (STY))DFTGPPQLQALK-2+

Source : QE3\_201126\_FR\_TiOx\_hum\_tissue\_Urea\_RNAB\_B Scan : 51749

Andromeda score : 163.27

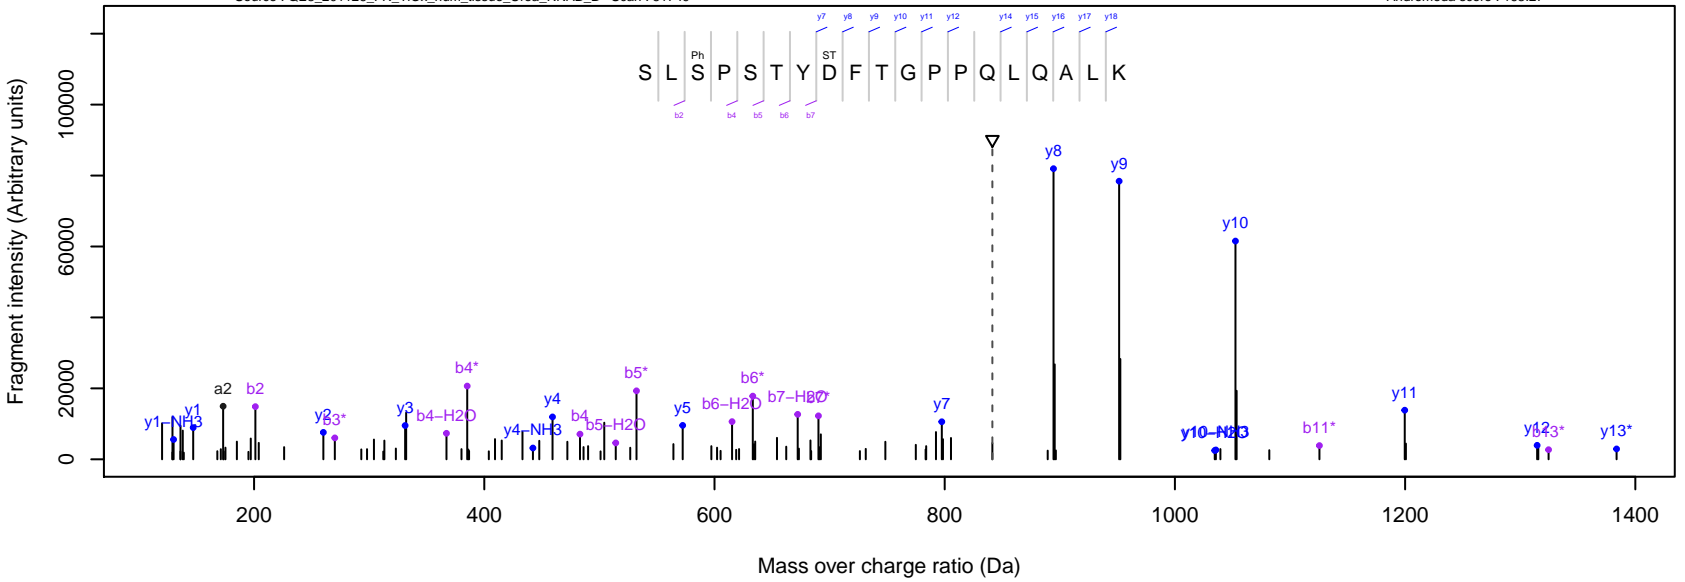

SPVNEDNQDGVTHSDGAGNLD EEQDS(Phospho (STY))EGETYEDIAASKER-4+

Source : QE3\_201126\_FR\_TiOx\_hum\_tissue\_Urea\_RNAB\_B Scan : 24090

Andromeda score : 163.27

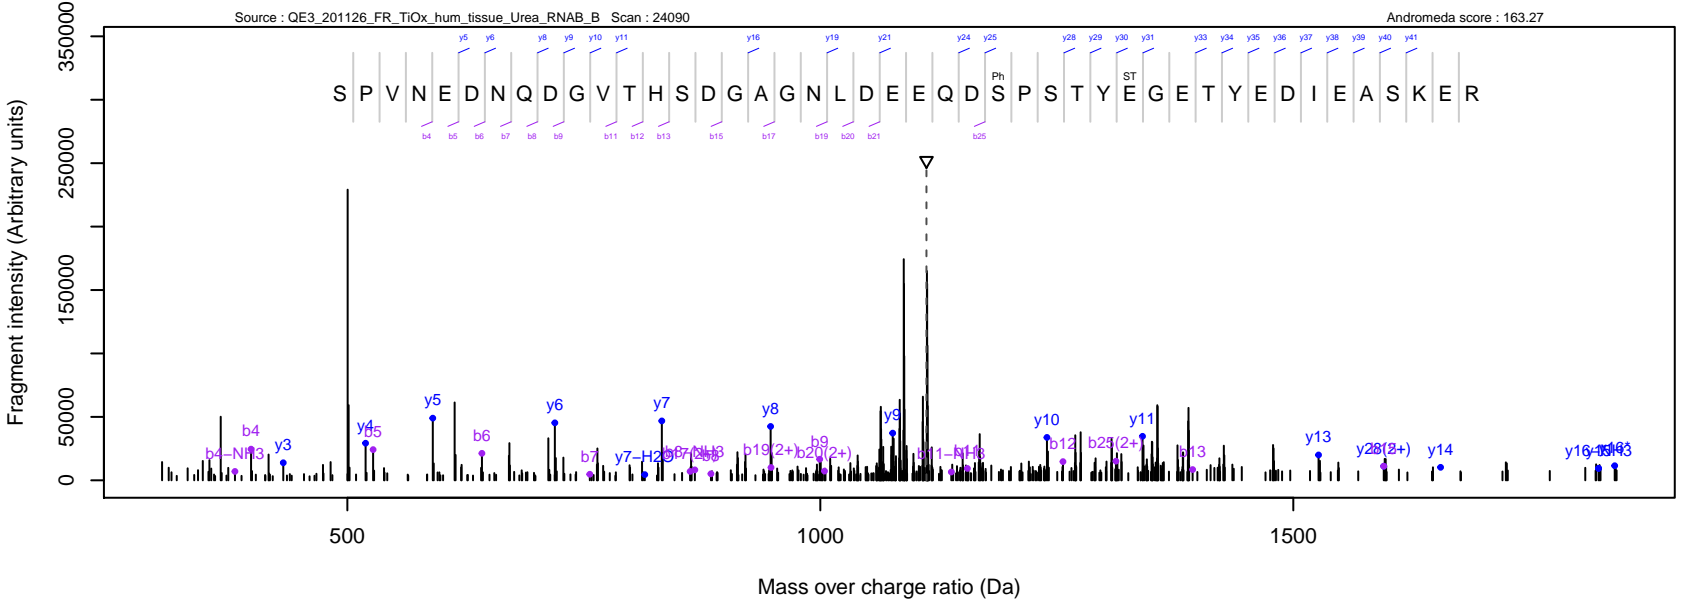

DPAQPM(Oxidation (M))S(Phospho (STY))PGEATQSGARPADR-3+

Source : QE3\_201126\_FR\_TiOx\_hum\_tissue\_Urea\_RNAB\_N Scan : 10291

Andromeda score : 163.18

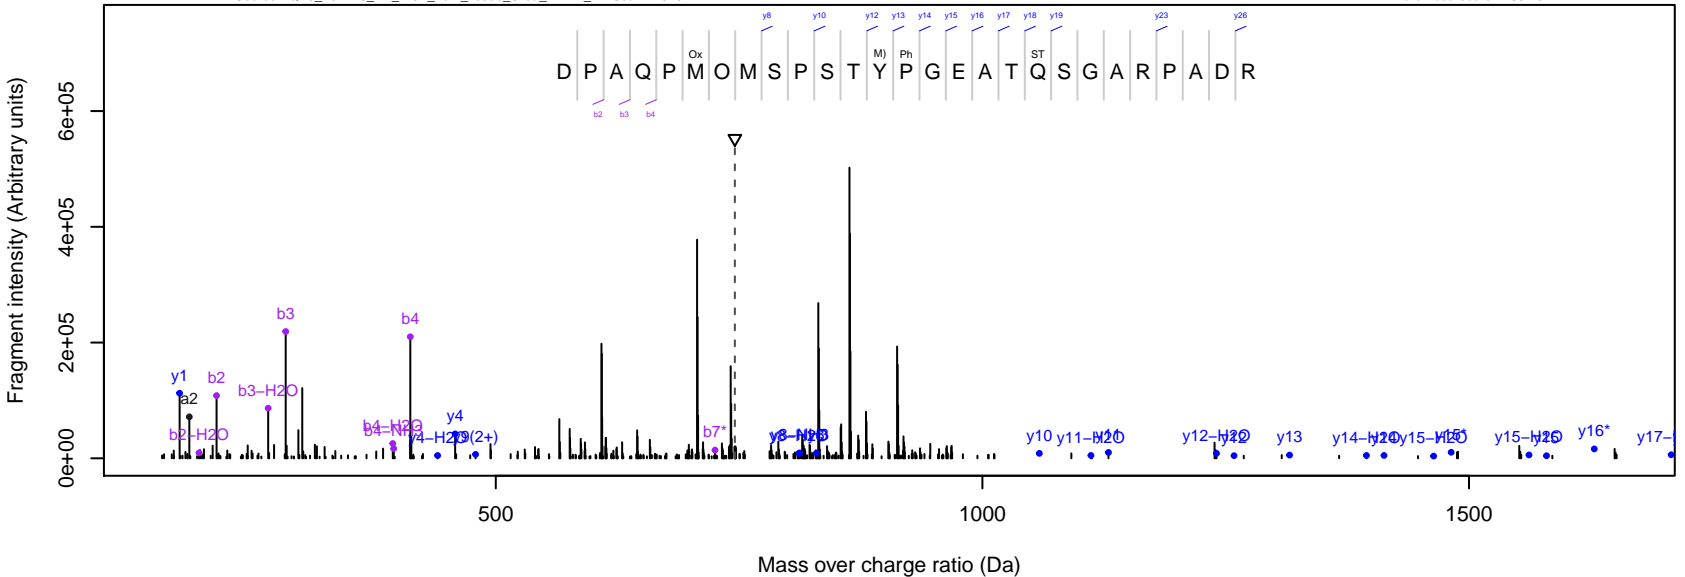

S(Phospho (STY))HNDFVAILDLPEGEHQYK-3+

Source : QE3\_201126\_FR\_TiOx\_hum\_tissue\_Urea\_RNAB\_H Scan : 42007

Andromeda score : 163.15

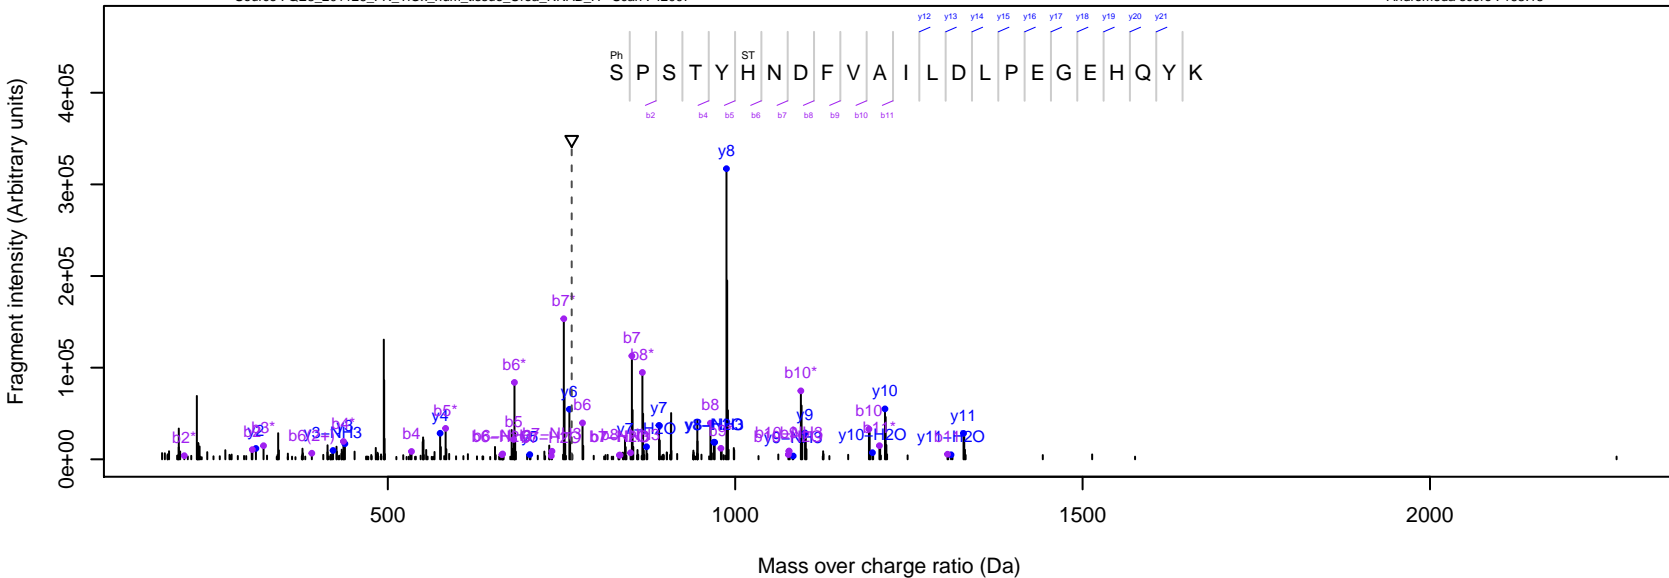

TTIPEEEEEEEAAGVVVEELFHQQGT(Phospho (STY))PR-3+

Source : QE3\_201126\_FR\_TiOx\_hum\_tissue\_Urea\_RNAB\_B Scan : 57407

Andromeda score : 163.13

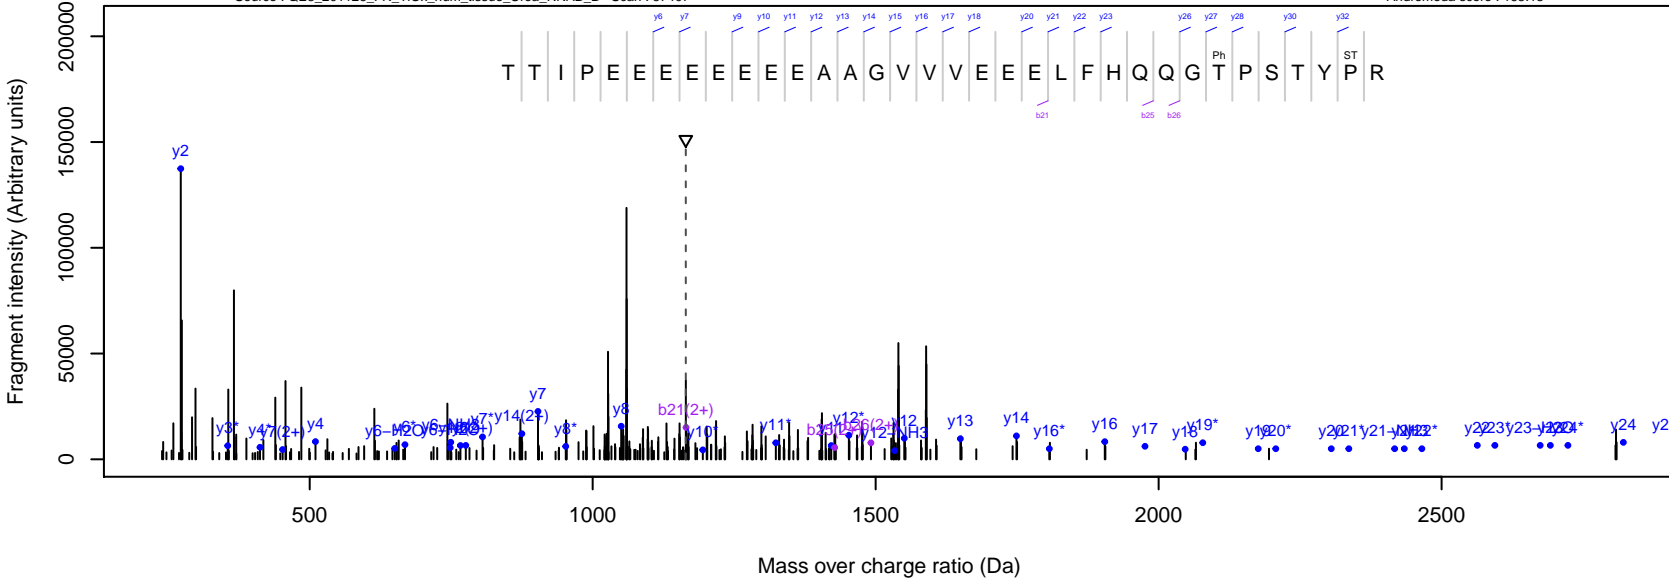

AADS(Phospho (STY))DDGAVSAPAASDGGVSK-2+

Source : QE3\_201126\_FR\_TiOx\_hum\_tissue\_Urea\_RNAB\_N Scan : 15487

Andromeda score : 163.11

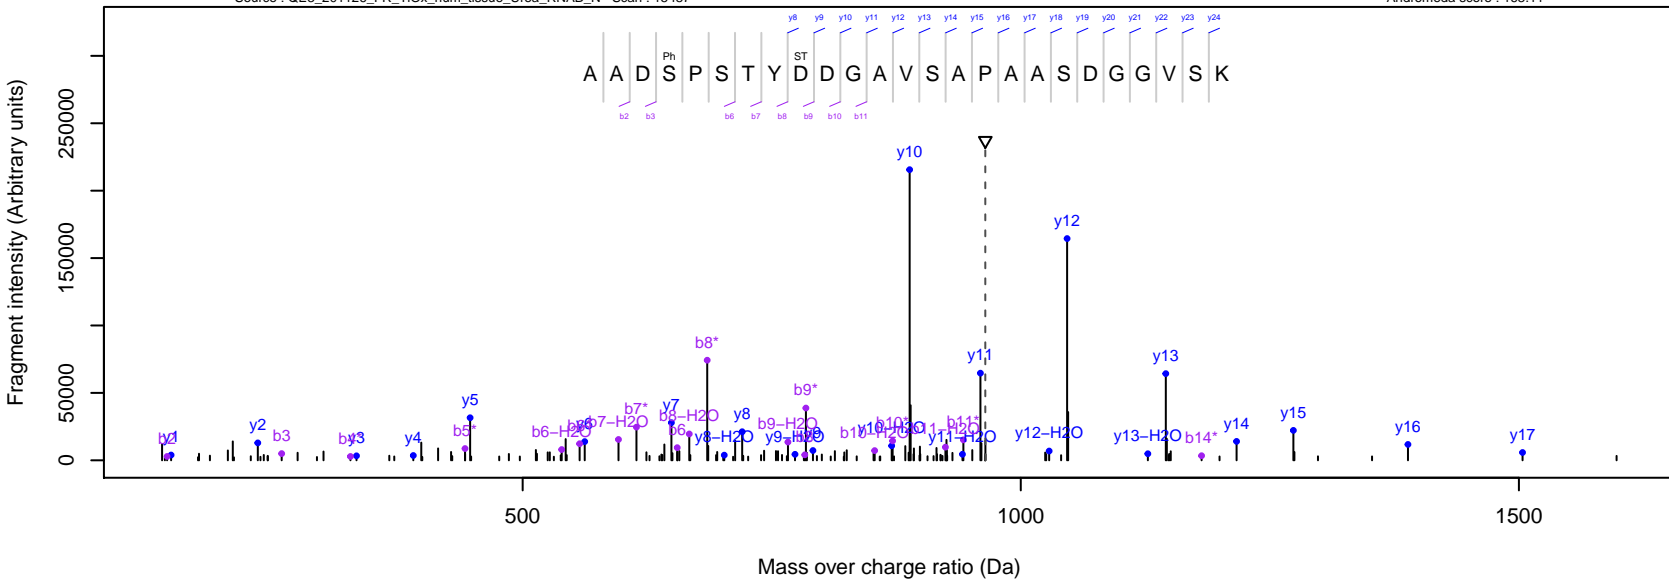

RAS(Phospho (STY))ISEPSTDPEPR-3+

Source : QE3\_201126\_FR\_TiOx\_hum\_tissue\_Urea\_RNAB\_H Scan : 11794

Andromeda score : 163.11

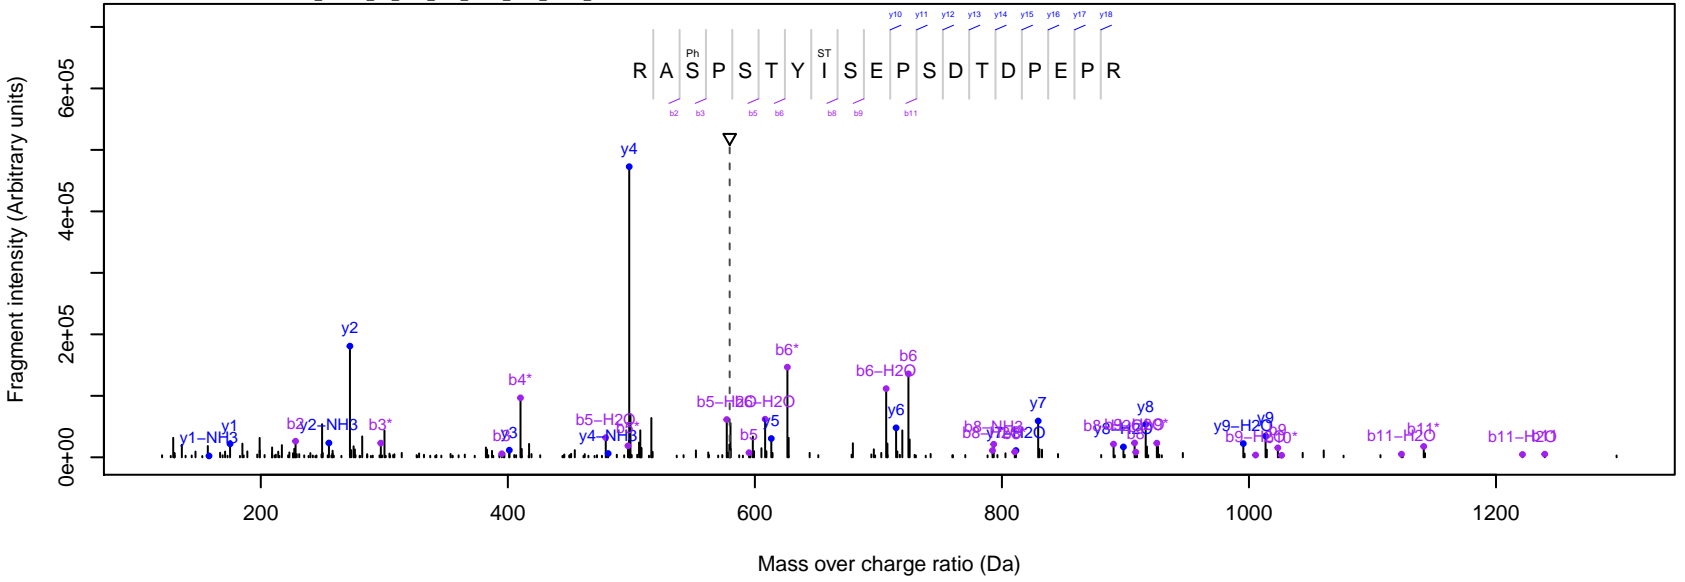

S(Phospho (STY))T(Phospho (STY))SFRGGMGSSGLATGIAGGLAGMGGIQNEK-3+

Source : QE3\_201126\_FR\_TiOx\_hum\_tissue\_Urea\_RNAB\_N Scan : 54317

Andromeda score : 163.06

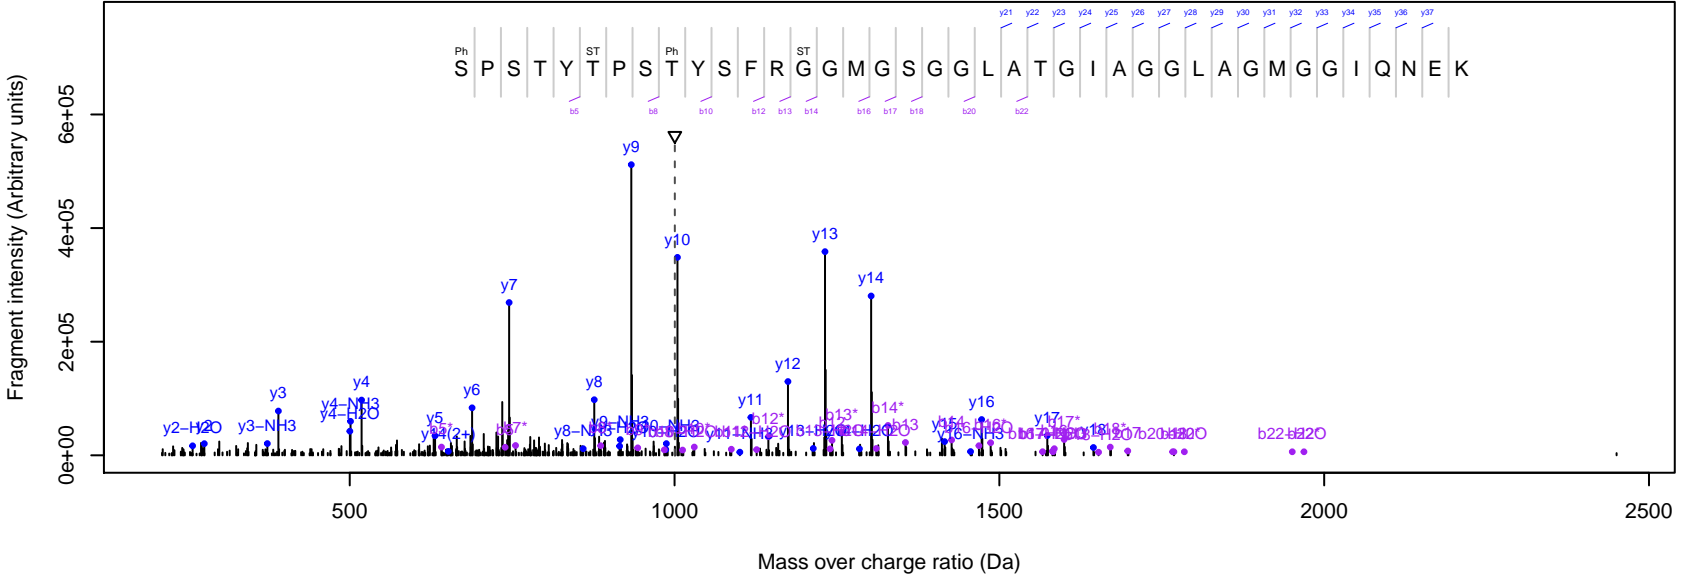

SAS(Phospho (STY))APTLAETEKETAEHLDLAGASSRPK-4+

Source : QE3\_201126\_FR\_TiOx\_hum\_tissue\_Urea\_RNAB\_H Scan : 31448

Andromeda score : 163

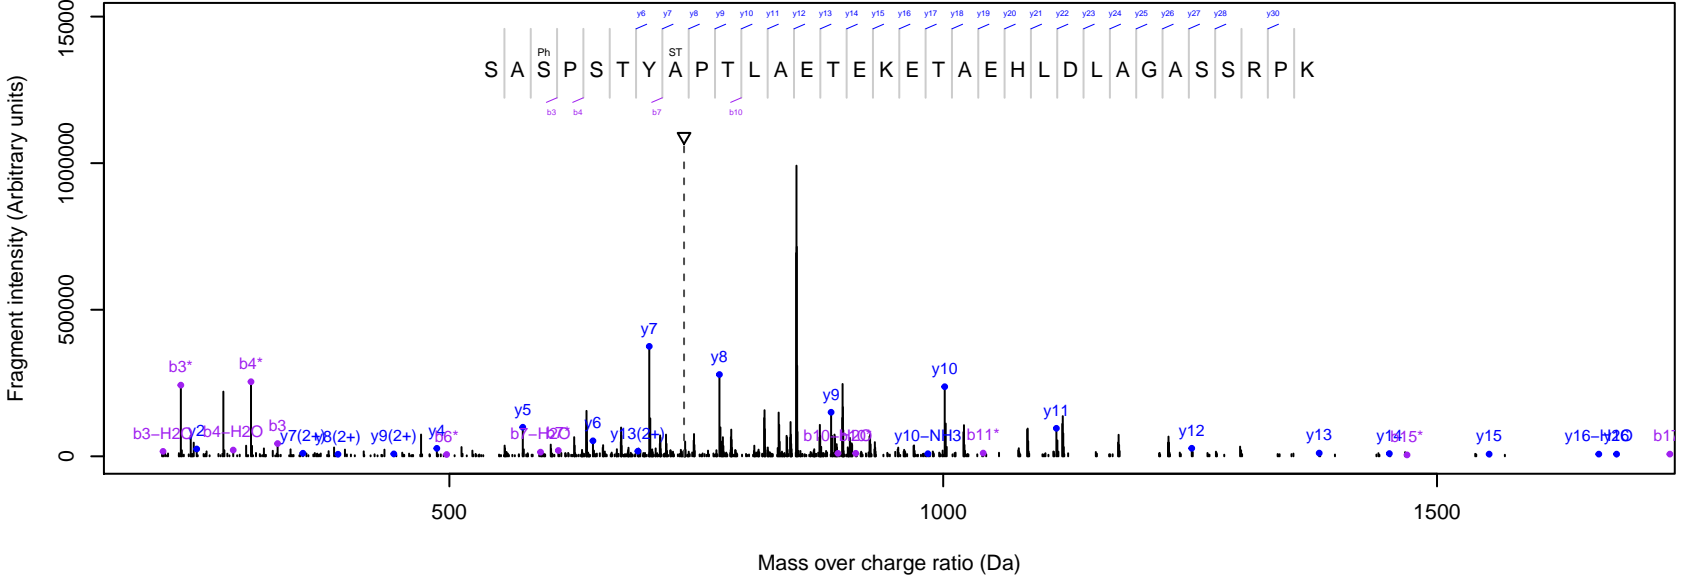



KEDS(Phospho (STY))DEEEDDDSEEEDEDEDEDEDEIEPAAMK-4+

Source : QE3\_201126\_FR\_TIOx\_hum\_tissue\_Urea\_RNAB\_N Scan : 28093

Andromeda score : 162.73

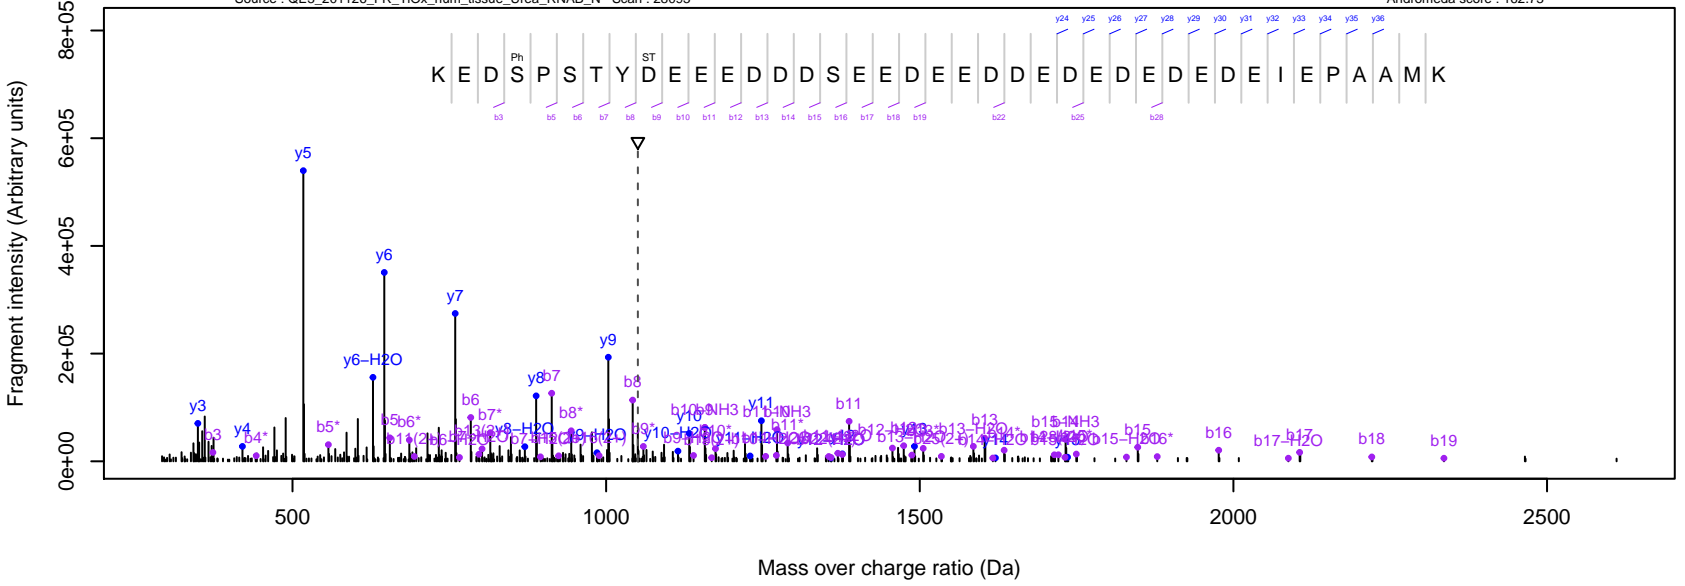

LVINGNPITIFQERDPS(Phospho (STY))KIK-3+

Source : QE3\_201126\_FR\_TIOx\_hum\_tissue\_Urea\_RNAB\_N Scan : 41756

Andromeda score : 162.61

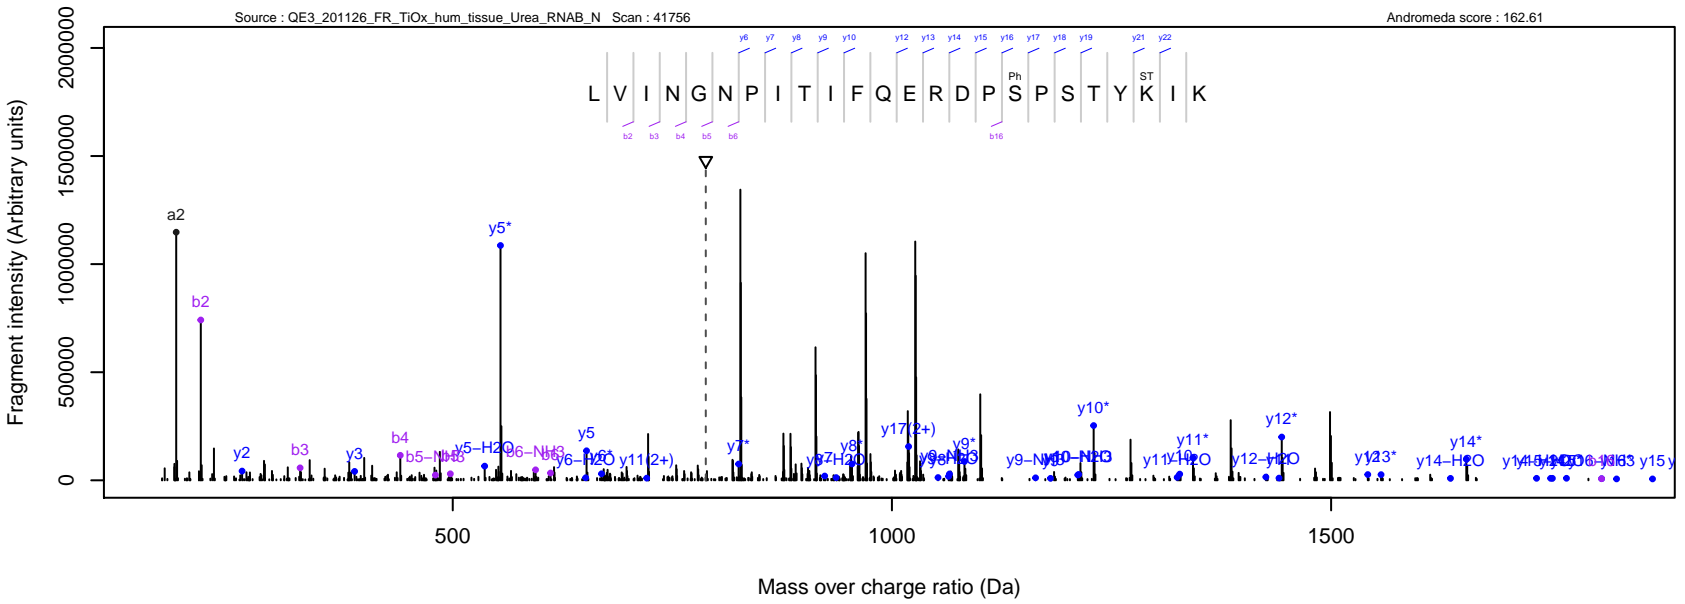

NS(Phospho (STY))LTGEEGLAR-2+

Source : QE3\_201126\_FR\_TIOx\_hum\_tissue\_Urea\_RNAB\_B Scan : 19448

Andromeda score : 162.48

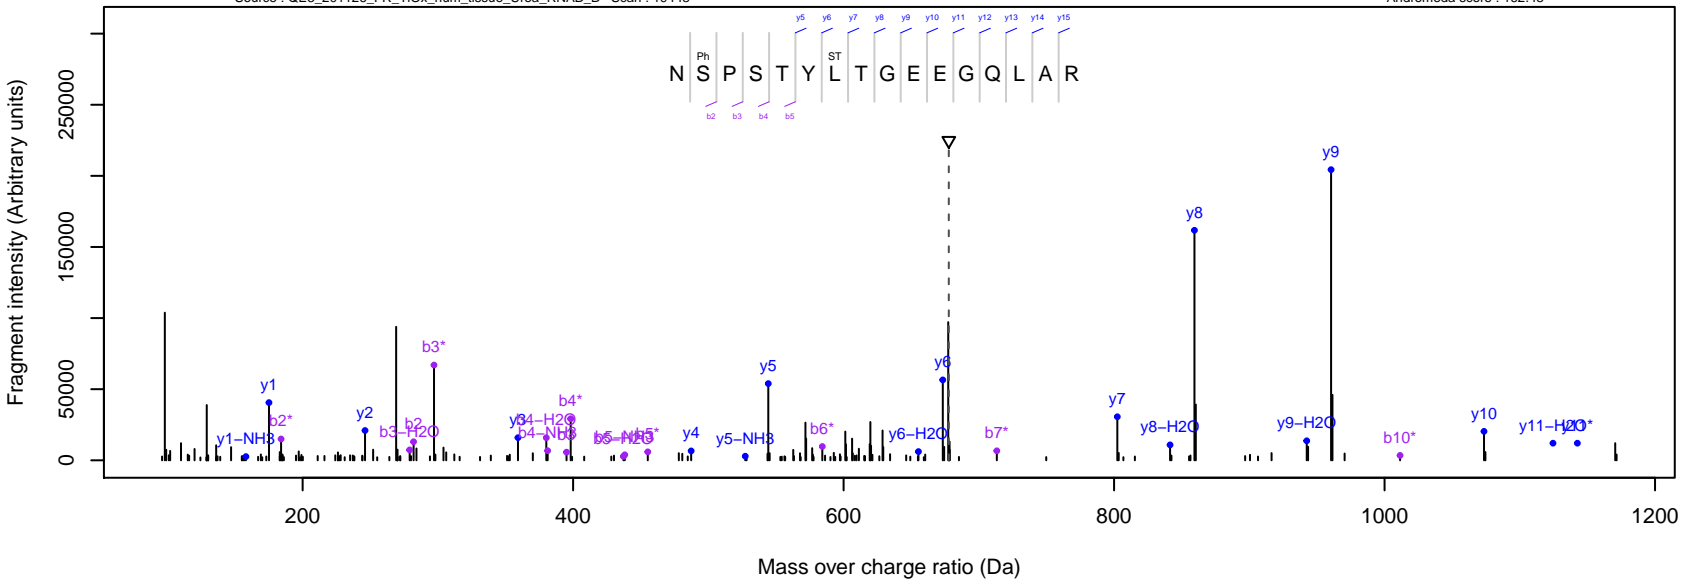

VPPAPVPCPPS(Phospho (STY))PGPSAVPSSPK-3+

Source : QE3\_201126\_FR\_TIOx\_hum\_tissue\_Urea\_RNAB\_N Scan : 30901

Andromeda score : 162.47

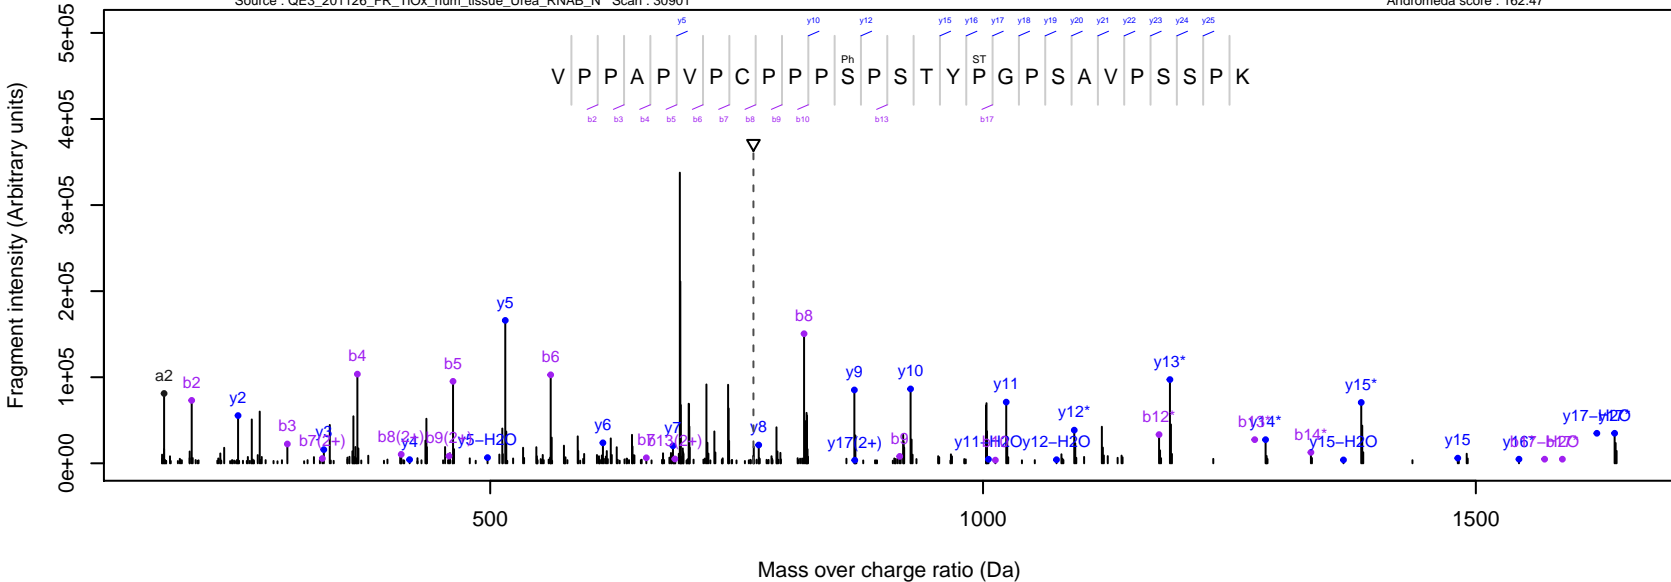

VSVGAPDLSLEAEGS(Phospho (STY))IKLPK-3+

Source : QE3\_201126\_FR\_TIOx\_hum\_tissue\_Urea\_RNAB\_N Scan : 41856

Andromeda score : 162.47

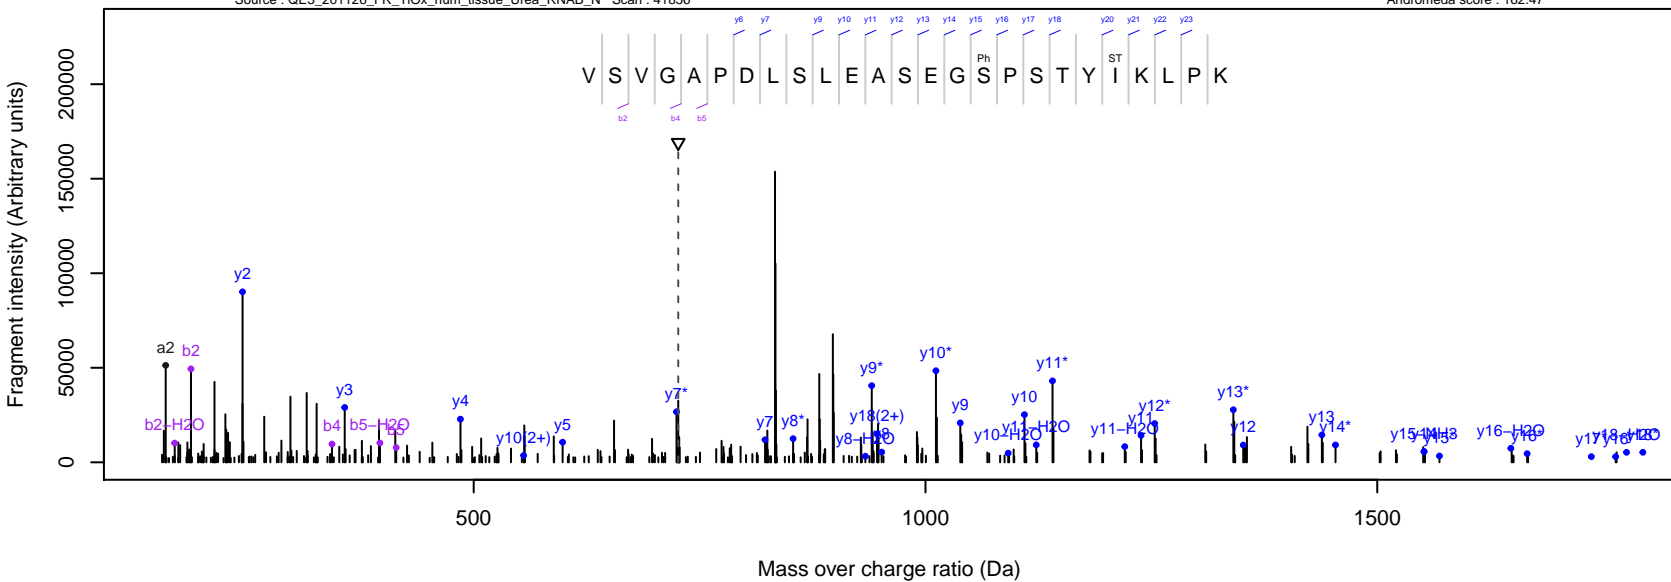

EVLDEDT(Phospho (STY))DEEKETLK-2+

Source : QE3\_201126\_FR\_TIOx\_hum\_tissue\_Urea\_RNAB\_N Scan : 18048

Andromeda score : 162.46

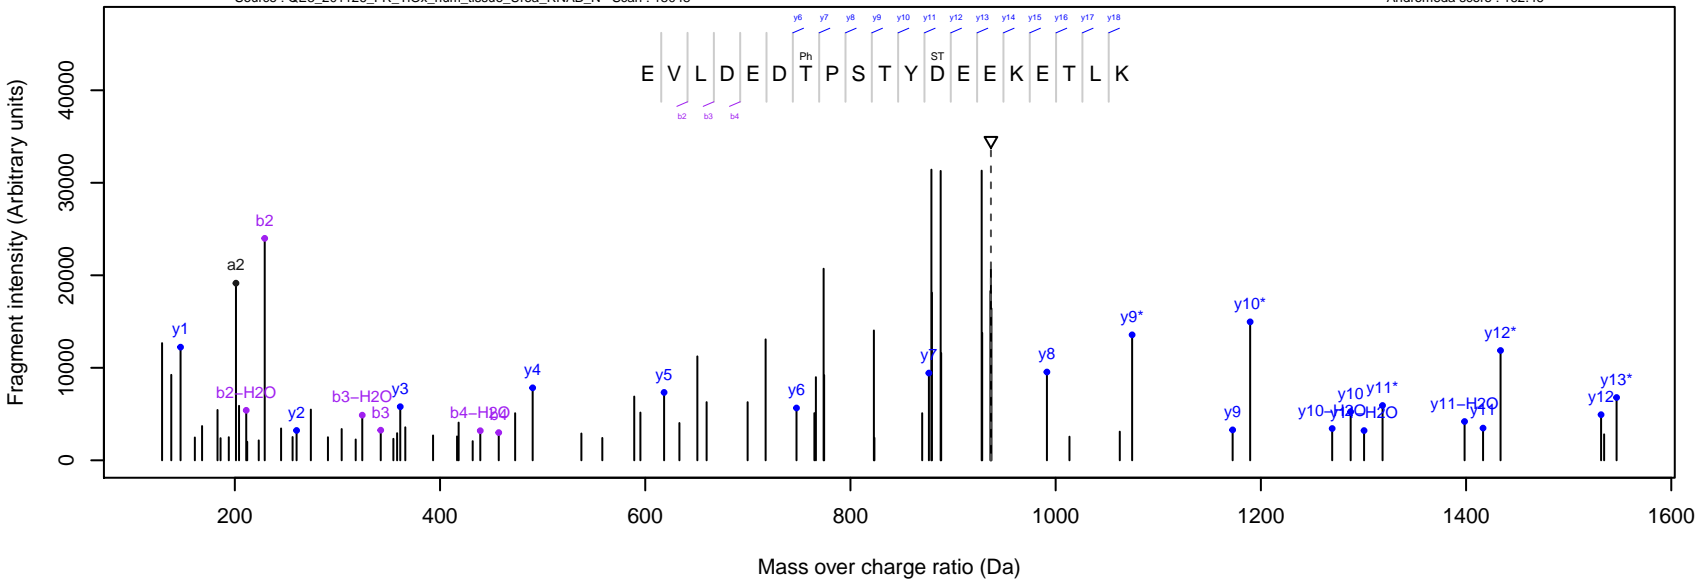

NS(Phospho (STY))PGLLVSPGNLNK-2+

Source : QE3\_201126\_FR\_TiOx\_hum\_tissue\_Urea\_RNAB\_H Scan : 33006

Andromeda score : 162.46

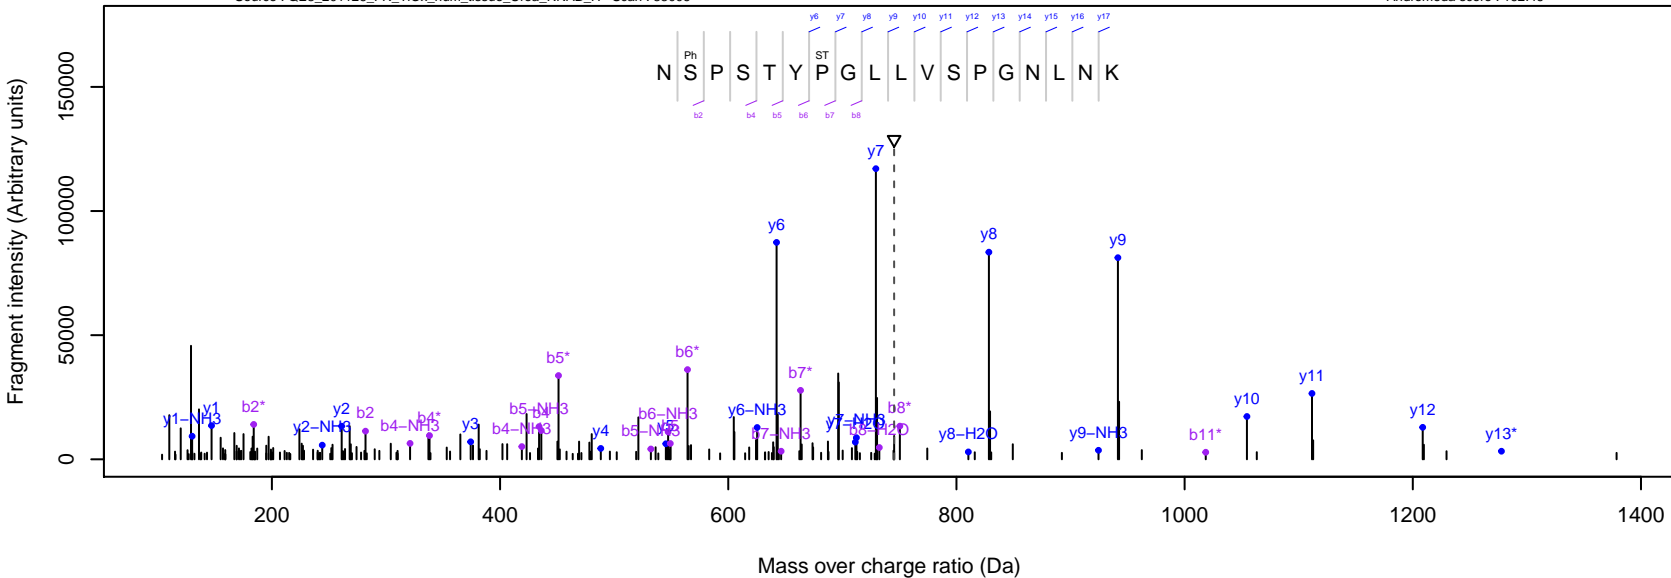

SIS(Phospho (STY))ENSLVAMDFSGQK-2+

Source : QE3\_201126\_FR\_TiOx\_hum\_tissue\_Urea\_RNAB\_B Scan : 45515

Andromeda score : 162.46

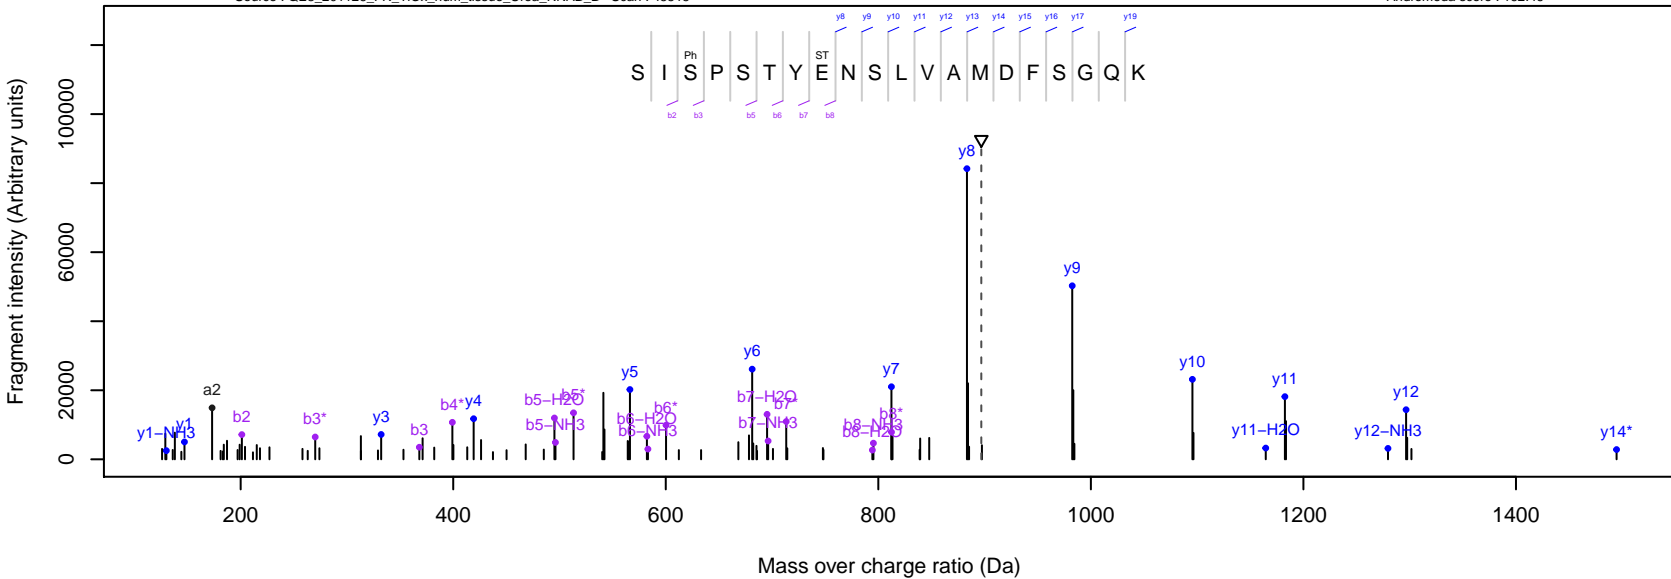

RGS(Phospho (STY))LCATCGLPVTGR-2+

Source : QE3\_201126\_FR\_TiOx\_hum\_tissue\_Urea\_RNAB\_B Scan : 20642

Andromeda score : 162.42

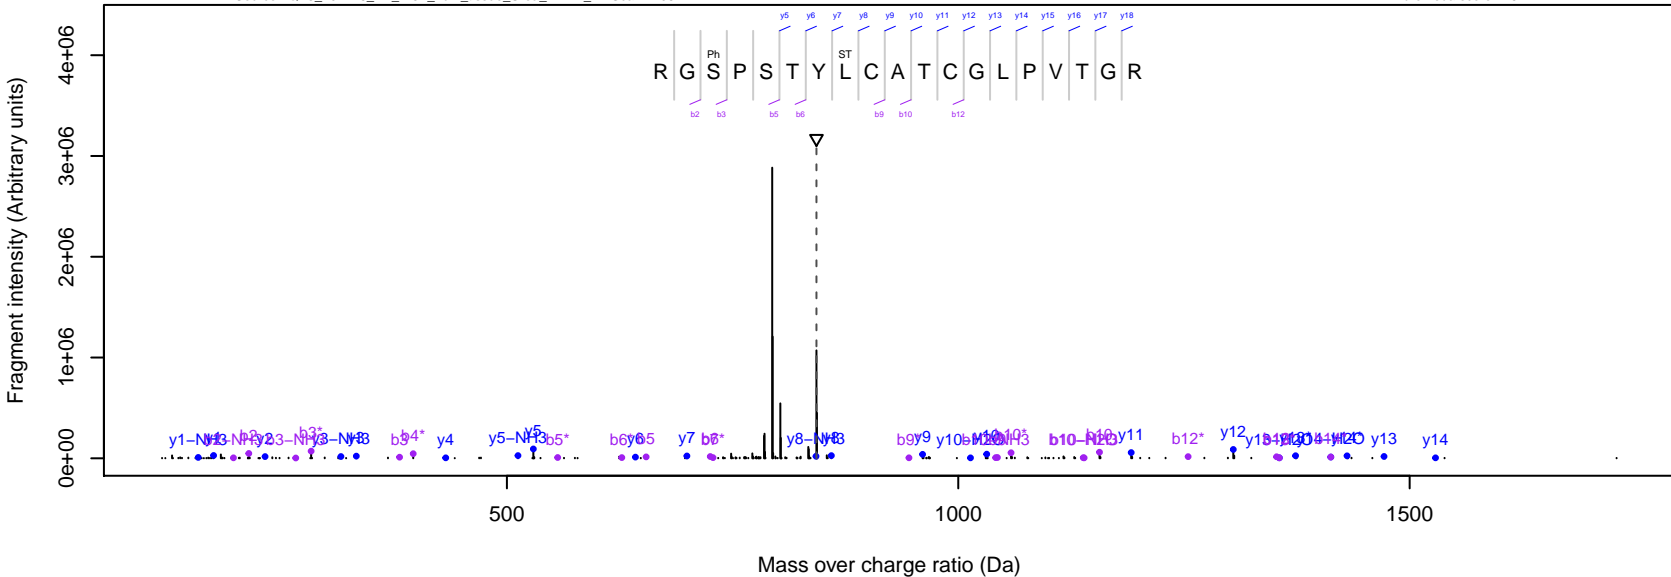

LCAGIM(Oxidation (M))ITAS(Phospho (STY))HNPK-2+

Source : QE3\_201126\_FR\_TiOx\_hum\_tissue\_Urea\_RNAB\_N Scan : 18266

Andromeda score : 162.41

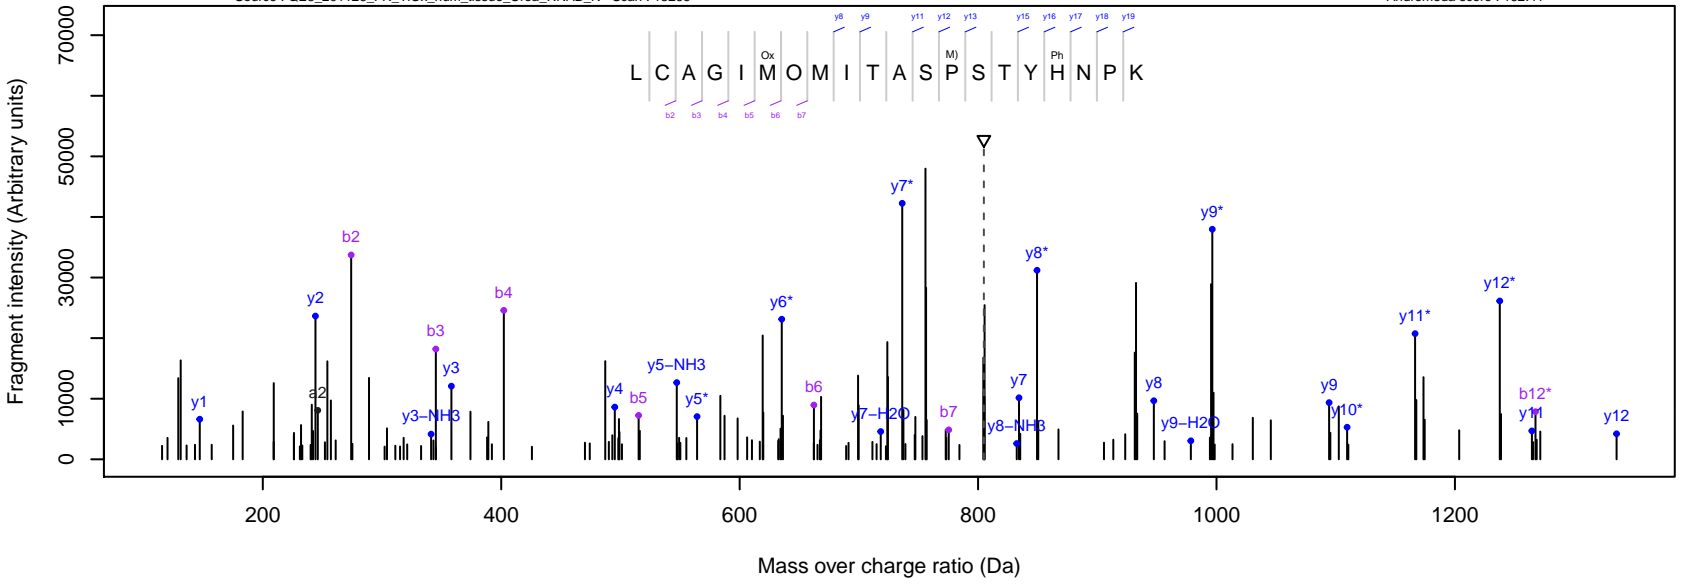

SPS(Phospho (STY))AEFSPAAPPGISSIHSPSLR-3+

Source : QE3\_201126\_FR\_TiOx\_hum\_tissue\_Urea\_RNAB\_N Scan : 39044

Andromeda score : 162.41

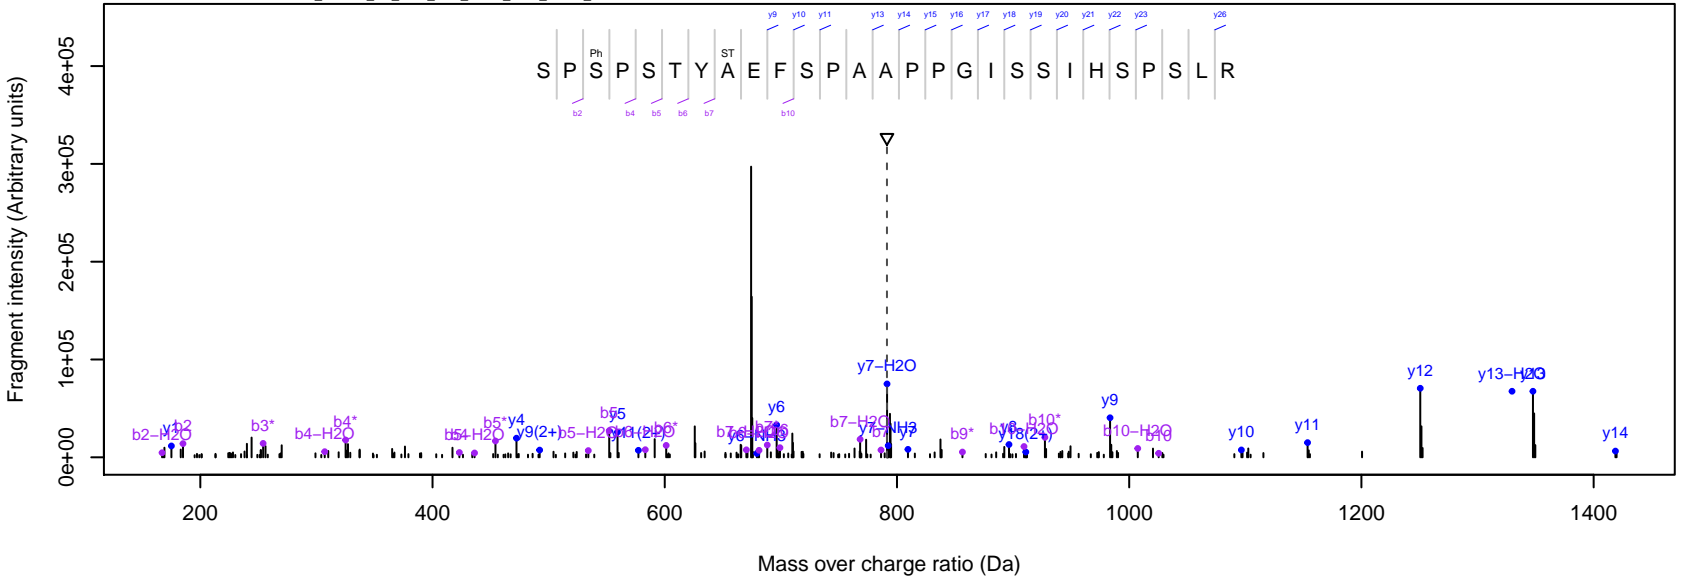

(Acetyl (Protein N-term))S(Phospho (STY))VELEEALPVTTAEGMAK-2+

Source : QE3\_201126\_FR\_TiOx\_hum\_tissue\_Urea\_RNAB\_N Scan : 60468

Andromeda score : 162.41

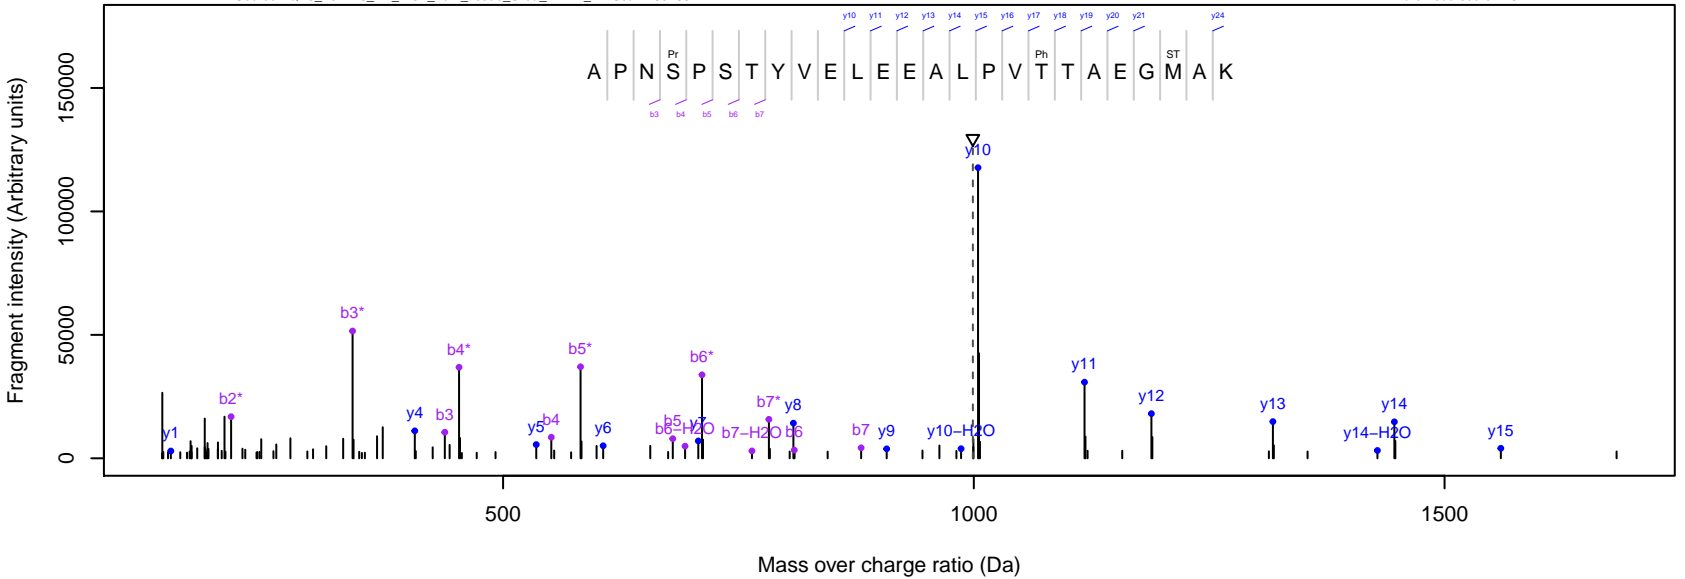

AVS(Phospho (STY))PPLDGPSPS(Phospho (STY))PR-2+

Source : QE3\_201126\_FR\_TiOx\_hum\_tissue\_Urea\_RNAB\_B Scan : 25026

Andromeda score : 162.37

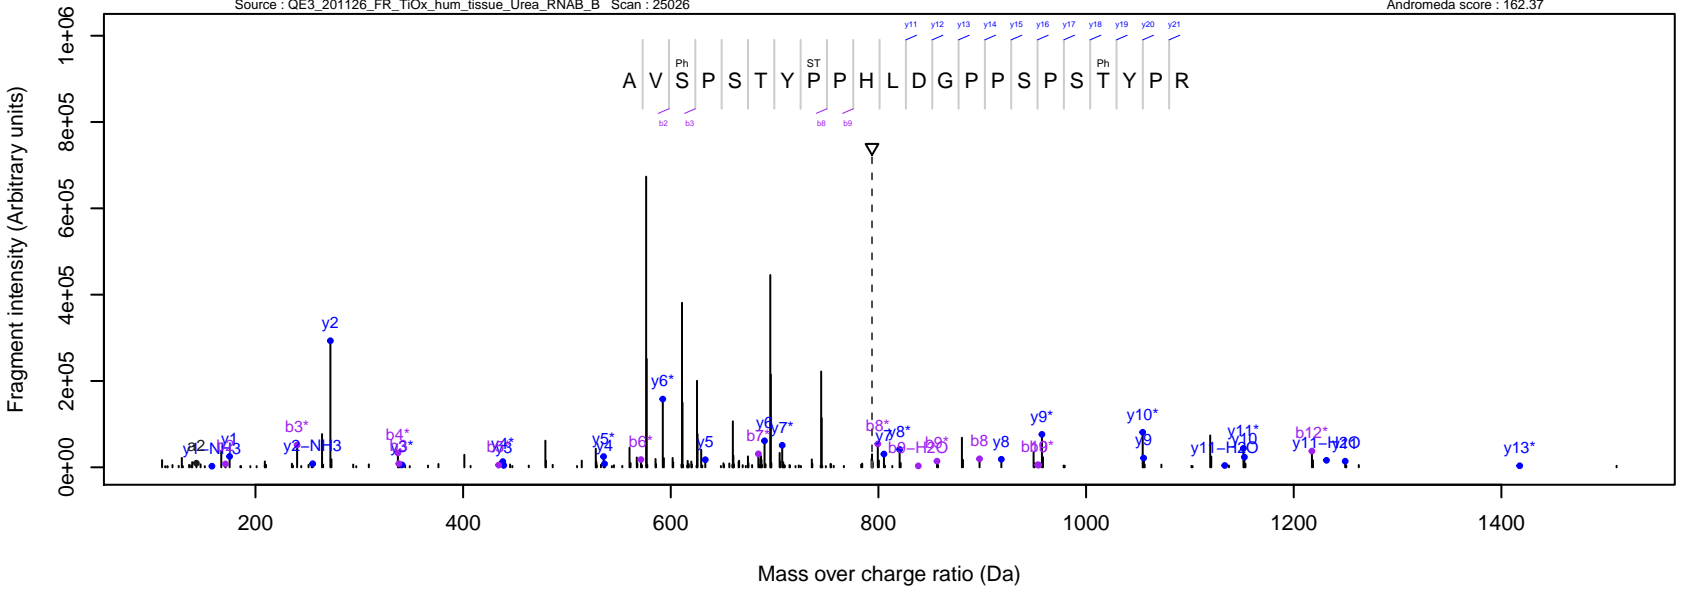

SIY(Phospho (STY))GEKFEDENFILK-3+

Source : QE3\_201126\_FR\_TiOx\_hum\_tissue\_Urea\_RNAB\_H Scan : 39035

Andromeda score : 162.37

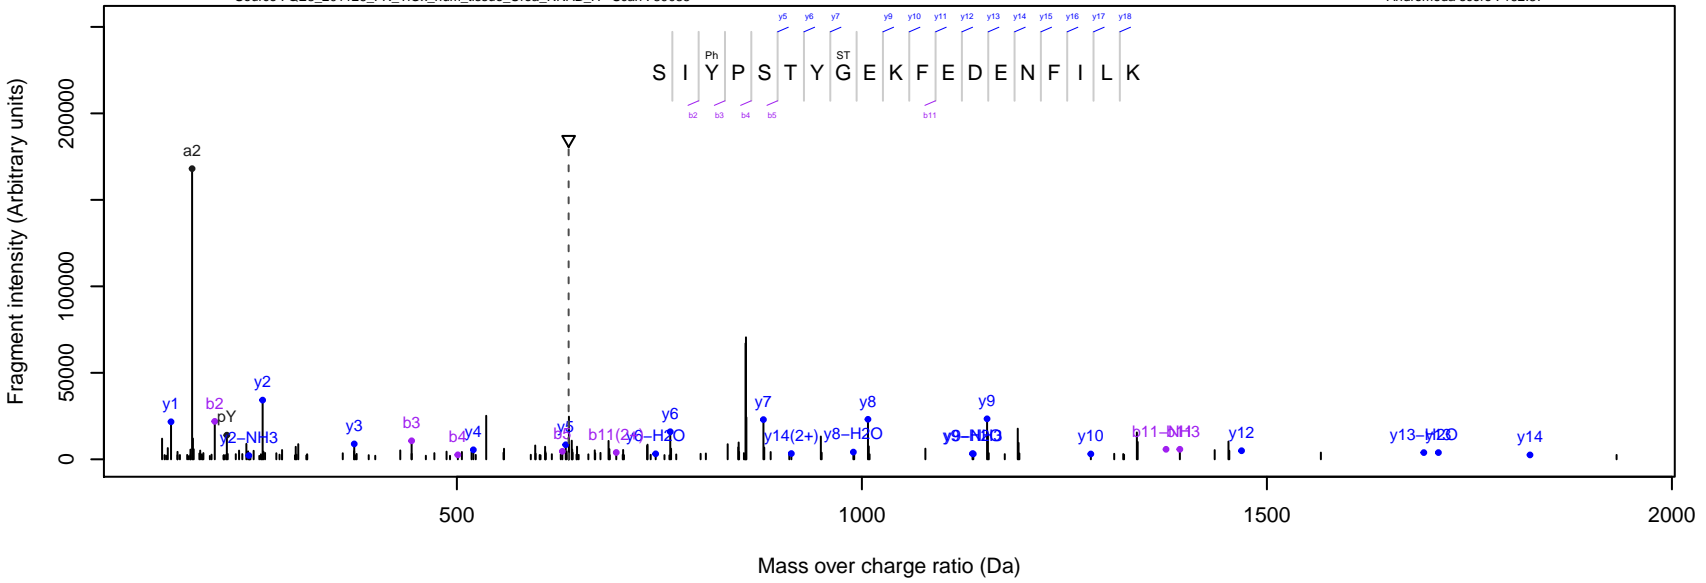

TVANLLSGKS(Phospho (STY))PR-2+

Source : QE3\_201126\_FR\_TiOx\_hum\_tissue\_Urea\_RNAB\_N Scan : 18614

Andromeda score : 162.37

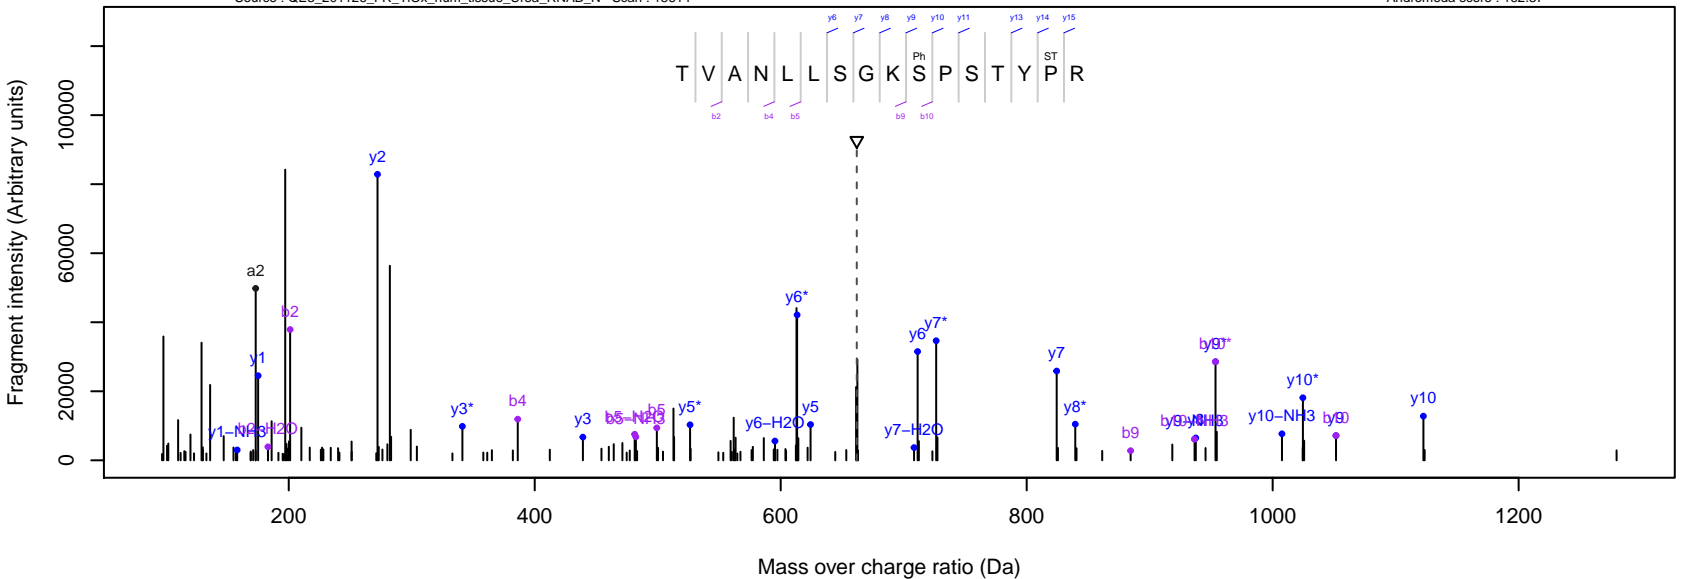

GPSS(Phospho (STY))VEDIKAK-2+

Source : QE3\_201126\_FR\_TiOx\_hum\_tissue\_Urea\_RNAB\_N Scan : 8556

Andromeda score : 162.34

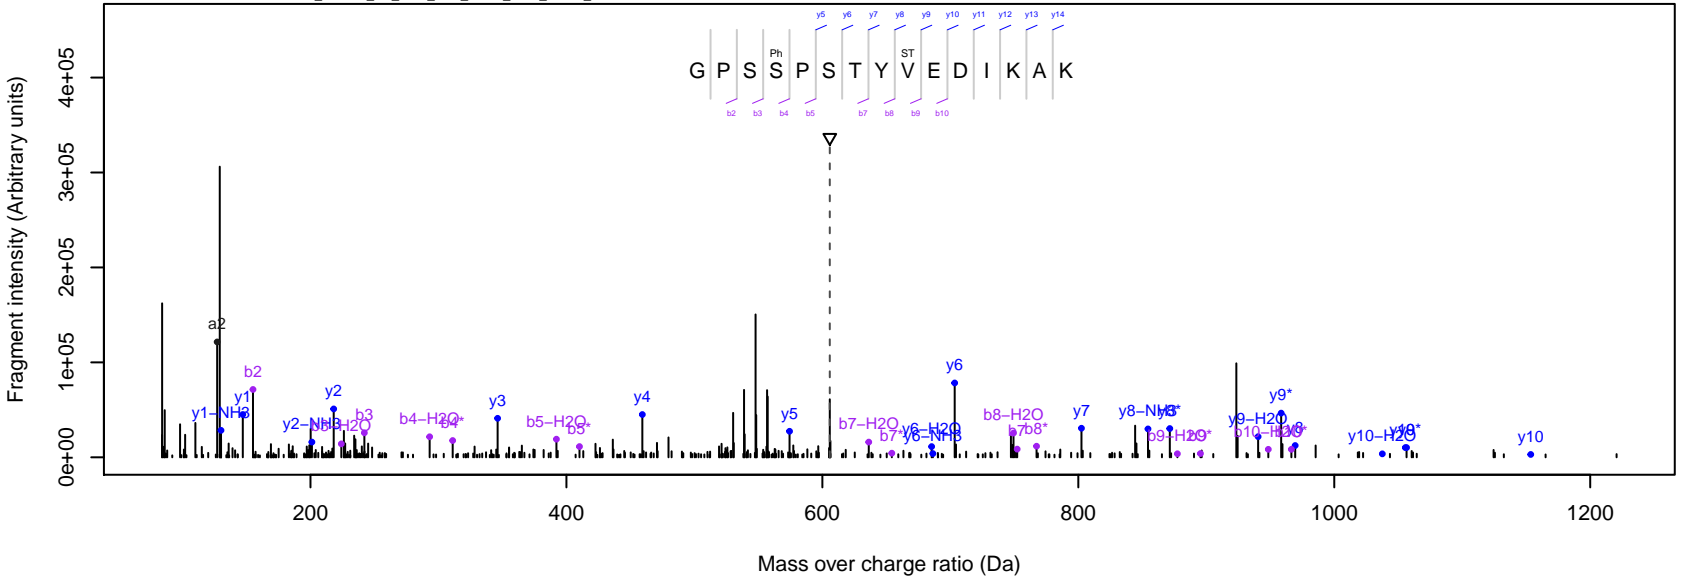

GS(Phospho (STY))PTRNPPVR-2+

Source : QE3\_201126\_FR\_TiOx\_hum\_tissue\_Urea\_RNAB\_N Scan : 7456

Andromeda score : 162.34

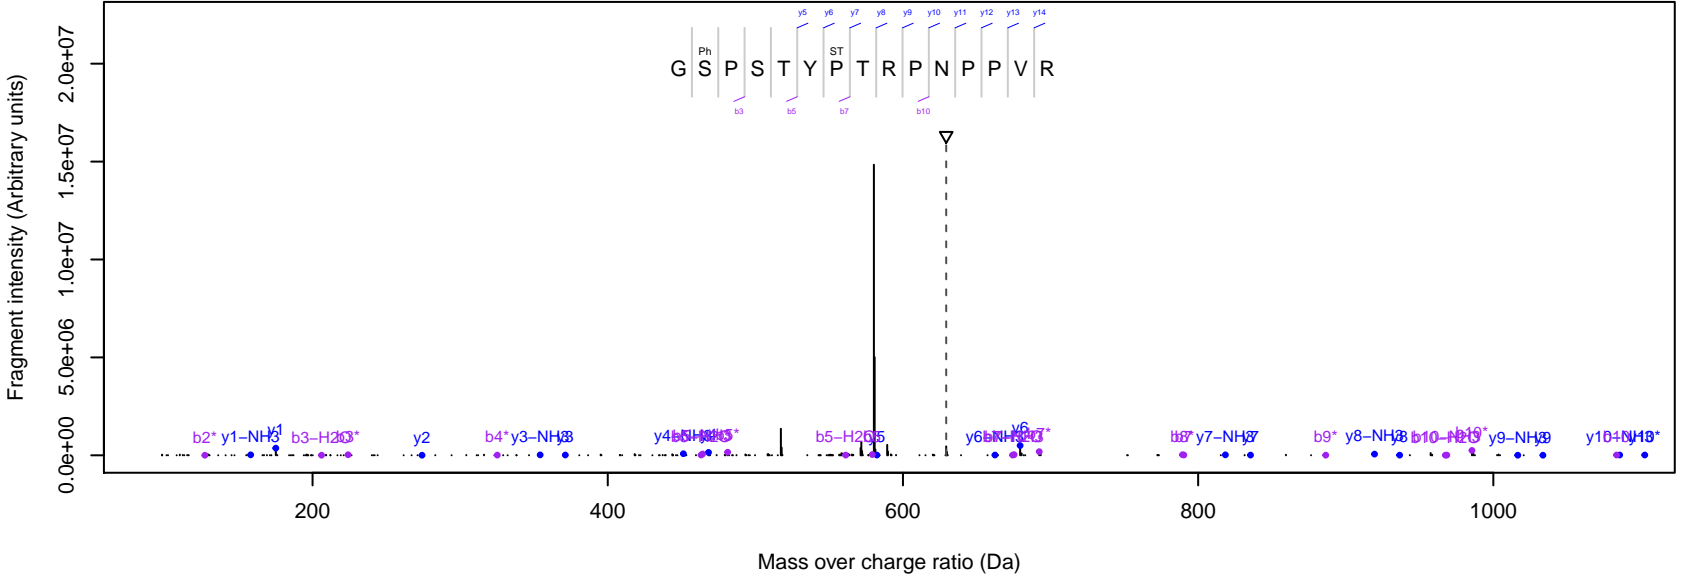

SLS(Phospho (STY))PSHLTEDR-2+

Source : QE3\_201126\_FR\_TiOx\_hum\_tissue\_Urea\_RNAB\_B Scan : 14388

Andromeda score : 162.34

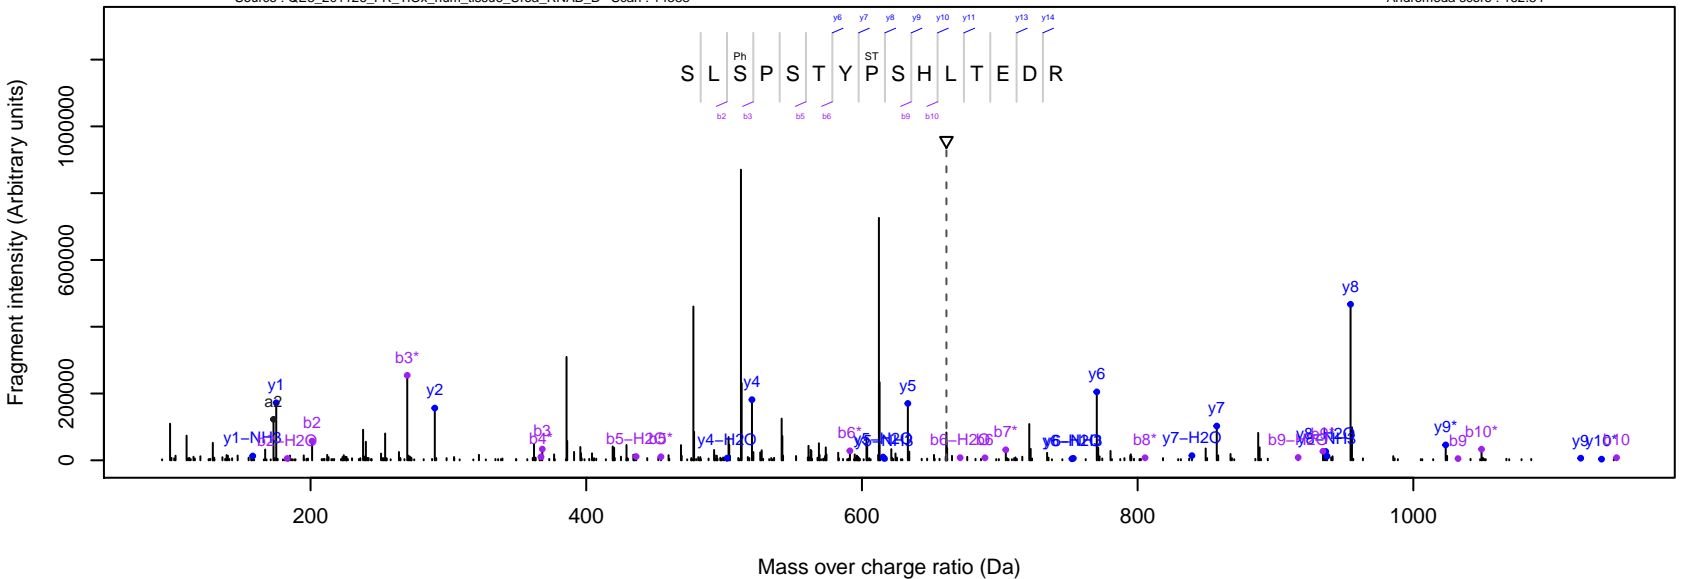

FQS(Phospho (STY))LGVAFYR-2+

Source : QE3\_201126\_FR\_TiOx\_hum\_tissue\_Urea\_RNAB\_H Scan : 44727

Andromeda score : 162.26

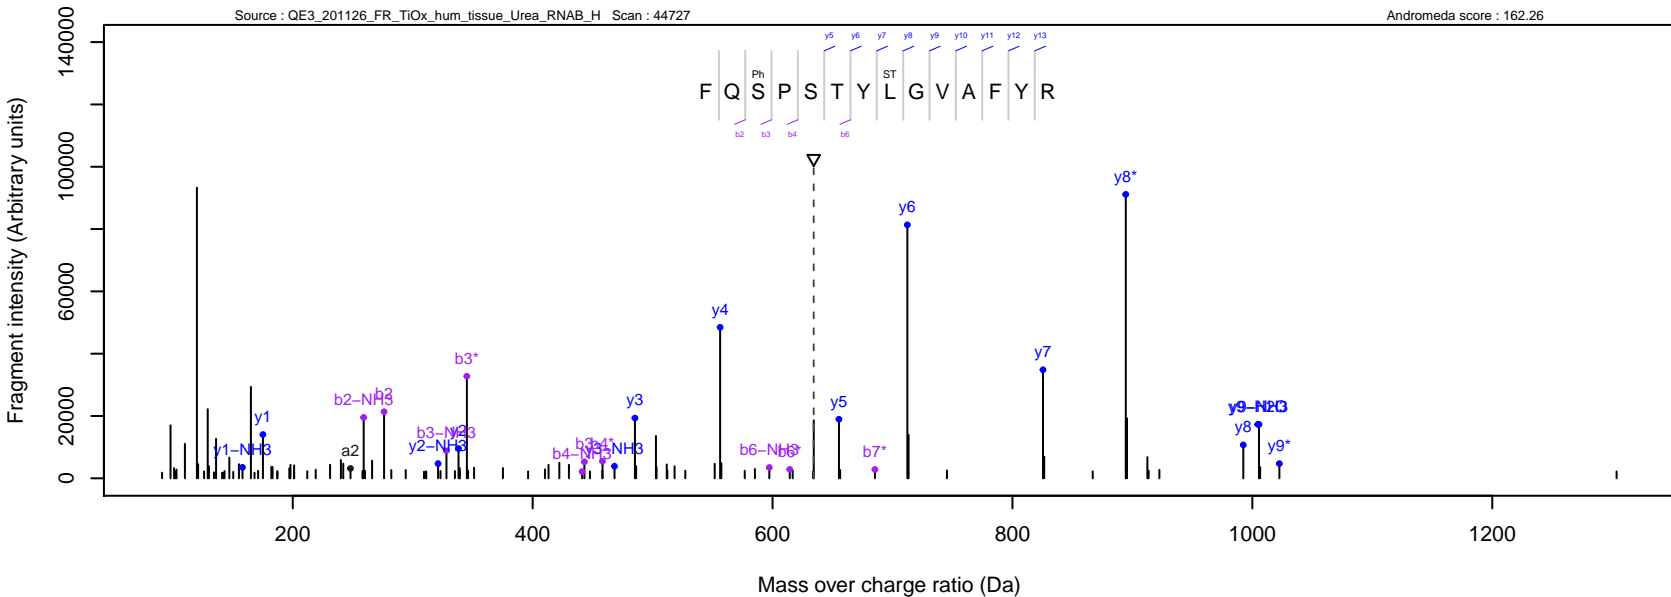

LEISPD(SPhospho (STY))SPER-2+

Source : QE3\_201126\_FR\_TiOx\_hum\_tissue\_Urea\_RNAB\_H Scan : 19136

Andromeda score : 162.22

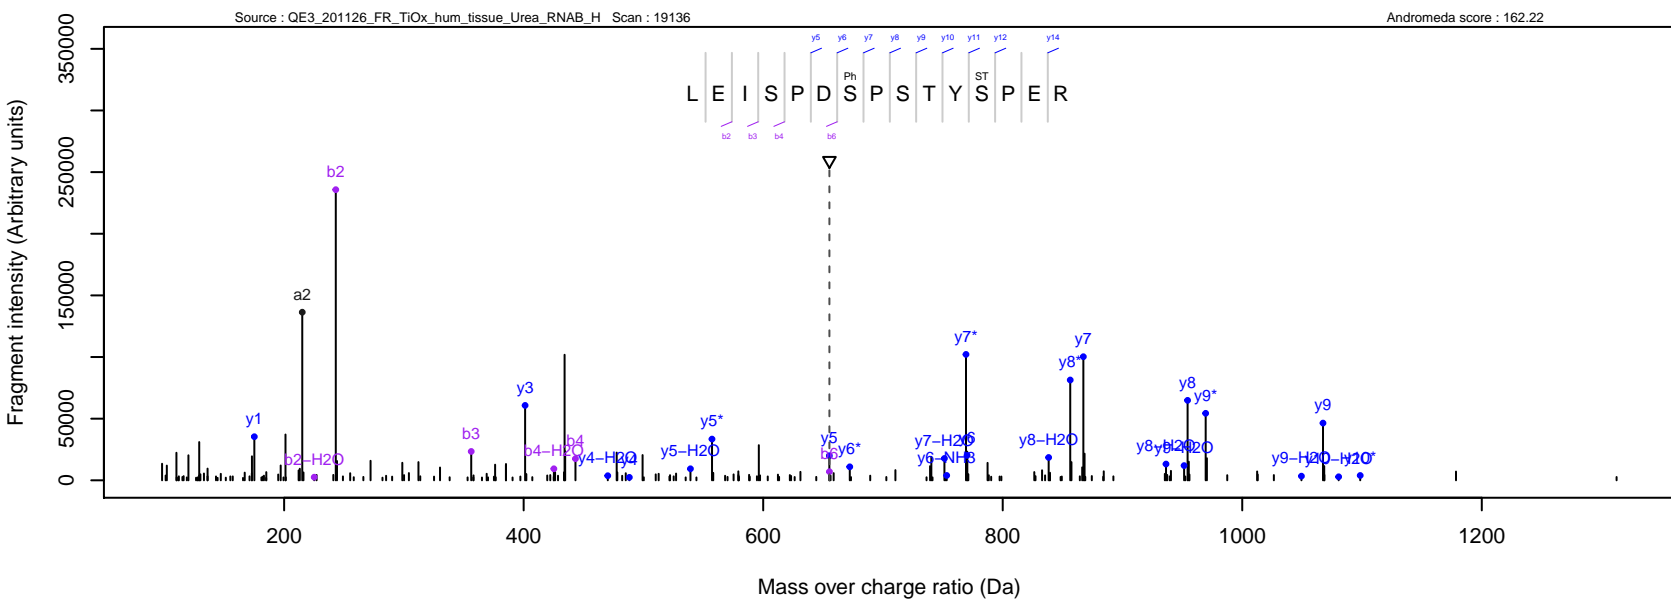

RPHT(Phospho (STY))PTPGIYMGRPTYGSSR-4+

Source : QE3\_201126\_FR\_TiOx\_hum\_tissue\_Urea\_RNAB\_B Scan : 15298

Andromeda score : 162.2

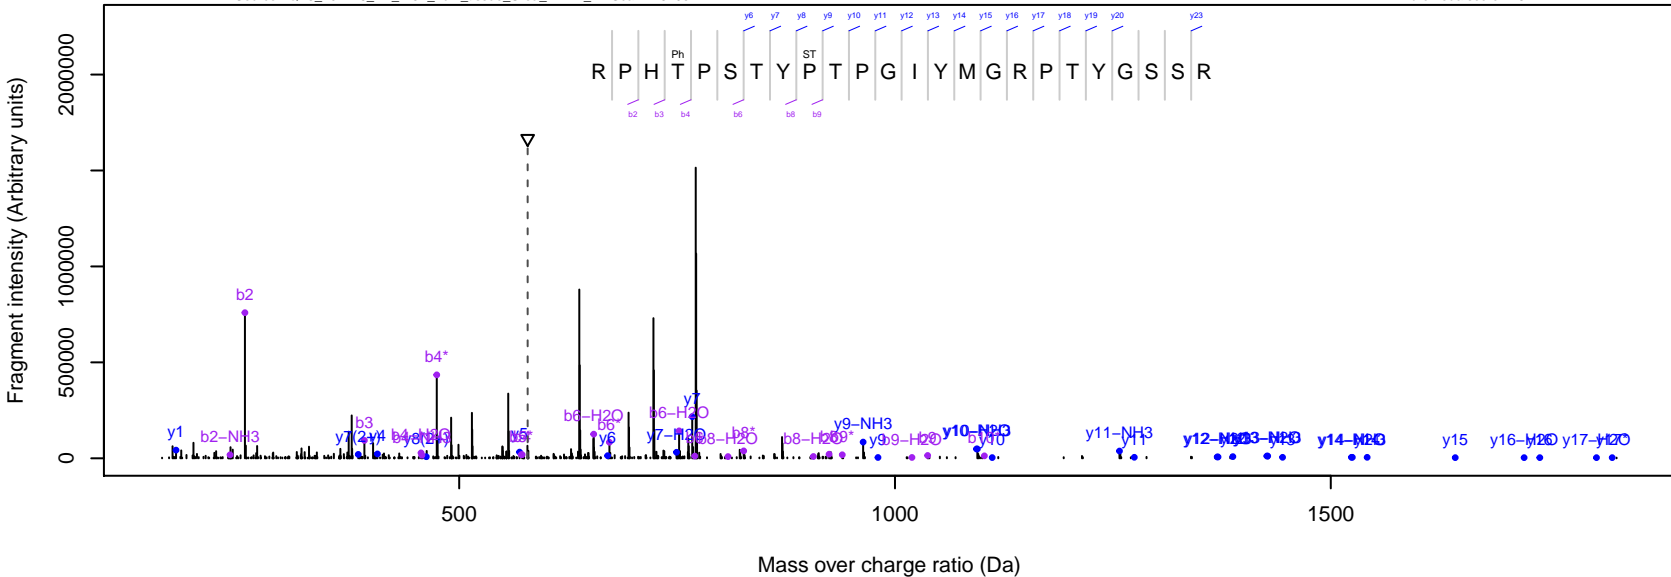

### RSS(Phospho (STY))ITEPEGPNQK-2+

Source : QE3\_201126\_FR\_TiOx\_hum\_tissue\_Urea\_RNAB\_H Scan : 14231

Andromeda score : 162.15

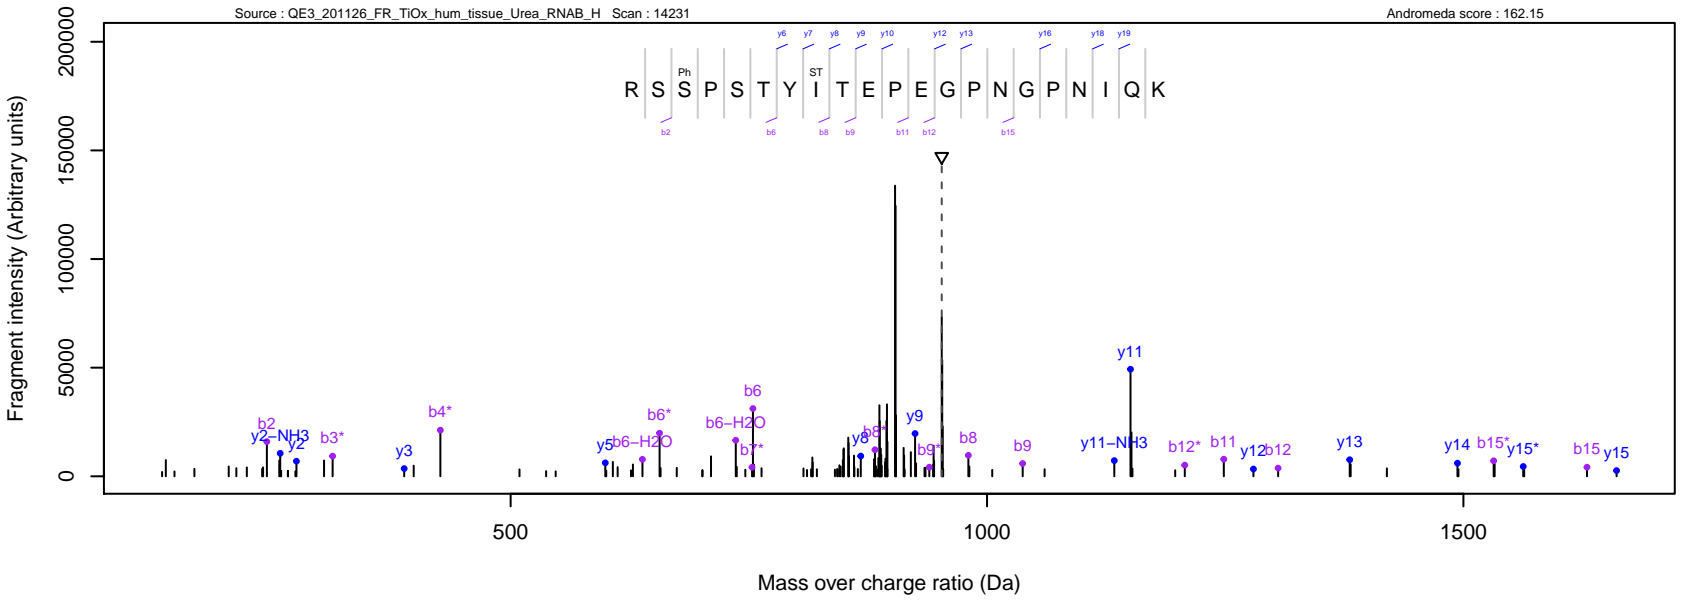

### RRGS(Phospho (STY))SGSVDETLFALPAASEPVIR-3+

Source : QE3\_201126\_FR\_TiOx\_hum\_tissue\_Urea\_RNAB\_H Scan : 42986

Andromeda score : 162.1

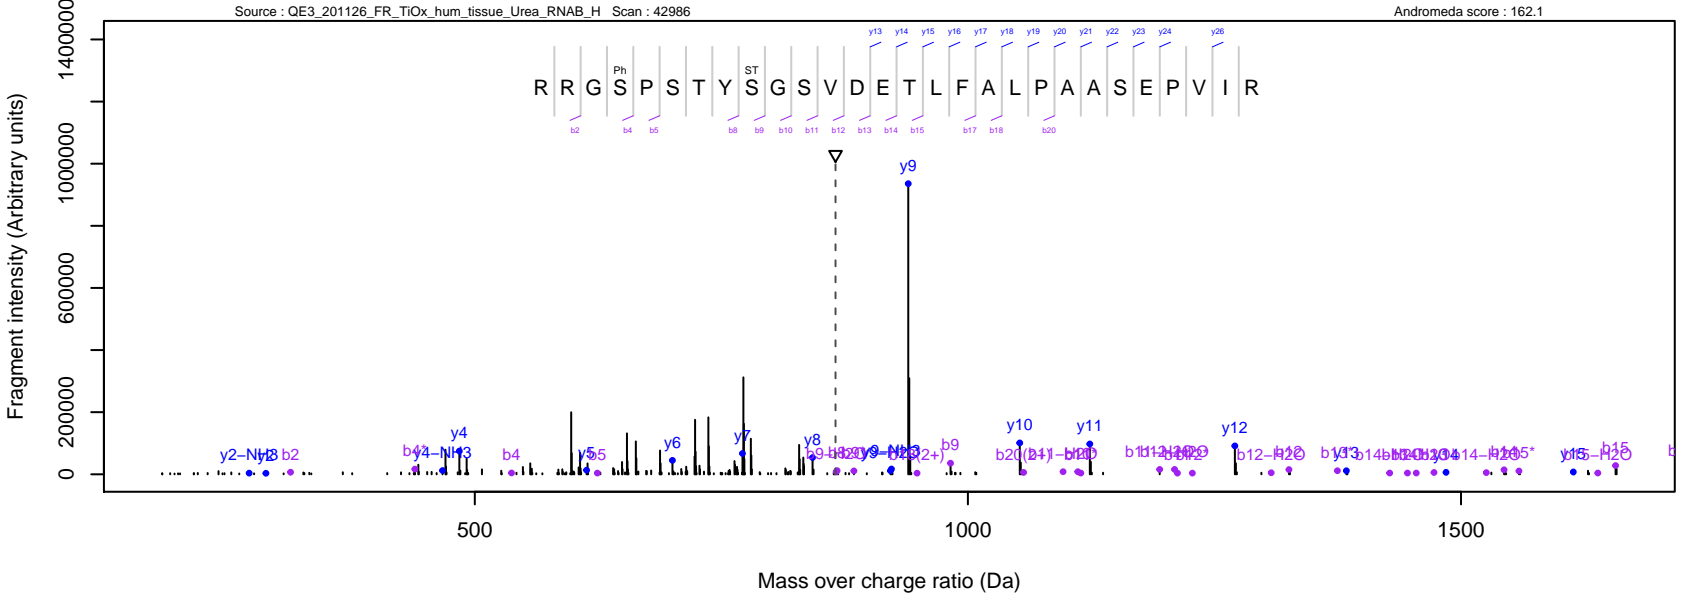

### RGS(Phospho (STY))GDTSSLIDPDTSLSLELRELSSEVEEK-3+

Source : QE3\_201126\_FR\_TiOx\_hum\_tissue\_Urea\_RNAB\_N Scan : 54639

Andromeda score : 162.08

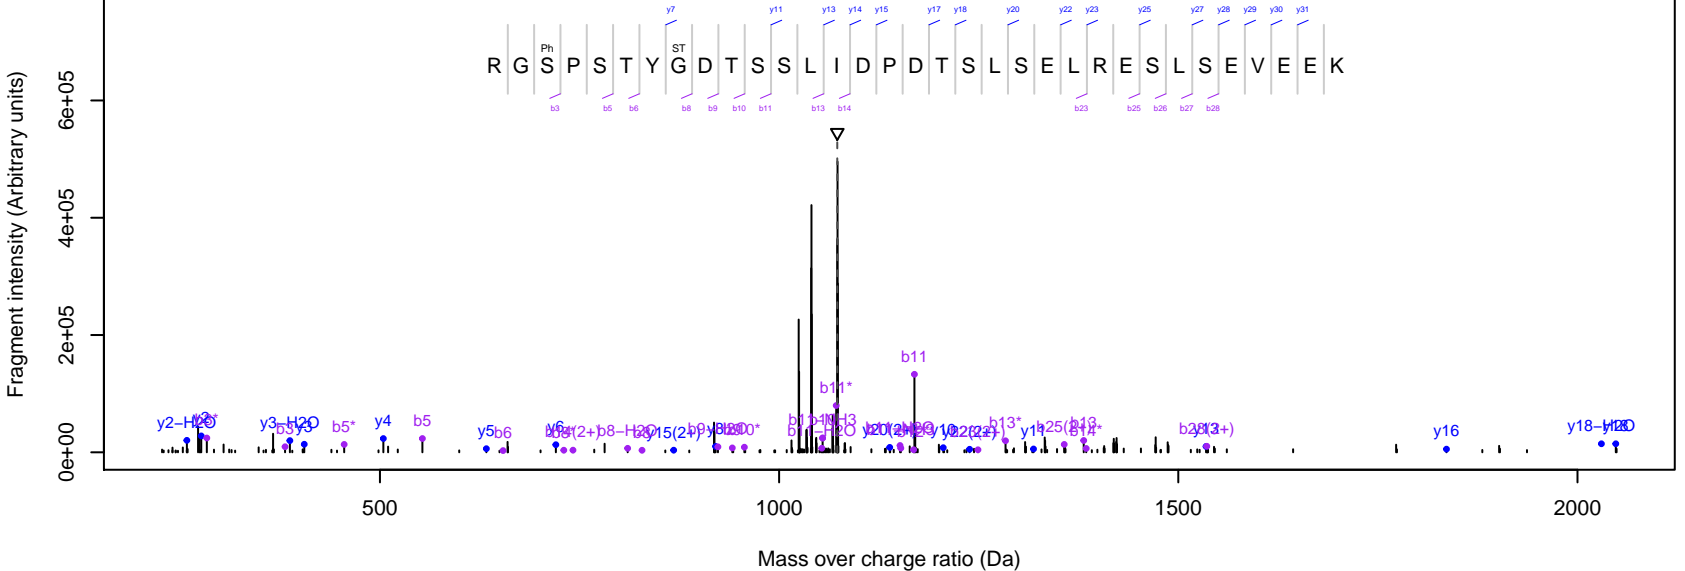



KHISQIVAEDDDES(Phospho (STY))LLGHLMIVGK-4+

Source : QE3\_201126\_FR\_TIOx\_hum\_tissue\_Urea\_RNAB\_N Scan : 48954

Andromeda score : 162.07

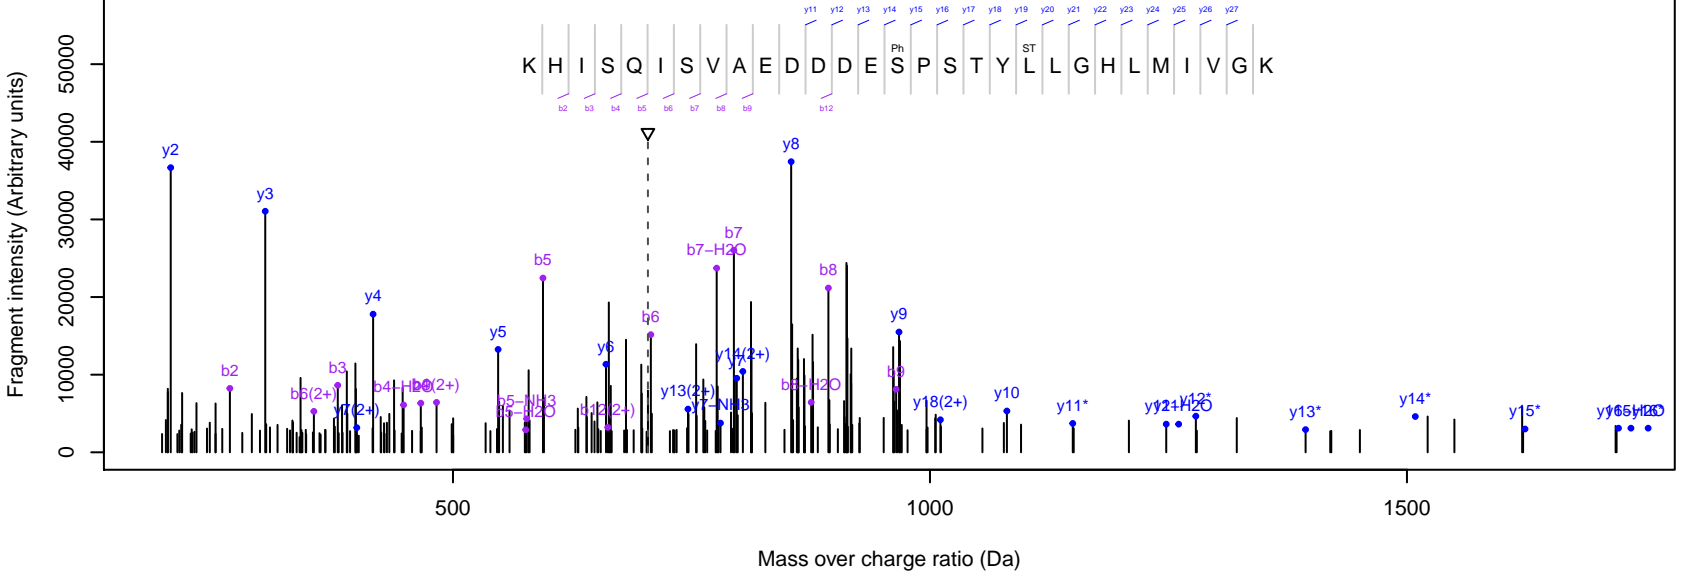

M(Oxidation (M))GPSGGEGM(Oxidation (M))EPERRDS(Phospho (STY))QDGSSYR-4+

Source : QE3\_201126\_FR\_TIOx\_hum\_tissue\_Urea\_RNAB\_H Scan : 6817

Andromeda score : 162.07

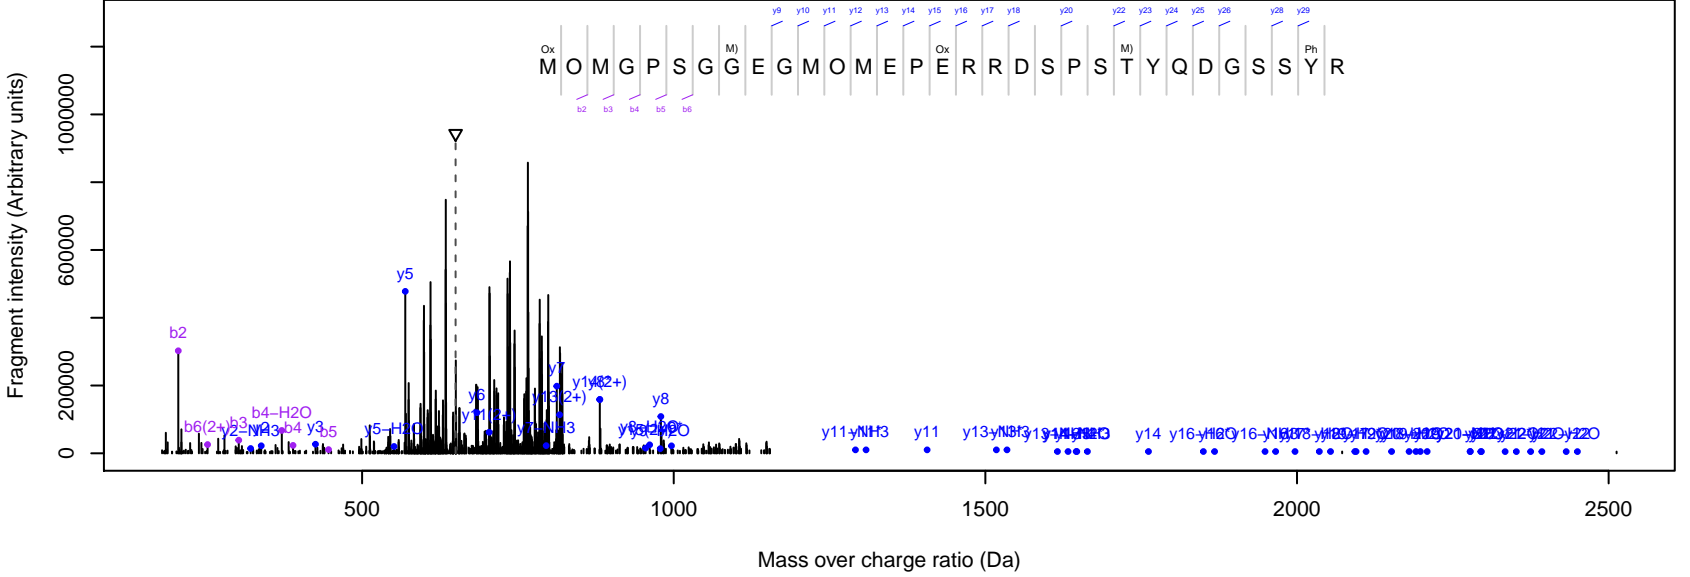

KEEQAASAAEDTCDVGVSPSTYSPSTYDDDKGAQAAR-3+

Source : QE3\_201126\_FR\_TIOx\_hum\_tissue\_Urea\_RNAB\_N Scan : 14812

Andromeda score : 162.02

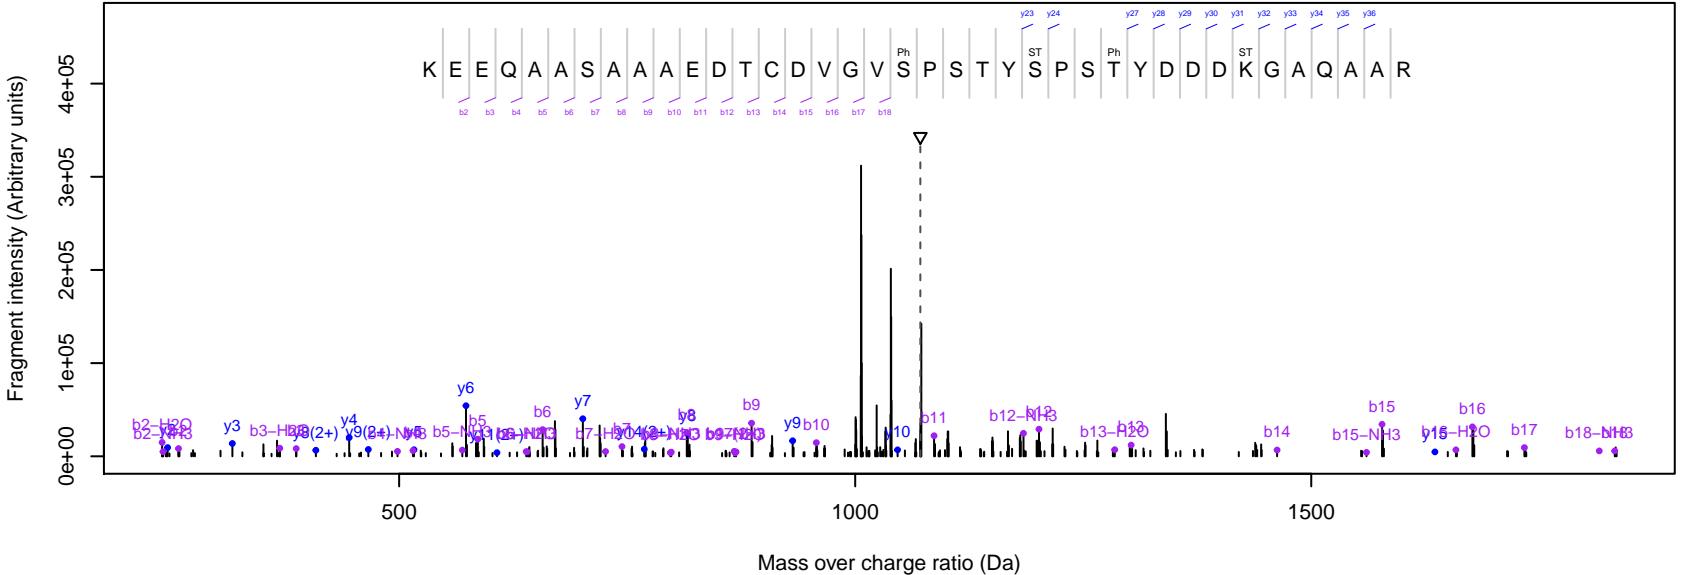

LEEGVAS(Phospho (STY))DEEEAAEQPGSGPSPEEGS(Phospho (STY))PPAHPQ-3+

Source : QE3\_201126\_FR\_TiOx\_hum\_tissue\_Urea\_RNAB\_H Scan : 31209

Andromeda score : 162.01

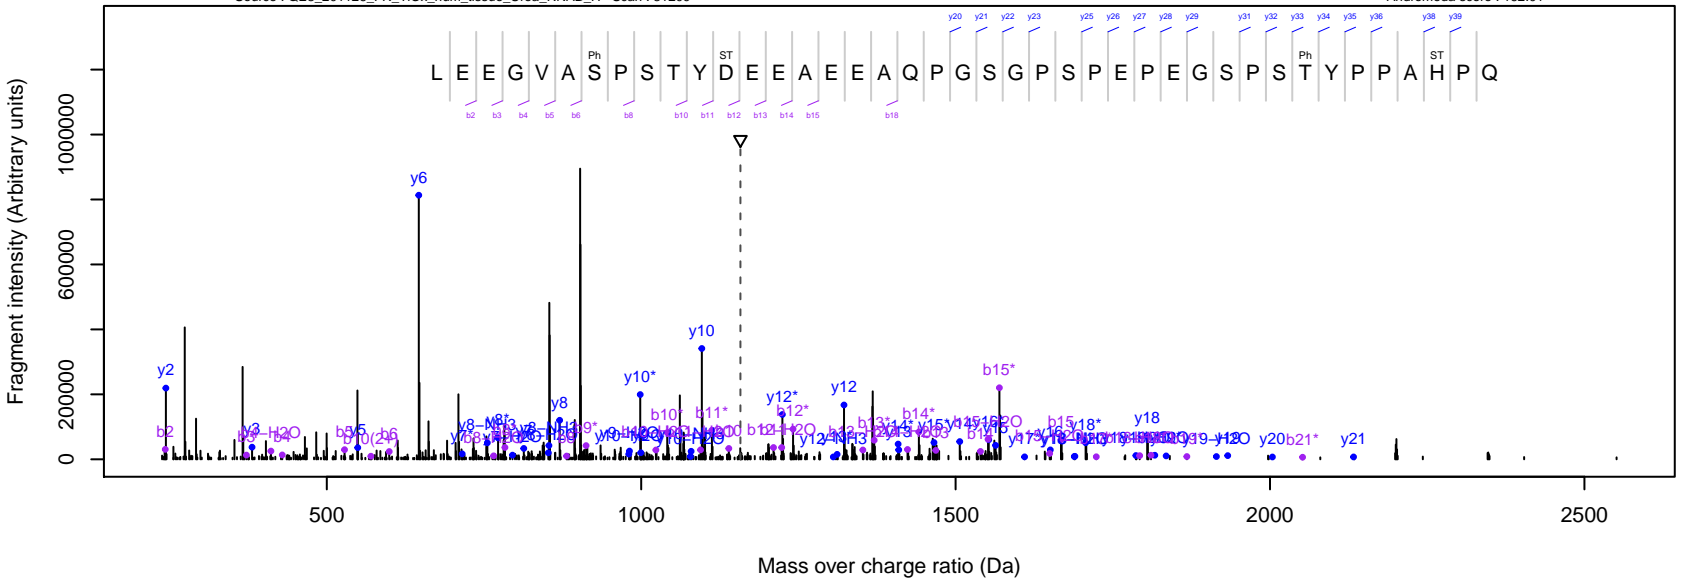

NVFTS(Phospho (STY))AEELER-2+

Source : QE3\_201126\_FR\_TiOx\_hum\_tissue\_Urea\_RNAB\_H Scan : 36086

Andromeda score : 161.94

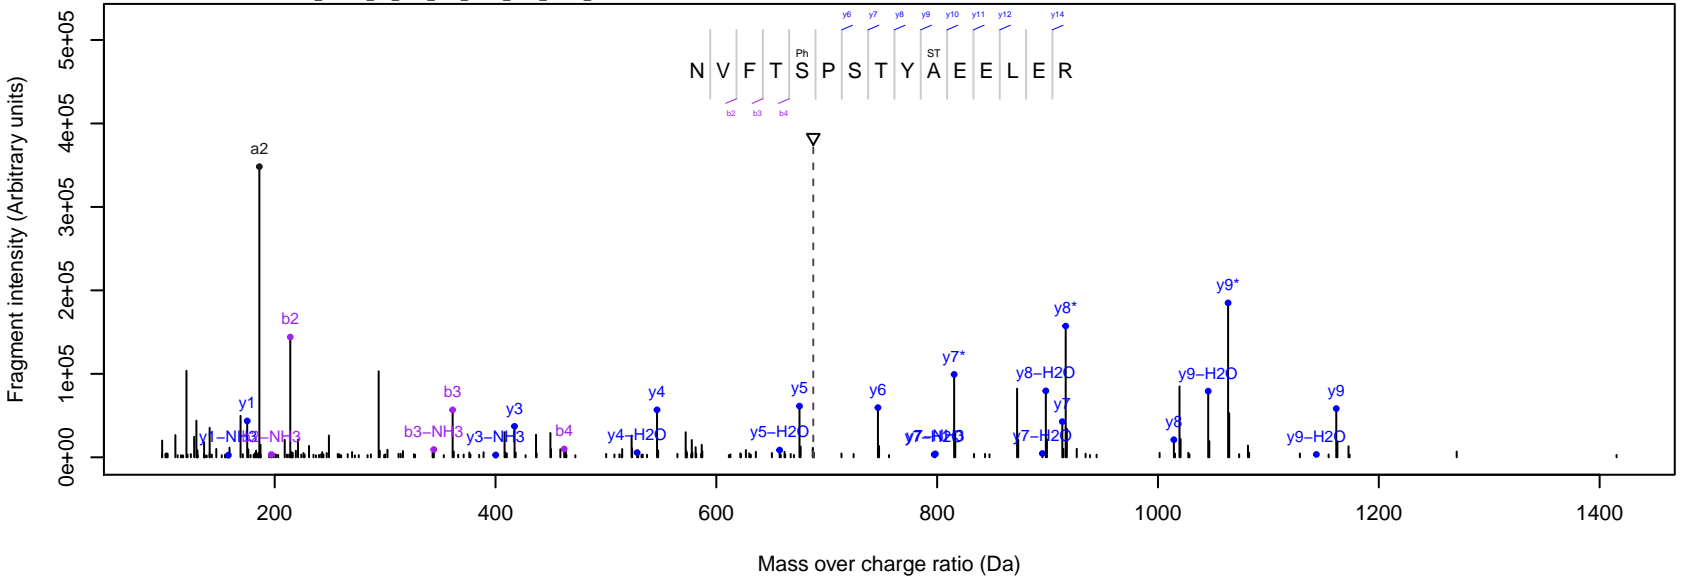

AELGM(Oxidation (M))GDSTSQSPSTYPPPIKR-3+

Source : QE3\_201126\_FR\_TiOx\_hum\_tissue\_Urea\_RNAB\_B Scan : 13146

Andromeda score : 161.8

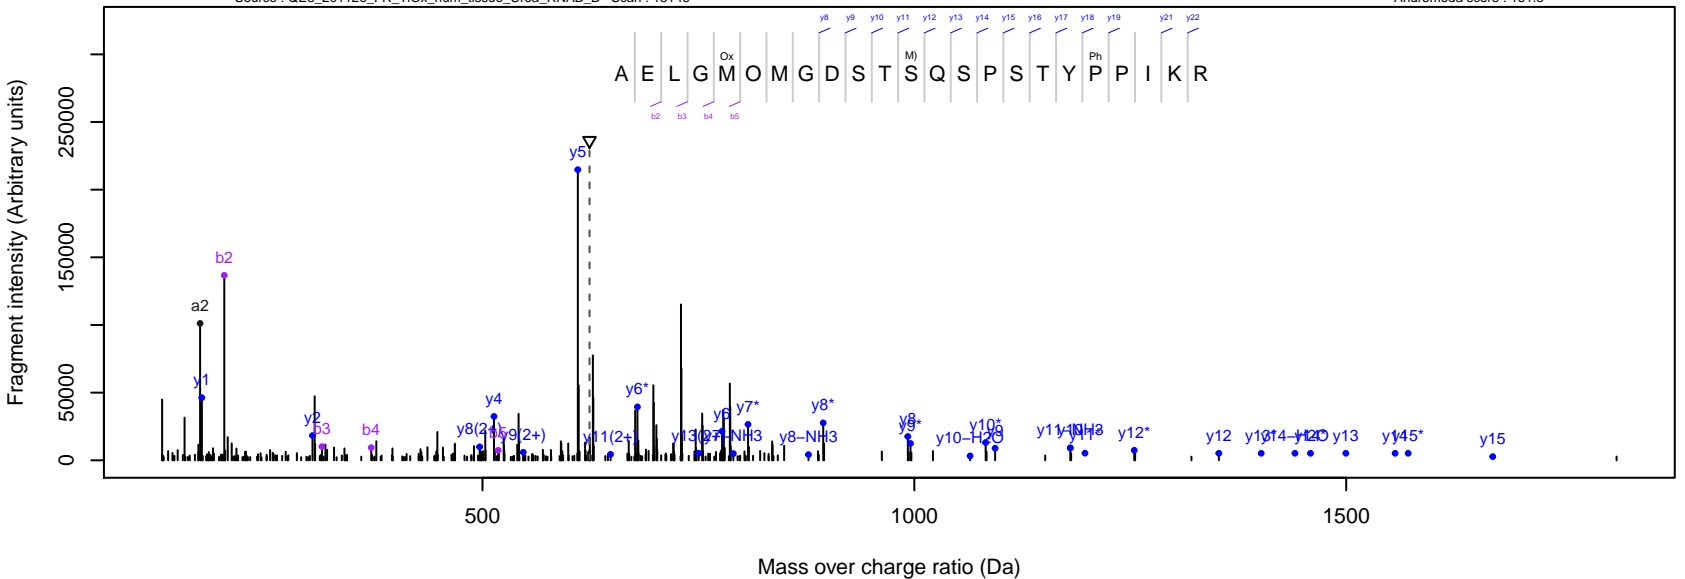

GNIYYQSYEHR(SPhospho (STY))PS(Phospho (STY))PNIR-3+

Source : QE3\_201126\_FR\_TIOx\_hum\_tissue\_Urea\_RNAB\_H Scan : 20737

Andromeda score : 161.68

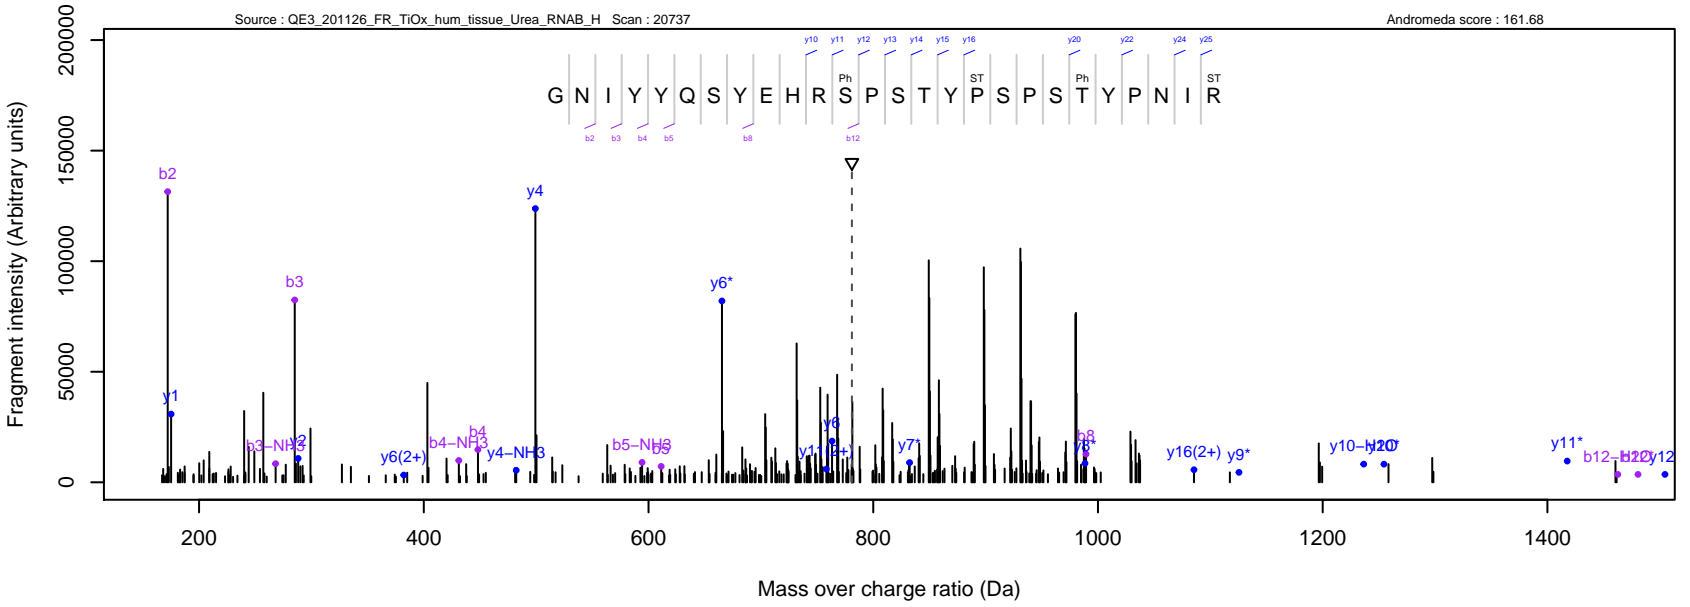

TEARSS(Phospho (STY))DEENGPPSSPDLDR-3+

Source : QE3\_201126\_FR\_TIOx\_hum\_tissue\_Urea\_RNAB\_N Scan : 13357

Andromeda score : 161.68

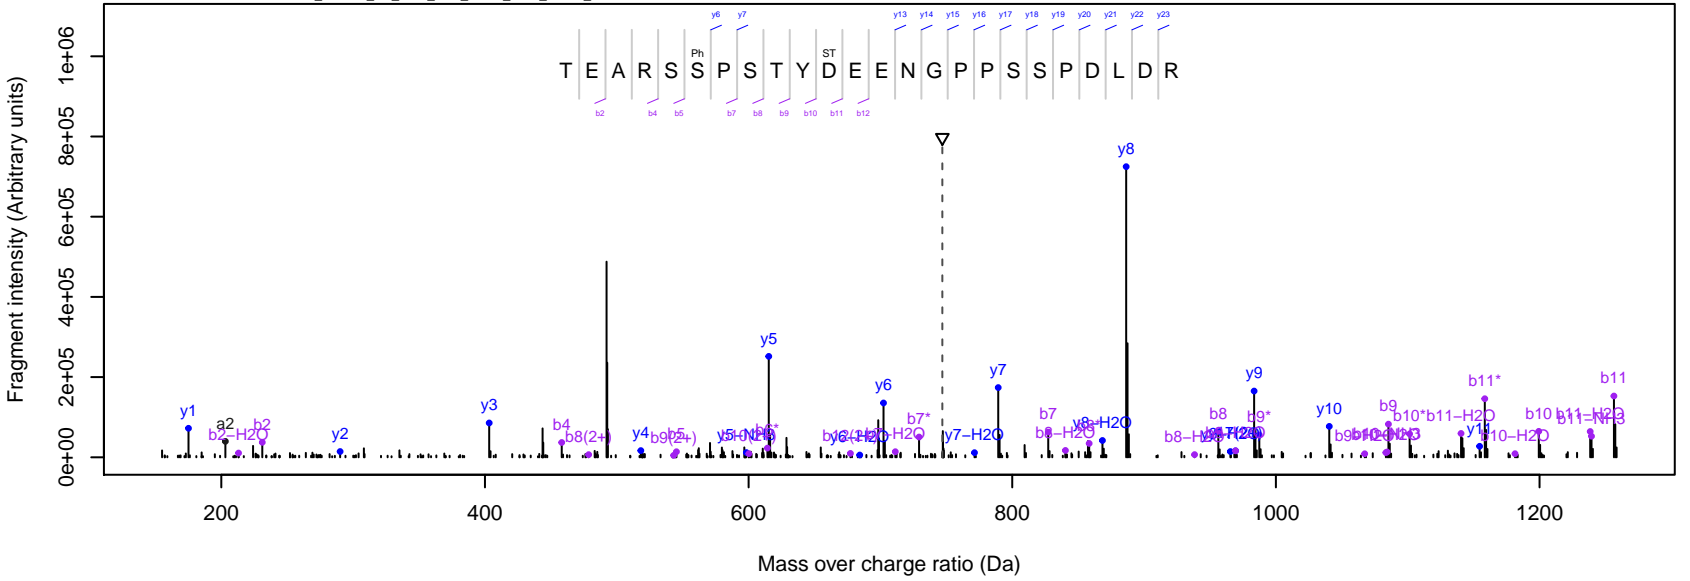

LGLAVIHGEAQCTELDDGRHS(Phospho (STY))PPM(Oxidation (M))VK-4+

Source : QE3\_201126\_FR\_TIOx\_hum\_tissue\_Urea\_RNAB\_H Scan : 29630

Andromeda score : 161.62

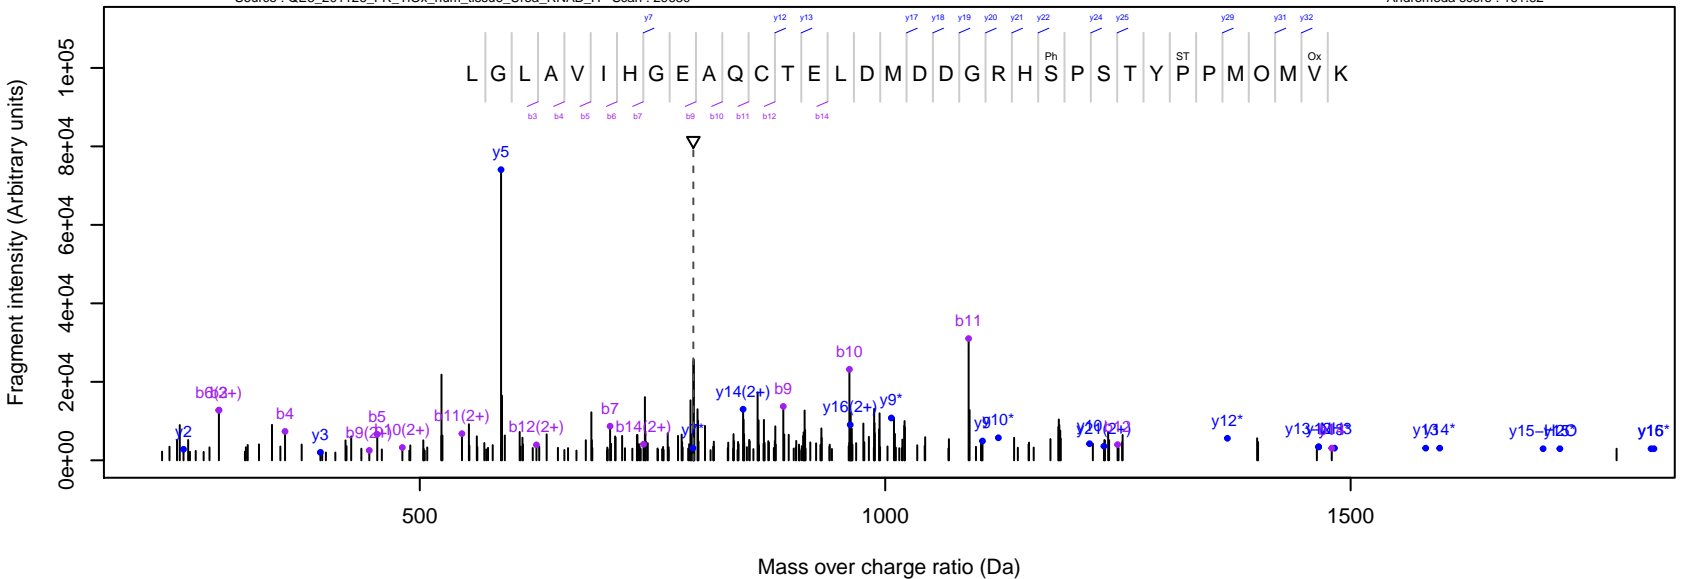

ARTDEV P A G G S P S T Y R S E A E D E D D E D Y V P Y V P L R -4+

Source : QE3\_201126\_FR\_TiOx\_hum\_tissue\_Urea\_RNAB\_H Scan : 34962

Andromeda score : 161.55

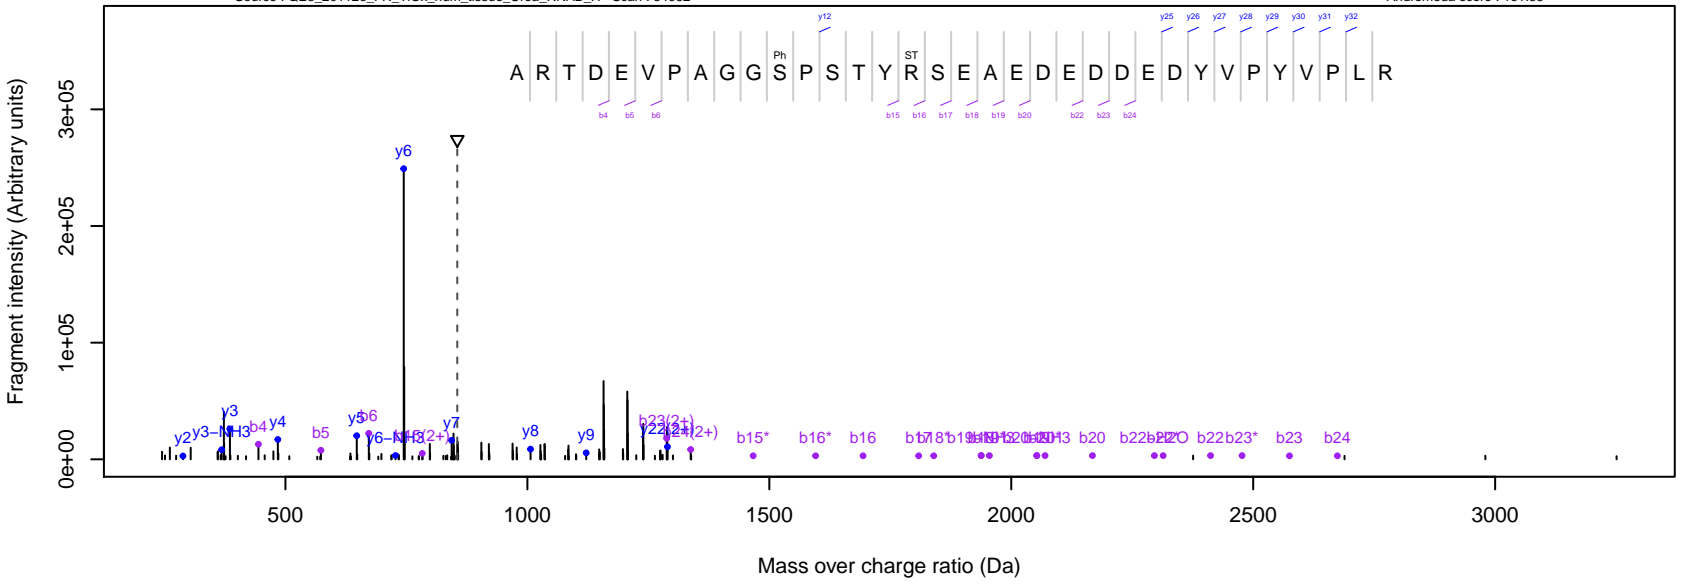

A E S P S T Y G P D L R Y E V T S G G G G T S R -3+

Source : QE3\_201126\_FR\_TiOx\_hum\_tissue\_Urea\_RNAB\_H Scan : 20513

Andromeda score : 161.51

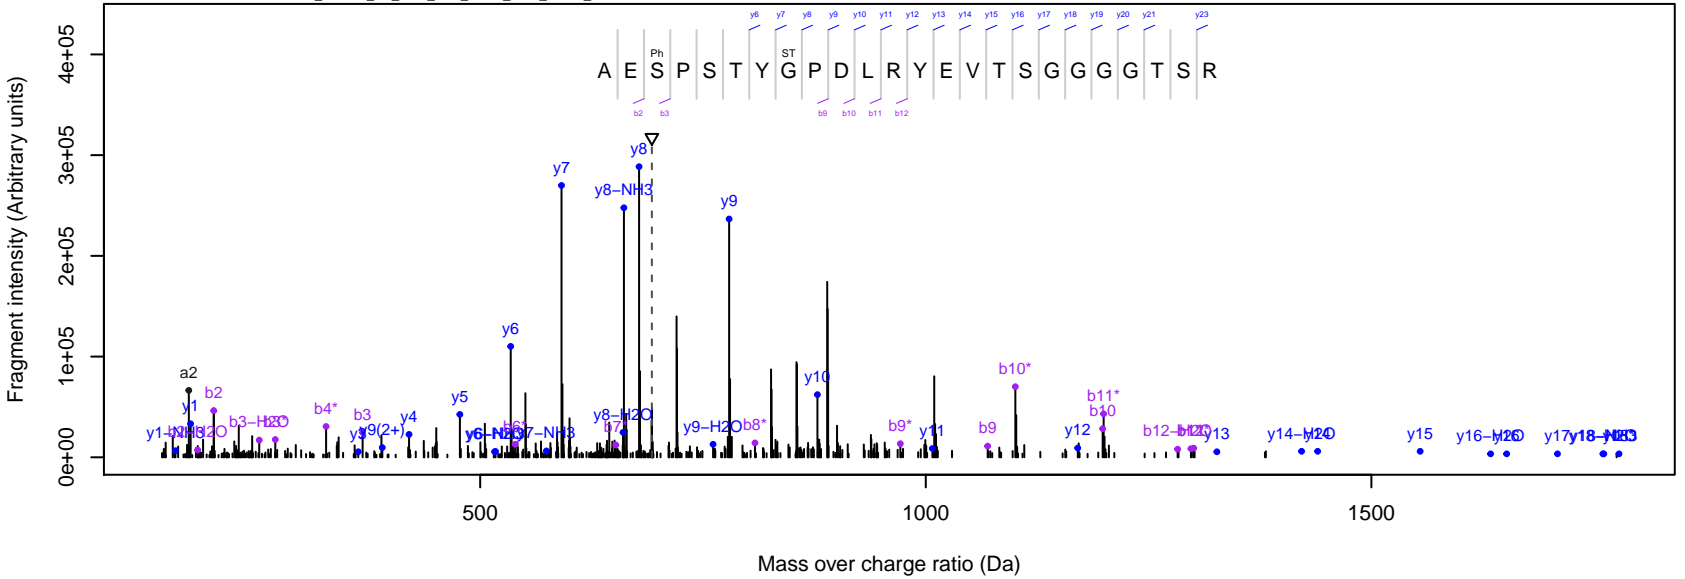

G P K P E P P G S G S P S T Y P A P P R -3+

Source : QE3\_201126\_FR\_TiOx\_hum\_tissue\_Urea\_RNAB\_N Scan : 9025

Andromeda score : 161.51

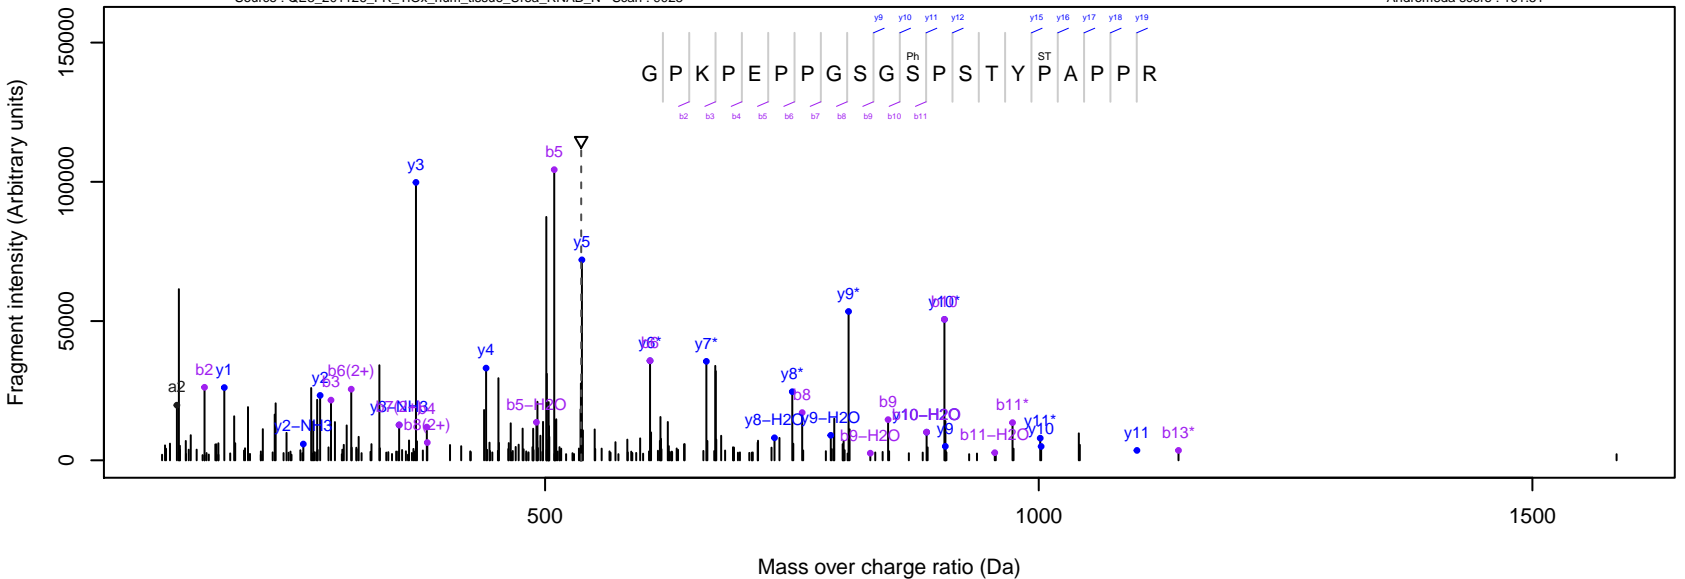

TKPTQAAGPSS(Phospho (STY))PQKPPTPEETK-3+

Source : QE3\_201126\_FR\_TiOx\_hum\_tissue\_Urea\_RNAB\_H Scan : 8101

Andromeda score : 161.5

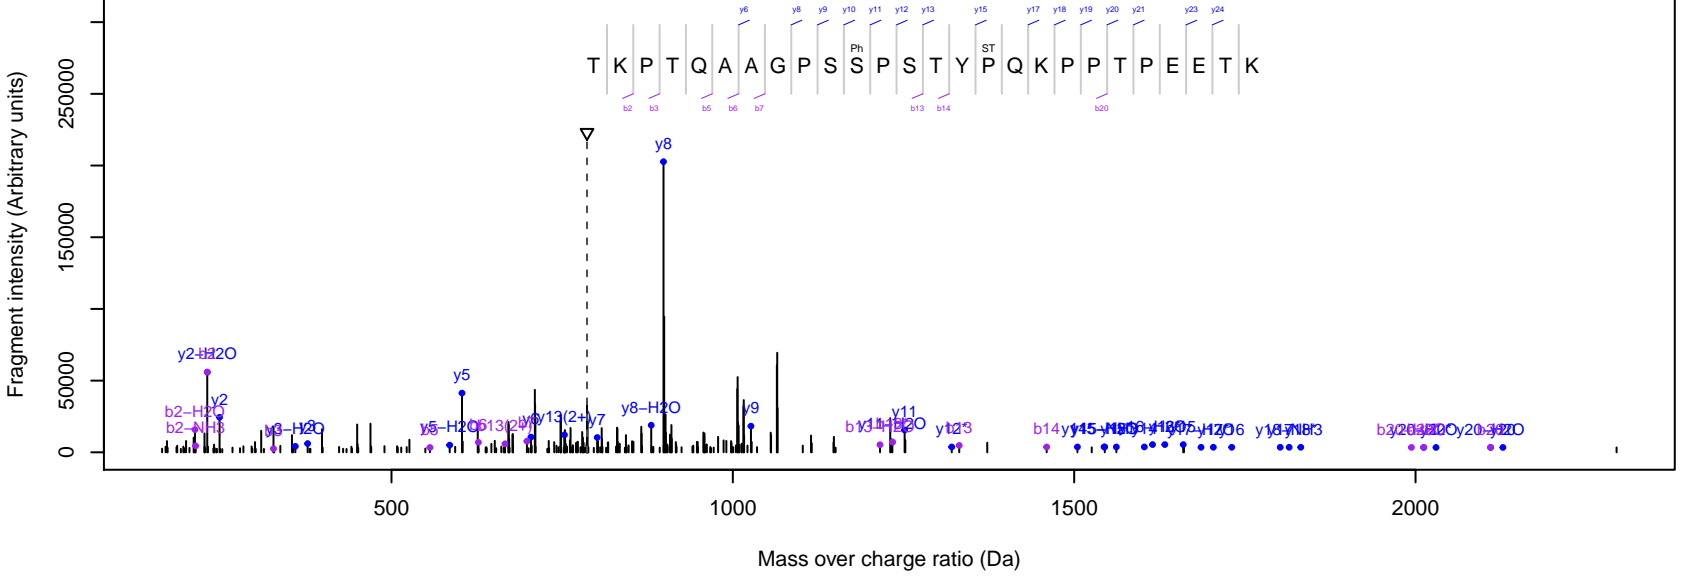

TPSNTPSAEADWS(Phospho (STY))PGLLEHPDYK-3+

Source : QE3\_201126\_FR\_TiOx\_hum\_tissue\_Urea\_RNAB\_H Scan : 37685

Andromeda score : 161.5

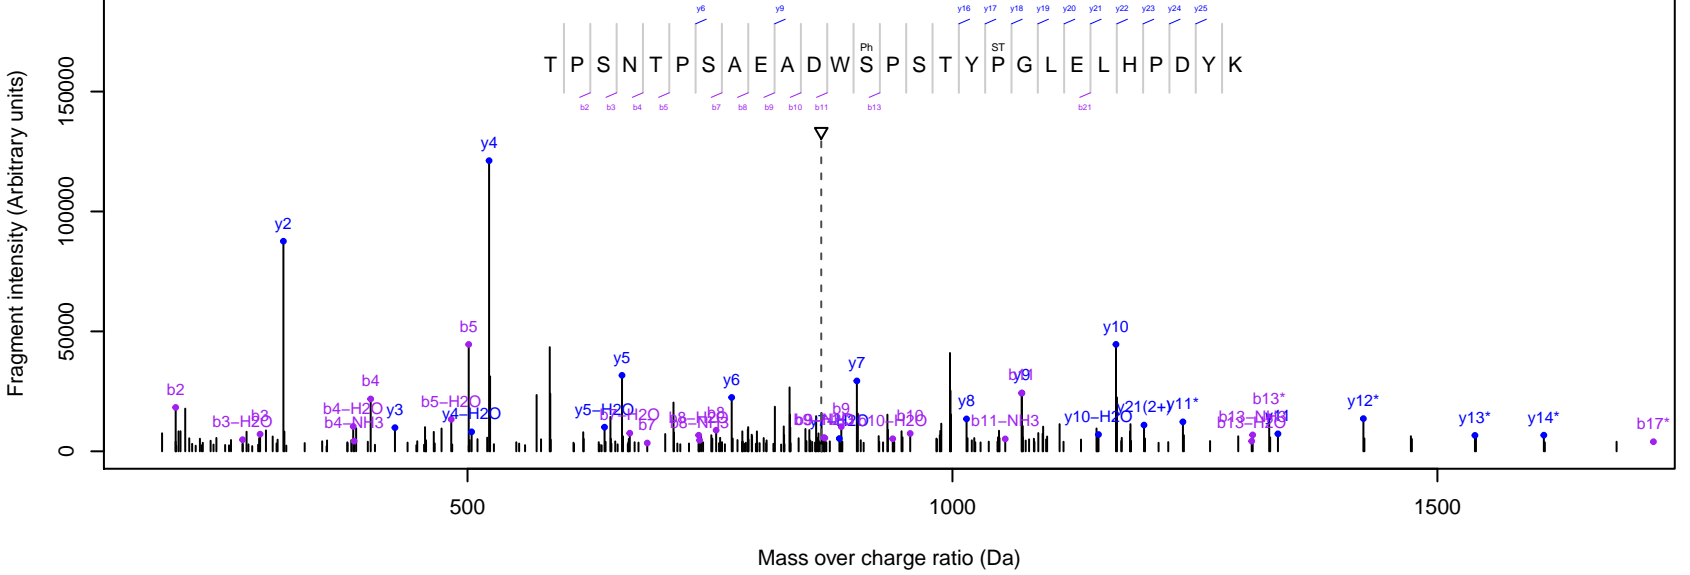

KGVDLLLEGVQGES(Phospho (STY))SPTRR-3+

Source : QE3\_201126\_FR\_TiOx\_hum\_tissue\_Urea\_RNAB\_H Scan : 28551

Andromeda score : 161.46

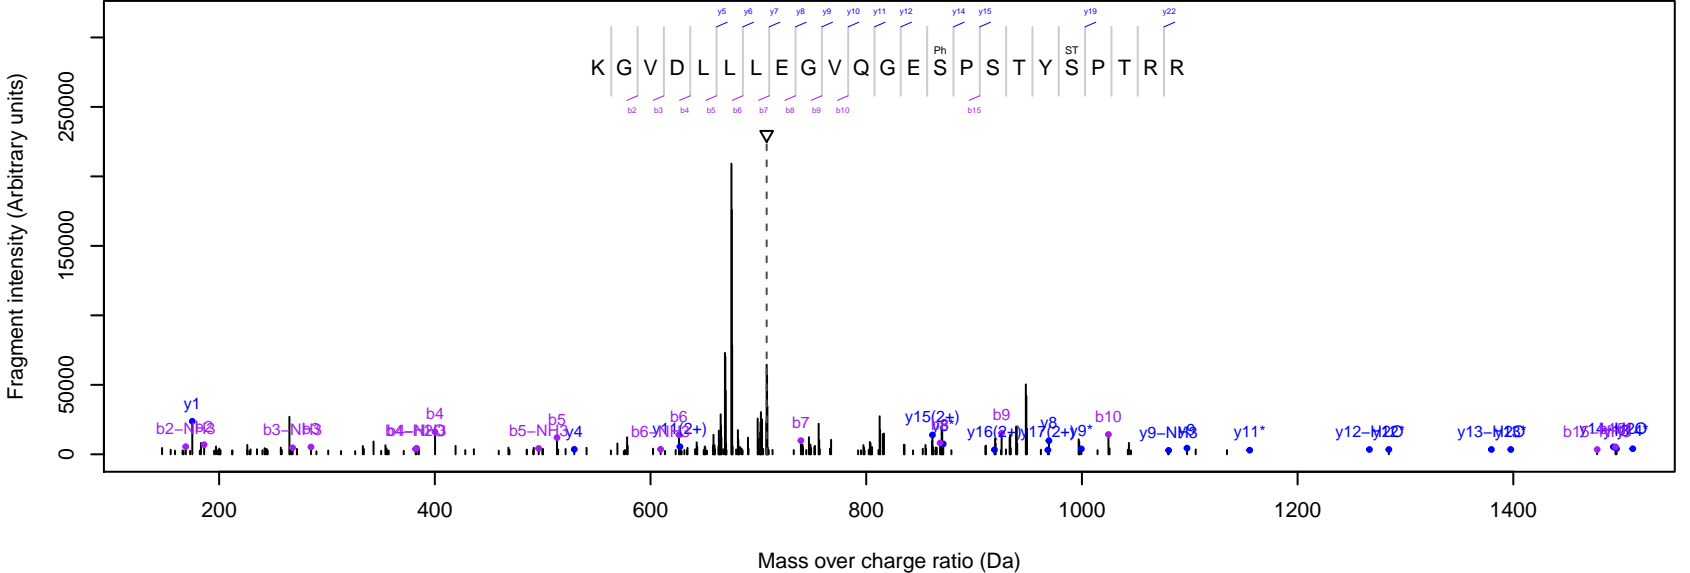

AEGEWEDQEALDYFS(Phospho (STY))DKESGKQK-4+

Source : QE3\_201126\_FR\_TiOx\_hum\_tissue\_Urea\_RNAB\_N Scan : 31994

Andromeda score : 161.39

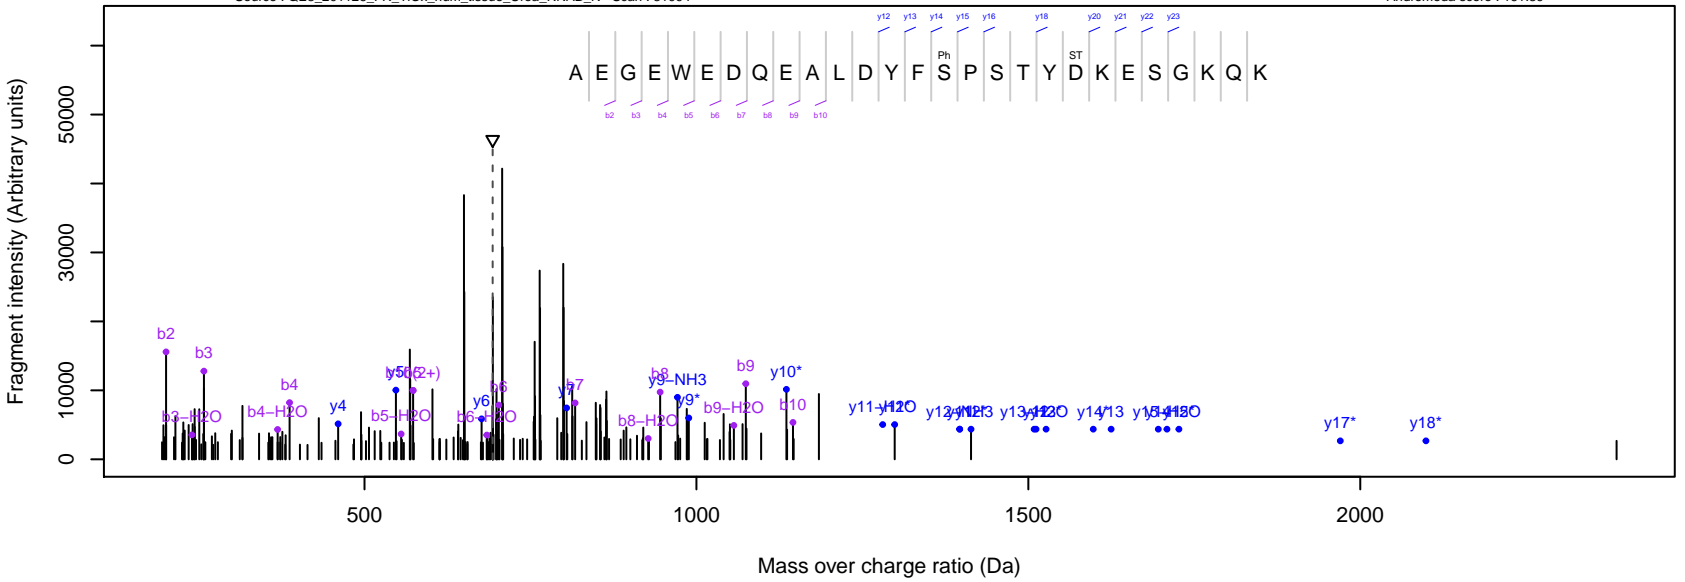

GQVM(Oxidation (M))SS(Phospho (STY))LAELEDDFKEGYLETVAAYEEQHPELTLPLEK-4+

Source : QE3\_201126\_FR\_TiOx\_hum\_tissue\_Urea\_RNAB\_H Scan : 61794

Andromeda score : 161.29

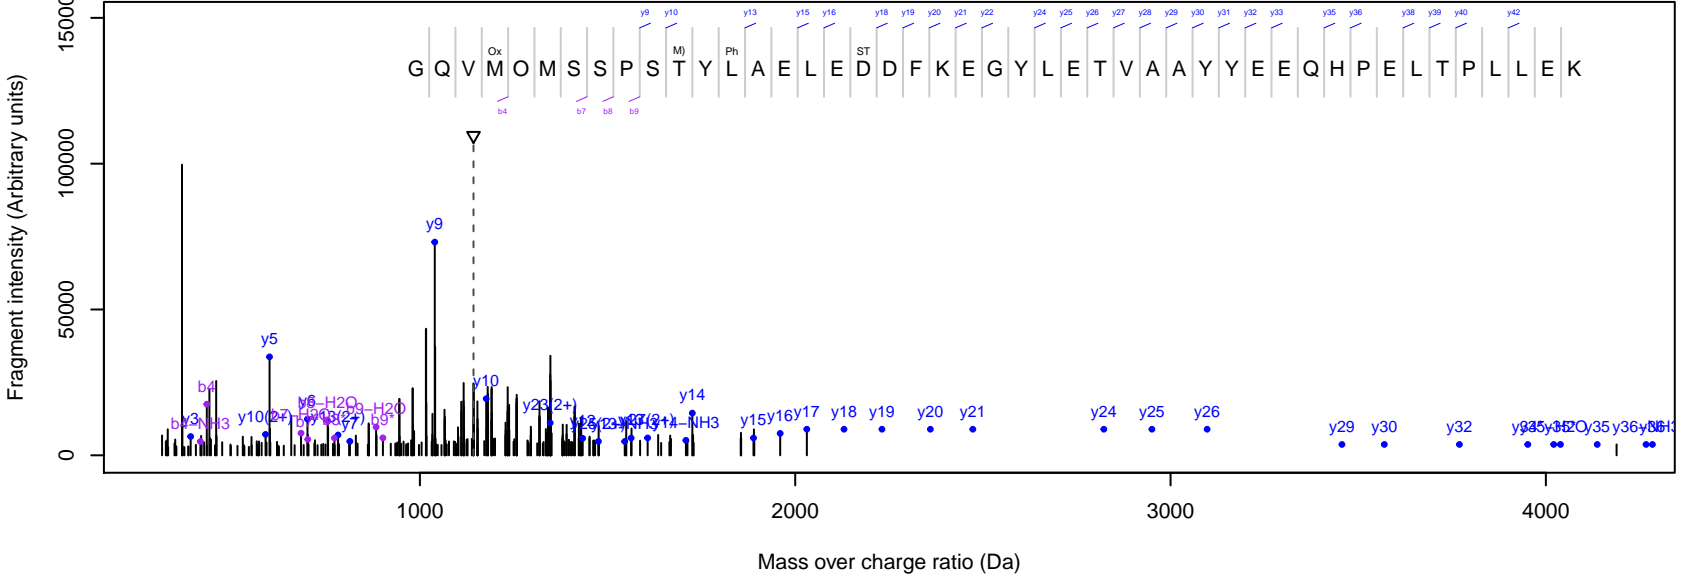

TPS(Phospho (STY))FLKK-2+

Source : QE3\_201126\_FR\_TiOx\_hum\_tissue\_Urea\_RNAB\_H Scan : 12418

Andromeda score : 161.28

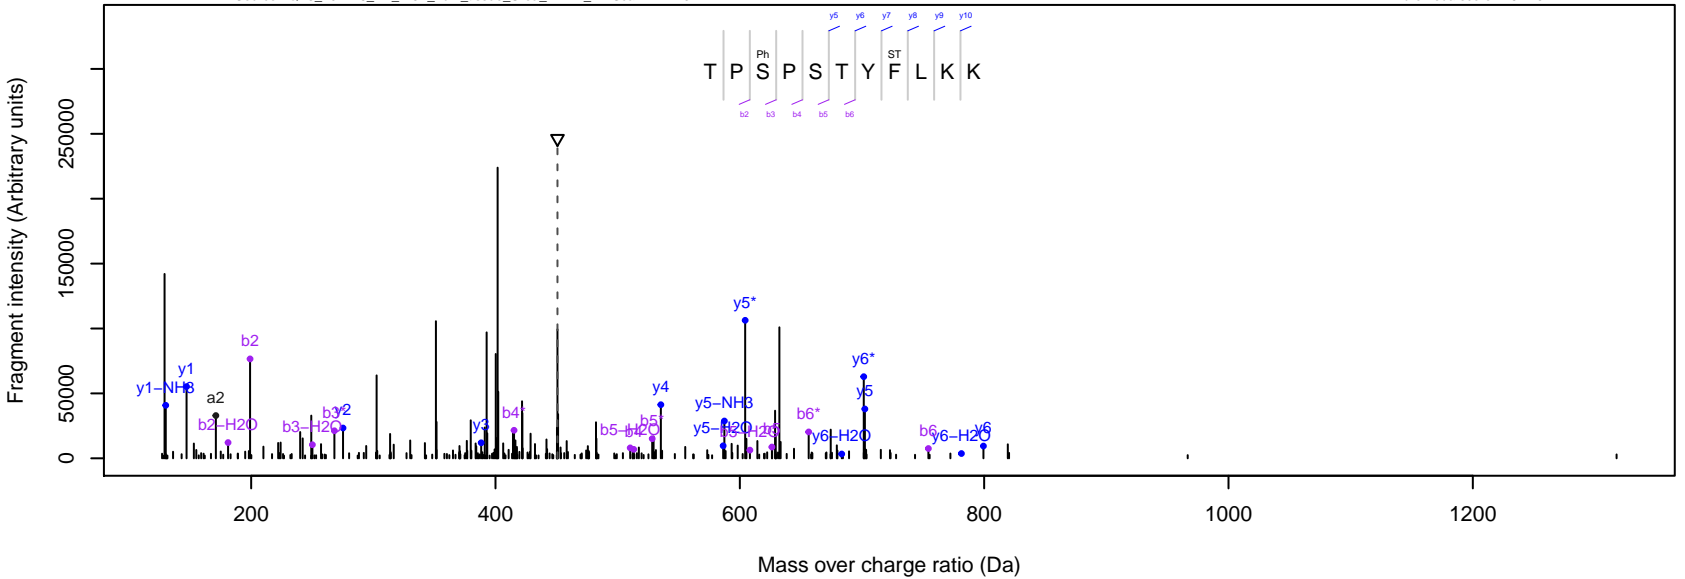

TSETS(Phospho (STY))ISPPGSSIGSPNR-2+

Source : QE3\_201126\_FR\_TiOx\_hum\_tissue\_Urea\_RNAB\_H Scan : 22738

Andromeda score : 161.24

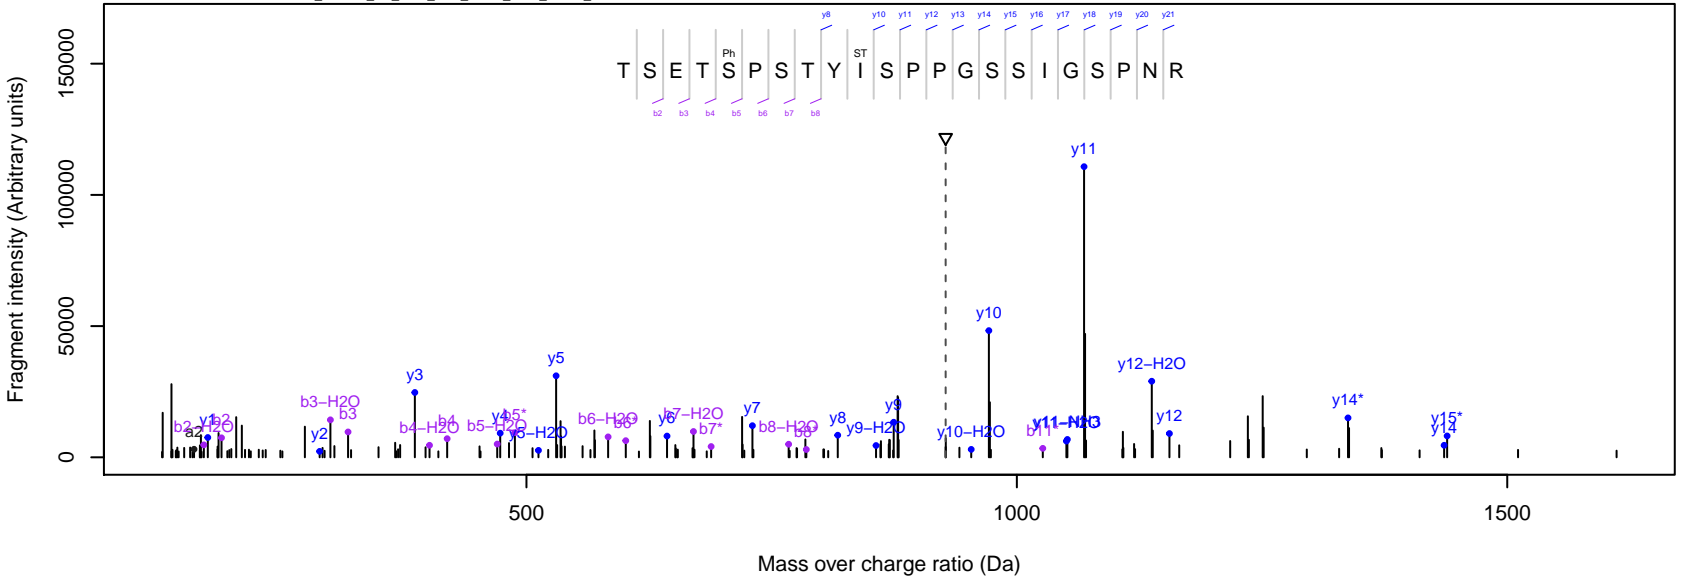

RQS(Phospho (STY))FASLALR-2+

Source : QE3\_201126\_FR\_TiOx\_hum\_tissue\_Urea\_RNAB\_N Scan : 24343

Andromeda score : 161.21

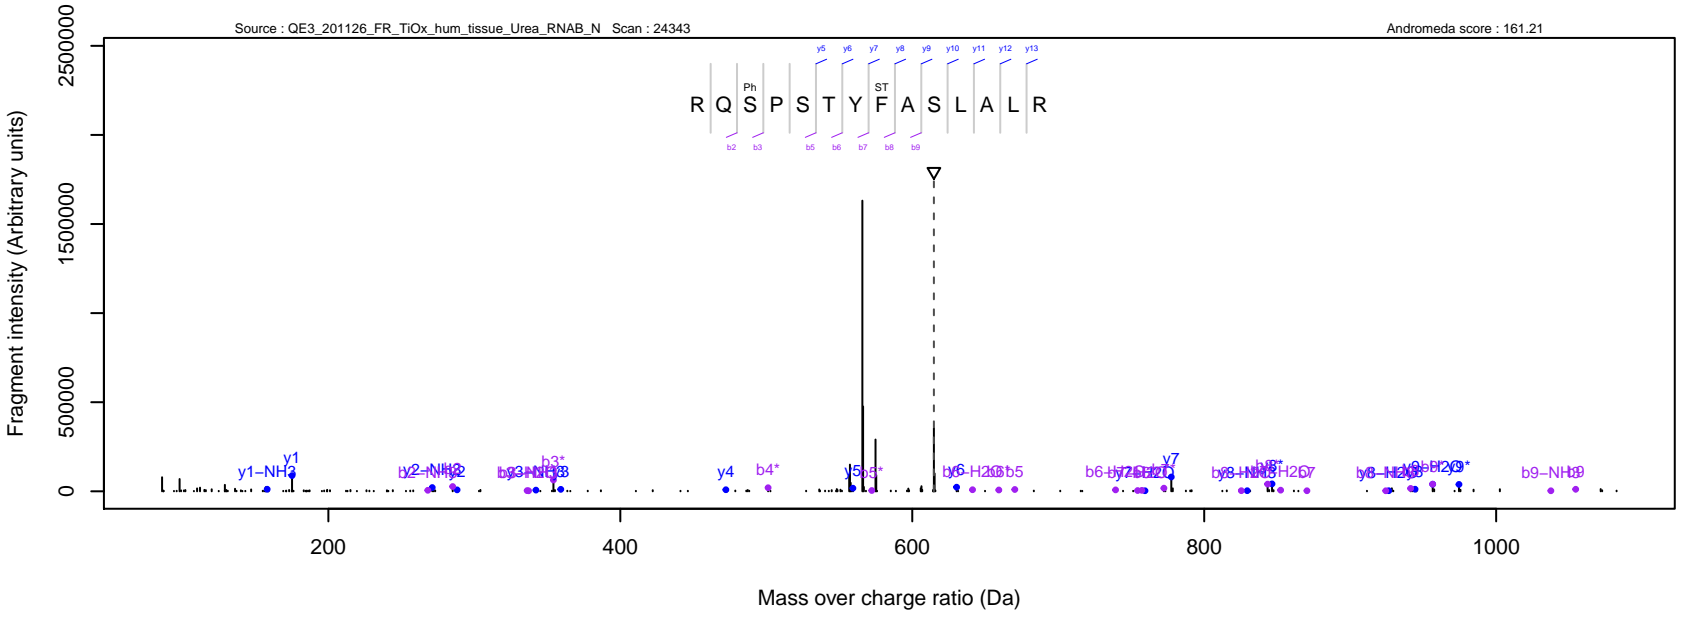

KPLTS(Phospho (STY))SSAAPQPSTQR-3+

Source : QE3\_201126\_FR\_TiOx\_hum\_tissue\_Urea\_RNAB\_B Scan : 9206

Andromeda score : 161.2

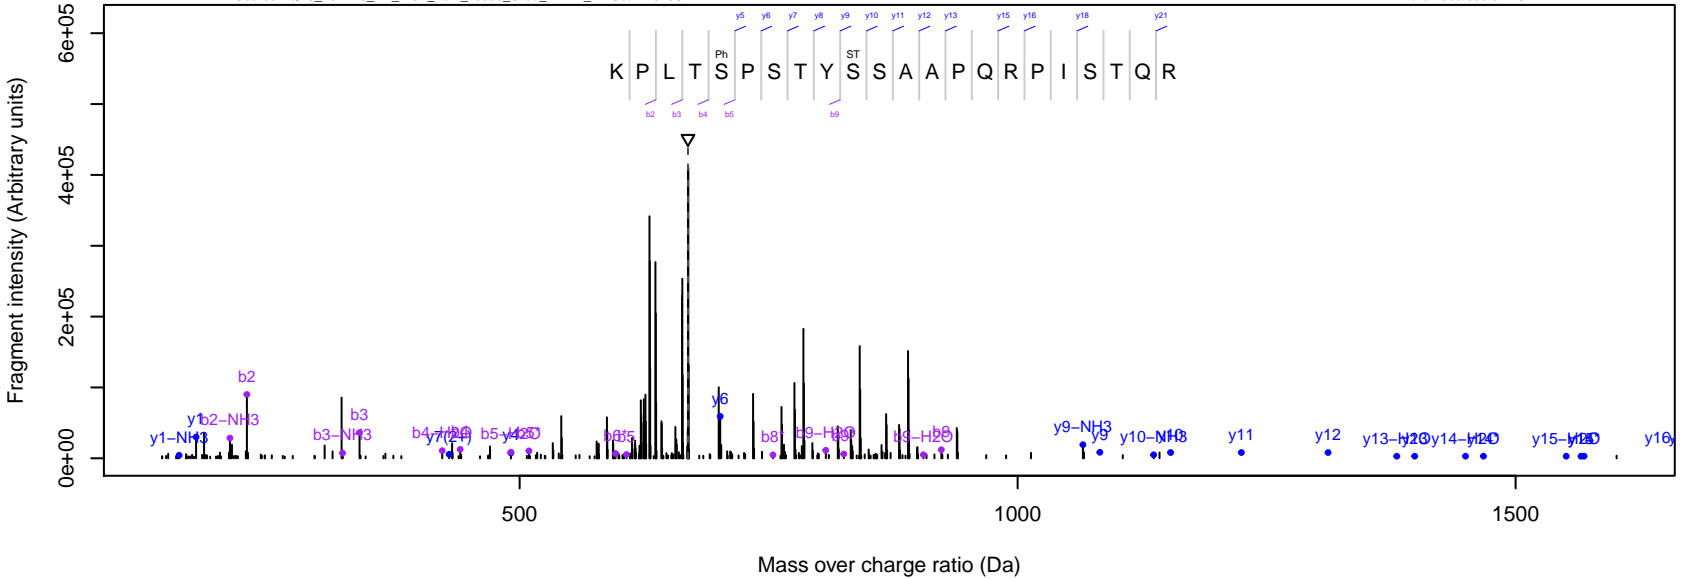

SHS(Phospho (STY))GTSPDNTAPPPPPRQPSSHR-3+

Source : QE3\_201126\_FR\_TIOx\_hum\_tissue\_Urea\_RNAB\_H Scan : 7688

Andromeda score : 161.2

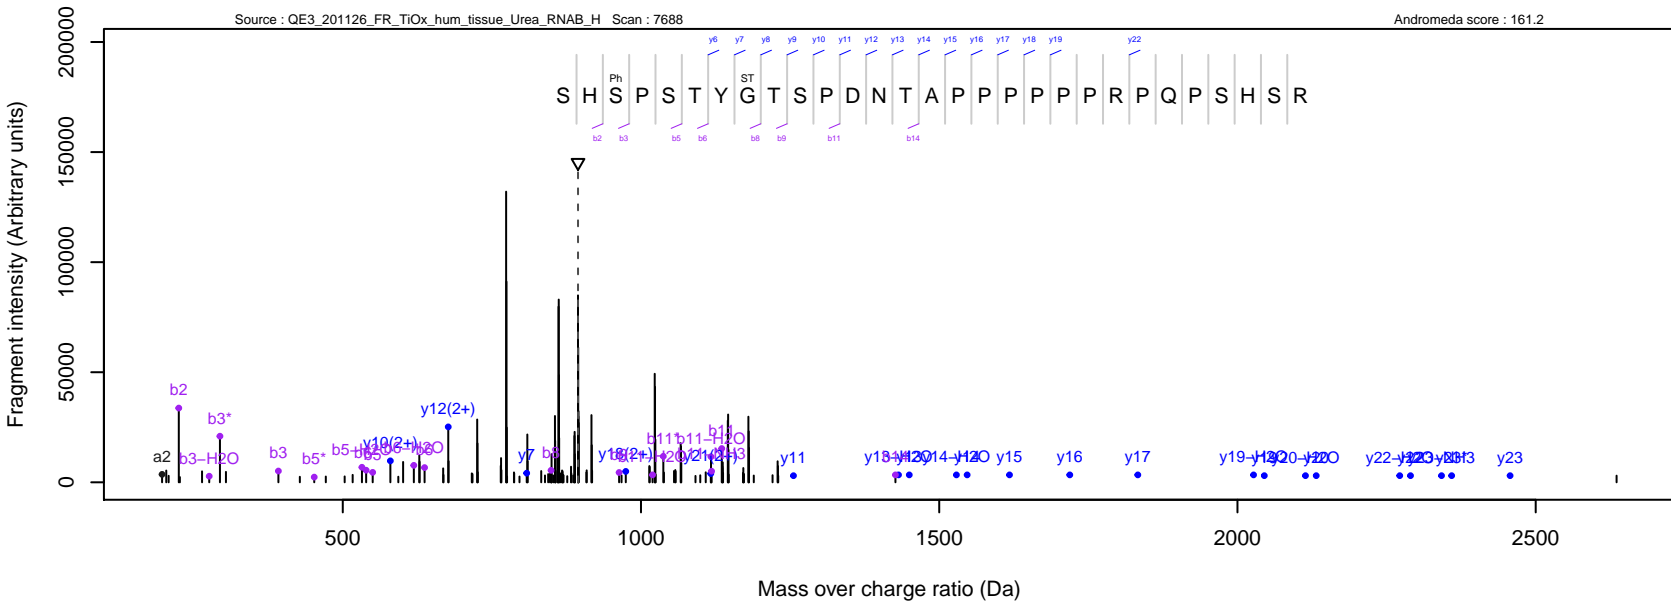

ISM(Oxidation (M))QDVDSLGS(Phospho (STY))PK-2+

Source : QE3\_201126\_FR\_TIOx\_hum\_tissue\_Urea\_RNAB\_H Scan : 31271

Andromeda score : 161.14

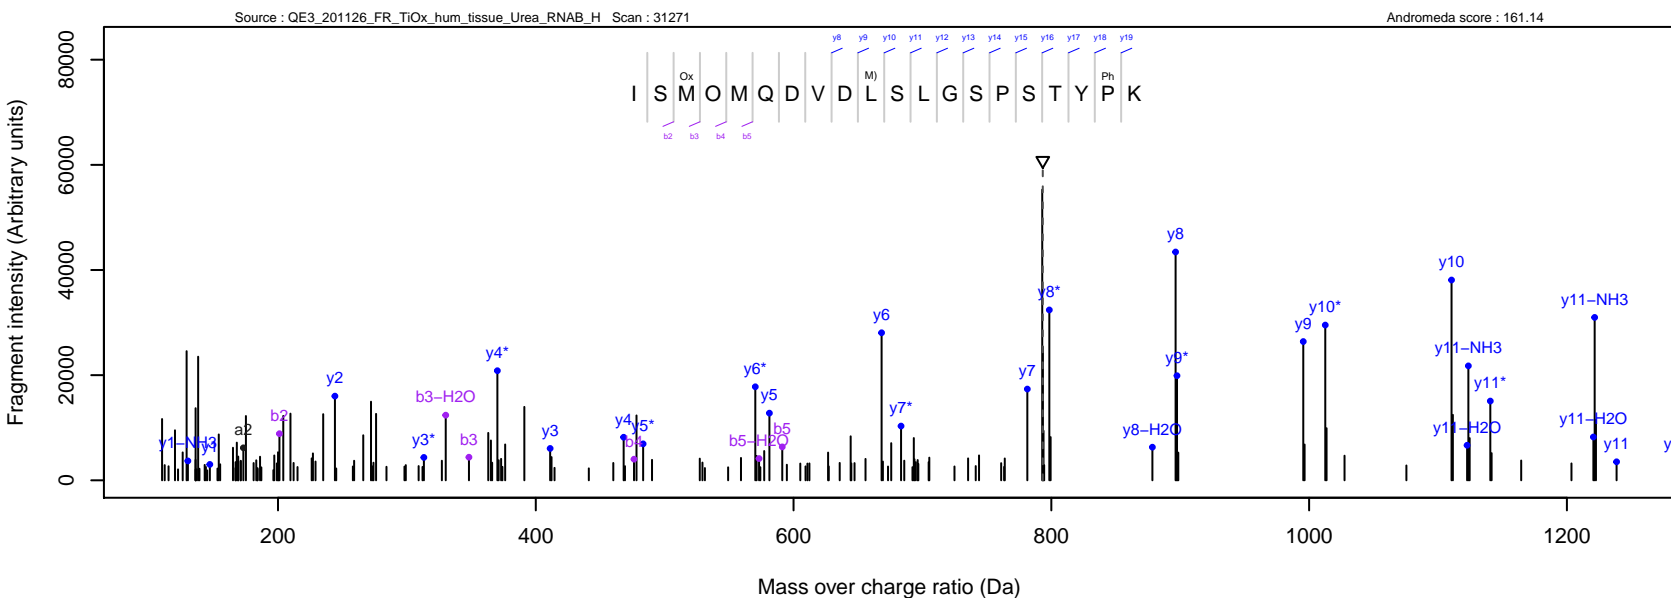

LLEDGEDFNLGDALDS(Phospho (STY))SNS(Phospho (STY))M(Oxidation (M))QTIQK-3+

Source : QE3\_201126\_FR\_TIOx\_hum\_tissue\_Urea\_RNAB\_N Scan : 57450

Andromeda score : 161.05

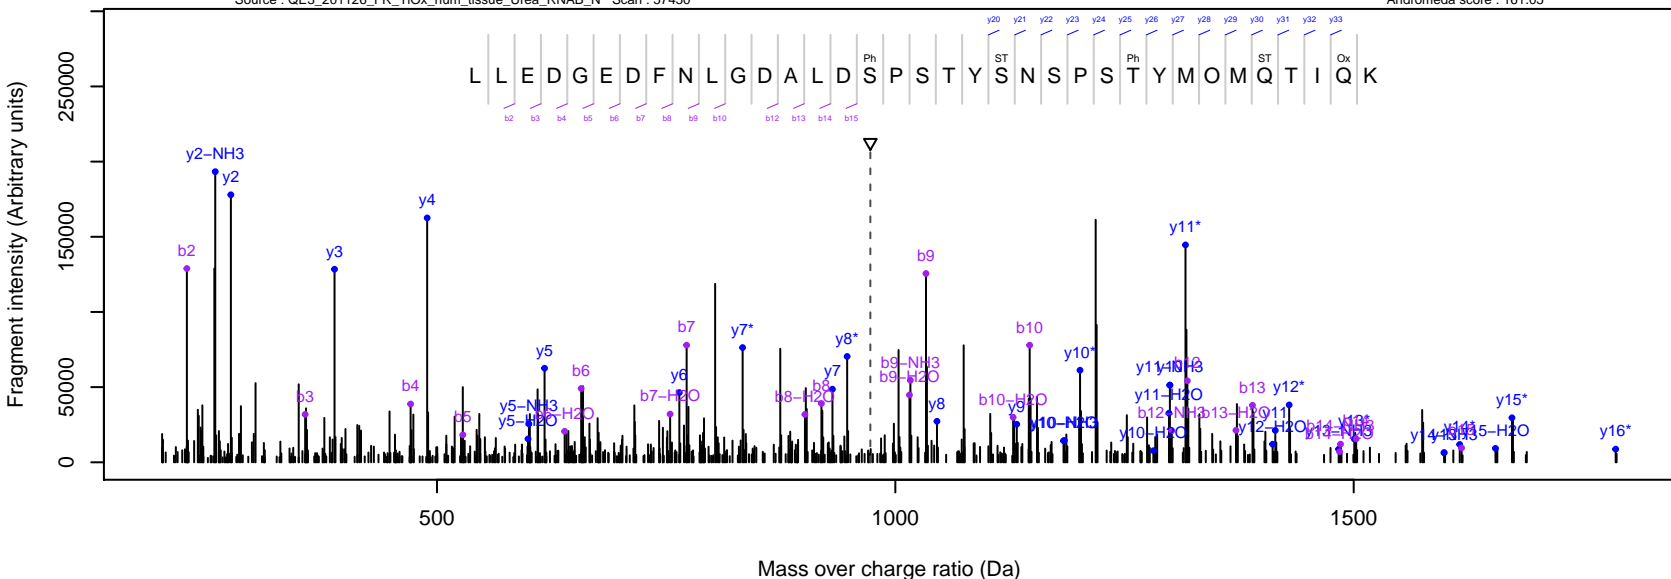



AGS(Phospho (STY))ISPGSPYPQSR-2+

Source : QE3\_201126\_FR\_TiOx\_hum\_tissue\_Urea\_RNAB\_H Scan : 20798

Andromeda score : 161.04

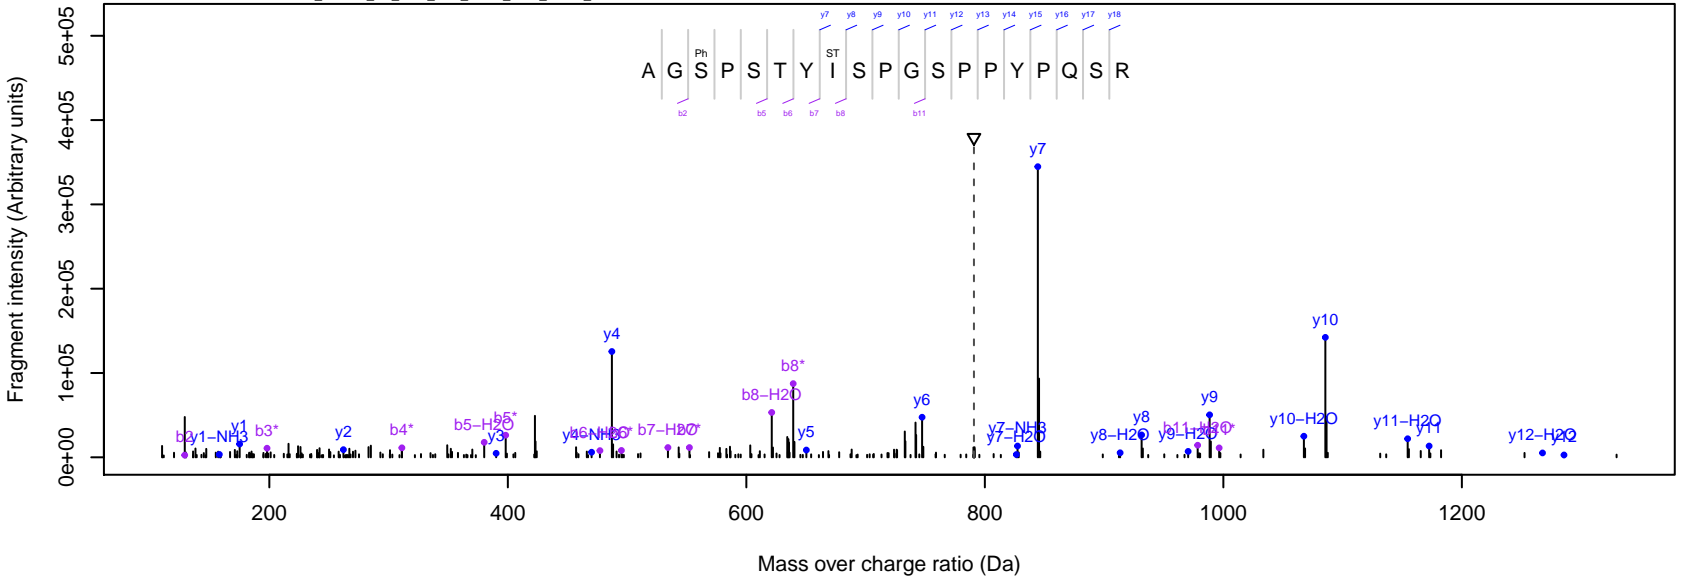

DPAQPMS(Phospho (STY))PGEATQSGARPADR-3+

Source : QE3\_201126\_FR\_TiOx\_hum\_tissue\_Urea\_RNAB\_N Scan : 15502

Andromeda score : 161.04

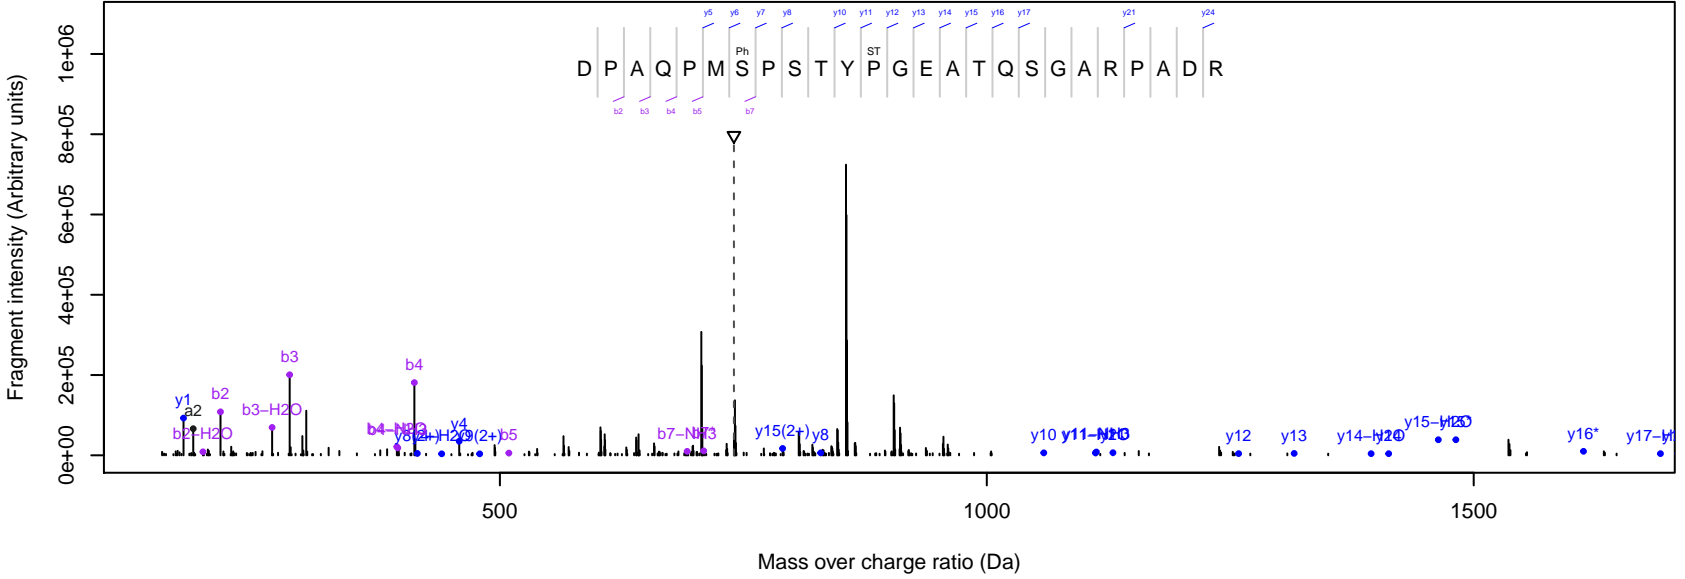

S(Phospho (STY))TQSLSLQR-2+

Source : QE3\_201126\_FR\_TiOx\_hum\_tissue\_Urea\_RNAB\_N Scan : 15998

Andromeda score : 160.98

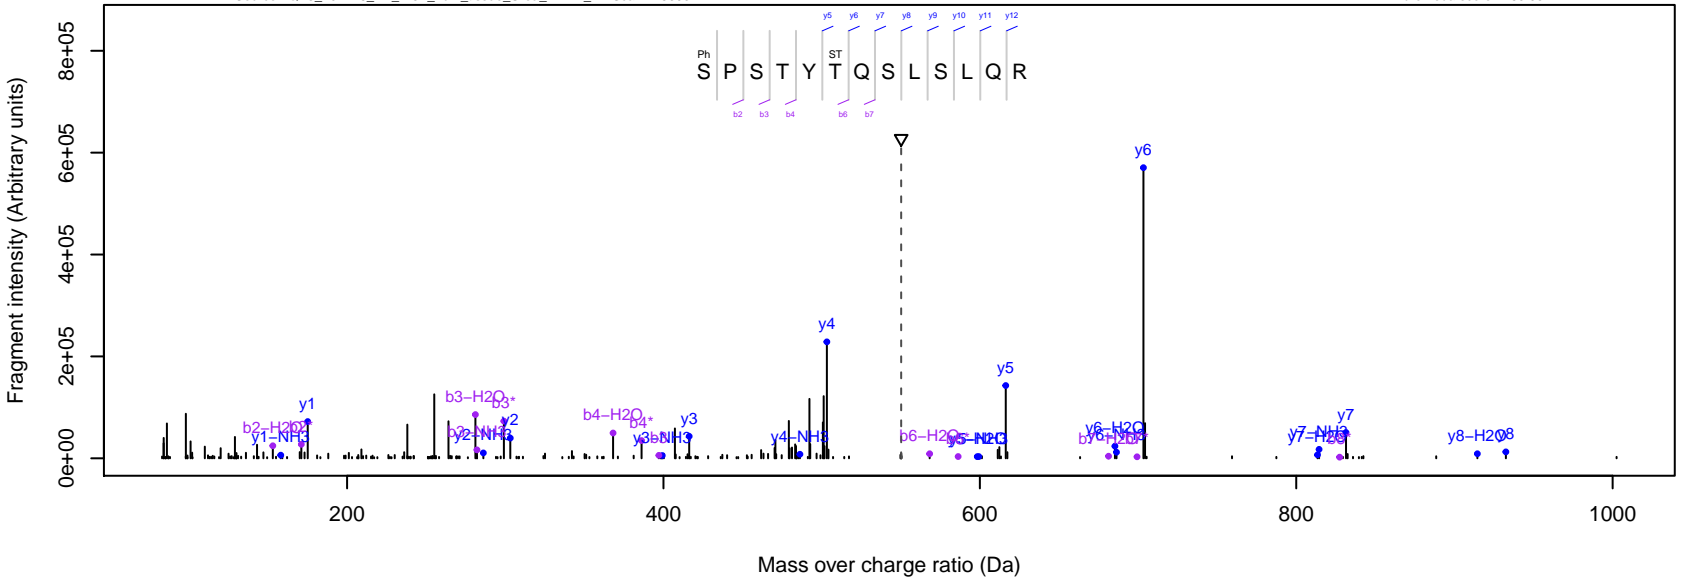

SRS(Phospho (STY))S(Phospho (STY))PSTDHYKQEASVELR-3+

Source : QE3\_201126\_FR\_TiOx\_hum\_tissue\_Urea\_RNAB\_N Scan : 14528

Andromeda score : 160.92

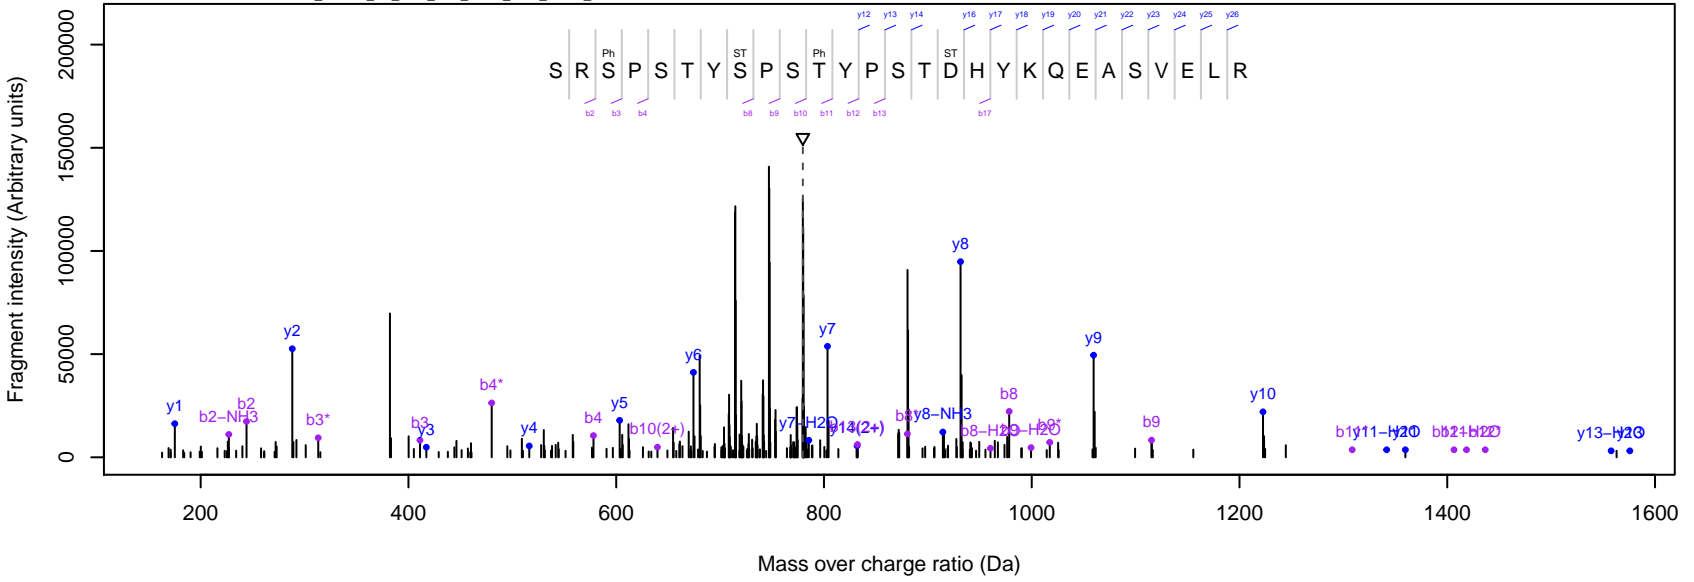

RDFS(Phospho (STY))LEQLR-2+

Source : QE3\_201126\_FR\_TiOx\_hum\_tissue\_Urea\_RNAB\_H Scan : 26269

Andromeda score : 160.86

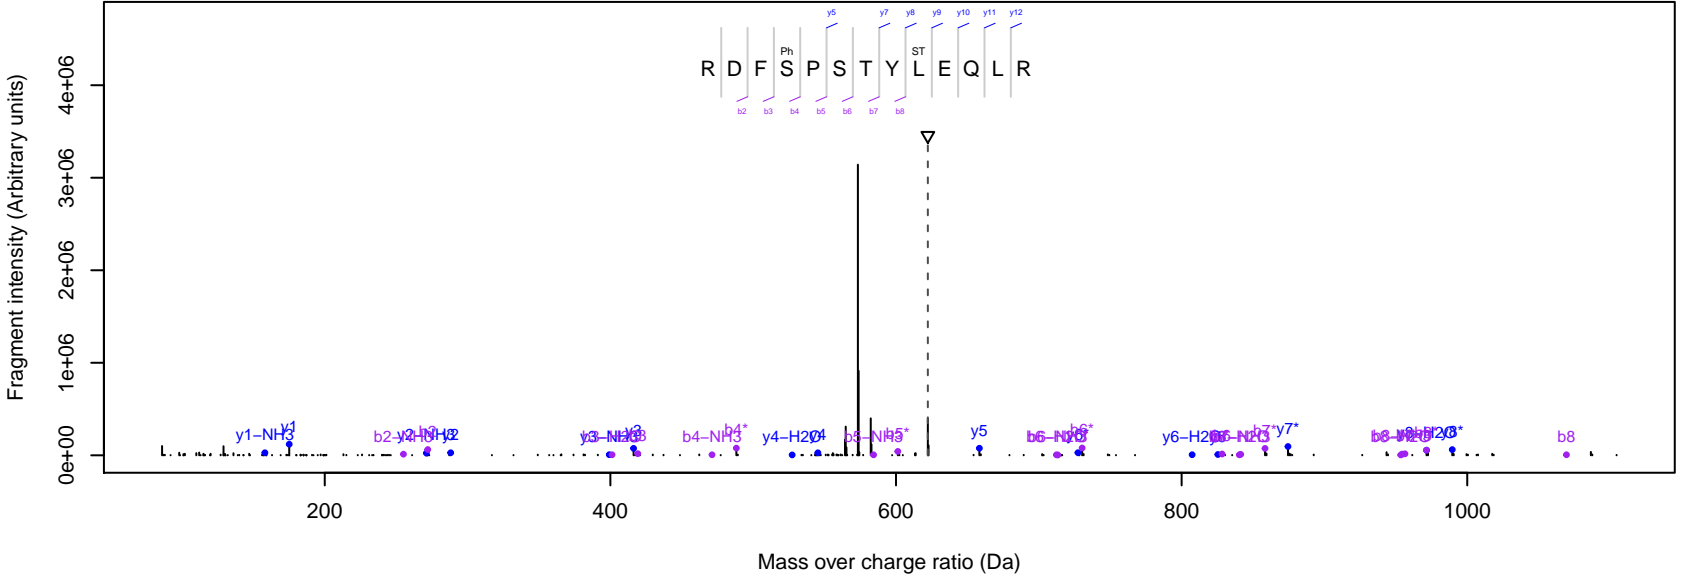

S(Phospho (STY))RS(Phospho (STY))PLDKDYPPSASVVGASVGGHR-4+

Source : QE3\_201126\_FR\_TiOx\_hum\_tissue\_Urea\_RNAB\_H Scan : 22763

Andromeda score : 160.86

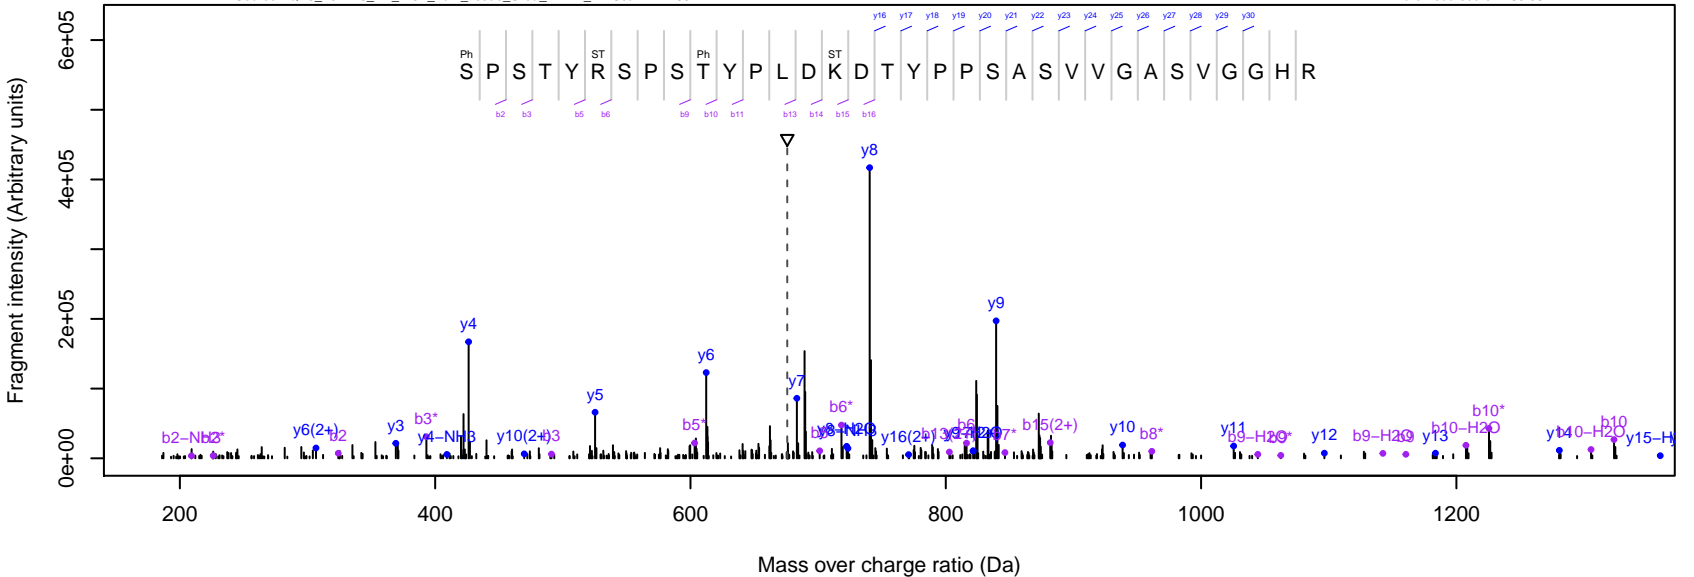

VAS(Phospho (STY))EEEEPLVVYLK-2+

Source : QE3\_201126\_FR\_TiOx\_hum\_tissue\_Urea\_RNAB\_H Scan : 55928

Andromeda score : 160.84

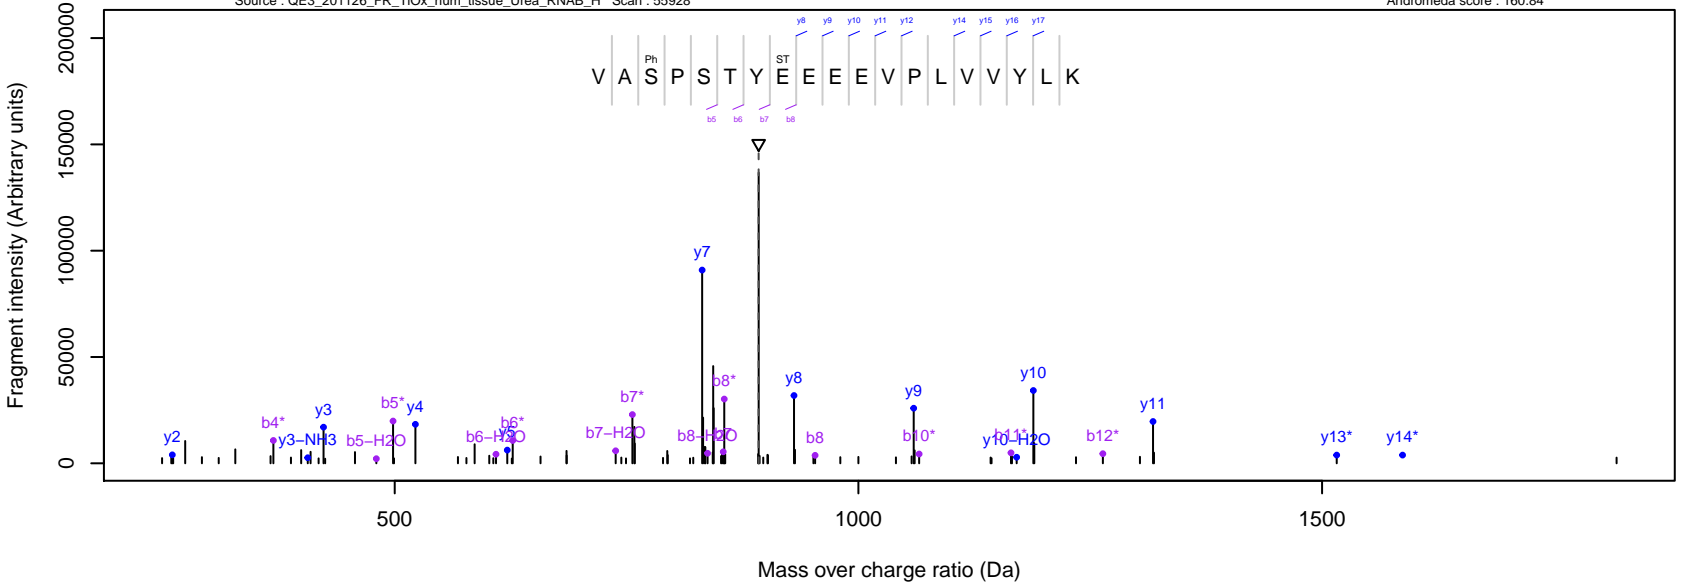

TAS(Phospho (STY))NPKVENEDEPVR-2+

Source : QE3\_201126\_FR\_TiOx\_hum\_tissue\_Urea\_RNAB\_H Scan : 8963

Andromeda score : 160.81

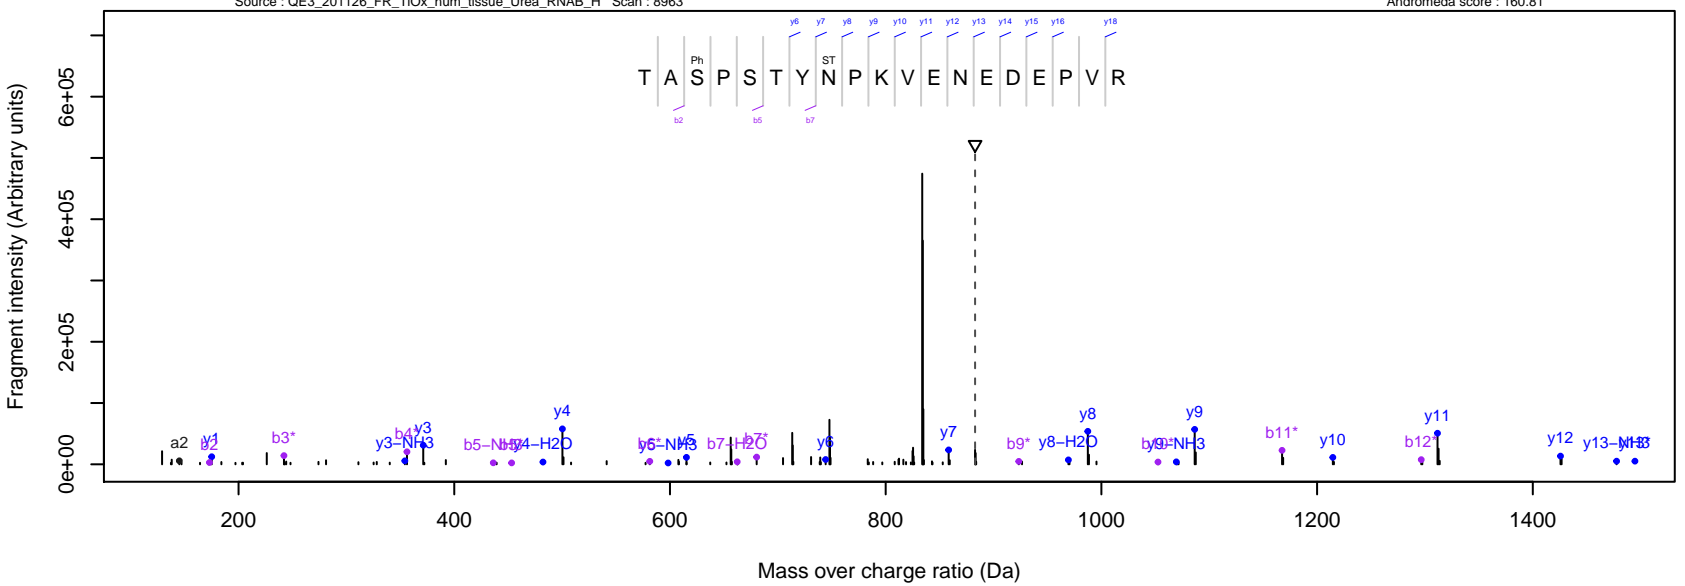

M(Oxidation (M))EREDS(Phospho (STY))S(Phospho (STY))EEEEIIDDEEIER-3+

Source : QE3\_201126\_FR\_TiOx\_hum\_tissue\_Urea\_RNAB\_B Scan : 26203

Andromeda score : 160.8

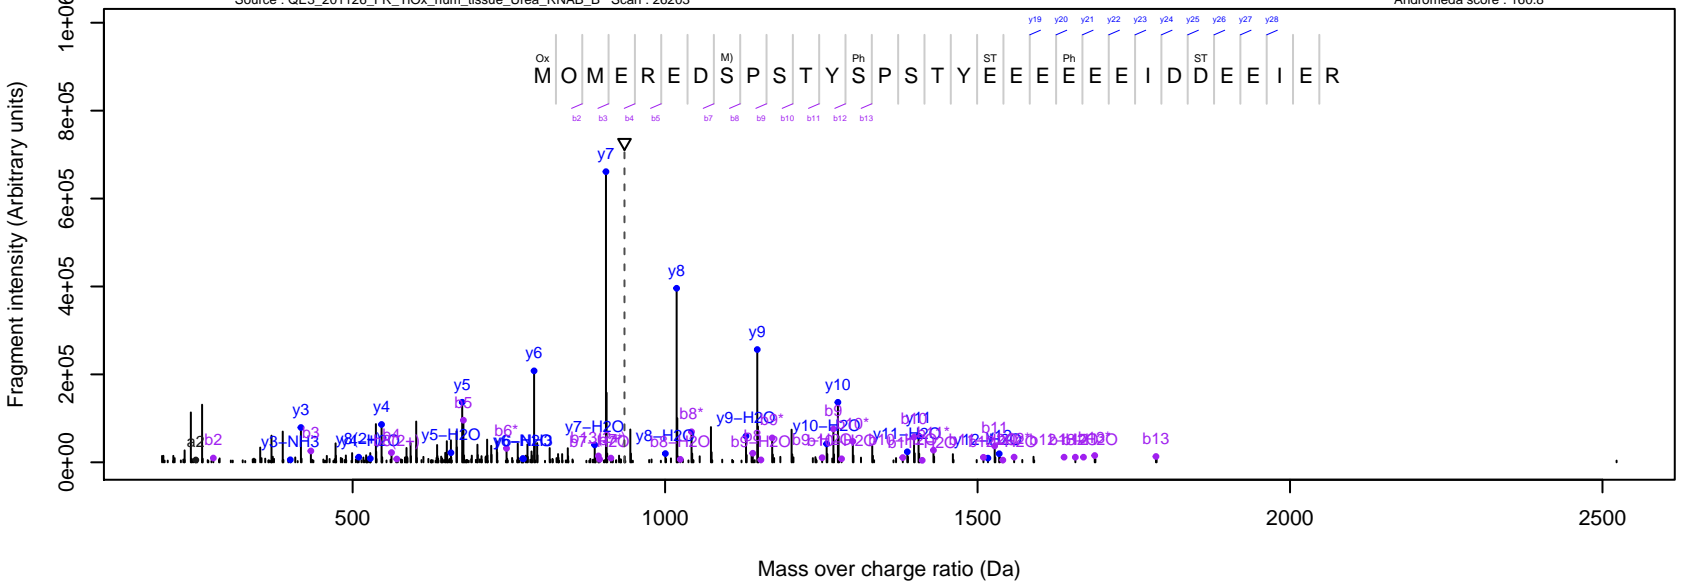

M(Oxidation (M))NEEIS(Phospho (STY))S(Phospho (STY))DSESESLAPR-2+

Source : QE3\_201126\_FR\_TiOx\_hum\_tissue\_Urea\_RNAB\_N Scan : 26840

Andromeda score : 160.8

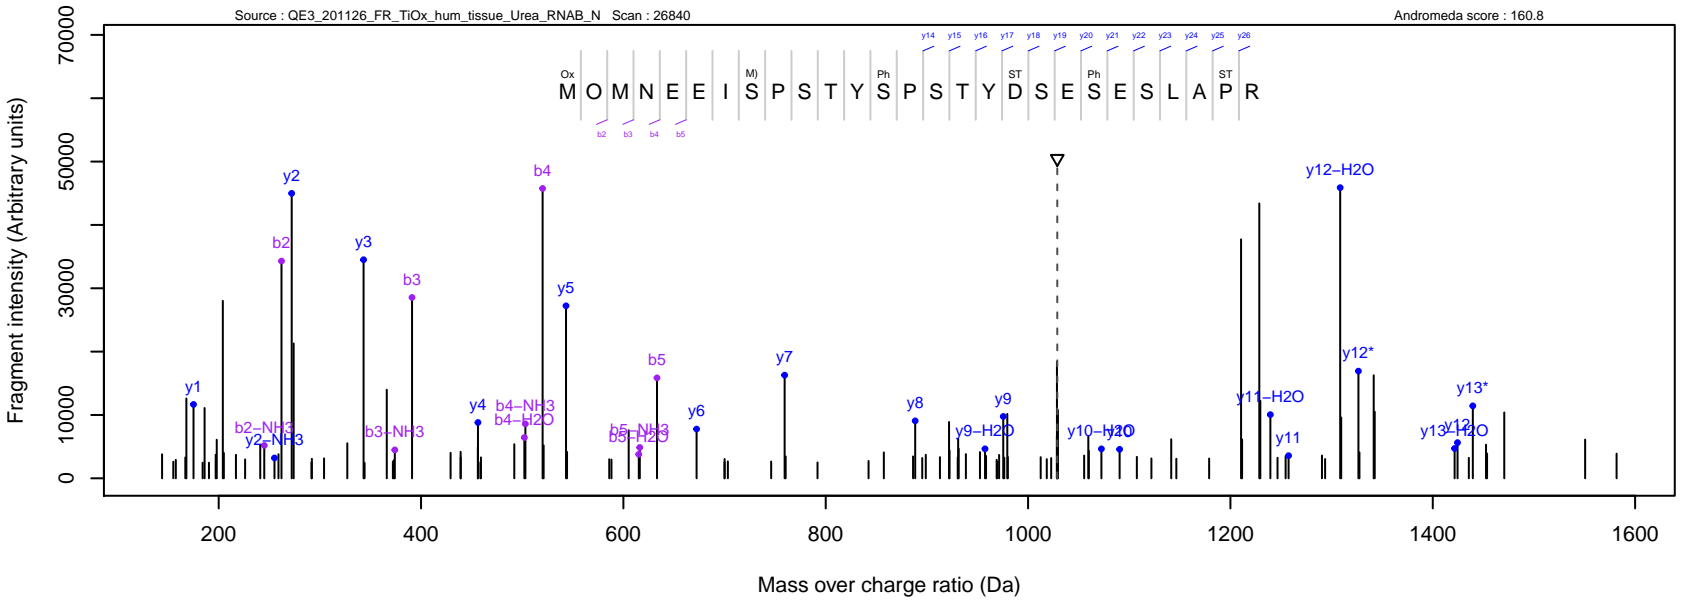

TASESISNLS(Phospho (STY))EAGSIK-2+

Source : QE3\_201126\_FR\_TiOx\_hum\_tissue\_Urea\_RNAB\_B Scan : 25815

Andromeda score : 160.8

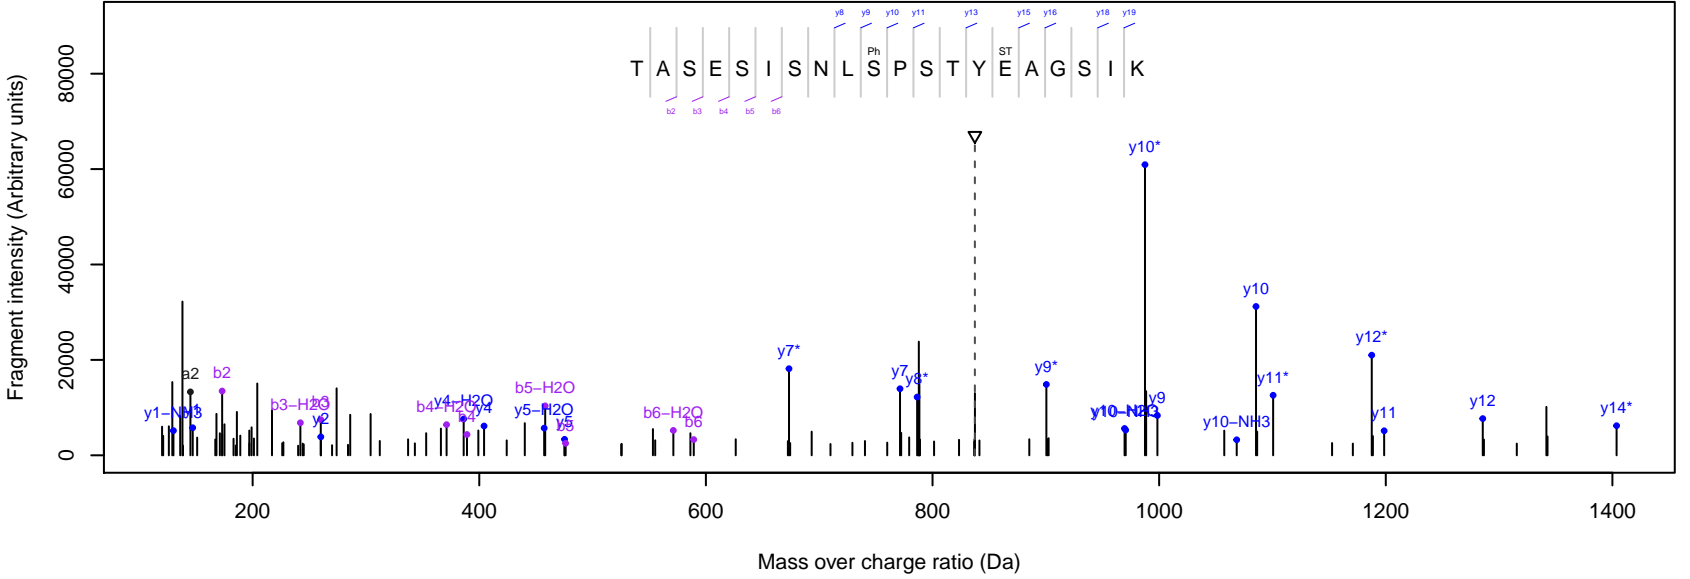

TMTTNS(Phospho (STY))DPFLNSGTYHSR-3+

Source : QE3\_201126\_FR\_TiOx\_hum\_tissue\_Urea\_RNAB\_H Scan : 25555

Andromeda score : 160.77

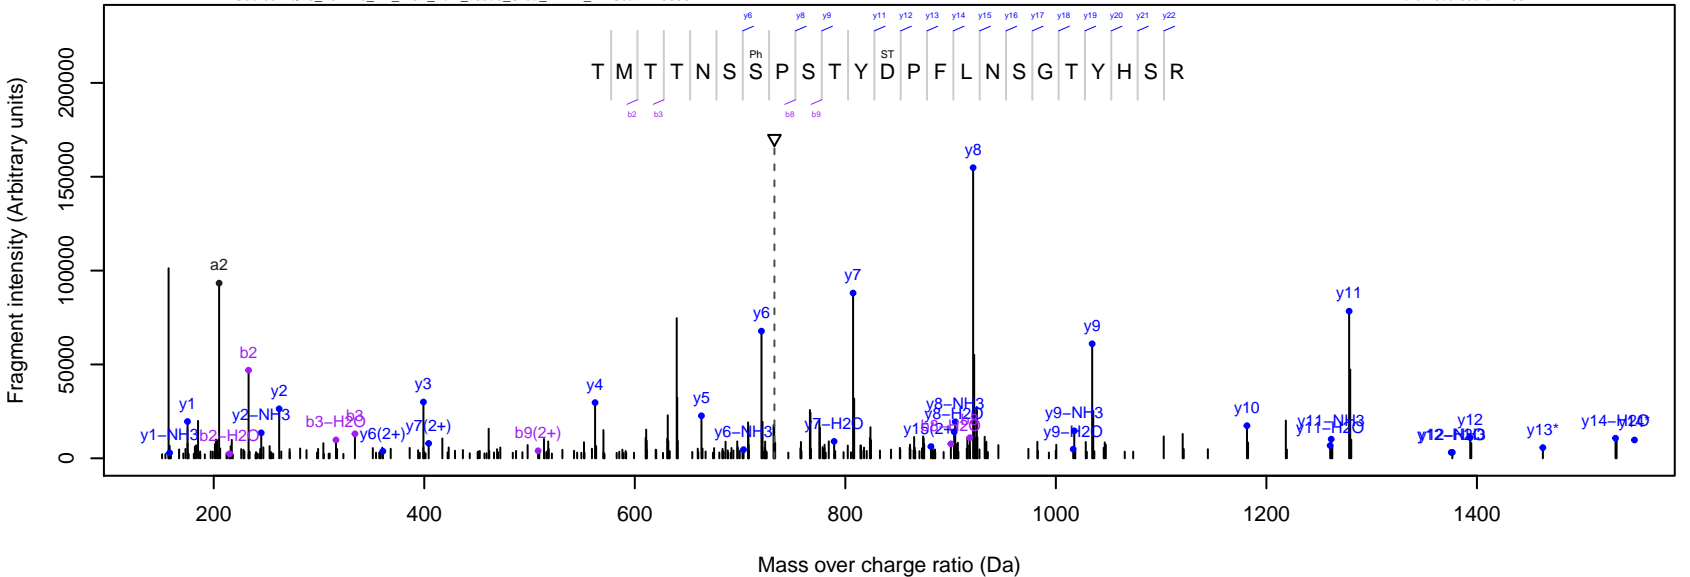

EALQS(Phospho (STY))EEDEEVKEEDTEQKR-3+

Source : QE3\_201126\_FR\_TiOx\_hum\_tissue\_Urea\_RNAB\_H Scan : 14242

Andromeda score : 160.69

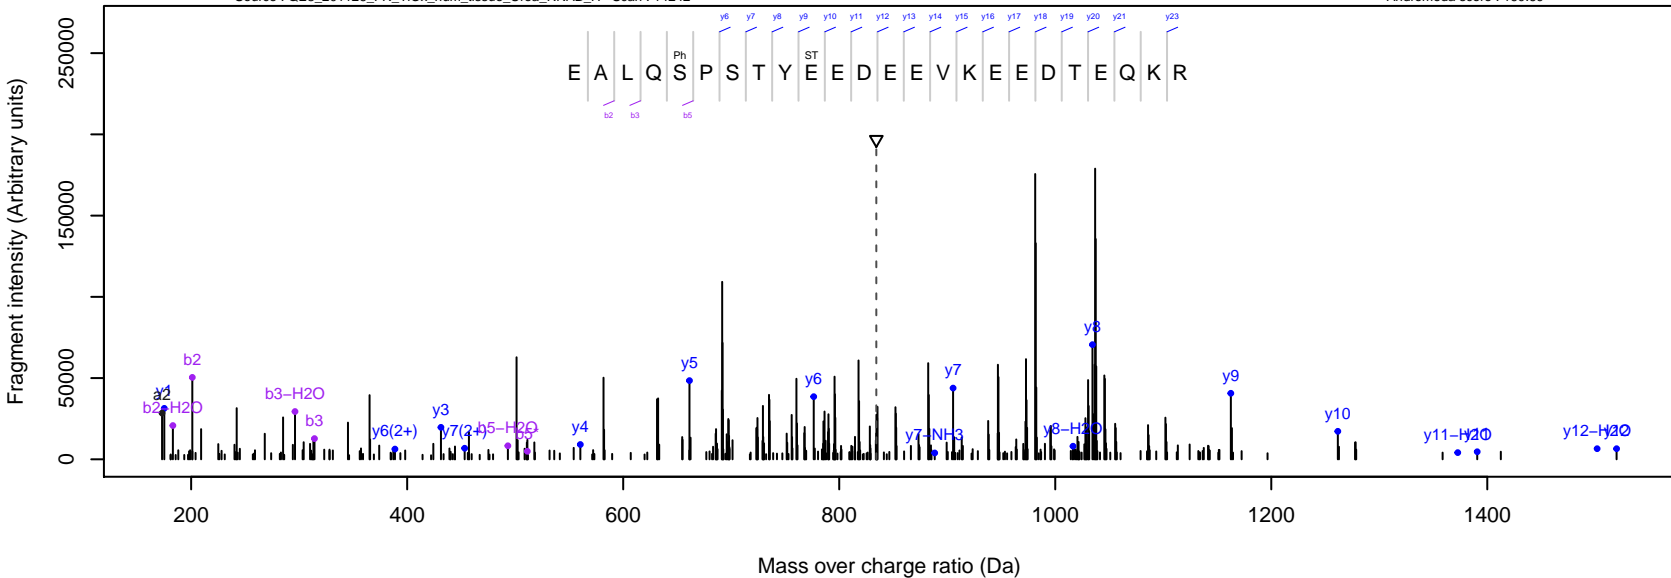

LSEGS(Phospho (STY))QPAEEEEQETPSR-2+

Source : QE3\_201126\_FR\_TiOx\_hum\_tissue\_Urea\_RNAB\_H Scan : 15273

Andromeda score : 160.67

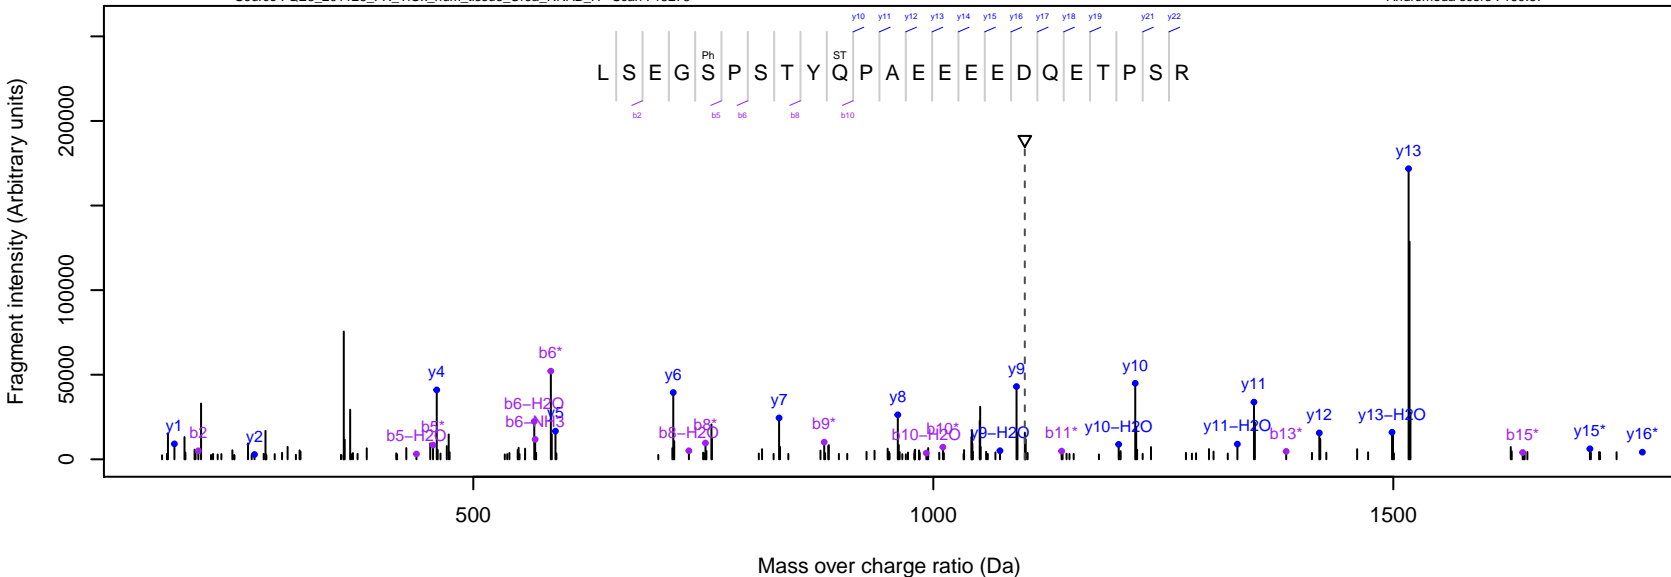

TET(Phospho (STY))QEKNLPSKETIEQEK-3+

Source : QE3\_201126\_FR\_TiOx\_hum\_tissue\_Urea\_RNAB\_N Scan : 13782

Andromeda score : 160.67

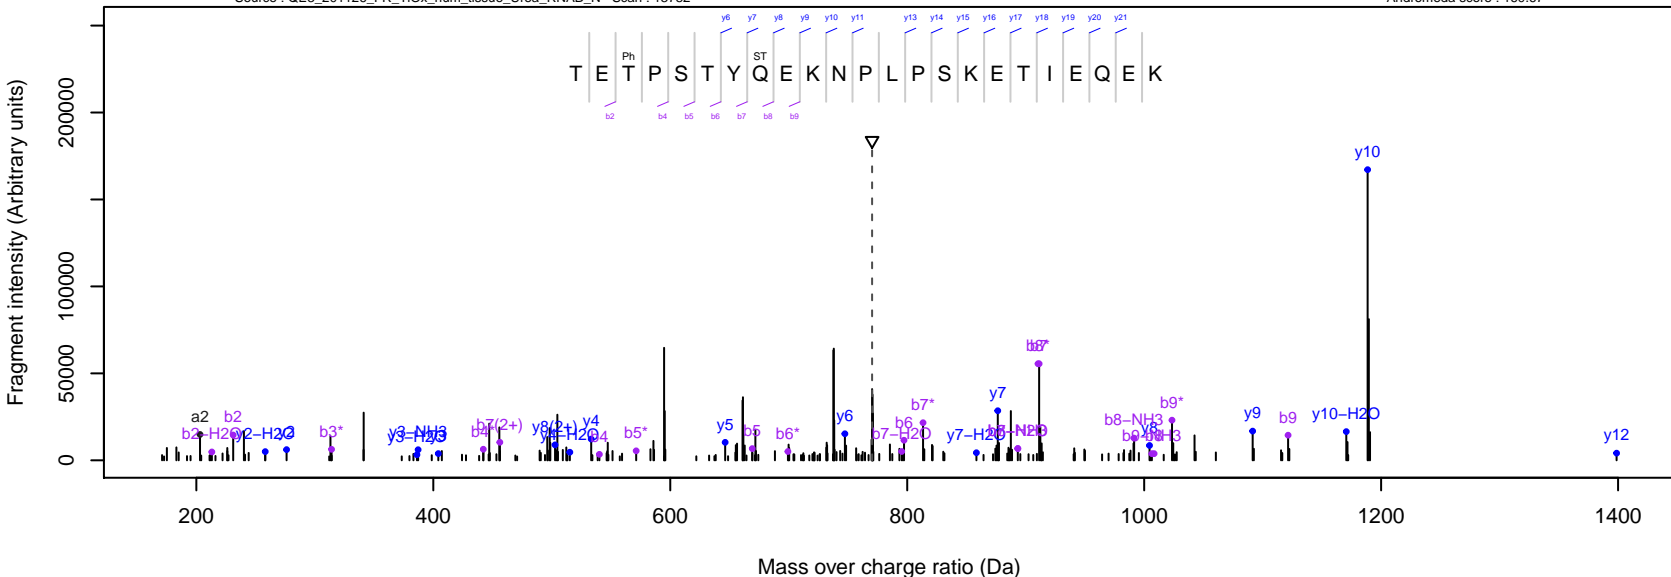

VLAVTDS(Phospho (STY))PAR-2+

Source : QE3\_201126\_FR\_TiOx\_hum\_tissue\_Urea\_RNAB\_H Scan : 15767

Andromeda score : 160.67

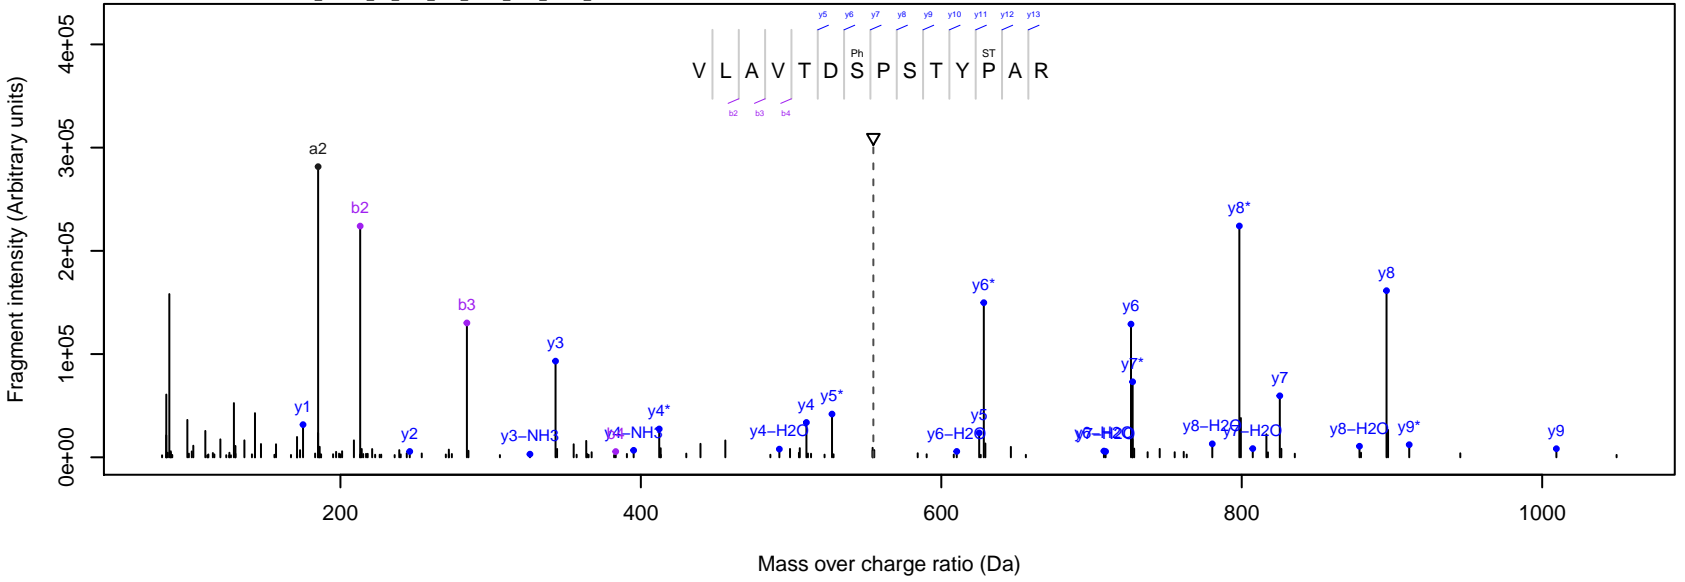

EGAKDIDISSPSTYPEFK

Source : QE3\_201126\_FR\_TiOx\_hum\_tissue\_Urea\_RNAB\_B Scan : 23292

Andromeda score : 160.65

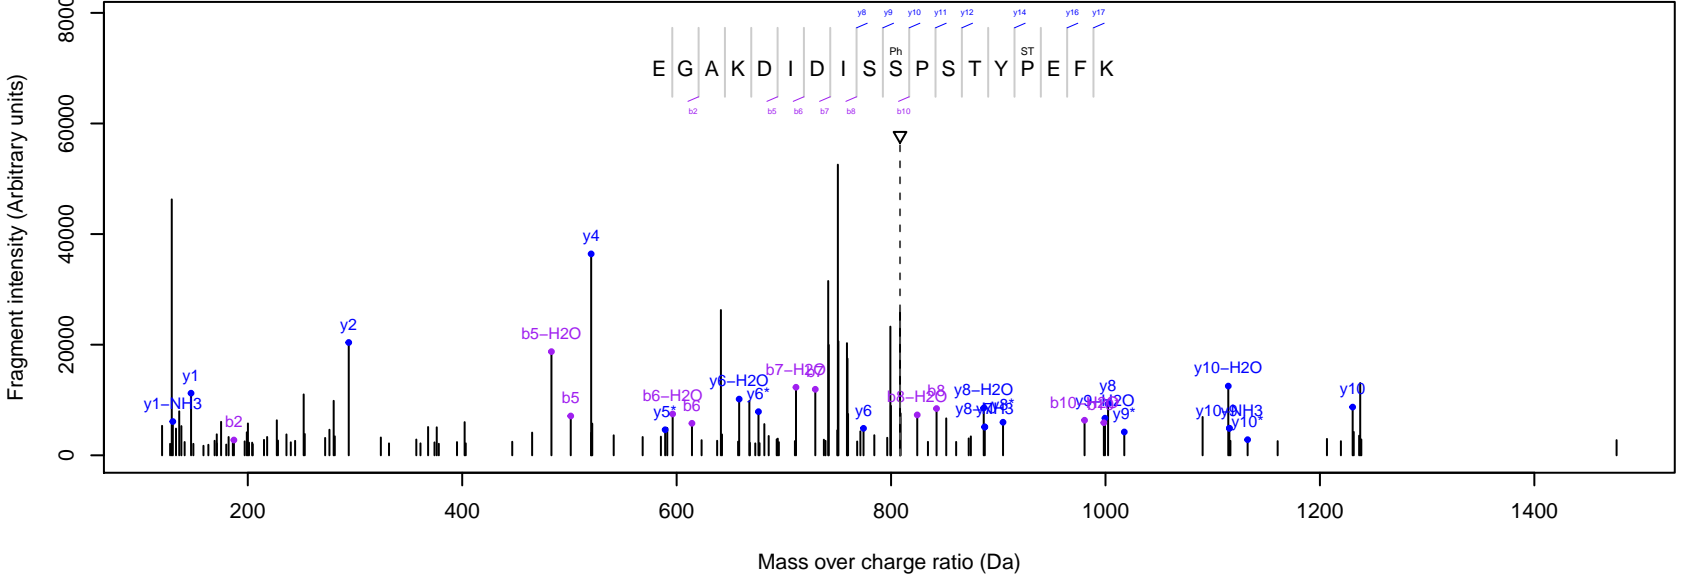

DWEDDS(Phospho (STY))DEDM(Oxidation (M))SNFDR-3+

Source : QE3\_201126\_FR\_TiOx\_hum\_tissue\_Urea\_RNAB\_N Scan : 29882

Andromeda score : 160.64

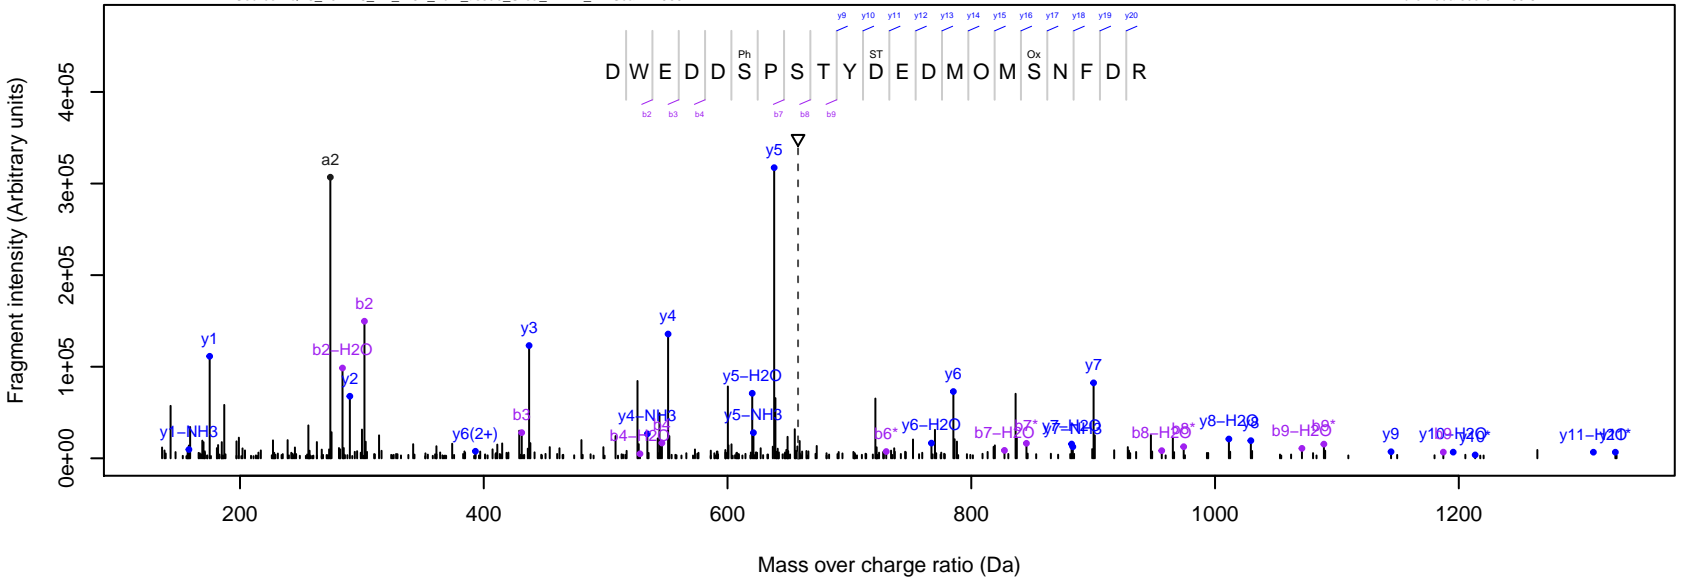

AGSSAAGSGWTSAGLSNVPTNSAQQGHNSPDS(Phospho (STY))PVTSAAK-3+

Source : QE3\_201126\_FR\_TIOx\_hum\_tissue\_Urea\_RNAB\_N Scan : 27559

Andromeda score : 160.58

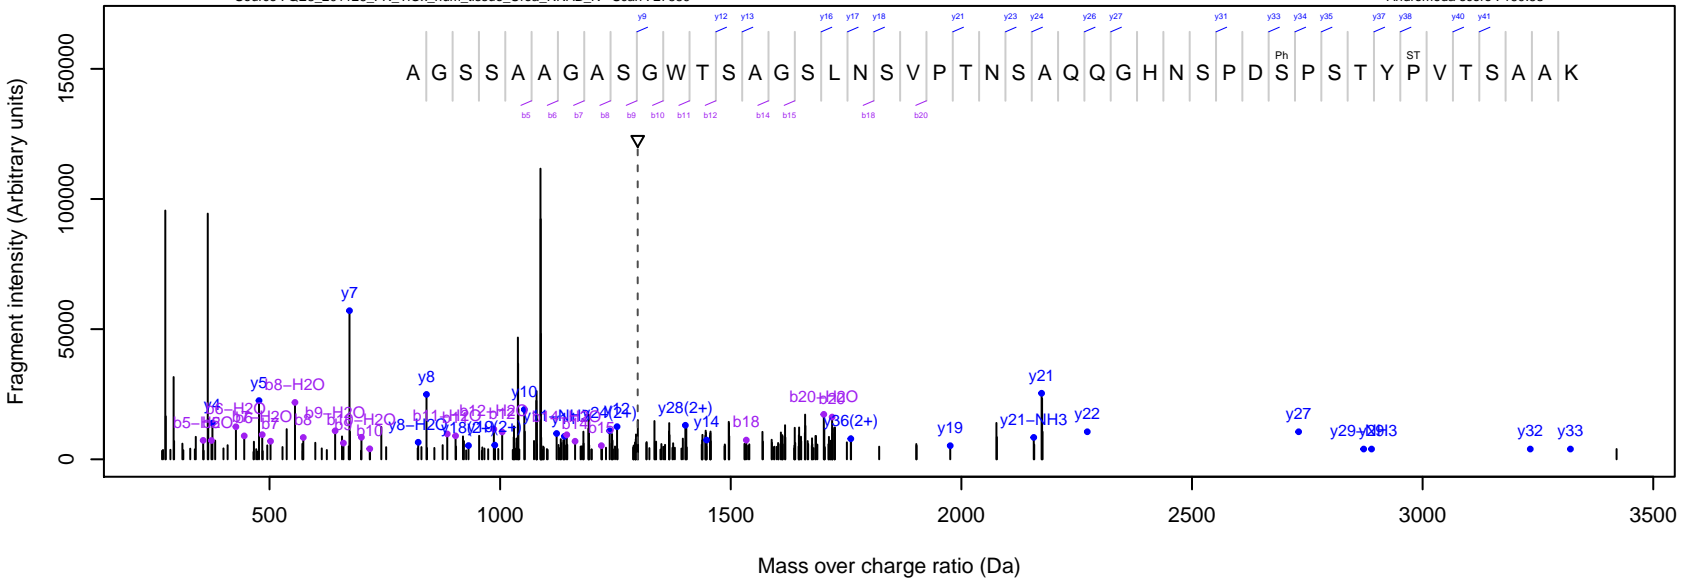

TCEERPAEDGS(Phospho (STY))DEEDPDSM(Oxidation (M))EAPTR-3+

Source : QE3\_201126\_FR\_TIOx\_hum\_tissue\_Urea\_RNAB\_B Scan : 11718

Andromeda score : 160.57

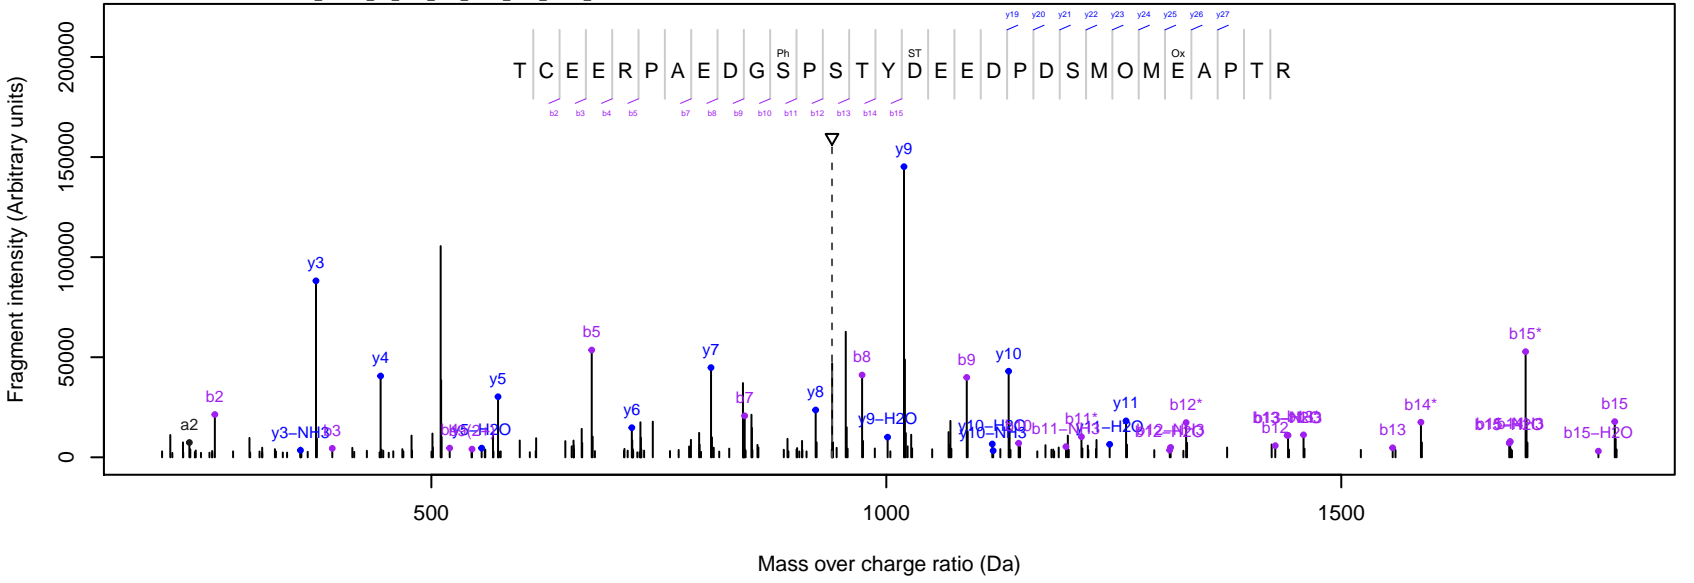

IGS(Phospho (STY))PLS(Phospho (STY))PKKNSETSI LQAMSR-3+

Source : QE3\_201126\_FR\_TIOx\_hum\_tissue\_Urea\_RNAB\_H Scan : 38133

Andromeda score : 160.52

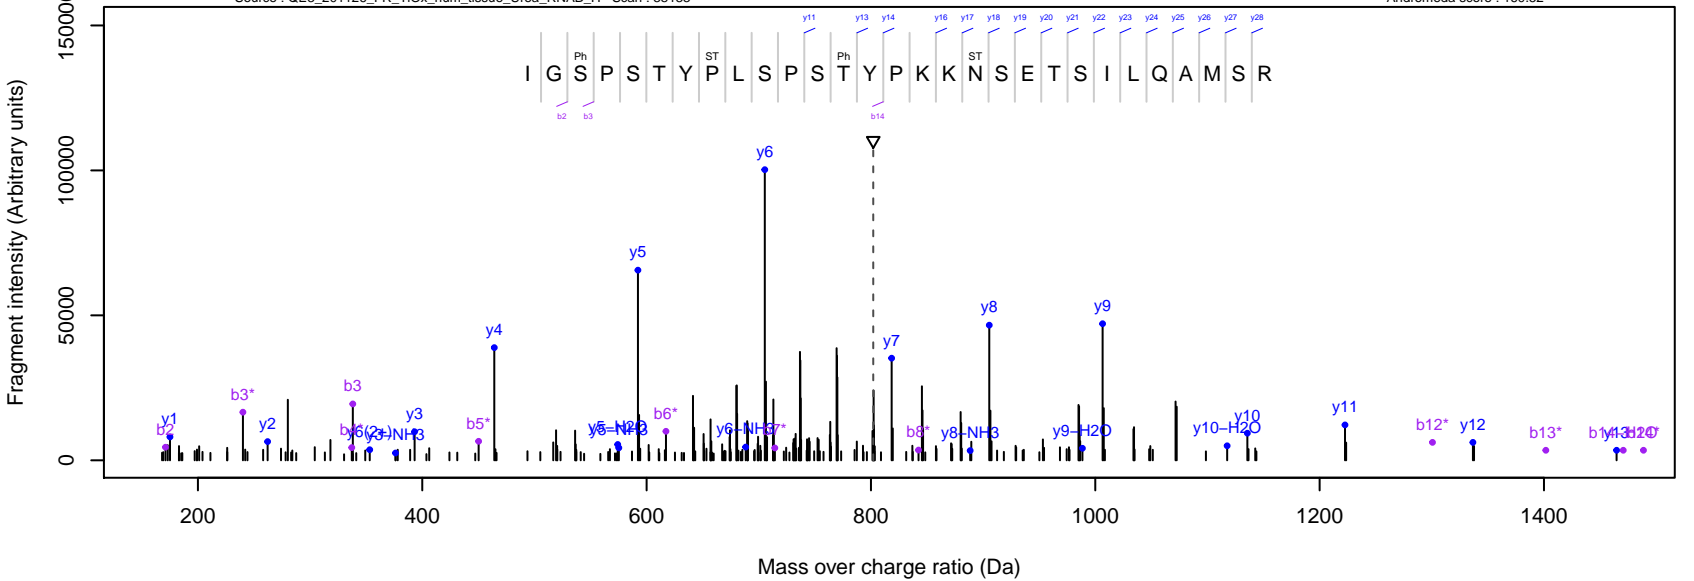

### SGLTVPTS(Phospho (STY))PK-2+

Source : QE3\_201126\_FR\_TiOx\_hum\_tissue\_Urea\_RNAB\_H Scan : 18396

Andromeda score : 160.52

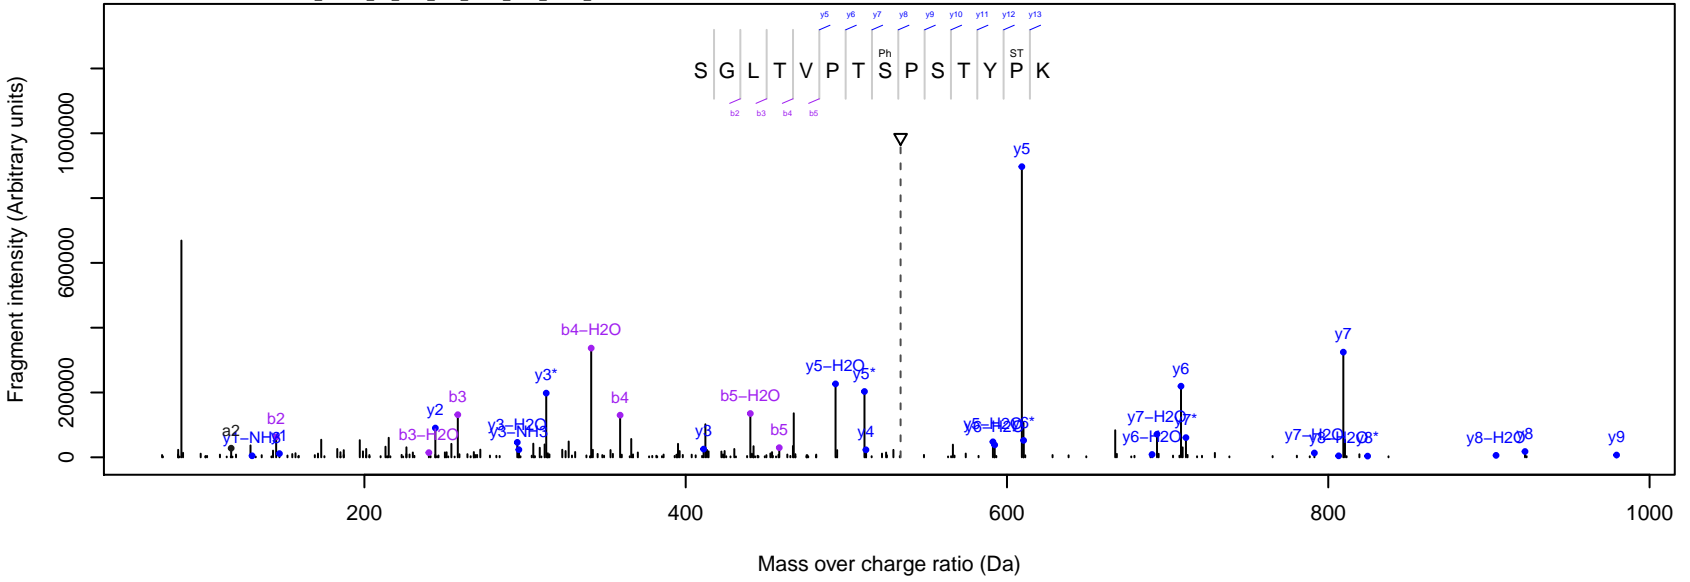

### SVIDLRPEDVVHESGS(Phospho (STY))LGDR-3+

Source : QE3\_201126\_FR\_TiOx\_hum\_tissue\_Urea\_RNAB\_N Scan : 34527

Andromeda score : 160.52

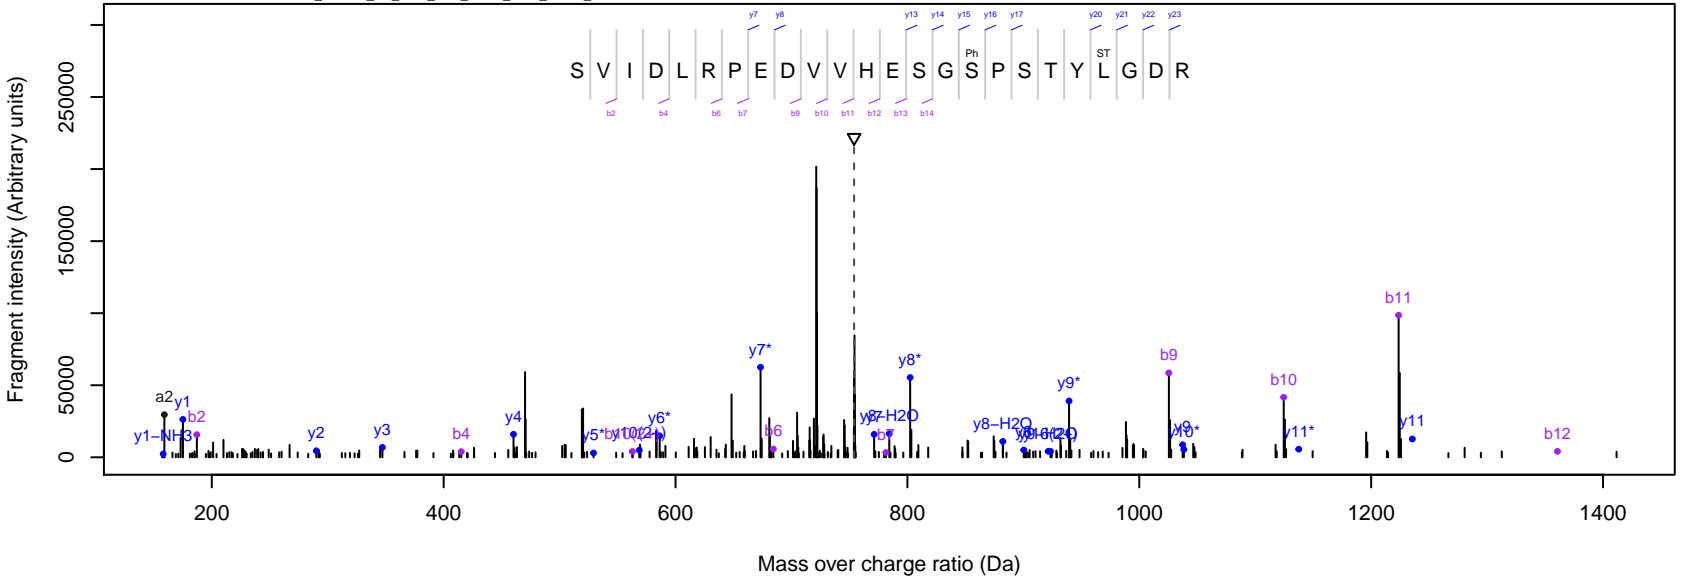

### NKQDDDLNCEPLS(Phospho (STY))PHNITPEPVSK-3+

Source : QE3\_201126\_FR\_TiOx\_hum\_tissue\_Urea\_RNAB\_H Scan : 23667

Andromeda score : 160.41

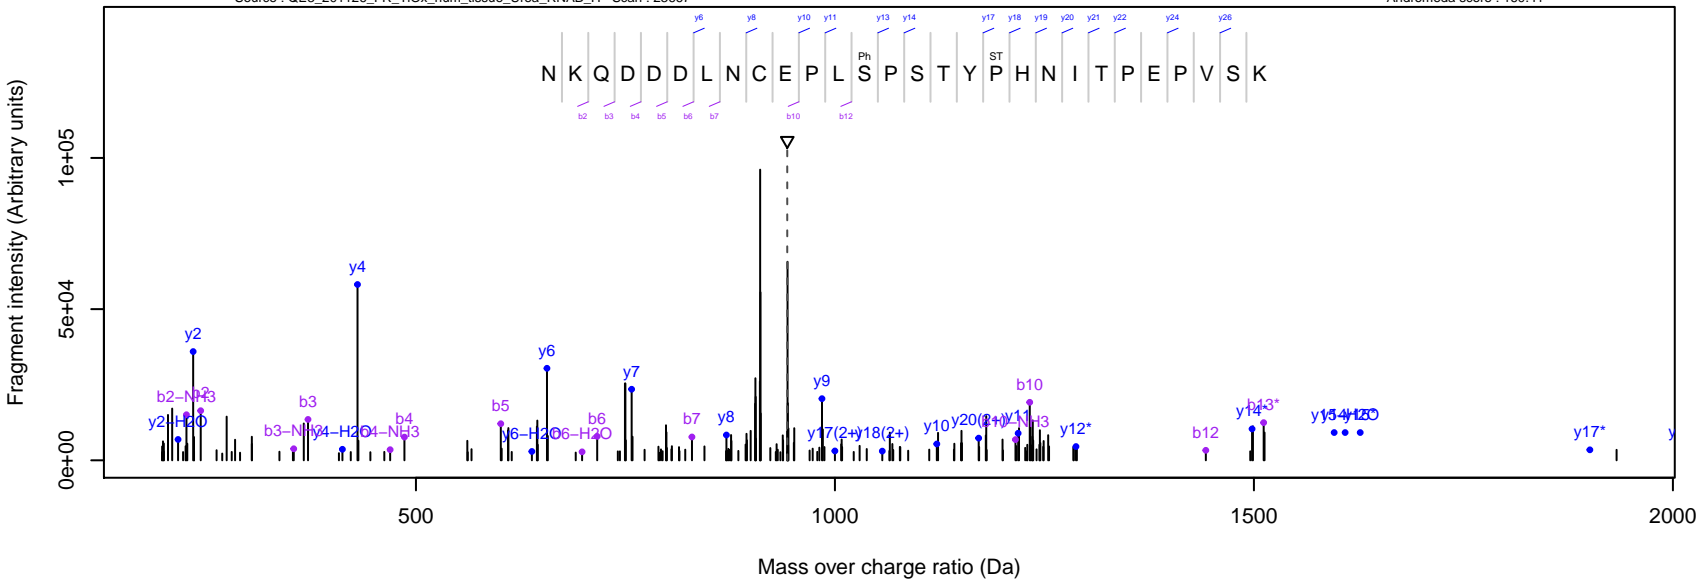



ELDEEGS(Phospho (STY))DPPLPGR-2+

Source : QE3\_201126\_FR\_TiOx\_hum\_tissue\_Urea\_RNAB\_N Scan : 24360

Andromeda score : 160.38

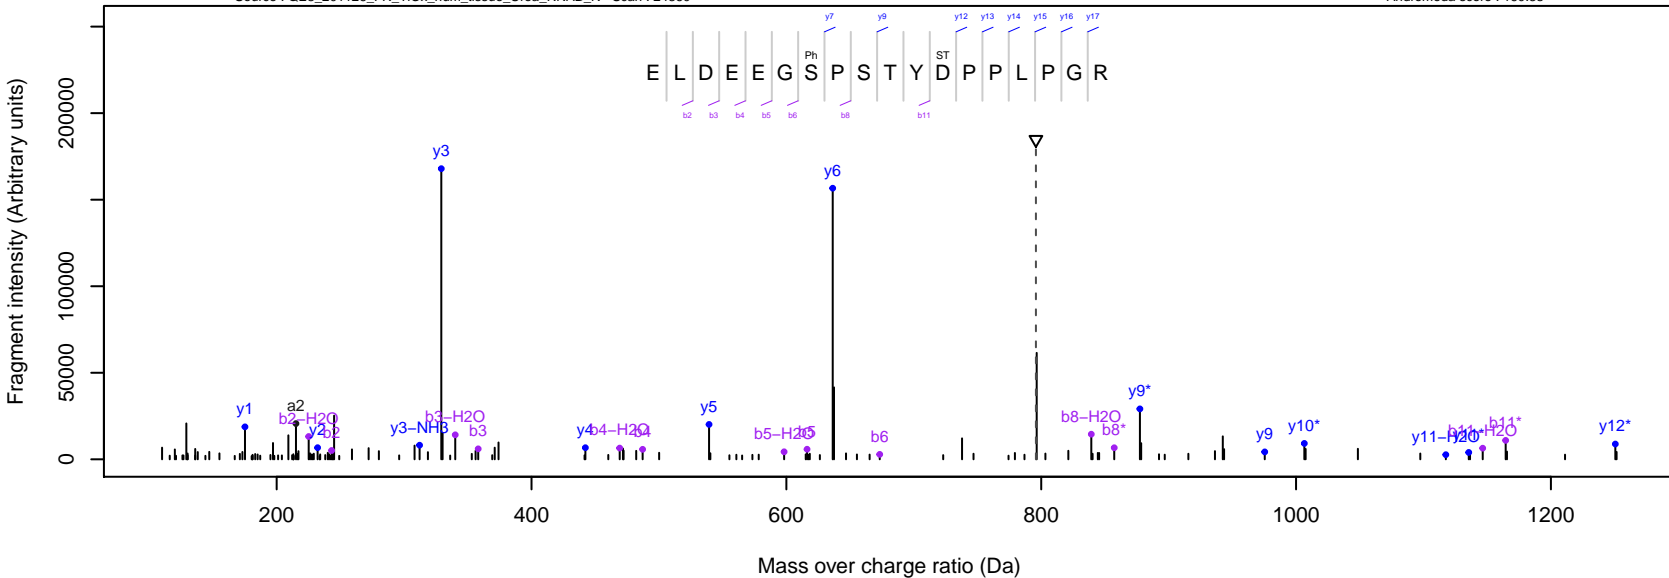

(Acetyl (Protein N-term))S(Phospho (STY))GDEM(Oxidation (M))IFDPTMSK-2+

Source : QE3\_201126\_FR\_TiOx\_hum\_tissue\_Urea\_RNAB\_B Scan : 50295

Andromeda score : 160.38

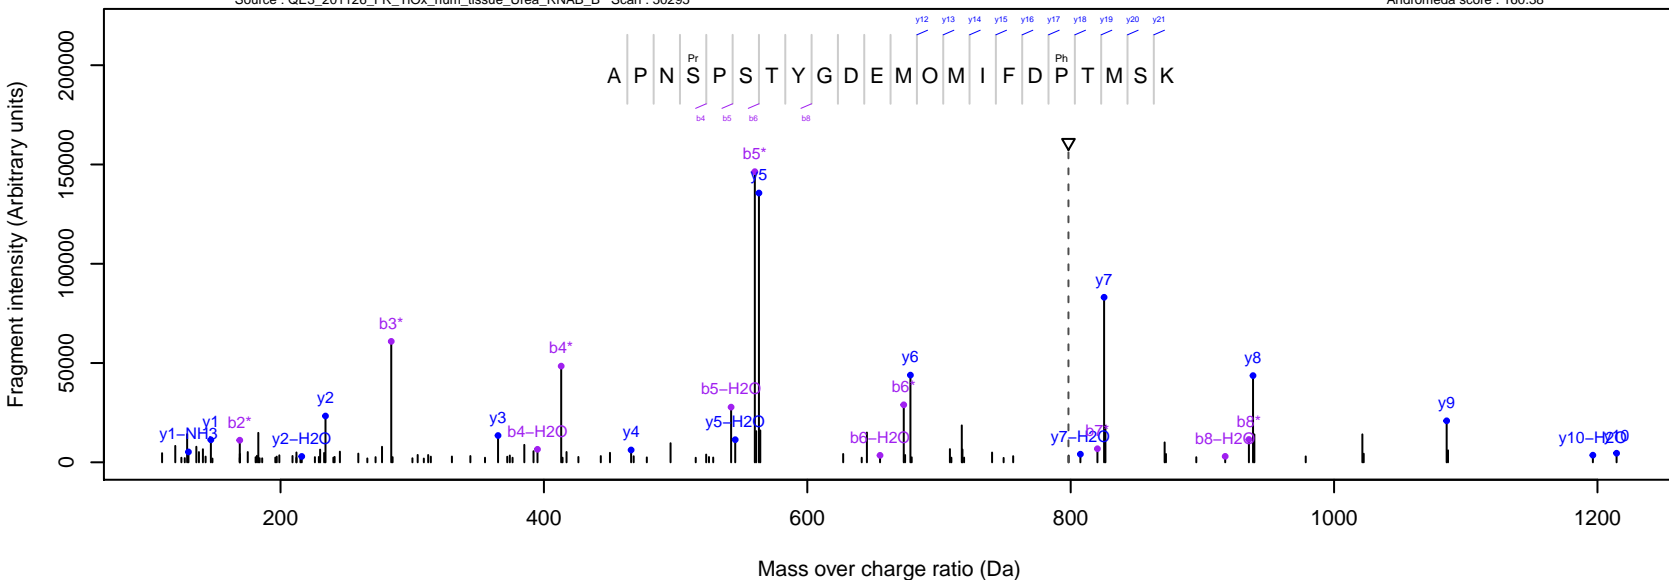

DDKHGS(Phospho (STY))YEDAVHSGALND-3+

Source : QE3\_201126\_FR\_TiOx\_hum\_tissue\_Urea\_RNAB\_B Scan : 15447

Andromeda score : 160.36

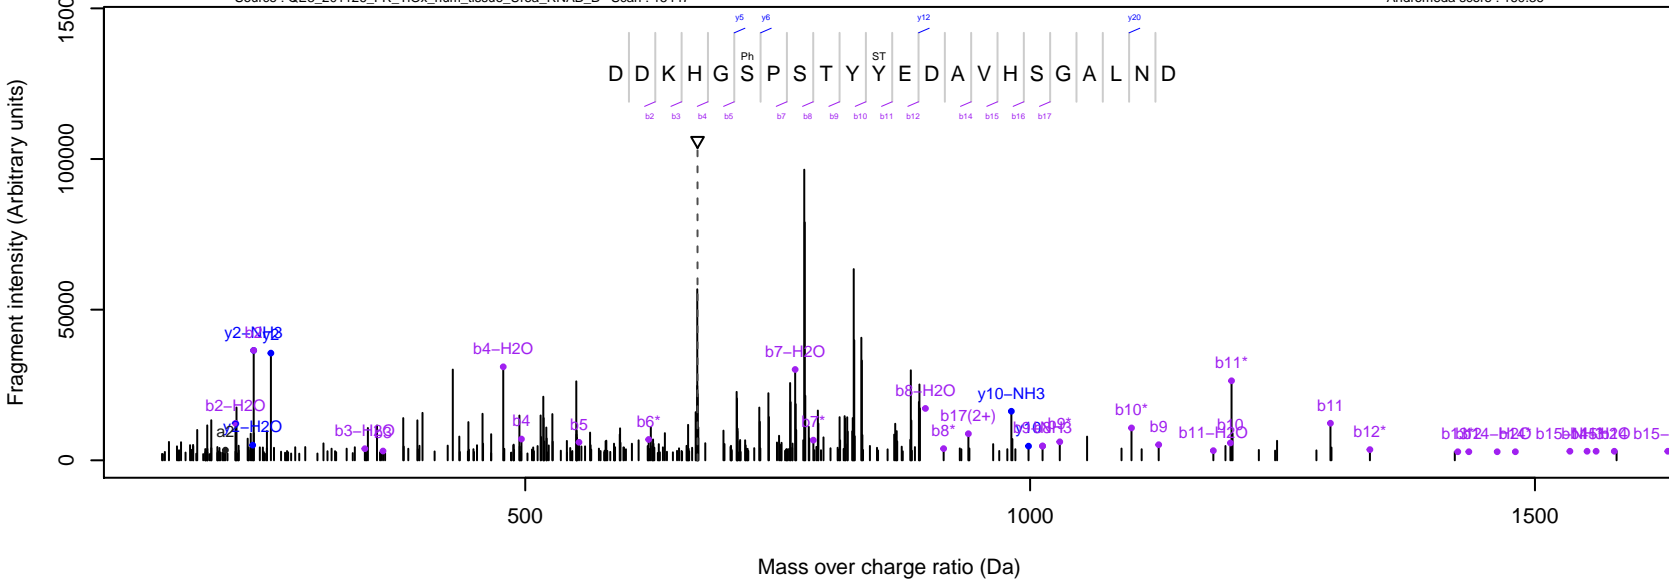

S(Phospho (STY))PGSNSKVPEIEVTVEGPNNNNPQTSAVR-3+

Source : QE3\_201126\_FR\_TiOx\_hum\_tissue\_Urea\_RNAB\_N Scan : 29956

Andromeda score : 160.35

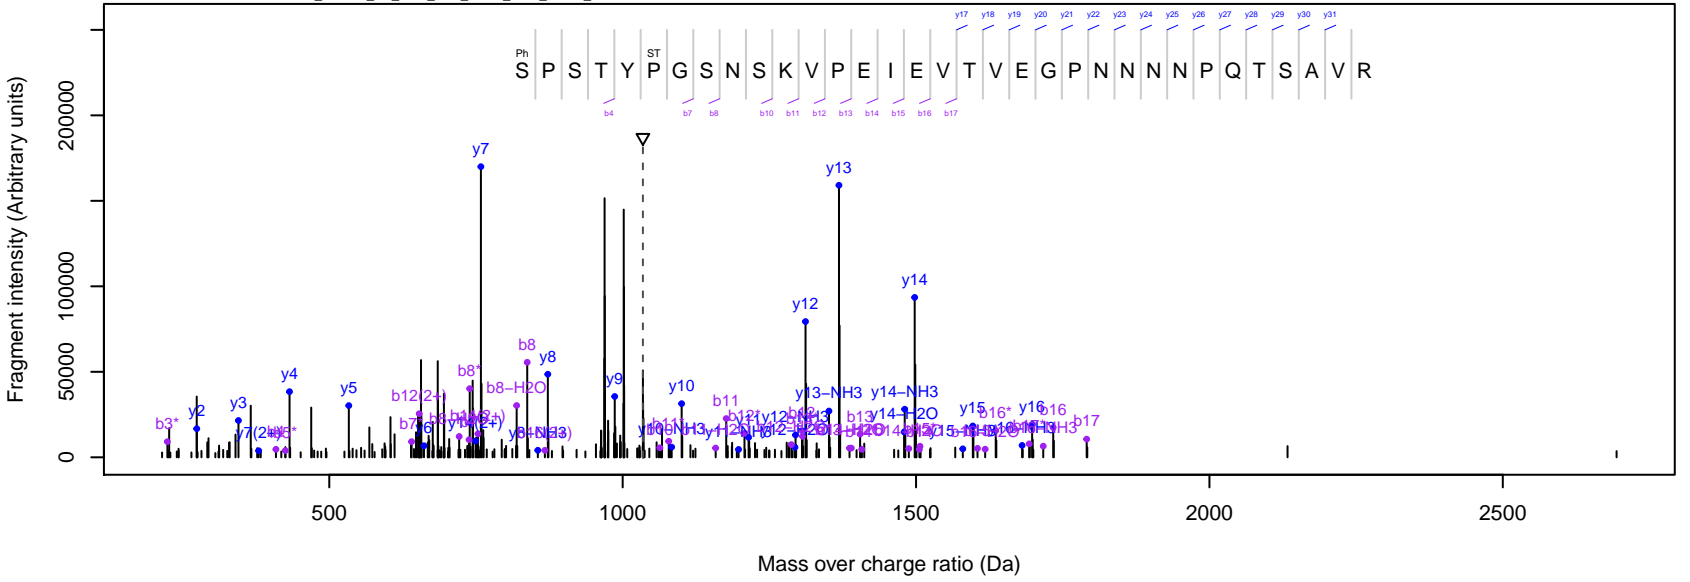

EVFISGS(Phospho (STY))FNNWSTK-2+

Source : QE3\_201126\_FR\_TiOx\_hum\_tissue\_Urea\_RNAB\_B Scan : 47239

Andromeda score : 160.27

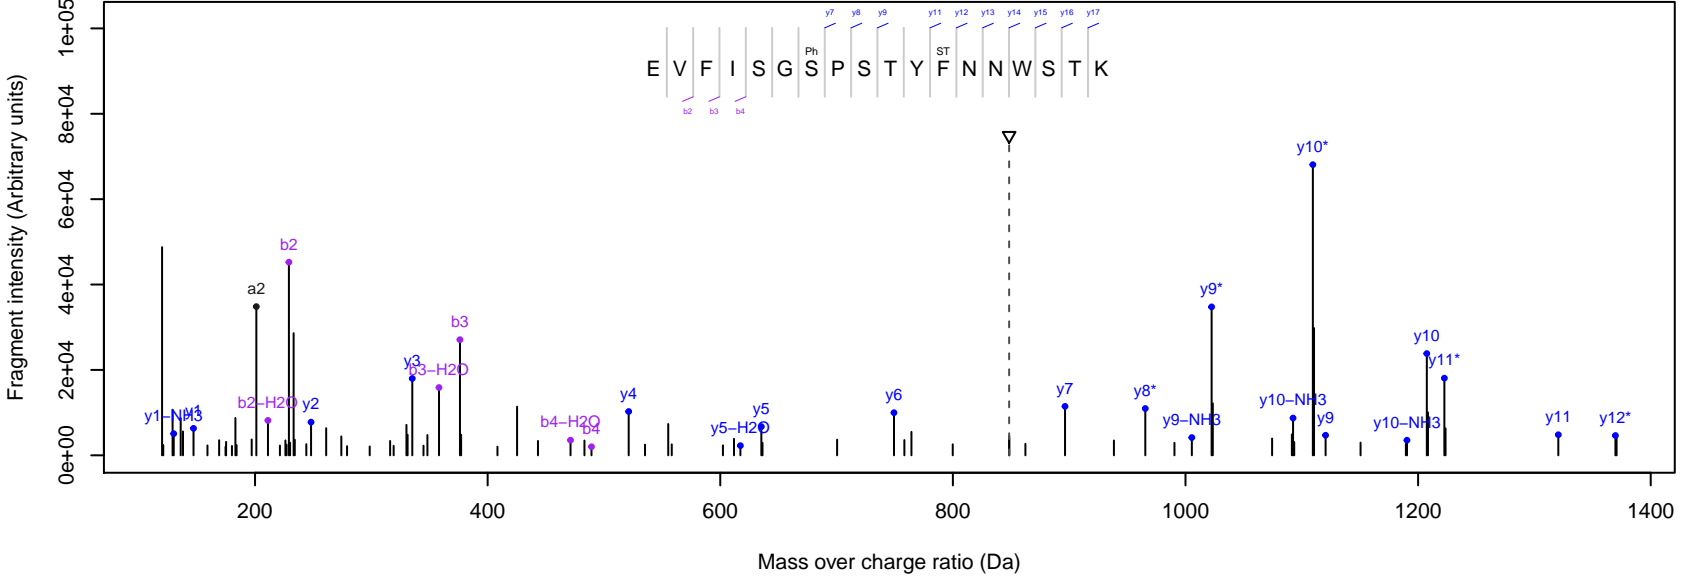

S(Phospho (STY))RS(Phospho (STY))FDYNYR-2+

Source : QE3\_201126\_FR\_TiOx\_hum\_tissue\_Urea\_RNAB\_B Scan : 20948

Andromeda score : 160.11

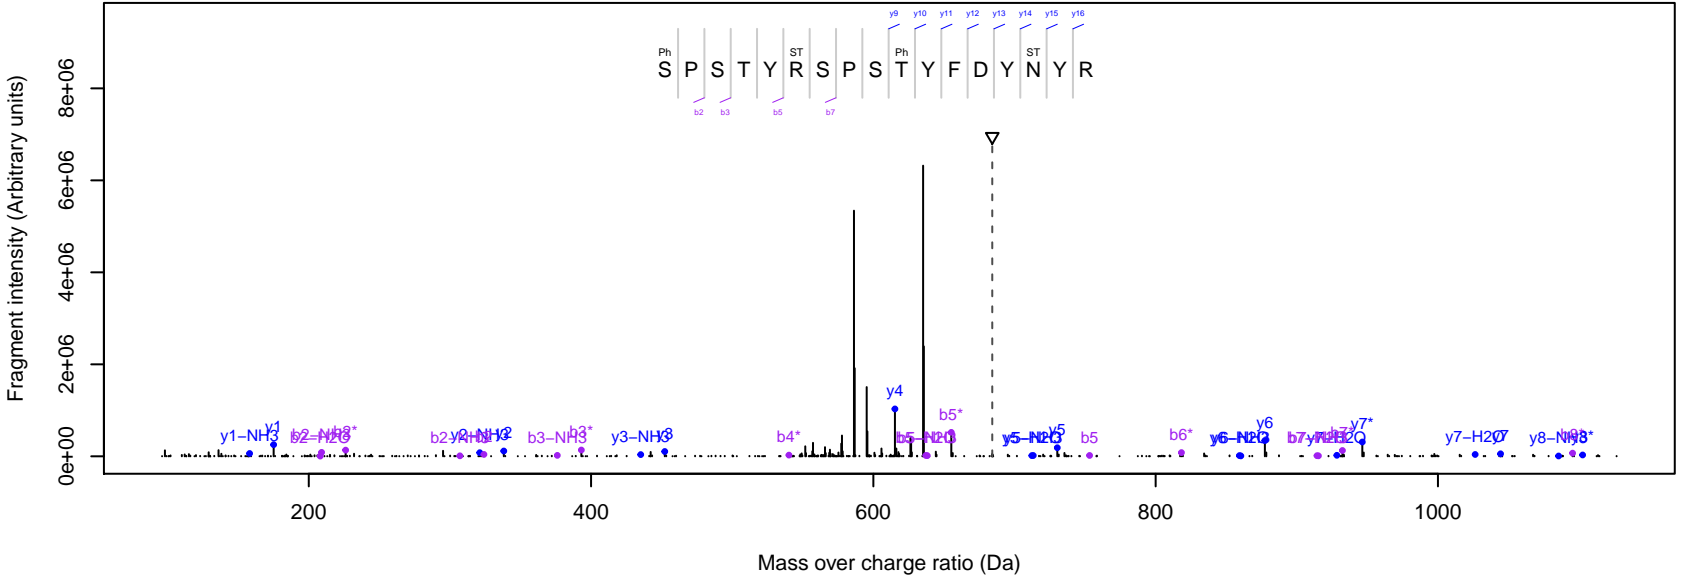

NKLEGDS(Phospho (STY))DVDS(Phospho (STY))ELED RVDGVK-3+

Source : QE3\_201126\_FR\_TiOx\_hum\_tissue\_Urea\_RNAB\_B Scan : 31449

Andromeda score : 160

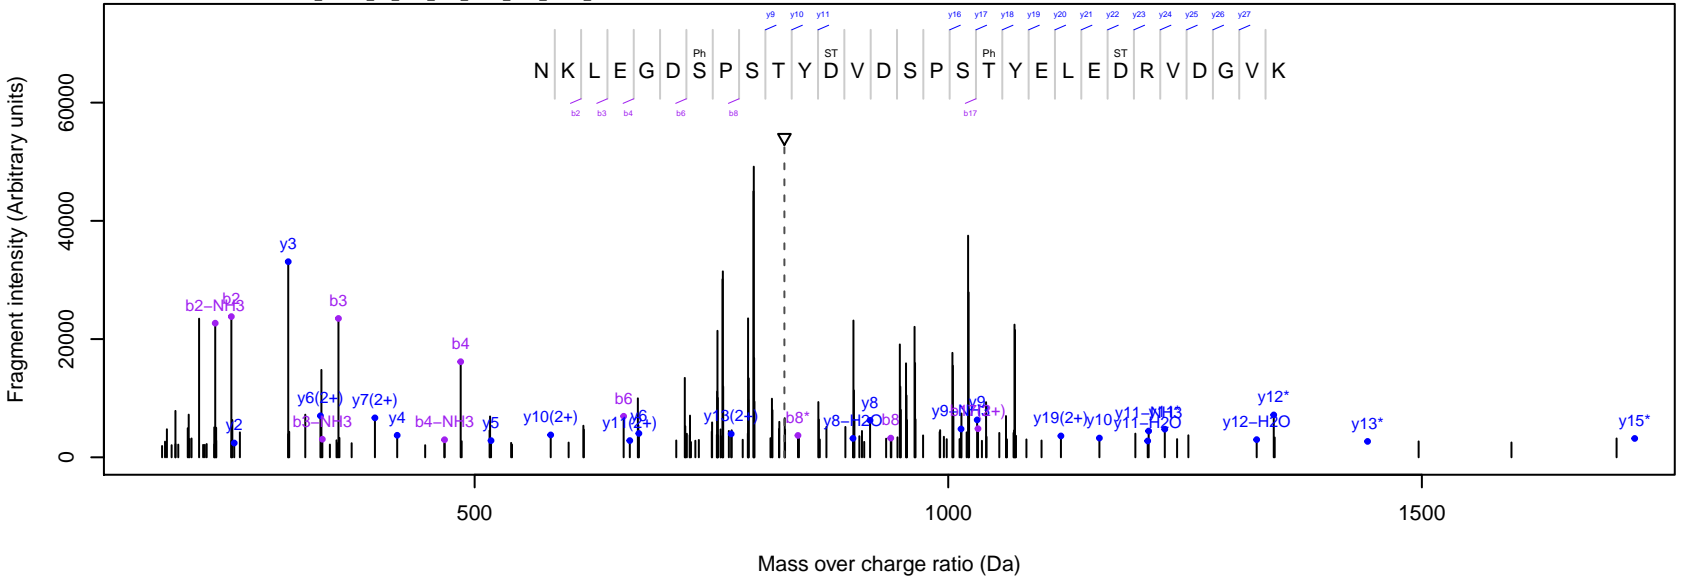

SGSGSVGNSSRYS(Phospho (STY))PSQNS(Phospho (STY))PIHHIPSRR-4+

Source : QE3\_201126\_FR\_TiOx\_hum\_tissue\_Urea\_RNAB\_N Scan : 11765

Andromeda score : 159.91

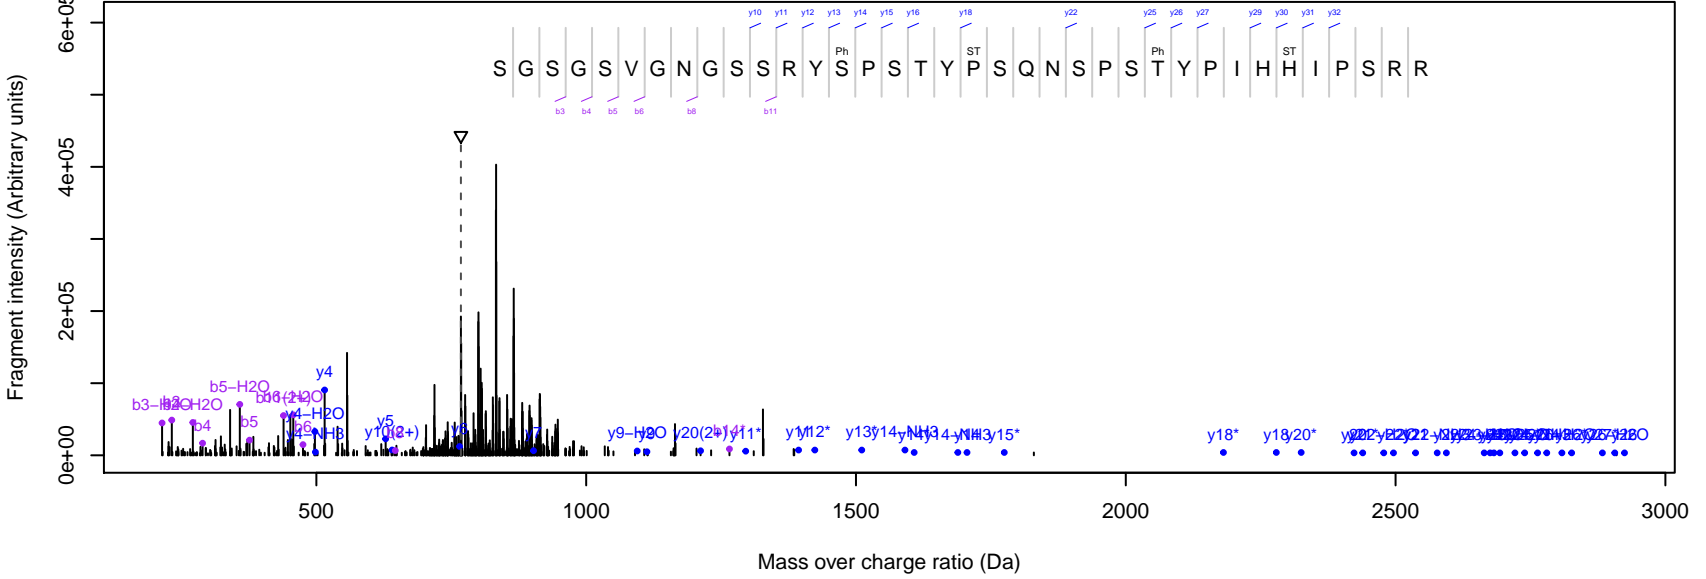

VQIPVSRPDPPEPVS DNEEDSPSTY YDEEIHDP R-3+

Source : QE3\_201126\_FR\_TiOx\_hum\_tissue\_Urea\_RNAB\_N Scan : 29069

Andromeda score : 159.91

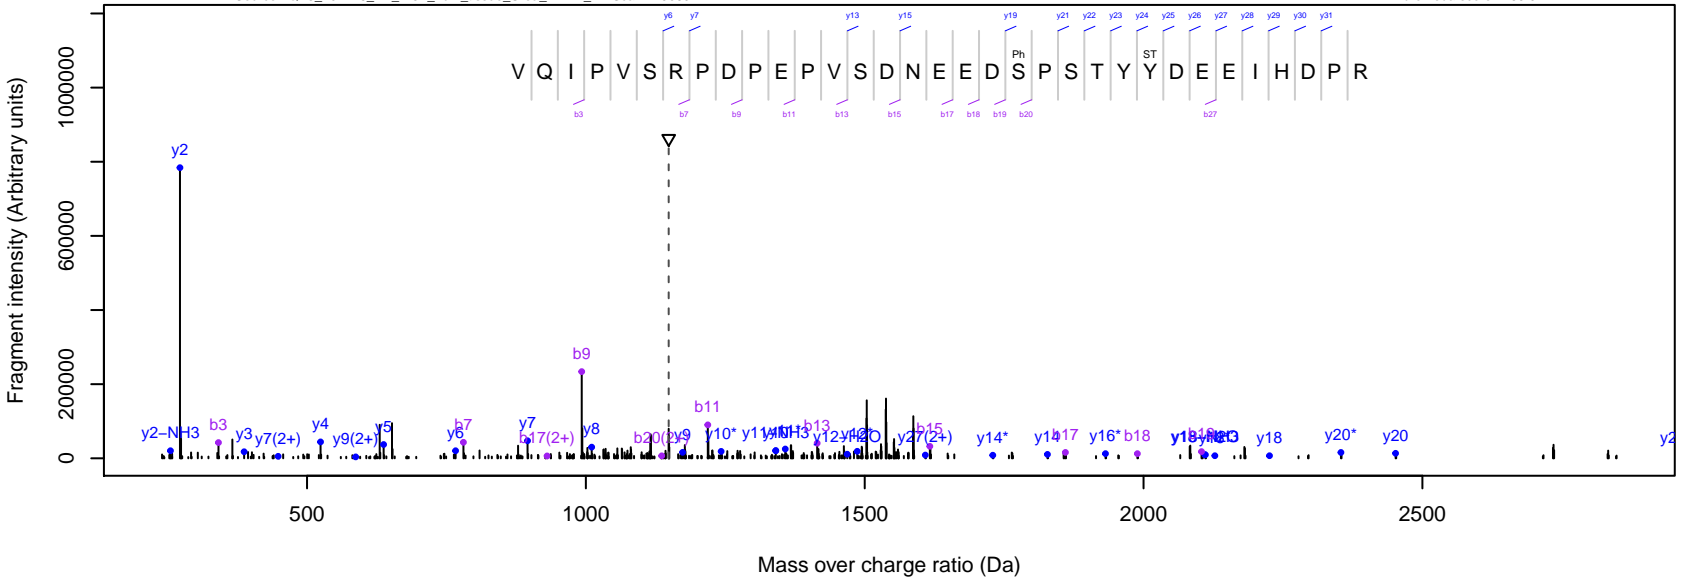

DEKKEES(Phospho (STY))EES(Phospho (STY))DDDMGFLFD-2+

Source : QE3\_201126\_FR\_TiOx\_hum\_tissue\_Urea\_RNAB\_H Scan : 58985

Andromeda score : 159.84

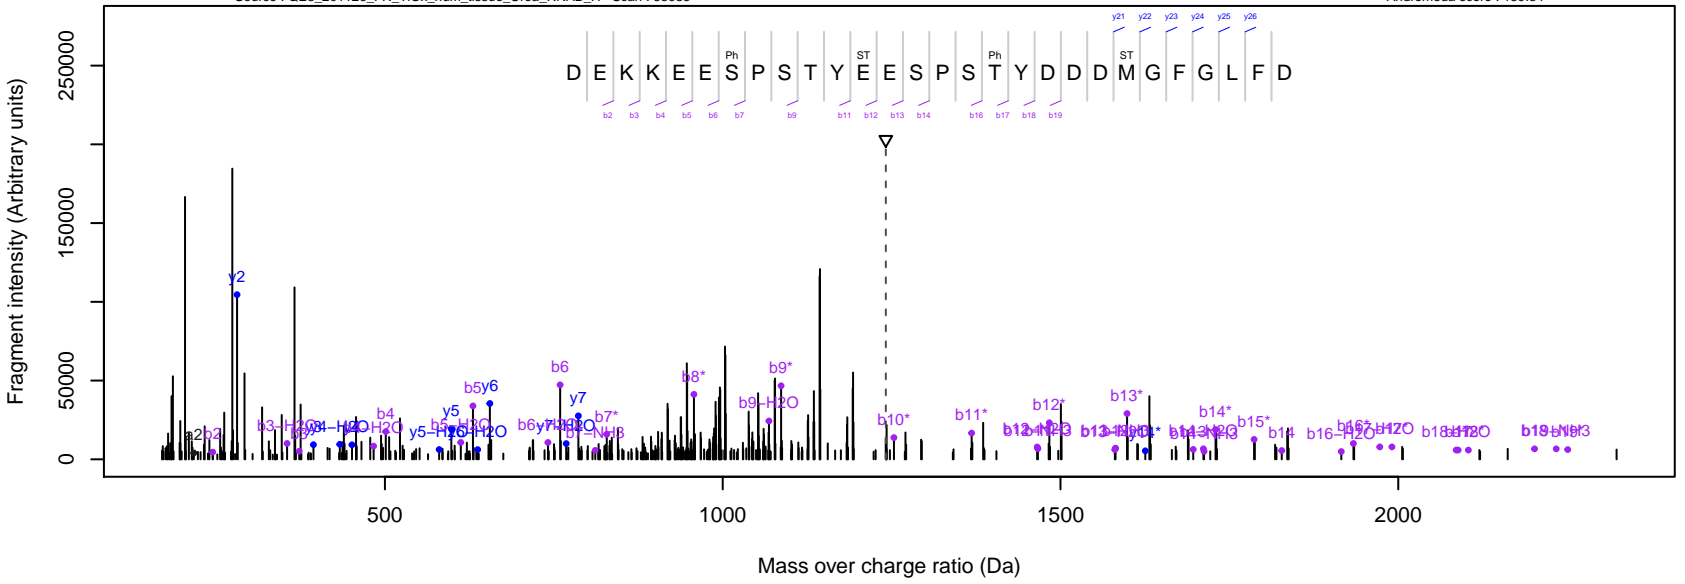

ESESALMEDRDESEVS(Phospho (STY))DEGGSPISSEGQEP-3+

Source : QE3\_201126\_FR\_TiOx\_hum\_tissue\_Urea\_RNAB\_H Scan : 26487

Andromeda score : 159.8

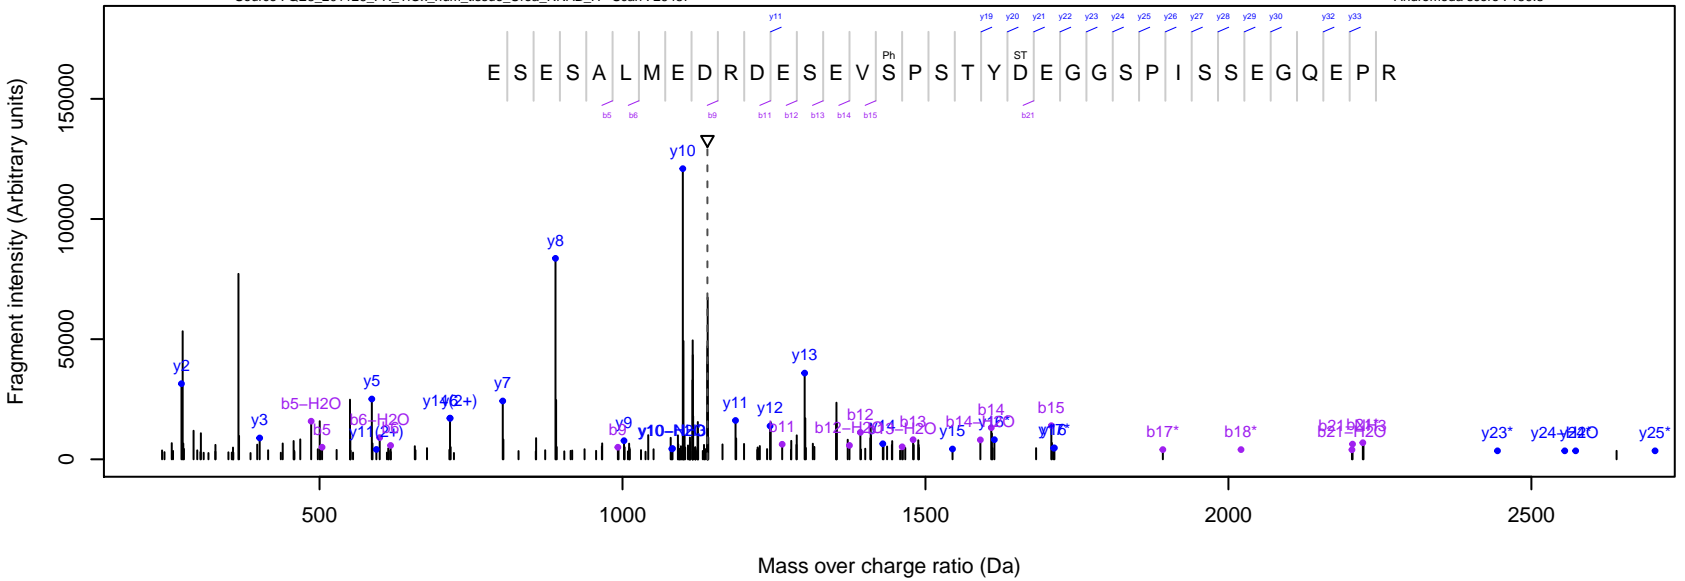

S(Phospho (STY))RSAPDGGDEENQEQLQDQIAEGSSIEEEEKTDNATLLR-4+

Source : QE3\_201126\_FR\_TiOx\_hum\_tissue\_Urea\_RNAB\_H Scan : 37874

Andromeda score : 159.8

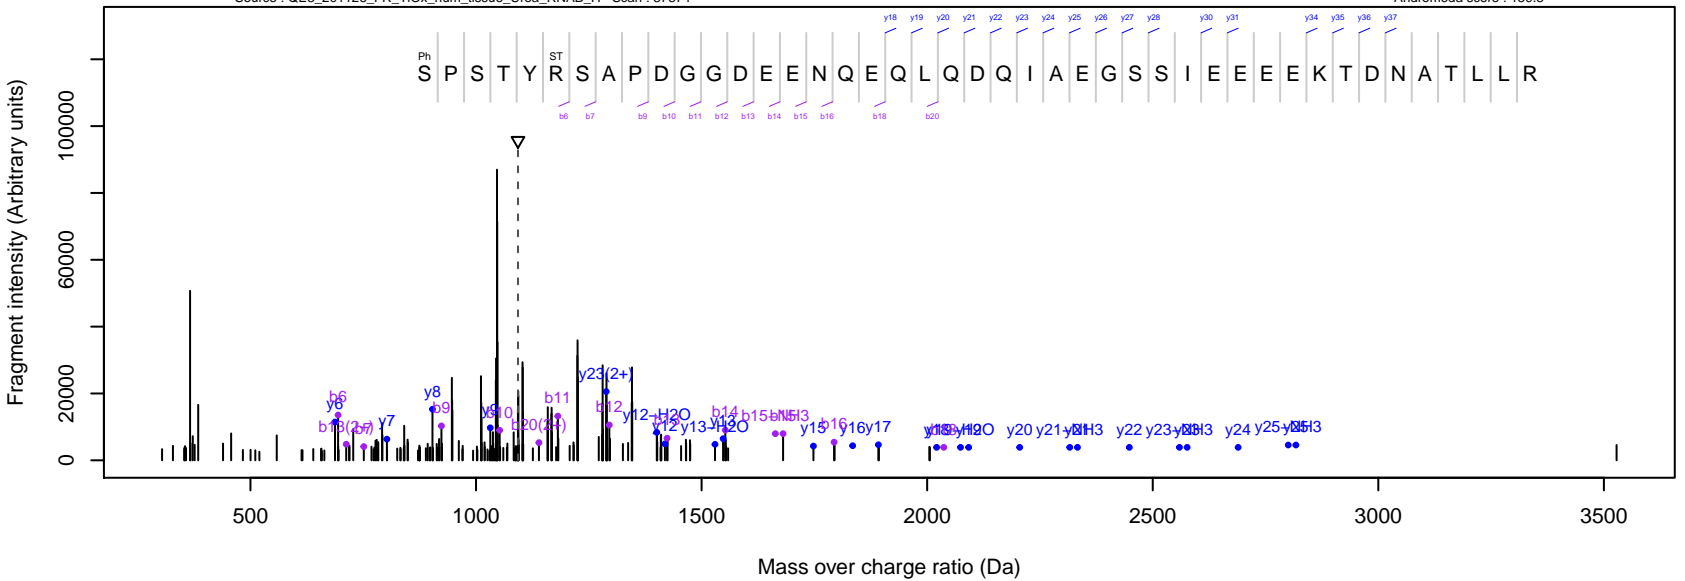

SSSQRS(Phospho (STY))PS(Phospho (STY))PGPNHTSNSSNASNATVVPQNSSAR-3+

Source : QE3\_201126\_FR\_TIOx\_hum\_tissue\_Urea\_RNAB\_N Scan : 10074

Andromeda score : 159.77

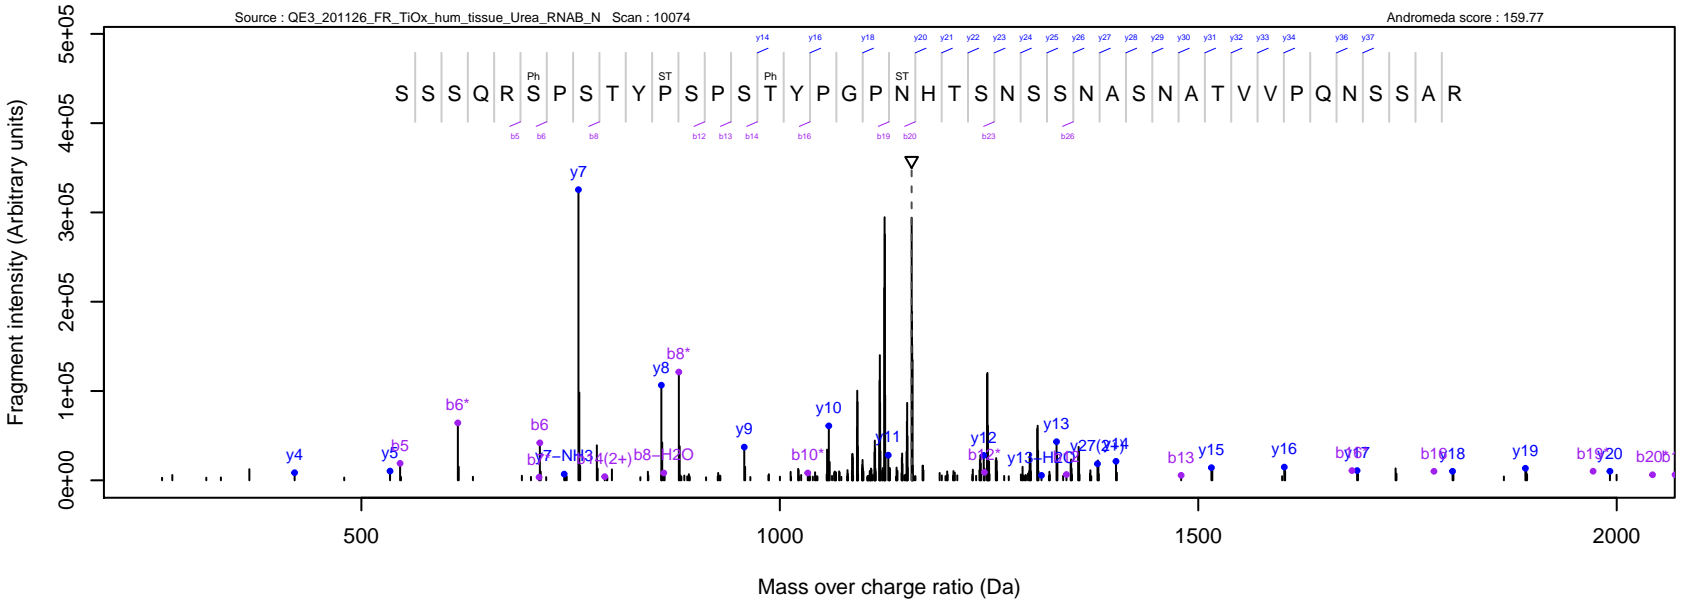

(Acetyl (Protein N-term))SQPGQKPAAS(Phospho (STY))PRPR-3+

Source : QE3\_201126\_FR\_TIOx\_hum\_tissue\_Urea\_RNAB\_B Scan : 5584

Andromeda score : 159.75

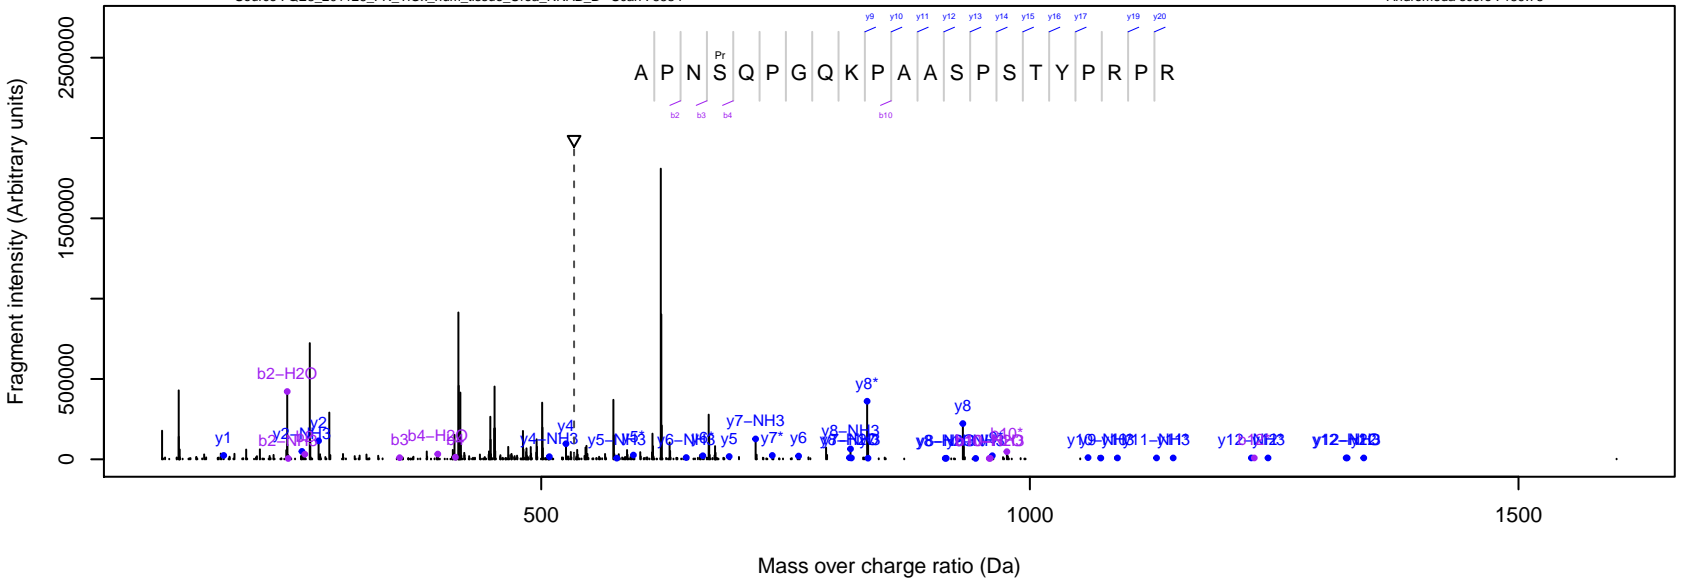

NNQLGIGSGS(Phospho (STY))TIVHAVQR-3+

Source : QE3\_201126\_FR\_TIOx\_hum\_tissue\_Urea\_RNAB\_H Scan : 36176

Andromeda score : 159.74

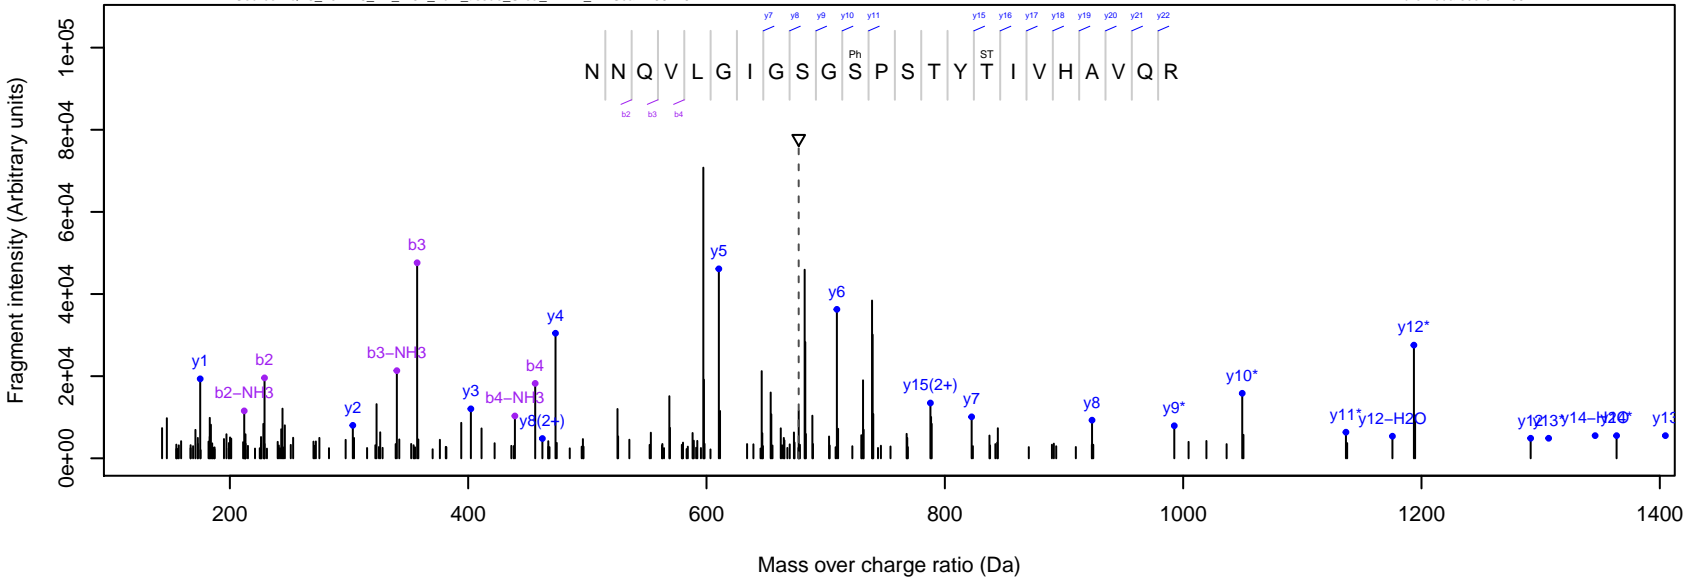

IHPMAYQLQLQAASNFKS(Phospho (STY))PVK-3+

Source : QE3\_201126\_FR\_TiOx\_hum\_tissue\_Urea\_RNAB\_B Scan : 33630

Andromeda score : 159.66

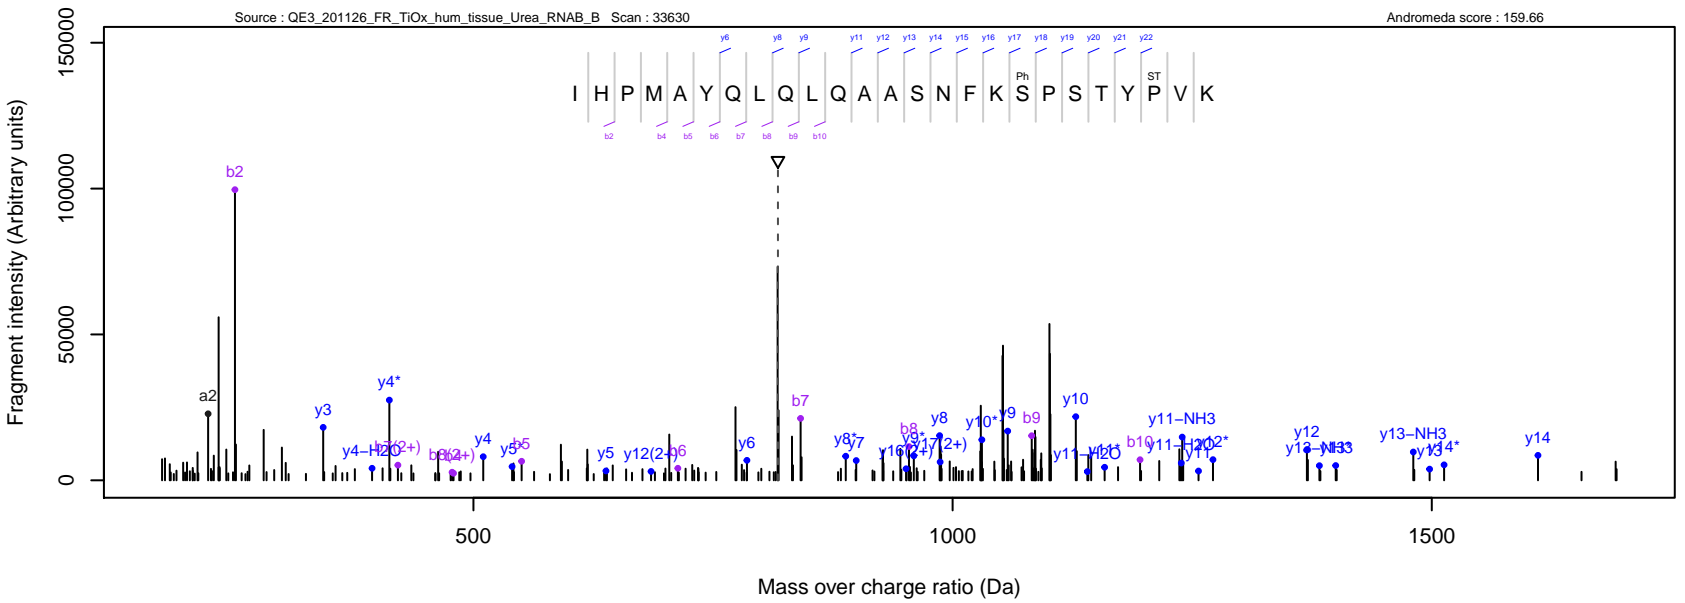

KQIT(Phospho (STY))M(Oxidation (M))EELVR-2+

Source : QE3\_201126\_FR\_TiOx\_hum\_tissue\_Urea\_RNAB\_B Scan : 12651

Andromeda score : 159.66

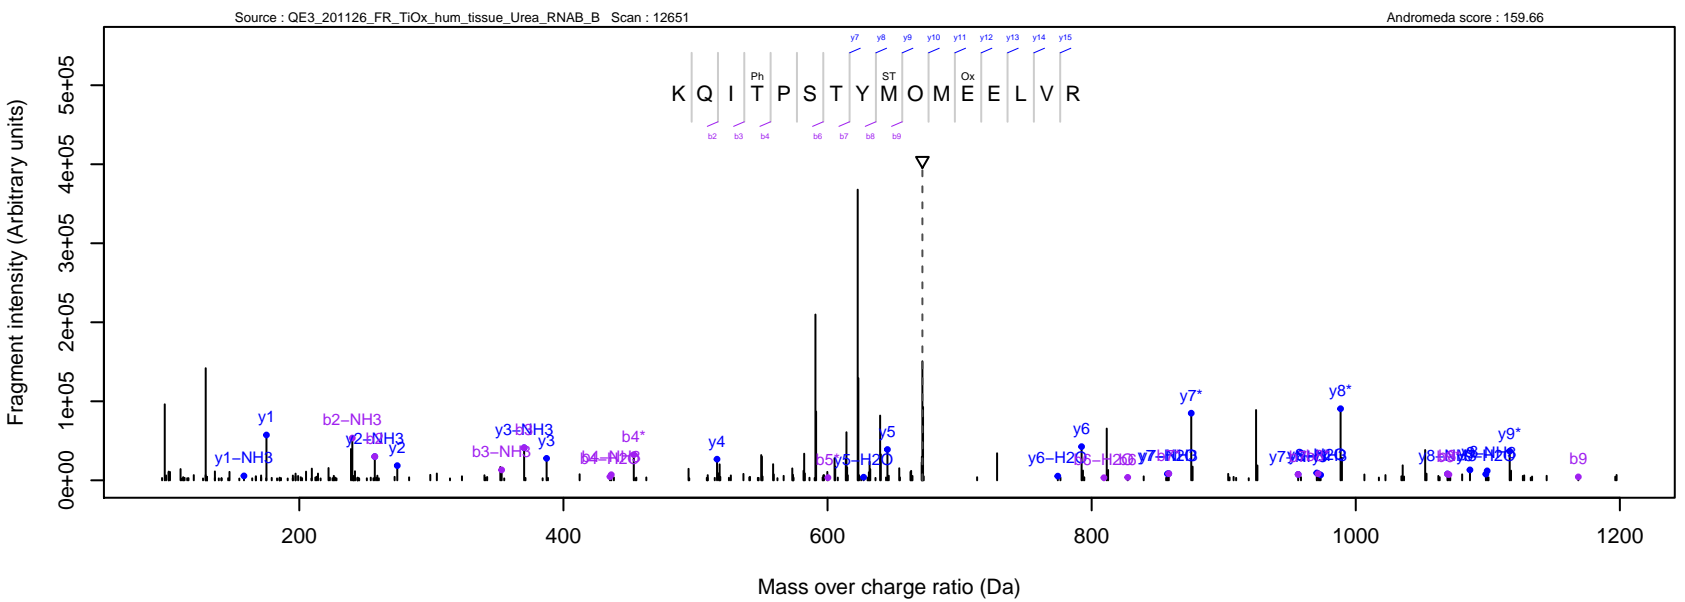

RDS(Phospho (STY))FIGTPYWMAPPEVVMCETSK-3+

Source : QE3\_201126\_FR\_TiOx\_hum\_tissue\_Urea\_RNAB\_N Scan : 56927

Andromeda score : 159.66

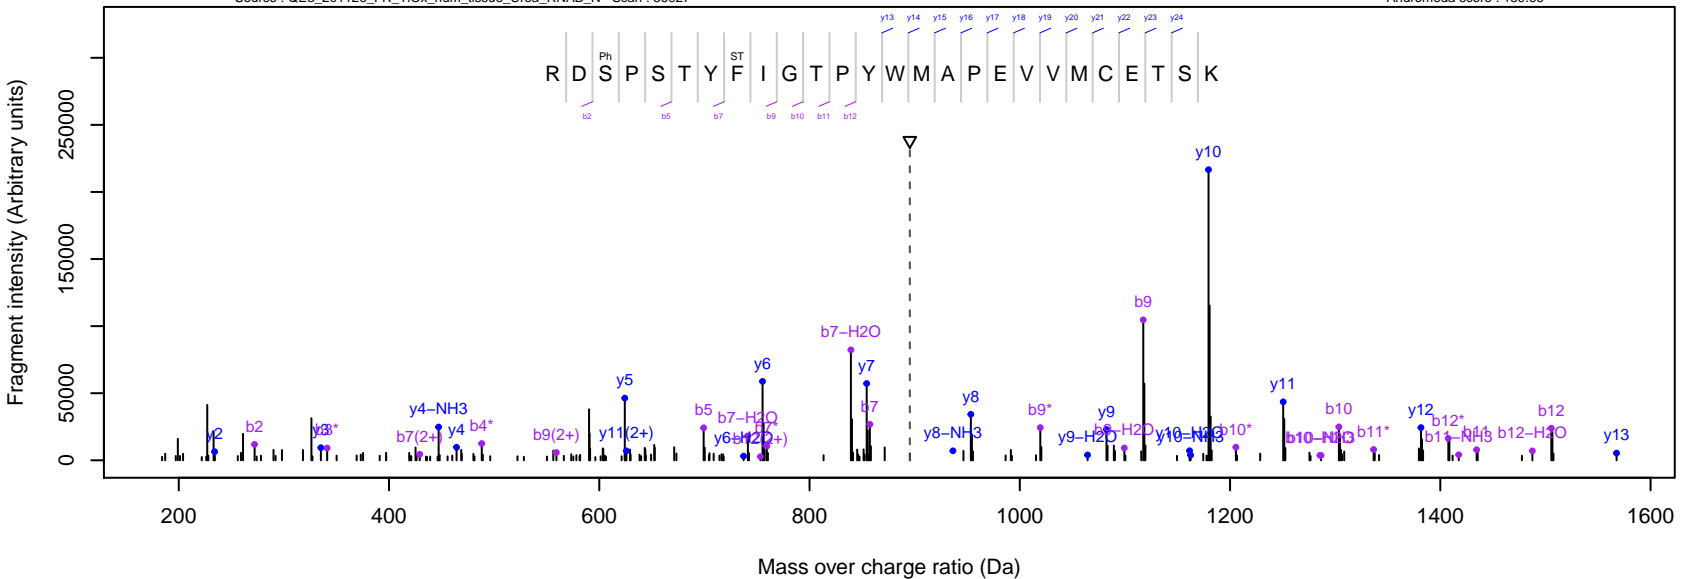

RKS(Phospho (STY))LVGTPYWMAPELISR-3+

Source : QE3\_201126\_FR\_TiOx\_hum\_tissue\_Urea\_RNAB\_H Scan : 43808

Andromeda score : 159.59

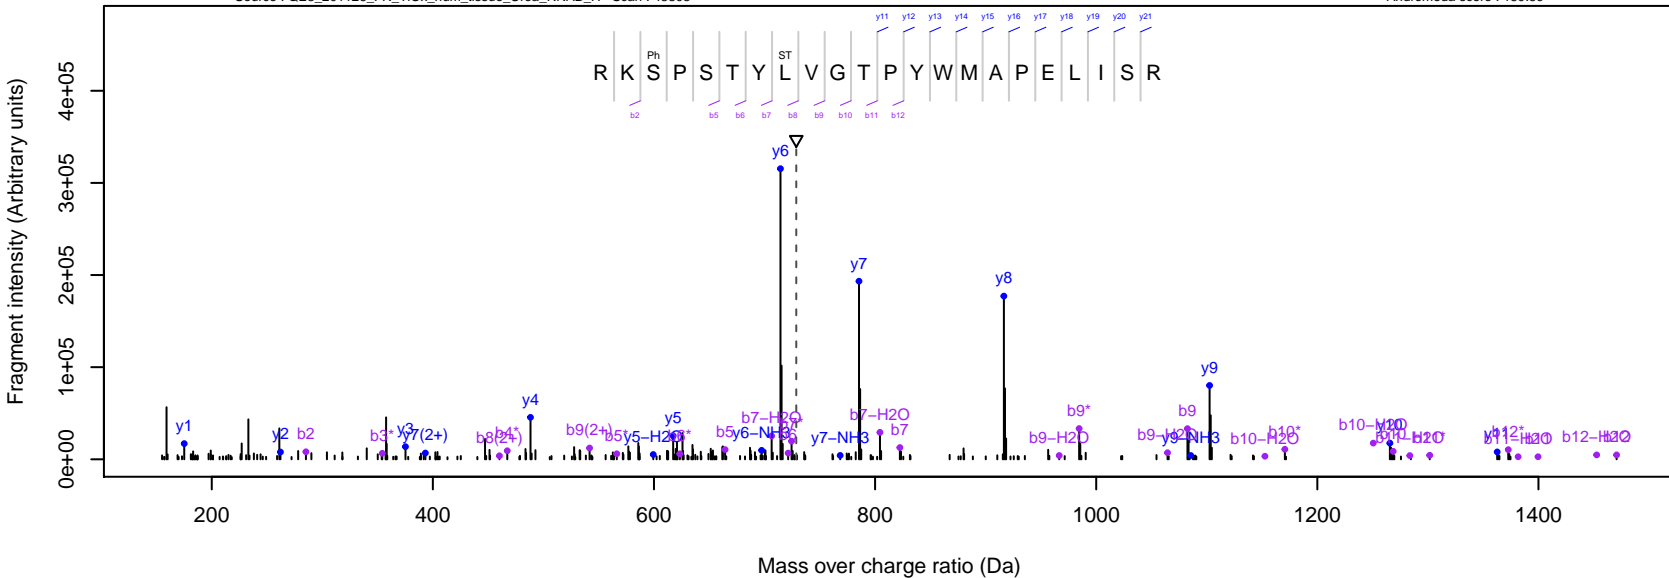

LIDLES(Phospho (STY))PTPESQK-2+

Source : QE3\_201126\_FR\_TiOx\_hum\_tissue\_Urea\_RNAB\_H Scan : 28105

Andromeda score : 159.58

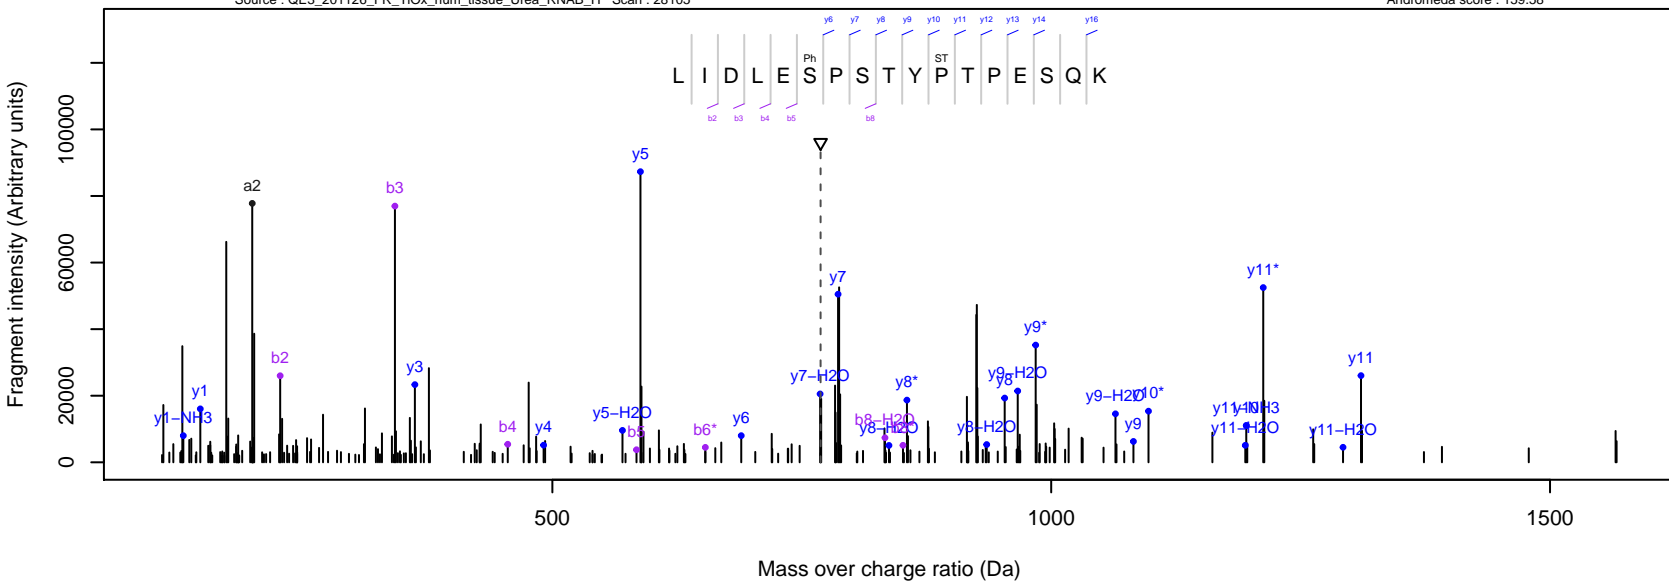

SCS(Phospho (STY))LVLEHQPDK-2+

Source : QE3\_201126\_FR\_TiOx\_hum\_tissue\_Urea\_RNAB\_H Scan : 21116

Andromeda score : 159.52

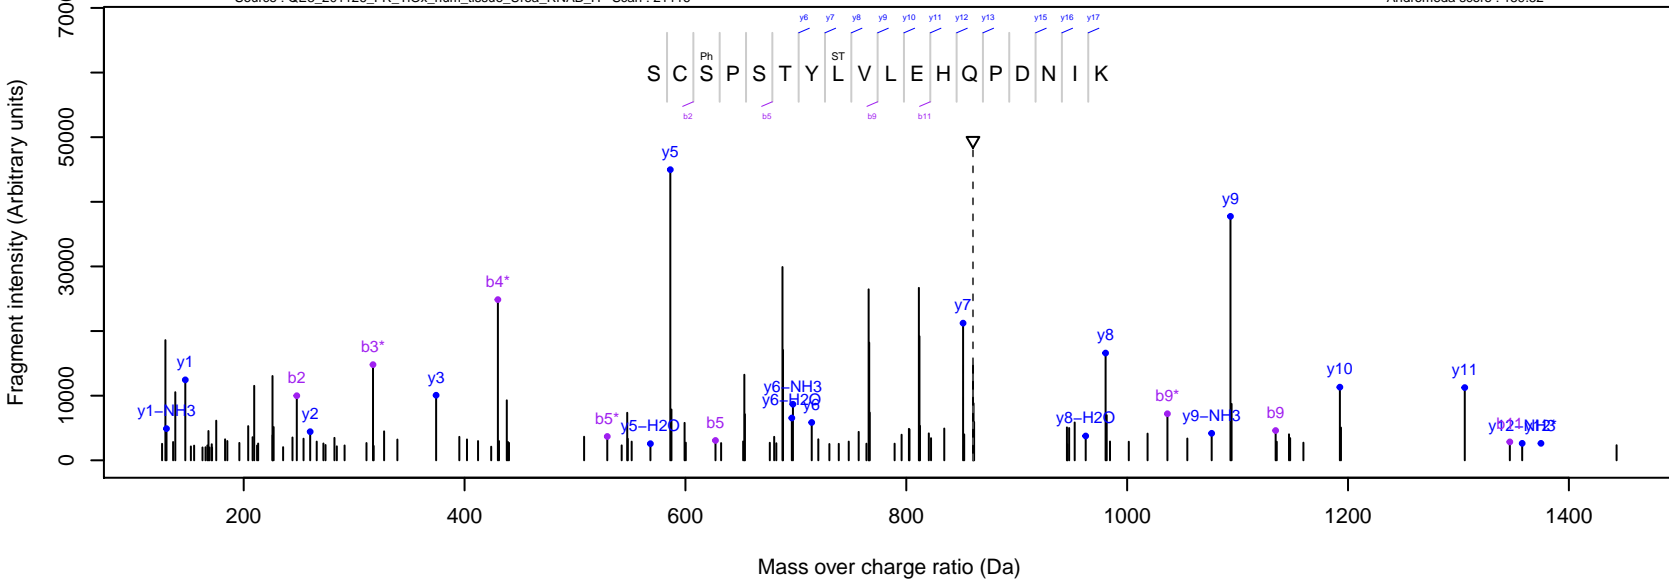

RFS(Phospho (STY))EGVLQSPSQDQEK-2+

Source : QE3\_201126\_FR\_TiOx\_hum\_tissue\_Urea\_RNAB\_B Scan : 19688

Andromeda score : 159.5

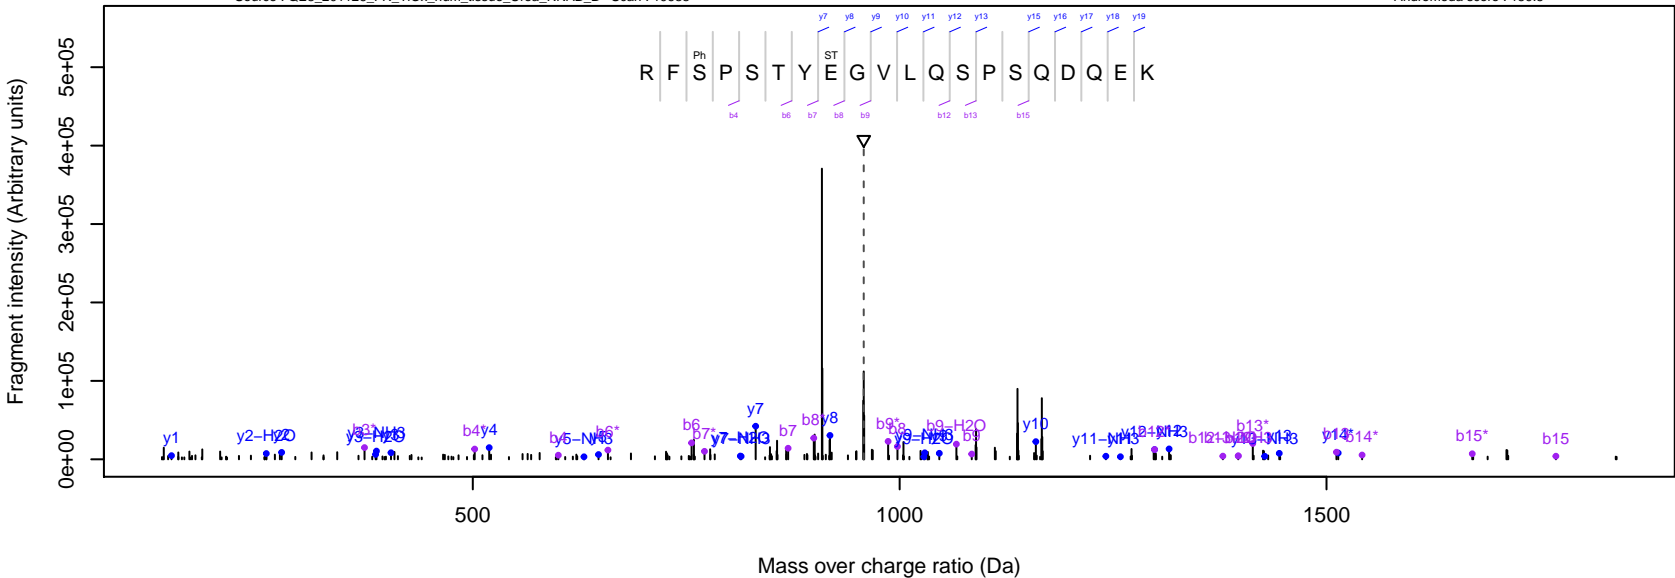

S(Phospho (STY))LGEQDQMTLRPPEKVDLEPLK-3+

Source : QE3\_201126\_FR\_TiOx\_hum\_tissue\_Urea\_RNAB\_H Scan : 37319

Andromeda score : 159.36

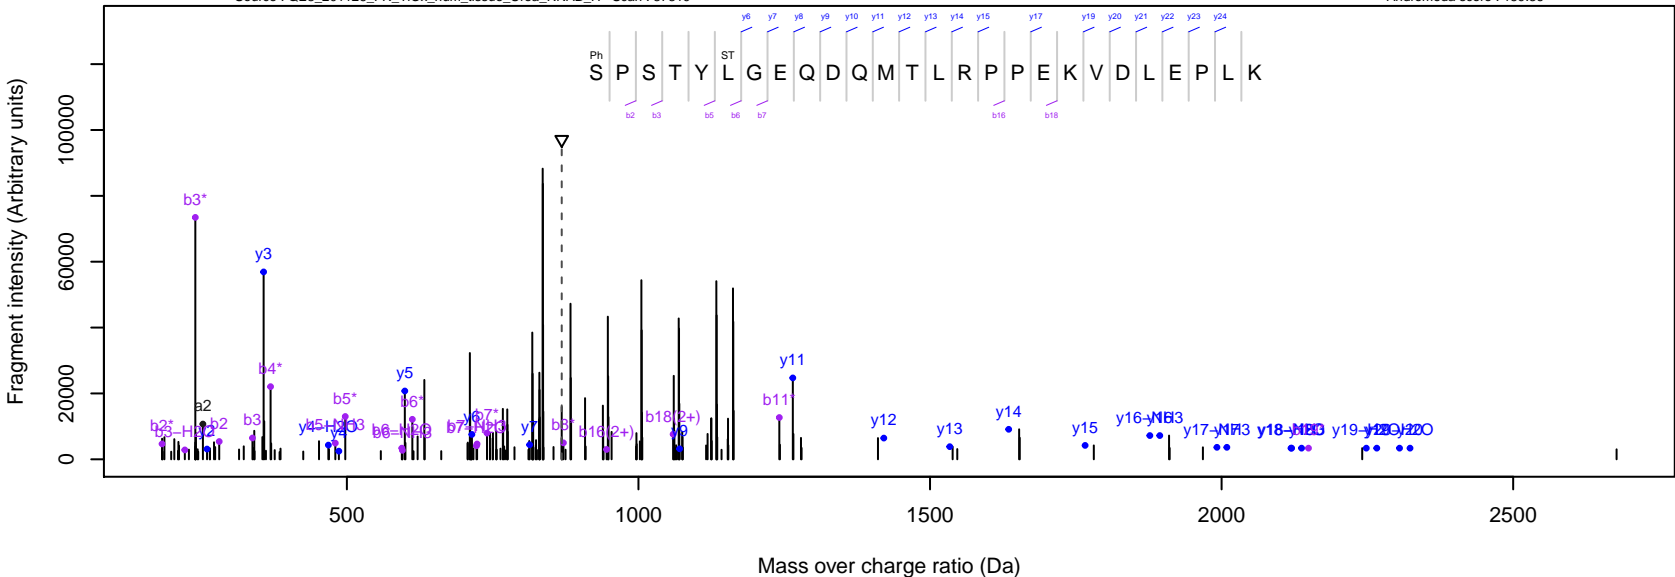

(Acetyl (Protein N-term))S(Phospho (STY))DKPDM(Oxidation (M))AEIEKFDK-2+

Source : QE3\_201126\_FR\_TiOx\_hum\_tissue\_Urea\_RNAB\_B Scan : 21907

Andromeda score : 159.34

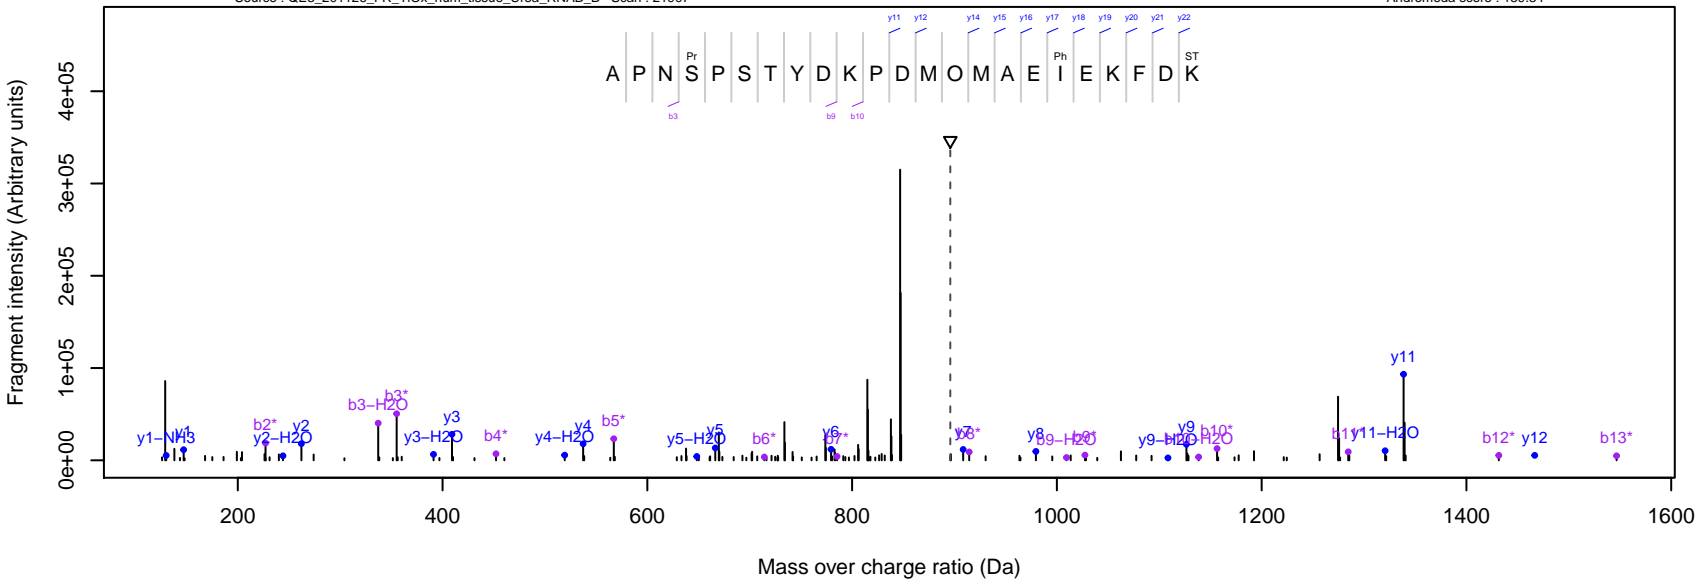



VDDDS(Phospho (STY))LGEFPVTNSR-2+

Source : QE3\_201126\_FR\_TiOx\_hum\_tissue\_Urea\_RNAB\_N Scan : 34466

Andromeda score : 159.34

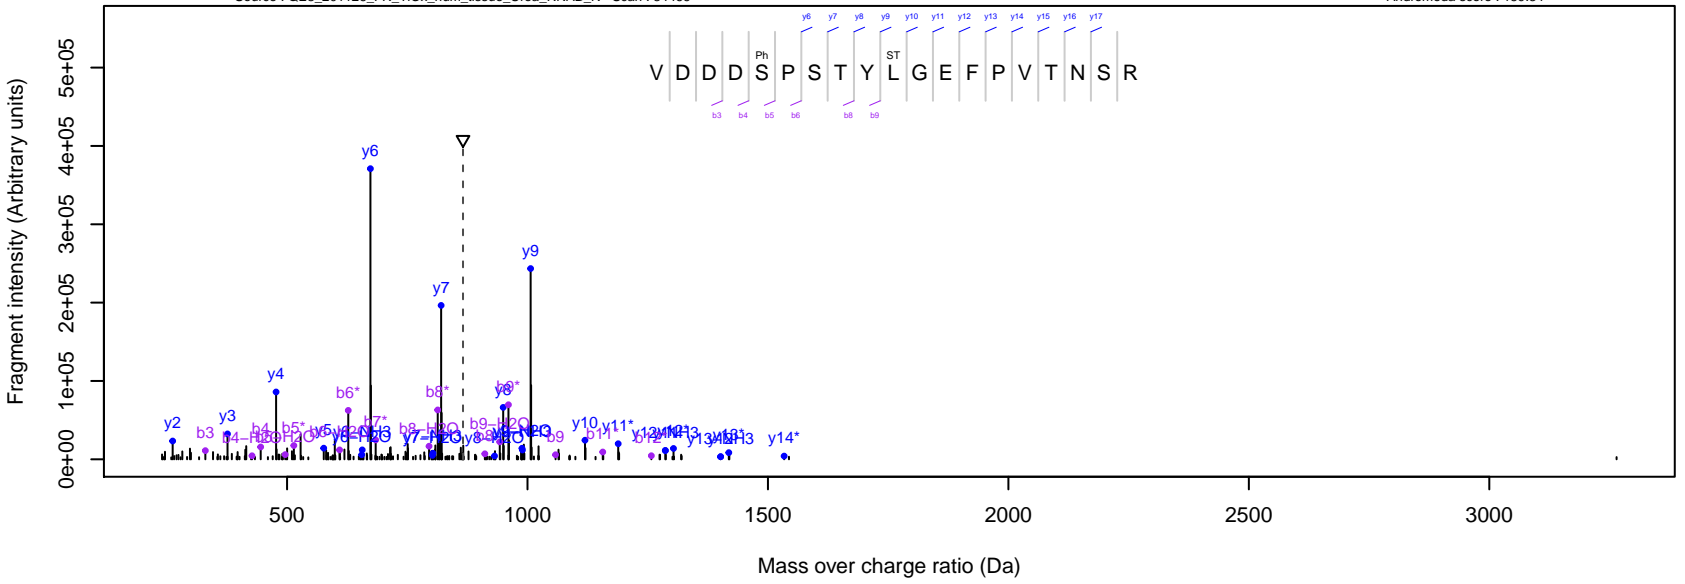

GDS(Phospho (STY))ETDLEALFNAVM(Oxidation (M))NPK-2+

Source : QE3\_201126\_FR\_TiOx\_hum\_tissue\_Urea\_RNAB\_N Scan : 61478

Andromeda score : 159.22

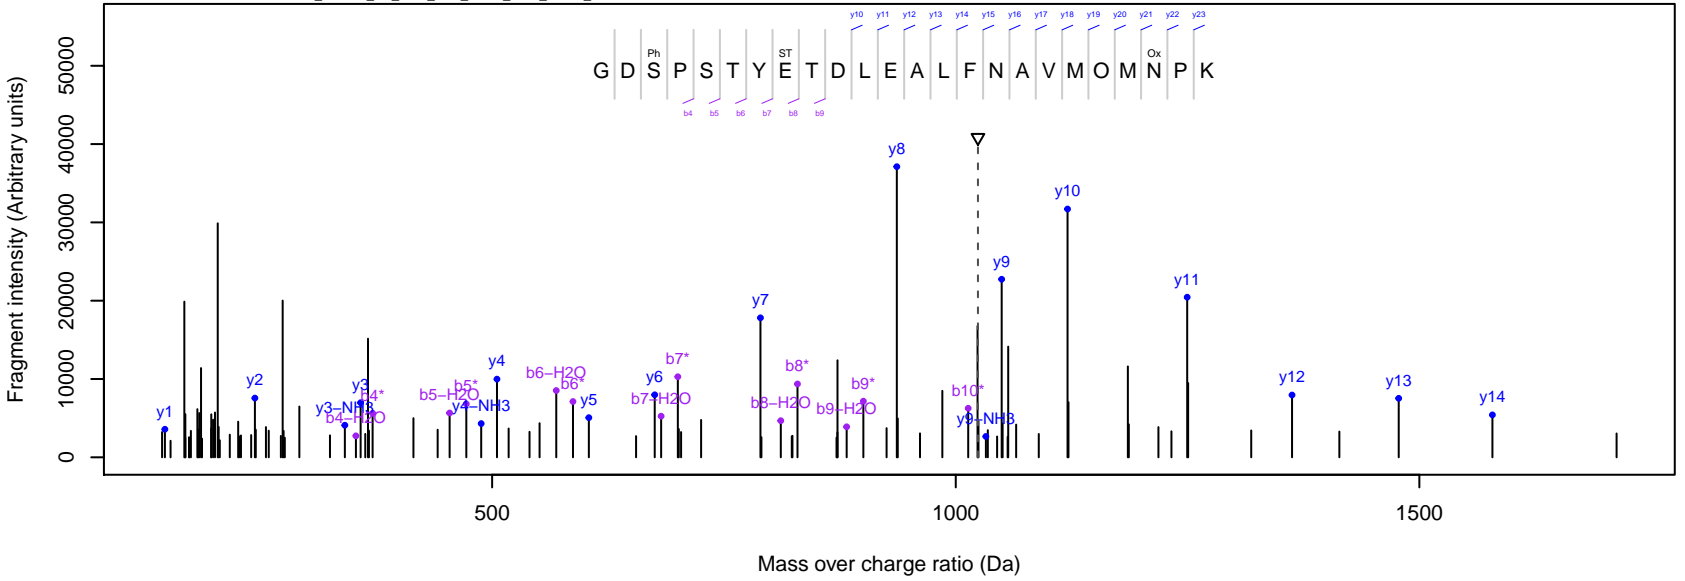

LEEPELNRQS(Phospho (STY))PNPR-2+

Source : QE3\_201126\_FR\_TiOx\_hum\_tissue\_Urea\_RNAB\_H Scan : 17179

Andromeda score : 159.22

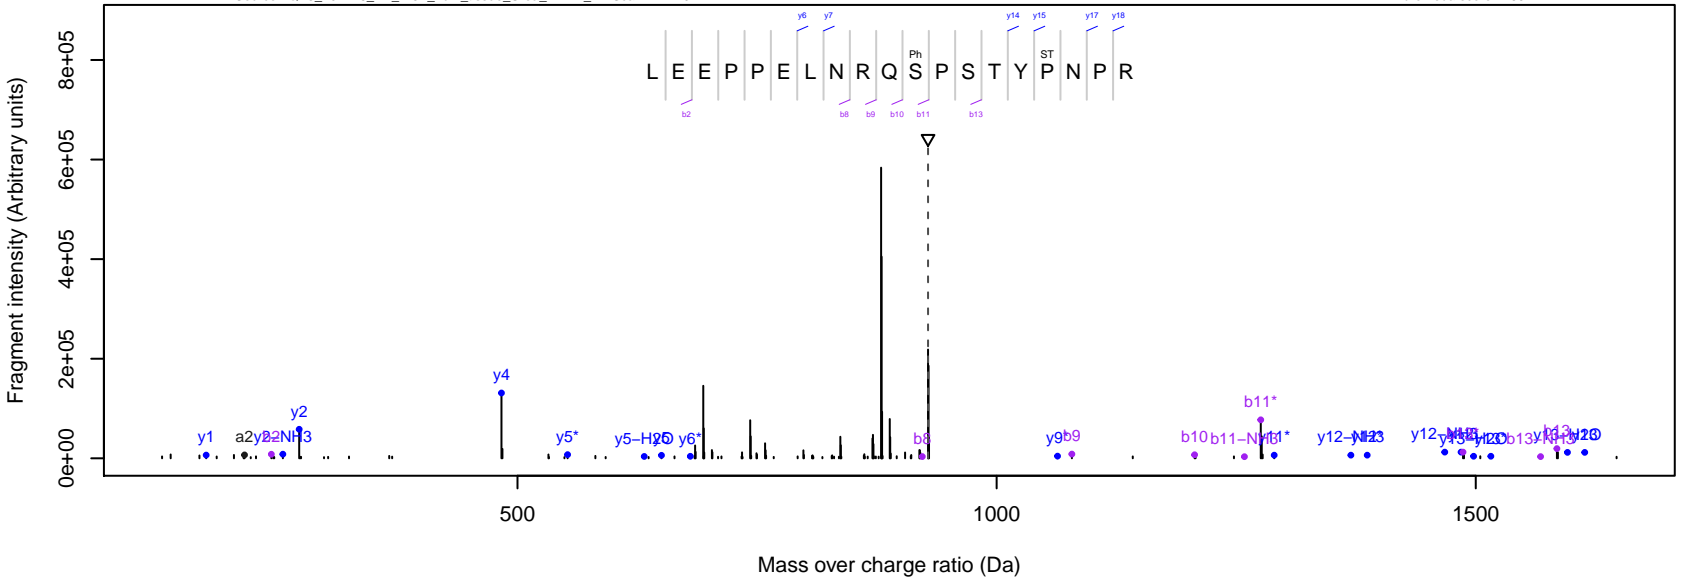

QQS(Phospho (STY))EEDLLLQDFSR-2+

Source : QE3\_201126\_FR\_TiOx\_hum\_tissue\_Urea\_RNAB\_H Scan : 51998

Andromeda score : 159.18

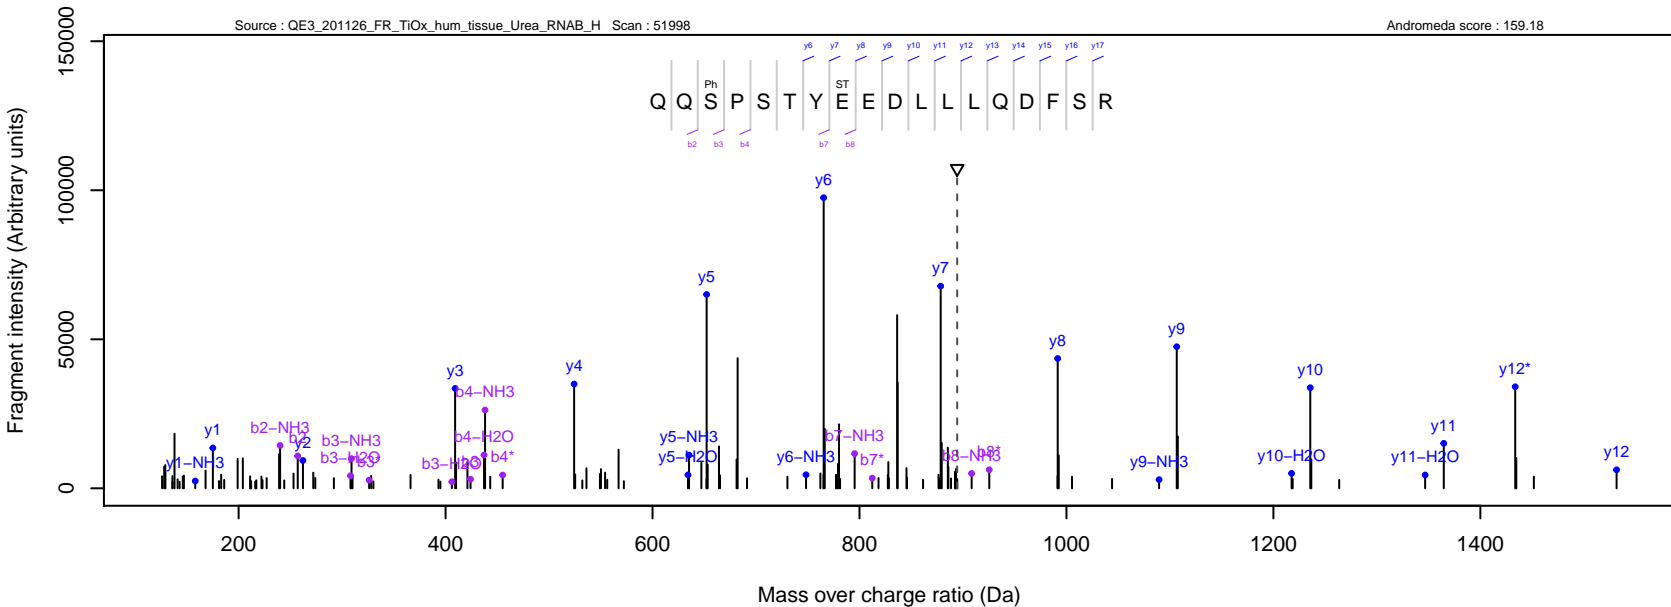

RS(Phospho (STY))PVSTRPLPSASQK-3+

Source : QE3\_201126\_FR\_TiOx\_hum\_tissue\_Urea\_RNAB\_H Scan : 7710

Andromeda score : 159.18

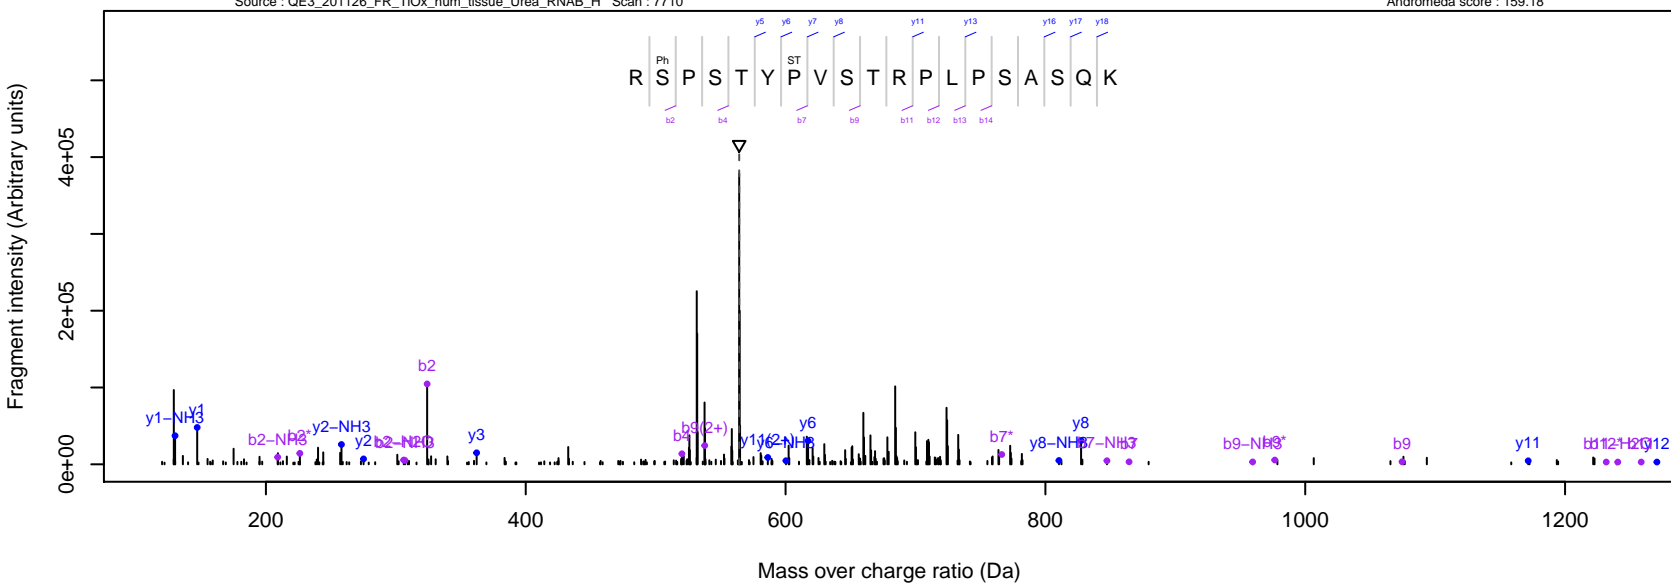

HGTDLWIDNM(Oxidation (M))SSAVPNHSPSTYPEKK-4+

Source : QE3\_201126\_FR\_TiOx\_hum\_tissue\_Urea\_RNAB\_N Scan : 18073

Andromeda score : 159.13

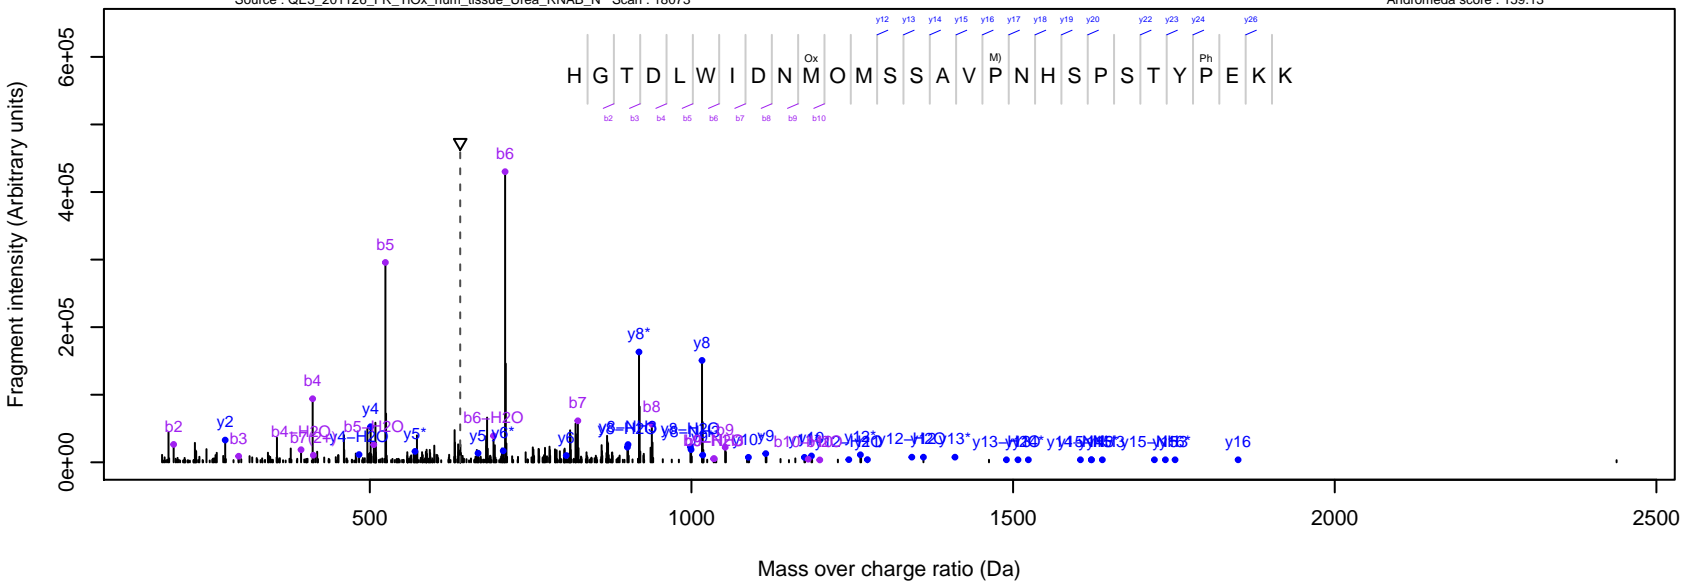

GAVENEEDLPELS(Phospho (STY))DSPSTYD(Phospho (STY))GDEAAWEDEDDADLPHGK-3+

Source : QE3\_201126\_FR\_TIOx\_hum\_tissue\_Urea\_RNAB\_N Scan : 48420

Andromeda score : 159.1

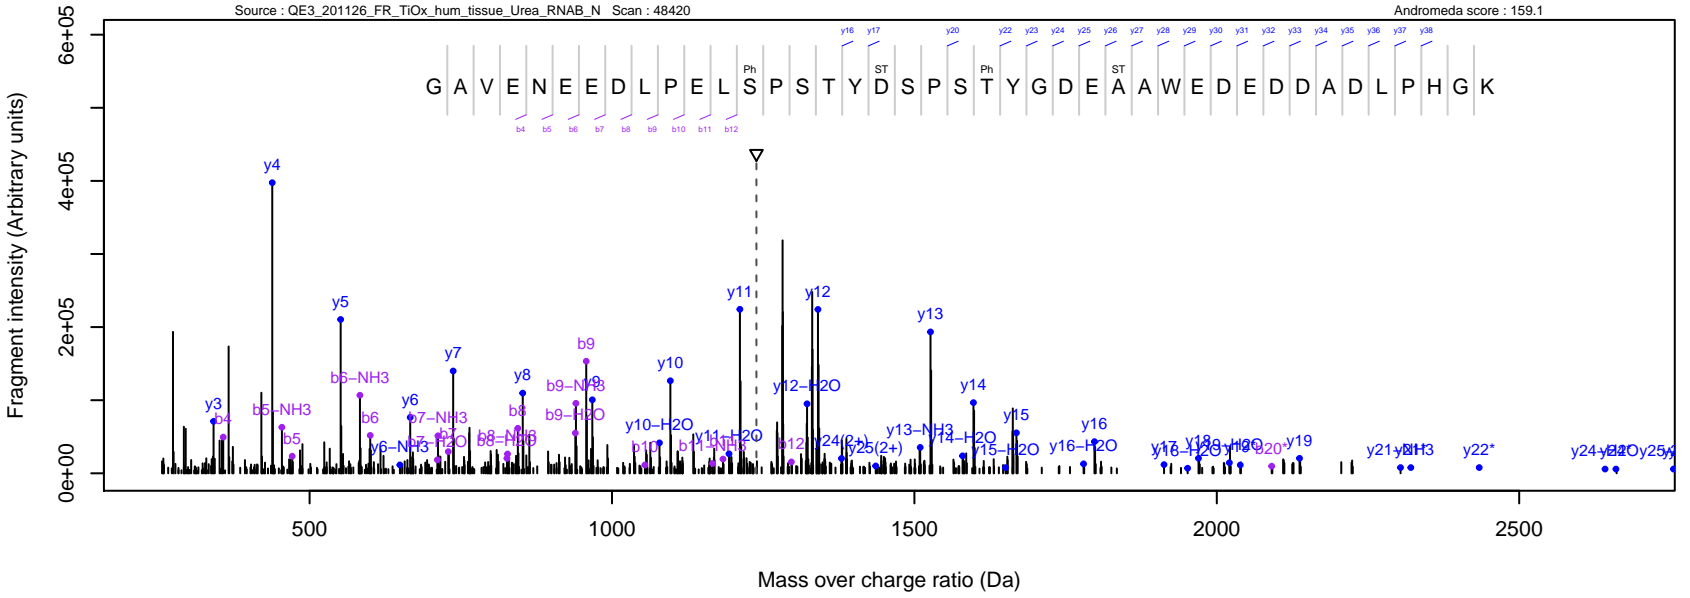

TS(Phospho (STY))SKESS(Phospho (STY))PIPS(Phospho (STY))PTSDRK-2+

Source : QE3\_201126\_FR\_TIOx\_hum\_tissue\_Urea\_RNAB\_B Scan : 10944

Andromeda score : 159.01

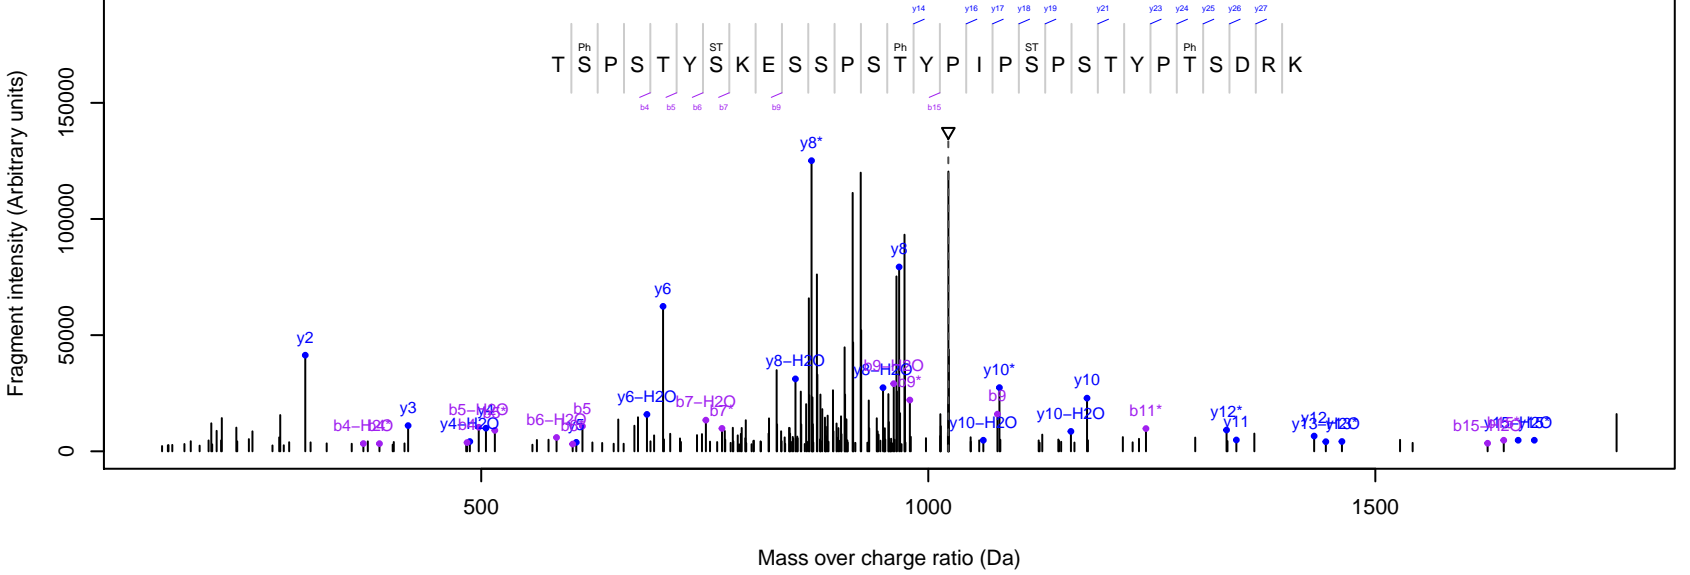

DRLS(Phospho (STY))DSTTGADSLDISSEADQQLLLQAK-3+

Source : QE3\_201126\_FR\_TIOx\_hum\_tissue\_Urea\_RNAB\_B Scan : 62351

Andromeda score : 158.99

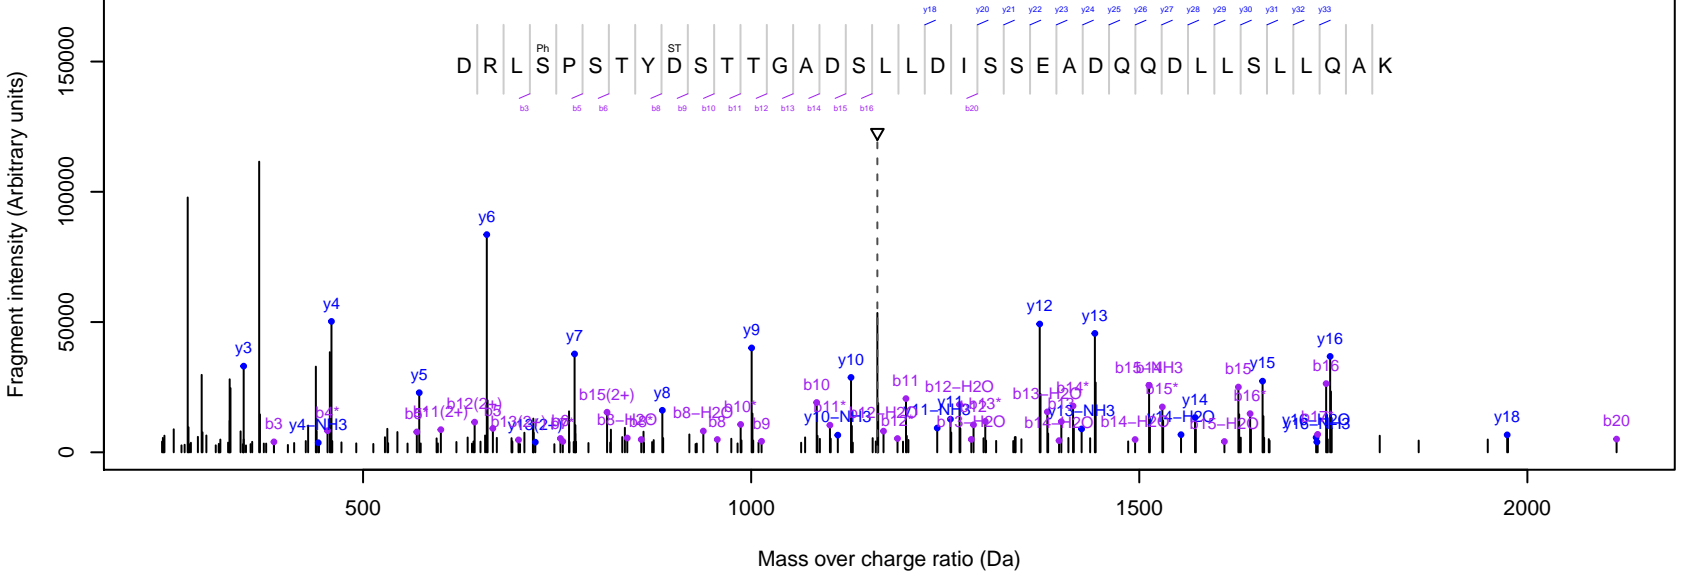

S(Phospho (STY))PSKPLPEVTDEYKNDVK-3+

Source : QE3\_201126\_FR\_TiOx\_hum\_tissue\_Urea\_RNAB\_H Scan : 19302

Andromeda score : 158.94

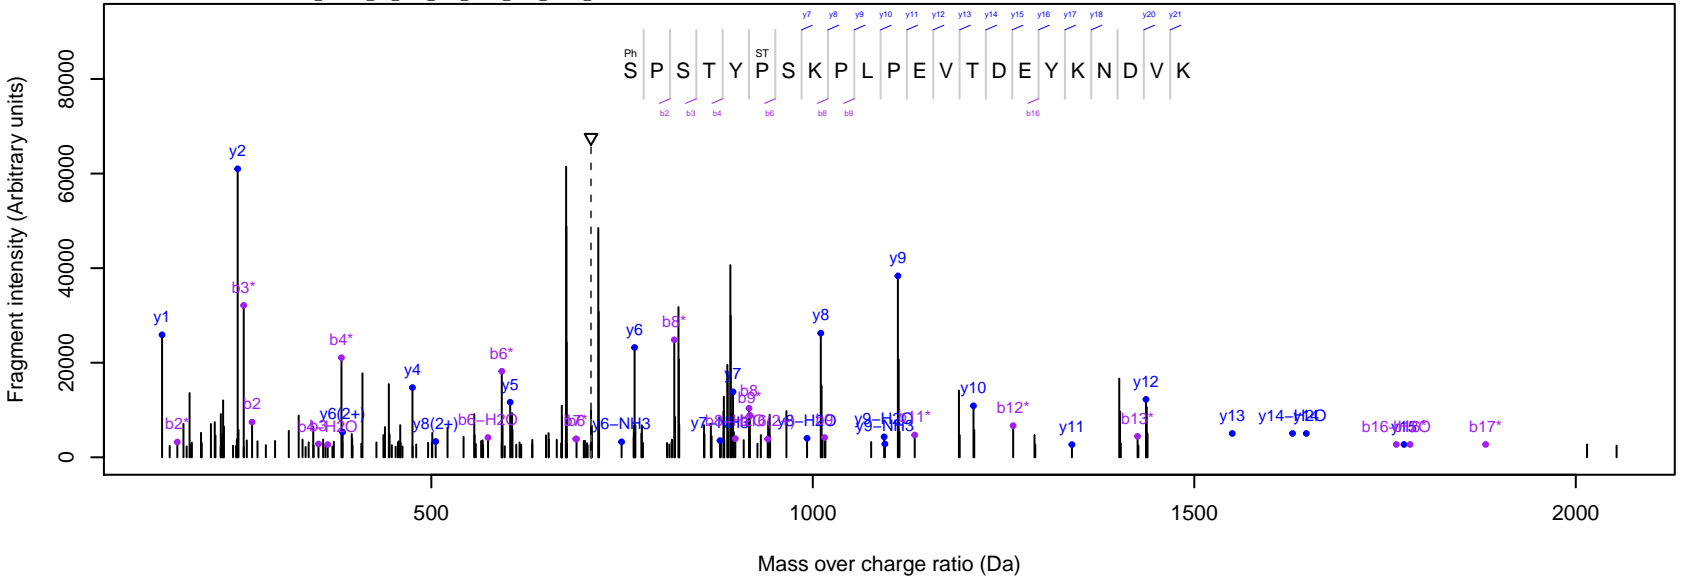

ASS(Phospho (STY))PPDRIDIFGR-2+

Source : QE3\_201126\_FR\_TiOx\_hum\_tissue\_Urea\_RNAB\_H Scan : 32553

Andromeda score : 158.89

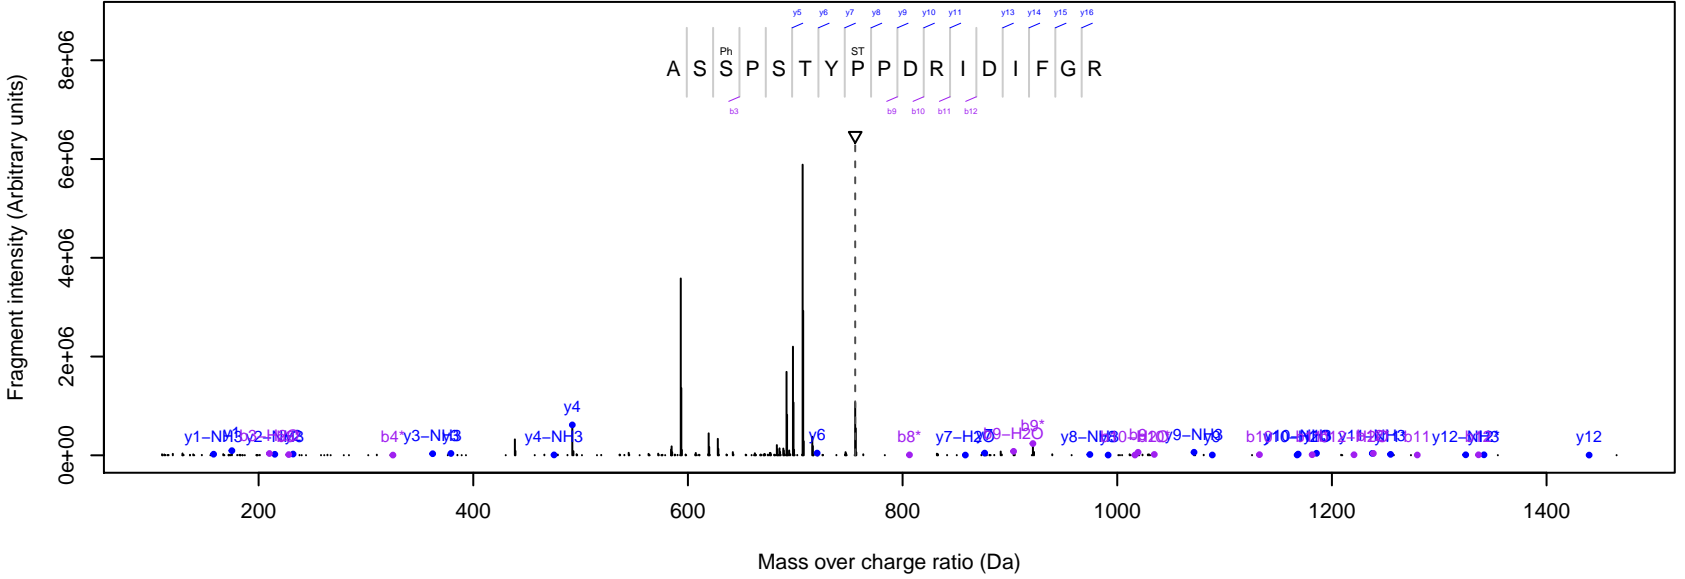

TSTS(Phospho (STY))PPPEKSGDEGS(Phospho (STY))EDEAPSGED-2+

Source : QE3\_201126\_FR\_TiOx\_hum\_tissue\_Urea\_RNAB\_N Scan : 15270

Andromeda score : 158.89

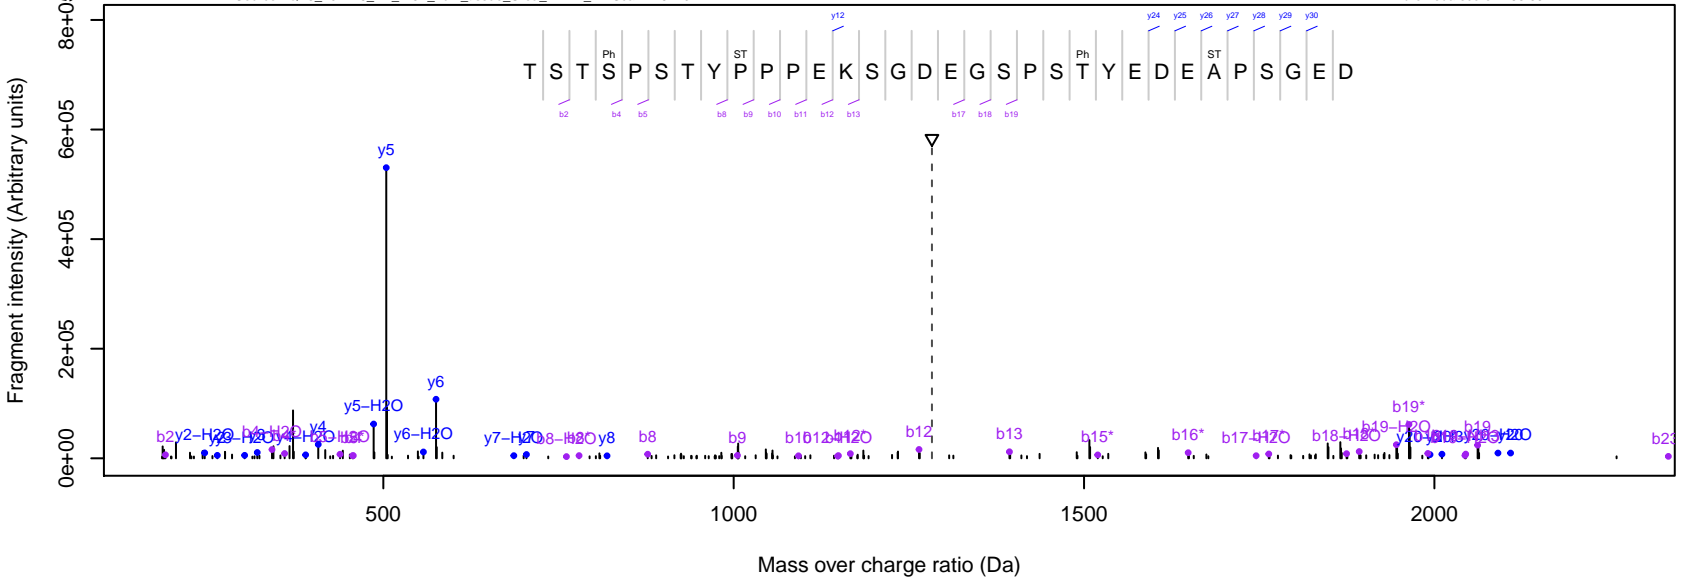

WDS(Phospho (STY))YENFNQHHEDSV DGS LTHTR-4+

Source : QE3\_201126\_FR\_TiOx\_hum\_tissue\_Urea\_RNAB\_N Scan : 22367

Andromeda score : 158.8

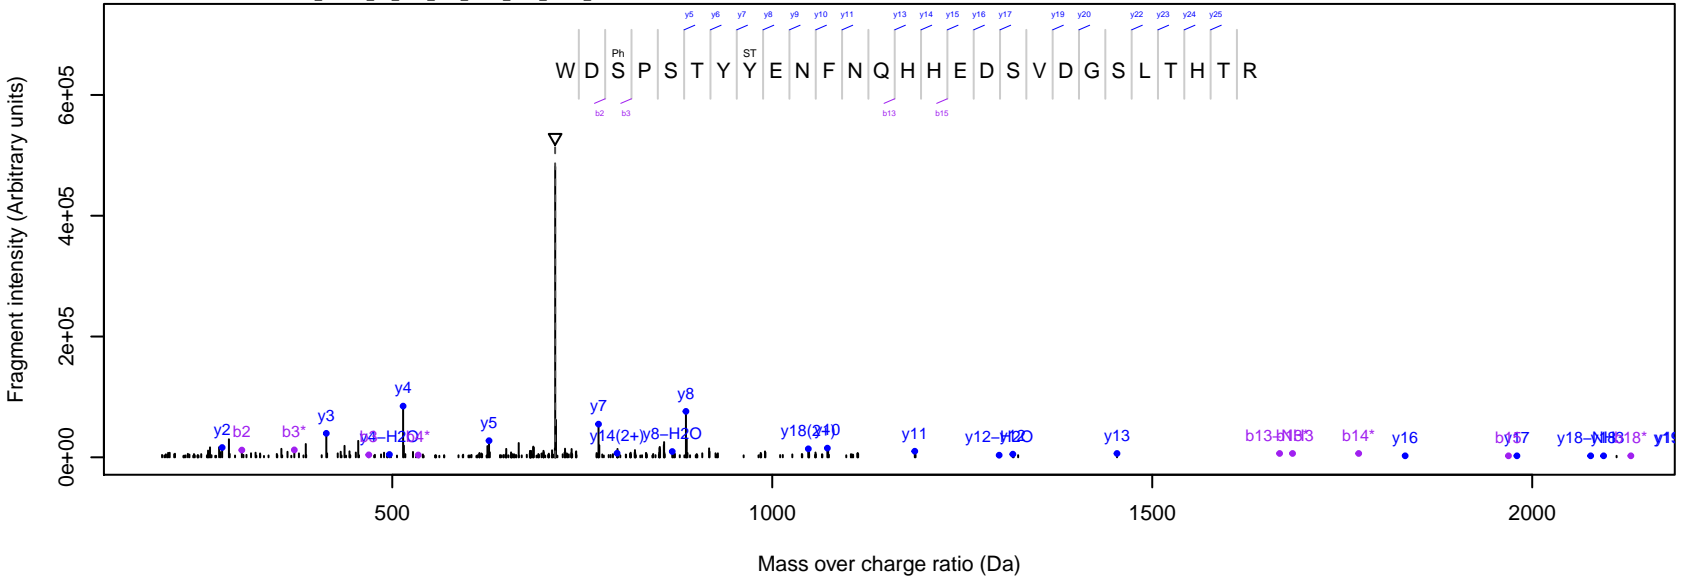

ERKNS(Phospho (STY))ITEISDNEDDLLEYHR-4+

Source : QE3\_201126\_FR\_TiOx\_hum\_tissue\_Urea\_RNAB\_N Scan : 26847

Andromeda score : 158.67

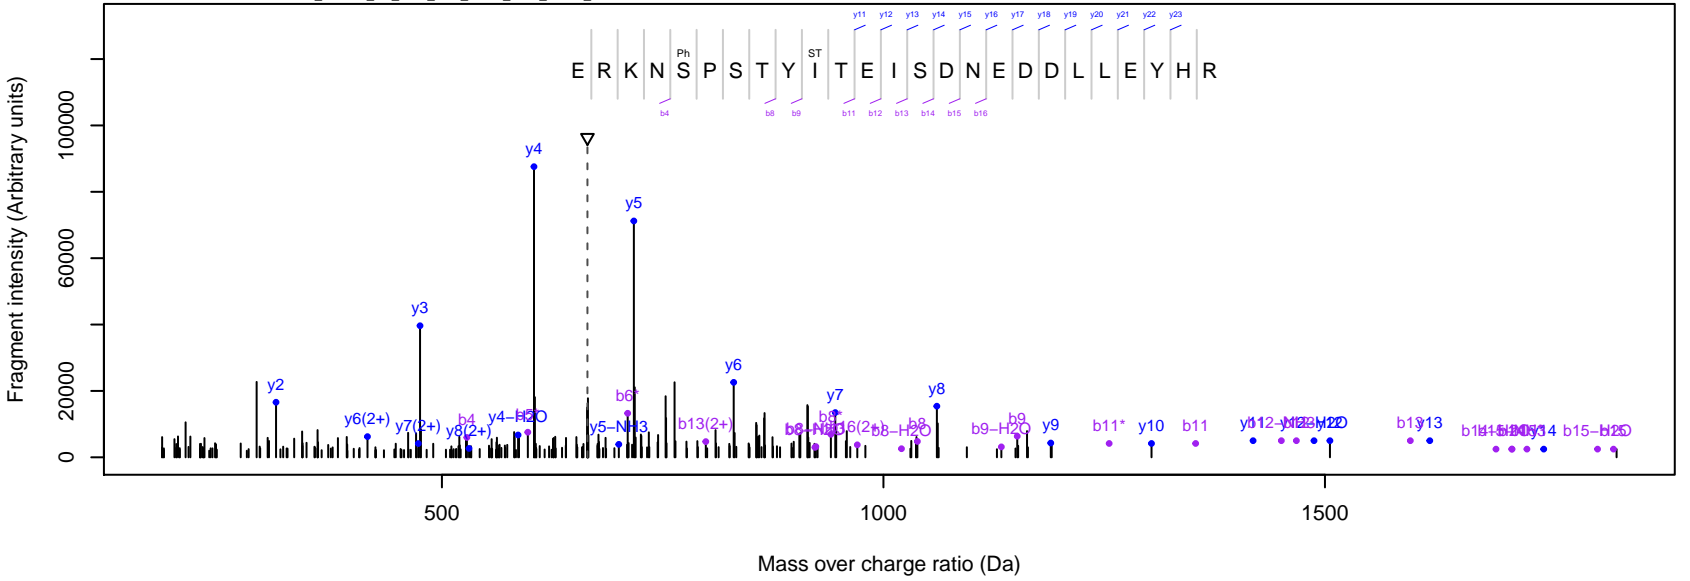

EKEVDGLLTSEPMGS(Phospho (STY))PVSSK-3+

Source : QE3\_201126\_FR\_TiOx\_hum\_tissue\_Urea\_RNAB\_H Scan : 30067

Andromeda score : 158.65

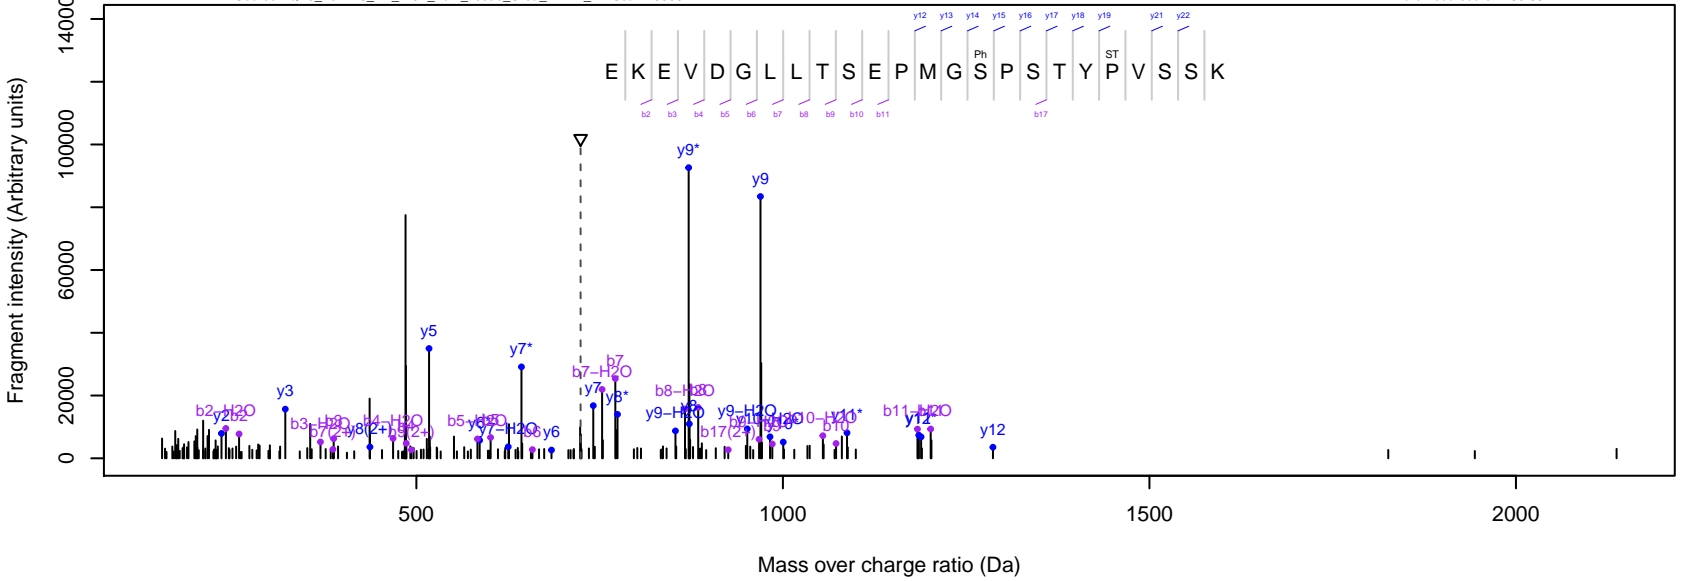

TAS(Phospho (STY))FSERADEVAPAKK-3+

Source : QE3\_201126\_FR\_TiOx\_hum\_tissue\_Urea\_RNAB\_B Scan : 10480

Andromeda score : 158.53

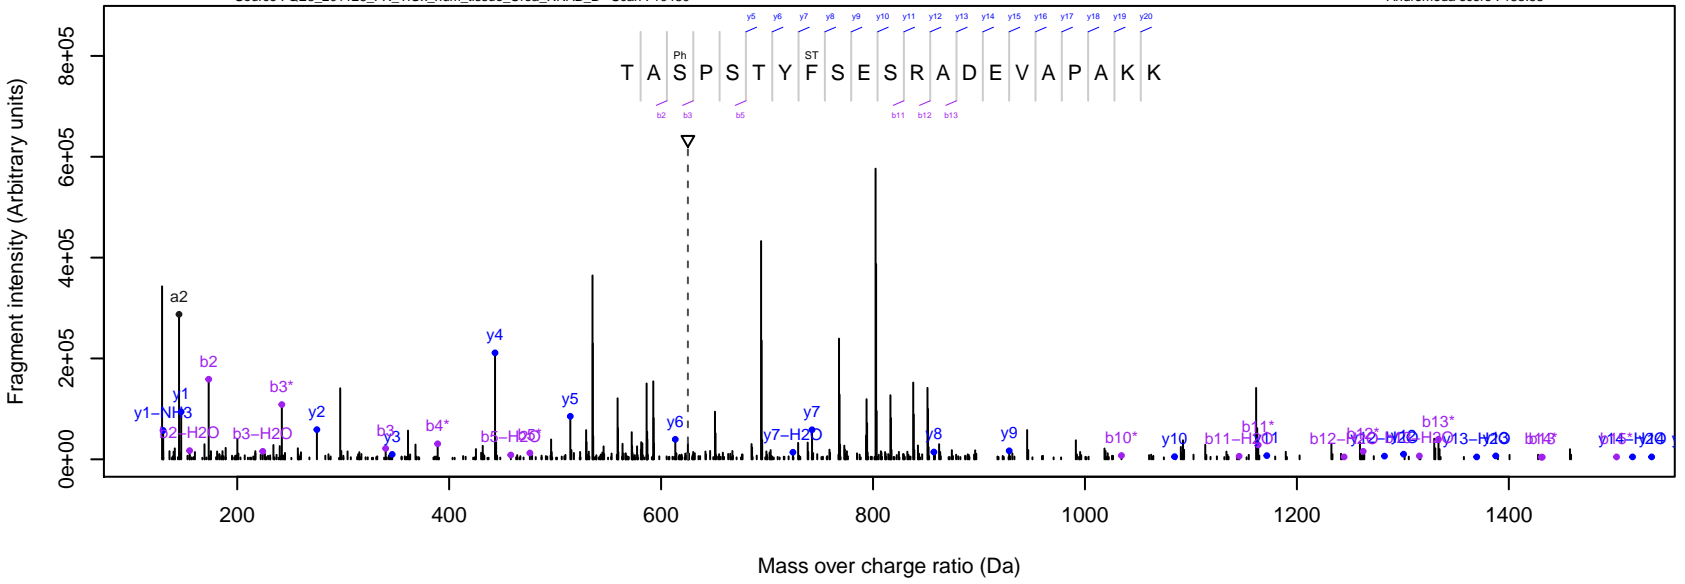

SHS(Phospho (STY))PSASQSGSLR-2+

Source : QE3\_201126\_FR\_TiOx\_hum\_tissue\_Urea\_RNAB\_H Scan : 5213

Andromeda score : 158.52

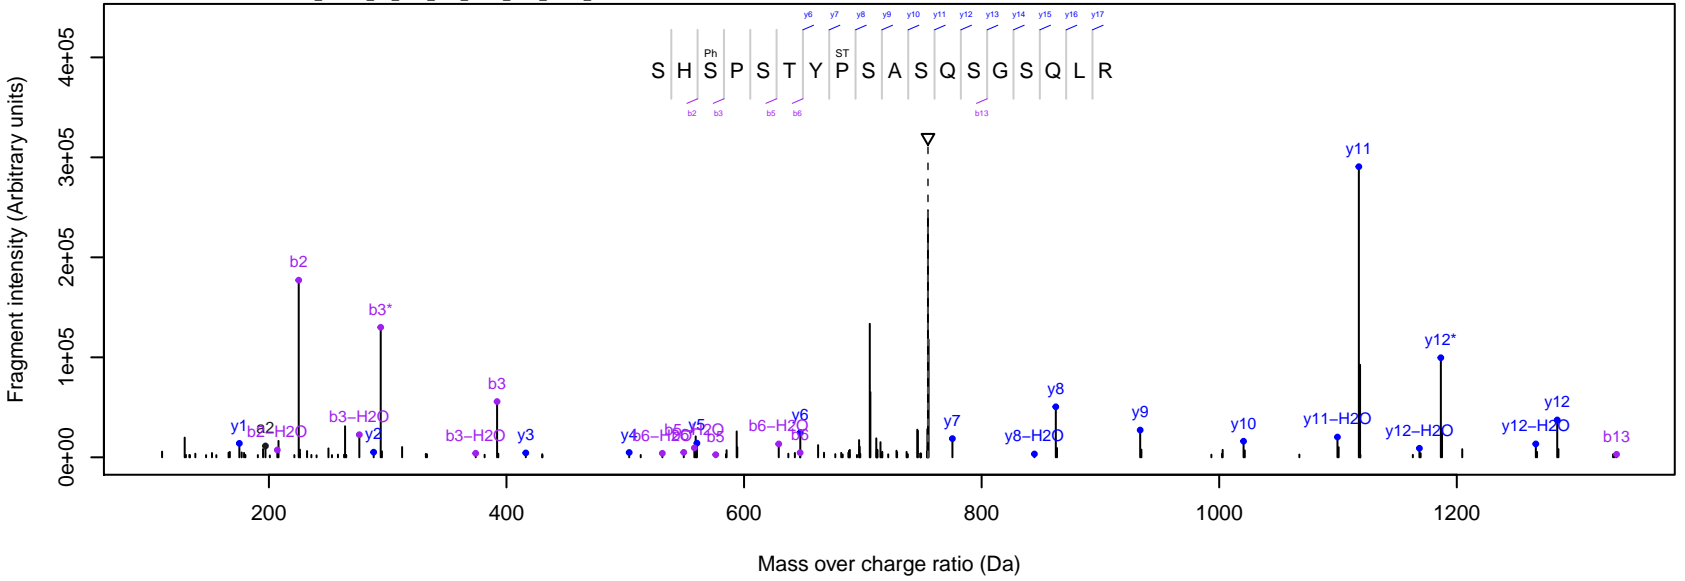

TSS(Phospho (STY))FTEQLDEGTPNR-2+

Source : QE3\_201126\_FR\_TiOx\_hum\_tissue\_Urea\_RNAB\_N Scan : 25527

Andromeda score : 158.52

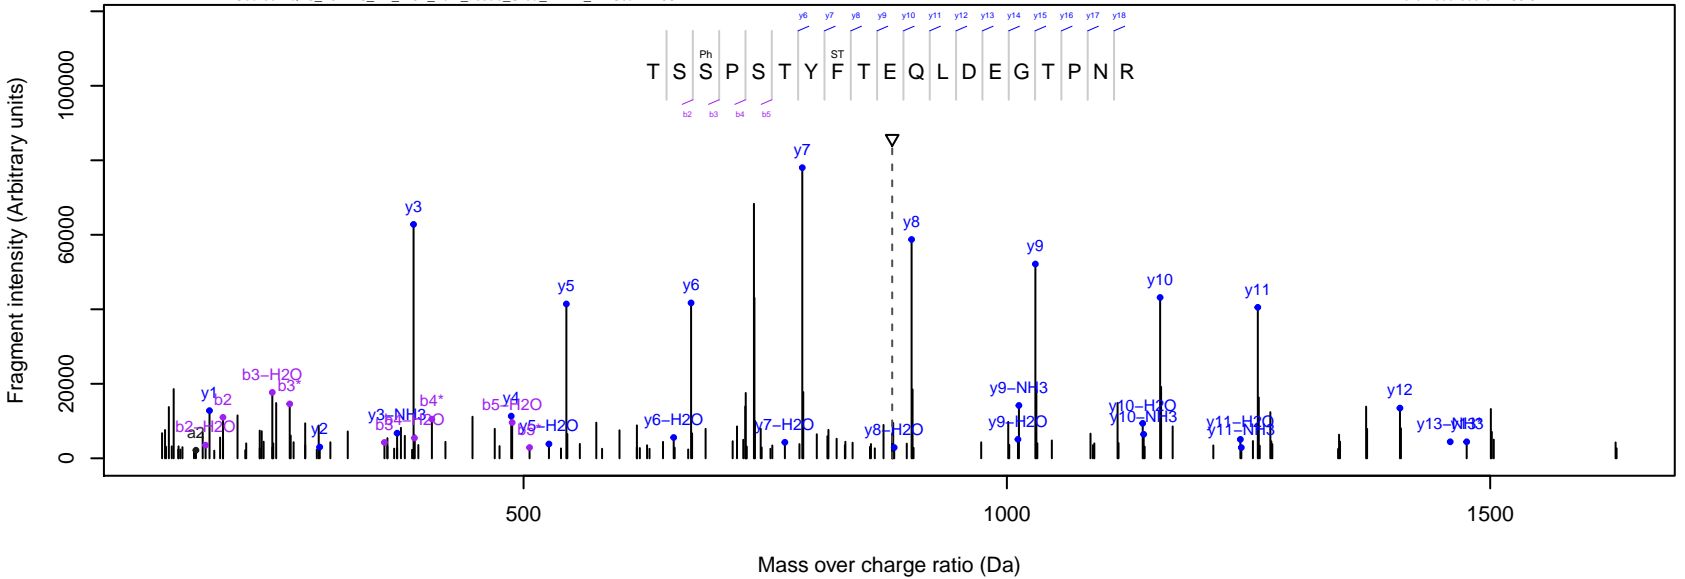

RPPSQTSSLSLSSPDIFDSPS(Phospho (STY))PEEDKEEHISLAHR-4+

Source : QE3\_201126\_FR\_TiOx\_hum\_tissue\_Urea\_RNAB\_B Scan : 30475

Andromeda score : 158.48

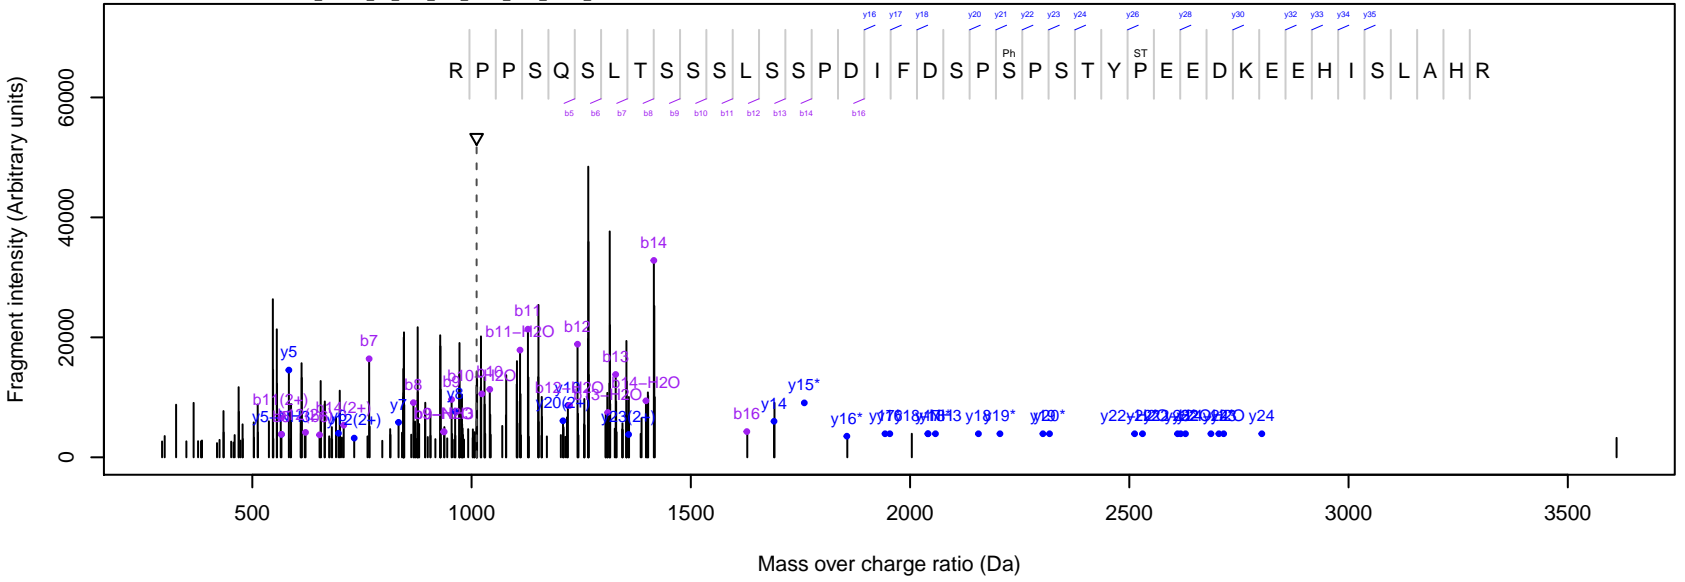

ESSPLYS(Phospho (STY))PTFSDSTSAVK-2+

Source : QE3\_201126\_FR\_TiOx\_hum\_tissue\_Urea\_RNAB\_H Scan : 35302

Andromeda score : 158.45

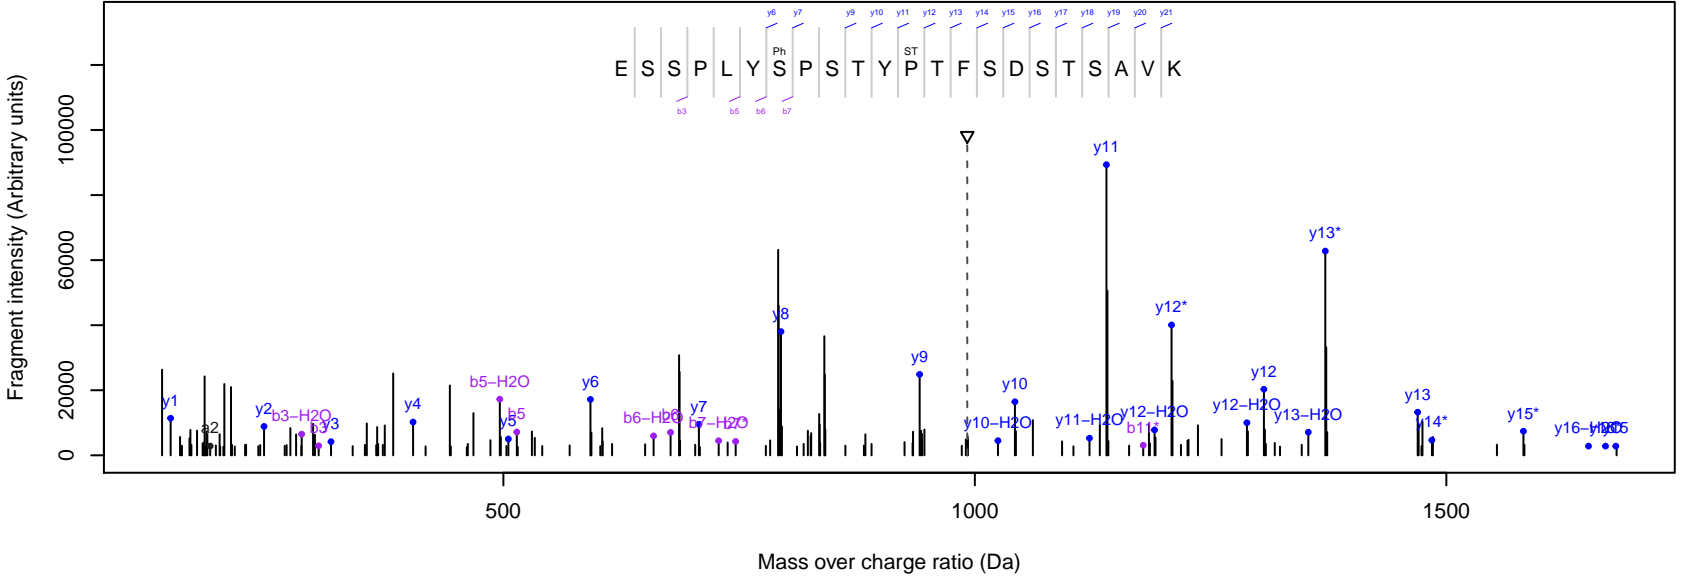

EFHSHEFHS(Phospho (STY))HEDMLVDPK-4+

Source : QE3\_201126\_FR\_TiOx\_hum\_tissue\_Urea\_RNAB\_N Scan : 21192

Andromeda score : 158.44

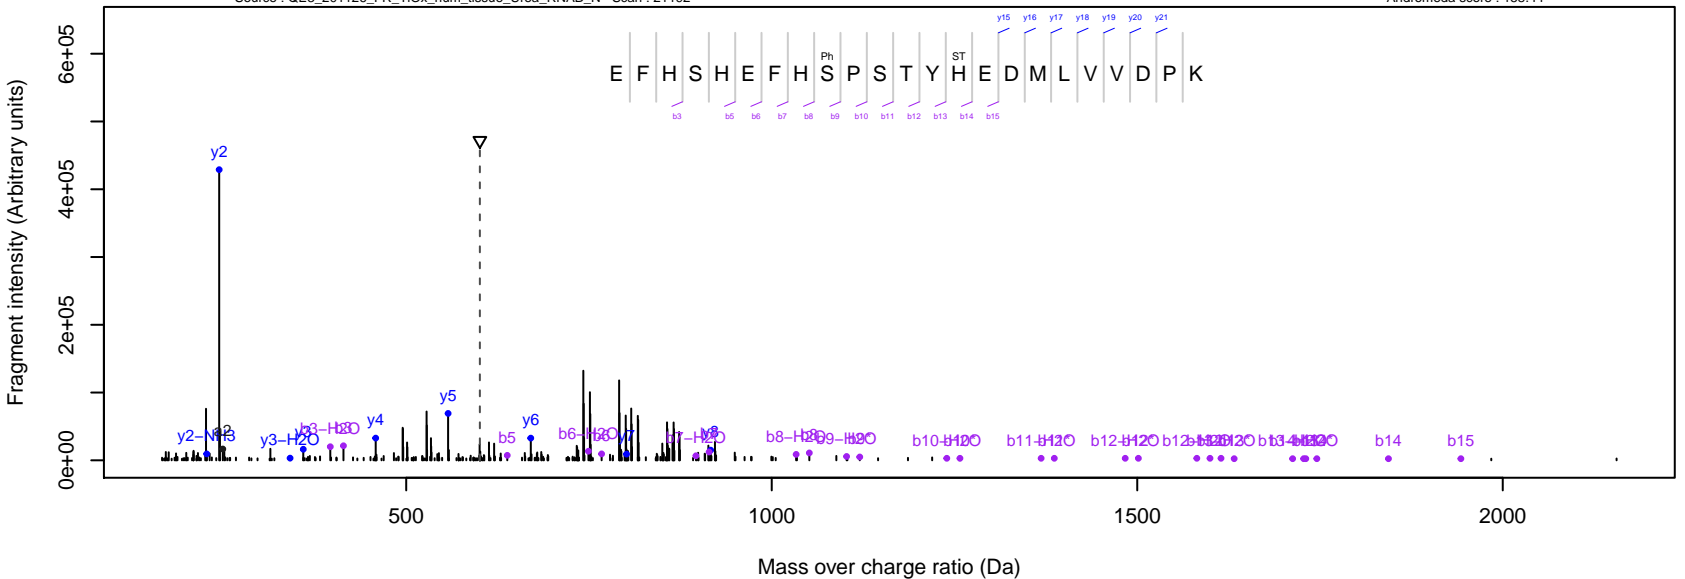

LIDRTES(Phospho (STY))LNR-3+

Source : QE3\_201126\_FR\_TiOx\_hum\_tissue\_Urea\_RNAB\_N Scan : 10742

Andromeda score : 158.42

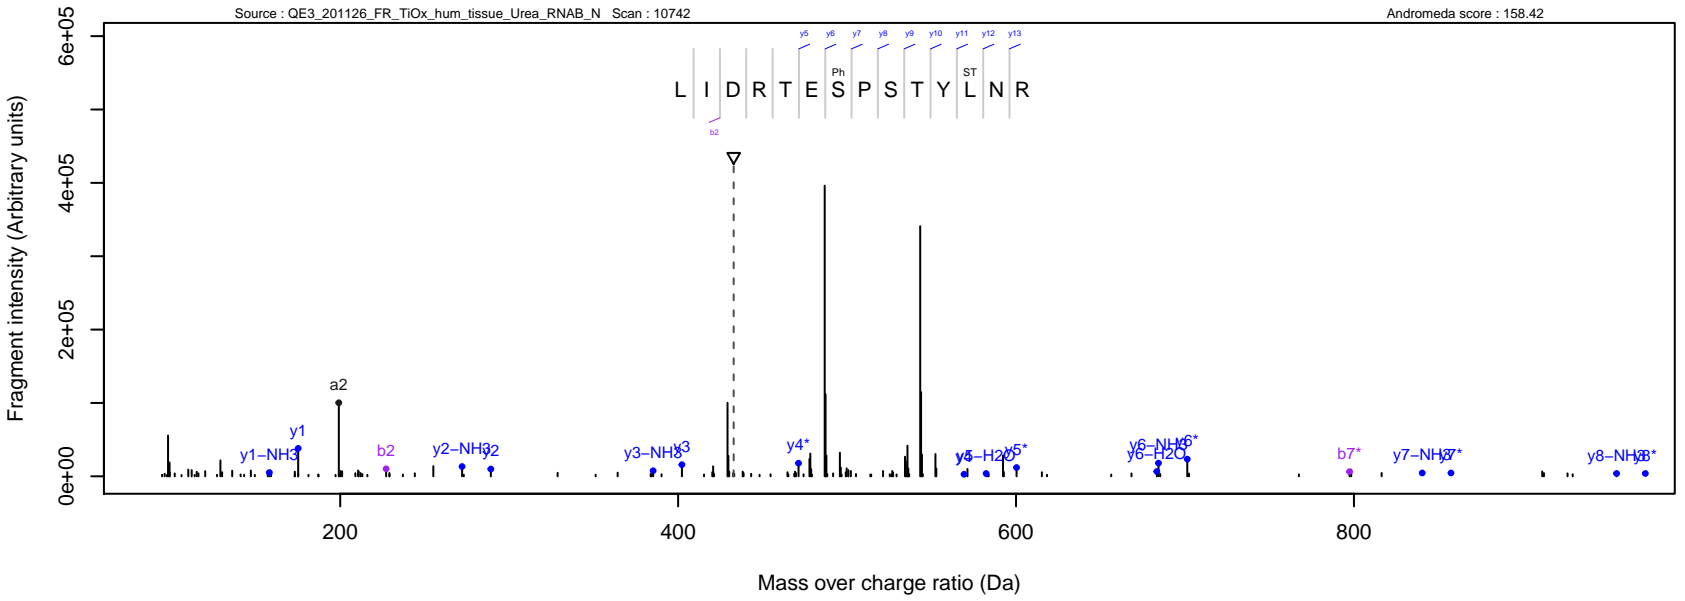

SVS(Phospho (STY))VATGLNMMK-2+

Source : QE3\_201126\_FR\_TiOx\_hum\_tissue\_Urea\_RNAB\_N Scan : 37192

Andromeda score : 158.42

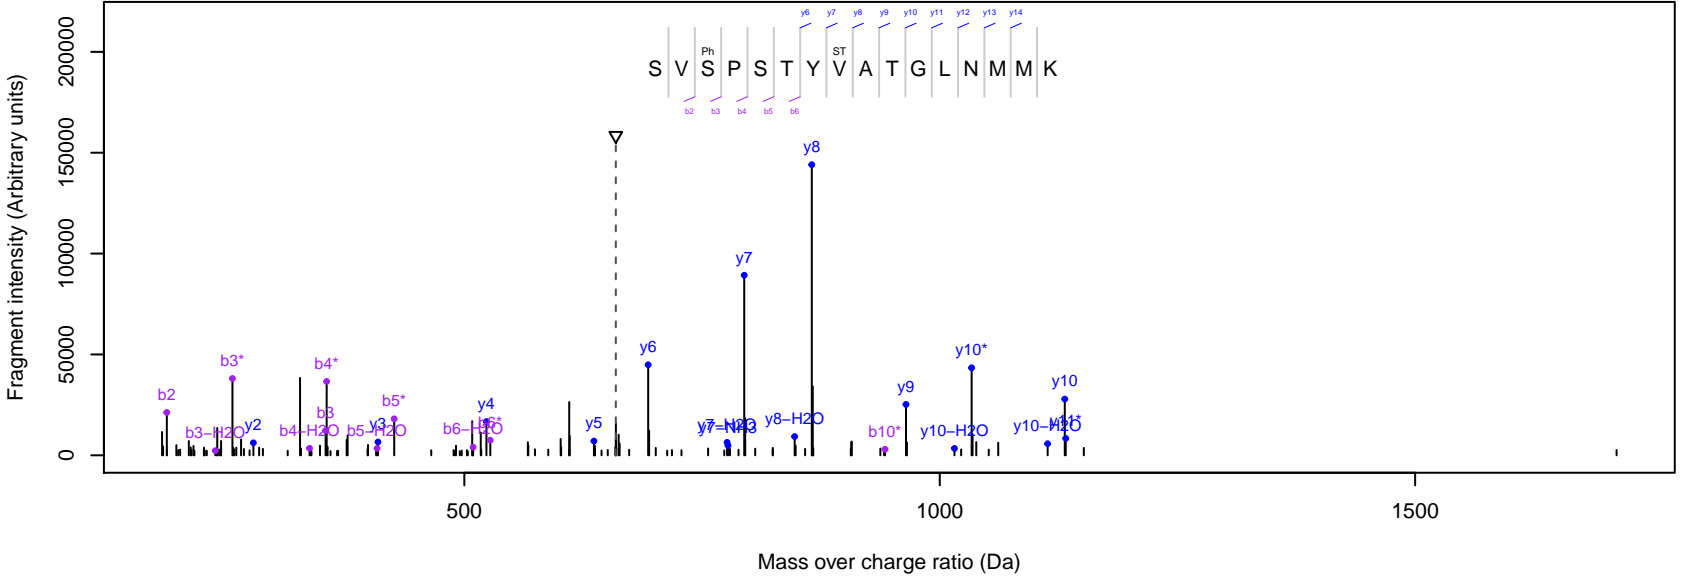

FKT(Phospho (STY))QPVTFDIEIQEVEEEGVSP(Phospho (STY))PMEEK-3+

Source : QE3\_201126\_FR\_TiOx\_hum\_tissue\_Urea\_RNAB\_H Scan : 53083

Andromeda score : 158.37

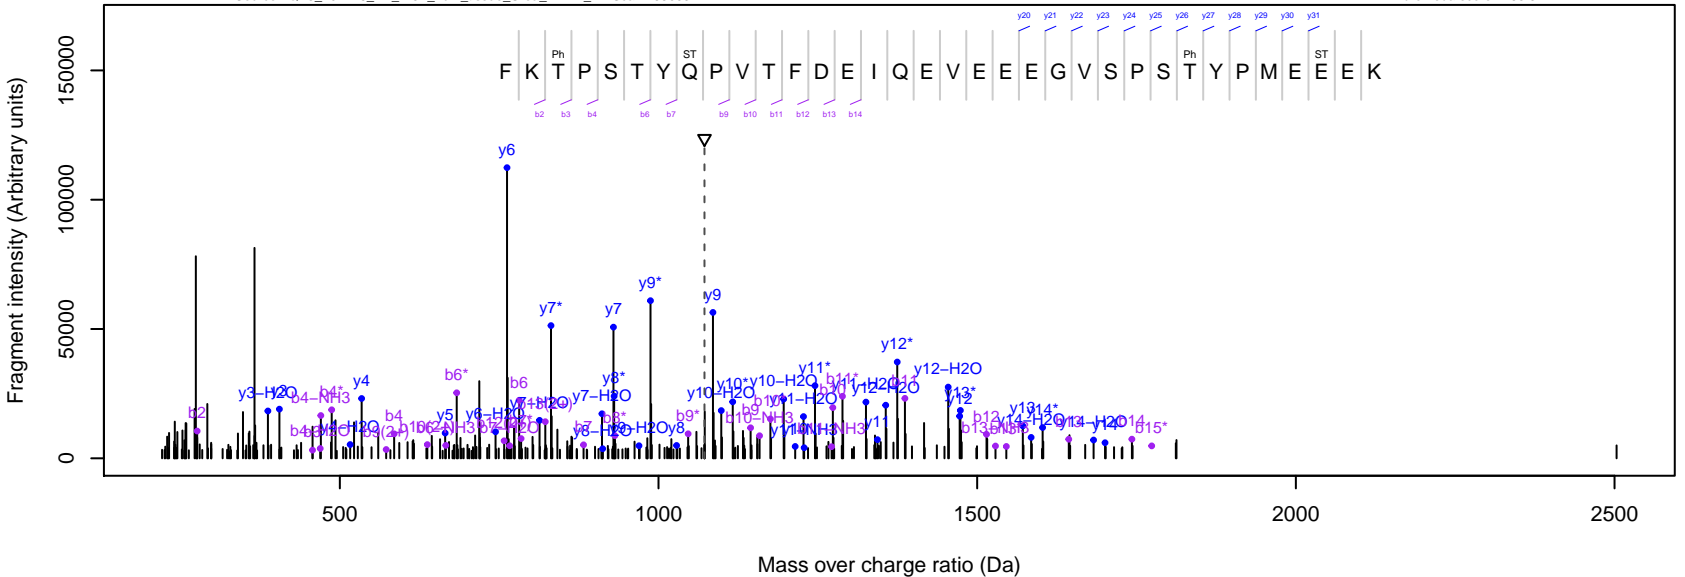



ATS(Phospho (STY))NVFAM(Oxidation (M))FDQSQIQEFKEAFNM(Oxidation (M))IDQNR-3+

Source : QE3\_201126\_FR\_TIOx\_hum\_tissue\_Urea\_RNAB\_N Scan : 60736

Andromeda score : 158.36

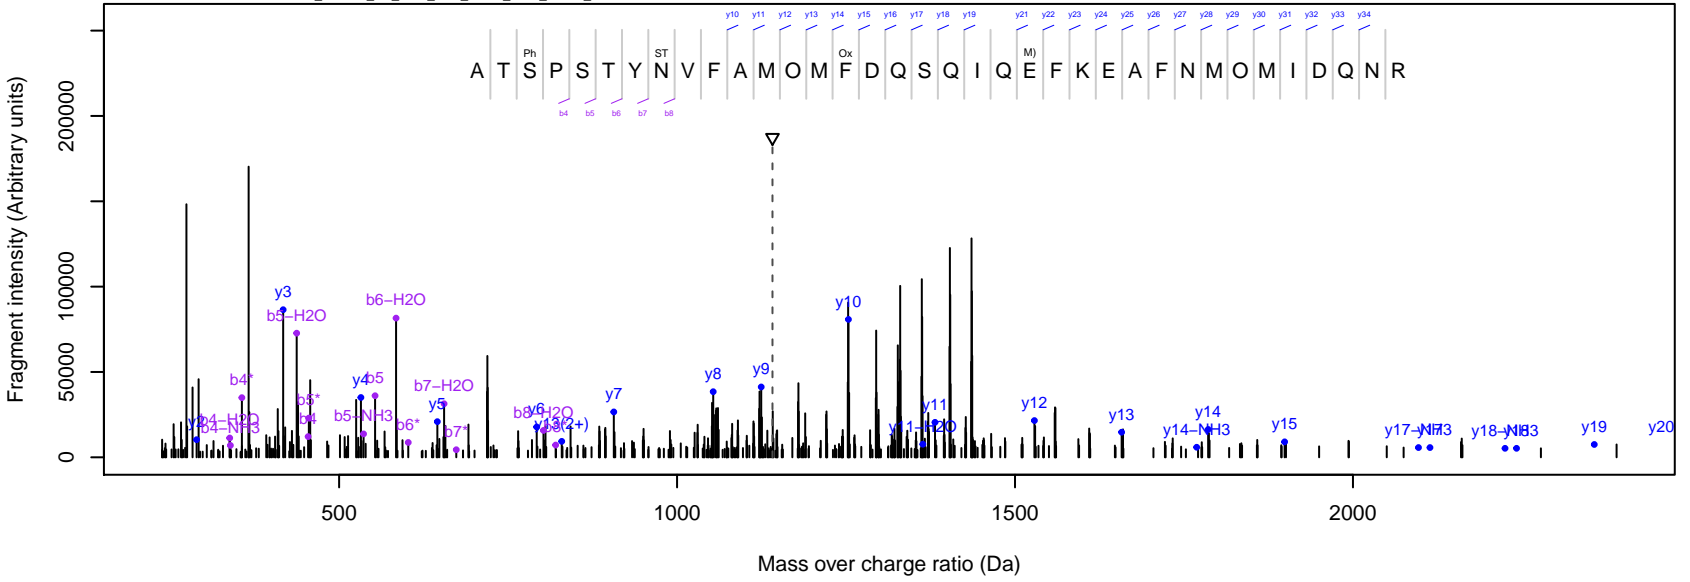

(Acetyl (Protein N-term))SS(Phospho (STY))PPEGKLETK-2+

Source : QE3\_201126\_FR\_TIOx\_hum\_tissue\_Urea\_RNAB\_H Scan : 13437

Andromeda score : 158.34

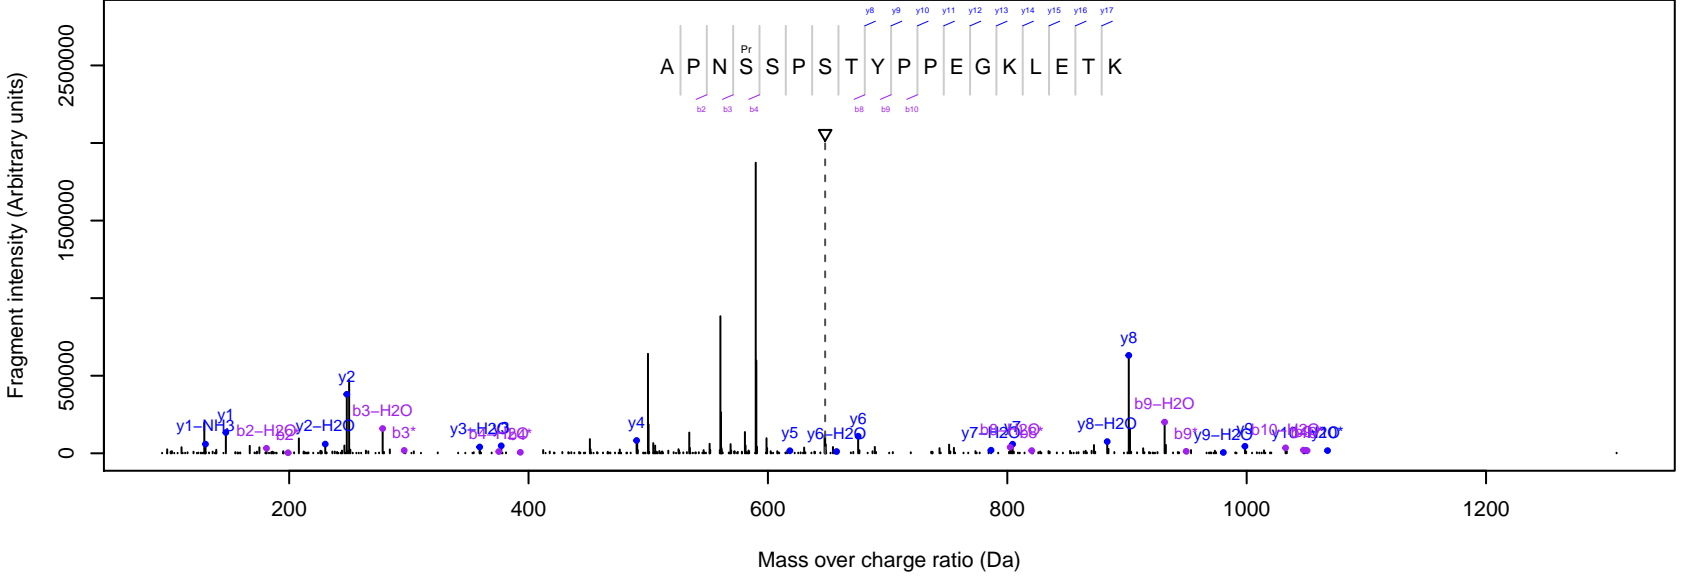

VSDS(Phospho (STY))LTDLALK-2+

Source : QE3\_201126\_FR\_TIOx\_hum\_tissue\_Urea\_RNAB\_H Scan : 36387

Andromeda score : 158.34

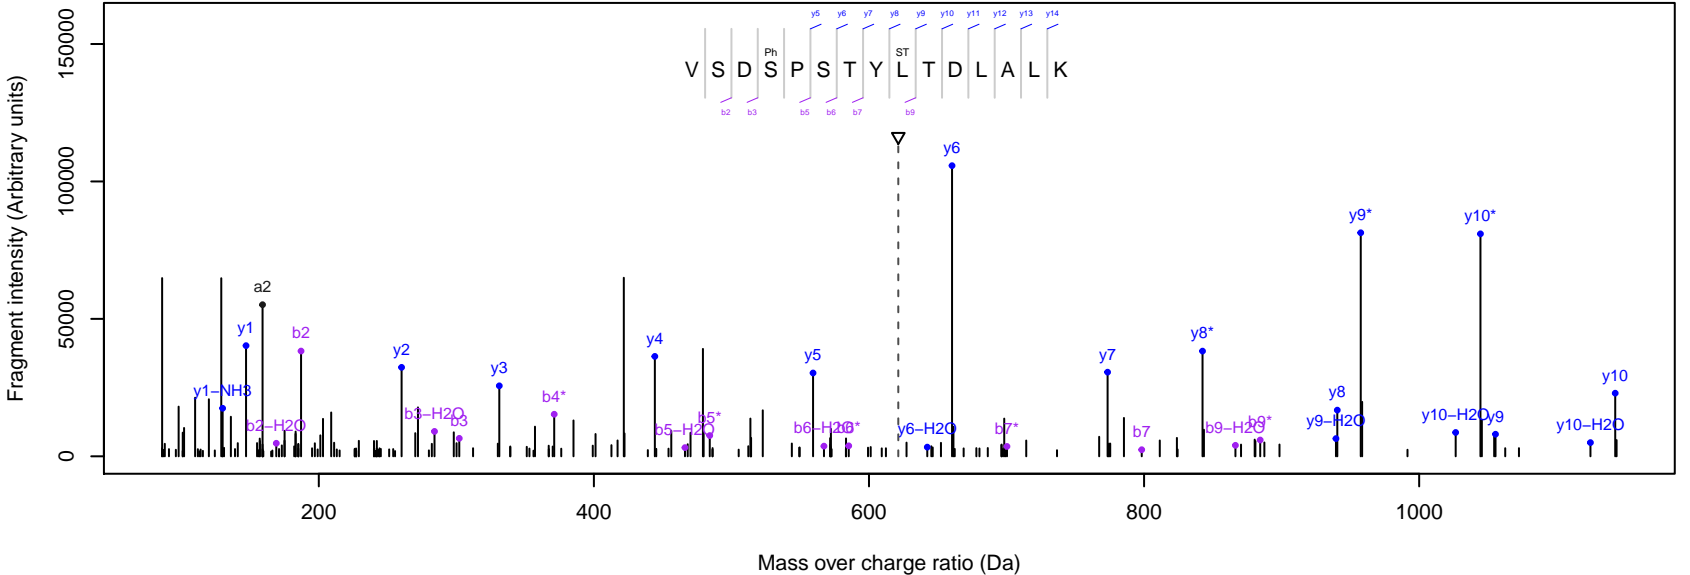

TPLSFTNPLHS(Phospho (STY))DDS(Phospho (STY))DSDERNSDGAVTQNK-3+

Source : QE3\_201126\_FR\_TIOx\_hum\_tissue\_Urea\_RNAB\_N Scan : 33136

Andromeda score : 158.31

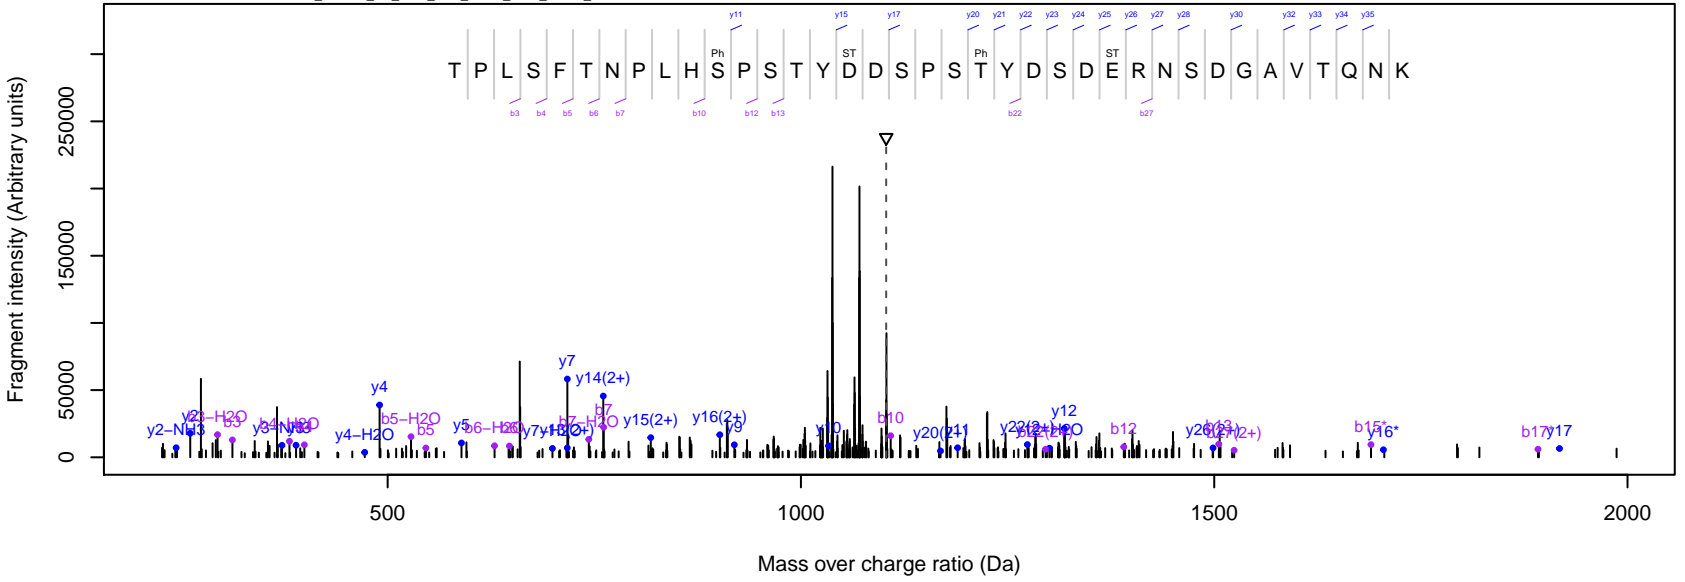

KTAHNSEADLEESFNEHELEPS(Phospho (STY))SPK-4+

Source : QE3\_201126\_FR\_TIOx\_hum\_tissue\_Urea\_RNAB\_N Scan : 23304

Andromeda score : 158.2

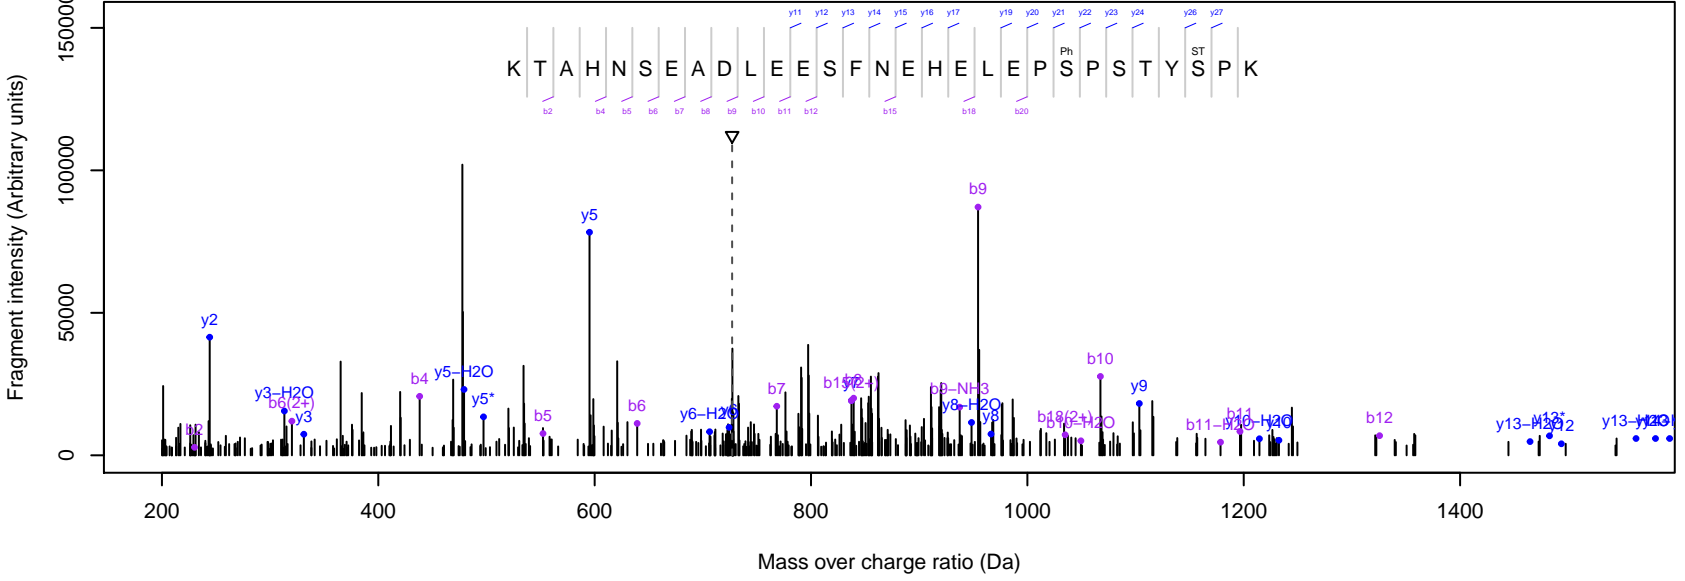

KLS(Phospho (STY))NPDIFSSTGK-2+

Source : QE3\_201126\_FR\_TIOx\_hum\_tissue\_Urea\_RNAB\_N Scan : 22586

Andromeda score : 158.14

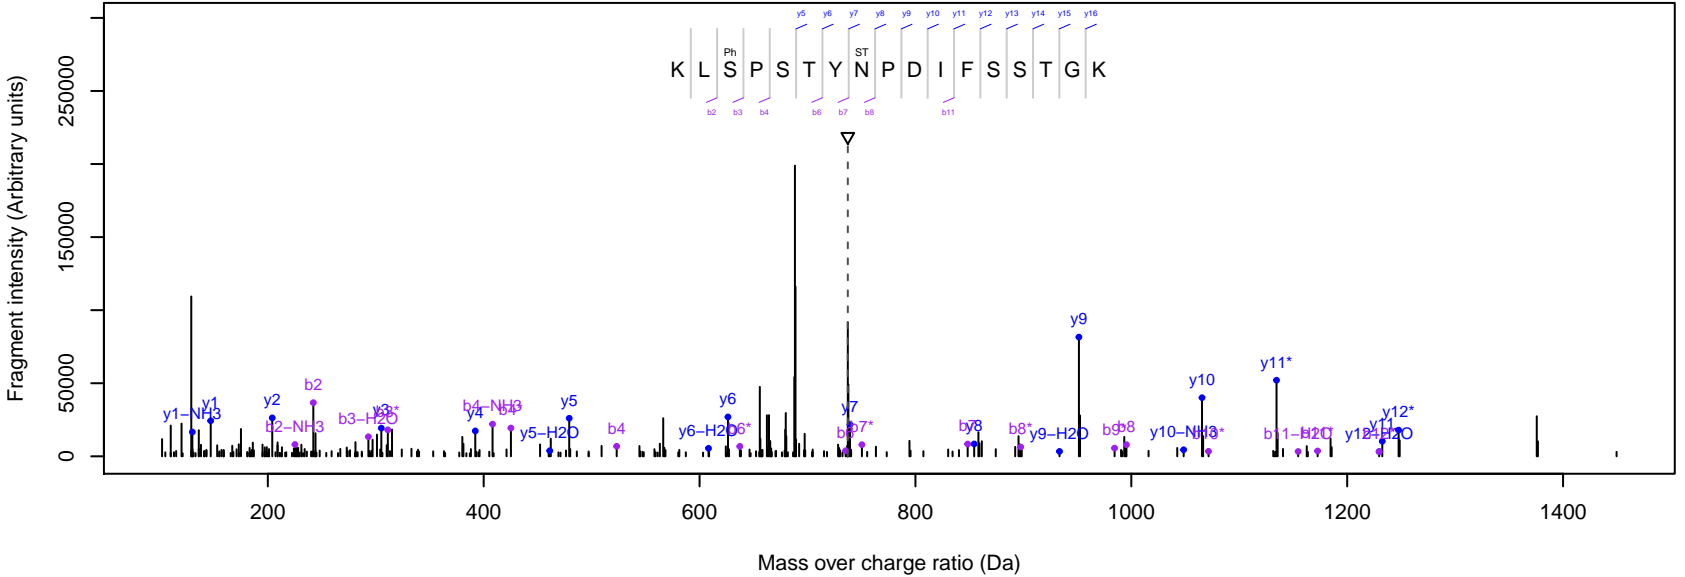

VPPAPVPCPPS(Phospho (STY))PGPSAVPS(Phospho (STY))SPK-3+

Source : QE3\_201126\_FR\_TiOx\_hum\_tissue\_Urea\_RNAB\_H Scan : 36516

Andromeda score : 158.1

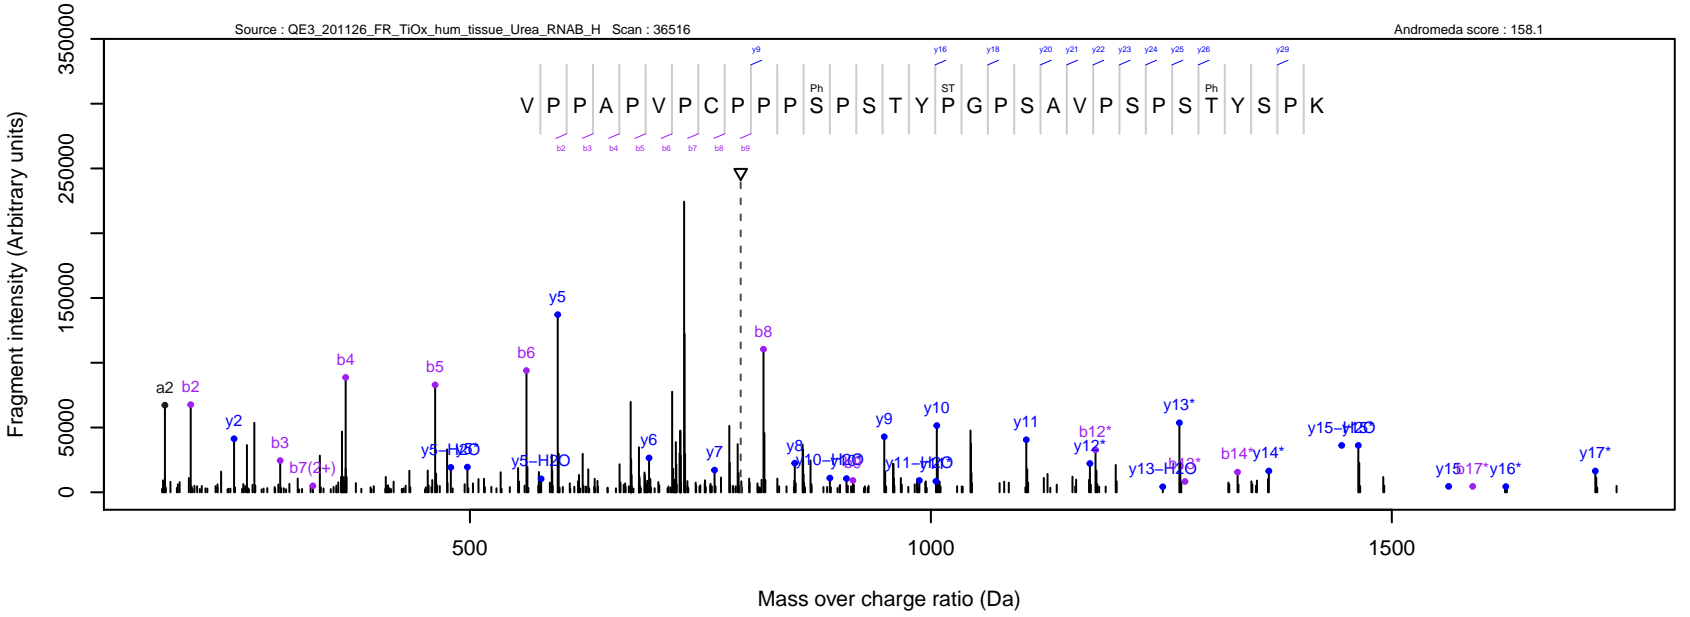

(Acetyl (Protein N-term))AS(Phospho (STY))PSLERPEK-2+

Source : QE3\_201126\_FR\_TiOx\_hum\_tissue\_Urea\_RNAB\_B Scan : 14635

Andromeda score : 158.06

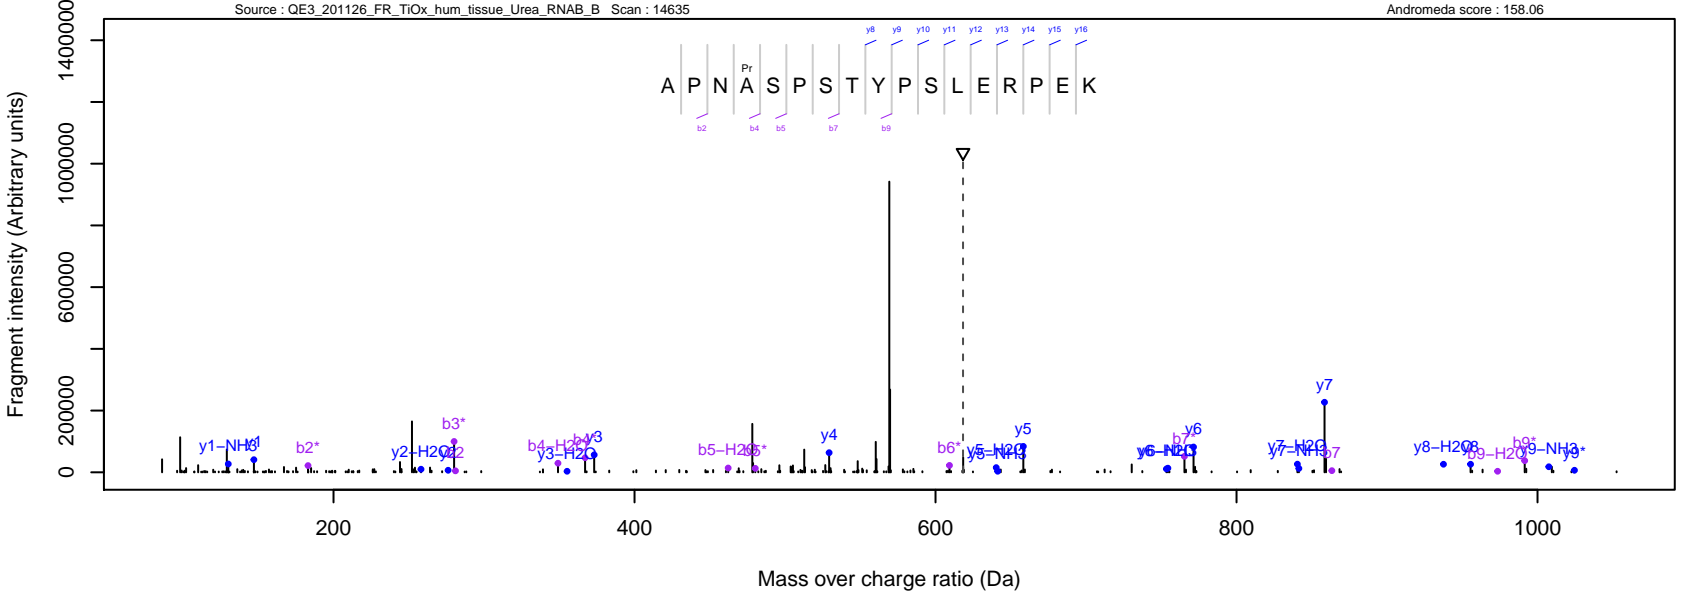

(Acetyl (Protein N-term))ADGGS(Phospho (STY))PFLGR-2+

Source : QE3\_201126\_FR\_TiOx\_hum\_tissue\_Urea\_RNAB\_H Scan : 38630

Andromeda score : 158.05

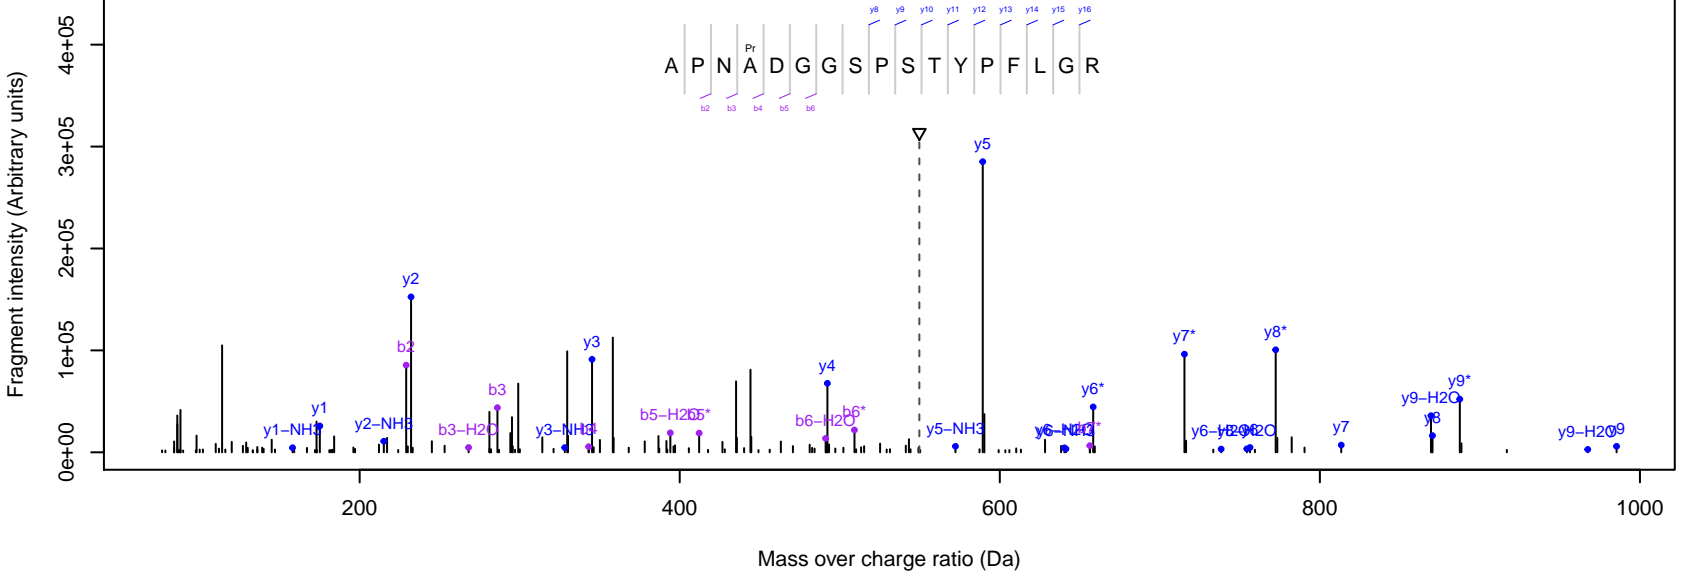

ES(Phospho (STY))KGSPVFLPR-2+

Source : QE3\_201126\_FR\_TIOx\_hum\_tissue\_Urea\_RNAB\_H Scan : 19694

Andromeda score : 158.04

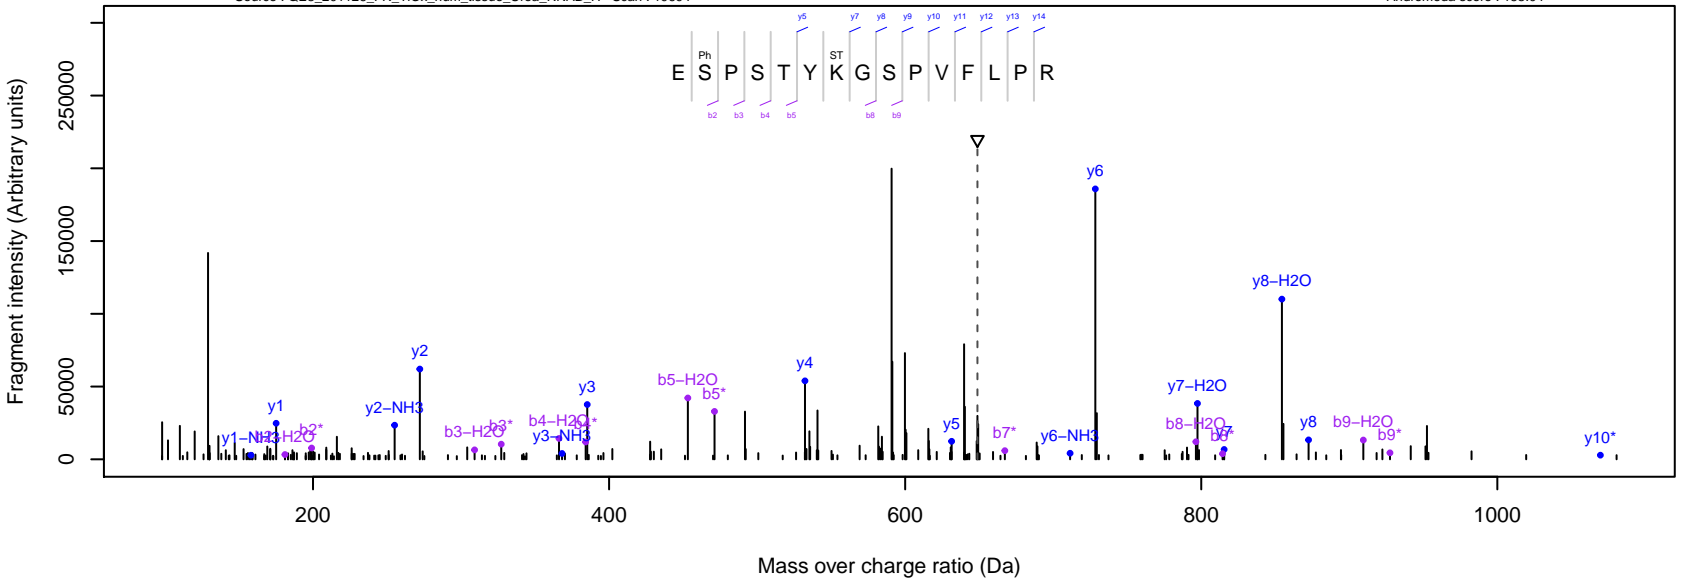

GS(Phospho (STY))VSDEEMM(Oxidation (M))ELR-2+

Source : QE3\_201126\_FR\_TIOx\_hum\_tissue\_Urea\_RNAB\_H Scan : 23629

Andromeda score : 158.04

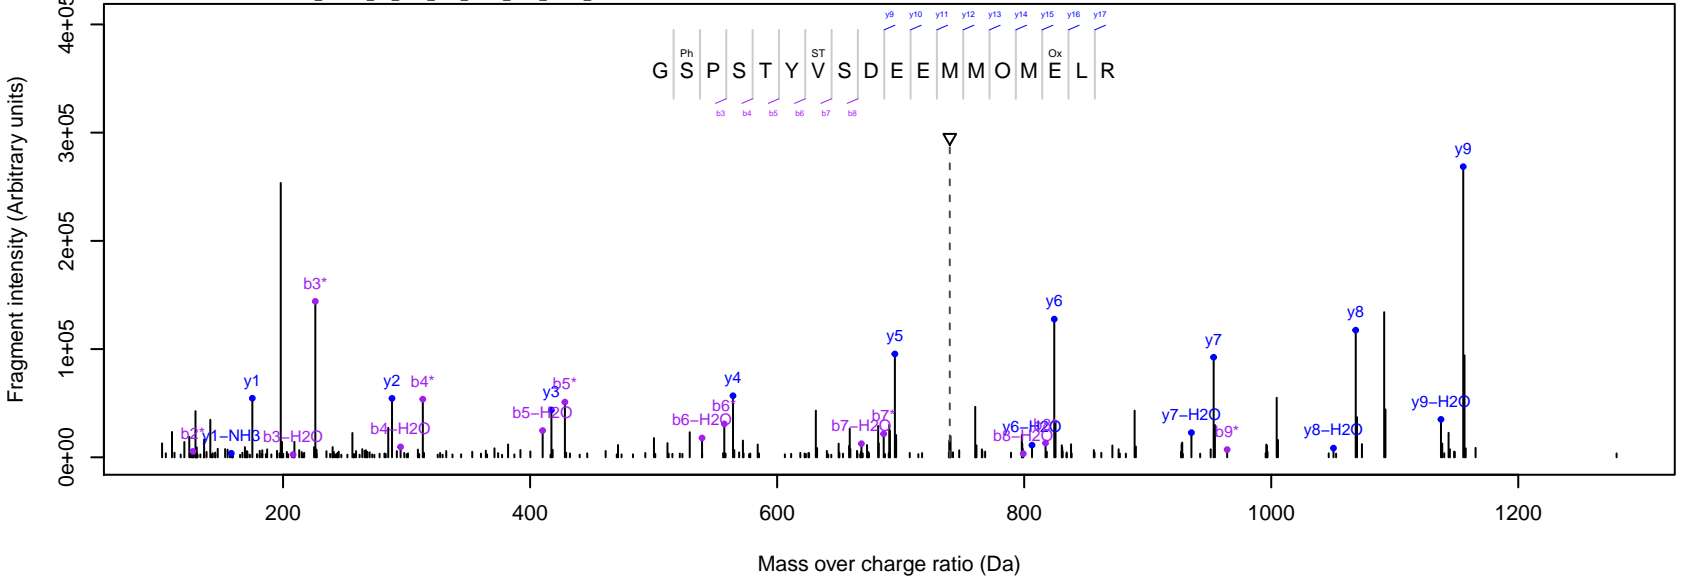

EGES(Phospho (STY))LEDLMKLSPEELLR-3+

Source : QE3\_201126\_FR\_TIOx\_hum\_tissue\_Urea\_RNAB\_H Scan : 61200

Andromeda score : 158.02

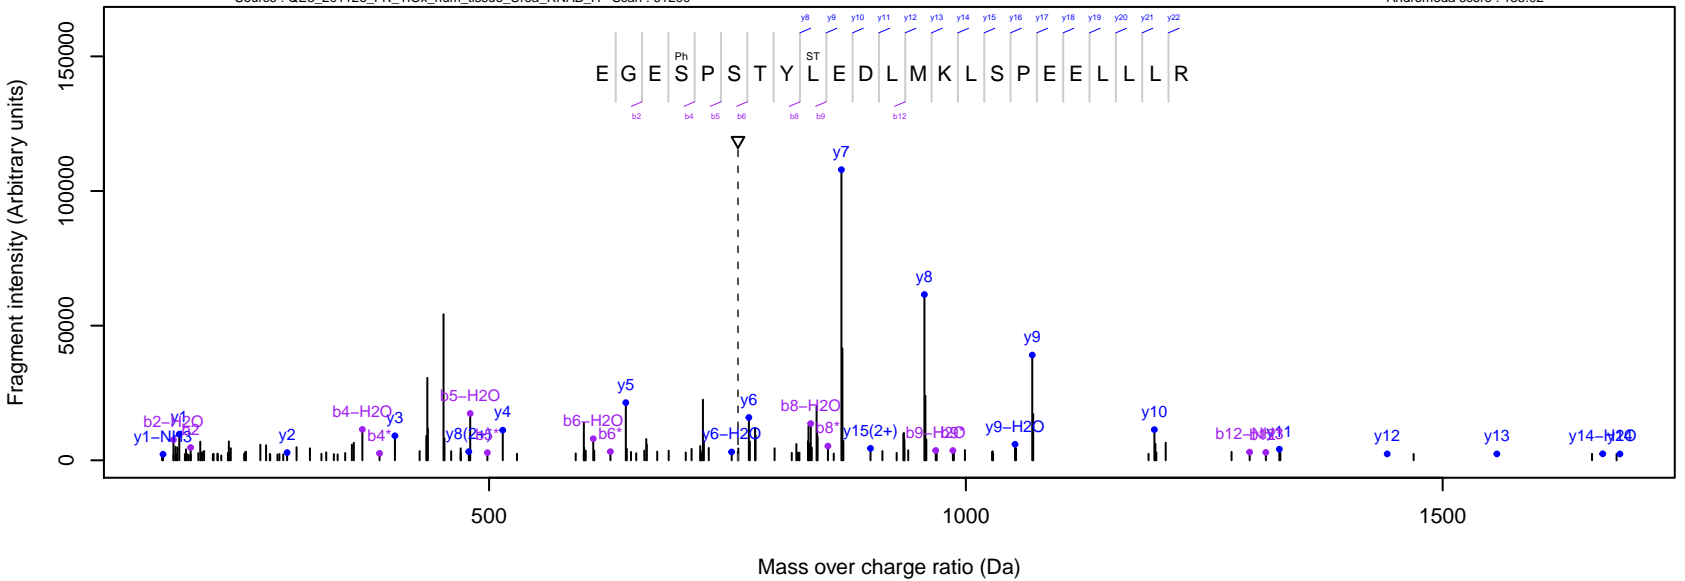

TPESQPD(Phospho (STY))PPGTPLVSQDEKR-3+

Source : QE3\_201126\_FR\_TiOx\_hum\_tissue\_Urea\_RNAB\_N Scan : 19146

Andromeda score : 157.96

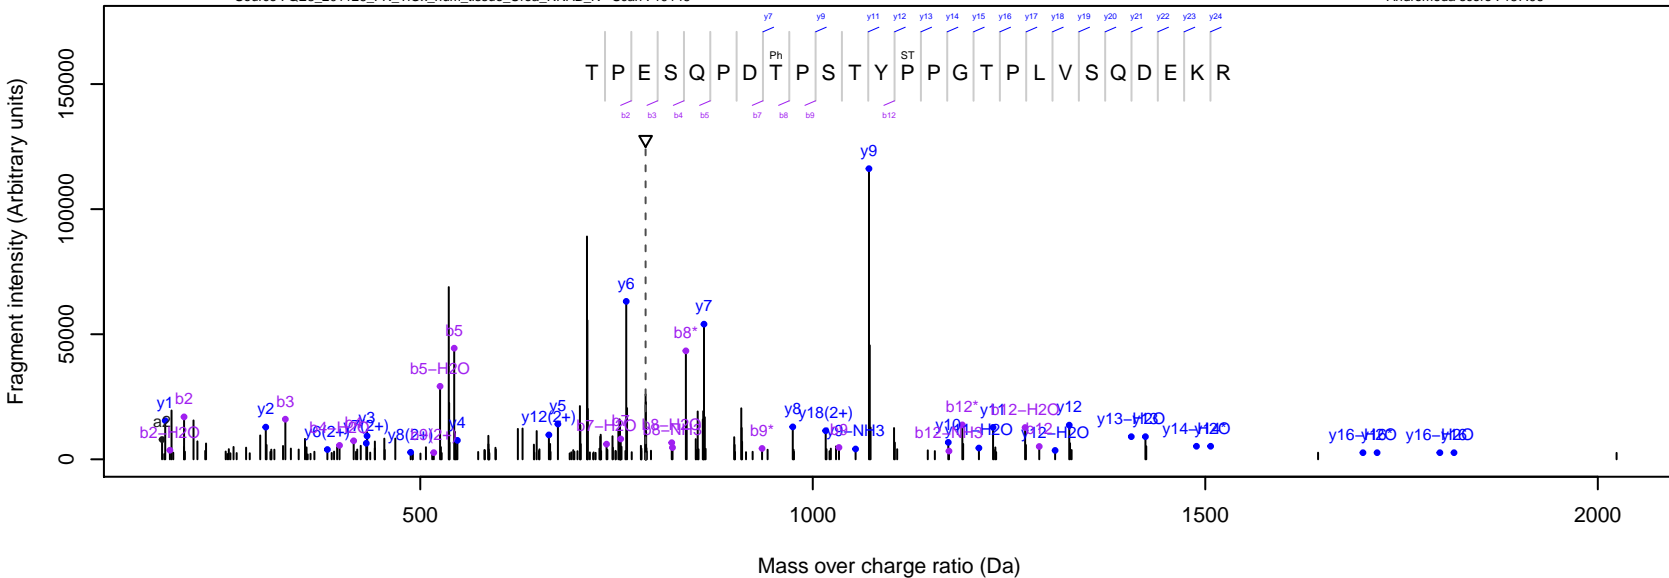

QADPQAWPPDS(Phospho (STY))PVRVDTVR-3+

Source : QE3\_201126\_FR\_TiOx\_hum\_tissue\_Urea\_RNAB\_N Scan : 31285

Andromeda score : 157.95

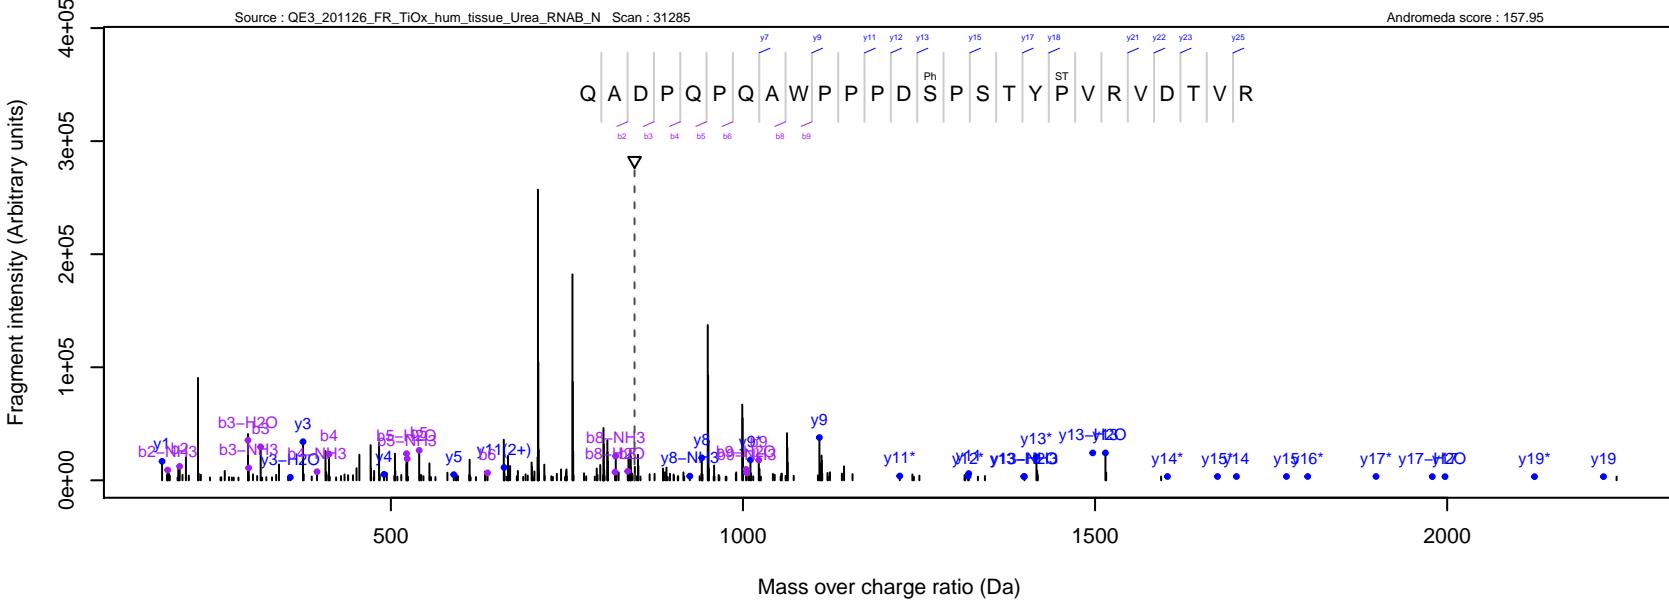

RGS(Phospho (STY))IGENQVEVM(Oxidation (M))VEEK-2+

Source : QE3\_201126\_FR\_TiOx\_hum\_tissue\_Urea\_RNAB\_B Scan : 18795

Andromeda score : 157.88

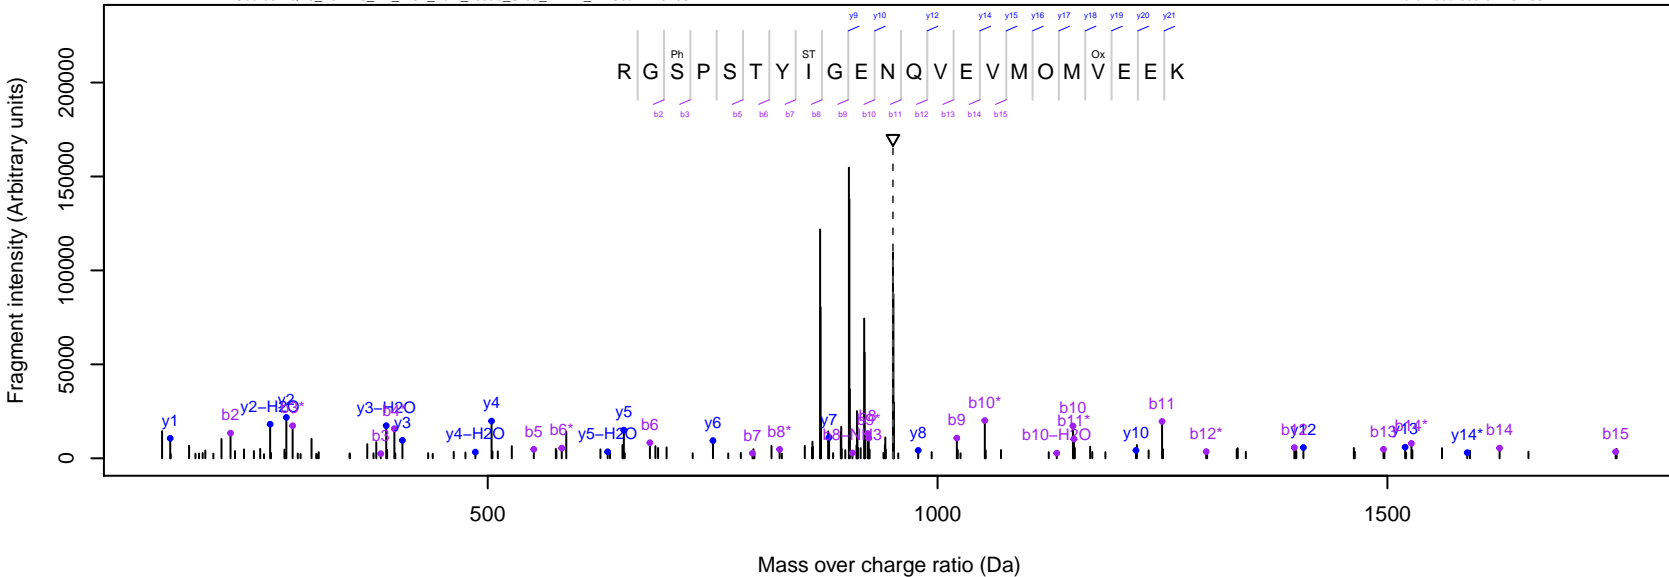

ILGSAS(Phospho (STY))PEEQEKILDRPTR-3+

Source : QE3\_201126\_FR\_TiOx\_hum\_tissue\_Urea\_RNAB\_B Scan : 21036

Andromeda score : 157.83

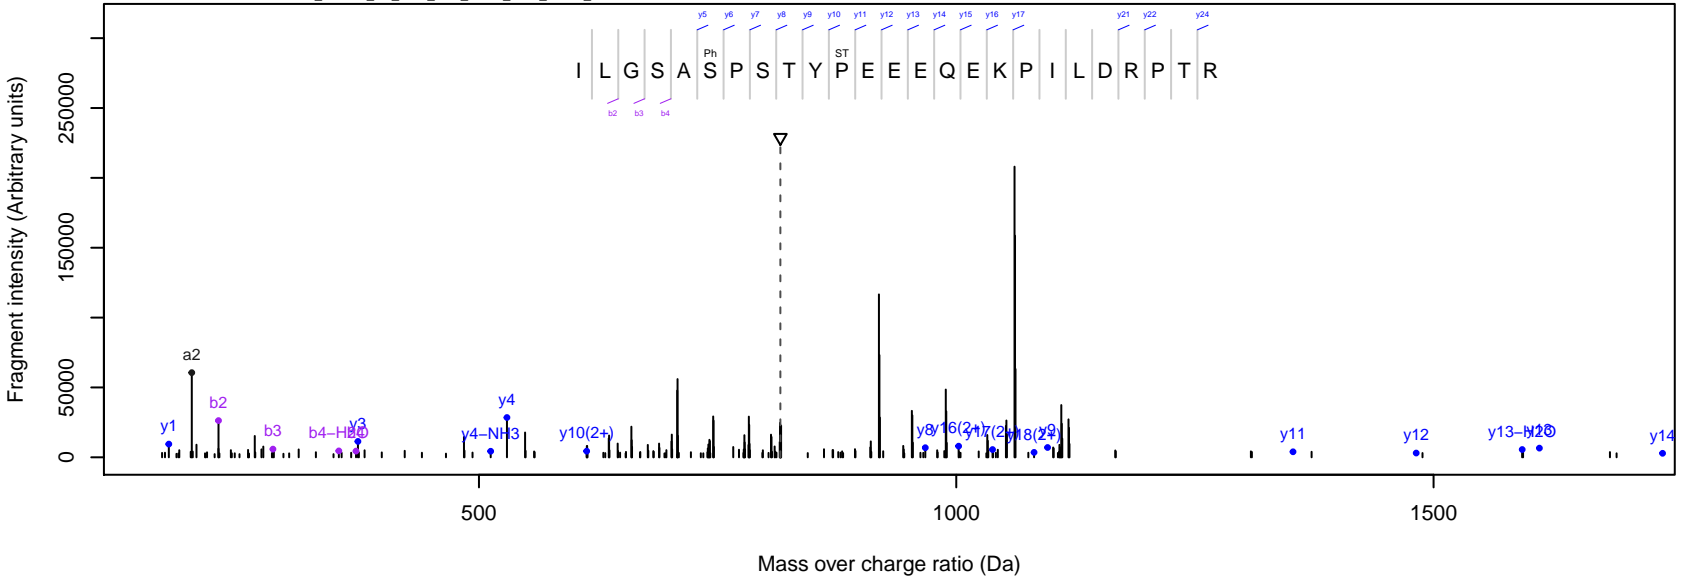

ASHWSRS(Phospho (STY))PPRPPR-4+

Source : QE3\_201126\_FR\_TiOx\_hum\_tissue\_Urea\_RNAB\_N Scan : 8177

Andromeda score : 157.68

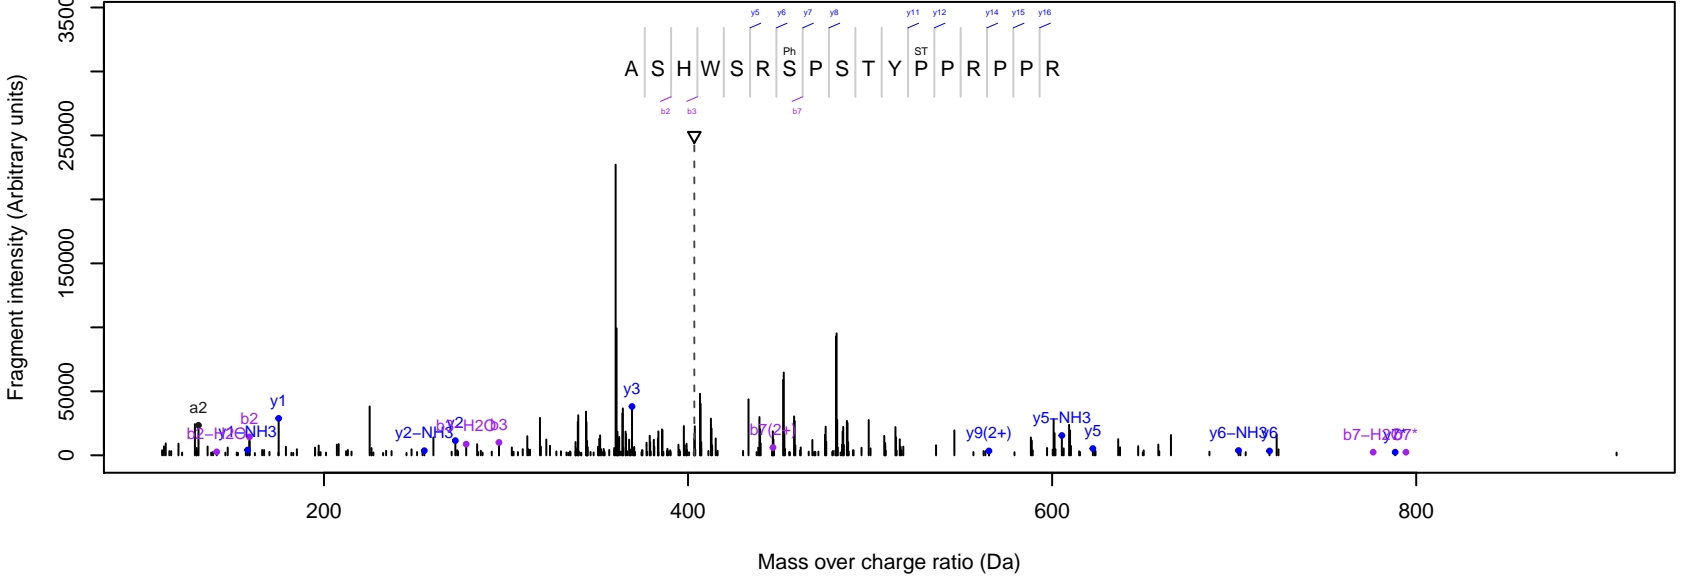

NAEAVLQ(Phospho (STY))PGLSGK-2+

Source : QE3\_201126\_FR\_TiOx\_hum\_tissue\_Urea\_RNAB\_H Scan : 23242

Andromeda score : 157.68

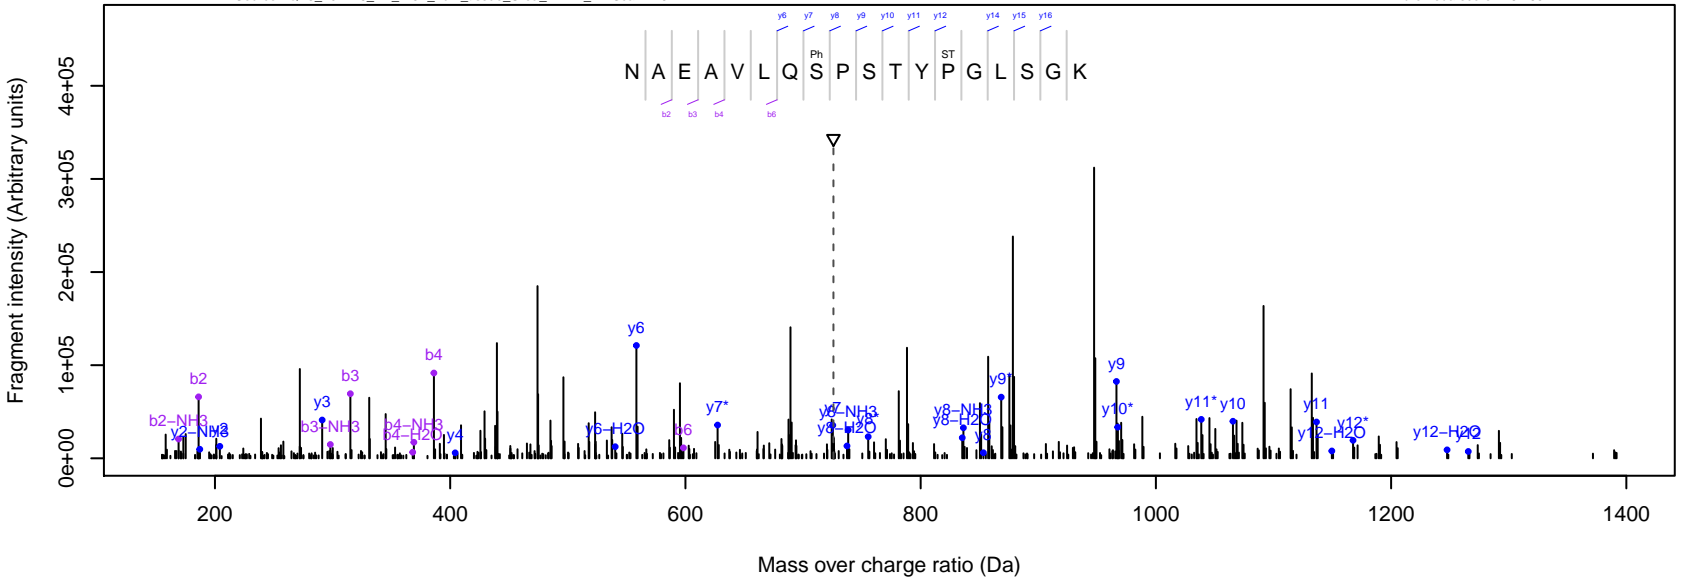

SINKLDS(Phospho (STY))PDPFK-2+

Source : QE3\_201126\_FR\_TiOx\_hum\_tissue\_Urea\_RNAB\_H Scan : 25331

Andromeda score : 157.68

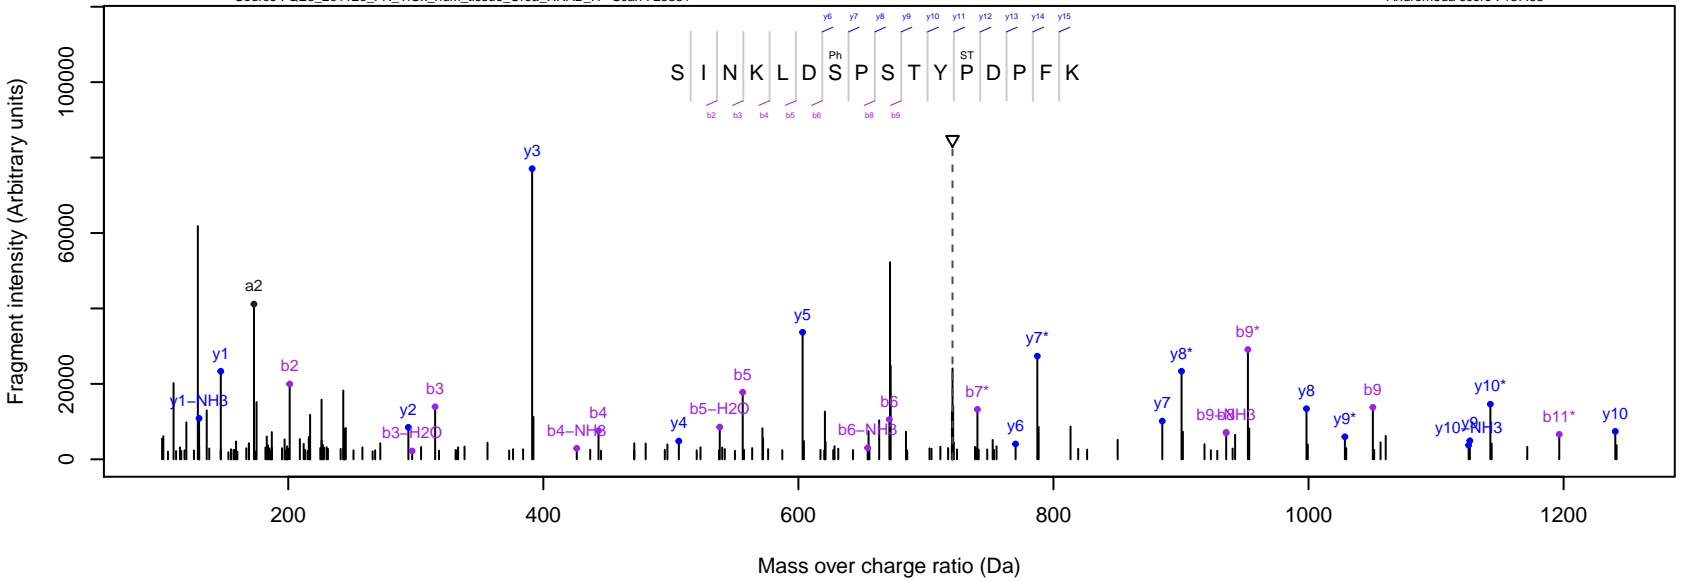

KQFKDLFLNS(Phospho (STY))S(Phospho (STY))EEDTEGFSER-3+

Source : QE3\_201126\_FR\_TiOx\_hum\_tissue\_Urea\_RNAB\_B Scan : 50089

Andromeda score : 157.66

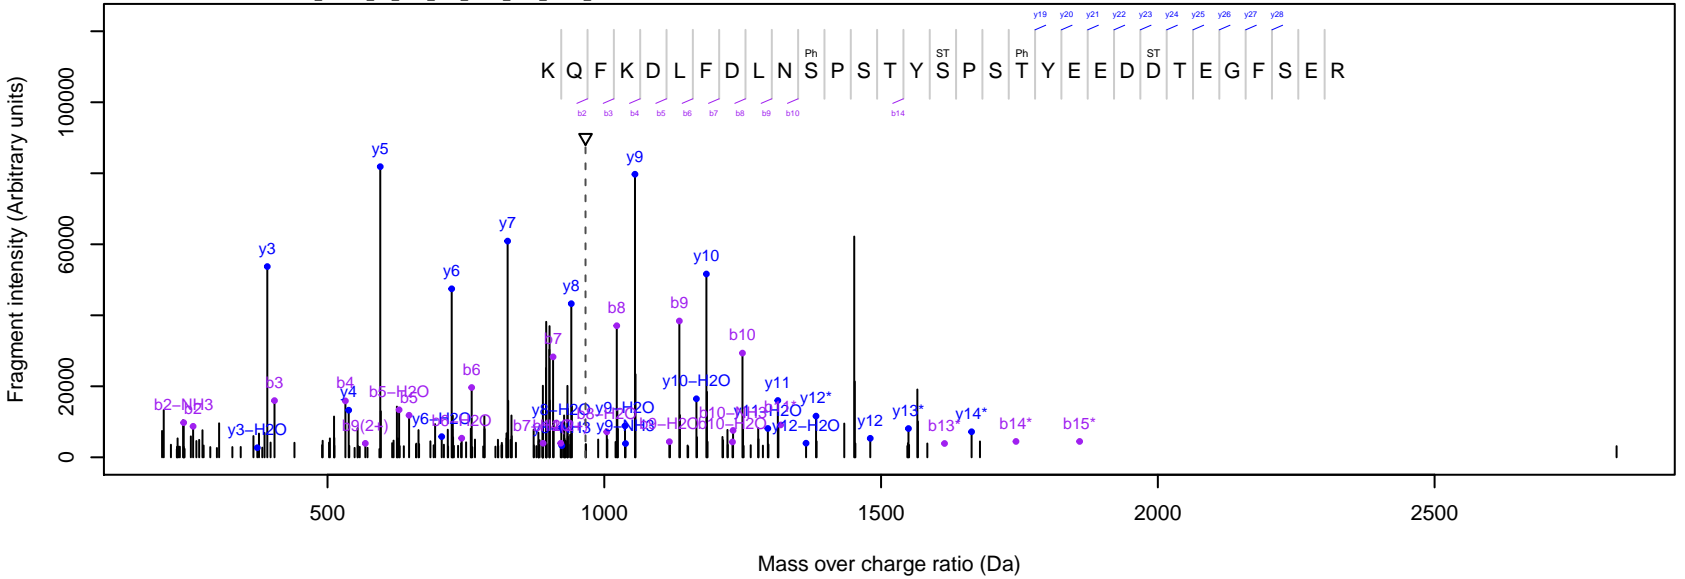

QVYEEYGS(Phospho (STY))SLEDDVVGDTSGYYQR-3+

Source : QE3\_201126\_FR\_TiOx\_hum\_tissue\_Urea\_RNAB\_N Scan : 50138

Andromeda score : 157.64

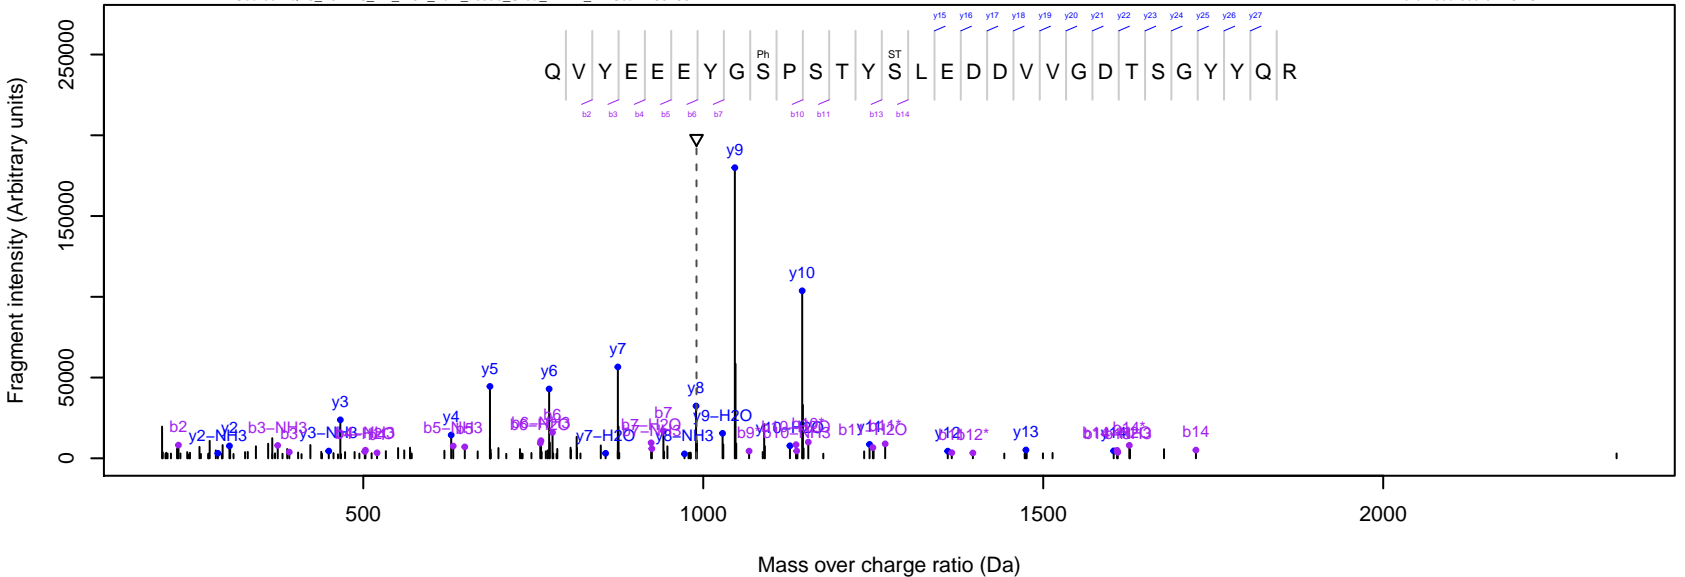

SVAVS(Phospho (STY))DEEEVEEAER-2+

Source : QE3\_201126\_FR\_TiOx\_hum\_tissue\_Urea\_RNAB\_B Scan : 28106

Andromeda score : 157.58

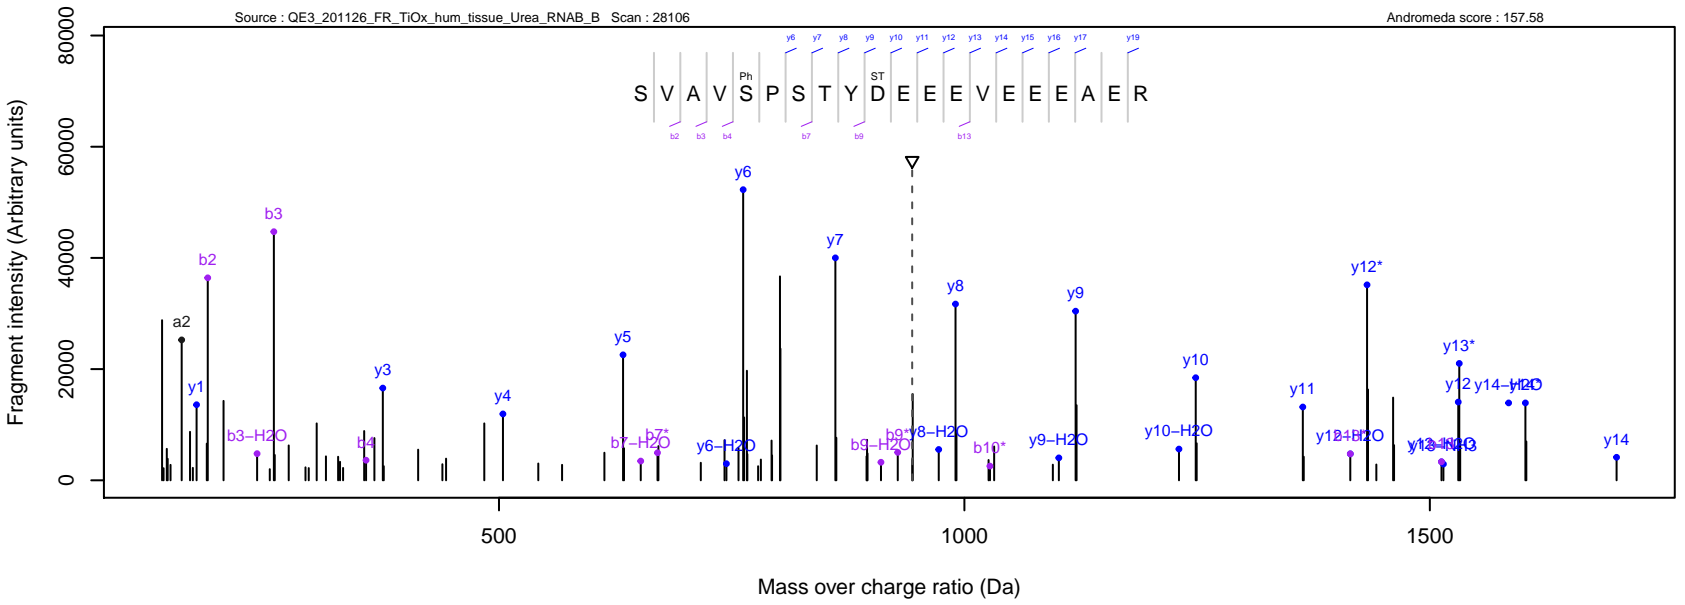

ATLSSTSGLDLMSESGEIS(Phospho (STY))PQREVSR-3+

Source : QE3\_201126\_FR\_TiOx\_hum\_tissue\_Urea\_RNAB\_H Scan : 38438

Andromeda score : 157.5

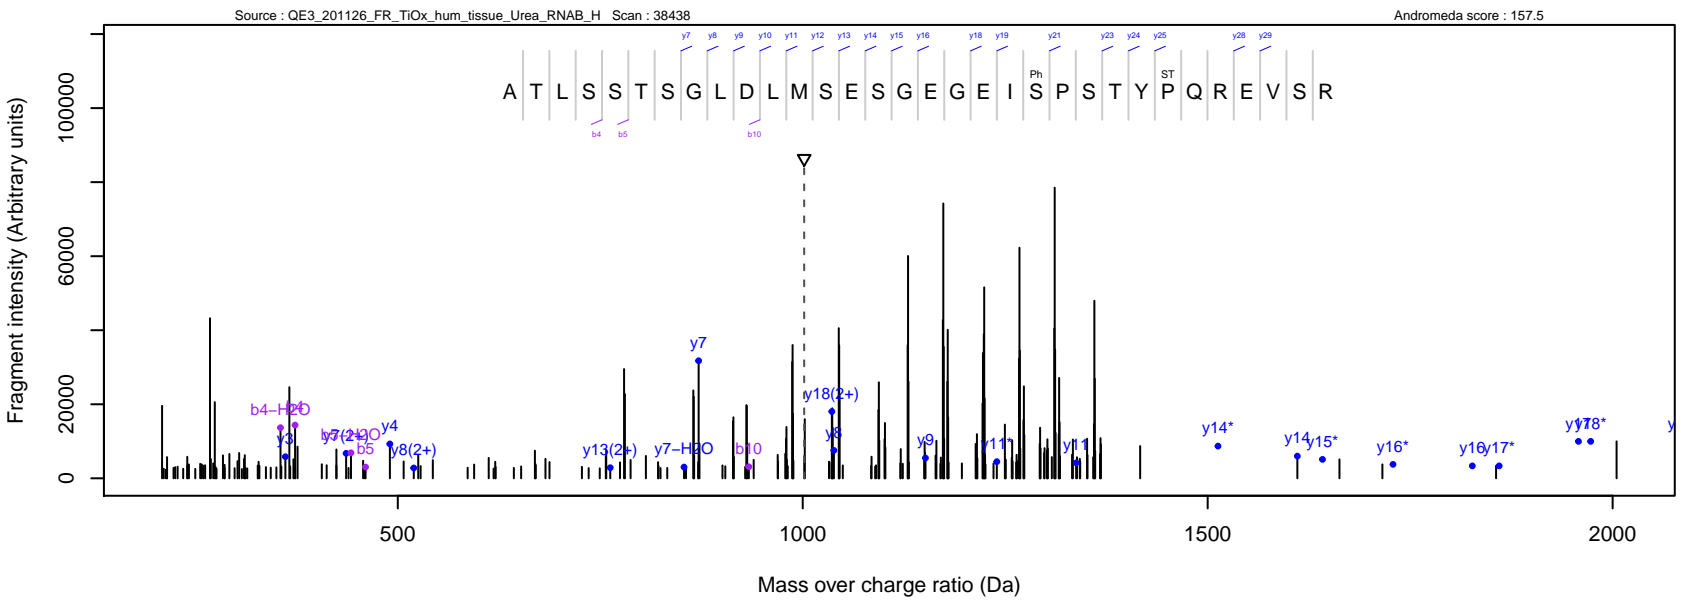

RRYS(Phospho (STY))DFEWLR-3+

Source : QE3\_201126\_FR\_TiOx\_hum\_tissue\_Urea\_RNAB\_N Scan : 31875

Andromeda score : 157.5

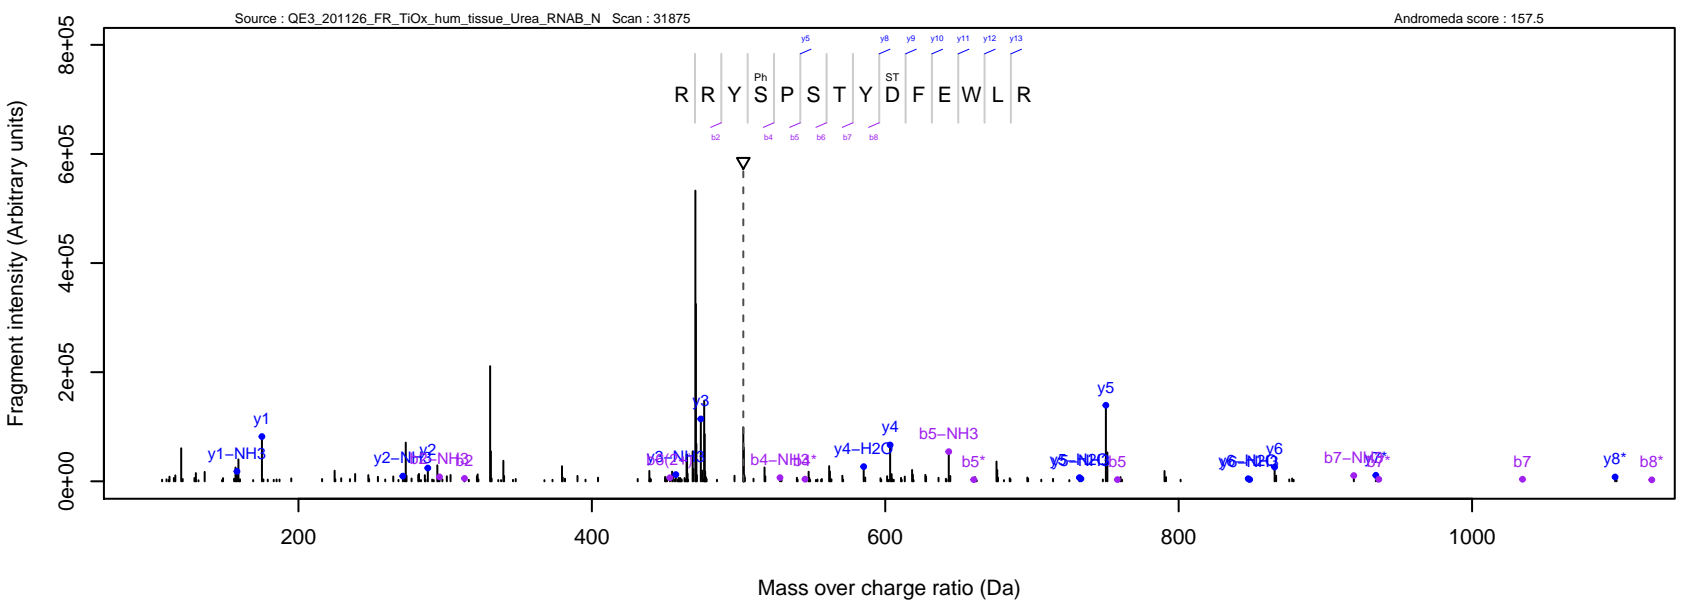



PATPAEDDEDDEDIDLFSGSPSTYDNEEEDKAAQLREER-4+

Source : QE3\_201126\_FR\_TiOx\_hum\_tissue\_Urea\_RNAB\_H Scan : 37482

Andromeda score : 157.47

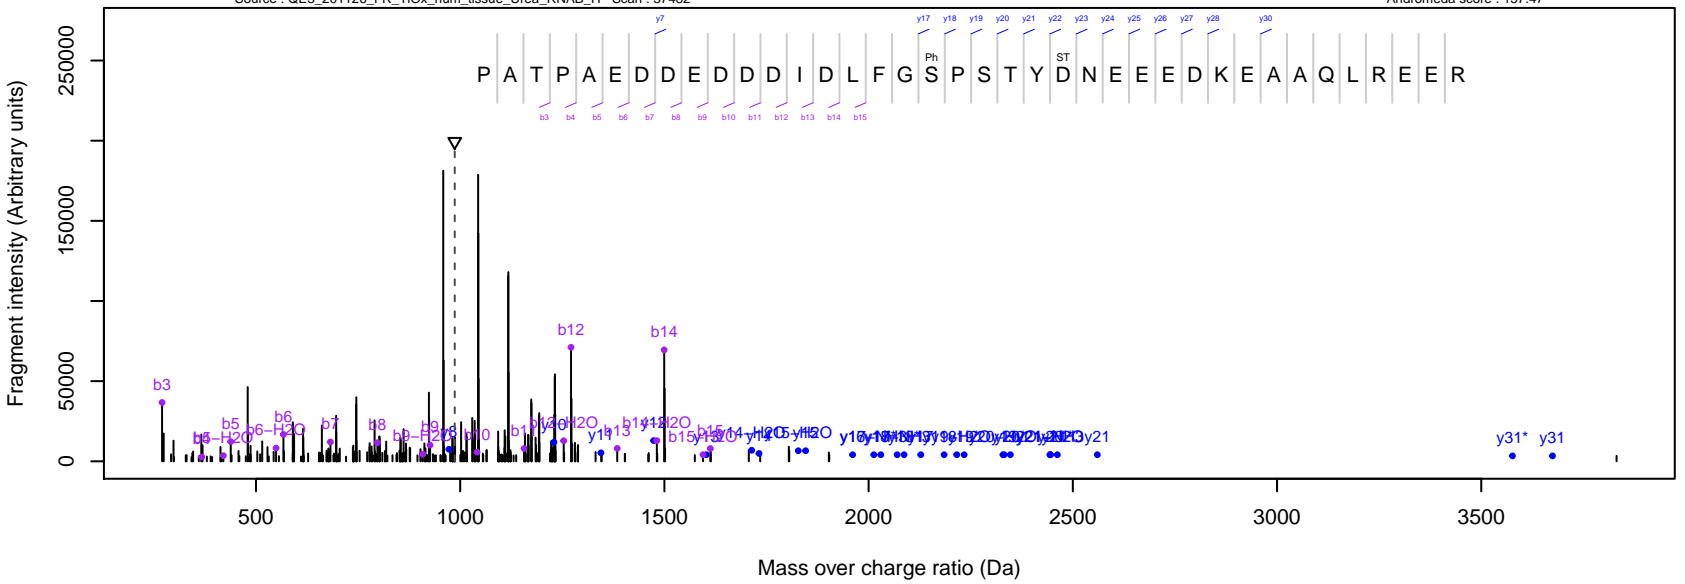

LLEDS(Phospho (STY))D(Phospho (STY))EDEAA(Phospho (STY))PSPLQPALRPNPNTAILDEAPKPK-3+

Source : QE3\_201126\_FR\_TiOx\_hum\_tissue\_Urea\_RNAB\_N Scan : 52774

Andromeda score : 157.45

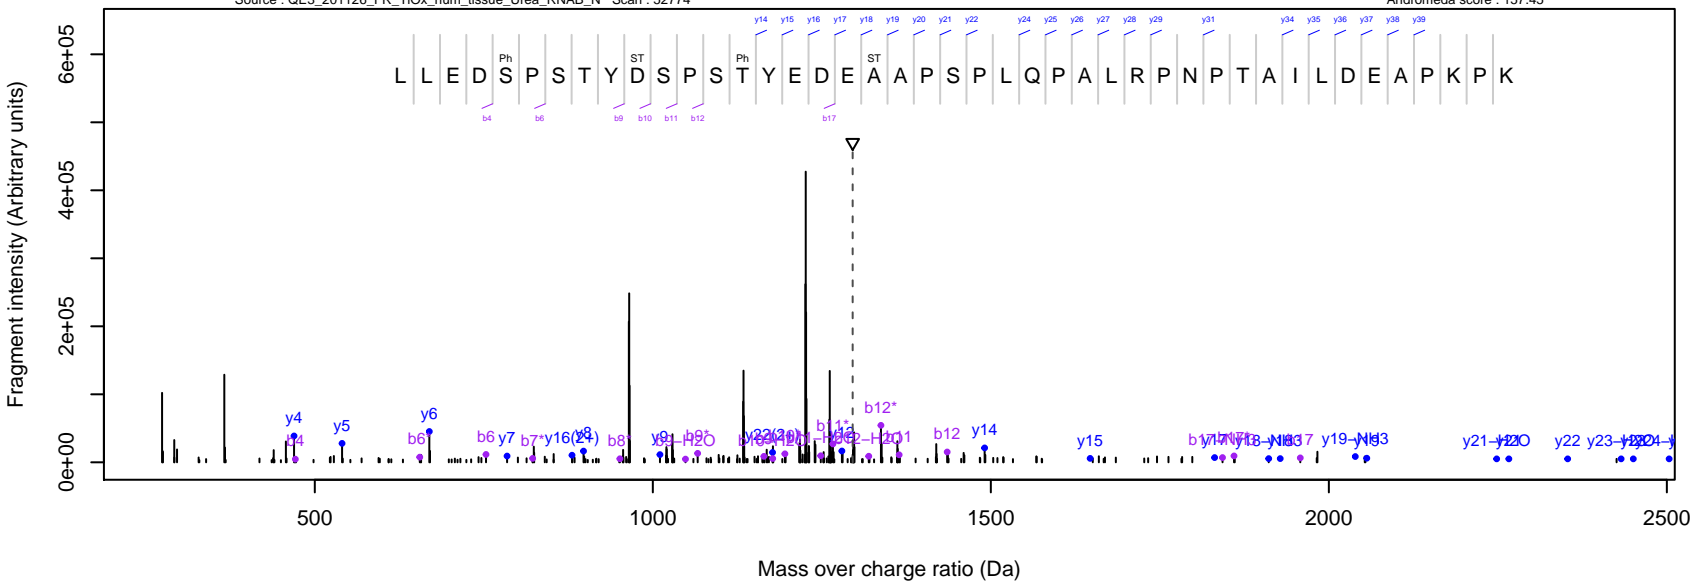

VESEES(Phospho (STY))GDEEGKKHSSGIVADLSEQSLK-4+

Source : QE3\_201126\_FR\_TiOx\_hum\_tissue\_Urea\_RNAB\_B Scan : 20950

Andromeda score : 157.43

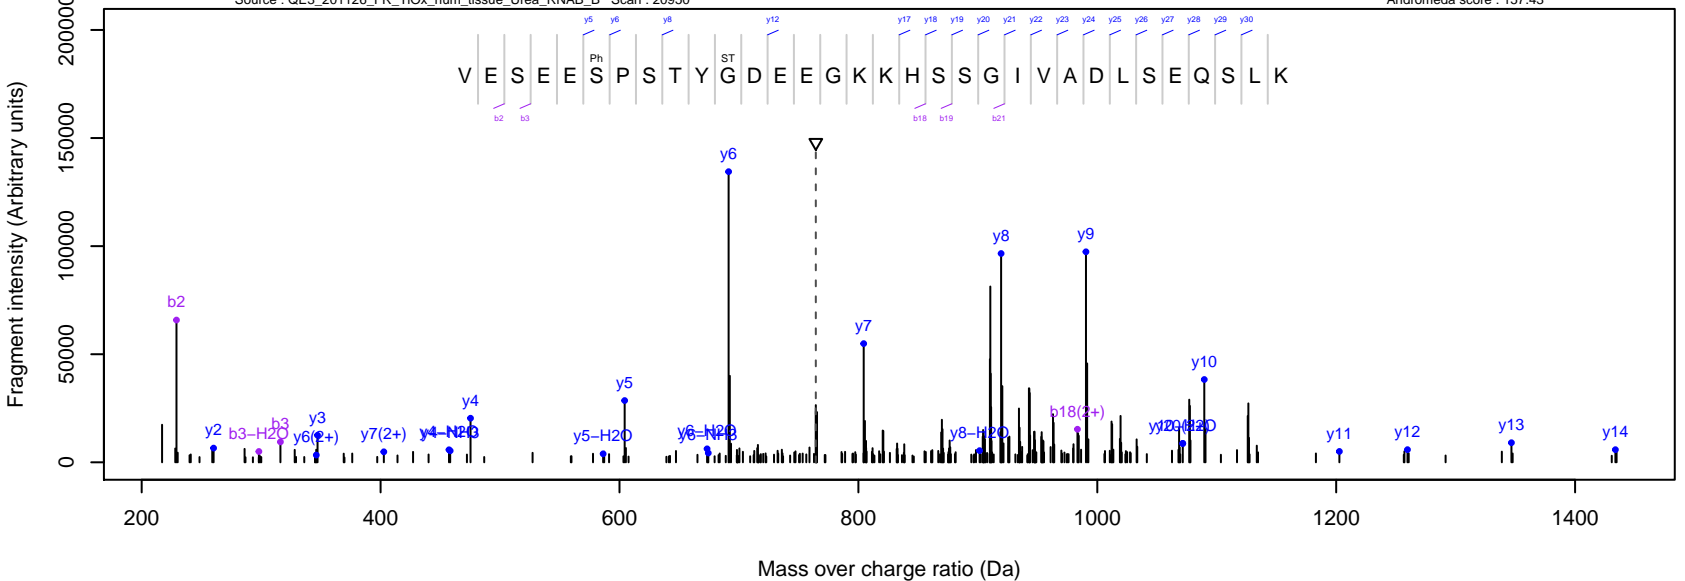

GYNHGQGSYSYSNSYNS(Phospho (STY))PGGGGSDYNYESK-3+

Source : QE3\_201126\_FR\_TIOx\_hum\_tissue\_Urea\_RNAB\_B Scan : 20038

Andromeda score : 157.42

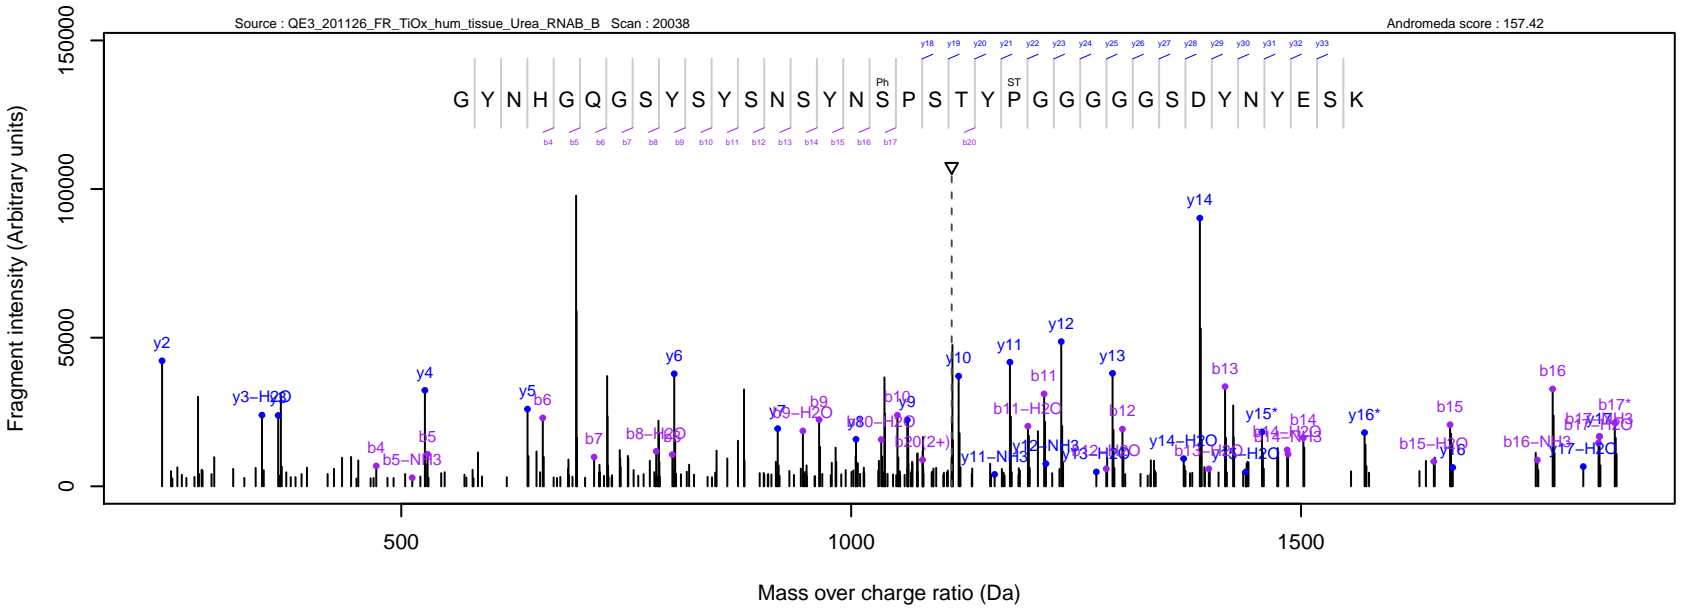

LSESHHGGS(Phospho (STY))PIHWVLPAGMSAK-4+

Source : QE3\_201126\_FR\_TIOx\_hum\_tissue\_Urea\_RNAB\_H Scan : 28915

Andromeda score : 157.42

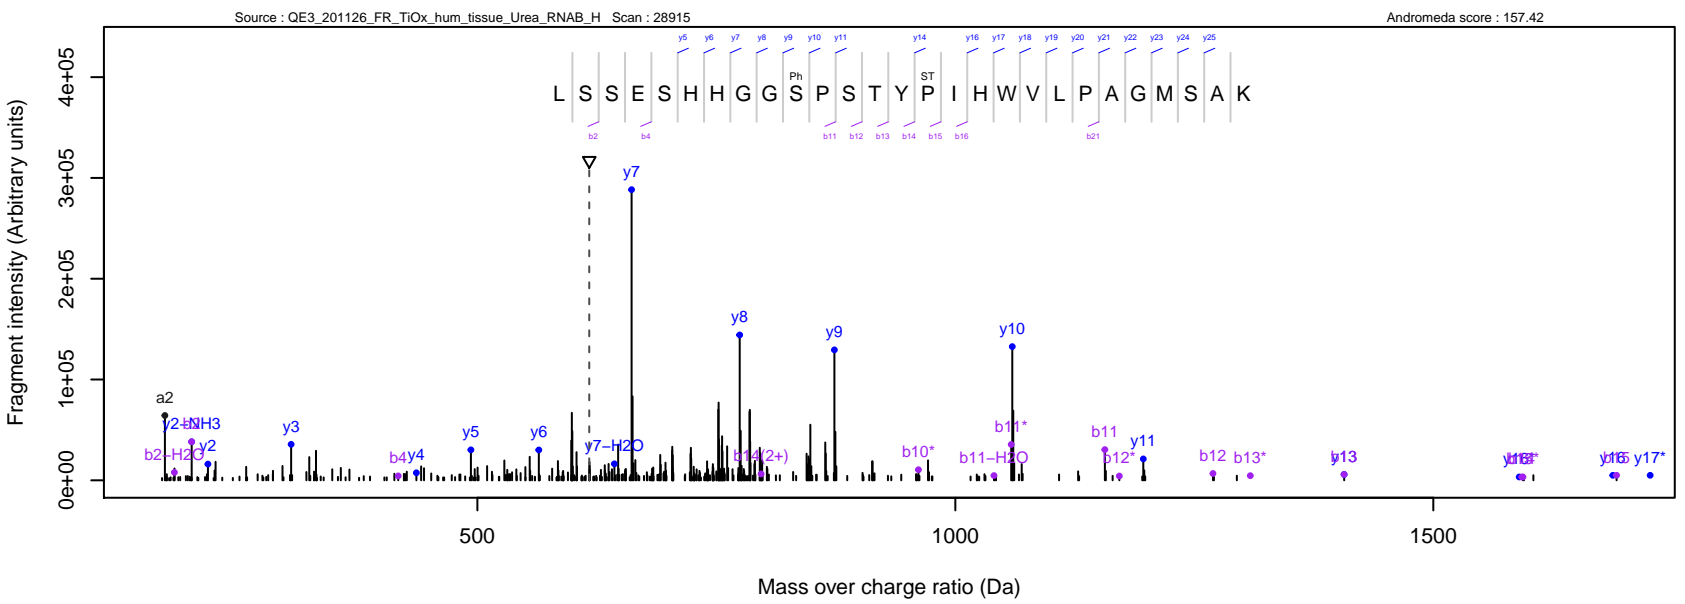

S(Phospho (STY))IDDSEMPVDDVFYPTGR-2+

Source : QE3\_201126\_FR\_TIOx\_hum\_tissue\_Urea\_RNAB\_H Scan : 54106

Andromeda score : 157.42

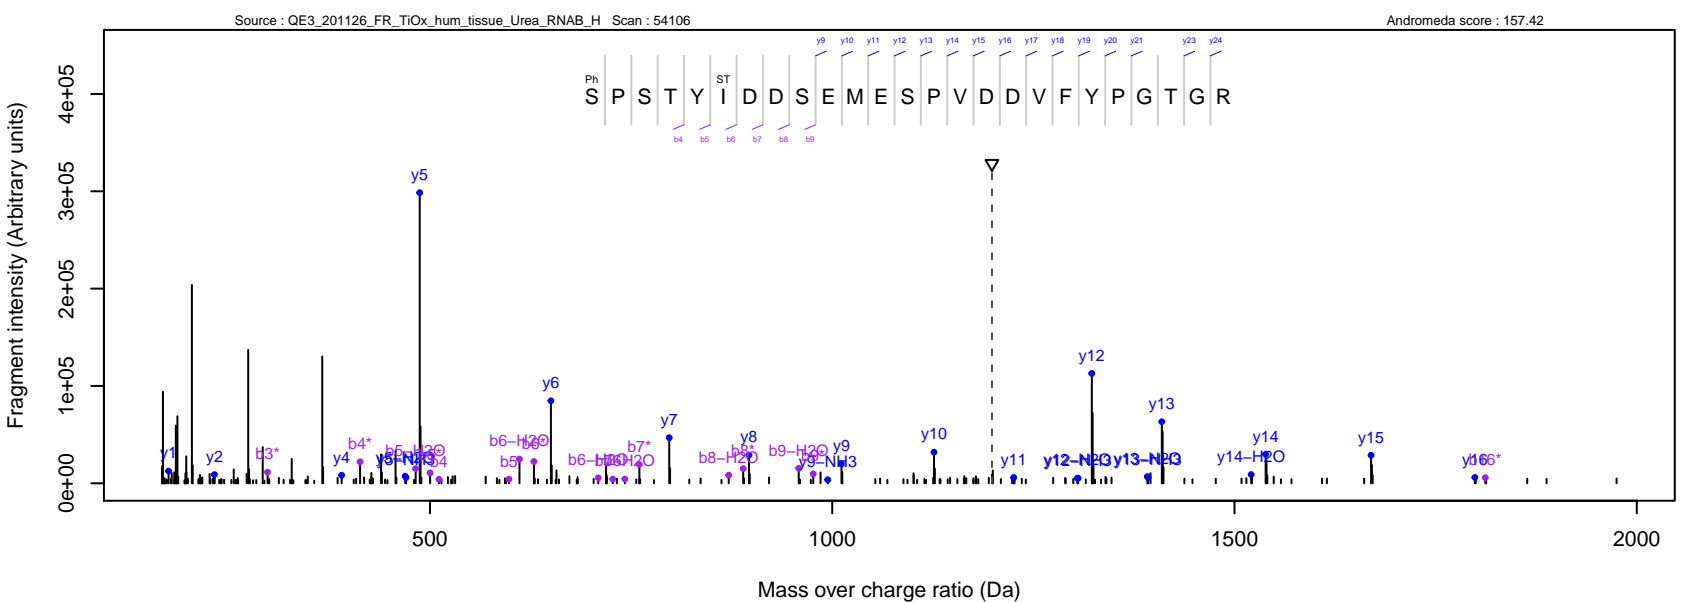

APS(Phospho (STY))PPPPGSEAAPSPSKR-3+

Source : QE3\_201126\_FR\_TiOx\_hum\_tissue\_Urea\_RNAB\_N Scan : 10358

Andromeda score : 157.28

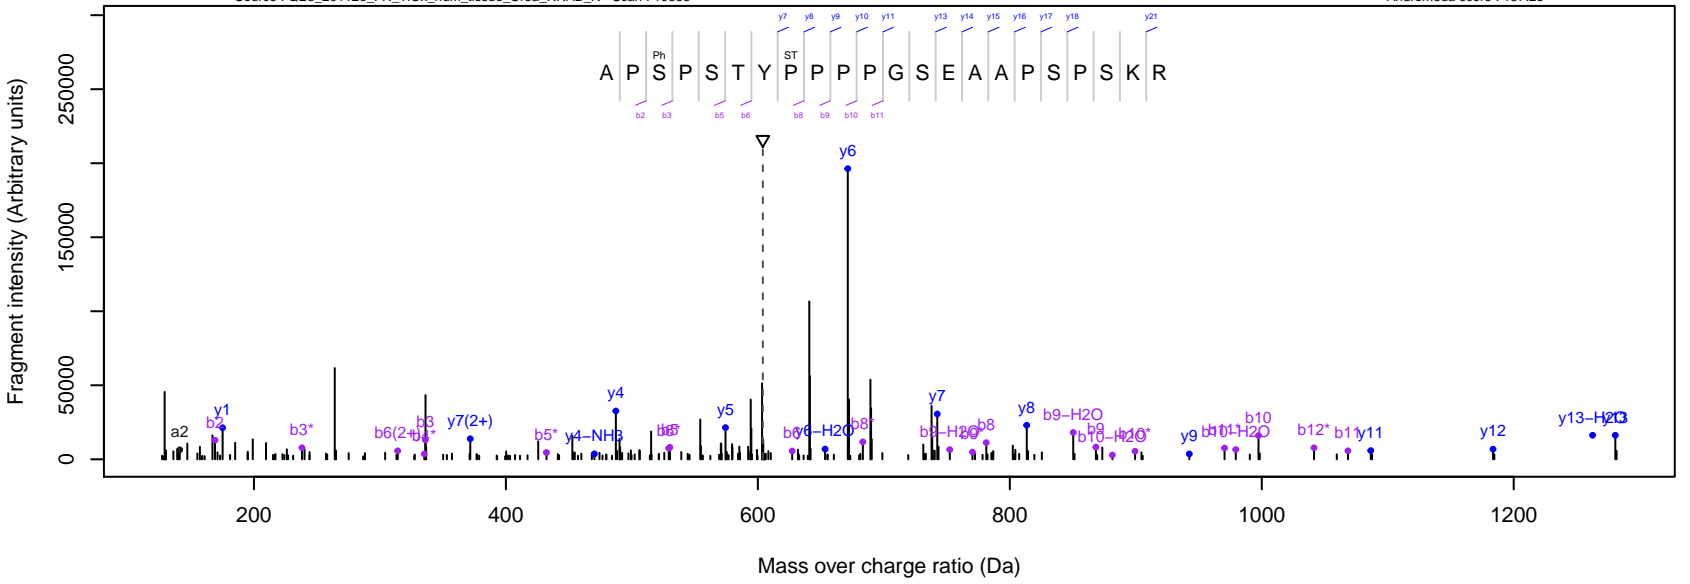

GLS(Phospho (STY))WDSGPEEPGR-2+

Source : QE3\_201126\_FR\_TiOx\_hum\_tissue\_Urea\_RNAB\_N Scan : 32740

Andromeda score : 157.22

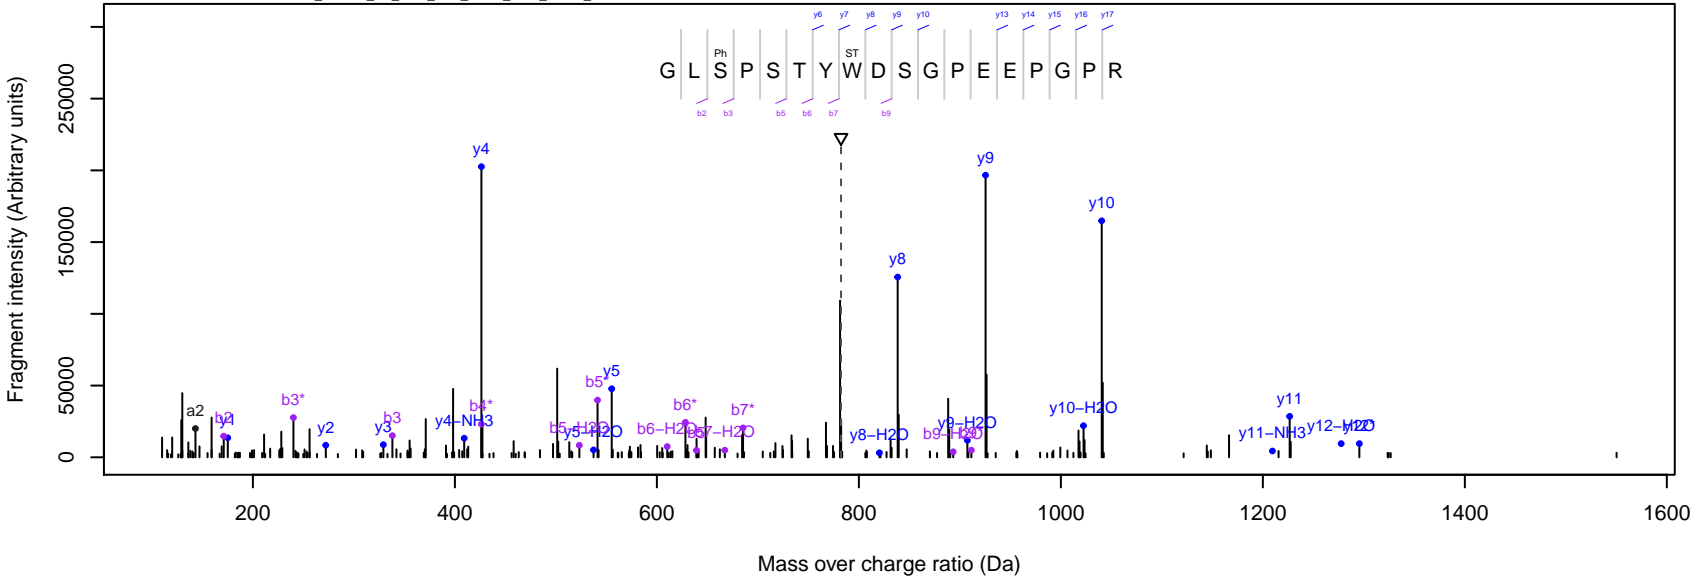

GS(Phospho (STY))PHYFS(Phospho (STY))PFRPY-2+

Source : QE3\_201126\_FR\_TiOx\_hum\_tissue\_Urea\_RNAB\_B Scan : 48899

Andromeda score : 157.2

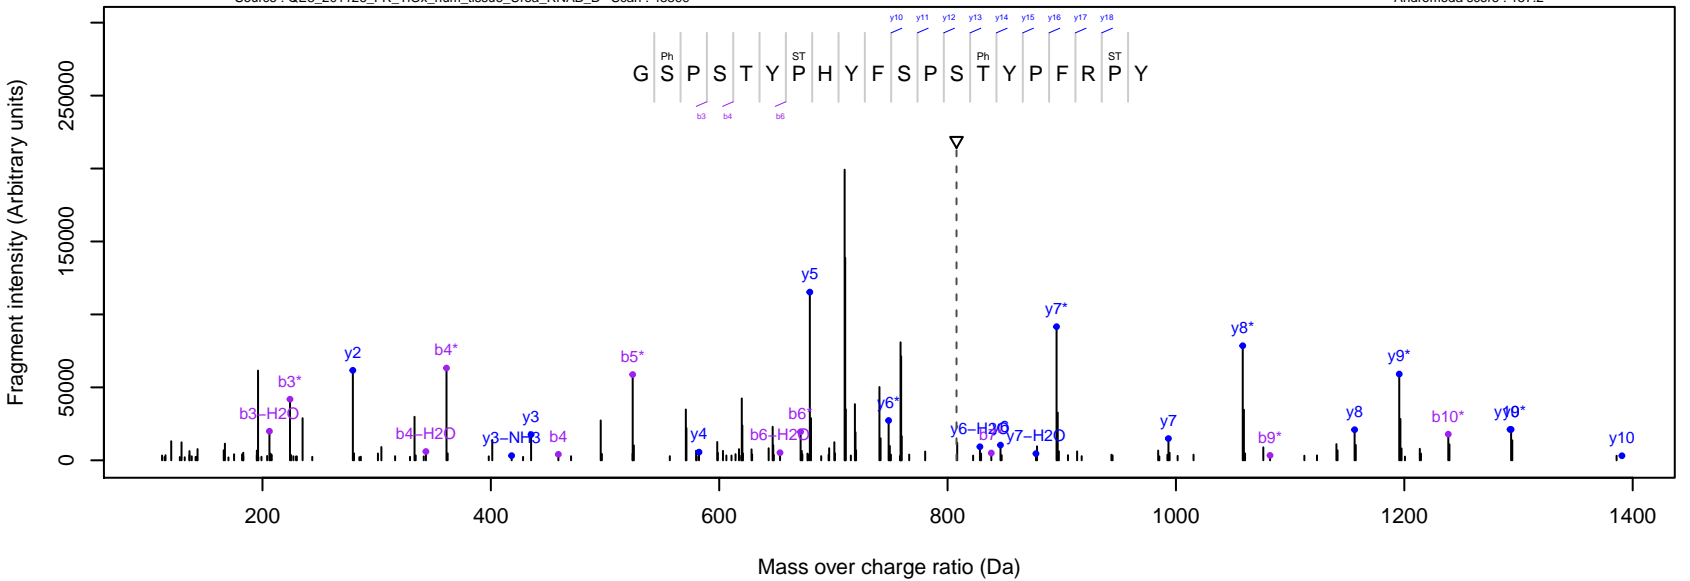

QGS(Phospho (STY))LHVGDEILEINGTNTNHSVDQLQK-4+

Source : QE3\_201126\_FR\_TiOx\_hum\_tissue\_Urea\_RNAB\_N Scan : 39927

Andromeda score : 157.2

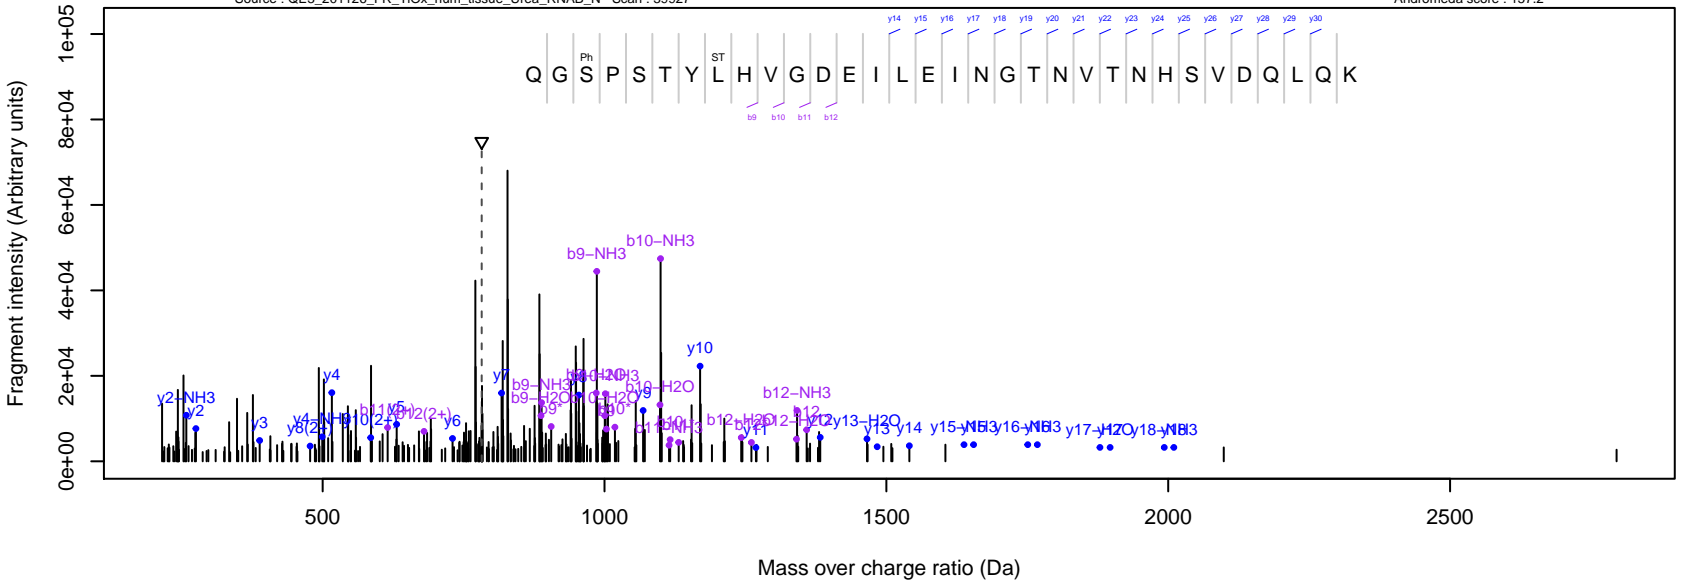

S(Phospho (STY))KDHFGLEGEESTMLEDSVSPK-3+

Source : QE3\_201126\_FR\_TiOx\_hum\_tissue\_Urea\_RNAB\_H Scan : 34699

Andromeda score : 157.16

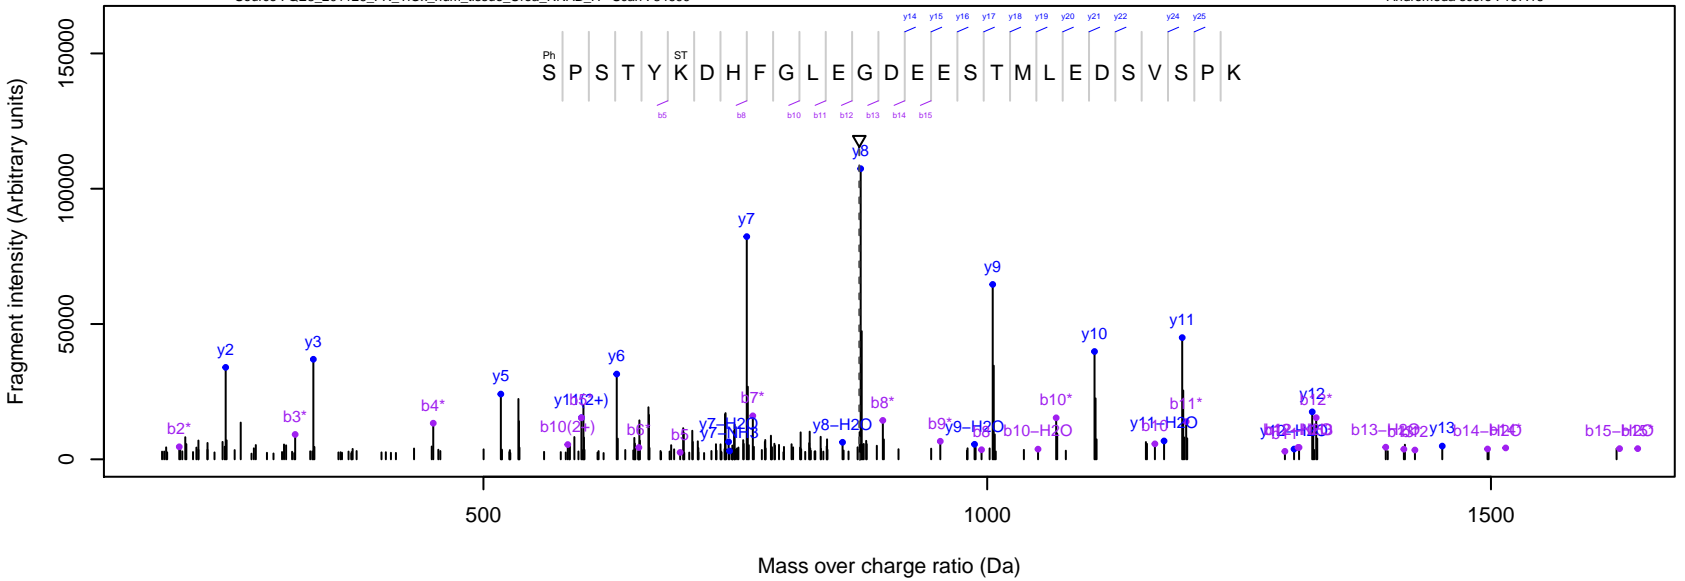

APS(Phospho (STY))DSSLGTPSDGRPELR-3+

Source : QE3\_201126\_FR\_TiOx\_hum\_tissue\_Urea\_RNAB\_B Scan : 18264

Andromeda score : 157.14

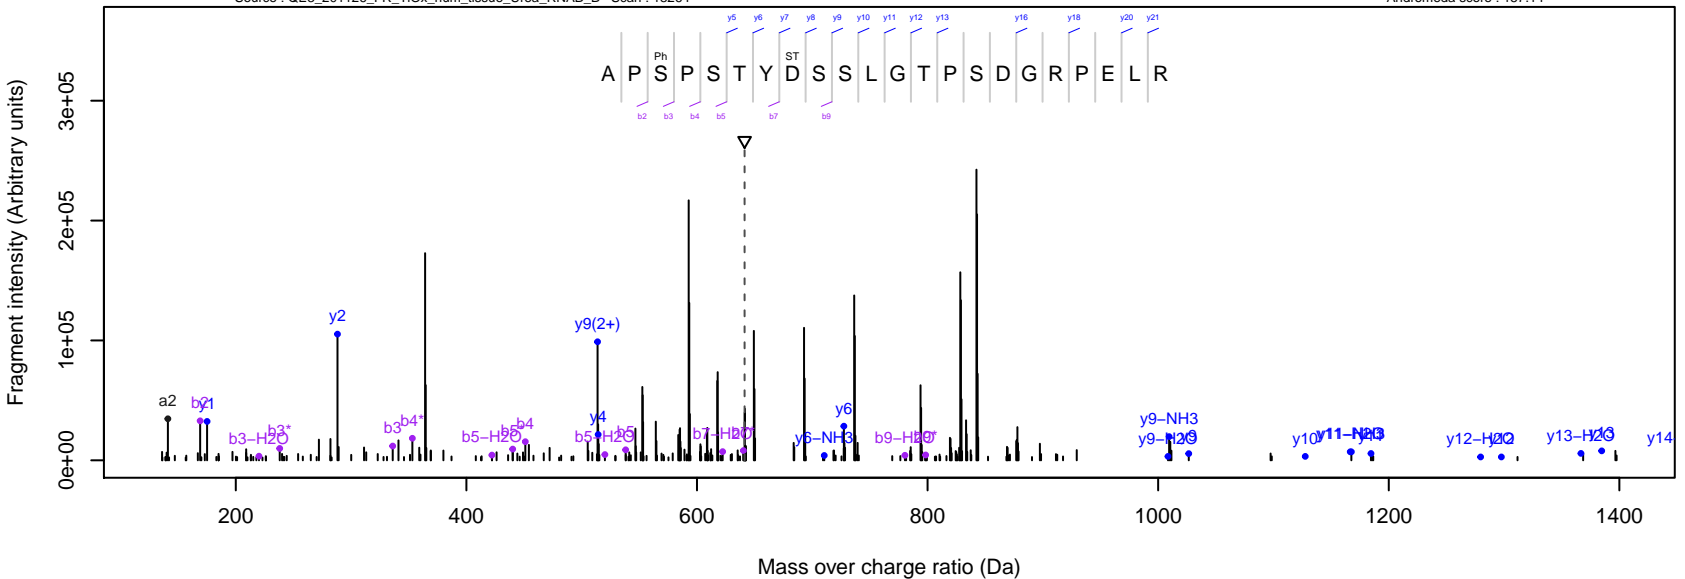

### GILADES(PSTY)VGSMOMAK-2+

Source : QE3\_201126\_FR\_TIOx\_hum\_tissue\_Urea\_RNAB\_N Scan : 22287

Andromeda score : 157.09

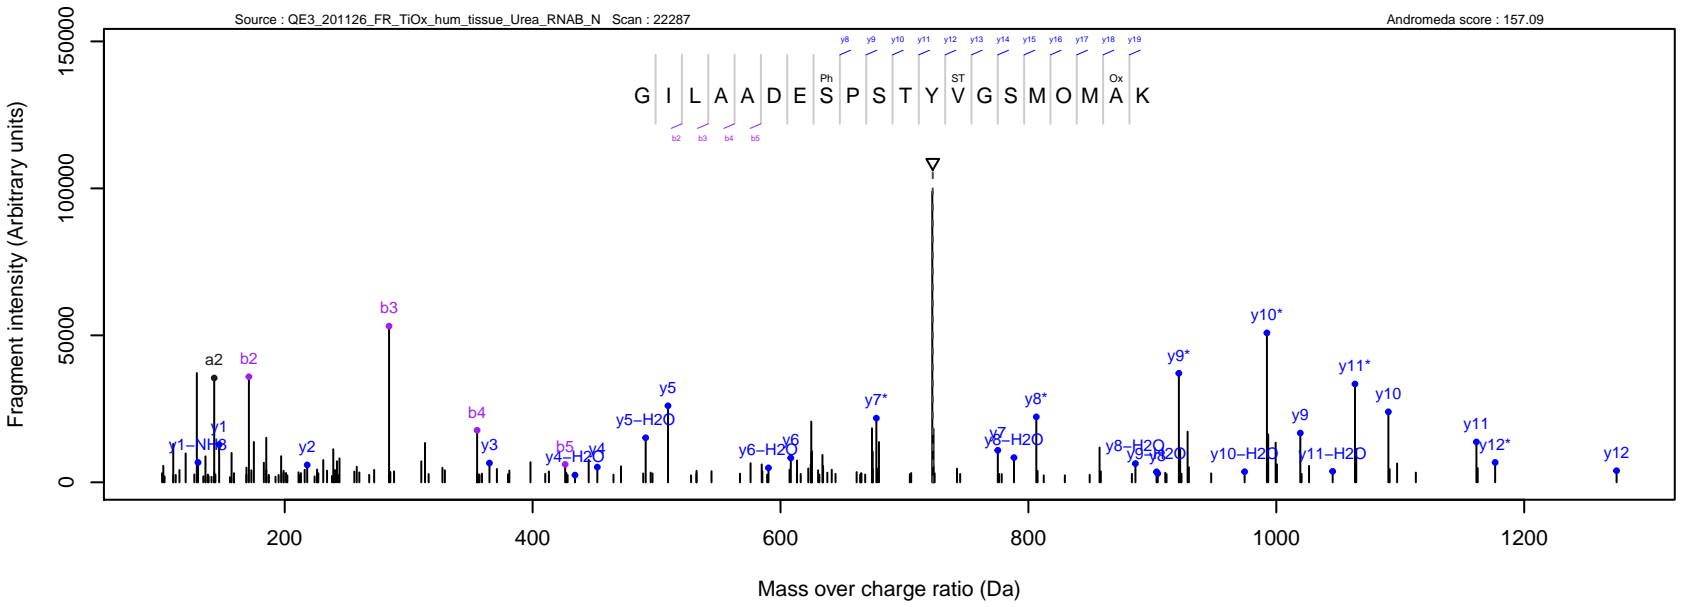

### HGTDLWIDNMSSAVPNHSPSTYPEKK-3+

Source : QE3\_201126\_FR\_TIOx\_hum\_tissue\_Urea\_RNAB\_H Scan : 26319

Andromeda score : 157.09

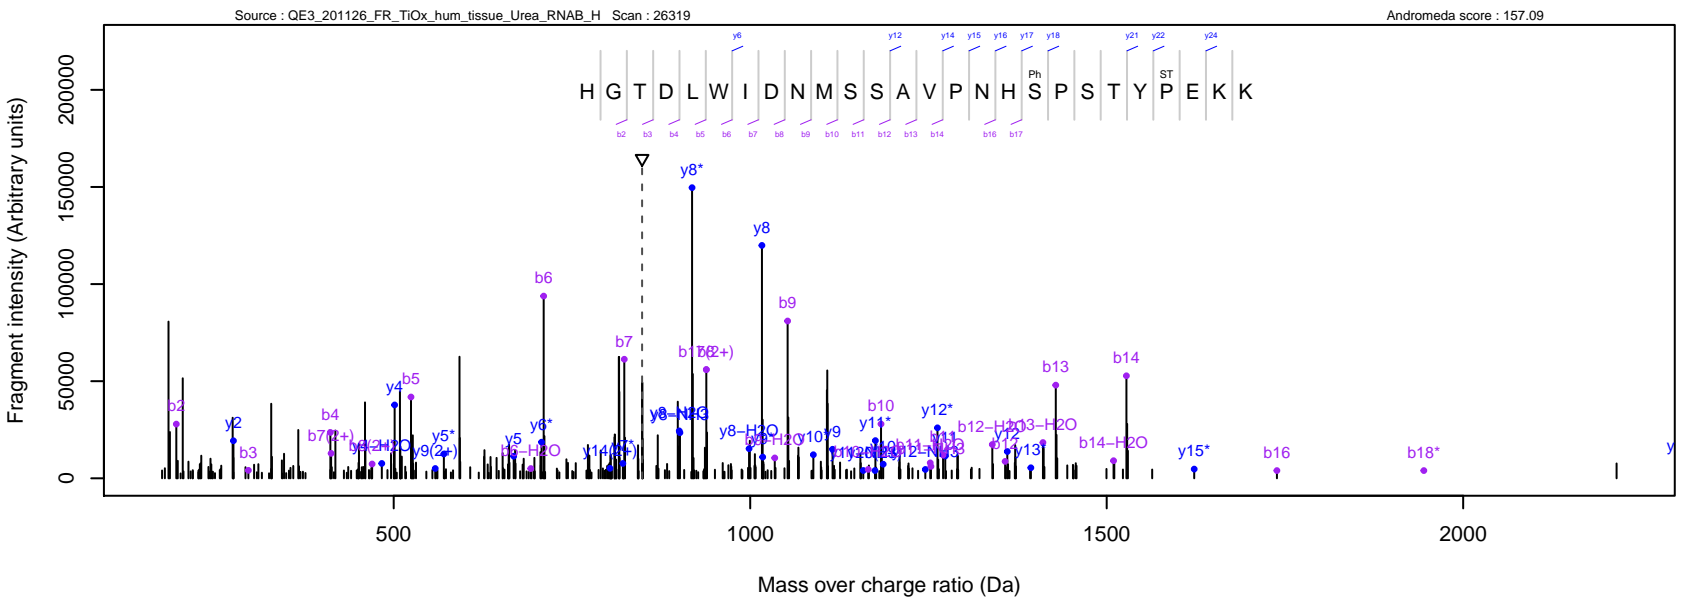

### STS(Phospho (STY))QGSINSPVYSR-2+

Source : QE3\_201126\_FR\_TIOx\_hum\_tissue\_Urea\_RNAB\_N Scan : 17864

Andromeda score : 157.09

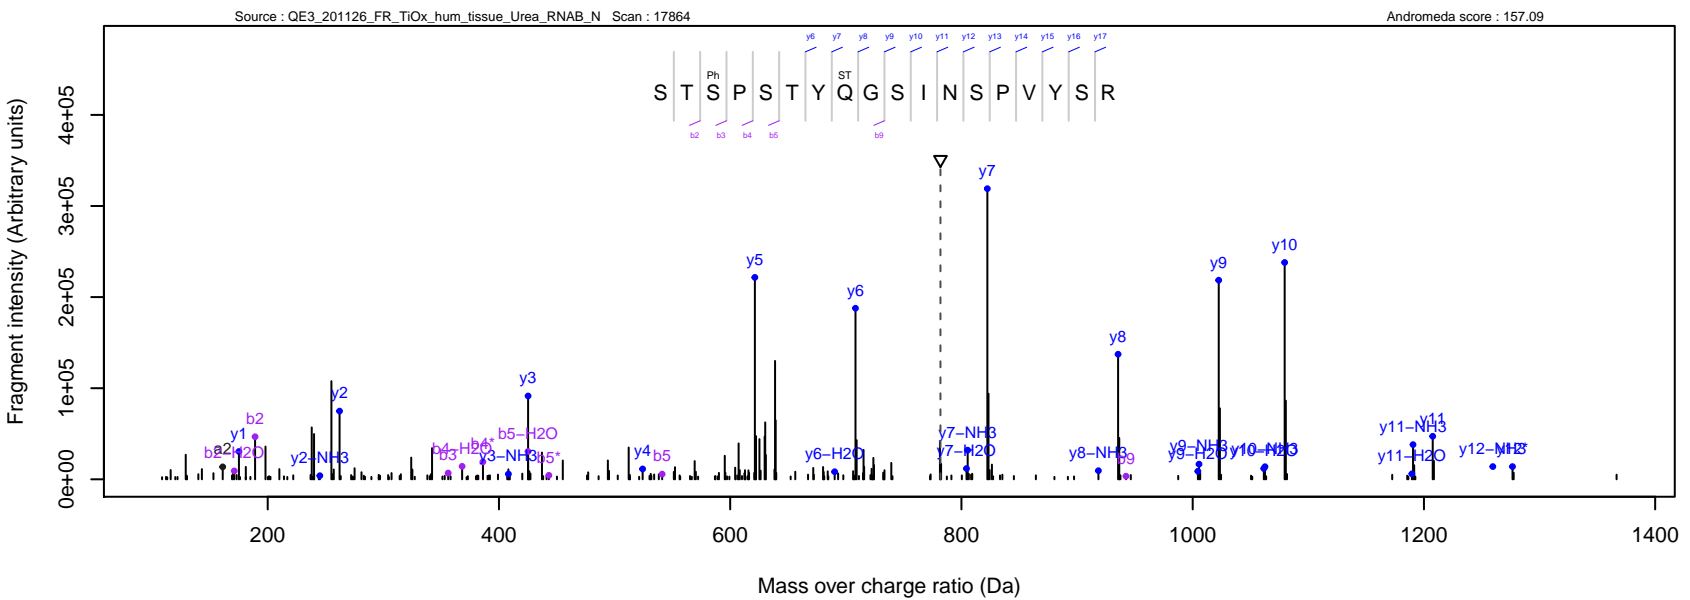



TQT(Phospho (STY))PPVS(Phospho (STY))PAPQPTEER-2+

Source : QE3\_201126\_FR\_TiOx\_hum\_tissue\_Urea\_RNAB\_N Scan : 18976

Andromeda score : 156.83

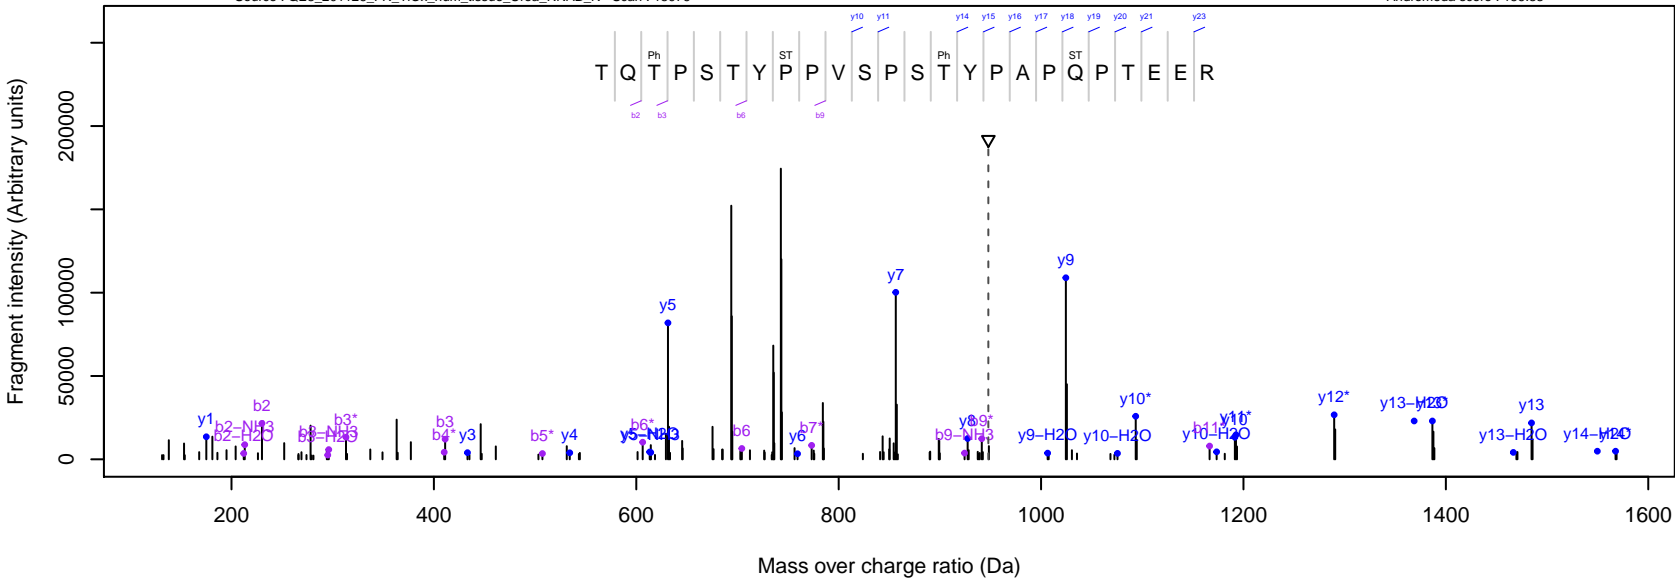

NMPGLSAATLASGGT(Phospho (STY))SSR-2+

Source : QE3\_201126\_FR\_TiOx\_hum\_tissue\_Urea\_RNAB\_N Scan : 48884

Andromeda score : 156.73

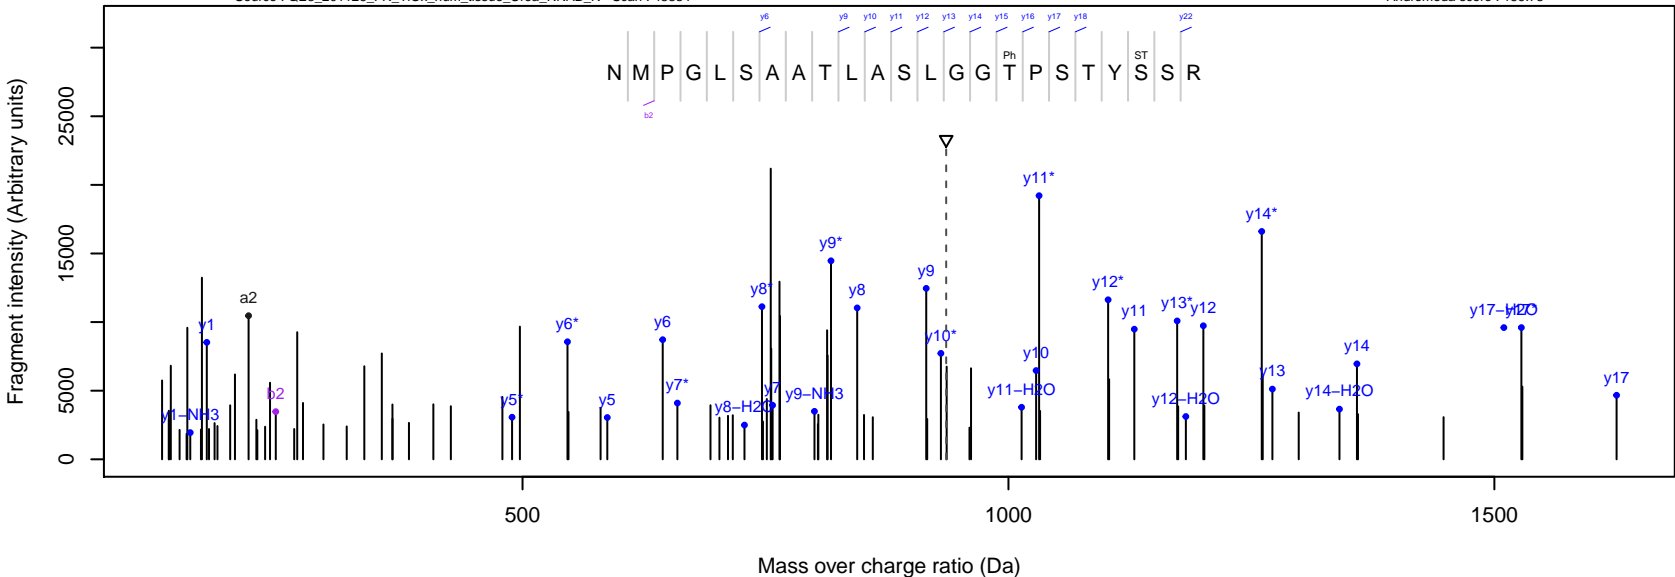

RSS(Phospho (STY))QPSPTAVPASDSPPTK-2+

Source : QE3\_201126\_FR\_TiOx\_hum\_tissue\_Urea\_RNAB\_N Scan : 11798

Andromeda score : 156.73

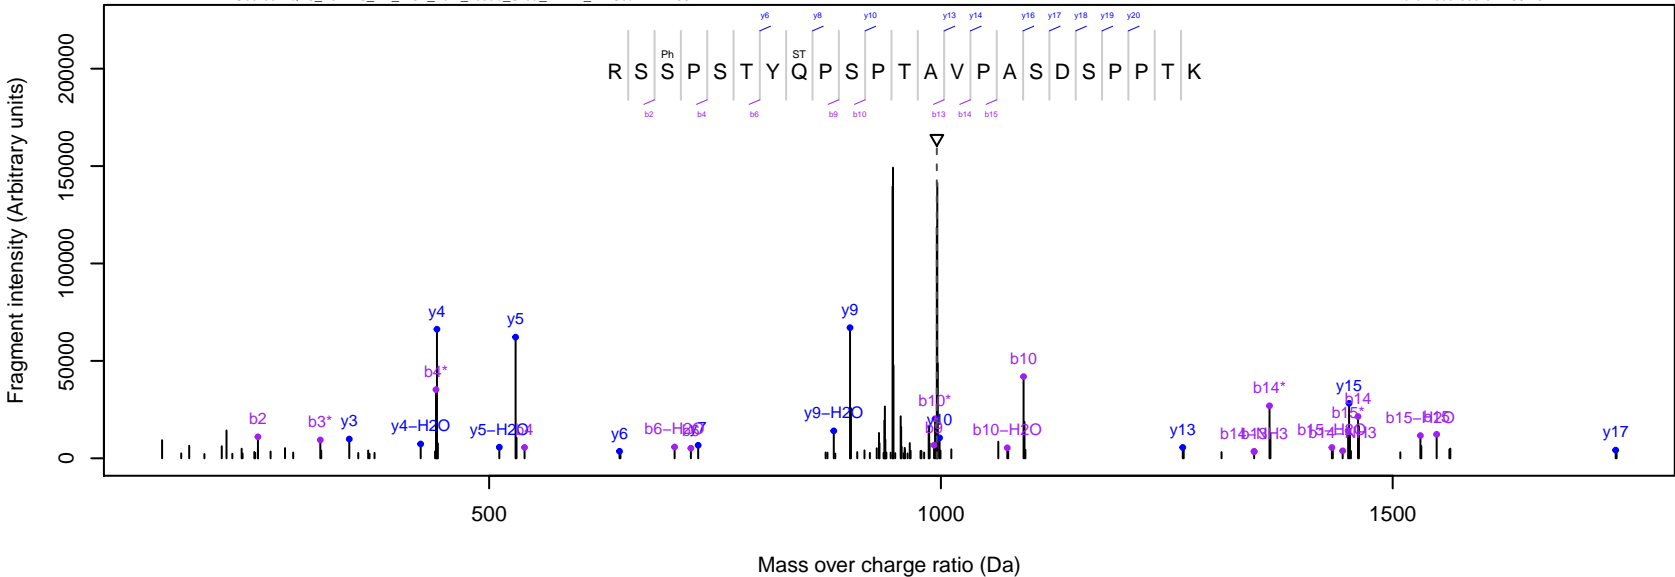

VDS(Phospho (STY))EGDFS(Phospho (STY))ENDDAAGDFR-2+

Source : QE3\_201126\_FR\_TiOx\_hum\_tissue\_Urea\_RNAB\_N Scan : 38027

Andromeda score : 156.73

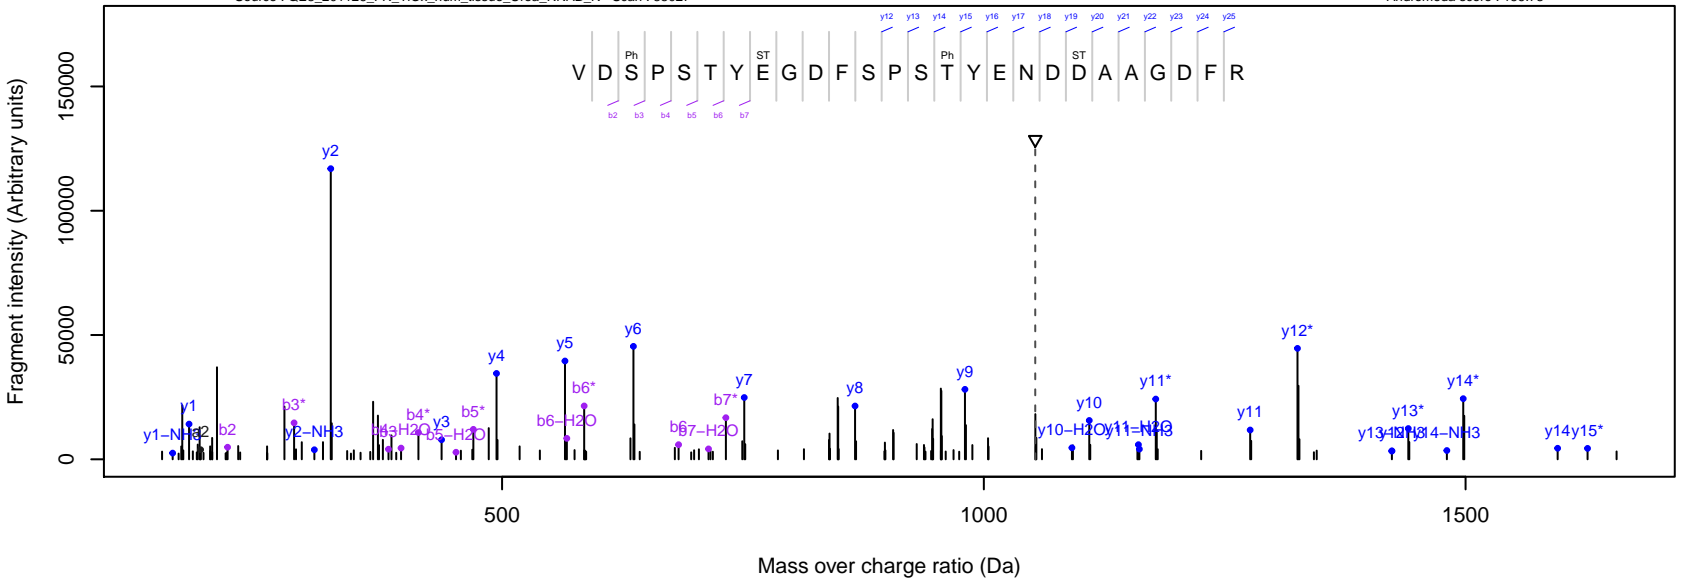

HRHS(Phospho (STY))PTGPPGFPR-3+

Source : QE3\_201126\_FR\_TiOx\_hum\_tissue\_Urea\_RNAB\_B Scan : 9192

Andromeda score : 156.67

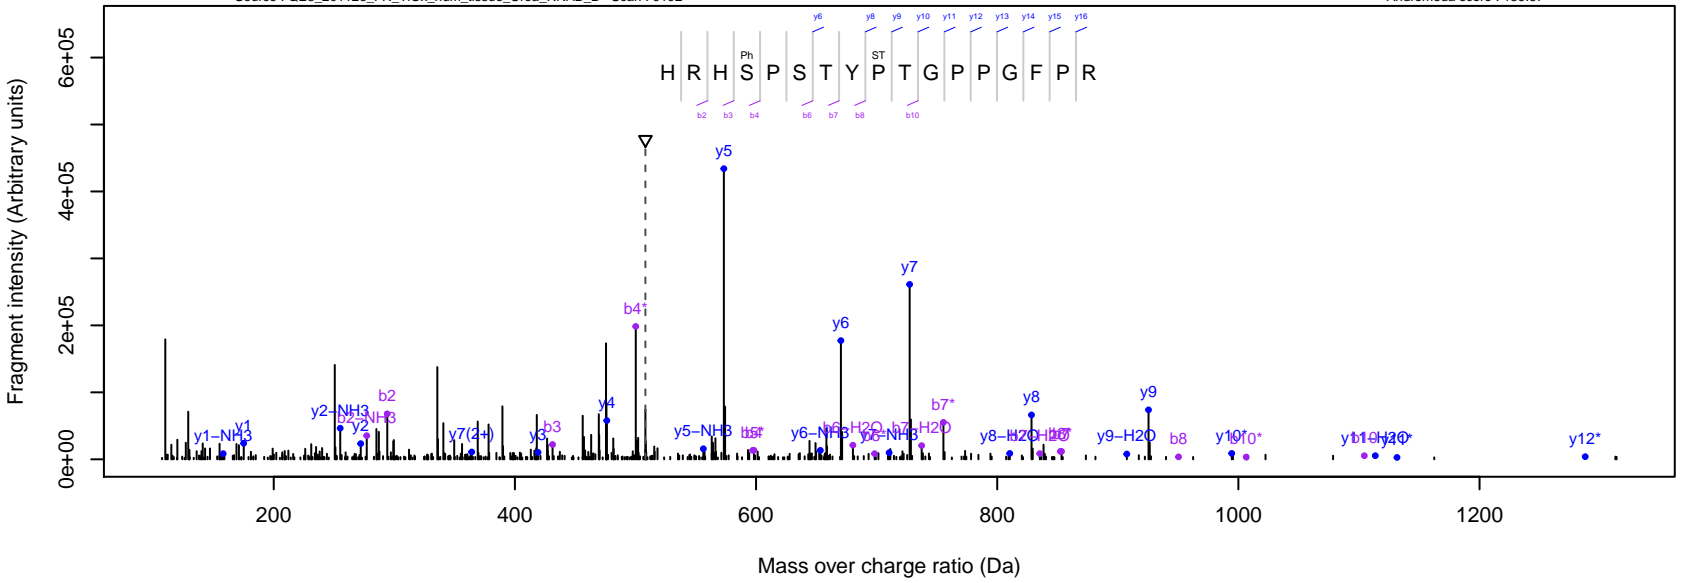

ILEGDNGMDS(Phospho (STY))DMEEEADDGSK-2+

Source : QE3\_201126\_FR\_TiOx\_hum\_tissue\_Urea\_RNAB\_H Scan : 29501

Andromeda score : 156.67

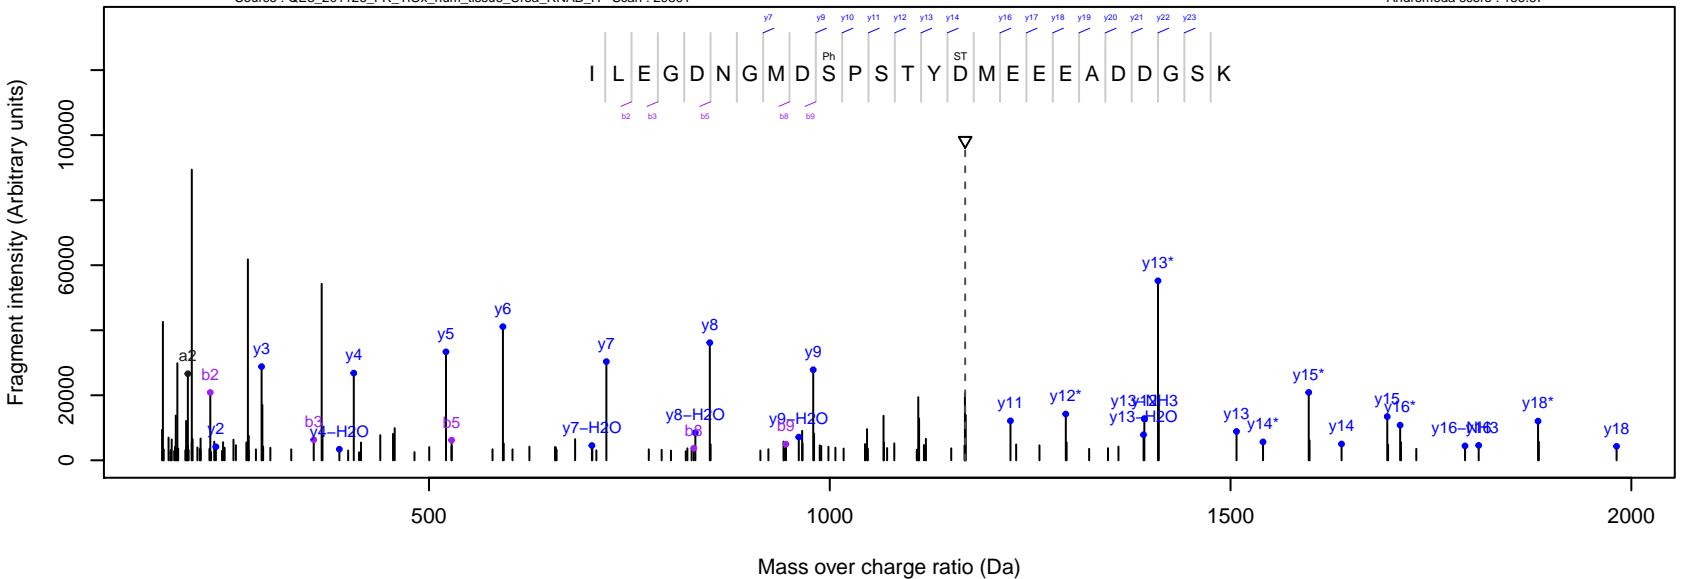



RGS(Phospho (STY))S(Phospho (STY))PDVHALLEITEESDAVLVDKSDSD-3+

Source : QE3\_201126\_FR\_TiOx\_hum\_tissue\_Urea\_RNAB\_N Scan : 58563

Andromeda score : 156.65

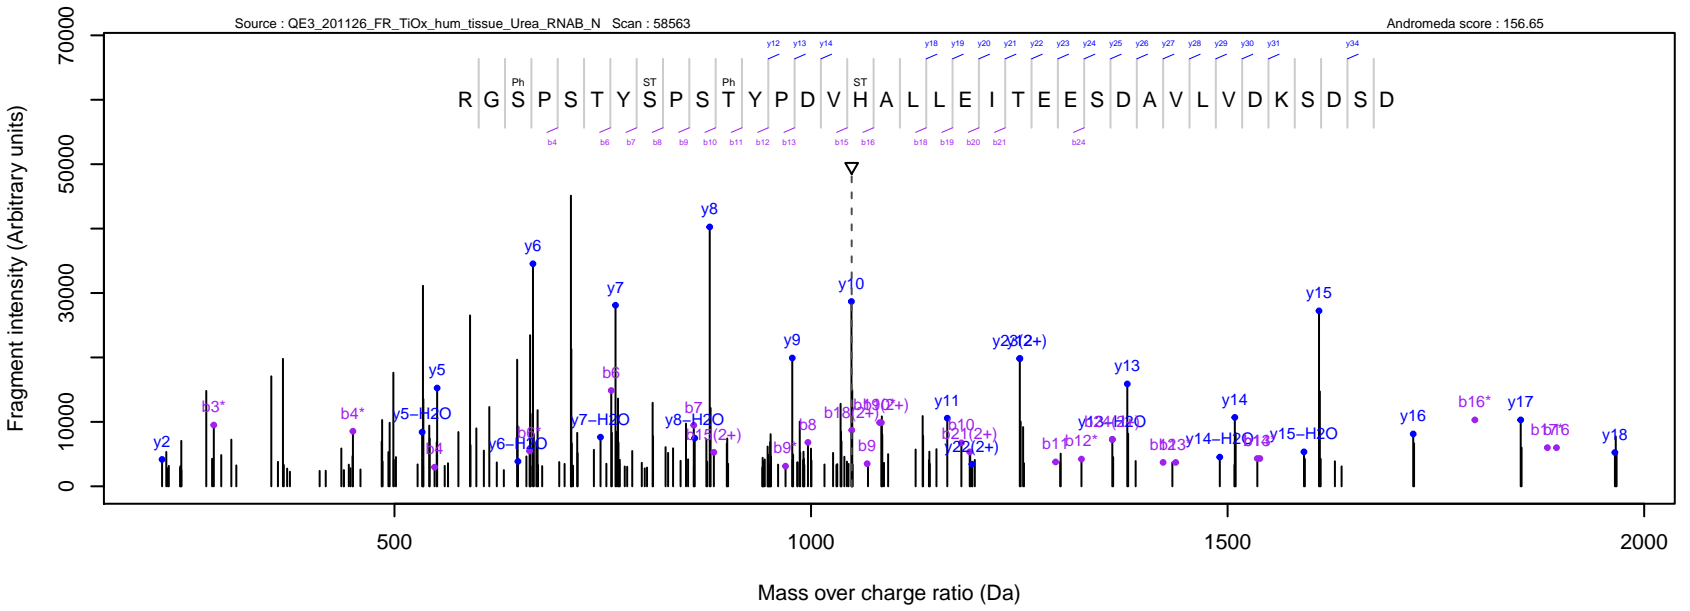

GPPQEEEEEEEEATKEDAEPGIRDHES(Phospho (STY))L-3+

Source : QE3\_201126\_FR\_TiOx\_hum\_tissue\_Urea\_RNAB\_H Scan : 26650

Andromeda score : 156.61

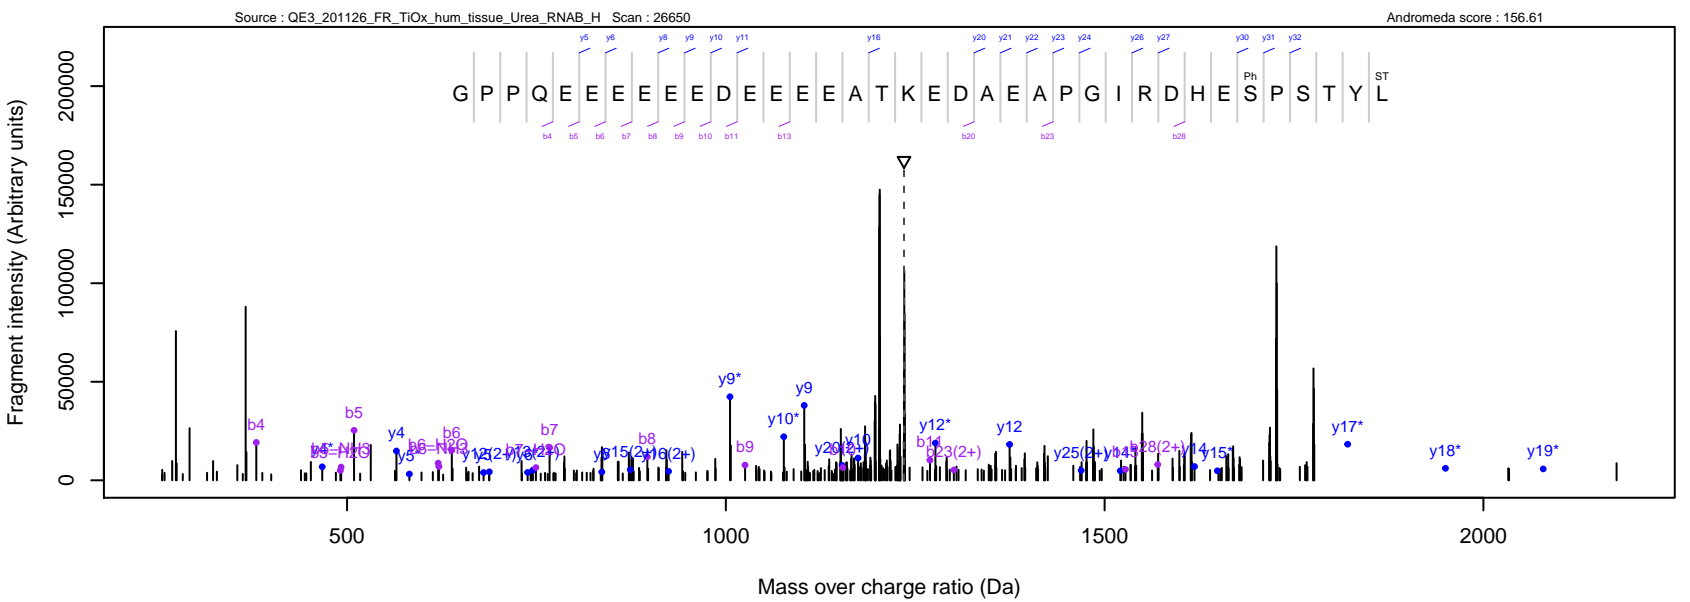

RAT(Phospho (STY))ISSPLEGTVSR-3+

Source : QE3\_201126\_FR\_TiOx\_hum\_tissue\_Urea\_RNAB\_N Scan : 31843

Andromeda score : 156.61

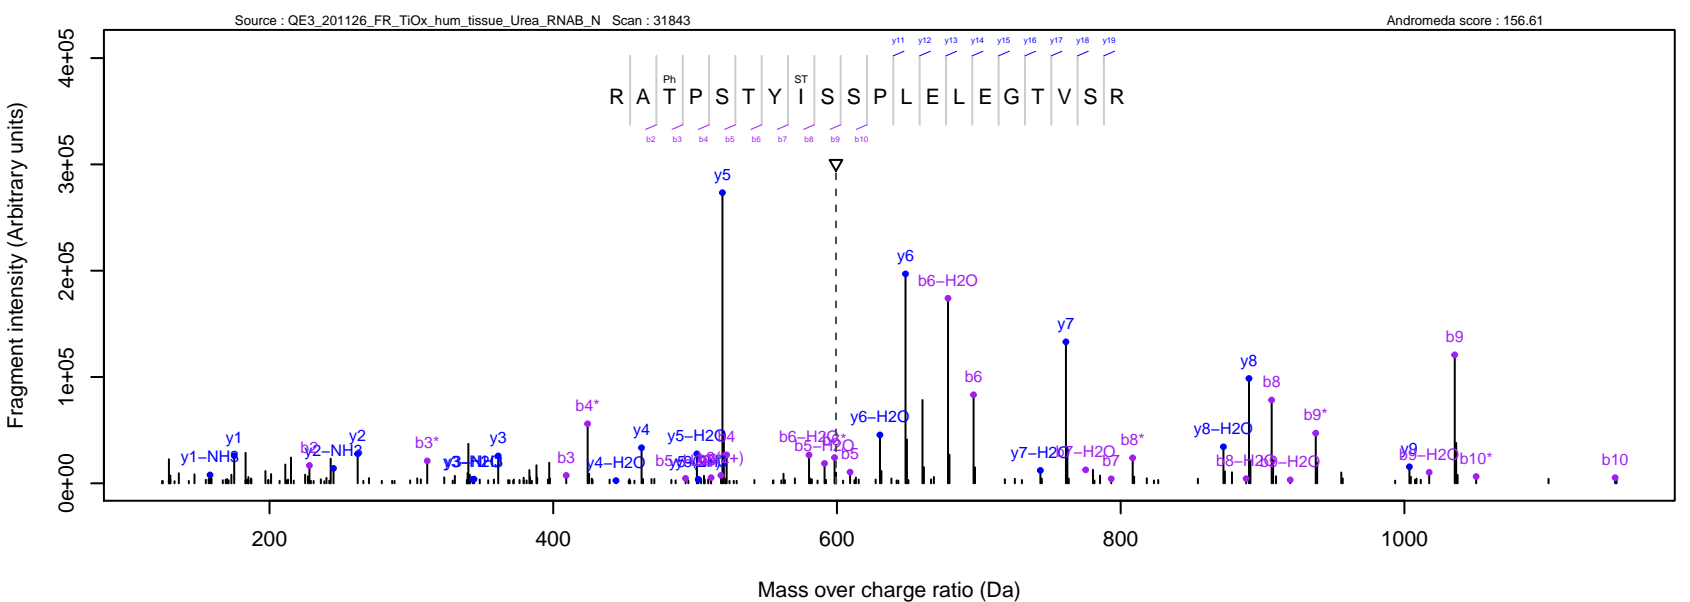

RGS(Phospho (STY))LPAEASCTT-2+

Source : QE3\_201126\_FR\_TIOx\_hum\_tissue\_Urea\_RNAB\_H Scan : 12880

Andromeda score : 156.6

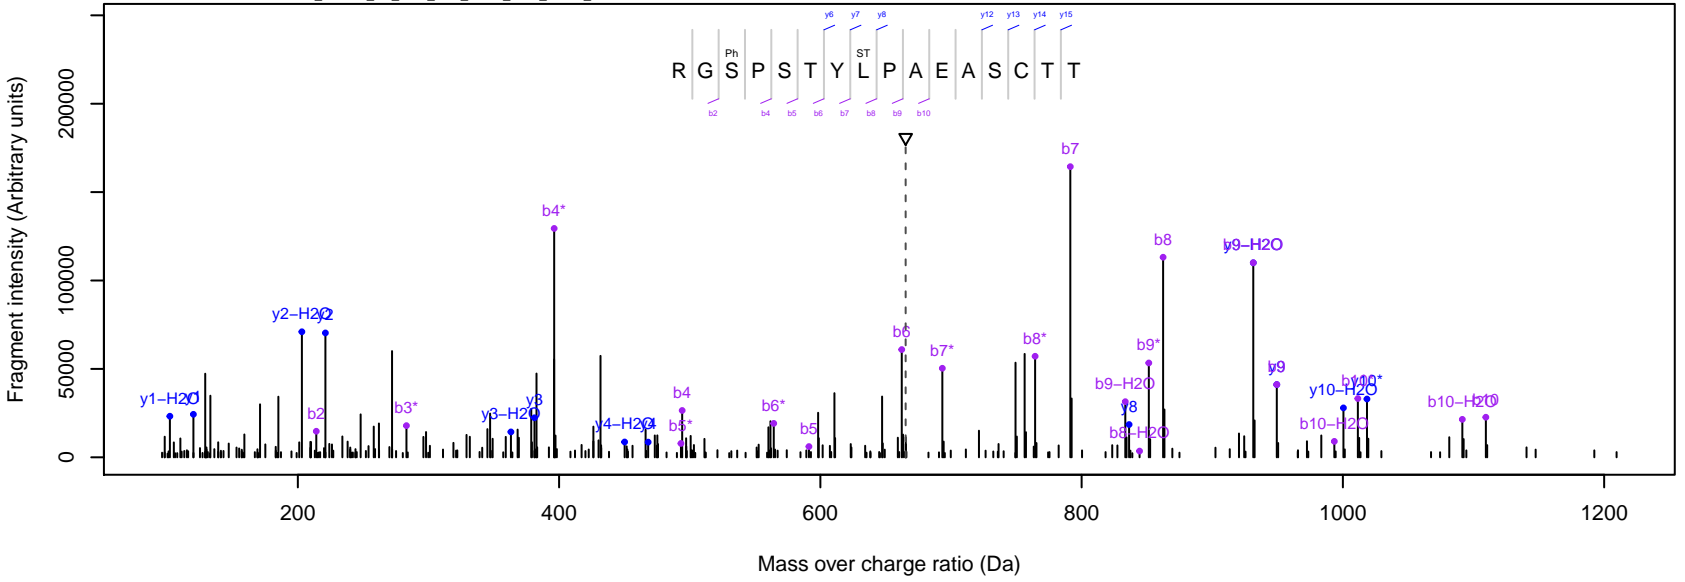

ASRVPS(Phospho (STY))S(Phospho (STY))DEEVVEEPQSR-2+

Source : QE3\_201126\_FR\_TIOx\_hum\_tissue\_Urea\_RNAB\_N Scan : 19674

Andromeda score : 156.58

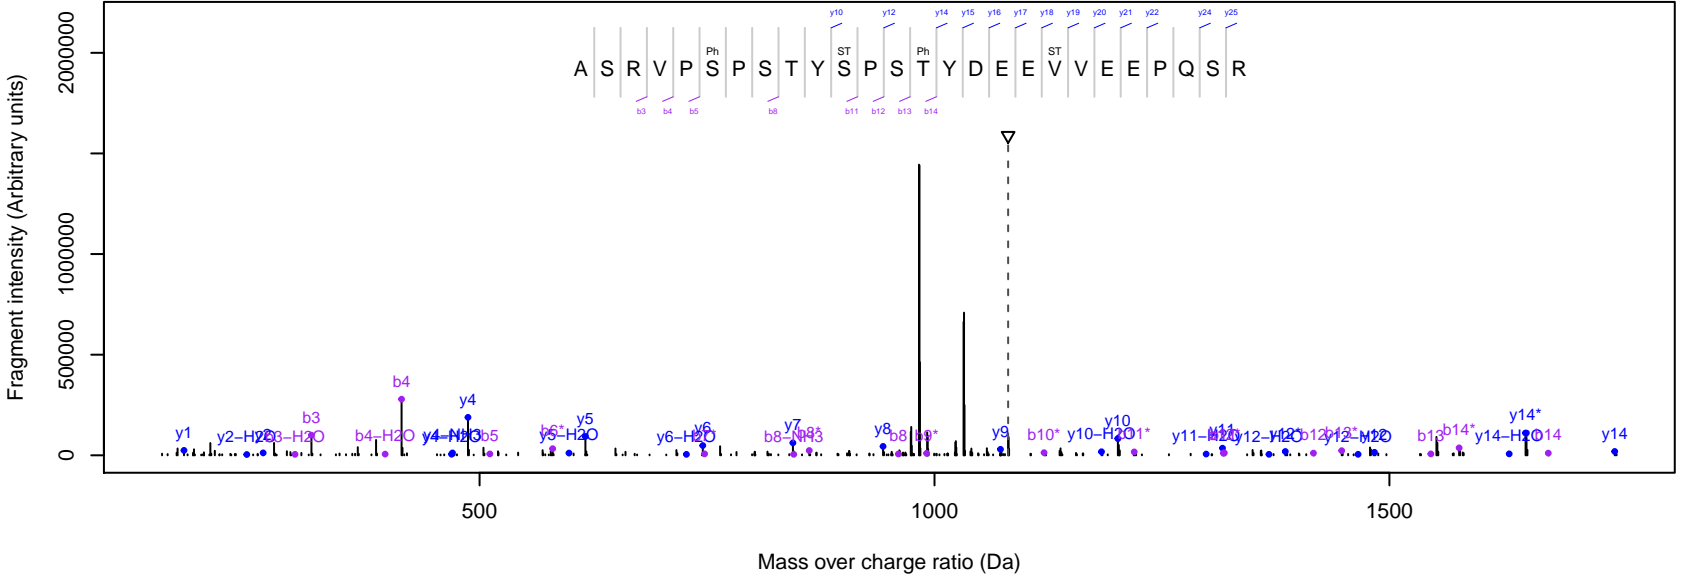

IEDS(Phospho (STY))EPHILIDDTDAEDDAPTQR-3+

Source : QE3\_201126\_FR\_TIOx\_hum\_tissue\_Urea\_RNAB\_H Scan : 34256

Andromeda score : 156.58

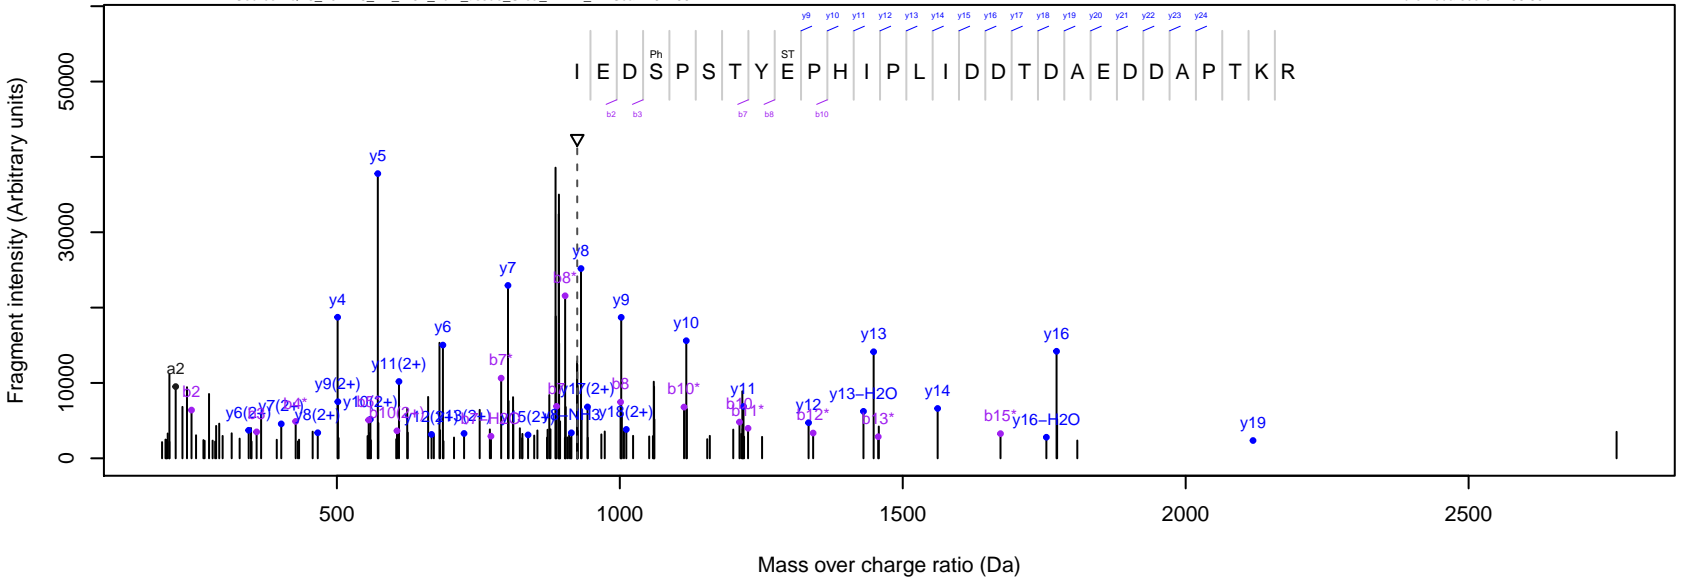

VPVPGGS(Phospho (STY))GGNGPER-2+

Source : QE3\_201126\_FR\_TiOx\_hum\_tissue\_Urea\_RNAB\_N Scan : 15662

Andromeda score : 156.57

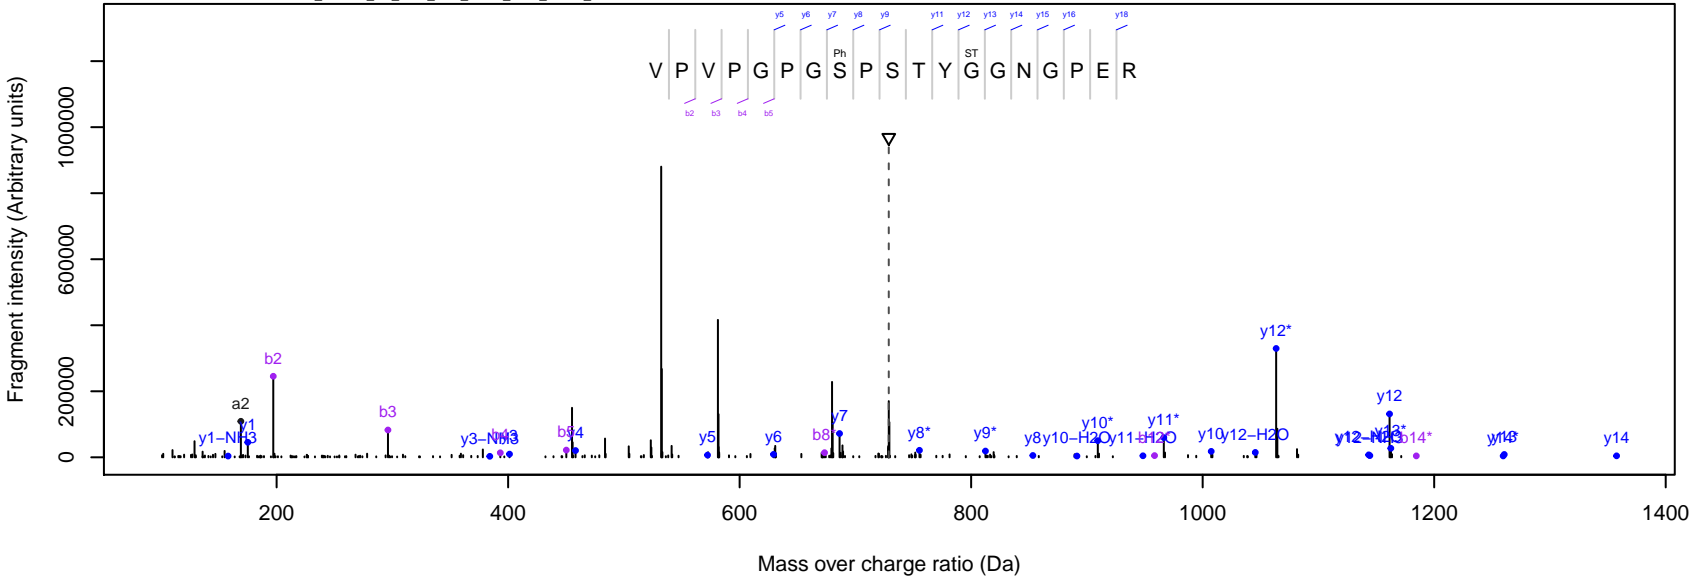

MKSSS(Phospho (STY))SVTTSETQPCTPSSSDYSDLQR-3+

Source : QE3\_201126\_FR\_TiOx\_hum\_tissue\_Urea\_RNAB\_N Scan : 20576

Andromeda score : 156.51

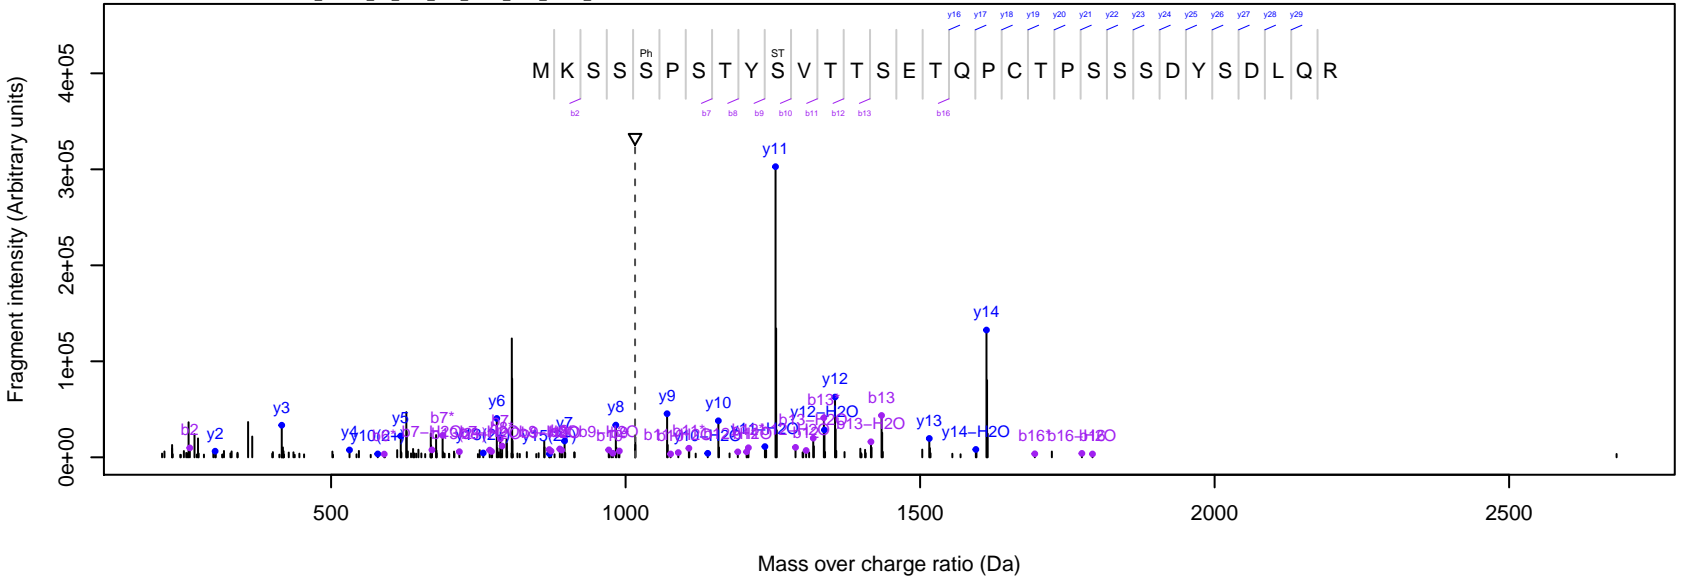

ASGQAFELILSPSTYPR-2+

Source : QE3\_201126\_FR\_TiOx\_hum\_tissue\_Urea\_RNAB\_H Scan : 48038

Andromeda score : 156.5

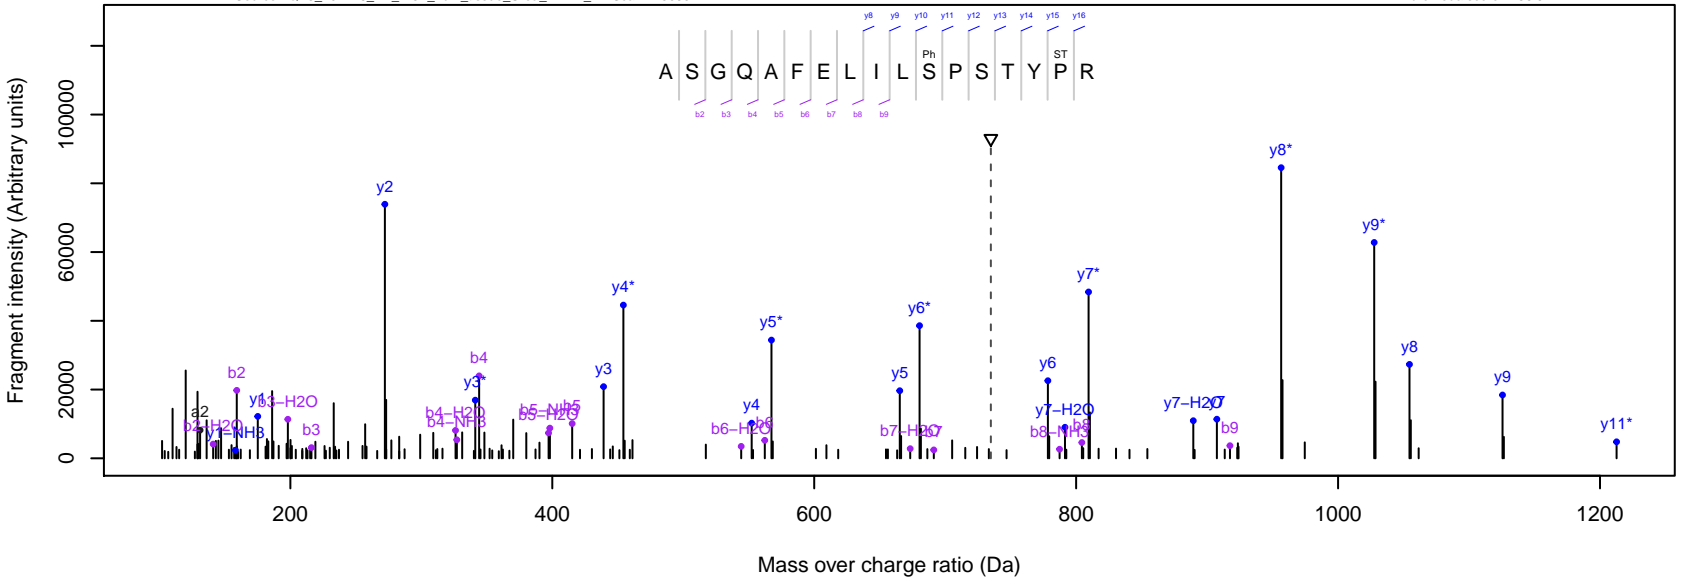

DSQQLINIPSLNDS(Phospho (STY))DSEIEDISEIESNR-3+

Source : QE3\_201126\_FR\_TIOx\_hum\_tissue\_Urea\_RNAB\_B Scan : 60999

Andromeda score : 156.43

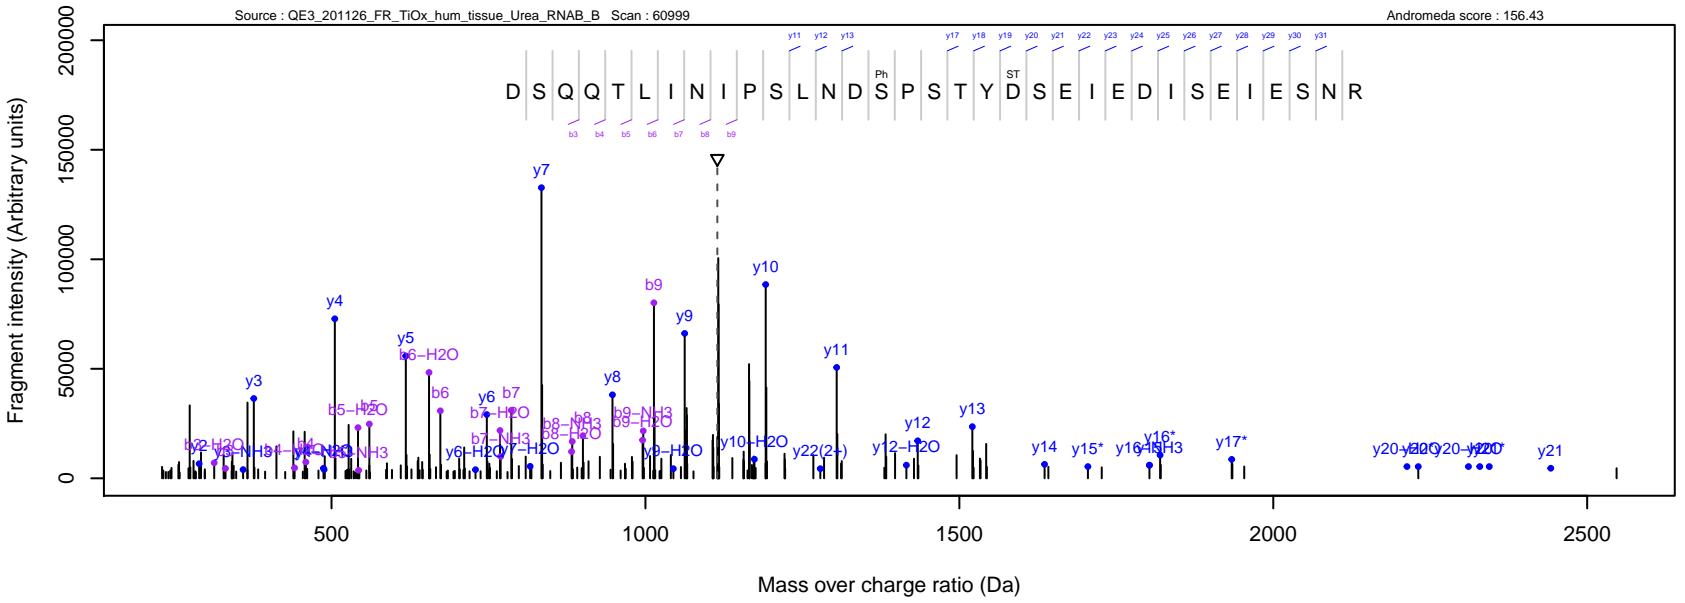

VVNTDHGS(Phospho (STY))PEQLQIPVTDSGR-3+

Source : QE3\_201126\_FR\_TIOx\_hum\_tissue\_Urea\_RNAB\_B Scan : 25826

Andromeda score : 156.43

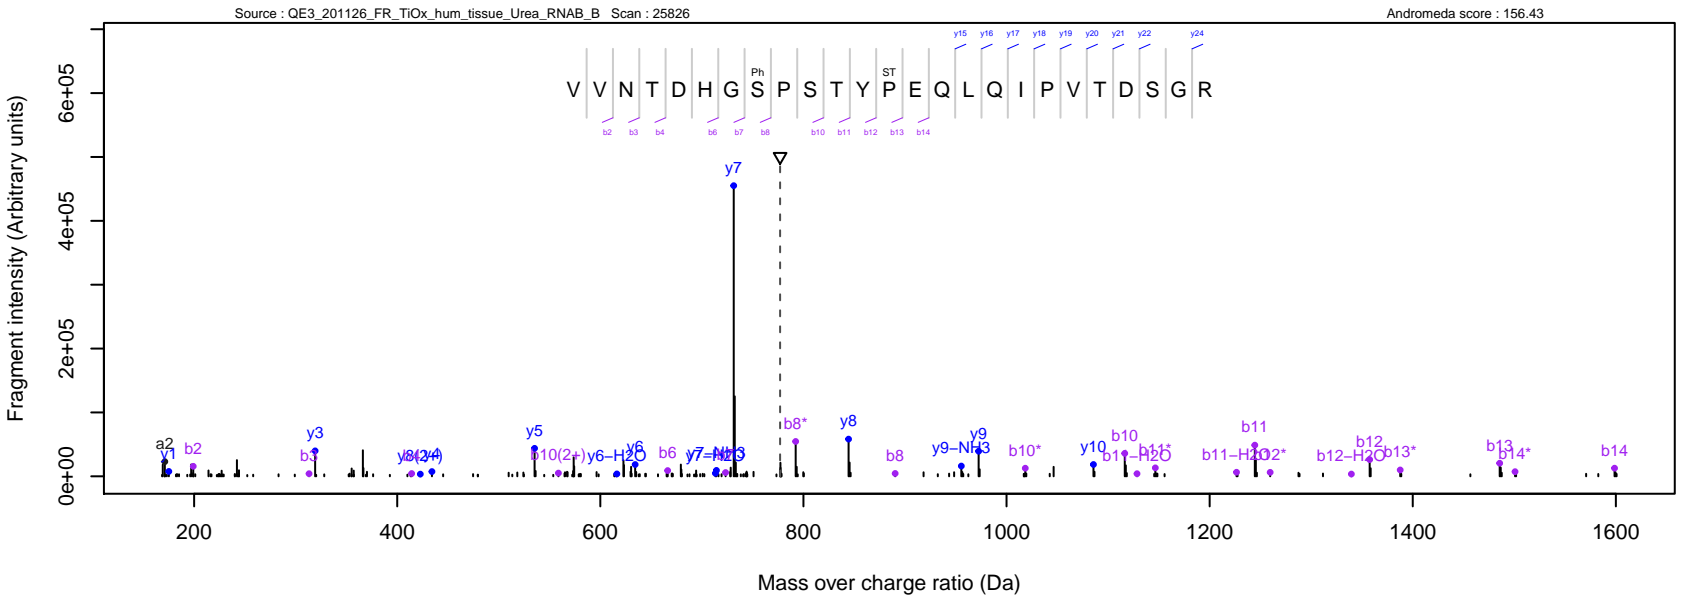

LPELDPRGS(Phospho (STY))DEENLDSETSASTESLLEER-3+

Source : QE3\_201126\_FR\_TIOx\_hum\_tissue\_Urea\_RNAB\_H Scan : 46334

Andromeda score : 156.39

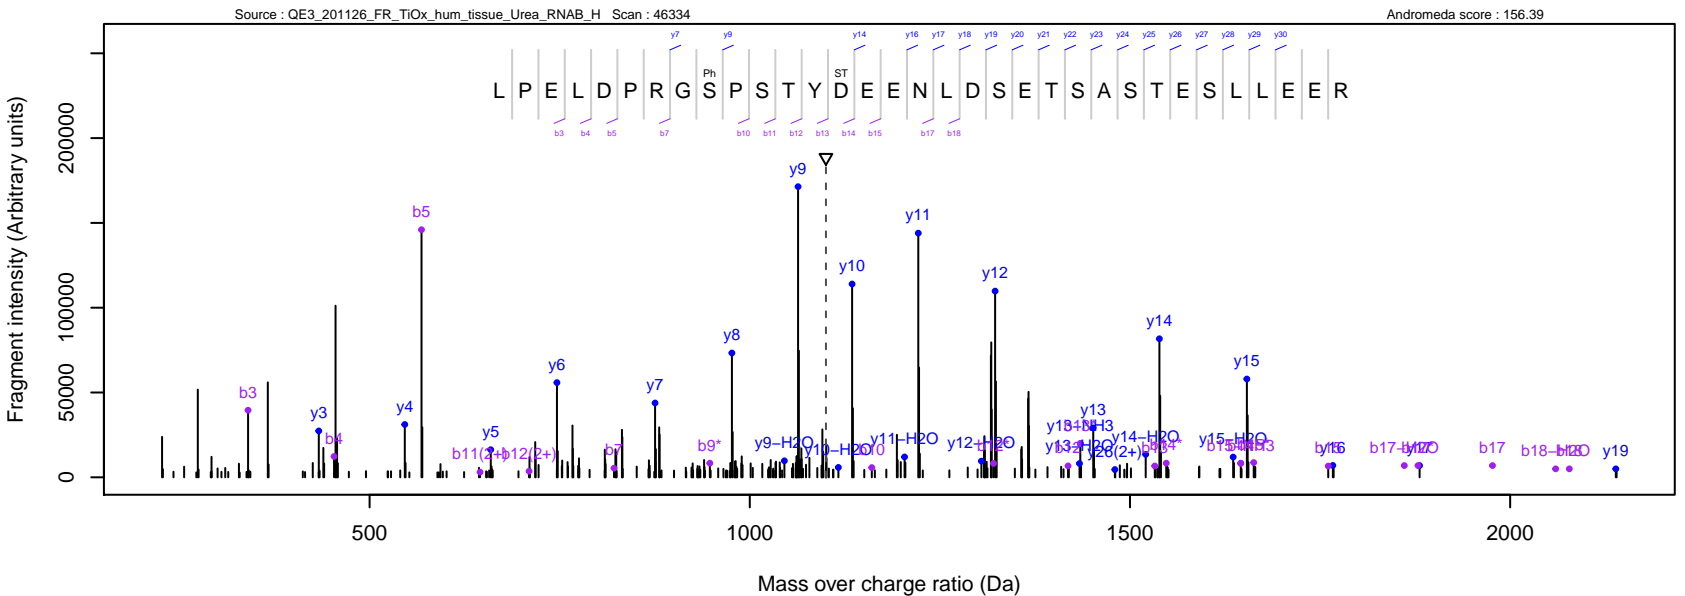

GLVAAYSGES(Phospho (STY))DS(Phospho (STY))EEEQERGGPEREEK-3+

Source : QE3\_201126\_FR\_TiOx\_hum\_tissue\_Urea\_RNAB\_H Scan : 19281

Andromeda score : 156.37

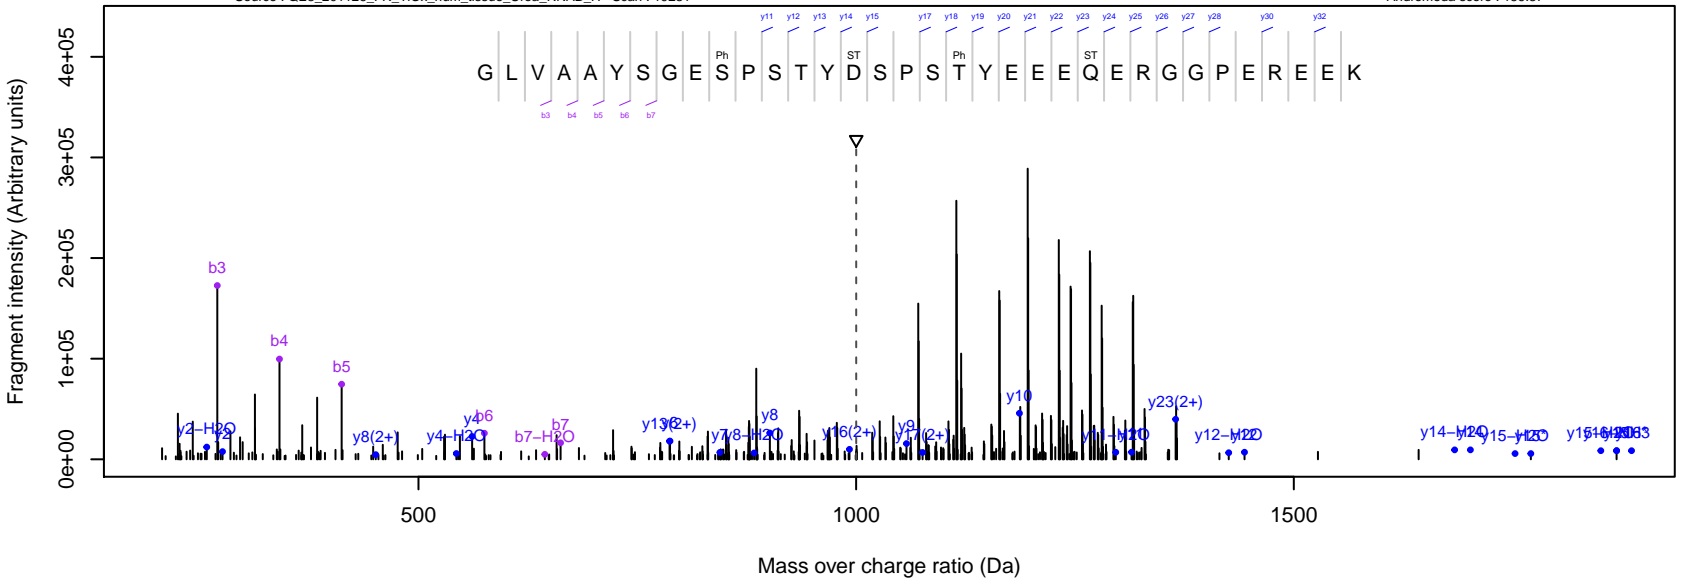

RVSHQGYSPSTY(Phospho (STY))TEAEFEEPR-3+

Source : QE3\_201126\_FR\_TiOx\_hum\_tissue\_Urea\_RNAB\_H Scan : 15165

Andromeda score : 156.36

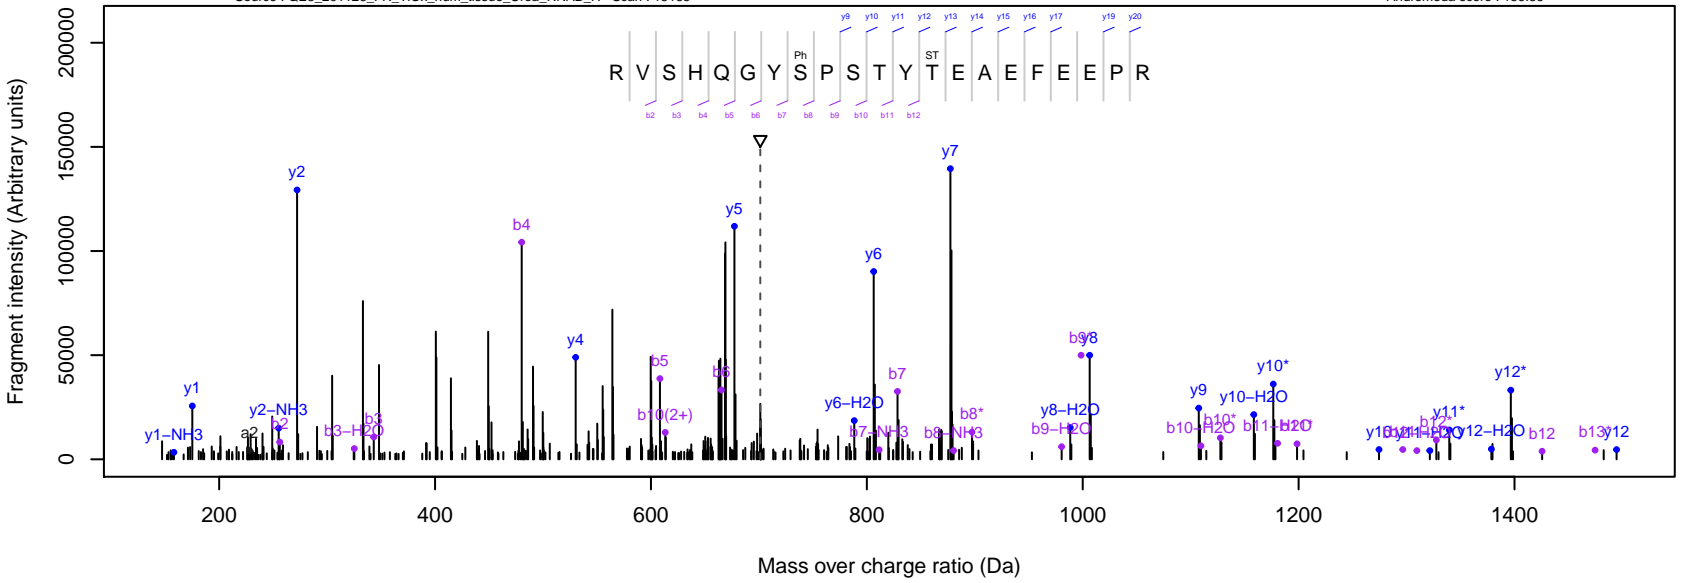

SPSPSTY(Phospho (STY))PLRGNVVPSPLPTR-3+

Source : QE3\_201126\_FR\_TiOx\_hum\_tissue\_Urea\_RNAB\_H Scan : 22924

Andromeda score : 156.36

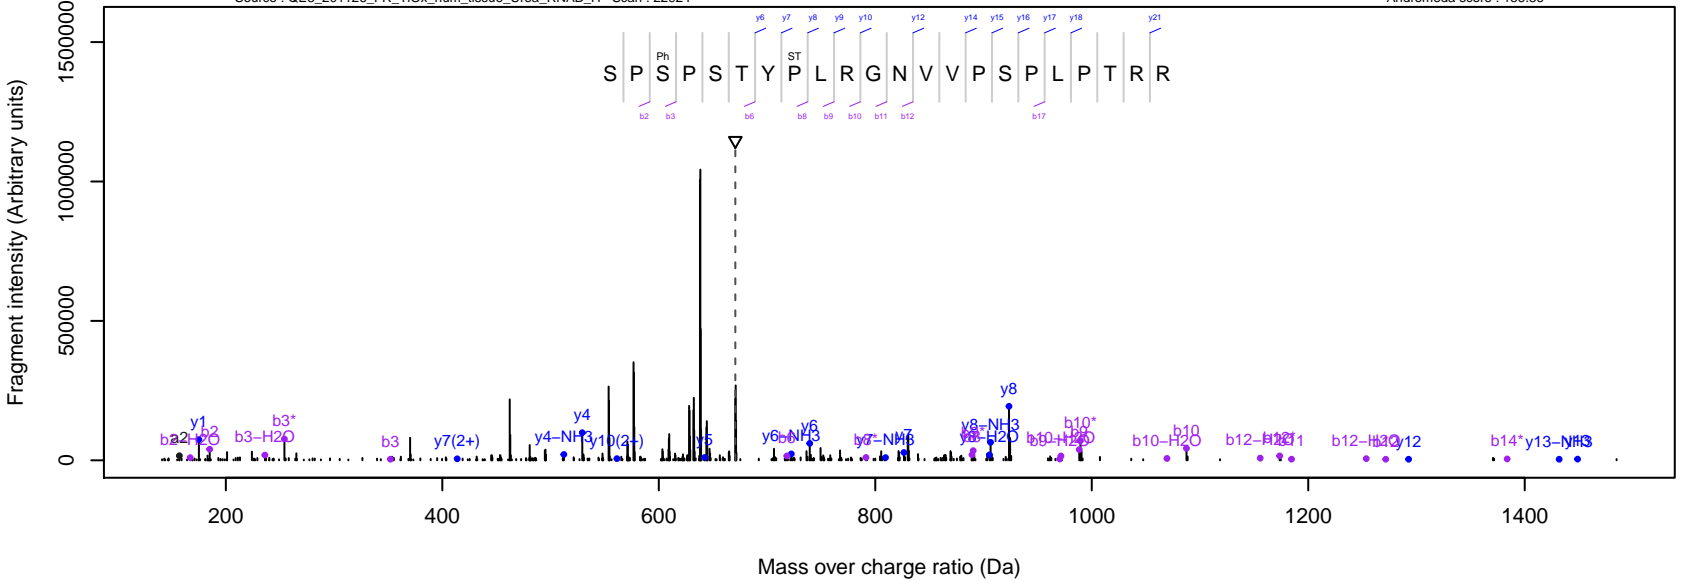

SKYDEIFYNLAPADGKLS(Phospho (STY))GSK-3+

Source : QE3\_201126\_FR\_TIOx\_hum\_tissue\_Urea\_RNAB\_N Scan : 38656

Andromeda score : 156.3

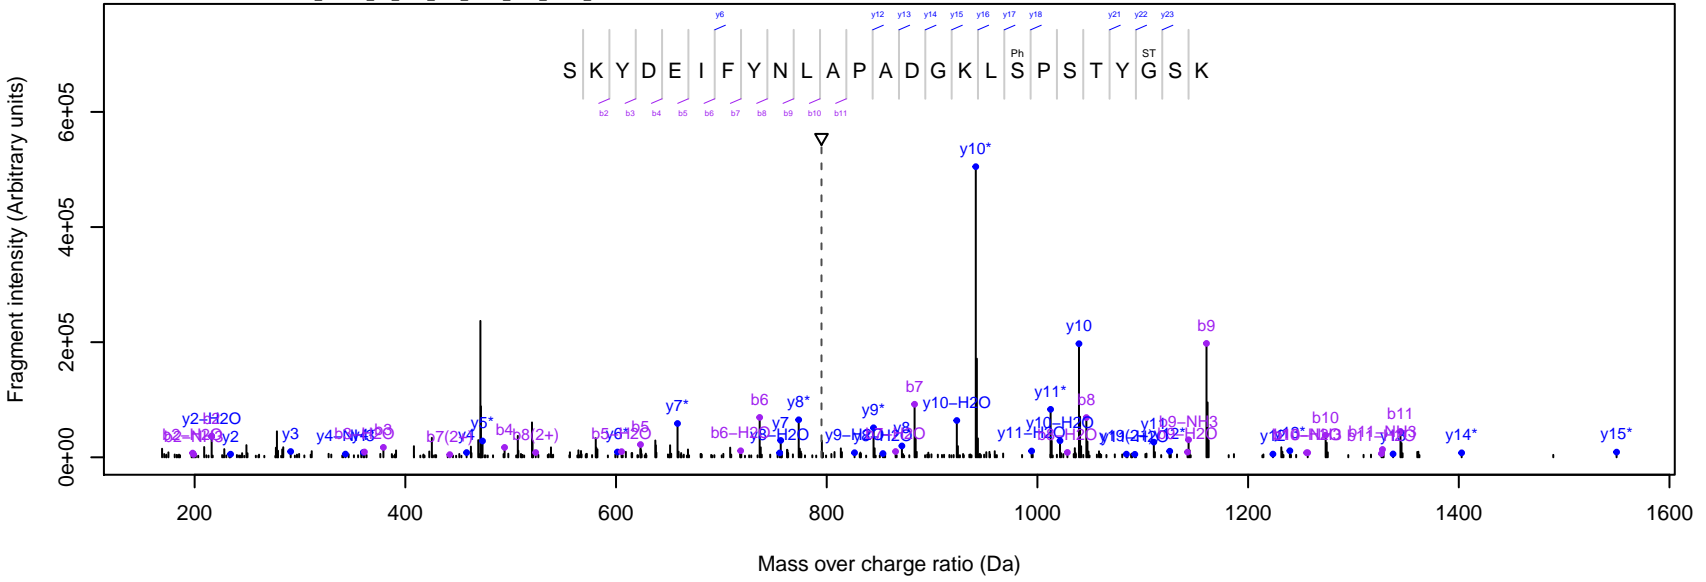

QERLS(Phospho (STY))PEVAPPAHR-3+

Source : QE3\_201126\_FR\_TIOx\_hum\_tissue\_Urea\_RNAB\_B Scan : 11150

Andromeda score : 156.29

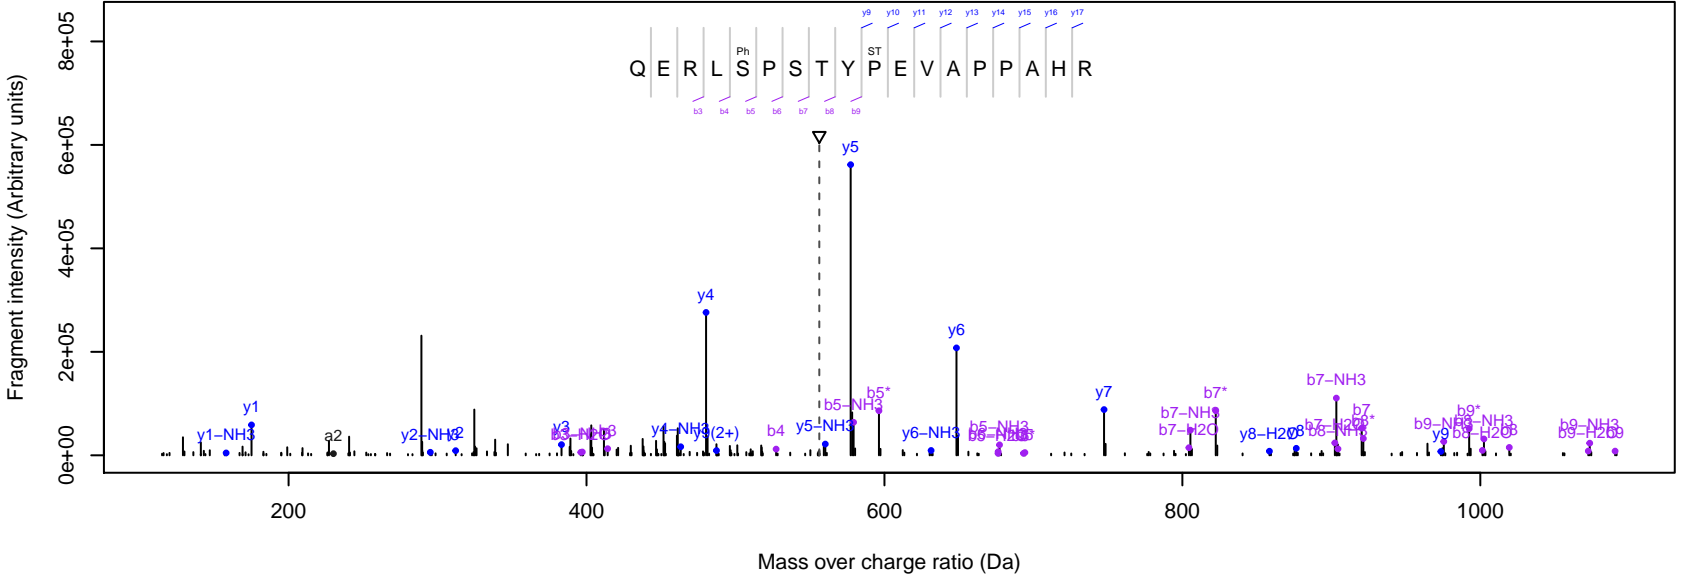

RS(Phospho (STY))ASPHDVLCLVSPCFEHRK-4+

Source : QE3\_201126\_FR\_TIOx\_hum\_tissue\_Urea\_RNAB\_H Scan : 24962

Andromeda score : 156.27

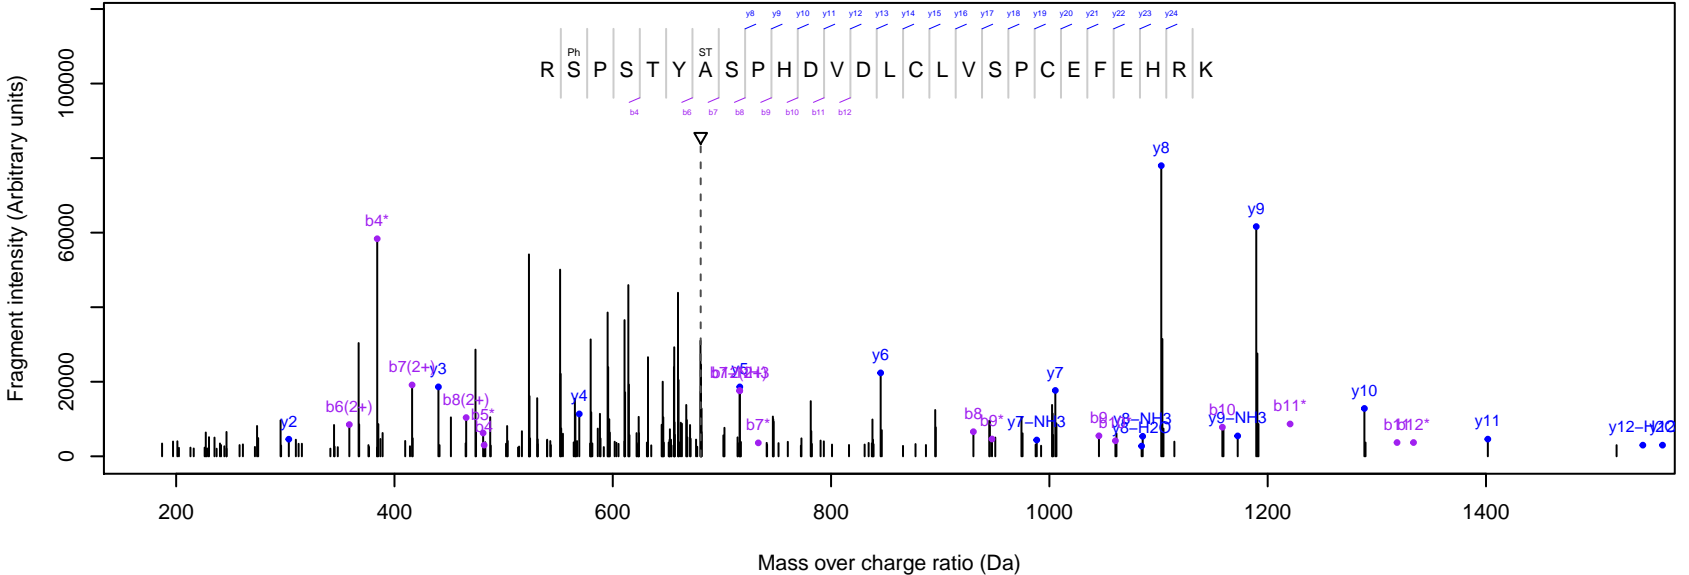

SAGGS(Phospho (STY))S(Phospho (STY))PEGGEDS(Phospho (STY))DREDGNYCPPVKR-3+

Source : QE3\_201126\_FR\_TiOx\_hum\_tissue\_Urea\_RNAB\_H Scan : 16808

Andromeda score : 156.26

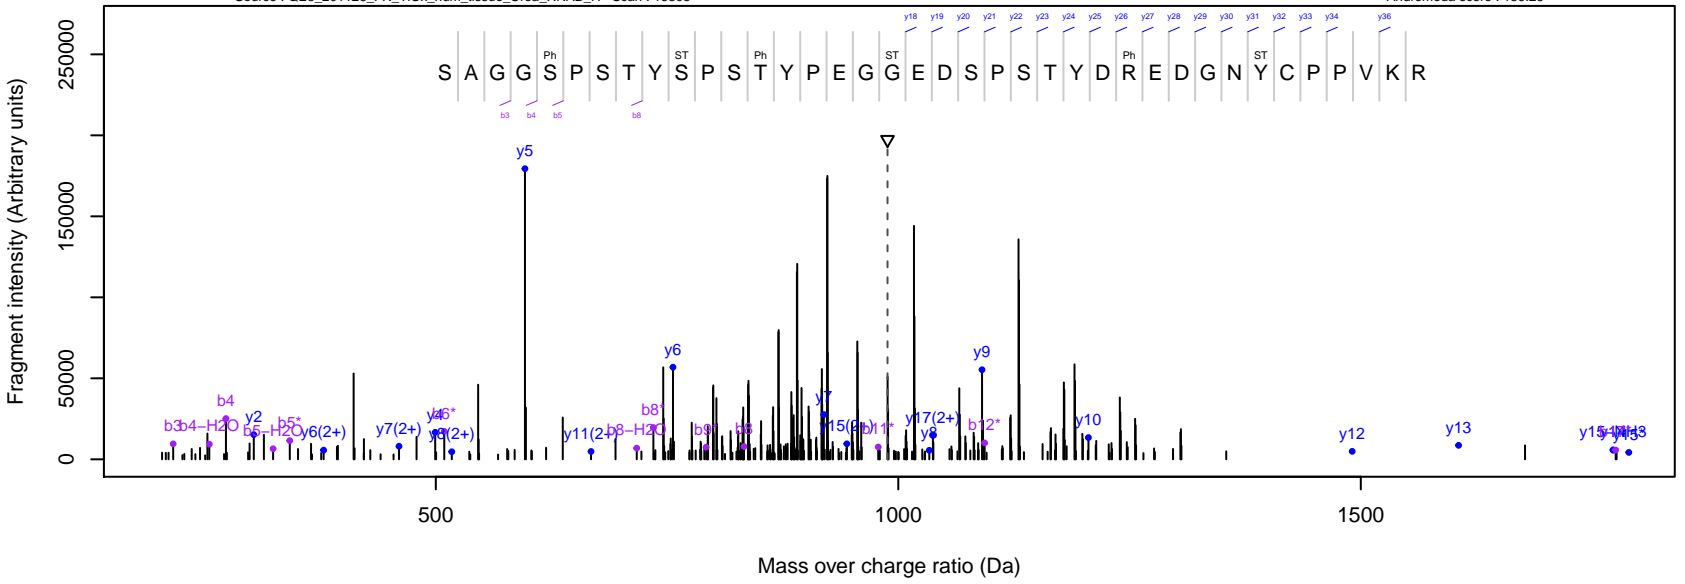

VNHEPEPAGGATPGATLPKS(Phospho (STY))PSQLR-3+

Source : QE3\_201126\_FR\_TiOx\_hum\_tissue\_Urea\_RNAB\_H Scan : 19459

Andromeda score : 156.26

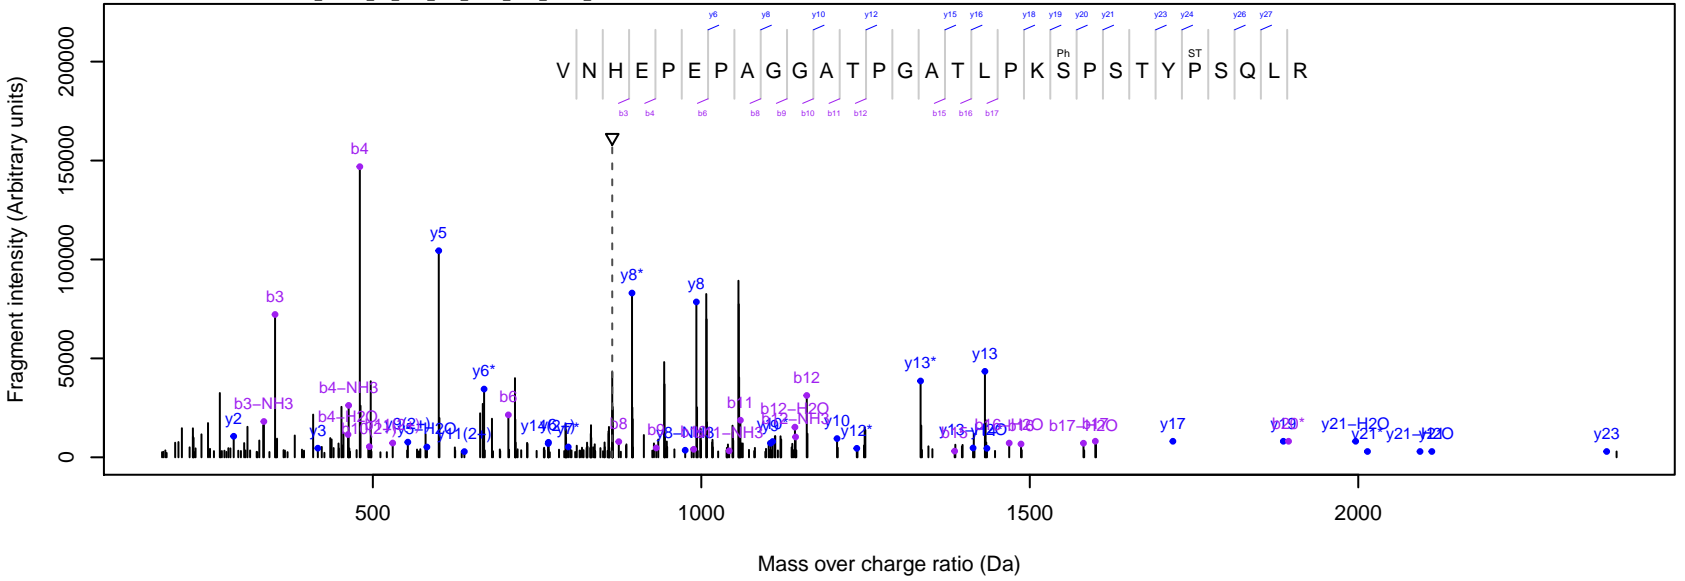

RDS(Phospho (STY))LTGSSDLK-2+

Source : QE3\_201126\_FR\_TiOx\_hum\_tissue\_Urea\_RNAB\_B Scan : 15524

Andromeda score : 156.25

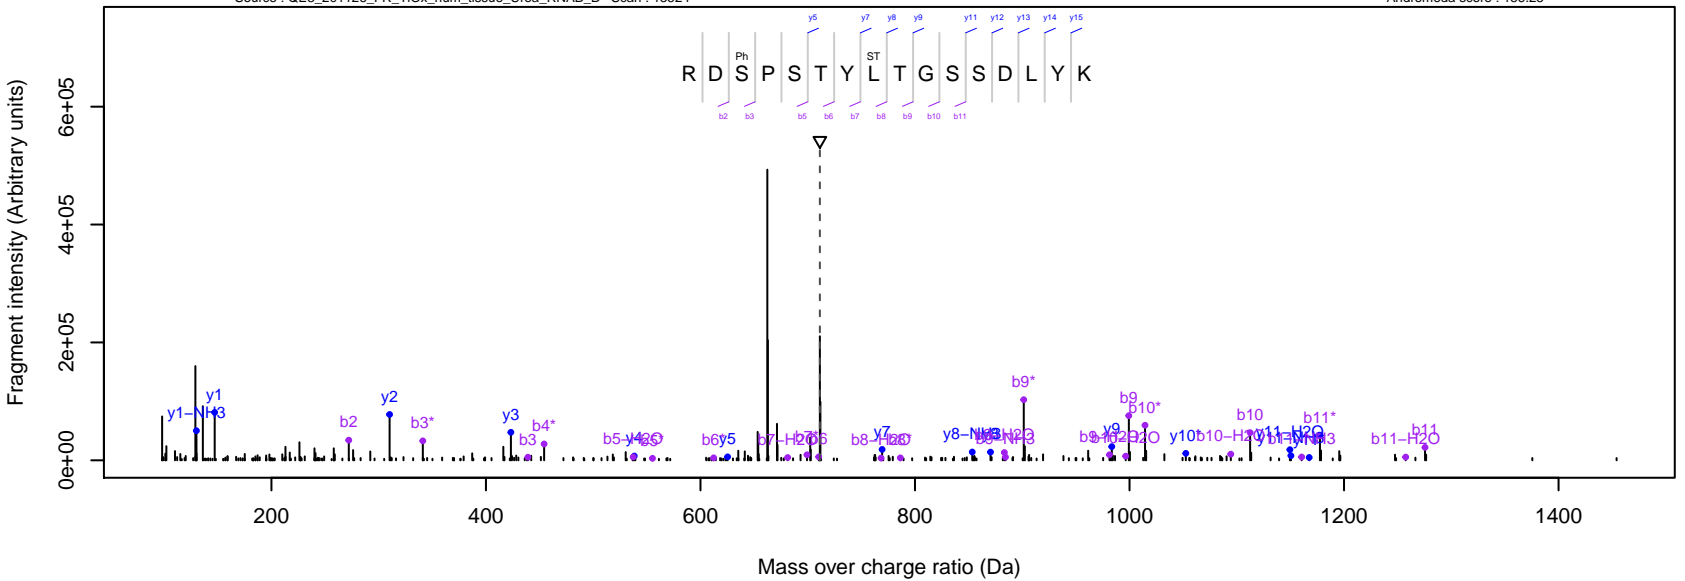

AQNEFKDEAQLSHS(Phospho (STY))PK-3+

Source : QE3\_201126\_FR\_TiOx\_hum\_tissue\_Urea\_RNAB\_B Scan : 13666

Andromeda score : 156.23

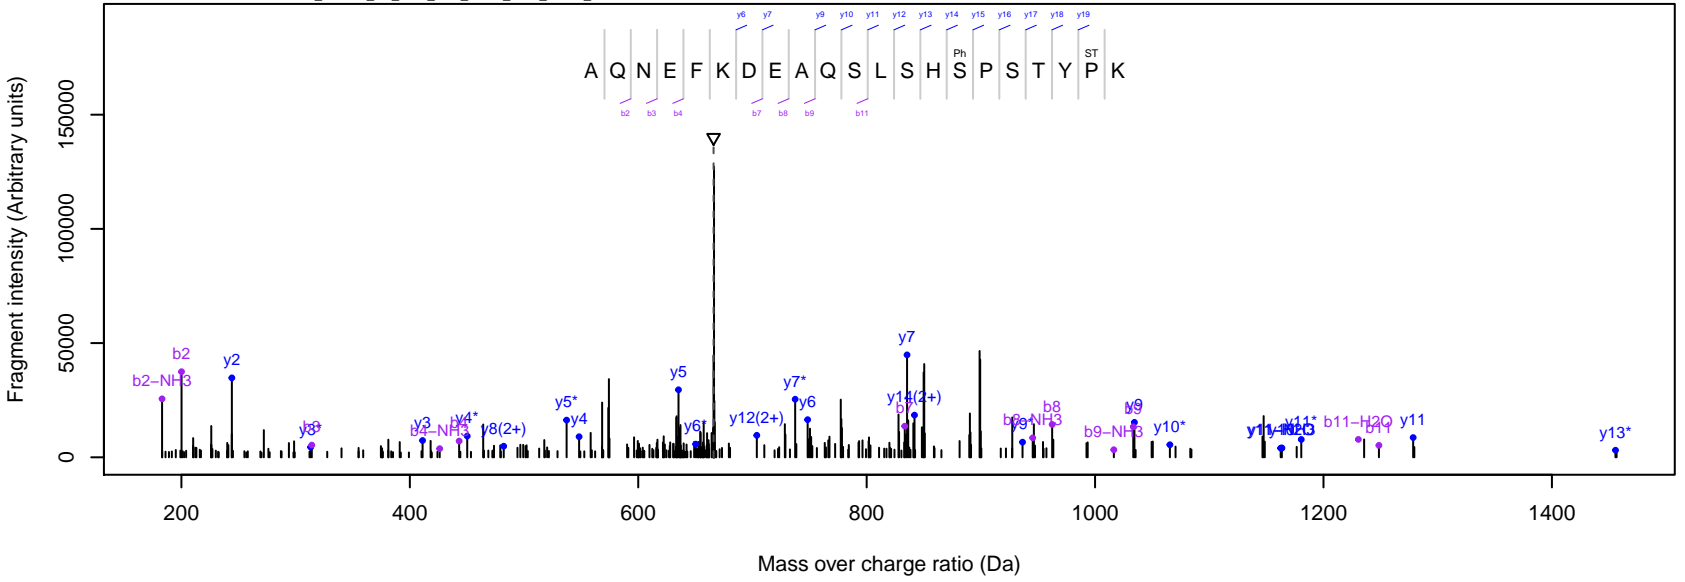

ELEEEENS(Phospho (STY))DEDELDSTMTVK-3+

Source : QE3\_201126\_FR\_TiOx\_hum\_tissue\_Urea\_RNAB\_H Scan : 24636

Andromeda score : 156.2

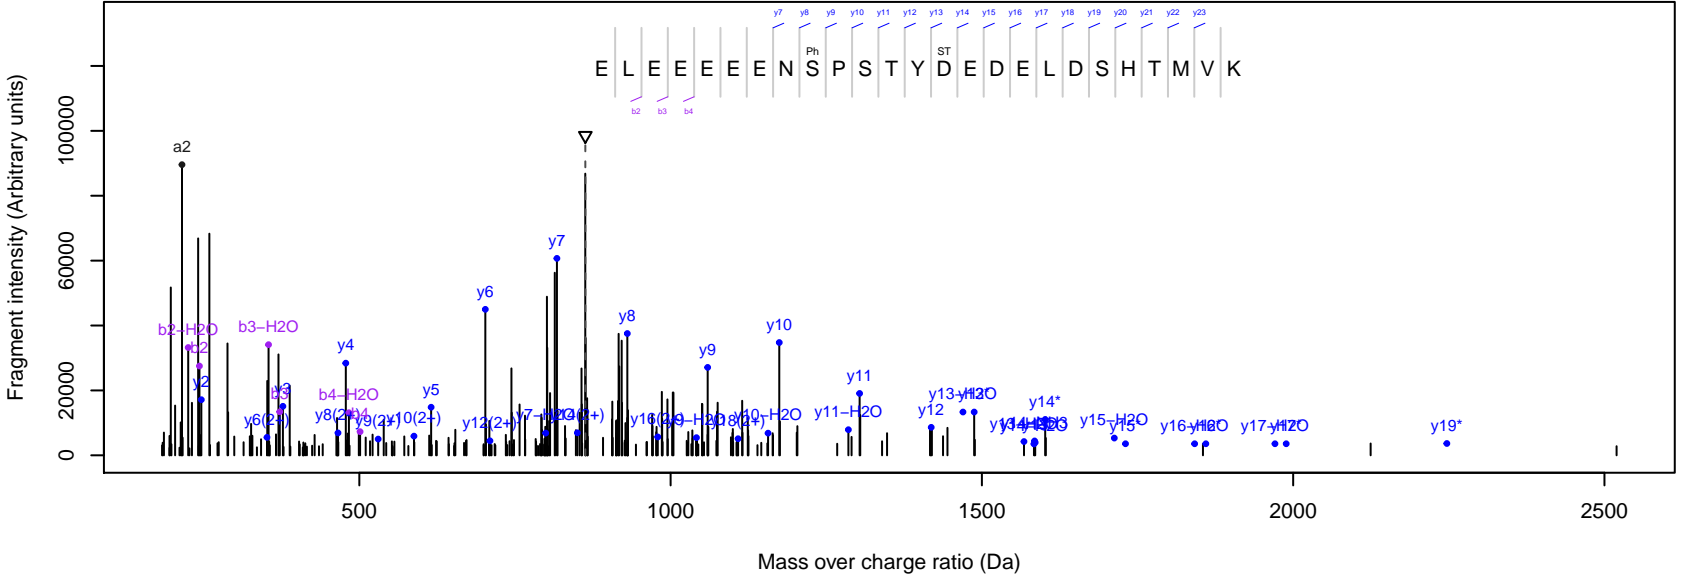

TSTS(Phospho (STY))PPPEKSGDEGS(Phospho (STY))EDEAPS(Phospho (STY))GED-2+

Source : QE3\_201126\_FR\_TiOx\_hum\_tissue\_Urea\_RNAB\_H Scan : 18839

Andromeda score : 156.2

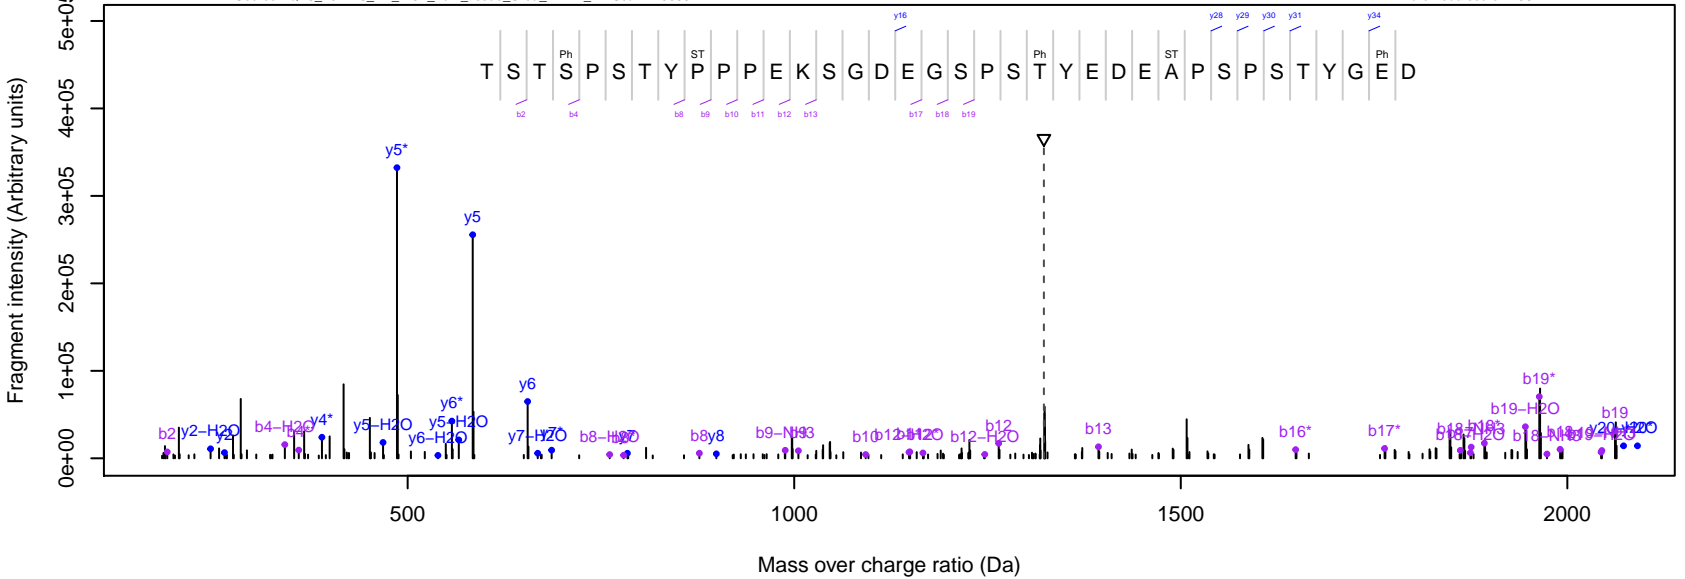



LQPSSS(Phospho (STY))PENSLDPFPPR-2+

Source : QE3\_201126\_FR\_TiOx\_hum\_tissue\_Urea\_RNAB\_H Scan : 40628

Andromeda score : 156.17

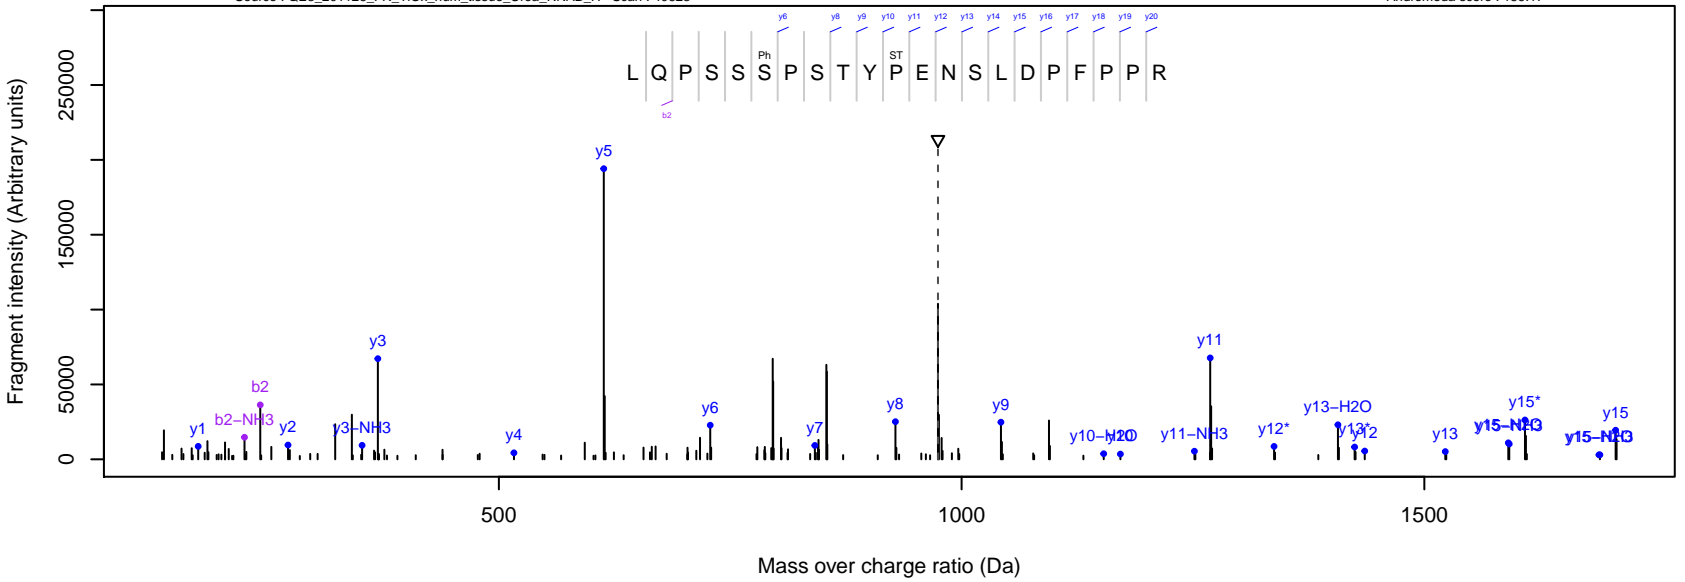

SRS(Phospho (STY))FDYNYR-2+

Source : QE3\_201126\_FR\_TiOx\_hum\_tissue\_Urea\_RNAB\_H Scan : 14965

Andromeda score : 156.14

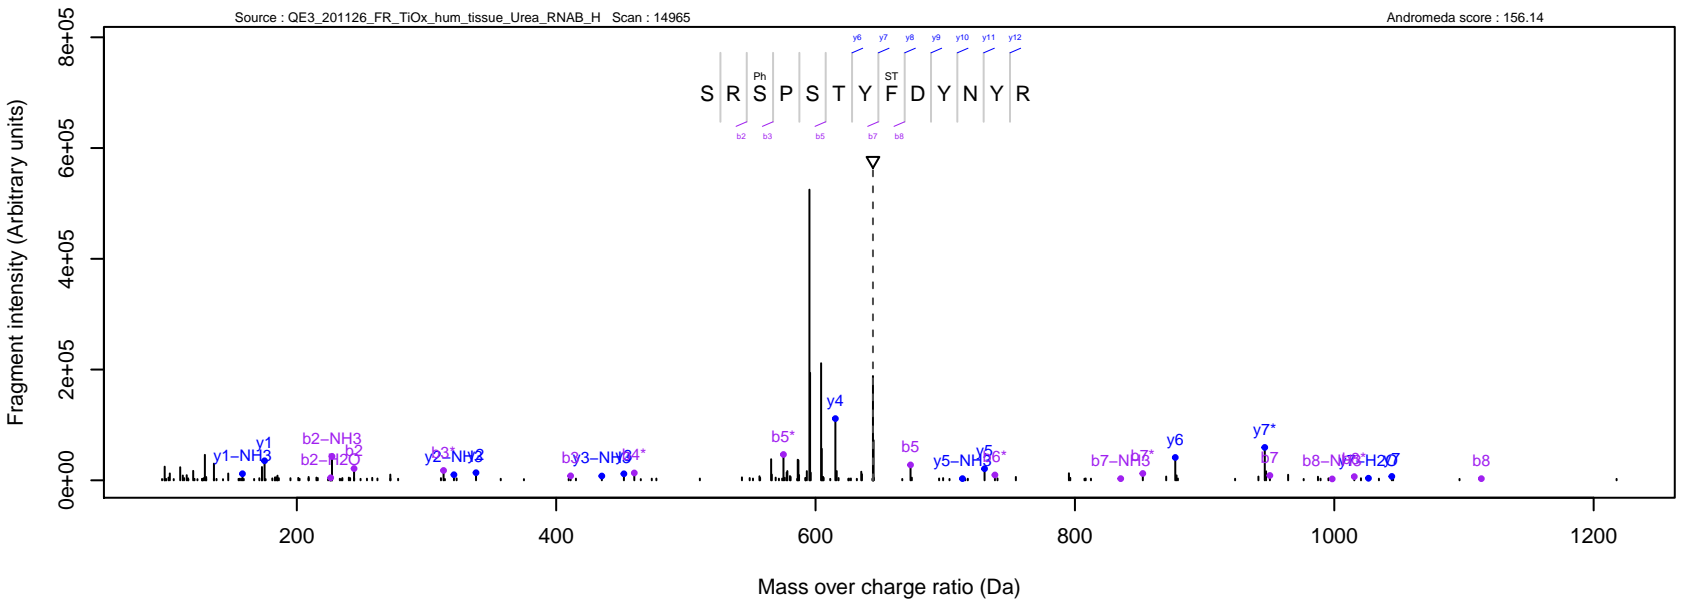

DKAS(Phospho (STY))PEPEKDFSEK-3+

Source : QE3\_201126\_FR\_TiOx\_hum\_tissue\_Urea\_RNAB\_B Scan : 8731

Andromeda score : 156.13

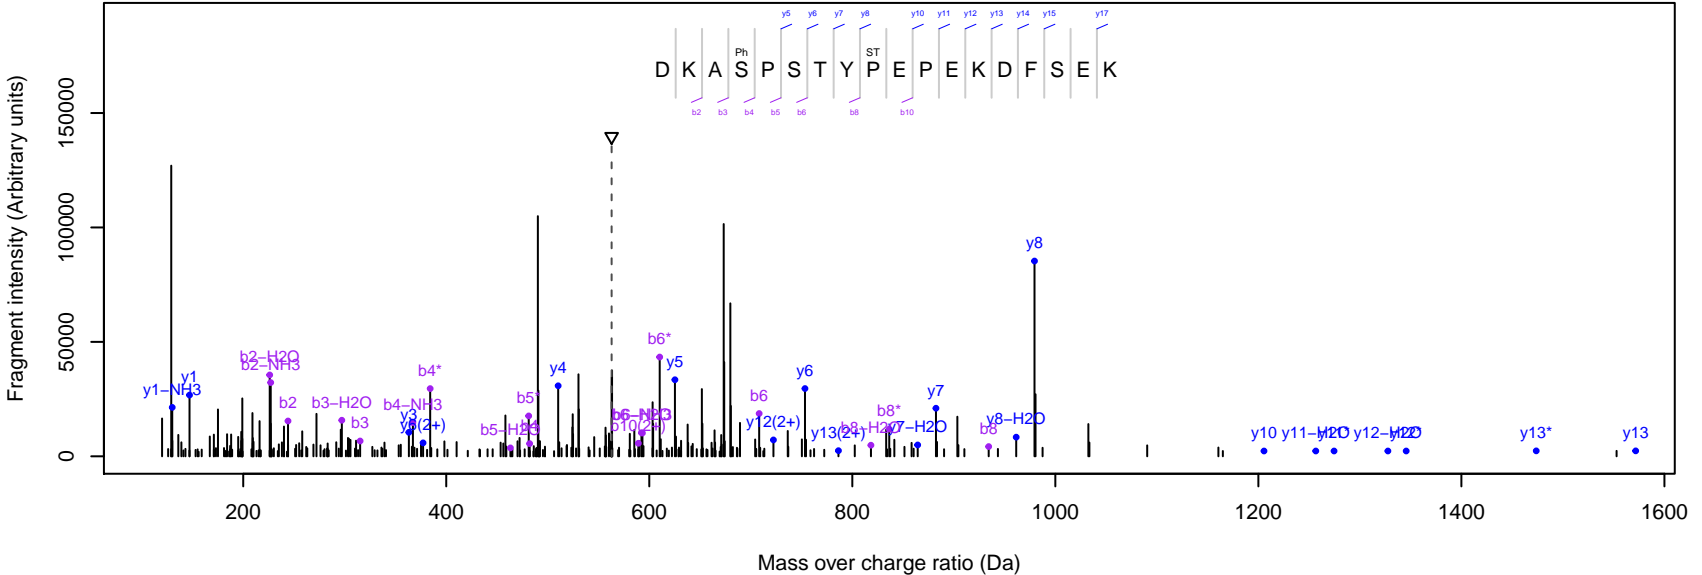

NATDLQNSS(Phospho (STY))M(Oxidation (M))SEELTK-2+

Source : QE3\_201126\_FR\_TIOx\_hum\_tissue\_Urea\_RNAB\_B Scan : 19657

Andromeda score : 156.11

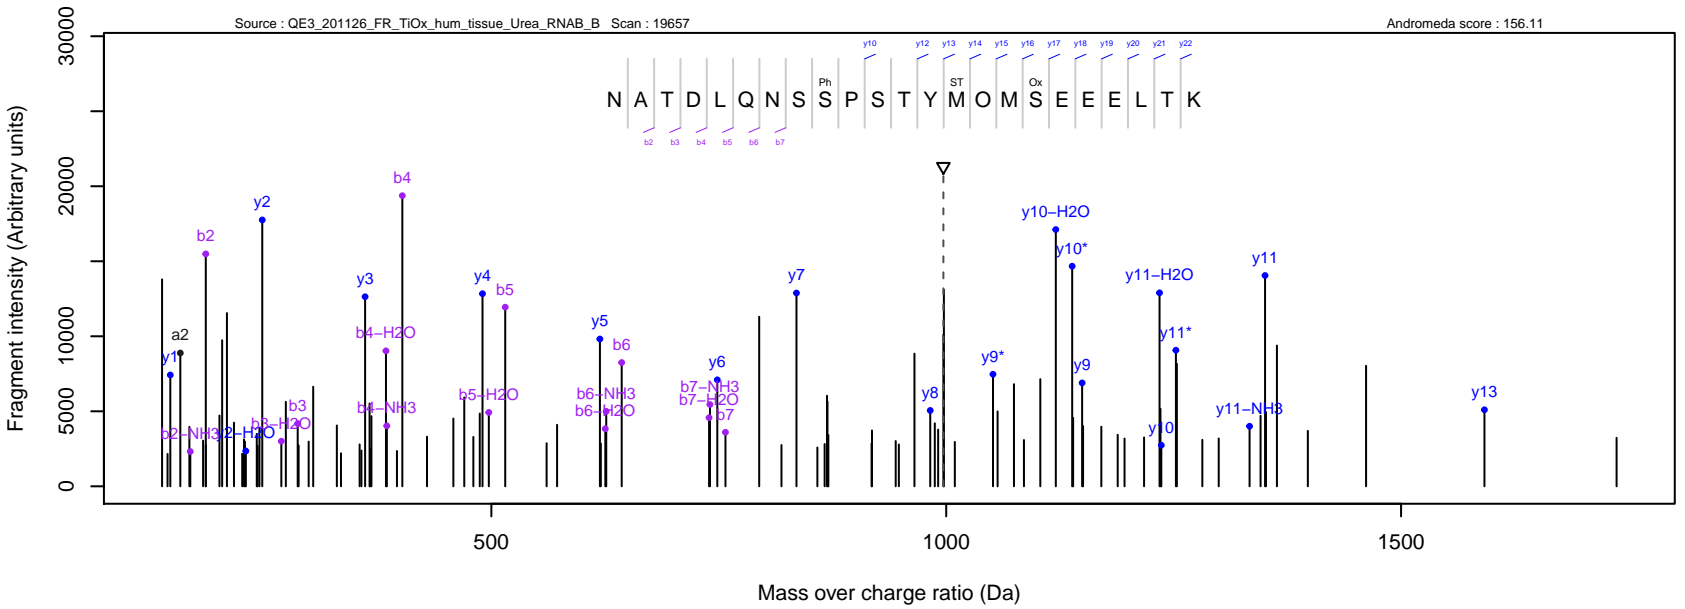

NLEQLNGGES(Phospho (STY))PKQK-3+

Source : QE3\_201126\_FR\_TIOx\_hum\_tissue\_Urea\_RNAB\_N Scan : 26606

Andromeda score : 156.1

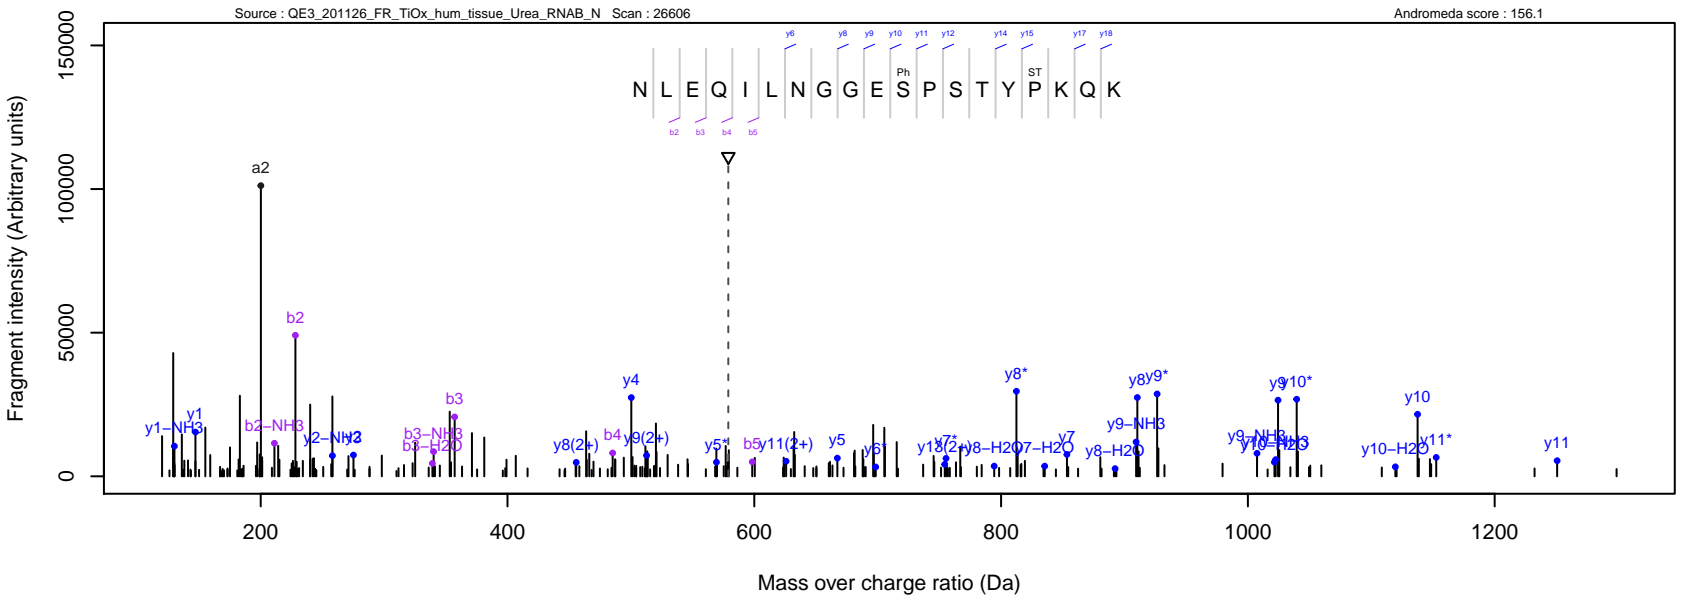

RRFS(Phospho (STY))DS(Phospho (STY))EGEETVPEPR-3+

Source : QE3\_201126\_FR\_TIOx\_hum\_tissue\_Urea\_RNAB\_N Scan : 15579

Andromeda score : 156.1

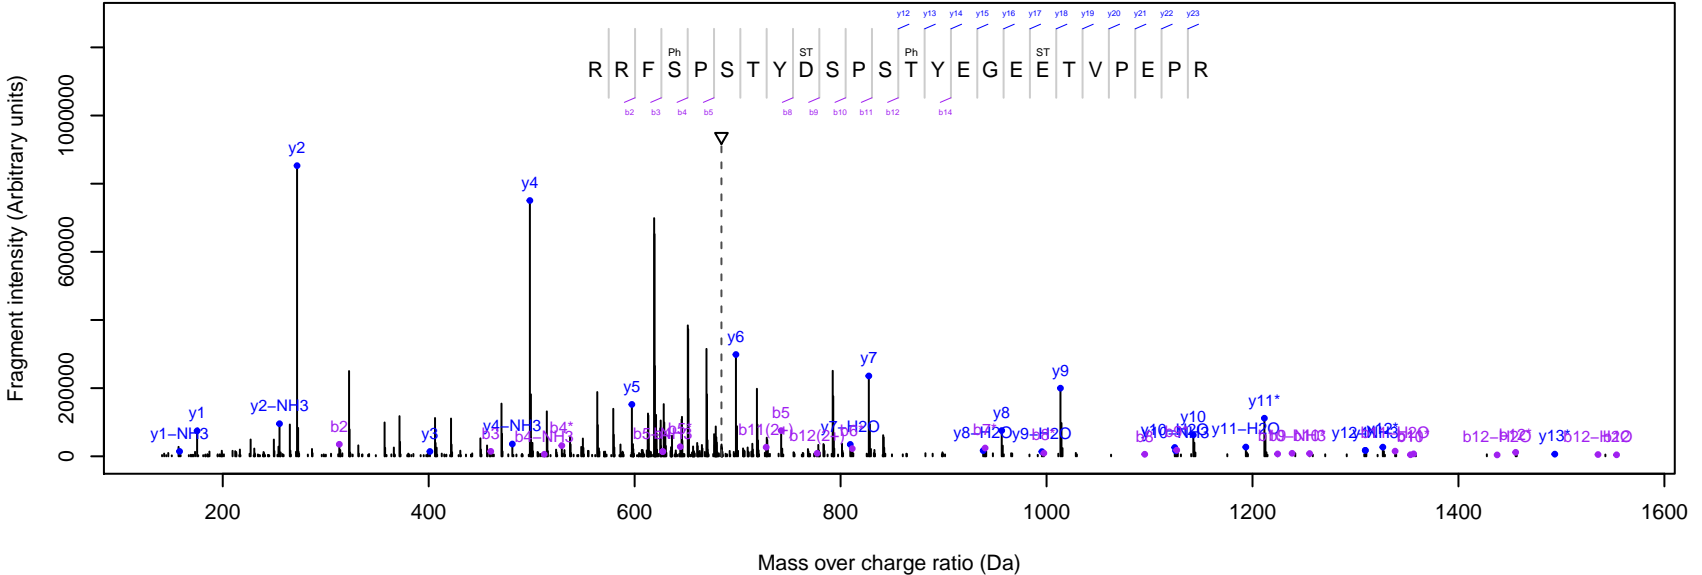

VASPSQGQVGSSTPSTYPKR-3+

Source : QE3\_201126\_FR\_TiOx\_hum\_tissue\_Urea\_RNAB\_B Scan : 5265

Andromeda score : 156.08

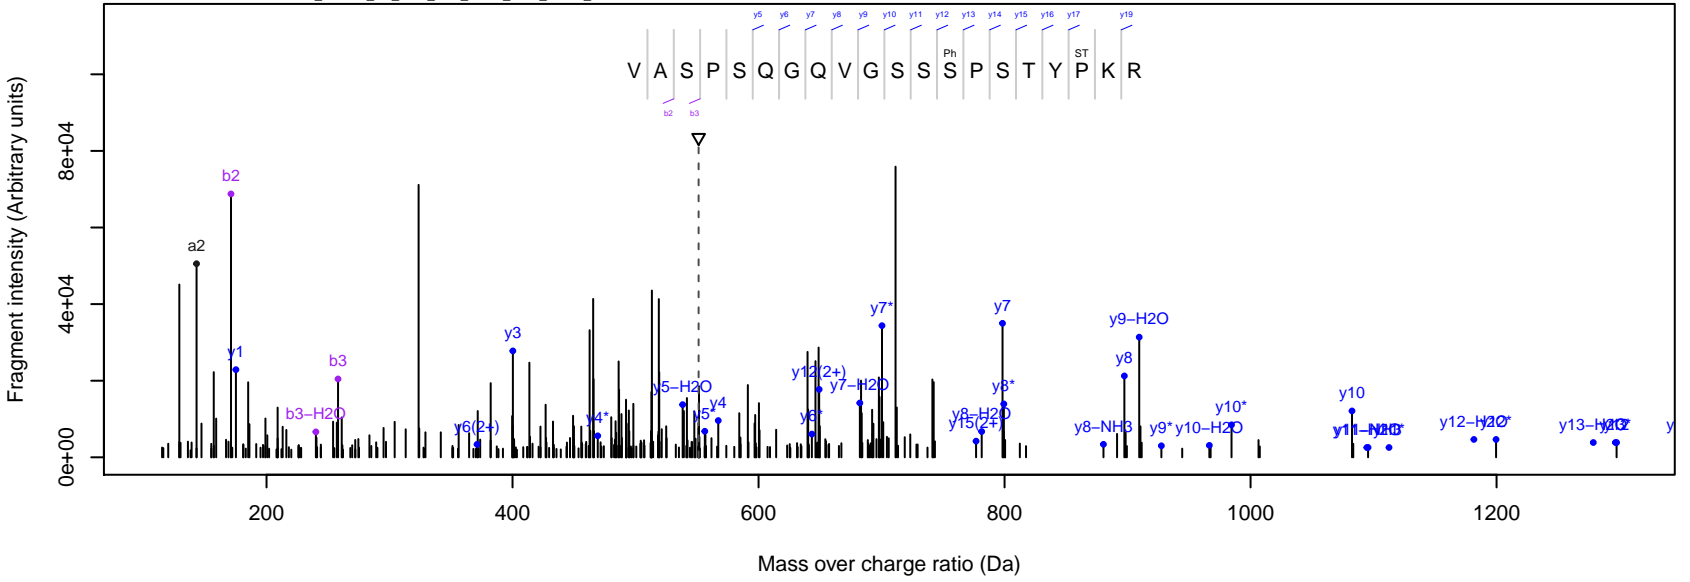

LVNALSEDTTPSTYGHSSYPSHR-3+

Source : QE3\_201126\_FR\_TiOx\_hum\_tissue\_Urea\_RNAB\_B Scan : 13611

Andromeda score : 156.05

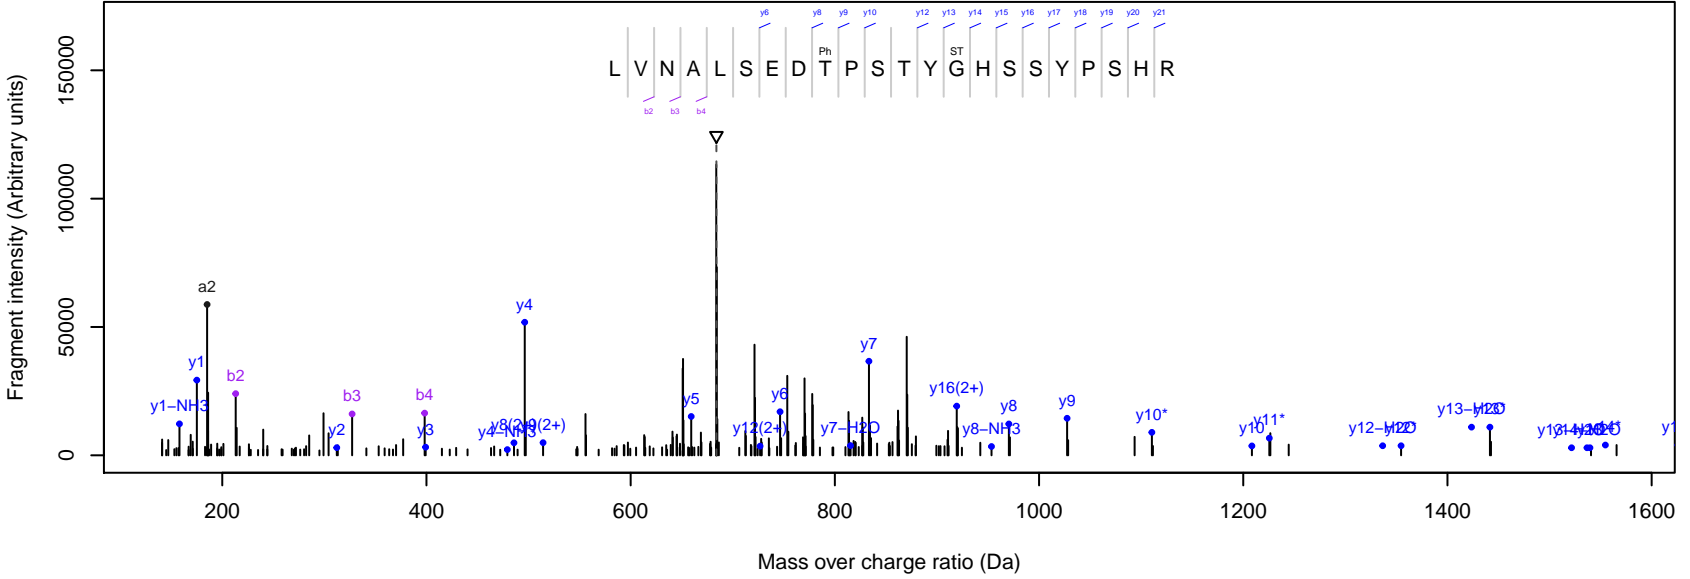

GGDVFGDTSLNSHGGSPSTYSGSTHRSPR-4+

Source : QE3\_201126\_FR\_TiOx\_hum\_tissue\_Urea\_RNAB\_H Scan : 21477

Andromeda score : 156.03

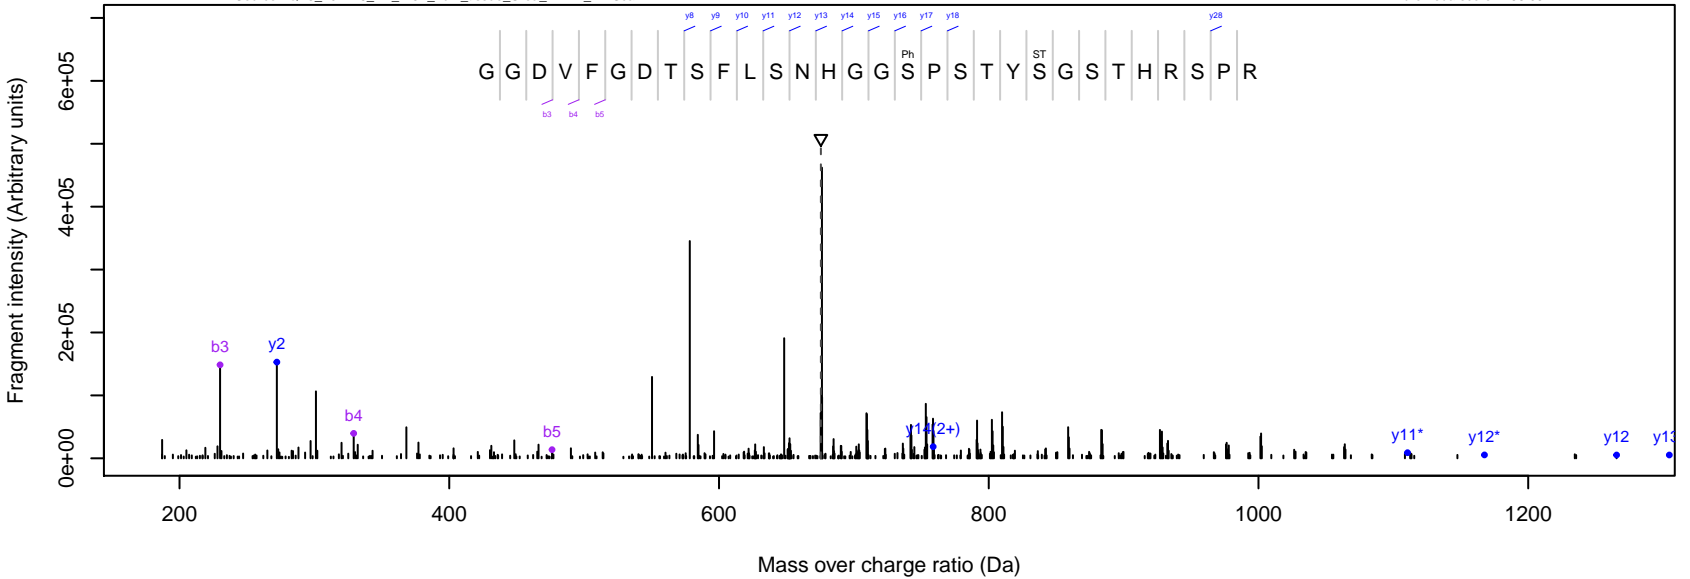

NQS(Phospho (STY))PVLEPVGR-2+

Source : QE3\_201126\_FR\_TiOx\_hum\_tissue\_Urea\_RNAB\_H Scan : 20012

Andromeda score : 155.99

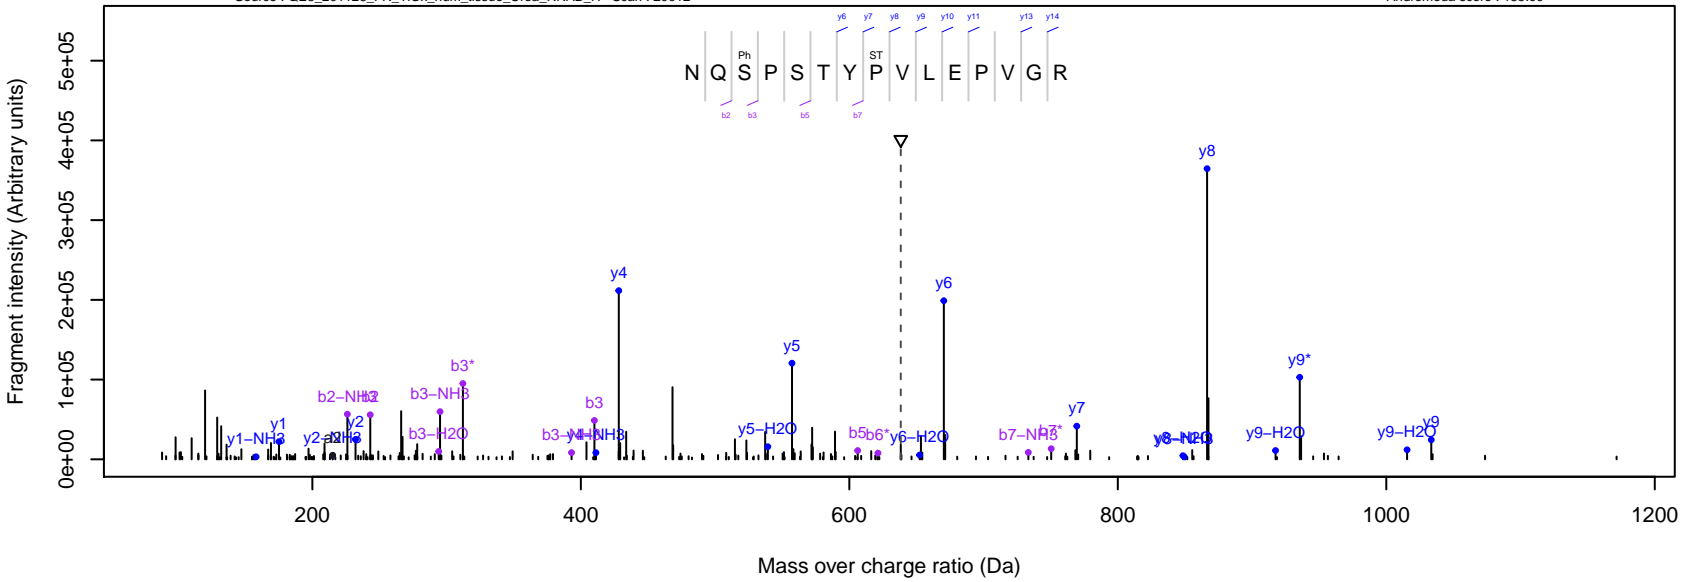

EQSSDLTPSGDVS(Phospho (STY))PVKPLSR-3+

Source : QE3\_201126\_FR\_TiOx\_hum\_tissue\_Urea\_RNAB\_B Scan : 23382

Andromeda score : 155.97

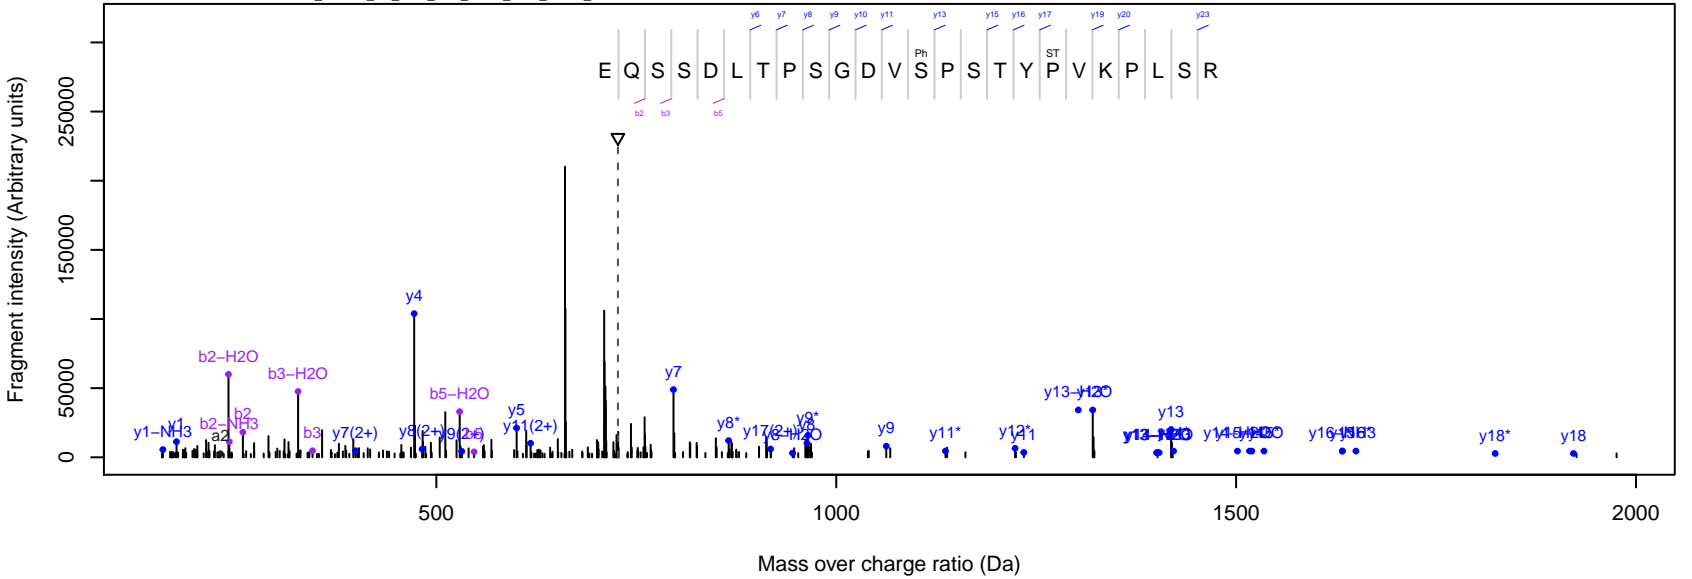

GDREEEVERPVSSPSTYPGDPEQK-3+

Source : QE3\_201126\_FR\_TiOx\_hum\_tissue\_Urea\_RNAB\_B Scan : 10549

Andromeda score : 155.97

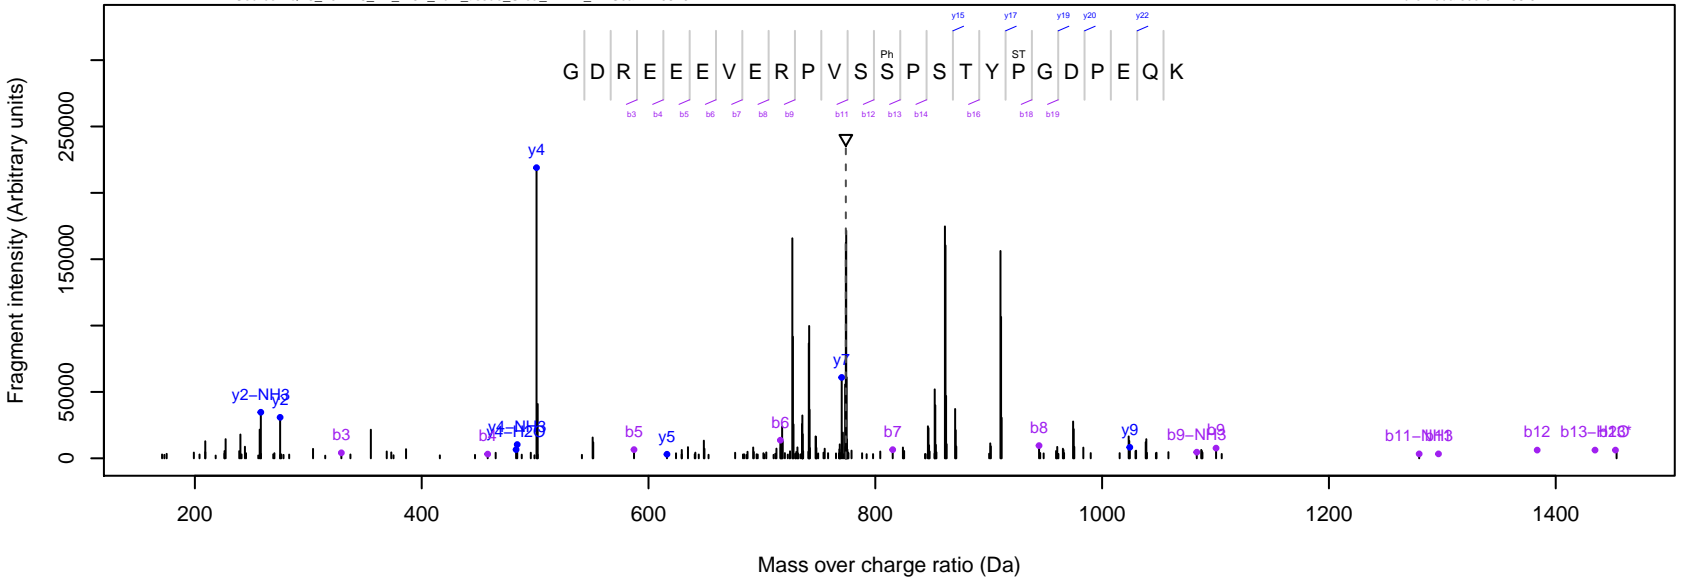

GSLASLDS(Phospho (STY))LRK-2+

Source : QE3\_201126\_FR\_TiOx\_hum\_tissue\_Urea\_RNAB\_H Scan : 20427

Andromeda score : 155.86

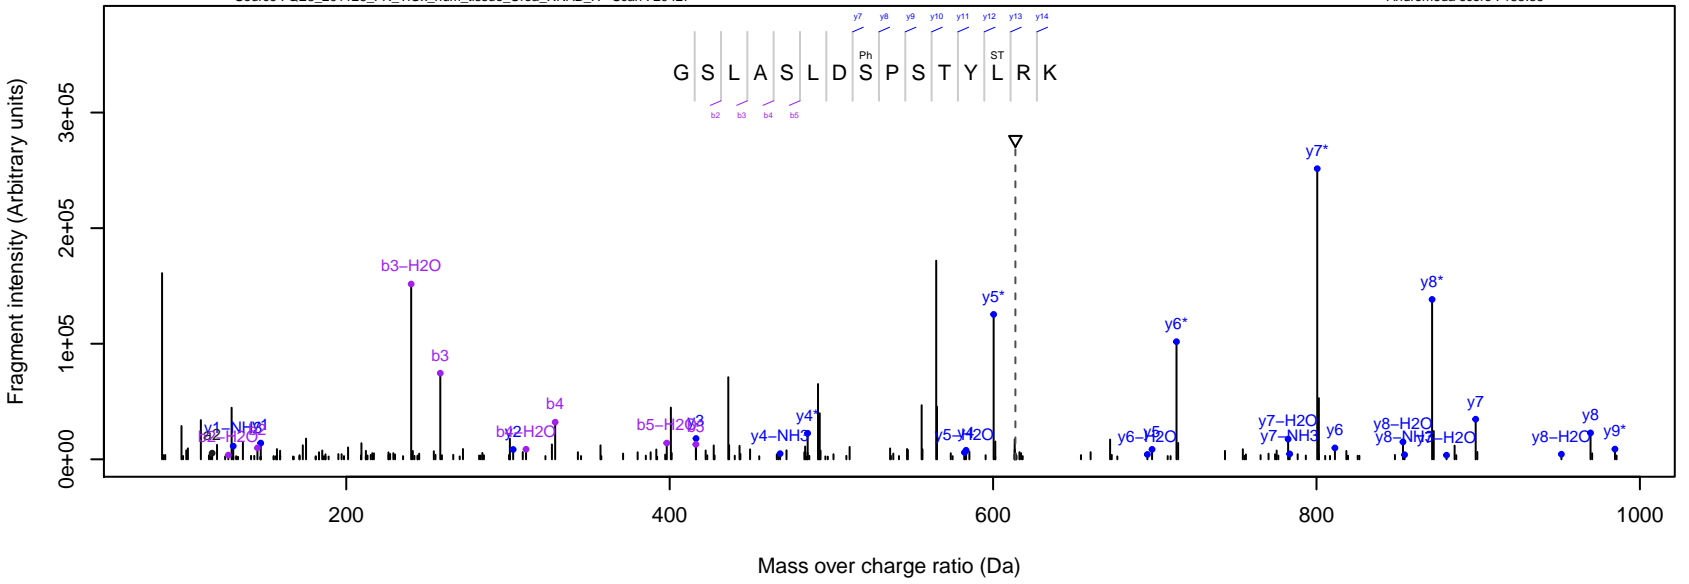

LSPGS(Phospho (STY))YPTVIQQNATSQR-3+

Source : QE3\_201126\_FR\_TiOx\_hum\_tissue\_Urea\_RNAB\_H Scan : 31456

Andromeda score : 155.86

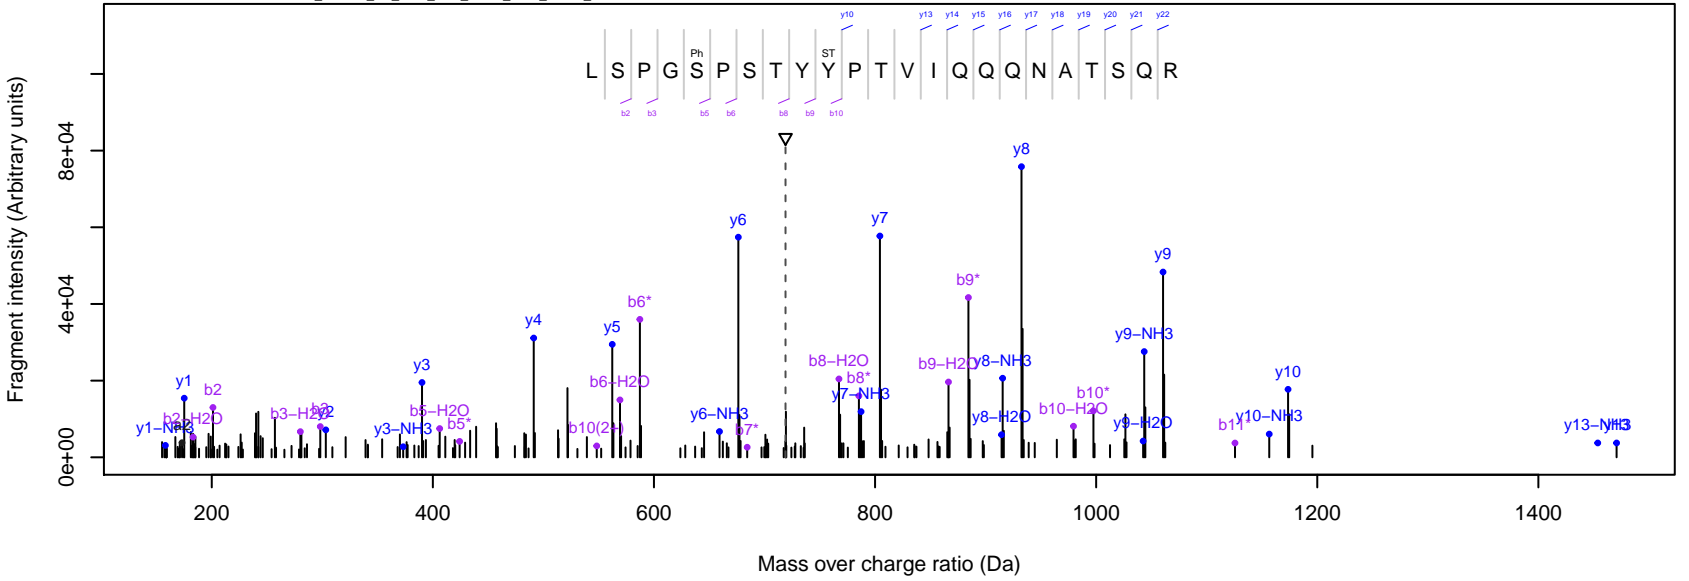

VQDLSAGGQGS(Phospho (STY))LTDSGPER-2+

Source : QE3\_201126\_FR\_TiOx\_hum\_tissue\_Urea\_RNAB\_B Scan : 20838

Andromeda score : 155.86

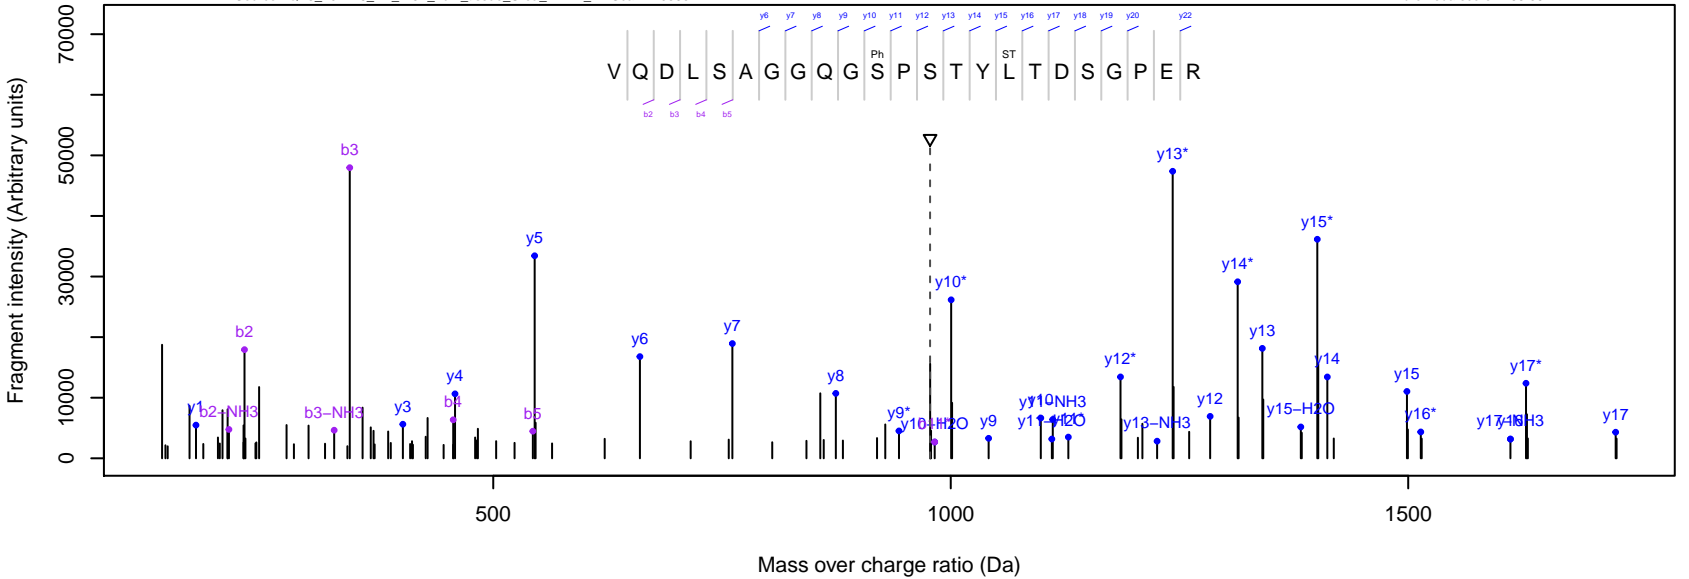

**ALELPLAASSIPRPRT(Phospho (STY))PS(Phospho (STY))PESHR-3+**

Source : QE3\_201126\_FR\_TIOx\_hum\_tissue\_Urea\_RNAB\_H Scan : 34476

Andromeda score : 155.8

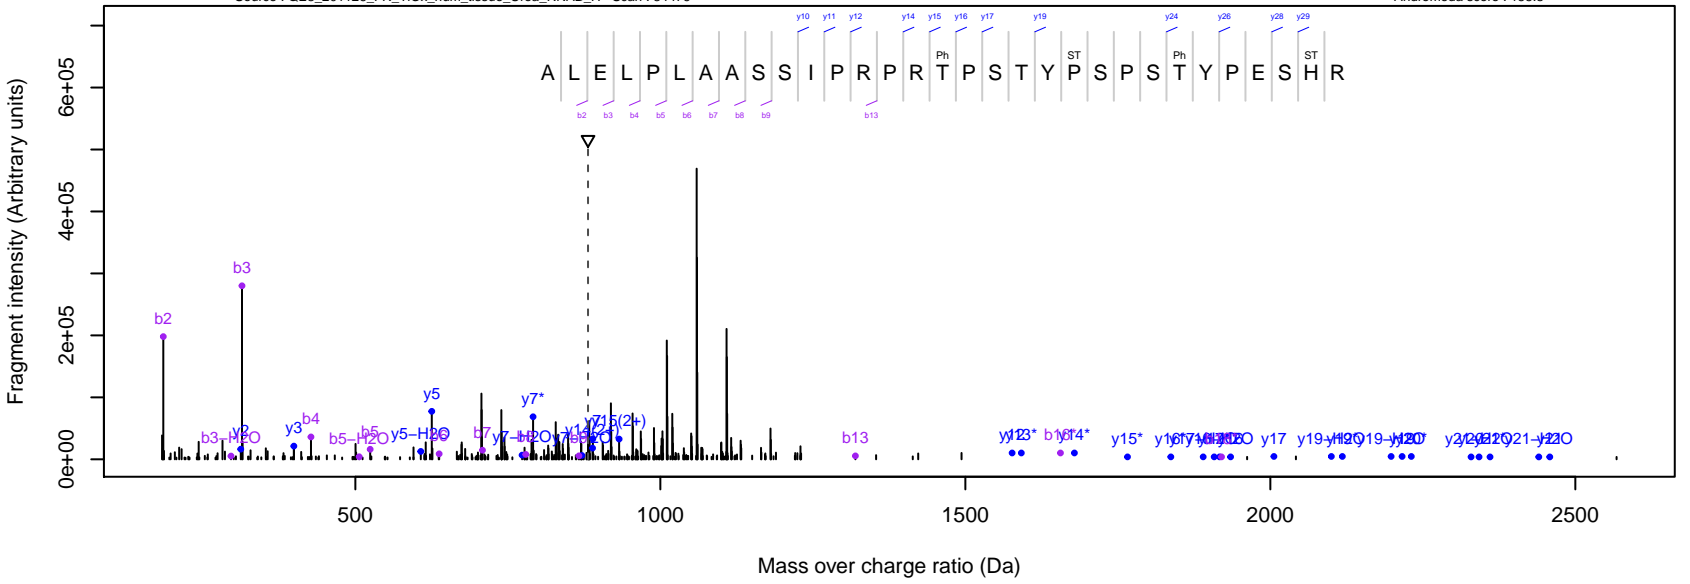

**S(Phospho (STY))HSDNDRPNC SWNTQYSSAYYSR-4+**

Source : QE3\_201126\_FR\_TIOx\_hum\_tissue\_Urea\_RNAB\_N Scan : 22409

Andromeda score : 155.8

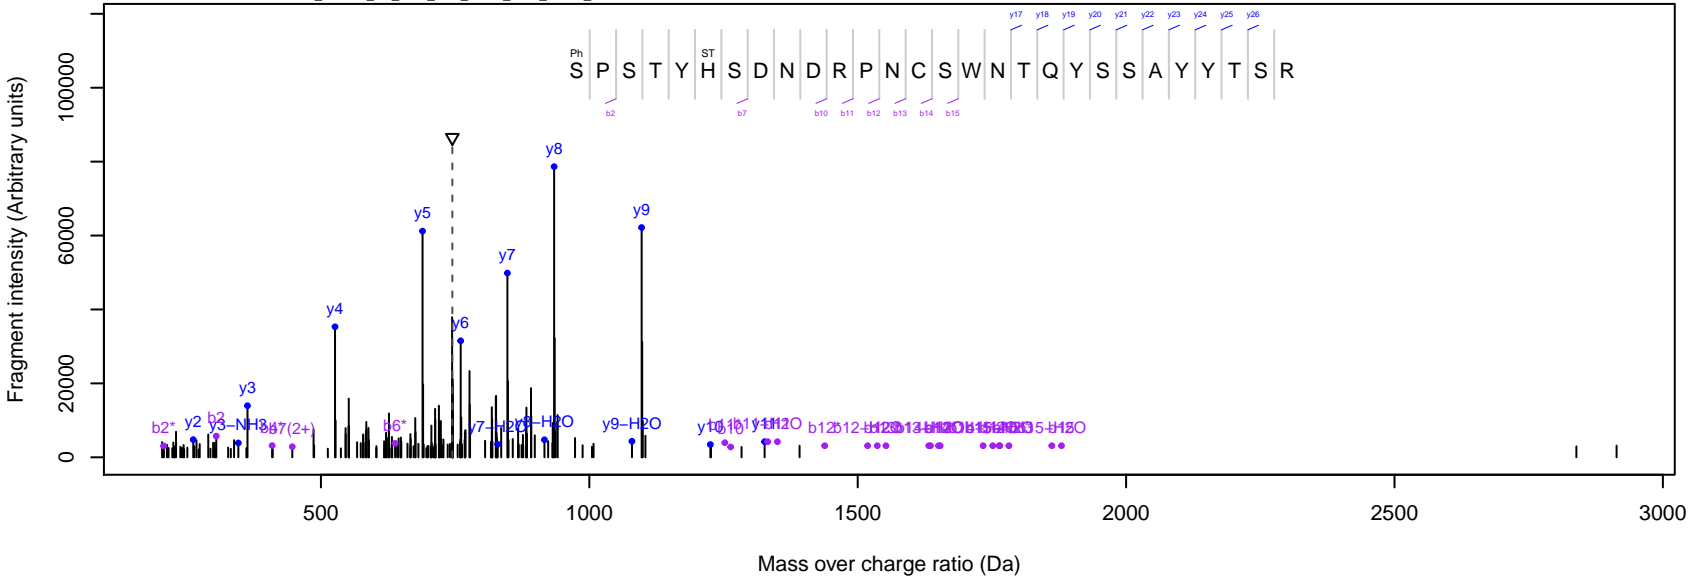

**STFREES(Phospho (STY))PLR-2+**

Source : QE3\_201126\_FR\_TIOx\_hum\_tissue\_Urea\_RNAB\_H Scan : 11965

Andromeda score : 155.8

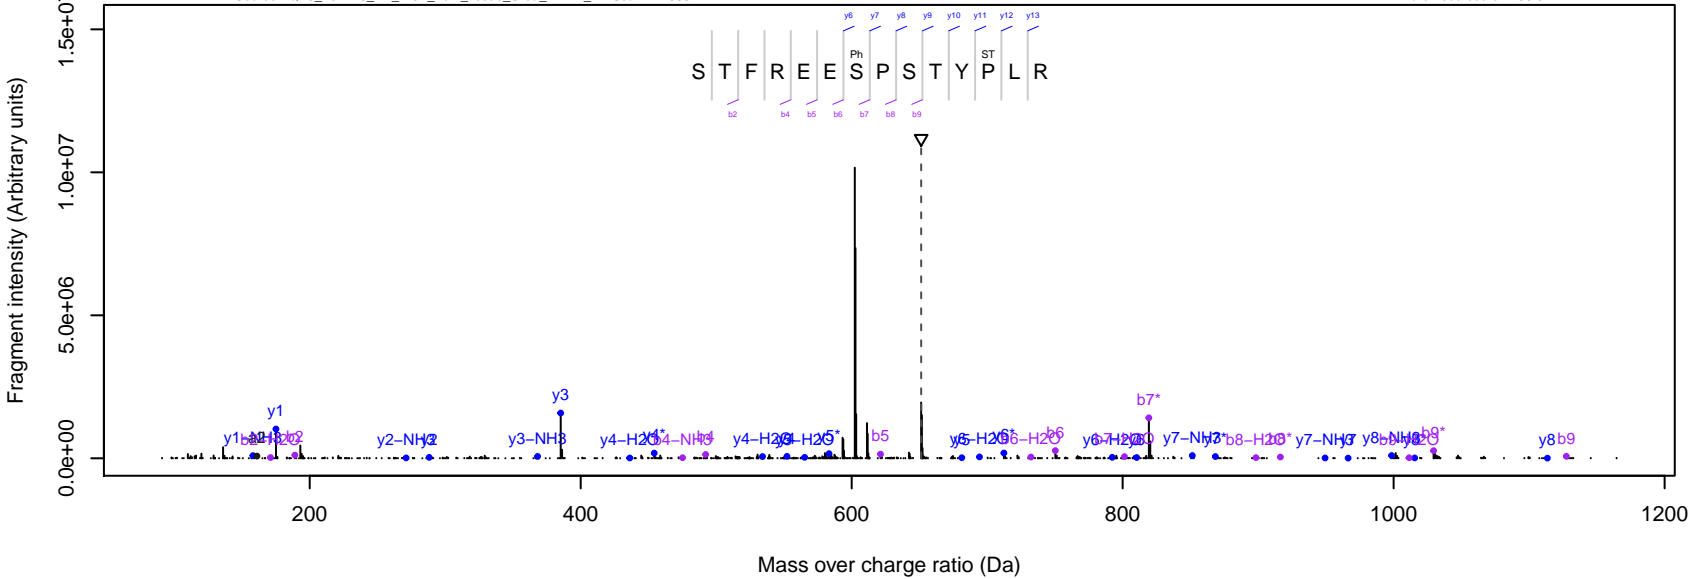

NRPDYVS(Phospho (STY))EEEEDEDFETAVK-3+

Source : QE3\_201126\_FR\_TIOx\_hum\_tissue\_Urea\_RNAB\_B Scan : 30544

Andromeda score : 155.73

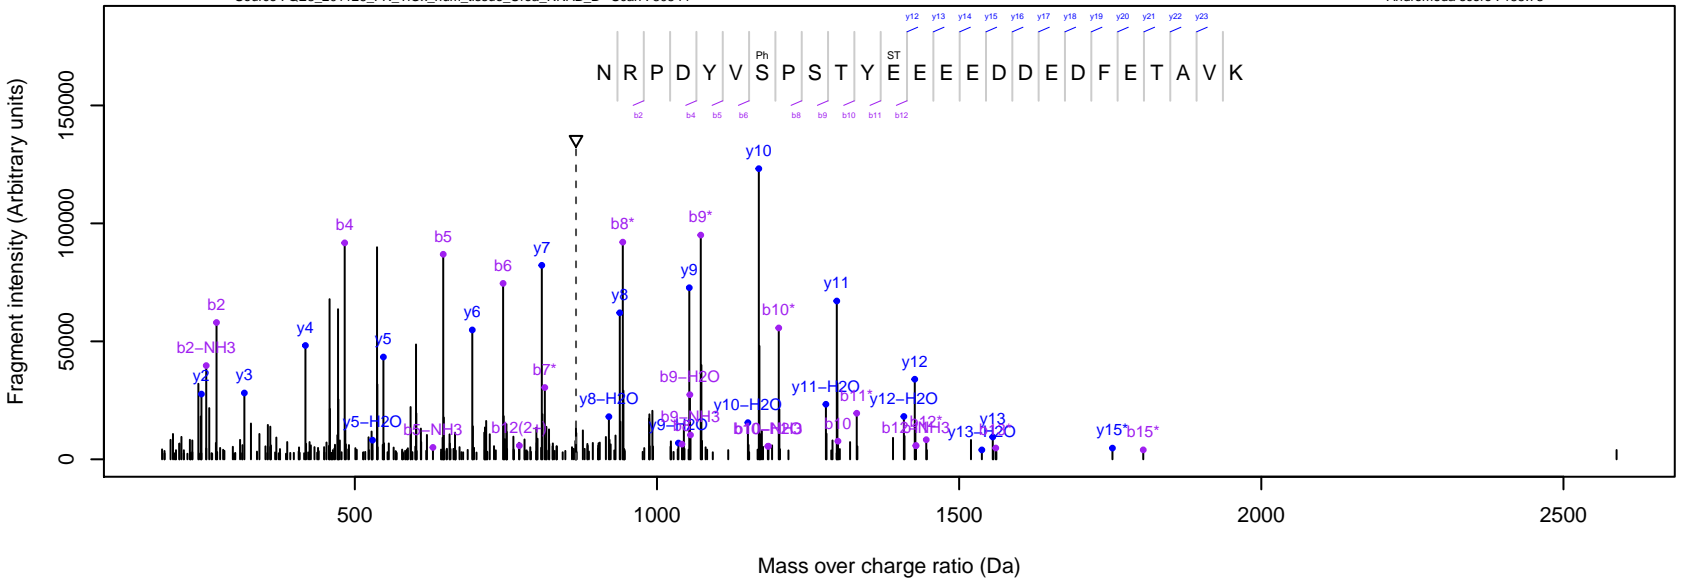

LNVLEKSS(Phospho (STY))PGHR-3+

Source : QE3\_201126\_FR\_TIOx\_hum\_tissue\_Urea\_RNAB\_N Scan : 8532

Andromeda score : 155.57

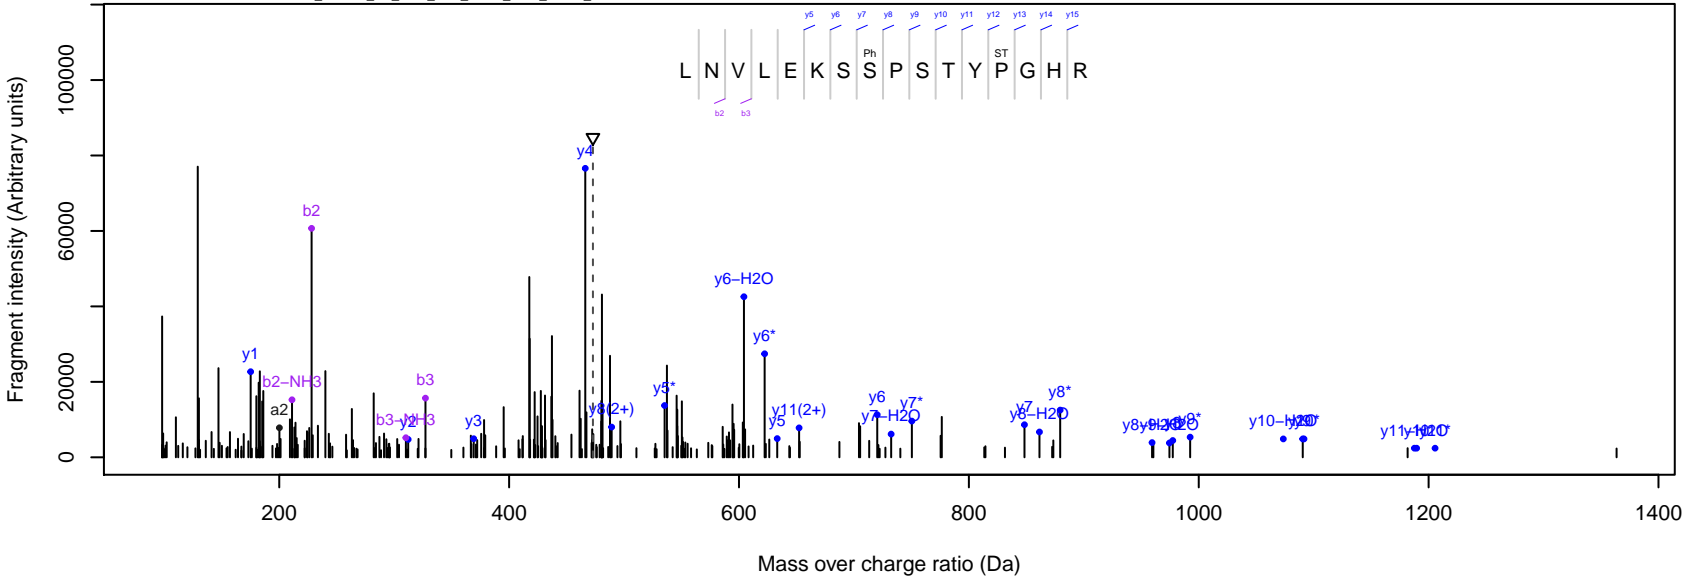

S(Phospho (STY))RS(Phospho (STY))PQRPGWSR-3+

Source : QE3\_201126\_FR\_TIOx\_hum\_tissue\_Urea\_RNAB\_H Scan : 9164

Andromeda score : 155.57

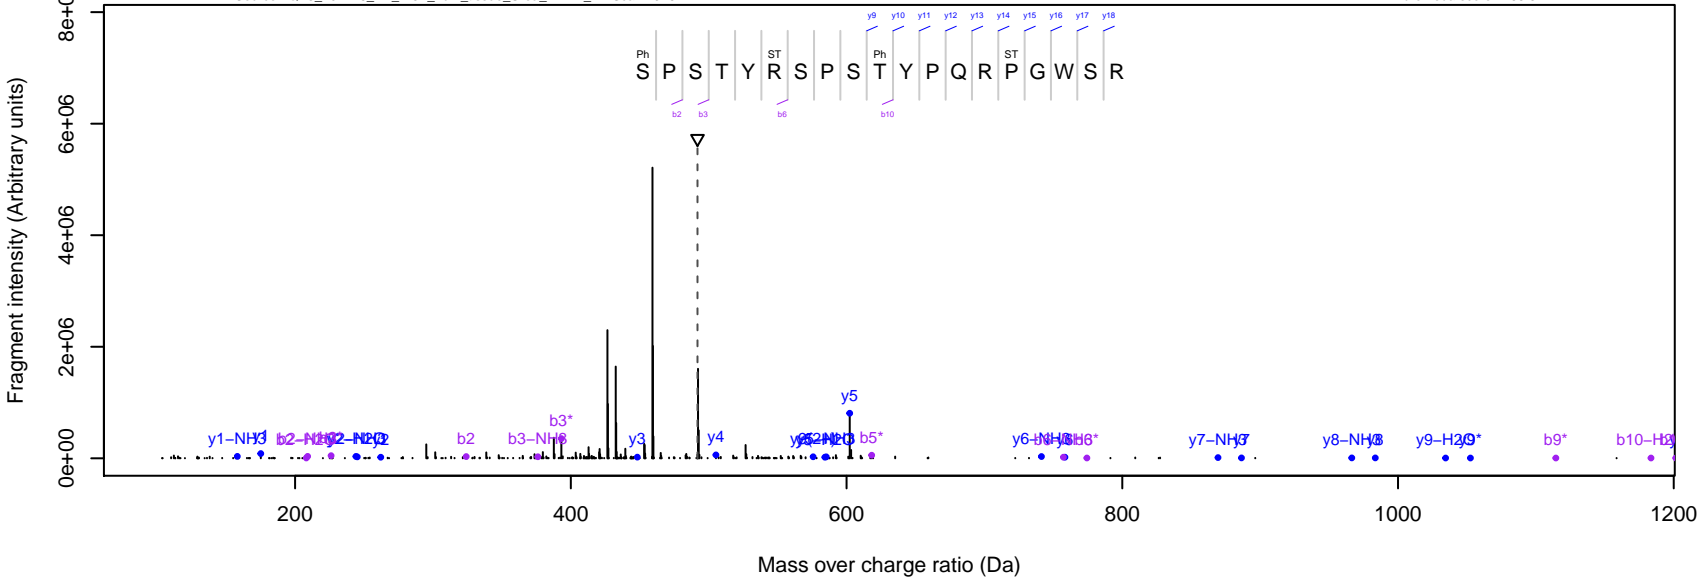

WRPHS(Phospho (STY))PDGPR-3+

Source : QE3\_201126\_FR\_TiOx\_hum\_tissue\_Urea\_RNAB\_H Scan : 6955

Andromeda score : 155.57

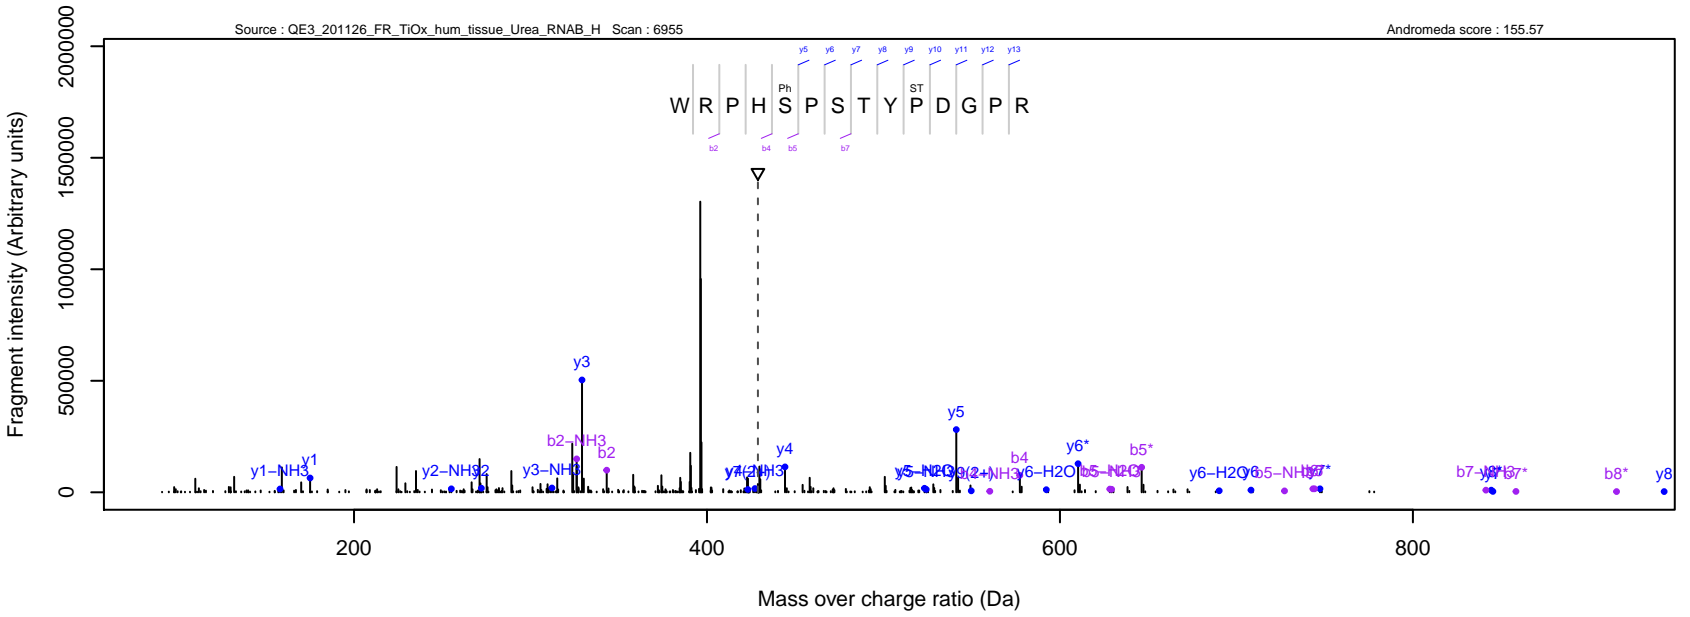

RTS(Phospho (STY))FSTSDVSK-2+

Source : QE3\_201126\_FR\_TiOx\_hum\_tissue\_Urea\_RNAB\_B Scan : 9304

Andromeda score : 155.56

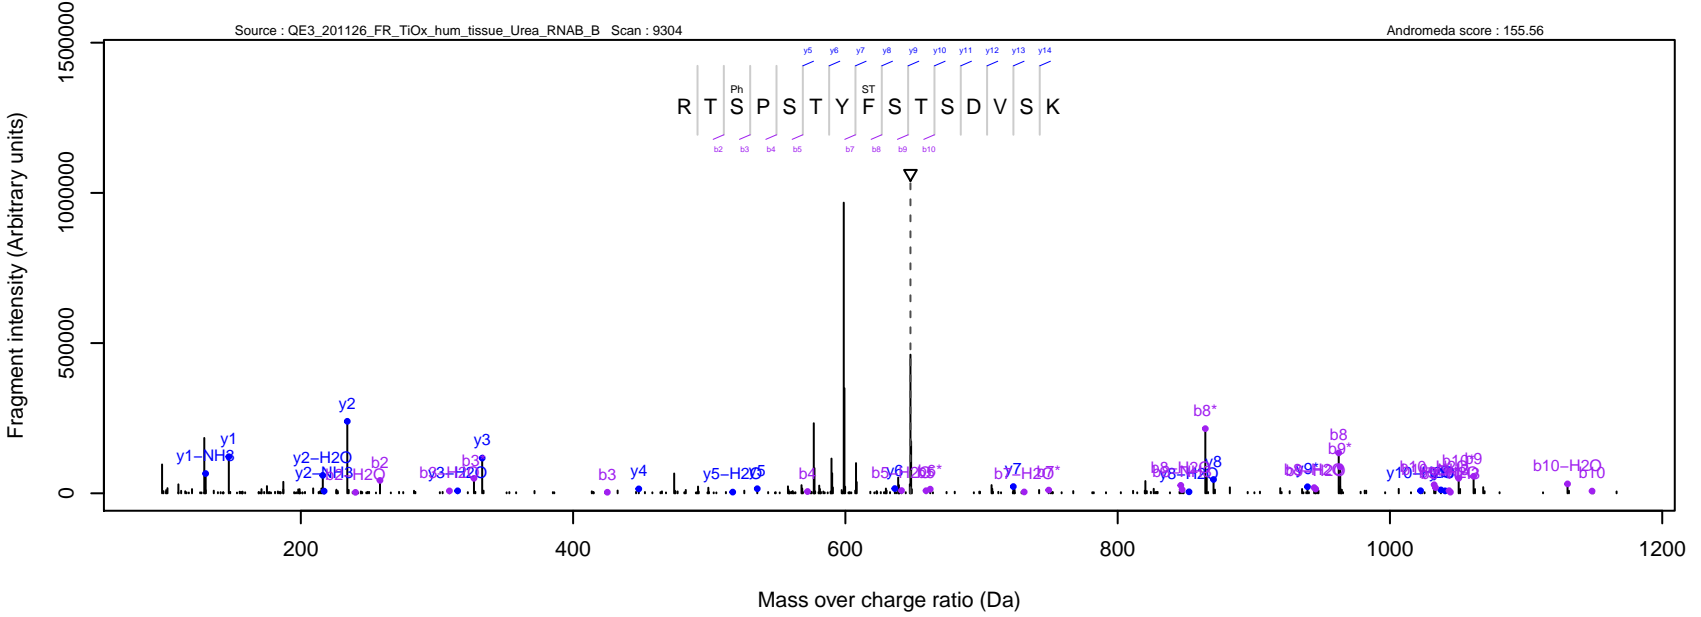

TSETDDGVVGK(Phospho (STY))SDGEDEQQVPK-3+

Source : QE3\_201126\_FR\_TiOx\_hum\_tissue\_Urea\_RNAB\_H Scan : 13443

Andromeda score : 155.56

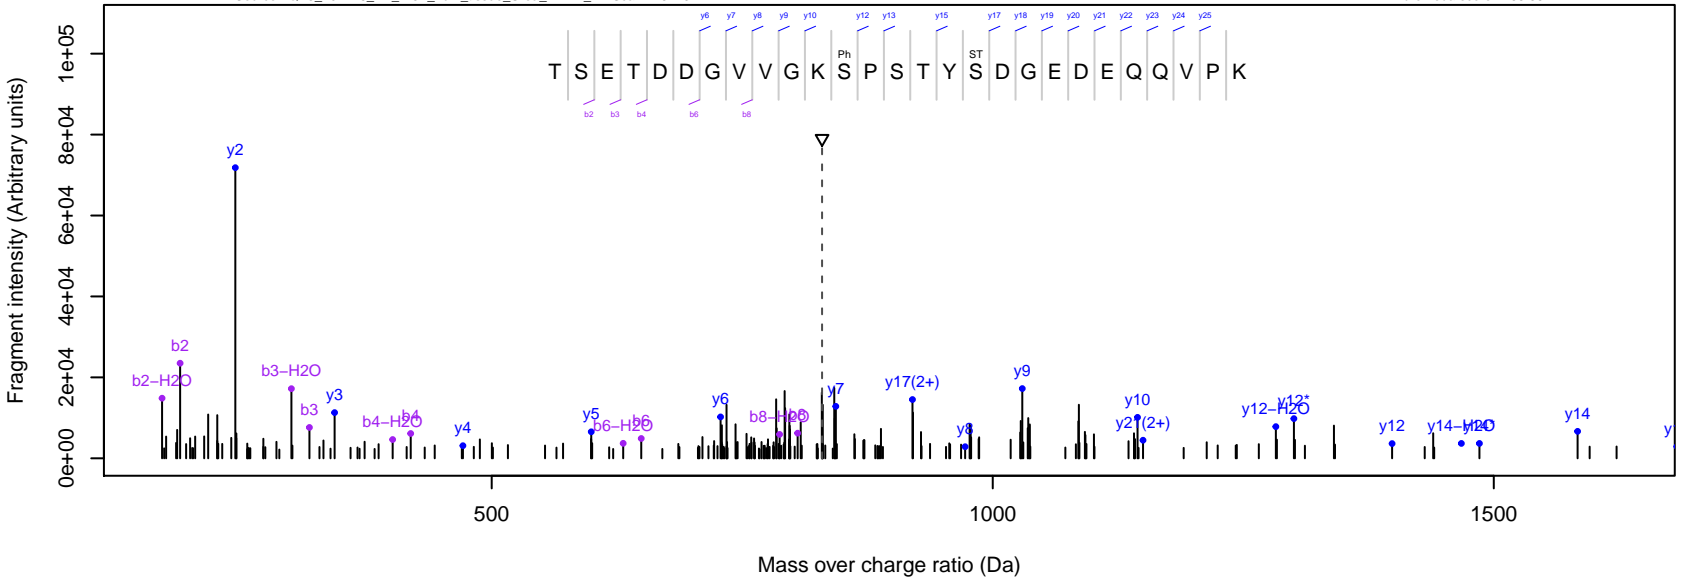



GPPDFS(Phospho (STY))S(Phospho (STY))DEEREPTVLGSGAAAAGR-3+

Source : QE3\_201126\_FR\_TIOx\_hum\_tissue\_Urea\_RNAB\_B Scan : 36958

Andromeda score : 155.55

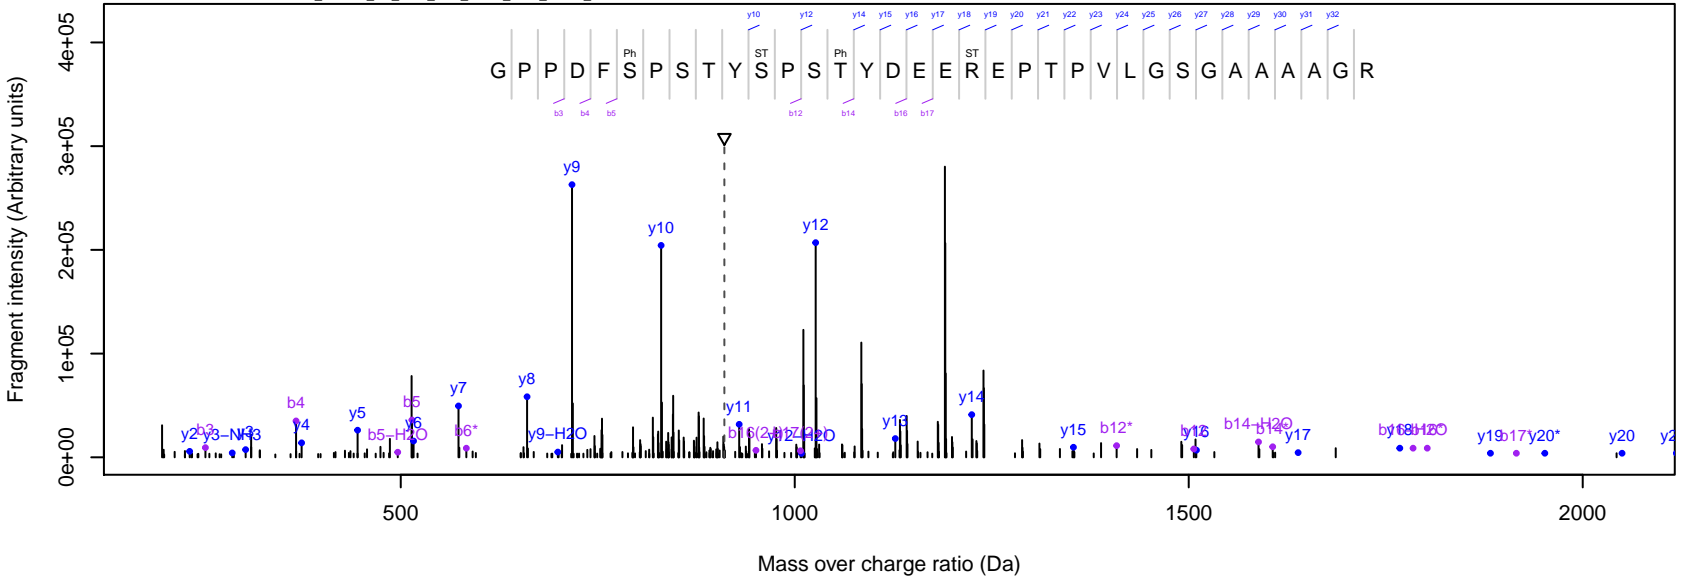

FSFCCS(Phospho (STY))PEPEAEAAAGPGPCER-2+

Source : QE3\_201126\_FR\_TIOx\_hum\_tissue\_Urea\_RNAB\_H Scan : 40696

Andromeda score : 155.49

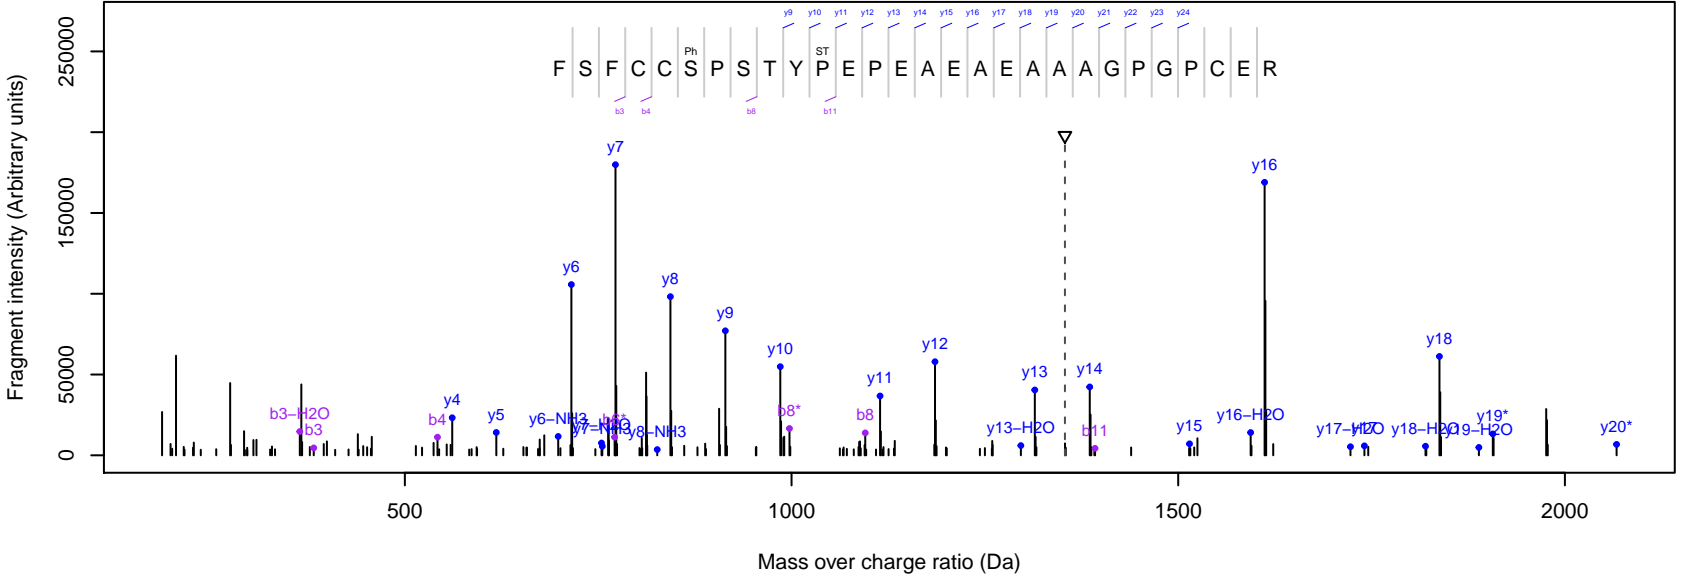

RLS(Phospho (STY))EQLAHTPTAFK-3+

Source : QE3\_201126\_FR\_TIOx\_hum\_tissue\_Urea\_RNAB\_H Scan : 19903

Andromeda score : 155.49

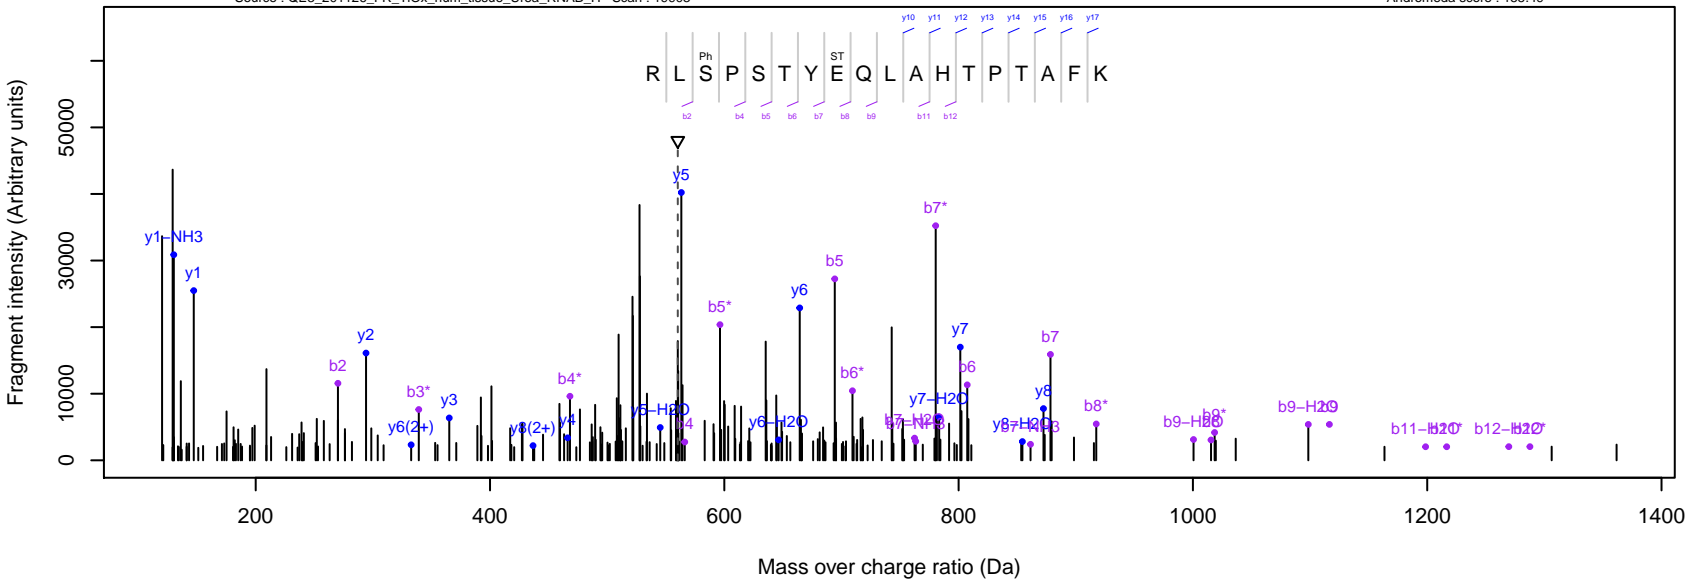

SLT(Phospho (STY))DSCLFEK-2+

Source : QE3\_201126\_FR\_TiOx\_hum\_tissue\_Urea\_RNAB\_H Scan : 33743

Andromeda score : 155.48

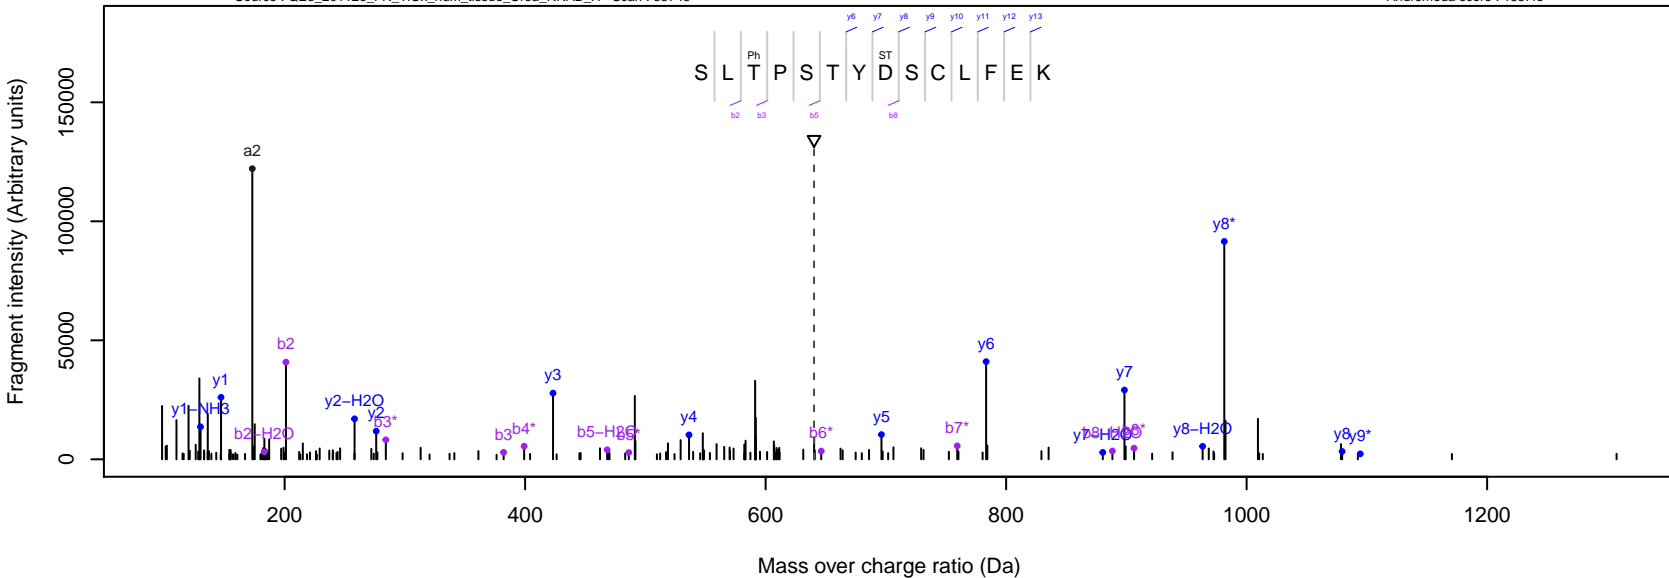

MEREDS(Phospho (STY))S(Phospho (STY))EEEEIIDDEEIER-3+

Source : QE3\_201126\_FR\_TiOx\_hum\_tissue\_Urea\_RNAB\_H Scan : 27384

Andromeda score : 155.46

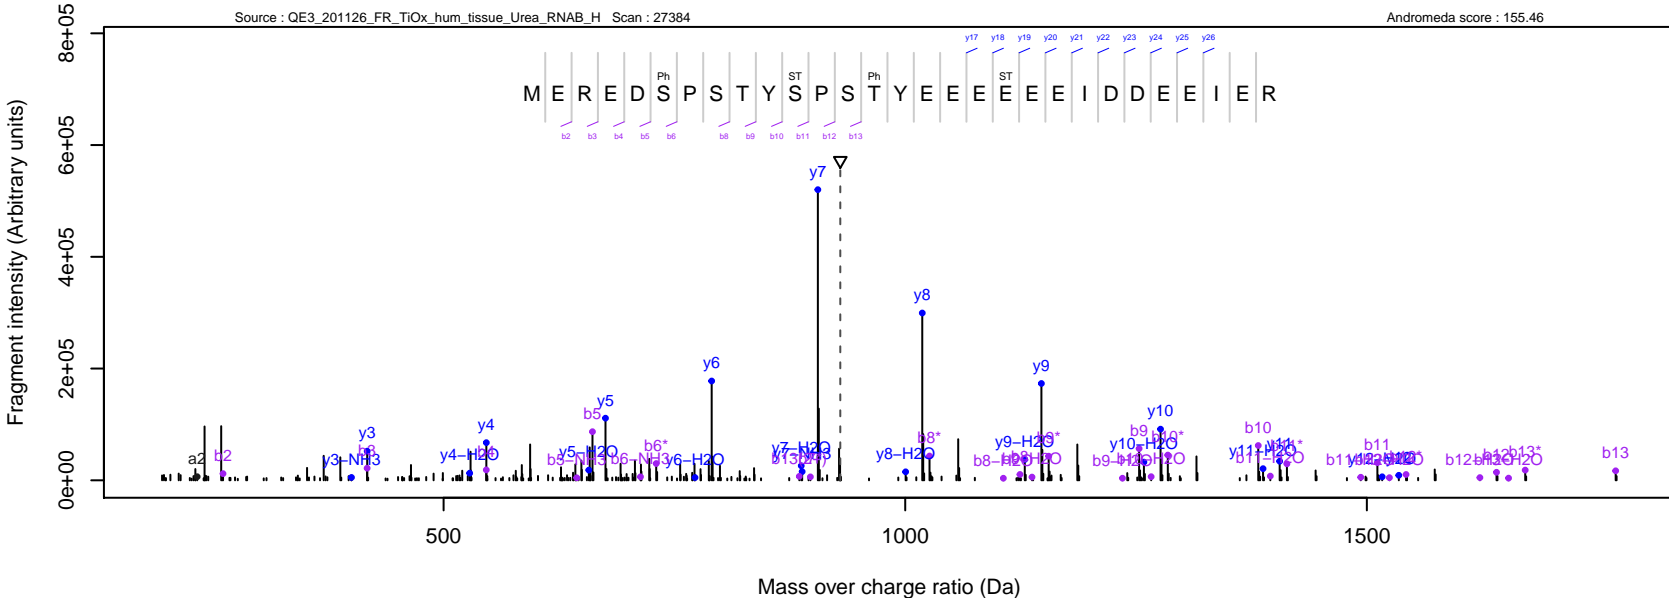

RPPSQSLTSSSLSPDIFDS(Phospho (STY))PS(Phospho (STY))PEEDKEEHISLAHR-4+

Source : QE3\_201126\_FR\_TiOx\_hum\_tissue\_Urea\_RNAB\_H Scan : 33466

Andromeda score : 155.38

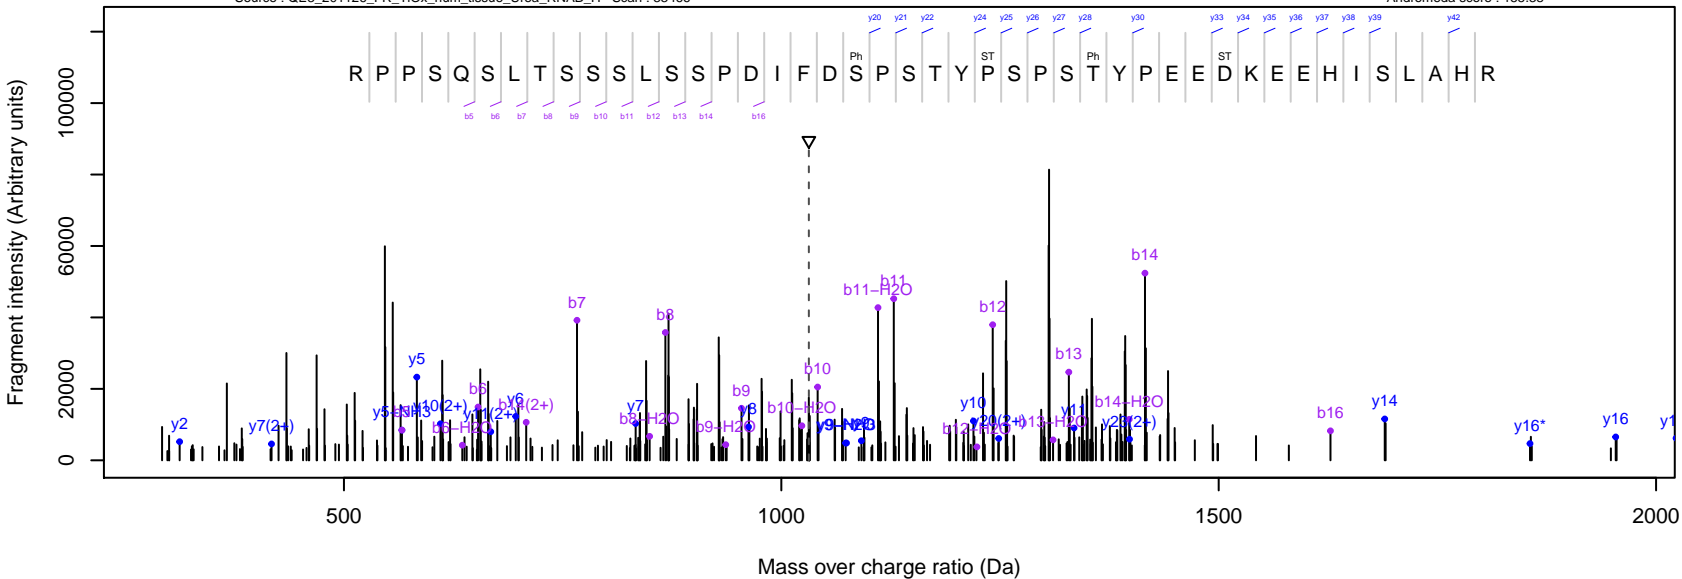

GS(Phospho (STY))YGLDGGPIITTQVTIPK-2+

Source : QE3\_201126\_FR\_TiOx\_hum\_tissue\_Urea\_RNAB\_B Scan : 50804

Andromeda score : 155.2

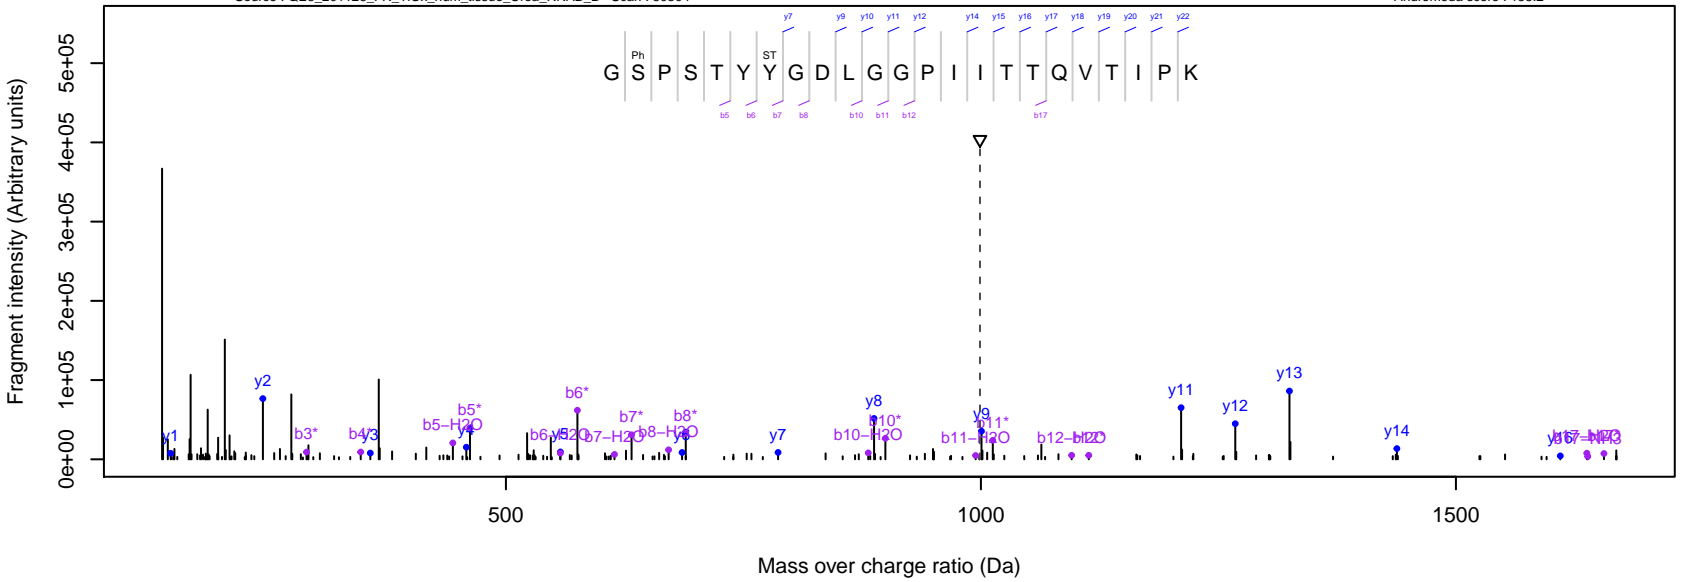

HVGLDGNVTADKDGVDV(SPhospho (STY))IEDSVISLSGSDHCCIIGR-4+

Source : QE3\_201126\_FR\_TiOx\_hum\_tissue\_Urea\_RNAB\_H Scan : 47804

Andromeda score : 155.2

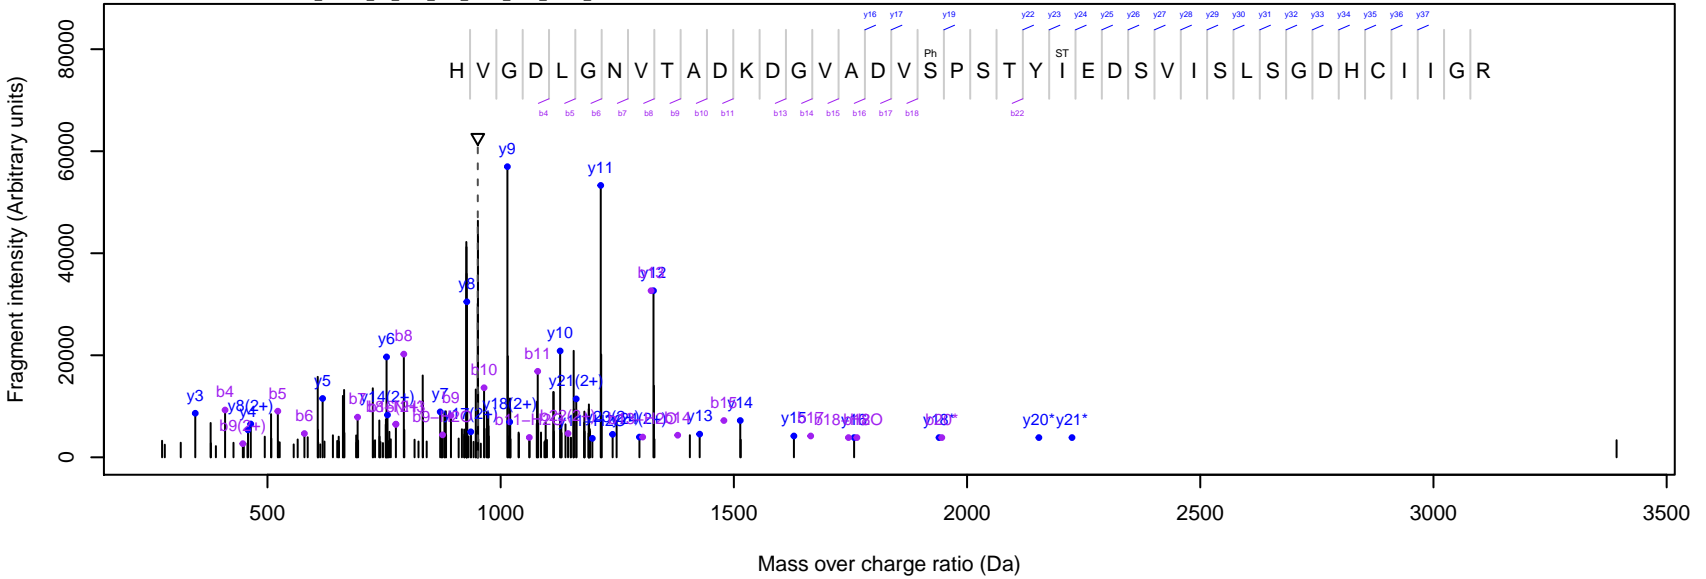

M(Oxidation (M))ADHLEGLS(Phospho (STY))S(Phospho (STY))DDEETSTDITNFNLEKDR-3+

Source : QE3\_201126\_FR\_TiOx\_hum\_tissue\_Urea\_RNAB\_B Scan : 41106

Andromeda score : 155.17

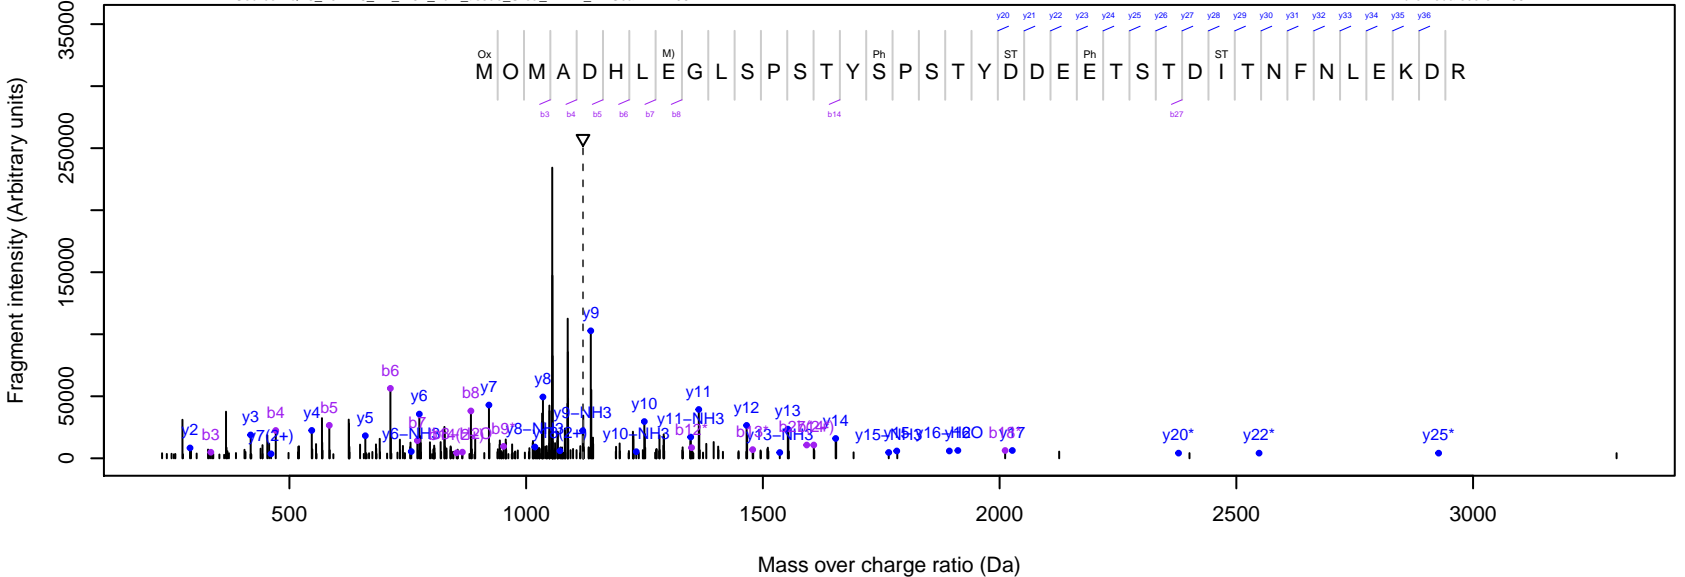

CSS(Phospho (STY))LGDLLGEGPRHPLQPR-3+

Source : QE3\_201126\_FR\_TIOx\_hum\_tissue\_Urea\_RNAB\_H Scan : 31335

Andromeda score : 155.16

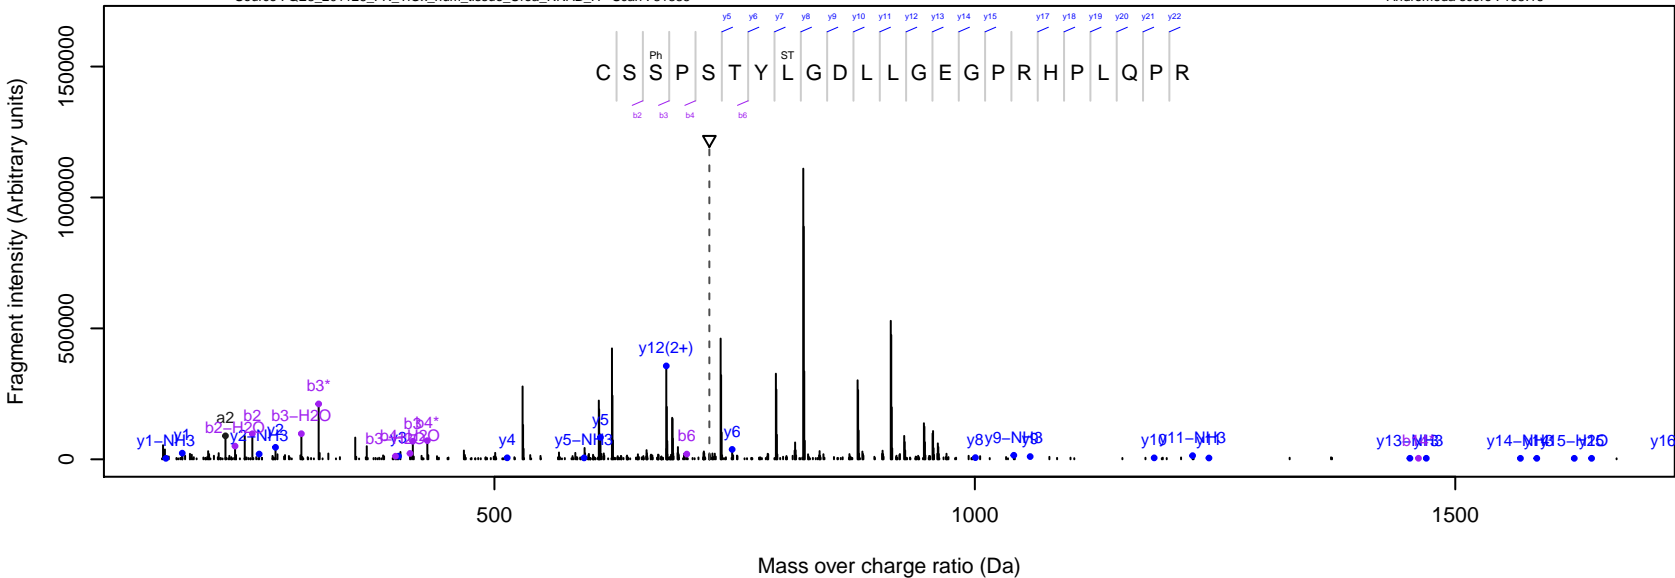

SFS(Phospho (STY))SPENFQR-2+

Source : QE3\_201126\_FR\_TIOx\_hum\_tissue\_Urea\_RNAB\_H Scan : 23755

Andromeda score : 155.11

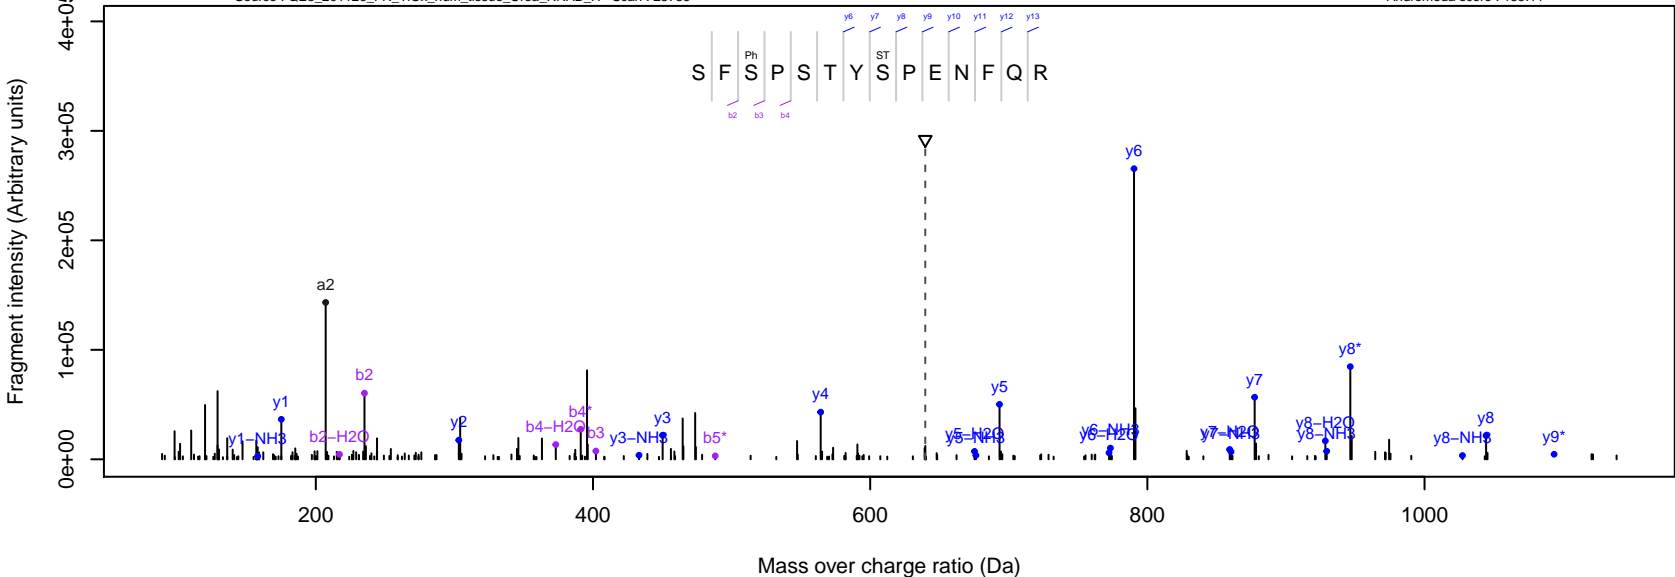

SPS(Phospho (STY))DSSTASTPVAEQIER-2+

Source : QE3\_201126\_FR\_TIOx\_hum\_tissue\_Urea\_RNAB\_N Scan : 22724

Andromeda score : 155.1

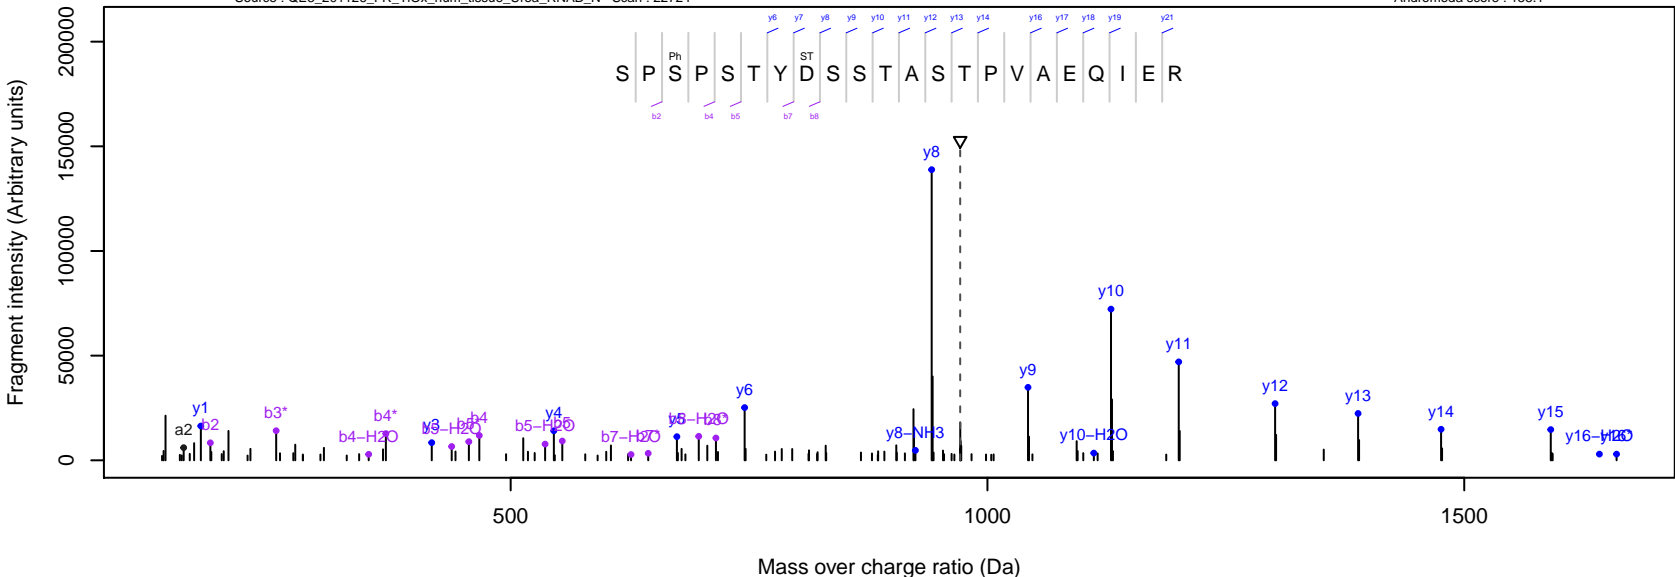

FLQPGS(Phospho (STY))PR-2+

Source : QE3\_201126\_FR\_TiOx\_hum\_tissue\_Urea\_RNAB\_N Scan : 17080

Andromeda score : 154.84

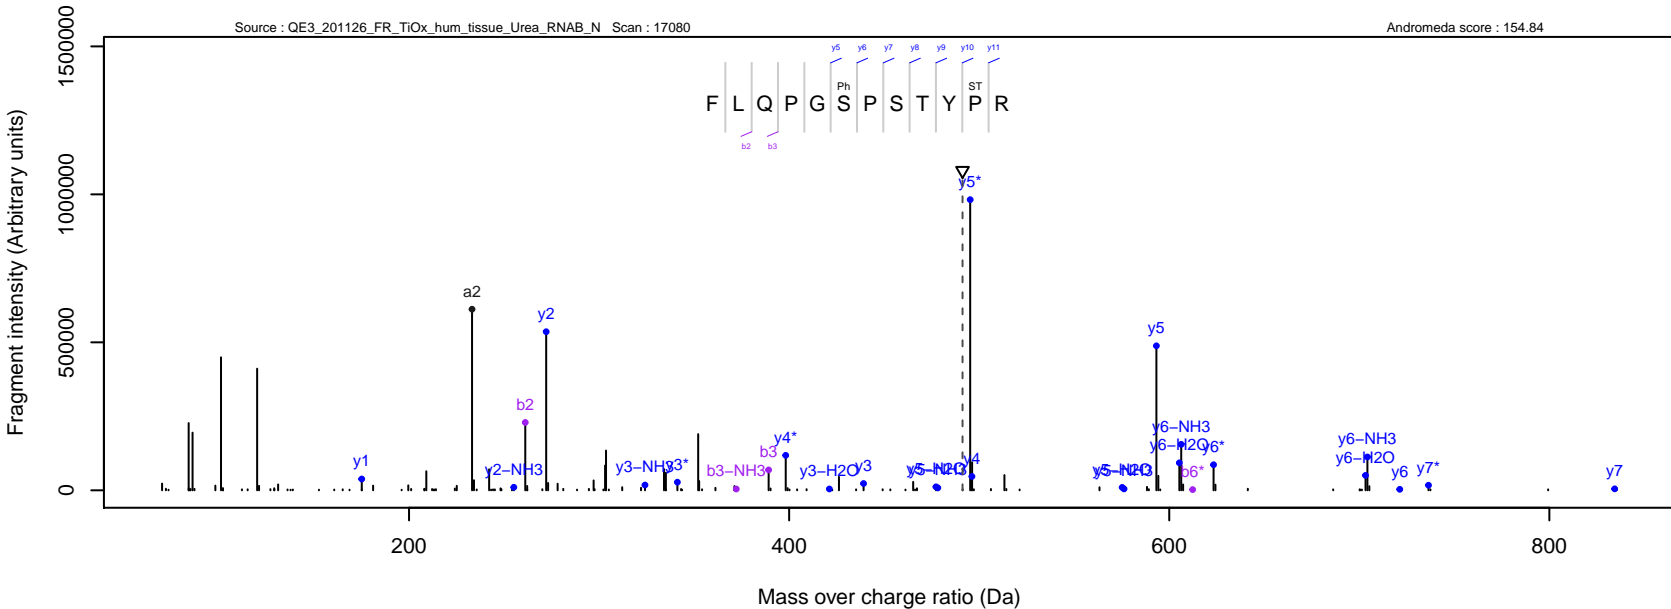

LSGLS(Phospho (STY))FKR-2+

Source : QE3\_201126\_FR\_TiOx\_hum\_tissue\_Urea\_RNAB\_B Scan : 18726

Andromeda score : 154.84

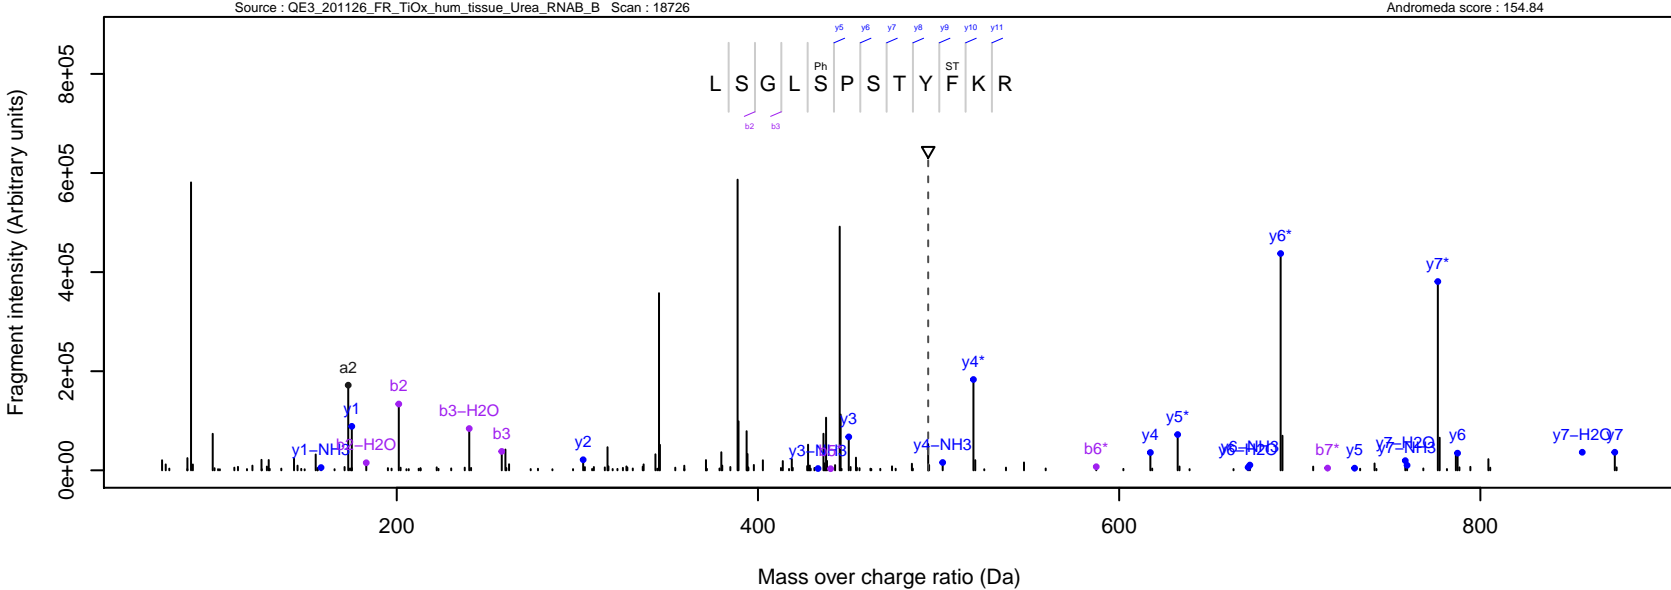

SVGKVEPSSQSPGRS(Phospho (STY))PR-3+

Source : QE3\_201126\_FR\_TiOx\_hum\_tissue\_Urea\_RNAB\_B Scan : 4906

Andromeda score : 154.84

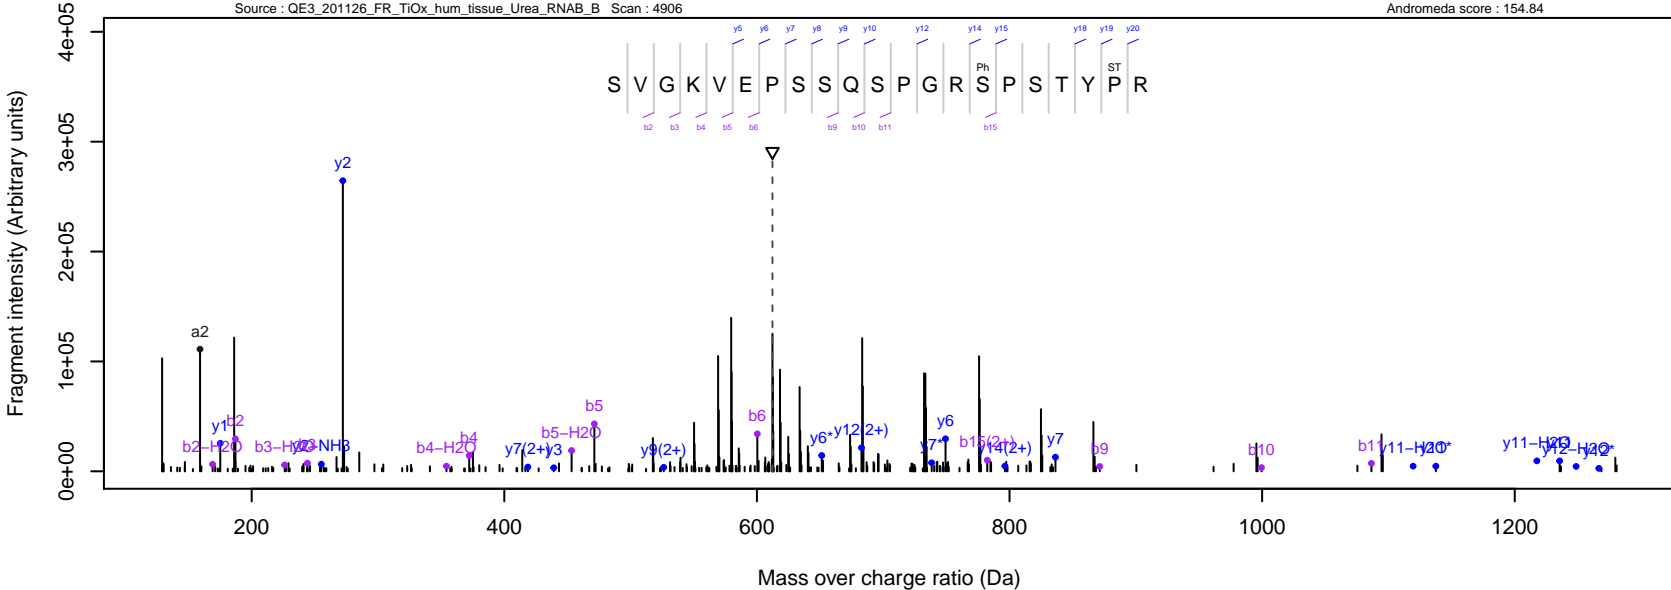

RGS(Phospho (STY))FDATGSGFSMTFSSSSSYSSSGYGR-3+

Source : QE3\_201126\_FR\_TiOx\_hum\_tissue\_Urea\_RNAB\_B Scan : 41523

Andromeda score : 154.83

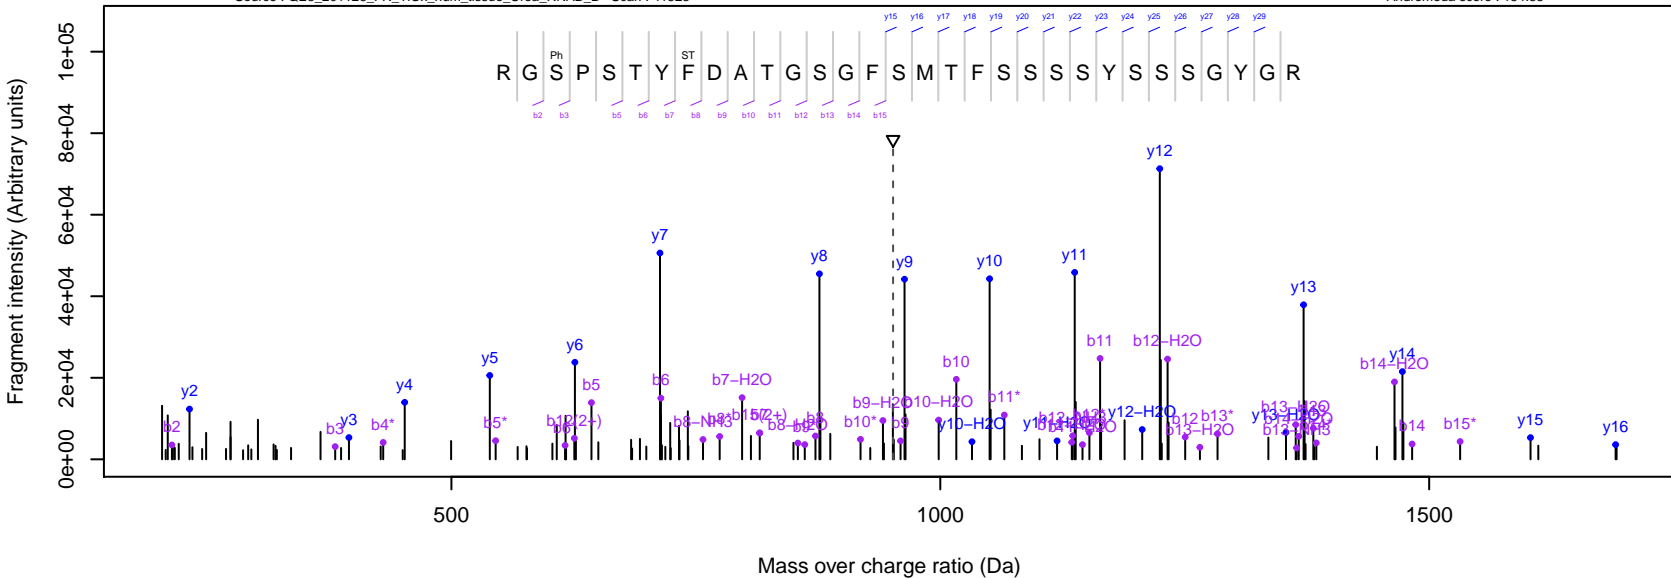

RFS(Phospho (STY))S(Phospho (STY))GGEEDDFDR-2+

Source : QE3\_201126\_FR\_TiOx\_hum\_tissue\_Urea\_RNAB\_N Scan : 20876

Andromeda score : 154.81

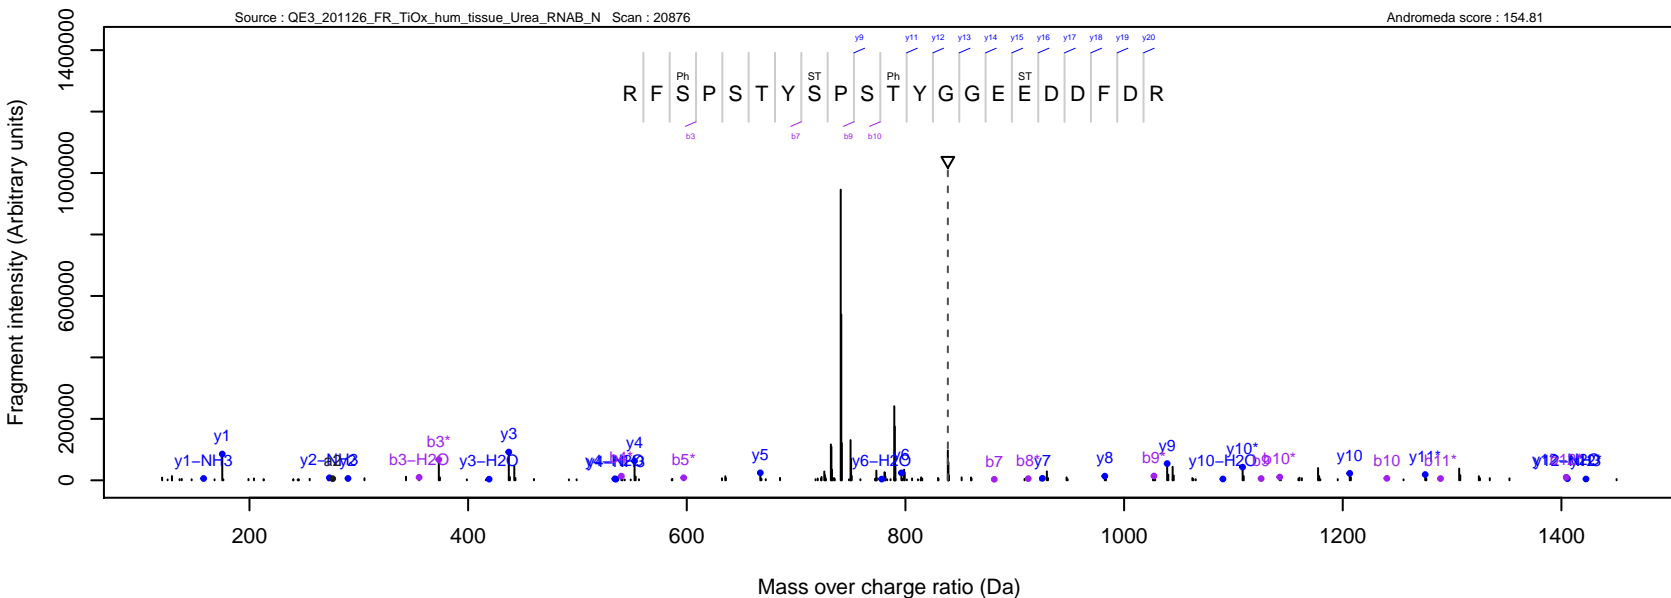

EAEES(Phospho (STY))SGGEEDEENIEVVYSK-3+

Source : QE3\_201126\_FR\_TiOx\_hum\_tissue\_Urea\_RNAB\_N Scan : 31704

Andromeda score : 154.77

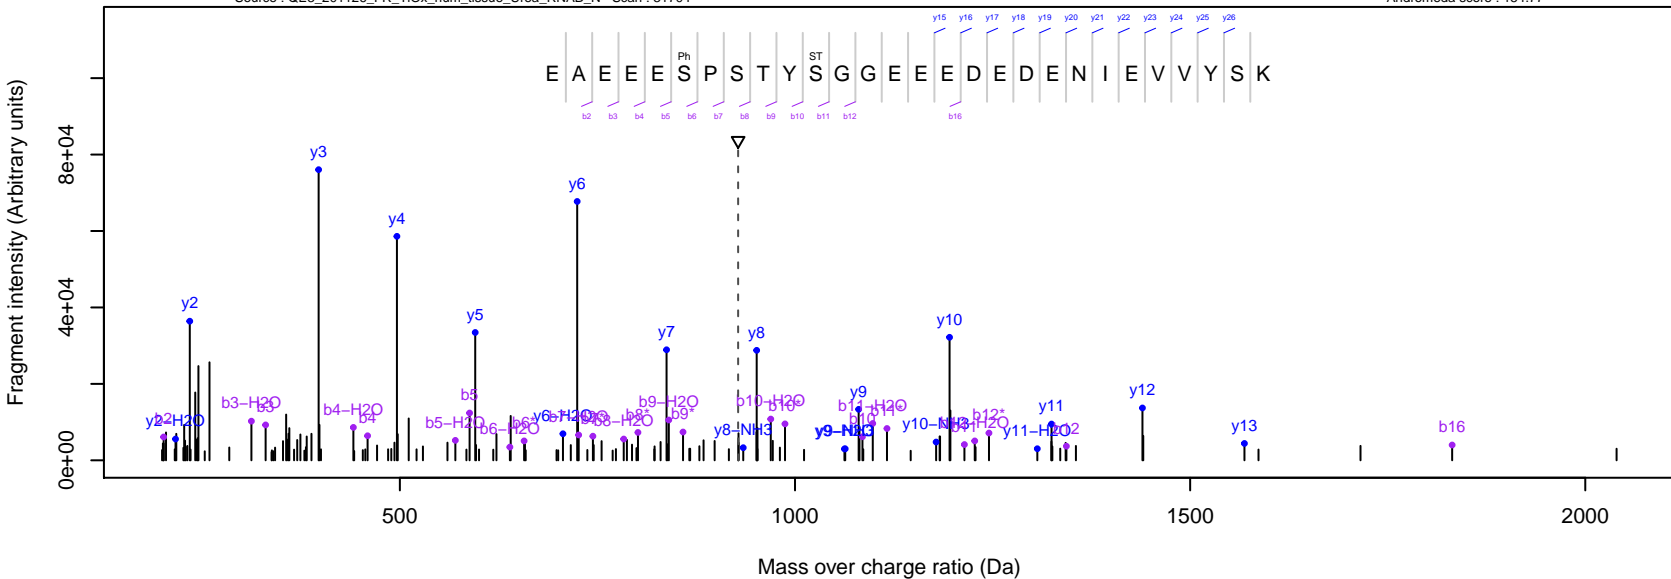

KDSNELS(Phospho (STY))DS(Phospho (STY))AGEEDSADLKR-3+

Source : QE3\_201126\_FR\_TiOx\_hum\_tissue\_Urea\_RNAB\_H Scan : 13870

Andromeda score : 154.77

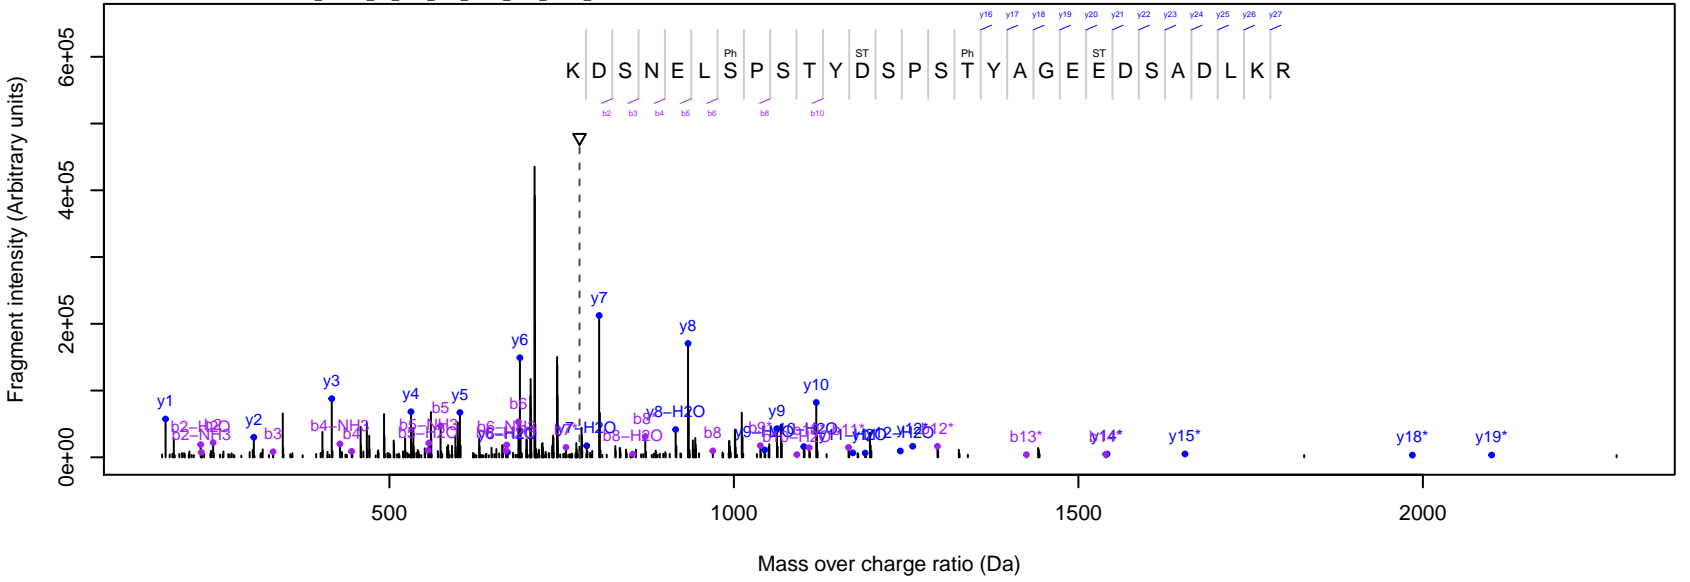

GS(Phospho (STY))VSDEEM(Oxidation (M))M(Oxidation (M))ELR-2+

Source : QE3\_201126\_FR\_TiOx\_hum\_tissue\_Urea\_RNAB\_B Scan : 15348

Andromeda score : 154.74

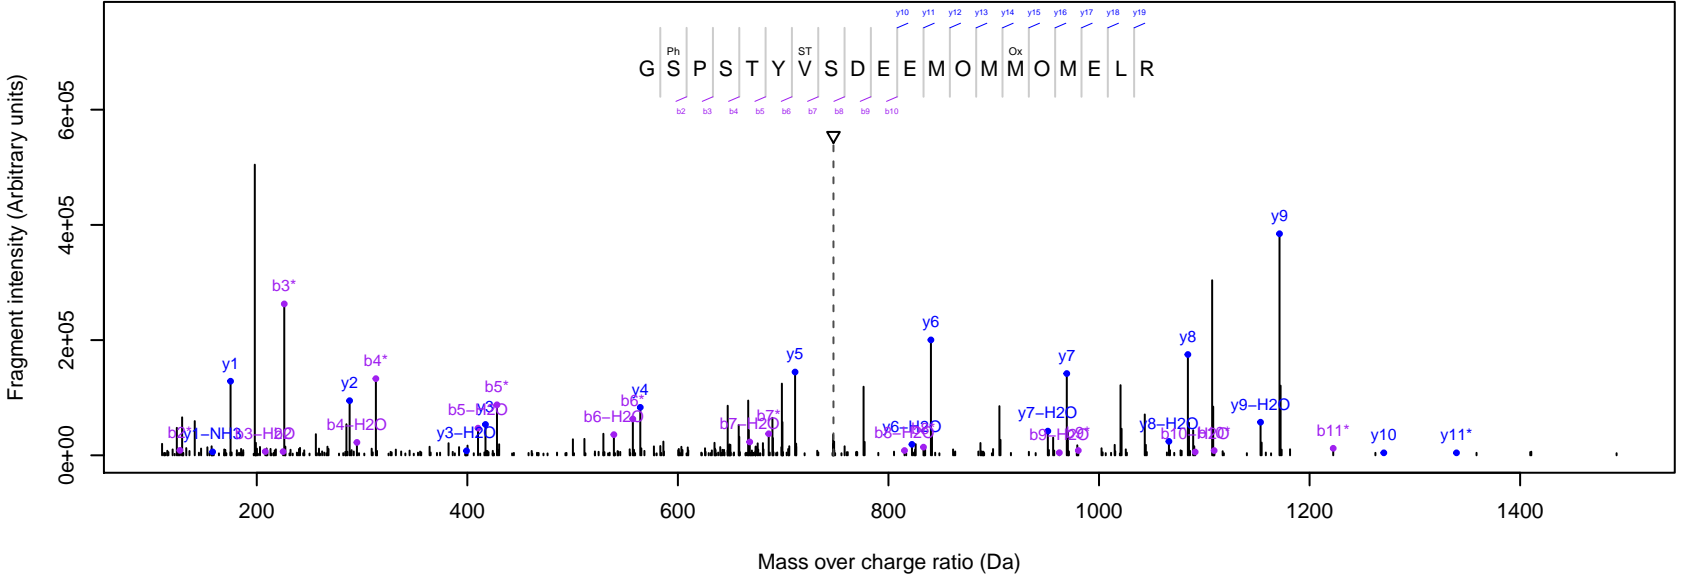

RDS(Phospho (STY))DGVDFEAEK-2+

Source : QE3\_201126\_FR\_TiOx\_hum\_tissue\_Urea\_RNAB\_N Scan : 15382

Andromeda score : 154.74

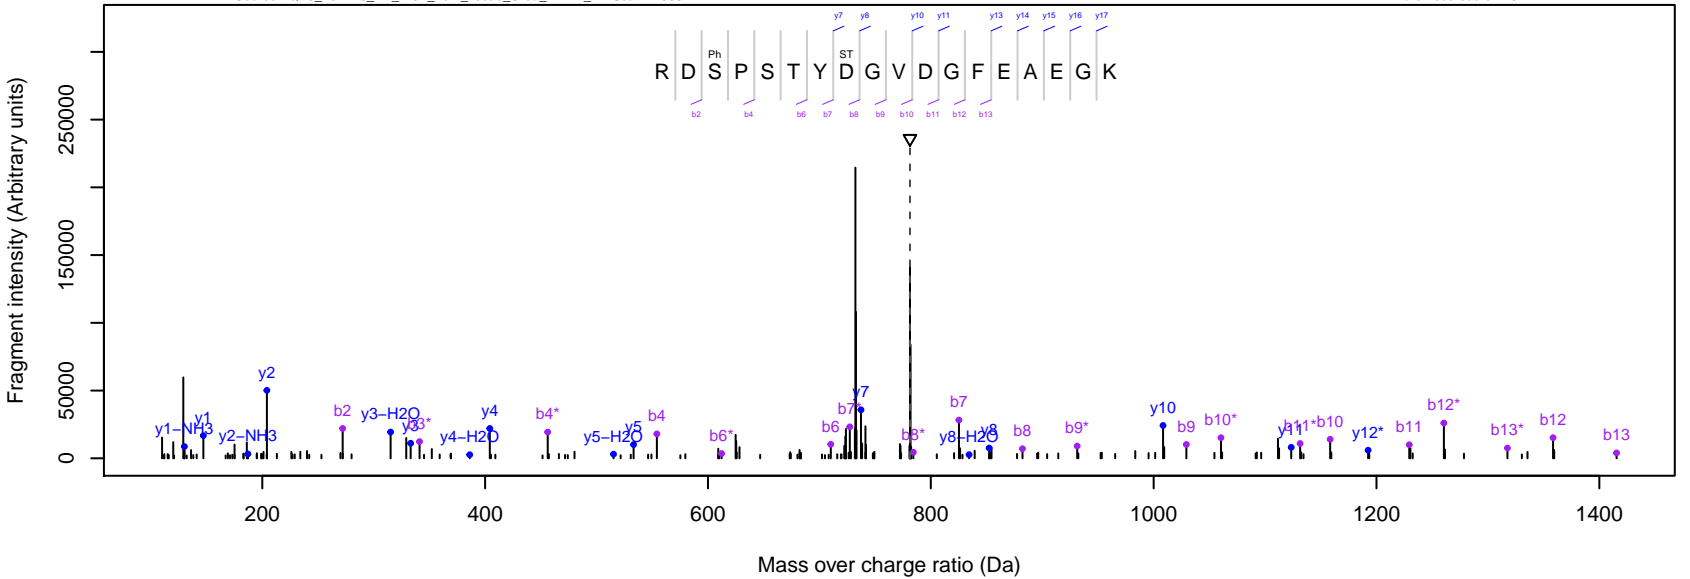

SQS(Phospho (STY))ESSDEVTELDLSHGKK-3+

Source : QE3\_201126\_FR\_TiOx\_hum\_tissue\_Urea\_RNAB\_N Scan : 16034

Andromeda score : 154.73

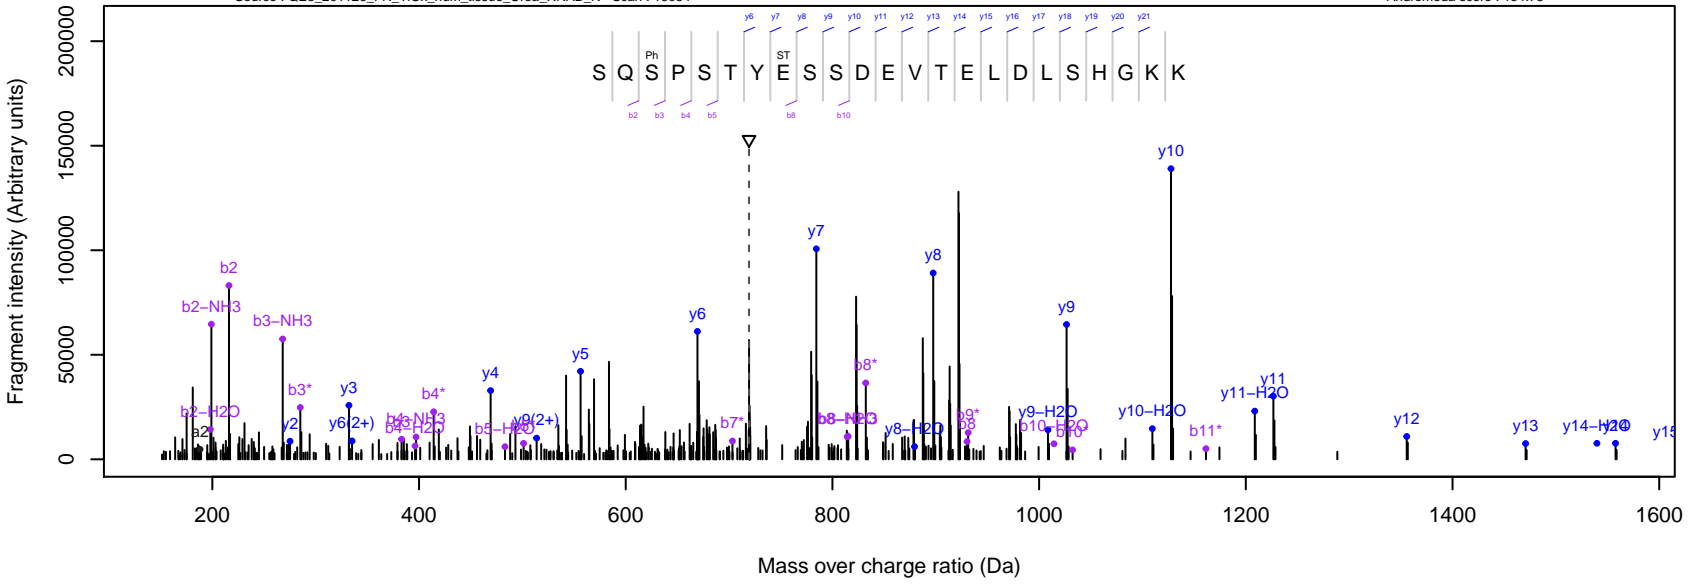

ADEASELACPT(Phospho (STY))PK-2+

Source : QE3\_201126\_FR\_TiOx\_hum\_tissue\_Urea\_RNAB\_N Scan : 17807

Andromeda score : 154.72

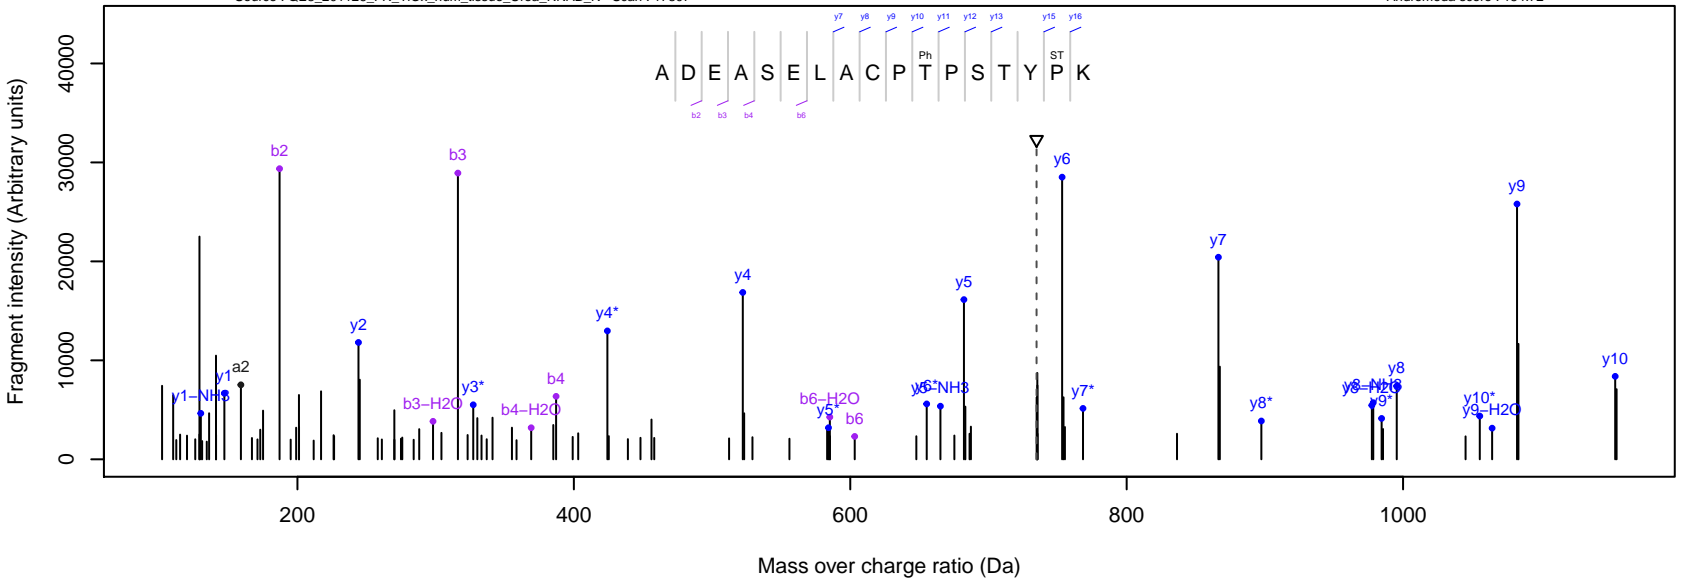

S(Phospho (STY))LES(Phospho (STY))CLLDLR-2+

Source : QE3\_201126\_FR\_TiOx\_hum\_tissue\_Urea\_RNAB\_N Scan : 62306

Andromeda score : 154.67

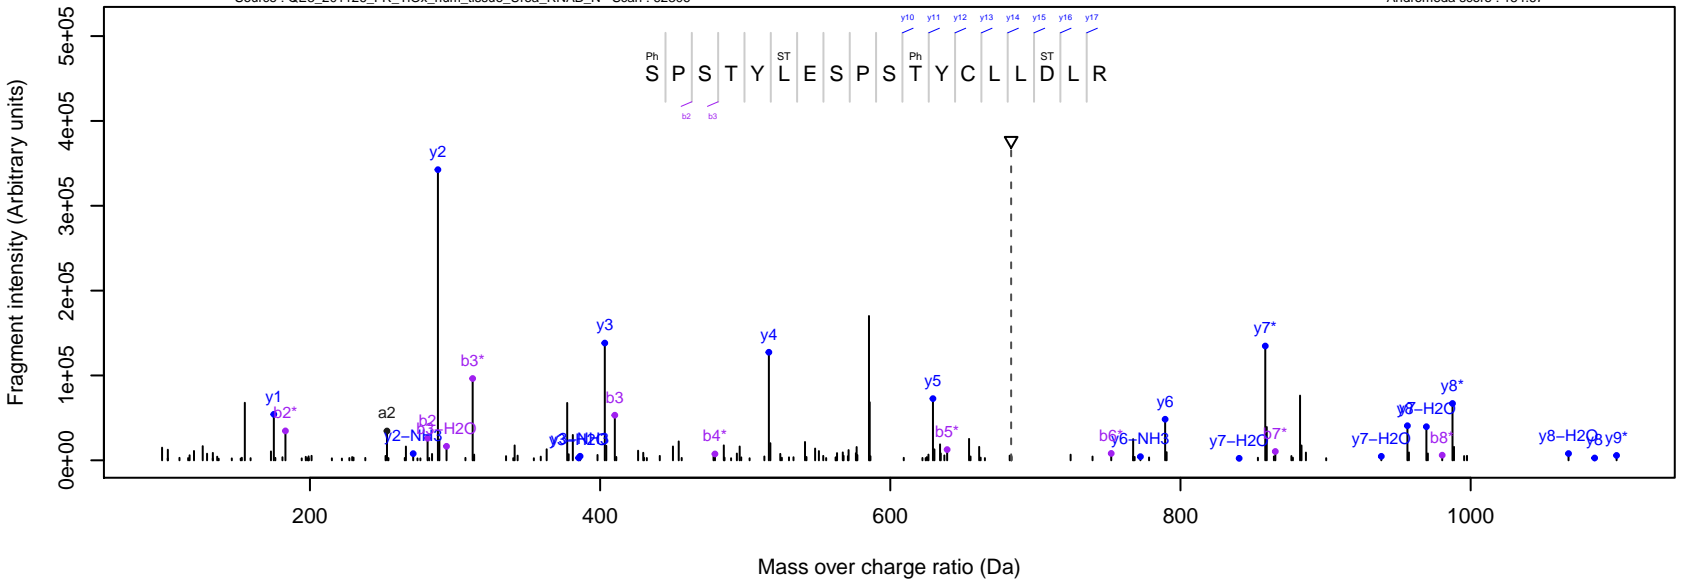





GLNPDGTPALSTLGGFSPSTYPASKPSPSTYSPR

Source : QE3\_201126\_FR\_TIOx\_hum\_tissue\_Urea\_RNAB\_N Scan : 45458

Andromeda score : 154.51

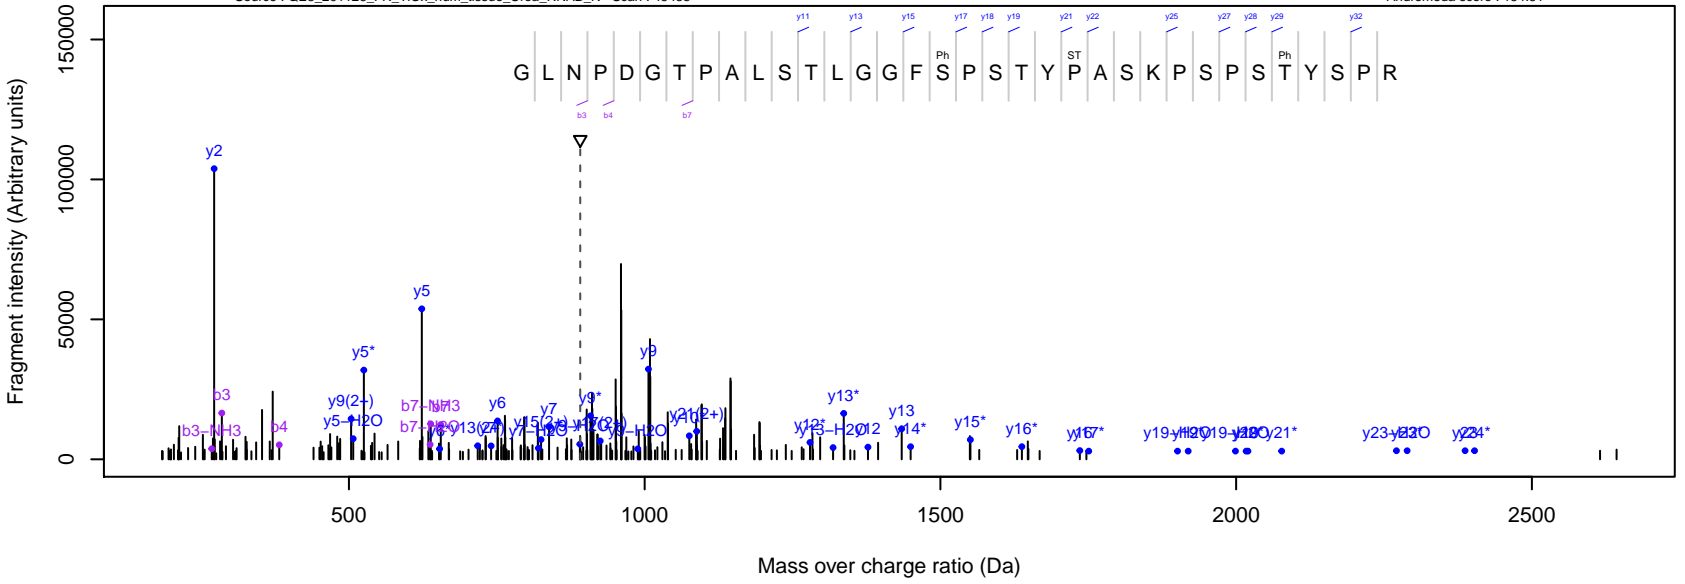

VTNDISPESSPSTYPGVGR

Source : QE3\_201126\_FR\_TIOx\_hum\_tissue\_Urea\_RNAB\_B Scan : 20816

Andromeda score : 154.51

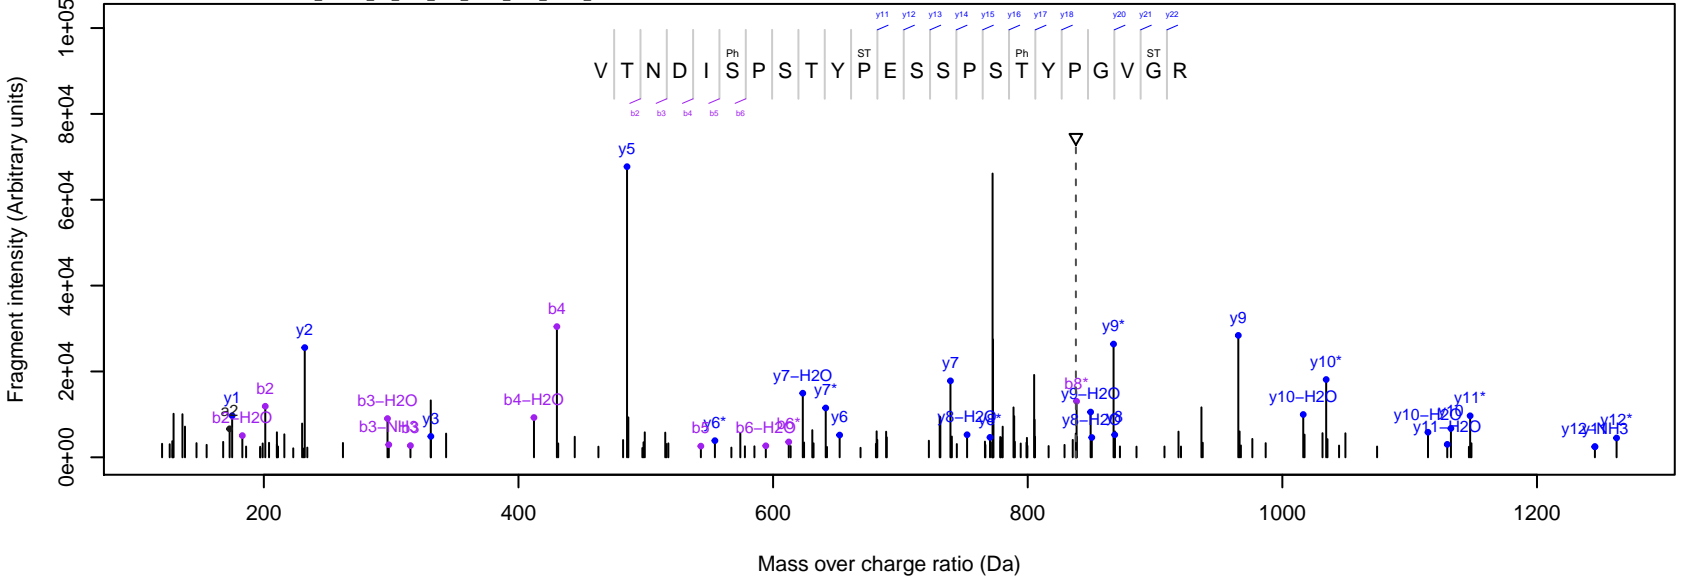

VDNLTYRTSPSTYPTDLR

Source : QE3\_201126\_FR\_TIOx\_hum\_tissue\_Urea\_RNAB\_B Scan : 20356

Andromeda score : 154.49

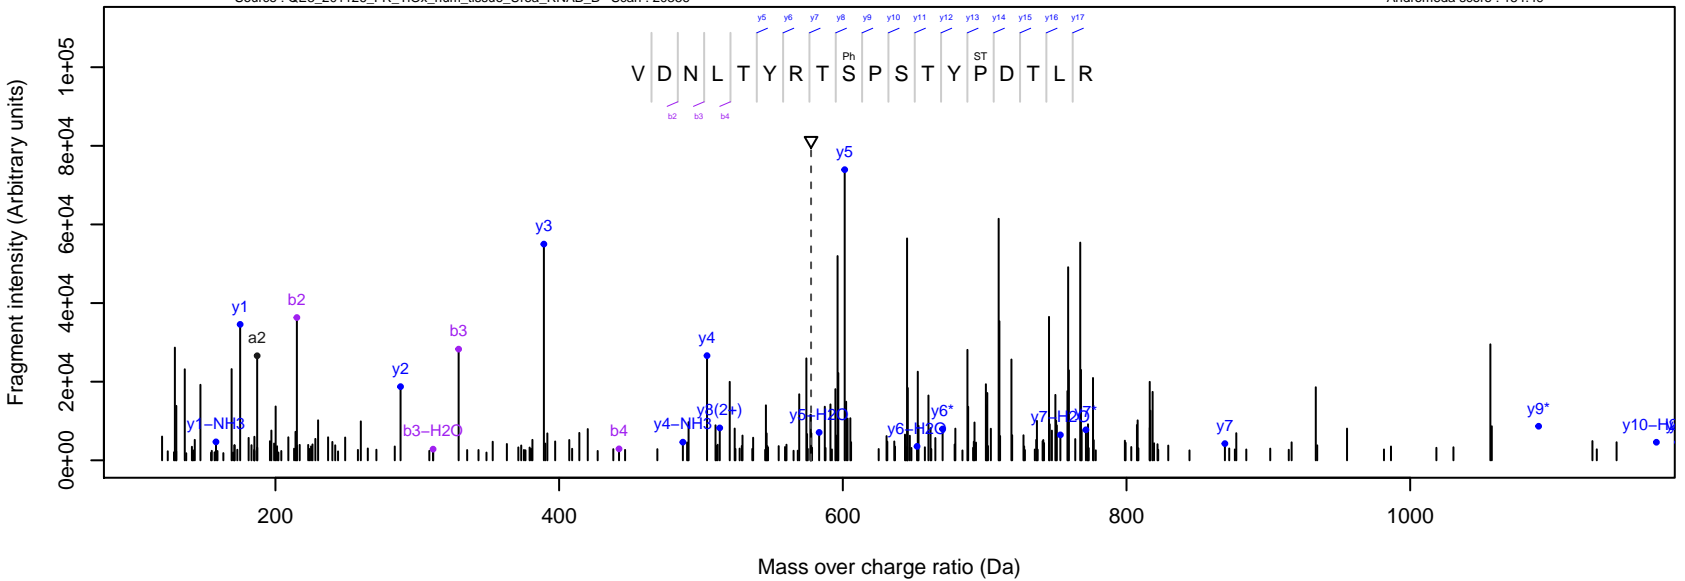

**SYS(Phospho (STY))PDGKESPSDKK-3+**

Source : QE3\_201126\_FR\_TIOx\_hum\_tissue\_Urea\_RNAB\_H Scan : 3753

Andromeda score : 154.48

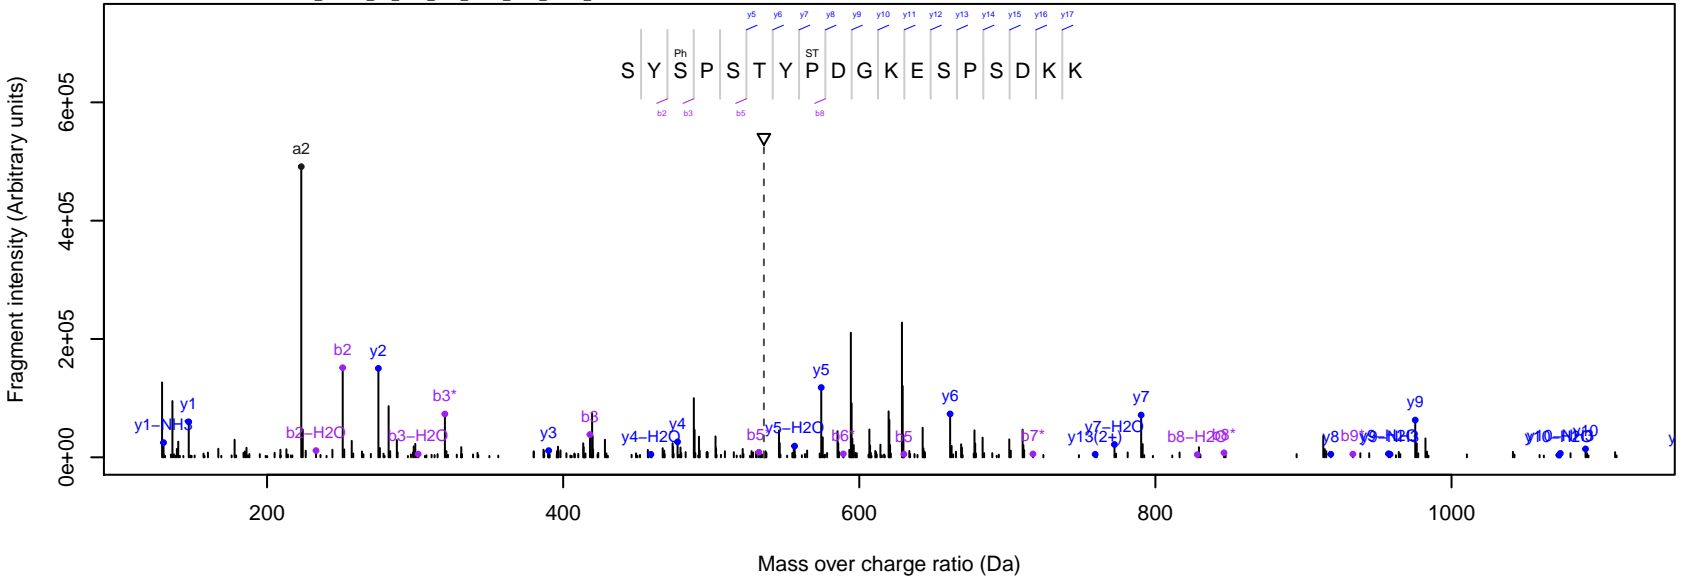

**GRS(Phospho (STY))IDQDYER-2+**

Source : QE3\_201126\_FR\_TIOx\_hum\_tissue\_Urea\_RNAB\_B Scan : 8410

Andromeda score : 154.47

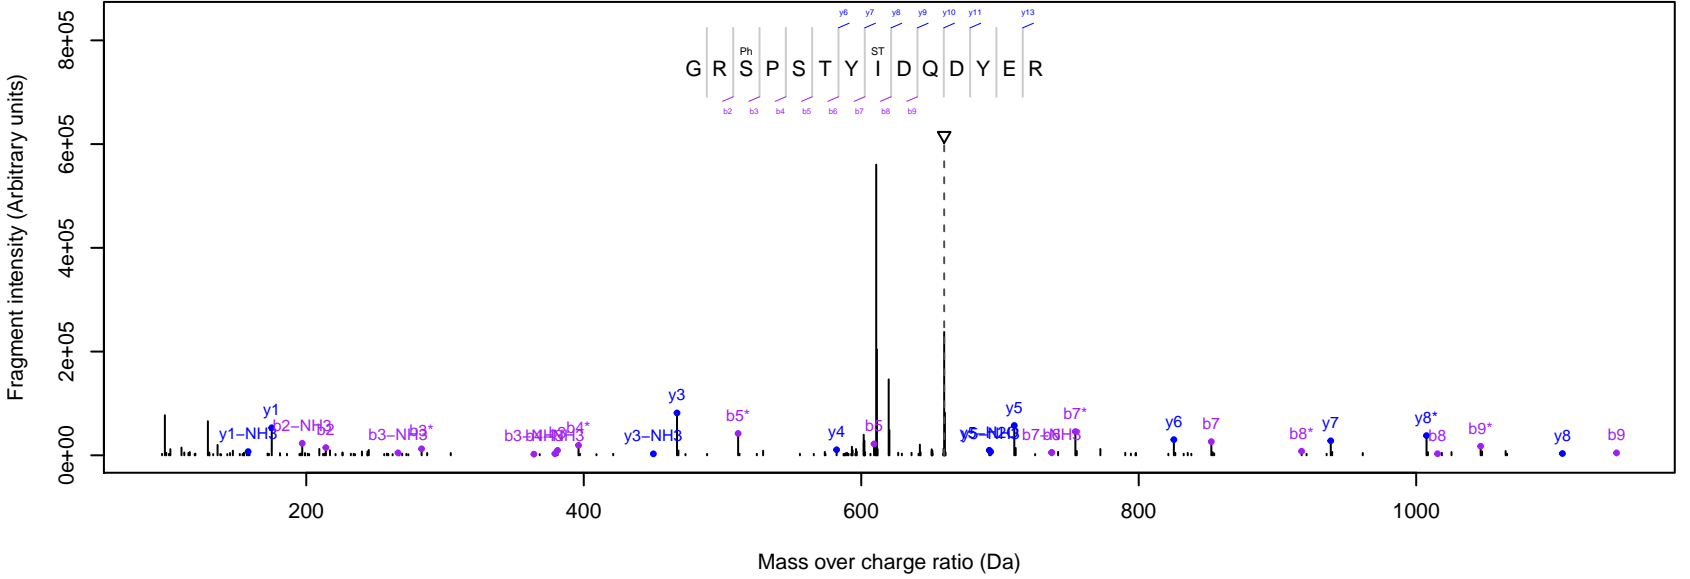

**RES(Phospho (STY))WISDIR-2+**

Source : QE3\_201126\_FR\_TIOx\_hum\_tissue\_Urea\_RNAB\_N Scan : 25848

Andromeda score : 154.41

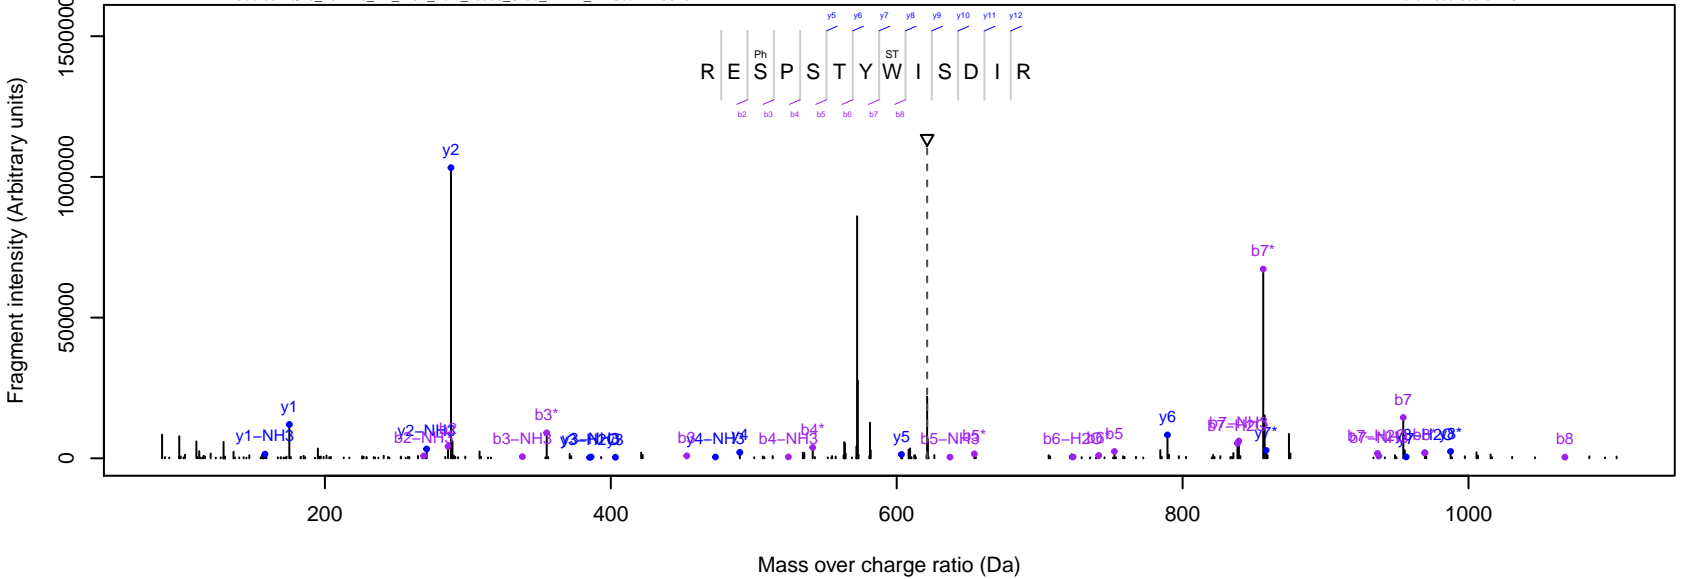

GHTAS(Phospho (STY))ESDEQQWPEEK-3+

Source : QE3\_201126\_FR\_TiOx\_hum\_tissue\_Urea\_RNAB\_B Scan : 12764

Andromeda score : 154.39

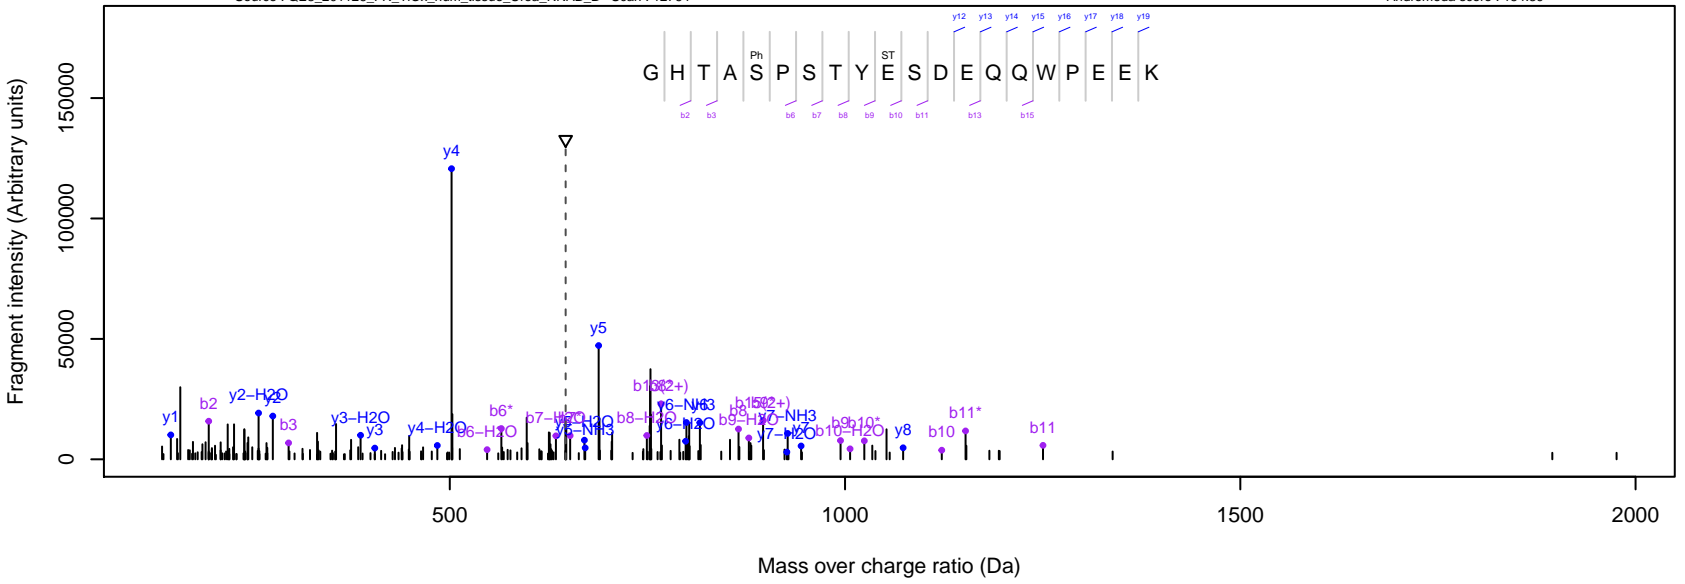

RGS(Phospho (STY))PVPPVPERR-3+

Source : QE3\_201126\_FR\_TiOx\_hum\_tissue\_Urea\_RNAB\_N Scan : 8000

Andromeda score : 154.36

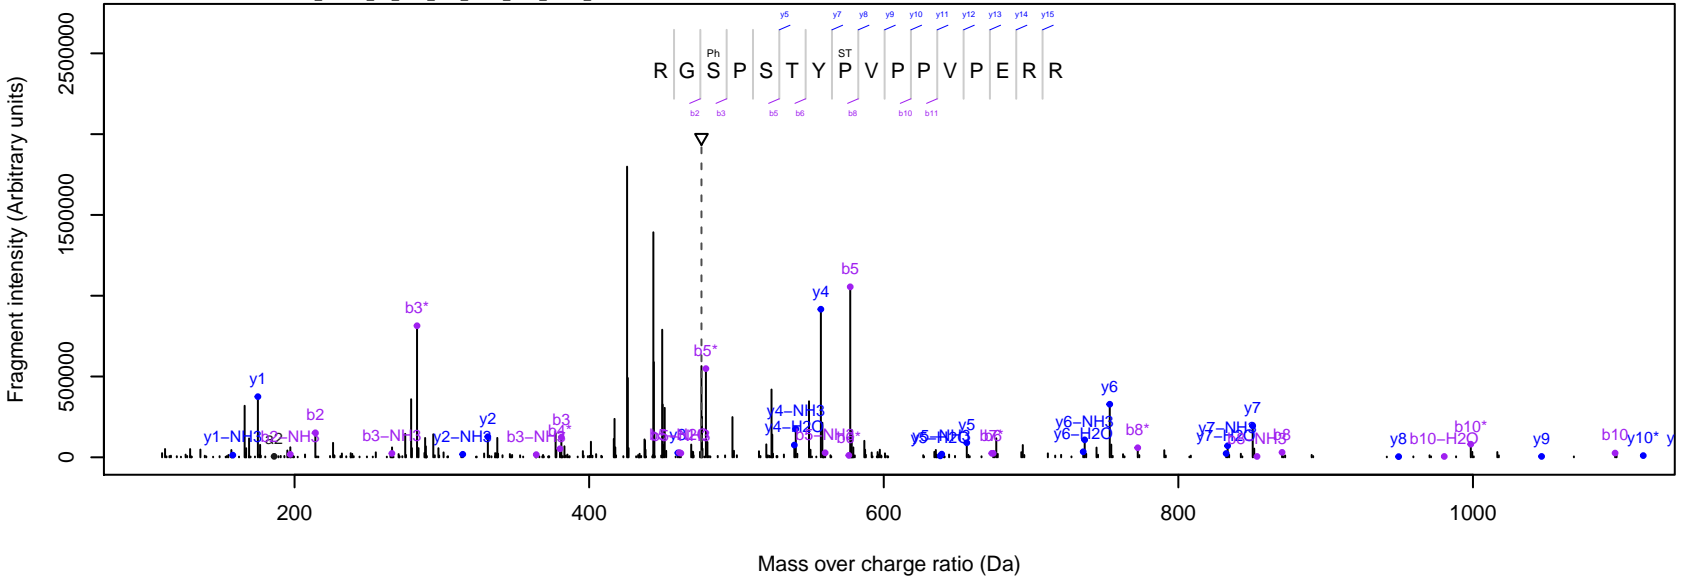

SES(Phospho (STY))PPAELPSLR-2+

Source : QE3\_201126\_FR\_TiOx\_hum\_tissue\_Urea\_RNAB\_H Scan : 31814

Andromeda score : 154.36

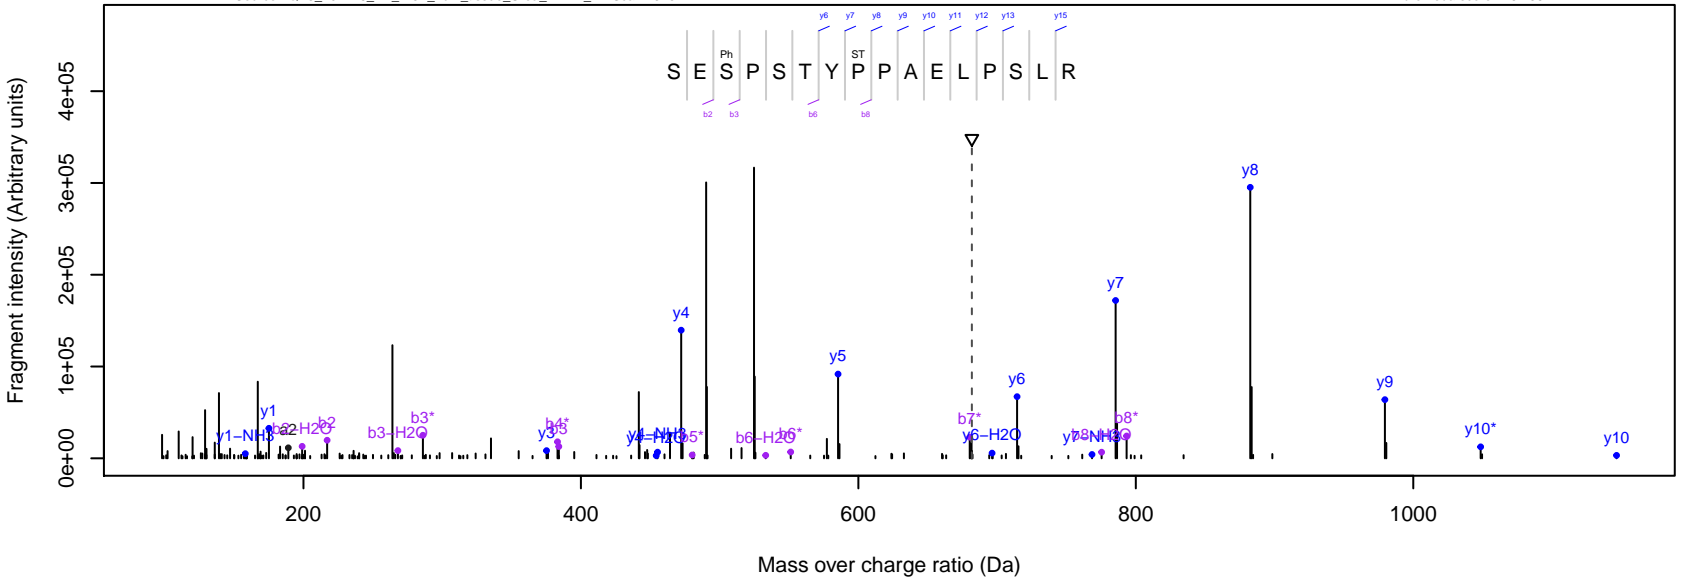

M(Oxidation (M))LPHAPGVQMQAIPEDAIP(EES(Phospho (STY)))GDEDEDDPKR-3+

Source : QE3\_201126\_FR\_TiOx\_hum\_tissue\_Urea\_RNAB\_H Scan : 36152

Andromeda score : 154.32

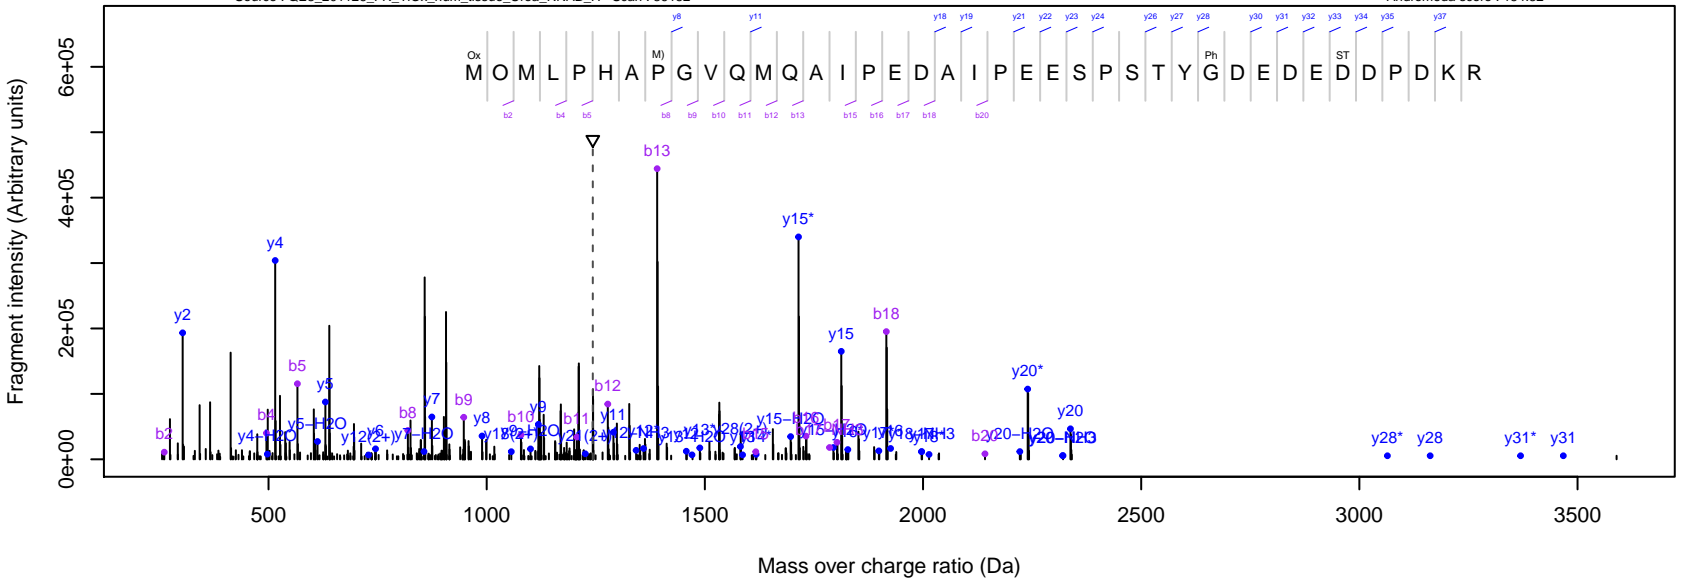

RTS(Phospho (STY))STLDSEGTFSYR-3+

Source : QE3\_201126\_FR\_TiOx\_hum\_tissue\_Urea\_RNAB\_H Scan : 20031

Andromeda score : 154.07

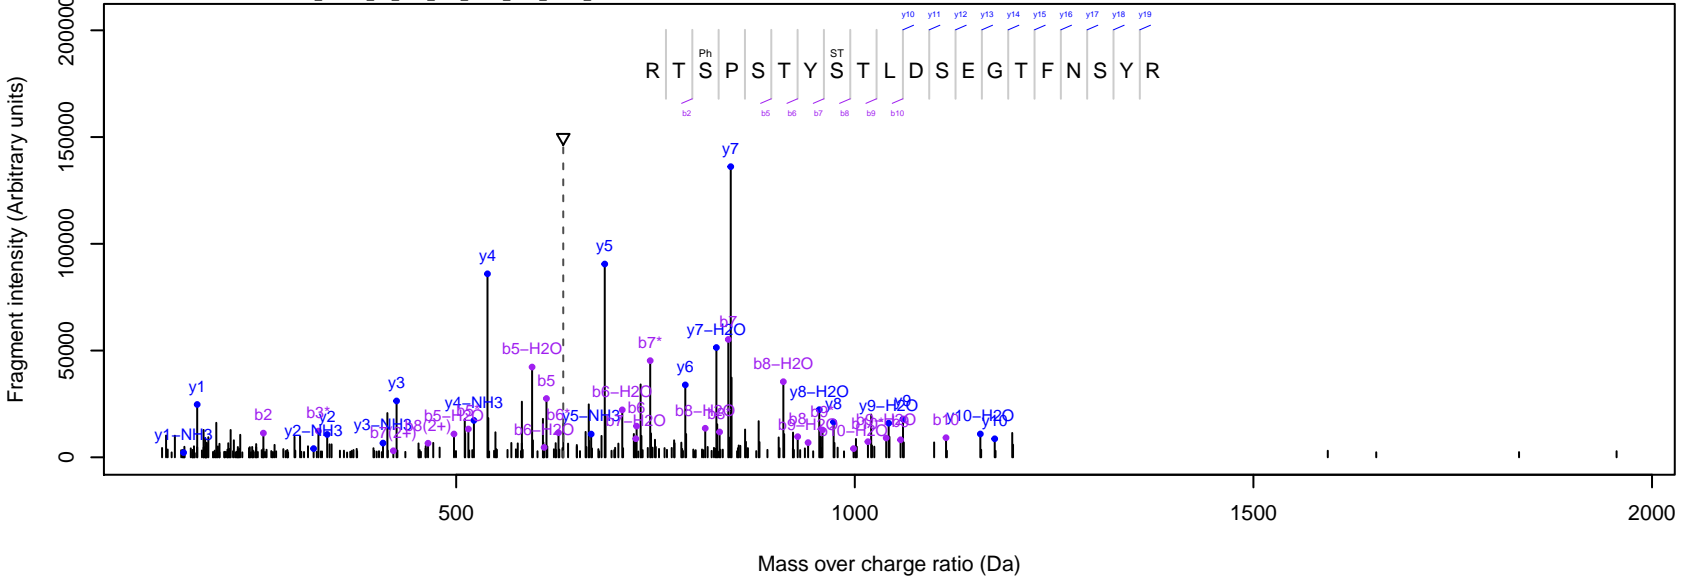

S(Phospho (STY))GDETPGSEVPGDKAAEEQGDDQDSEK-3+

Source : QE3\_201126\_FR\_TiOx\_hum\_tissue\_Urea\_RNAB\_N Scan : 14391

Andromeda score : 154.02

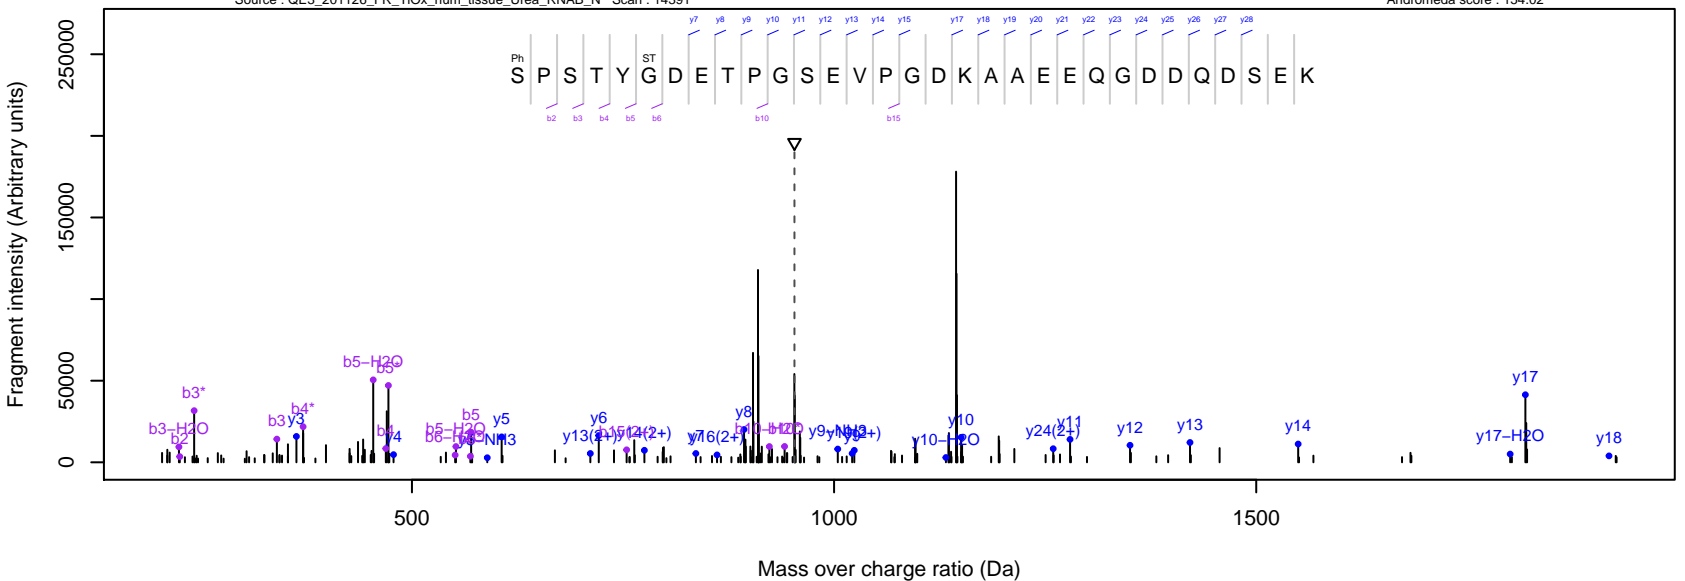

RLS(Phospho (STY))ELLR-2+

Source : QE3\_2011126\_FR\_TIOx\_hum\_tissue\_Urea\_RNAB\_N Scan : 24549

Andromeda score : 154.01

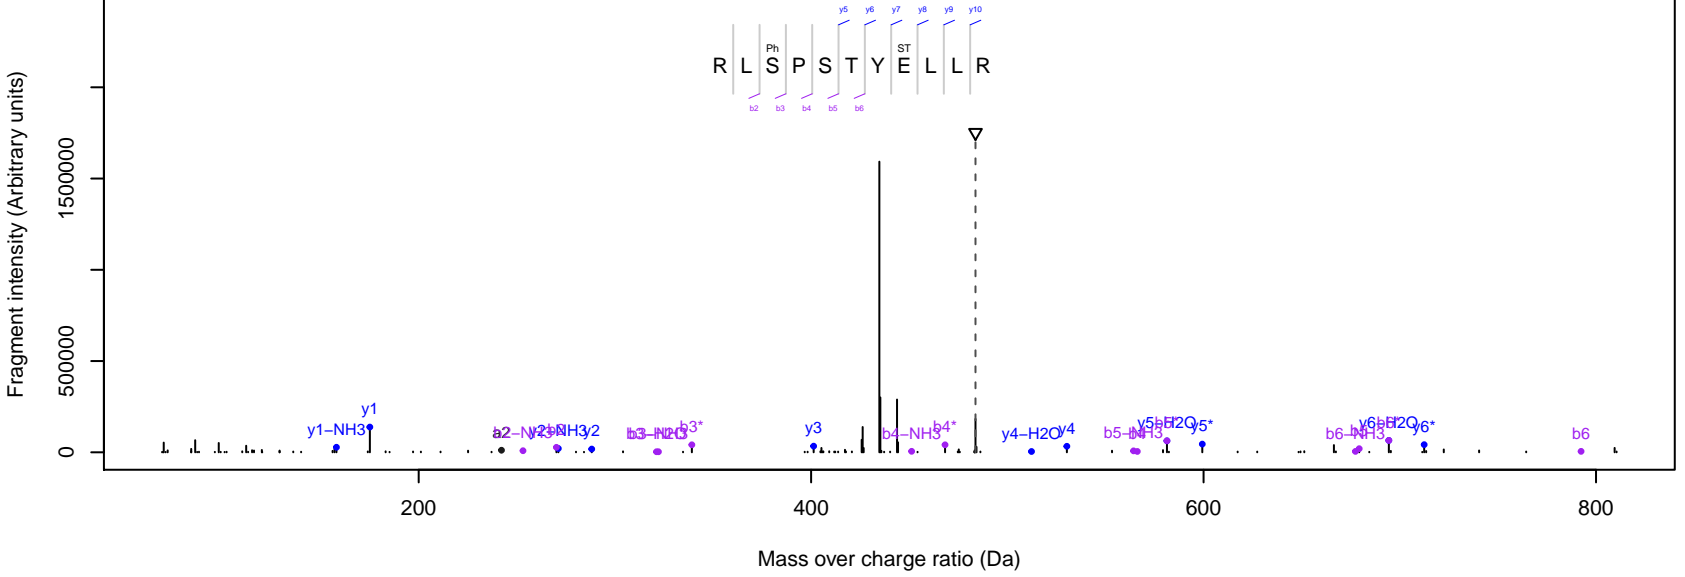

KLS(Phospho (STY))PTEPK-2+

Source : QE3\_2011126\_FR\_TIOx\_hum\_tissue\_Urea\_RNAB\_H Scan : 5805

Andromeda score : 154

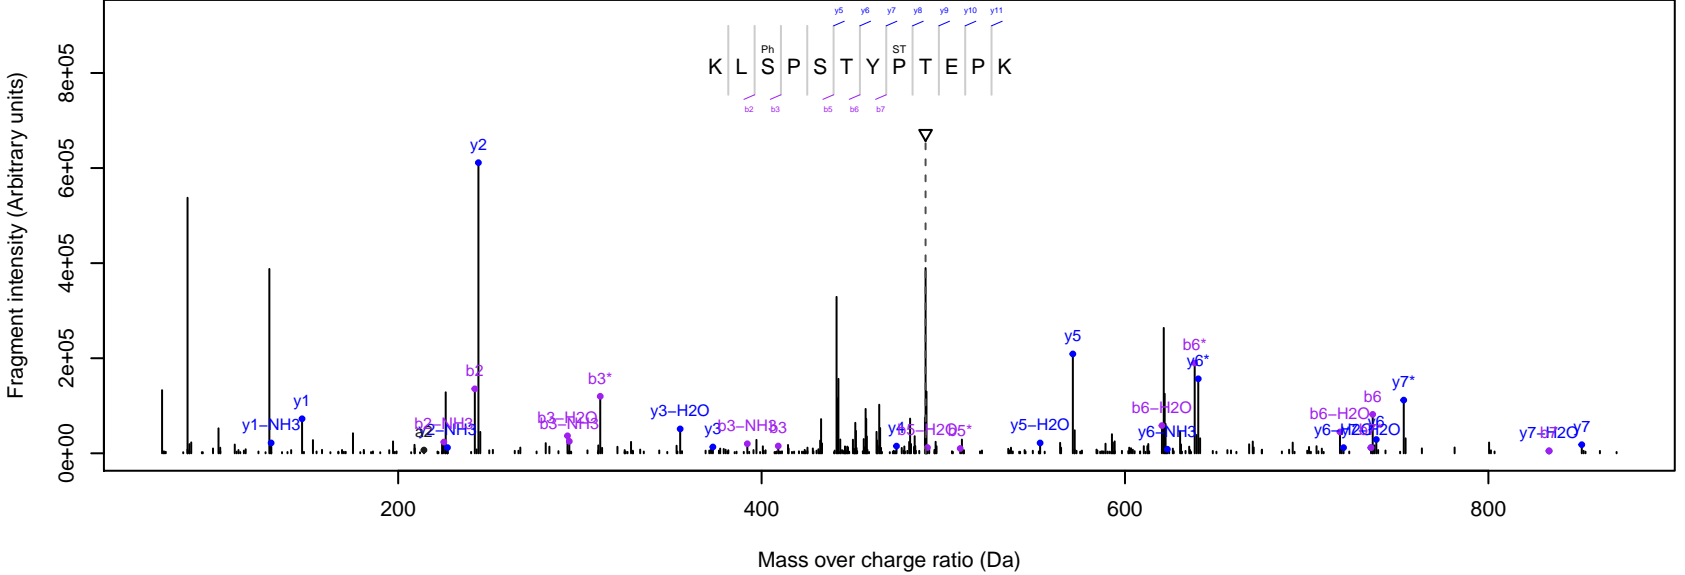

IAT(Phospho (STY))SLDGFVAVQQQR-2+

Source : QE3\_2011126\_FR\_TIOx\_hum\_tissue\_Urea\_RNAB\_N Scan : 45709

Andromeda score : 153.95

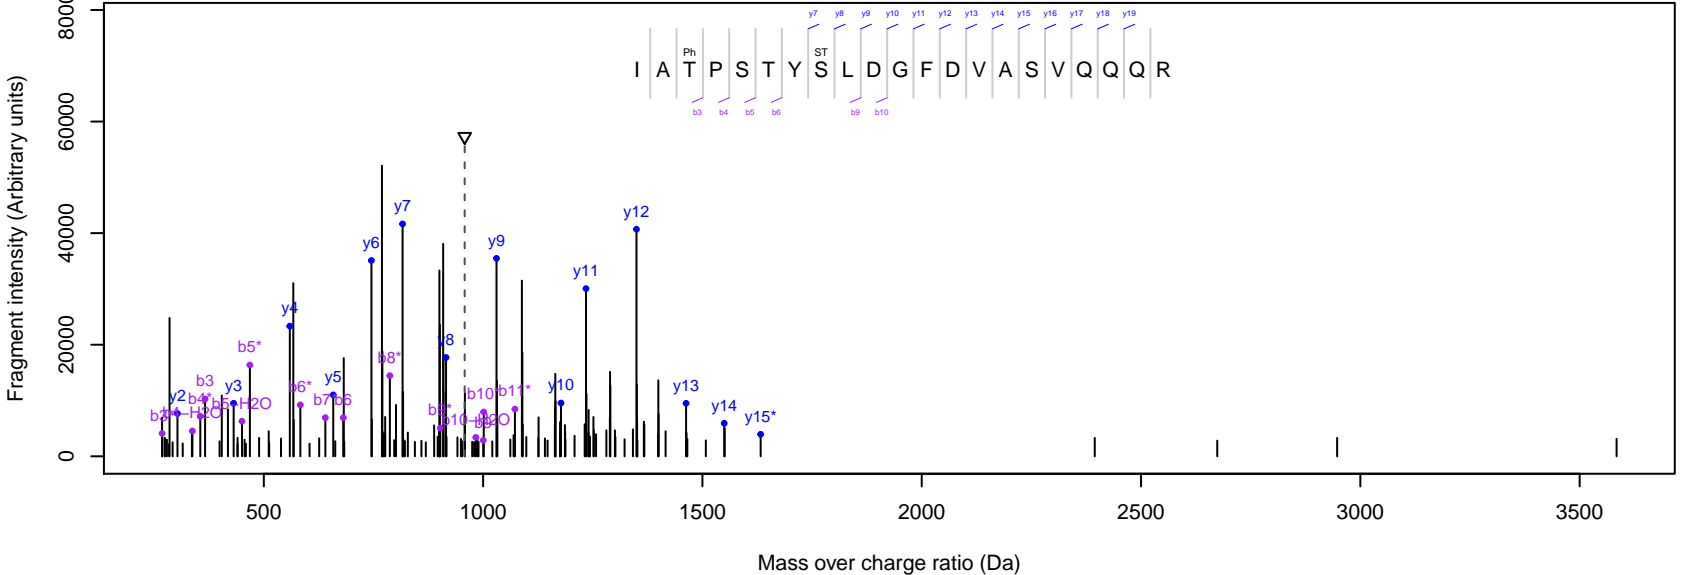

QSS(Phospho (STY))GPGASSGTSGDHGELVVR-3+

Source : QE3\_201126\_FR\_TiOx\_hum\_tissue\_Urea\_RNAB\_N Scan : 13685

Andromeda score : 153.87

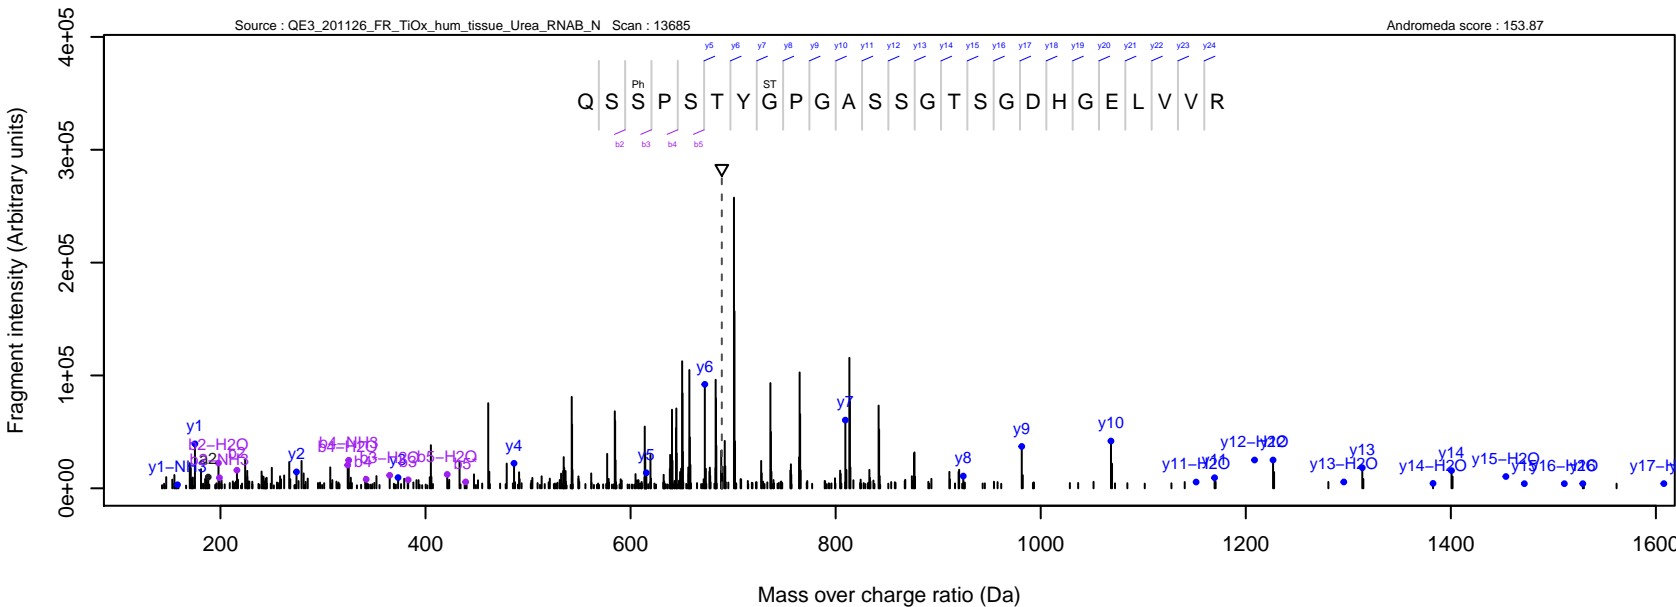

SPSLS(Phospho (STY))PSPPS(Phospho (STY))PLEKTPLEGER-3+

Source : QE3\_201126\_FR\_TiOx\_hum\_tissue\_Urea\_RNAB\_N Scan : 38359

Andromeda score : 153.87

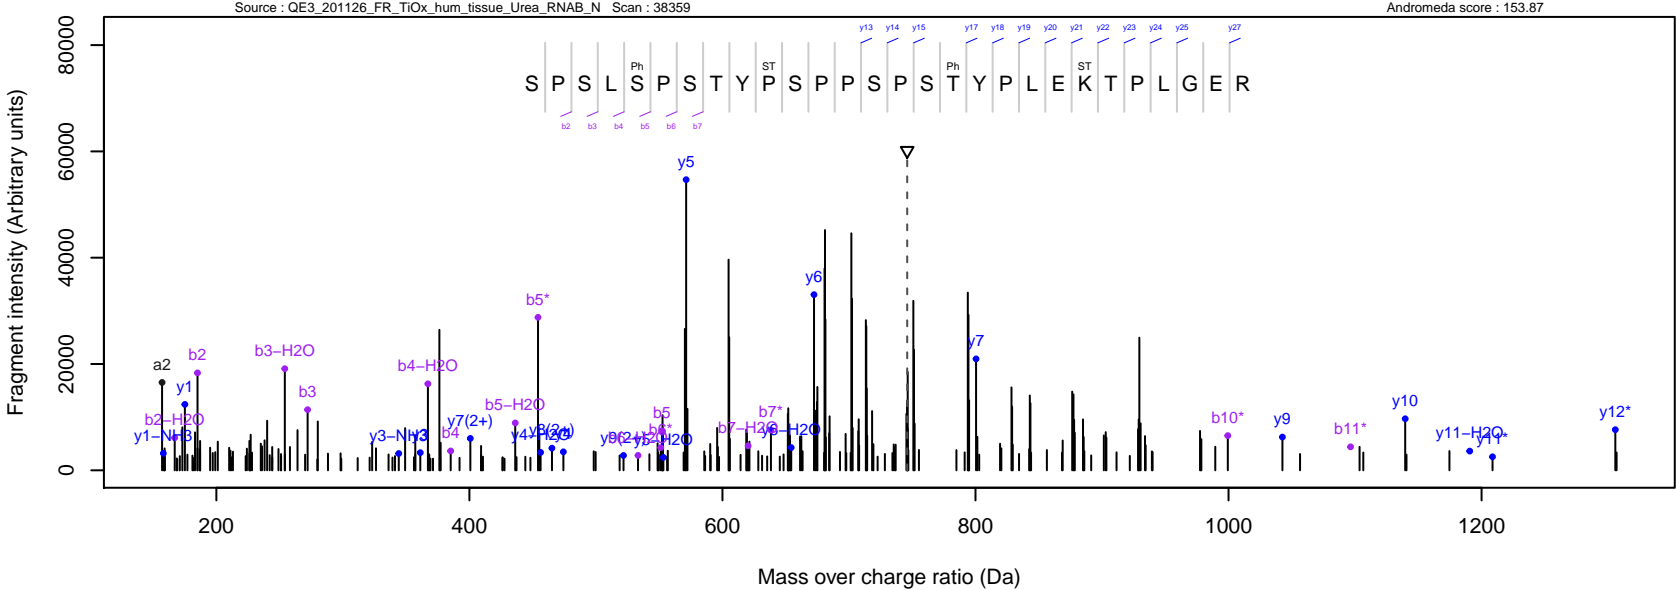

(Acetyl (Protein N-term))M(Oxidation (M))NTAPSRPS(Phospho (STY))PTR-2+

Source : QE3\_201126\_FR\_TiOx\_hum\_tissue\_Urea\_RNAB\_H Scan : 9390

Andromeda score : 153.85

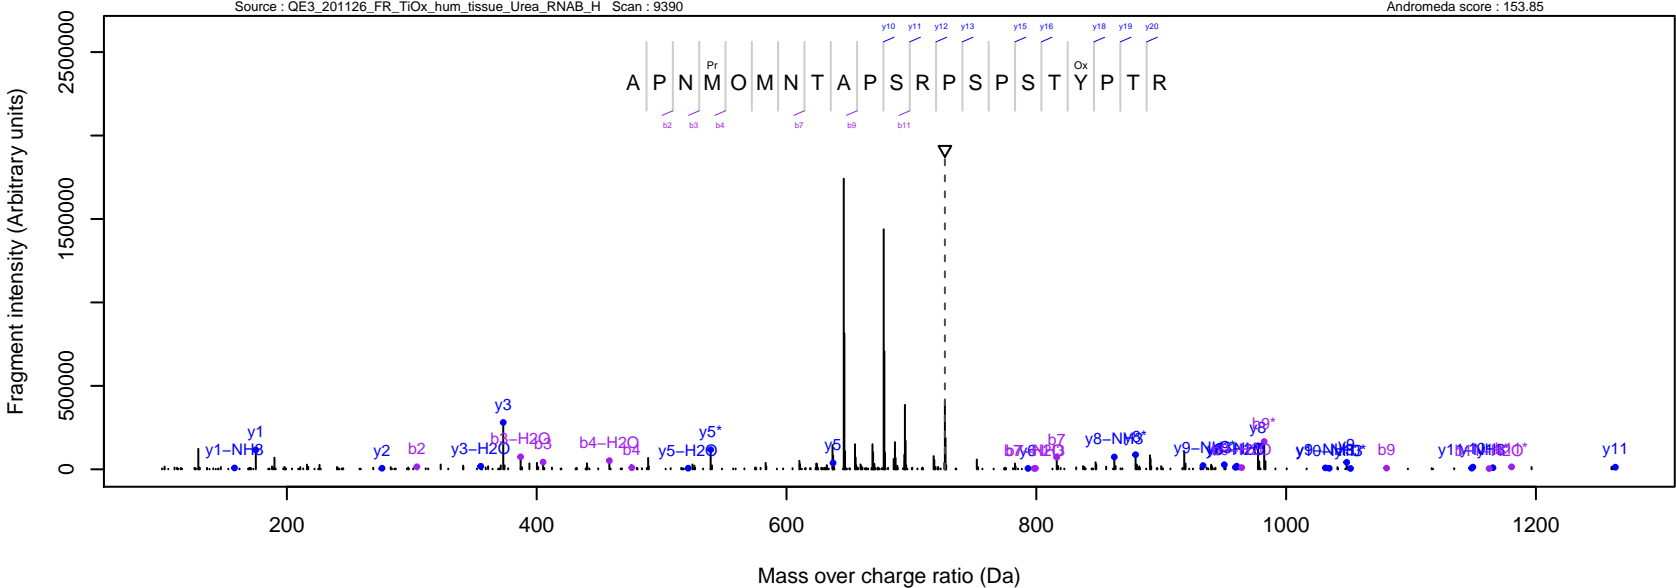

TDGS(Phospho (STY))IS(Phospho (STY))GDRQPVTVDYISR-3+

Source : QE3\_201126\_FR\_TIOx\_hum\_tissue\_Urea\_RNAB\_N Scan : 39887

Andromeda score : 153.84

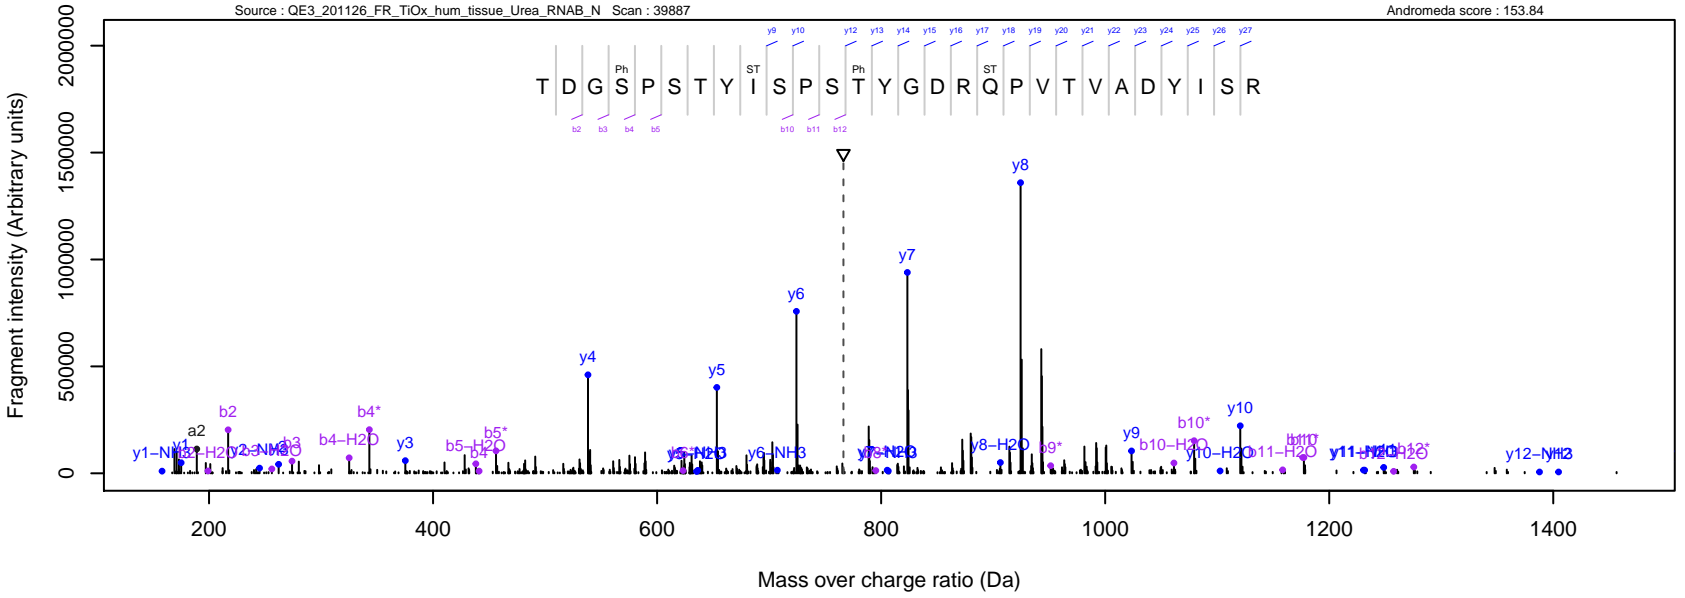

(Acetyl (Protein N-term))M(Oxidation (M))DNYADLS(Phospho (STY))DTELTLRR-3+

Source : QE3\_201126\_FR\_TIOx\_hum\_tissue\_Urea\_RNAB\_H Scan : 57162

Andromeda score : 153.82

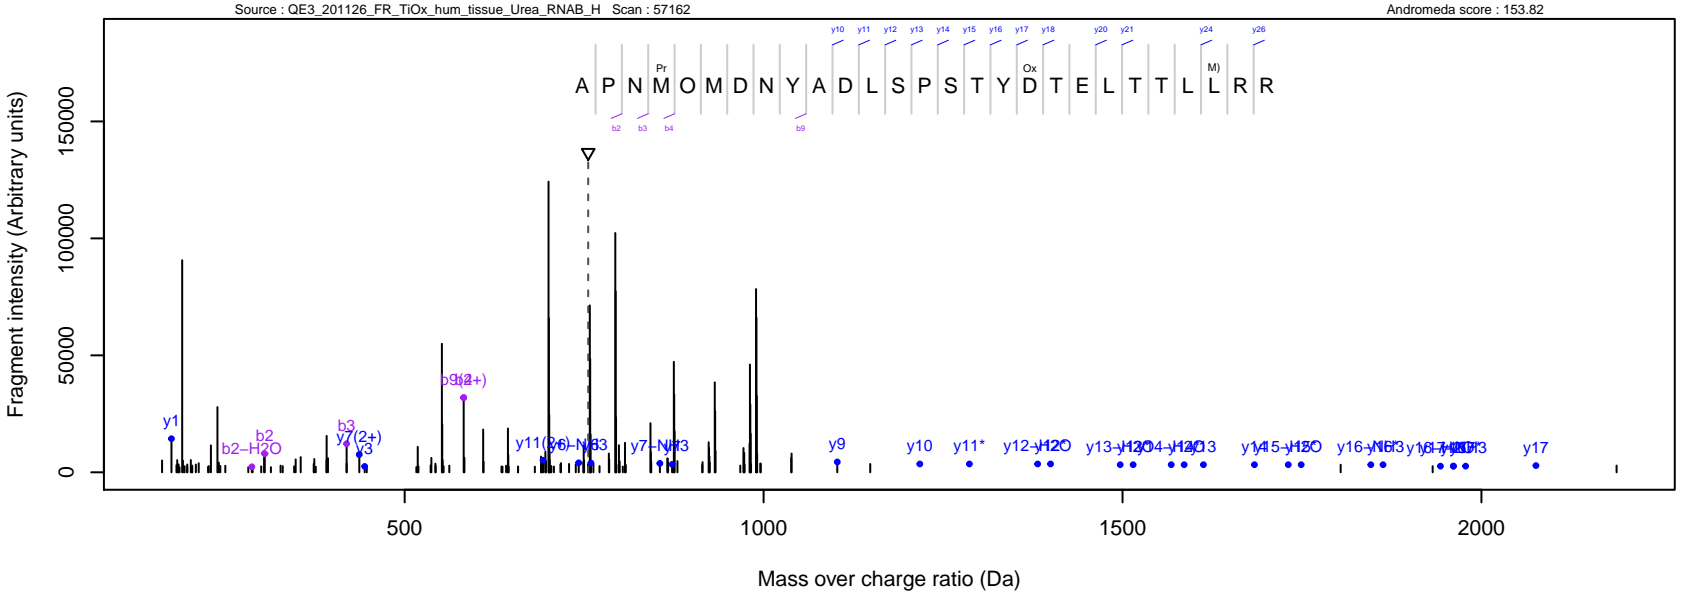

EGMNP SYDEYADS(Phospho (STY))DEDQHDAYLER-3+

Source : QE3\_201126\_FR\_TIOx\_hum\_tissue\_Urea\_RNAB\_N Scan : 29788

Andromeda score : 153.81

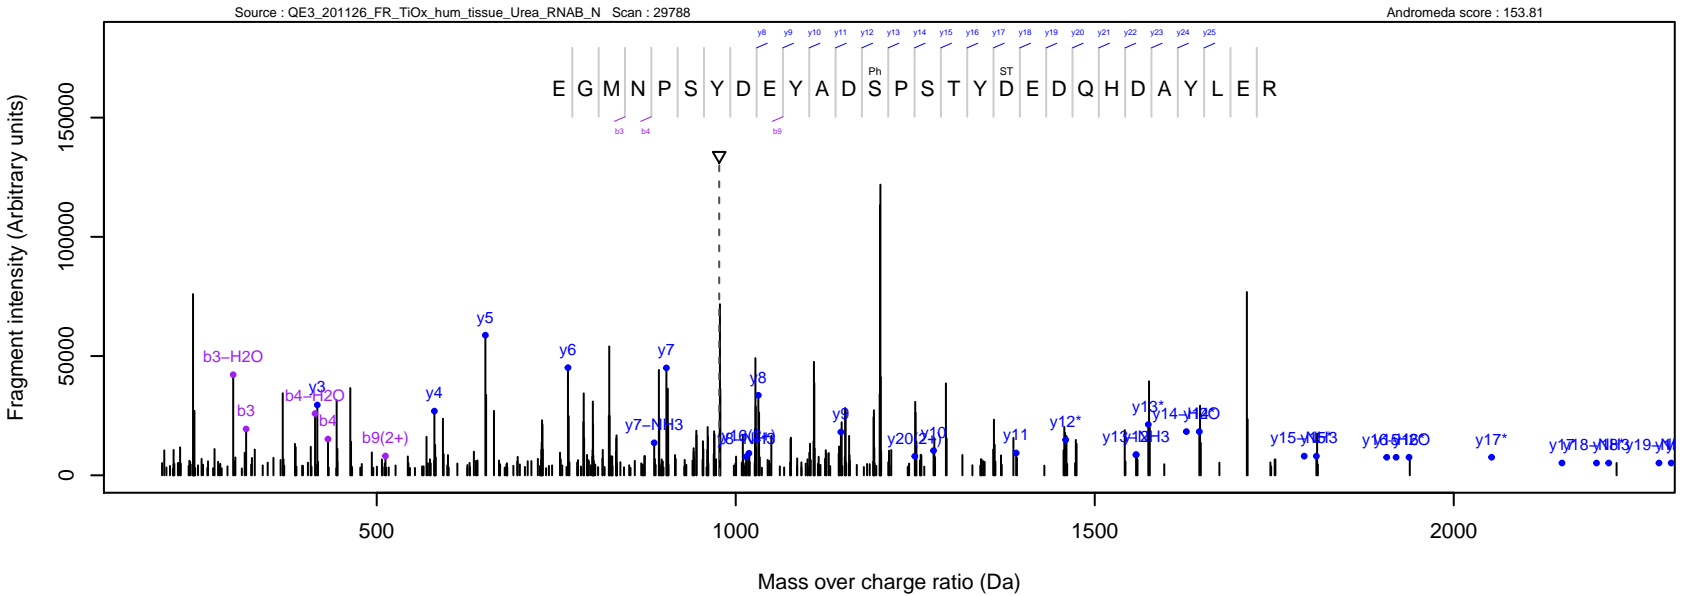





YQQITPVNQS(Phospho (STY))R-2+

Source : QE3\_201126\_FR\_TiOx\_hum\_tissue\_Urea\_RNAB\_N Scan : 15584

Andromeda score : 153.75

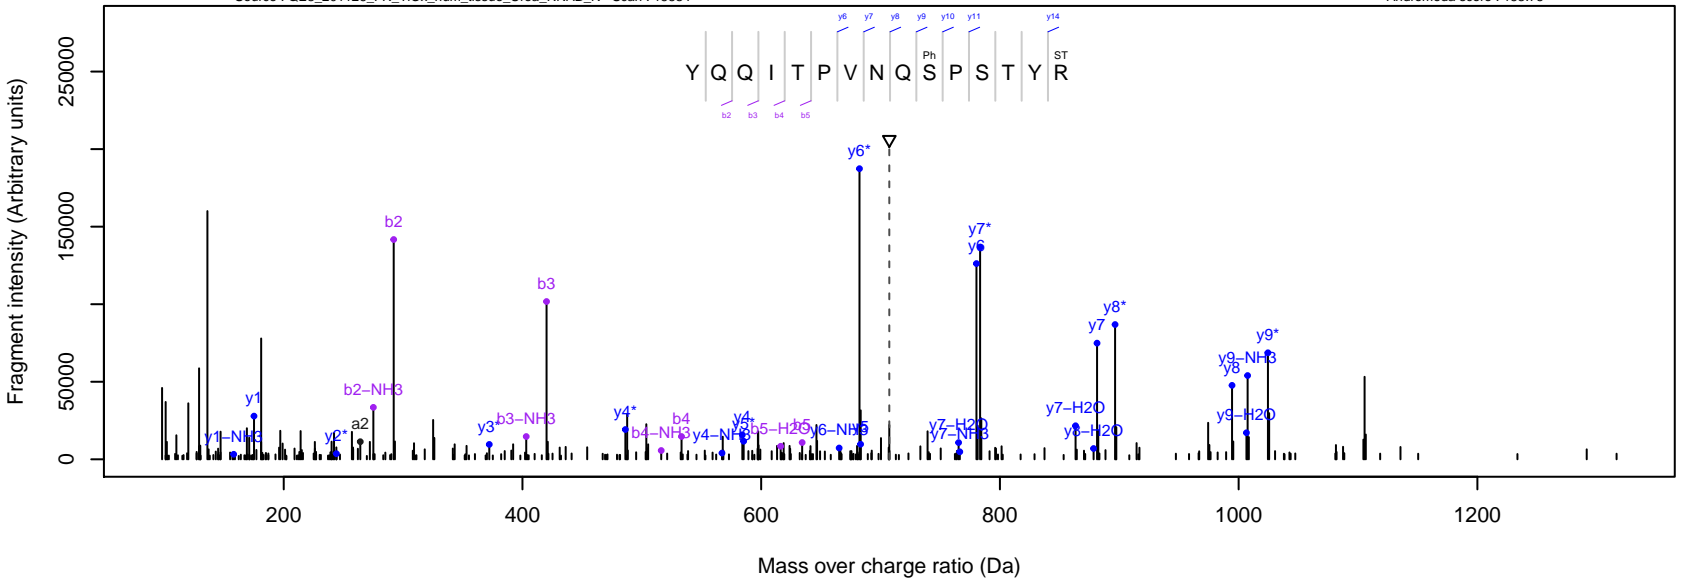

EVELVS(Phospho (STY))E-1+

Source : QE3\_201126\_FR\_TiOx\_hum\_tissue\_Urea\_RNAB\_B Scan : 28375

Andromeda score : 153.71

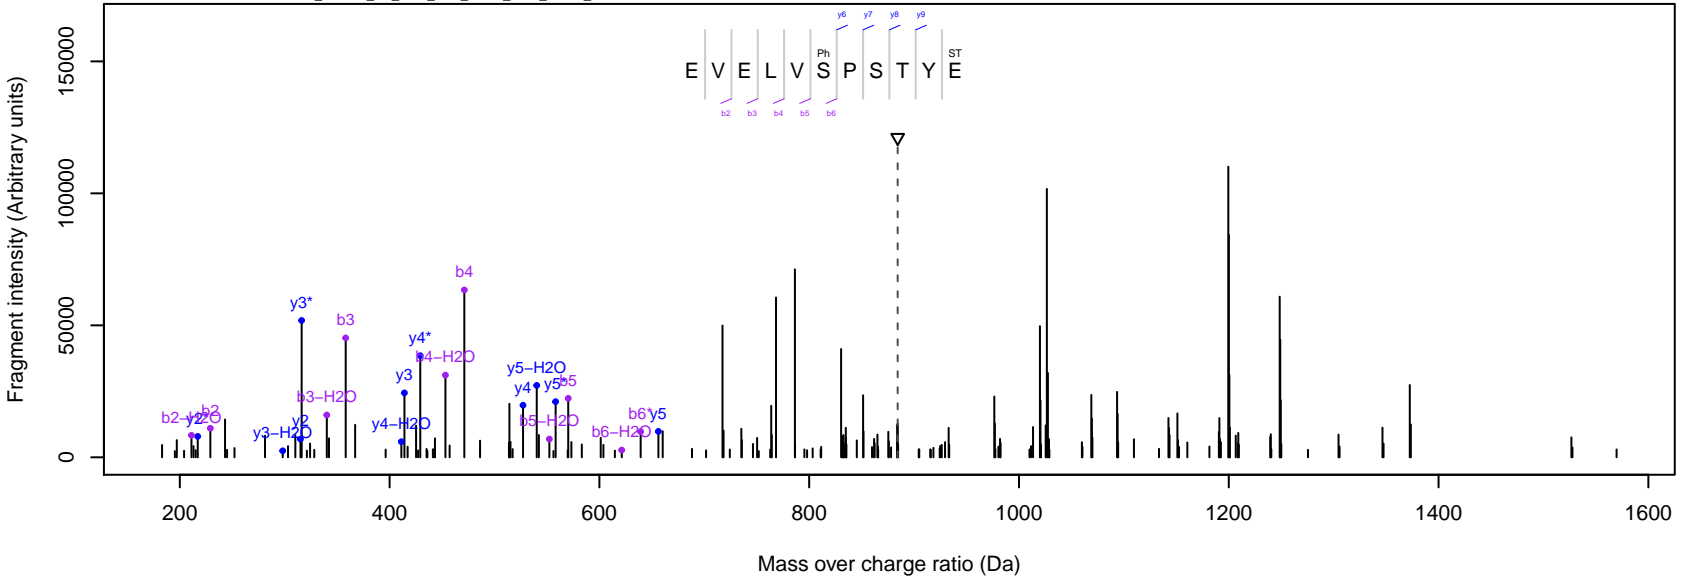

DSLGFIEHYAQLGPS(Phospho (STY))SPEQLAAGAE EGGPRR-3+

Source : QE3\_201126\_FR\_TiOx\_hum\_tissue\_Urea\_RNAB\_H Scan : 55446

Andromeda score : 153.65

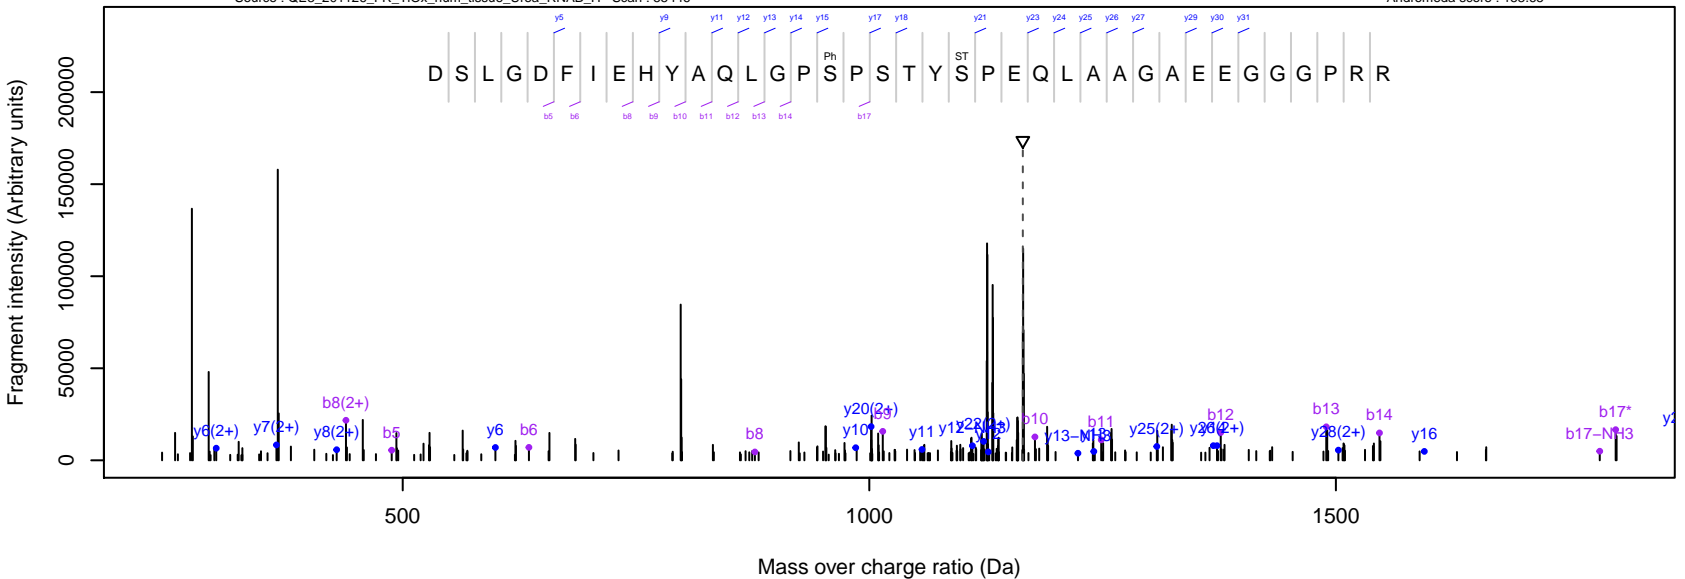

APS(Phospho (STY))SDEECFFDLLTK--2+

Source : QE3\_201126\_FR\_TiOx\_hum\_tissue\_Urea\_RNAB\_N Scan : 60316

Andromeda score : 153.63

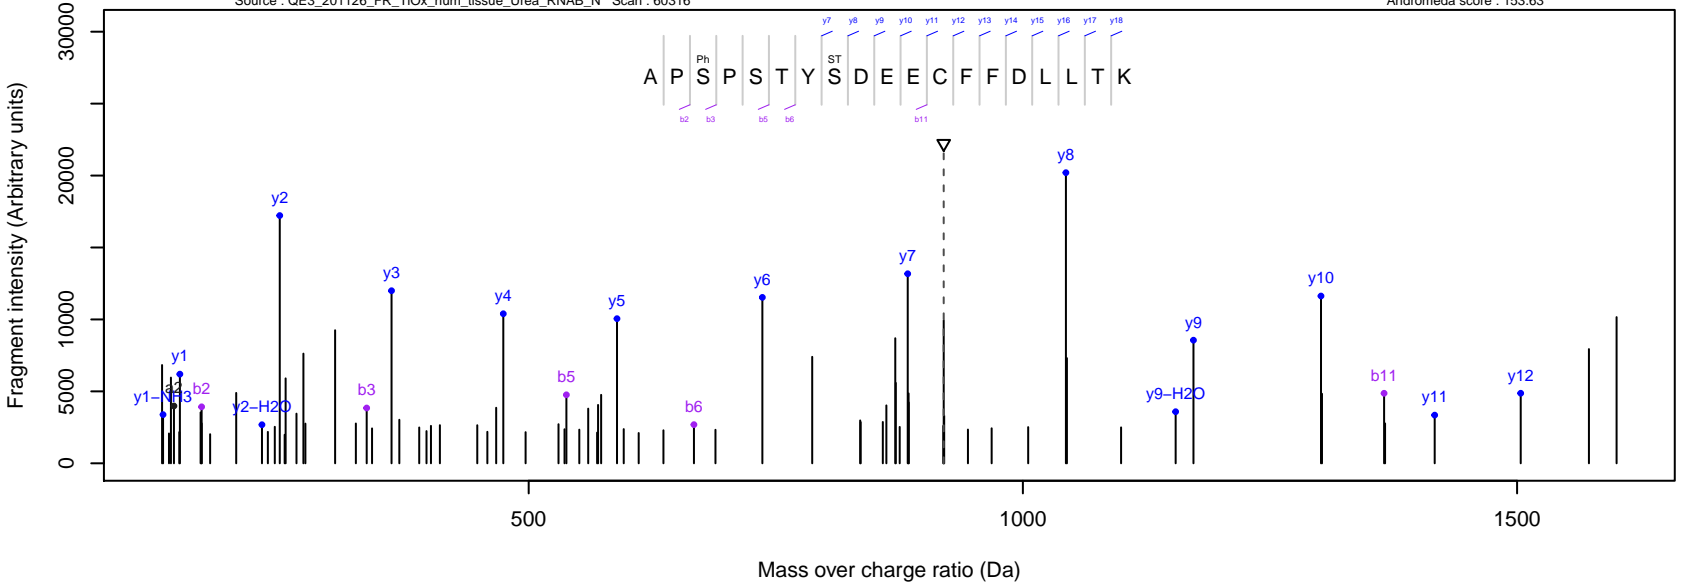

QGPVQSATQQPVTDKQQGHEPVS(Phospho (STY))PR-4+

Source : QE3\_201126\_FR\_TiOx\_hum\_tissue\_Urea\_RNAB\_N Scan : 11417

Andromeda score : 153.63

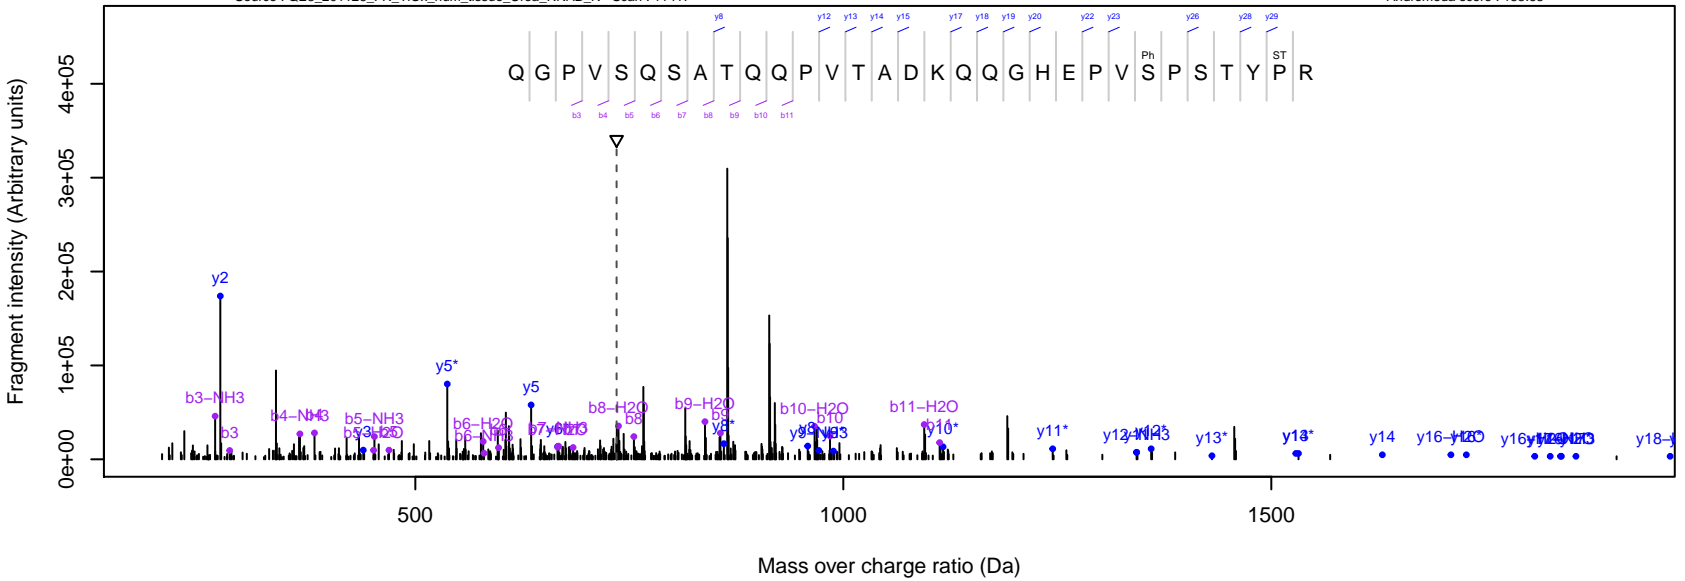

RHEEQRELEEEEEENS(Phospho (STY))DEELDSHTM(Oxidation (M))VK-4+

Source : QE3\_201126\_FR\_TiOx\_hum\_tissue\_Urea\_RNAB\_N Scan : 16018

Andromeda score : 153.63

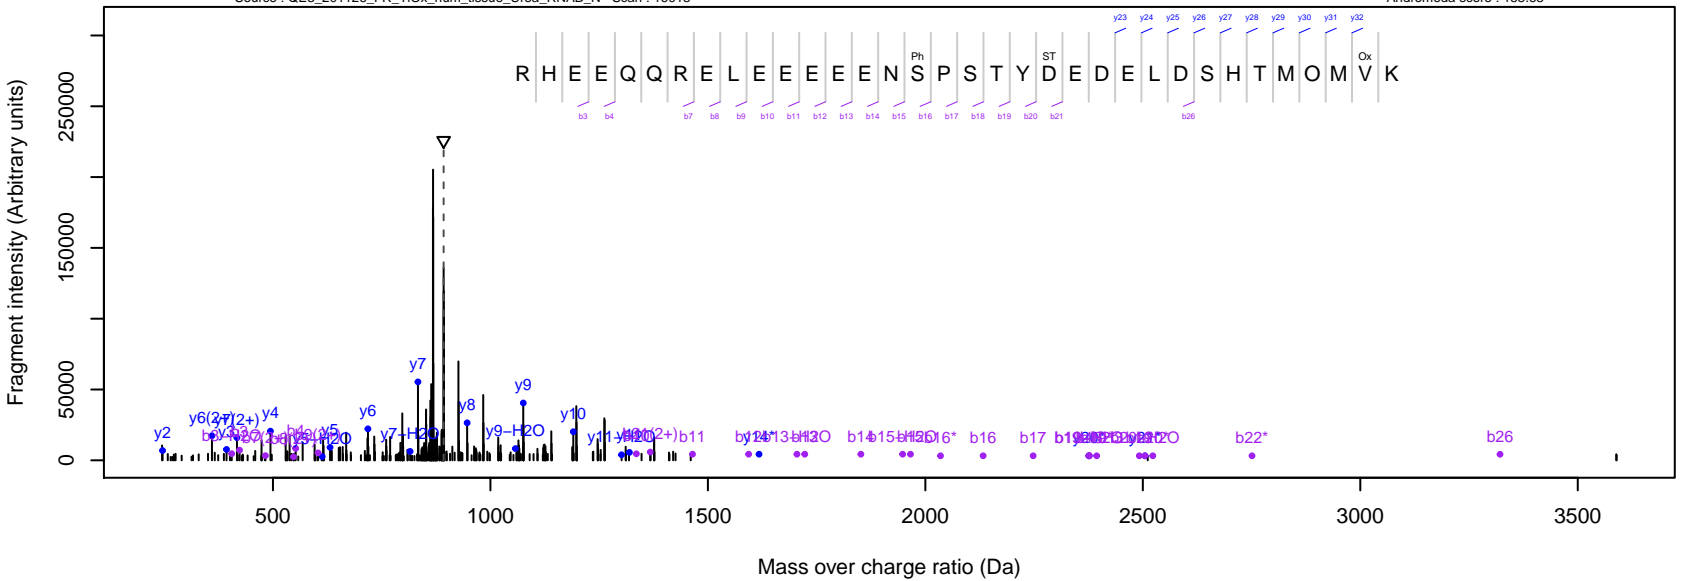

SSS(Phospho (STY))EDKITVHFINR-3+

Source : QE3\_201126\_FR\_TiOx\_hum\_tissue\_Urea\_RNAB\_H Scan : 21052

Andromeda score : 153.56

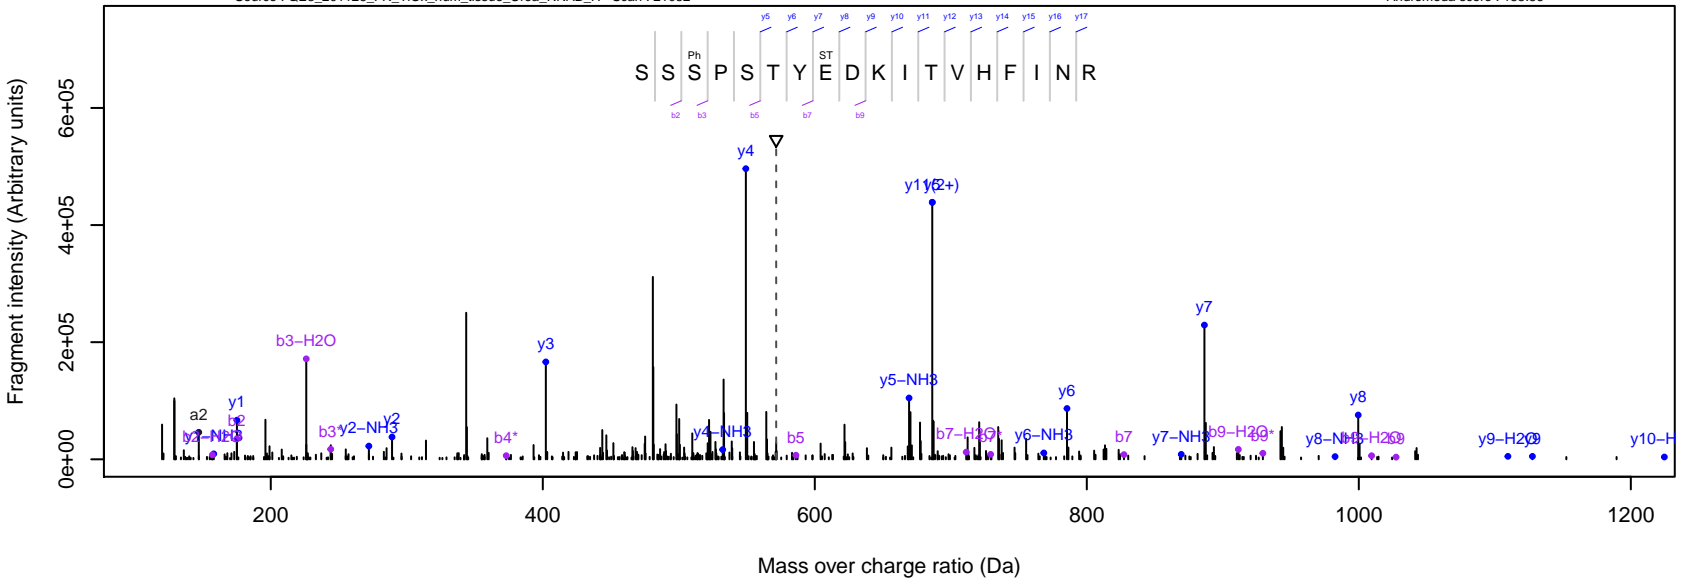

VSAL EEDMDDVES(Phospho (STY))S(Phospho (STY))EEEE EDEKLERVPS(Phospho (STY))PDHR-4+

Source : QE3\_201126\_FR\_TiOx\_hum\_tissue\_Urea\_RNAB\_N Scan : 36957

Andromeda score : 153.56

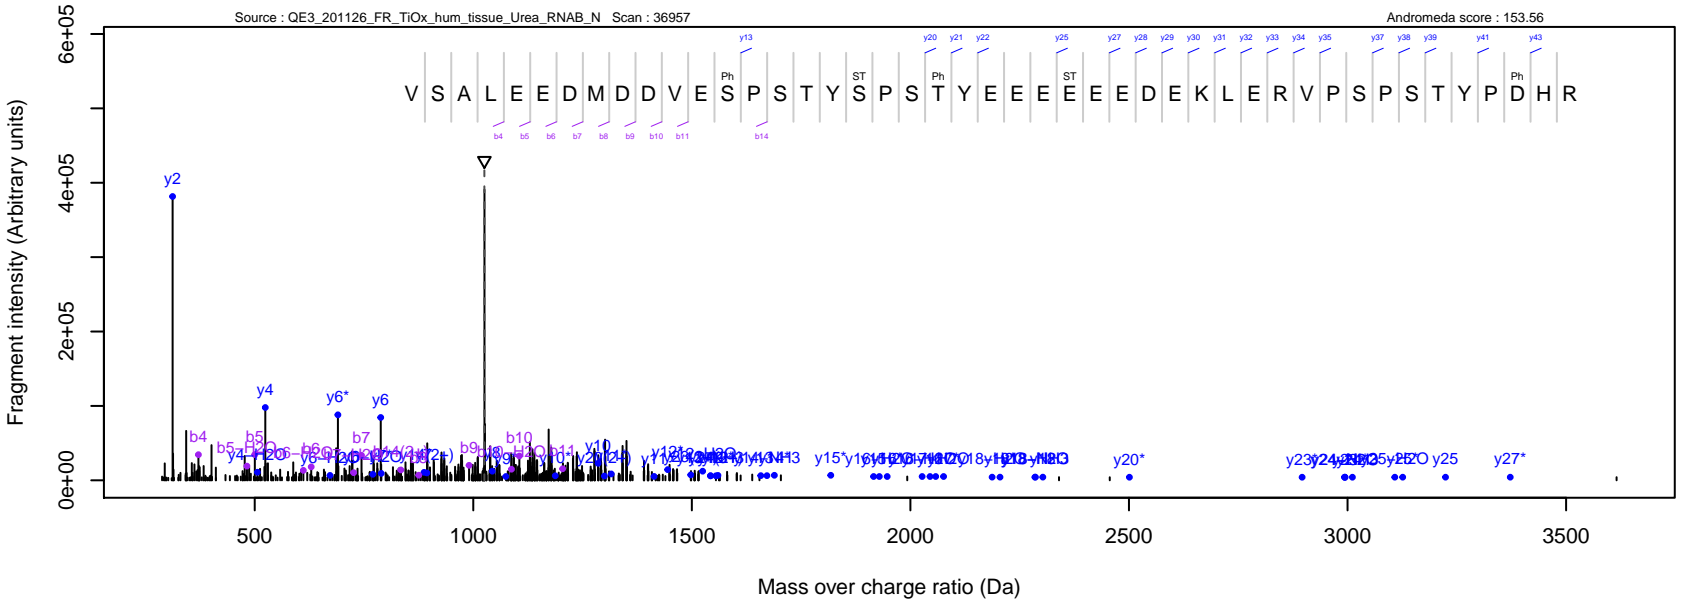

SDGS(Phospho (STY))LEDGDDVHR-2+

Source : QE3\_201126\_FR\_TiOx\_hum\_tissue\_Urea\_RNAB\_N Scan : 8514

Andromeda score : 153.52

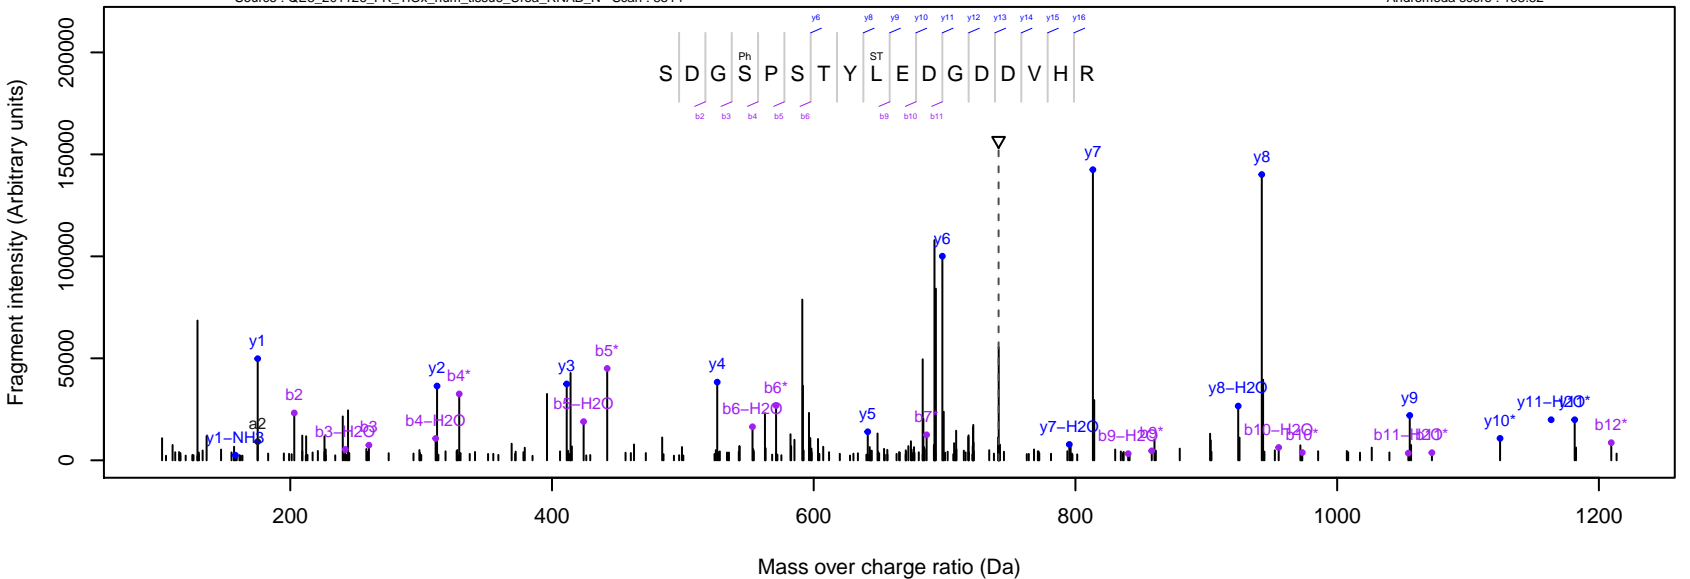

(Acetyl (Protein N-term))ADLEEQLS(Phospho (STY))DEEKVR-2+

Source : QE3\_201126\_FR\_TiOx\_hum\_tissue\_Urea\_RNAB\_N Scan : 40132

Andromeda score : 153.39

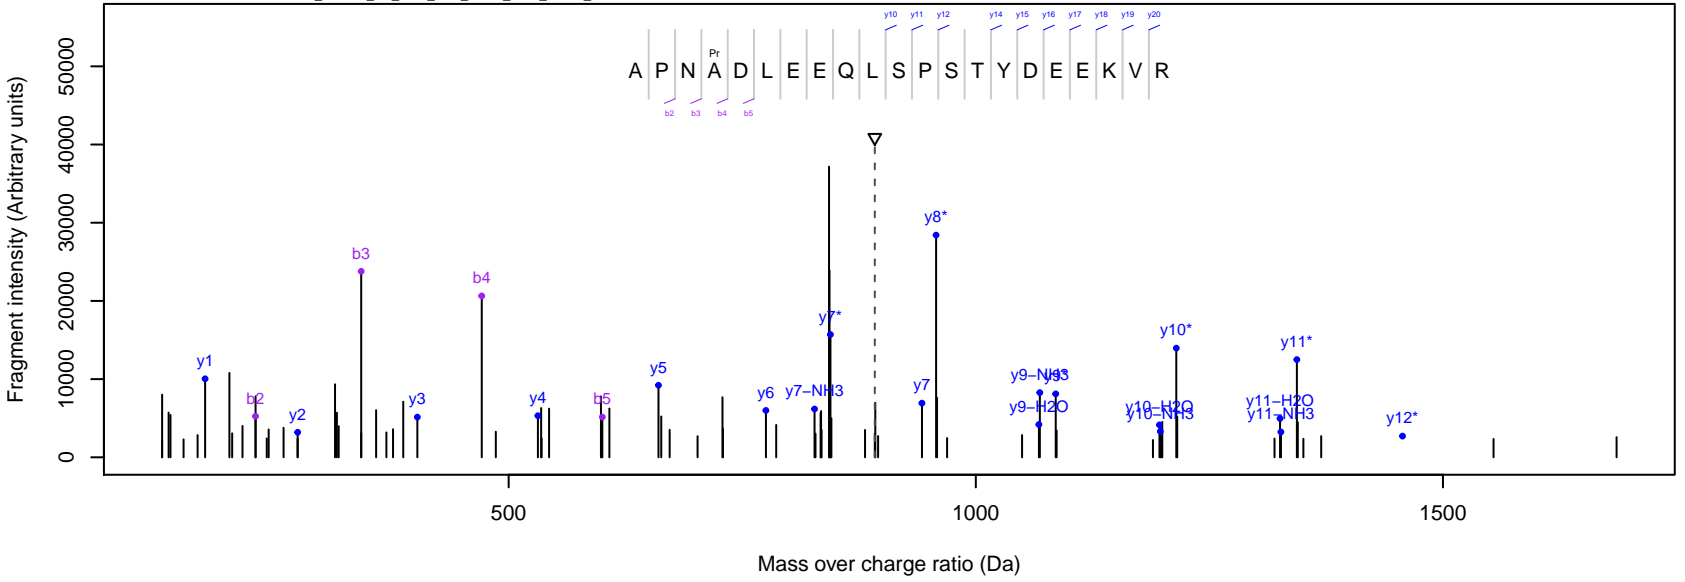

QEKPAAEKPAET(Phospho (STY))PVATSPATDSTSGDSSR-3+

Source : QE3\_201126\_FR\_TiOx\_hum\_tissue\_Urea\_RNAB\_N Scan : 9437

Andromeda score : 153.37

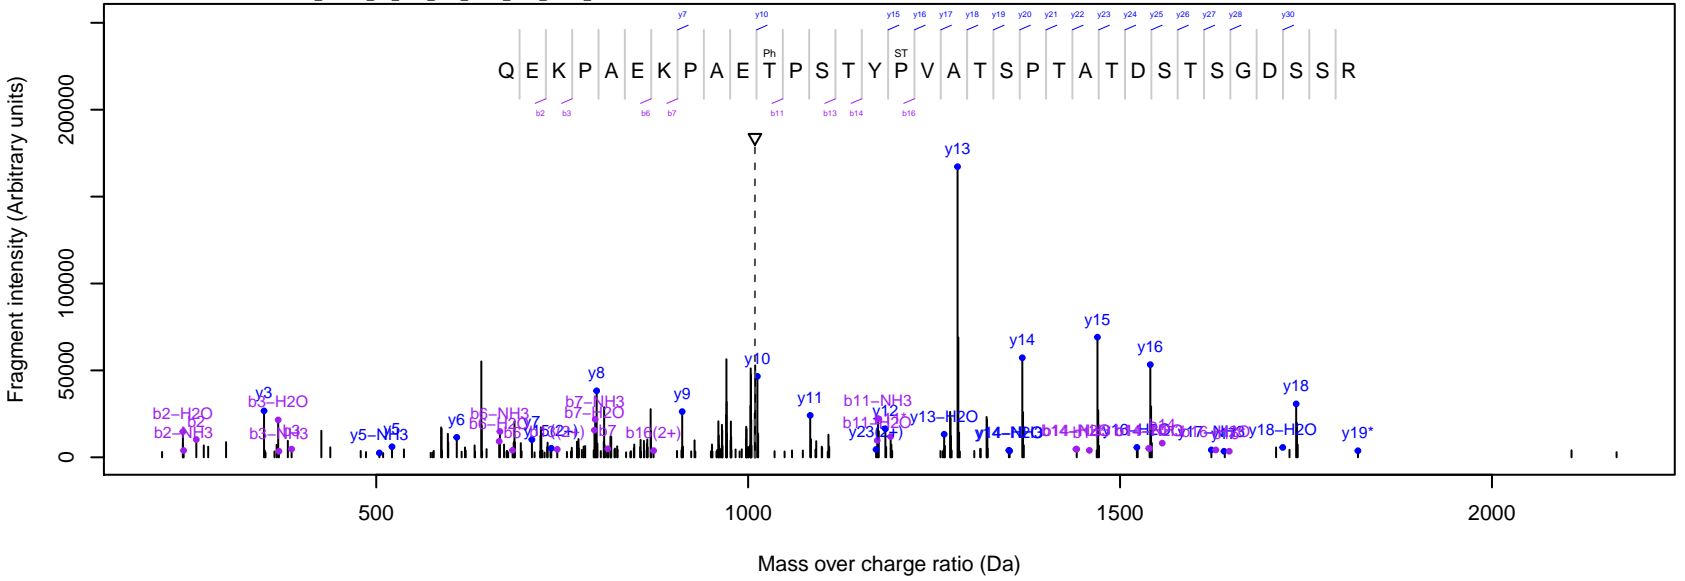

QQTEKPE(Phospho (STY))EDEWERTER-3+

Source : QE3\_201126\_FR\_TiOx\_hum\_tissue\_Urea\_RNAB\_N Scan : 10860

Andromeda score : 153.36

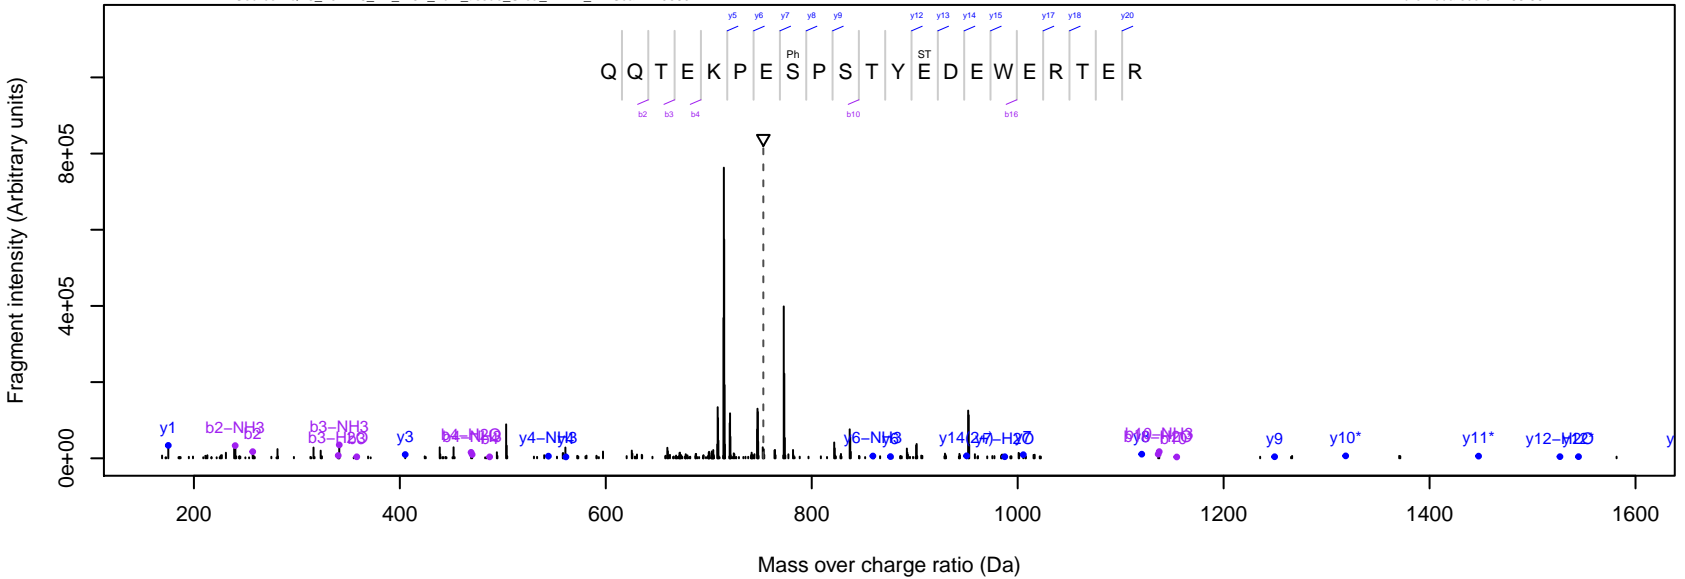

KPS(Phospho (STY))DEEFASR-2+

Source : QE3\_201126\_FR\_TiOx\_hum\_tissue\_Urea\_RNAB\_H Scan : 7840

Andromeda score : 153.32

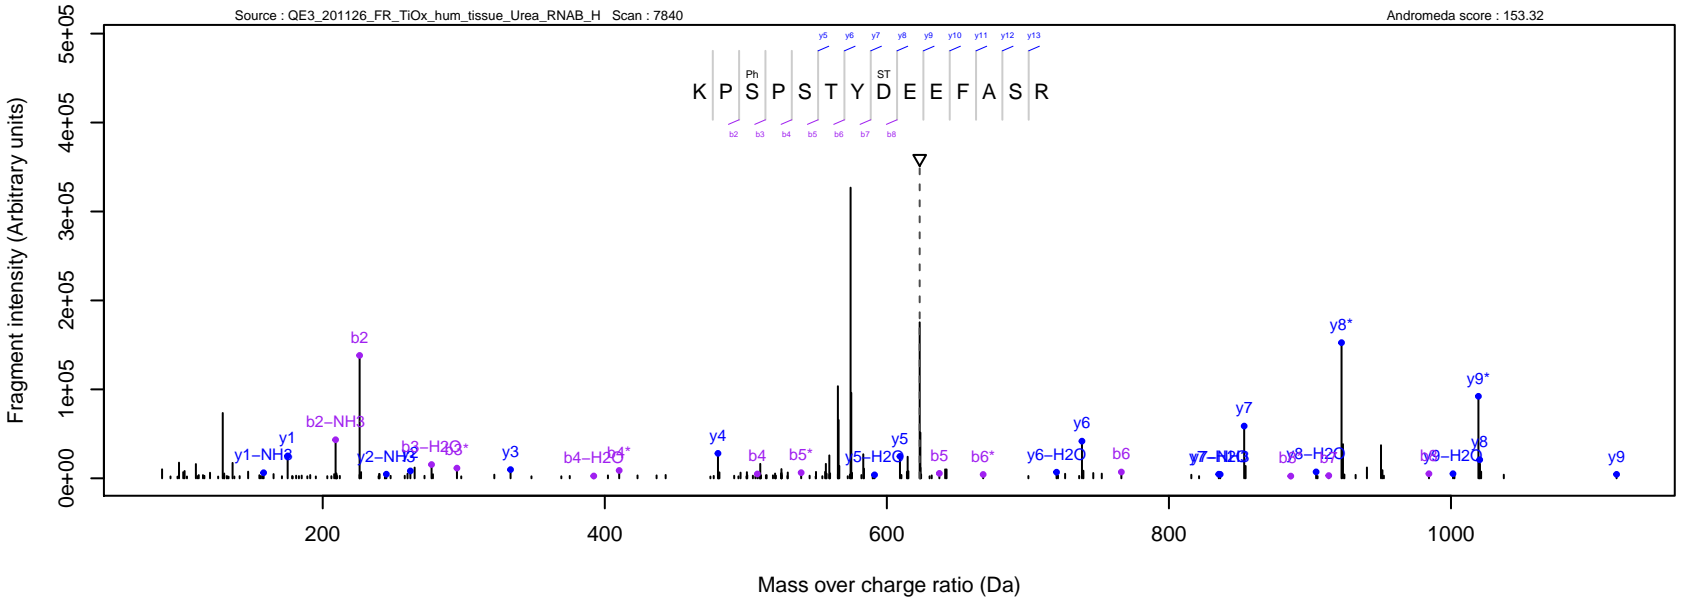

M(Oxidation (M))EHIPESRPLS(Phospho (STY))PTAFSLQLFLHK-4+

Source : QE3\_201126\_FR\_TiOx\_hum\_tissue\_Urea\_RNAB\_H Scan : 40820

Andromeda score : 153.27

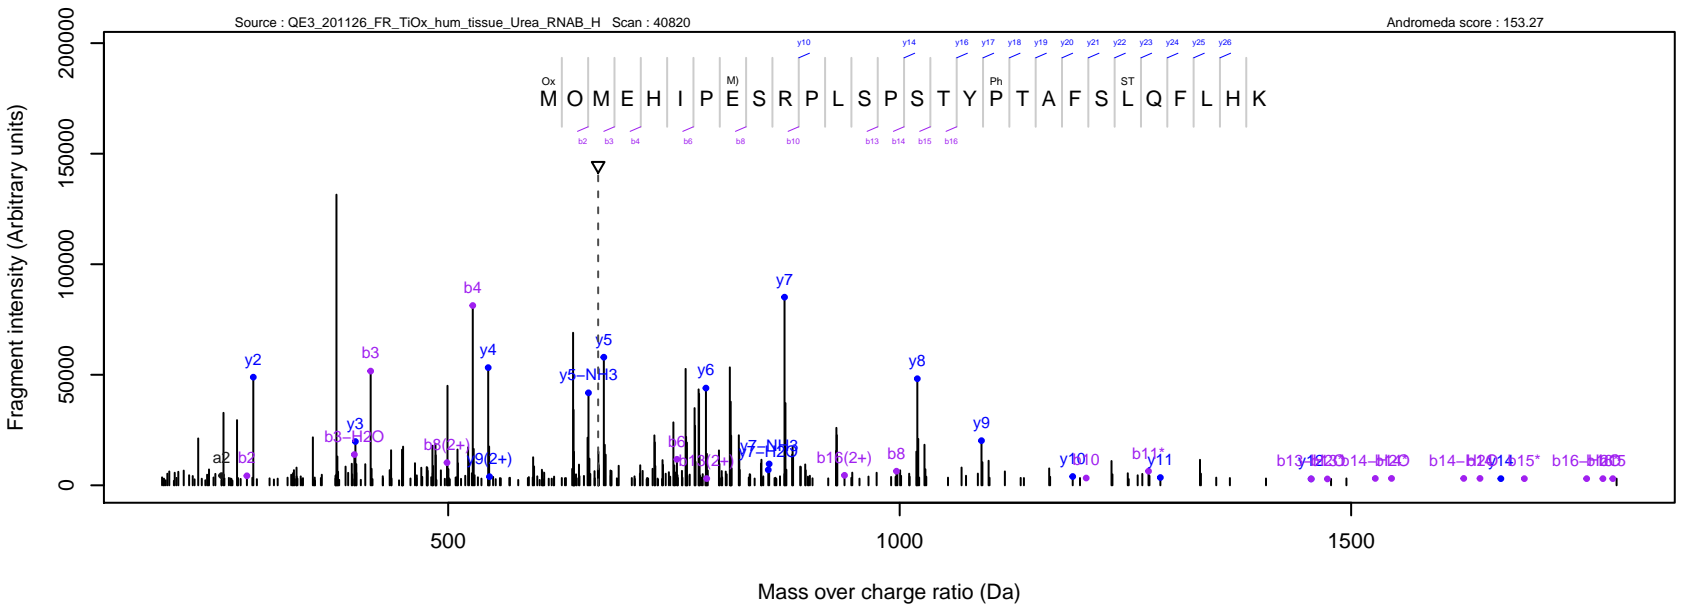

KES(Phospho (STY))ESEDSPSTYS(Phospho (STY))DDEPLIKK-2+

Source : QE3\_201126\_FR\_TiOx\_hum\_tissue\_Urea\_RNAB\_N Scan : 17716

Andromeda score : 153.25

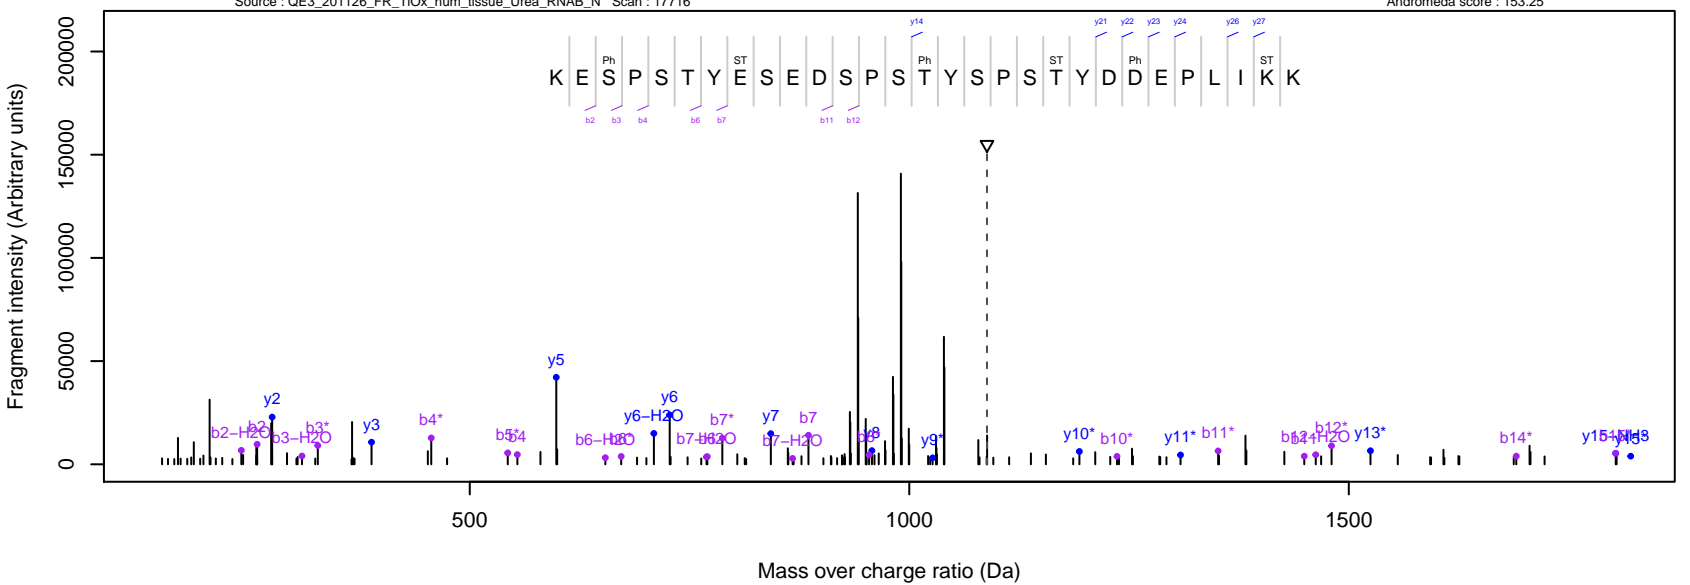

DSVINLS(Phospho (STY))ESVEDGPK--2+

Source : QE3\_201126\_FR\_TiOx\_hum\_tissue\_Urea\_RNAB\_N Scan : 37102

Andromeda score : 153.24

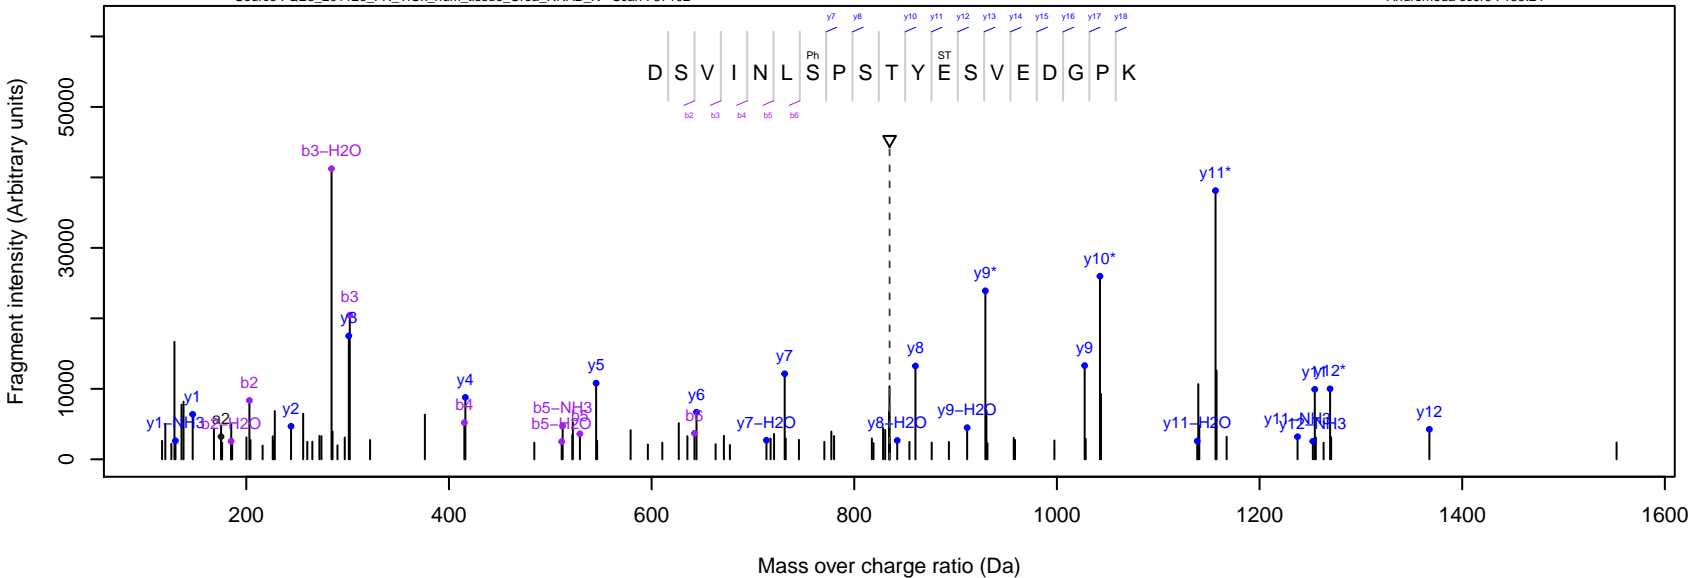

(Acetyl (Protein N-term))SSVAVLQES(Phospho (STY))FAEHR--2+

Source : QE3\_201126\_FR\_TiOx\_hum\_tissue\_Urea\_RNAB\_N Scan : 39922

Andromeda score : 153.24

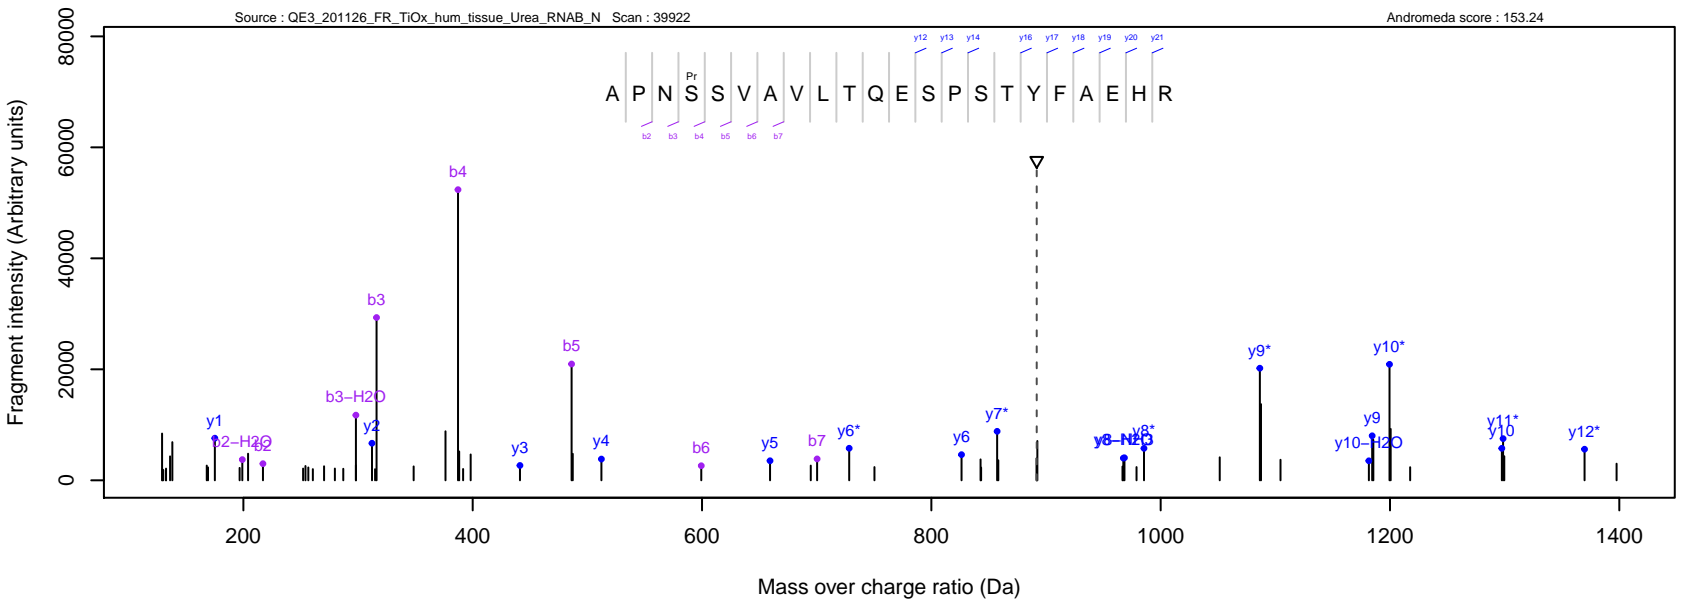

ALEEGDGSVSGSS(Phospho (STY))PR--2+

Source : QE3\_201126\_FR\_TiOx\_hum\_tissue\_Urea\_RNAB\_N Scan : 11611

Andromeda score : 153.22

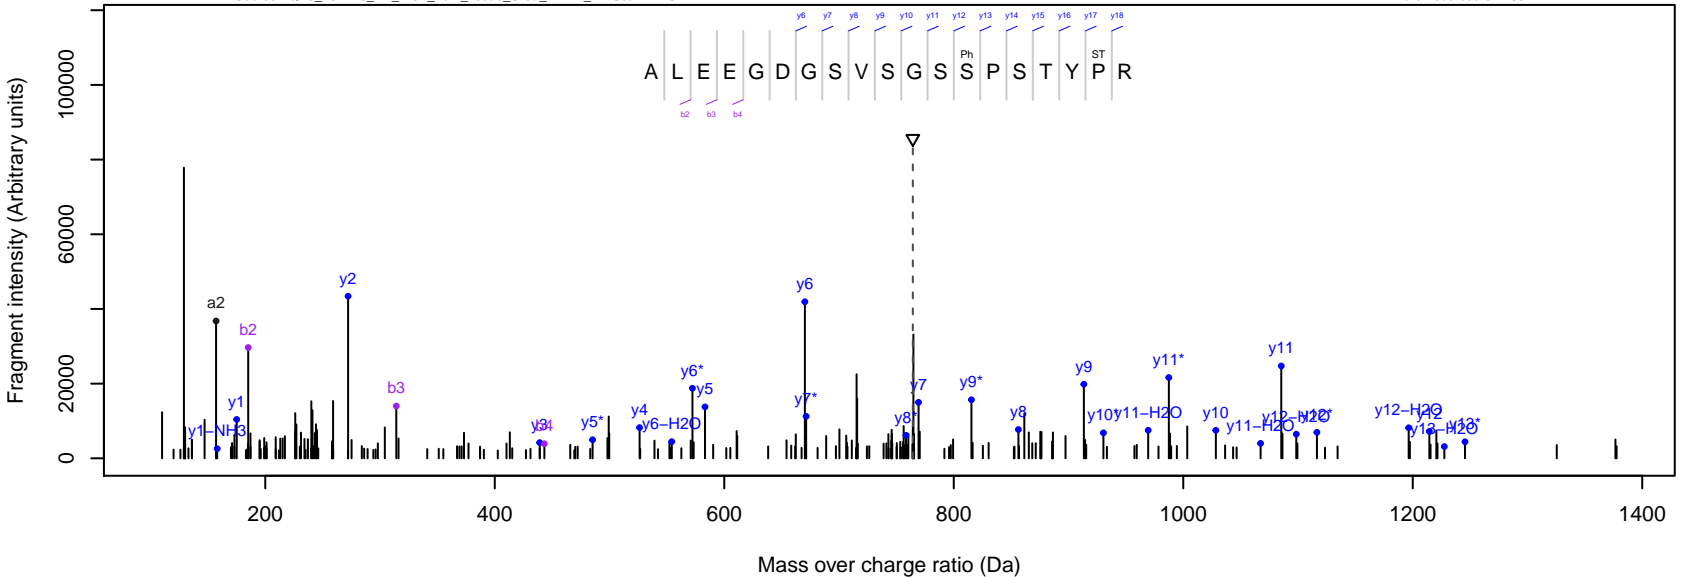

HTGM(Oxidation (M))ASIDSSAPETTS(DSS(Phospho (STY)))PTLSR-3+

Source : QE3\_201126\_FR\_TiOx\_hum\_tissue\_Urea\_RNAB\_N Scan : 15863

Andromeda score : 153.12

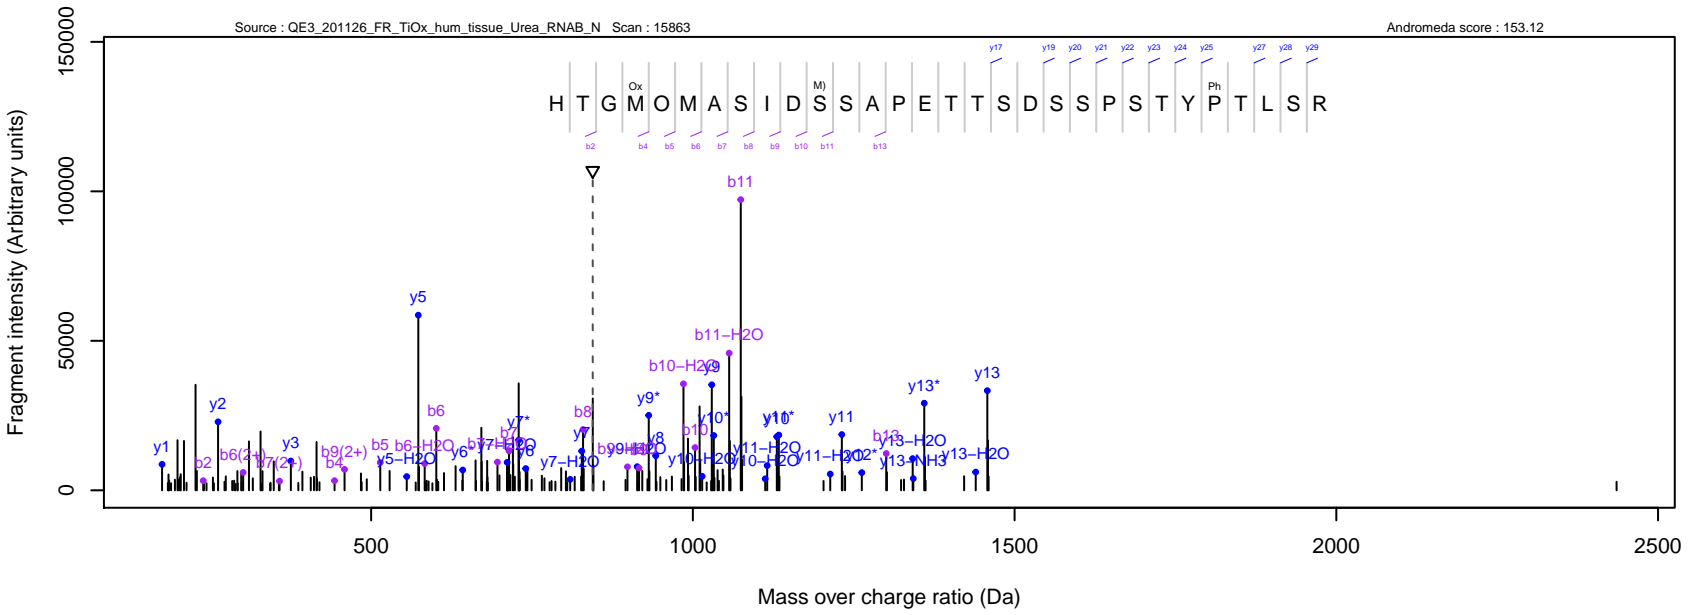

AEAPPLEREDS(Phospho (STY))GTFLSGK-2+

Source : QE3\_201126\_FR\_TiOx\_hum\_tissue\_Urea\_RNAB\_H Scan : 28425

Andromeda score : 153.11

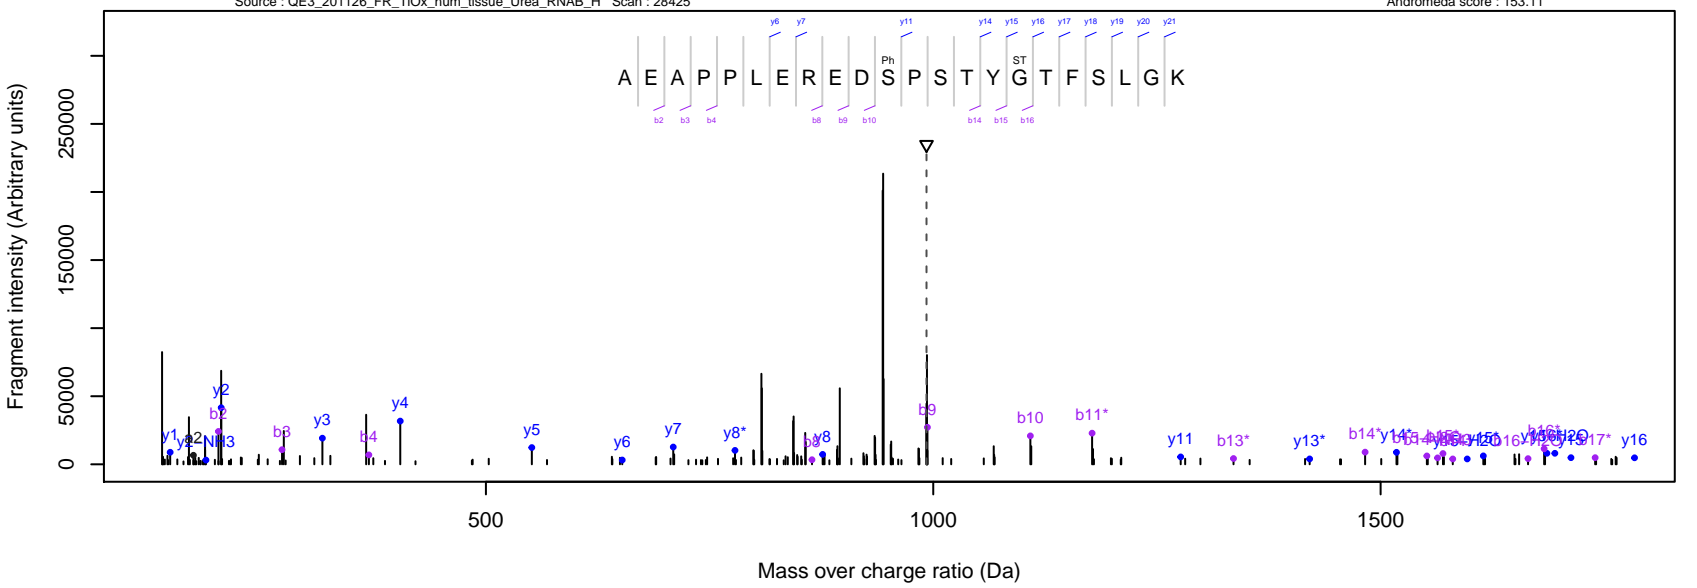

LSGQNAMGS(Phospho (STY))QDS(Phospho (STY))LLEITFR-2+

Source : QE3\_201126\_FR\_TiOx\_hum\_tissue\_Urea\_RNAB\_H Scan : 60762

Andromeda score : 153.11

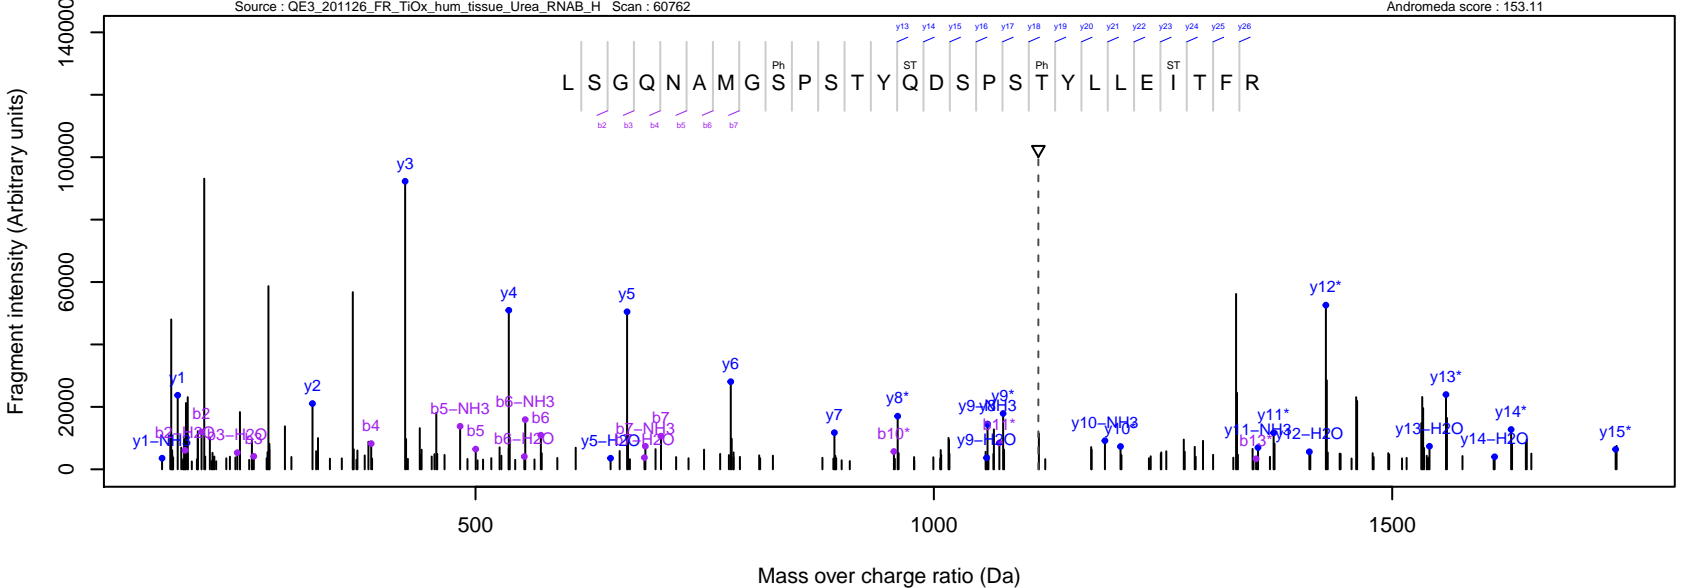



AAAYDIS(Phospho (STY))EDED-2+

Source : QE3\_201126\_FR\_TIOx\_hum\_tissue\_Urea\_RNAB\_H Scan : 28337

Andromeda score : 153.1

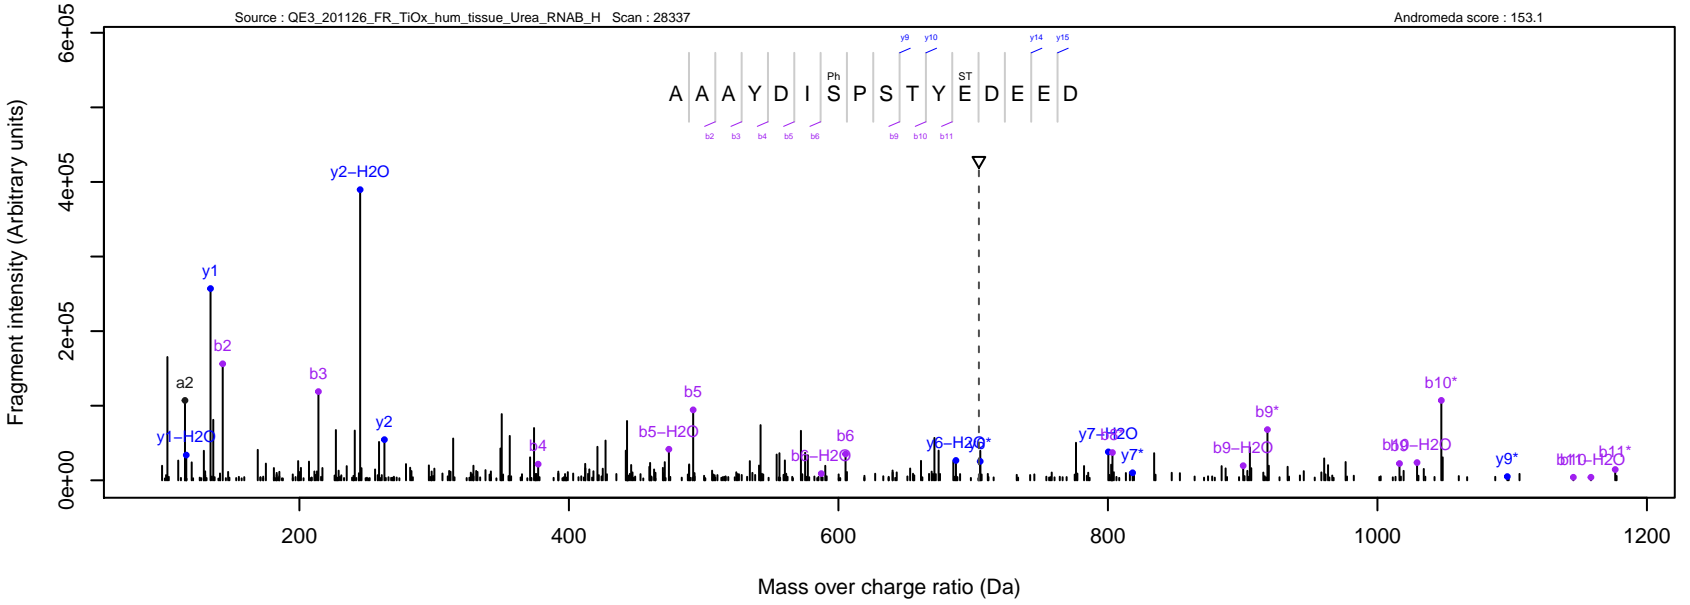

QGSITSPQANEQSVTPSTYR-3+

Source : QE3\_201126\_FR\_TIOx\_hum\_tissue\_Urea\_RNAB\_N Scan : 11108

Andromeda score : 153.1

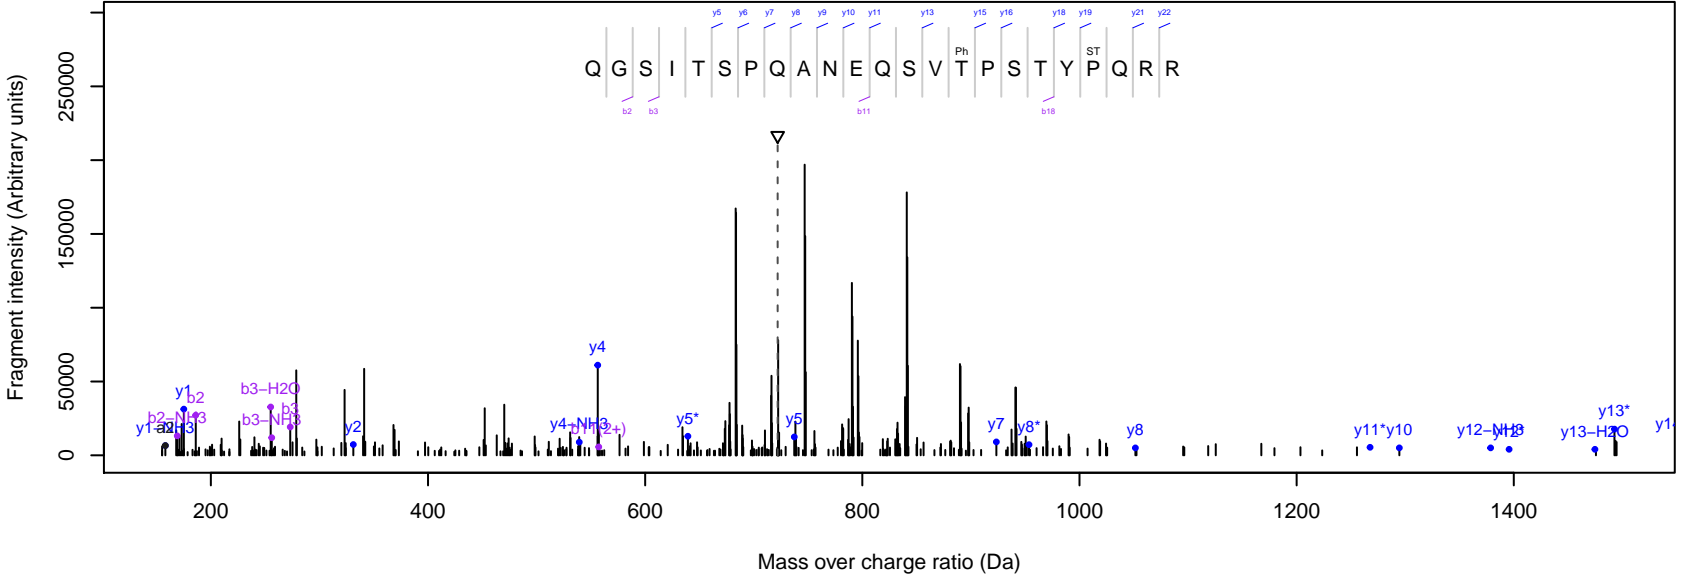

TVSPGSVSPSTYPIHGQGVVENLK-3+

Source : QE3\_201126\_FR\_TIOx\_hum\_tissue\_Urea\_RNAB\_H Scan : 25344

Andromeda score : 153.1

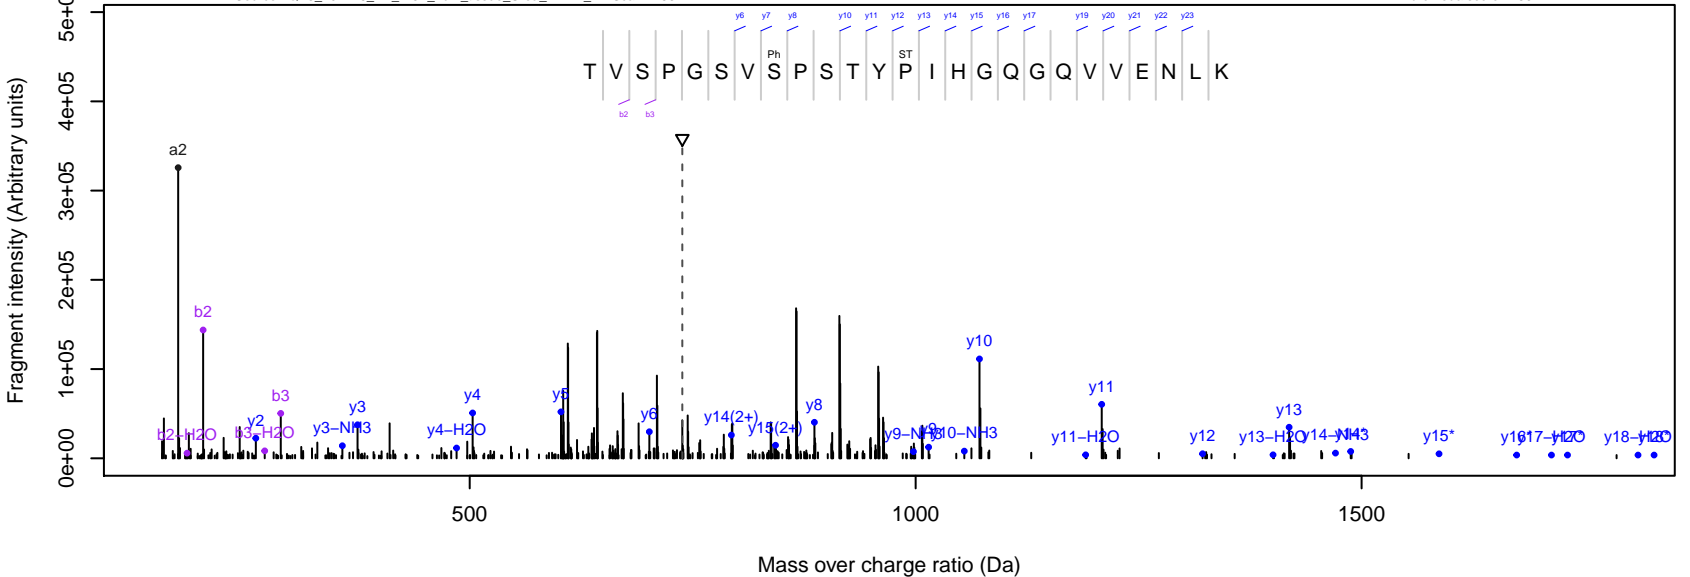



LLSSNEDDANILSS(Phospho (STY))PTDR-2+

Source : QE3\_201126\_FR\_TiOx\_hum\_tissue\_Urea\_RNAB\_B Scan : 32886

Andromeda score : 153.06

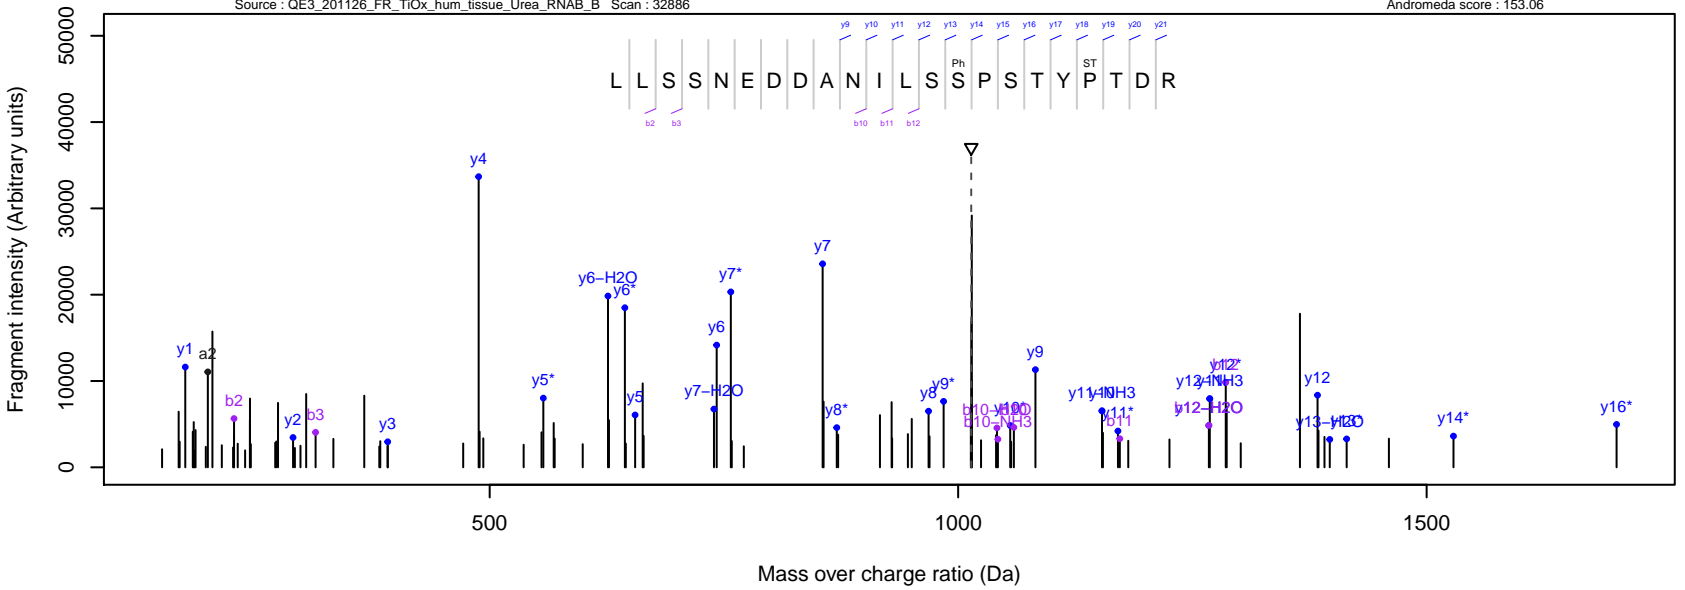

TGGGGGAS(Phospho (STY))GSEDEEVSEVSEFILDQEDLDNPK-3+

Source : QE3\_201126\_FR\_TiOx\_hum\_tissue\_Urea\_RNAB\_N Scan : 62585

Andromeda score : 153.06

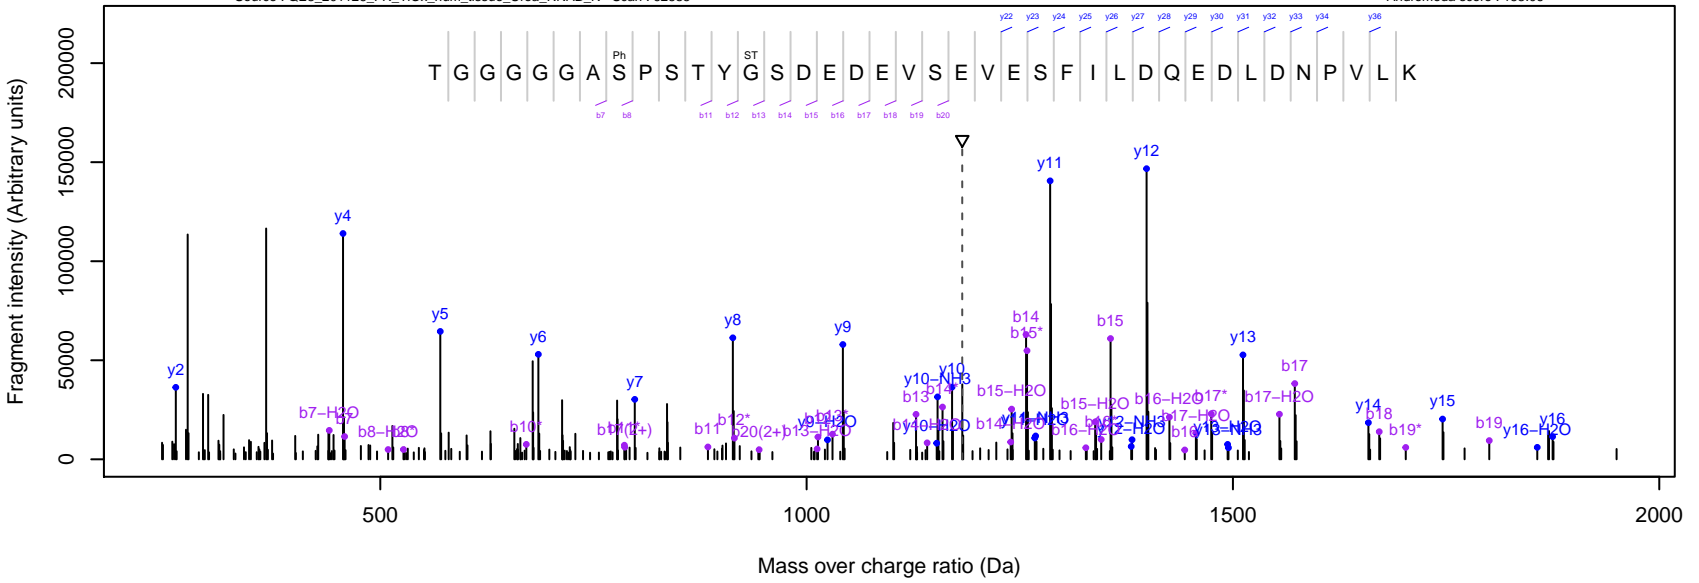

RDS(Phospho (STY))IVAELDREMSR-3+

Source : QE3\_201126\_FR\_TiOx\_hum\_tissue\_Urea\_RNAB\_H Scan : 33165

Andromeda score : 153.04

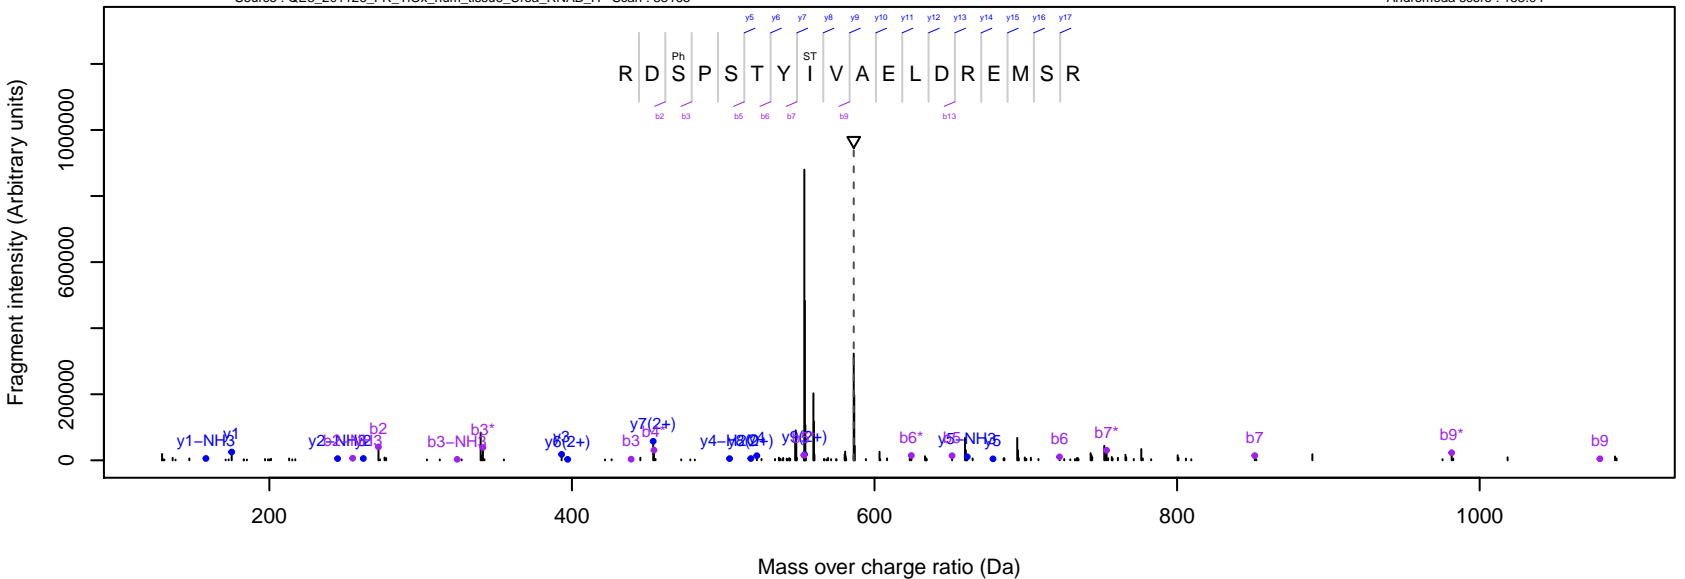

LGASNS(Phospho (STY))PGQPNSVKR-2+

Source : QE3\_201126\_FR\_TiOx\_hum\_tissue\_Urea\_RNAB\_H Scan : 6533

Andromeda score : 153.03

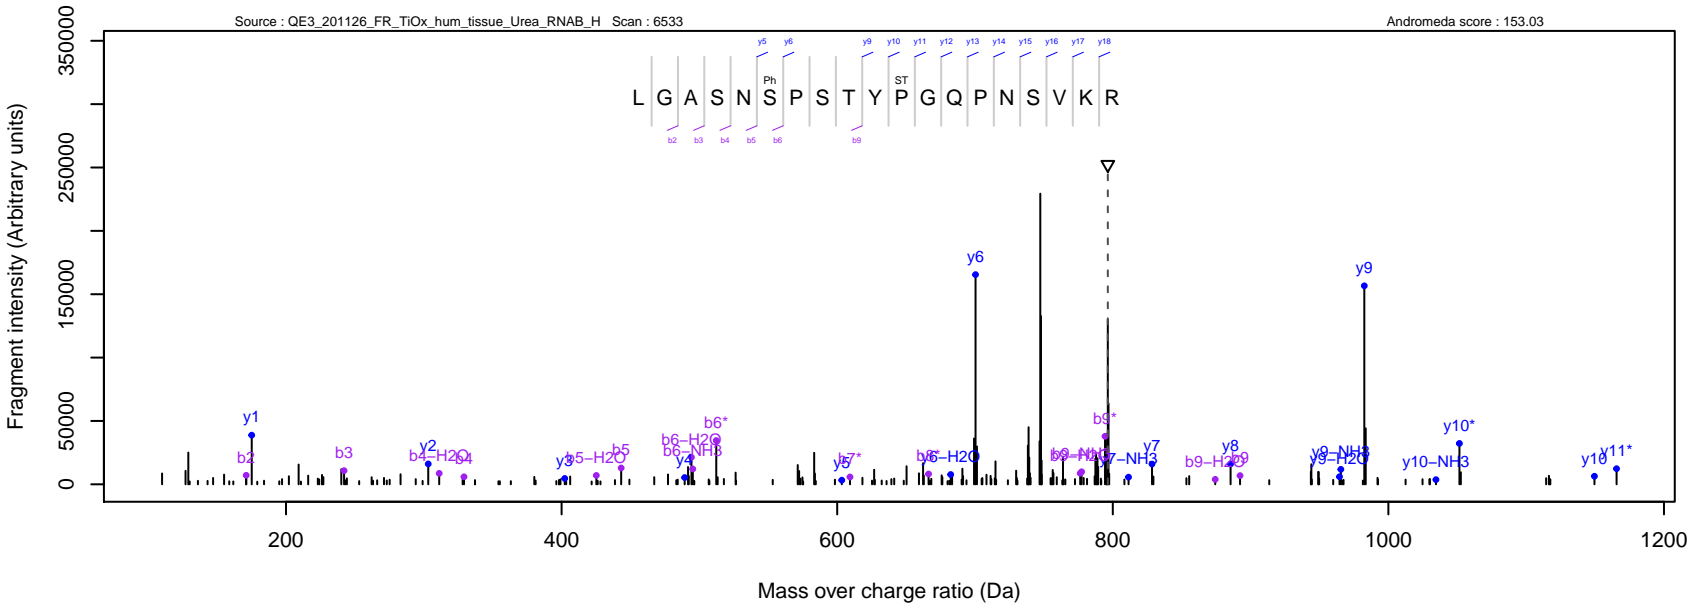

MTEEEVEM(Oxidation (M))LVAGHEDS(Phospho (STY))NGCINYEELVR-3+

Source : QE3\_201126\_FR\_TiOx\_hum\_tissue\_Urea\_RNAB\_H Scan : 53123

Andromeda score : 153.02

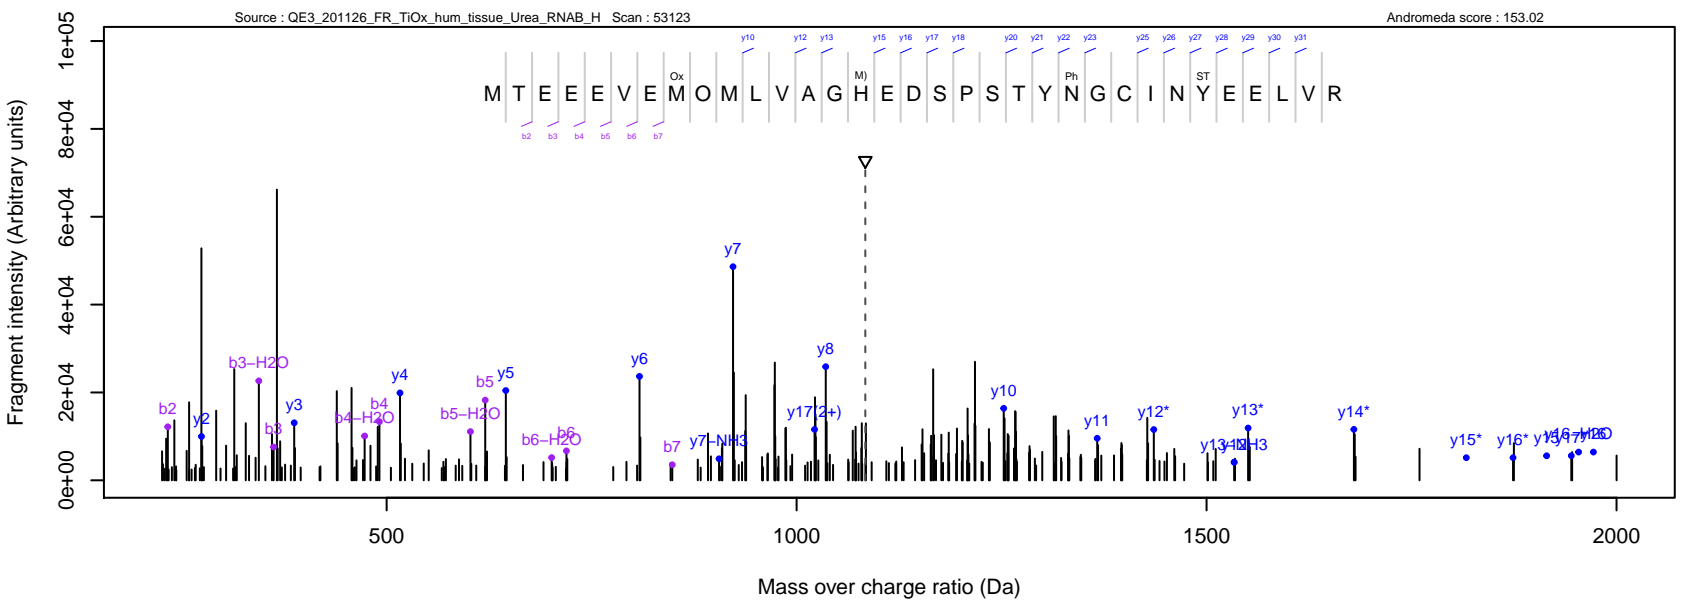

(Acetyl (Protein N-term))M(Oxidation (M))EDSM(Oxidation (M))DMDMS(Phospho (STY))PLRPQNYLFGCELK-3+

Source : QE3\_201126\_FR\_TiOx\_hum\_tissue\_Urea\_RNAB\_N Scan : 59071

Andromeda score : 153.01

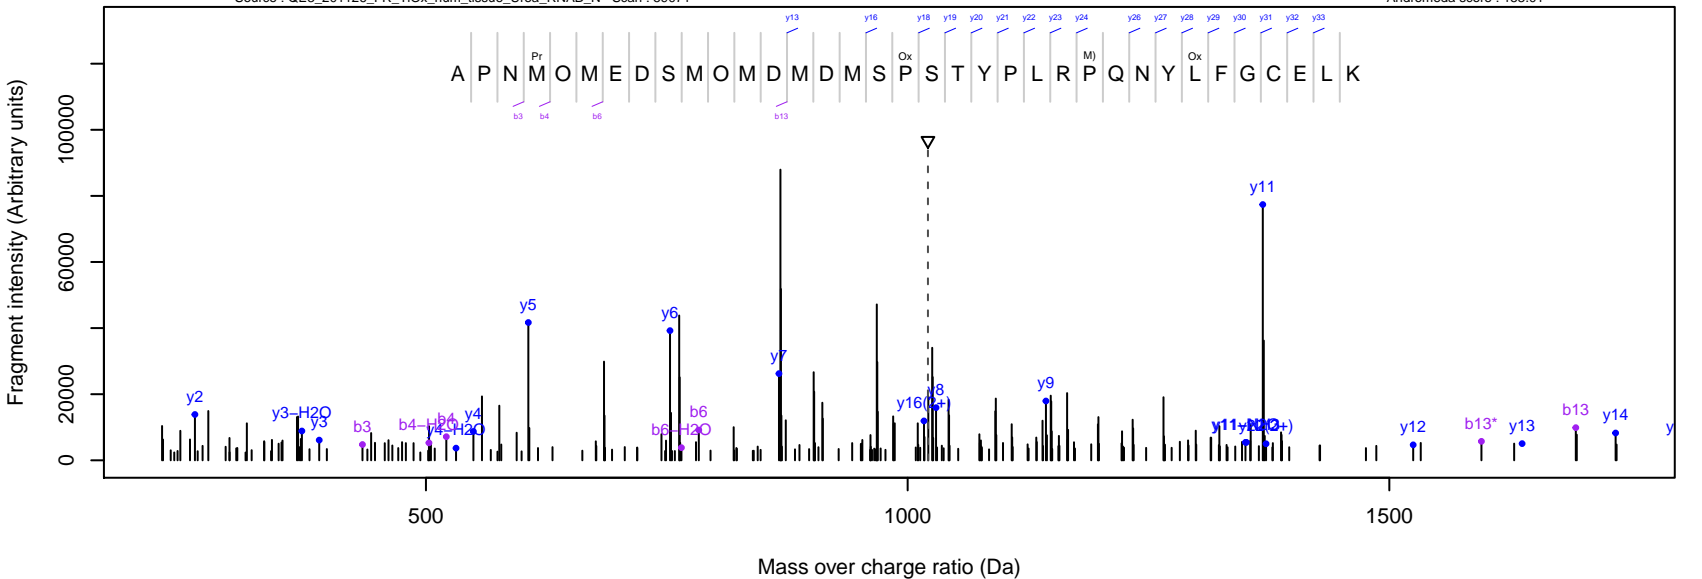

EDS(Phospho (STY))QRPGAHLTVK-2+

Source : QE3\_201126\_FR\_TiOx\_hum\_tissue\_Urea\_RNAB\_H Scan : 7762

Andromeda score : 152.99

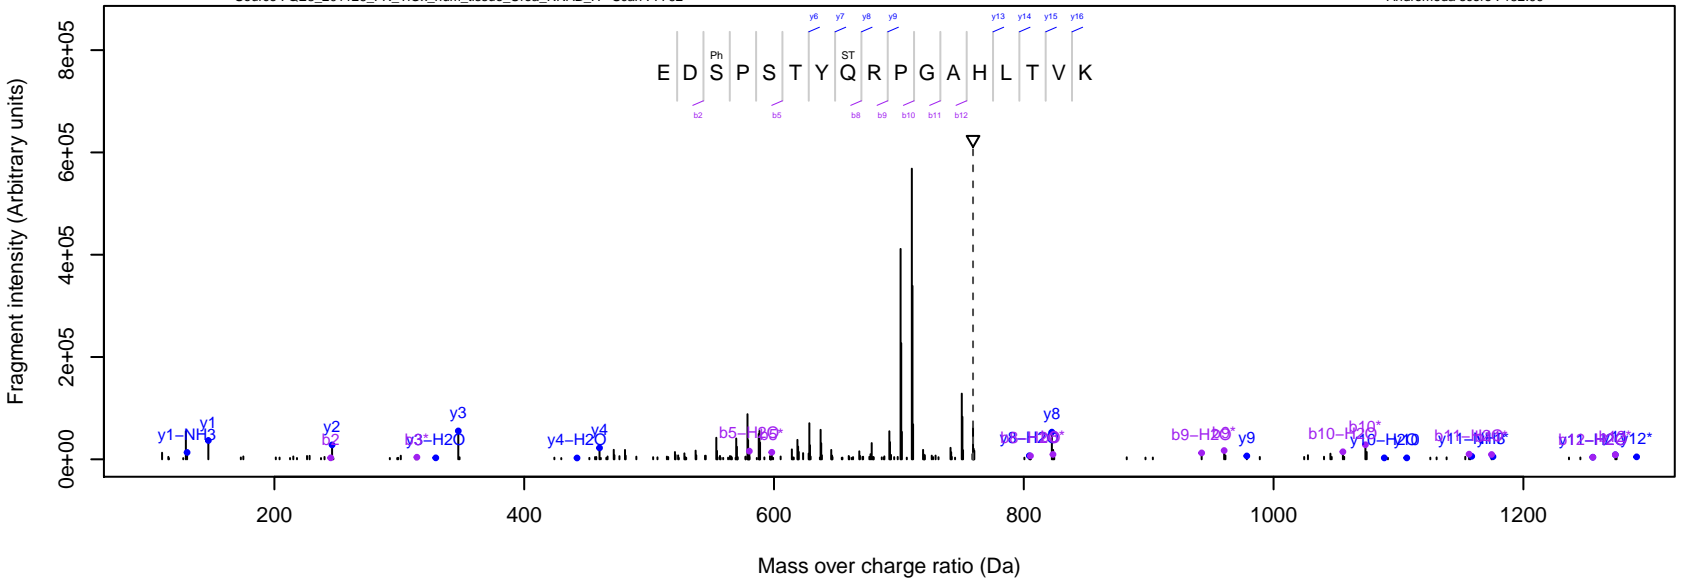

ALEAASLQHPPLCIS(Phospho (STY))DS(Phospho (STY))EEEEER-3+

Source : QE3\_201126\_FR\_TiOx\_hum\_tissue\_Urea\_RNAB\_N Scan : 40187

Andromeda score : 152.98

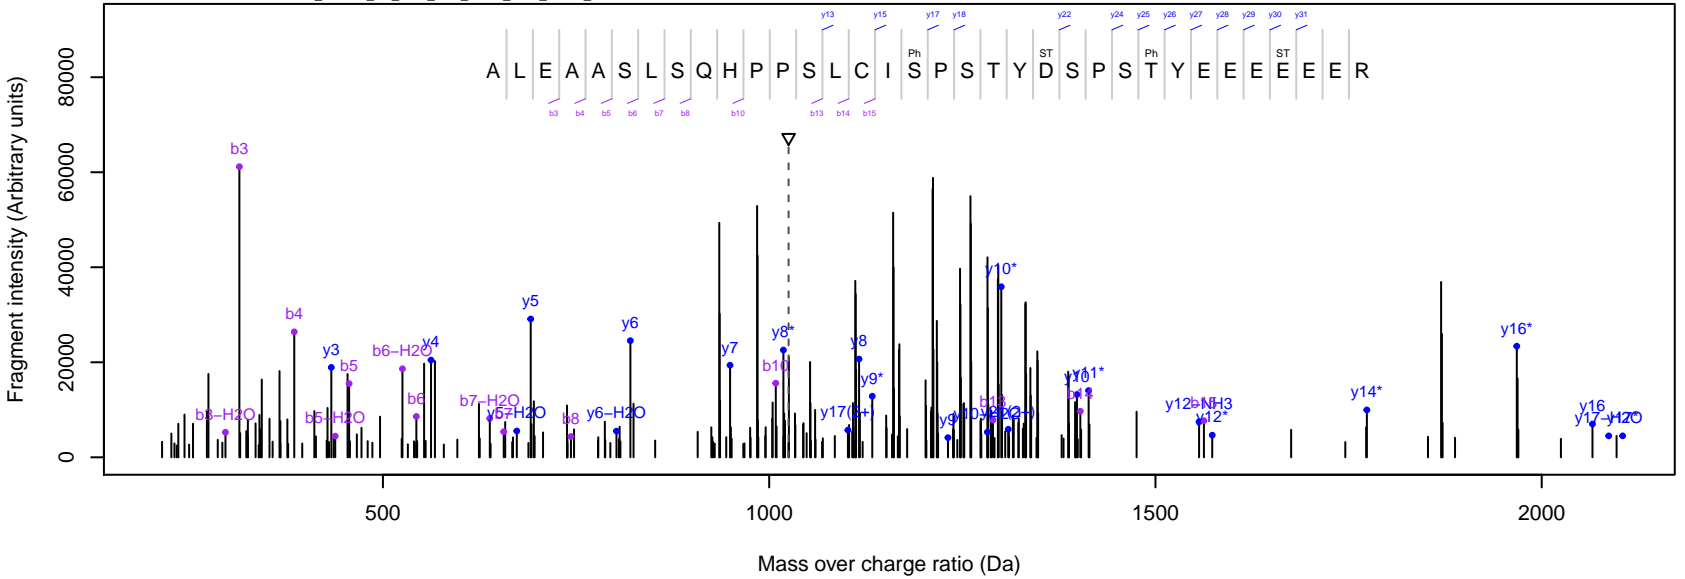

DGGTYS(Phospho (STY))PQENSHNHSHSSNSNPSK-4+

Source : QE3\_201126\_FR\_TiOx\_hum\_tissue\_Urea\_RNAB\_H Scan : 6055

Andromeda score : 152.98

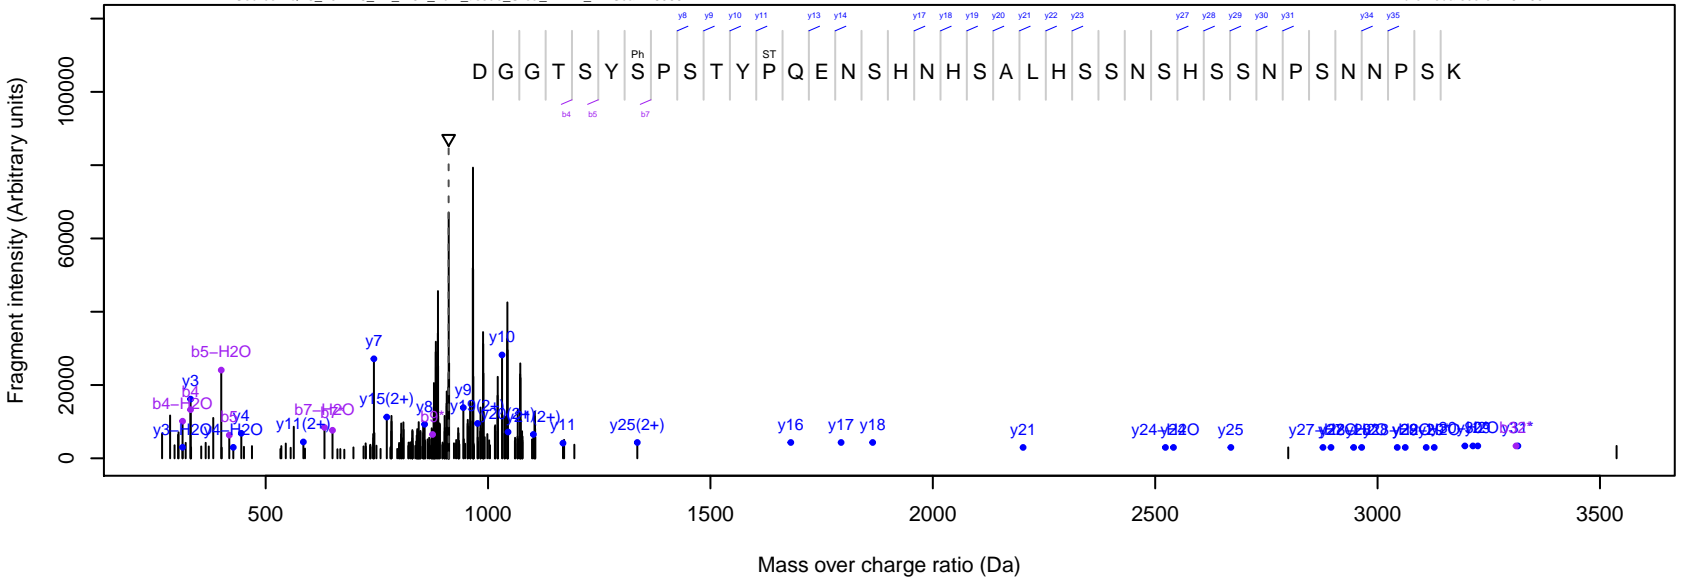

GAAEEEQDQD(Phospho (STY))GS(Phospho (STY))EPRGDEDDIPLGPQSNVSLLDQHQHLK-4+

Source : QE3\_201126\_FR\_TiOx\_hum\_tissue\_Urea\_RNAB\_H Scan : 35603

Andromeda score : 152.95

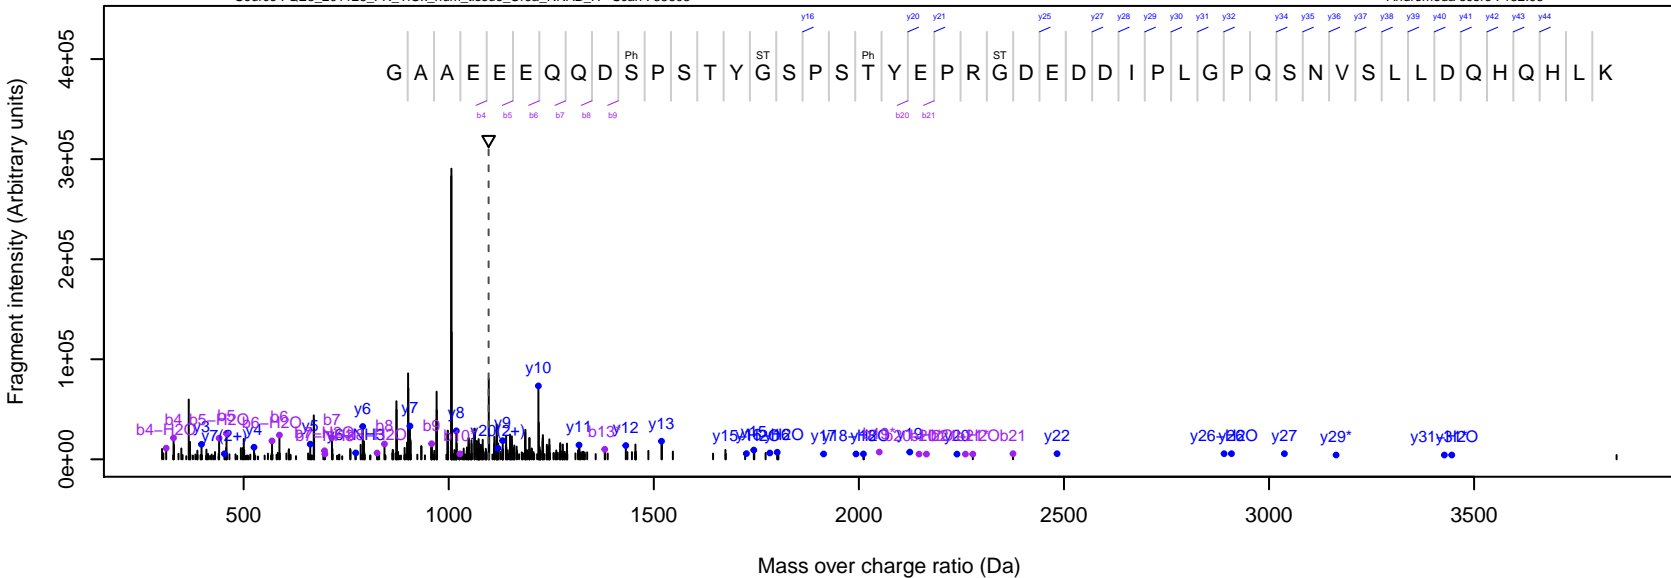

VQNHLPASGPTQPPVVSSTNEGSPSPSTYPPPEPTGK-3+

Source : QE3\_201126\_FR\_TiOx\_hum\_tissue\_Urea\_RNAB\_N Scan : 23900

Andromeda score : 152.89

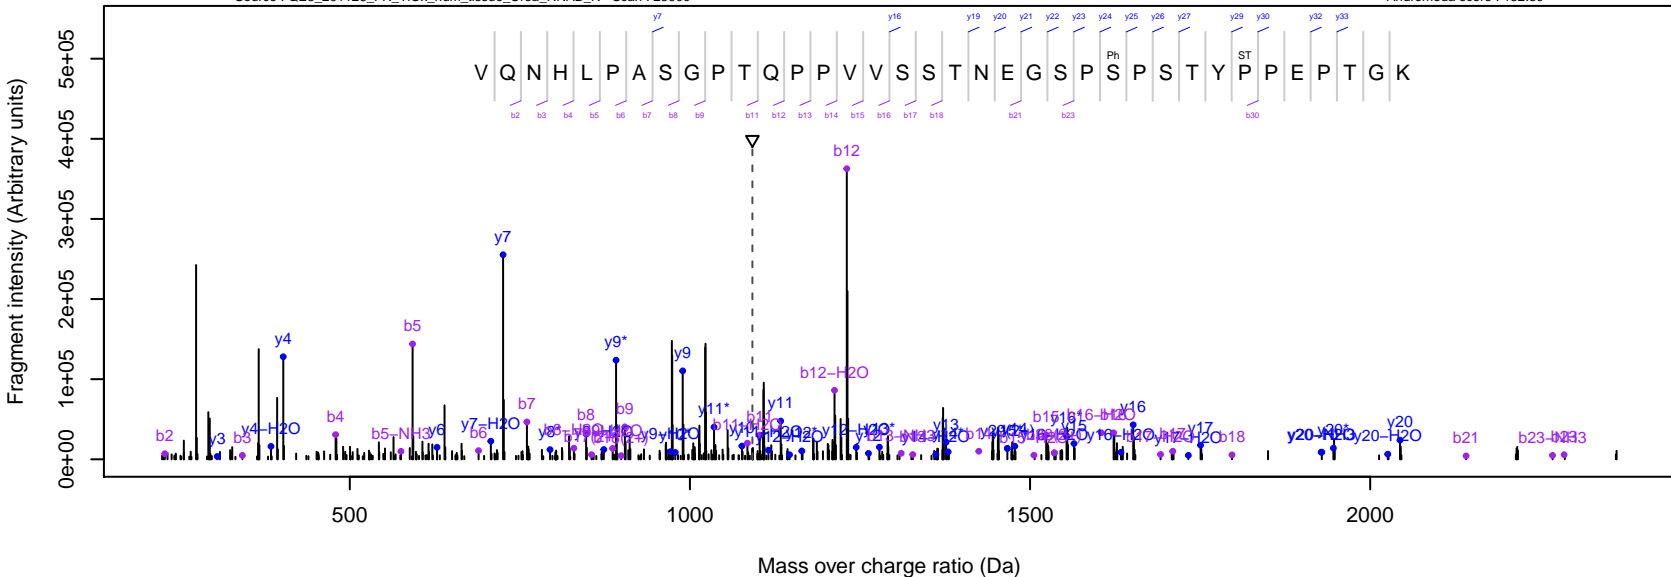

GSDALS(Phospho (STY))ETSS(Phospho (STY))VSHIEDLEKVER-3+

Source : QE3\_201126\_FR\_TiOx\_hum\_tissue\_Urea\_RNAB\_N Scan : 34749

Andromeda score : 152.88

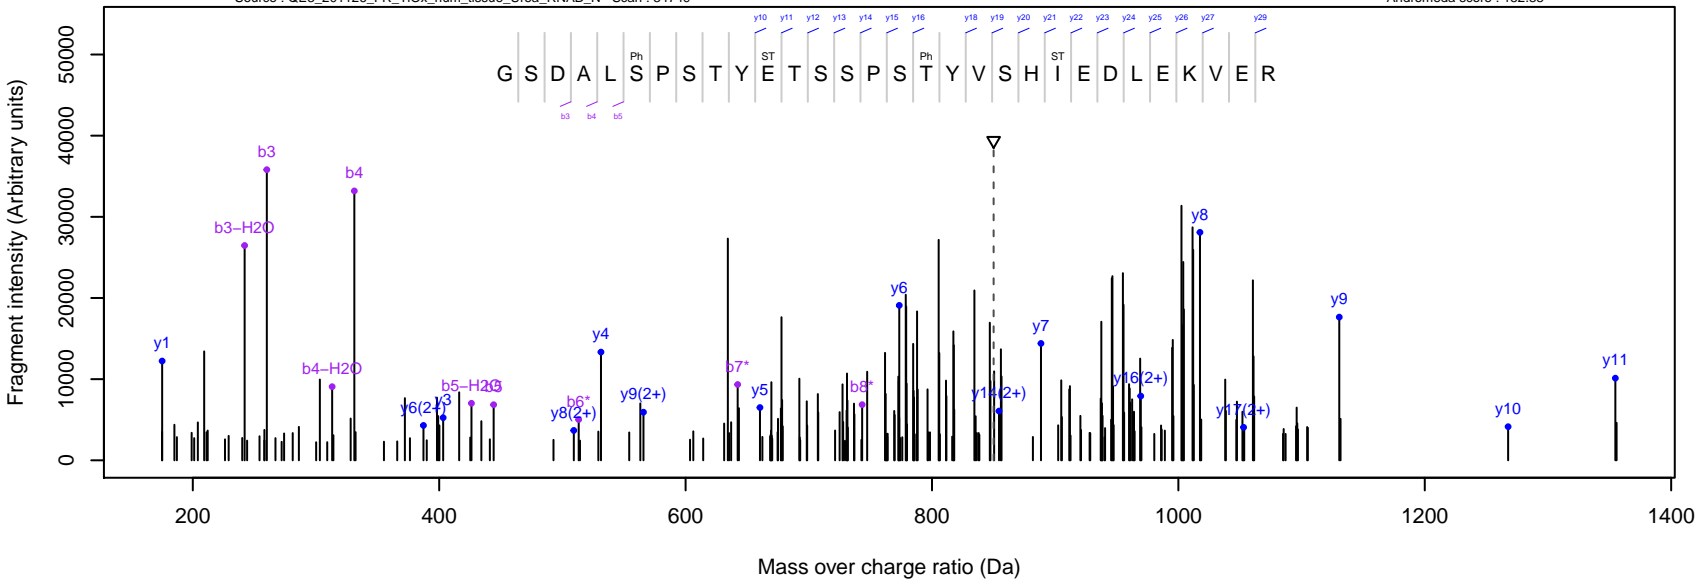

IQQEQES(Phospho (STY))S(Phospho (STY))GEEDSDLSP EER-2+

Source : QE3\_201126\_FR\_TiOx\_hum\_tissue\_Urea\_RNAB\_N Scan : 23201

Andromeda score : 152.86

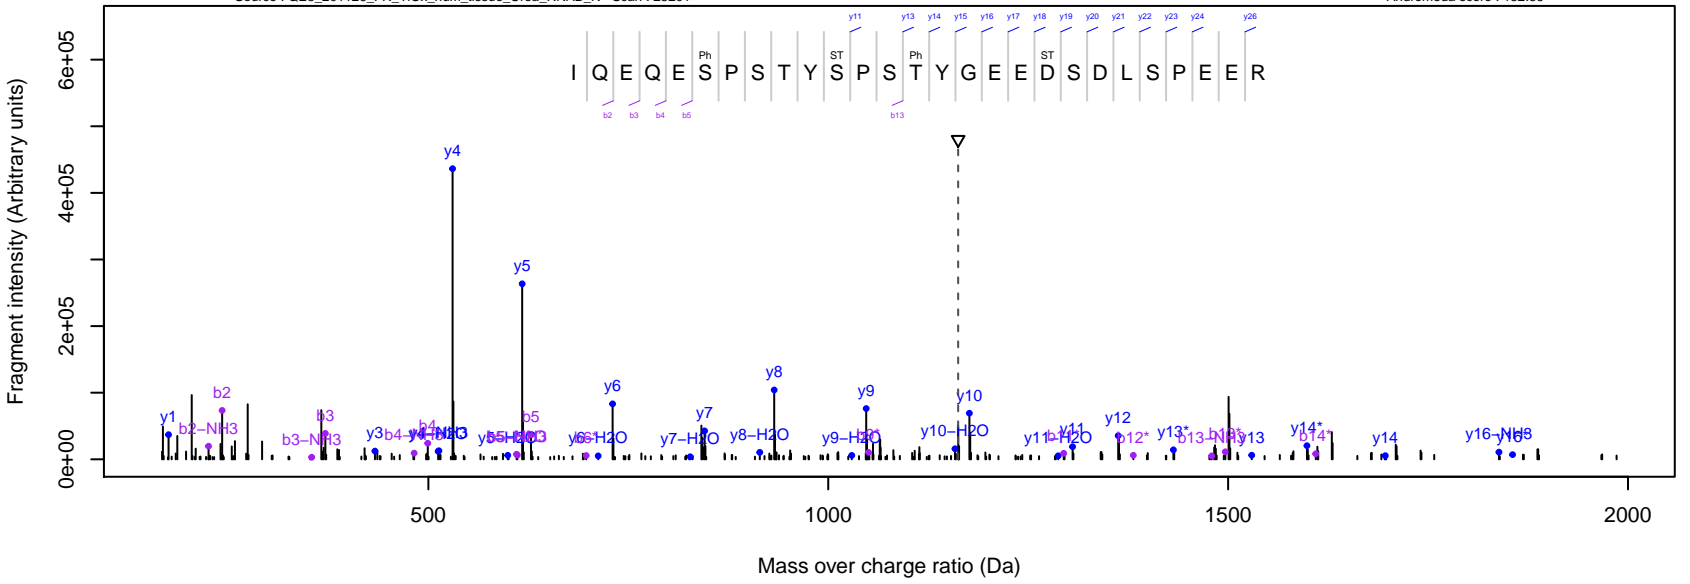

SITNNS(Phospho (STY))SDPFLNGGPPYHSR-3+

Source : QE3\_201126\_FR\_TiOx\_hum\_tissue\_Urea\_RNAB\_N Scan : 29409

Andromeda score : 152.81

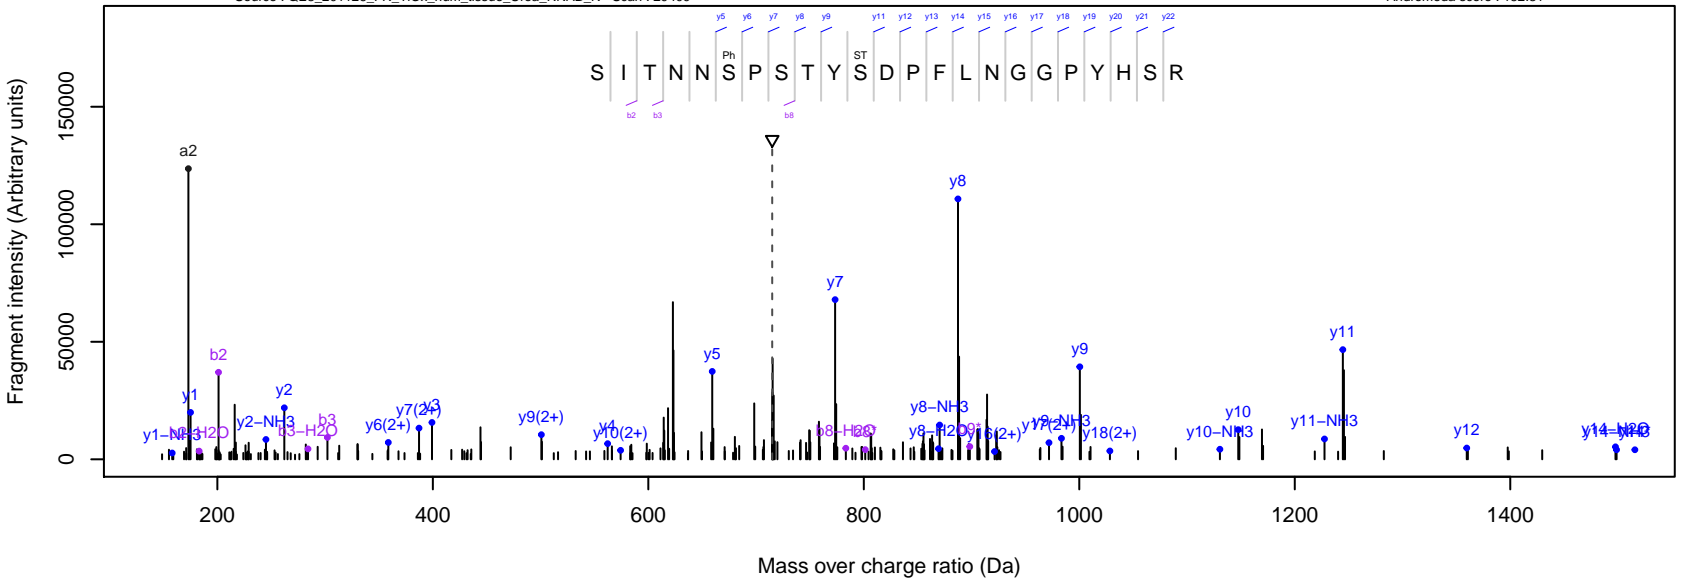

AQEDDLKWEENVSSVTDVALPALLDS(Phospho (STY))DEER-3+

Source : QE3\_201126\_FR\_TiOx\_hum\_tissue\_Urea\_RNAB\_H Scan : 60647

Andromeda score : 152.73

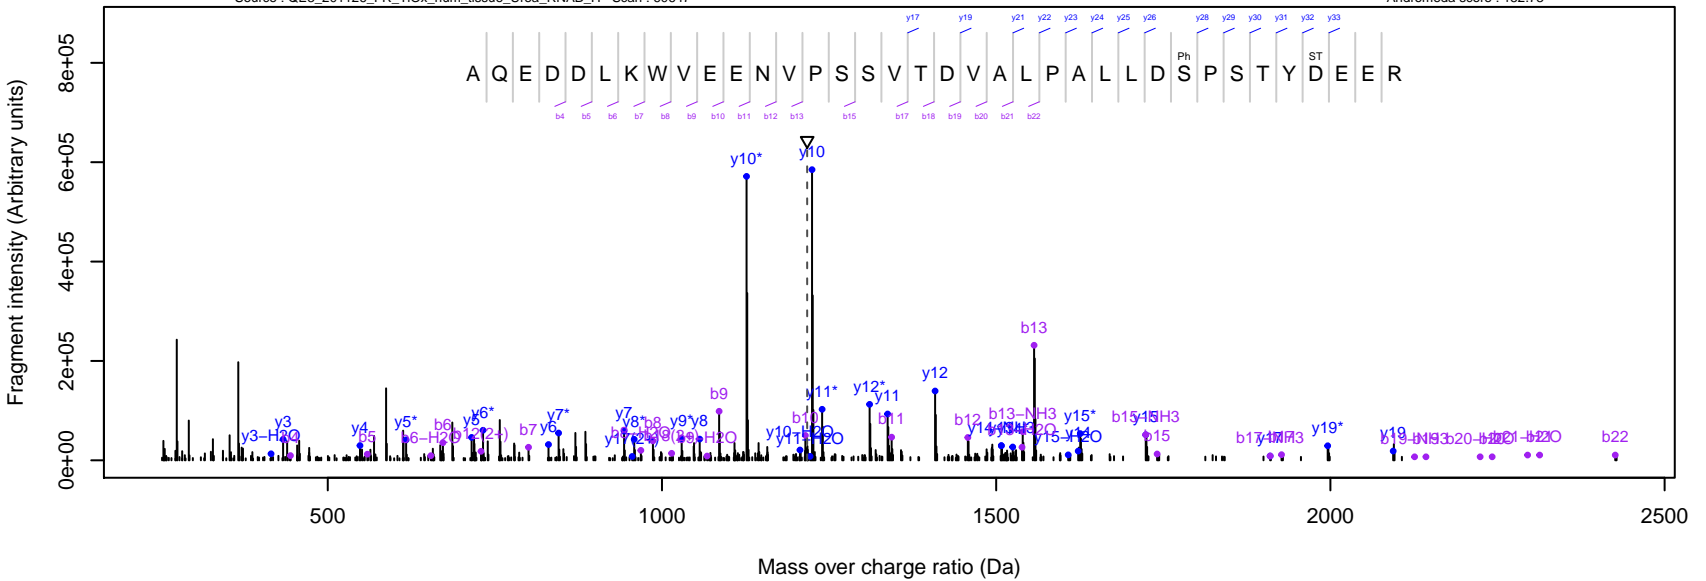

LAS(Phospho (STY))PSGSTSSGLEVVAPEEGTSA PGGGPGTLDDSATICR-4+

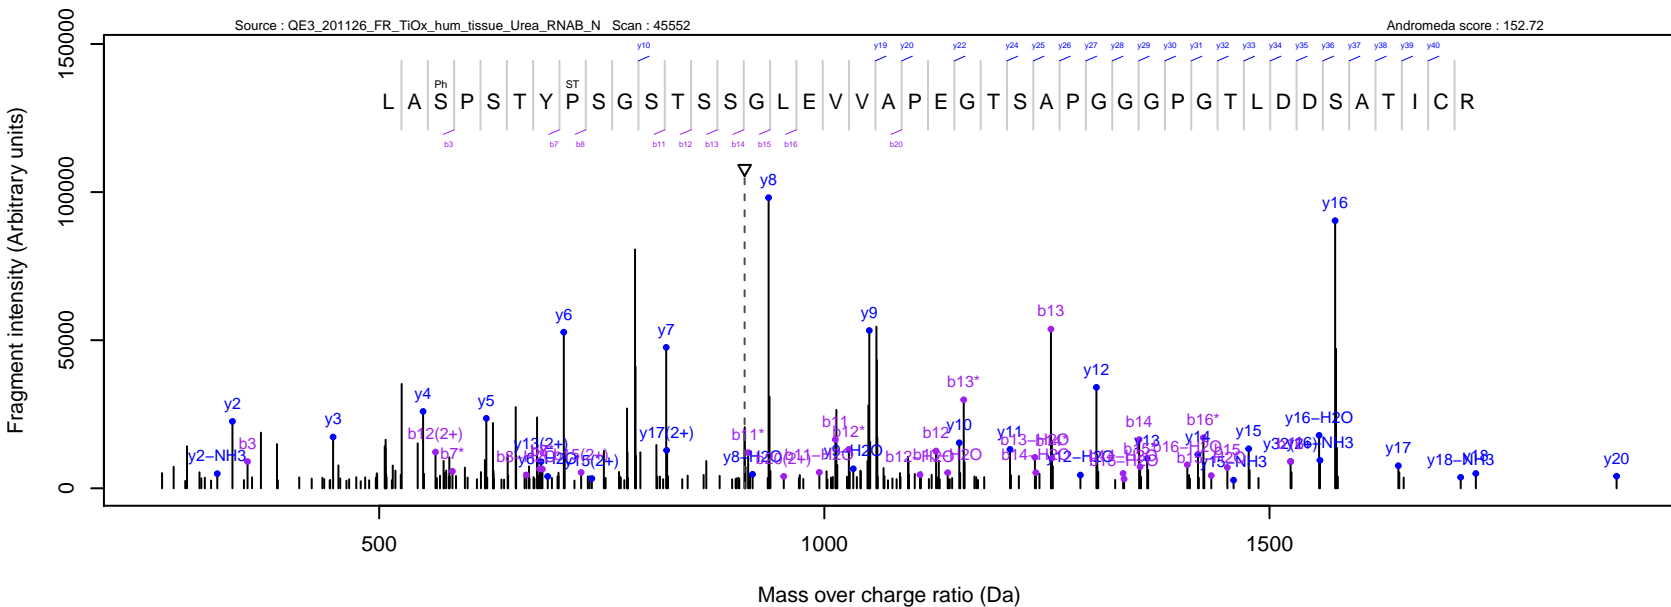

GLVAAYSGES(Phospho (STY))DS(Phospho (STY))EEEQER-2+

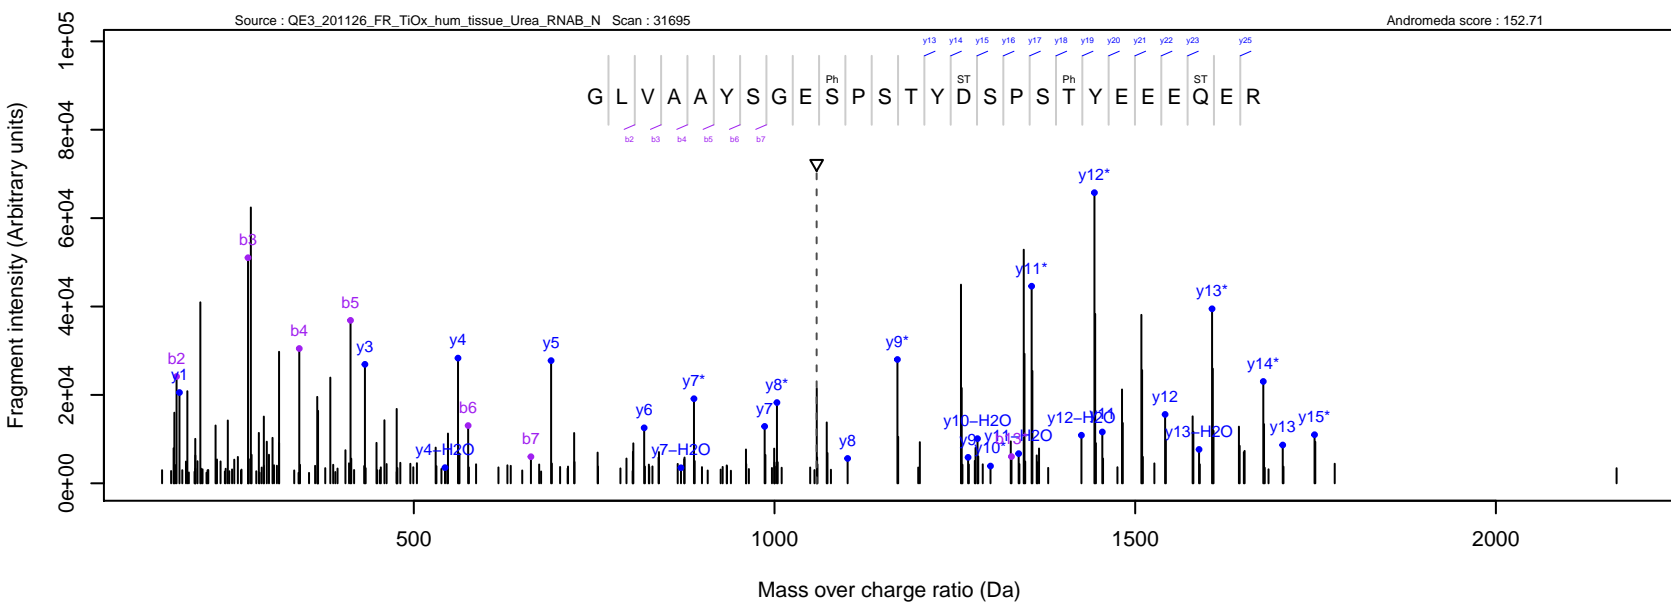

RSDS(Phospho (STY))ASSEPVG I Y Q G F E K

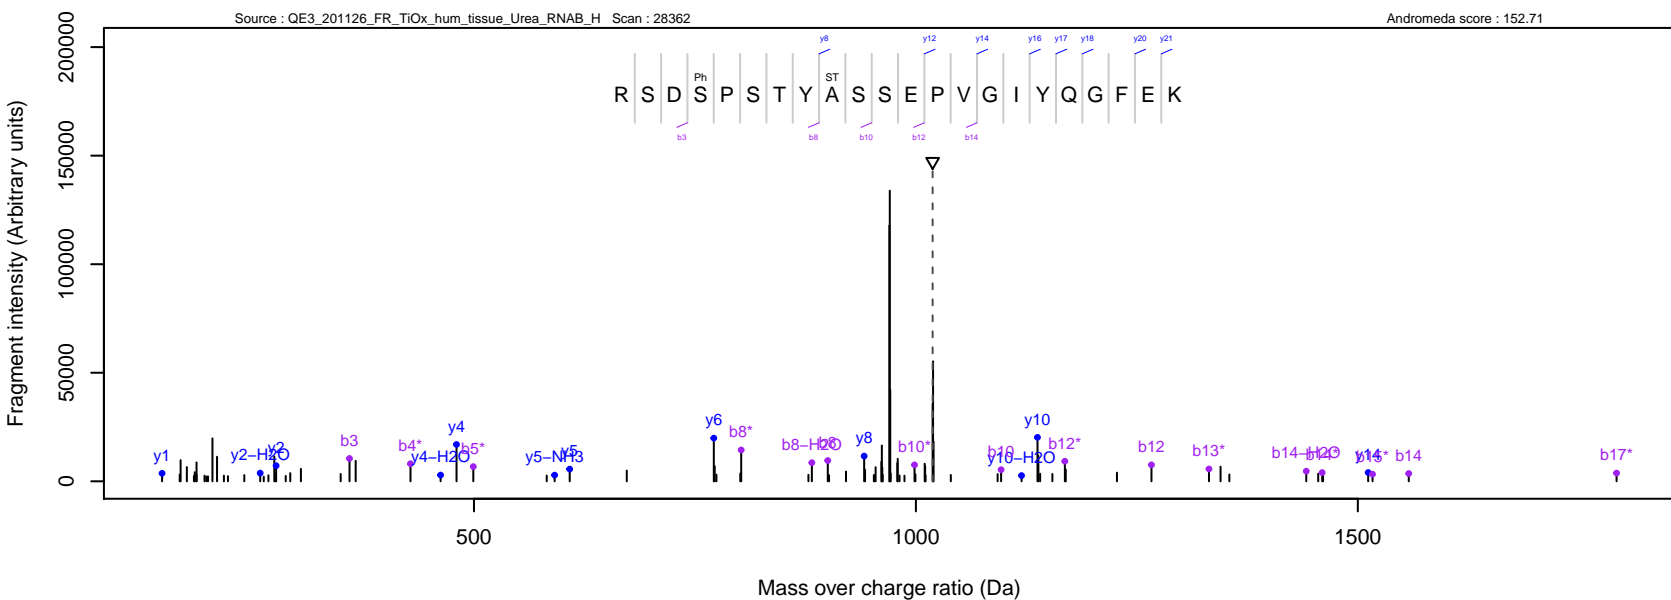



VAS(Phospho (STY))GSDLHLTDIDSDSNR-2+

Source : QE3\_201126\_FR\_TiOx\_hum\_tissue\_Urea\_RNAB\_B Scan : 26126

Andromeda score : 152.68

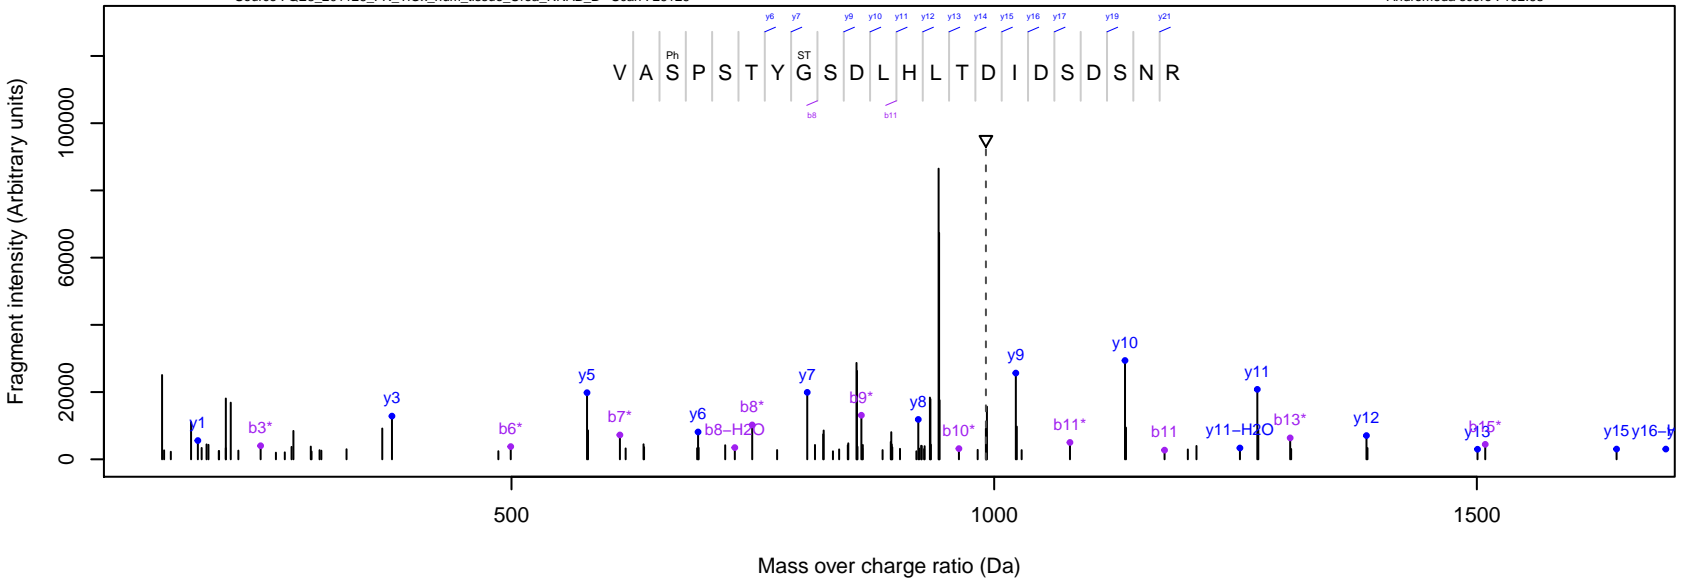

GEPNVS(Y)ICSR-2+

Source : QE3\_201126\_FR\_TiOx\_hum\_tissue\_Urea\_RNAB\_H Scan : 20011

Andromeda score : 152.67

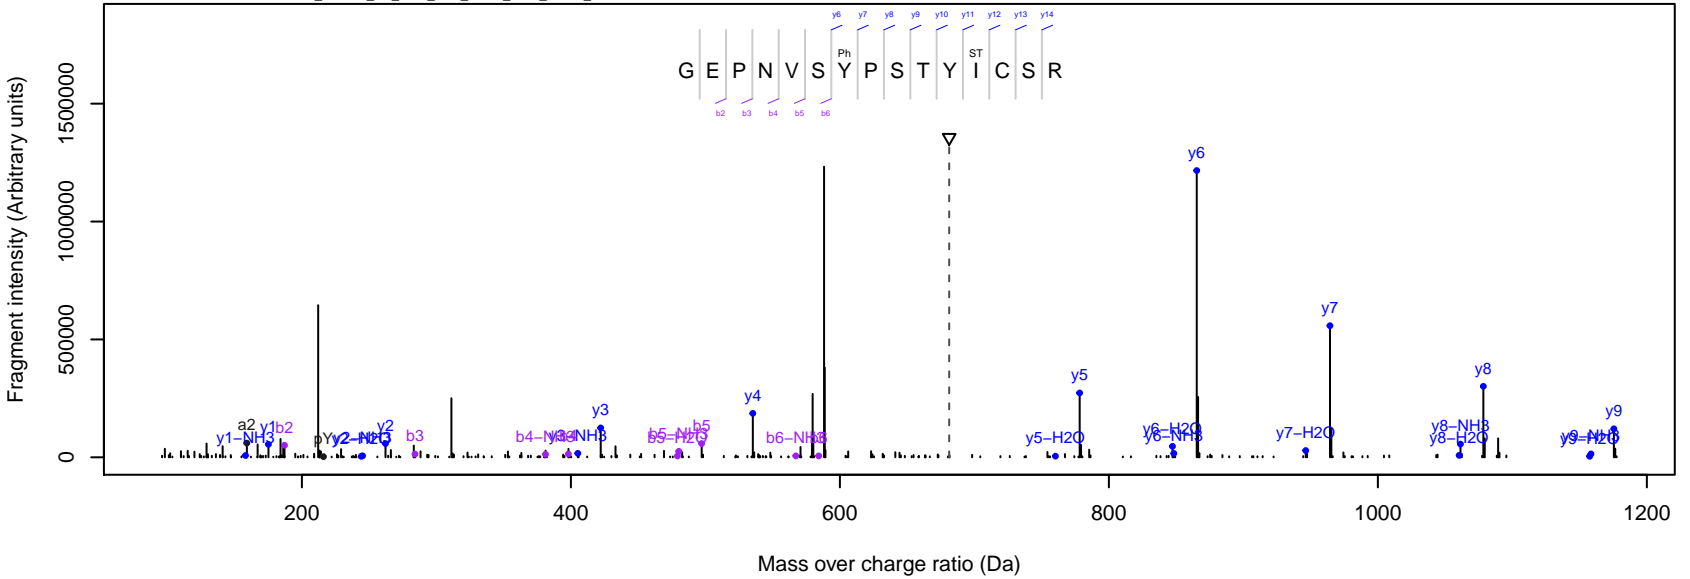

HAS(Phospho (STY))S(Phospho (STY))S(Phospho (STY))PESPAPAPGSHR-3+

Source : QE3\_201126\_FR\_TiOx\_hum\_tissue\_Urea\_RNAB\_N Scan : 5857

Andromeda score : 152.66

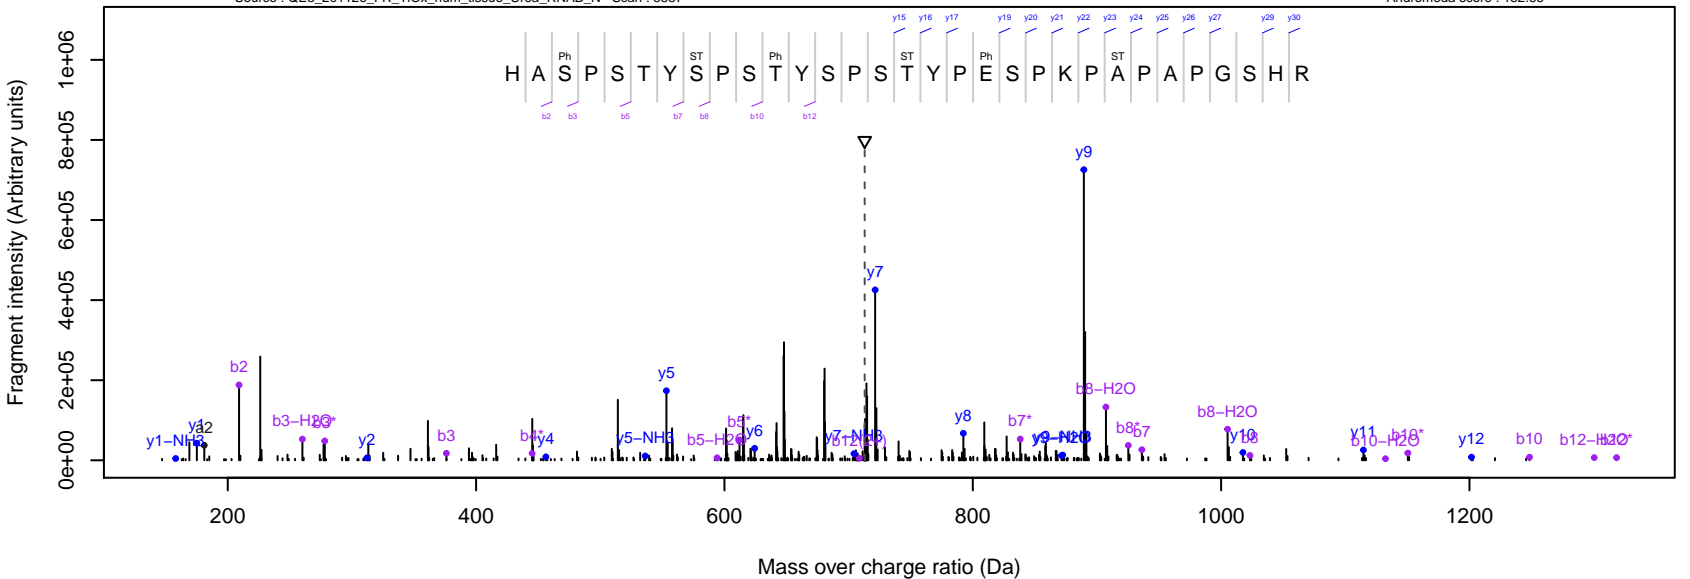

TKPTQAAGPSS(Phospho (STY))PQKPPT(Phospho (STY))PEETK-3+

Source : QE3\_201126\_FR\_TIOx\_hum\_tissue\_Urea\_RNAB\_N Scan : 9337

Andromeda score : 152.53

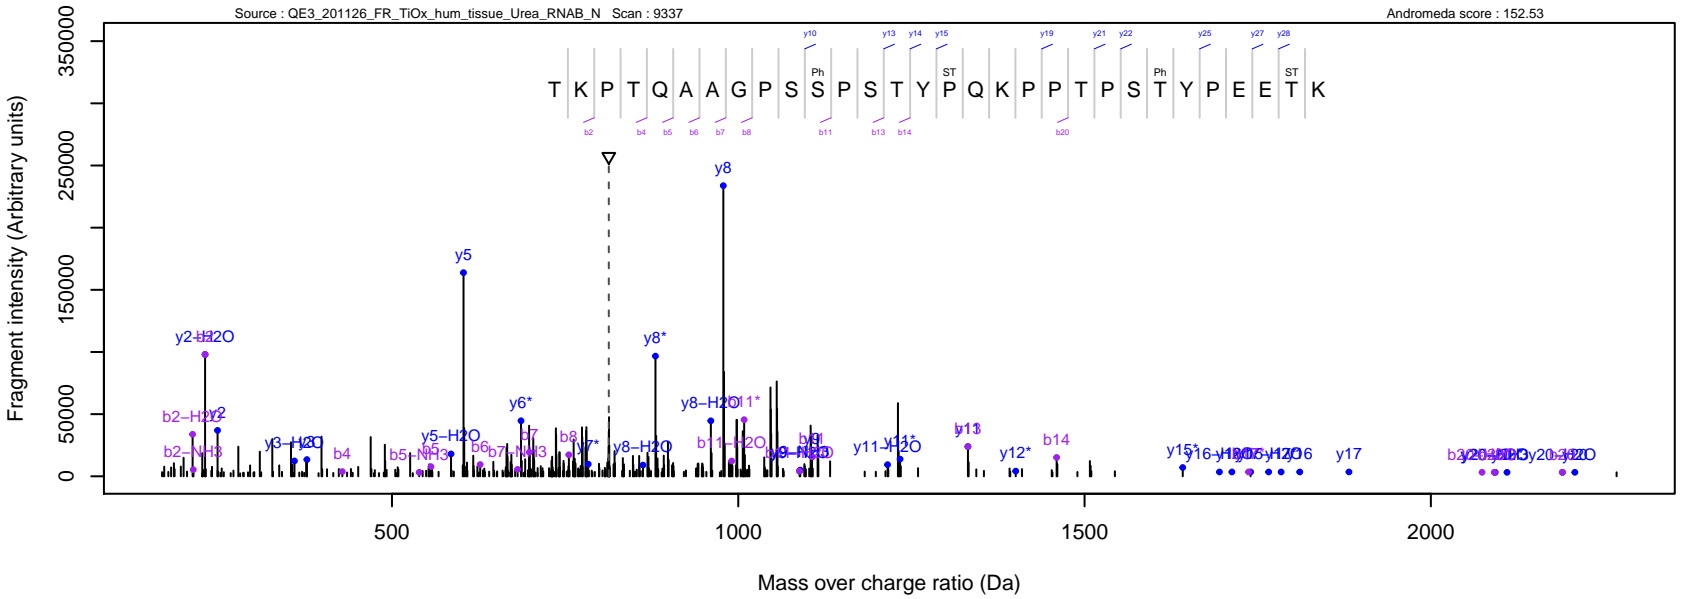

IHPM(Oxidation (M))AYQLQLQAASNFKS(Phospho (STY))PVK-3+

Source : QE3\_201126\_FR\_TIOx\_hum\_tissue\_Urea\_RNAB\_N Scan : 30013

Andromeda score : 152.5

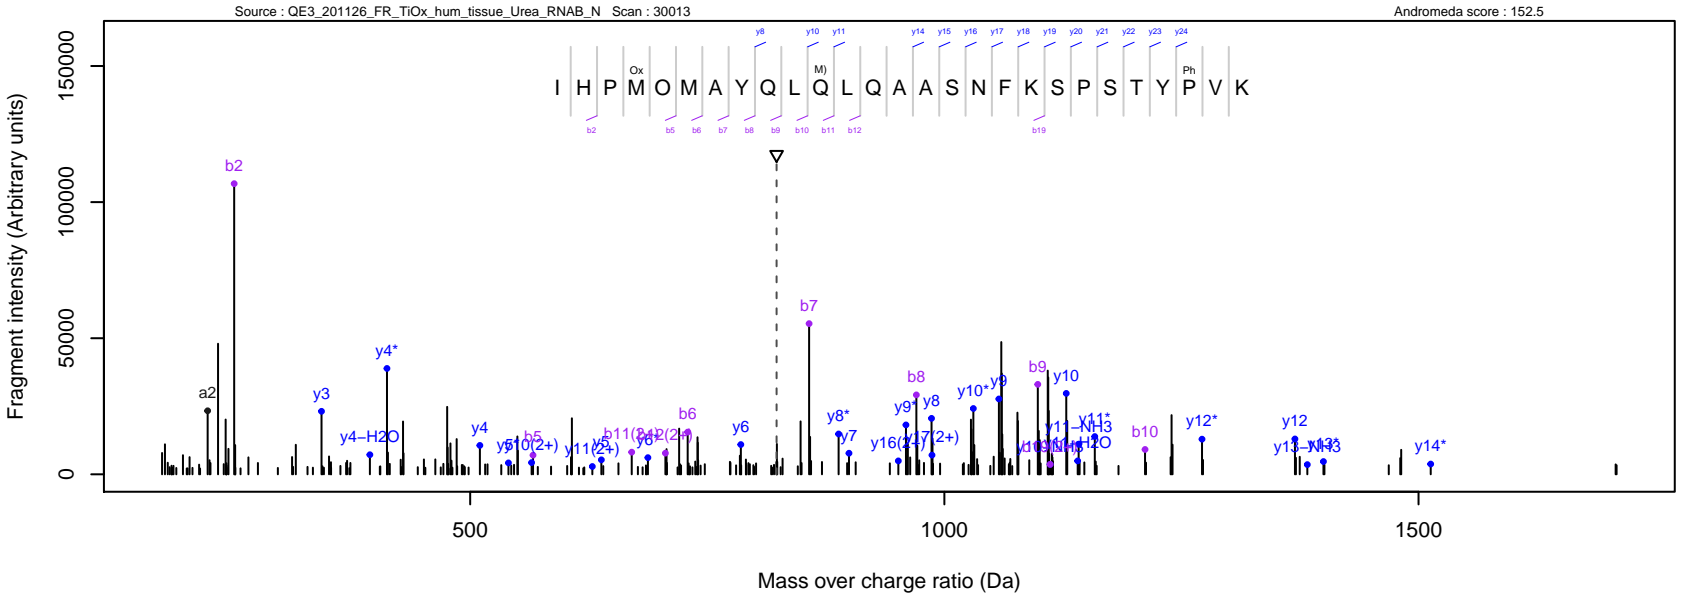

NLLEDDSPSTYDEEEDFFLRGSPSGPR-3+

Source : QE3\_201126\_FR\_TIOx\_hum\_tissue\_Urea\_RNAB\_H Scan : 51554

Andromeda score : 152.41

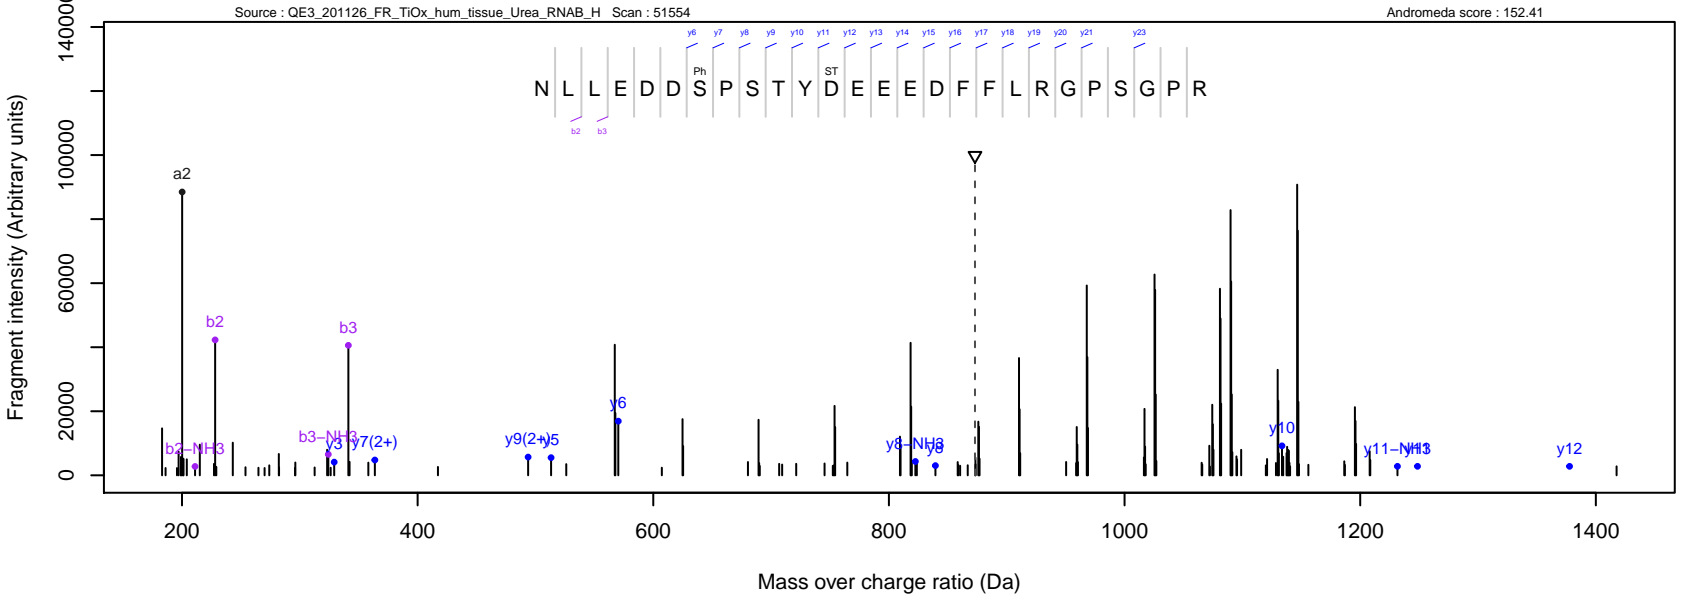

RGS(Phospho (STY))FDATGSGFSM(Oxidation (M))TFSSSS(Phospho (STY))YSSSGYGR-3+

Source : QE3\_201126\_FR\_TiOx\_hum\_tissue\_Urea\_RNAB\_N Scan : 39825

Andromeda score : 152.4

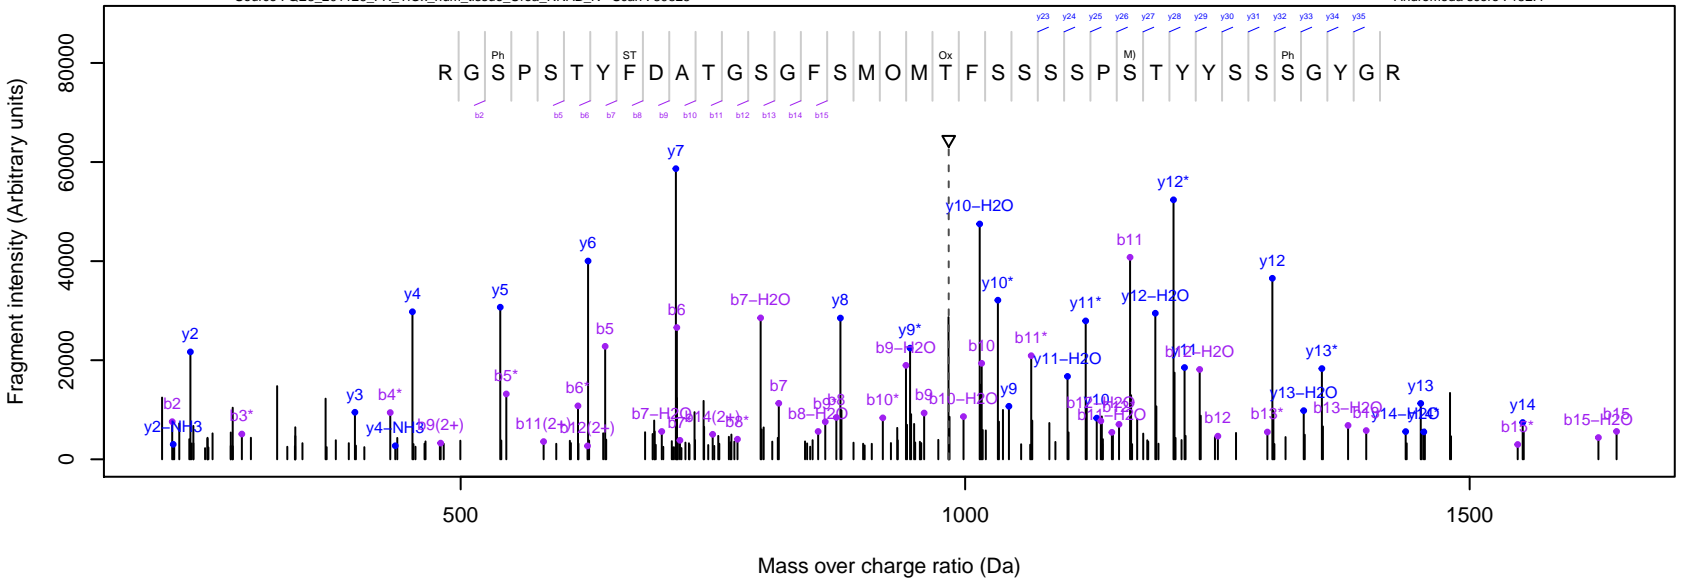

DKQS(Phospho (STY))PSQANGCSDHRPIDILEMLSR-4+

Source : QE3\_201126\_FR\_TiOx\_hum\_tissue\_Urea\_RNAB\_H Scan : 44576

Andromeda score : 152.35

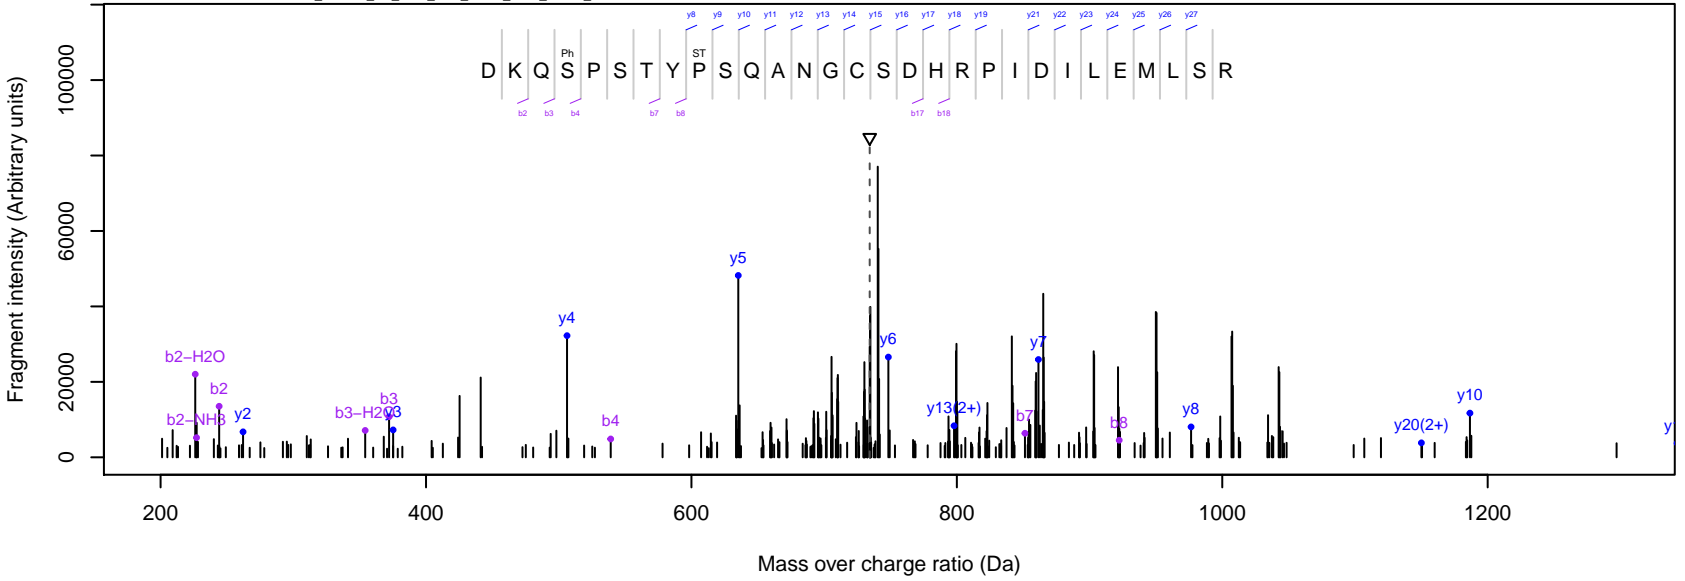

AEDGATPSPS(Phospho (STY))NETPK-2+

Source : QE3\_201126\_FR\_TiOx\_hum\_tissue\_Urea\_RNAB\_H Scan : 8206

Andromeda score : 152.34

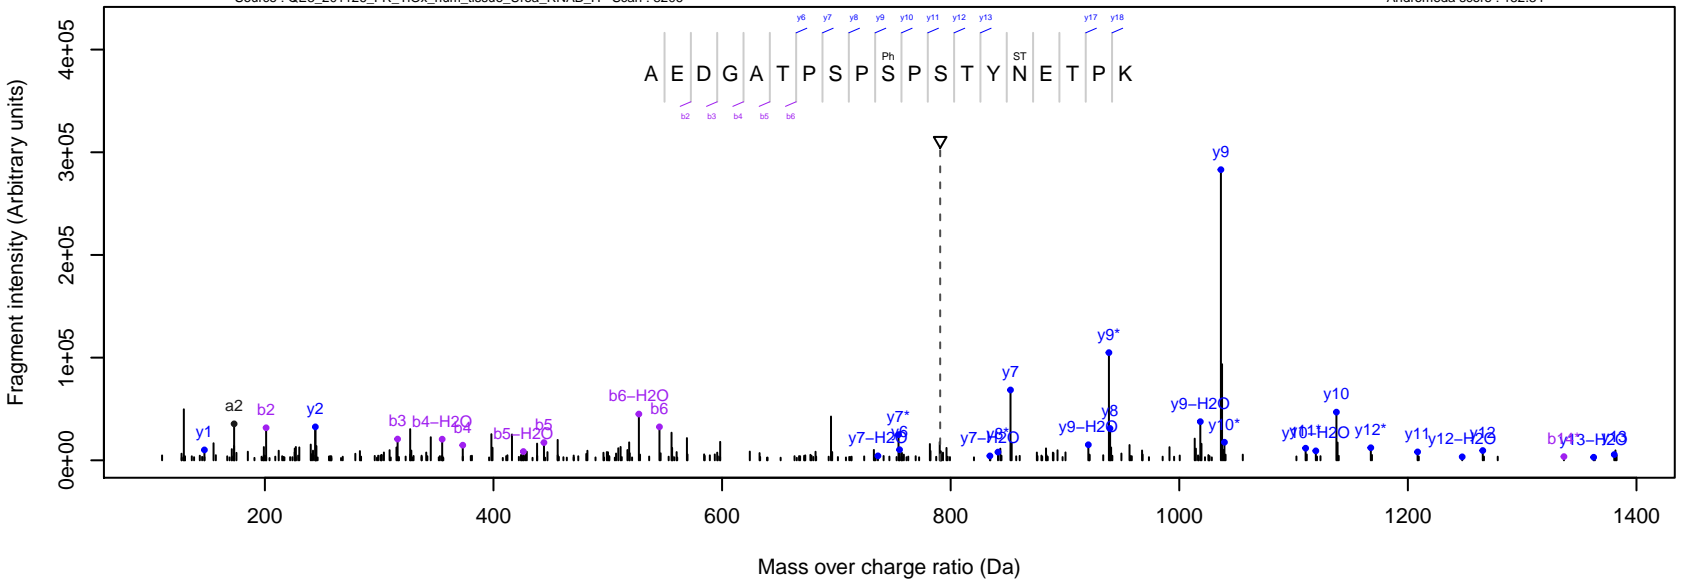

RAS(Phospho (STY))DGGANIQLHAQLLK-3+

Source : QE3\_201126\_FR\_TiOx\_hum\_tissue\_Urea\_RNAB\_H Scan : 24194

Andromeda score : 152.34

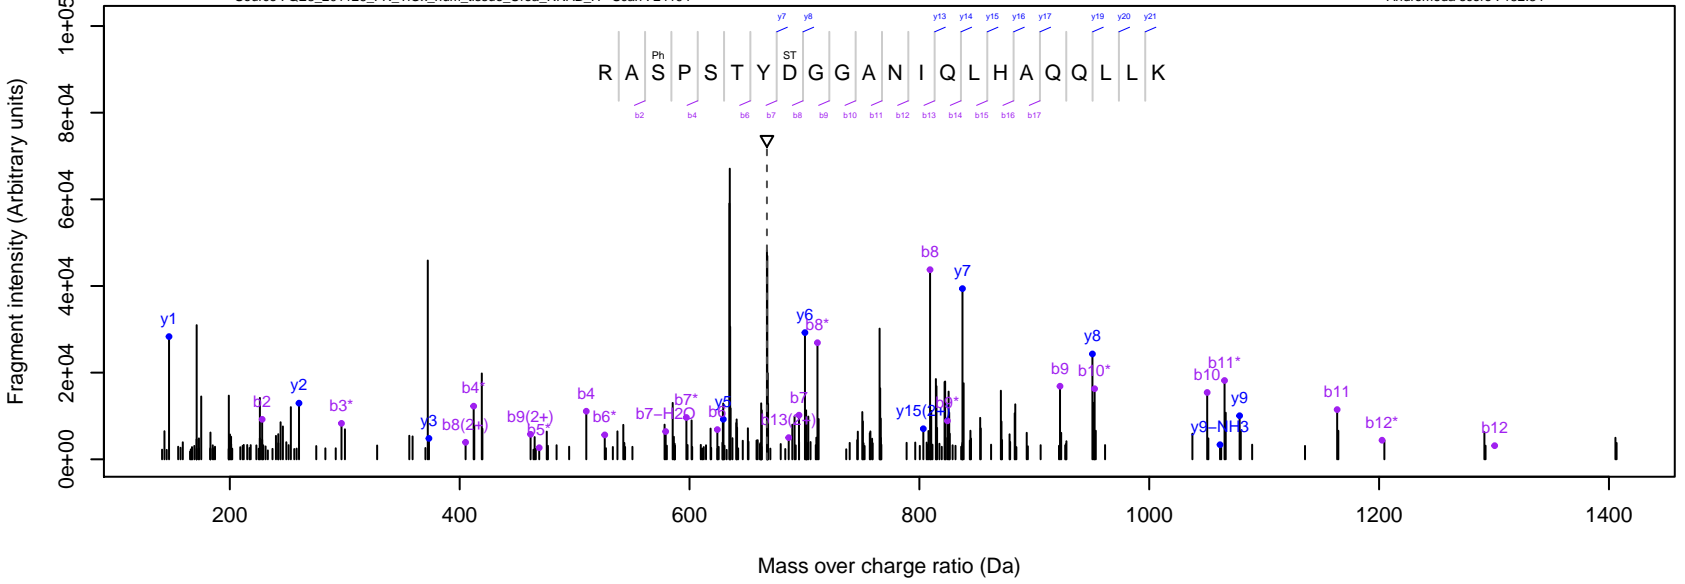

AGDLEDS(Phospho (STY))PK-1+

Source : QE3\_201126\_FR\_TiOx\_hum\_tissue\_Urea\_RNAB\_H Scan : 18872

Andromeda score : 152.31

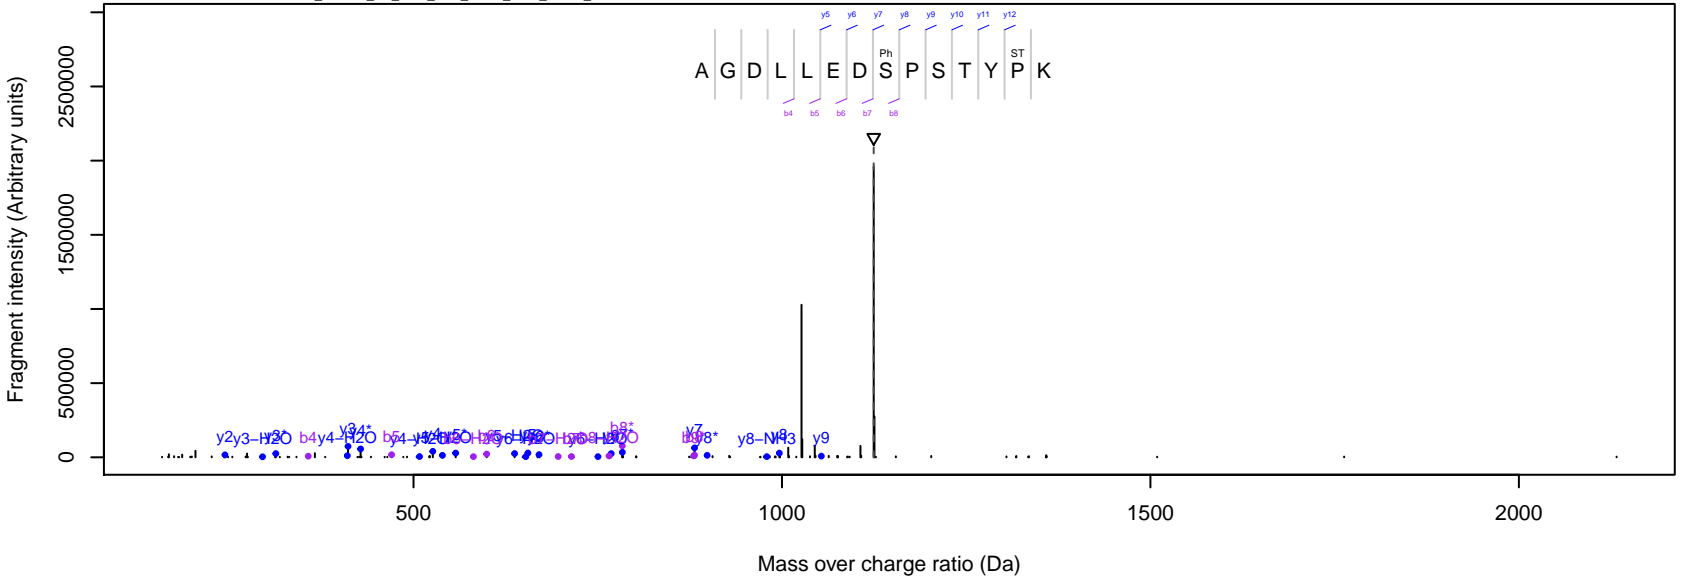

ERPQPQAFSSALHEAAPSQLLEGKLPSPSTYPDVR-4+

Source : QE3\_201126\_FR\_TiOx\_hum\_tissue\_Urea\_RNAB\_H Scan : 41379

Andromeda score : 152.31

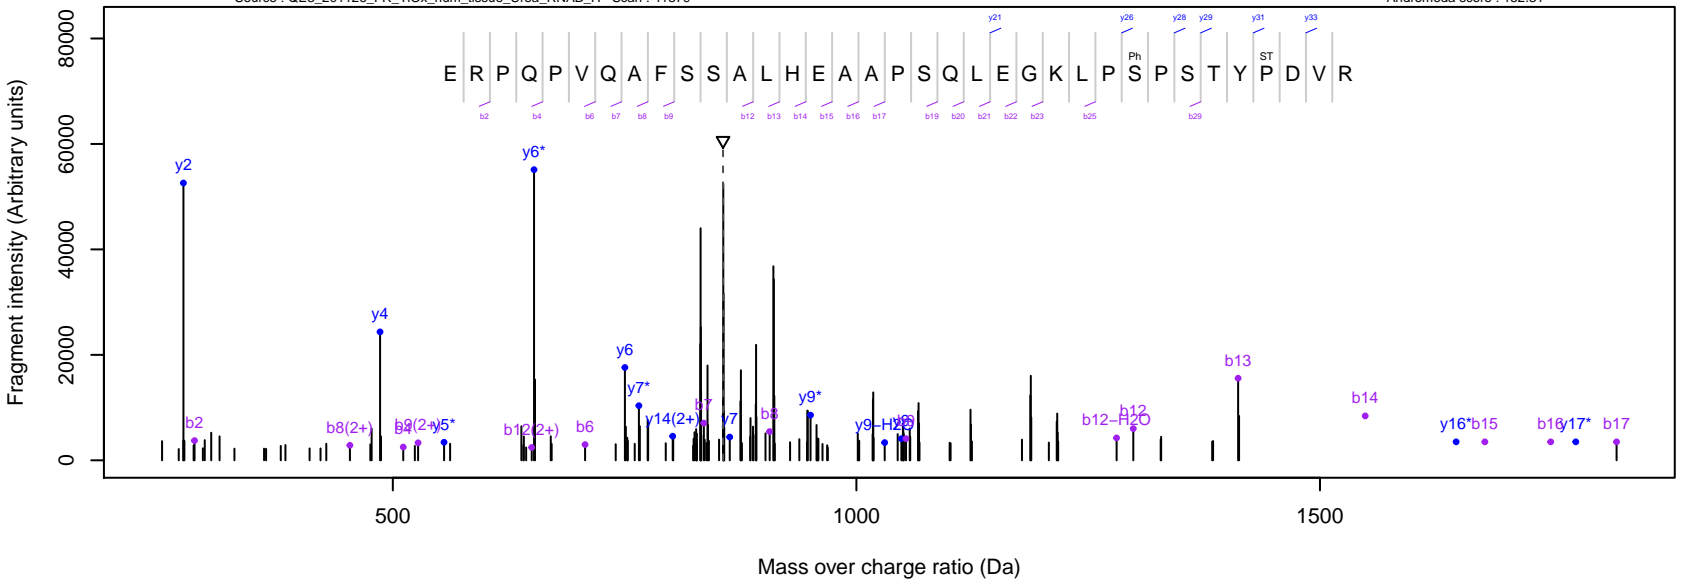

STAQQELDGKPAS(PSTY)PTPVIVASHTANK-3+

Source : QE3\_201126\_FR\_TiOx\_hum\_tissue\_Urea\_RNAB\_B Scan : 18766

Andromeda score : 152.23

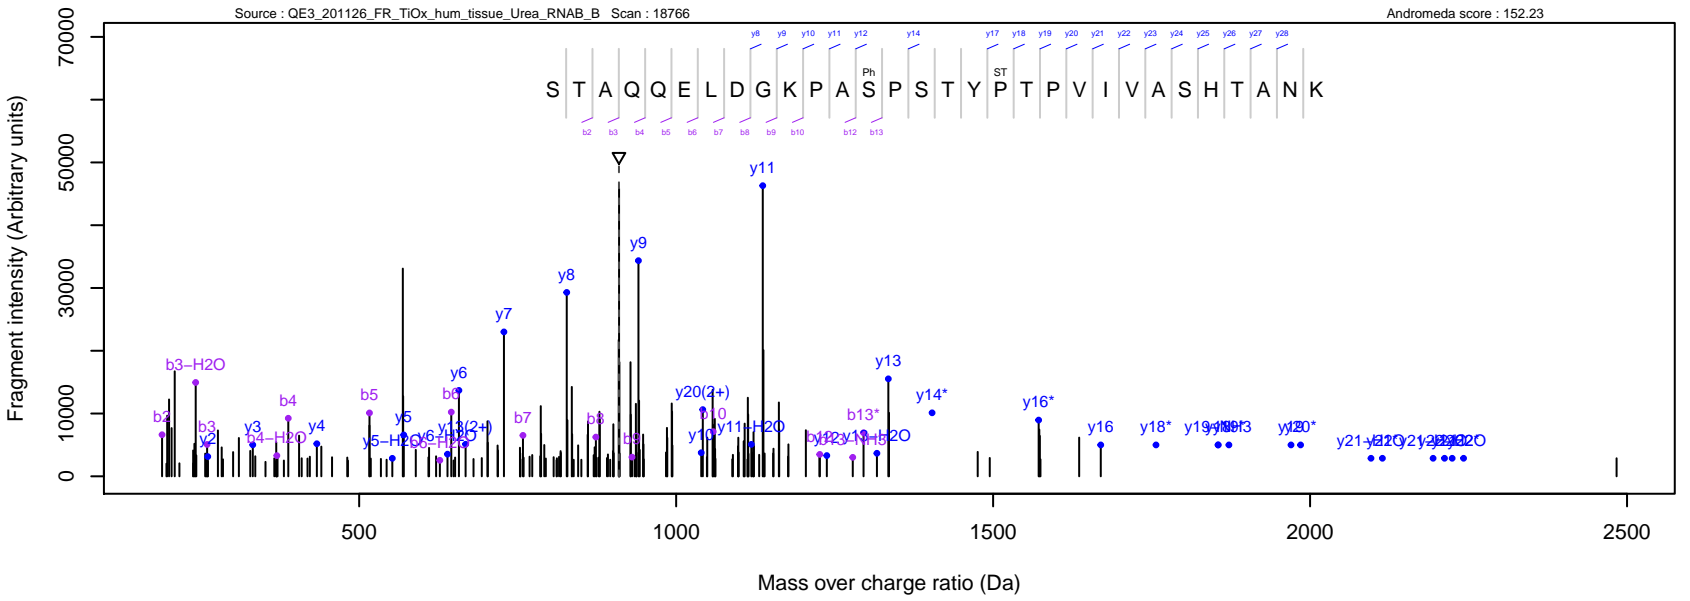

RLS(Phospho (STY))ELALGTGAQG-2+

Source : QE3\_201126\_FR\_TiOx\_hum\_tissue\_Urea\_RNAB\_B Scan : 32354

Andromeda score : 152.17

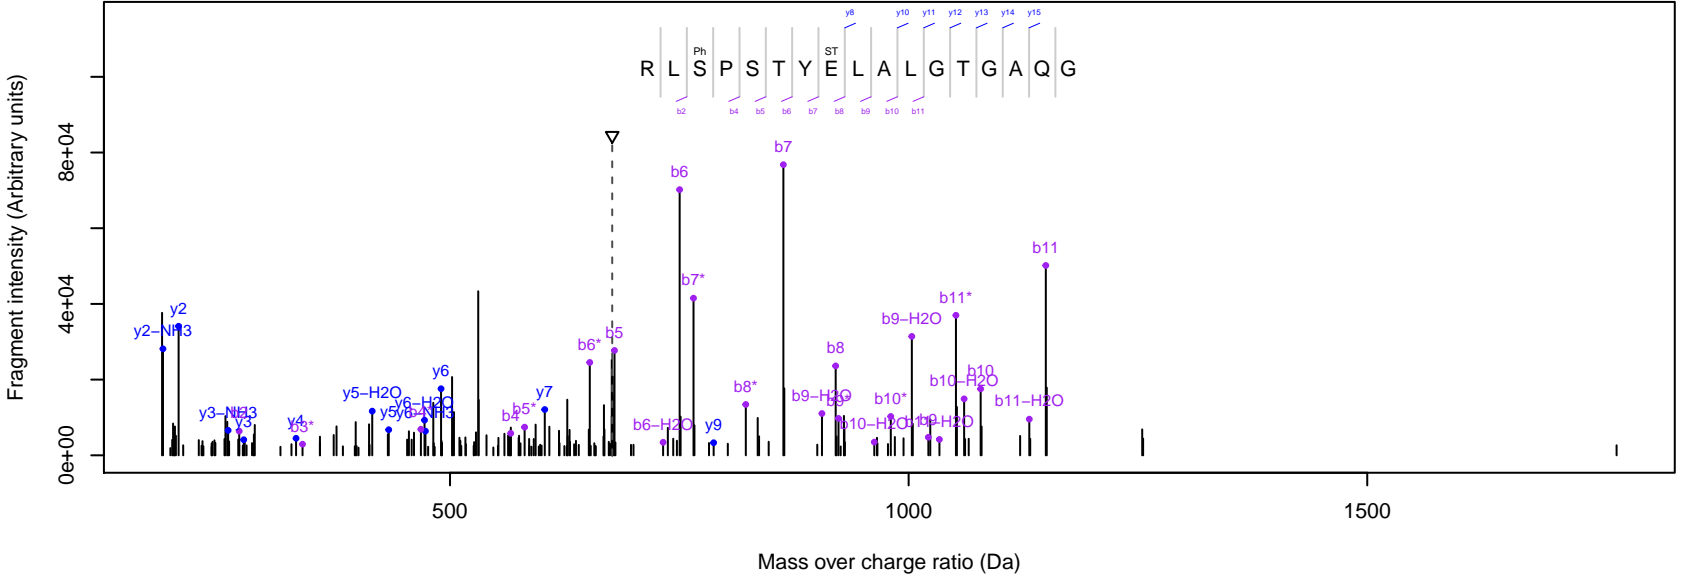

NLS(Phospho (STY))PGAVESDVR-2+

Source : QE3\_201126\_FR\_TiOx\_hum\_tissue\_Urea\_RNAB\_H Scan : 26562

Andromeda score : 152.16

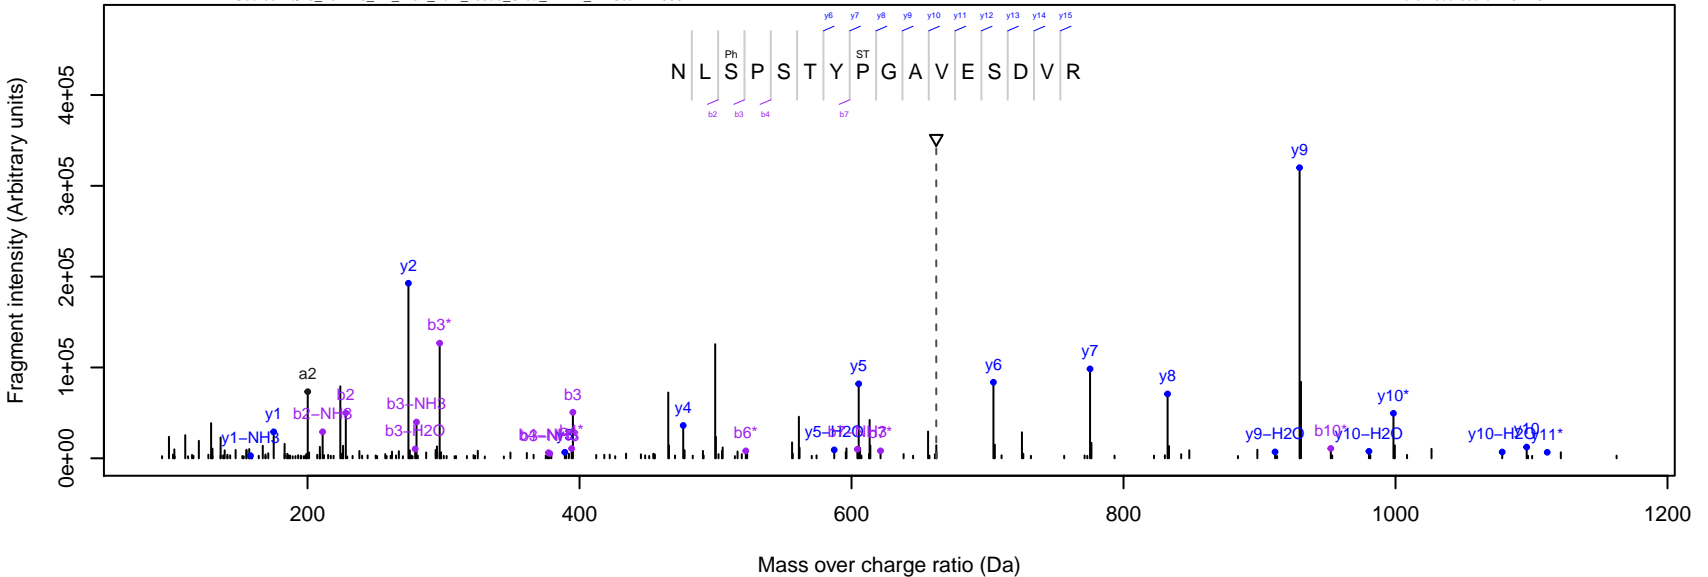

AQS(Phospho (STY))SPASATFPVSVQEPPTKPR-3+

Source : QE3\_201126\_FR\_TiOx\_hum\_tissue\_Urea\_RNAB\_N Scan : 28092

Andromeda score : 152.14

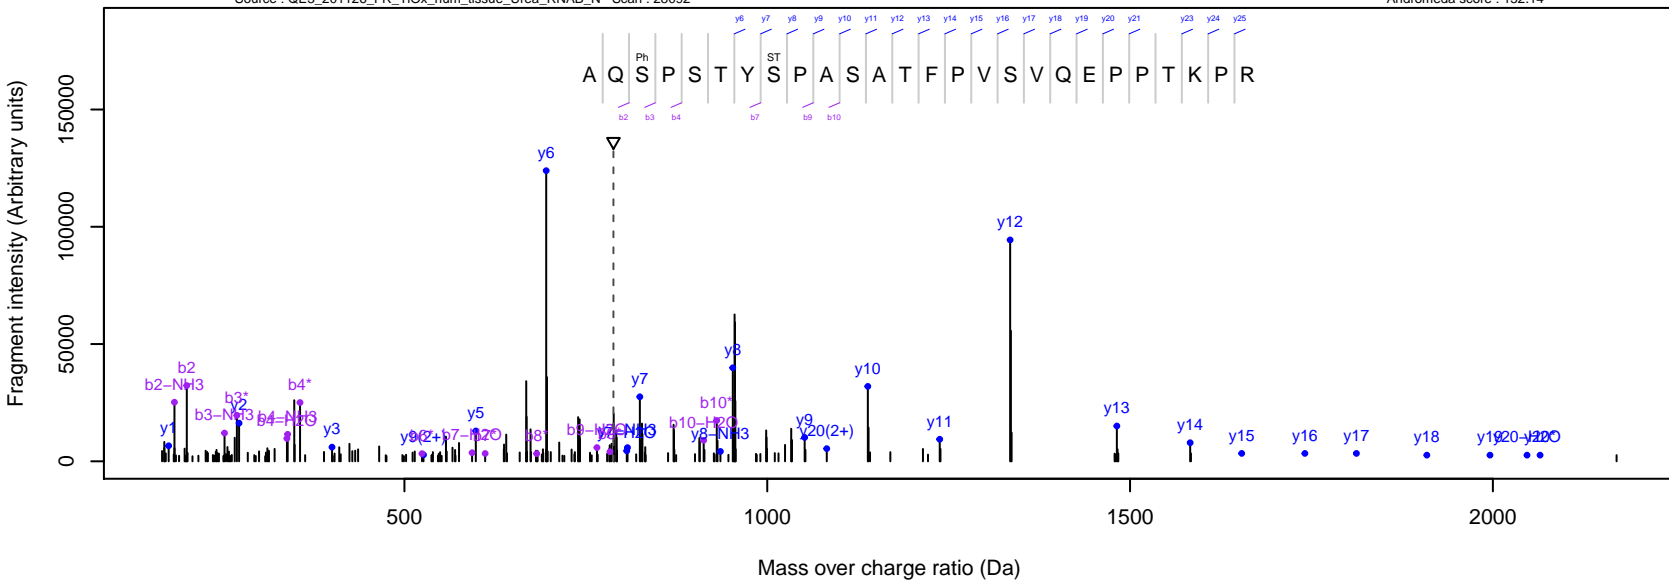

IS(Phospho (STY))APNVDFNLEGPK-2+

Source : QE3\_201126\_FR\_TiOx\_hum\_tissue\_Urea\_RNAB\_H Scan : 43869

Andromeda score : 152.11

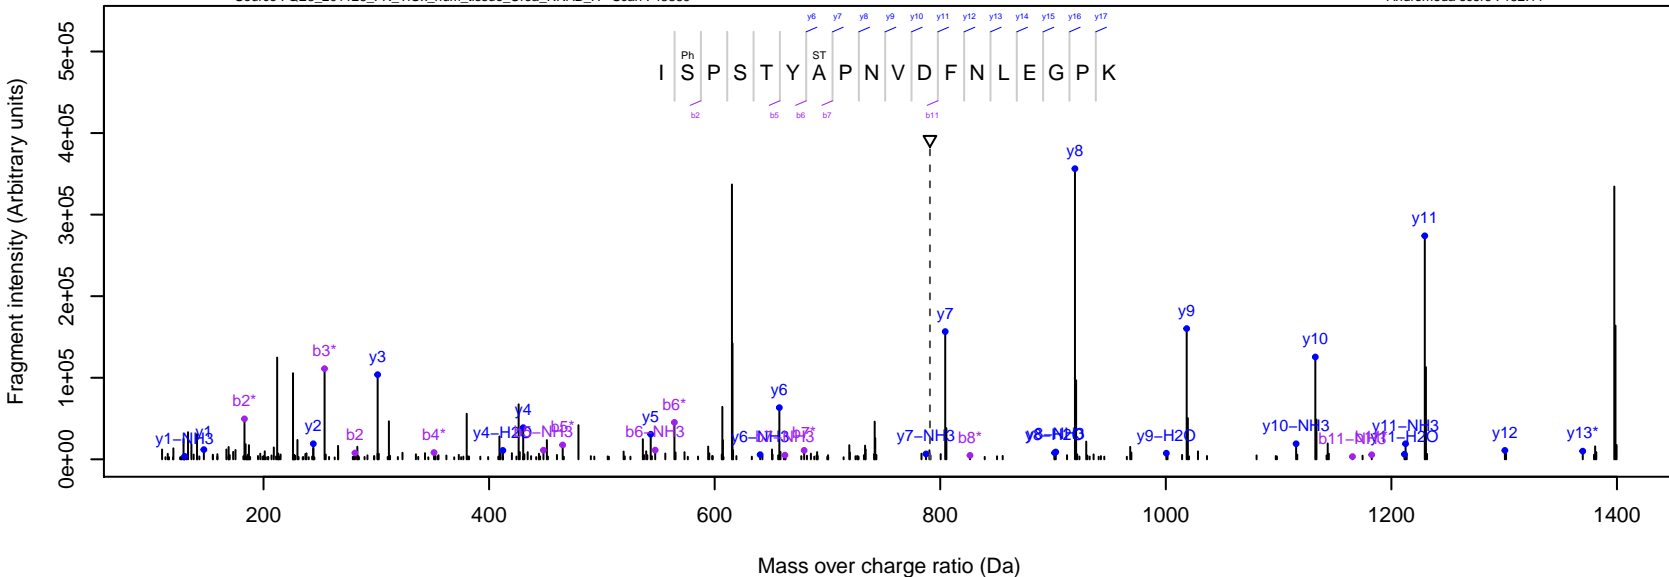

VSEEQTPPS(Phospho (STY))PAGAGMSTAMOMGR-2+

Source : QE3\_201126\_FR\_TiOx\_hum\_tissue\_Urea\_RNAB\_H Scan : 19364

Andromeda score : 152.06

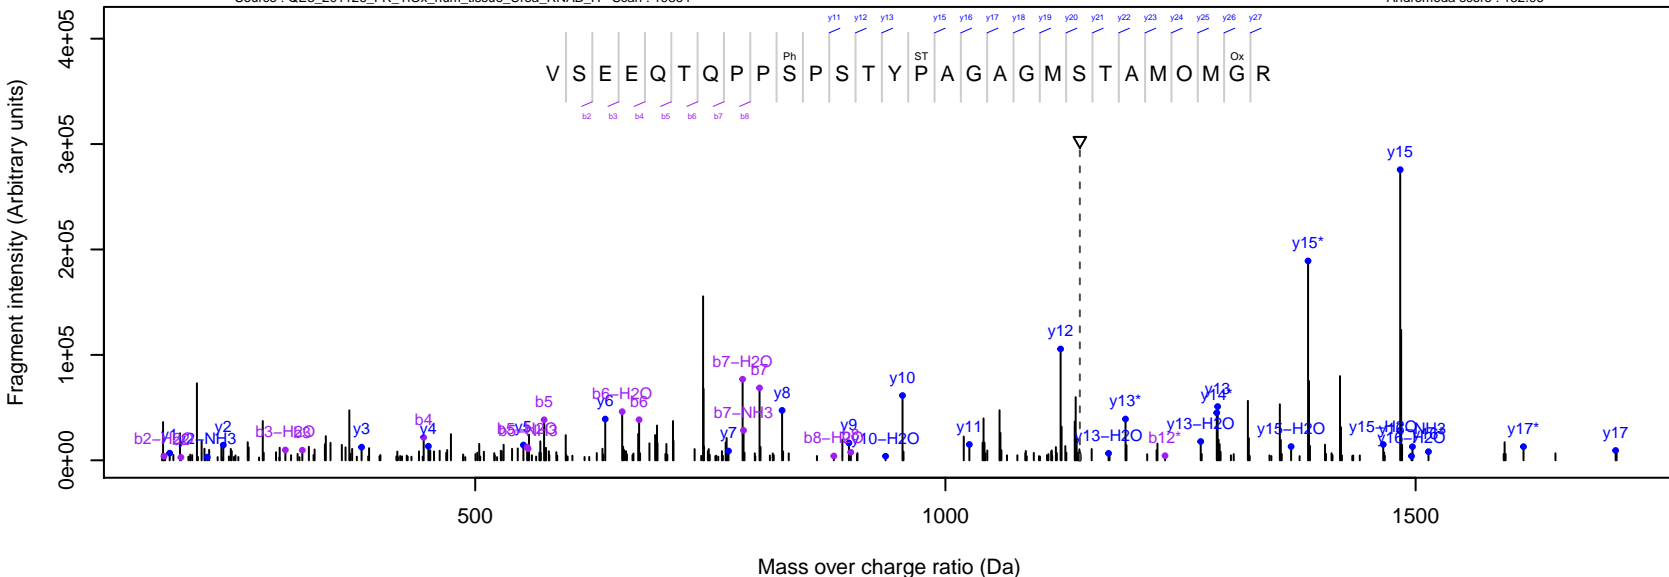

GLRDS(Phospho (STY))HS(Phospho (STY))S(Phospho (STY))EEDASSQTDLSQTISK-3+

Source : QE3\_201126\_FR\_TiOx\_hum\_tissue\_Urea\_RNAB\_N Scan : 25520

Andromeda score : 152.01

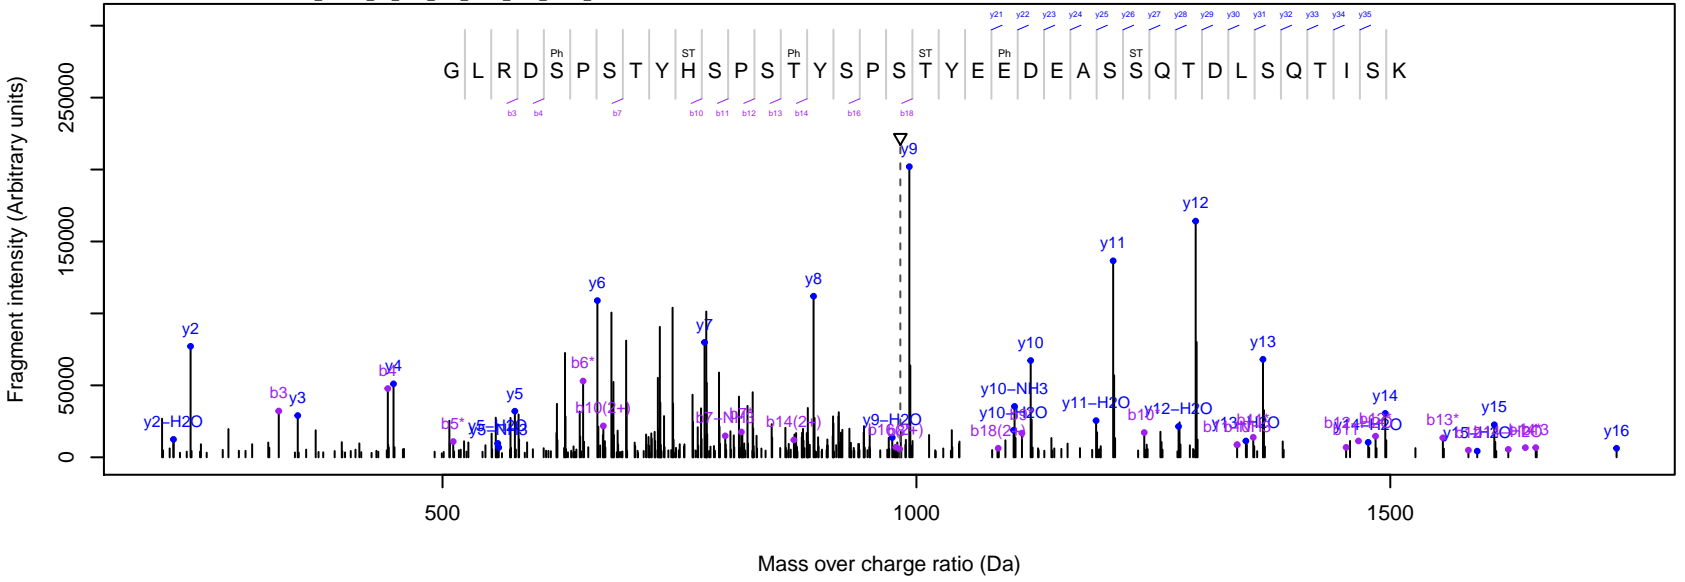

TDS(Phospho (STY))TSDGRPAWMR-2+

Source : QE3\_201126\_FR\_TiOx\_hum\_tissue\_Urea\_RNAB\_H Scan : 21003

Andromeda score : 151.99

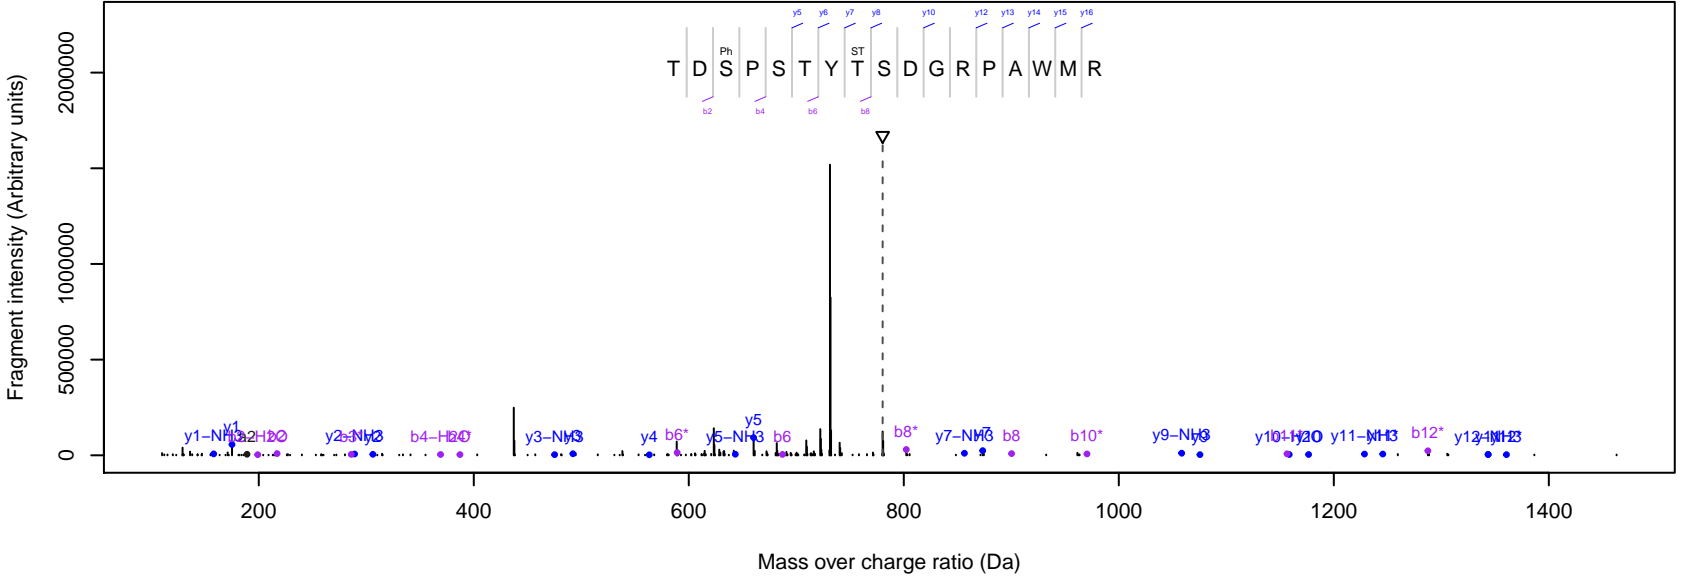

TSS(Phospho (STY))PSSTGSVSLGR-2+

Source : QE3\_201126\_FR\_TiOx\_hum\_tissue\_Urea\_RNAB\_B Scan : 14711

Andromeda score : 151.99

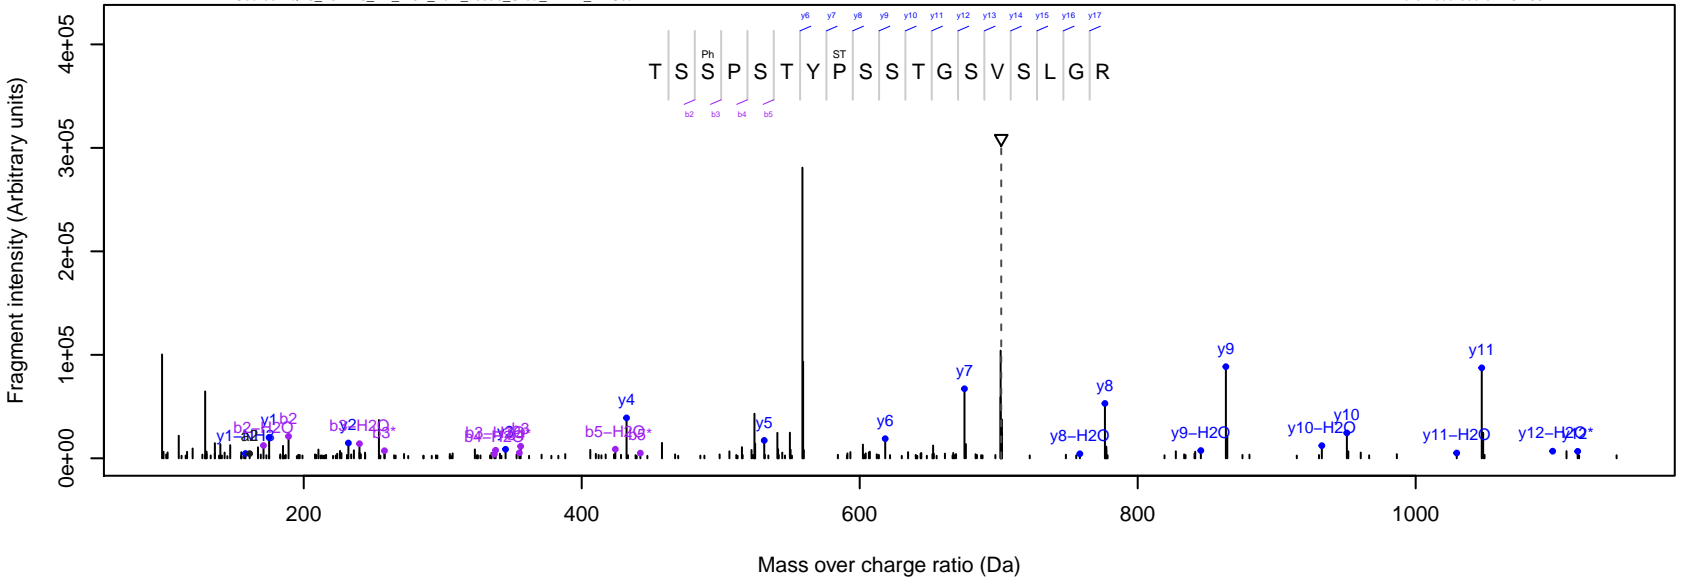

(Acetyl (Protein N-term))S(Phospho (STY))TAVLENPGLGR-2+

Source : QE3\_201126\_FR\_TIOx\_hum\_tissue\_Urea\_RNAB\_H Scan : 41878

Andromeda score : 151.98

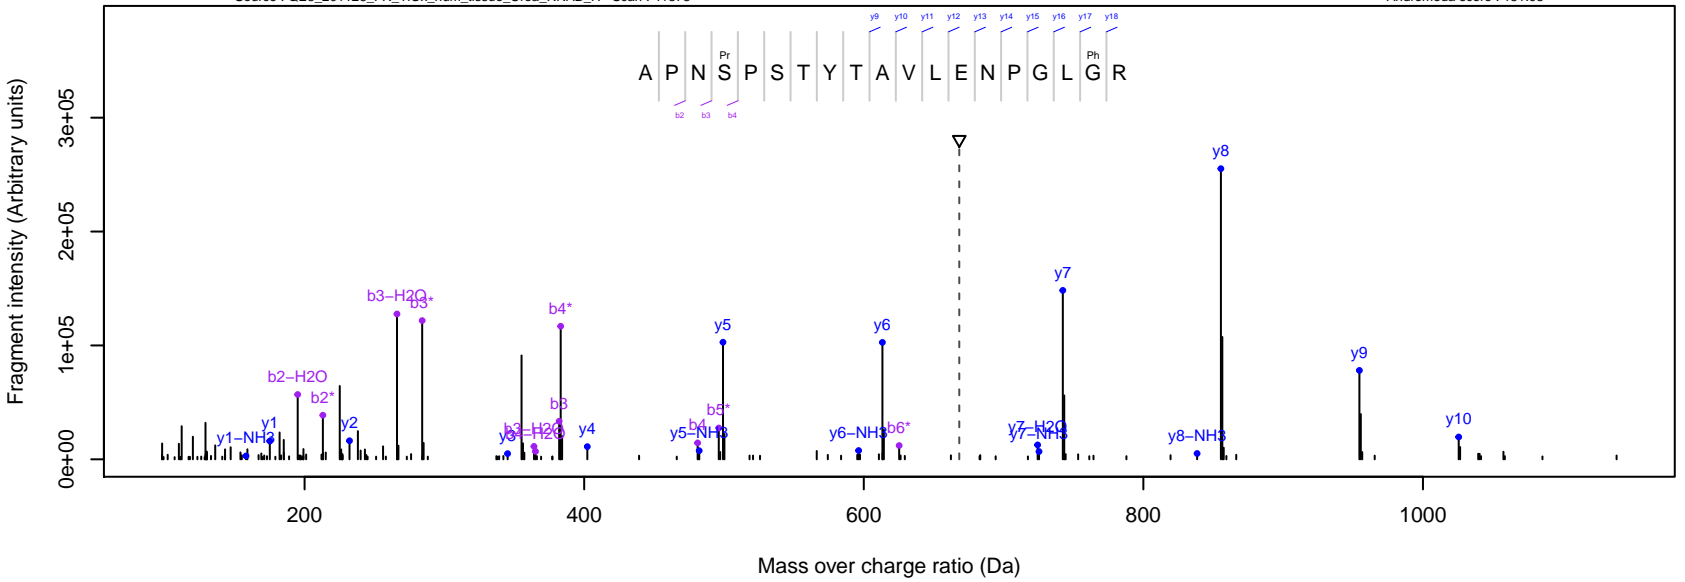

AHS(Phospho (STY))PAEGASVSSSPGPK-3+

Source : QE3\_201126\_FR\_TIOx\_hum\_tissue\_Urea\_RNAB\_N Scan : 7874

Andromeda score : 151.96

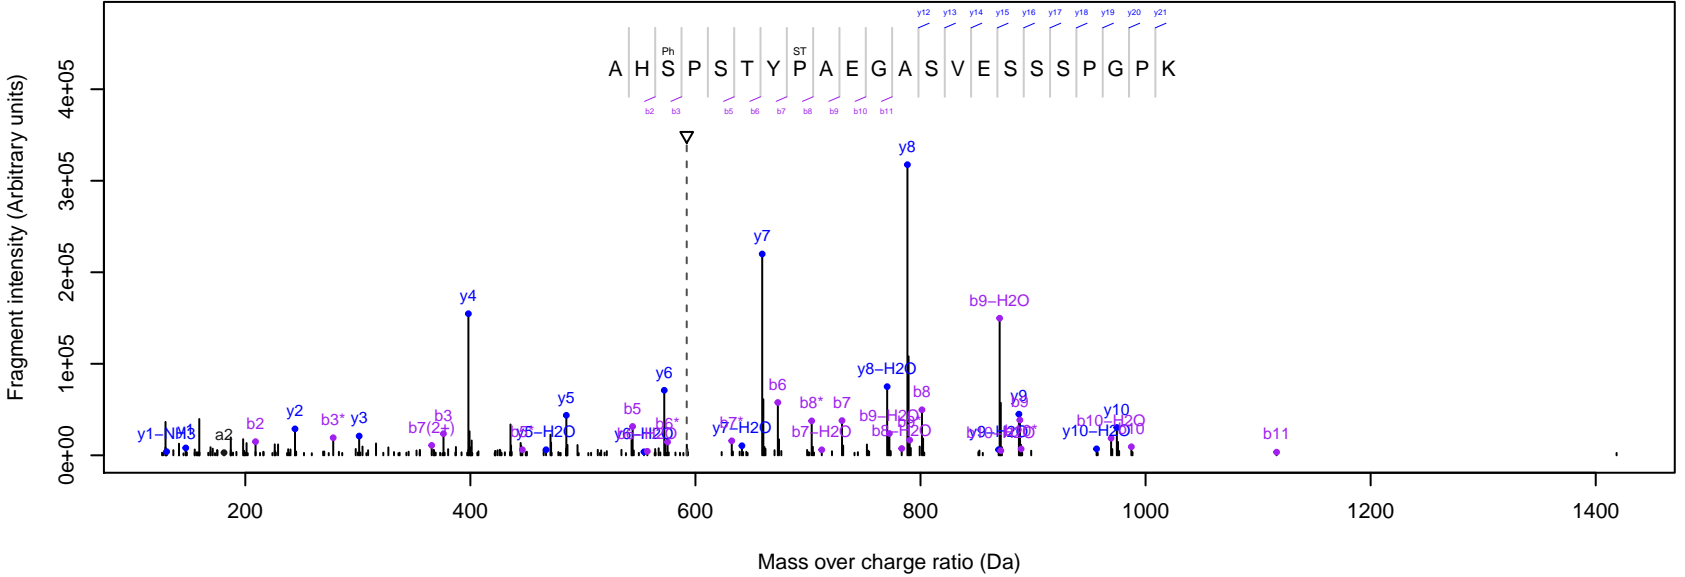

DYDEEQGYDS(Phospho (STY))EKEKK-3+

Source : QE3\_201126\_FR\_TIOx\_hum\_tissue\_Urea\_RNAB\_B Scan : 7899

Andromeda score : 151.96

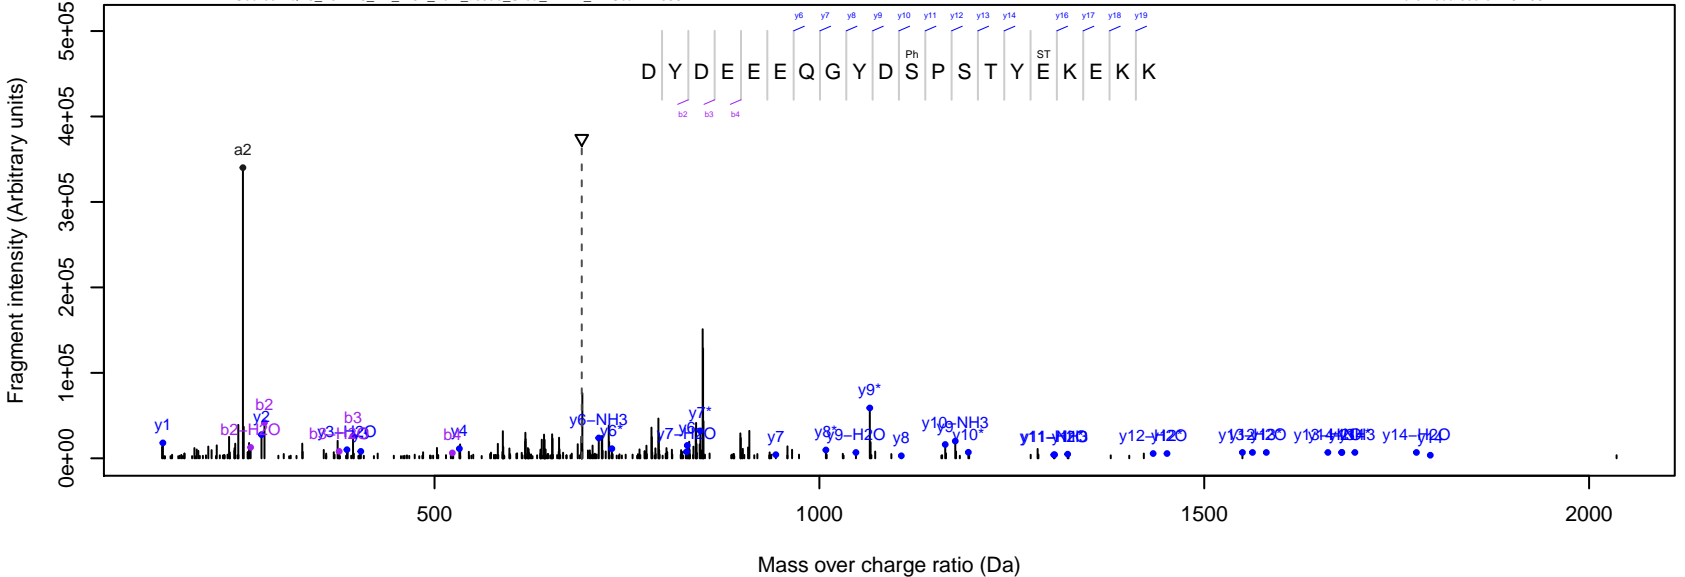



GGQS(Phospho (STY))DDDEDEGVPSYHTVSLQLLLDLMLHTLHTR-4+

Source : QE3\_201126\_FR\_TiOx\_hum\_tissue\_Urea\_RNAB\_N Scan : 56322

Andromeda score : 151.96

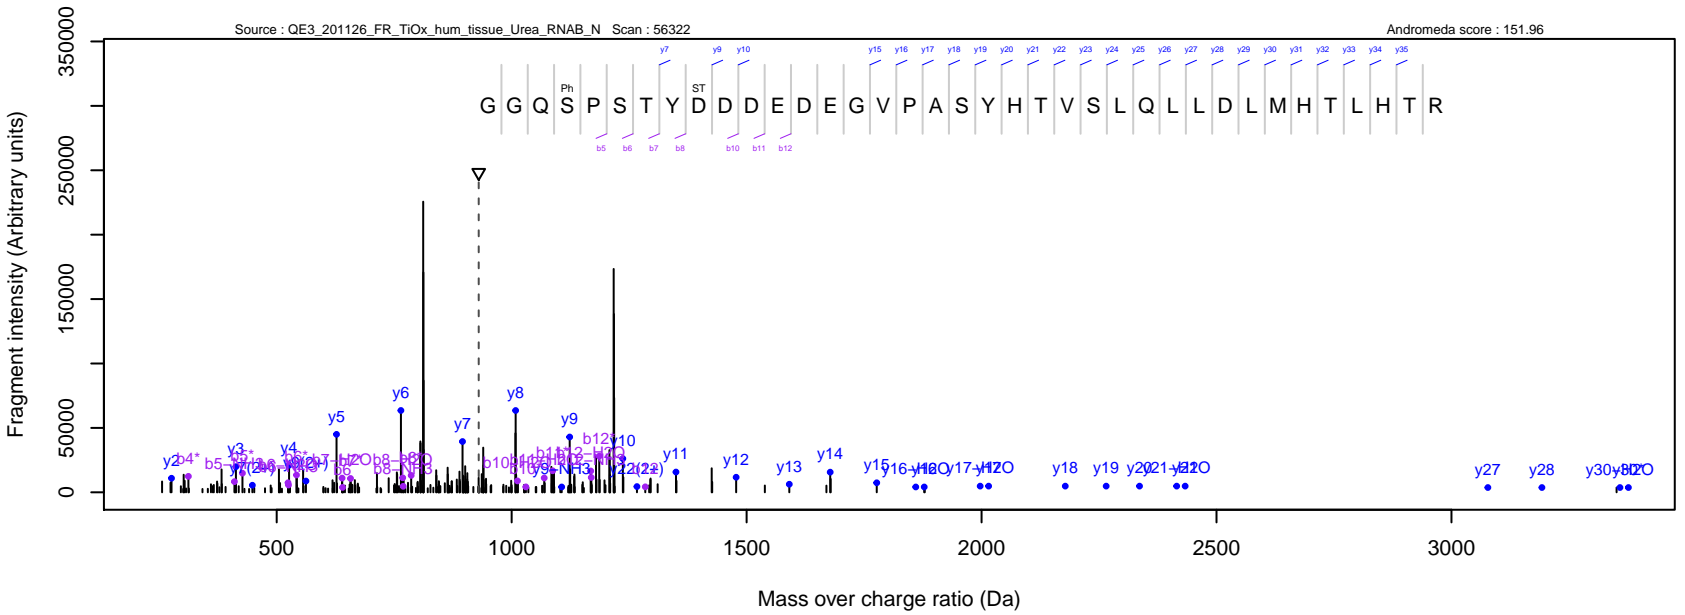

GNIETTS(Phospho (STY))EDGQVFSPK-2+

Source : QE3\_201126\_FR\_TiOx\_hum\_tissue\_Urea\_RNAB\_N Scan : 25188

Andromeda score : 151.9

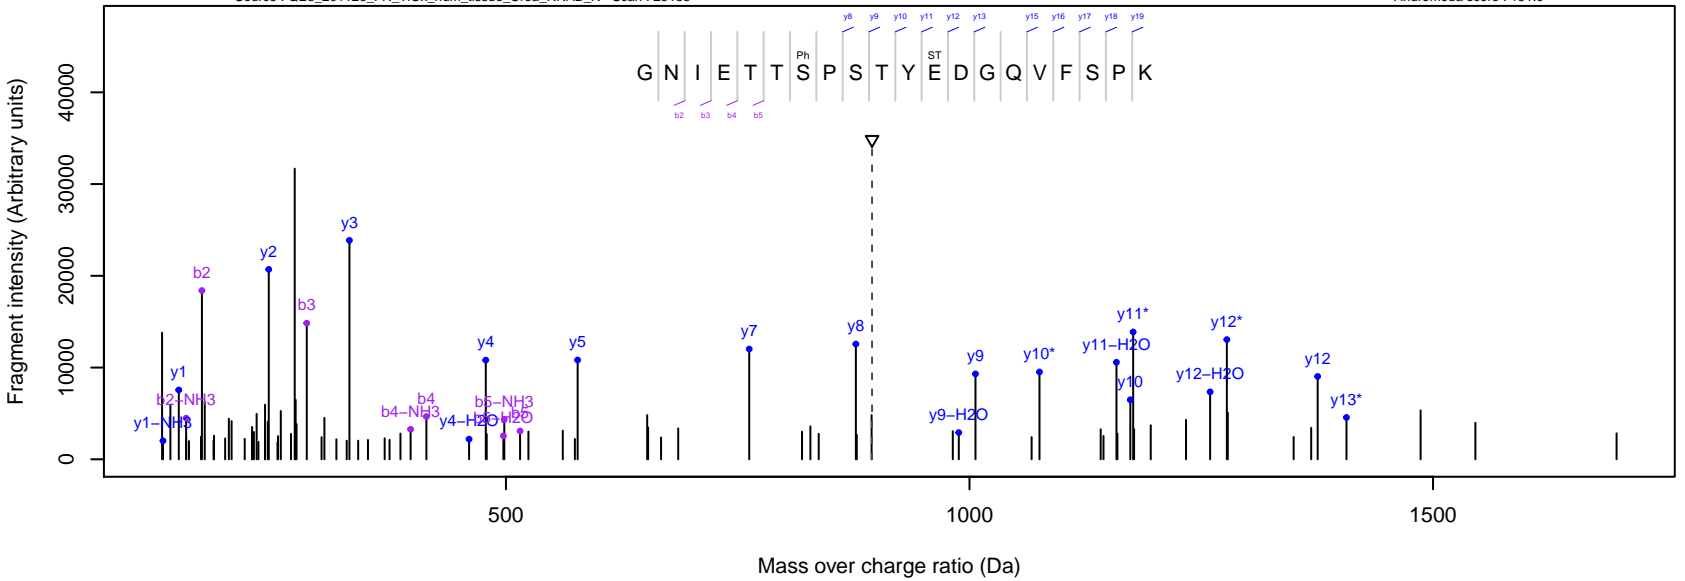

SISASKAS(Phospho (STY))PPGDLQNPKR-3+

Source : QE3\_201126\_FR\_TiOx\_hum\_tissue\_Urea\_RNAB\_H Scan : 10253

Andromeda score : 151.82

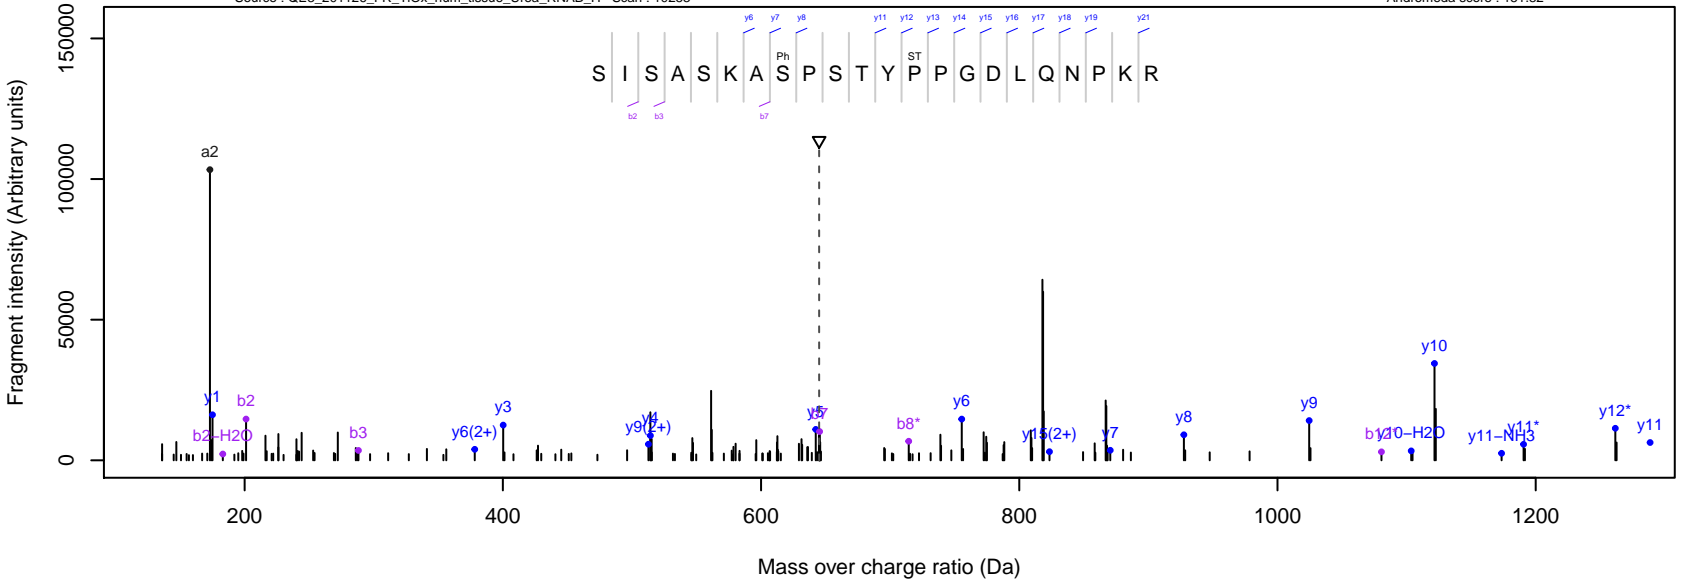

**SYS(Phospho (STY))SPDITQAIQEEK-2+**

Source : QE3\_201126\_FR\_TiOx\_hum\_tissue\_Urea\_RNAB\_N Scan : 38169

Andromeda score : 151.8

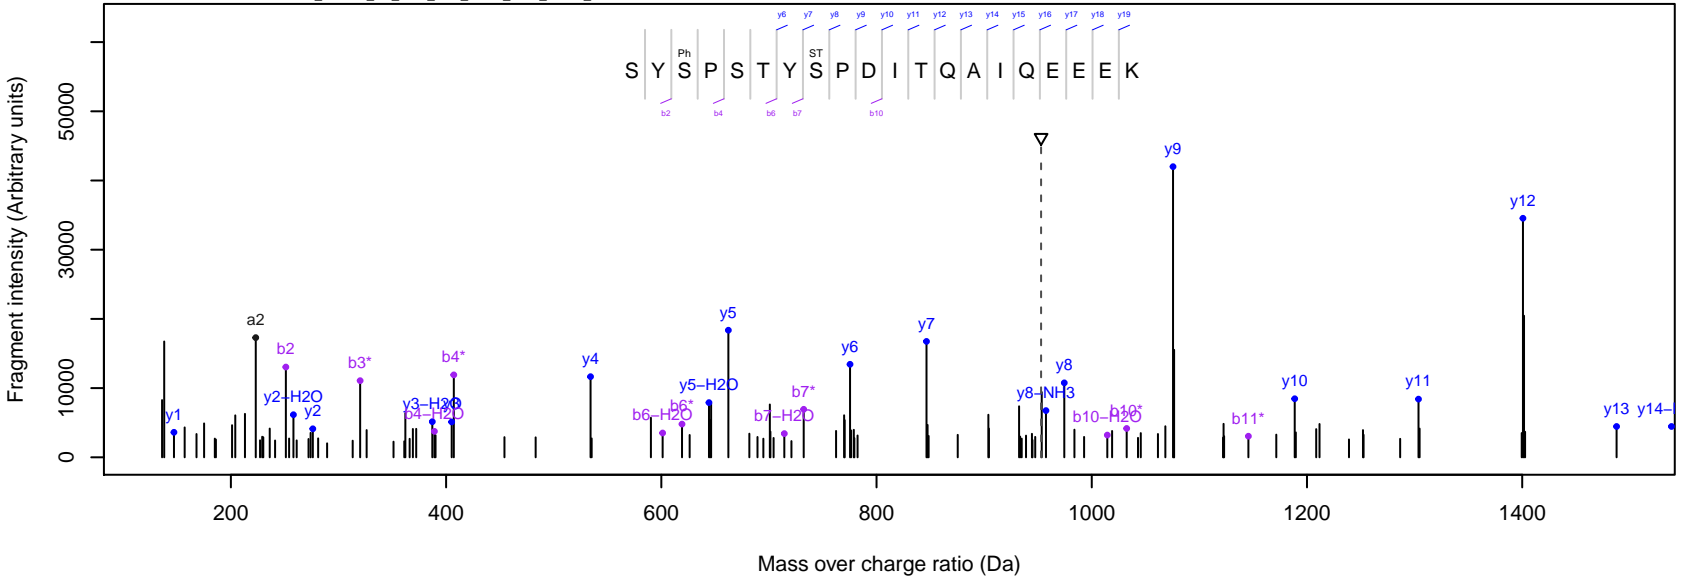

**AALLKAS(Phospho (STY))PK-2+**

Source : QE3\_201126\_FR\_TiOx\_hum\_tissue\_Urea\_RNAB\_N Scan : 8626

Andromeda score : 151.79

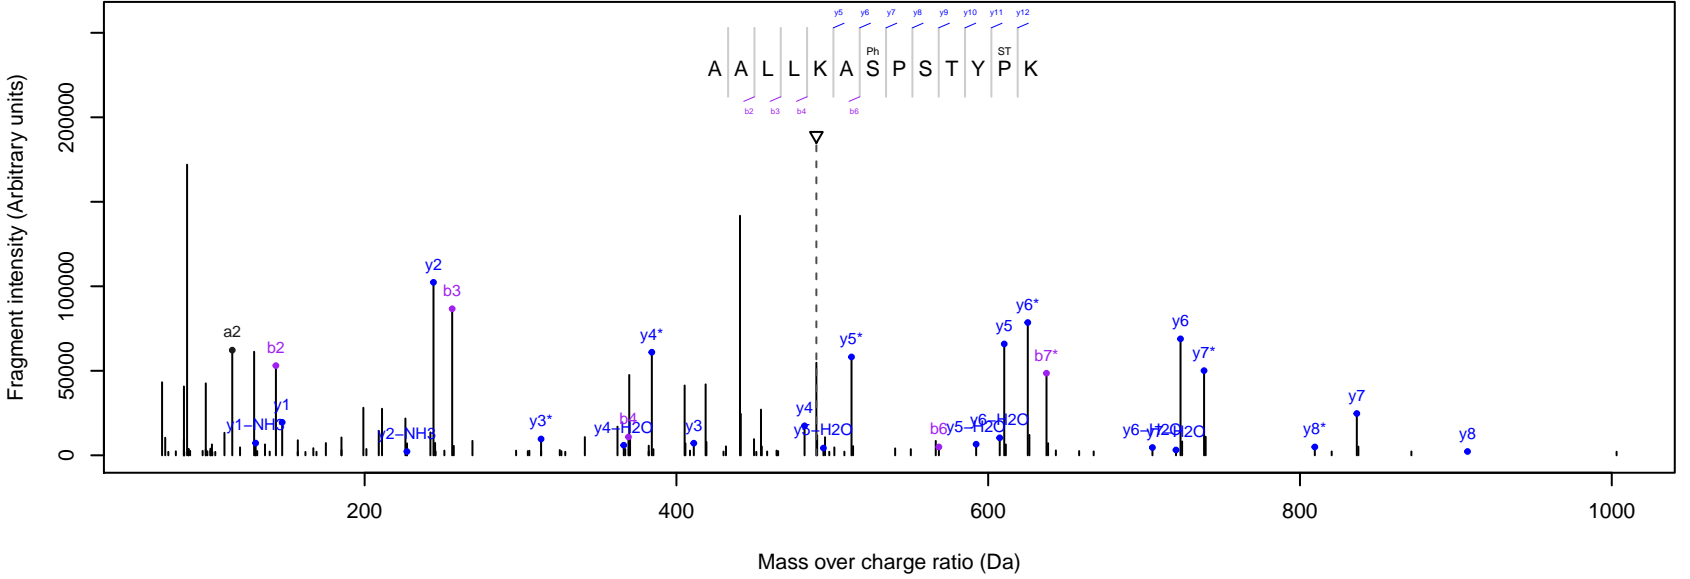

**SIPLECPLS(Phospho (STY))SPK-2+**

Source : QE3\_201126\_FR\_TiOx\_hum\_tissue\_Urea\_RNAB\_H Scan : 32400

Andromeda score : 151.78

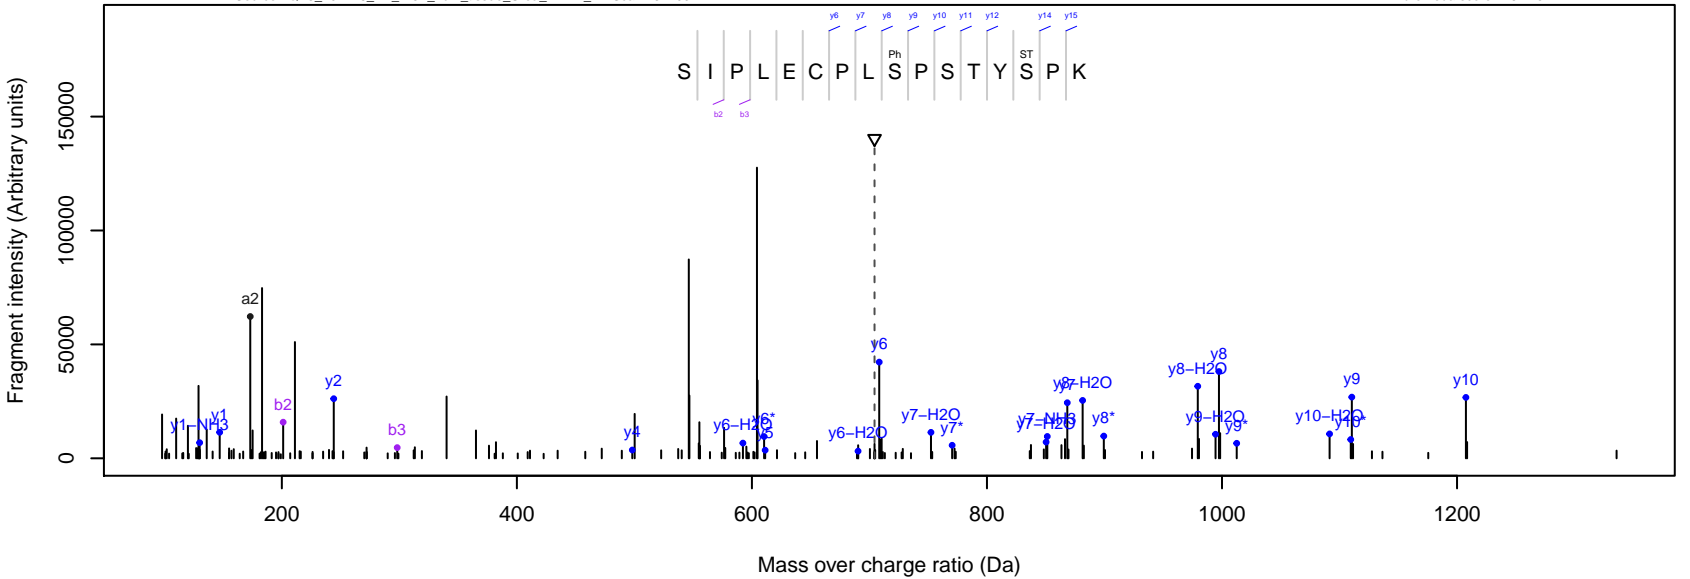

S(Phospho (STY))PNELVDDLK-2+

Source : QE3\_201126\_FR\_TIOx\_hum\_tissue\_Urea\_RNAB\_N Scan : 55861

Andromeda score : 151.78

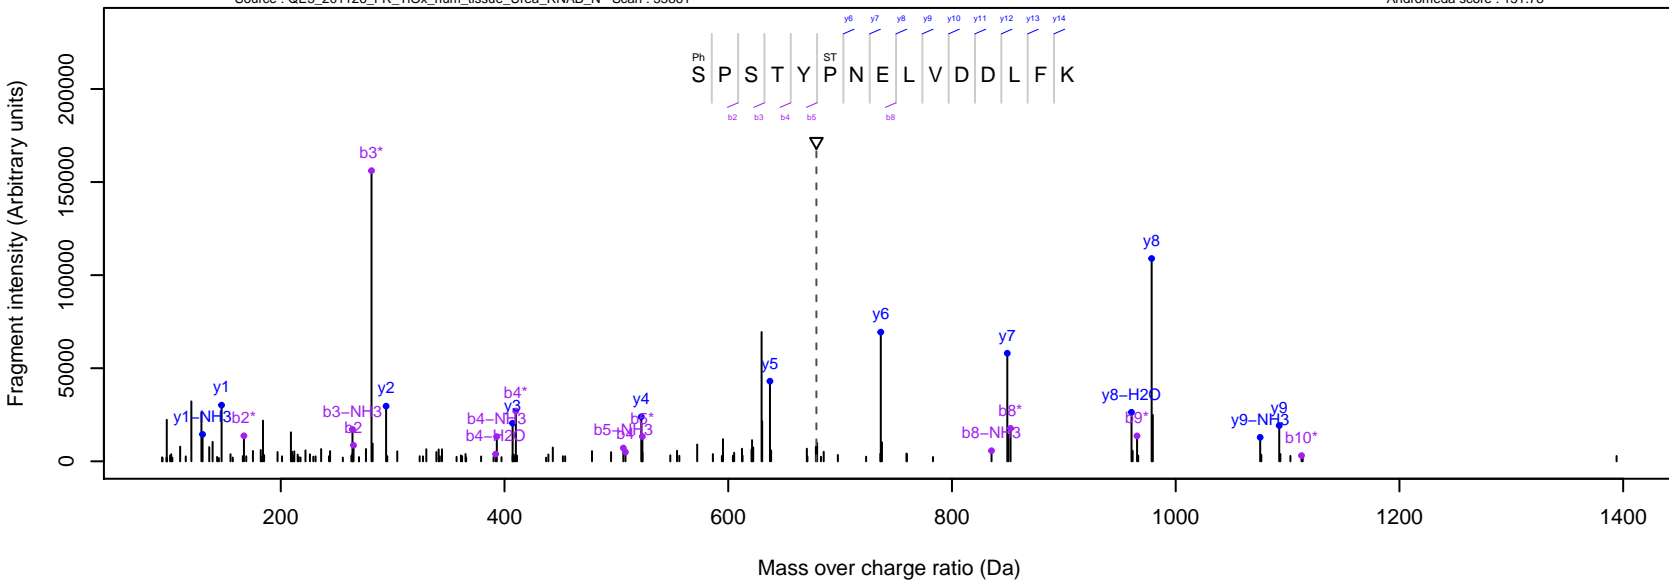

SGSGVGVNGSSRY(Phospho (STY))SPSQNS(Phospho (STY))PIHHIPSR-4+

Source : QE3\_201126\_FR\_TIOx\_hum\_tissue\_Urea\_RNAB\_B Scan : 14325

Andromeda score : 151.73

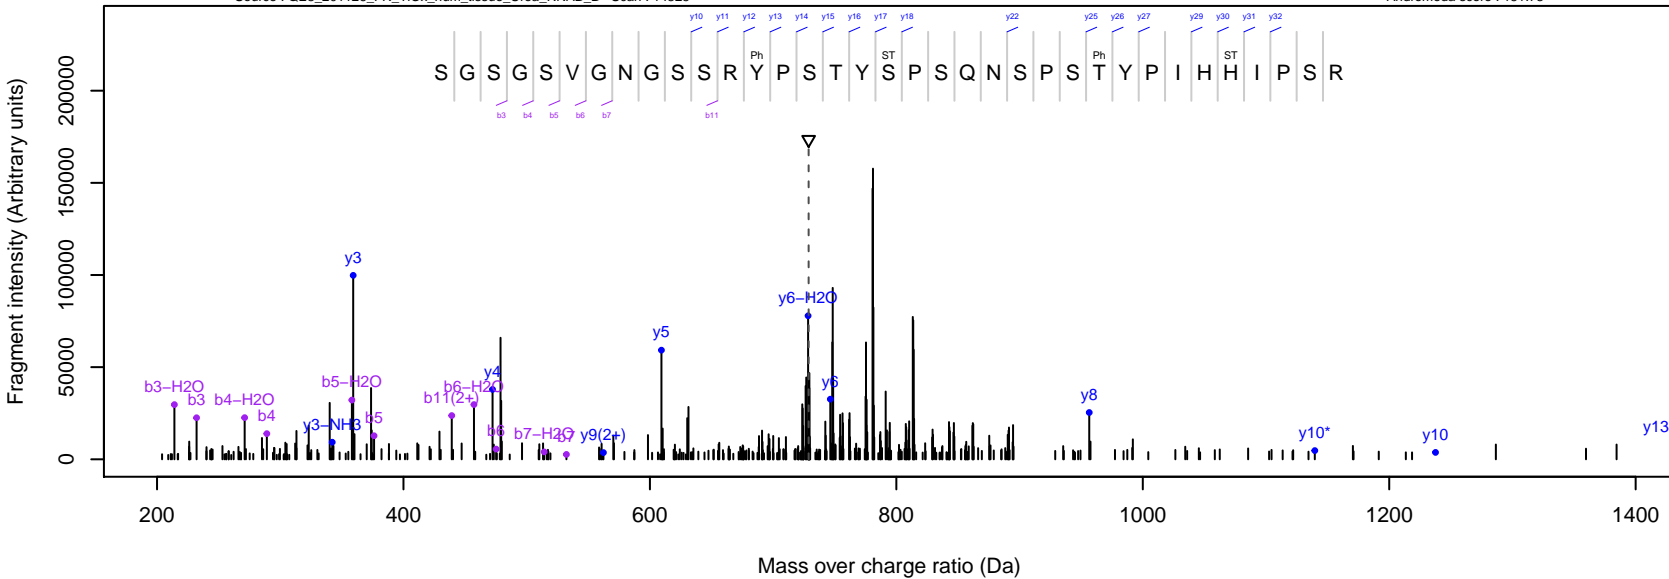

MLPHAPGVQMQAIPEDAIP EES P S T Y G D E D E D D P D K R-3+

Source : QE3\_201126\_FR\_TIOx\_hum\_tissue\_Urea\_RNAB\_N Scan : 38011

Andromeda score : 151.65

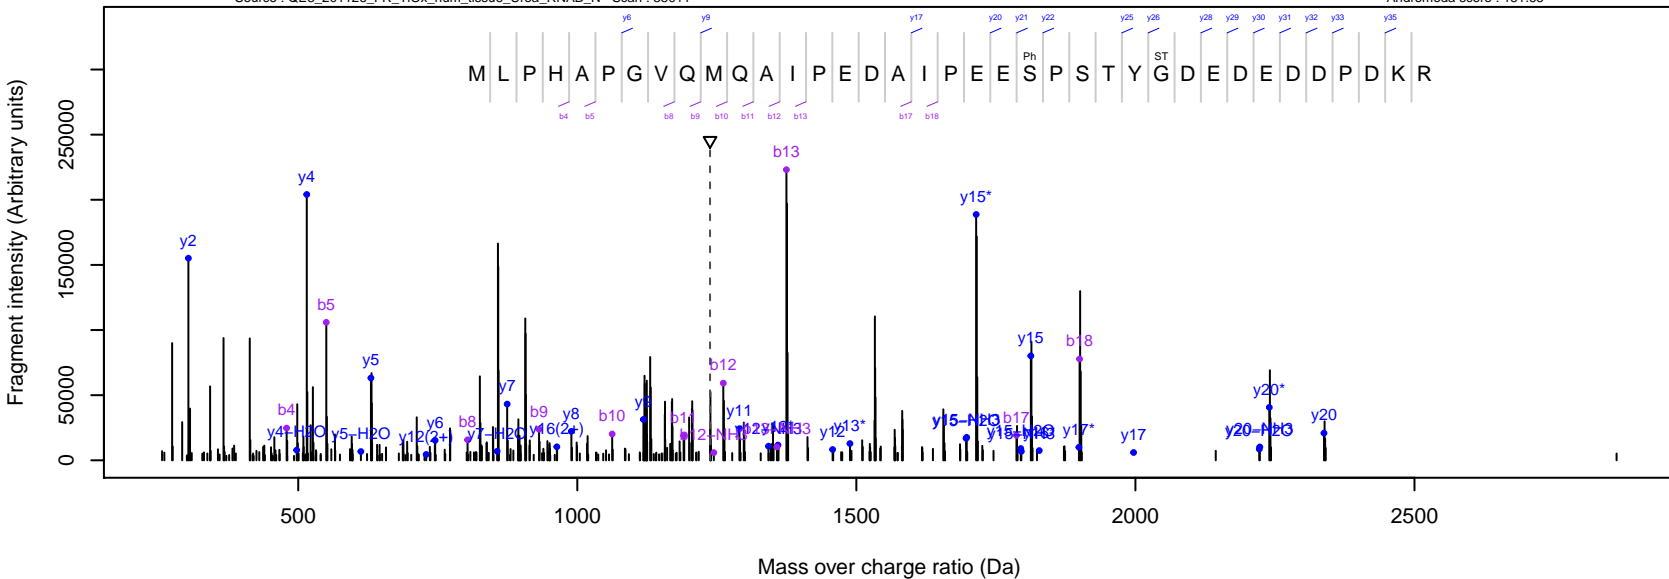

GAEDYDPPPIPHYSYS(Phospho (STY))SDR-2+

Source : QE3\_201126\_FR\_TiOx\_hum\_tissue\_Urea\_RNAB\_B Scan : 26249

Andromeda score : 151.62

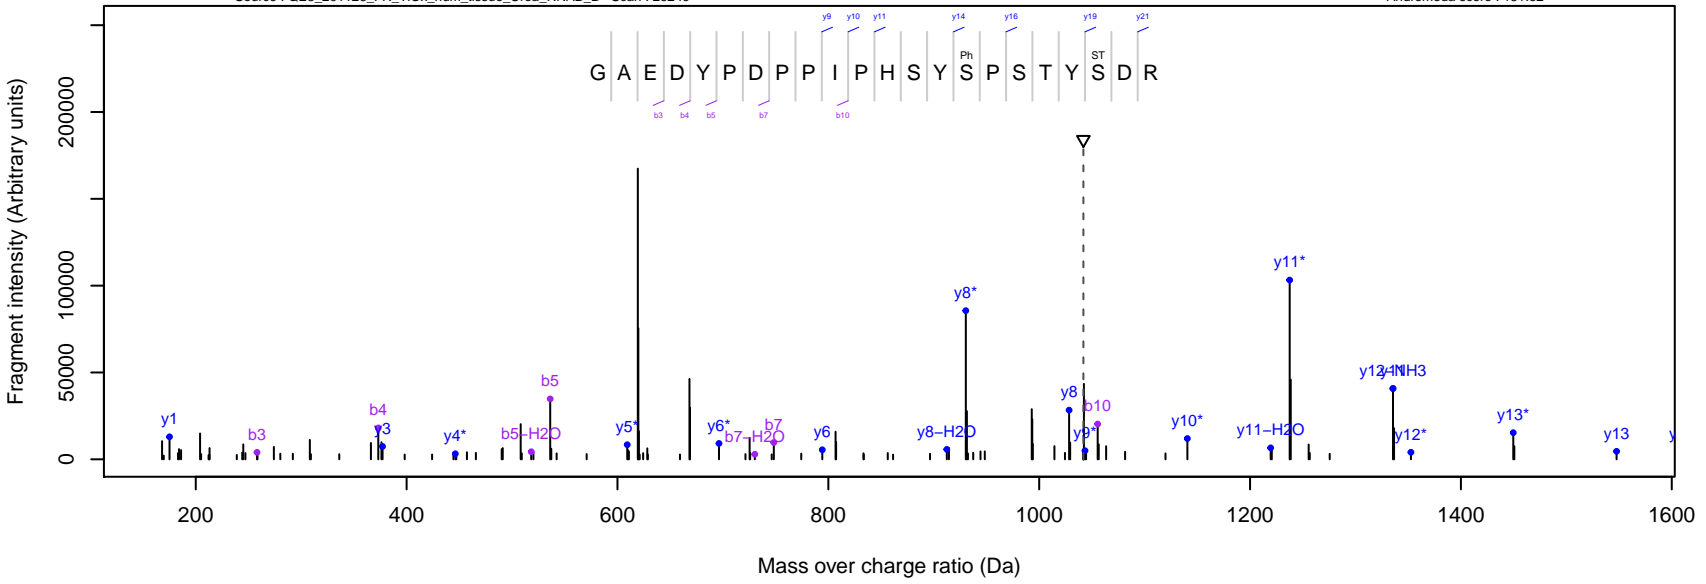

AAVLS(Phospho (STY))DS(Phospho (STY))EDEEKASAKK-3+

Source : QE3\_201126\_FR\_TiOx\_hum\_tissue\_Urea\_RNAB\_N Scan : 9261

Andromeda score : 151.58

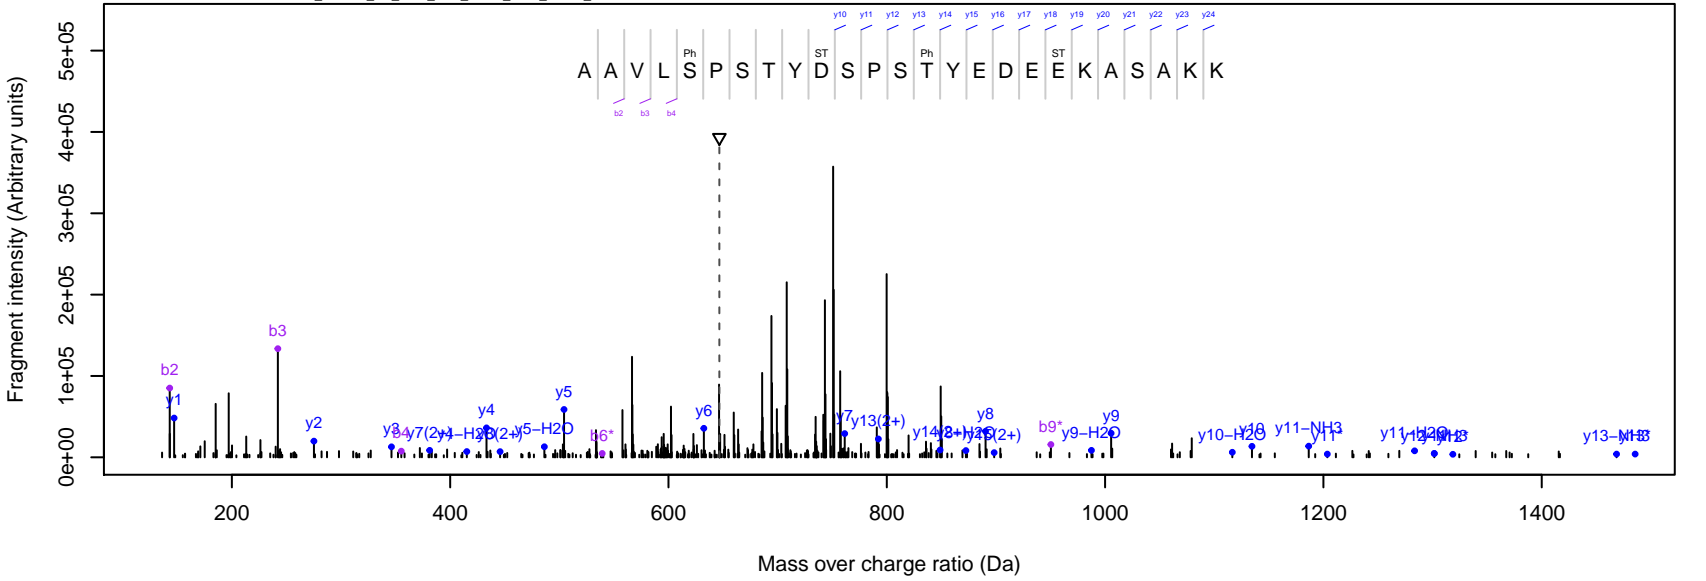

LGLAVIHGEAQCTELDDGRHS(Phospho (STY))PPMVK-4+

Source : QE3\_201126\_FR\_TiOx\_hum\_tissue\_Urea\_RNAB\_N Scan : 32349

Andromeda score : 151.5

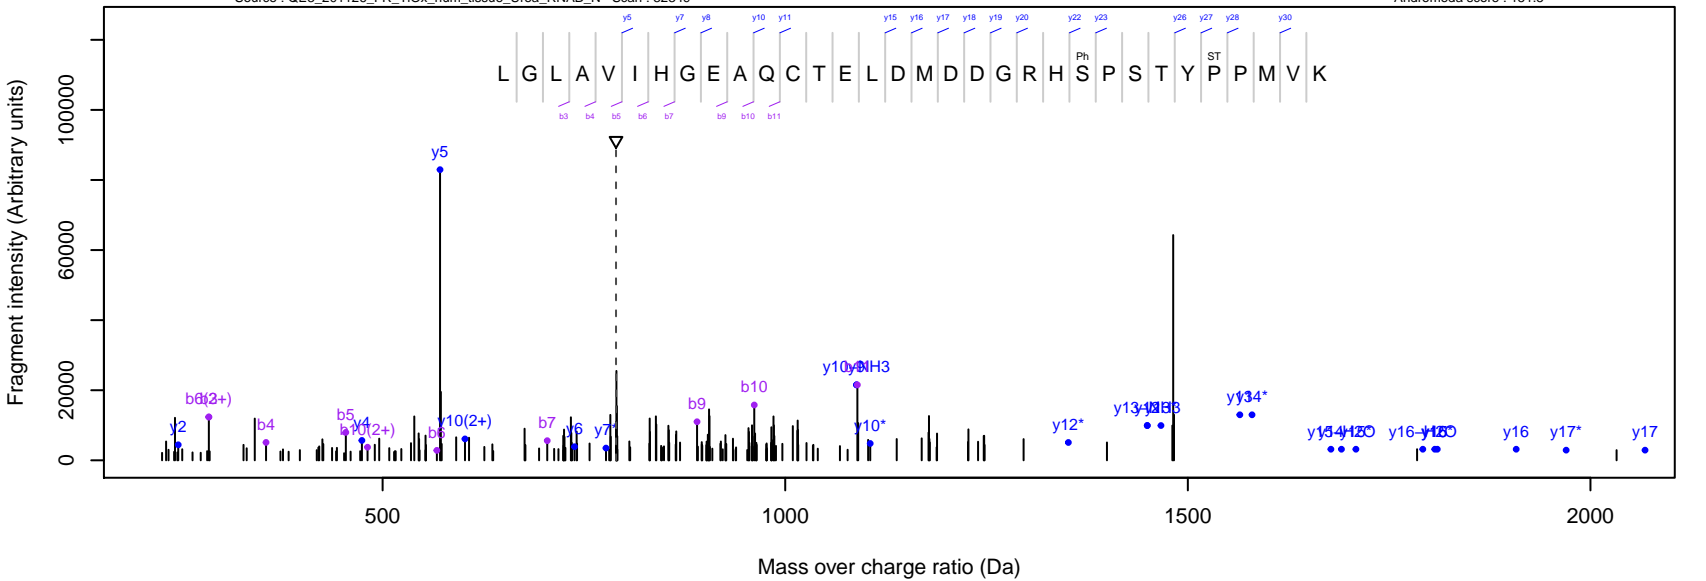

### NDS(Phospho (STY))PTQIPVSSDVC R--2+

Source : QE3\_201126\_FR\_TIOx\_hum\_tissue\_Urea\_RNAB\_N Scan : 24135

Andromeda score : 151.49

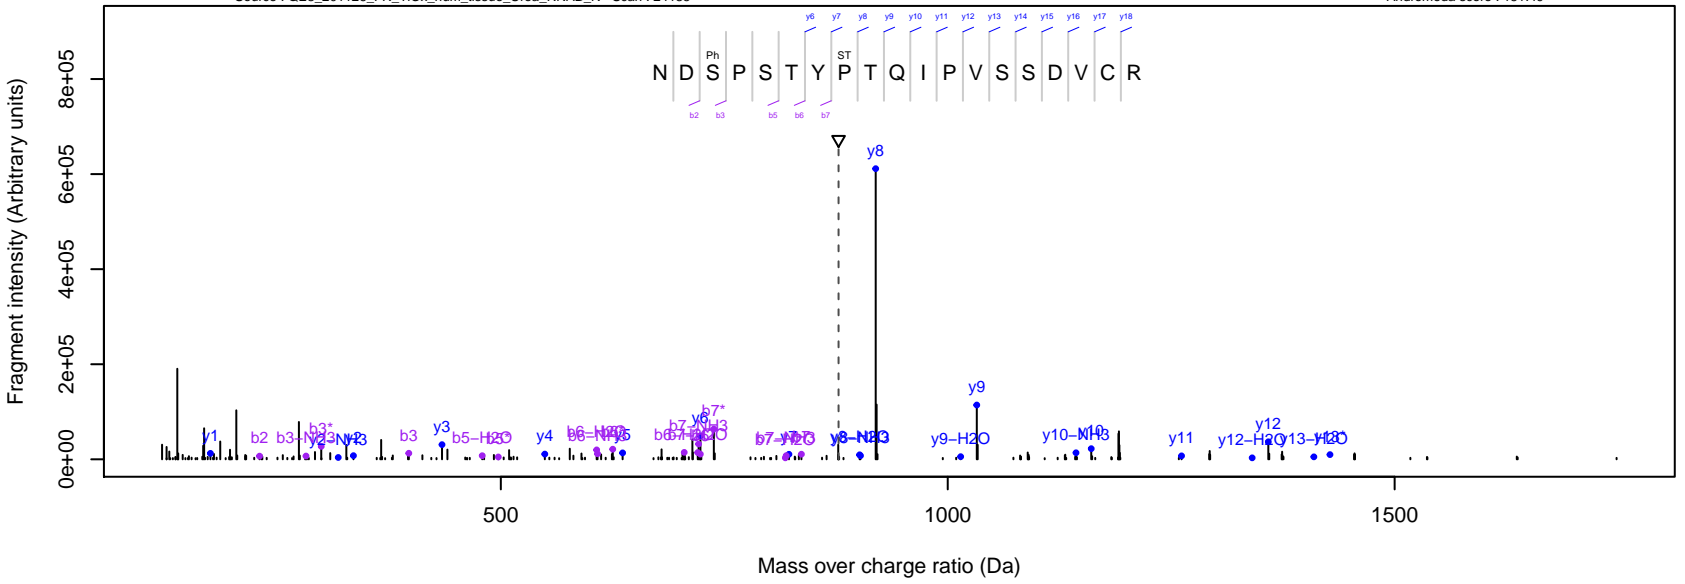

### ERDHS(Phospho (STY))PTPSVFNSDEERY R--4+

Source : QE3\_201126\_FR\_TIOx\_hum\_tissue\_Urea\_RNAB\_H Scan : 15431

Andromeda score : 151.42

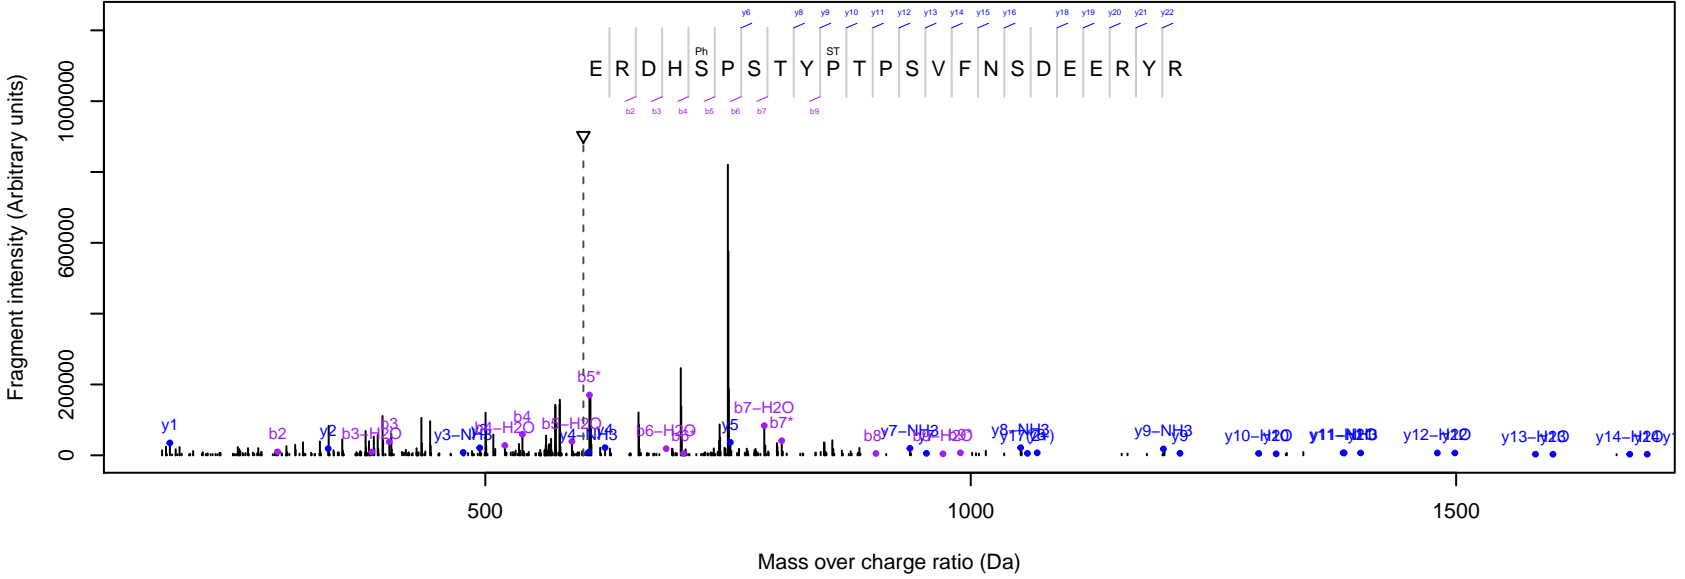

### KGGHERPPS(Phospho (STY))PGLR--3+

Source : QE3\_201126\_FR\_TIOx\_hum\_tissue\_Urea\_RNAB\_H Scan : 5869

Andromeda score : 151.41

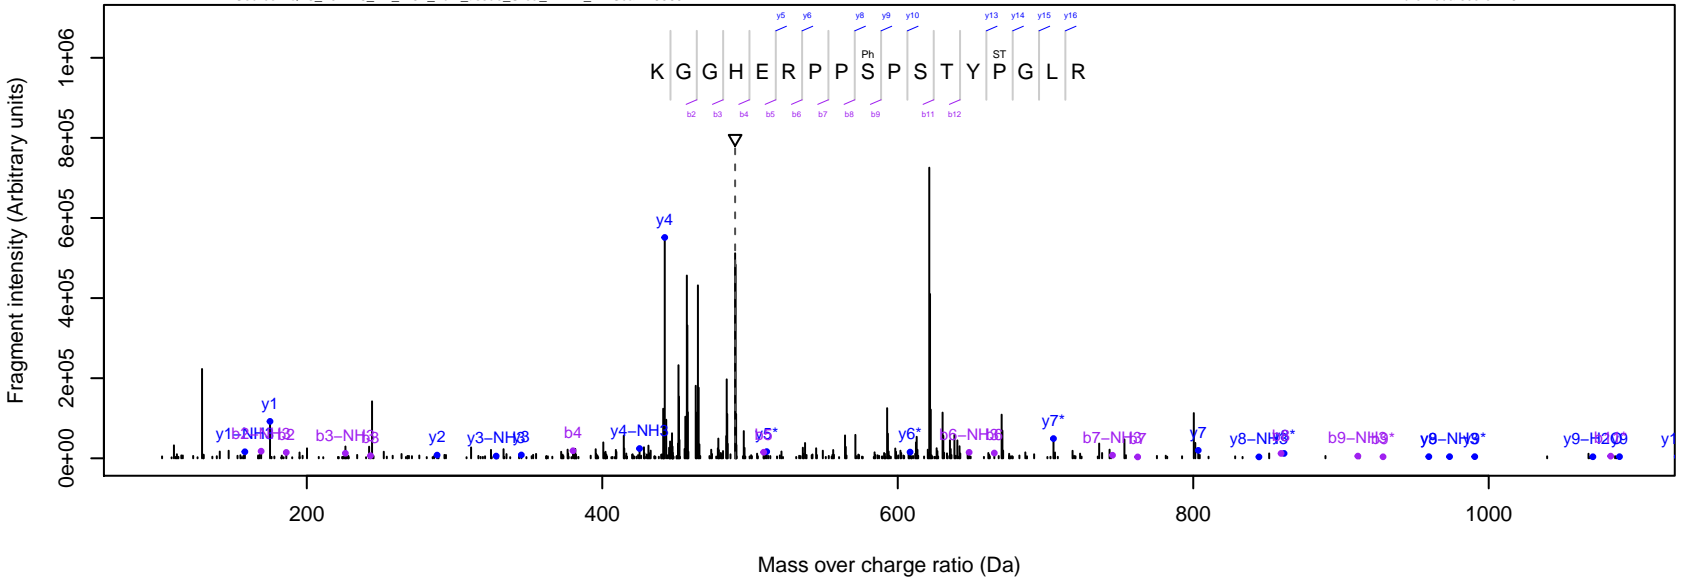

RFS(Phospho (STY))SGGEEDDFDR-2+

Source : QE3\_201126\_FR\_TiOx\_hum\_tissue\_Urea\_RNAB\_B Scan : 15922

Andromeda score : 151.39

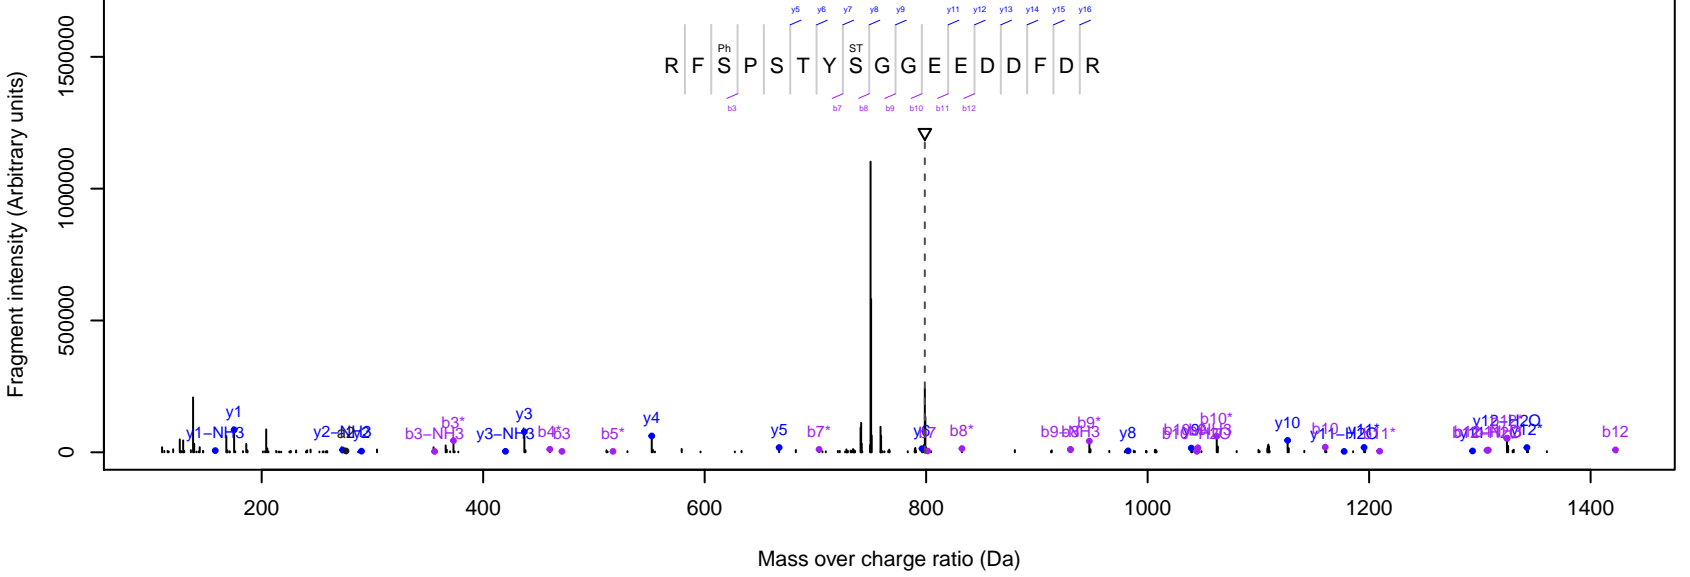

LQQLQGGS(Phospho (STY))REITK-2+

Source : QE3\_201126\_FR\_TiOx\_hum\_tissue\_Urea\_RNAB\_N Scan : 10900

Andromeda score : 151.38

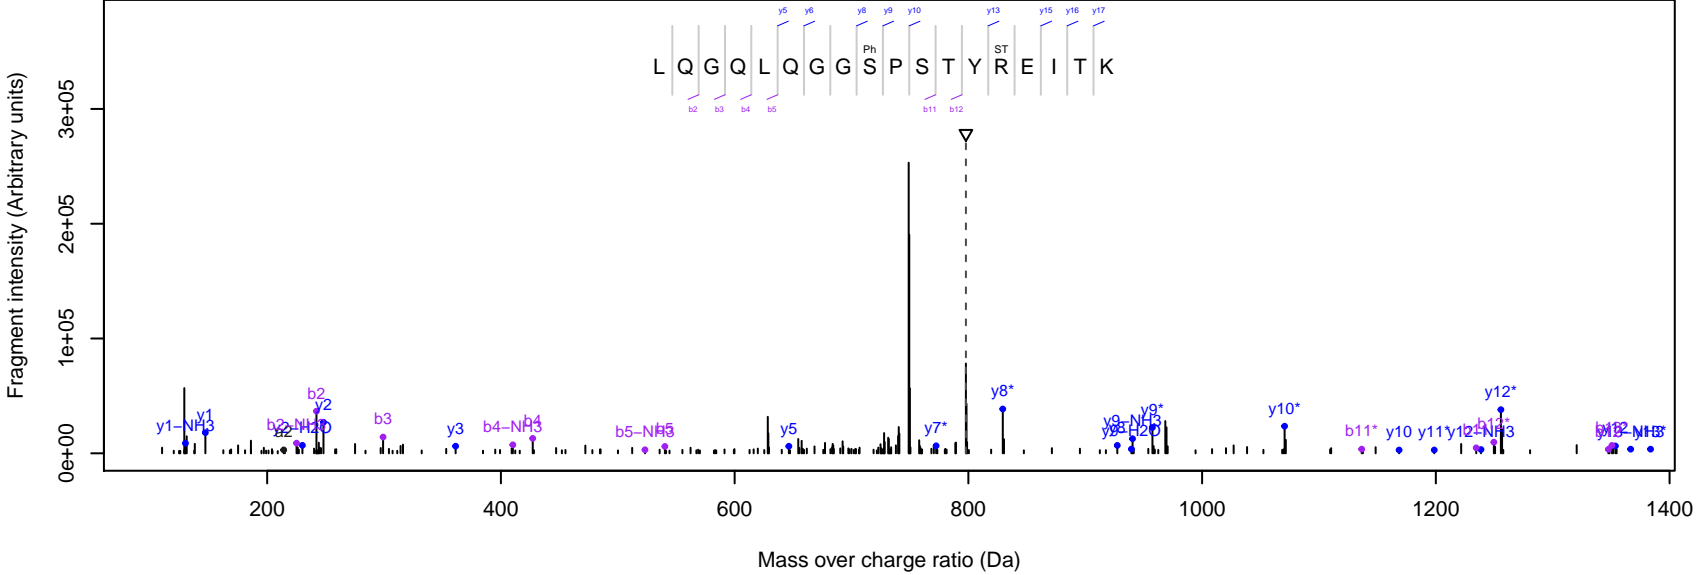

ENIIPLLVTS(Phospho (STY))NSDQLTTPDGDEKDITQDENSELK-3+

Source : QE3\_201126\_FR\_TiOx\_hum\_tissue\_Urea\_RNAB\_N Scan : 57551

Andromeda score : 151.33

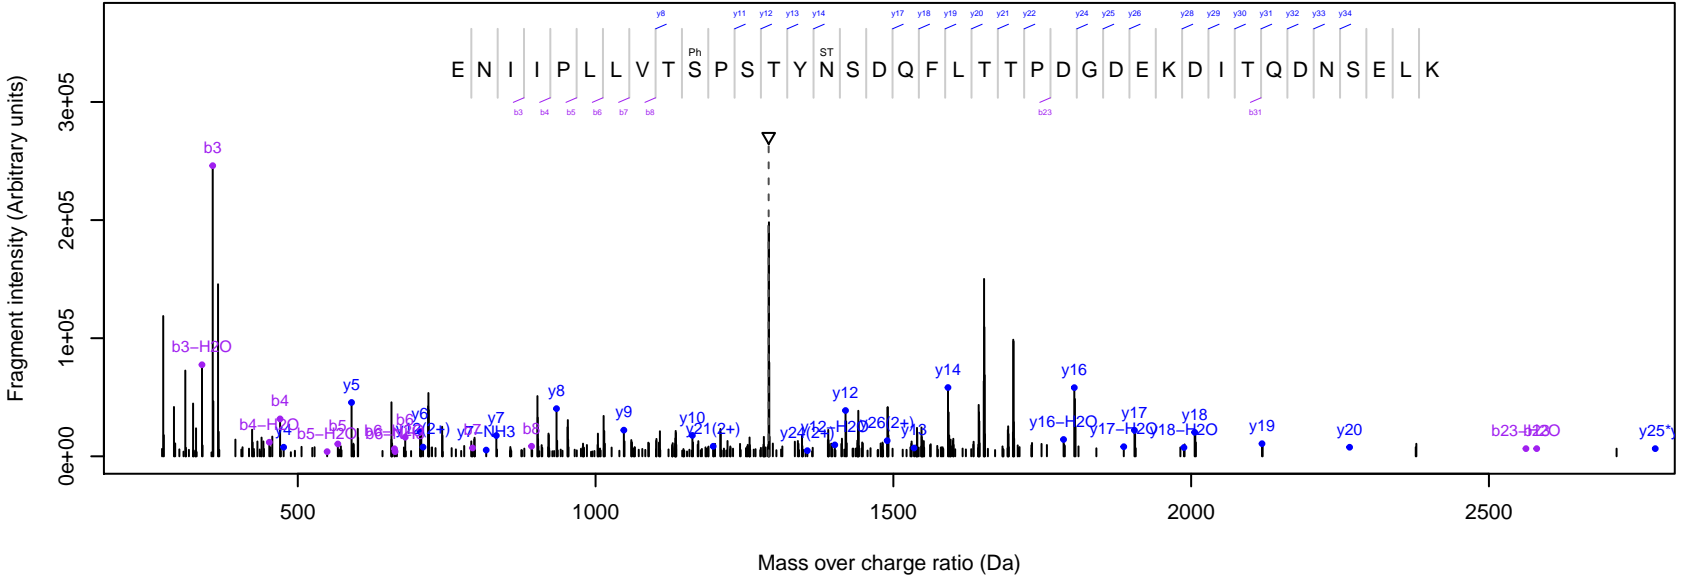

ESS(Phospho (STY))PEKEAEEGCPKEKESEEGCPK-3+

Source : QE3\_201126\_FR\_TiOx\_hum\_tissue\_Urea\_RNAB\_H Scan : 9740

Andromeda score : 151.31

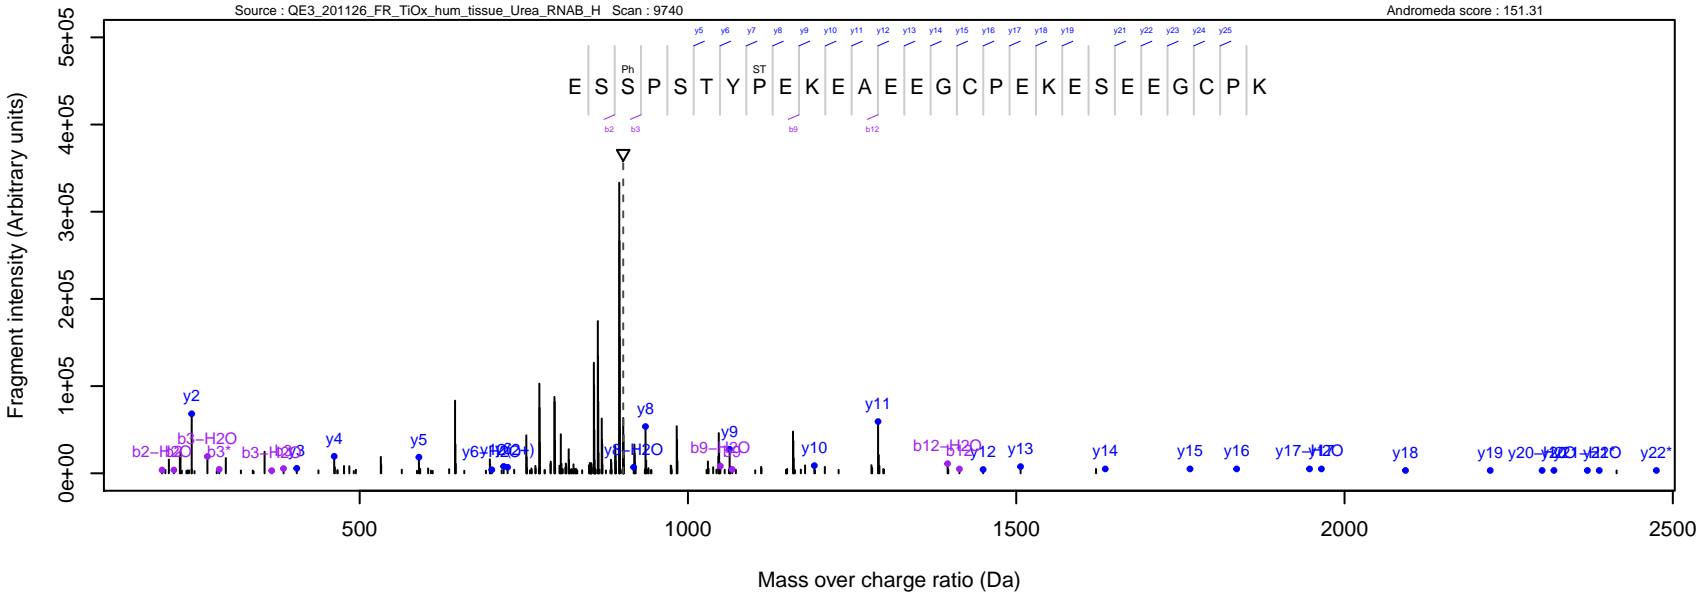

IDRGETHLWSPQVS(Phospho (STY))EDGKAHPFK-4+

Source : QE3\_201126\_FR\_TiOx\_hum\_tissue\_Urea\_RNAB\_H Scan : 20783

Andromeda score : 151.31

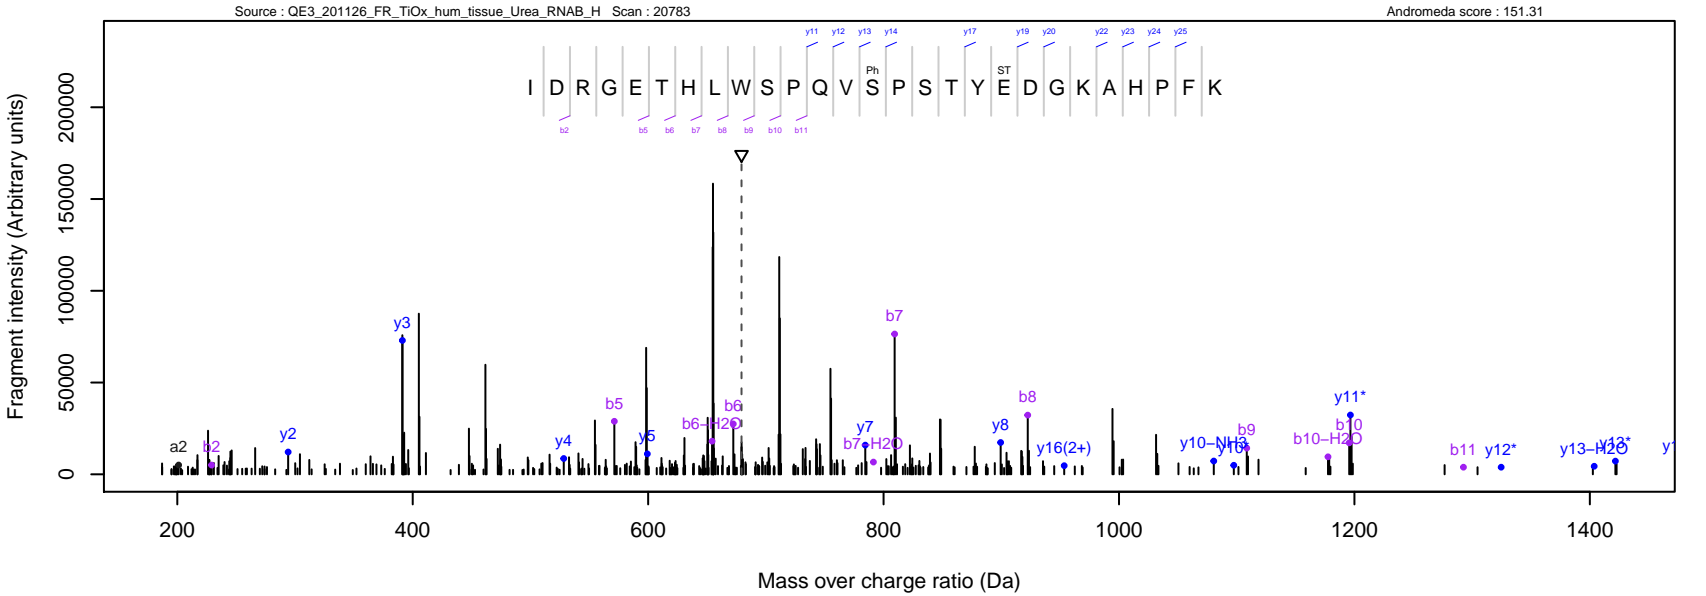

ESESALMEDRDES(Phospho (STY))EVS(Phospho (STY))DEGGSPISSEGEQEPK-3+

Source : QE3\_201126\_FR\_TiOx\_hum\_tissue\_Urea\_RNAB\_N Scan : 31083

Andromeda score : 151.24

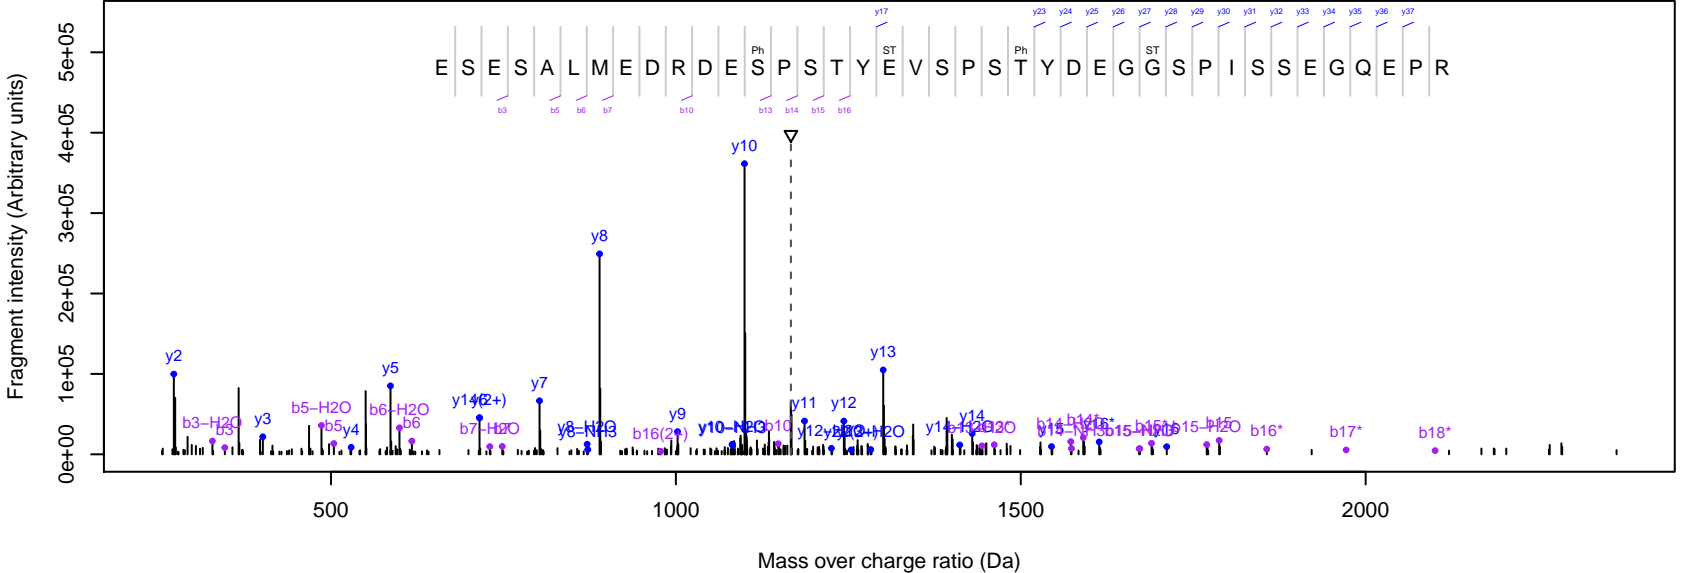

QPT(Phospho (STY))PPFFGR-2+

Source : QE3\_201126\_FR\_TiOx\_hum\_tissue\_Urea\_RNAB\_H Scan : 35113

Andromeda score : 151.22

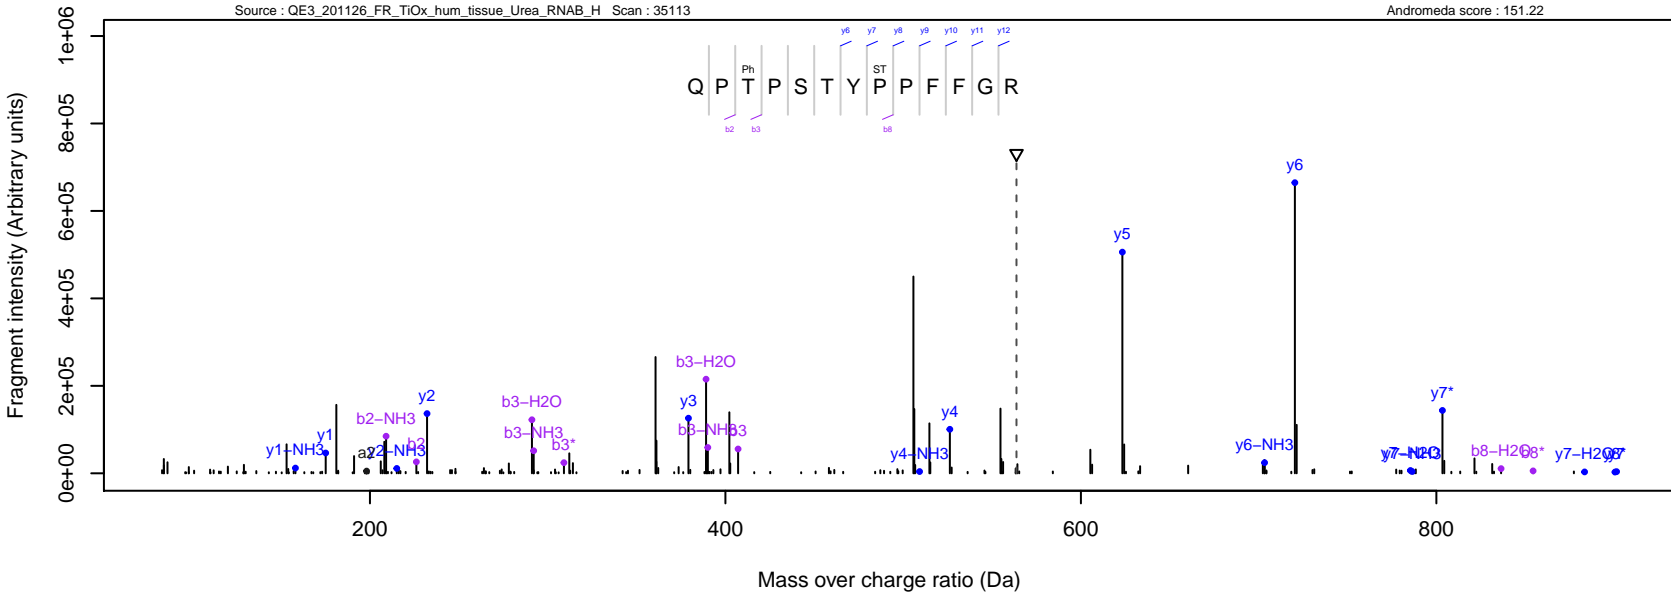

S(Phospho (STY))RESLNVDVVK-2+

Source : QE3\_201126\_FR\_TiOx\_hum\_tissue\_Urea\_RNAB\_H Scan : 17287

Andromeda score : 151.22

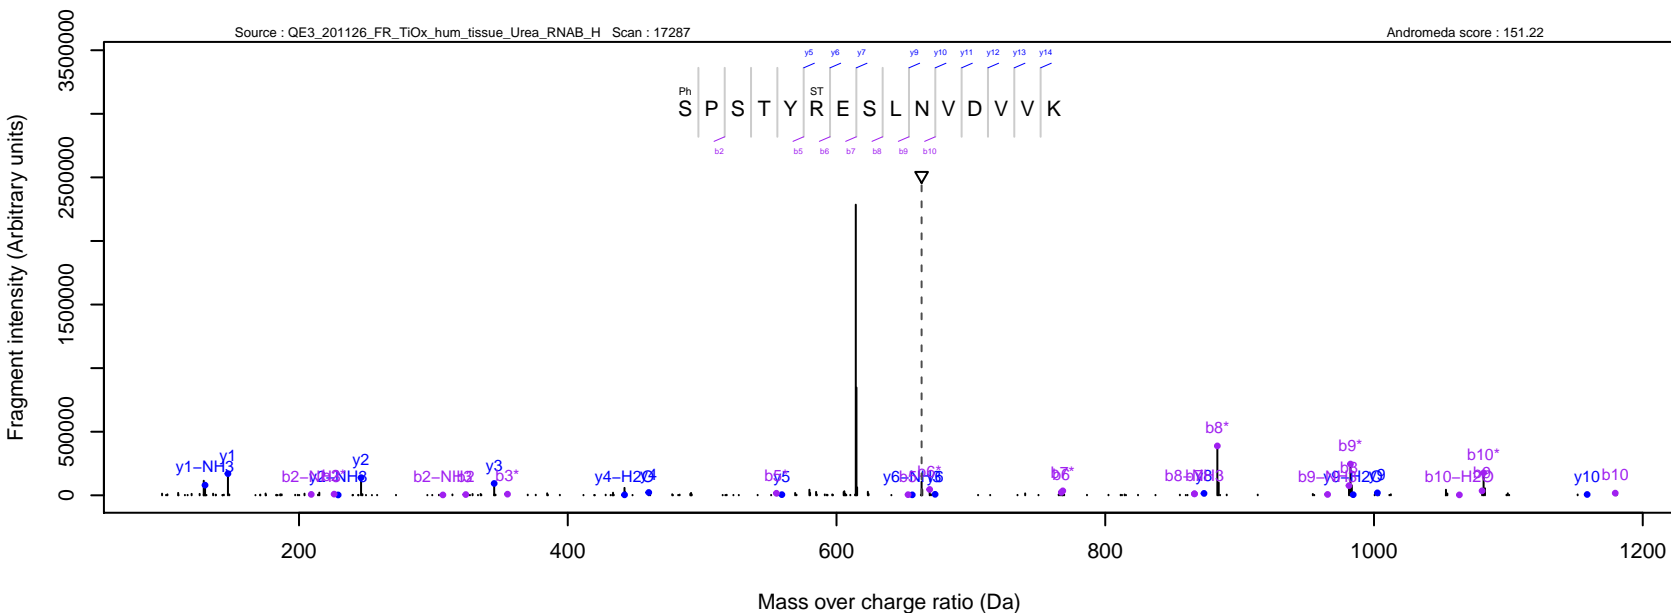

RPAS(Phospho (STY))PSS(Phospho (STY))PEHLPATPAESPAQR-3+

Source : QE3\_201126\_FR\_TiOx\_hum\_tissue\_Urea\_RNAB\_N Scan : 17049

Andromeda score : 151.19

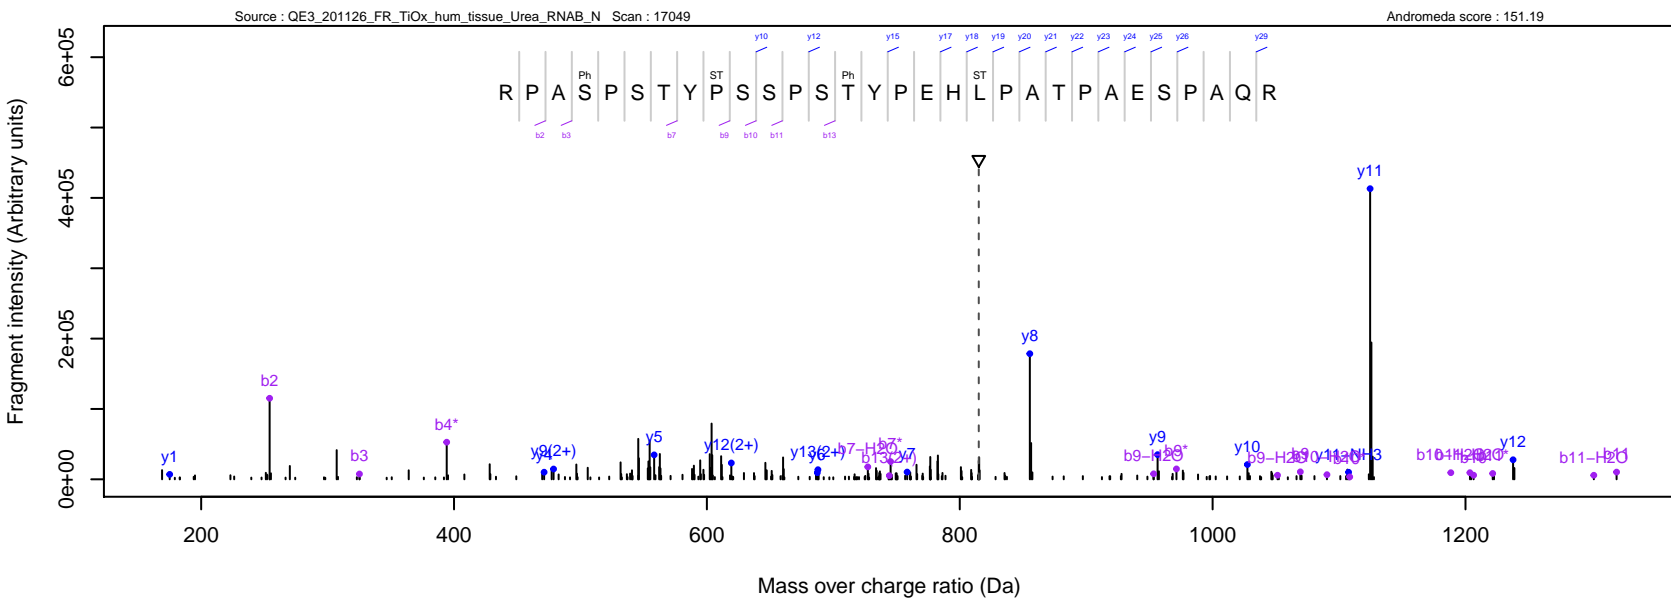



STGVSWTQDS(Phospho (STY))DENEQEQQS(Phospho (STY))DTEEGSNKKETQTD SISR-4+

Source : QE3\_201126\_FR\_TiOx\_hum\_tissue\_Urea\_RNAB\_N Scan : 31340

Andromeda score : 151.18

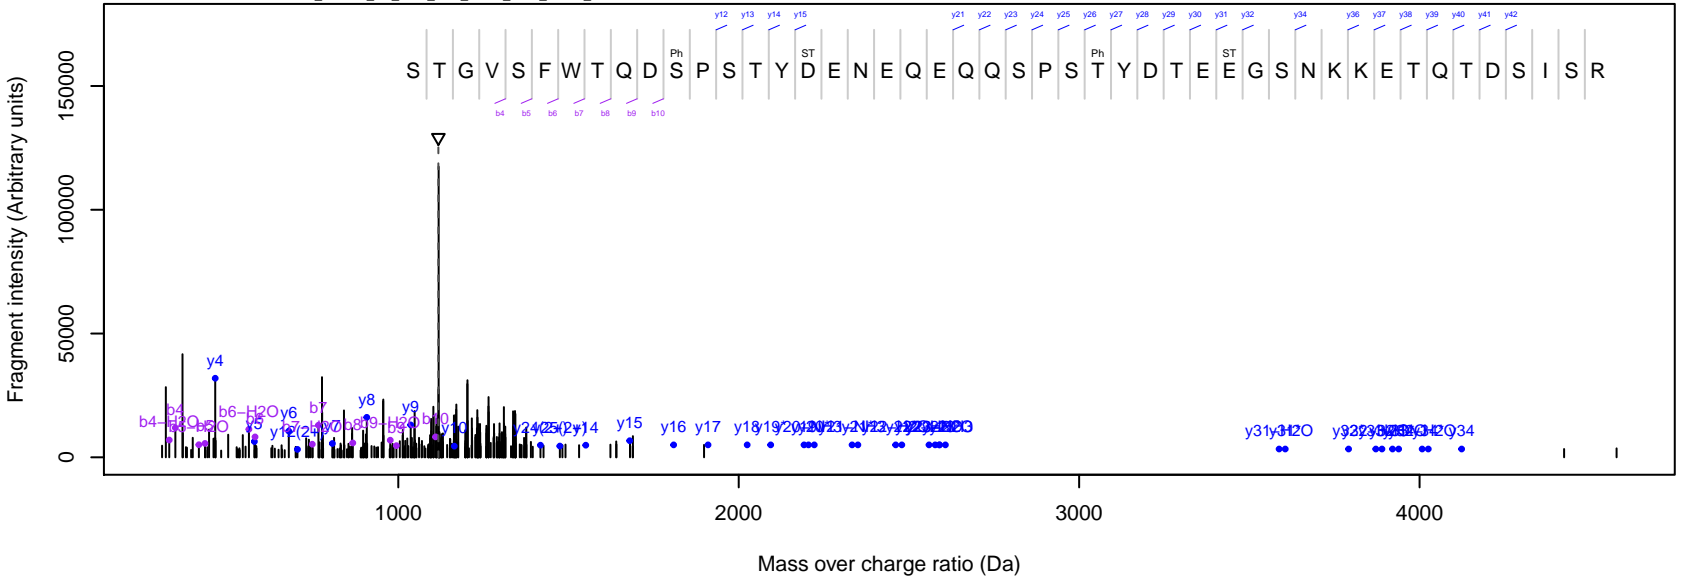

DKFS(Phospho (STY))PFPVQDRPESSLVFK-3+

Source : QE3\_201126\_FR\_TiOx\_hum\_tissue\_Urea\_RNAB\_B Scan : 39951

Andromeda score : 151.06

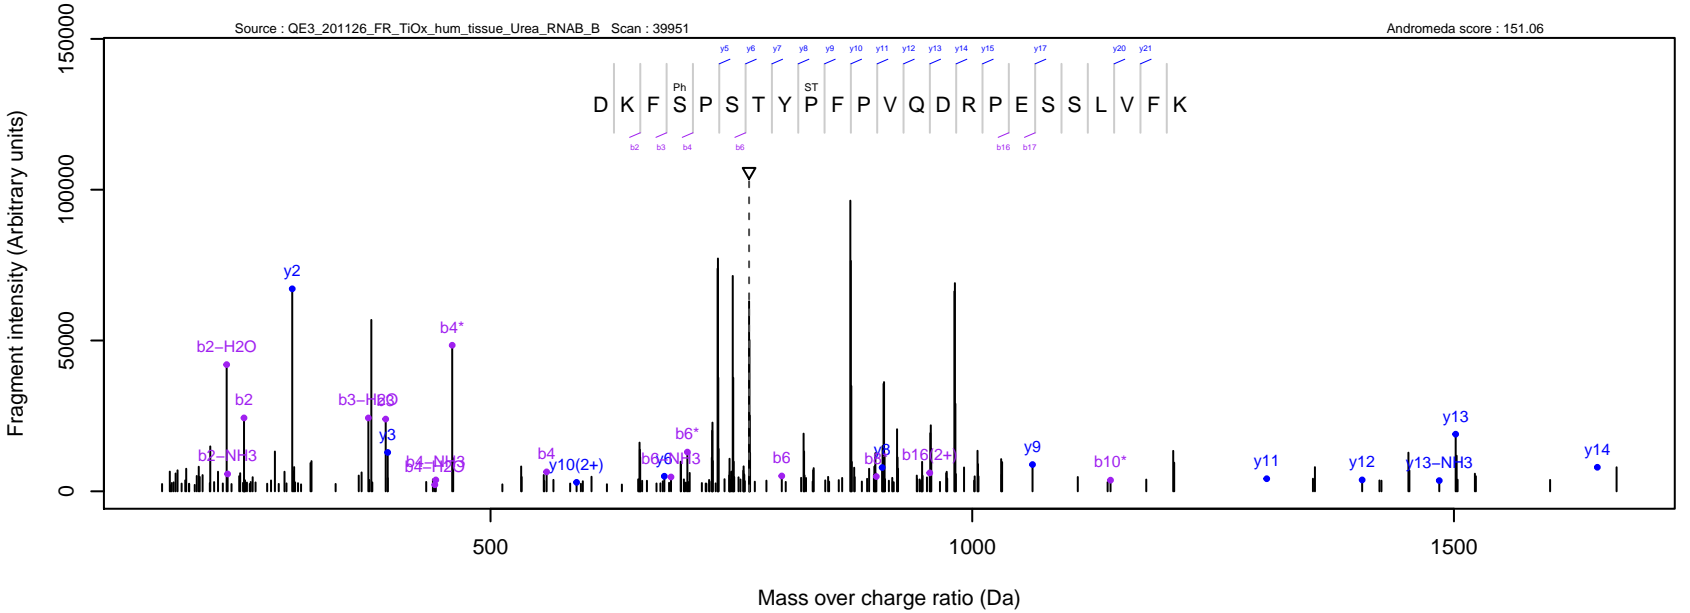

GNAEGSS(Phospho (STY))DEEGKLVIDEPAK-3+

Source : QE3\_201126\_FR\_TiOx\_hum\_tissue\_Urea\_RNAB\_N Scan : 20184

Andromeda score : 151.06

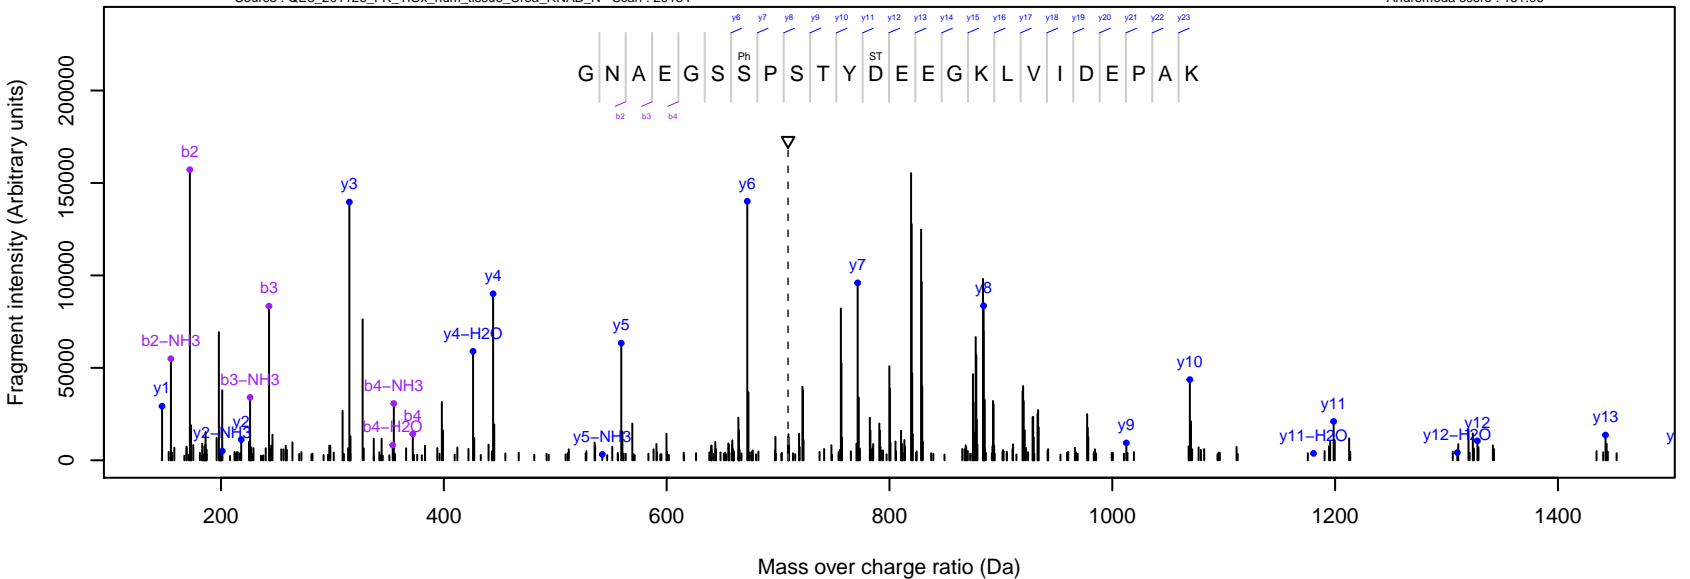

AATEALGEKS(Phospho (STY))PDSATVSGYDIMK-3+

Source : QE3\_201126\_FR\_TIOx\_hum\_tissue\_Urea\_RNAB\_H Scan : 31000

Andromeda score : 151.02

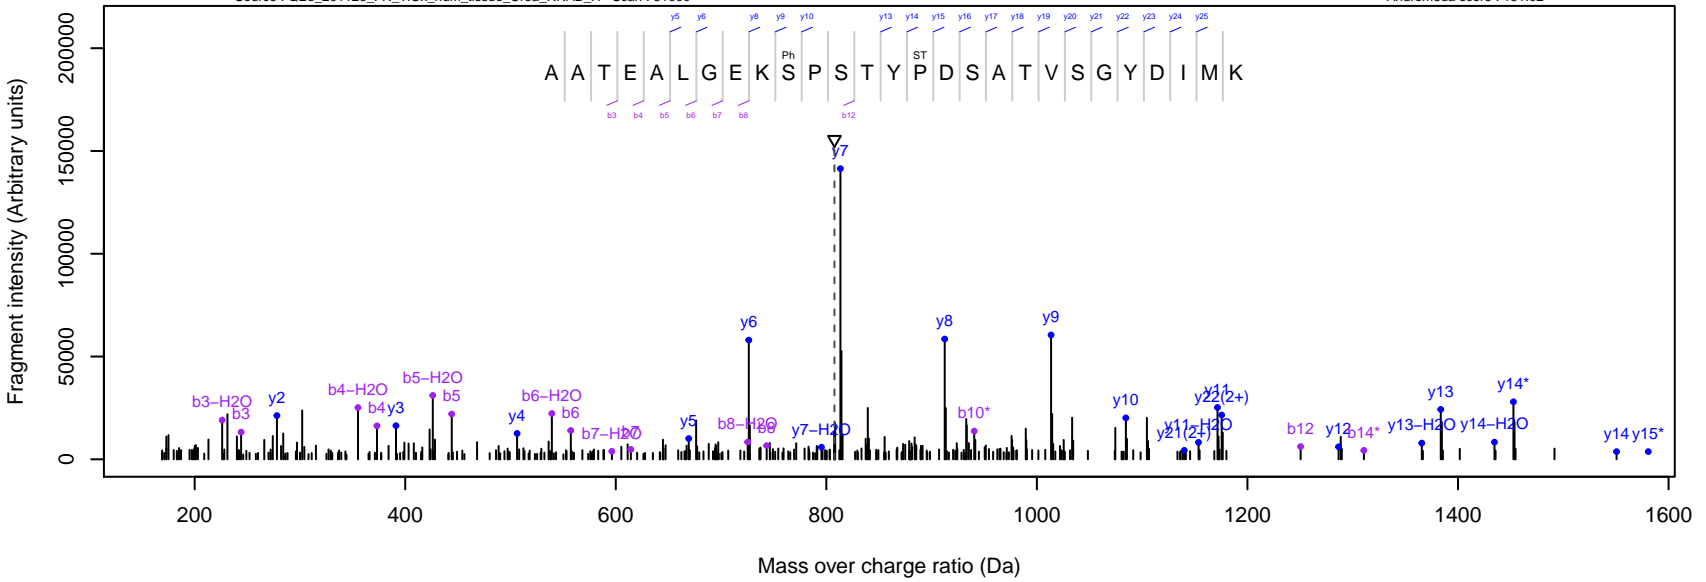

AQVLATIHGHAGFPAAGDAGEGAPGGGS(Phospho (STY))SPER-3+

Source : QE3\_201126\_FR\_TIOx\_hum\_tissue\_Urea\_RNAB\_B Scan : 24665

Andromeda score : 151

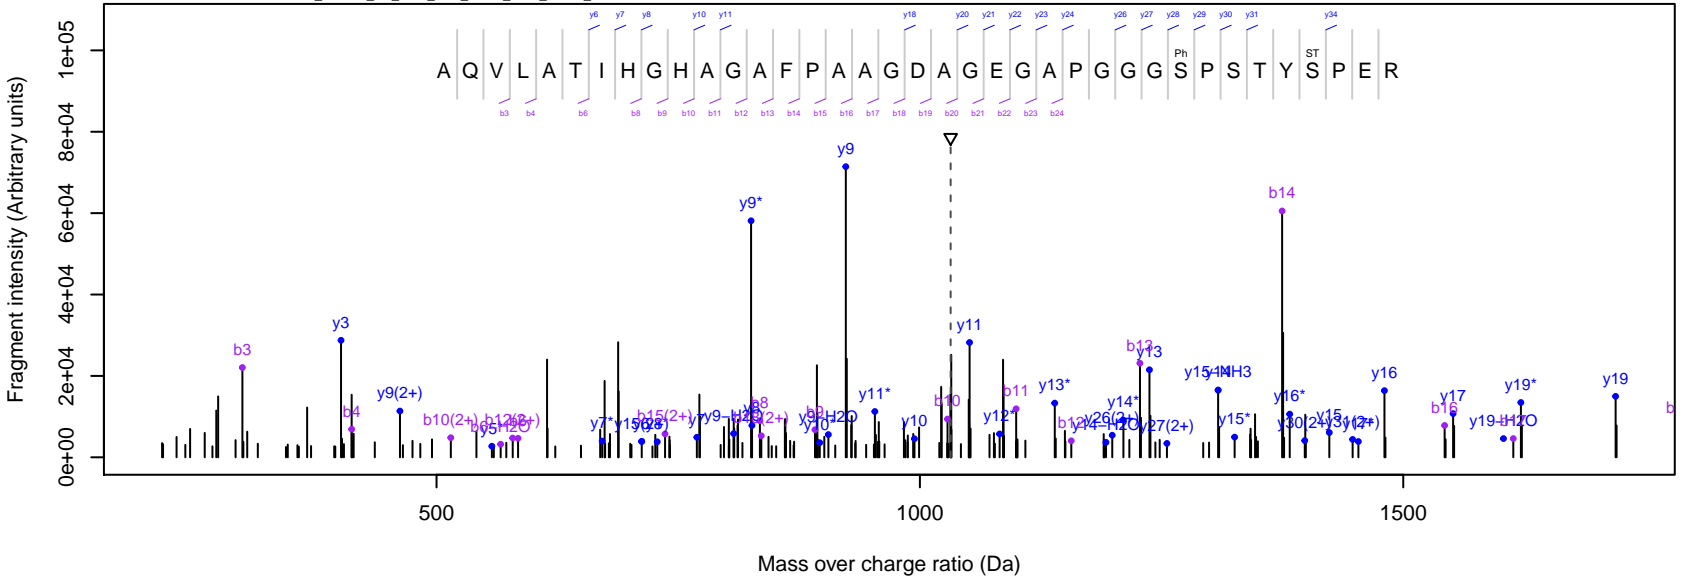

VSEEQTPPS(Phospho (STY))PAGAGMOM(StAM(oxidation (M)))GR-2+

Source : QE3\_201126\_FR\_TIOx\_hum\_tissue\_Urea\_RNAB\_N Scan : 14124

Andromeda score : 150.94

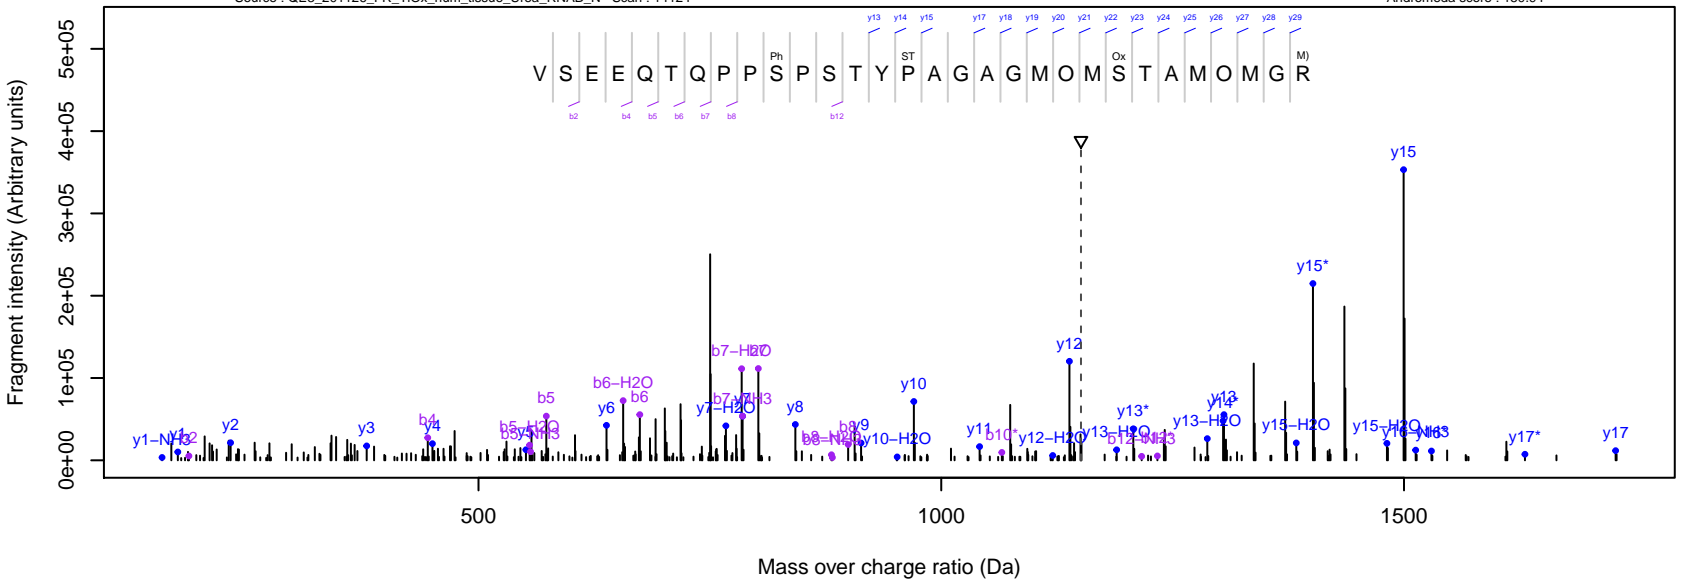

RPPS(Phospho (STY))PDVILSDNEQPSS(Phospho (STY))PR-3+

Source : QE3\_201126\_FR\_TIOx\_hum\_tissue\_Urea\_RNAB\_B Scan : 34293

Andromeda score : 150.87

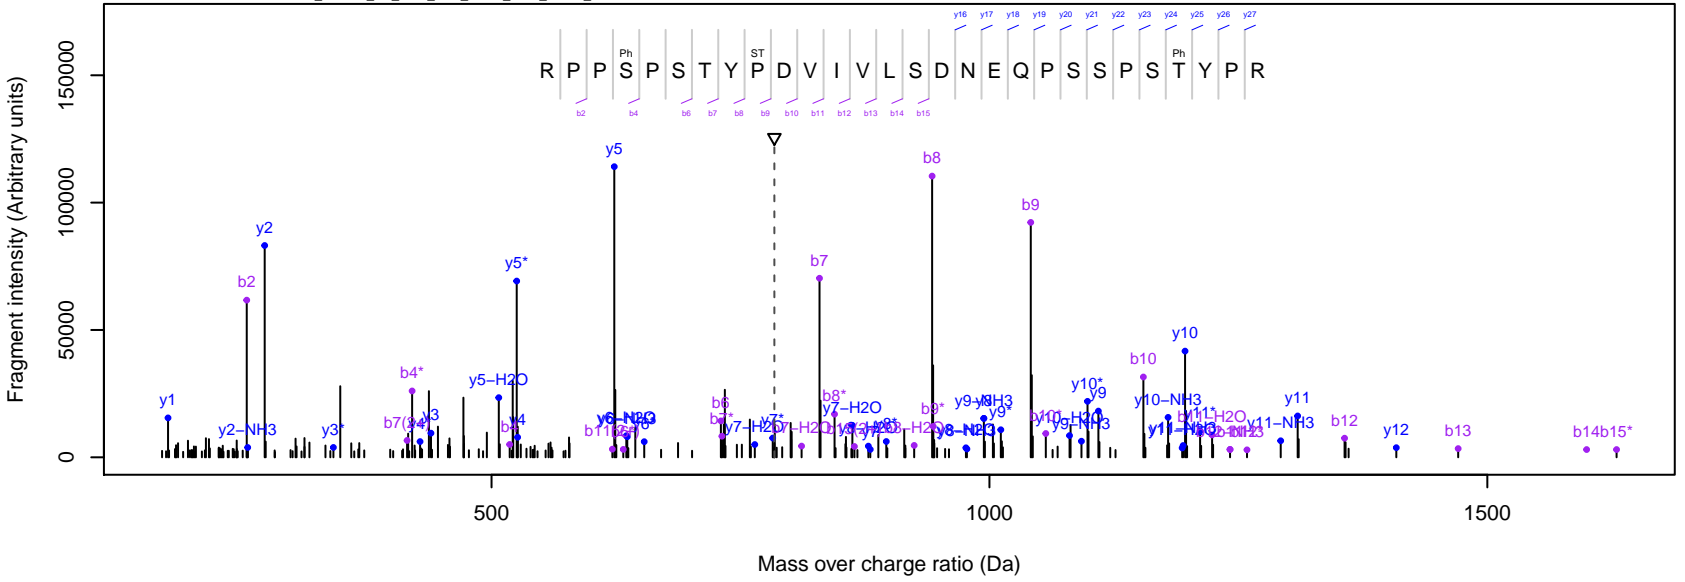

RGPSASSVAVM(Oxidation (M))TSSTS(Phospho (STY))DHHLDAAAAR-4+

Source : QE3\_201126\_FR\_TIOx\_hum\_tissue\_Urea\_RNAB\_N Scan : 12156

Andromeda score : 150.82

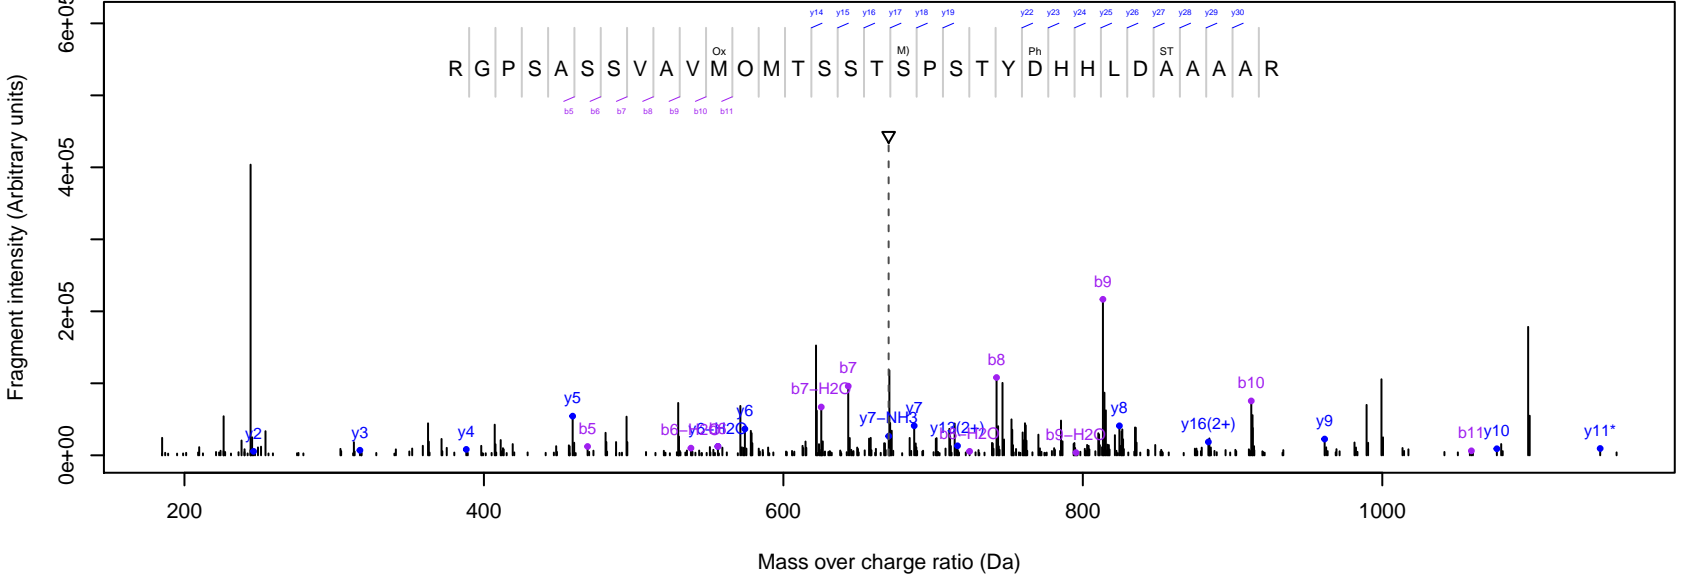

IEIEAVAIQGLTTAS(Phospho (STY))L-2+

Source : QE3\_201126\_FR\_TIOx\_hum\_tissue\_Urea\_RNAB\_B Scan : 62745

Andromeda score : 150.76

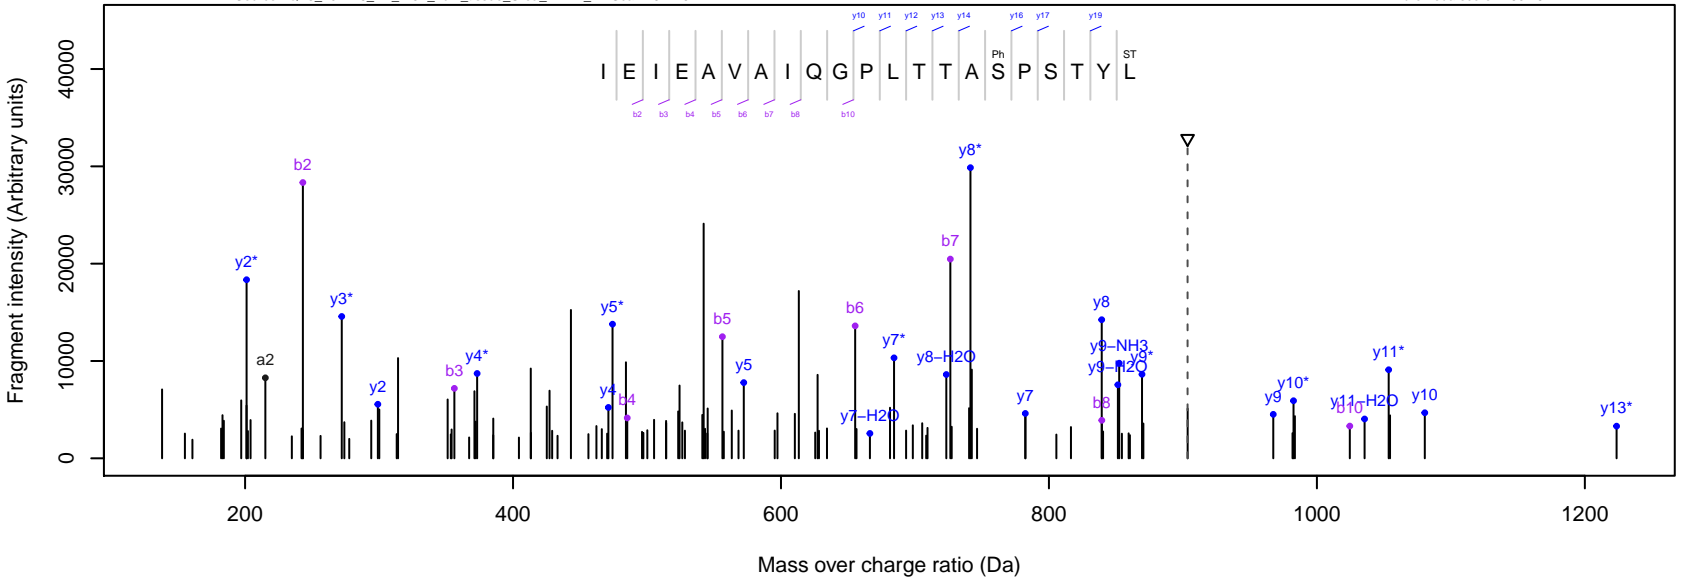

**RSYS(Phospho (STY))SPDITQAIQEEER-3+**

Source : QE3\_201126\_FR\_TiOx\_hum\_tissue\_Urea\_RNAB\_H Scan : 25666

Andromeda score : 150.72

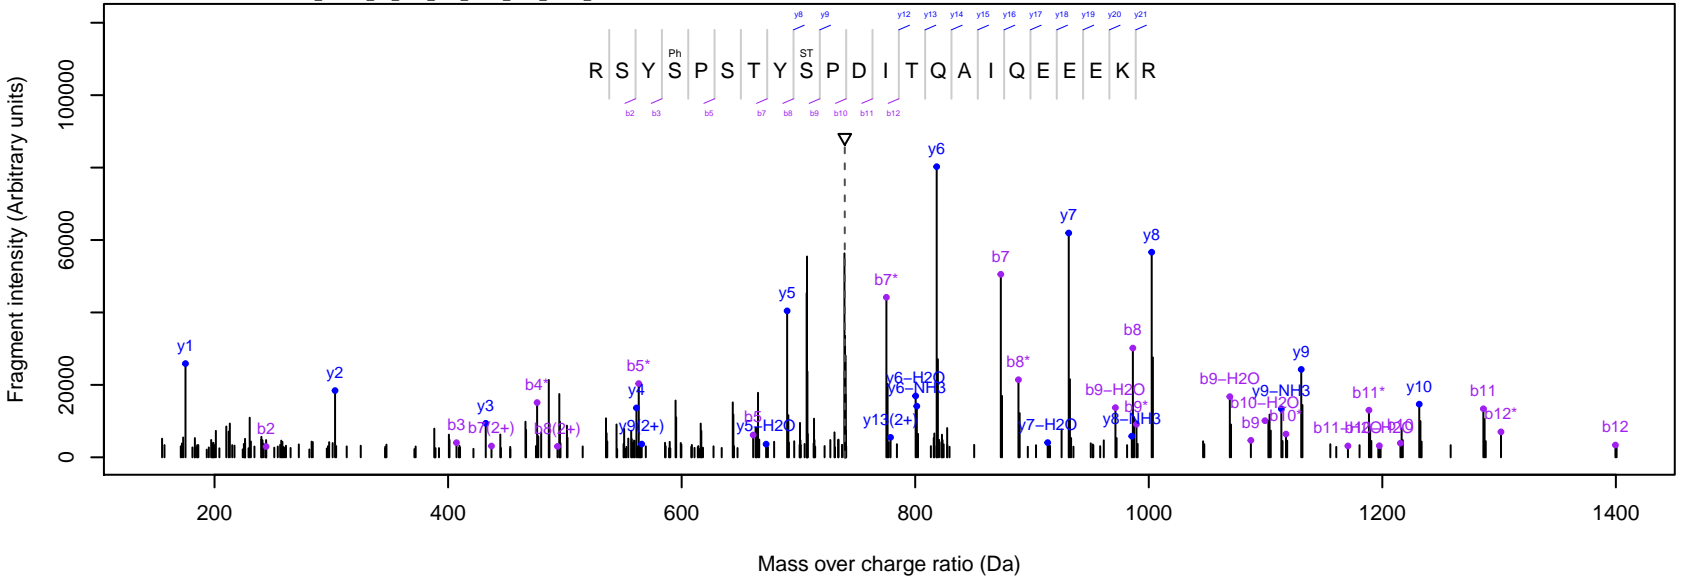

**AS(Phospho (STY))VDTKEAGAPQVEAGK-2+**

Source : QE3\_201126\_FR\_TiOx\_hum\_tissue\_Urea\_RNAB\_B Scan : 12681

Andromeda score : 150.7

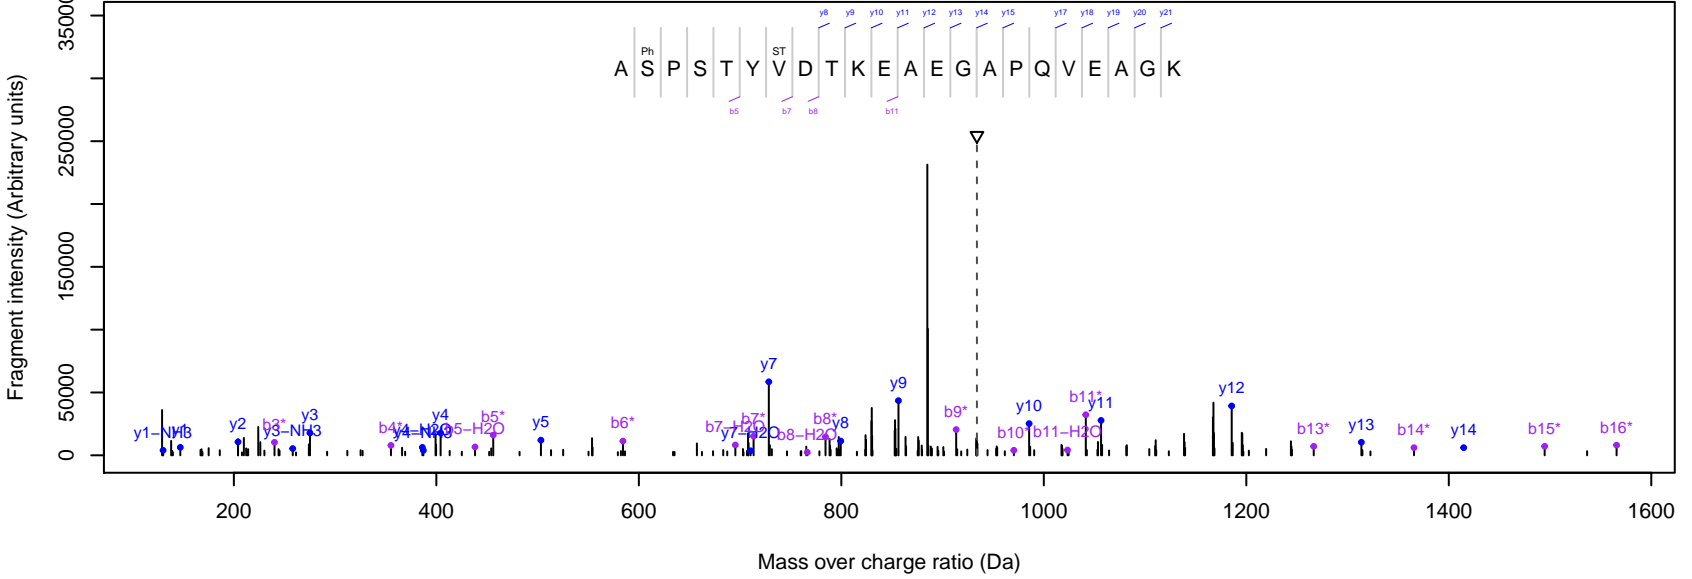

**LSSSDRYS(Phospho (STY))DAS(Phospho (STY))DDSFSEPR-2+**

Source : QE3\_201126\_FR\_TiOx\_hum\_tissue\_Urea\_RNAB\_B Scan : 22473

Andromeda score : 150.69

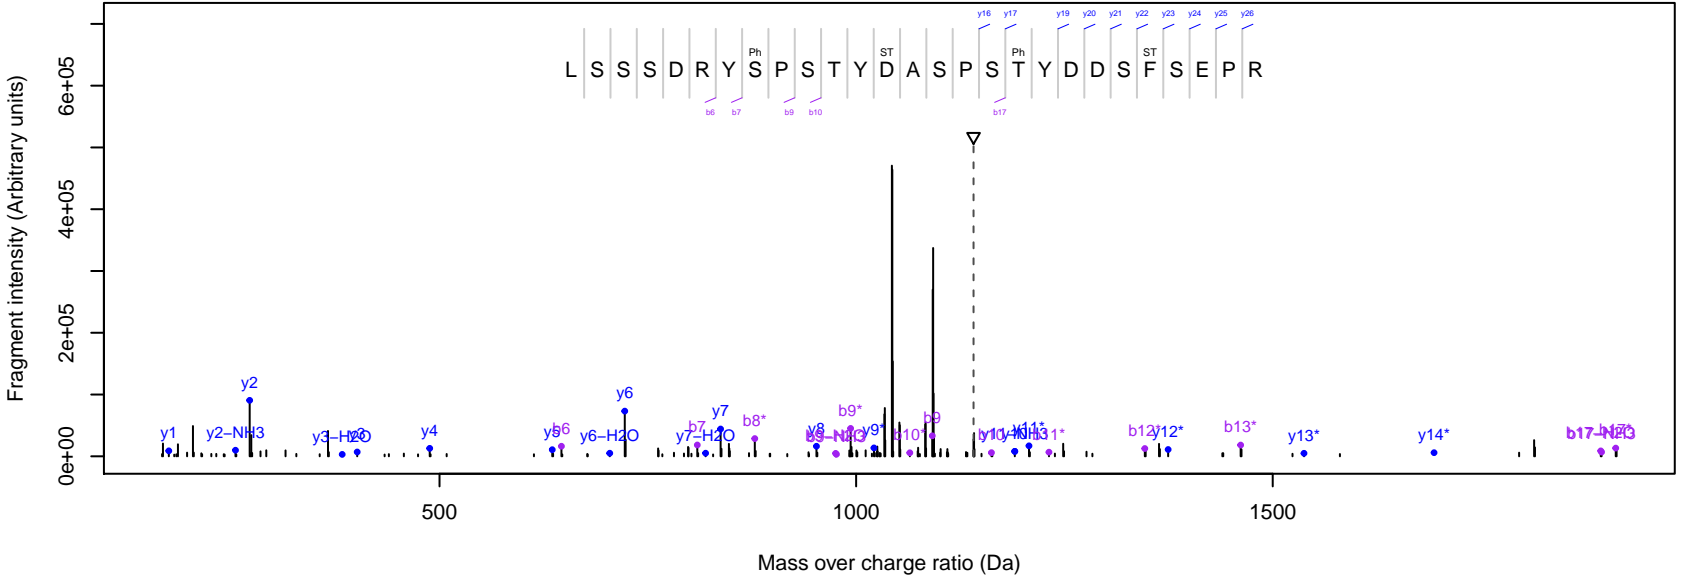

VDPSLM(Oxidation (M))EDS(Phospho (STY))DDGPSLPTK-2+

Source : QE3\_201126\_FR\_TiOx\_hum\_tissue\_Urea\_RNAB\_H Scan : 28922

Andromeda score : 150.68

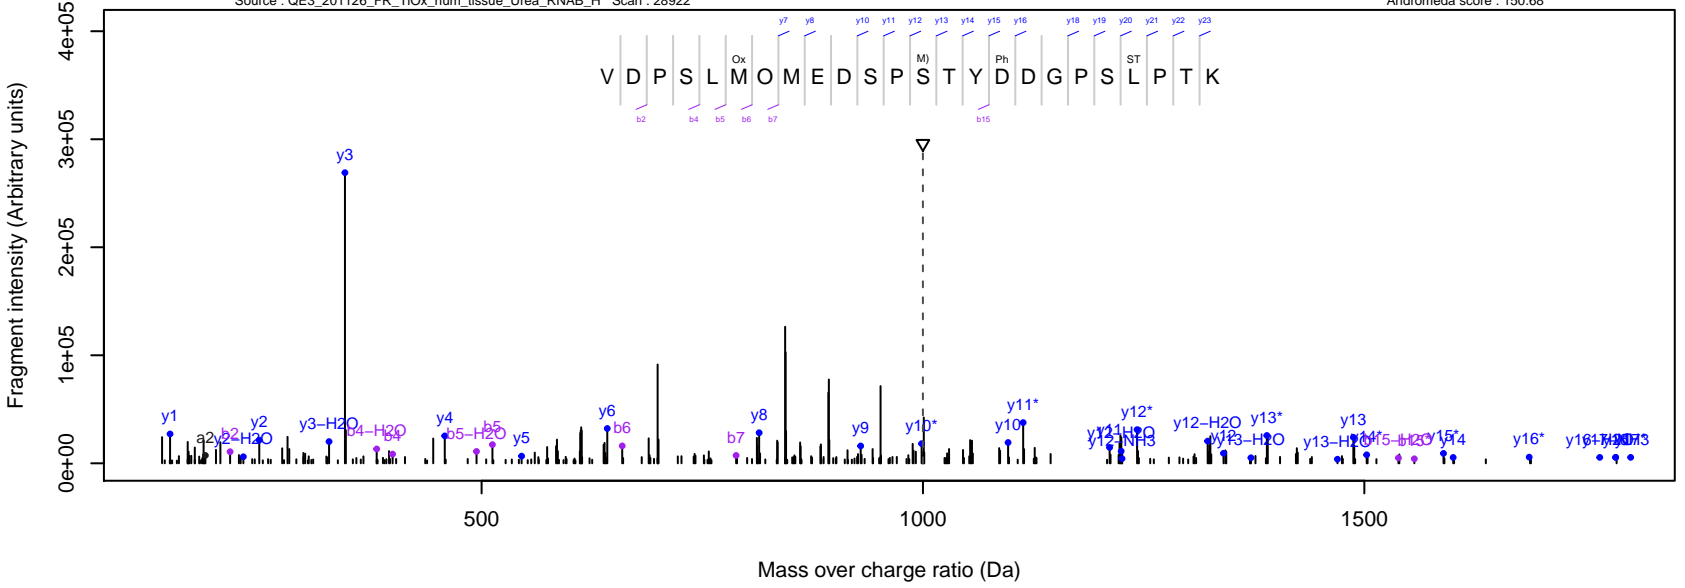

DVDDGSGSPHS(Phospho (STY))PHQLSSK-3+

Source : QE3\_201126\_FR\_TiOx\_hum\_tissue\_Urea\_RNAB\_B Scan : 7015

Andromeda score : 150.64

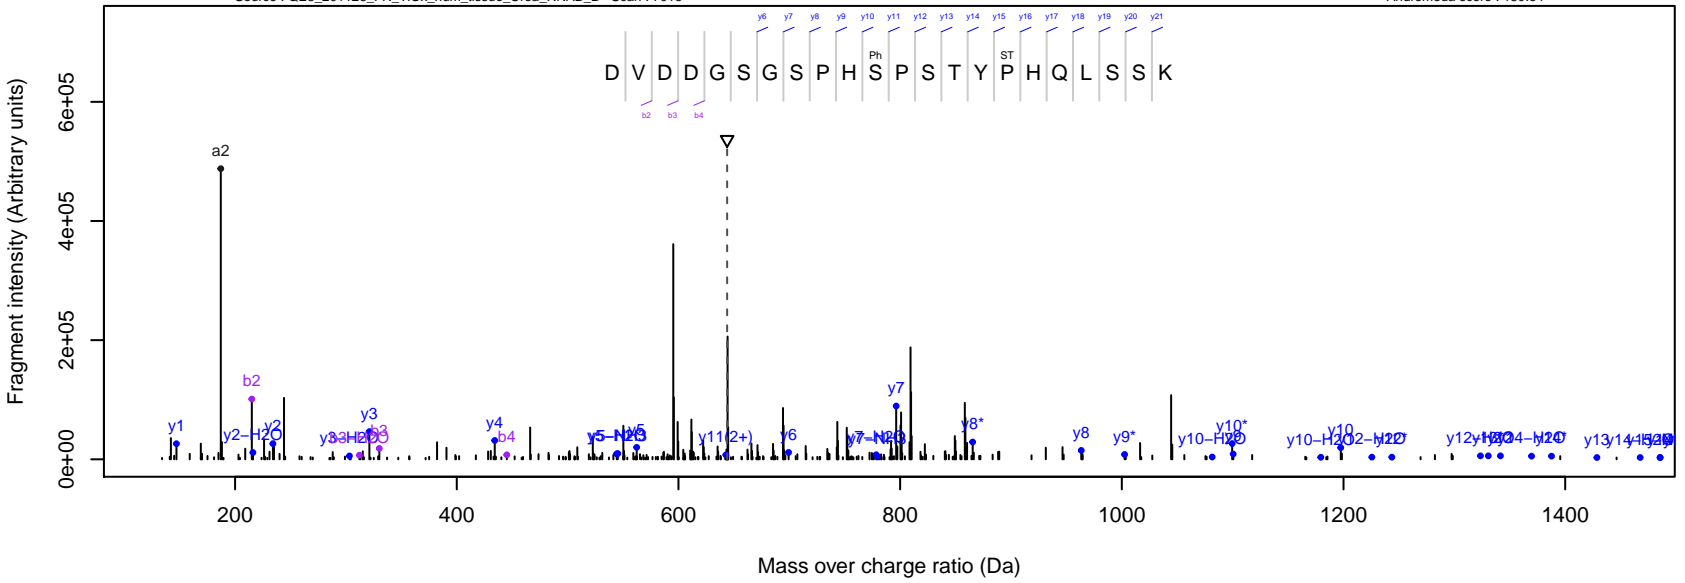

HCAPS(Phospho (STY))PDRS(Phospho (STY))PELSSSR-3+

Source : QE3\_201126\_FR\_TiOx\_hum\_tissue\_Urea\_RNAB\_H Scan : 8798

Andromeda score : 150.63

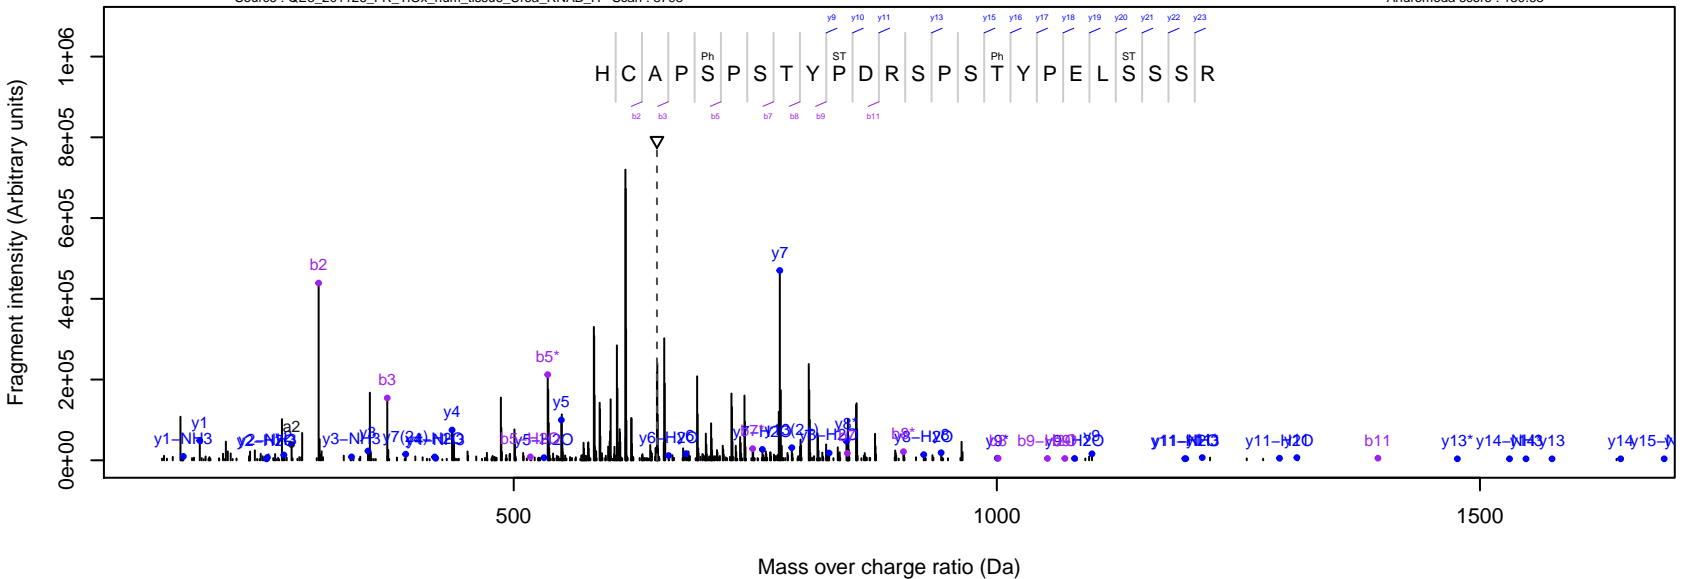

LVSNHS(Phospho (STY))LHETSSVFVDSLTK-3+

Source : QE3\_201126\_FR\_TiOx\_hum\_tissue\_Urea\_RNAB\_H Scan : 31137

Andromeda score : 150.59

Fragment intensity (Arbitrary units)

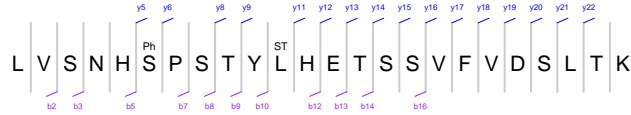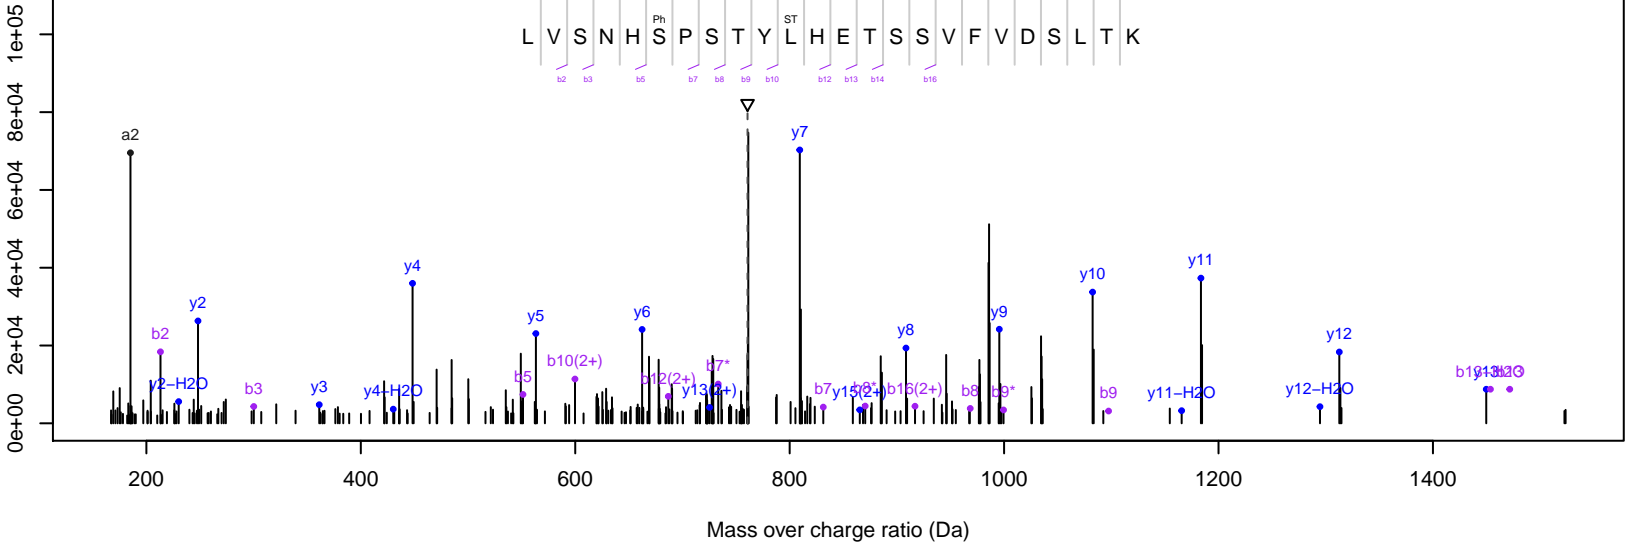

QVPDS(Phospho (STY))AATATAYLCGVK-2+

Source : QE3\_201126\_FR\_TiOx\_hum\_tissue\_Urea\_RNAB\_N Scan : 38306

Andromeda score : 150.59

Fragment intensity (Arbitrary units)

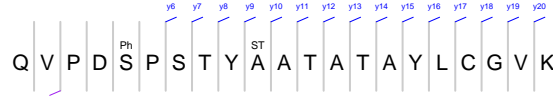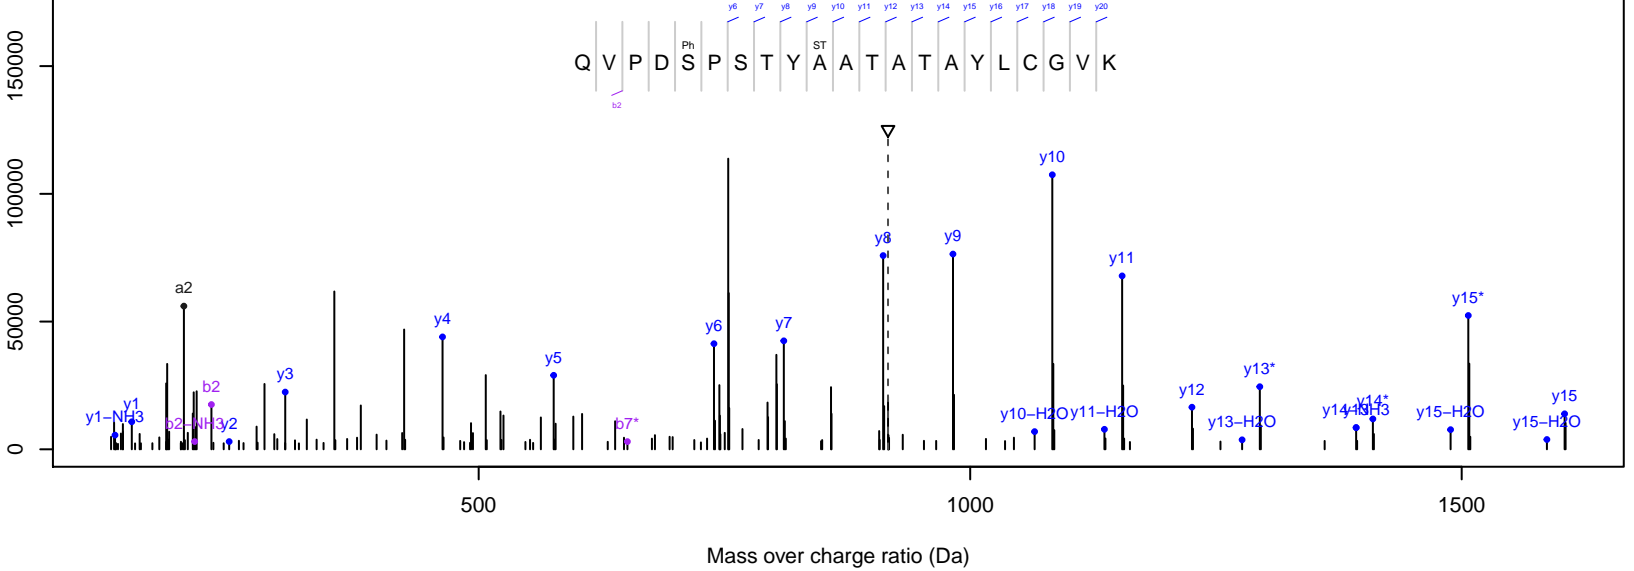

S(Phospho (STY))DYCLPVADYNYPHPR-2+

Source : QE3\_201126\_FR\_TiOx\_hum\_tissue\_Urea\_RNAB\_N Scan : 33907

Andromeda score : 150.59

Fragment intensity (Arbitrary units)

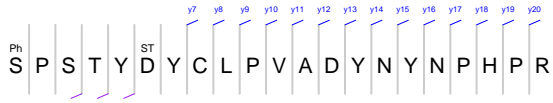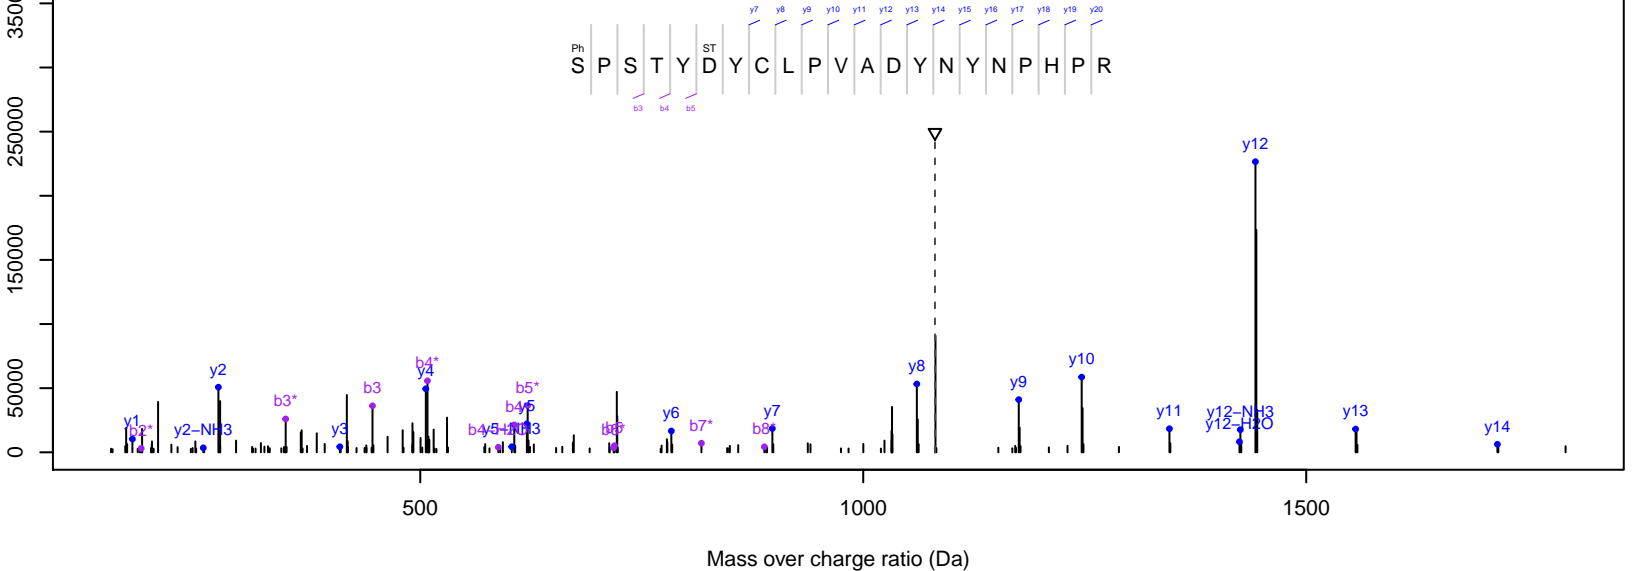

DAPERDDPPASAAWS(Phospho (STY))PVQADVSSAGPK-3+

Source : QE3\_201126\_FR\_TIOx\_hum\_tissue\_Urea\_RNAB\_H Scan : 33561

Andromeda score : 150.55

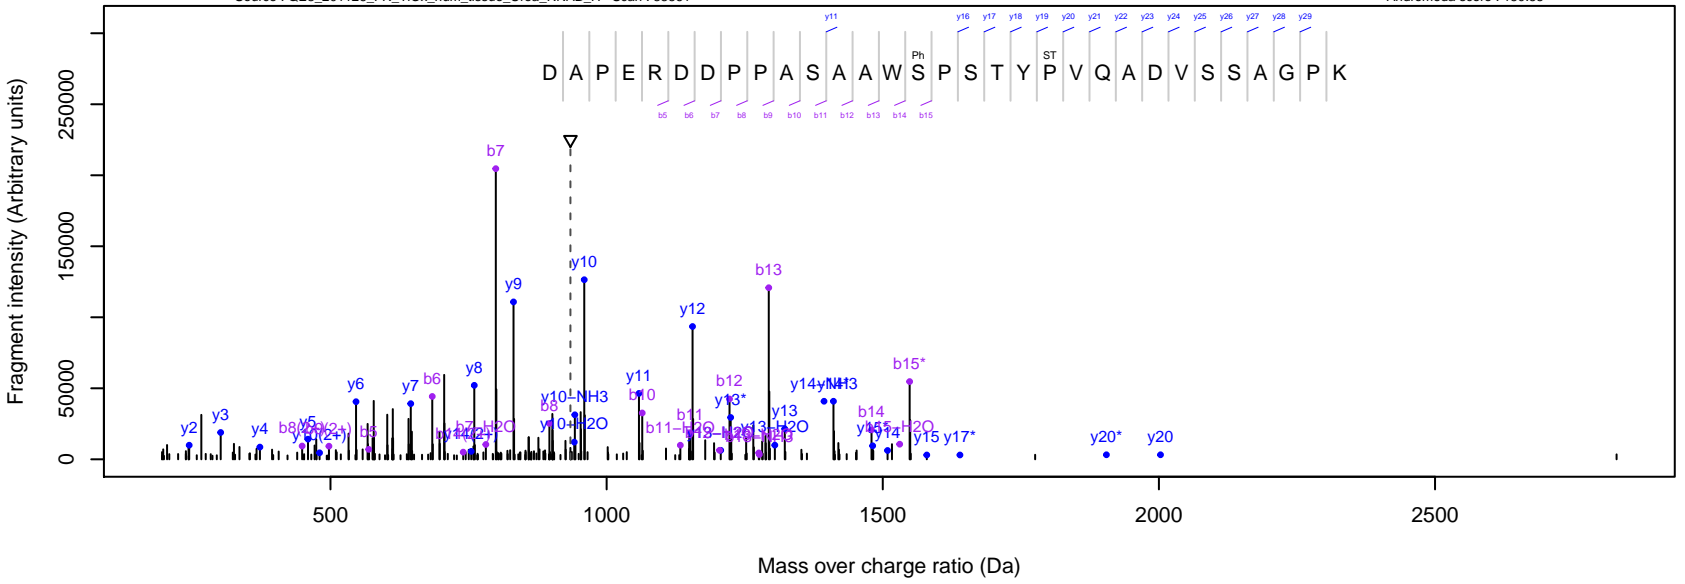

VQS(Phospho (STY))GLDLFSLMLLEQNLEPGHTELLR-3+

Source : QE3\_201126\_FR\_TIOx\_hum\_tissue\_Urea\_RNAB\_N Scan : 62336

Andromeda score : 150.55

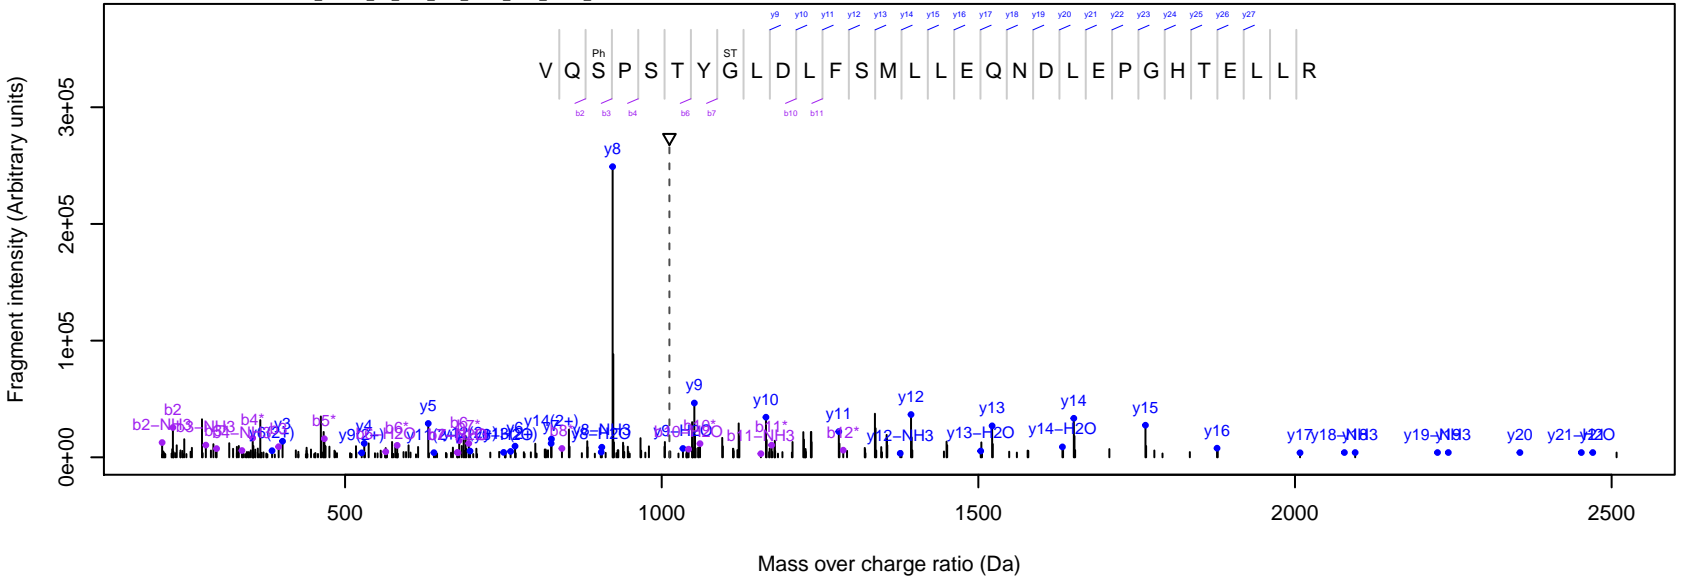

QVEKEET(Phospho (STY))NEIQVVNEEPQRDR-3+

Source : QE3\_201126\_FR\_TIOx\_hum\_tissue\_Urea\_RNAB\_H Scan : 14859

Andromeda score : 150.53

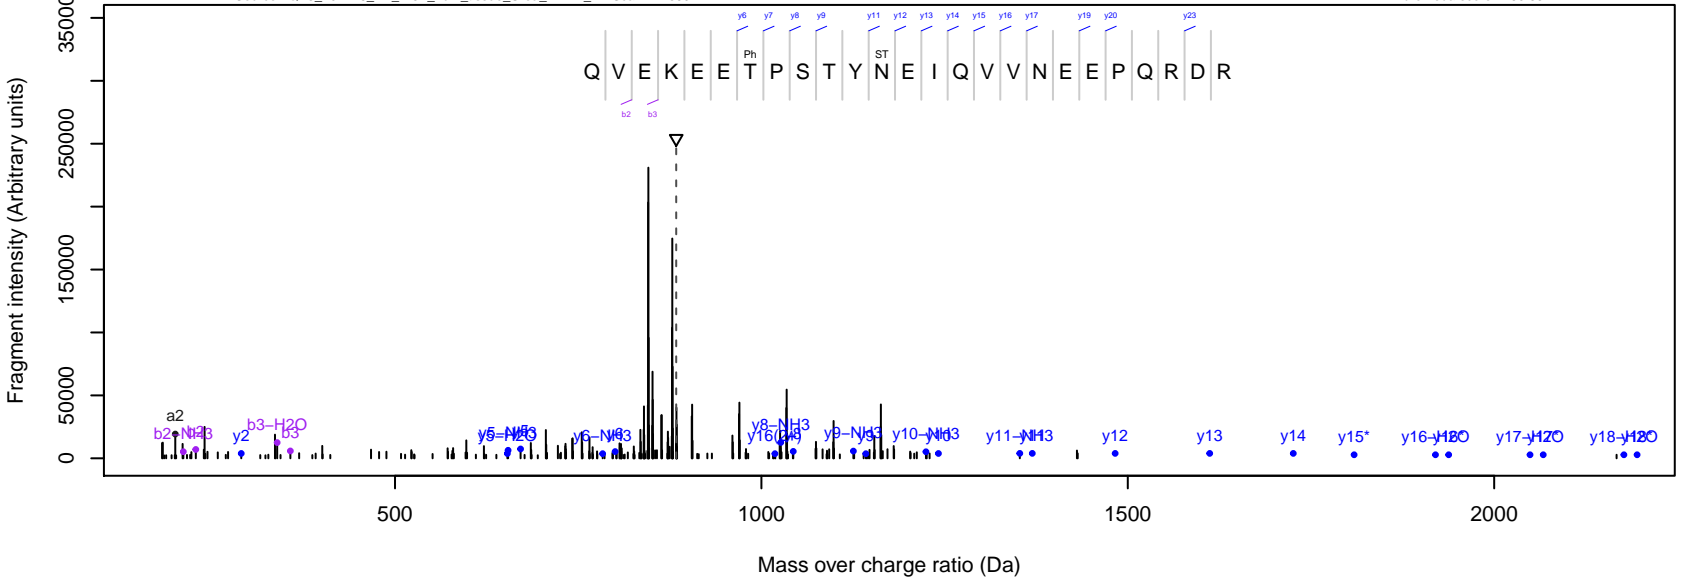

DLS(Phospho (STY))GLDAETLLK-2+

Source : QE3\_201126\_FR\_TiOx\_hum\_tissue\_Urea\_RNAB\_B Scan : 51776

Andromeda score : 150.49

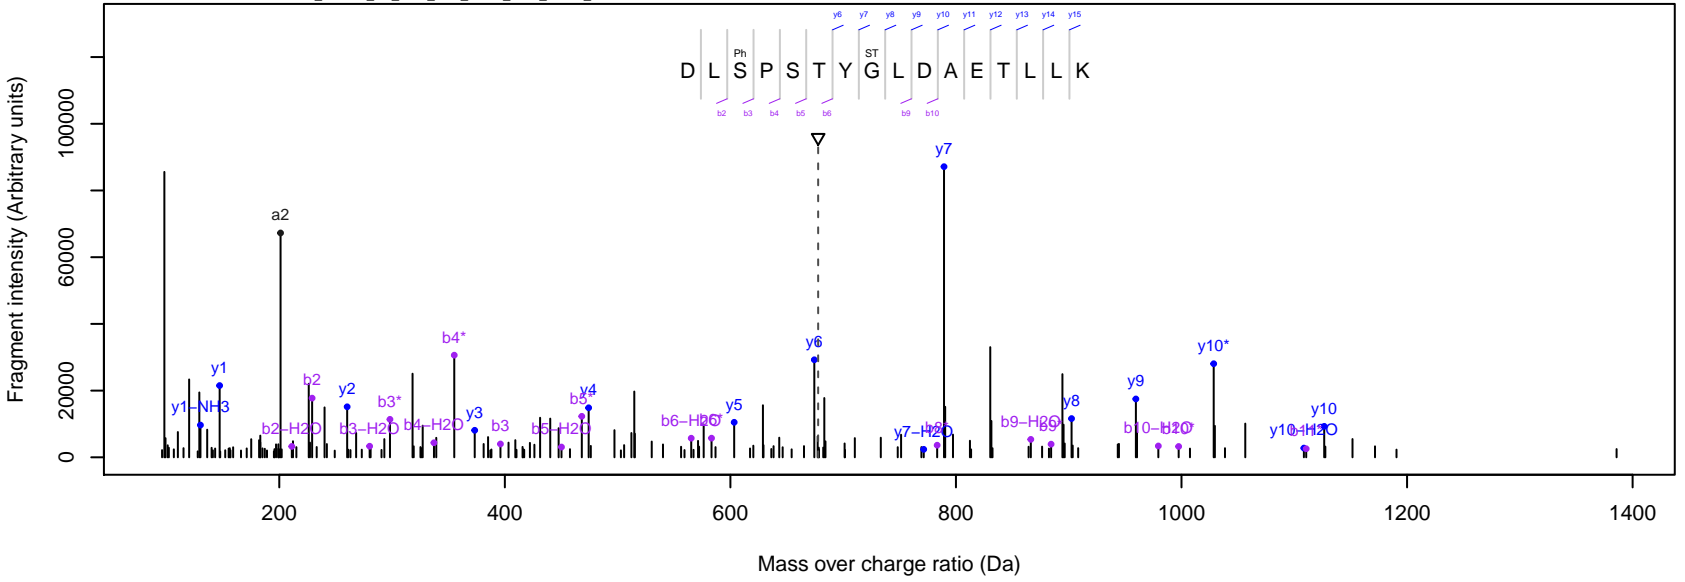

RTEARS(Phospho (STY))SDEENGPSSPDLDR-3+

Source : QE3\_201126\_FR\_TiOx\_hum\_tissue\_Urea\_RNAB\_N Scan : 9966

Andromeda score : 150.48

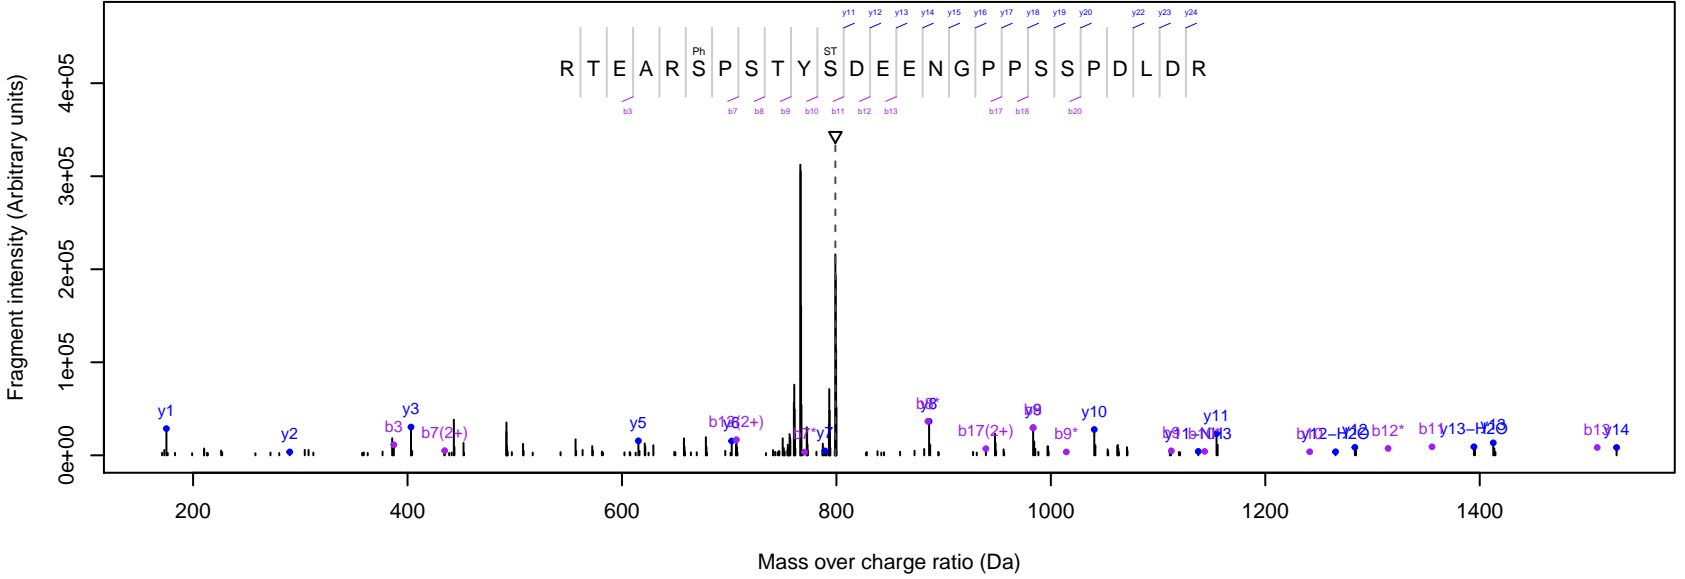

QAS(Phospho (STY))PTEVVER-2+

Source : QE3\_201126\_FR\_TiOx\_hum\_tissue\_Urea\_RNAB\_H Scan : 13518

Andromeda score : 150.46

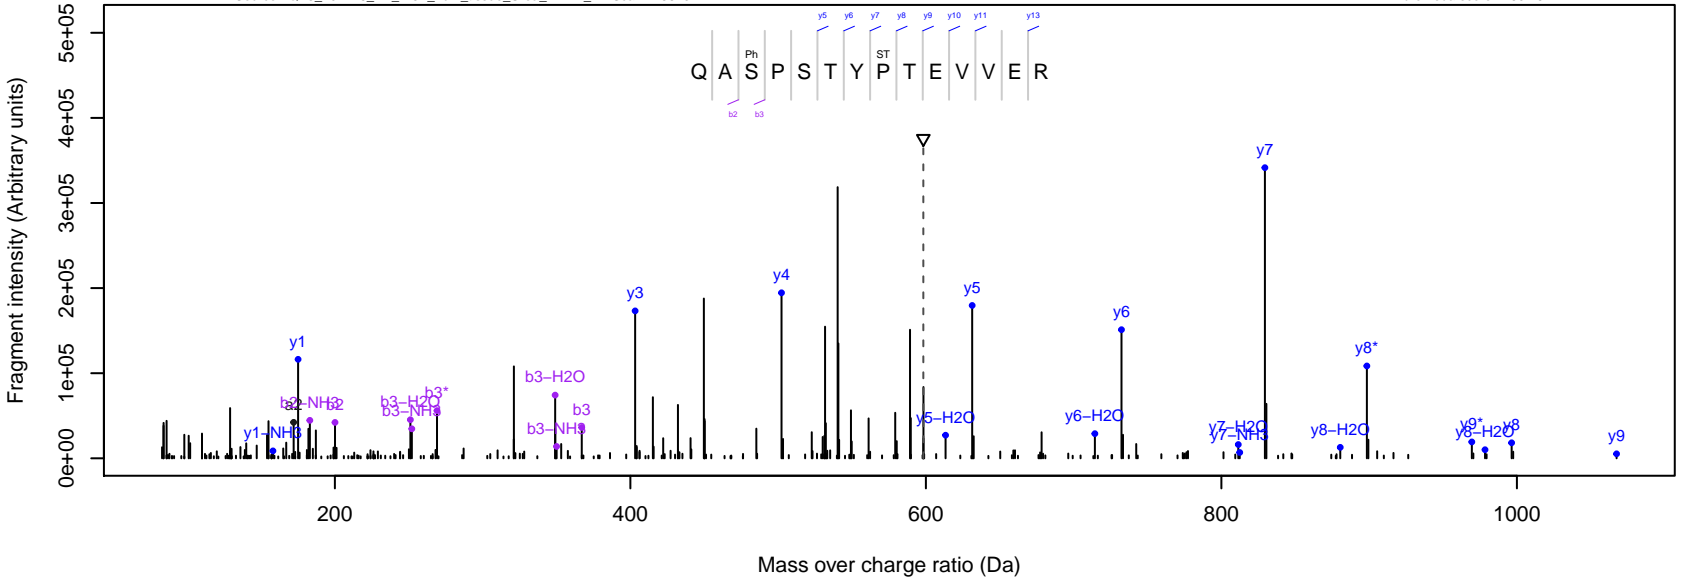



QPS(Phospho (STY))PSHDGSLSPQLQDR-2+

Source : QE3\_201126\_FR\_TiOx\_hum\_tissue\_Urea\_RNAB\_N Scan : 17356

Andromeda score : 150.39

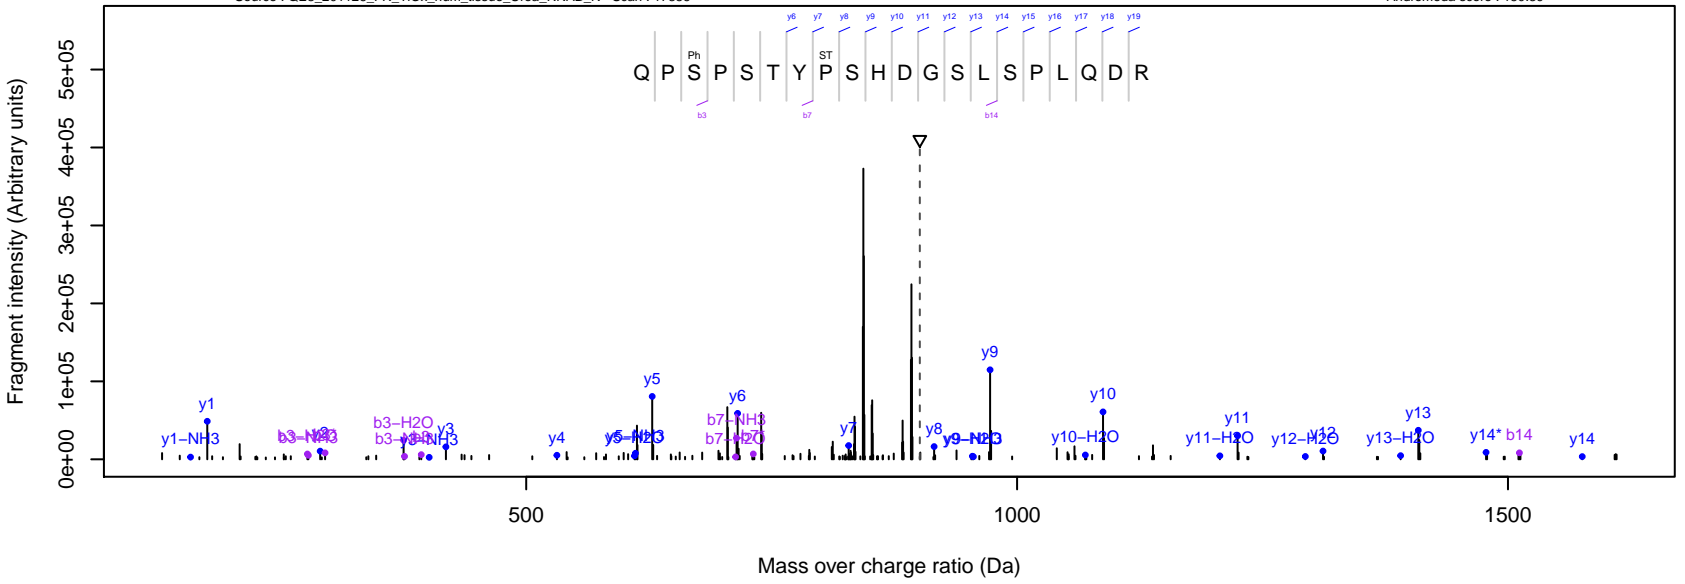

SLDPENS(Phospho (STY))ETELER-2+

Source : QE3\_201126\_FR\_TiOx\_hum\_tissue\_Urea\_RNAB\_B Scan : 21732

Andromeda score : 150.26

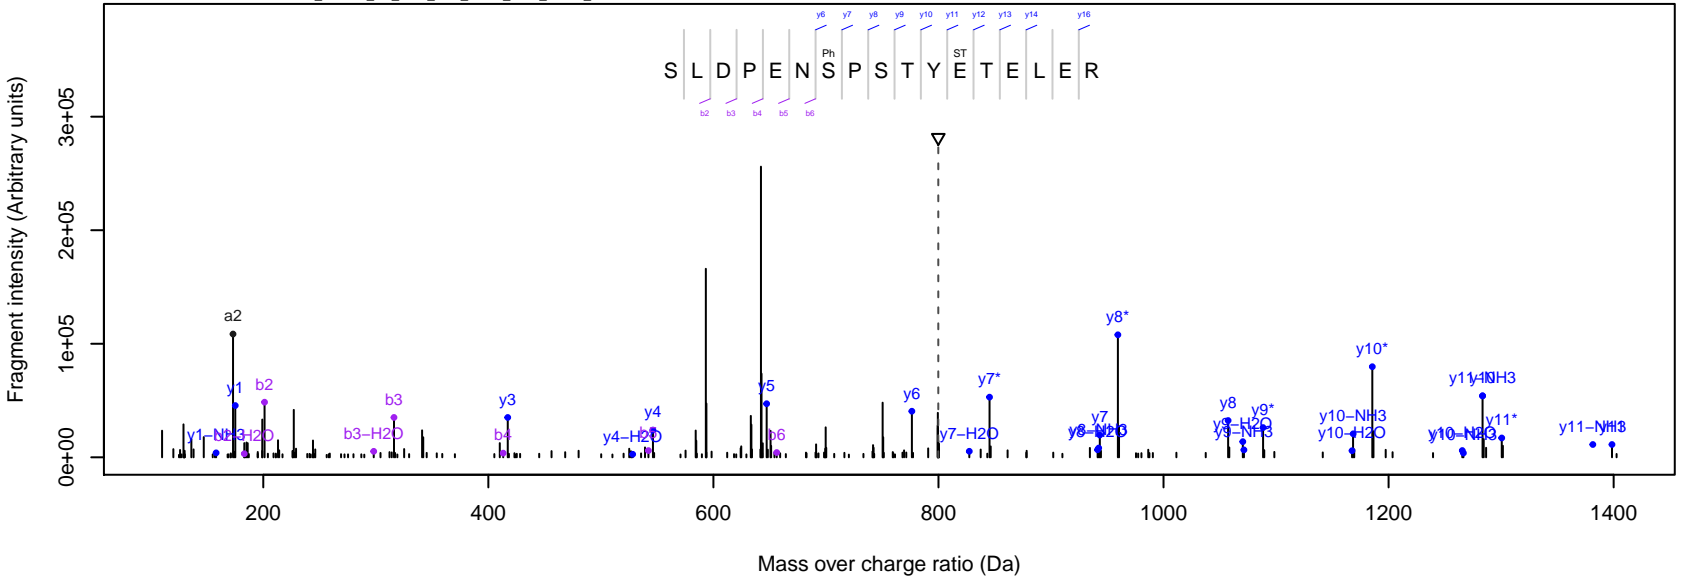

S(Phospho (STY))SSFSDTLEESSPIAIFDTENLEK-3+

Source : QE3\_201126\_FR\_TiOx\_hum\_tissue\_Urea\_RNAB\_N Scan : 62494

Andromeda score : 150.25

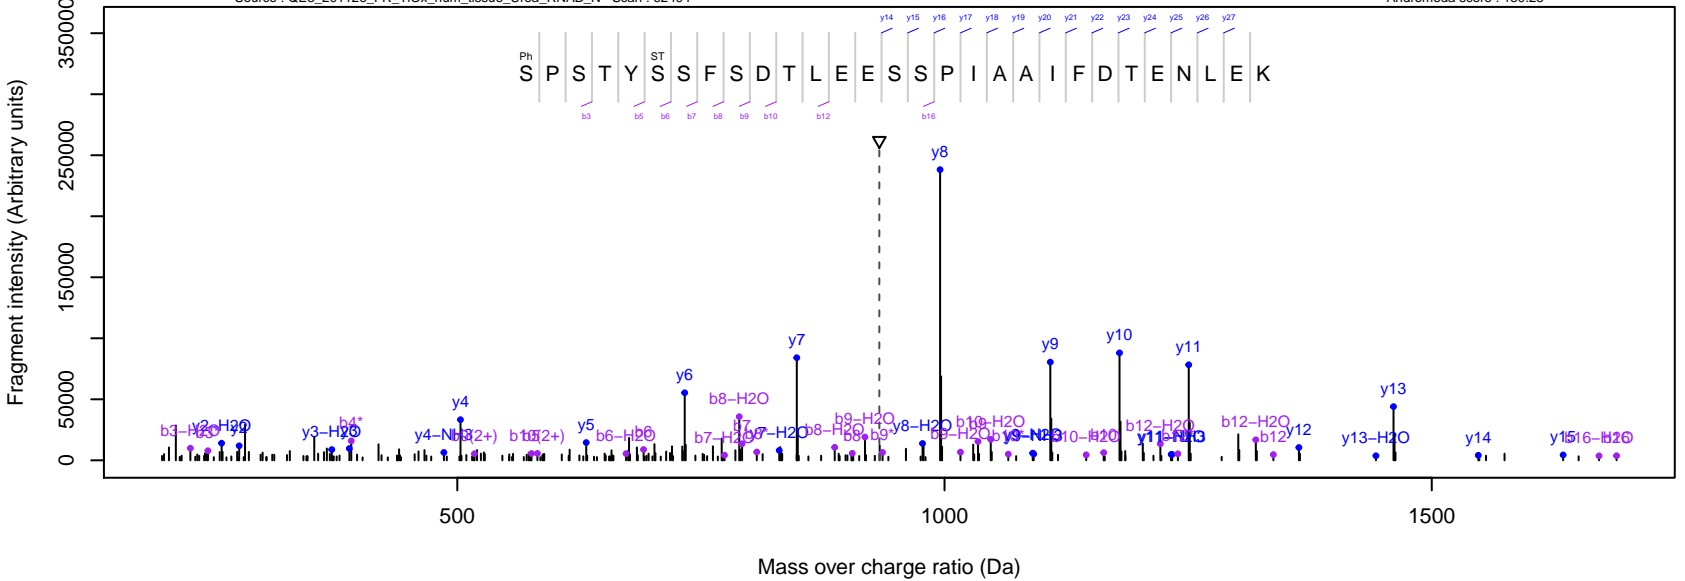

AGTLSITEFADM(Oxidation (M))LSGNAGGFRS(Phospho (STY))R-3+

Source : QE3\_201126\_FR\_TIOx\_hum\_tissue\_Urea\_RNAB\_N Scan : 53987

Andromeda score : 150.24

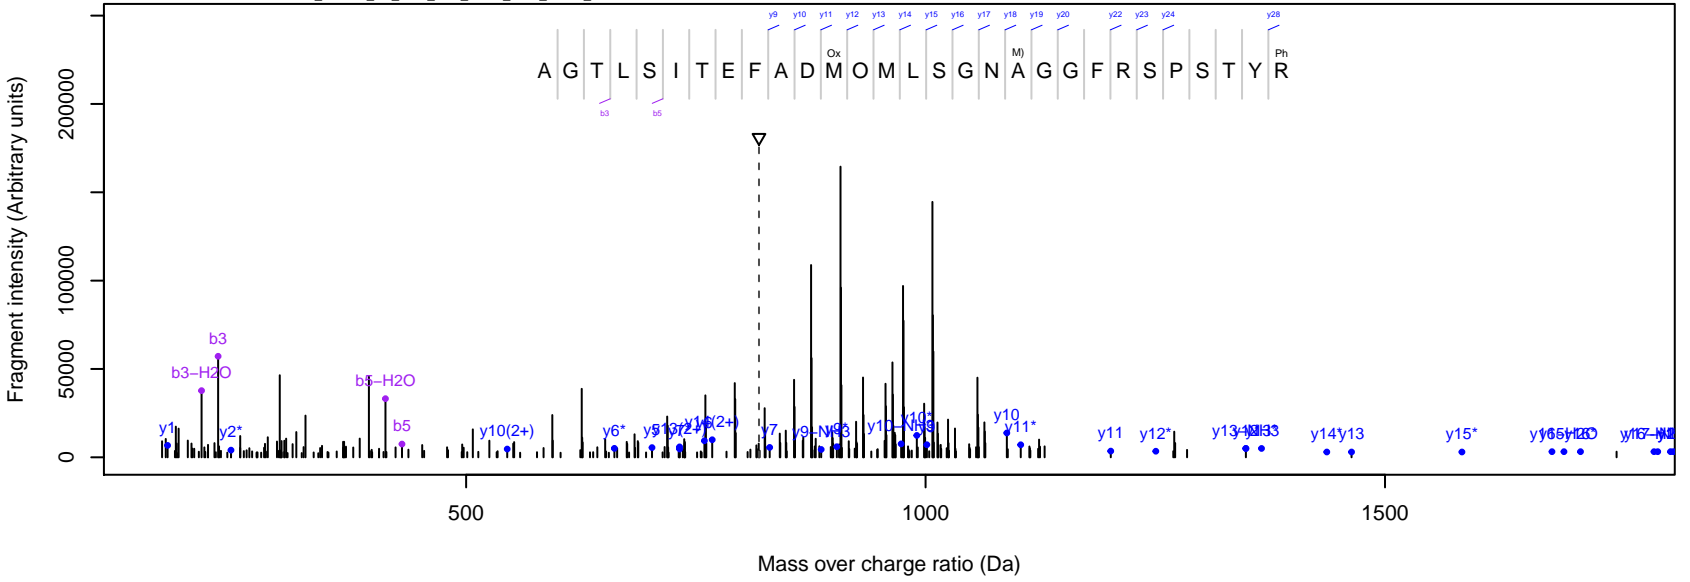

(Acetyl (Protein N-term))AENDVDNELLDY(Phospho (STY))EDDEVETAAGGDGAEAPAKK-3+

Source : QE3\_201126\_FR\_TIOx\_hum\_tissue\_Urea\_RNAB\_H Scan : 47925

Andromeda score : 150.23

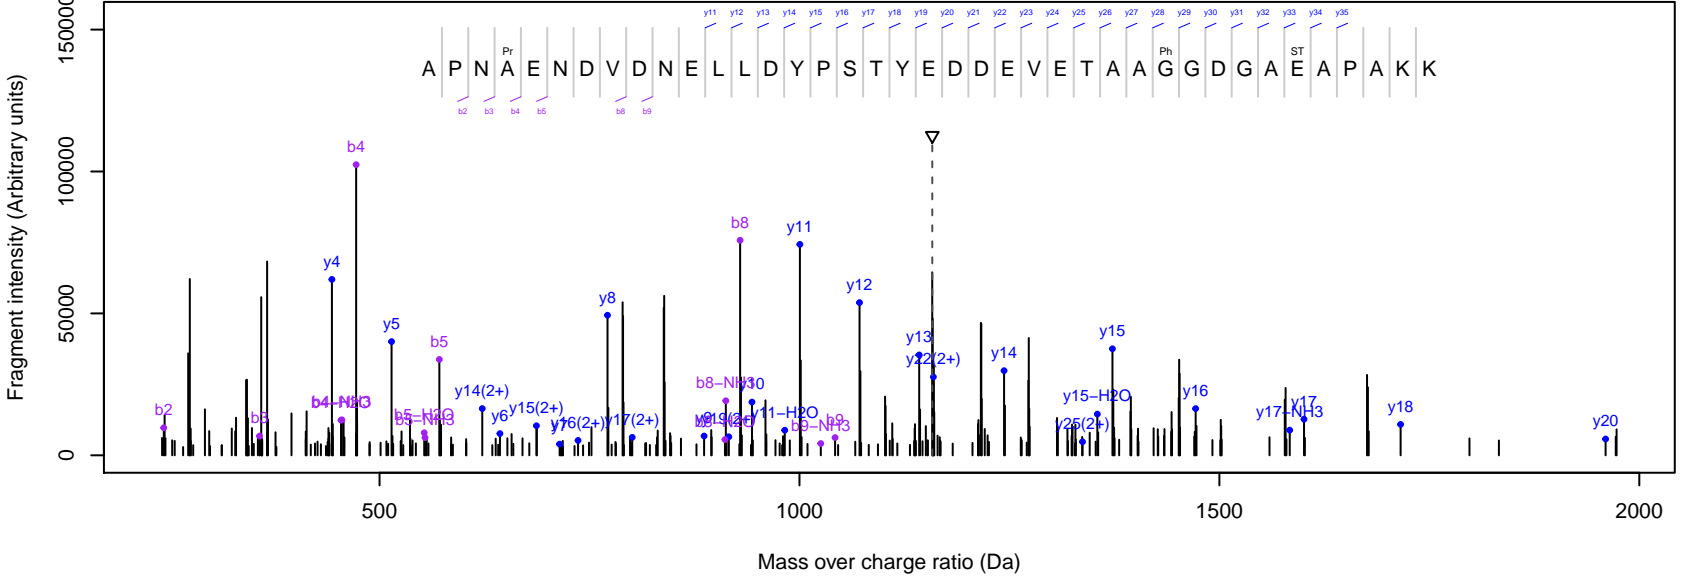

NADSEIKHSTPS(Phospho (STY))PTR-3+

Source : QE3\_201126\_FR\_TIOx\_hum\_tissue\_Urea\_RNAB\_B Scan : 6157

Andromeda score : 150.23

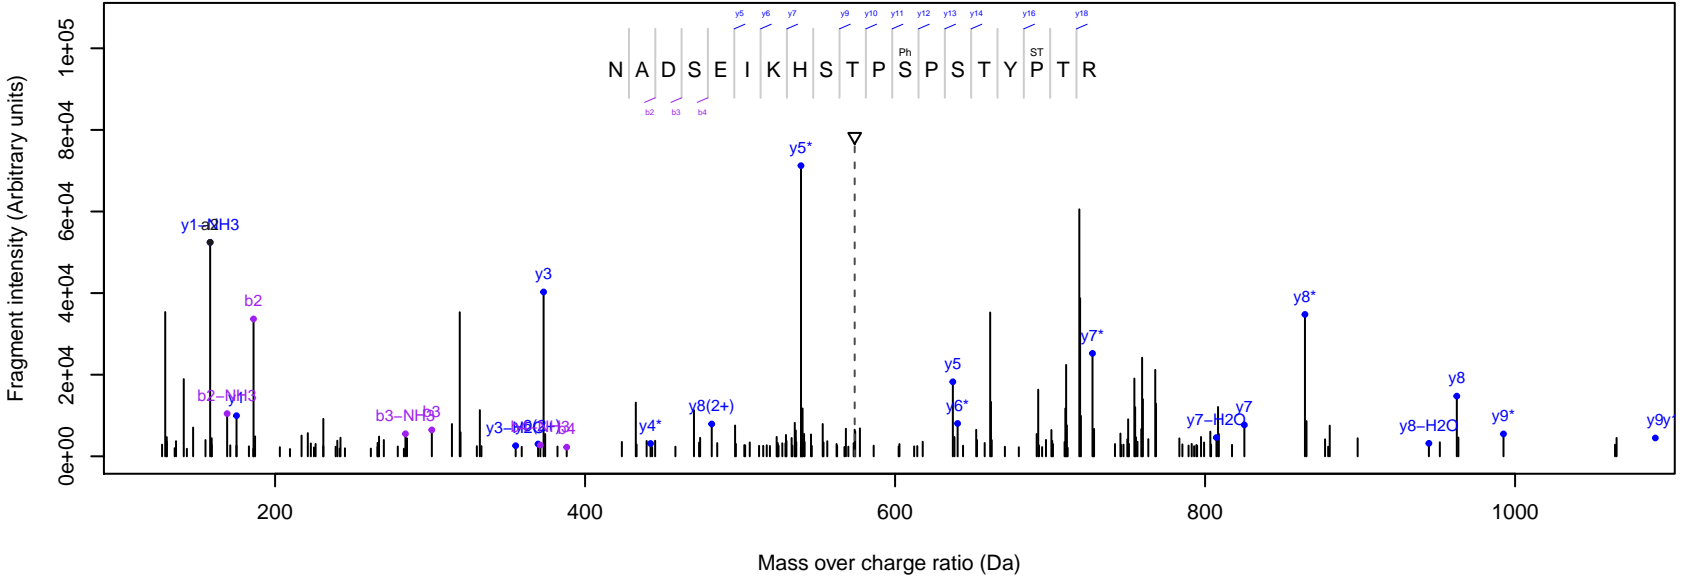

RSS(Phospho (STY))LS(Phospho (STY))SHSHQSQIYR-3+

Source : QE3\_201126\_FR\_TiOx\_hum\_tissue\_Urea\_RNAB\_N Scan : 6851

Andromeda score : 150.23

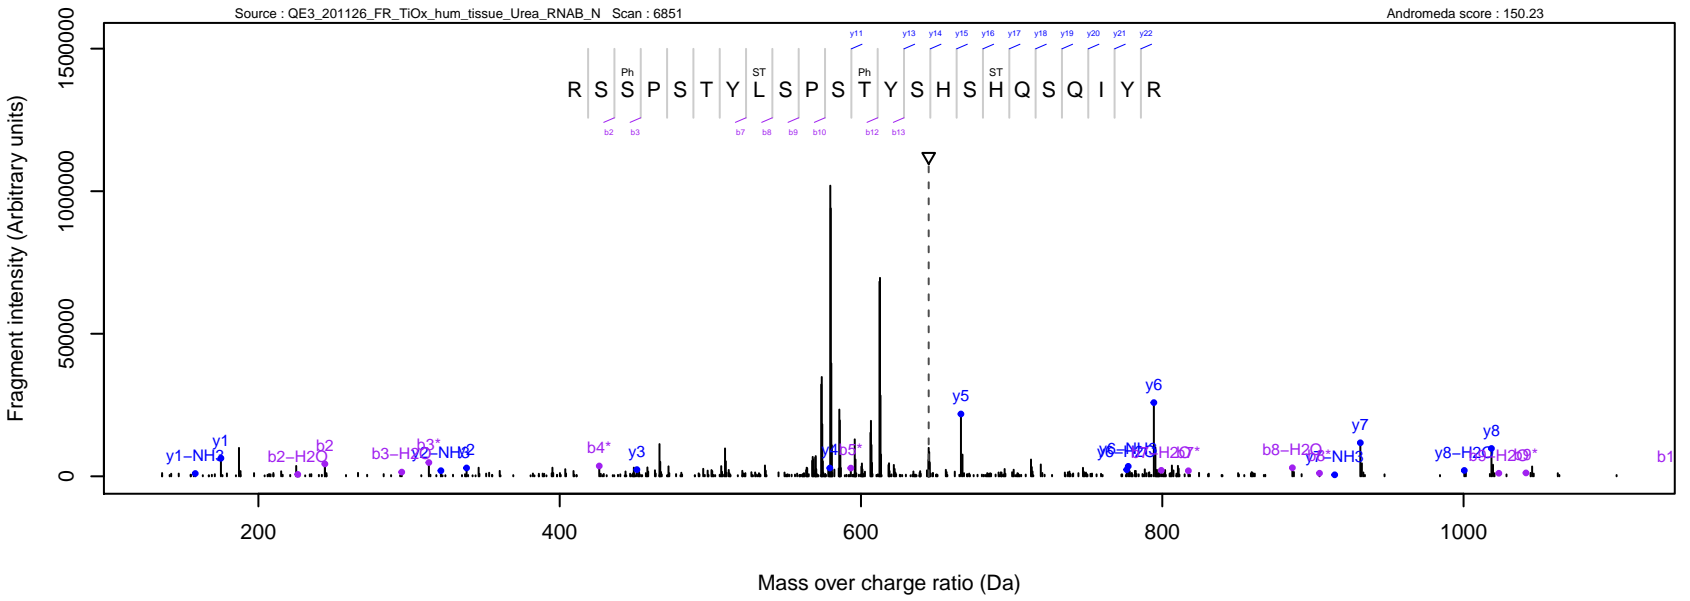

GS(Phospho (STY))LTLTISGESP-2+

Source : QE3\_201126\_FR\_TiOx\_hum\_tissue\_Urea\_RNAB\_H Scan : 30376

Andromeda score : 150.21

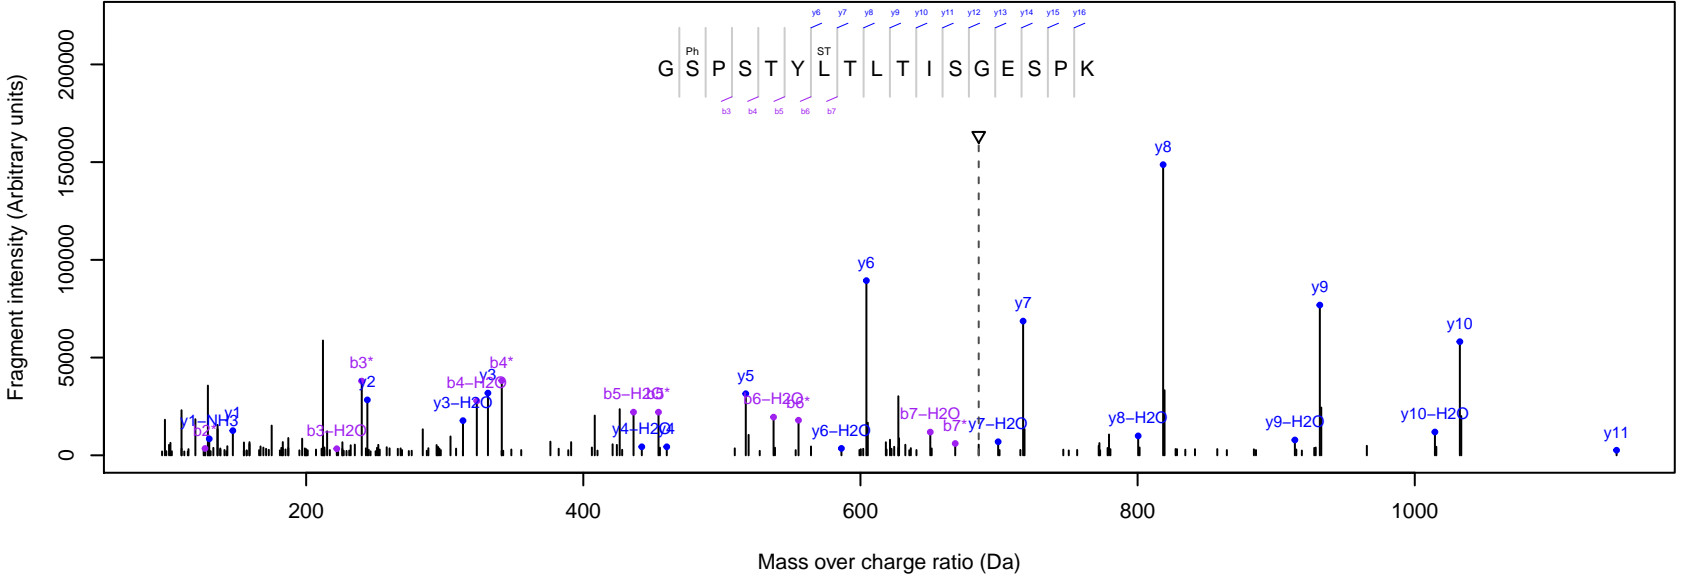

AFGES(Phospho (STY))S(Phospho (STY))T(Phospho (STY))ES(Phospho (STY))DEEEEECGHTHCVR-3+

Source : QE3\_201126\_FR\_TiOx\_hum\_tissue\_Urea\_RNAB\_H Scan : 22654

Andromeda score : 150.18

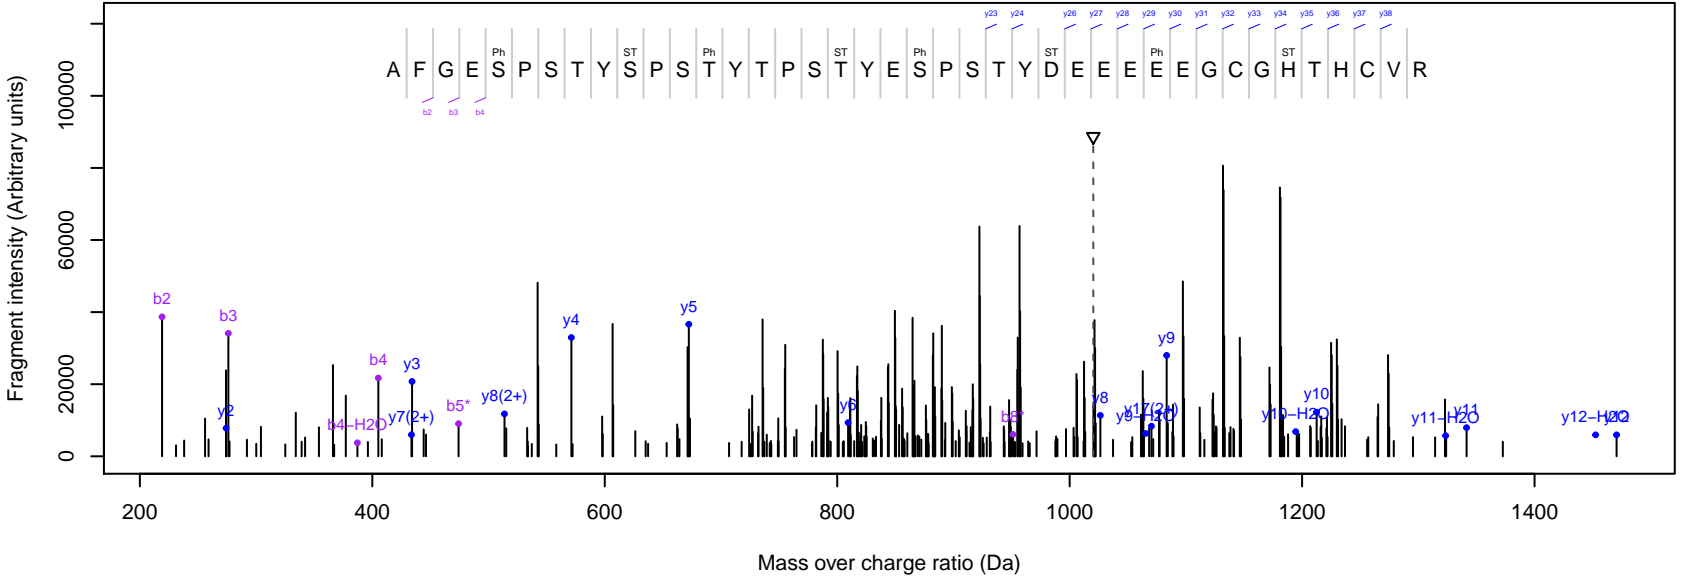

RGAEEEEEEDDS(Phospho (STY))GEEMKALR-3+

Source : QE3\_201126\_FR\_TiOx\_hum\_tissue\_Urea\_RNAB\_N Scan : 15096

Andromeda score : 150.18

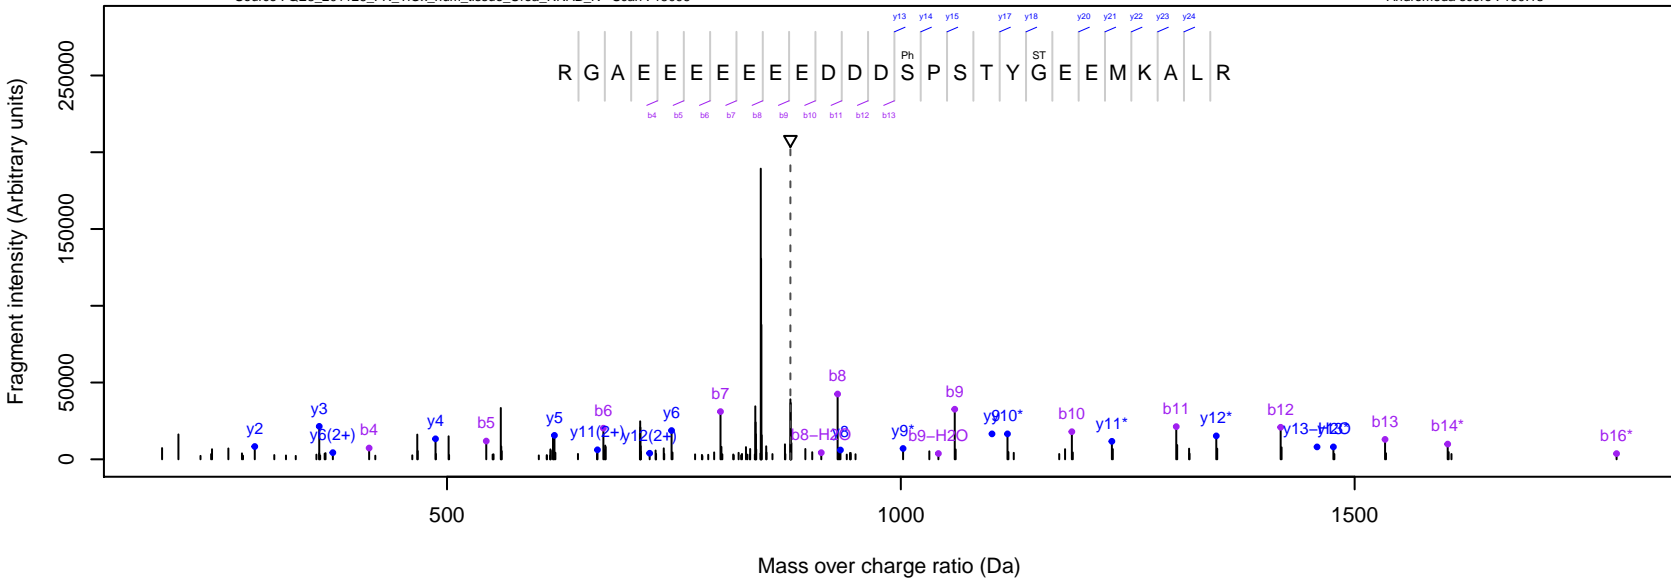

ADHRSS(Phospho (STY))PNVANQPPS(Phospho (STY))PGGK-3+

Source : QE3\_201126\_FR\_TiOx\_hum\_tissue\_Urea\_RNAB\_B Scan : 7482

Andromeda score : 150.17

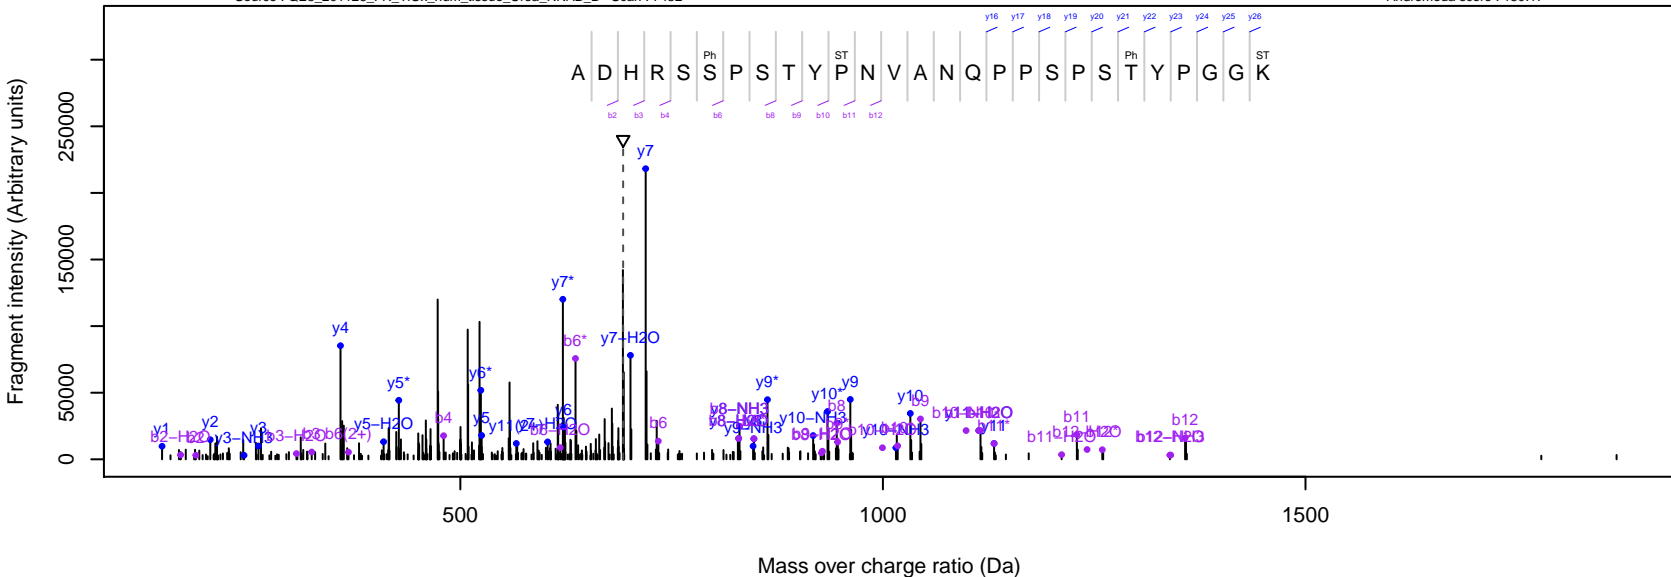

ELISNS(Phospho (STY))SDALDKIR-2+

Source : QE3\_201126\_FR\_TiOx\_hum\_tissue\_Urea\_RNAB\_N Scan : 27731

Andromeda score : 150.11

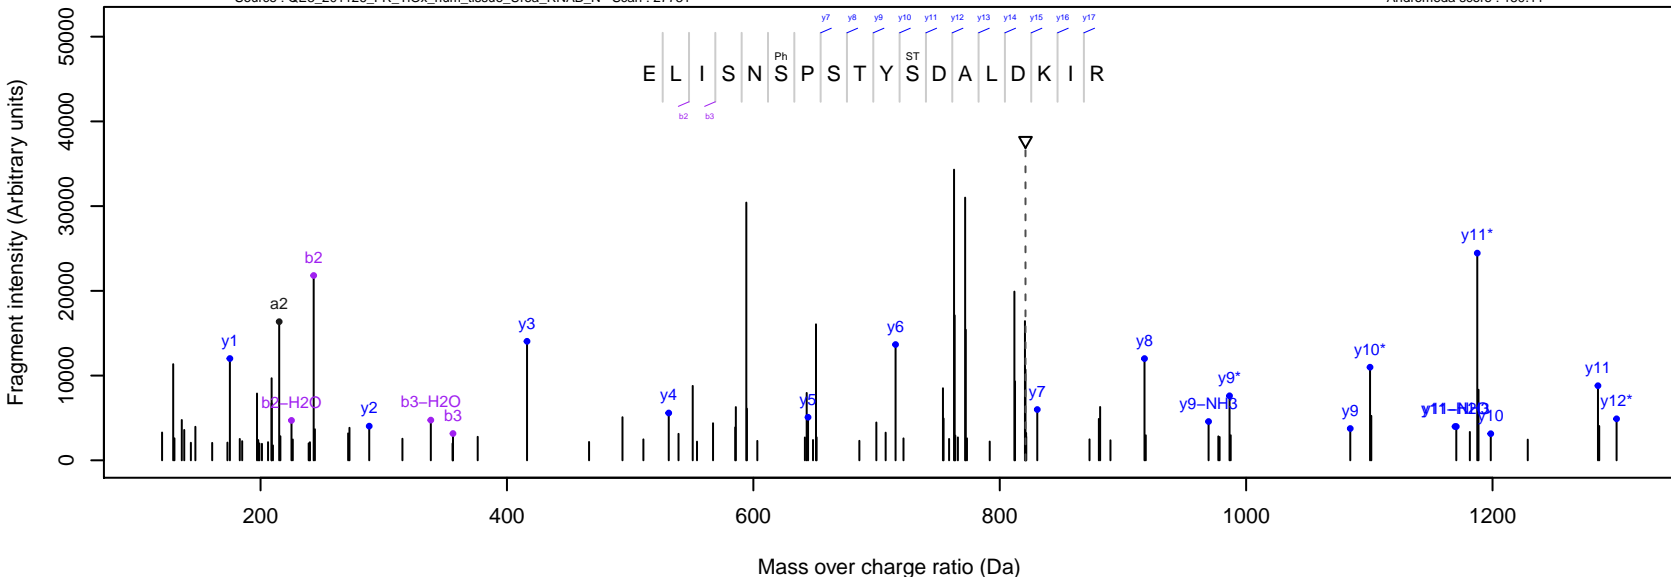

S(Phospho (STY))LDGAAAVDSADR-2+

Source : QE3\_201126\_FR\_TiOx\_hum\_tissue\_Urea\_RNAB\_H Scan : 18692

Andromeda score : 150.11

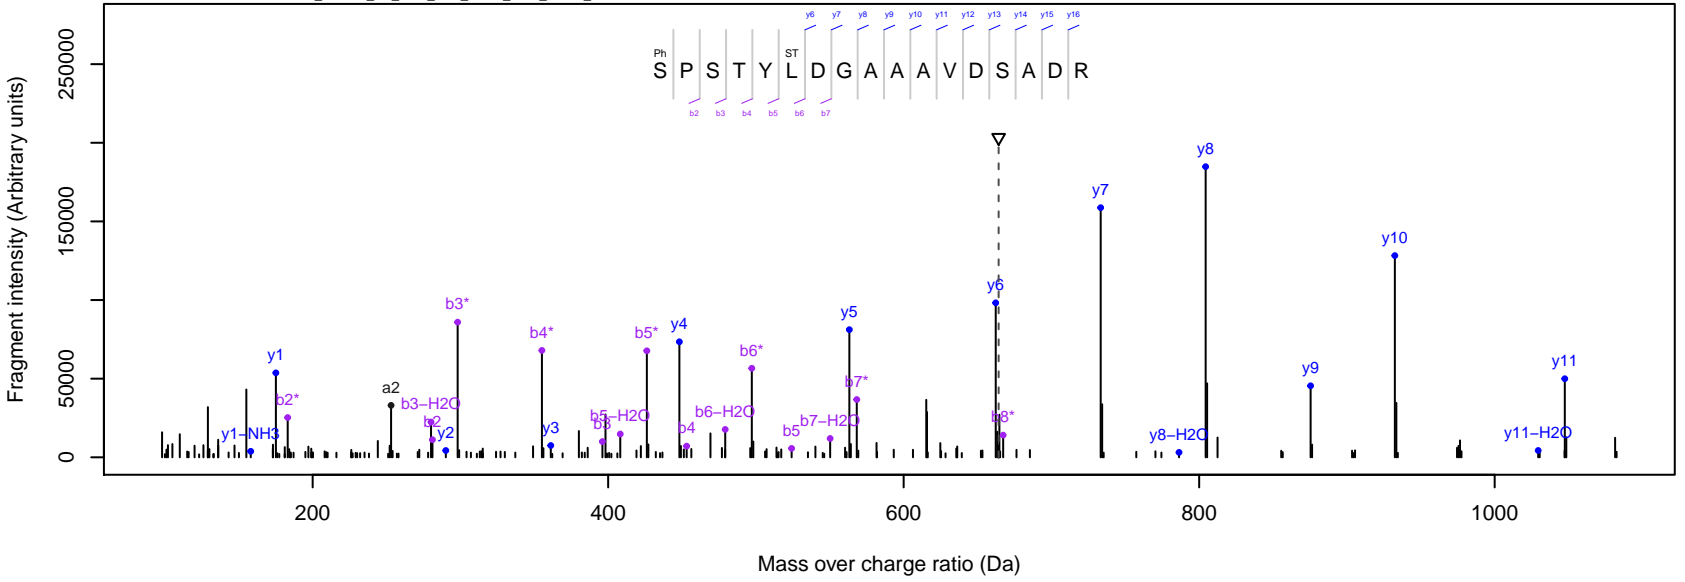

EHASIDAQSGAGVNPSTSAS(Phospho (STY))PK-3+

Source : QE3\_201126\_FR\_TiOx\_hum\_tissue\_Urea\_RNAB\_H Scan : 16031

Andromeda score : 150.06

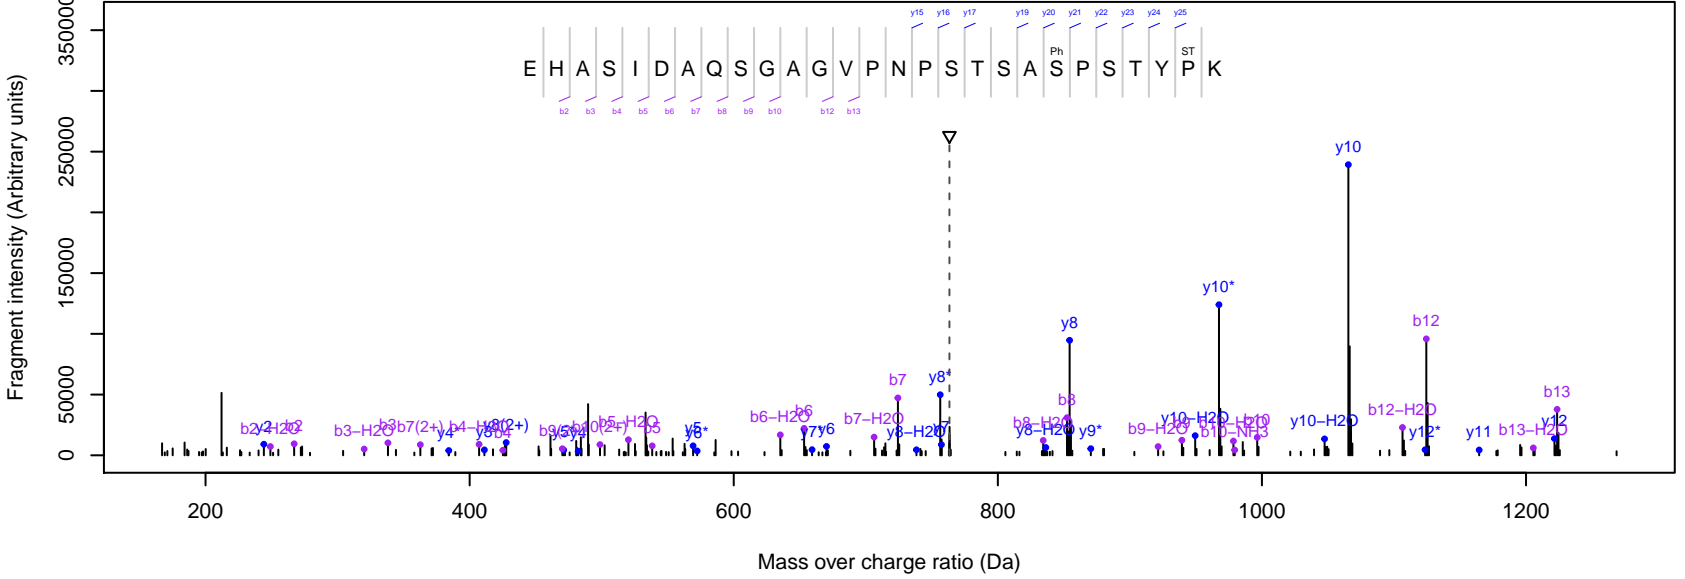

RGS(Phospho (STY))FSEN YWR-2+

Source : QE3\_201126\_FR\_TiOx\_hum\_tissue\_Urea\_RNAB\_H Scan : 22343

Andromeda score : 150.05

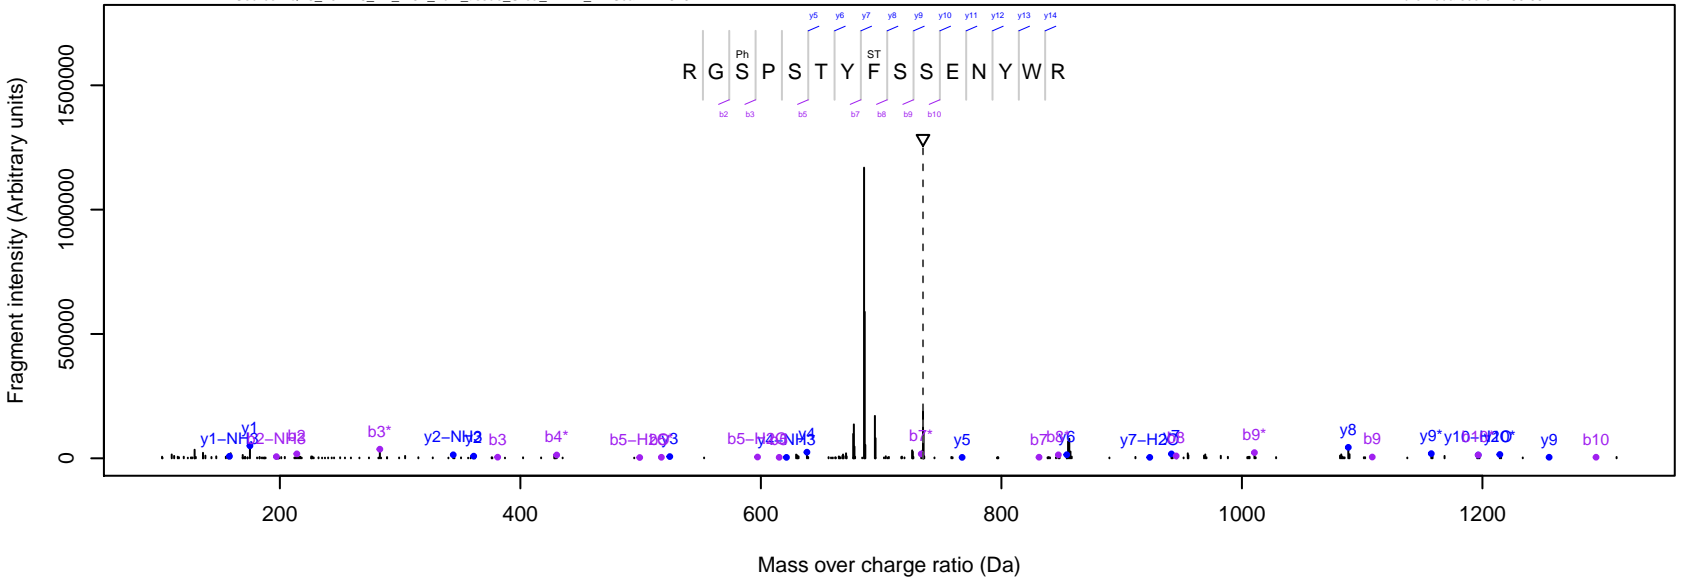

SIS(Phospho (STY))NEGLTLNNSHVSK-2+

Source : QE3\_201126\_FR\_TIOx\_hum\_tissue\_Urea\_RNAB\_H Scan : 18787

Andromeda score : 149.99

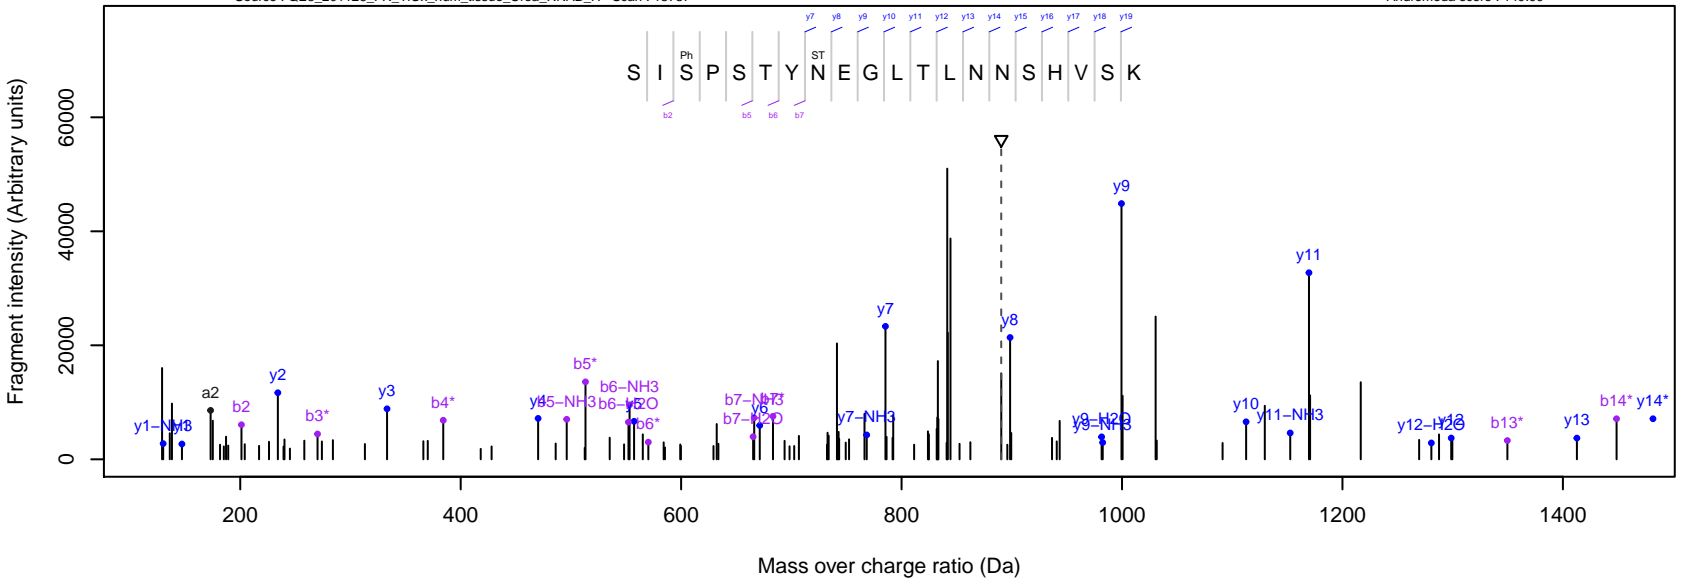

ILEDHGS(Phospho (STY))PAGEIDDEDKDKDETETVK-4+

Source : QE3\_201126\_FR\_TIOx\_hum\_tissue\_Urea\_RNAB\_H Scan : 15730

Andromeda score : 149.98

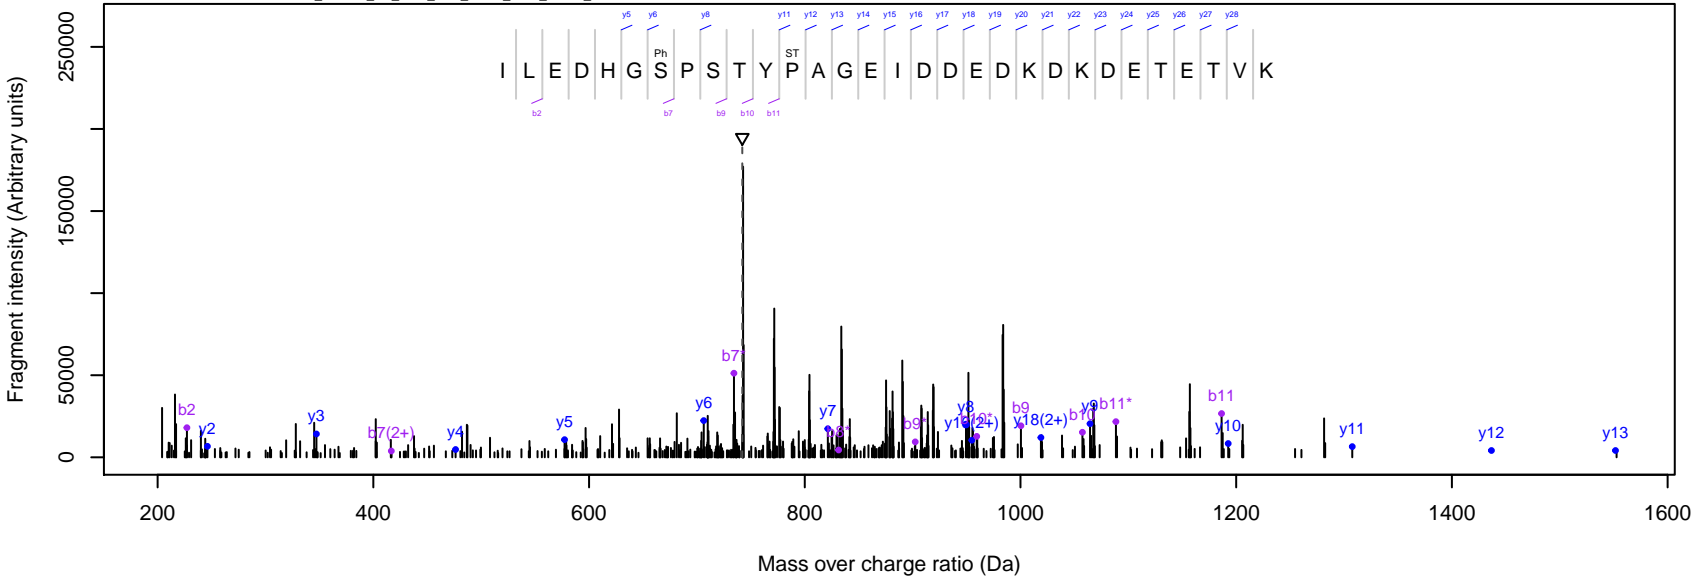

LPPFPGLEPESEGAAGGSEPEAGDSDT(Phospho (STY))EGEDIFTGAAVVSK-4+

Source : QE3\_201126\_FR\_TIOx\_hum\_tissue\_Urea\_RNAB\_N Scan : 60304

Andromeda score : 149.98

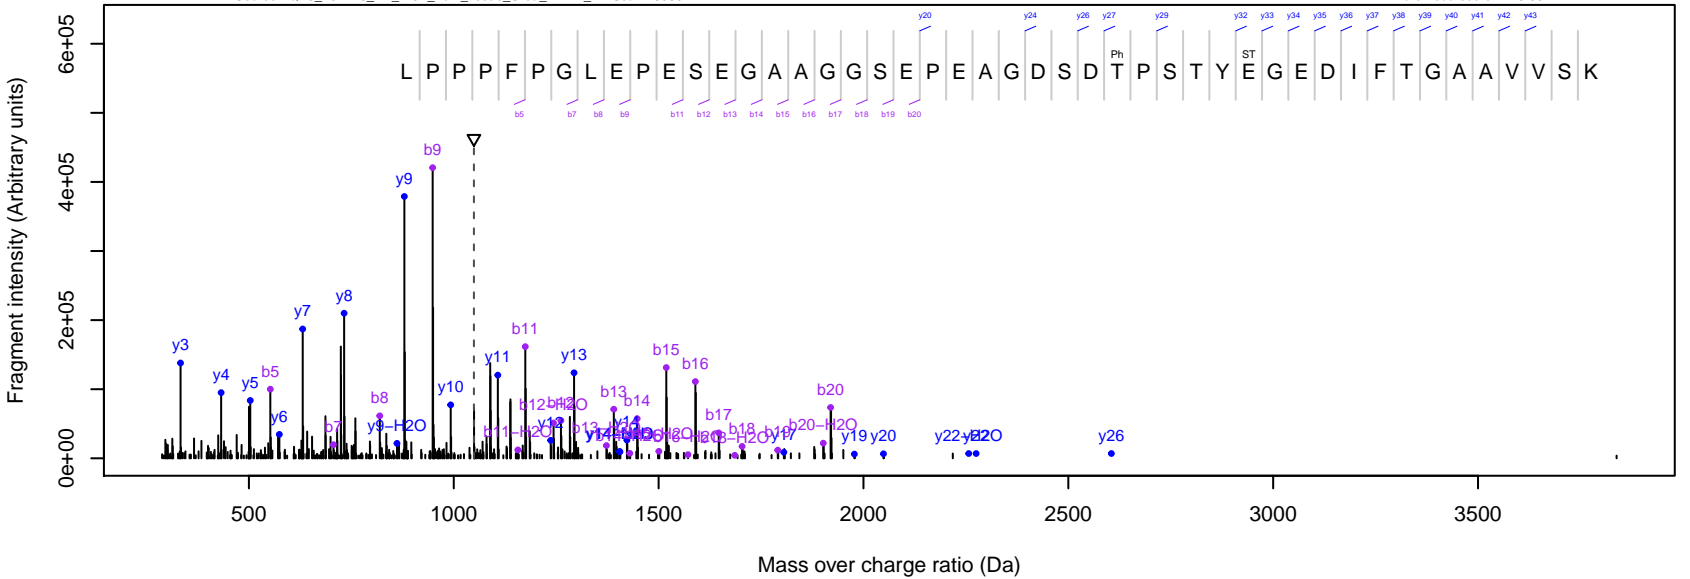

ALASEKS(Phospho (STY))PTADAKPAK-3+

Source : QE3\_201126\_FR\_TiOx\_hum\_tissue\_Urea\_RNAB\_N Scan : 5718

Andromeda score : 149.94

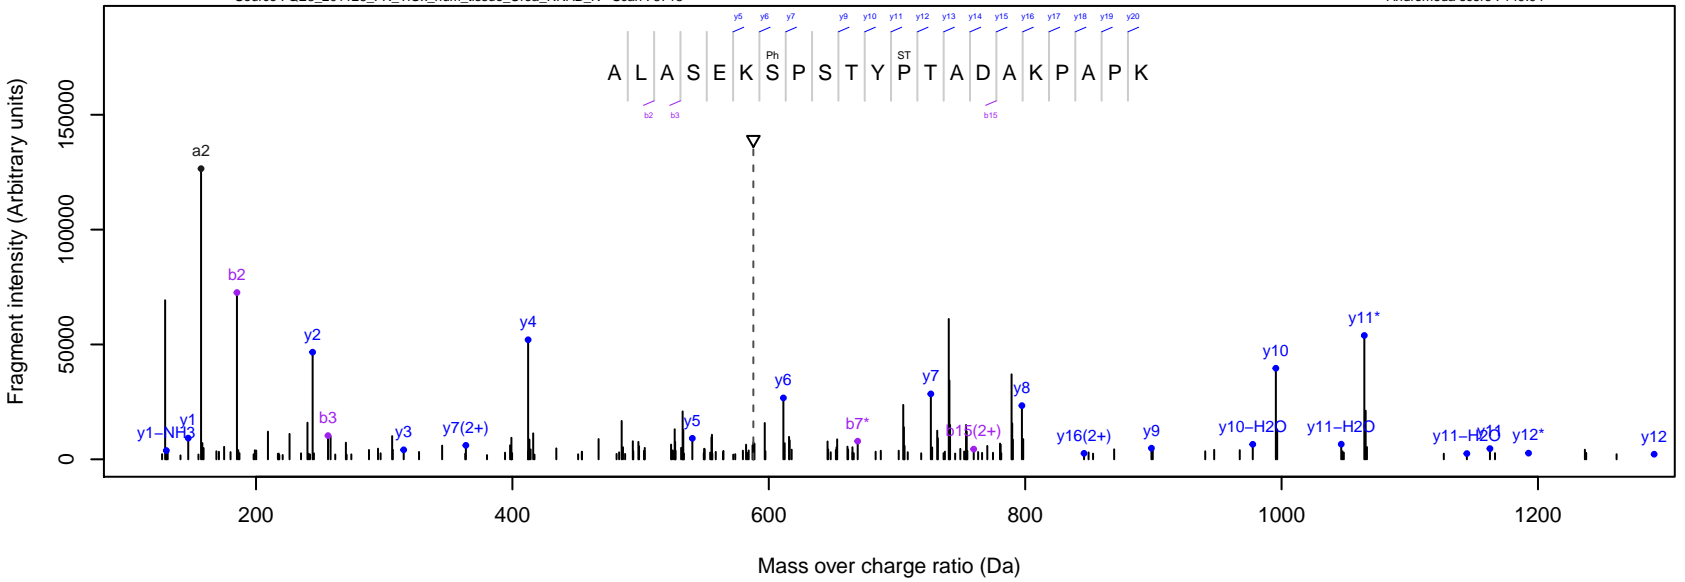

ASS(Phospho (STY))LNLVNLVGGK-2+

Source : QE3\_201126\_FR\_TiOx\_hum\_tissue\_Urea\_RNAB\_H Scan : 30534

Andromeda score : 149.93

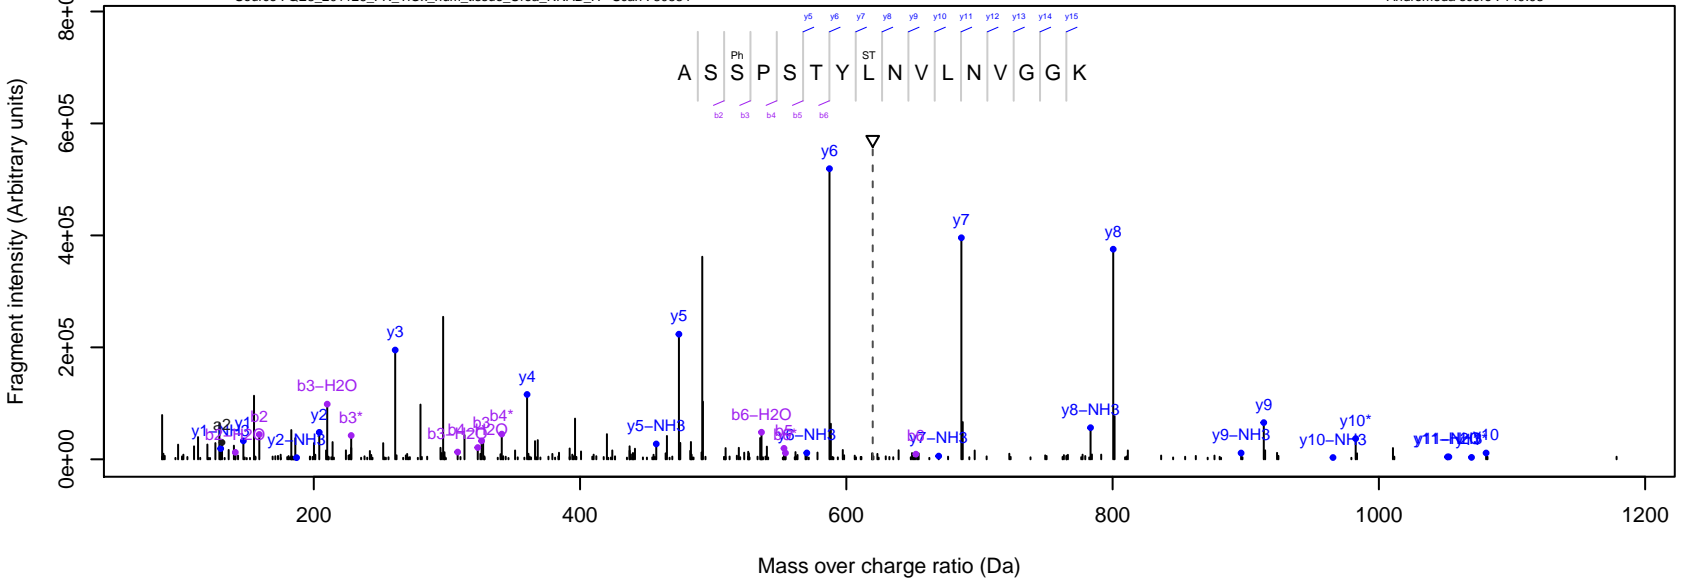

EAPAEGEAAEPGS(Phospho (STY))PTAAEGEAASASTSSPK-3+

Source : QE3\_201126\_FR\_TiOx\_hum\_tissue\_Urea\_RNAB\_N Scan : 26057

Andromeda score : 149.93

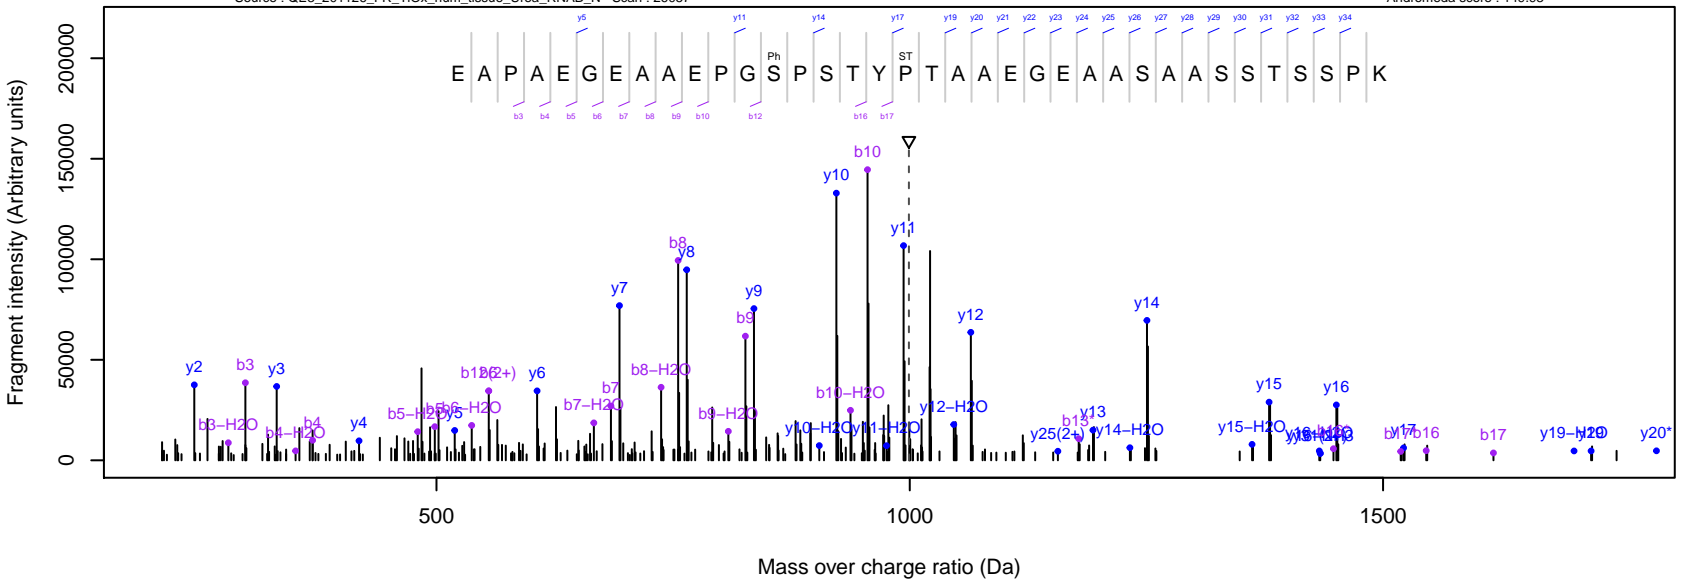

APEKPLHEVPS(Phospho (STY))GNSLLSSETILR-3+

Source : QE3\_201126\_FR\_TiOx\_hum\_tissue\_Urea\_RNAB\_H Scan : 35668

Andromeda score : 149.84

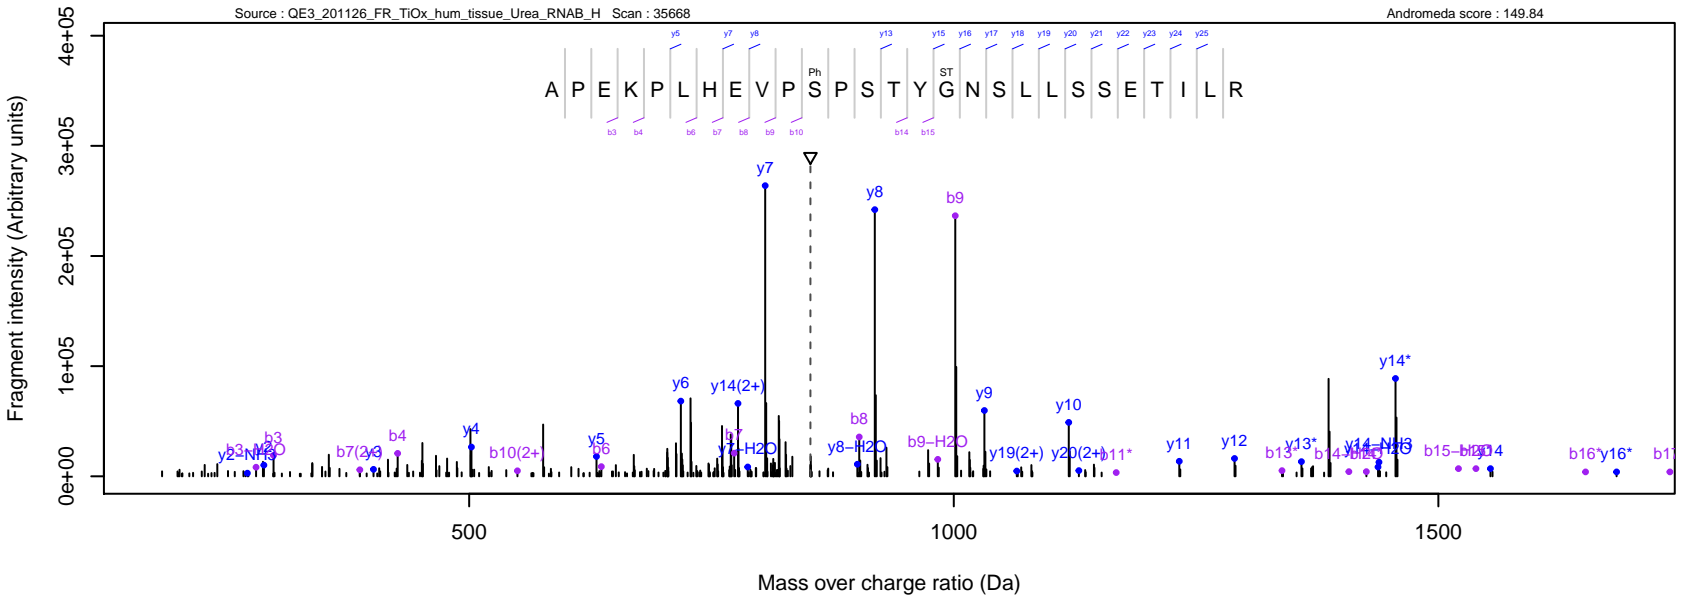

M(Oxidation (M))SCFSRPSM(Oxidation (M))S(Phospho (STY))PTPLDR-3+

Source : QE3\_201126\_FR\_TiOx\_hum\_tissue\_Urea\_RNAB\_H Scan : 17288

Andromeda score : 149.84

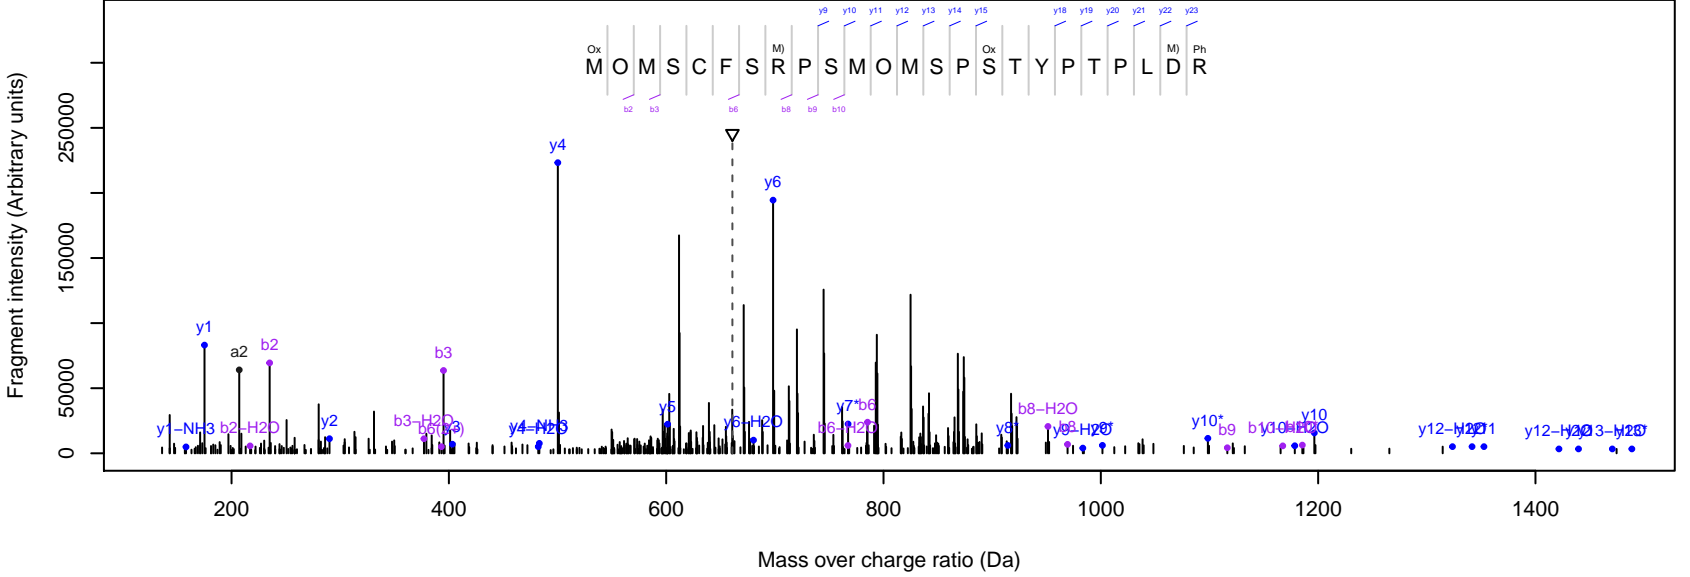

(Acetyl (Protein N-term))ASLEVSR(S(Phospho (STY)))PRR-2+

Source : QE3\_201126\_FR\_TiOx\_hum\_tissue\_Urea\_RNAB\_B Scan : 12227

Andromeda score : 149.83

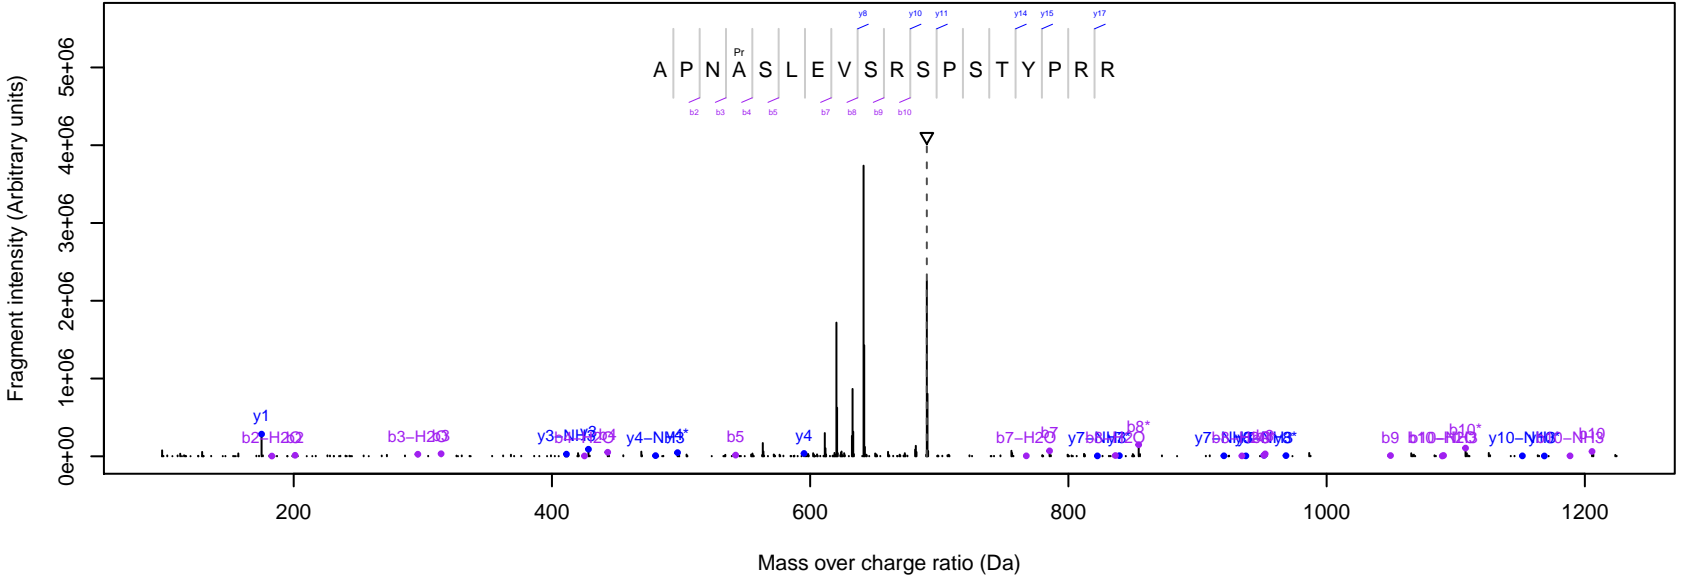



KAS(Phospho (STY))LEELQSVHSER-3+

Source : QE3\_201126\_FR\_TiOx\_hum\_tissue\_Urea\_RNAB\_H Scan : 13126

Andromeda score : 149.74

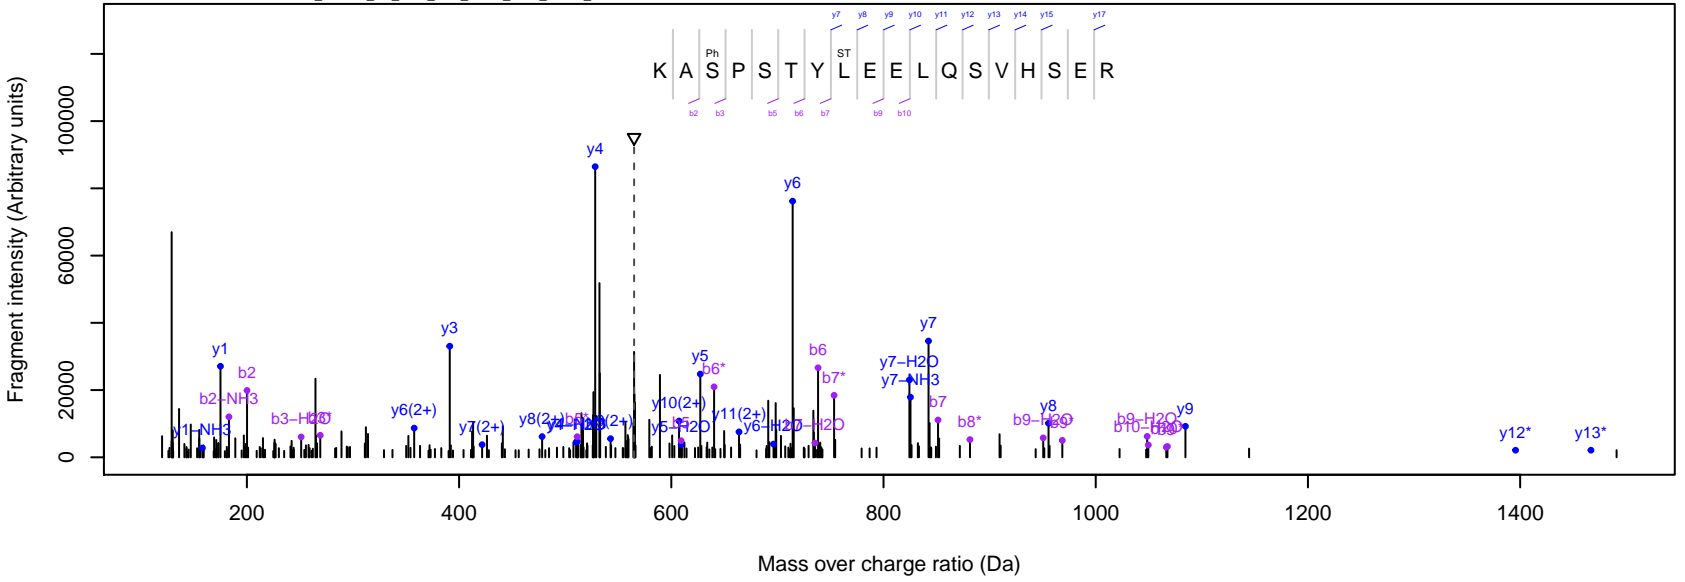

AGMSSNQSISS(Phospho (STY))PVLDAVPR-2+

Source : QE3\_201126\_FR\_TiOx\_hum\_tissue\_Urea\_RNAB\_H Scan : 39298

Andromeda score : 149.73

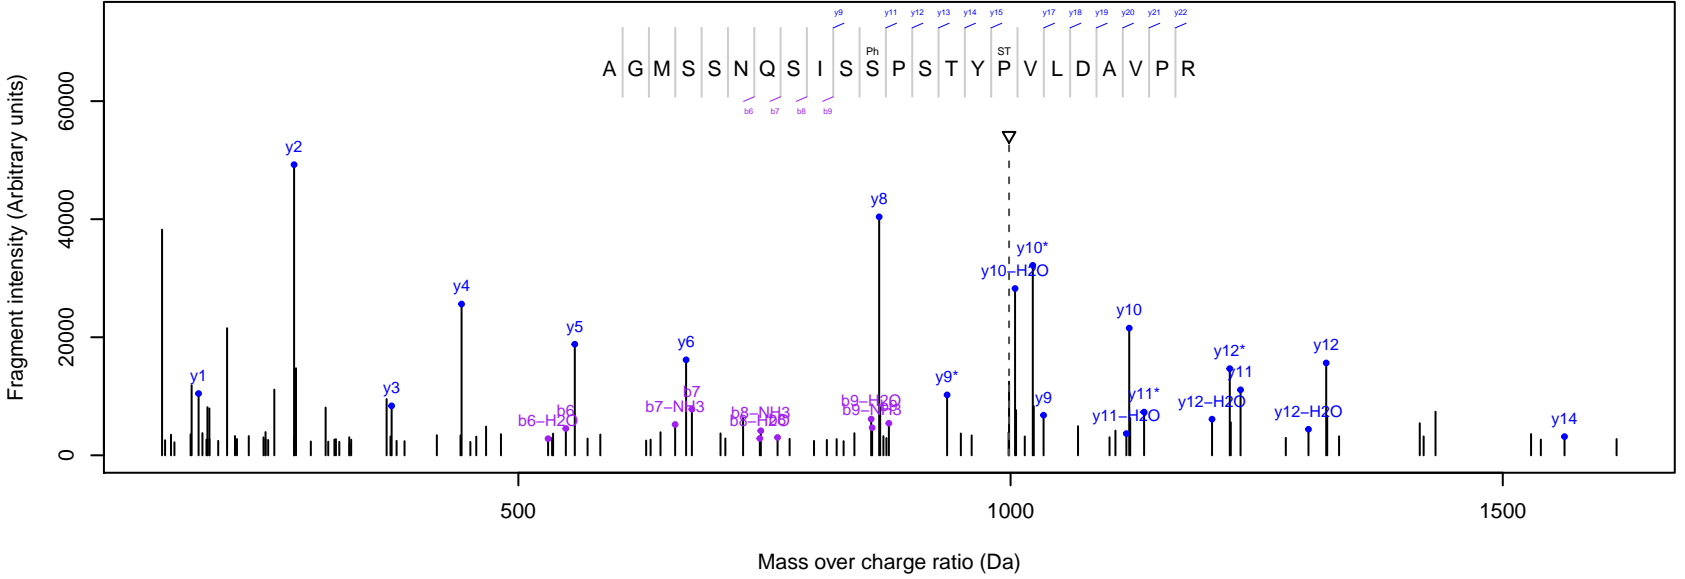

RYS(Phospho (STY))WGTVEVENPHHCDFLNLR-4+

Source : QE3\_201126\_FR\_TiOx\_hum\_tissue\_Urea\_RNAB\_H Scan : 37575

Andromeda score : 149.73

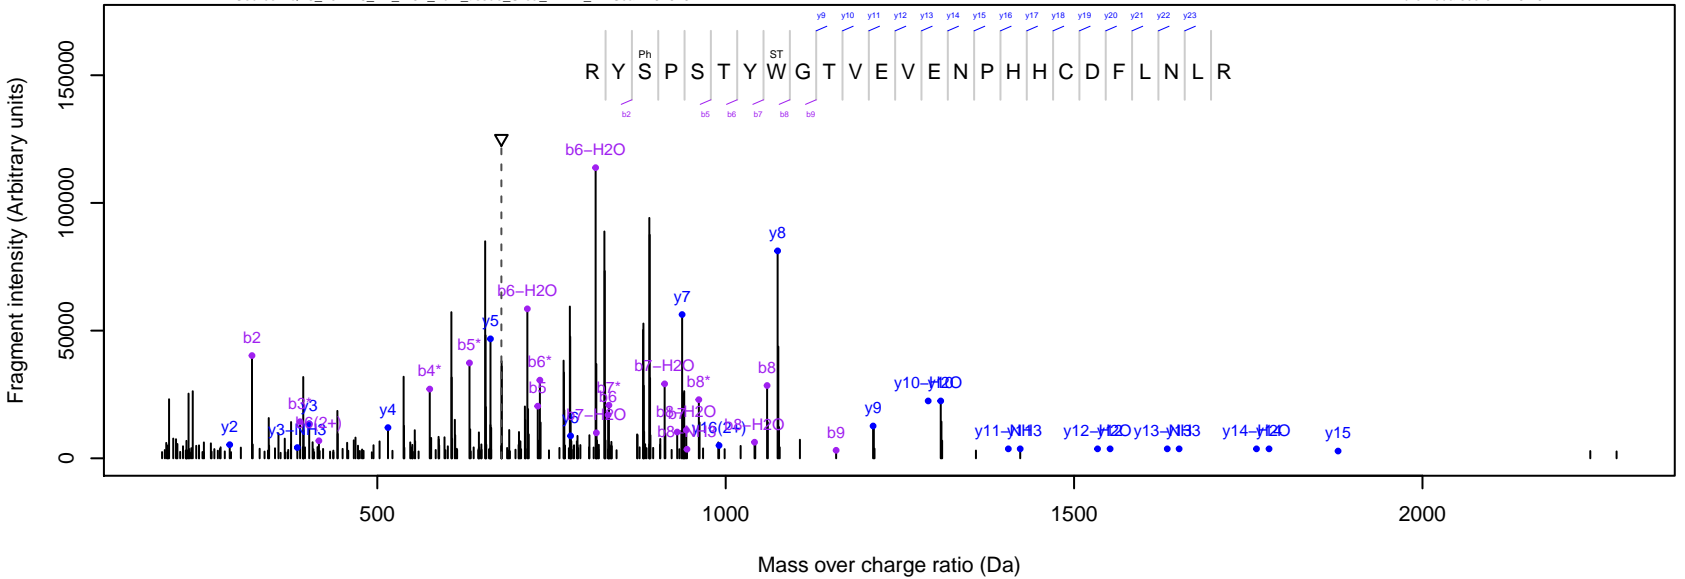

LVEDERS(Phospho (STY))DREET(Phospho (STY))ES(Phospho (STY))S(Phospho (STY))EGEEAAAGGAK-3+

Source : QE3\_201126\_FR\_TIOx\_hum\_tissue\_Urea\_RNAB\_N Scan : 17120

Andromeda score : 149.72

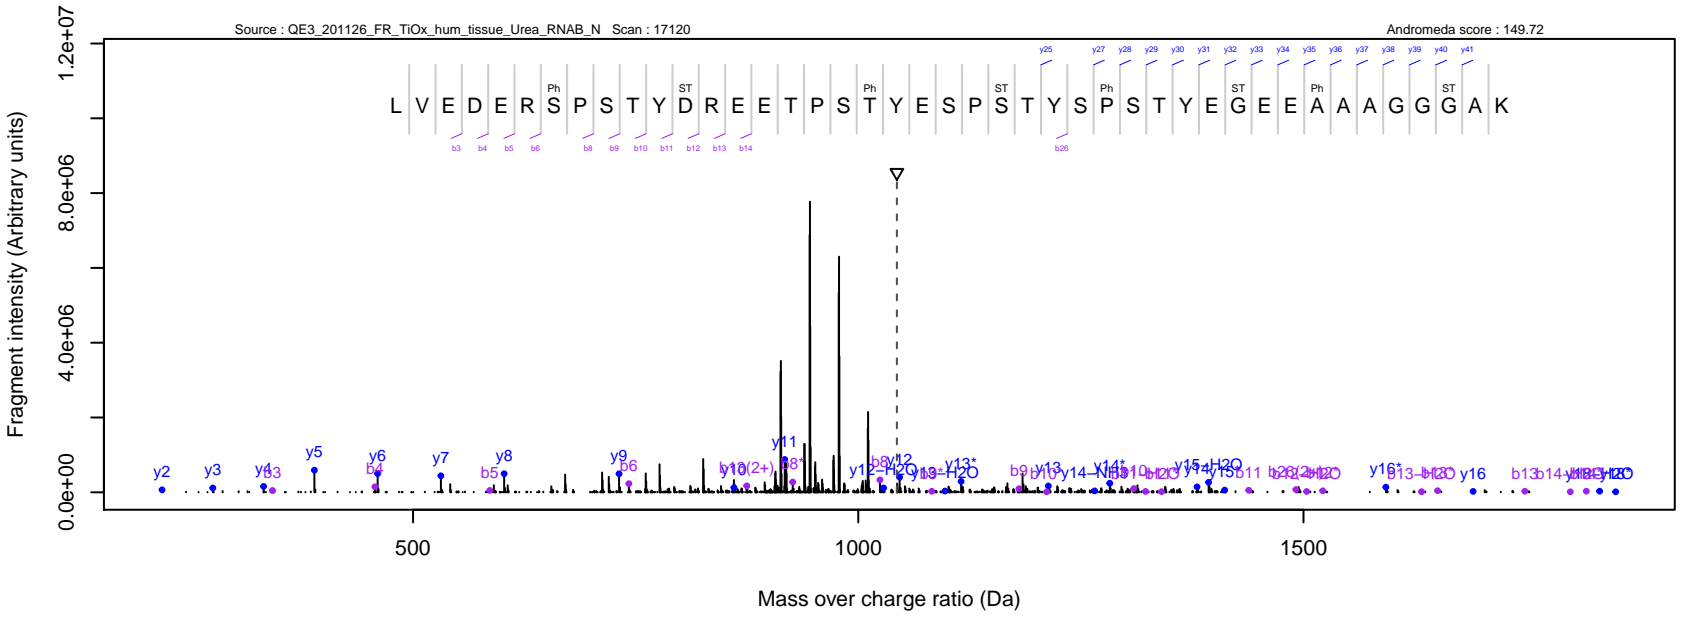

EIAQDFKT(Phospho (STY))DLR-2+

Source : QE3\_201126\_FR\_TIOx\_hum\_tissue\_Urea\_RNAB\_B Scan : 20569

Andromeda score : 149.57

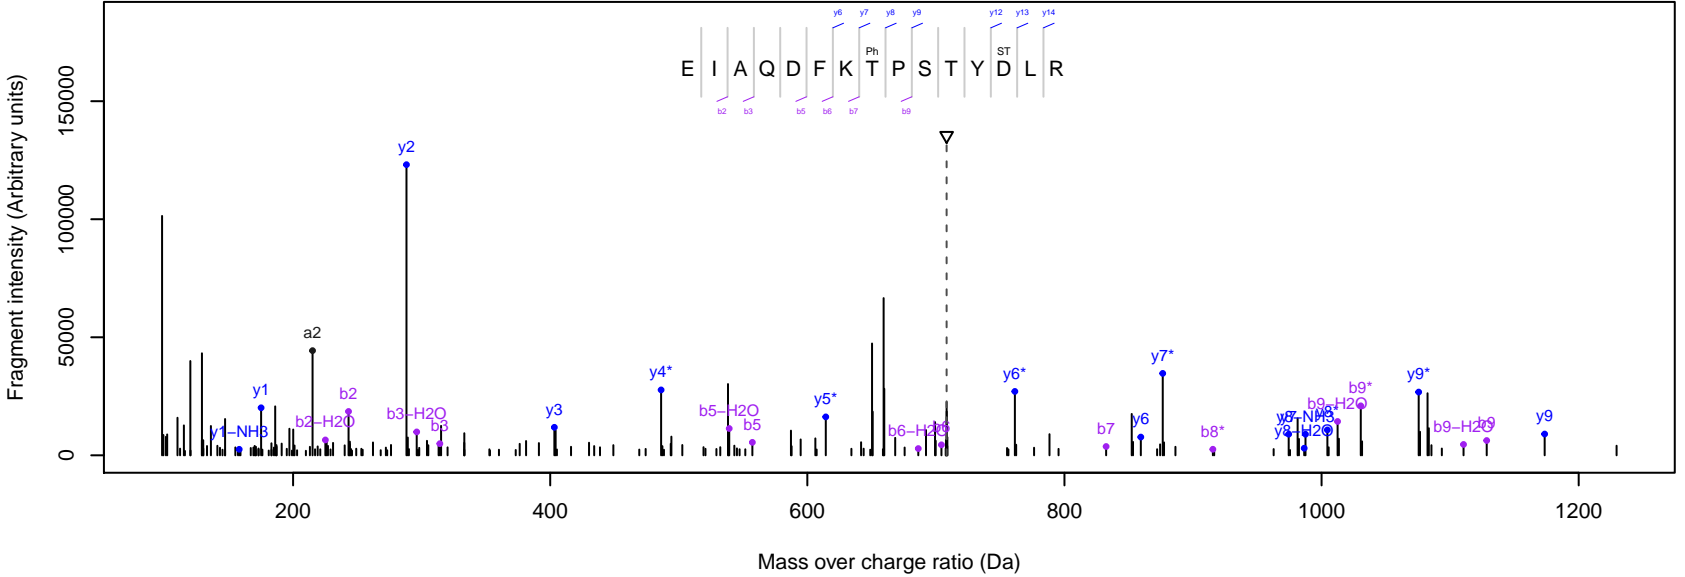

EELMSS(Phospho (STY))DLEETAGSTSIPK-2+

Source : QE3\_201126\_FR\_TIOx\_hum\_tissue\_Urea\_RNAB\_H Scan : 39770

Andromeda score : 149.52

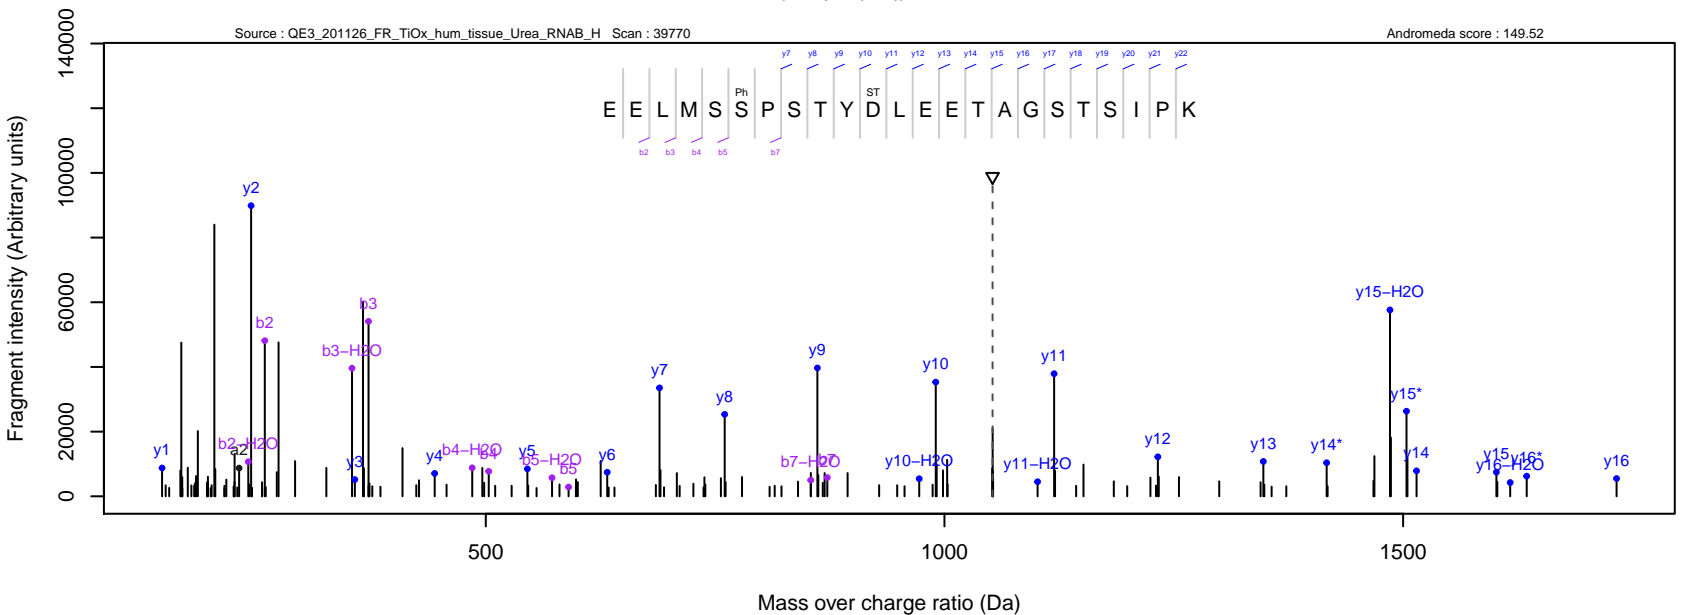

(Acetyl (Protein N-term))M(Oxidation (M))DTDLYDEFGNYIGPELDS(Phospho (STY))DEDDDELGR-3+

Source : QE3\_201126\_FR\_TIOx\_hum\_tissue\_Urea\_RNAB\_N Scan : 63539

Andromeda score : 149.49

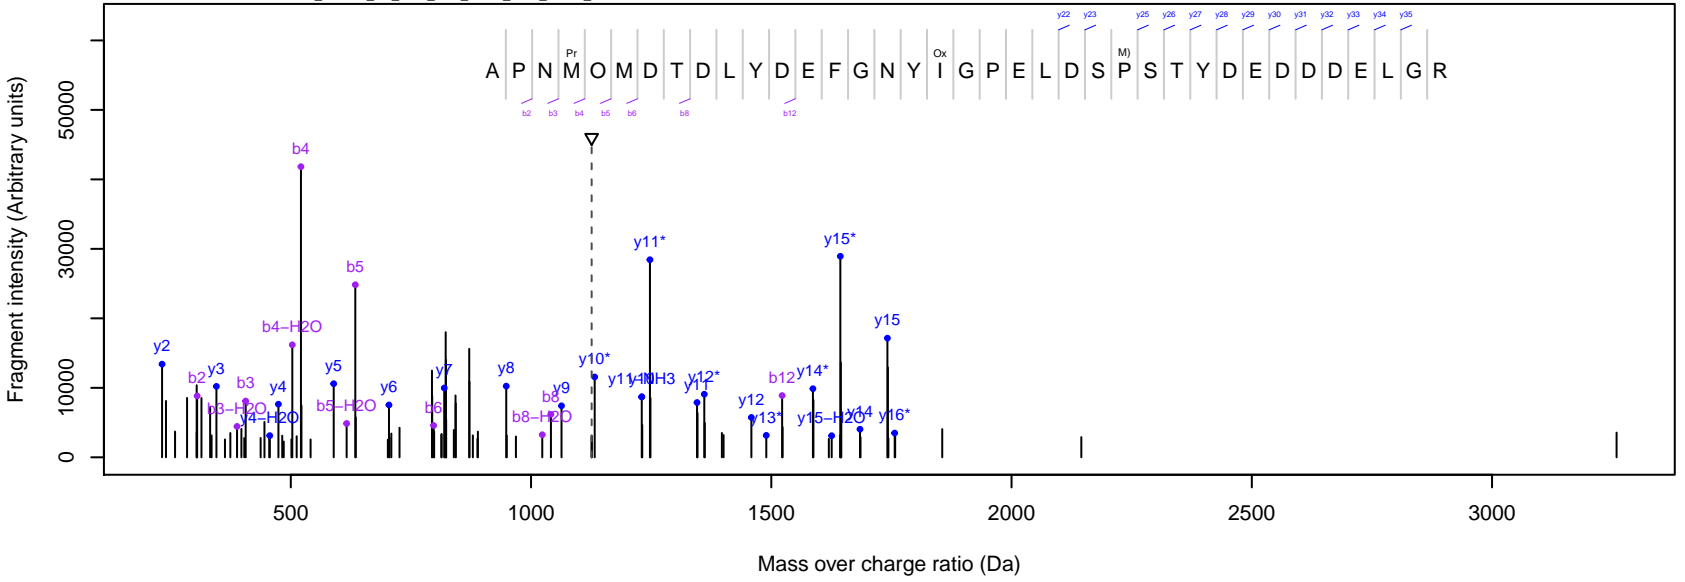

RPHT(Phospho (STY))PTPGIYM(Oxidation (M))GRPTYGSSR-4+

Source : QE3\_201126\_FR\_TIOx\_hum\_tissue\_Urea\_RNAB\_B Scan : 11726

Andromeda score : 149.44

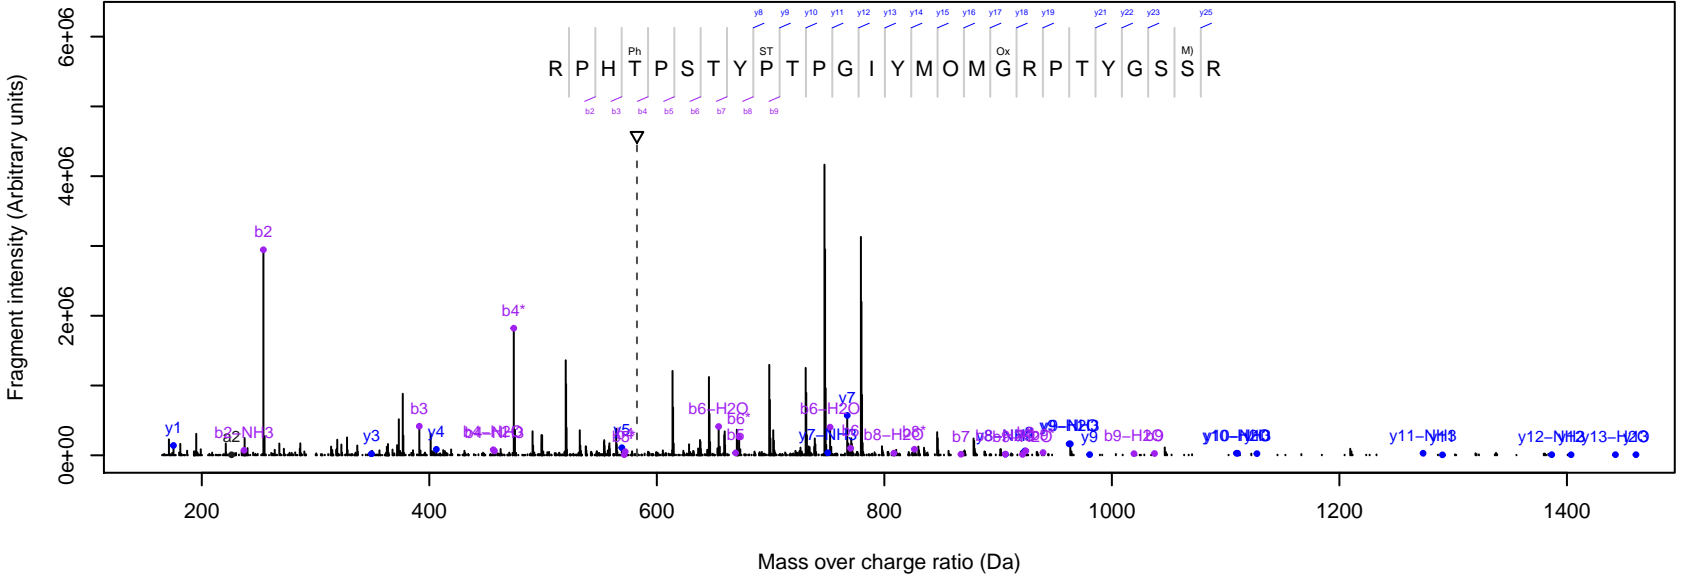

TINNHSVESQDNDQPDYD(Phospho (STY))VAS(Phospho (STY))DEDDLETTASK-3+

Source : QE3\_201126\_FR\_TIOx\_hum\_tissue\_Urea\_RNAB\_N Scan : 29591

Andromeda score : 149.37

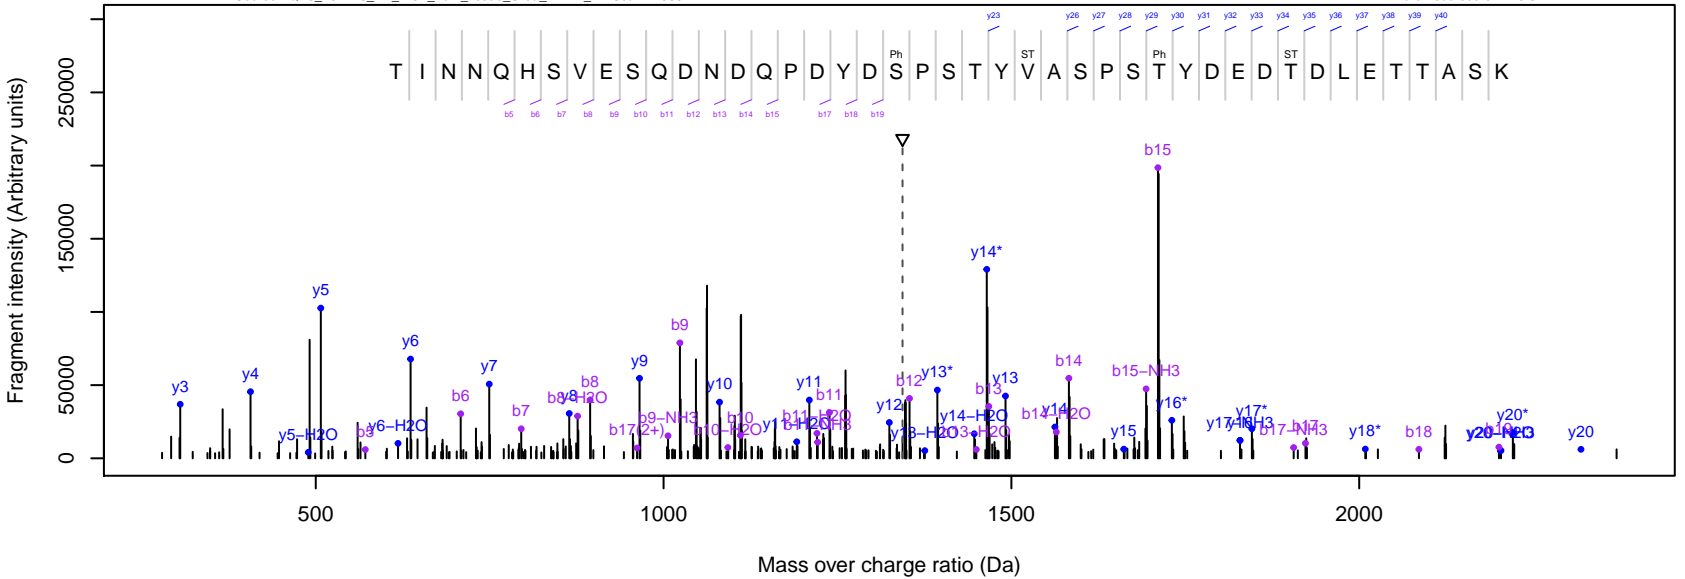

NSVSQISVLS(Phospho (STY))G GK-2+

Source : QE3\_201126\_FR\_TIOx\_hum\_tissue\_Urea\_RNAB\_H Scan : 24741

Andromeda score : 149.35

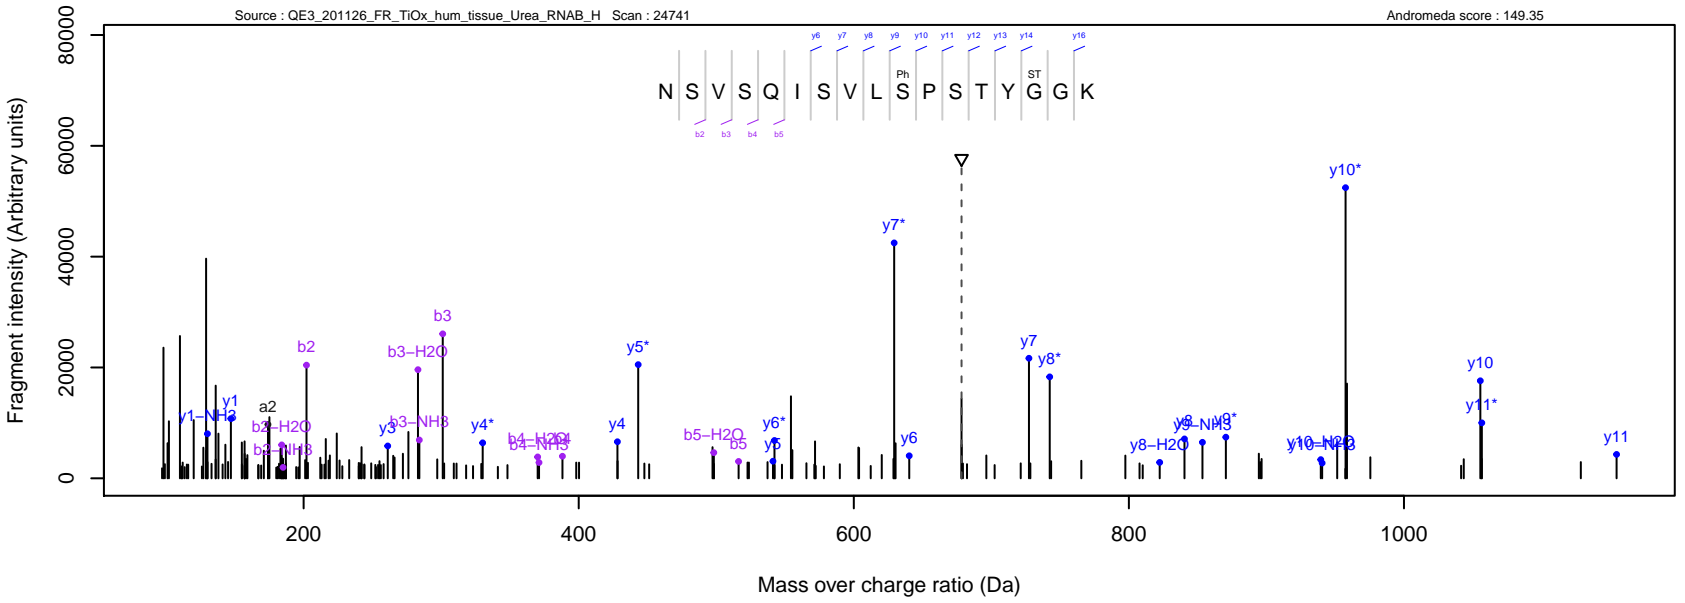

RVT(Phospho (STY))LPAITPIILQK-2+

Source : QE3\_201126\_FR\_TIOx\_hum\_tissue\_Urea\_RNAB\_B Scan : 47223

Andromeda score : 149.3

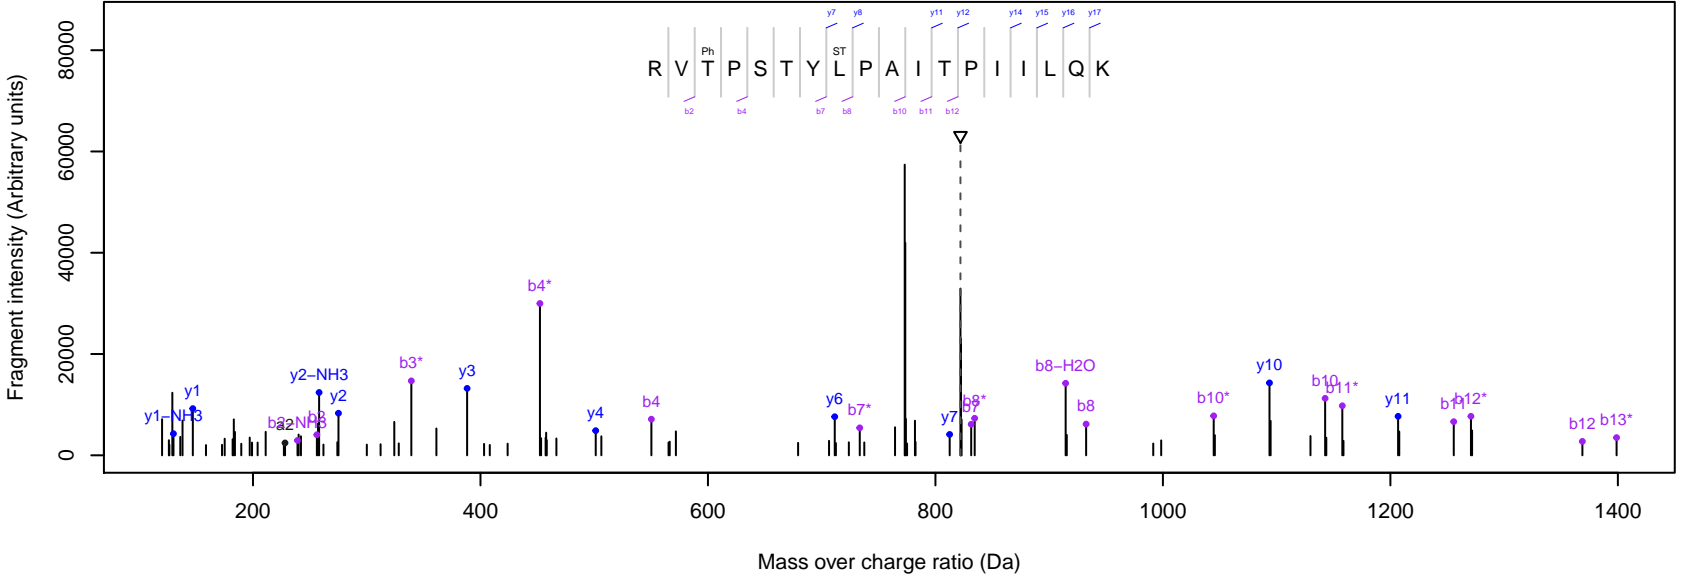

EGVTPWAS(Phospho (STY))FKK-2+

Source : QE3\_201126\_FR\_TIOx\_hum\_tissue\_Urea\_RNAB\_N Scan : 27165

Andromeda score : 149.23

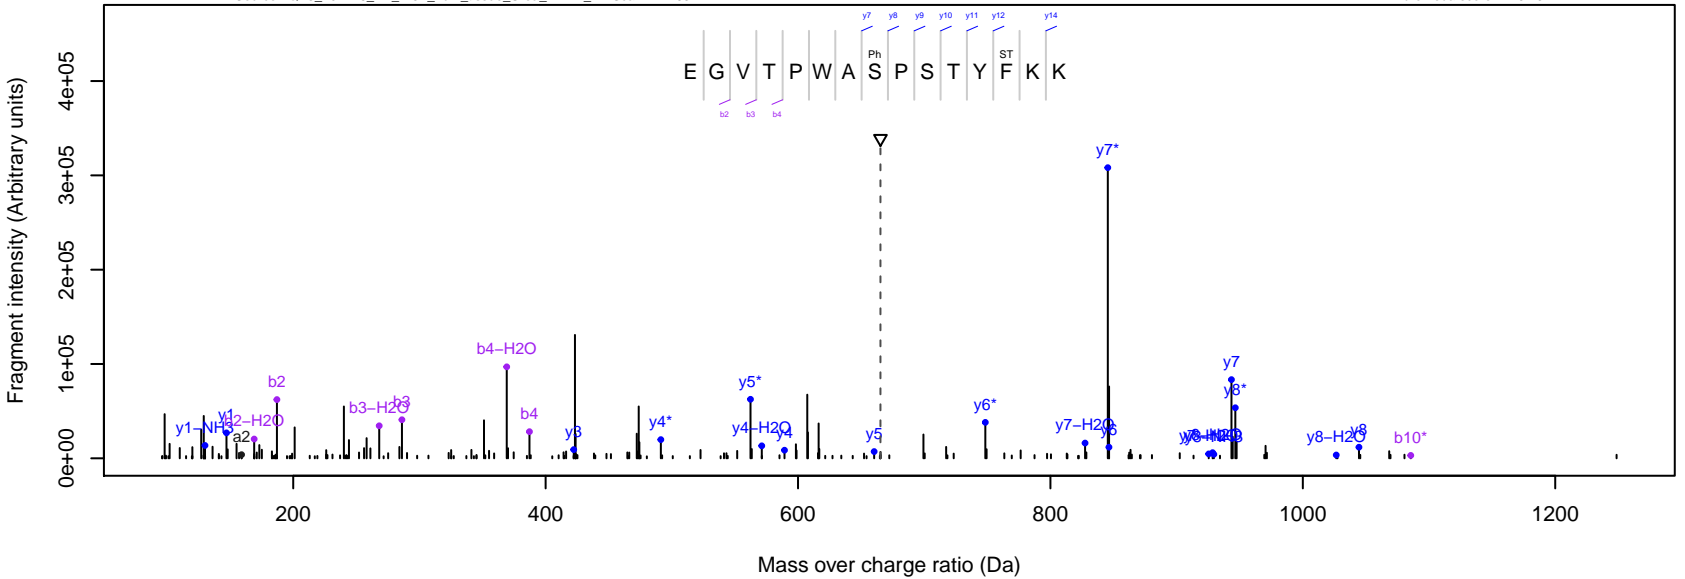

STPFIVPSS(Phospho (STY))PTEQGR-2+

Source : QE3\_201126\_FR\_TiOx\_hum\_tissue\_Urea\_RNAB\_B Scan : 33628

Andromeda score : 149.22

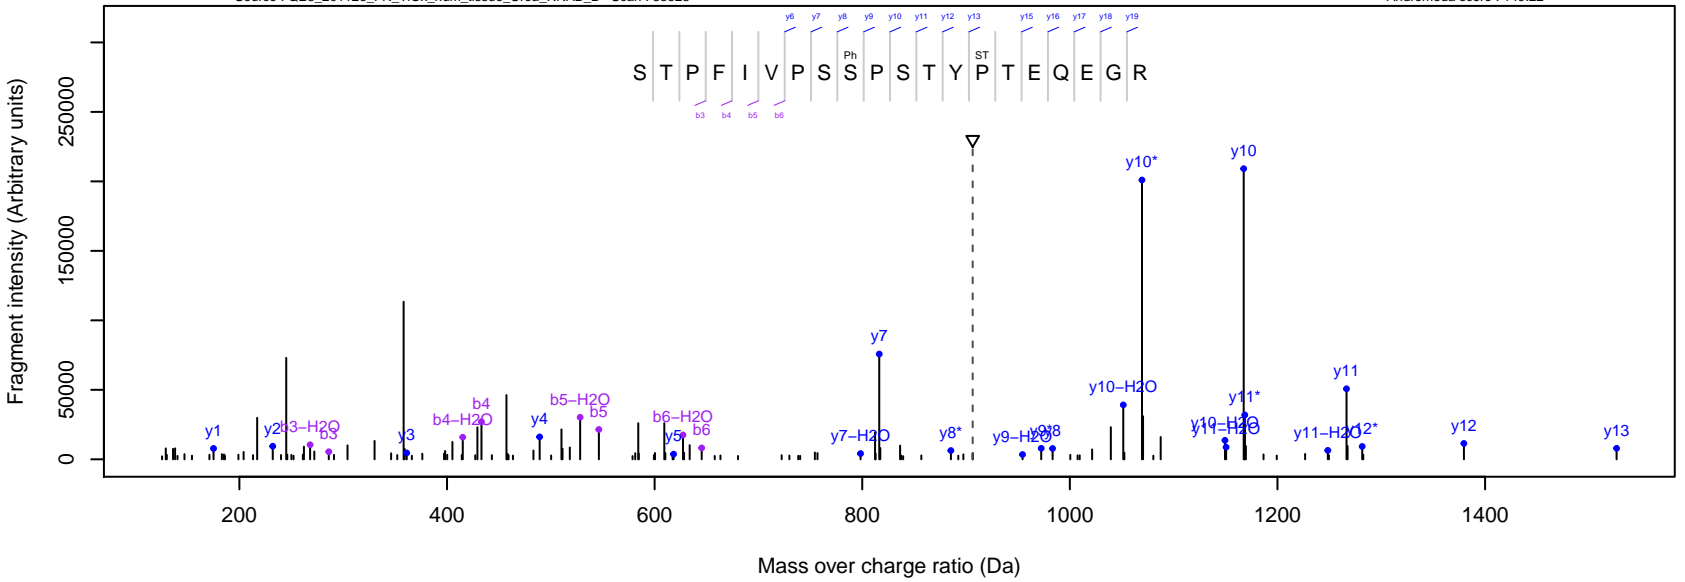

DLFSLDSEDSPAS(Phospho (STY))PPLR-2+

Source : QE3\_201126\_FR\_TiOx\_hum\_tissue\_Urea\_RNAB\_H Scan : 55771

Andromeda score : 149.09

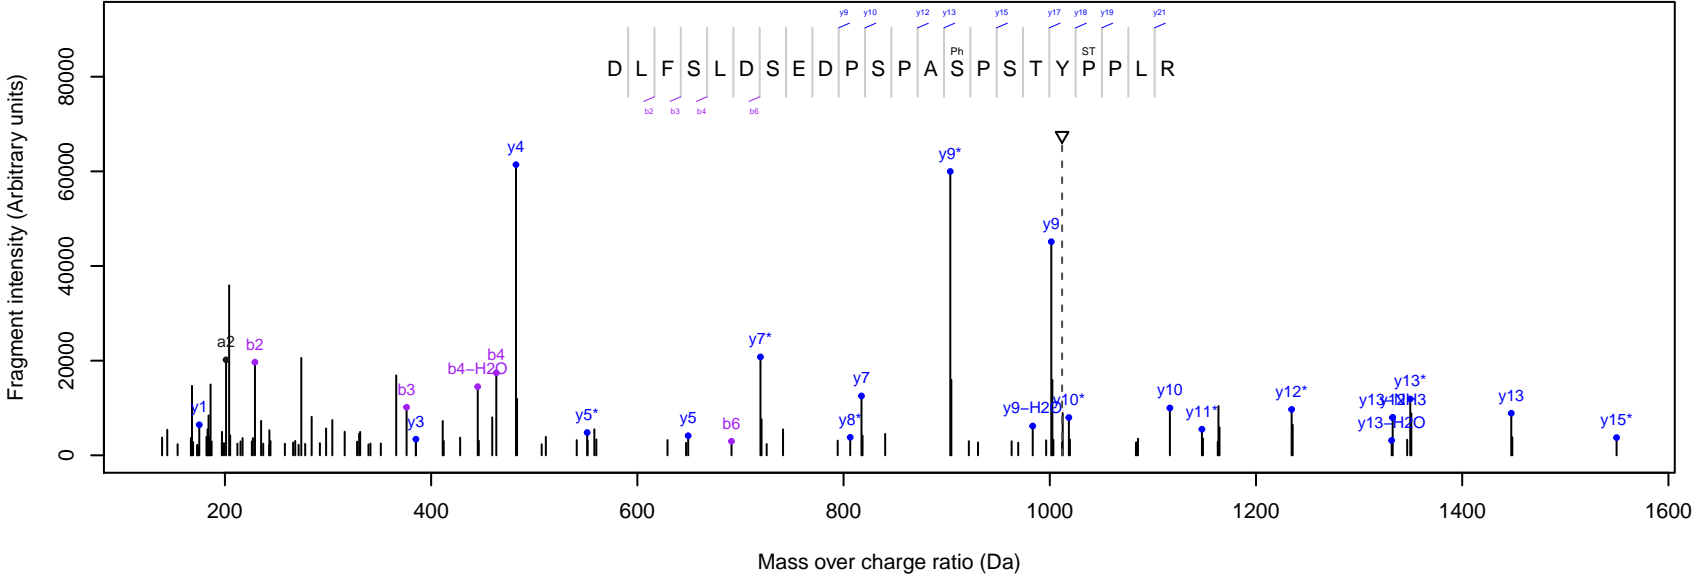

TSIDAYDNFDNIS(Phospho (STY))LAQR-2+

Source : QE3\_201126\_FR\_TiOx\_hum\_tissue\_Urea\_RNAB\_B Scan : 45592

Andromeda score : 149.09

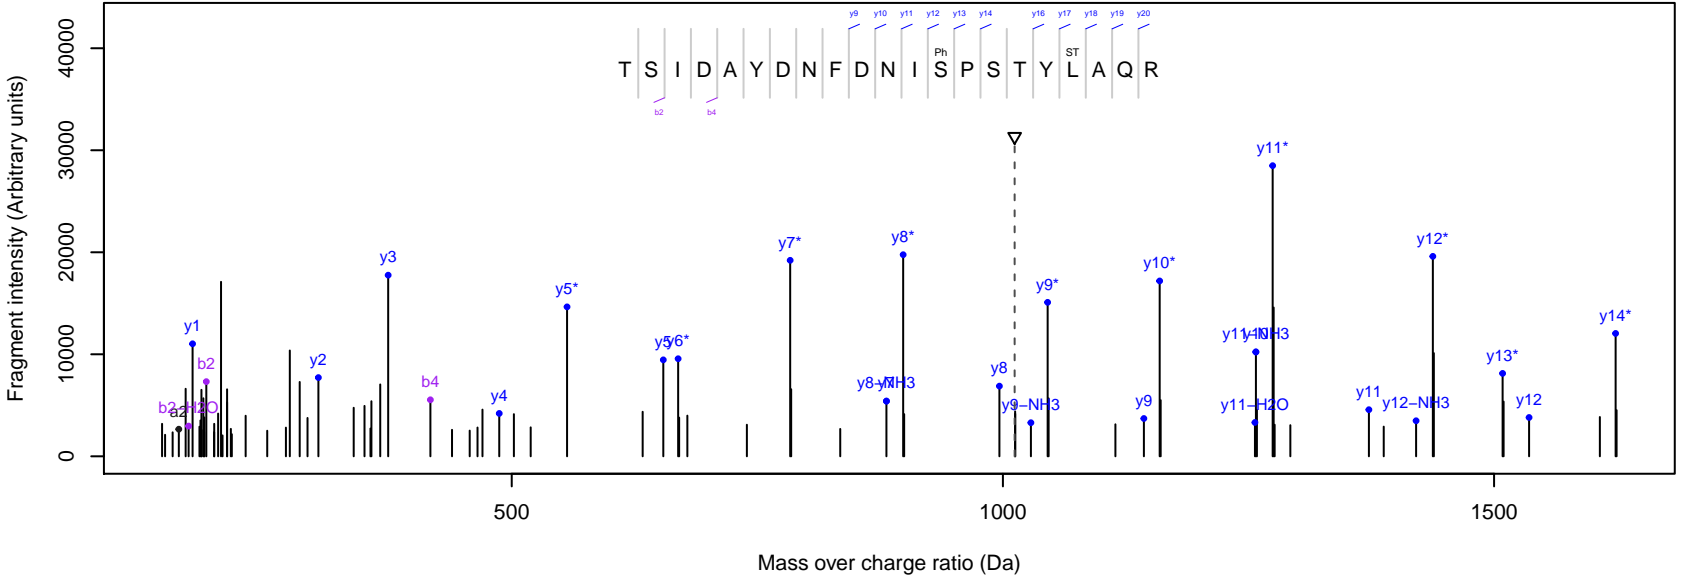

AHLTVGQAAAGGS(Phospho (STY))GNLLTER-3+

Source : QE3\_201126\_FR\_TiOx\_hum\_tissue\_Urea\_RNAB\_H Scan : 25305

Andromeda score : 149.07

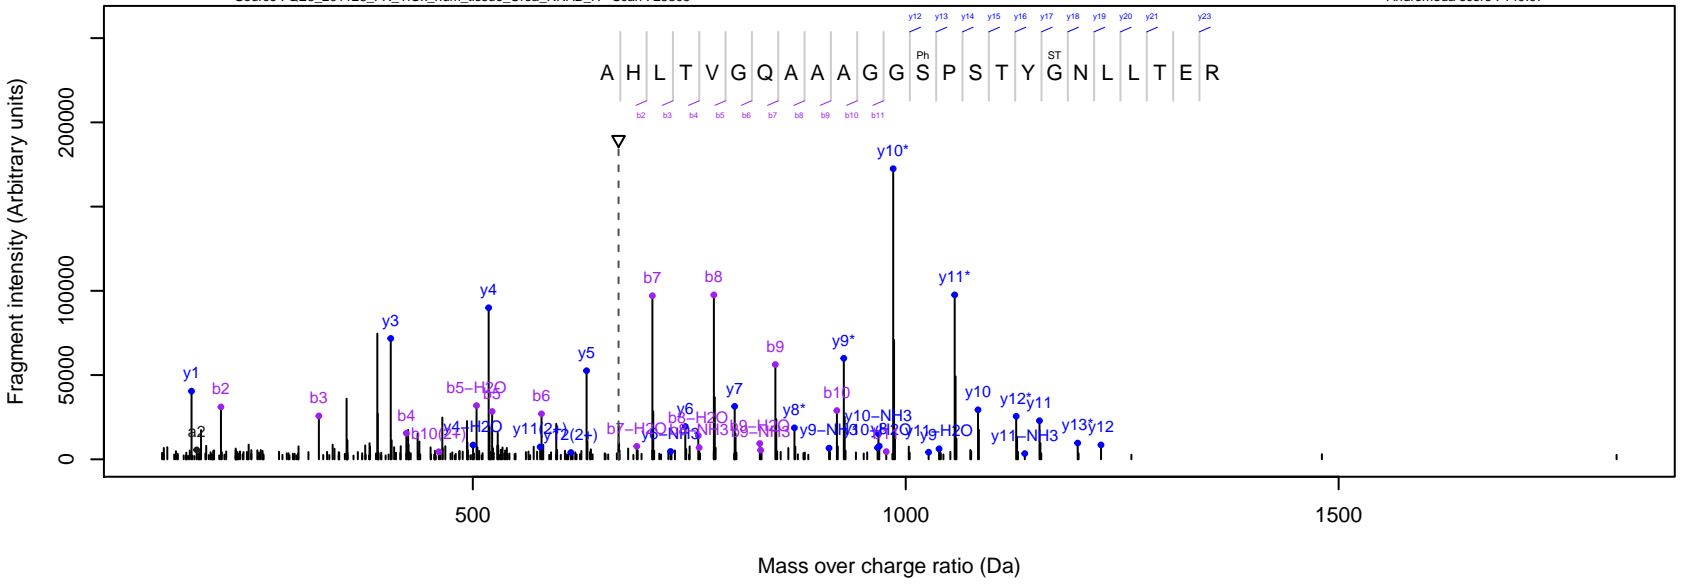

SGSM(Oxidation (M))EEDVDT(Phospho (STY))PGGDYITSPSSPTSSSR-3+

Source : QE3\_201126\_FR\_TiOx\_hum\_tissue\_Urea\_RNAB\_H Scan : 23854

Andromeda score : 149.07

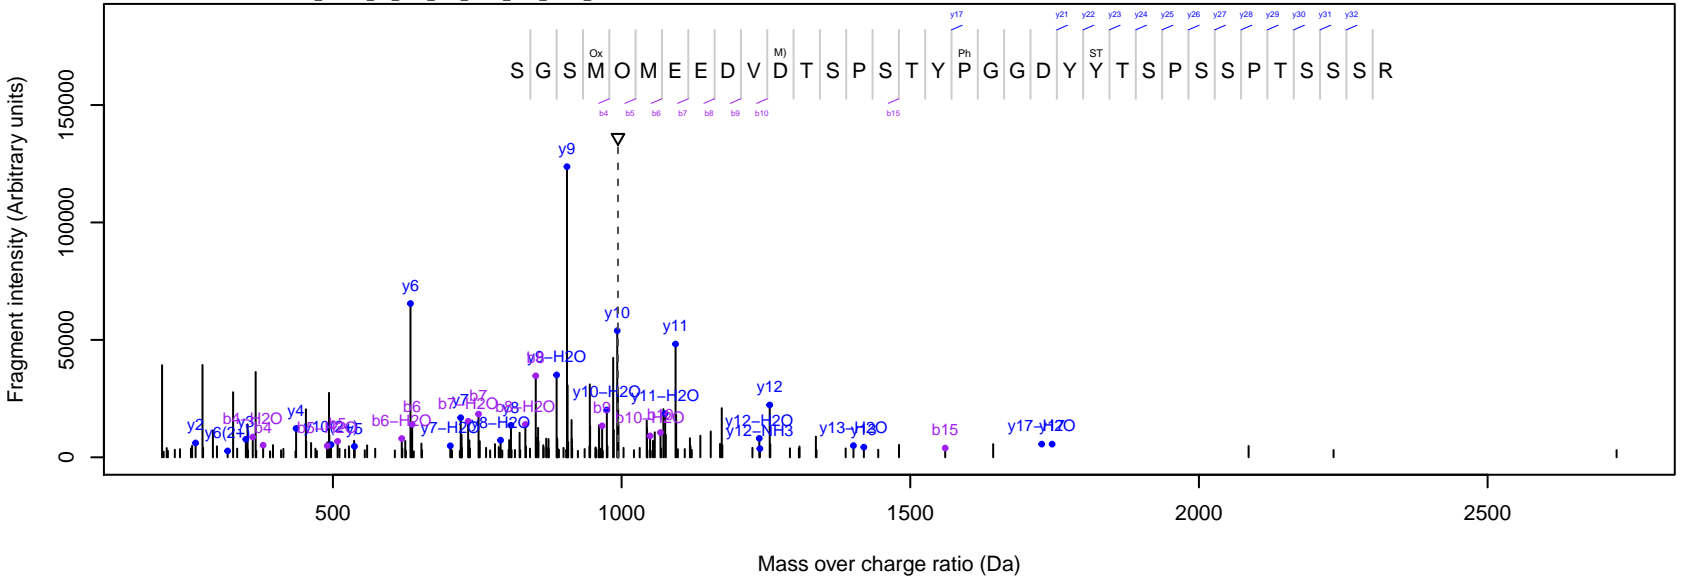

VQAYEEPSVASS(Phospho (STY))PNGKESDLR-3+

Source : QE3\_201126\_FR\_TiOx\_hum\_tissue\_Urea\_RNAB\_N Scan : 18987

Andromeda score : 149.07

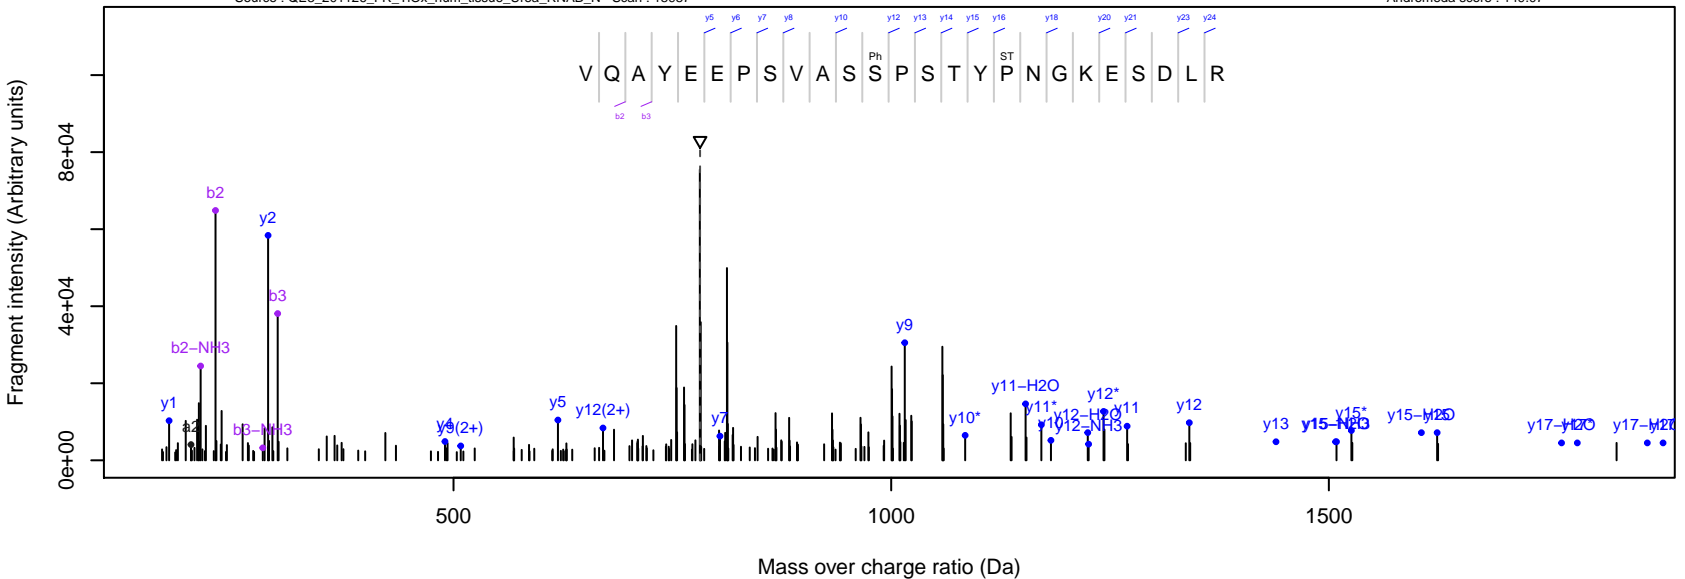

EGSLGDELLPLGYSEPEQQEGASAGAPS(Phospho (STY))PTLELASR-3+

Source : QE3\_201126\_FR\_TIOx\_hum\_tissue\_Urea\_RNAB\_H Scan : 58436

Andromeda score : 149.01

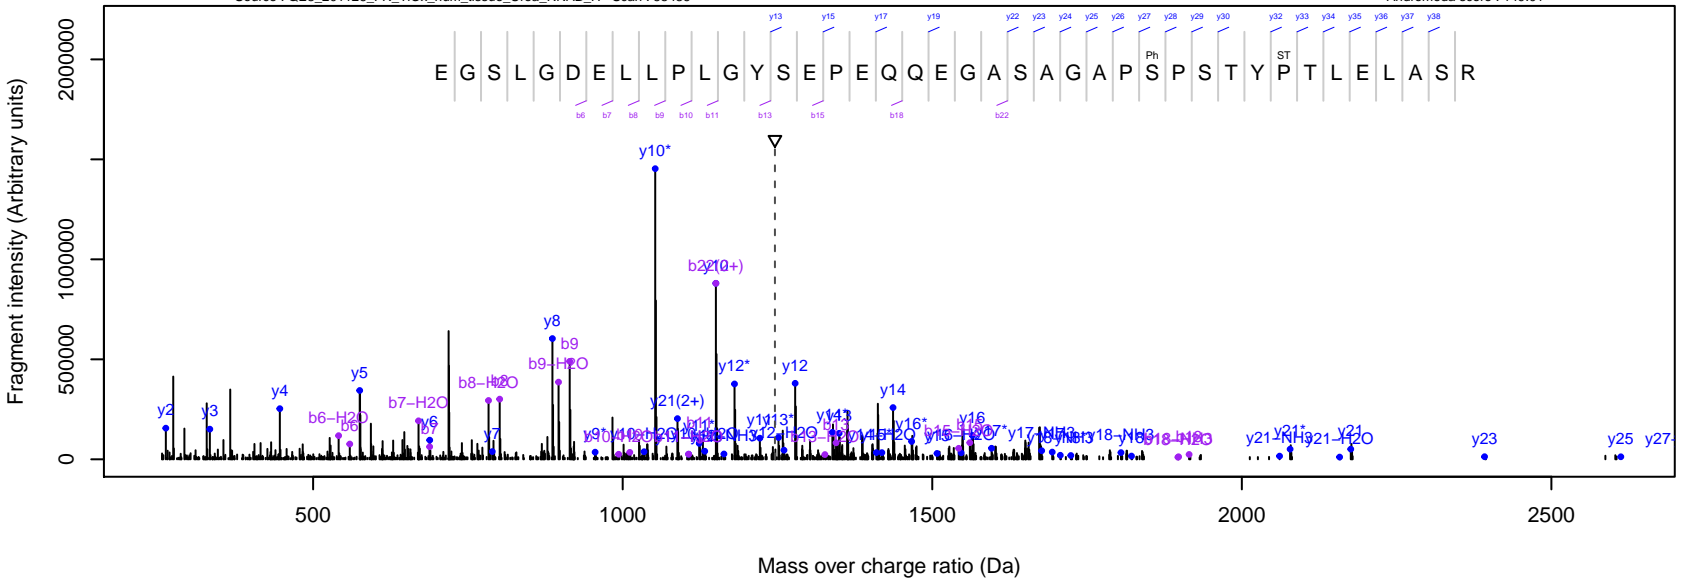

LLDAEDVDVPS(Phospho (STY))PDEK-2+

Source : QE3\_201126\_FR\_TIOx\_hum\_tissue\_Urea\_RNAB\_B Scan : 33575

Andromeda score : 149

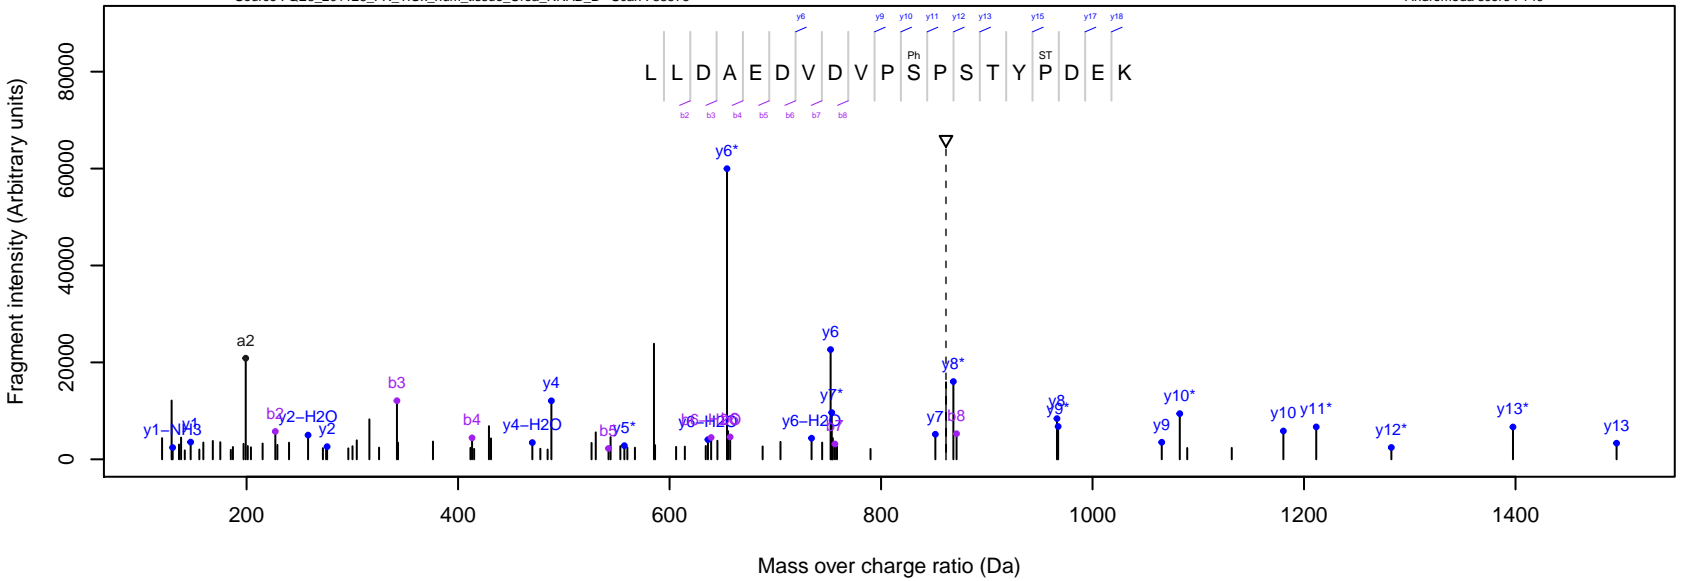

VGSLT(Phospho (STY))PPS(Phospho (STY))SPK-2+

Source : QE3\_201126\_FR\_TIOx\_hum\_tissue\_Urea\_RNAB\_H Scan : 21085

Andromeda score : 148.96

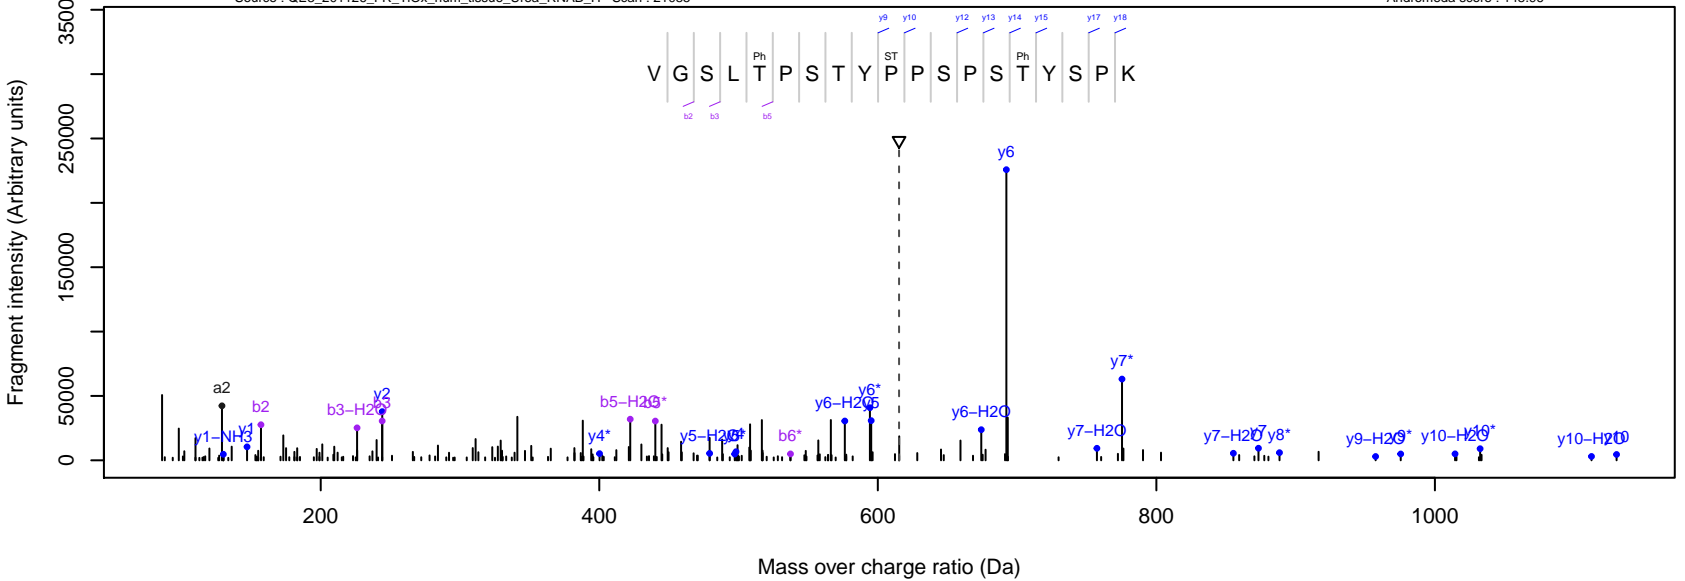

EGDPVSLSTPLETEFGSPS(Phospho (STY))ELSPR-2+

Source : QE3\_201126\_FR\_TiOx\_hum\_tissue\_Urea\_RNAB\_B Scan : 55266

Andromeda score : 148.91

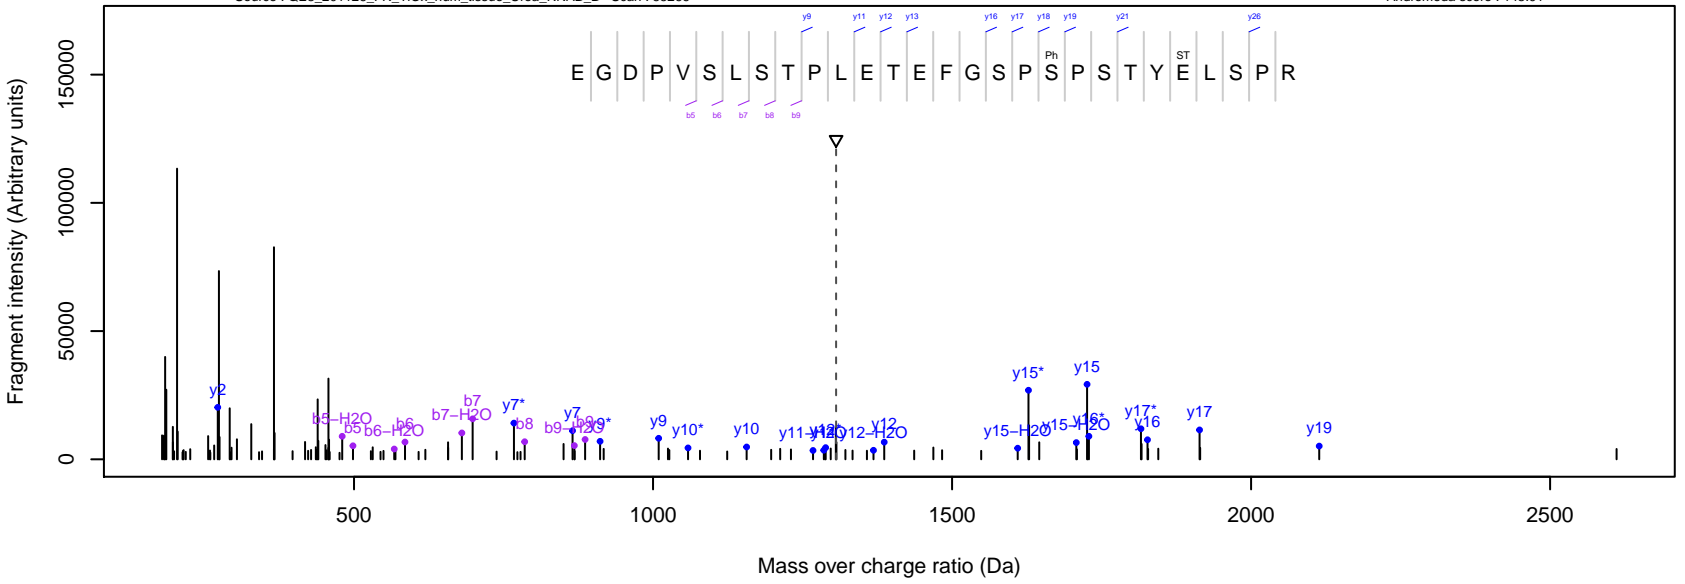

LSLEGDHSTPPSAY(Phospho (STY))GSVK-2+

Source : QE3\_201126\_FR\_TiOx\_hum\_tissue\_Urea\_RNAB\_B Scan : 19142

Andromeda score : 148.91

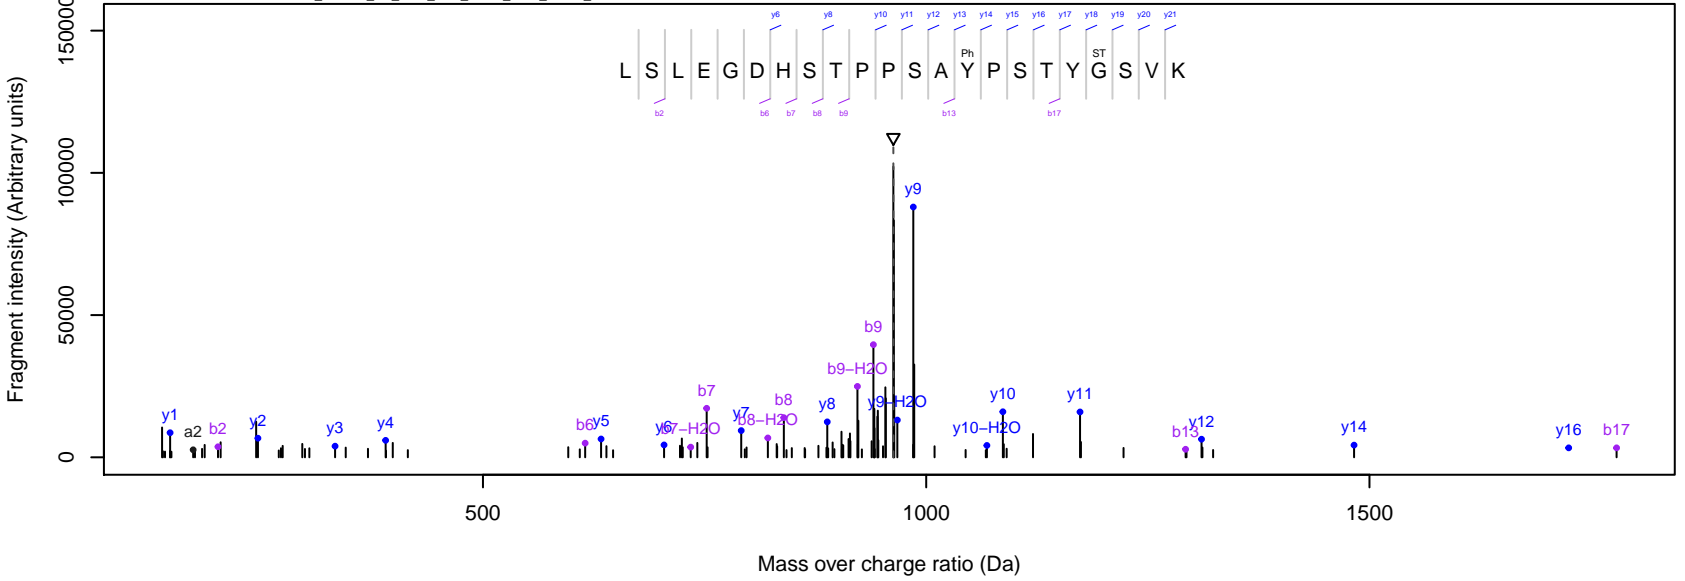

VT(Phospho (STY))QHESDNENEIQINQK-3+

Source : QE3\_201126\_FR\_TiOx\_hum\_tissue\_Urea\_RNAB\_N Scan : 11522

Andromeda score : 148.91

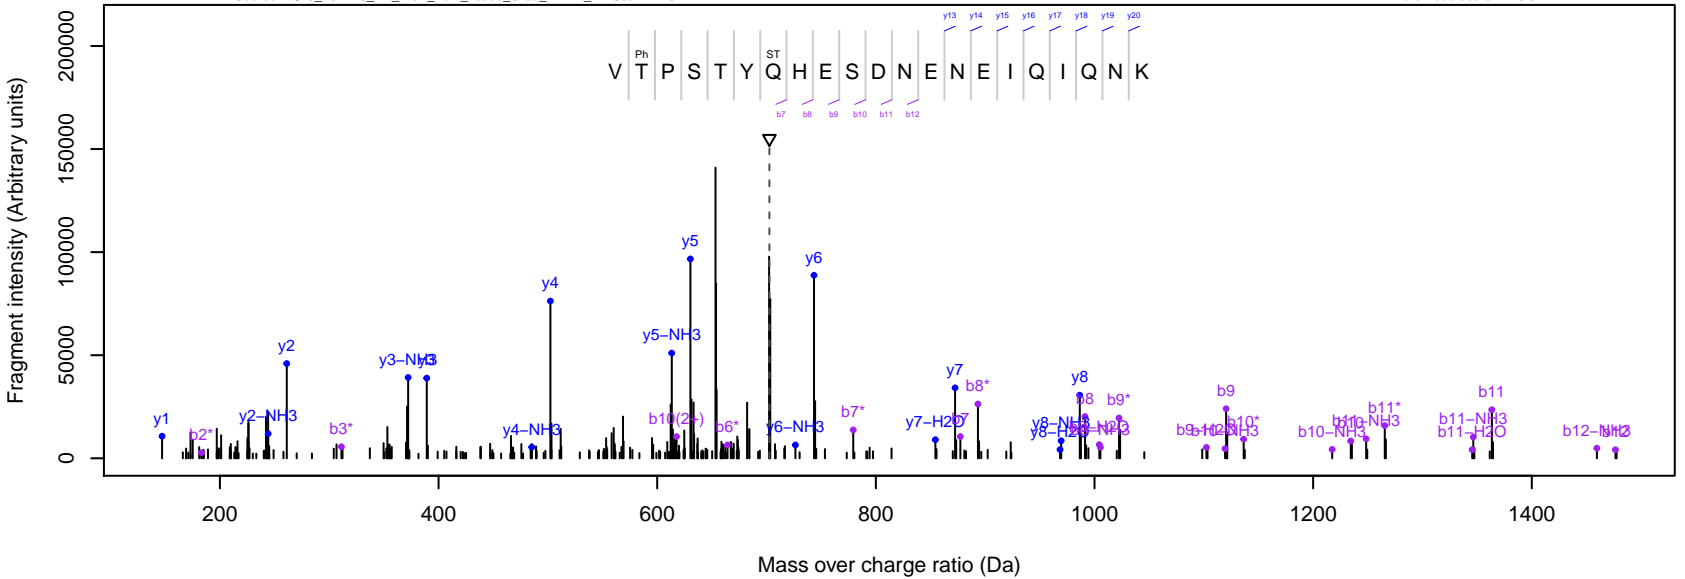



NIIIEEGKEILVGDVGGQTVD DDPY P ST Y A T F V K-3+

Source : QE3\_201126\_FR\_TIOx\_hum\_tissue\_Urea\_RNAB\_H Scan : 56377

Andromeda score : 148.9

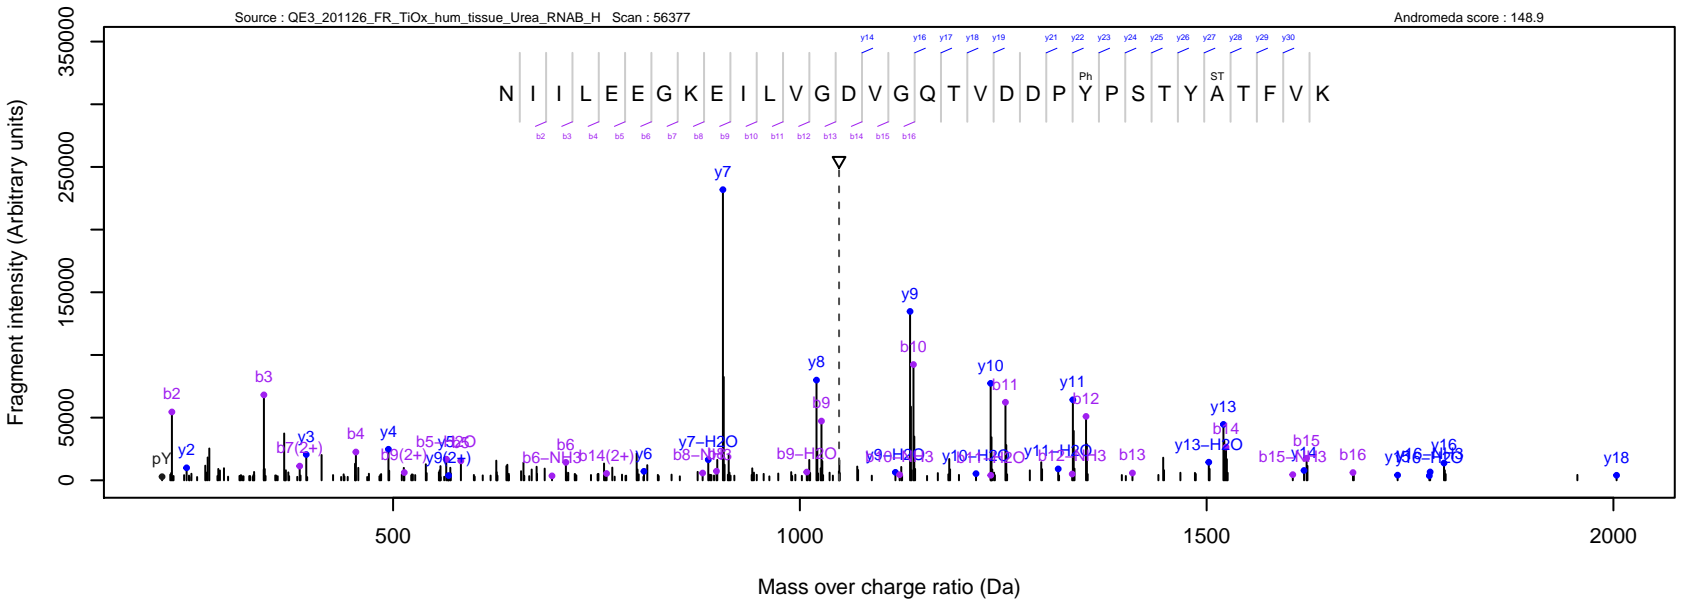

QNGSNDSPSTYDRYS P ST Y D N E E D S K I E L K-3+

Source : QE3\_201126\_FR\_TIOx\_hum\_tissue\_Urea\_RNAB\_N Scan : 17279

Andromeda score : 148.9

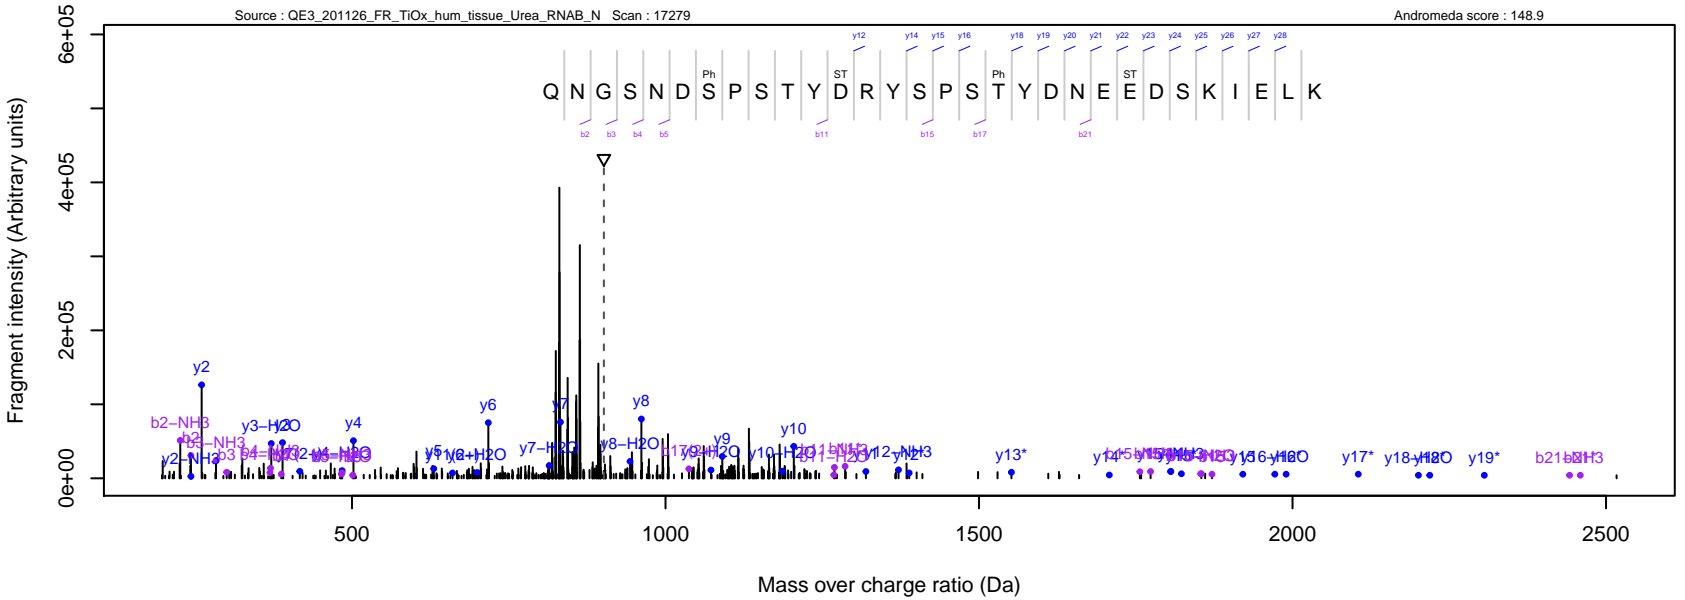

SQTKEEQSQIT S Q V T P S T Y G Q I G W R-3+

Source : QE3\_201126\_FR\_TIOx\_hum\_tissue\_Urea\_RNAB\_N Scan : 28647

Andromeda score : 148.87

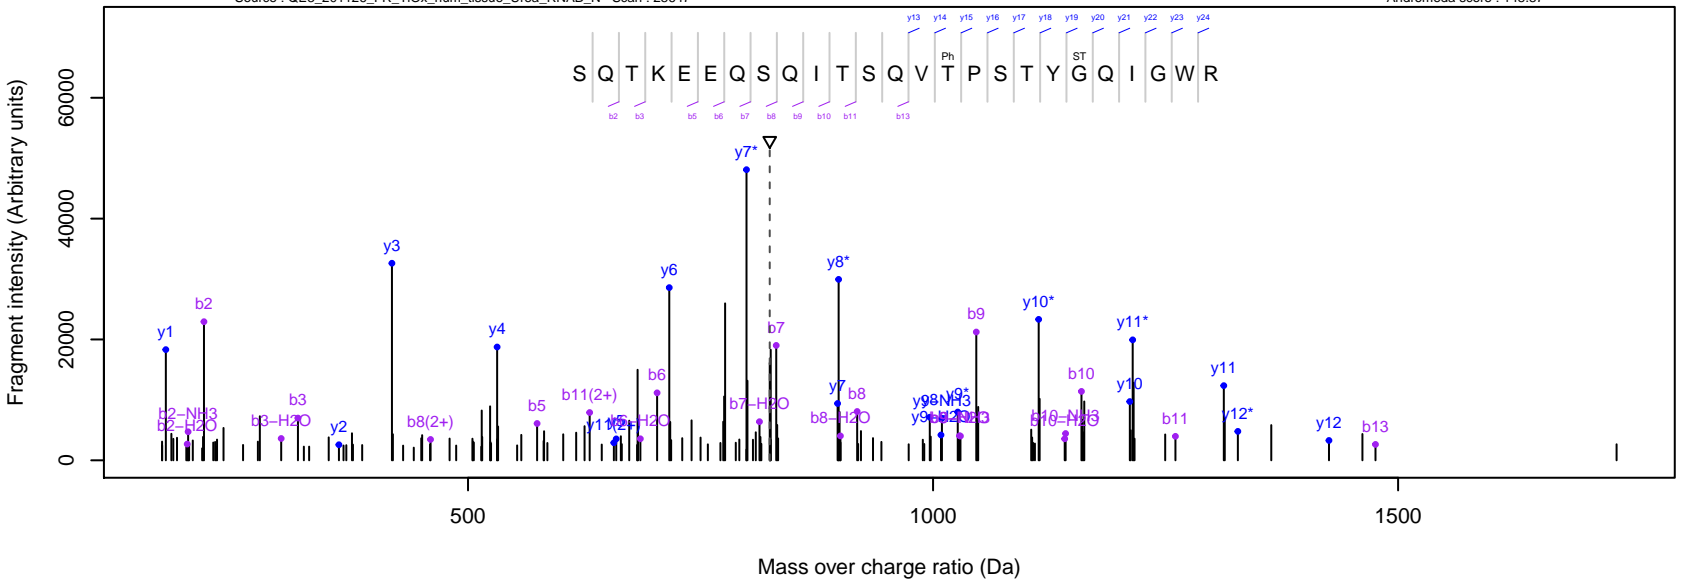

STGVSWTQDS(Phospho (STY))DENEQEQQS(Phospho (STY))DTEEGSNKK-3+

Source : QE3\_201126\_FR\_TIOx\_hum\_tissue\_Urea\_RNAB\_N Scan : 34752

Andromeda score : 148.77

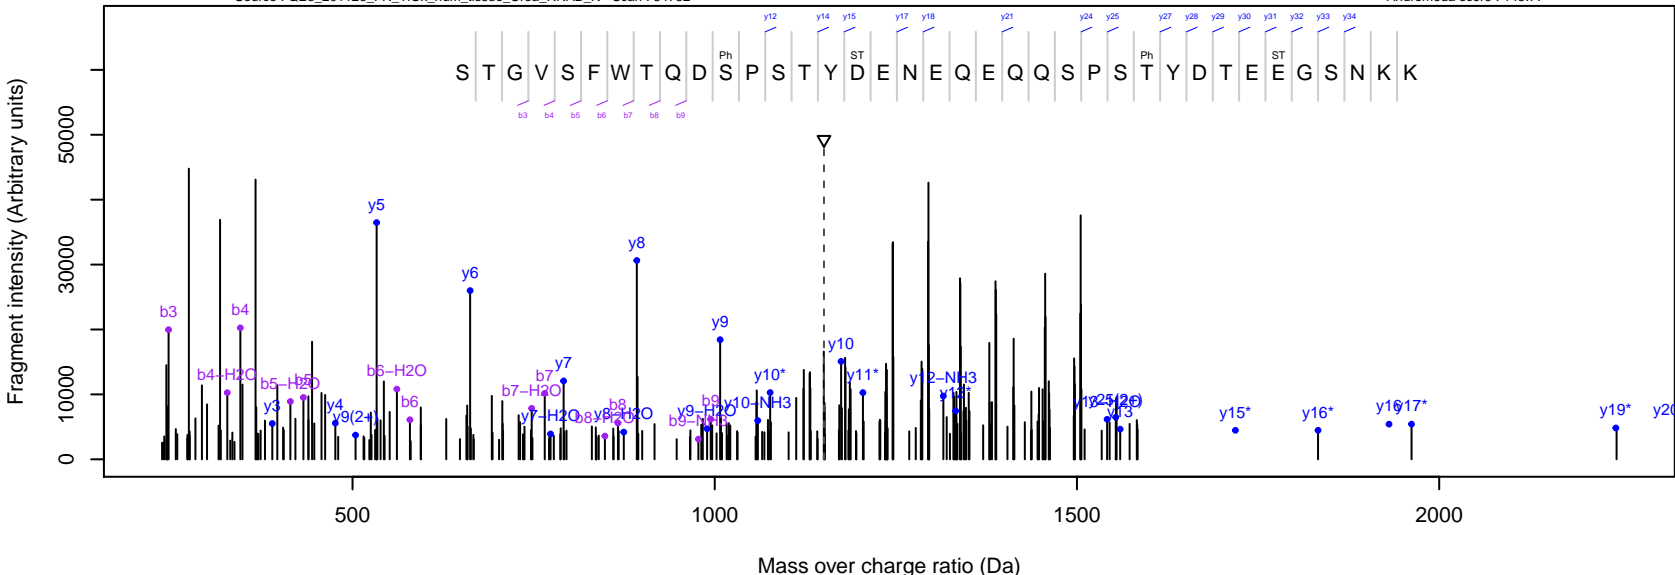

RVGEQDSAPTQEKP(Phospho (STY))PGK-3+

Source : QE3\_201126\_FR\_TIOx\_hum\_tissue\_Urea\_RNAB\_B Scan : 5655

Andromeda score : 148.74

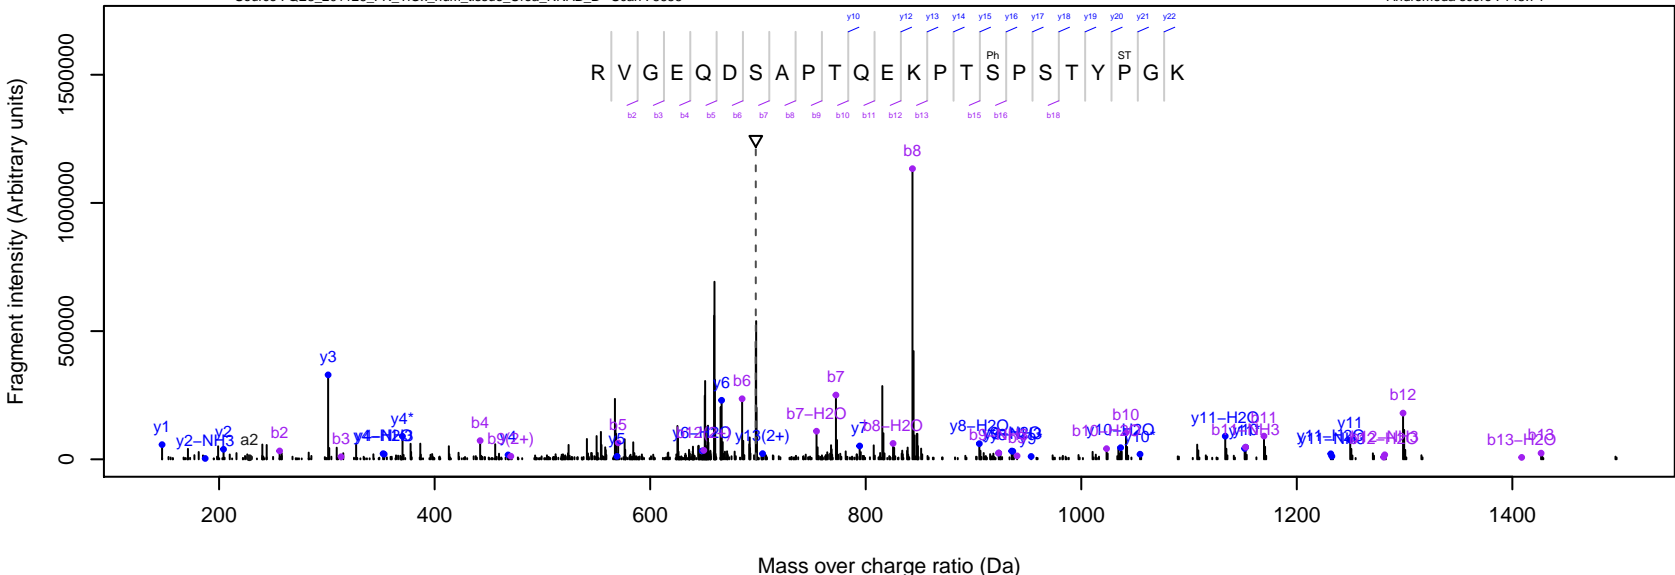

EDS(Phospho (STY))VKPGAHLTVK-2+

Source : QE3\_201126\_FR\_TIOx\_hum\_tissue\_Urea\_RNAB\_B Scan : 9161

Andromeda score : 148.72

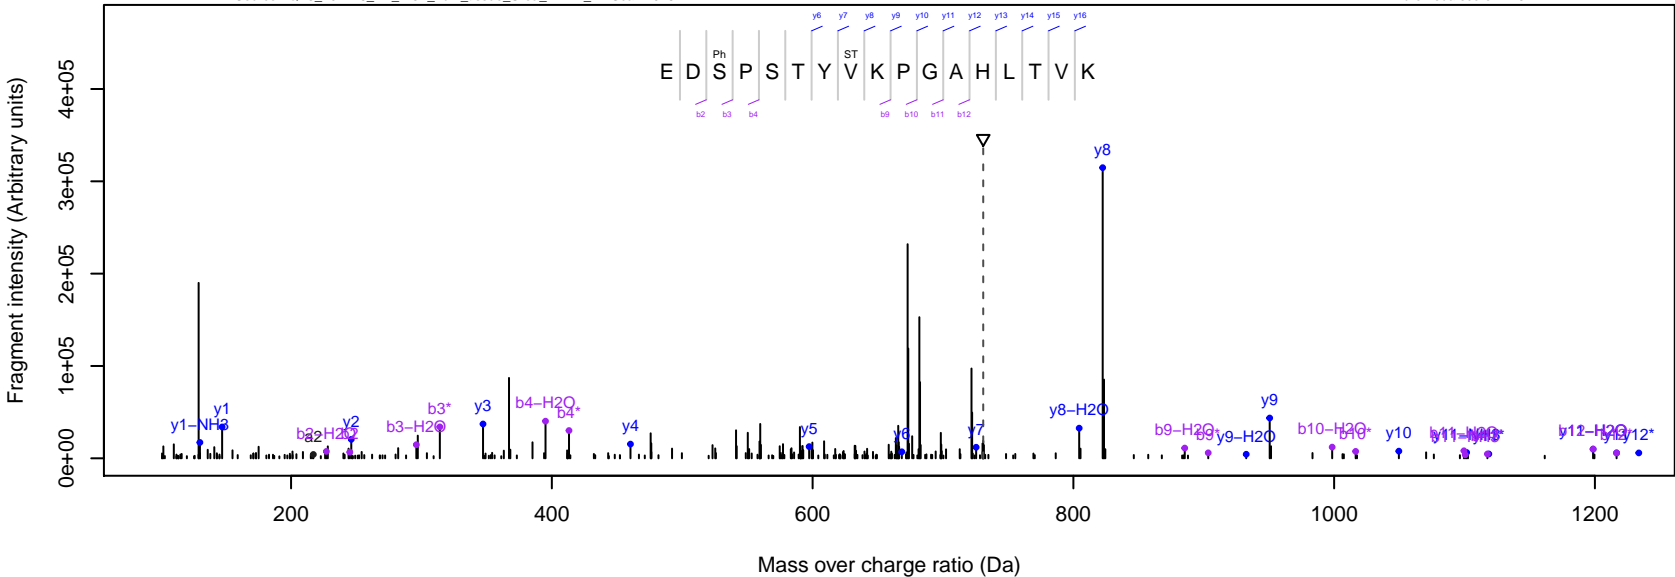

APAPQPPSLPDRS(Phospho (STY))PRPQR-3+

Source : QE3\_201126\_FR\_TiOx\_hum\_tissue\_Urea\_RNAB\_N Scan : 14336

Andromeda score : 148.69

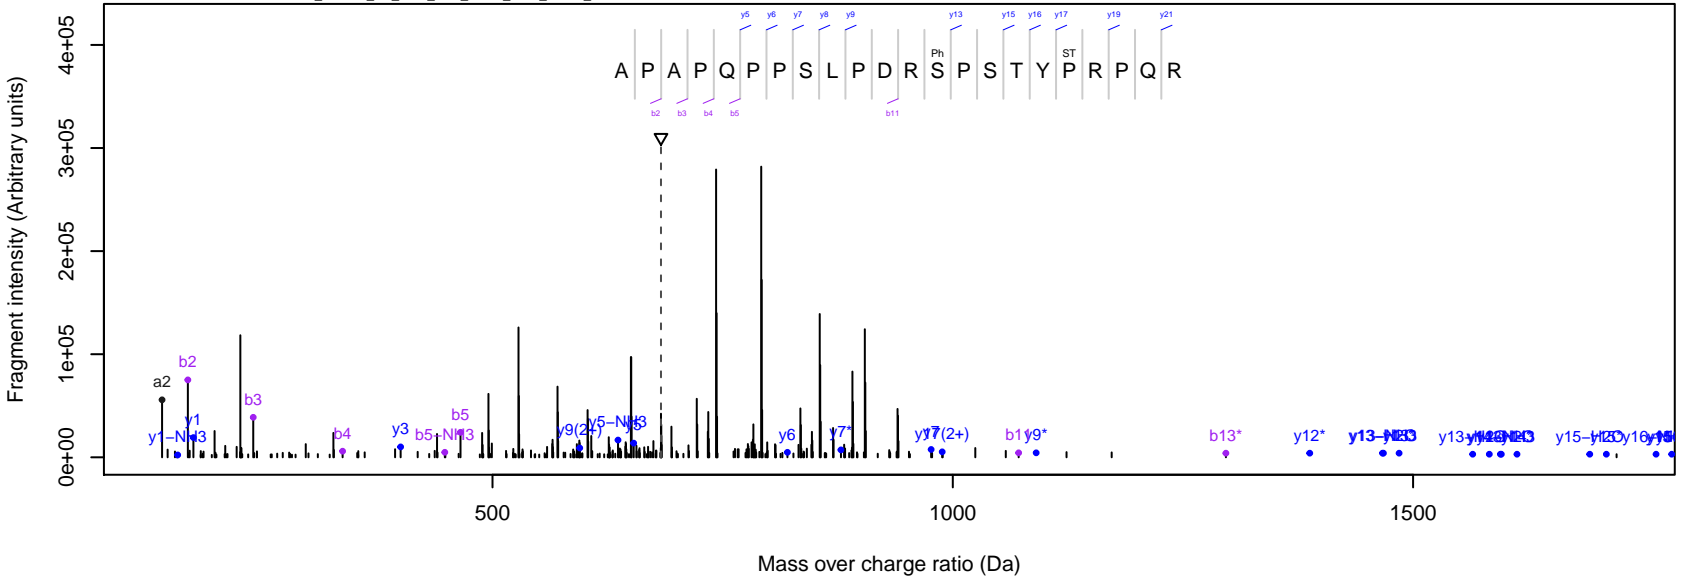

NISSPS(Phospho (STY))VESLPGR-2+

Source : QE3\_201126\_FR\_TiOx\_hum\_tissue\_Urea\_RNAB\_N Scan : 23115

Andromeda score : 148.57

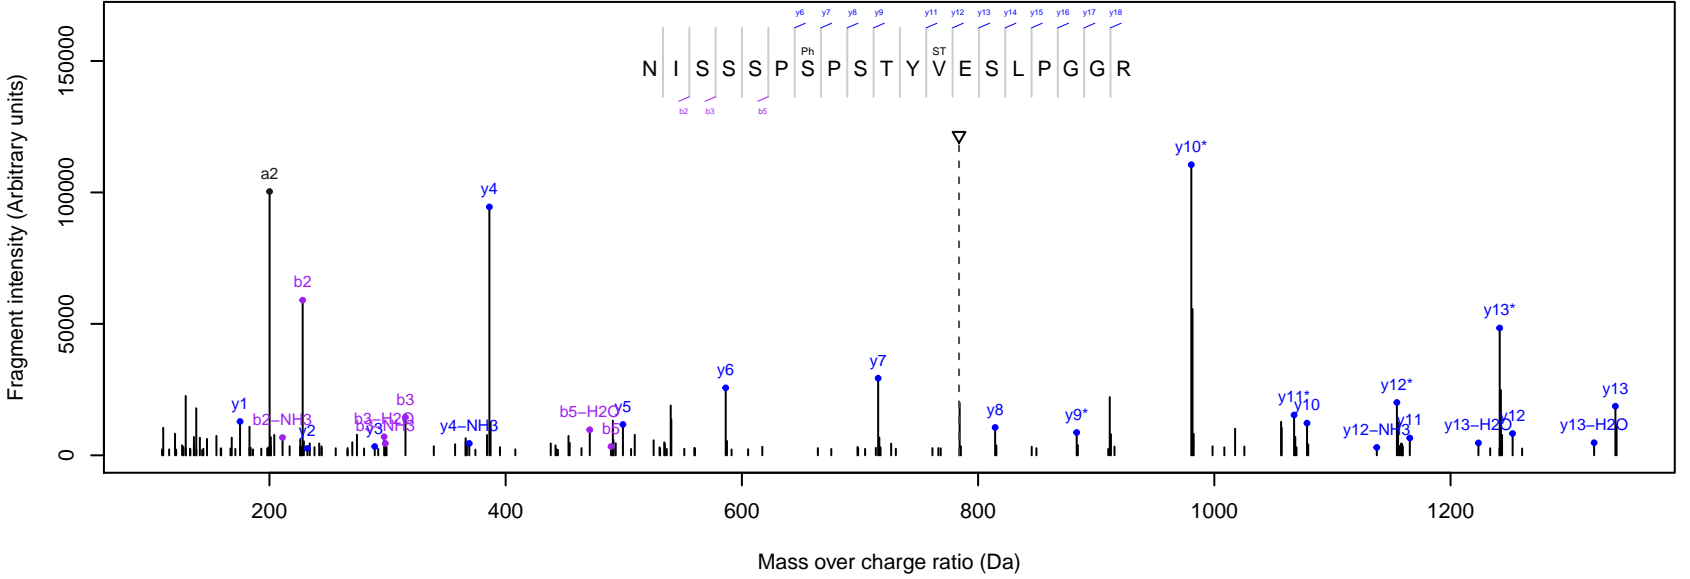

AFGPGGGAGS(Phospho (STY))PAR-2+

Source : QE3\_201126\_FR\_TiOx\_hum\_tissue\_Urea\_RNAB\_H Scan : 21487

Andromeda score : 148.52

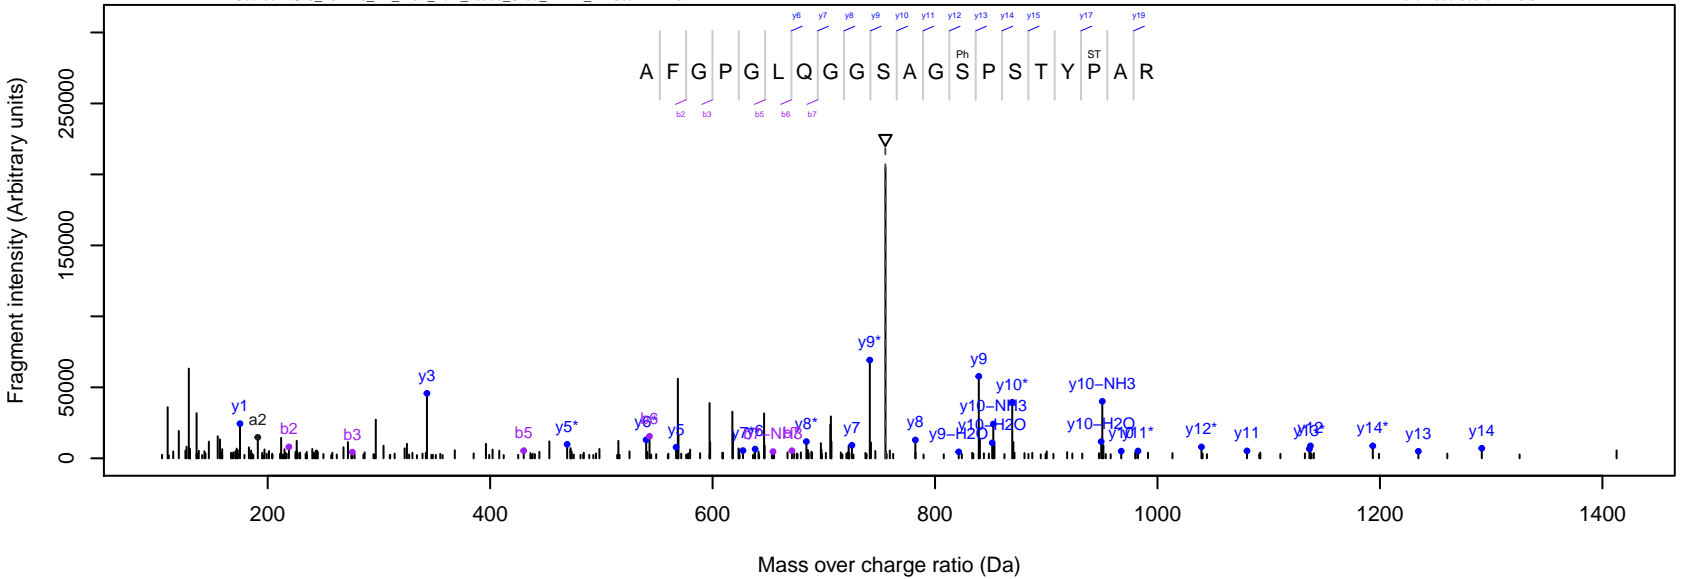

GVGSGPHPPDTQQPS(Phospho (STY))PSK-2+

Source : QE3\_201126\_FR\_TiOx\_hum\_tissue\_Urea\_RNAB\_N Scan : 9153

Andromeda score : 148.52

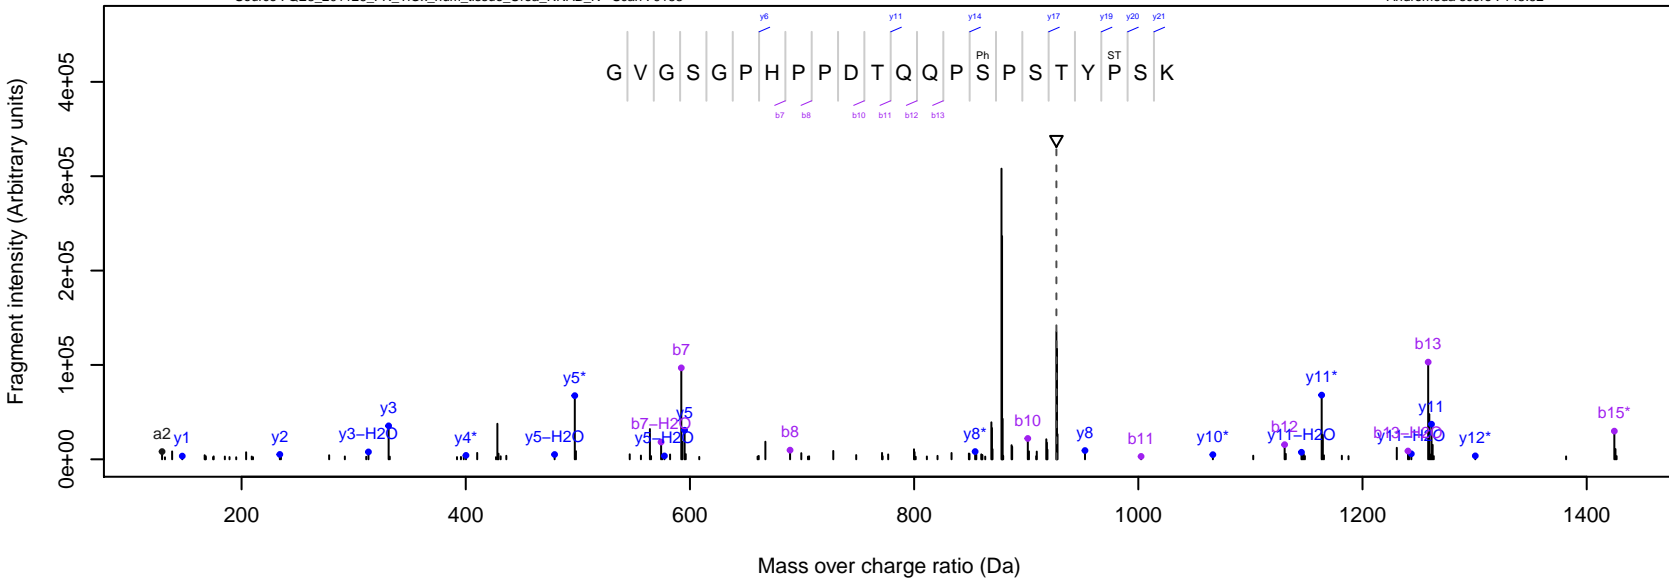

VVEAVNSDS(Phospho (STY))DSEFGIPK-2+

Source : QE3\_201126\_FR\_TiOx\_hum\_tissue\_Urea\_RNAB\_H Scan : 35286

Andromeda score : 148.52

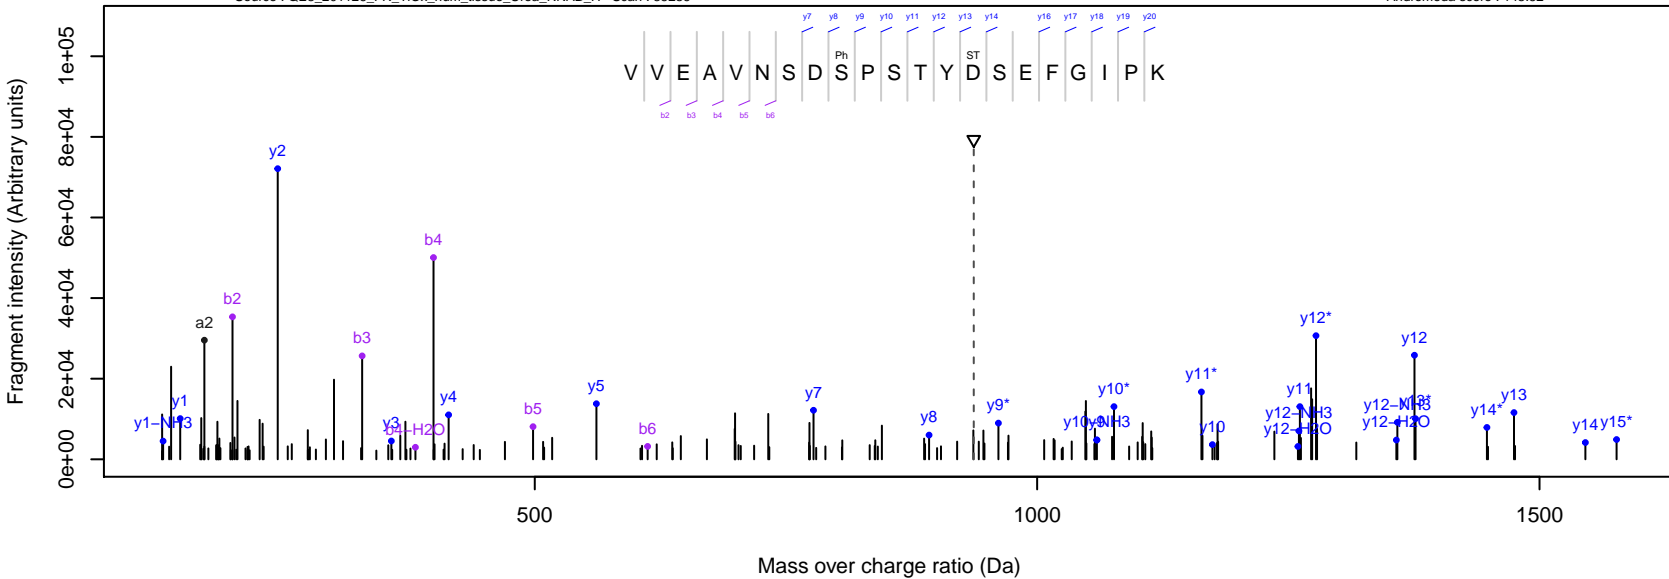

RSS(Phospho (STY))PVPPVPERR-3+

Source : QE3\_201126\_FR\_TiOx\_hum\_tissue\_Urea\_RNAB\_H Scan : 7836

Andromeda score : 148.44

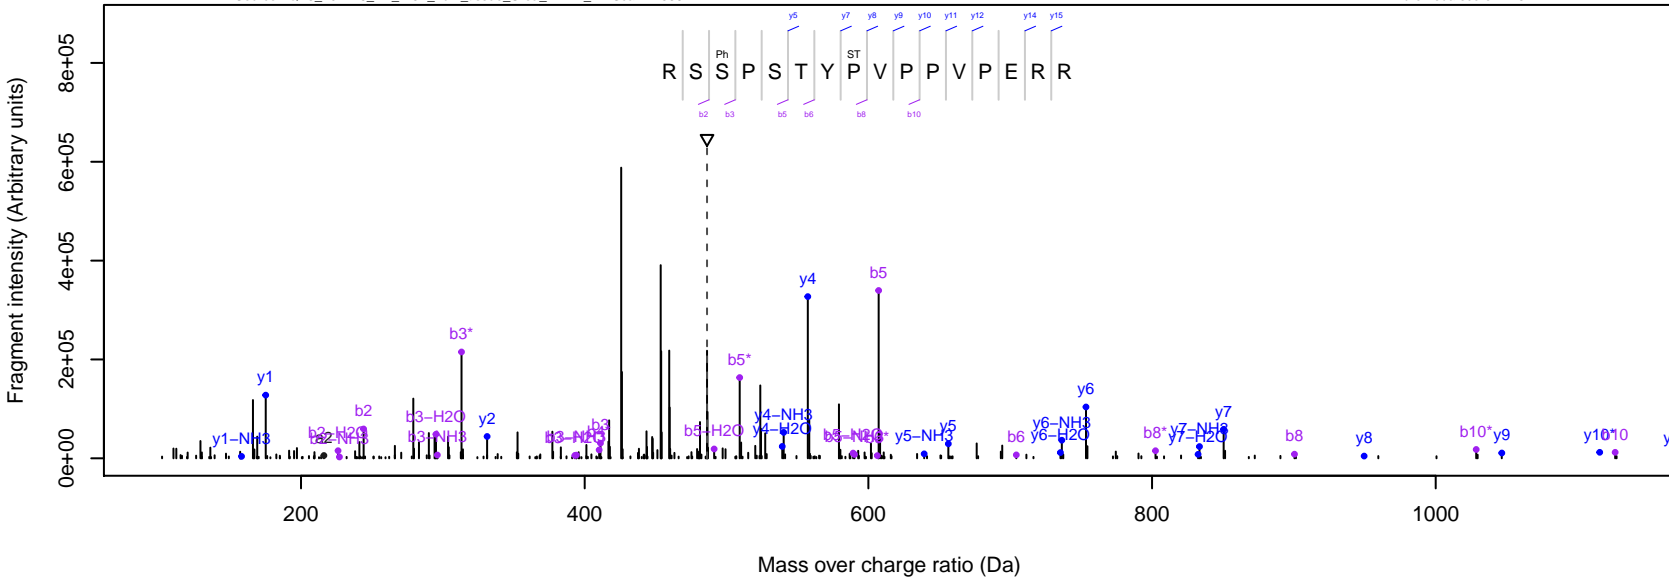

ITHS(Phospho (STY))PTVSQVTER-2+

Source : QE3\_201126\_FR\_TIOx\_hum\_tissue\_Urea\_RNAB\_B Scan : 10967

Andromeda score : 148.41

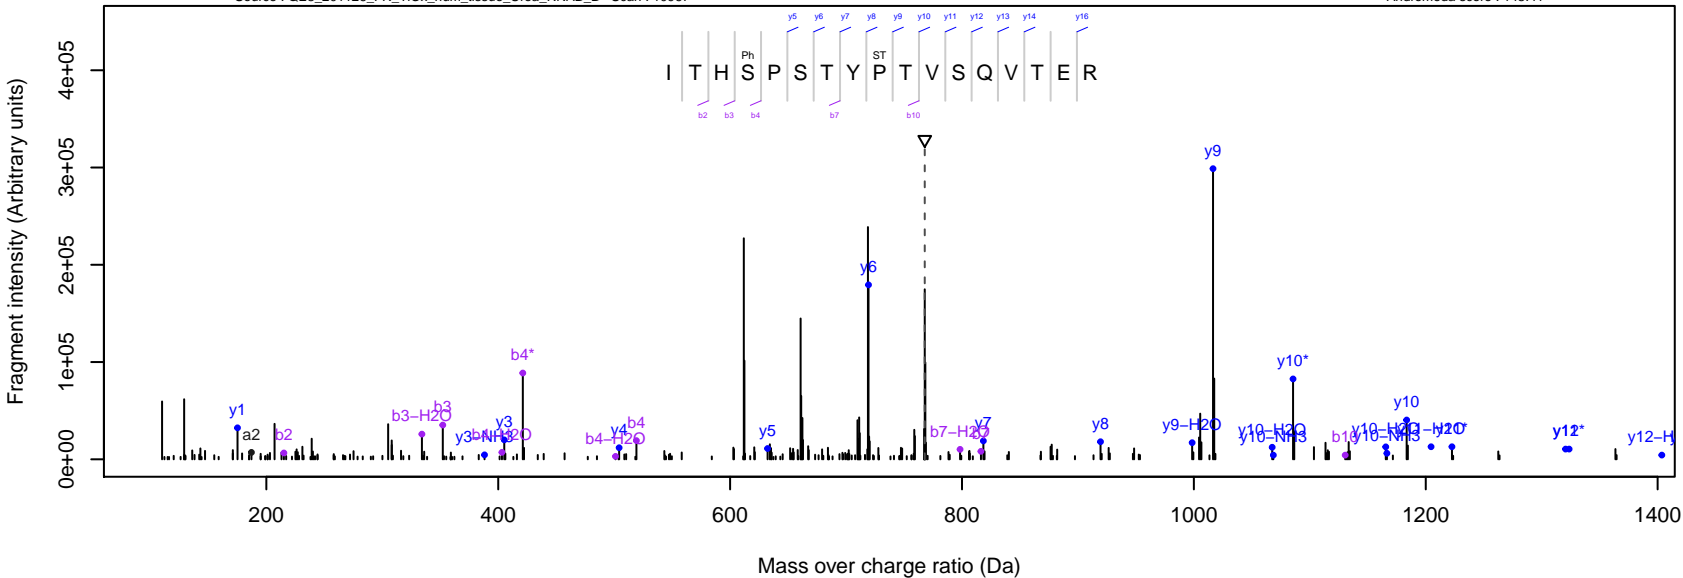

LTQTSS(Phospho (STY))TEQLNVLETETEVLNK-2+

Source : QE3\_201126\_FR\_TIOx\_hum\_tissue\_Urea\_RNAB\_B Scan : 51423

Andromeda score : 148.38

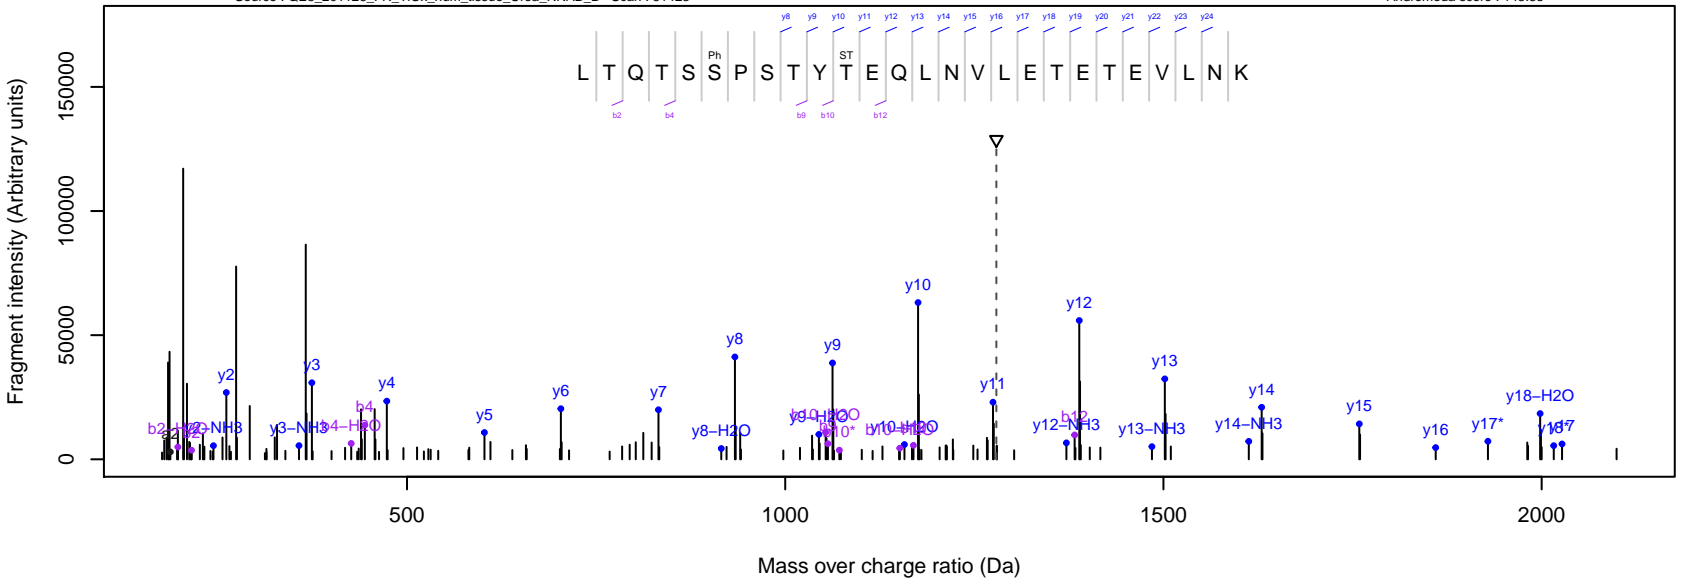

M(Oxidation (M))FGGPGTASRPSS(Phospho (STY))SR-3+

Source : QE3\_201126\_FR\_TIOx\_hum\_tissue\_Urea\_RNAB\_N Scan : 8530

Andromeda score : 148.36

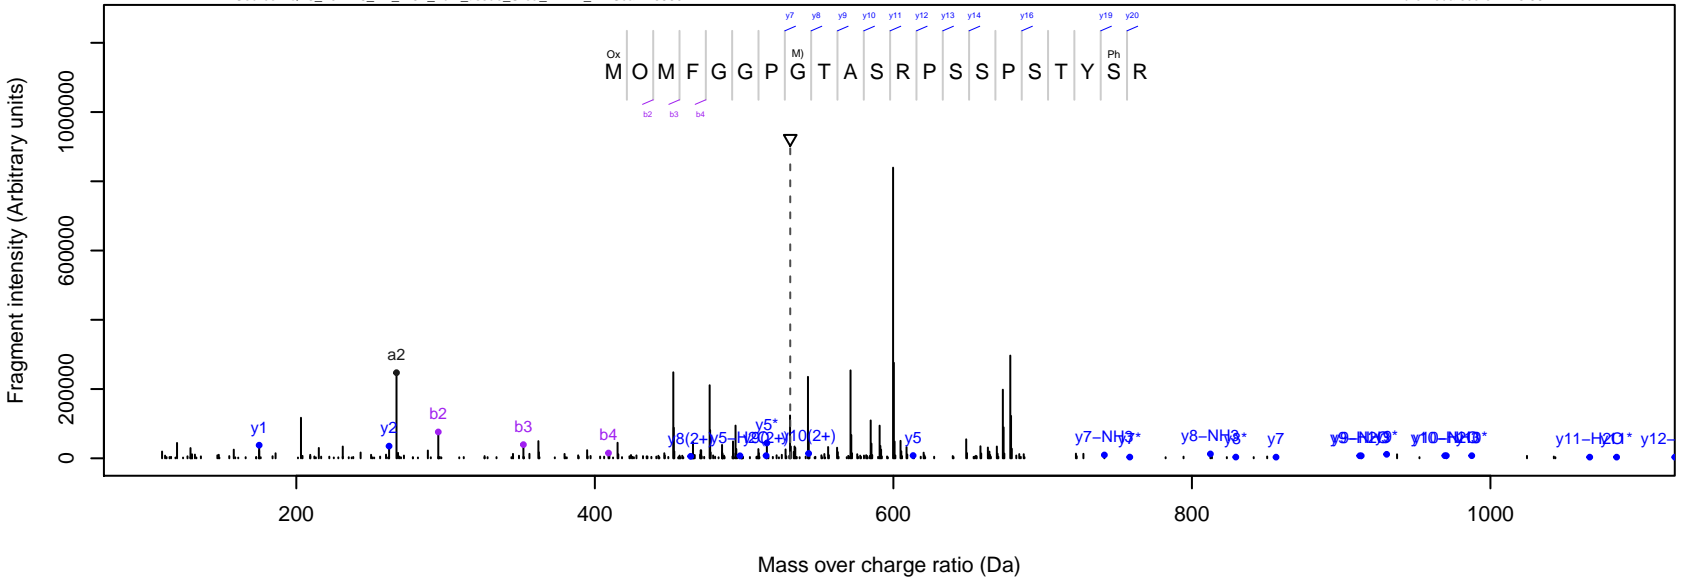

**QKDFLDGVYAFEYYPST(Phospho (STY))PGR-3+**

Source : QE3\_201126\_FR\_TiOx\_hum\_tissue\_Urea\_RNAB\_B Scan : 53346

Andromeda score : 148.36

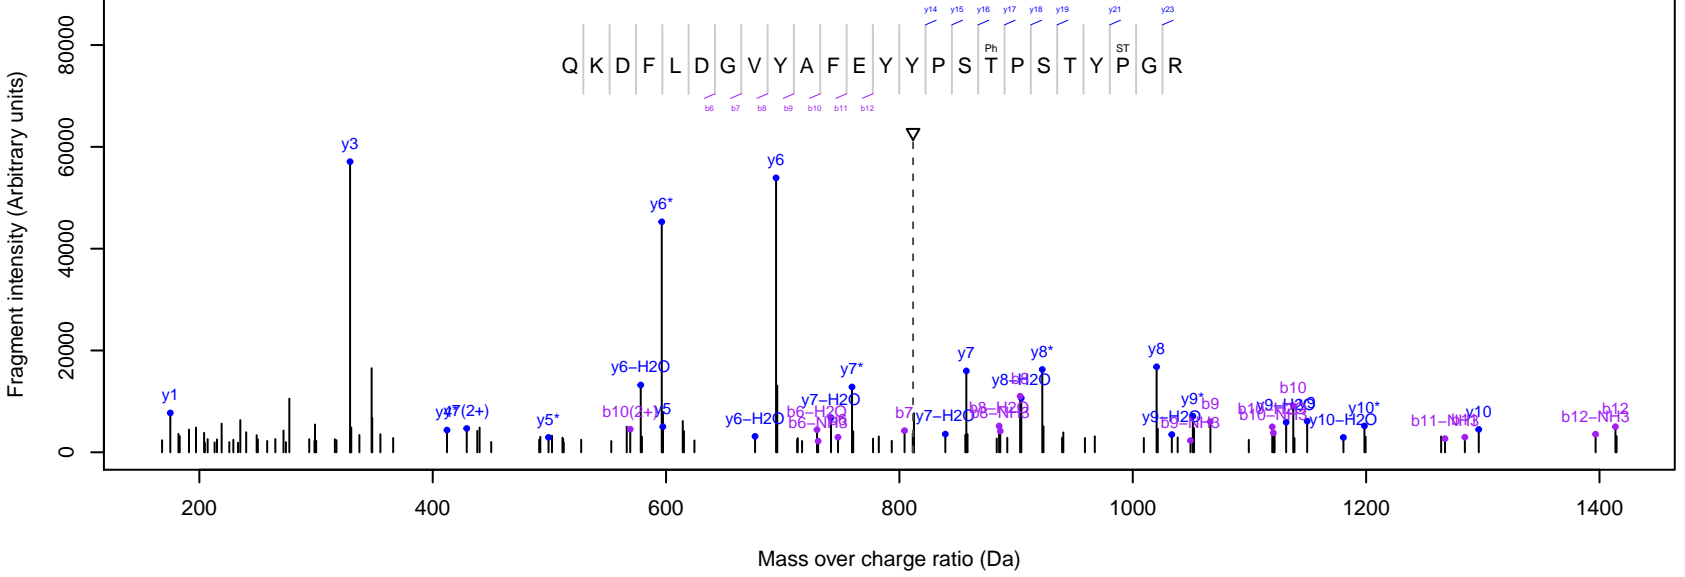

**ISYT(Phospho (STY))PPES(Phospho (STY))PVPSYASSTPLHVPVPR-3+**

Source : QE3\_201126\_FR\_TiOx\_hum\_tissue\_Urea\_RNAB\_H Scan : 49667

Andromeda score : 148.3

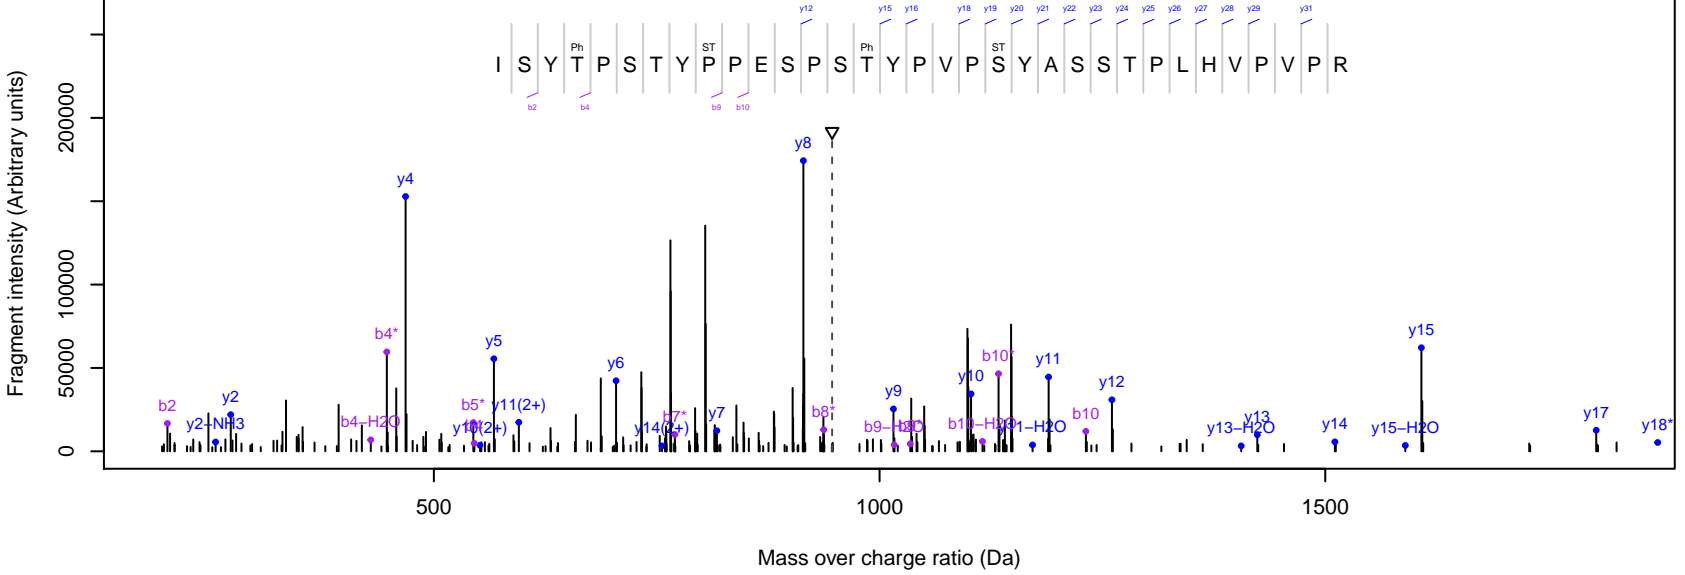

**AGNS(Phospho (STY))DS(Phospho (STY))EEDDANGRVELILEPK-2+**

Source : QE3\_201126\_FR\_TiOx\_hum\_tissue\_Urea\_RNAB\_H Scan : 42941

Andromeda score : 148.26

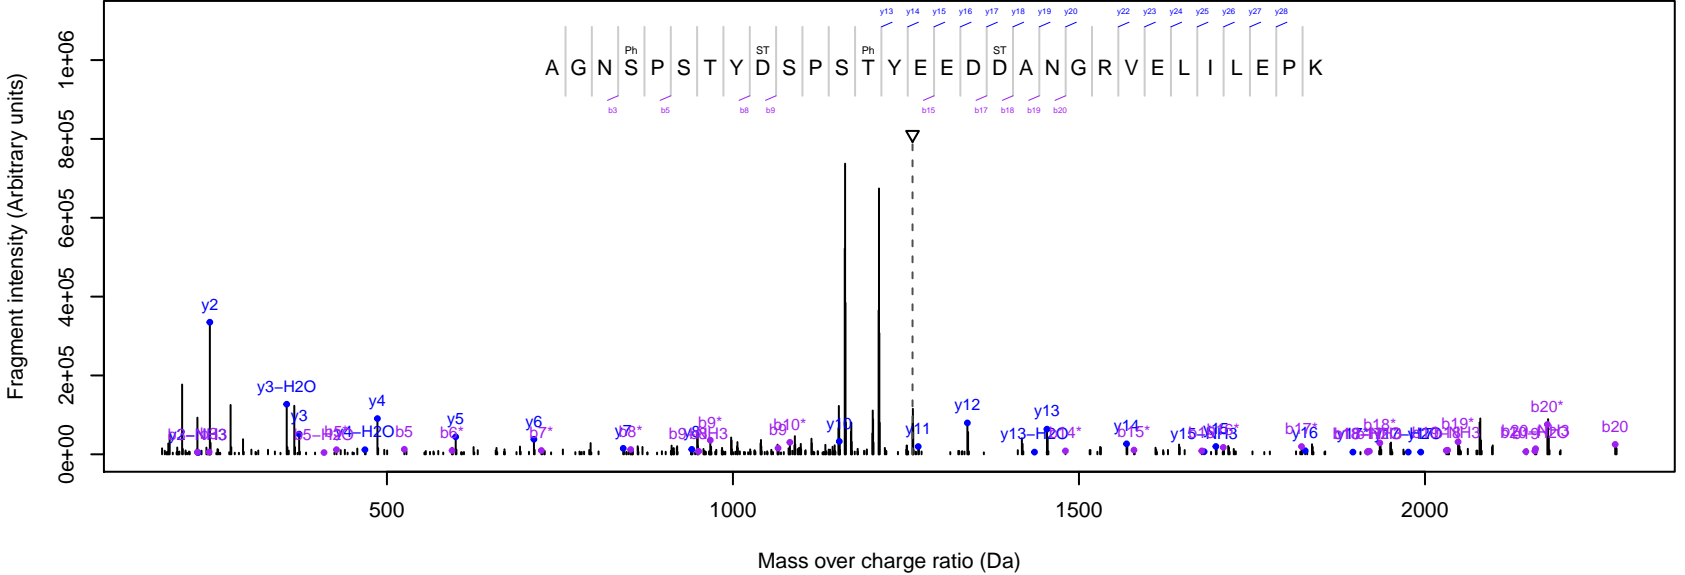

**GGTPAGS(Phospho (STY))ARGSPTRNPPV-3+**

Source : QE3\_201126\_FR\_TIOx\_hum\_tissue\_Urea\_RNAB\_H Scan : 9803

Andromeda score : 148.26

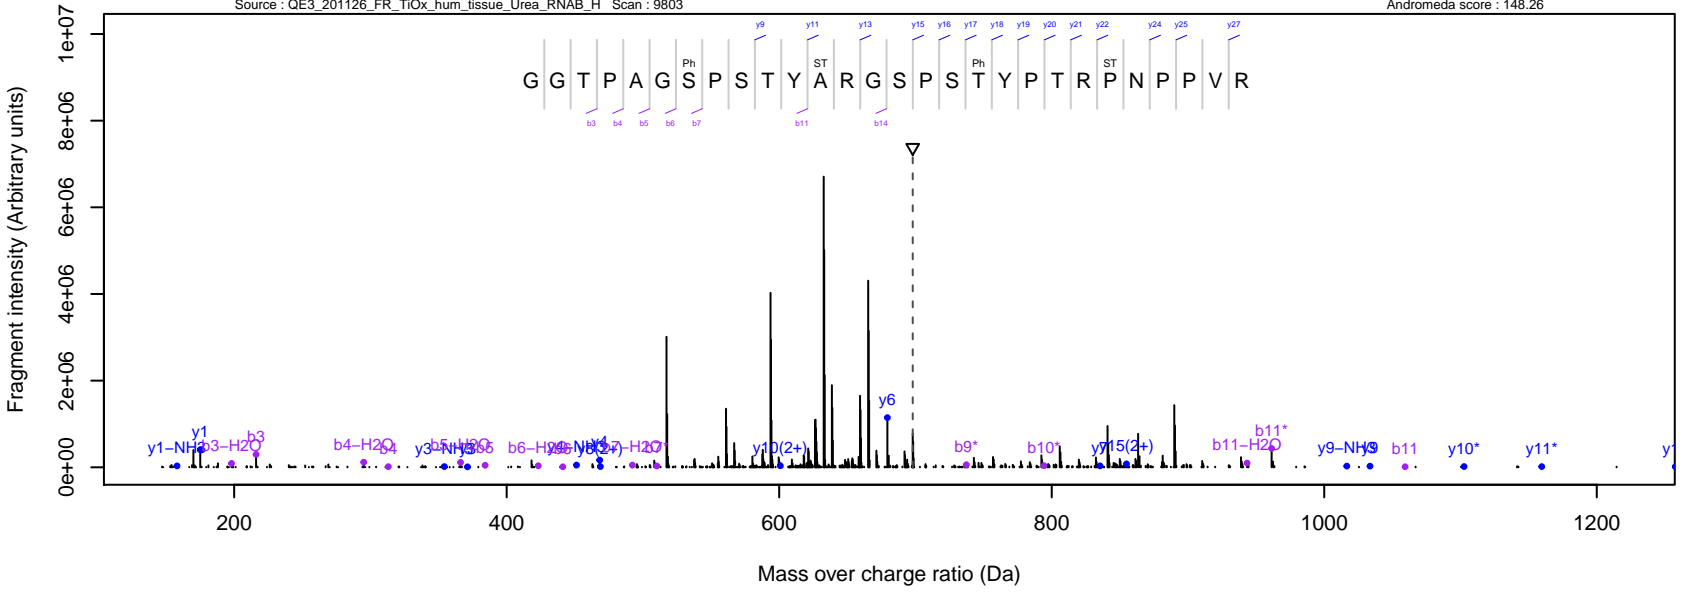

**S(Phospho (STY))GSIVELIAGGGSCSPVLSR-2+**

Source : QE3\_201126\_FR\_TIOx\_hum\_tissue\_Urea\_RNAB\_N Scan : 52894

Andromeda score : 148.26

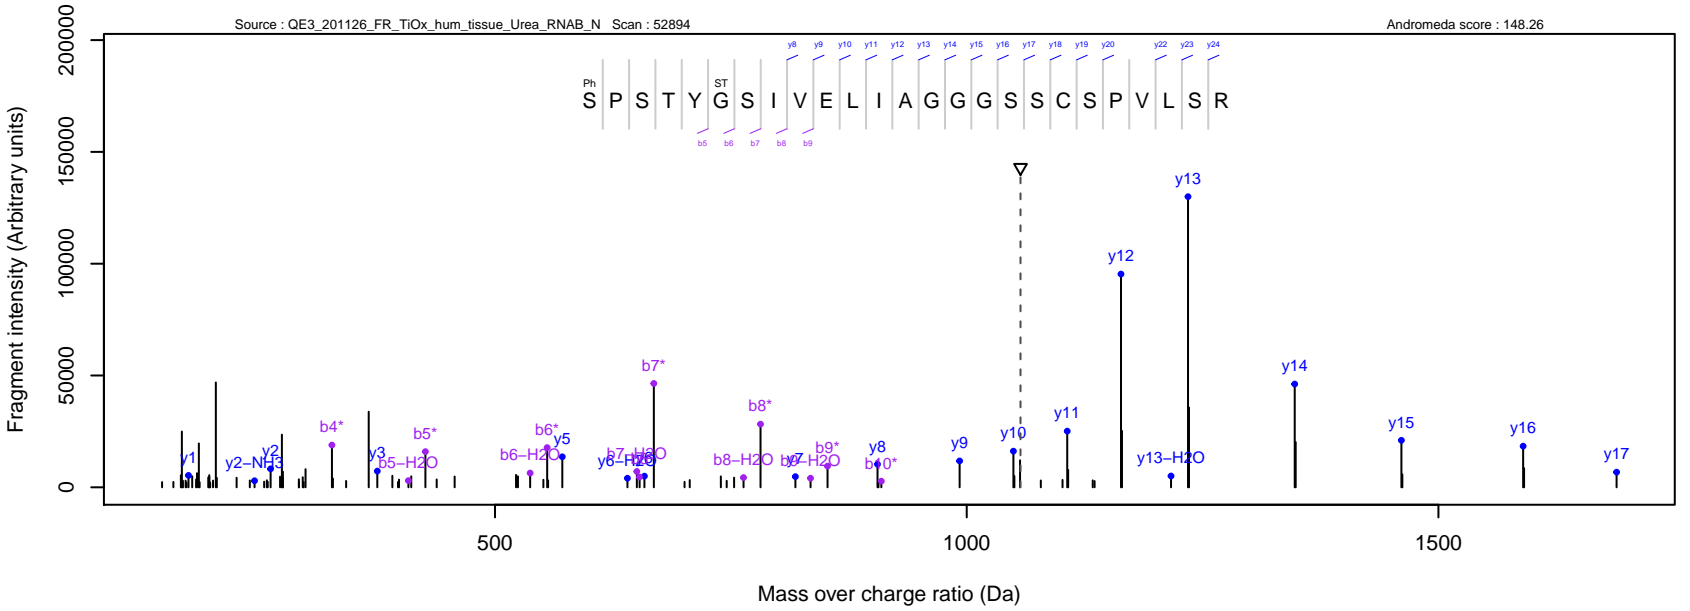

**LPPPPFGLPESEGAAGGS(Phospho (STY))EPEAGDS(Phospho (STY))DTEGEDIFTGAAVVSK-4+**

Source : QE3\_201126\_FR\_TIOx\_hum\_tissue\_Urea\_RNAB\_H Scan : 62916

Andromeda score : 148.24

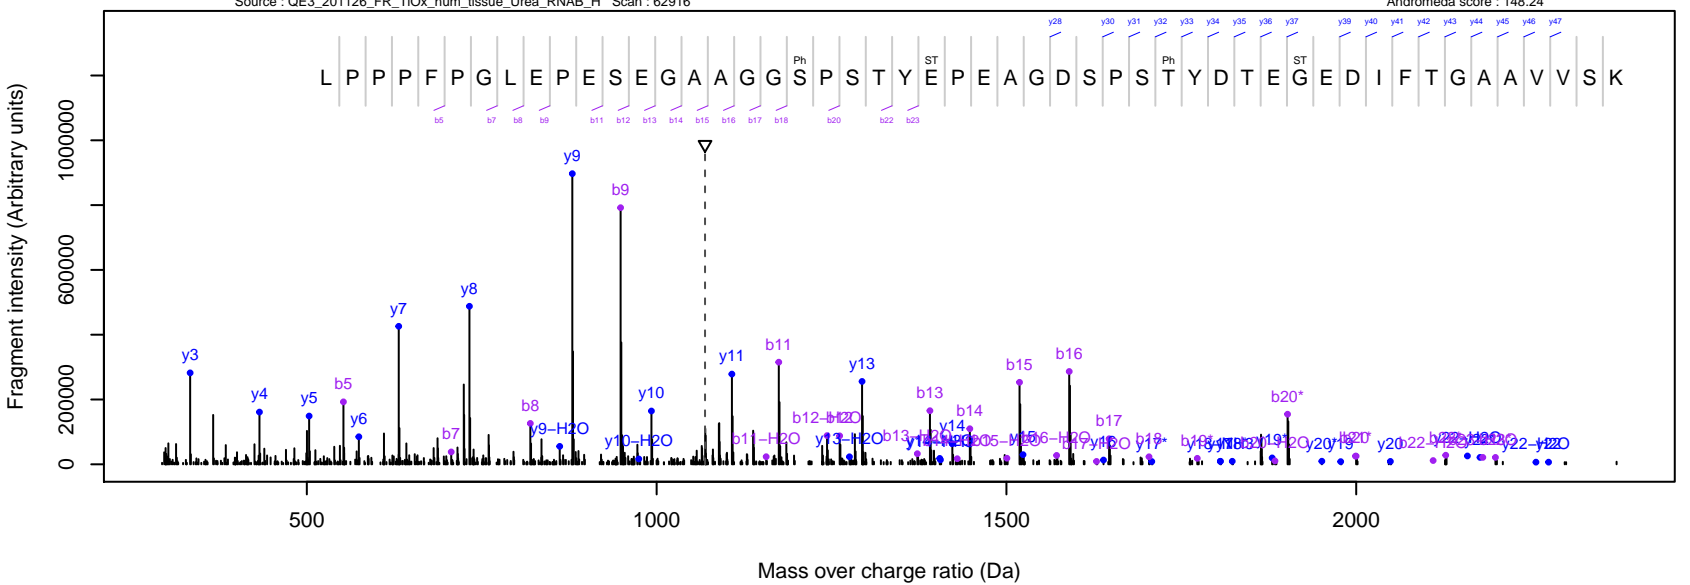

ESAS(Phospho (STY))PTIPNLDLLEAHTK-3+

Source : QE3\_201126\_FR\_TiOx\_hum\_tissue\_Urea\_RNAB\_H Scan : 43982

Andromeda score : 148.2

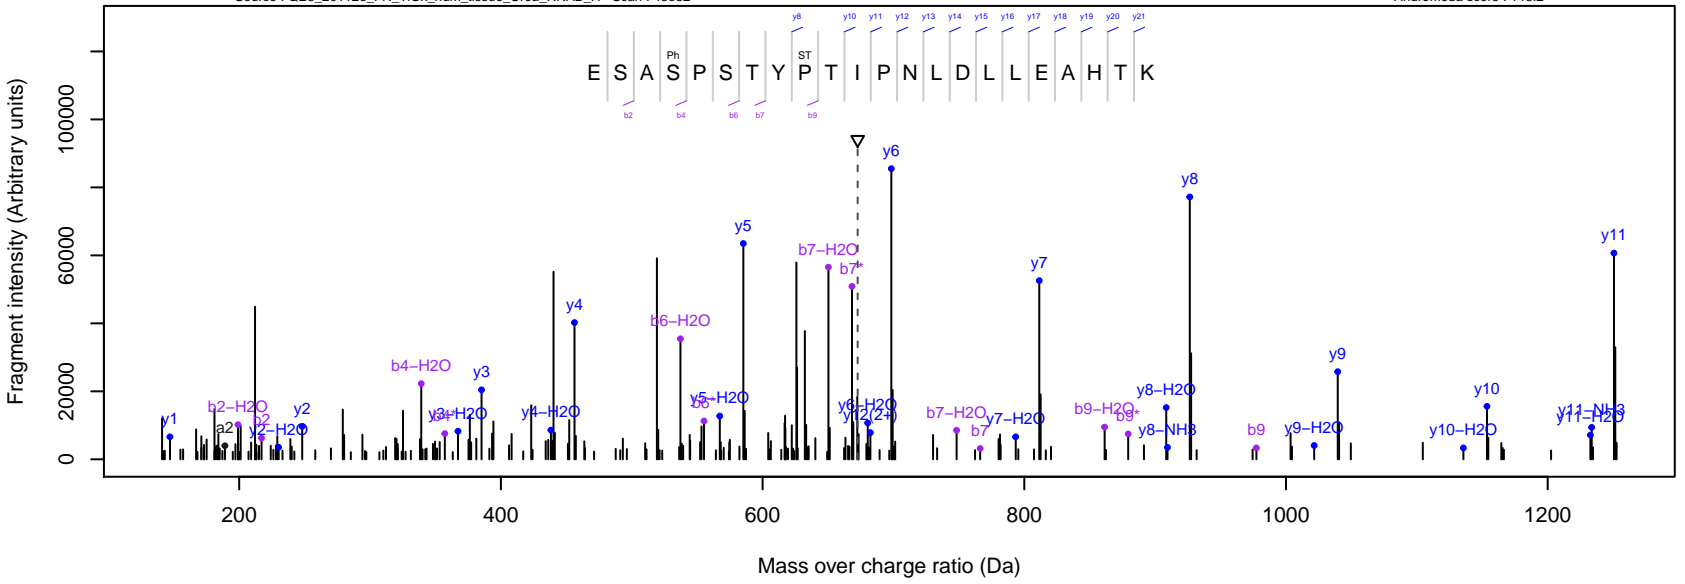

ASS(Phospho (STY))LEDLVLK-2+

Source : QE3\_201126\_FR\_TiOx\_hum\_tissue\_Urea\_RNAB\_H Scan : 41113

Andromeda score : 148.19

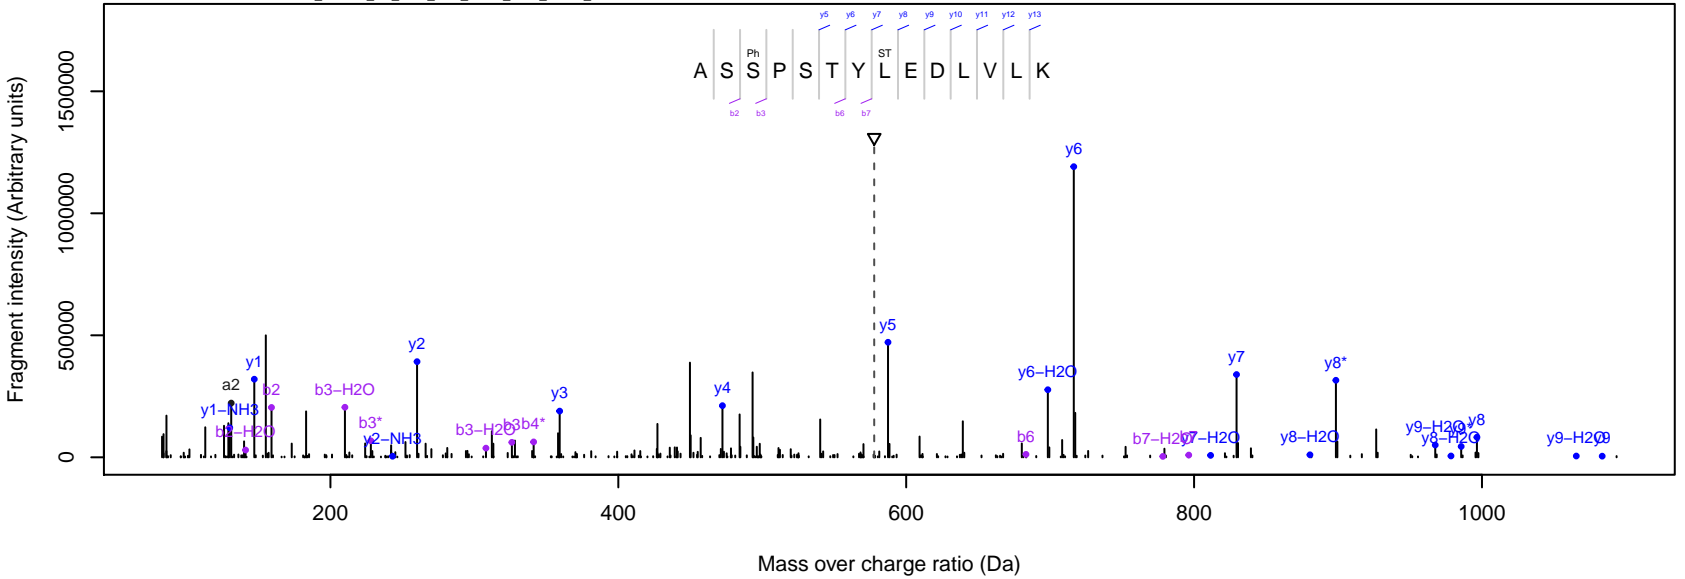

RM(Oxidation (M))S(Phospho (STY))DEFVDSFK-2+

Source : QE3\_201126\_FR\_TiOx\_hum\_tissue\_Urea\_RNAB\_H Scan : 24301

Andromeda score : 148.18

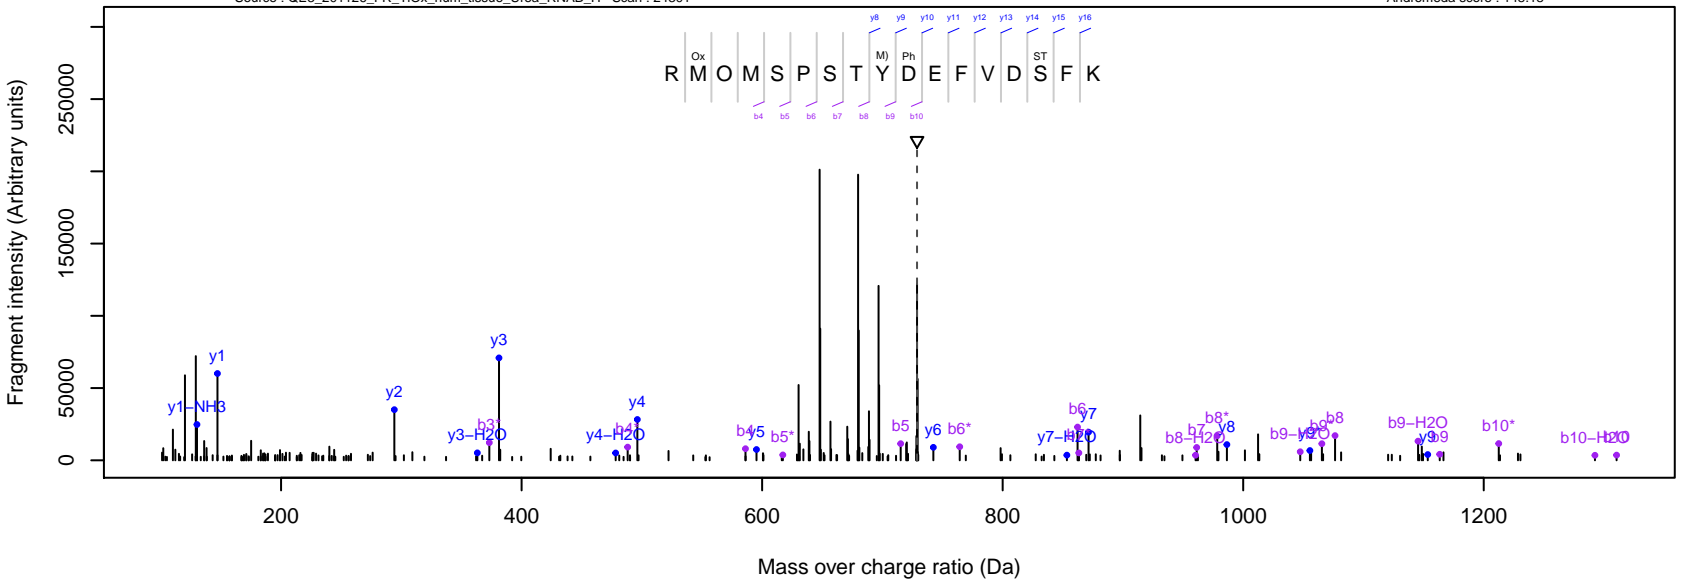



SES(Phospho (STY))NEDLFGLVPFDEITGSQQQK-3+

Source : QE3\_201126\_FR\_TiOx\_hum\_tissue\_Urea\_RNAB\_N Scan : 61701

Andromeda score : 148.17

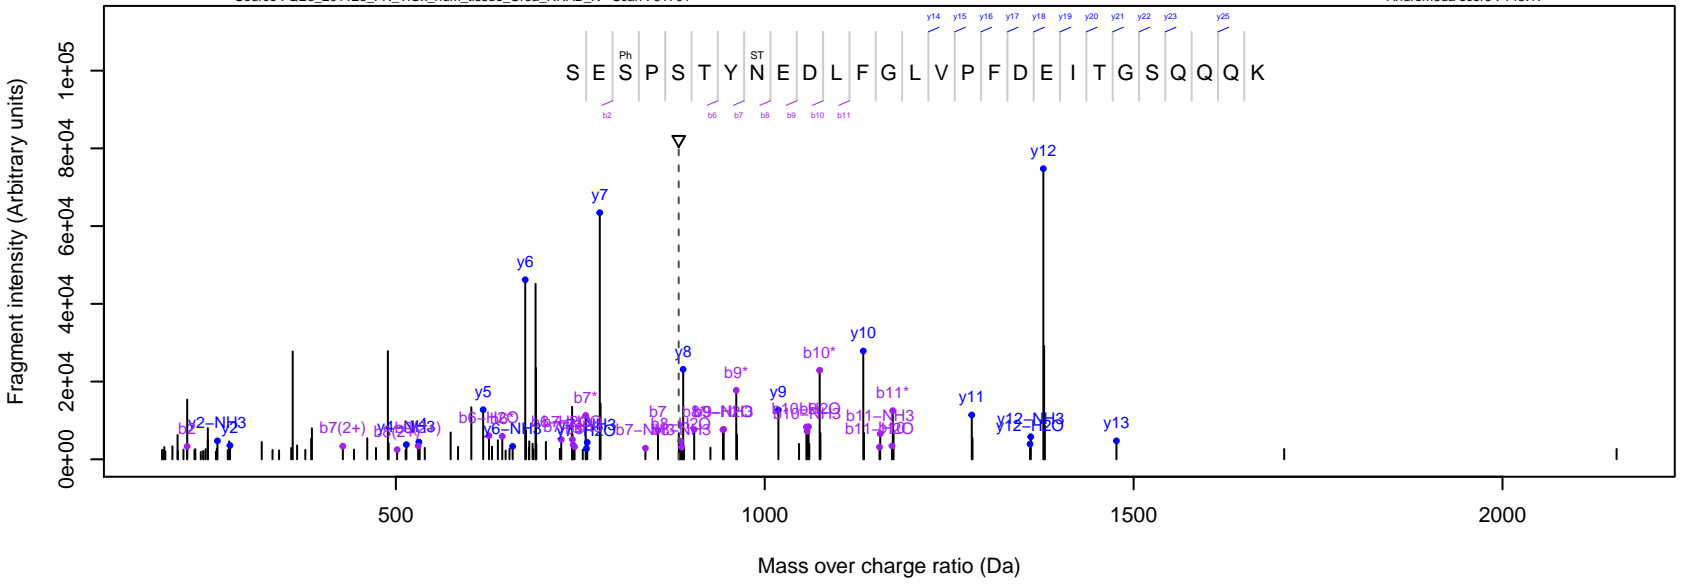

QGS(Phospho (STY))PTPALPEK-2+

Source : QE3\_201126\_FR\_TiOx\_hum\_tissue\_Urea\_RNAB\_H Scan : 14937

Andromeda score : 148.13

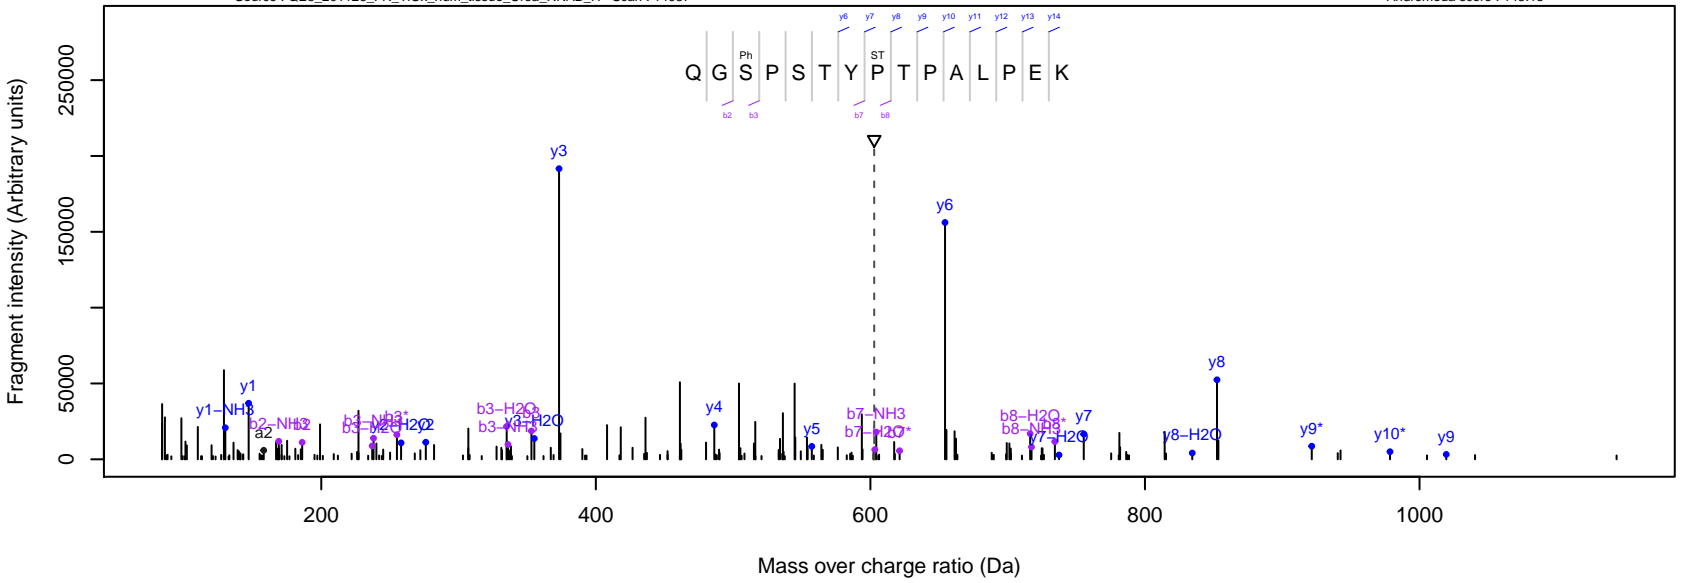

SNS(Phospho (STY))SSEAVLGQEELSAAK-2+

Source : QE3\_201126\_FR\_TiOx\_hum\_tissue\_Urea\_RNAB\_B Scan : 28498

Andromeda score : 148.06

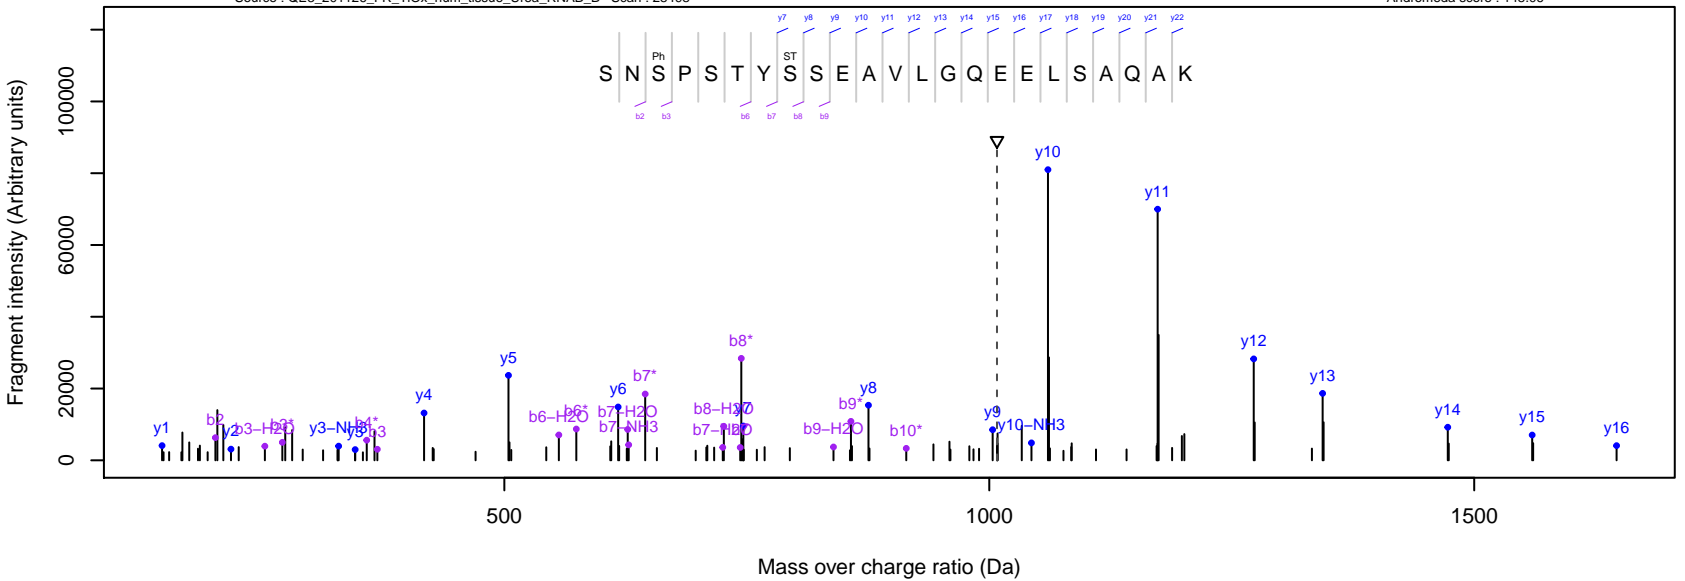

FICVTPITCSNTIDLPMOMSPSTYPR-2+

Source : QE3\_201126\_FR\_TiOx\_hum\_tissue\_Urea\_RNAB\_H Scan : 43181

Andromeda score : 148.01

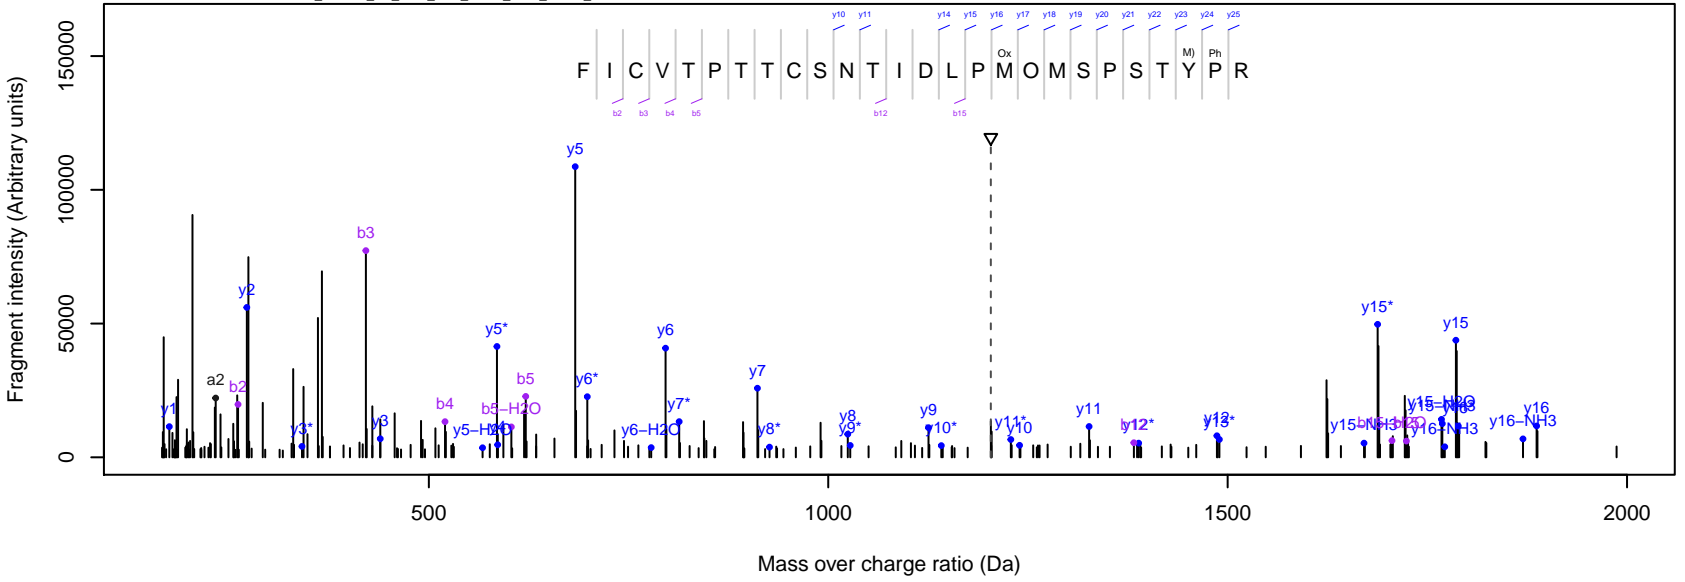

HCSLQAVPEEIYRYS(Phospho (STY))R-3+

Source : QE3\_201126\_FR\_TiOx\_hum\_tissue\_Urea\_RNAB\_B Scan : 25587

Andromeda score : 148.01

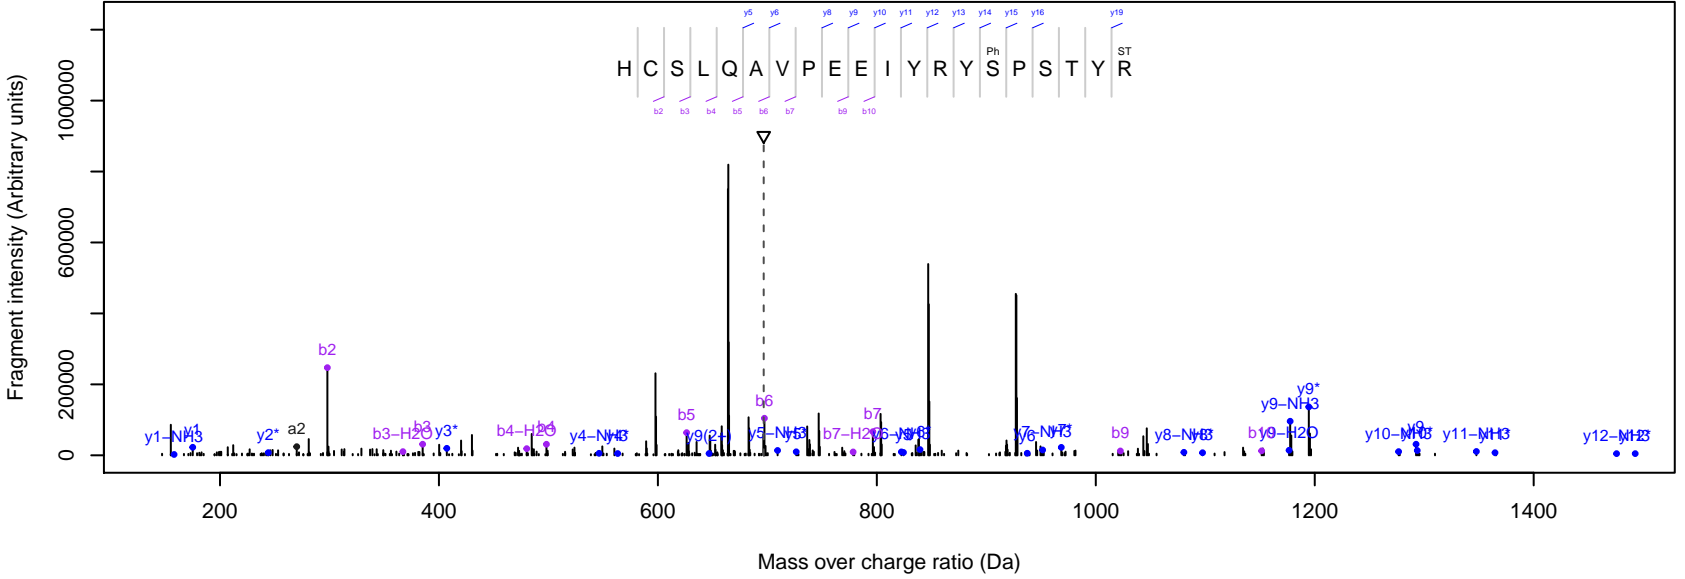

RPDYAPMOMESPSTYSPSTYDEEDDEEFQFIKK-3+

Source : QE3\_201126\_FR\_TiOx\_hum\_tissue\_Urea\_RNAB\_B Scan : 35981

Andromeda score : 148

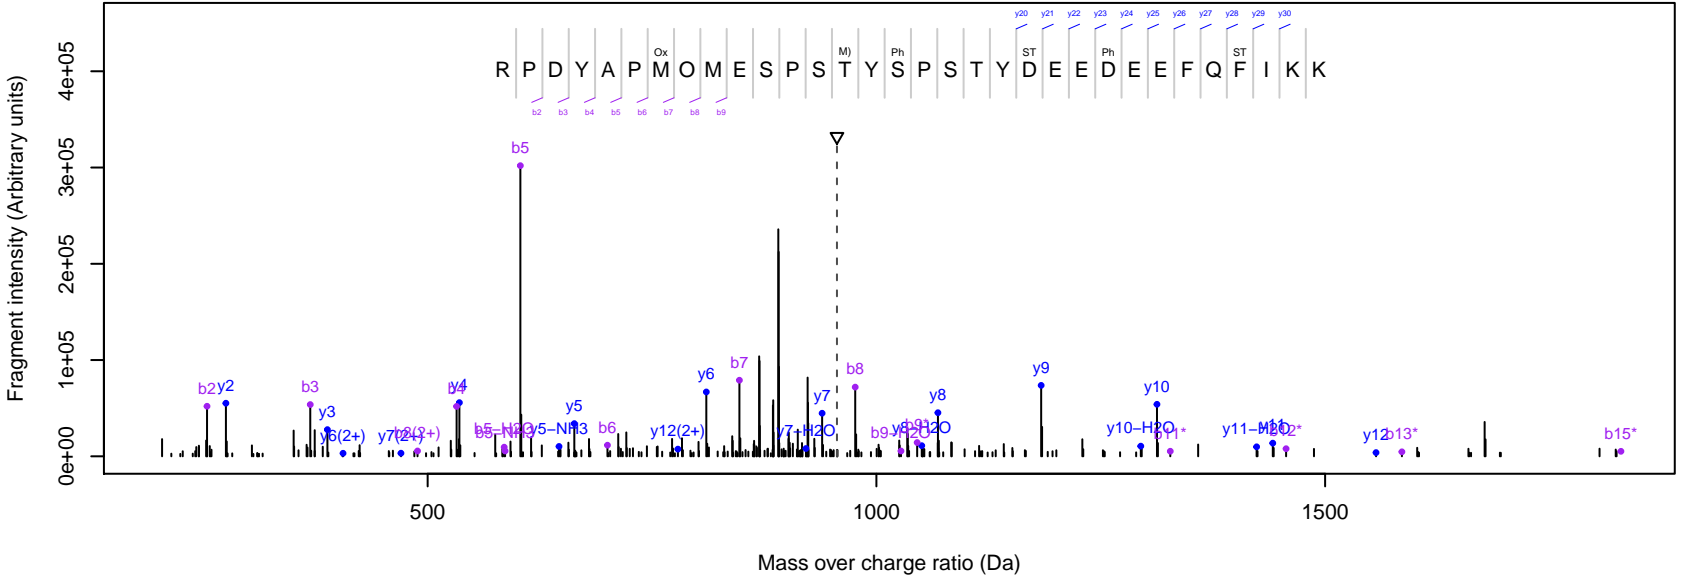

DDSDLYSPRYS(Phospho (STY))FSEDTK-3+

Source : QE3\_201126\_FR\_TiOx\_hum\_tissue\_Urea\_RNAB\_N Scan : 34087

Andromeda score : 147.93

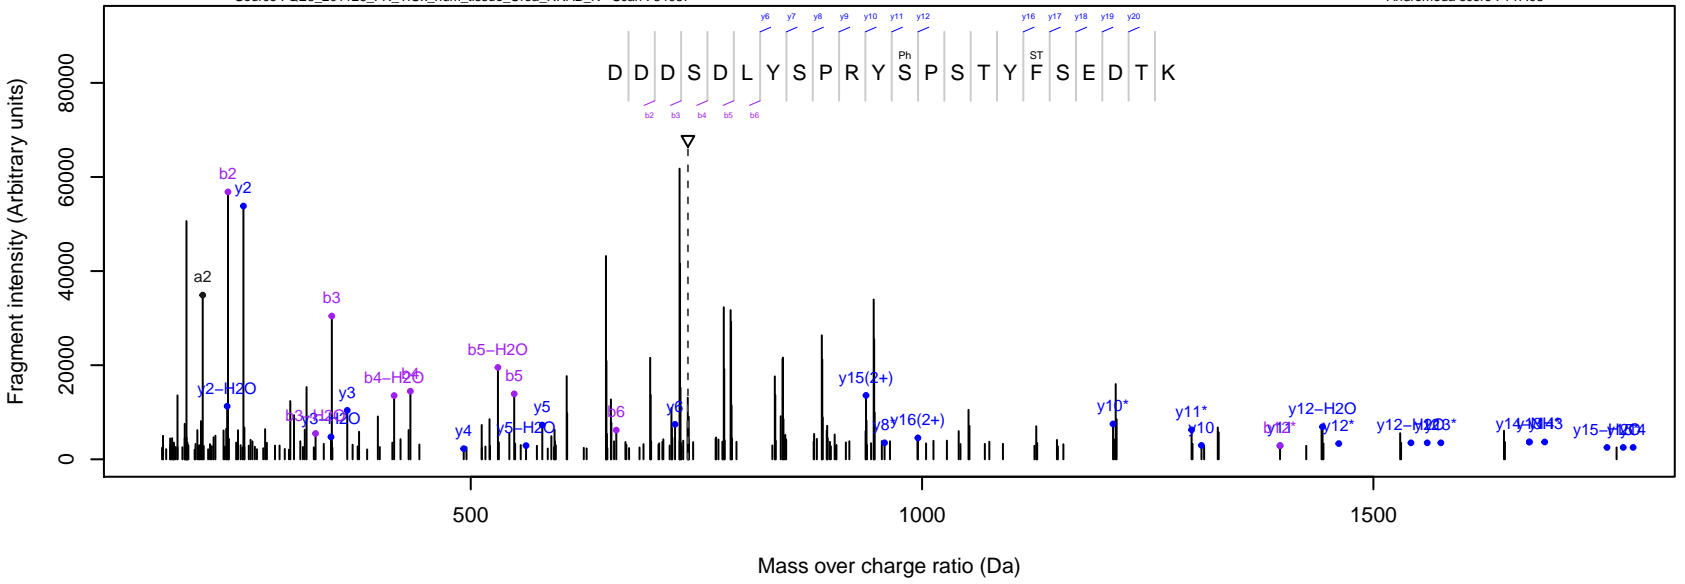

SES(Phospho (STY))ELIDELSEDFDRSECK-3+

Source : QE3\_201126\_FR\_TiOx\_hum\_tissue\_Urea\_RNAB\_N Scan : 55615

Andromeda score : 147.93

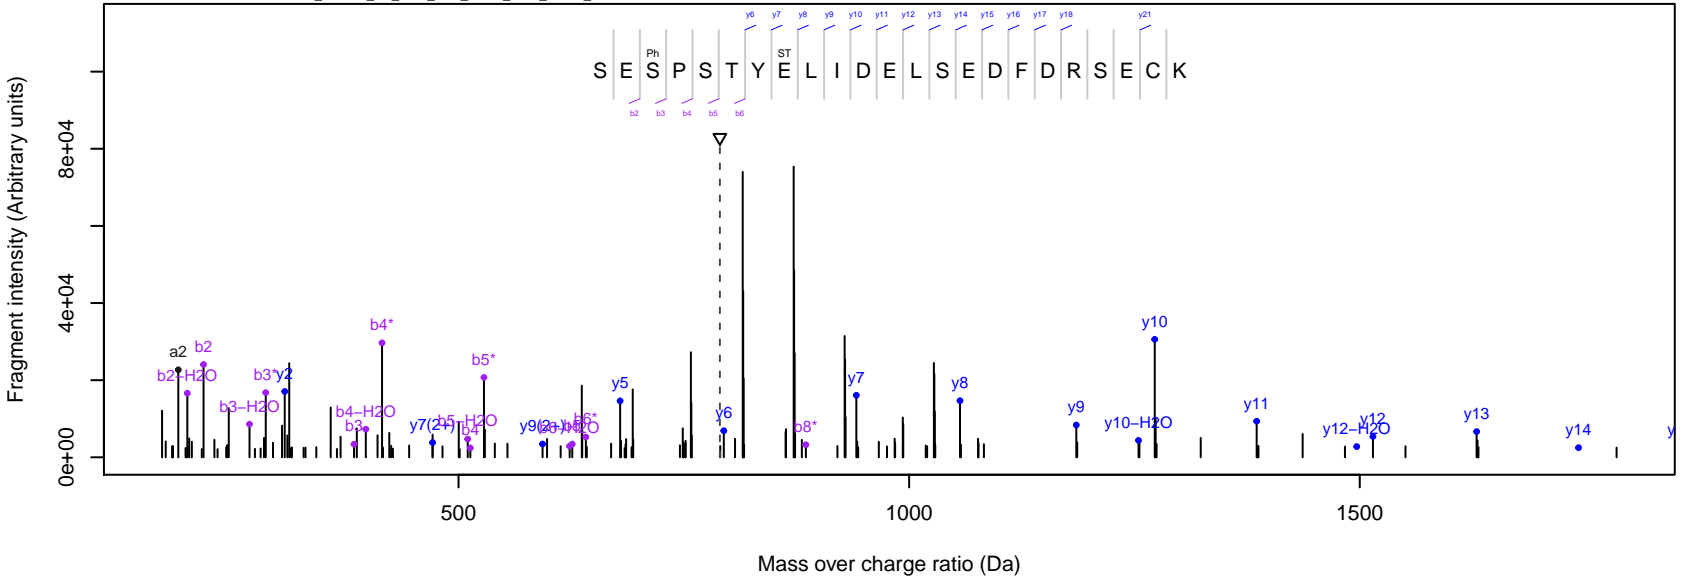

SKS(Phospho (STY))FSLR-2+

Source : QE3\_201126\_FR\_TiOx\_hum\_tissue\_Urea\_RNAB\_H Scan : 10182

Andromeda score : 147.78

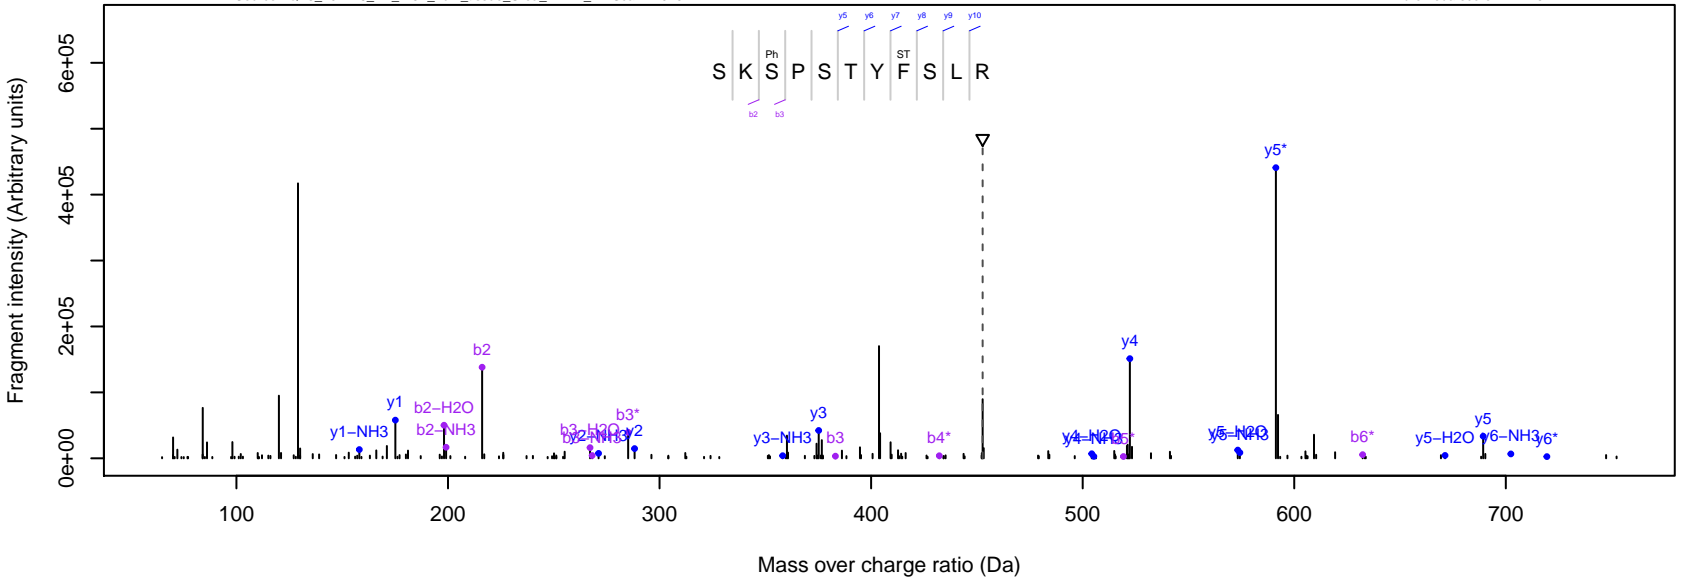

**RGFS(Phospho (STY))DSGGGPPAK-2+**

Source : QE3\_201126\_FR\_TiOx\_hum\_tissue\_Urea\_RNAB\_B Scan : 7498

Andromeda score : 147.75

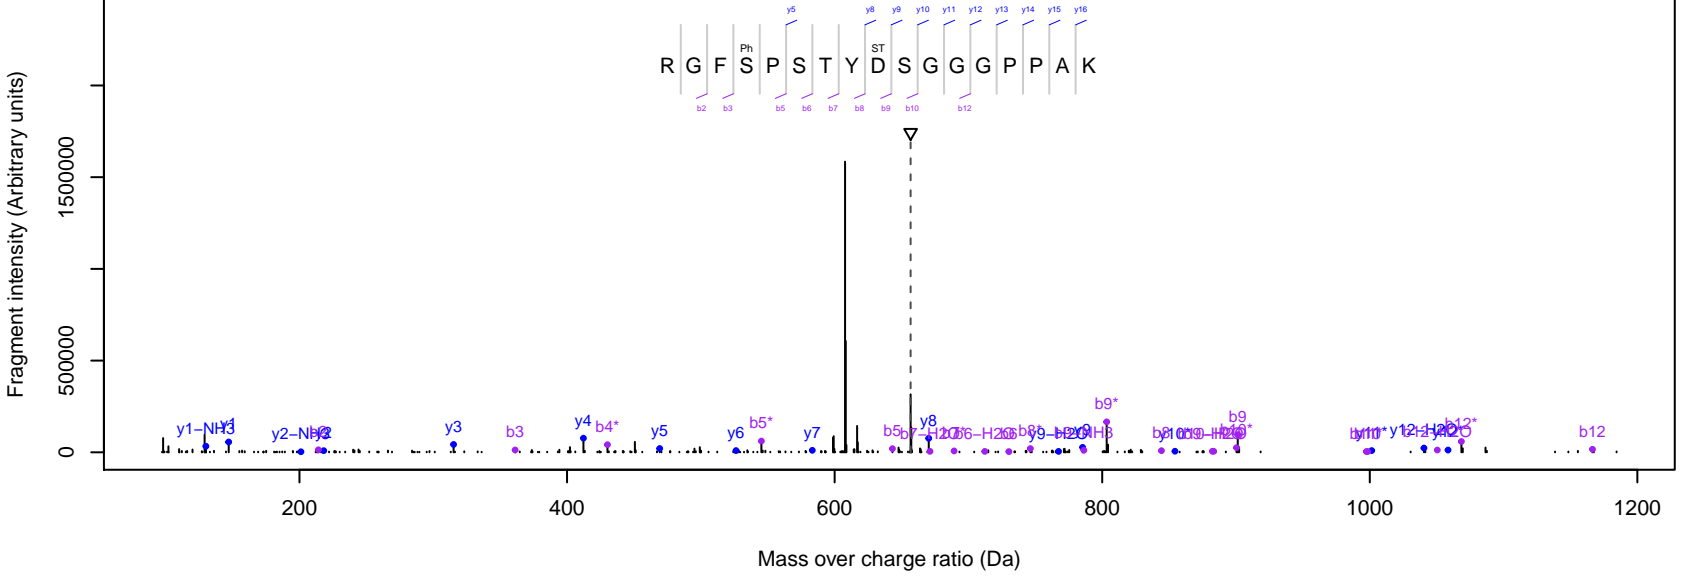

**RRS(Phospho (STY))PS(Phospho (STY))PYYSR-2+**

Source : QE3\_201126\_FR\_TiOx\_hum\_tissue\_Urea\_RNAB\_H Scan : 6667

Andromeda score : 147.73

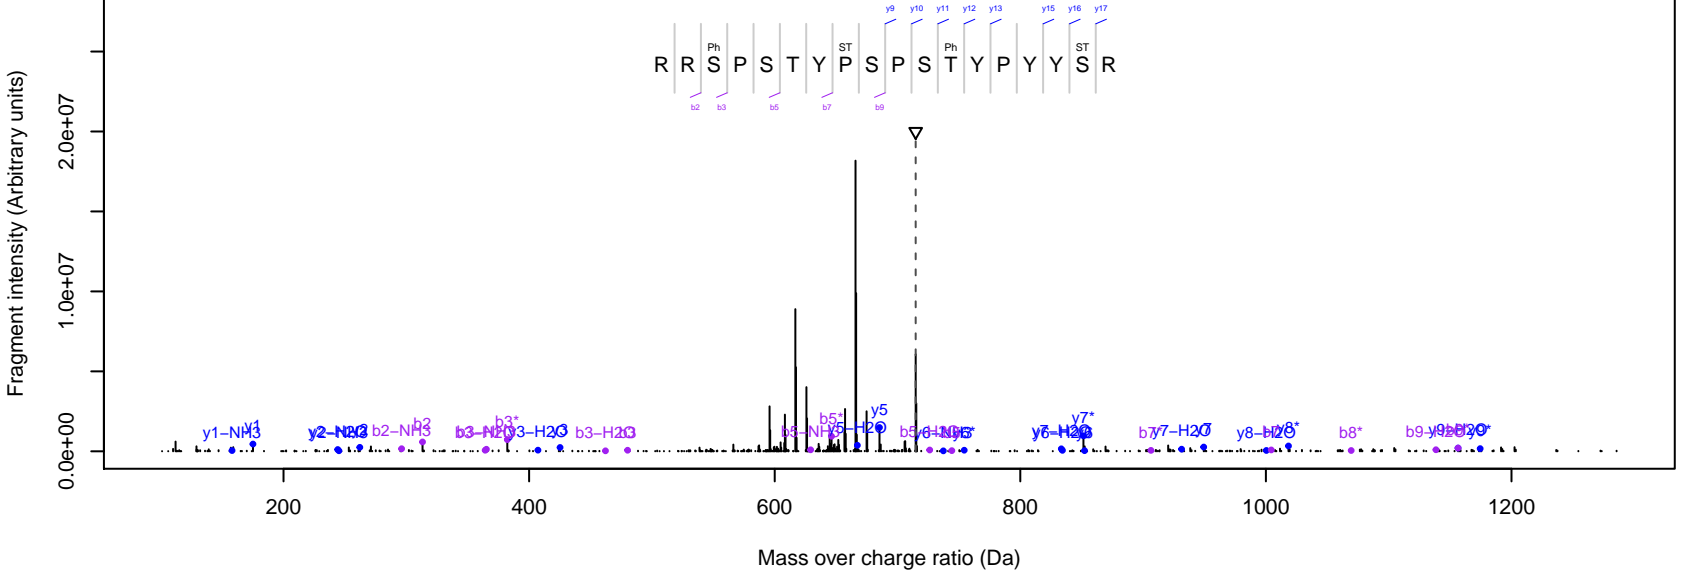

**SWS(Phospho (STY))ASDPFYTND R-2+**

Source : QE3\_201126\_FR\_TiOx\_hum\_tissue\_Urea\_RNAB\_N Scan : 41788

Andromeda score : 147.73

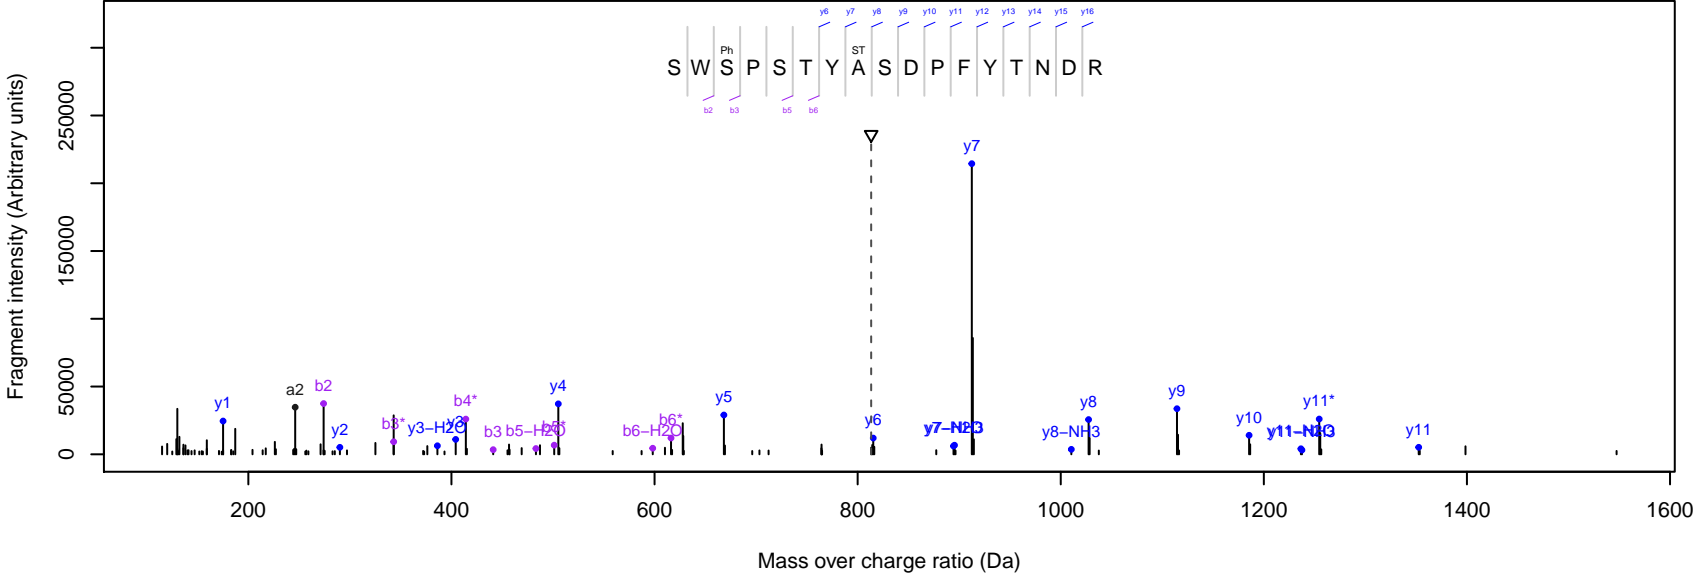



DGGGVRDEGPAAAGDGLGRPLGPTPS(Phospho (STY))QSR-4+

Source : QE3\_201126\_FR\_TiOx\_hum\_tissue\_Urea\_RNAB\_H Scan : 22440

Andromeda score : 147.51

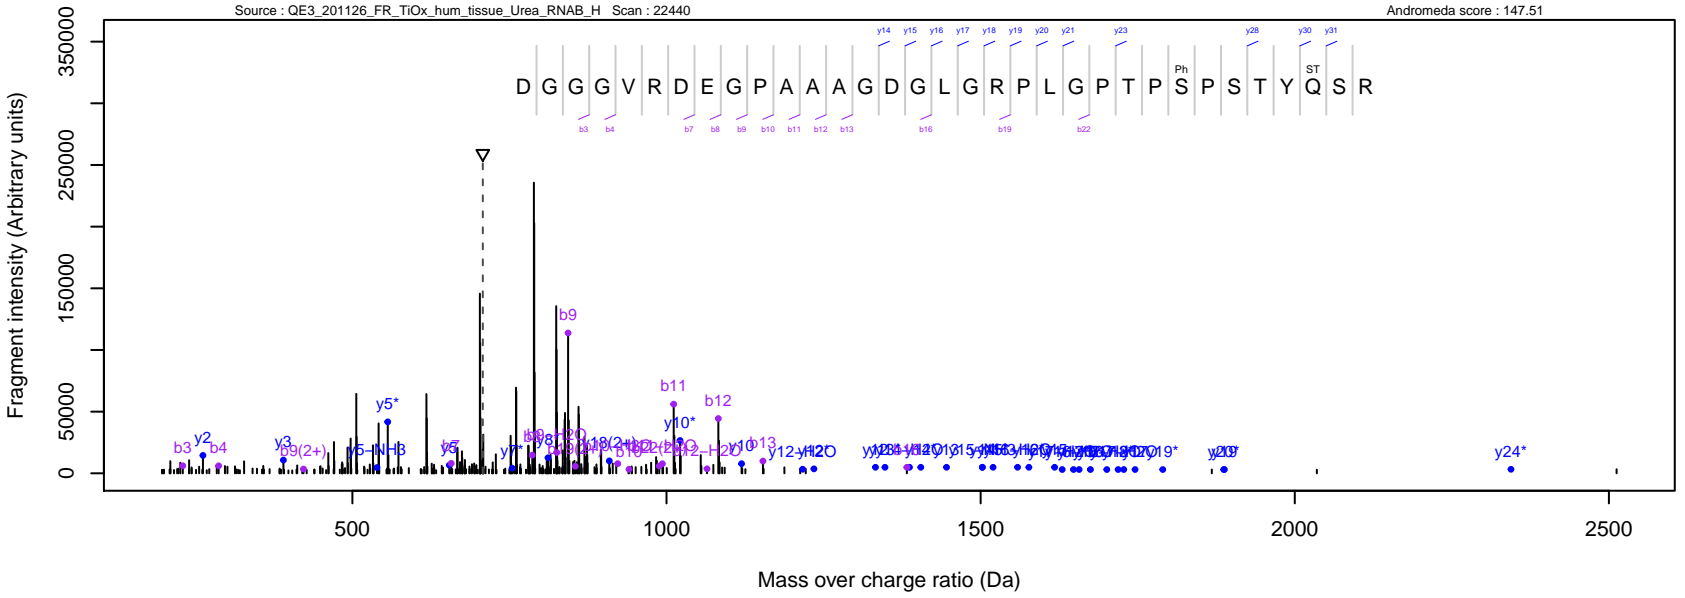

IDS(Phospho (STY))PGFKPASQQK-2+

Source : QE3\_201126\_FR\_TiOx\_hum\_tissue\_Urea\_RNAB\_H Scan : 10507

Andromeda score : 147.51

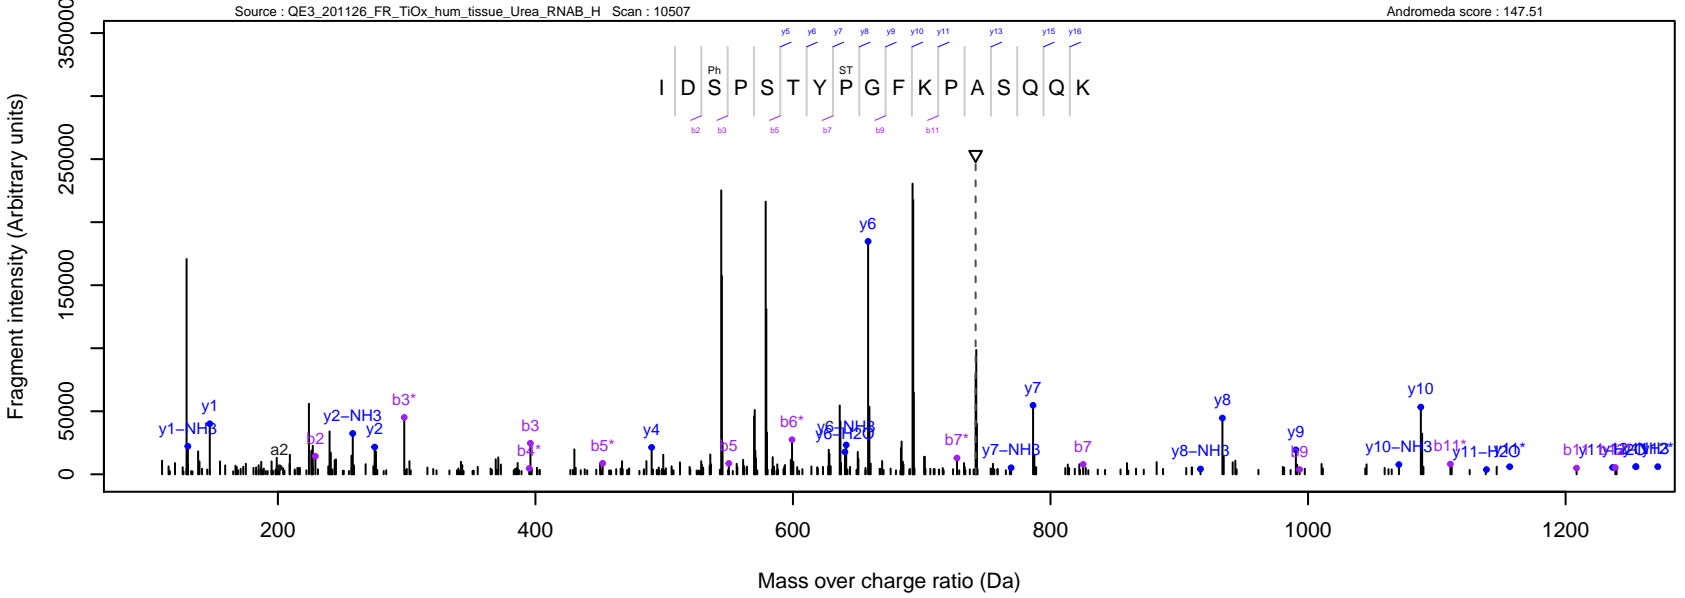

LLDFGS(Phospho (STY))LSNLQVTQPVTGMNFK-3+

Source : QE3\_201126\_FR\_TiOx\_hum\_tissue\_Urea\_RNAB\_N Scan : 61026

Andromeda score : 147.45

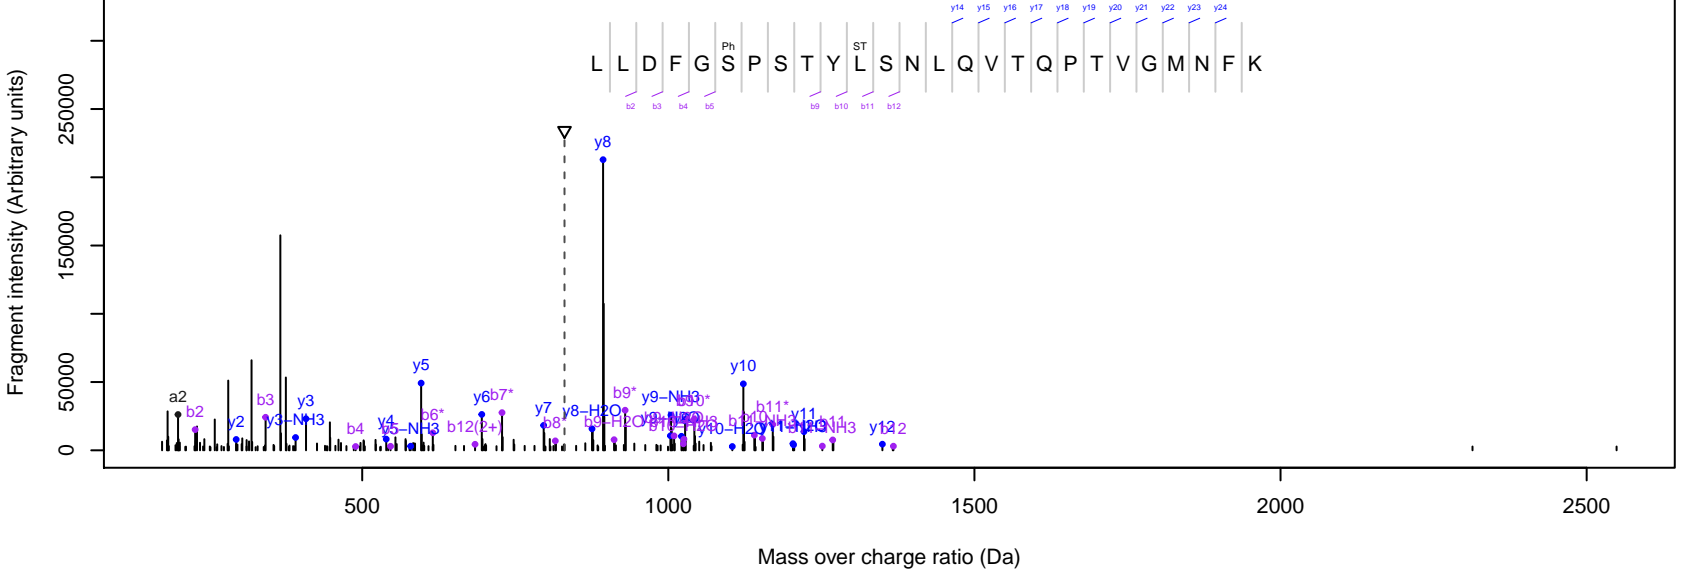

KNS(Phospho (STY))VVEASEAYKEAFEISK-3+

Source : QE3\_201126\_FR\_TIOx\_hum\_tissue\_Urea\_RNAB\_B Scan : 39687

Andromeda score : 147.41

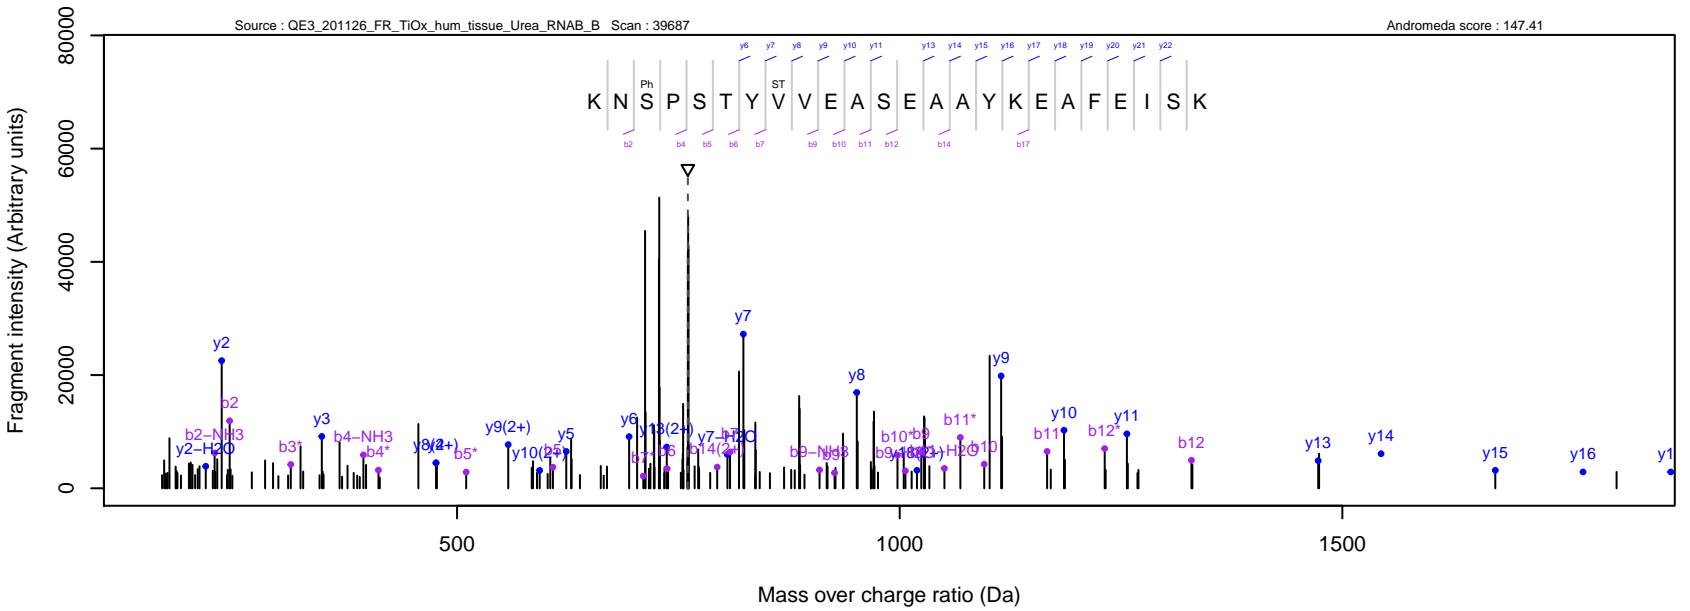

S(Phospho (STY))PGAPGLTLK-2+

Source : QE3\_201126\_FR\_TIOx\_hum\_tissue\_Urea\_RNAB\_N Scan : 26323

Andromeda score : 147.39

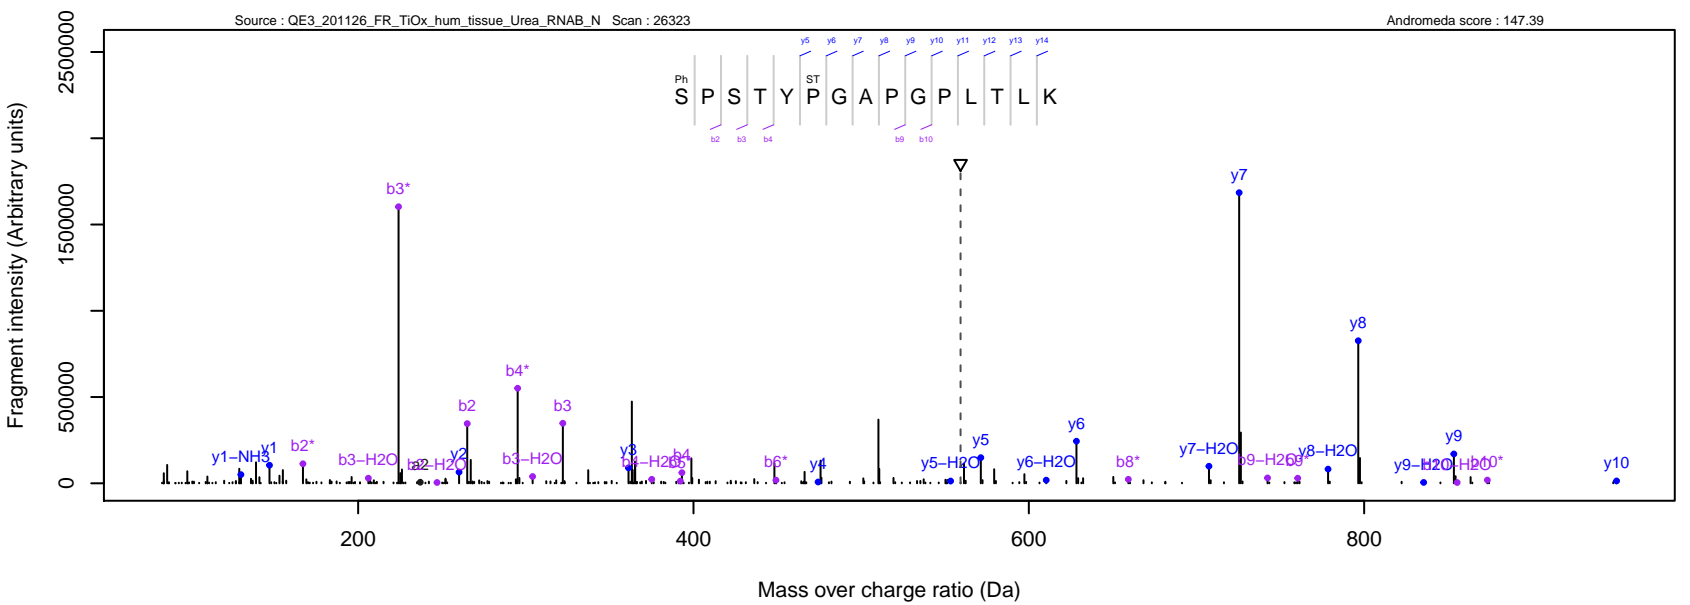

KVPVPEGLDLDAWINEPLS(Phospho (STY))DS(Phospho (STY))ES(Phospho (STY))EDERPR-3+

Source : QE3\_201126\_FR\_TIOx\_hum\_tissue\_Urea\_RNAB\_N Scan : 61112

Andromeda score : 147.37

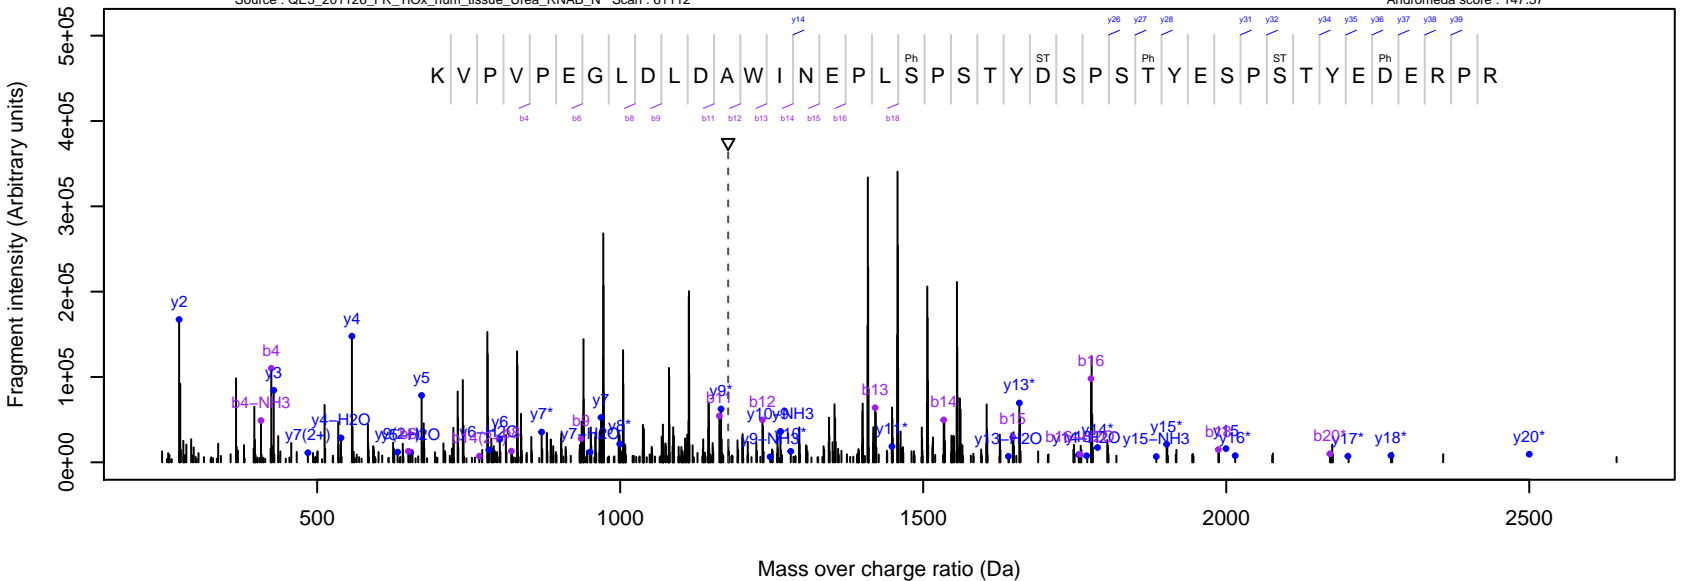

VTKNEEPS(Phospho (STY))EEDIDAPKPK-3+

Source : QE3\_201126\_FR\_TiOx\_hum\_tissue\_Urea\_RNAB\_N Scan : 9955

Andromeda score : 147.35

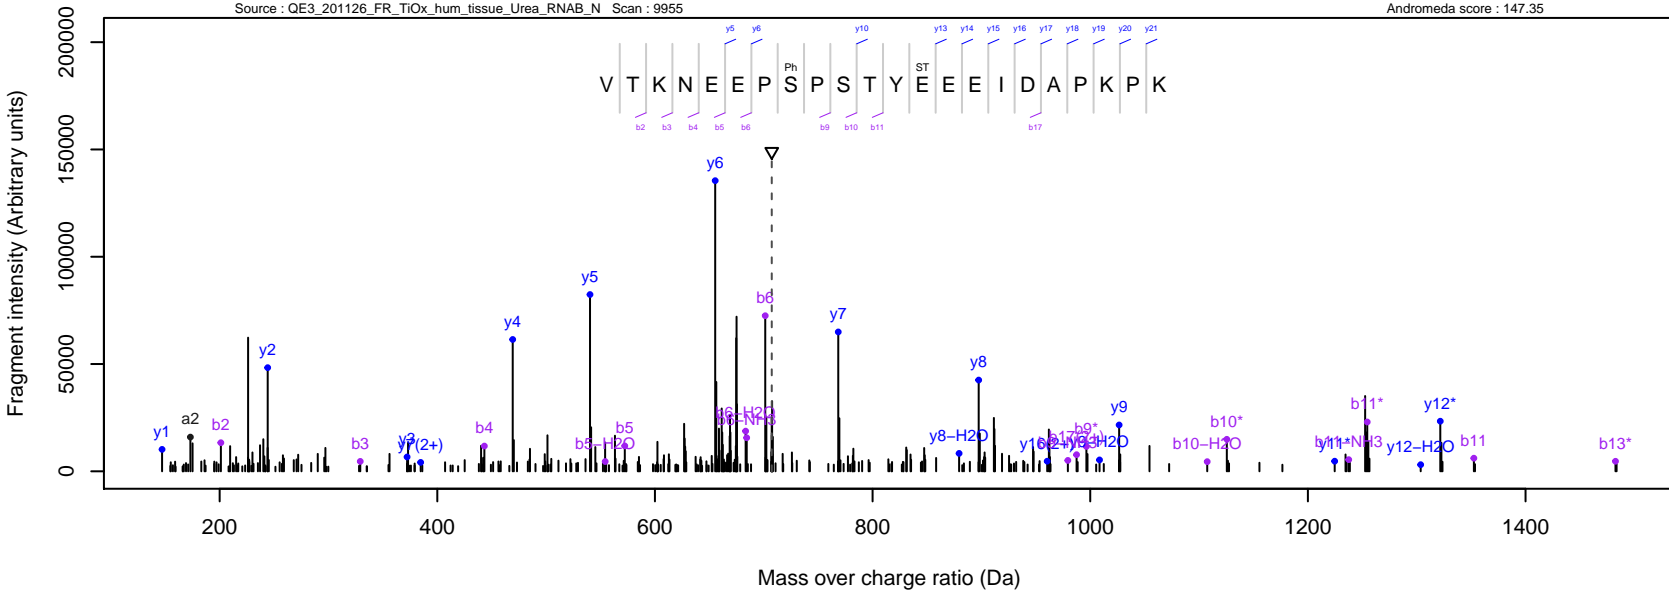

YLVDGTPNAGS(Phospho (STY))EIS(Phospho (STY))S(Phospho (STY))EDELVEEK-3+

Source : QE3\_201126\_FR\_TiOx\_hum\_tissue\_Urea\_RNAB\_N Scan : 33904

Andromeda score : 147.35

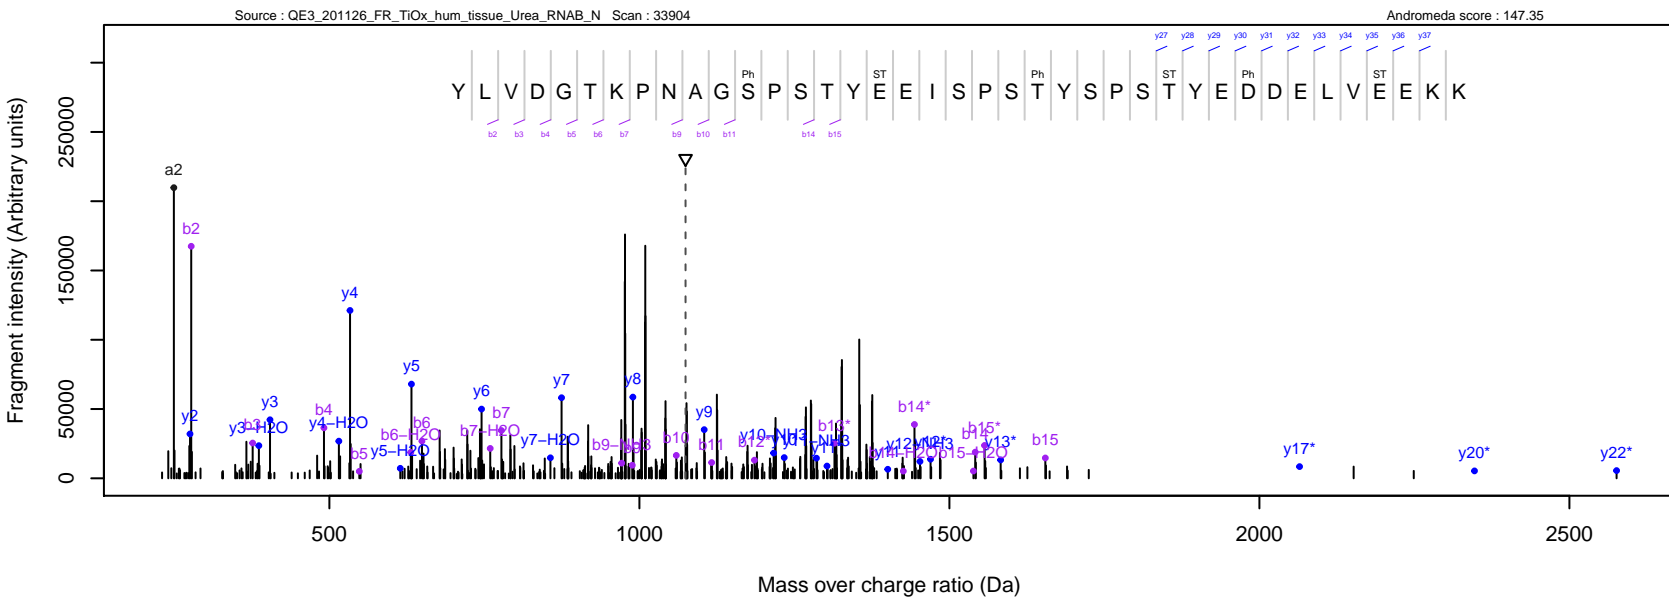

MGGAGGEGS(Phospho (STY))DDDTSLT-2+

Source : QE3\_201126\_FR\_TiOx\_hum\_tissue\_Urea\_RNAB\_H Scan : 23595

Andromeda score : 147.33

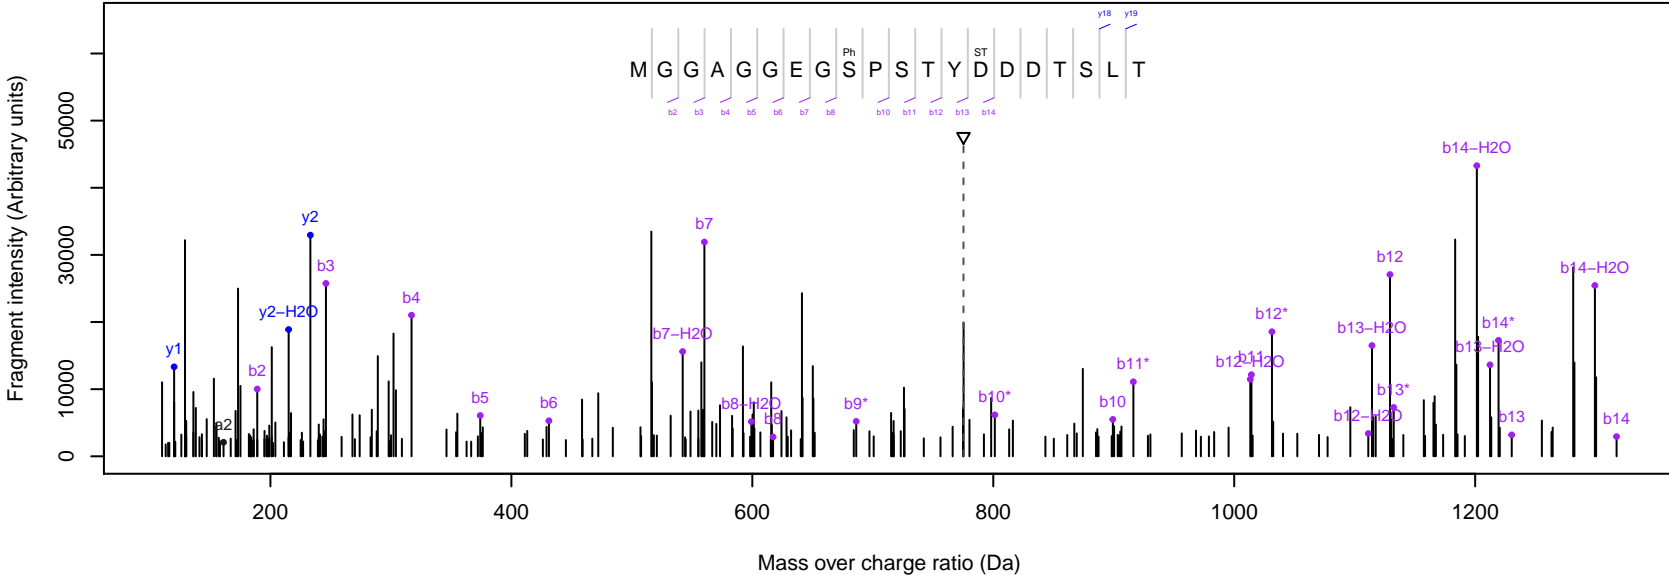



EKTYSPSTYECEDGTYSP E I S W H H R

Source : QE3\_201126\_FR\_TiOx\_hum\_tissue\_Urea\_RNAB\_H Scan : 20083

Andromeda score : 147.26

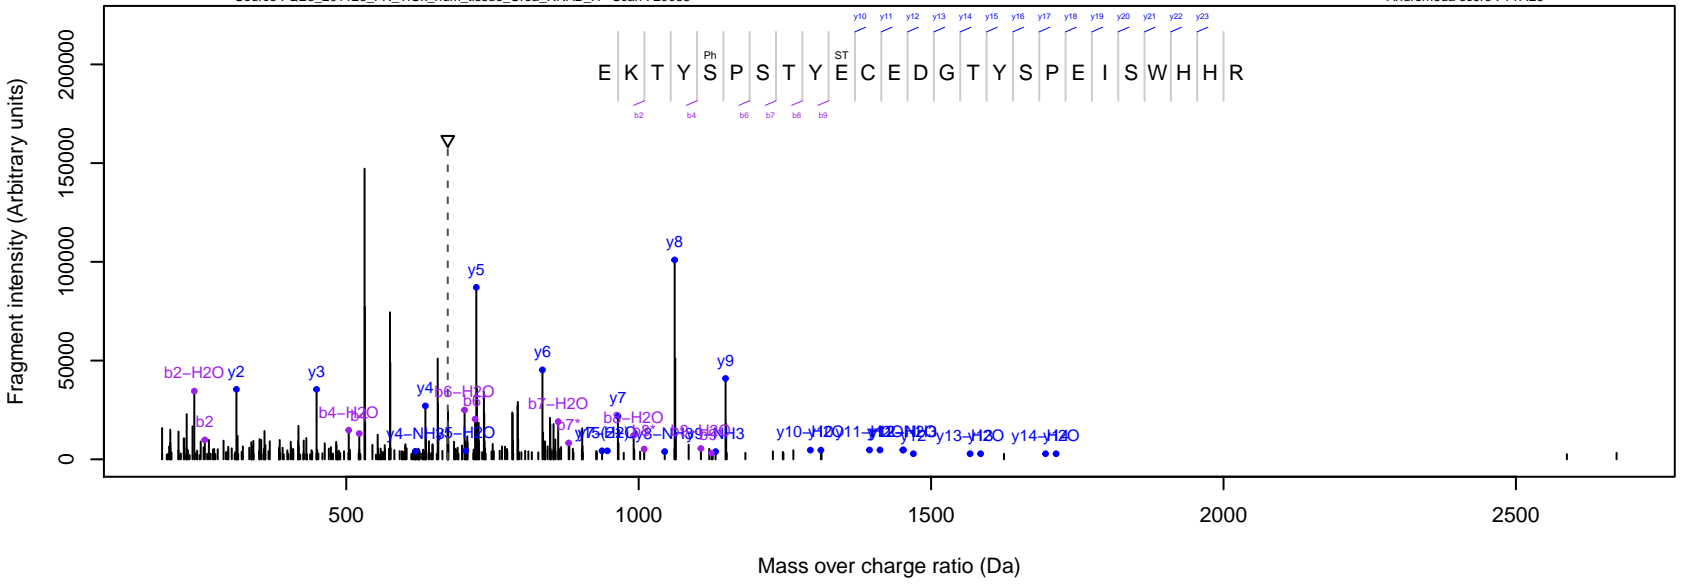

M(Oxidation (M))ALPPQEDATAS P S T Y P R Q K

Source : QE3\_201126\_FR\_TiOx\_hum\_tissue\_Urea\_RNAB\_H Scan : 12836

Andromeda score : 147.25

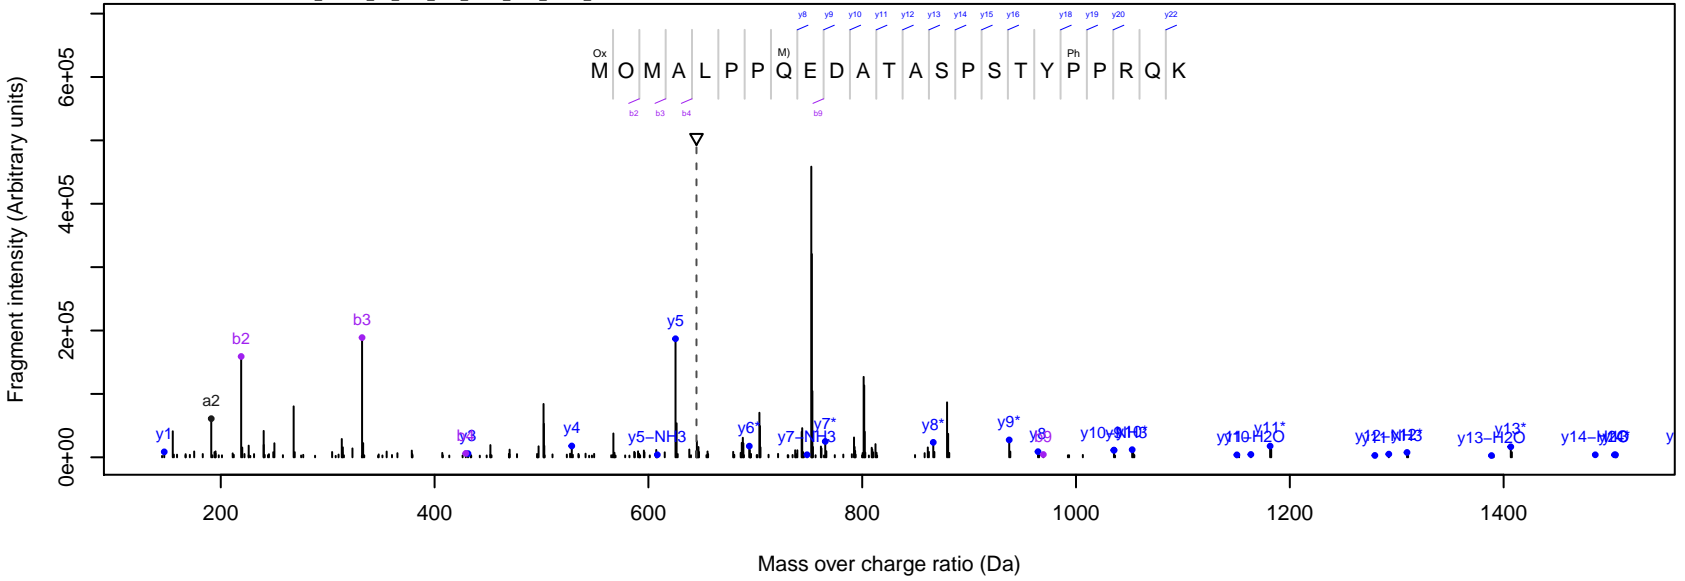

NLHQS G F S P S T Y L S G A Q I D D N I P R

Source : QE3\_201126\_FR\_TiOx\_hum\_tissue\_Urea\_RNAB\_N Scan : 37501

Andromeda score : 147.25

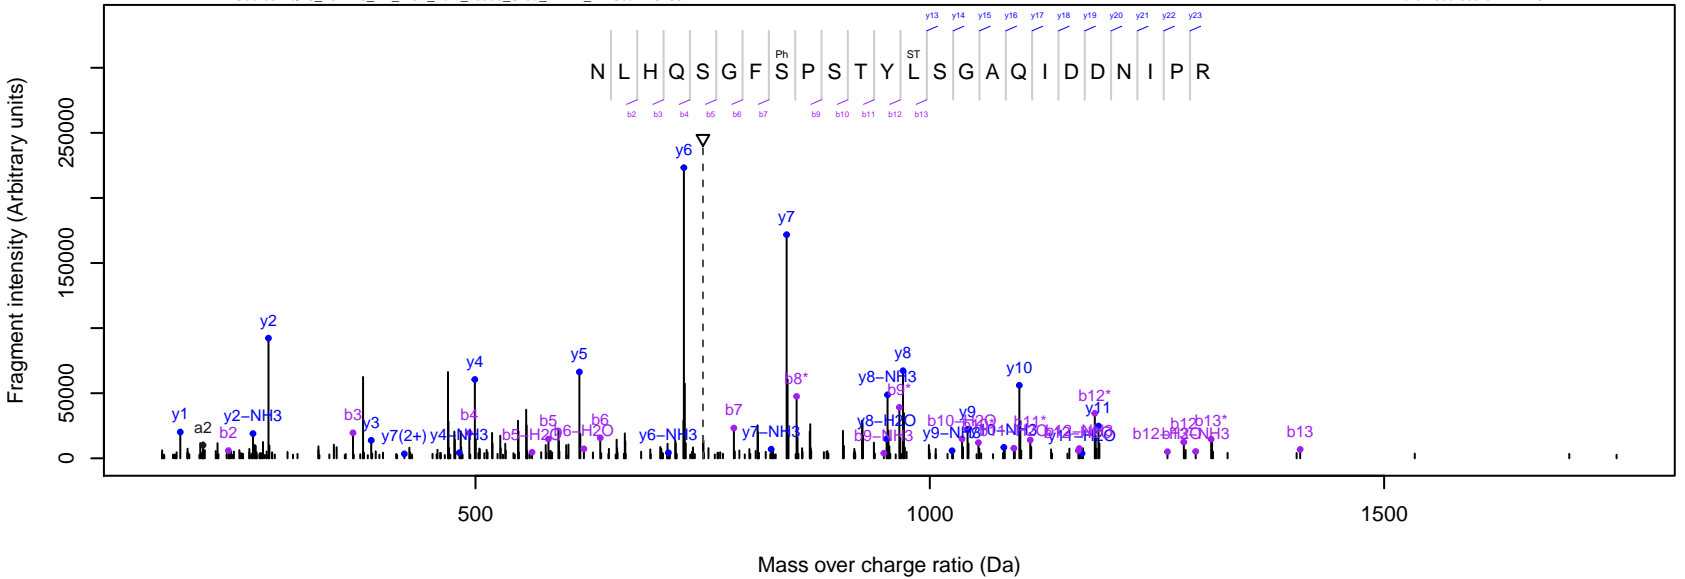

GEIEFEVYVAPEVDS(Phospho (STY))DDENVEYEDSGHR-3+

Source : QE3\_201126\_FR\_TIOx\_hum\_tissue\_Urea\_RNAB\_N Scan : 52720

Andromeda score : 147.17

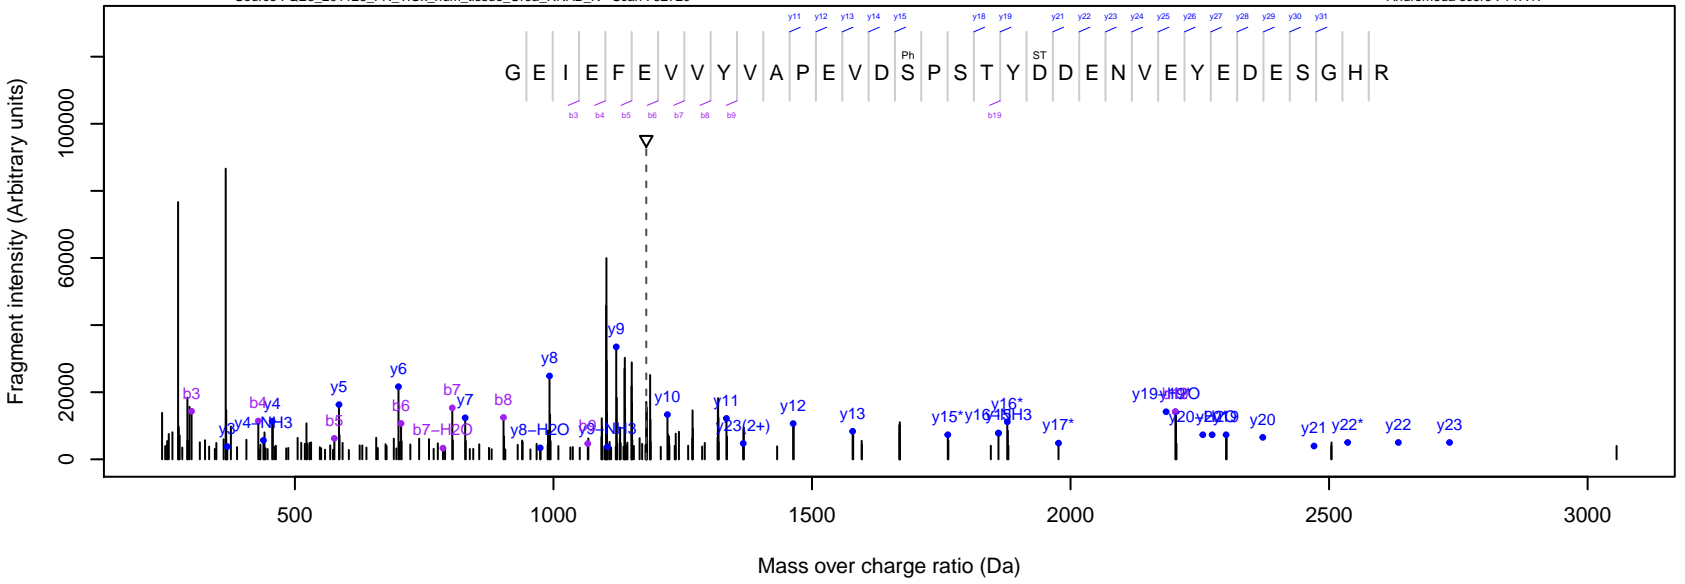

AVPMAPAPAS(Phospho (STY))PGSSNDSSAR-2+

Source : QE3\_201126\_FR\_TIOx\_hum\_tissue\_Urea\_RNAB\_N Scan : 19376

Andromeda score : 147.16

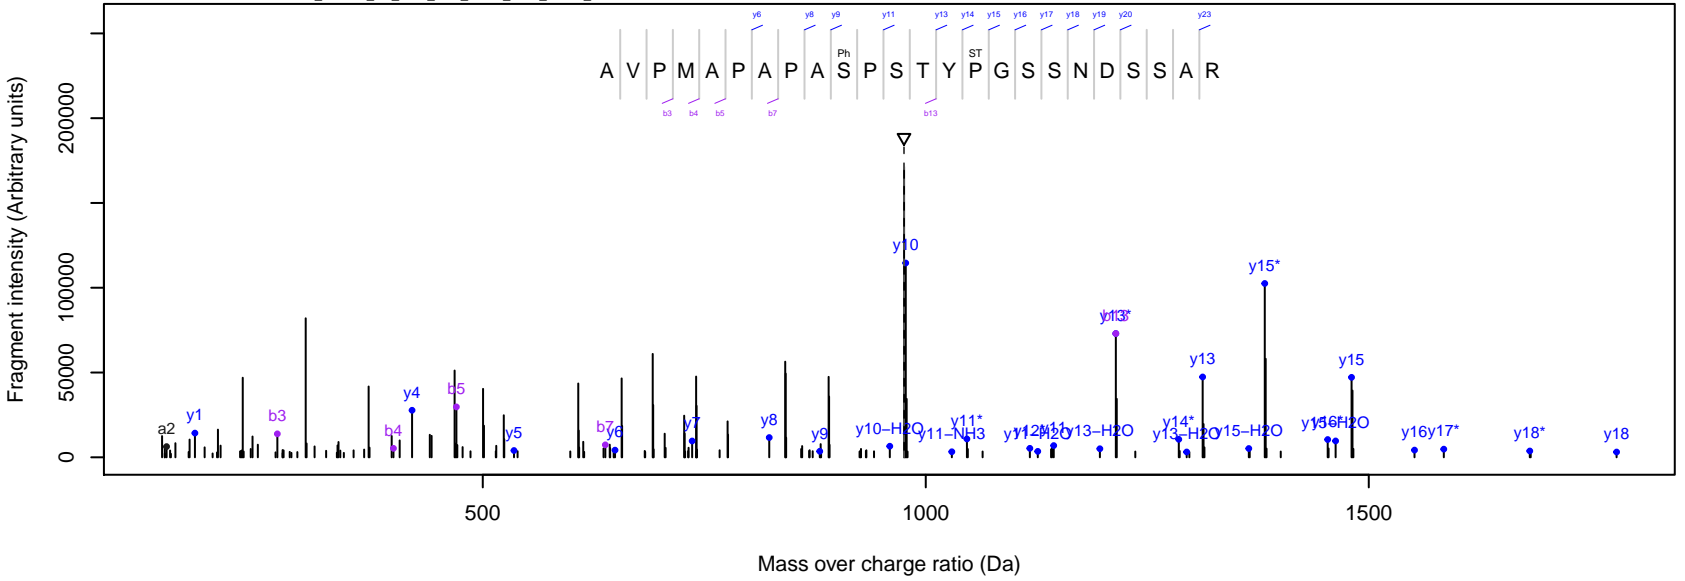

NDFEGLS(Phospho (STY))PVIAPK-2+

Source : QE3\_201126\_FR\_TIOx\_hum\_tissue\_Urea\_RNAB\_H Scan : 52254

Andromeda score : 147.12

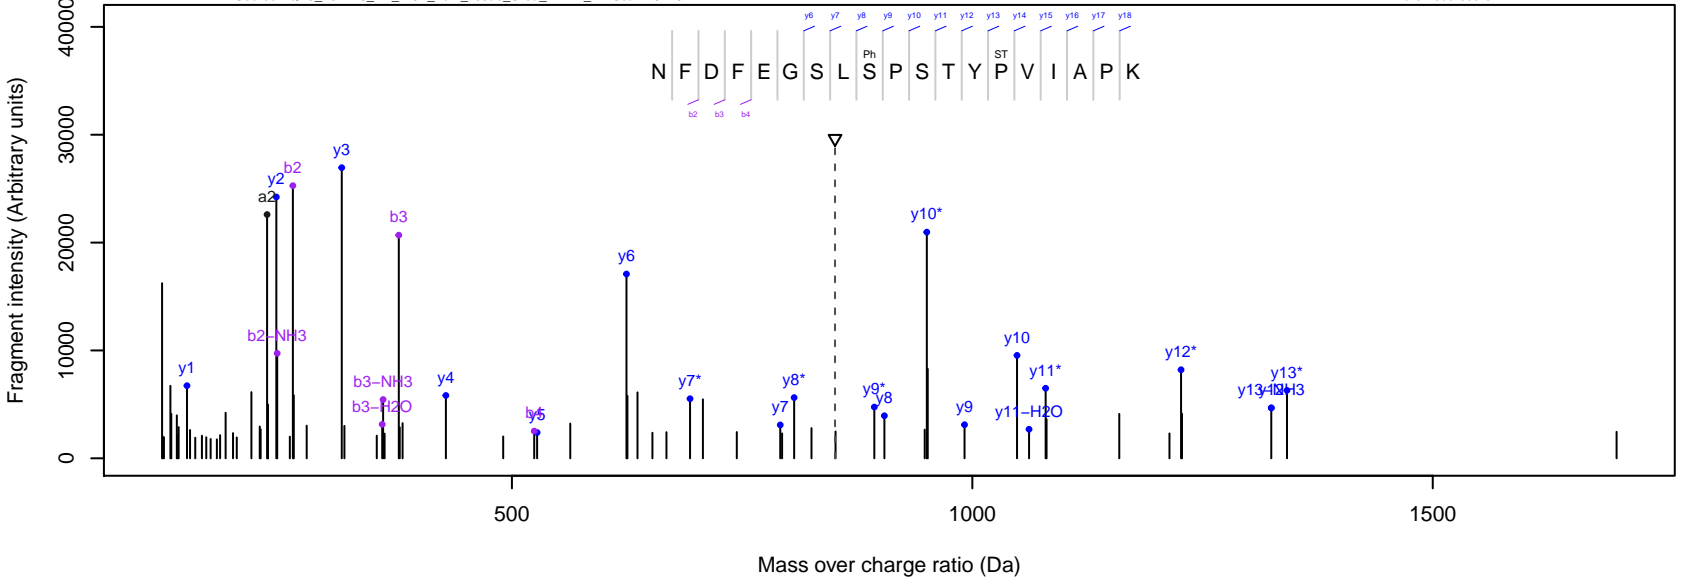

SQS(Phospho (STY))GEDESMOMNQPGPIK-2+

Source : QE3\_201126\_FR\_TIOx\_hum\_tissue\_Urea\_RNAB\_B Scan : 11748

Andromeda score : 147.12

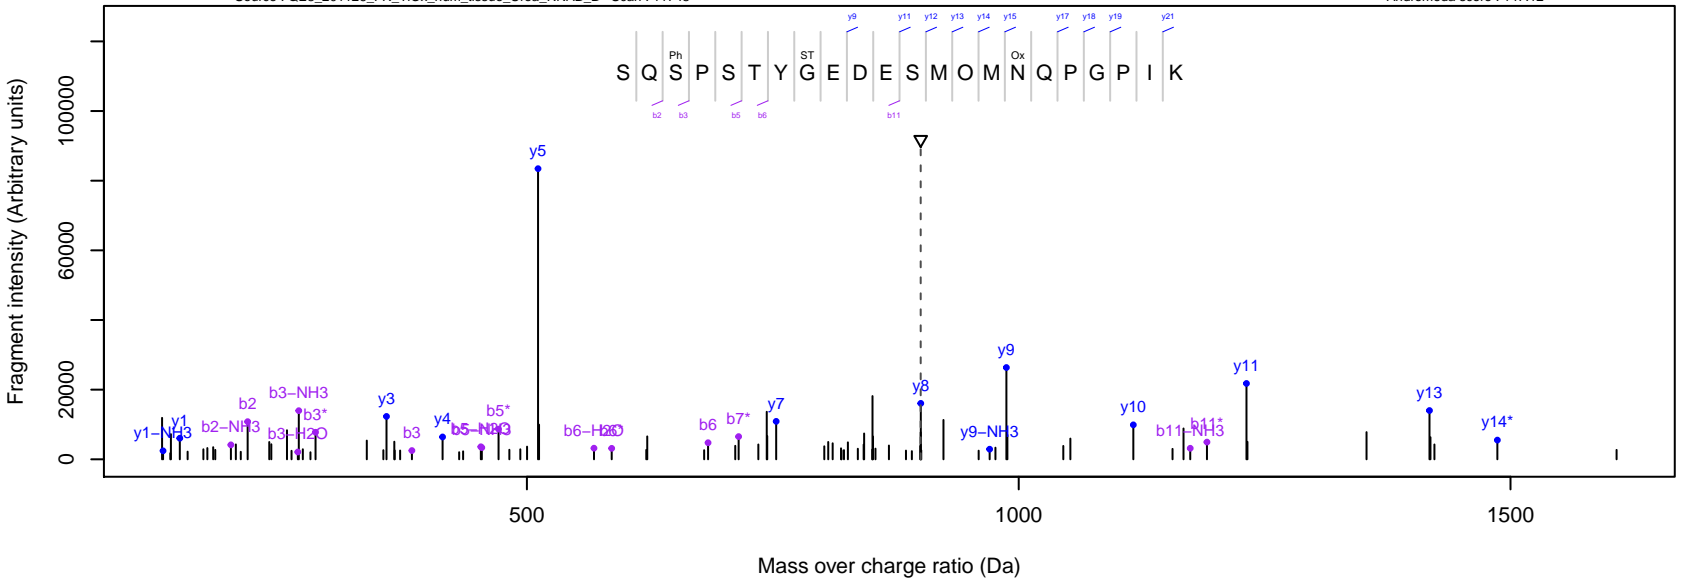

(Acetyl (Protein N-term))S(Phospho (STY))SSGTPDLVLLTDLK-2+

Source : QE3\_201126\_FR\_TIOx\_hum\_tissue\_Urea\_RNAB\_H Scan : 63015

Andromeda score : 147.12

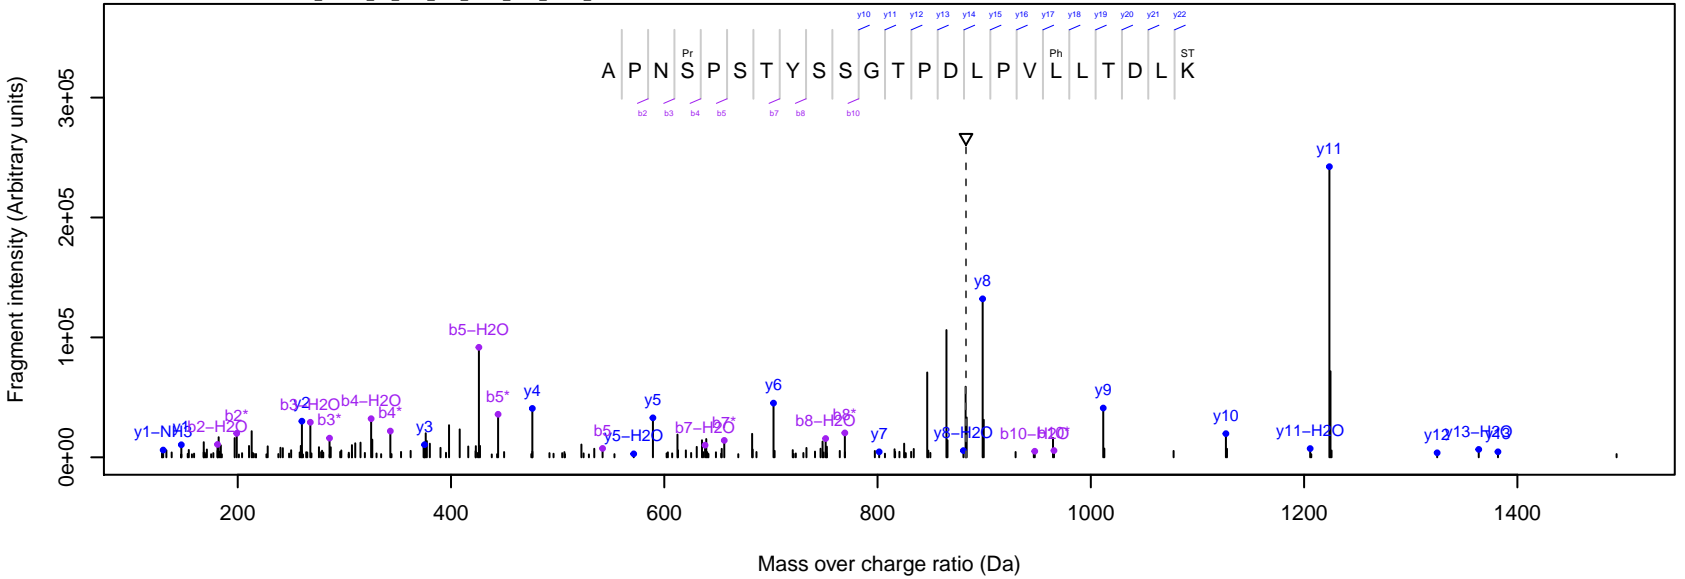

(Acetyl (Protein N-term))AEDLIFRLEGVGGQS(Phospho (STY))PR-3+

Source : QE3\_201126\_FR\_TIOx\_hum\_tissue\_Urea\_RNAB\_N Scan : 59078

Andromeda score : 147.11

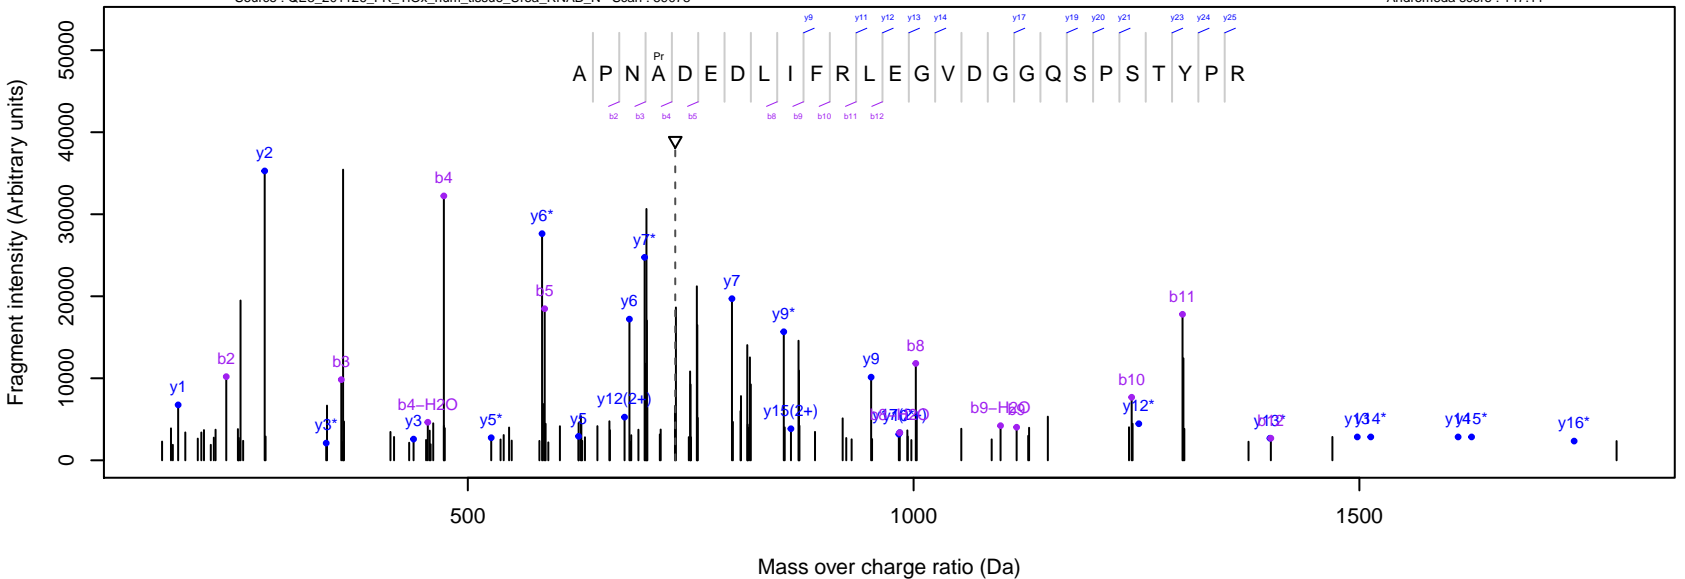

GNPTVEVDLFTS(Phospho (STY))K-2+

Source : QE3\_201126\_FR\_TIOx\_hum\_tissue\_Urea\_RNAB\_H Scan : 41094

Andromeda score : 147.1

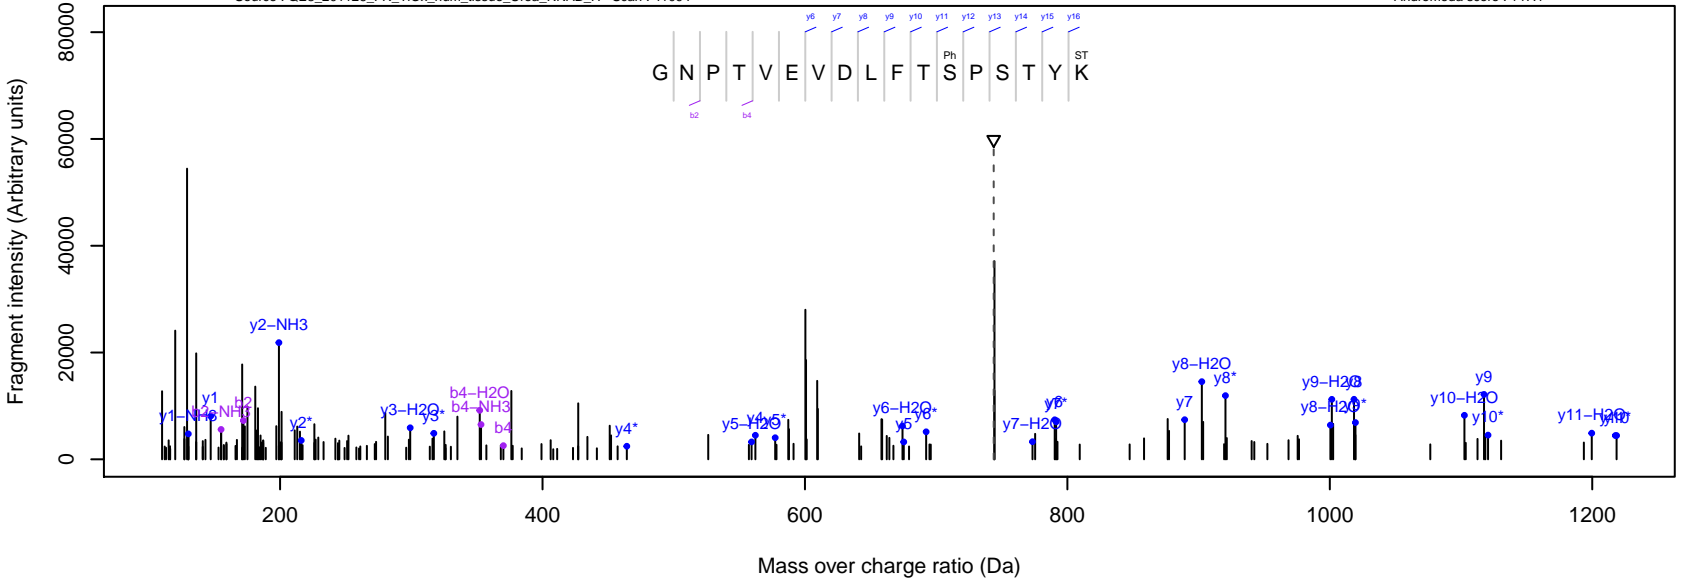

FAIQDIS(Phospho (STY))VEETSAK-2+

Source : QE3\_201126\_FR\_TIOx\_hum\_tissue\_Urea\_RNAB\_N Scan : 36371

Andromeda score : 146.96

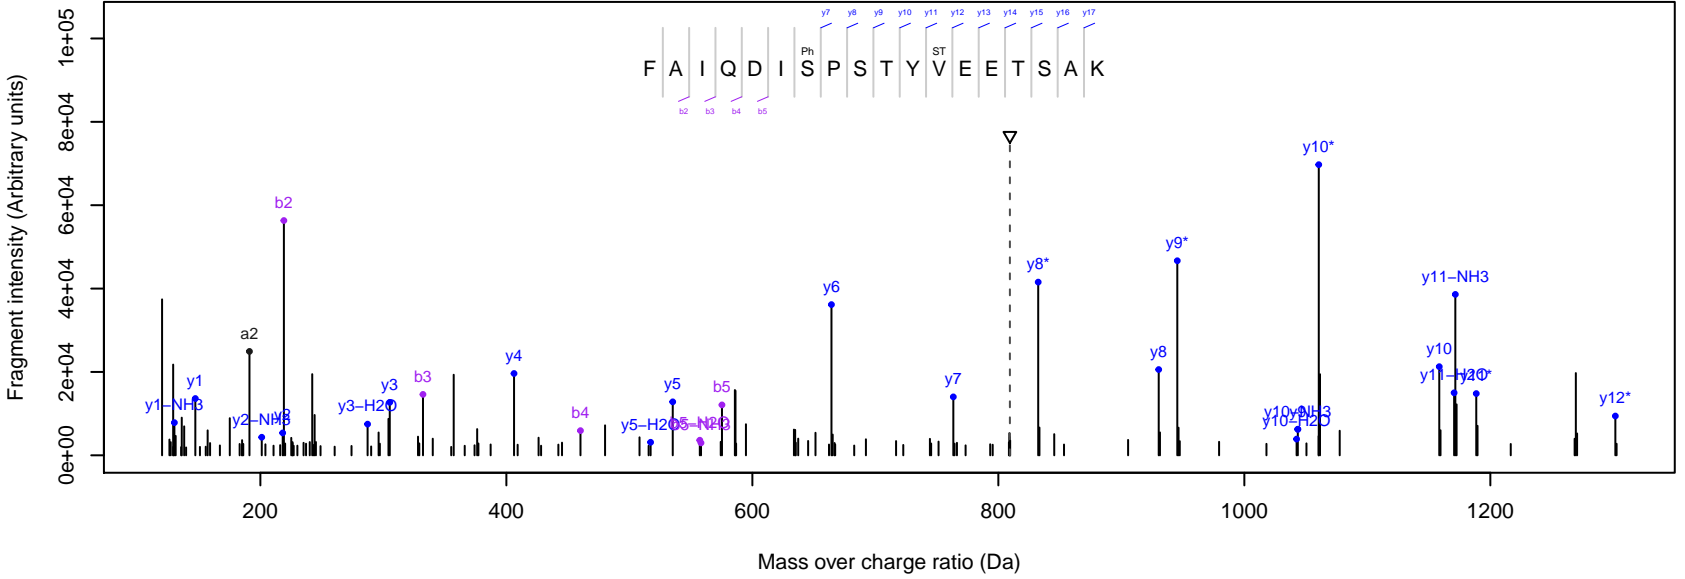

REESPMVDQPS(Phospho (STY))PSAQDTQSIASDGTGPQGEK-3+

Source : QE3\_201126\_FR\_TIOx\_hum\_tissue\_Urea\_RNAB\_N Scan : 24072

Andromeda score : 146.94

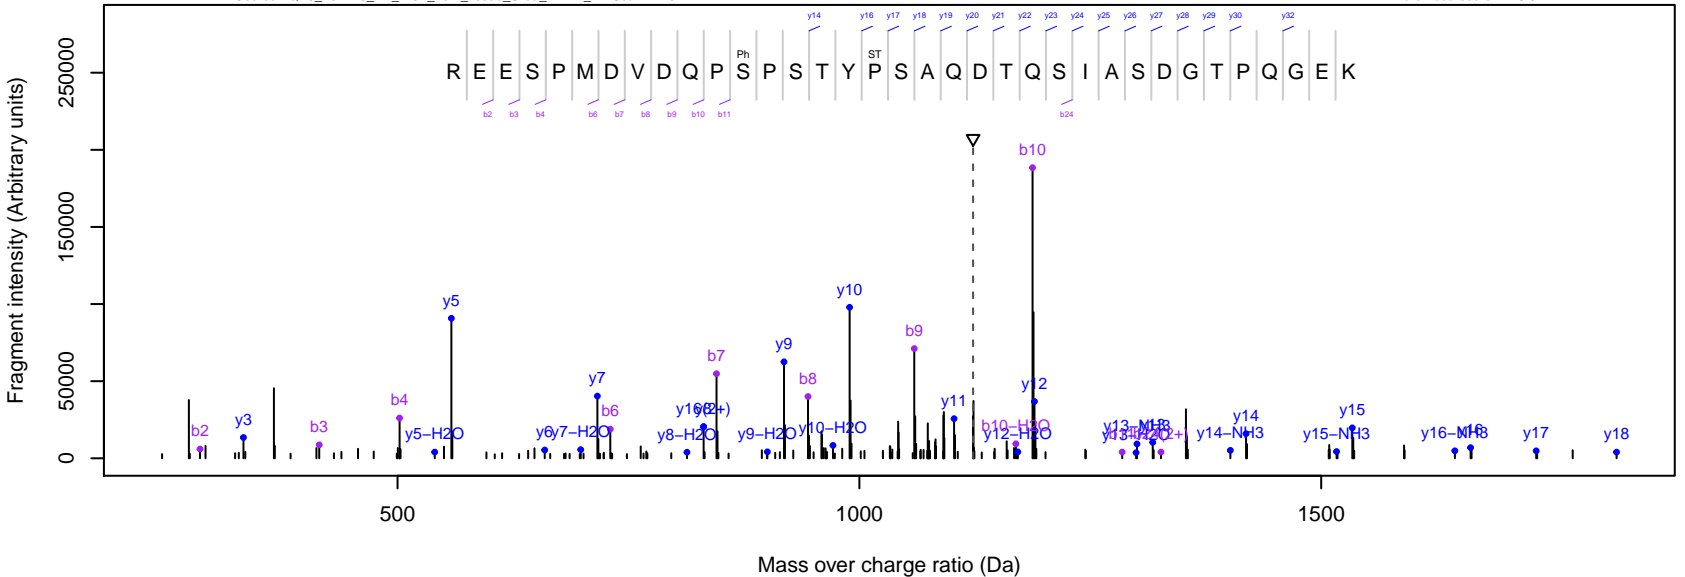

SLMS(Phospho (STY))SPEDLTQDFEELKAAEVDVTK-3+

Source : QE3\_201126\_FR\_TiOx\_hum\_tissue\_Urea\_RNAB\_H Scan : 55883

Andromeda score : 146.94

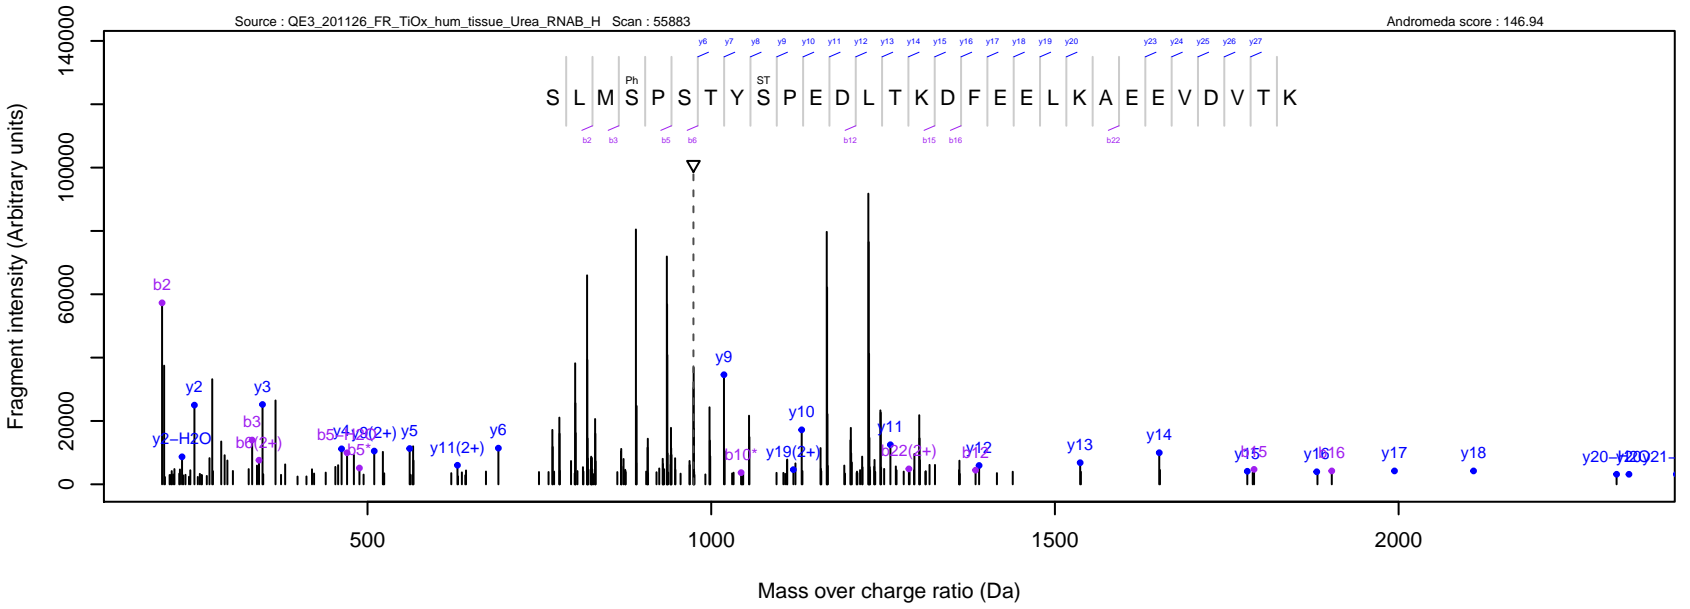

IES(Phospho (STY))PKLER-2+

Source : QE3\_201126\_FR\_TiOx\_hum\_tissue\_Urea\_RNAB\_N Scan : 9345

Andromeda score : 146.9

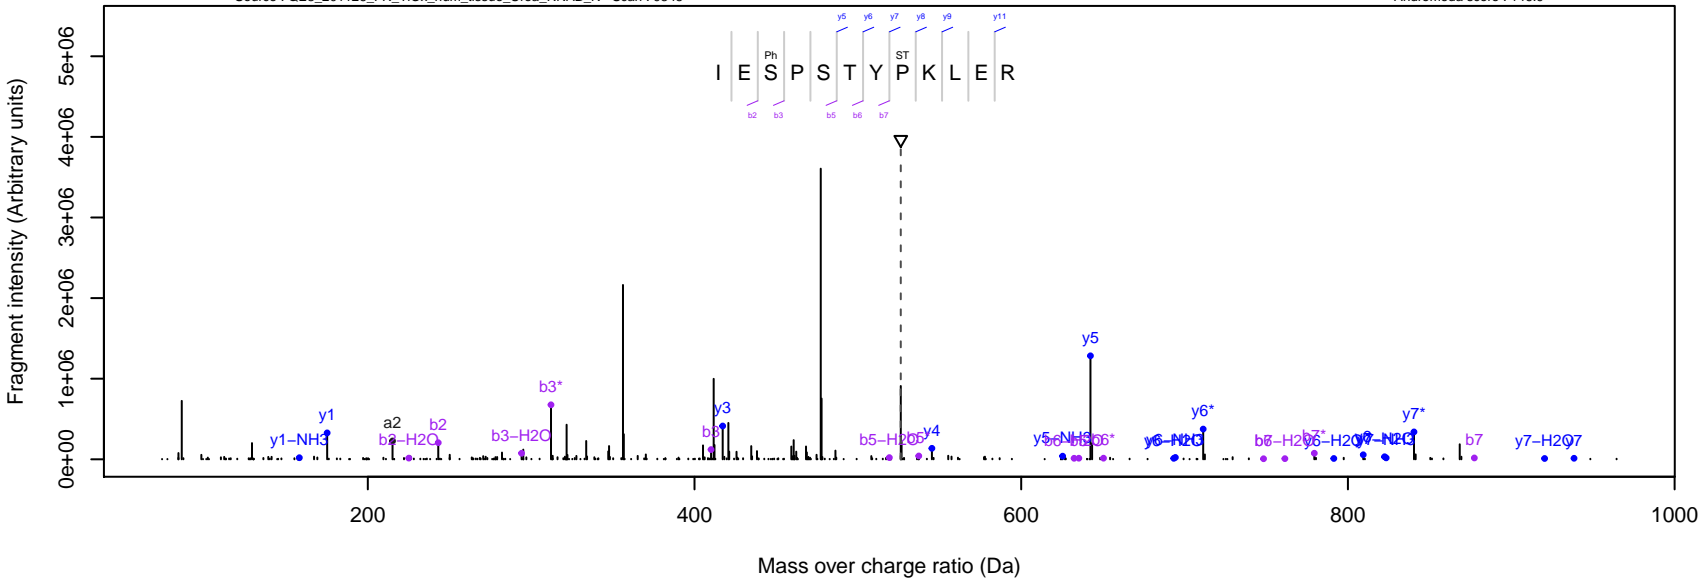

KVQIPVSRPDPEPVS(Phospho (STY))DNEEDS(Phospho (STY))YDEIHDPR-3+

Source : QE3\_201126\_FR\_TiOx\_hum\_tissue\_Urea\_RNAB\_H Scan : 27422

Andromeda score : 146.78

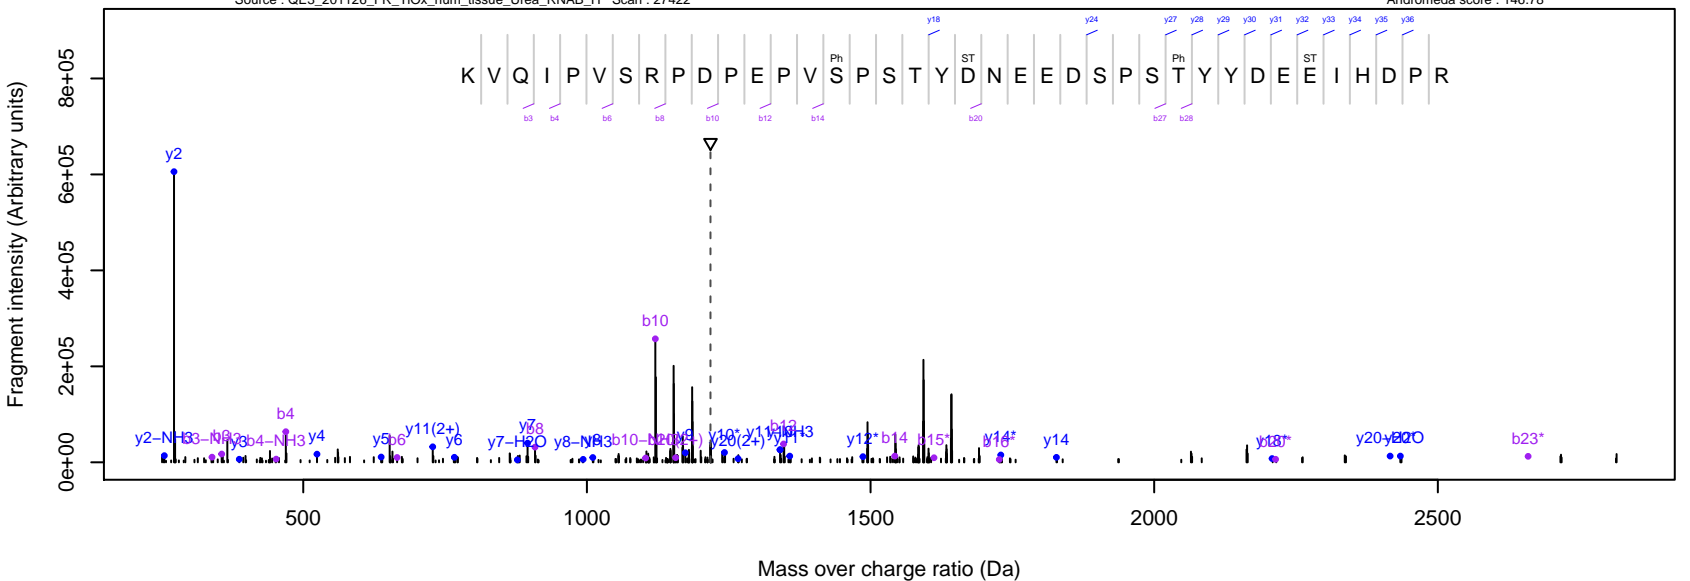

SAS(Phospho (STY))M(Oxidation (M))KLPDNTVK-2+

Source : QE3\_201126\_FR\_TIOx\_hum\_tissue\_Urea\_RNAB\_N Scan : 8580

Andromeda score : 146.77

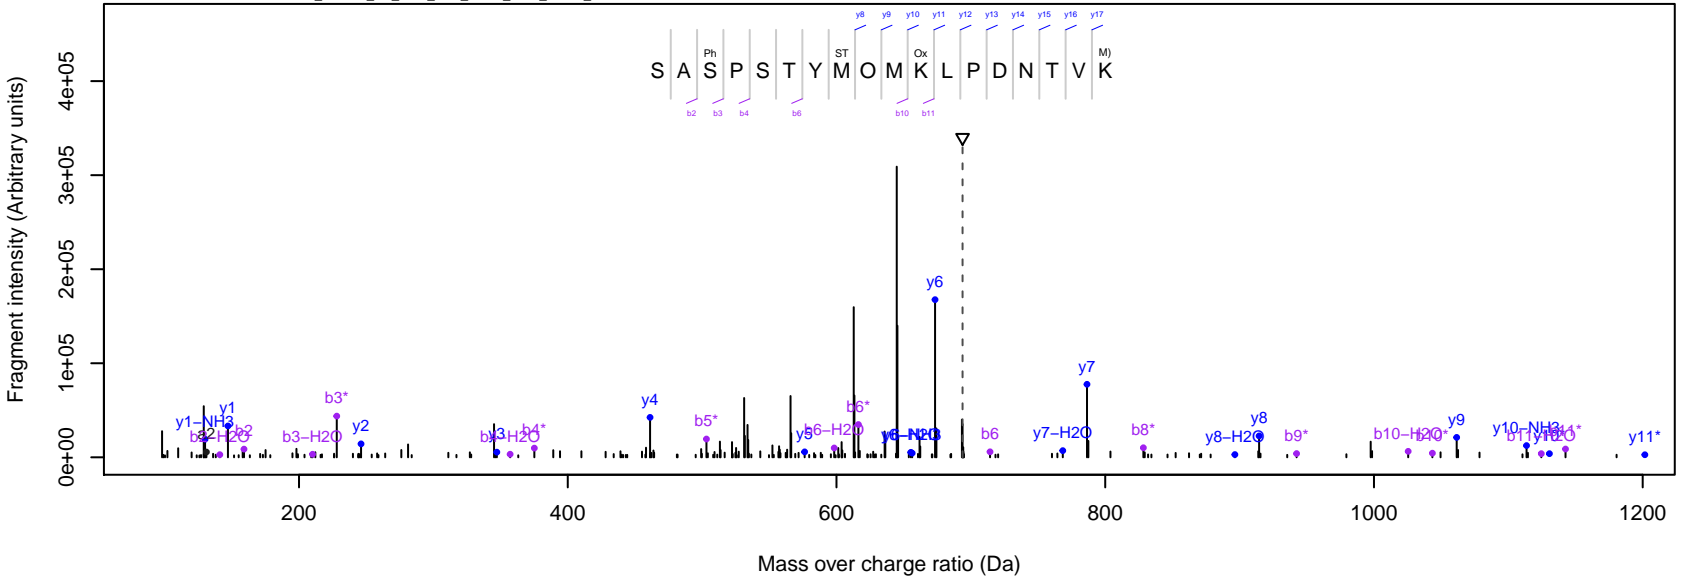

QGAIYHGLATLLNQPS(Phospho (STY))PMMQR-3+

Source : QE3\_201126\_FR\_TIOx\_hum\_tissue\_Urea\_RNAB\_H Scan : 48207

Andromeda score : 146.76

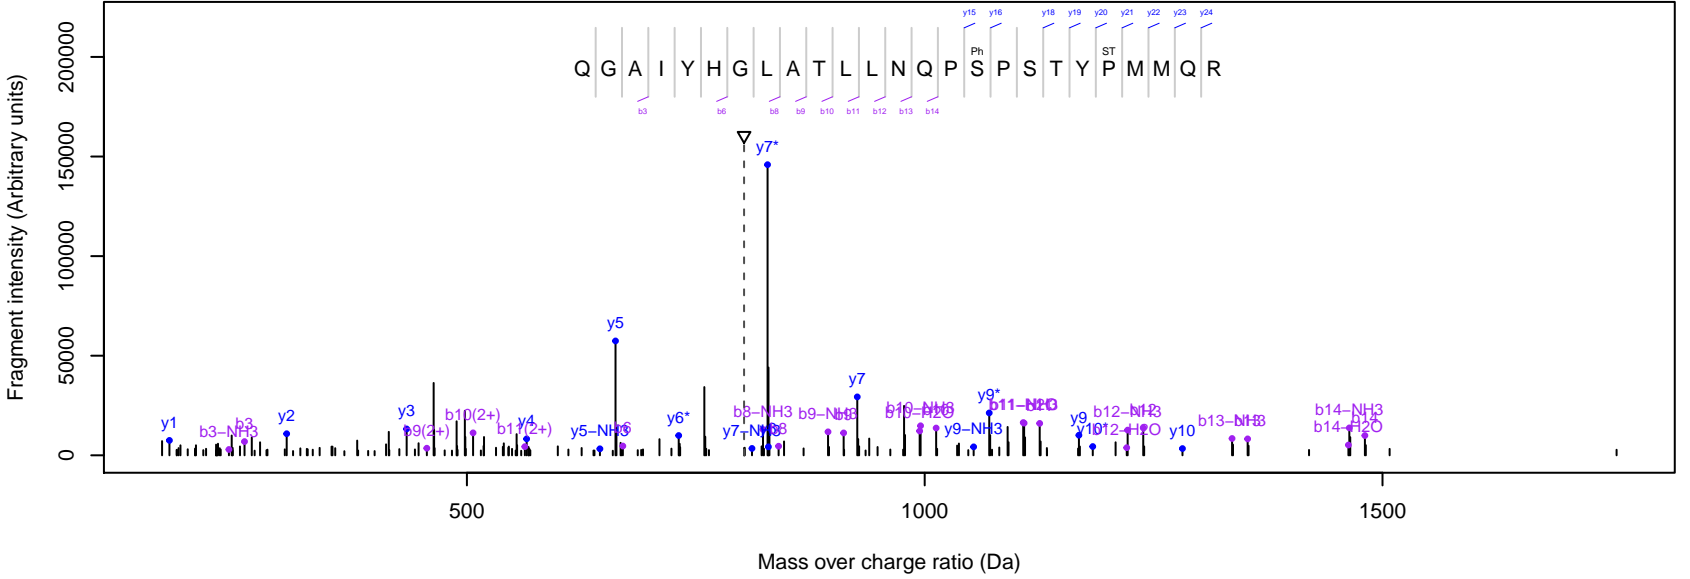

TGVTSTS(Phospho (STY))DS(Phospho (STY))EEEGDDQEGEKK-3+

Source : QE3\_201126\_FR\_TIOx\_hum\_tissue\_Urea\_RNAB\_N Scan : 6054

Andromeda score : 146.72

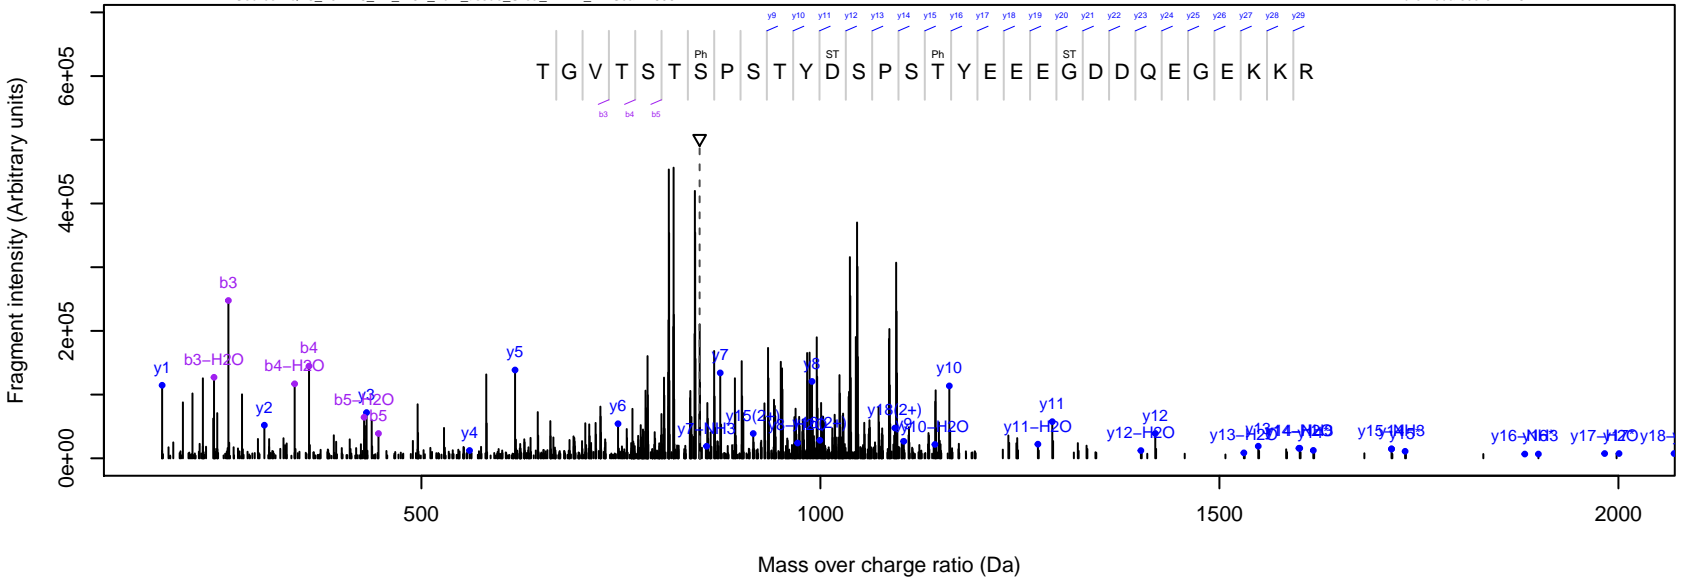

LPSFISLQSS(Phospho (STY))PS(Phospho (STY))PGAQPR-2+

Source : QE3\_201126\_FR\_TiOx\_hum\_tissue\_Urea\_RNAB\_H Scan : 56697

Andromeda score : 146.67

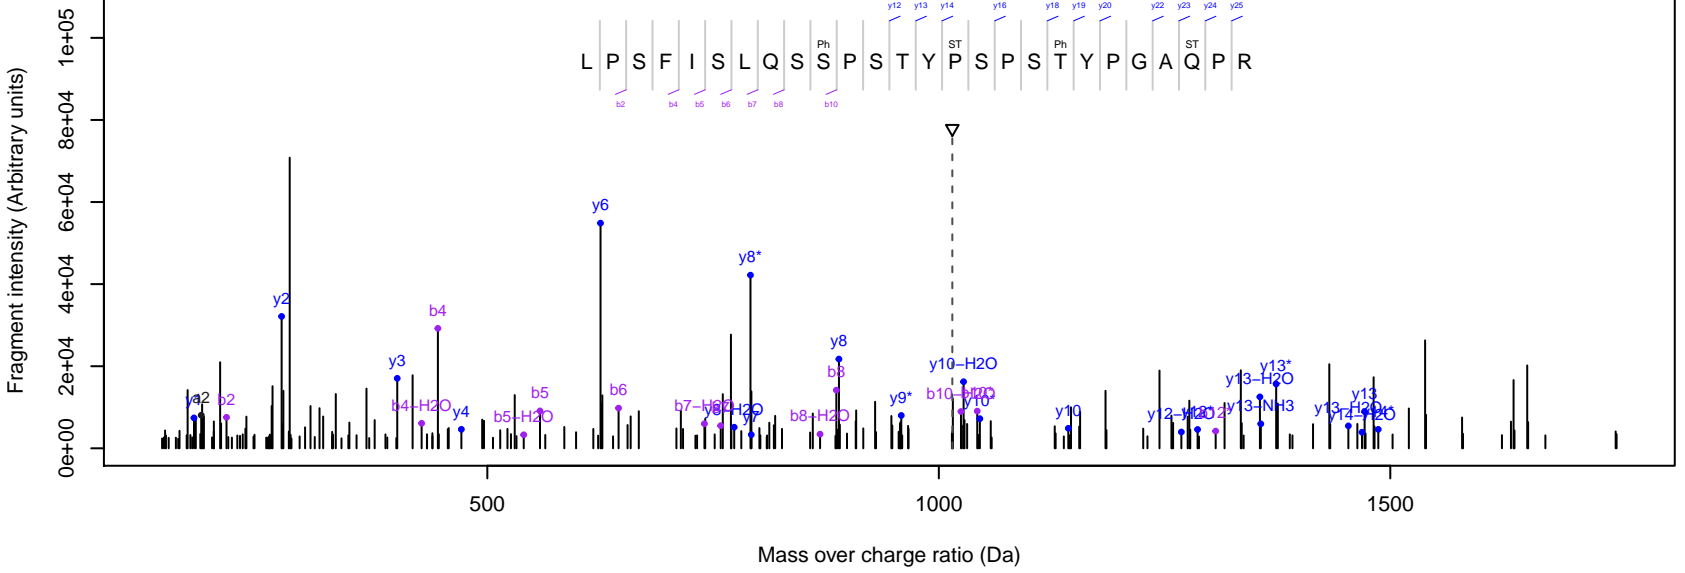

TSS(Phospho (STY))KESPIPSPTSDR-2+

Source : QE3\_201126\_FR\_TiOx\_hum\_tissue\_Urea\_RNAB\_N Scan : 13023

Andromeda score : 146.67

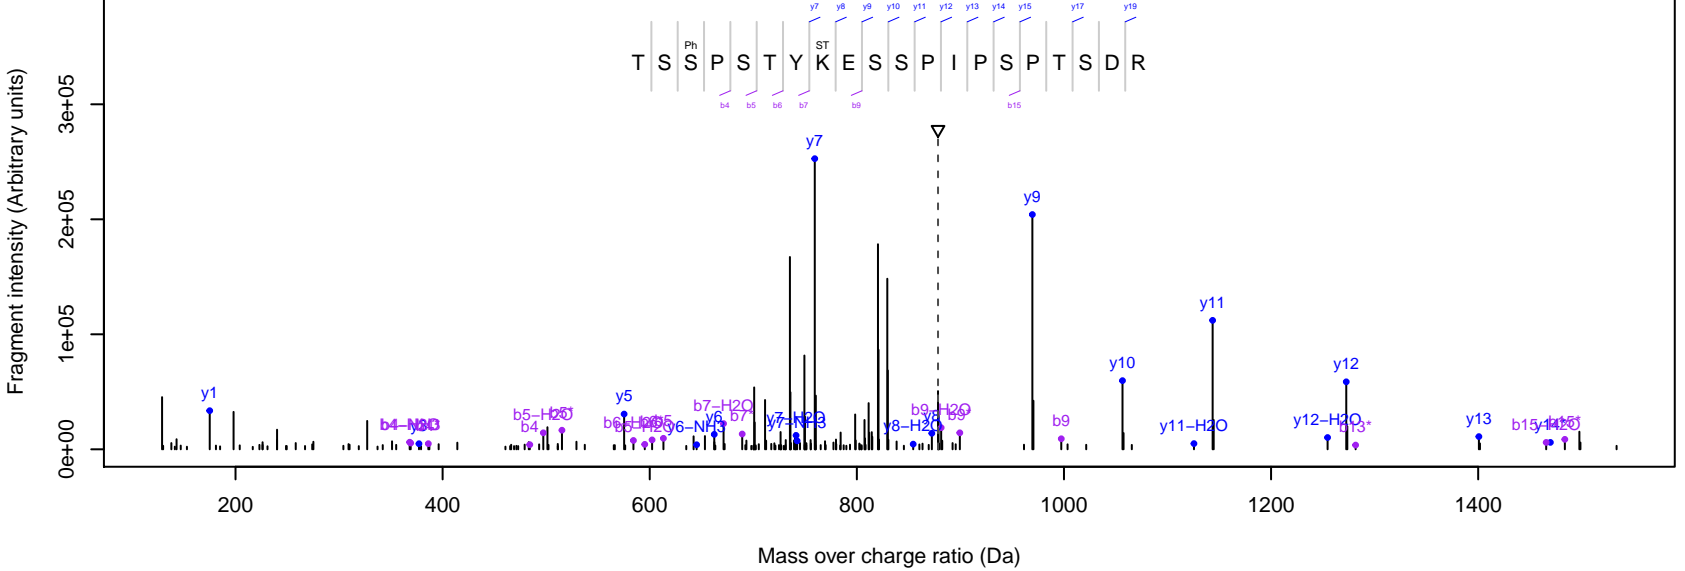

YASGSAS(Phospho (STY))LGGPESAVA-2+

Source : QE3\_201126\_FR\_TiOx\_hum\_tissue\_Urea\_RNAB\_H Scan : 30839

Andromeda score : 146.67

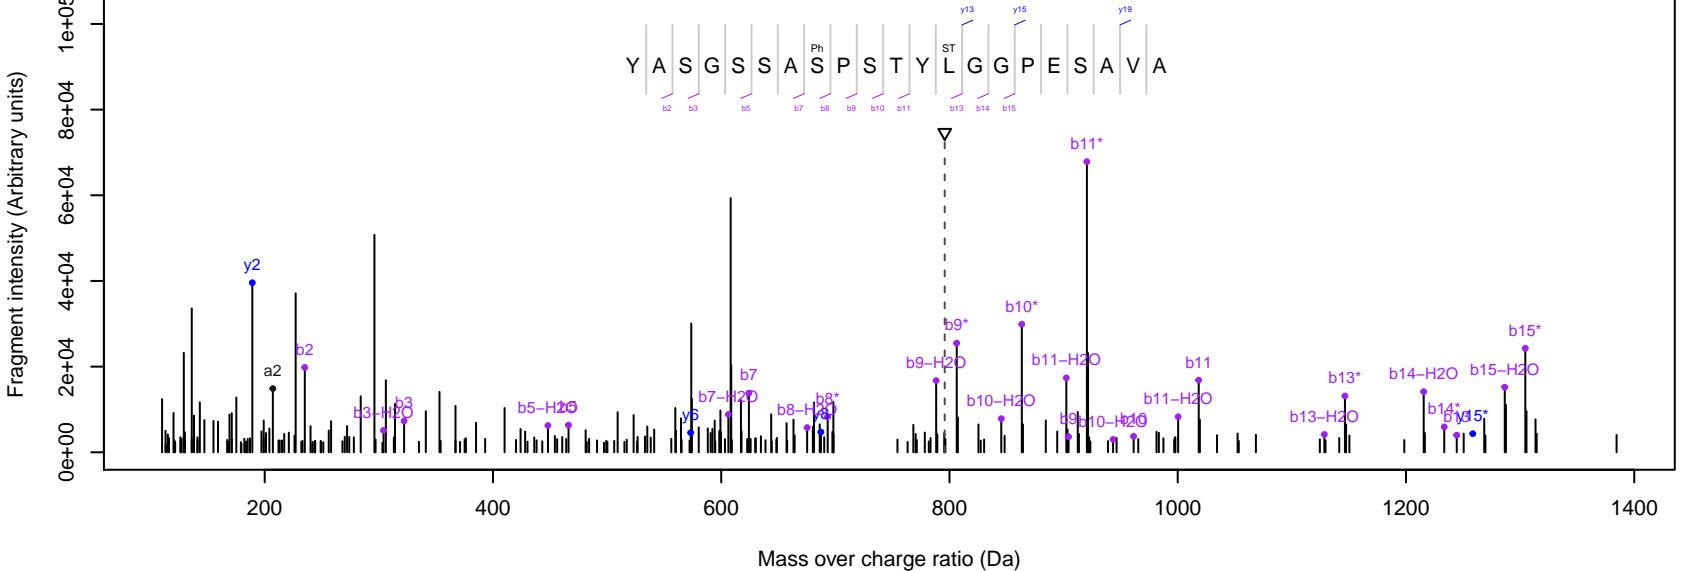

FHS(Phospho (STY))PSTTWSPNKDTPQEK-3+

Source : QE3\_201126\_FR\_TiOx\_hum\_tissue\_Urea\_RNAB\_H Scan : 13769

Andromeda score : 146.6

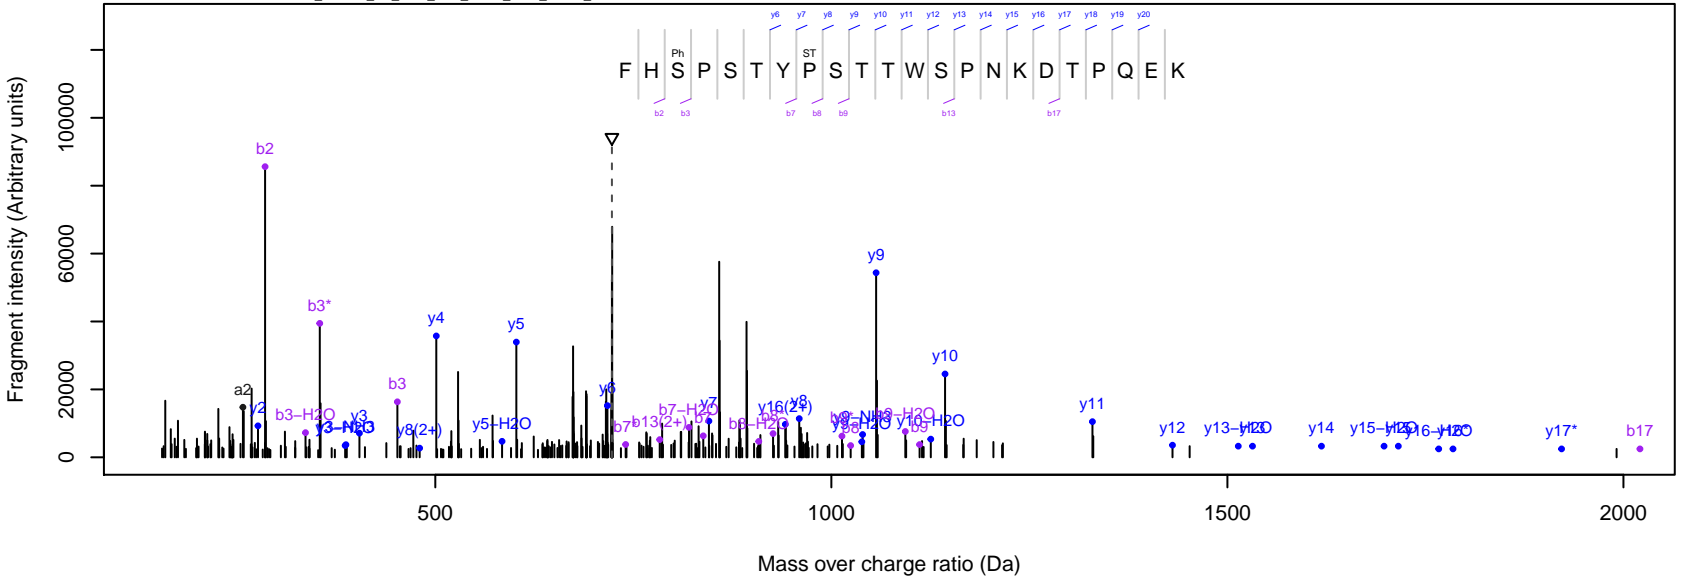

NHS(Phospho (STY))GSRT(Phospho (STY))PPVALN SSR-3+

Source : QE3\_201126\_FR\_TiOx\_hum\_tissue\_Urea\_RNAB\_H Scan : 10247

Andromeda score : 146.6

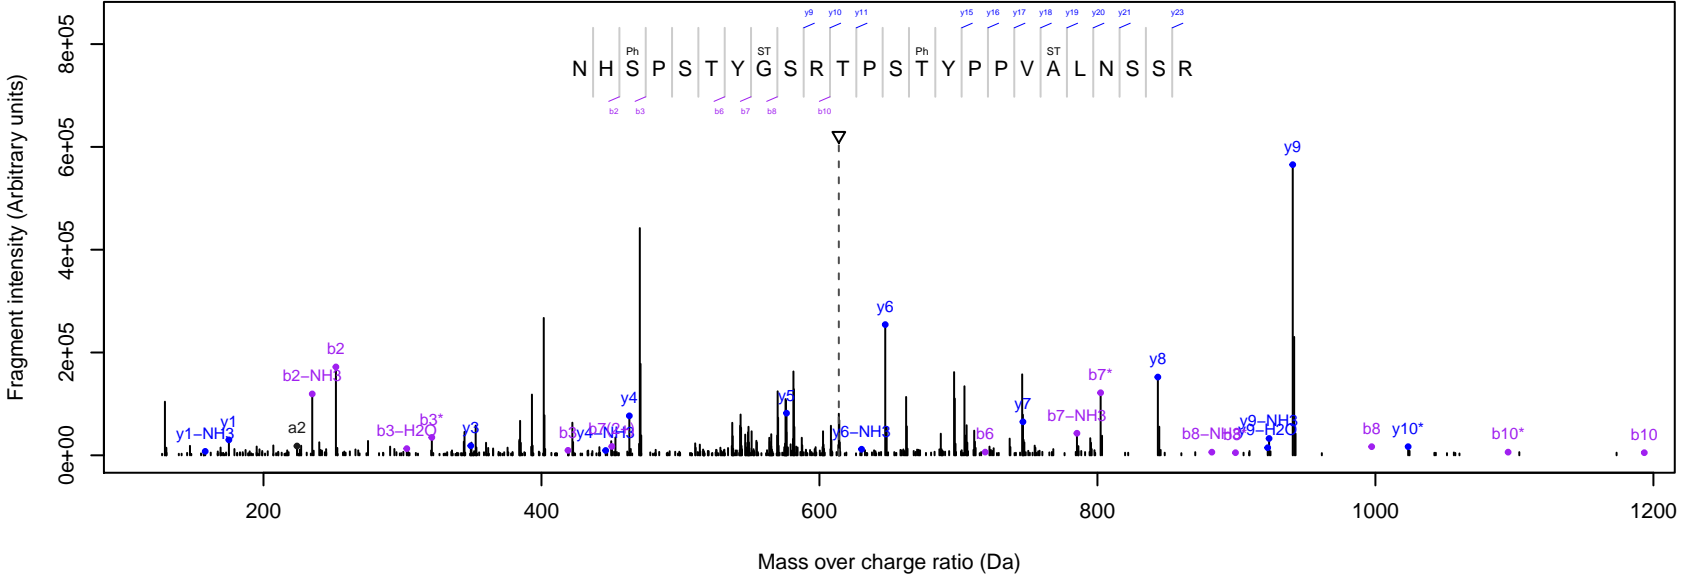

KEEDSHT(Phospho (STY))T(Phospho (STY))LHETPTTGNHYP SNHQ P-4+

Source : QE3\_201126\_FR\_TiOx\_hum\_tissue\_Urea\_RNAB\_N Scan : 9034

Andromeda score : 146.58

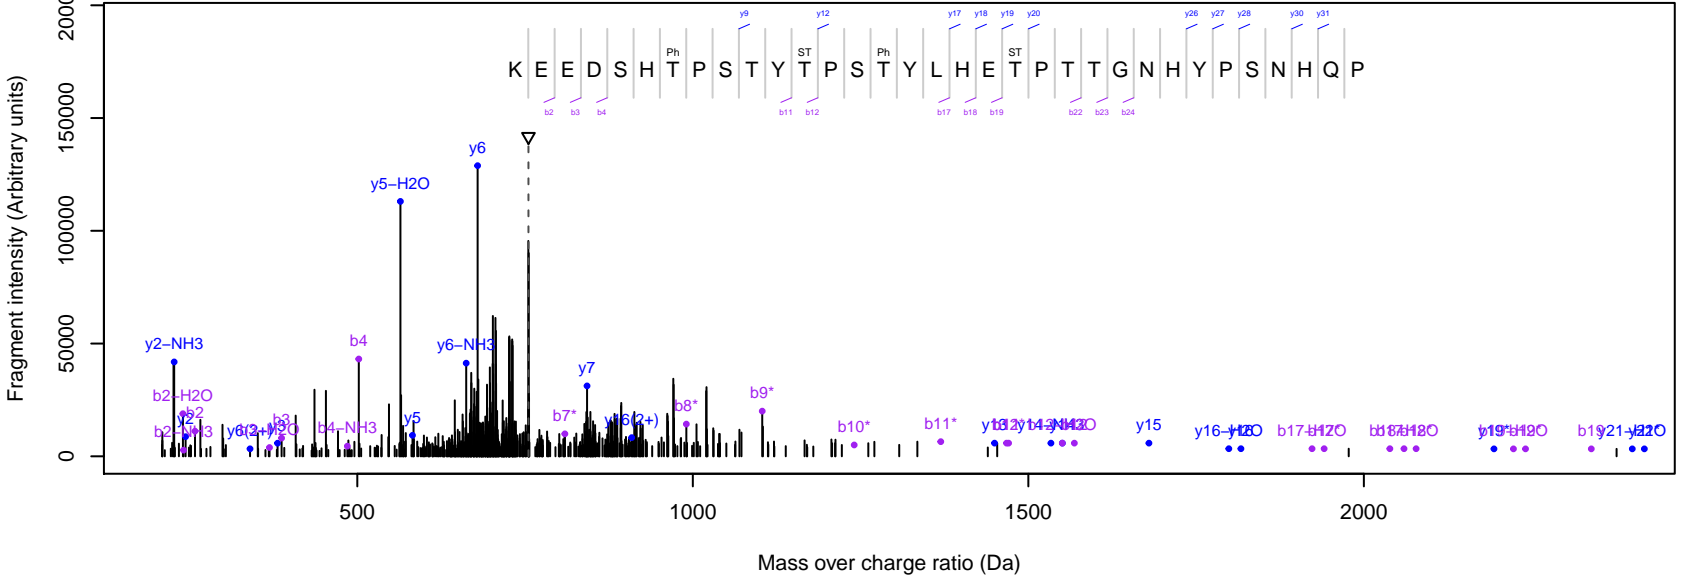



FKT(Phospho (STY))QPVTDFDEIQEVEEEGVSPMEEEKAK-4+

Source : QE3\_201126\_FR\_TIOx\_hum\_tissue\_Urea\_RNAB\_H Scan : 44675

Andromeda score : 146.57

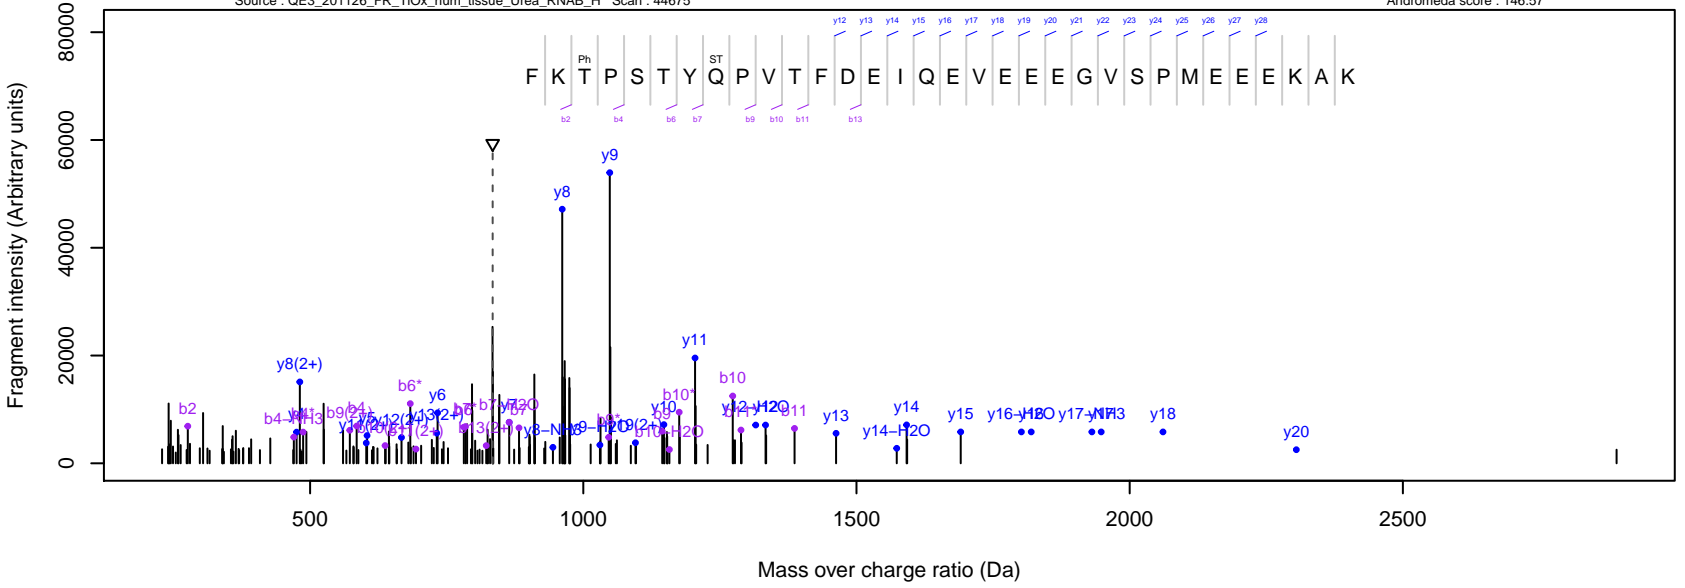

DRPHASGTDGDES(Phospho (STY))EEDPPEHKPSK-4+

Source : QE3\_201126\_FR\_TIOx\_hum\_tissue\_Urea\_RNAB\_B Scan : 3828

Andromeda score : 146.53

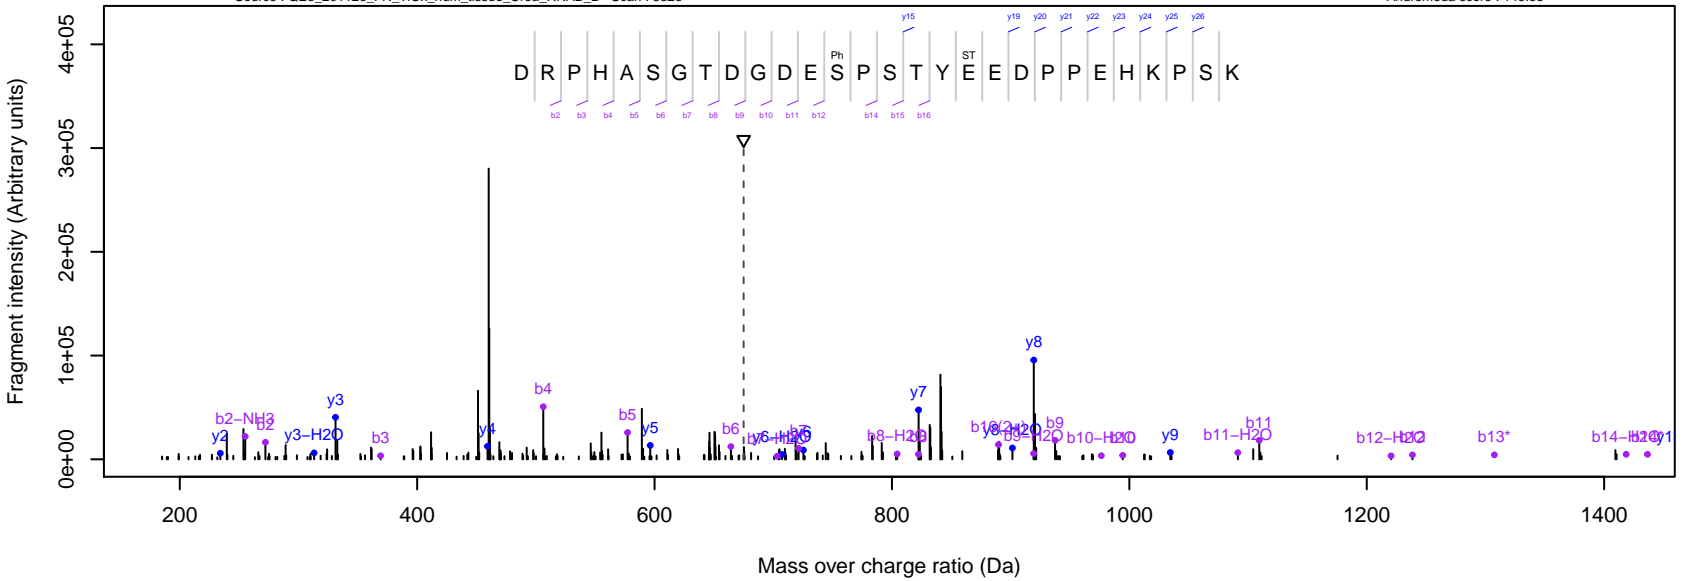

RGS(Phospho (STY))DASDFDLLETQSACSDTSESSAAGGQGNR-3+

Source : QE3\_201126\_FR\_TIOx\_hum\_tissue\_Urea\_RNAB\_N Scan : 32872

Andromeda score : 146.5

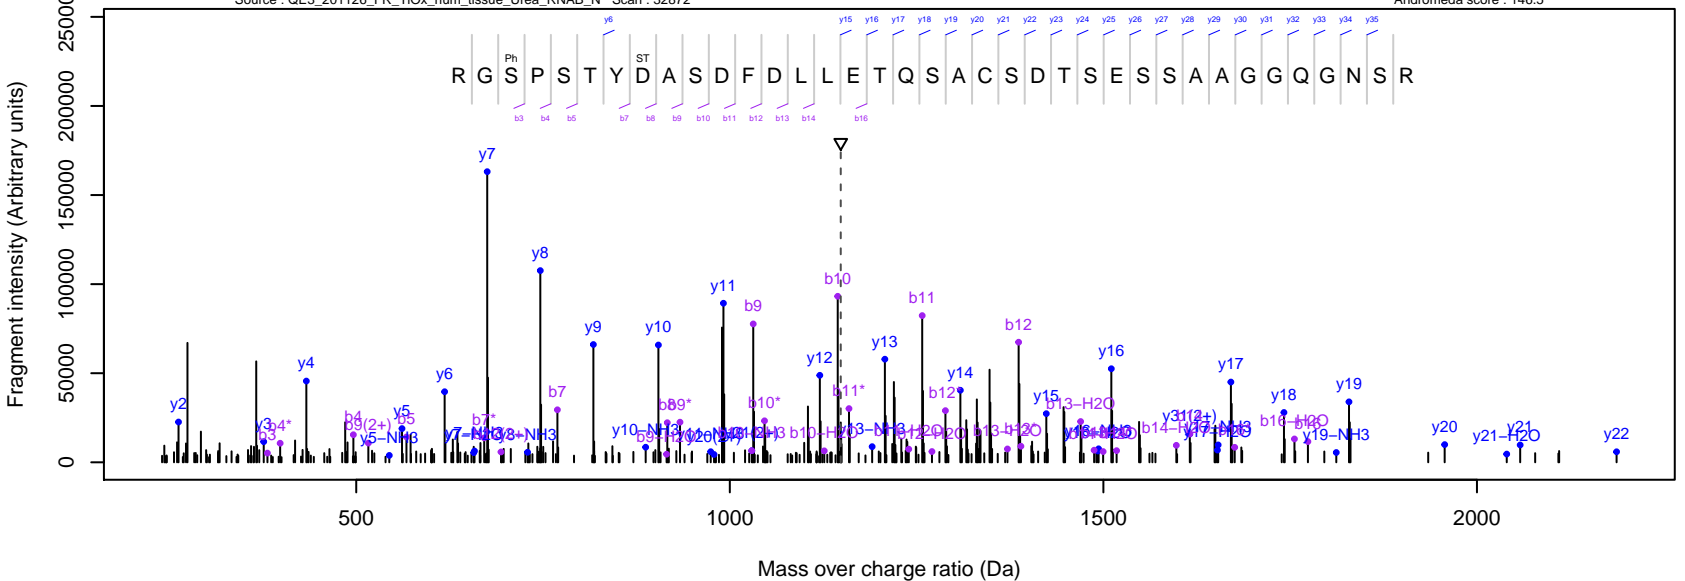

**SDSVLPASHGHLPPQAGS(Phospho (STY))LER-3+**

Source : QE3\_201126\_FR\_TIOx\_hum\_tissue\_Urea\_RNAB\_H Scan : 21234

Andromeda score : 146.5

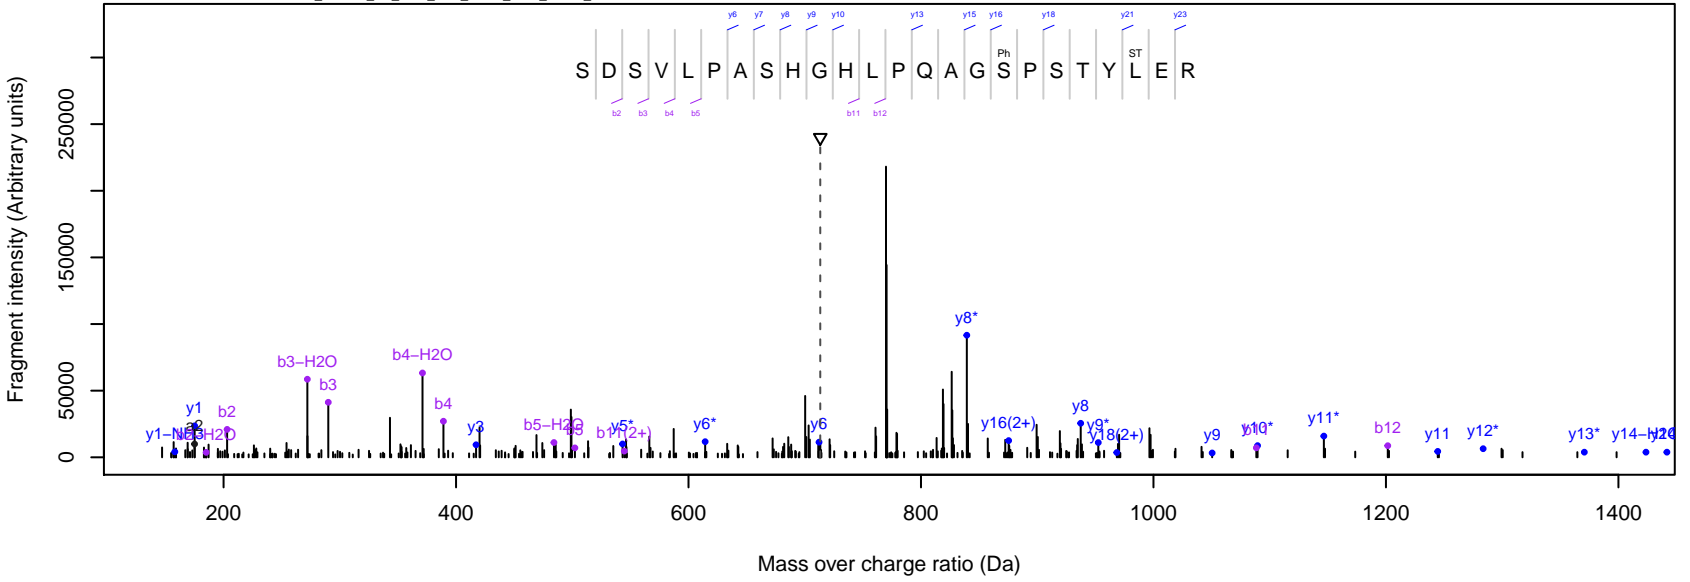

**RQS(Phospho (STY))PSPSTRPIR-3+**

Source : QE3\_201126\_FR\_TIOx\_hum\_tissue\_Urea\_RNAB\_H Scan : 5212

Andromeda score : 146.48

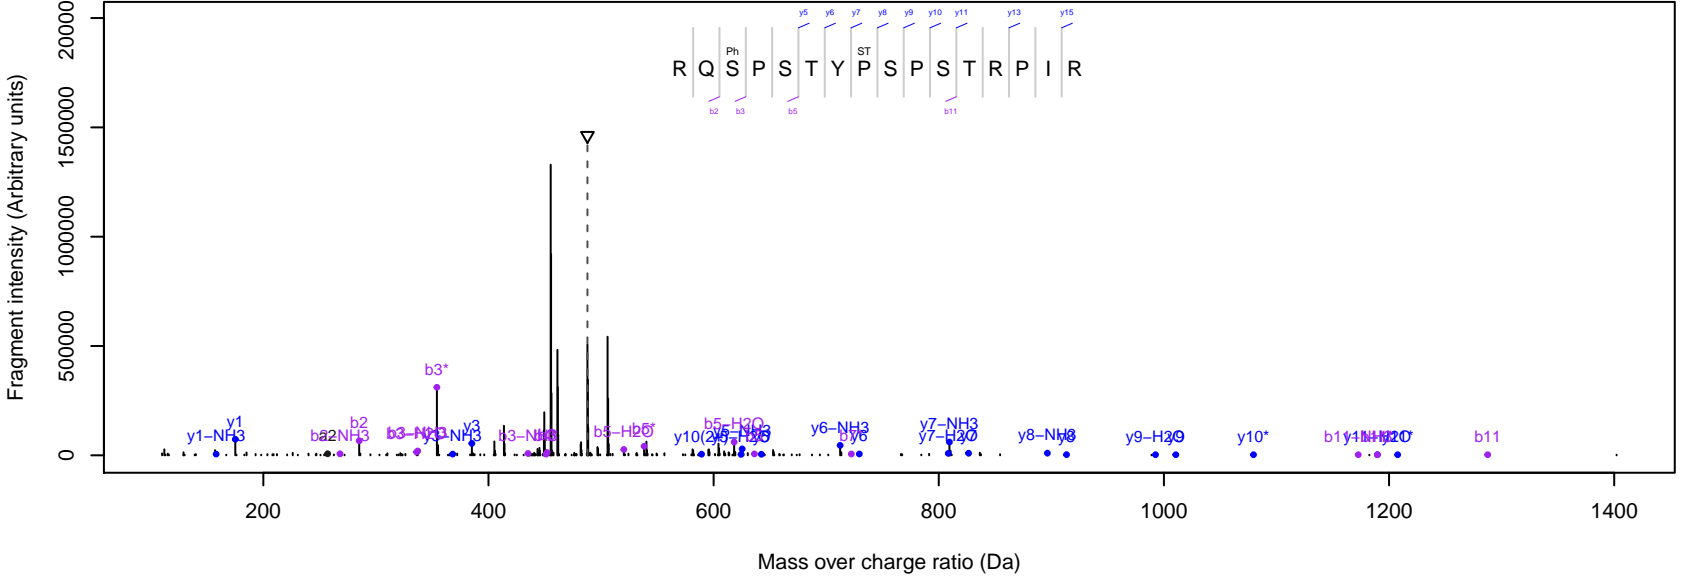

**APVQPQS(Phospho (STY))PAAAPGGTDEKPSGK-3+**

Source : QE3\_201126\_FR\_TIOx\_hum\_tissue\_Urea\_RNAB\_B Scan : 9603

Andromeda score : 146.45

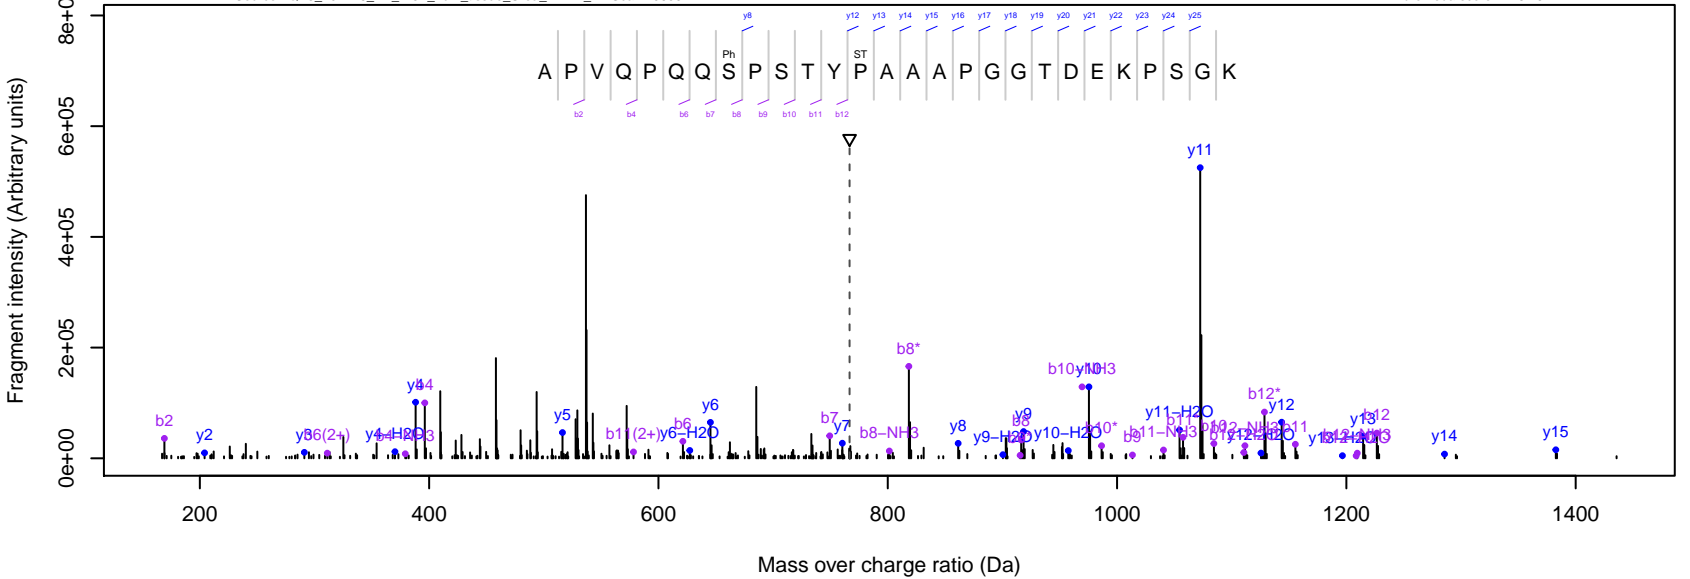

EKEEETKTS(Phospho (STY))NGDLS DSTVSADPVVK-3+

Source : QE3\_201126\_FR\_TiOx\_hum\_tissue\_Urea\_RNAB\_B Scan : 15898

Andromeda score : 146.45

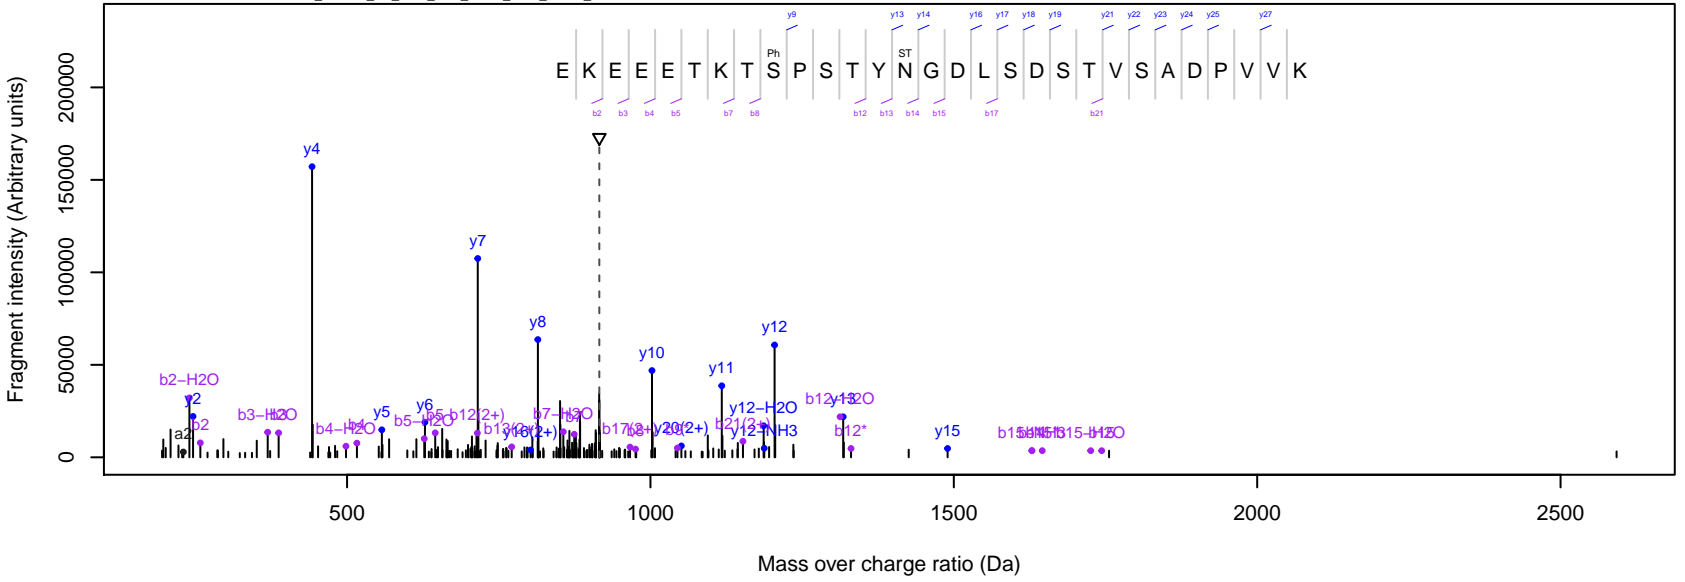

SQLDDHPES(Phospho (STY))DDEENFIDANDEEDM(Oxidation (M))EKFTDADKETEIVK-4+

Source : QE3\_201126\_FR\_TiOx\_hum\_tissue\_Urea\_RNAB\_B Scan : 34194

Andromeda score : 146.41

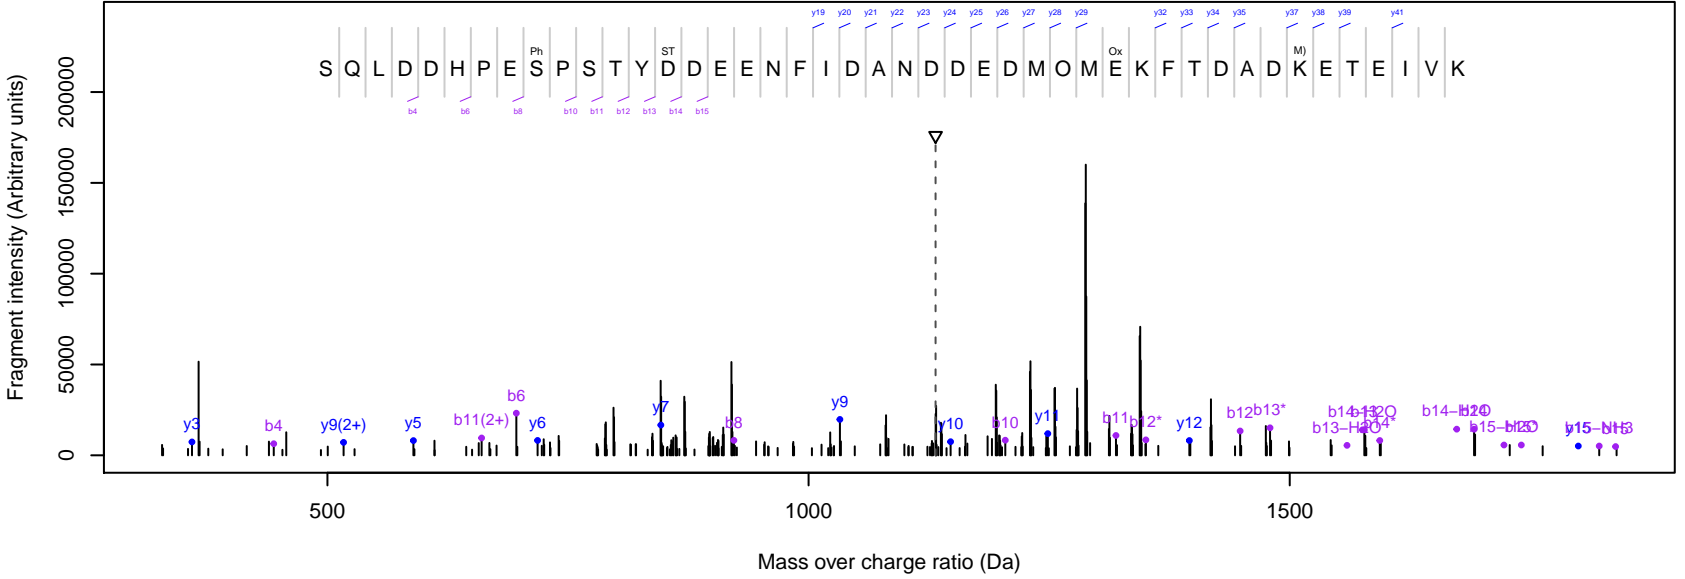

DGGRS(Phospho (STY))SPGGQDEGGFM(Oxidation (M))AQGK-3+

Source : QE3\_201126\_FR\_TiOx\_hum\_tissue\_Urea\_RNAB\_H Scan : 9922

Andromeda score : 146.39

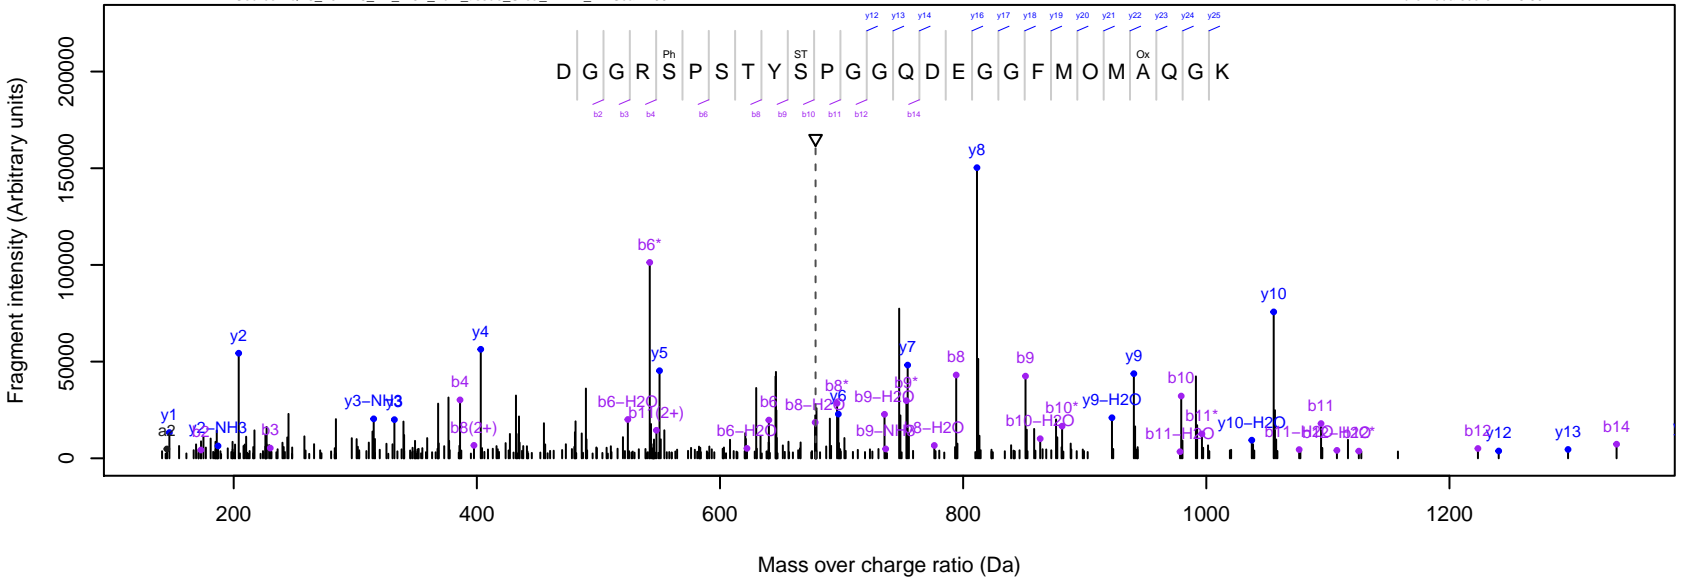

RRT(Phospho (STY))SDPSAAVNHVSSSTTSLGENYEDDDLVSNSDEVVK-4+

Source : QE3\_201126\_FR\_TIOx\_hum\_tissue\_Urea\_RNAB\_H Scan : 30494

Andromeda score : 146.37

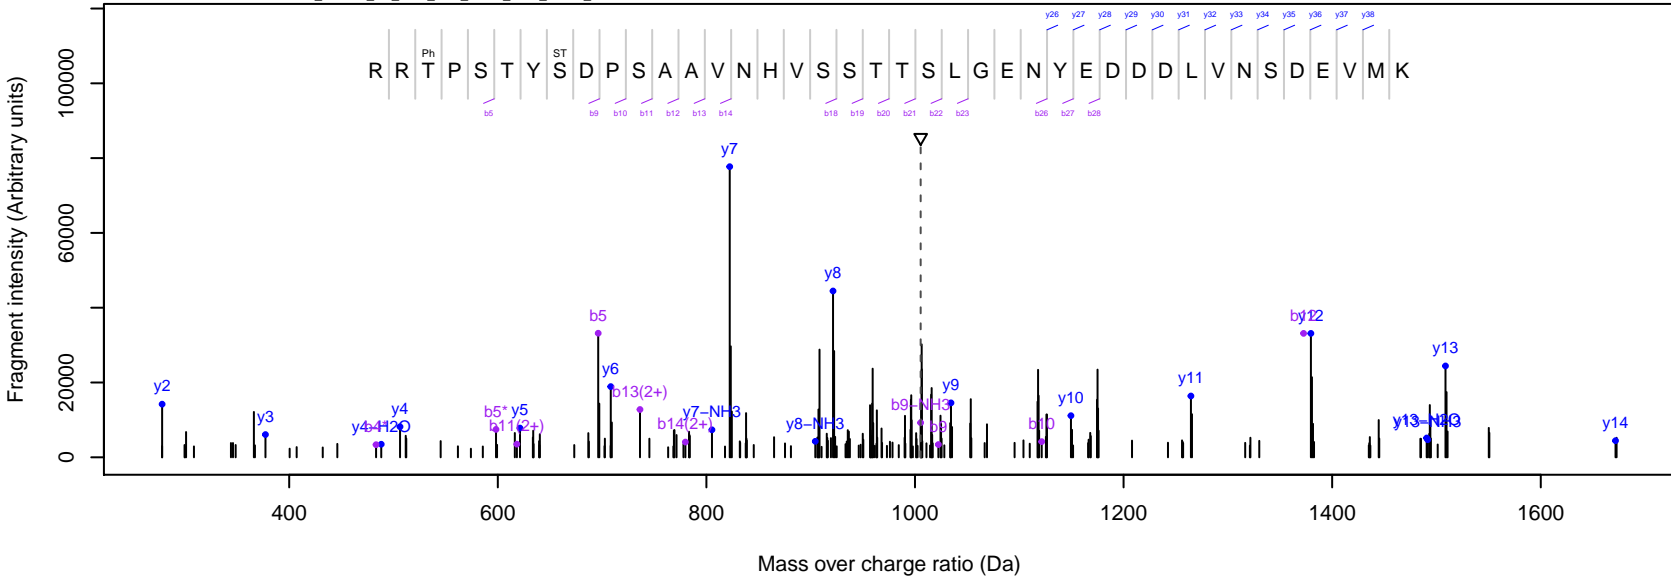

SPAIDSTRGDSS(Phospho (STY))SLVAELQEK-3+

Source : QE3\_201126\_FR\_TIOx\_hum\_tissue\_Urea\_RNAB\_H Scan : 30594

Andromeda score : 146.34

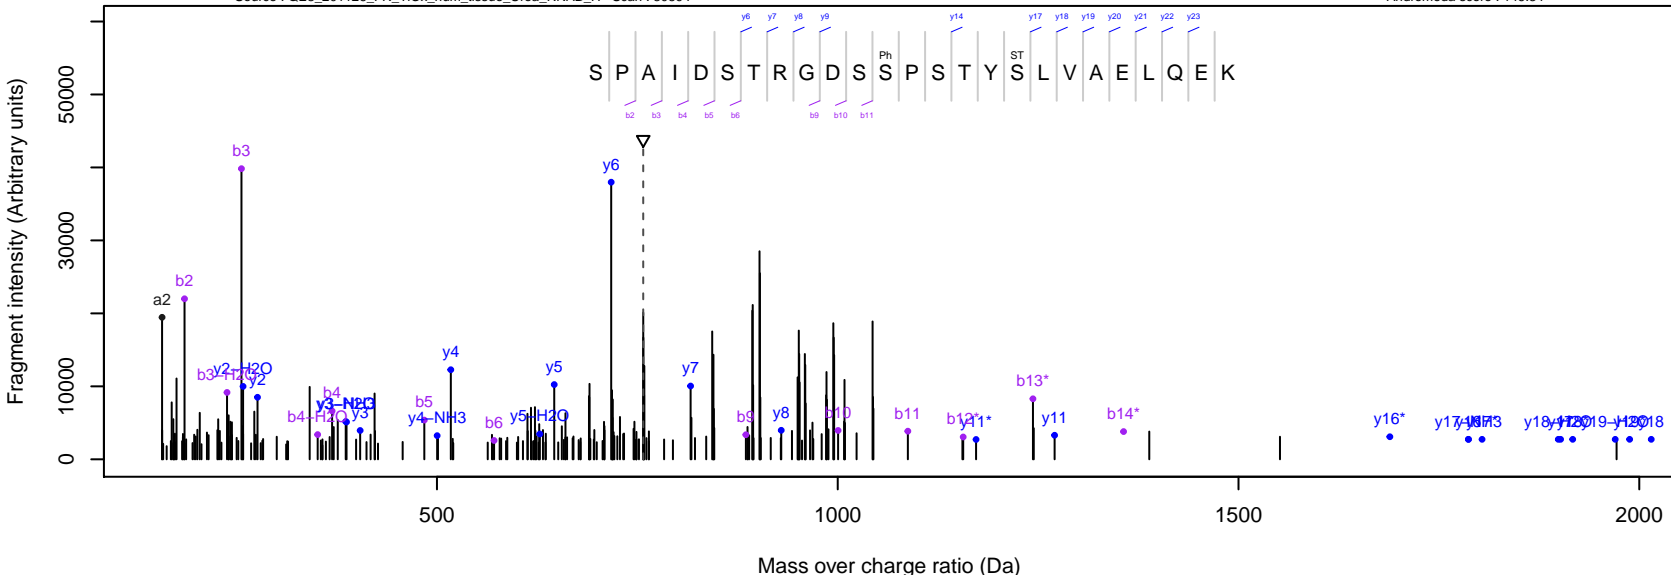

ESEKQQDS(Phospho (STY))QPPEVMDVLEMVENVK-3+

Source : QE3\_201126\_FR\_TIOx\_hum\_tissue\_Urea\_RNAB\_H Scan : 59815

Andromeda score : 146.28

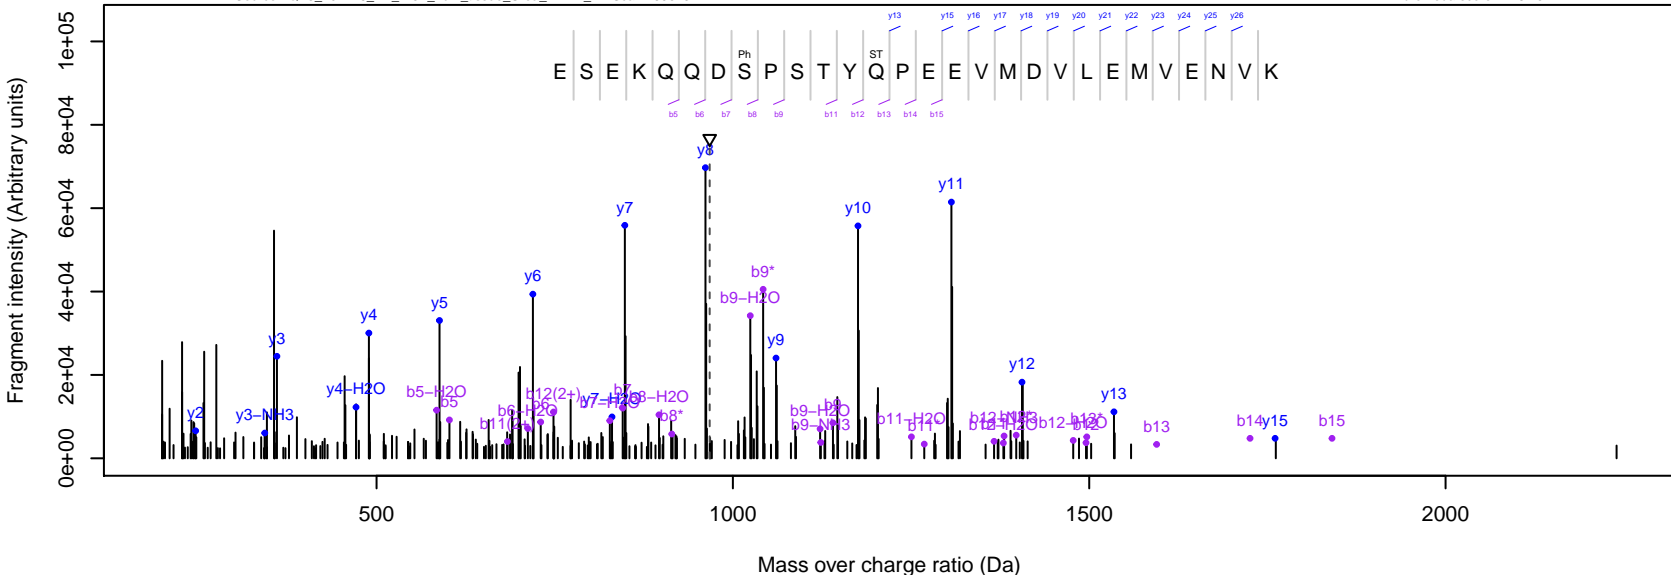

TEDGGWEWS(Phospho (STY))DDEFDEESEEGKAAISQLR-3+

Source : QE3\_201126\_FR\_TIOx\_hum\_tissue\_Urea\_RNAB\_H Scan : 52698

Andromeda score : 146.26

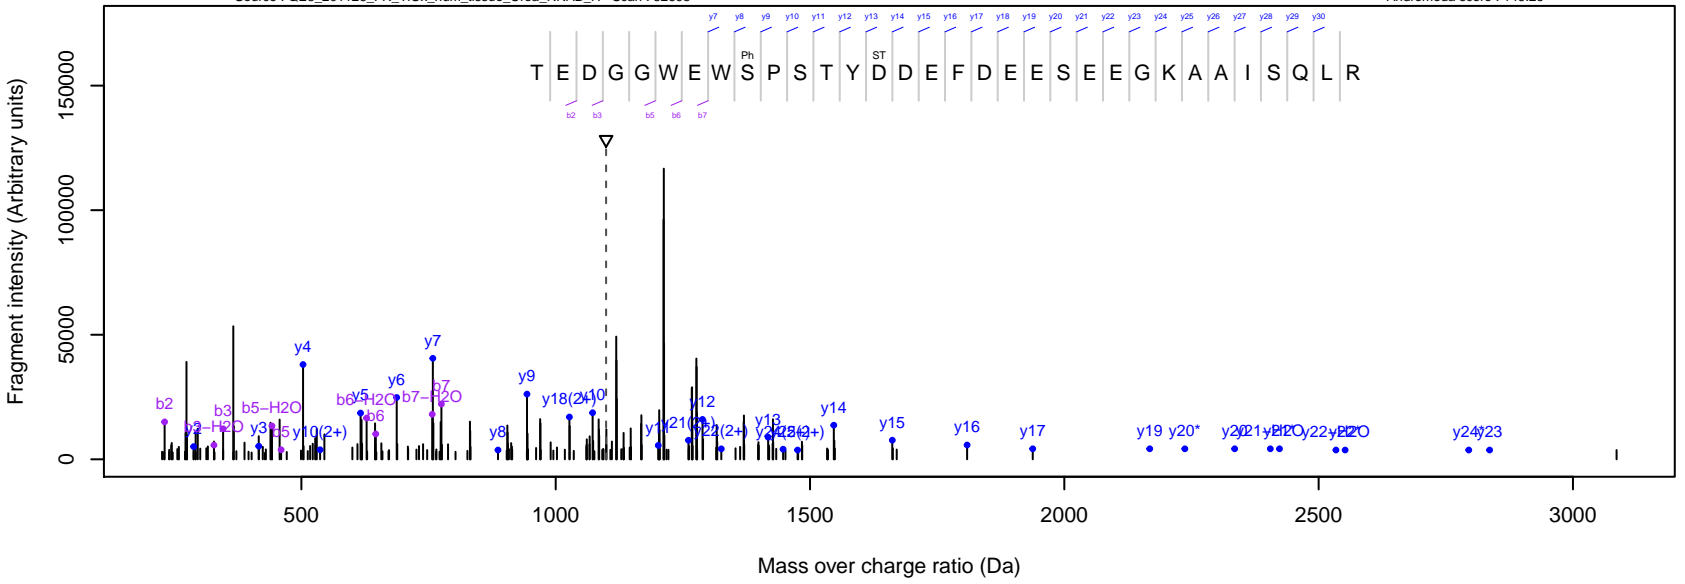

S(Phospho (STY))TSEGAWPQLPSGLSMMR-2+

Source : QE3\_201126\_FR\_TIOx\_hum\_tissue\_Urea\_RNAB\_N Scan : 56864

Andromeda score : 146.2

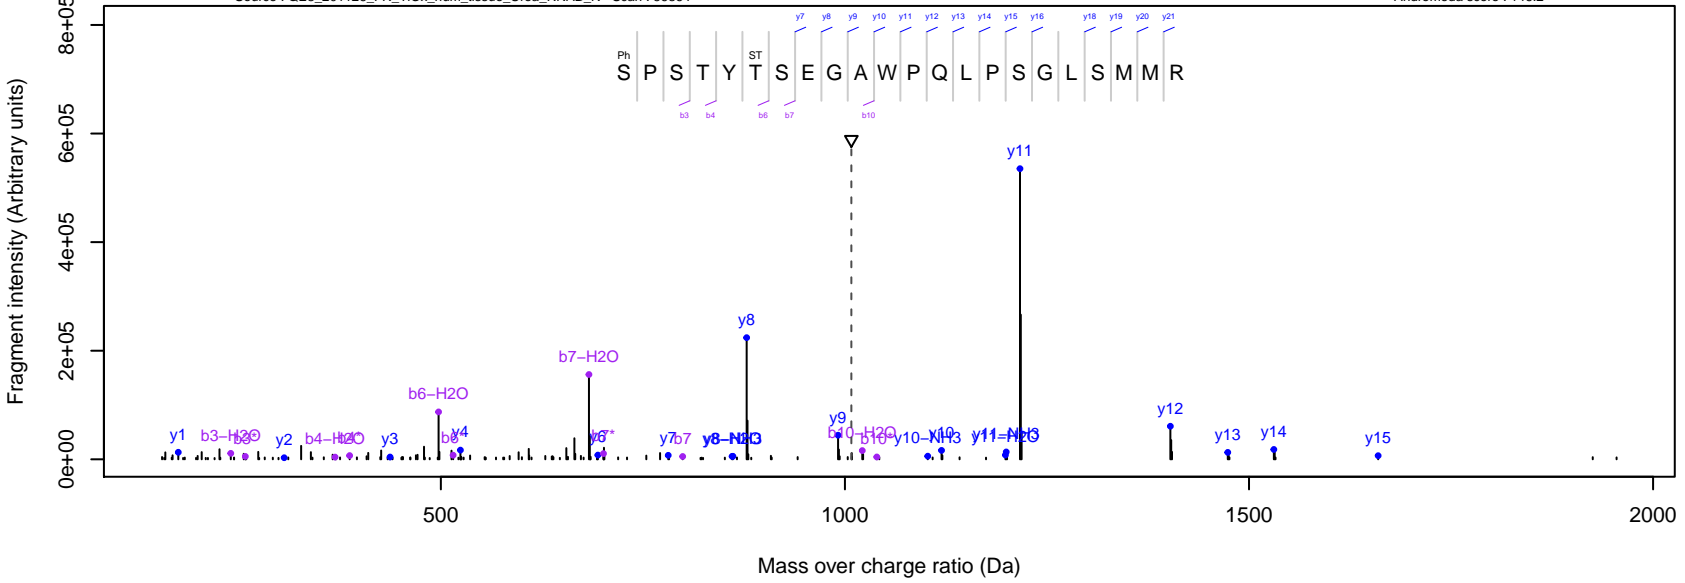

VENM(Oxidation (M))SSNQDGNDS(Phospho (STY))DEFM(Oxidation (M))-2+

Source : QE3\_201126\_FR\_TIOx\_hum\_tissue\_Urea\_RNAB\_N Scan : 19353

Andromeda score : 146.2

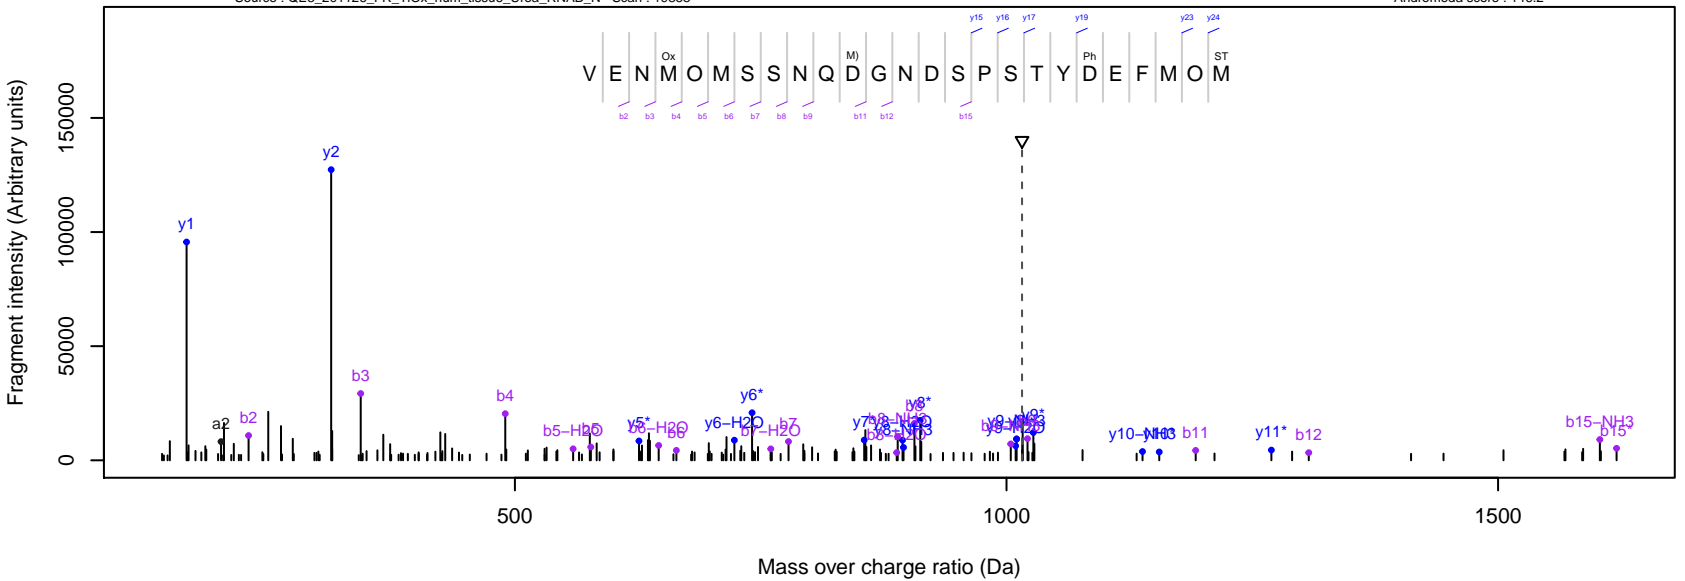

SGS(Phospho (STY))SQELDVKPSASPQER-3+

Source : QE3\_201126\_FR\_TiOx\_hum\_tissue\_Urea\_RNAB\_N Scan : 13322

Andromeda score : 146.19

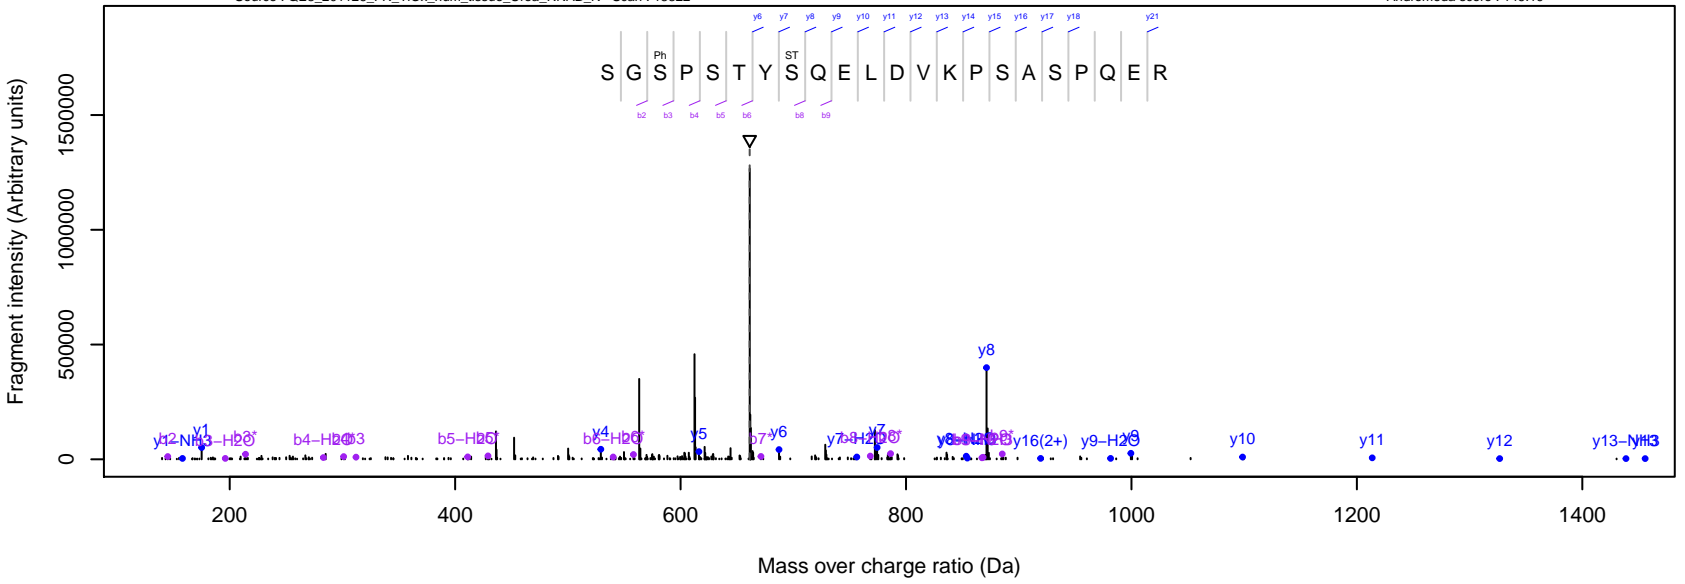

DLS(Phospho (STY))TPGLEK-2+

Source : QE3\_201126\_FR\_TiOx\_hum\_tissue\_Urea\_RNAB\_N Scan : 20695

Andromeda score : 146.17

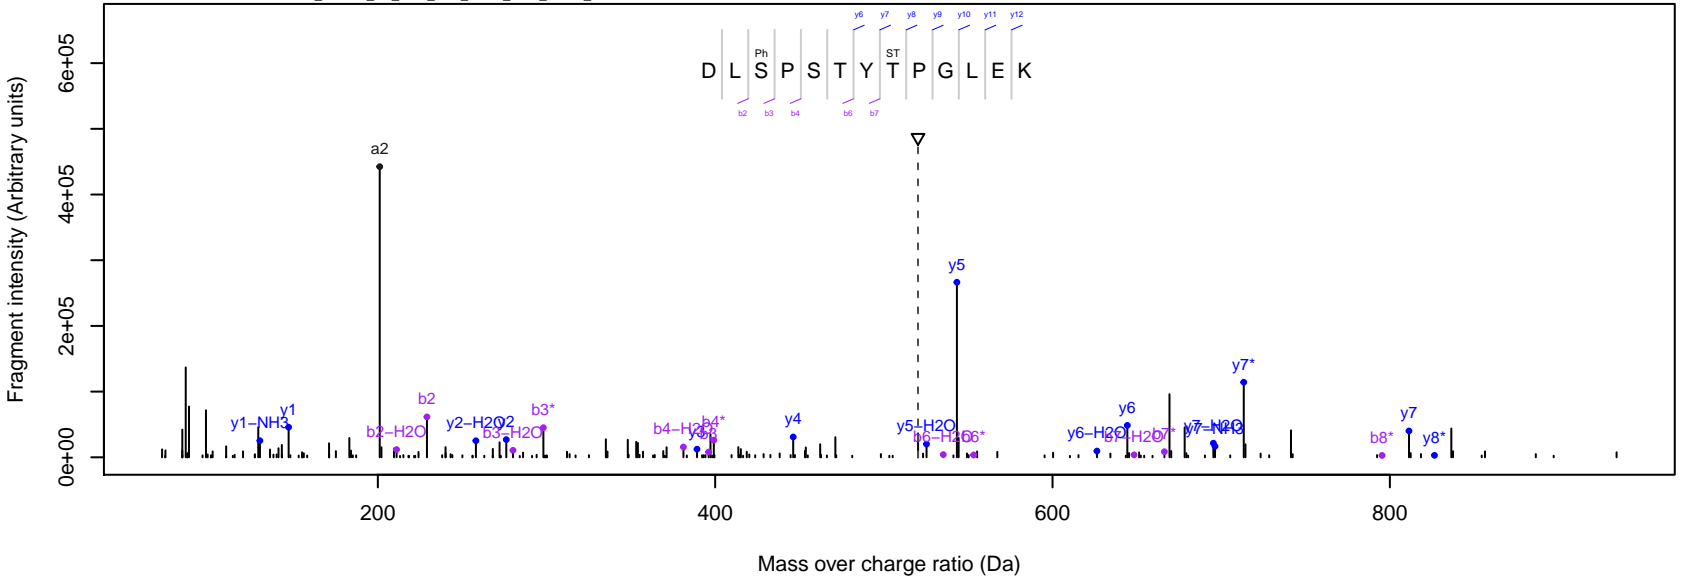

RFS(Phospho (STY))LTTLR-2+

Source : QE3\_201126\_FR\_TiOx\_hum\_tissue\_Urea\_RNAB\_B Scan : 24804

Andromeda score : 146.11

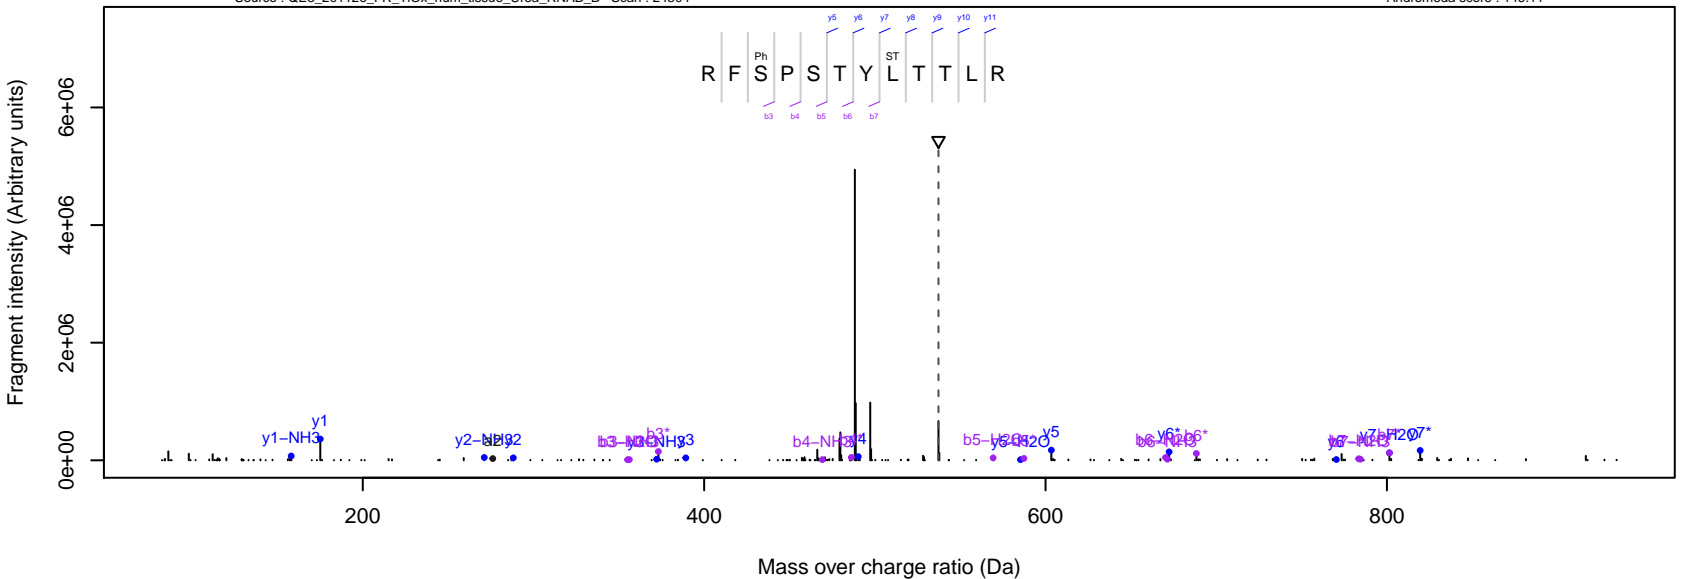

LLEDS(Phospho (STY))EES(Phospho (STY))SEETVSR-2+

Source : QE3\_201126\_FR\_TiOx\_hum\_tissue\_Urea\_RNAB\_N Scan : 25912

Andromeda score : 146.1

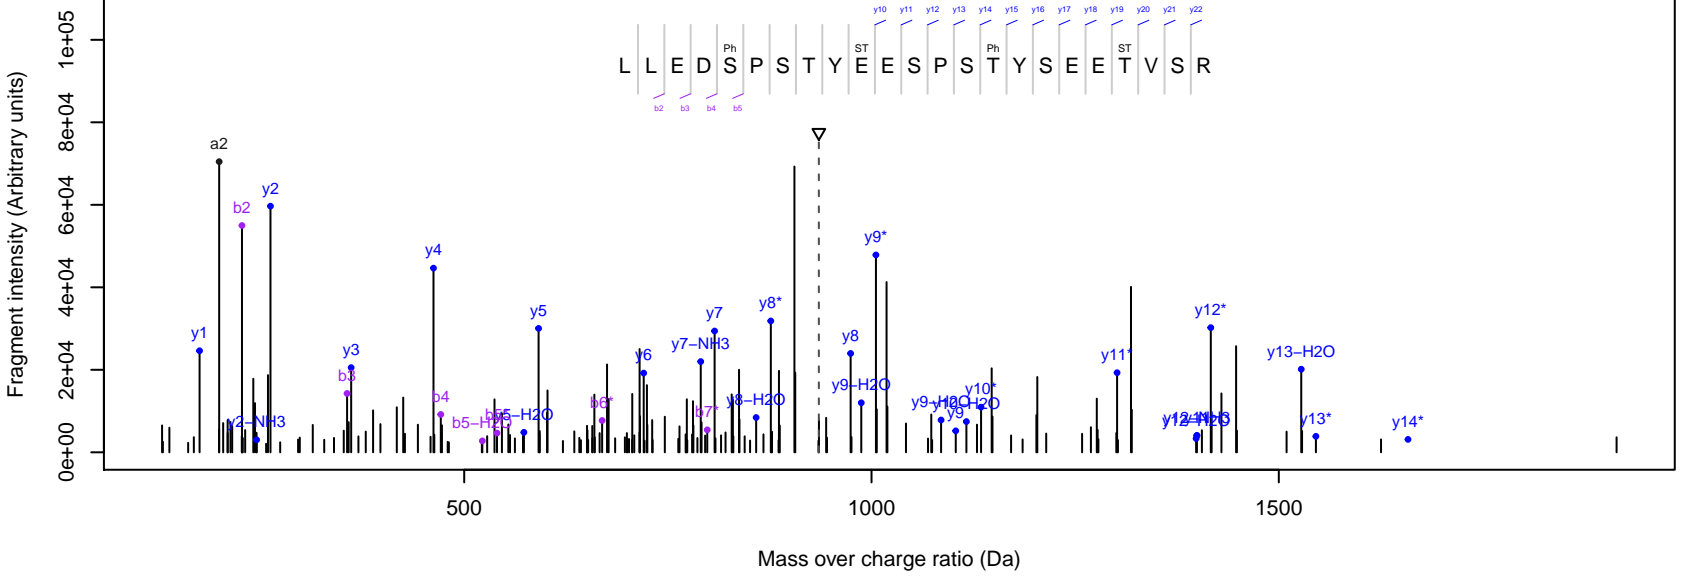

RLEIS(Phospho (STY))PDSS(Phospho (STY))PER-2+

Source : QE3\_201126\_FR\_TiOx\_hum\_tissue\_Urea\_RNAB\_N Scan : 18570

Andromeda score : 146.1

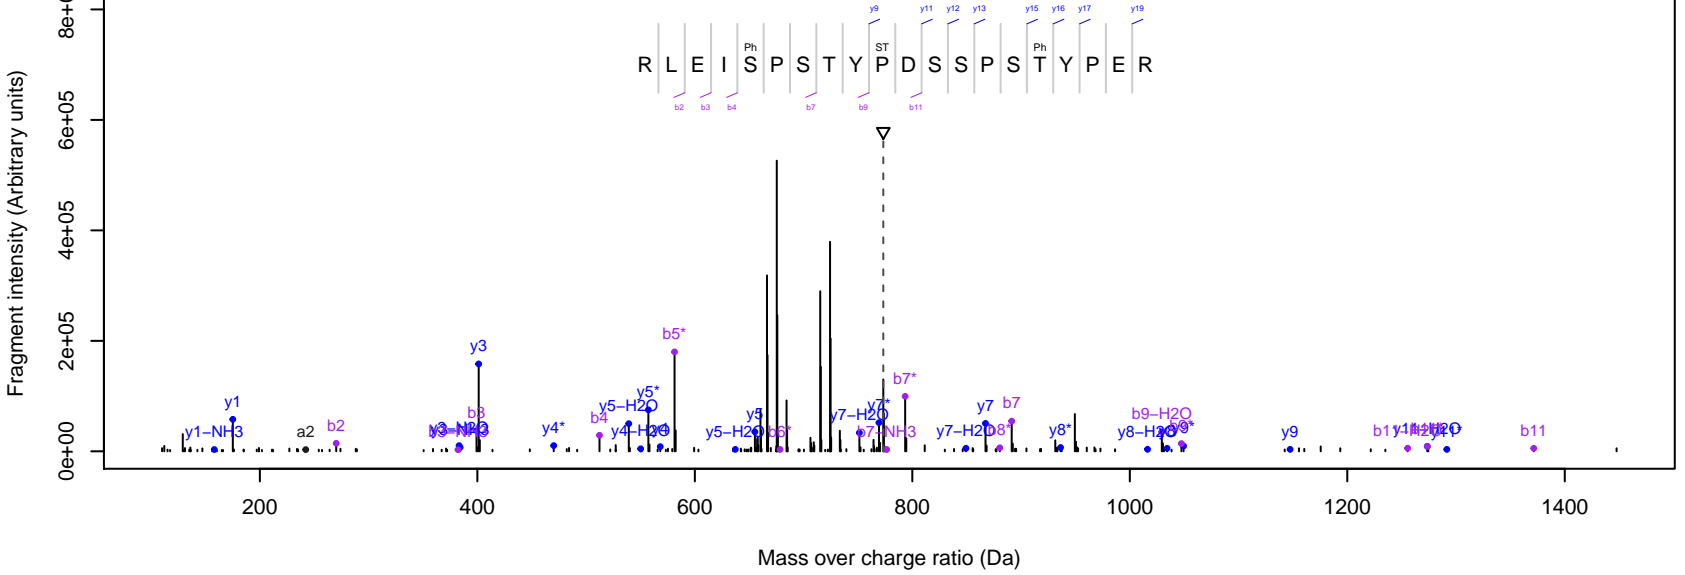

DM(Oxidation (M))SPLSETEMALGKDVT(Phospho (STY))PPPETEVLIIK-3+

Source : QE3\_201126\_FR\_TiOx\_hum\_tissue\_Urea\_RNAB\_H Scan : 55002

Andromeda score : 146.03

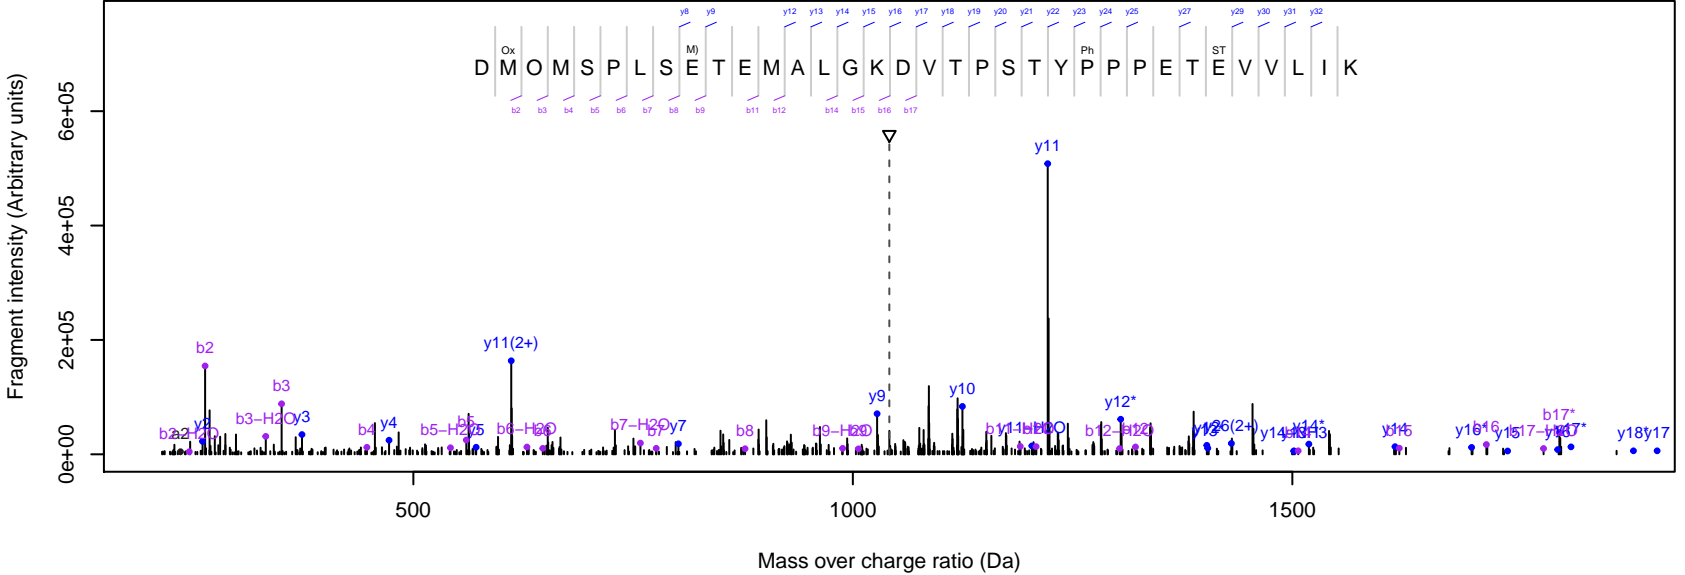

NS(Phospho (STY))TPSEPGSRGPPQEEEEEEEEEEATKEDAEAPGIR-4+

Source : QE3\_201126\_FR\_TiOx\_hum\_tissue\_Urea\_RNAB\_N Scan : 23445

Andromeda score : 146.01

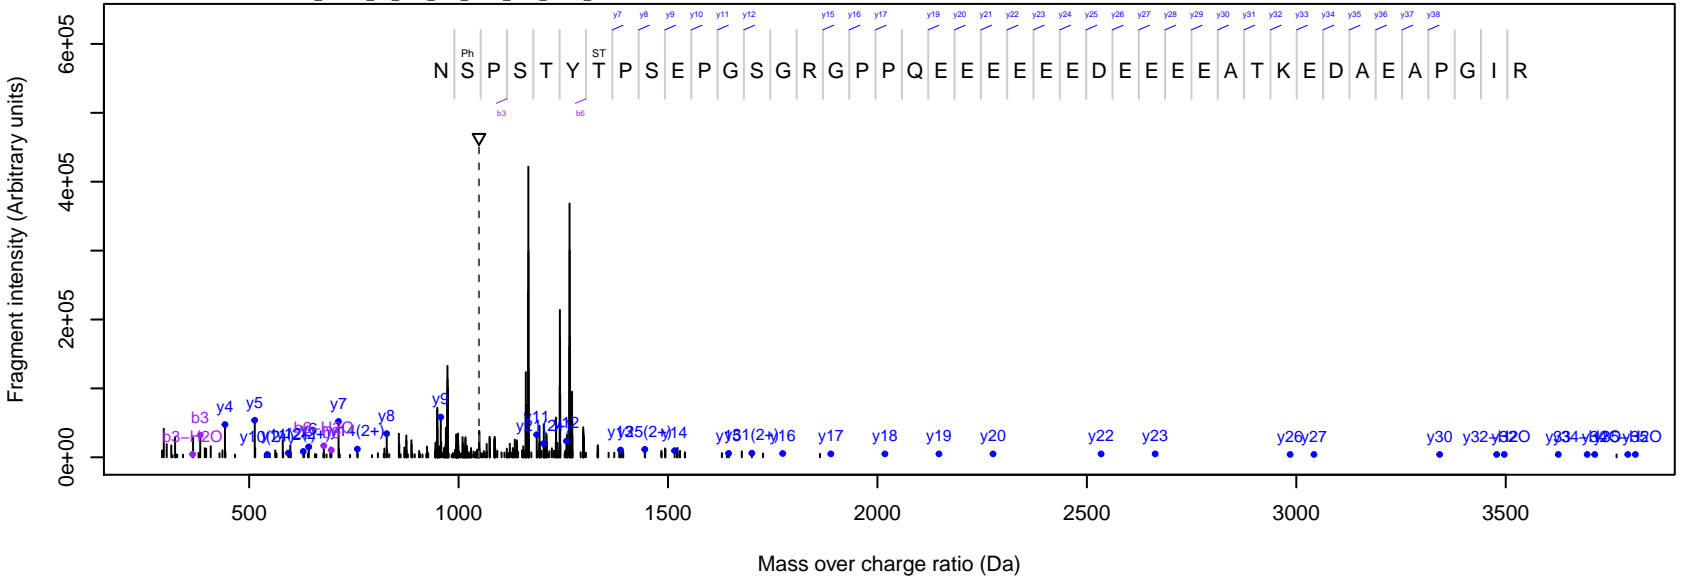

TLS(Phospho (STY))PTPSAEGYQDVR-2+

Source : QE3\_201126\_FR\_TiOx\_hum\_tissue\_Urea\_RNAB\_B Scan : 23717

Andromeda score : 146

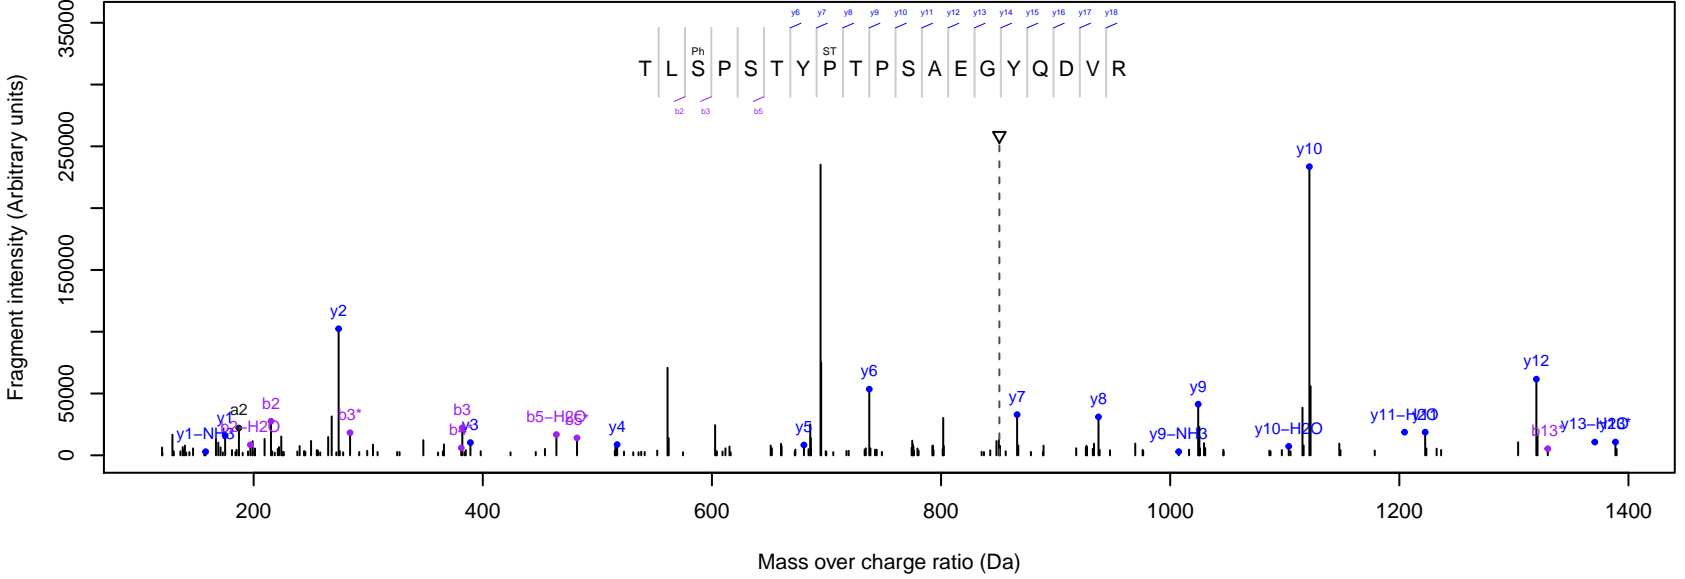

FIKS(Phospho (STY))AEDLDKLR-3+

Source : QE3\_201126\_FR\_TiOx\_hum\_tissue\_Urea\_RNAB\_N Scan : 23063

Andromeda score : 145.86

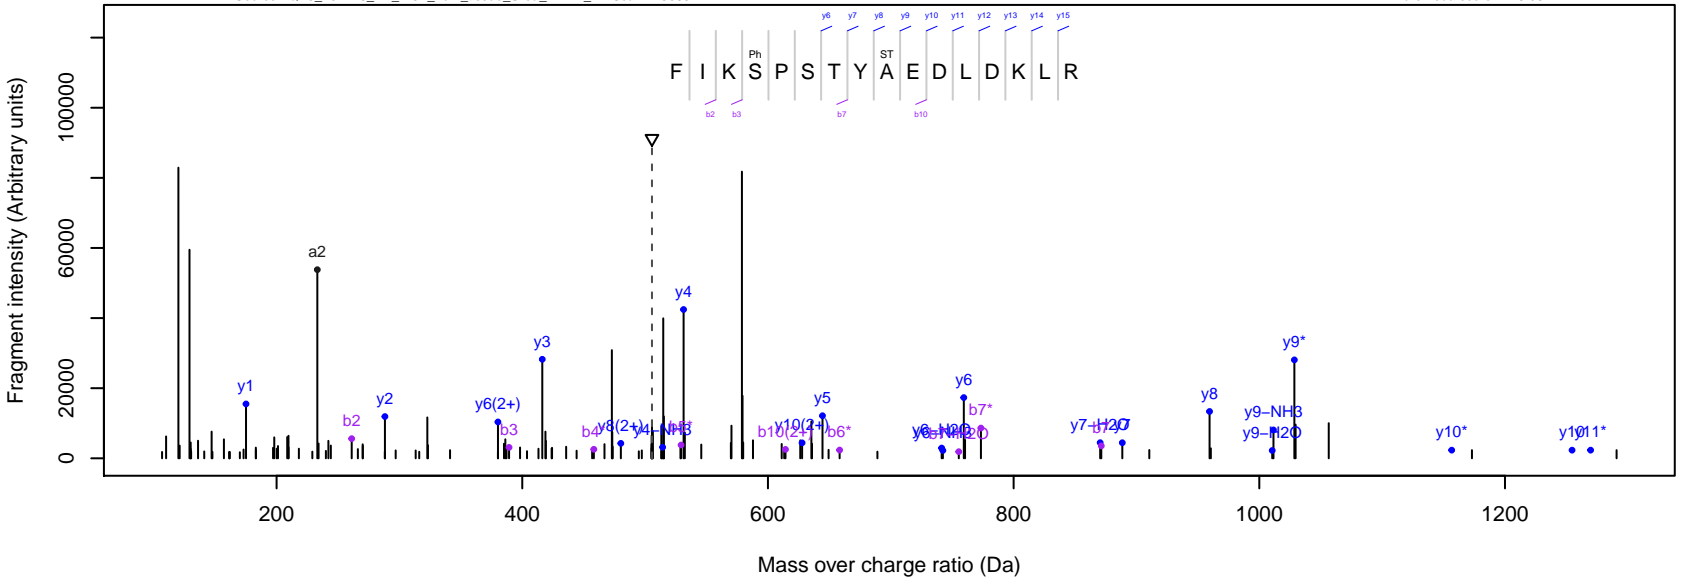



RM(Oxidation (M))S(Phospho (STY))DEFVDSFKK-2+

Source : QE3\_201126\_FR\_TiOx\_hum\_tissue\_Urea\_RNAB\_N Scan : 16826

Andromeda score : 145.86

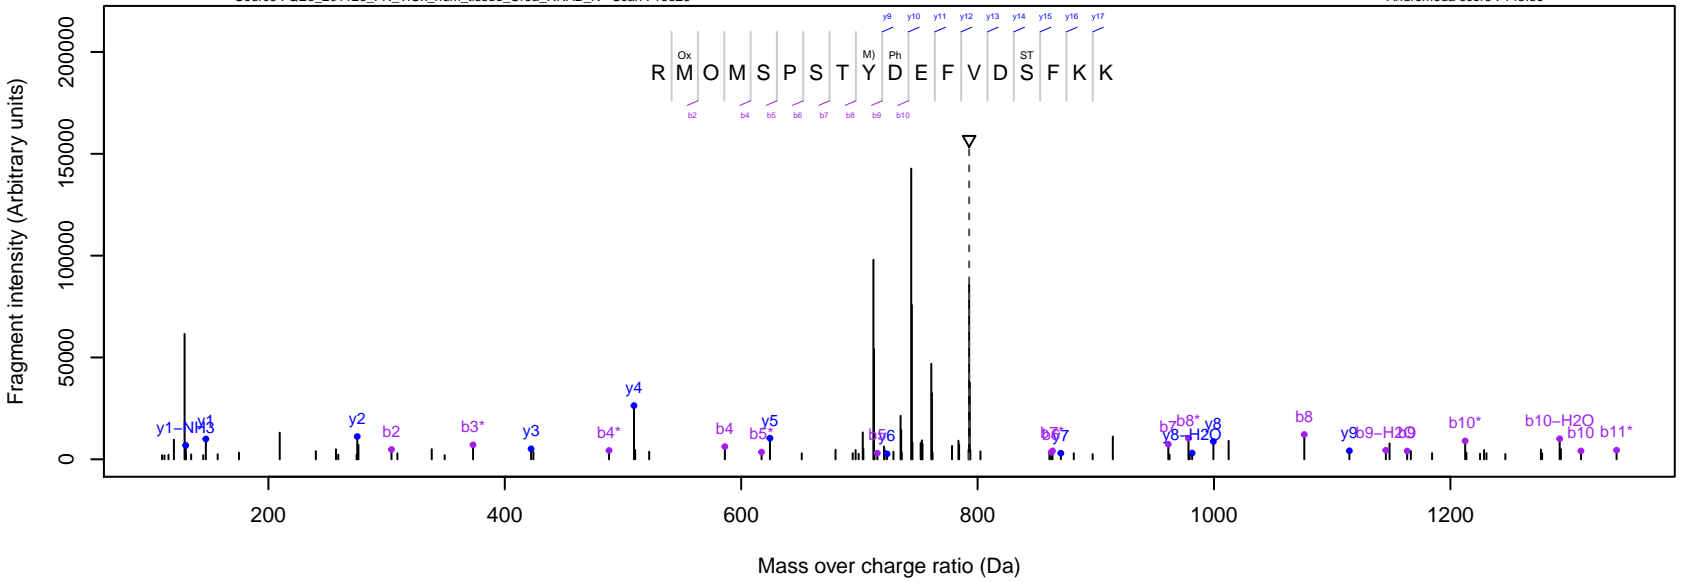

RVS(Phospho (STY))GPDPKPGSNCSPAQSVLSEVPSVPTNGMAK-3+

Source : QE3\_201126\_FR\_TiOx\_hum\_tissue\_Urea\_RNAB\_H Scan : 35396

Andromeda score : 145.86

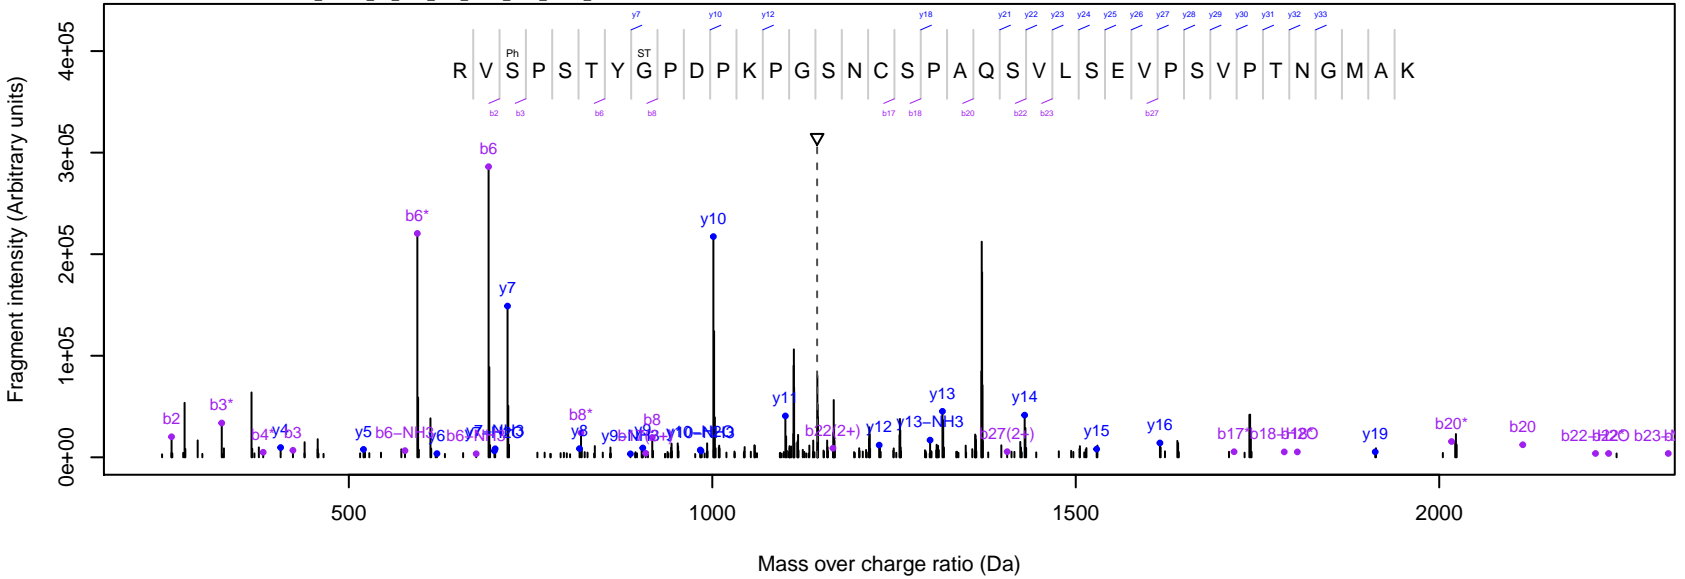

TGQAGSLSGS(Phospho (STY))PKPFSPQLSAPITTK-3+

Source : QE3\_201126\_FR\_TiOx\_hum\_tissue\_Urea\_RNAB\_N Scan : 33430

Andromeda score : 145.86

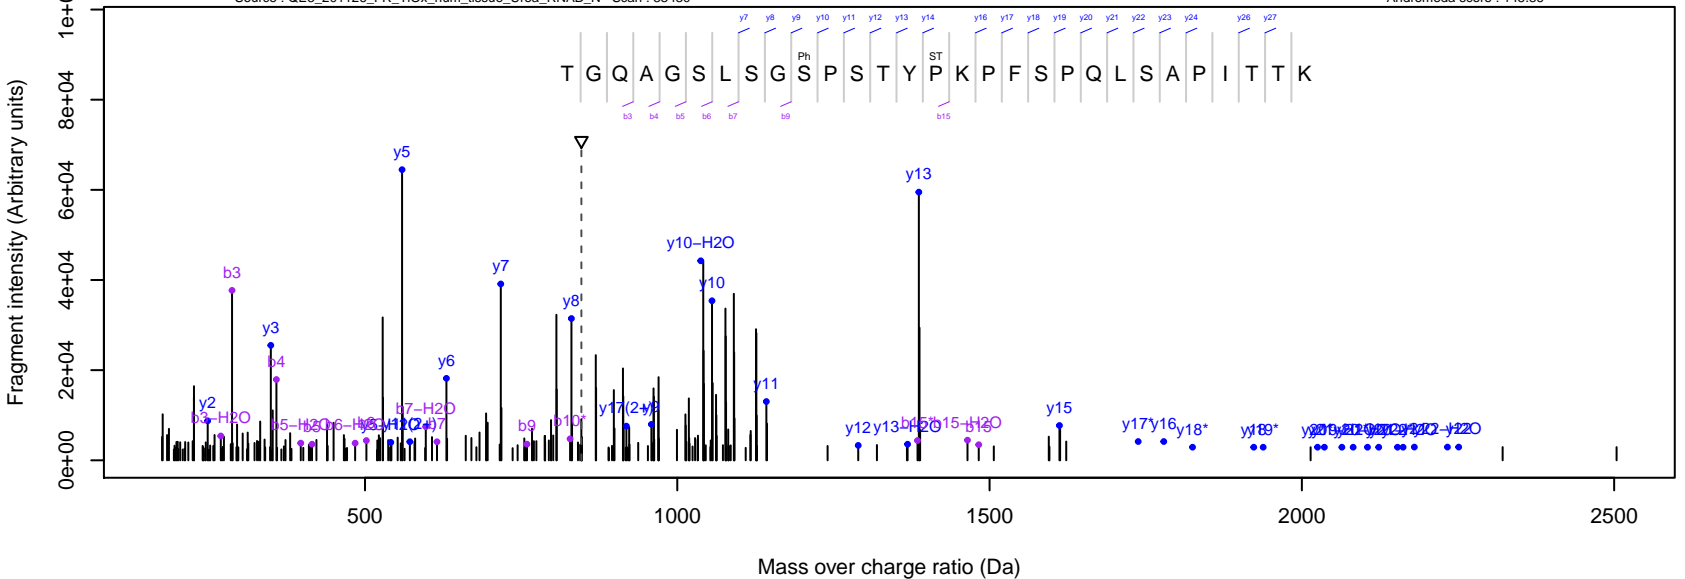

QVQS(Phospho (STY))LTCEVDALK-2+

Source : QE3\_201126\_FR\_TiOx\_hum\_tissue\_Urea\_RNAB\_B Scan : 37310

Andromeda score : 145.83

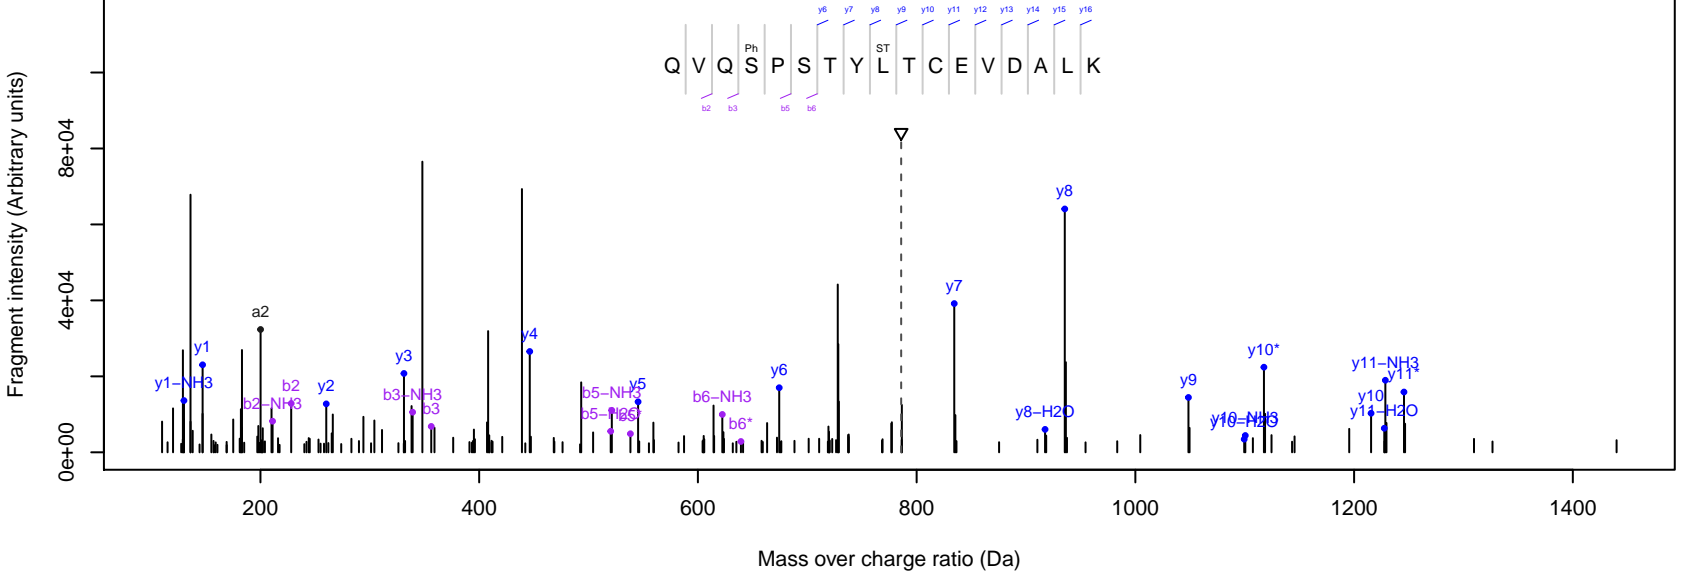

GLPWSCS(Phospho (STY))ADEVQR-2+

Source : QE3\_201126\_FR\_TiOx\_hum\_tissue\_Urea\_RNAB\_N Scan : 35598

Andromeda score : 145.81

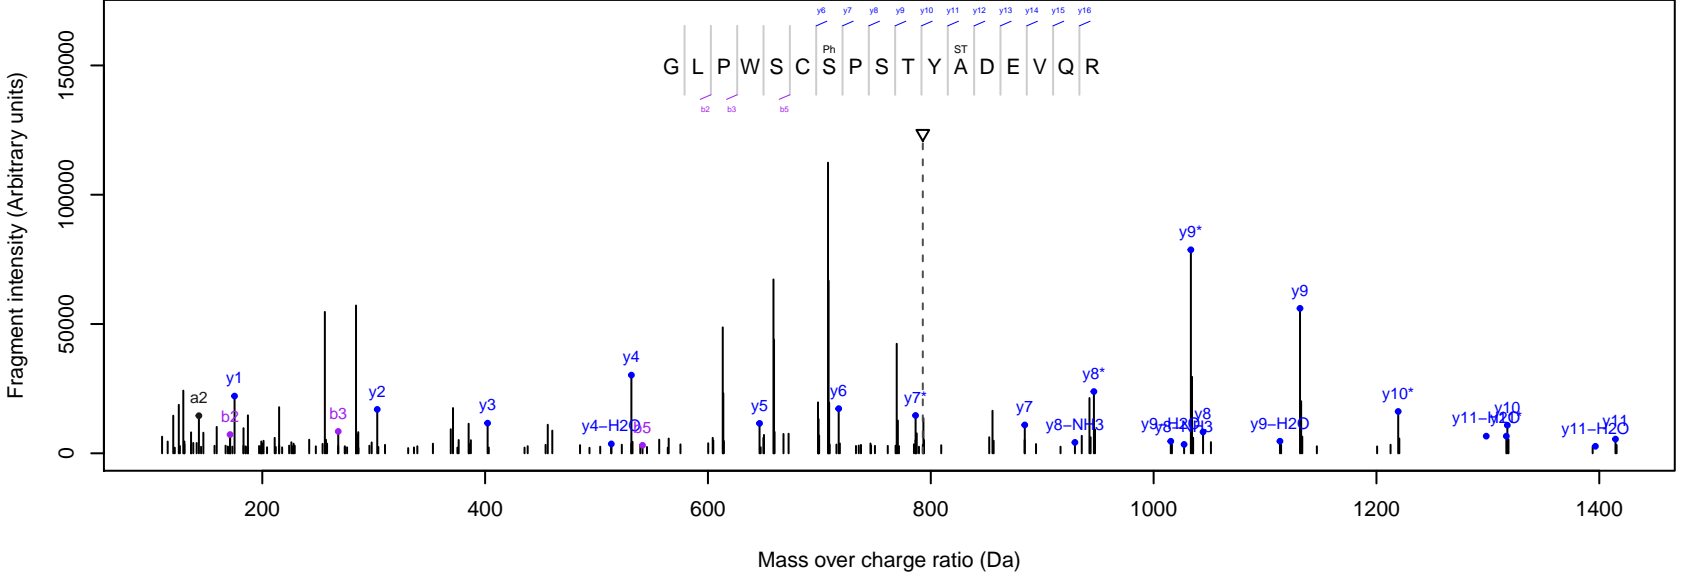

HGLAHDEM(Oxidation (M))KS(Phospho (STY))PREPGYK-4+

Source : QE3\_201126\_FR\_TiOx\_hum\_tissue\_Urea\_RNAB\_B Scan : 5084

Andromeda score : 145.73

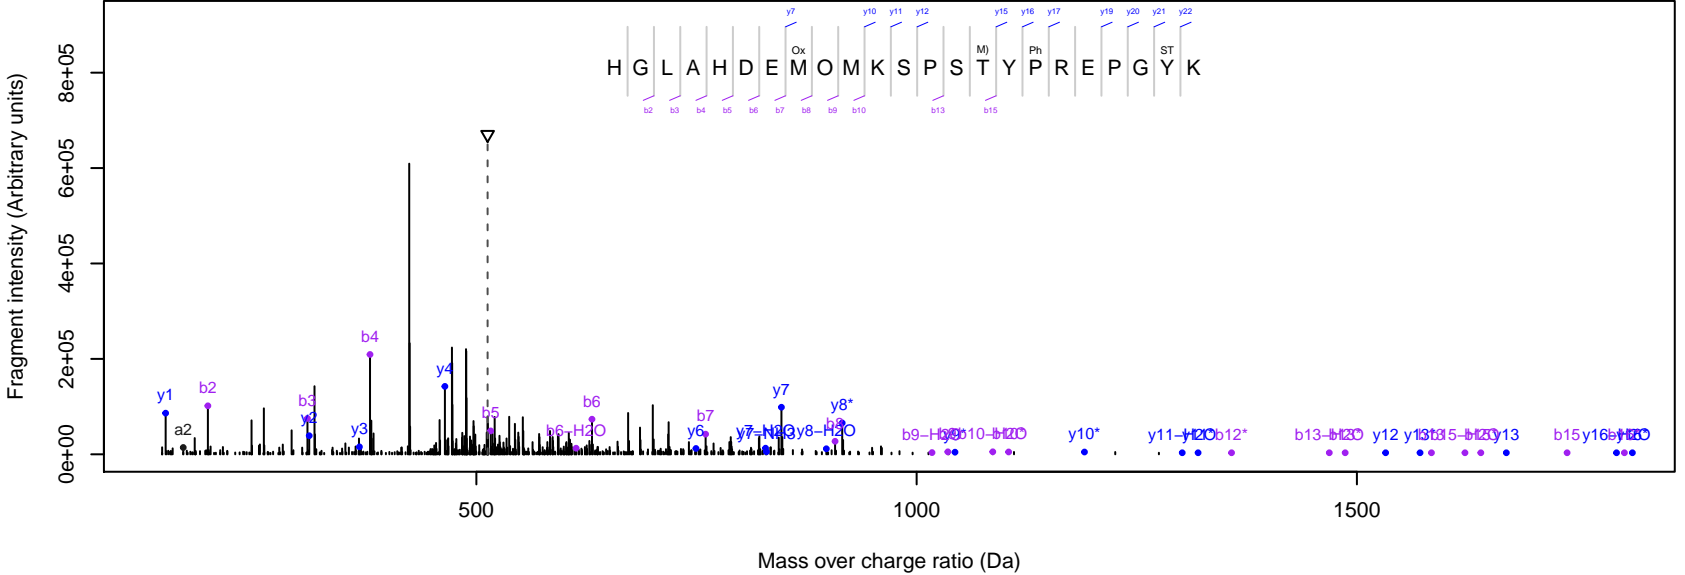

SLDS(Phospho (STY))DLS(Phospho (STY))DGPVTVQEFMEVK-2+

Source : QE3\_201126\_FR\_TiOx\_hum\_tissue\_Urea\_RNAB\_N Scan : 62889

Andromeda score : 145.71

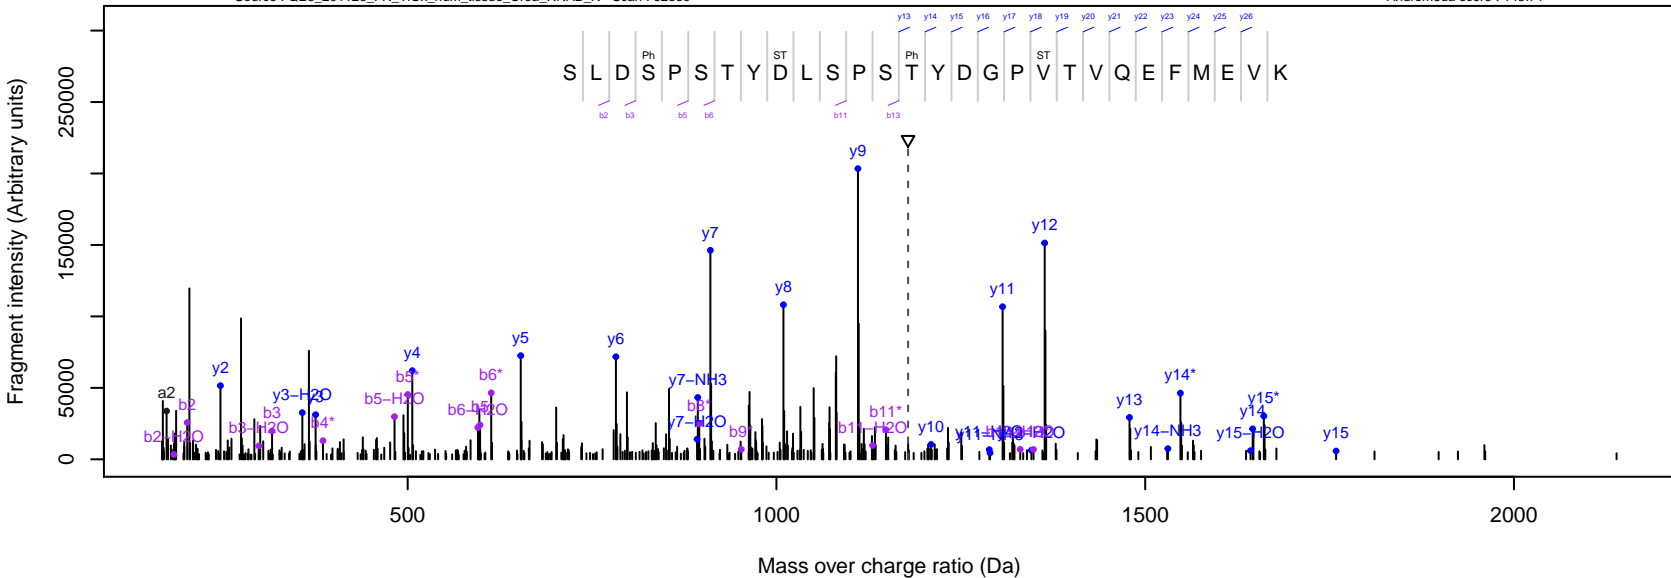

LADM(Oxidation (M))YGGVDS(Phospho (STY))DKDS-2+

Source : QE3\_201126\_FR\_TiOx\_hum\_tissue\_Urea\_RNAB\_H Scan : 16190

Andromeda score : 145.69

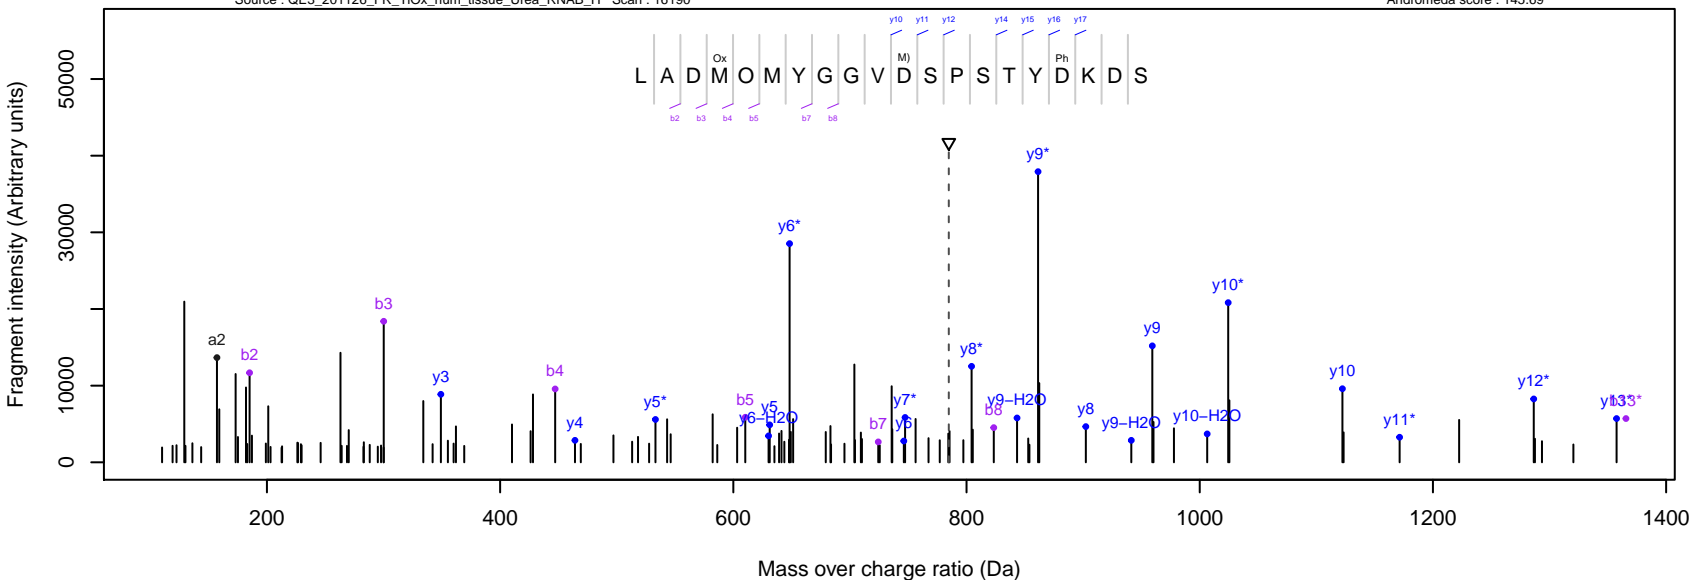

M(Oxidation (M))S(Phospho (STY))PM(Oxidation (M))GTASGSNSPTSDSASVQR-2+

Source : QE3\_201126\_FR\_TiOx\_hum\_tissue\_Urea\_RNAB\_H Scan : 10444

Andromeda score : 145.69

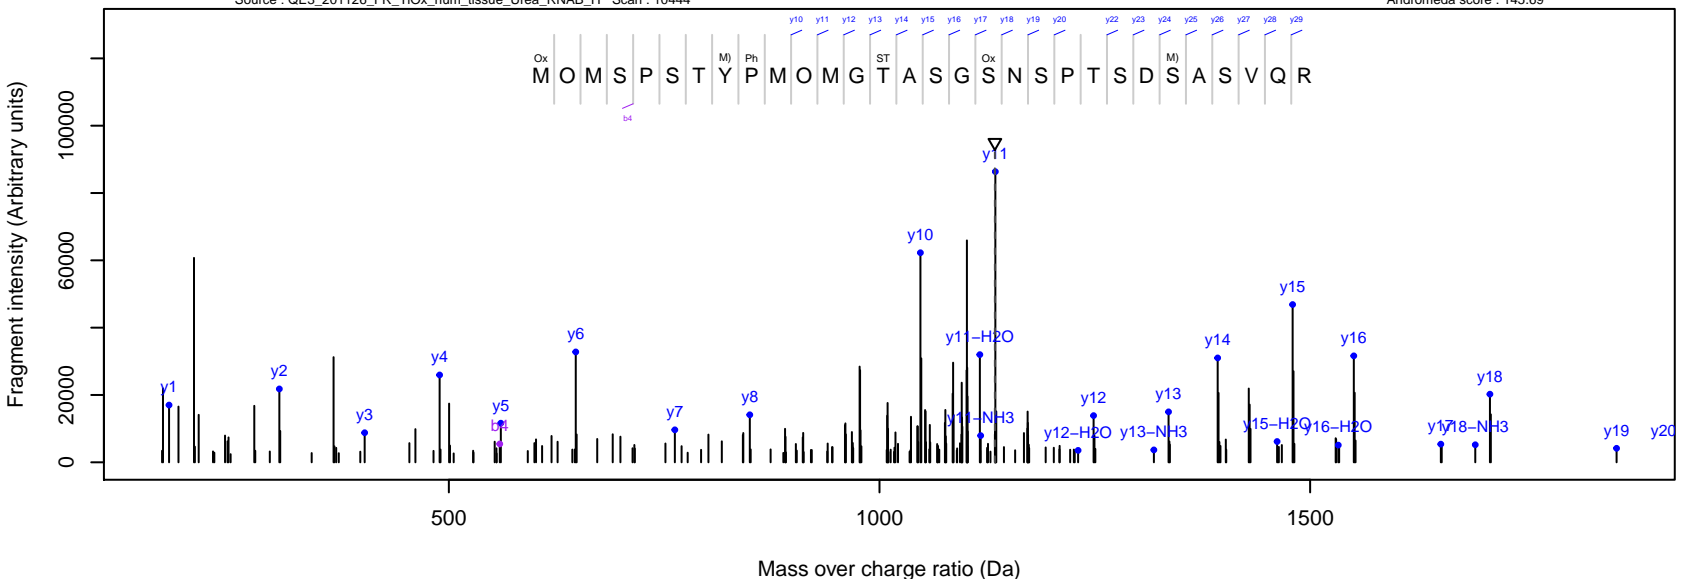

RAS(Phospho (STY))QEANLLLAQK-2+

Source : QE3\_201126\_FR\_TiOx\_hum\_tissue\_Urea\_RNAB\_N Scan : 27984

Andromeda score : 145.69

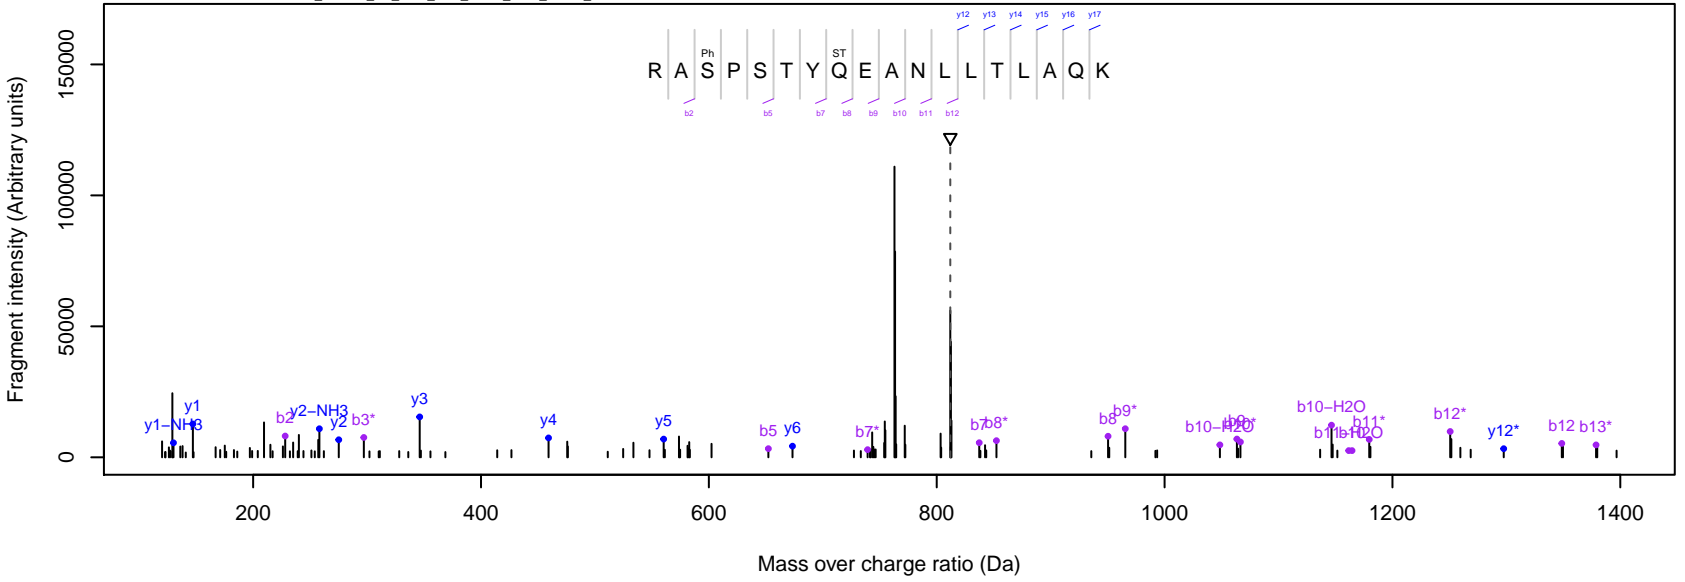

AGAAAGDS(Phospho (STY))DEESRADDKGVMDYYLK-3+

Source : QE3\_201126\_FR\_TiOx\_hum\_tissue\_Urea\_RNAB\_H Scan : 27123

Andromeda score : 145.67

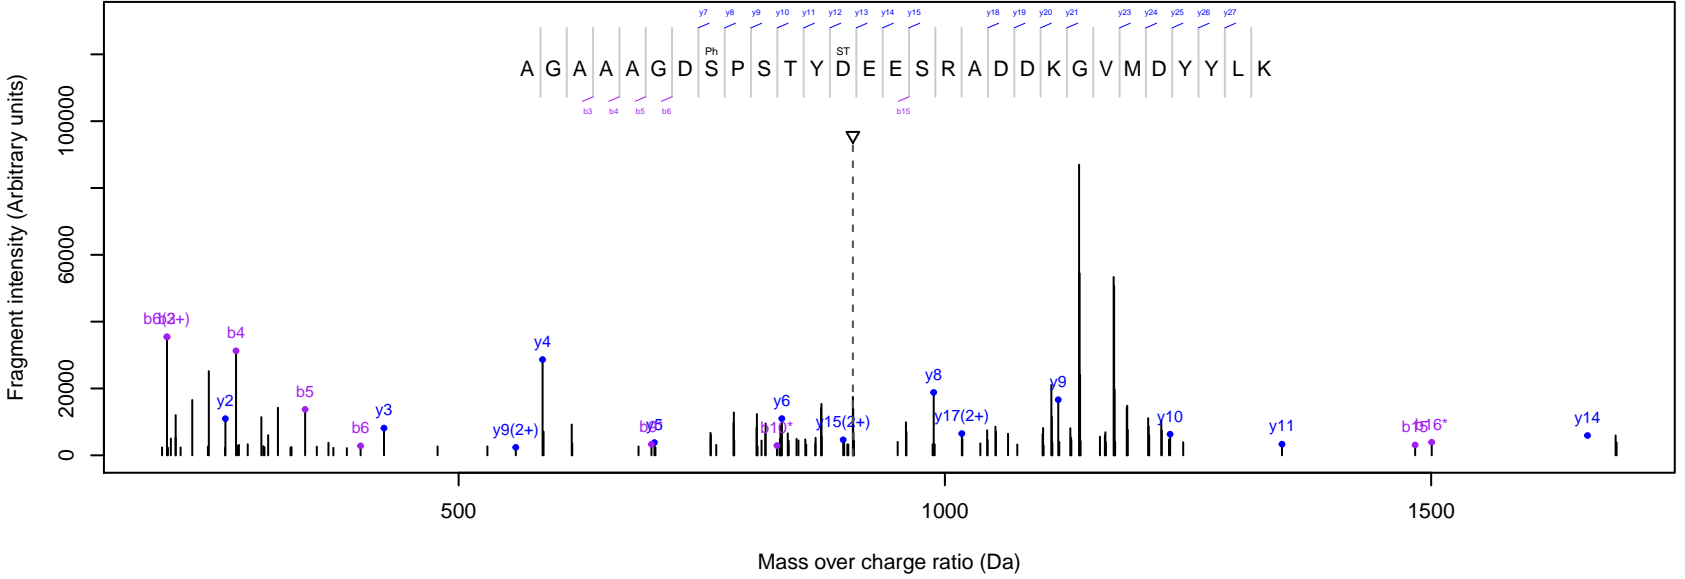

GLSSAGGGS(Phospho (STY))PHREDAQPEHSASAR-3+

Source : QE3\_201126\_FR\_TiOx\_hum\_tissue\_Urea\_RNAB\_H Scan : 5398

Andromeda score : 145.67

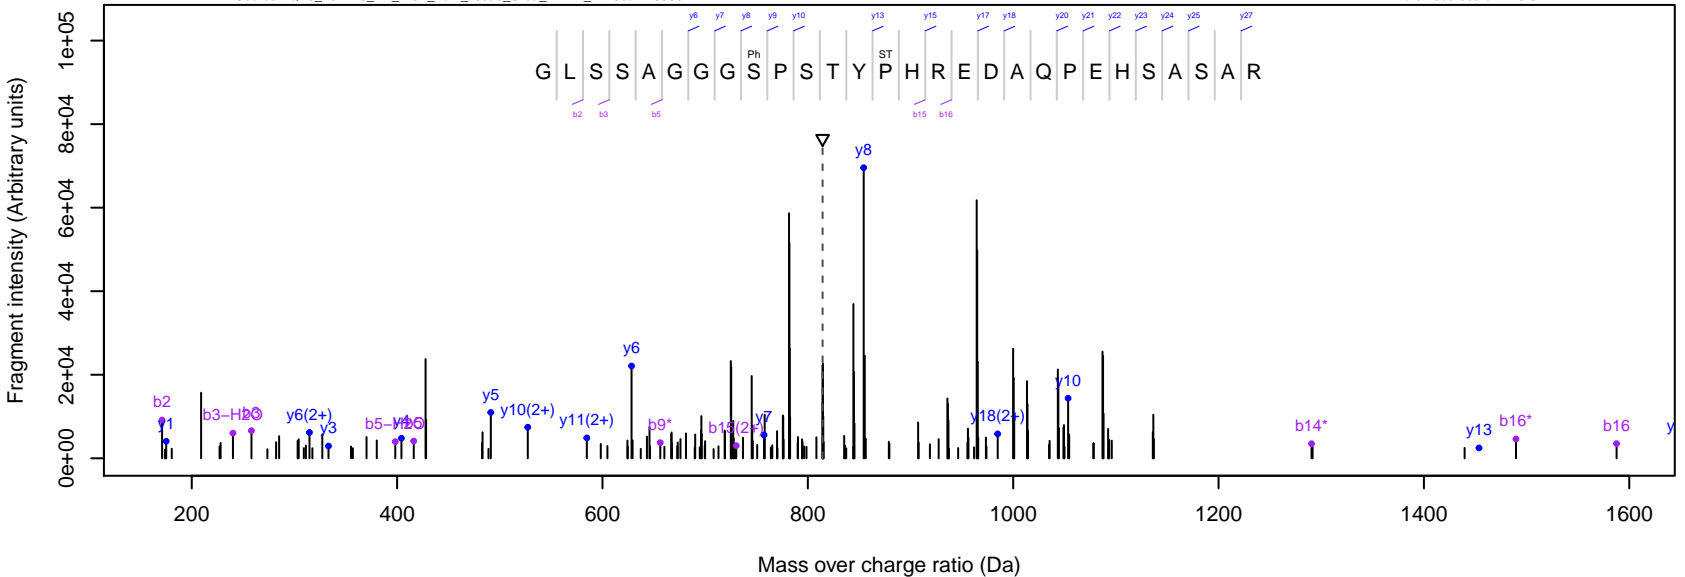

ACEVALEEIKAE(TPhospho (STY))EKQSPPHGEAK-4+

Source : QE3\_201126\_FR\_TiOx\_hum\_tissue\_Urea\_RNAB\_H Scan : 21119

Andromeda score : 145.65

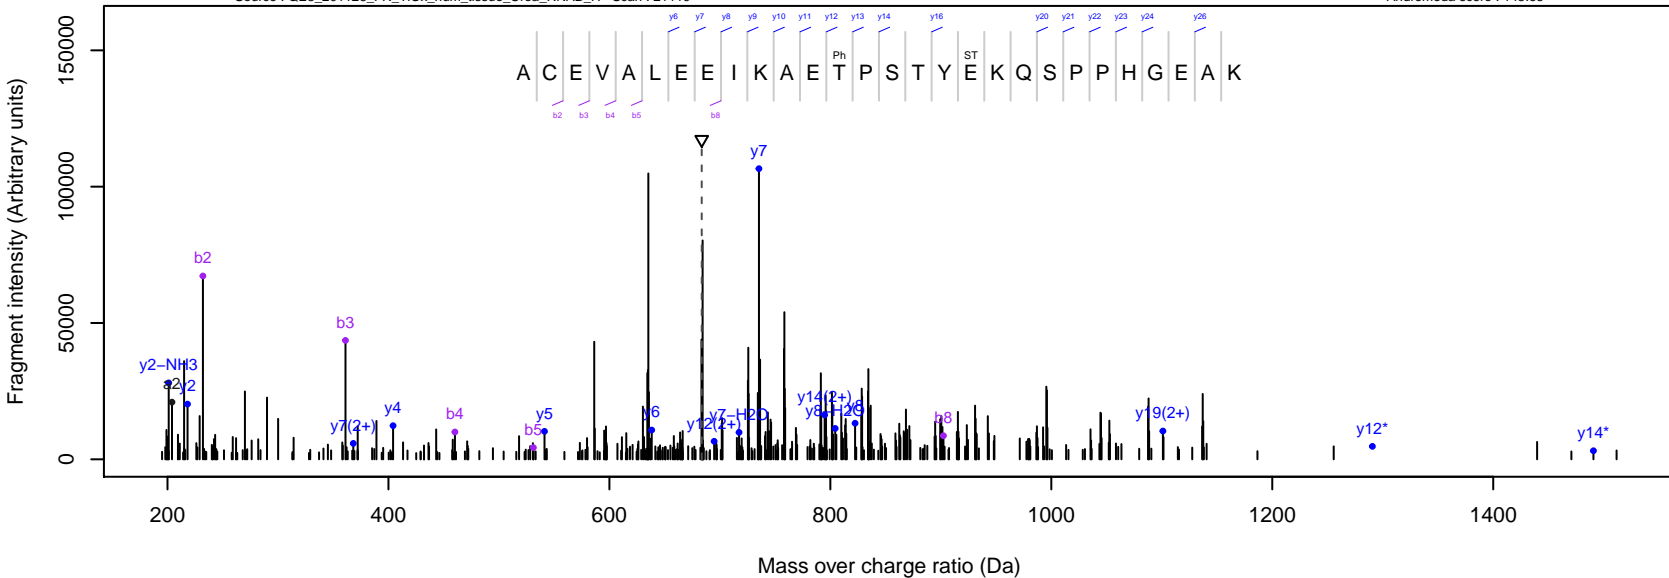

TLHCEGTEINS(Phospho (STY))DDEQESKEVEETATAK-3+

Source : QE3\_201126\_FR\_TiOx\_hum\_tissue\_Urea\_RNAB\_N Scan : 20115

Andromeda score : 145.64

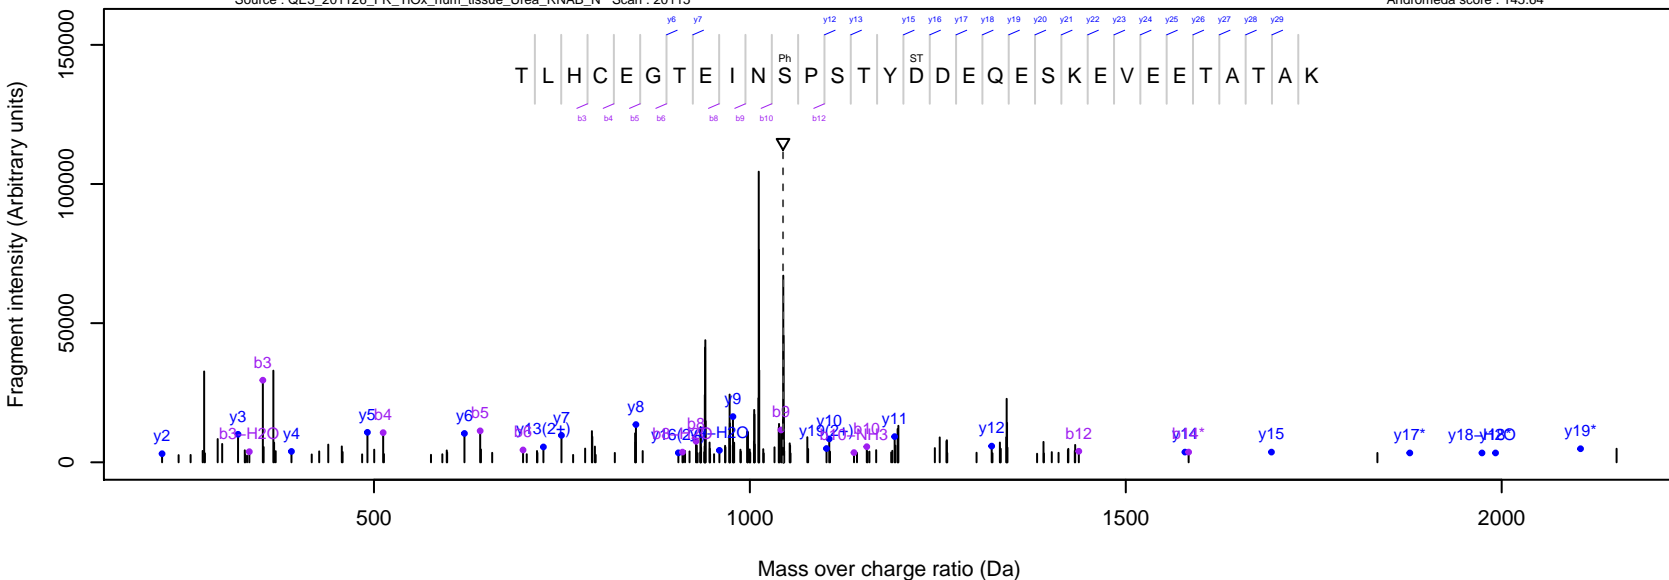

TEDGDWEWS(Phospho (STY))DDEM(Oxidation (M))DEKSEEK-3+

Source : QE3\_201126\_FR\_TiOx\_hum\_tissue\_Urea\_RNAB\_H Scan : 25908

Andromeda score : 145.63

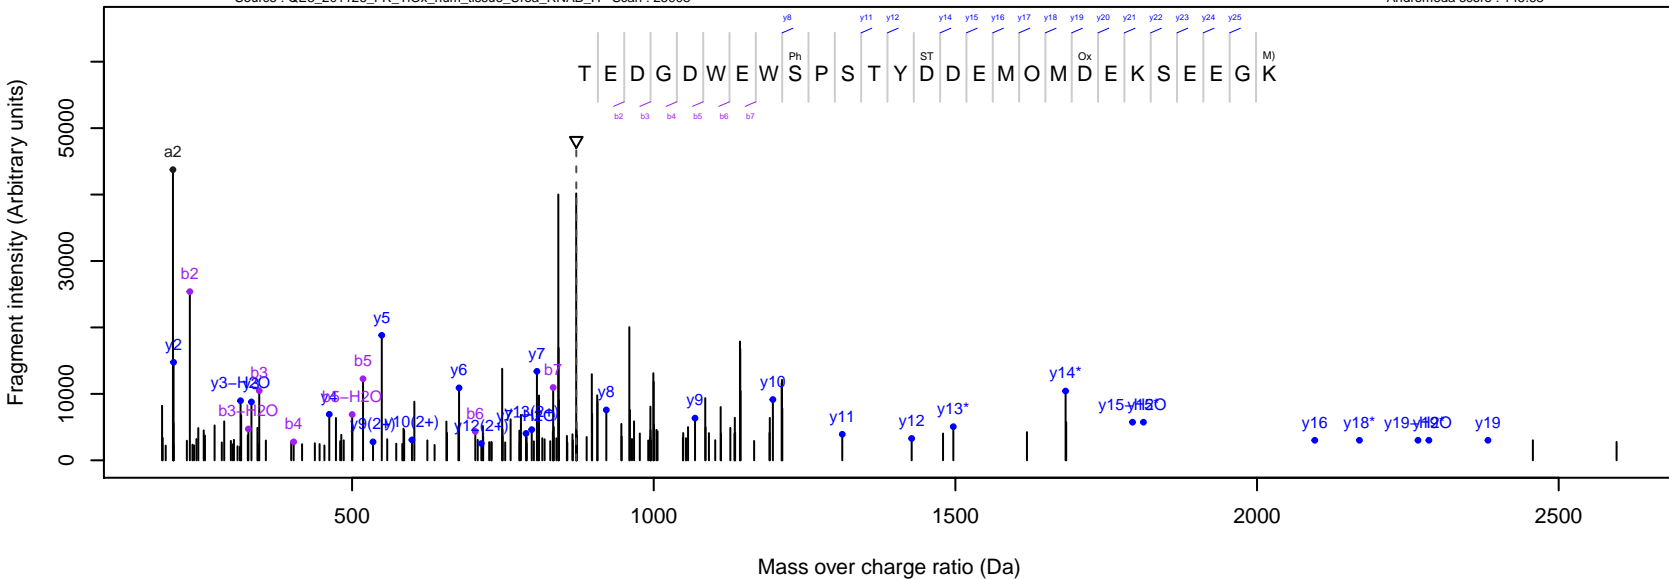

DRS(Phospho (STY))FSEHDLAQLR-3+

Source : QE3\_201126\_FR\_TiOx\_hum\_tissue\_Urea\_RNAB\_N Scan : 22641

Andromeda score : 145.62

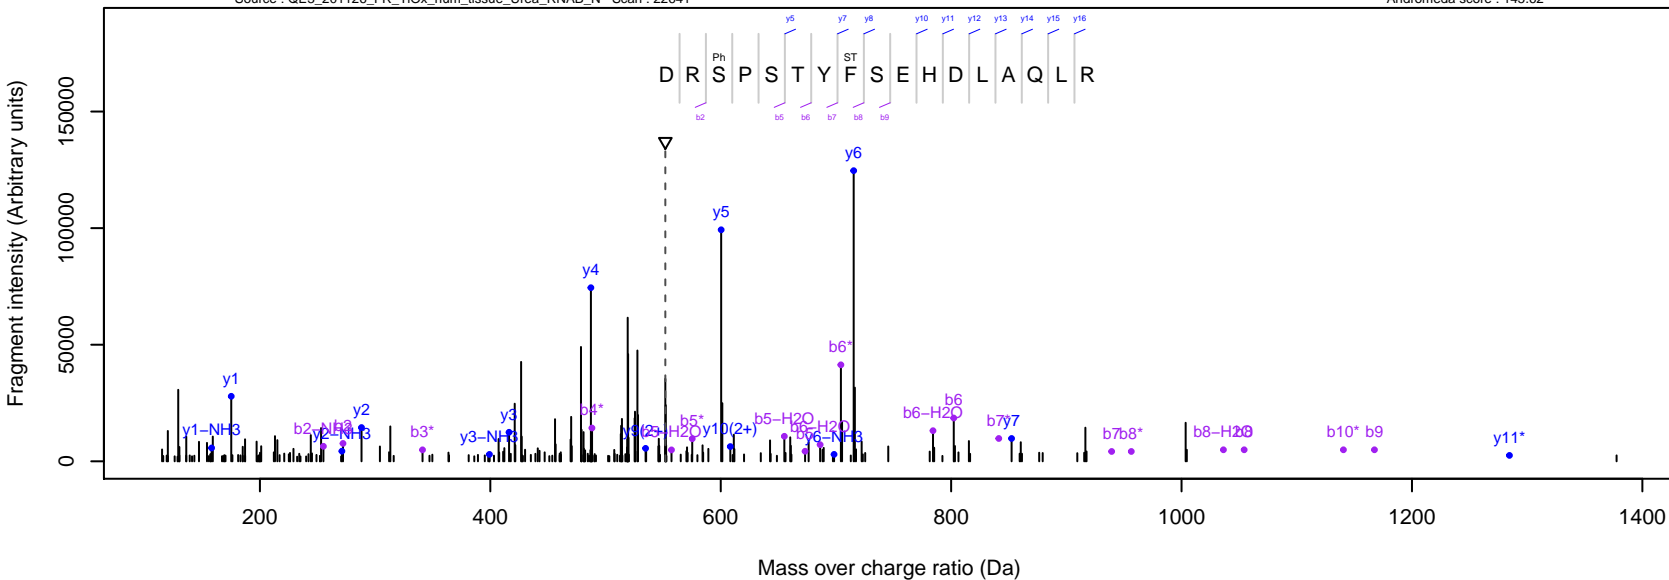

YSQGDDGSSSSGGSSVAGSQSTLFKDS(Phospho (STY))PLR-3+

Source : QE3\_201126\_FR\_TiOx\_hum\_tissue\_Urea\_RNAB\_H Scan : 28829

Andromeda score : 145.62

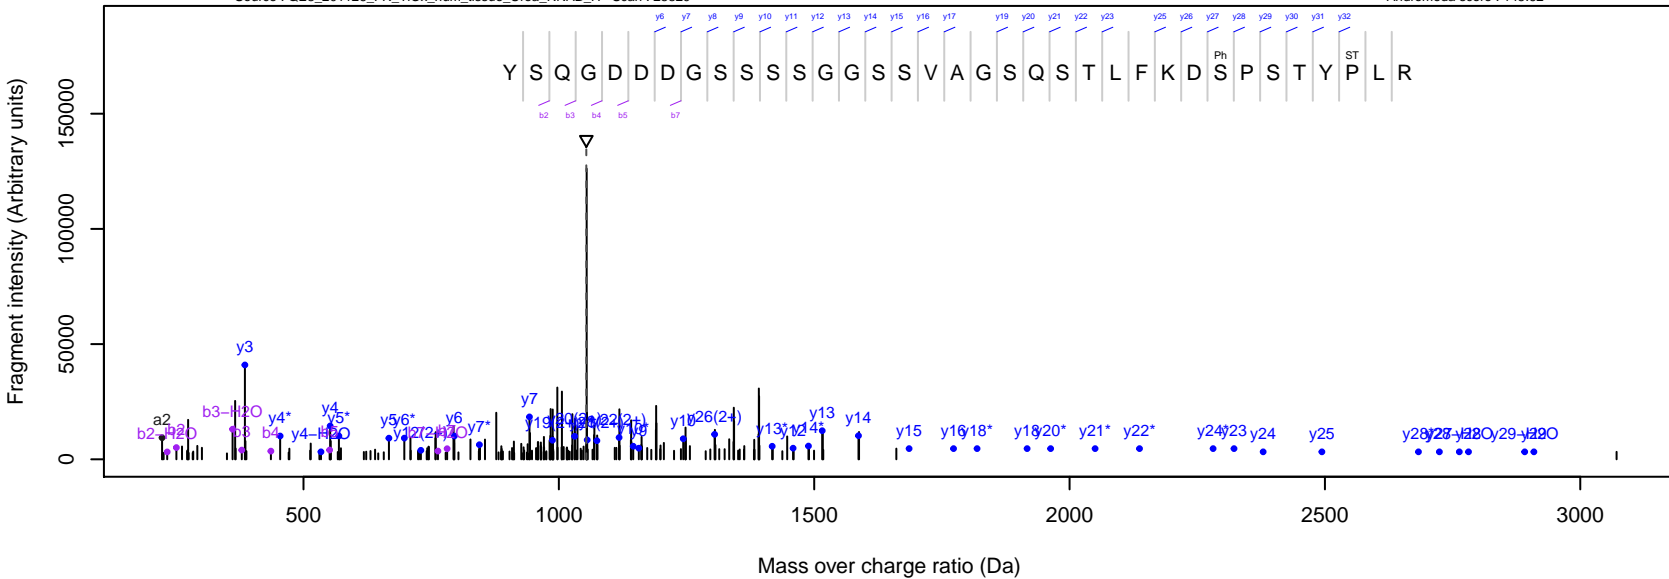

IKNENTEGS(Phospho (STY))PQEDGVELEGLK-3+

Source : QE3\_201126\_FR\_TiOx\_hum\_tissue\_Urea\_RNAB\_H Scan : 24114

Andromeda score : 145.61

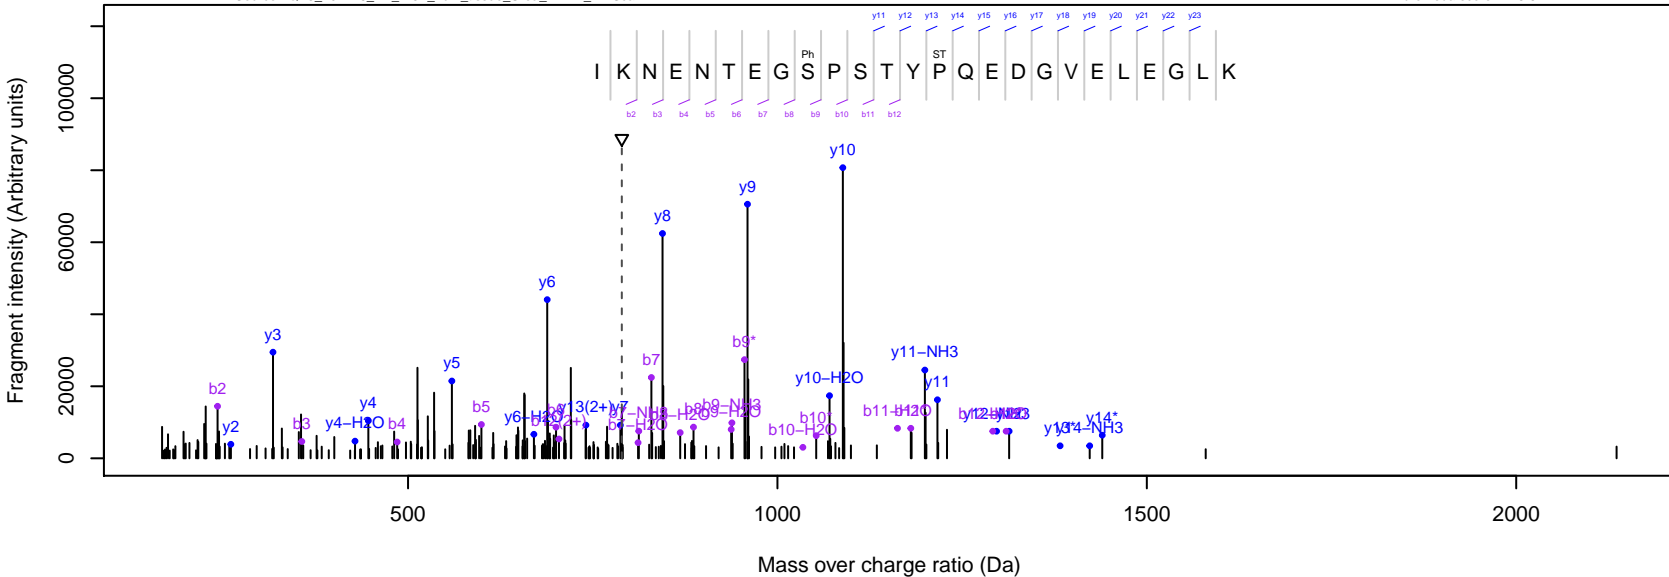

AAGS(Phospho (STY))PSPLPAPDPAPK-2+

Source : QE3\_201126\_FR\_TIOx\_hum\_tissue\_Urea\_RNAB\_H Scan : 22929

Andromeda score : 145.52

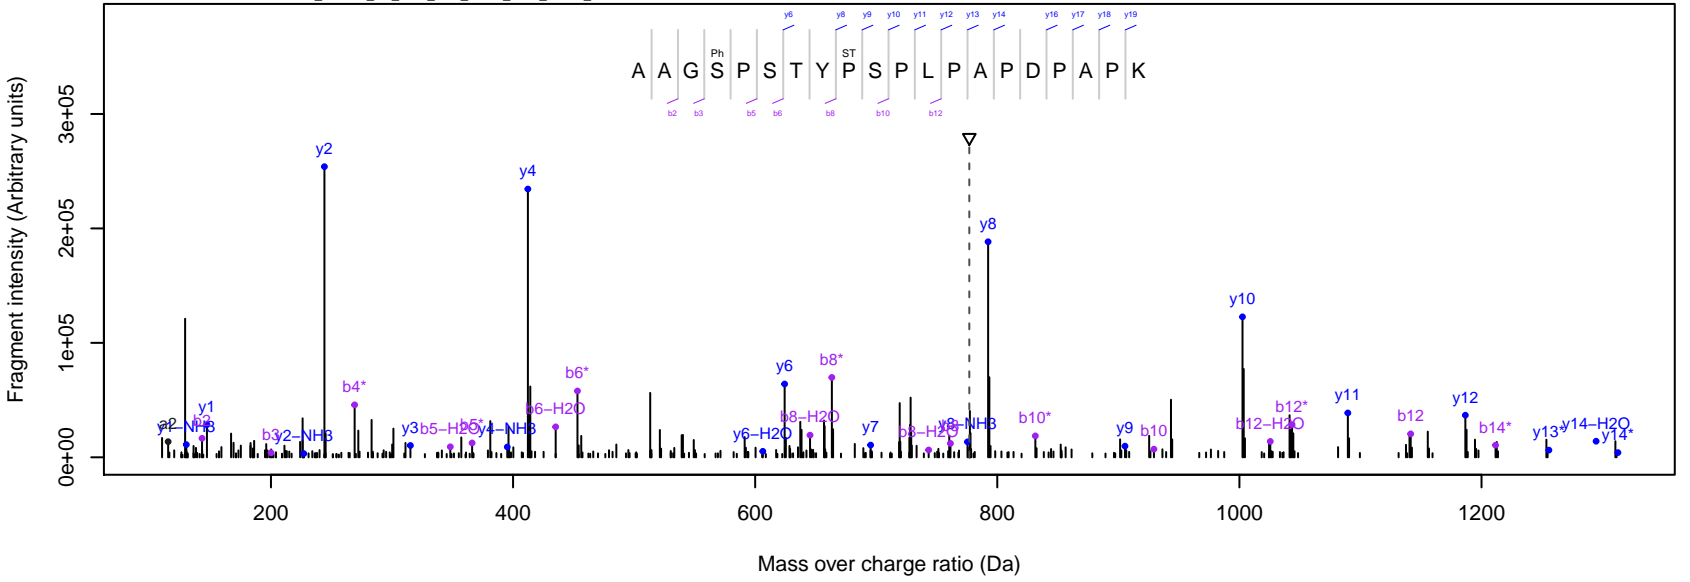

VM TIPYQPM(Oxidation (M))PASS(Phospho (STY))PVICAGGQDR-2+

Source : QE3\_201126\_FR\_TIOx\_hum\_tissue\_Urea\_RNAB\_H Scan : 41620

Andromeda score : 145.52

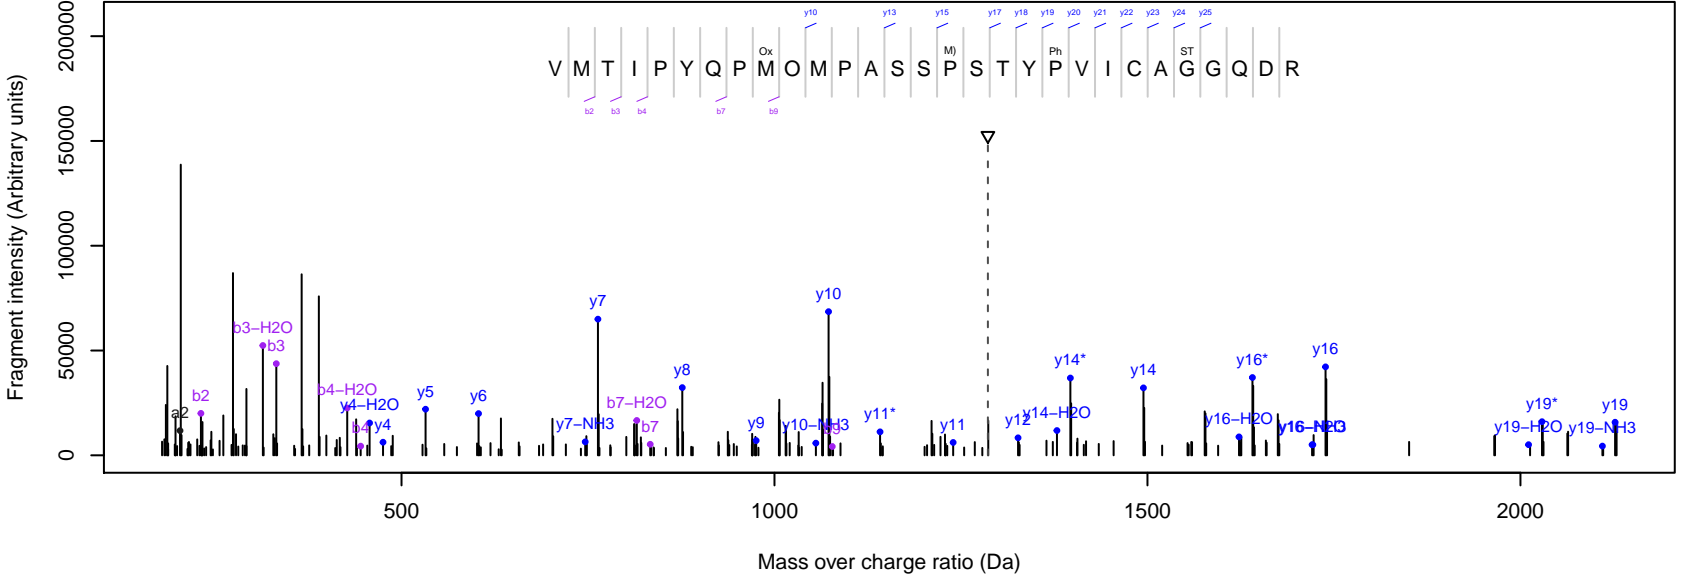

T(Phospho (STY))SPGRVDLP GSSTTLTK-2+

Source : QE3\_201126\_FR\_TIOx\_hum\_tissue\_Urea\_RNAB\_H Scan : 21404

Andromeda score : 145.48

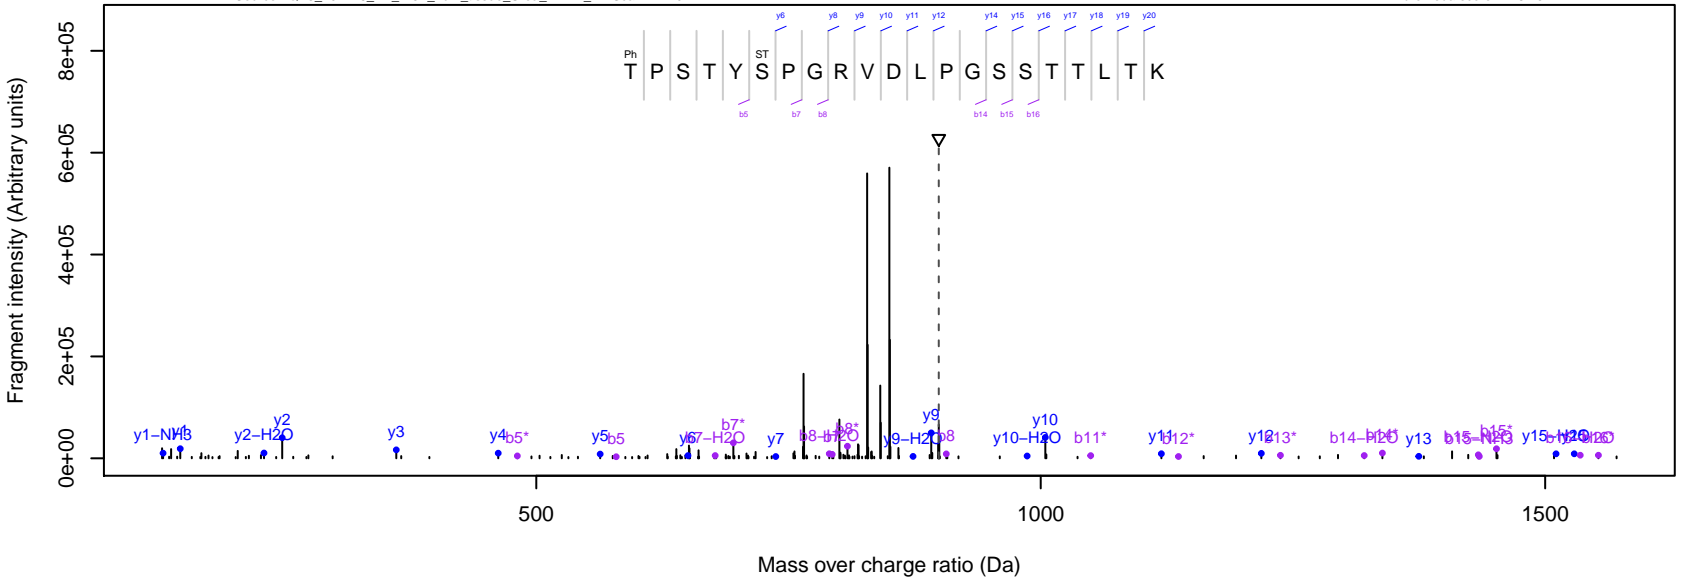

LTEPQHGLGS(Phospho (STY))QR-2+

Source : QE3\_201126\_FR\_TiOx\_hum\_tissue\_Urea\_RNAB\_N Scan : 9430

Andromeda score : 145.43

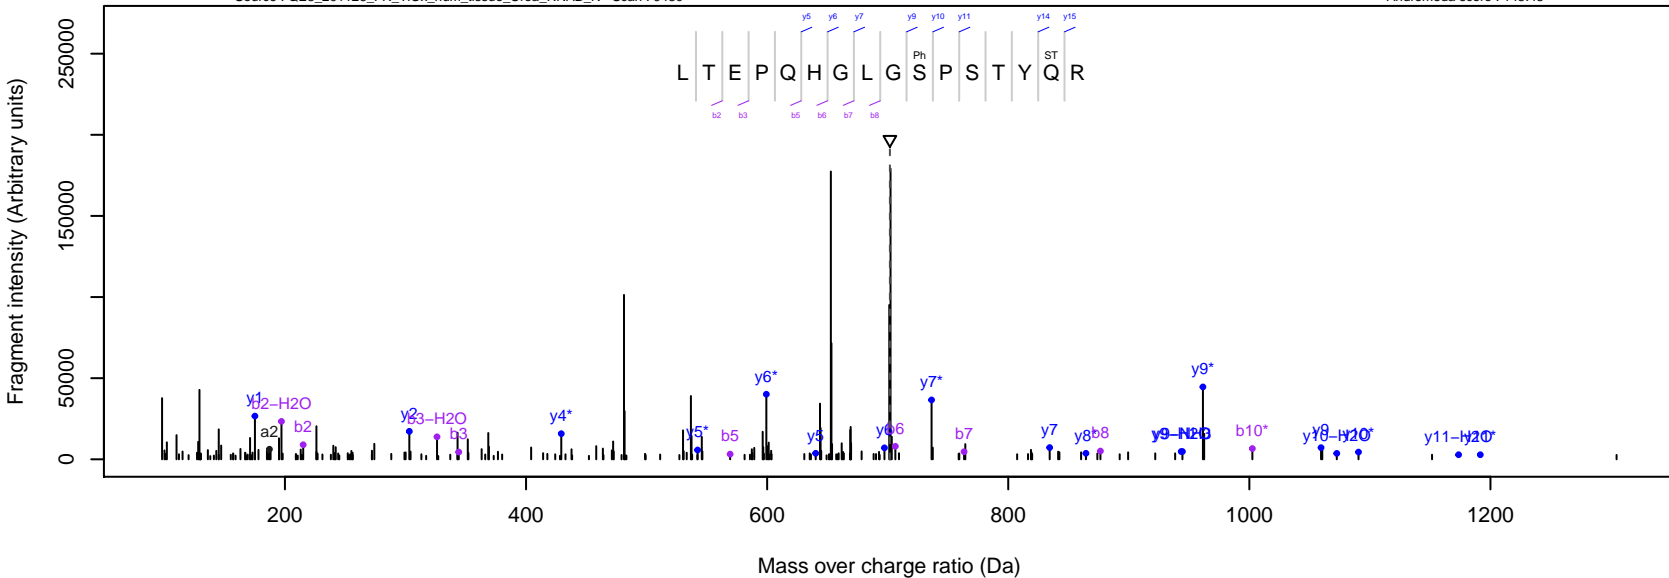

QDRENEEGDTGNWYS(Phospho (STY))S(Phospho (STY))DEDEGGSSVTSILK-3+

Source : QE3\_201126\_FR\_TiOx\_hum\_tissue\_Urea\_RNAB\_N Scan : 46969

Andromeda score : 145.33

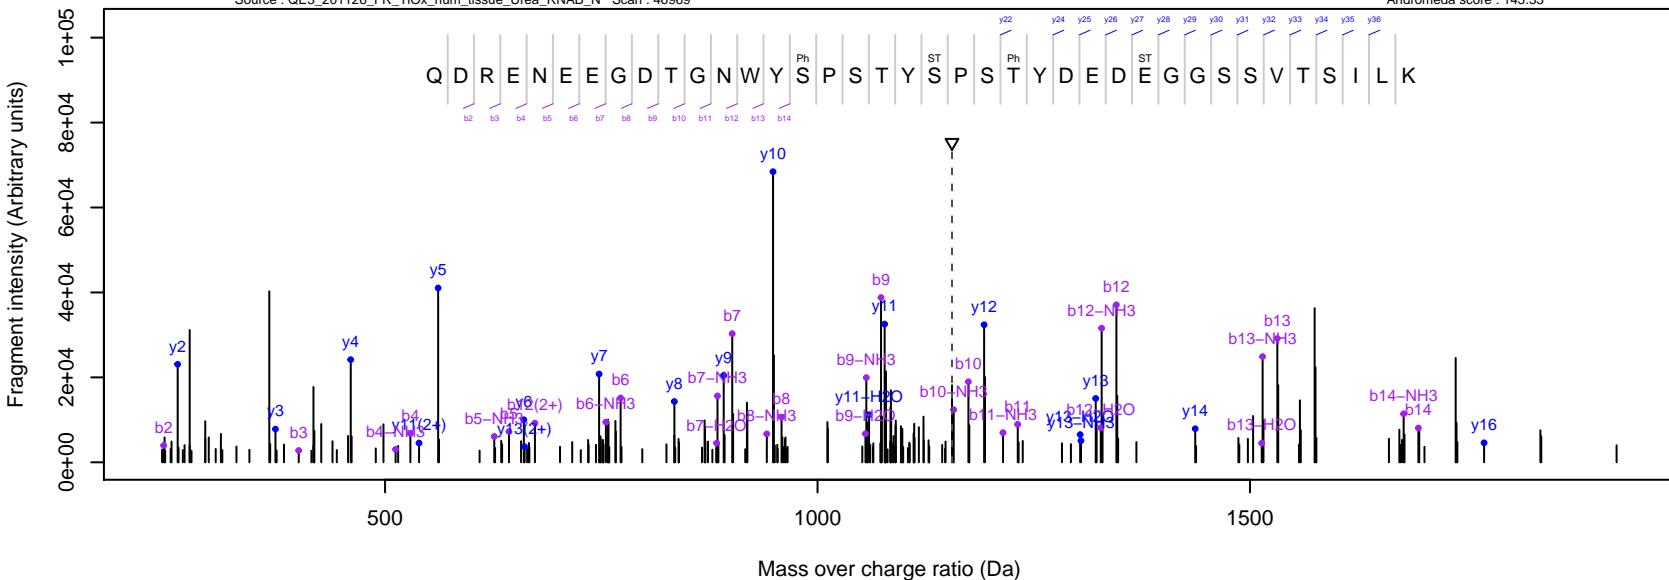

ALENGDADEPSF(Phospho (STY))DPEDFVDDVS(Phospho (STY))EEELLGDVLK-3+

Source : QE3\_201126\_FR\_TiOx\_hum\_tissue\_Urea\_RNAB\_H Scan : 63017

Andromeda score : 145.32

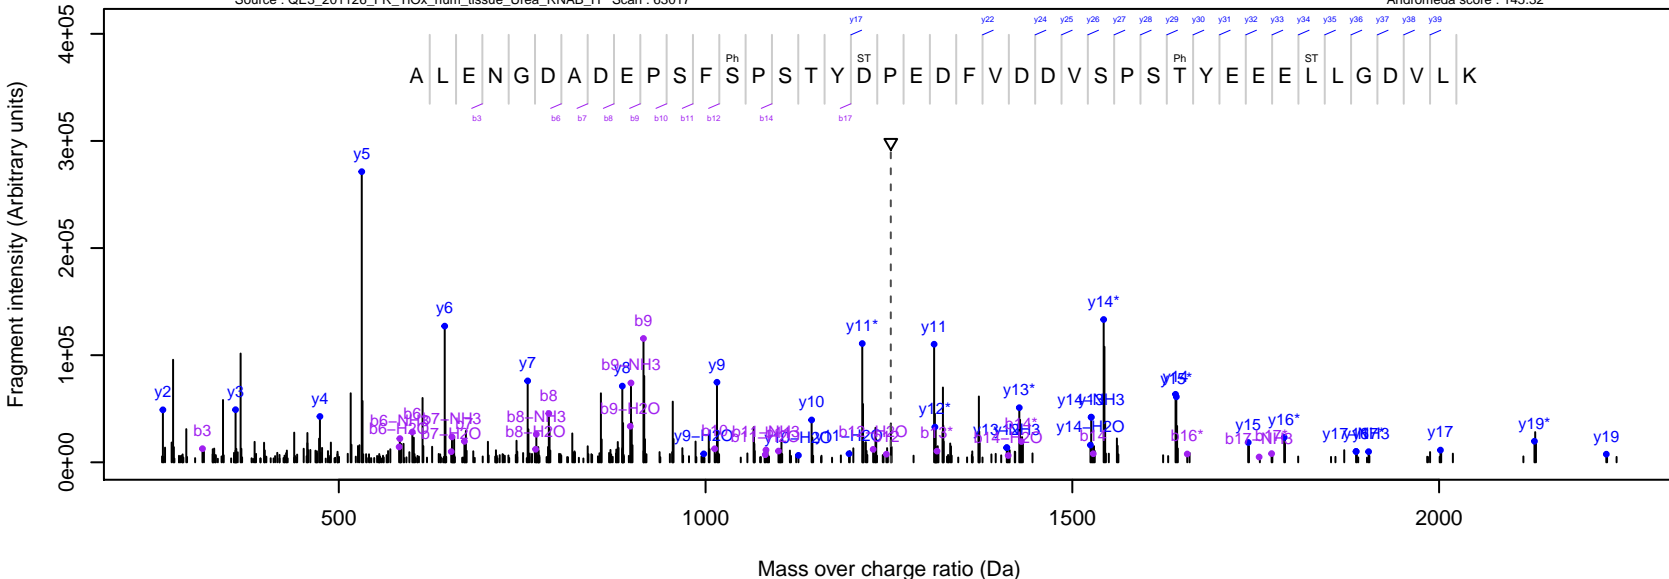



RGPSASSVAVMTSSTS(Phospho (STY))DHLDAAAR-4+

Source : QE3\_201126\_FR\_TiOx\_hum\_tissue\_Urea\_RNAB\_N Scan : 16544

Andromeda score : 145.29

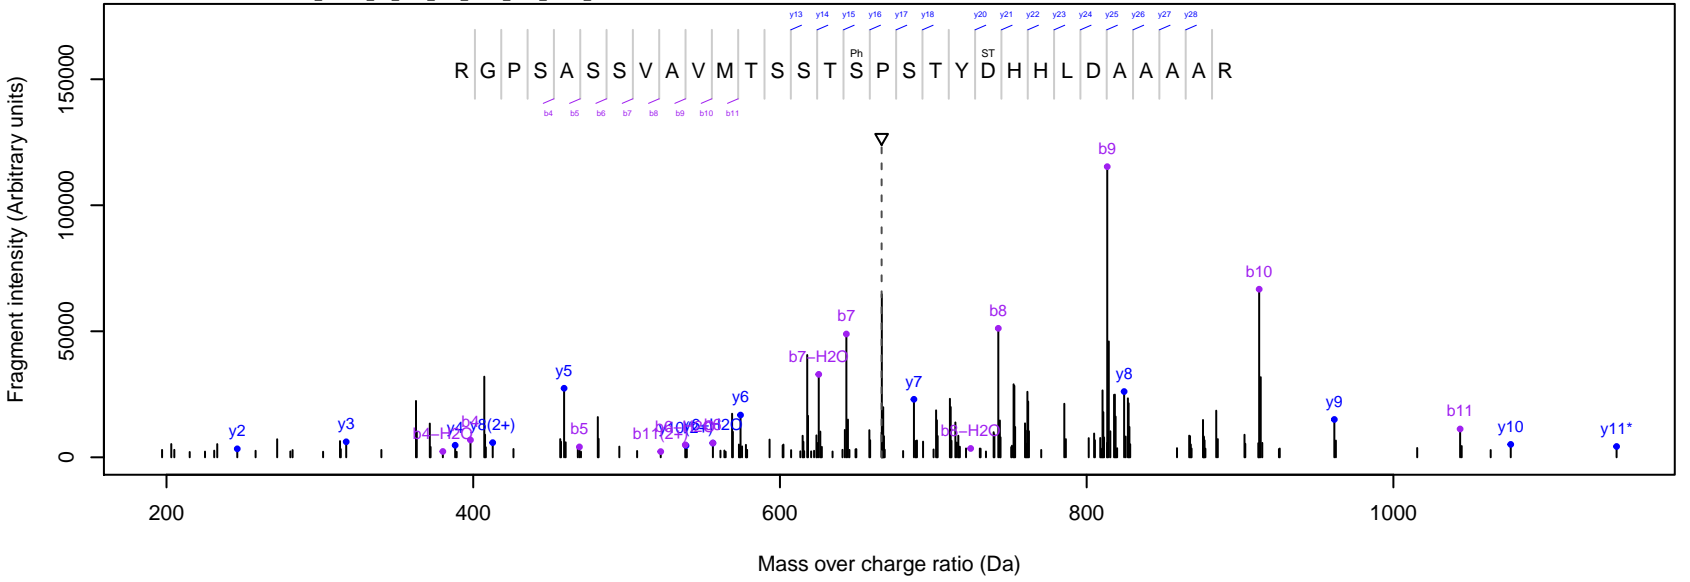

TFLDKDAQRLS(Phospho (STY))PIPEVVK-3+

Source : QE3\_201126\_FR\_TiOx\_hum\_tissue\_Urea\_RNAB\_B Scan : 31014

Andromeda score : 145.25

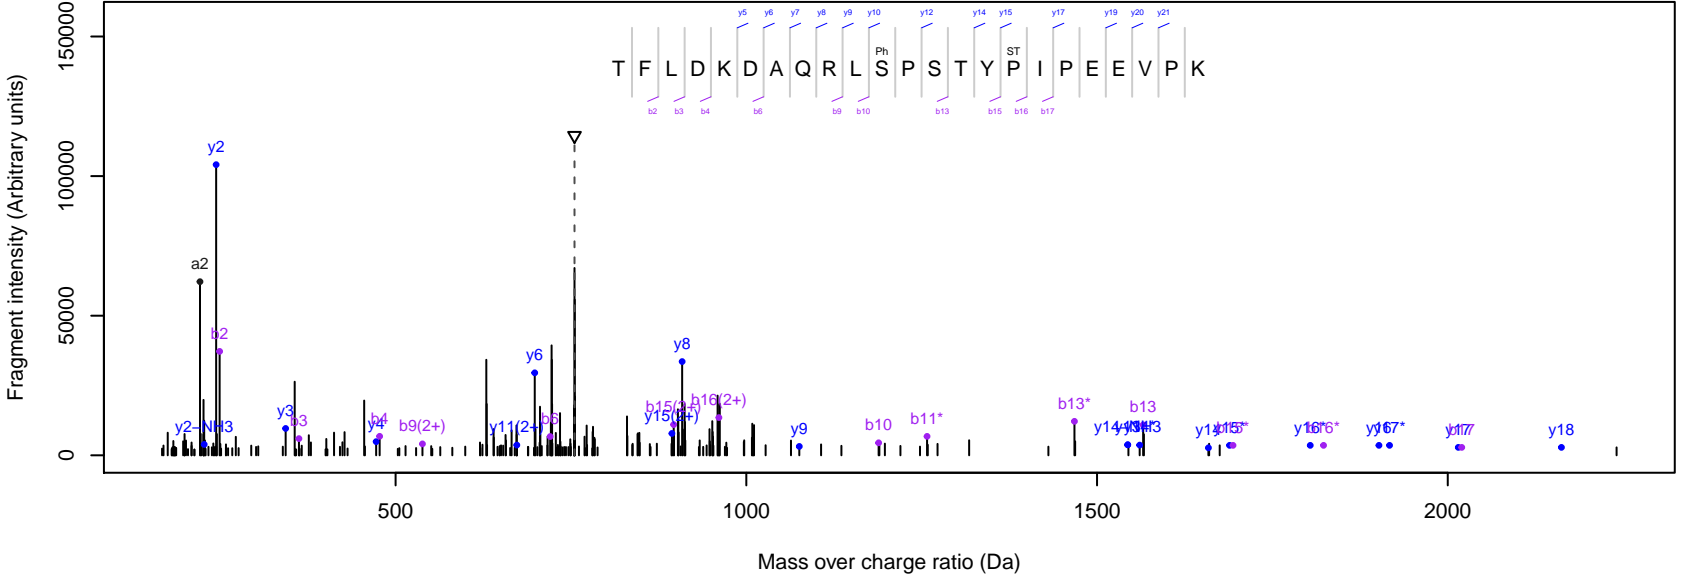

QQFHSPVDS(Phospho (STY))DSDDDPLEAFMAEVEDQAAR-3+

Source : QE3\_201126\_FR\_TiOx\_hum\_tissue\_Urea\_RNAB\_H Scan : 58300

Andromeda score : 145.23

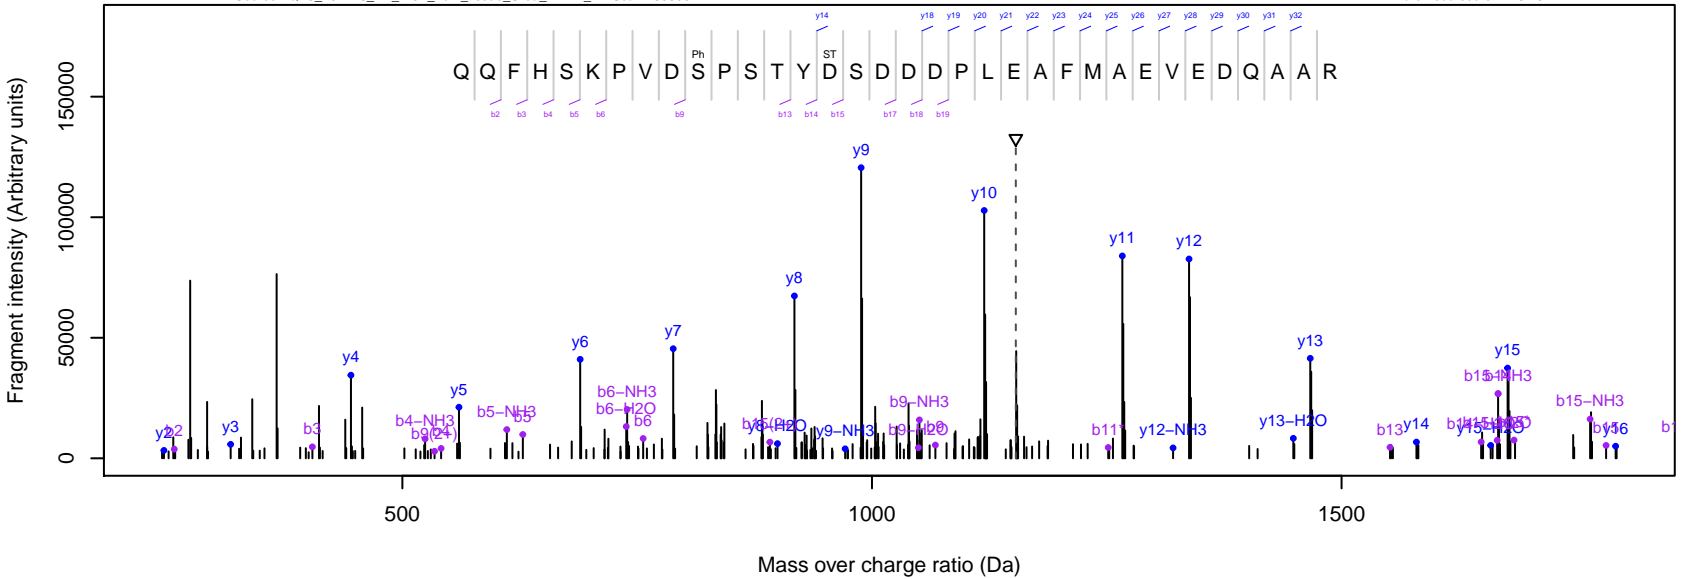

VTGEGSSSTLVDTSTSTGGG(Phospho (STY))PVRK-3+

Source : QE3\_201126\_FR\_TiOx\_hum\_tissue\_Urea\_RNAB\_B Scan : 20933

Andromeda score : 145.23

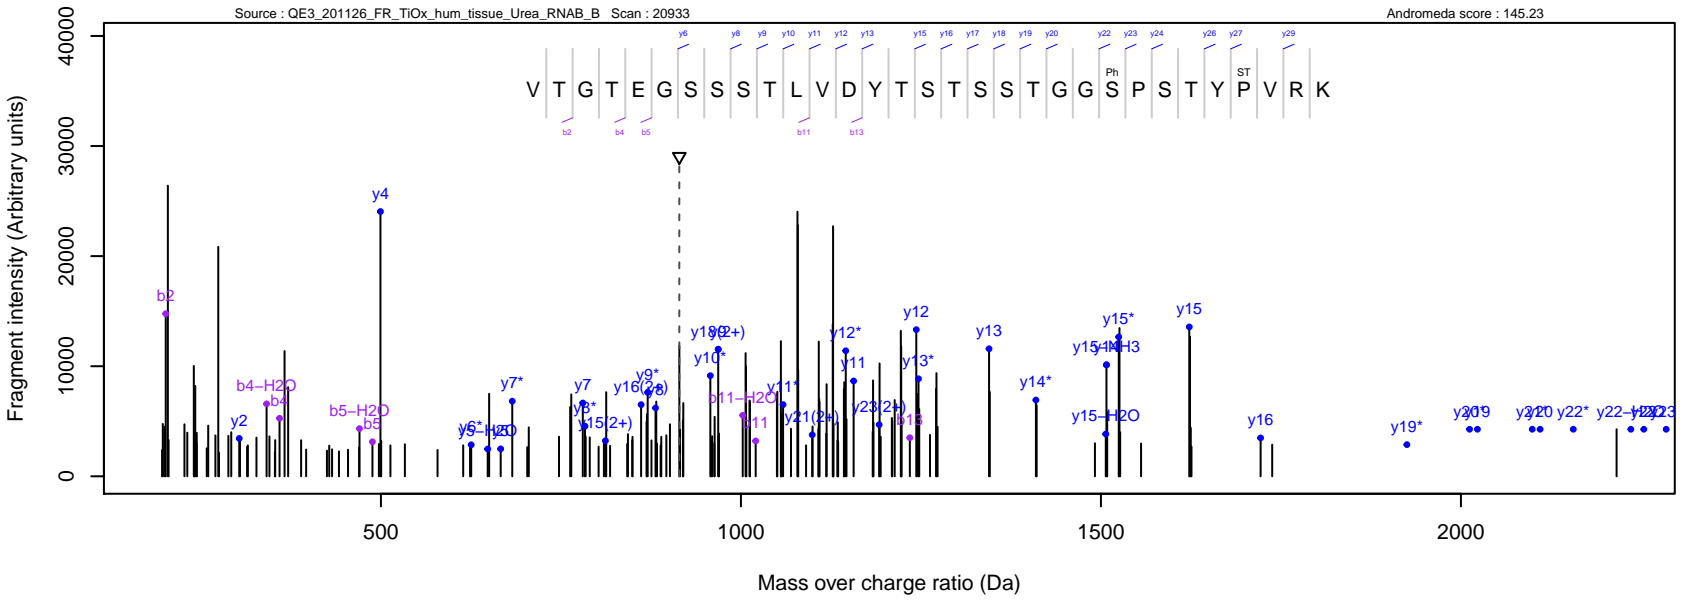

HSSIS(Phospho (STY))PVRLPLNSSLGAELSR-3+

Source : QE3\_201126\_FR\_TiOx\_hum\_tissue\_Urea\_RNAB\_N Scan : 38484

Andromeda score : 145.2

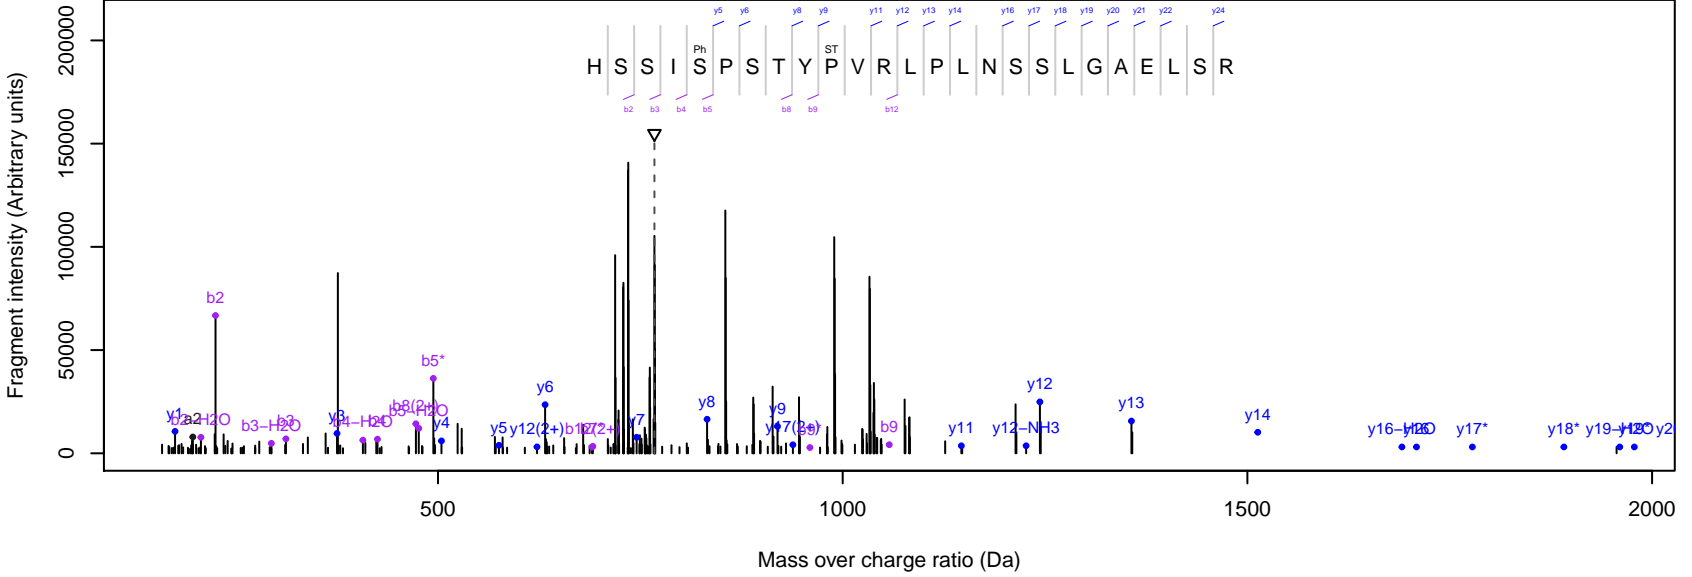

M(Oxidation (M))VVPGLDGAQIPRDPS(Phospho (STY))QQELPR-3+

Source : QE3\_201126\_FR\_TiOx\_hum\_tissue\_Urea\_RNAB\_H Scan : 35158

Andromeda score : 145.2

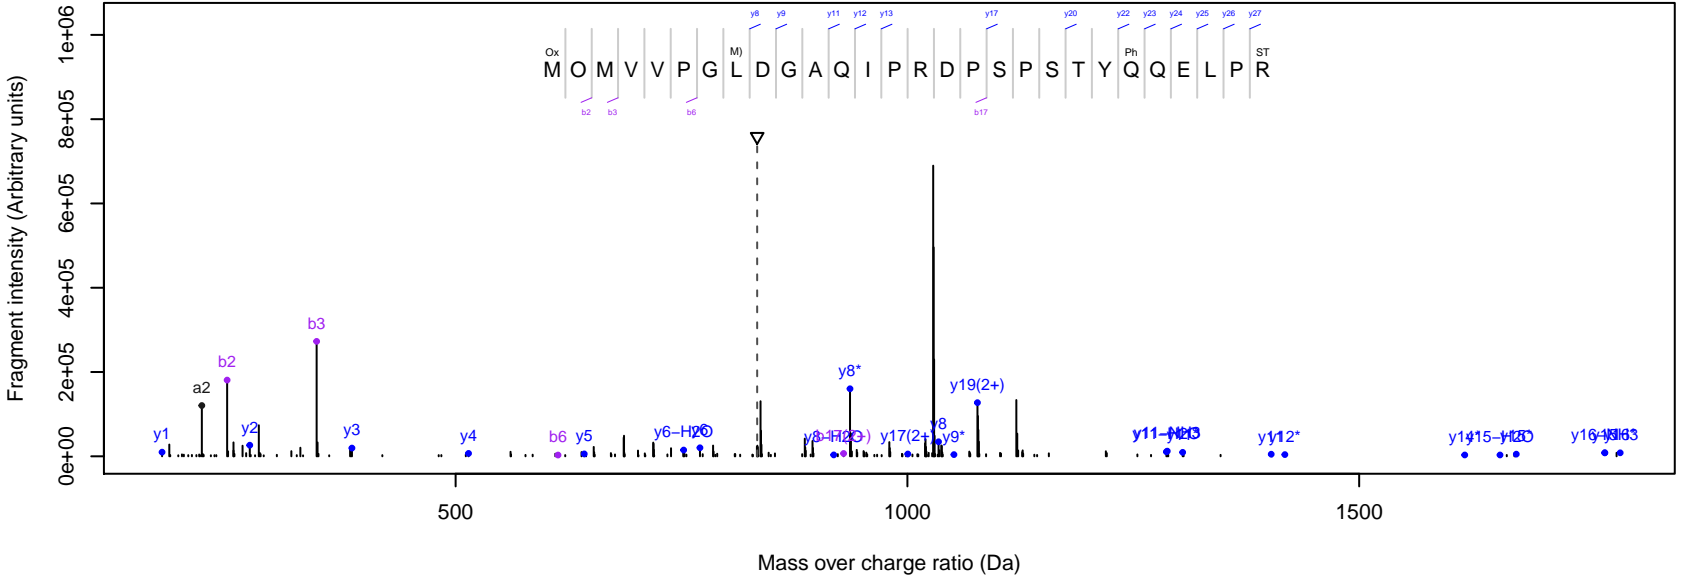

RQS(Phospho (STY))SSYDDPWKITDEQR-3+

Source : QE3\_201126\_FR\_TIOx\_hum\_tissue\_Urea\_RNAB\_H Scan : 23715

Andromeda score : 145.13

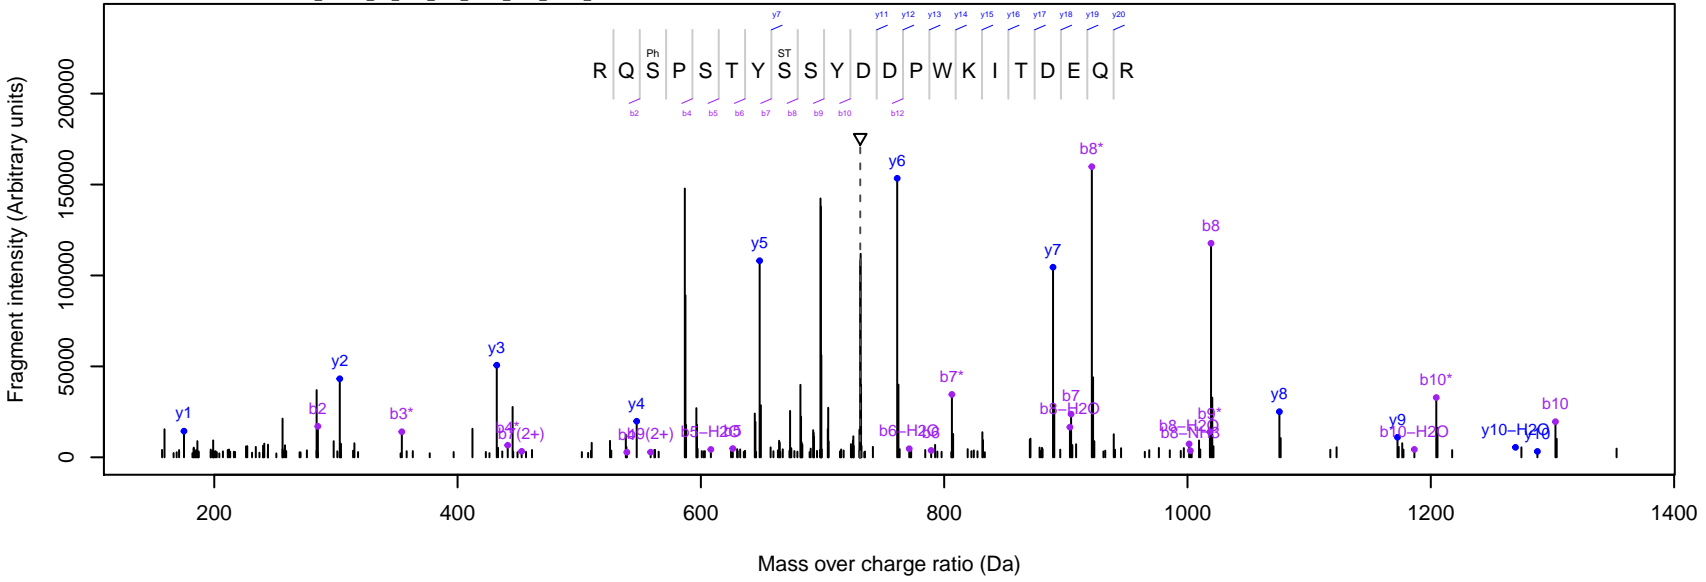

EM(Oxidation (M))LAS(Phospho (STY))DDEEDVSSK-2+

Source : QE3\_201126\_FR\_TIOx\_hum\_tissue\_Urea\_RNAB\_N Scan : 14031

Andromeda score : 145.1

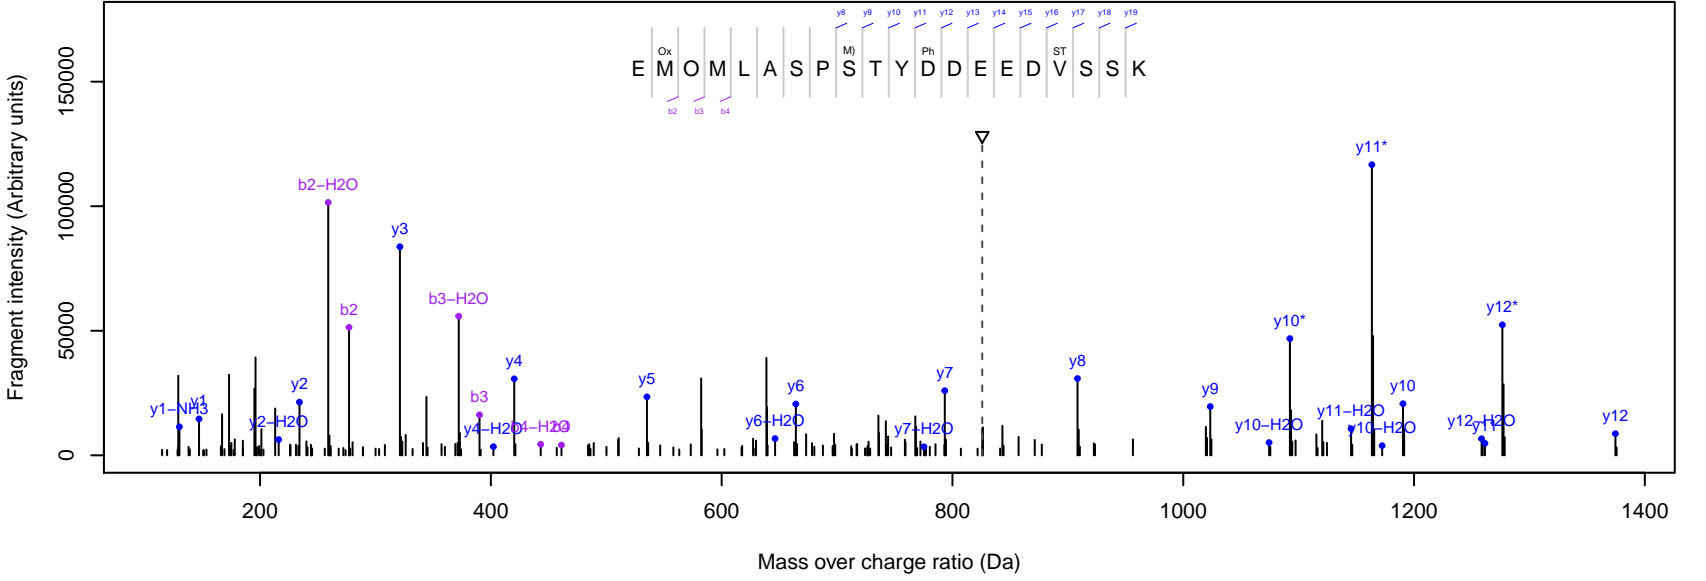

GS(Phospho (STY))IGENQIKDEK-2+

Source : QE3\_201126\_FR\_TIOx\_hum\_tissue\_Urea\_RNAB\_N Scan : 8809

Andromeda score : 145

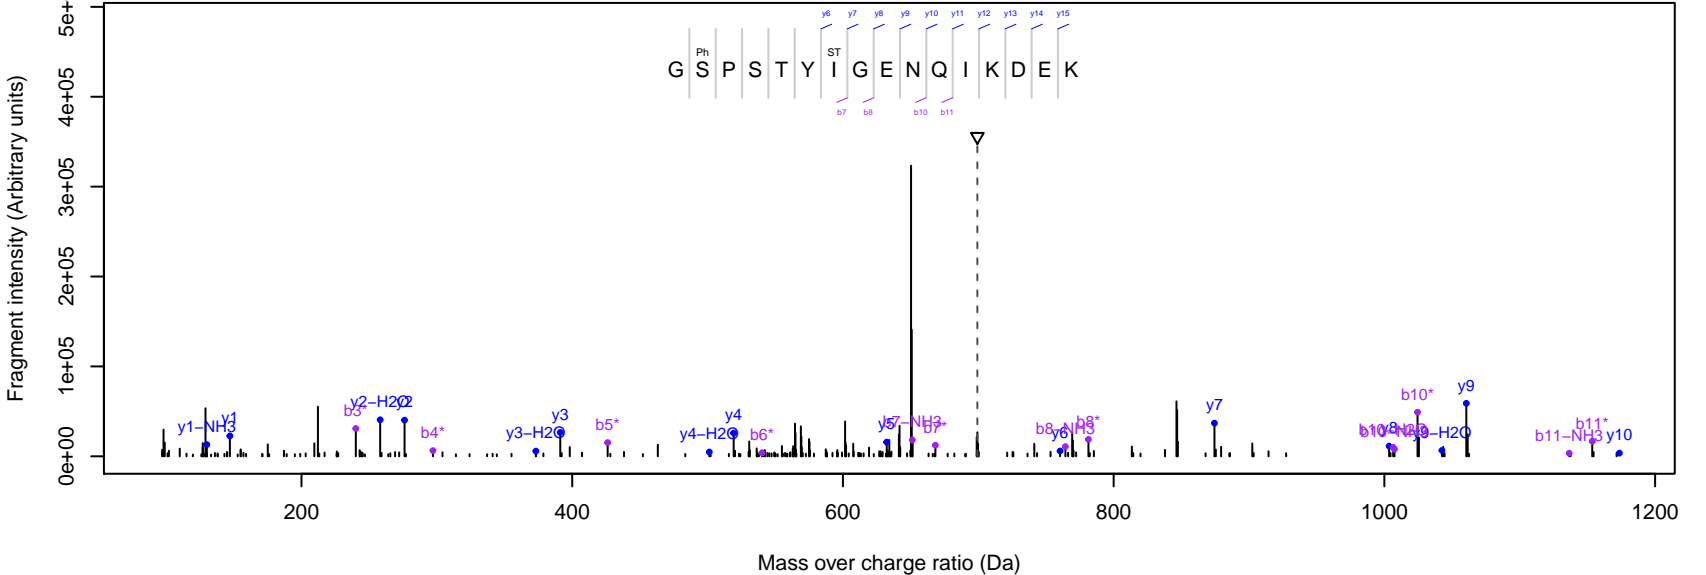

AAAAATAPPS(Phospho (STY))PGPAQPGR-2+

Source : QE3\_201126\_FR\_TIOx\_hum\_tissue\_Urea\_RNAB\_H Scan : 15534

Andromeda score : 144.97

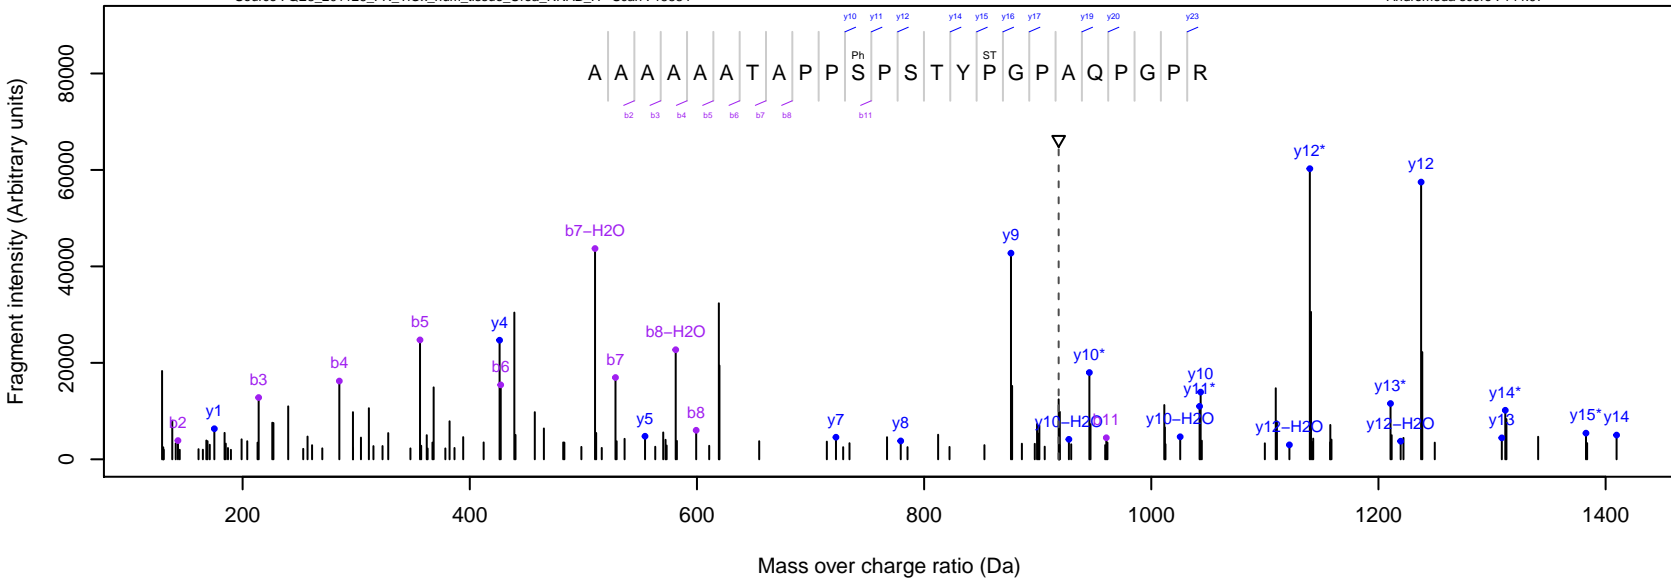

(Acetyl (Protein N-term))ADGDS(Phospho (STY))GS(Phospho (STY))ERGGGGGPGFQPASR-2+

Source : QE3\_201126\_FR\_TIOx\_hum\_tissue\_Urea\_RNAB\_H Scan : 27040

Andromeda score : 144.95

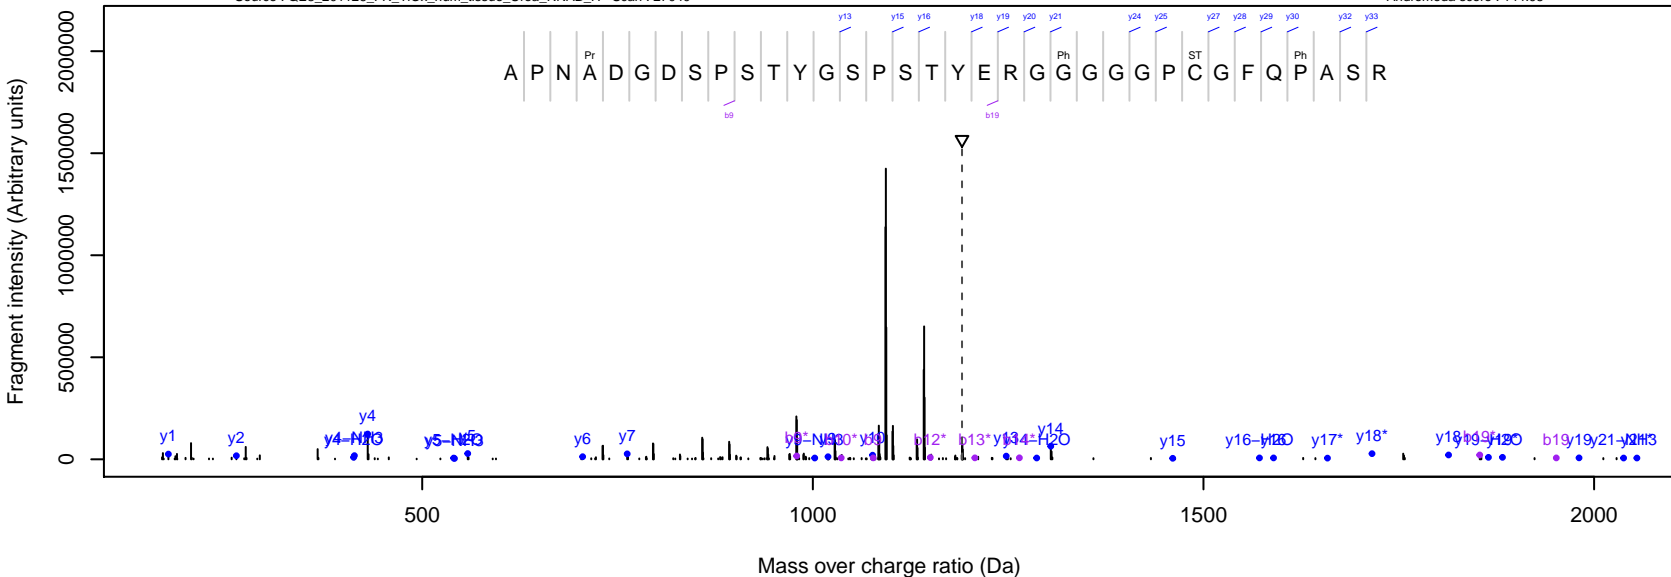

DMPGGFLFEGLS(Phospho (STY))DDEDDFHPNTR-3+

Source : QE3\_201126\_FR\_TIOx\_hum\_tissue\_Urea\_RNAB\_H Scan : 57671

Andromeda score : 144.89

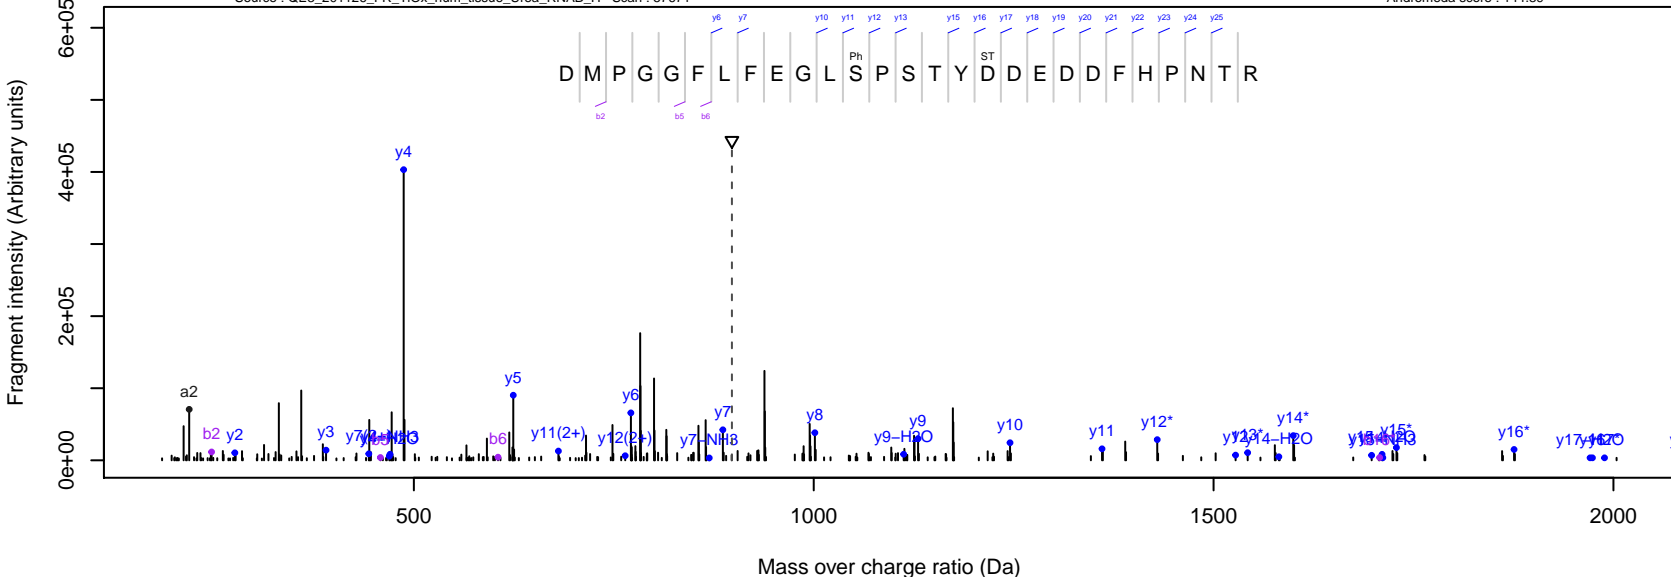

RVS(Phospho (STY))TDLPEGQDVYTAACNSVIHR-3+

Source : QE3\_201126\_FR\_TiOx\_hum\_tissue\_Urea\_RNAB\_N Scan : 32883

Andromeda score : 144.89

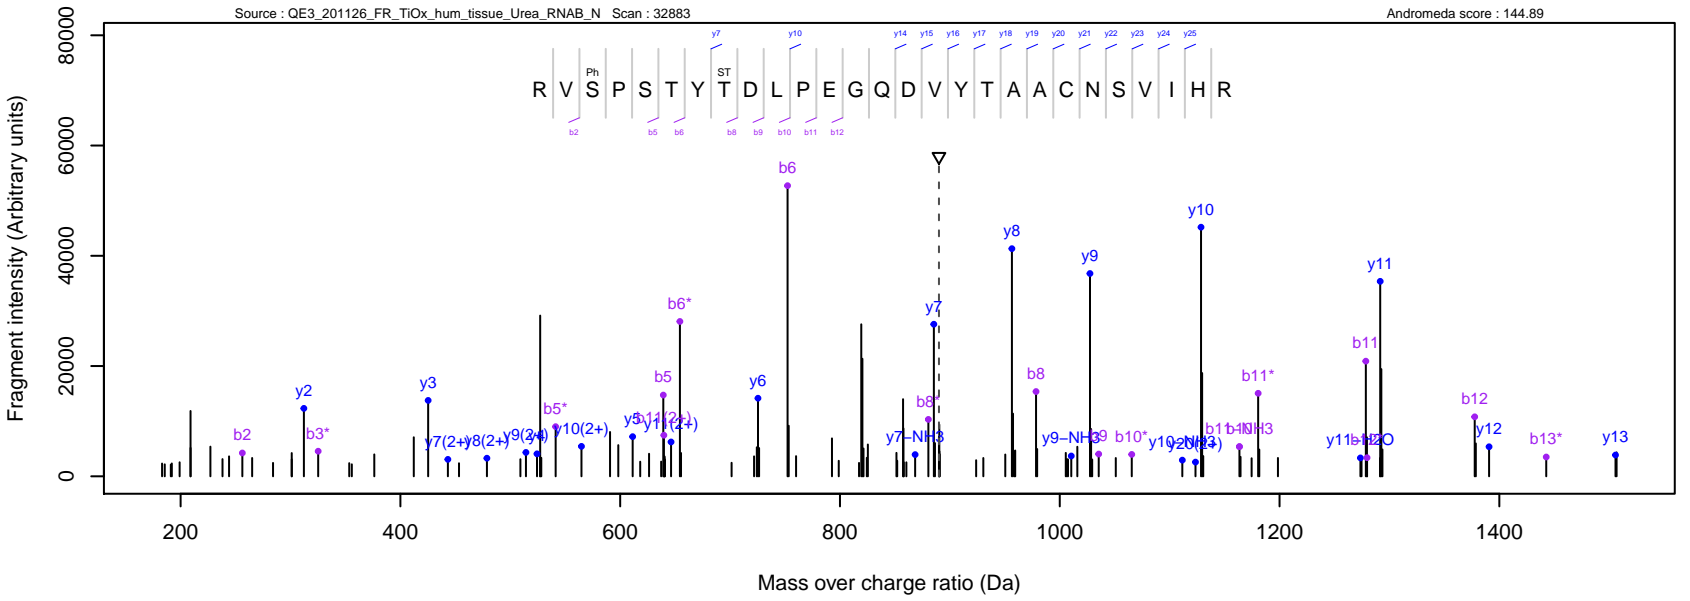

GS(Phospho (STY))SPQNTTTPKPSVEGQQPAAAAACEPVDHAQSESILK-4+

Source : QE3\_201126\_FR\_TiOx\_hum\_tissue\_Urea\_RNAB\_H Scan : 23556

Andromeda score : 144.86

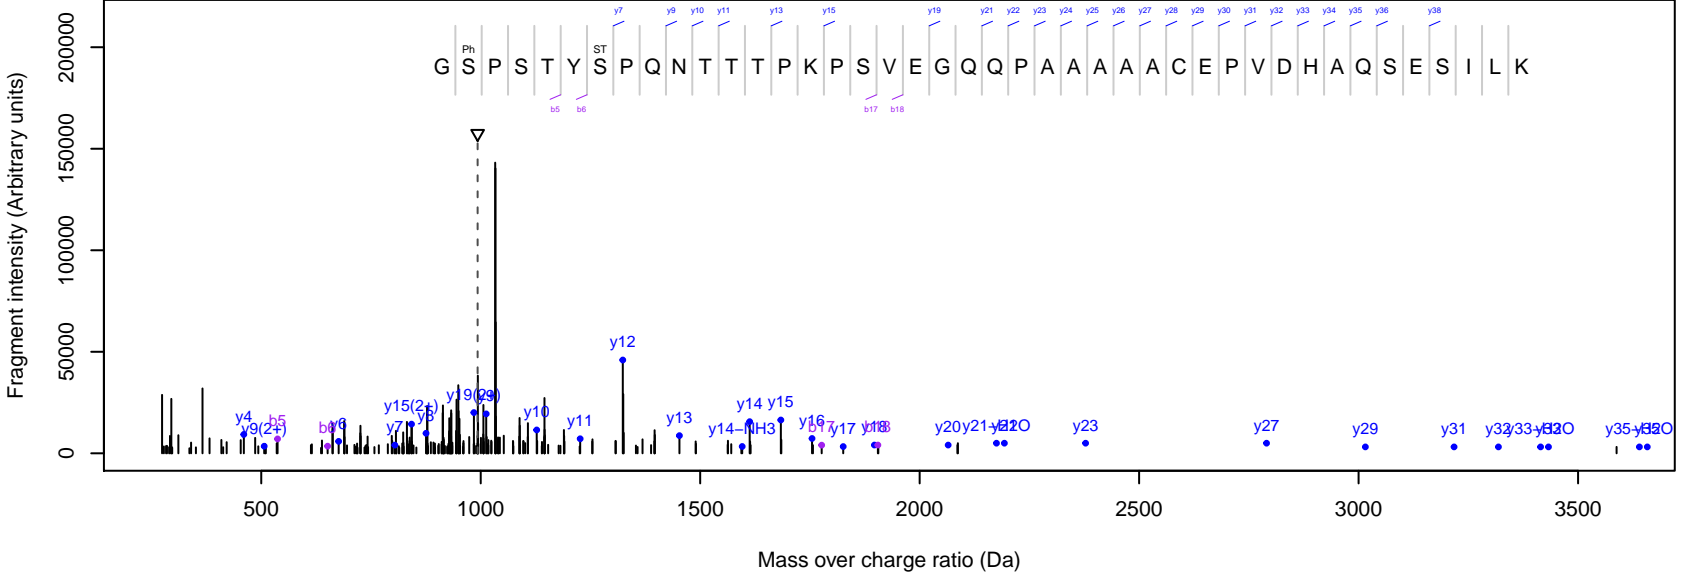

RGS(Phospho (STY))S(Phospho (STY))PGSLEIPKDLPLDILNK-3+

Source : QE3\_201126\_FR\_TiOx\_hum\_tissue\_Urea\_RNAB\_N Scan : 49411

Andromeda score : 144.83

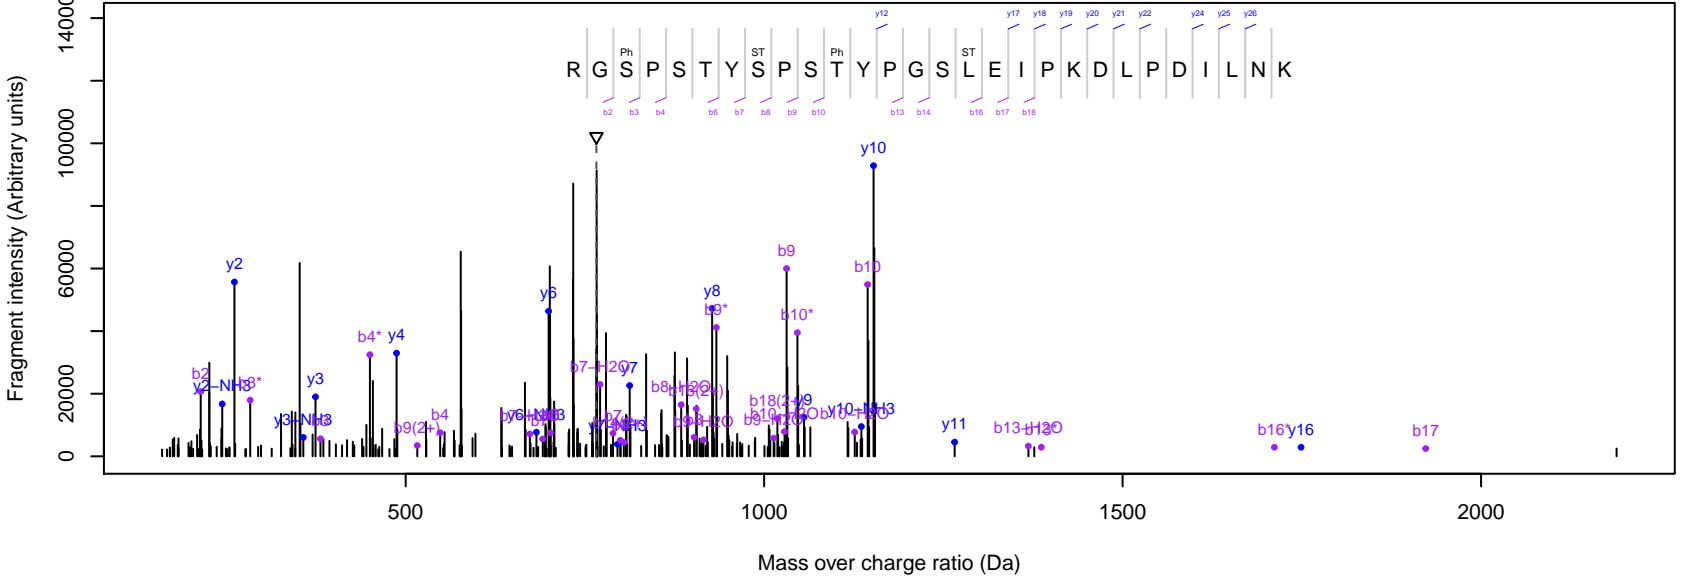

TGVTSTSDS(Phospho (STY))EEEGDDQEGEKK-3+

Source : QE3\_201126\_FR\_TiOx\_hum\_tissue\_Urea\_RNAB\_N Scan : 4469

Andromeda score : 144.76

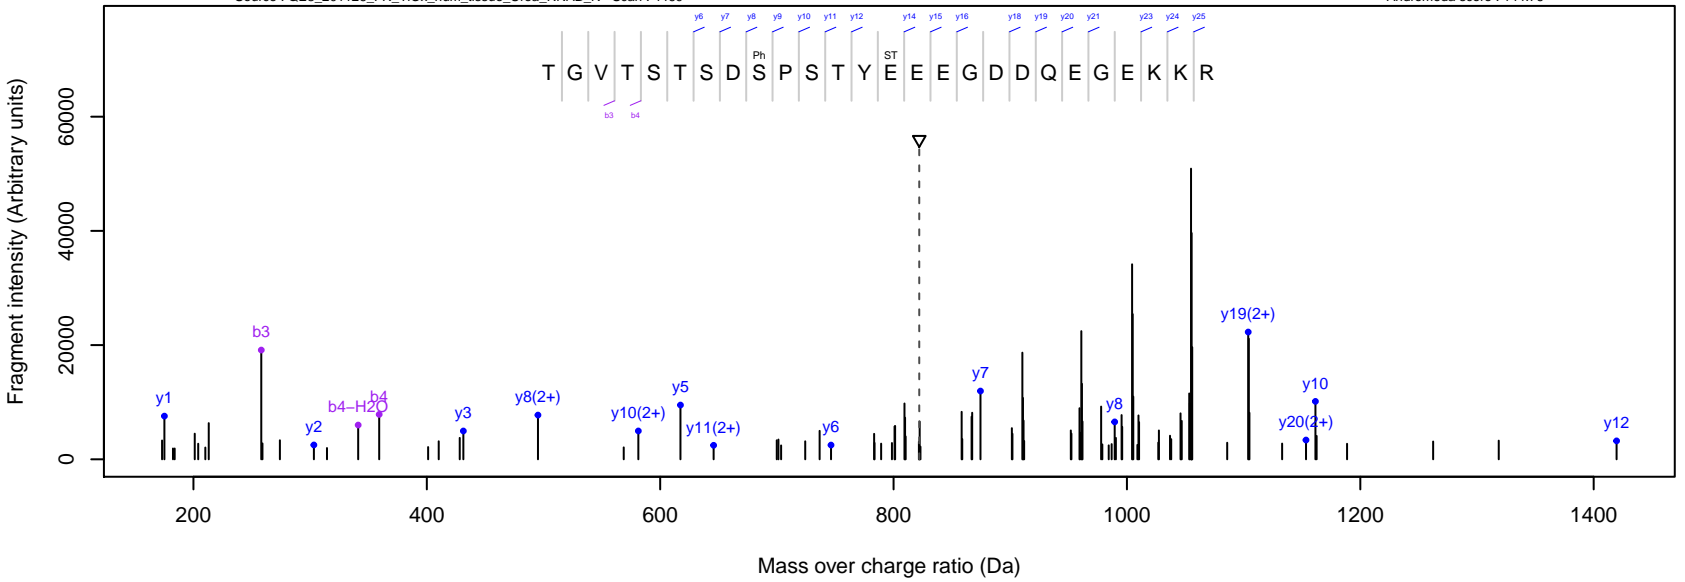

RLT(Phospho (STY))VSSLQESGLK-2+

Source : QE3\_201126\_FR\_TiOx\_hum\_tissue\_Urea\_RNAB\_B Scan : 23293

Andromeda score : 144.73

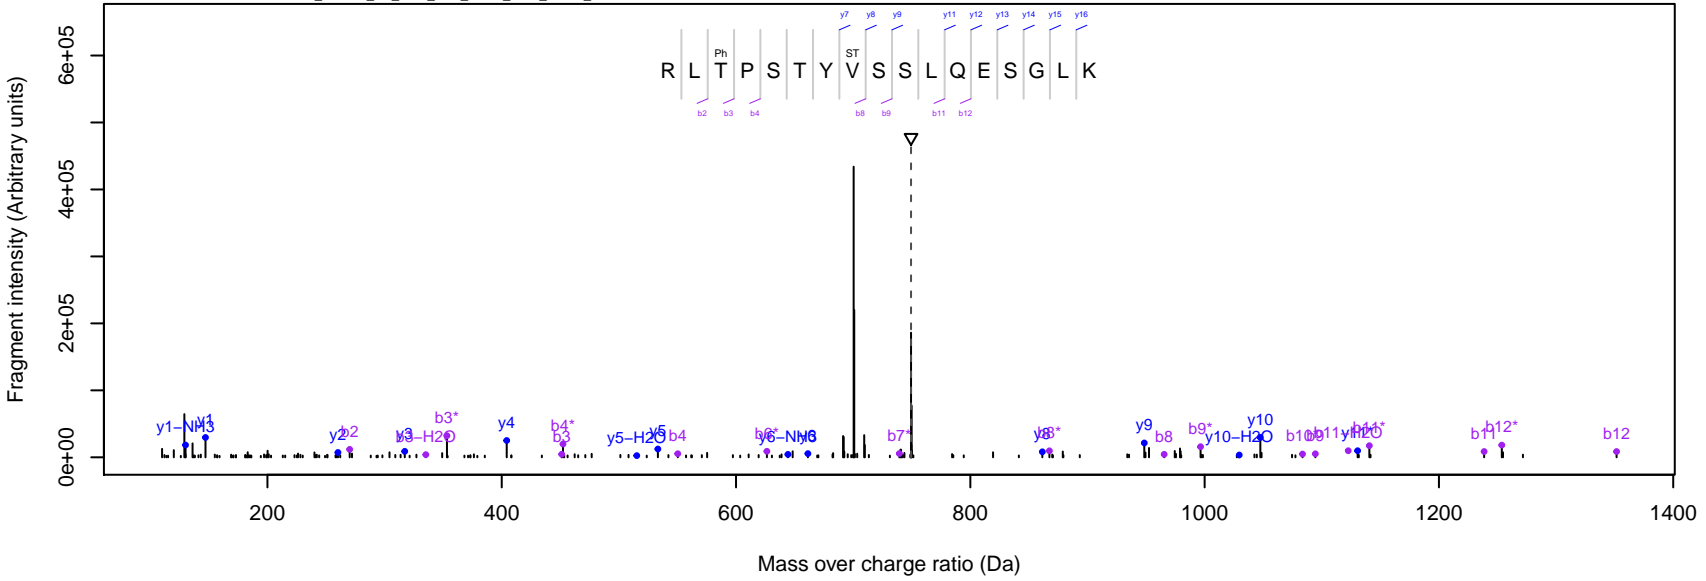

NADDLEVSS(Phospho (STY))DIIEAVAISNSFITTK-3+

Source : QE3\_201126\_FR\_TiOx\_hum\_tissue\_Urea\_RNAB\_H Scan : 62791

Andromeda score : 144.7

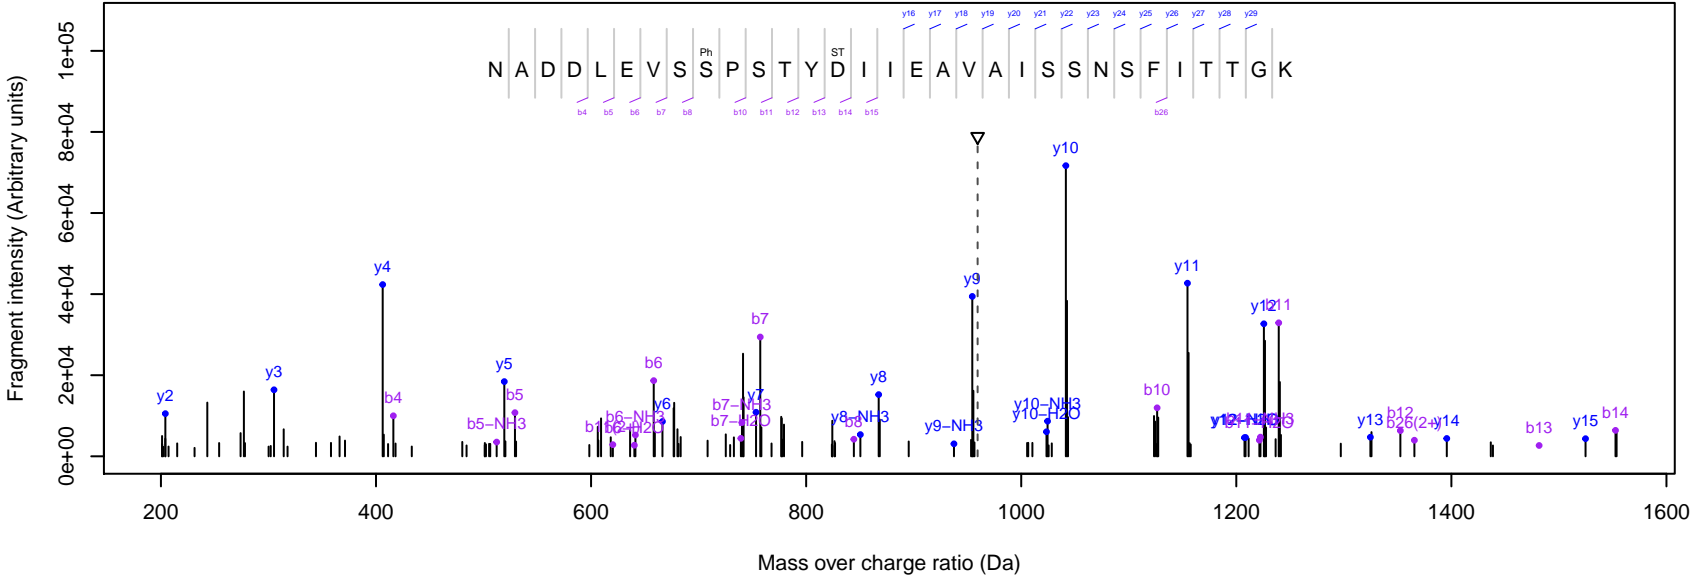

QNVQVFEFQLTS(Phospho (STY))EEMK-2+

Source : QE3\_201126\_FR\_TiOx\_hum\_tissue\_Urea\_RNAB\_H Scan : 53027

Andromeda score : 144.68

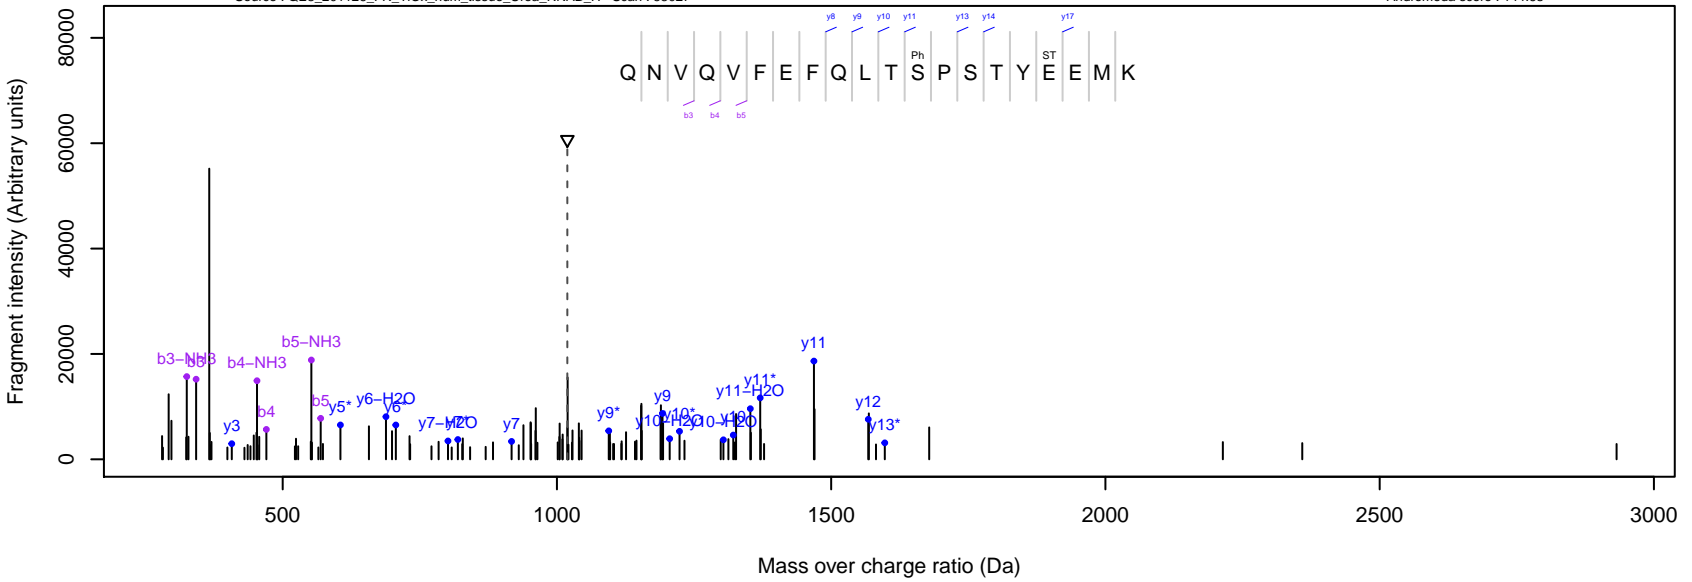

TQSEESRPSLQQPATSTTETPAS(Phospho (STY))PAHTTPQTQSTSGR-4+

Source : QE3\_201126\_FR\_TiOx\_hum\_tissue\_Urea\_RNAB\_H Scan : 13736

Andromeda score : 144.68

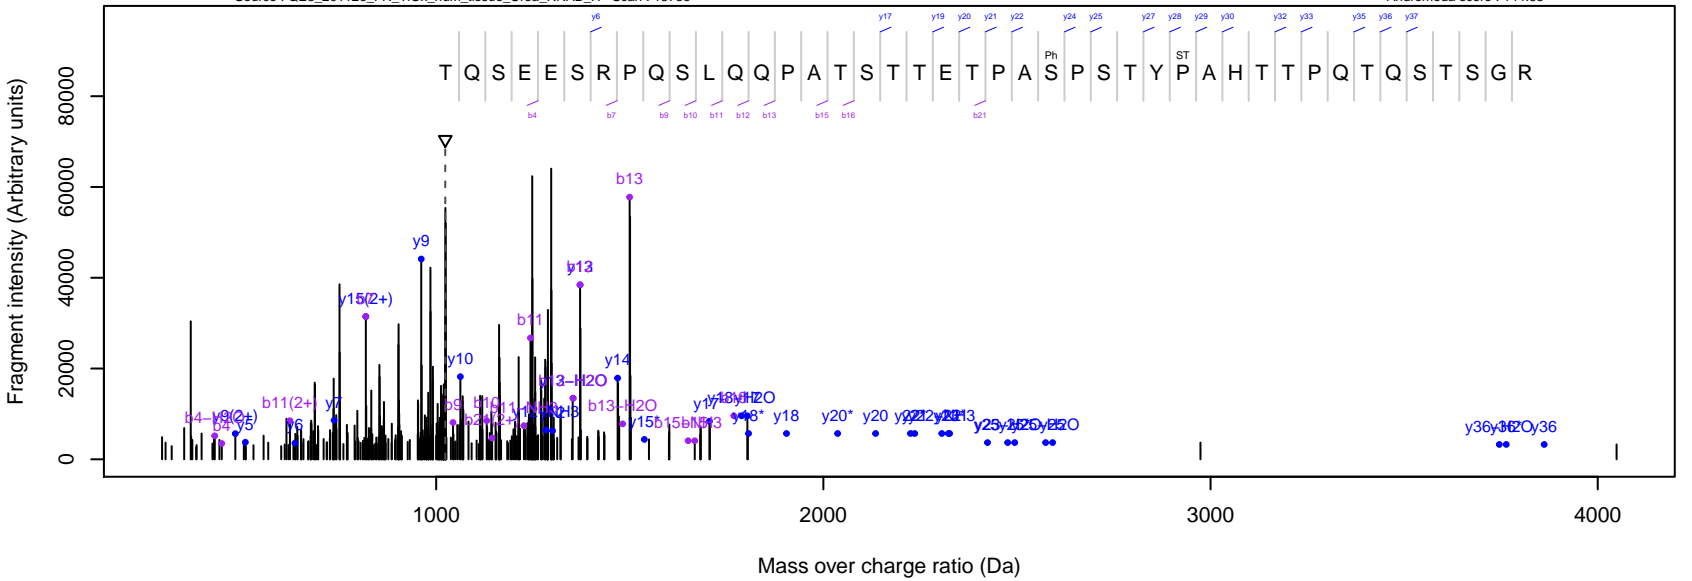

TQTGDSSS(Phospho (STY))ISSFSYR-2+

Source : QE3\_201126\_FR\_TiOx\_hum\_tissue\_Urea\_RNAB\_N Scan : 25208

Andromeda score : 144.68

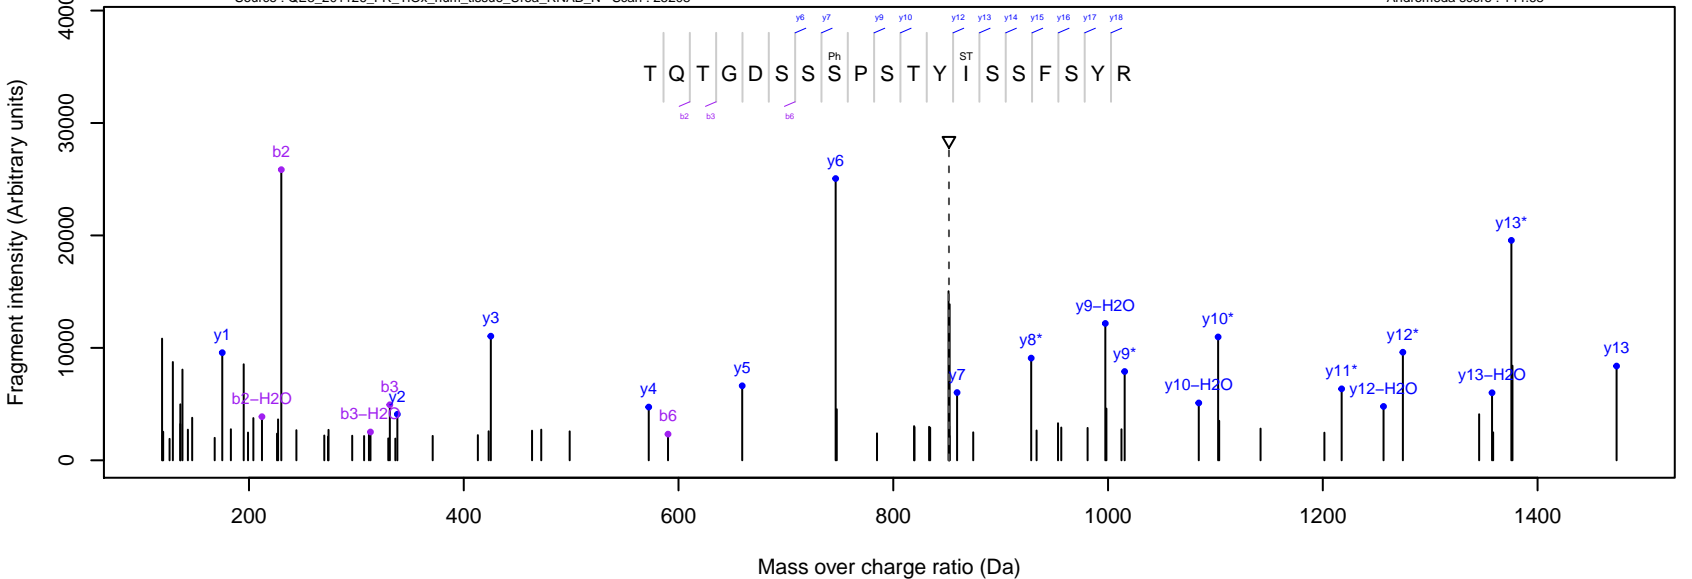

**TDCEPVGLEPAVEQSSAAASELAEASSEEELAEAPTEAPS(Phospho (STY))PEAR-4+**

Source : QE3\_201126\_FR\_TiOx\_hum\_tissue\_Urea\_RNAB\_B Scan : 56851

Andromeda score : 144.64

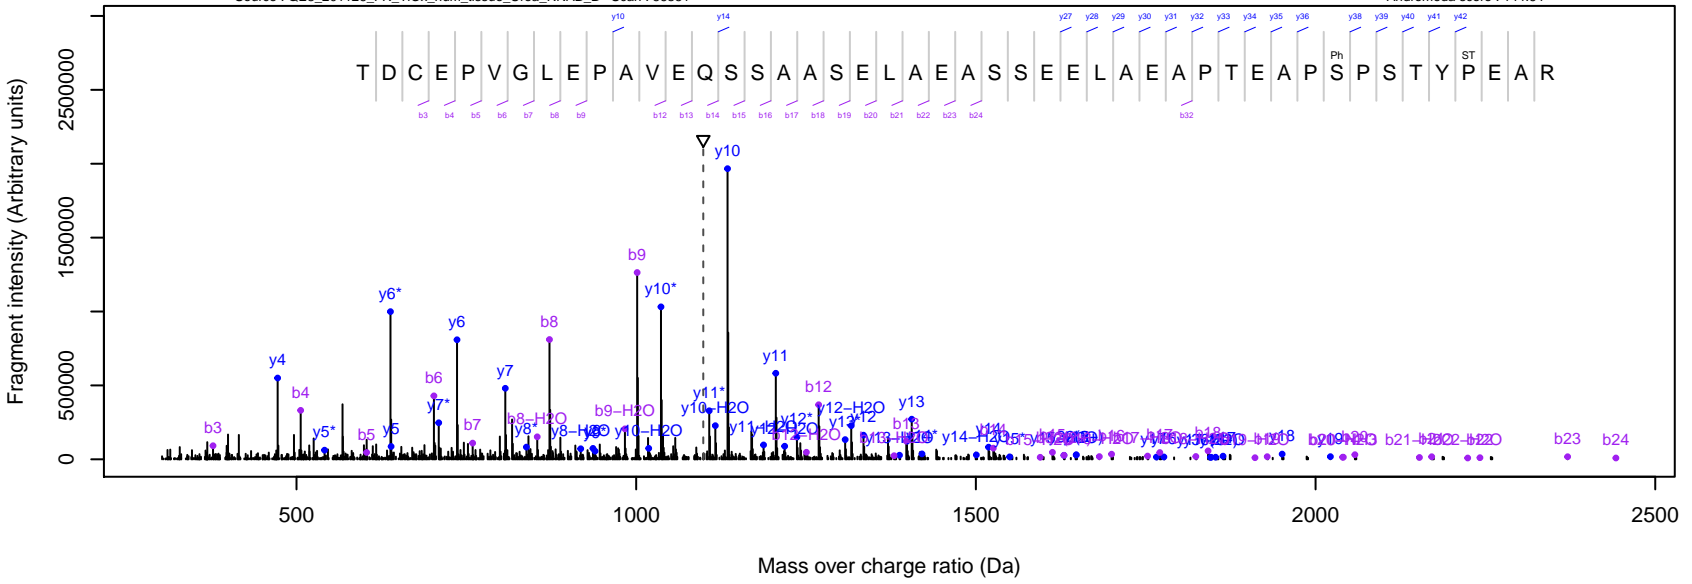

**ENSPFLNNVEVEQESPSTYFFEGK-3+**

Source : QE3\_201126\_FR\_TiOx\_hum\_tissue\_Urea\_RNAB\_H Scan : 55026

Andromeda score : 144.63

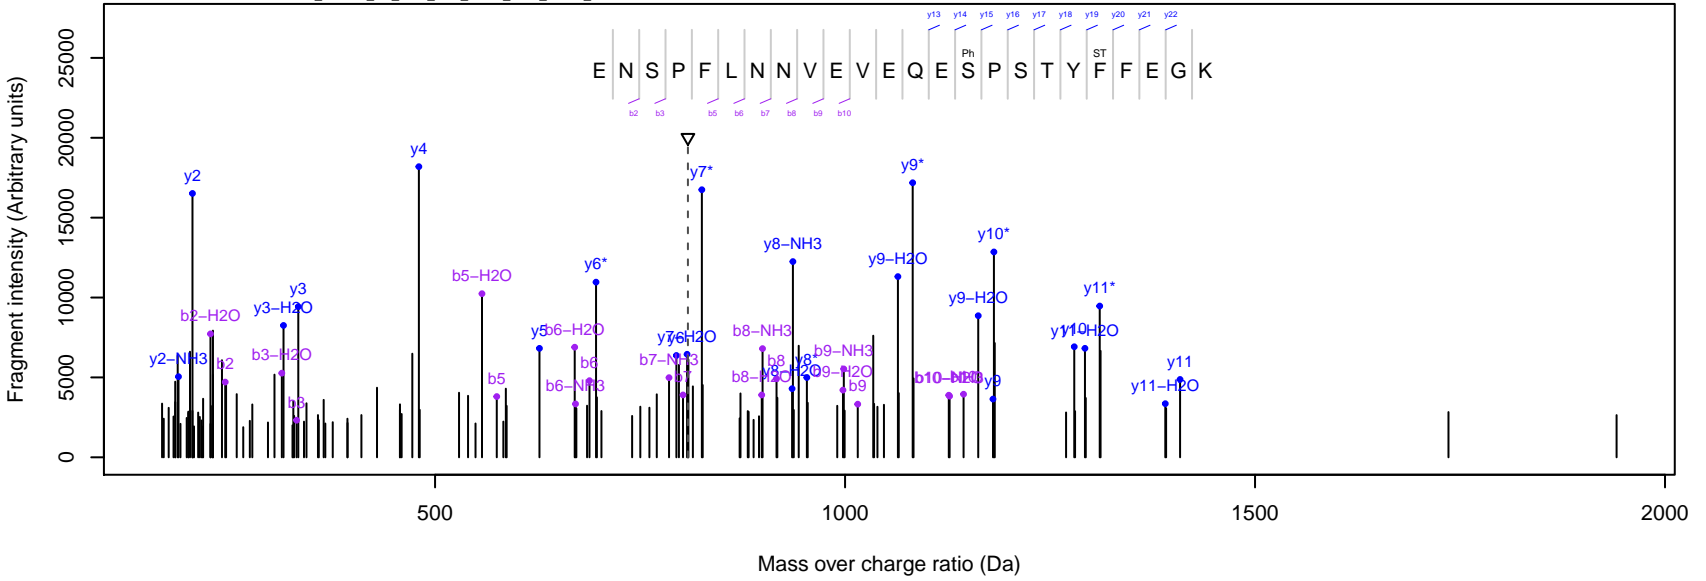

**GHREEEQEDLTKDMDEPS(Phospho (STY))PVPNVEEVTLPK-4+**

Source : QE3\_201126\_FR\_TiOx\_hum\_tissue\_Urea\_RNAB\_B Scan : 33566

Andromeda score : 144.55

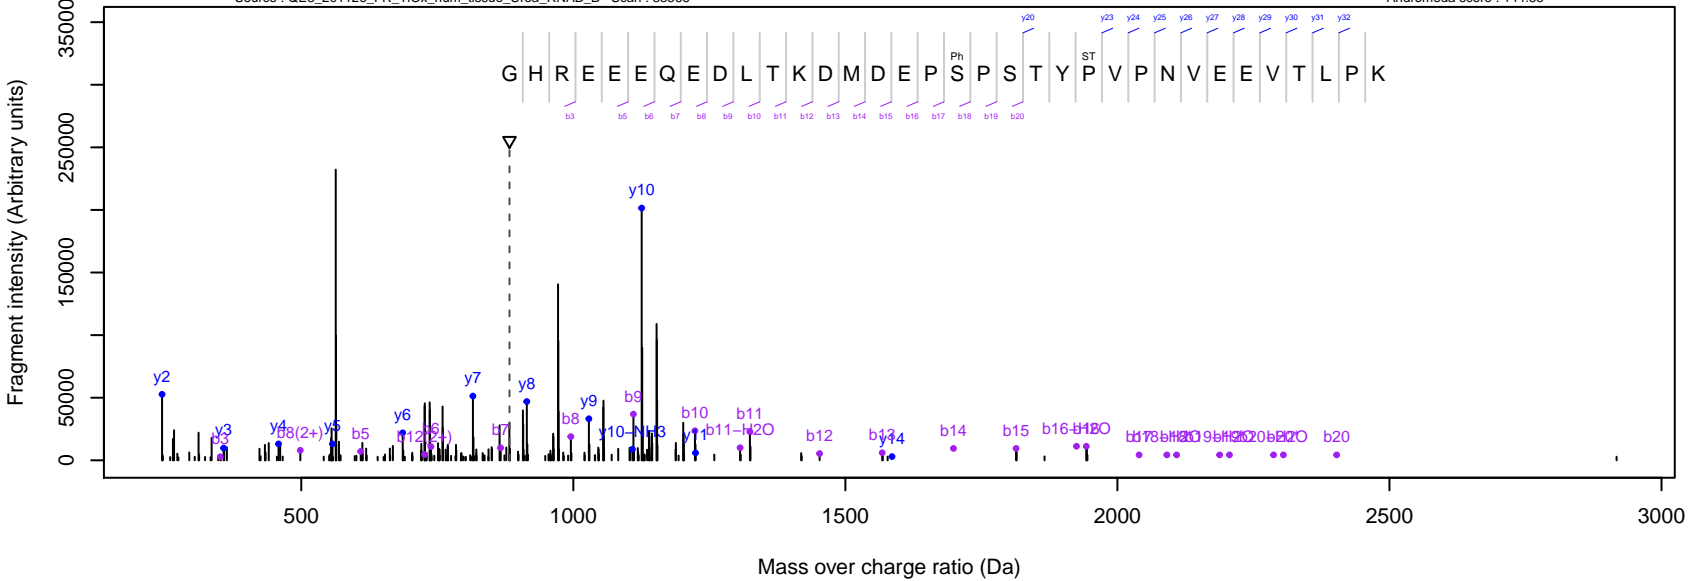



SES(Phospho (STY))M(Oxidation (M))PVQLNK-2+

Source : QE3\_201126\_FR\_TiOx\_hum\_tissue\_Urea\_RNAB\_N Scan : 13757

Andromeda score : 144.55

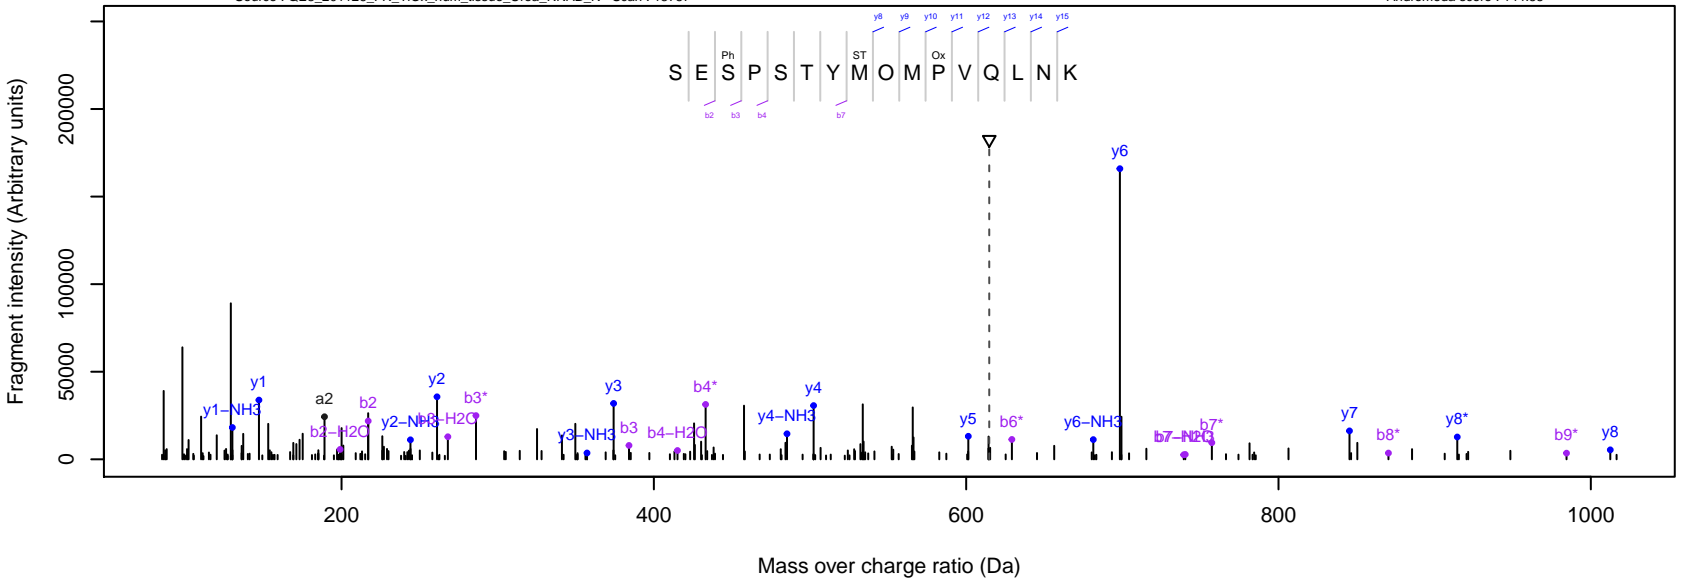

SYS(Phospho (STY))VVASEYDKQHSILPAR-3+

Source : QE3\_201126\_FR\_TiOx\_hum\_tissue\_Urea\_RNAB\_B Scan : 27463

Andromeda score : 144.5

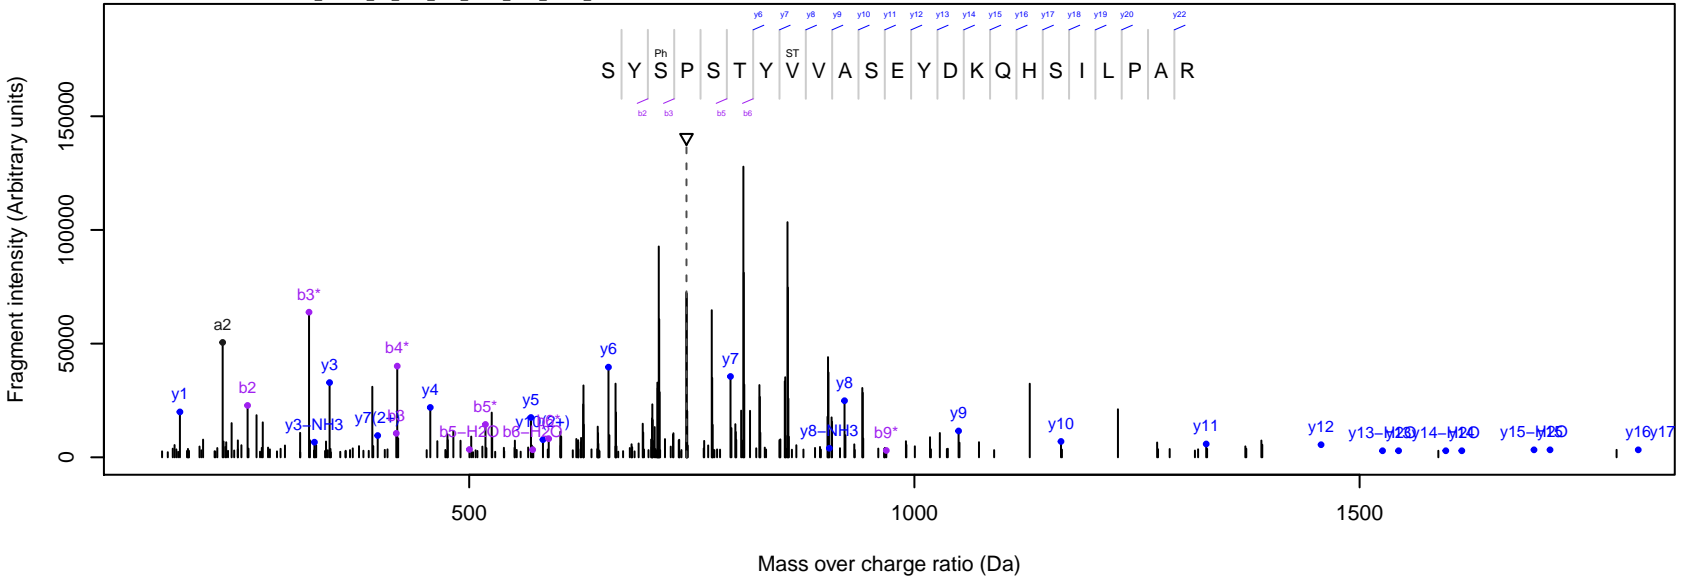

ASGANYS(Phospho (STY))FHKESGR-3+

Source : QE3\_201126\_FR\_TiOx\_hum\_tissue\_Urea\_RNAB\_N Scan : 7014

Andromeda score : 144.33

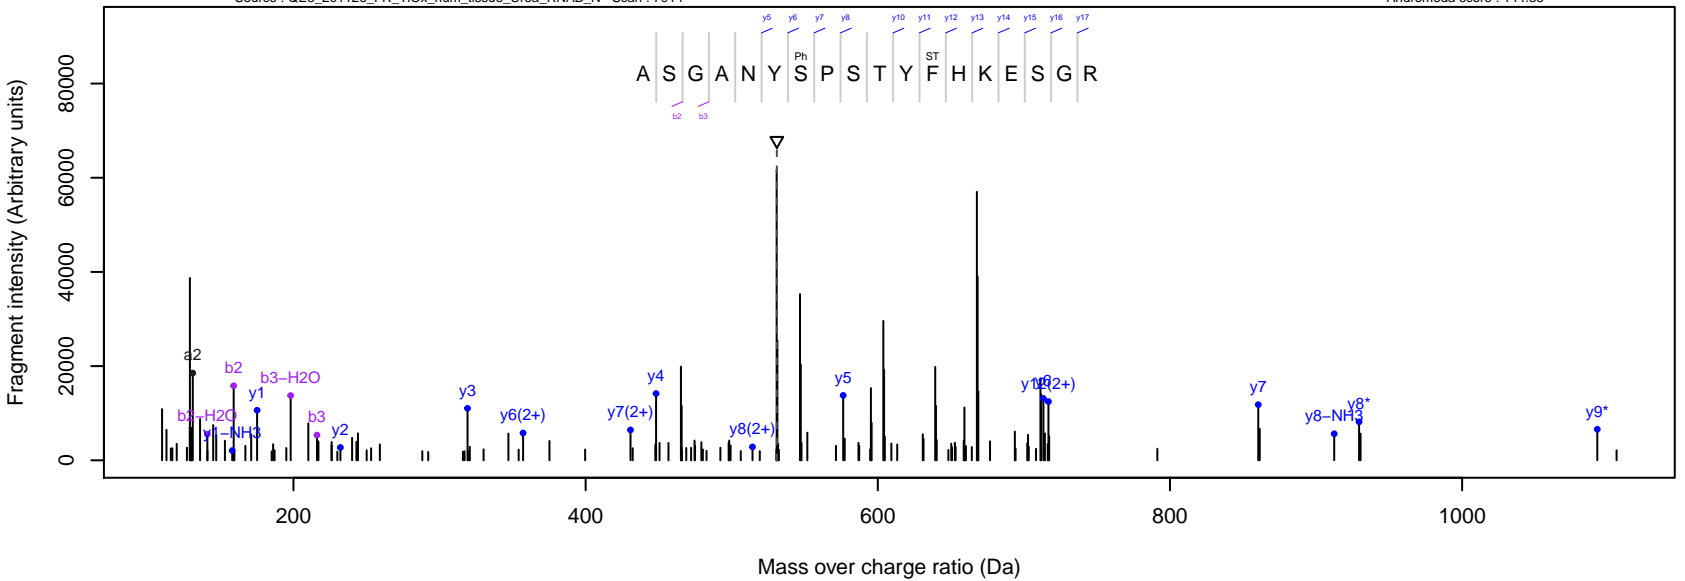

NKPSLAS(Phospho (STY))ESNLLQQR-3+

Source : QE3\_201126\_FR\_TiOx\_hum\_tissue\_Urea\_RNAB\_H Scan : 24414

Andromeda score : 144.3

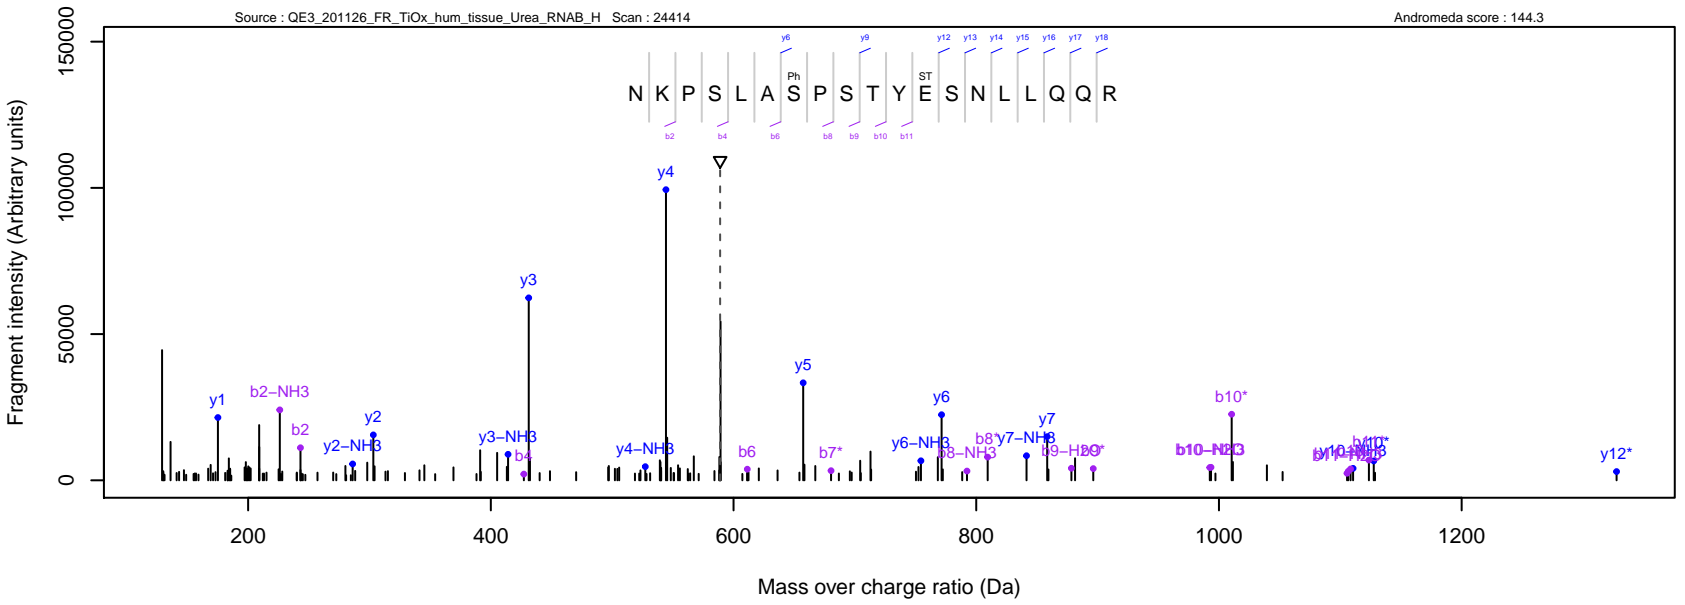

(Acetyl (Protein N-term))S(Phospho (STY))LDIQSLDIQCEELSDAR-2+

Source : QE3\_201126\_FR\_TiOx\_hum\_tissue\_Urea\_RNAB\_B Scan : 61387

Andromeda score : 144.3

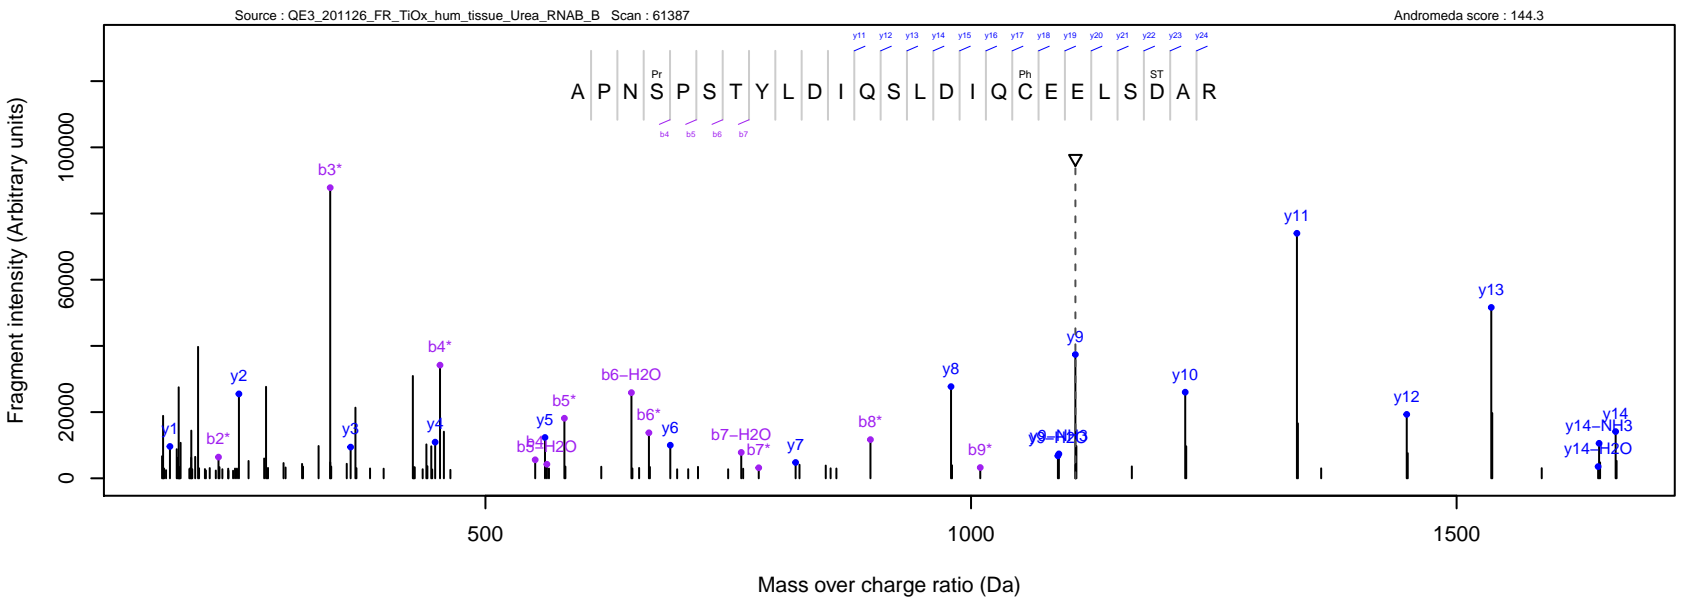

AGEPNS(Phospho (STY))PDAEEANSPDVTAGCDPAGVHPPR-3+

Source : QE3\_201126\_FR\_TiOx\_hum\_tissue\_Urea\_RNAB\_H Scan : 23072

Andromeda score : 144.29

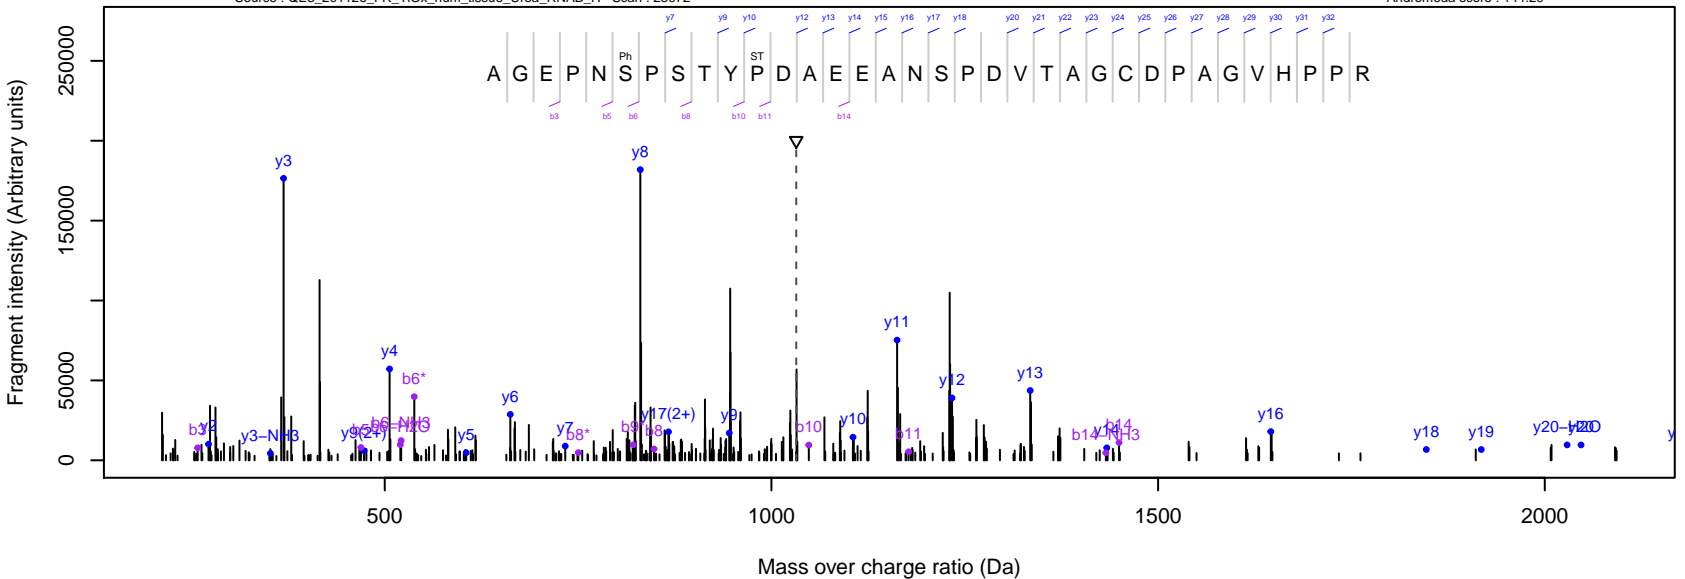

RRGS(Phospho (STY))SGSVVVDLLYWR-3+

Source : QE3\_201126\_FR\_TiOx\_hum\_tissue\_Urea\_RNAB\_N Scan : 48774

Andromeda score : 144.29

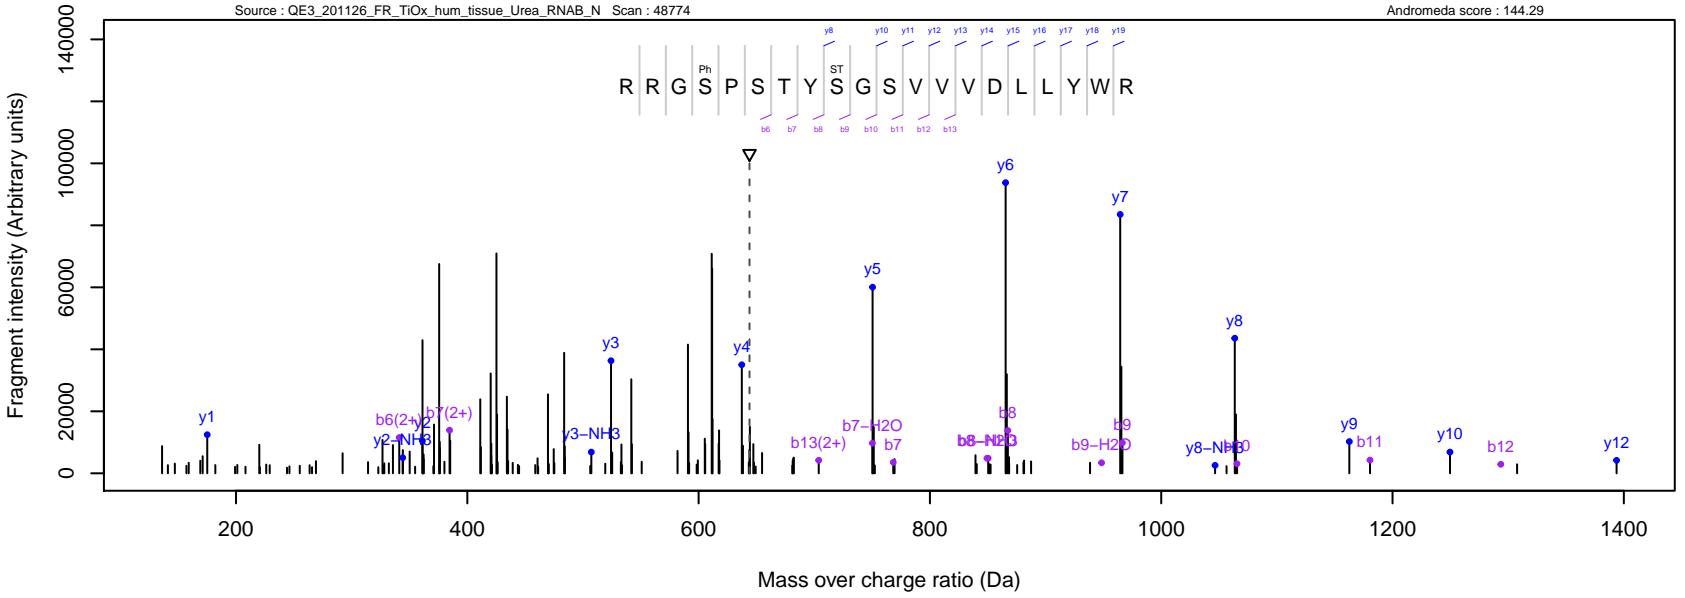

TGEEEEEEEQIS(Phospho (STY))ES(Phospho (STY))ES(Phospho (STY))EDEENEIYNPK-3+

Source : QE3\_201126\_FR\_TiOx\_hum\_tissue\_Urea\_RNAB\_N Scan : 40004

Andromeda score : 144.29

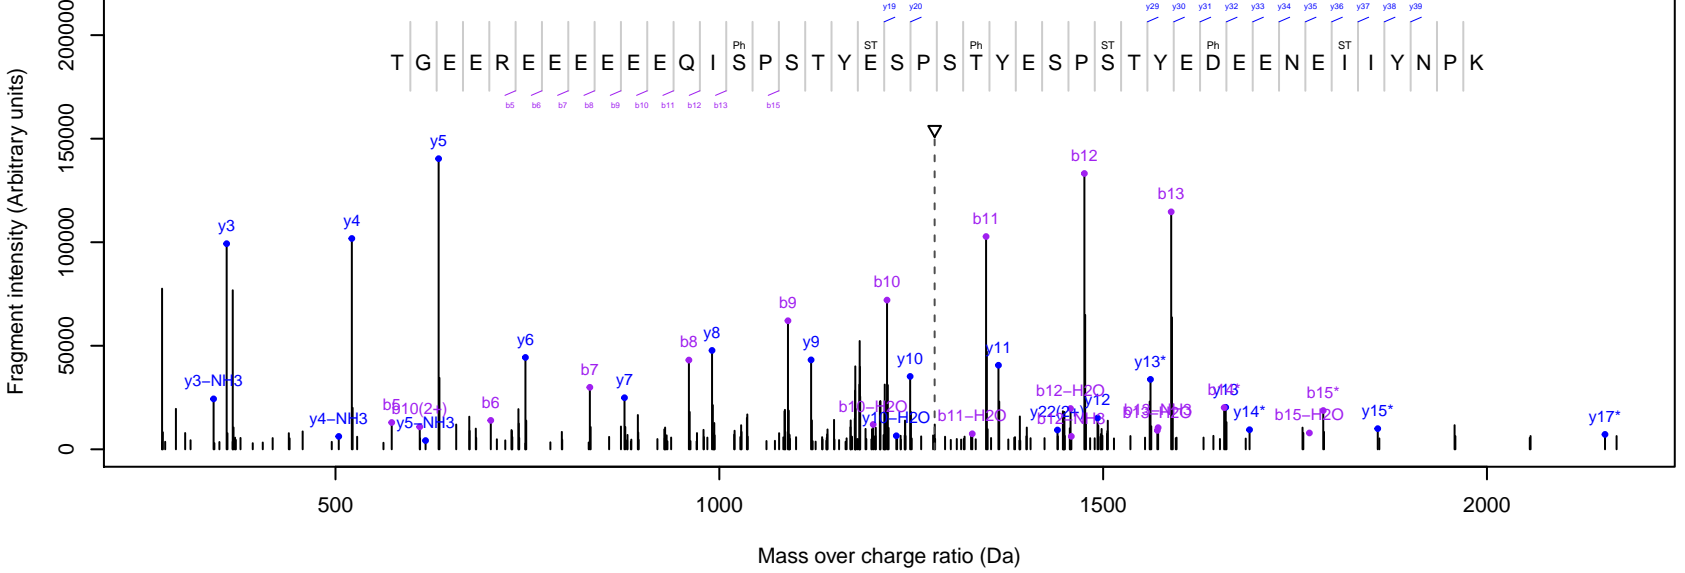

LLEENETEAVTPTPS(Phospho (STY))PTPVR-3+

Source : QE3\_201126\_FR\_TiOx\_hum\_tissue\_Urea\_RNAB\_H Scan : 38330

Andromeda score : 144.27

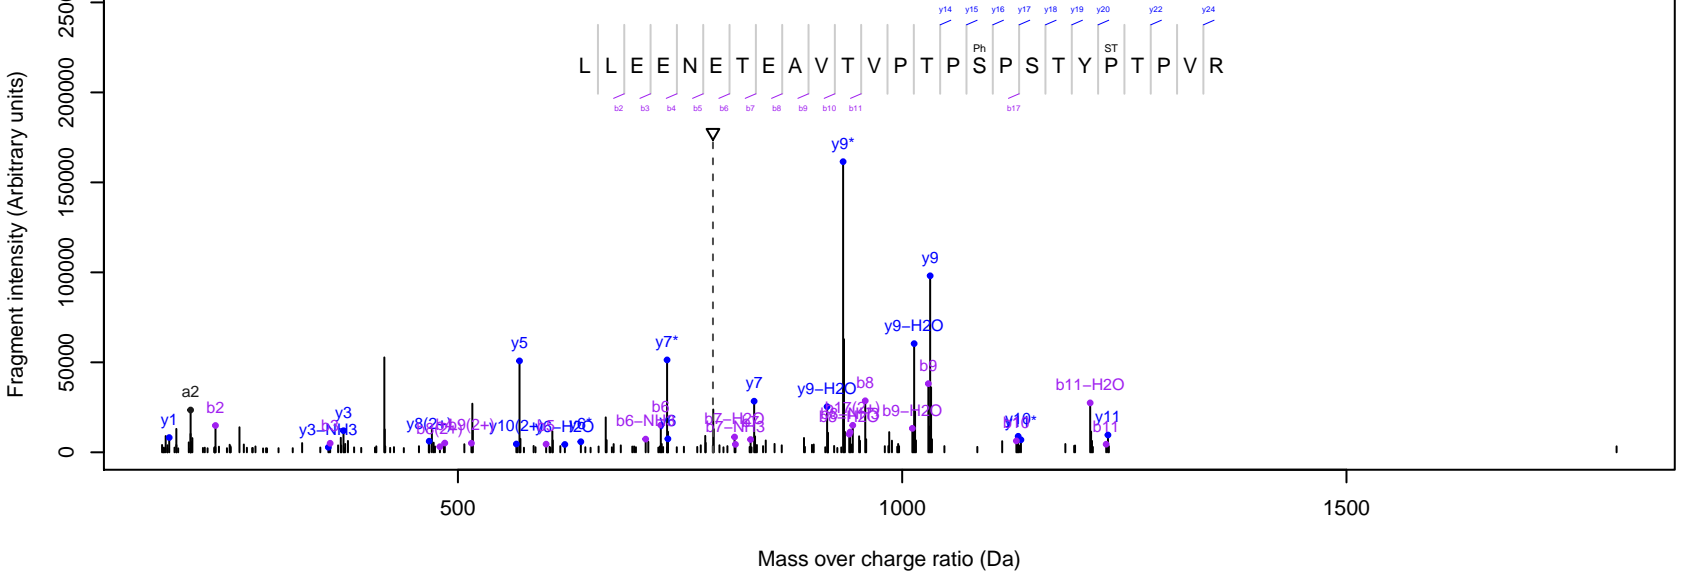

KS(Phospho (STY))LPEEDVAEIQAHEEFLIKPESK-4+

Source : QE3\_201126\_FR\_TiOx\_hum\_tissue\_Urea\_RNAB\_H Scan : 44239

Andromeda score : 144.26

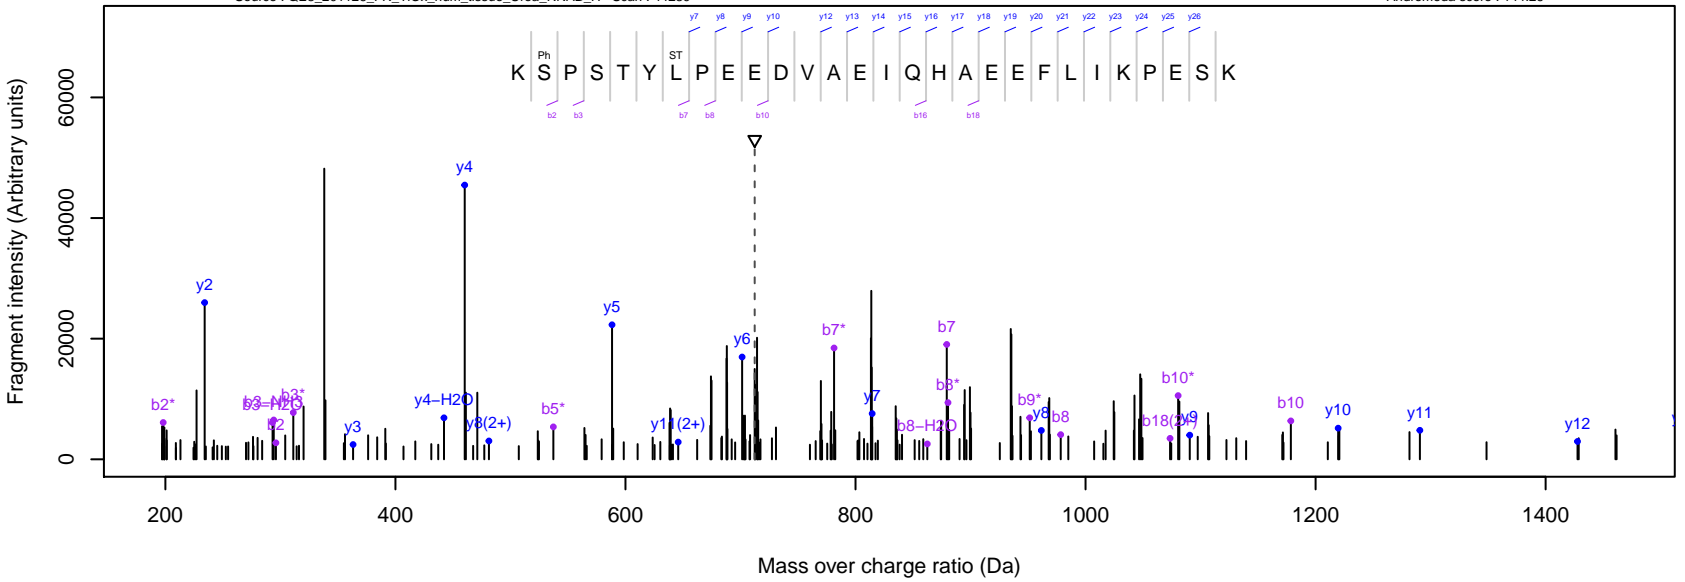

S(Phospho (STY))REDLSAQPVQTKFPAYER-3+

Source : QE3\_201126\_FR\_TiOx\_hum\_tissue\_Urea\_RNAB\_N Scan : 22638

Andromeda score : 144.26

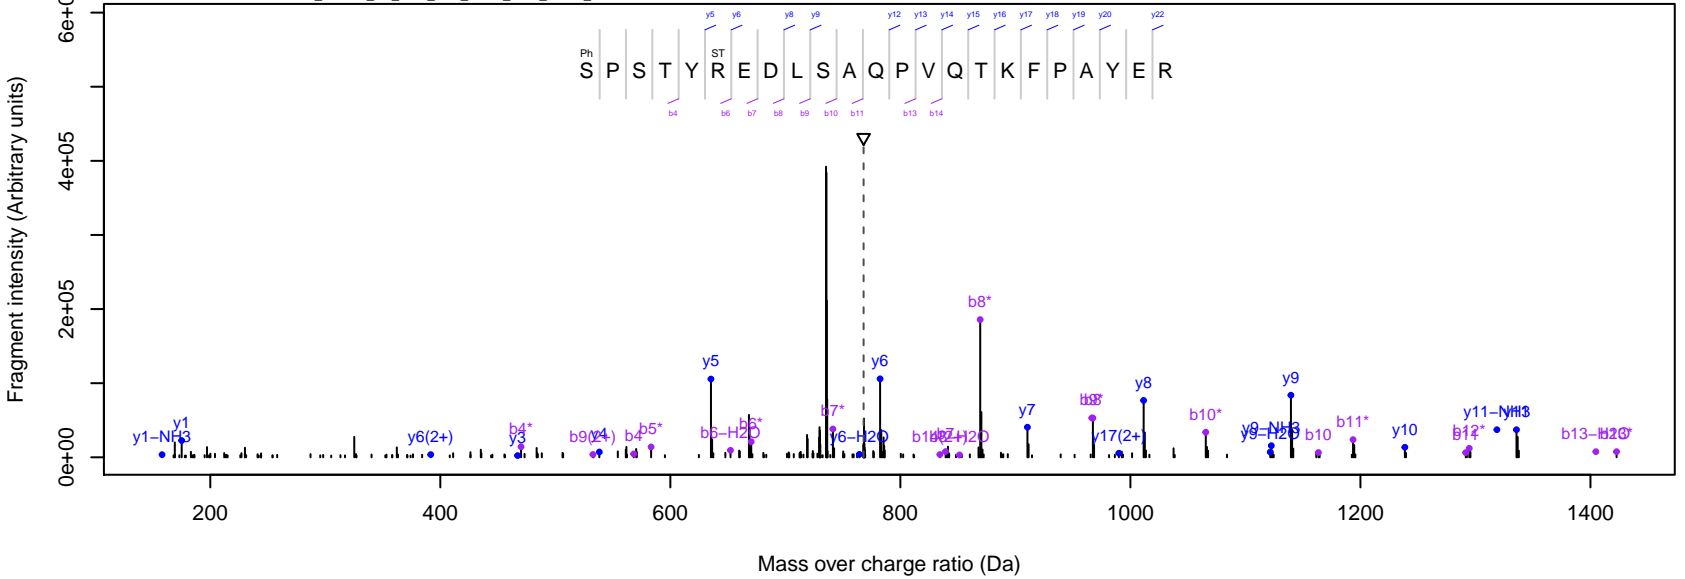

SSS(Phospho (STY))VNPVLEETHEGEAPGCCEEQKPTSEILSTSGK-3+

Source : QE3\_201126\_FR\_TiOx\_hum\_tissue\_Urea\_RNAB\_H Scan : 27806

Andromeda score : 144.23

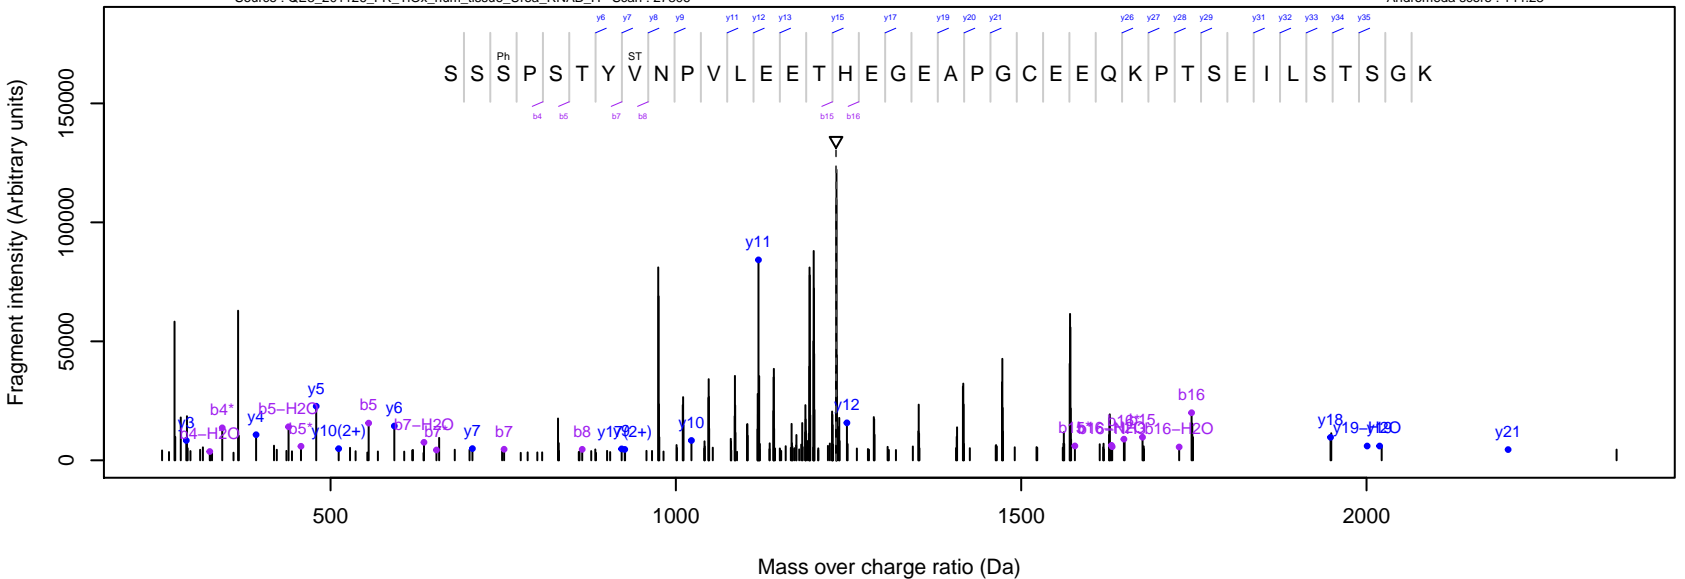

KLIGTAVPQRT(Phospho (STY))SPTGPK-3+

Source : QE3\_201126\_FR\_TiOx\_hum\_tissue\_Urea\_RNAB\_H Scan : 11926

Andromeda score : 144.22

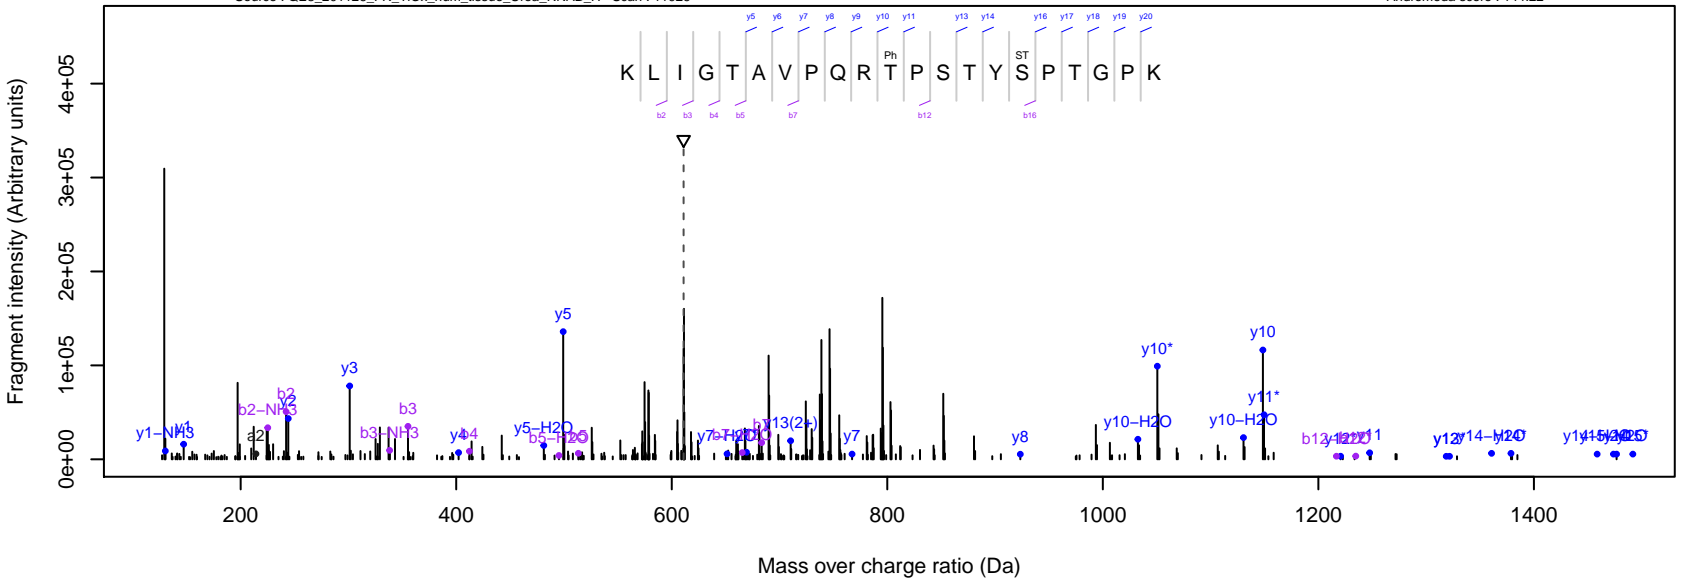

SPVVGK(Phospho (STY))PPSTGYGSSQKEESAASGGAAYTK-3+

Source : QE3\_201126\_FR\_TiOx\_hum\_tissue\_Urea\_RNAB\_N Scan : 13587

Andromeda score : 144.18

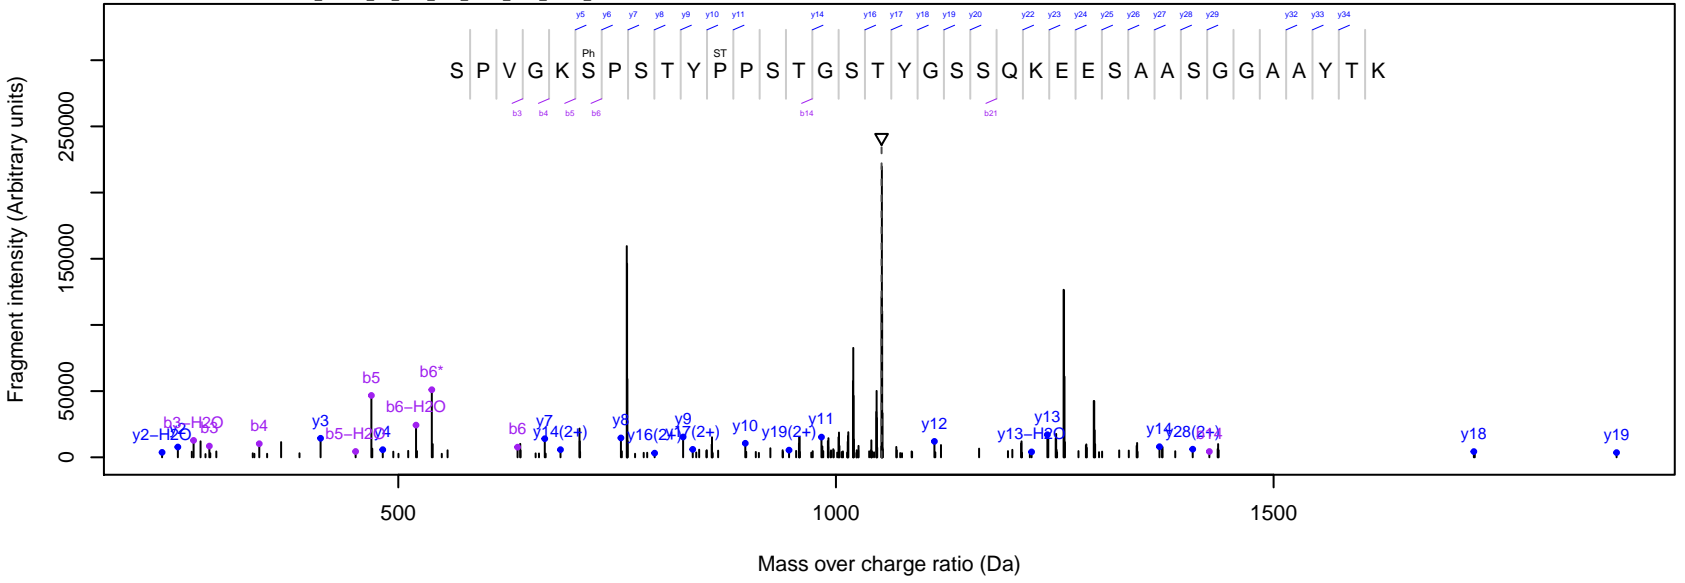

SKS(Phospho (STY))PPKVPIQDDSLPAGPPQIR-3+

Source : QE3\_201126\_FR\_TiOx\_hum\_tissue\_Urea\_RNAB\_H Scan : 37181

Andromeda score : 144.12

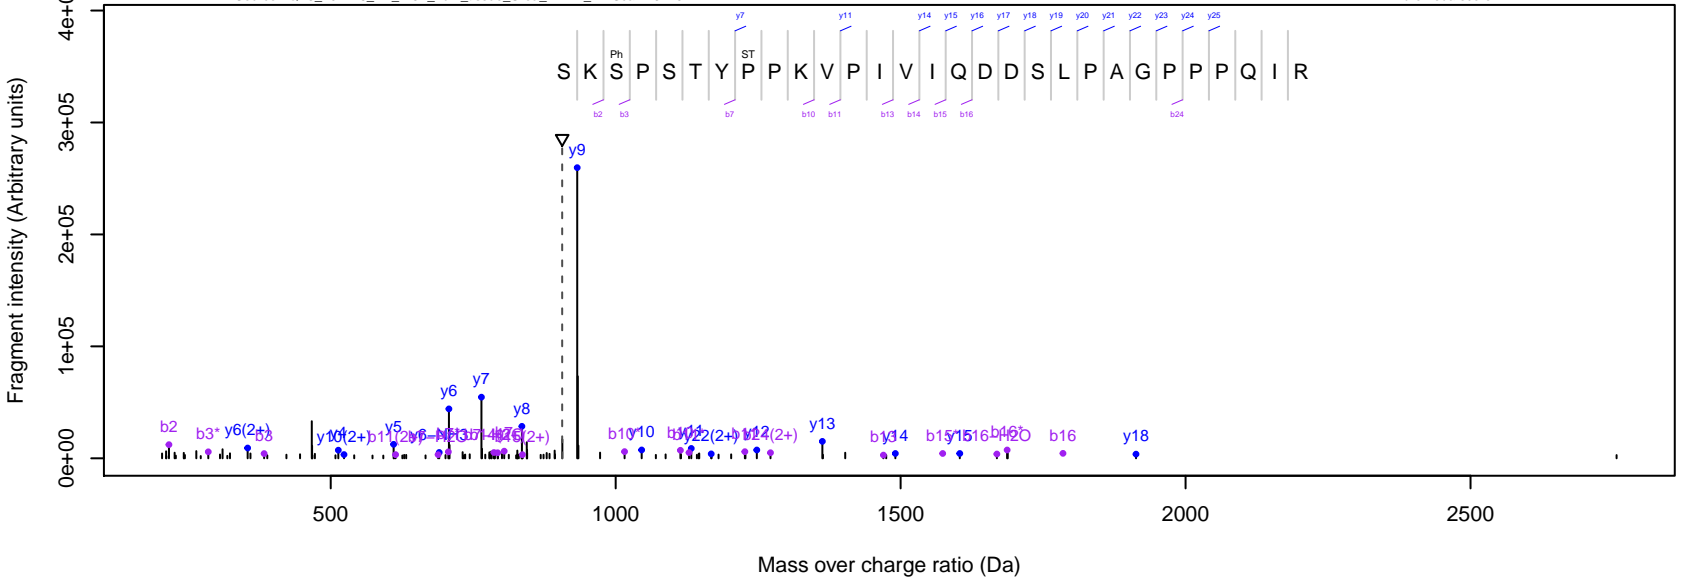

HVDLS(Phospho (STY))QRSPK-2+

Source : QE3\_201126\_FR\_TiOx\_hum\_tissue\_Urea\_RNAB\_H Scan : 4174

Andromeda score : 144.1

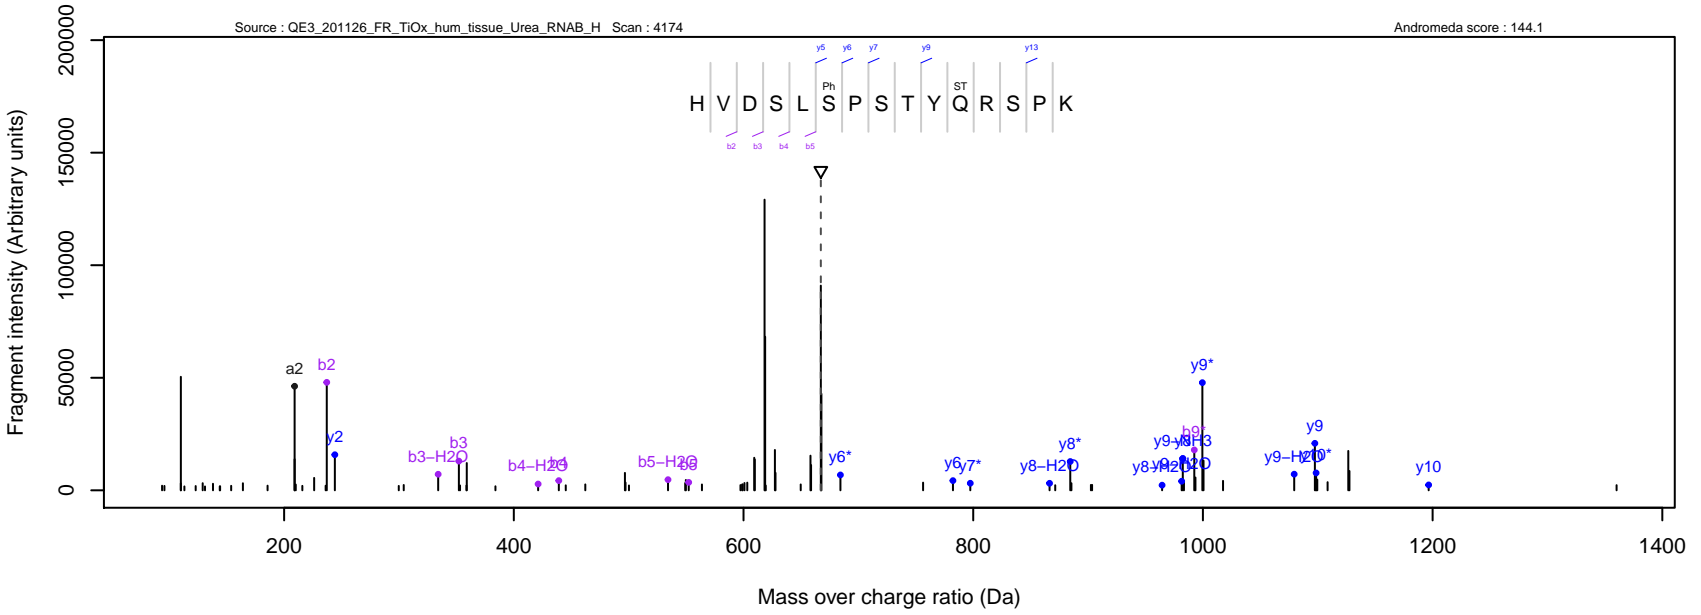

GPS(Phospho (STY))PSPVGPSPASVAQSR-2+

Source : QE3\_201126\_FR\_TiOx\_hum\_tissue\_Urea\_RNAB\_H Scan : 19339

Andromeda score : 143.97

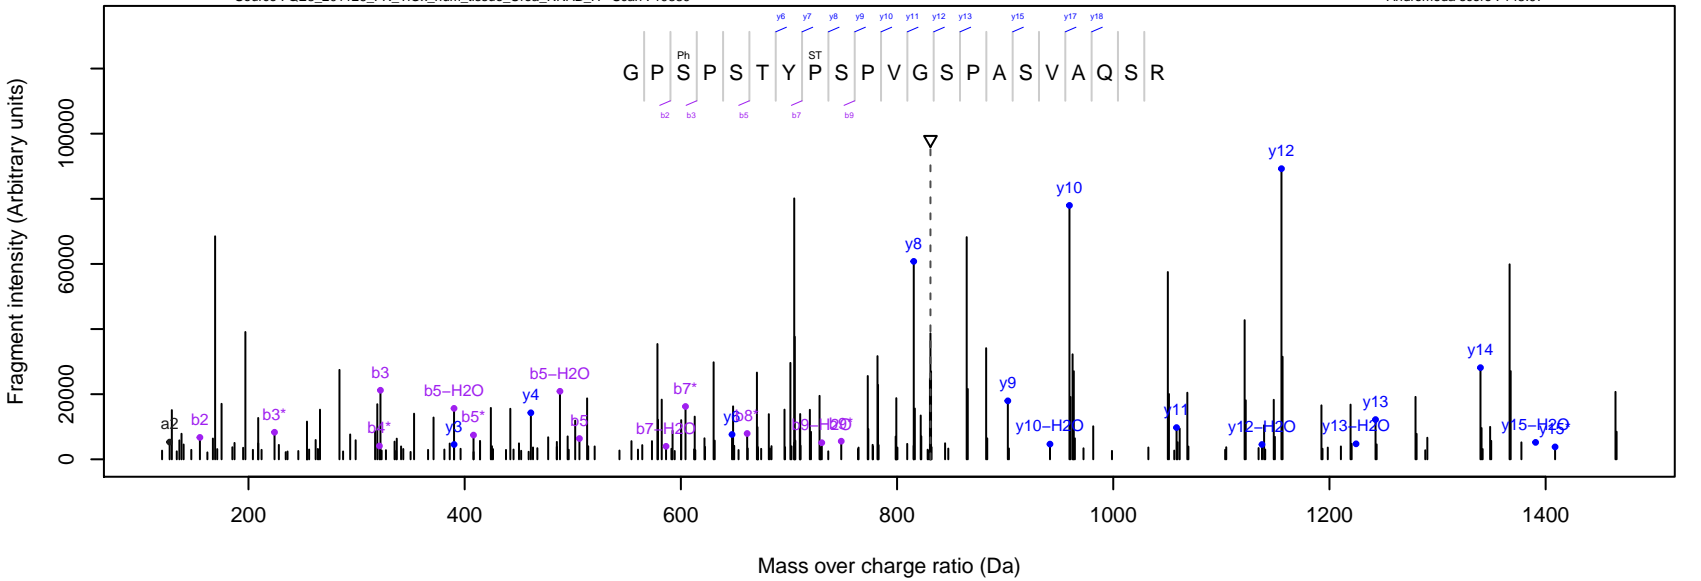

M(Oxidation (M))KSSS(Phospho (STY))SVTTSETQPCTPSSSDYSDLQR-3+

Source : QE3\_201126\_FR\_TiOx\_hum\_tissue\_Urea\_RNAB\_N Scan : 19664

Andromeda score : 143.96

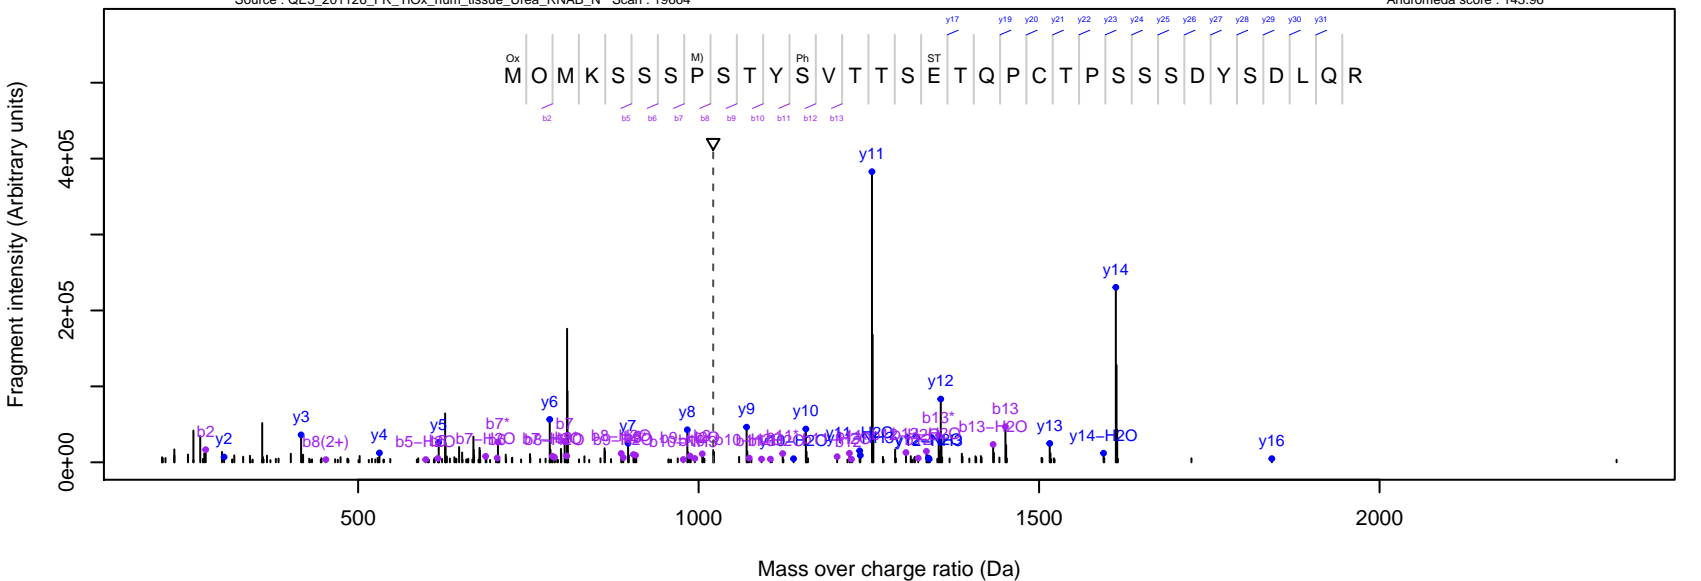

LAFPS(Phospho (STY))PFGHLEGFHSHR-3+

Source : QE3\_201126\_FR\_TiOx\_hum\_tissue\_Urea\_RNAB\_B Scan : 45814

Andromeda score : 143.95

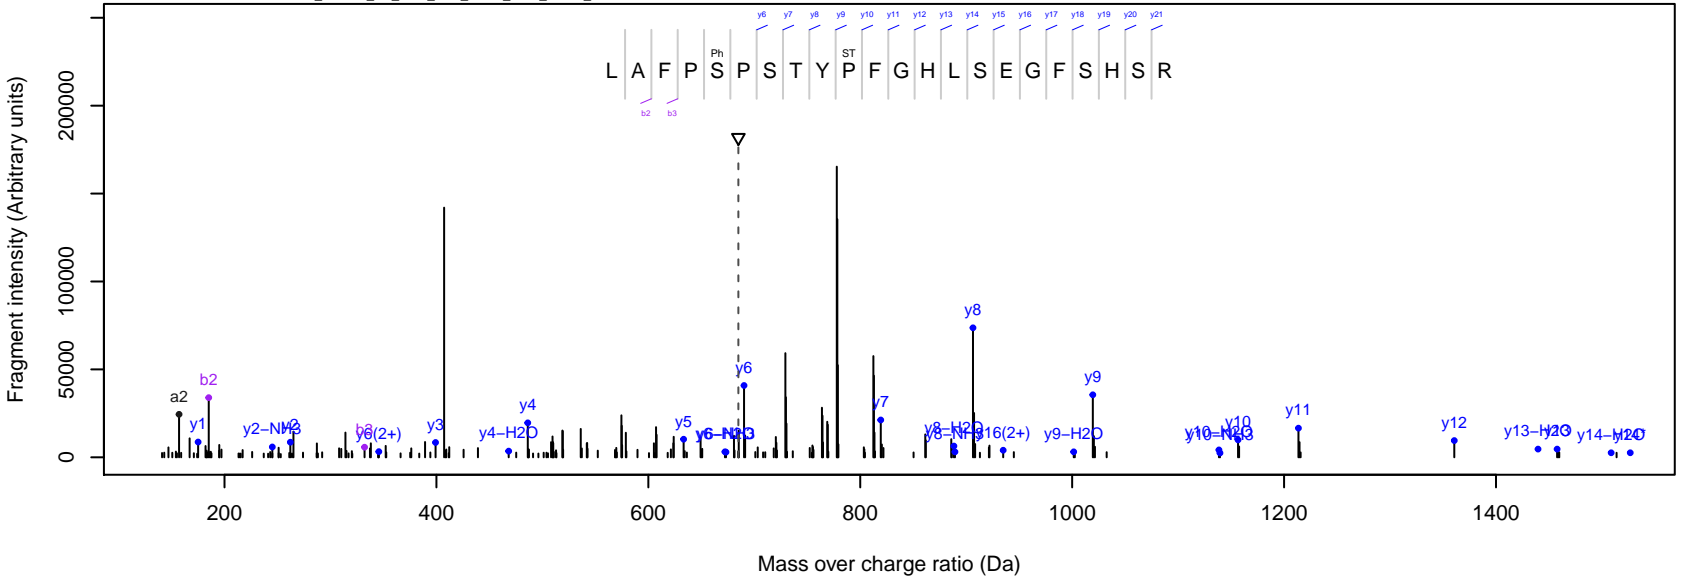

LKEAS(Phospho (STY))RSSPVEFECINEK-3+

Source : QE3\_201126\_FR\_TiOx\_hum\_tissue\_Urea\_RNAB\_N Scan : 17325

Andromeda score : 143.95

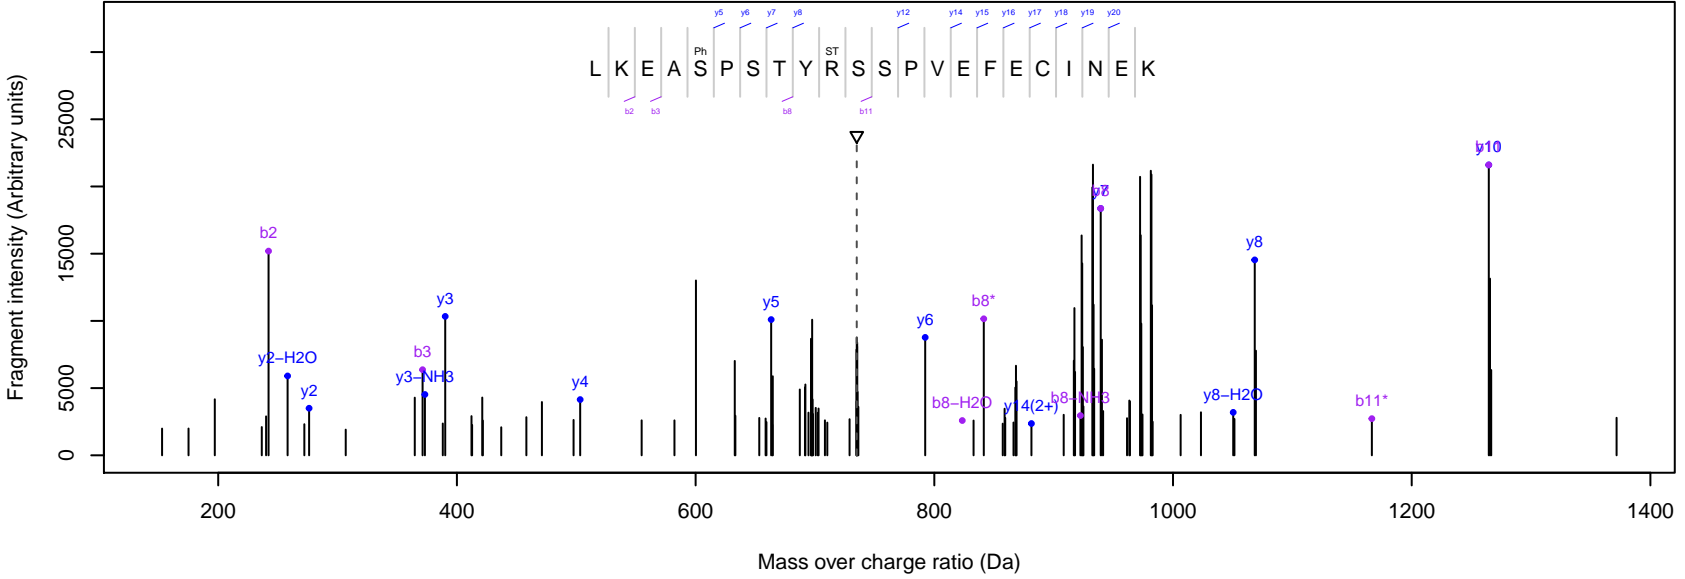

LSMEDSKS(Phospho (STY))PPPKATEEK-3+

Source : QE3\_201126\_FR\_TiOx\_hum\_tissue\_Urea\_RNAB\_H Scan : 8065

Andromeda score : 143.95

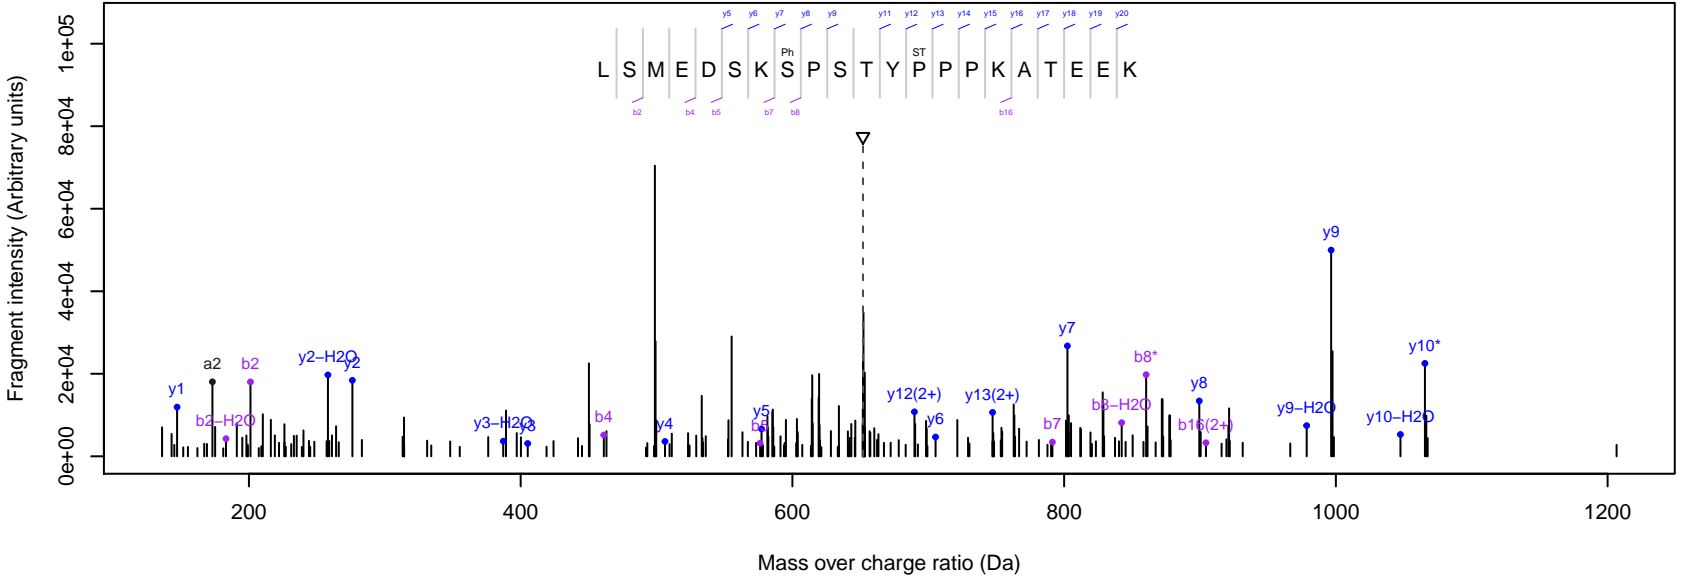

SPTEPMPRGS(Phospho (STY))LTGVQTCR-3+

Source : QE3\_201126\_FR\_TiOx\_hum\_tissue\_Urea\_RNAB\_H Scan : 20785

Andromeda score : 143.95

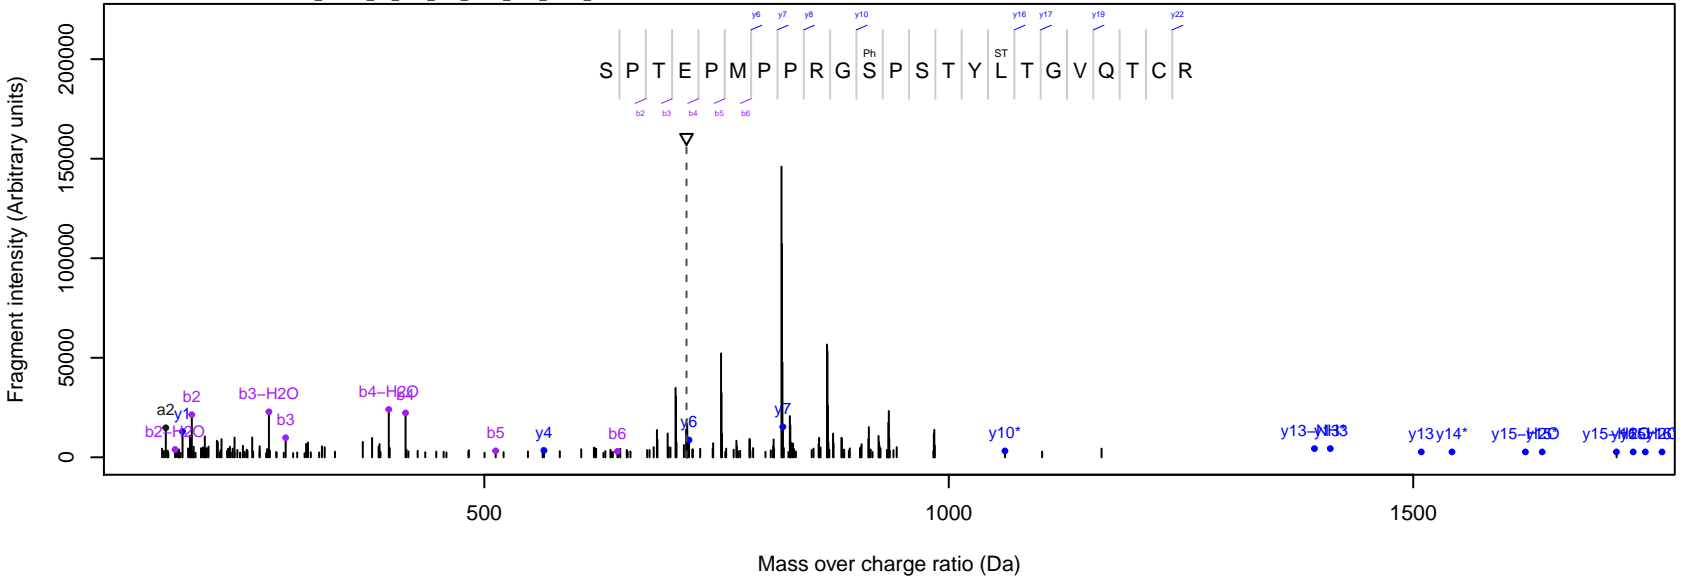

FKAEAPLPS(Phospho (STY))PK-2+

Source : QE3\_201126\_FR\_TiOx\_hum\_tissue\_Urea\_RNAB\_B Scan : 18039

Andromeda score : 143.93

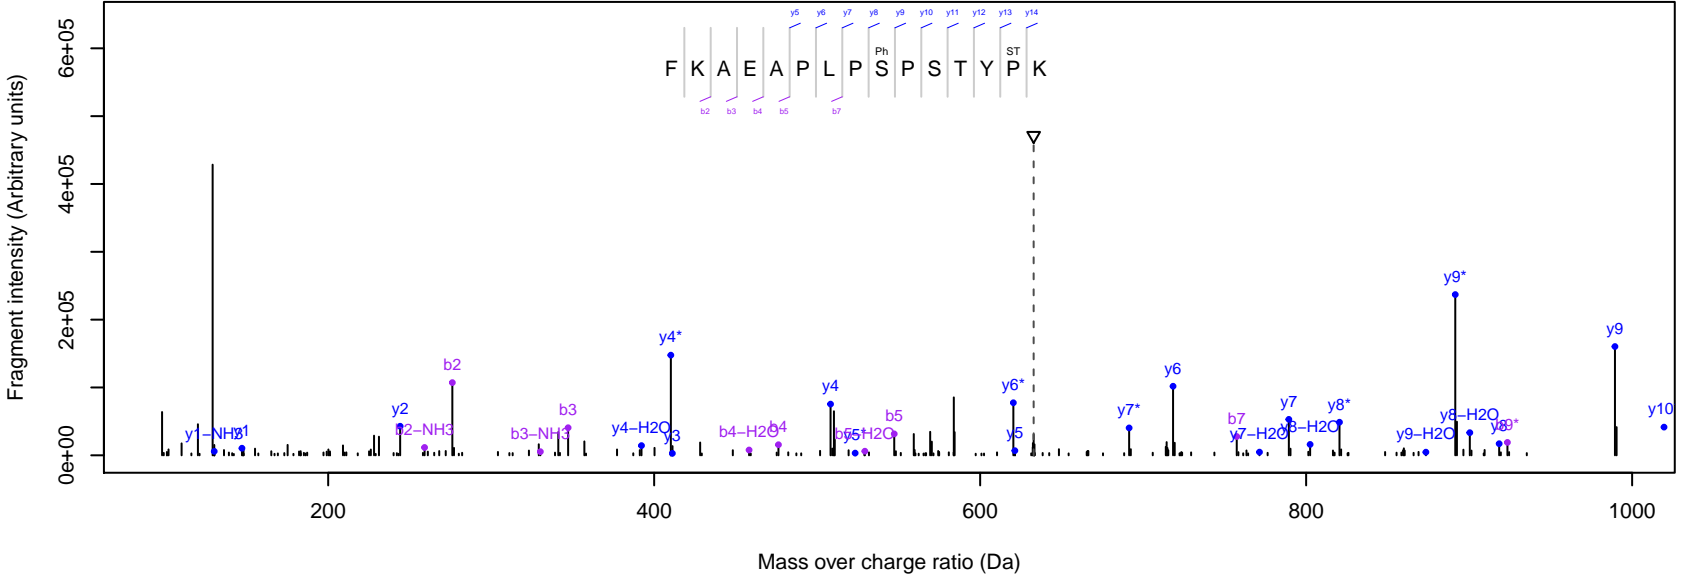

VKPPPS(Phospho (STY))PTTEGPSLQPDLAPEEAAGTQRPK-4+

Source : QE3\_201126\_FR\_TiOx\_hum\_tissue\_Urea\_RNAB\_B Scan : 24437

Andromeda score : 143.92

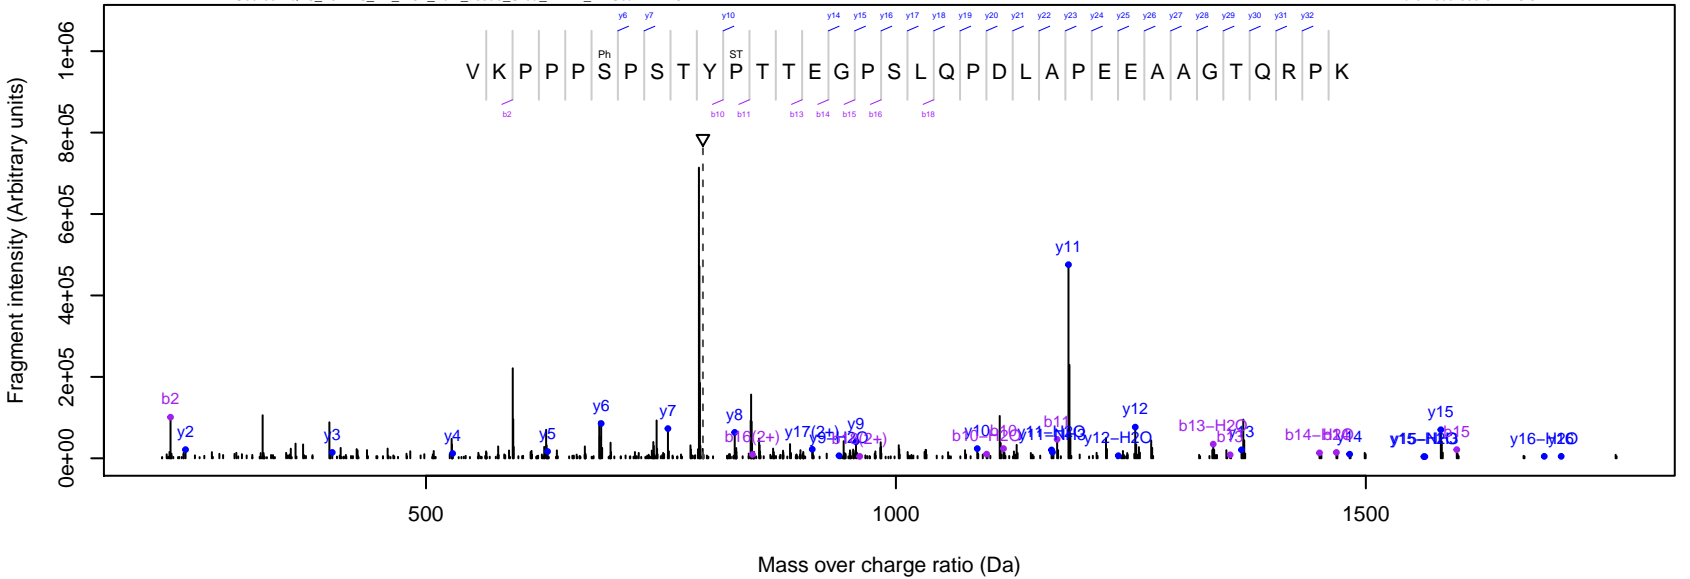





KALS(Phospho (STY))RQEM(Oxidation (M))QEVQSSR-3+

Source : QE3\_201126\_FR\_TIOx\_hum\_tissue\_Urea\_RNAB\_H Scan : 5893

Andromeda score : 143.69

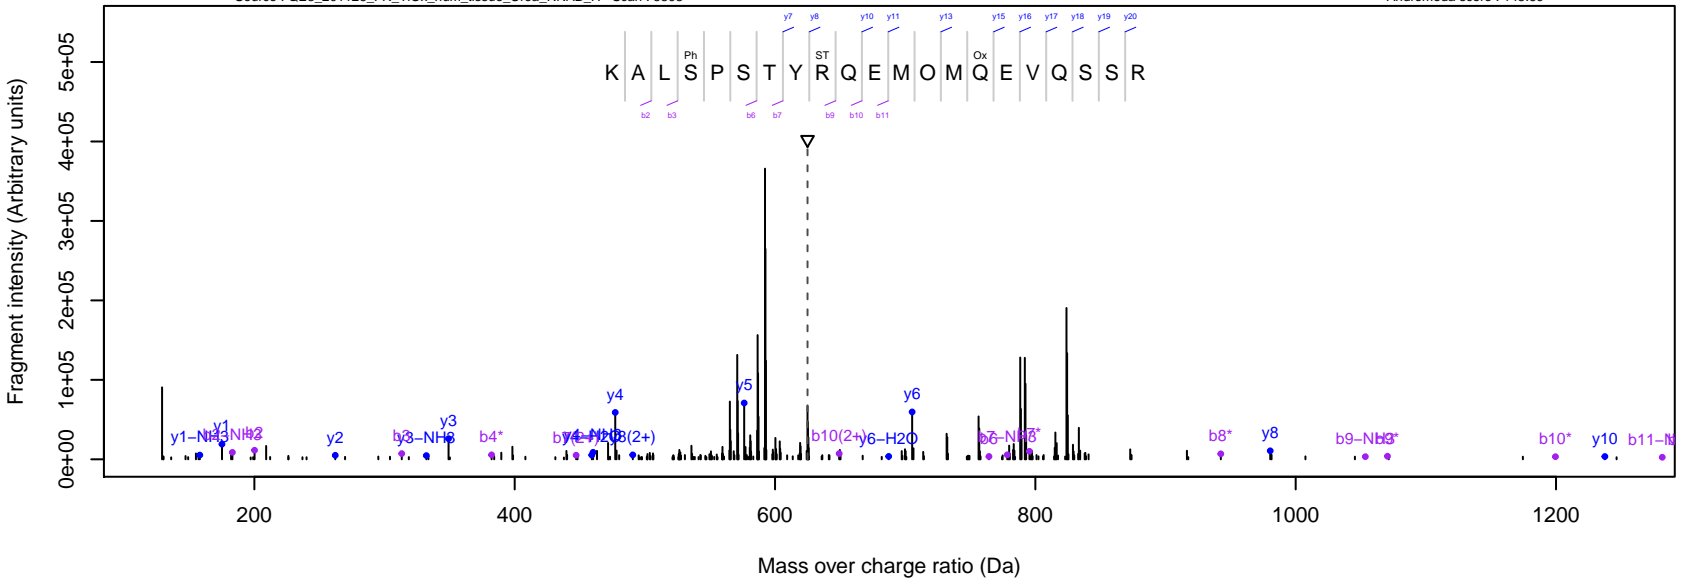

EAAAGIQWS(Phospho (STY))EEET(Phospho (STY))EDEEEKEVTPESGPPK-3+

Source : QE3\_201126\_FR\_TIOx\_hum\_tissue\_Urea\_RNAB\_N Scan : 36846

Andromeda score : 143.62

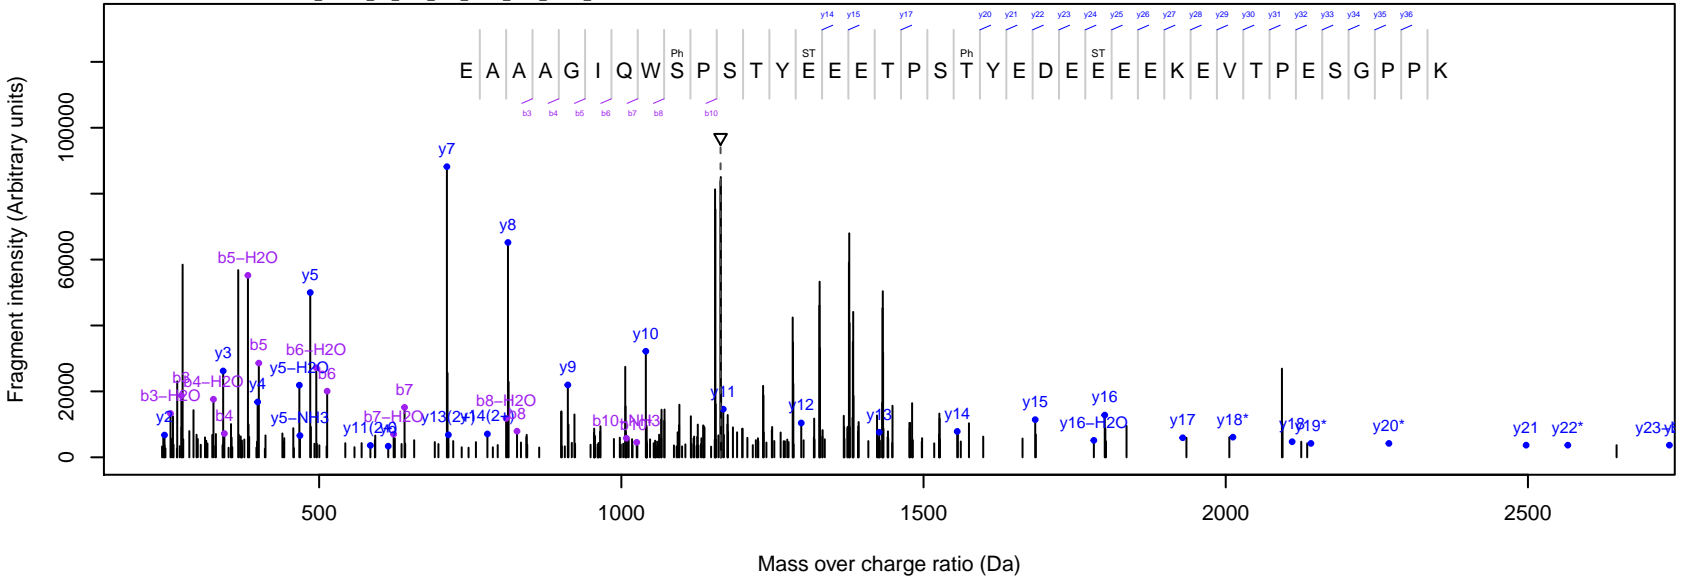

KALS(Phospho (STY))RQEMQEVQSSR-3+

Source : QE3\_201126\_FR\_TIOx\_hum\_tissue\_Urea\_RNAB\_H Scan : 9273

Andromeda score : 143.57

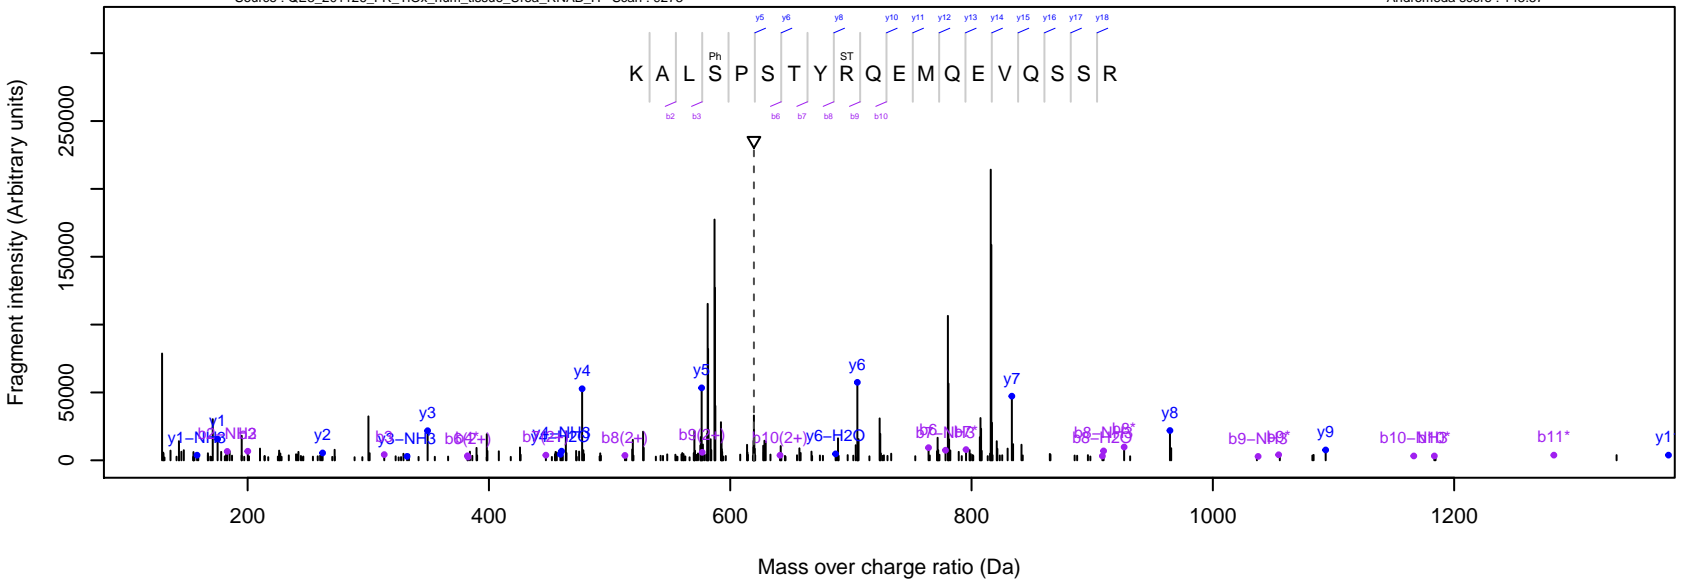

**NGLQSCPKEDS(Phospho (STY))FLQR-3+**

Source : QE3\_201126\_FR\_TiOx\_hum\_tissue\_Urea\_RNAB\_H Scan : 28243

Andromeda score : 143.57

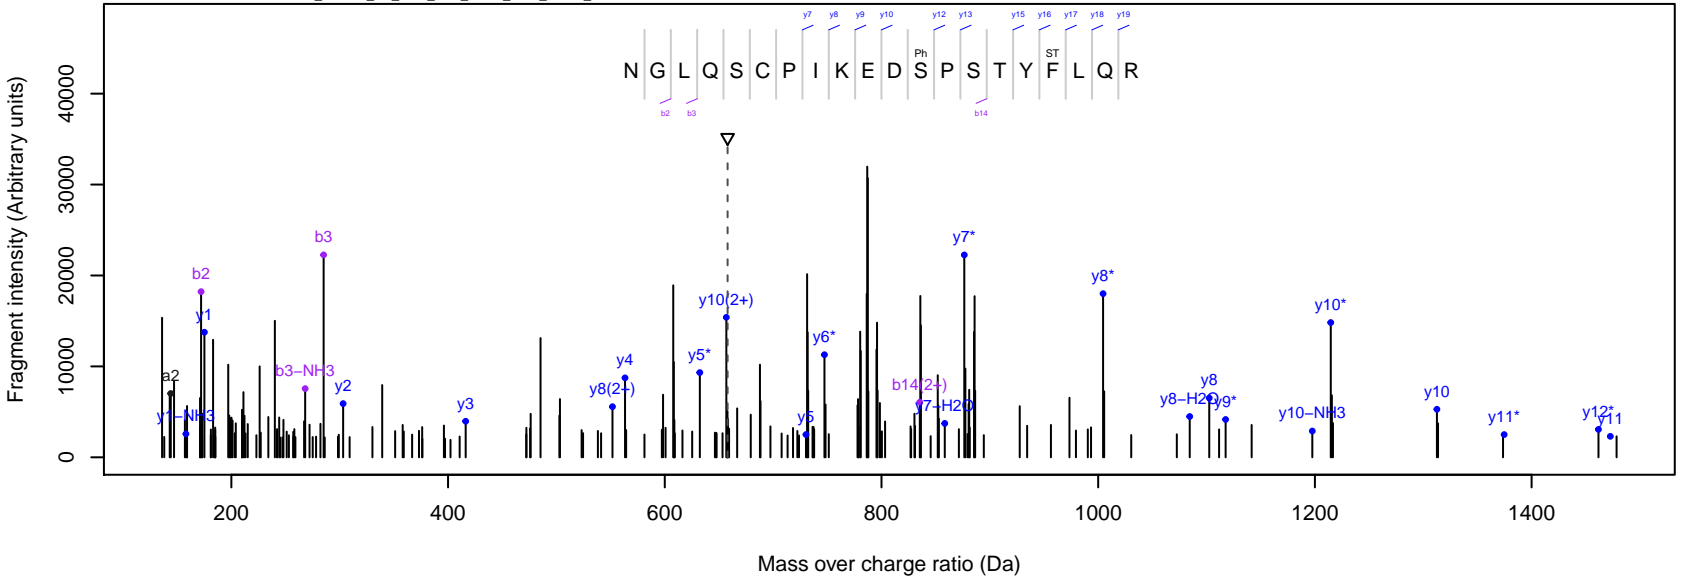

**YFDFEFTAQSITIT(Phospho (STY))PPDRYDSLGLLELDQR-3+**

Source : QE3\_201126\_FR\_TiOx\_hum\_tissue\_Urea\_RNAB\_N Scan : 60363

Andromeda score : 143.48

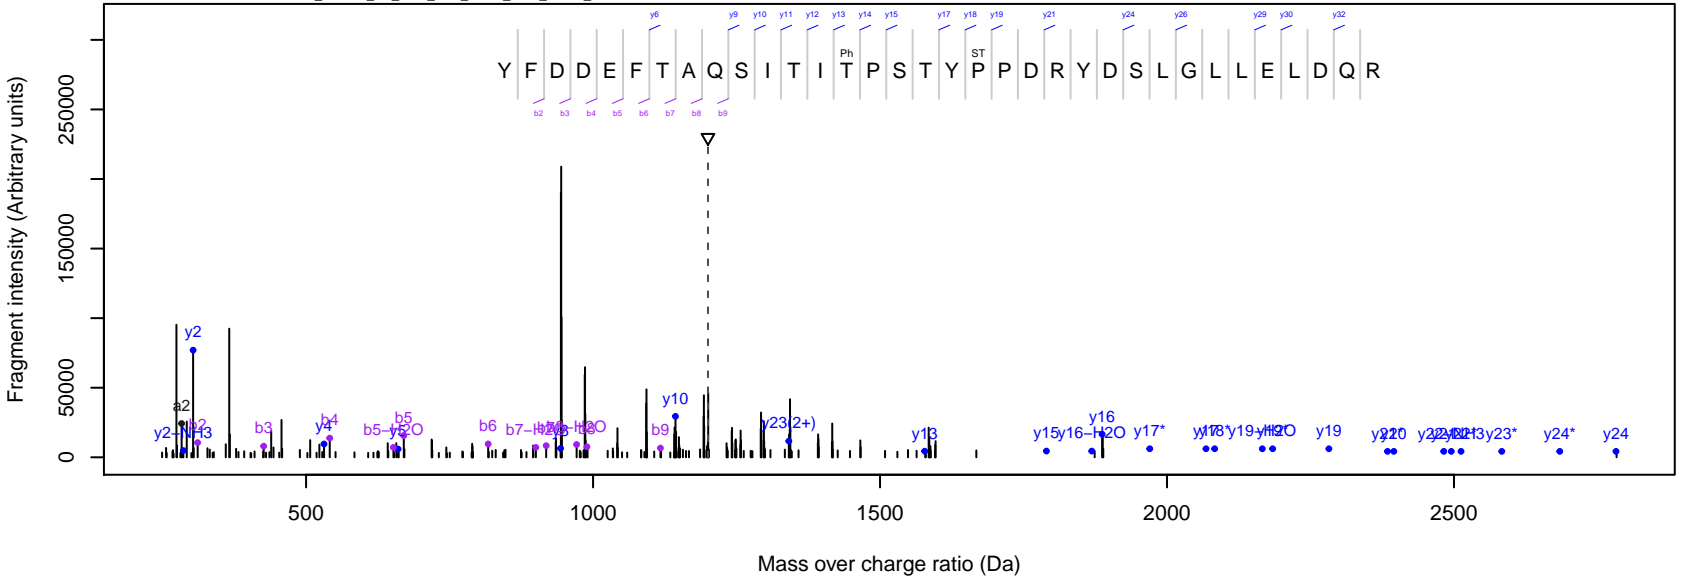

**DNTRPGANS(Phospho (STY))PEM(Oxidation (M))WSEAIK-3+**

Source : QE3\_201126\_FR\_TiOx\_hum\_tissue\_Urea\_RNAB\_H Scan : 26371

Andromeda score : 143.47

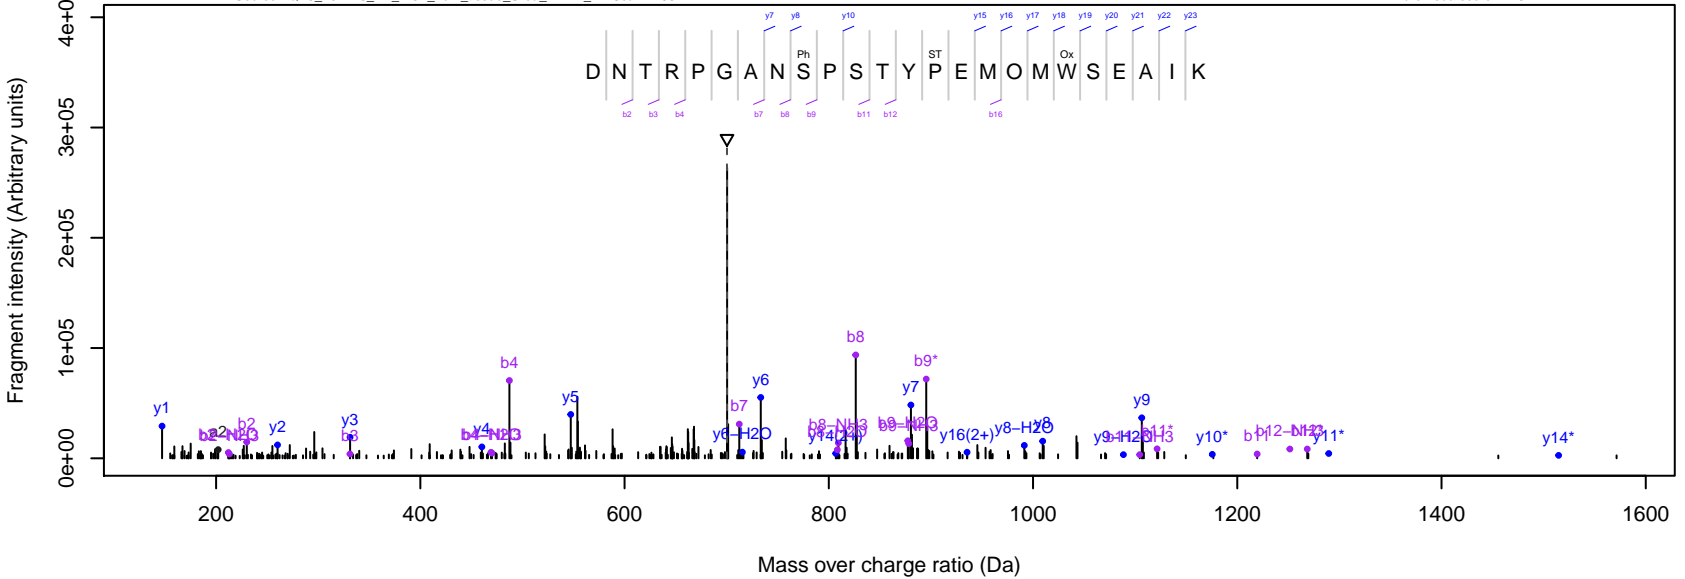

ESDTKNEVNGTSEDIKSPSTYEGDTSQSPSTYN-3+

Source : QE3\_201126\_FR\_TIOx\_hum\_tissue\_Urea\_RNAB\_H Scan : 13144

Andromeda score : 143.47

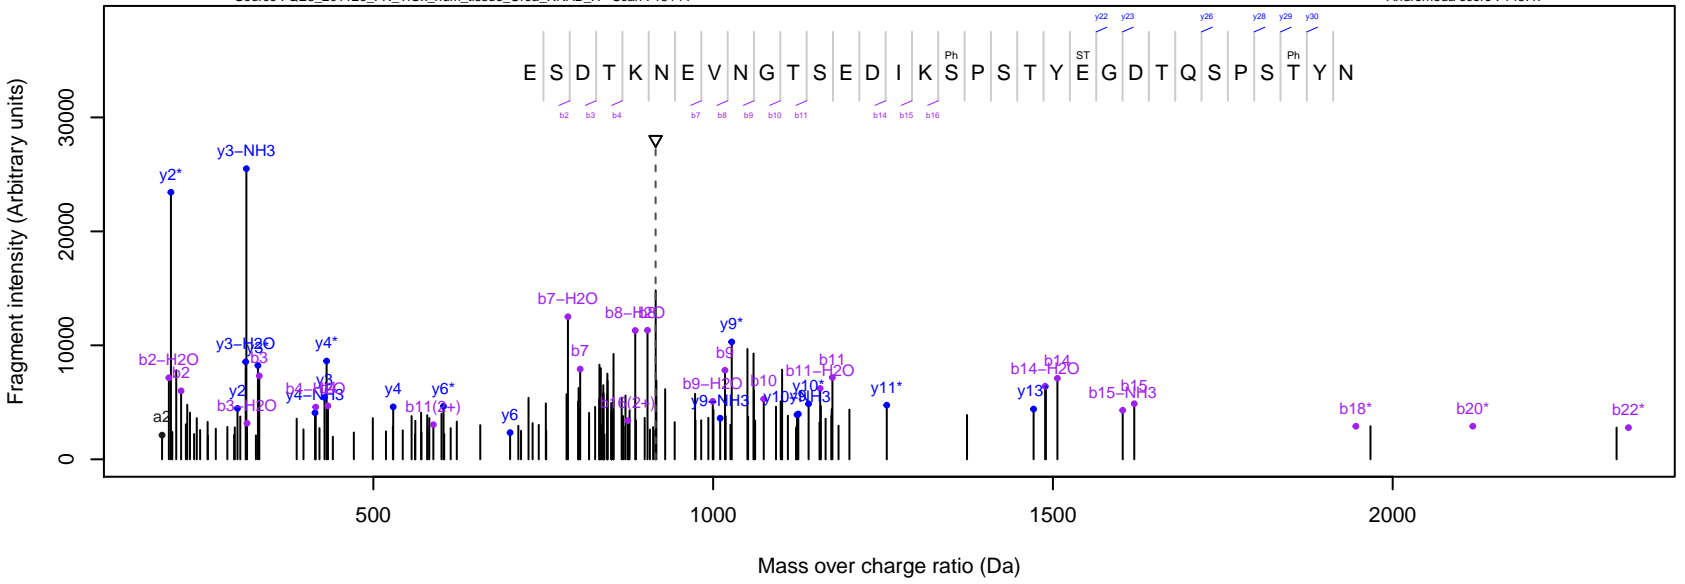

AGDGSS(Phospho (STY))VKEVETVYHR-3+

Source : QE3\_201126\_FR\_TIOx\_hum\_tissue\_Urea\_RNAB\_N Scan : 9053

Andromeda score : 143.46

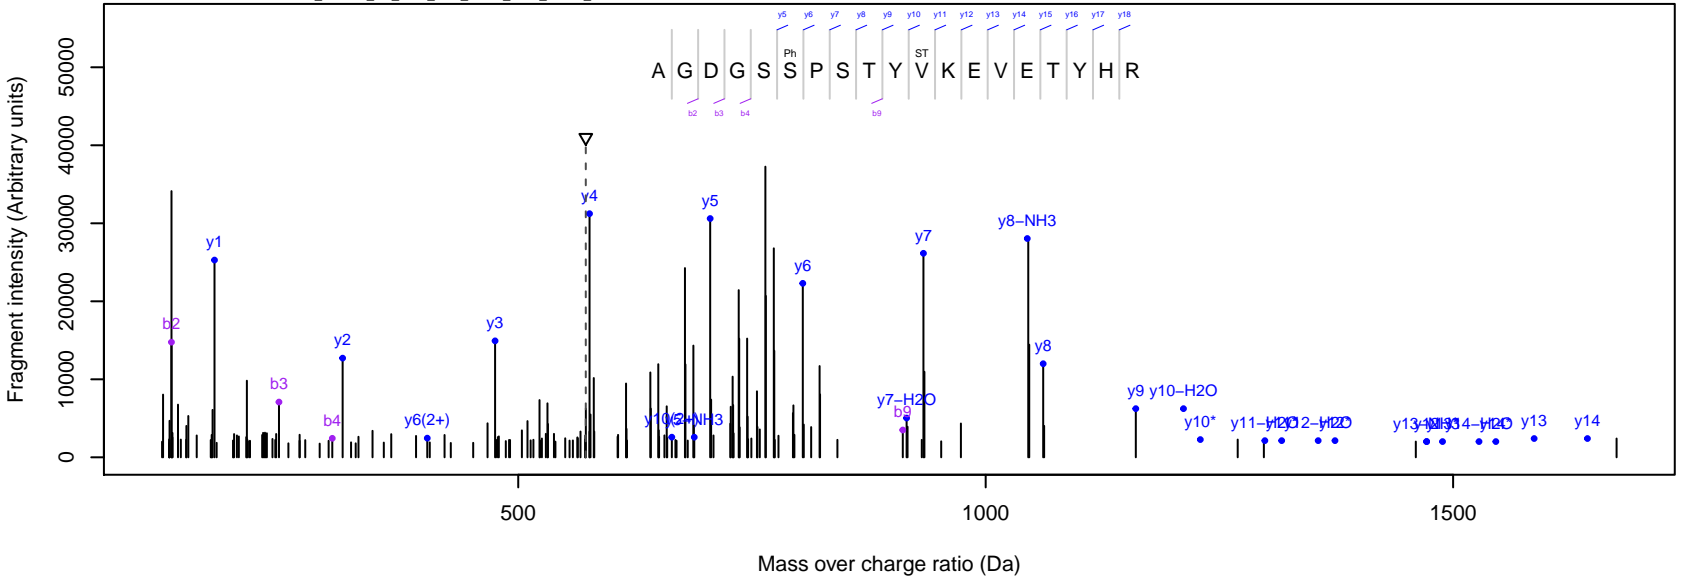

SLS(Phospho (STY))SYGIDKEK-2+

Source : QE3\_201126\_FR\_TIOx\_hum\_tissue\_Urea\_RNAB\_N Scan : 16411

Andromeda score : 143.42

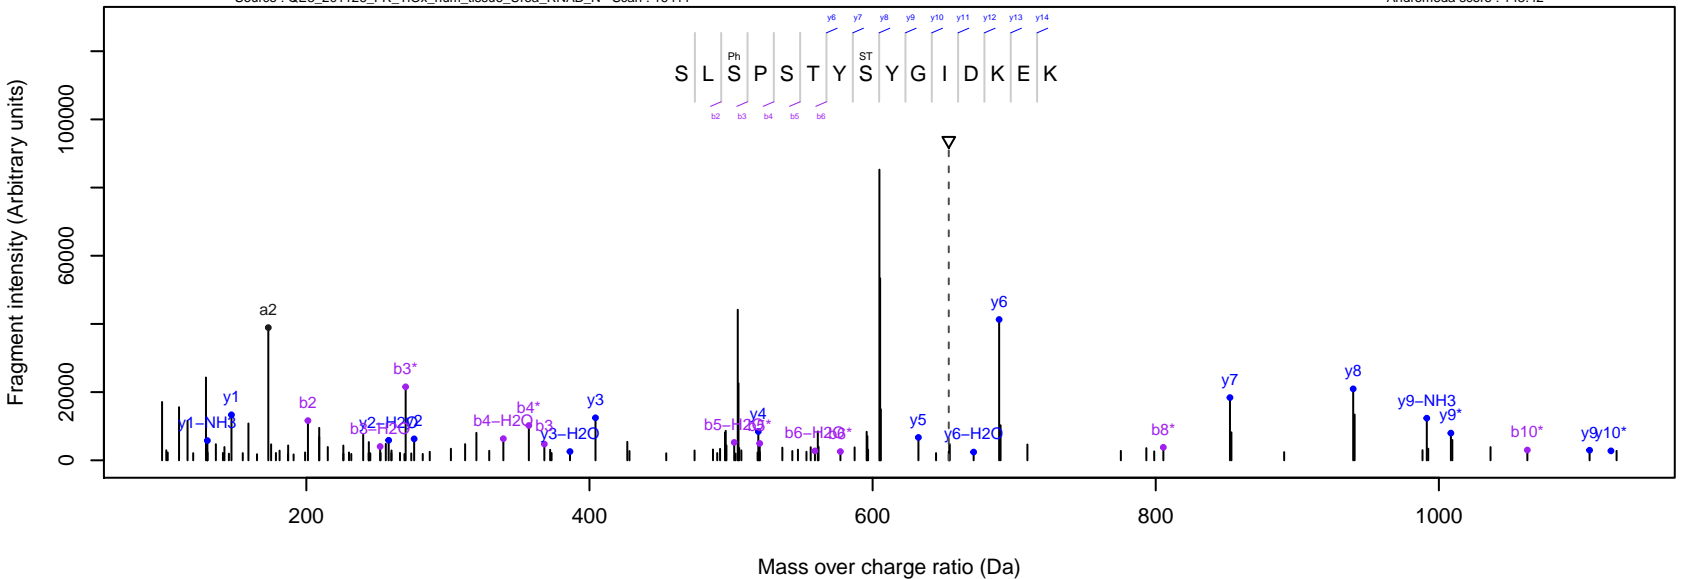

ILS(Phospho (STY))DVTHSAVFGVPASKS(Phospho (STY))TQLLQAAAEASLNK-3+

Source : QE3\_201126\_FR\_TiOx\_hum\_tissue\_Urea\_RNAB\_B Scan : 56934

Andromeda score : 143.39

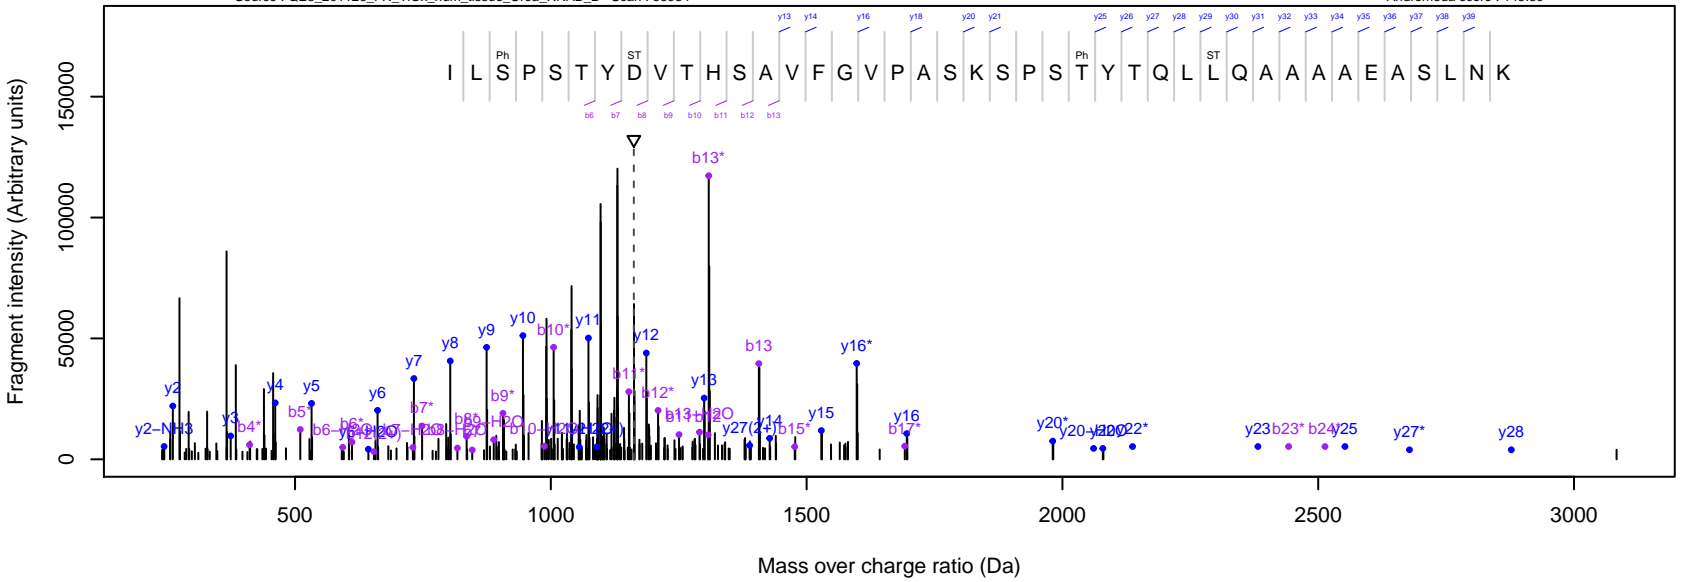

KS(Phospho (STY))PRPAGQLFLPDPDQR-3+

Source : QE3\_201126\_FR\_TiOx\_hum\_tissue\_Urea\_RNAB\_N Scan : 31123

Andromeda score : 143.37

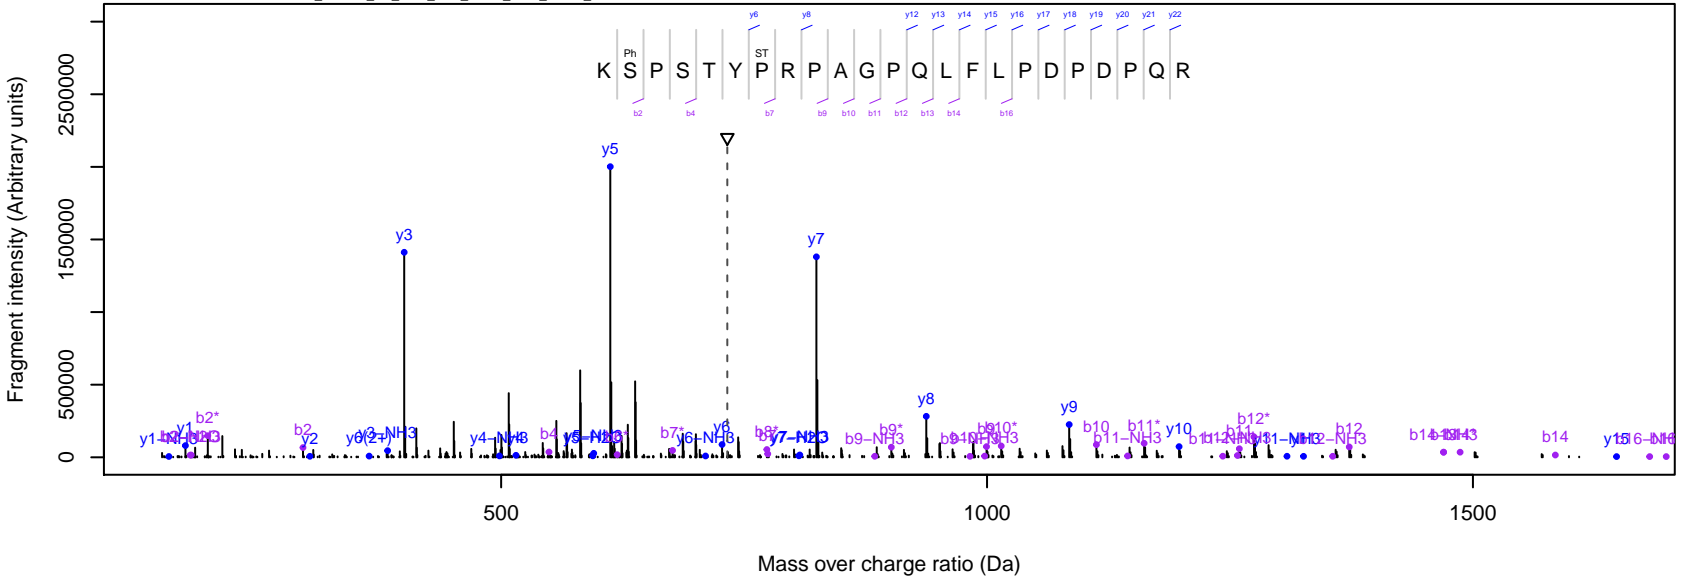

HSS(Phospho (STY))WGDVGVGSSLKAPVLLNLNQGM(Oxidation (M))DNGR-4+

Source : QE3\_201126\_FR\_TiOx\_hum\_tissue\_Urea\_RNAB\_N Scan : 39858

Andromeda score : 143.36

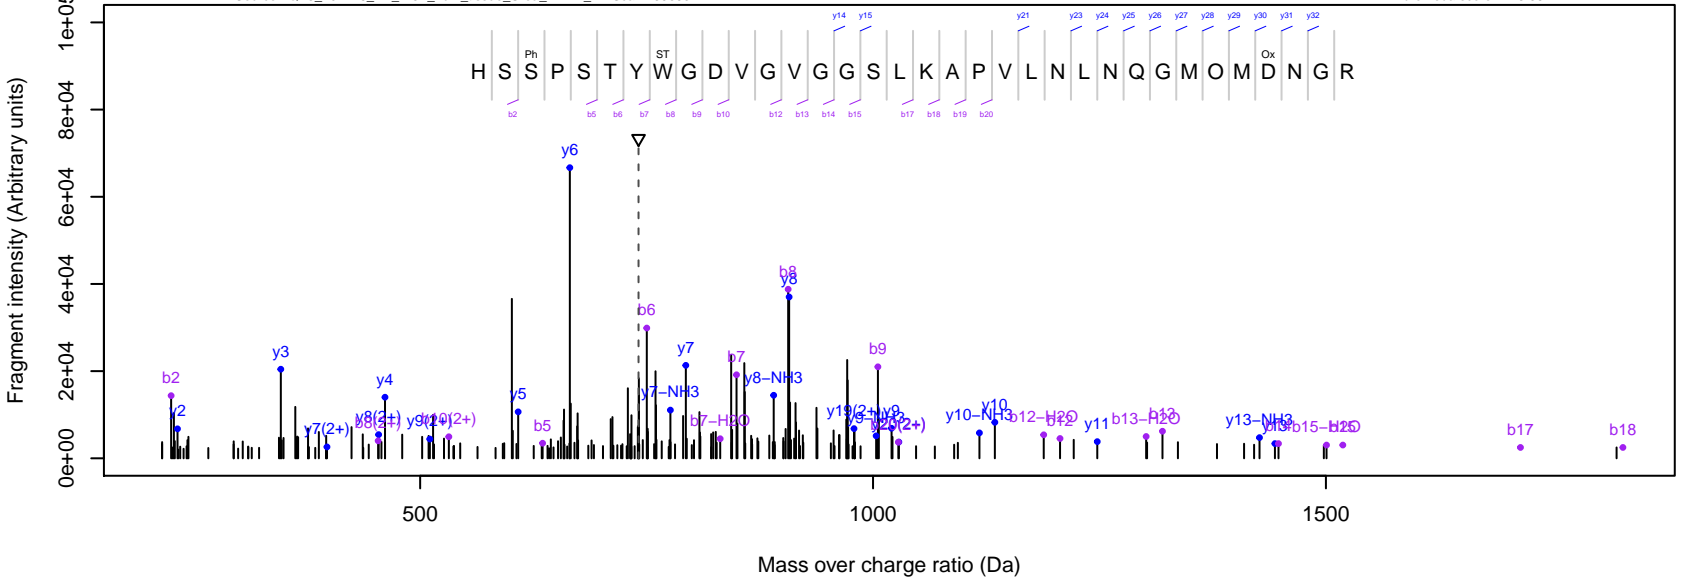

RAET(Phospho (STY))FGFDSSHQ(M)NASK-3+

Source : QE3\_201126\_FR\_TiOx\_hum\_tissue\_Urea\_RNAB\_N Scan : 11972

Andromeda score : 143.36

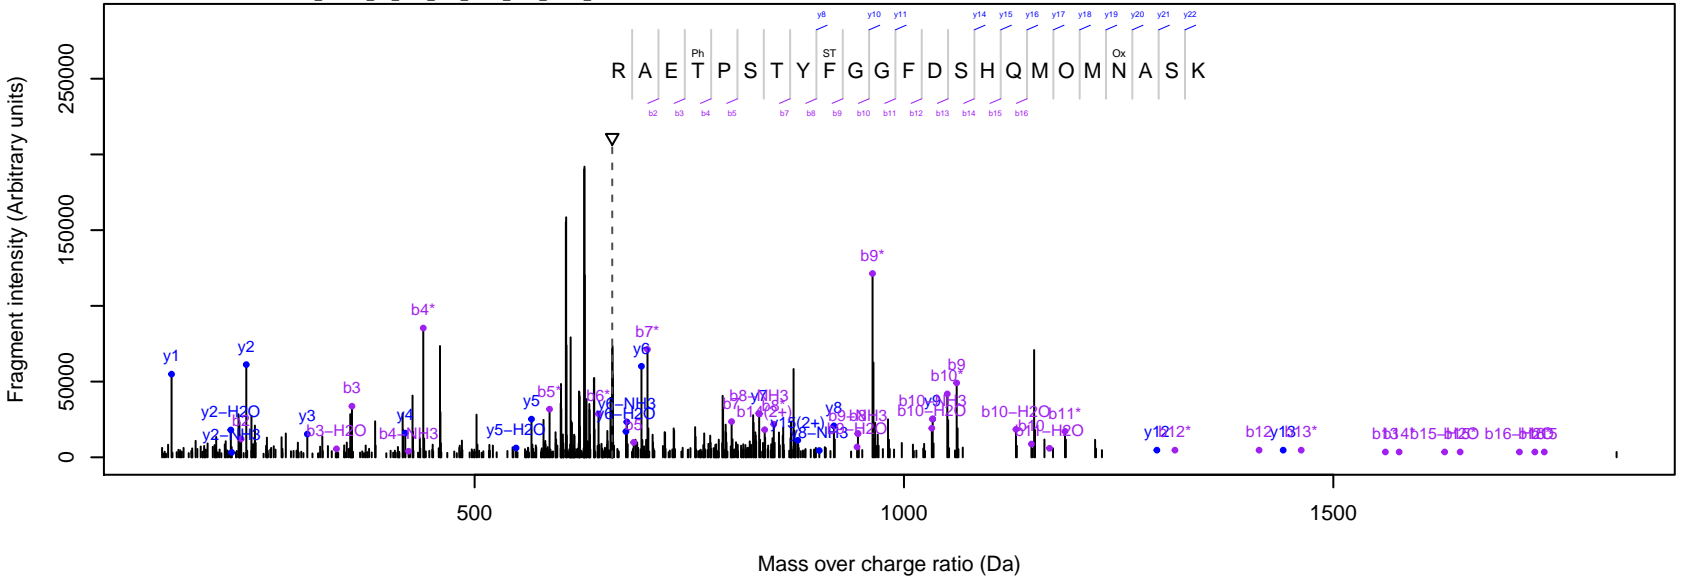

DGLNQTTPVS(Phospho (STY))PPSTTKPSR-3+

Source : QE3\_201126\_FR\_TiOx\_hum\_tissue\_Urea\_RNAB\_H Scan : 25982

Andromeda score : 143.32

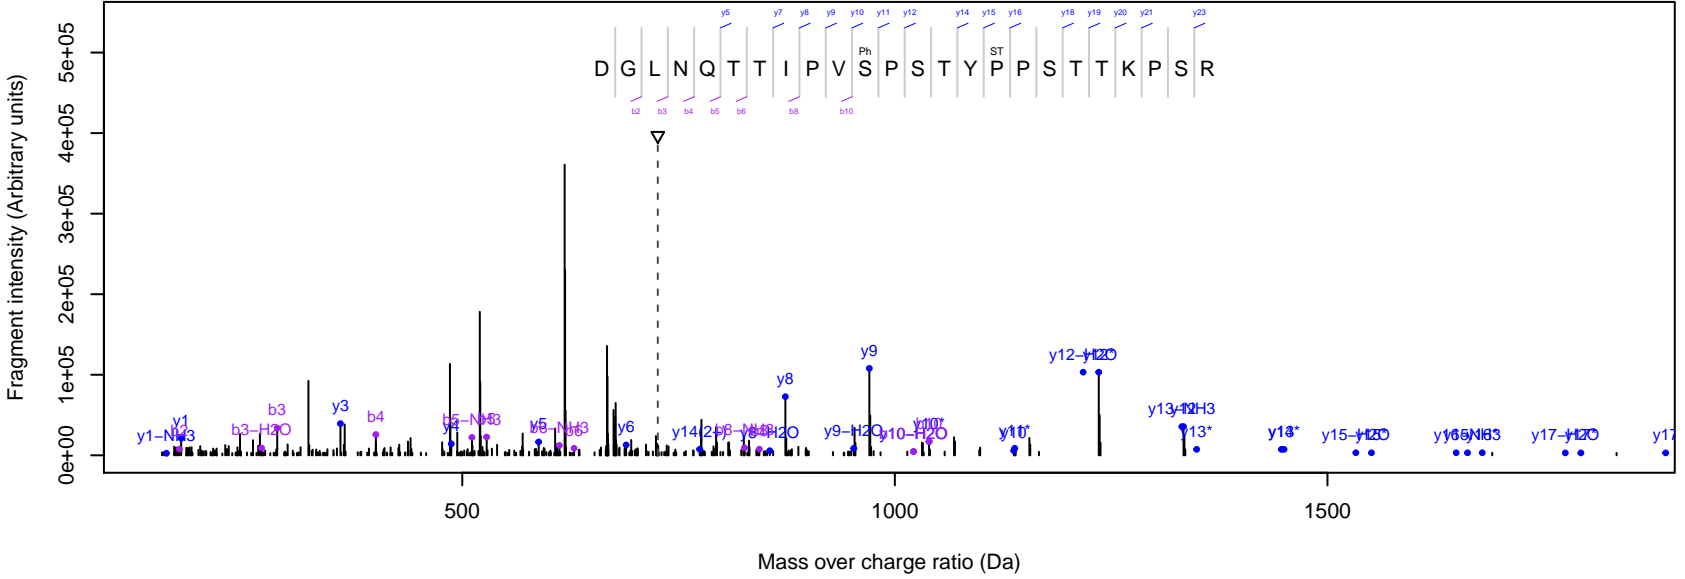

DSGS(Phospho (STY))DEDFLMEDDDSPSTYDYGSSK-2+

Source : QE3\_201126\_FR\_TiOx\_hum\_tissue\_Urea\_RNAB\_H Scan : 52240

Andromeda score : 143.31

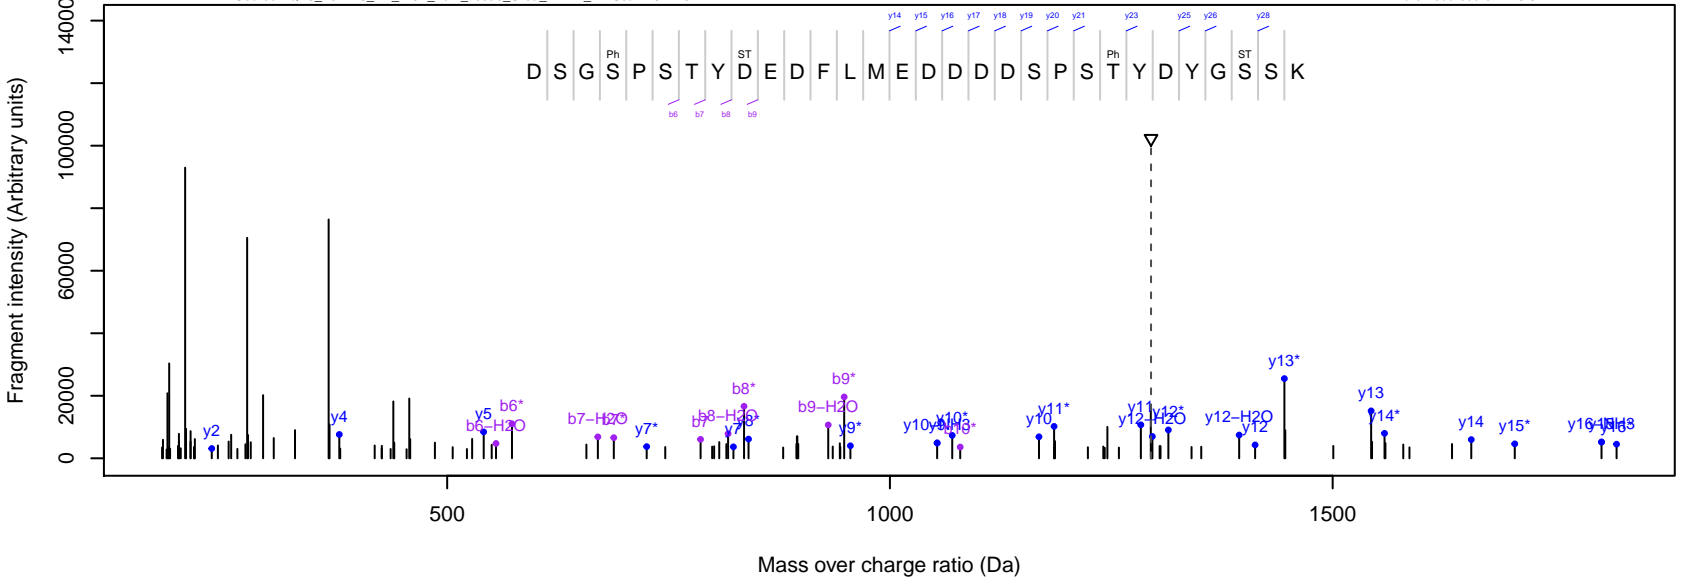

KLPVEGSEEDK(Phospho (STY))QTGVNR-3+

Source : QE3\_201126\_FR\_TiOx\_hum\_tissue\_Urea\_RNAB\_B Scan : 8969

Andromeda score : 143.31

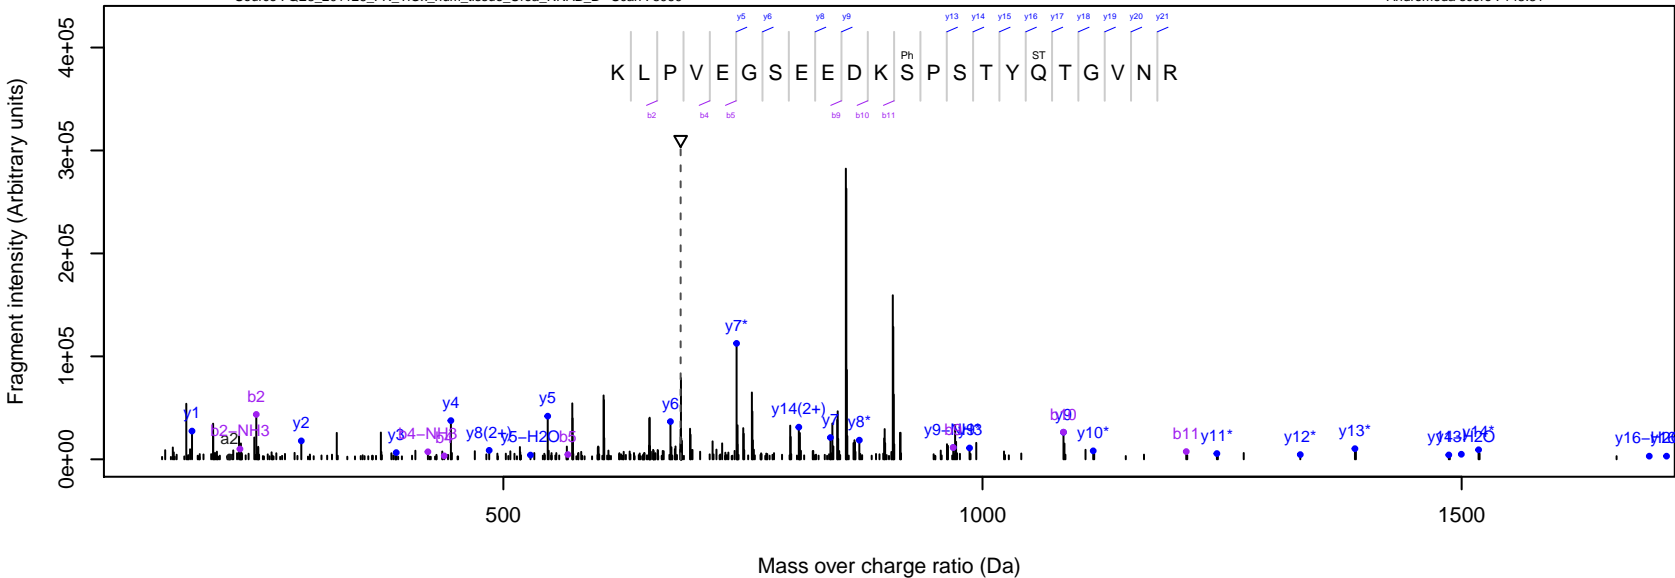

RKS(Phospho (STY))LVGTPYWM(Oxidation (M))APELISR-3+

Source : QE3\_201126\_FR\_TiOx\_hum\_tissue\_Urea\_RNAB\_N Scan : 37936

Andromeda score : 143.29

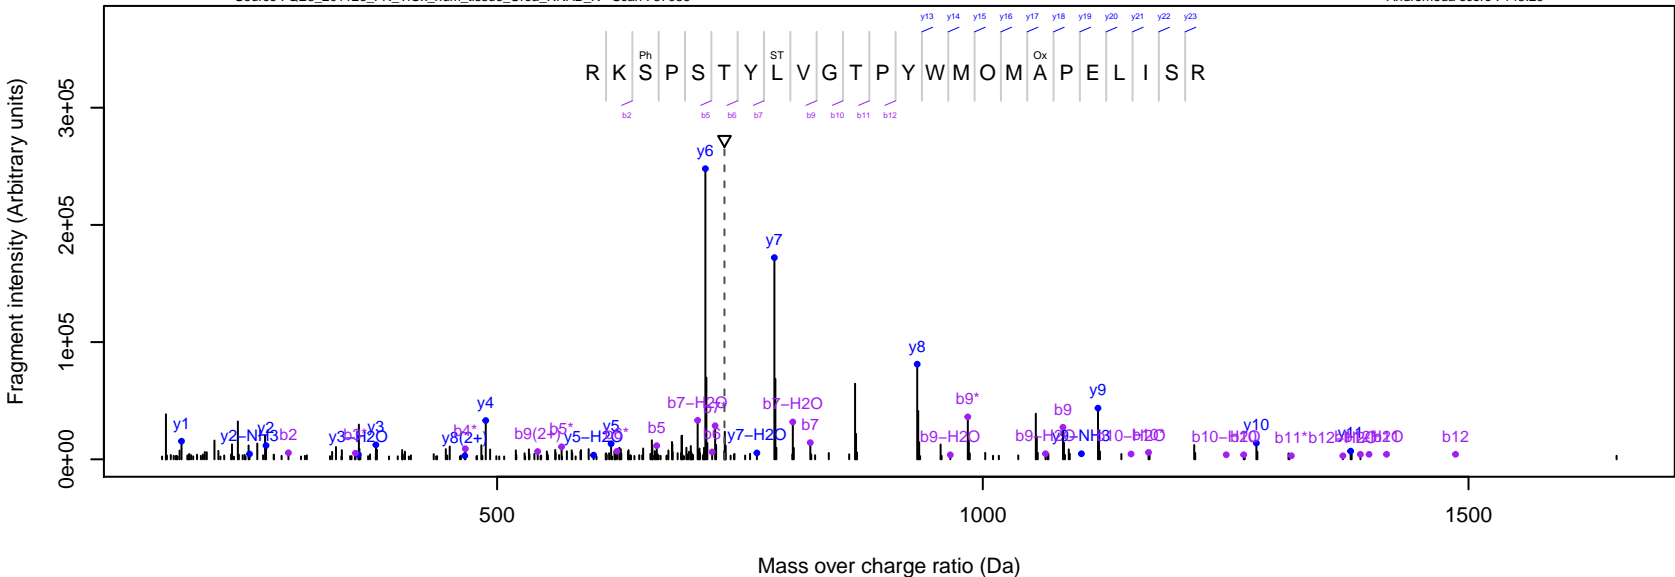

TWT(Phospho (STY))FCGTPPEYVAPEIILNK-2+

Source : QE3\_201126\_FR\_TiOx\_hum\_tissue\_Urea\_RNAB\_B Scan : 59695

Andromeda score : 143.28

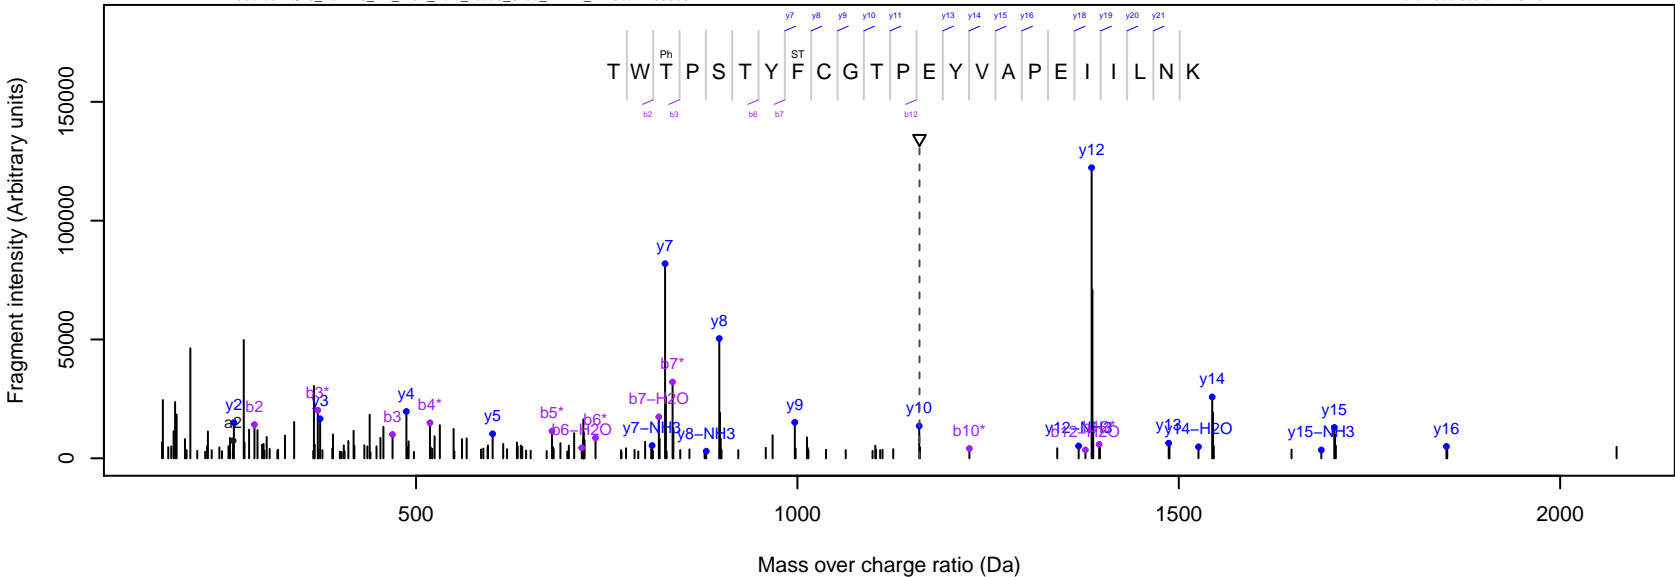

LLQDSSS(Phospho (STY))PVDLAK-2+

Source : QE3\_201126\_FR\_TiOx\_hum\_tissue\_Urea\_RNAB\_N Scan : 27230

Andromeda score : 143.25

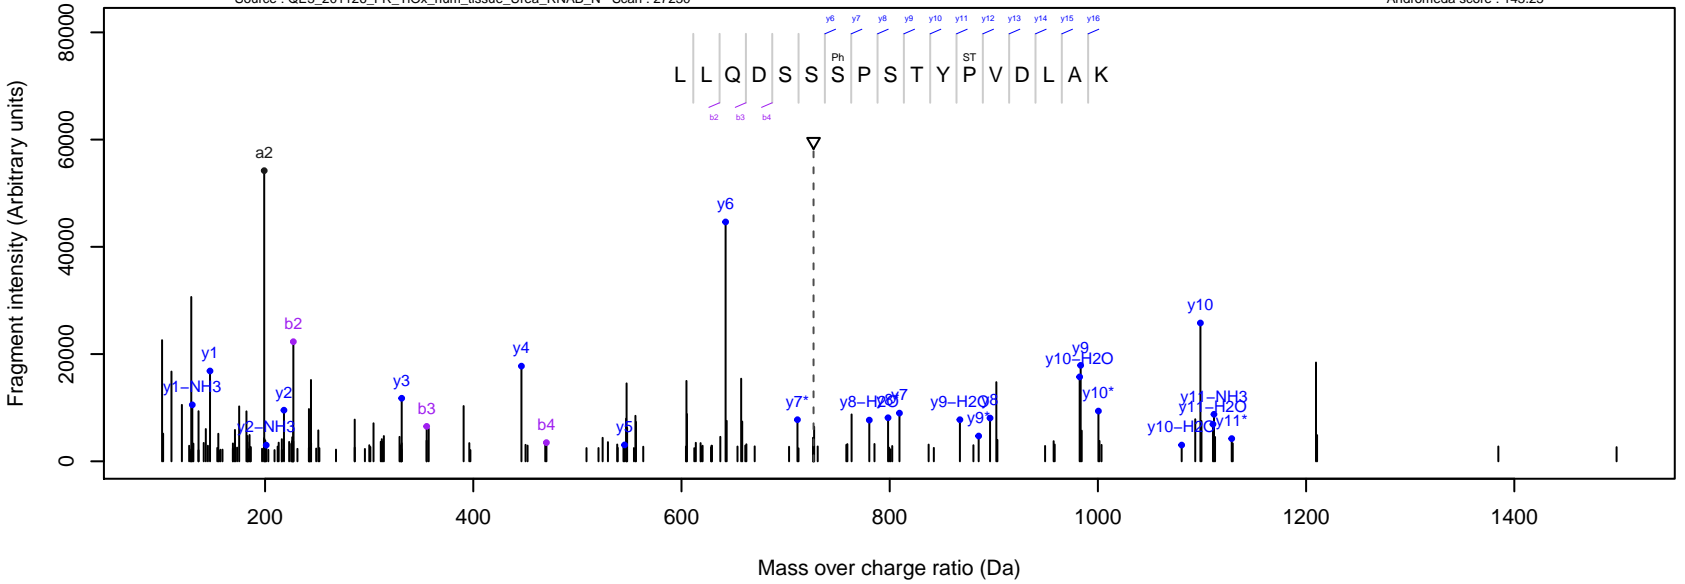

SRSS(Phospho (STY))S(Phospho (STY))VGSSTYPISPAVSR-2+

Source : QE3\_201126\_FR\_TiOx\_hum\_tissue\_Urea\_RNAB\_N Scan : 24386

Andromeda score : 143.14

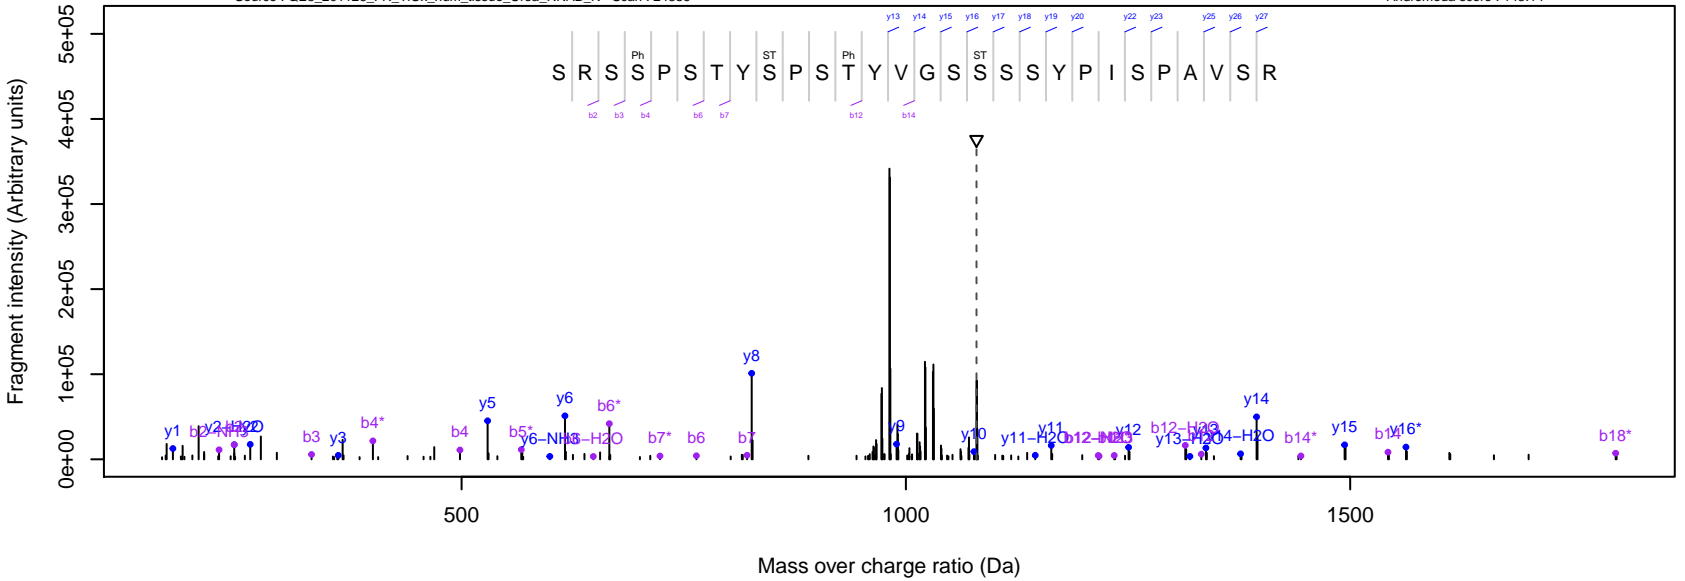

AATEALGEKS(Phospho (STY))PDSATVSGYDIM(Oxidation (M))K-3+

Source : QE3\_201126\_FR\_TiOx\_hum\_tissue\_Urea\_RNAB\_B Scan : 23476

Andromeda score : 143.12

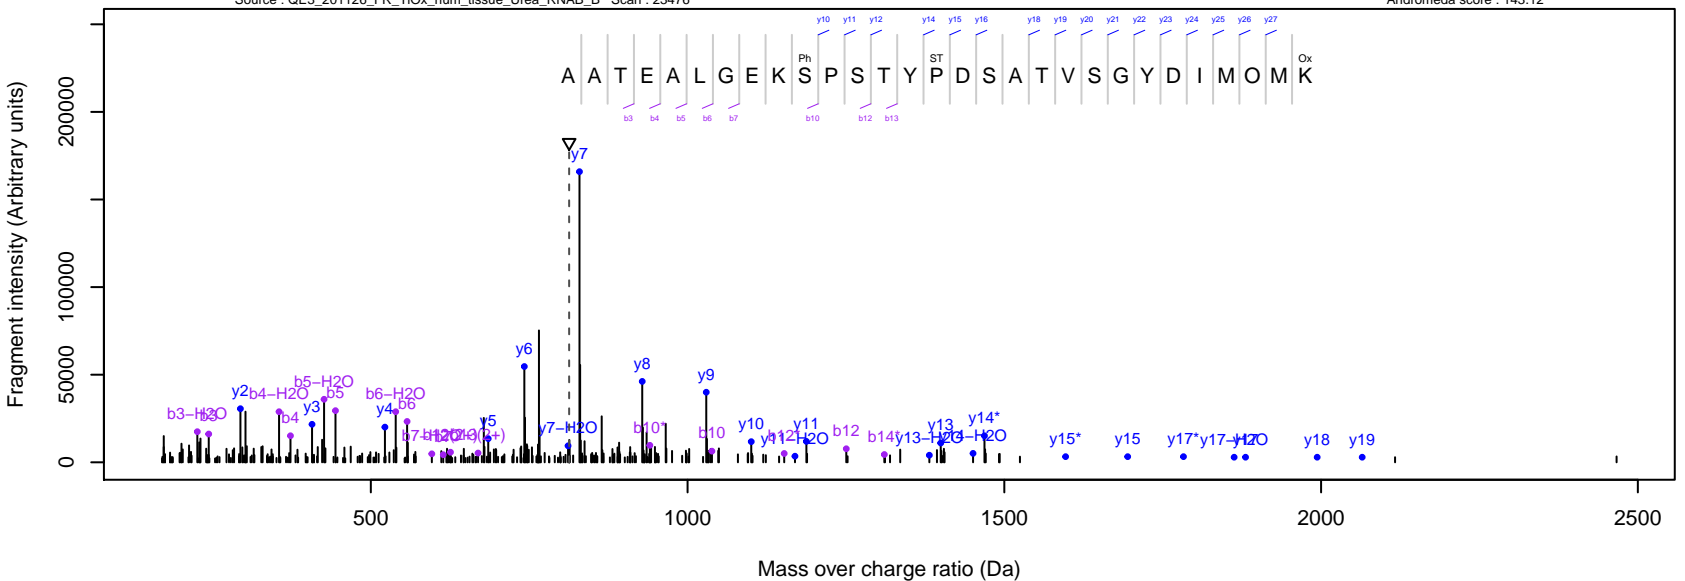



LQGVGALGQAASDNS(Phospho (STY))GPEDAKR-3+

Source : QE3\_201126\_FR\_TiOx\_hum\_tissue\_Urea\_RNAB\_H Scan : 20226

Andromeda score : 143.12

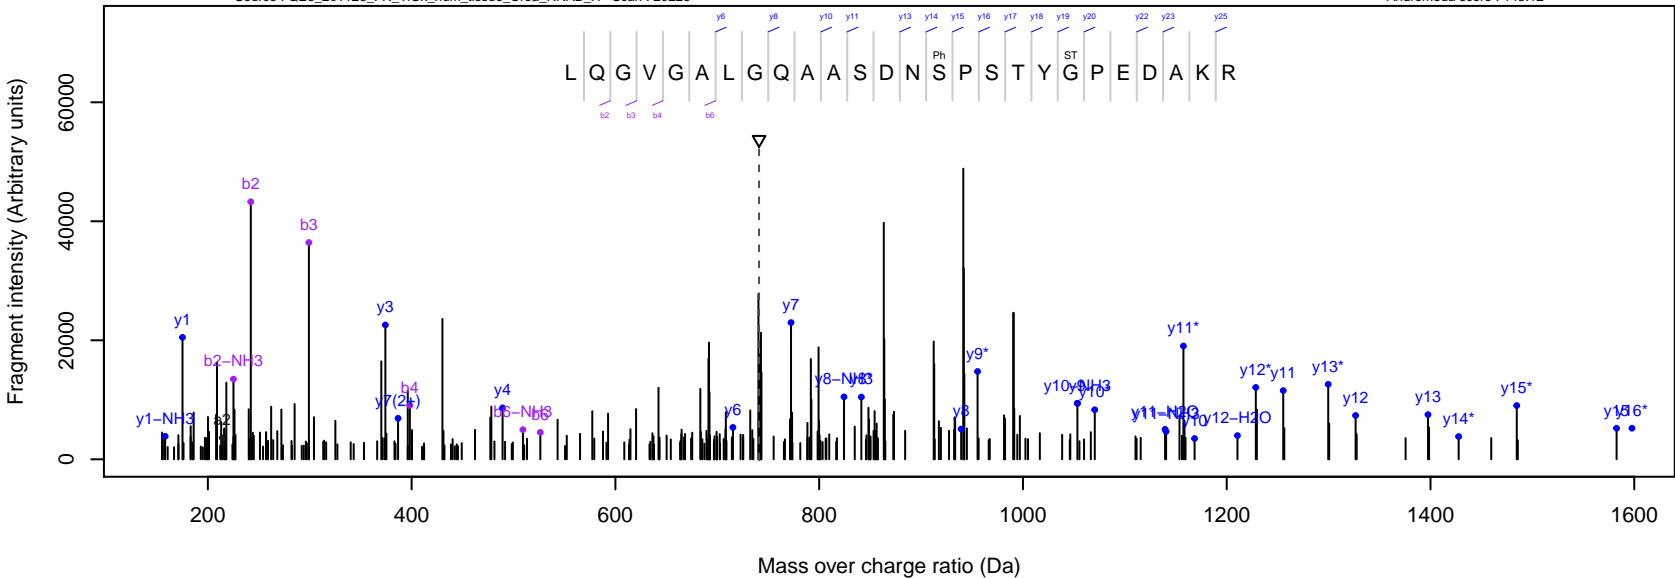

ATT(Phospho (STY))PPNQGRPDS(Phospho (STY))PVYANLQELK-3+

Source : QE3\_201126\_FR\_TiOx\_hum\_tissue\_Urea\_RNAB\_H Scan : 36501

Andromeda score : 143.07

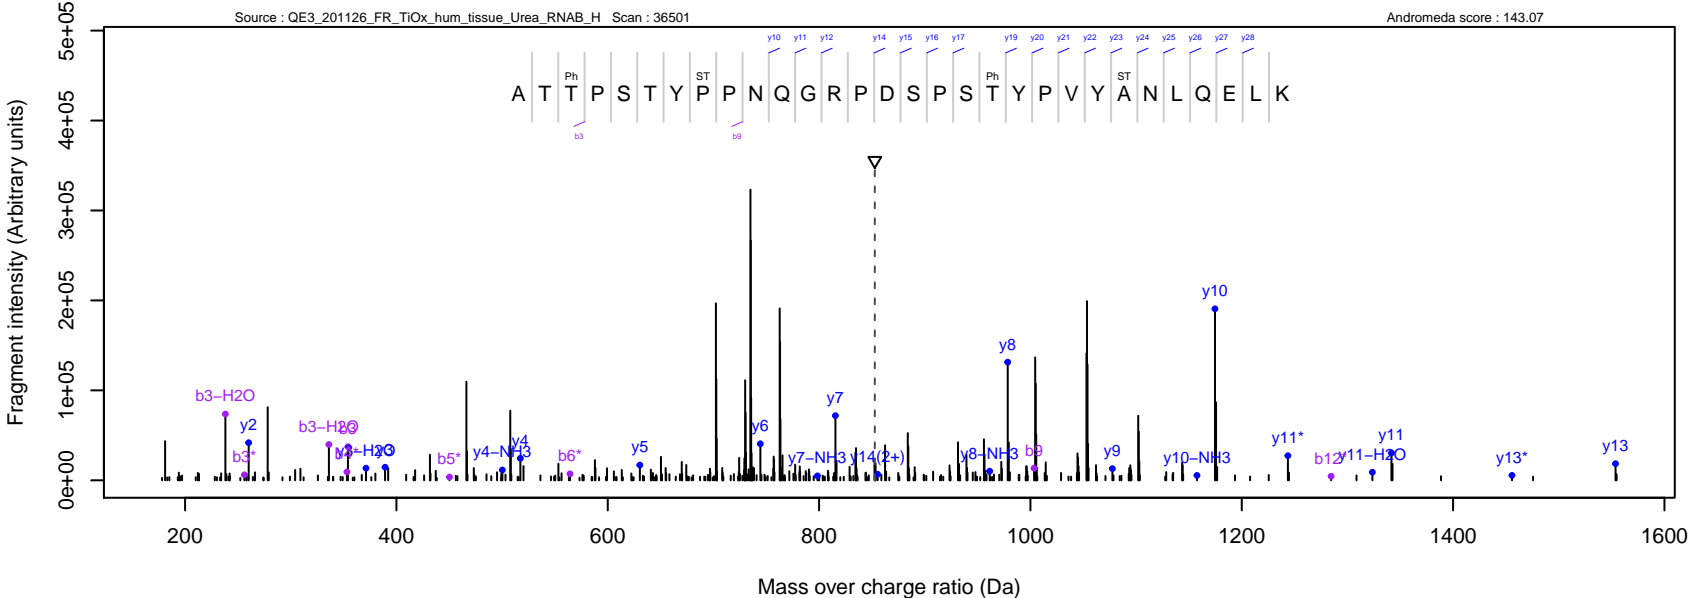

TGS(Phospho (STY))NIS(Phospho (STY))GASSDISLDEQYKHKLEETKK-4+

Source : QE3\_201126\_FR\_TiOx\_hum\_tissue\_Urea\_RNAB\_N Scan : 26204

Andromeda score : 143.06

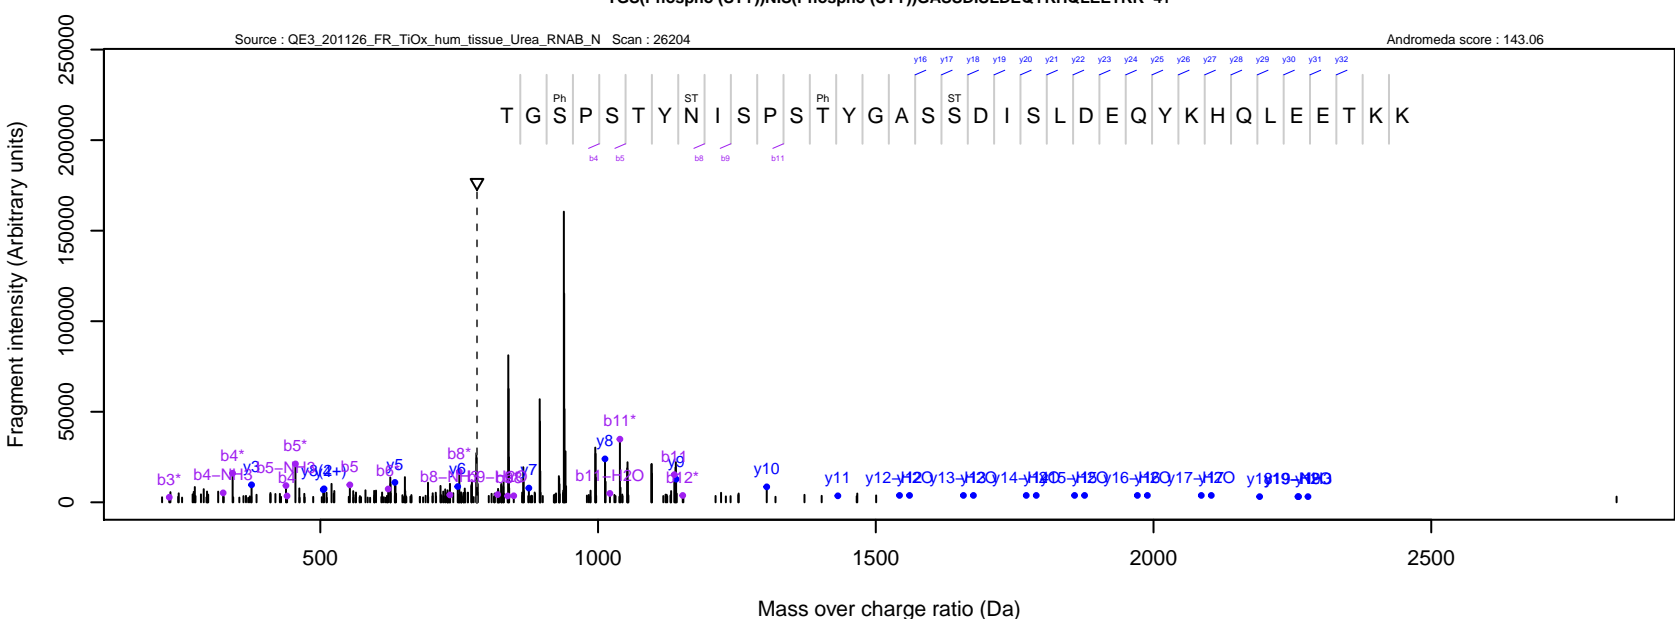

DLVQPKPAS(Phospho (STY))PK-2+

Source : QE3\_201126\_FR\_TIOx\_hum\_tissue\_Urea\_RNAB\_N Scan : 11505

Andromeda score : 143.05

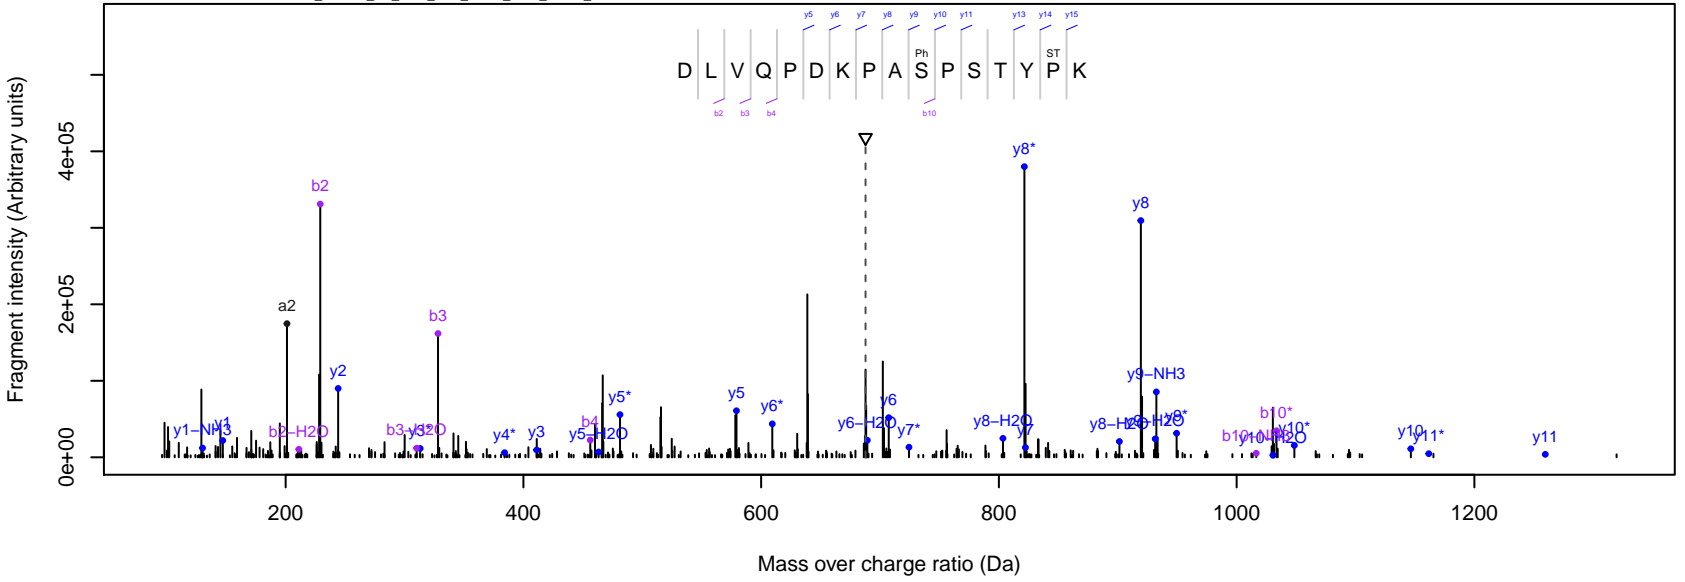

SS(Phospho (STY))S(Phospho (STY))PVTELASRS(Phospho (STY))PIRQDR-3+

Source : QE3\_201126\_FR\_TIOx\_hum\_tissue\_Urea\_RNAB\_H Scan : 26577

Andromeda score : 143.05

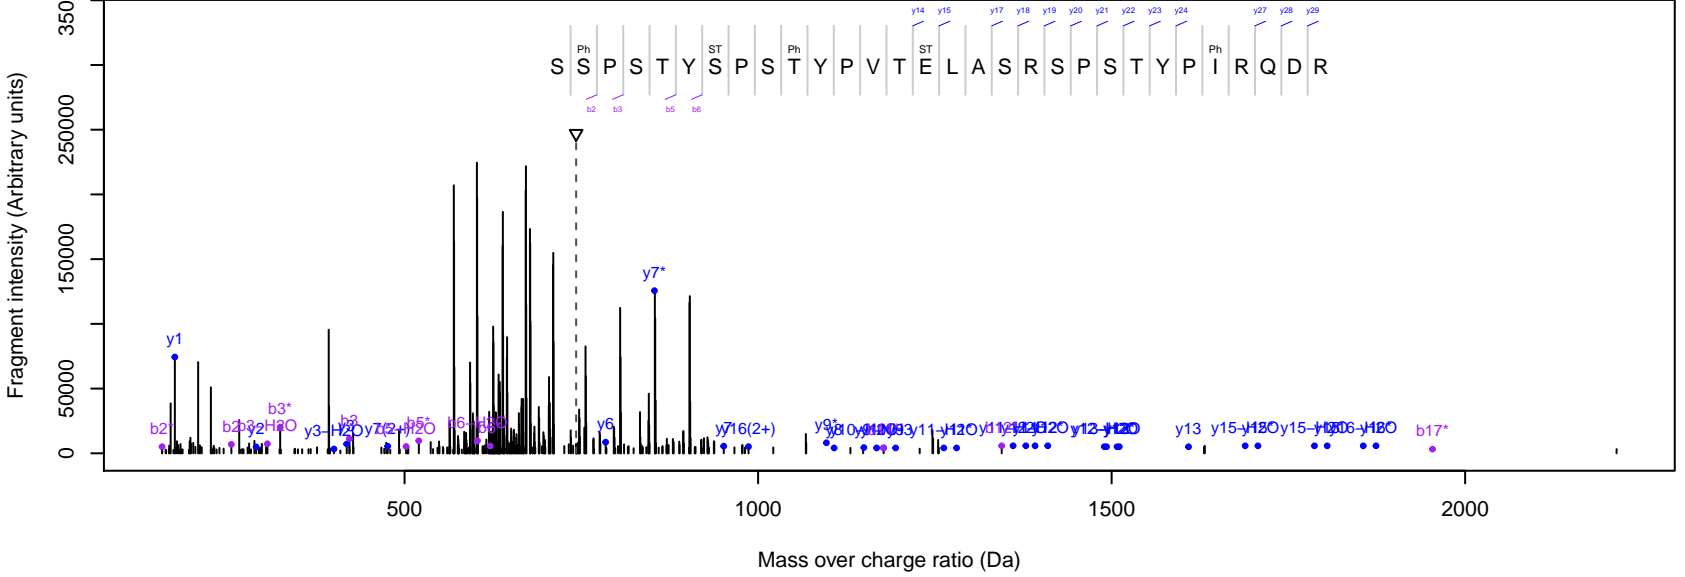

VLSAPPHFHFGQT(Phospho (STY))NRTPEFLR-4+

Source : QE3\_201126\_FR\_TIOx\_hum\_tissue\_Urea\_RNAB\_H Scan : 34540

Andromeda score : 143.05

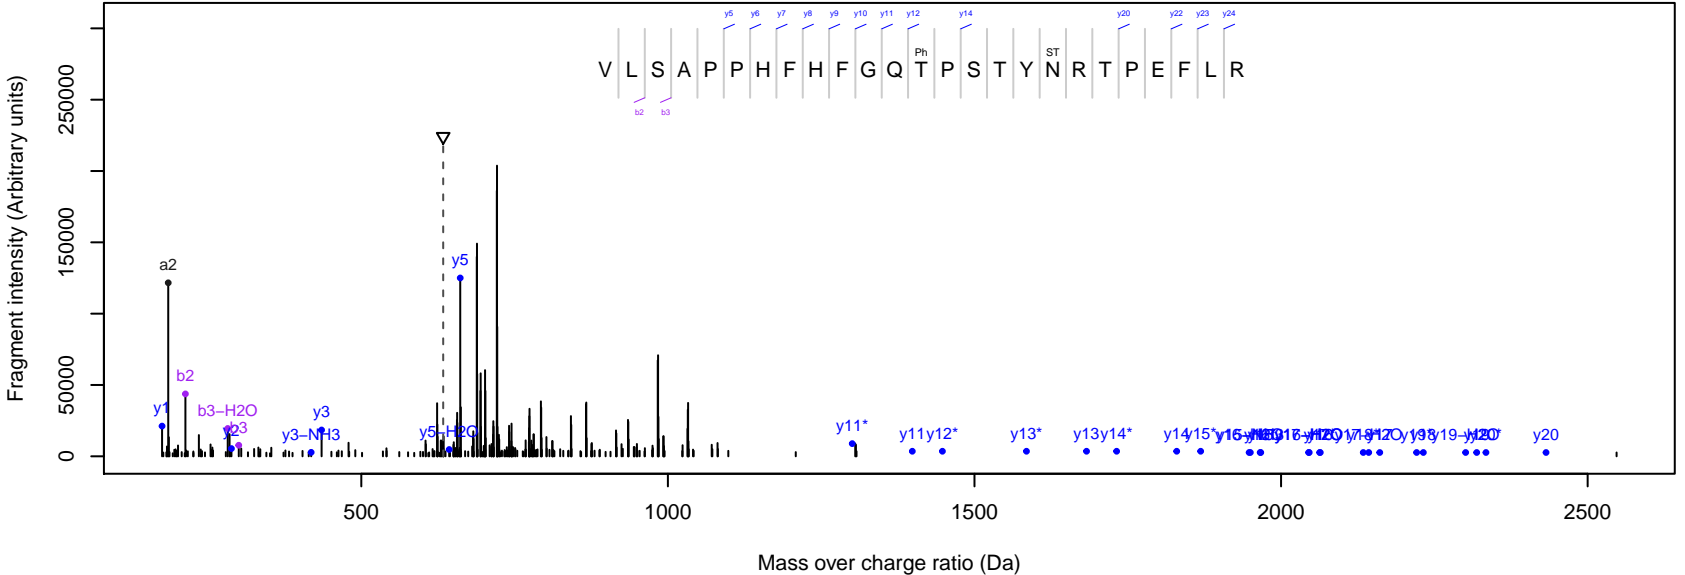



KFQEQECPPS(Phospho (STY))PEPTRK-3+

Source : QE3\_201126\_FR\_TiOx\_hum\_tissue\_Urea\_RNAB\_N Scan : 8597

Andromeda score : 142.89

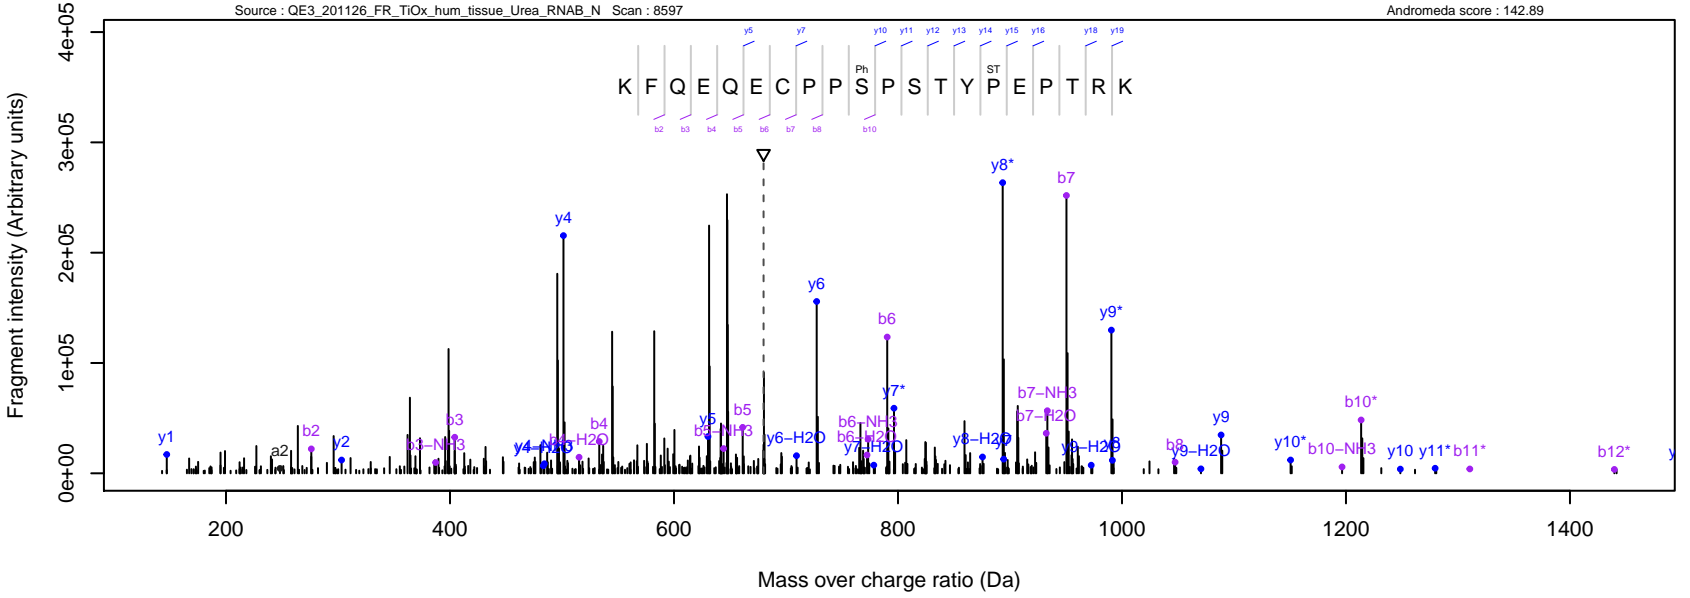

AVT(Phospho (STY))PVPTKTEEVSNLK-3+

Source : QE3\_201126\_FR\_TiOx\_hum\_tissue\_Urea\_RNAB\_N Scan : 17657

Andromeda score : 142.88

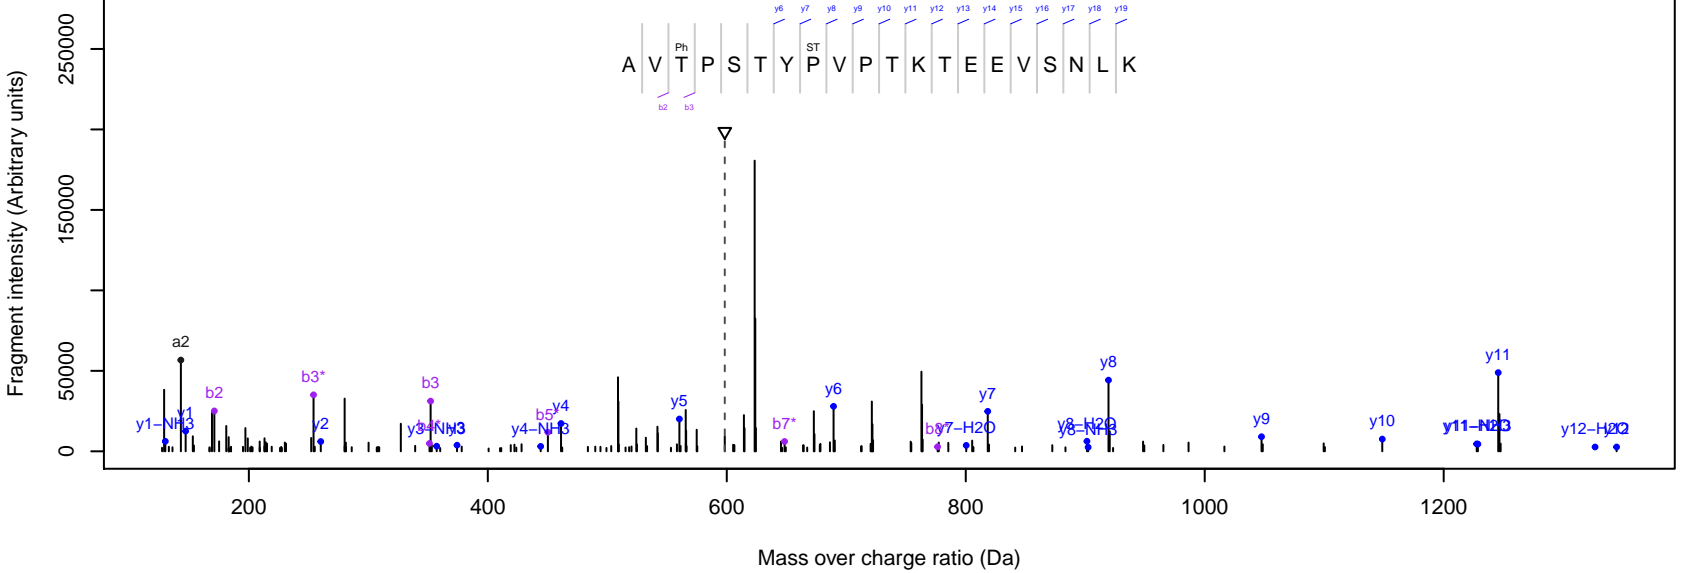

APS(Phospho (STY))DSS(Phospho (STY))LGTSPDGRPELR-3+

Source : QE3\_201126\_FR\_TiOx\_hum\_tissue\_Urea\_RNAB\_N Scan : 21609

Andromeda score : 142.85

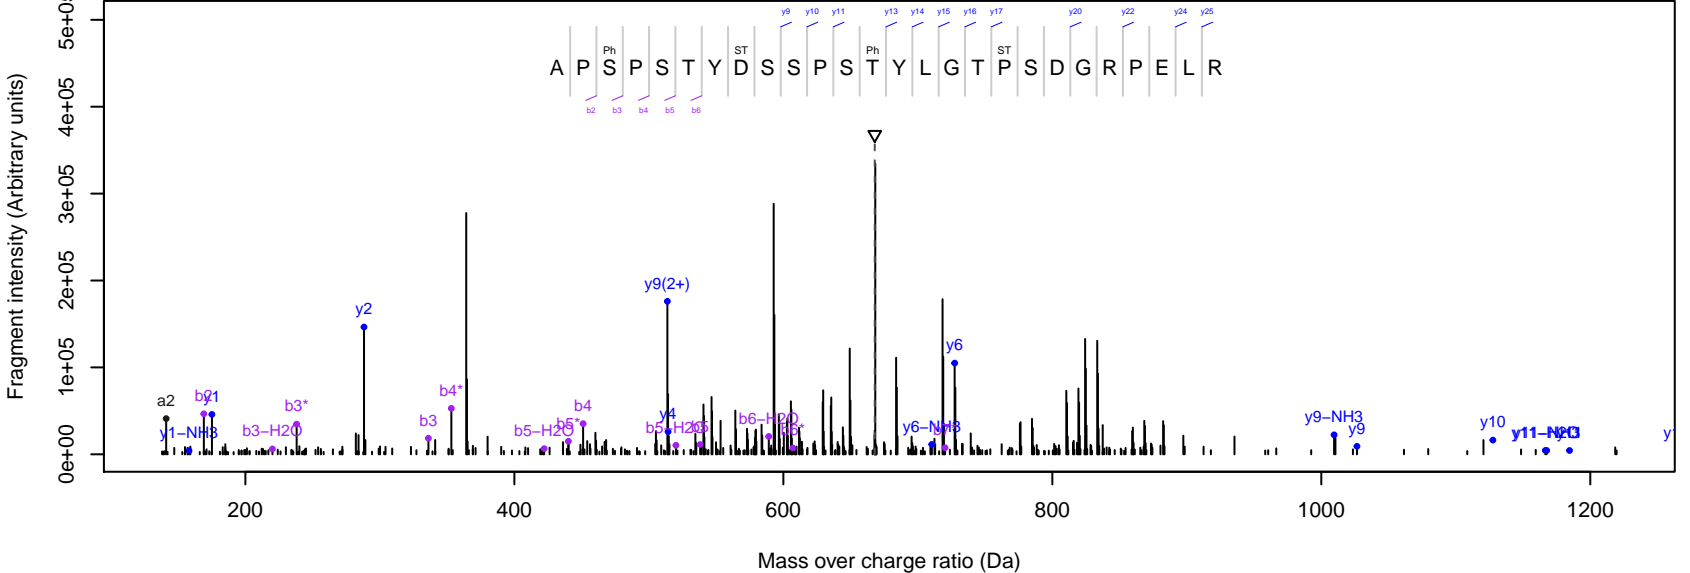

NFS(Phospho (STY))GALEGLVR-2+

Source : QE3\_201126\_FR\_TIOx\_hum\_tissue\_Urea\_RNAB\_H Scan : 45584

Andromeda score : 142.85

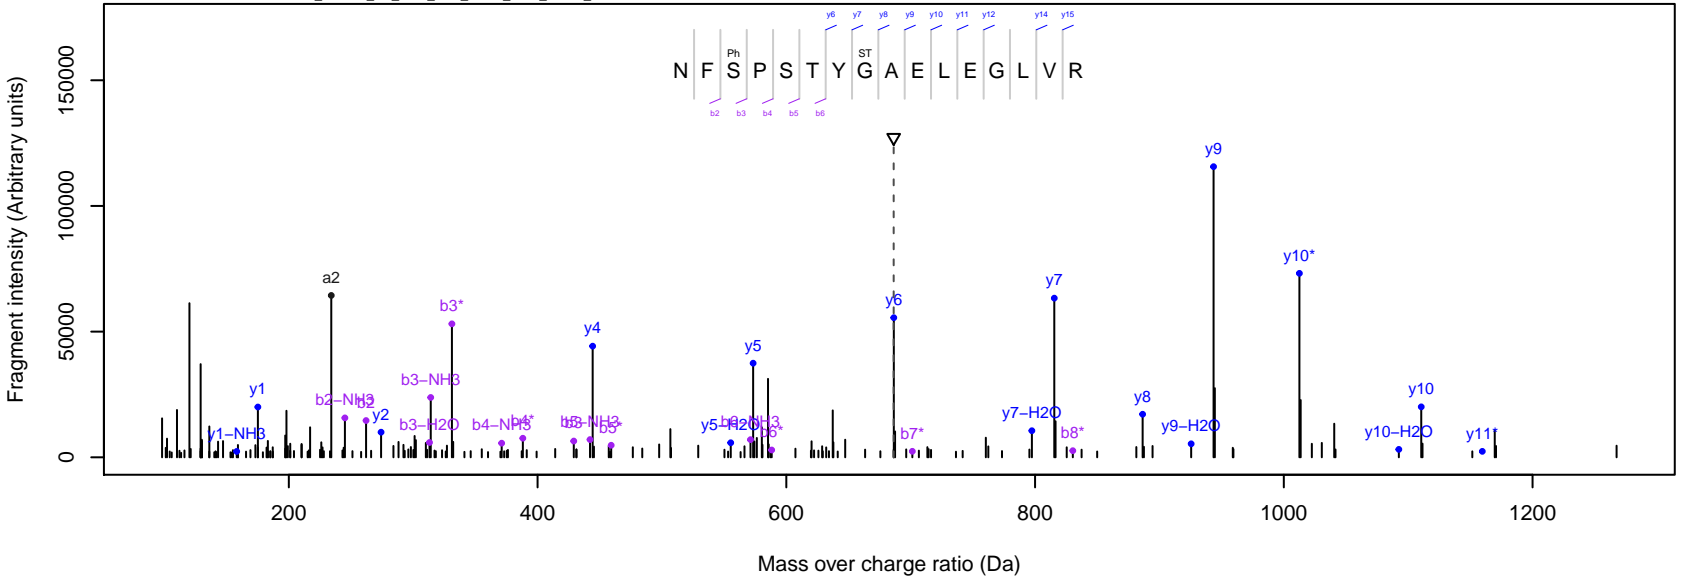

GIS(Phospho (STY))PIVFDR-2+

Source : QE3\_201126\_FR\_TIOx\_hum\_tissue\_Urea\_RNAB\_H Scan : 38934

Andromeda score : 142.83

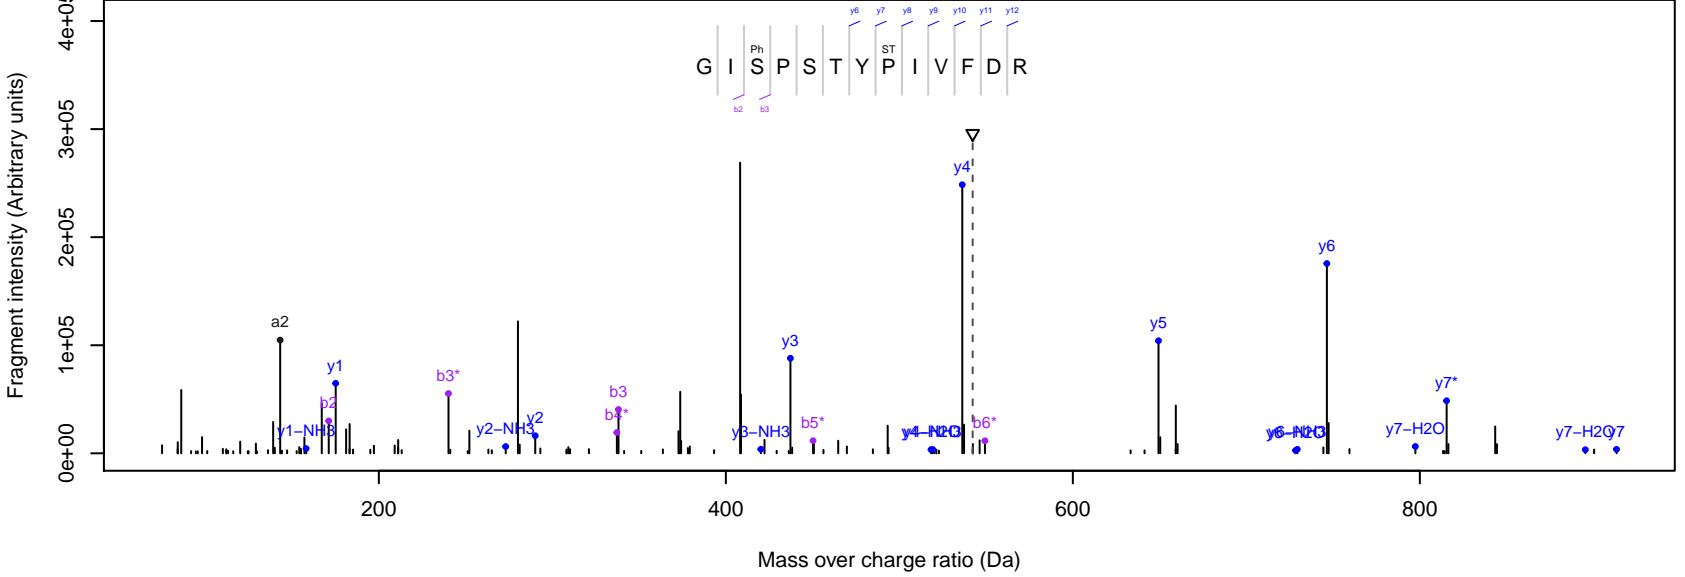

LAS(Phospho (STY))YLDRVR-2+

Source : QE3\_201126\_FR\_TIOx\_hum\_tissue\_Urea\_RNAB\_N Scan : 25438

Andromeda score : 142.83

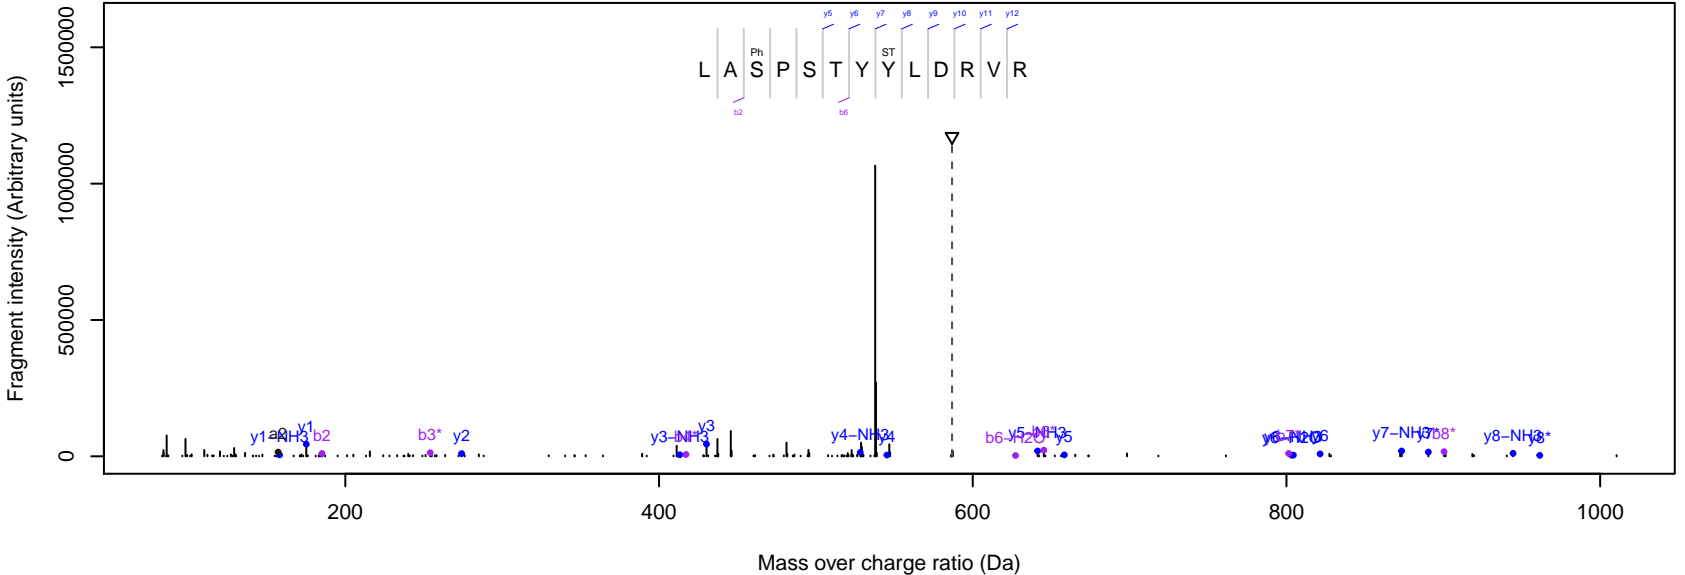

AQT(Phospho (STY))PPGPSLSGS(Phospho (STY))KSPCPQEK-2+

Source : QE3\_201126\_FR\_TiOx\_hum\_tissue\_Urea\_RNAB\_N Scan : 16038

Andromeda score : 142.79

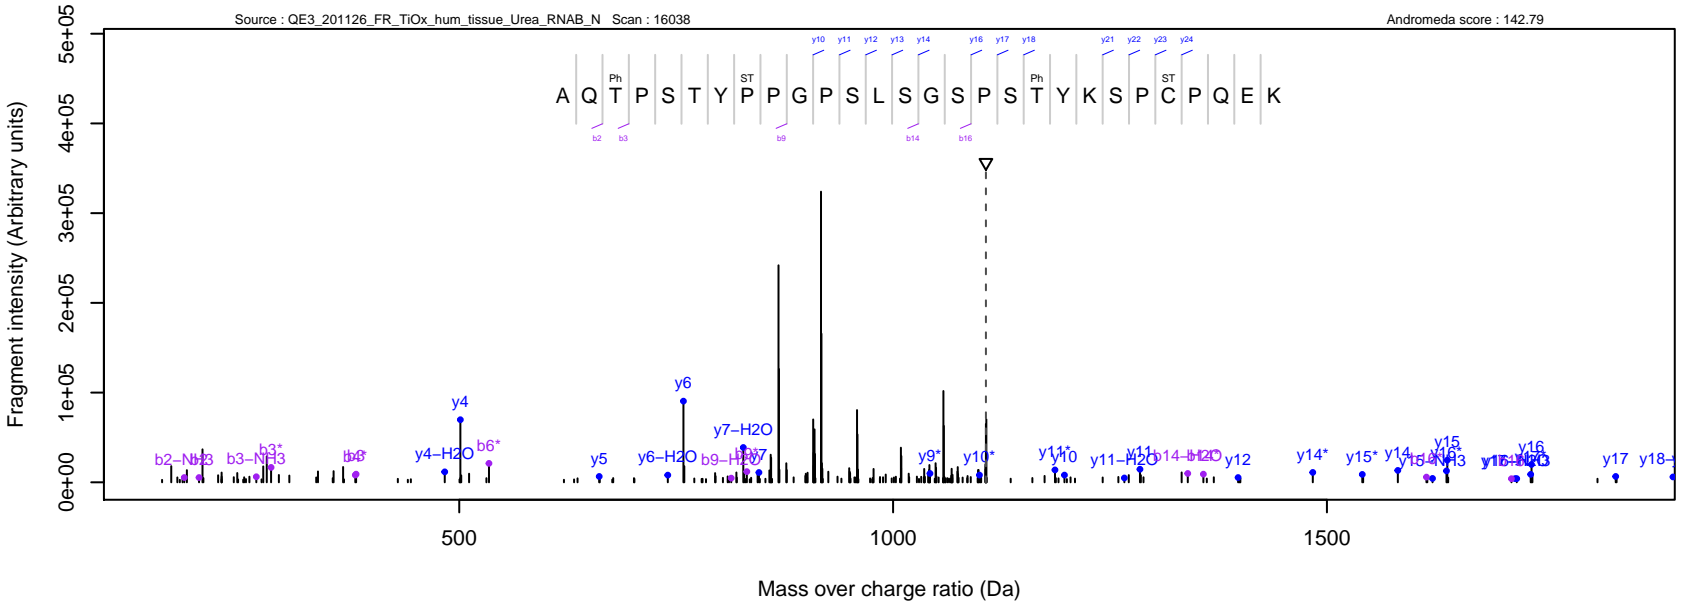

SQET(Phospho (STY))GDLVGGGLQETDKIIIEVEEQEDPYLNDR-3+

Source : QE3\_201126\_FR\_TiOx\_hum\_tissue\_Urea\_RNAB\_B Scan : 55621

Andromeda score : 142.78

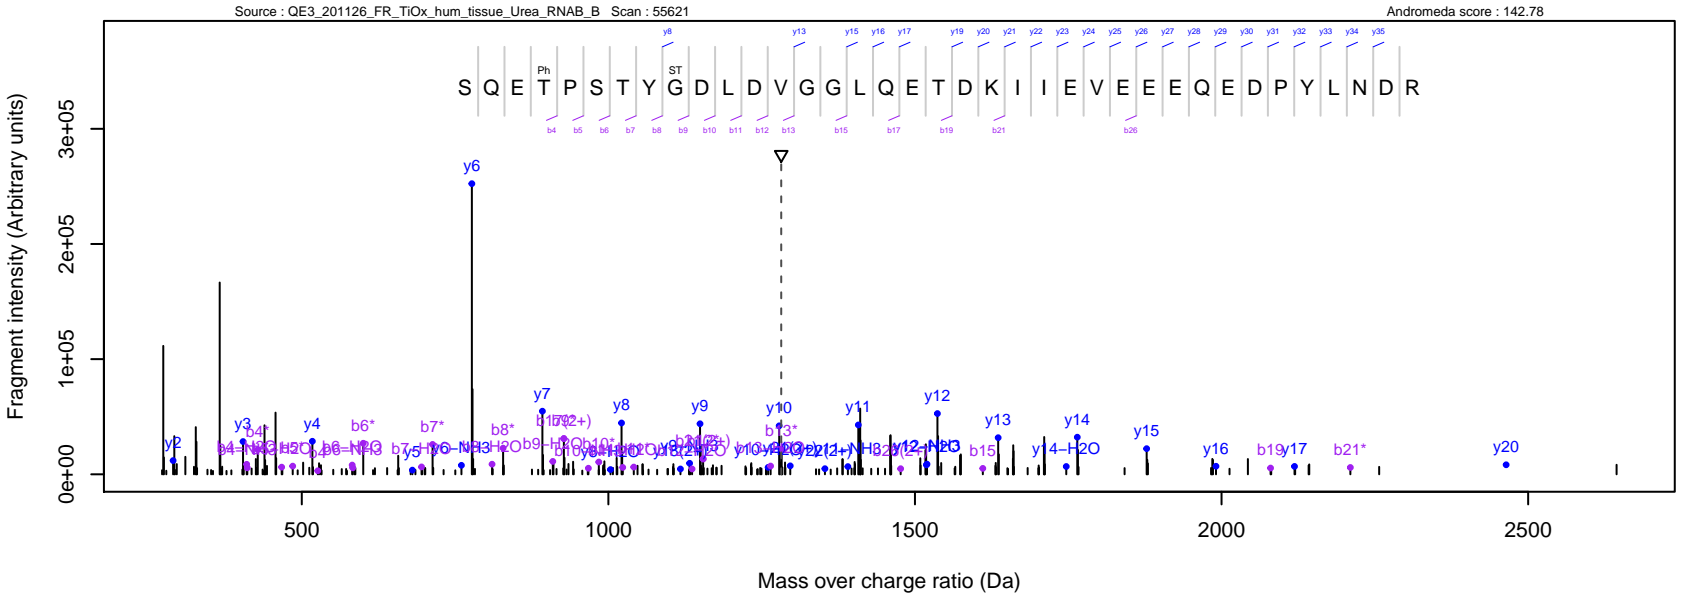

RLS(Phospho (STY))PS(Phospho (STY))AS(Phospho (STY))PPR-2+

Source : QE3\_201126\_FR\_TiOx\_hum\_tissue\_Urea\_RNAB\_H Scan : 14607

Andromeda score : 142.77

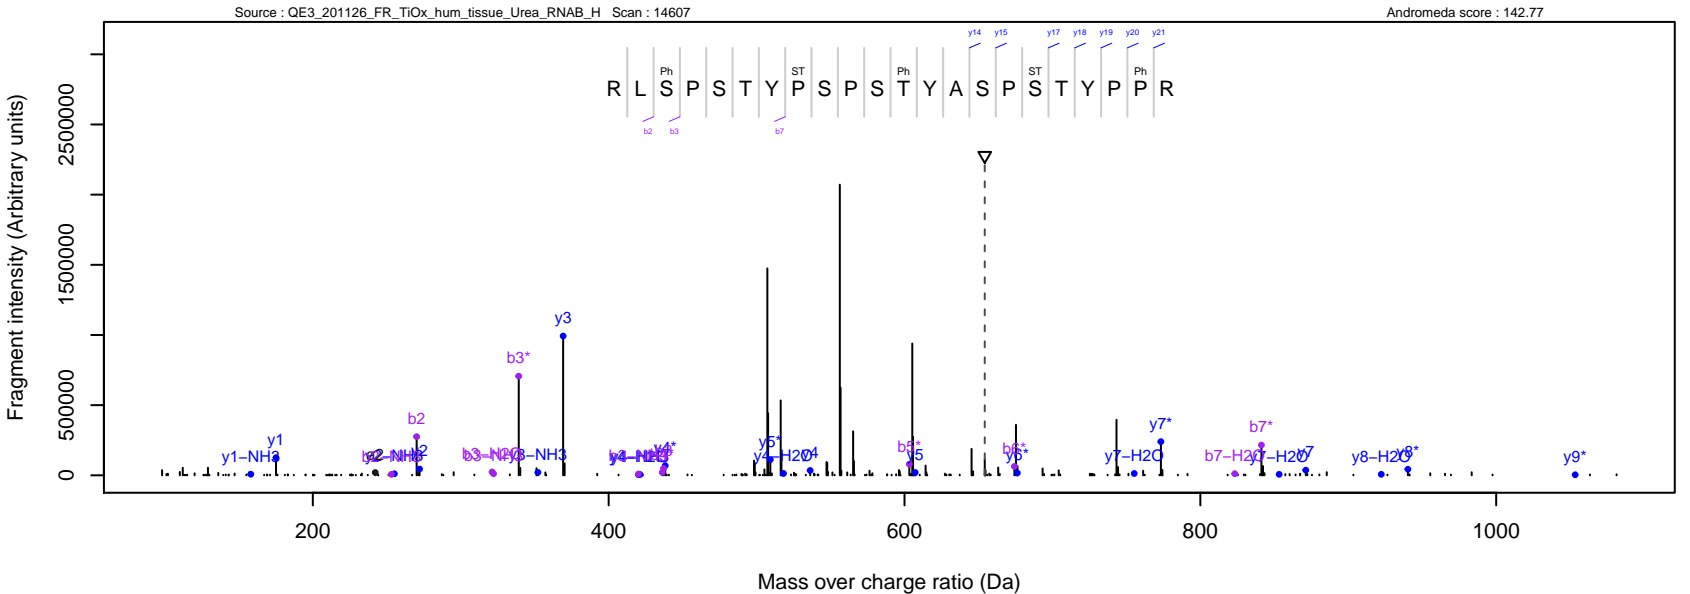

SSS(Phospho (STY))FKDFAK-2+

Source : QE3\_201126\_FR\_TiOx\_hum\_tissue\_Urea\_RNAB\_N Scan : 13081

Andromeda score : 142.71

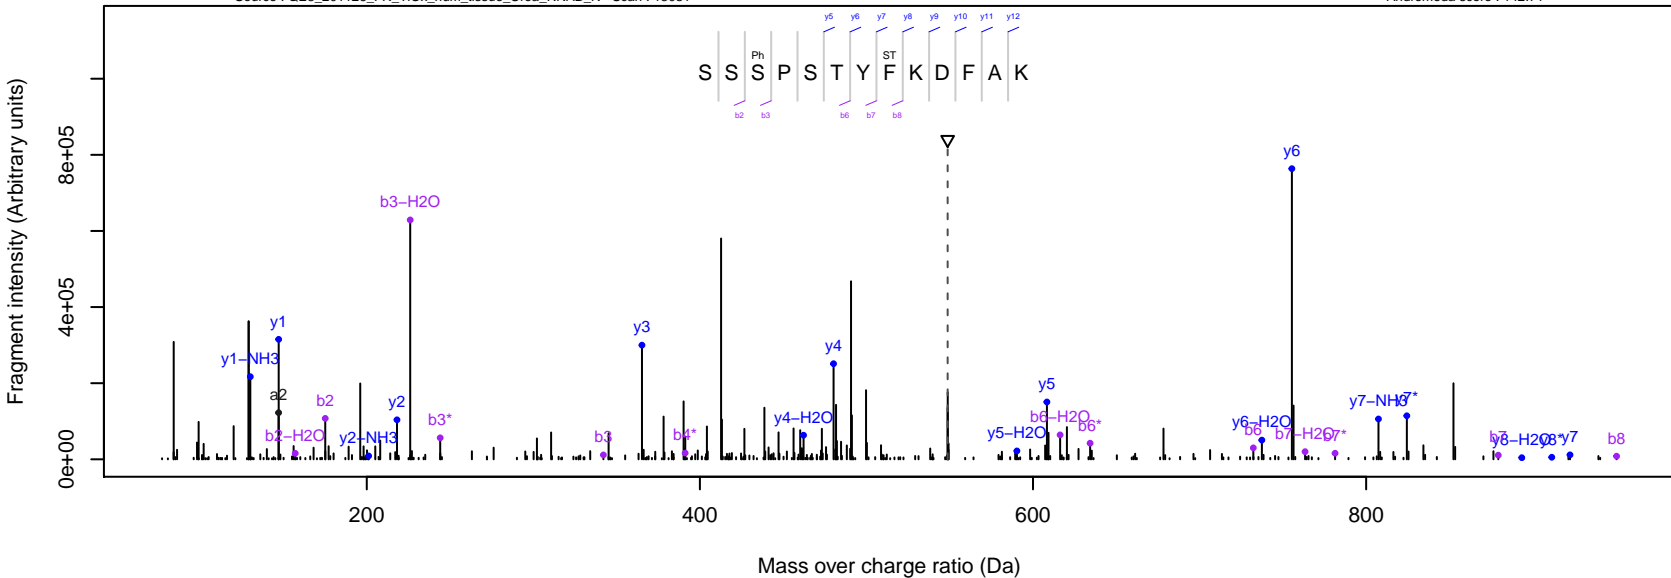

ST(Phospho (STY))S(Phospho (STY))FRGGM(Oxidation (M))GSGGLATGIAGGLAGMGGIQNEKETMQLNDR-3+

Source : QE3\_201126\_FR\_TiOx\_hum\_tissue\_Urea\_RNAB\_N Scan : 49893

Andromeda score : 142.71

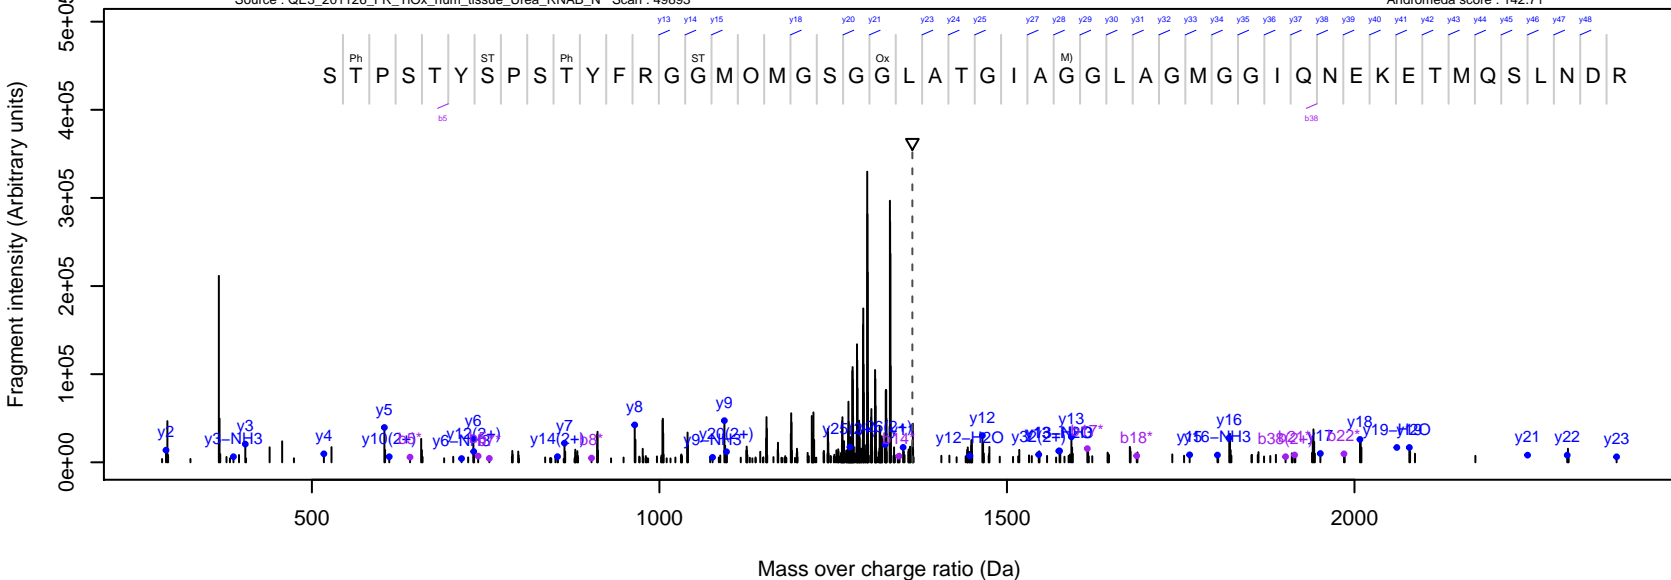

SKS(Phospho (STY))PVGNPQLIQFSR-3+

Source : QE3\_201126\_FR\_TiOx\_hum\_tissue\_Urea\_RNAB\_H Scan : 26352

Andromeda score : 142.58

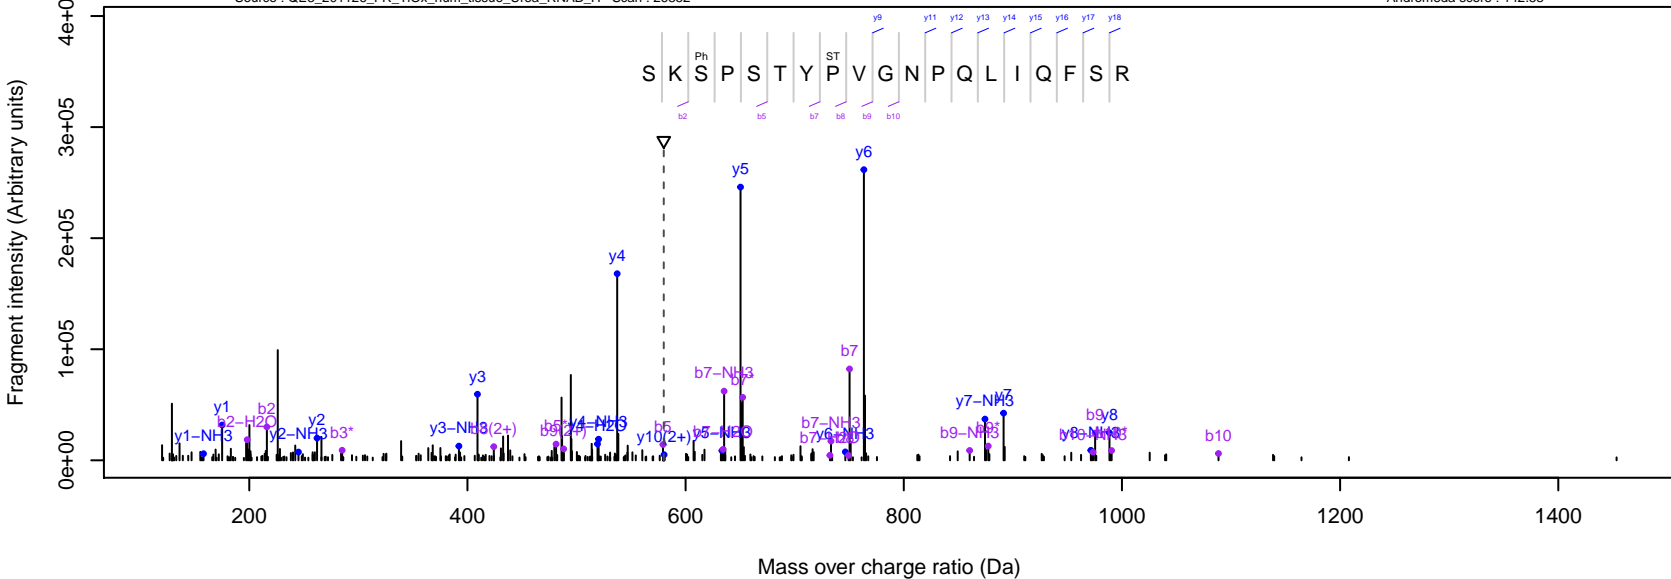

NKAGT(Phospho (STY))PVSELTK-2+

Source : QE3\_201126\_FR\_TiOx\_hum\_tissue\_Urea\_RNAB\_B Scan : 11092

Andromeda score : 142.54

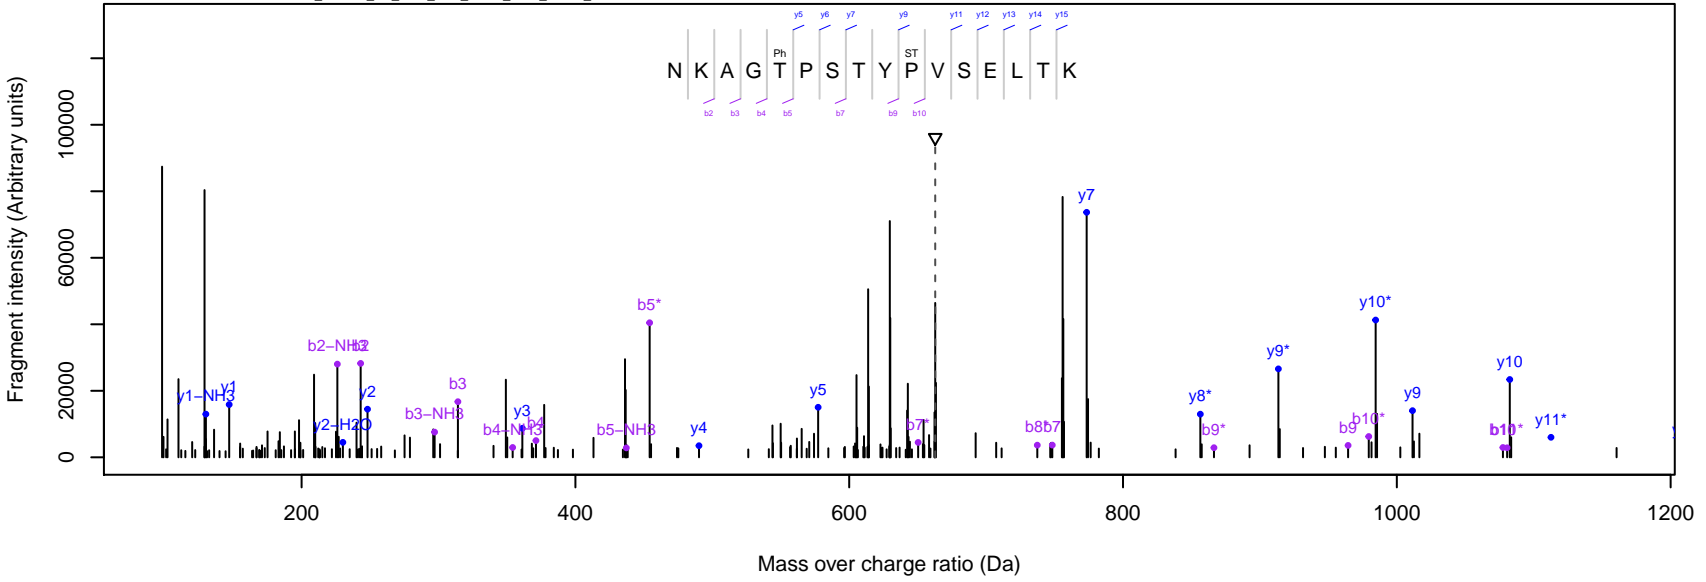

ISHELDS(Phospho (STY))ASS(Phospho (STY))EVN-2+

Source : QE3\_201126\_FR\_TiOx\_hum\_tissue\_Urea\_RNAB\_N Scan : 20600

Andromeda score : 142.51

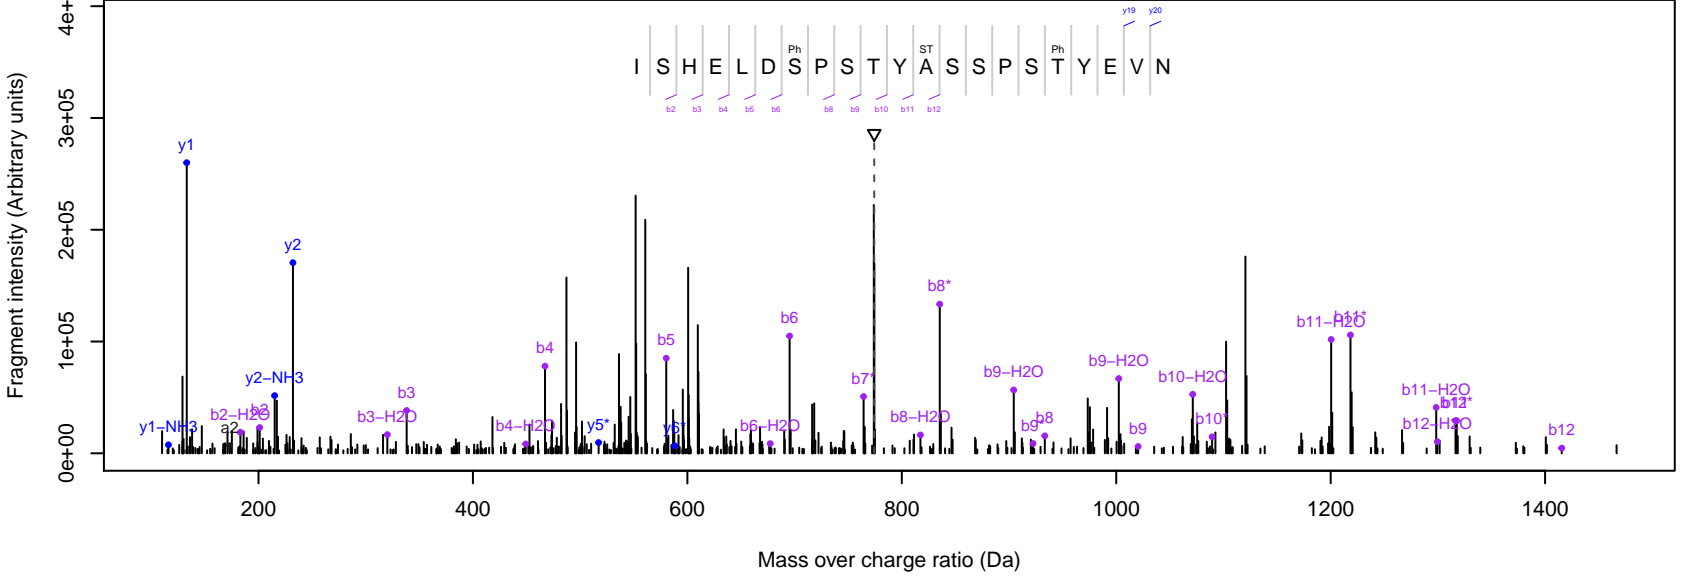

KGS(Phospho (STY))SGNASEVSVACLTER-3+

Source : QE3\_201126\_FR\_TiOx\_hum\_tissue\_Urea\_RNAB\_H Scan : 21655

Andromeda score : 142.45

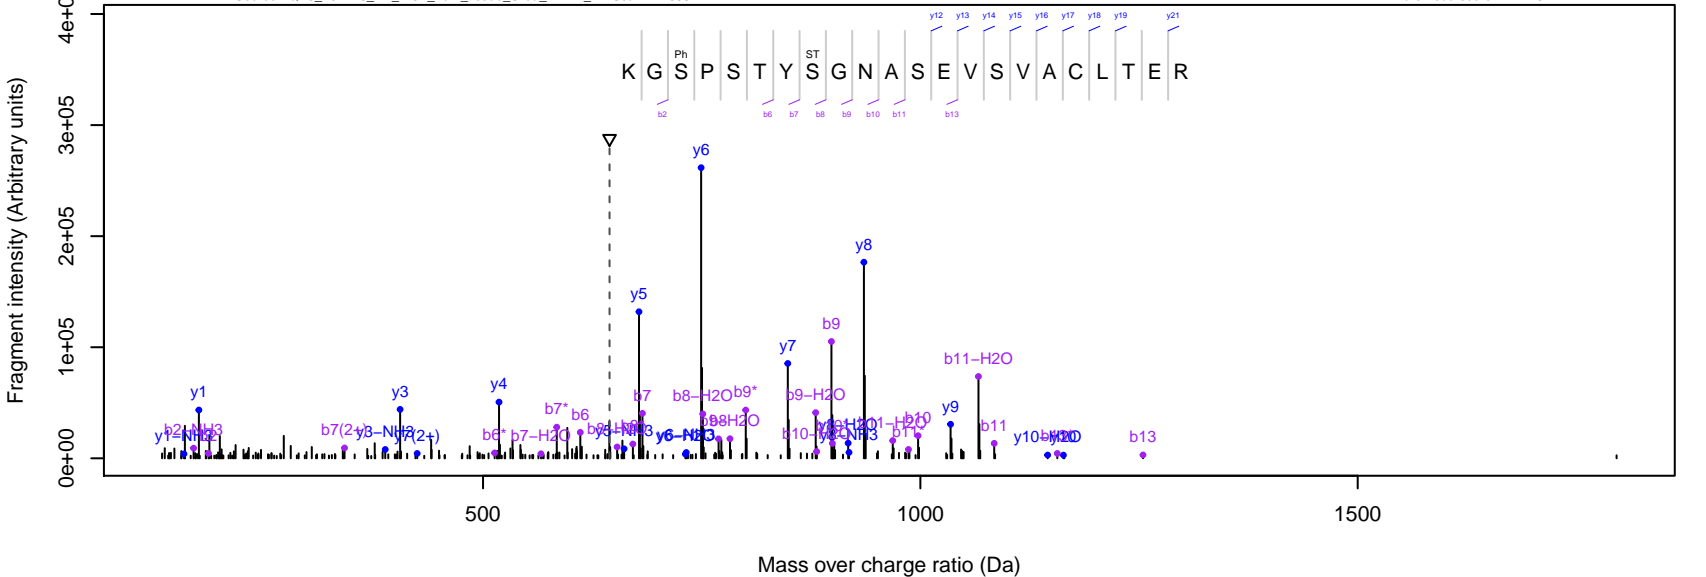



NATLAWDSSHSS(Phospho (STY))IQNSPK-3+

Source : QE3\_201126\_FR\_TiOx\_hum\_tissue\_Urea\_RNAB\_H Scan : 20885

Andromeda score : 142.42

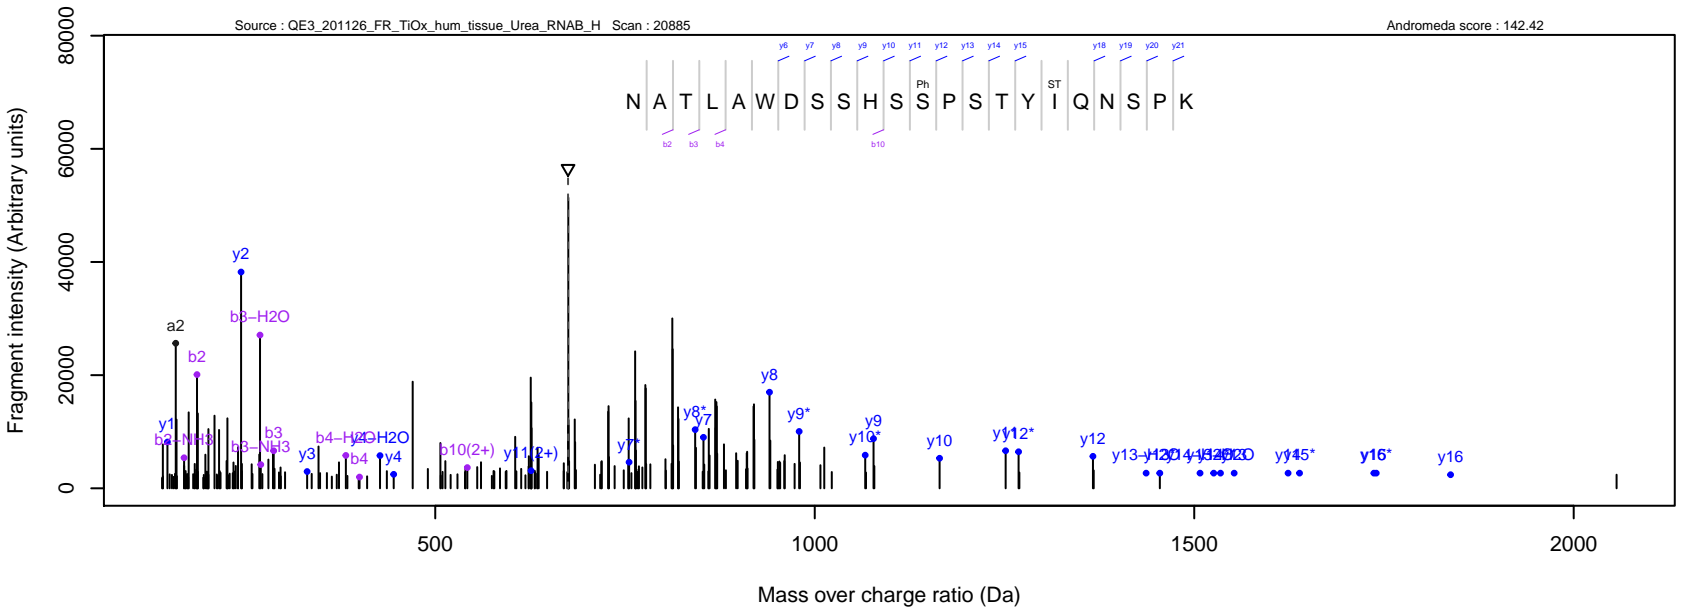

SQS(Phospho (STY))ESS(Phospho (STY))DEVTELDLSHGKK-3+

Source : QE3\_201126\_FR\_TiOx\_hum\_tissue\_Urea\_RNAB\_H Scan : 19761

Andromeda score : 142.42

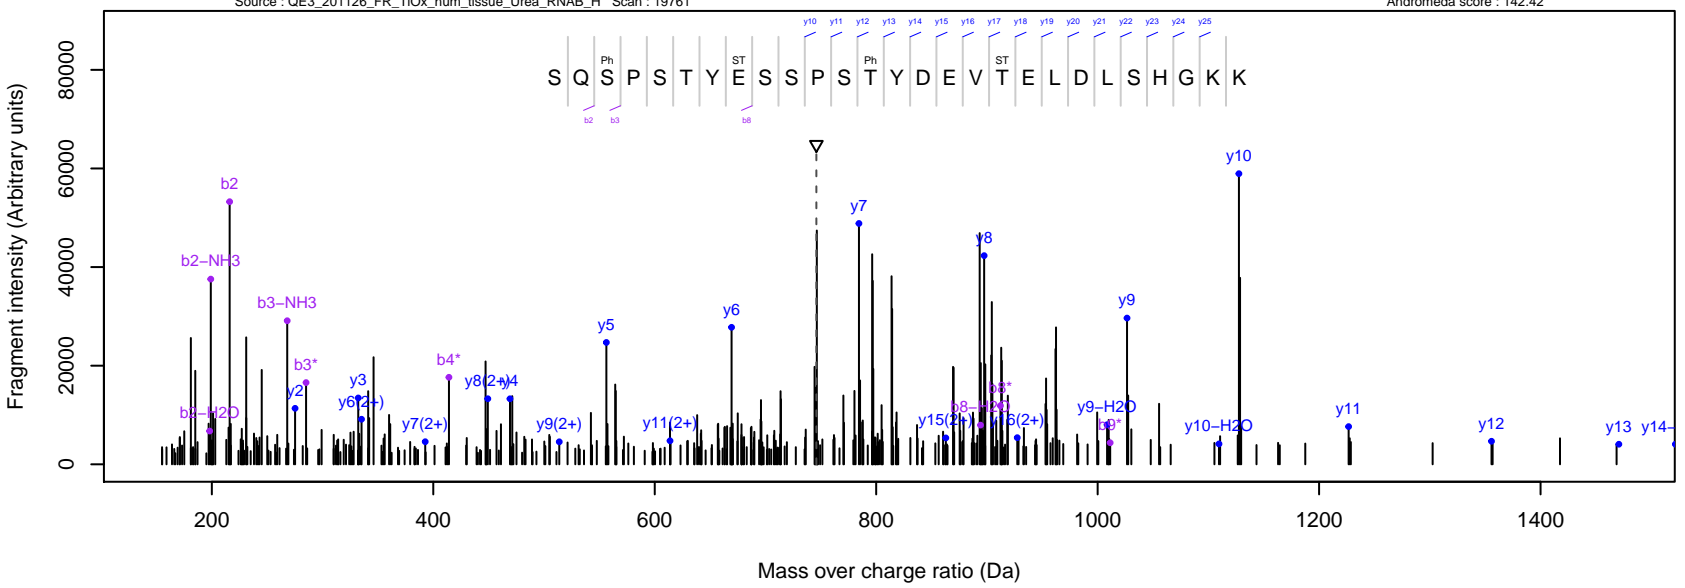

TVS(Phospho (STY))DNS(Phospho (STY))LSNSRGEGKPDLK-3+

Source : QE3\_201126\_FR\_TiOx\_hum\_tissue\_Urea\_RNAB\_N Scan : 11970

Andromeda score : 142.41

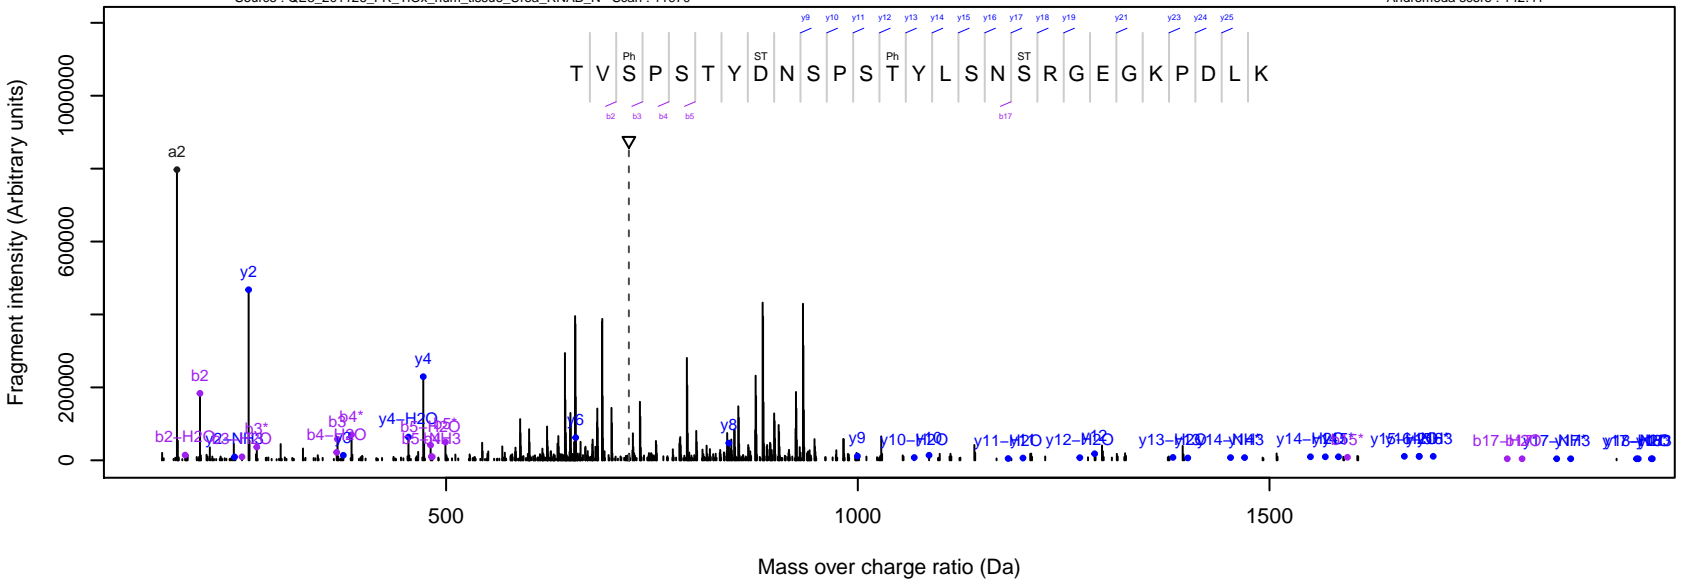

LSSSDRYS(Phospho (STY))DASDDSFSEPR-3+

Source : QE3\_201126\_FR\_TiOx\_hum\_tissue\_Urea\_RNAB\_B Scan : 19017

Andromeda score : 142.4

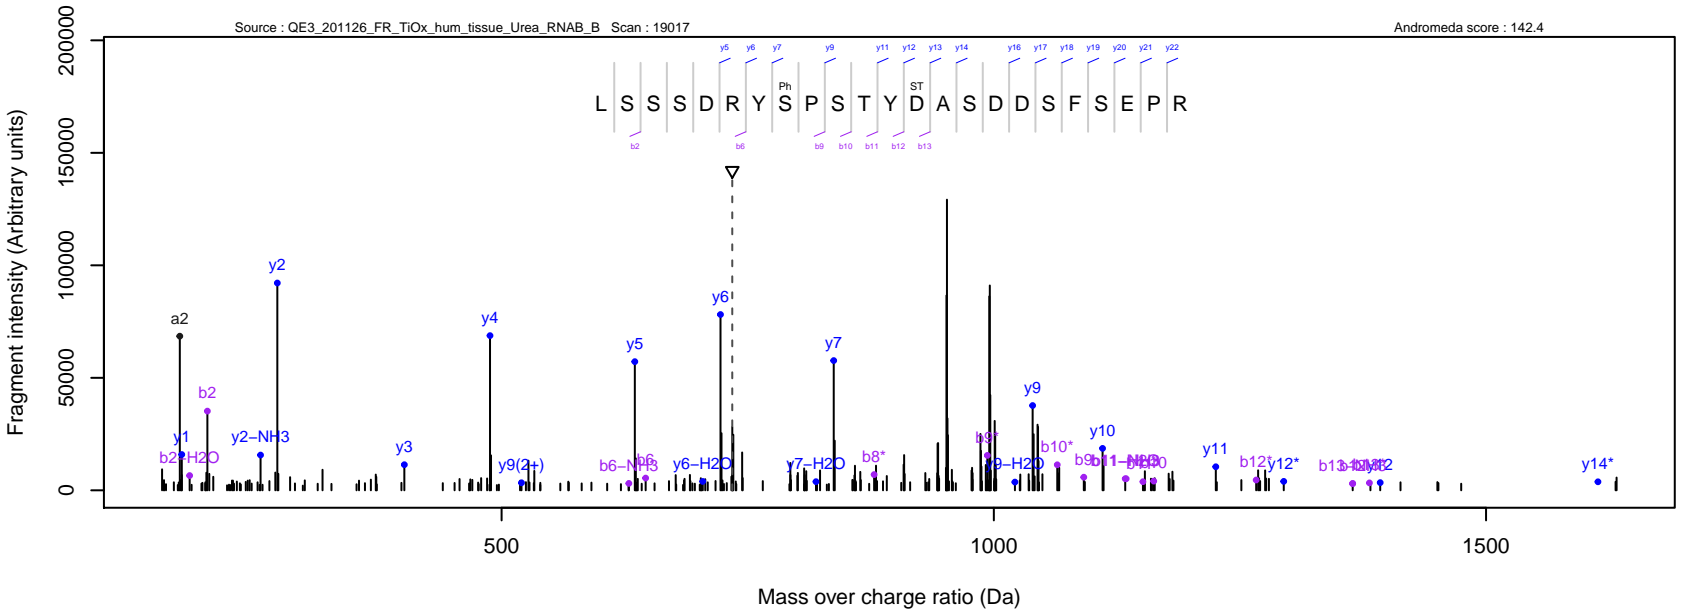

SHS(Phospho (STY))SPSLNPDTSPIITAK-2+

Source : QE3\_201126\_FR\_TiOx\_hum\_tissue\_Urea\_RNAB\_N Scan : 18516

Andromeda score : 142.39

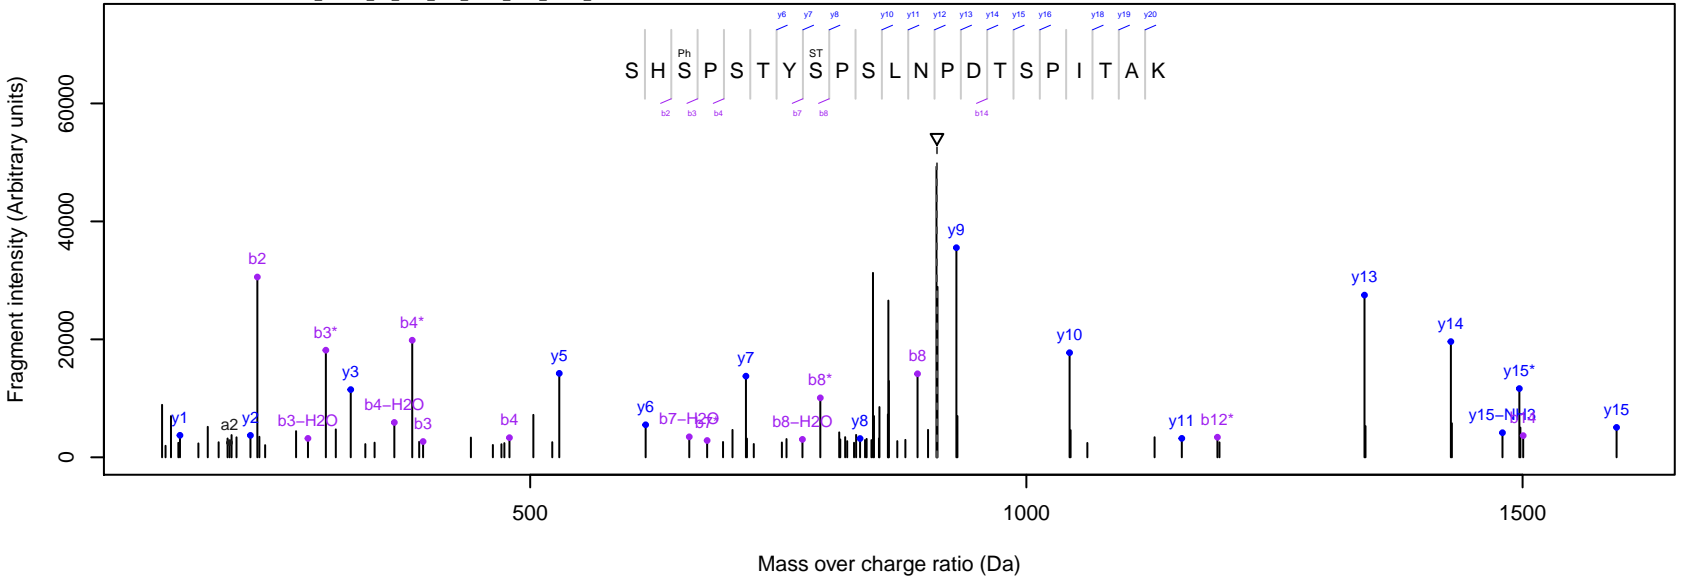

S(Phospho (STY))PTMEQAVQTASAHLPAAPAVGR-3+

Source : QE3\_201126\_FR\_TiOx\_hum\_tissue\_Urea\_RNAB\_N Scan : 42356

Andromeda score : 142.28

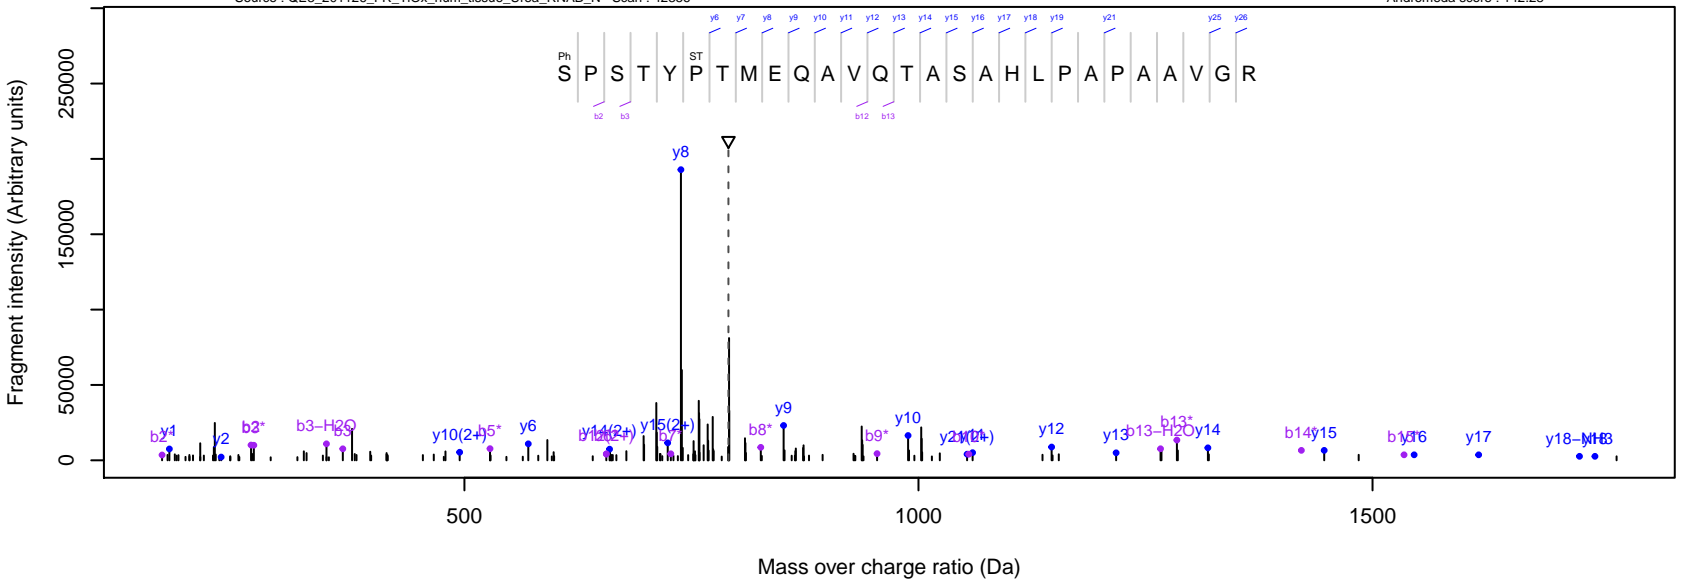

GAGAGHPGAGGAQPPDS(Phospho (STY))PAGVR-2+

Source : QE3\_201126\_FR\_TiOx\_hum\_tissue\_Urea\_RNAB\_B Scan : 10141

Andromeda score : 142.26

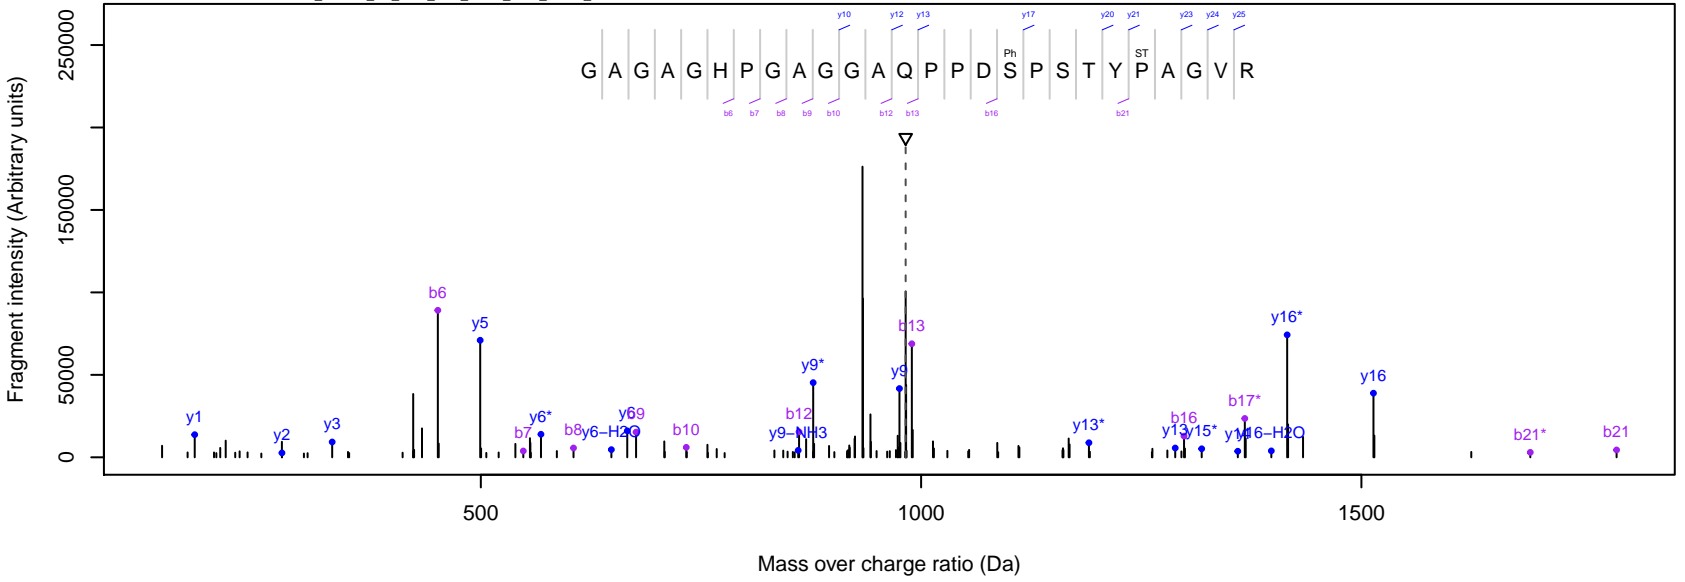

GHTAS(Phospho (STY))ESDEQQWPEEK-3+

Source : QE3\_201126\_FR\_TiOx\_hum\_tissue\_Urea\_RNAB\_N Scan : 9459

Andromeda score : 142.22

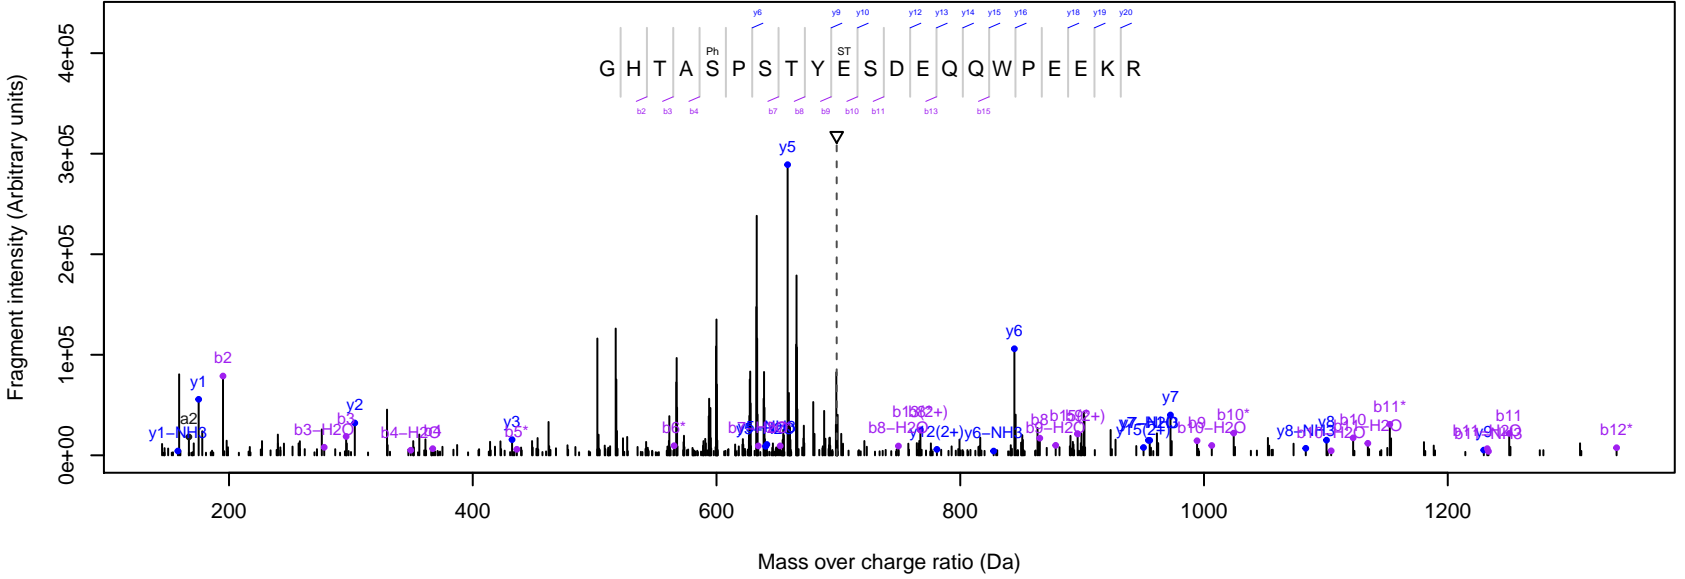

SPPREGS(Phospho (STY))QGELTPANSQSR-3+

Source : QE3\_201126\_FR\_TiOx\_hum\_tissue\_Urea\_RNAB\_H Scan : 9307

Andromeda score : 142.21

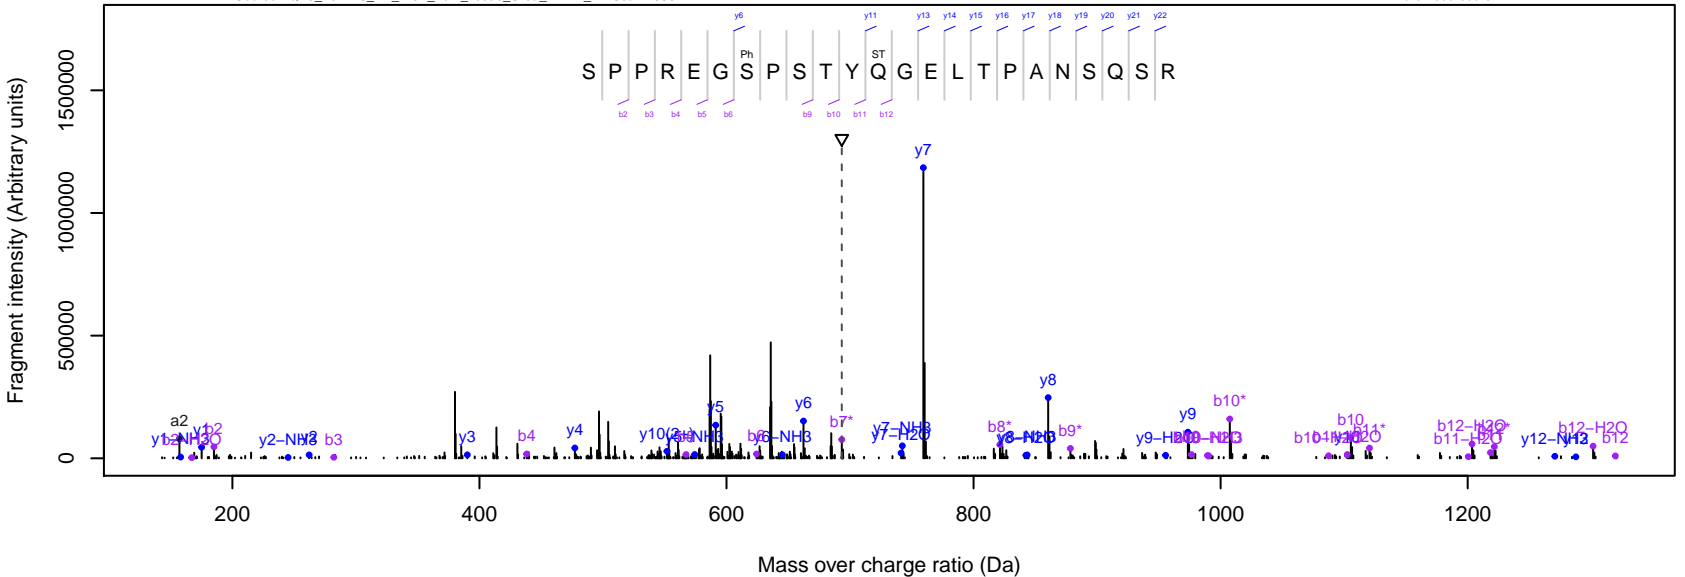

SS(Phospho (STY))GTNFQGLPSK-2+

Source : QE3\_201126\_FR\_TiOx\_hum\_tissue\_Urea\_RNAB\_N Scan : 20329

Andromeda score : 142.12

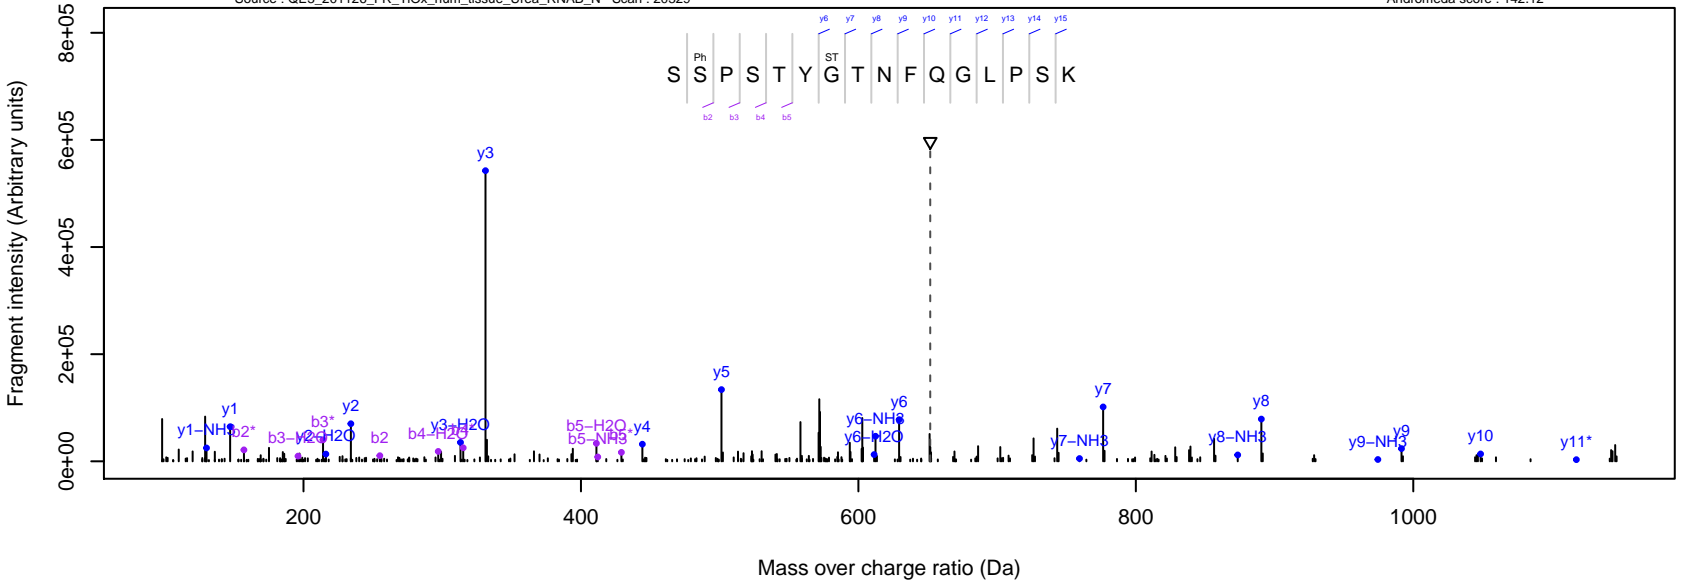

EELM(Oxidation (M))SS(Phospho (STY))DLEETAGSTSIPK-2+

Source : QE3\_201126\_FR\_TiOx\_hum\_tissue\_Urea\_RNAB\_H Scan : 31774

Andromeda score : 142.1

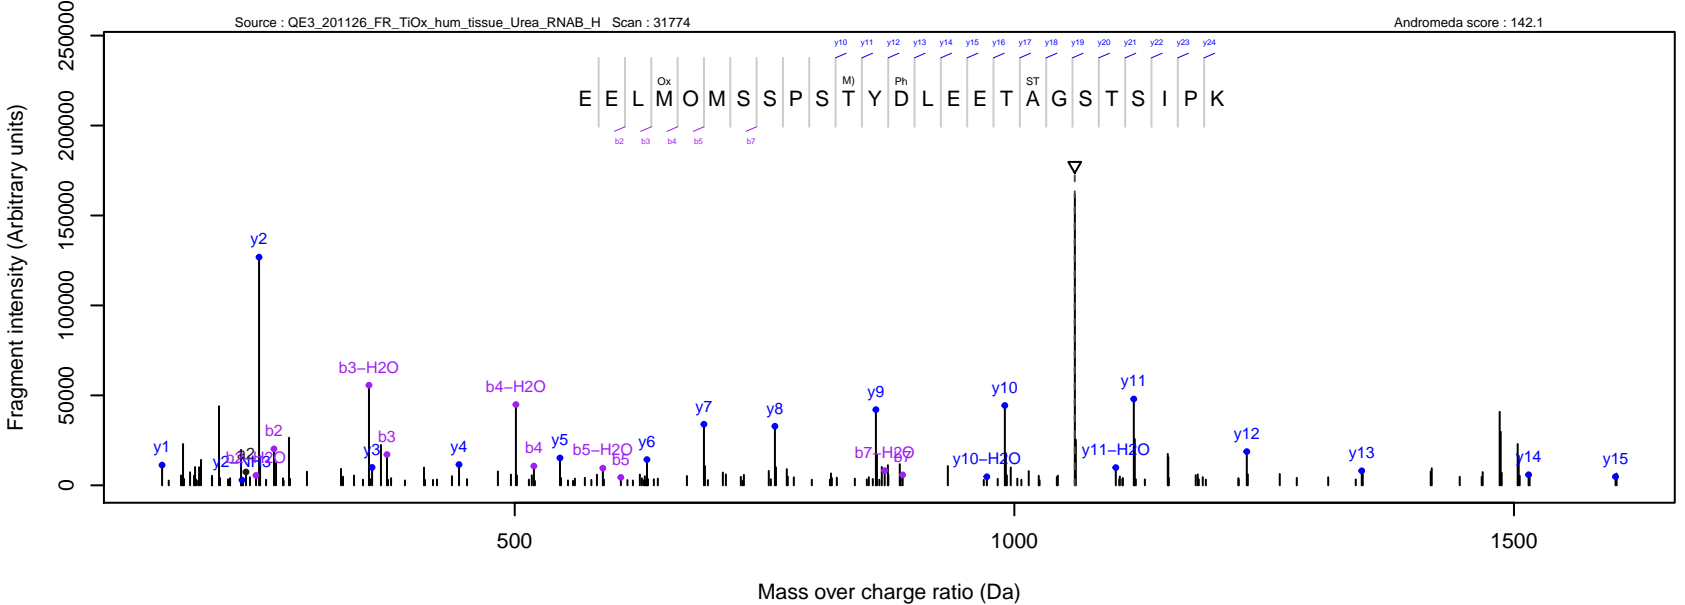

SCLEEEEEES(Phospho (STY))GEEAAEAME-2+

Source : QE3\_201126\_FR\_TiOx\_hum\_tissue\_Urea\_RNAB\_N Scan : 51045

Andromeda score : 142.1

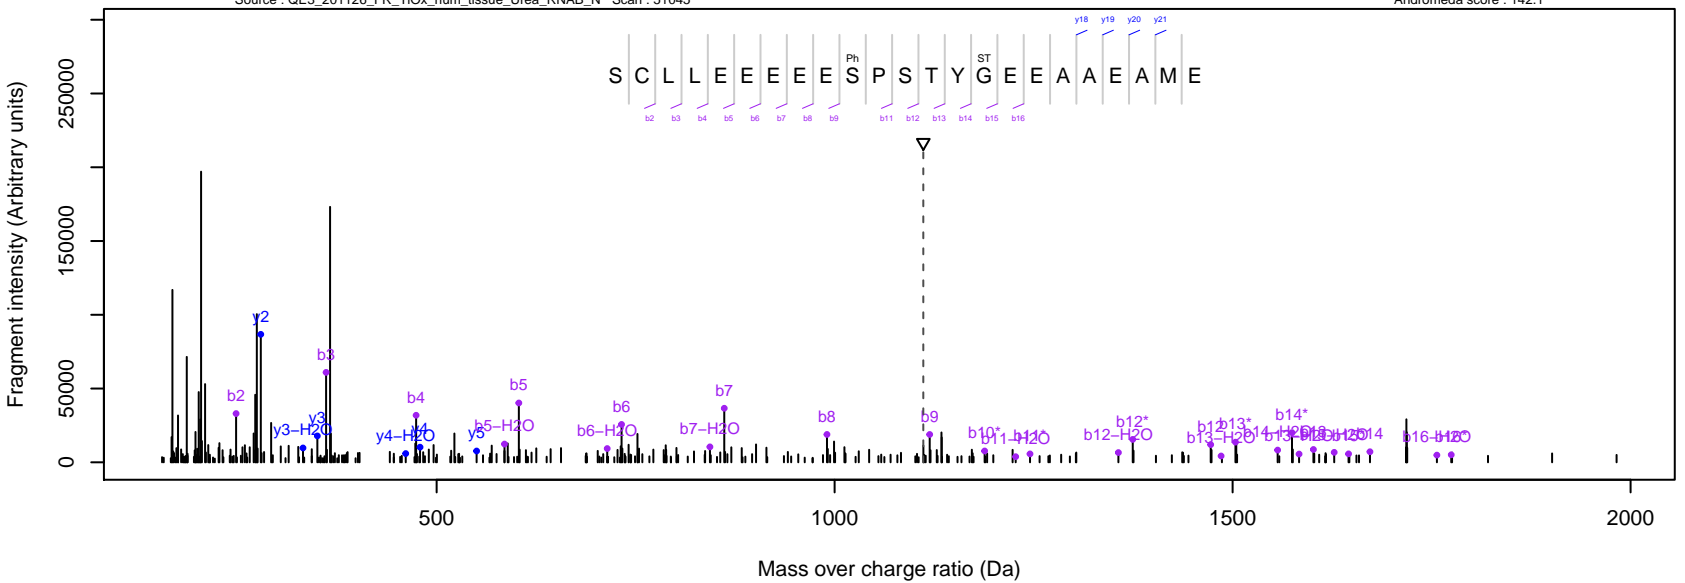



EHALLAYPSTYTLGVK-2+

Source : QE3\_201126\_FR\_TiOx\_hum\_tissue\_Urea\_RNAB\_B Scan : 34814

Andromeda score : 141.95

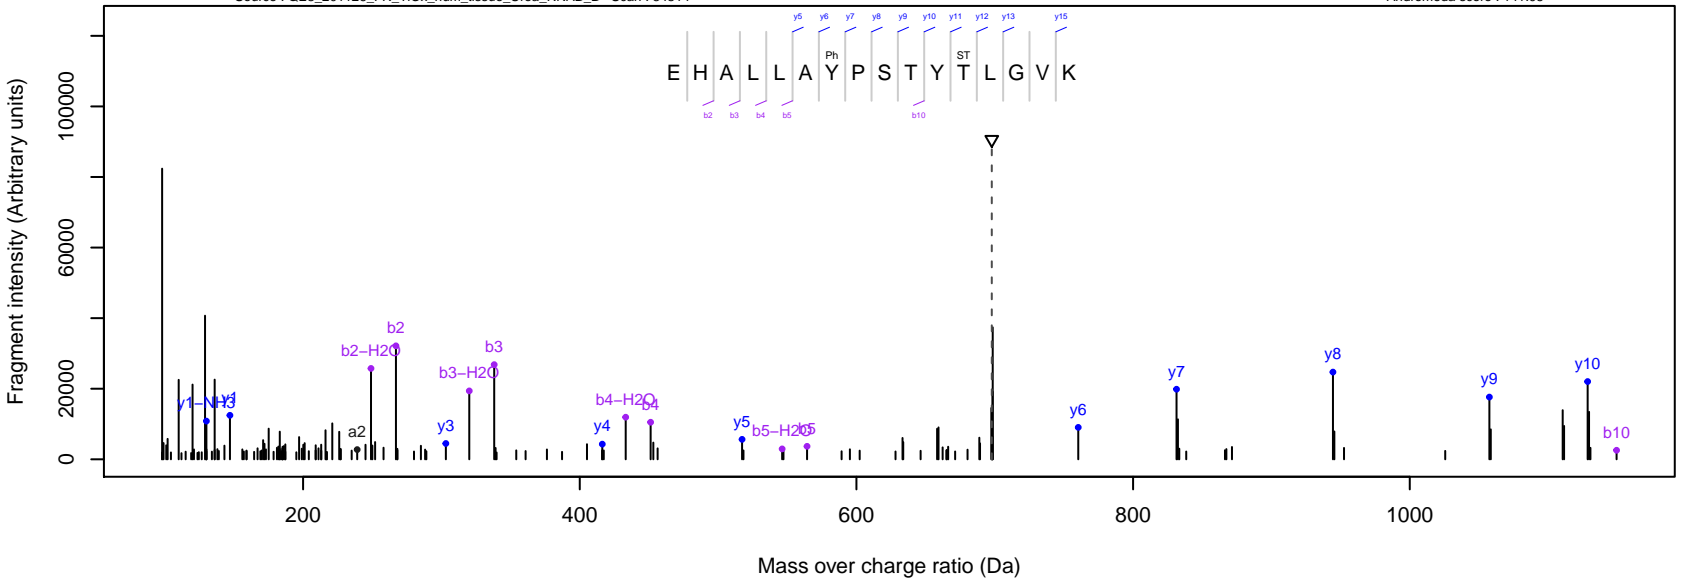

PVSSPSTYAAASPSTYVYAGAGGSPSTYGSR-2+

Source : QE3\_201126\_FR\_TiOx\_hum\_tissue\_Urea\_RNAB\_N Scan : 29764

Andromeda score : 141.93

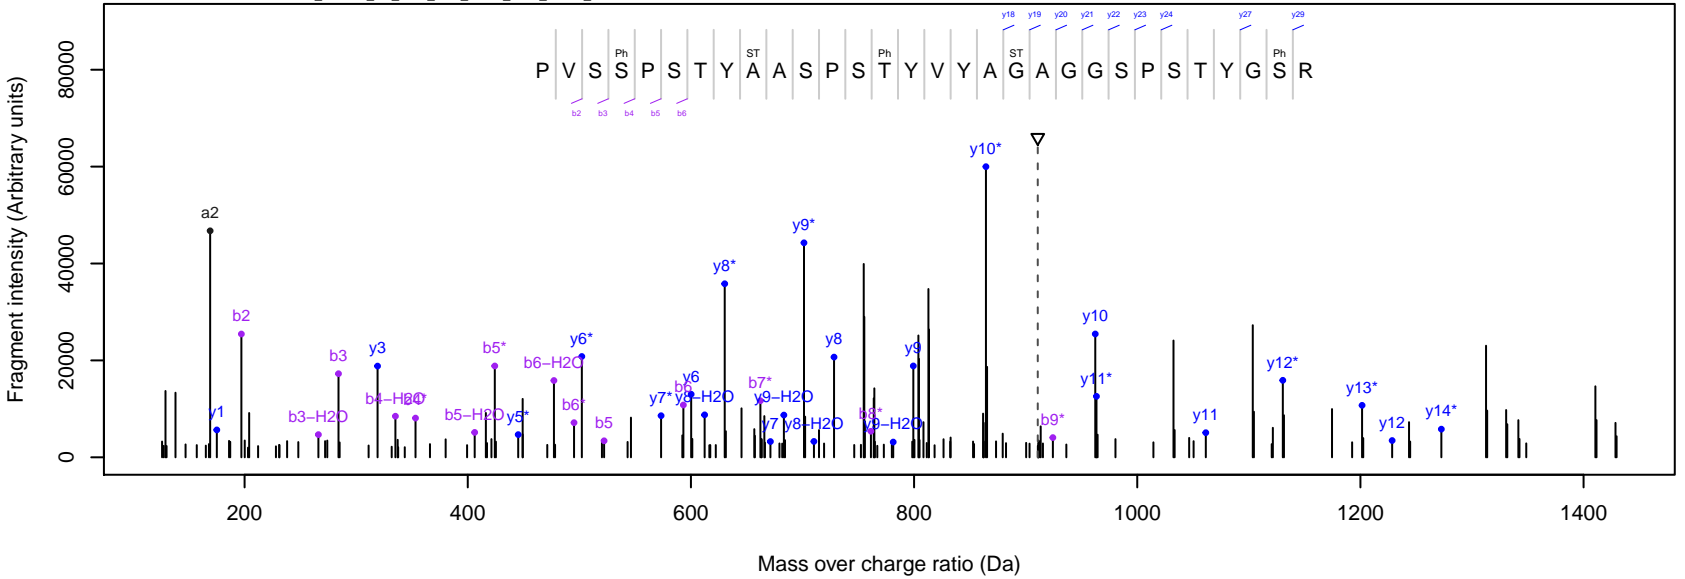

SRSRSPSTYRDSGDENEP IQER-3+

Source : QE3\_201126\_FR\_TiOx\_hum\_tissue\_Urea\_RNAB\_H Scan : 5748

Andromeda score : 141.91

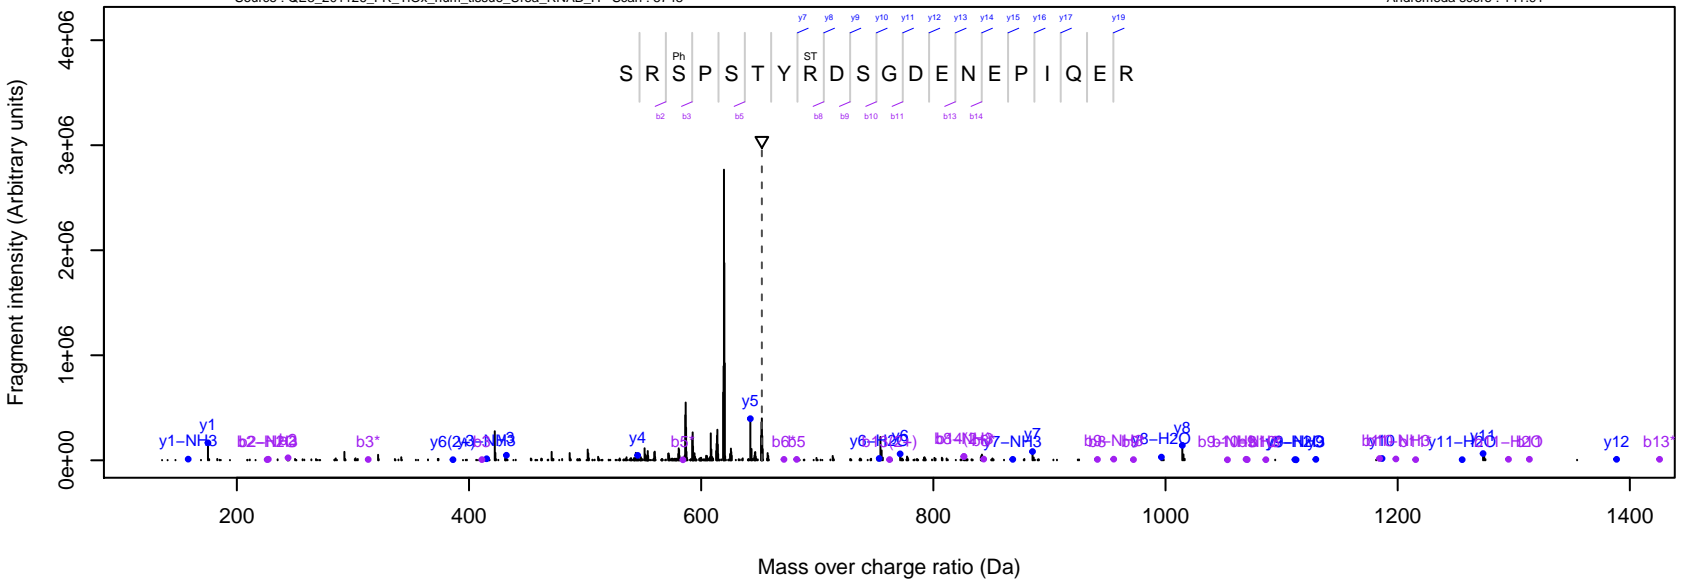

KIS(Phospho (STY))PPSYAR-2+

Source : QE3\_201126\_FR\_TiOx\_hum\_tissue\_Urea\_RNAB\_B Scan : 12412

Andromeda score : 141.89

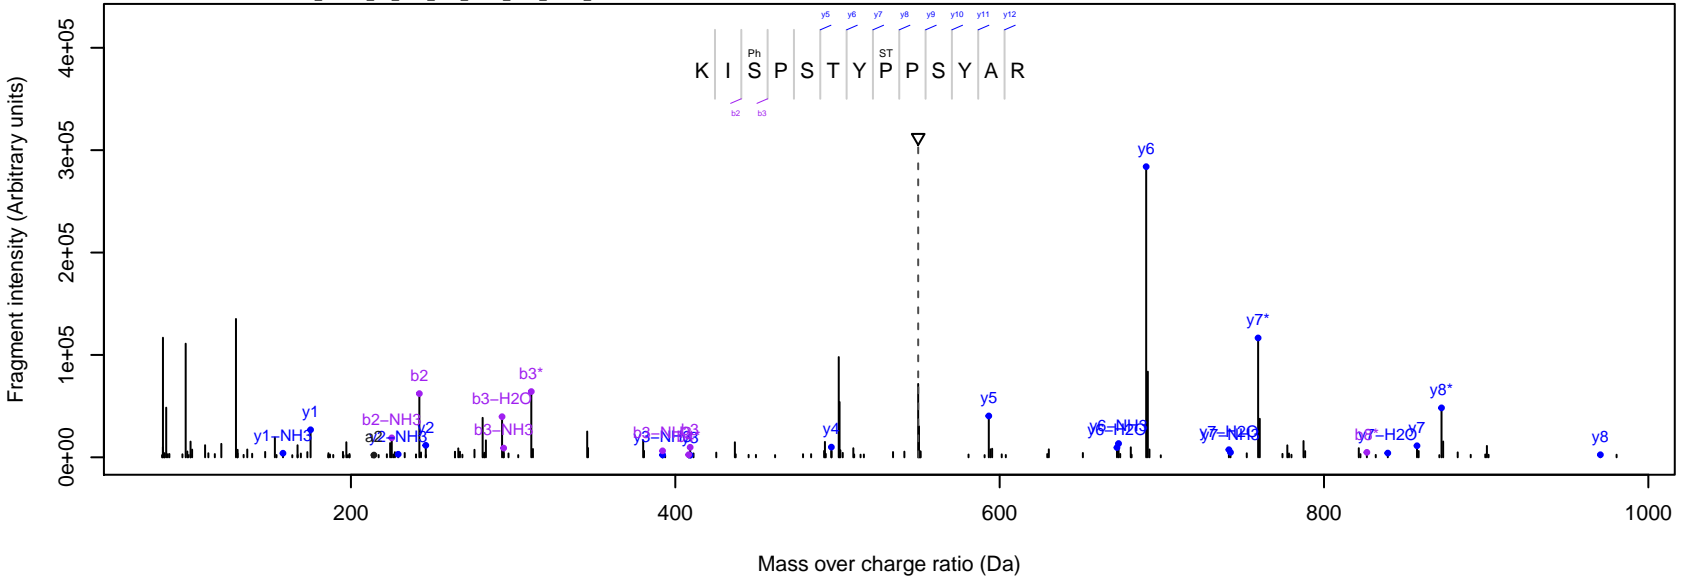

S(Phospho (STY))IQEELQLR-2+

Source : QE3\_201126\_FR\_TiOx\_hum\_tissue\_Urea\_RNAB\_N Scan : 36439

Andromeda score : 141.88

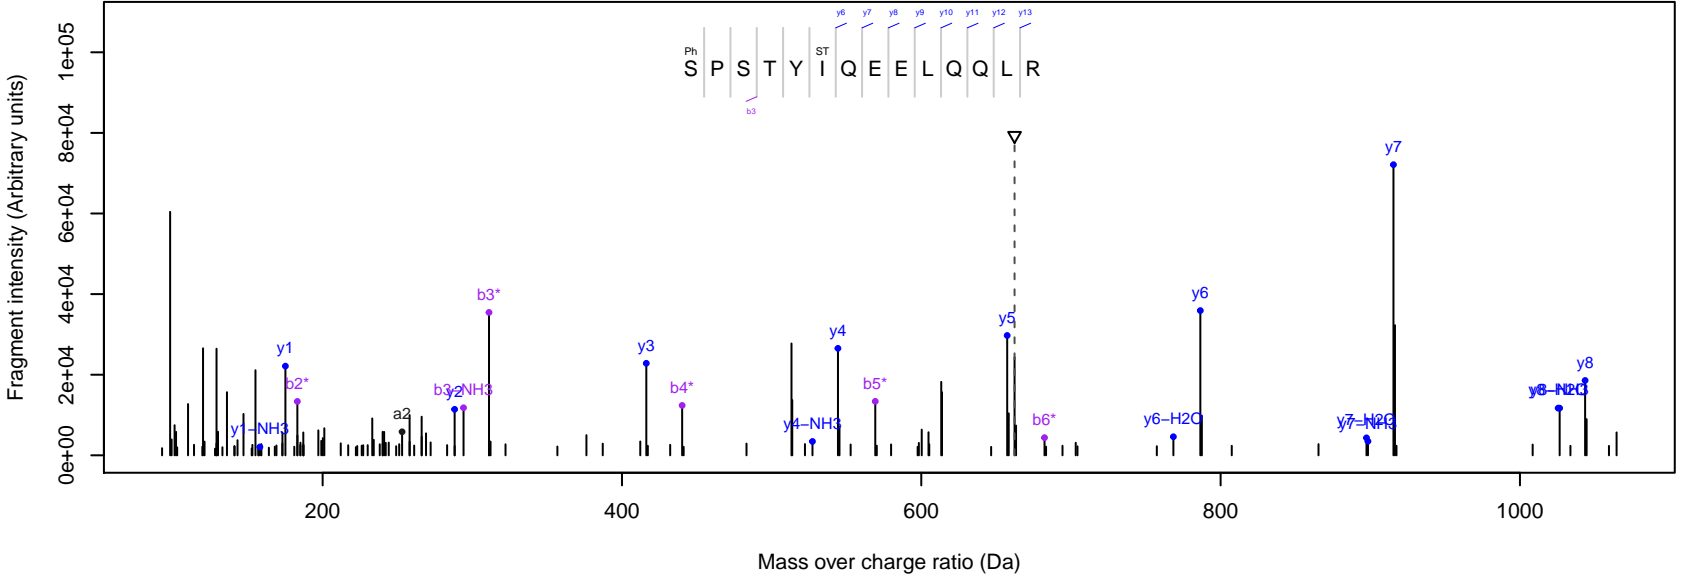

RNLGS(Phospho (STY))INTELQDVQR-3+

Source : QE3\_201126\_FR\_TiOx\_hum\_tissue\_Urea\_RNAB\_N Scan : 27623

Andromeda score : 141.85

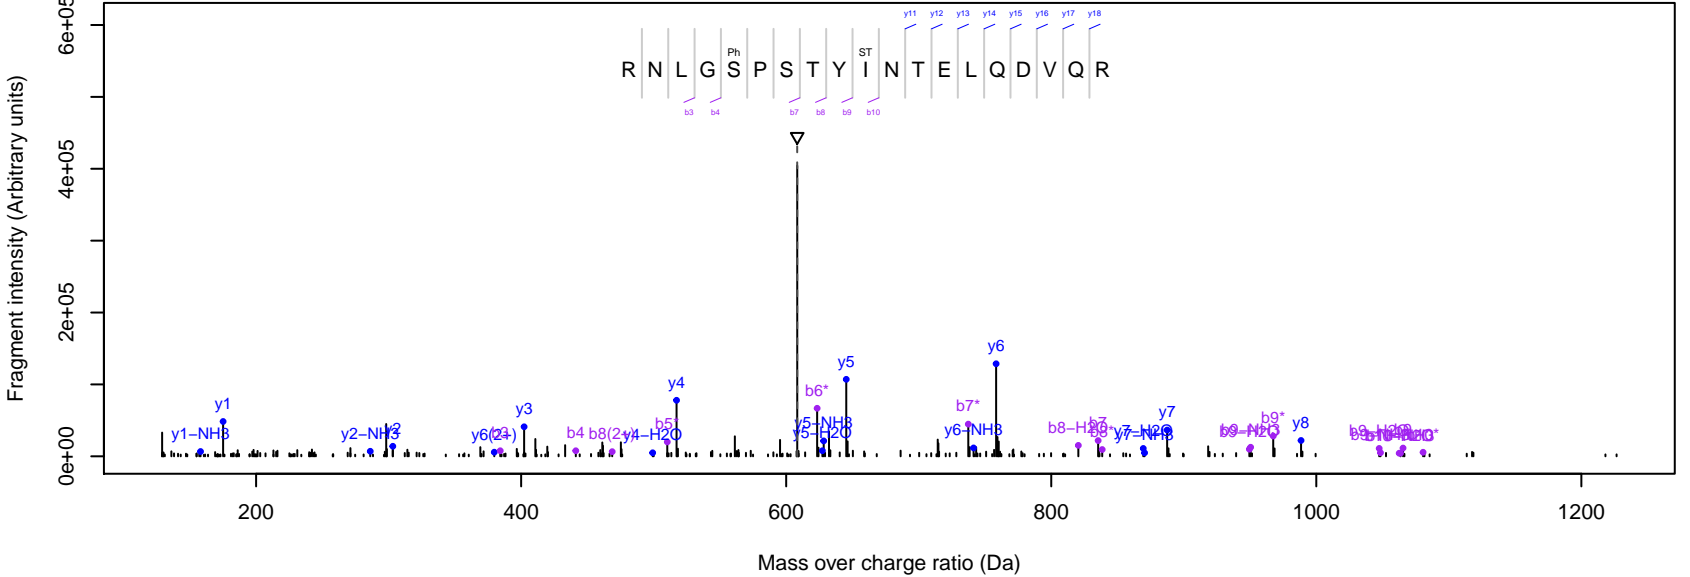

S(Phospho (STY))TSRDRLDDIIVLTK-3+

Source : QE3\_201126\_FR\_TIOx\_hum\_tissue\_Urea\_RNAB\_H Scan : 31848

Andromeda score : 141.83

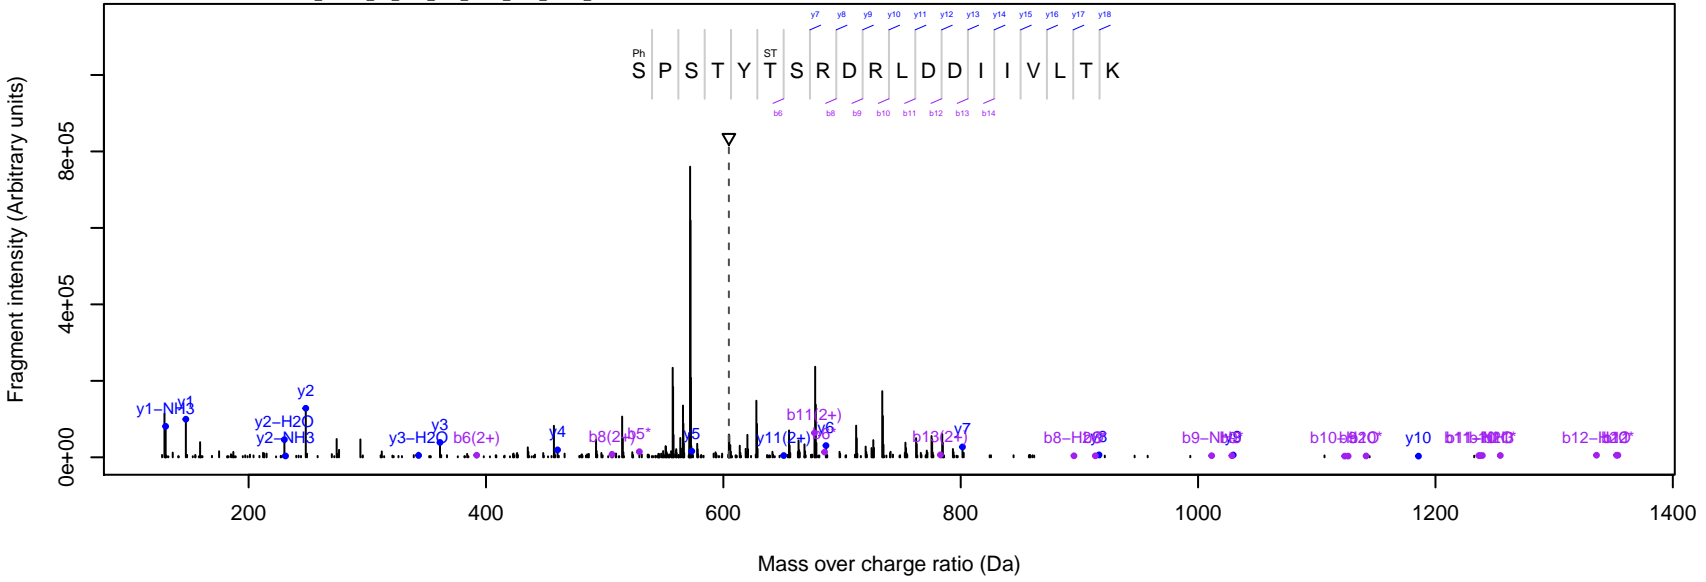

(Acetyl (Protein N-term))S(Phospho (STY))ETAPAAPAAAPPAEK-2+

Source : QE3\_201126\_FR\_TIOx\_hum\_tissue\_Urea\_RNAB\_H Scan : 22970

Andromeda score : 141.82

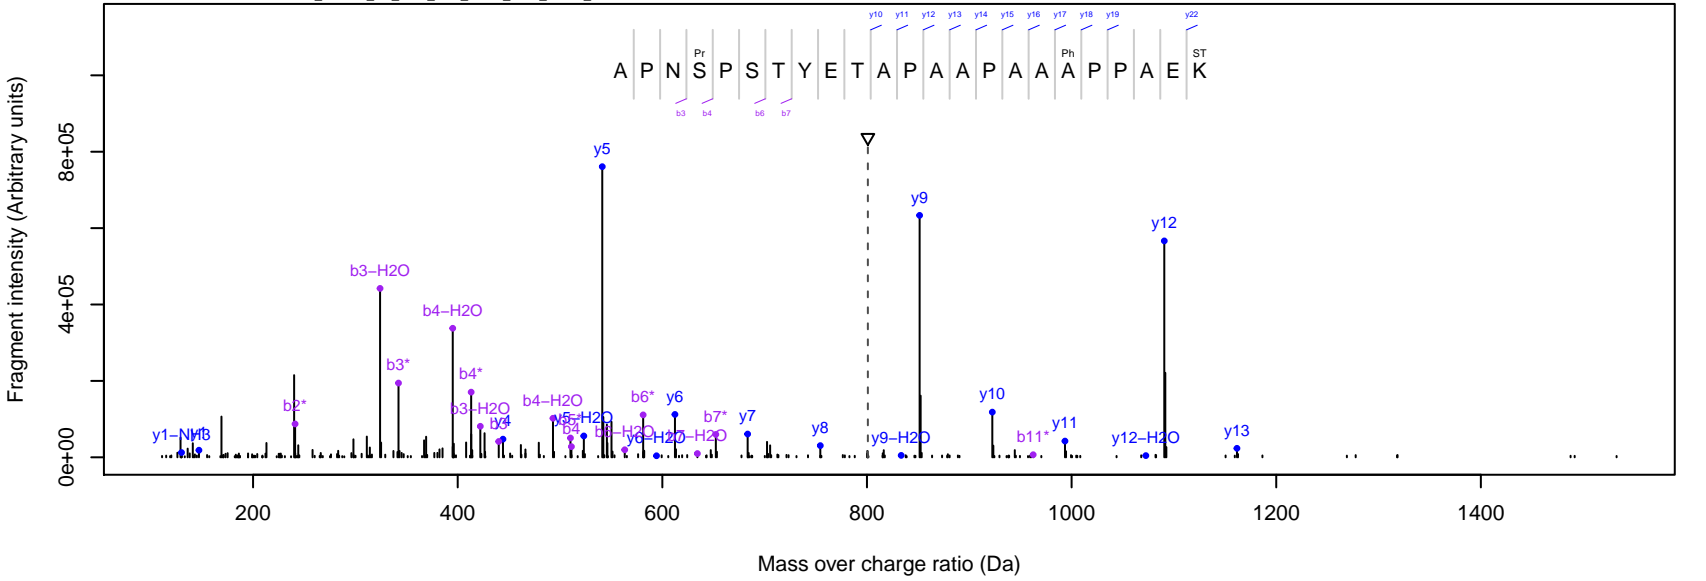

QEVNPNVRQEIESET(Phospho (STY))TSPSTYEEQIQEEK-3+

Source : QE3\_201126\_FR\_TIOx\_hum\_tissue\_Urea\_RNAB\_H Scan : 28068

Andromeda score : 141.79

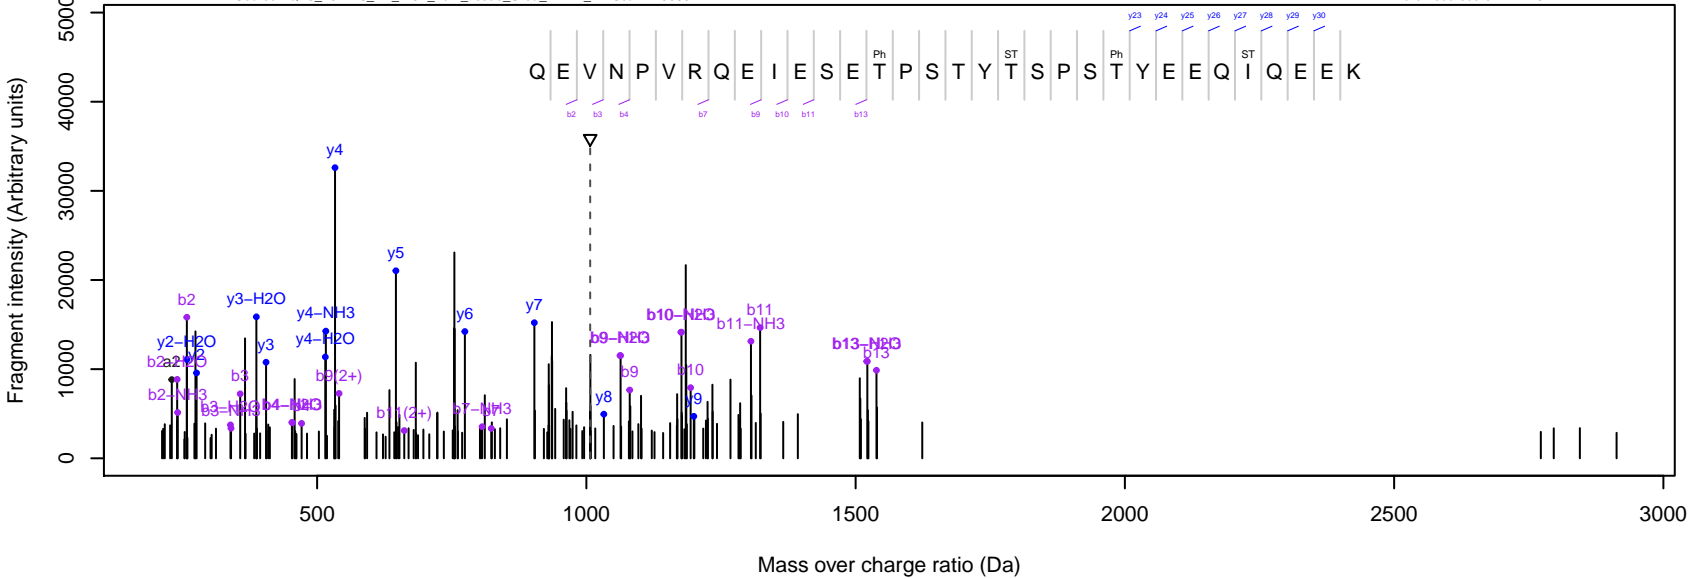



(Acetyl (Protein N-term))AS(Phospho (STY))PPACPEEEDSLKGCELYVQLHGIQVVLK-3+

Source : QE3\_201126\_FR\_TIOx\_hum\_tissue\_Urea\_RNAB\_H Scan : 54570

Andromeda score : 141.69

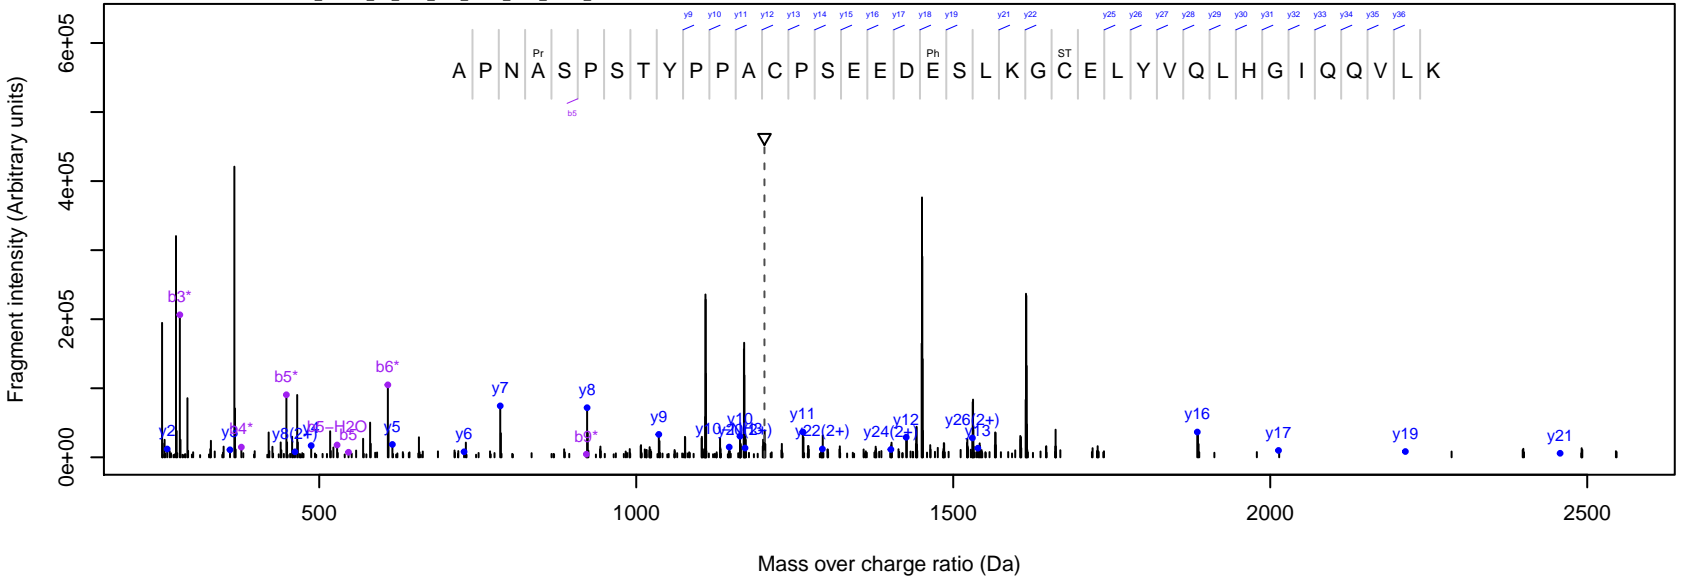

TEM(Oxidation (M))DKSPFNSPS(Phospho (STY))PQDSPR-3+

Source : QE3\_201126\_FR\_TIOx\_hum\_tissue\_Urea\_RNAB\_H Scan : 16002

Andromeda score : 141.69

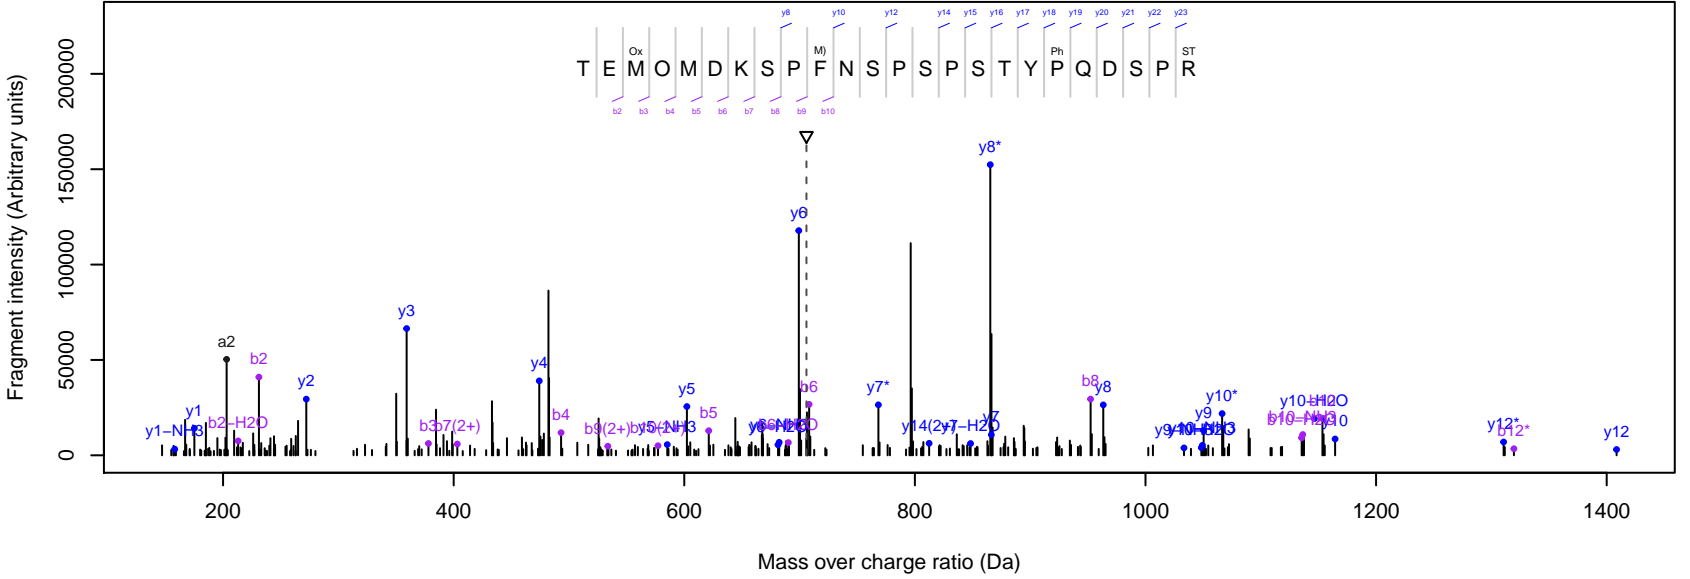

ANS(Phospho (STY))PSLFGTEGKPK-2+

Source : QE3\_201126\_FR\_TIOx\_hum\_tissue\_Urea\_RNAB\_H Scan : 17050

Andromeda score : 141.65

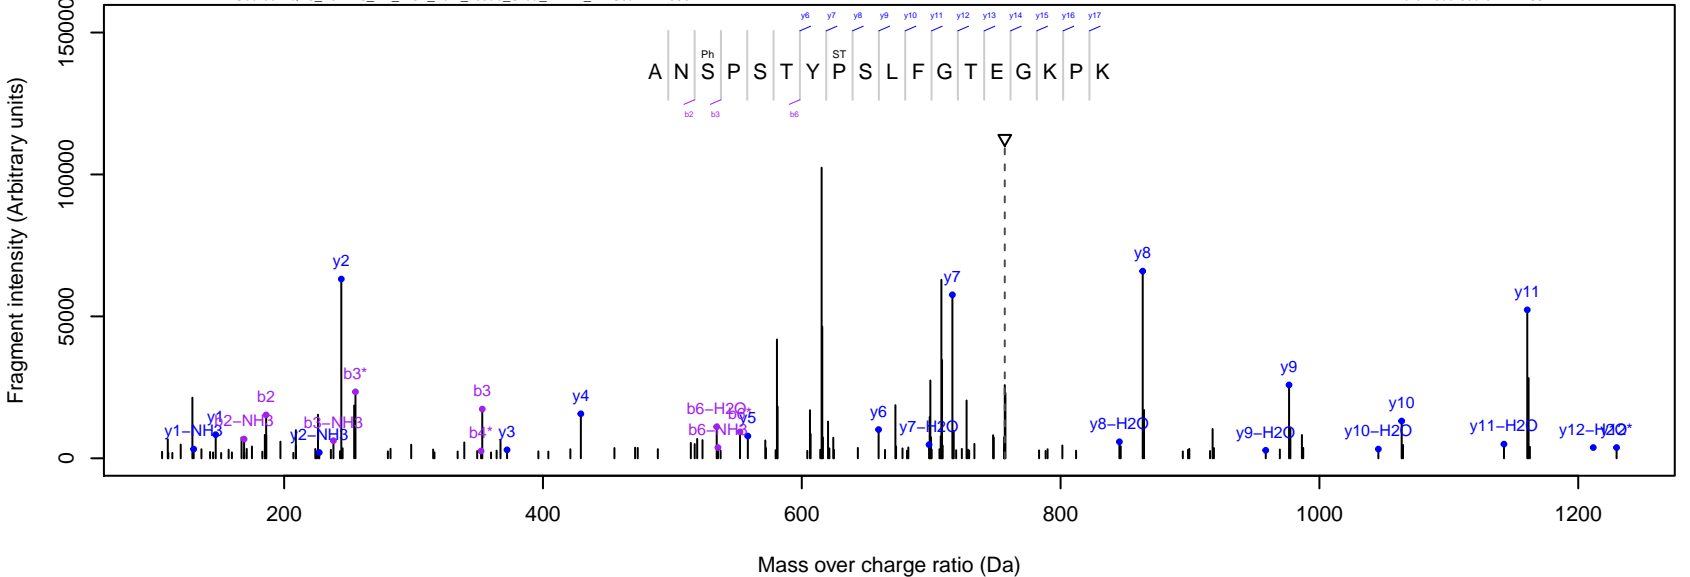

(Acetyl (Protein N-term))S(Phospho (STY))REMQDVDLAEVKPLVEK-3+

Source : QE3\_201126\_FR\_TiOx\_hum\_tissue\_Urea\_RNAB\_H Scan : 40244

Andromeda score : 141.64

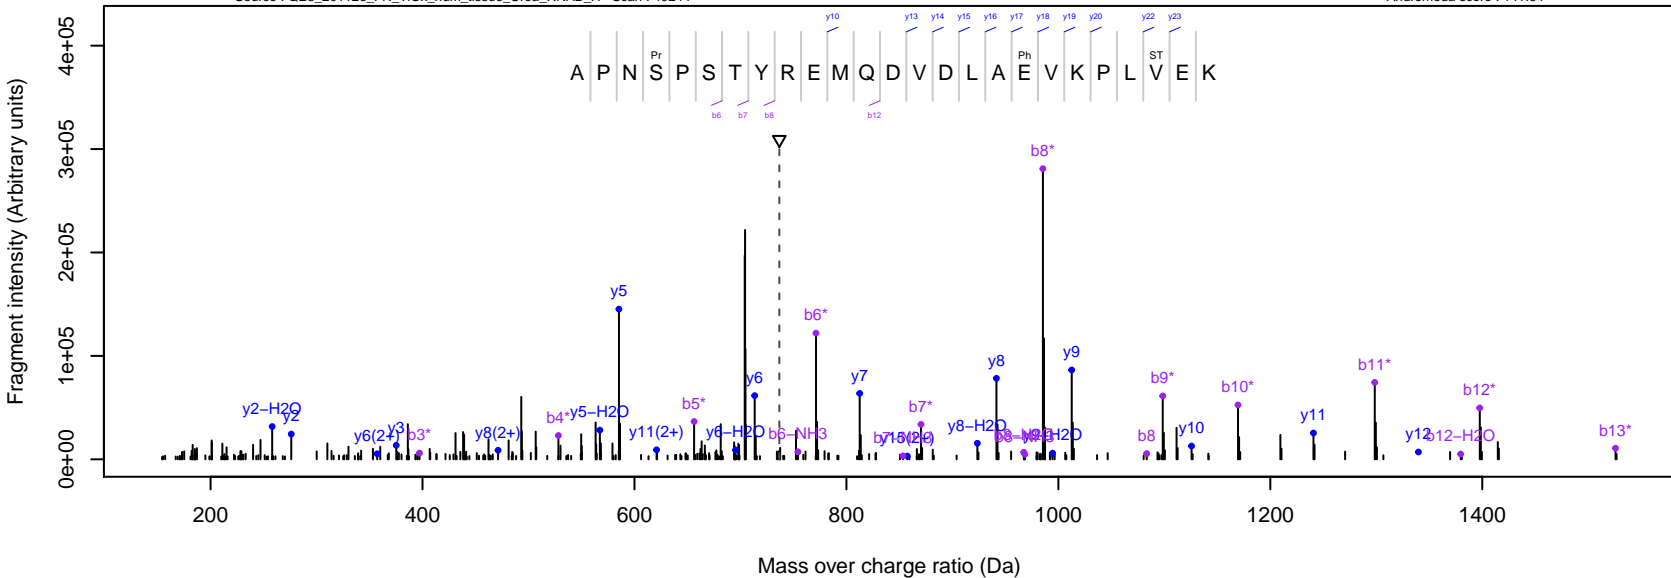

SS(Phospho (STY))PQLDPLRKS(Phospho (STY))PTM(Oxidation (M))EQAVQTASAHLPAAPAVGR-4+

Source : QE3\_201126\_FR\_TiOx\_hum\_tissue\_Urea\_RNAB\_H Scan : 33936

Andromeda score : 141.57

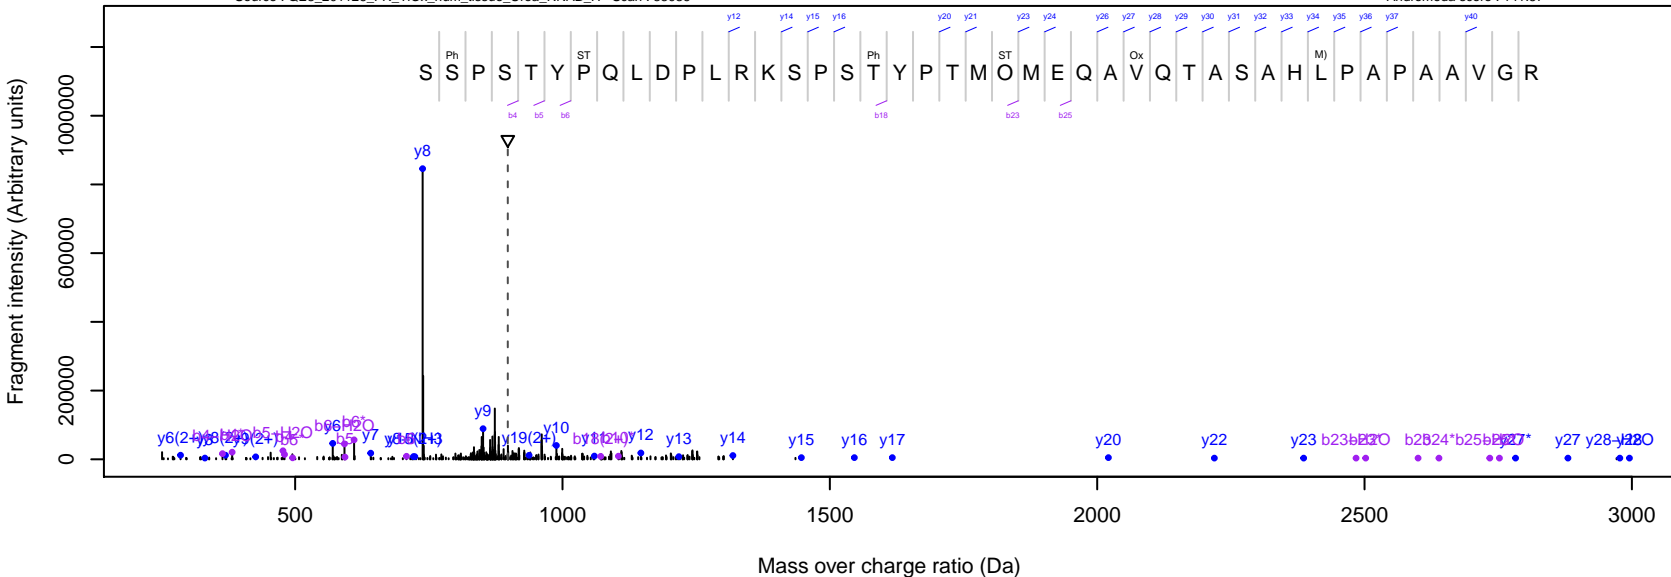

SSTPS(Phospho (STY))SPTGTSSSDSGHHHWGER-4+

Source : QE3\_201126\_FR\_TiOx\_hum\_tissue\_Urea\_RNAB\_N Scan : 13691

Andromeda score : 141.53

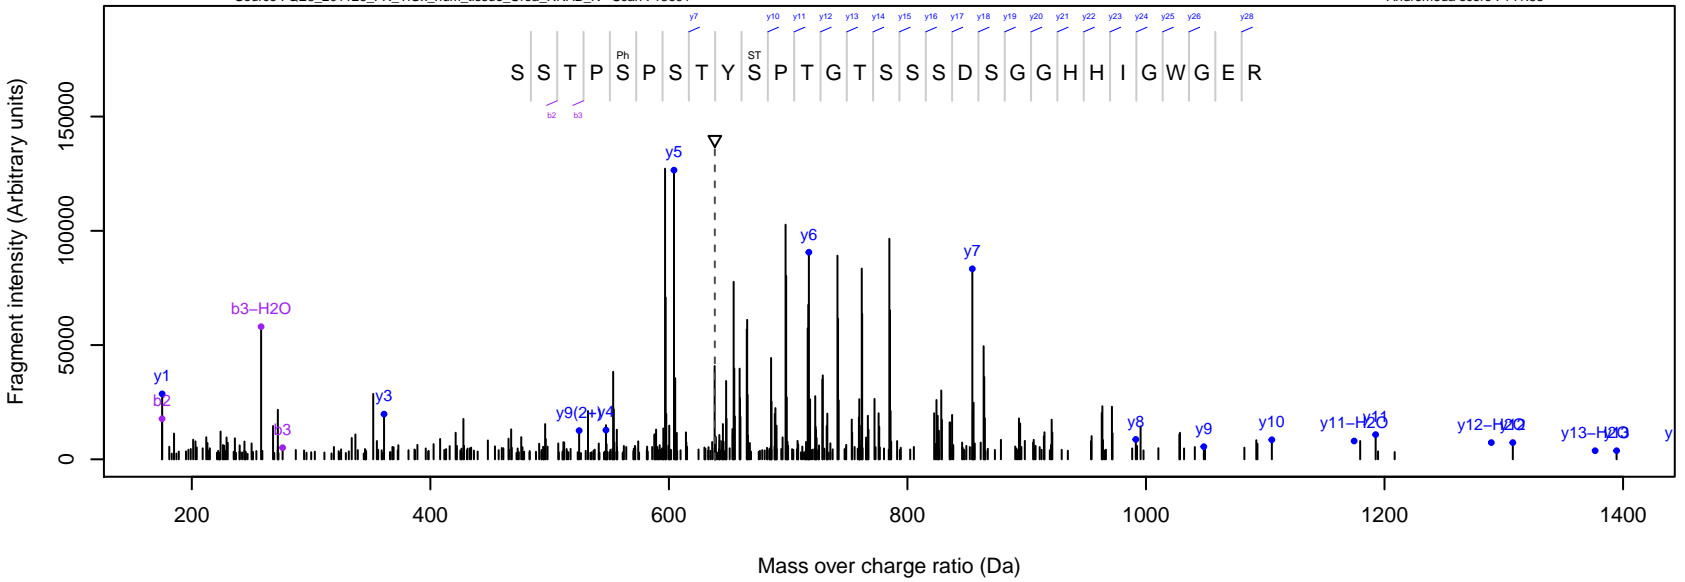

SPS(Phospho (STY))PSFR-2+

Source : QE3\_201126\_FR\_TiOx\_hum\_tissue\_Urea\_RNAB\_H Scan : 11364

Andromeda score : 141.52

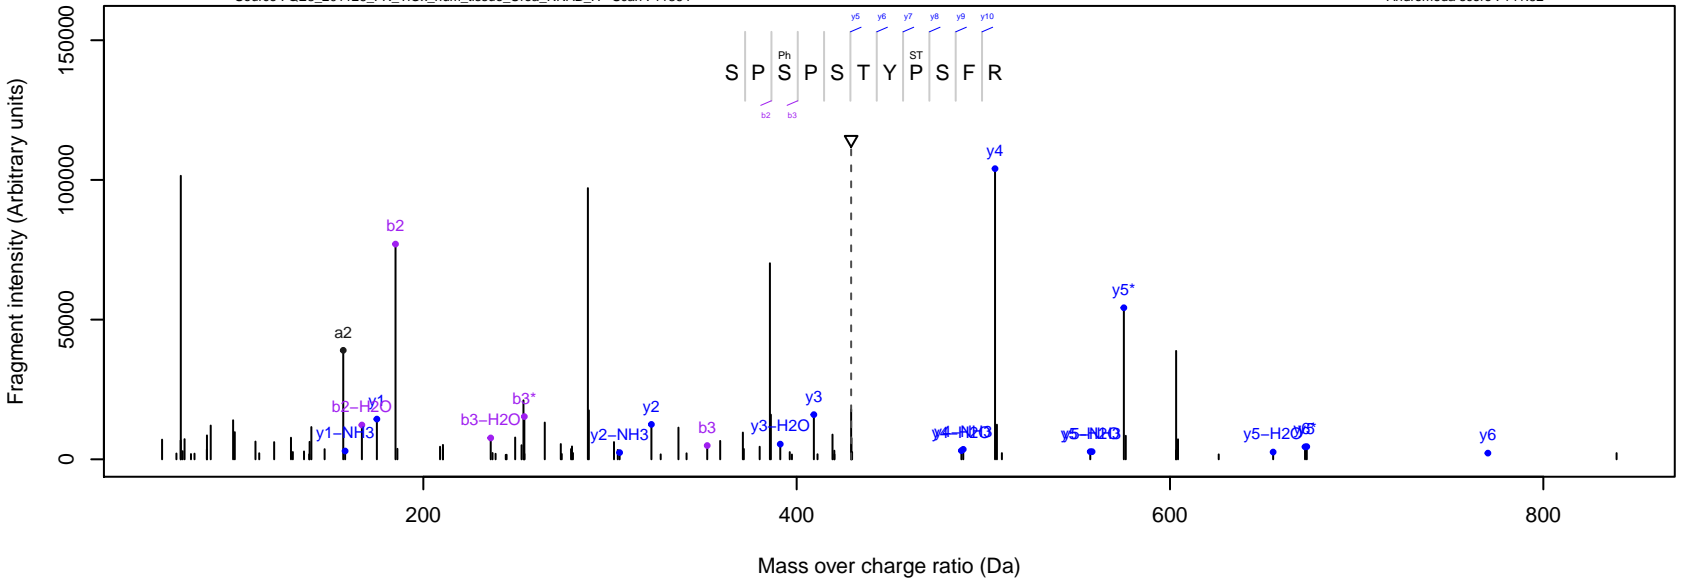

GRLT(Phospho (STY))PS(Phospho (STY))PDIIVLSDNEASSPR-3+

Source : QE3\_201126\_FR\_TiOx\_hum\_tissue\_Urea\_RNAB\_N Scan : 44227

Andromeda score : 141.48

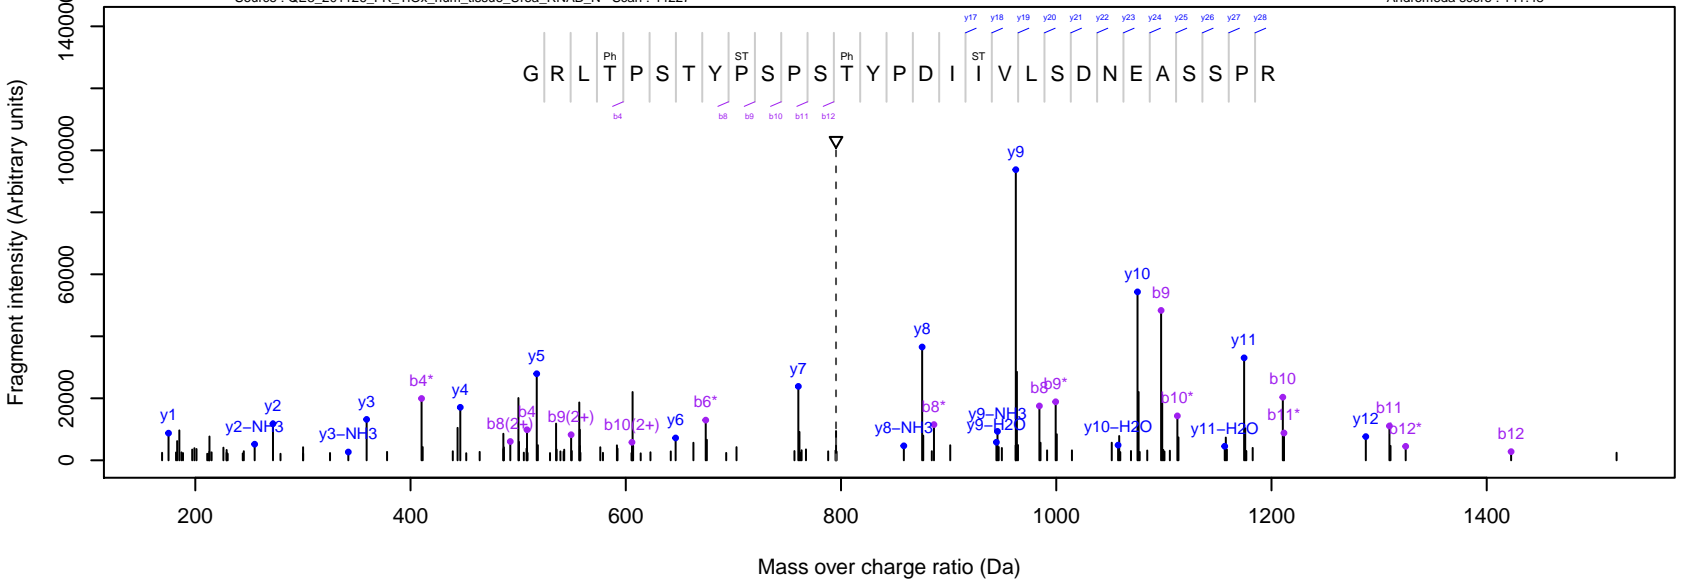

ASTIFLSKS(Phospho (STY))QT DVR-2+

Source : QE3\_201126\_FR\_TiOx\_hum\_tissue\_Urea\_RNAB\_B Scan : 21705

Andromeda score : 141.46

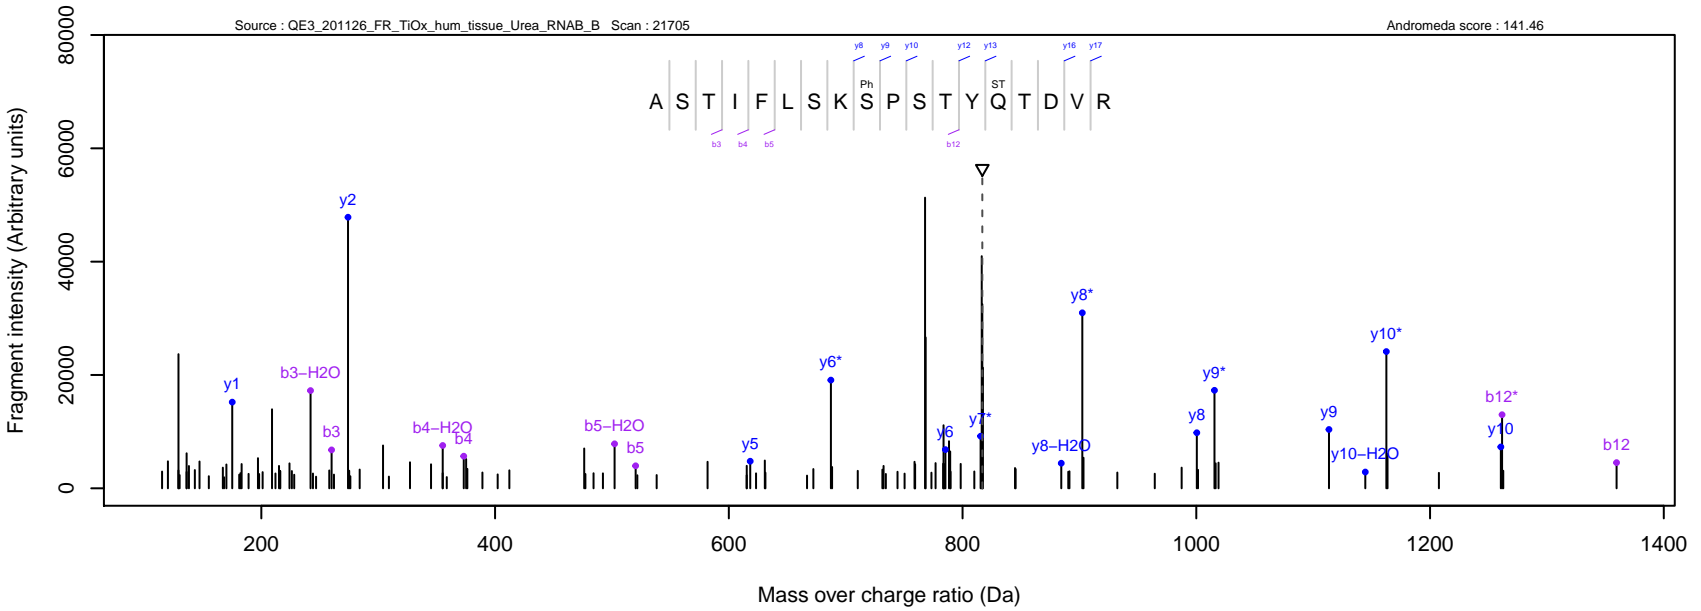

S(Phospho (STY))PPSYSVLYPSSDPK-2+

Source : QE3\_201126\_FR\_TiOx\_hum\_tissue\_Urea\_RNAB\_H Scan : 34974

Andromeda score : 141.46

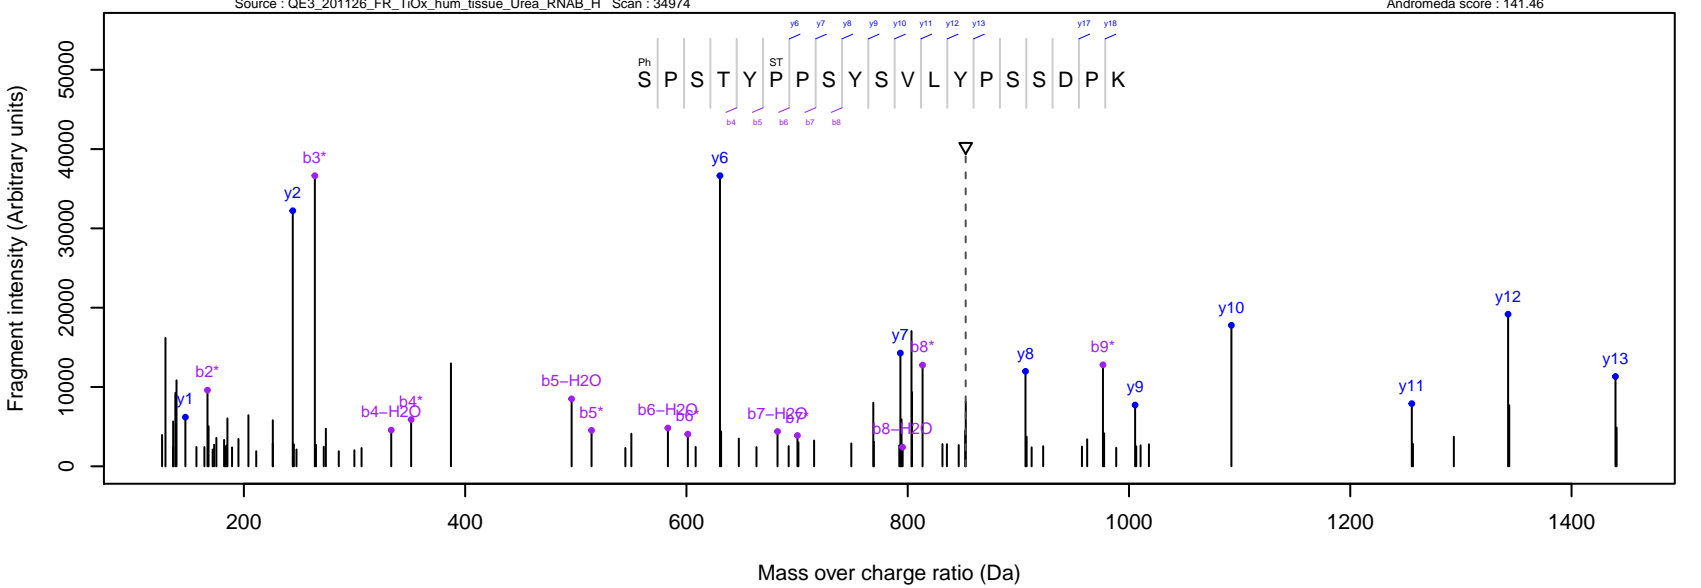

GQVMS(Phospho (STY))SLAELEDDFKEGYLETVAAYEEQHP E L T P L L E K-4+

Source : QE3\_201126\_FR\_TiOx\_hum\_tissue\_Urea\_RNAB\_B Scan : 62317

Andromeda score : 141.39

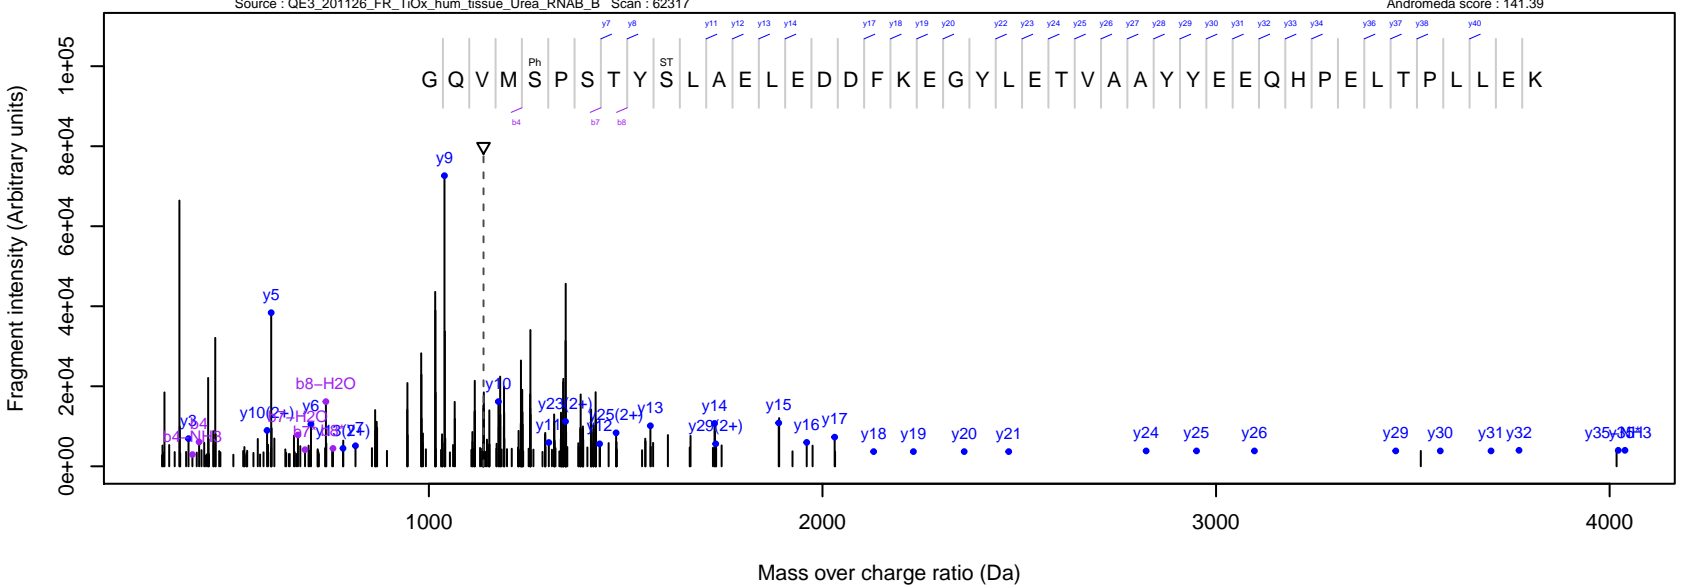

ELLVSALQELESSTNS(Phospho (STY))PSNK-3+

Source : QE3\_201126\_FR\_TiOx\_hum\_tissue\_Urea\_RNAB\_N Scan : 58495

Andromeda score : 141.37

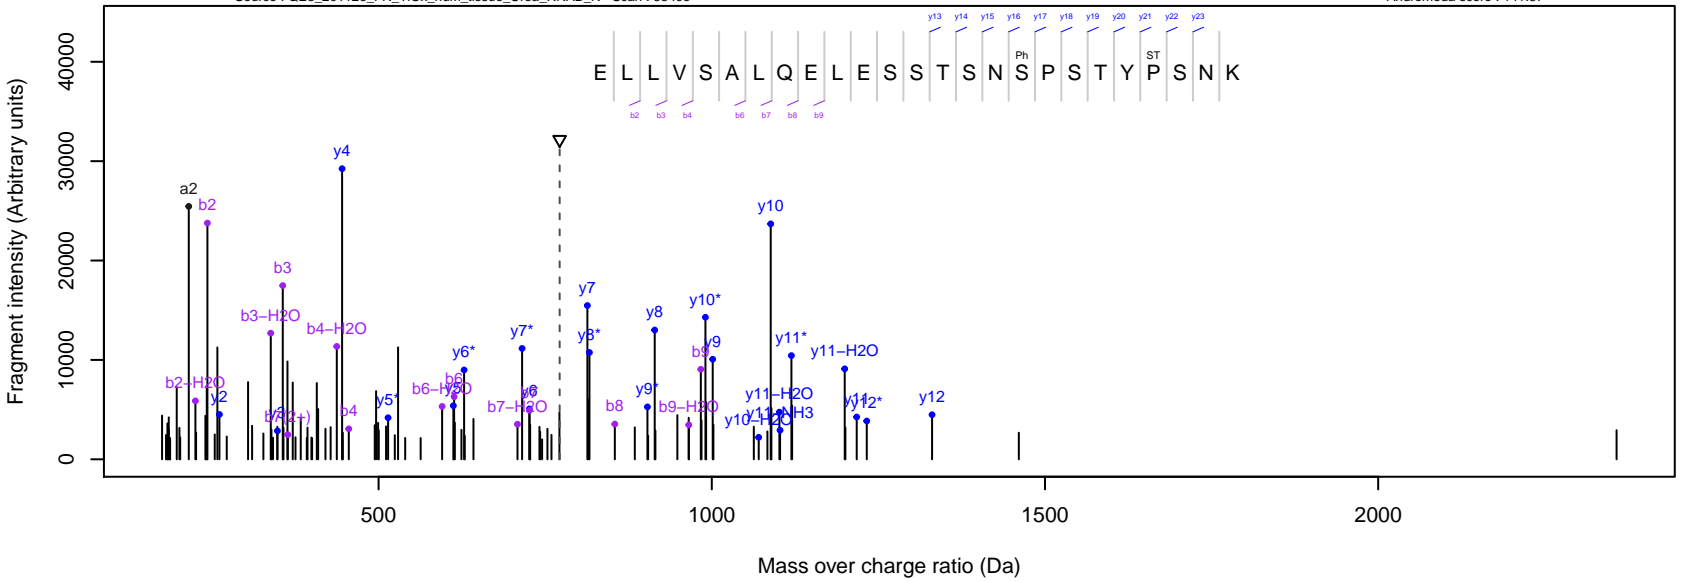

GHLSRPEAQSLS(Phospho (STY))PYTTSANR-3+

Source : QE3\_201126\_FR\_TiOx\_hum\_tissue\_Urea\_RNAB\_H Scan : 16032

Andromeda score : 141.37

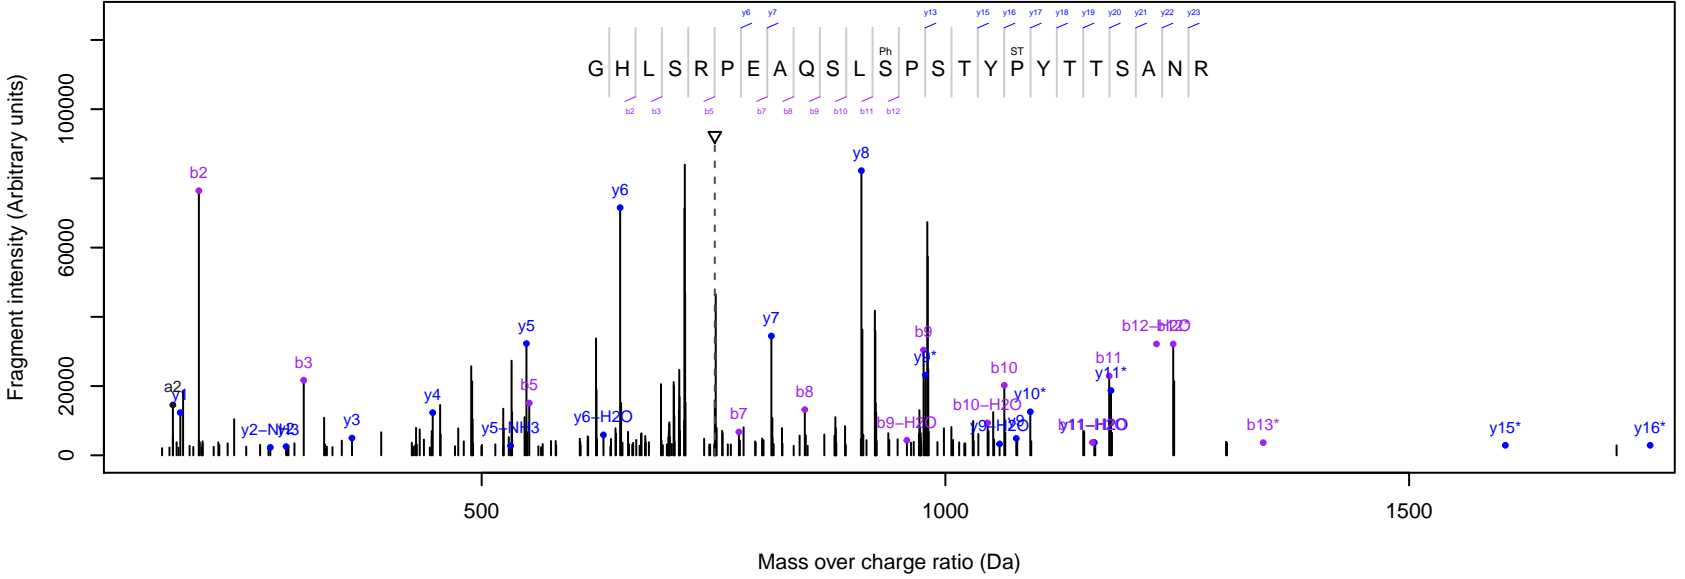

S(Phospho (STY))PSQDFSFIEDTEILDSAMYR-3+

Source : QE3\_201126\_FR\_TiOx\_hum\_tissue\_Urea\_RNAB\_H Scan : 62322

Andromeda score : 141.37

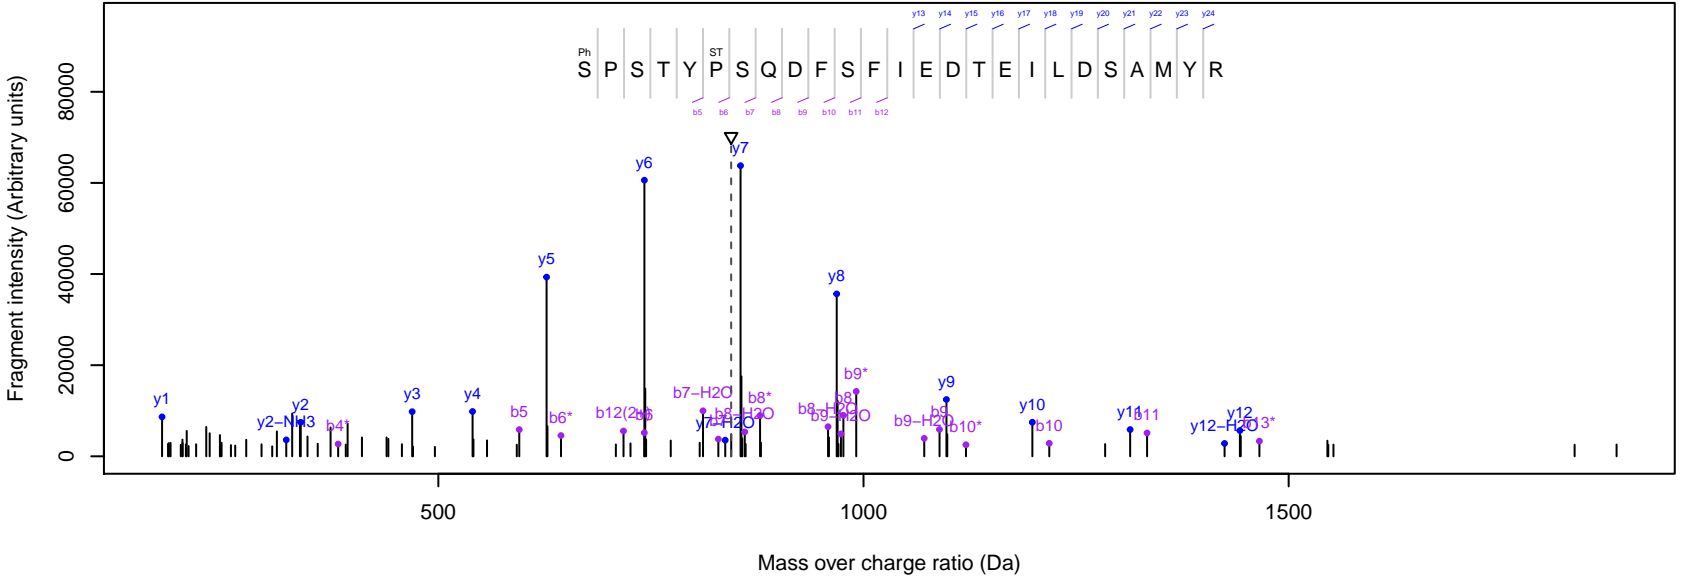

STFAGS(Phospho (STY))PERESIHILSVDEK-3+

Source : QE3\_201126\_FR\_TiOx\_hum\_tissue\_Urea\_RNAB\_H Scan : 30748

Andromeda score : 141.36

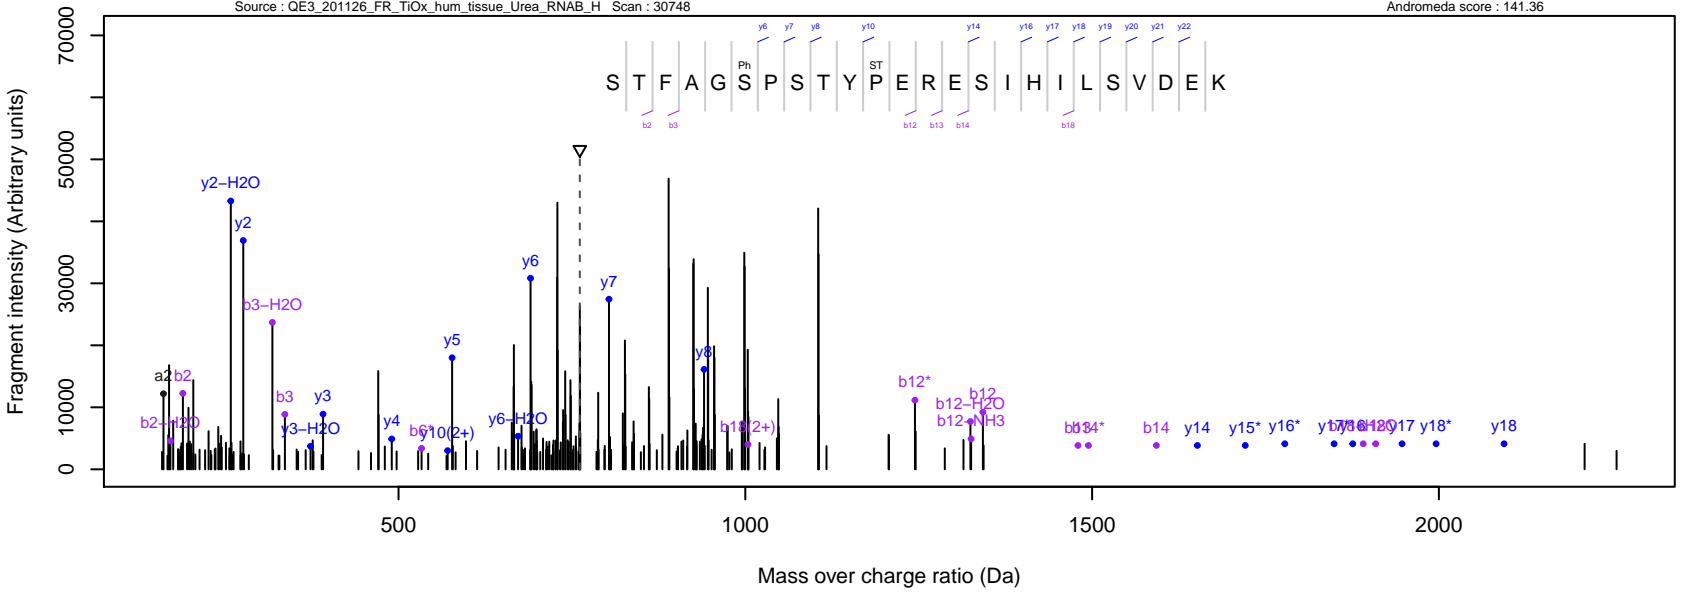

(Acetyl (Protein N-term))ATSPQKS(Phospho (STY))PSVPK(SPhospho (STY))PTPK-2+

Source : QE3\_201126\_FR\_TiOx\_hum\_tissue\_Urea\_RNAB\_H Scan : 13541

Andromeda score : 141.22

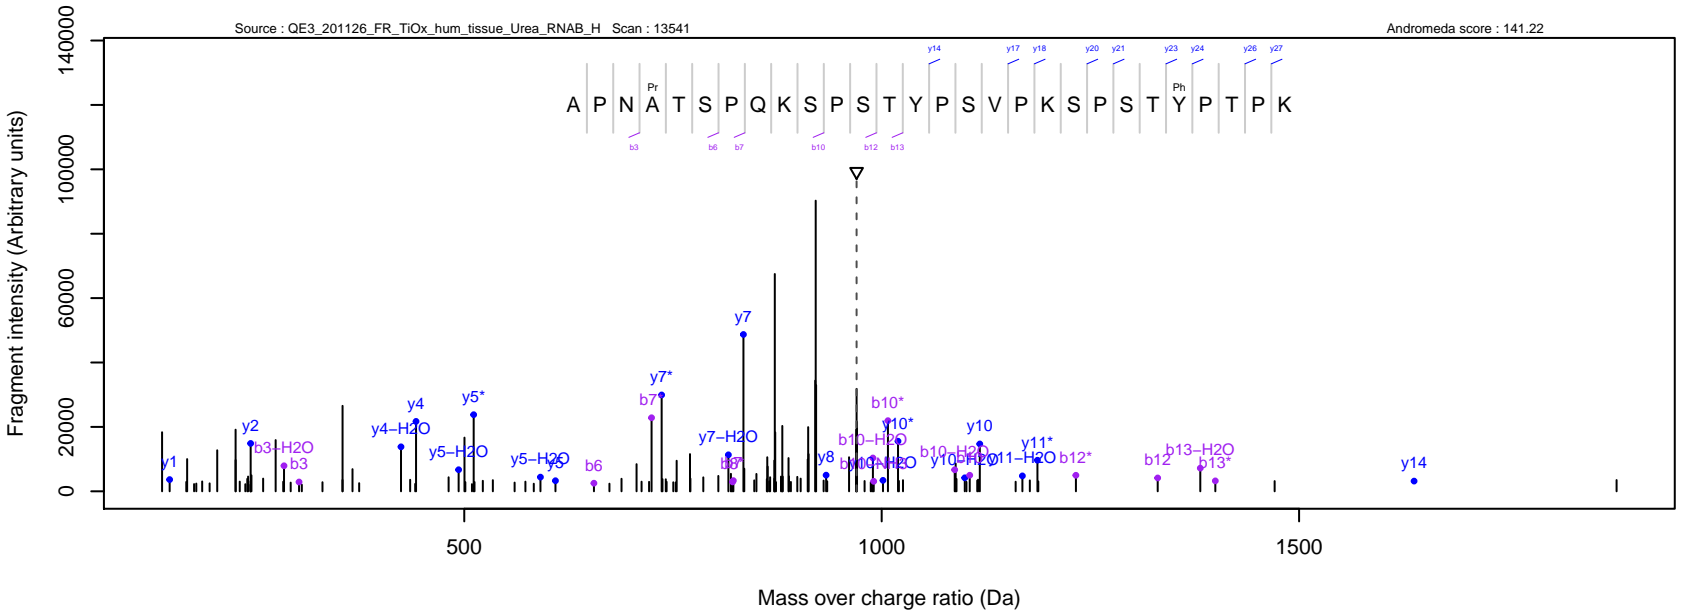

KRS(Phospho (STY))PS(Phospho (STY))PSPTPEAK-3+

Source : QE3\_201126\_FR\_TiOx\_hum\_tissue\_Urea\_RNAB\_H Scan : 3835

Andromeda score : 141.22

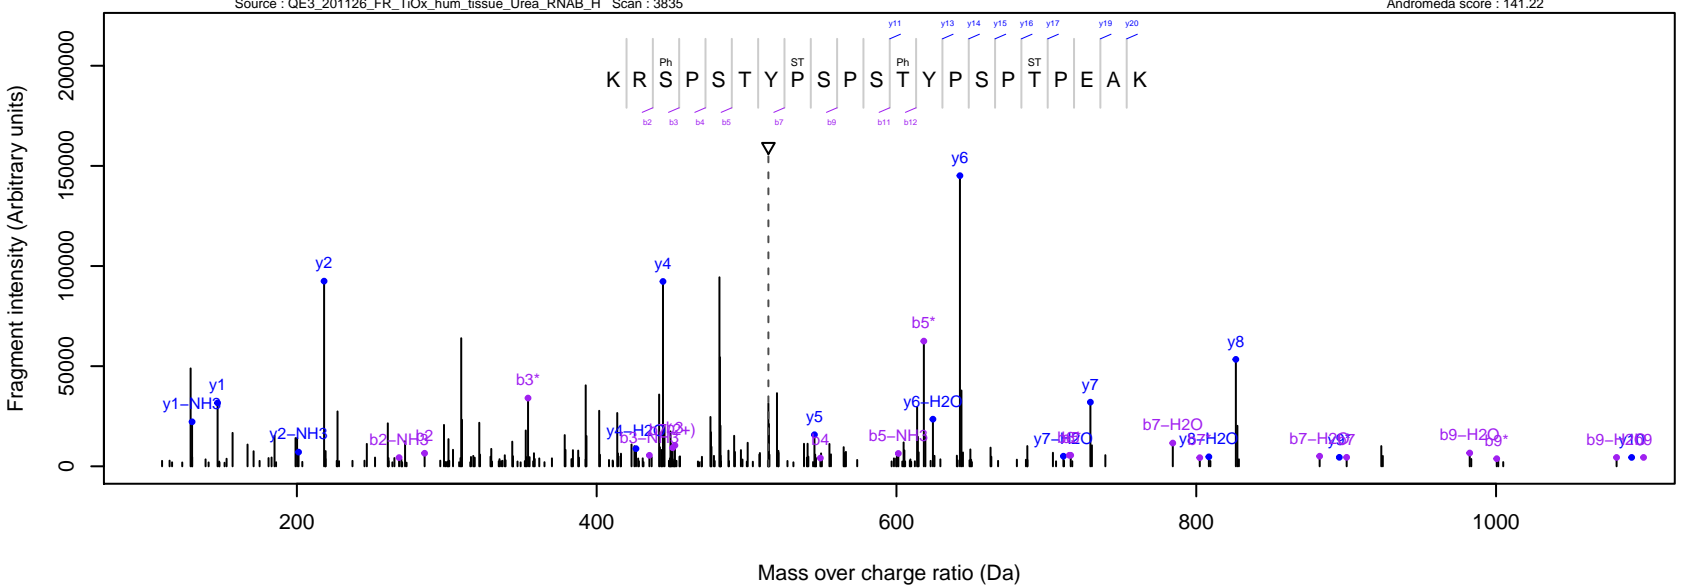

AAGDSGEDSDS(Phospho (STY))DYENLIDPTEPSNSEYSHSK-3+

Source : QE3\_201126\_FR\_TiOx\_hum\_tissue\_Urea\_RNAB\_N Scan : 34150

Andromeda score : 141.21

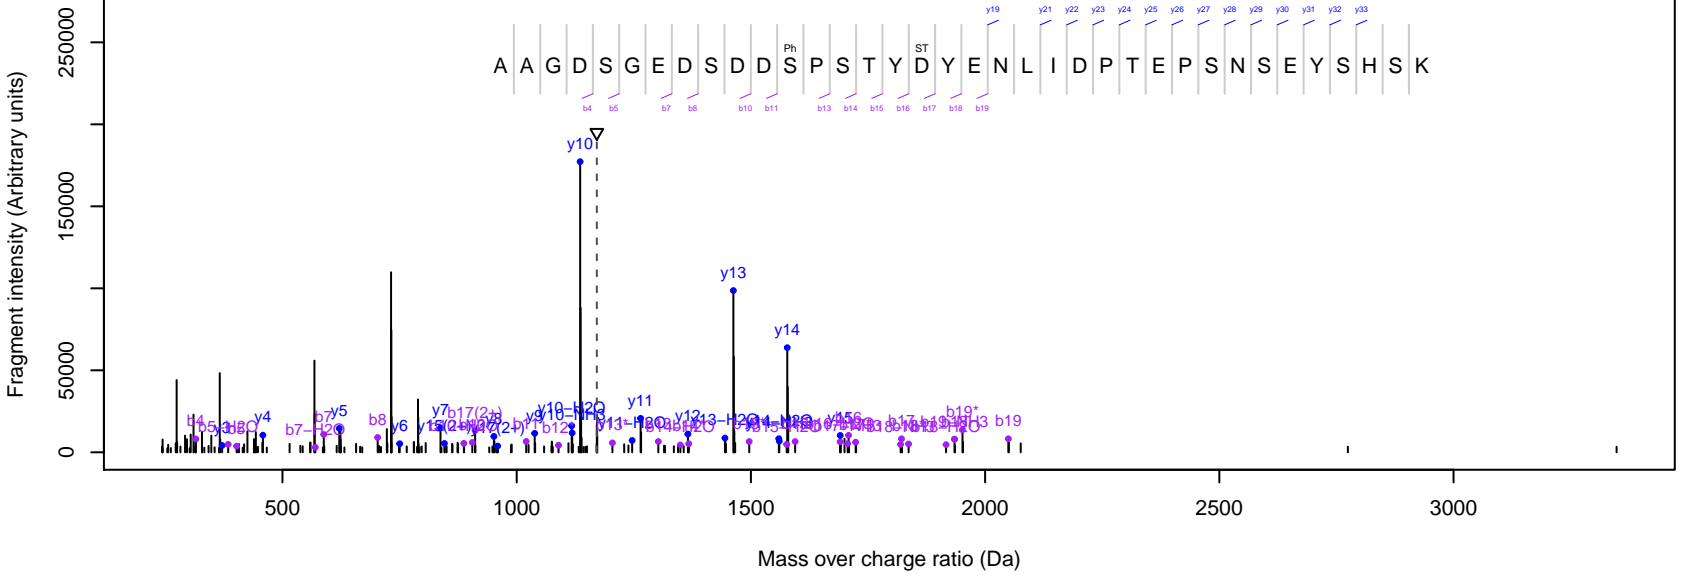

ELDEGRYGVYEDENYEVGS(Phospho (STY))DDEEIPFK-3+

Source : QE3\_201126\_FR\_TiOx\_hum\_tissue\_Urea\_RNAB\_N Scan : 46166

Andromeda score : 141.17

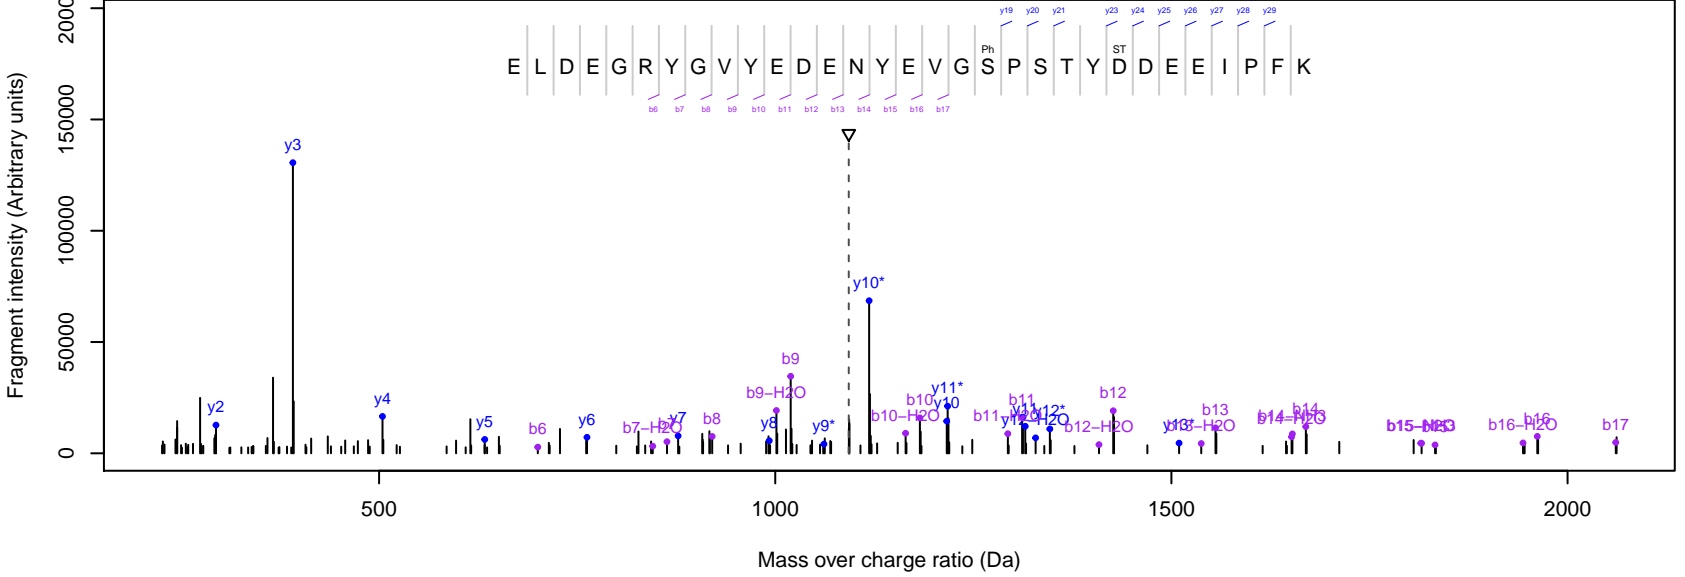

AS(Phospho (STY))SPHQAGLGLSLTPSPESPPLPDVSAFNR-3+

Source : QE3\_201126\_FR\_TiOx\_hum\_tissue\_Urea\_RNAB\_B Scan : 53168

Andromeda score : 141.16

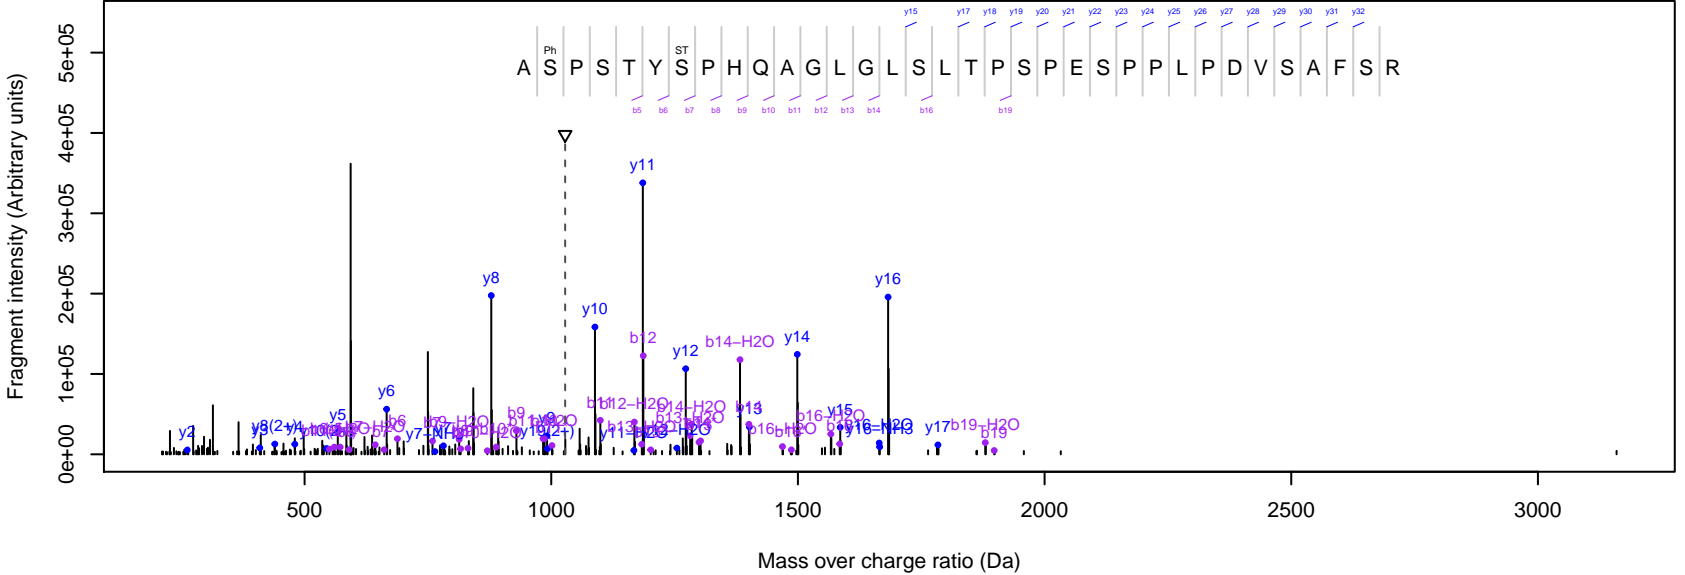

S(Phospho (STY))SLSGDEEDLFK-2+

Source : QE3\_201126\_FR\_TiOx\_hum\_tissue\_Urea\_RNAB\_N Scan : 35572

Andromeda score : 141.13

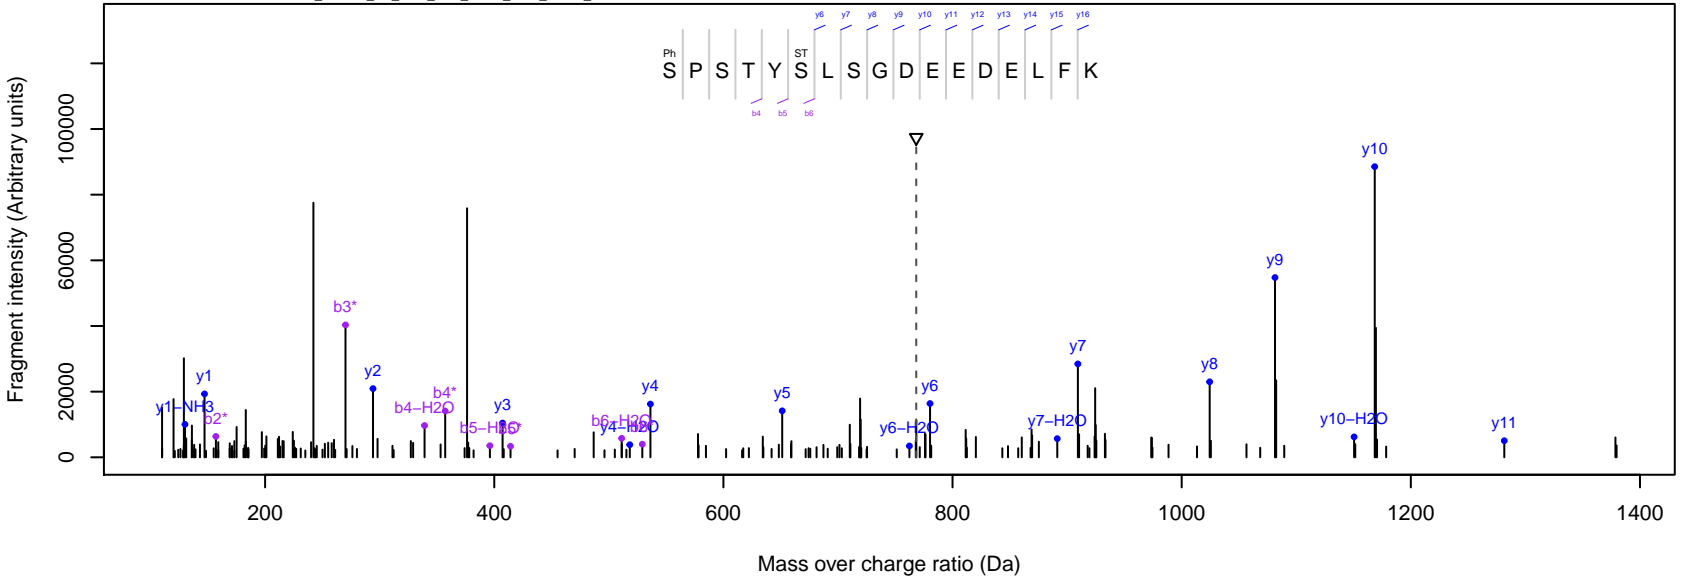

YTFAPSVS(Phospho (STY))LNK-2+

Source : QE3\_201126\_FR\_TiOx\_hum\_tissue\_Urea\_RNAB\_N Scan : 35308

Andromeda score : 141.13

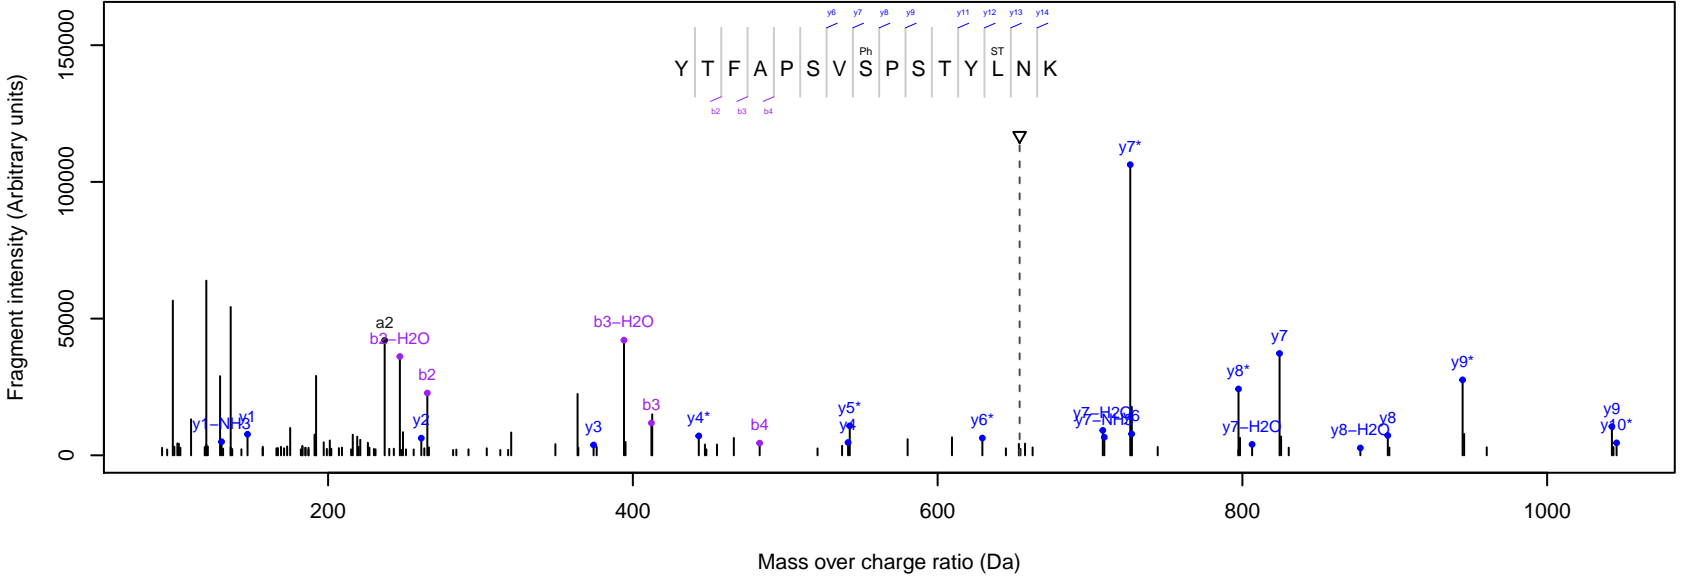

(Acetyl (Protein N-term))M(Oxidation (M))EDSM(Oxidation (M))DMDM(Oxidation (M))S(Phospho (STY))PLRPQNYLFGCELEK-3+

Source : QE3\_201126\_FR\_TiOx\_hum\_tissue\_Urea\_RNAB\_H Scan : 55653

Andromeda score : 141.12

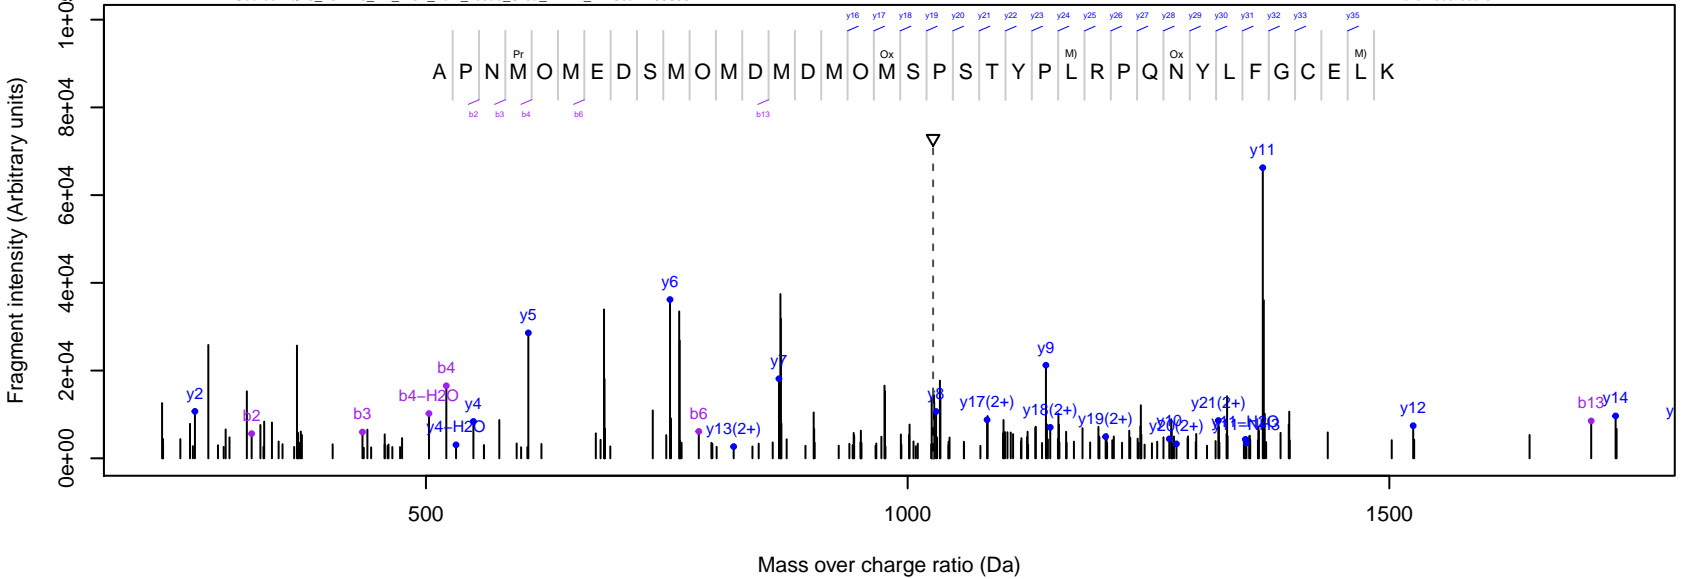



YS(Phospho (STY))PSQNS(Phospho (STY))PIHHIPSRR-3+

Source : QE3\_201126\_FR\_TiOx\_hum\_tissue\_Urea\_RNAB\_N Scan : 12047

Andromeda score : 141.08

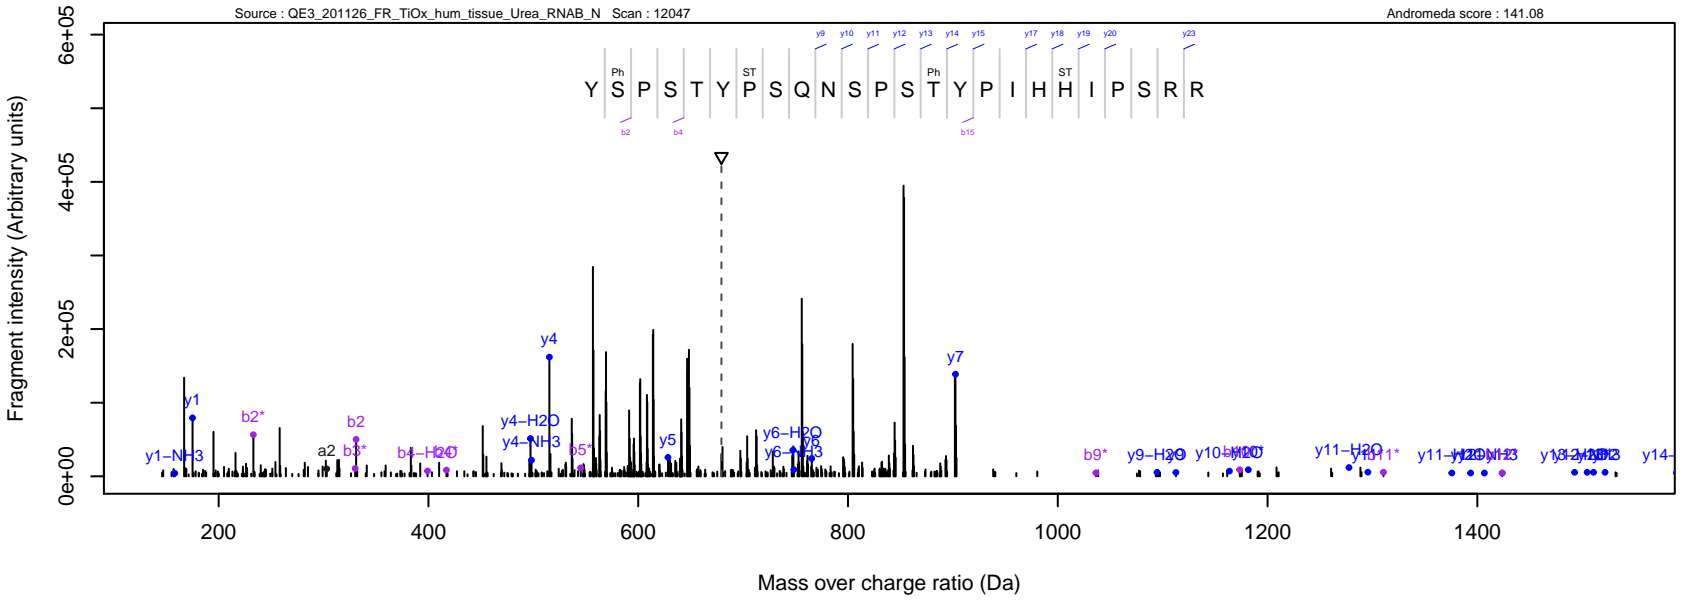

TVGTNT(Phospho (STY))PPS(Phospho (STY))PGFGWR-2+

Source : QE3\_201126\_FR\_TiOx\_hum\_tissue\_Urea\_RNAB\_H Scan : 47871

Andromeda score : 141

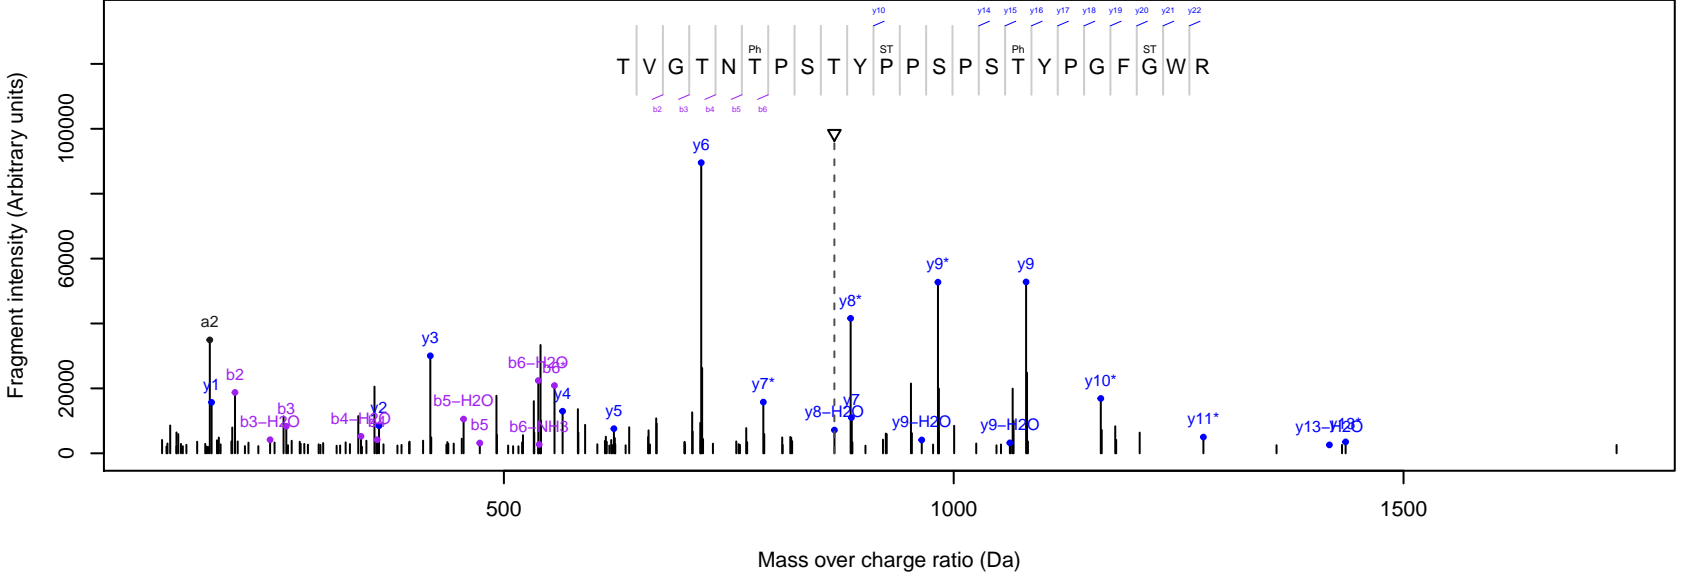

ASLQSGQEGAGDS(Phospho (STY))PGSQFSK-2+

Source : QE3\_201126\_FR\_TiOx\_hum\_tissue\_Urea\_RNAB\_B Scan : 18573

Andromeda score : 140.97

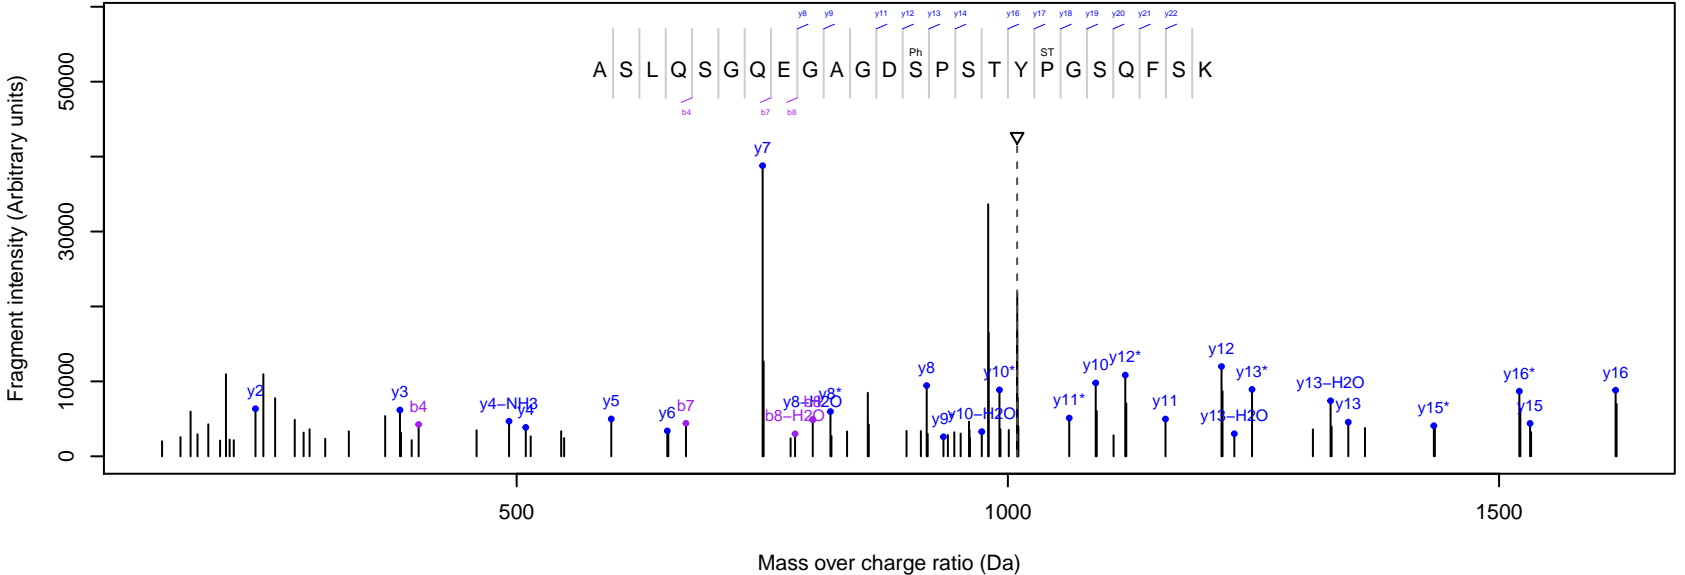

KVCST(Phospho (STY))NDLKELLIFNK-3+

Source : QE3\_201126\_FR\_TiOx\_hum\_tissue\_Urea\_RNAB\_H Scan : 39817

Andromeda score : 140.97

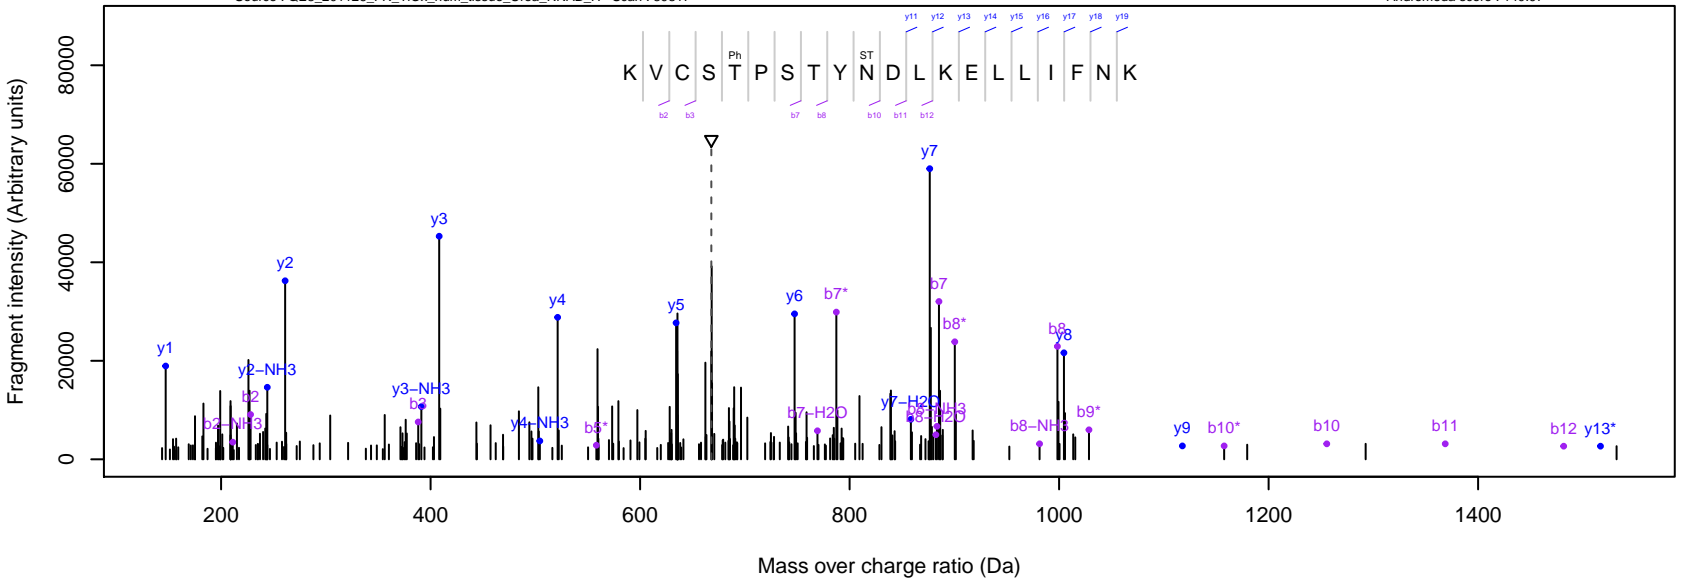

LKTEKEDATPPS(Phospho (STY))PR-3+

Source : QE3\_201126\_FR\_TiOx\_hum\_tissue\_Urea\_RNAB\_H Scan : 7598

Andromeda score : 140.97

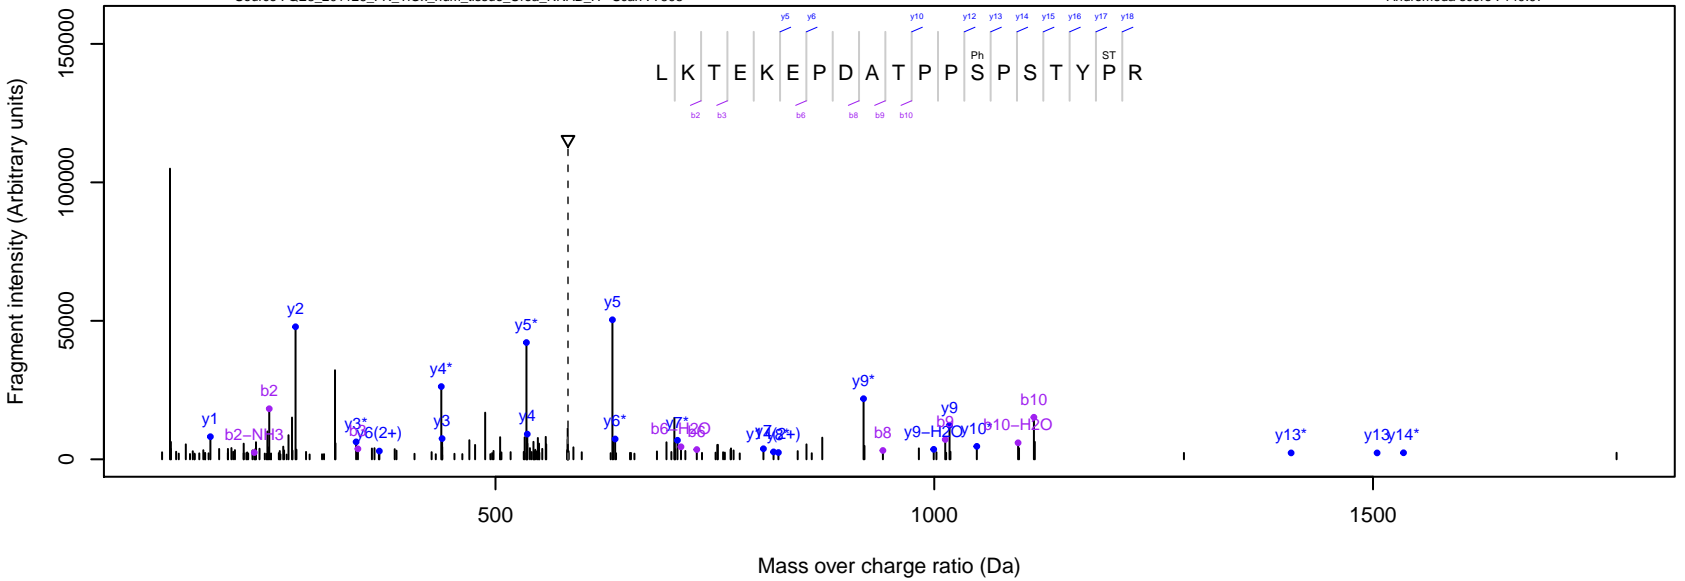

RDS(Phospho (STY))SDDWEIPDGQITVGQR-2+

Source : QE3\_201126\_FR\_TiOx\_hum\_tissue\_Urea\_RNAB\_N Scan : 37870

Andromeda score : 140.97

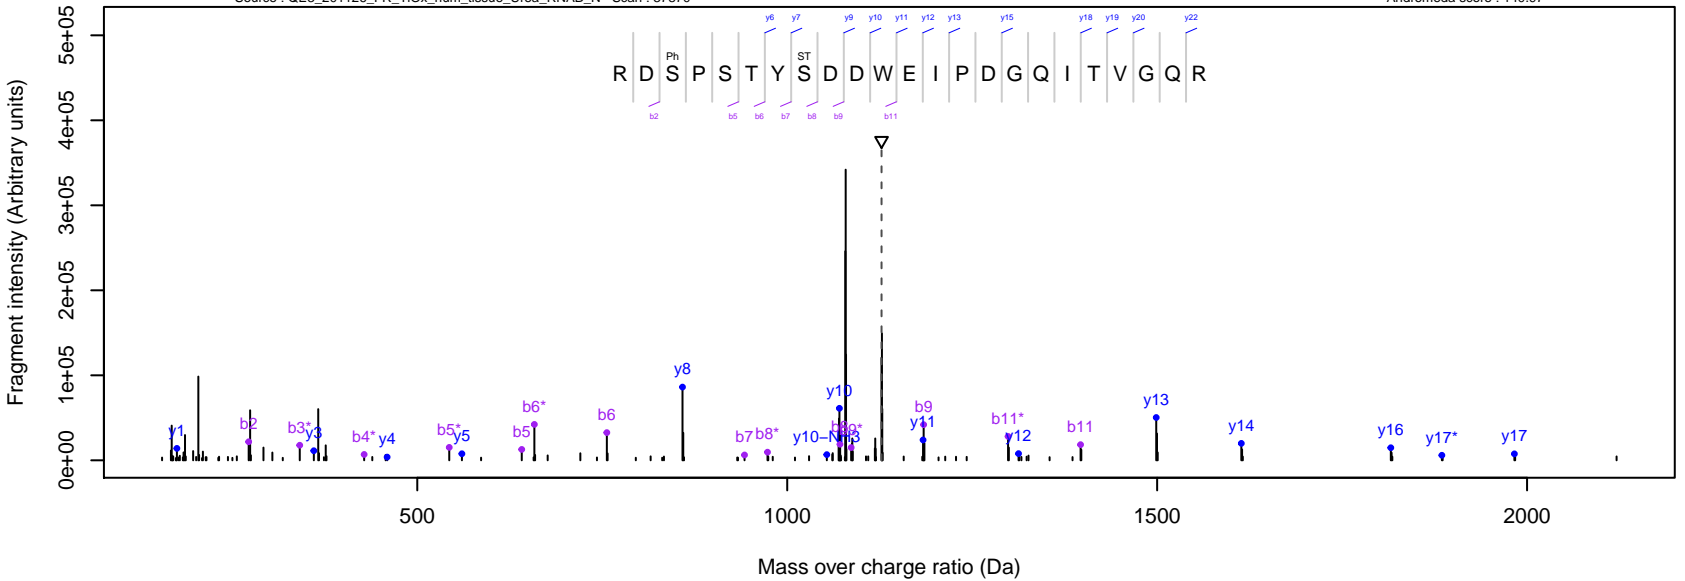

(Acetyl (Protein N-term))AATDLERFS(Phospho (STY))NAEPEPR-3+

Source : QE3\_201126\_FR\_TIOx\_hum\_tissue\_Urea\_RNAB\_H Scan : 34101

Andromeda score : 140.95

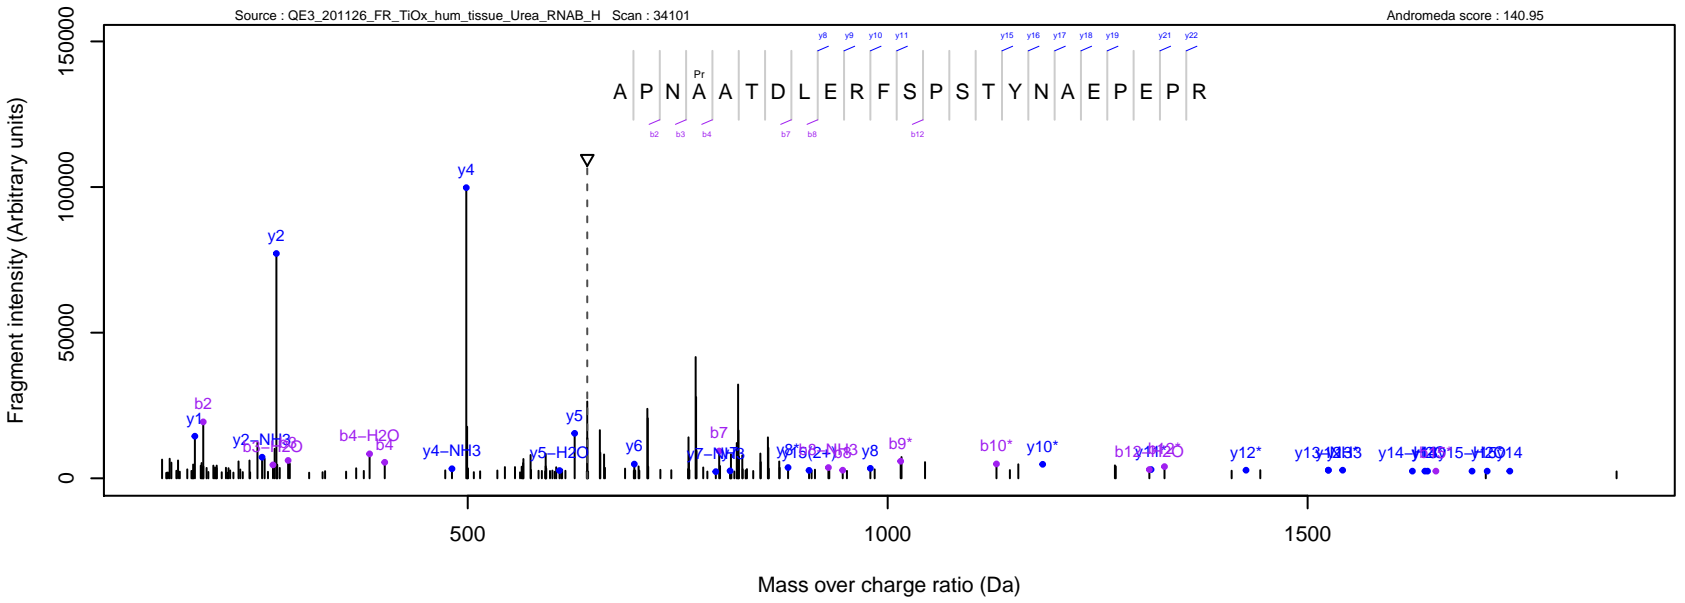

SLS(Phospho (STY))LQPQLTQR-2+

Source : QE3\_201126\_FR\_TIOx\_hum\_tissue\_Urea\_RNAB\_H Scan : 28821

Andromeda score : 140.91

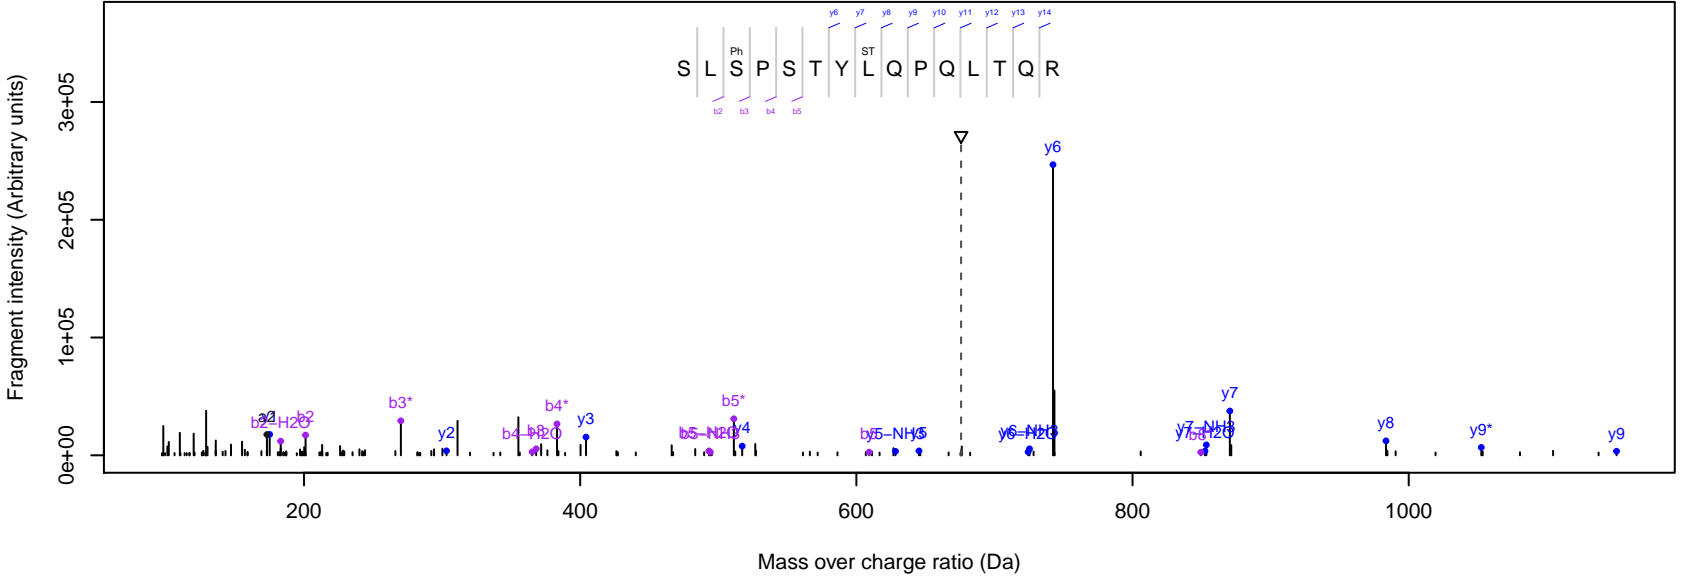

EGLRGS(Phospho (STY))PPGPQELDVWLLGTVR-3+

Source : QE3\_201126\_FR\_TIOx\_hum\_tissue\_Urea\_RNAB\_N Scan : 58803

Andromeda score : 140.9

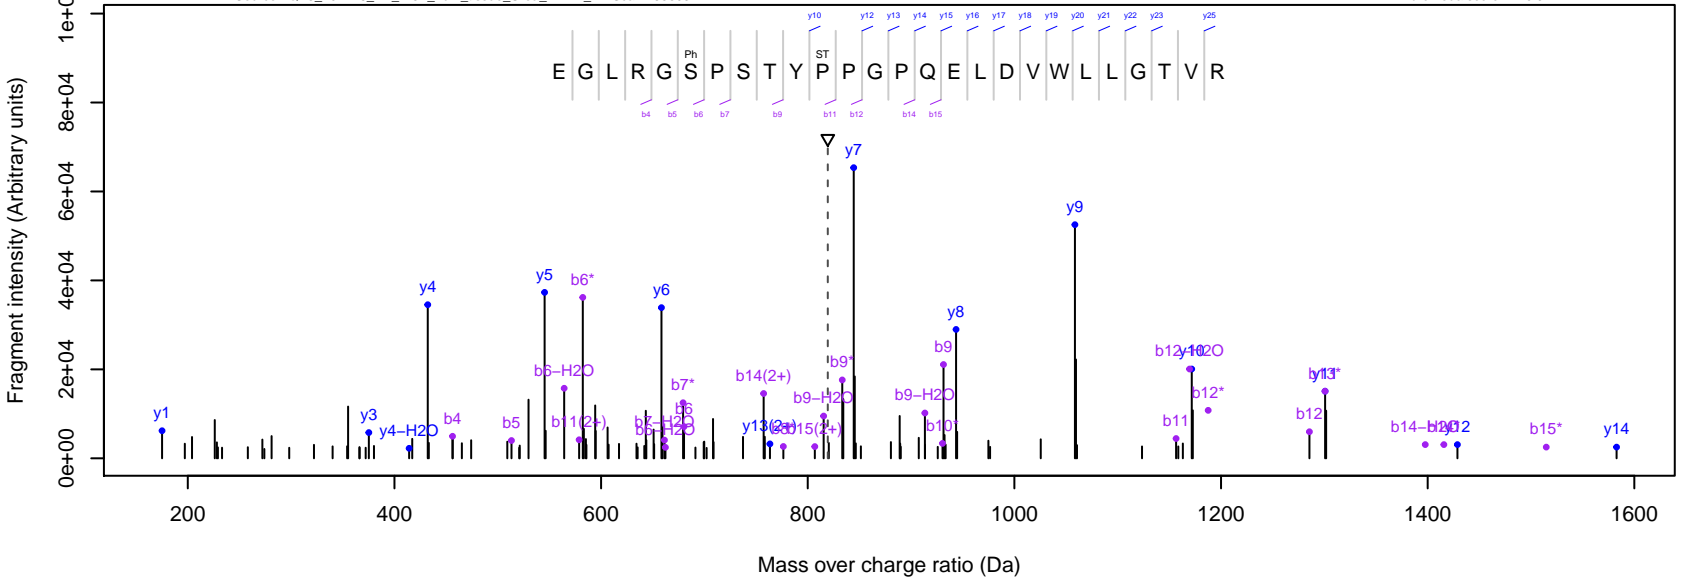



GS(Phospho (STY))PSGGSTAEASDLSIR-2+

Source : QE3\_201126\_FR\_TIOx\_hum\_tissue\_Urea\_RNAB\_B Scan : 23424

Andromeda score : 140.81

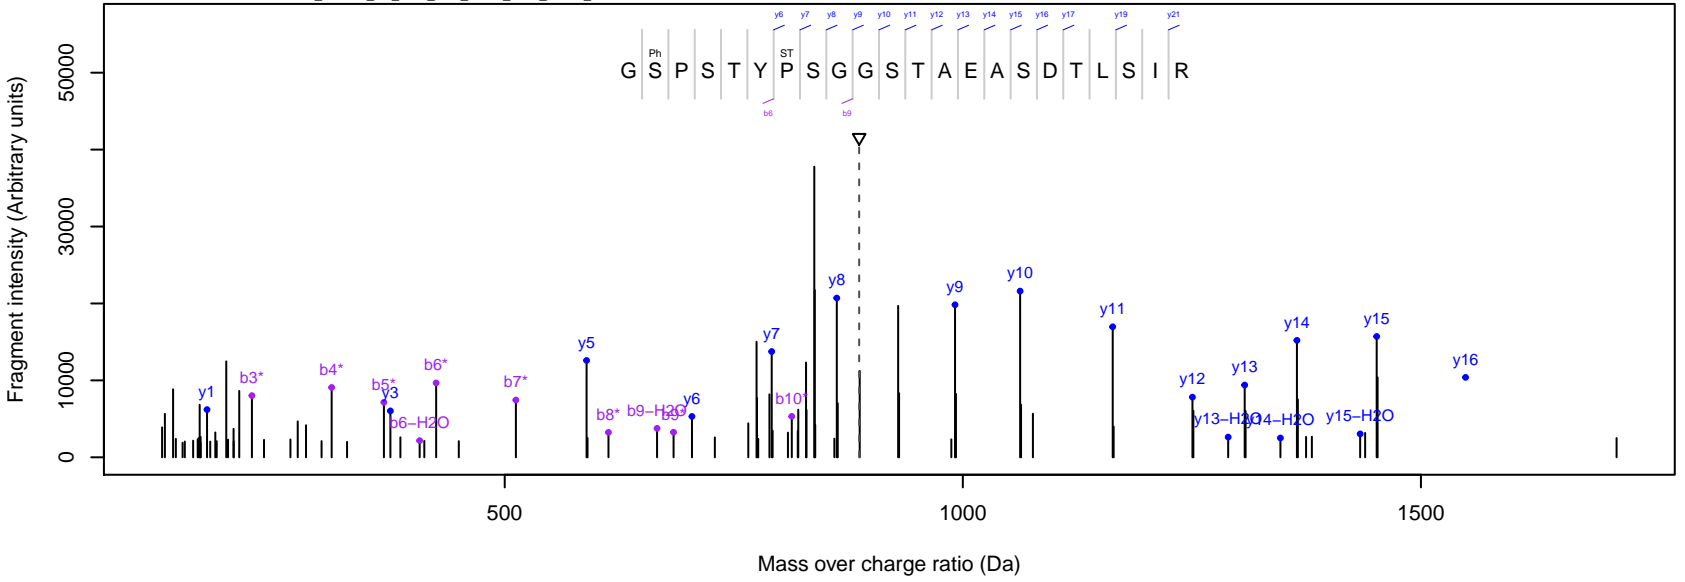

S(Phospho (STY))PGEYINIDFGEPGAR-2+

Source : QE3\_201126\_FR\_TIOx\_hum\_tissue\_Urea\_RNAB\_N Scan : 48675

Andromeda score : 140.74

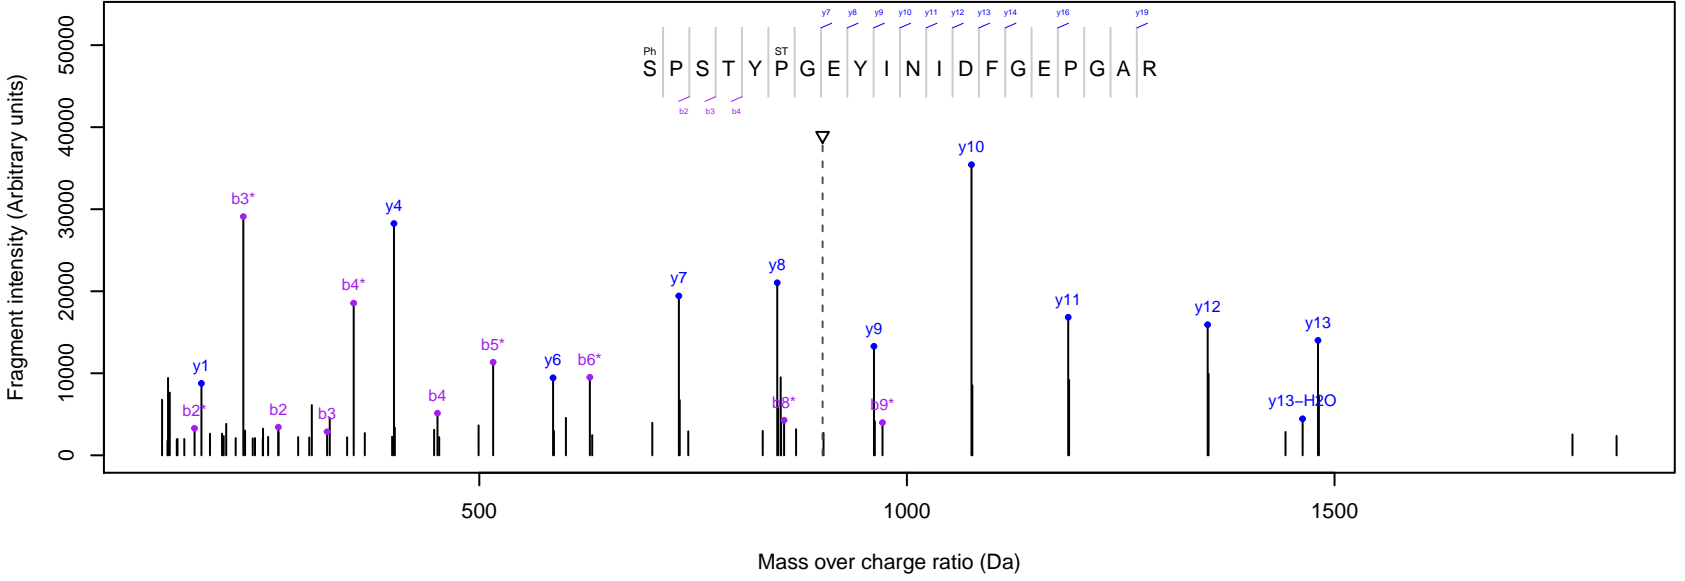

AALLAQYADV(Phospho (STY))DEEDEADEKDDSGATTMNI GSDK-3+

Source : QE3\_201126\_FR\_TIOx\_hum\_tissue\_Urea\_RNAB\_N Scan : 41577

Andromeda score : 140.73

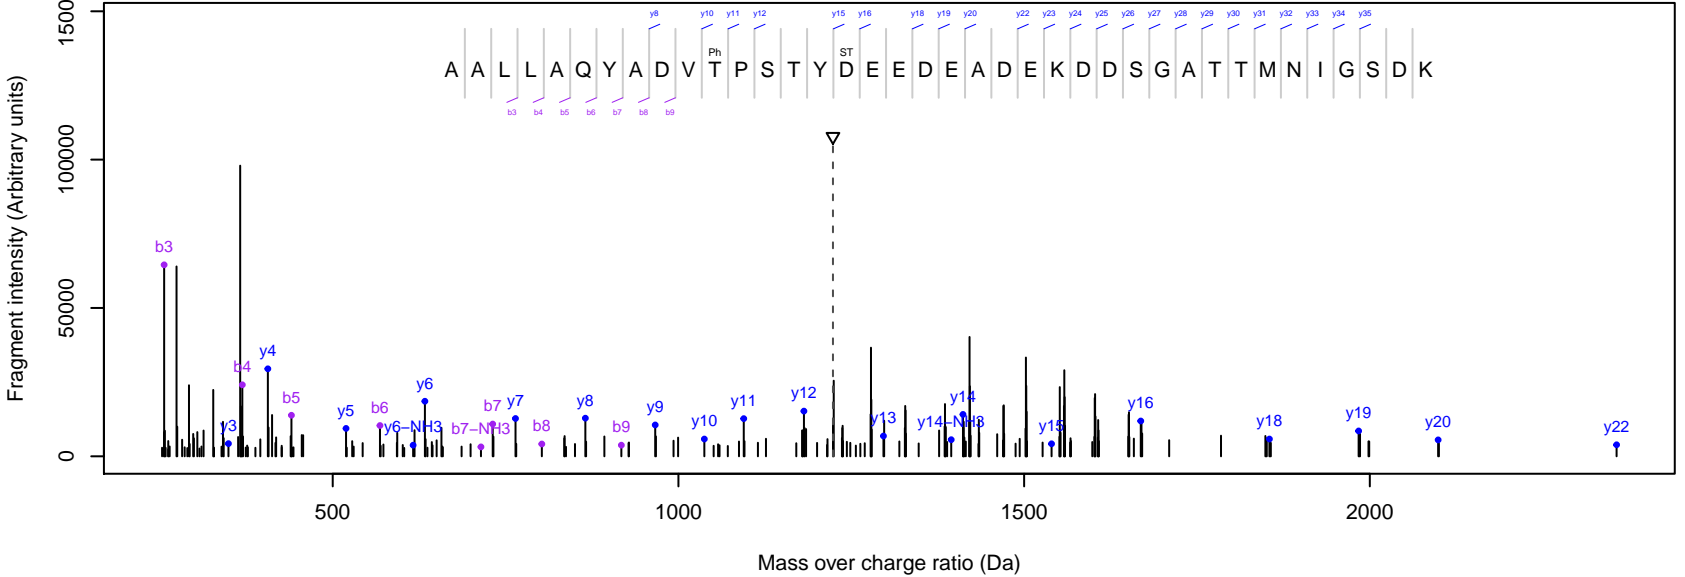

KQAREES(Phospho (STY))EES(Phospho (STY))EAEPVQR-3+

Source : QE3\_201126\_FR\_TiOx\_hum\_tissue\_Urea\_RNAB\_B Scan : 6904

Andromeda score : 140.73

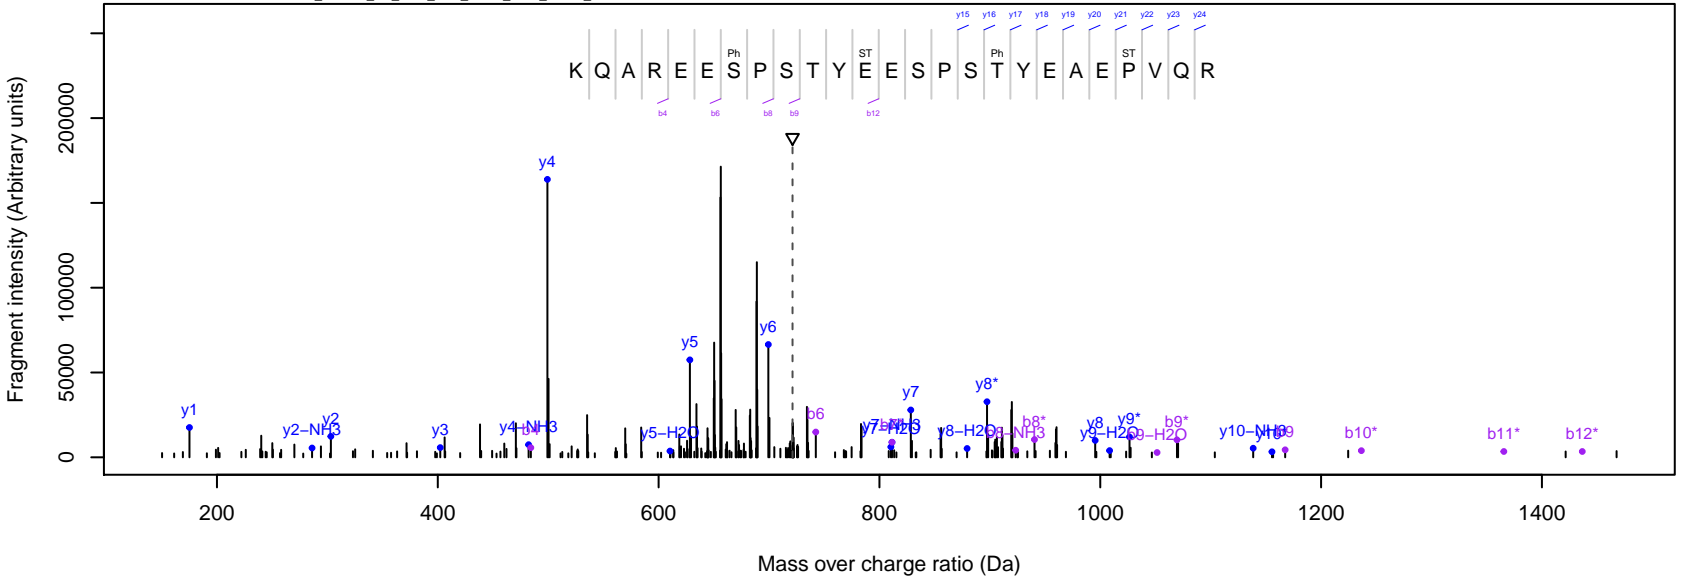

HQGVM(Oxidation (M))VGM(Oxidation (M))GQKDS(Phospho (STY))YVGDEAQSQR-4+

Source : QE3\_201126\_FR\_TiOx\_hum\_tissue\_Urea\_RNAB\_B Scan : 8631

Andromeda score : 140.71

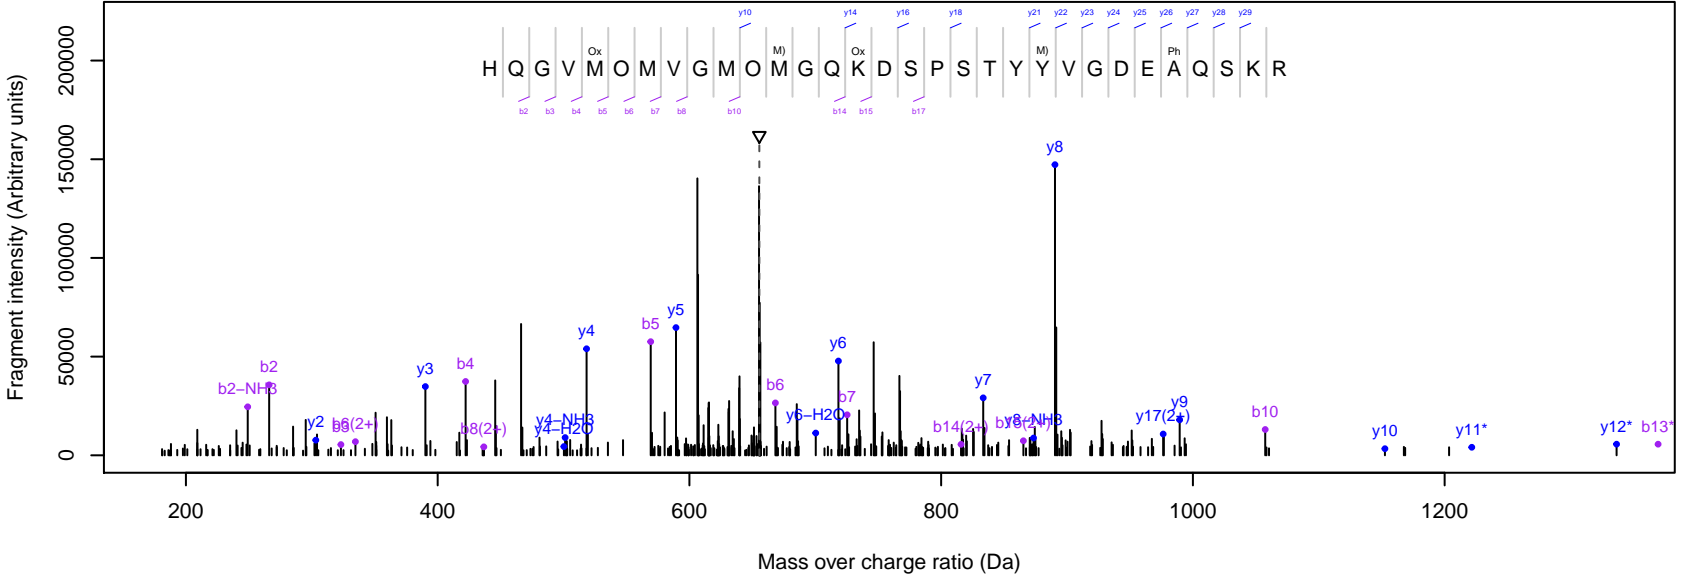

SQTT(Phospho (STY))TERDSDTVEEEELPVENR-3+

Source : QE3\_201126\_FR\_TiOx\_hum\_tissue\_Urea\_RNAB\_B Scan : 21827

Andromeda score : 140.57

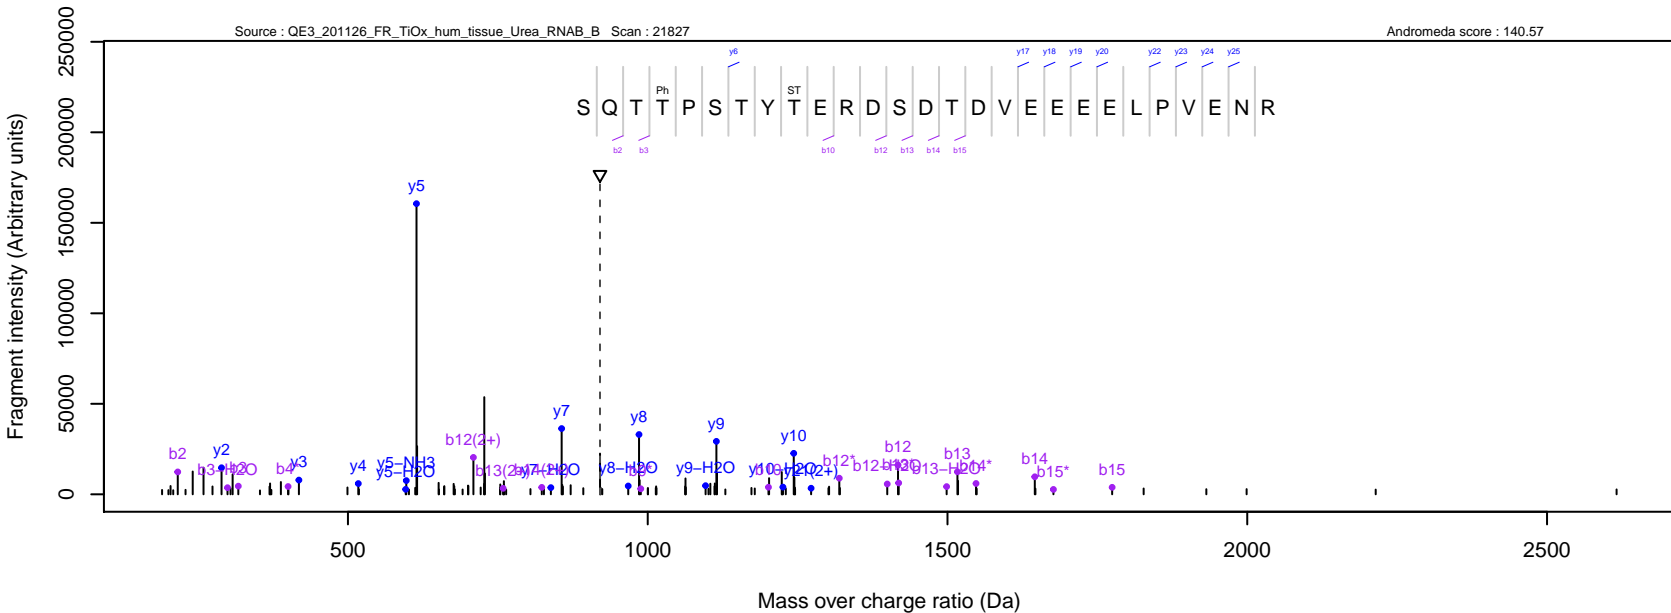

QLS(Phospho (STY))LEGSGLVEDLKDNTPSGK-3+

Source : QE3\_201126\_FR\_TiOx\_hum\_tissue\_Urea\_RNAB\_N Scan : 36130

Andromeda score : 140.55

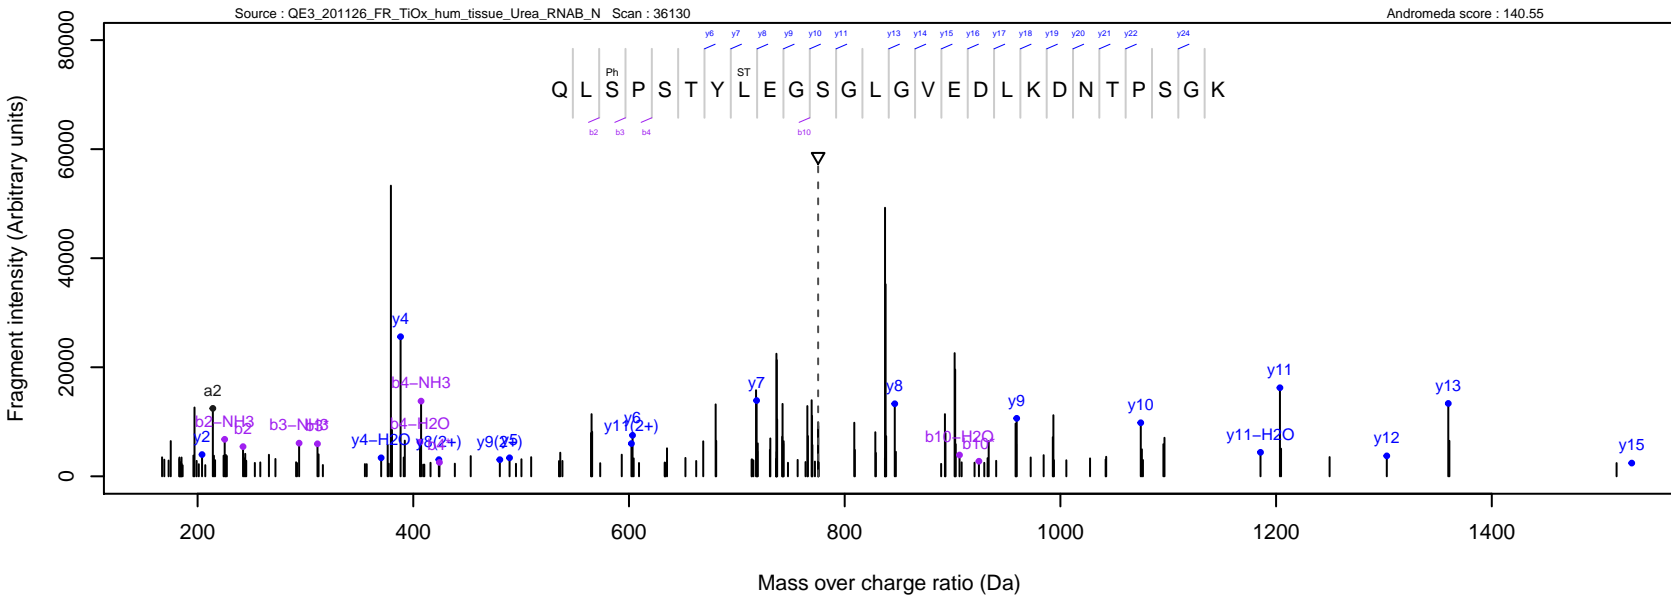

EEHGGLIRS(Phospho (STY))PR-2+

Source : QE3\_201126\_FR\_TiOx\_hum\_tissue\_Urea\_RNAB\_H Scan : 7311

Andromeda score : 140.33

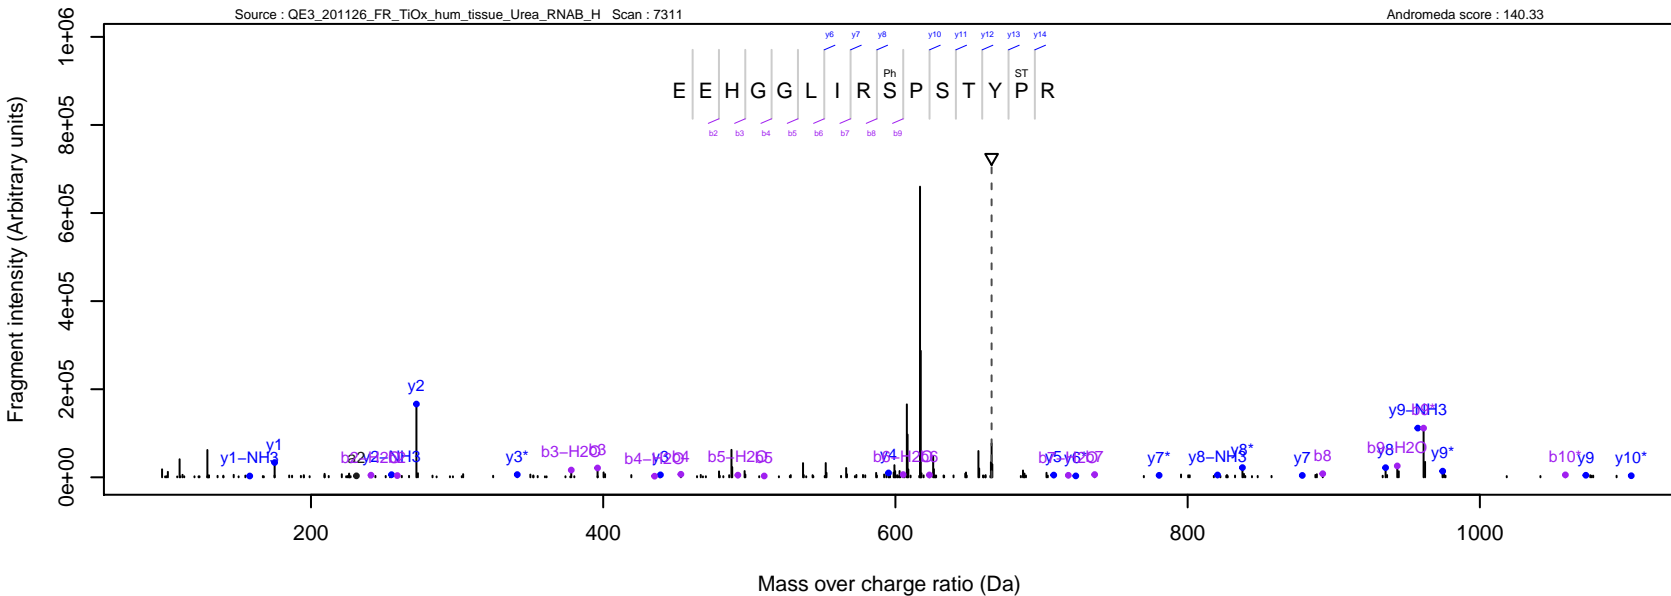

EHSPYGPS(Phospho (STY))PLGWPSSETR-3+

Source : QE3\_201126\_FR\_TiOx\_hum\_tissue\_Urea\_RNAB\_N Scan : 33217

Andromeda score : 140.32

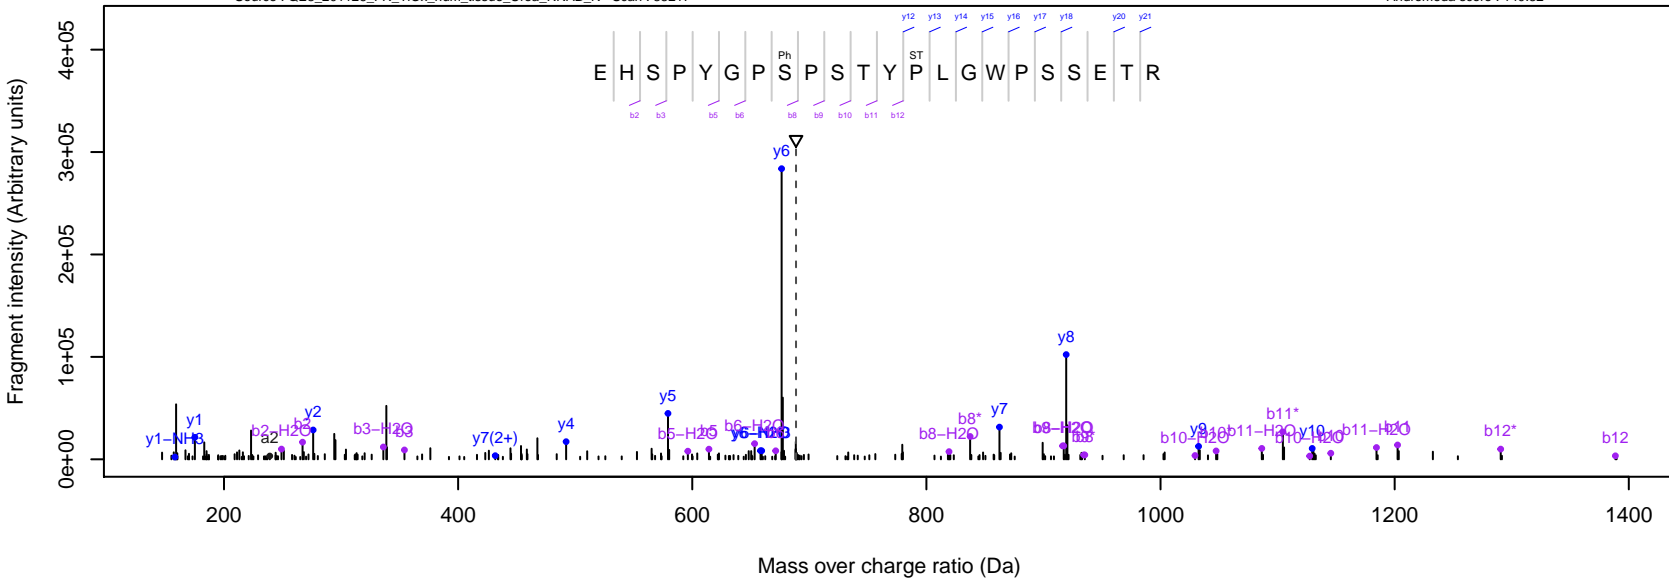

SNIS(Phospho (STY))PNFNFMGQLLDFER-2+

Source : QE3\_201126\_FR\_TiOx\_hum\_tissue\_Urea\_RNAB\_N Scan : 62770

Andromeda score : 140.28

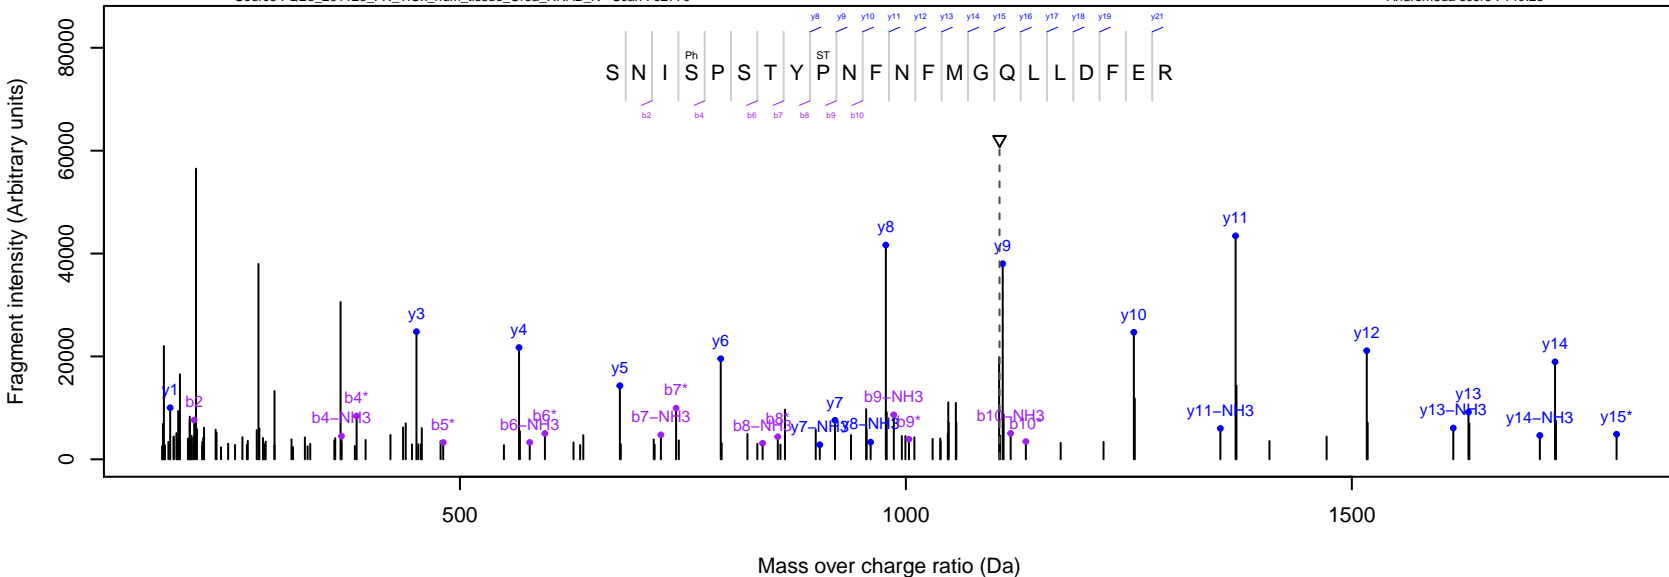

TGDLGIPPEDRS(Phospho (STY))PS(Phospho (STY))PEPIYNSEGKR-3+

Source : QE3\_201126\_FR\_TiOx\_hum\_tissue\_Urea\_RNAB\_B Scan : 30215

Andromeda score : 140.24

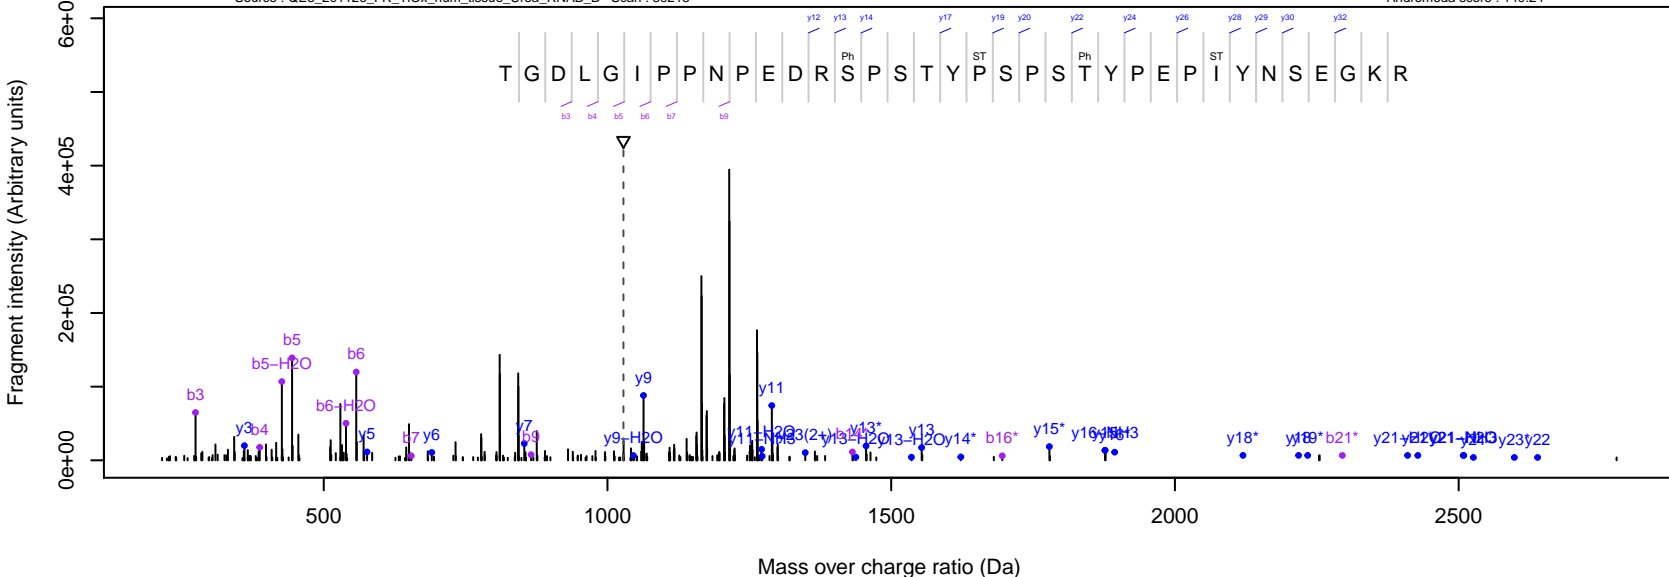



RLKS(Phospho (STY))STSP(Phospho (STY))FANIQENS-2+

Source : QE3\_201126\_FR\_TiOx\_hum\_tissue\_Urea\_RNAB\_N Scan : 21966

Andromeda score : 140.22

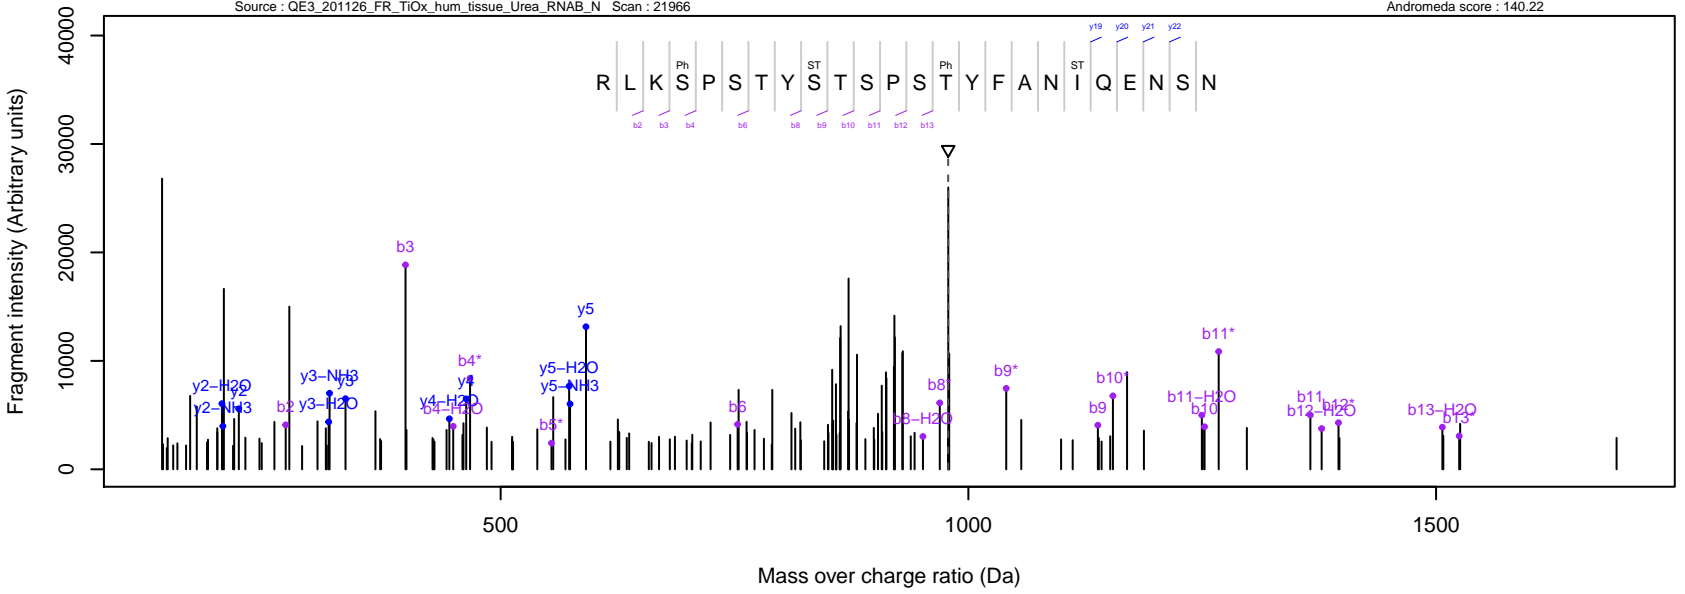

THS(Phospho (STY))TSSSLGSGESPFSR-2+

Source : QE3\_201126\_FR\_TiOx\_hum\_tissue\_Urea\_RNAB\_B Scan : 17926

Andromeda score : 140.22

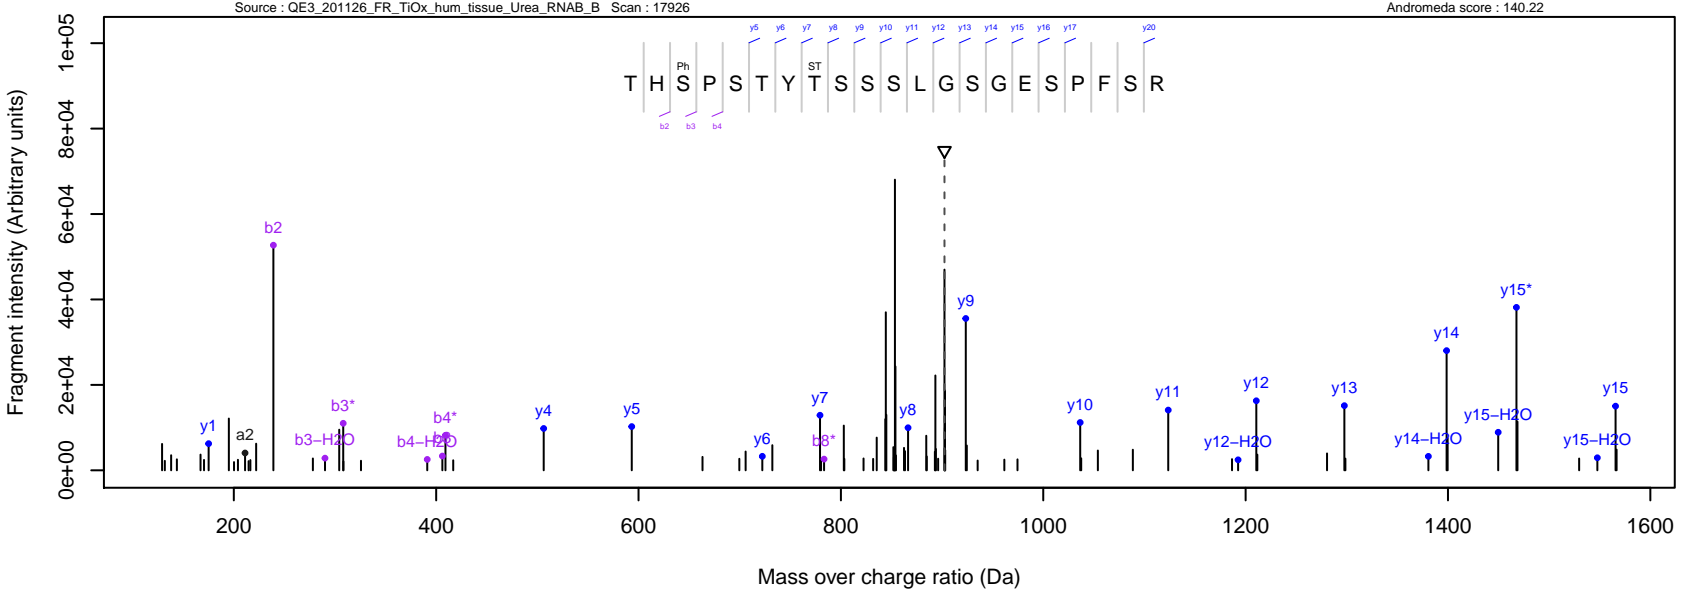

(Acetyl (Protein N-term))S(Phospho (STY))GGKYVDSEGHLYTVPIR-3+

Source : QE3\_201126\_FR\_TiOx\_hum\_tissue\_Urea\_RNAB\_H Scan : 32580

Andromeda score : 140.17

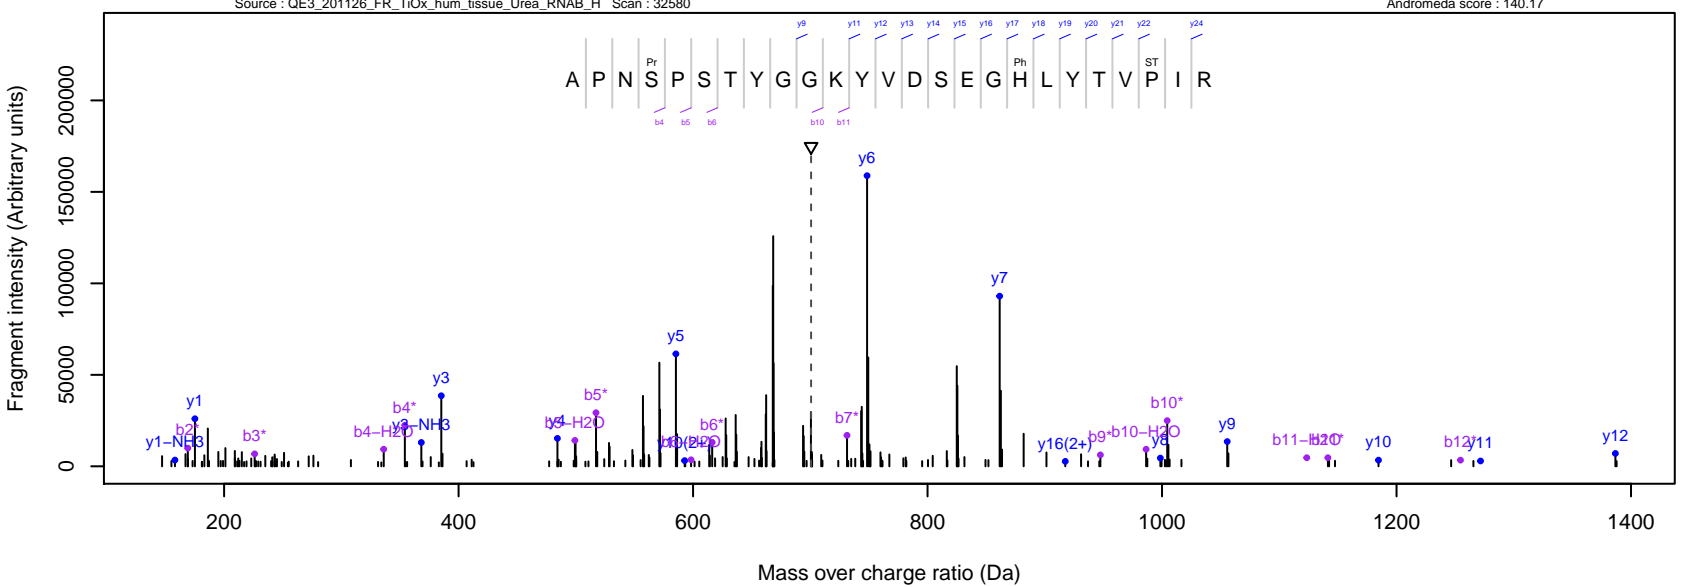

VQEHEDS(PSTY)GDSEVENEAK-2+

Source : QE3\_201126\_FR\_TiOx\_hum\_tissue\_Urea\_RNAB\_B Scan : 8031

Andromeda score : 140.16

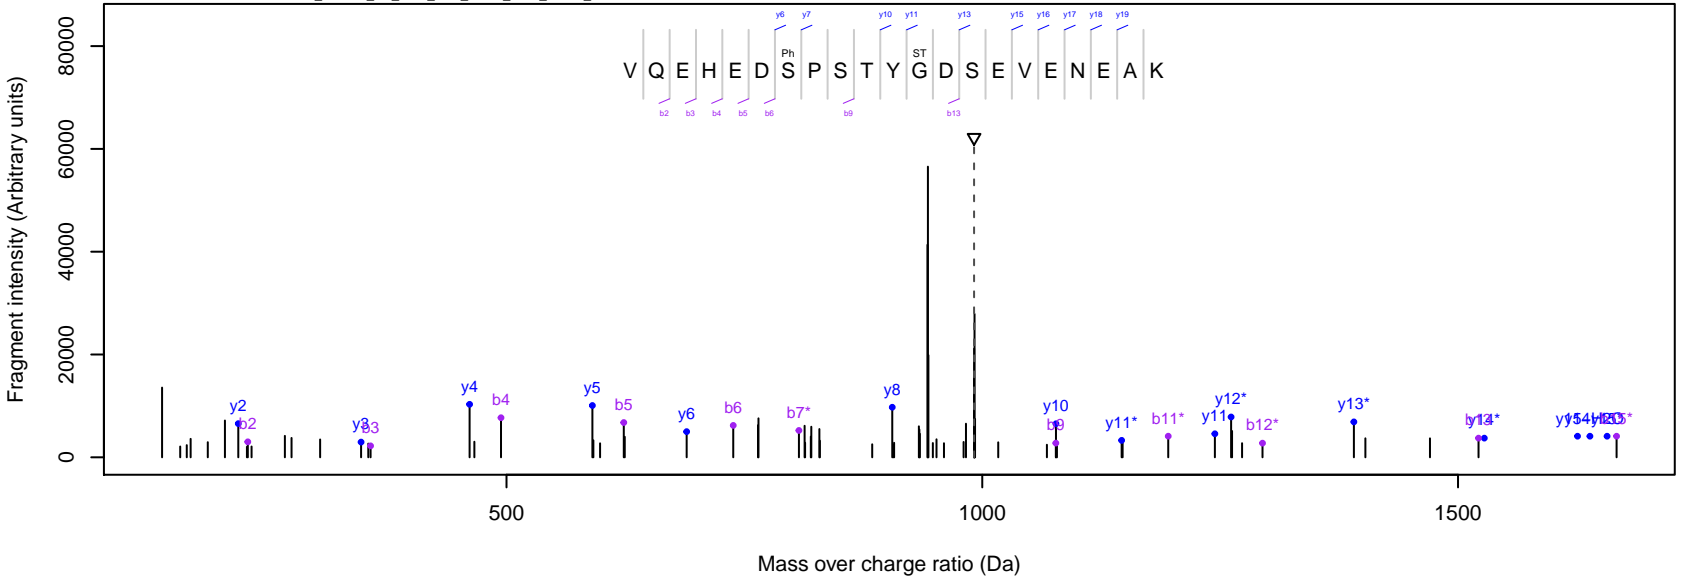

EKEIS(PSTY)DDEAEK-2+

Source : QE3\_201126\_FR\_TiOx\_hum\_tissue\_Urea\_RNAB\_N Scan : 6839

Andromeda score : 140.1

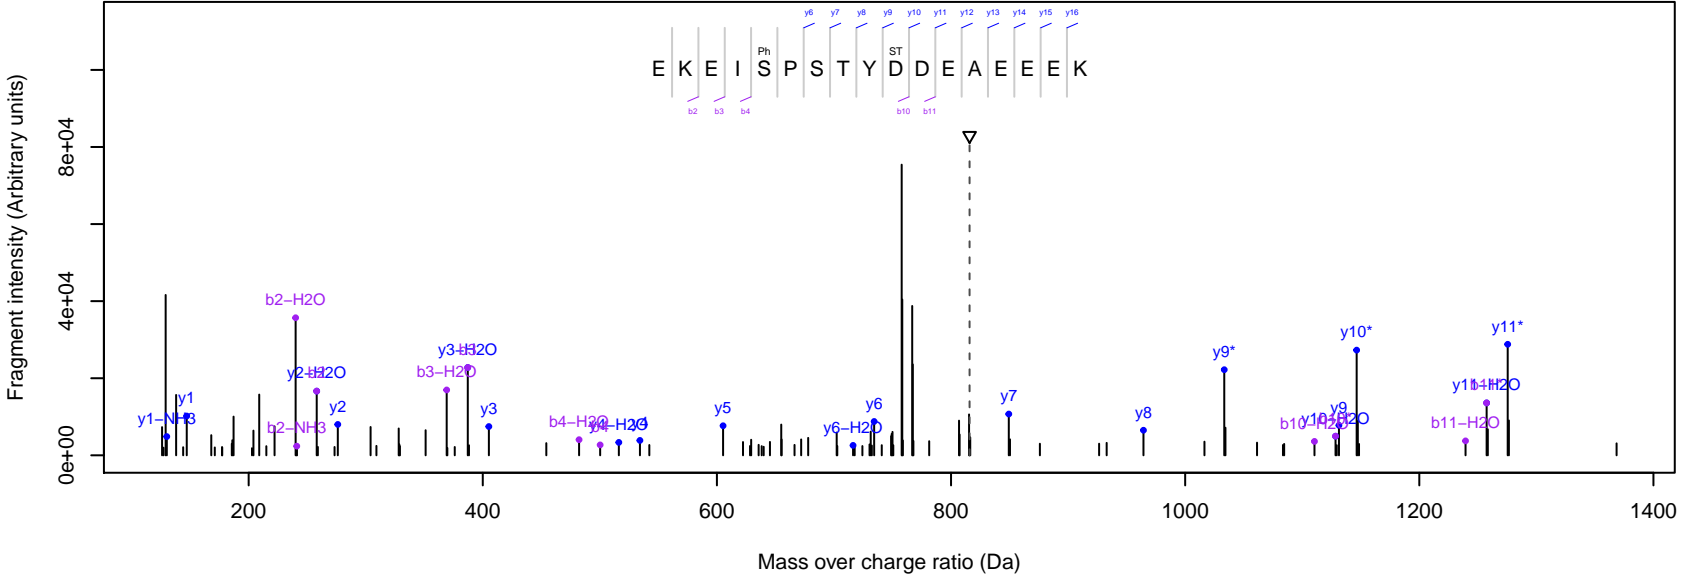

HCS(PSTY)LQAVPEEYR-2+

Source : QE3\_201126\_FR\_TiOx\_hum\_tissue\_Urea\_RNAB\_H Scan : 27204

Andromeda score : 140.1

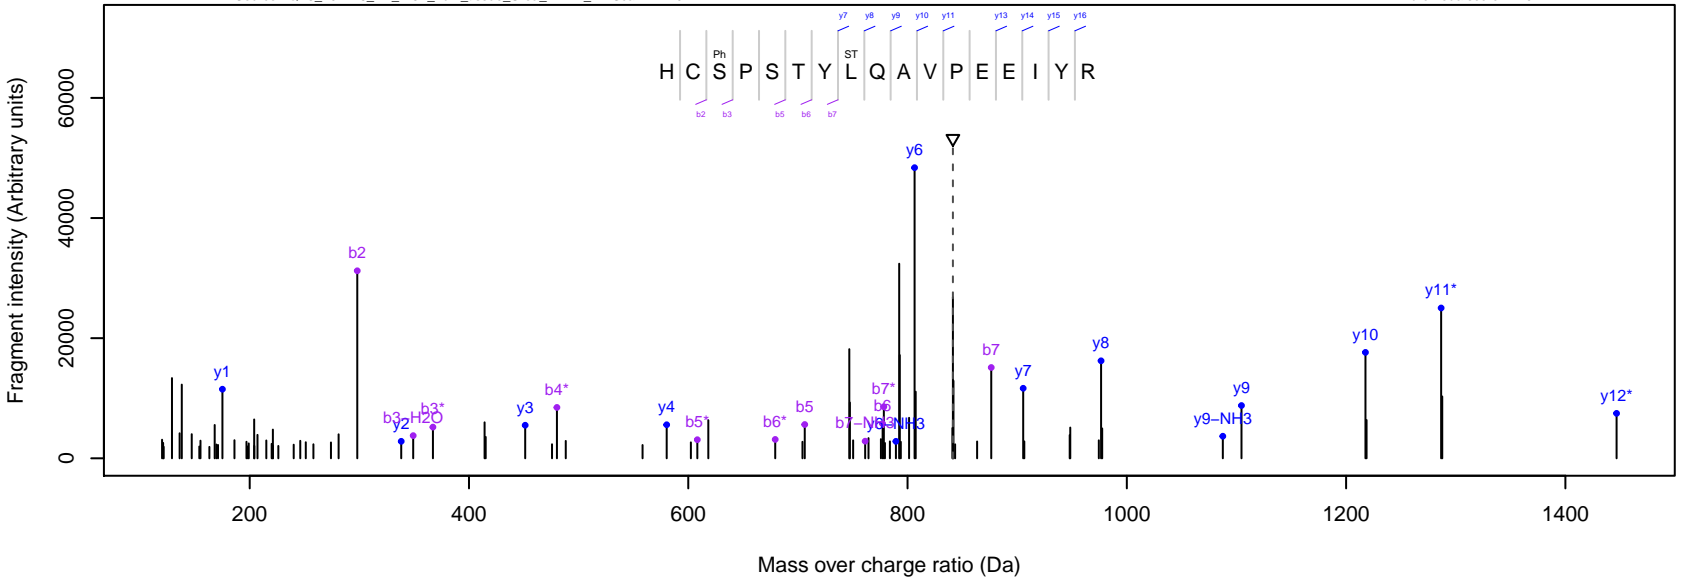

LTRYSPSTYQGGDDGSSSSGSSVAGSQSTLFK-3+

Source : QE3\_201126\_FR\_TiOx\_hum\_tissue\_Urea\_RNAB\_N Scan : 24202

Andromeda score : 139.93

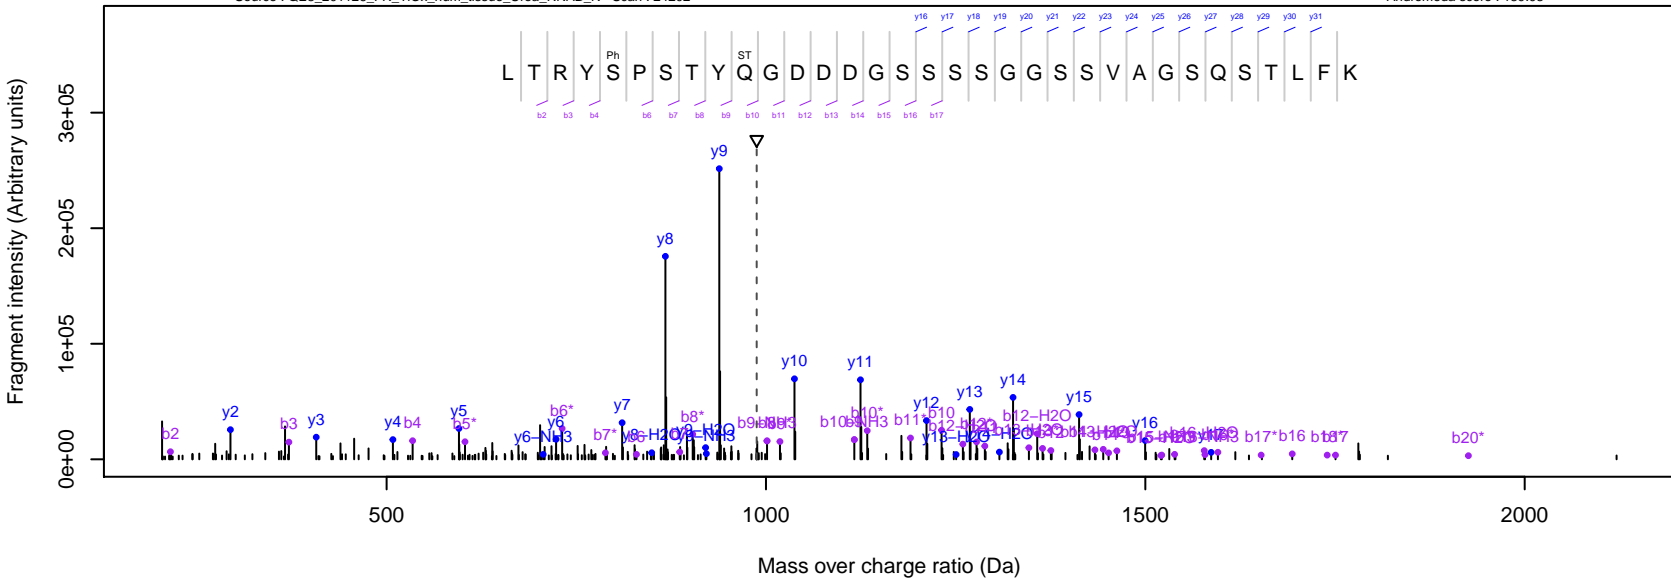

DDGVFVQEVTQNS(Phospho (STY))PAAR-2+

Source : QE3\_201126\_FR\_TiOx\_hum\_tissue\_Urea\_RNAB\_N Scan : 34686

Andromeda score : 139.88

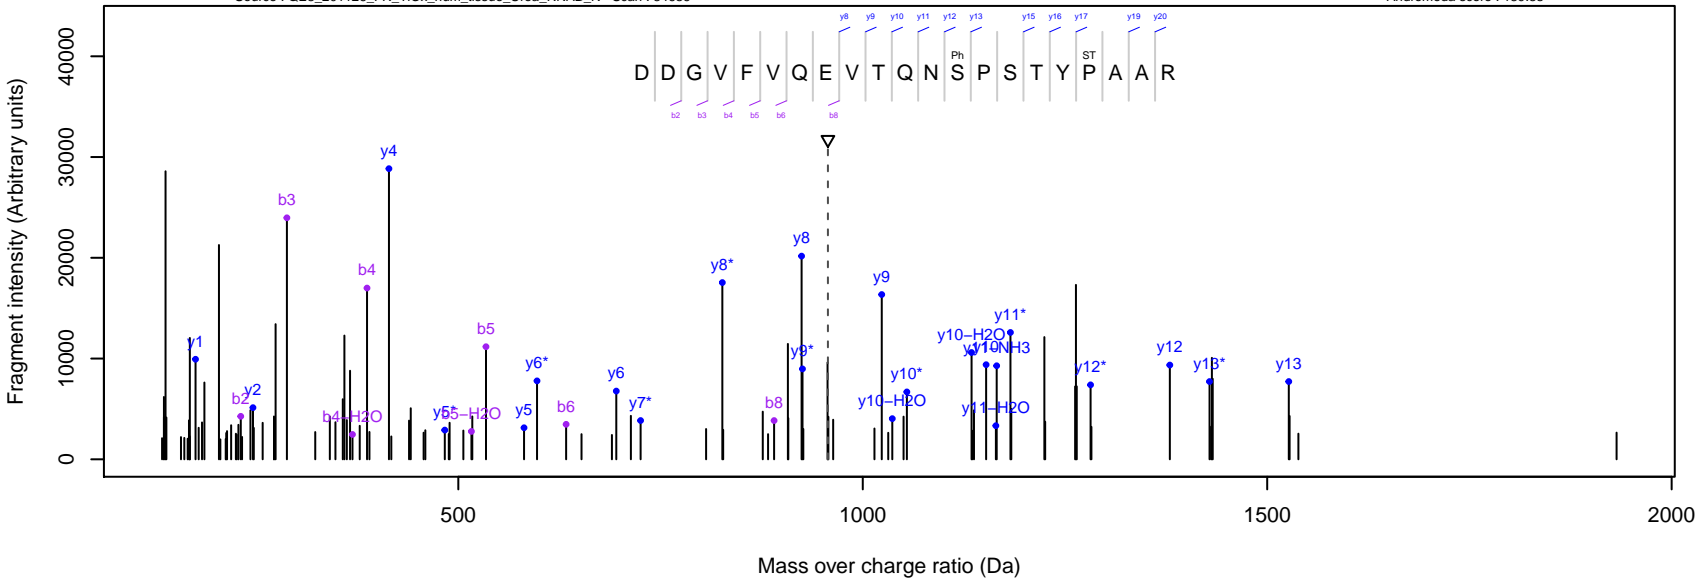

ISMQDVLSDLGSPSTYPK-2+

Source : QE3\_201126\_FR\_TiOx\_hum\_tissue\_Urea\_RNAB\_B Scan : 44330

Andromeda score : 139.88

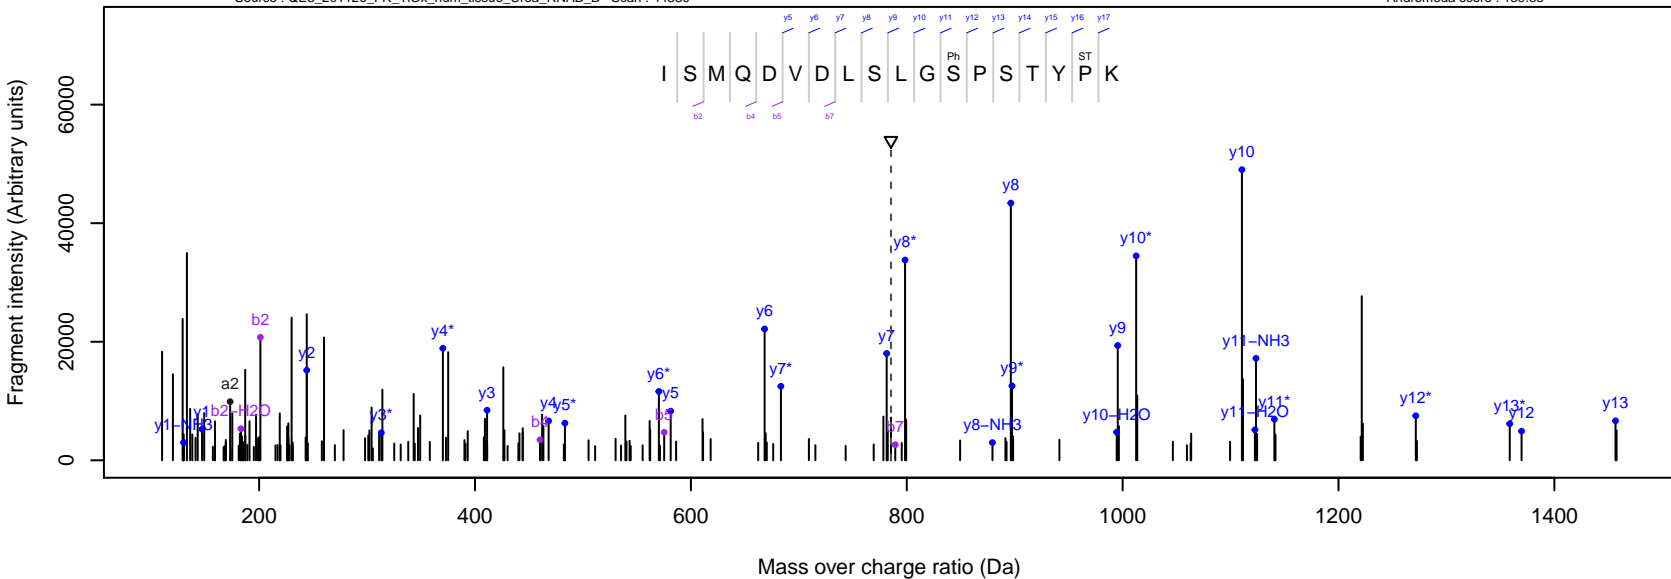

YDERPGPS(Phospho (STY))PLPHR-3+

Source : QE3\_201126\_FR\_TiOx\_hum\_tissue\_Urea\_RNAB\_H Scan : 11112

Andromeda score : 139.88

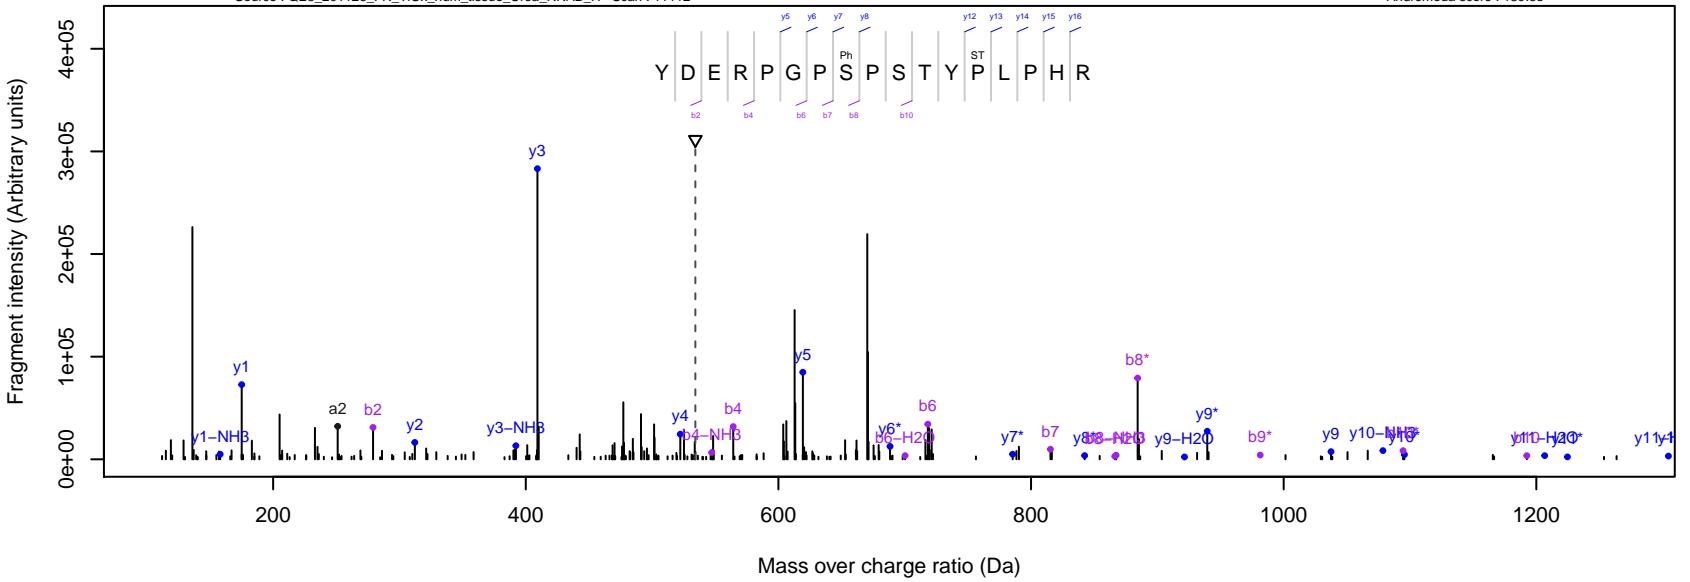

SETSWES(Phospho (STY))PK-2+

Source : QE3\_201126\_FR\_TiOx\_hum\_tissue\_Urea\_RNAB\_N Scan : 13468

Andromeda score : 139.86

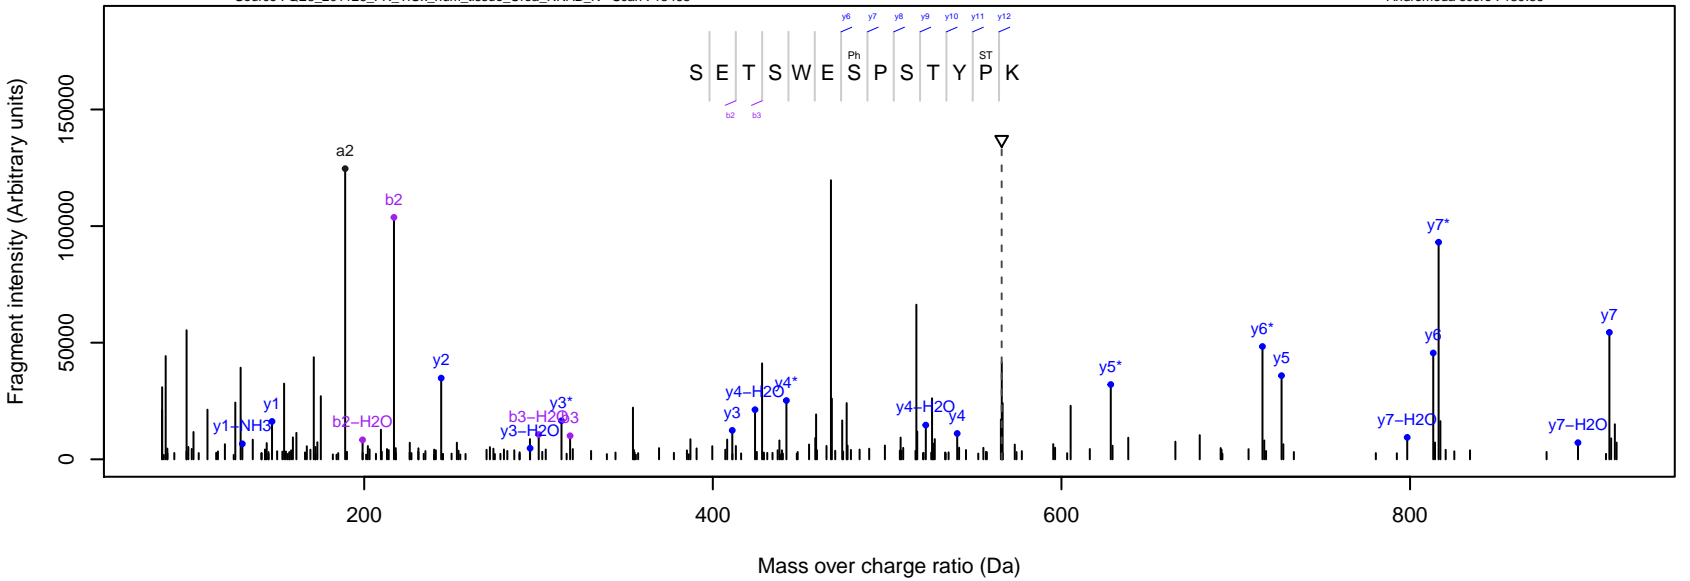

EYVNSTSEES(Phospho (STY))HDEDEIRPVQQDLHR-4+

Source : QE3\_201126\_FR\_TiOx\_hum\_tissue\_Urea\_RNAB\_B Scan : 17432

Andromeda score : 139.81

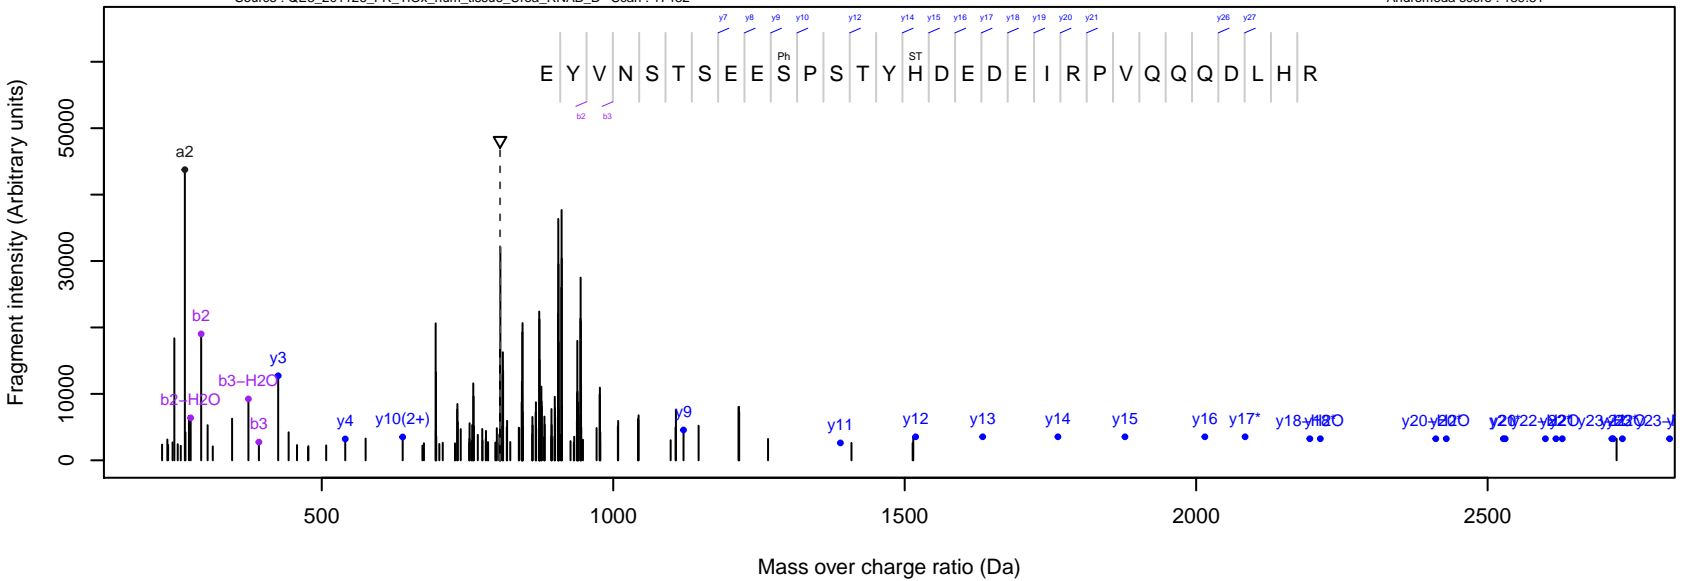

S(Phospho (STY))FSKEVEER-2+

Source : QE3\_201126\_FR\_TIOx\_hum\_tissue\_Urea\_RNAB\_N Scan : 10080

Andromeda score : 139.78

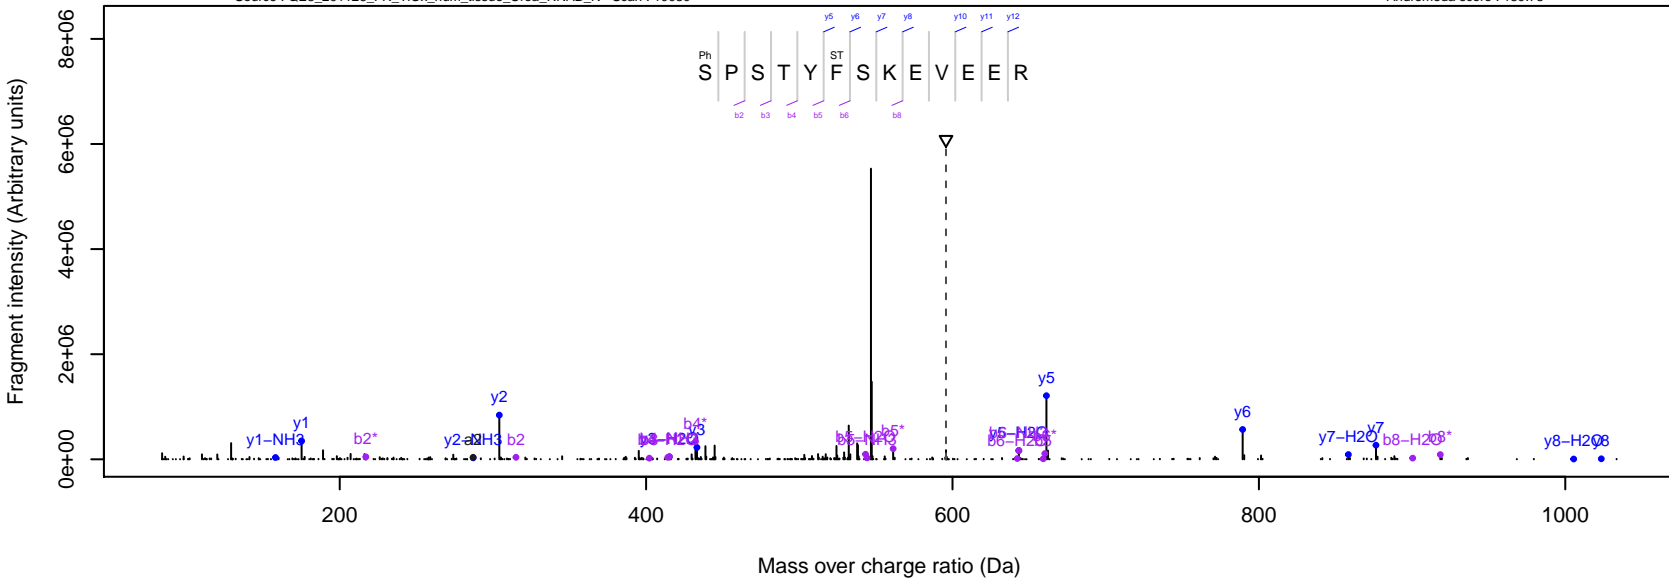

VDGPRS(Phospho (STY))PSYGR-3+

Source : QE3\_201126\_FR\_TIOx\_hum\_tissue\_Urea\_RNAB\_N Scan : 7106

Andromeda score : 139.77

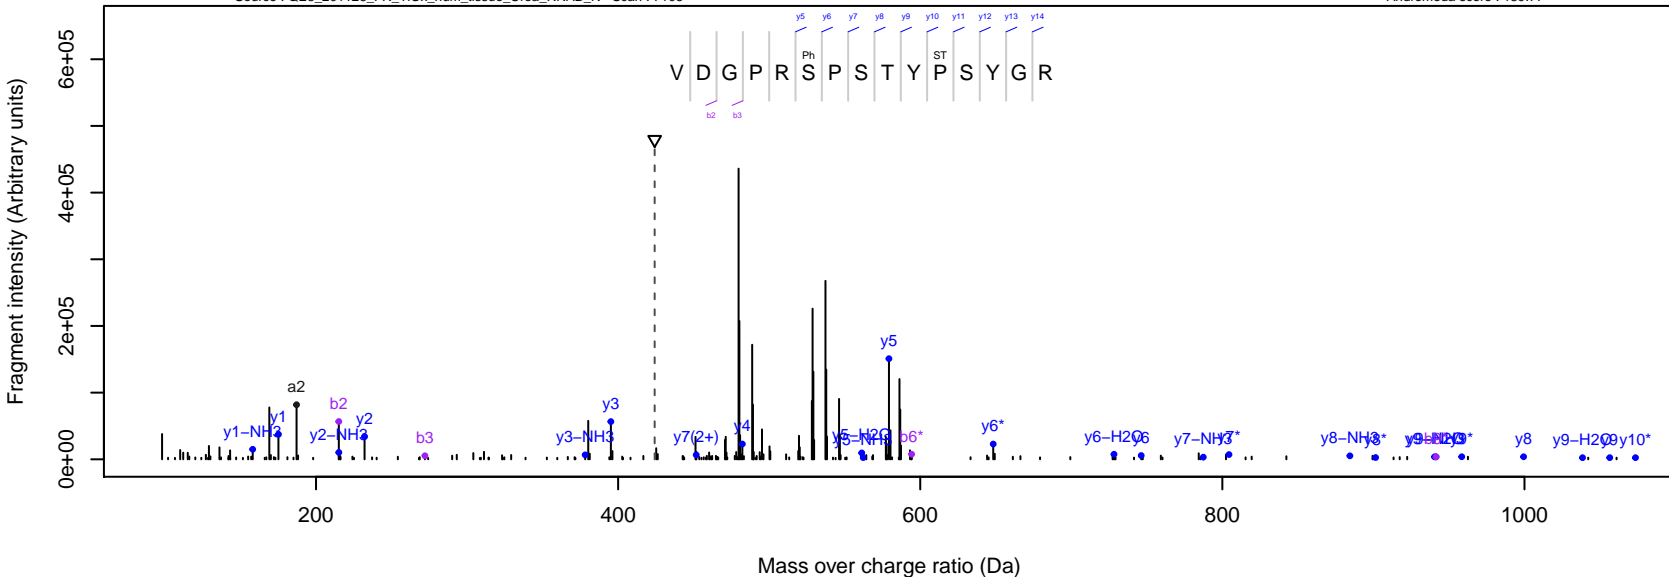

(Acetyl (Protein N-term))S(Phospho (STY))GDEM(Oxidation (M))IFDPTM(Oxidation (M))SKK-2+

Source : QE3\_201126\_FR\_TIOx\_hum\_tissue\_Urea\_RNAB\_H Scan : 30295

Andromeda score : 139.74

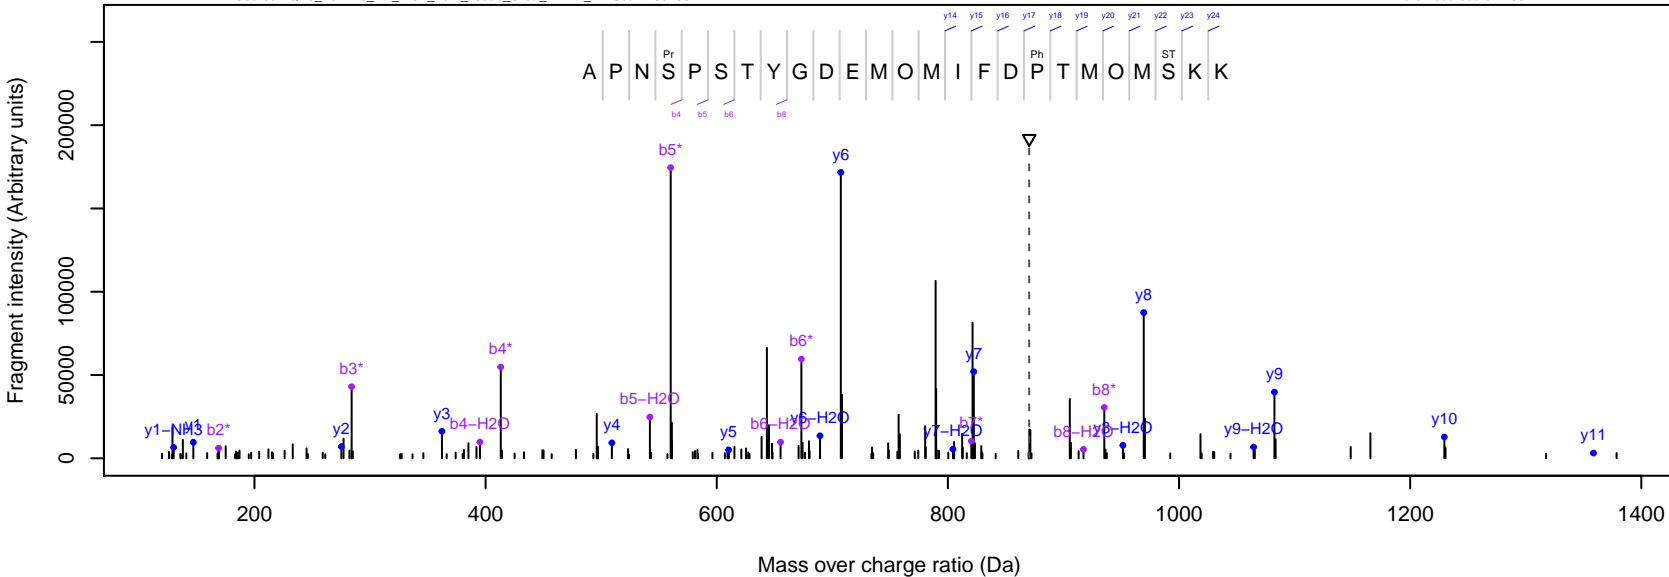

LKPVIGVNTDPERSPSTYEGHLC LPVR-4+

Source : QE3\_201126\_FR\_TiOx\_hum\_tissue\_Urea\_RNAB\_N Scan : 29790

Andromeda score : 139.73

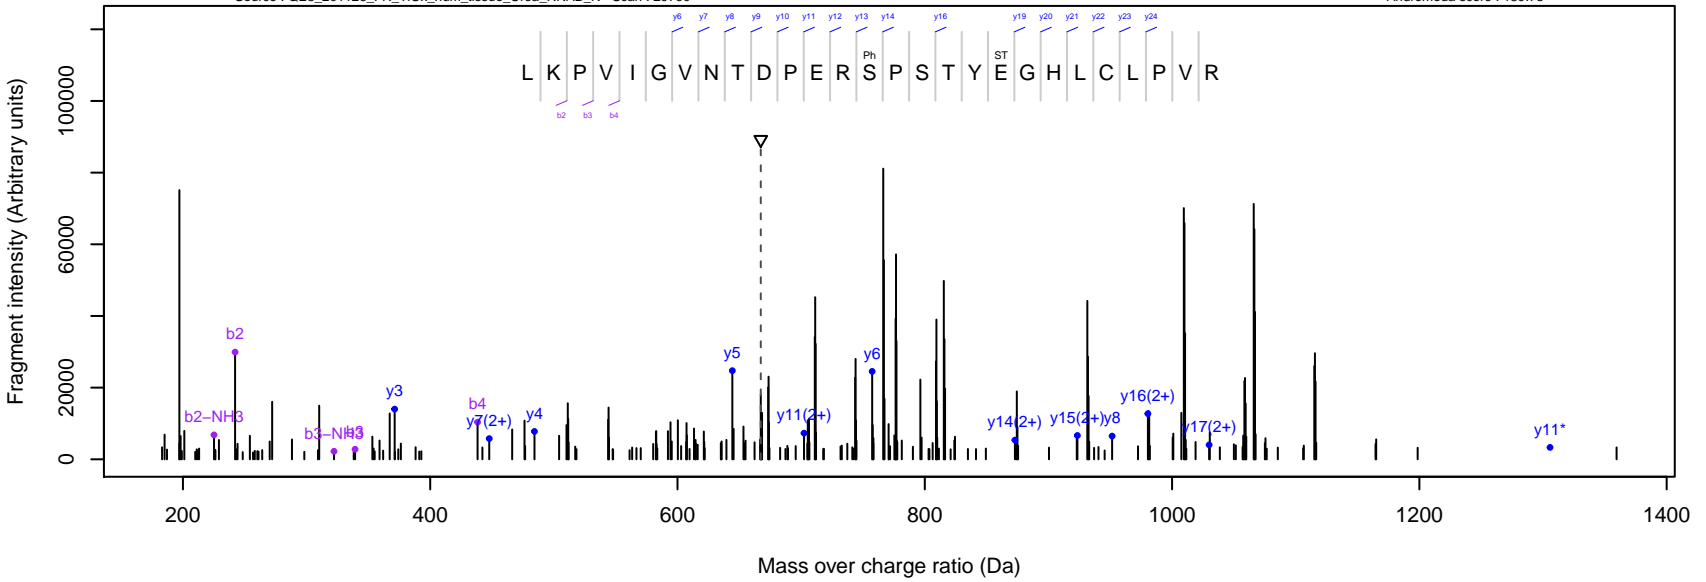

SKSAT(Phospho (STY))LLYDQLQVFTGSSS(Phospho (STY))SSDLISGTK-3+

Source : QE3\_201126\_FR\_TiOx\_hum\_tissue\_Urea\_RNAB\_H Scan : 57935

Andromeda score : 139.72

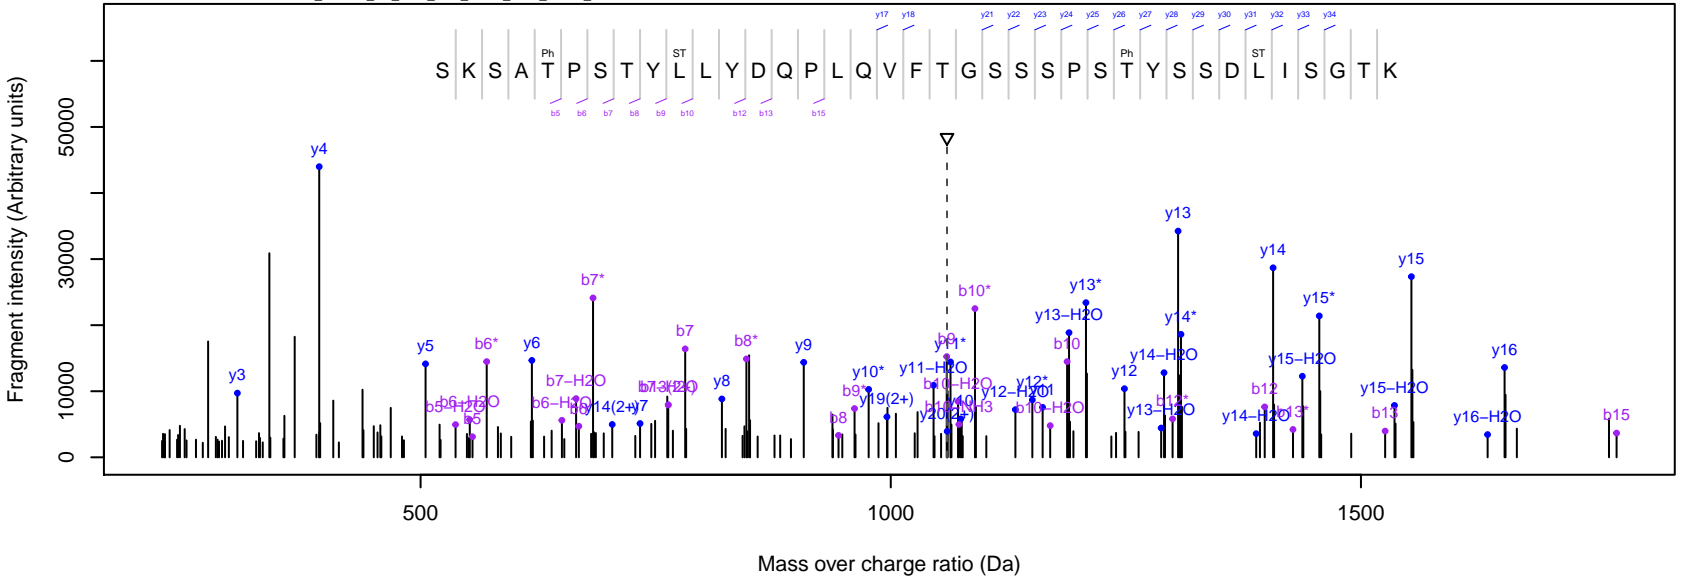

TKDQPDGSSLS(Phospho (STY))PAQS(Phospho (STY))PSQSQPPAASSLREPGLESK-4+

Source : QE3\_201126\_FR\_TiOx\_hum\_tissue\_Urea\_RNAB\_N Scan : 25167

Andromeda score : 139.7

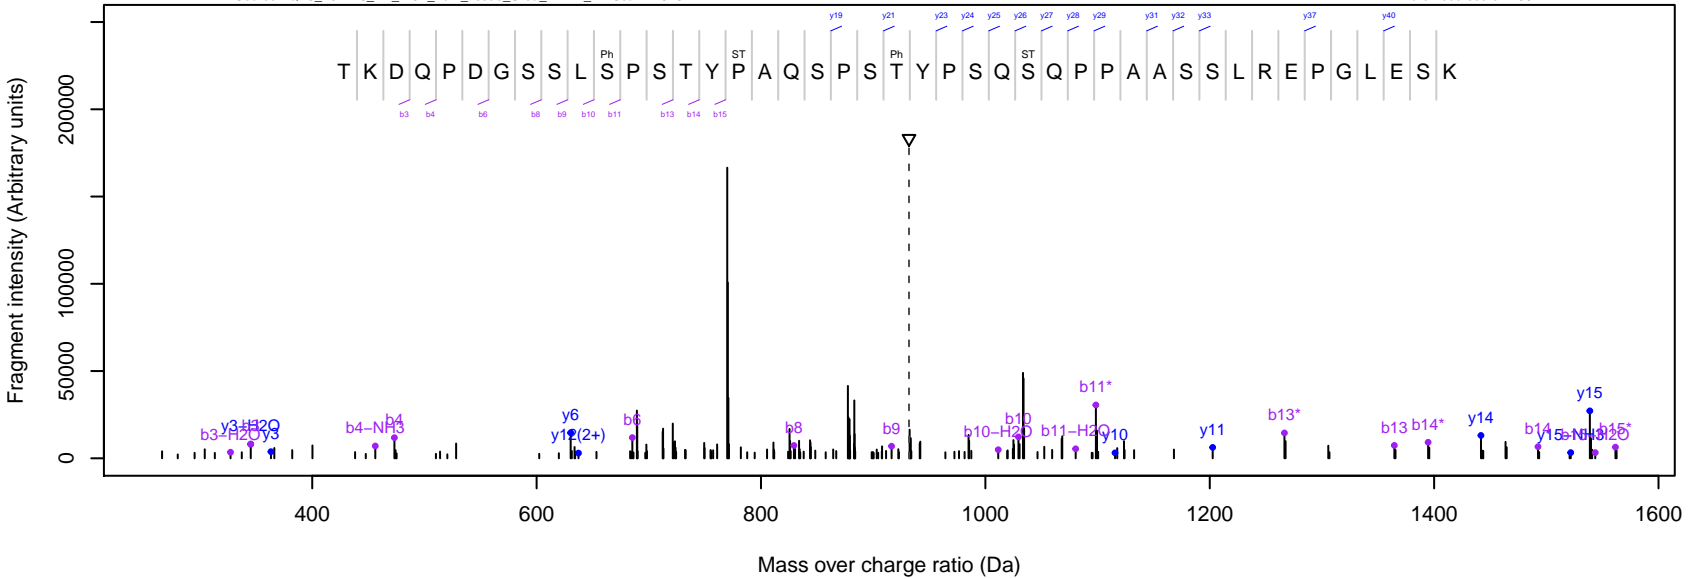

ERDHS(Phospho (STY))PTPSVFNSDEER-3+

Source : QE3\_201126\_FR\_TiOx\_hum\_tissue\_Urea\_RNAB\_H Scan : 13479

Andromeda score : 139.69

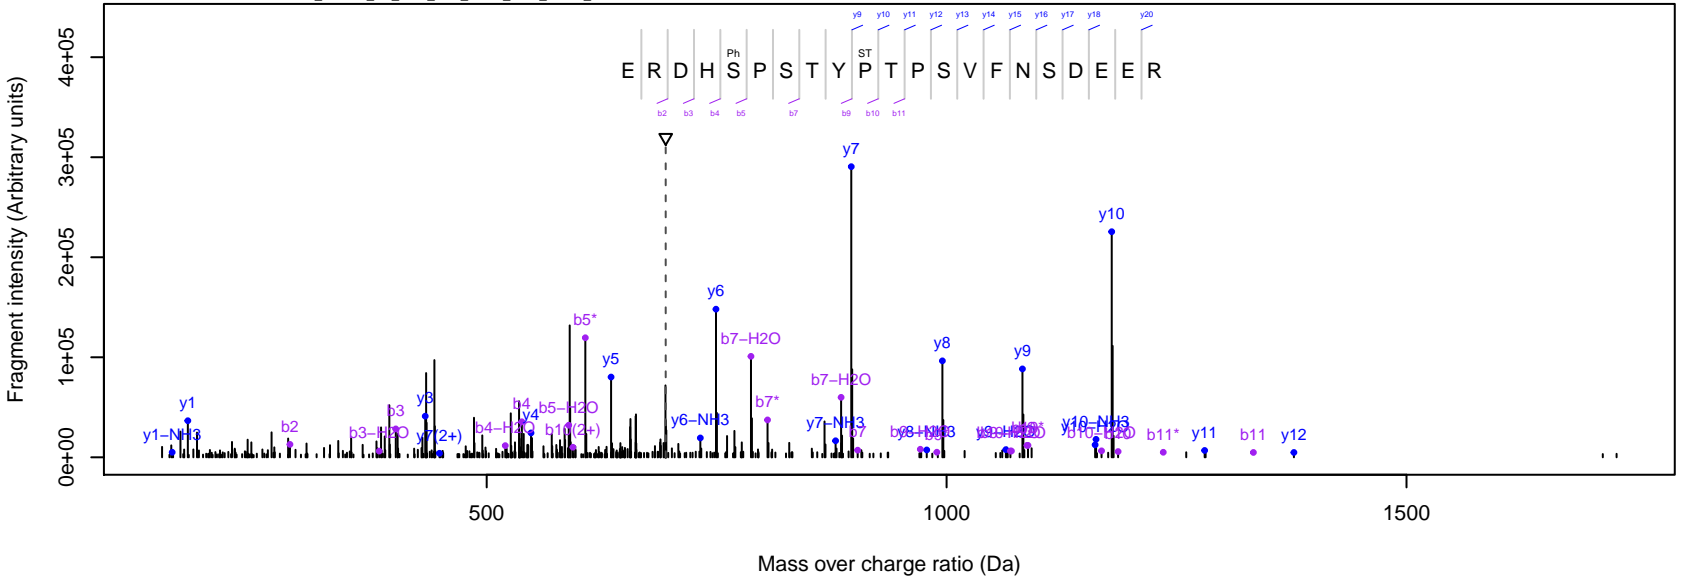

LESLYS(Phospho (STY))DEEDSAVGADK-2+

Source : QE3\_201126\_FR\_TiOx\_hum\_tissue\_Urea\_RNAB\_B Scan : 31457

Andromeda score : 139.67

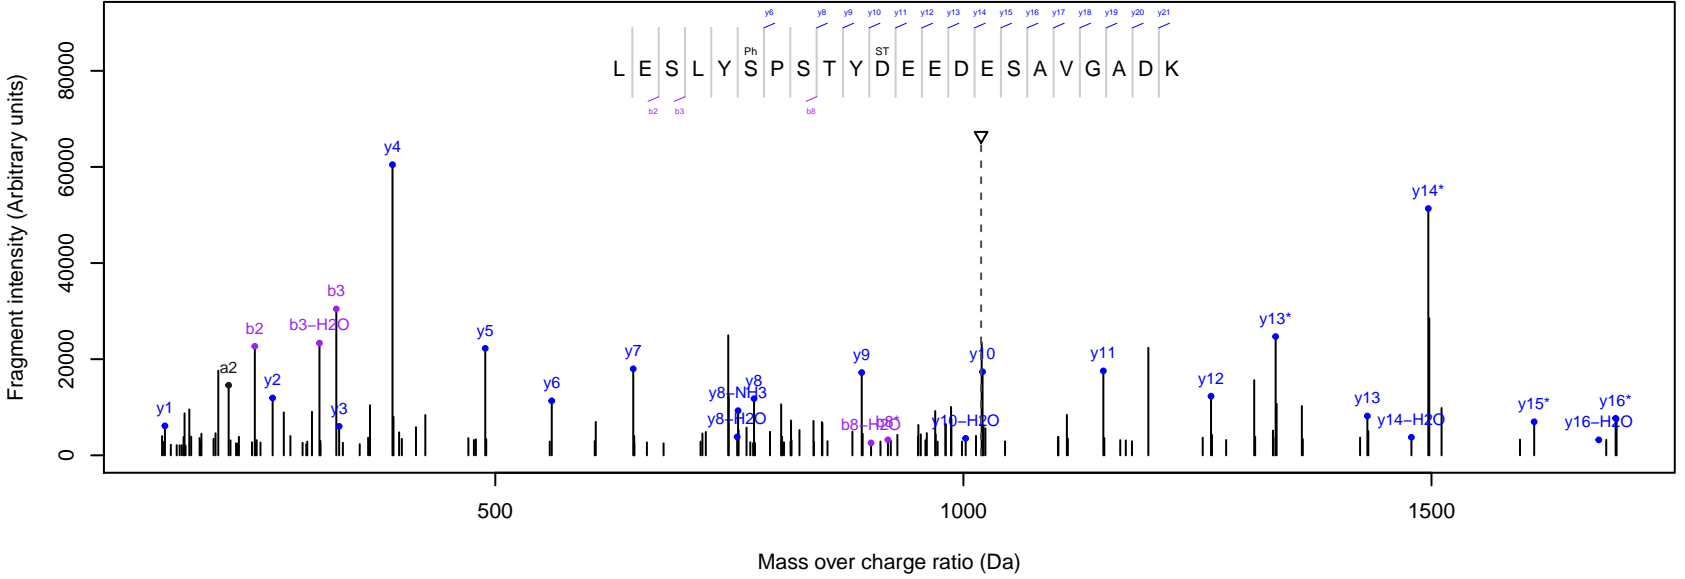

TIS(Phospho (STY))AQDTLAYATALLNEK-2+

Source : QE3\_201126\_FR\_TiOx\_hum\_tissue\_Urea\_RNAB\_N Scan : 59837

Andromeda score : 139.67

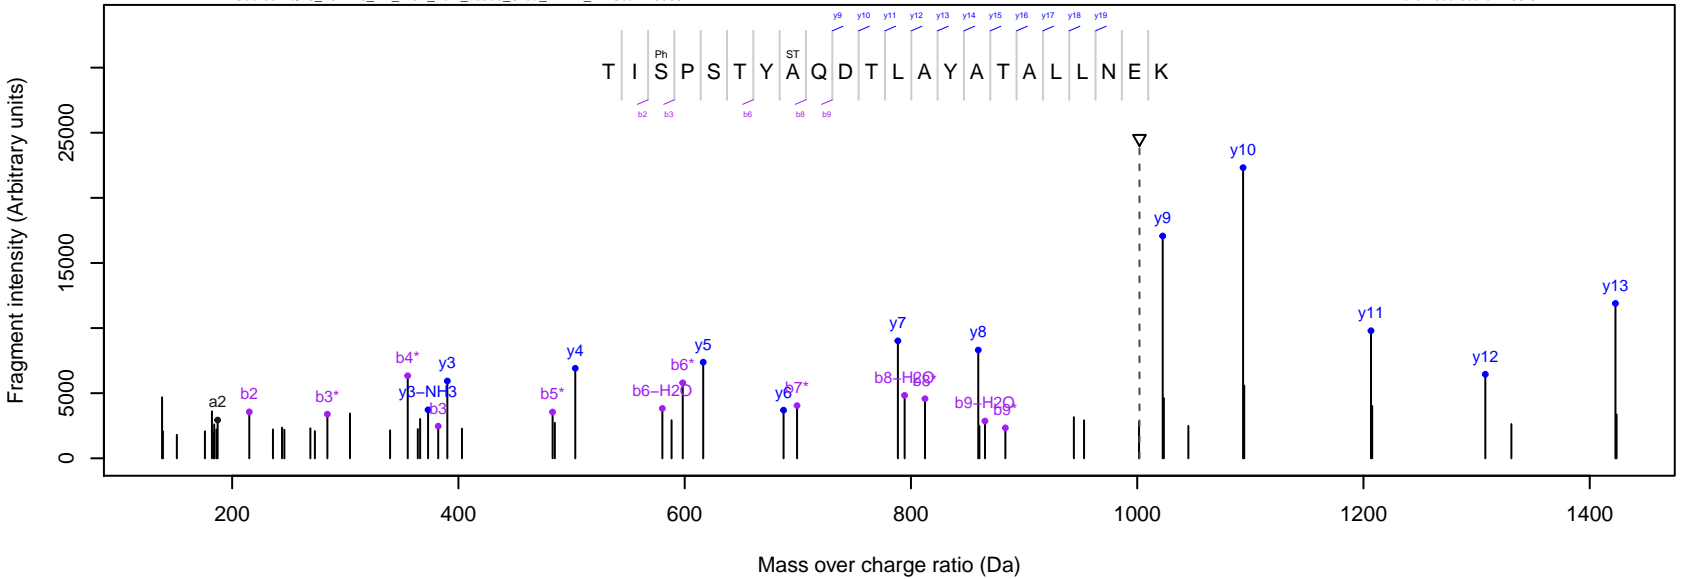

LSSS(Phospho (STY))WES(Phospho (STY))LQPEPSHPY-2+

Source : QE3\_201126\_FR\_TiOx\_hum\_tissue\_Urea\_RNAB\_N Scan : 49394

Andromeda score : 139.64

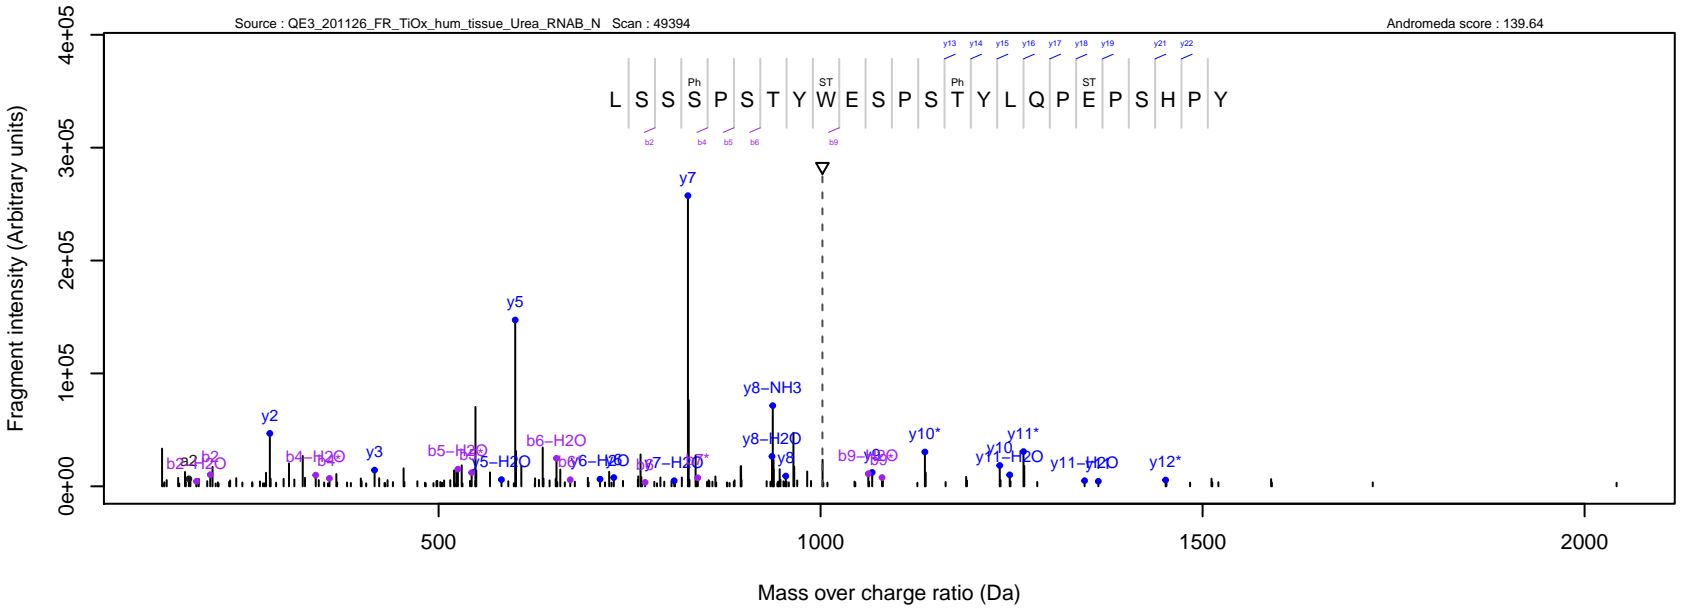

LAAFADALEFADEEKES(Phospho (STY))PVEFTGHK-4+

Source : QE3\_201126\_FR\_TiOx\_hum\_tissue\_Urea\_RNAB\_H Scan : 49021

Andromeda score : 139.61

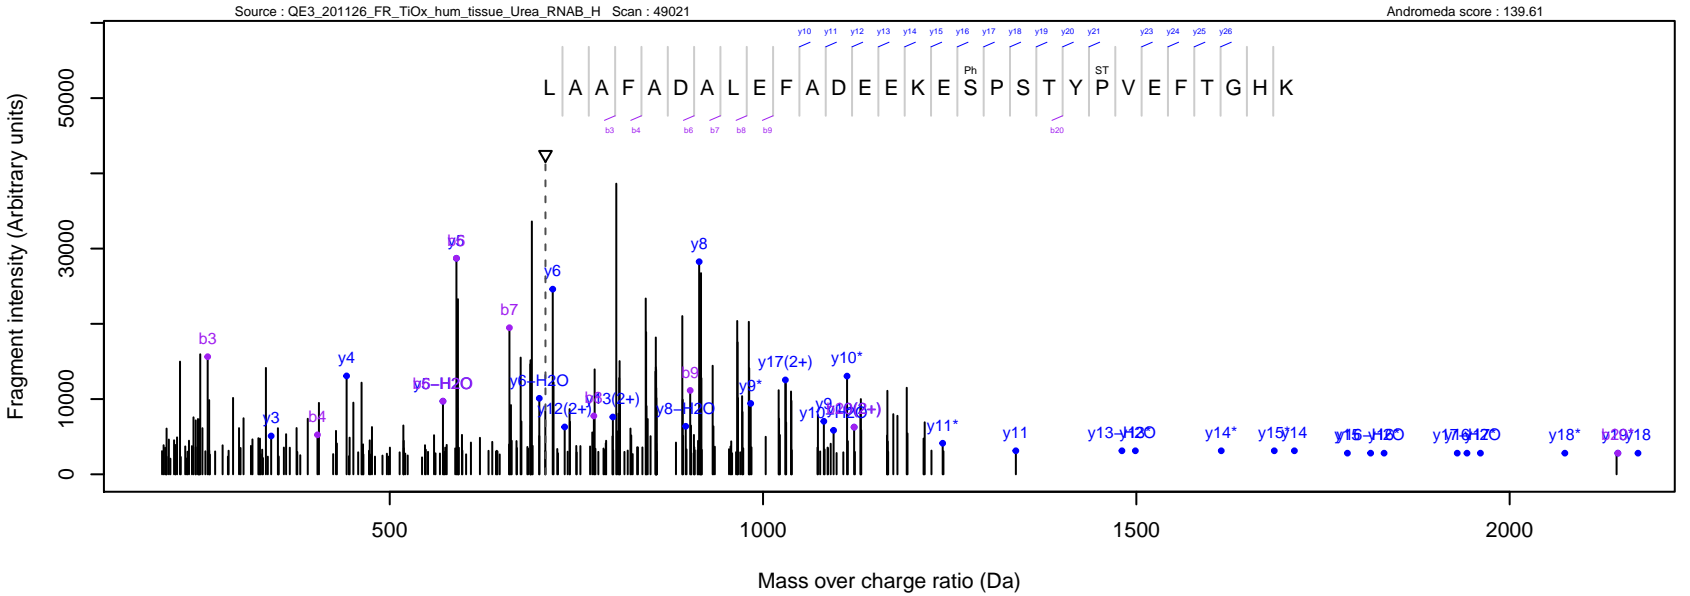

QNLLAPQNAVSS(Phospho (STY))EETNDFKQETLPSK-3+

Source : QE3\_201126\_FR\_TiOx\_hum\_tissue\_Urea\_RNAB\_B Scan : 35762

Andromeda score : 139.61

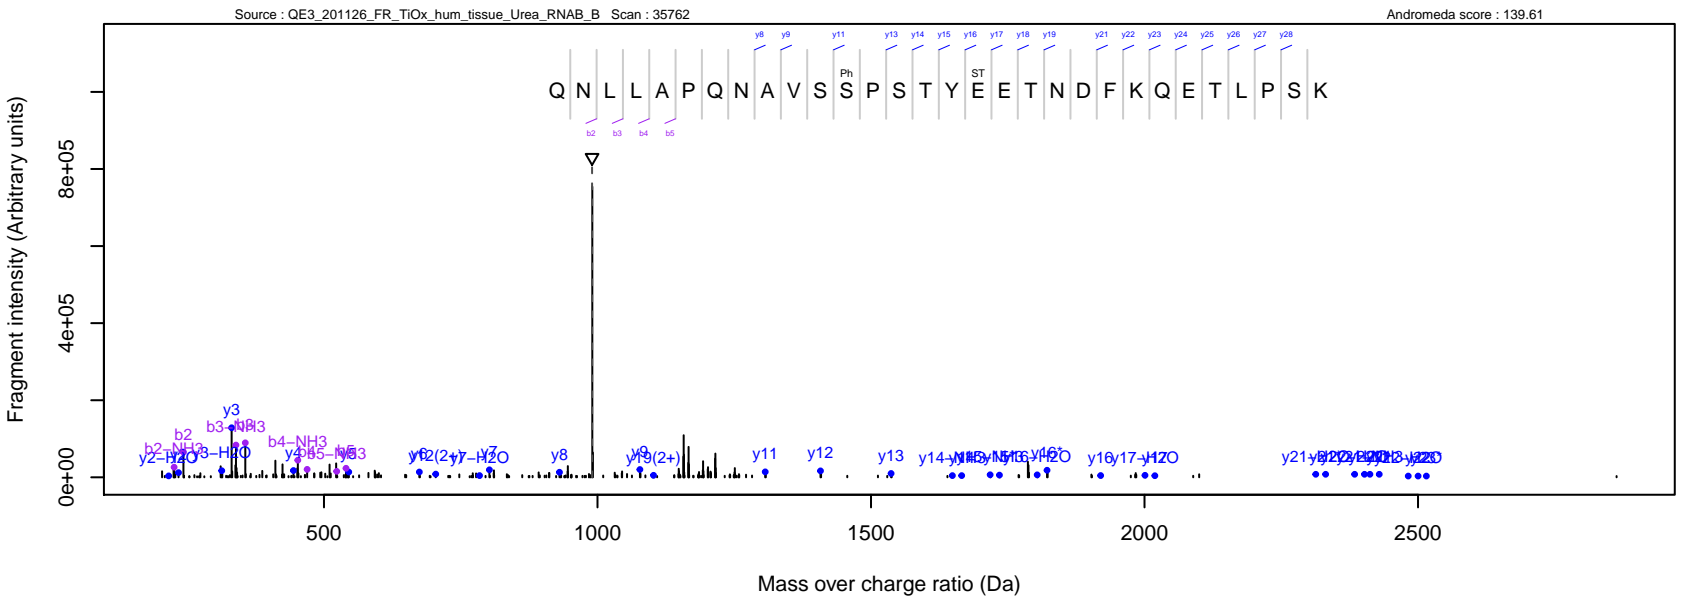



HSS(Phospho (STY))WGDVGVGGS LKAPV LNLNQGMDNGR-3+

Source : QE3\_201126\_FR\_TiOx\_hum\_tissue\_Urea\_RNAB\_N Scan : 42983

Andromeda score : 139.6

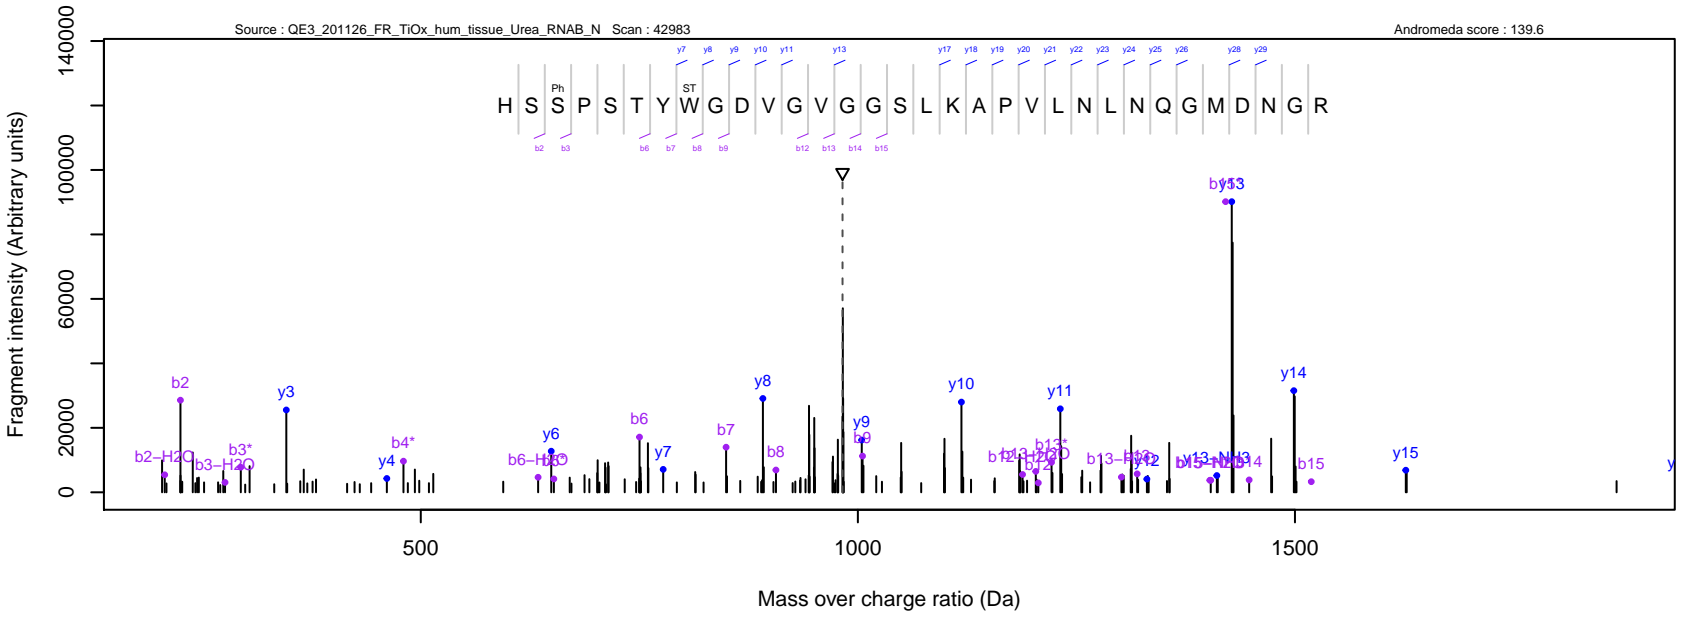

TQT(Phospho (STY))PPLGQTPQLGLK-2+

Source : QE3\_201126\_FR\_TiOx\_hum\_tissue\_Urea\_RNAB\_N Scan : 35052

Andromeda score : 139.58

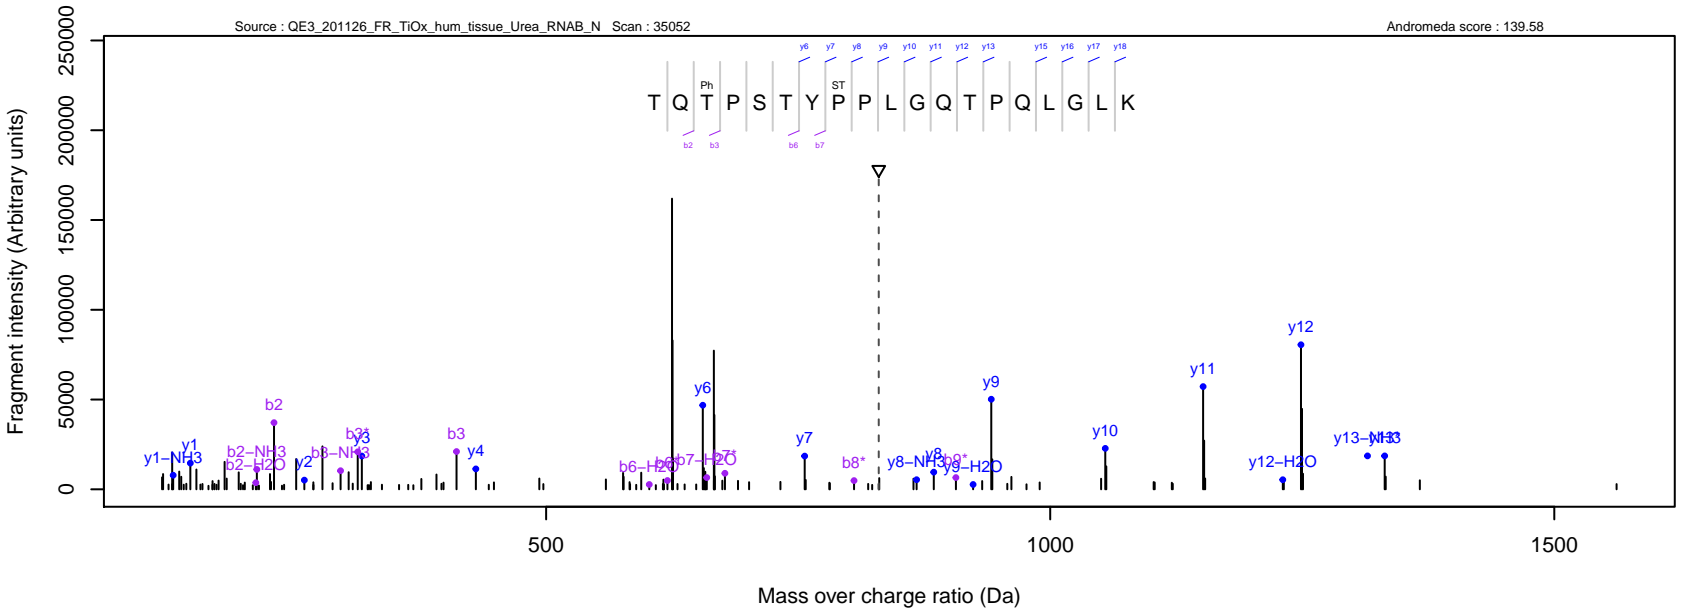

S(Phospho (STY))PSGDRPAVGHSG LKPLSGETPLSAYK-4+

Source : QE3\_201126\_FR\_TiOx\_hum\_tissue\_Urea\_RNAB\_B Scan : 22789

Andromeda score : 139.54

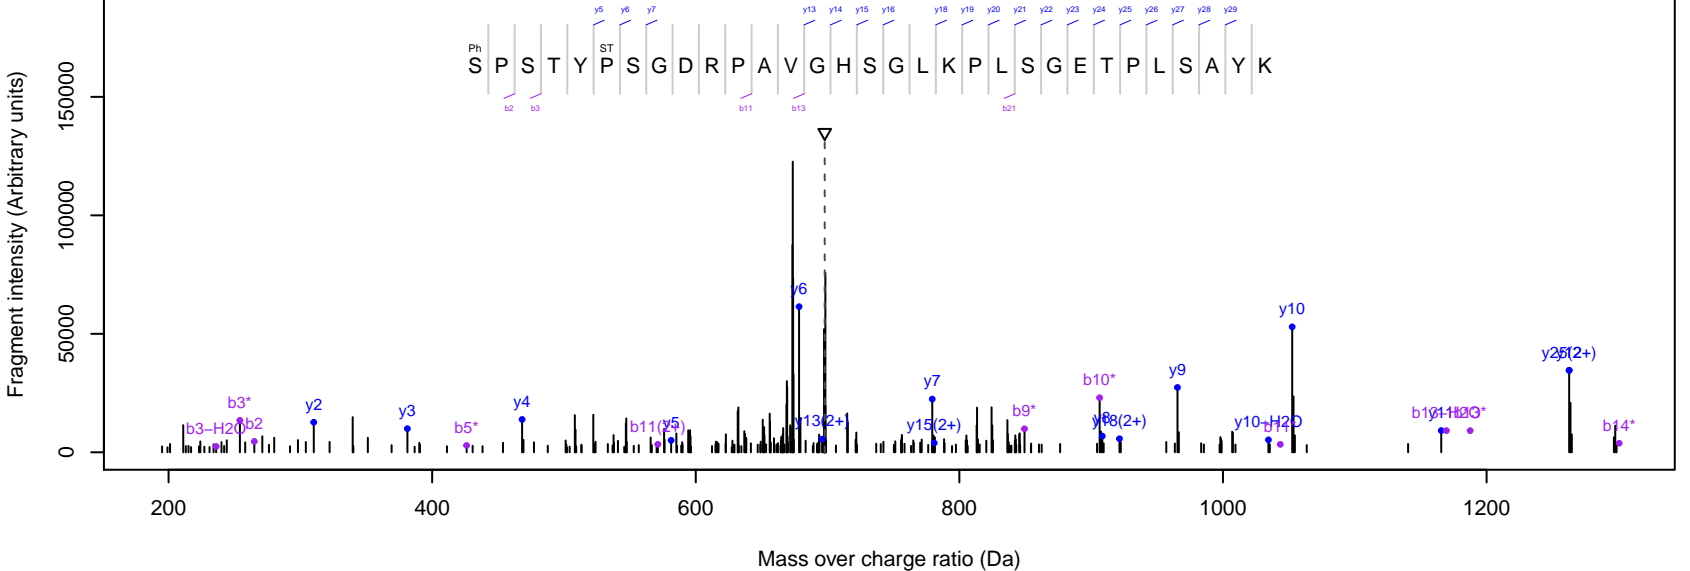

CTELNQAWS(Phospho (STY))LGKR-3+

Source : QE3\_201126\_FR\_TiOx\_hum\_tissue\_Urea\_RNAB\_H Scan : 25705

Andromeda score : 139.49

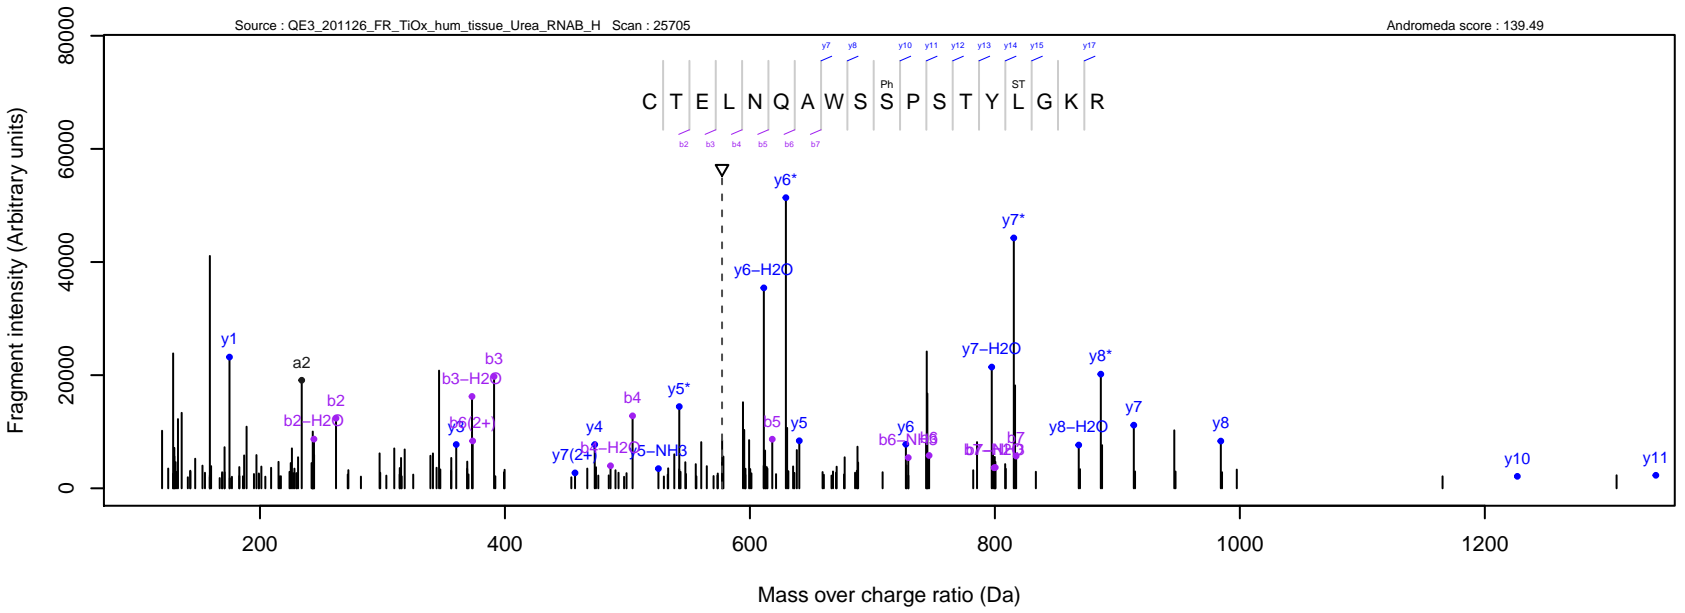

EGPEEPGLAKQDS(Phospho (STY))FR-2+

Source : QE3\_201126\_FR\_TiOx\_hum\_tissue\_Urea\_RNAB\_H Scan : 17871

Andromeda score : 139.49

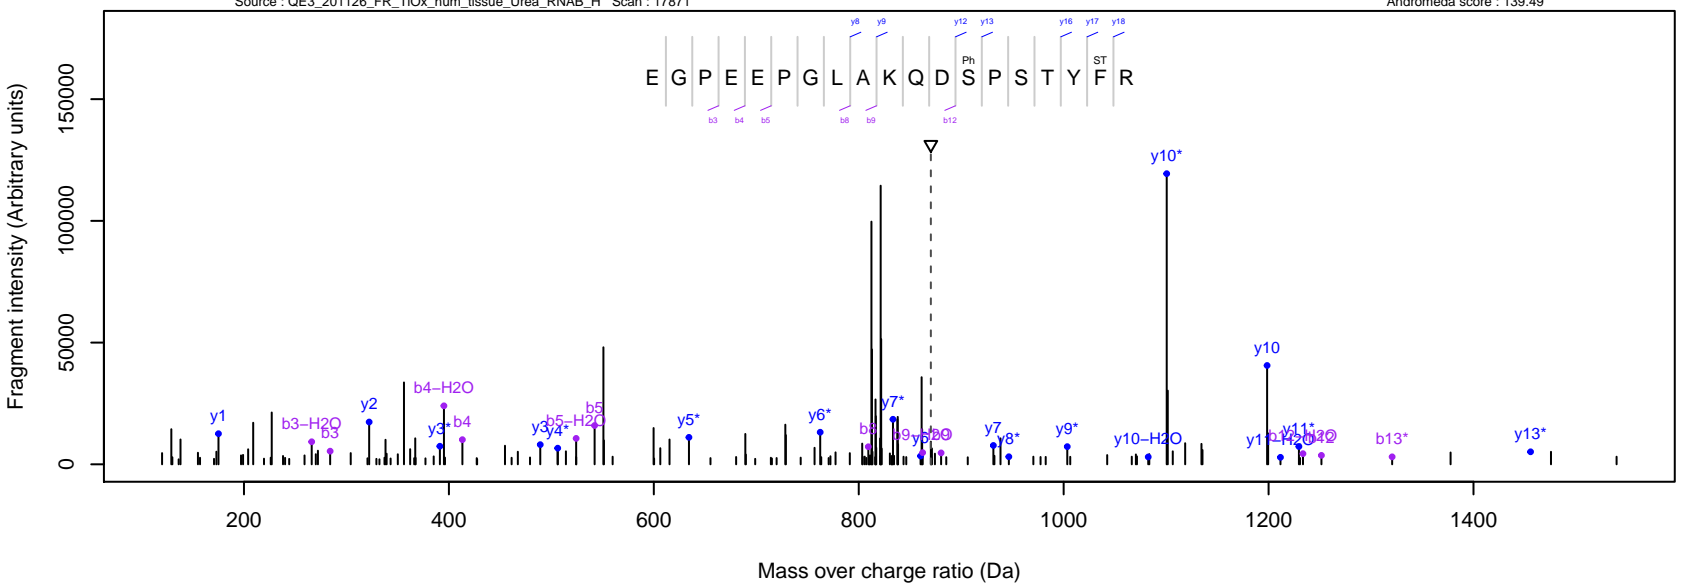

AADTEEM(Oxidation (M))DIEM(Oxidation (M))DS(Phospho (STY))GDEA-2+

Source : QE3\_201126\_FR\_TiOx\_hum\_tissue\_Urea\_RNAB\_B Scan : 21786

Andromeda score : 139.48

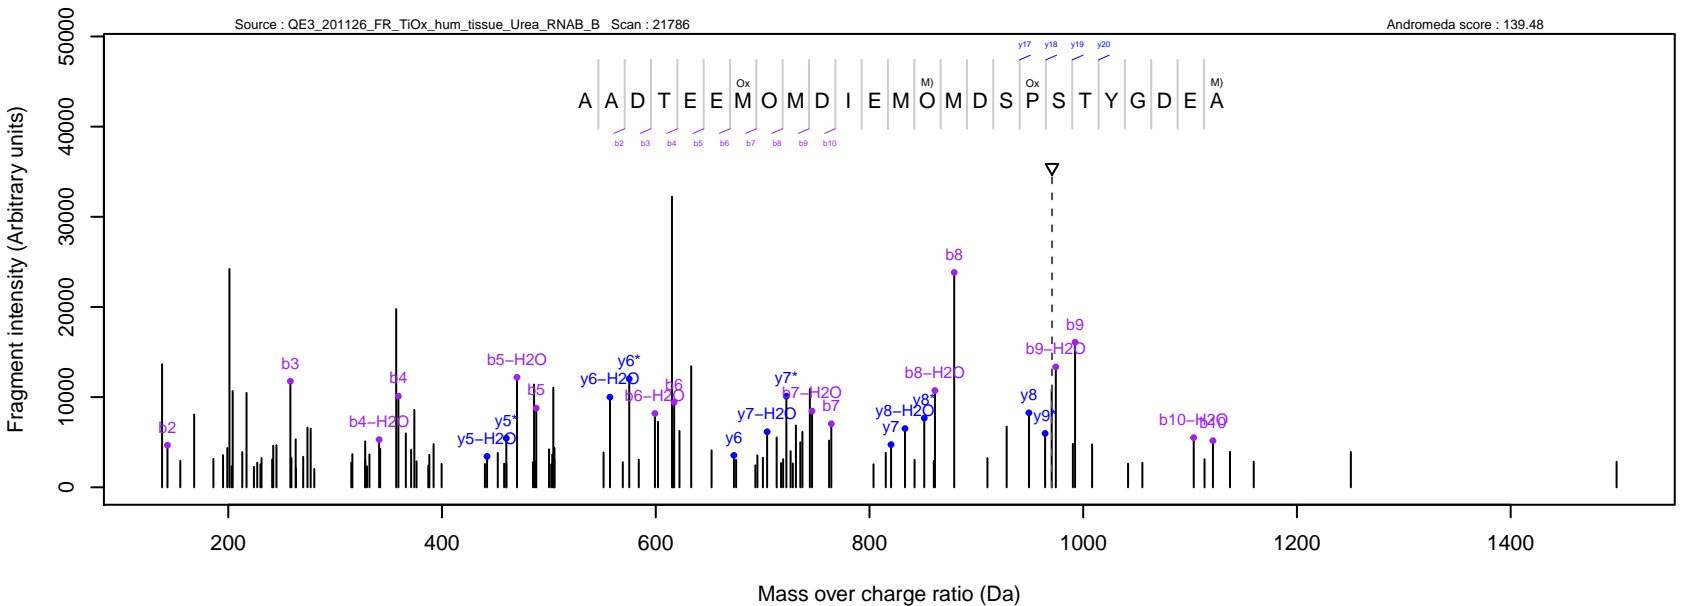

ASSS(Phospho (STY))YRETSPSSPASPQETR-3+

Source : QE3\_201126\_FR\_TiOx\_hum\_tissue\_Urea\_RNAB\_H Scan : 9510

Andromeda score : 139.47

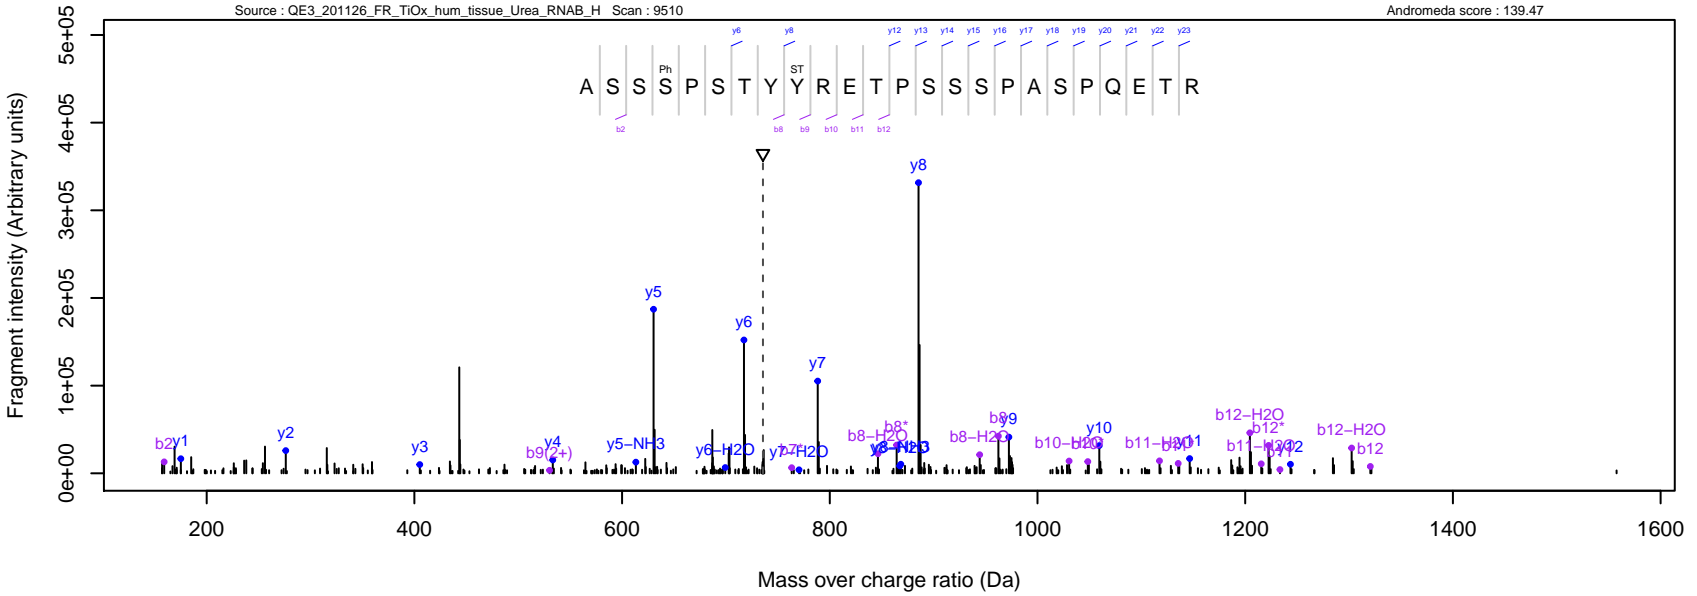

KLS(Phospho (STY))VPTS(Phospho (STY))DEEDEVPAKPR-3+

Source : QE3\_201126\_FR\_TiOx\_hum\_tissue\_Urea\_RNAB\_B Scan : 22581

Andromeda score : 139.47

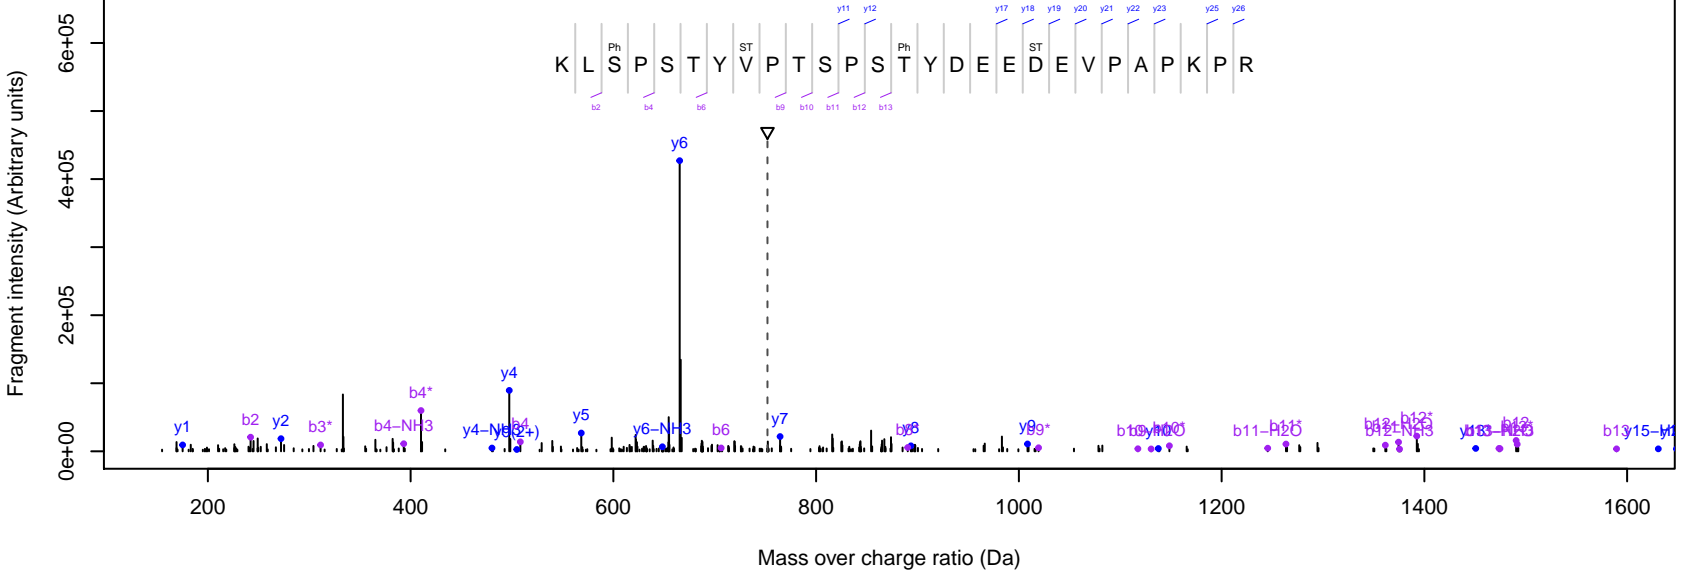

VLS(Phospho (STY))DS(Phospho (STY))EDEEKDADVPGTSTR-3+

Source : QE3\_201126\_FR\_TiOx\_hum\_tissue\_Urea\_RNAB\_H Scan : 22705

Andromeda score : 139.47

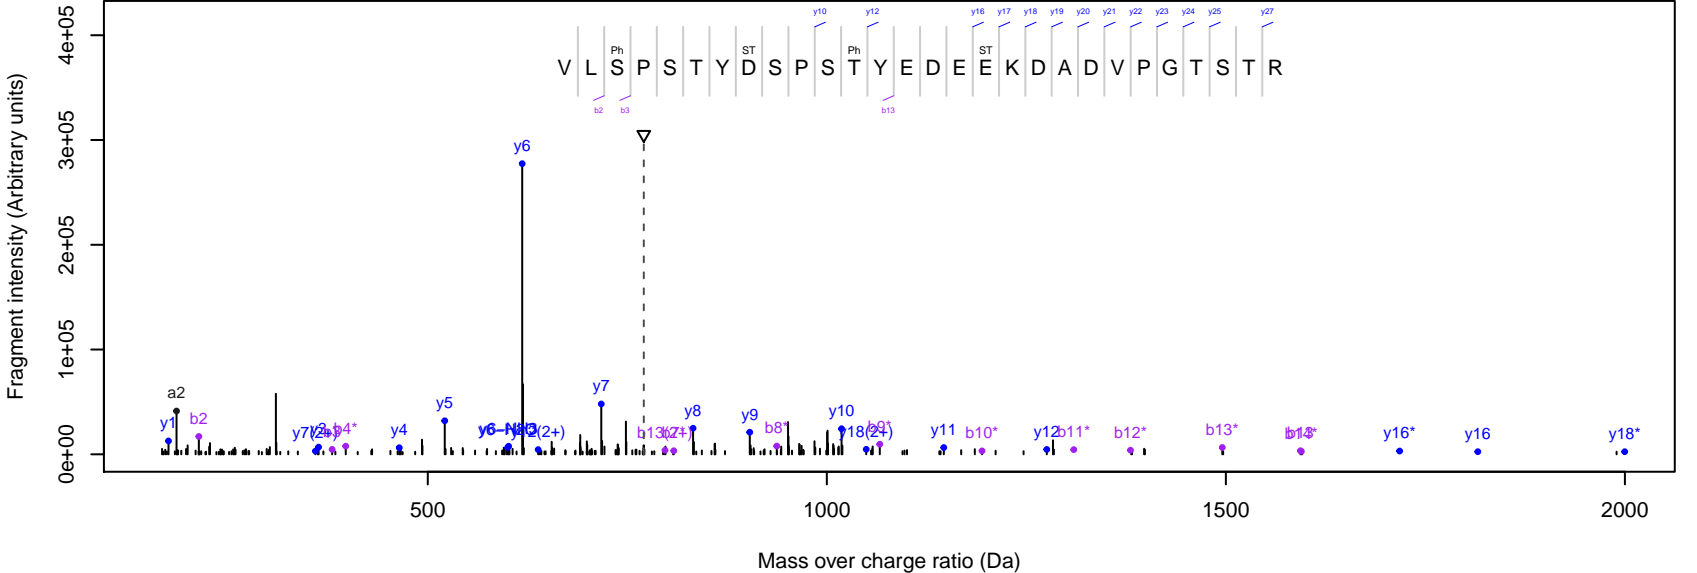

S(Phospho (STY))VMTEEYKVPDGMVGFIIGR-3+

Source : QE3\_201126\_FR\_TiOx\_hum\_tissue\_Urea\_RNAB\_H Scan : 56071

Andromeda score : 139.46

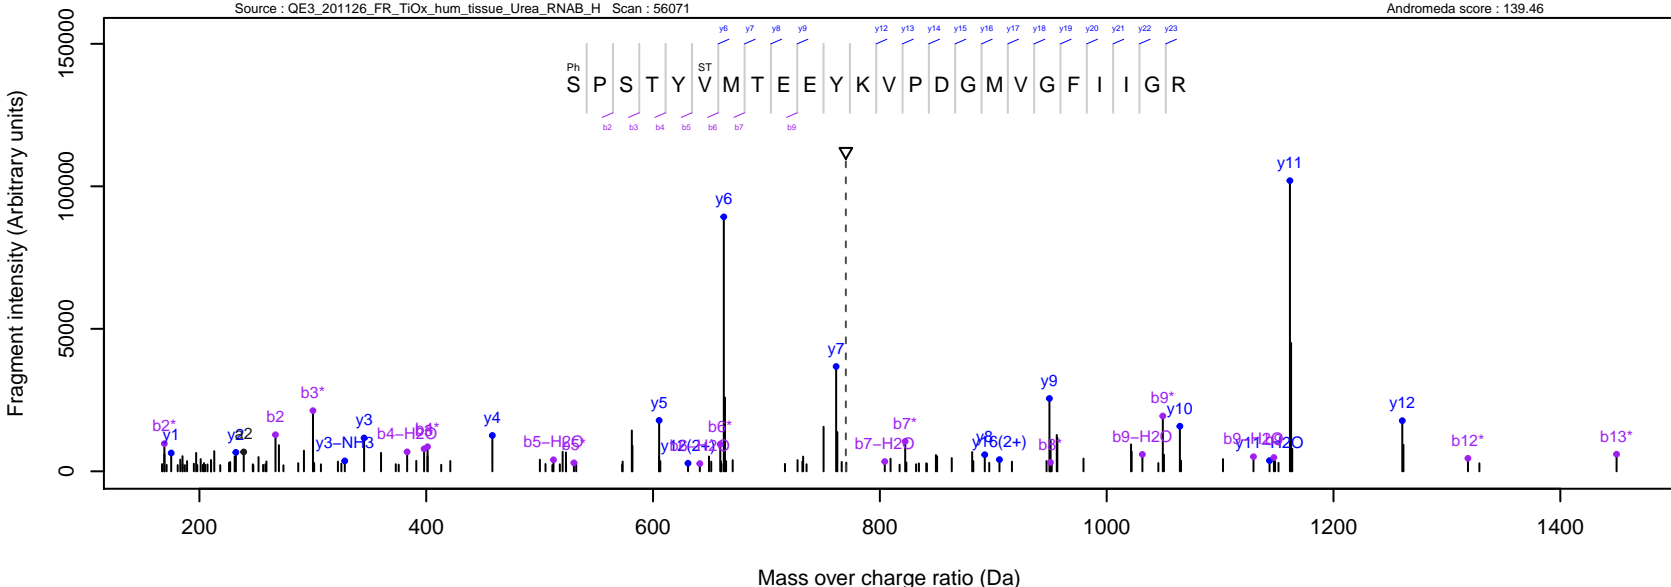

ATASPRPSSGNIPSSPTASGGGS(Phospho (STY))PTSPR-3+

Source : QE3\_201126\_FR\_TiOx\_hum\_tissue\_Urea\_RNAB\_H Scan : 14452

Andromeda score : 139.42

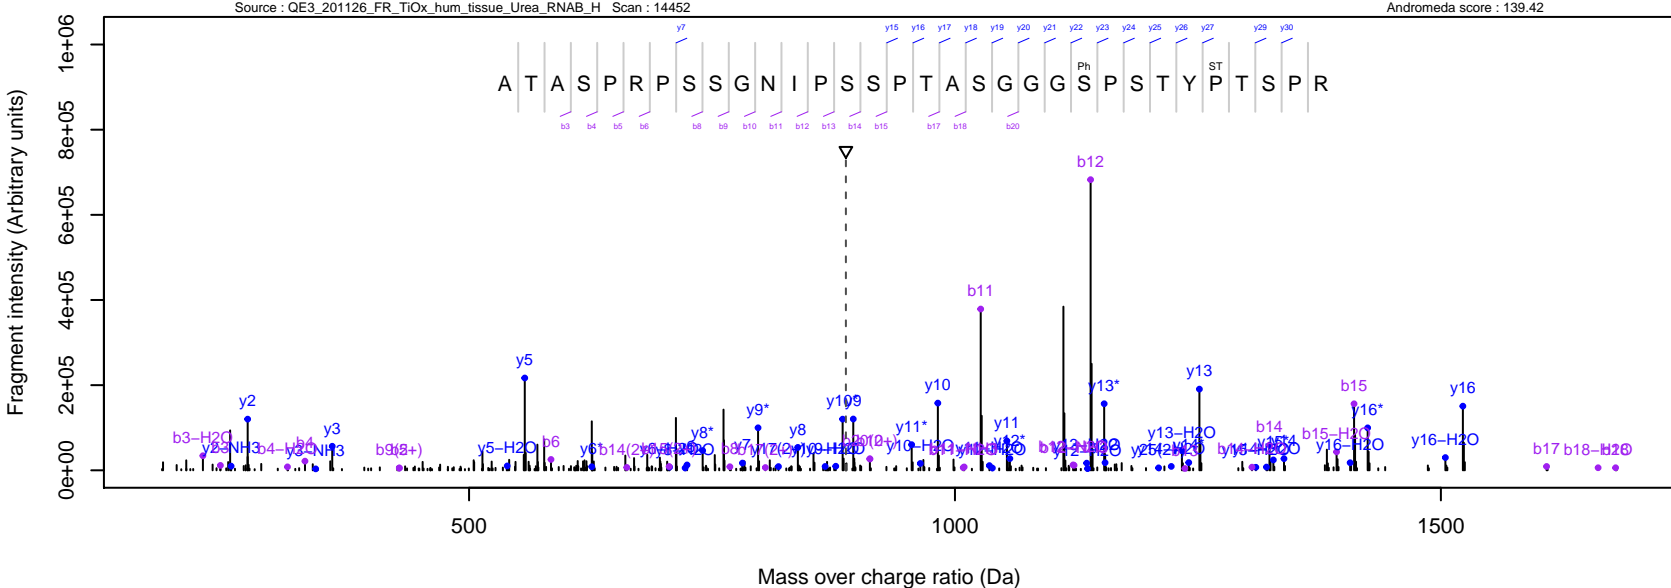

SPVDES(Phospho (STY))GDEVQYGDVPVENGMAPPFEM(Oxidation (M))K-3+

Source : QE3\_201126\_FR\_TiOx\_hum\_tissue\_Urea\_RNAB\_H Scan : 57167

Andromeda score : 139.41

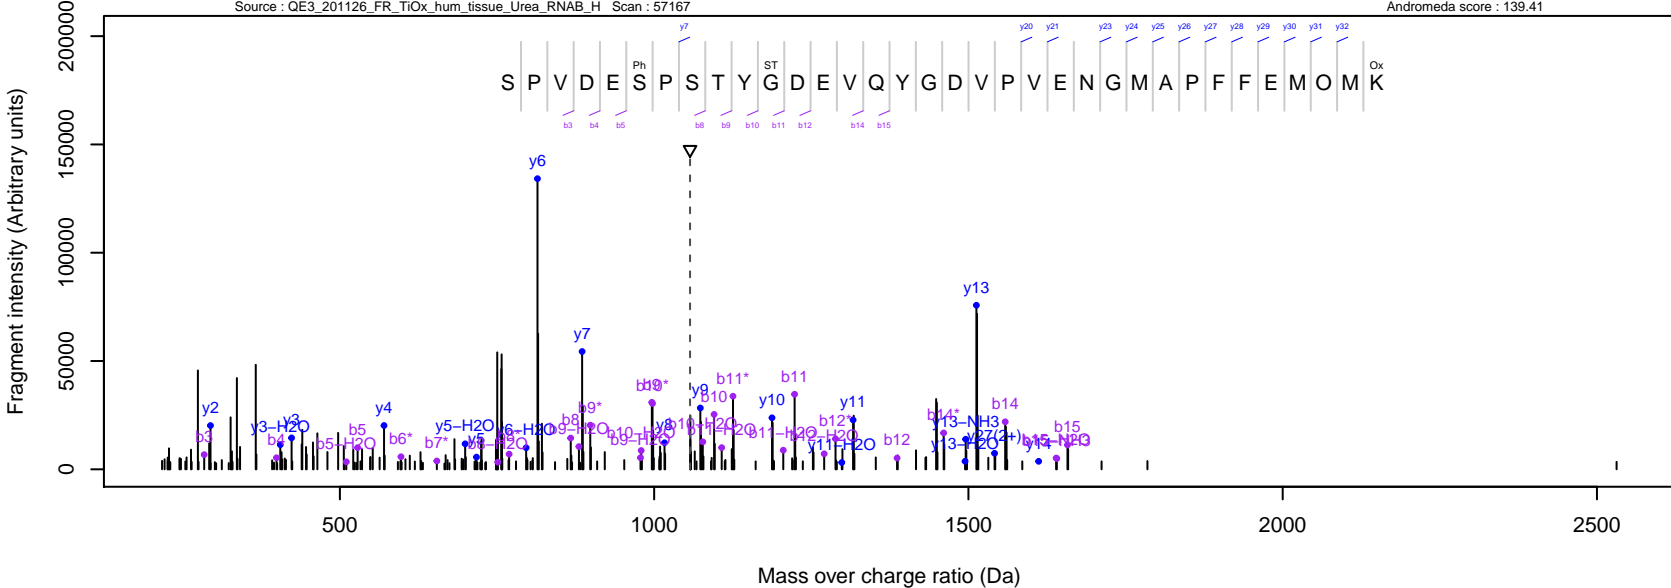

SKEGHSLEMENLVENGADS(Phospho (STY))DEDDNSFLKQKSPQEPK-4+

Source : QE3\_201126\_FR\_TiOx\_hum\_tissue\_Urea\_RNAB\_H Scan : 28663

Andromeda score : 139.36

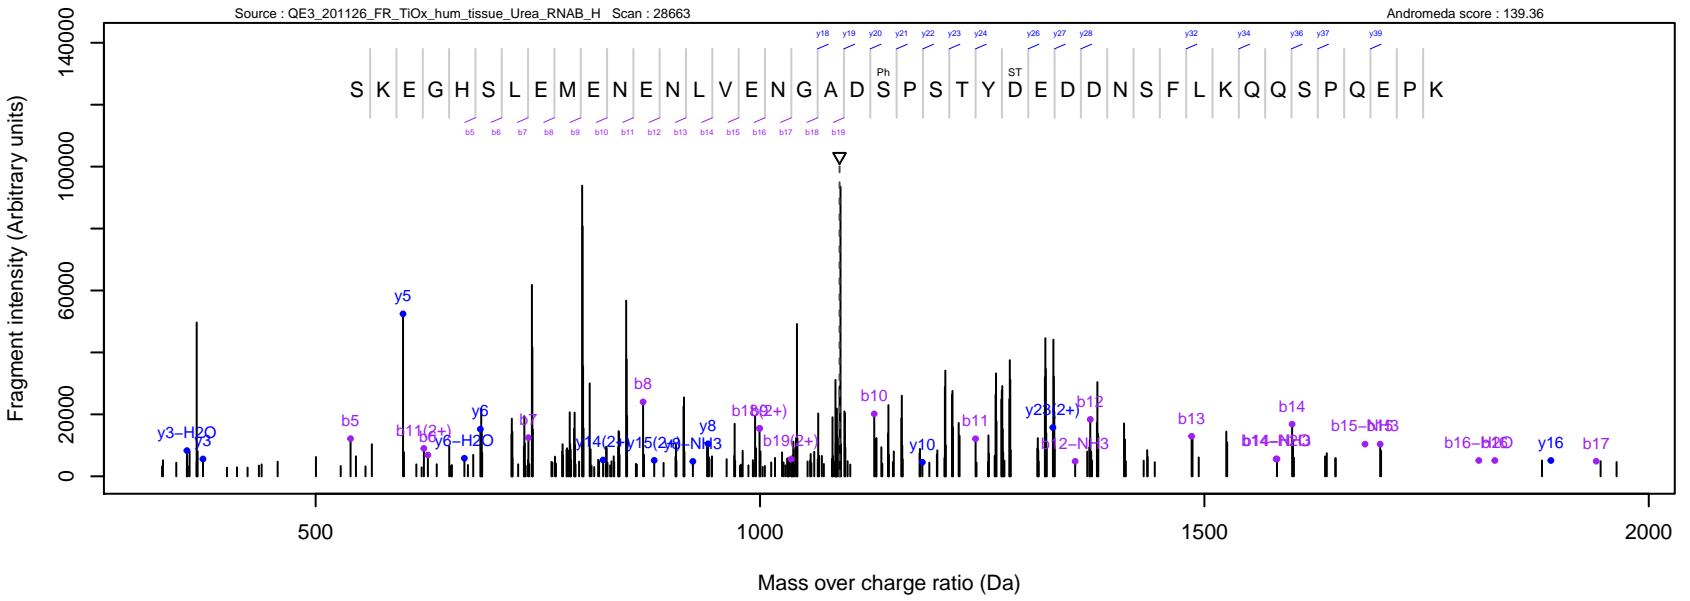

EADES(Phospho (STY))LNFEQILEAAK-2+

Source : QE3\_201126\_FR\_TiOx\_hum\_tissue\_Urea\_RNAB\_B Scan : 56536

Andromeda score : 139.34

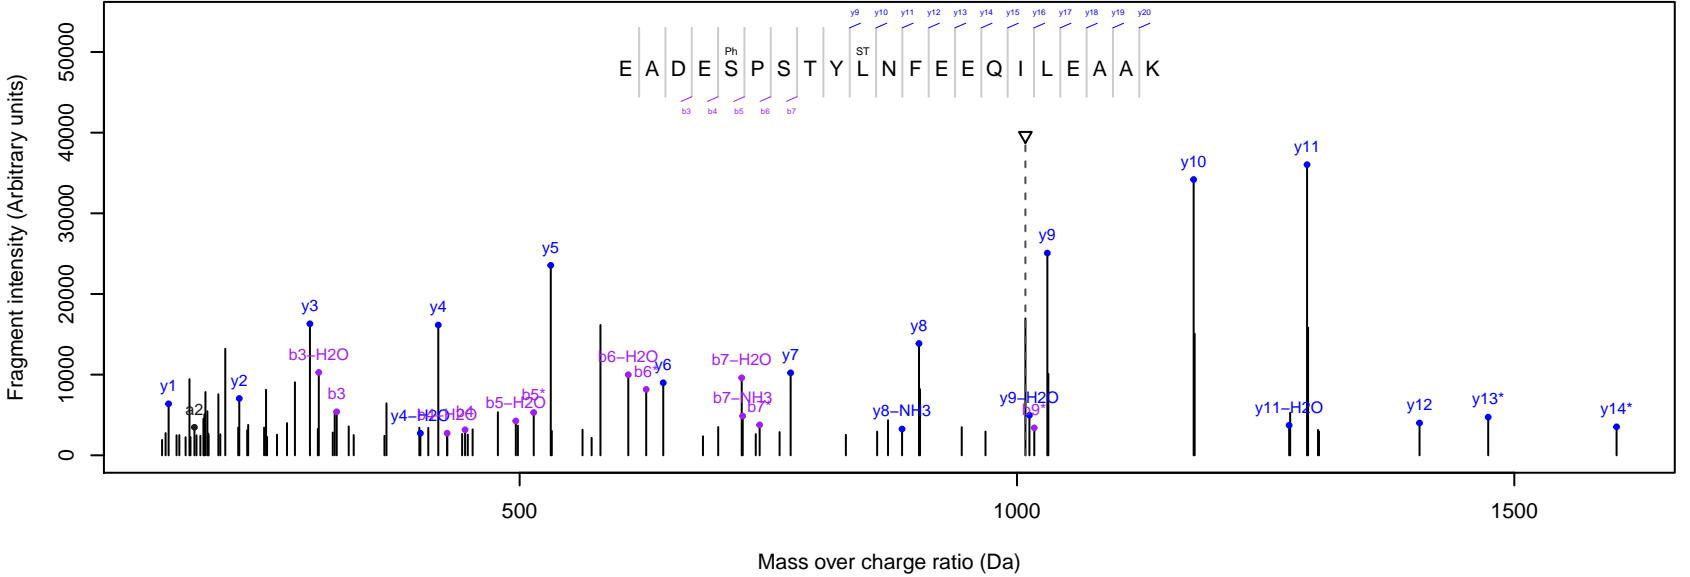

STFREES(Phospho (STY))PLRIK-3+

Source : QE3\_201126\_FR\_TiOx\_hum\_tissue\_Urea\_RNAB\_N Scan : 15708

Andromeda score : 139.34

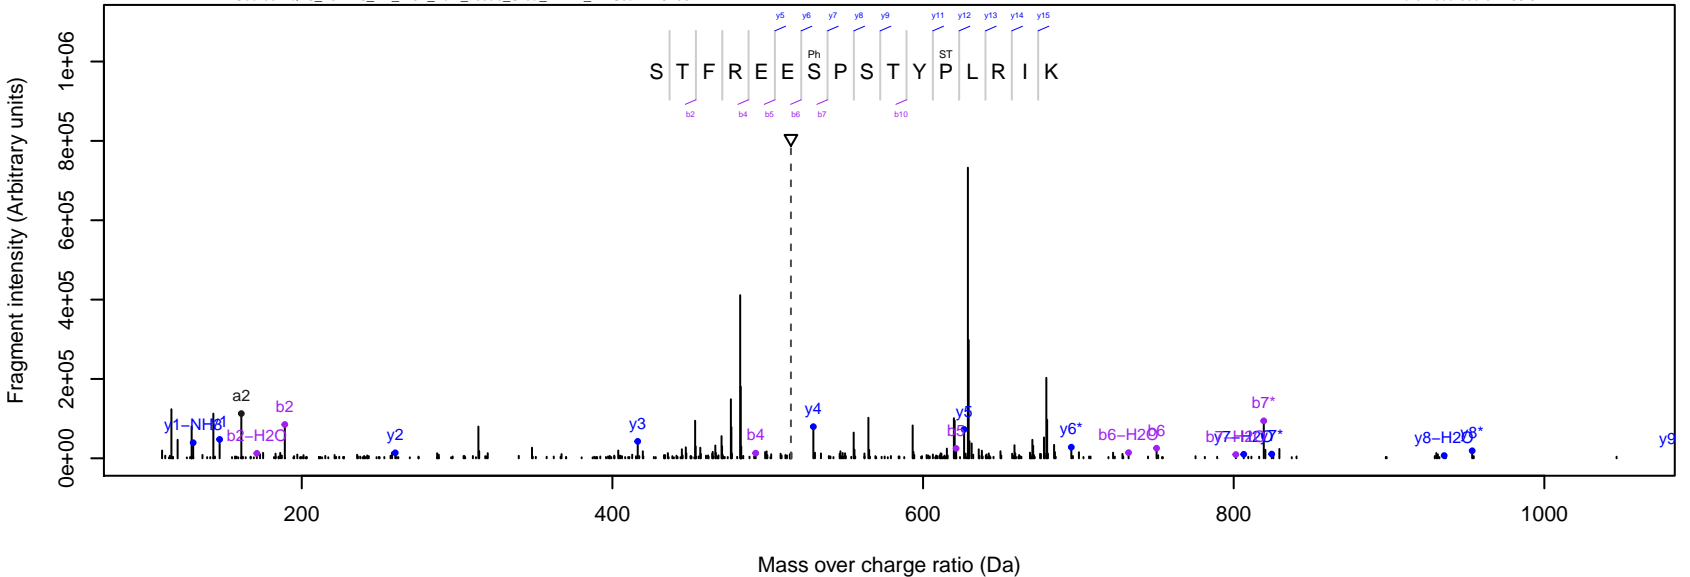

GSLAS(Phospho (STY))LDSLRL-2+

Source : QE3\_201126\_FR\_TIOx\_hum\_tissue\_Urea\_RNAB\_H Scan : 34457

Andromeda score : 139.31

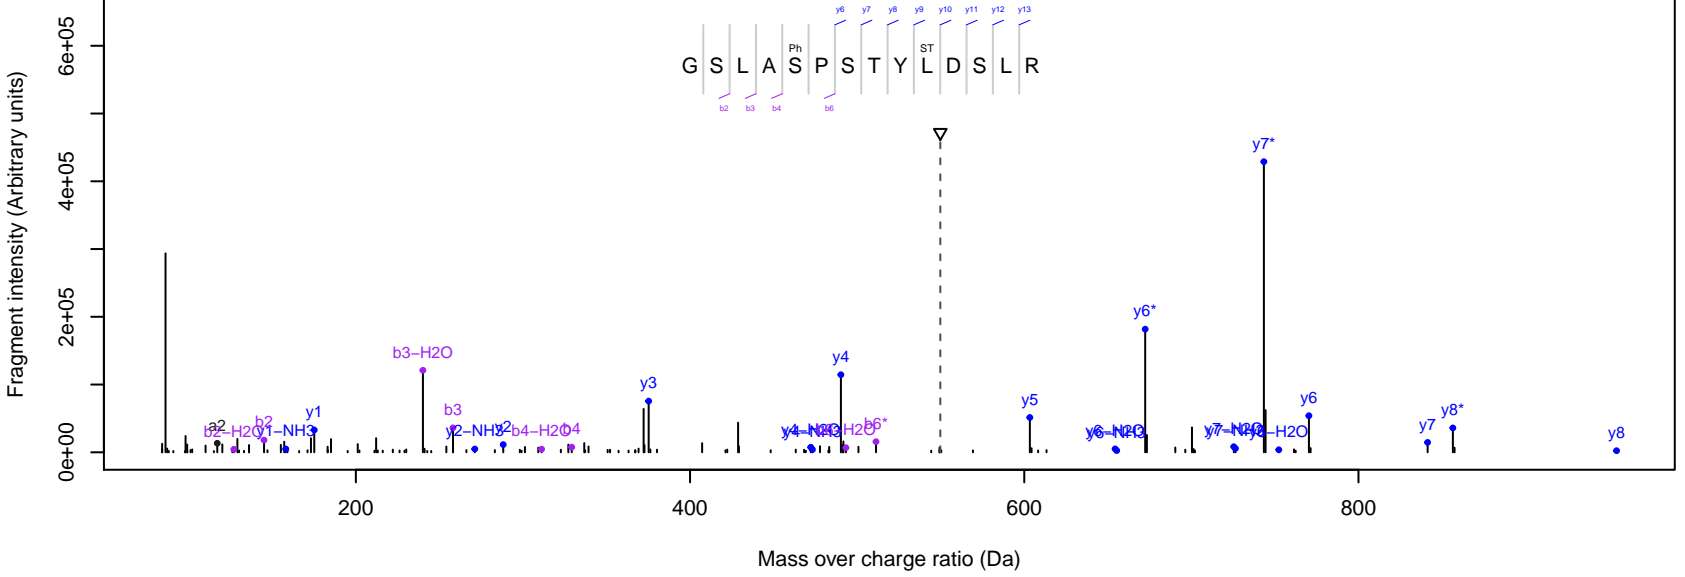

YQLQS(Phospho (STY))QENFEAFM(Oxidation (M))K-2+

Source : QE3\_201126\_FR\_TIOx\_hum\_tissue\_Urea\_RNAB\_B Scan : 37306

Andromeda score : 139.3

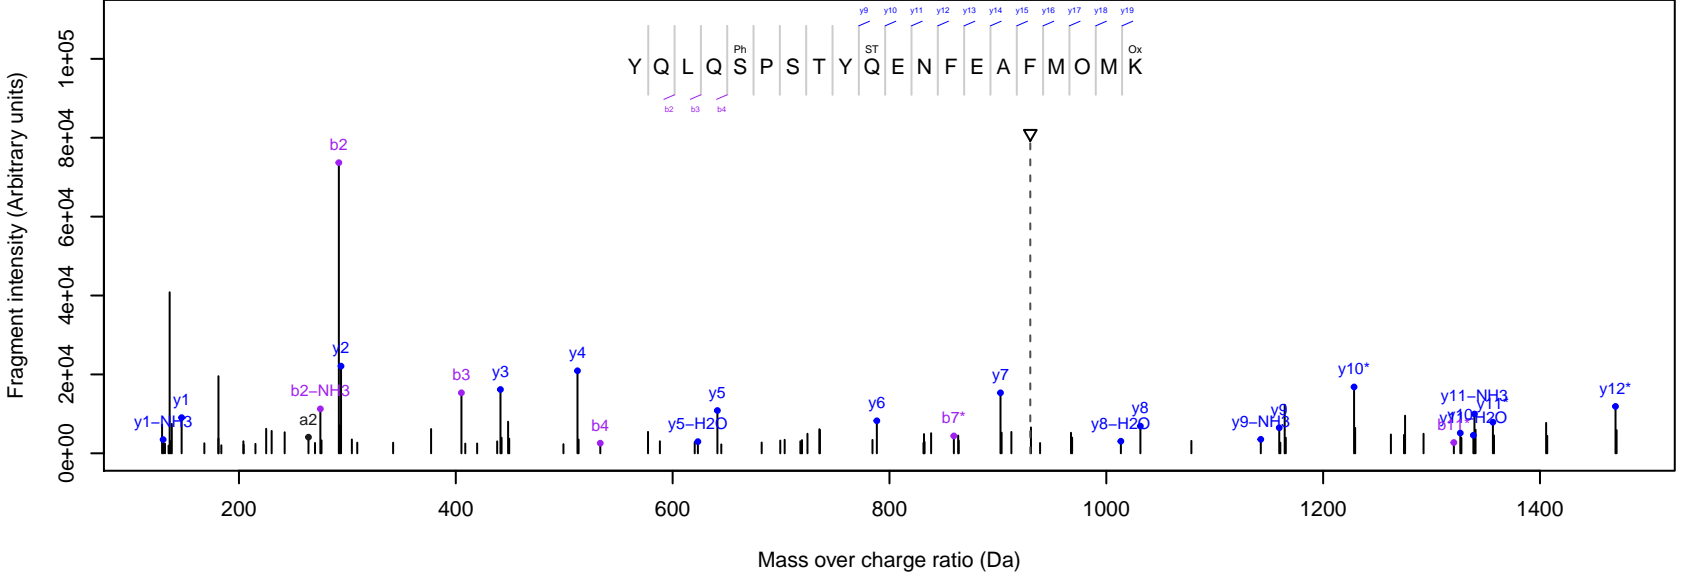

THS(Phospho (STY))TSSS(Phospho (STY))LGSGESPFSLR-2+

Source : QE3\_201126\_FR\_TIOx\_hum\_tissue\_Urea\_RNAB\_B Scan : 22983

Andromeda score : 139.29

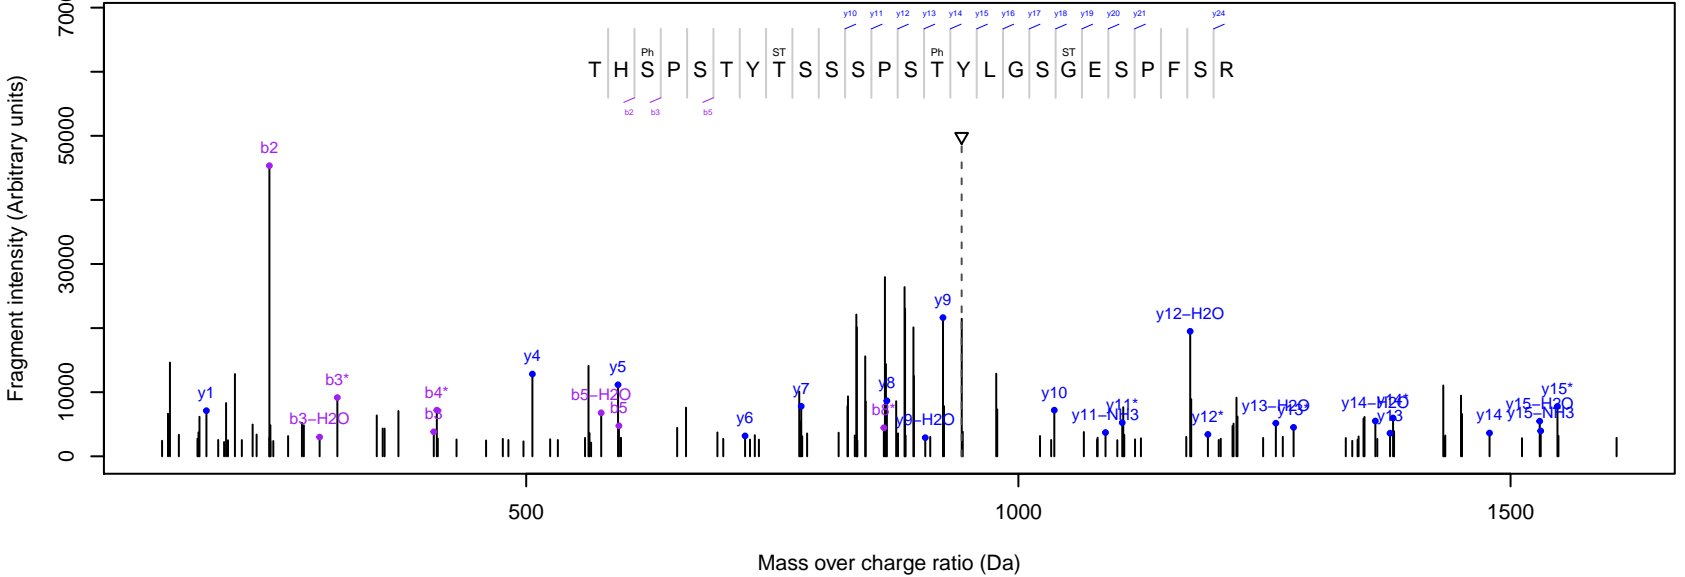



DM(Oxidation (M))PGGFLFEGLS(Phospho (STY))DDEDDFHPNTR-3+

Source : QE3\_201126\_FR\_TiOx\_hum\_tissue\_Urea\_RNAB\_H Scan : 53904

Andromeda score : 139.16

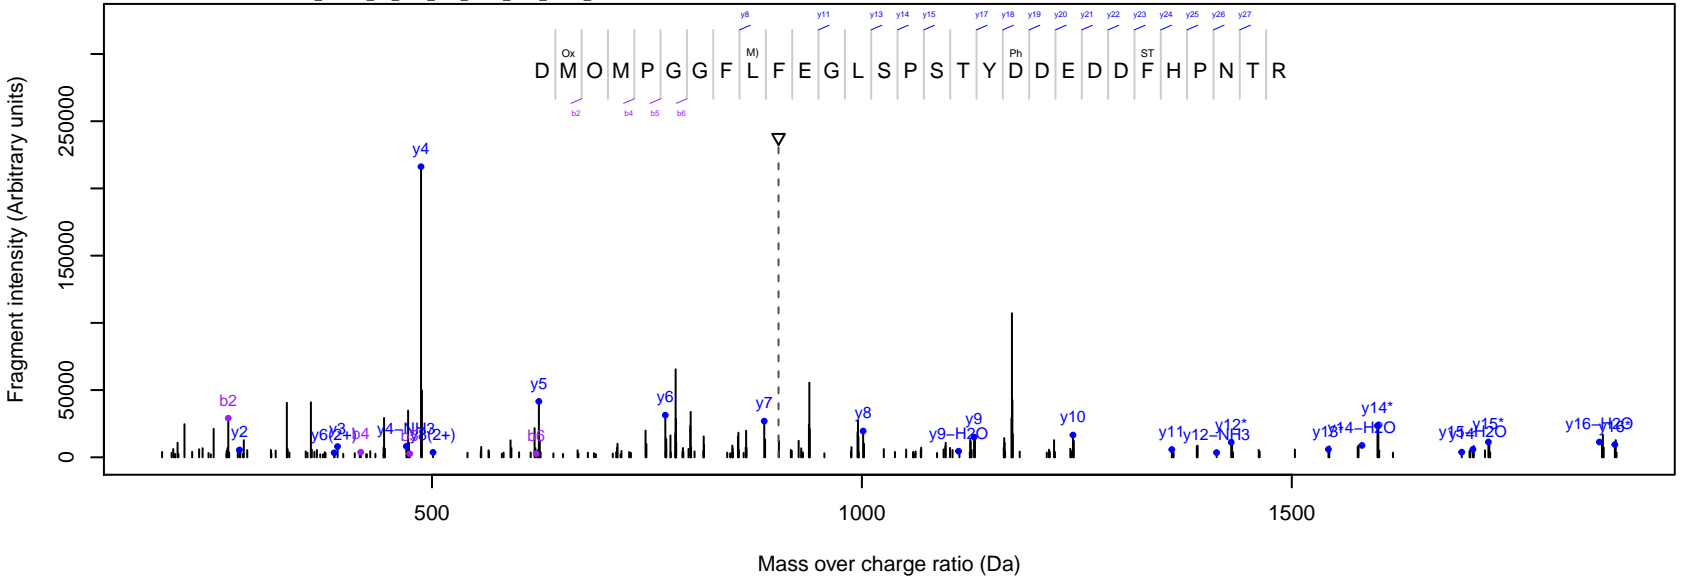

GDAPVDKVELSEDS(Phospho (STY))PNSEQDLEK-3+

Source : QE3\_201126\_FR\_TiOx\_hum\_tissue\_Urea\_RNAB\_B Scan : 23992

Andromeda score : 139.16

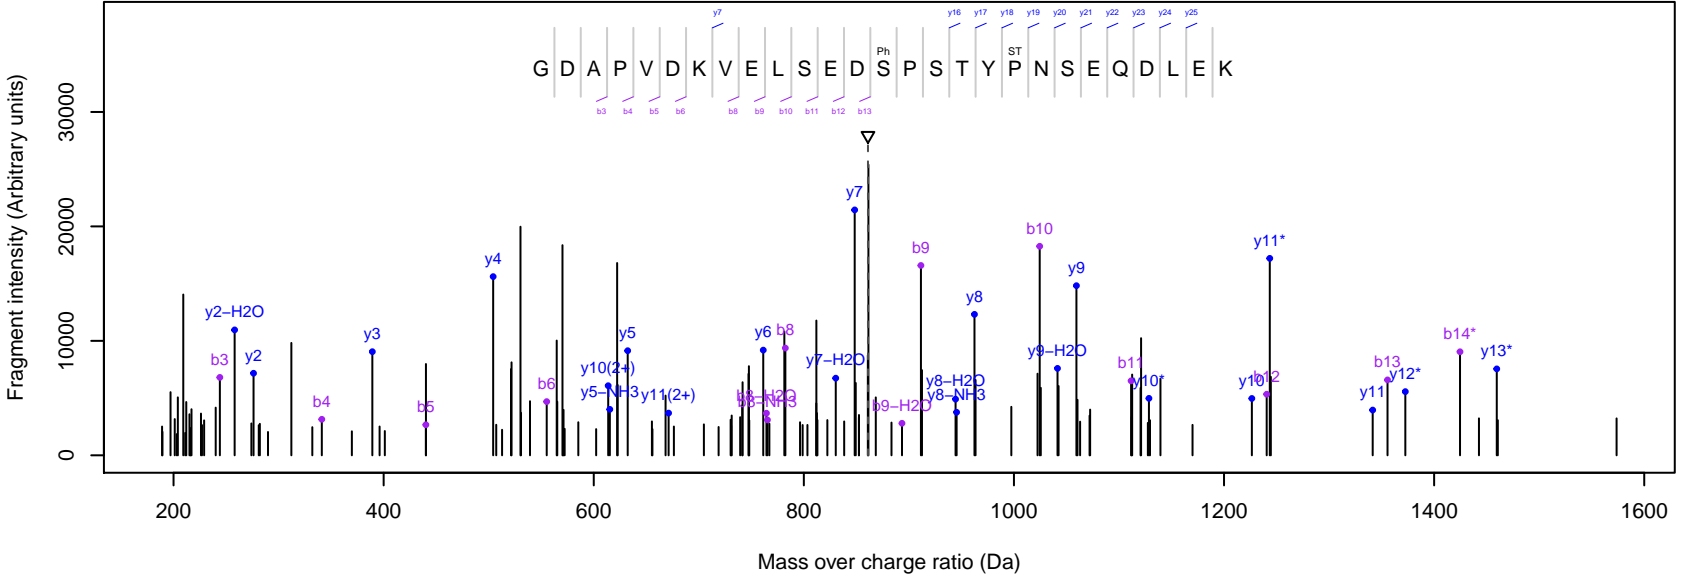

SSSPTSS(Phospho (STY))LTQPIEMPTLSSS(Phospho (STY))PTEERPTVGPQQDNPLLK-4+

Source : QE3\_201126\_FR\_TiOx\_hum\_tissue\_Urea\_RNAB\_N Scan : 55091

Andromeda score : 139.1

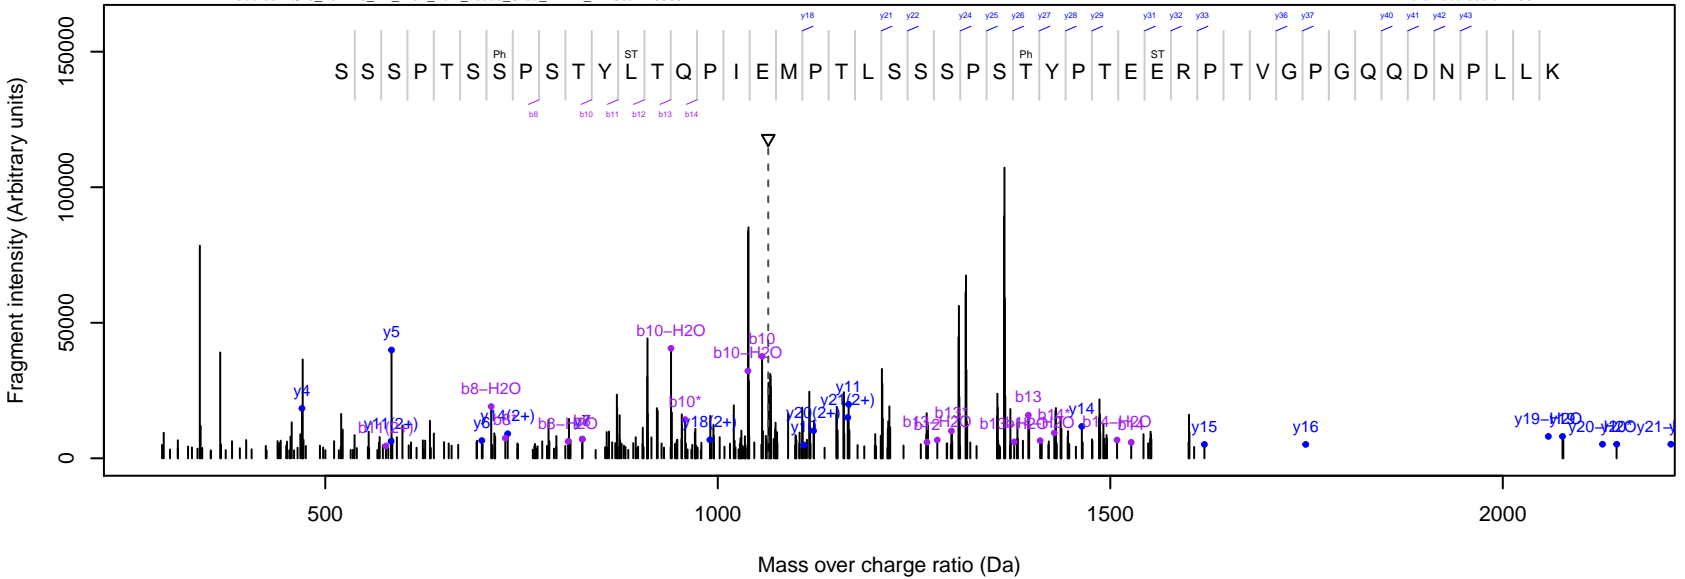



GS(Phospho (STY))NSGMDSNIDLTIVEDEEEESVALEQAQK-3+

Source : QE3\_201126\_FR\_TiOx\_hum\_tissue\_Urea\_RNAB\_H Scan : 58149

Andromeda score : 139

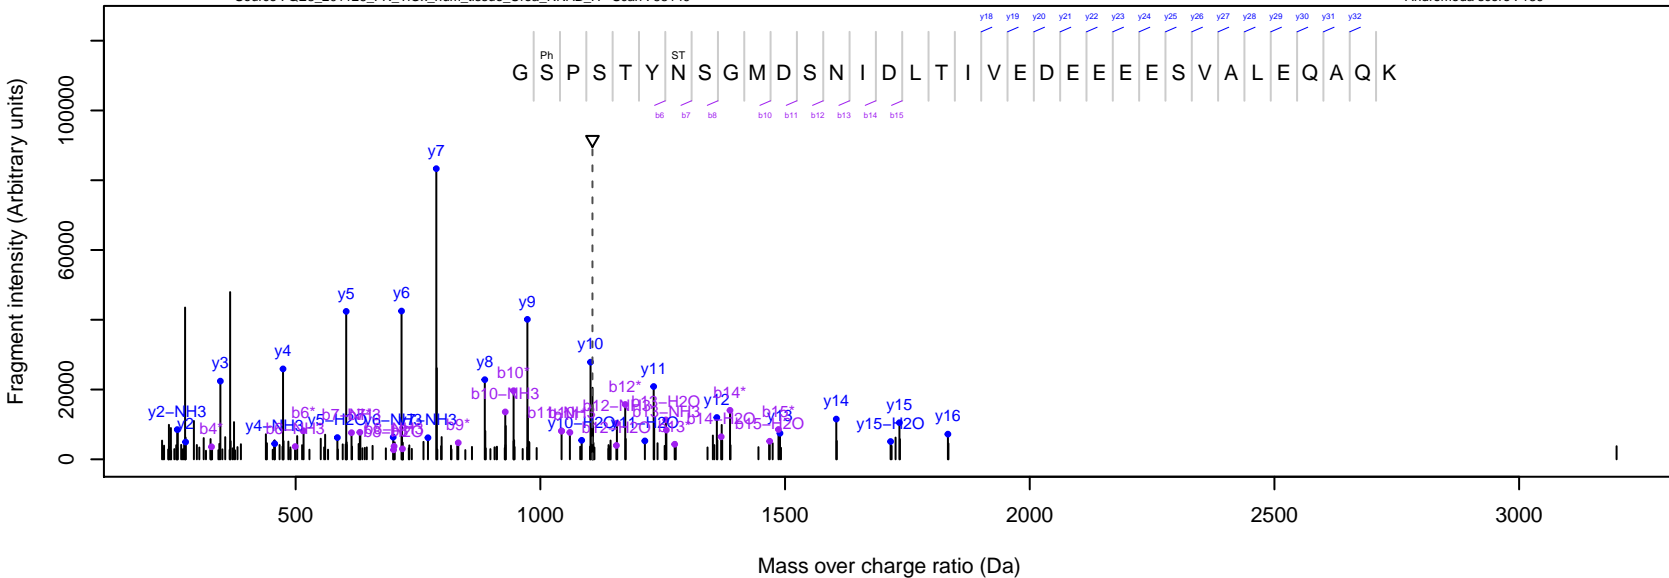

SPS(Phospho (STY))PTLGESLAPHK-3+

Source : QE3\_201126\_FR\_TiOx\_hum\_tissue\_Urea\_RNAB\_N Scan : 20120

Andromeda score : 139

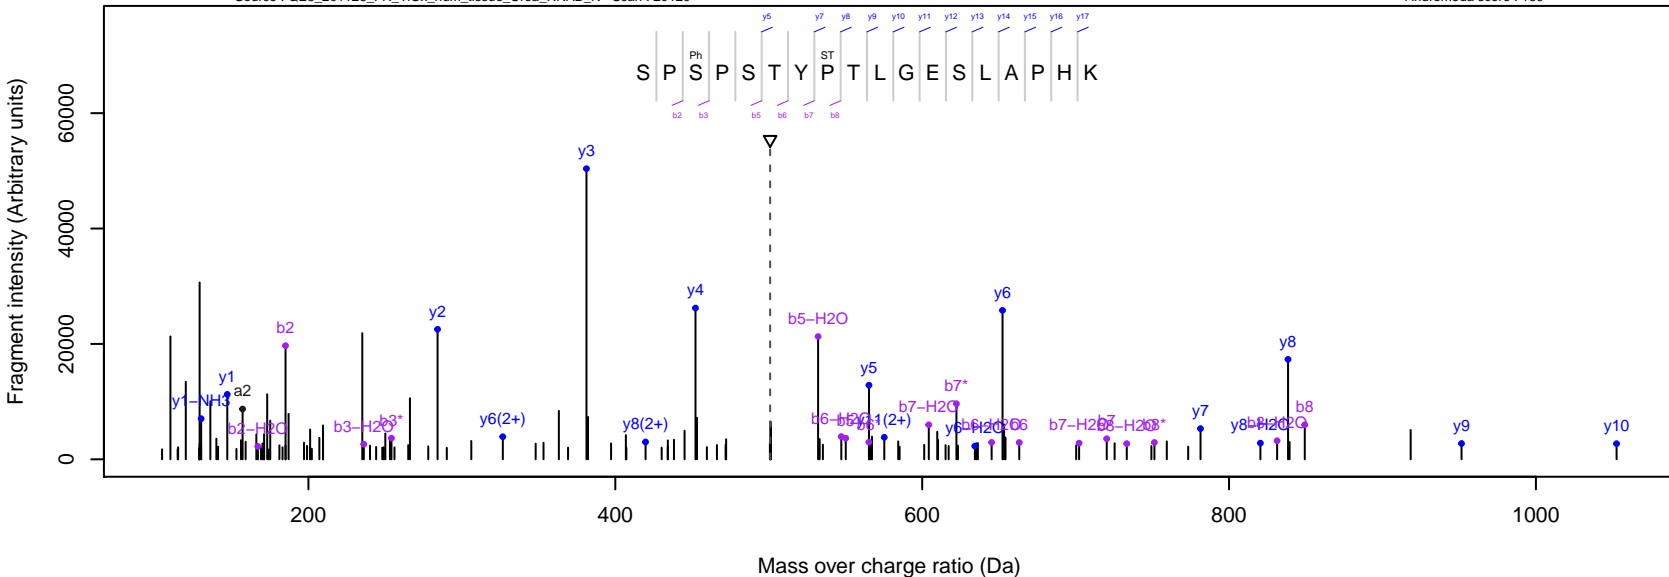

S(Phospho (STY))M(Oxidation (M))GYDDLDM(Oxidation (M))M(Oxidation (M))SDYGTAR-2+

Source : QE3\_201126\_FR\_TiOx\_hum\_tissue\_Urea\_RNAB\_N Scan : 31420

Andromeda score : 138.97

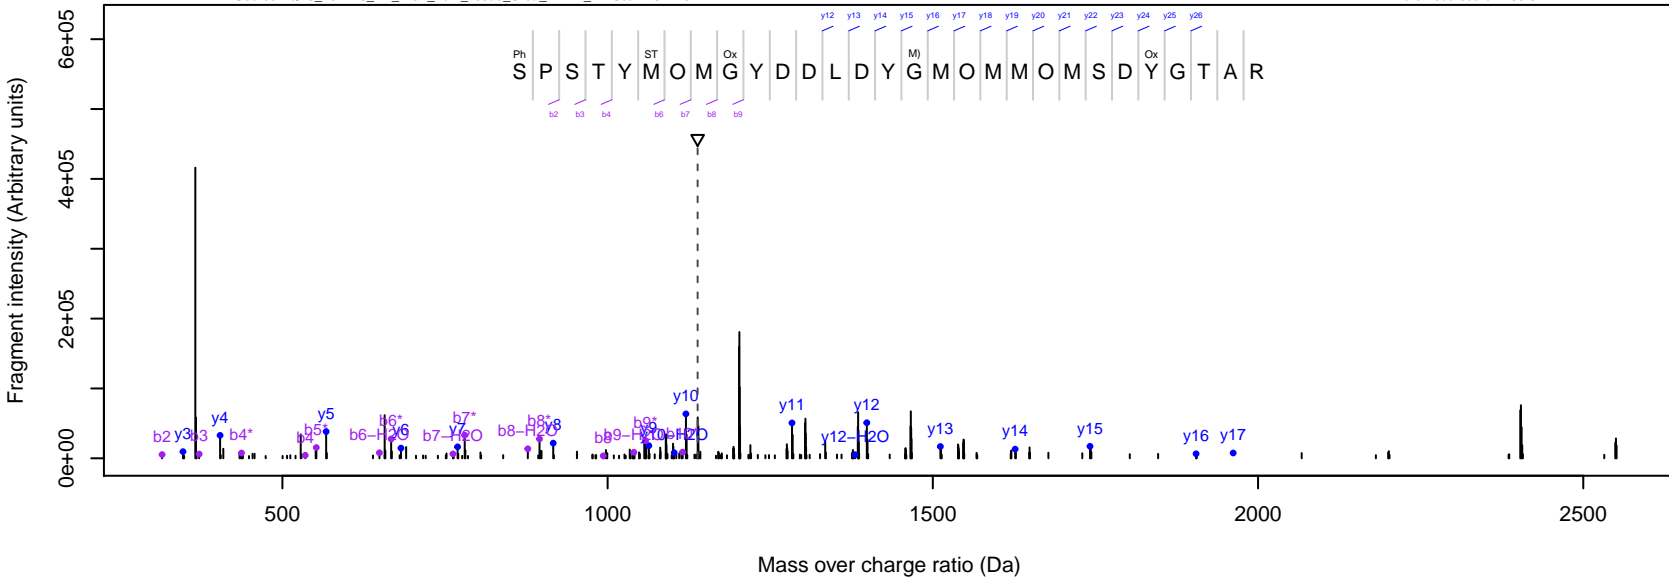

TPEELDD(Phospho (STY))DFETEDFVRS(Phospho (STY))RTS(Phospho (STY))VQT(Phospho (STY))EDDQLIAGQSAR-4+

Source : QE3\_201126\_FR\_TiOx\_hum\_tissue\_Urea\_RNAB\_N Scan : 55839

Andromeda score : 138.95

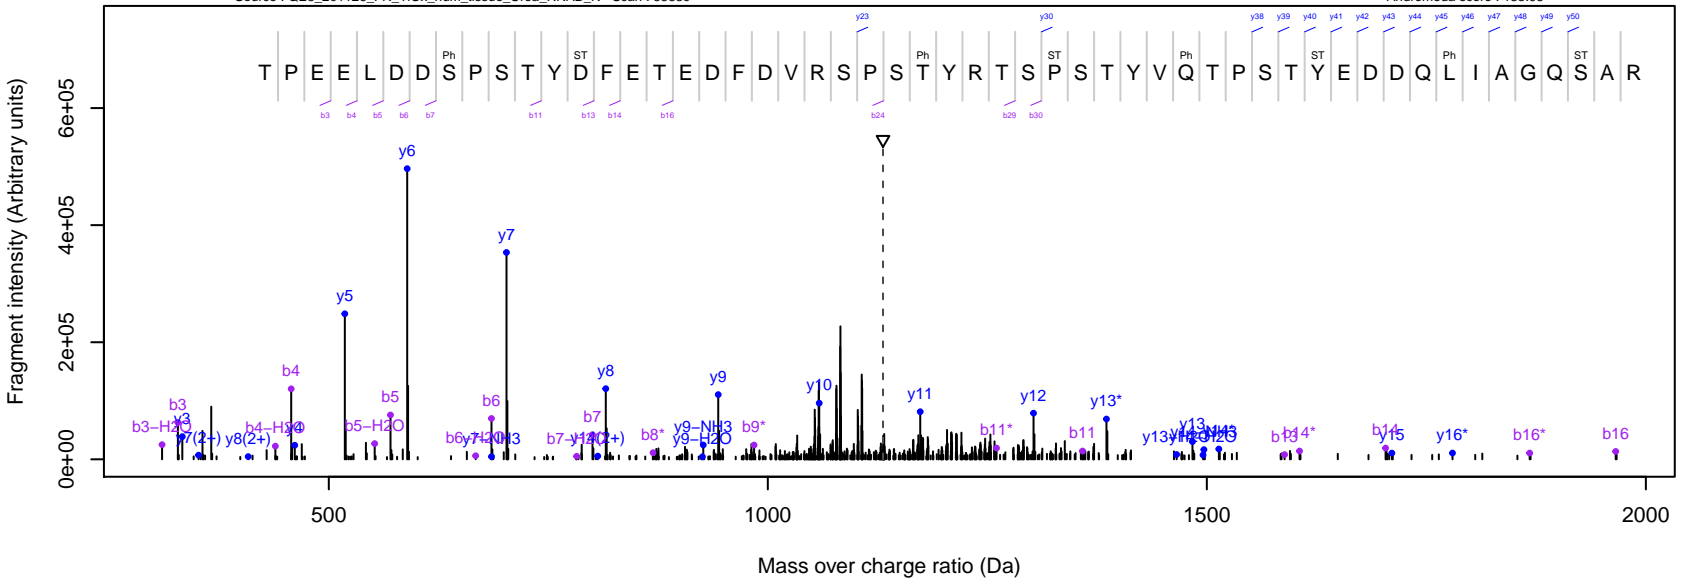

QREMLMEDVGS(Phospho (STY))EEEEEEDEAPFQEK-3+

Source : QE3\_201126\_FR\_TiOx\_hum\_tissue\_Urea\_RNAB\_N Scan : 38698

Andromeda score : 138.93

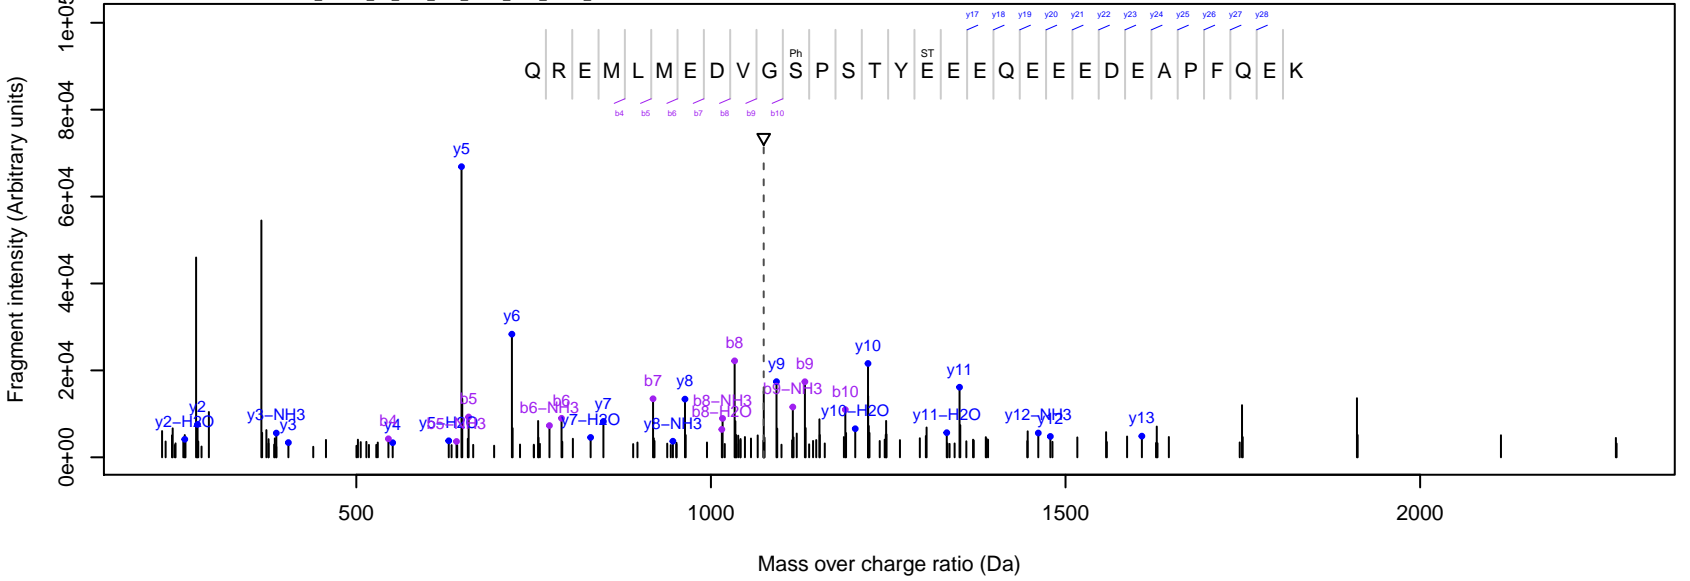

SGSS(Phospho (STY))S(Phospho (STY))PDSEITELKFP SINHD-3+

Source : QE3\_201126\_FR\_TiOx\_hum\_tissue\_Urea\_RNAB\_H Scan : 52083

Andromeda score : 138.93

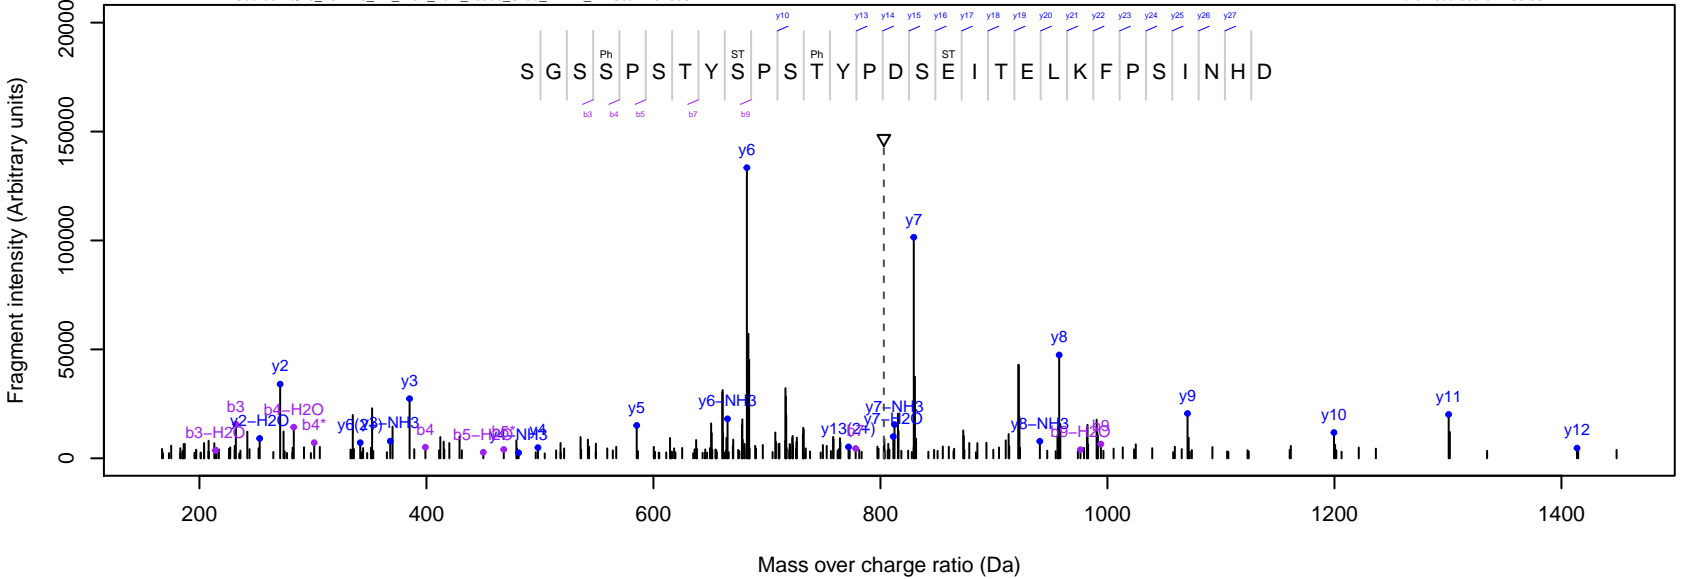

KTPEGRAS(Phospho (STY))PAPGSGHPEGPAHLDM(Oxidation (M))NSLDR-4+

Source : QE3\_201126\_FR\_TiOx\_hum\_tissue\_Urea\_RNAB\_N Scan : 11201

Andromeda score : 138.87

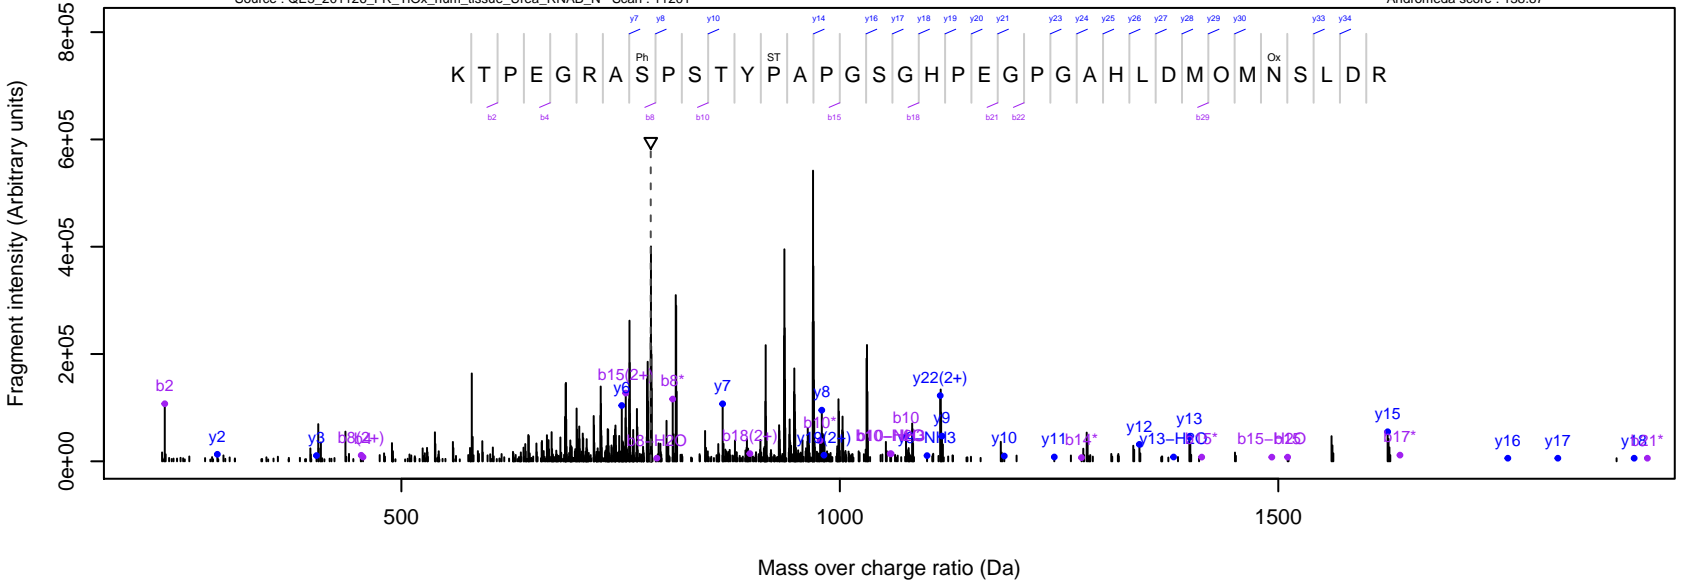

(Acetyl (Protein N-term))AEASS(Phospho (STY))DPGAEREELLGPTAQWSVEDEEEAVHEQCQHER-4+

Source : QE3\_201126\_FR\_TiOx\_hum\_tissue\_Urea\_RNAB\_H Scan : 44325

Andromeda score : 138.8

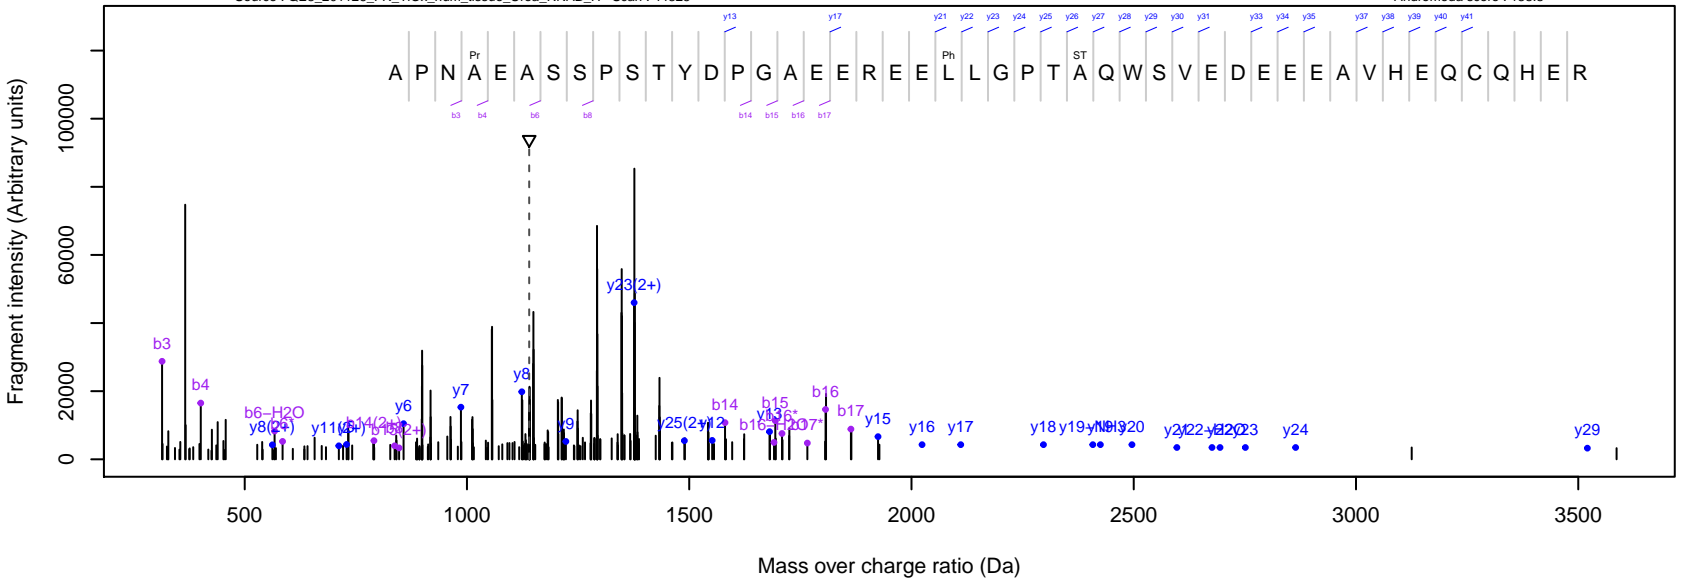

IHDLEDDLEMSSDA(Phospho (STY))DAS(Phospho (STY))GEEGRVPK-3+

Source : QE3\_201126\_FR\_TiOx\_hum\_tissue\_Urea\_RNAB\_N Scan : 33343

Andromeda score : 138.8

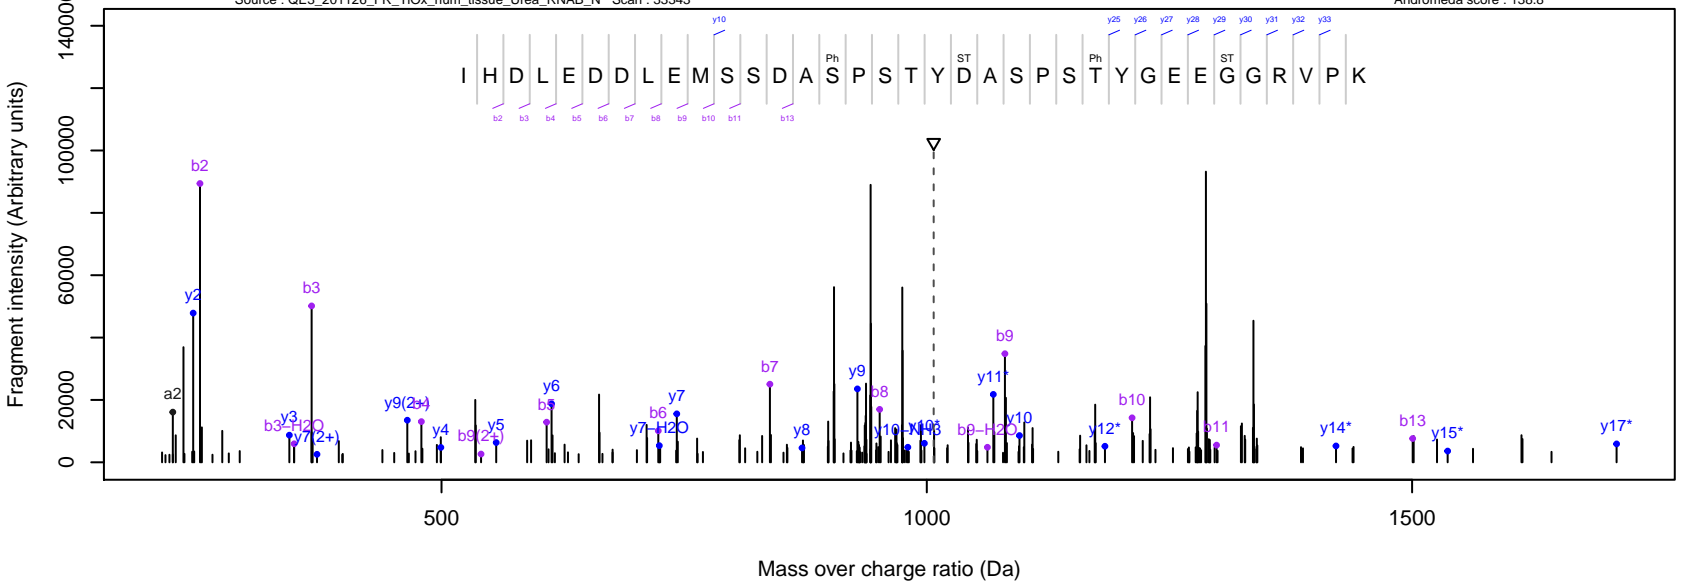

AALGLQDS(Phospho (STY))DDEDAAVDIDEQIESMOMFNSK-3+

Source : QE3\_201126\_FR\_TiOx\_hum\_tissue\_Urea\_RNAB\_N Scan : 60252

Andromeda score : 138.78

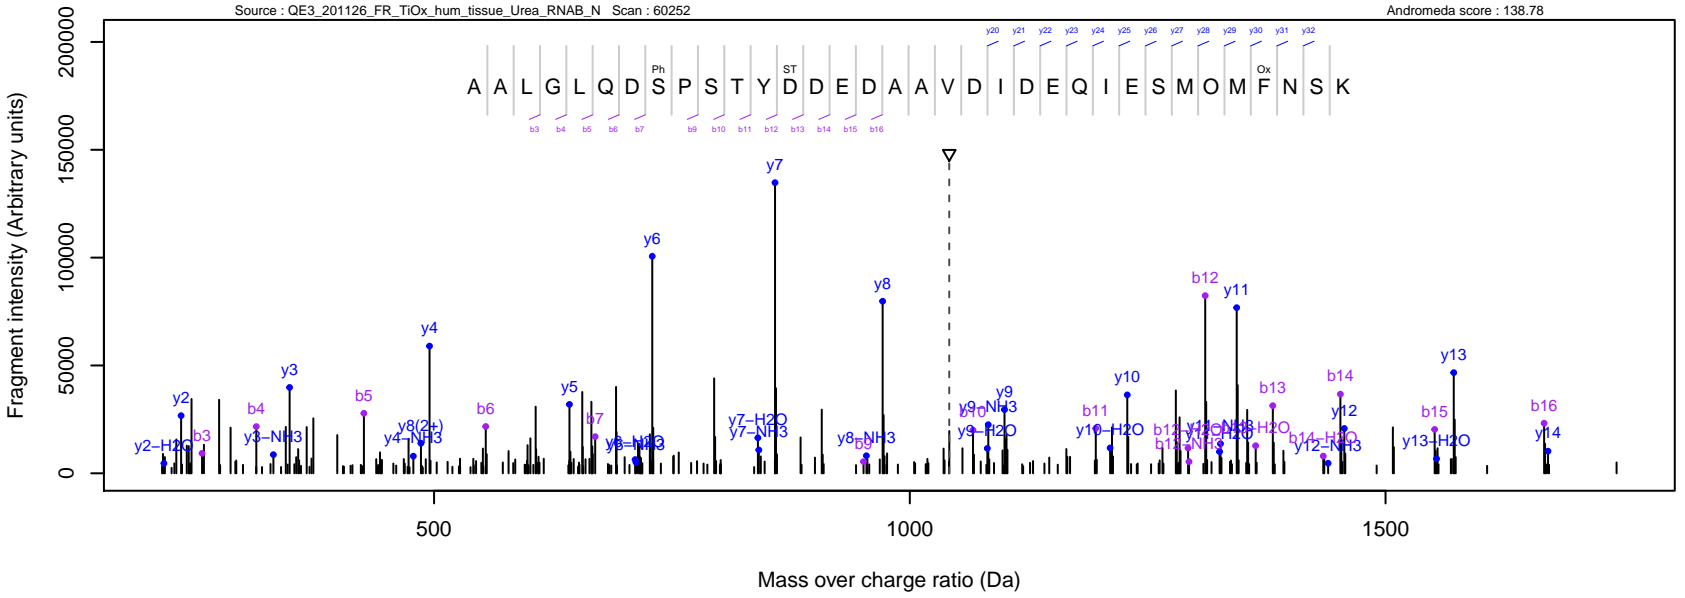

SGS(Phospho (STY))MDPSGAHPSVR-2+

Source : QE3\_201126\_FR\_TiOx\_hum\_tissue\_Urea\_RNAB\_N Scan : 9368

Andromeda score : 138.77

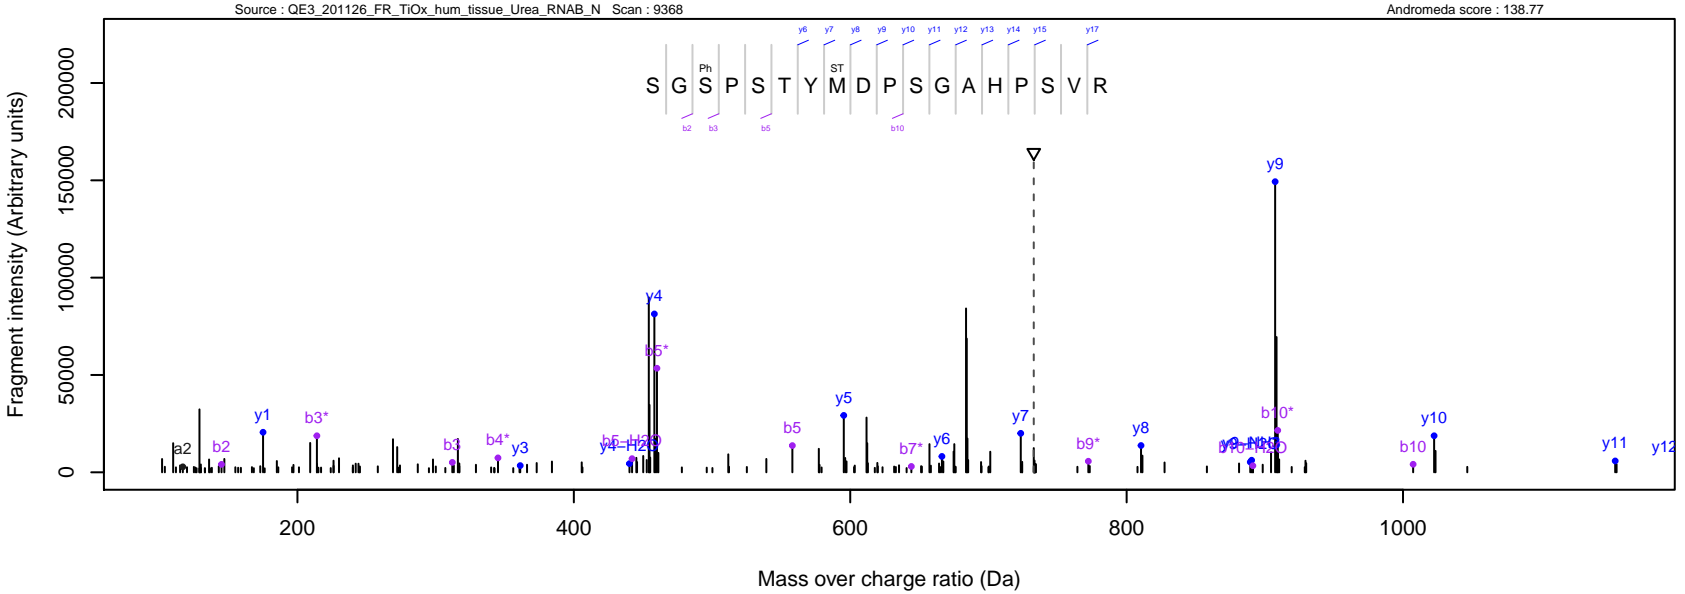

EVKAEKES(Phospho (STY))PISINVK-3+

Source : QE3\_201126\_FR\_TiOx\_hum\_tissue\_Urea\_RNAB\_B Scan : 13736

Andromeda score : 138.75

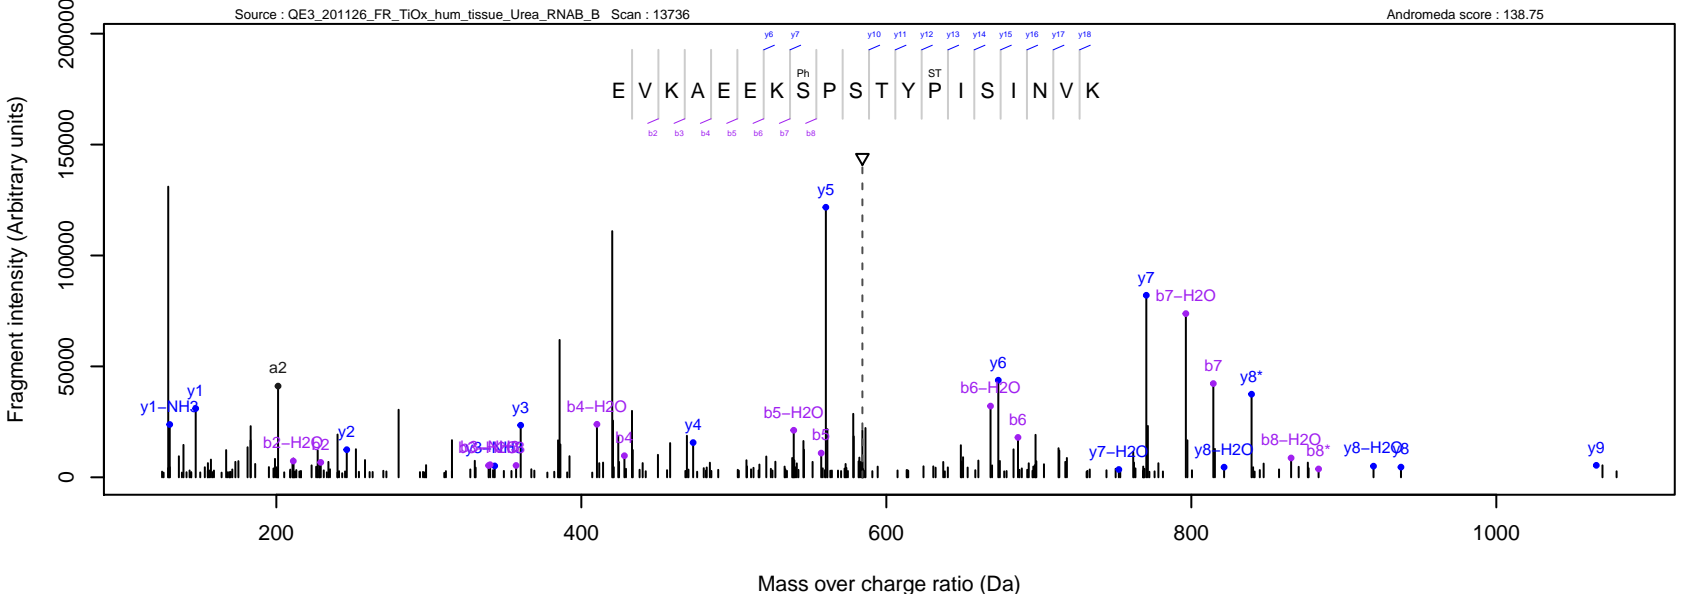

S(Phospho (STY))RS(Phospho (STY))PHEAGFCVYLK-3+

Source : QE3\_201126\_FR\_TiOx\_hum\_tissue\_Urea\_RNAB\_H Scan : 28000

Andromeda score : 138.75

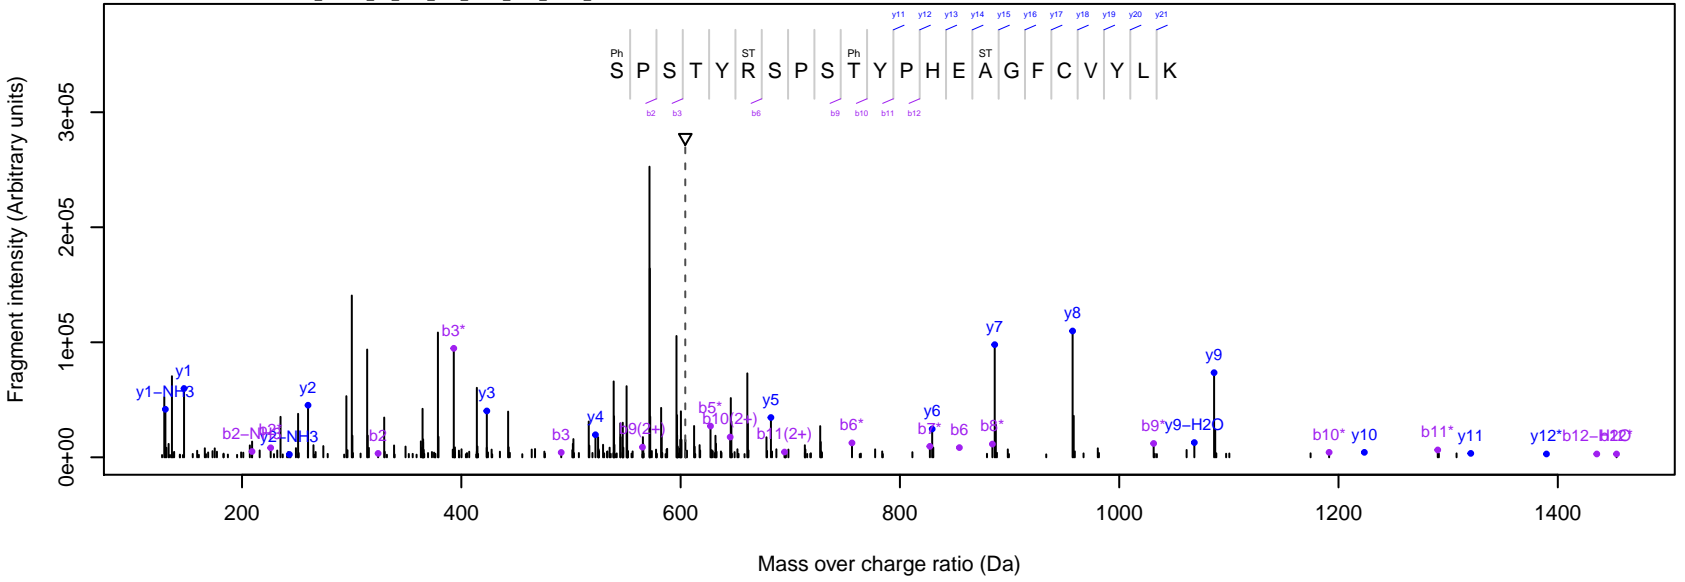

DYQYS(Phospho (STY))DQGIDY-2+

Source : QE3\_201126\_FR\_TiOx\_hum\_tissue\_Urea\_RNAB\_B Scan : 43304

Andromeda score : 138.63

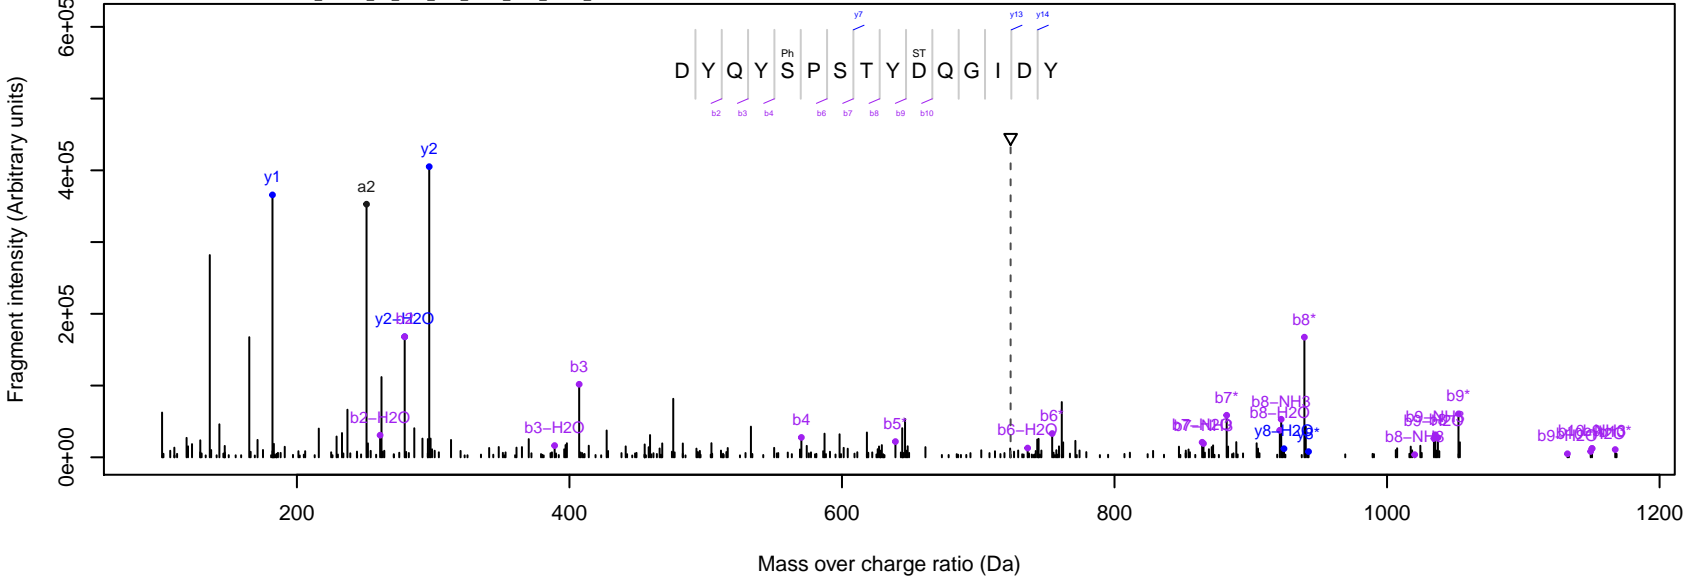

QDGPMPKPHSV(Phospho (STY))LNDTETR-3+

Source : QE3\_201126\_FR\_TiOx\_hum\_tissue\_Urea\_RNAB\_N Scan : 15780

Andromeda score : 138.62

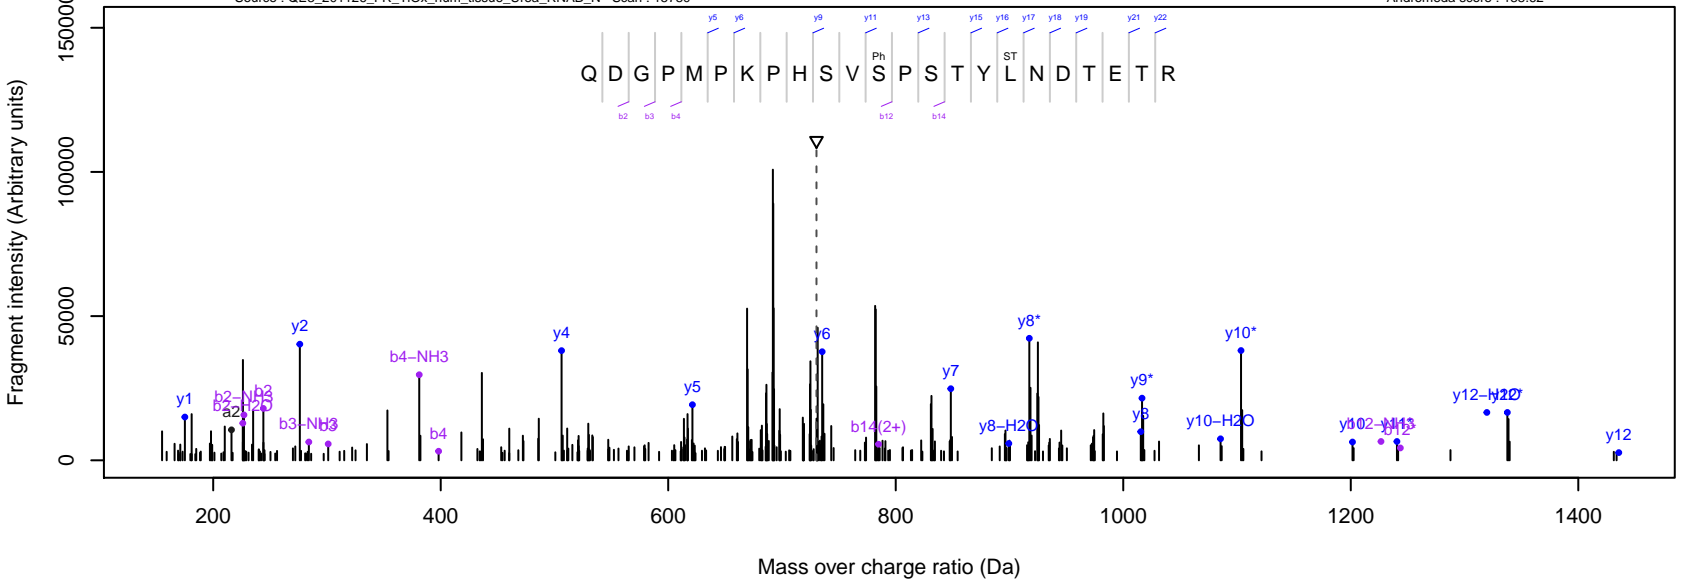

GSYNGQVGWFPSNYVTEEGDS(Phospho (STY))PLGDHVGSLSEK-3+

Source : QE3\_201126\_FR\_TiOx\_hum\_tissue\_Urea\_RNAB\_H Scan : 51359

Andromeda score : 138.57

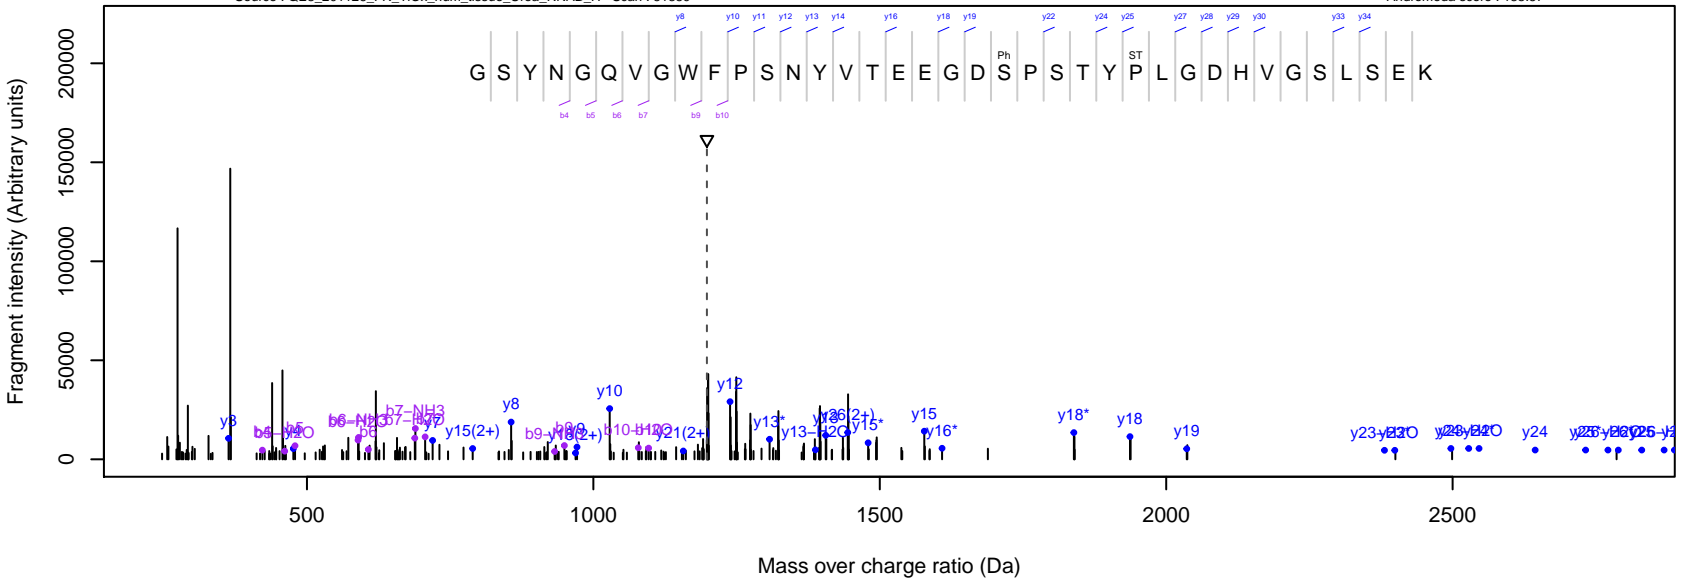

SSESDHFS(Phospho (STY))YVQLR-3+

Source : QE3\_201126\_FR\_TiOx\_hum\_tissue\_Urea\_RNAB\_H Scan : 25919

Andromeda score : 138.57

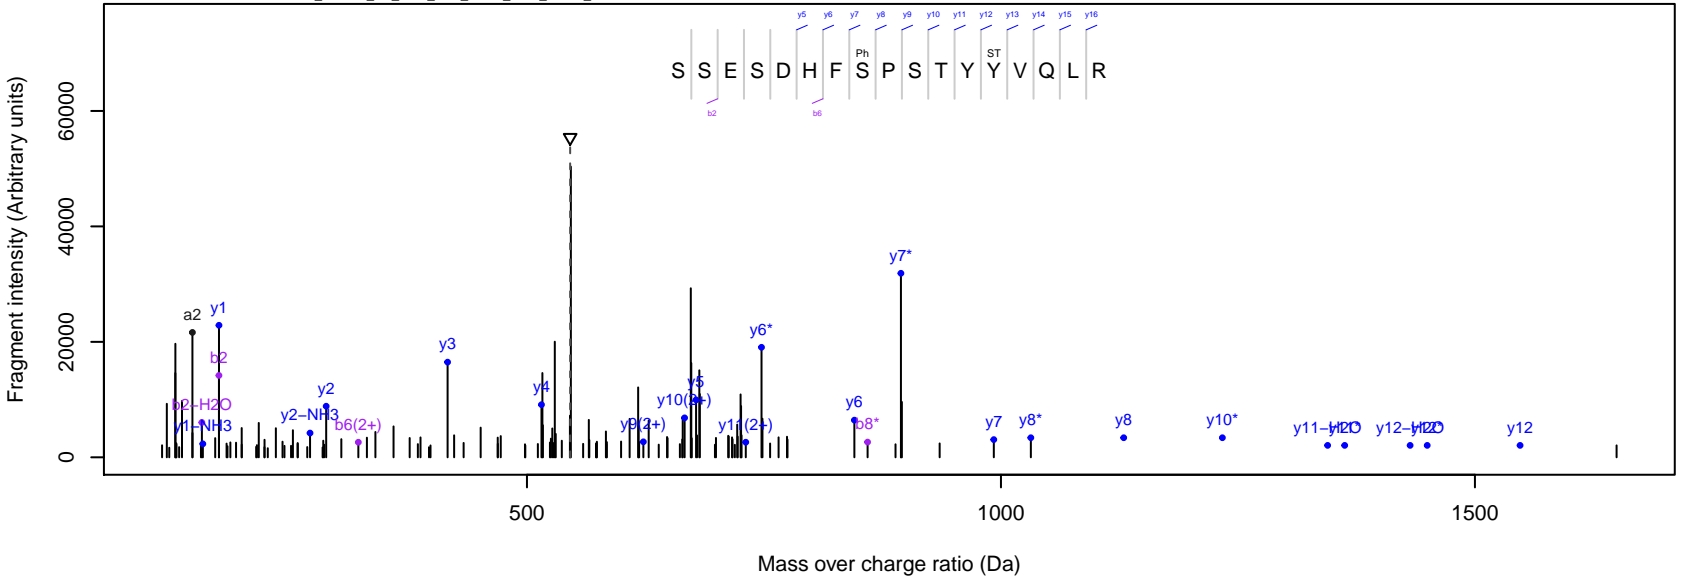

GGSGYVNLQSLAGYESVDS(Phospho (STY))PTGSENLSLTHQSNDDSSHDPQEEK-4+

Source : QE3\_201126\_FR\_TiOx\_hum\_tissue\_Urea\_RNAB\_H Scan : 28979

Andromeda score : 138.48

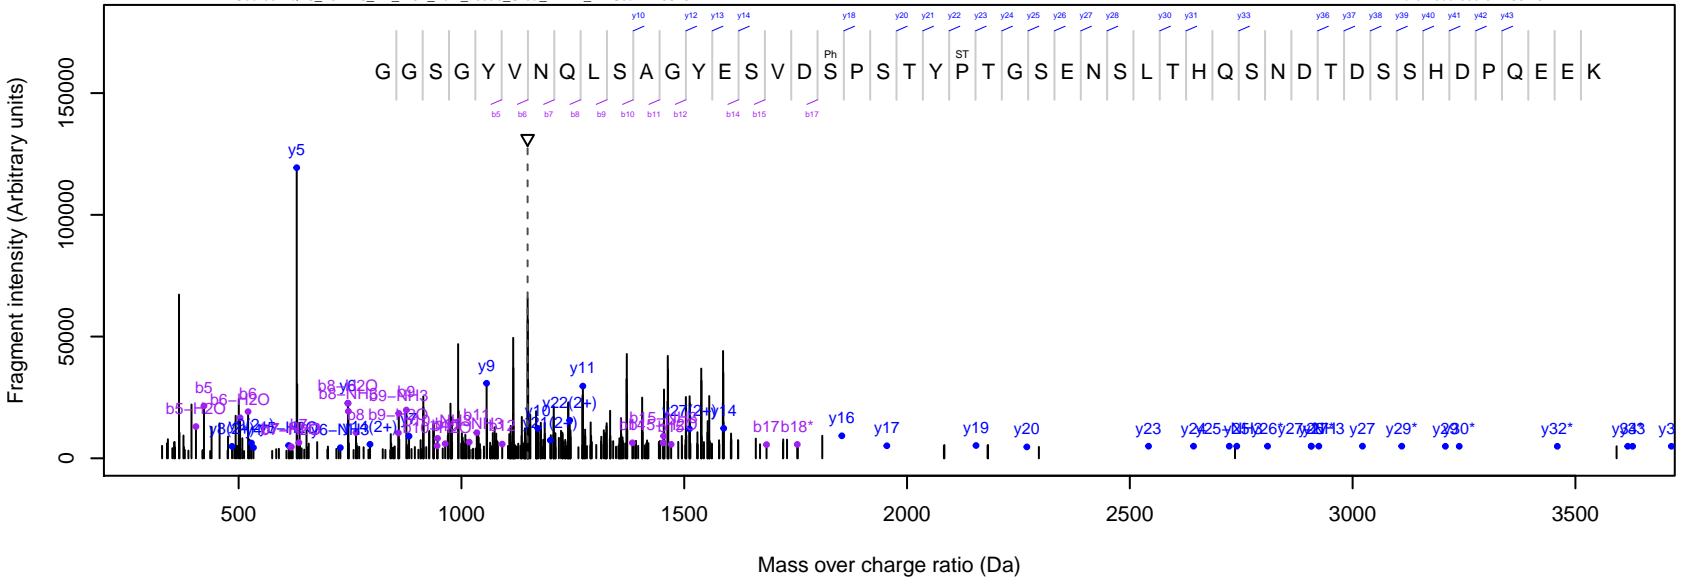

GS(Phospho (STY))SGSVVVDLLYWR-2+

Source : QE3\_201126\_FR\_TiOx\_hum\_tissue\_Urea\_RNAB\_N Scan : 61445

Andromeda score : 138.42

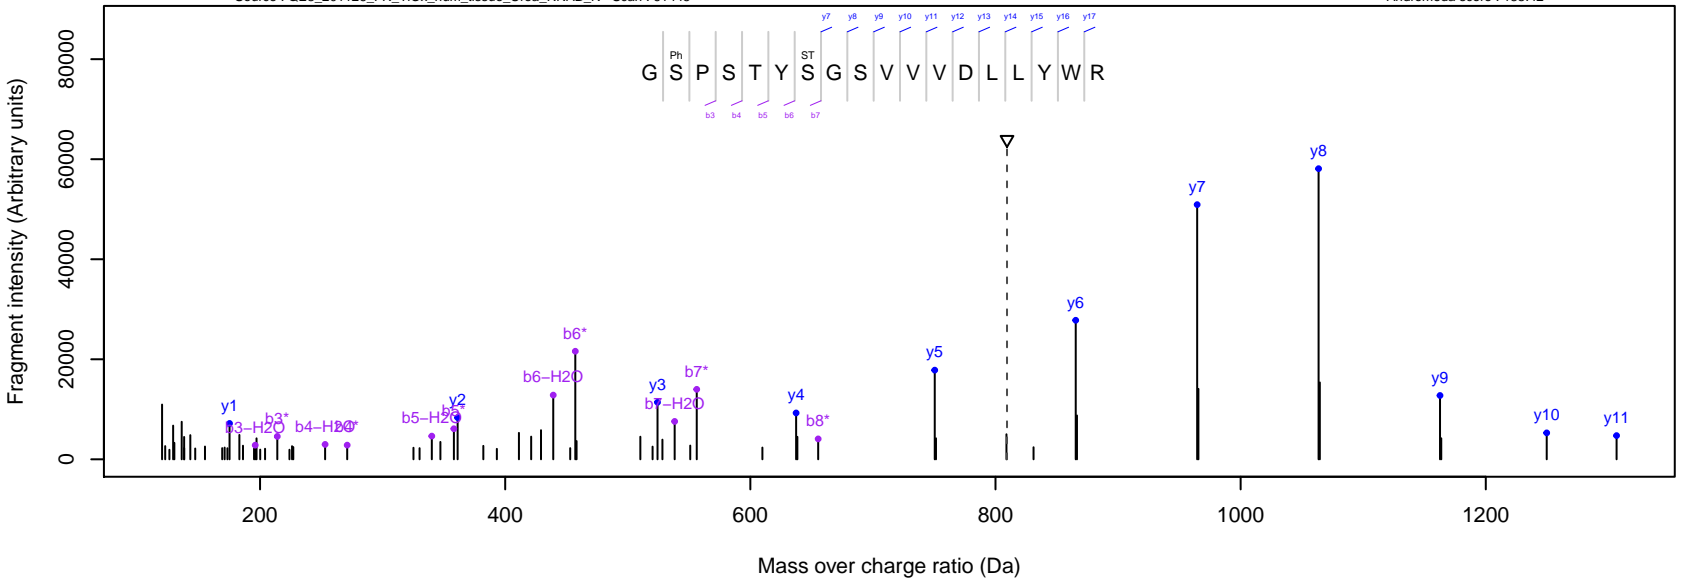

YVAAAFPS(Phospho (STY))ACGK-2+

Source : QE3\_201126\_FR\_TiOx\_hum\_tissue\_Urea\_RNAB\_H Scan : 23580

Andromeda score : 138.42

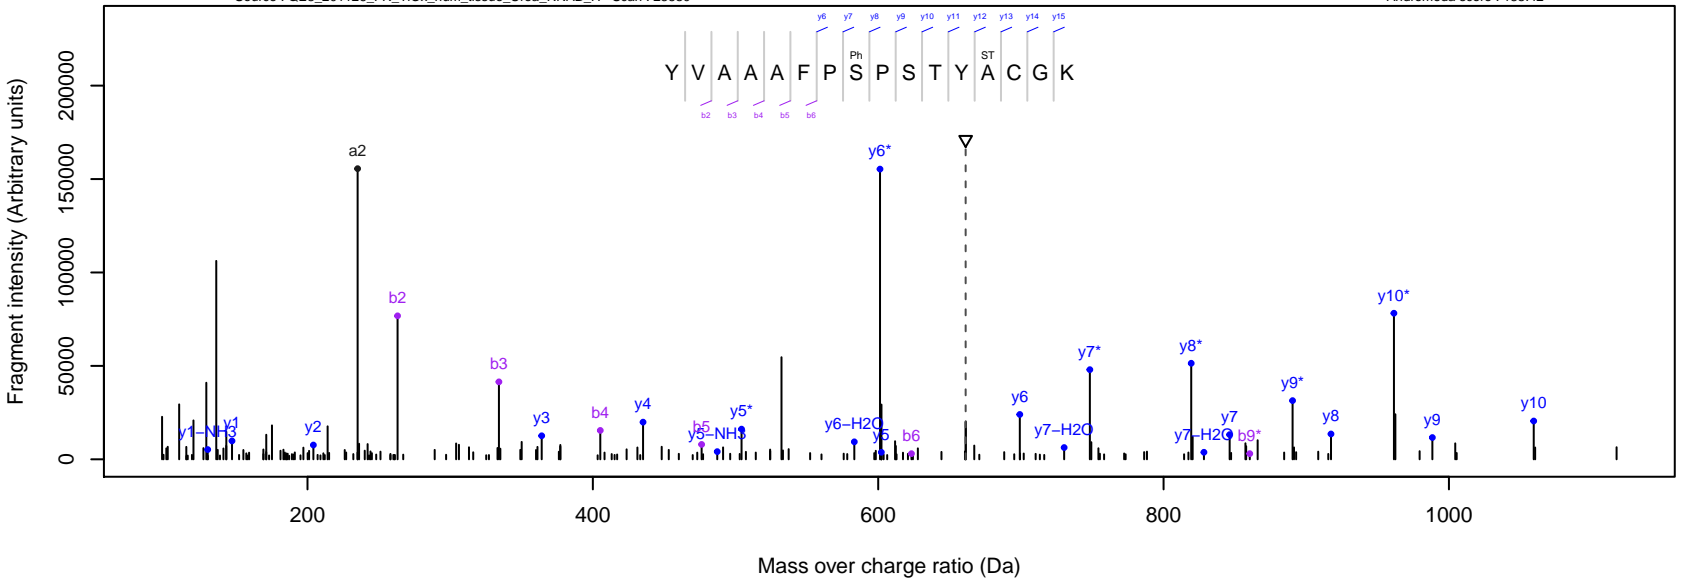

RS(Phospho (STY))PEAPQVIAM(Oxidation (M))EEPAVPAPLPK-3+

Source : QE3\_201126\_FR\_TiOx\_hum\_tissue\_Urea\_RNAB\_H Scan : 34345

Andromeda score : 138.4

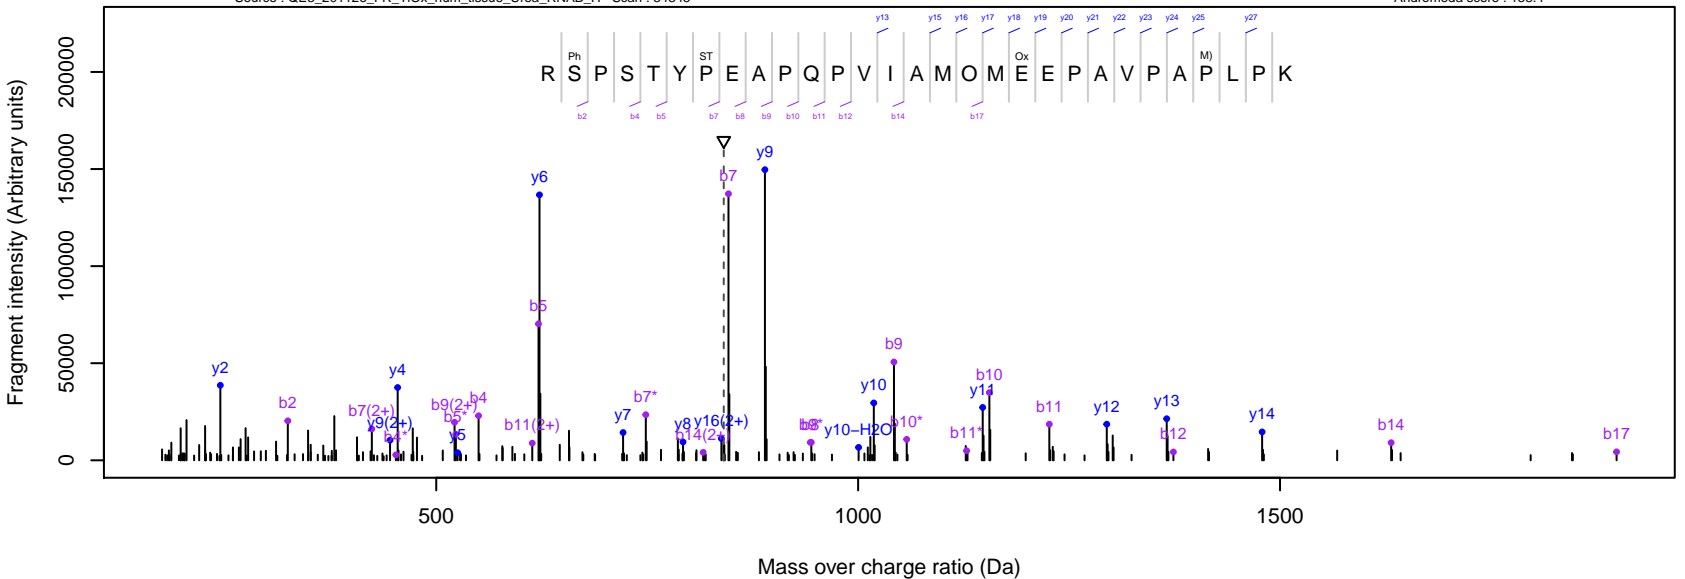

STPESGDS(Phospho (STY))DKESVGSSTSTNEGGR-3+

Source : QE3\_201126\_FR\_TiOx\_hum\_tissue\_Urea\_RNAB\_H Scan : 6276

Andromeda score : 138.4

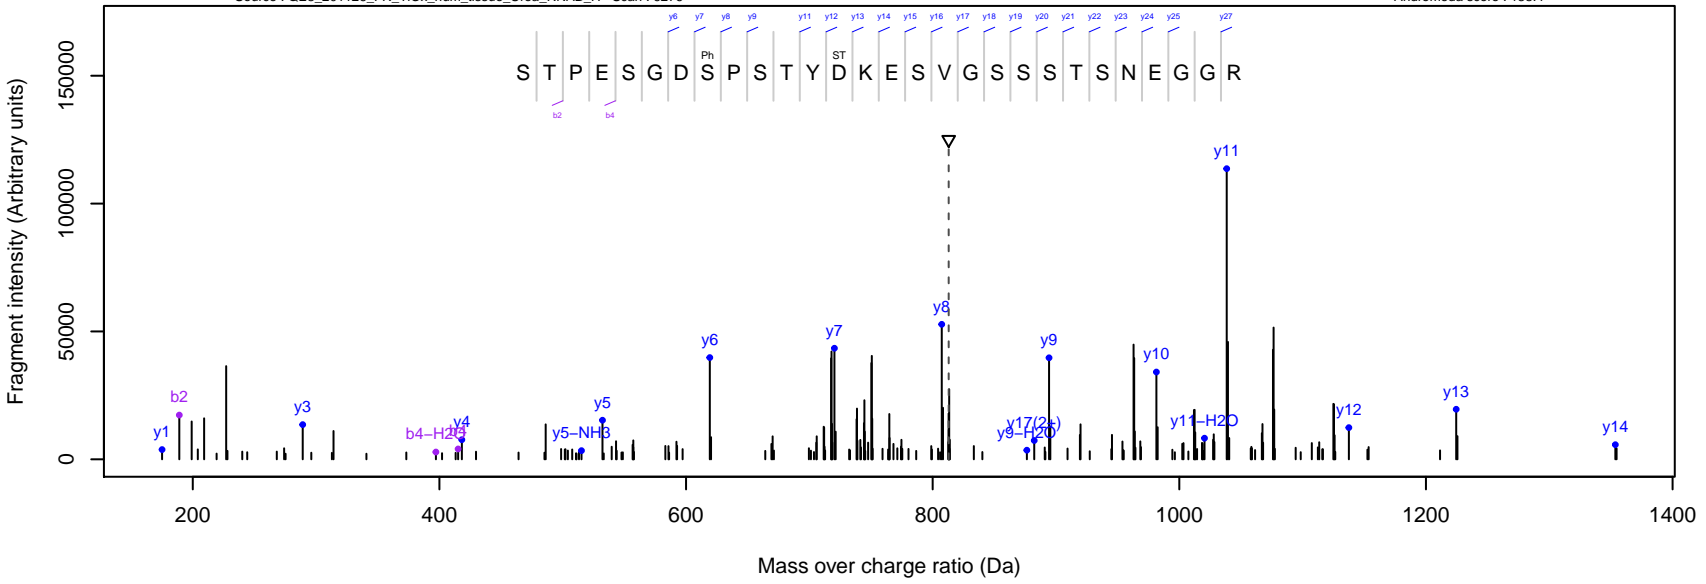

NNS(Phospho (STY))LSKPDDSTEAEHGDP TNGSGEQSK-3+

Source : QE3\_201126\_FR\_TiOx\_hum\_tissue\_Urea\_RNAB\_N Scan : 8204

Andromeda score : 138.28

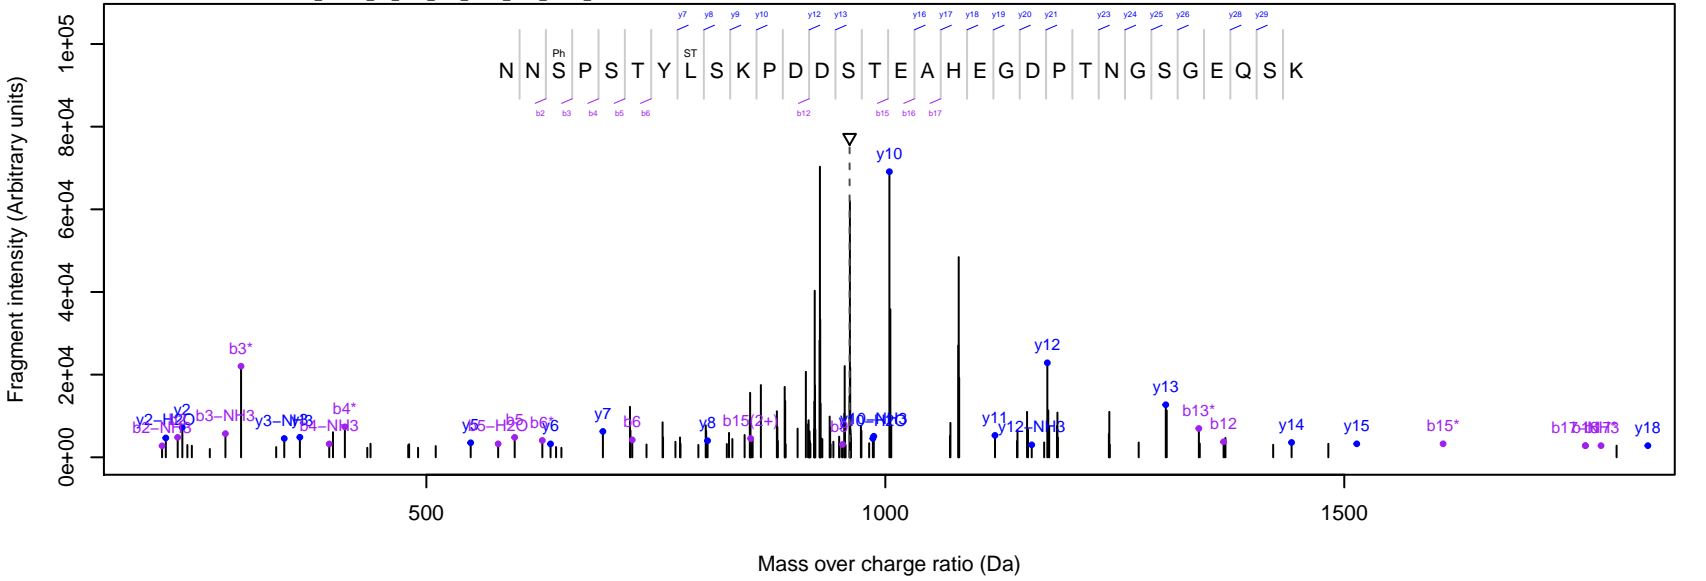

S(Phospho (STY))LGHP EPLSNGRPQGN SR-3+

Source : QE3\_201126\_FR\_TiOx\_hum\_tissue\_Urea\_RNAB\_H Scan : 9725

Andromeda score : 138.28

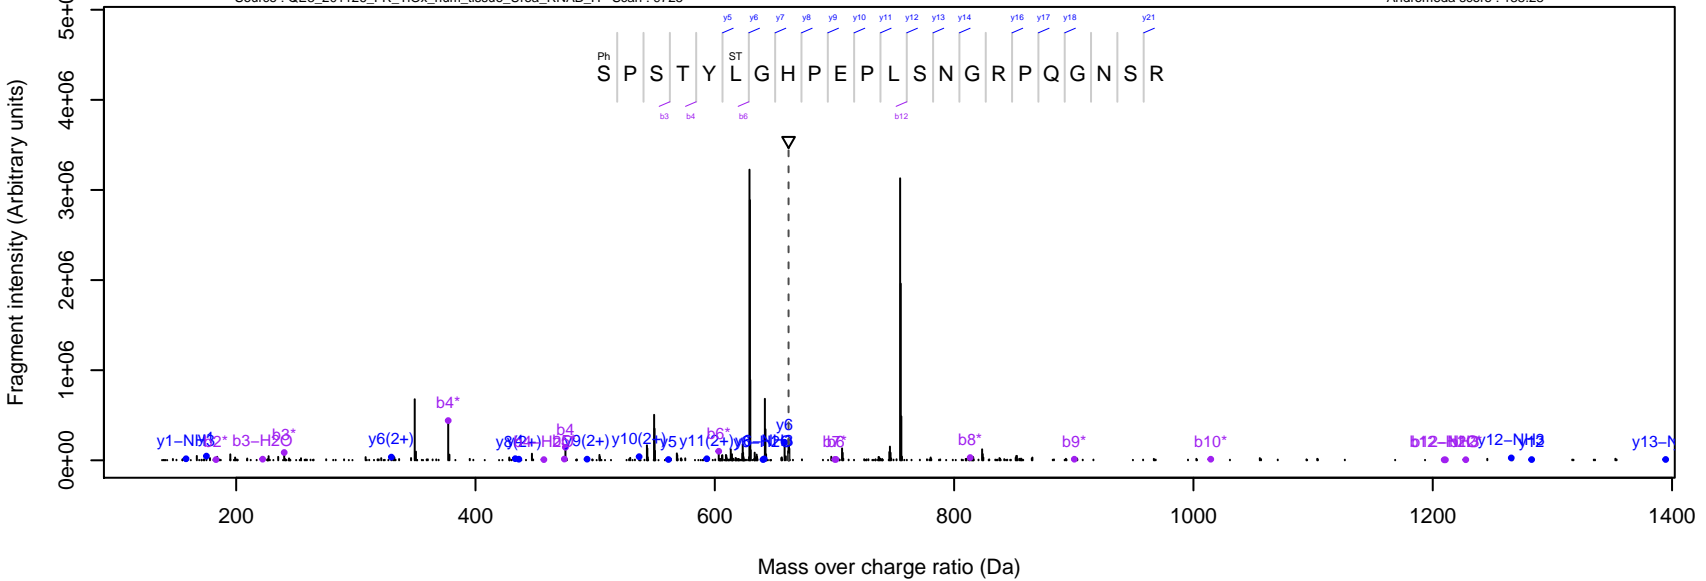



NPEDKSPQLSLSPRPAS(Phospho (STY))PK-3+

Source : QE3\_201126\_FR\_TIOx\_hum\_tissue\_Urea\_RNAB\_B Scan : 15785

Andromeda score : 138.25

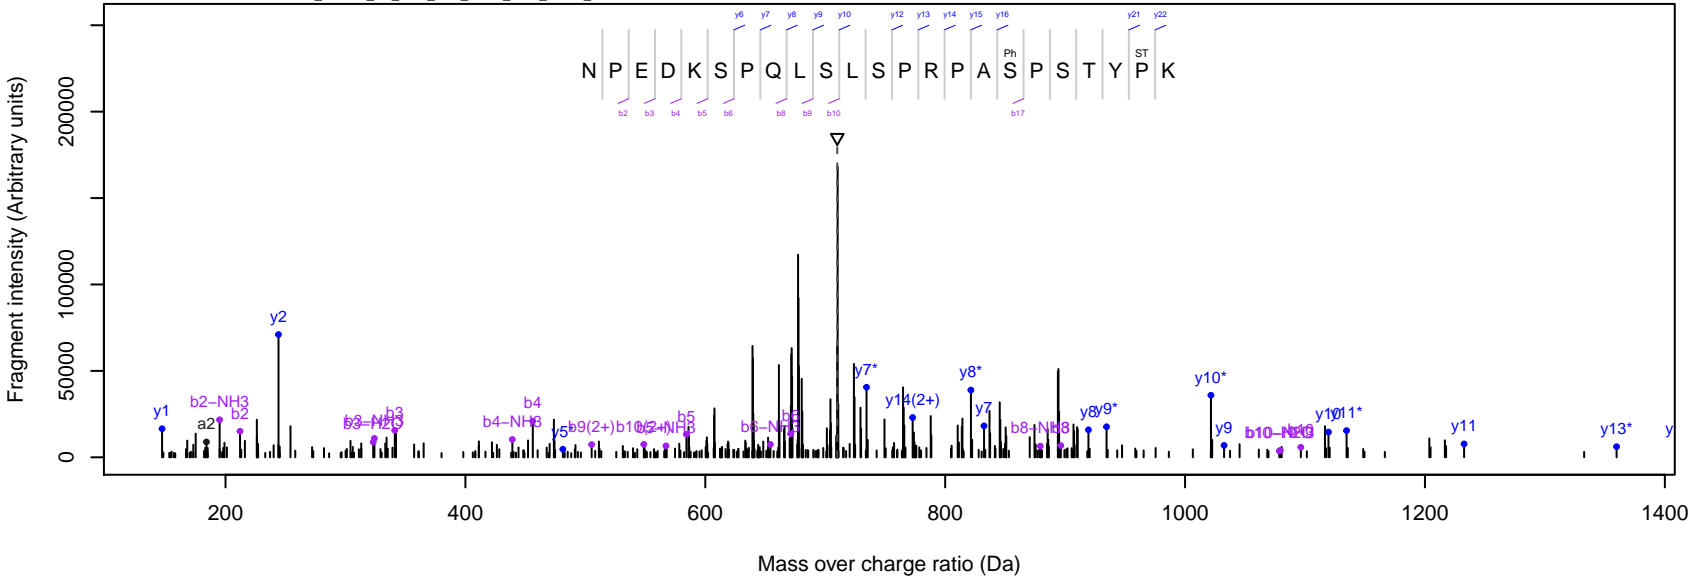

YGMGTS(Phospho (STY))VER-2+

Source : QE3\_201126\_FR\_TIOx\_hum\_tissue\_Urea\_RNAB\_H Scan : 14655

Andromeda score : 138.25

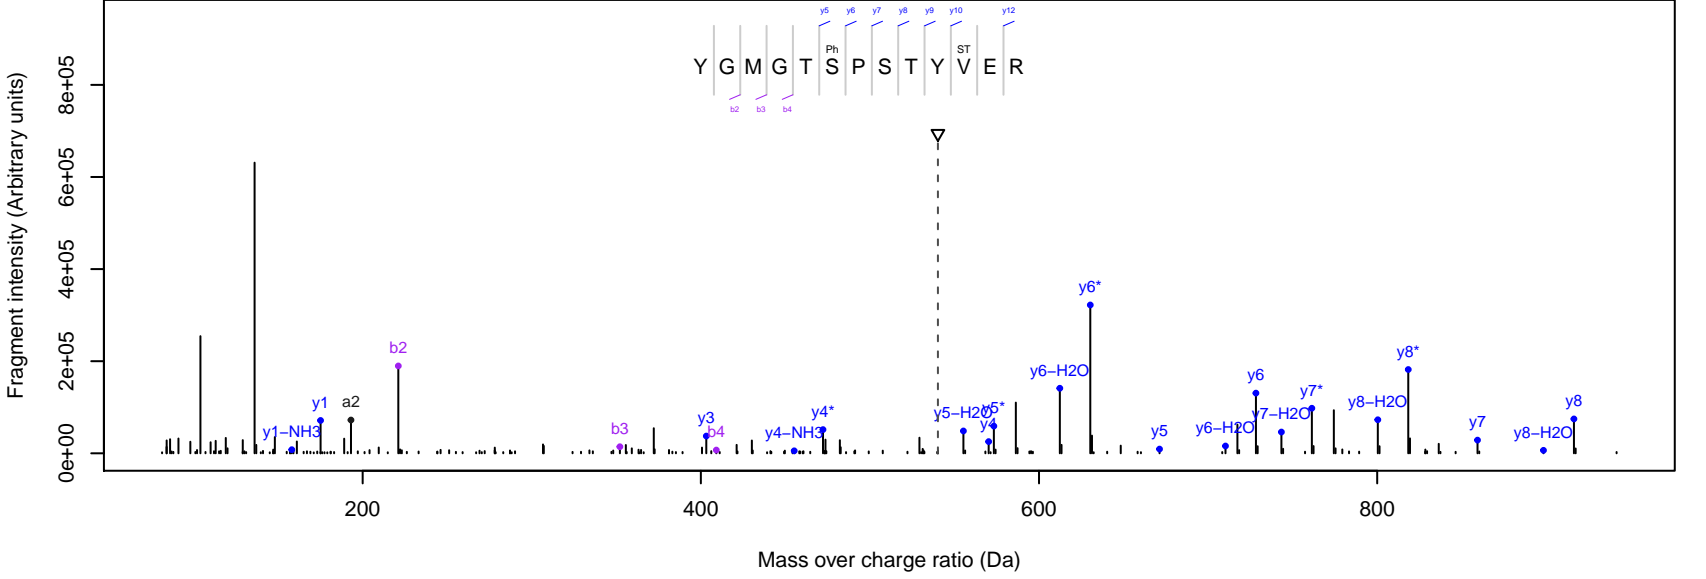

SFGS(Phospho (STY))PNRAYT(Phospho (STY))HQVVTR-3+

Source : QE3\_201126\_FR\_TIOx\_hum\_tissue\_Urea\_RNAB\_H Scan : 15910

Andromeda score : 138.24

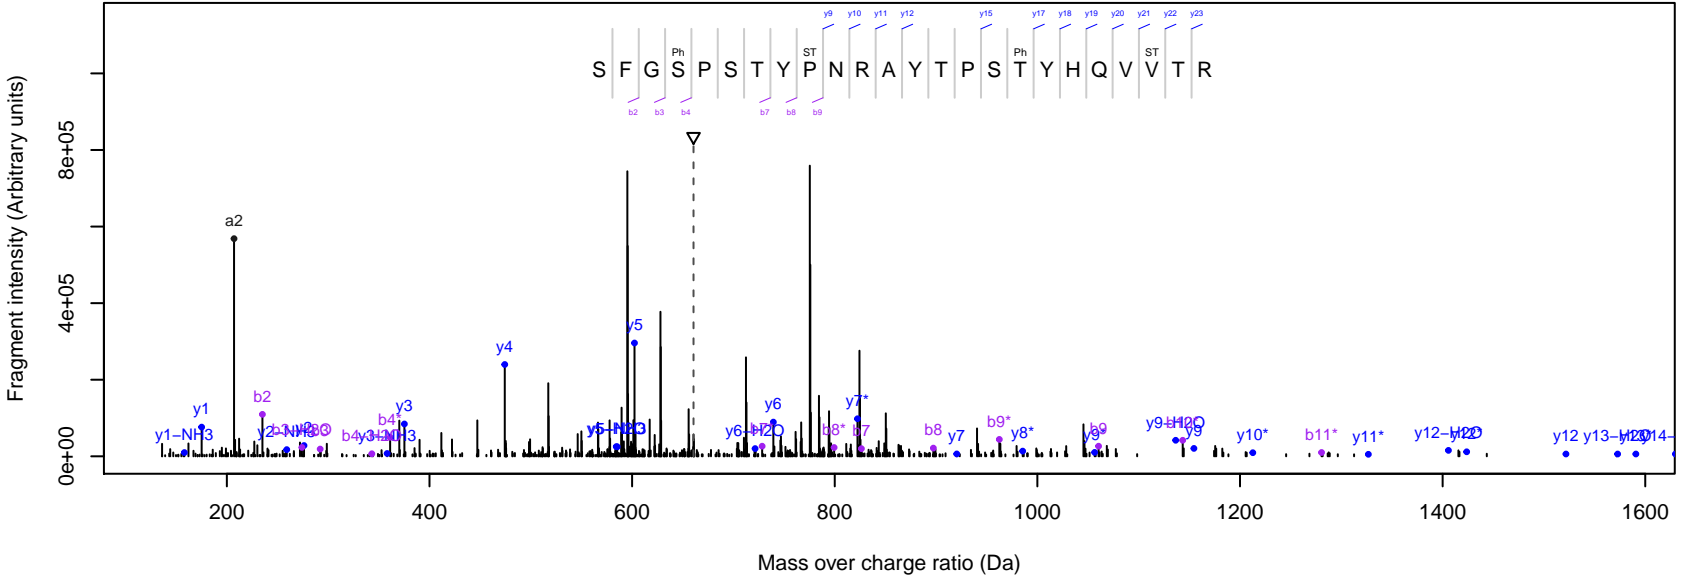

VTEPISAES(PSTY)GEQVER-2+

Source : QE3\_201126\_FR\_TiOx\_hum\_tissue\_Urea\_RNAB\_N Scan : 18314

Andromeda score : 138.19

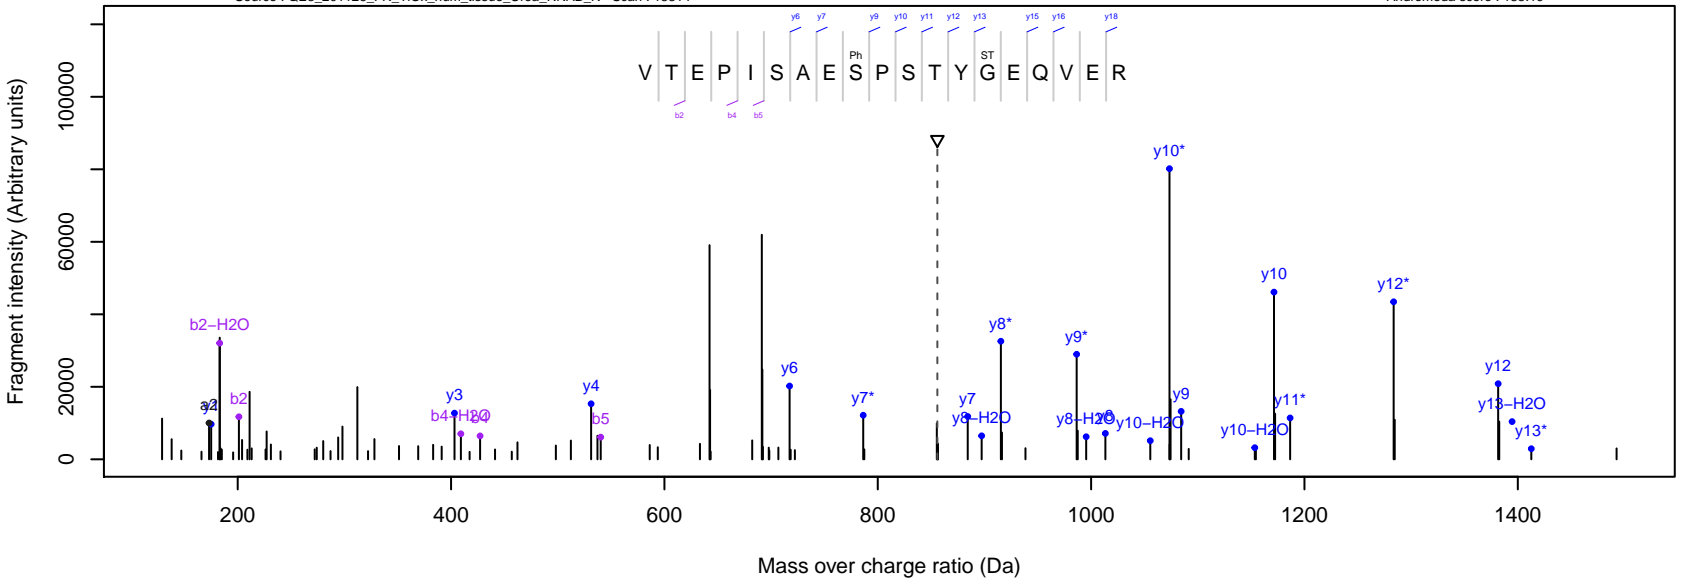

RPPSPSPSTY(PDVI)VLS(DNE)QPS(S)PR-3+

Source : QE3\_201126\_FR\_TiOx\_hum\_tissue\_Urea\_RNAB\_H Scan : 28230

Andromeda score : 138.11

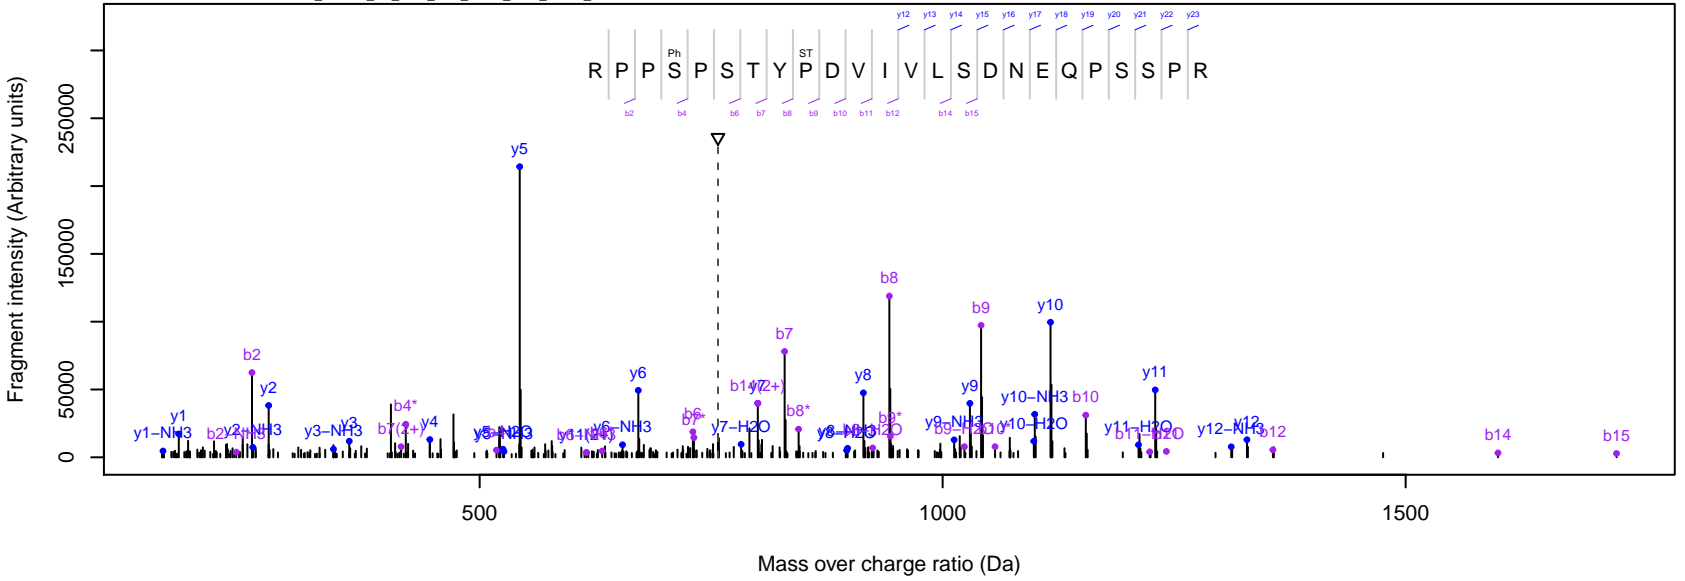

SIS(PSTY)LTRPGSS(LSS)GPN(S)ILCR-3+

Source : QE3\_201126\_FR\_TiOx\_hum\_tissue\_Urea\_RNAB\_N Scan : 35617

Andromeda score : 138.11

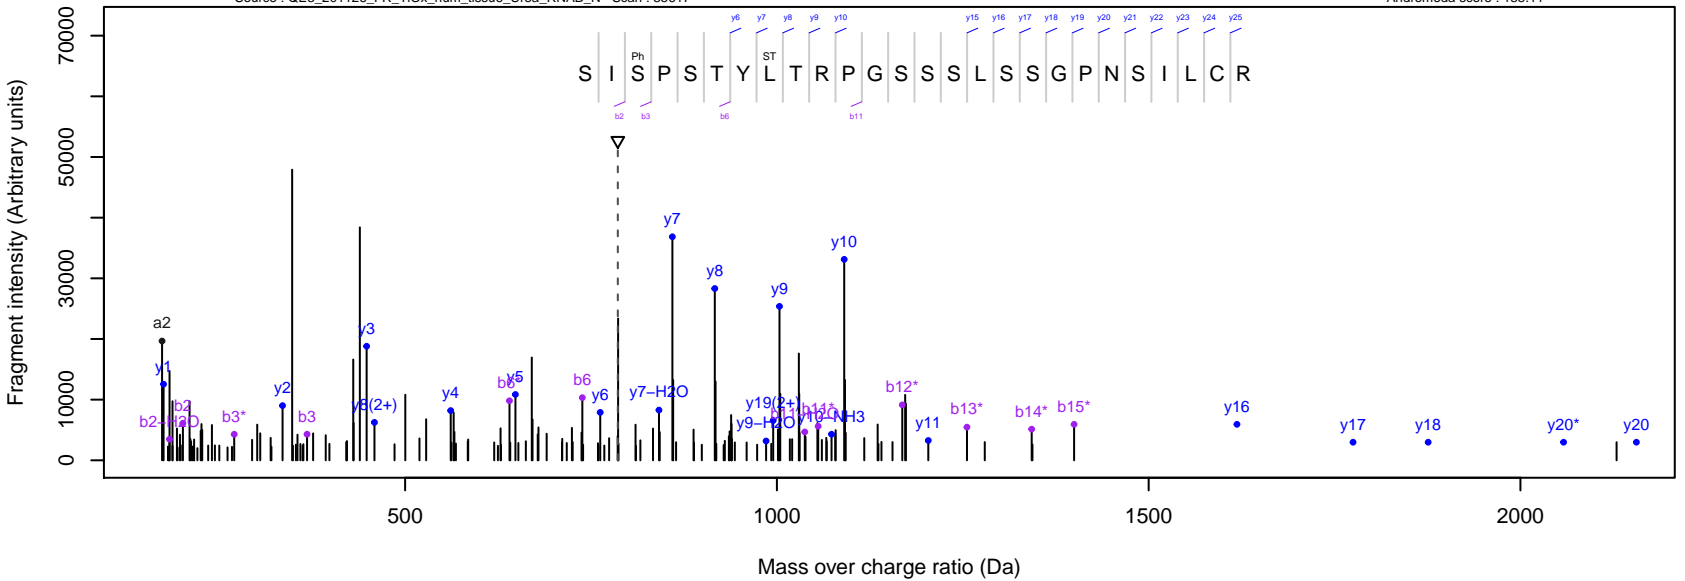

LGLAVIHGEAQCTELDM(Oxidation (M))DDGRHS(Phospho (STY))PPM(Oxidation (M))VK-4+

Source : QE3\_201126\_FR\_TiOx\_hum\_tissue\_Urea\_RNAB\_B Scan : 24694

Andromeda score : 138.1

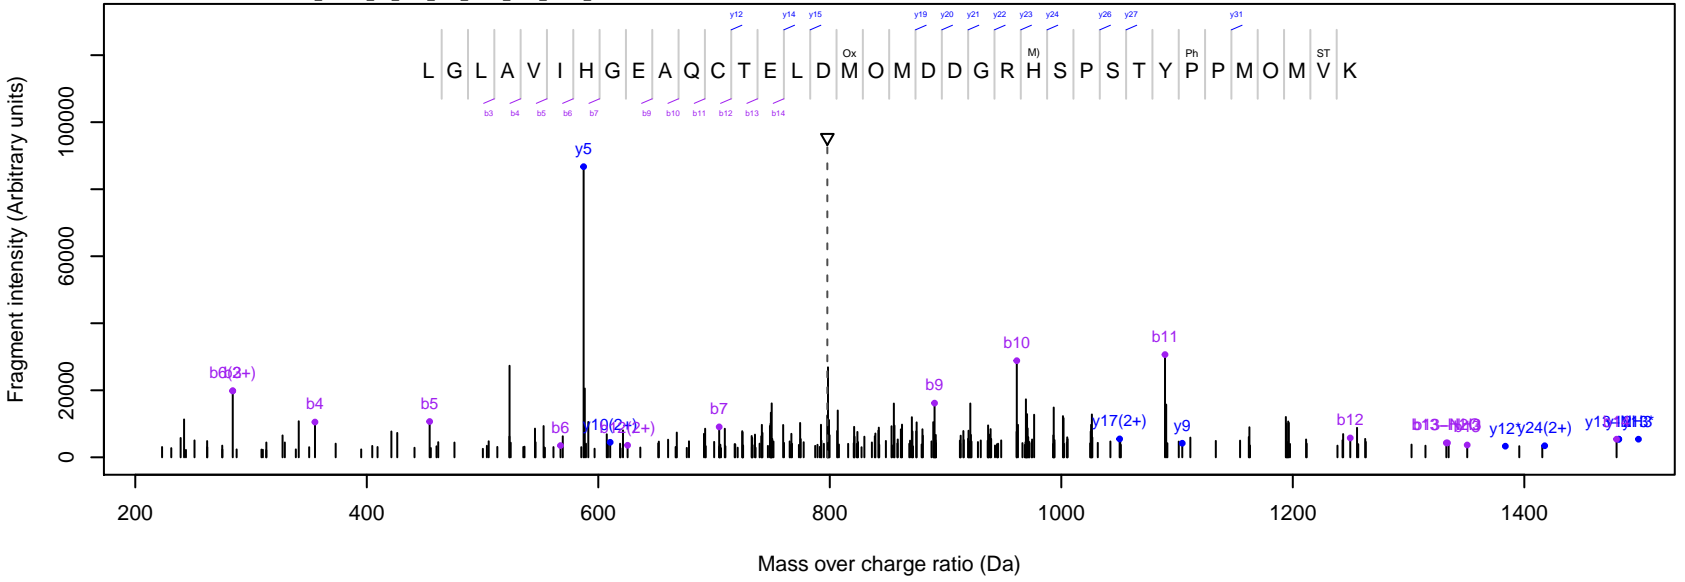

DFT(Phospho (STY))PAELR-2+

Source : QE3\_201126\_FR\_TiOx\_hum\_tissue\_Urea\_RNAB\_H Scan : 29910

Andromeda score : 138.08

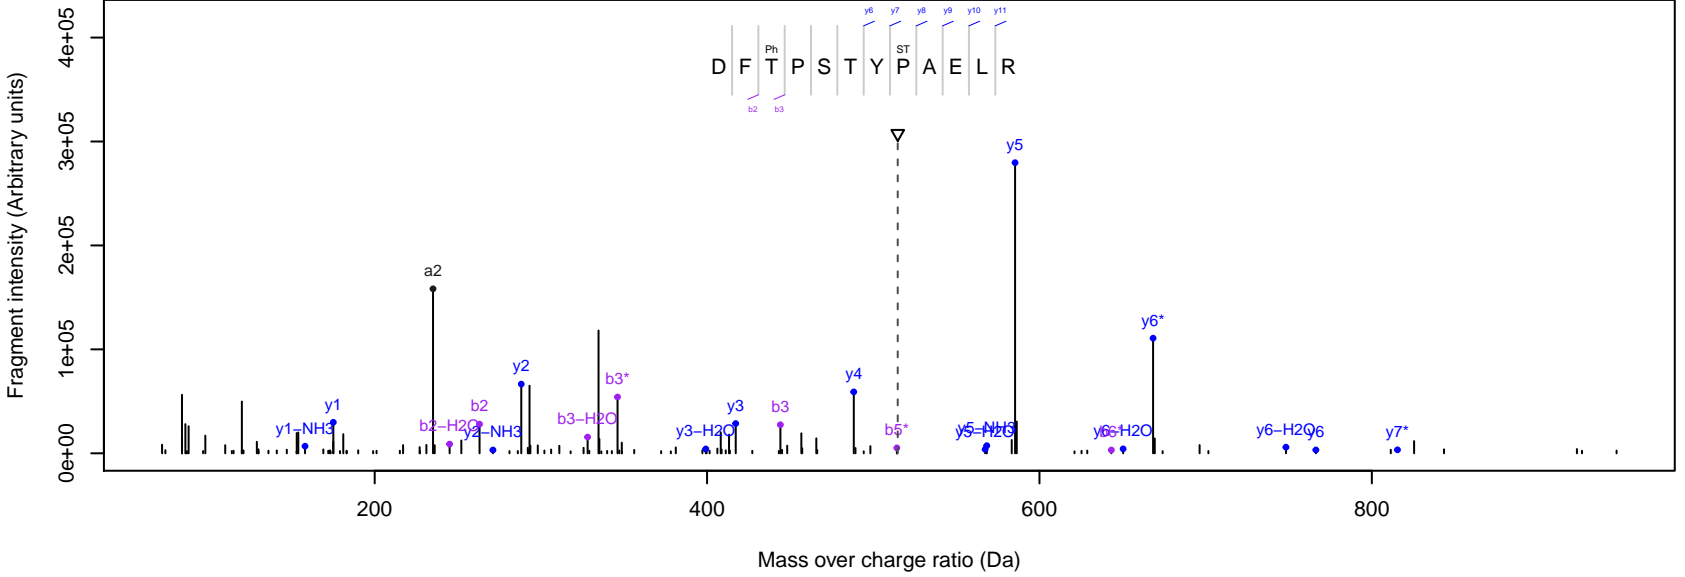

S(Phospho (STY))FEVEETPNSTPPRR-3+

Source : QE3\_201126\_FR\_TiOx\_hum\_tissue\_Urea\_RNAB\_H Scan : 24093

Andromeda score : 138.07

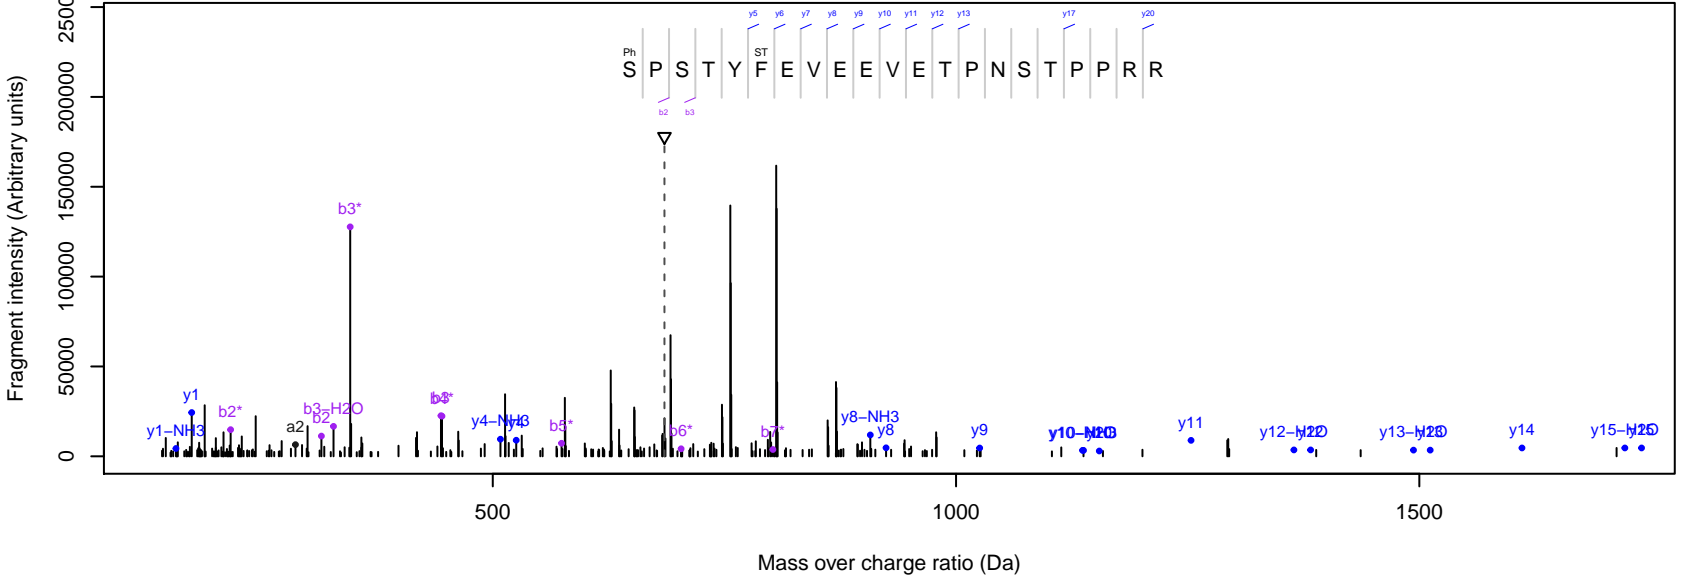

SAPAM(Oxidation (M))QSSGS(Phospho (STY))FNYARPK-2+

Source : QE3\_201126\_FR\_TiOx\_hum\_tissue\_Urea\_RNAB\_B Scan : 13119

Andromeda score : 138.05

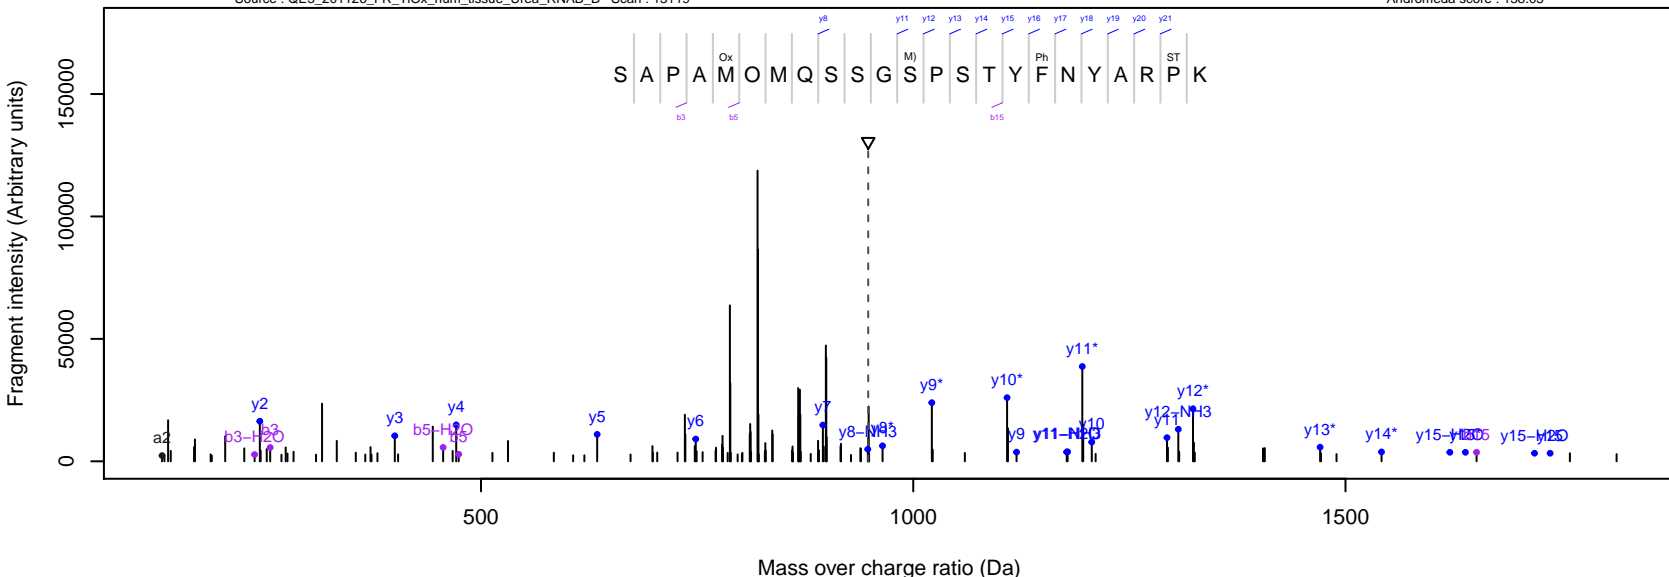

ANS(Phospho (STY))TSDSVFTETPS(Phospho (STY))PVLK-2+

Source : QE3\_201126\_FR\_TiOx\_hum\_tissue\_Urea\_RNAB\_H Scan : 48232

Andromeda score : 138.04

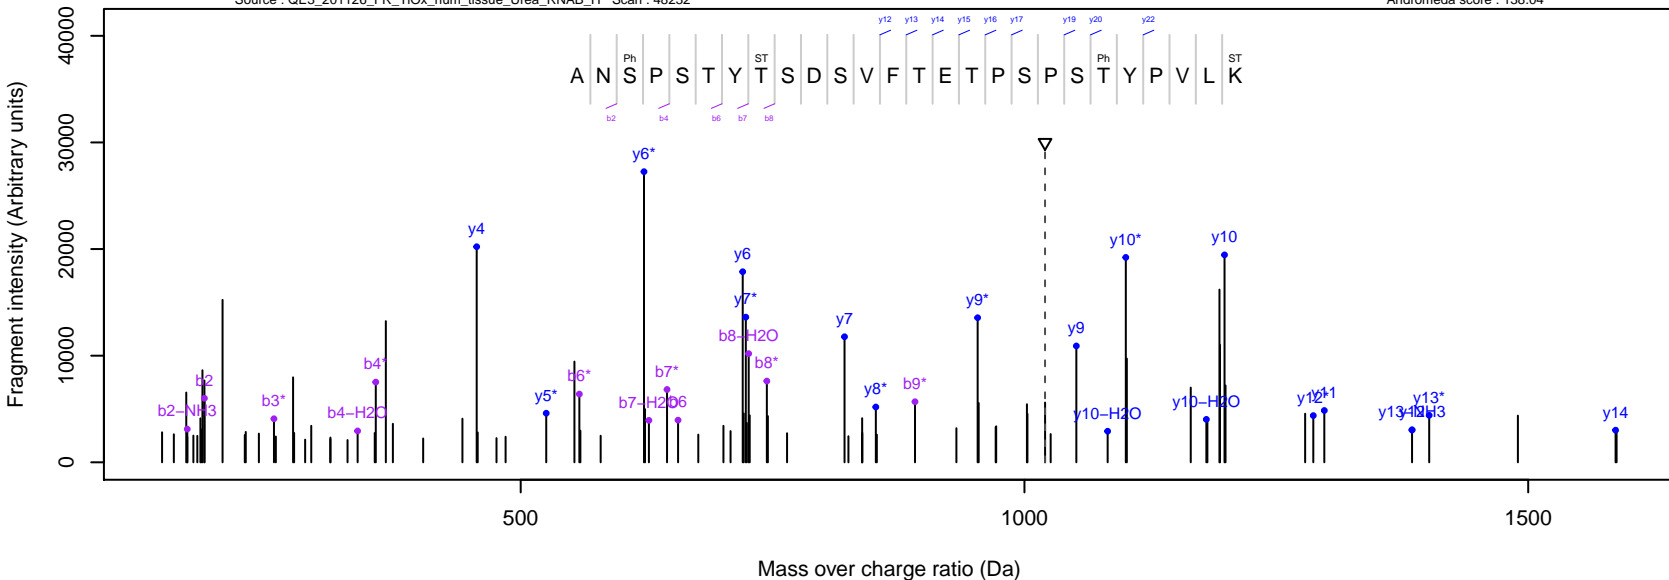

SSSSQPVT(Phospho (STY))PVWS(Phospho (STY))PGVAPTQPPAFPTSNPSK-3+

Source : QE3\_201126\_FR\_TiOx\_hum\_tissue\_Urea\_RNAB\_N Scan : 55088

Andromeda score : 138.04

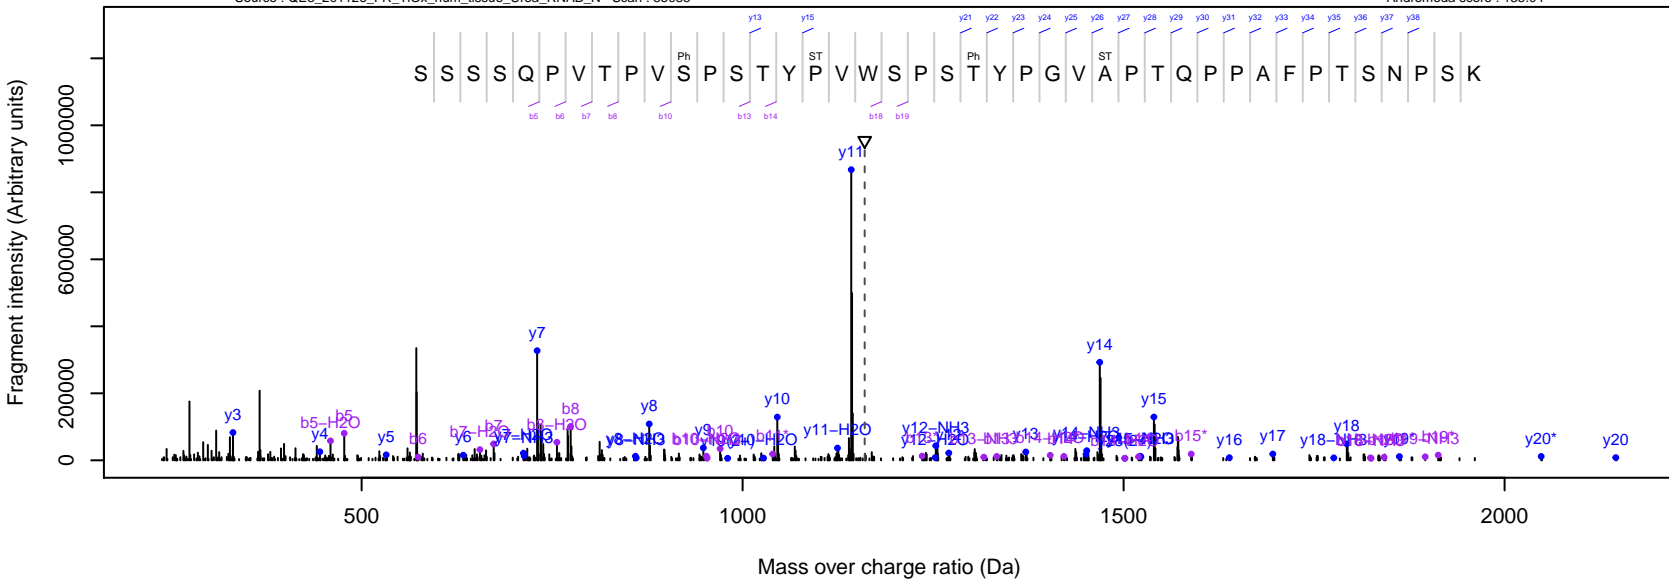

VS(Phospho (STY))PGLPSPNLENGAPAVGPVQPR-2+

Source : QE3\_201126\_FR\_TiOx\_hum\_tissue\_Urea\_RNAB\_H Scan : 42436

Andromeda score : 138.03

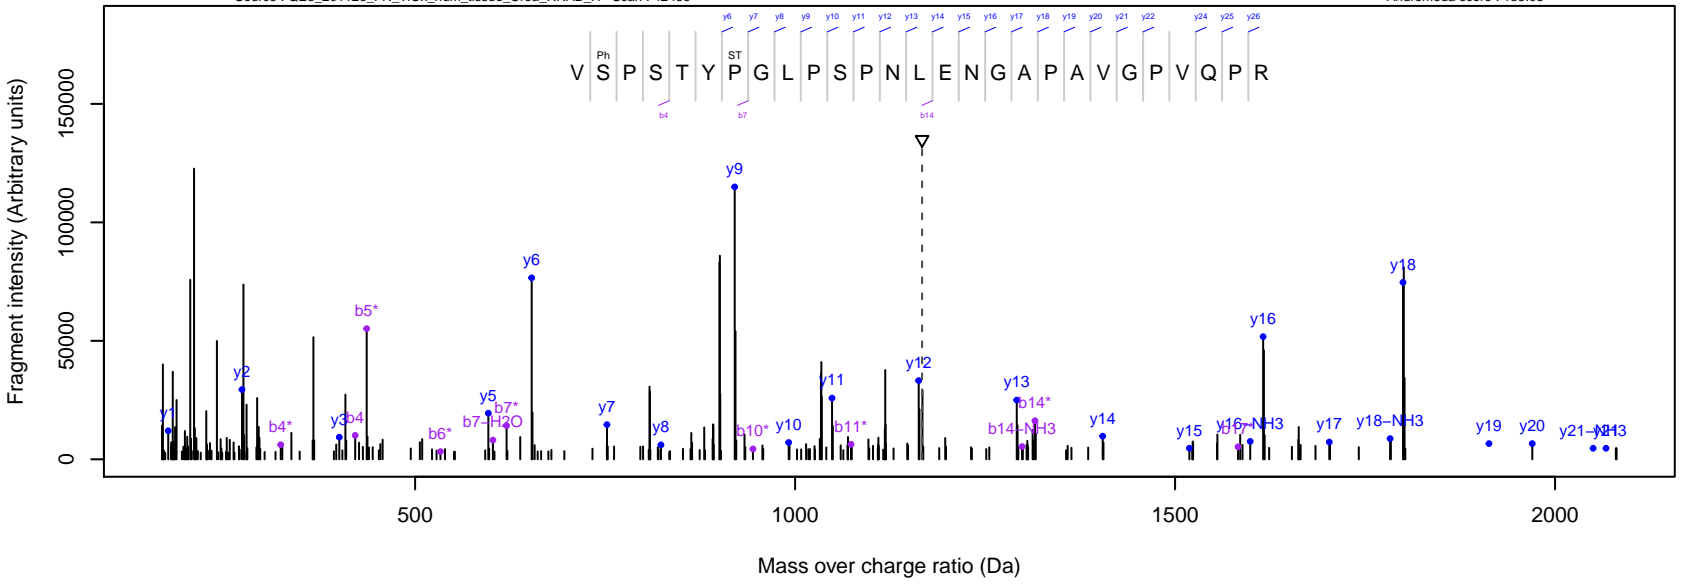

QVVSVVQDEEVGLPFEASPE(Phospho (STY))PPPAS(Phospho (STY))PDGVTEIR-3+

Source : QE3\_201126\_FR\_TiOx\_hum\_tissue\_Urea\_RNAB\_B Scan : 61594

Andromeda score : 138.01

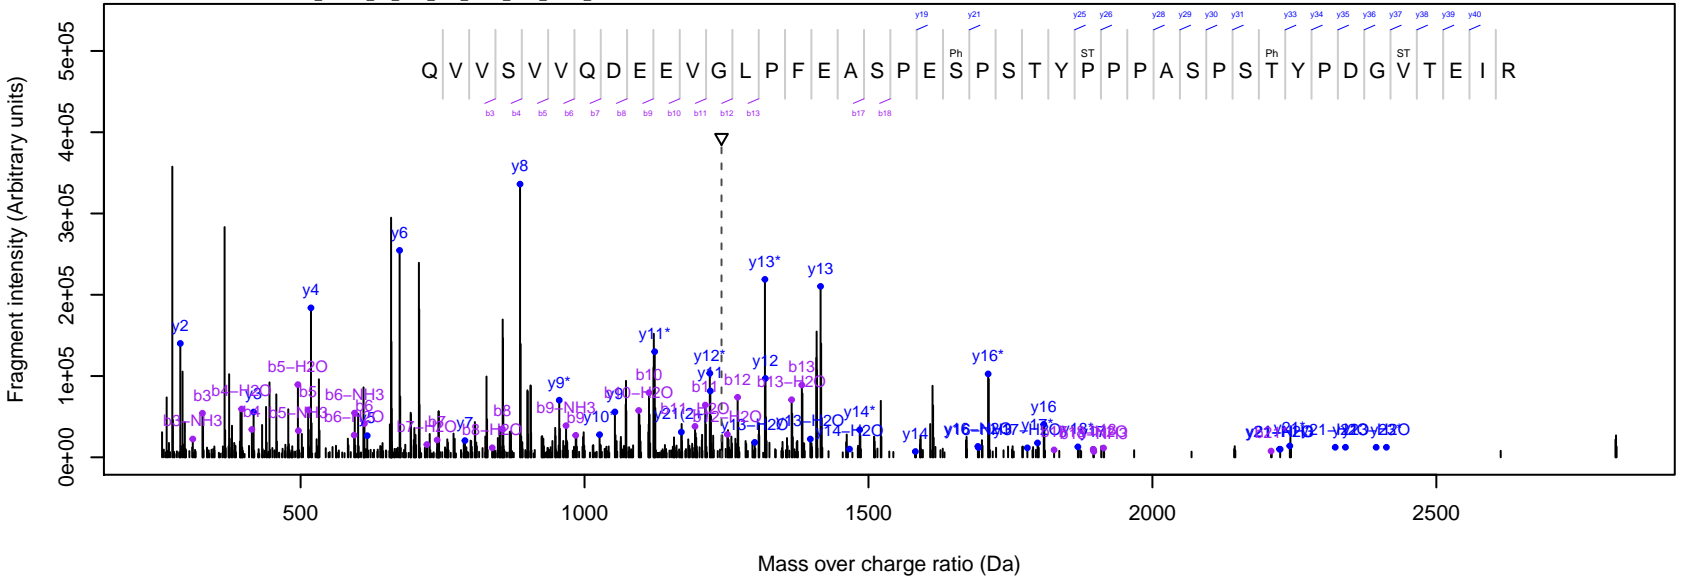

RSS(Phospho (STY))PPGHYYQK-3+

Source : QE3\_201126\_FR\_TiOx\_hum\_tissue\_Urea\_RNAB\_H Scan : 5227

Andromeda score : 138.01

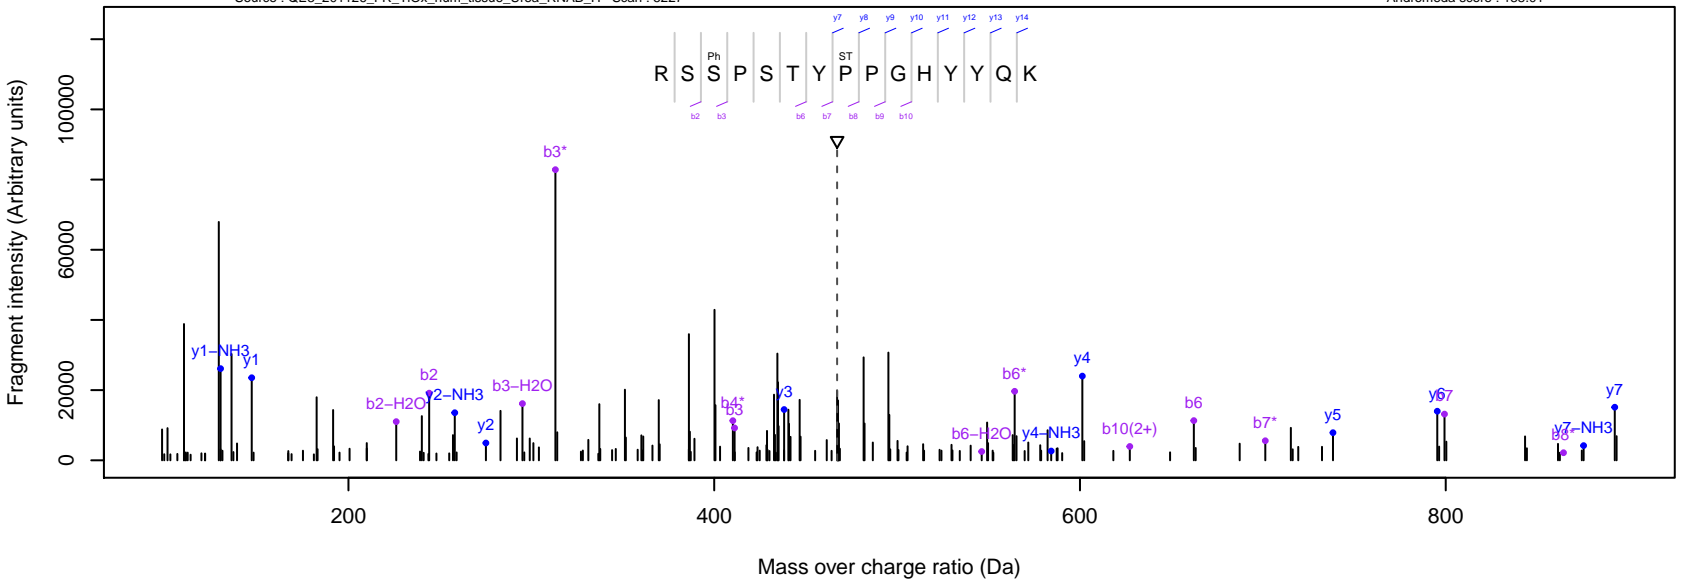

PVSSAASVYAGAGGS(Phospho (STY))GS(Phospho (STY))RIS(Phospho (STY))VSR-2+

Source : QE3\_201126\_FR\_TiOx\_hum\_tissue\_Urea\_RNAB\_B Scan : 31174

Andromeda score : 138

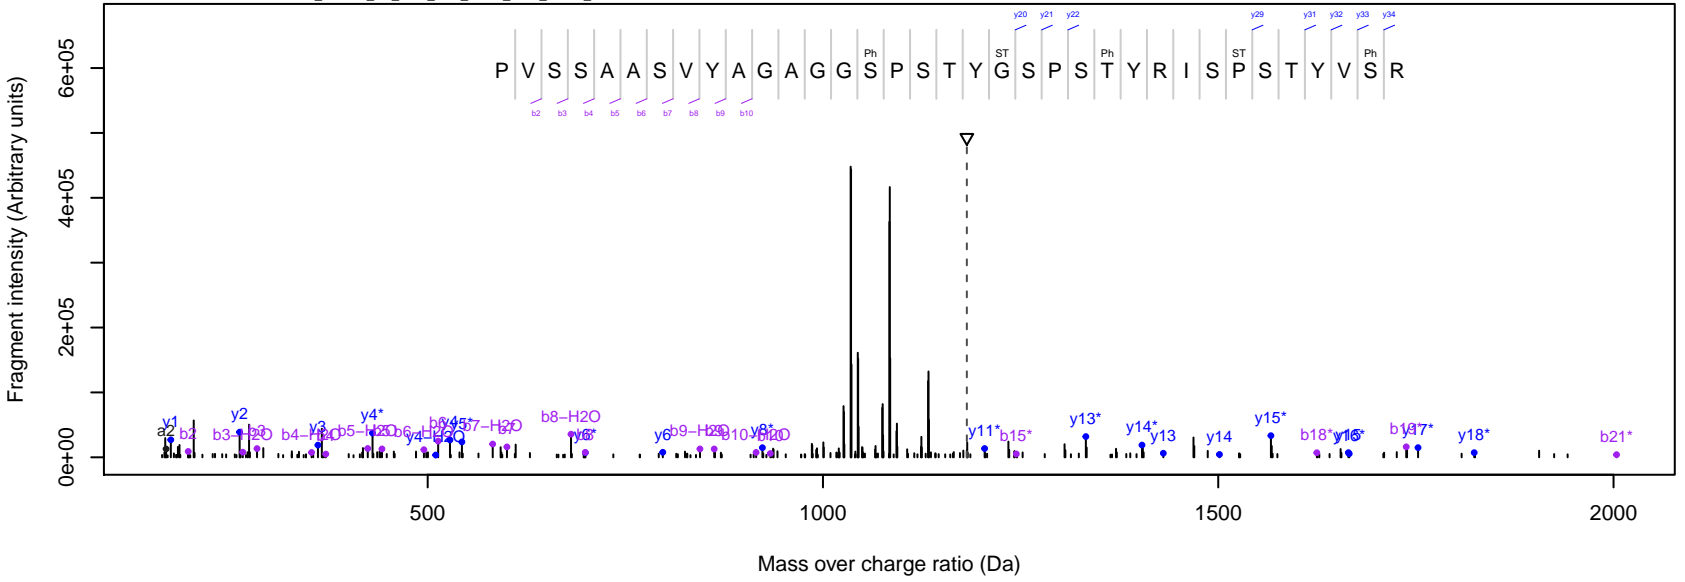

SLSYS(Phospho (STY))PVER-2+

Source : QE3\_201126\_FR\_TiOx\_hum\_tissue\_Urea\_RNAB\_H Scan : 19436

Andromeda score : 137.98

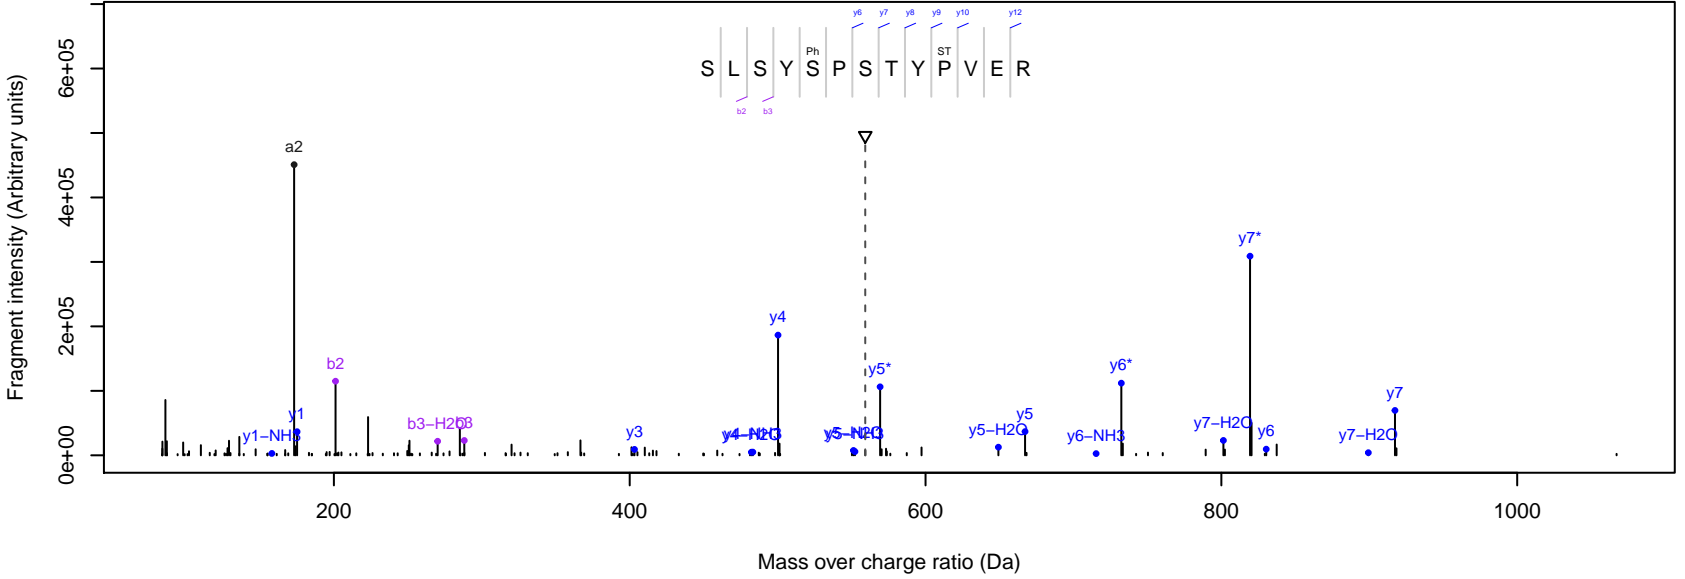

LIHGEDS(Phospho (STY))DS(Phospho (STY))EGEEEGRGSSGCSEAGGAGHEEGR-3+

Source : QE3\_201126\_FR\_TiOx\_hum\_tissue\_Urea\_RNAB\_B Scan : 9388

Andromeda score : 137.97

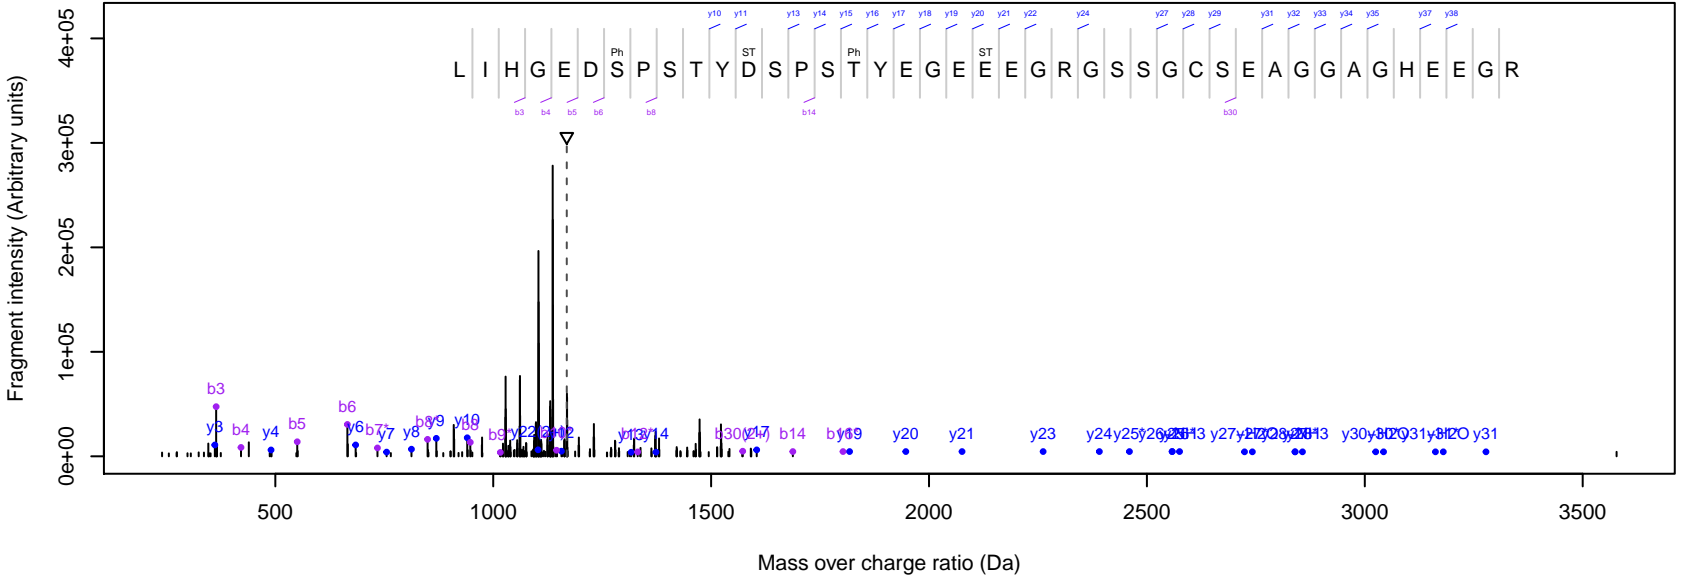

HVIGLQM(Oxidation (M))GS(Phospho (STY))NR-2+

Source : QE3\_201126\_FR\_TIOx\_hum\_tissue\_Urea\_RNAB\_B Scan : 11105

Andromeda score : 137.95

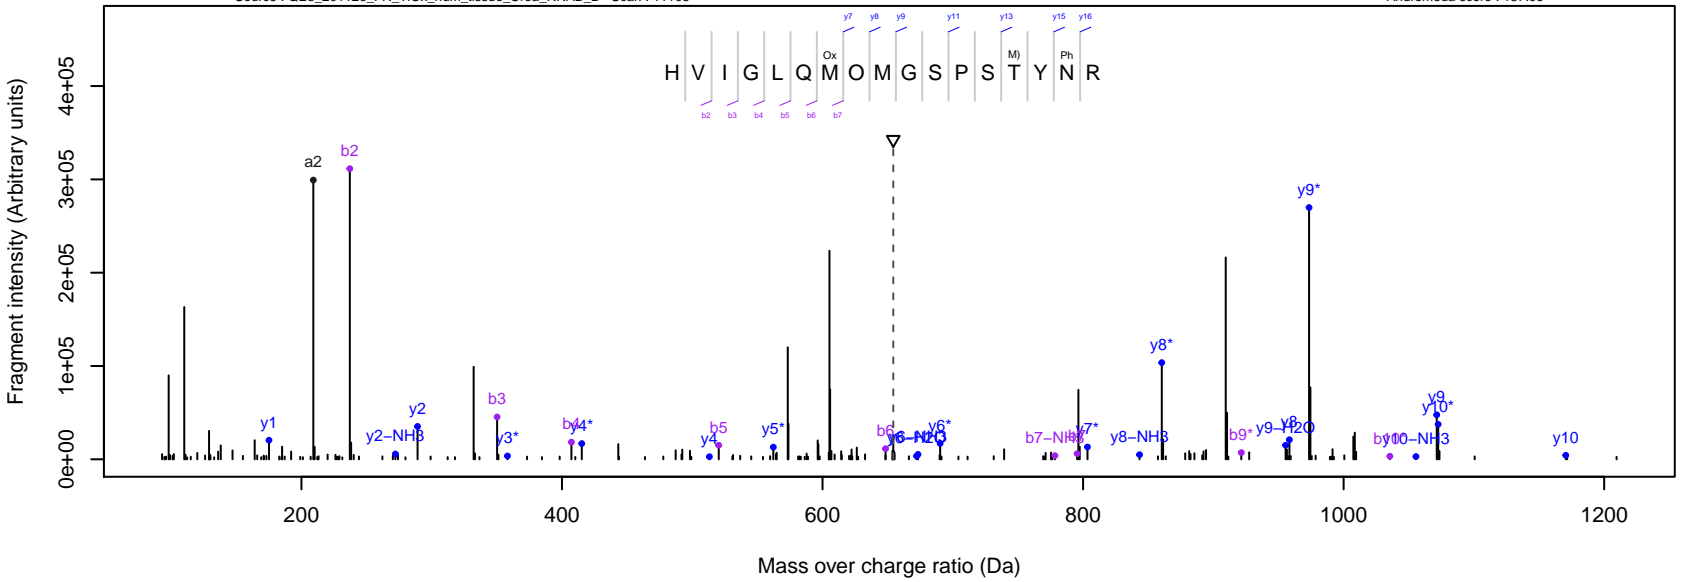

GDM(Oxidation (M))S(Phospho (STY))DEDDENEFFDAPEITM(Oxidation (M))PENLGHK-3+

Source : QE3\_201126\_FR\_TIOx\_hum\_tissue\_Urea\_RNAB\_H Scan : 54072

Andromeda score : 137.91

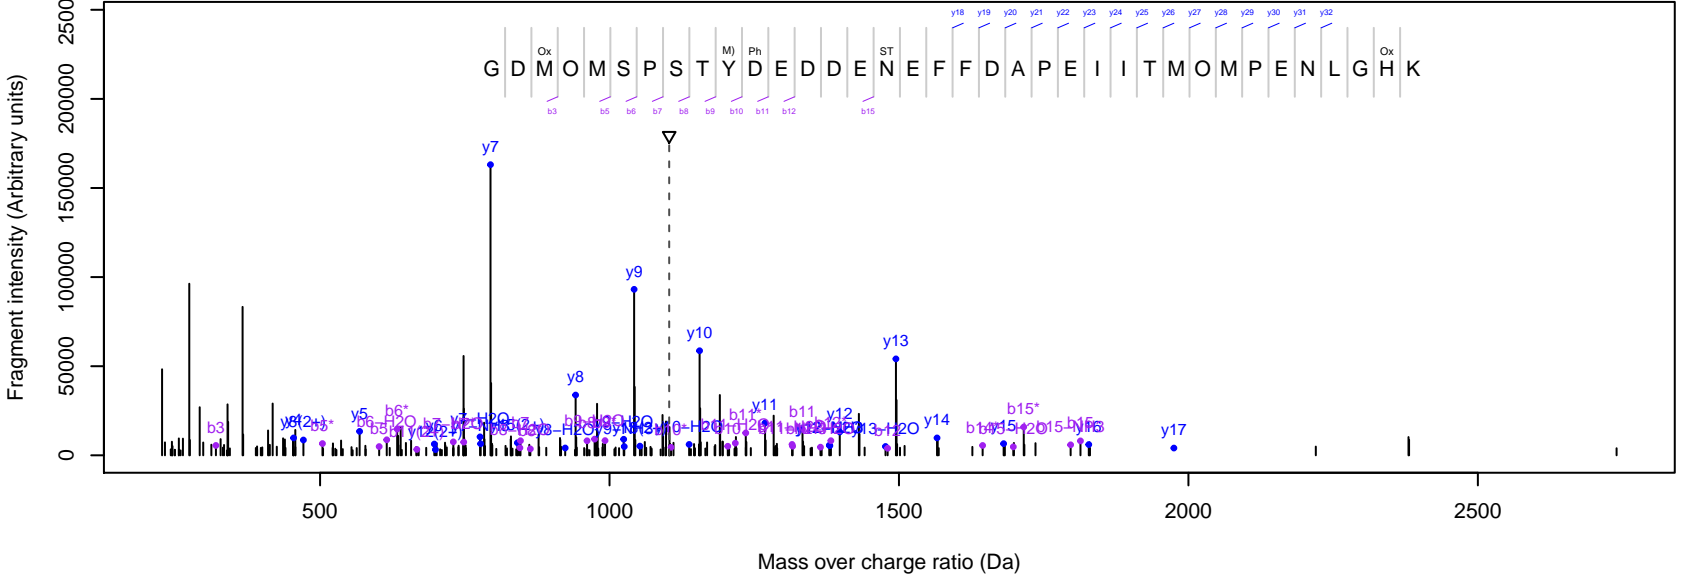

AVS(Phospho (STY))PPHLDGPPS(Phospho (STY))PRS(Phospho (STY))PVIGSEVFLPNSNHVASGAGEAGR-4+

Source : QE3\_201126\_FR\_TIOx\_hum\_tissue\_Urea\_RNAB\_N Scan : 45848

Andromeda score : 137.82

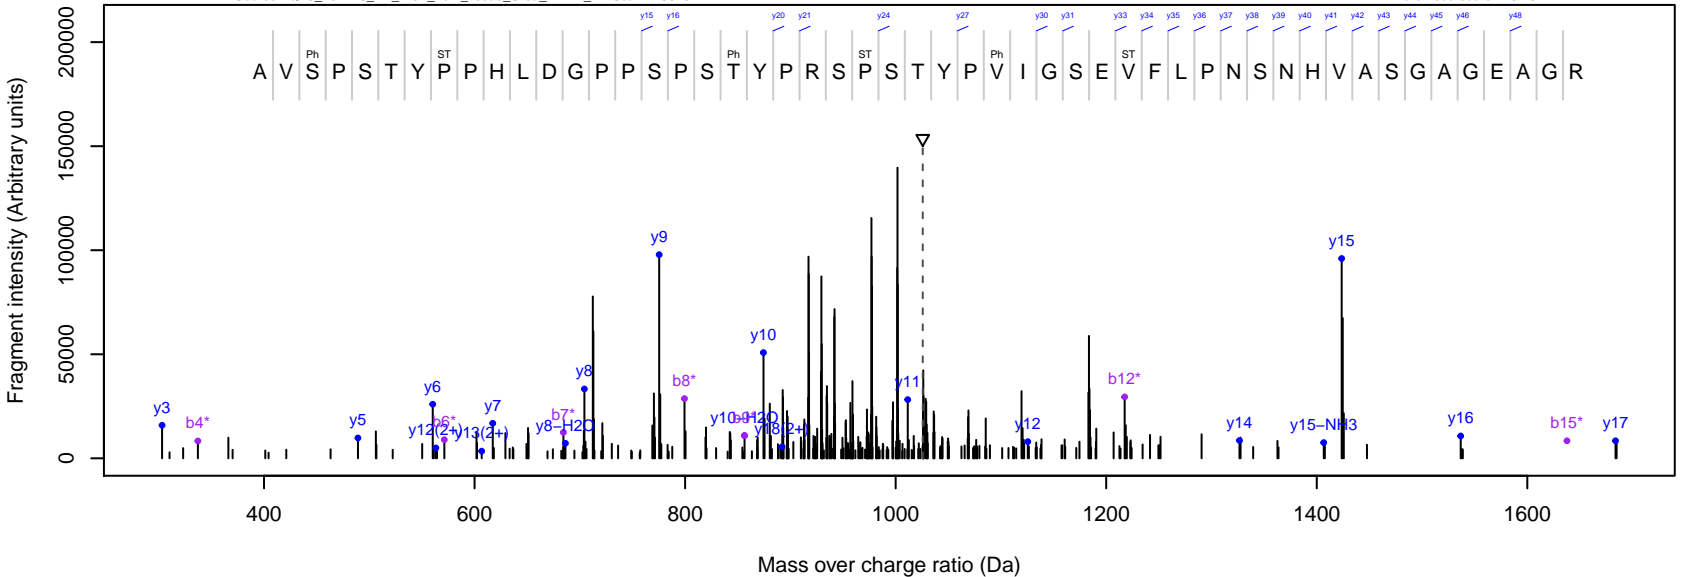

LHGGFDS(Phospho (STY))DCS(Phospho (STY))EDGEALNGEPELDLTSK-3+

Source : QE3\_201126\_FR\_TiOx\_hum\_tissue\_Urea\_RNAB\_H Scan : 45949

Andromeda score : 137.82

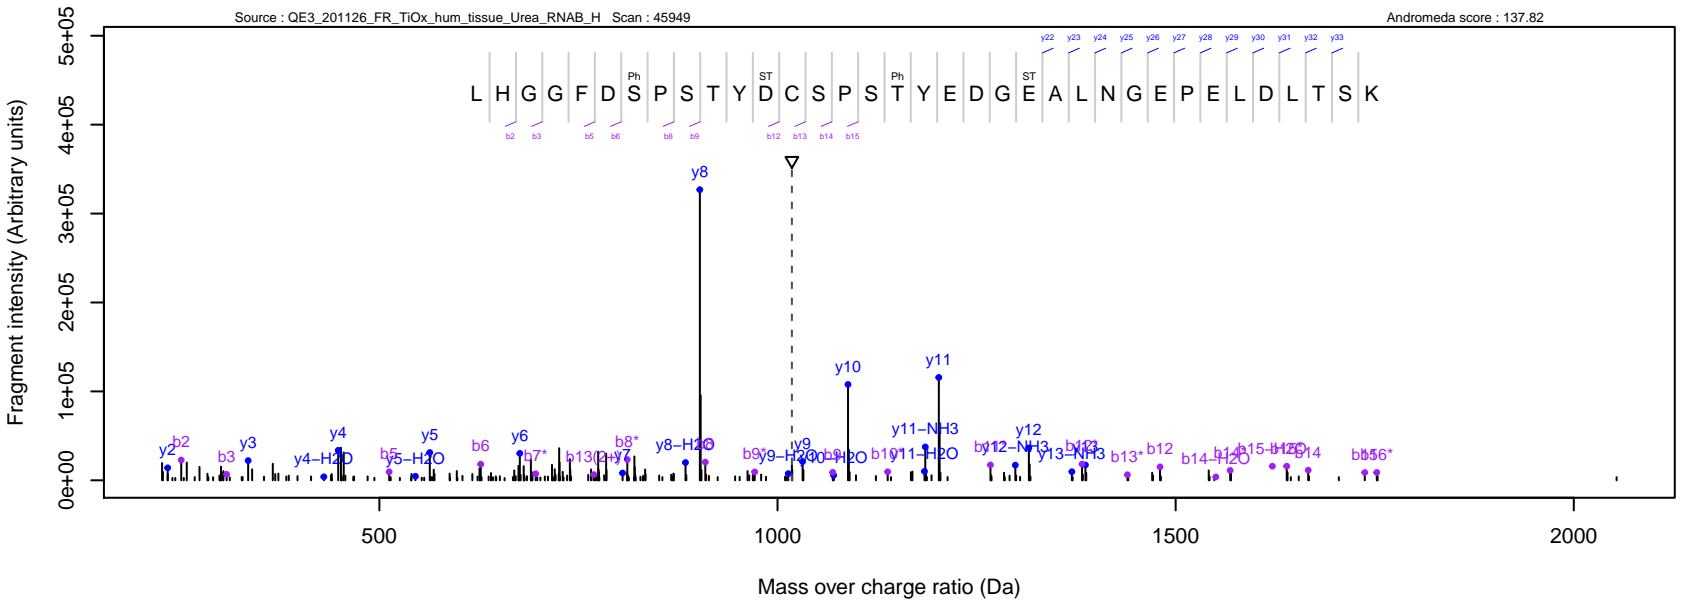

GEFSAS(Phospho (STY))PM(Oxidation (M))LK-2+

Source : QE3\_201126\_FR\_TiOx\_hum\_tissue\_Urea\_RNAB\_H Scan : 20619

Andromeda score : 137.78

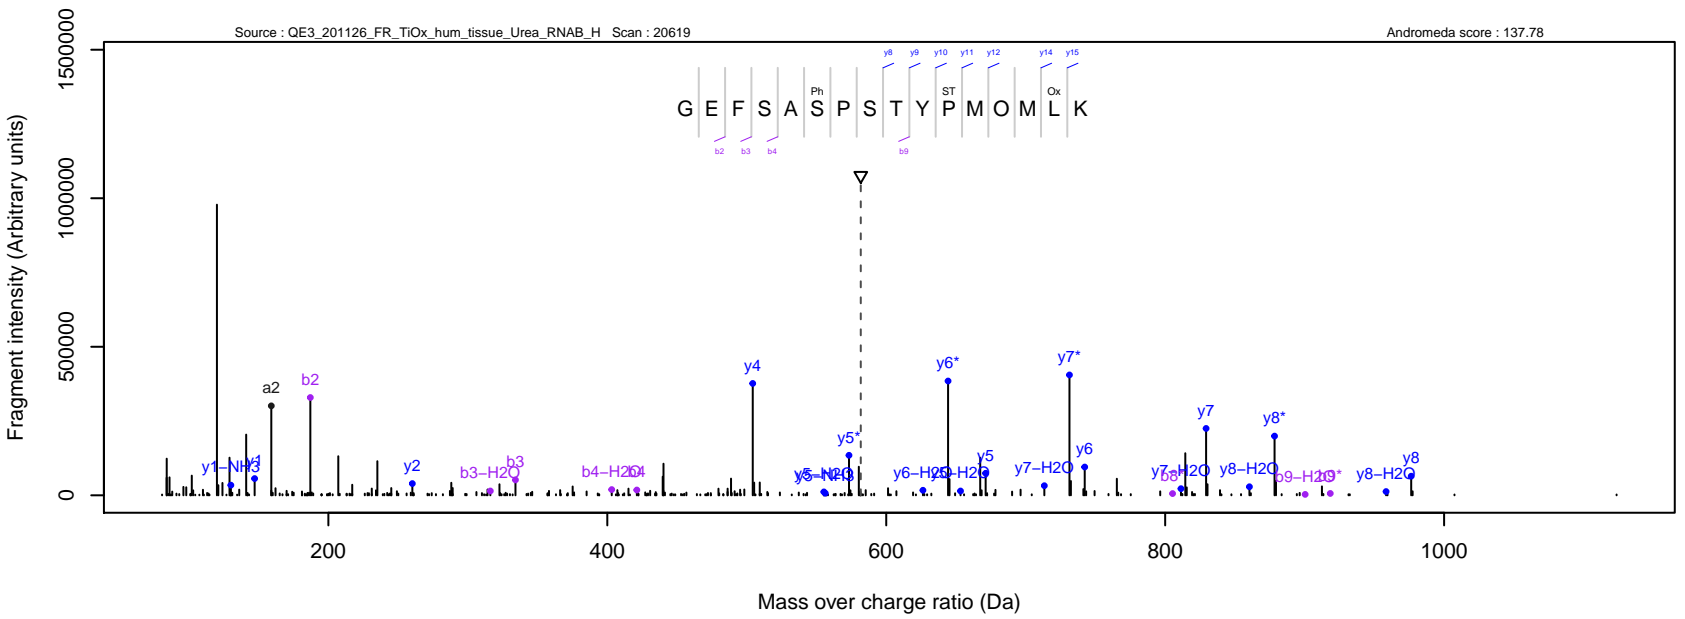

SKS(Phospho (STY))PS(Phospho (STY))PPRLTEDR-3+

Source : QE3\_201126\_FR\_TiOx\_hum\_tissue\_Urea\_RNAB\_B Scan : 11310

Andromeda score : 137.73

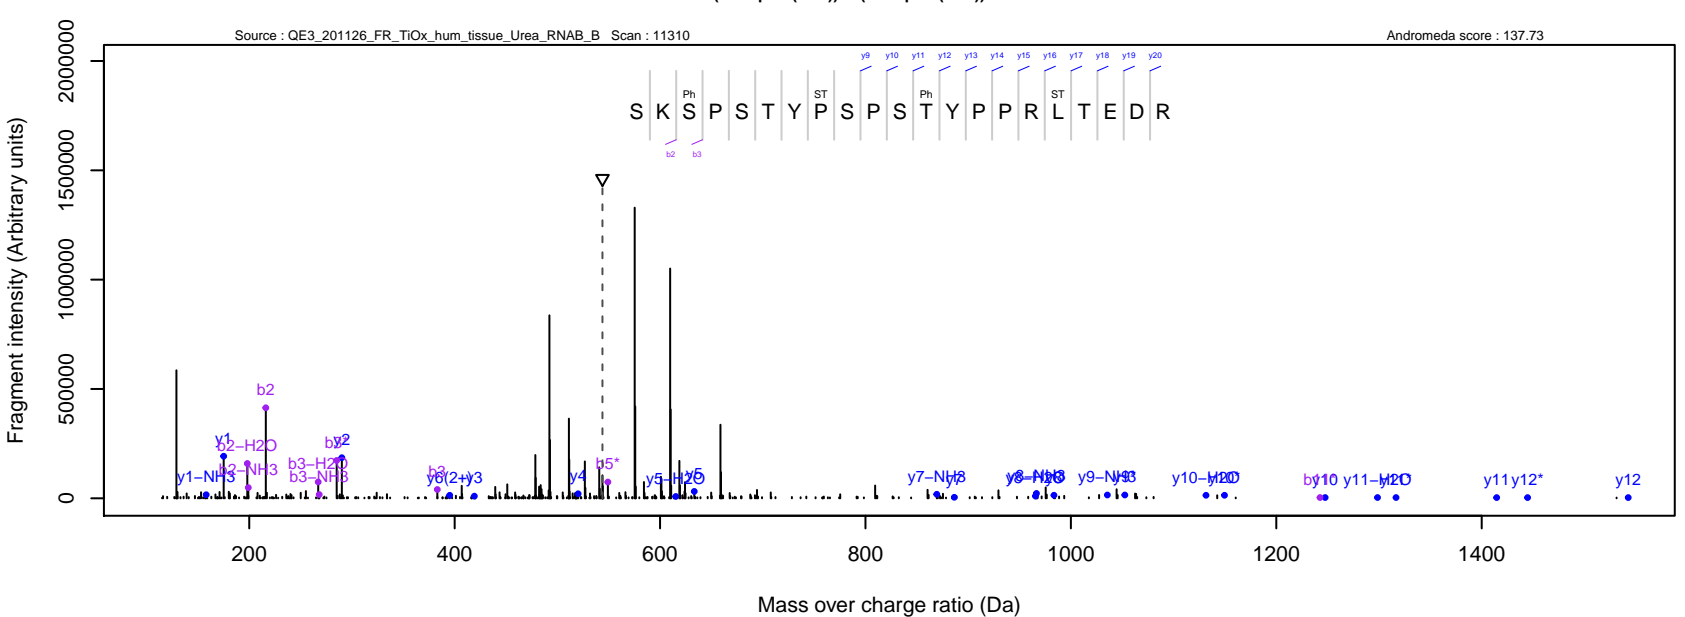



GPSTPKS(Phospho (STY))PGASNFSTLPK-3+

Source : QE3\_201126\_FR\_TiOx\_hum\_tissue\_Urea\_RNAB\_H Scan : 19185

Andromeda score : 137.72

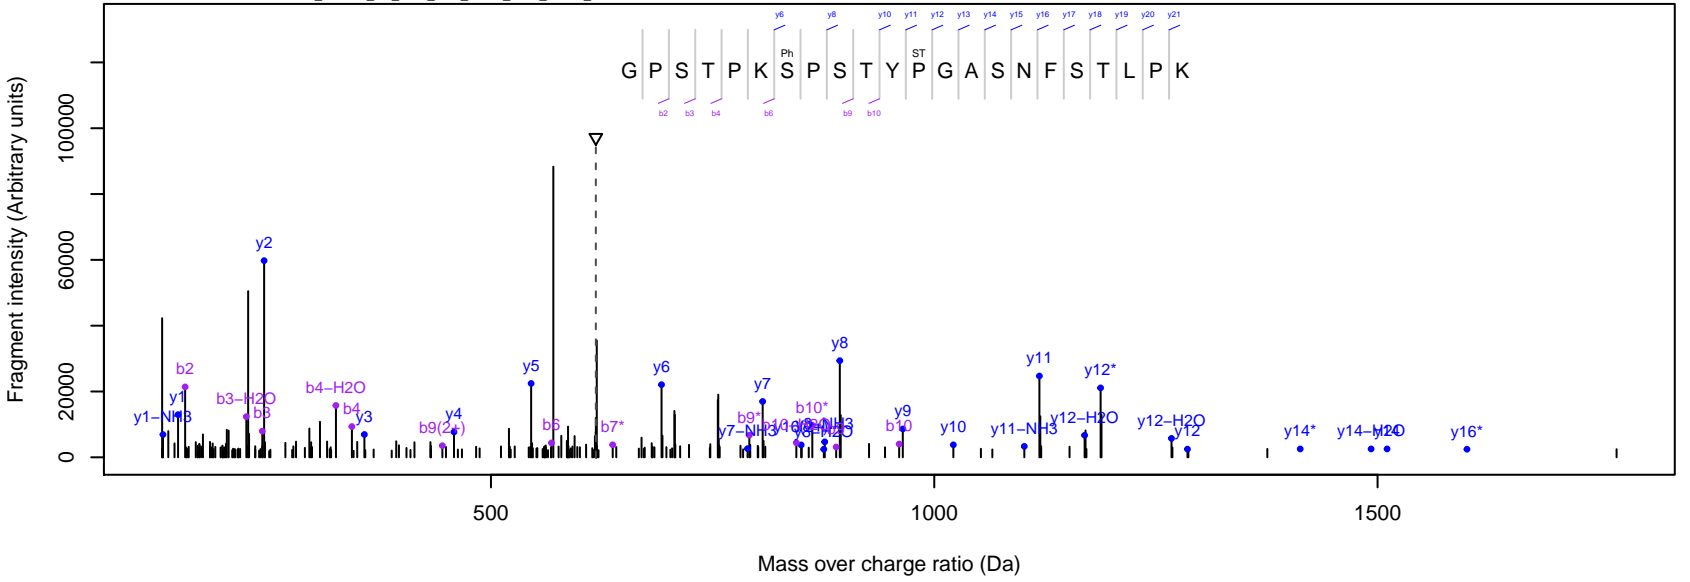

GSDALSETSS(Phospho (STY))VSHIEDLEK-3+

Source : QE3\_201126\_FR\_TiOx\_hum\_tissue\_Urea\_RNAB\_H Scan : 28786

Andromeda score : 137.72

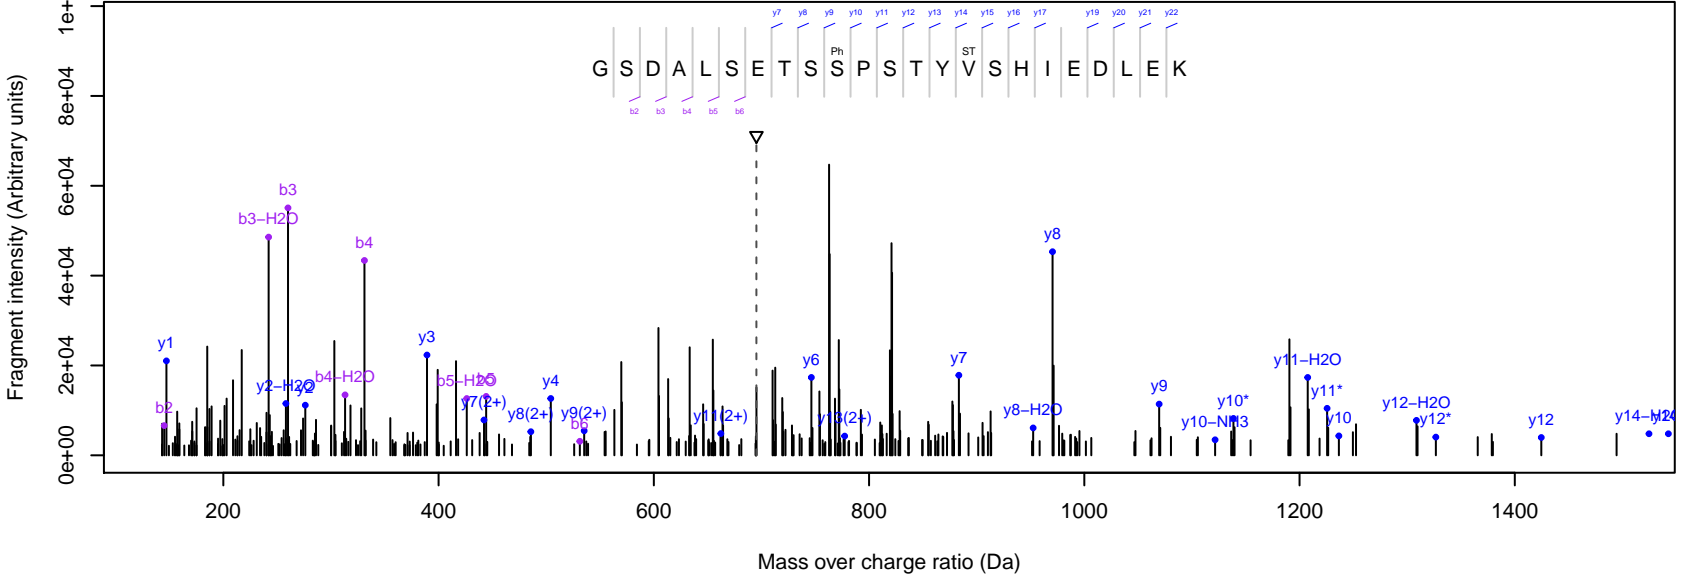

RYGLLANTEDPTEMAS(Phospho (STY))LDS(Phospho (STY))DEETVFESR-3+

Source : QE3\_201126\_FR\_TiOx\_hum\_tissue\_Urea\_RNAB\_N Scan : 57096

Andromeda score : 137.69

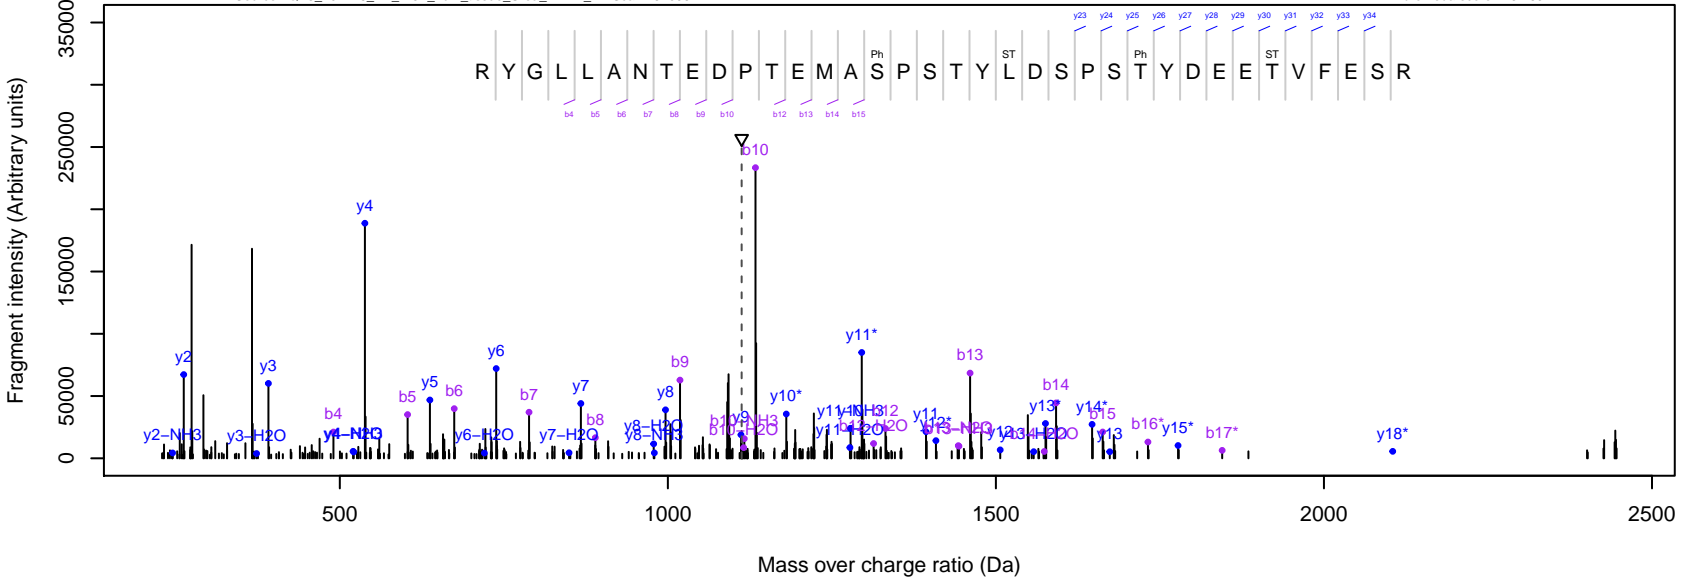

EKAERPTFDYLQSVLDDFYTATEGQYPSSTYQQQP-3+

Source : QE3\_201126\_FR\_TIOx\_hum\_tissue\_Urea\_RNAB\_B Scan : 62532

Andromeda score : 137.64

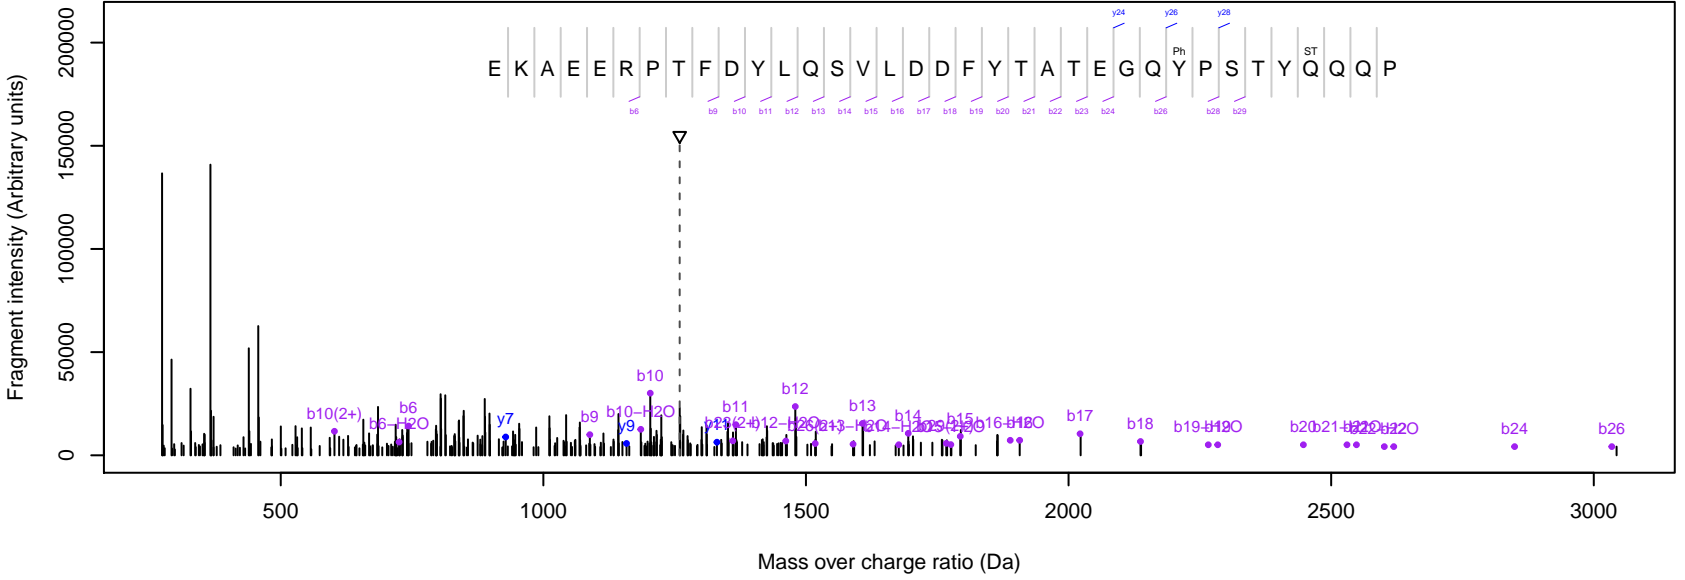

S(Phospho (STY))PKGFEKDEEETVTK-3+

Source : QE3\_201126\_FR\_TIOx\_hum\_tissue\_Urea\_RNAB\_B Scan : 13776

Andromeda score : 137.64

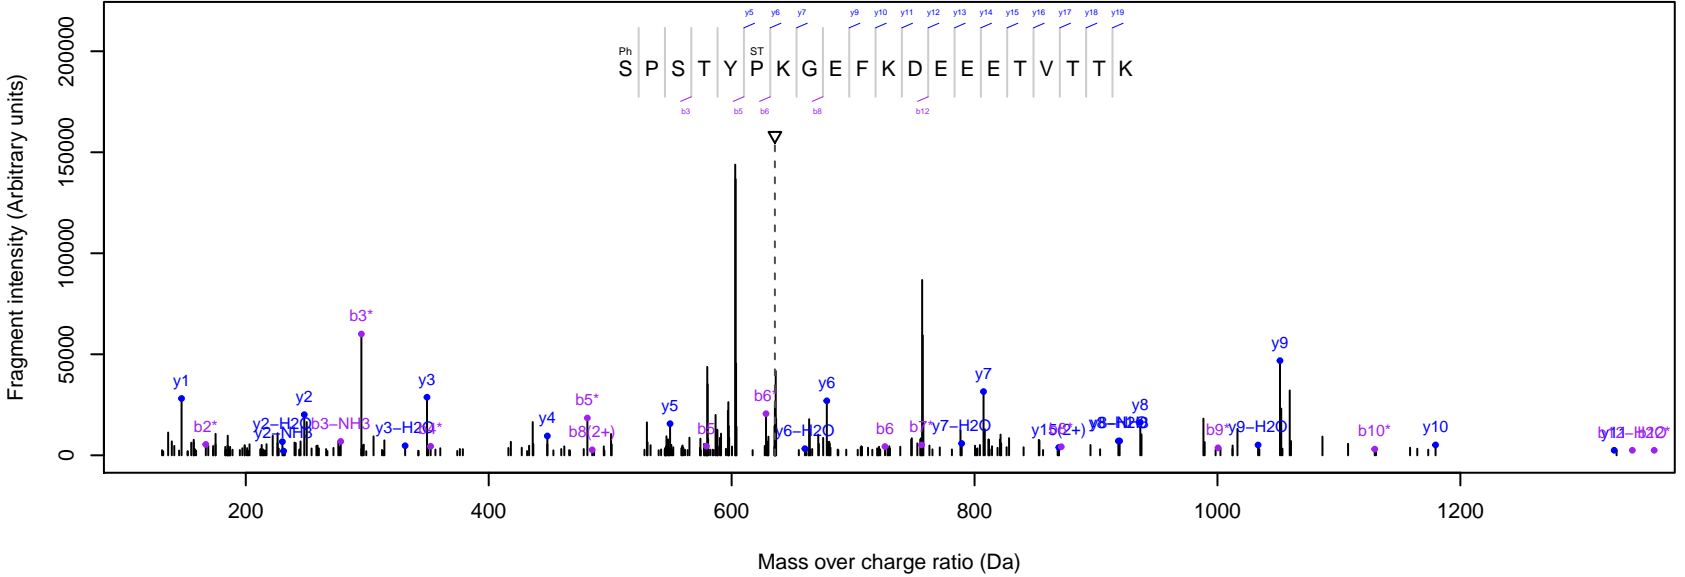

KES(Phospho (STY))NLETELK-2+

Source : QE3\_201126\_FR\_TIOx\_hum\_tissue\_Urea\_RNAB\_N Scan : 12272

Andromeda score : 137.62

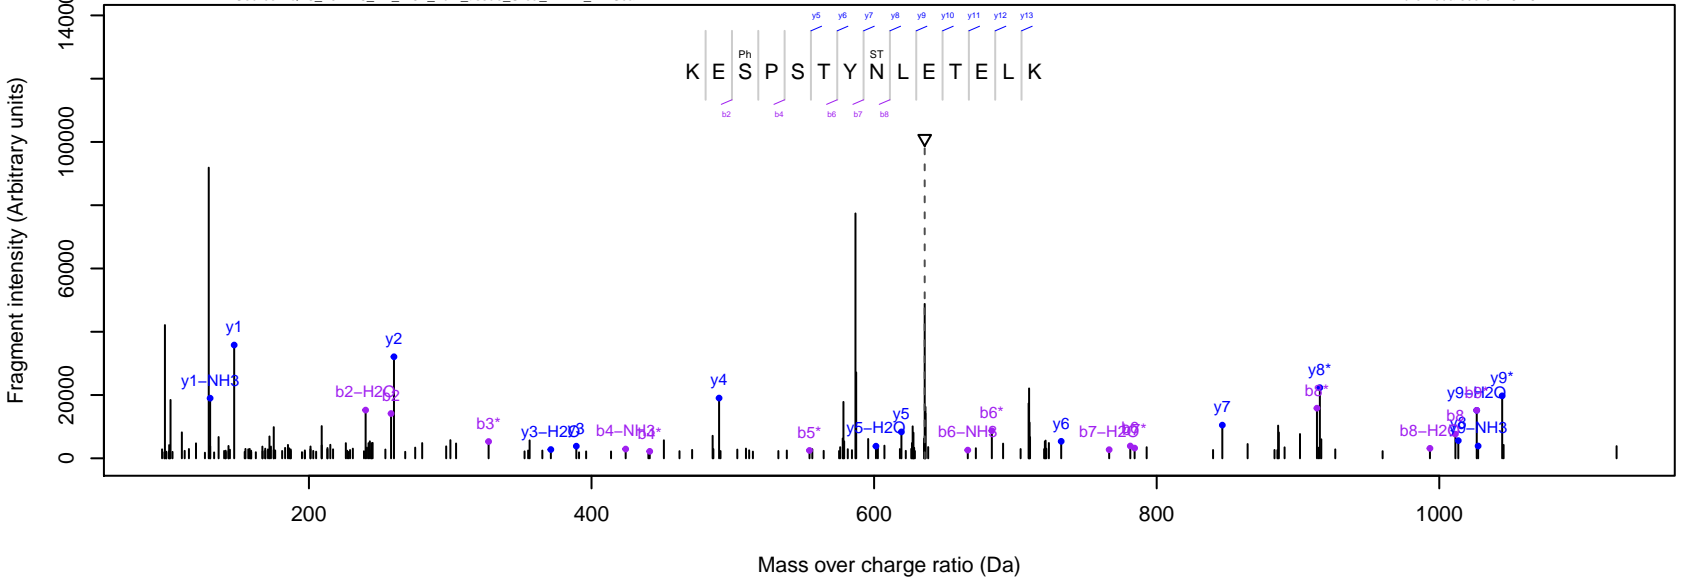

QPS(Phospho (STY))EEEEIK-2+

Source : QE3\_201126\_FR\_TiOx\_hum\_tissue\_Urea\_RNAB\_N Scan : 18376

Andromeda score : 137.62

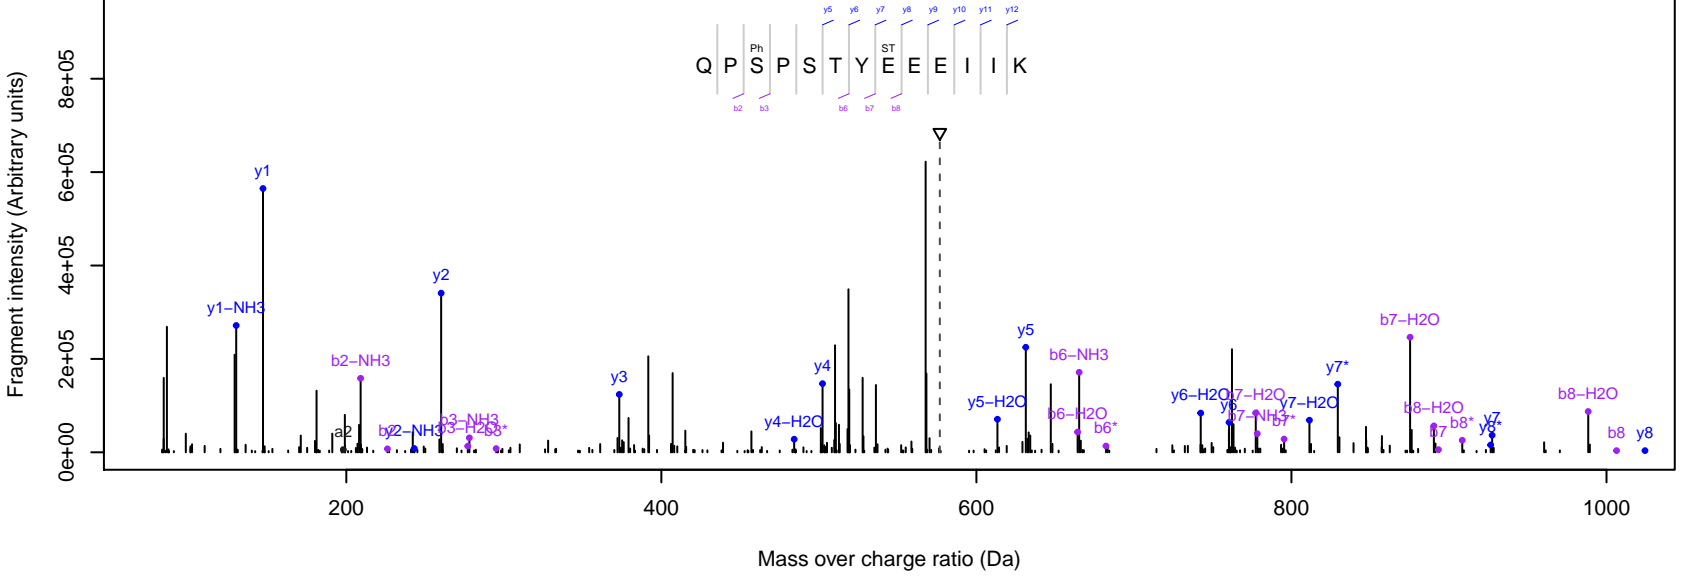

RS(Phospho (STY))PS(Phospho (STY))PYYSR-2+

Source : QE3\_201126\_FR\_TiOx\_hum\_tissue\_Urea\_RNAB\_H Scan : 9809

Andromeda score : 137.6

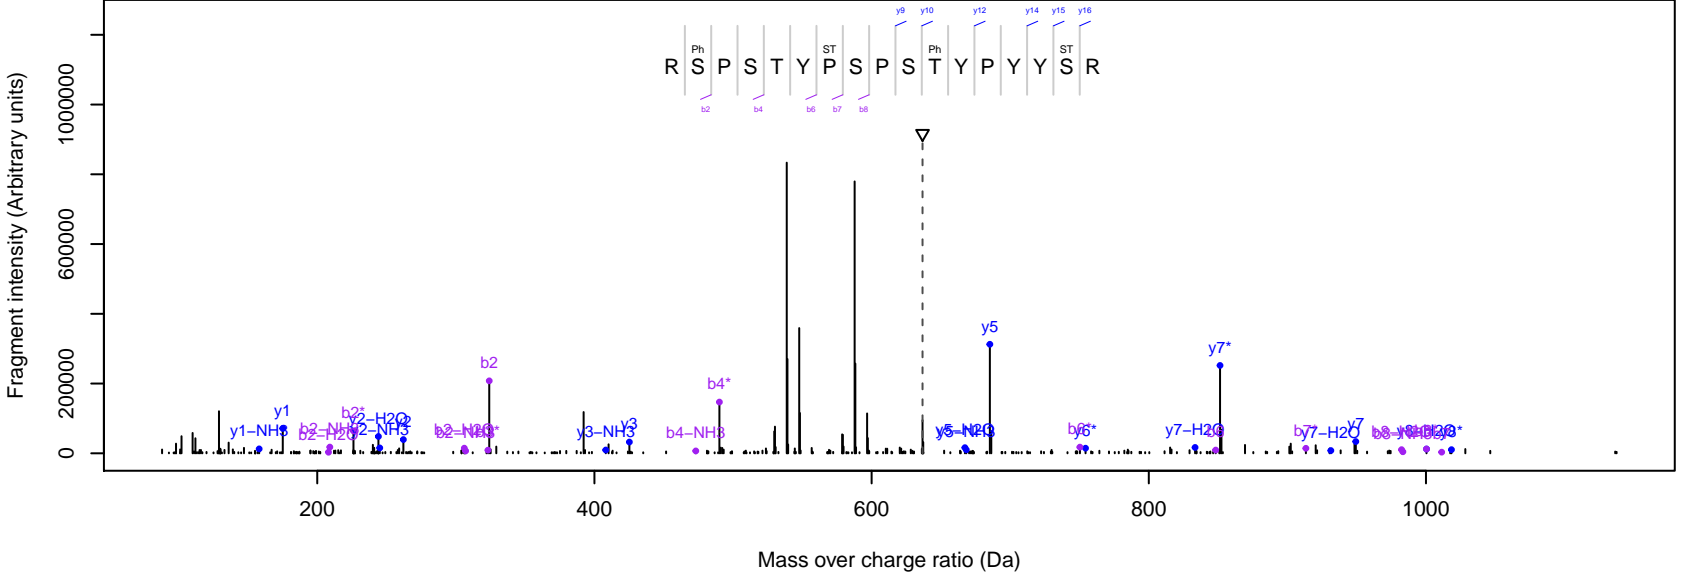

IDIS(Phospho (STY))PSTFRK-2+

Source : QE3\_201126\_FR\_TiOx\_hum\_tissue\_Urea\_RNAB\_N Scan : 23541

Andromeda score : 137.55

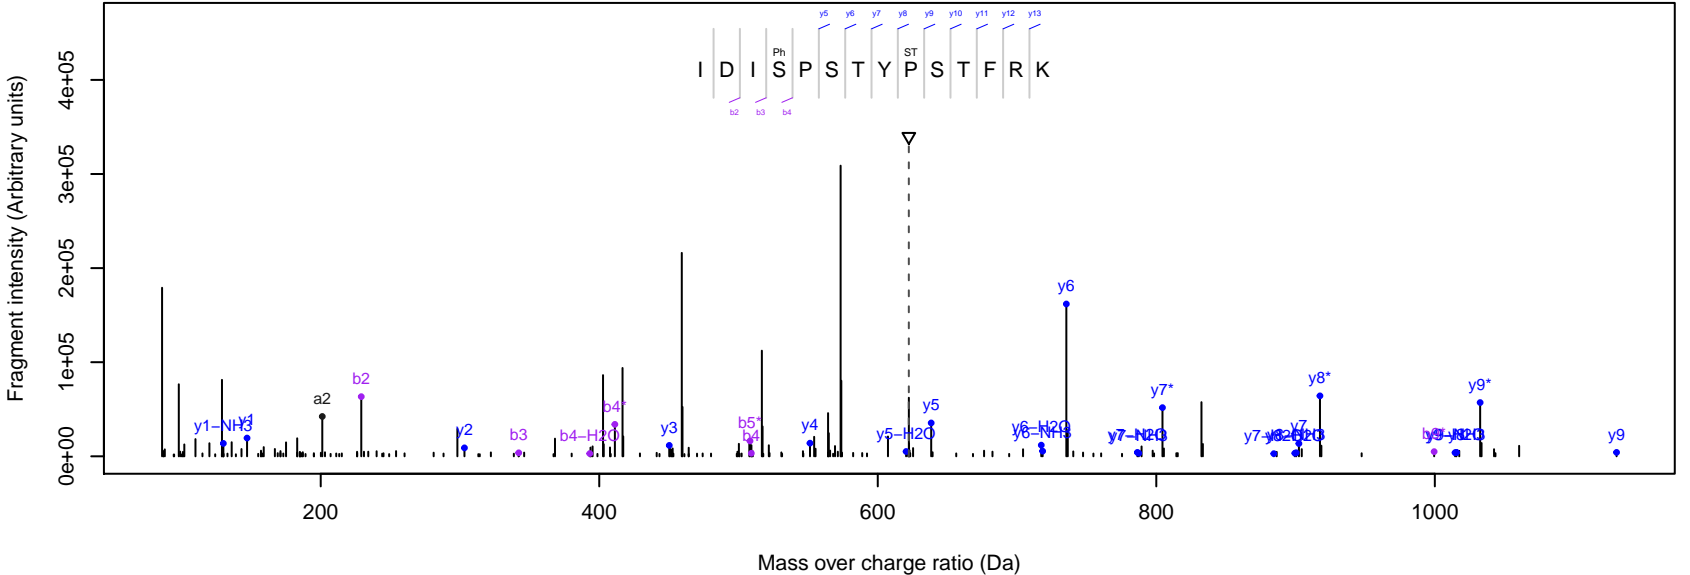

KATEDEGS(Phospho (STY))EQIPEATNR-3+

Source : QE3\_201126\_FR\_TiOx\_hum\_tissue\_Urea\_RNAB\_B Scan : 7535

Andromeda score : 137.52

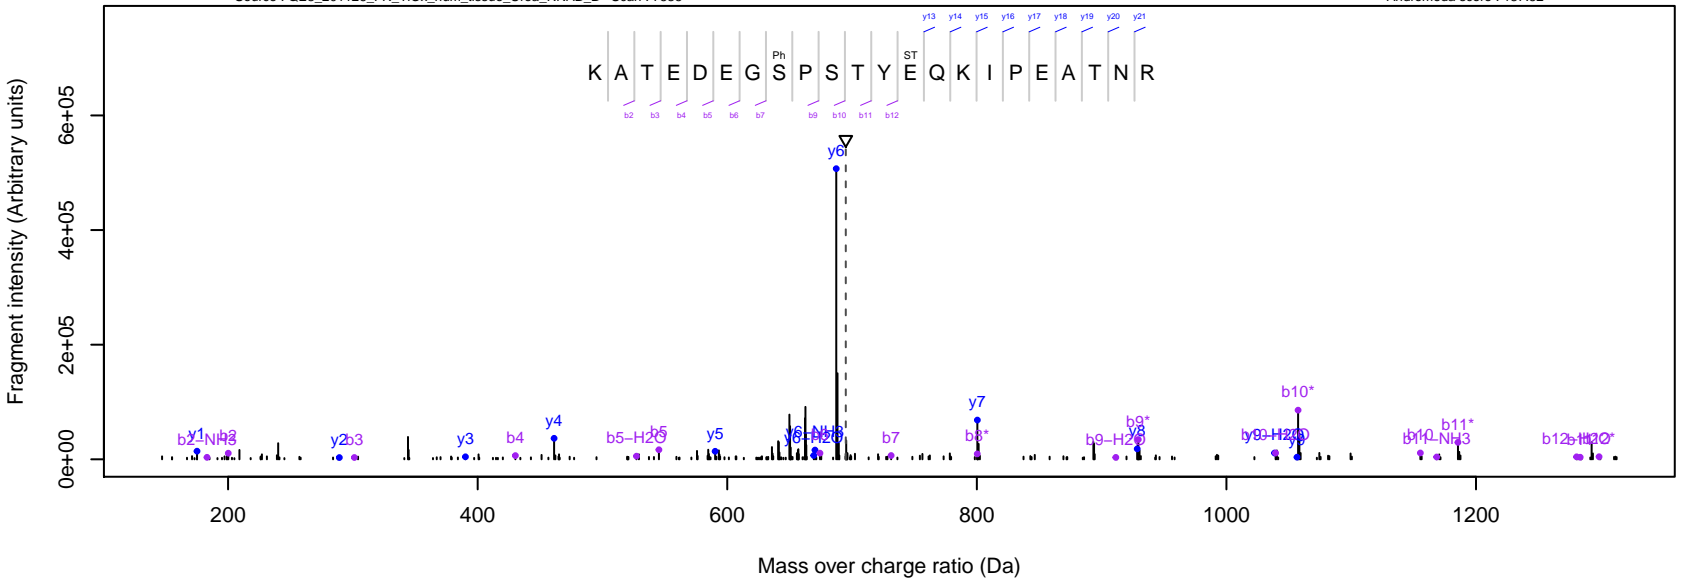

NLNLVSS(Phospho (STY))TAS(Phospho (STY))IKDLADVDLR-3+

Source : QE3\_201126\_FR\_TiOx\_hum\_tissue\_Urea\_RNAB\_N Scan : 54501

Andromeda score : 137.52

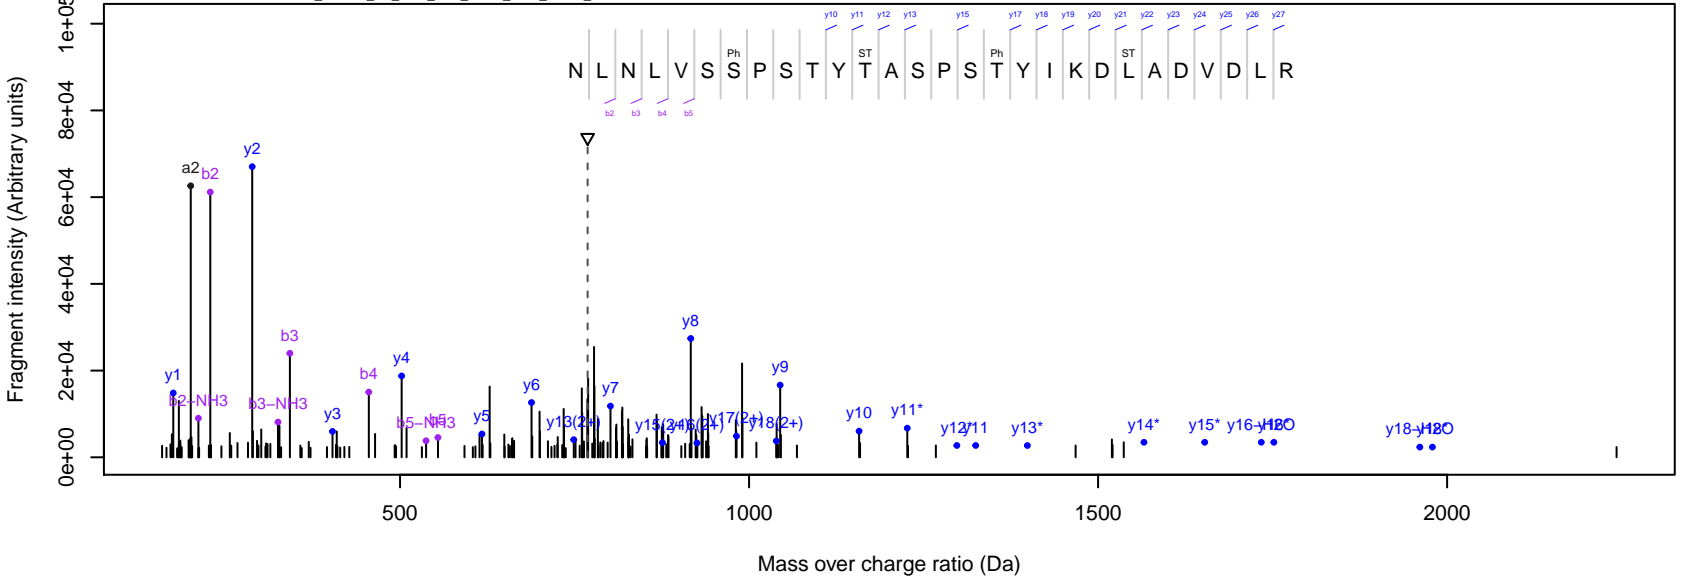

GLRDSHS(Phospho (STY))S(Phospho (STY))EEDEASSQTDLSTISKK-3+

Source : QE3\_201126\_FR\_TiOx\_hum\_tissue\_Urea\_RNAB\_N Scan : 16972

Andromeda score : 137.47

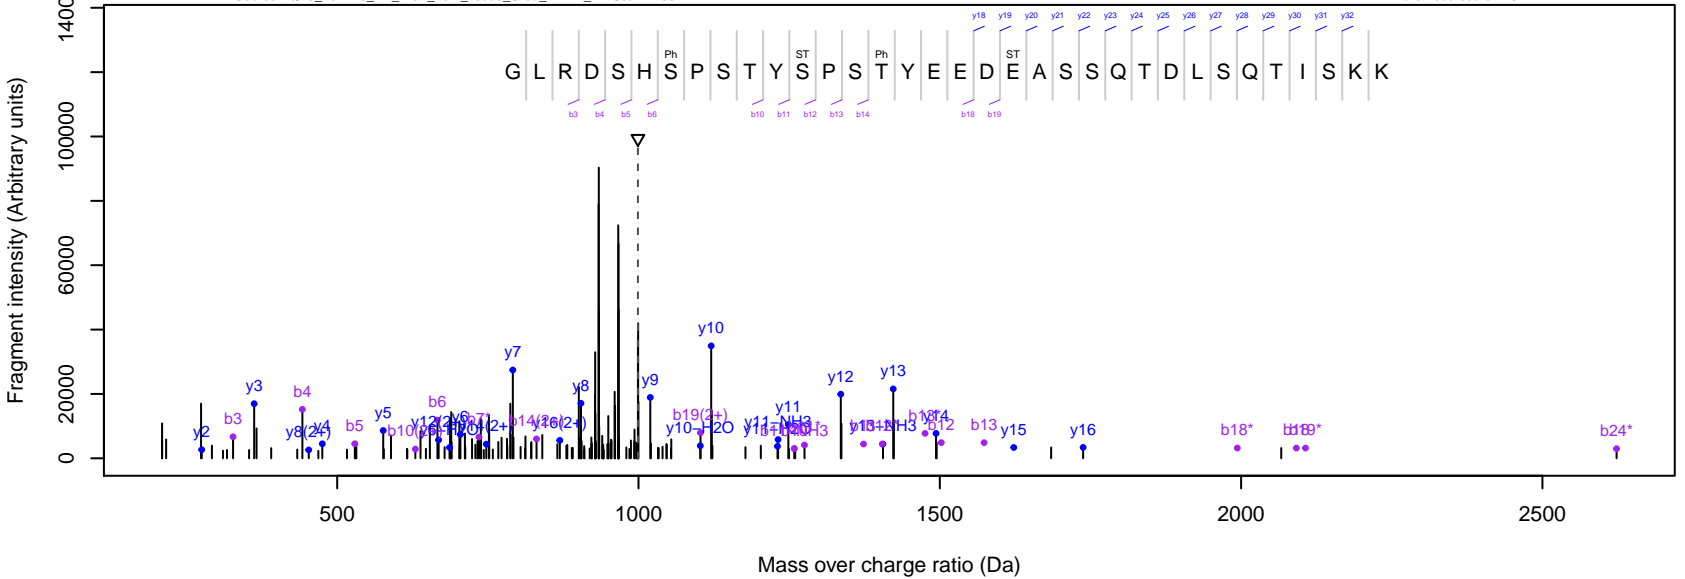

NKPRPPPLSPLGGPVPSALPNGPPS(Phospho (STY))PR-4+

Source : QE3\_201126\_FR\_TIOx\_hum\_tissue\_Urea\_RNAB\_N Scan : 35212

Andromeda score : 137.47

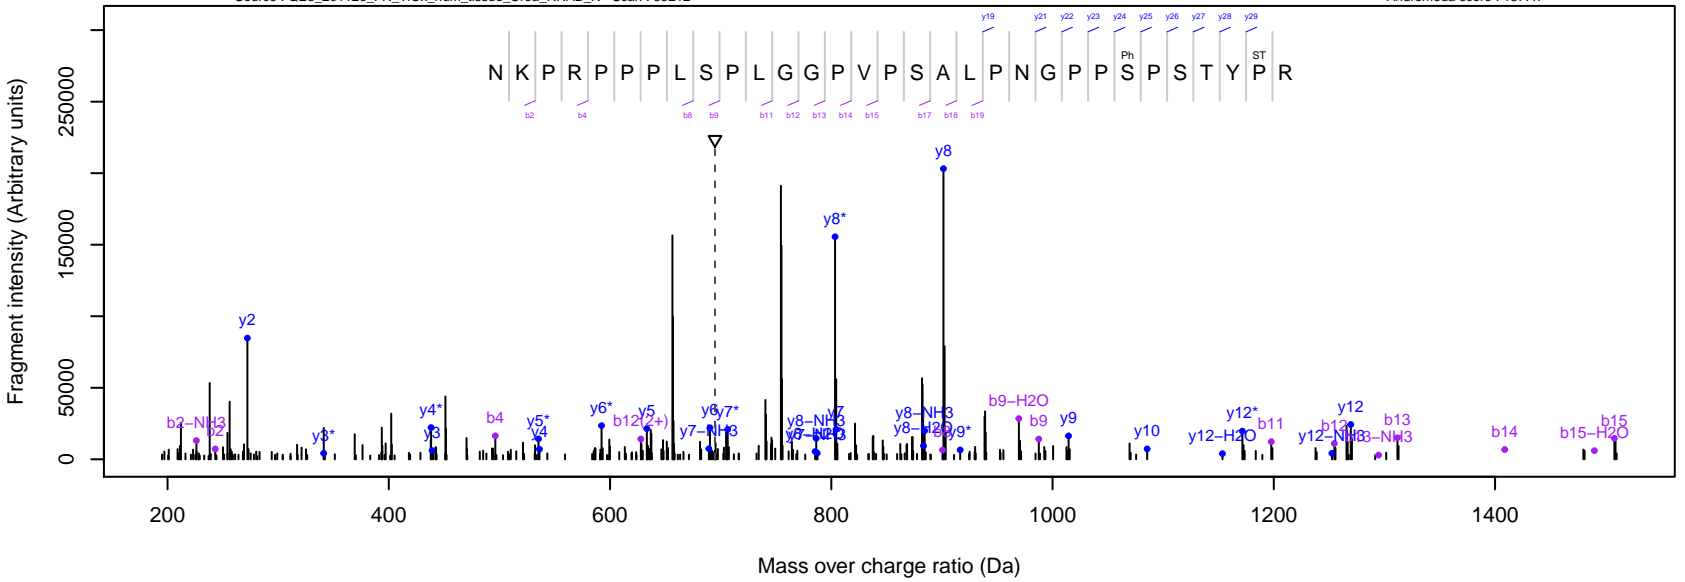

CRS(Phospho (STY))PGM(Oxidation (M))LEPLGSSR-2+

Source : QE3\_201126\_FR\_TIOx\_hum\_tissue\_Urea\_RNAB\_H Scan : 15271

Andromeda score : 137.46

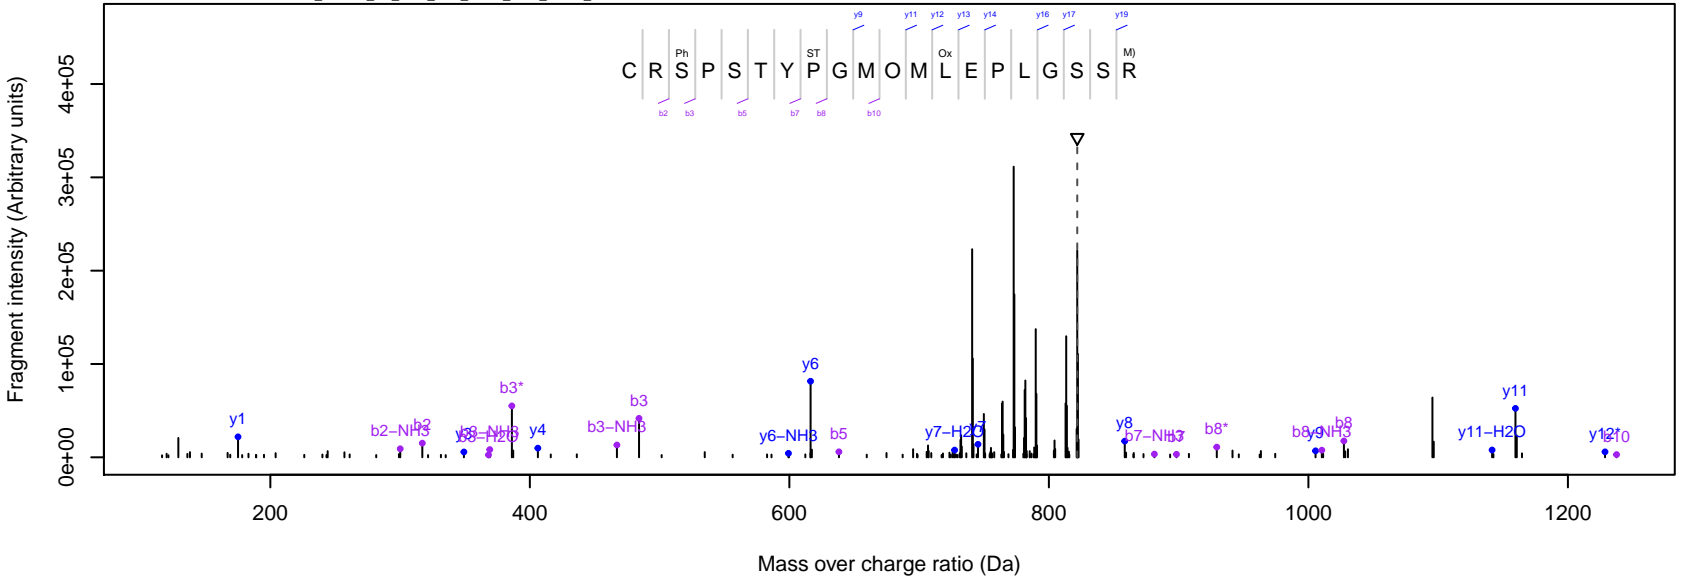

RTFQQIEEEDDYPGSYS(Phospho (STY))PQDPSAGPLLTEELIK-3+

Source : QE3\_201126\_FR\_TIOx\_hum\_tissue\_Urea\_RNAB\_H Scan : 52866

Andromeda score : 137.46

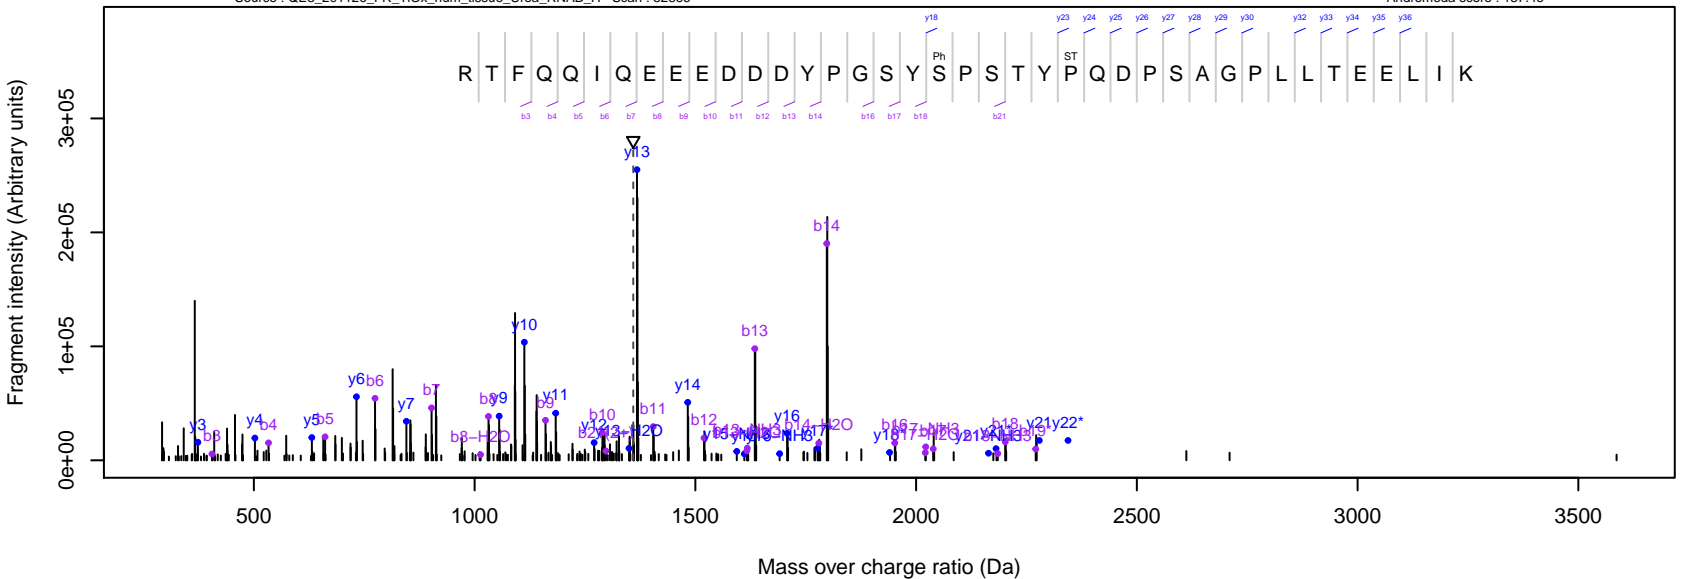

GLQAQIAS(Phospho (STY))SGLT(Phospho (STY))VEVDAPK-2+

Source : QE3\_201126\_FR\_TIOx\_hum\_tissue\_Urea\_RNAB\_N Scan : 46812

Andromeda score : 137.45

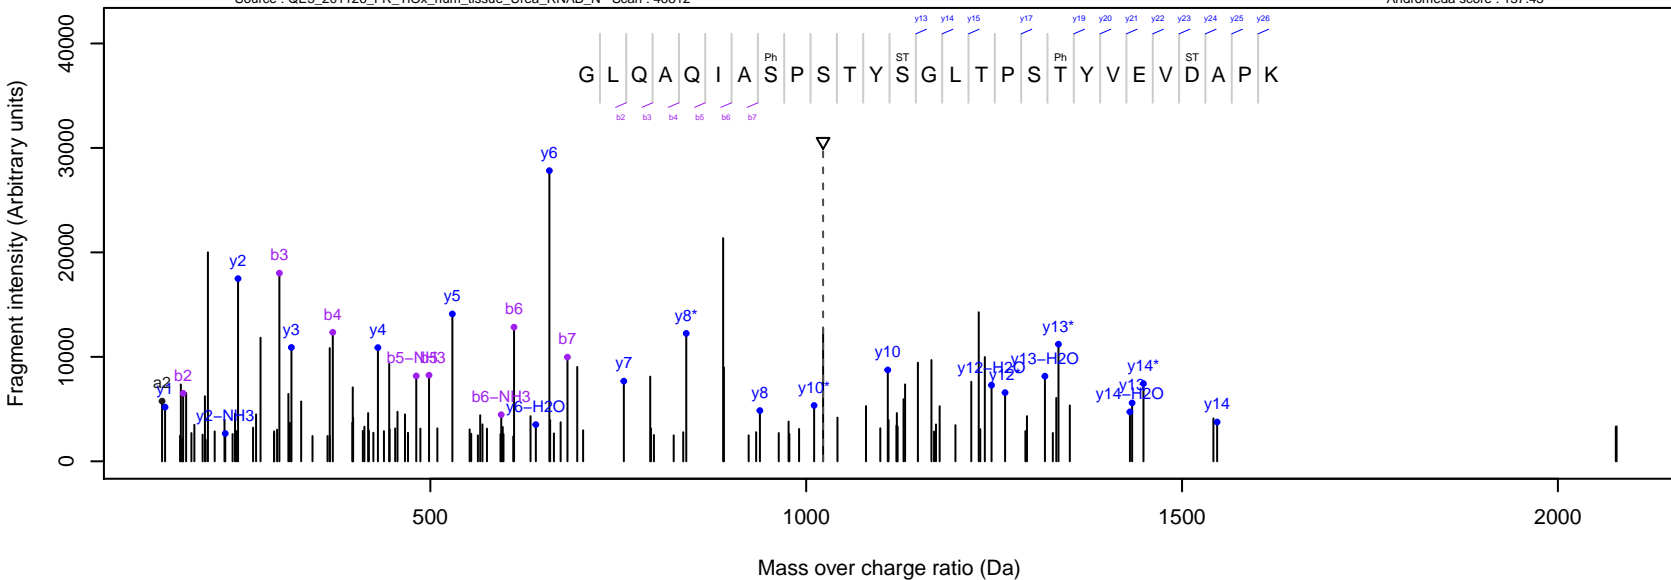

AATS(Phospho (STY))PAPGSDATAR-2+

Source : QE3\_201126\_FR\_TIOx\_hum\_tissue\_Urea\_RNAB\_H Scan : 9727

Andromeda score : 137.33

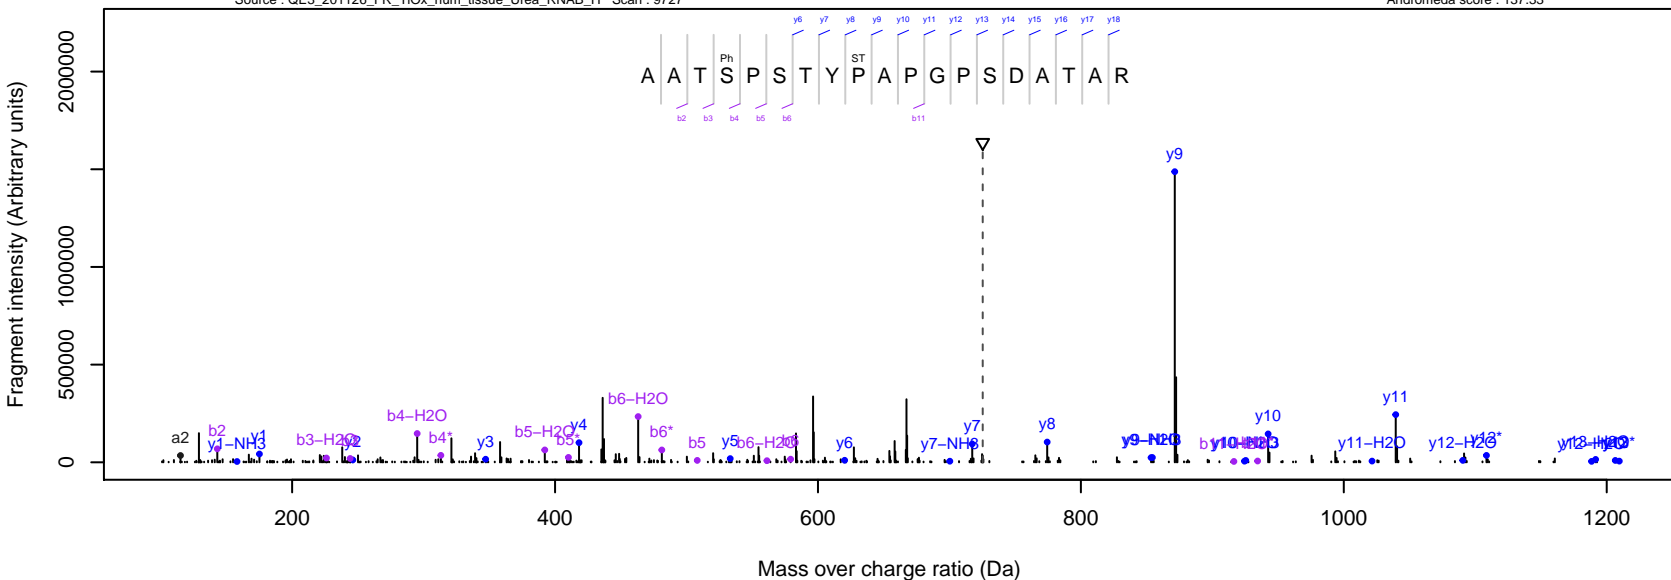

AKEEMS(Phospho (STY))LSDLNSQDRVDHEEWEMVPR-4+

Source : QE3\_201126\_FR\_TIOx\_hum\_tissue\_Urea\_RNAB\_N Scan : 36320

Andromeda score : 137.25

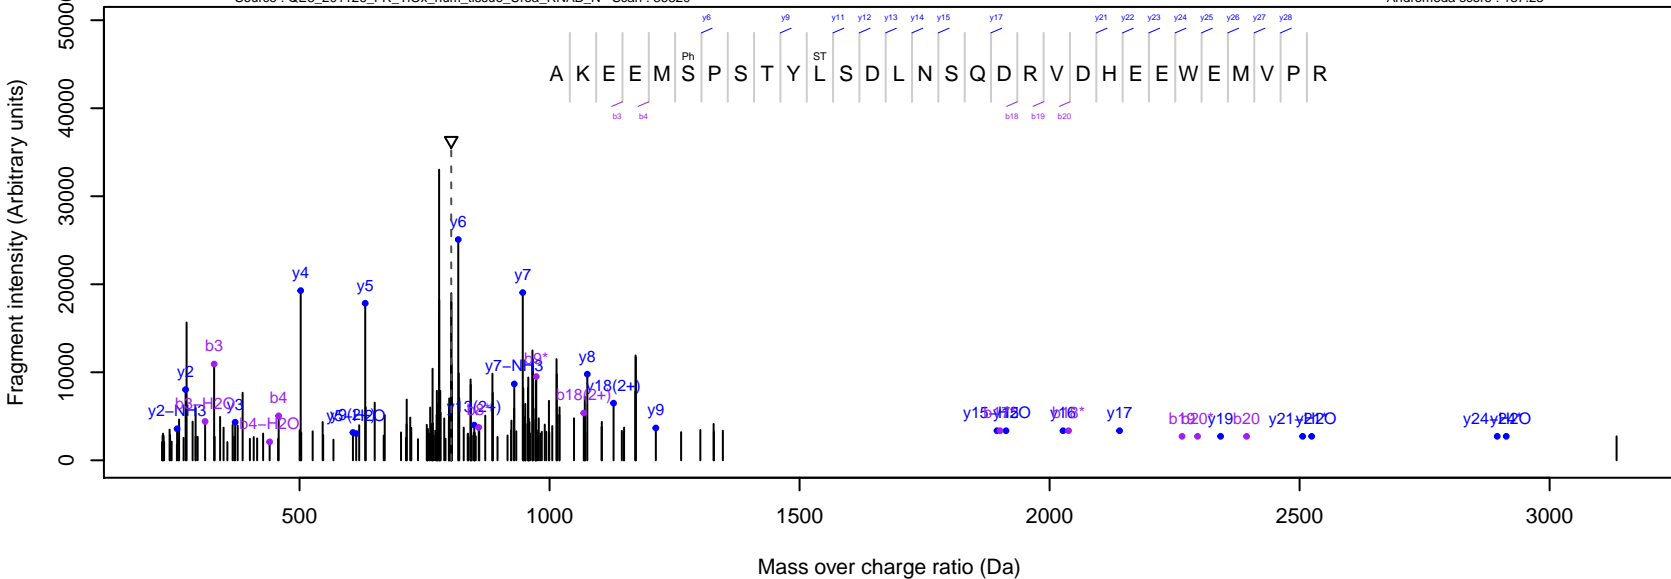

ENVEYIEREES(Phospho (STY))DGEYDFGRK-3+

Source : QE3\_201126\_FR\_TiOx\_hum\_tissue\_Urea\_RNAB\_H Scan : 25463

Andromeda score : 137.24

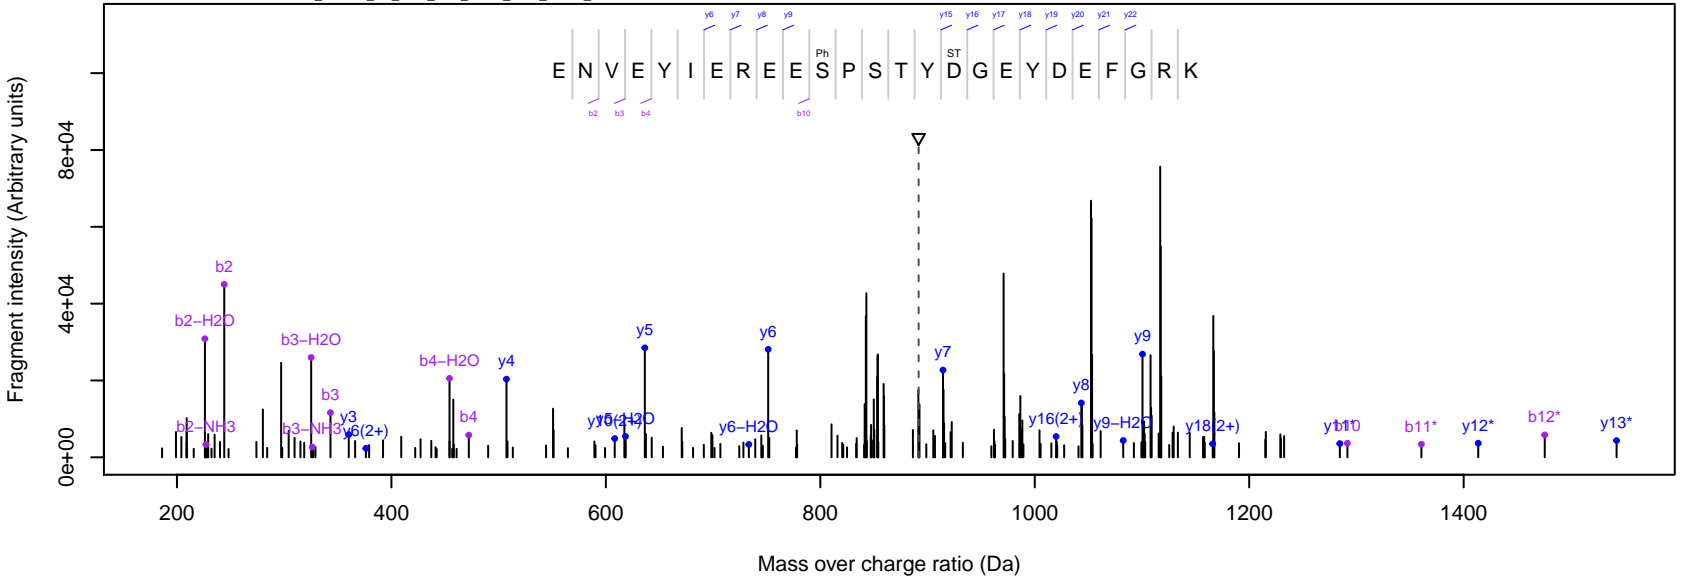

RSTS(Phospho (STY))PIIGSPVVR-2+

Source : QE3\_201126\_FR\_TiOx\_hum\_tissue\_Urea\_RNAB\_H Scan : 16472

Andromeda score : 137.21

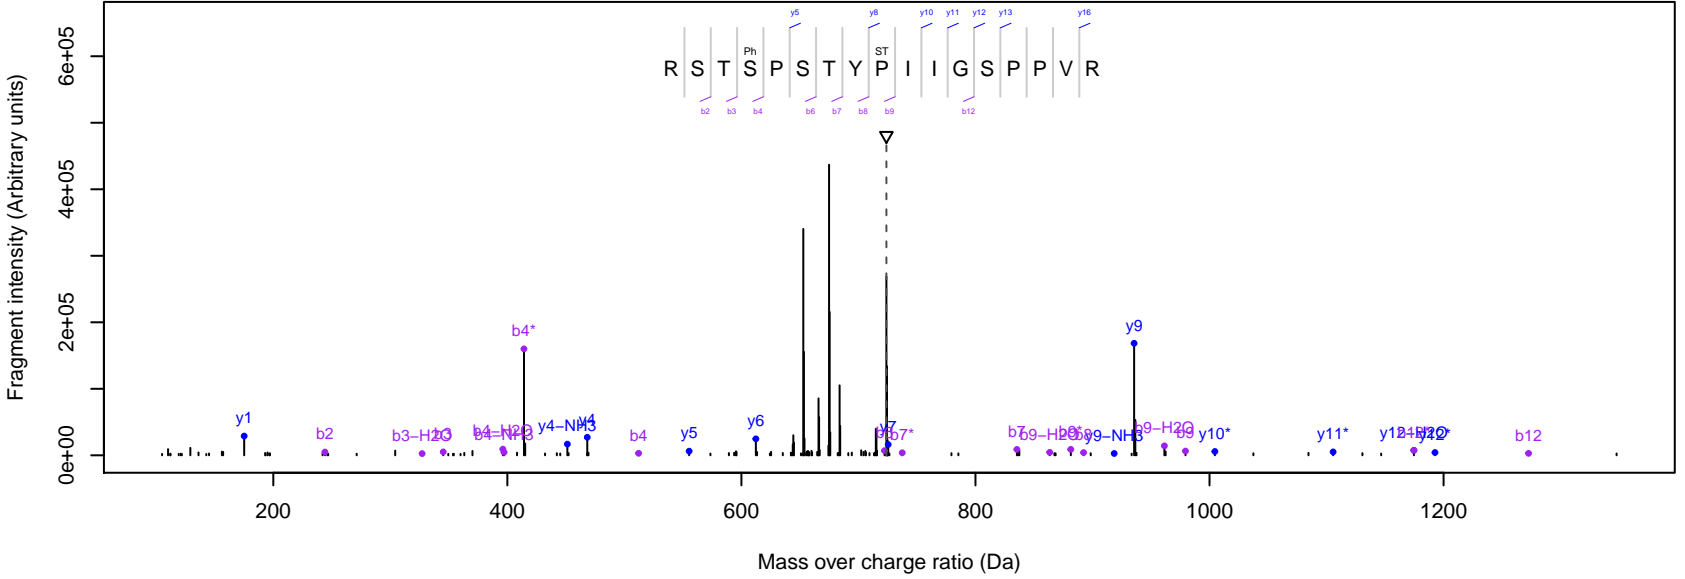

GIGFDIFKEGS(Phospho (STY))VK-2+

Source : QE3\_201126\_FR\_TiOx\_hum\_tissue\_Urea\_RNAB\_H Scan : 42722

Andromeda score : 137.19

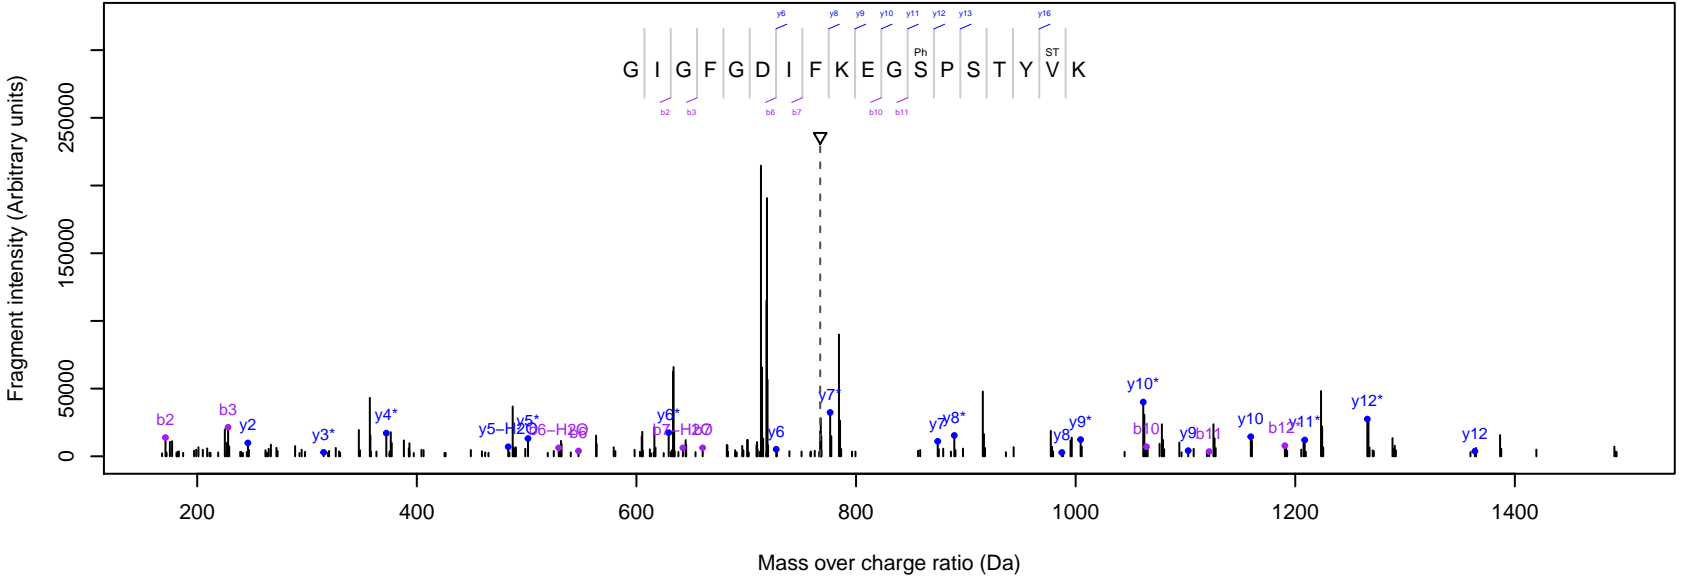

**GQLS(Phospho (STY))DDEKFLFVDK-2+**

Source : QE3\_201126\_FR\_TiOx\_hum\_tissue\_Urea\_RNAB\_N Scan : 44846

Andromeda score : 137.19

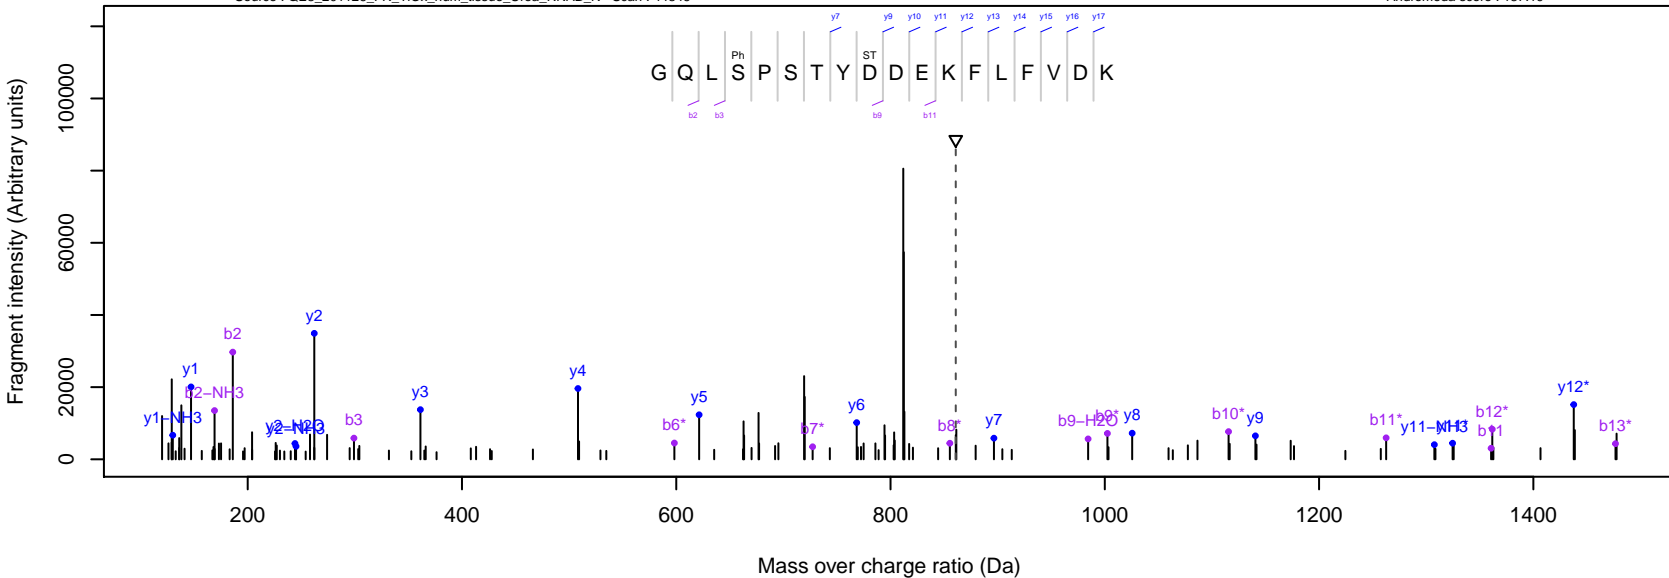

**KSS(Phospho (STY))TGSPTSPLNAEK-2+**

Source : QE3\_201126\_FR\_TiOx\_hum\_tissue\_Urea\_RNAB\_H Scan : 9441

Andromeda score : 137.17

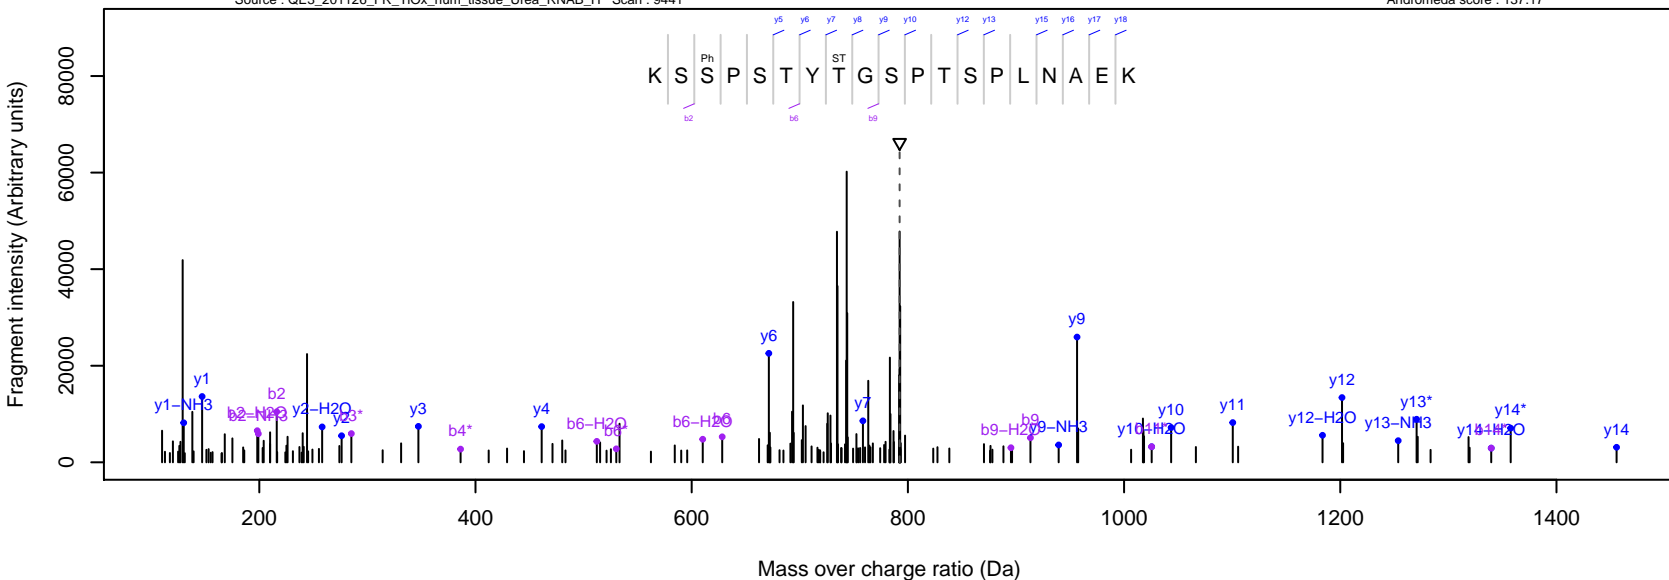

**EGT(Phospho (STY))GQQERESPRPLQLPGAEGPAISPSTYDGE(Phospho (STY))EGGGEPGAGGGAAGAAGR-4+**

Source : QE3\_201126\_FR\_TiOx\_hum\_tissue\_Urea\_RNAB\_N Scan : 33377

Andromeda score : 137.15

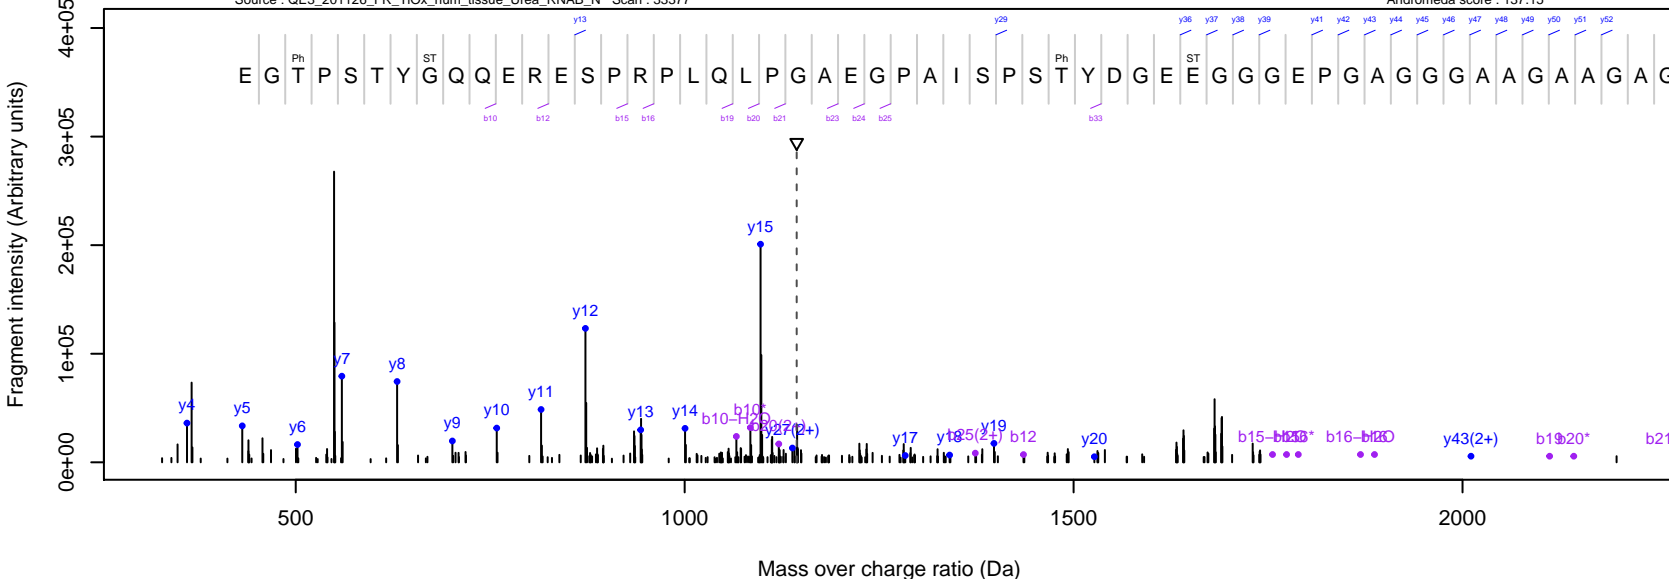



LITSFLELHCLESPTELSQSS(Phospho (STY))DSEAGDPASQS-3+

Source : QE3\_201126\_FR\_TiOx\_hum\_tissue\_Urea\_RNAB\_H Scan : 59275

Andromeda score : 137.03

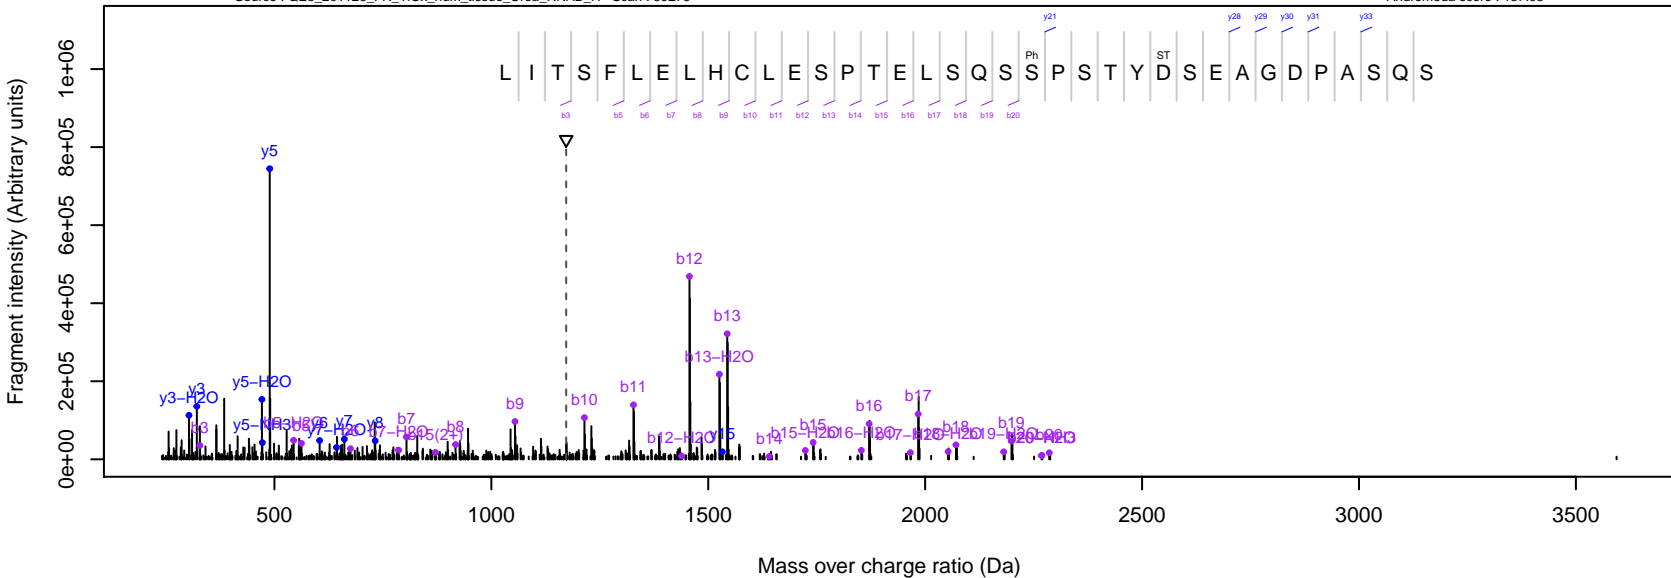

QLS(Phospho (STY))LPLTQSK-2+

Source : QE3\_201126\_FR\_TiOx\_hum\_tissue\_Urea\_RNAB\_H Scan : 32604

Andromeda score : 137.01

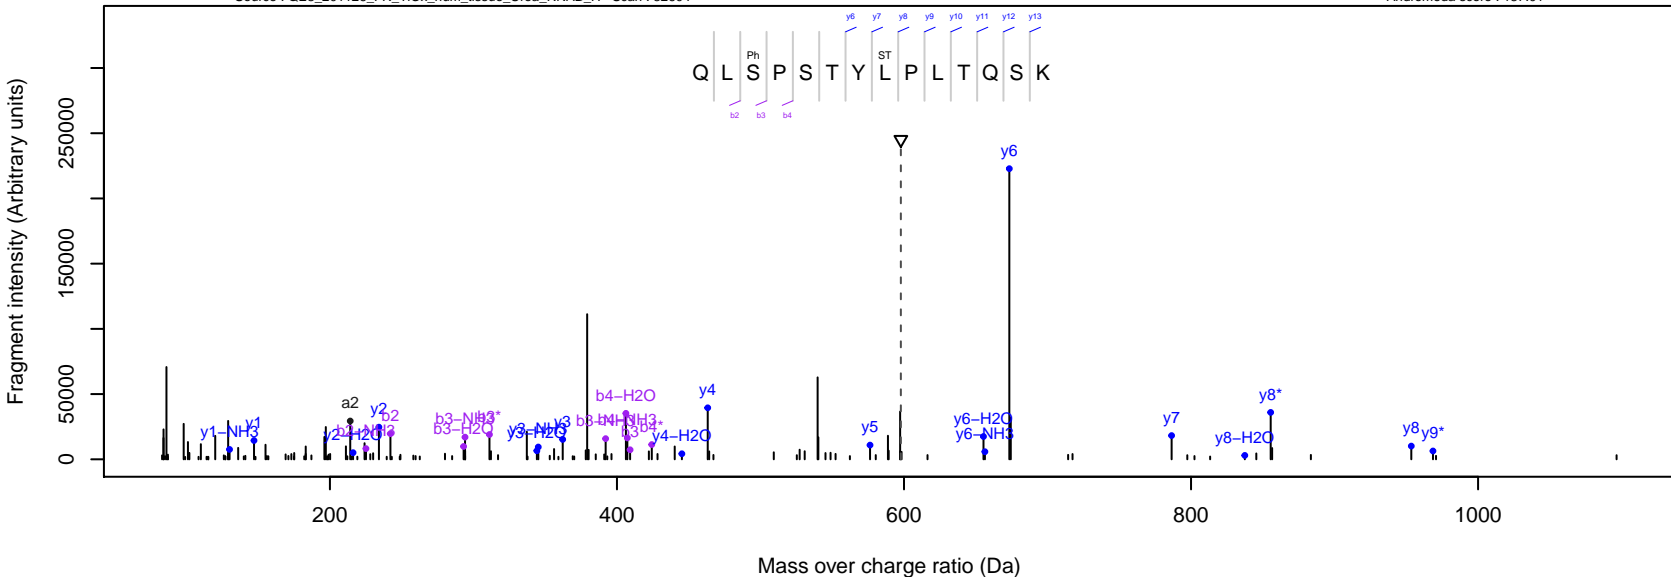

NASASFQELEDKKELES(Phospho (STY))EES(Phospho (STY))EDELQLEEFMLK-3+

Source : QE3\_201126\_FR\_TiOx\_hum\_tissue\_Urea\_RNAB\_N Scan : 54879

Andromeda score : 136.99

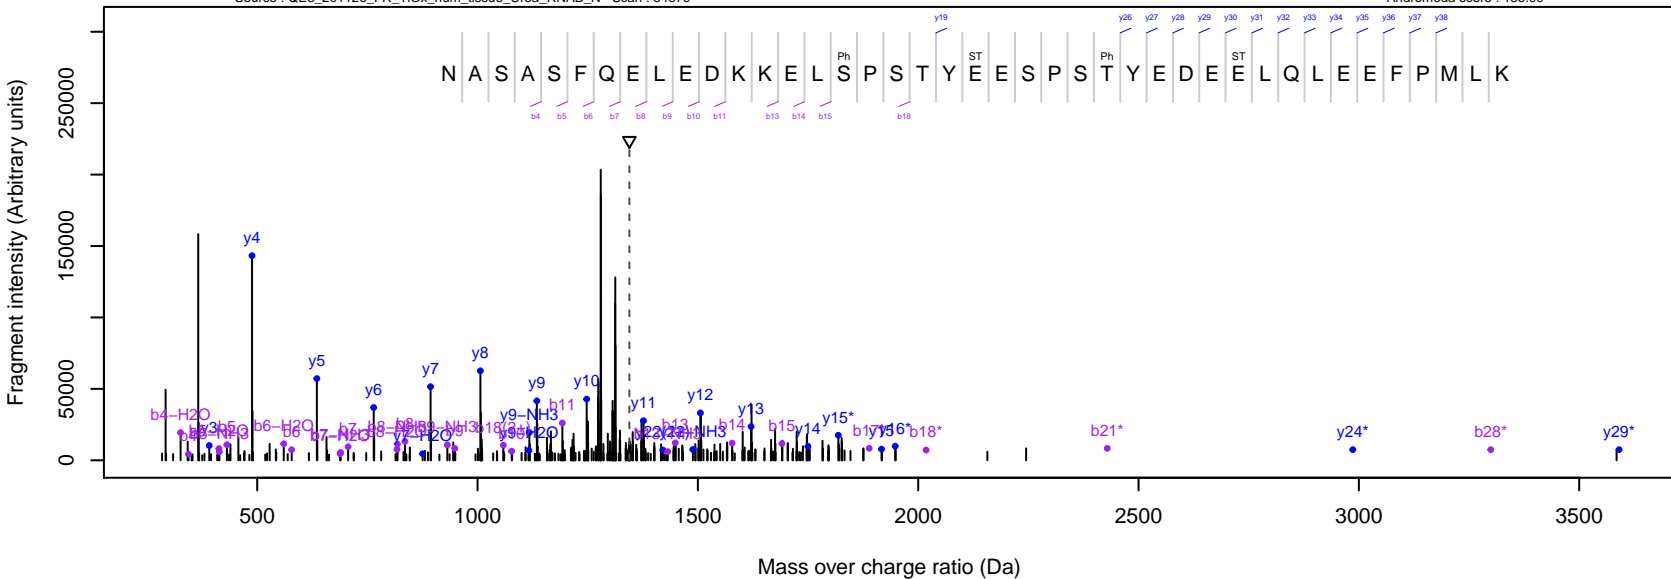

GFEGS(Phospho (STY))FEELCR-2+

Source : QE3\_201126\_FR\_TiOx\_hum\_tissue\_Urea\_RNAB\_N Scan : 35990

Andromeda score : 136.96

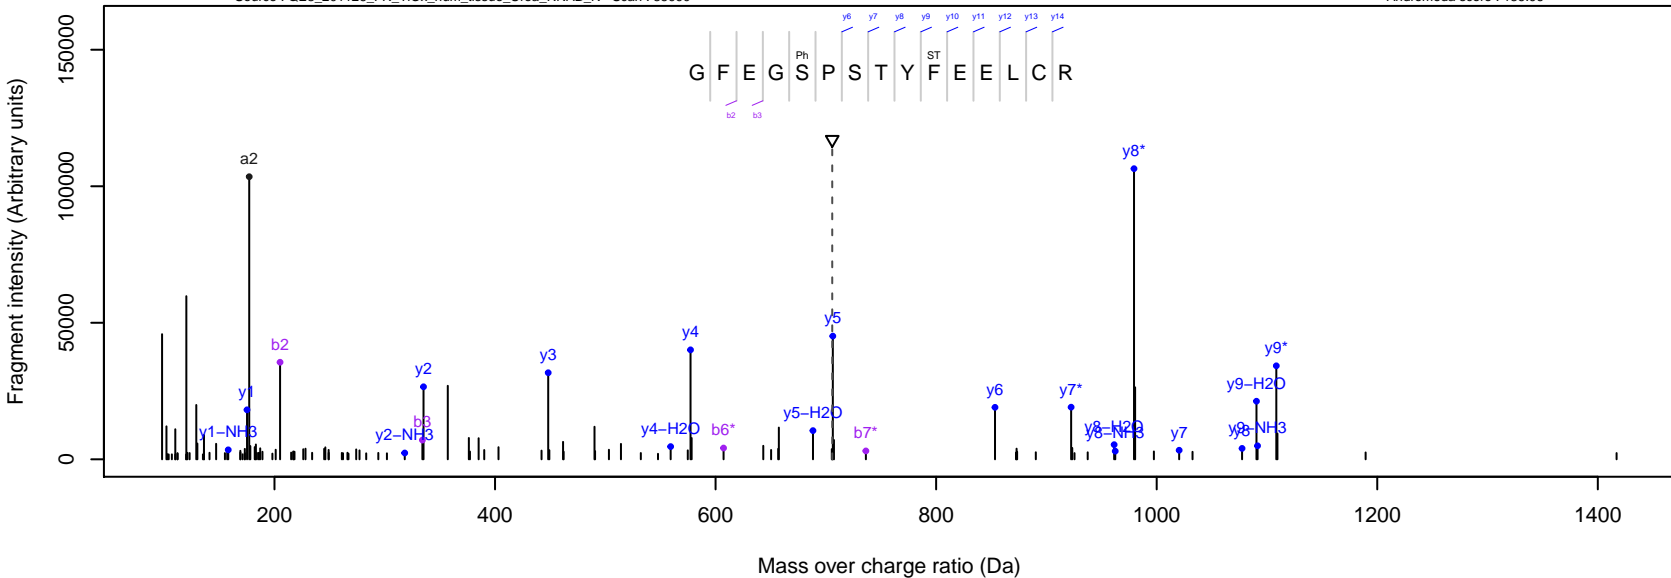

FGS(Phospho (STY))NINLEADES-2+

Source : QE3\_201126\_FR\_TiOx\_hum\_tissue\_Urea\_RNAB\_N Scan : 45550

Andromeda score : 136.93

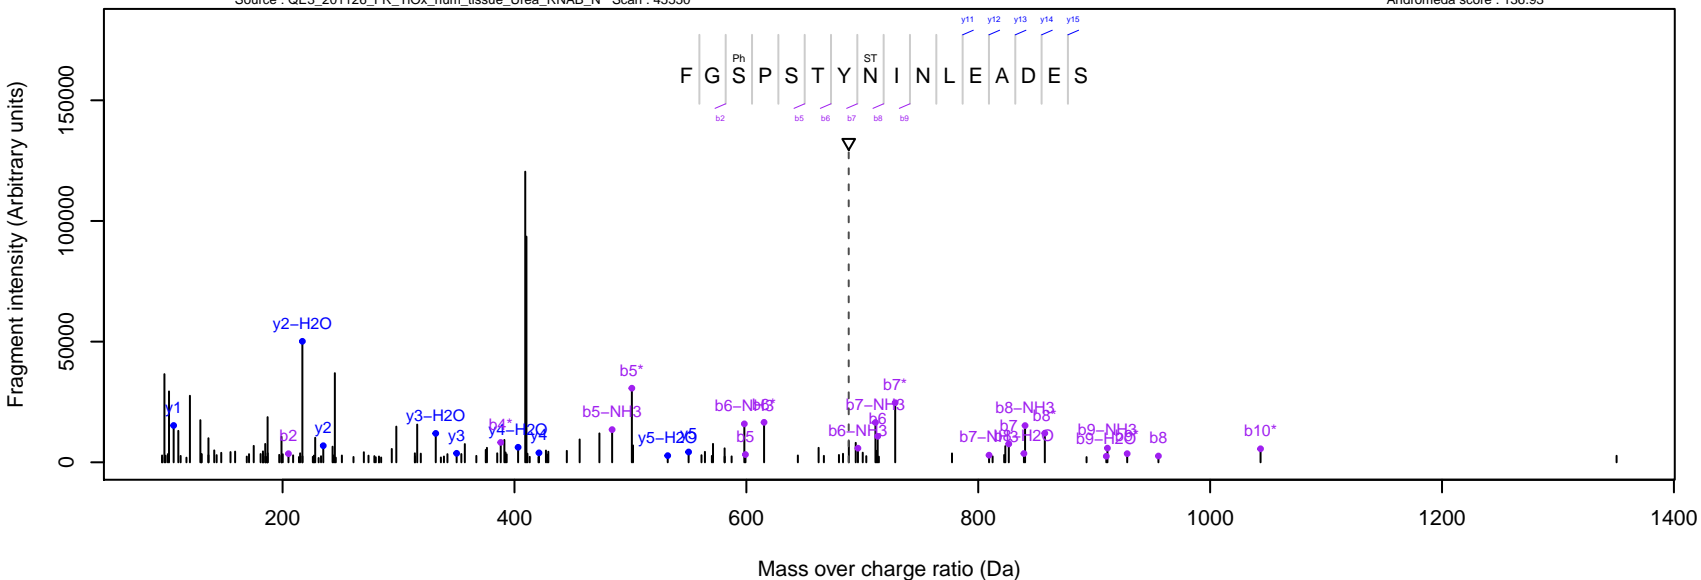

GNS(Phospho (STY))DGYIIPINK-2+

Source : QE3\_201126\_FR\_TiOx\_hum\_tissue\_Urea\_RNAB\_H Scan : 34286

Andromeda score : 136.93

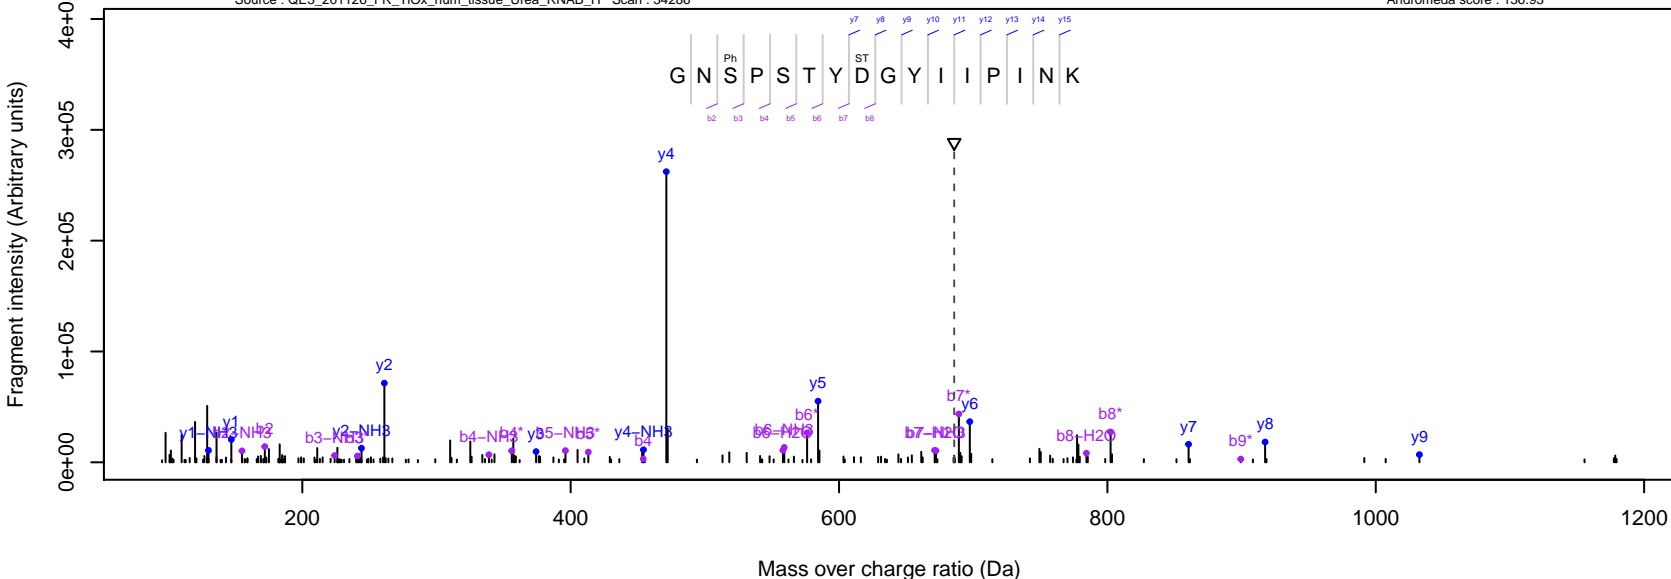

**KAIS(Phospho (STY))SANLLVR-2+**

Source : QE3\_201126\_FR\_TiOx\_hum\_tissue\_Urea\_RNAB\_H Scan : 21355

Andromeda score : 136.92

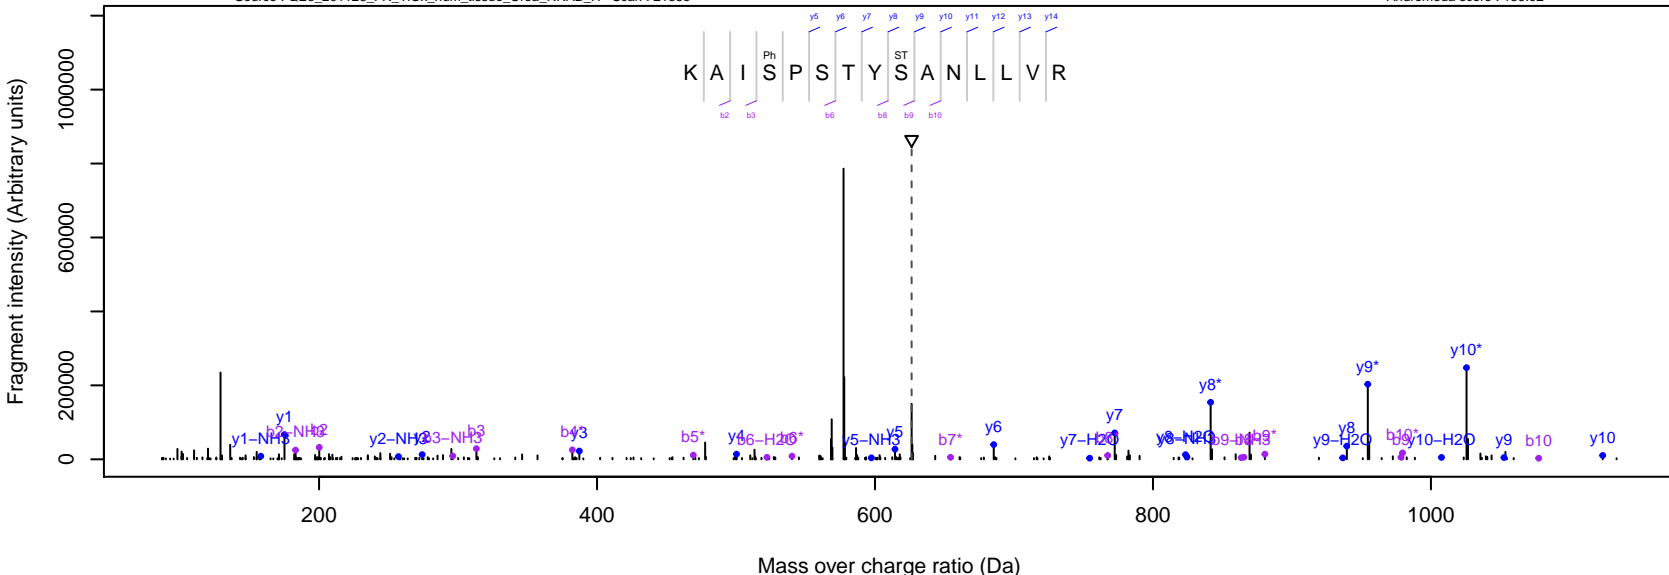

**LGEVTGSPS(Phospho (STY))PPPR-2+**

Source : QE3\_201126\_FR\_TiOx\_hum\_tissue\_Urea\_RNAB\_H Scan : 17320

Andromeda score : 136.83

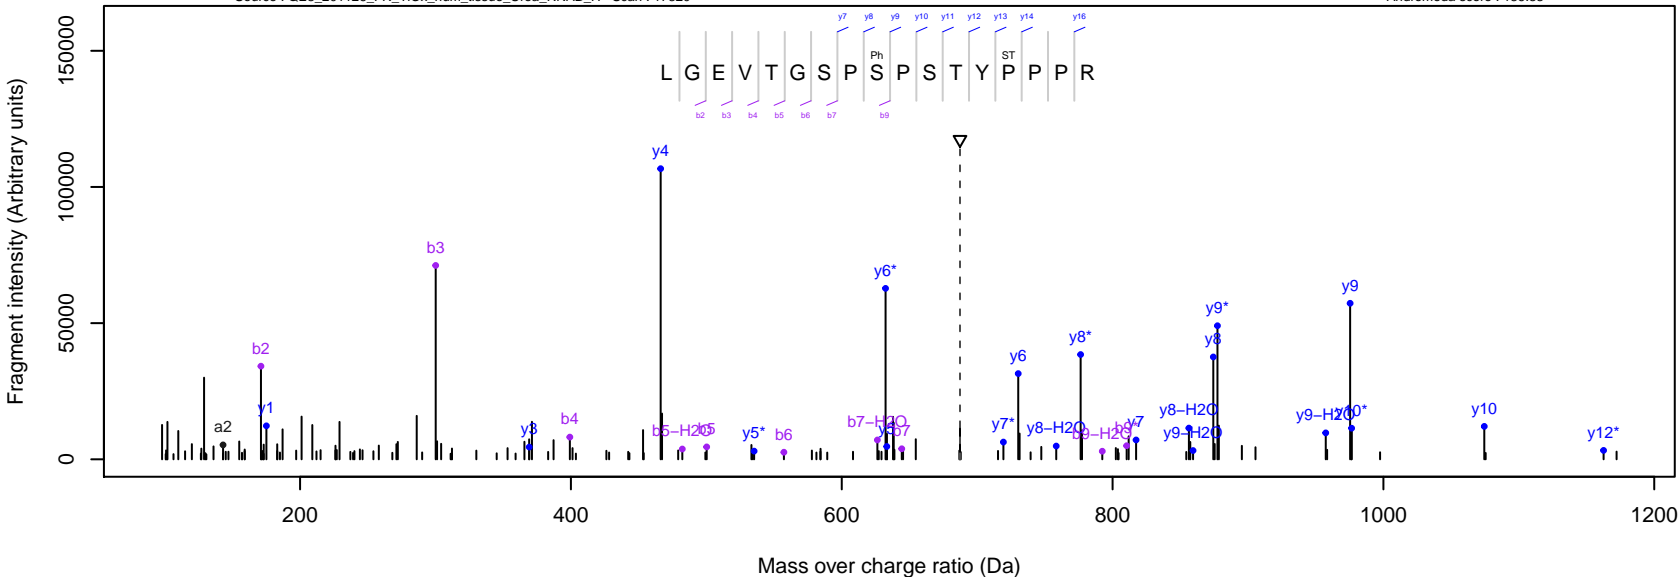

**SLPGES(Phospho (STY))EEMM(Oxidation (M))EVDQVTLYSYK-2+**

Source : QE3\_201126\_FR\_TiOx\_hum\_tissue\_Urea\_RNAB\_H Scan : 53953

Andromeda score : 136.72

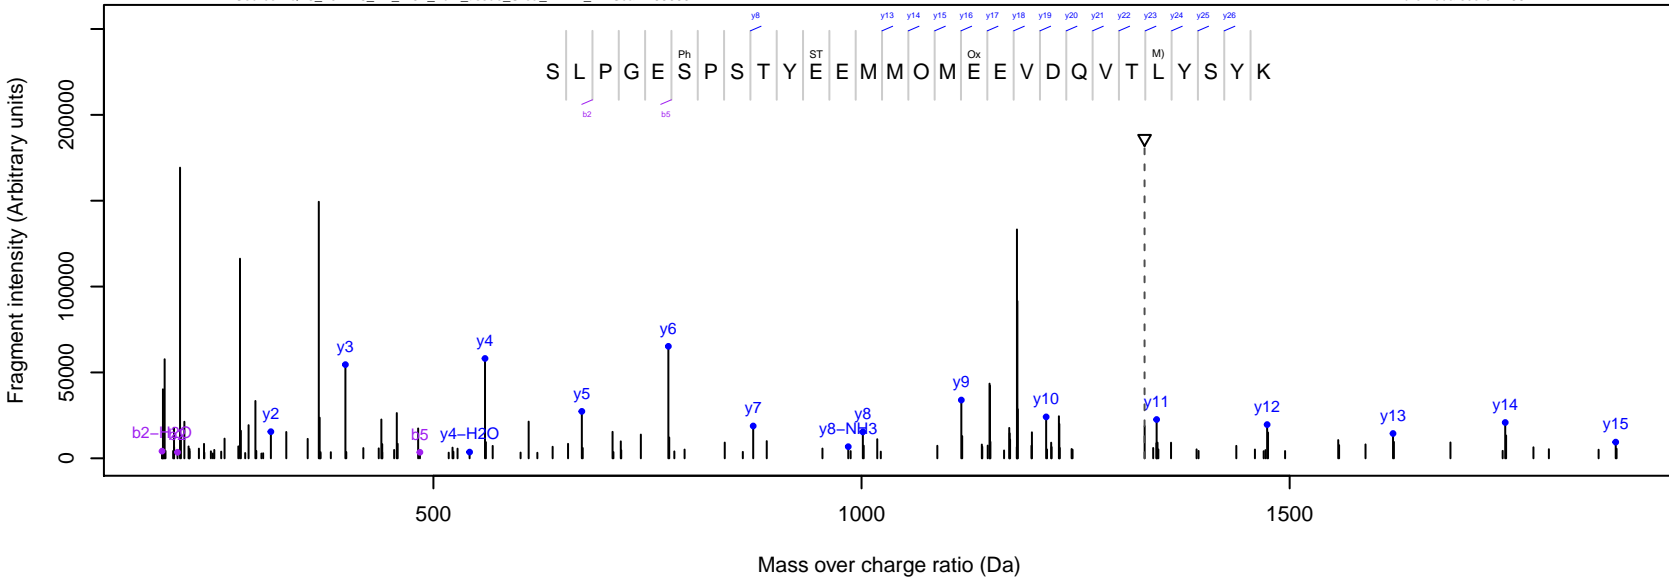

LITSFLELHCLSPTELSQSS(Phospho (STY))DS(Phospho (STY))EAGDPASQS-3+

Source : QE3\_201126\_FR\_TIOx\_hum\_tissue\_Urea\_RNAB\_H Scan : 62722

Andromeda score : 136.67

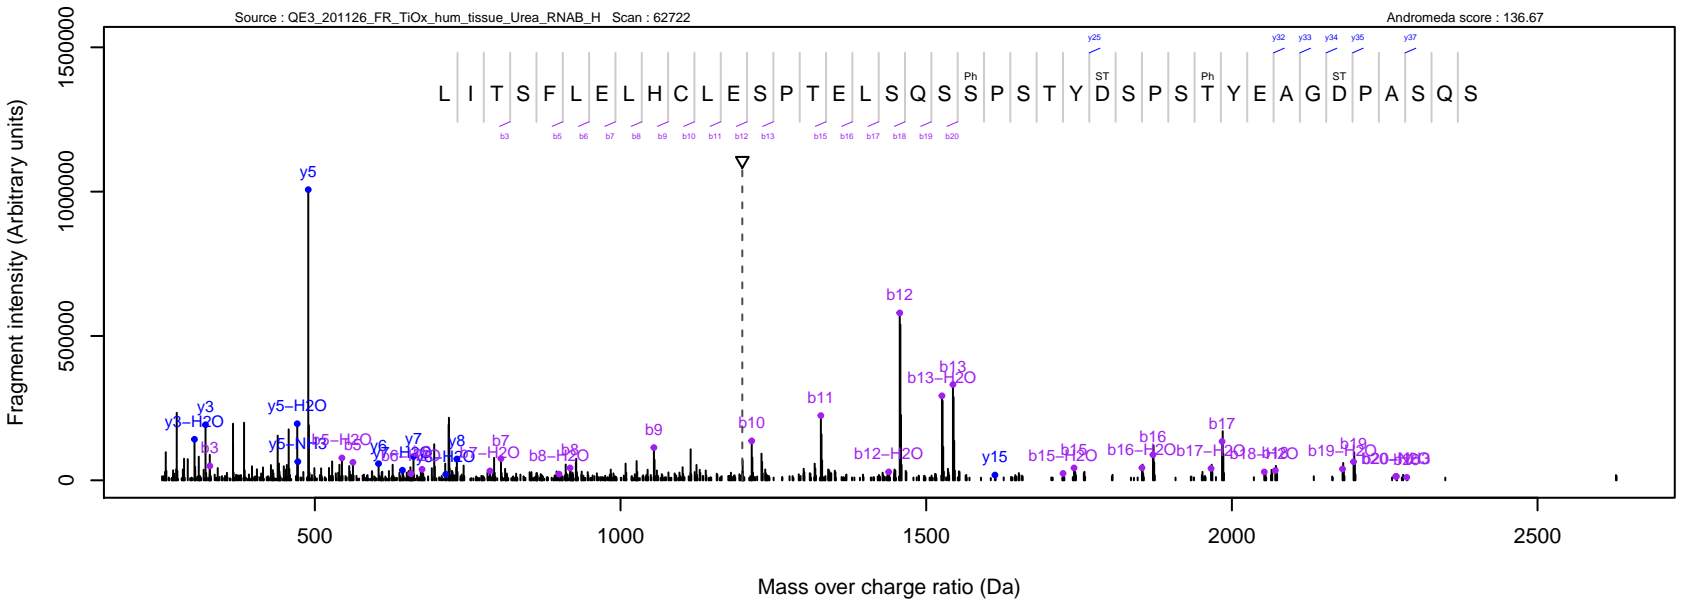

LKFS(Phospho (STY))DEEDGRDS(Phospho (STY))DEEGAEGHR-3+

Source : QE3\_201126\_FR\_TIOx\_hum\_tissue\_Urea\_RNAB\_H Scan : 12841

Andromeda score : 136.67

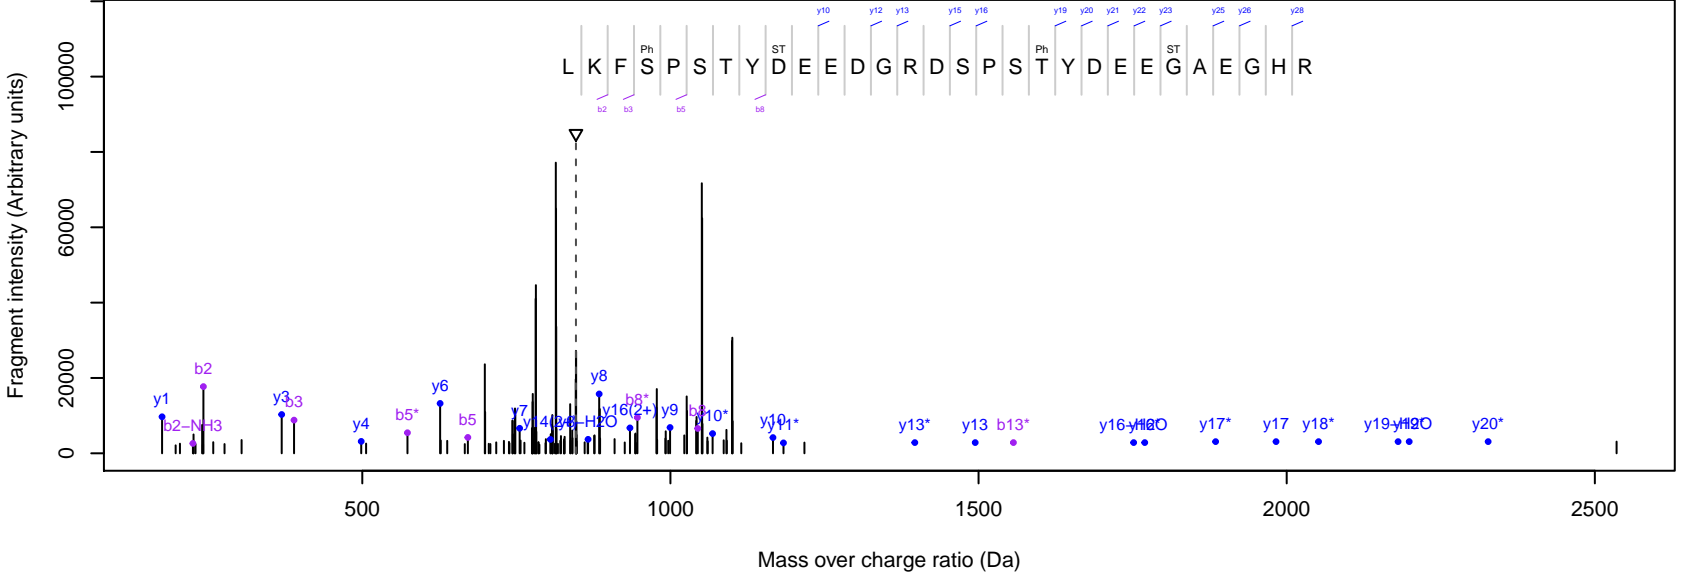

ALGGEDS(Phospho (STY))ENEEELGDEAM(Oxidation (M))M(Oxidation (M))ALDQSLASLFAEQK-3+

Source : QE3\_201126\_FR\_TIOx\_hum\_tissue\_Urea\_RNAB\_H Scan : 62888

Andromeda score : 136.63

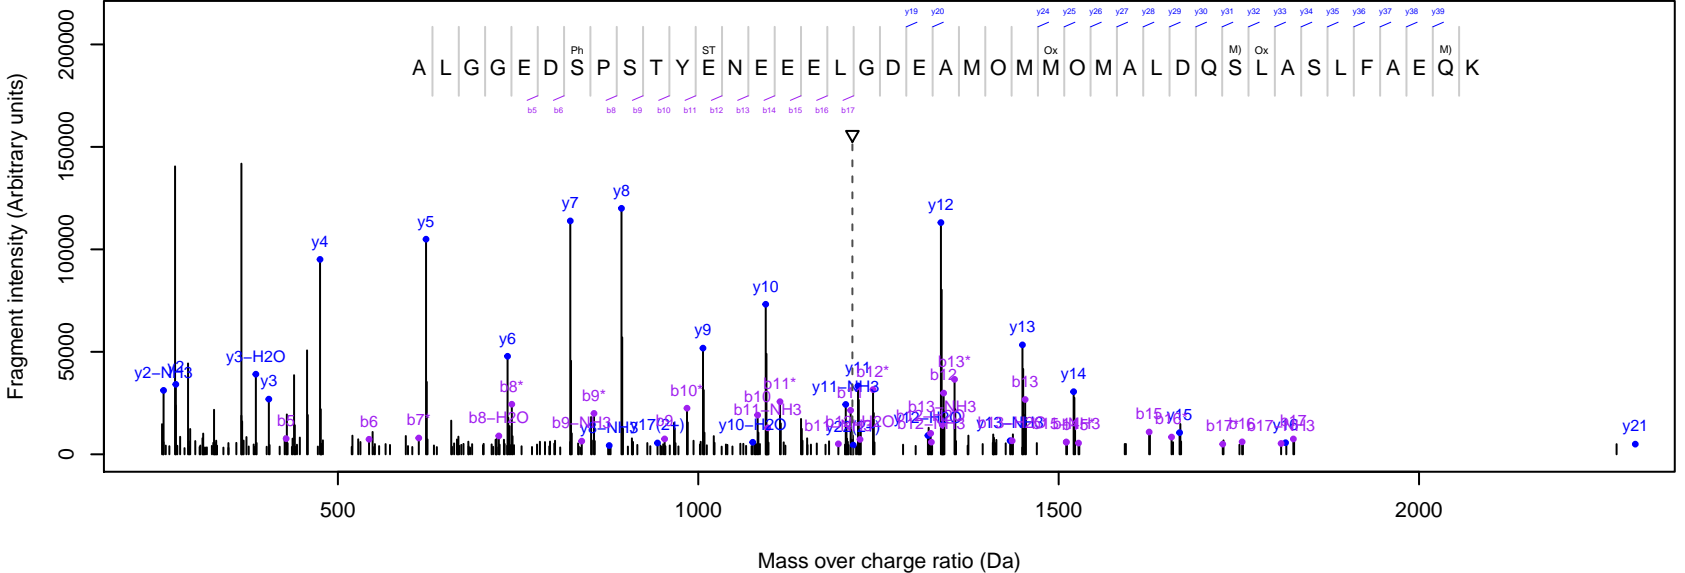

(Acetyl (Protein N-term))MLQQDS(Phospho (STY))NDDTEDVSLFDAEEETTNRPR-3+

Source : QE3\_201126\_FR\_TiOx\_hum\_tissue\_Urea\_RNAB\_B Scan : 54156

Andromeda score : 136.63

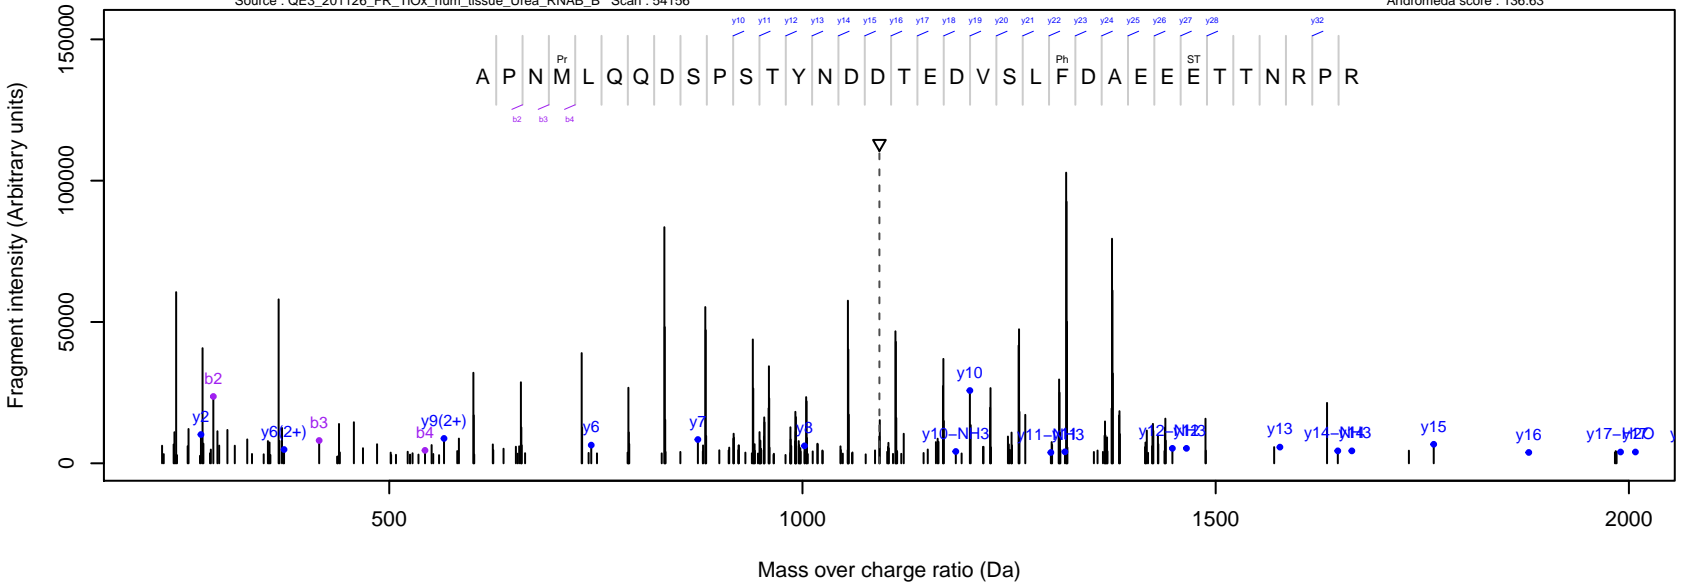

RLEIS(Phospho (STY))PDSS(Phospho (STY))PERAHYTHSDYQYSQR-4+

Source : QE3\_201126\_FR\_TiOx\_hum\_tissue\_Urea\_RNAB\_N Scan : 18112

Andromeda score : 136.63

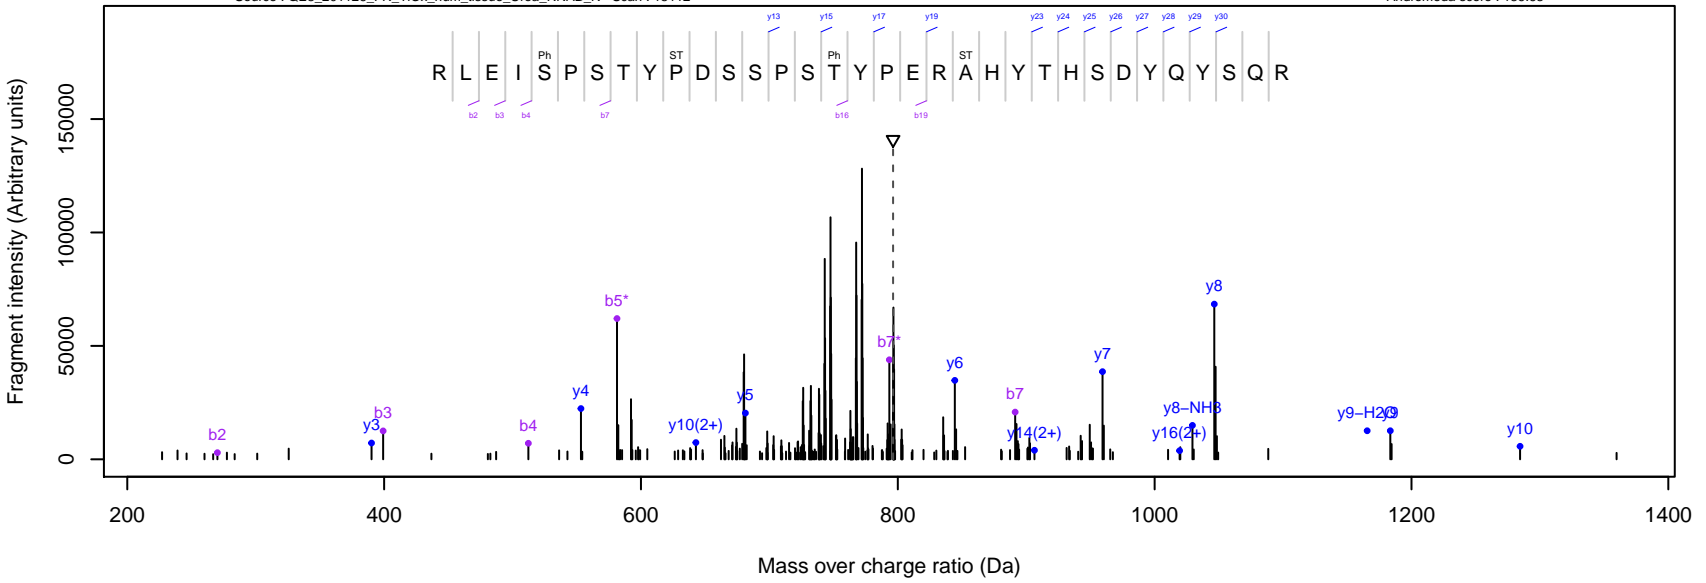

AEDGATPSPSPSNETPSTYPKK-3+

Source : QE3\_201126\_FR\_TiOx\_hum\_tissue\_Urea\_RNAB\_H Scan : 5215

Andromeda score : 136.61

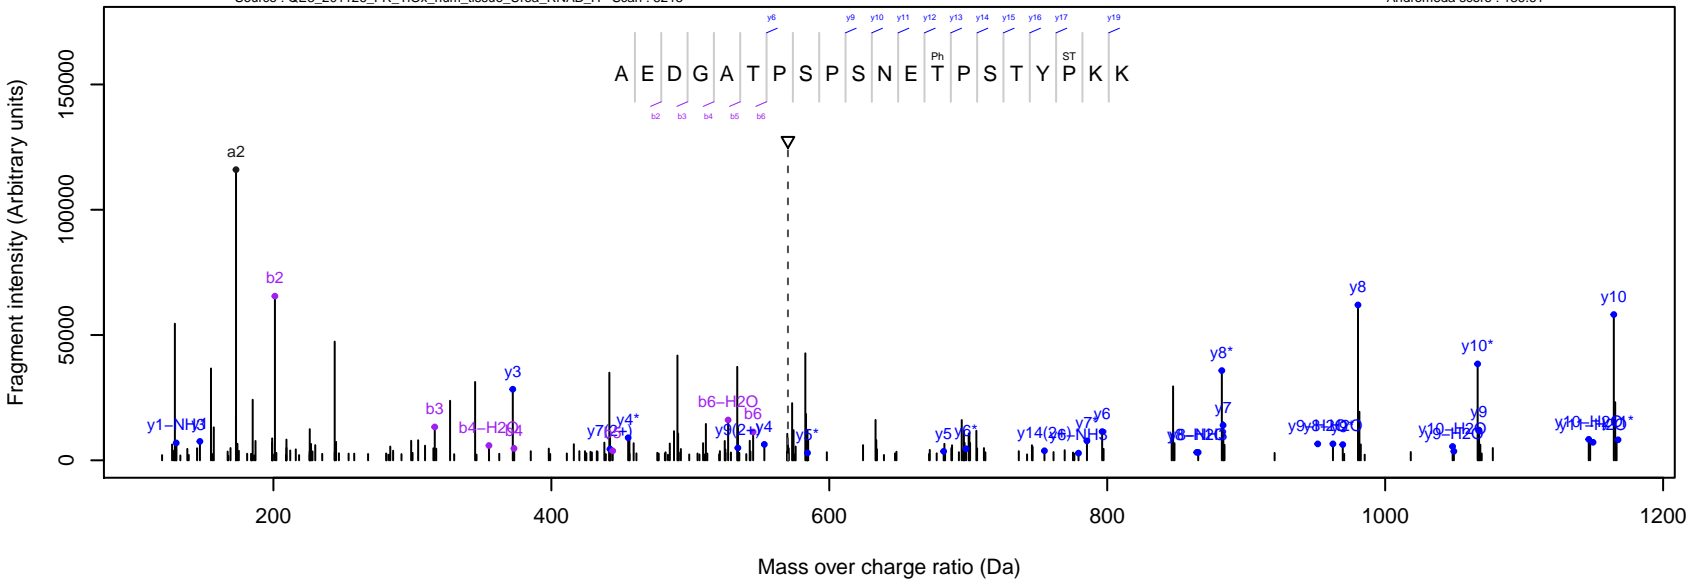

YSPTS(Phospho (STY))PTYSTSPK-2+

Source : QE3\_201126\_FR\_TiOx\_hum\_tissue\_Urea\_RNAB\_B Scan : 19608

Andromeda score : 136.6

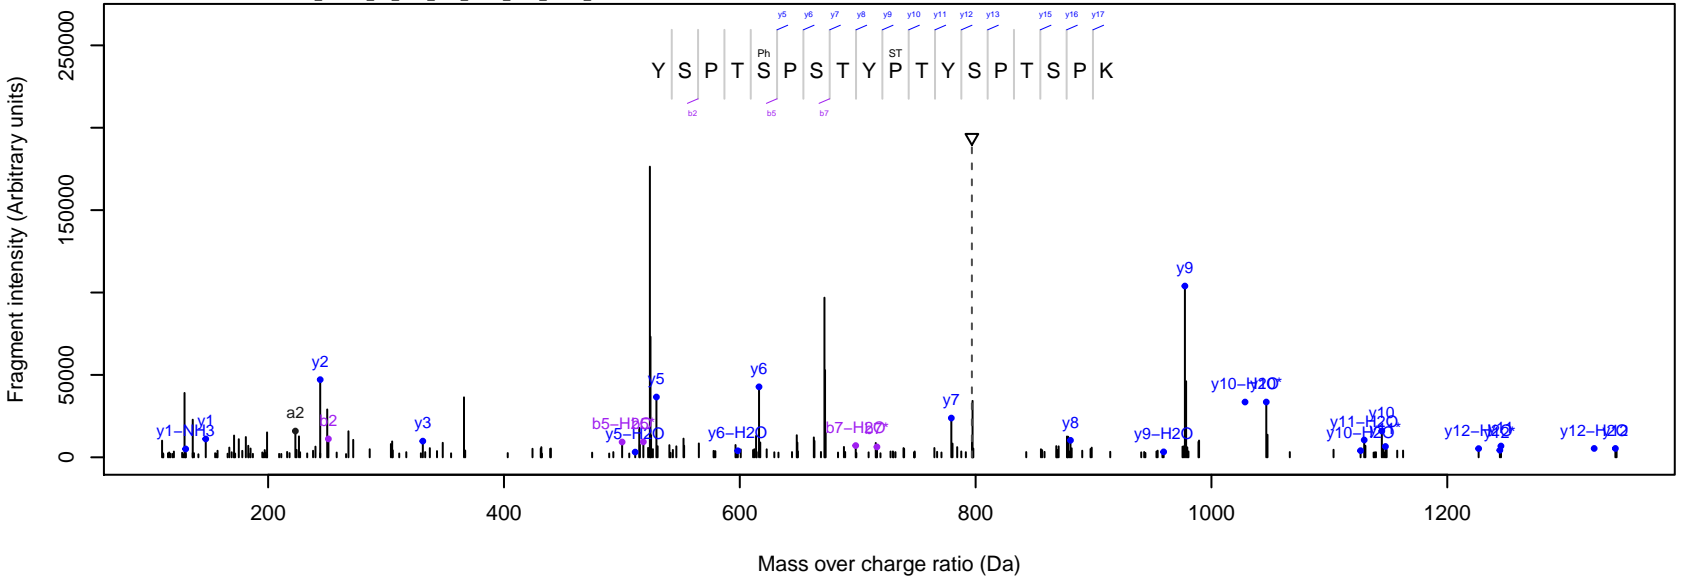

SCYNLTNPDSGRGS(Phospho (STY))S(Phospho (STY))LLDR-3+

Source : QE3\_201126\_FR\_TiOx\_hum\_tissue\_Urea\_RNAB\_N Scan : 32835

Andromeda score : 136.57

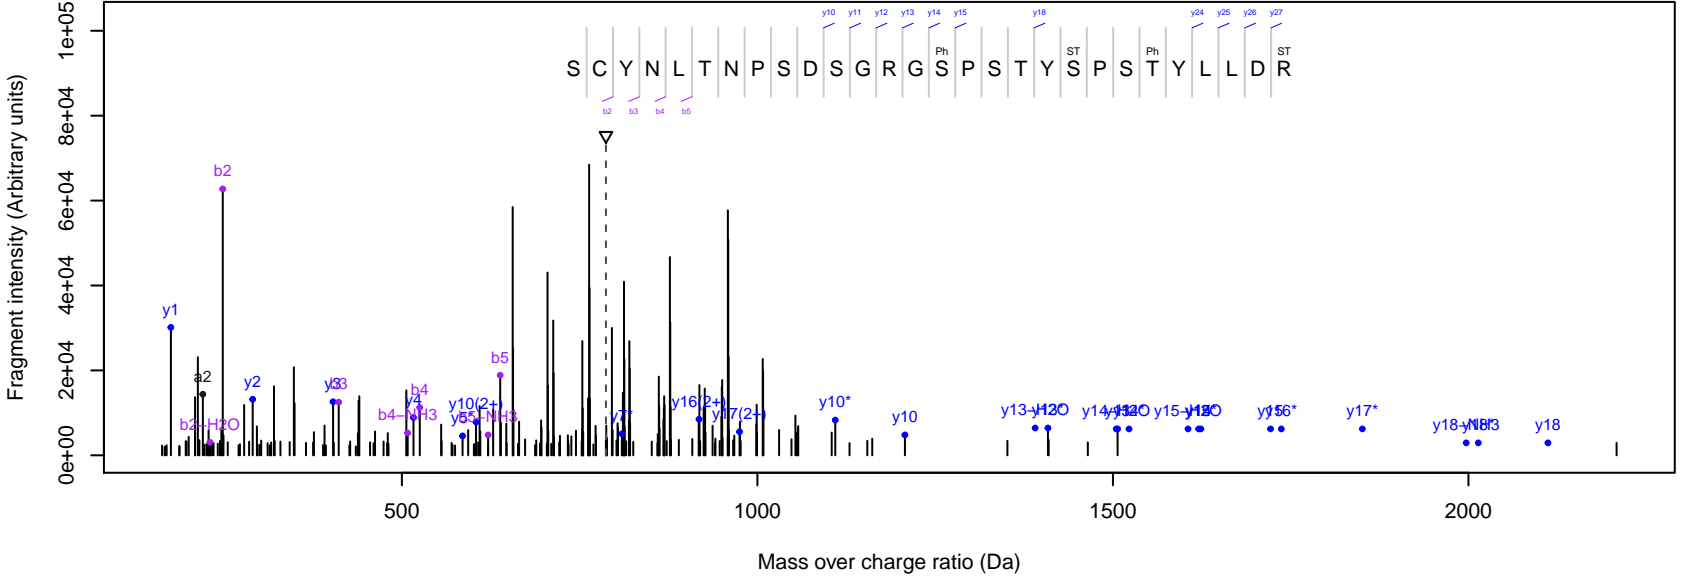

SSPFKVS(Phospho (STY))PLTFGR-2+

Source : QE3\_201126\_FR\_TiOx\_hum\_tissue\_Urea\_RNAB\_H Scan : 38616

Andromeda score : 136.57

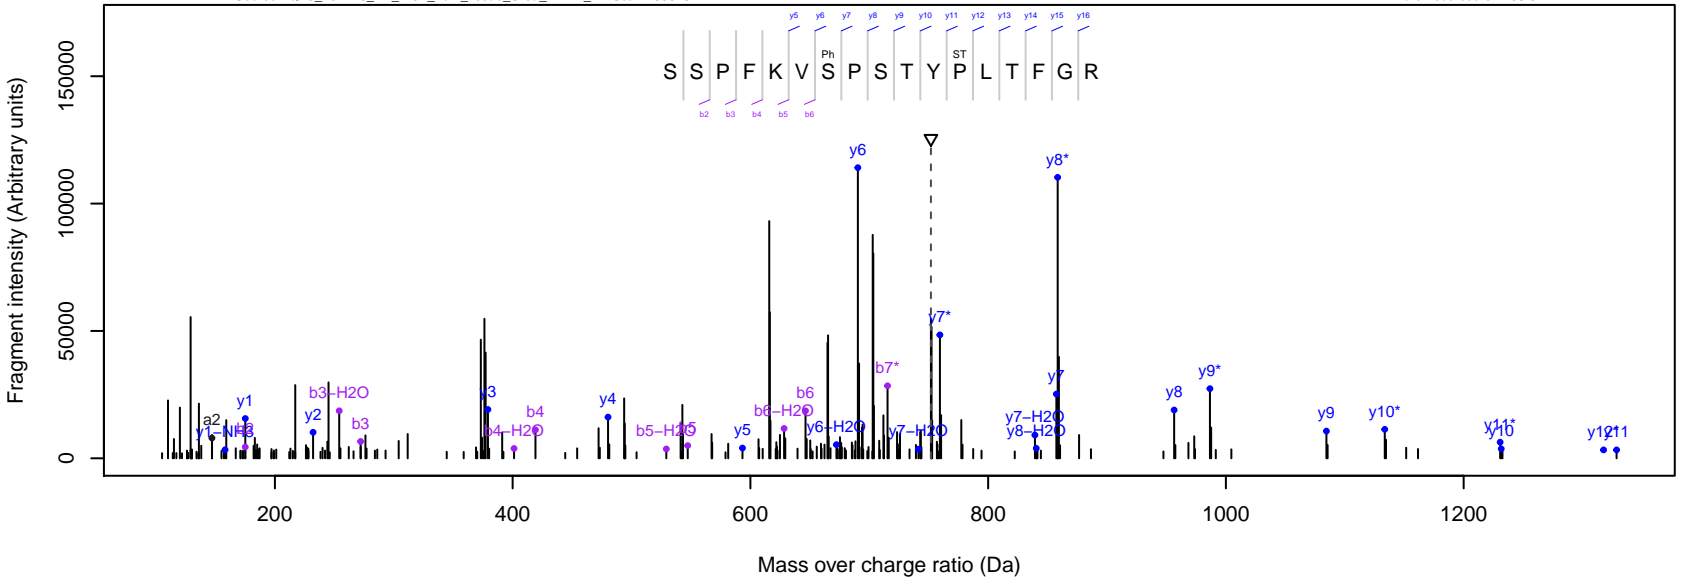

KET(Phospho (STY))ES(Phospho (STY))EAEDNLDLEKHLR-3+

Source : QE3\_201126\_FR\_TiOx\_hum\_tissue\_Urea\_RNAB\_H Scan : 34992

Andromeda score : 136.56

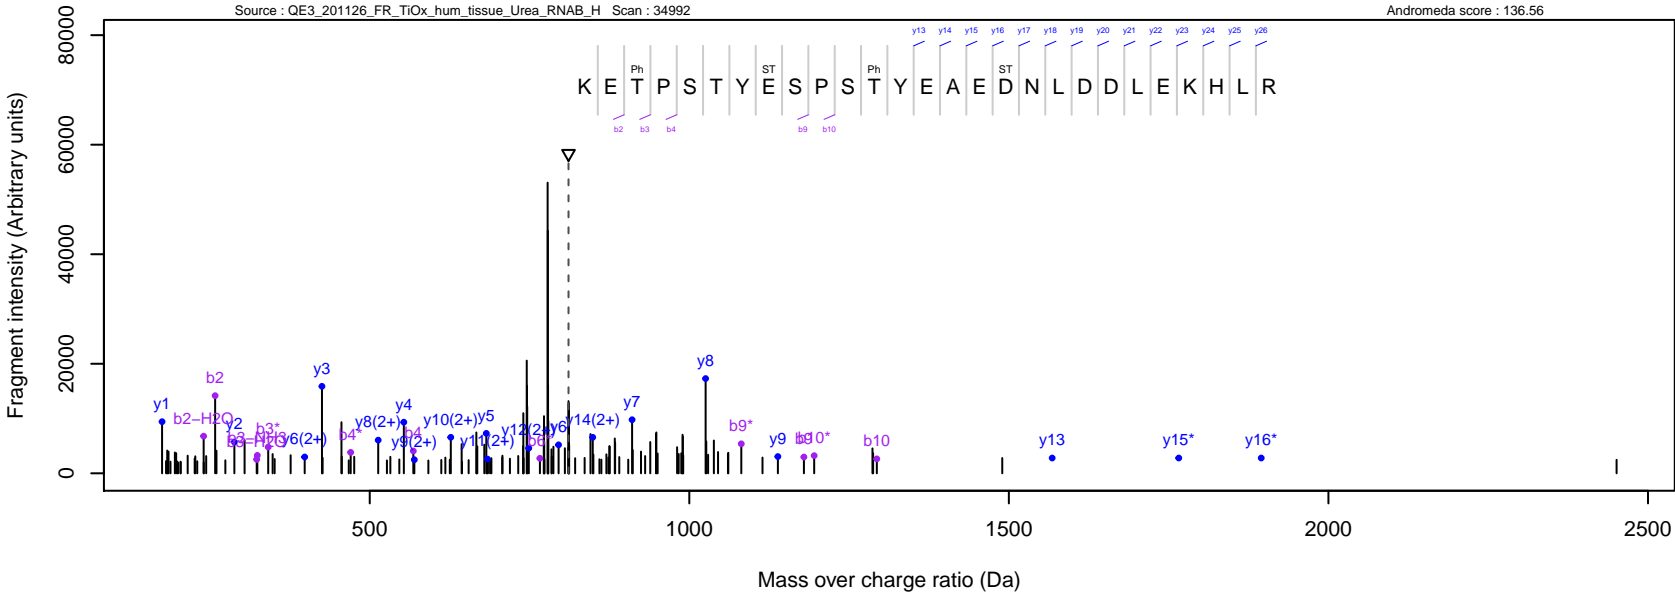

KSSS(Phospho (STY))LVDIREETEGR-3+

Source : QE3\_201126\_FR\_TiOx\_hum\_tissue\_Urea\_RNAB\_H Scan : 14539

Andromeda score : 136.56

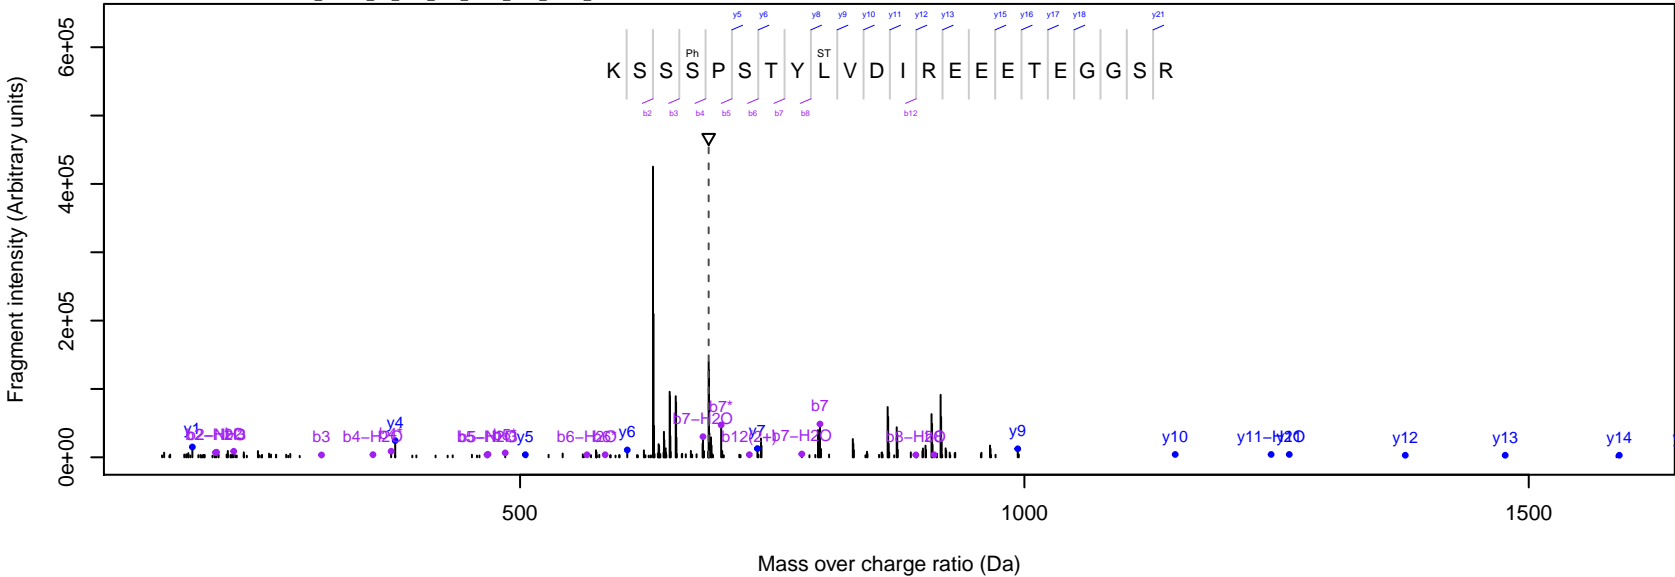

AATAARPPAPPQPPS(Phospho (STY))PTPS(Phospho (STY))PPRPTLAR-4+

Source : QE3\_201126\_FR\_TiOx\_hum\_tissue\_Urea\_RNAB\_N Scan : 27916

Andromeda score : 136.55

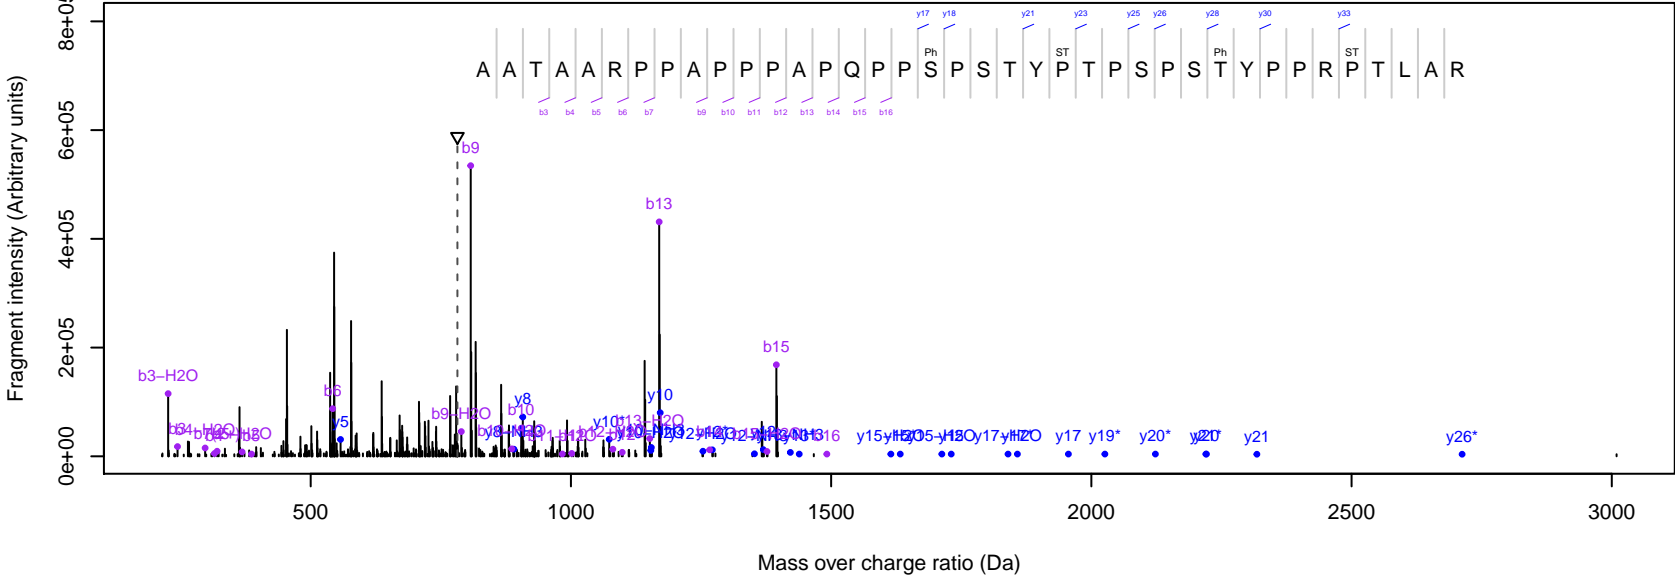

**NM(Oxidation (M))T(Phospho (STY))SPIADFPAPPYSAVT(Phospho (STY))PPDFAFSR-3+**

Source : QE3\_201126\_FR\_TiOx\_hum\_tissue\_Urea\_RNAB\_B Scan : 60116

Andromeda score : 136.55

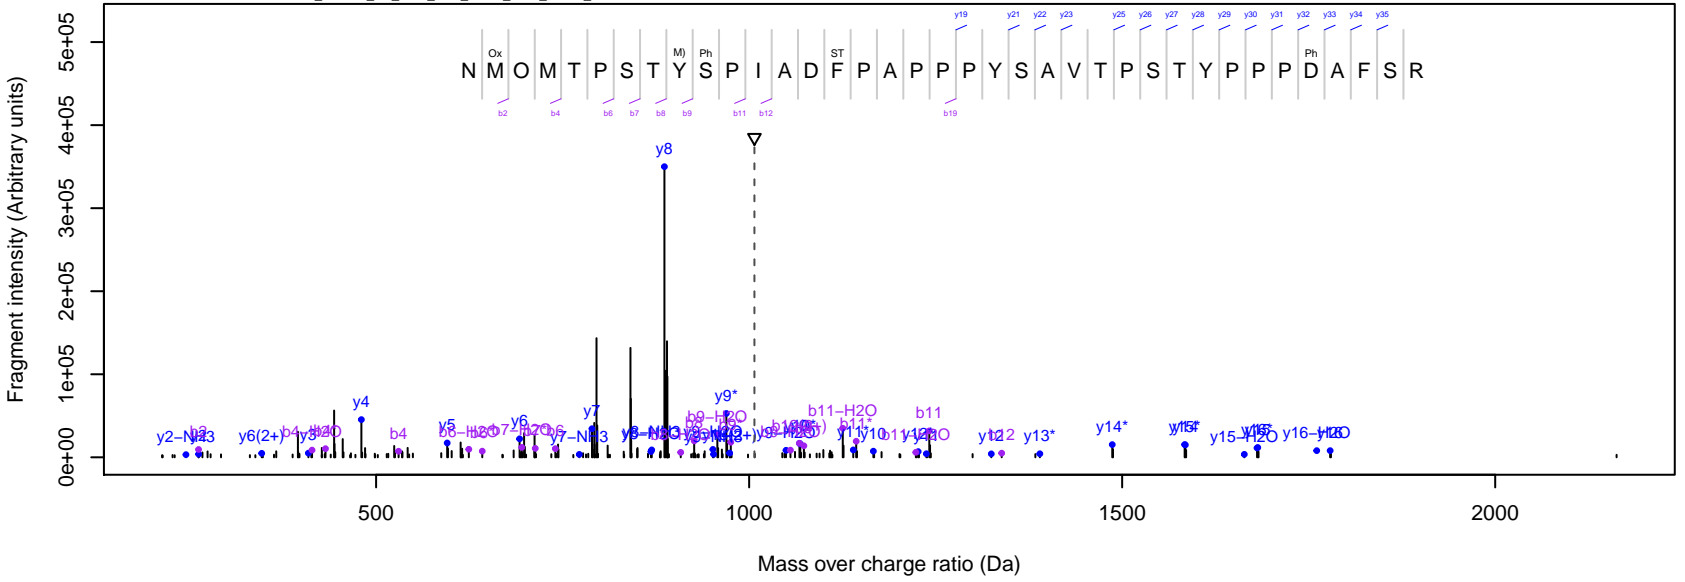

**KKS(Phospho (STY))IPLSIK-2+**

Source : QE3\_201126\_FR\_TiOx\_hum\_tissue\_Urea\_RNAB\_H Scan : 10263

Andromeda score : 136.53

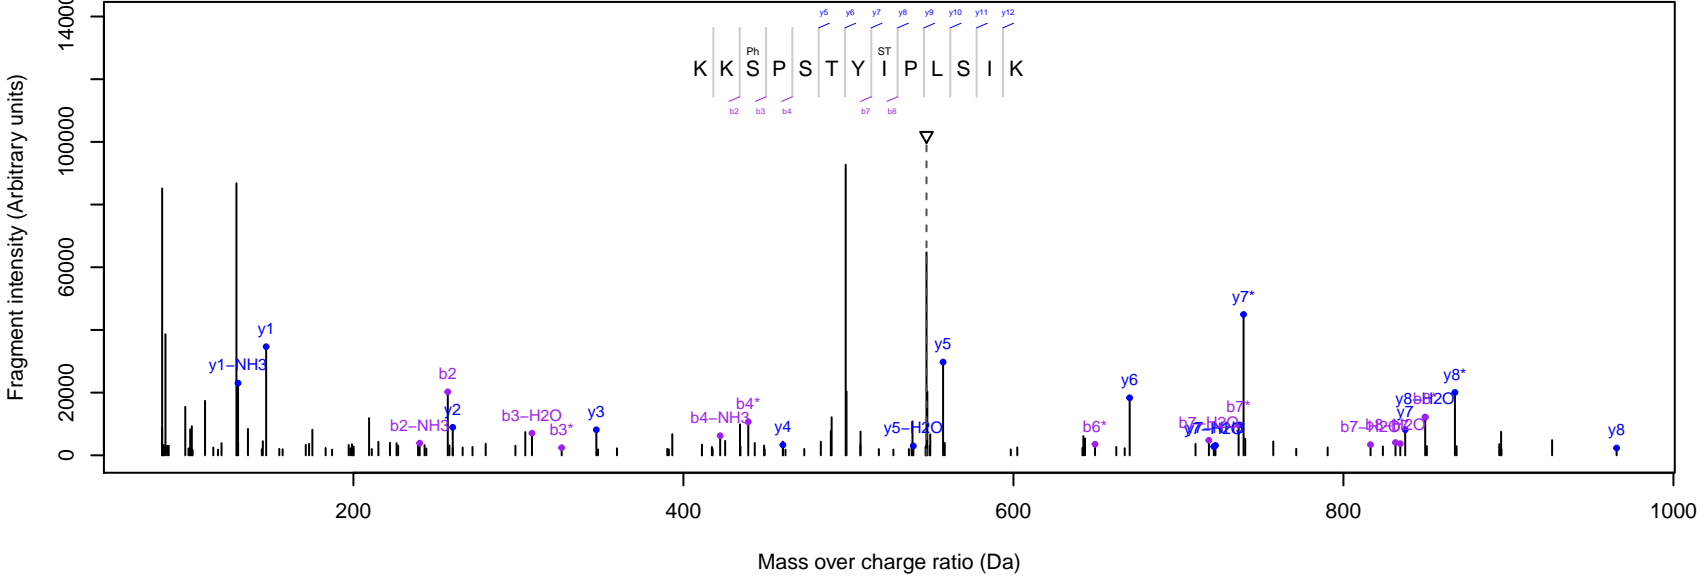

**KNS(Phospho (STY))TGS GHS A Q E L P T I R-3+**

Source : QE3\_201126\_FR\_TiOx\_hum\_tissue\_Urea\_RNAB\_N Scan : 11419

Andromeda score : 136.53

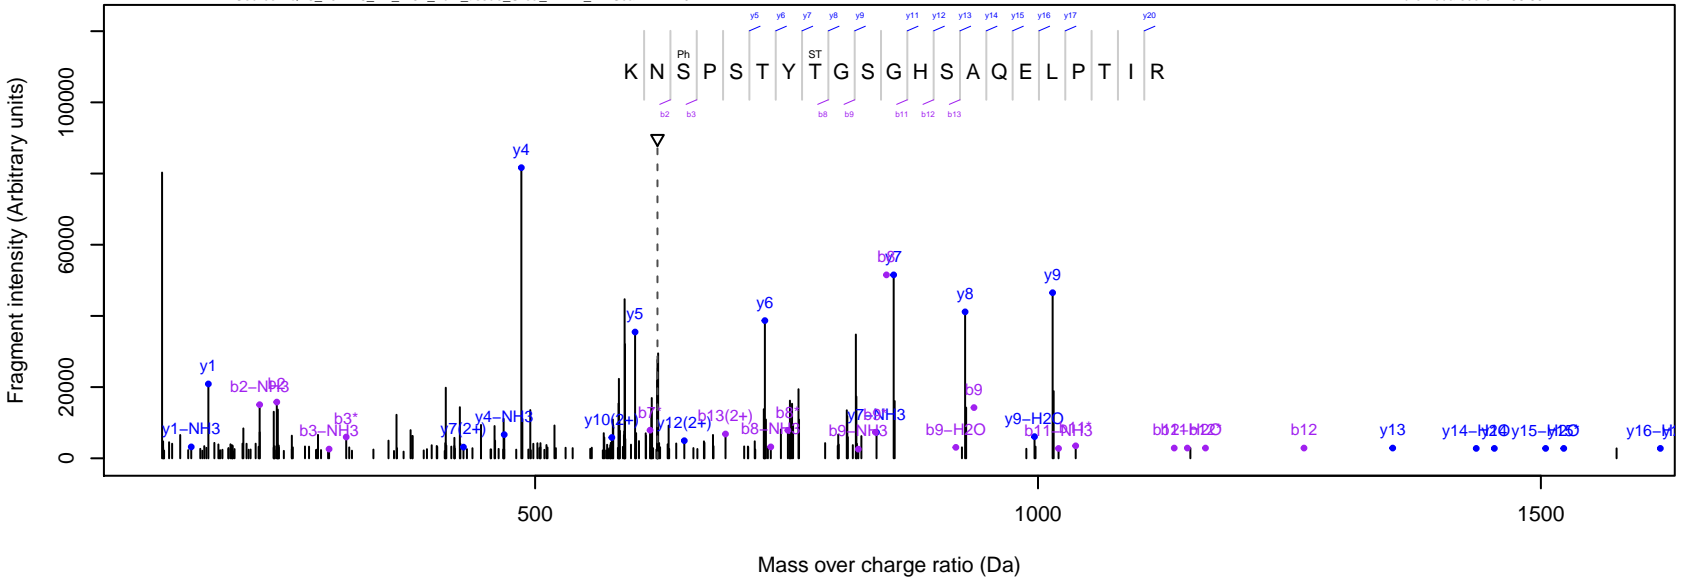



LSPHAFKT(Phospho (STY))ESGEETDLISPPQEEVK-3+

Source : QE3\_201126\_FR\_TiOx\_hum\_tissue\_Urea\_RNAB\_H Scan : 28423

Andromeda score : 136.49

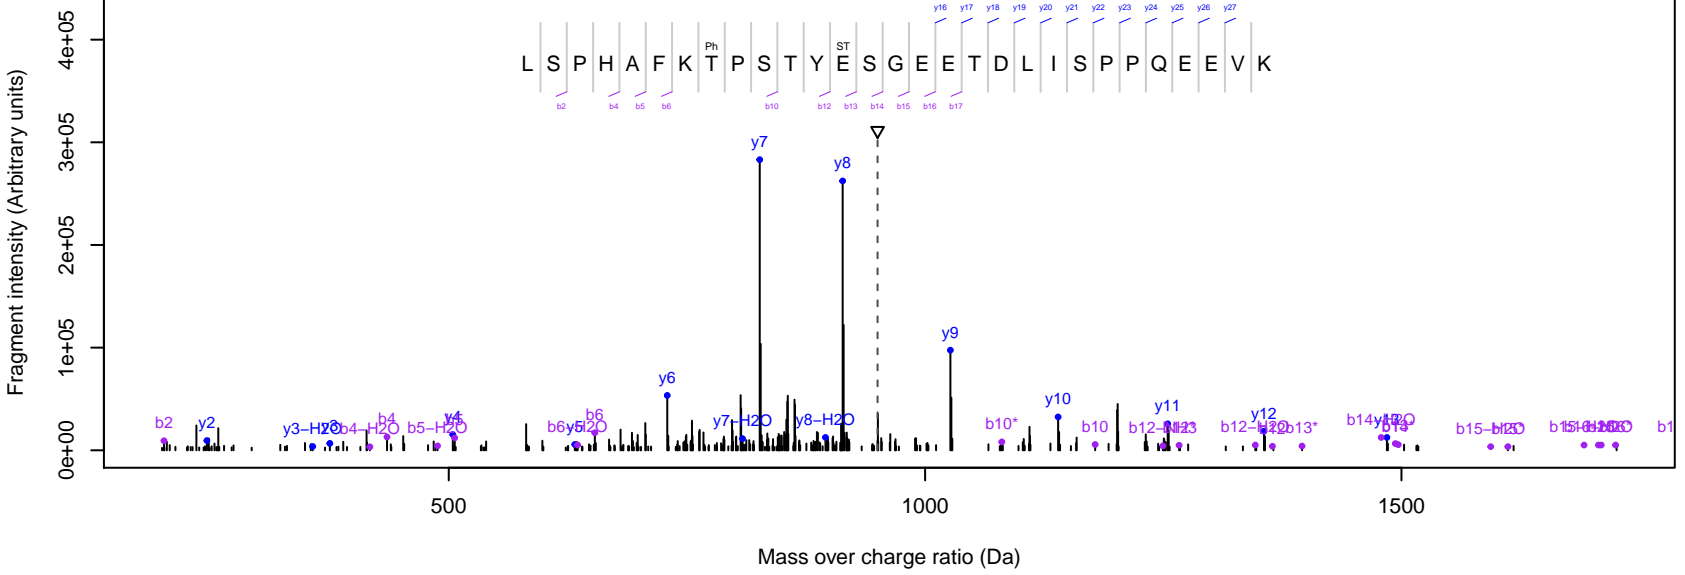

SKS(Phospho (STY))PASTSSVNGTPGSQLSTPR-3+

Source : QE3\_201126\_FR\_TiOx\_hum\_tissue\_Urea\_RNAB\_H Scan : 13862

Andromeda score : 136.49

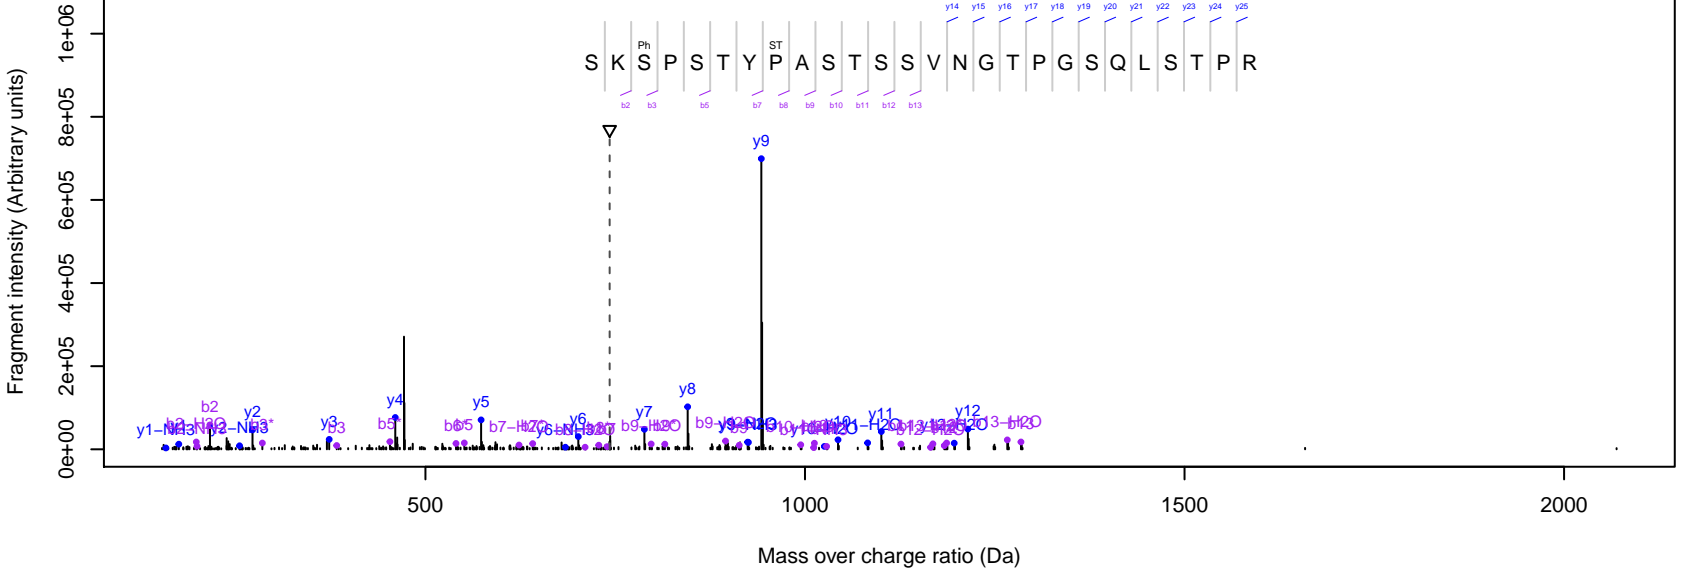

ASNLENSTYDLYTIKDA(Phospho (STY))QNPDAPEGK-4+

Source : QE3\_201126\_FR\_TiOx\_hum\_tissue\_Urea\_RNAB\_N Scan : 30583

Andromeda score : 136.39

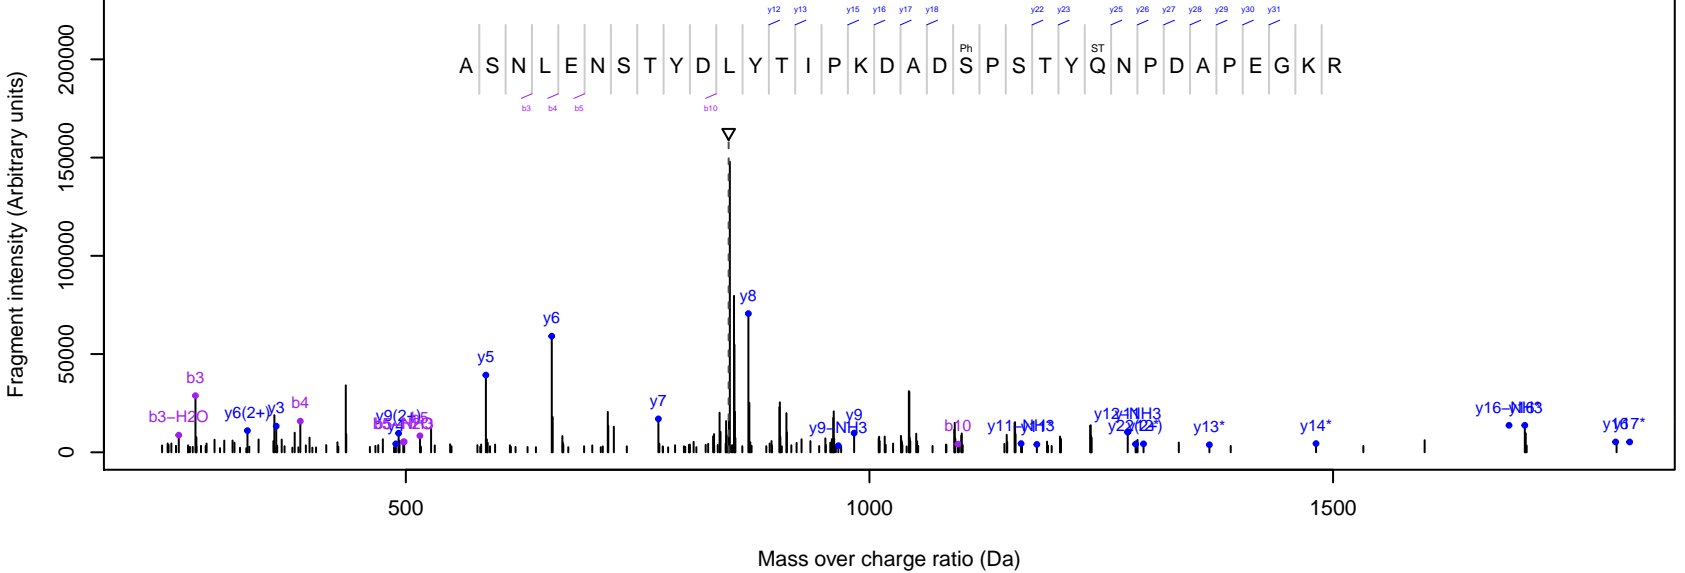

KVPSFT(Phospho (STY))FTPTVTYQR-3+

Source : QE3\_201126\_FR\_TiOx\_hum\_tissue\_Urea\_RNAB\_N Scan : 38768

Andromeda score : 136.39

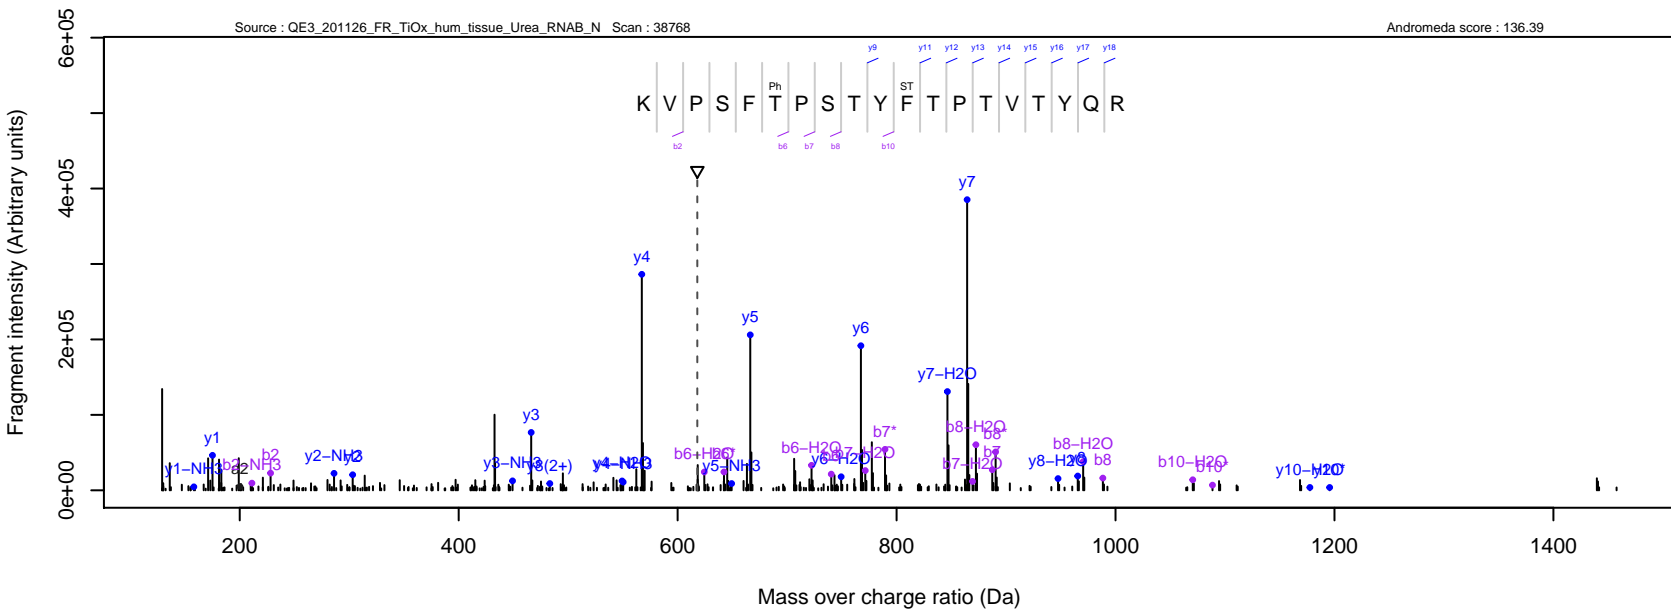

NGILASPQS(Phospho (STY))APGNLDNSK-2+

Source : QE3\_201126\_FR\_TiOx\_hum\_tissue\_Urea\_RNAB\_H Scan : 28160

Andromeda score : 136.39

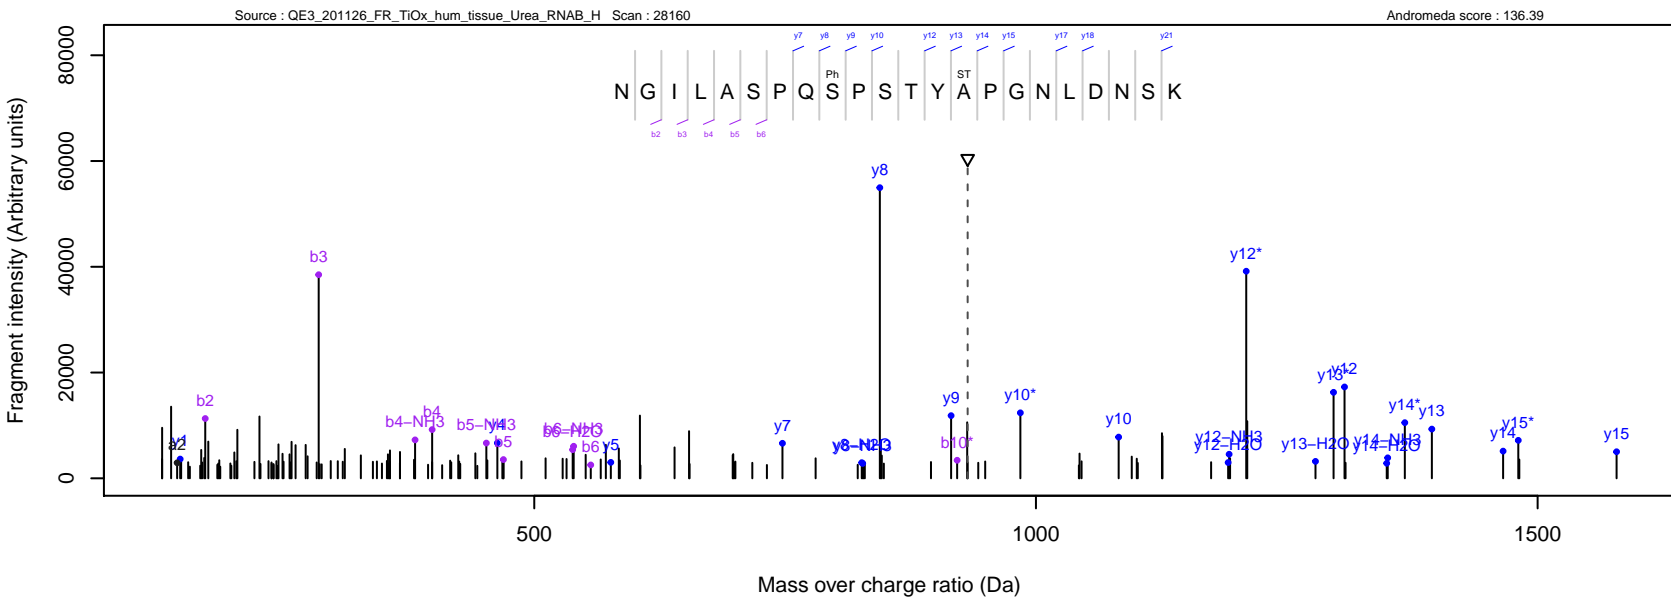

M(Oxidation (M))QFS(Phospho (STY))FEGPEK-2+

Source : QE3\_201126\_FR\_TiOx\_hum\_tissue\_Urea\_RNAB\_N Scan : 27181

Andromeda score : 136.38

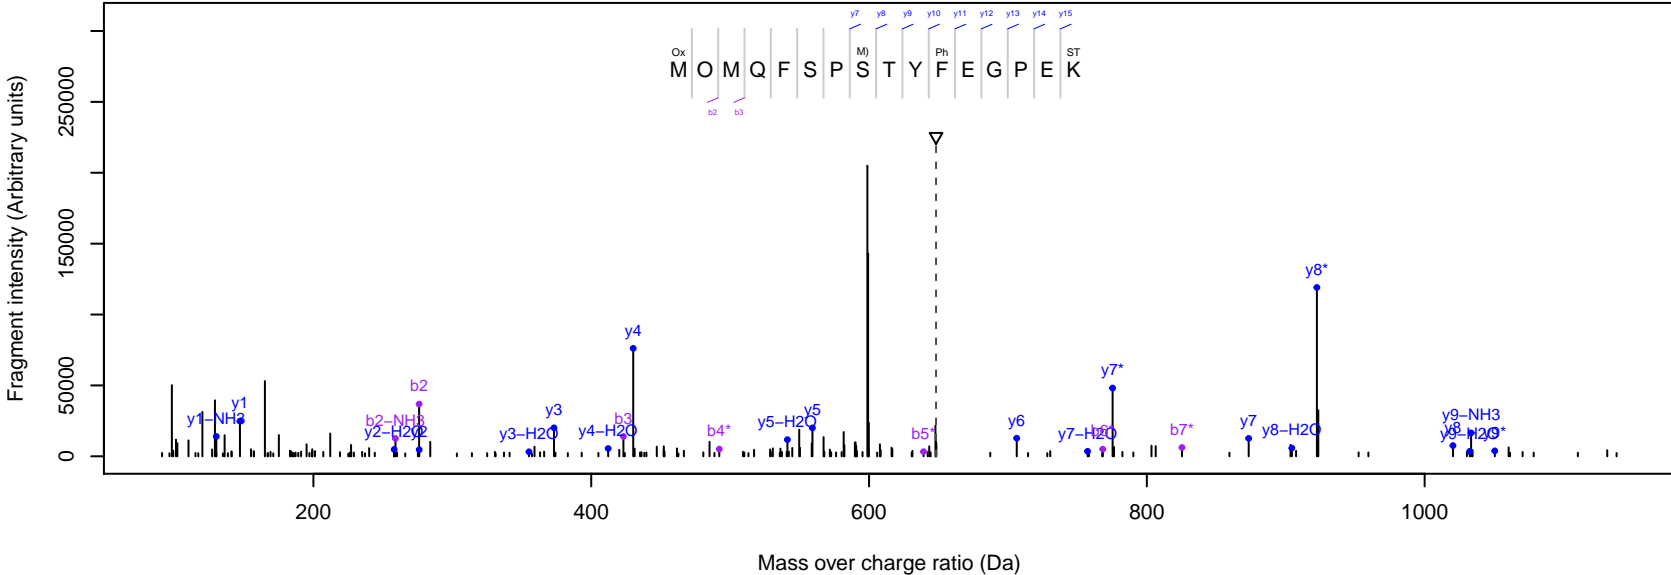

NMAEQIIEIY(Phospho (STY))SQIQSK-3+

Source : QE3\_201126\_FR\_TIOx\_hum\_tissue\_Urea\_RNAB\_N Scan : 62690

Andromeda score : 136.35

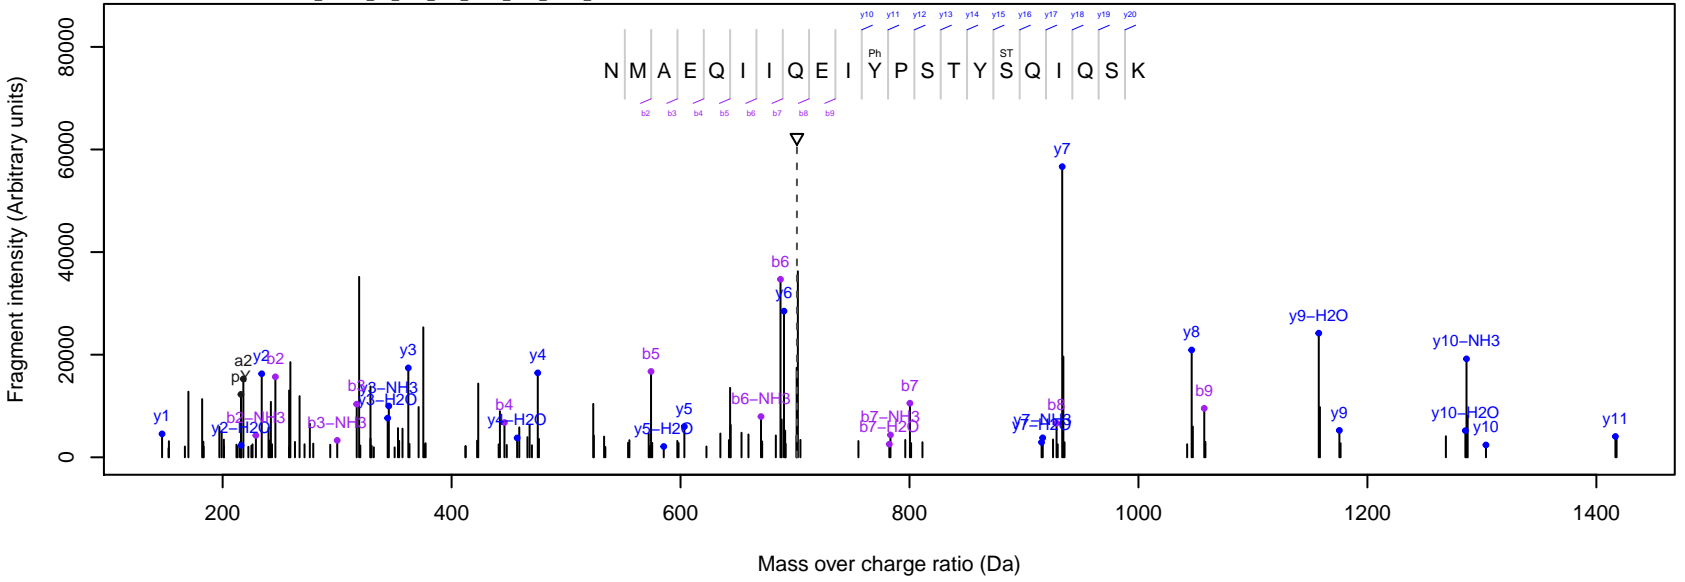

SYFEKS(Phospho (STY))KEQLTPLIK-3+

Source : QE3\_201126\_FR\_TIOx\_hum\_tissue\_Urea\_RNAB\_N Scan : 26552

Andromeda score : 136.35

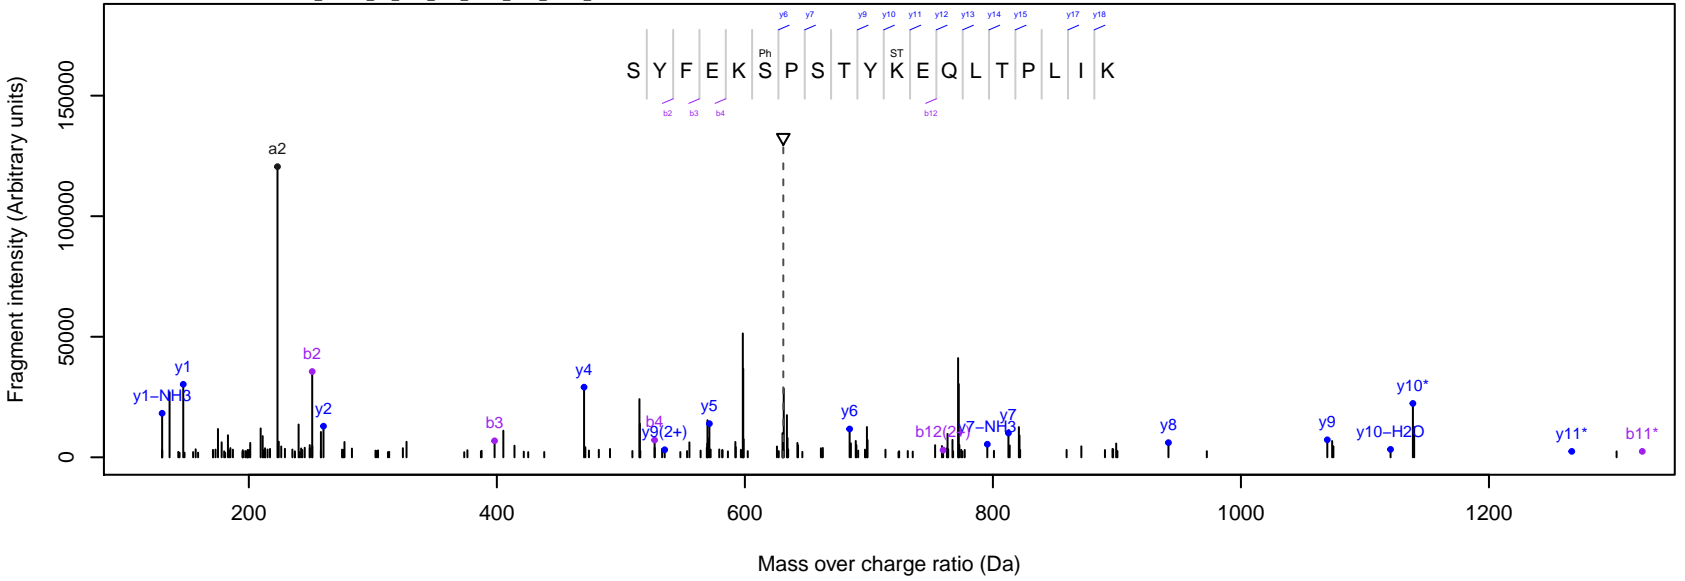

LAS(Phospho (STY))YLDR-2+

Source : QE3\_201126\_FR\_TIOx\_hum\_tissue\_Urea\_RNAB\_B Scan : 24851

Andromeda score : 136.21

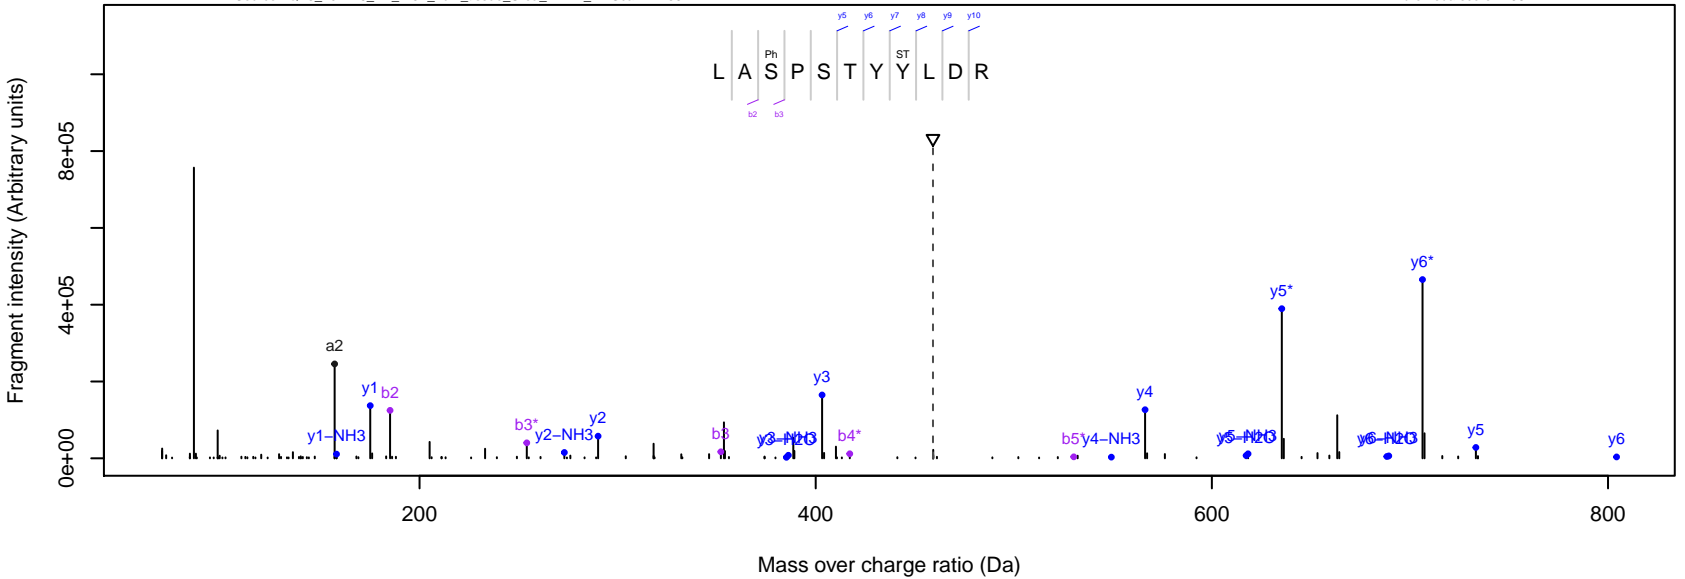

SAS(Phospho (STY))LSHPGEGEPAR-2+

Source : QE3\_201126\_FR\_TiOx\_hum\_tissue\_Urea\_RNAB\_H Scan : 8195

Andromeda score : 136.17

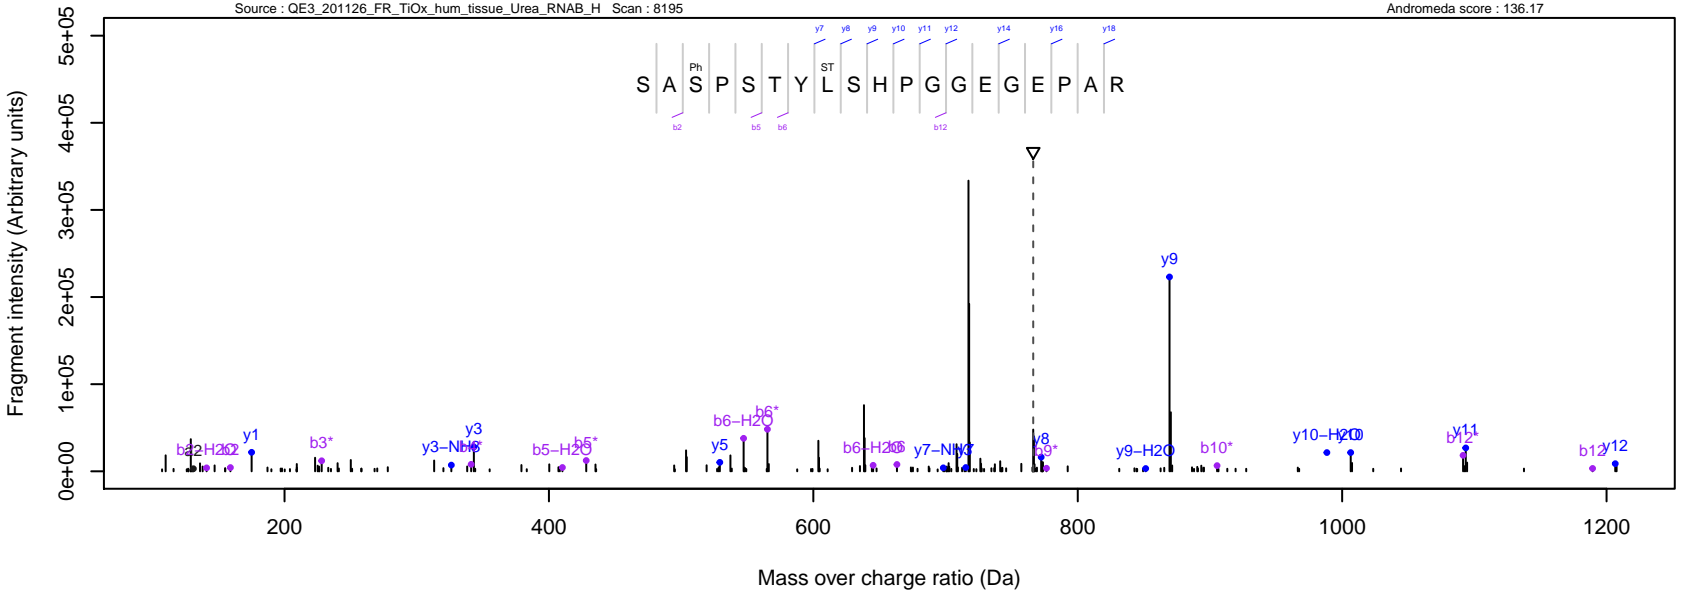

SGSLDSELSVS(Phospho (STY))PKR-2+

Source : QE3\_201126\_FR\_TiOx\_hum\_tissue\_Urea\_RNAB\_B Scan : 18257

Andromeda score : 136.17

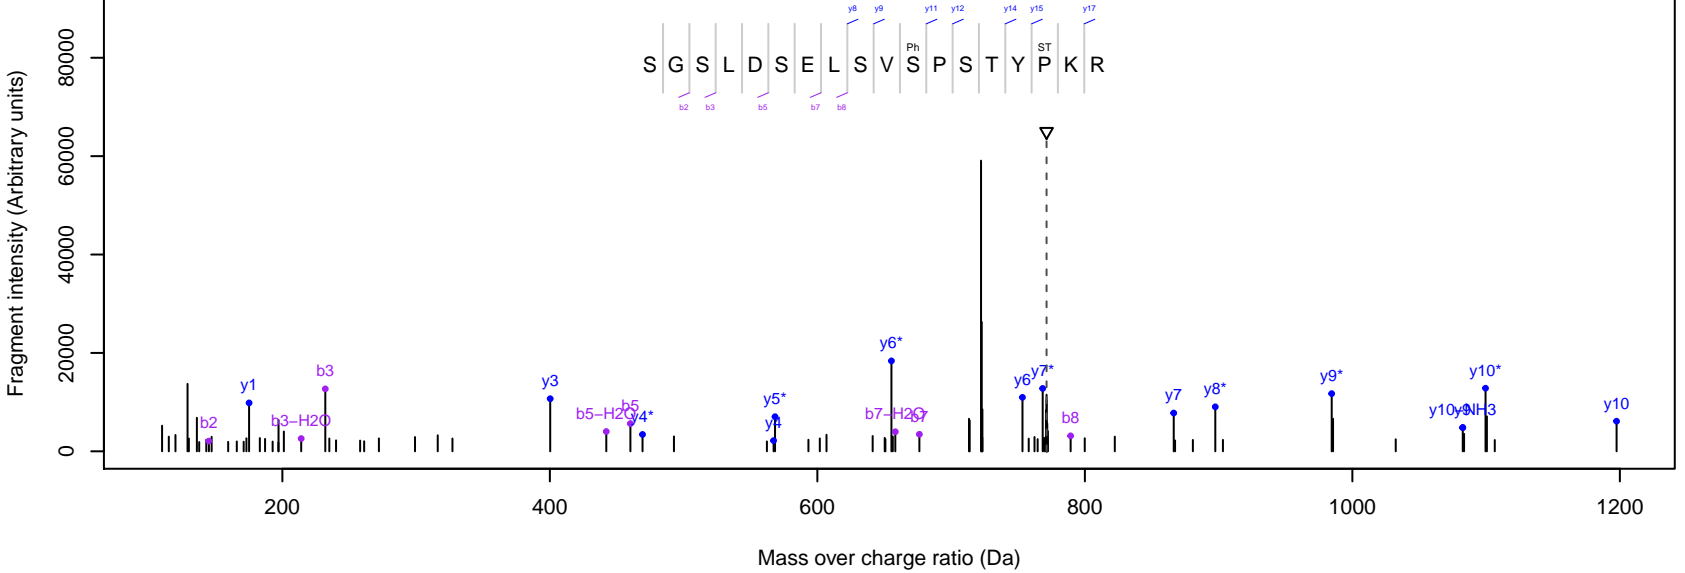

TTQSMQDFPVVDS(Phospho (STY))EEEEEEFQKELSQR-3+

Source : QE3\_201126\_FR\_TiOx\_hum\_tissue\_Urea\_RNAB\_N Scan : 58799

Andromeda score : 136.15

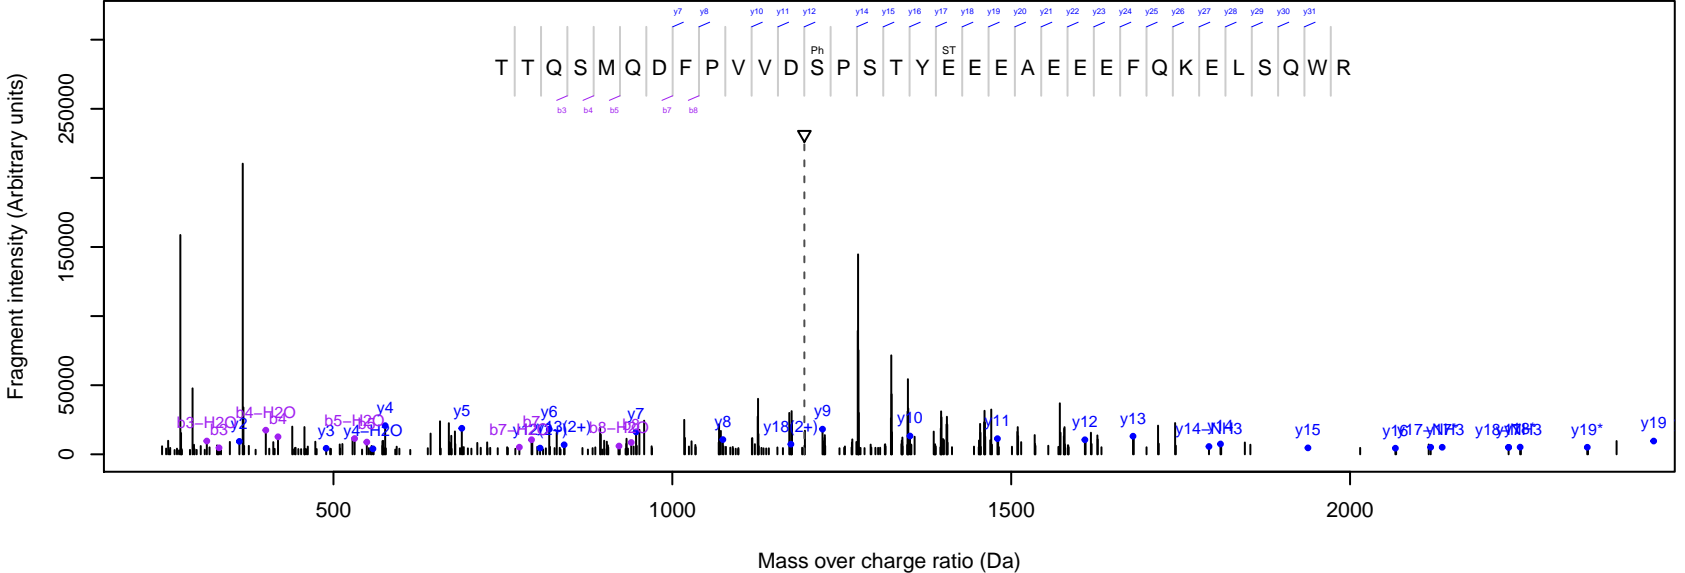

SRS(Phospho (STY))HTS(Phospho (STY))EGAHLDITPNSGAAGNSAGPK-4+

Source : QE3\_201126\_FR\_TiOx\_hum\_tissue\_Urea\_RNAB\_B Scan : 13391

Andromeda score : 136.12

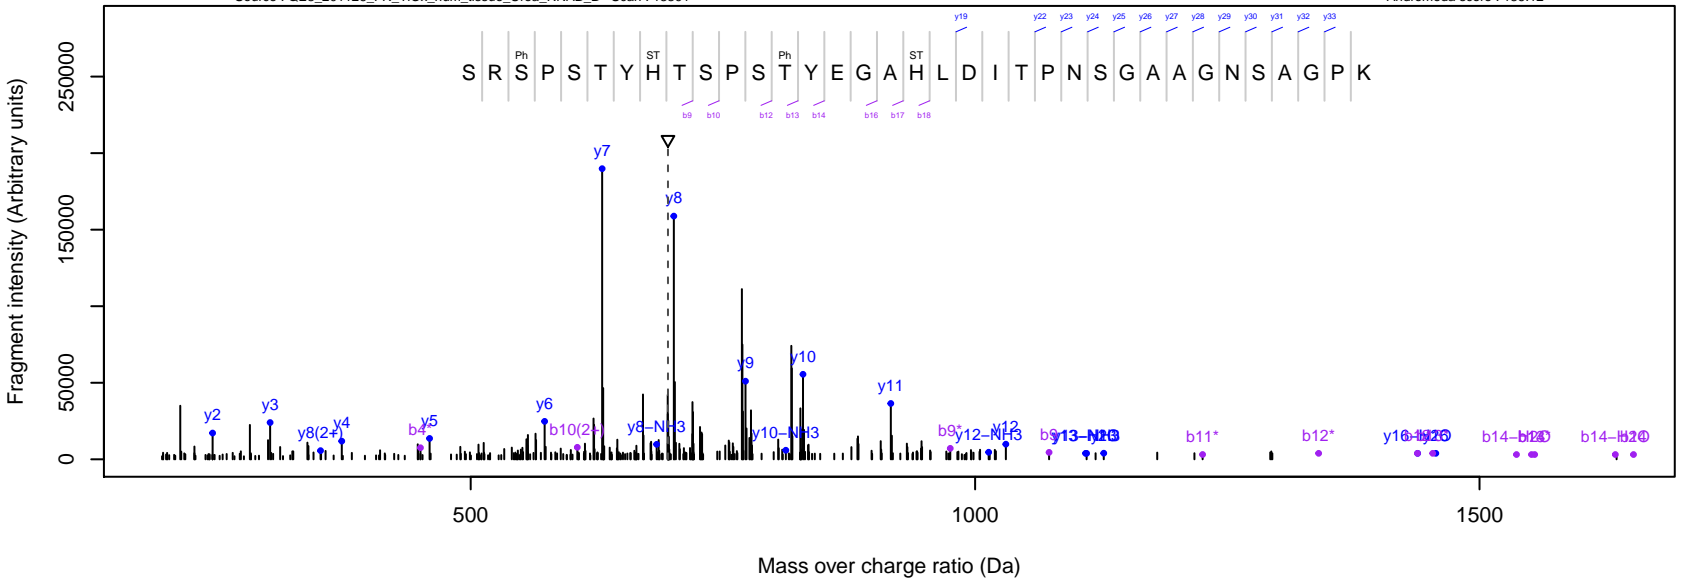

KRVS(Phospho (STY))VELTNSLFK-3+

Source : QE3\_201126\_FR\_TiOx\_hum\_tissue\_Urea\_RNAB\_H Scan : 27170

Andromeda score : 136.08

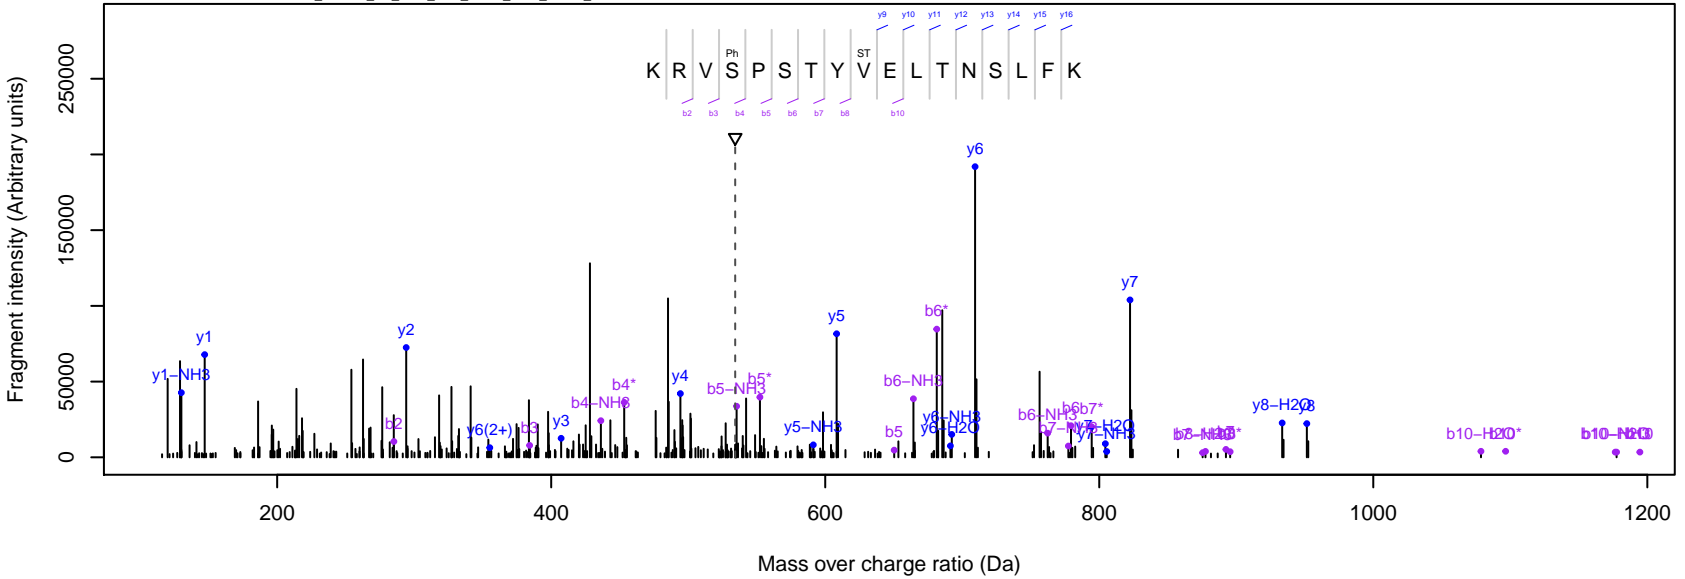

VS(Phospho (STY))SRDKLTEMAASSQGNFEGNFESLDLAEFAK-3+

Source : QE3\_201126\_FR\_TiOx\_hum\_tissue\_Urea\_RNAB\_H Scan : 52577

Andromeda score : 136.07

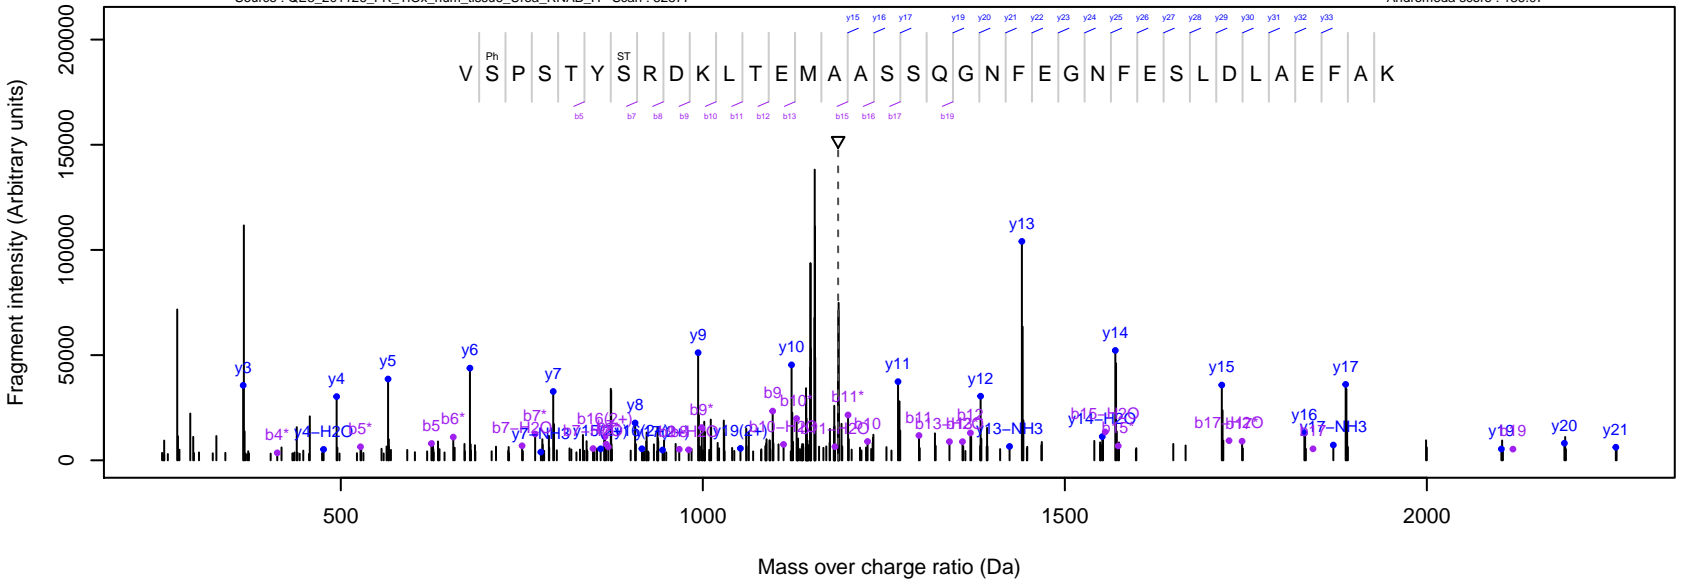

ISKLEVTEIVKPS(Phospho (STY))PK-3+

Source : QE3\_201126\_FR\_TiOx\_hum\_tissue\_Urea\_RNAB\_H Scan : 22400

Andromeda score : 136.02

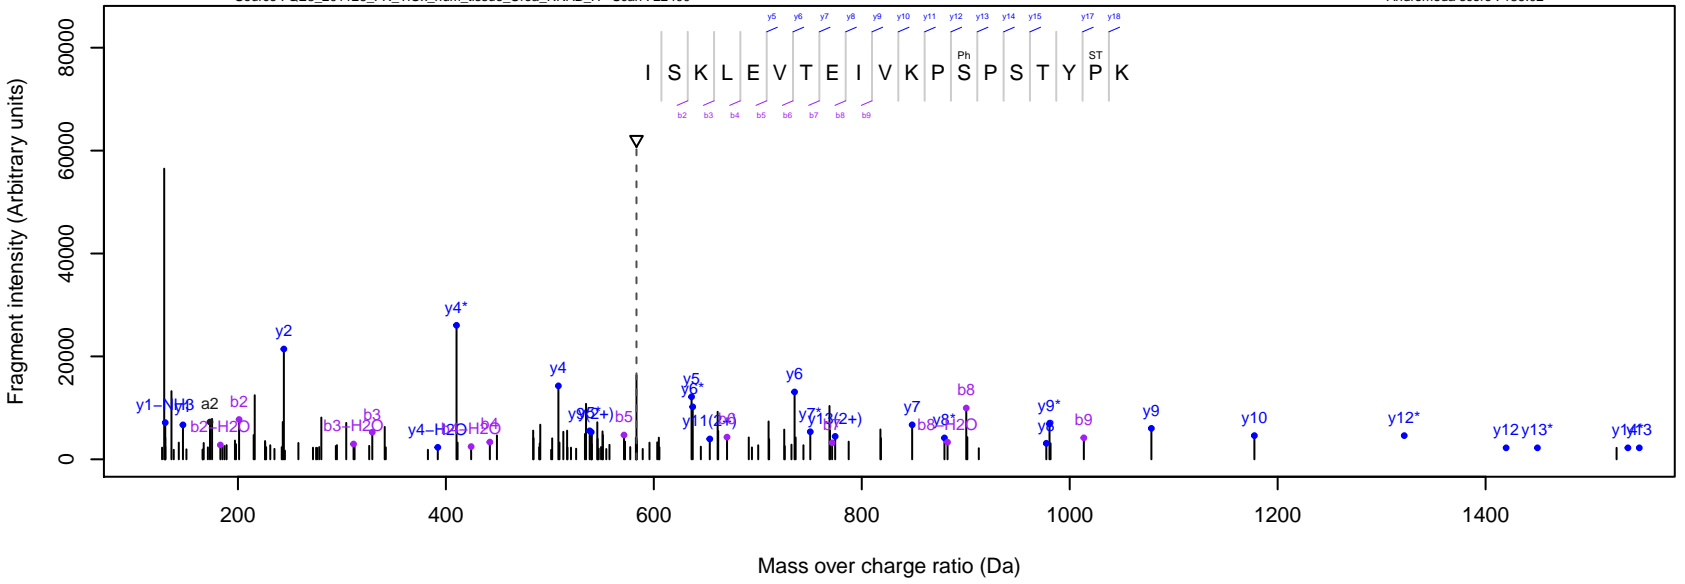

LRPYFGLSHSSS(Phospho (STY))QTEIGSIHSAR-4+

Source : QE3\_201126\_FR\_TiOx\_hum\_tissue\_Urea\_RNAB\_H Scan : 26423

Andromeda score : 136.01

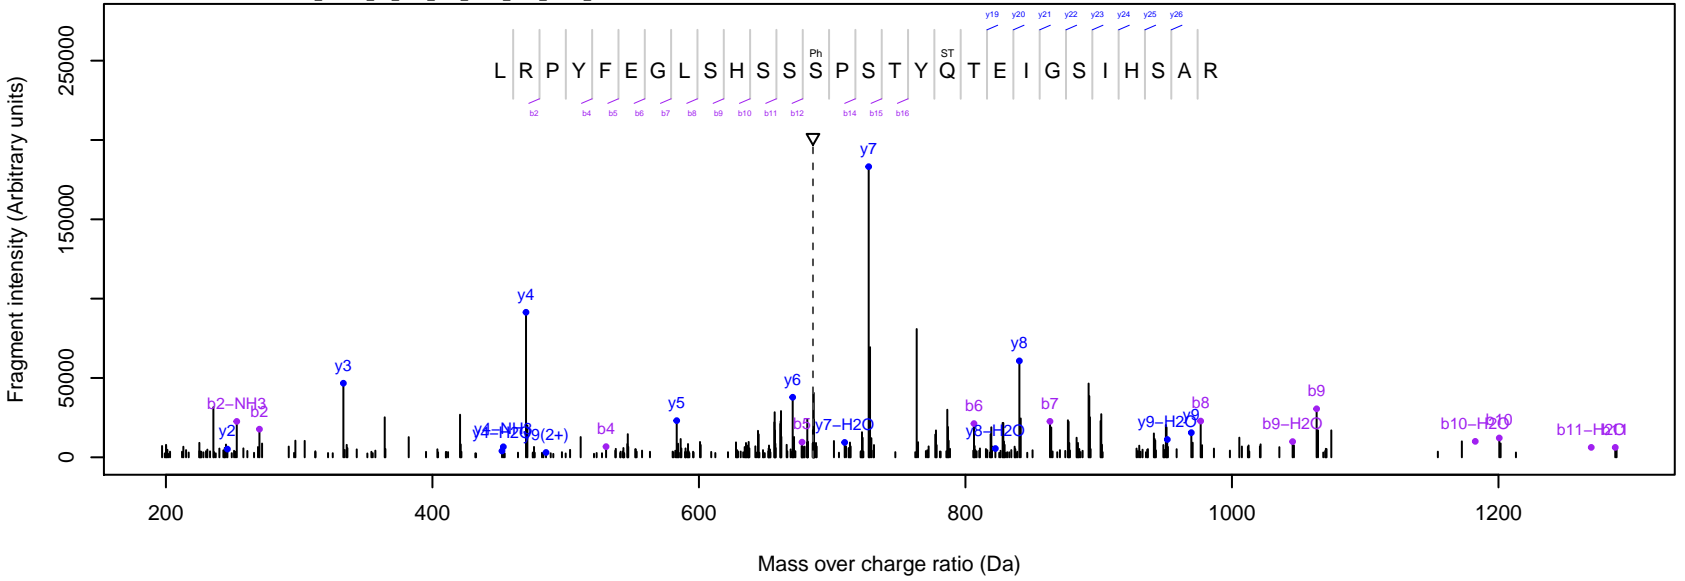

HAS(Phospho (STY))AAGFPLSGAASWTLGR-3+

Source : QE3\_201126\_FR\_TiOx\_hum\_tissue\_Urea\_RNAB\_H Scan : 46845

Andromeda score : 135.98

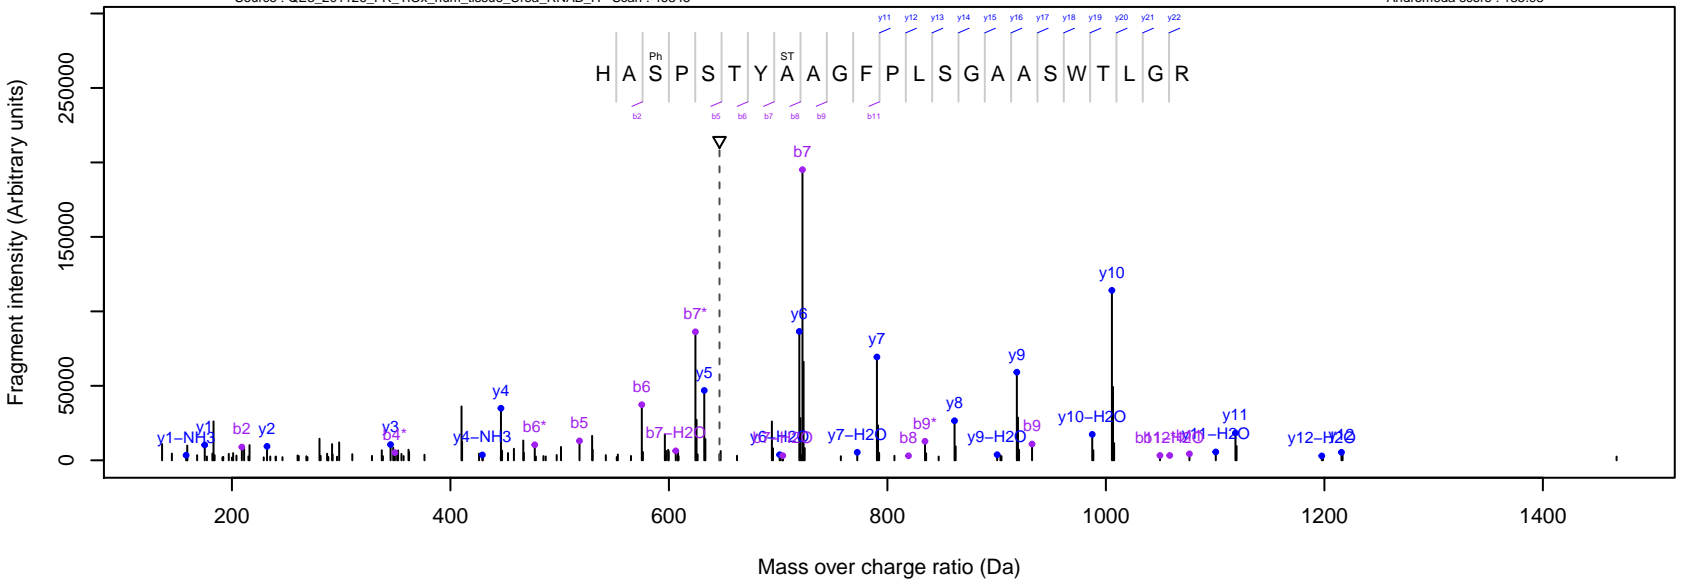

LDCASAIQNYLSGTHGGS(Phospho (STY))PGPER-3+

Source : QE3\_201126\_FR\_TiOx\_hum\_tissue\_Urea\_RNAB\_N Scan : 38118

Andromeda score : 135.91

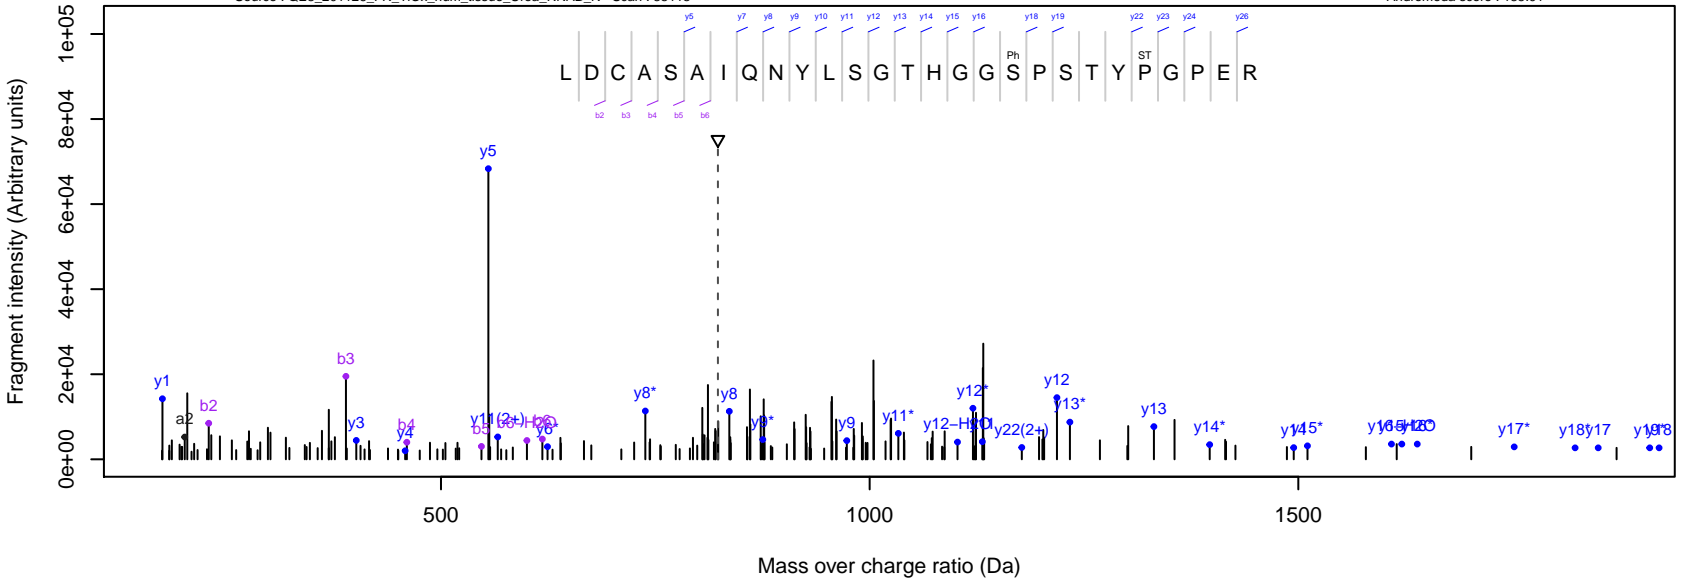

KM(Oxidation (M))LGEDS(Phospho (STY))DEEEEM(Oxidation (M))DTSER-3+

Source : QE3\_201126\_FR\_TiOx\_hum\_tissue\_Urea\_RNAB\_H Scan : 9569

Andromeda score : 135.86

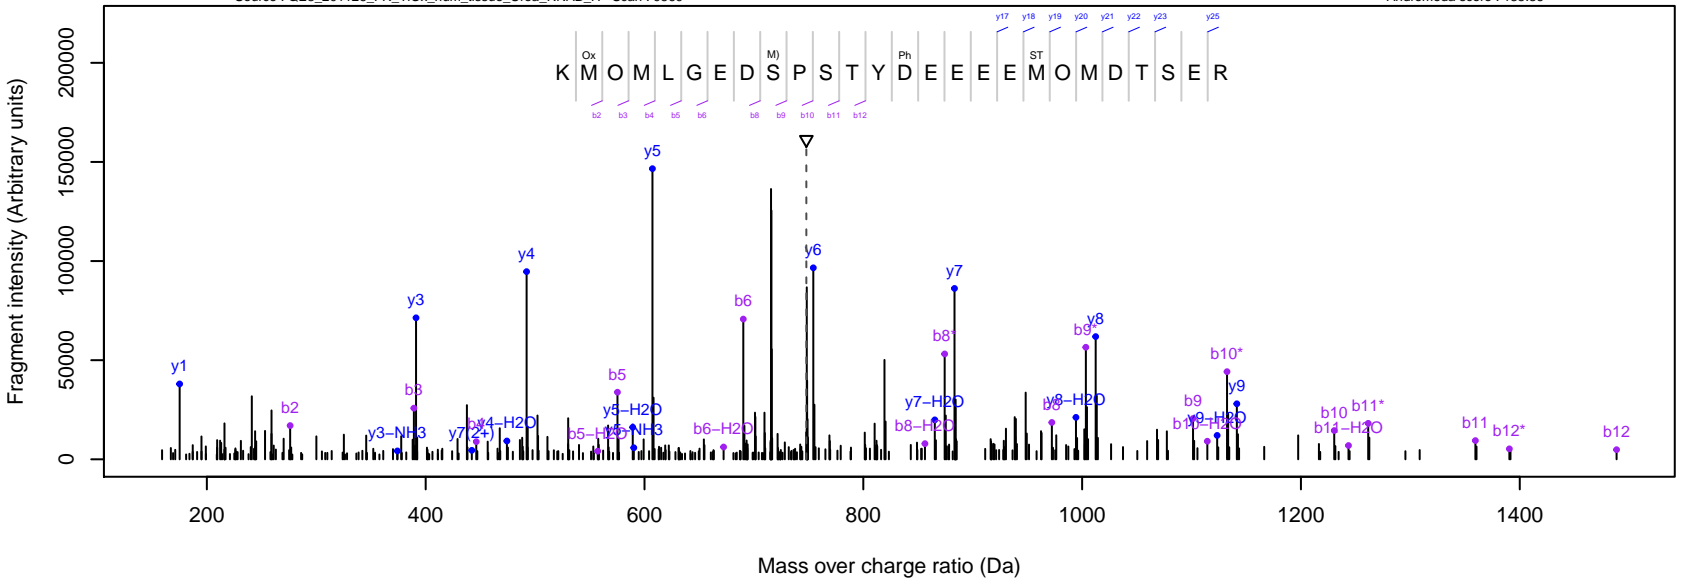

SQS(Phospho (STY))TTFNPDDM(Oxidation (M))SEPEFKR-3+

Source : QE3\_201126\_FR\_TiOx\_hum\_tissue\_Urea\_RNAB\_N Scan : 22111

Andromeda score : 135.76

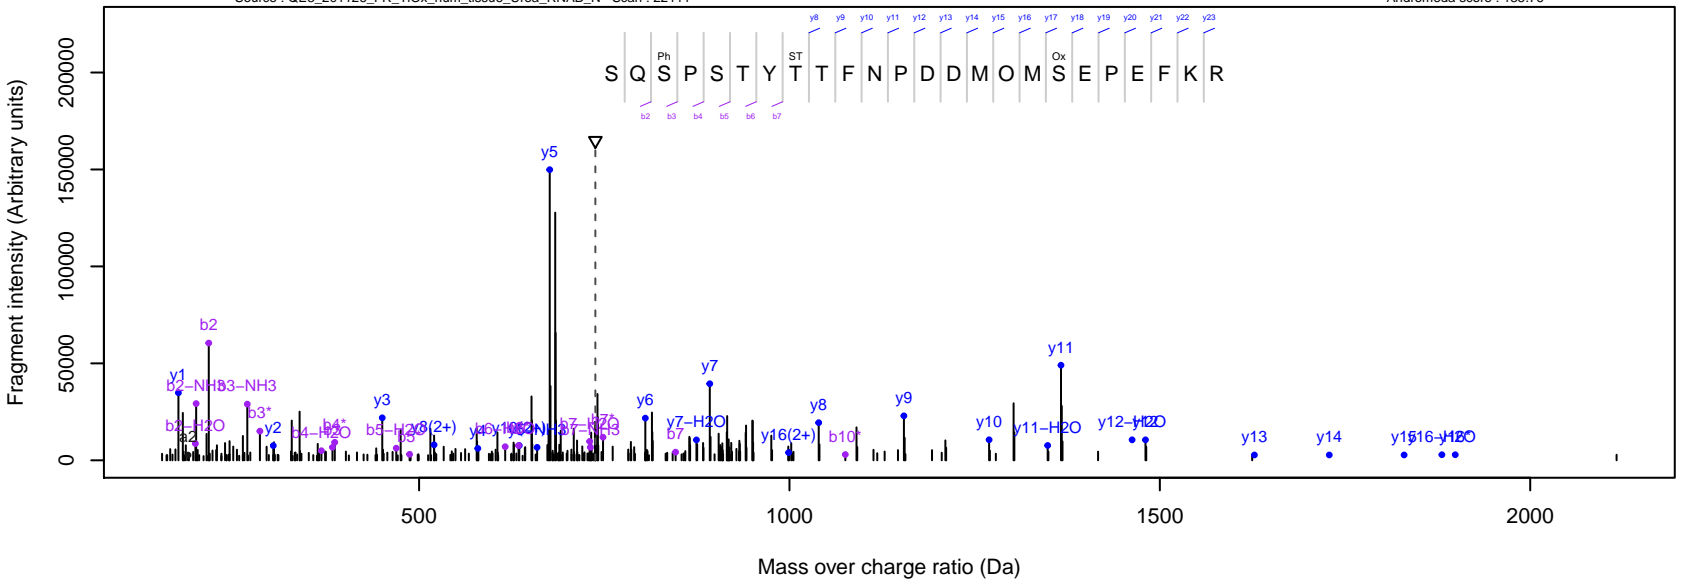

AAKLS(Phospho (STY))EGSQPAEEEEEDQETPSR-3+

Source : QE3\_201126\_FR\_TiOx\_hum\_tissue\_Urea\_RNAB\_B Scan : 12888

Andromeda score : 135.75

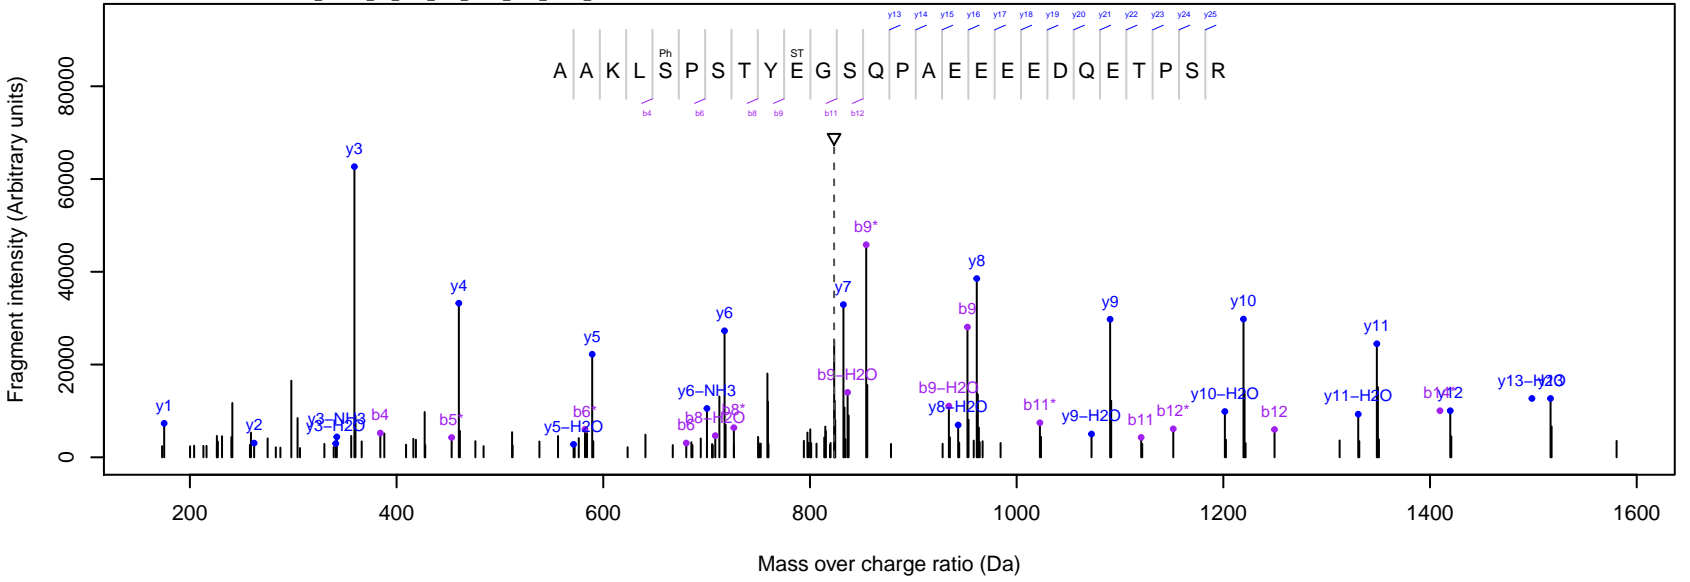

(Acetyl (Protein N-term))S(Phospho (STY))ETAPAAPAAPAEKAPVKK-3+

Source : QE3\_201126\_FR\_TiOx\_hum\_tissue\_Urea\_RNAB\_B Scan : 14808

Andromeda score : 135.72

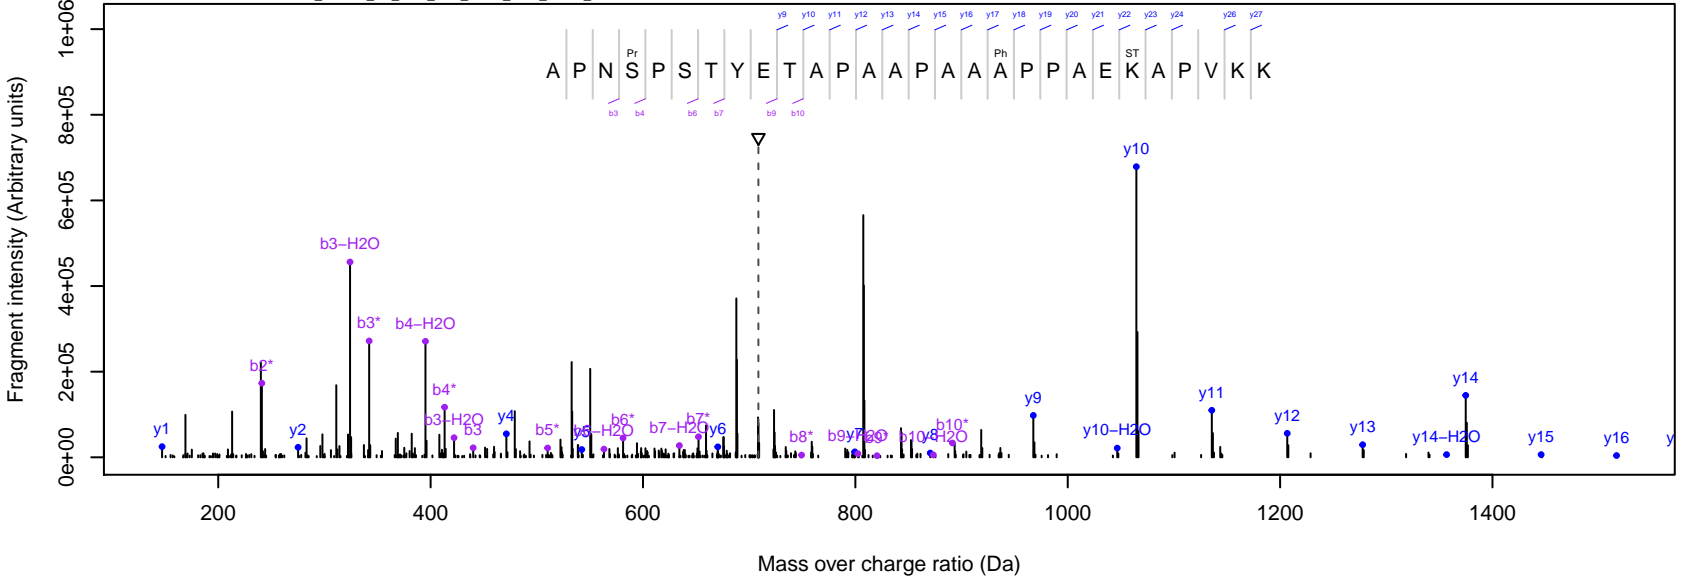

GTEPS(Phospho (STY))PGGTPQPSRPVS(Phospho (STY))PAGPPEGVPEEAQPPR-3+

Source : QE3\_201126\_FR\_TiOx\_hum\_tissue\_Urea\_RNAB\_B Scan : 29220

Andromeda score : 135.71

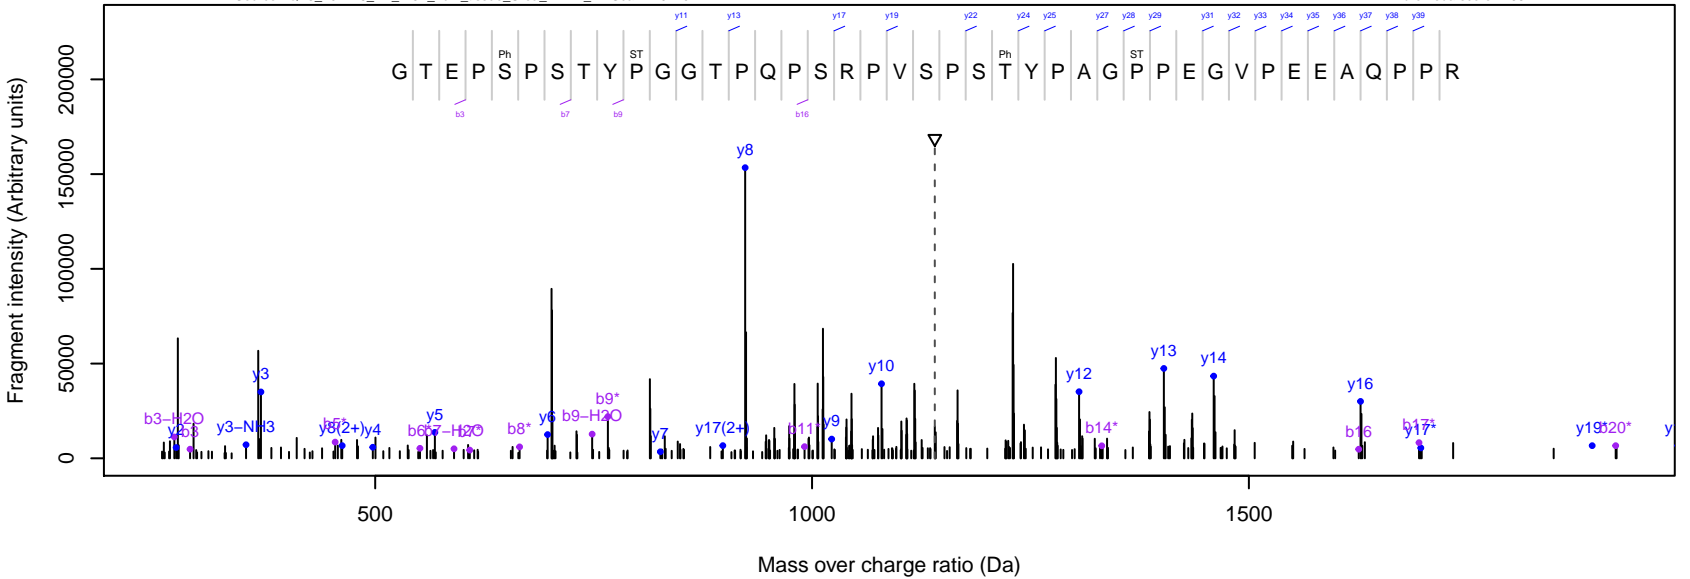





EGHSLEMENLVENGADS(Phospho (STY))DEDDNS(Phospho (STY))FLKQSPQEPK-4+

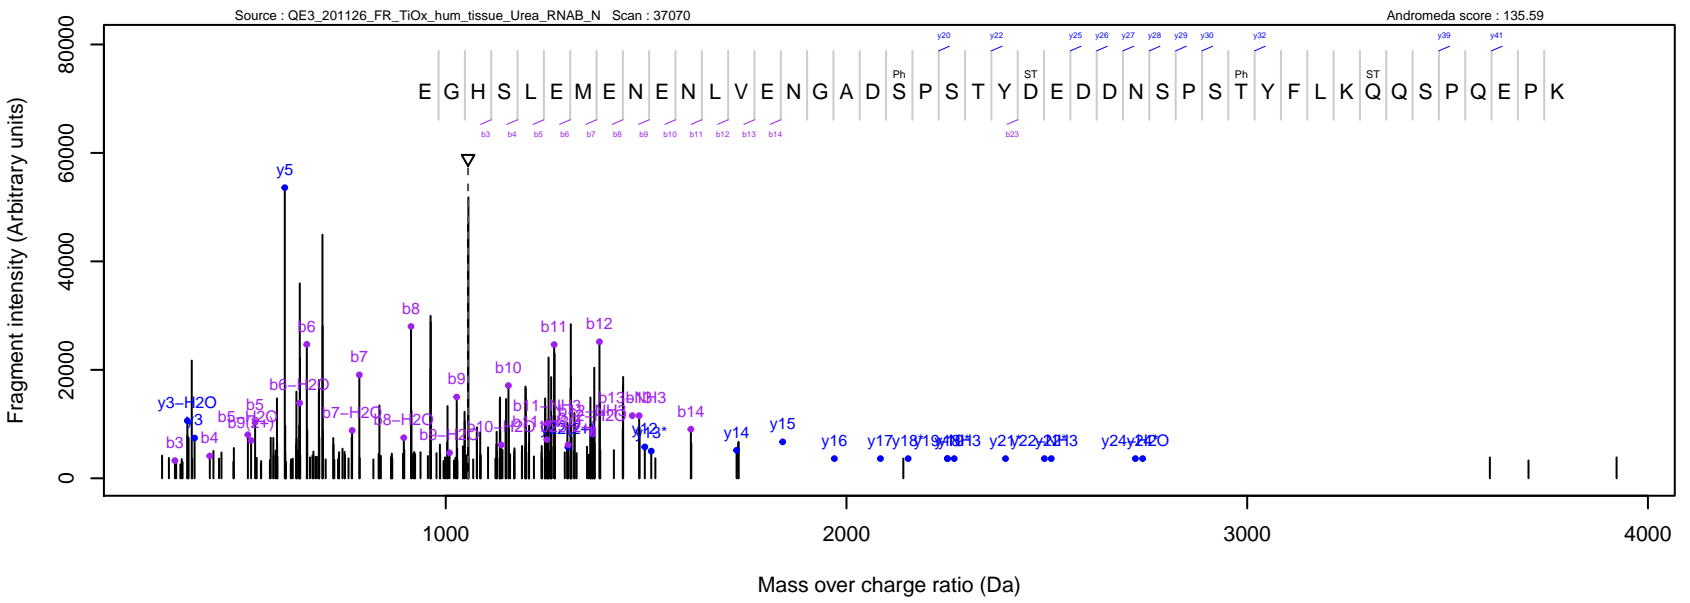

AMS(Phospho (STY))TTSISSPQPGK-2+

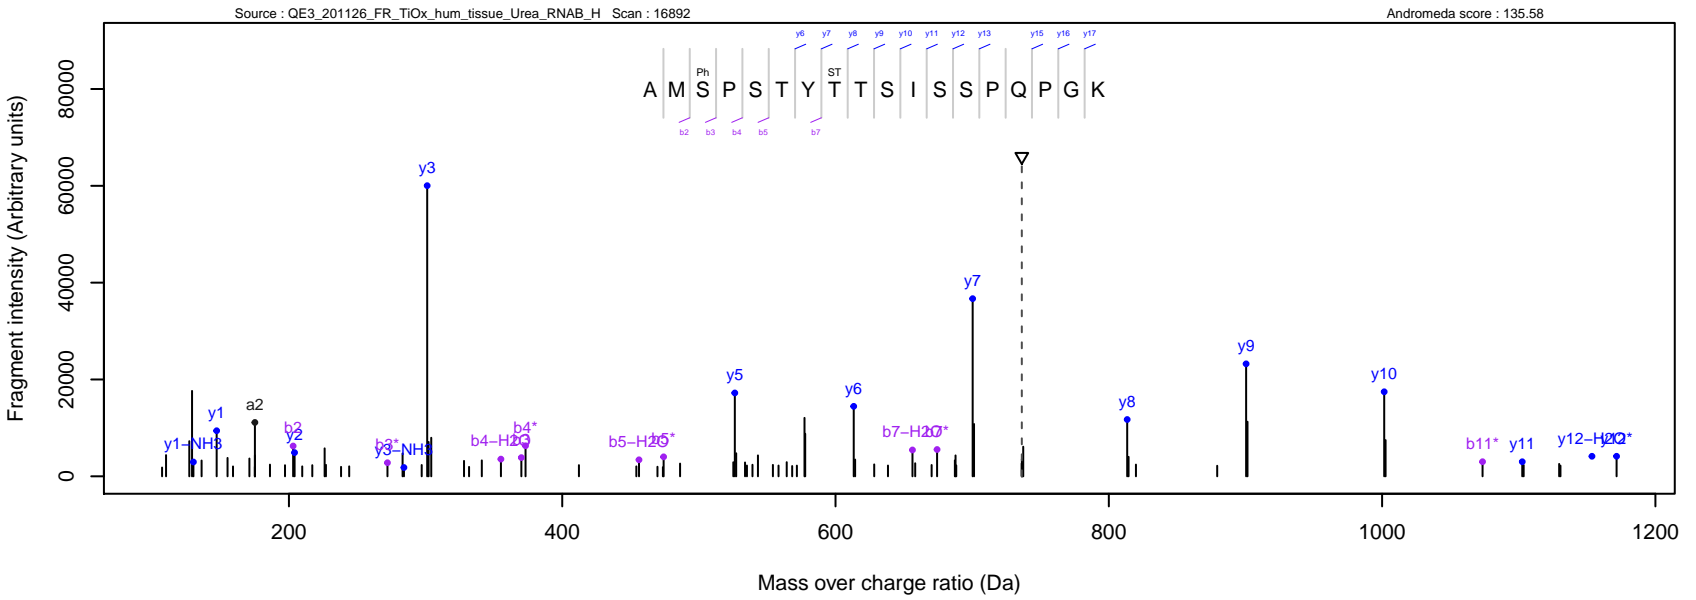

AAS(Phospho (STY))DPLLSSVSPAVSK-2+

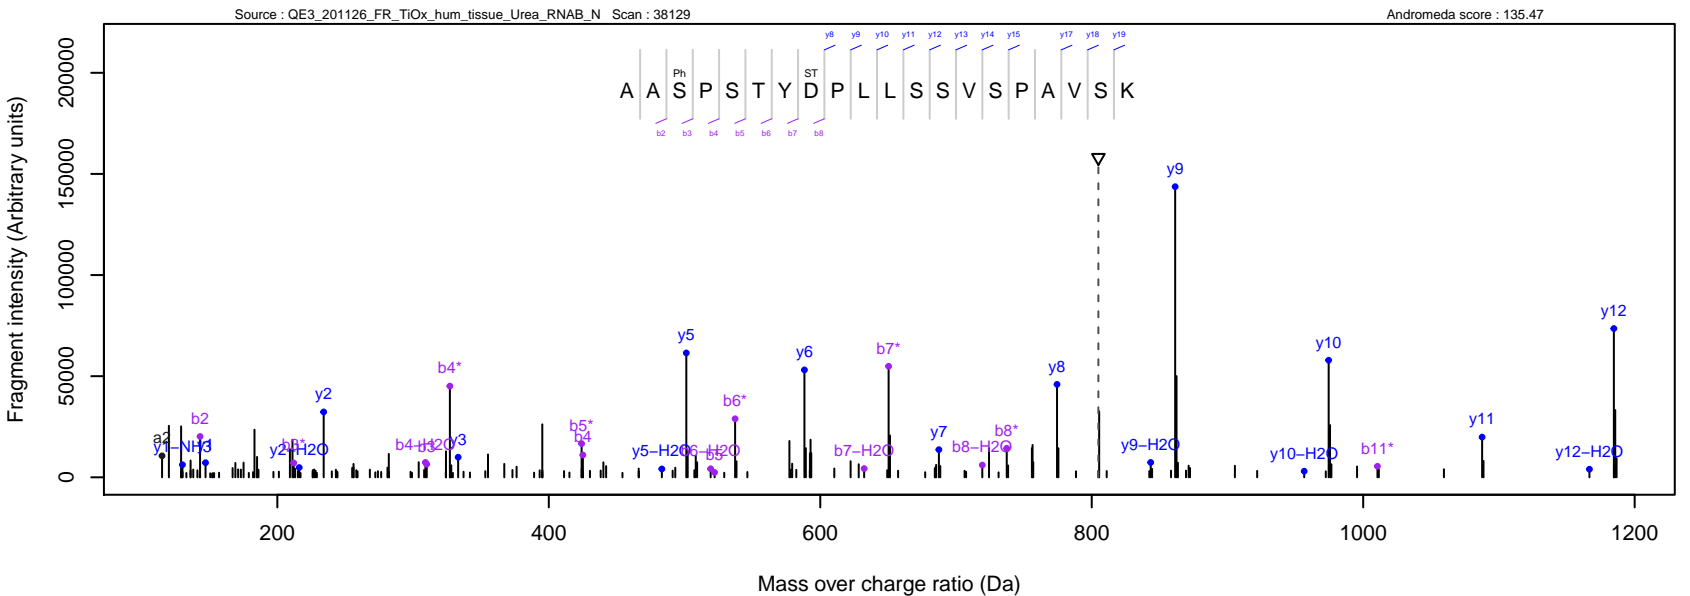

RPDPDS(Phospho (STY))DEDEDYER-2+

Source : QE3\_201126\_FR\_TiOx\_hum\_tissue\_Urea\_RNAB\_N Scan : 9431

Andromeda score : 135.37

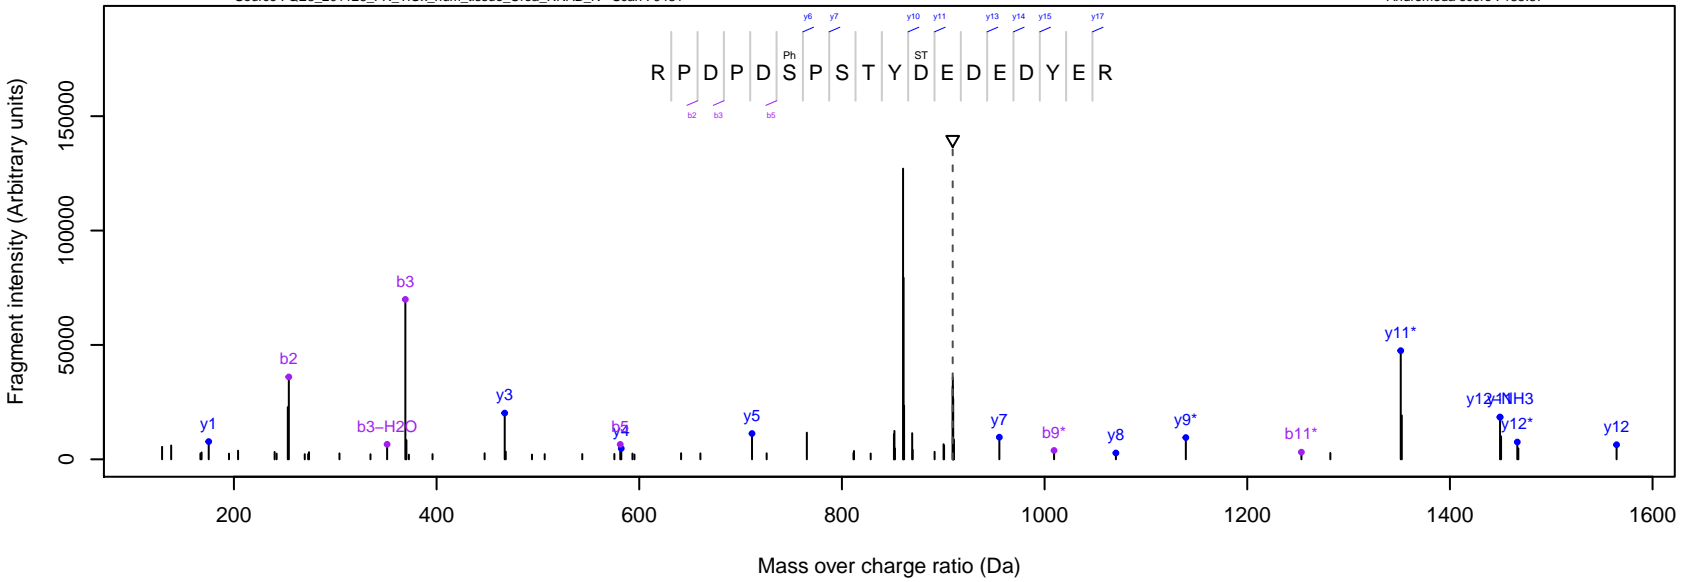

IDINMSGFNETDDLKRAES(Phospho (STY))MLQQADK-3+

Source : QE3\_201126\_FR\_TiOx\_hum\_tissue\_Urea\_RNAB\_N Scan : 54451

Andromeda score : 135.32

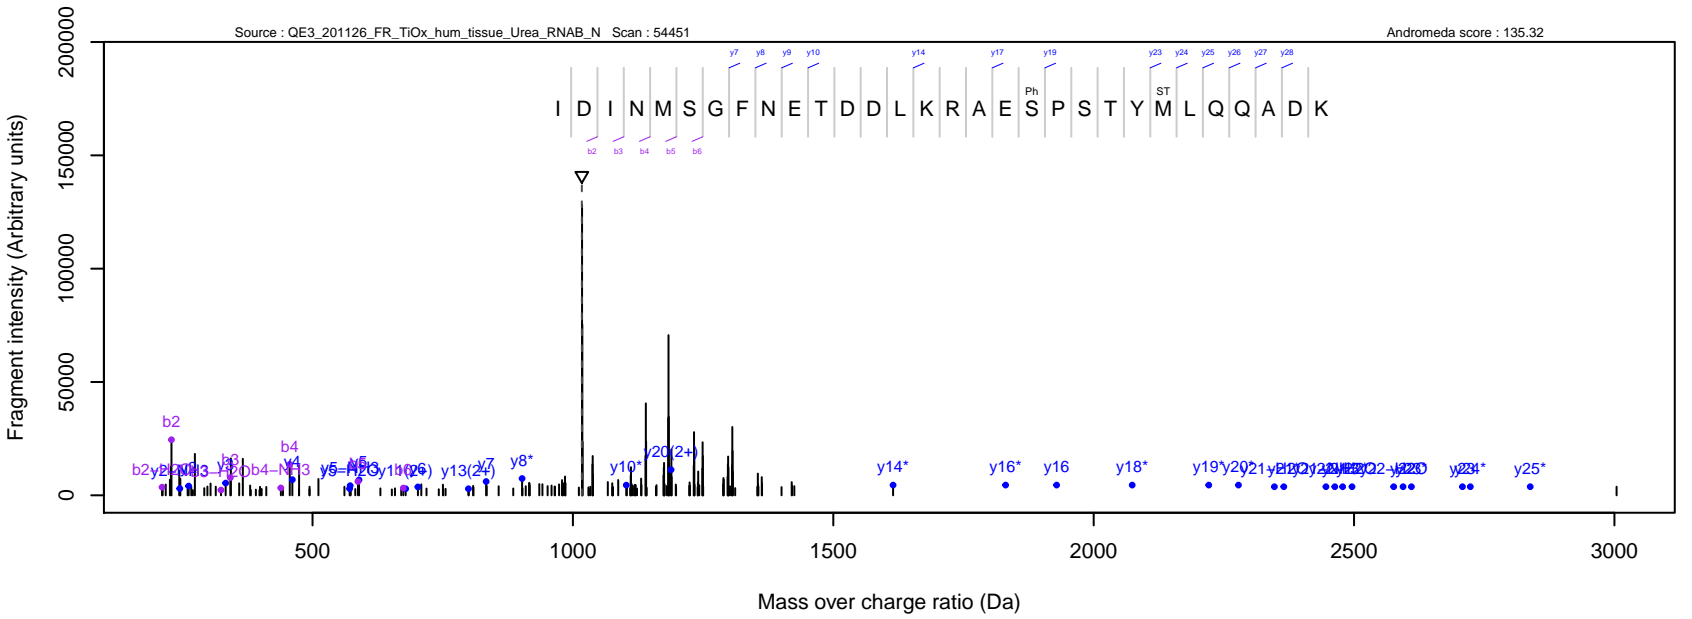

QPGSTAQYDAGAGSPEAEP TDSPPSSADASR-3+

Source : QE3\_201126\_FR\_TiOx\_hum\_tissue\_Urea\_RNAB\_N Scan : 20563

Andromeda score : 135.25

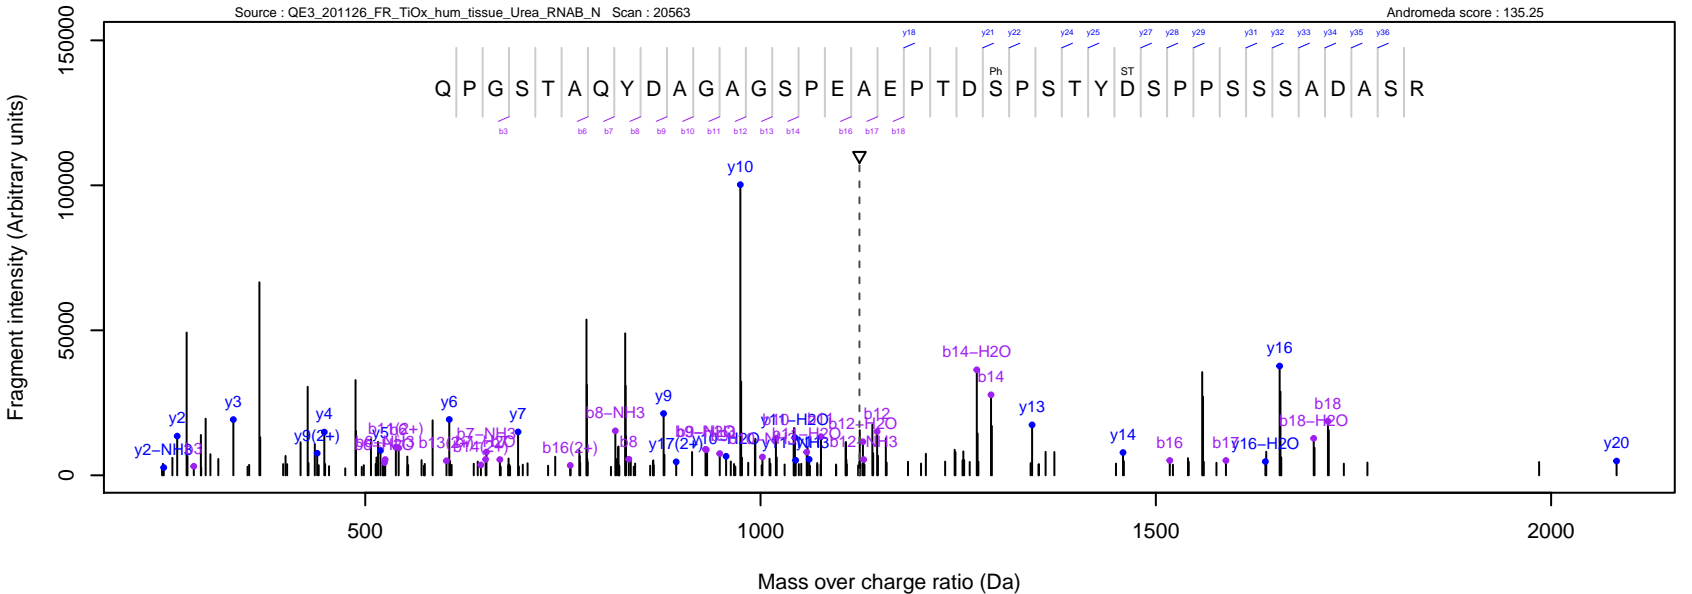

GYYSYSPVSGSGS(Phospho (STY))TAGS(Phospho (STY))R-2+

Source : QE3\_201126\_FR\_TiOx\_hum\_tissue\_Urea\_RNAB\_B Scan : 33346

Andromeda score : 135.21

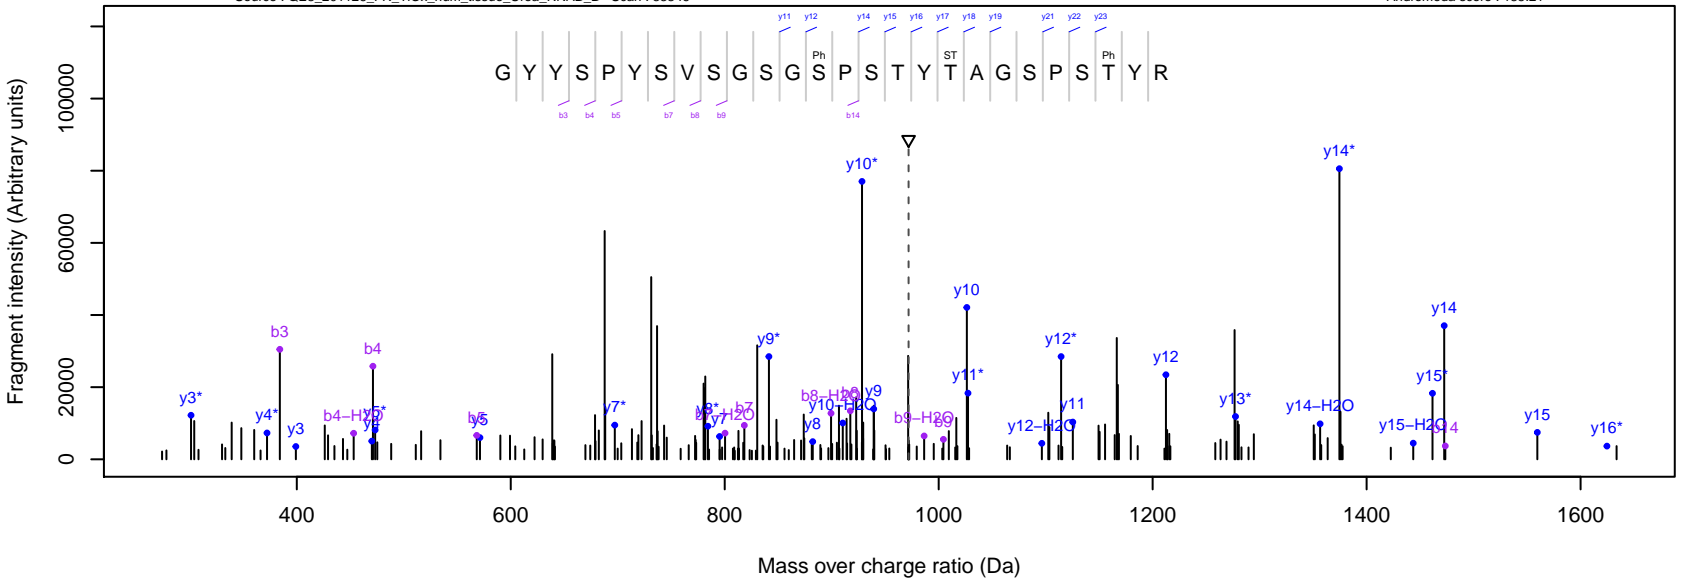

PATPAEDEDDEDLFGS(Phospho (STY))DNEEEDKEAAQLR-3+

Source : QE3\_201126\_FR\_TiOx\_hum\_tissue\_Urea\_RNAB\_H Scan : 42644

Andromeda score : 135.16

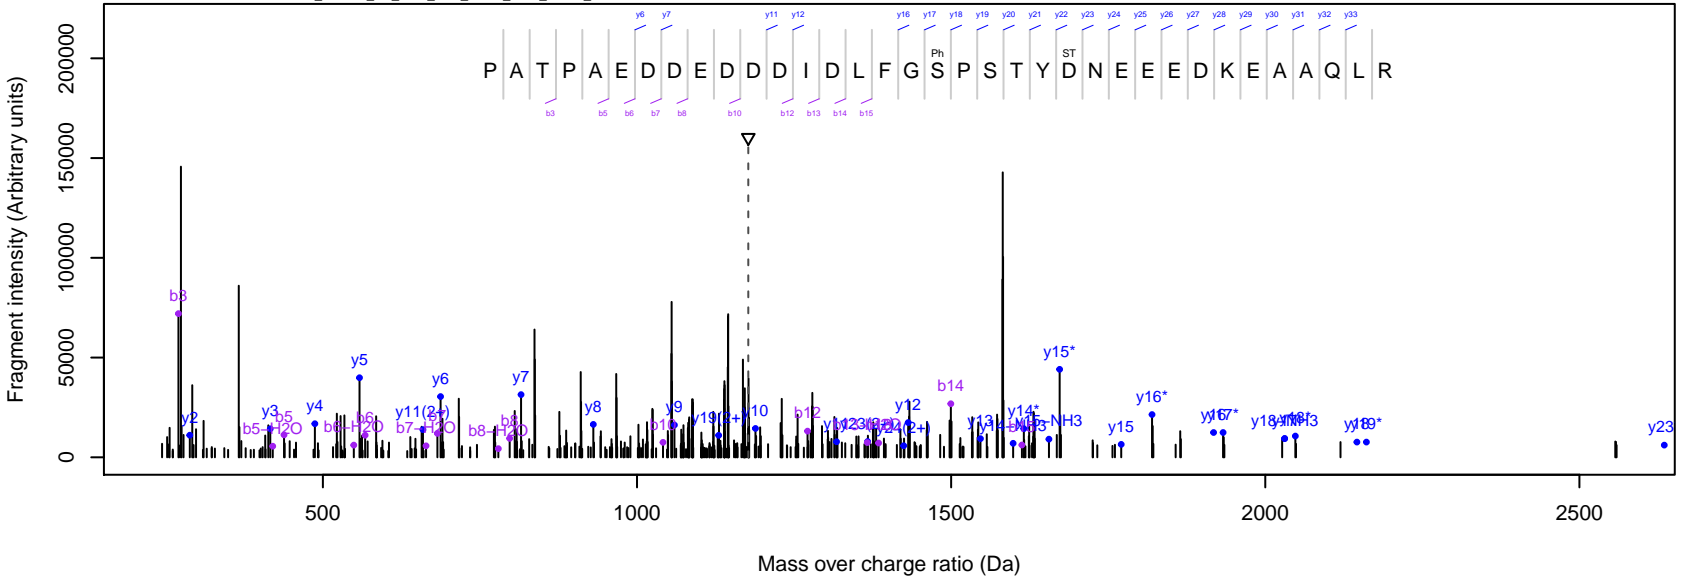

RPEGPGAQAPSS(Phospho (STY))PR-2+

Source : QE3\_201126\_FR\_TiOx\_hum\_tissue\_Urea\_RNAB\_N Scan : 5873

Andromeda score : 135.09

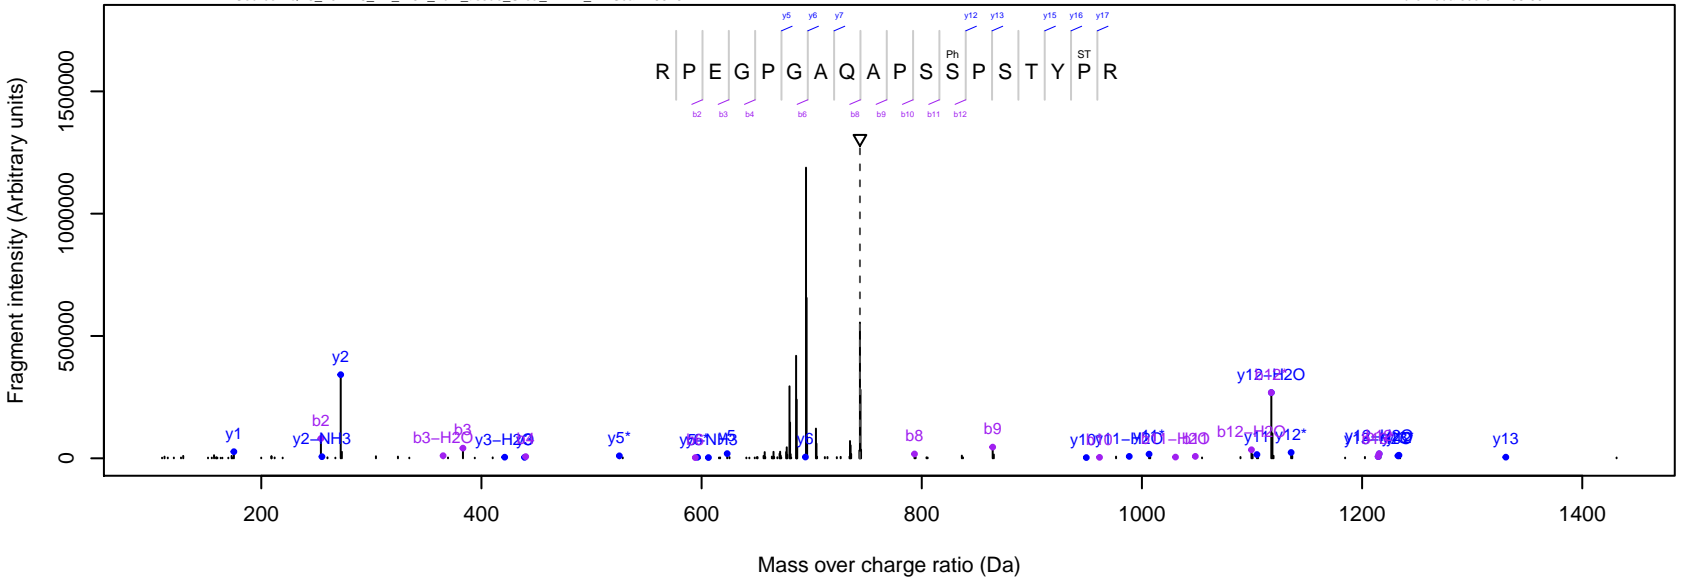

TPEELDD(Phospho (STY))DFET(Phospho (STY))EDFDVR-2+

Source : QE3\_201126\_FR\_TiOx\_hum\_tissue\_Urea\_RNAB\_N Scan : 52629

Andromeda score : 135.09

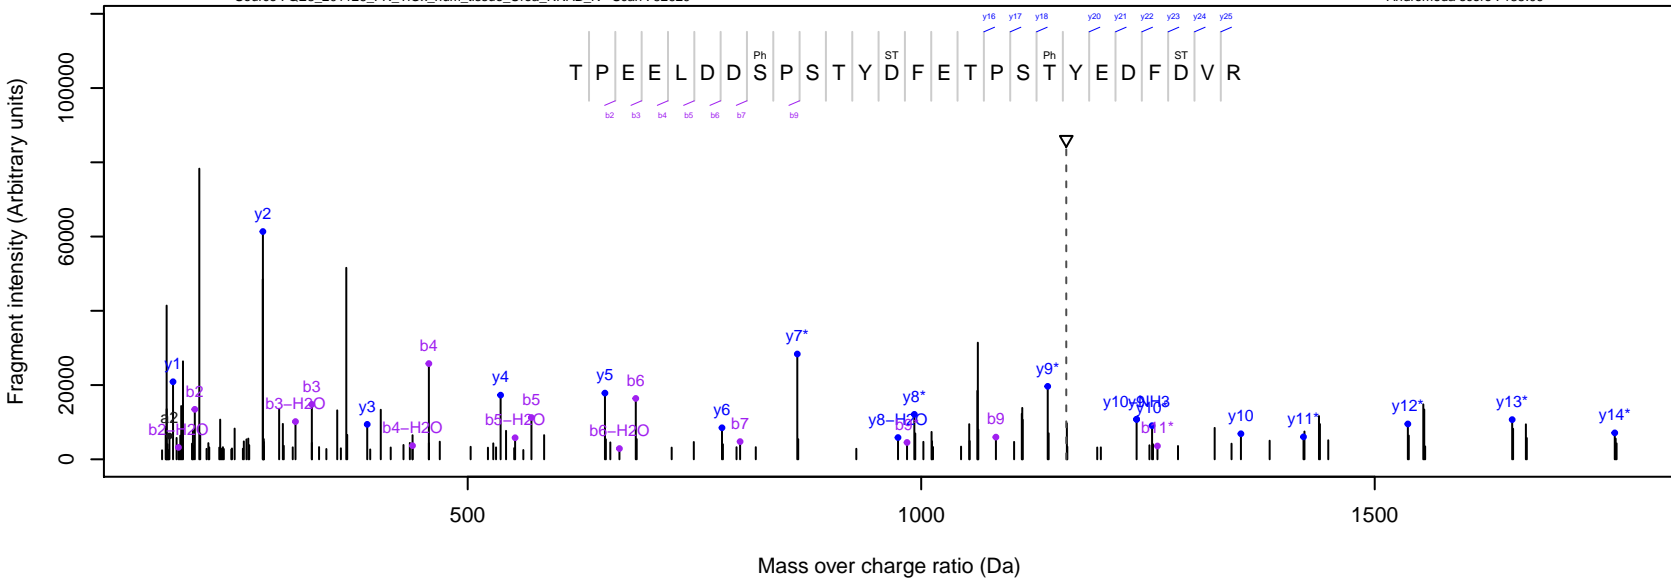

VVEAVNS(Phospho (STY))DS(Phospho (STY))DSEFGIPK-2+

Source : QE3\_201126\_FR\_TiOx\_hum\_tissue\_Urea\_RNAB\_H Scan : 45056

Andromeda score : 135.09

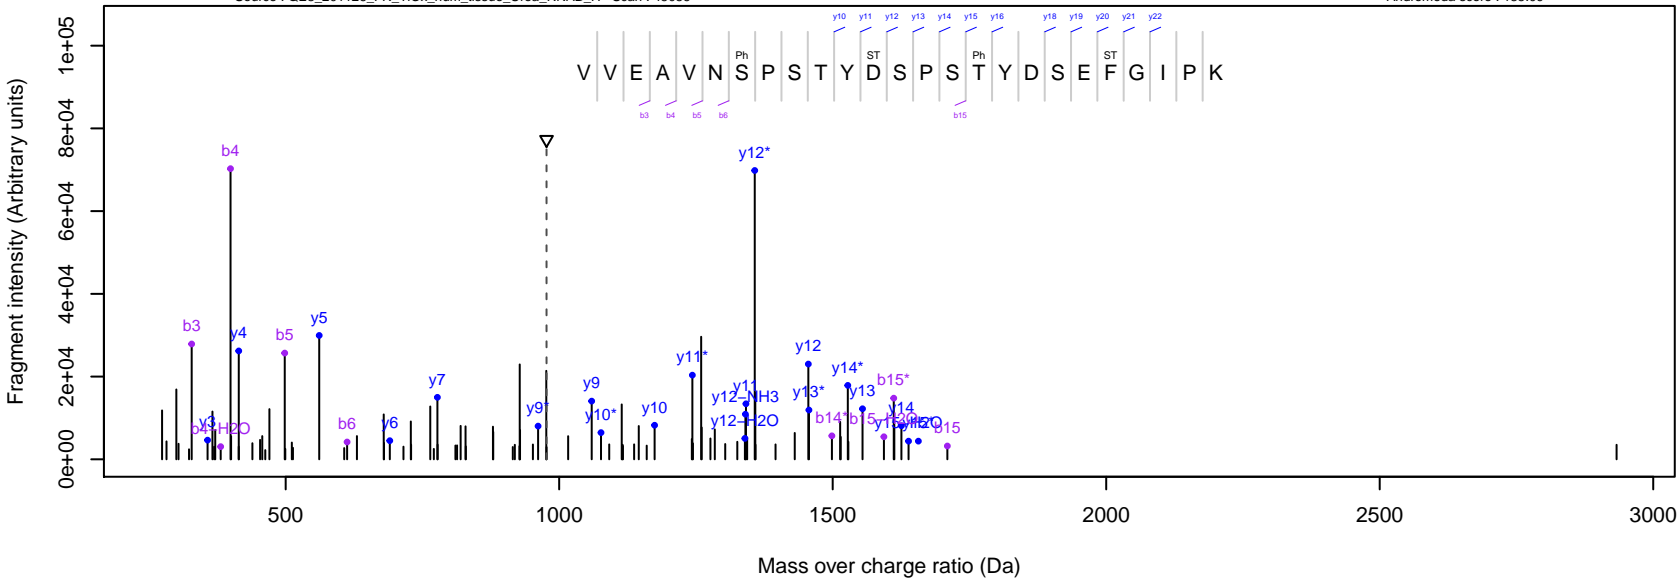

YGS(Phospho (STY))PPQRDPNWN GER-3+

Source : QE3\_201126\_FR\_TiOx\_hum\_tissue\_Urea\_RNAB\_N Scan : 15408

Andromeda score : 135.08

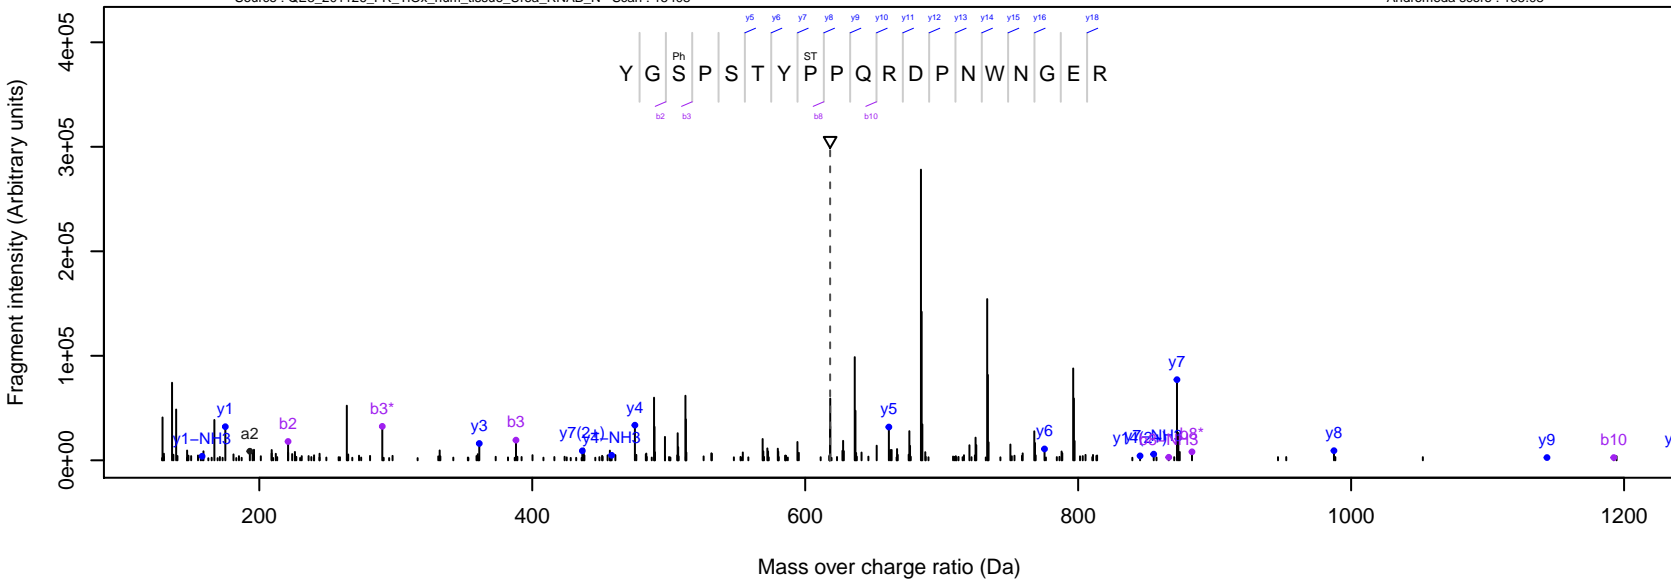

TGQEYKPGNPPAEIGQNISSNSSPSTYASILESK-3+

Source : QE3\_201126\_FR\_TIOx\_hum\_tissue\_Urea\_RNAB\_N Scan : 31832

Andromeda score : 135.03

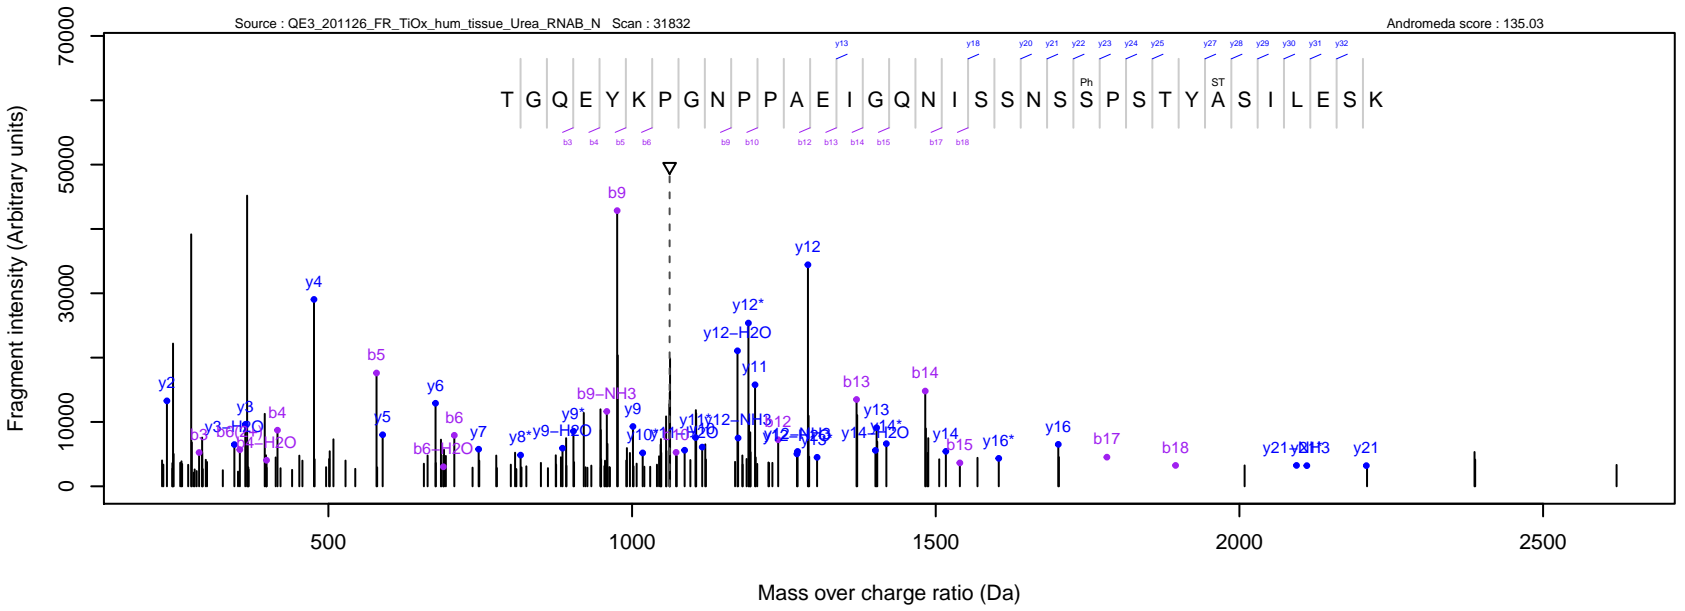

(Acetyl (Protein N-term))AEDVSSAAPS(Phospho (STY))PR-2+

Source : QE3\_201126\_FR\_TIOx\_hum\_tissue\_Urea\_RNAB\_H Scan : 21374

Andromeda score : 135.02

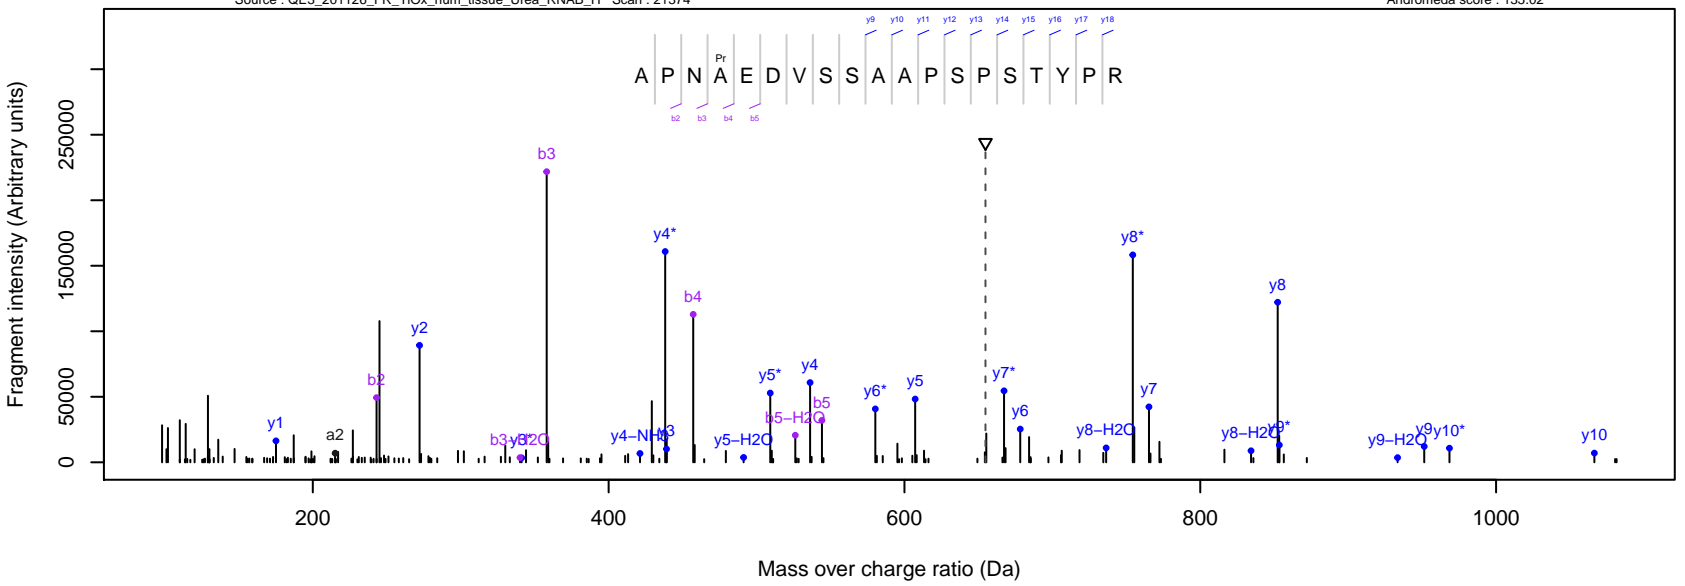

(Acetyl (Protein N-term))S(Phospho (STY))TGGDFGNPLRK-2+

Source : QE3\_201126\_FR\_TIOx\_hum\_tissue\_Urea\_RNAB\_N Scan : 26863

Andromeda score : 134.99

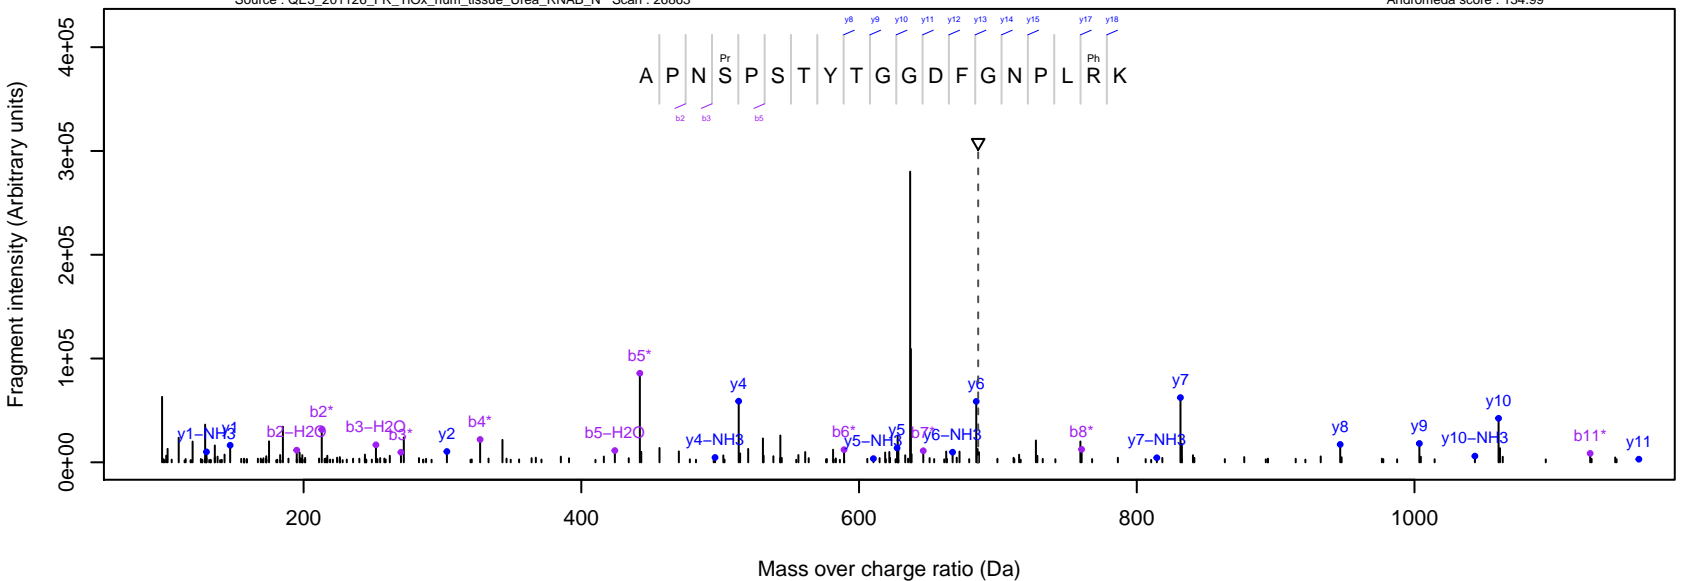

QQSHFAM(Oxidation (M))M(Oxidation (M))HGGTGFGAGIDSSSPSTY)PEVK-3+

Source : QE3\_201126\_FR\_TIOx\_hum\_tissue\_Urea\_RNAB\_N Scan : 20007

Andromeda score : 134.98

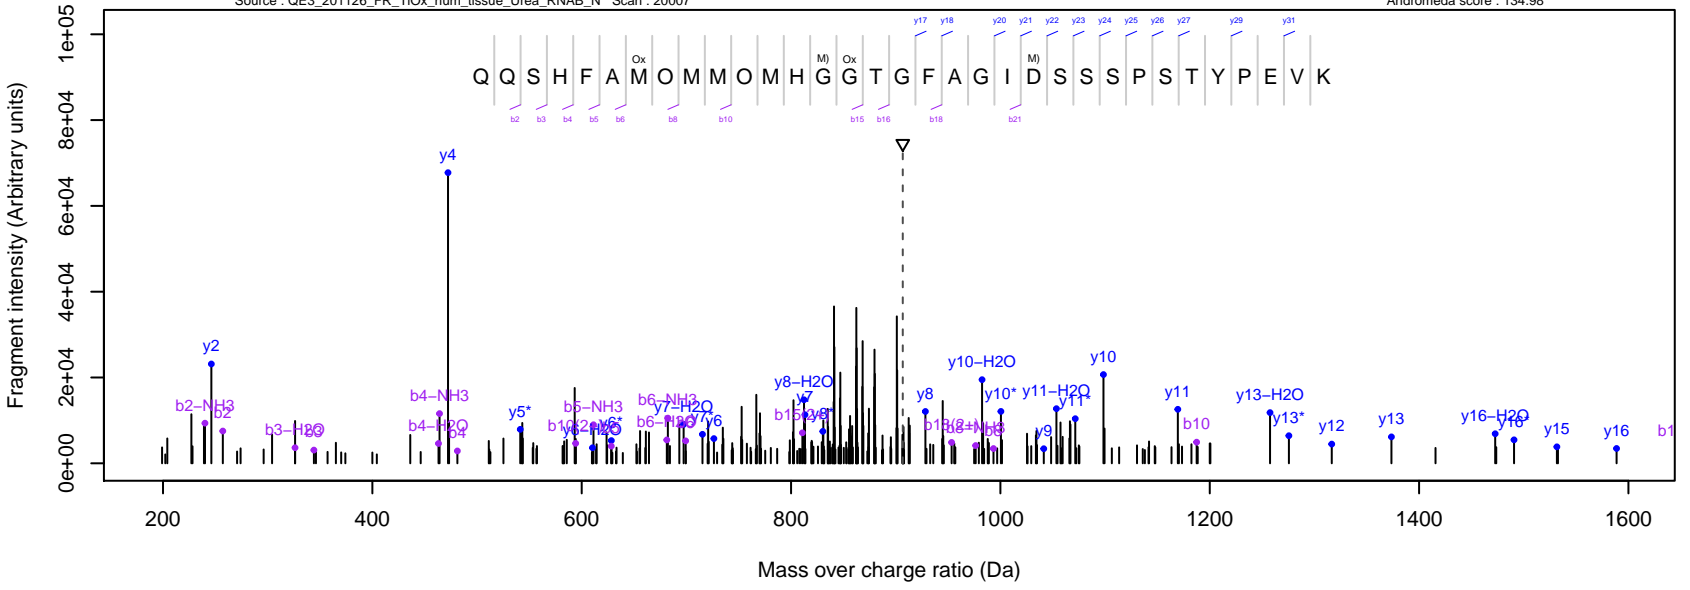

DGDSYDPYDFS(Phospho (STY))DTEEMPQVHTPK-3+

Source : QE3\_201126\_FR\_TIOx\_hum\_tissue\_Urea\_RNAB\_N Scan : 43714

Andromeda score : 134.97

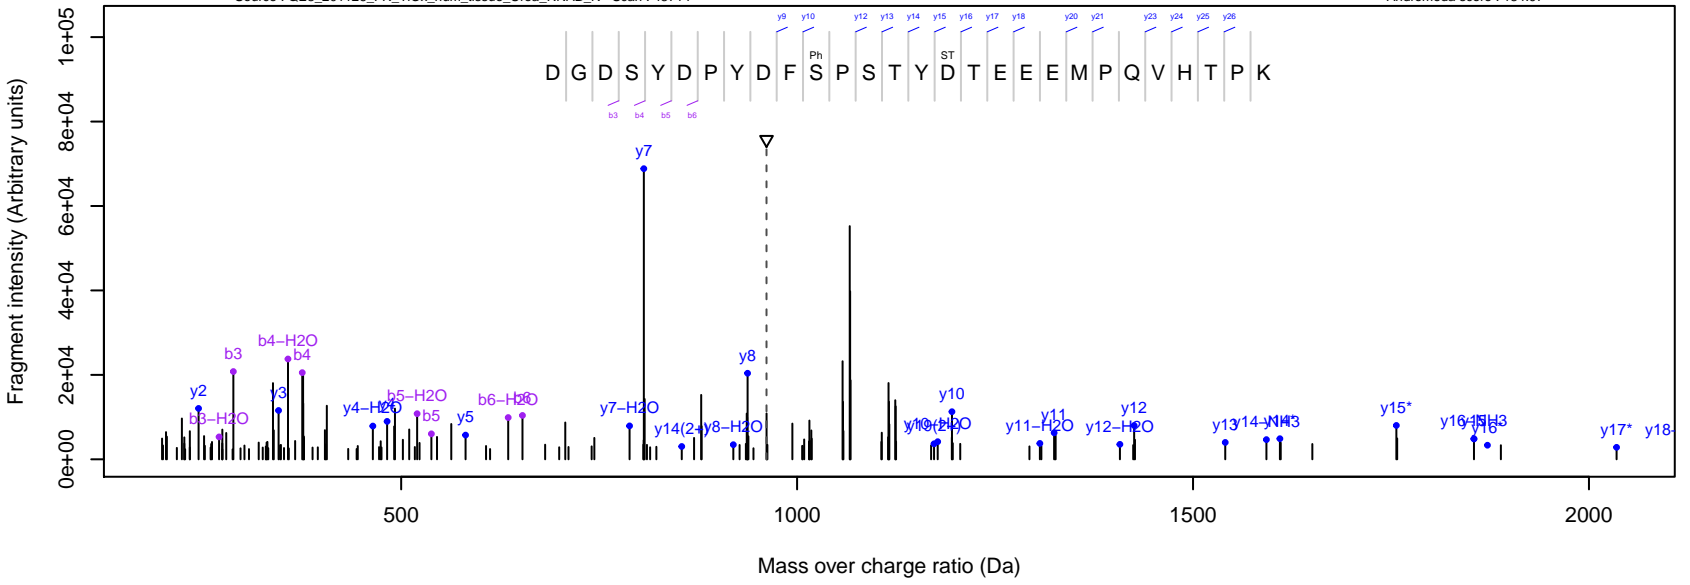

EVRS(Phospho (STY))PTKAPHLQLIEGK-4+

Source : QE3\_201126\_FR\_TIOx\_hum\_tissue\_Urea\_RNAB\_B Scan : 15875

Andromeda score : 134.83

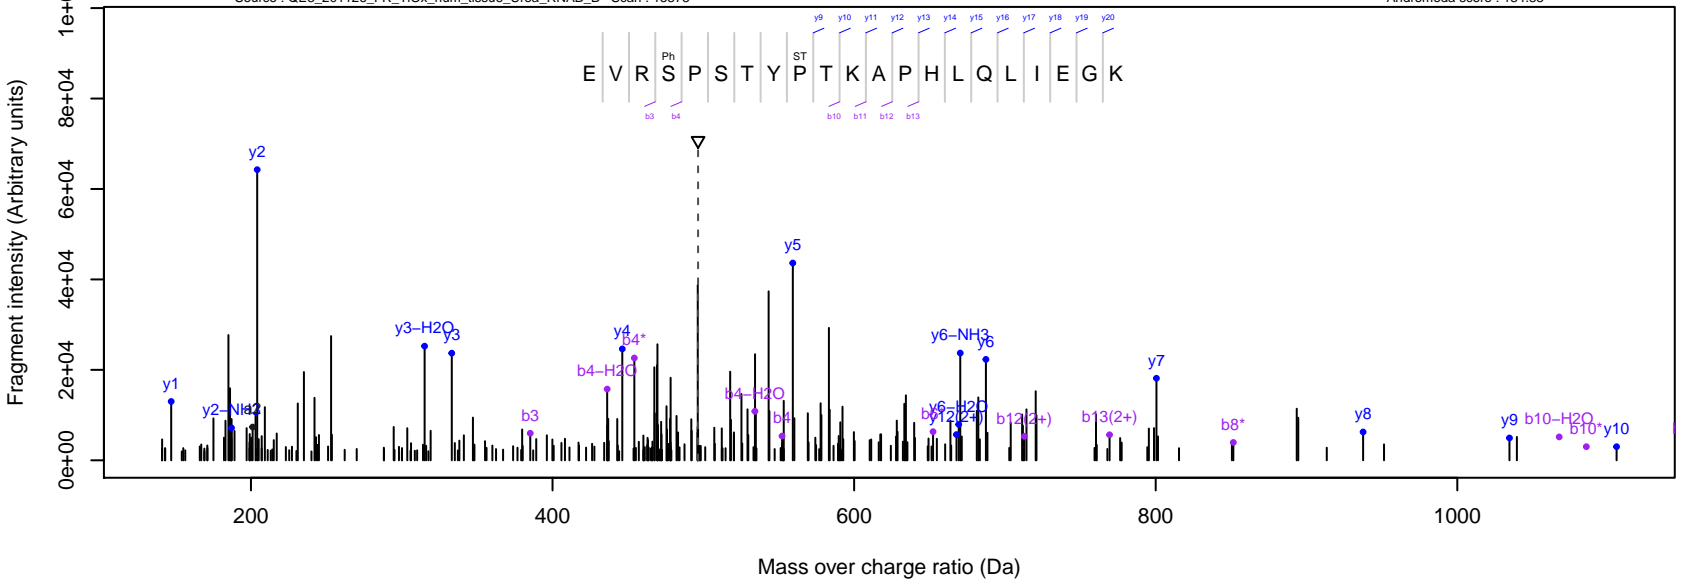

NFETSTLSFS(Phospho (STY))PEENFGDDSGLAAYVAK-3+

Source : QE3\_201126\_FR\_TiOx\_hum\_tissue\_Urea\_RNAB\_B Scan : 59513

Andromeda score : 134.77

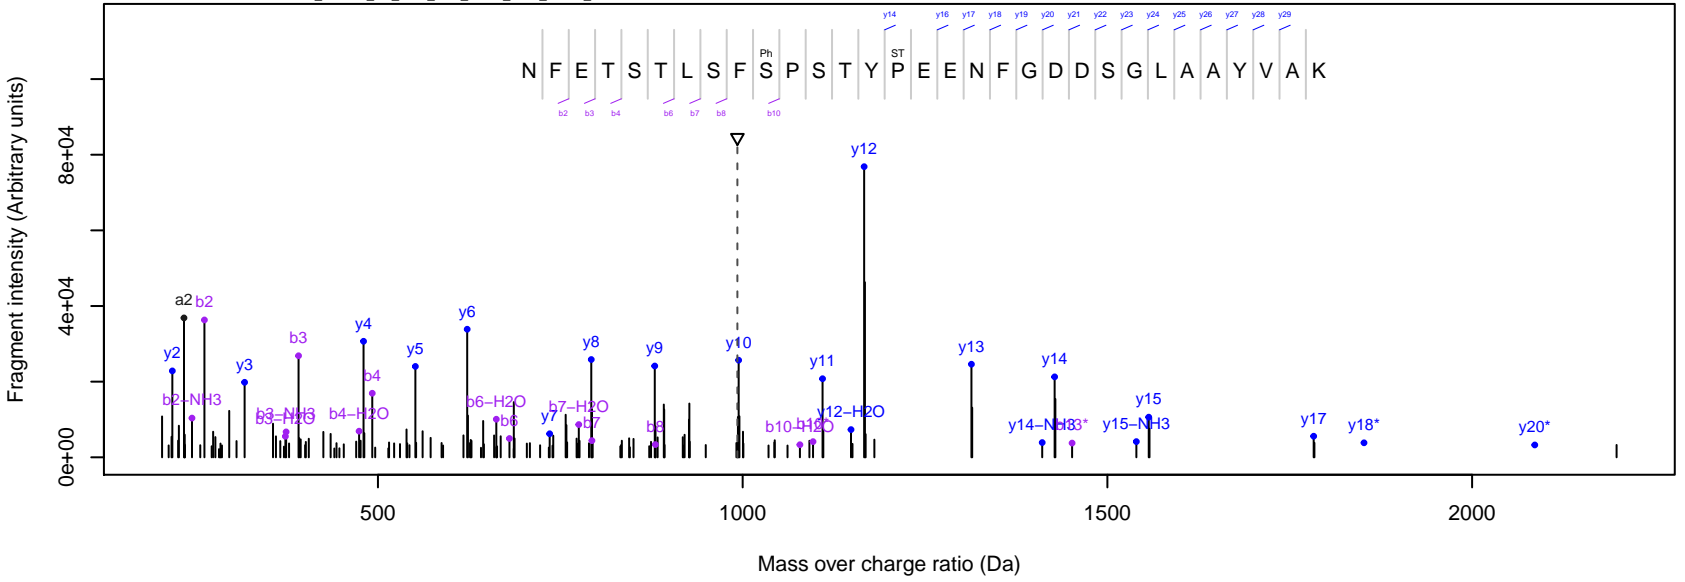

ASDGSFSLPLKPVISQPIHDSKSPSTYPGA S N L K-4+

Source : QE3\_201126\_FR\_TiOx\_hum\_tissue\_Urea\_RNAB\_N Scan : 33378

Andromeda score : 134.73

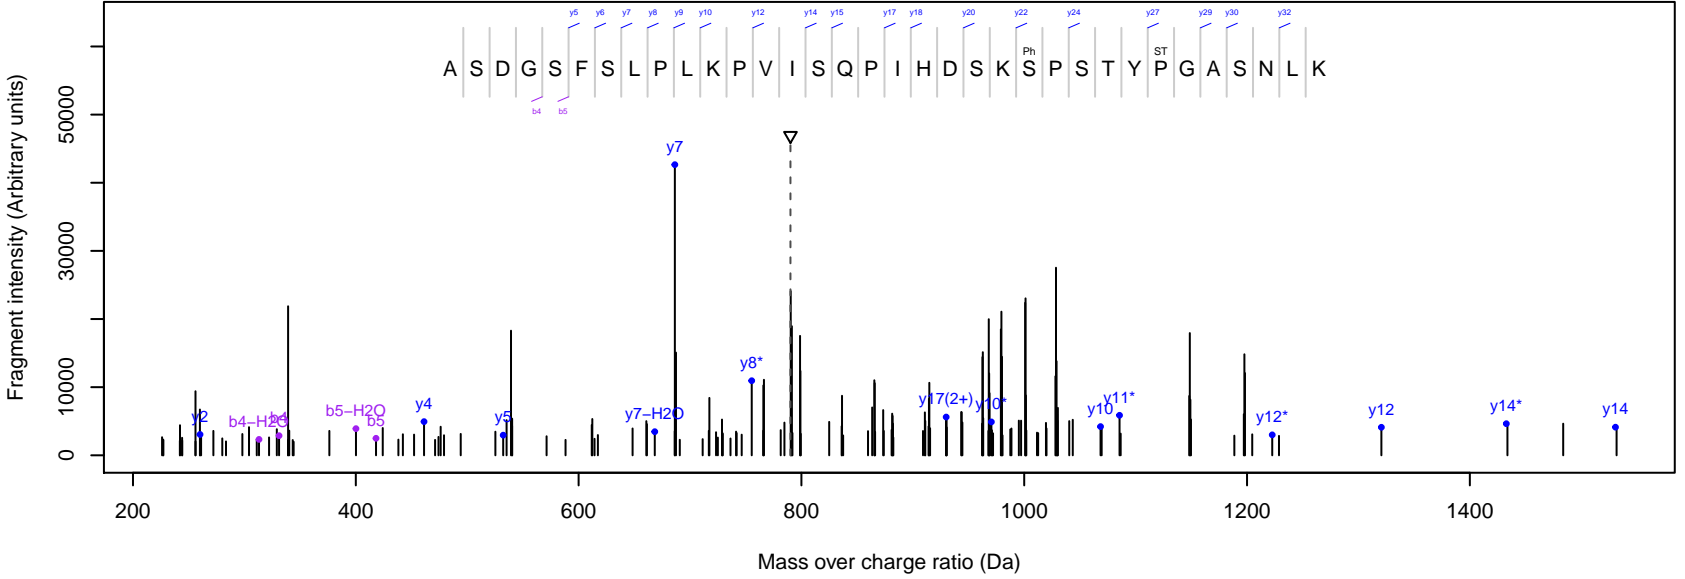

TYS(Phospho (STY))APAINAIQGGSFESPKK-3+

Source : QE3\_201126\_FR\_TiOx\_hum\_tissue\_Urea\_RNAB\_H Scan : 32230

Andromeda score : 134.68

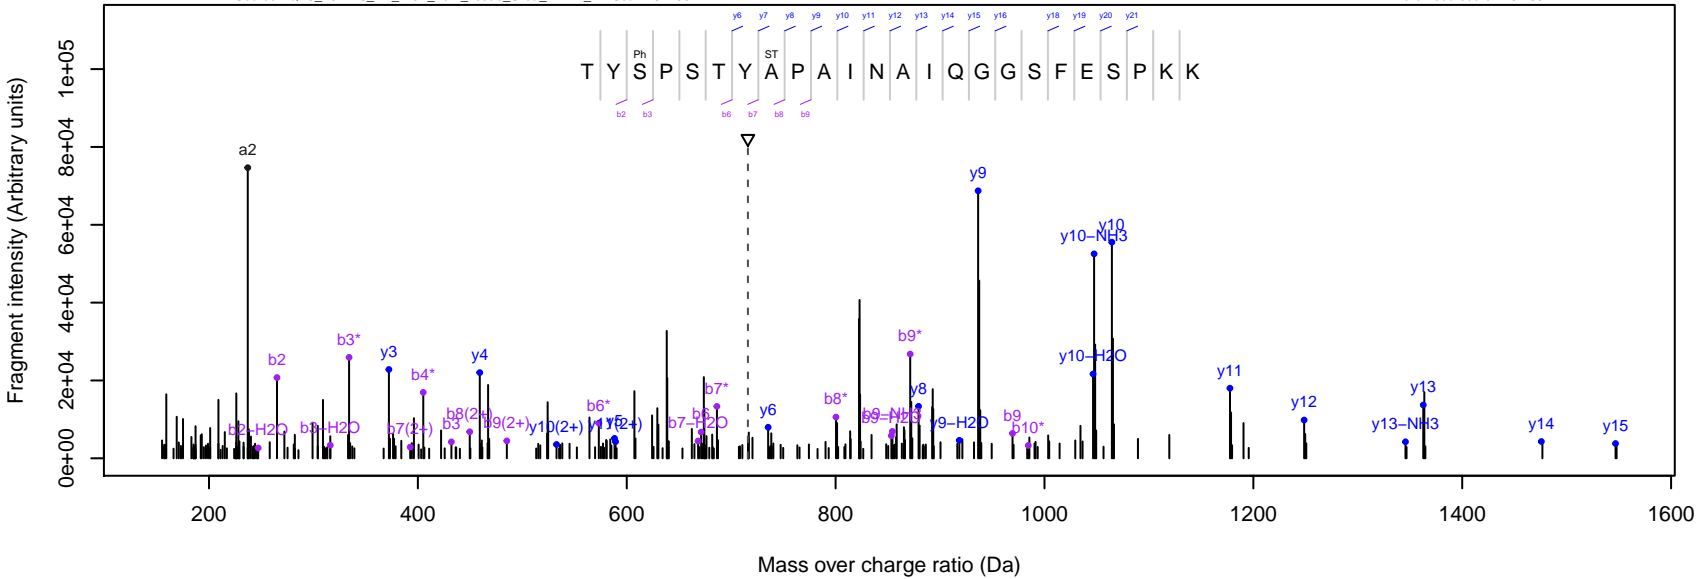



SAGGS(Phospho (STY))SPEGGEDS(Phospho (STY))DREDGNYCPPVKR-3+

Source : QE3\_201126\_FR\_TiOx\_hum\_tissue\_Urea\_RNAB\_H Scan : 13152

Andromeda score : 134.63

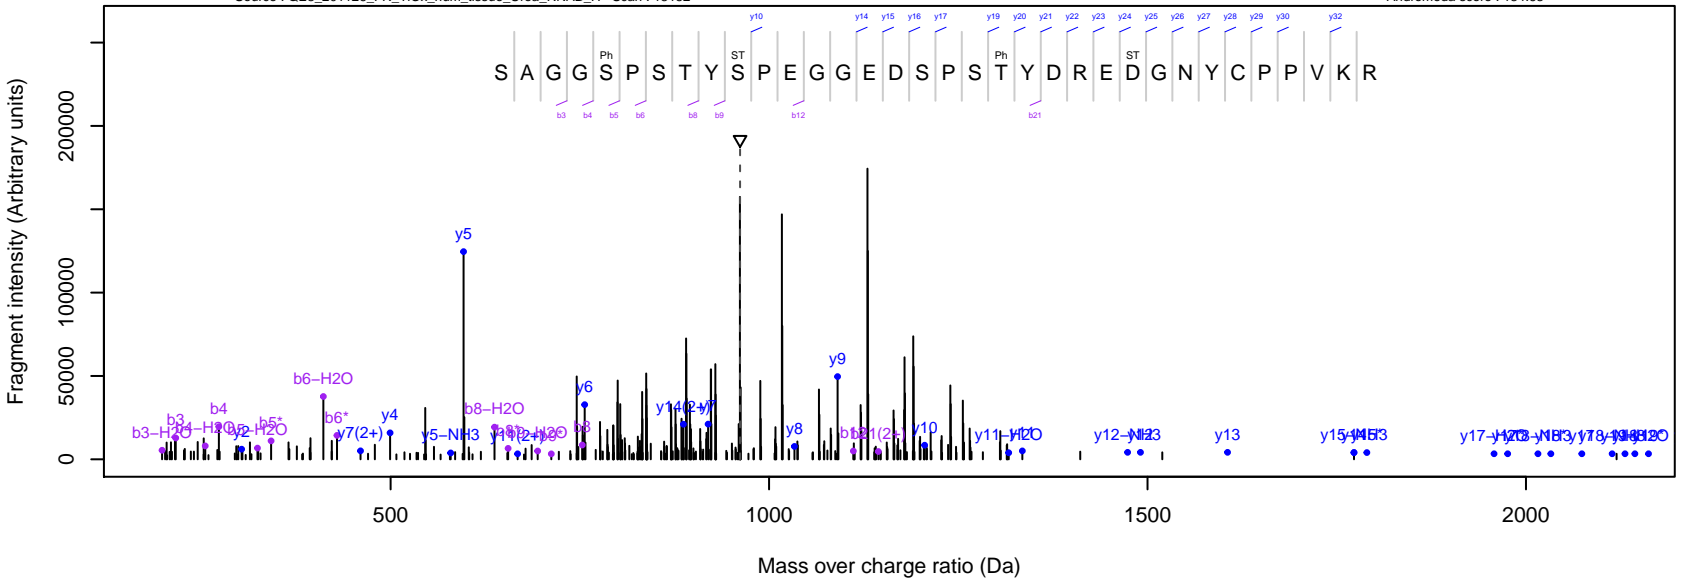

SKS(Phospho (STY))NPDFLKK-3+

Source : QE3\_201126\_FR\_TiOx\_hum\_tissue\_Urea\_RNAB\_H Scan : 7611

Andromeda score : 134.61

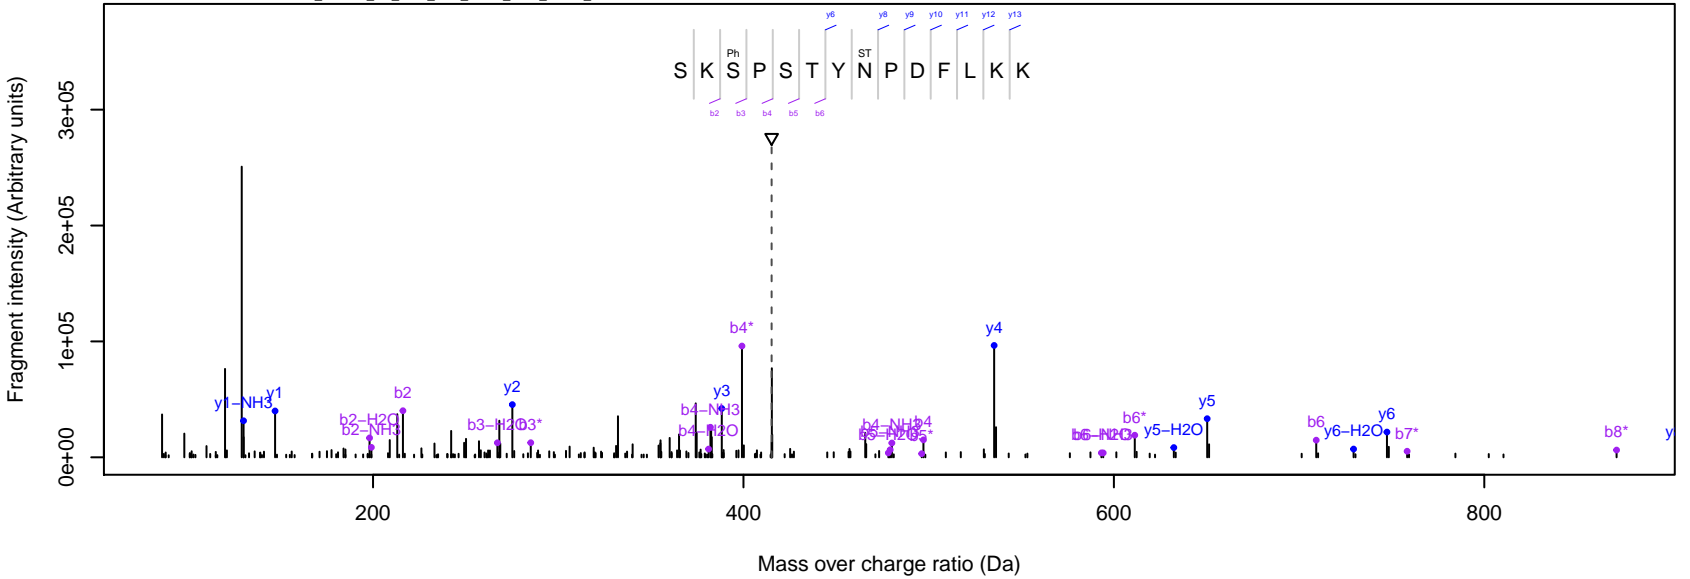

CPS(Phospho (STY))PTMSLPSSWK-2+

Source : QE3\_201126\_FR\_TiOx\_hum\_tissue\_Urea\_RNAB\_N Scan : 40146

Andromeda score : 134.56

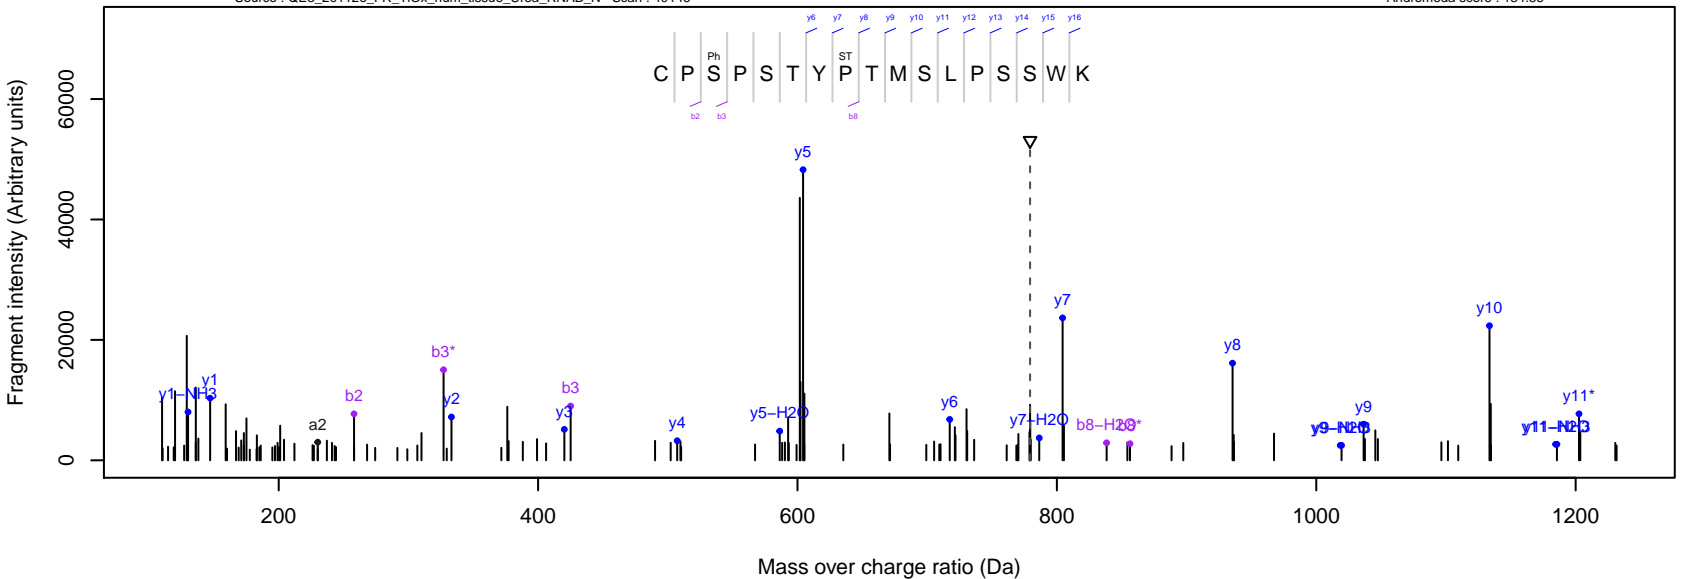

DNEESEQPPVPGT(Phospho (STY))PTLR-2+

Source : QE3\_201126\_FR\_TiOx\_hum\_tissue\_Urea\_RNAB\_N Scan : 28228

Andromeda score : 134.49

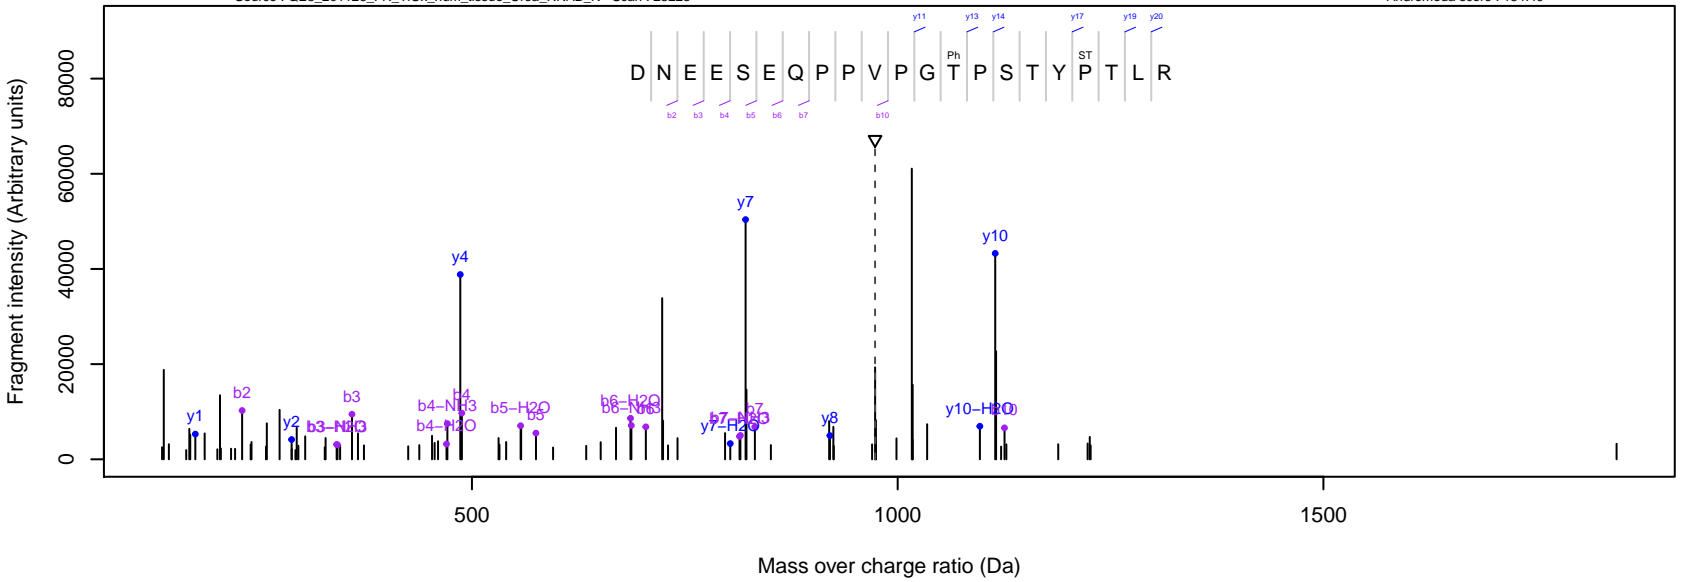

RVS(Phospho (STY))GDPKPGSNCSPAQSVLSEVPSTNGM(Oxidation (M))AK-4+

Source : QE3\_201126\_FR\_TiOx\_hum\_tissue\_Urea\_RNAB\_N Scan : 31860

Andromeda score : 134.49

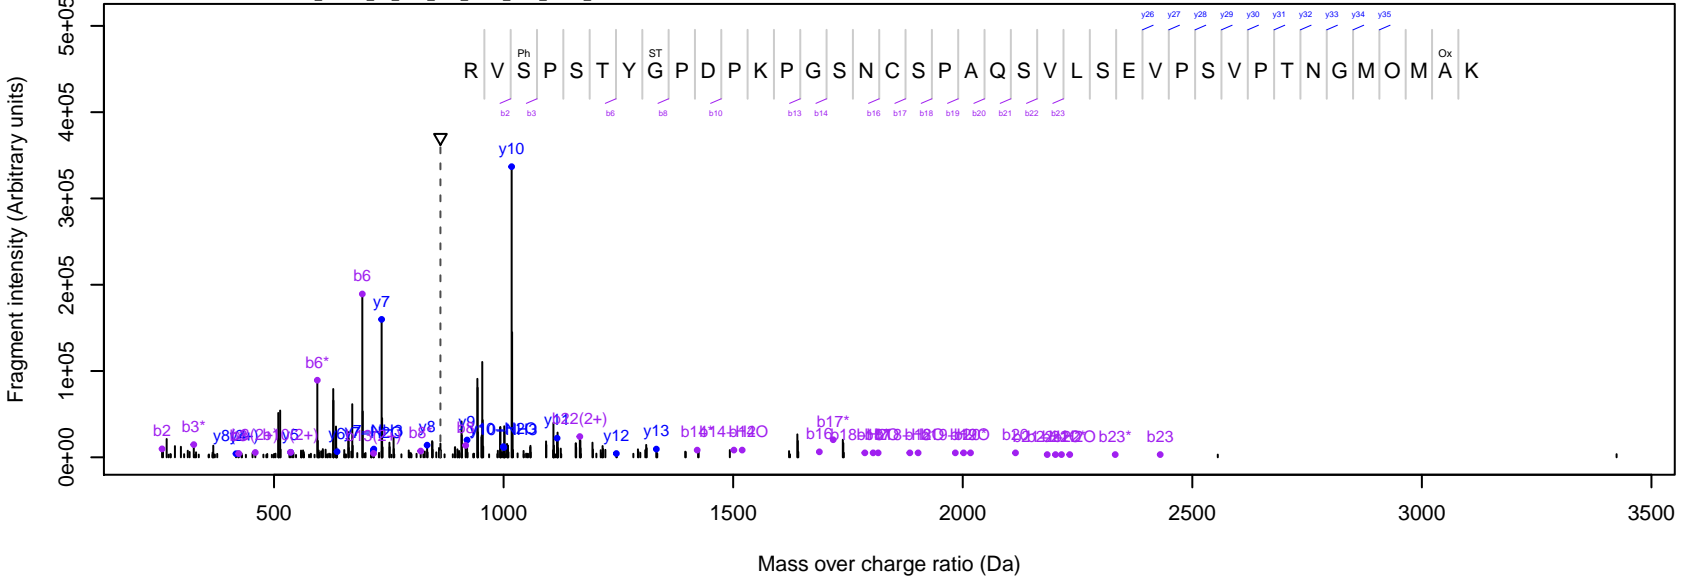

NYQQNQNS(Phospho (STY))ESGEKNEGS(Phospho (STY))ESAPEGQAQR-3+

Source : QE3\_201126\_FR\_TiOx\_hum\_tissue\_Urea\_RNAB\_B Scan : 13057

Andromeda score : 134.42

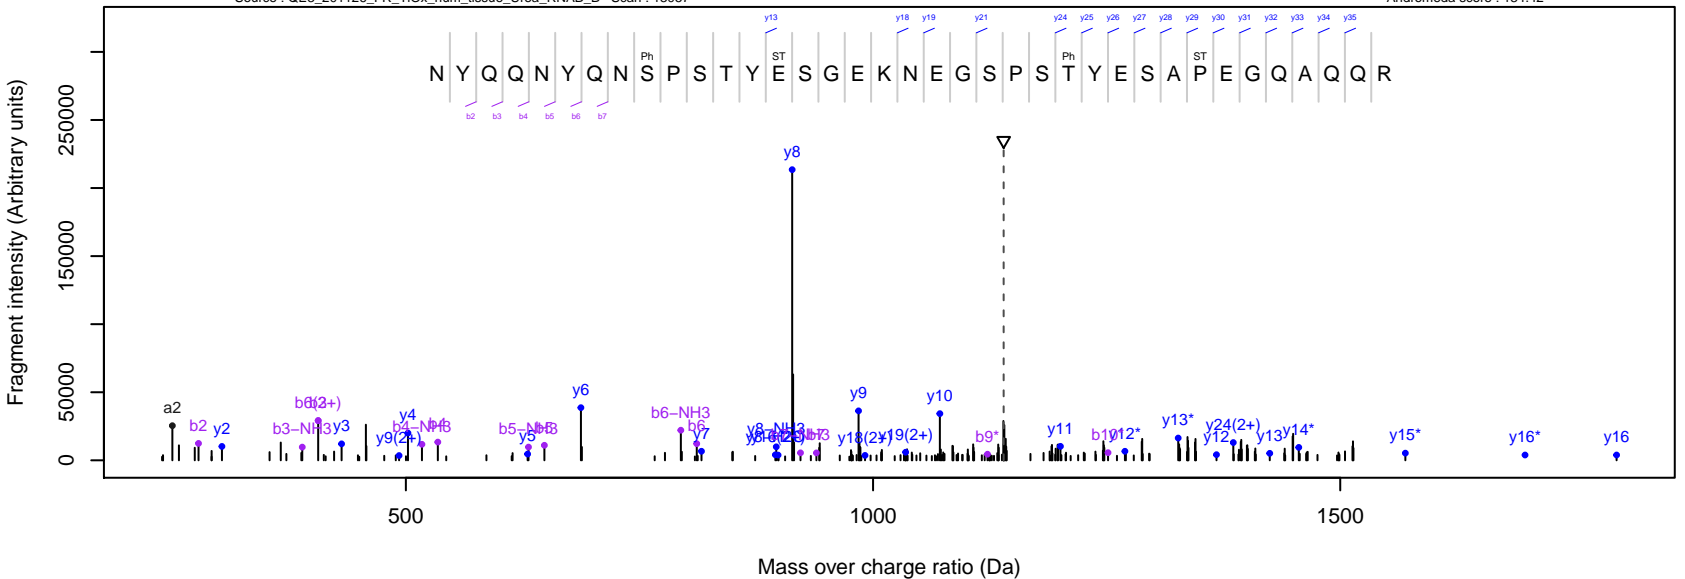

AVAEDNGSIGEETDSS(Phospho (STY))PGRK-3+

Source : QE3\_201126\_FR\_TiOx\_hum\_tissue\_Urea\_RNAB\_N Scan : 10748

Andromeda score : 134.37

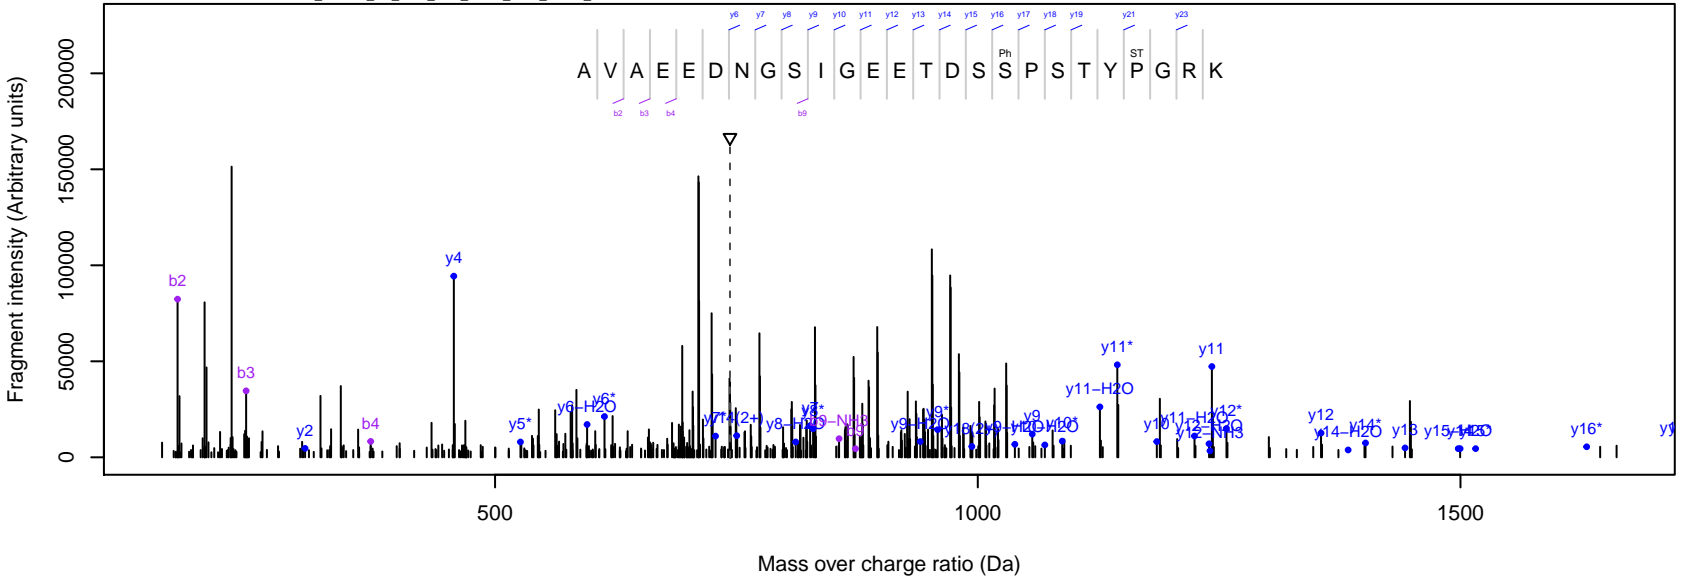

DGS(Phospho (STY))IDLVINLPNNNTK-2+

Source : QE3\_201126\_FR\_TiOx\_hum\_tissue\_Urea\_RNAB\_H Scan : 49958

Andromeda score : 134.37

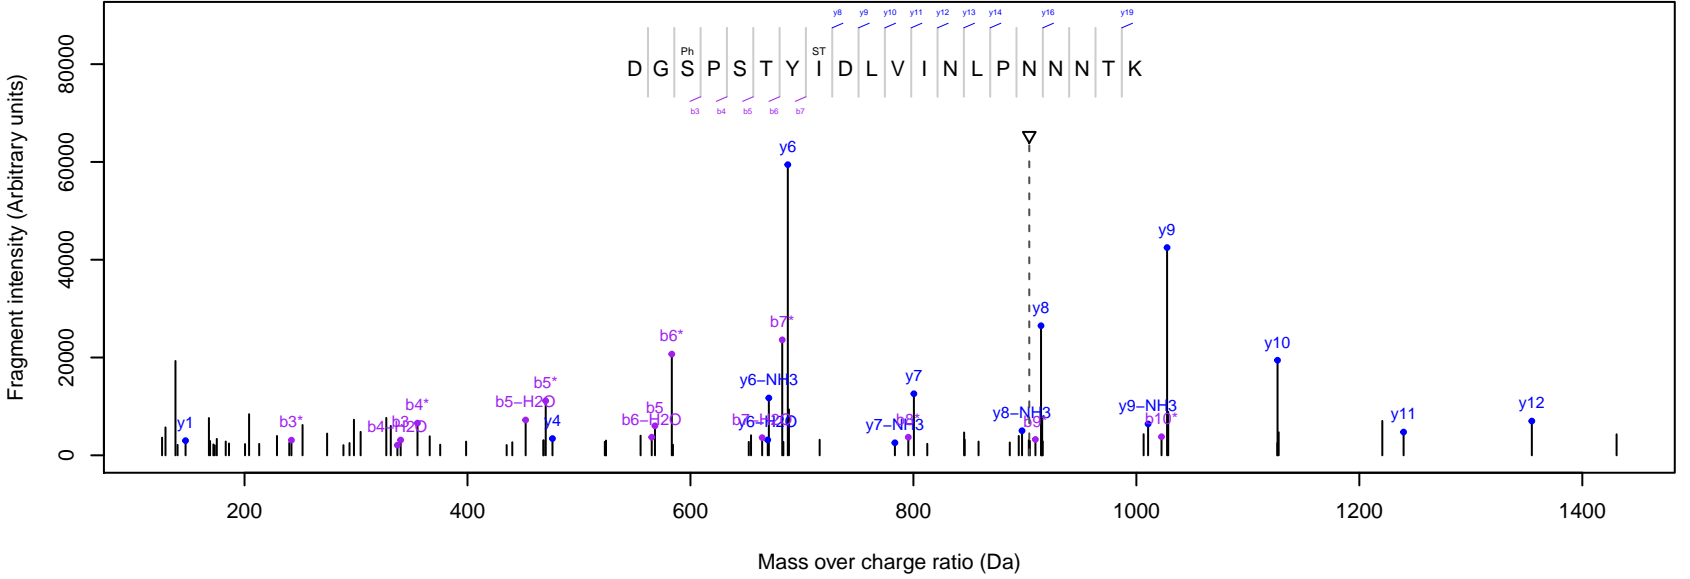

S(Phospho (STY))IQEIQELD KDESLRK-3+

Source : QE3\_201126\_FR\_TiOx\_hum\_tissue\_Urea\_RNAB\_H Scan : 24366

Andromeda score : 134.29

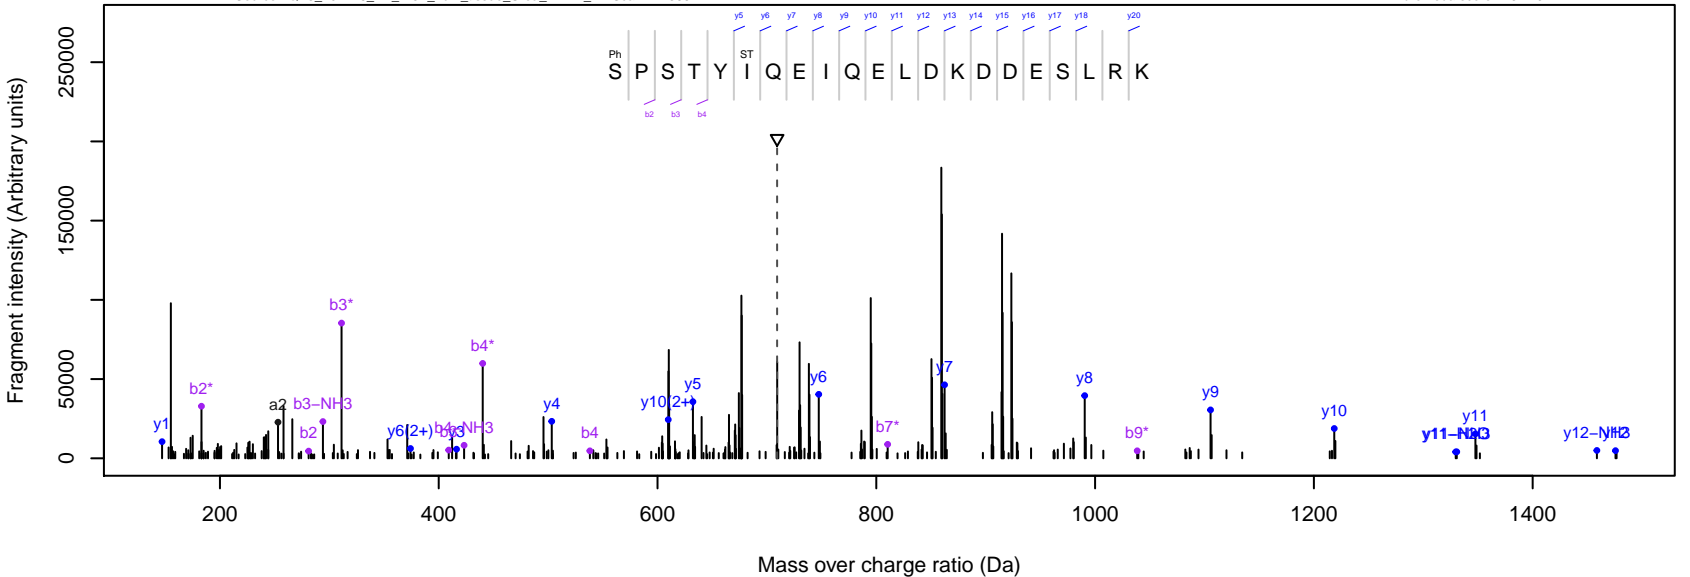

SRSPPGS(Phospho (STY))PVGEGTGSPPK-2+

Source : QE3\_201126\_FR\_TiOx\_hum\_tissue\_Urea\_RNAB\_H Scan : 7471

Andromeda score : 134.29

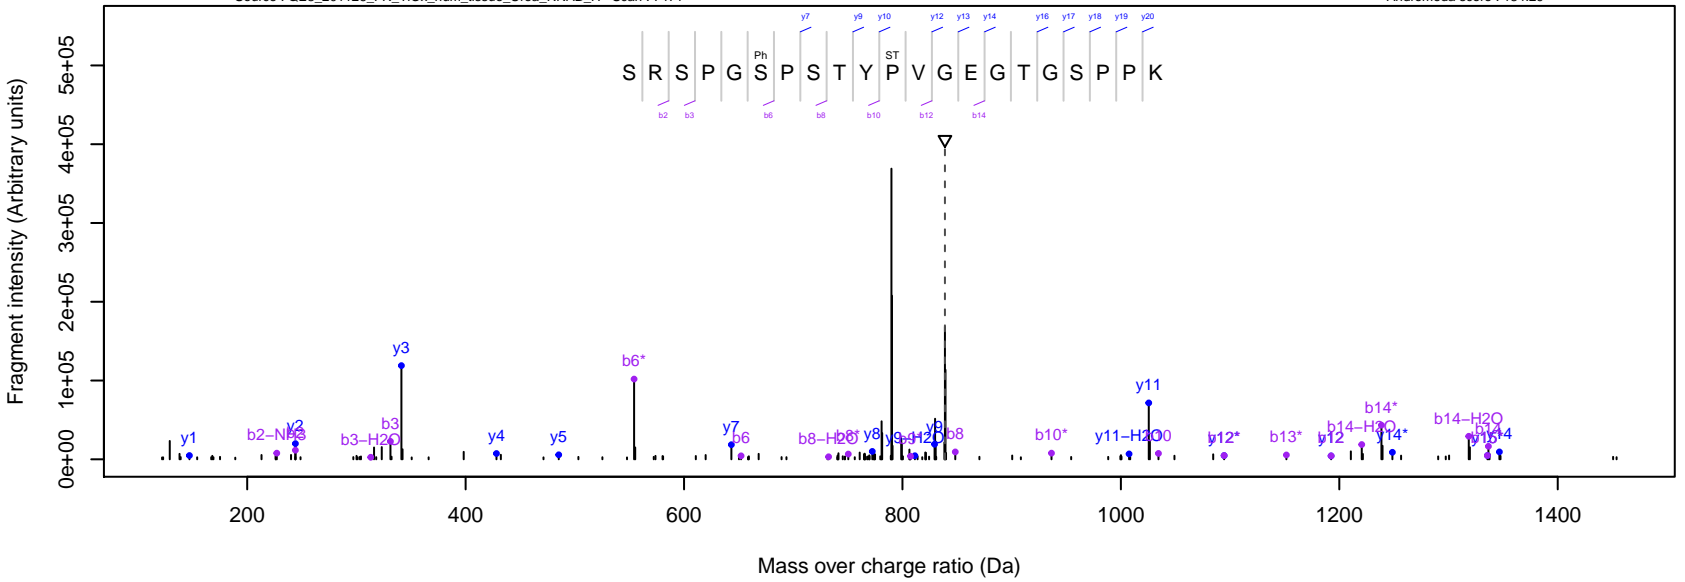

AQTTPGSLSGSKS(Phospho (STY))PCPQEK-3+

Source : QE3\_201126\_FR\_TiOx\_hum\_tissue\_Urea\_RNAB\_H Scan : 12259

Andromeda score : 134.26

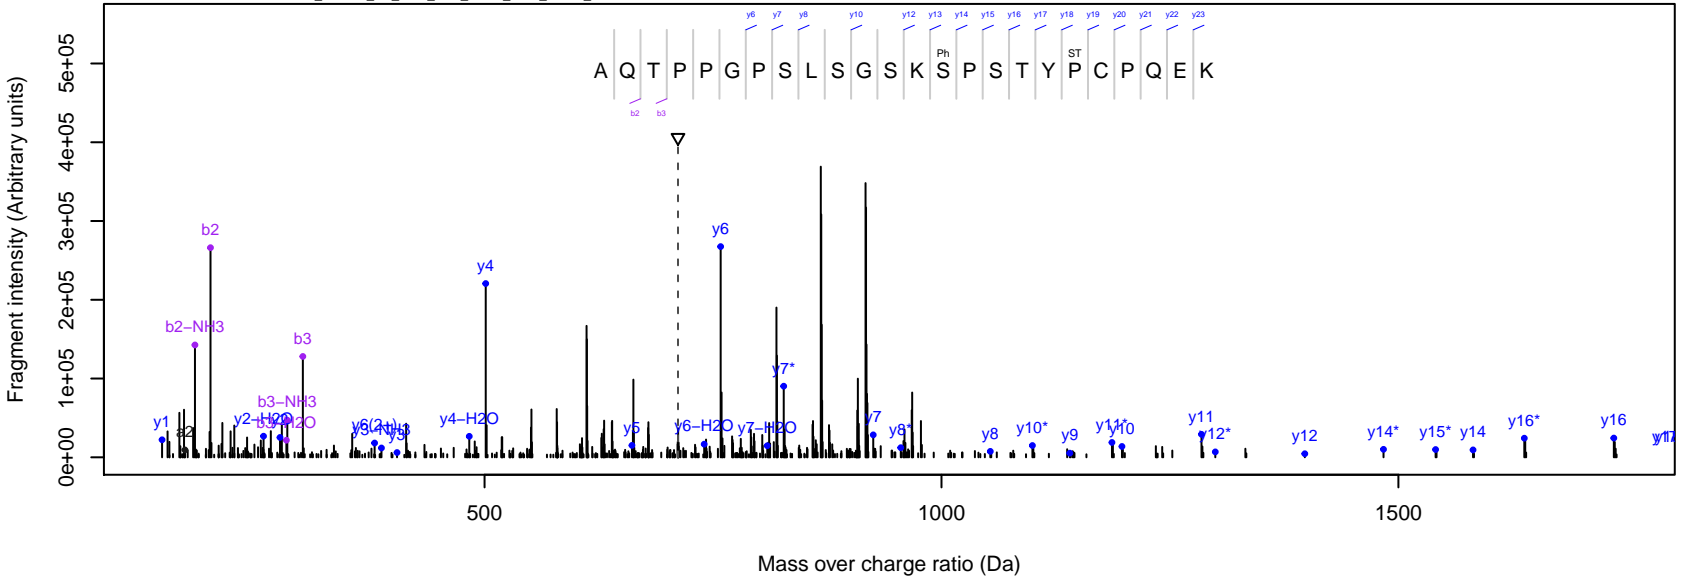

SCGHQTS(Phospho (STY))ASS(Phospho (STY))LKALTHNGTPR-3+

Source : QE3\_201126\_FR\_TiOx\_hum\_tissue\_Urea\_RNAB\_H Scan : 12473

Andromeda score : 134.26

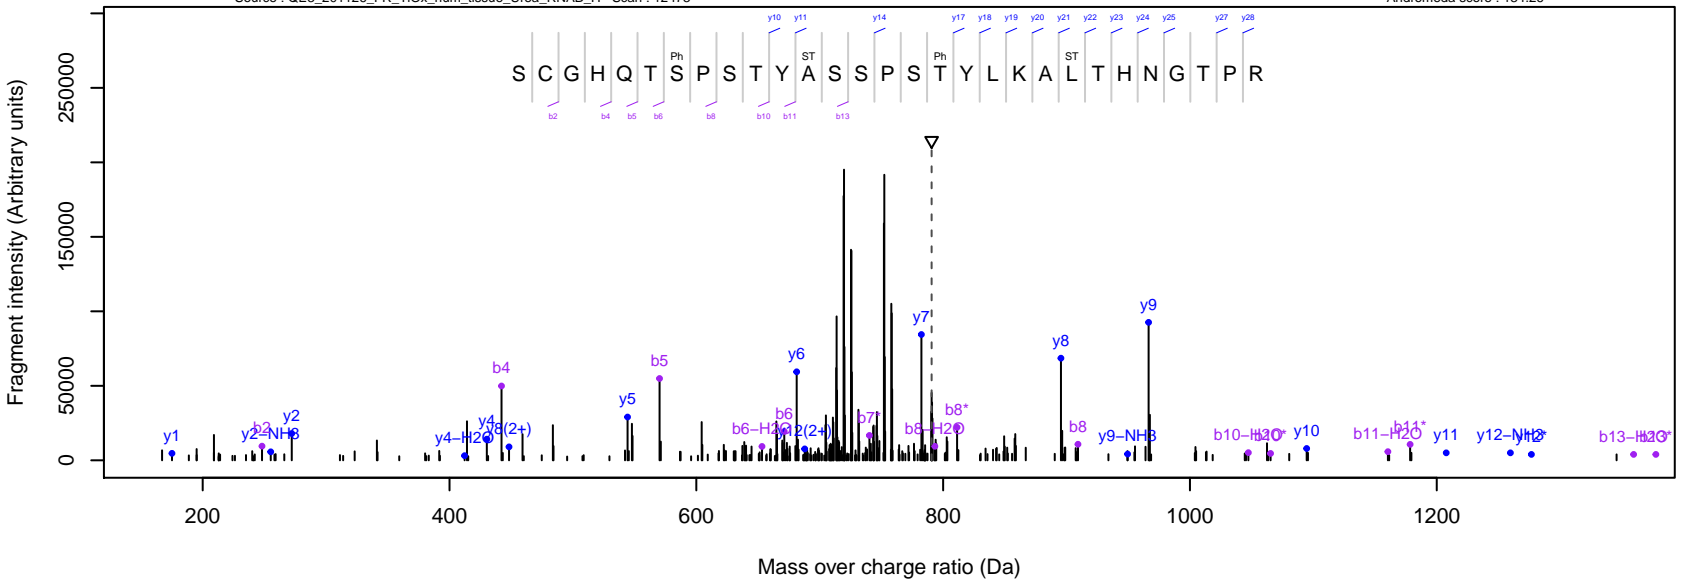

LSSKLS(Phospho (STY))AVSLR-2+

Source : QE3\_201126\_FR\_TiOx\_hum\_tissue\_Urea\_RNAB\_B Scan : 20490

Andromeda score : 134.21

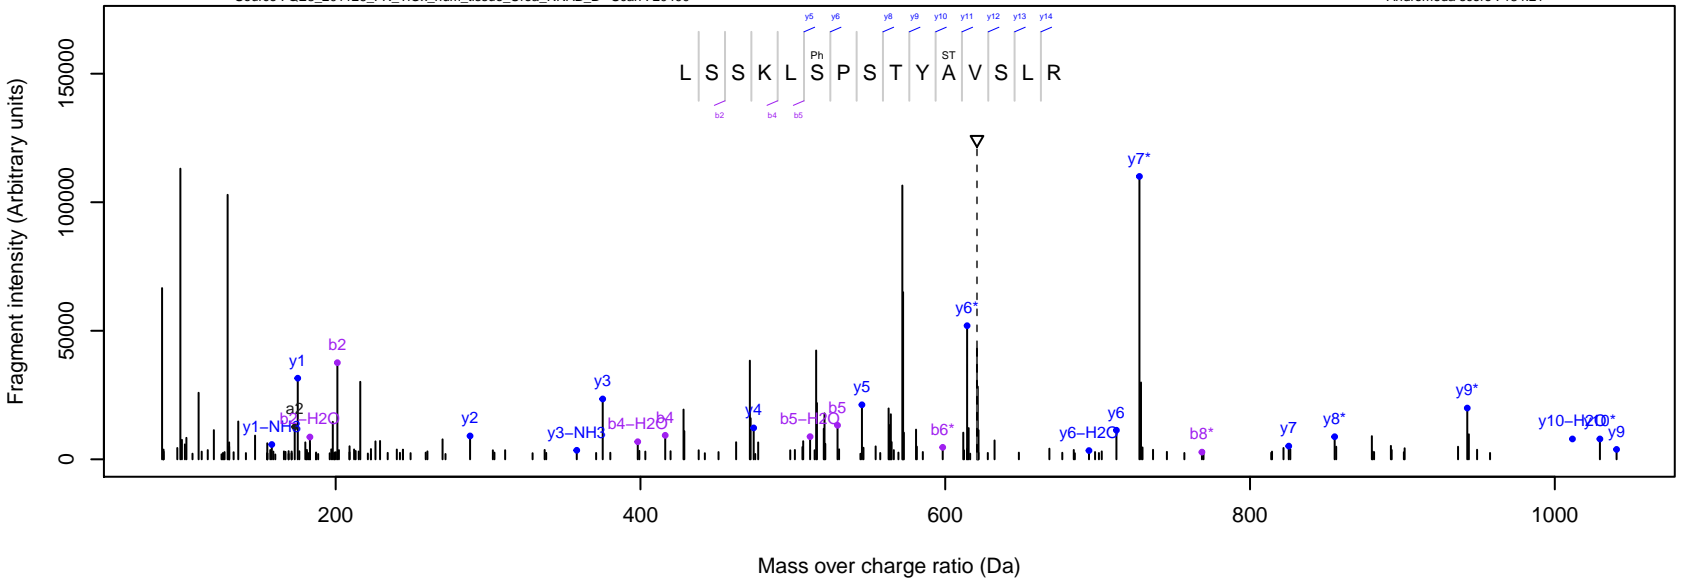

LNECIS(Phospho (STY))PVANEMNHLPAHSHDLQR-4+

Source : QE3\_201126\_FR\_TiOx\_hum\_tissue\_Urea\_RNAB\_N Scan : 26703

Andromeda score : 134.2

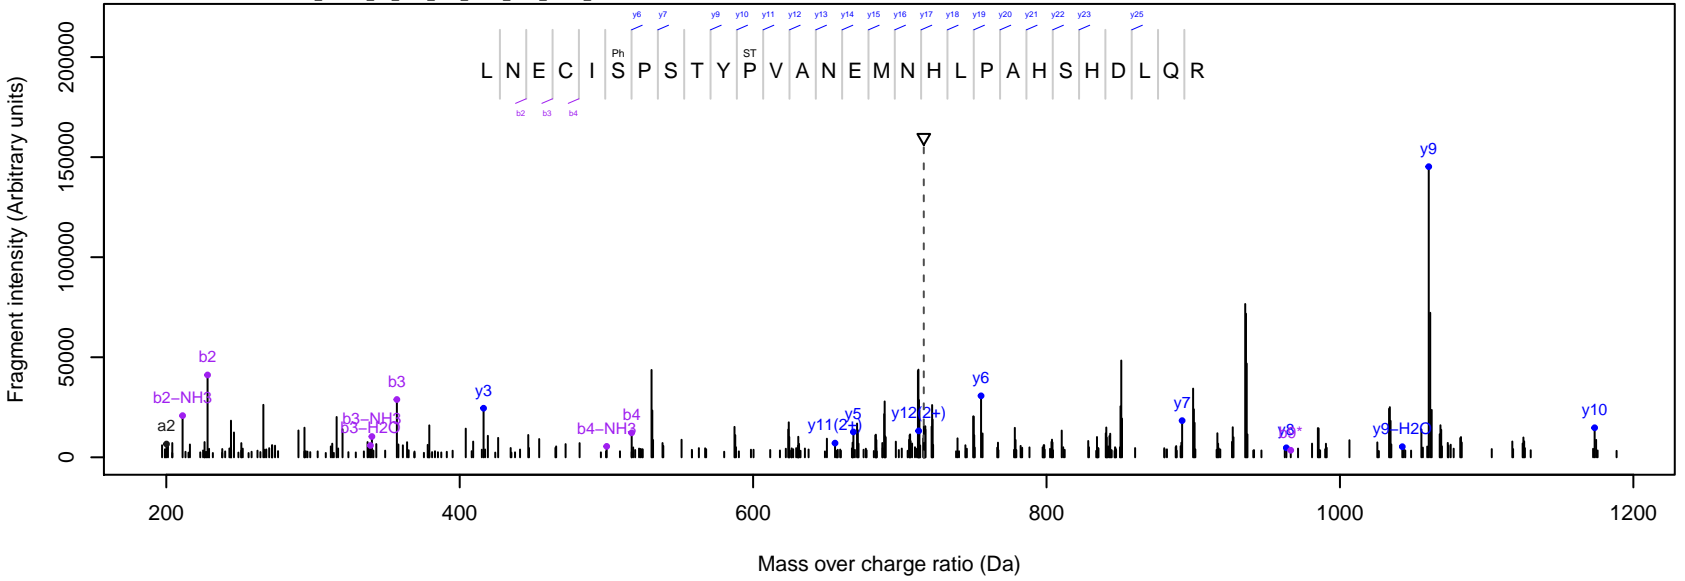

S(Phospho (STY))PKPAAPAAPPFSSSSGVLGTGLCELDLR-3+

Source : QE3\_201126\_FR\_TiOx\_hum\_tissue\_Urea\_RNAB\_N Scan : 47578

Andromeda score : 134.12

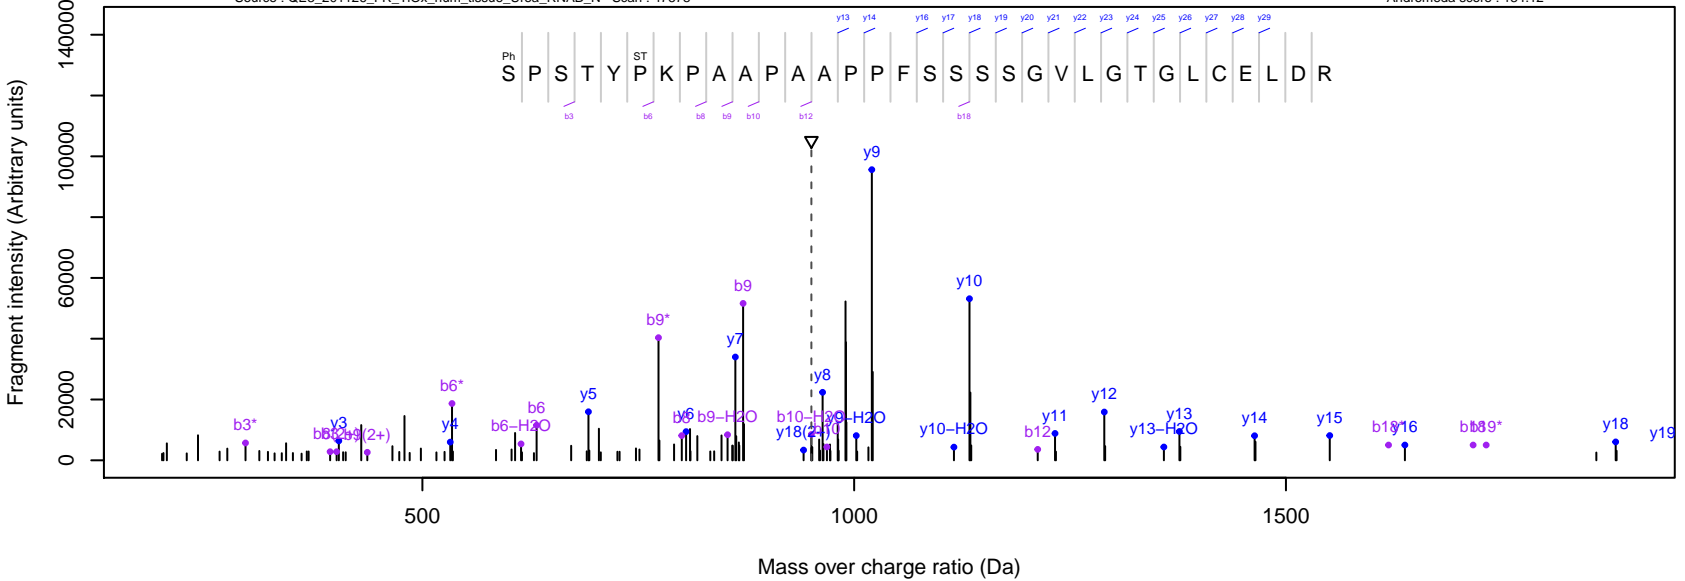

SSSS(Phospho (STY))PELQTLQDILGDGPKADVGRLS(Phospho (STY))PEVK-3+

Source : QE3\_201126\_FR\_TiOx\_hum\_tissue\_Urea\_RNAB\_N Scan : 56468

Andromeda score : 134.07

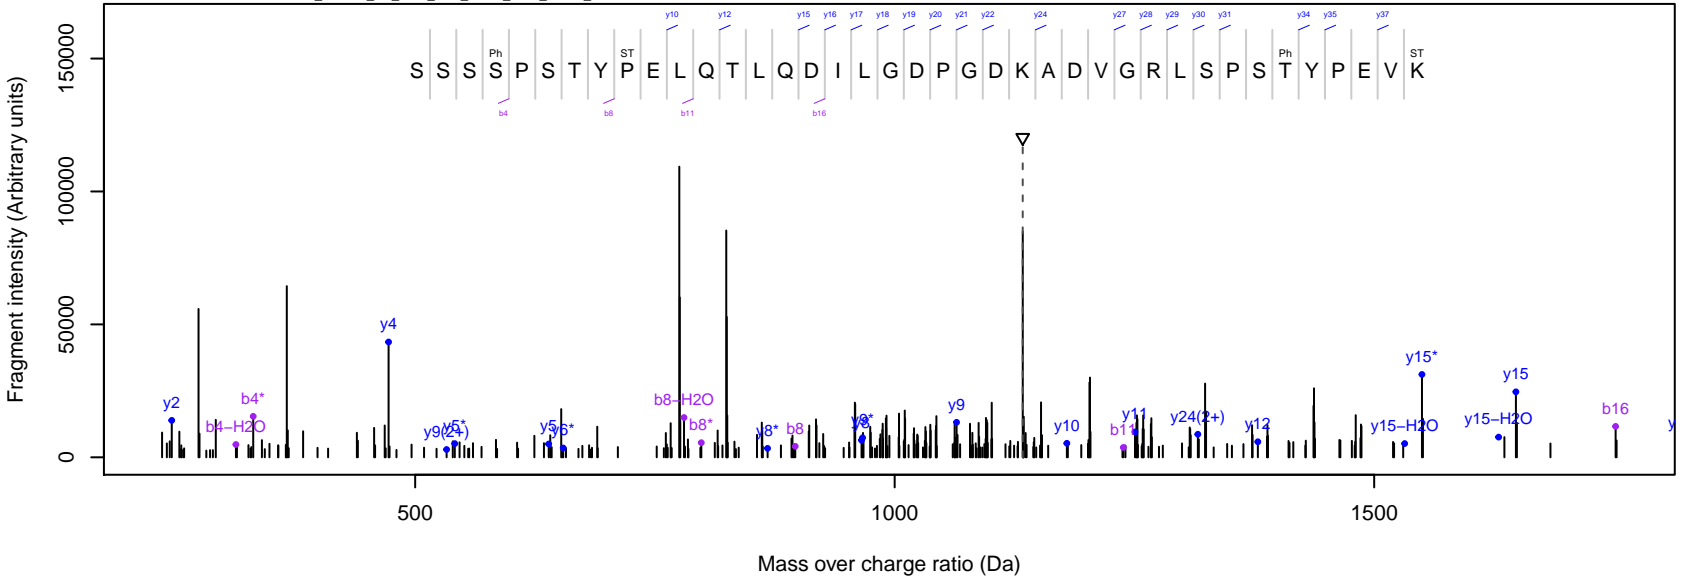

HKAAAYDIS(Phospho (STY))EDED-2+

Source : QE3\_201126\_FR\_TiOx\_hum\_tissue\_Urea\_RNAB\_N Scan : 14997

Andromeda score : 134.04

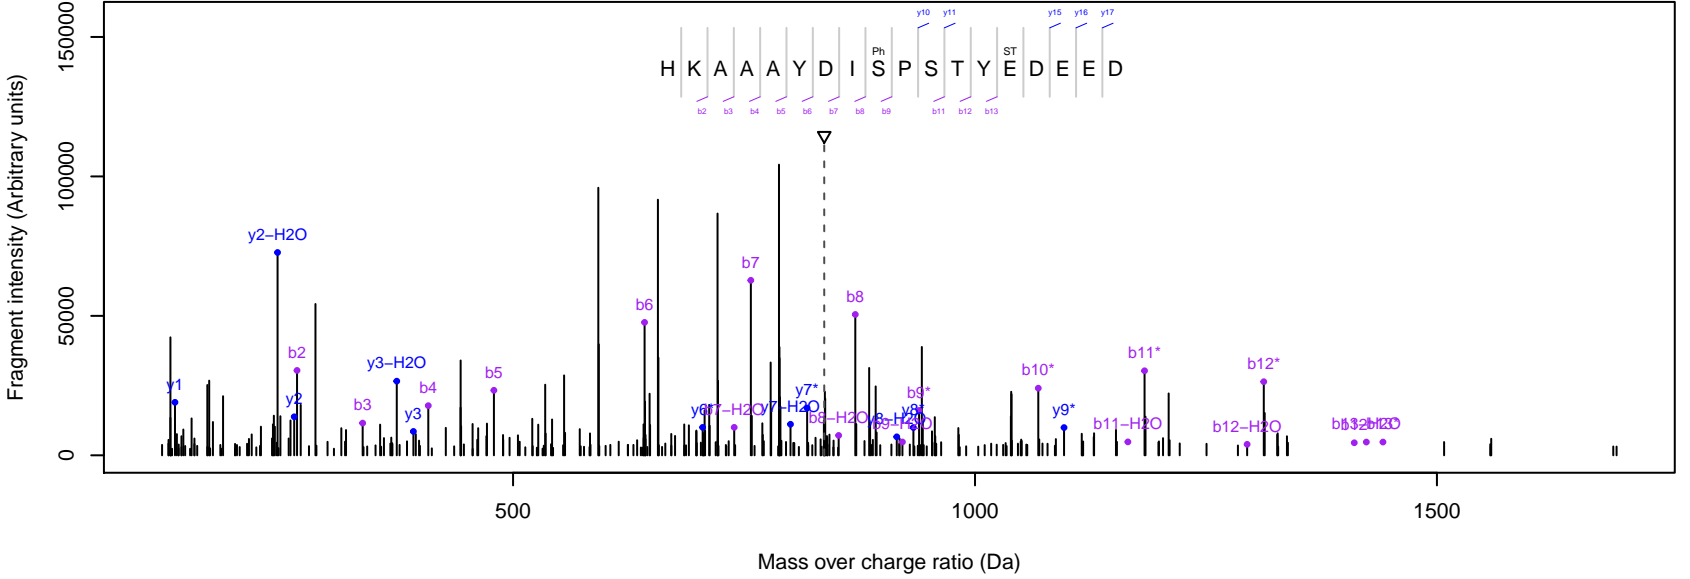

KRS(Phospho (STY))PTESVNTPVGK-3+

Source : QE3\_201126\_FR\_TiOx\_hum\_tissue\_Urea\_RNAB\_N Scan : 5882

Andromeda score : 134.04

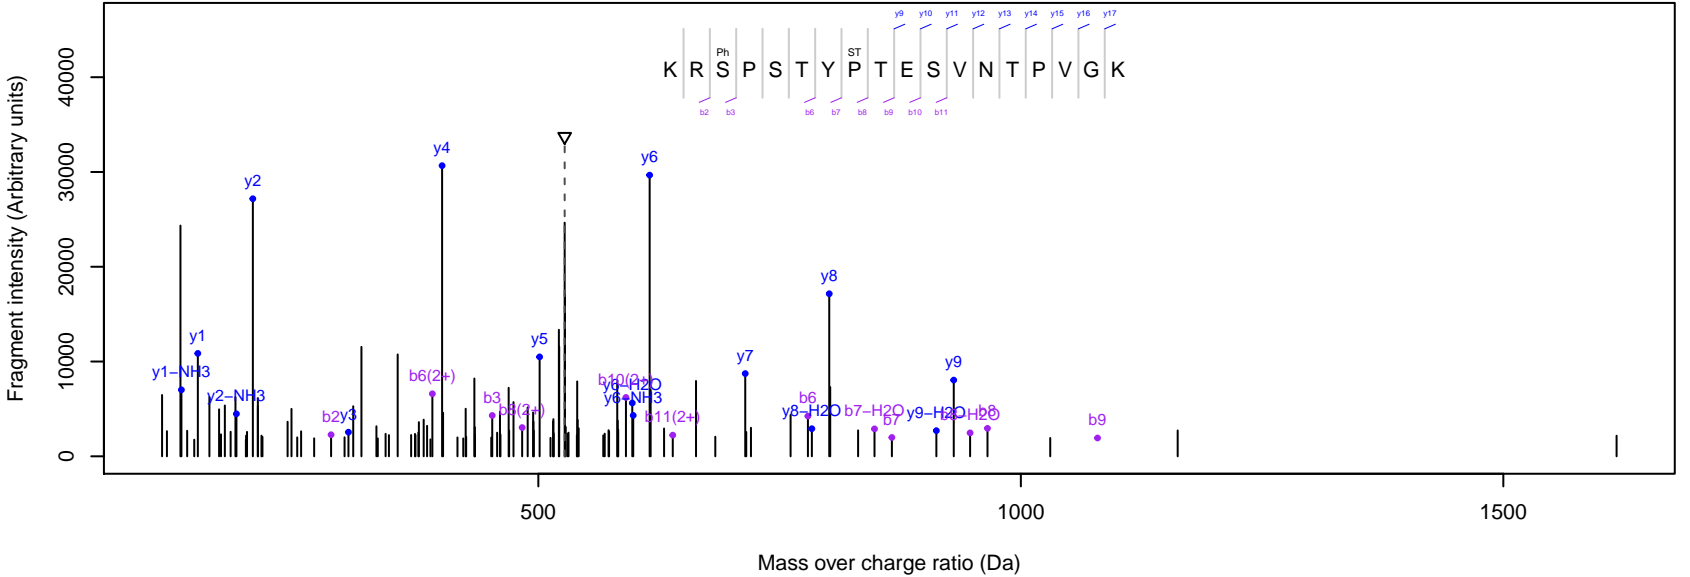

RLGS(Phospho (STY))DLTSAQK-2+

Source : QE3\_201126\_FR\_TiOx\_hum\_tissue\_Urea\_RNAB\_H Scan : 12230

Andromeda score : 134.04

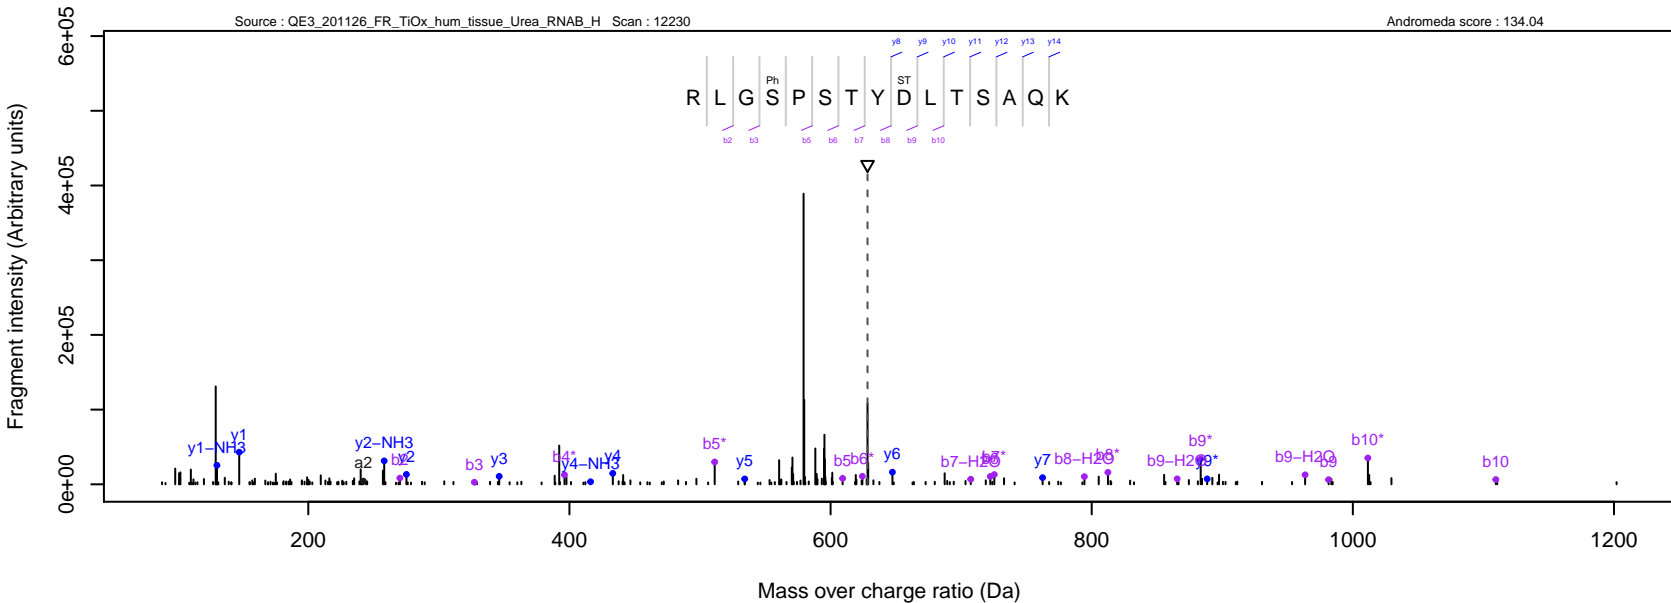

YS(Phospho (STY))GAYGASVSDEELK-2+

Source : QE3\_201126\_FR\_TiOx\_hum\_tissue\_Urea\_RNAB\_B Scan : 25967

Andromeda score : 134.02

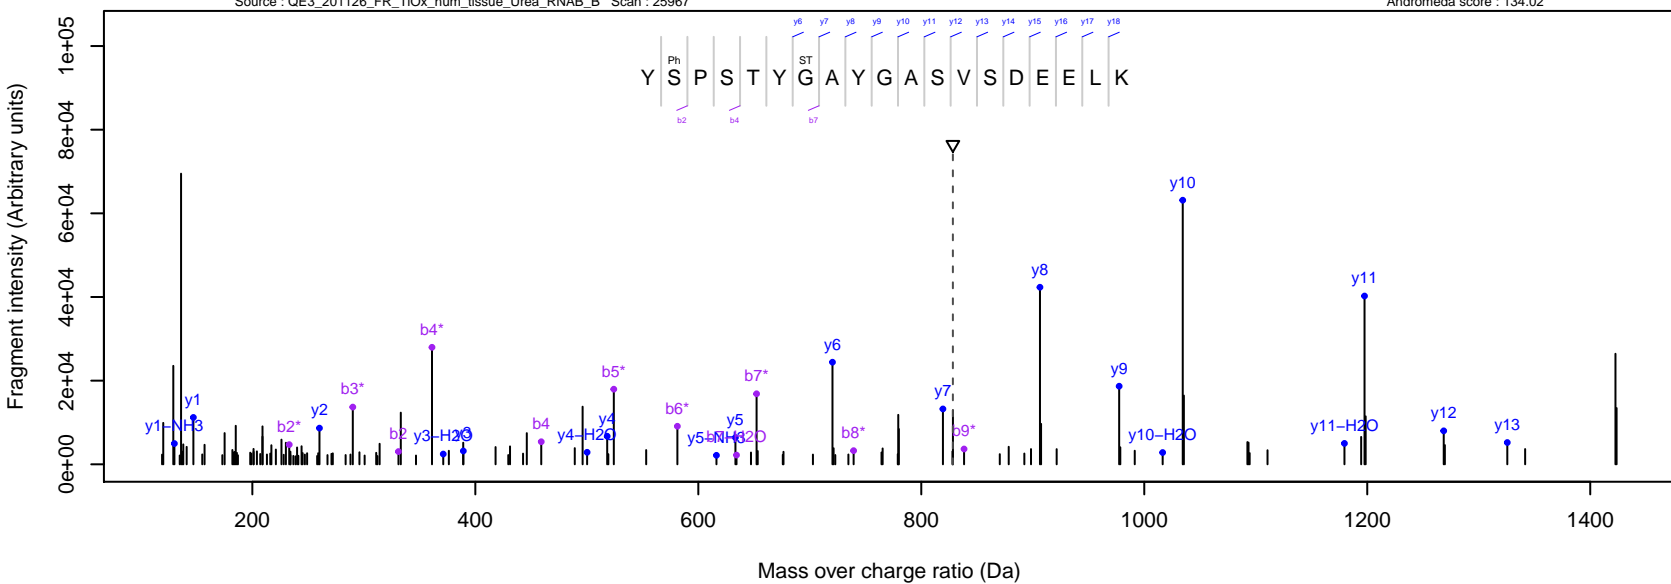

HTENTFSRPGGRAS(Phospho (STY))VDTK-3+

Source : QE3\_201126\_FR\_TiOx\_hum\_tissue\_Urea\_RNAB\_H Scan : 6939

Andromeda score : 133.96

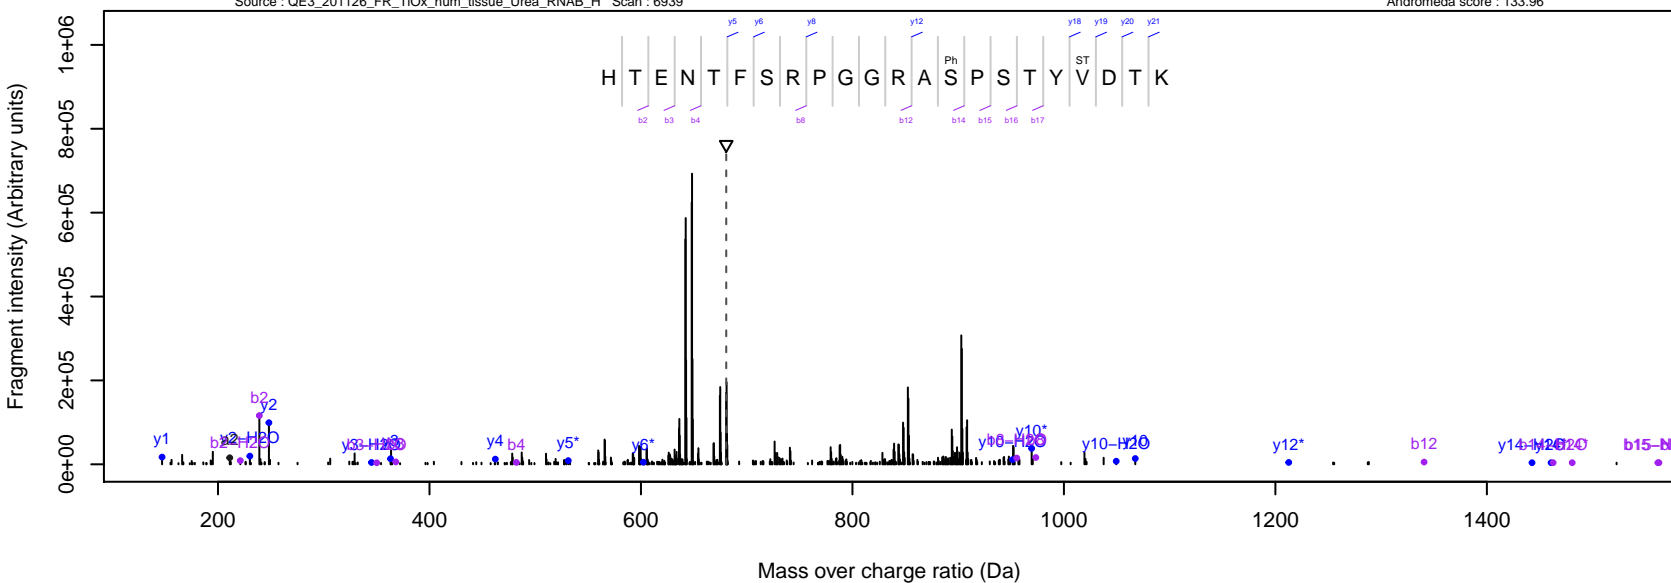

SNS(Phospho (STY))LPHSAVSNAGSK-2+

Source : QE3\_201126\_FR\_TiOx\_hum\_tissue\_Urea\_RNAB\_H Scan : 8629

Andromeda score : 133.96

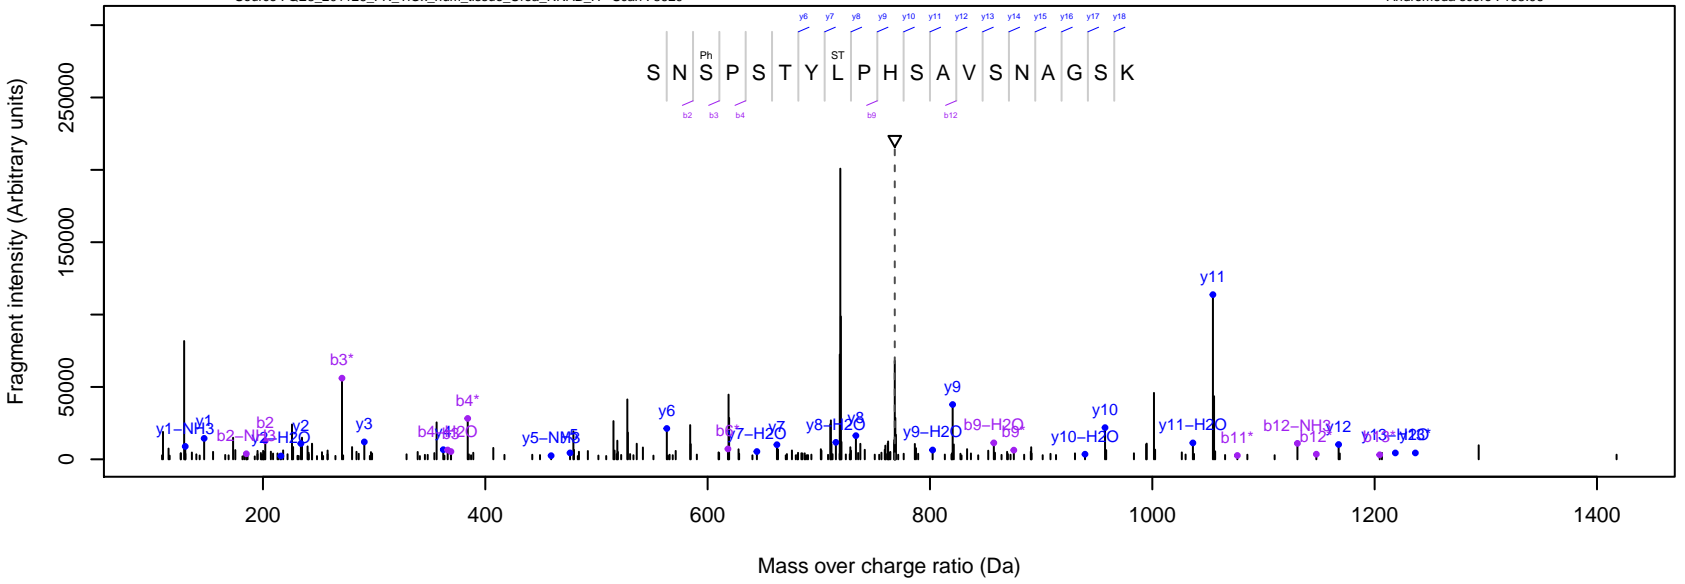

QEPIES(Phospho (STY))DEEEAEPPEVEPGQR-3+

Source : QE3\_201126\_FR\_TiOx\_hum\_tissue\_Urea\_RNAB\_H Scan : 20404

Andromeda score : 133.95

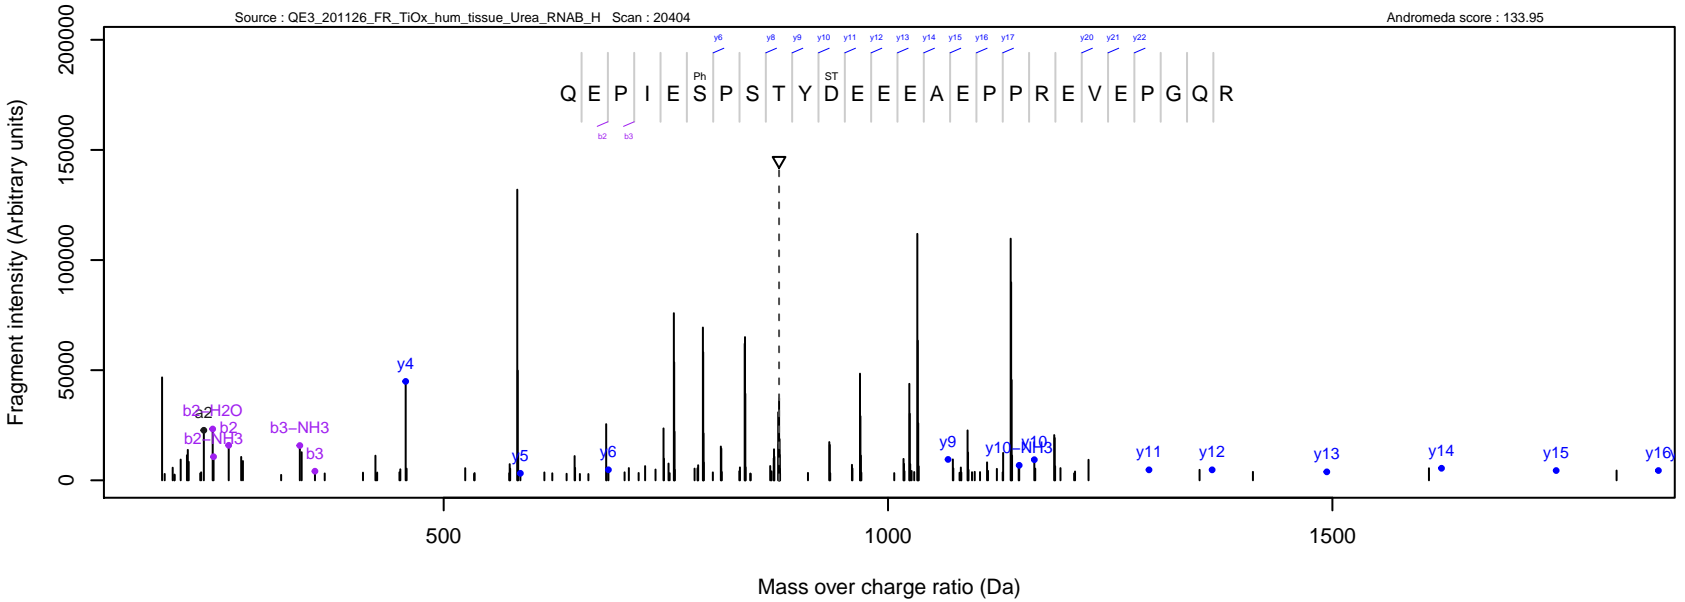

GGEFDEFVNDT(Phospho (STY))DDDLPIISK-2+

Source : QE3\_201126\_FR\_TiOx\_hum\_tissue\_Urea\_RNAB\_H Scan : 50704

Andromeda score : 133.94

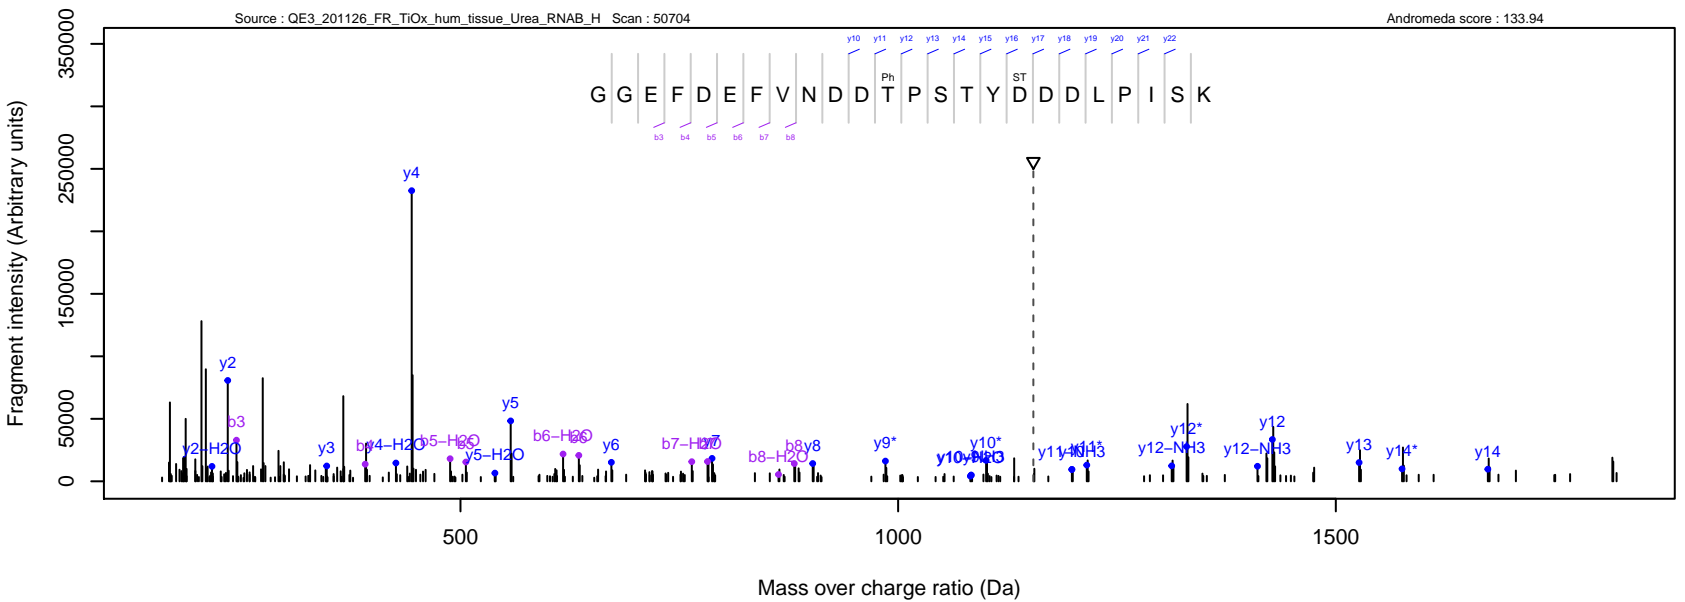



S(Phospho (STY))RS(Phospho (STY))PESQVIGENTKQP-2+

Source : QE3\_201126\_FR\_TiOx\_hum\_tissue\_Urea\_RNAB\_N Scan : 18571

Andromeda score : 133.94

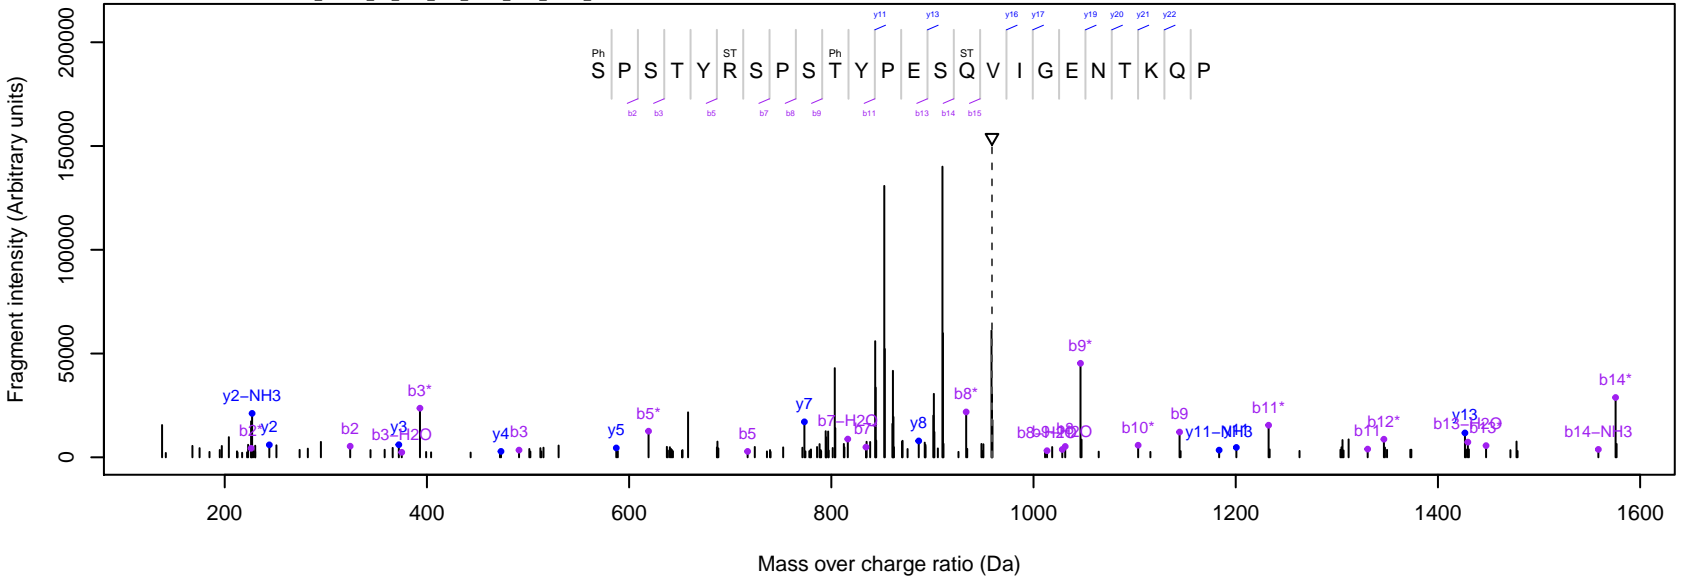

ALAMPGRPES(Phospho (STY))PPVFR-3+

Source : QE3\_201126\_FR\_TiOx\_hum\_tissue\_Urea\_RNAB\_N Scan : 31699

Andromeda score : 133.86

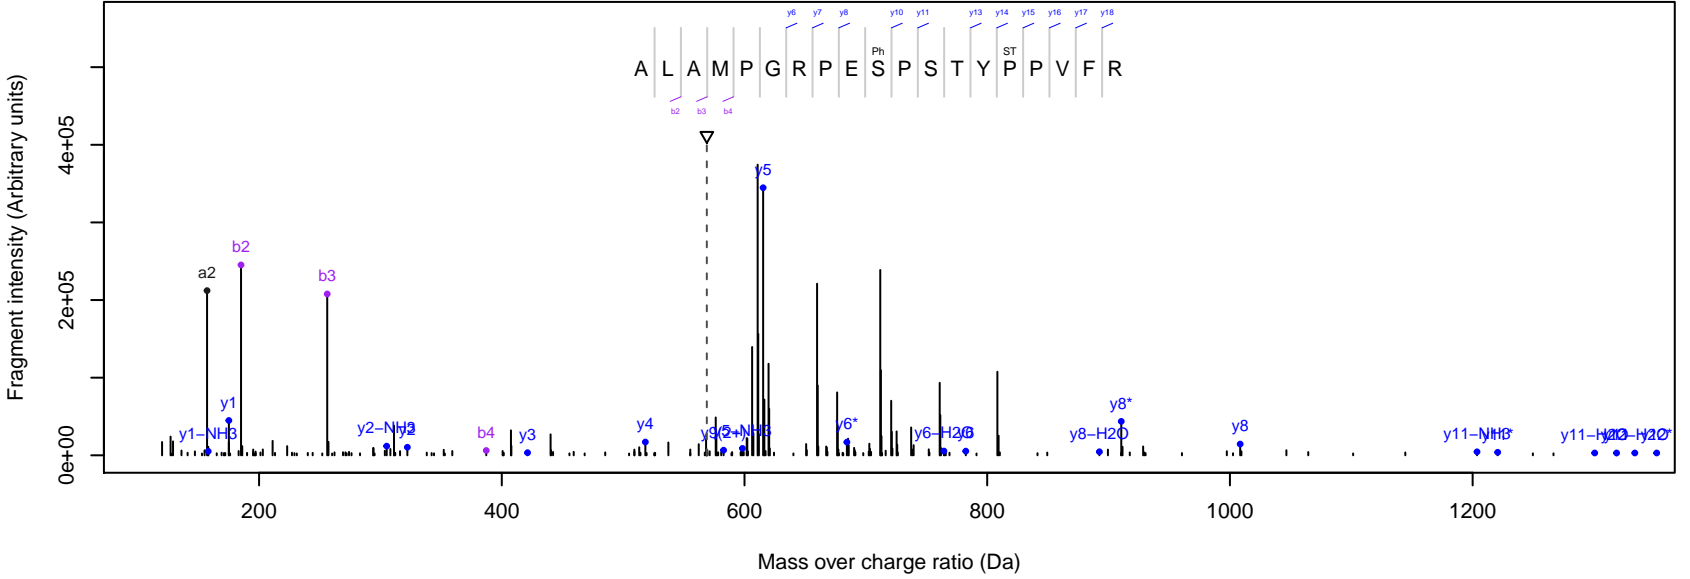

RDS(Phospho (STY))SEGPPGSEGGGQSKPSNASGGVDK-3+

Source : QE3\_201126\_FR\_TiOx\_hum\_tissue\_Urea\_RNAB\_H Scan : 6248

Andromeda score : 133.85

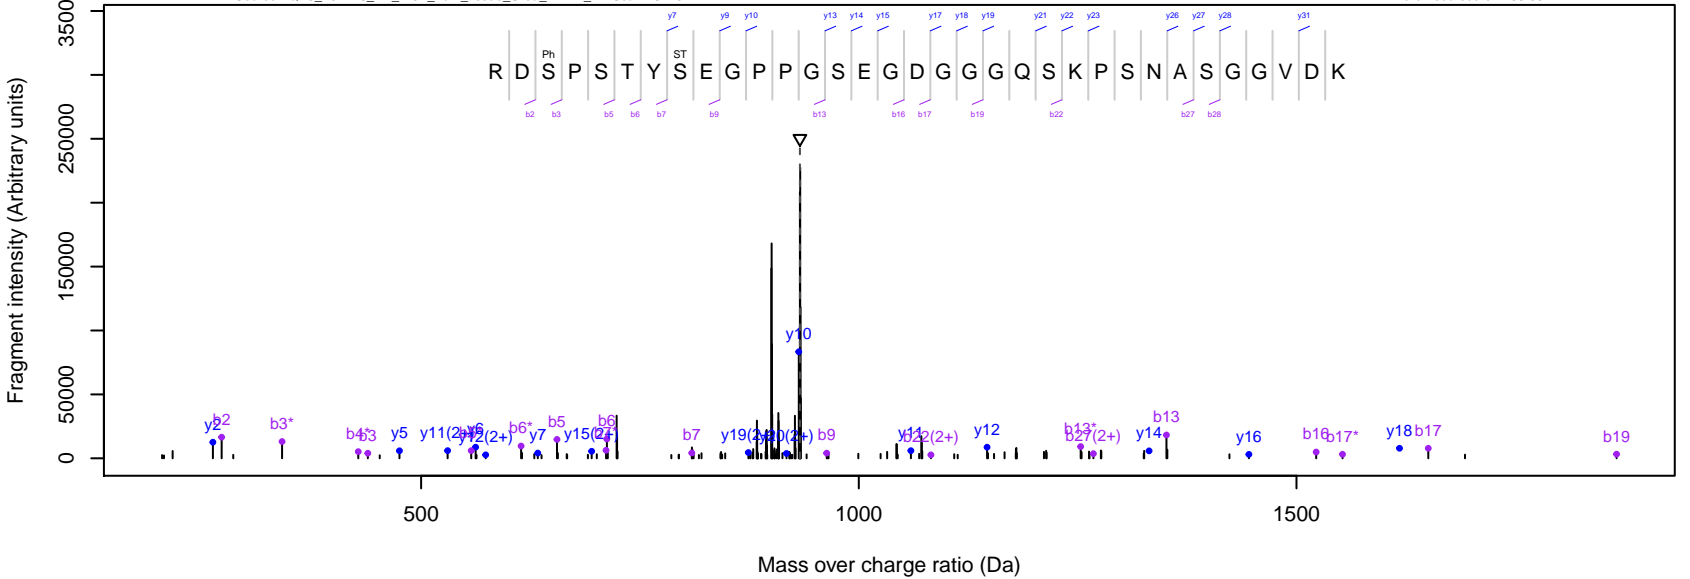

DPNSPLYSVKS(Phospho (STY))FEELR-3+

Source : QE3\_201126\_FR\_TiOx\_hum\_tissue\_Urea\_RNAB\_H Scan : 43797

Andromeda score : 133.84

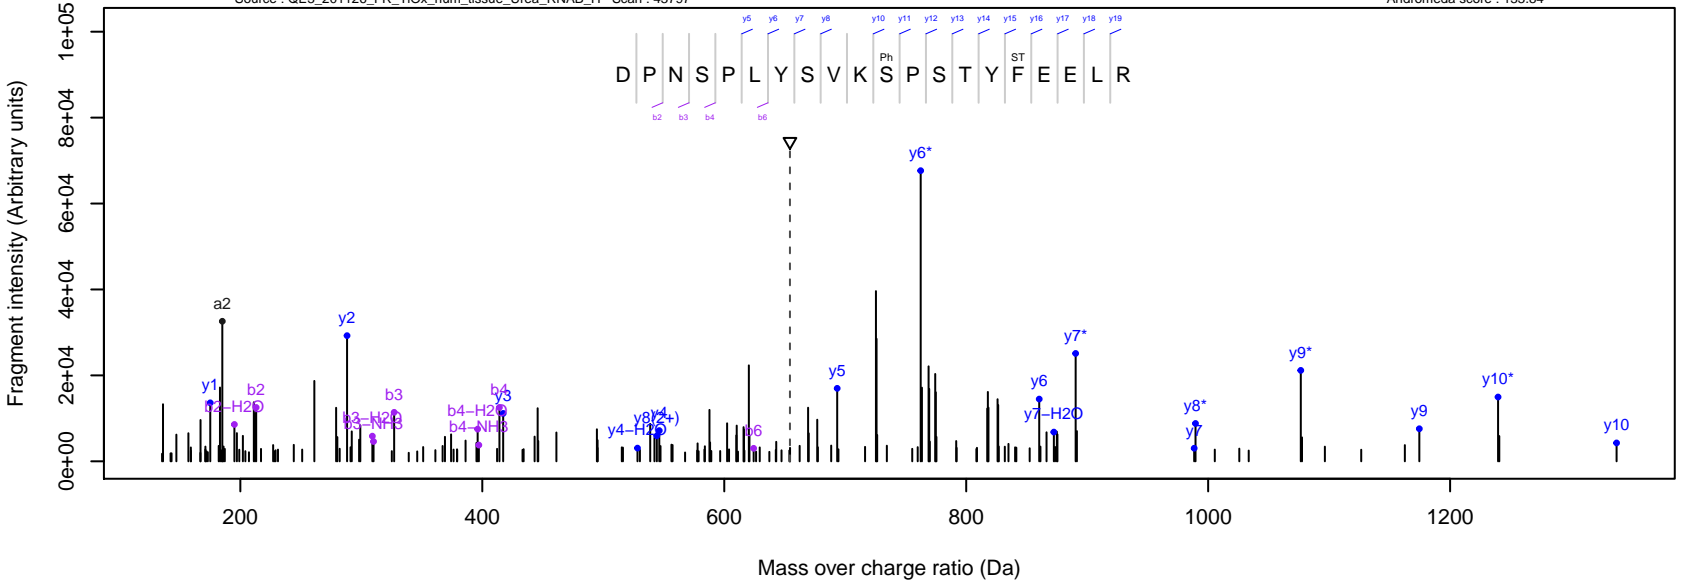

RVS(Phospho (STY))GEPQQSGDGLSPQAEAEVAAGESAGR-3+

Source : QE3\_201126\_FR\_TiOx\_hum\_tissue\_Urea\_RNAB\_N Scan : 36562

Andromeda score : 133.77

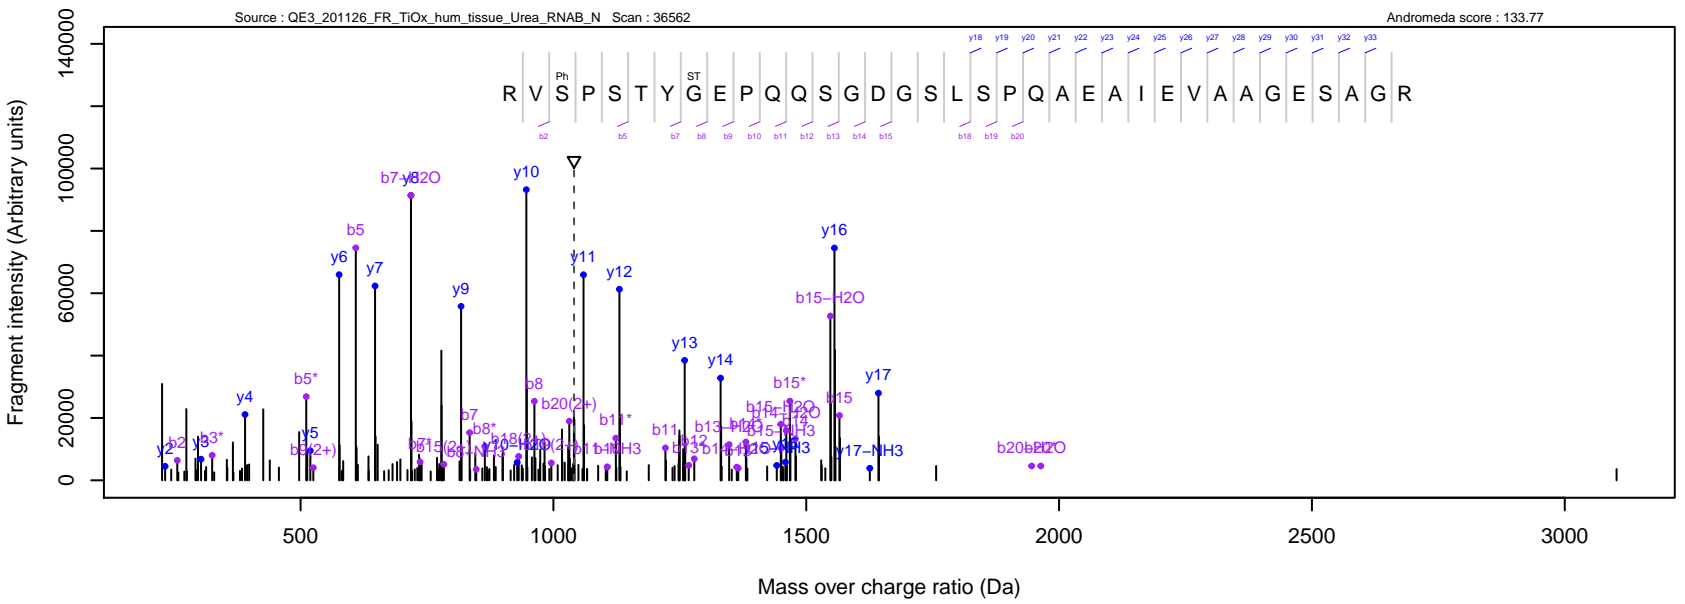

ATAPQTQHVS(Phospho (STY))PMRQVEPPAK-3+

Source : QE3\_201126\_FR\_TiOx\_hum\_tissue\_Urea\_RNAB\_B Scan : 13368

Andromeda score : 133.76

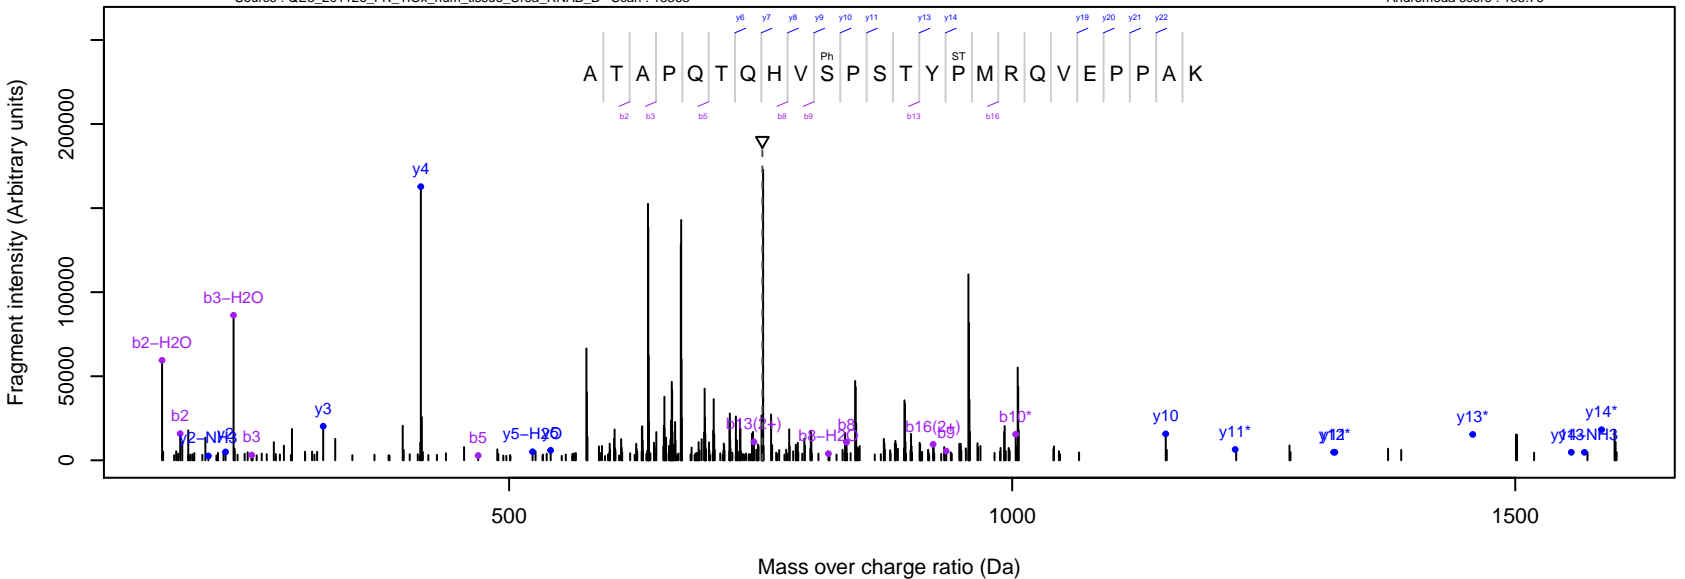

**TVEDEDQDS(Phospho (STY))EEEKDNDYSYIK-3+**

Source : QE3\_201126\_FR\_TiOx\_hum\_tissue\_Urea\_RNAB\_N Scan : 15218

Andromeda score : 133.76

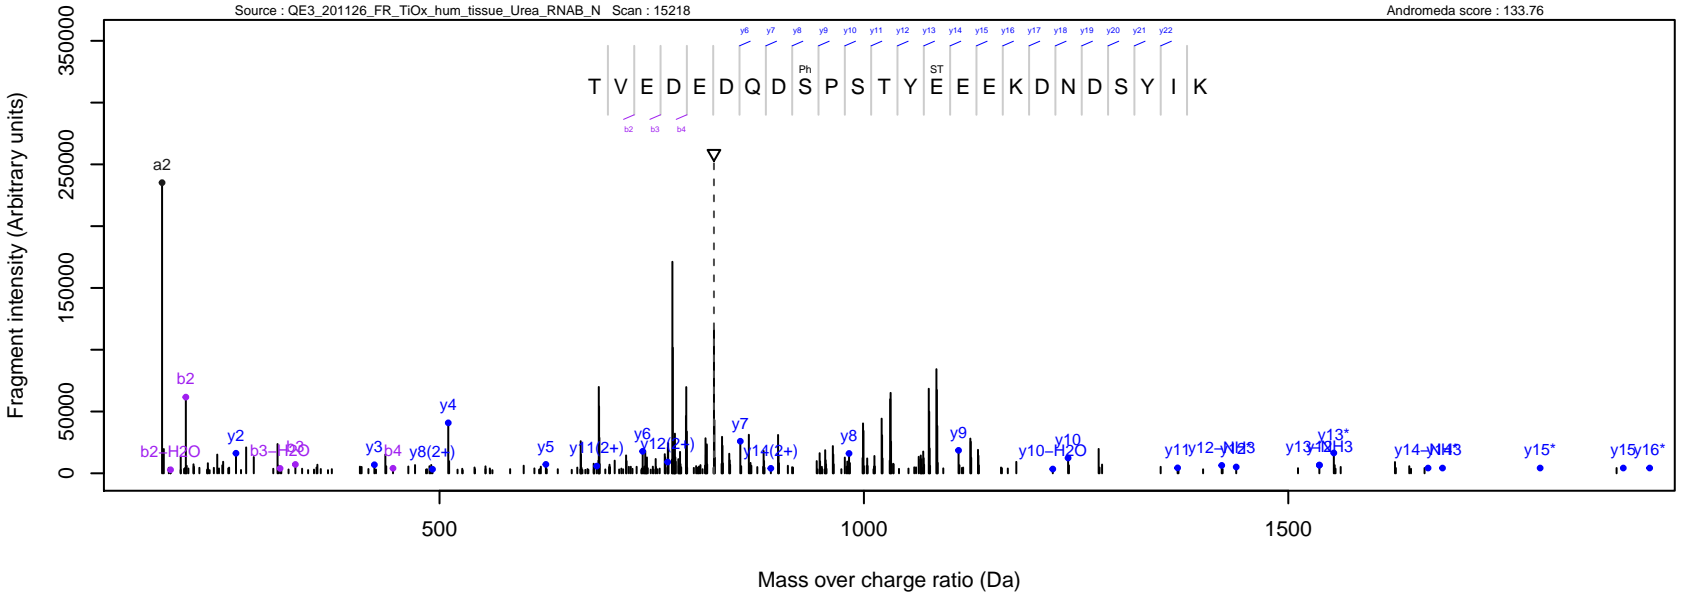

**TEARSS(Phospho (STY))DEENGPPSS(Phospho (STY))PDLDR-3+**

Source : QE3\_201126\_FR\_TiOx\_hum\_tissue\_Urea\_RNAB\_N Scan : 15719

Andromeda score : 133.75

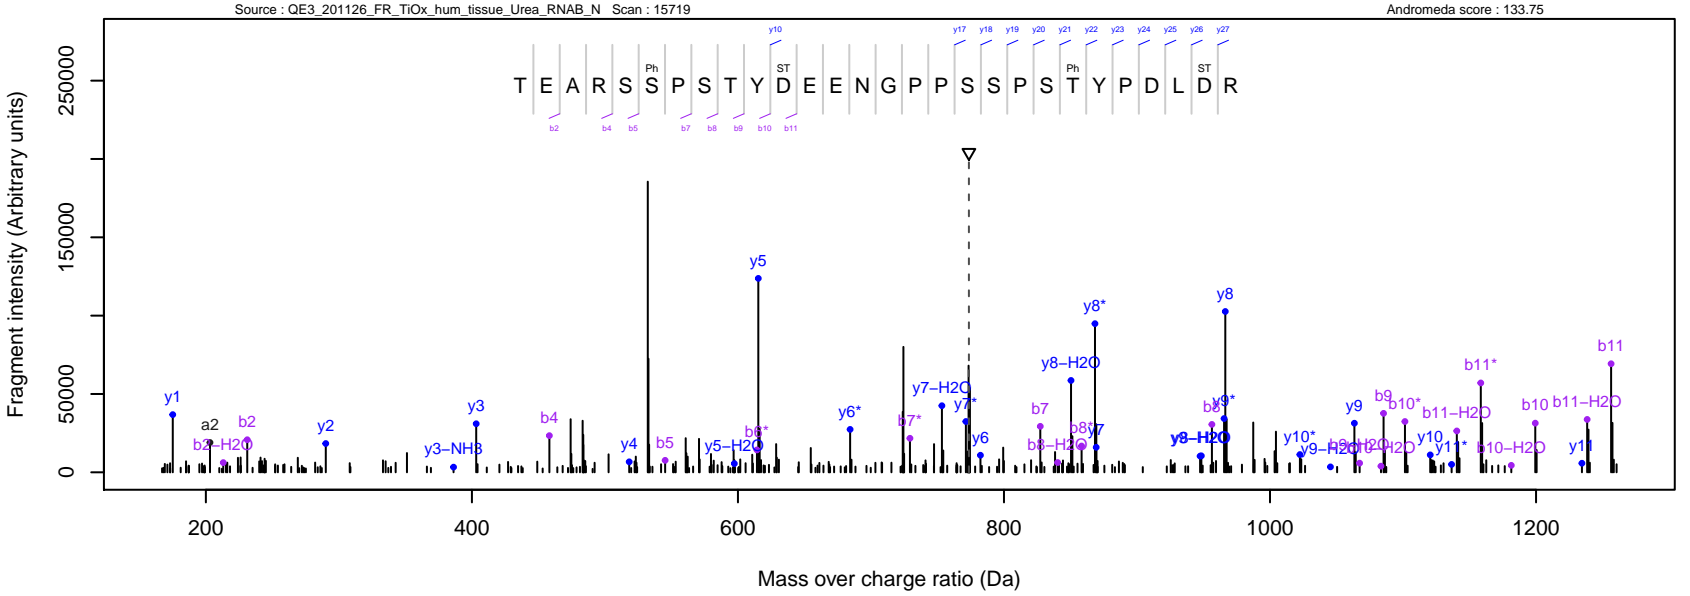

**AIKVEQATKPS(Phospho (STY))FER-3+**

Source : QE3\_201126\_FR\_TiOx\_hum\_tissue\_Urea\_RNAB\_H Scan : 12977

Andromeda score : 133.71

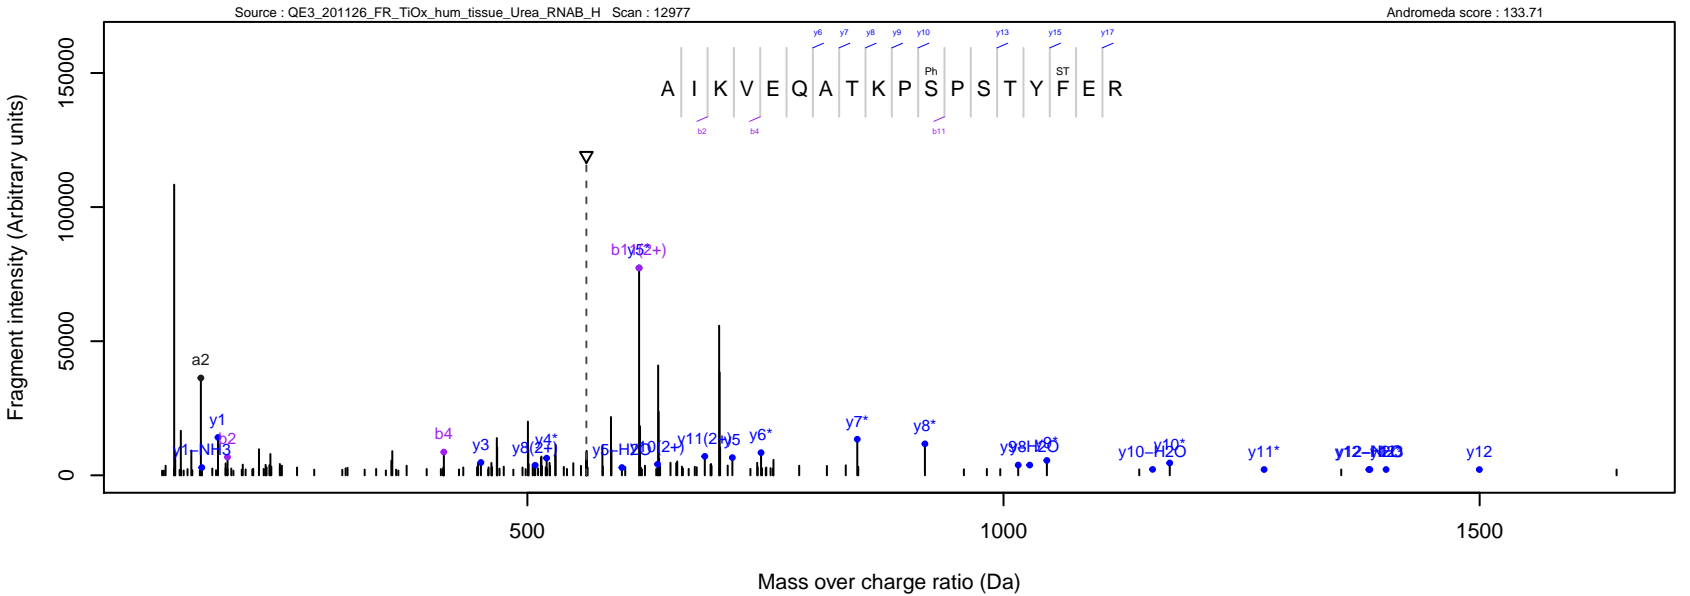

IVHLSNS(Phospho (STY))FTQTVNCR-3+

Source : QE3\_201126\_FR\_TiOx\_hum\_tissue\_Urea\_RNAB\_H Scan : 24846

Andromeda score : 133.71

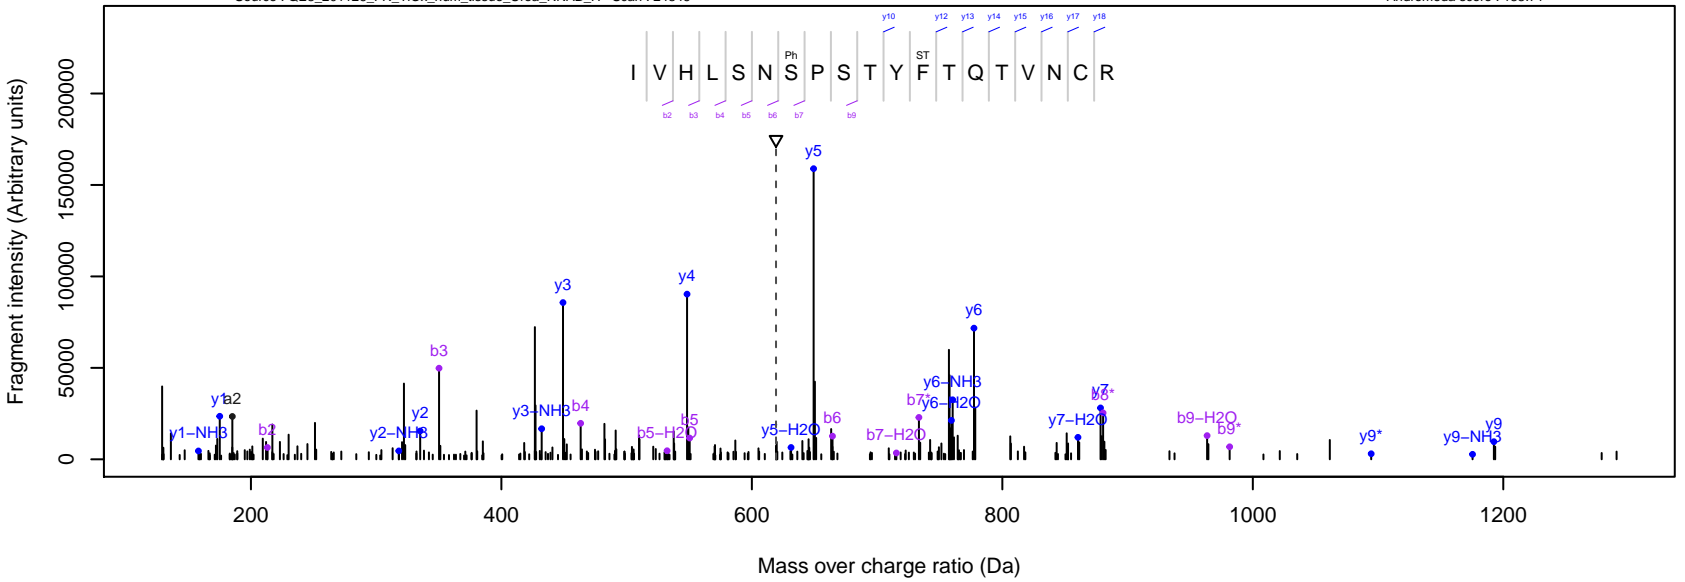

RHSS(Phospho (STY))DINHLVT(Phospho (STY))QGRESPEGSYTDDANQEV-4+

Source : QE3\_201126\_FR\_TiOx\_hum\_tissue\_Urea\_RNAB\_N Scan : 20153

Andromeda score : 133.66

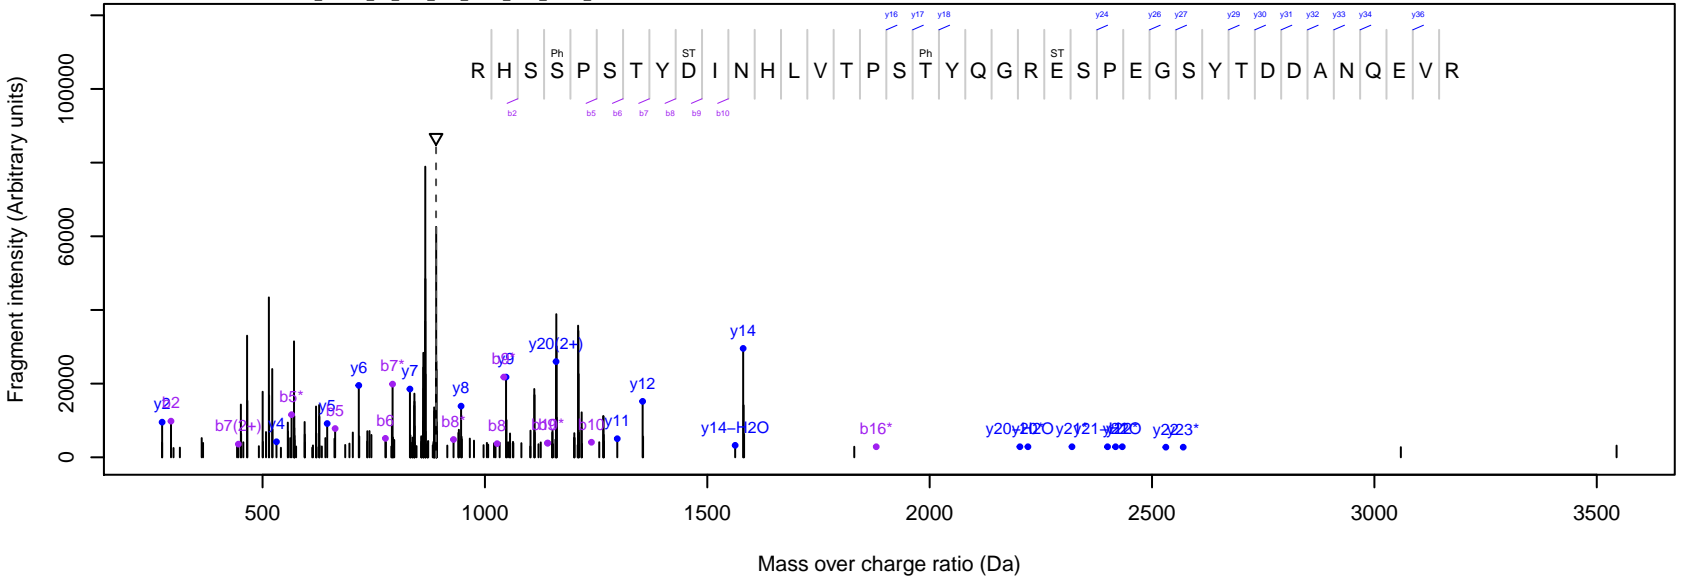

DTEELPVKESDQTLAALLS(Phospho (STY))PK-3+

Source : QE3\_201126\_FR\_TiOx\_hum\_tissue\_Urea\_RNAB\_N Scan : 55051

Andromeda score : 133.61

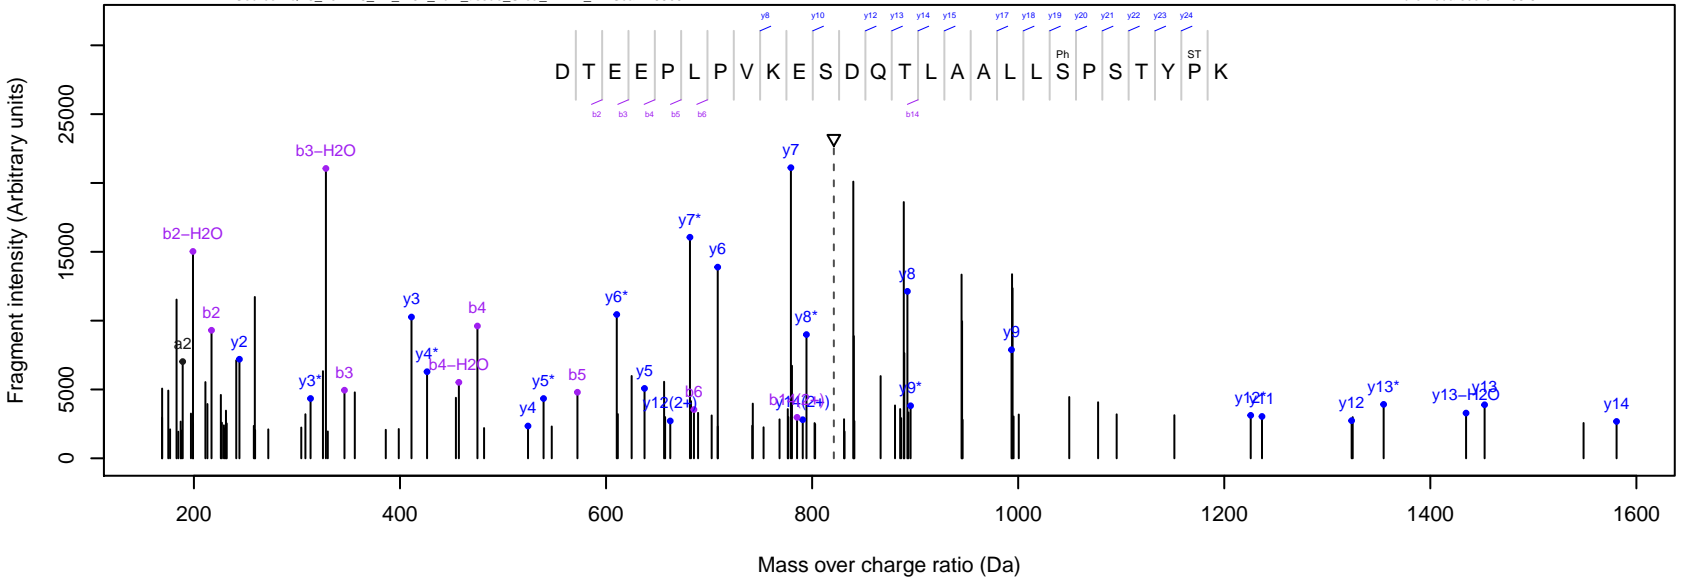

GPSLDIDT(Phospho (STY))PDVNIEGPEEK-2+

Source : QE3\_201126\_FR\_TiOx\_hum\_tissue\_Urea\_RNAB\_N Scan : 41392

Andromeda score : 133.52

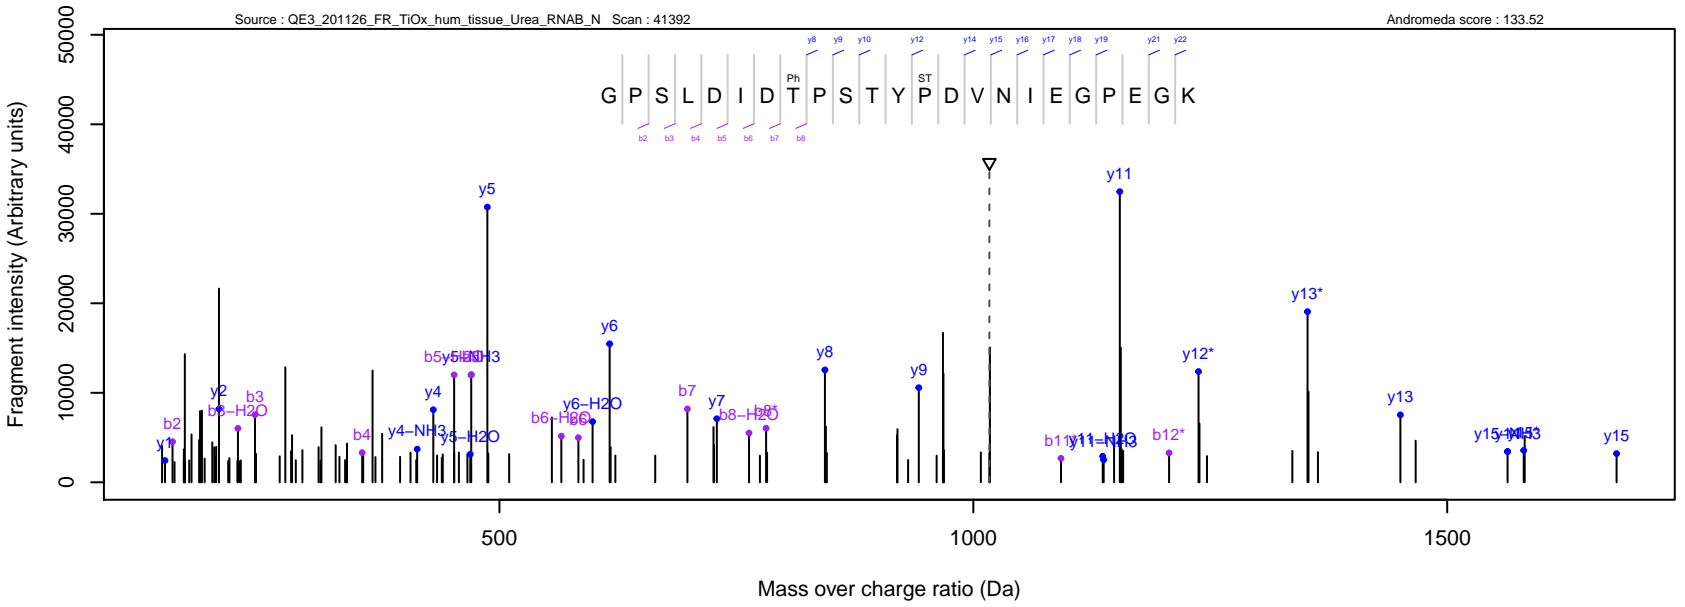

SGSLGQPS(Phospho (STY))PSAQR-2+

Source : QE3\_201126\_FR\_TiOx\_hum\_tissue\_Urea\_RNAB\_N Scan : 9921

Andromeda score : 133.48

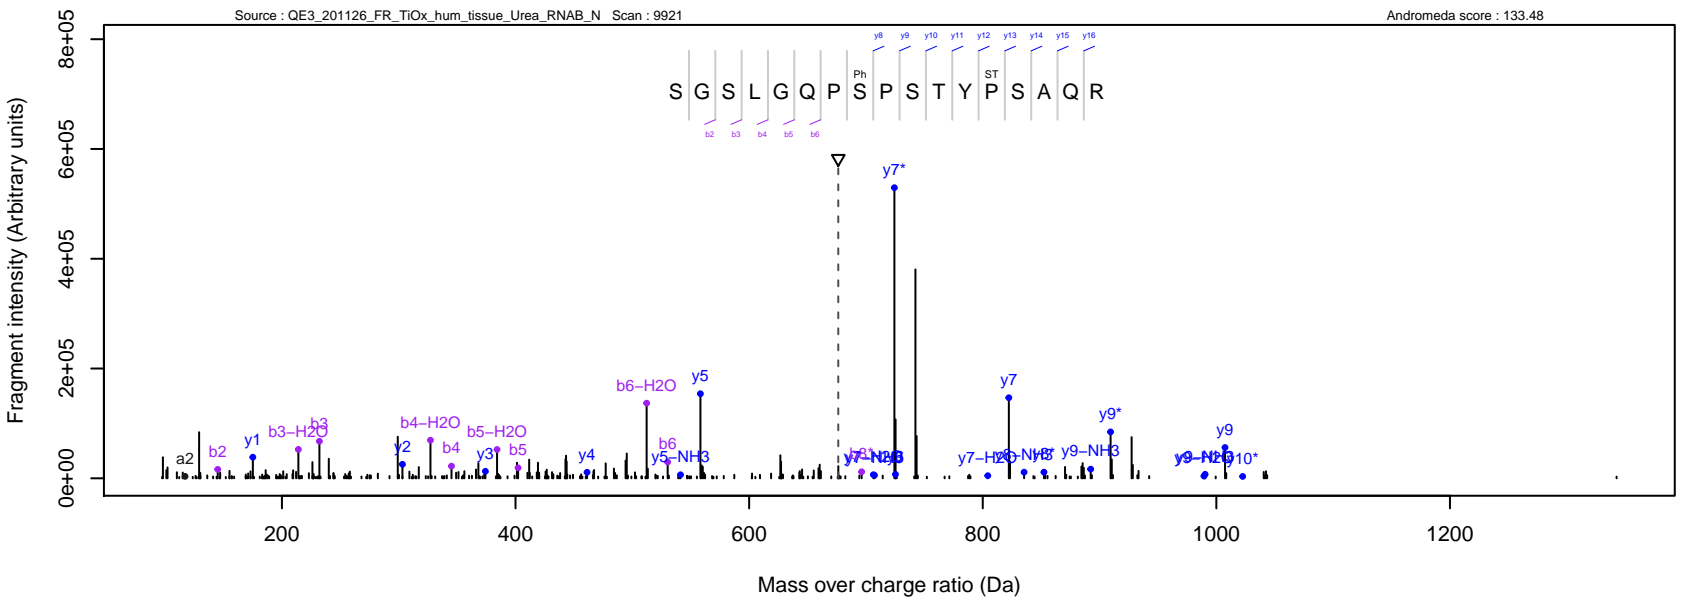

EGES(Phospho (STY))LEDLM(Oxidation (M))K-2+

Source : QE3\_201126\_FR\_TiOx\_hum\_tissue\_Urea\_RNAB\_H Scan : 21244

Andromeda score : 133.42

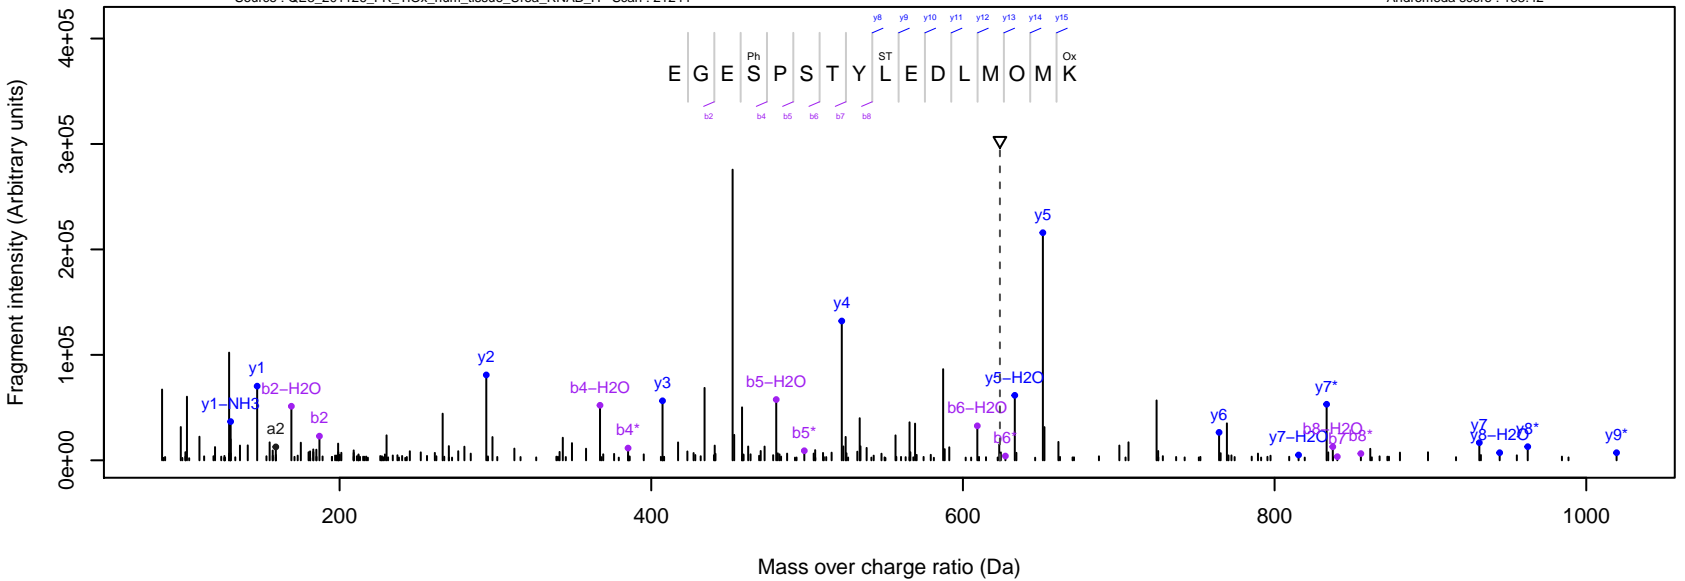

GNKS(Phospho (STY))PSPPDGSPAATPEIR-3+

Source : QE3\_201126\_FR\_TiOx\_hum\_tissue\_Urea\_RNAB\_H Scan : 15194

Andromeda score : 133.41

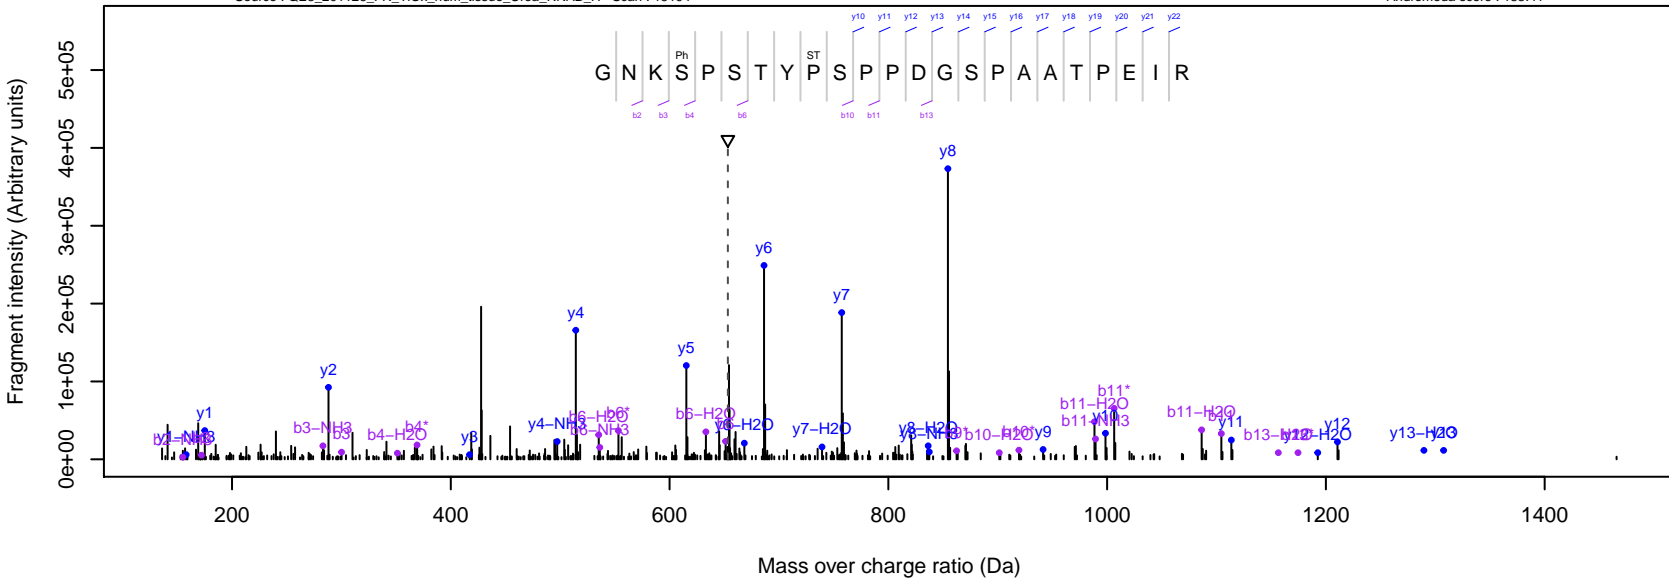

GHHVTDSENDEPLNLNAS(Phospho (STY))DSESEELHR-4+

Source : QE3\_201126\_FR\_TiOx\_hum\_tissue\_Urea\_RNAB\_N Scan : 19842

Andromeda score : 133.25

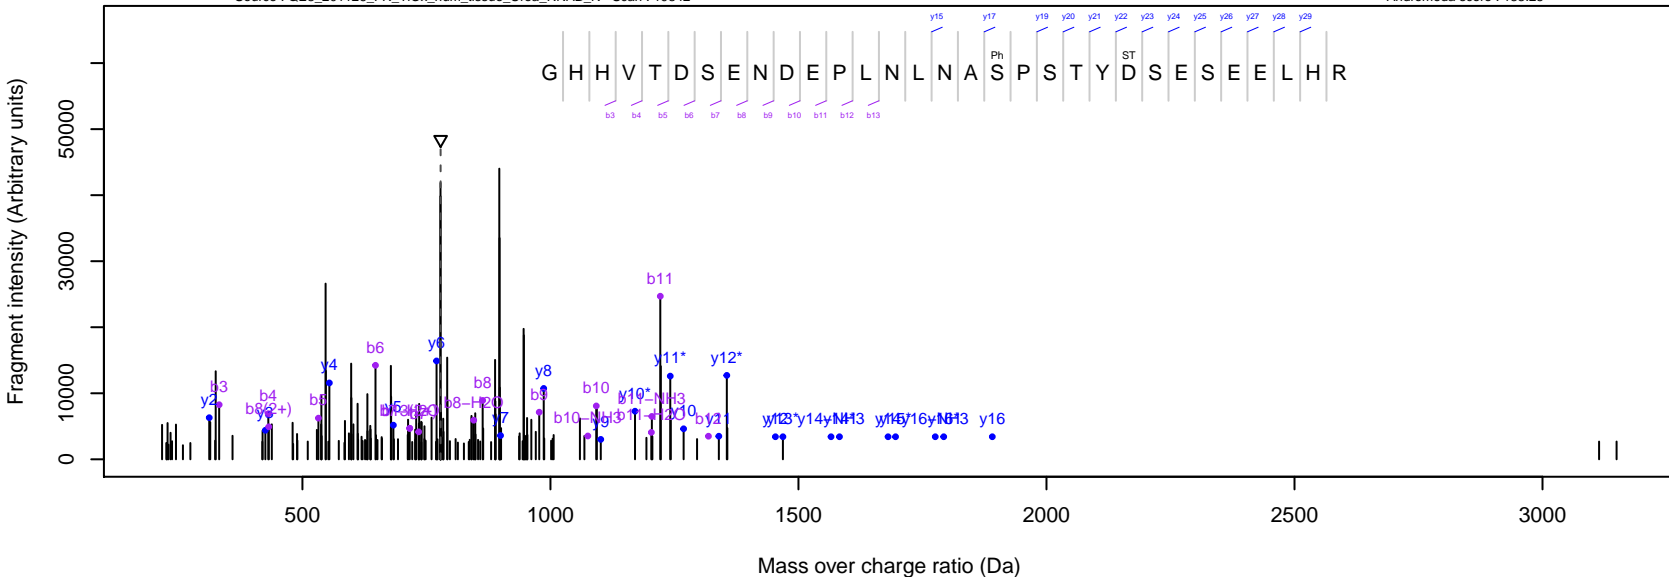

KREEEEEEGS(Phospho (STY))IM(Oxidation (M))NGS(Phospho (STY))TAEDEEQTR-3+

Source : QE3\_201126\_FR\_TiOx\_hum\_tissue\_Urea\_RNAB\_B Scan : 11529

Andromeda score : 133.25

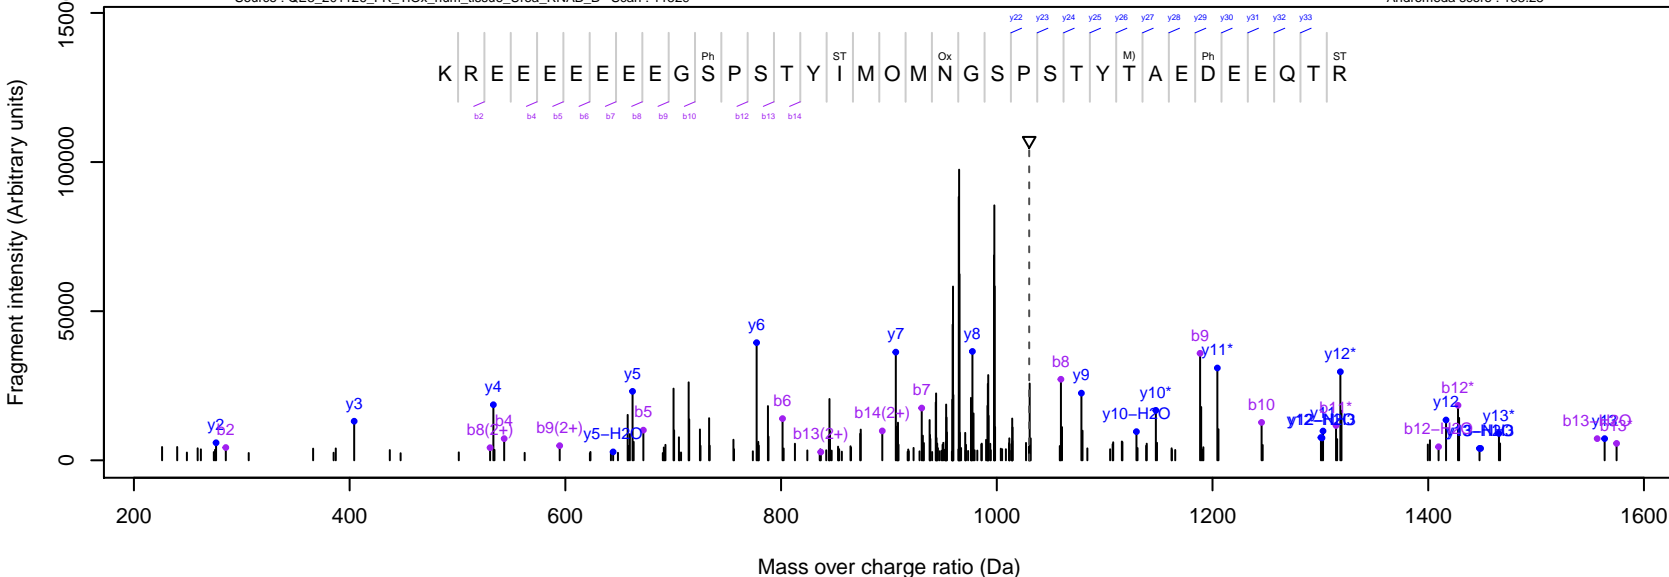

SSS(Phospho (STY))QIPEGFGLTSGGSNYSLAR-2+

Source : QE3\_201126\_FR\_TIOx\_hum\_tissue\_Urea\_RNAB\_N Scan : 46748

Andromeda score : 133.21

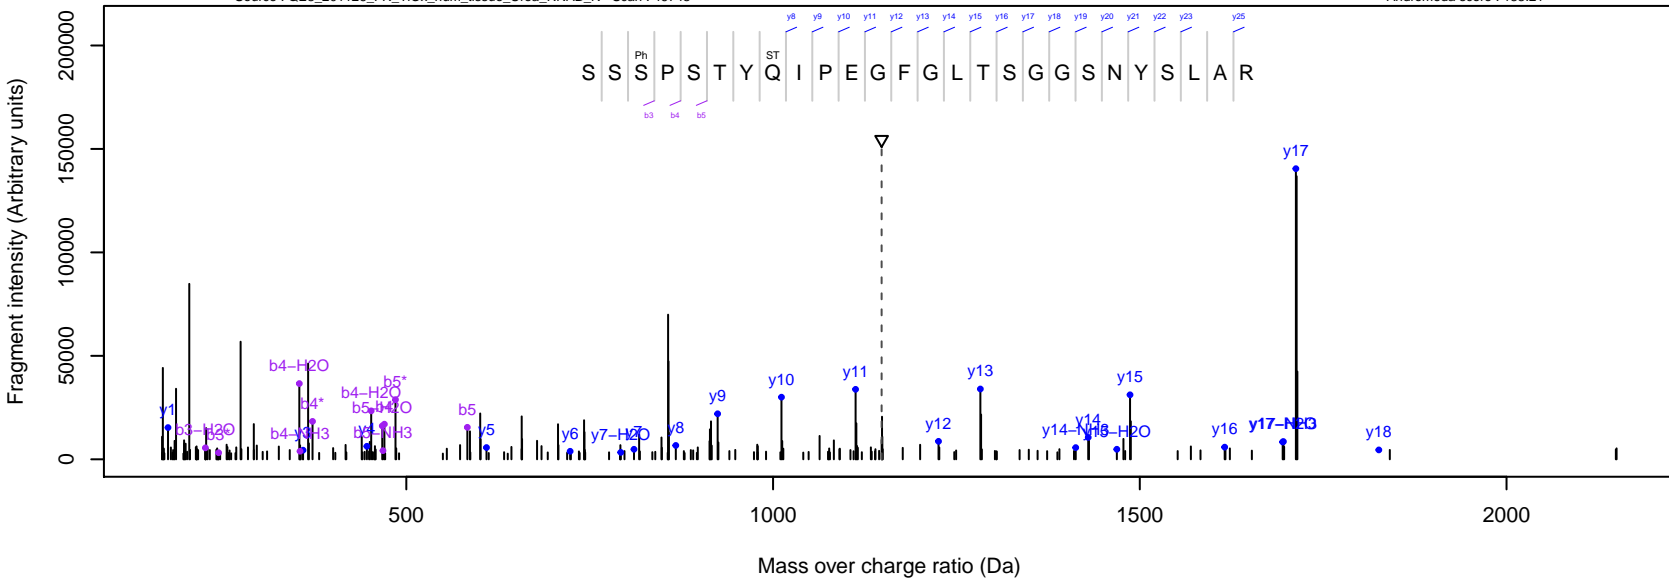

(Acetyl (Protein N-term))AEPSAATQSHSISSSSFGAEPSPGGGS(Phospho (STY))PGACPALGTK-3+

Source : QE3\_201126\_FR\_TIOx\_hum\_tissue\_Urea\_RNAB\_N Scan : 37073

Andromeda score : 133.2

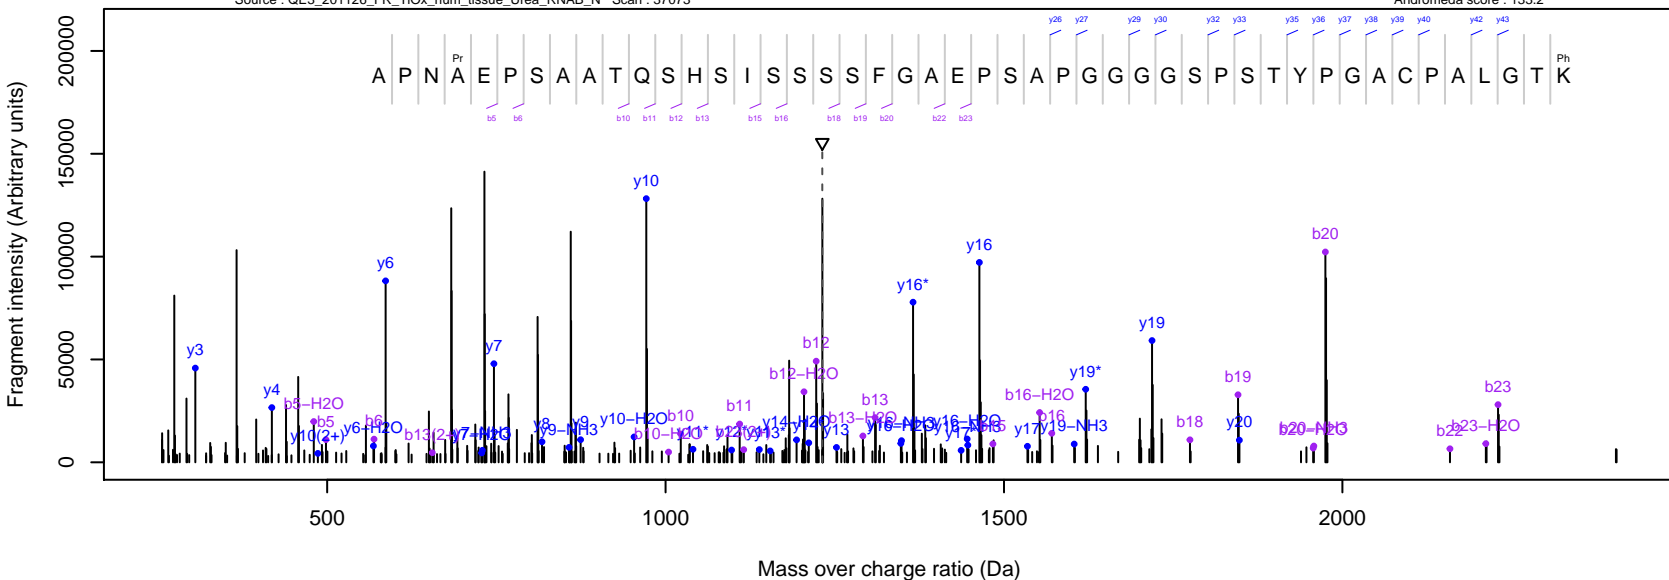

HSAS(Phospho (STY))PVVFTSAR-2+

Source : QE3\_201126\_FR\_TIOx\_hum\_tissue\_Urea\_RNAB\_H Scan : 13936

Andromeda score : 133.16

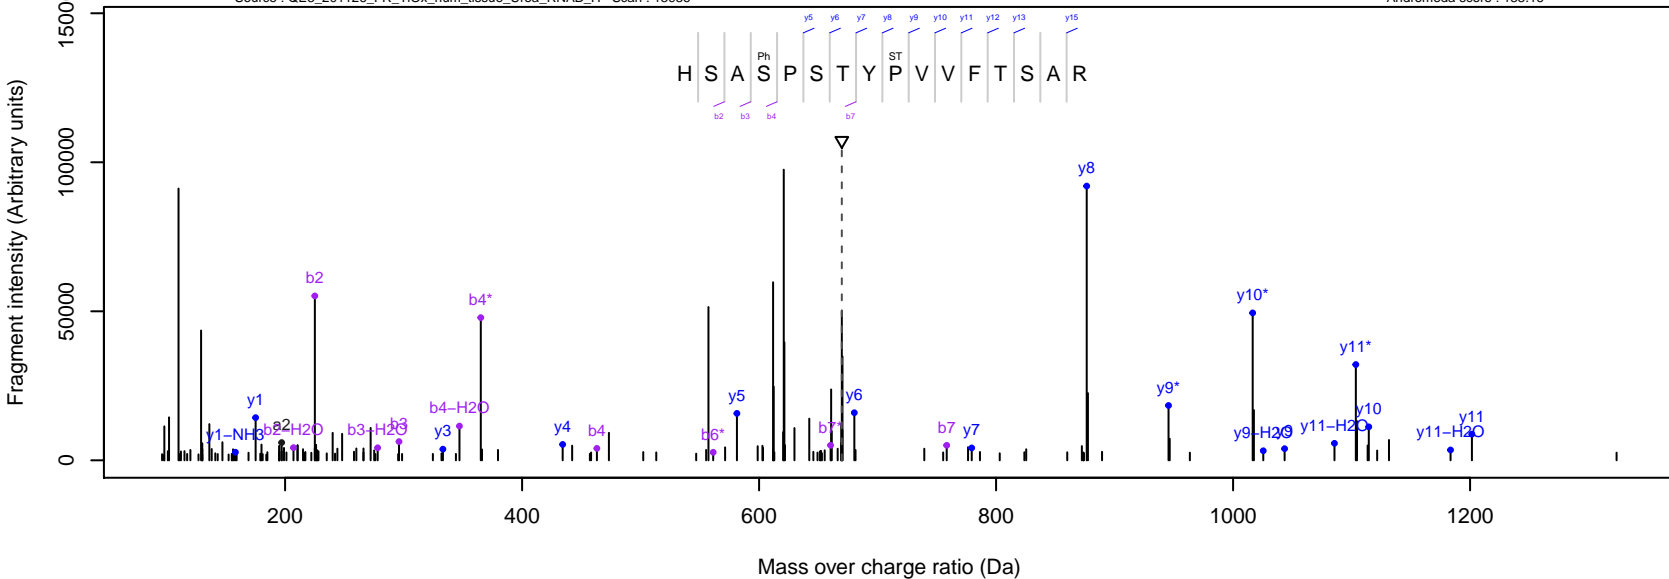

HVAYGGYSTPEDRRPT(Phospho (STY))LSR-4+

Source : QE3\_201126\_FR\_TiOx\_hum\_tissue\_Urea\_RNAB\_H Scan : 14103

Andromeda score : 133.16

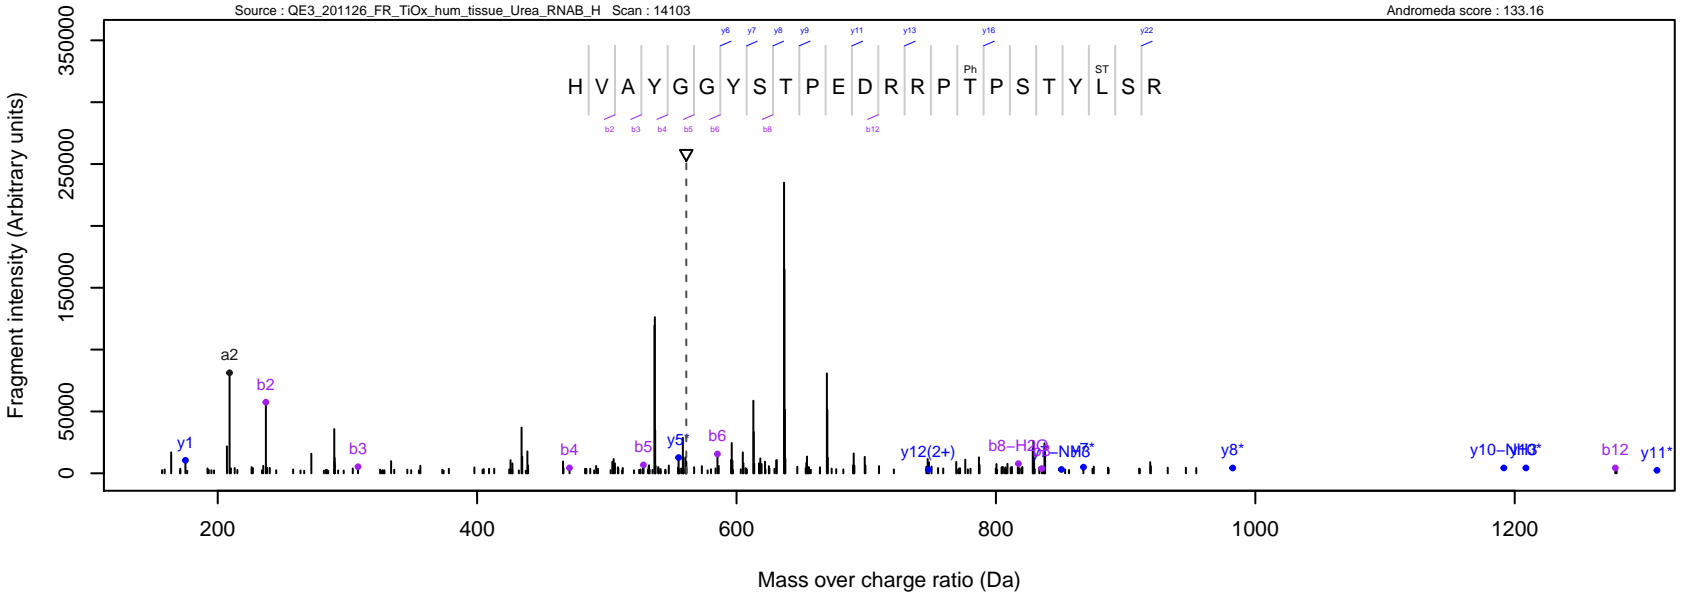

GPPASSPAPAPKFS(Phospho (STY))PVTPK-3+

Source : QE3\_201126\_FR\_TiOx\_hum\_tissue\_Urea\_RNAB\_H Scan : 22173

Andromeda score : 133.15

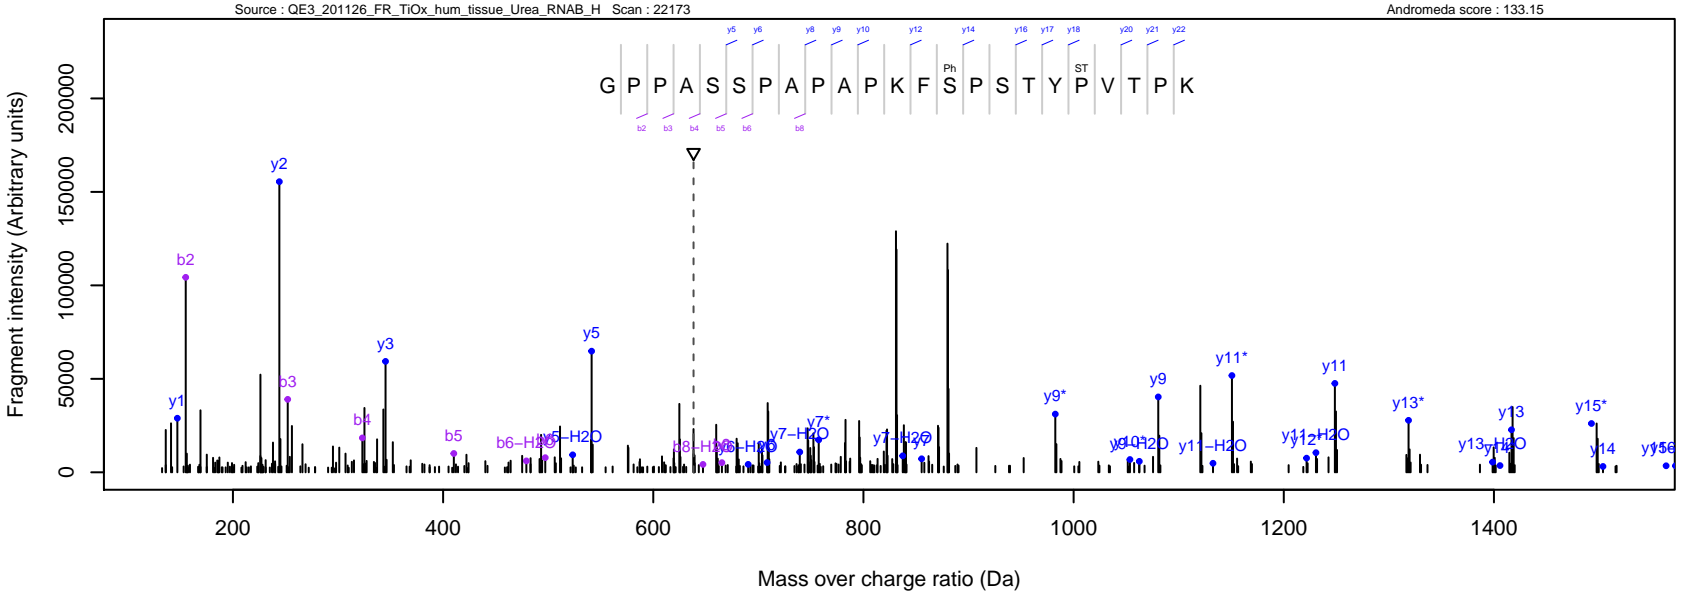

SQSDLLDQHDYDSVA(Phospho (STY))DEDTDQEPLR-3+

Source : QE3\_201126\_FR\_TiOx\_hum\_tissue\_Urea\_RNAB\_B Scan : 26004

Andromeda score : 133.13

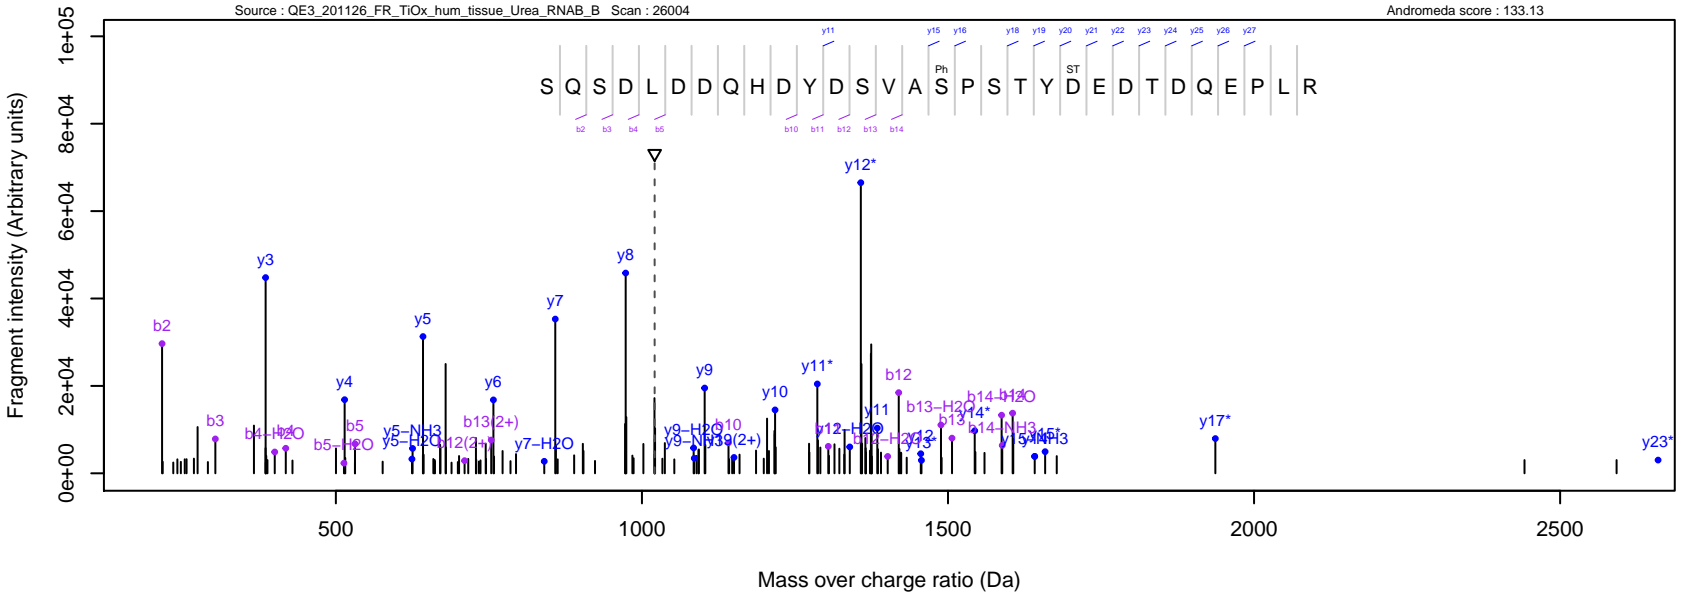



NEALIALREGES(Phospho (STY))LEDLMK-3+

Source : QE3\_201126\_FR\_TiOx\_hum\_tissue\_Urea\_RNAB\_N Scan : 61823

Andromeda score : 133.1

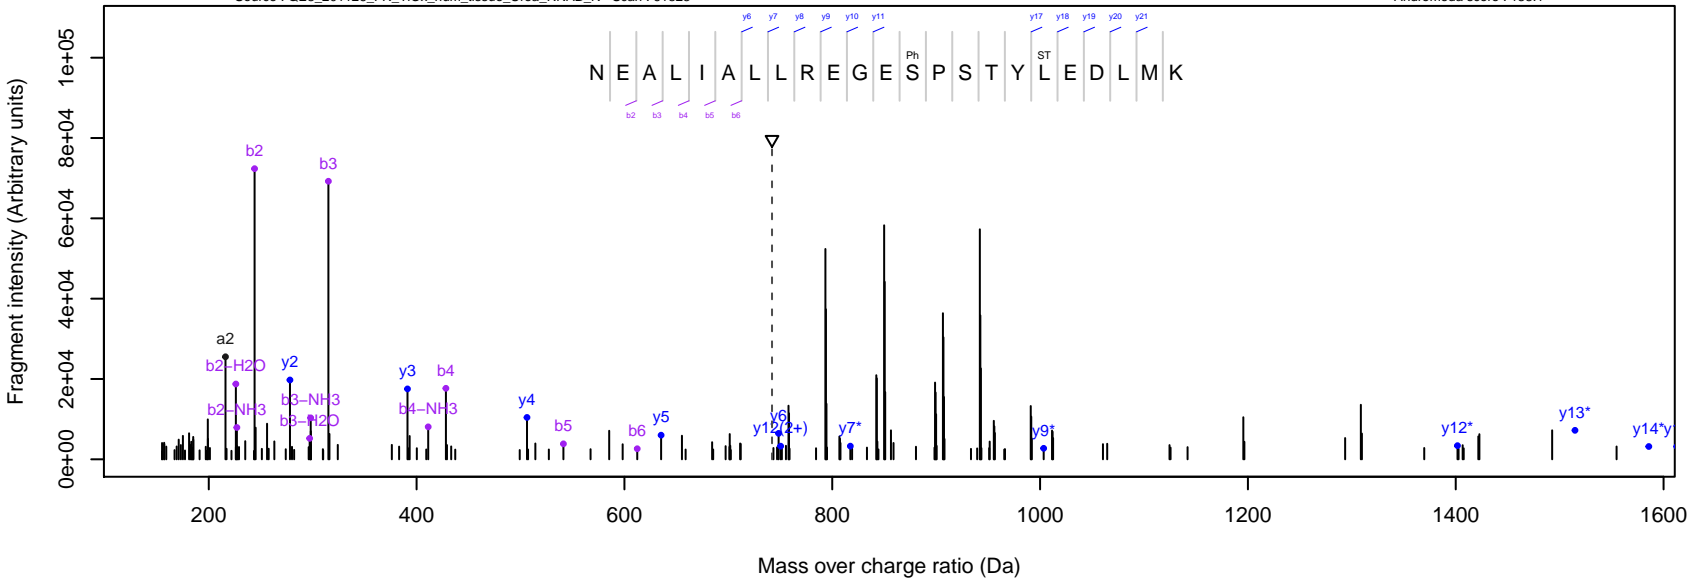

SFS(Phospho (STY))LDPLMER-2+

Source : QE3\_201126\_FR\_TiOx\_hum\_tissue\_Urea\_RNAB\_N Scan : 48949

Andromeda score : 133.07

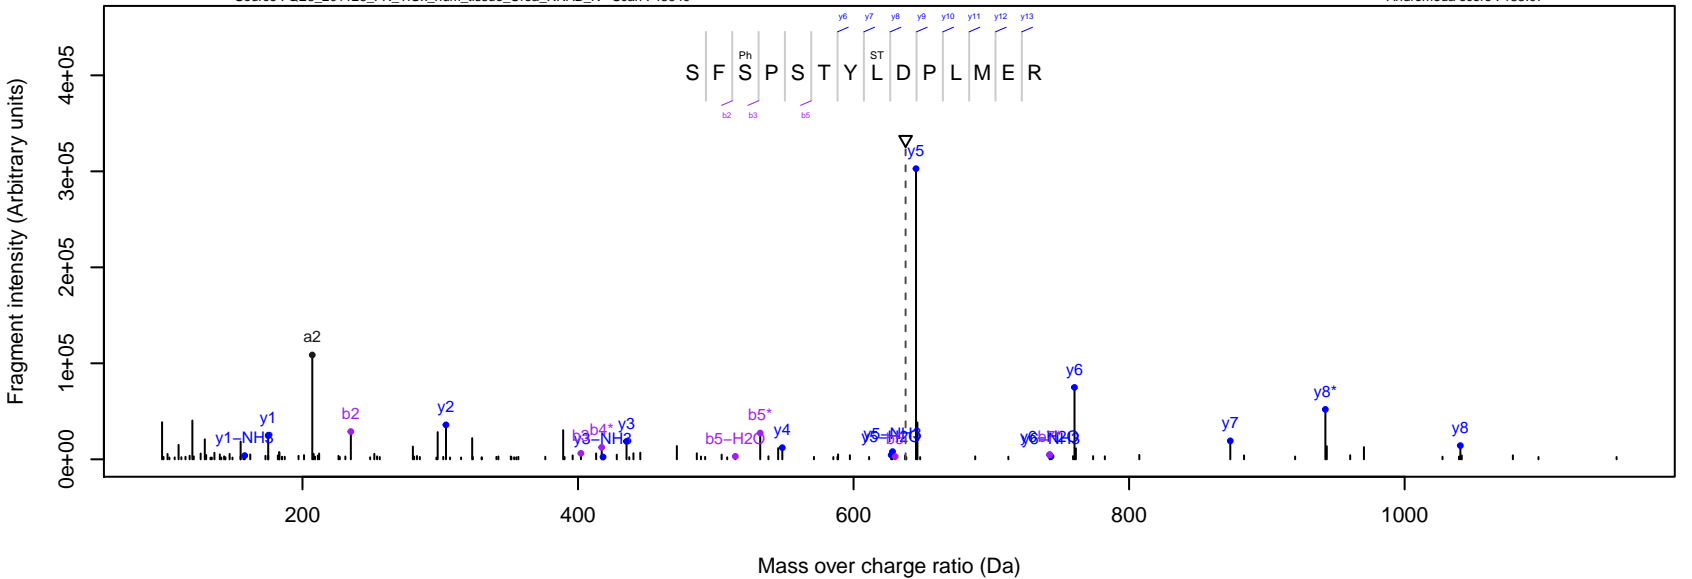

GSS(Phospho (STY))PSHSATSVHTSV-2+

Source : QE3\_201126\_FR\_TiOx\_hum\_tissue\_Urea\_RNAB\_N Scan : 7685

Andromeda score : 132.99

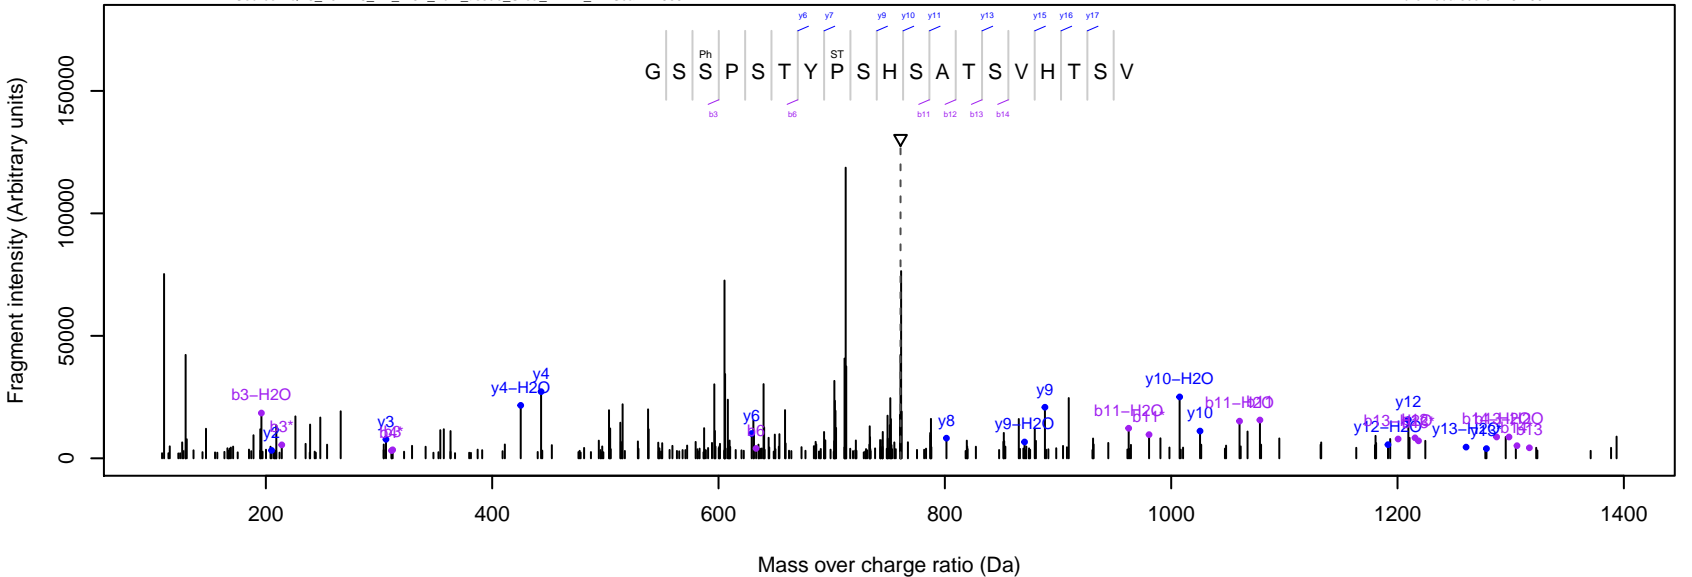

RVS(Phospho (STY))PLNLSVTP--2+

Source : QE3\_201126\_FR\_TiOx\_hum\_tissue\_Urea\_RNAB\_B Scan : 39131

Andromeda score : 132.97

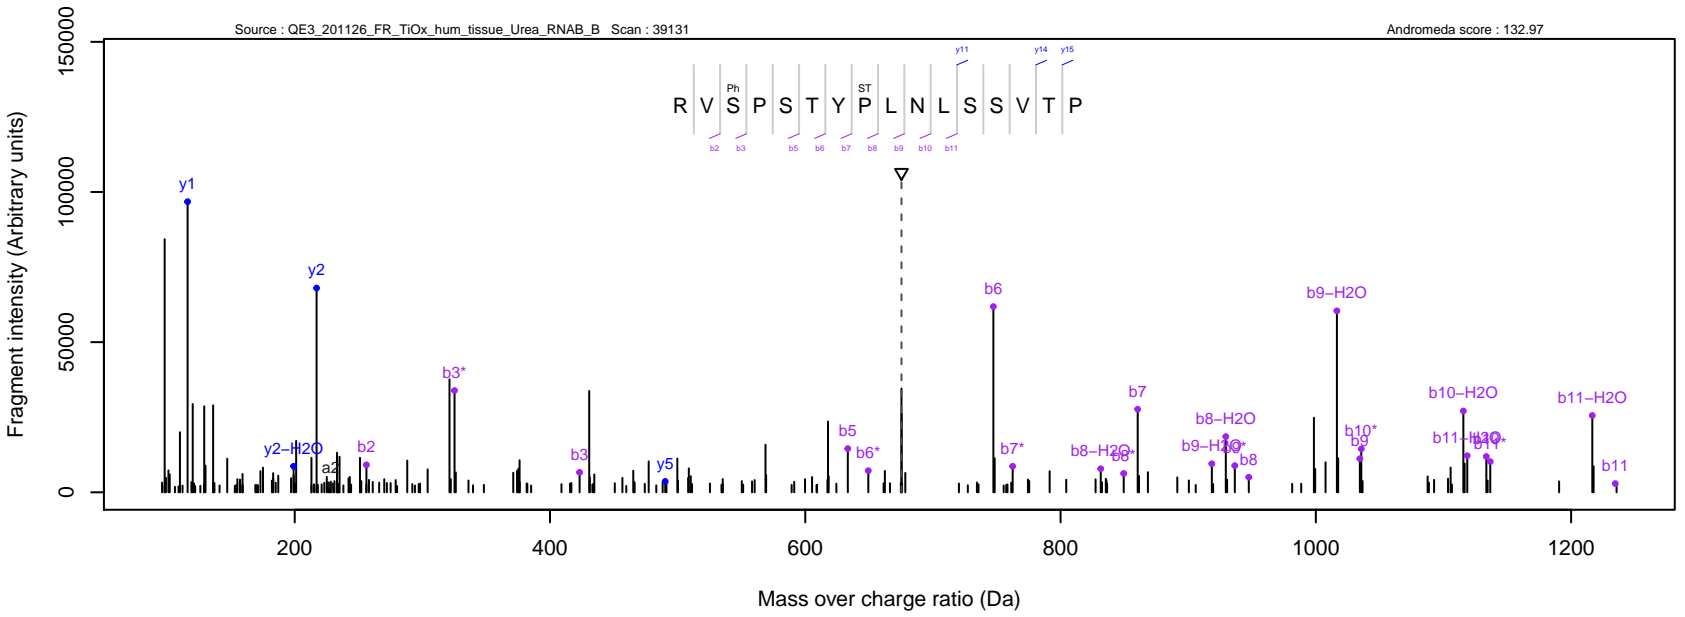

ALIQTCLNSPDS(Phospho (STY))PPRSDPTDQR--3+

Source : QE3\_201126\_FR\_TiOx\_hum\_tissue\_Urea\_RNAB\_H Scan : 25883

Andromeda score : 132.93

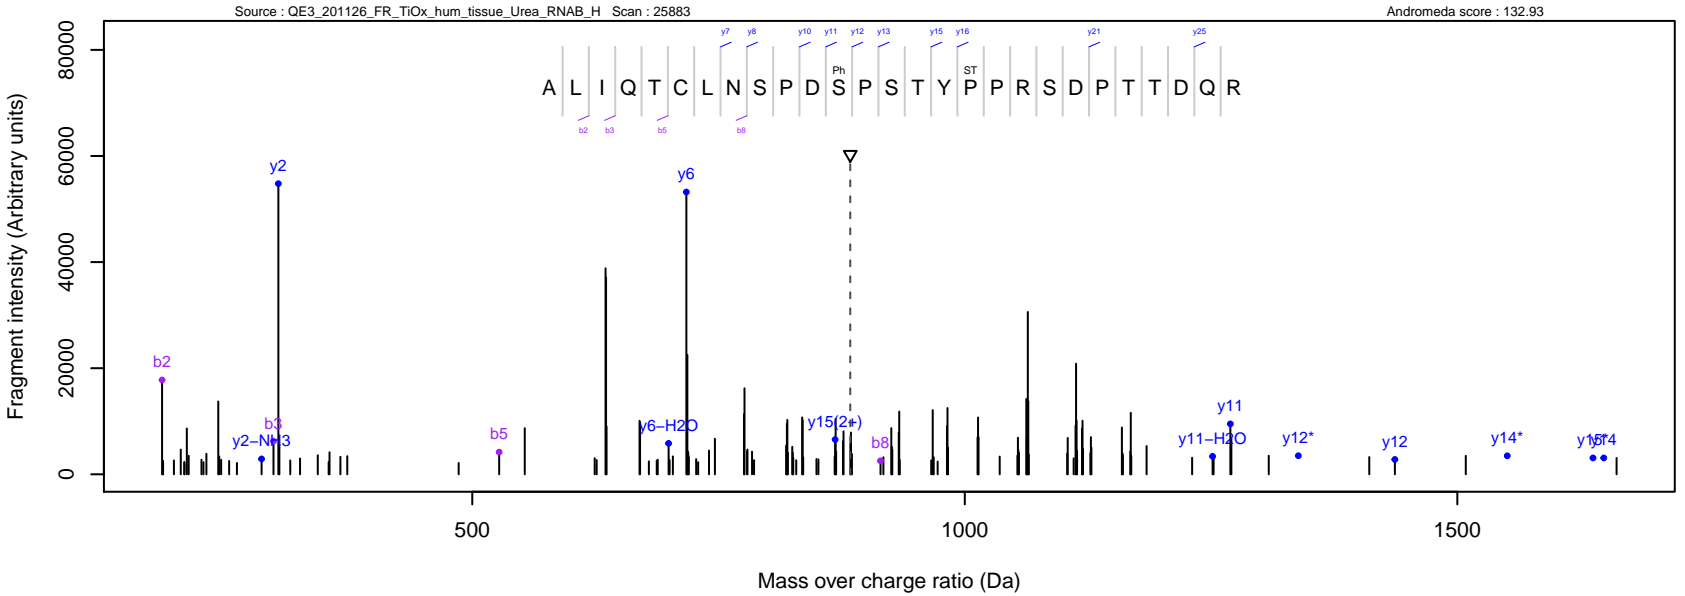

T(Phospho (STY))PESFLGPNAALVDLSVSRPGPTPPGAK--3+

Source : QE3\_201126\_FR\_TiOx\_hum\_tissue\_Urea\_RNAB\_H Scan : 59246

Andromeda score : 132.9

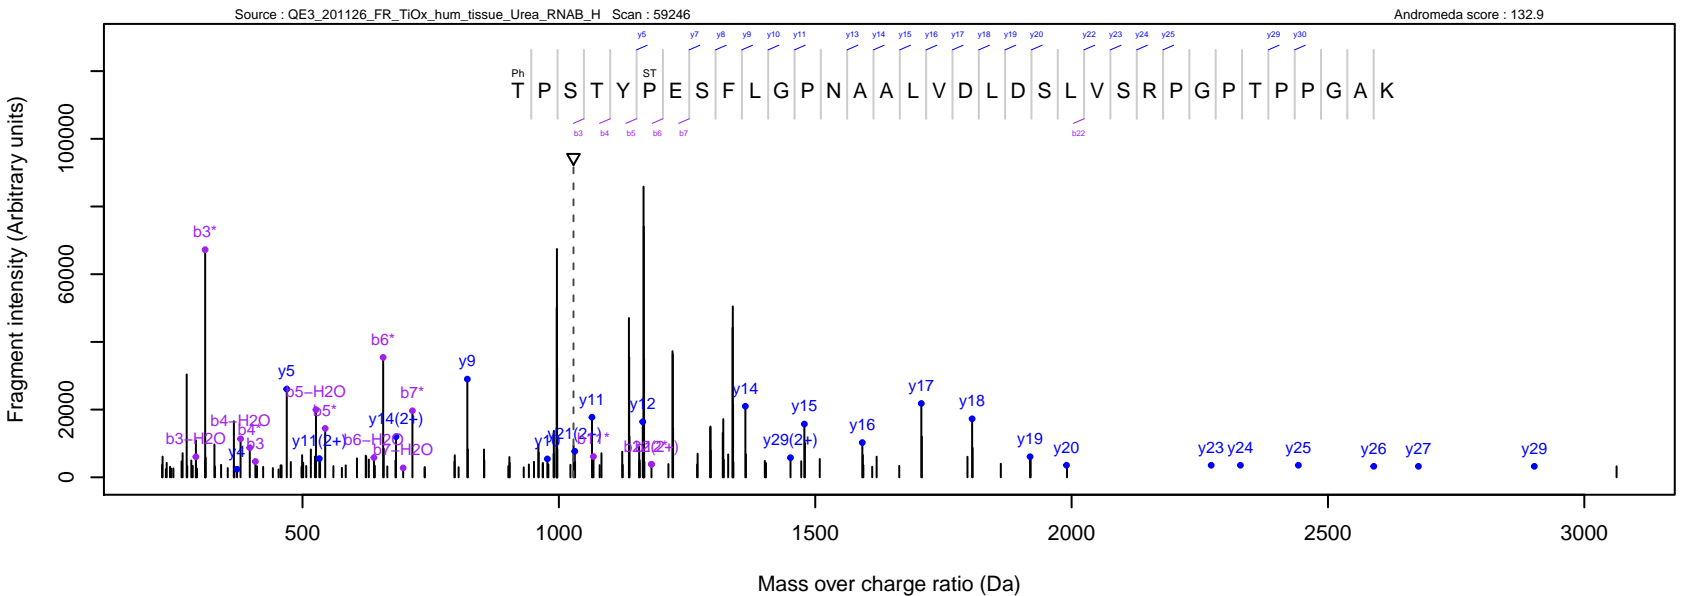



LENEGS(Phospho (STY))DEDIETDVLVLYSPQMALK-2+

Source : QE3\_201126\_FR\_TIOx\_hum\_tissue\_Urea\_RNAB\_N Scan : 54312

Andromeda score : 132.83

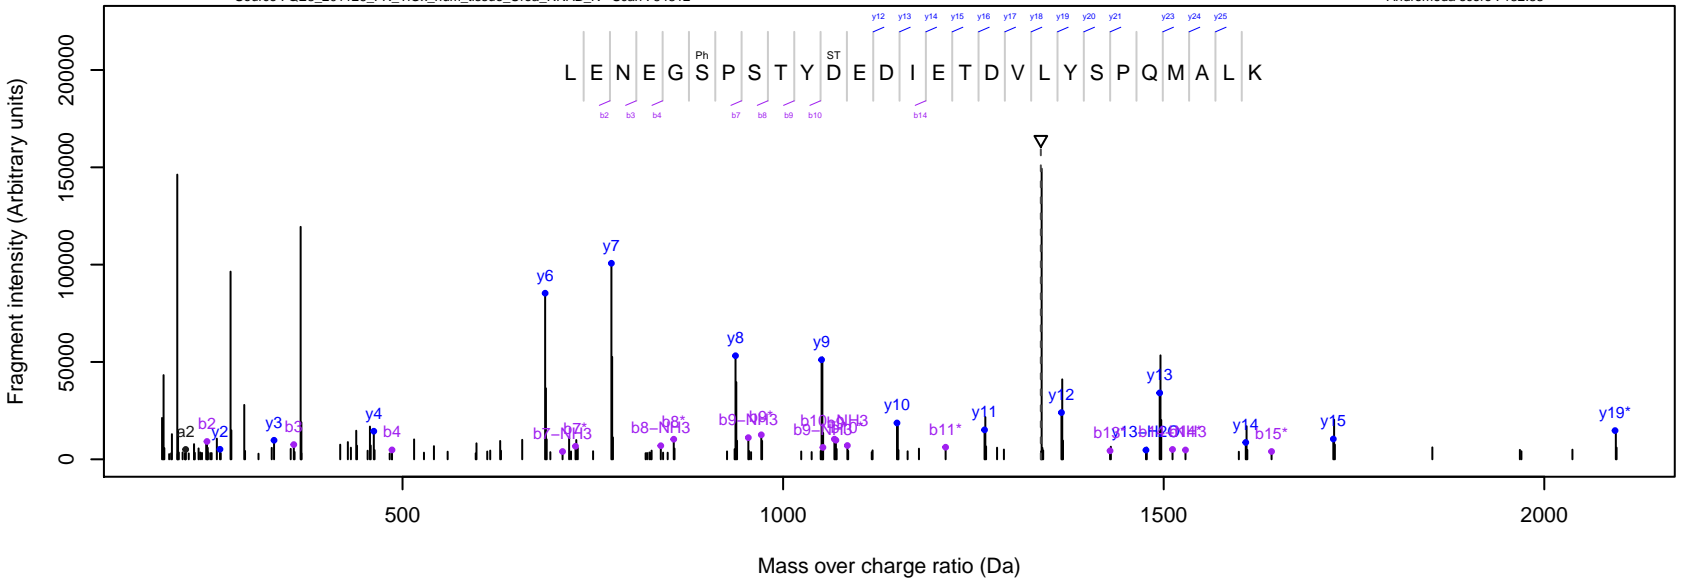

SLEETLHTVDLS(Phospho (STY))S(Phospho (STY))DDDLPHDEEALEDS(Phospho (STY))AEEKVEESR-4+

Source : QE3\_201126\_FR\_TIOx\_hum\_tissue\_Urea\_RNAB\_B Scan : 51768

Andromeda score : 132.82

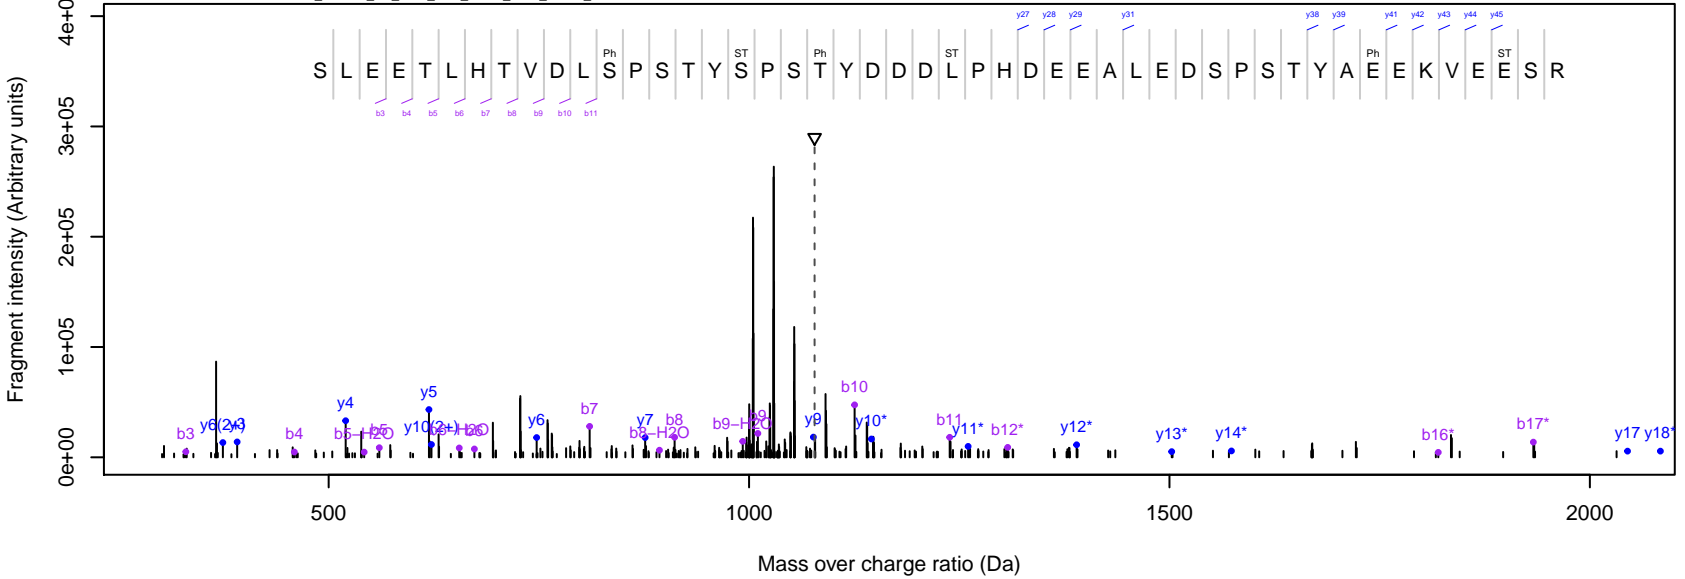

AAAGAQASQALGEEAAGPASETPTAGTES(Phospho (STY))PHS(Phospho (STY))SASPCQEHKR-4+

Source : QE3\_201126\_FR\_TIOx\_hum\_tissue\_Urea\_RNAB\_N Scan : 15304

Andromeda score : 132.81

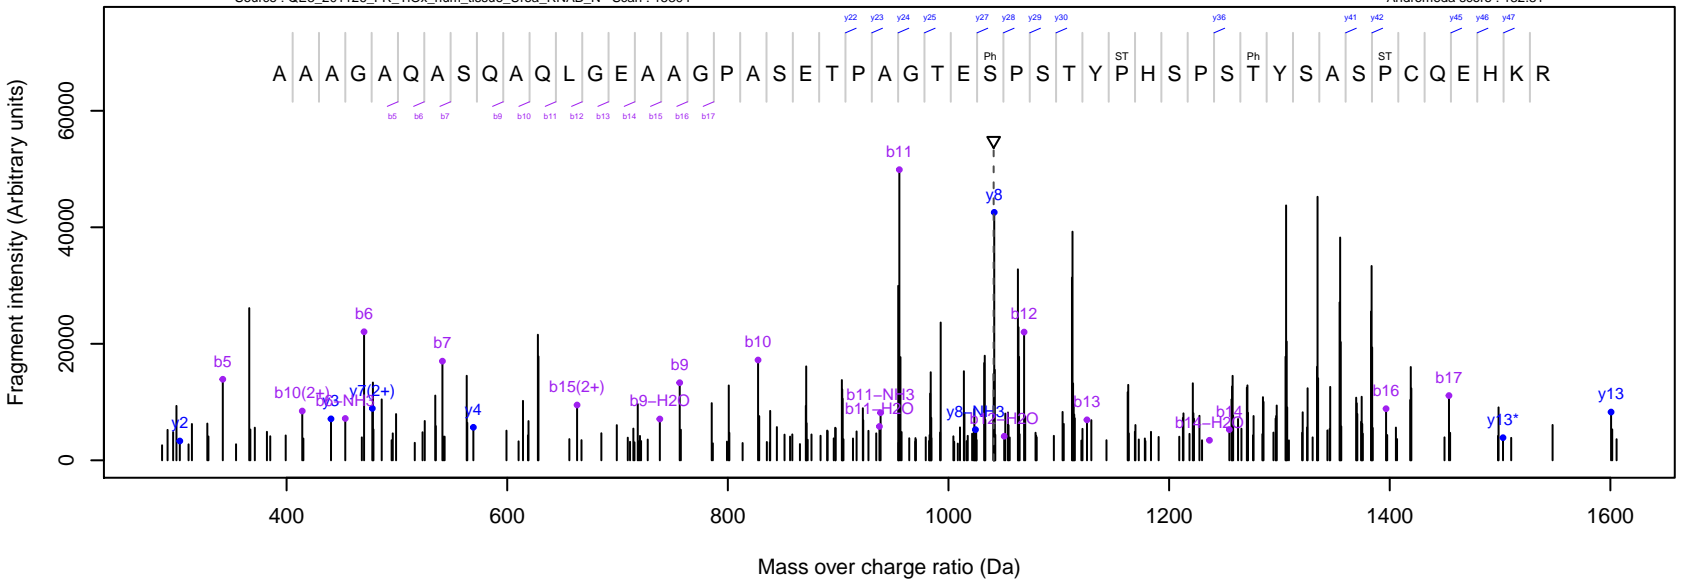

GNSRPGT(Phospho (STY))PSAEGGTSSTLR-3+

Source : QE3\_201126\_FR\_TIOx\_hum\_tissue\_Urea\_RNAB\_H Scan : 8658

Andromeda score : 132.81

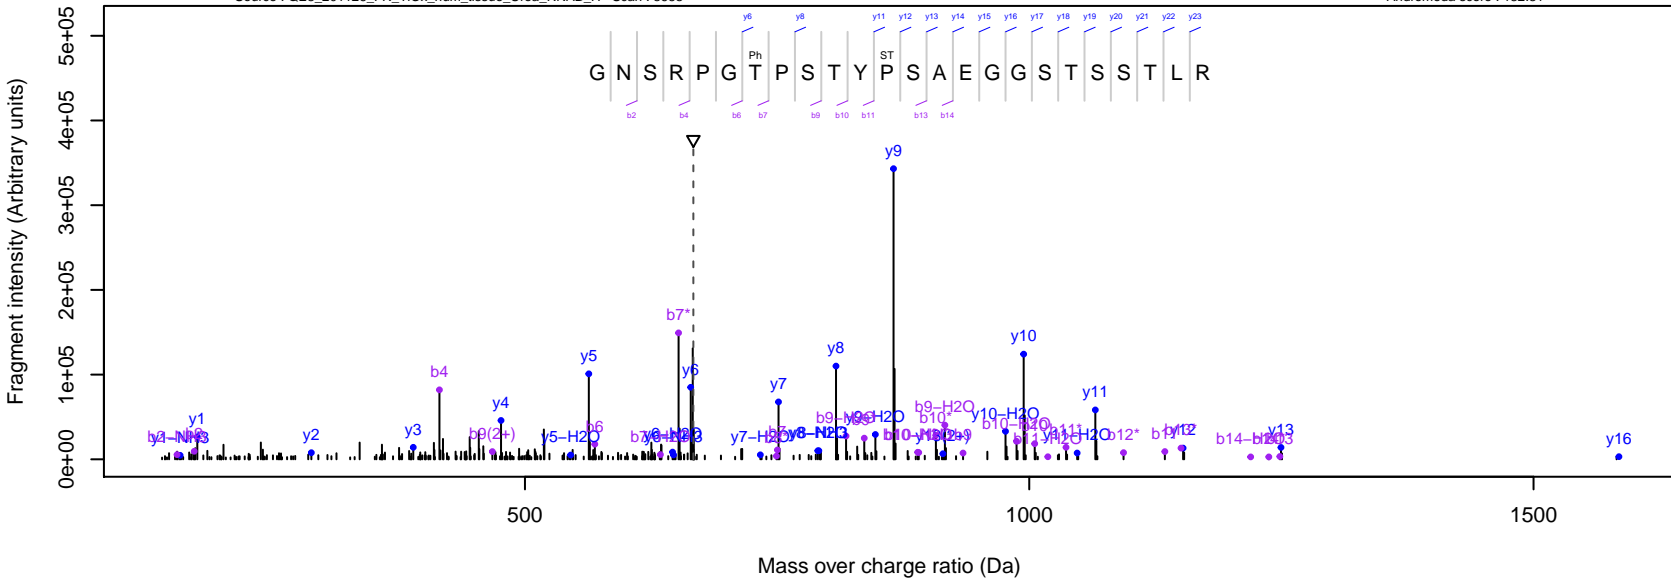

APS(Phospho (STY))PSGLM(Oxidation (M))SPSR-2+

Source : QE3\_201126\_FR\_TIOx\_hum\_tissue\_Urea\_RNAB\_N Scan : 13804

Andromeda score : 132.79

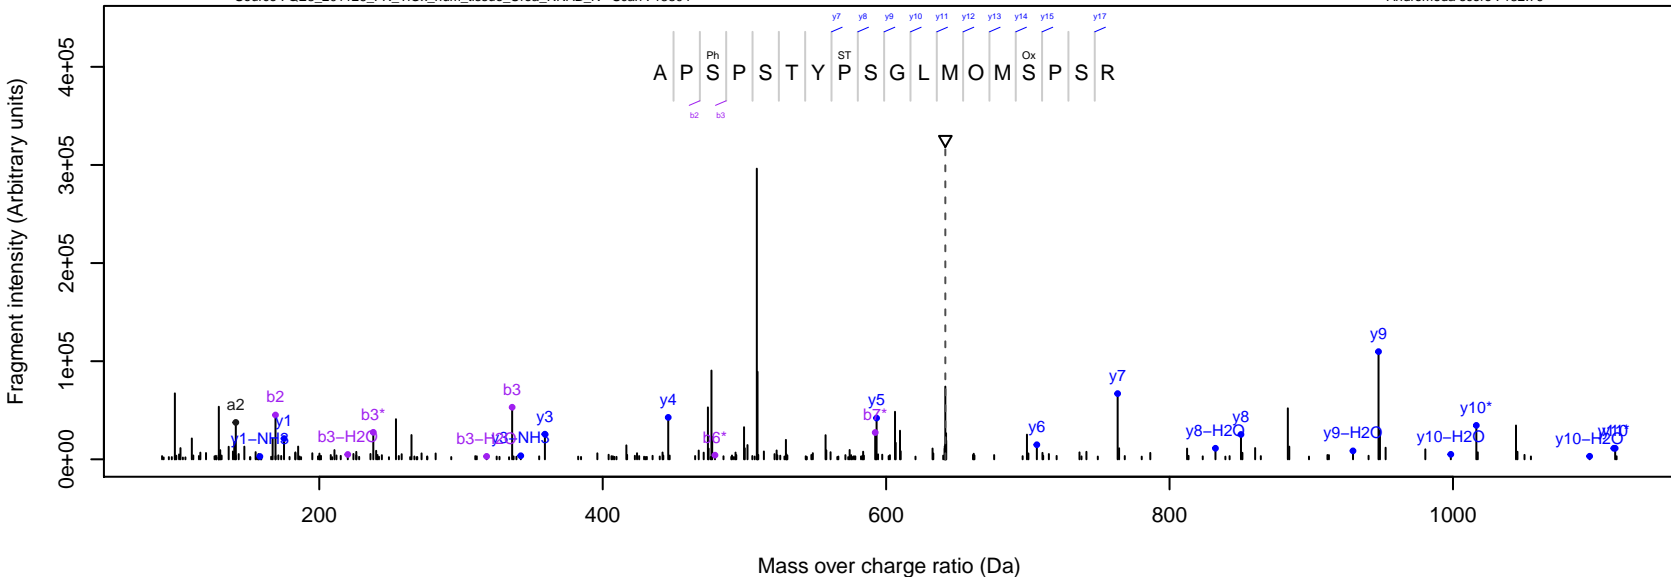

KGS(Phospho (STY))SSSVCSVASSDILGSTK-3+

Source : QE3\_201126\_FR\_TIOx\_hum\_tissue\_Urea\_RNAB\_H Scan : 21523

Andromeda score : 132.79

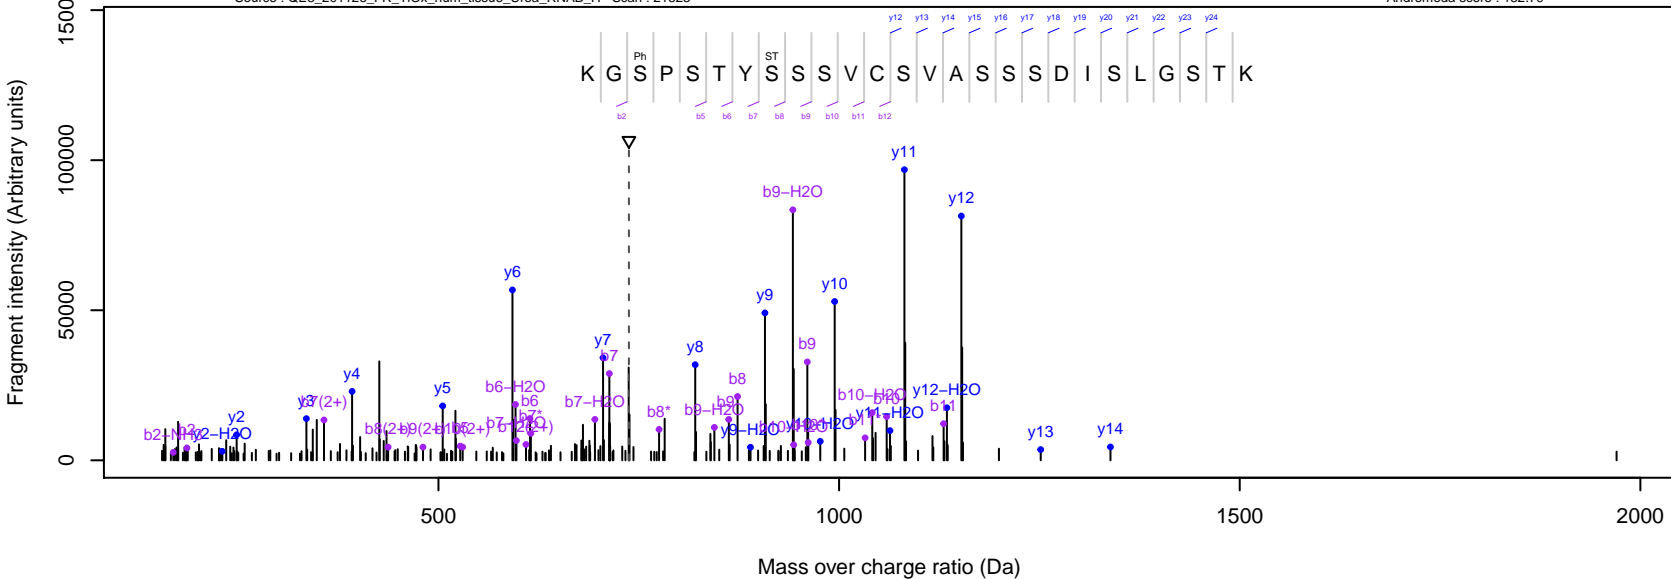

SAS(Phospho (STY))FAFEFPKDR-2+

Source : QE3\_201126\_FR\_TIOx\_hum\_tissue\_Urea\_RNAB\_H Scan : 35584

Andromeda score : 132.79

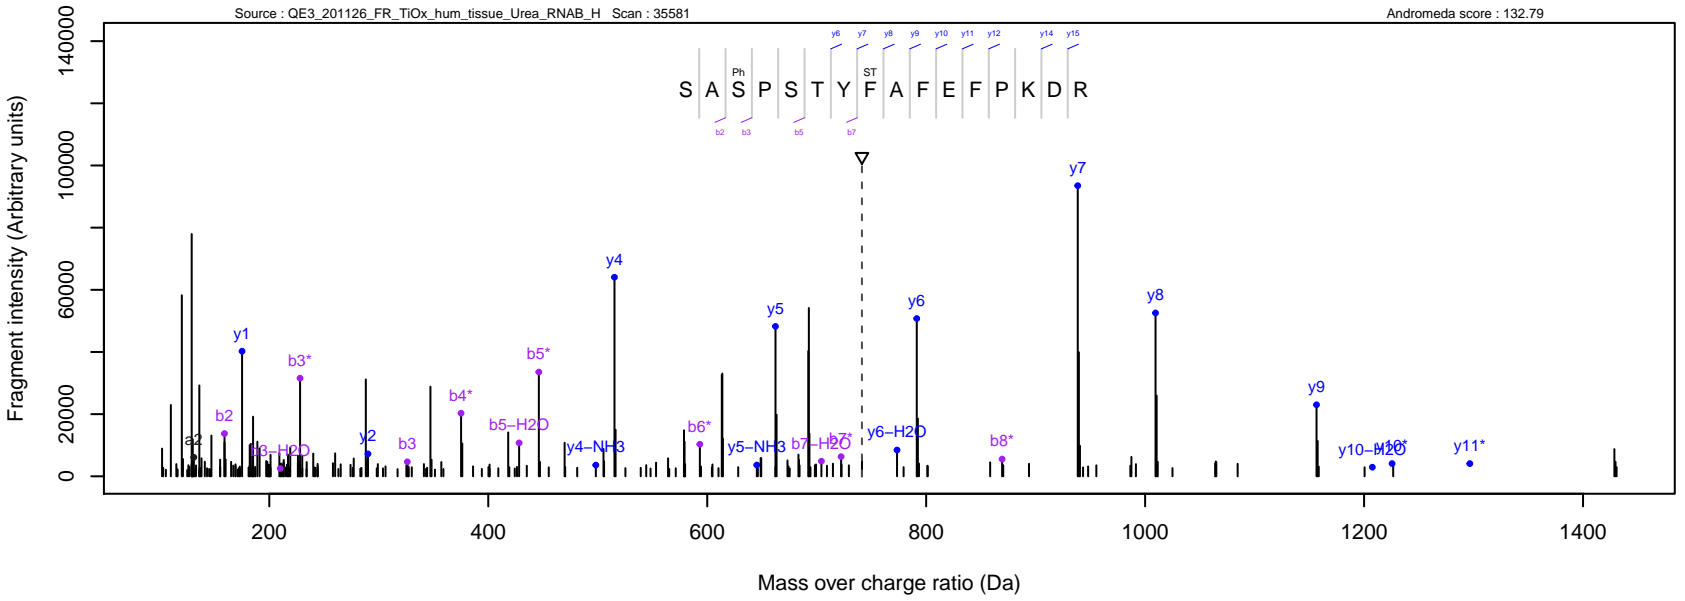

ASEAASPLPDS(Phospho (STY))PGDKLVIVK-3+

Source : QE3\_201126\_FR\_TIOx\_hum\_tissue\_Urea\_RNAB\_N Scan : 33434

Andromeda score : 132.72

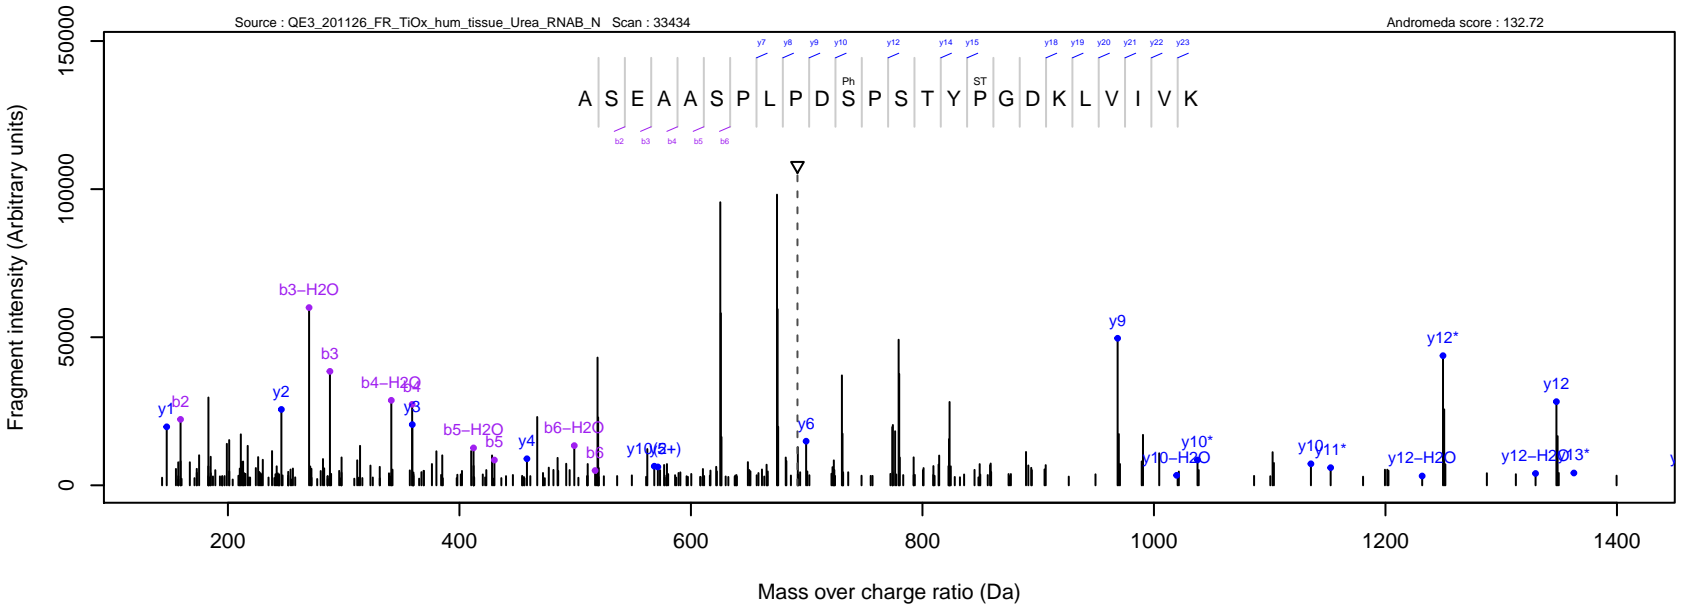

NHS(Phospho (STY))GS(Phospho (STY))RT(Phospho (STY))PPVALNSSR-3+

Source : QE3\_201126\_FR\_TIOx\_hum\_tissue\_Urea\_RNAB\_B Scan : 14548

Andromeda score : 132.66

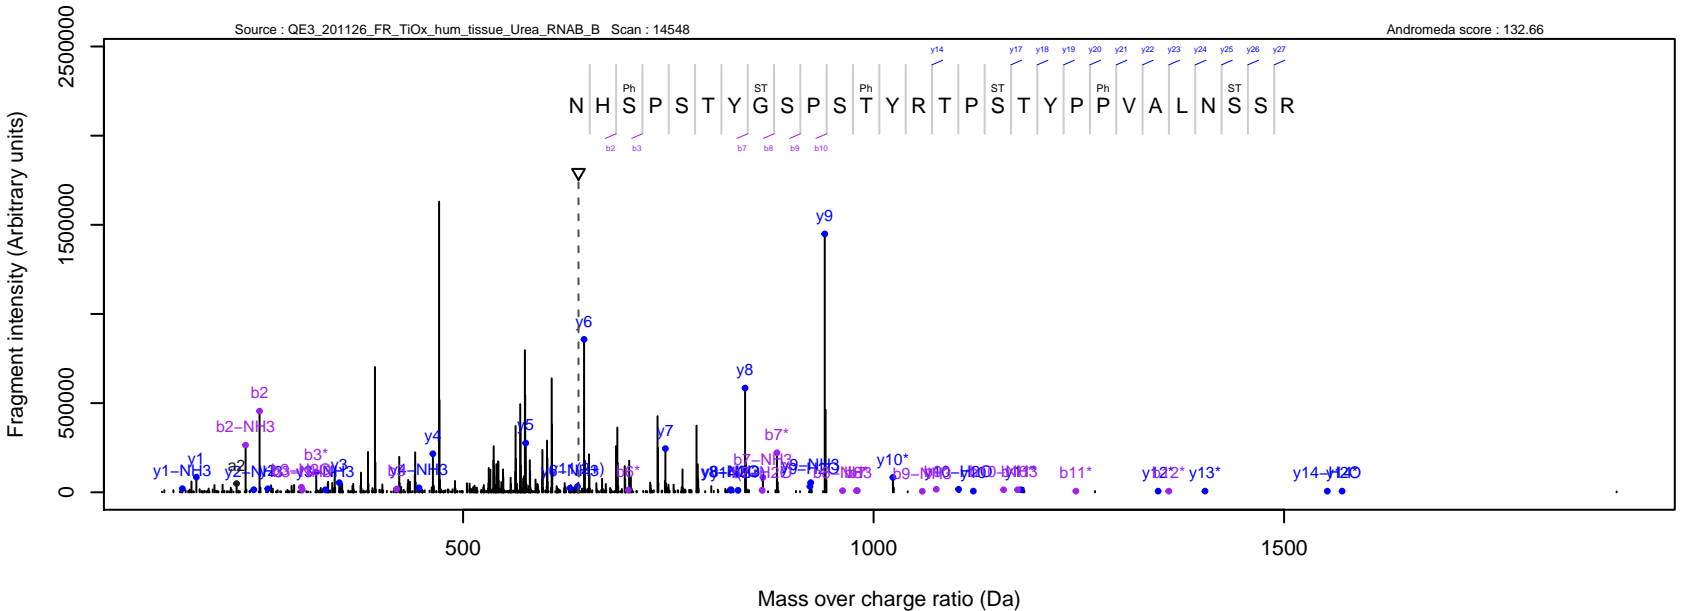

AST(Phospho (STY))FCGTPDYIAEILQLK-2+

Source : QE3\_201126\_FR\_TiOx\_hum\_tissue\_Urea\_RNAB\_N Scan : 59291

Andromeda score : 132.64

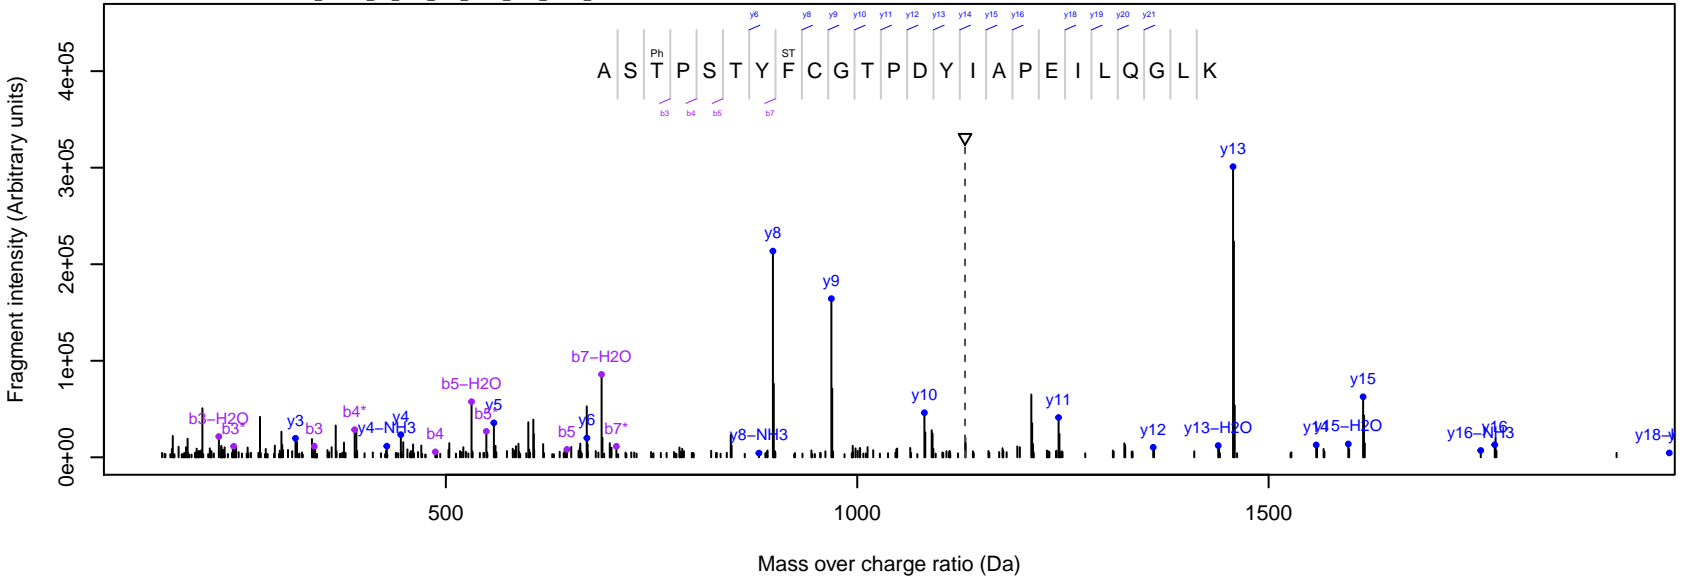

ELEKPIQSKPQ(Phospho (STY))PVIQAAVS(Phospho (STY))PK-3+

Source : QE3\_201126\_FR\_TiOx\_hum\_tissue\_Urea\_RNAB\_N Scan : 22718

Andromeda score : 132.6

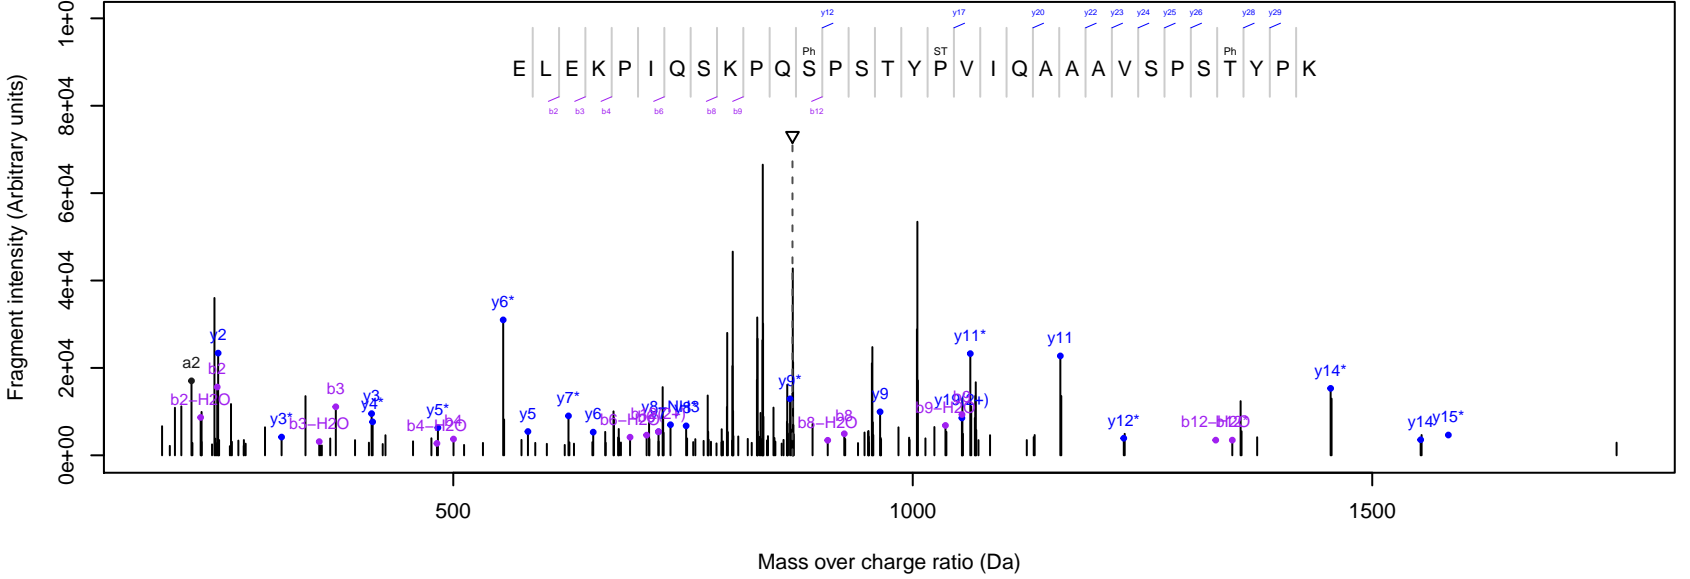

QS(Phospho (STY))SASGYQAPSTPSFPVSPAYYPGLSSPATSPSPD SAAFR-3+

Source : QE3\_201126\_FR\_TiOx\_hum\_tissue\_Urea\_RNAB\_H Scan : 56665

Andromeda score : 132.6

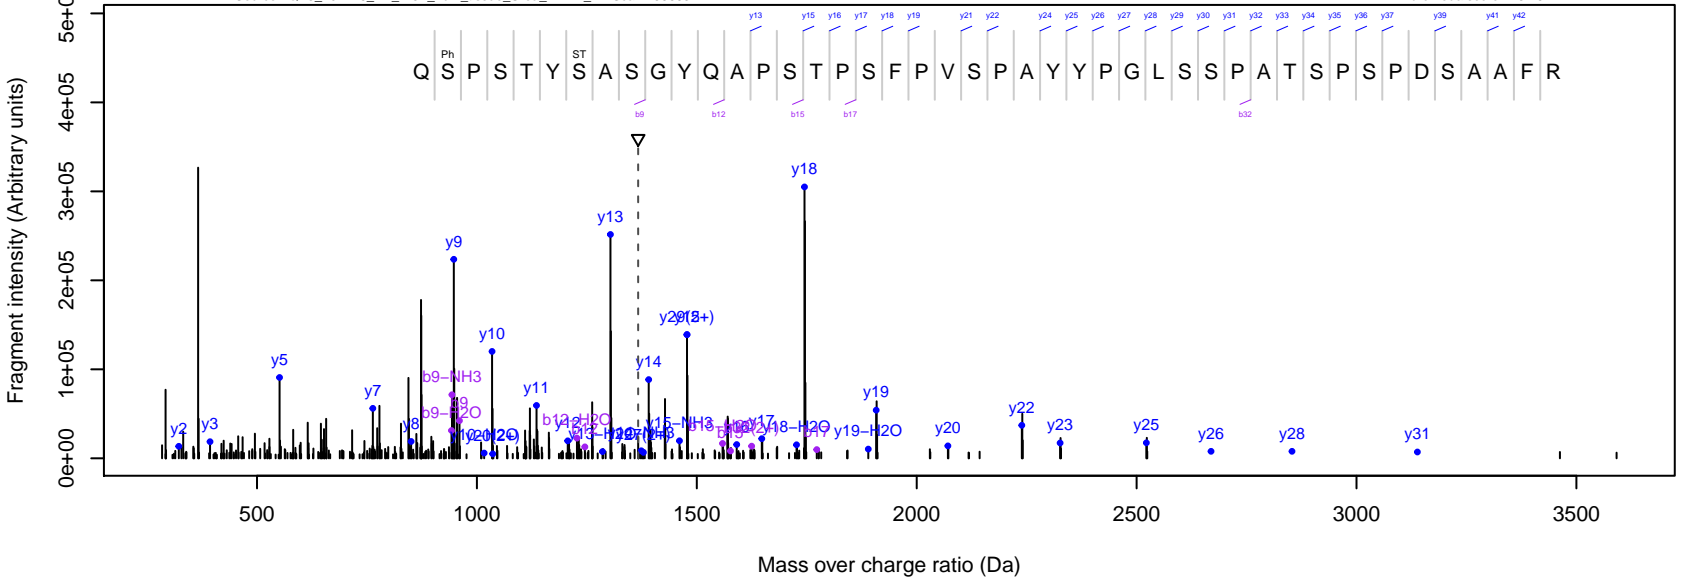

RGS(Phospho (STY))LCSGCQKPITGR-3+

Source : QE3\_201126\_FR\_TIOx\_hum\_tissue\_Urea\_RNAB\_N Scan : 6969

Andromeda score : 132.6

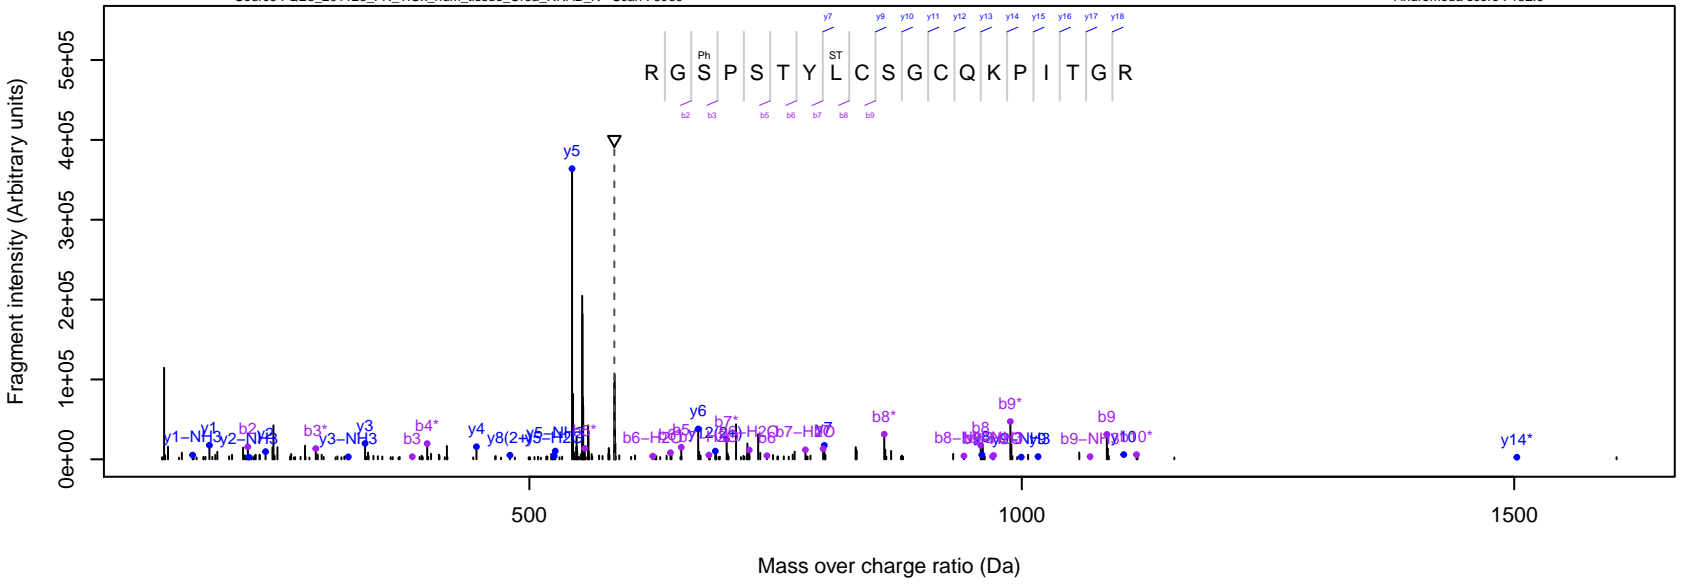

EM(Oxidation (M))APQSVS(Phospho (STY))PR-2+

Source : QE3\_201126\_FR\_TIOx\_hum\_tissue\_Urea\_RNAB\_H Scan : 7961

Andromeda score : 132.56

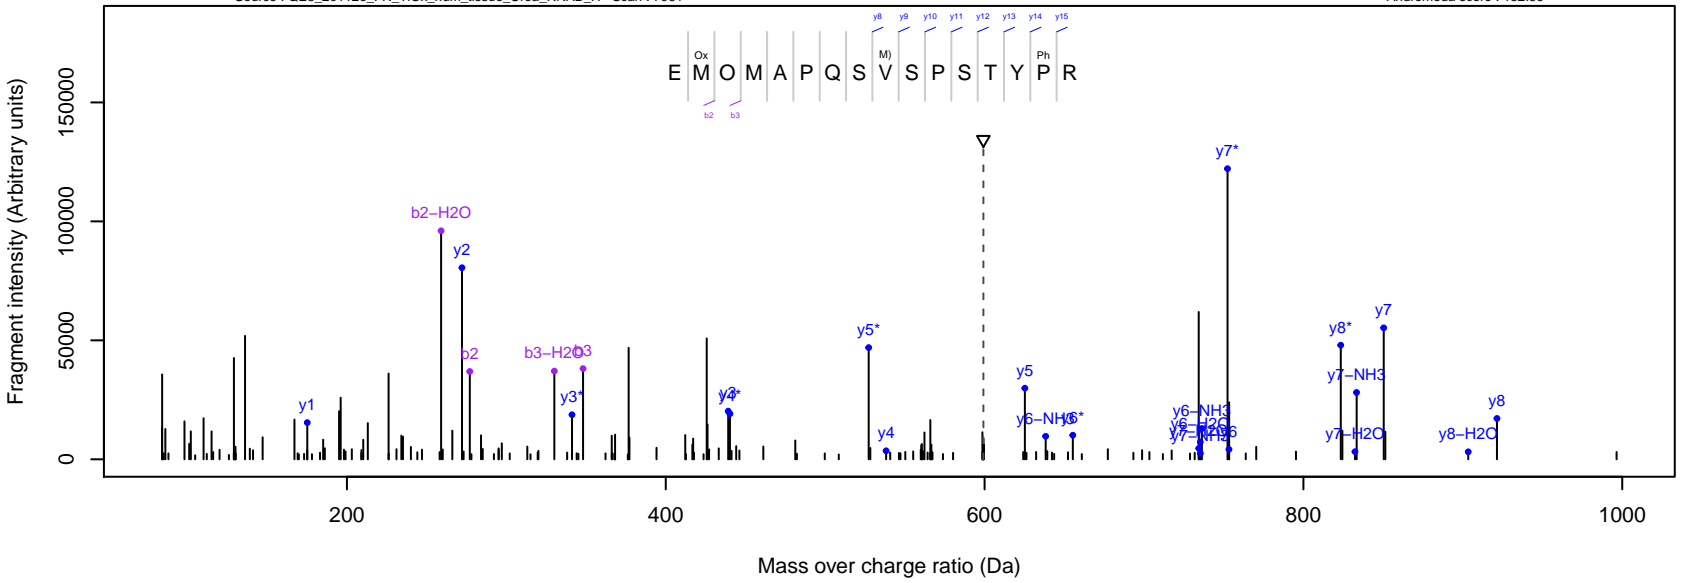

GPTTGEGALDSDVHS(Phospho (STY))PPKS(Phospho (STY))PEGK-3+

Source : QE3\_201126\_FR\_TIOx\_hum\_tissue\_Urea\_RNAB\_H Scan : 23931

Andromeda score : 132.53

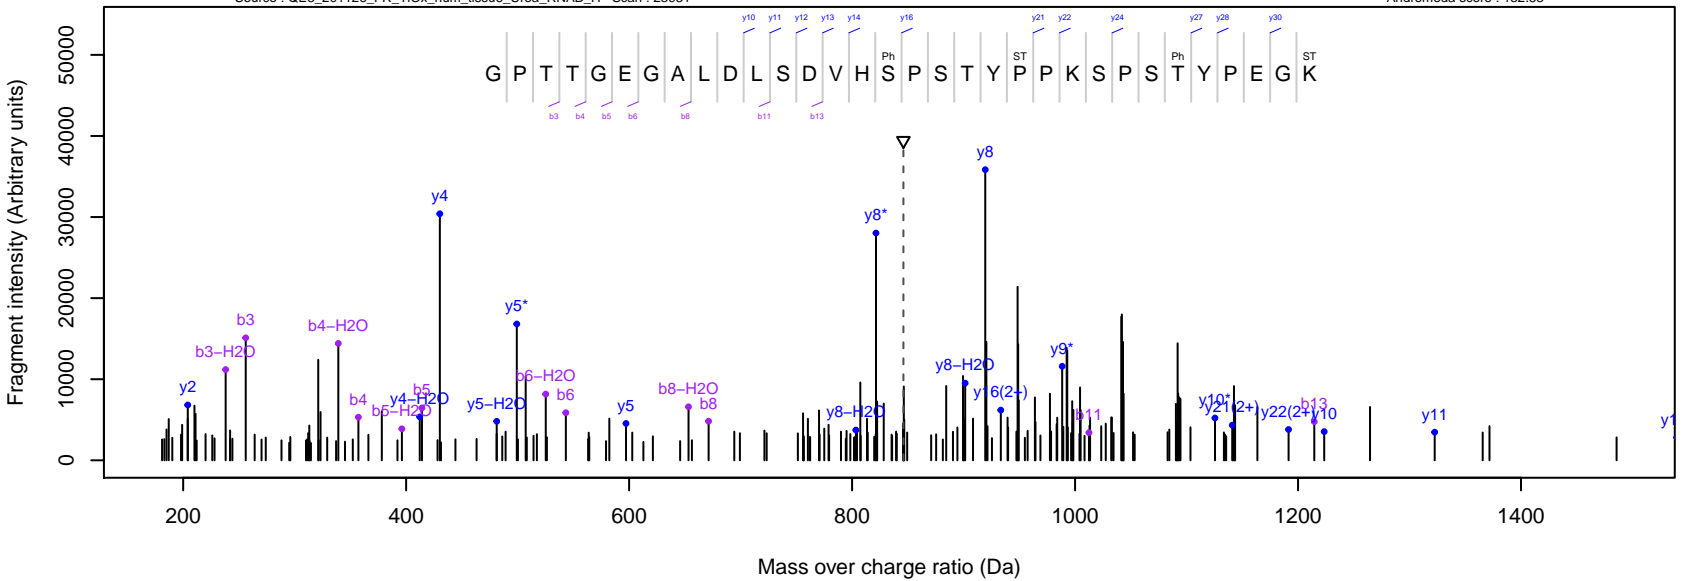



RES(Phospho (STY))CGSSVLTDFEGKDVATK-3+

Source : QE3\_201126\_FR\_TIOx\_hum\_tissue\_Urea\_RNAB\_N Scan : 25078

Andromeda score : 132.53

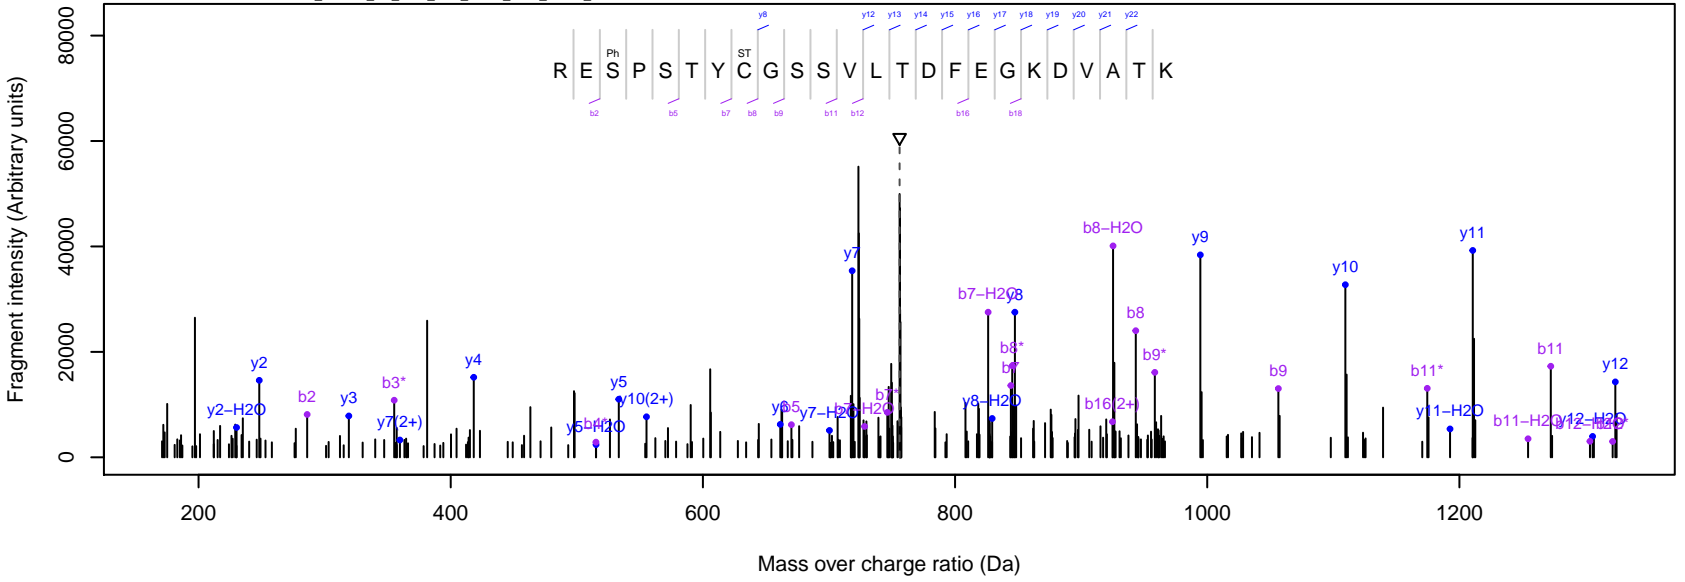

LSVPYVPQVTDEDRLS(Phospho (STY))R-3+

Source : QE3\_201126\_FR\_TIOx\_hum\_tissue\_Urea\_RNAB\_N Scan : 38708

Andromeda score : 132.48

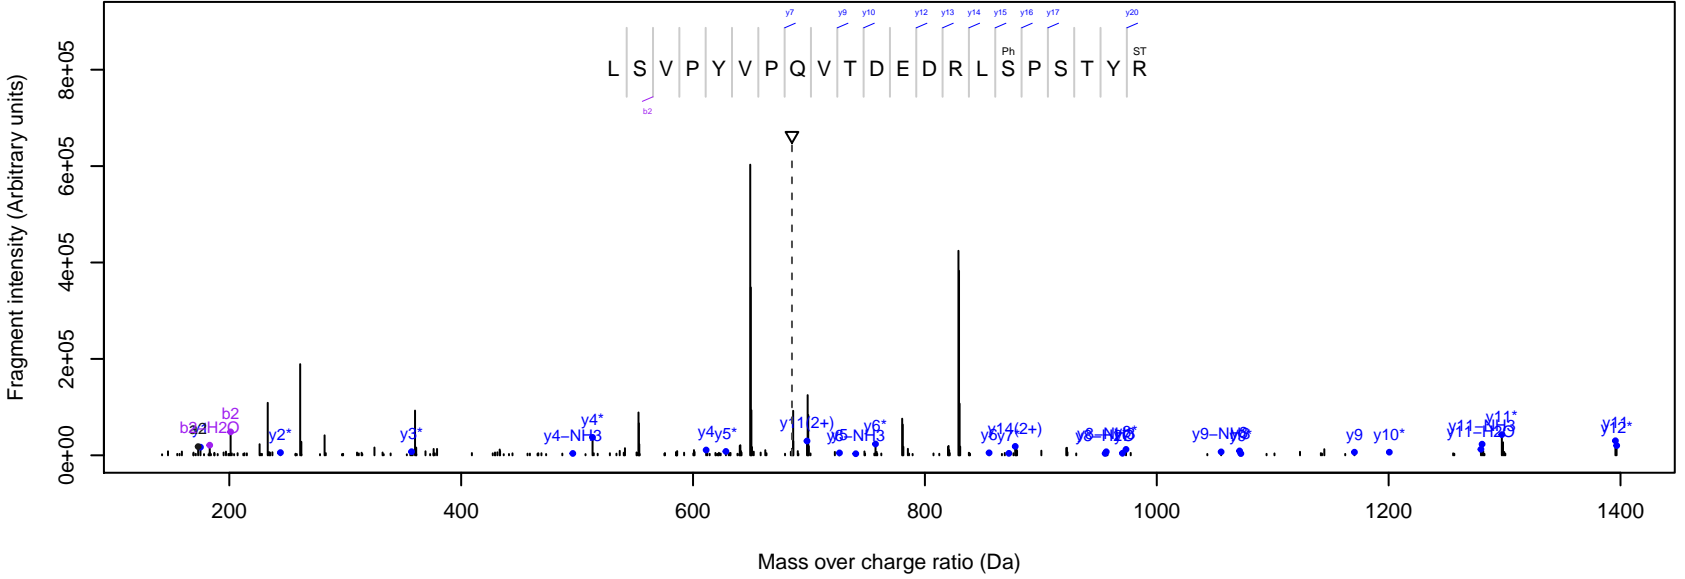

(Acetyl (Protein N-term))MDNYADLS(Phospho (STY))DTELTLLRR-3+

Source : QE3\_201126\_FR\_TIOx\_hum\_tissue\_Urea\_RNAB\_N Scan : 60423

Andromeda score : 132.48

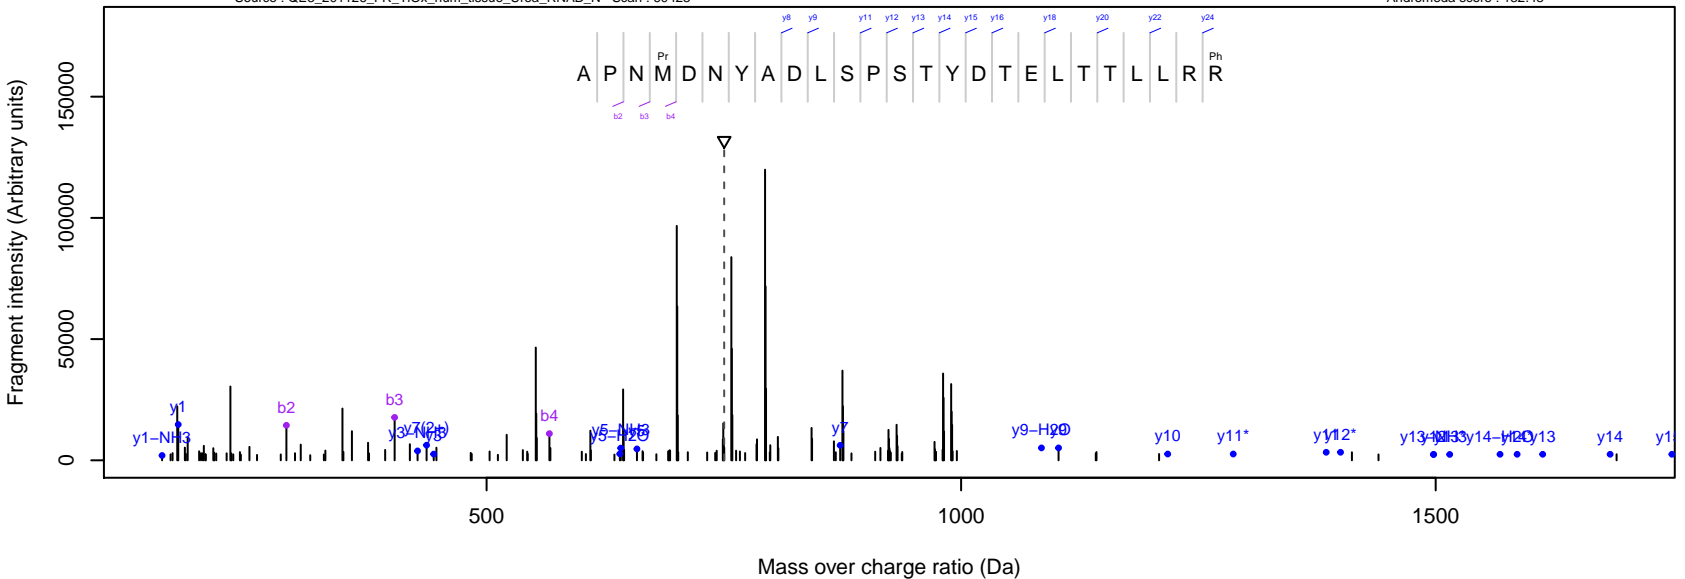

SHTS(Phospho (STY))LKDELSDVSGGSK-3+

Source : QE3\_201126\_FR\_TiOx\_hum\_tissue\_Urea\_RNAB\_N Scan : 16974

Andromeda score : 132.48

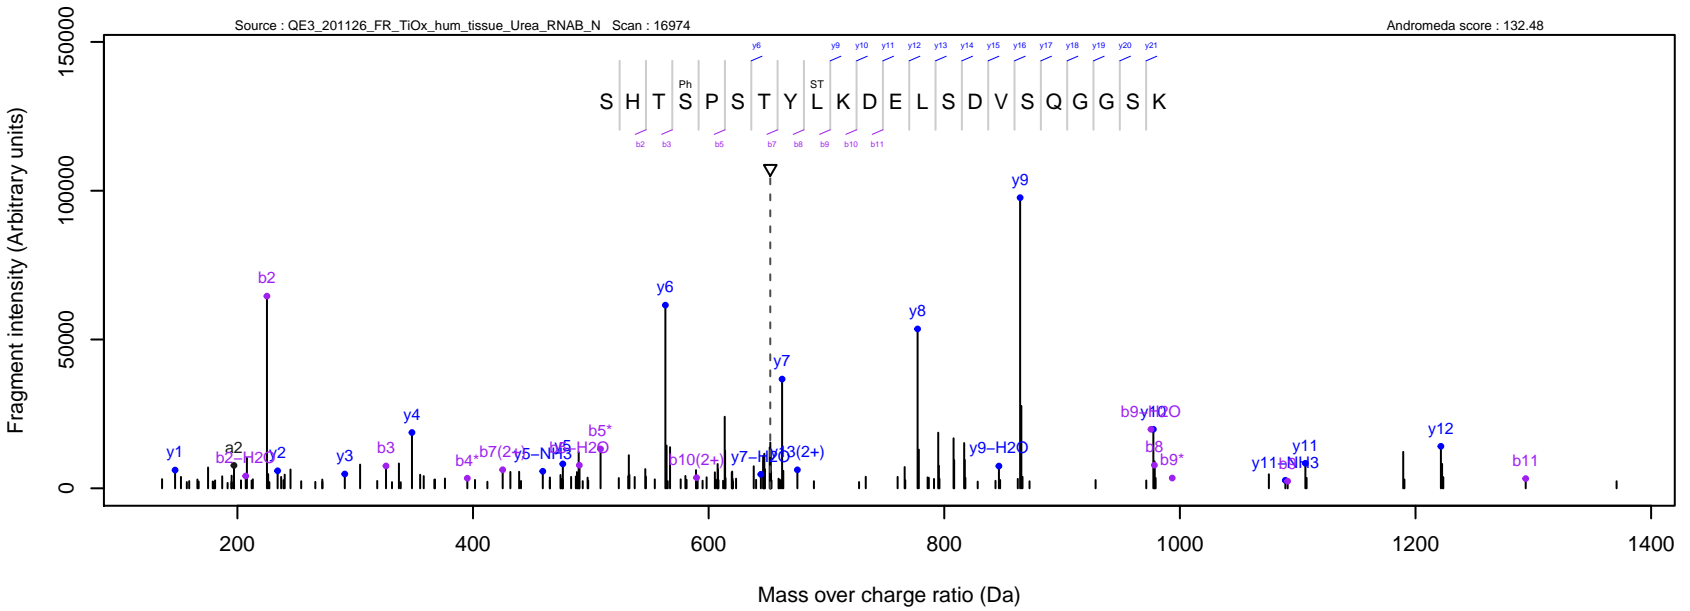

SQQQDS(Phospho (STY))EVNELSR-2+

Source : QE3\_201126\_FR\_TiOx\_hum\_tissue\_Urea\_RNAB\_N Scan : 16939

Andromeda score : 132.44

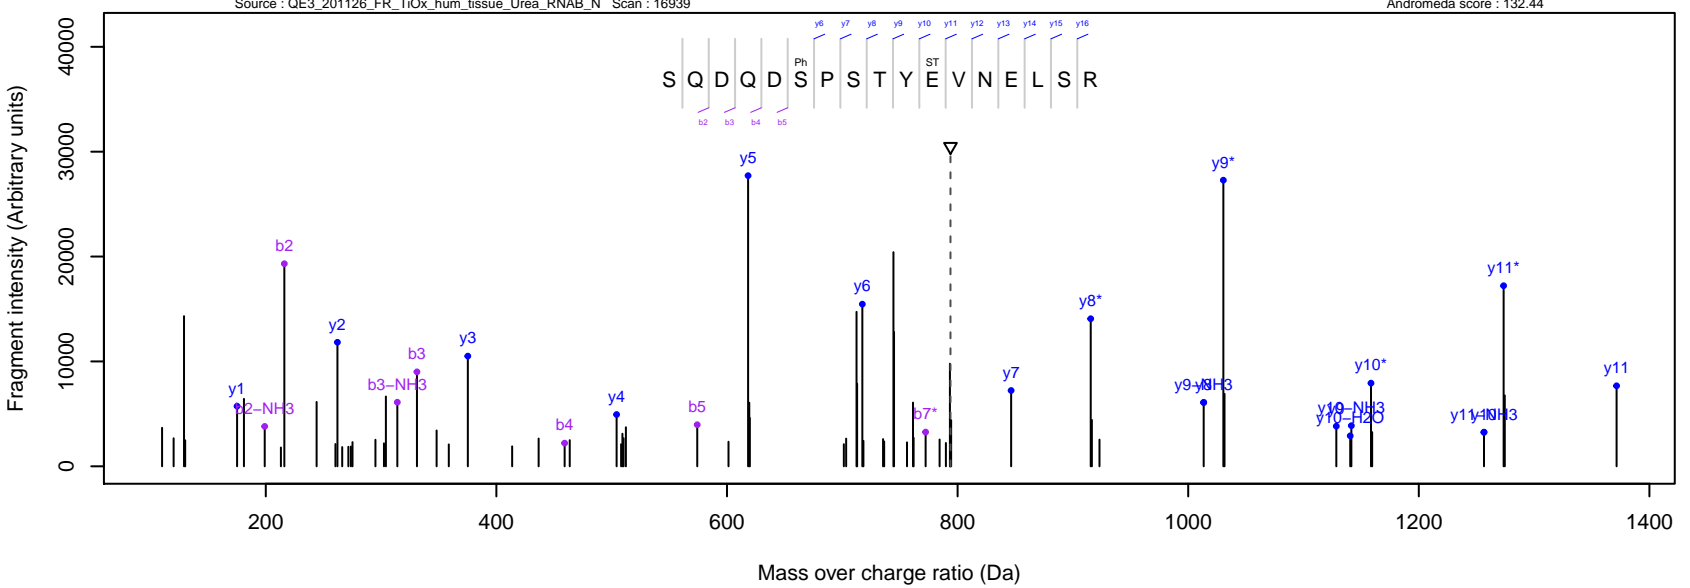

IHDLEDDLEM(Oxidation (M))SSDAS(Phospho (STY))DAS(Phospho (STY))GEEGGRVPK-3+

Source : QE3\_201126\_FR\_TiOx\_hum\_tissue\_Urea\_RNAB\_N Scan : 28685

Andromeda score : 132.37

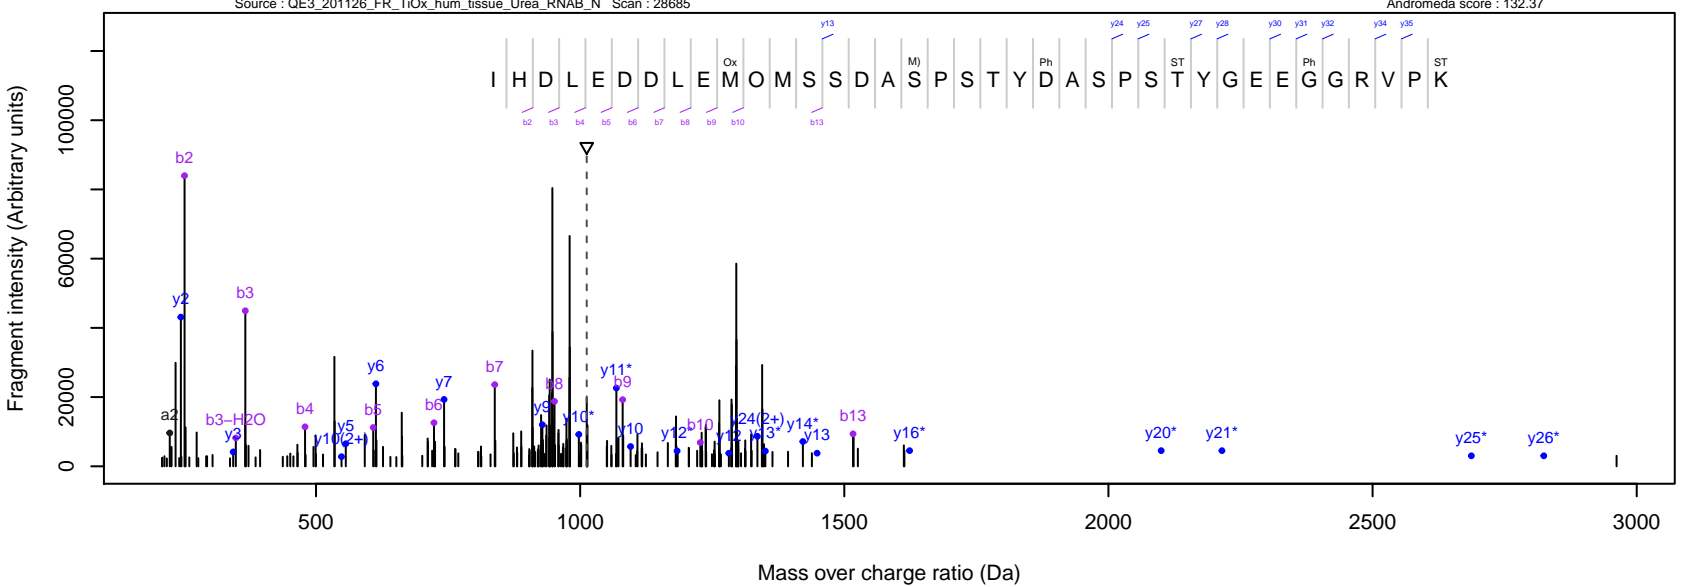

ESLCDS(Phospho (STY))PHQLNSRPLENK-3+

Source : QE3\_201126\_FR\_TiOx\_hum\_tissue\_Urea\_RNAB\_H Scan : 20159

Andromeda score : 132.36

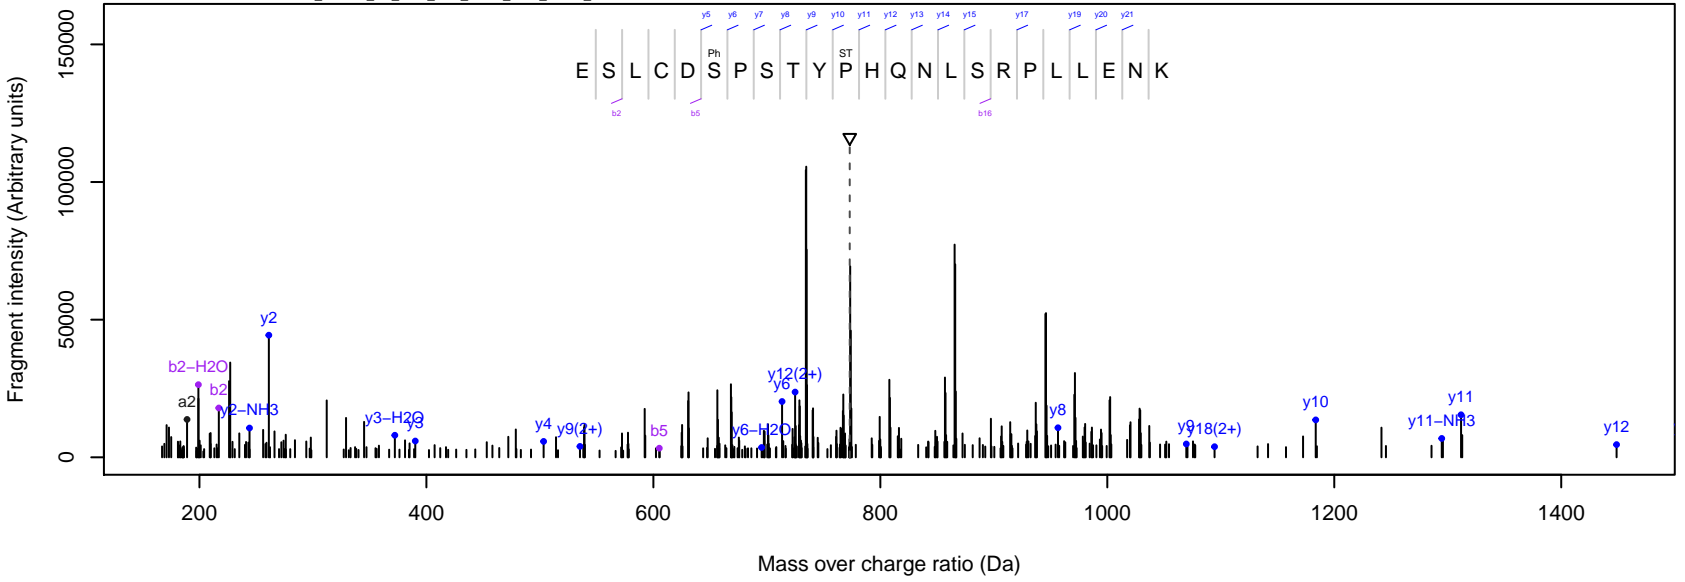

DHSS(Phospho (STY))QSEEEVVEGEKEVEALKK-4+

Source : QE3\_201126\_FR\_TiOx\_hum\_tissue\_Urea\_RNAB\_B Scan : 25303

Andromeda score : 132.35

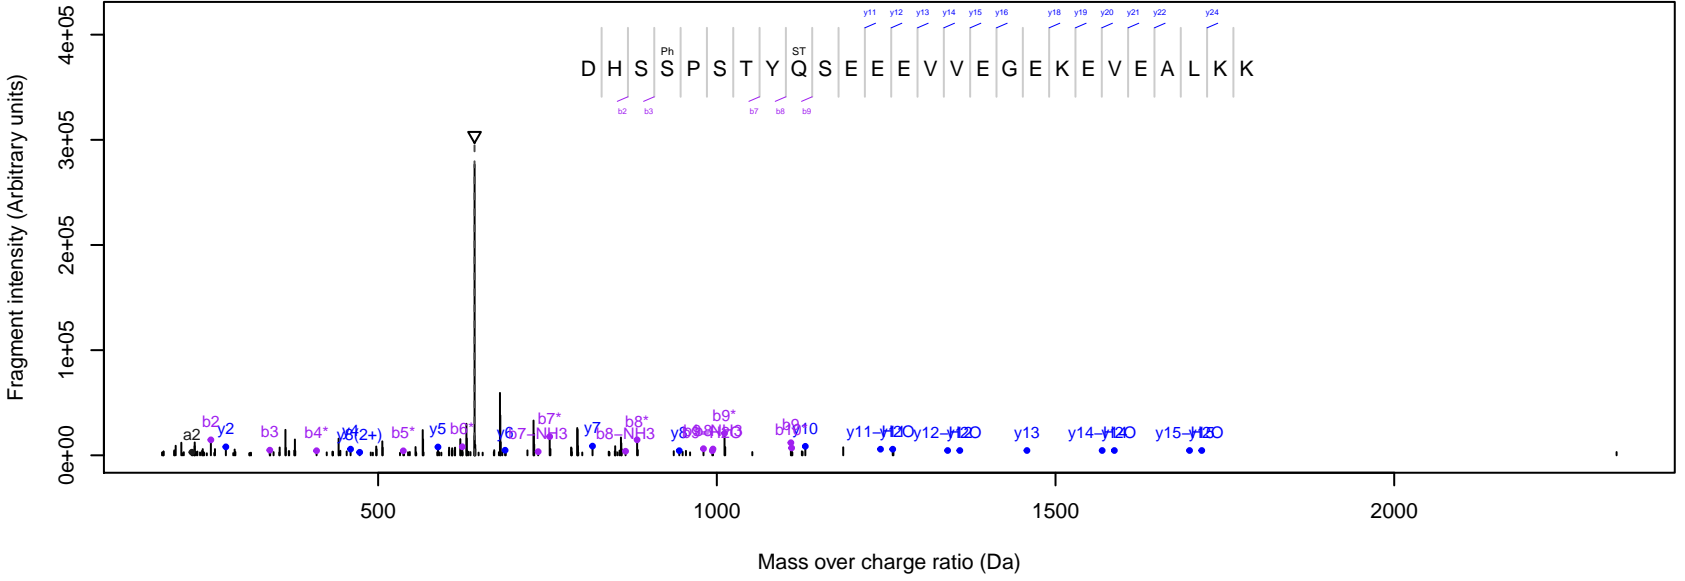

GPSHPLDLGTSS(Phospho (STY))PNTSQIHWTYPYR-4+

Source : QE3\_201126\_FR\_TiOx\_hum\_tissue\_Urea\_RNAB\_H Scan : 33989

Andromeda score : 132.35

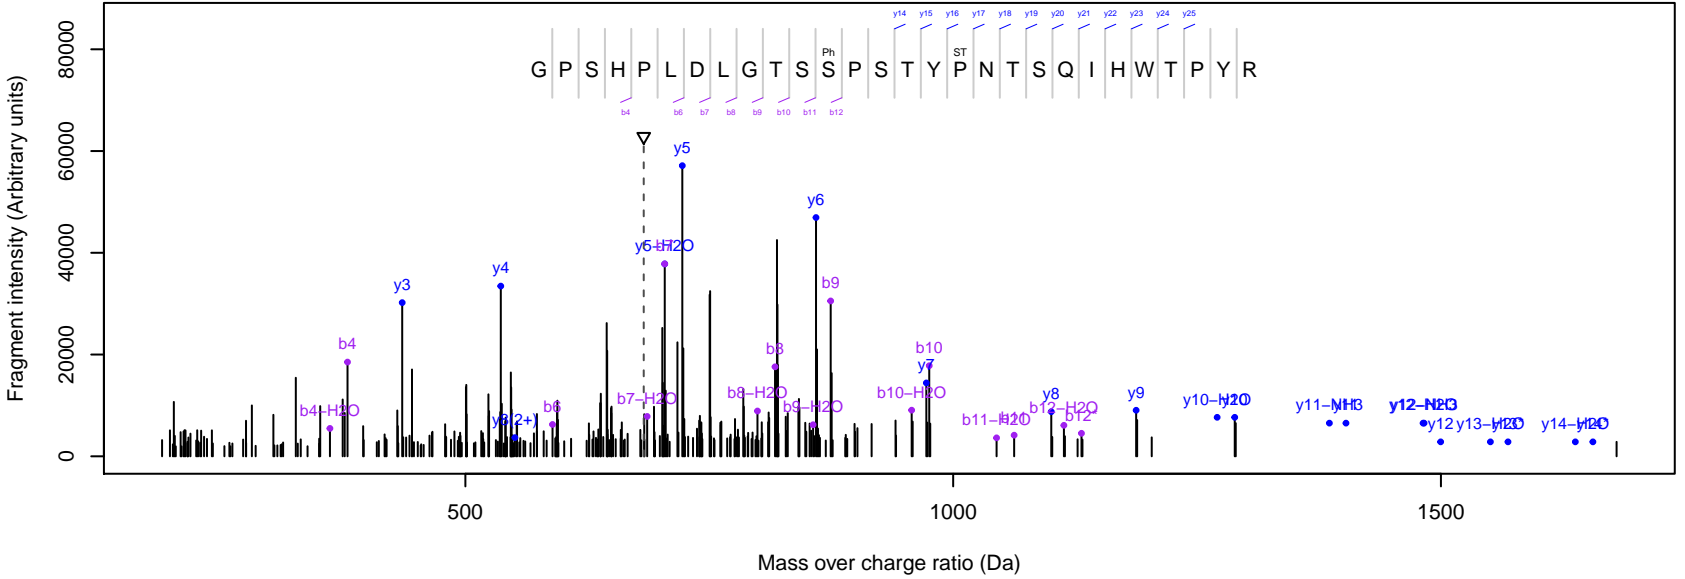

GSET(Phospho (STY))GSETHESDLAPSDKEAPT<sup>3+</sup>K

Source : QE3\_201126\_FR\_TiOx\_hum\_tissue\_Urea\_RNAB\_N Scan : 11333

Andromeda score : 132.35

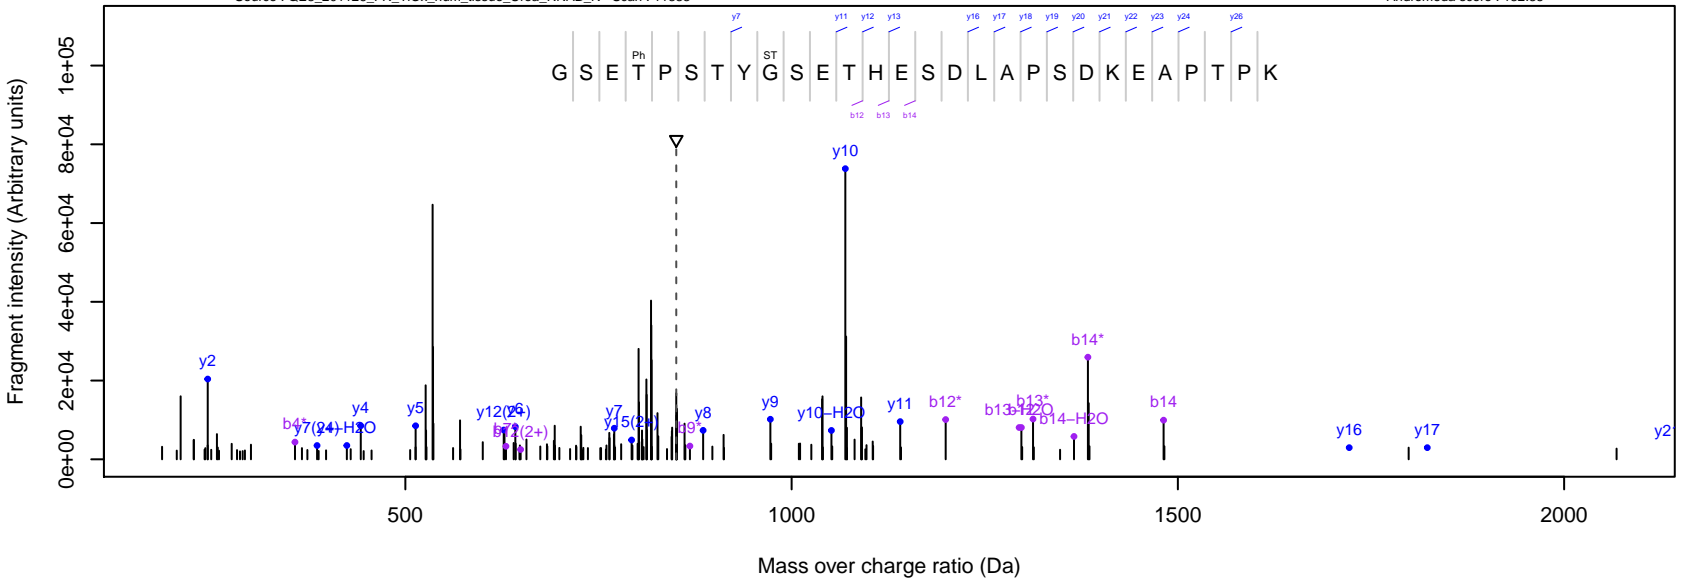

GLRDS(Phospho (STY))HS(Phospho (STY))S(Phospho (STY))EEDEASSQTDLSQTISK<sup>3+</sup>K

Source : QE3\_201126\_FR\_TiOx\_hum\_tissue\_Urea\_RNAB\_B Scan : 20394

Andromeda score : 132.34

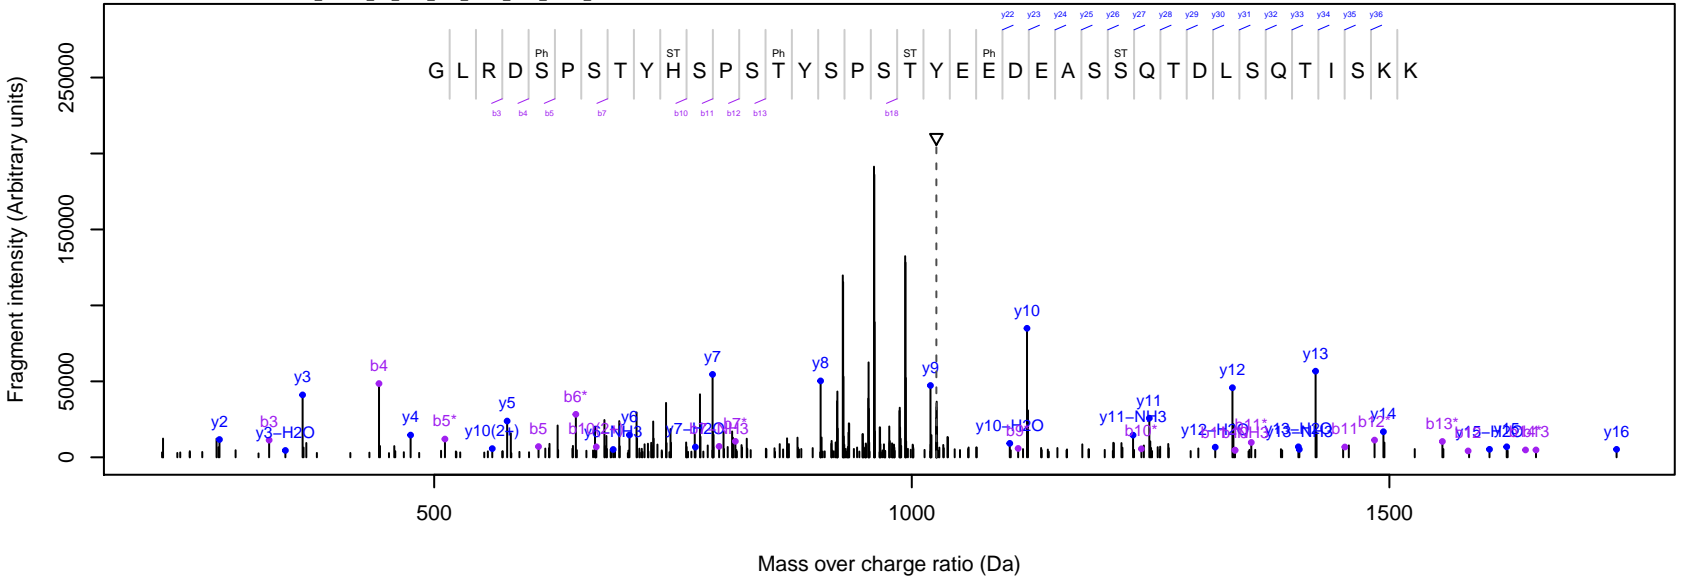

AASDGQYENQSPEATSPRSPSTYPGV<sup>3+</sup>R

Source : QE3\_201126\_FR\_TiOx\_hum\_tissue\_Urea\_RNAB\_B Scan : 13083

Andromeda score : 132.28

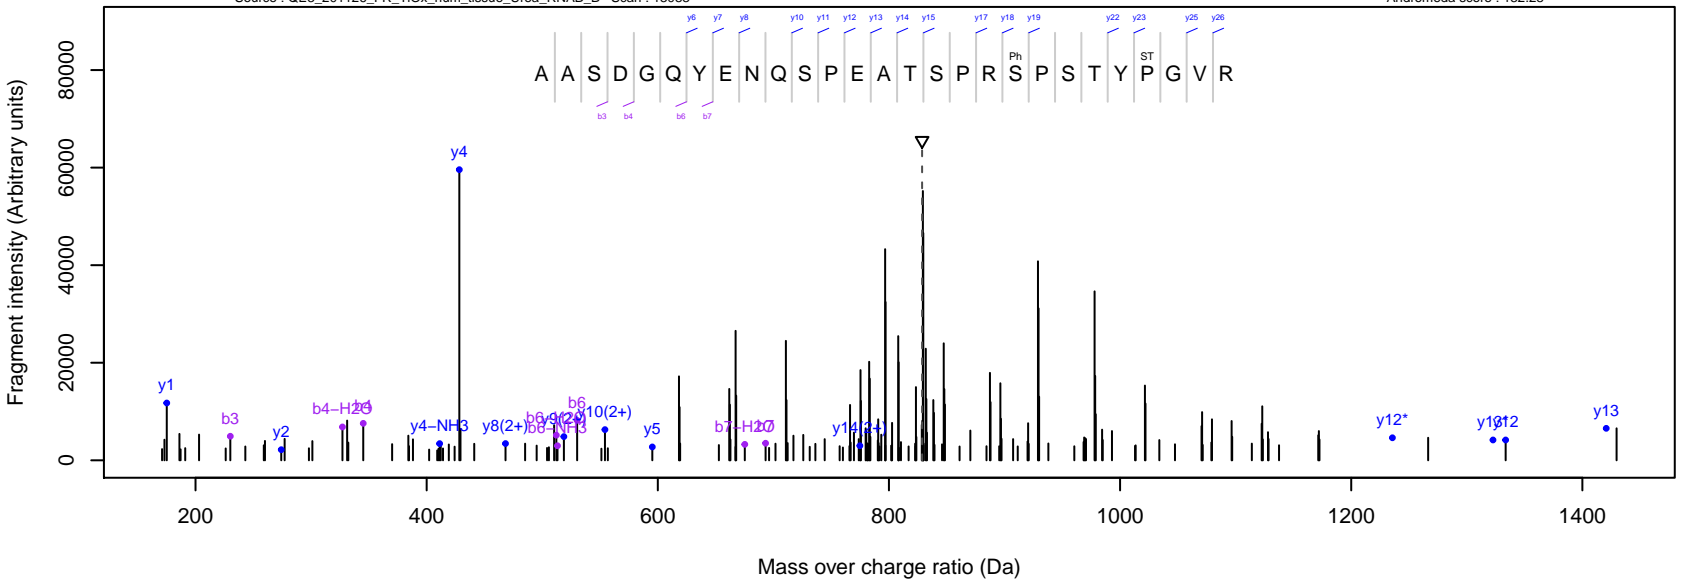

**QKFNDS(Phospho (STY))EGDDTEETEDYRQFR-3+**

Source : QE3\_201126\_FR\_TiOx\_hum\_tissue\_Urea\_RNAB\_N Scan : 19246

Andromeda score : 132.26

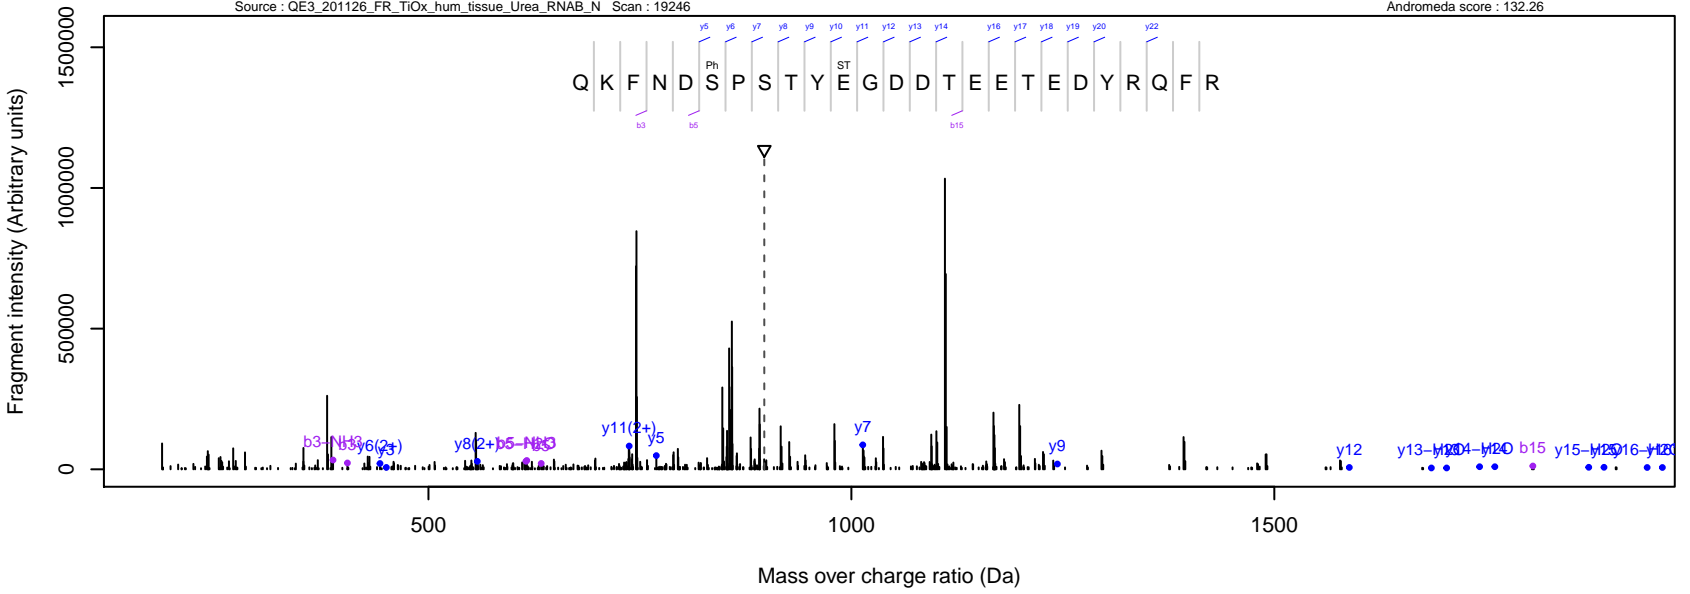

**RES(Phospho (STY))PSPAPKPR-3+**

Source : QE3\_201126\_FR\_TiOx\_hum\_tissue\_Urea\_RNAB\_H Scan : 3144

Andromeda score : 132.24

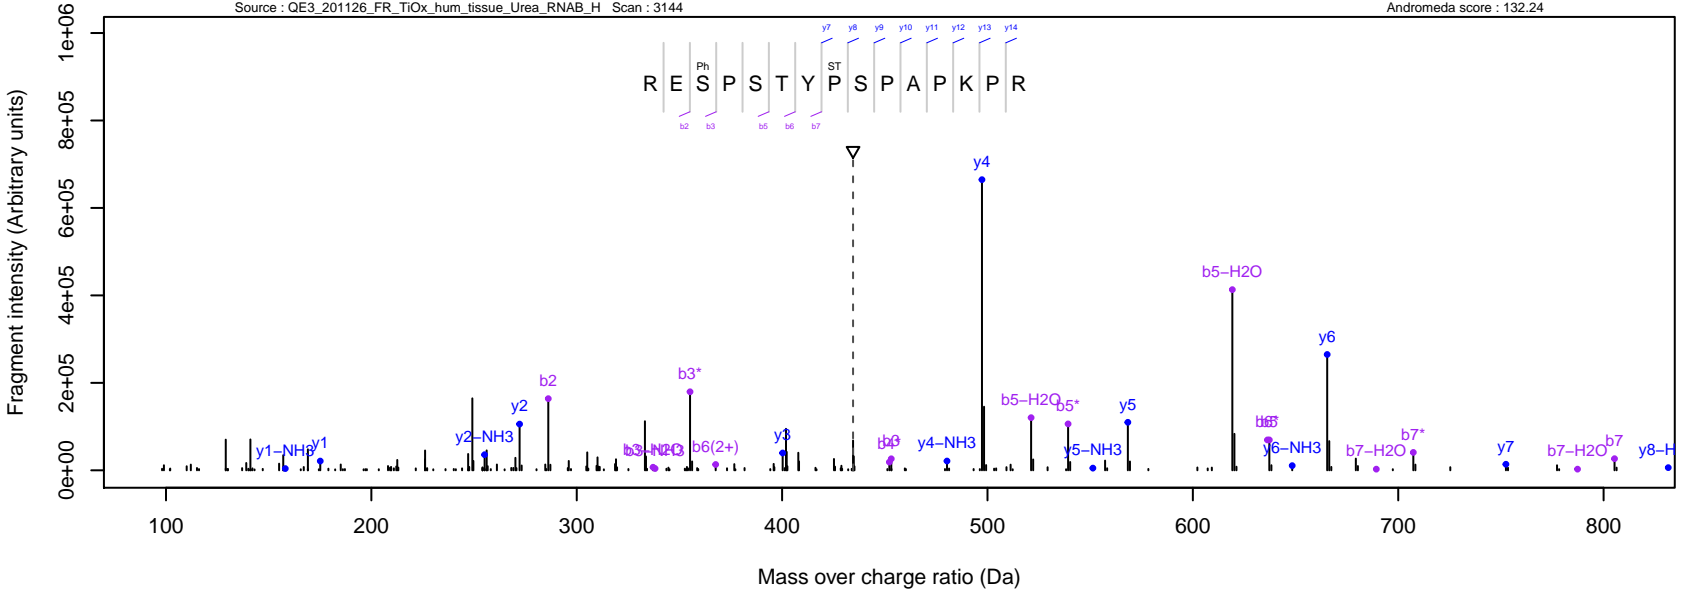

**GGSGS(Phospho (STY))GPTIEEVD-2+**

Source : QE3\_201126\_FR\_TiOx\_hum\_tissue\_Urea\_RNAB\_H Scan : 28211

Andromeda score : 132.17

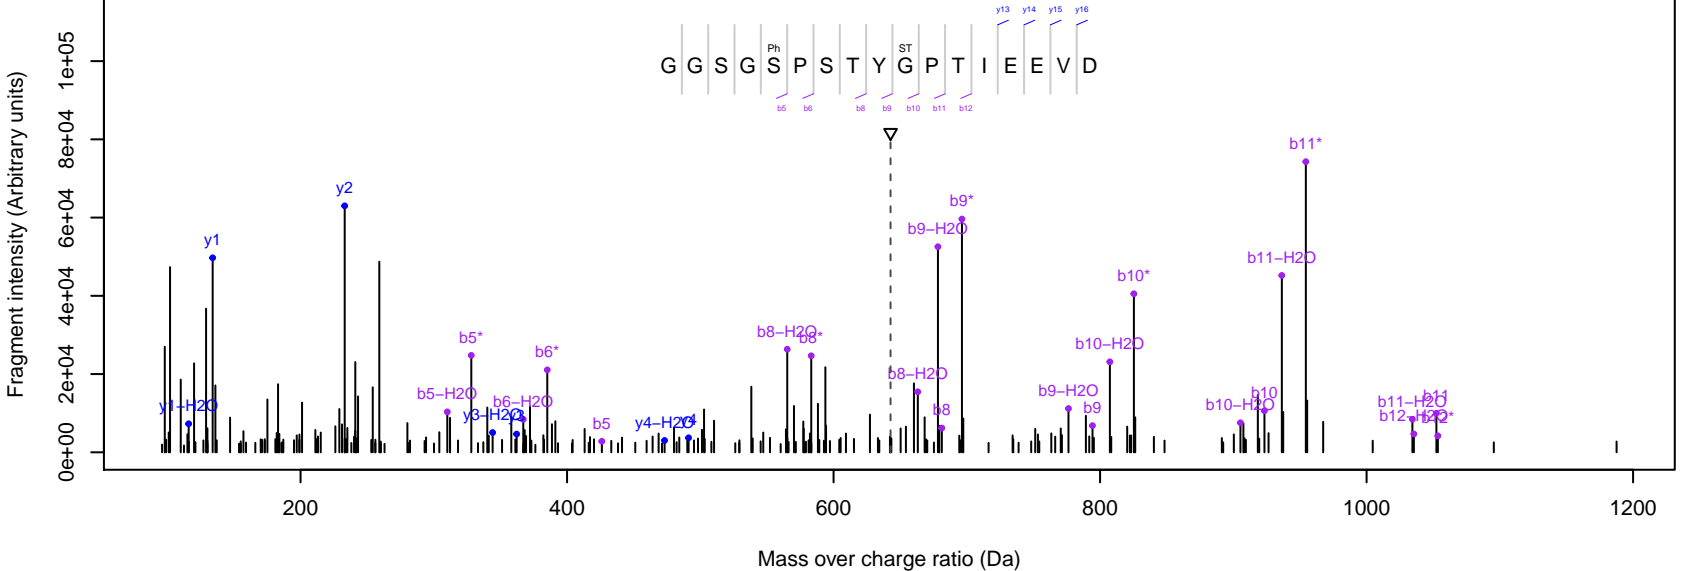

IGDLQAAIEDEMES(Phospho (STY))DENEDLINSLQDMVTK-3+

Source : QE3\_201126\_FR\_TiOx\_hum\_tissue\_Urea\_RNAB\_H Scan : 62552

Andromeda score : 132.16

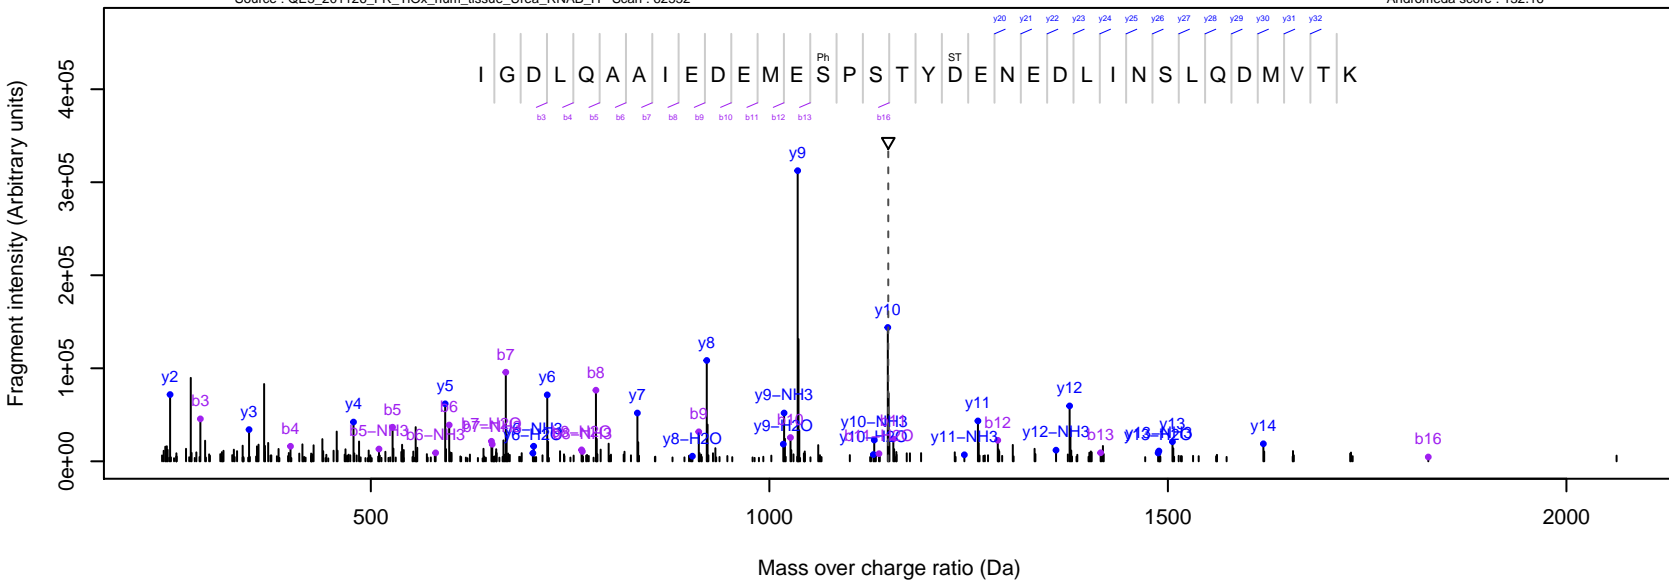

GFGEYSRS(Phospho (STY))PTF-2+

Source : QE3\_201126\_FR\_TiOx\_hum\_tissue\_Urea\_RNAB\_H Scan : 33087

Andromeda score : 132.14

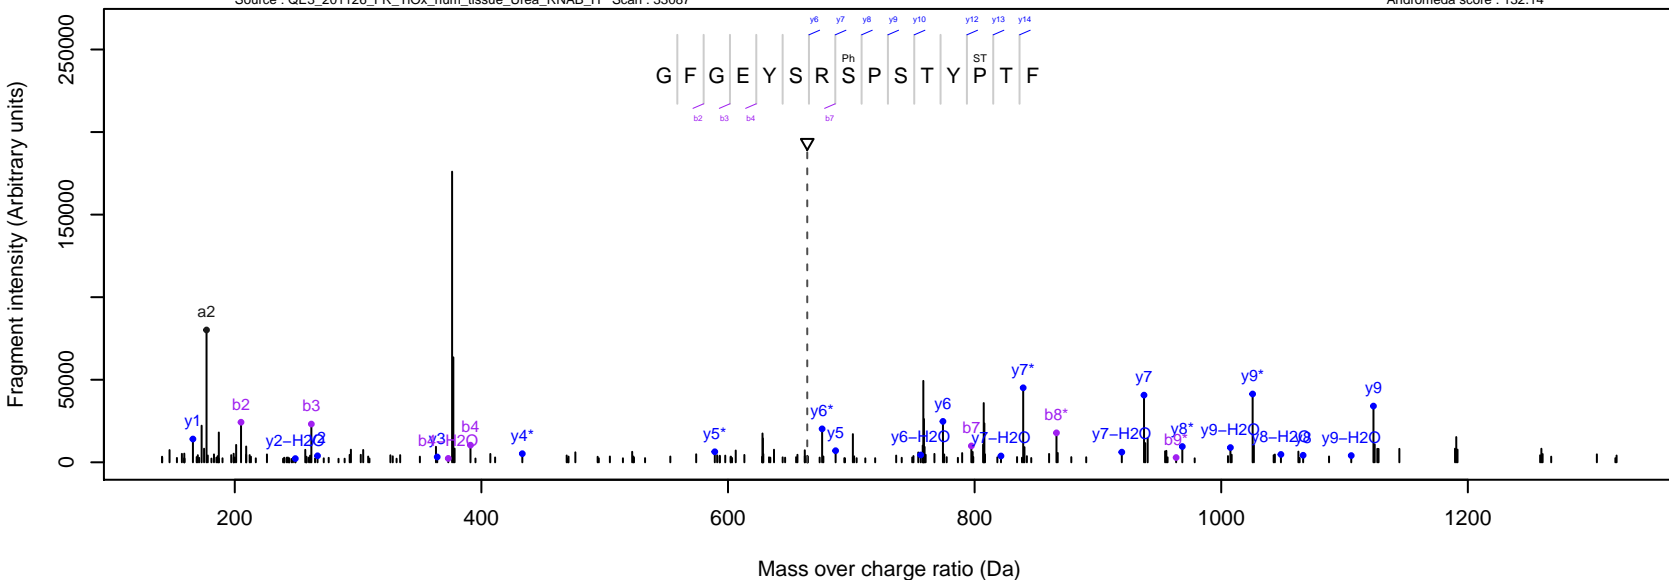

RRPPS(Phospho (STY))PEPSTK-3+

Source : QE3\_201126\_FR\_TiOx\_hum\_tissue\_Urea\_RNAB\_H Scan : 3161

Andromeda score : 132.08

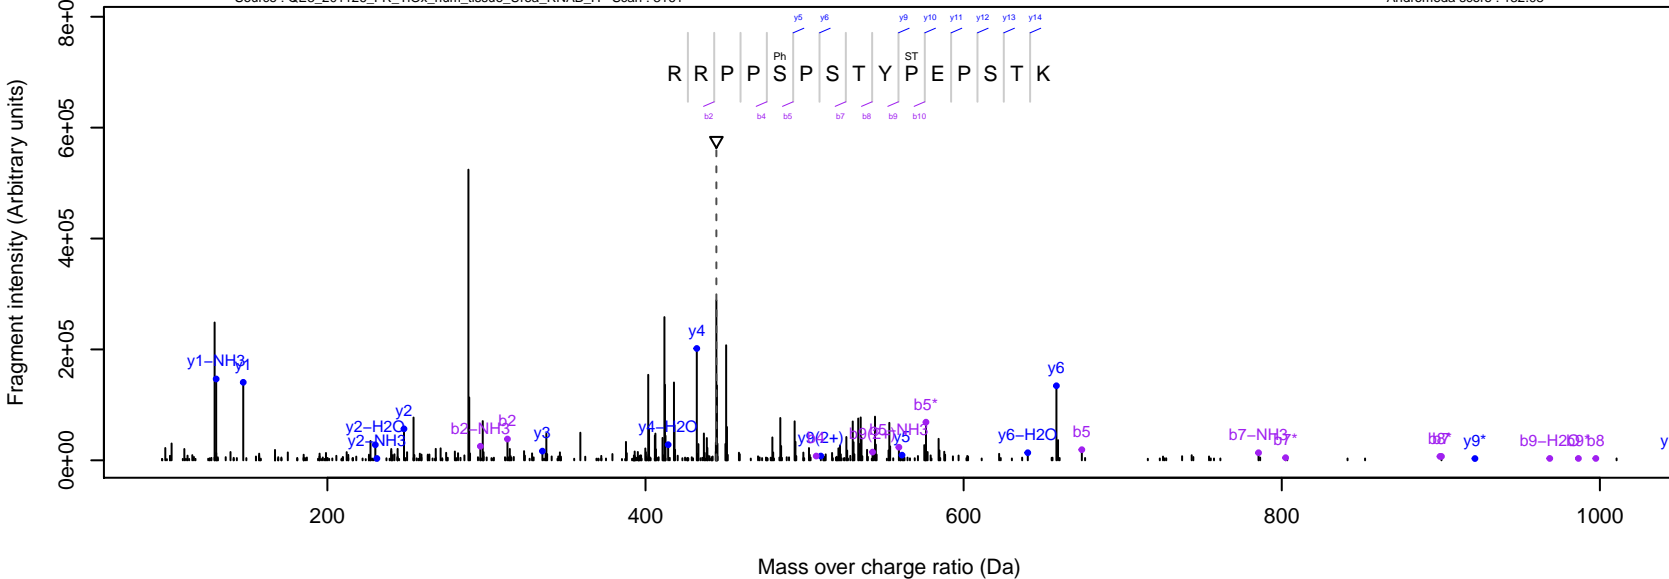

SQDSYPGS(Phospho (STY))PSLSPR-2+

Source : QE3\_201126\_FR\_TIOx\_hum\_tissue\_Urea\_RNAB\_N Scan : 21614

Andromeda score : 132.08

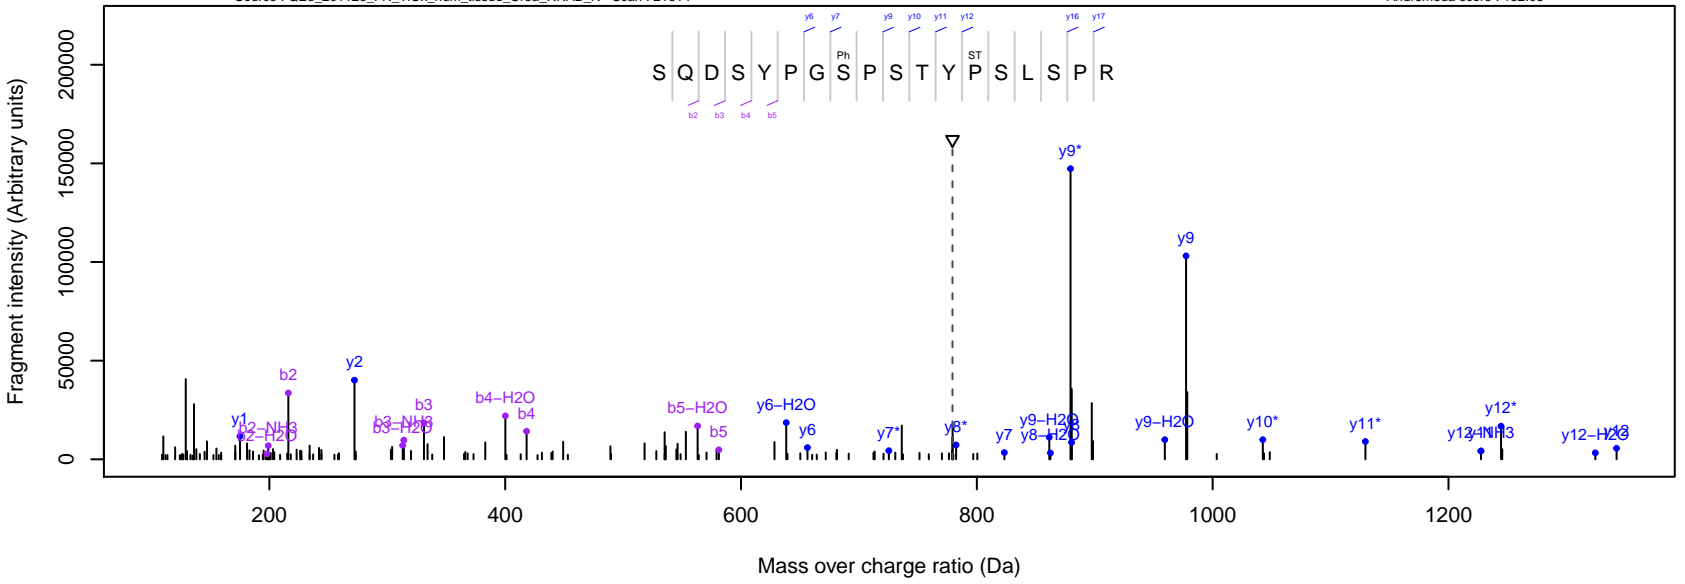

S(Phospho (STY))SPAVEQQLLVSGPGK-2+

Source : QE3\_201126\_FR\_TIOx\_hum\_tissue\_Urea\_RNAB\_N Scan : 31886

Andromeda score : 132.05

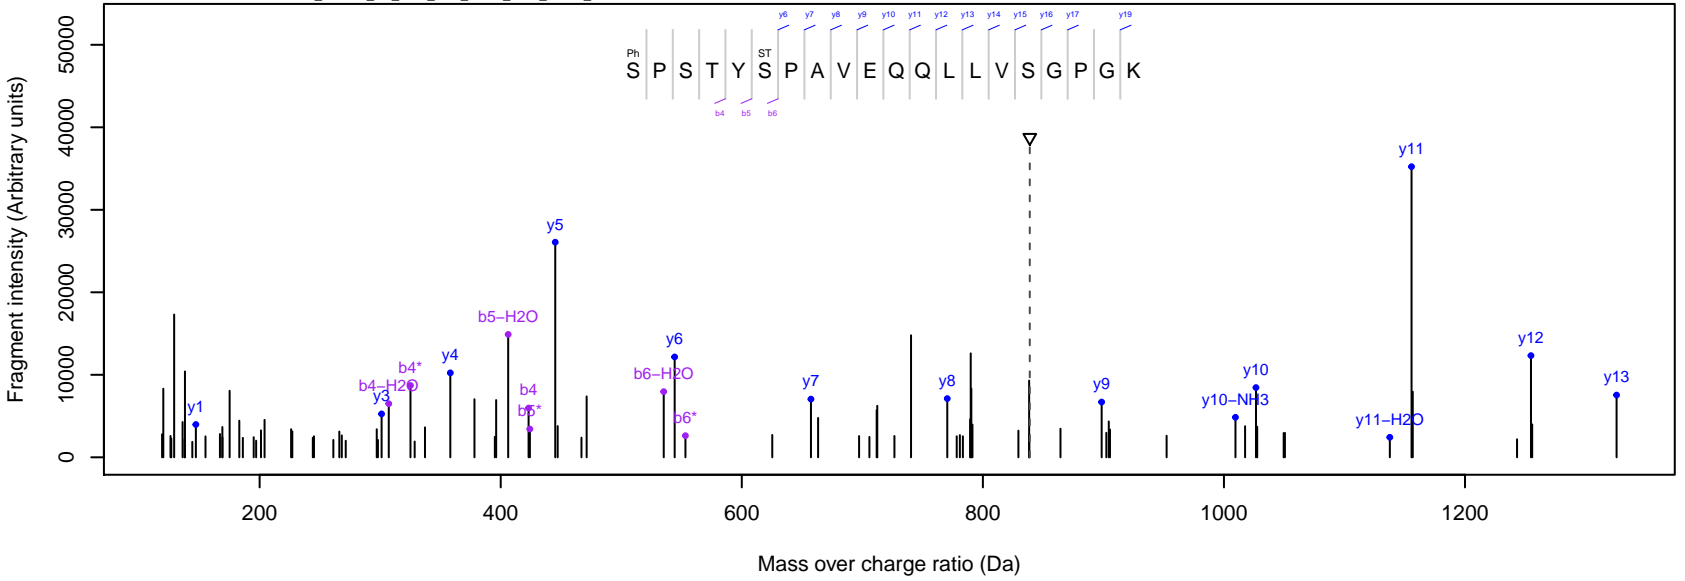

NKPLEQS(Phospho (STY))VEDLSKGPSSVPK-3+

Source : QE3\_201126\_FR\_TIOx\_hum\_tissue\_Urea\_RNAB\_H Scan : 22109

Andromeda score : 131.98

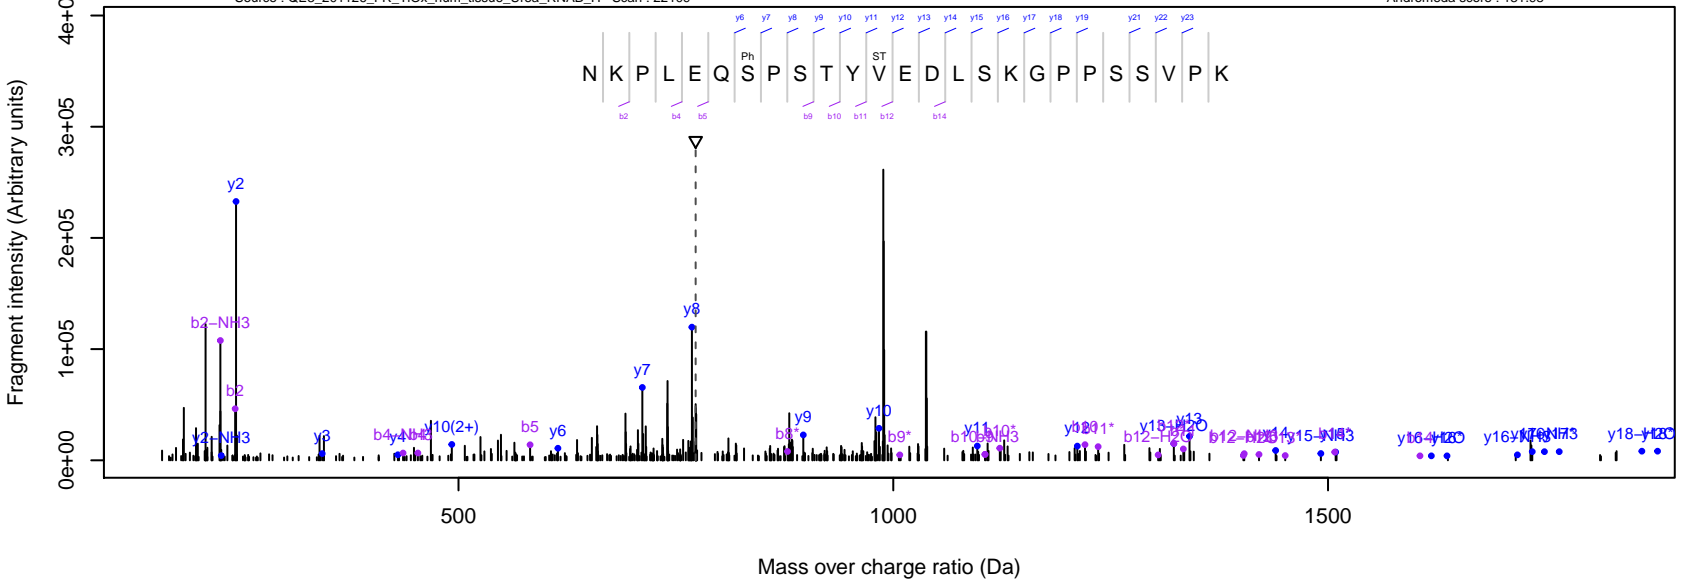





FKGPGDTSNFDYEEEEIRVS(Phospho (STY))INEK-3+

Source : QE3\_201126\_FR\_TIOx\_hum\_tissue\_Urea\_RNAB\_H Scan : 36701

Andromeda score : 131.9

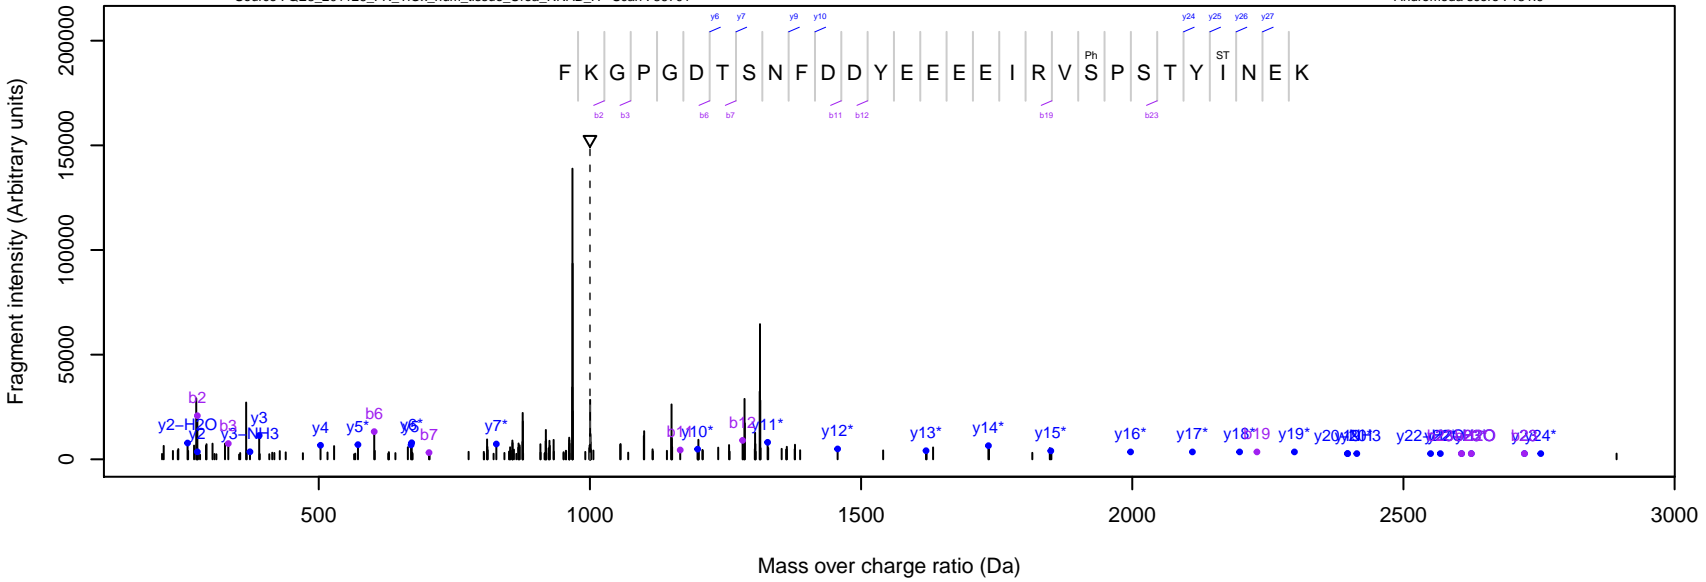

SLTEISTDFDRS(Phospho (STY))SPPLQPPPVNSLTTENR-3+

Source : QE3\_201126\_FR\_TIOx\_hum\_tissue\_Urea\_RNAB\_H Scan : 46817

Andromeda score : 131.9

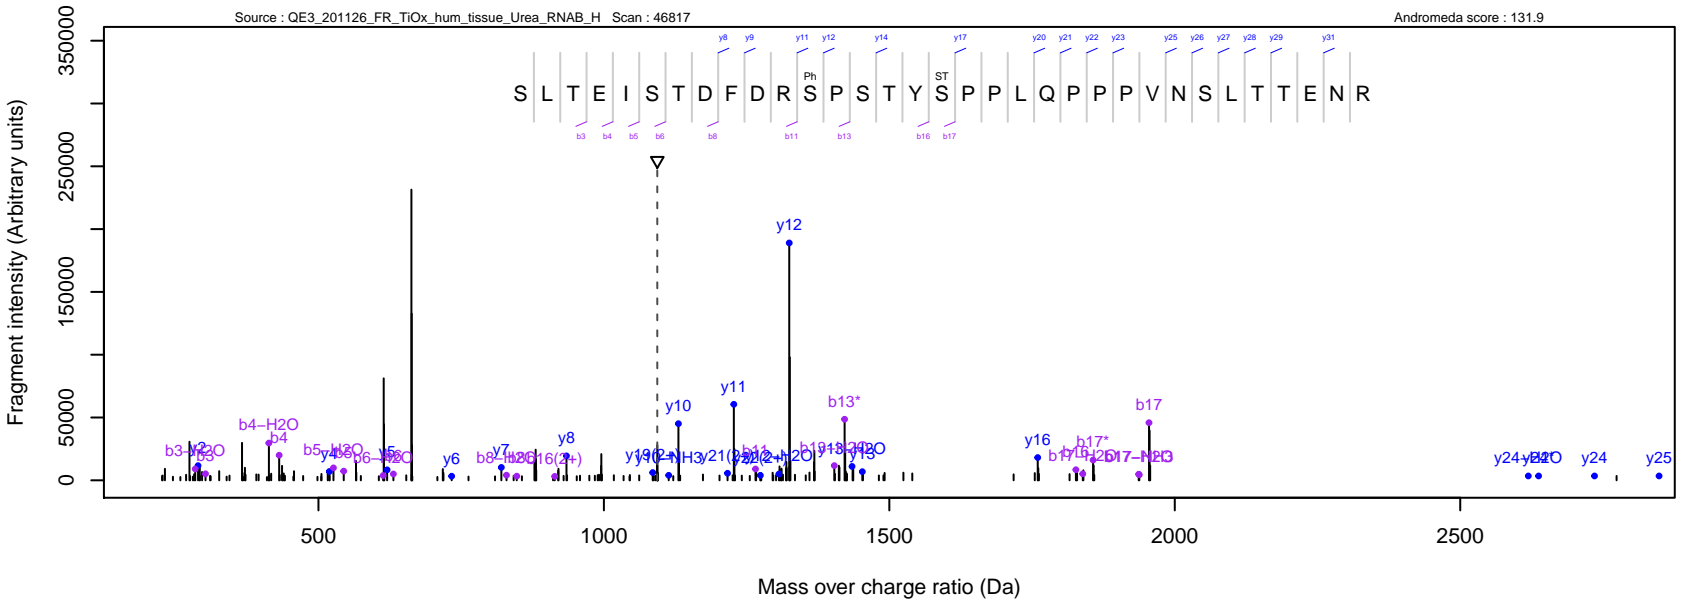

TAQVPS(Phospho (STY))PPR-2+

Source : QE3\_201126\_FR\_TIOx\_hum\_tissue\_Urea\_RNAB\_H Scan : 13496

Andromeda score : 131.83

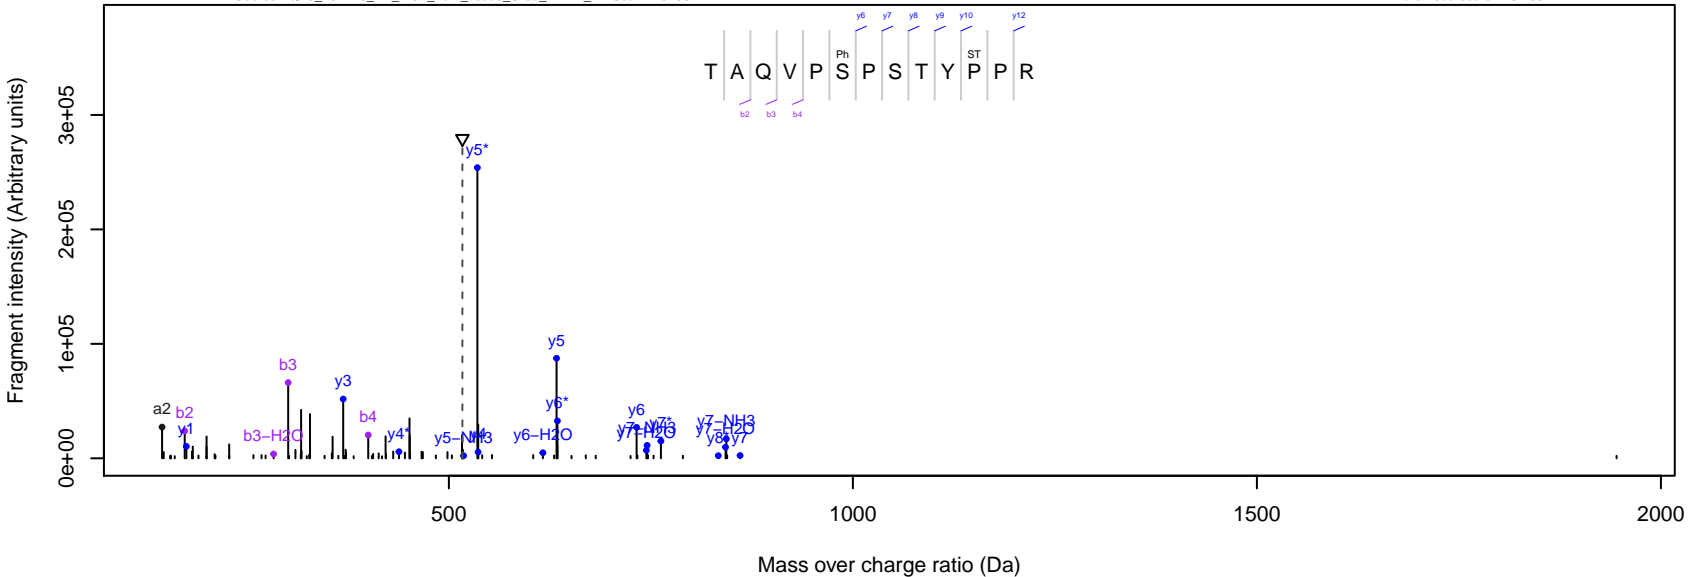

EFITGDVEPTDAESEWHS(Phospho(STY))ENEEEEK-3+

Source : QE3\_201126\_FR\_TiOx\_hum\_tissue\_Urea\_RNAB\_H Scan : 34643

Andromeda score : 131.81

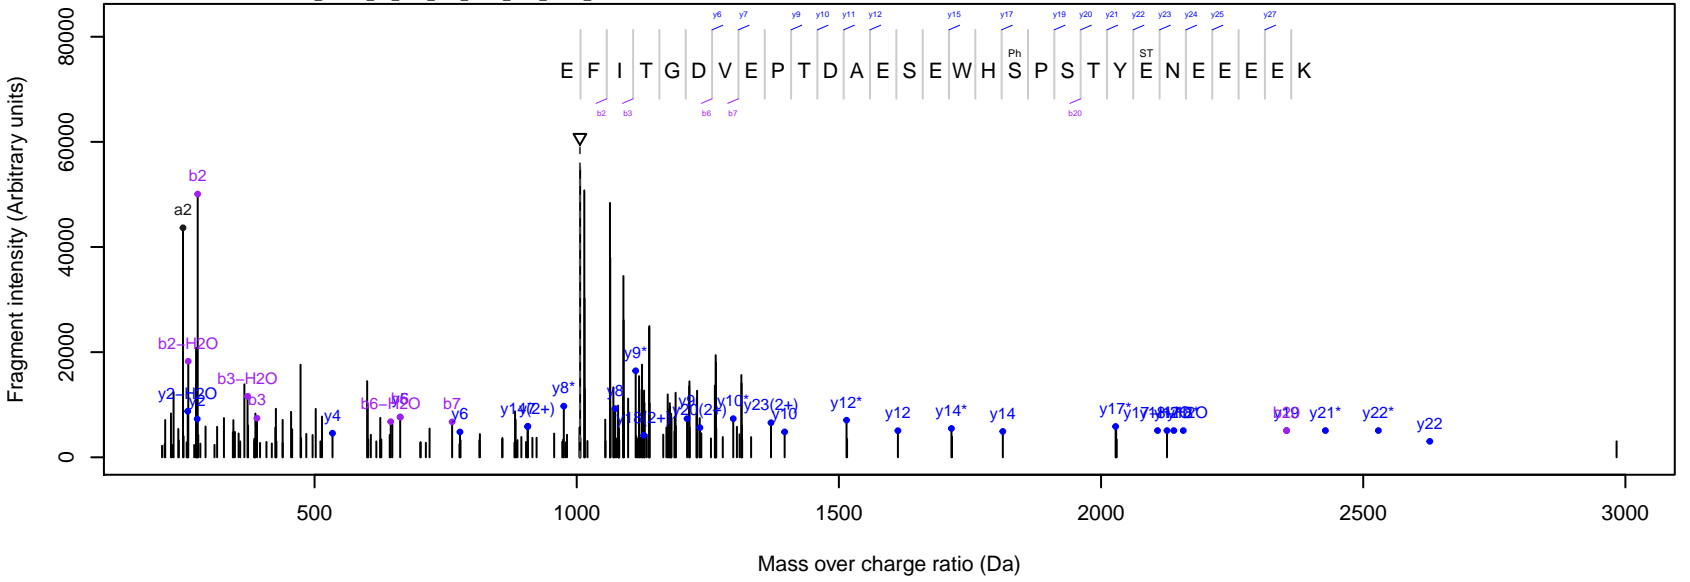

VIFWSALAGAIPLNGDS(Phospho(STY))EEEANRDDR-3+

Source : QE3\_201126\_FR\_TiOx\_hum\_tissue\_Urea\_RNAB\_H Scan : 58484

Andromeda score : 131.81

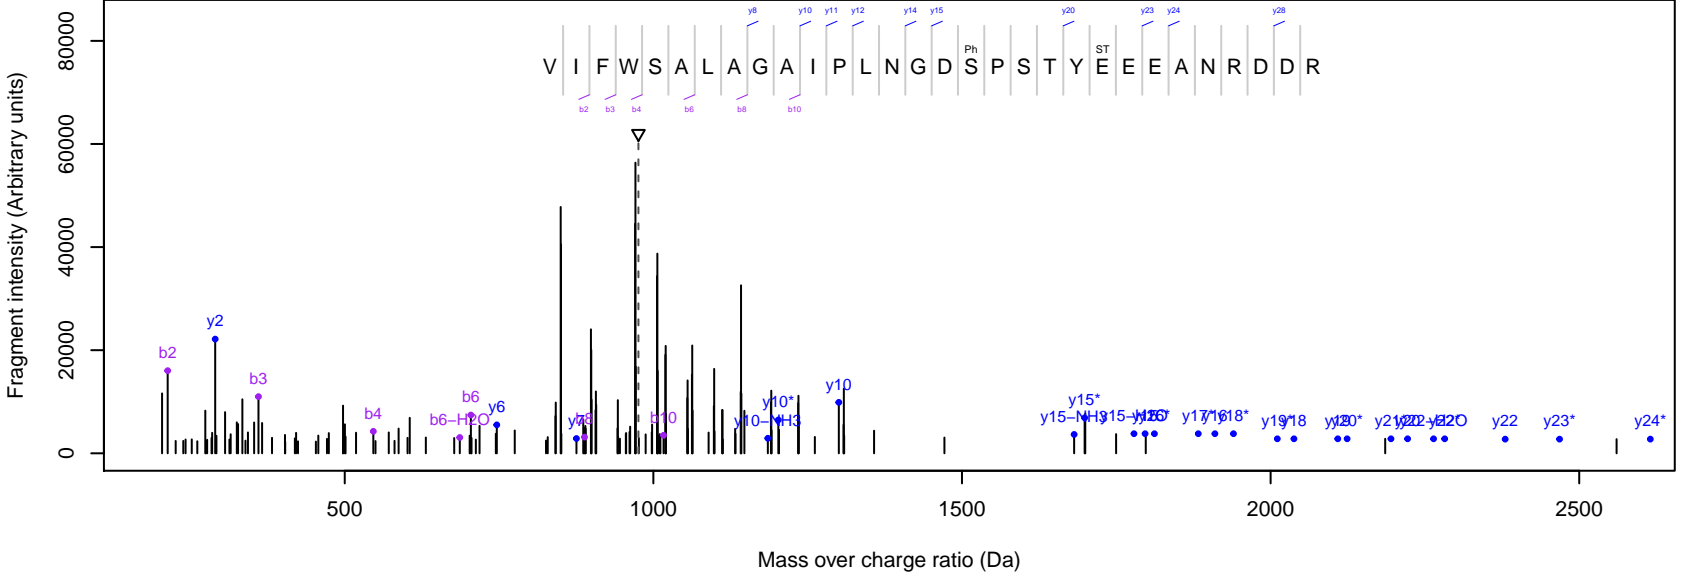

KPSGS(Phospho(STY))PDLWK-2+

Source : QE3\_201126\_FR\_TiOx\_hum\_tissue\_Urea\_RNAB\_H Scan : 14480

Andromeda score : 131.79

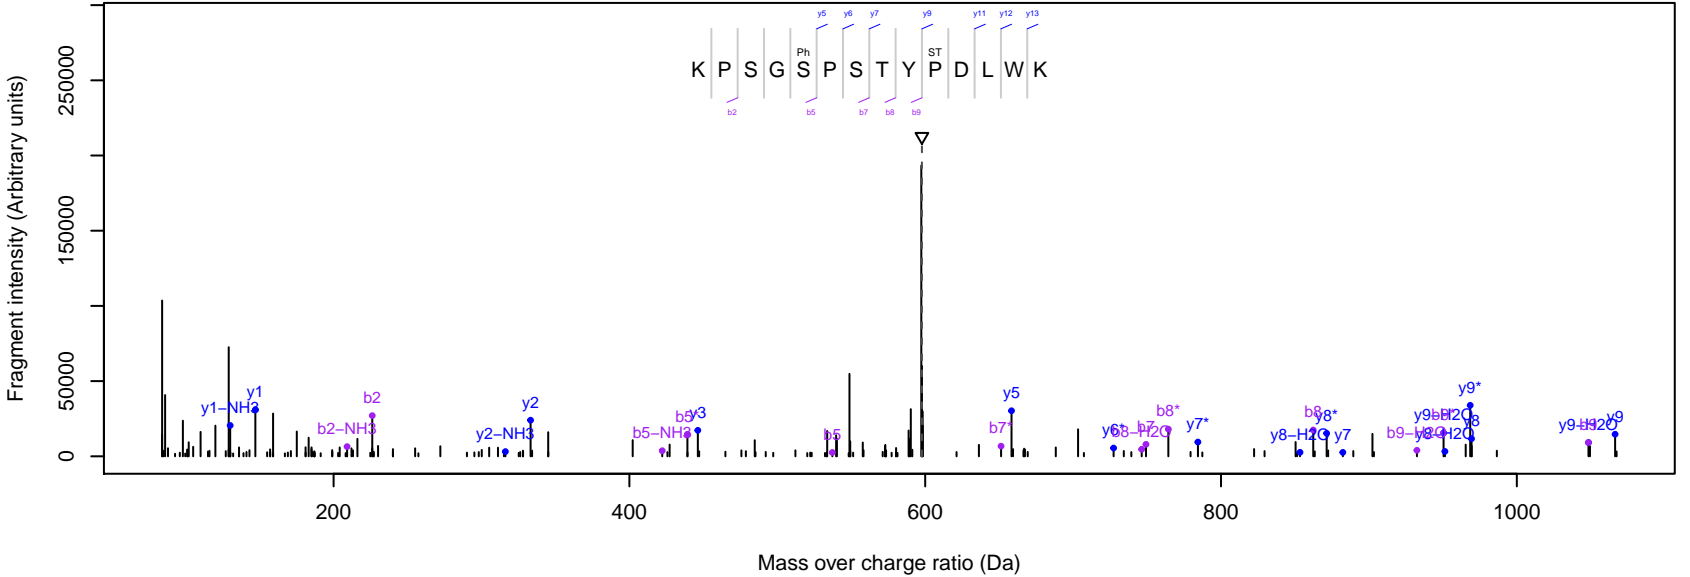

RTS(Phospho (STY))PQVLGSILK-2+

Source : QE3\_201126\_FR\_TiOx\_hum\_tissue\_Urea\_RNAB\_N Scan : 29118

Andromeda score : 131.72

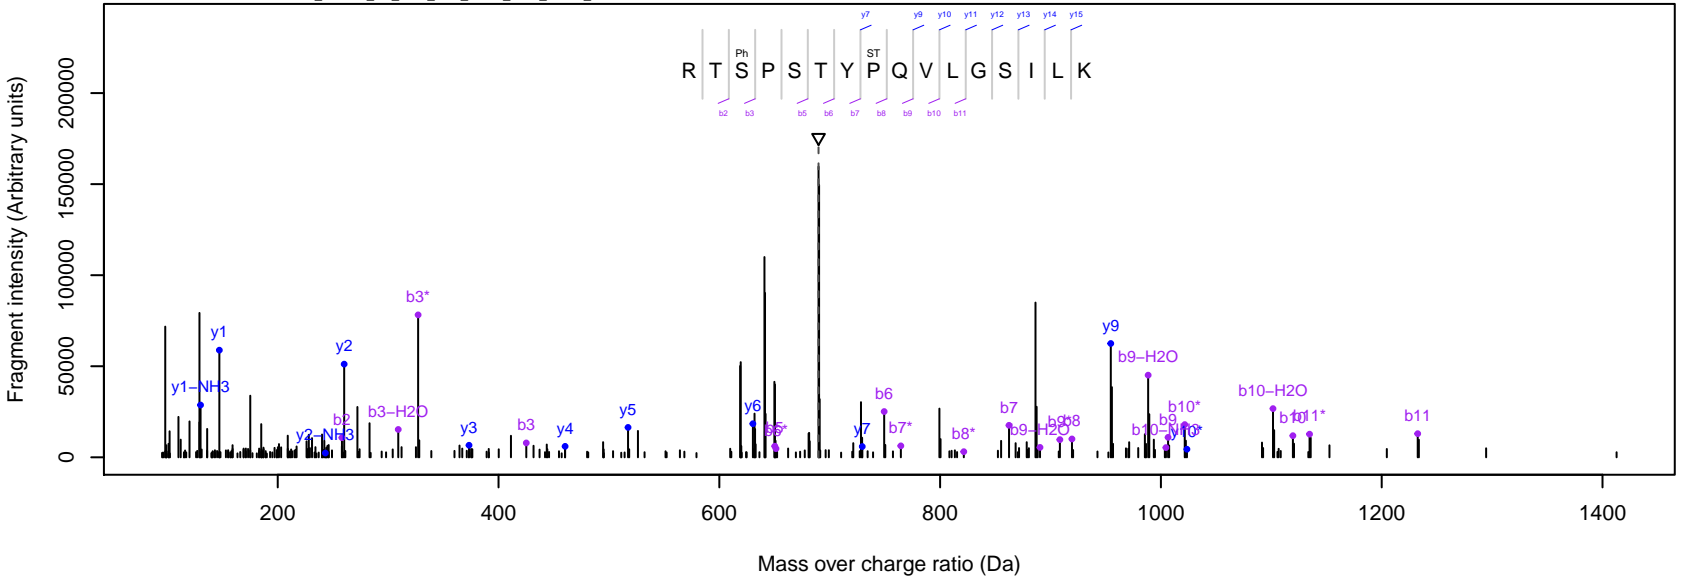

NCES(Phospho (STY))DTEEDIAR-2+

Source : QE3\_201126\_FR\_TiOx\_hum\_tissue\_Urea\_RNAB\_B Scan : 14588

Andromeda score : 131.69

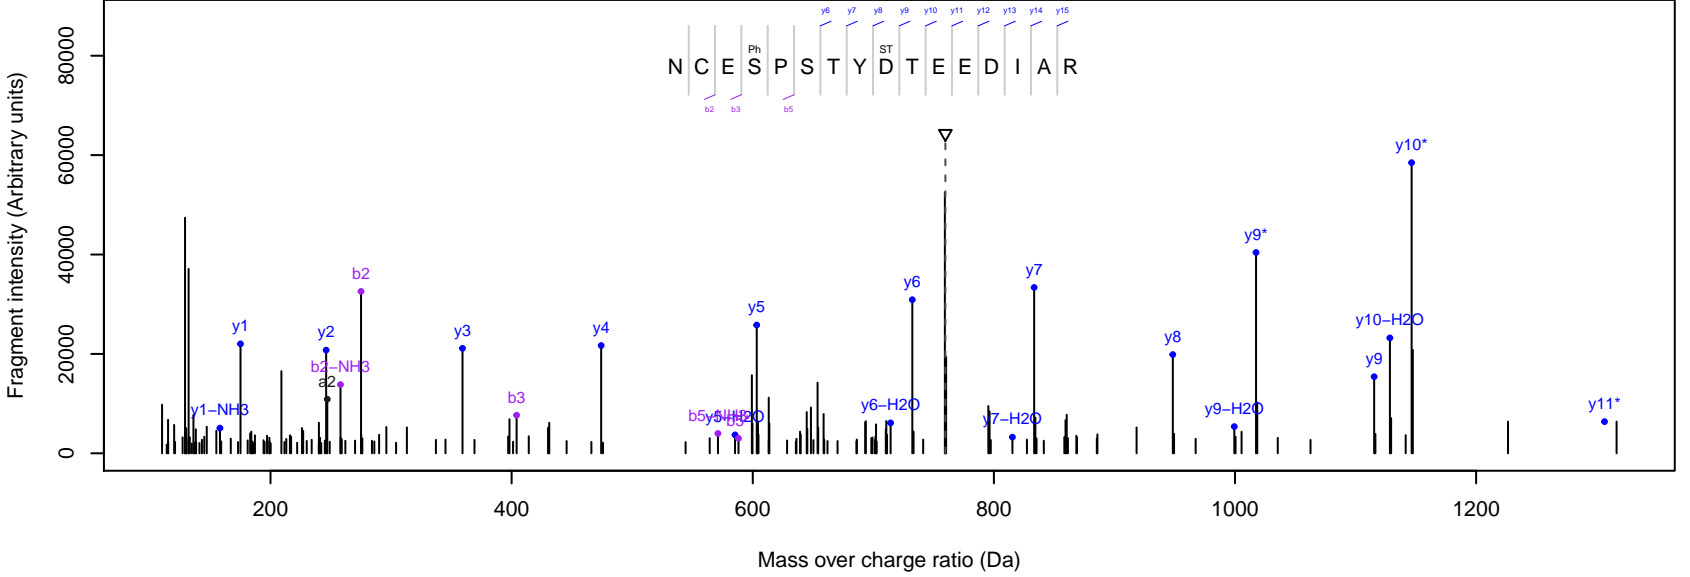

TGS(Phospho (STY))EPALSPAVVR-2+

Source : QE3\_201126\_FR\_TiOx\_hum\_tissue\_Urea\_RNAB\_B Scan : 26202

Andromeda score : 131.69

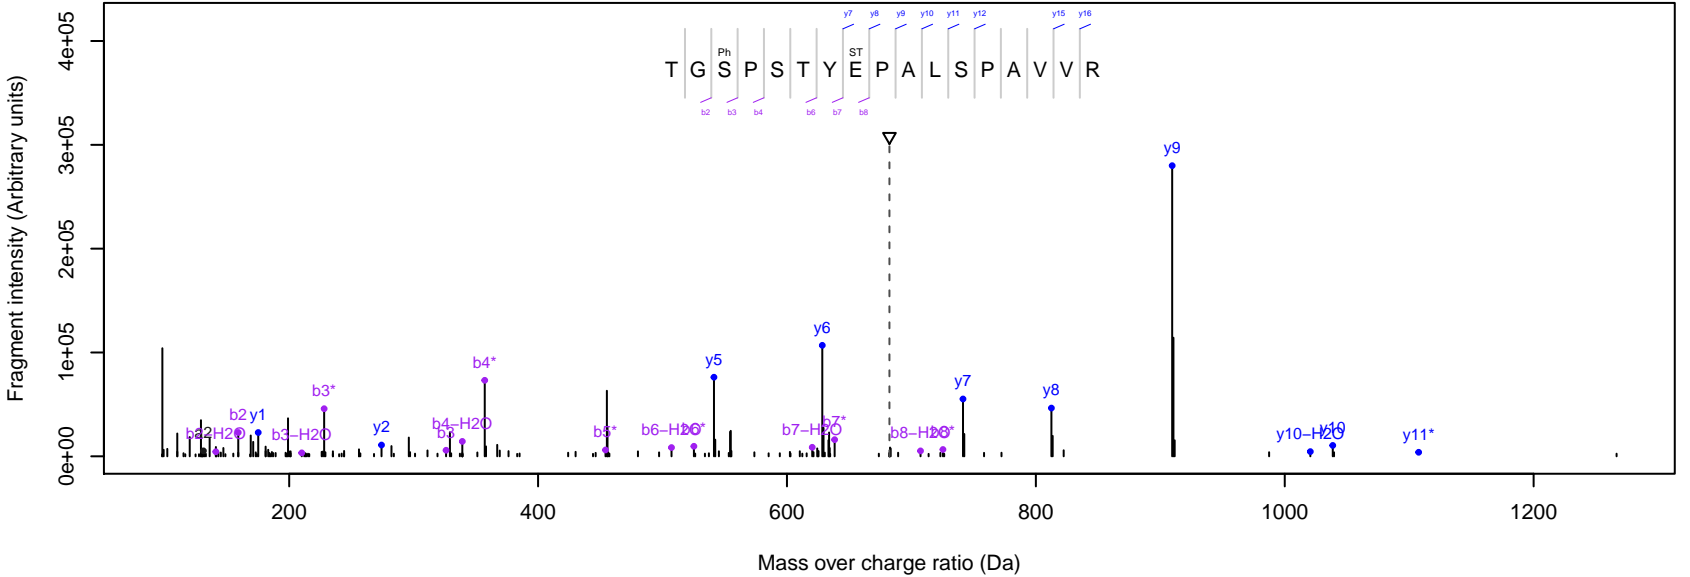

ISLSKS(Phospho (STY))PTKTDPK-2+

Source : QE3\_201126\_FR\_TiOx\_hum\_tissue\_Urea\_RNAB\_N Scan : 6916

Andromeda score : 131.66

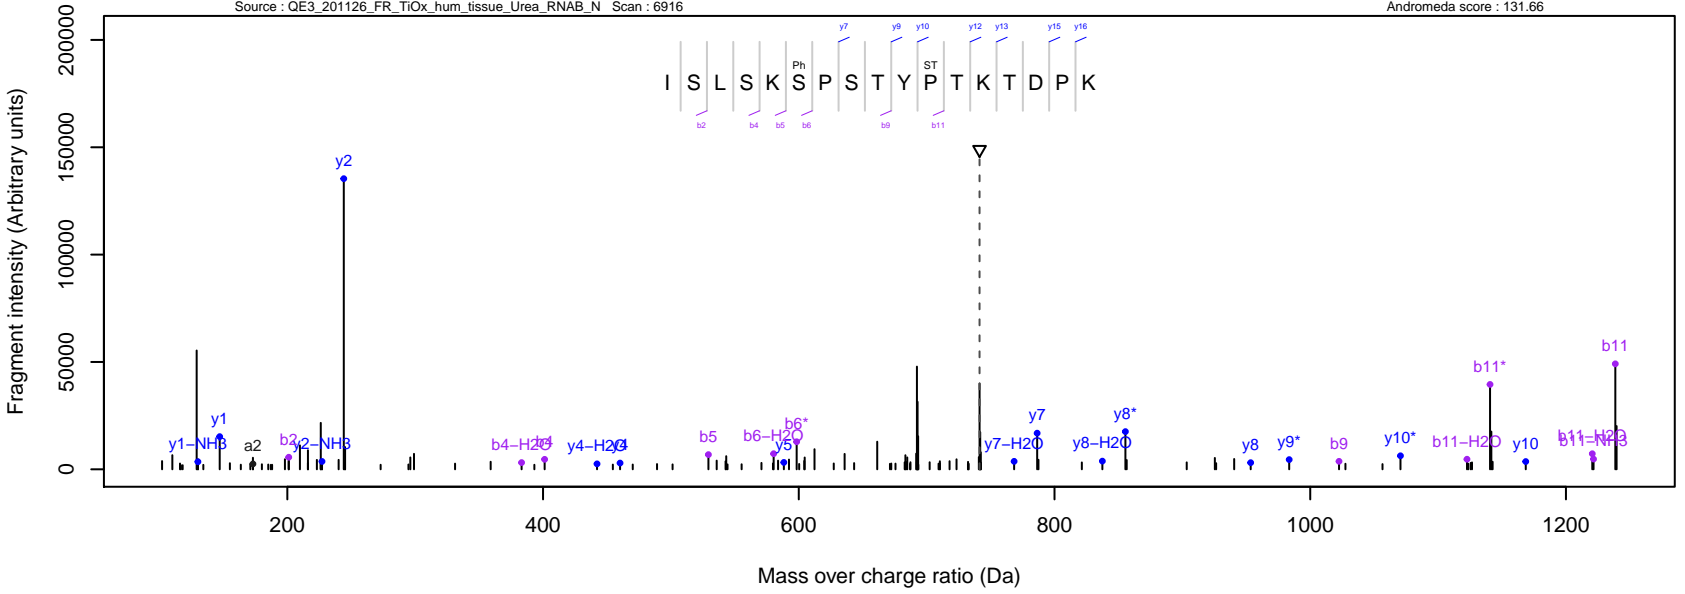

LSPPPSSAASSYS(Phospho (STY))FSDLNSTR-2+

Source : QE3\_201126\_FR\_TiOx\_hum\_tissue\_Urea\_RNAB\_N Scan : 36933

Andromeda score : 131.65

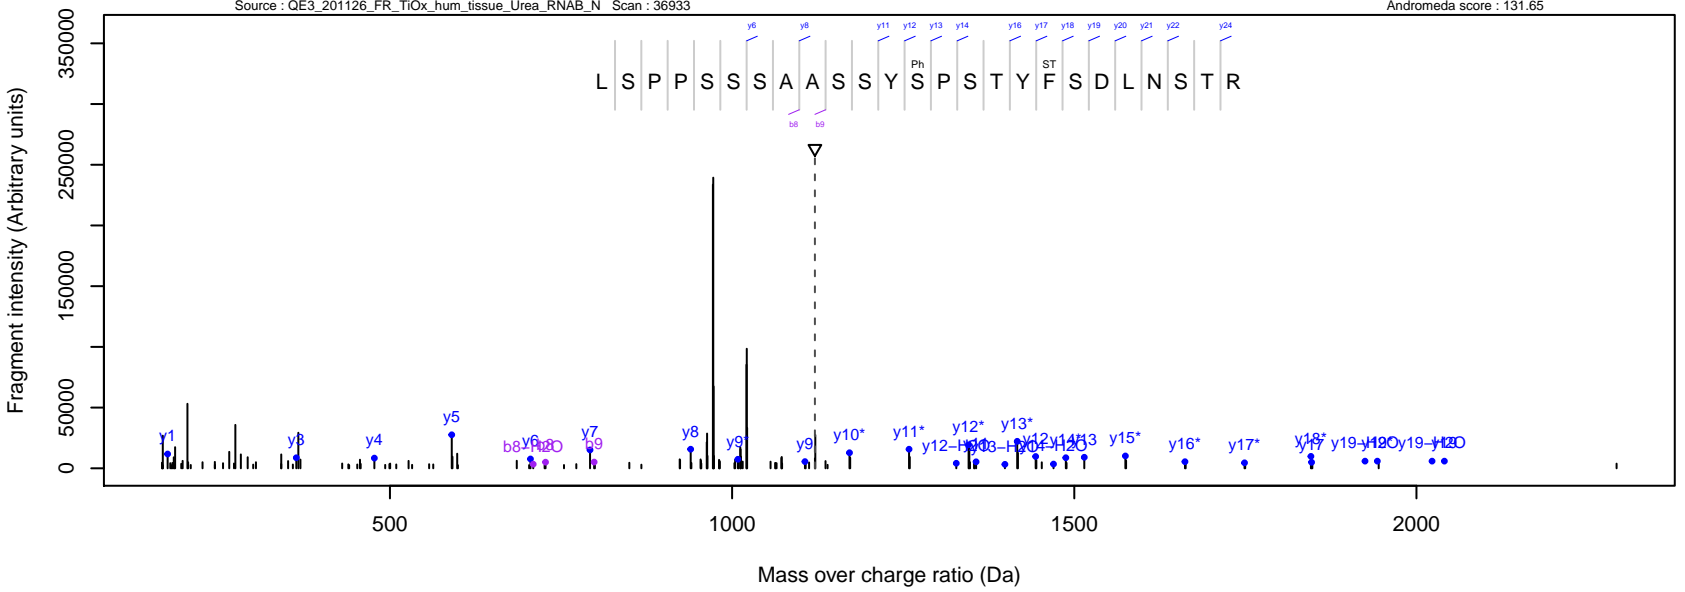

QDDS(Phospho (STY))PPRPIIGPALPPGFIK-3+

Source : QE3\_201126\_FR\_TiOx\_hum\_tissue\_Urea\_RNAB\_H Scan : 49020

Andromeda score : 131.64

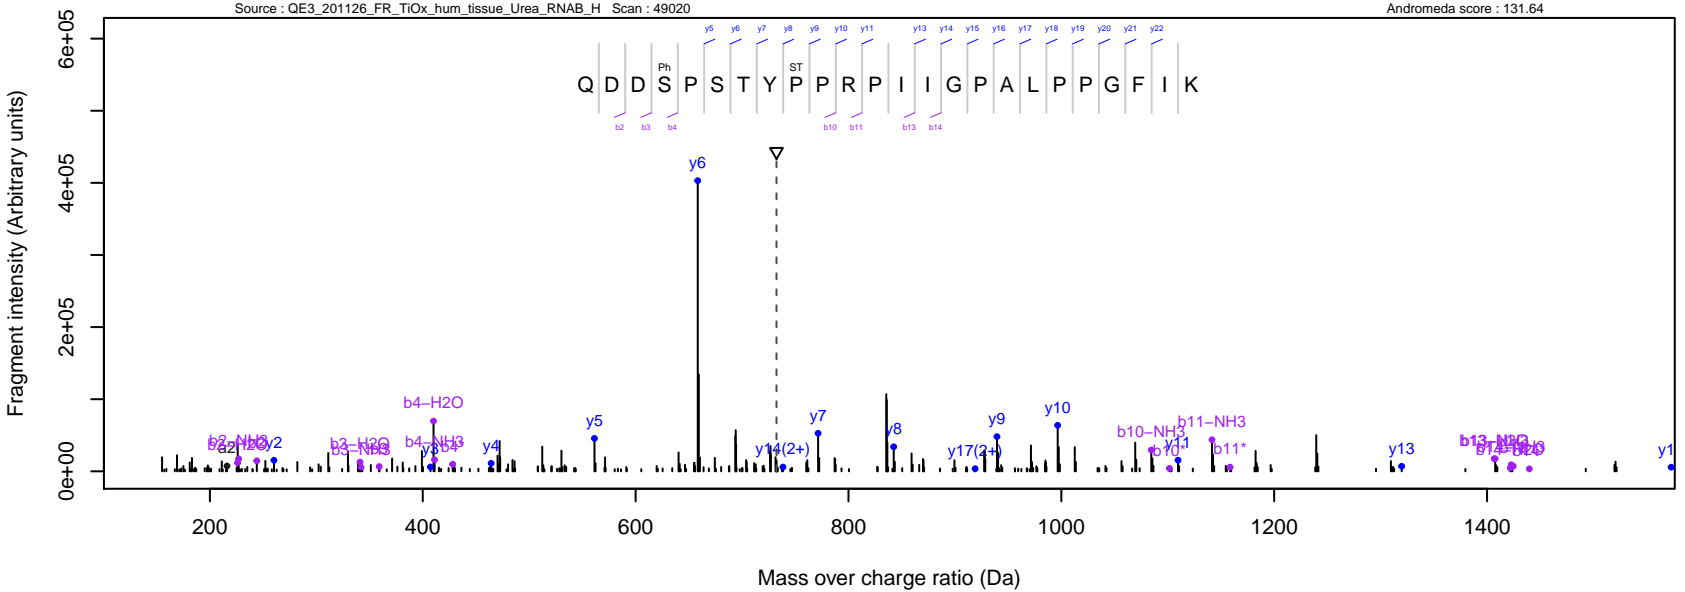

SQS(Phospho (STY))SHS(Phospho (STY))YDDSTLPLIDR-3+

Source : QE3\_201126\_FR\_TiOx\_hum\_tissue\_Urea\_RNAB\_H Scan : 37912

Andromeda score : 131.64

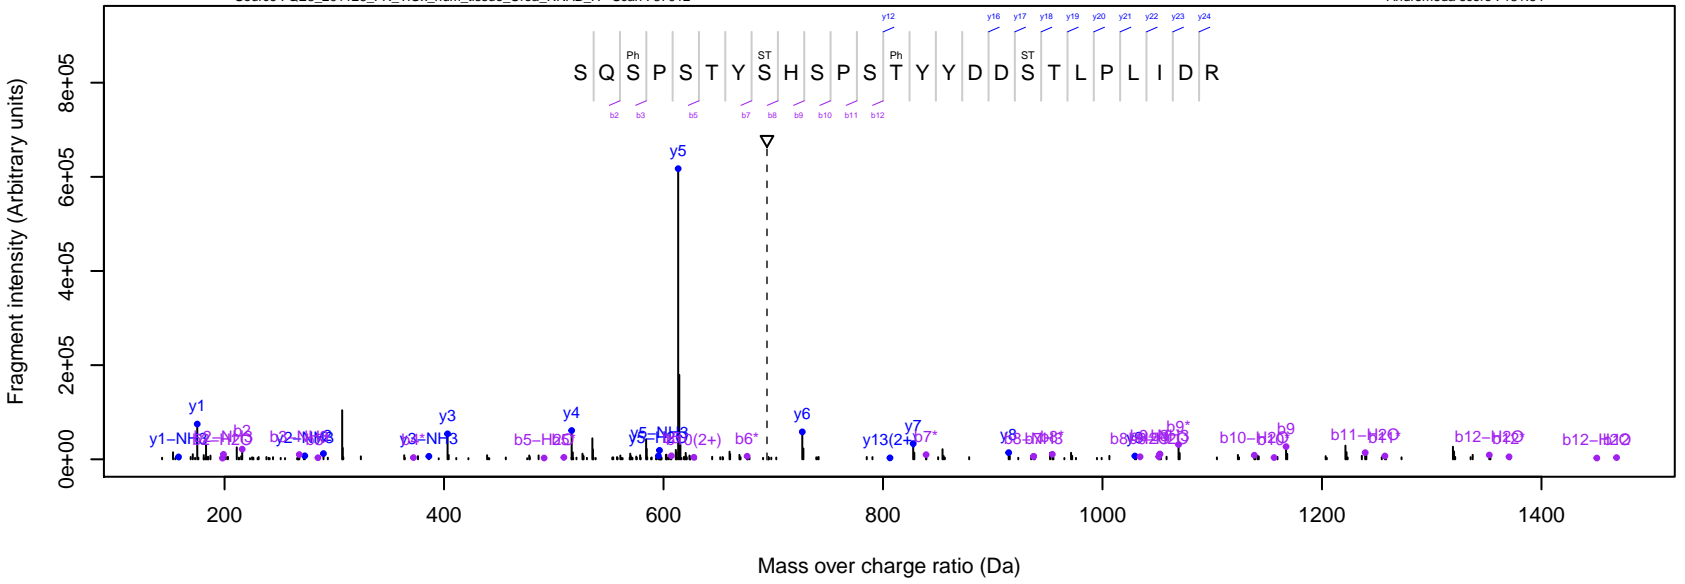

GM(Oxidation (M))YDGPVFDLTTT(Phospho (STY))PK-2+

Source : QE3\_201126\_FR\_TiOx\_hum\_tissue\_Urea\_RNAB\_H Scan : 44676

Andromeda score : 131.61

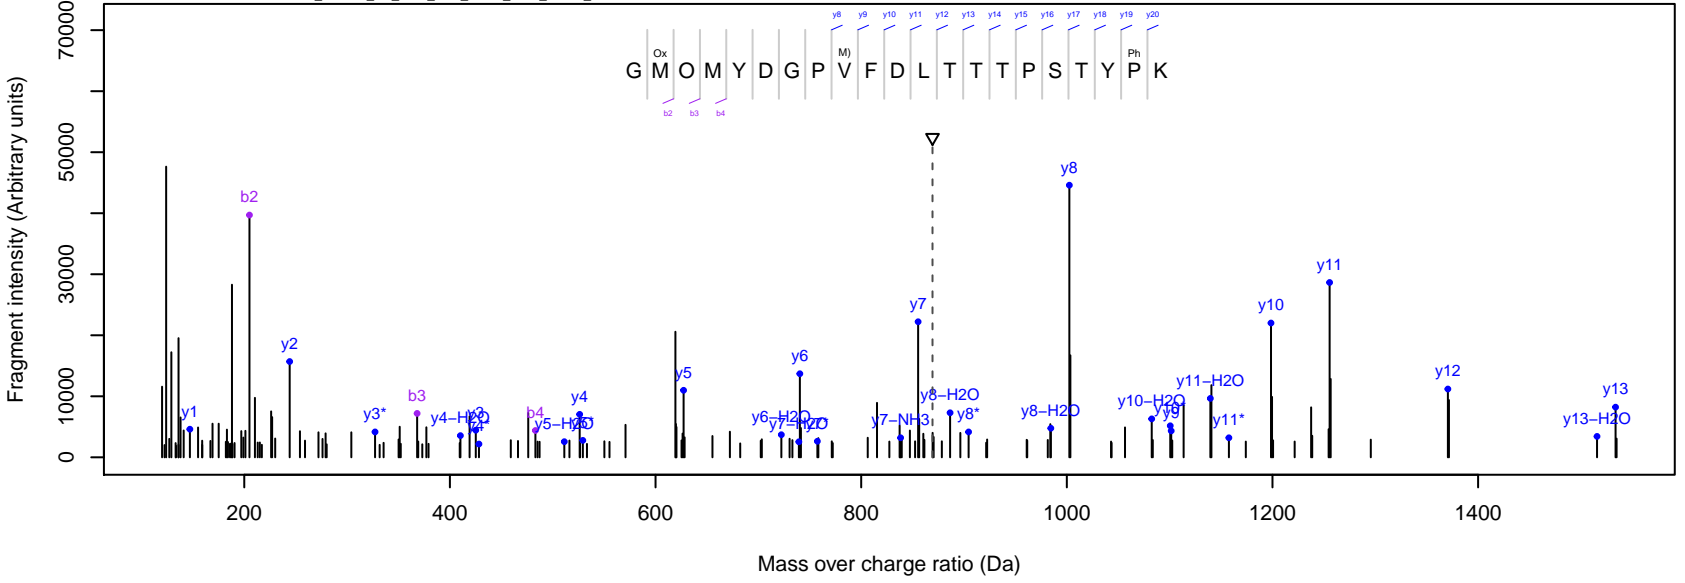

DVDDGS(Phospho (STY))GS(Phospho (STY))PHSPHQLSSK-3+

Source : QE3\_201126\_FR\_TiOx\_hum\_tissue\_Urea\_RNAB\_N Scan : 8425

Andromeda score : 131.59

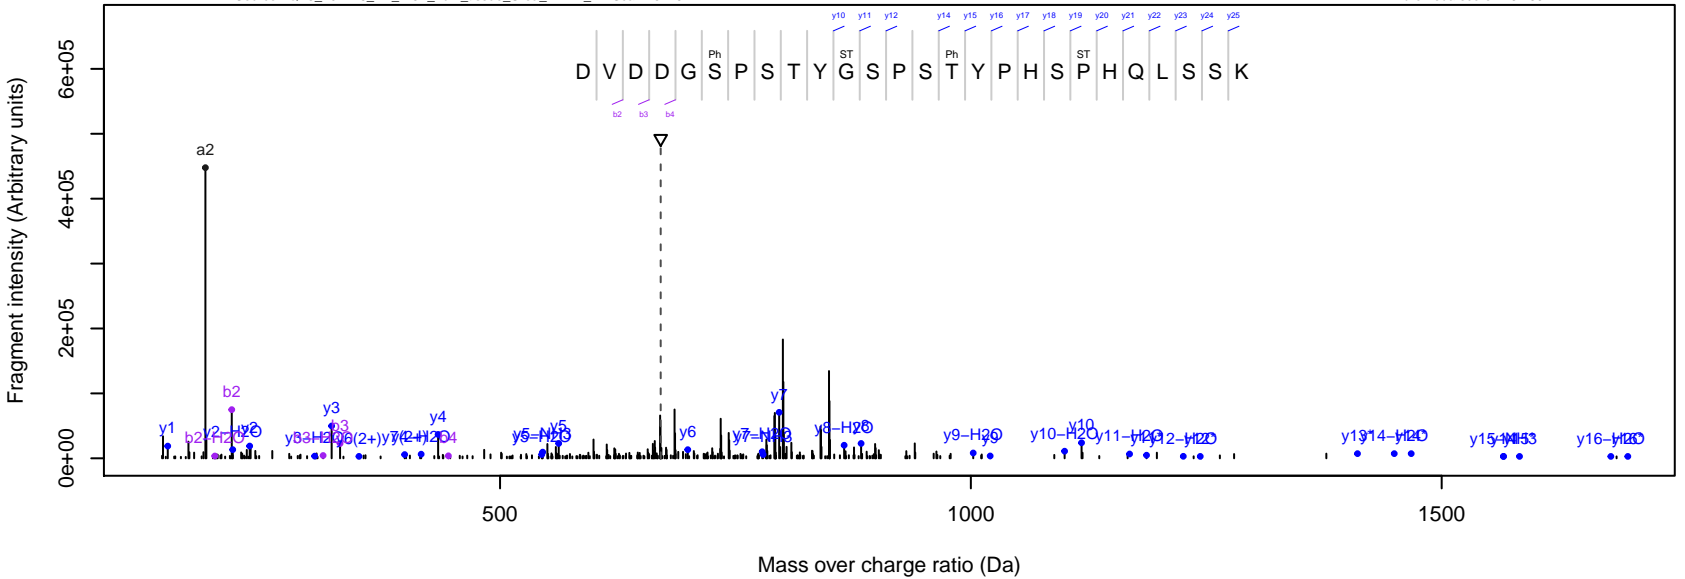



EGS(Phospho (STY))GRFSLPGATCLQGEGQGHL S Q K K-4+

Source : QE3\_201126\_FR\_TiOx\_hum\_tissue\_Urea\_RNAB\_H Scan : 22239

Andromeda score : 131.56

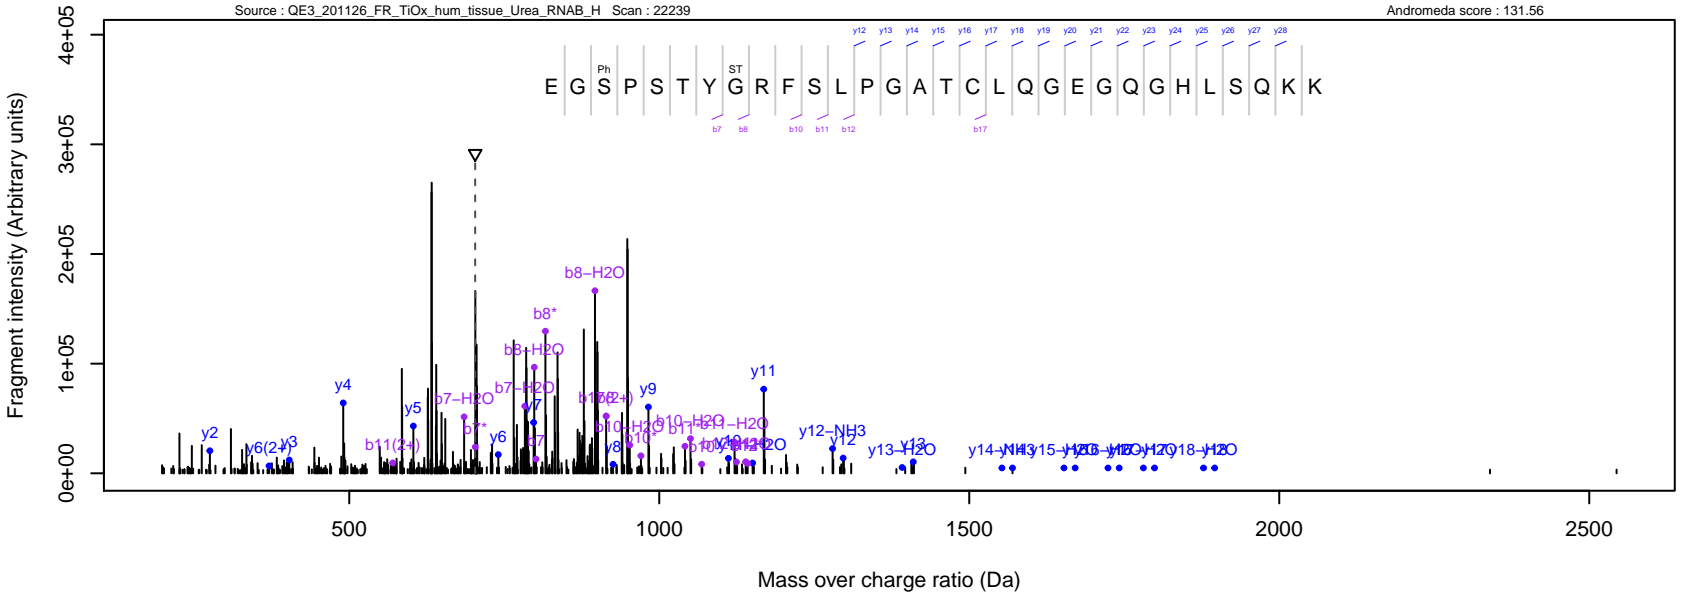

S(Phospho (STY))SIHNFMTHP E F R-3+

Source : QE3\_201126\_FR\_TiOx\_hum\_tissue\_Urea\_RNAB\_N Scan : 24166

Andromeda score : 131.56

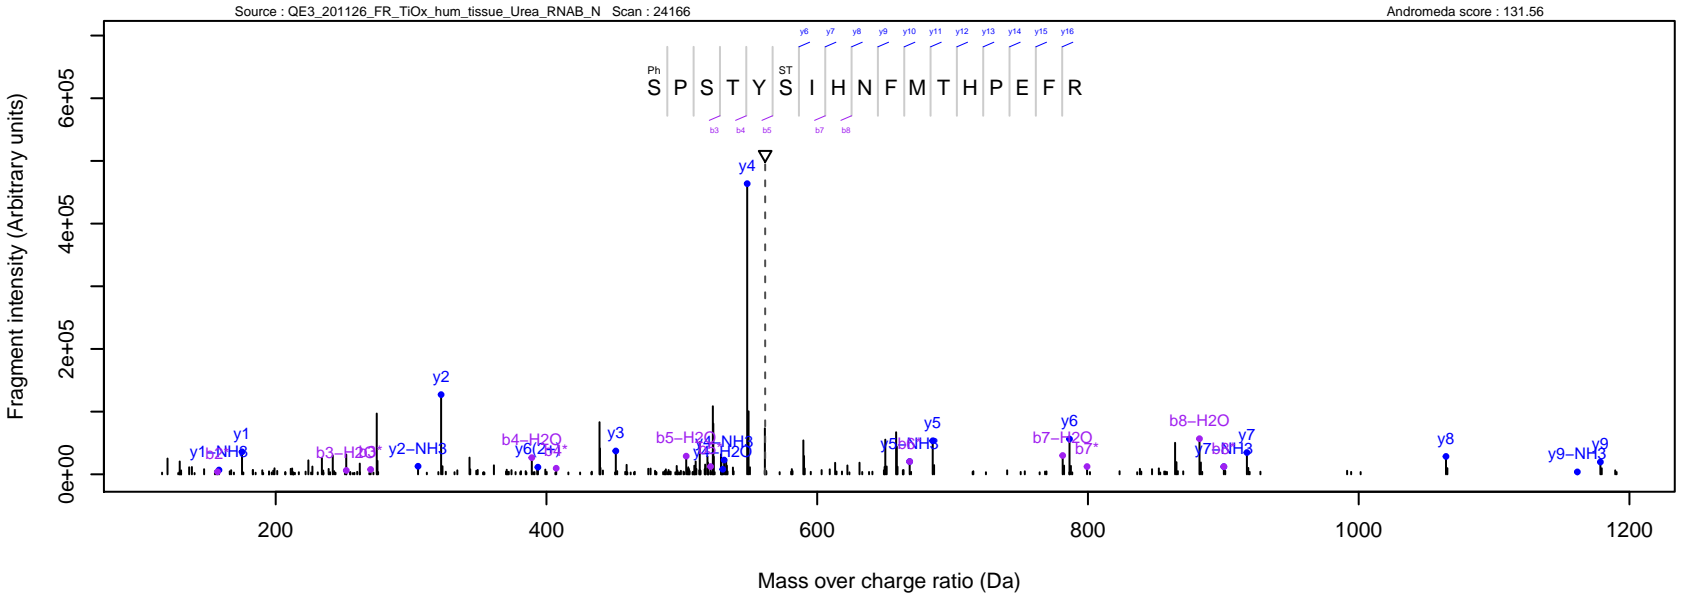

TSQVGAASAPAKES(Phospho (STY))P R-3+

Source : QE3\_201126\_FR\_TiOx\_hum\_tissue\_Urea\_RNAB\_B Scan : 6152

Andromeda score : 131.56

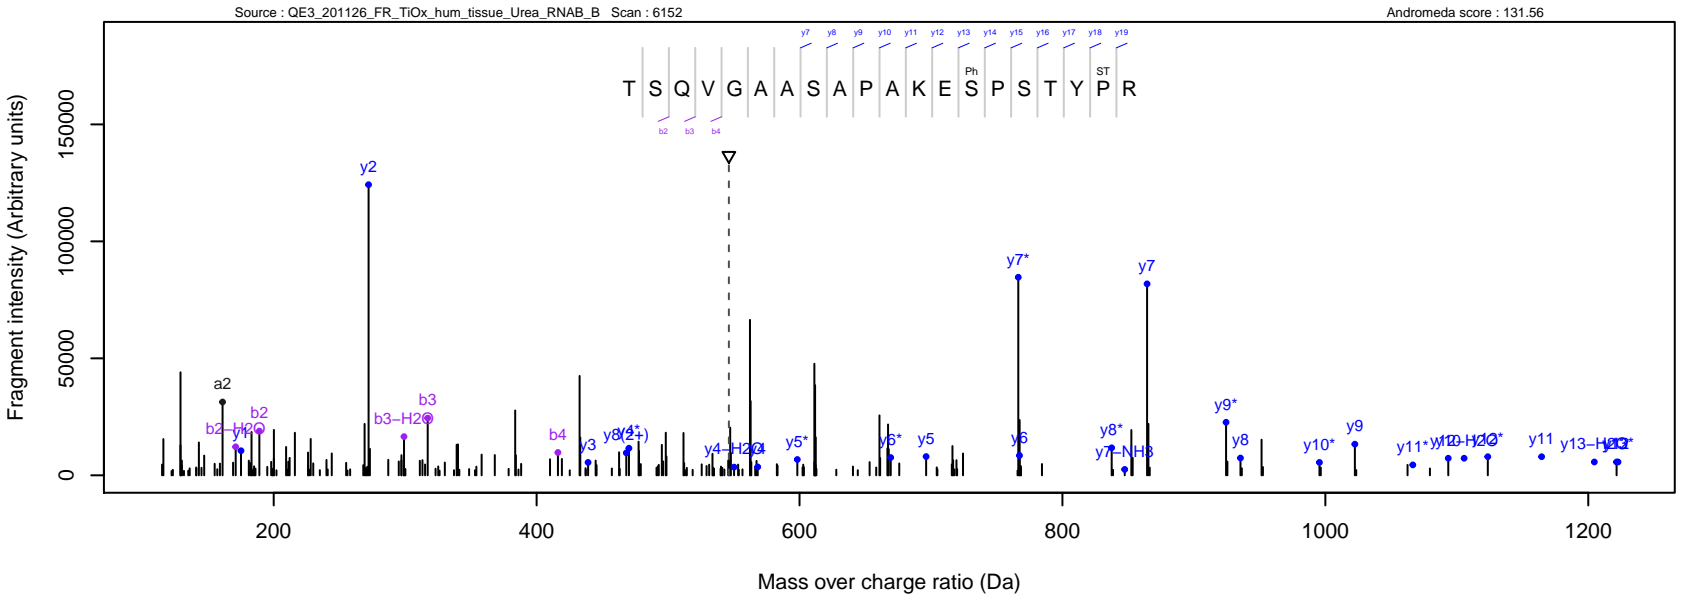





VGEQDSAPTQEKPTSPSTYPGK-2+

Source : QE3\_201126\_FR\_TIOx\_hum\_tissue\_Urea\_RNAB\_N Scan : 7261

Andromeda score : 131.45

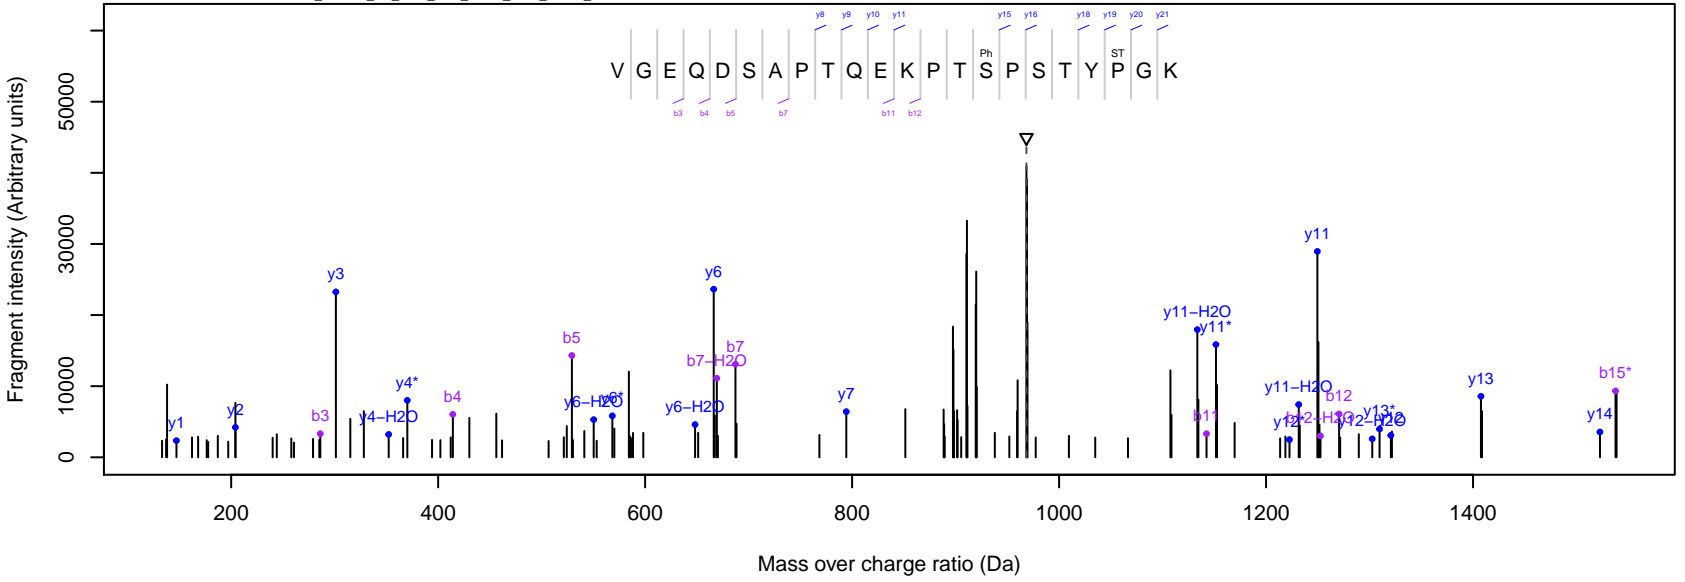

LIEDNEYPSITYTAR-2+

Source : QE3\_201126\_FR\_TIOx\_hum\_tissue\_Urea\_RNAB\_B Scan : 12822

Andromeda score : 131.44

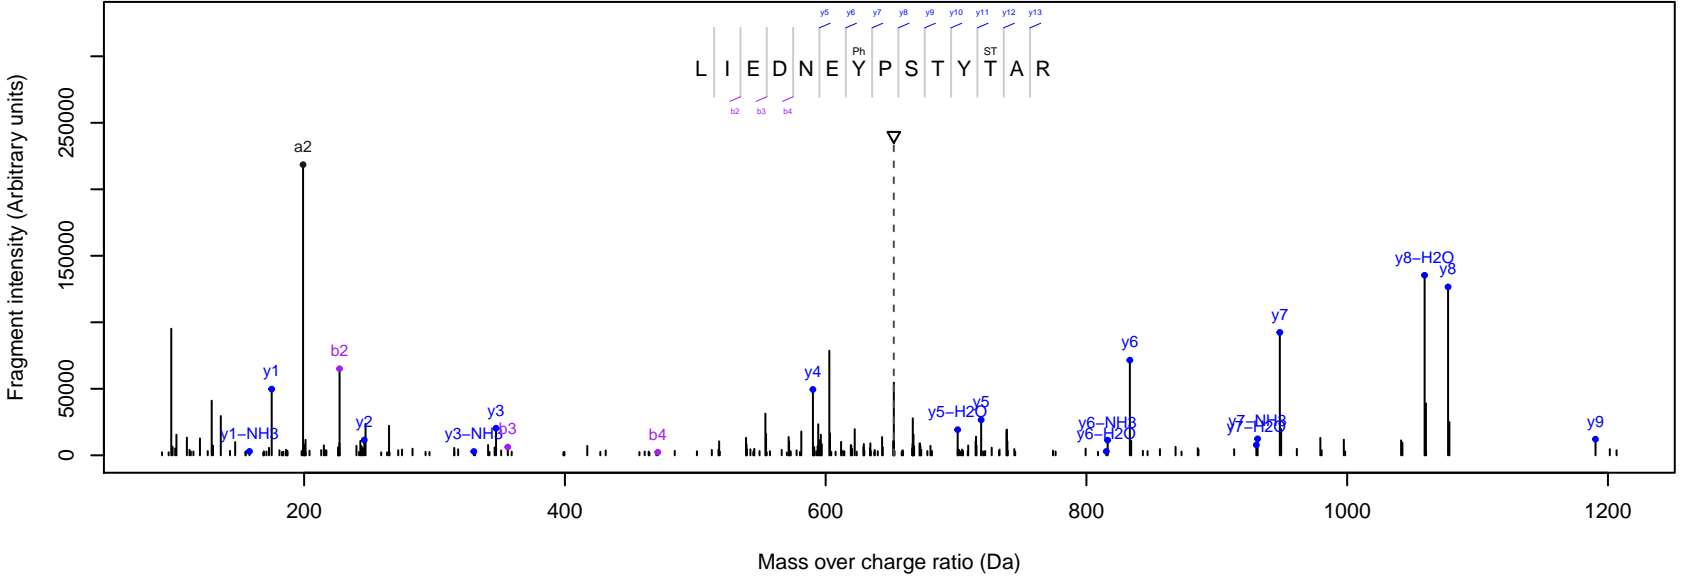

S(Phospho (STY))PEAPQPVIAMEEPAPVAPLPK-3+

Source : QE3\_201126\_FR\_TIOx\_hum\_tissue\_Urea\_RNAB\_N Scan : 51243

Andromeda score : 131.42

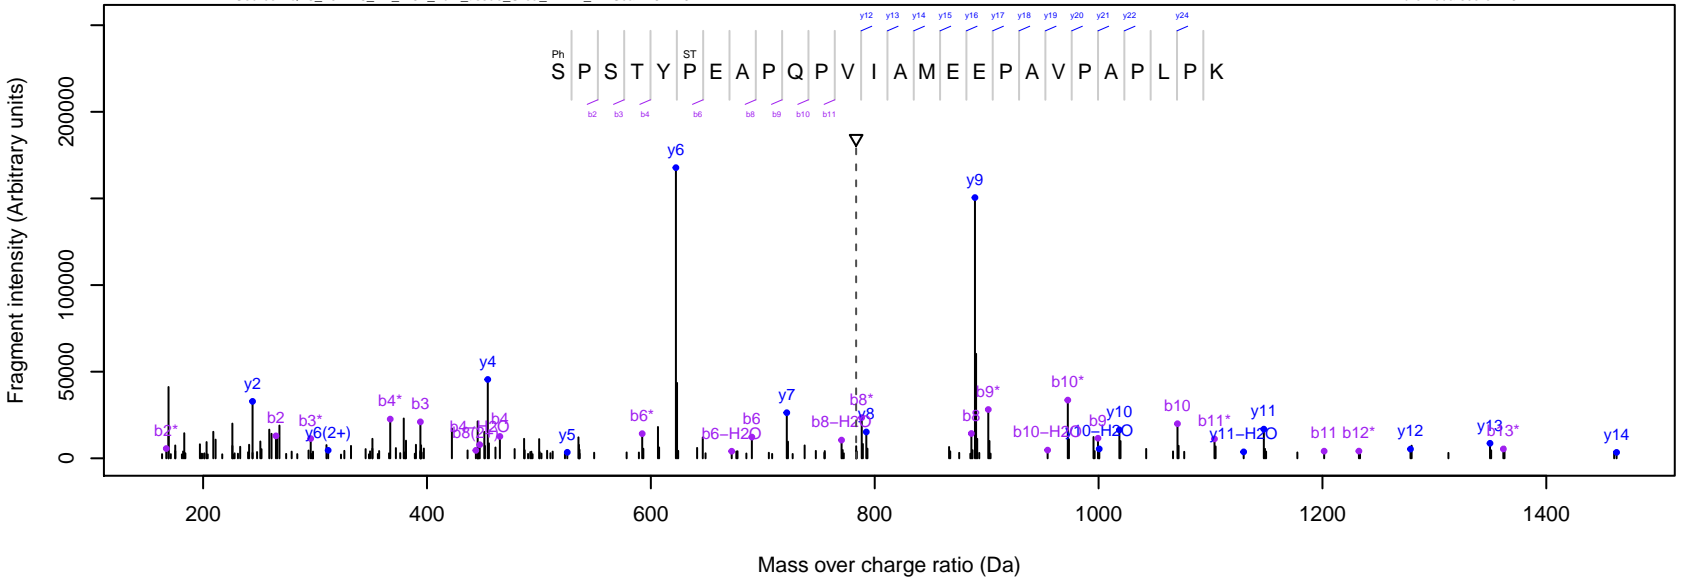

RLS(Phospho (STY))ITSLTGK-2+

Source : QE3\_201126\_FR\_TIOx\_hum\_tissue\_Urea\_RNAB\_B Scan : 23903

Andromeda score : 131.36

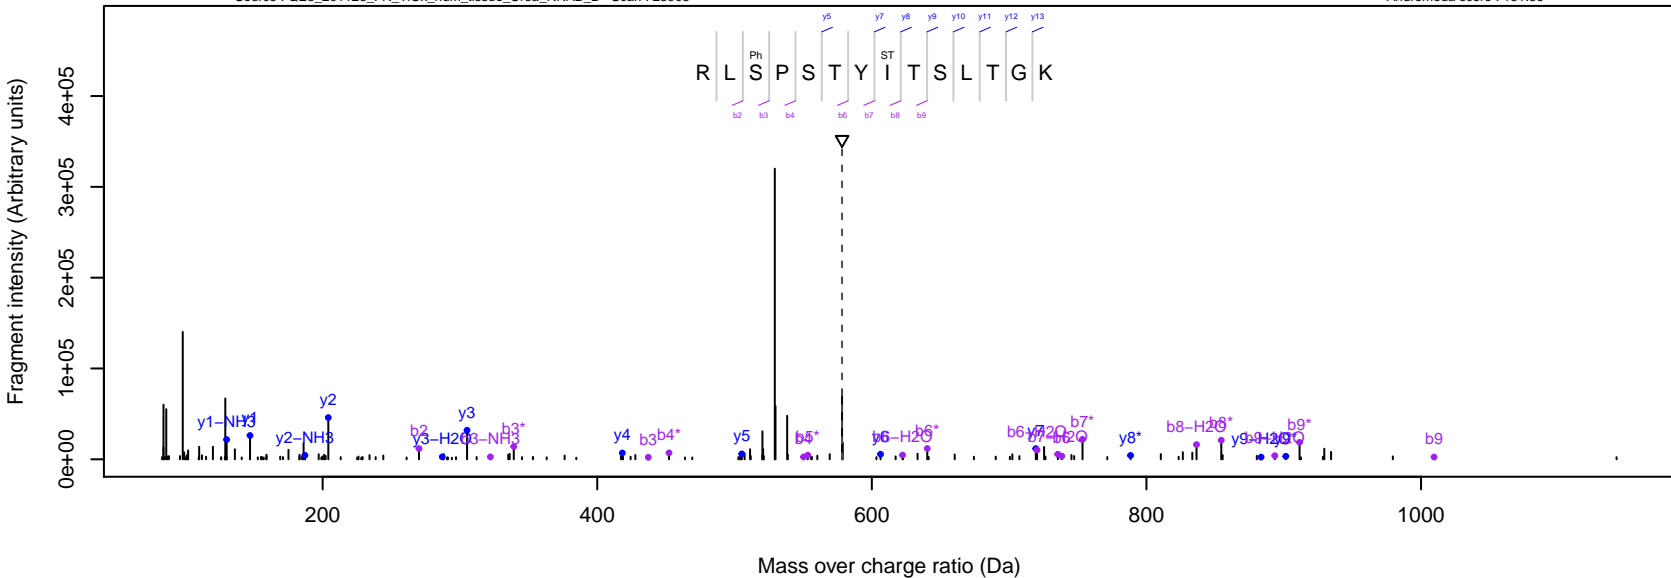

(Acetyl (Protein N-term))AQLVHPAPFPPTGPGAS(Phospho (STY))PPAFPAKDPDPYPYSVETPYGYR-4+

Source : QE3\_201126\_FR\_TIOx\_hum\_tissue\_Urea\_RNAB\_N Scan : 57036

Andromeda score : 131.33

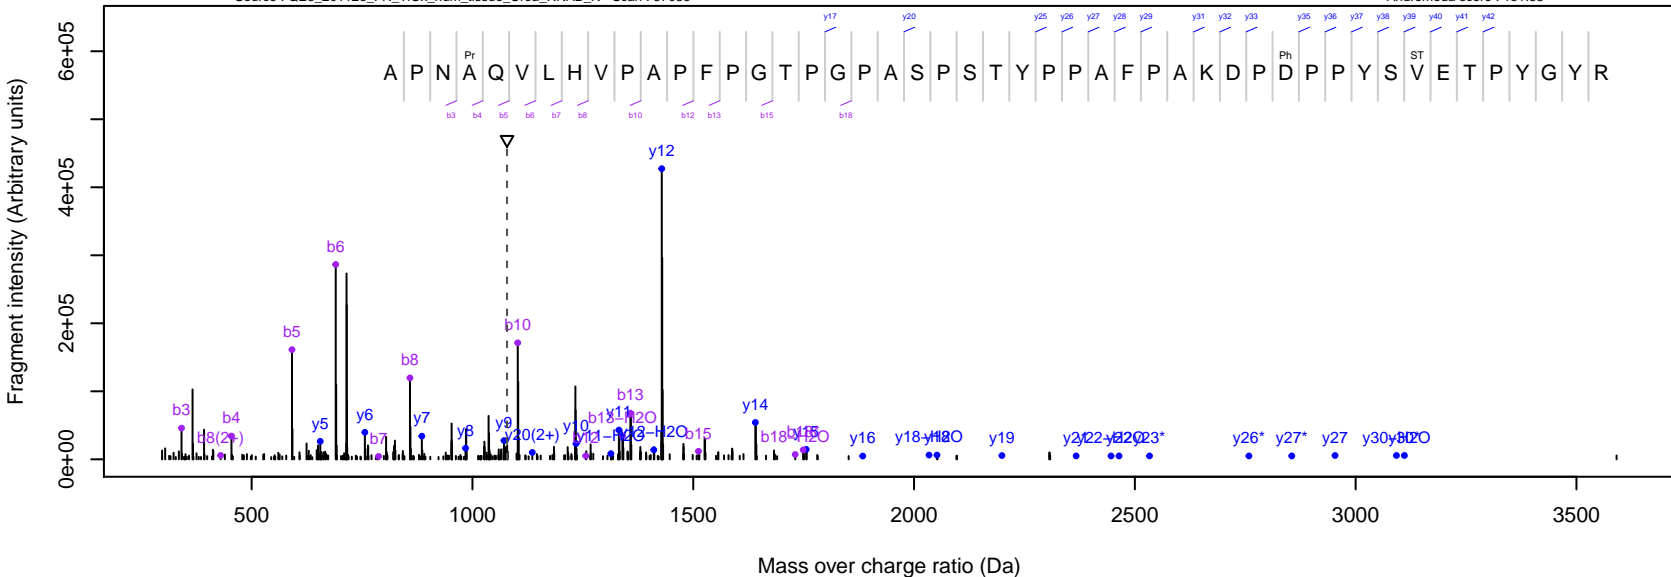

RT(Phospho (STY))SIISLTPWKPSK-3+

Source : QE3\_201126\_FR\_TIOx\_hum\_tissue\_Urea\_RNAB\_N Scan : 30856

Andromeda score : 131.25

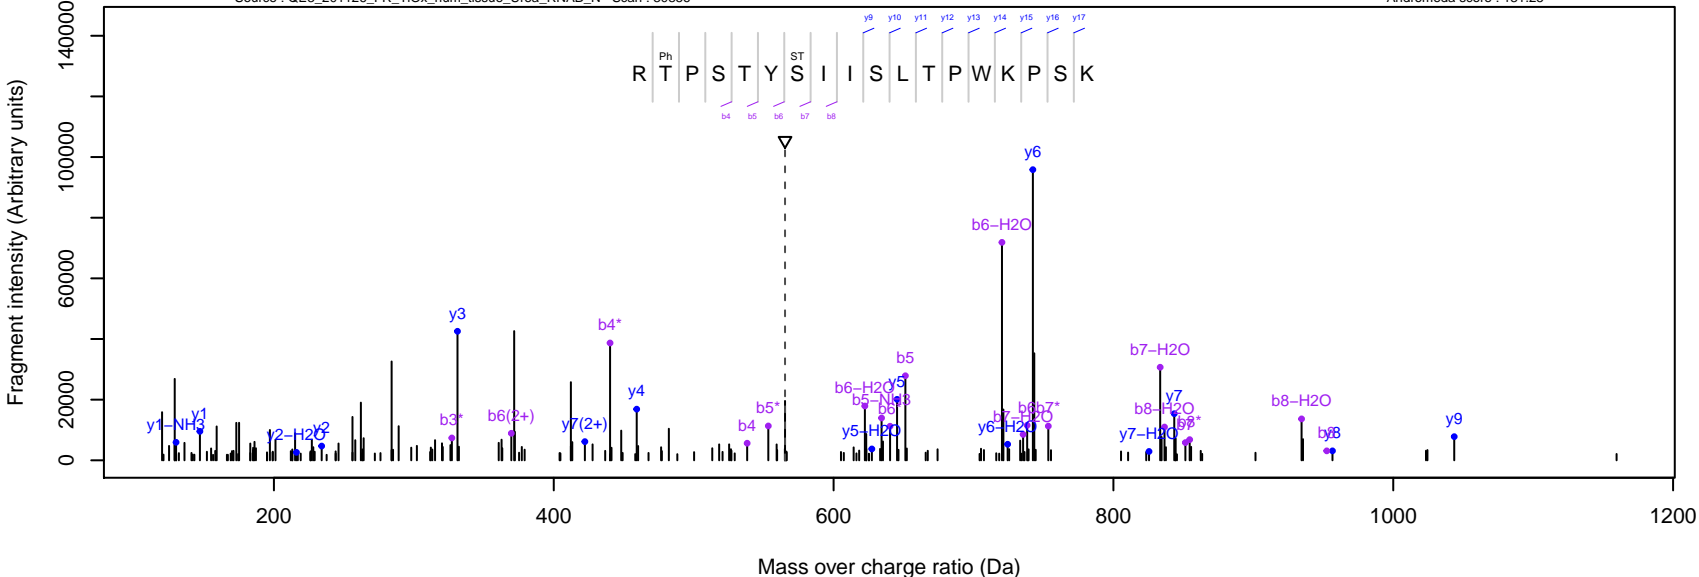

GLRDSHS(Phospho (STY))SEEDEASSQTDLSSQTISKK-4+

Source : QE3\_201126\_FR\_TIOx\_hum\_tissue\_Urea\_RNAB\_N Scan : 14645

Andromeda score : 131.23

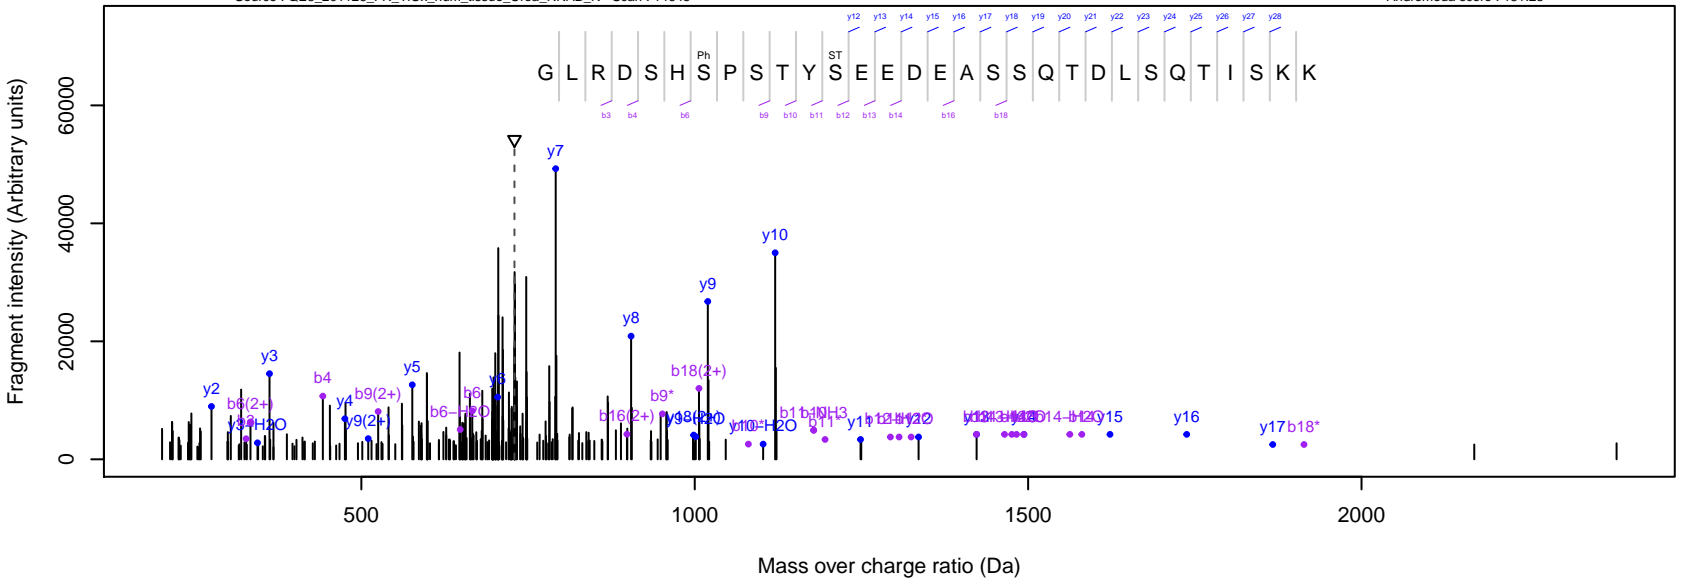

STSAPQM(Oxidation (M))S(Phospho (STY))PGSSDNQSSSPQAQQK-3+

Source : QE3\_201126\_FR\_TIOx\_hum\_tissue\_Urea\_RNAB\_N Scan : 7953

Andromeda score : 131.2

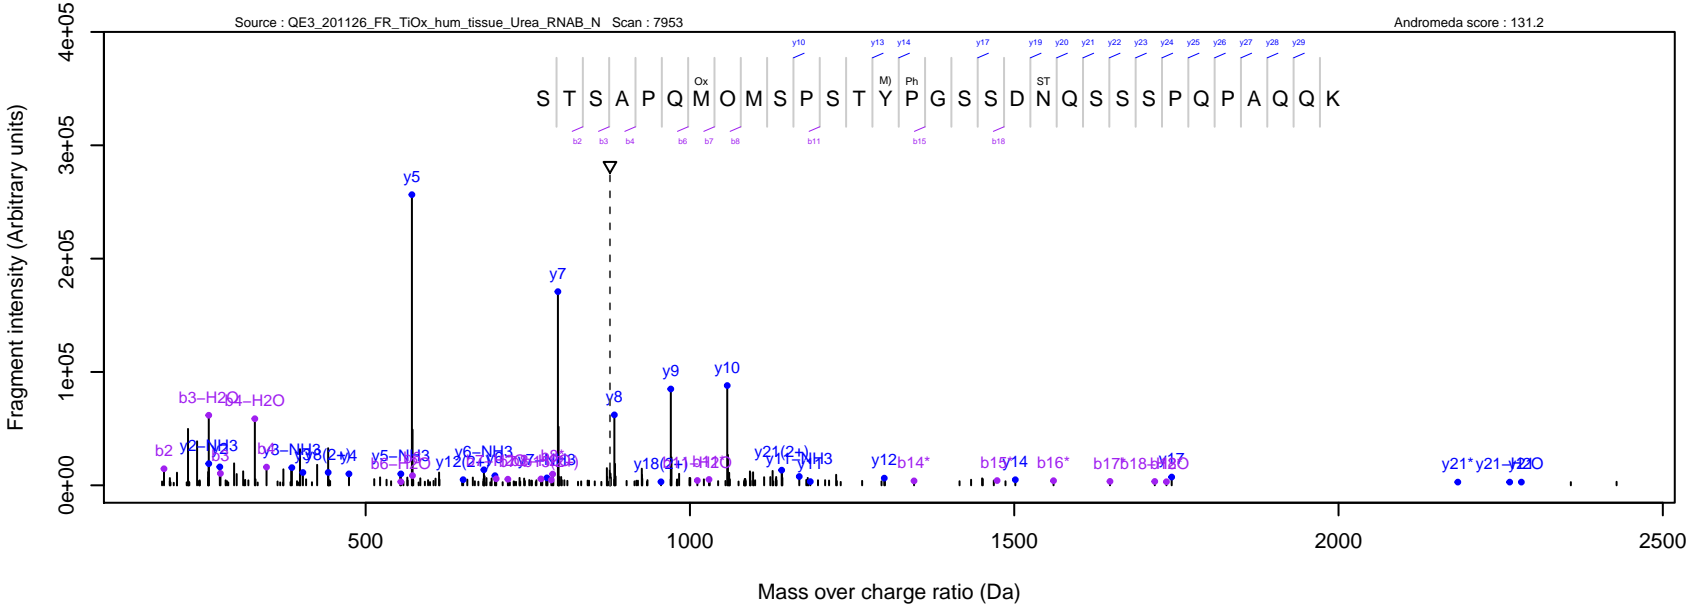

ASEENLLSSSVPSADRRS(Phospho (STY))SPTTNSK-3+

Source : QE3\_201126\_FR\_TIOx\_hum\_tissue\_Urea\_RNAB\_N Scan : 22015

Andromeda score : 131.1

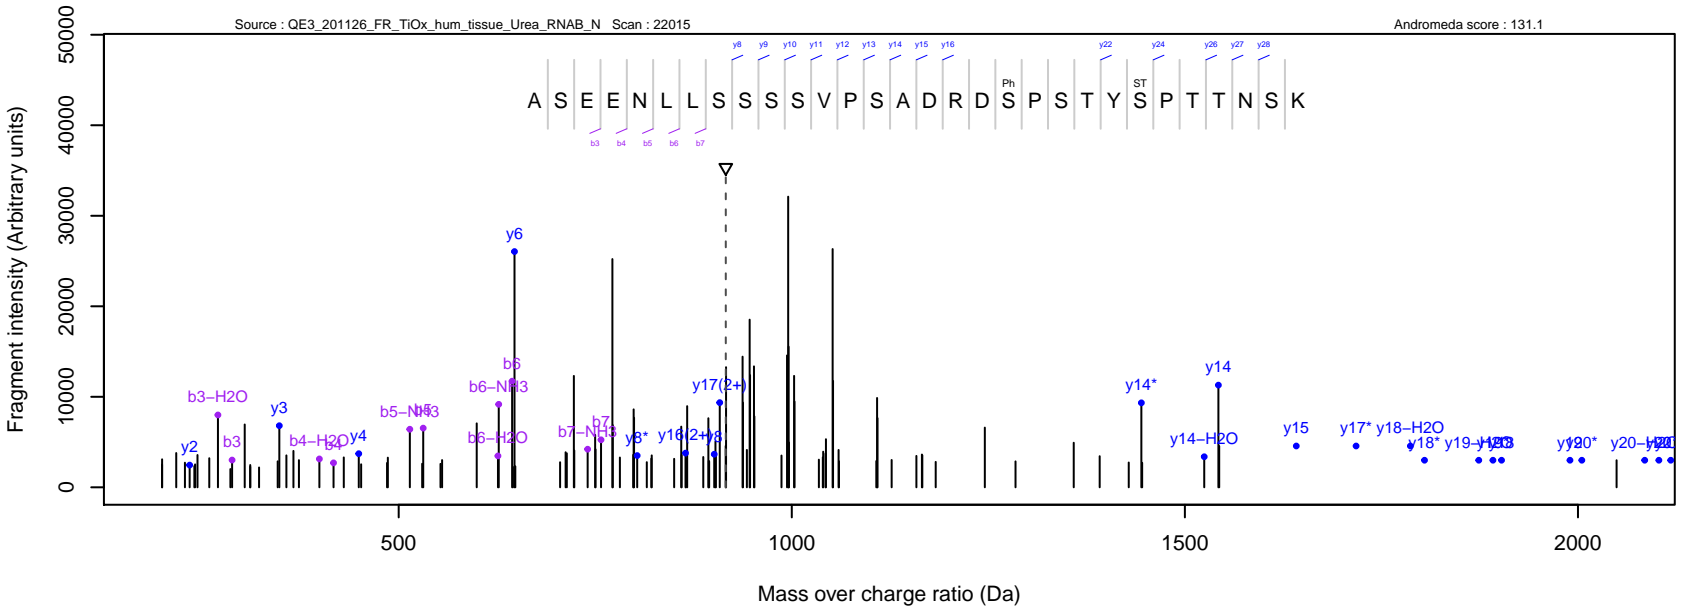

RPHS(Phospho (STY))PEKAFSSNPVVR-3+

Source : QE3\_201126\_FR\_TiOx\_hum\_tissue\_Urea\_RNAB\_N Scan : 11578

Andromeda score : 131.09

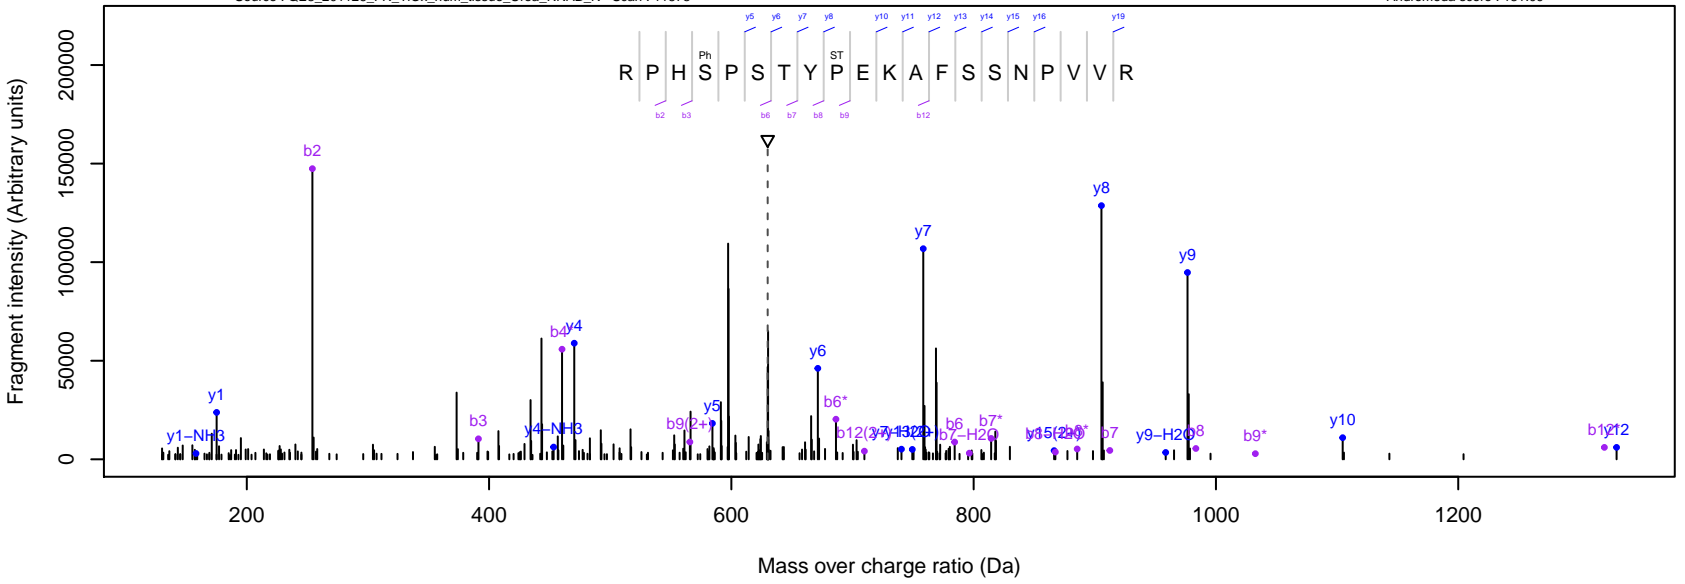

(Acetyl (Protein N-term))AATTGS(Phospho (STY))GVKVP R-2+

Source : QE3\_201126\_FR\_TiOx\_hum\_tissue\_Urea\_RNAB\_H Scan : 17195

Andromeda score : 131.06

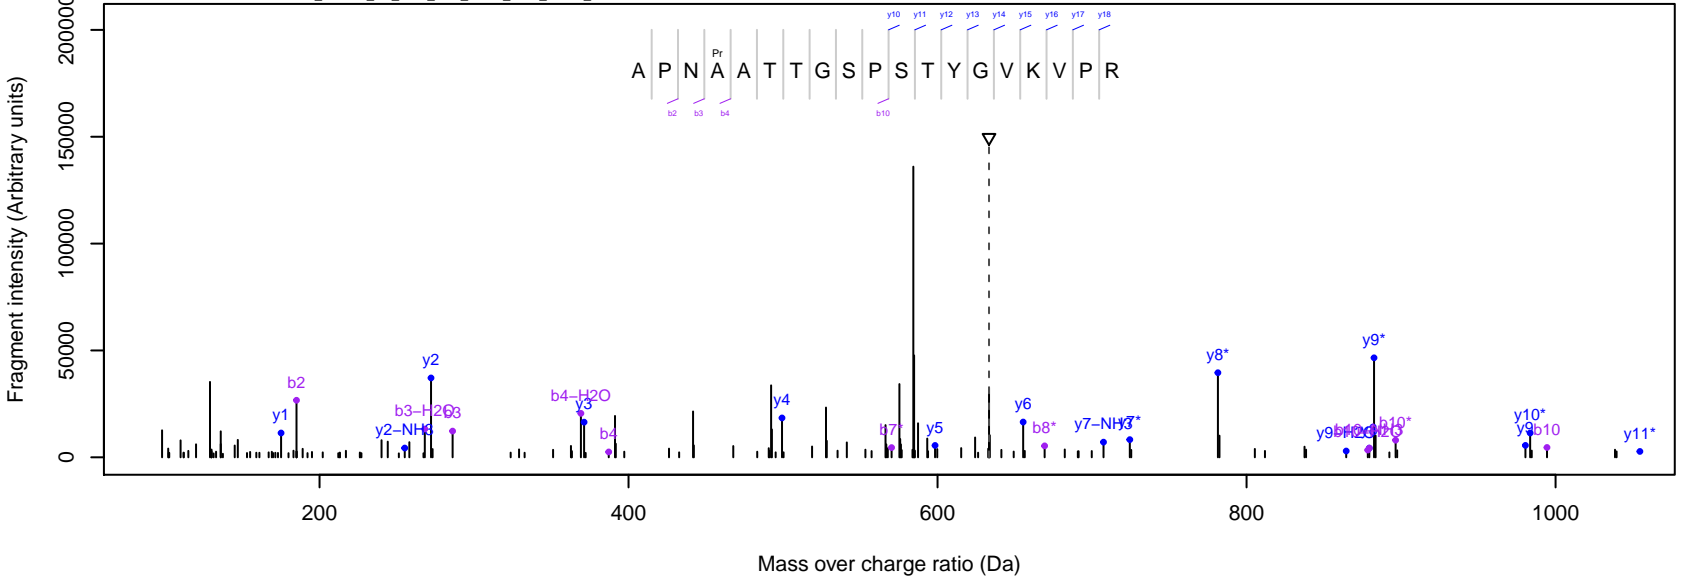

CPS(Phospho (STY))PTMOMSLPSSWK-2+

Source : QE3\_201126\_FR\_TiOx\_hum\_tissue\_Urea\_RNAB\_B Scan : 30418

Andromeda score : 131.06

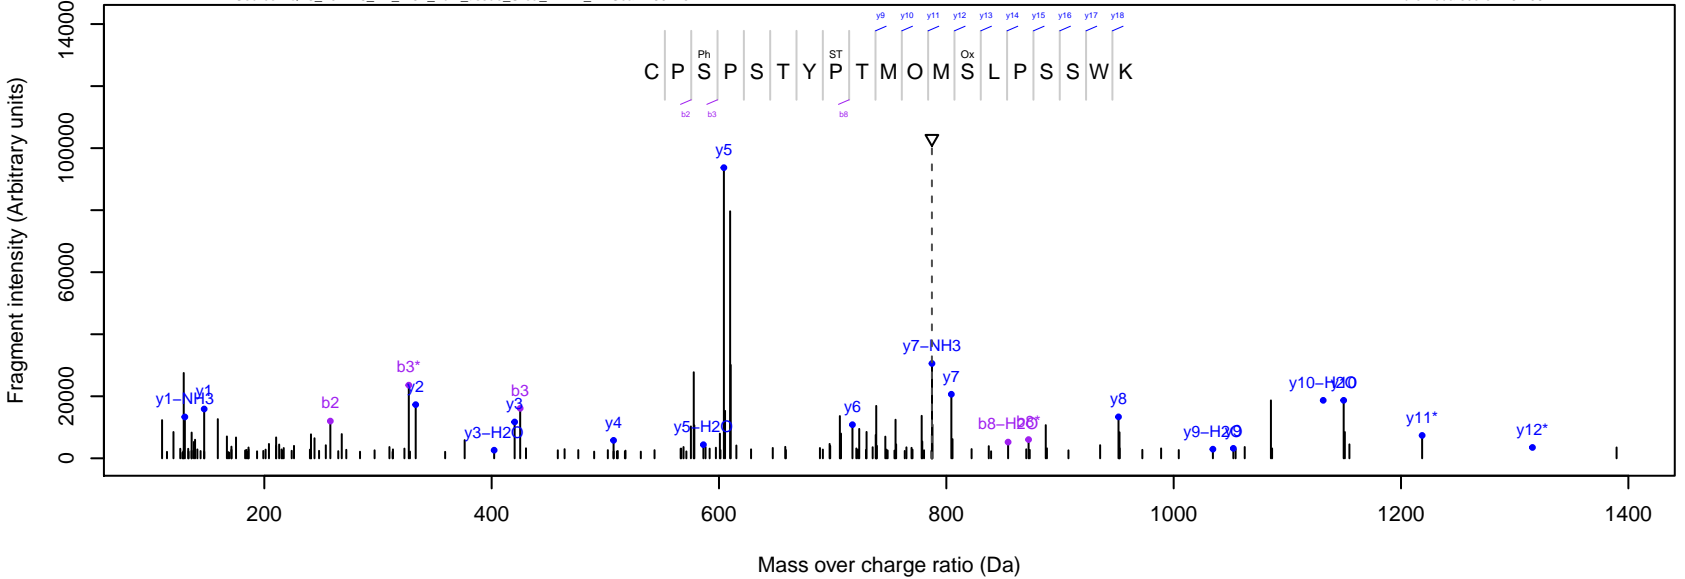

VPAAFPTKVVPVPGPGS(Phospho (STY))GGNGPEREGPEEPGLAK-4+

Source : QE3\_201126\_FR\_TIOx\_hum\_tissue\_Urea\_RNAB\_N Scan : 32343

Andromeda score : 131.04

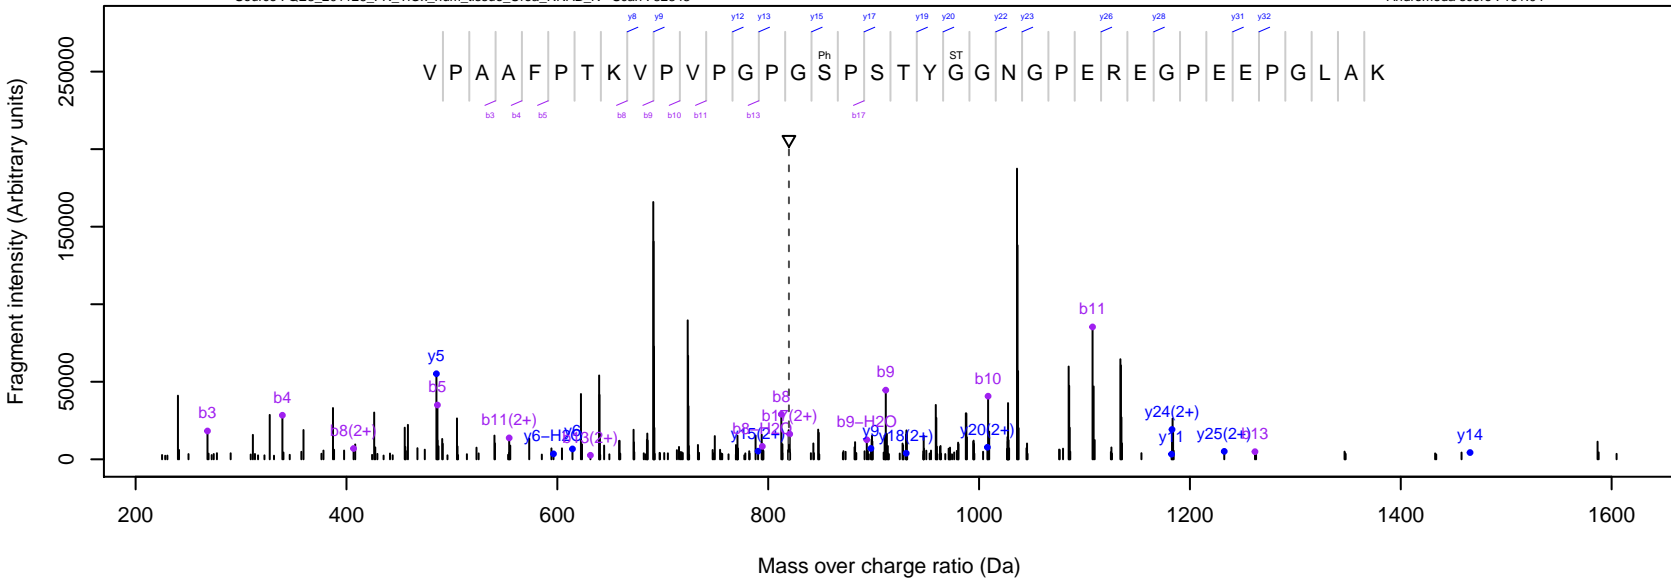

RKS(Phospho (STY))ELPQDVYTIK-2+

Source : QE3\_201126\_FR\_TIOx\_hum\_tissue\_Urea\_RNAB\_H Scan : 17387

Andromeda score : 130.98

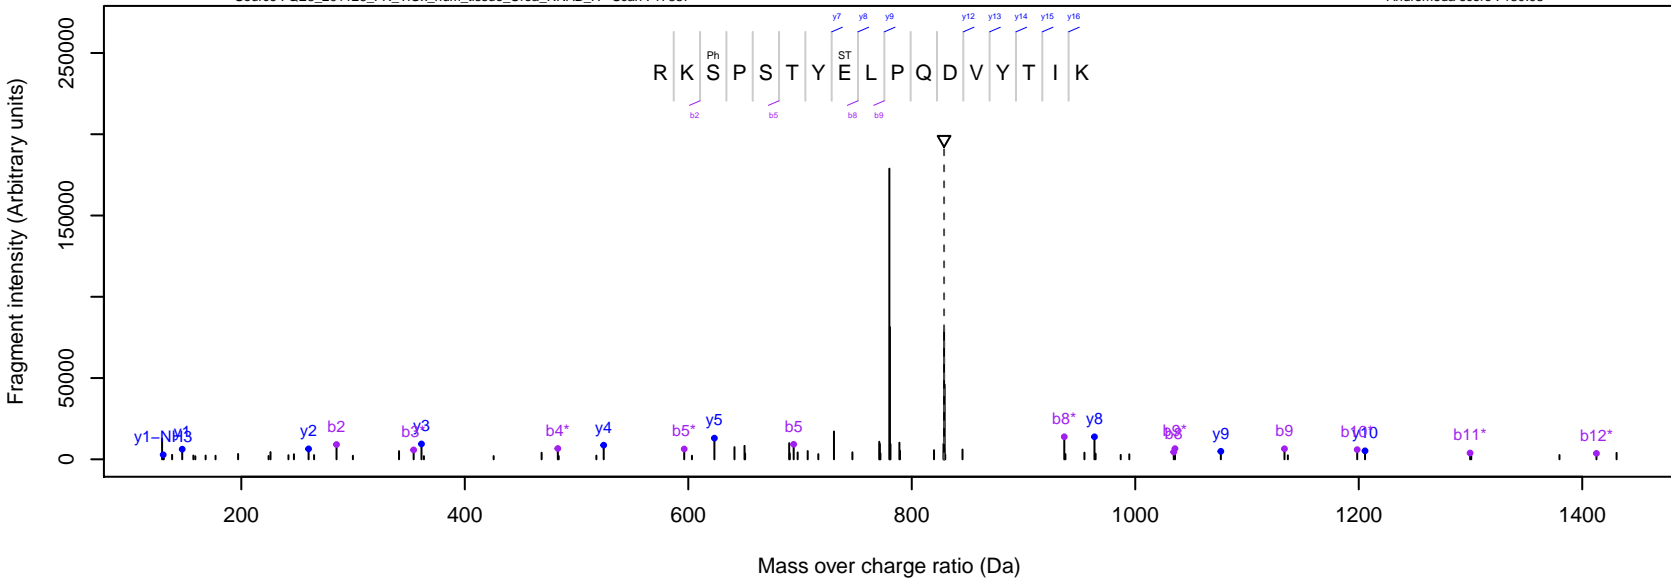

RQS(Phospho (STY))PS(Phospho (STY))PSTRPIR-3+

Source : QE3\_201126\_FR\_TIOx\_hum\_tissue\_Urea\_RNAB\_N Scan : 5747

Andromeda score : 130.95

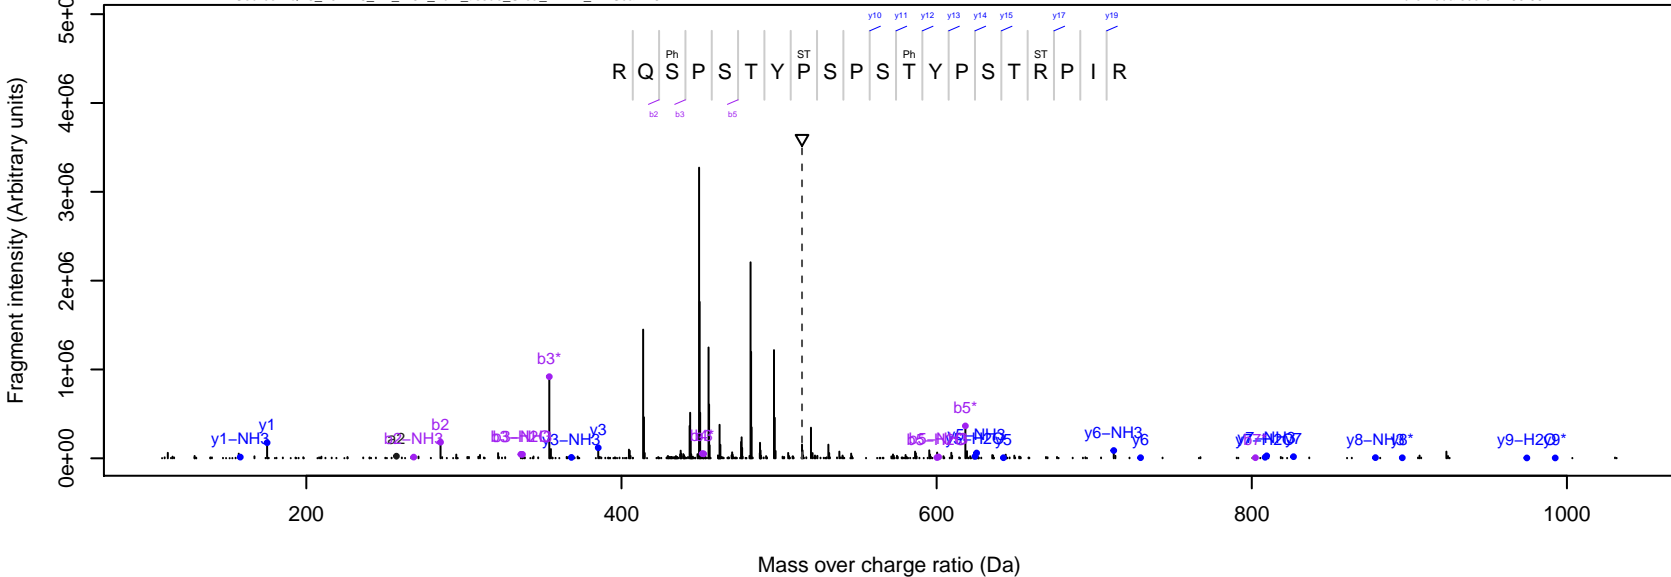

VPS(Phospho (STY))VESLFR-2+

Source : QE3\_201126\_FR\_TiOx\_hum\_tissue\_Urea\_RNAB\_H Scan : 48020

Andromeda score : 130.94

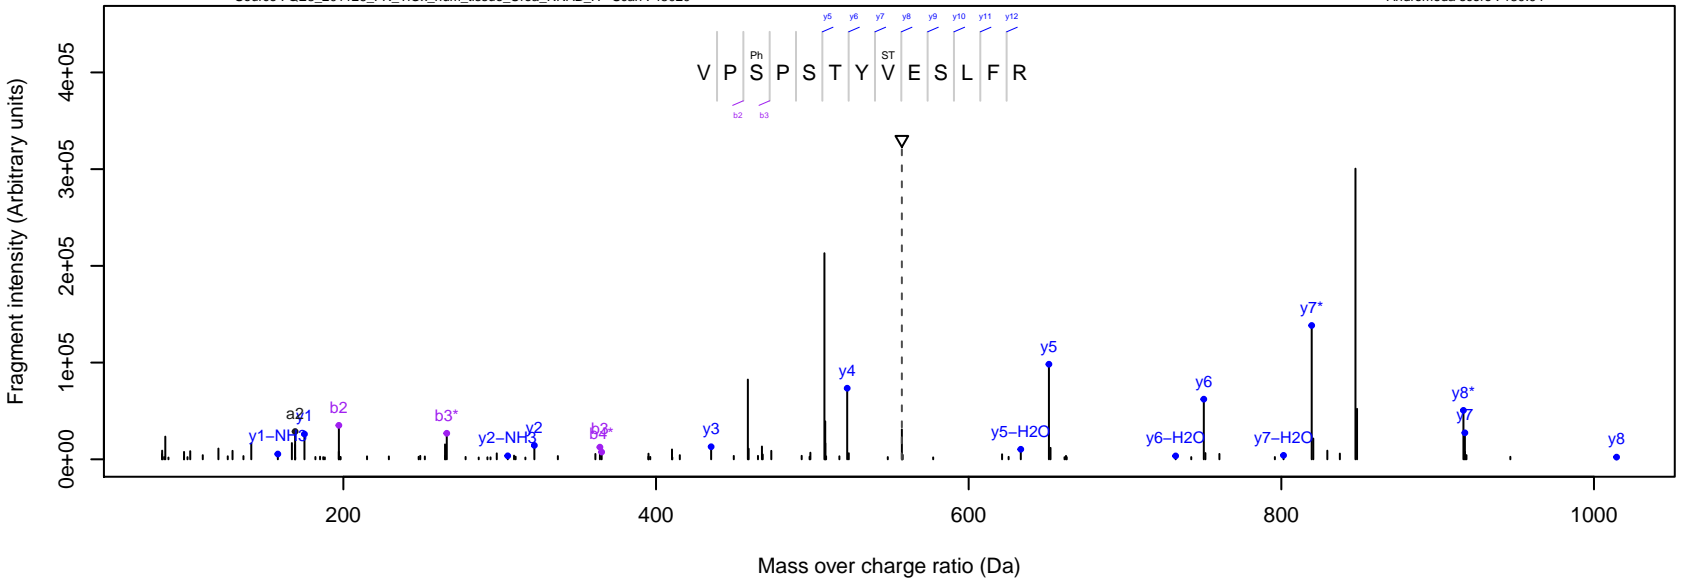

IHSNSSEEVSQELES(Phospho (STY))DDG-2+

Source : QE3\_201126\_FR\_TiOx\_hum\_tissue\_Urea\_RNAB\_N Scan : 19925

Andromeda score : 130.87

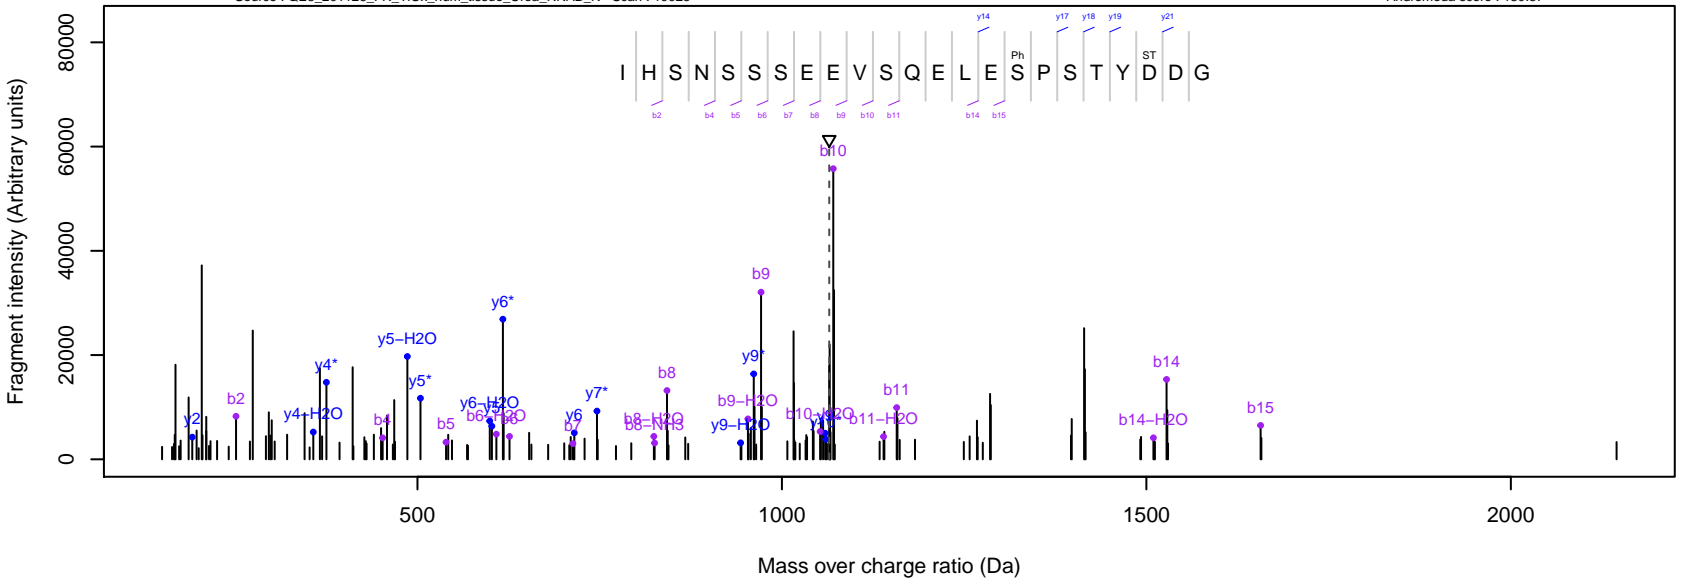

THNHDPQPGDPS(Phospho (STY))RPSSPKPAQPAALK-4+

Source : QE3\_201126\_FR\_TiOx\_hum\_tissue\_Urea\_RNAB\_N Scan : 7868

Andromeda score : 130.87

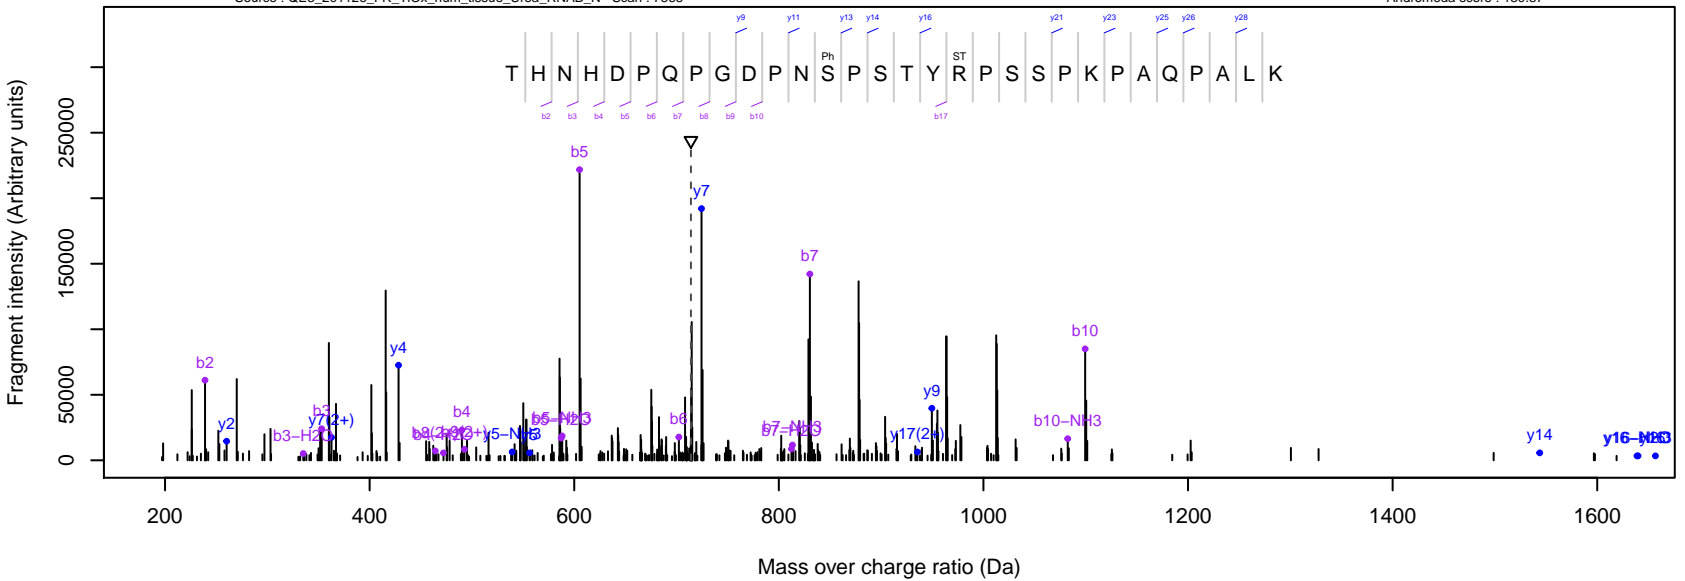

VKVDGPRS(Phospho (STY))PS(Phospho (STY))YGR-2+

Source : QE3\_201126\_FR\_TIOx\_hum\_tissue\_Urea\_RNAB\_B Scan : 9574

Andromeda score : 130.87

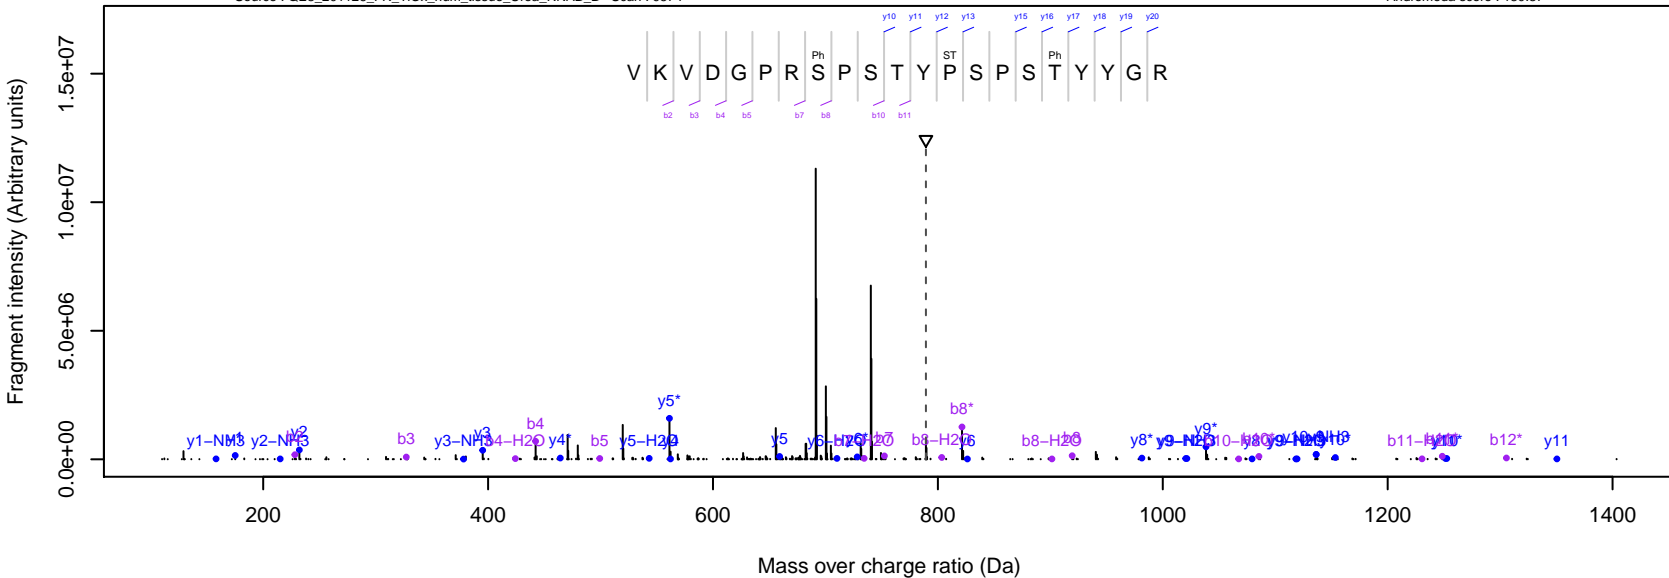

GLS(Phospho (STY))APDLR-2+

Source : QE3\_201126\_FR\_TIOx\_hum\_tissue\_Urea\_RNAB\_H Scan : 23002

Andromeda score : 130.66

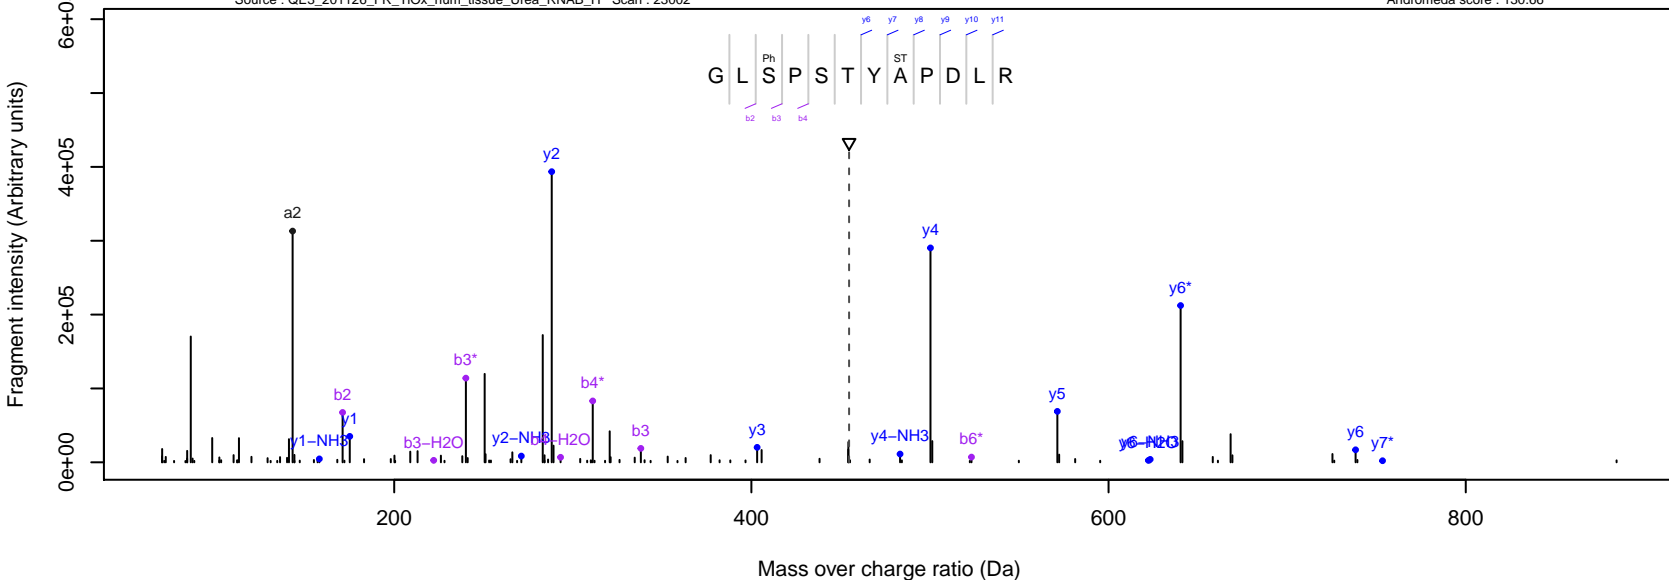

AAGDS(Phospho (STY))GEDS(Phospho (STY))DDS(Phospho (STY))DYENLIDPTEPSNSEYSHSK-3+

Source : QE3\_201126\_FR\_TIOx\_hum\_tissue\_Urea\_RNAB\_N Scan : 49034

Andromeda score : 130.64

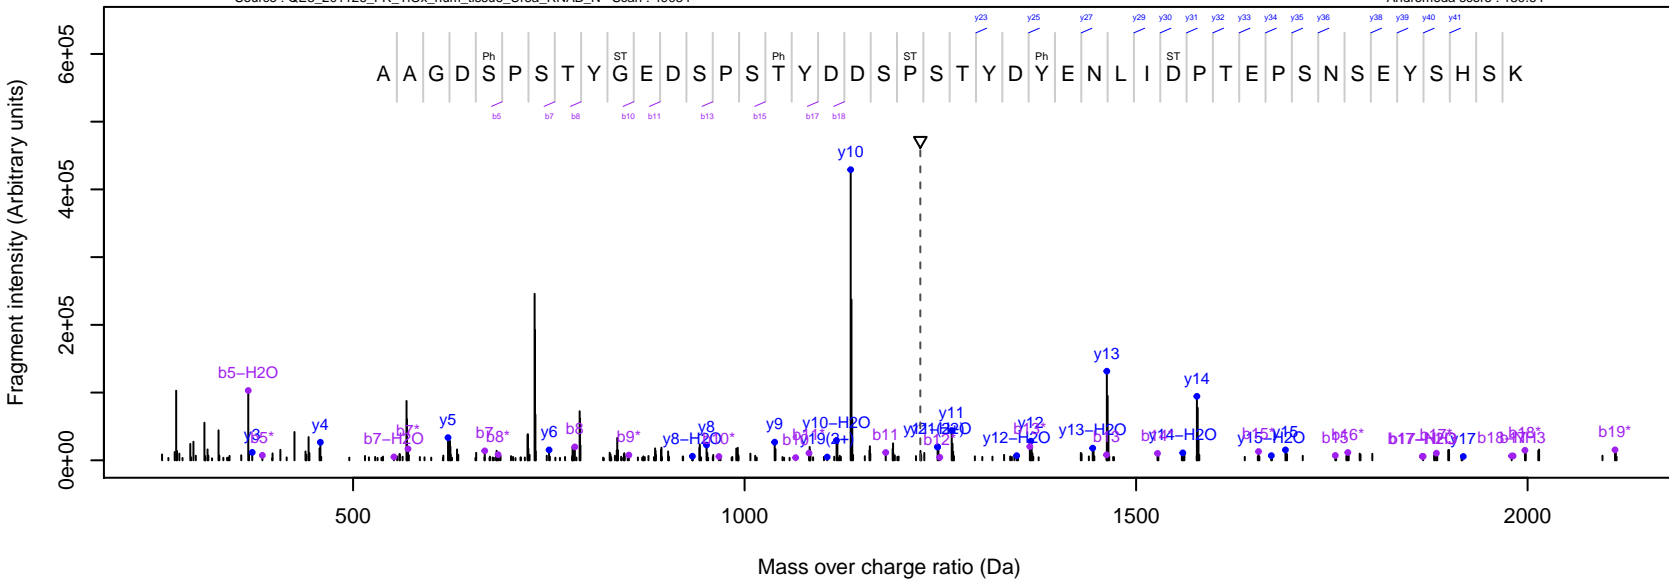

**GAS(Phospho (STY))PYGSLNNIADGLSSLTEHFSDLTLTSEAR-3+**

Source : QE3\_201126\_FR\_TIOx\_hum\_tissue\_Urea\_RNAB\_H Scan : 62215

Andromeda score : 130.64

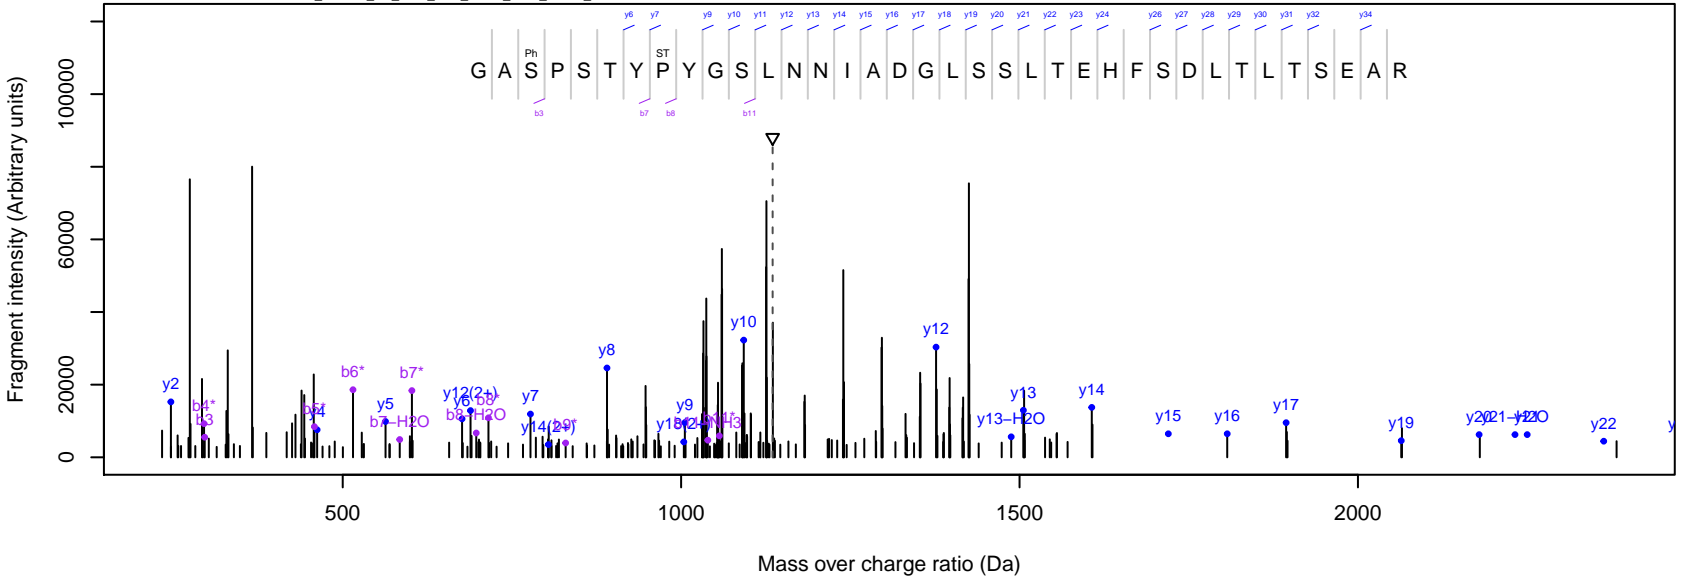

**AAS(Phospho (STY))QQEIEQSIETLNM(Oxidation (M))LMLDLEPASAAAPLHK-3+**

Source : QE3\_201126\_FR\_TIOx\_hum\_tissue\_Urea\_RNAB\_H Scan : 62615

Andromeda score : 130.62

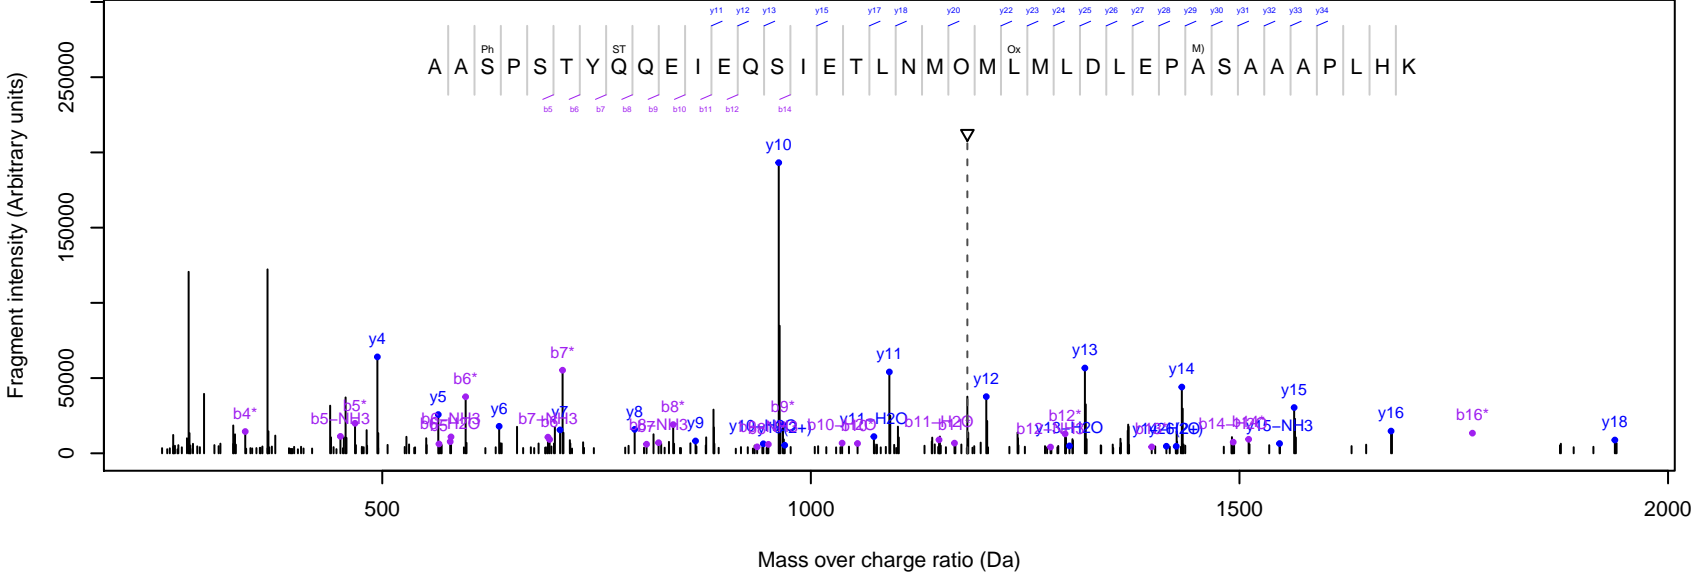

**IYGGG(Phospho (STY))VTGATCK-2+**

Source : QE3\_201126\_FR\_TIOx\_hum\_tissue\_Urea\_RNAB\_B Scan : 21061

Andromeda score : 130.61

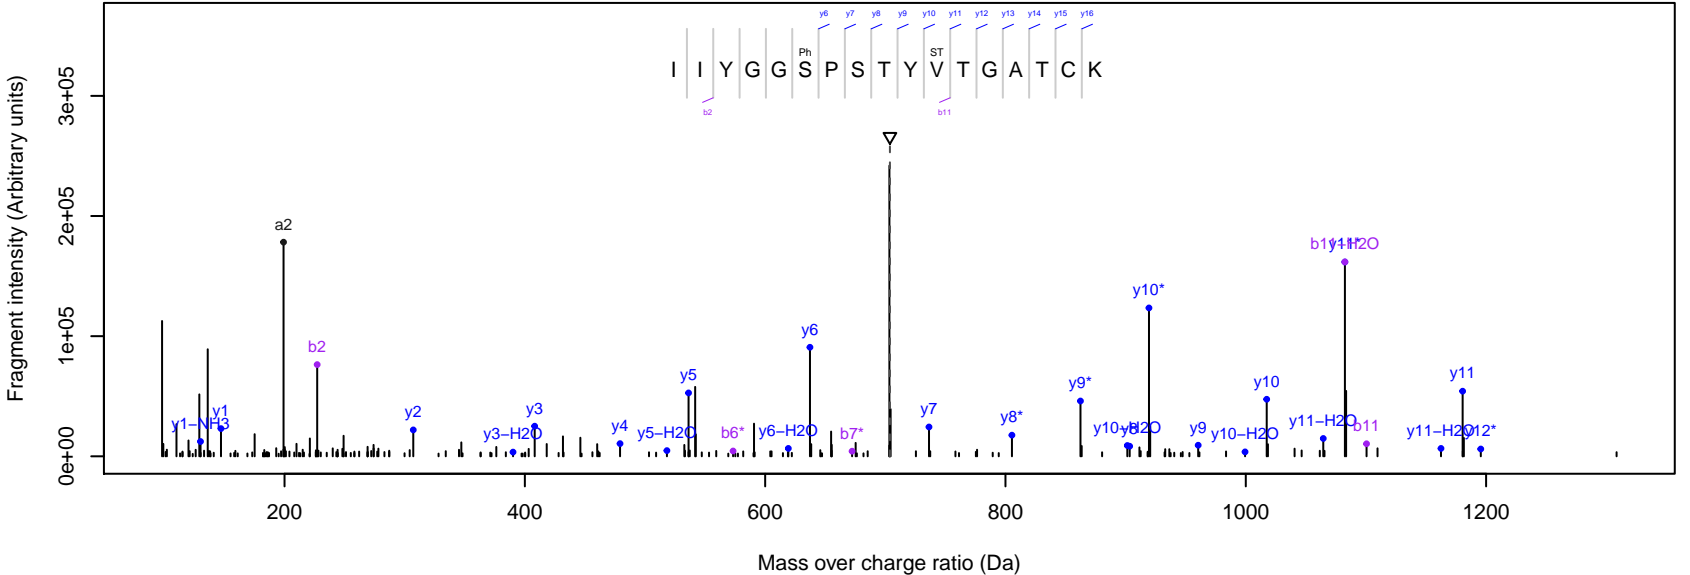



SNT(Phospho (STY))ISKPYISNTLPSDAPK-3+

Source : QE3\_201126\_FR\_TiOx\_hum\_tissue\_Urea\_RNAB\_B Scan : 25555

Andromeda score : 130.6

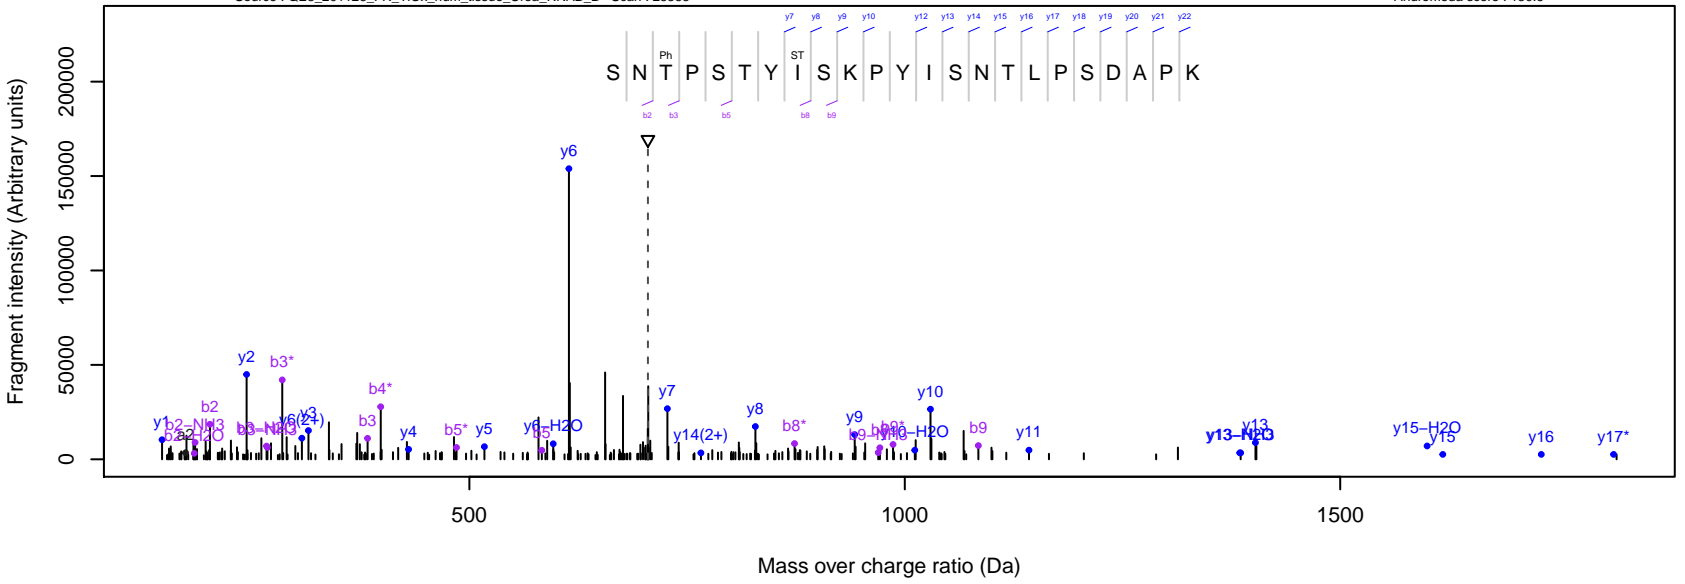

KFS(Phospho (STY))DAIQSKEEIR-3+

Source : QE3\_201126\_FR\_TiOx\_hum\_tissue\_Urea\_RNAB\_N Scan : 17551

Andromeda score : 130.56

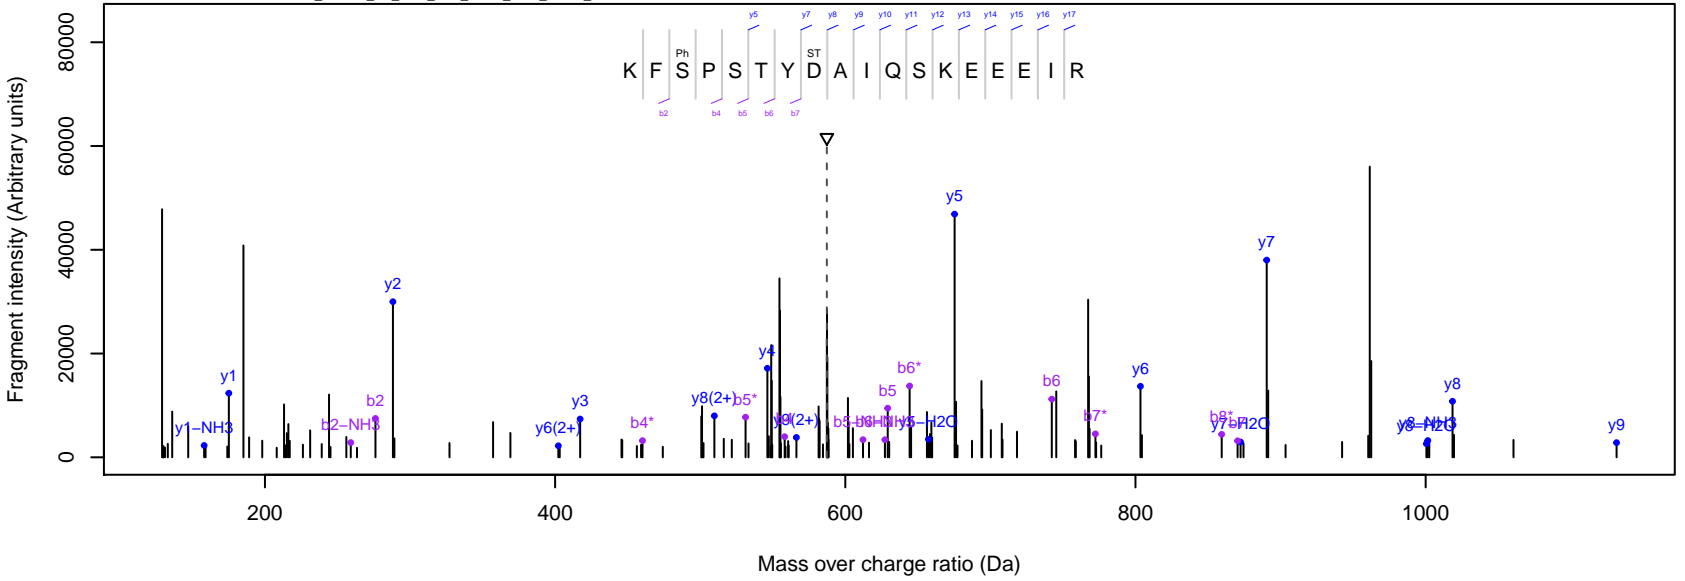

VSMPDVELNLKS(Phospho (STY))PK-3+

Source : QE3\_201126\_FR\_TiOx\_hum\_tissue\_Urea\_RNAB\_H Scan : 33259

Andromeda score : 130.56

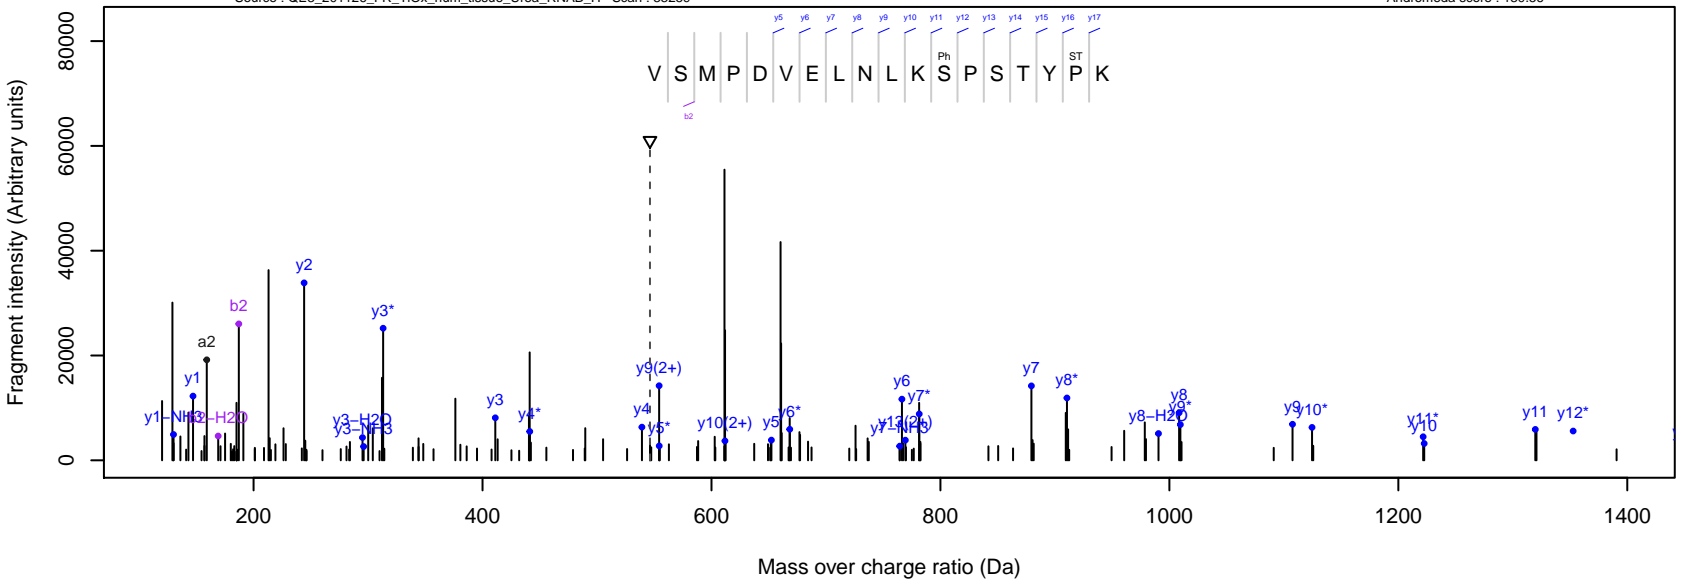

VTDALPEPEPPGAM(Oxidation (M))AAS(Phospho (STY))EDEEEEEALEAMQSR-3+

Source : QE3\_201126\_FR\_TIOx\_hum\_tissue\_Urea\_RNAB\_H Scan : 54076

Andromeda score : 130.52

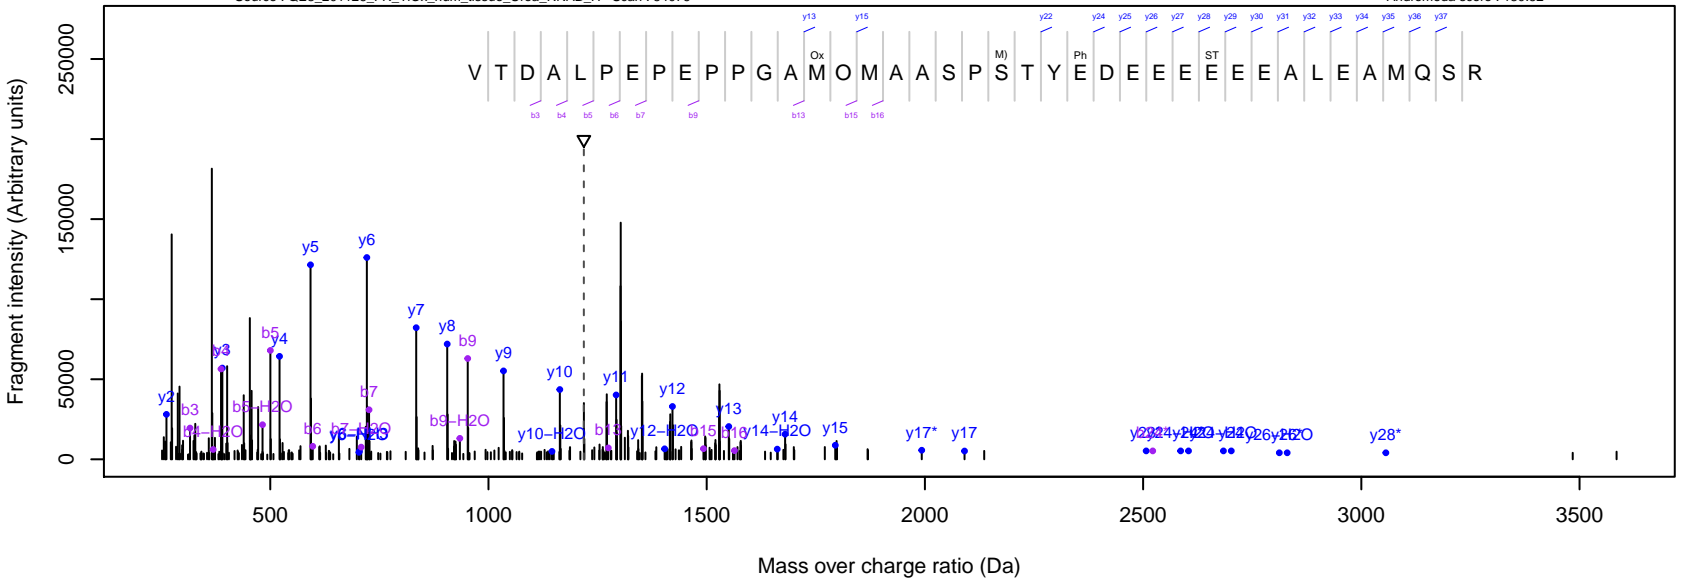

KREEEEEEGS(Phospho (STY))IMNGS(Phospho (STY))TAEDEEQTR-3+

Source : QE3\_201126\_FR\_TIOx\_hum\_tissue\_Urea\_RNAB\_N Scan : 16900

Andromeda score : 130.49

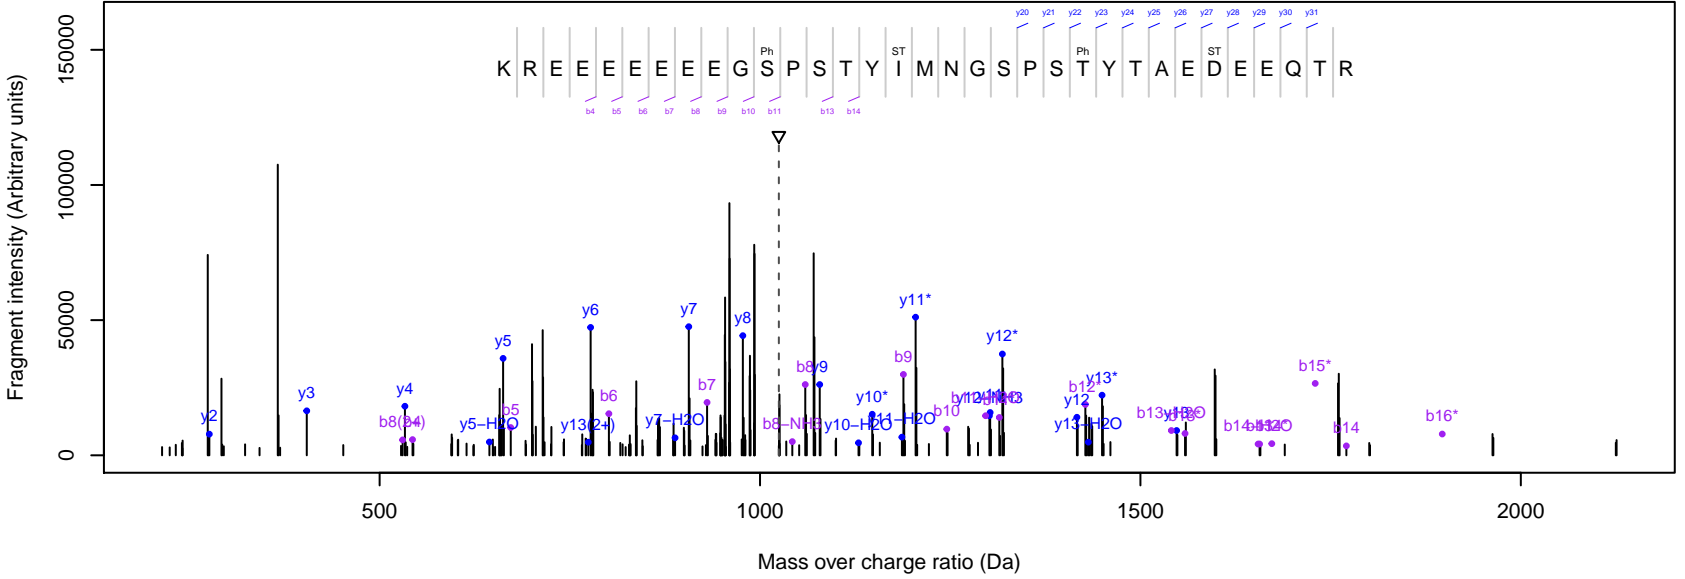

YGS(Phospho (STY))IVDDERLSAEEM(Oxidation (M))DER-3+

Source : QE3\_201126\_FR\_TIOx\_hum\_tissue\_Urea\_RNAB\_B Scan : 25726

Andromeda score : 130.49

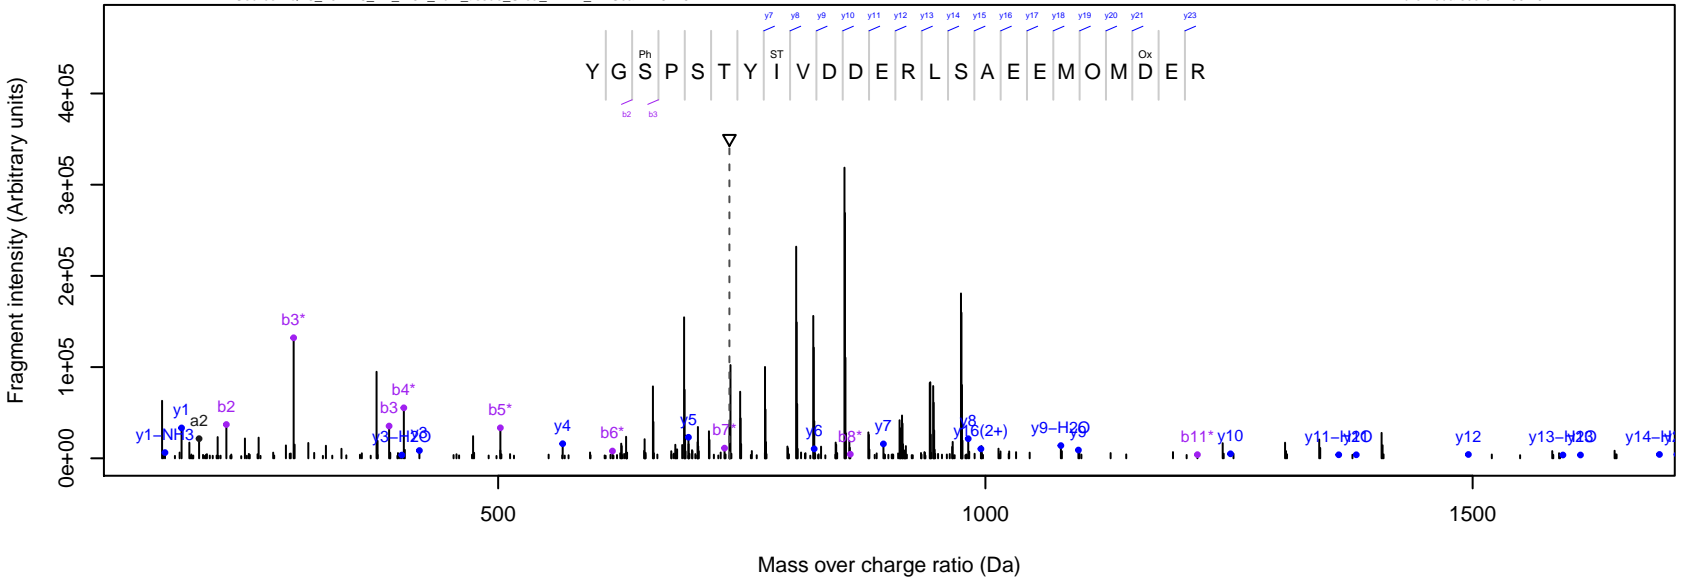

DVDAS(Phospho (STY))PSPLSVQDLK-2+

Source : QE3\_201126\_FR\_TiOx\_hum\_tissue\_Urea\_RNAB\_H Scan : 38524

Andromeda score : 130.47

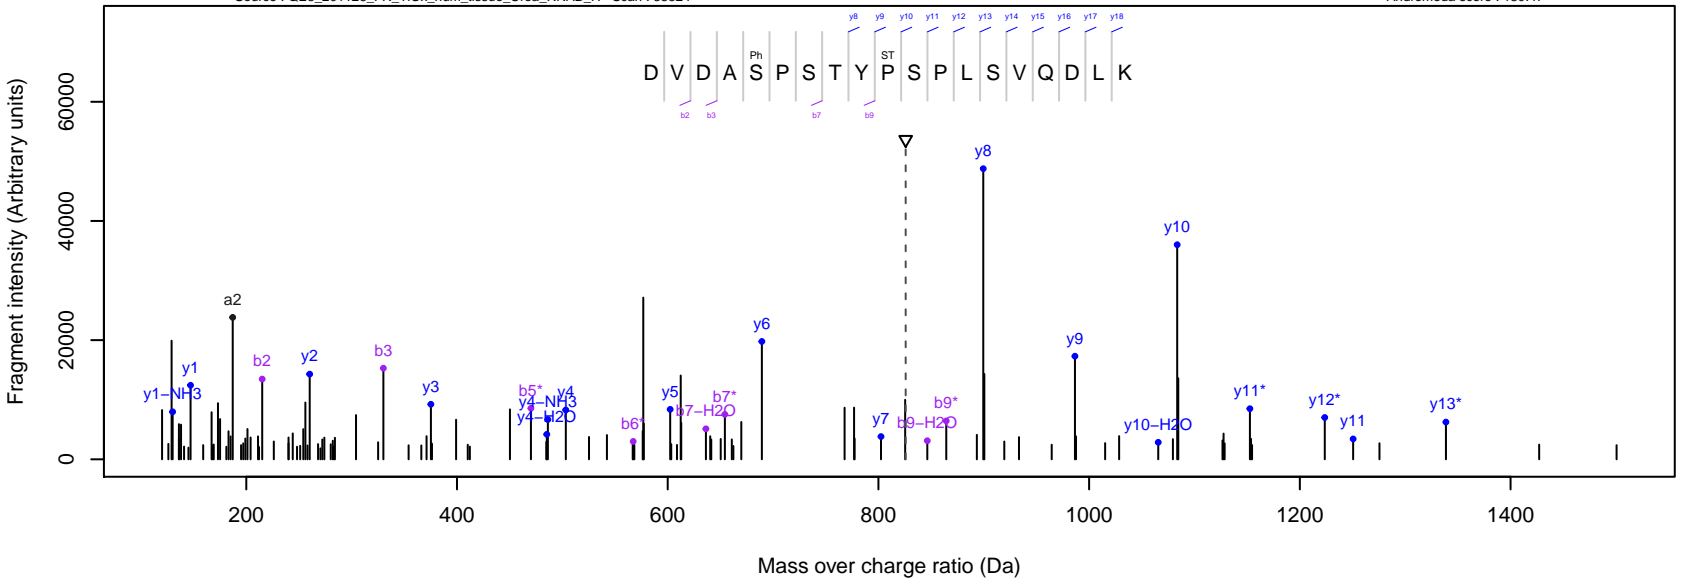

QS(Phospho (STY))LGELIGTLNAAK-2+

Source : QE3\_201126\_FR\_TiOx\_hum\_tissue\_Urea\_RNAB\_H Scan : 53254

Andromeda score : 130.47

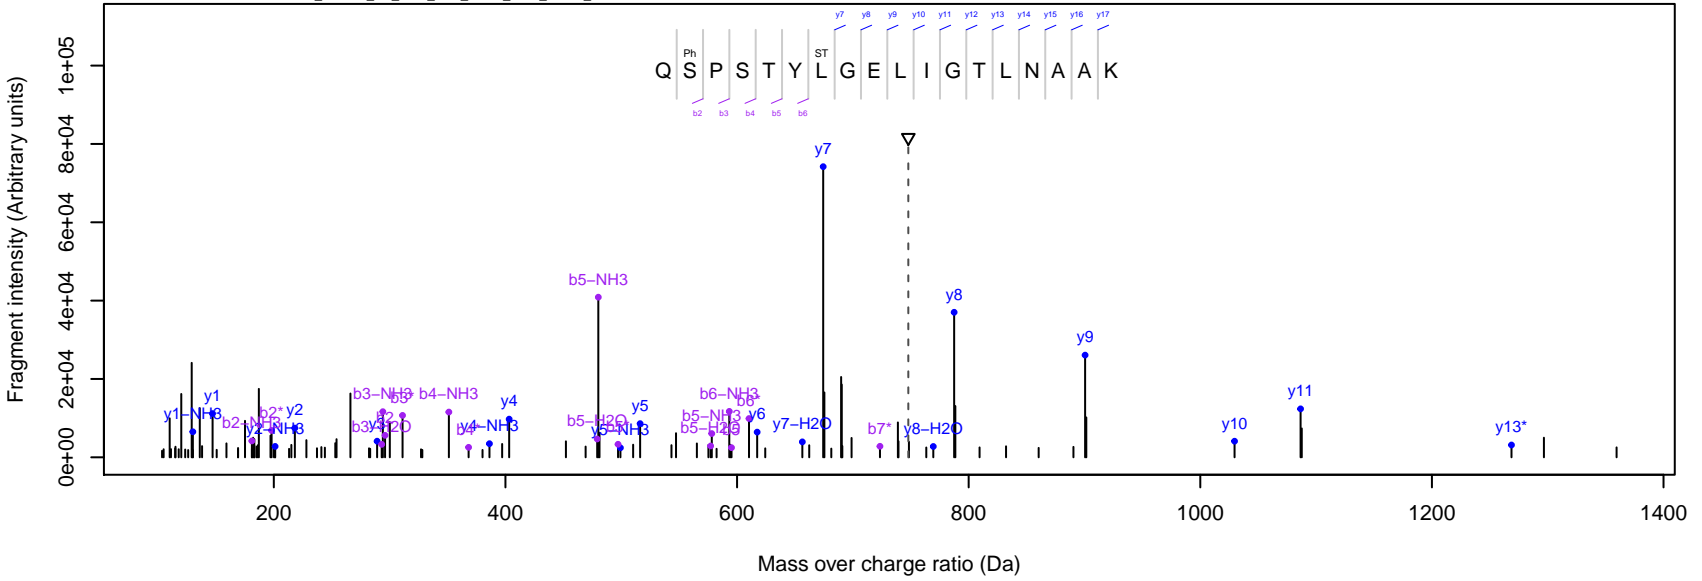

IDIS(Phospho (STY))PSTLRK-2+

Source : QE3\_201126\_FR\_TiOx\_hum\_tissue\_Urea\_RNAB\_N Scan : 20297

Andromeda score : 130.44

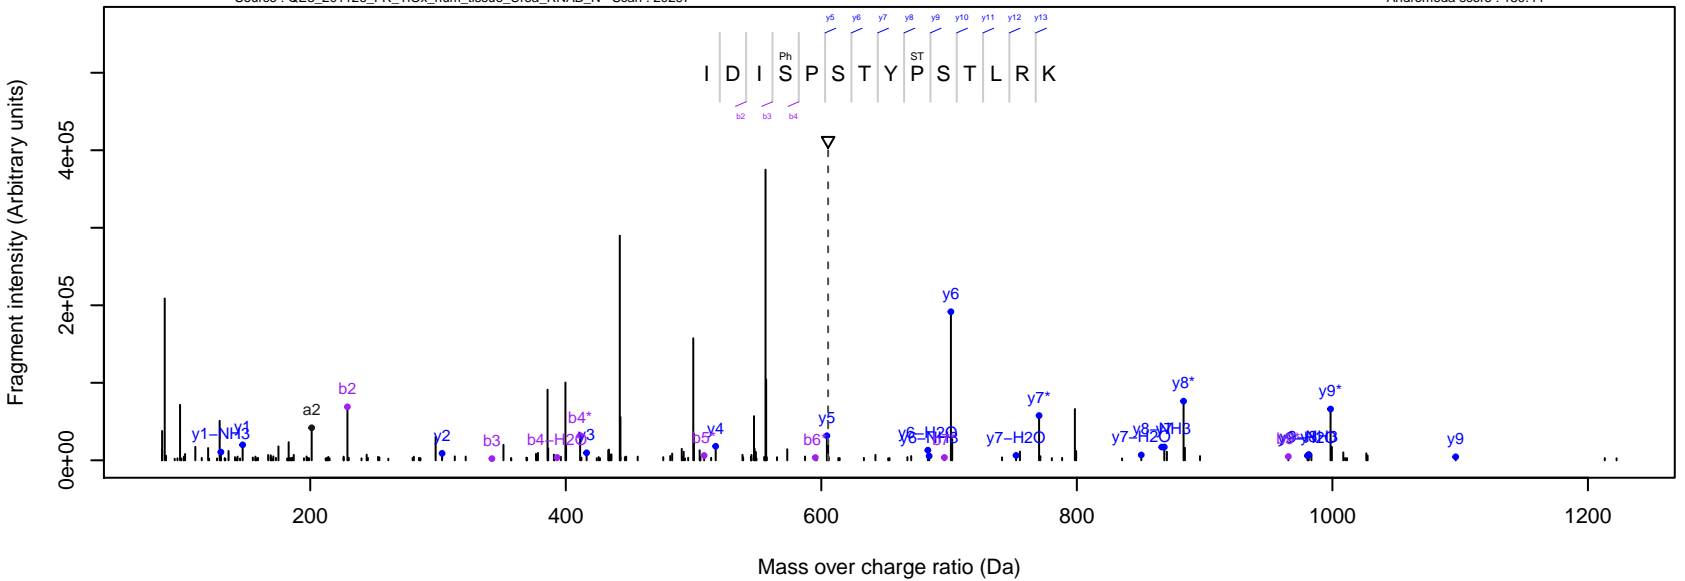

GLLSDS(Phospho (STY))MTDVPVDTGVAAR-2+

Source : QE3\_201126\_FR\_TiOx\_hum\_tissue\_Urea\_RNAB\_H Scan : 47121

Andromeda score : 130.4

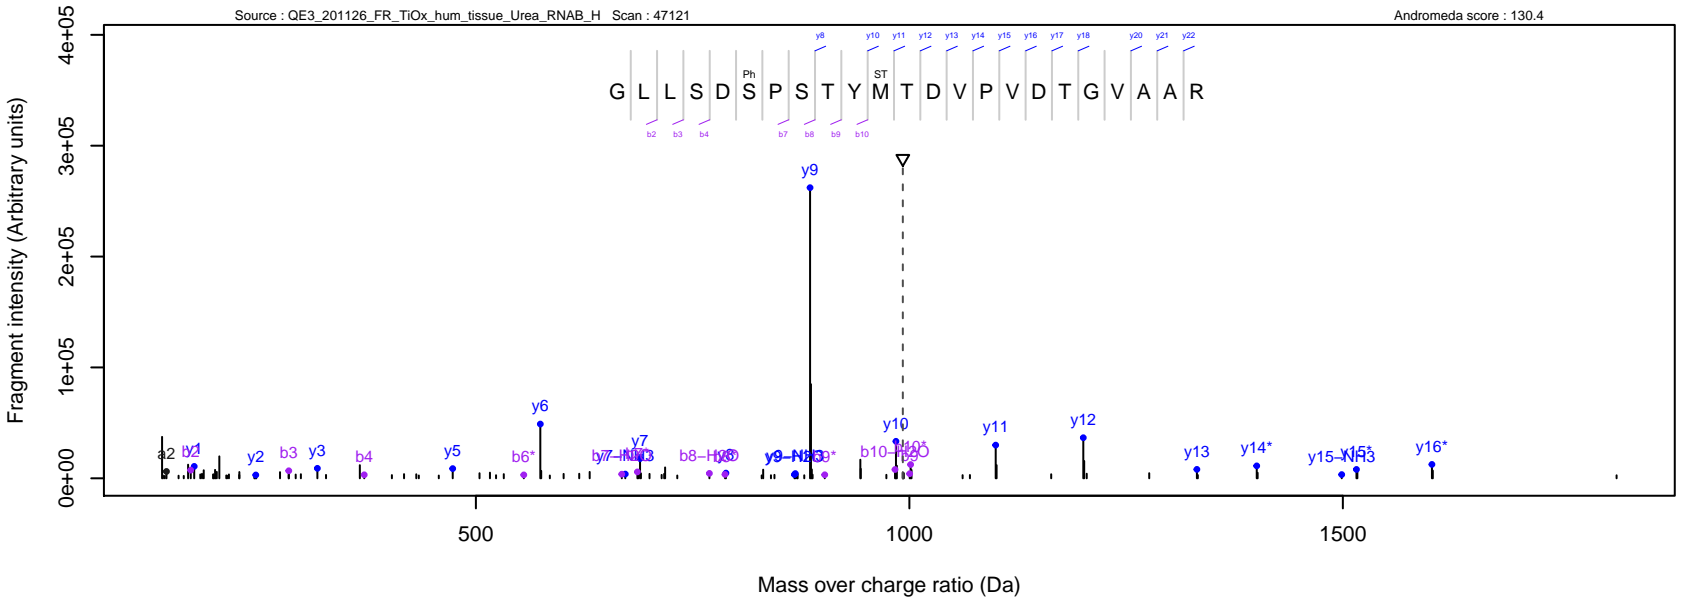

LSGQNAM(Oxidation (M))GS(Phospho (STY))QDS(Phospho (STY))LLEITFR-2+

Source : QE3\_201126\_FR\_TiOx\_hum\_tissue\_Urea\_RNAB\_B Scan : 58361

Andromeda score : 130.36

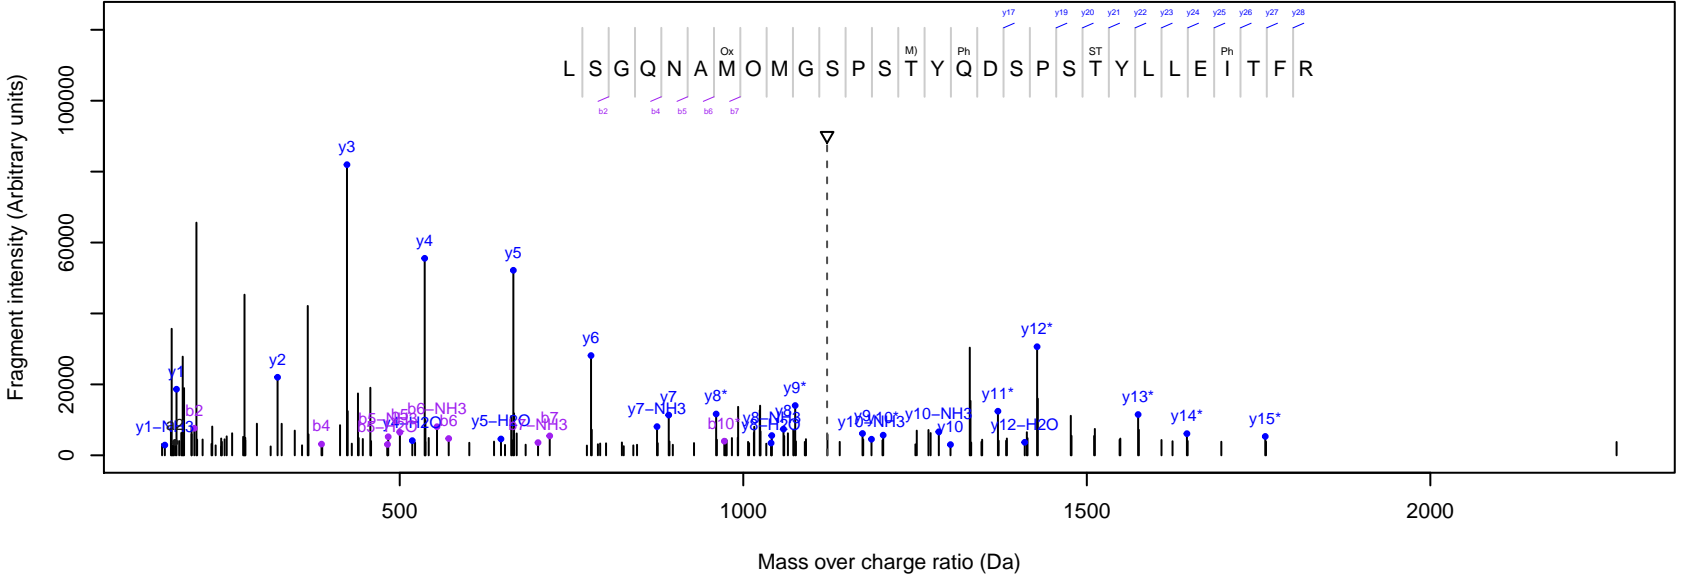

KQS(Phospho (STY))QQLELLESELR-3+

Source : QE3\_201126\_FR\_TiOx\_hum\_tissue\_Urea\_RNAB\_H Scan : 38760

Andromeda score : 130.27

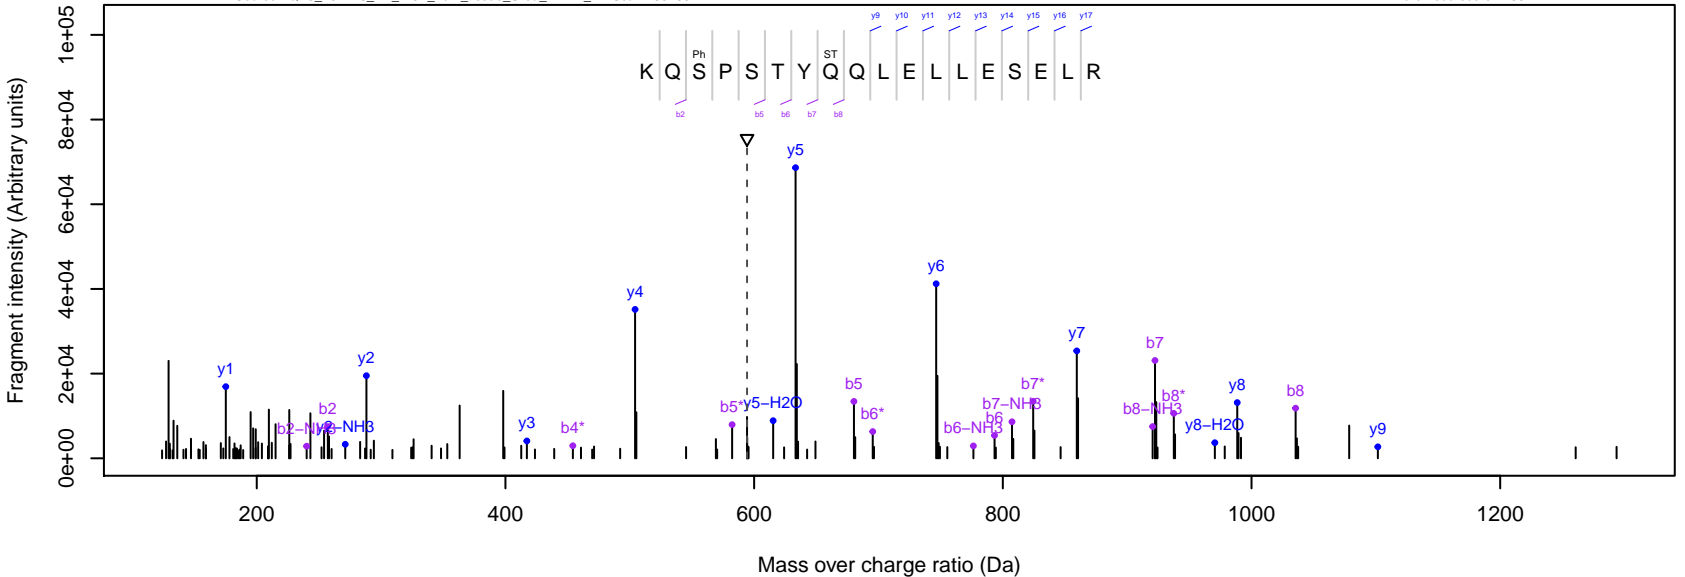

**SKT(Phospho (STY))PTGPELDTSYK-2+**

Source : QE3\_201126\_FR\_TiOx\_hum\_tissue\_Urea\_RNAB\_N Scan : 15183

Andromeda score : 130.27

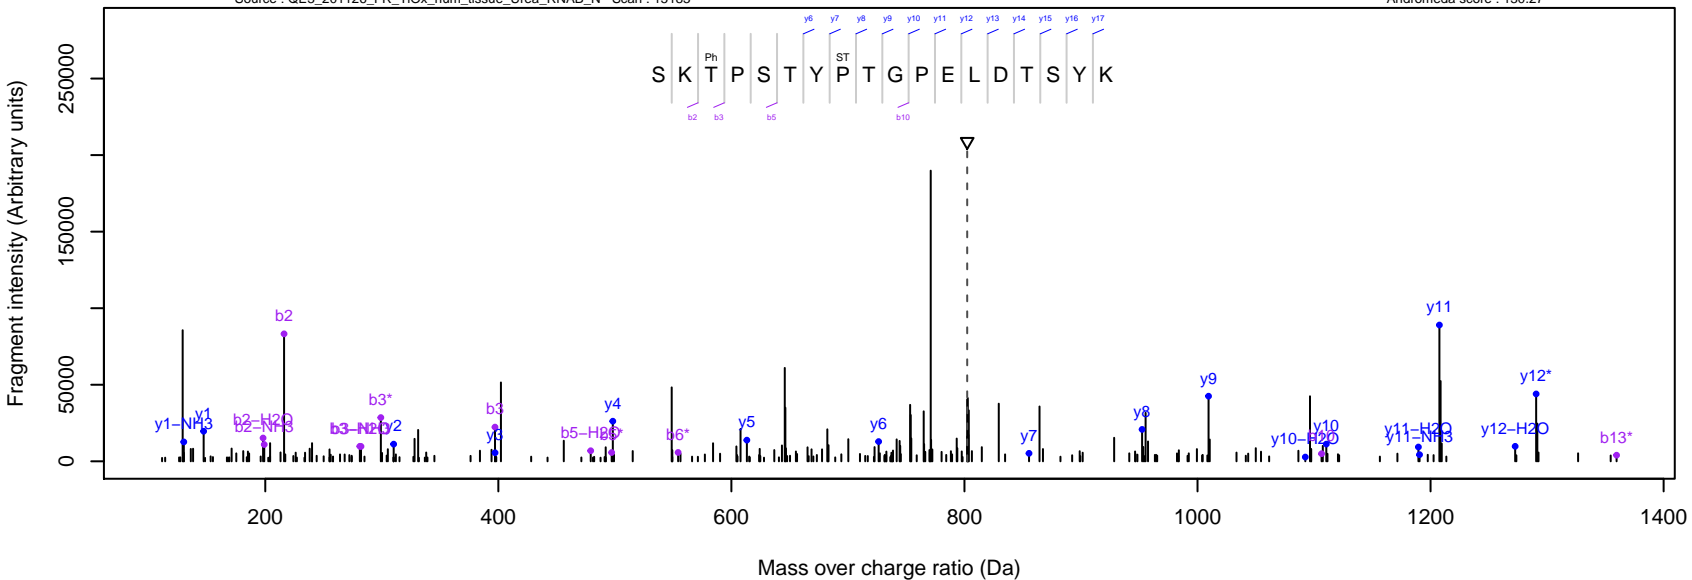

**KRGEAAS(Phospho (STY))GSGAELQEQAGCEAPEAAAPR-4+**

Source : QE3\_201126\_FR\_TiOx\_hum\_tissue\_Urea\_RNAB\_N Scan : 14366

Andromeda score : 130.26

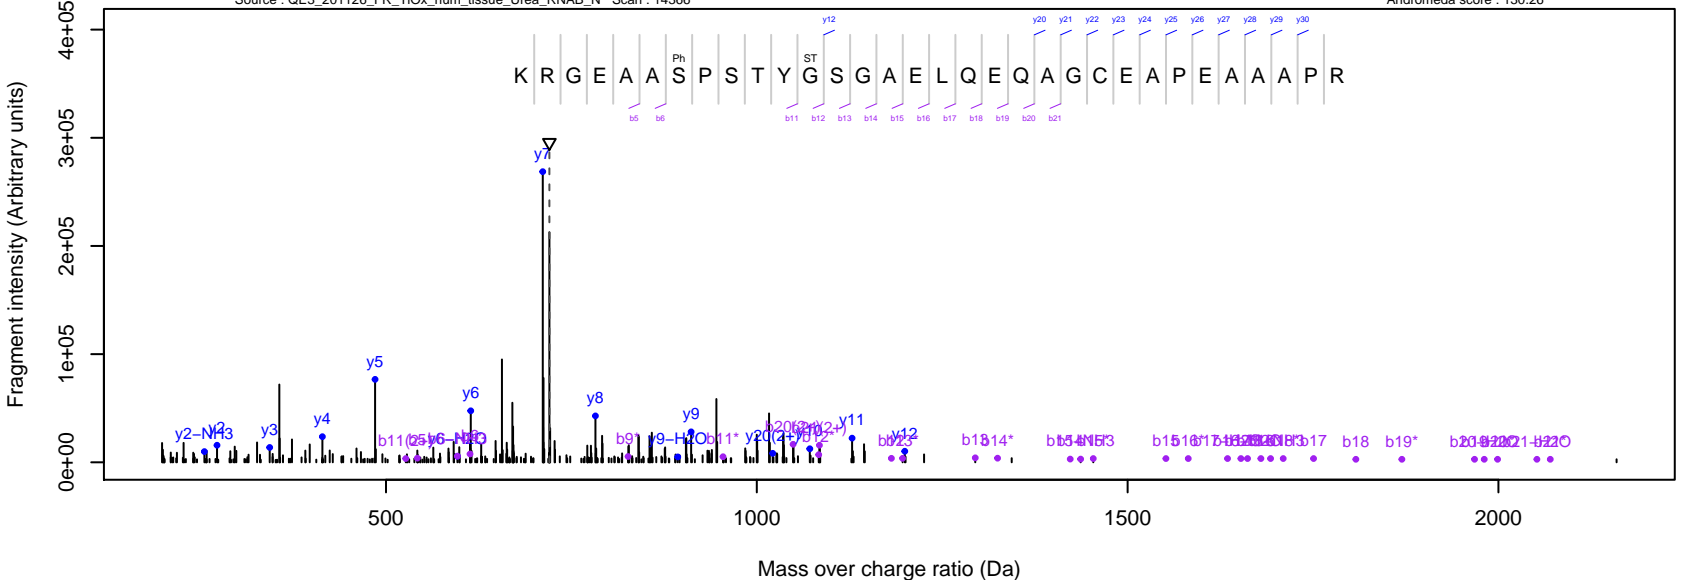

**ALDVSAS(Phospho (STY))DDEIAR-2+**

Source : QE3\_201126\_FR\_TiOx\_hum\_tissue\_Urea\_RNAB\_H Scan : 24804

Andromeda score : 130.24

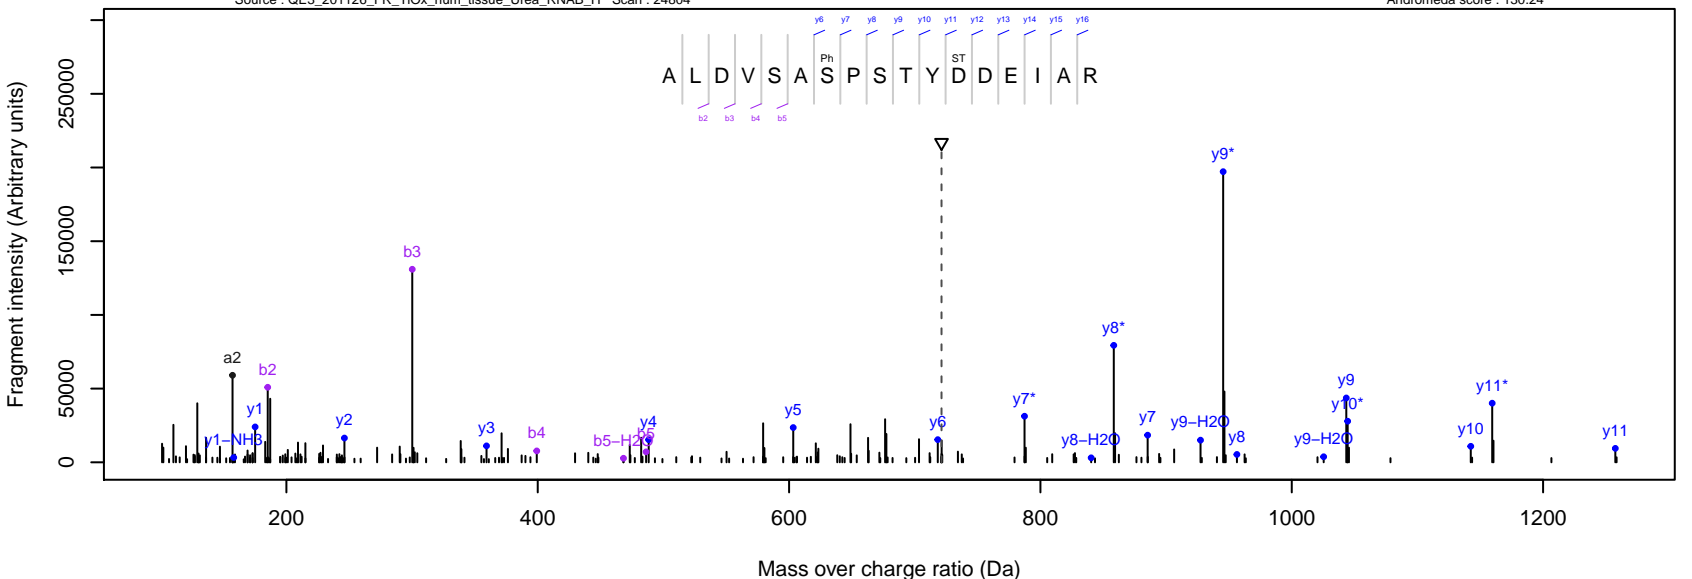

LSS(Phospho (STY))KLSAVS(Phospho (STY))LR-2+

Source : QE3\_201126\_FR\_TiOx\_hum\_tissue\_Urea\_RNAB\_N Scan : 25498

Andromeda score : 130.23

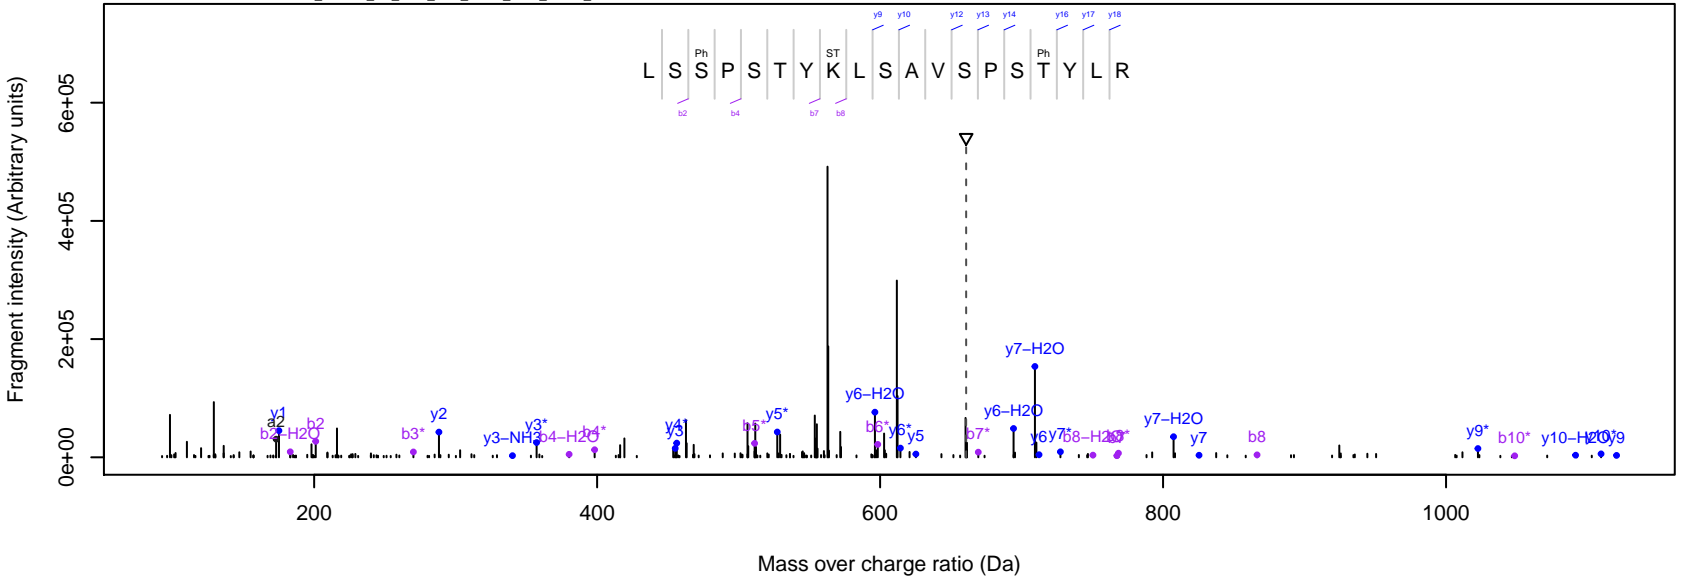

LNHVAAGLVS(Phospho (STY))PSLK-2+

Source : QE3\_201126\_FR\_TiOx\_hum\_tissue\_Urea\_RNAB\_N Scan : 23882

Andromeda score : 130.21

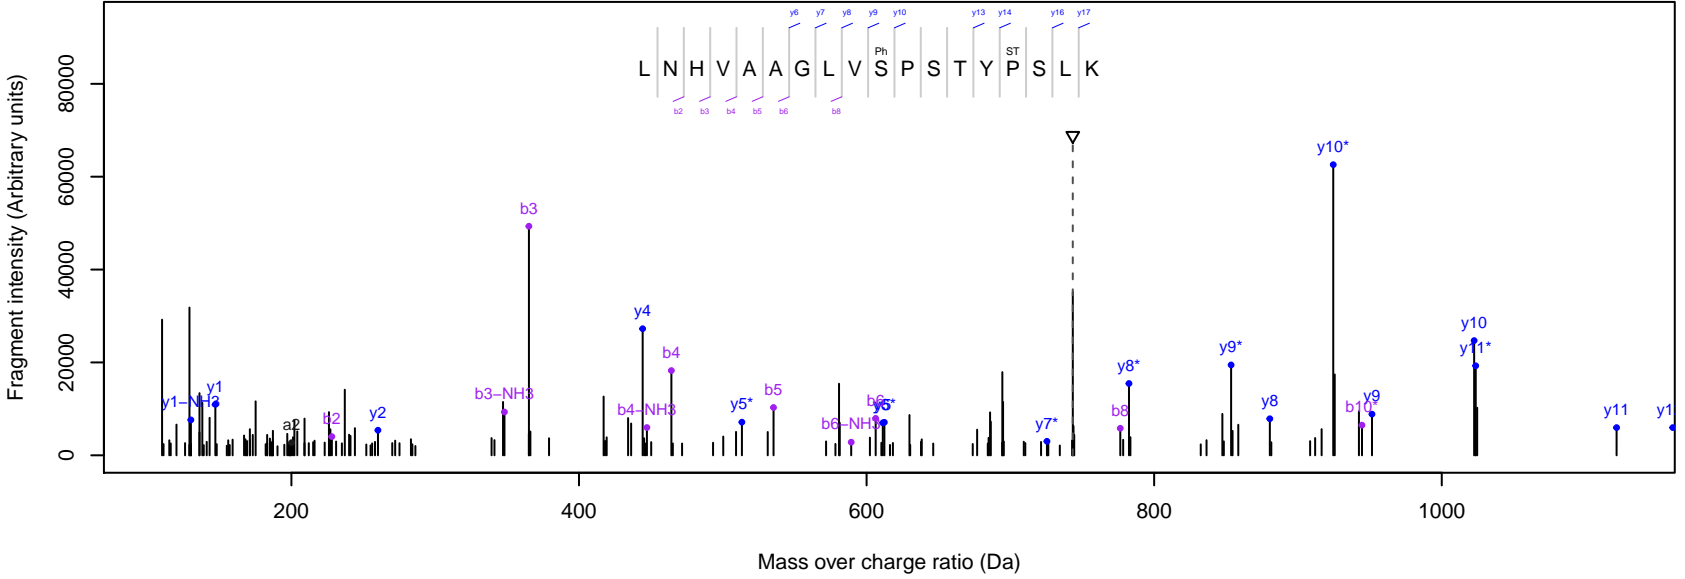

SDS(Phospho (STY))FENPVLQQHFR-3+

Source : QE3\_201126\_FR\_TiOx\_hum\_tissue\_Urea\_RNAB\_H Scan : 32618

Andromeda score : 130.21

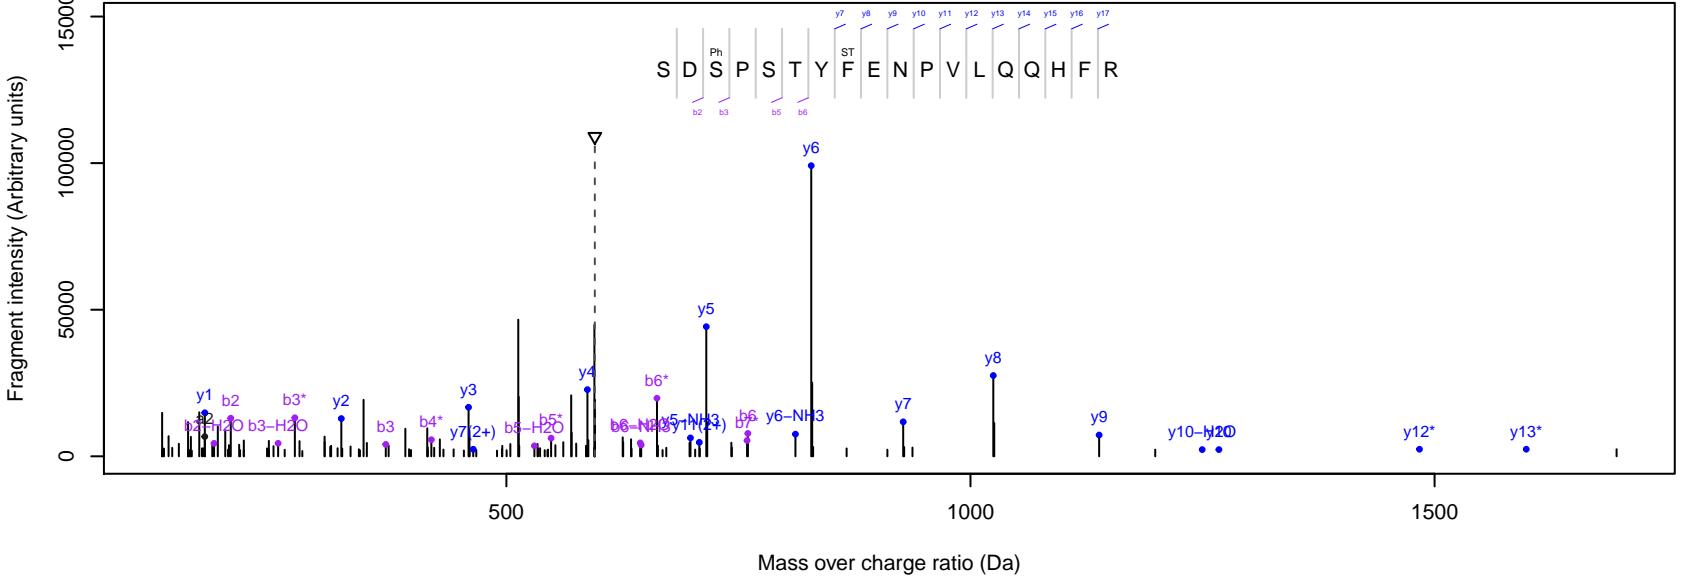

SLGGESS(Phospho (STY))GGTTPVGSFHTEAAR-3+

Source : QE3\_201126\_FR\_TiOx\_hum\_tissue\_Urea\_RNAB\_B Scan : 21453

Andromeda score : 130.15

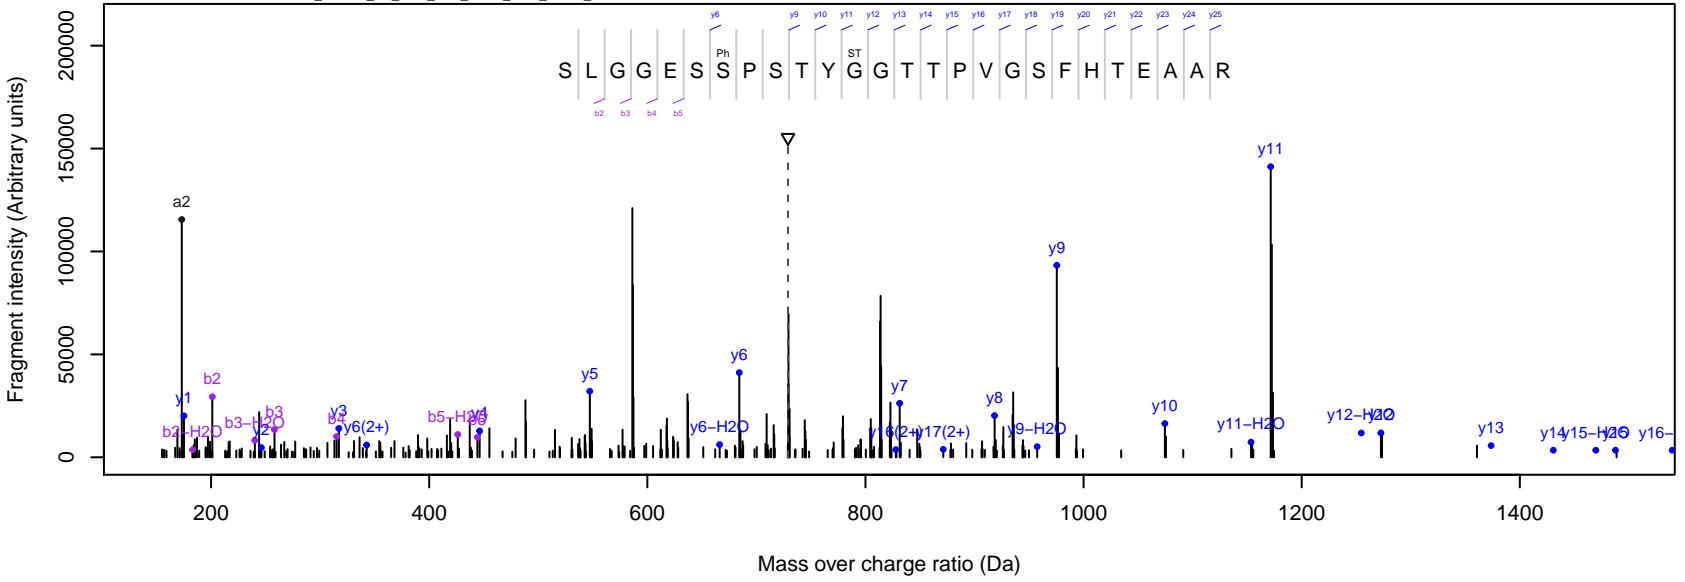

(Acetyl (Protein N-term))S(Phospho (STY))ETAPLAPTIPAPAEK-2+

Source : QE3\_201126\_FR\_TiOx\_hum\_tissue\_Urea\_RNAB\_H Scan : 47759

Andromeda score : 130.06

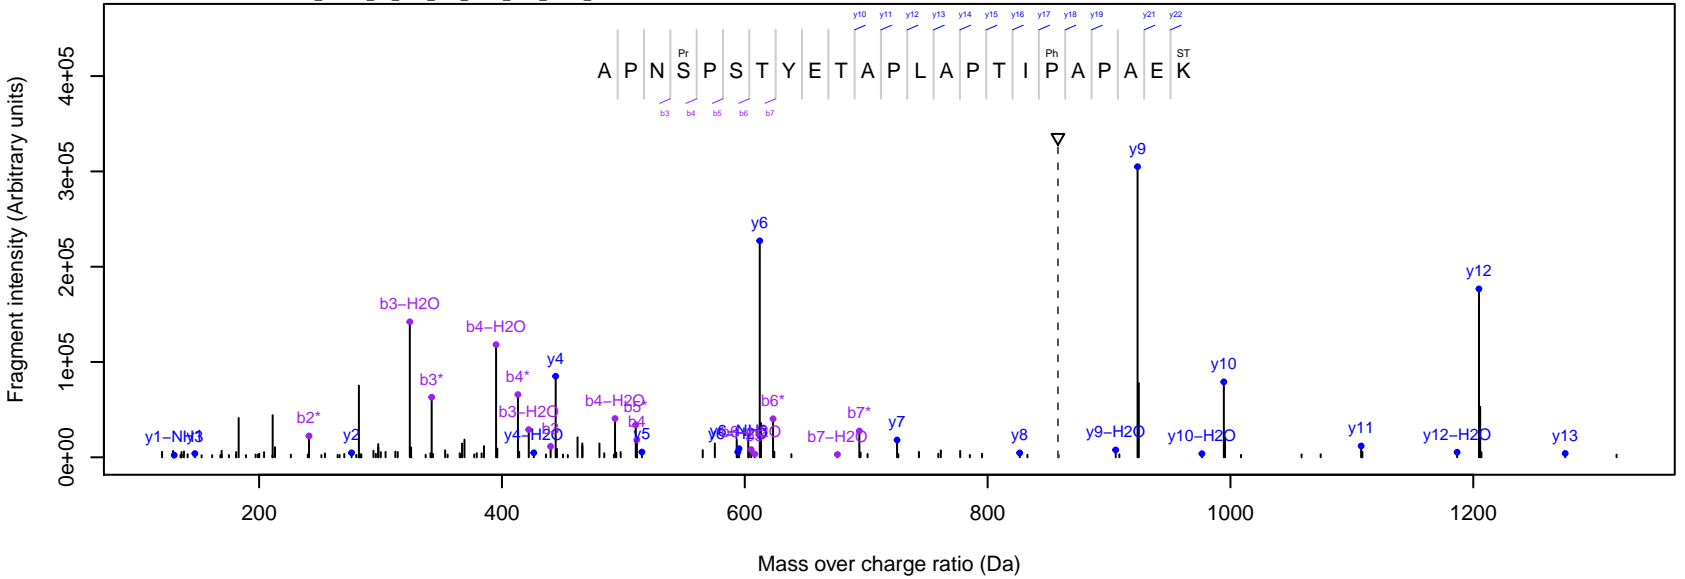

KFS(Phospho (STY))LDALITHVLPFEK-3+

Source : QE3\_201126\_FR\_TiOx\_hum\_tissue\_Urea\_RNAB\_H Scan : 58154

Andromeda score : 130.05

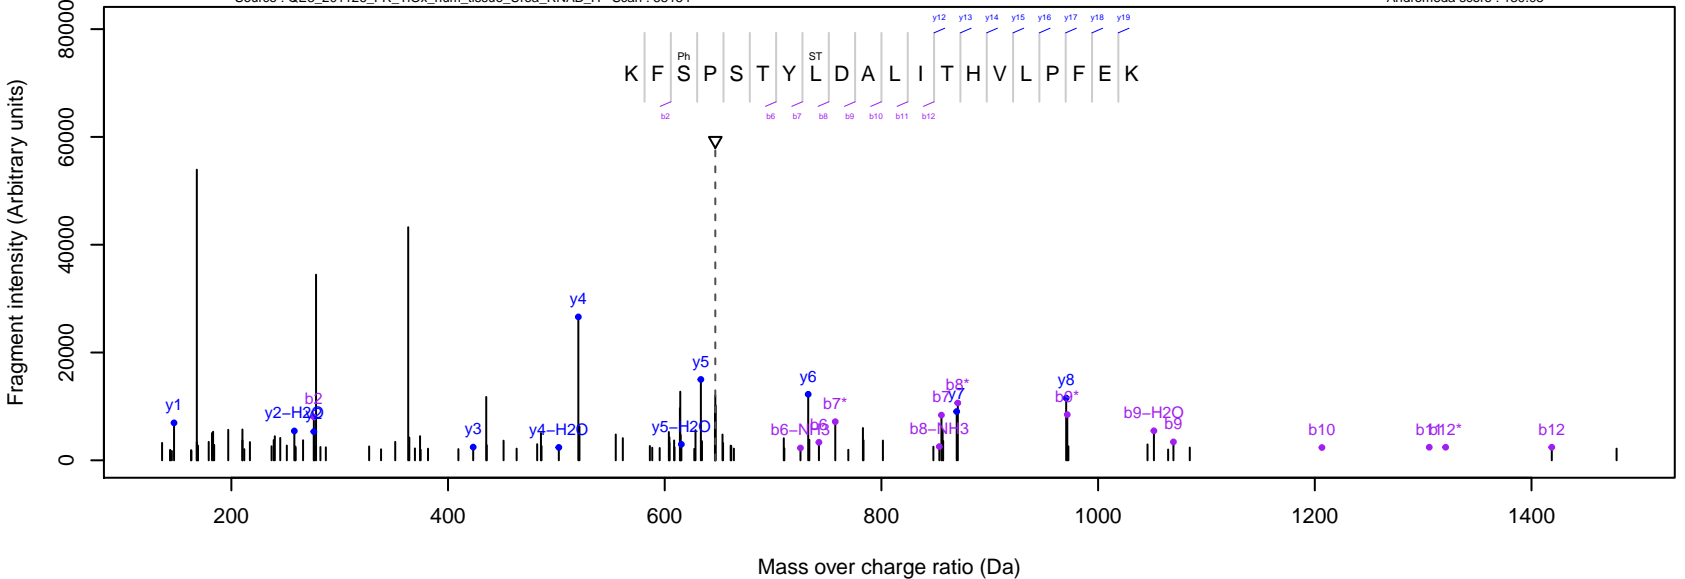

**KLS(Phospho (STY))LPTDLKPDLDVK-3+**

Source : QE3\_201126\_FR\_TiOx\_hum\_tissue\_Urea\_RNAB\_H Scan : 35427

Andromeda score : 130.05

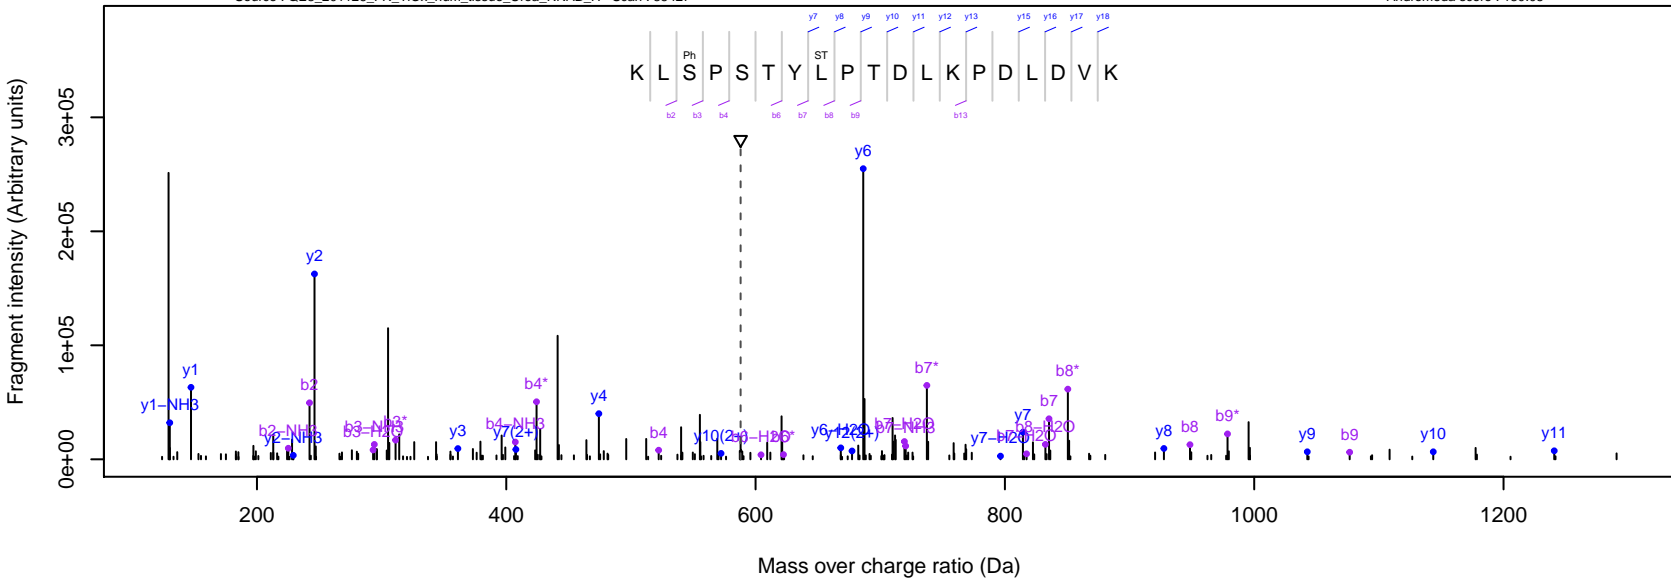

**VSQSALNPHQS(Phospho (STY))PDFKR-3+**

Source : QE3\_201126\_FR\_TiOx\_hum\_tissue\_Urea\_RNAB\_N Scan : 11821

Andromeda score : 130.05

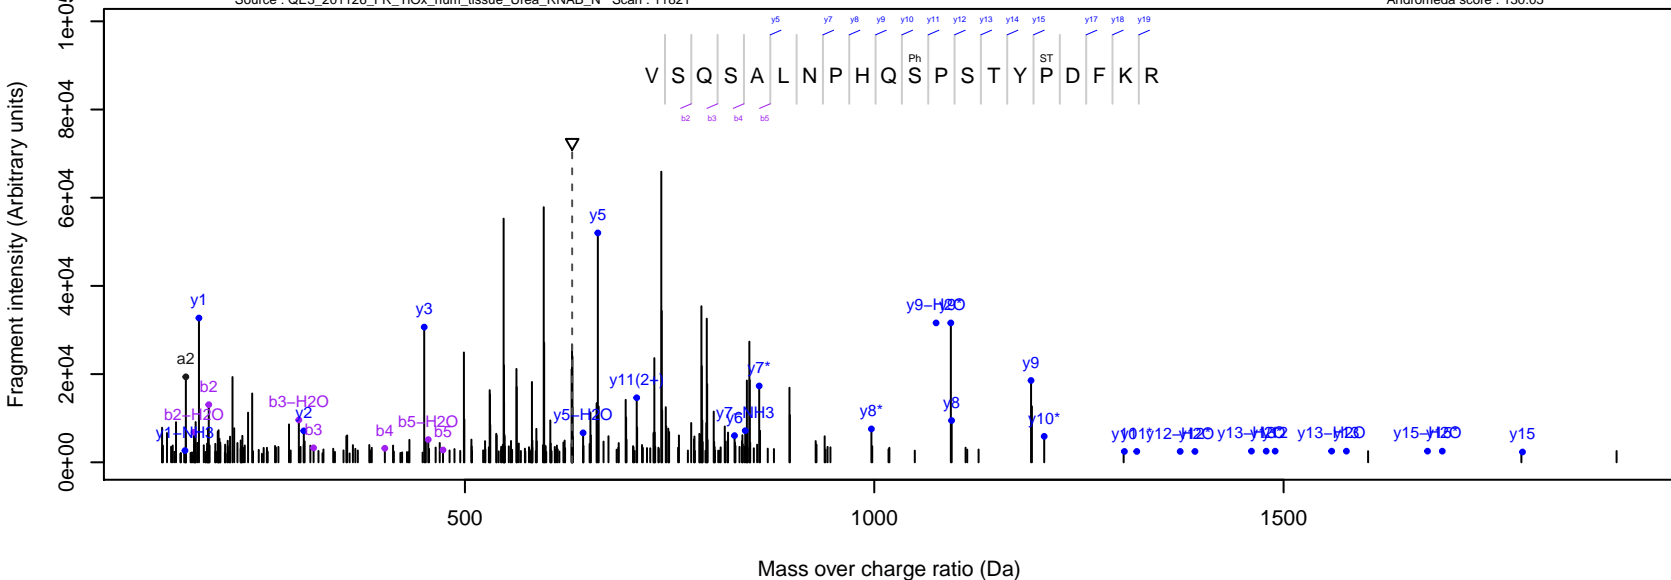

**NISS(Phospho (STY))SPSVES(Phospho (STY))LPGGR-2+**

Source : QE3\_201126\_FR\_TiOx\_hum\_tissue\_Urea\_RNAB\_N Scan : 28897

Andromeda score : 130.02

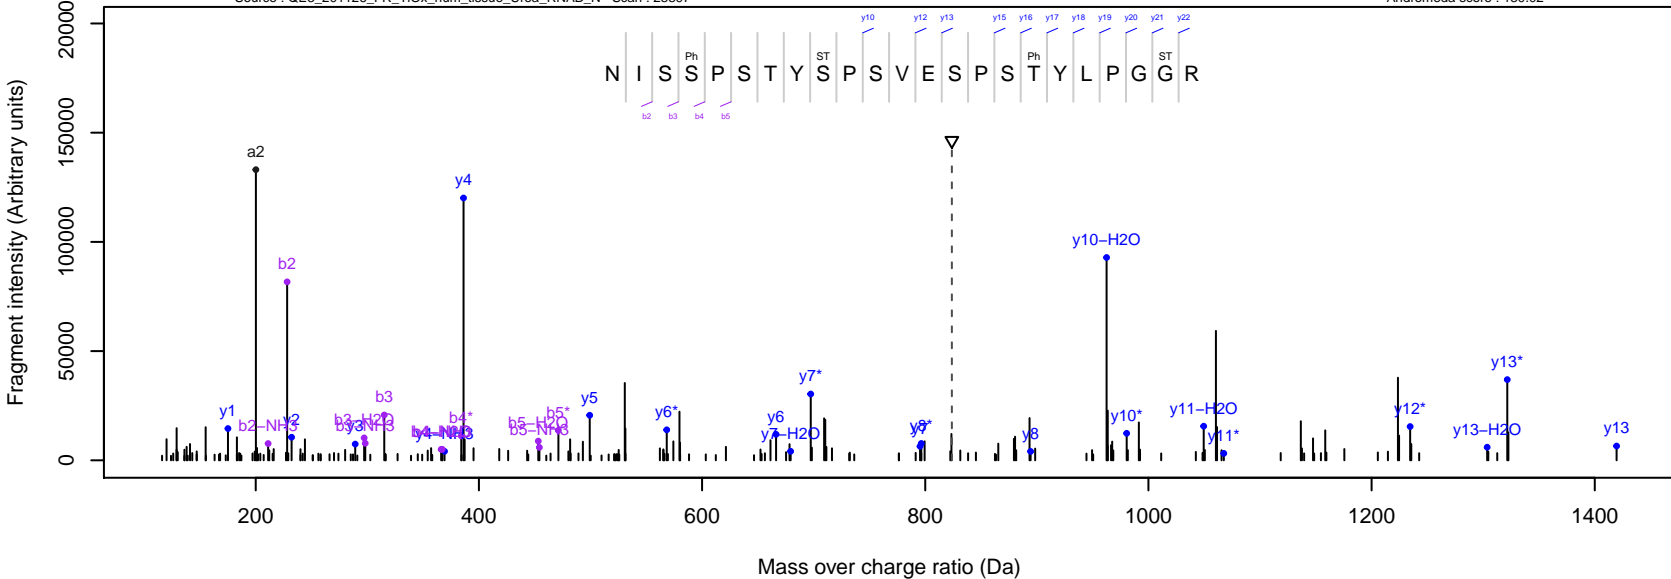



ARS(Phospho (STY))PSVAM(Oxidation (M))ASPQLCR-3+

Source : QE3\_201126\_FR\_TIOx\_hum\_tissue\_Urea\_RNAB\_N Scan : 14265

Andromeda score : 130.01

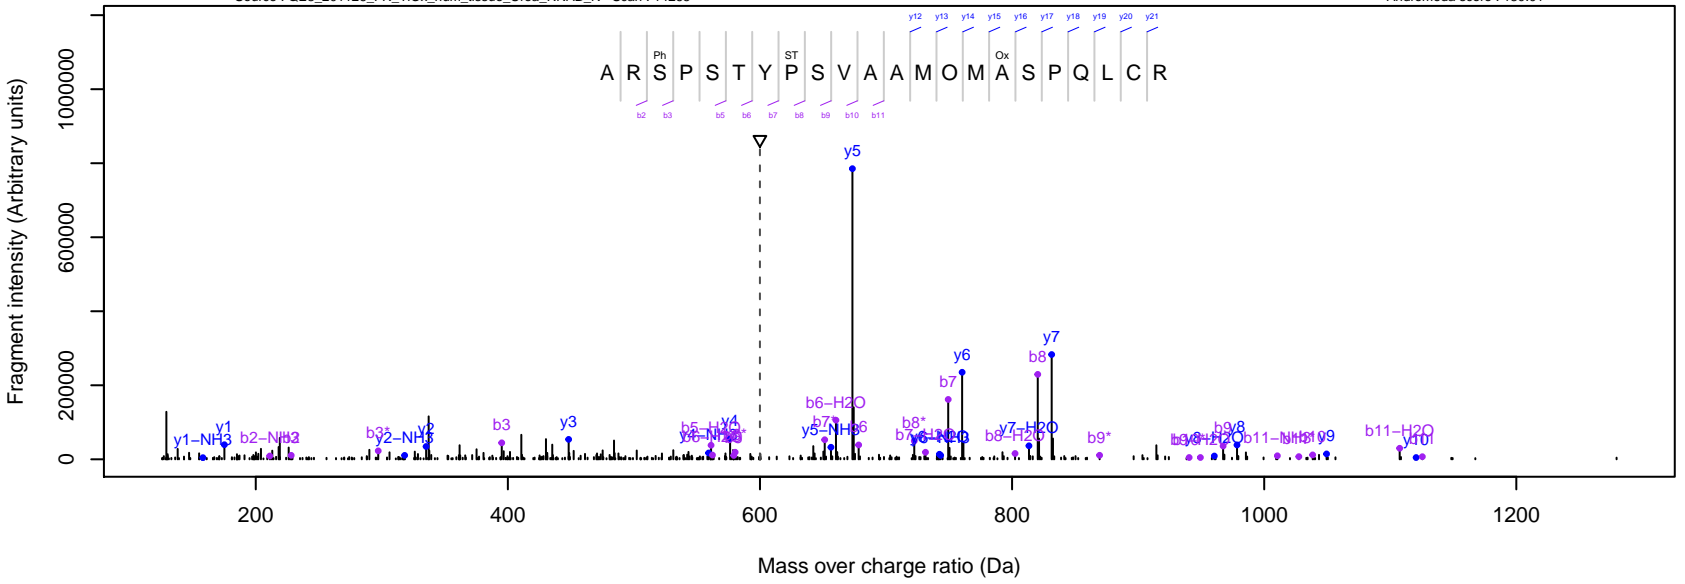

RAQVLATIHGAGFPAAGDAGEGAPGGGS(Phospho (STY))SPER-4+

Source : QE3\_201126\_FR\_TIOx\_hum\_tissue\_Urea\_RNAB\_H Scan : 22832

Andromeda score : 129.91

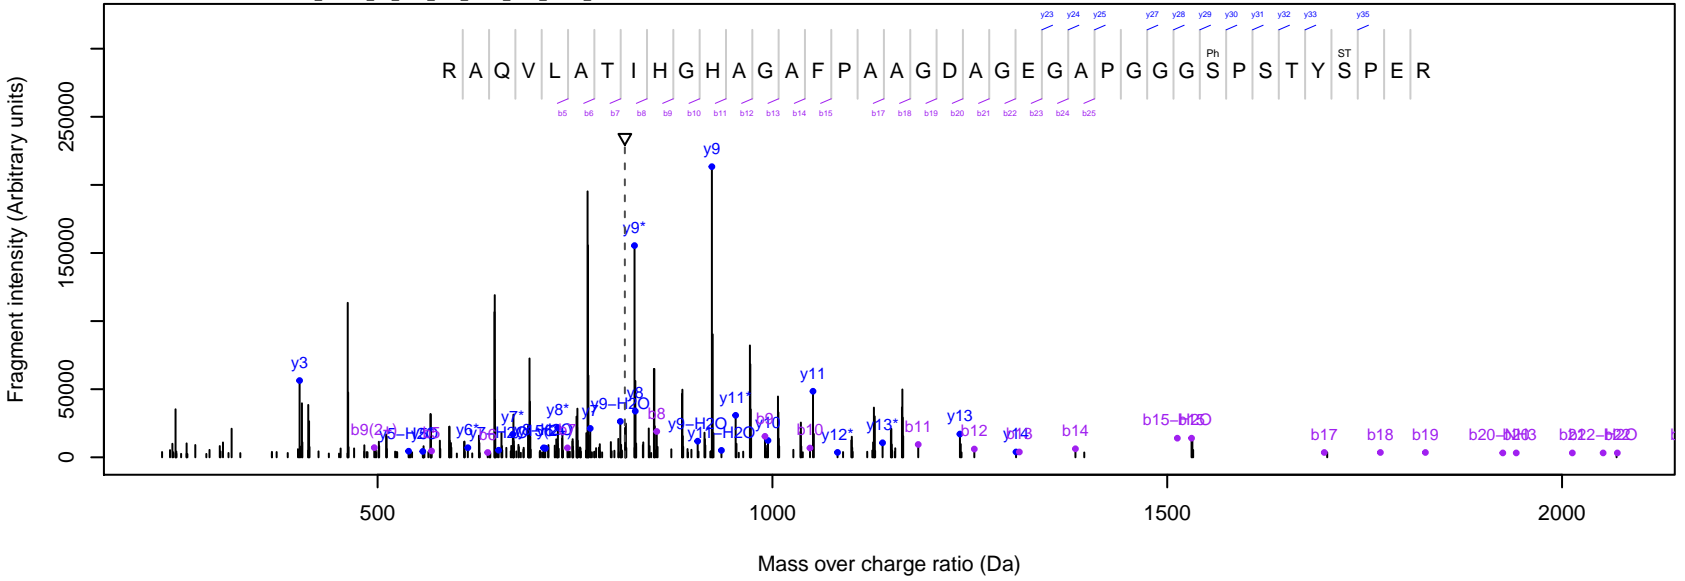

ADHRS(Phospho (STY))SPNVANQPSPGGK-3+

Source : QE3\_201126\_FR\_TIOx\_hum\_tissue\_Urea\_RNAB\_N Scan : 6081

Andromeda score : 129.9

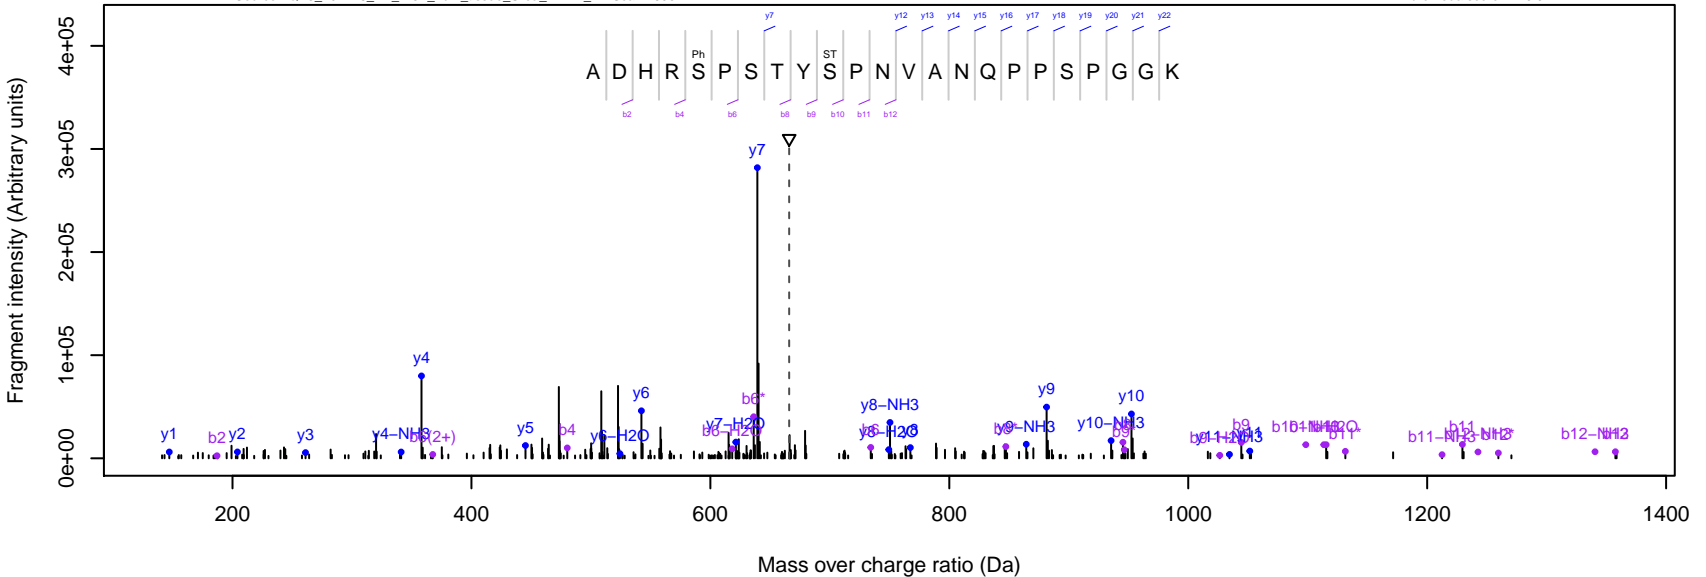

DIDHETVVEEQIIGENS(Phospho (STY))PPDYSEYMTGK-3+

Source : QE3\_201126\_FR\_TiOx\_hum\_tissue\_Urea\_RNAB\_N Scan : 51213

Andromeda score : 129.9

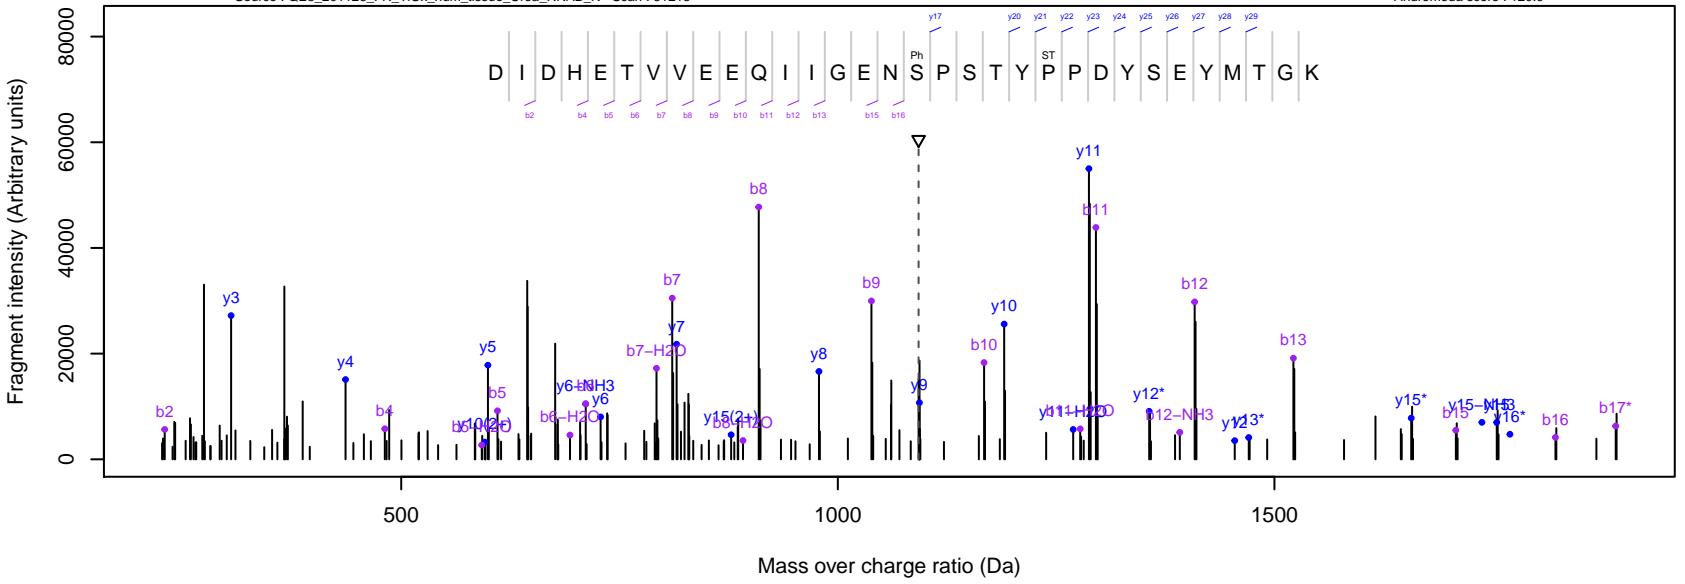

IQFTSLYHKEEAPAS(Phospho (STY))PLRPLYQISPLK-4+

Source : QE3\_201126\_FR\_TiOx\_hum\_tissue\_Urea\_RNAB\_H Scan : 44497

Andromeda score : 129.9

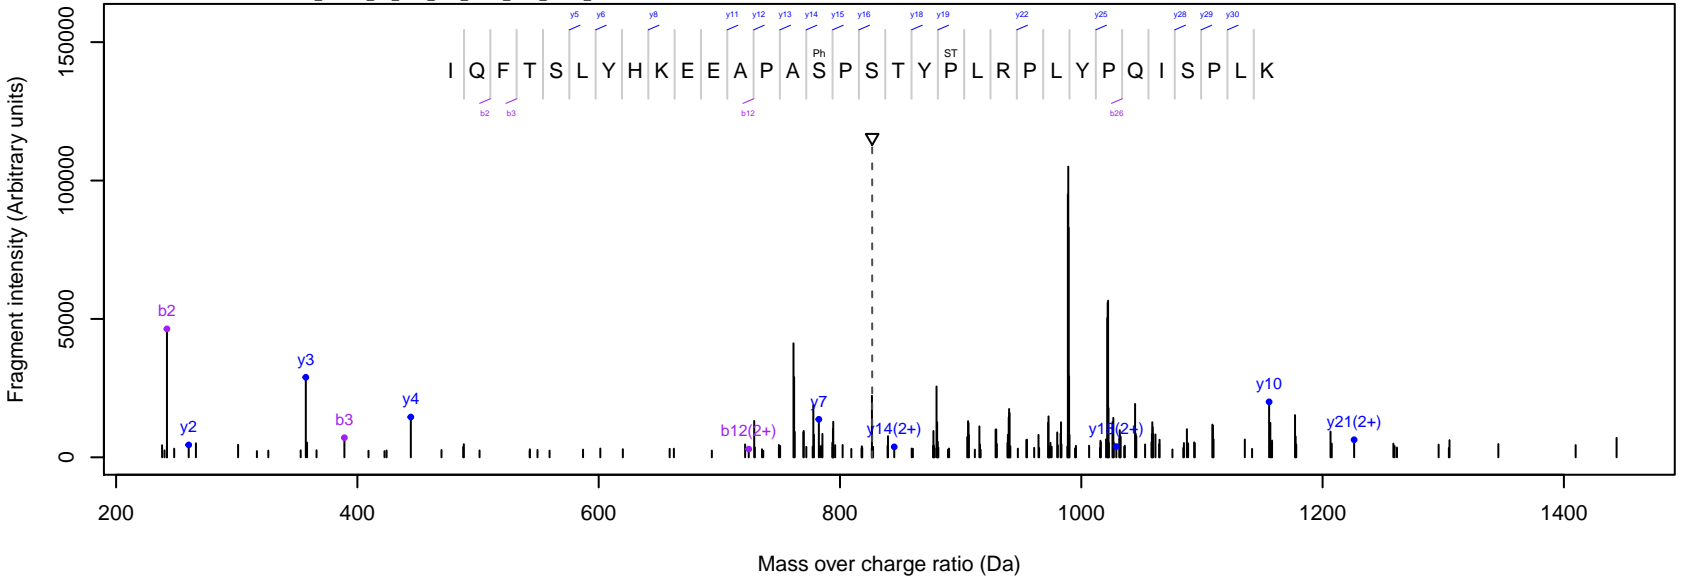

RFS(Phospho (STY))IATLR-2+

Source : QE3\_201126\_FR\_TiOx\_hum\_tissue\_Urea\_RNAB\_N Scan : 24980

Andromeda score : 129.89

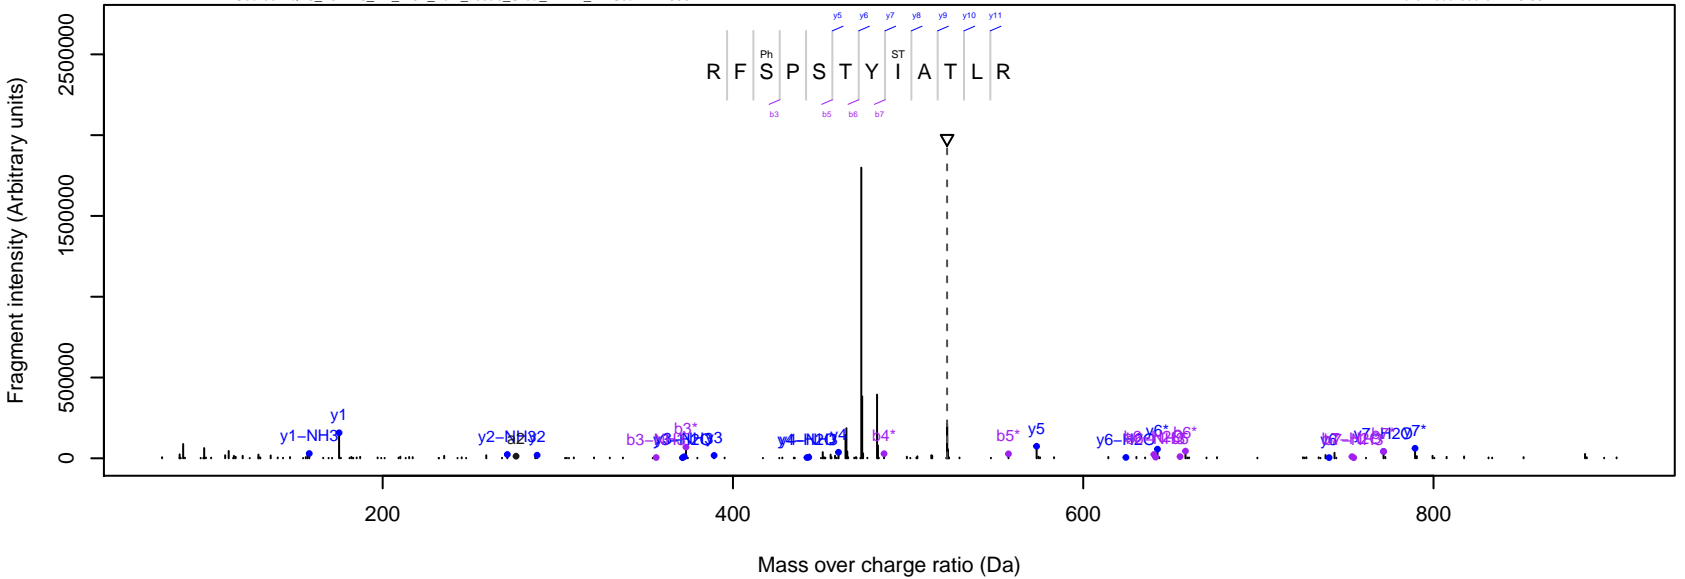

SEPVKEESELEQPF(AQDTSST)VGPD-3+

Source : QE3\_201126\_FR\_TiOx\_hum\_tissue\_Urea\_RNAB\_H Scan : 29591

Andromeda score : 129.88

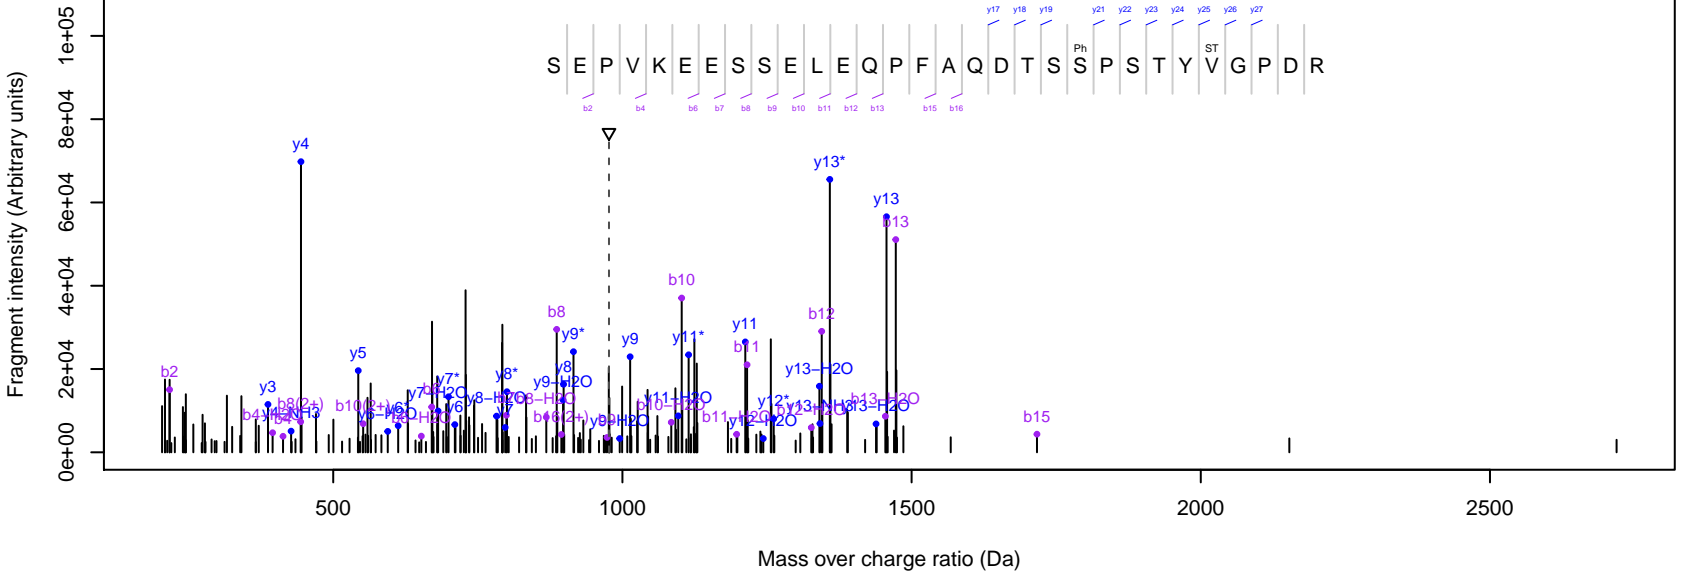

TAS(Phospho(STY))EINFDKLFEPPLRK-3+

Source : QE3\_201126\_FR\_TiOx\_hum\_tissue\_Urea\_RNAB\_N Scan : 39544

Andromeda score : 129.84

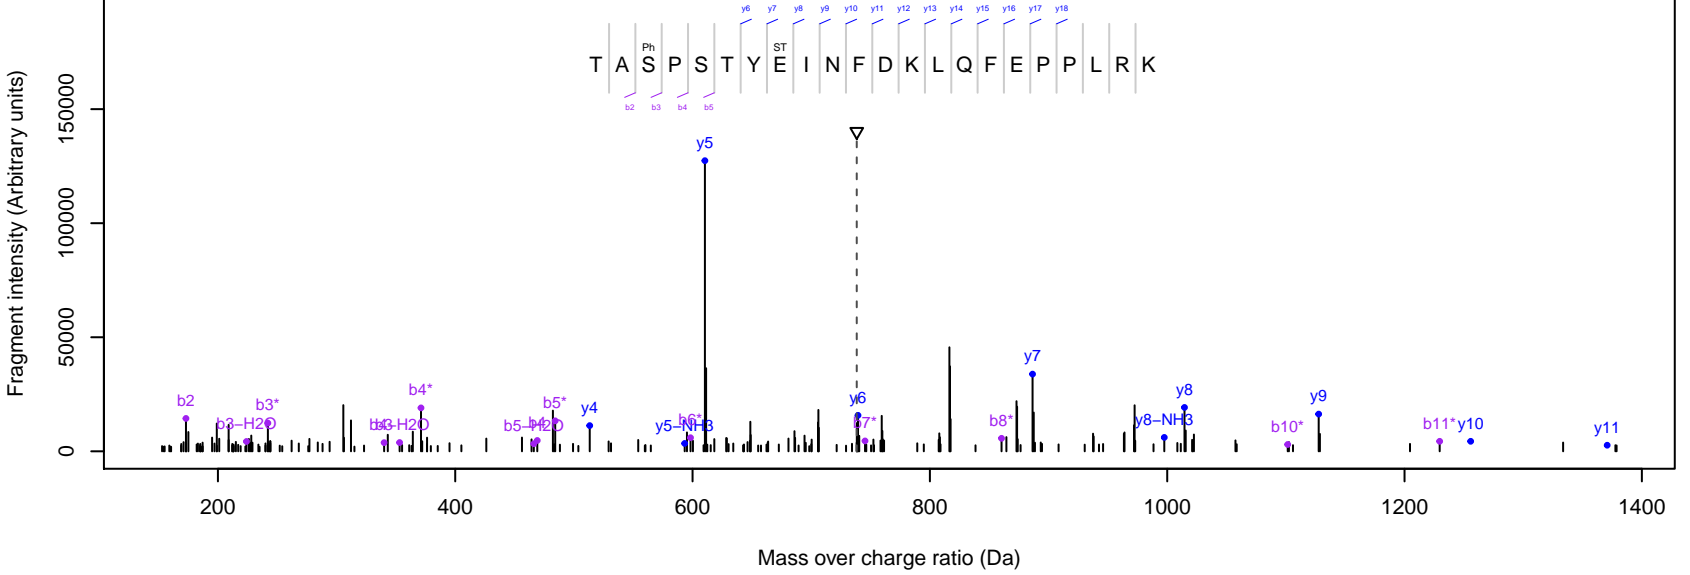

EGGDSSASS(PSTY)PTTEEQEQGEIGACSDTEGTAQEGK-3+

Source : QE3\_201126\_FR\_TiOx\_hum\_tissue\_Urea\_RNAB\_N Scan : 19794

Andromeda score : 129.83

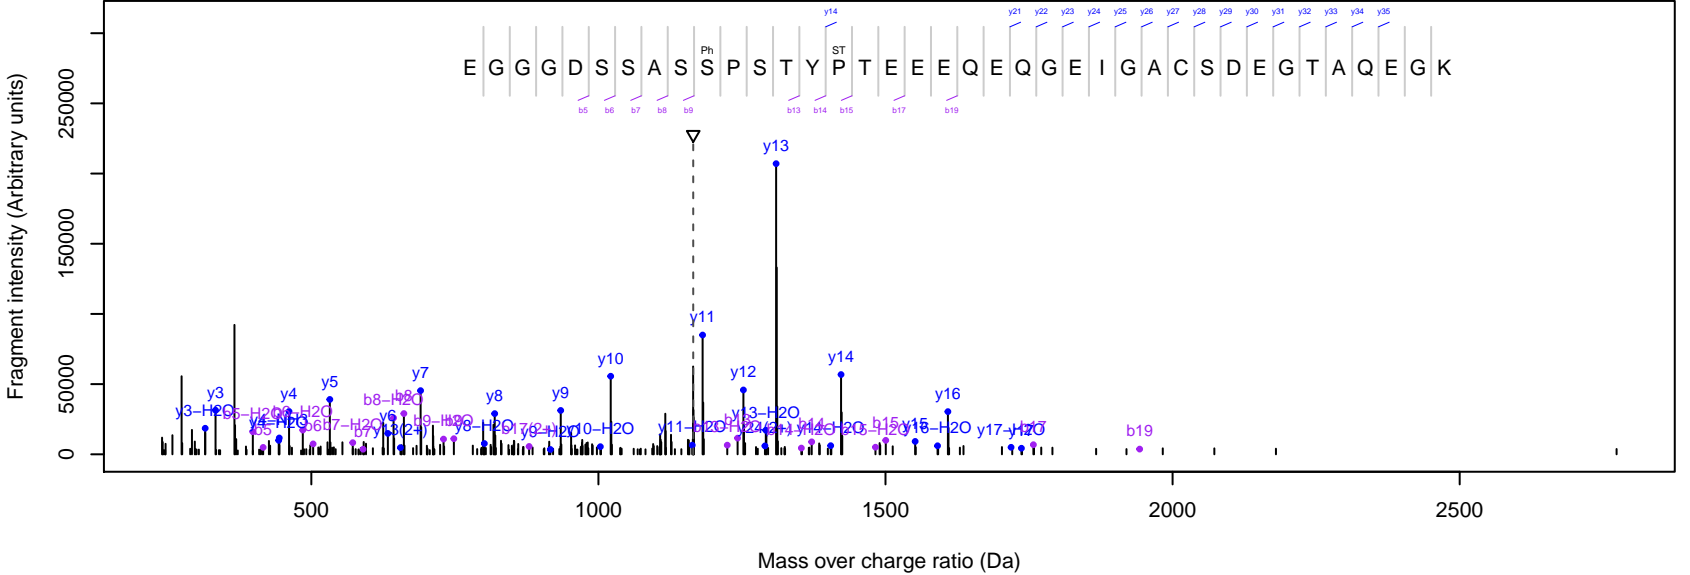

RPDHSGGS(Phospho (STY))PSPPTSEPAR-3+

Source : QE3\_201126\_FR\_TiOx\_hum\_tissue\_Urea\_RNAB\_B Scan : 5280

Andromeda score : 129.77

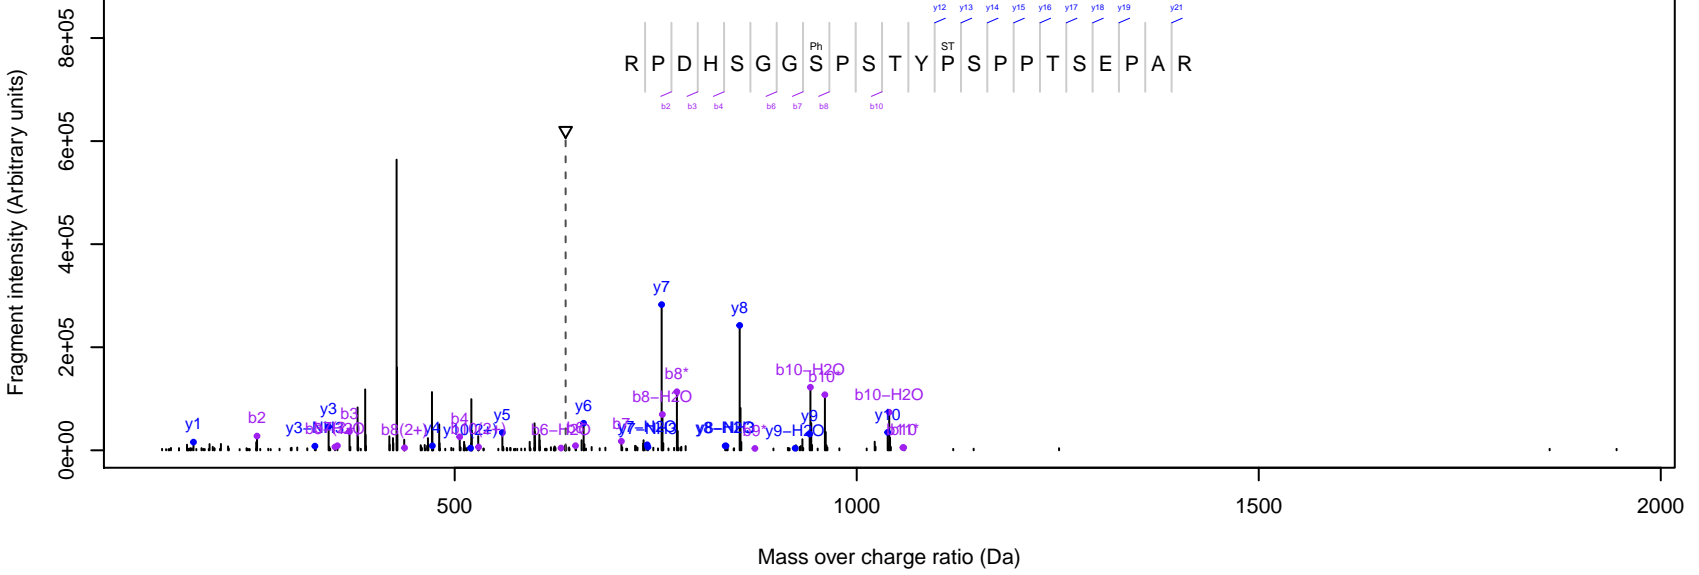

LNS(Phospho (STY))PPSSIYK-2+

Source : QE3\_201126\_FR\_TiOx\_hum\_tissue\_Urea\_RNAB\_H Scan : 19311

Andromeda score : 129.74

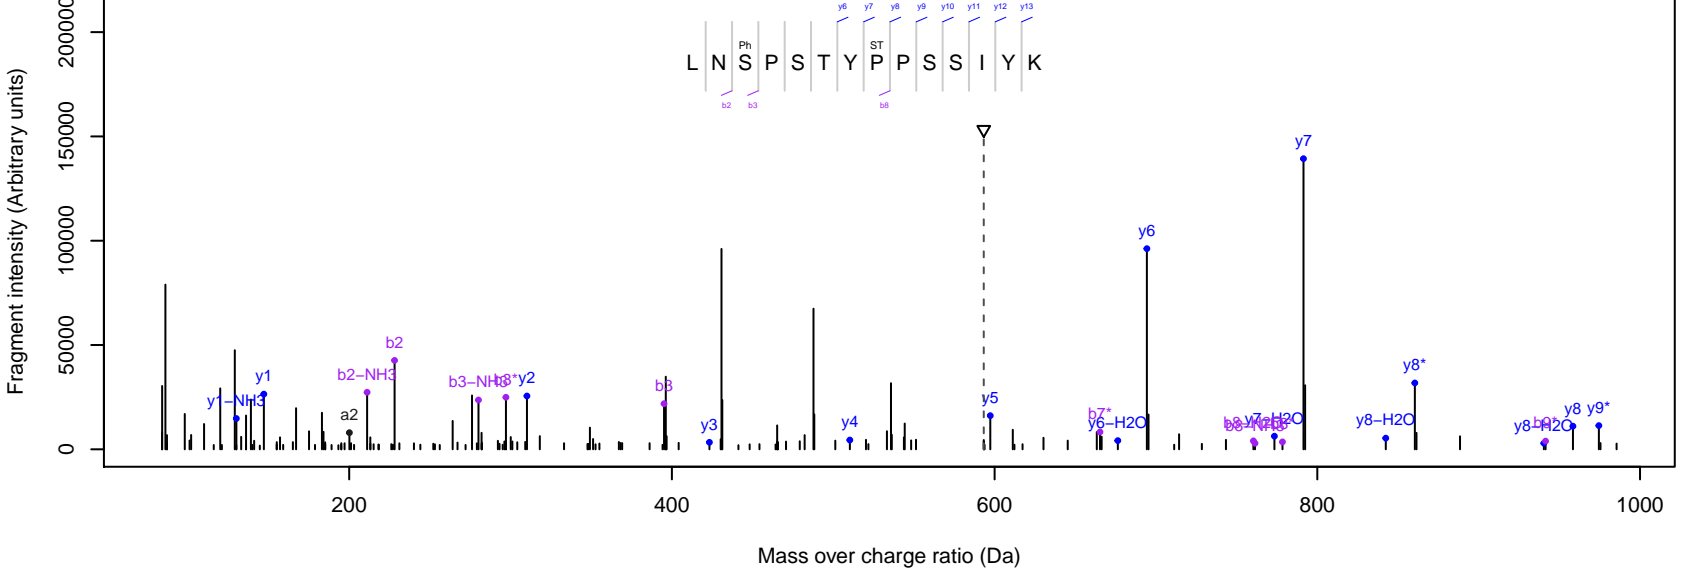

AIPVS(Phospho (STY))PSAVEEDEDGHTVVATAR-3+

Source : QE3\_201126\_FR\_TiOx\_hum\_tissue\_Urea\_RNAB\_H Scan : 31868

Andromeda score : 129.73

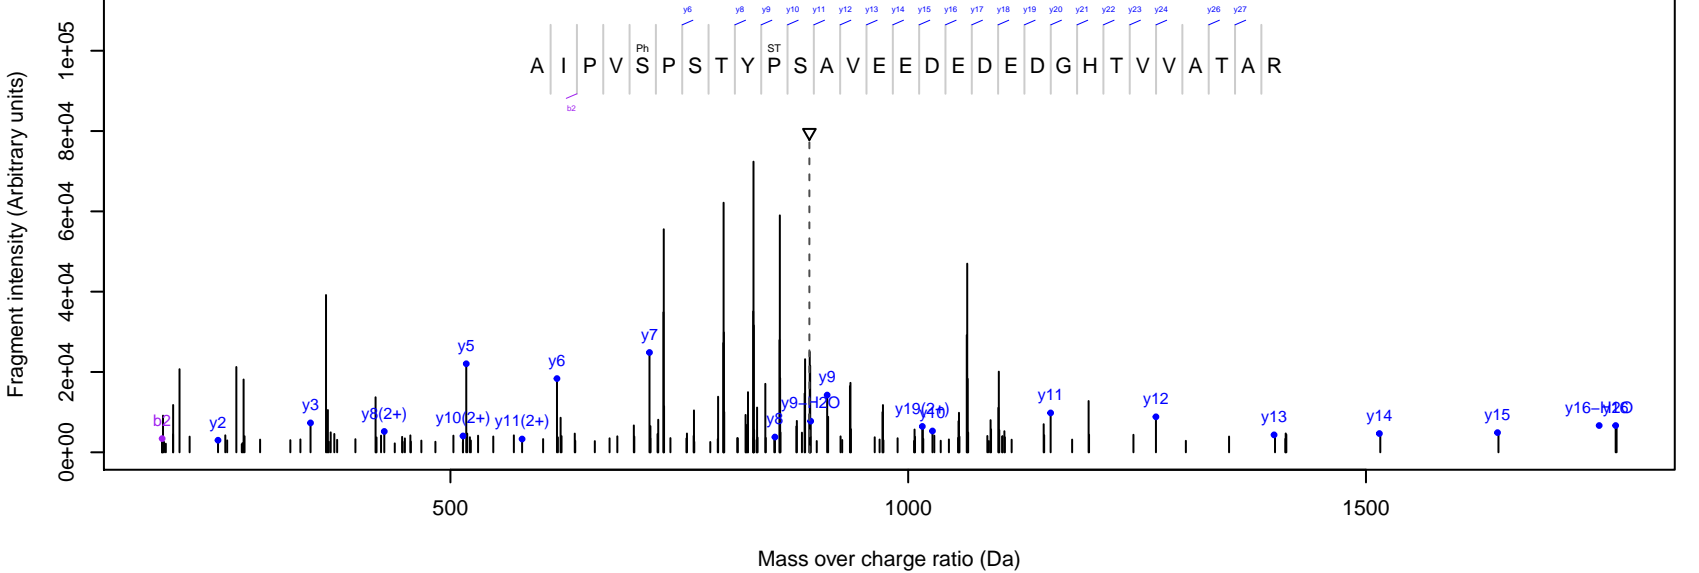

APS(Phospho (STY))WFDTGLSEMR-2+

Source : QE3\_201126\_FR\_TiOx\_hum\_tissue\_Urea\_RNAB\_H Scan : 53510

Andromeda score : 129.71

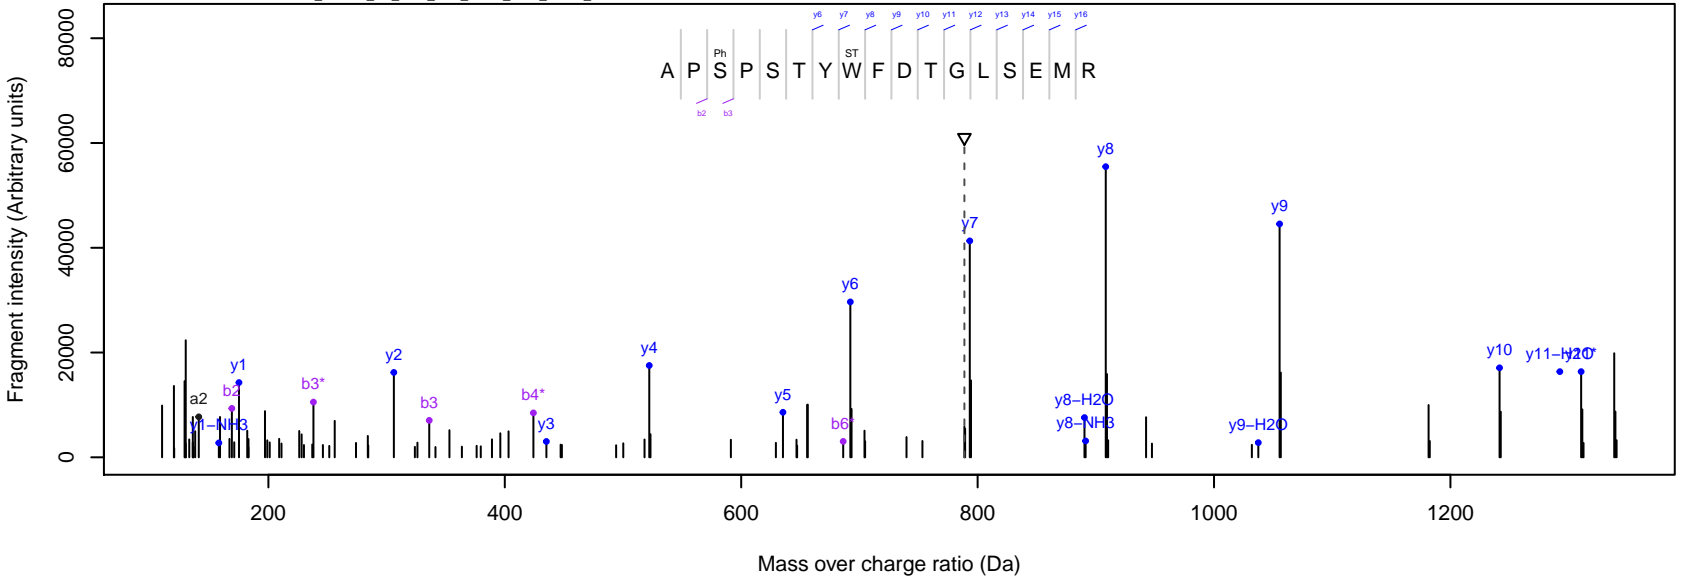

HSSS(Phospho (STY))PLS(Phospho (STY))PGGPTHLTKPTTTSSSER-4+

Source : QE3\_201126\_FR\_TiOx\_hum\_tissue\_Urea\_RNAB\_N Scan : 13971

Andromeda score : 129.64

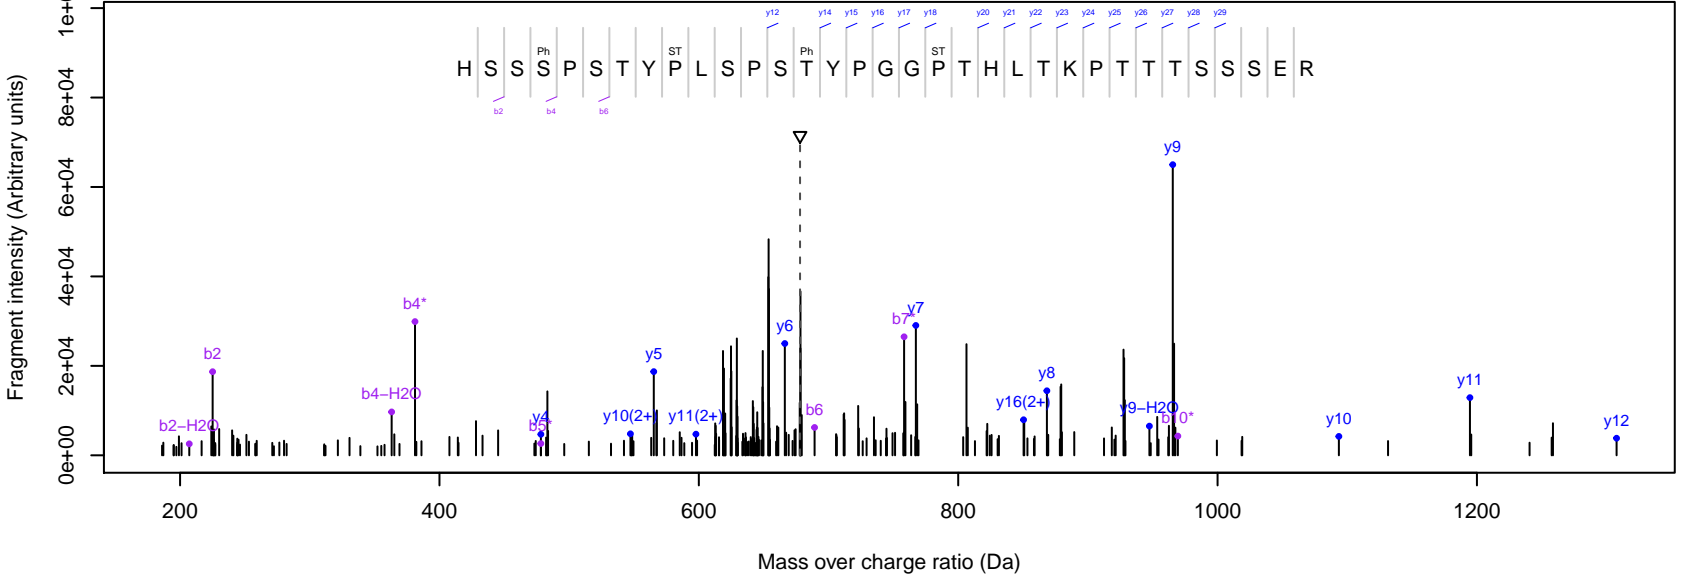

HSSDINHLVLTQGRES(Phospho (STY))PEGSYTDDANQEV-3+

Source : QE3\_201126\_FR\_TiOx\_hum\_tissue\_Urea\_RNAB\_B Scan : 19164

Andromeda score : 129.61

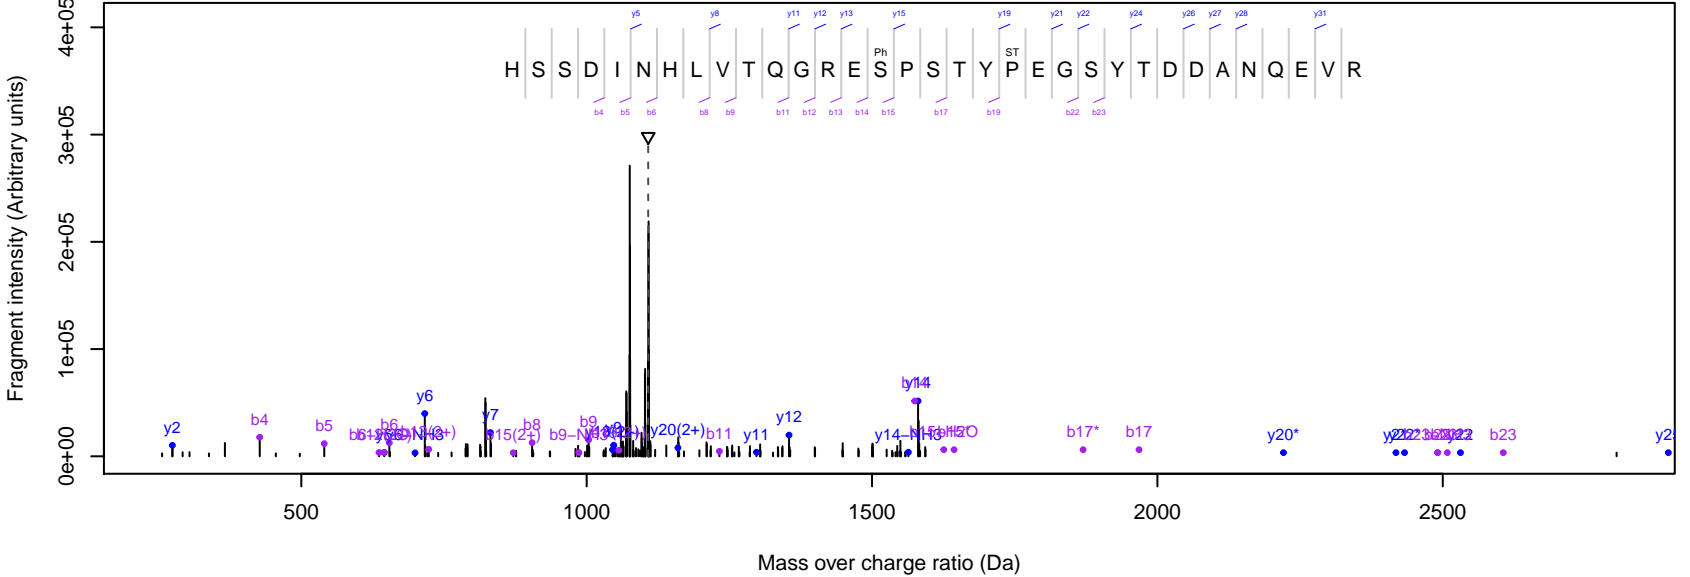

VDGETADSESES(Phospho (STY))RAESAPLPVSAADDTPVELNR-3+

Source : QE3\_201126\_FR\_TiOx\_hum\_tissue\_Urea\_RNAB\_N Scan : 36359

Andromeda score : 129.61

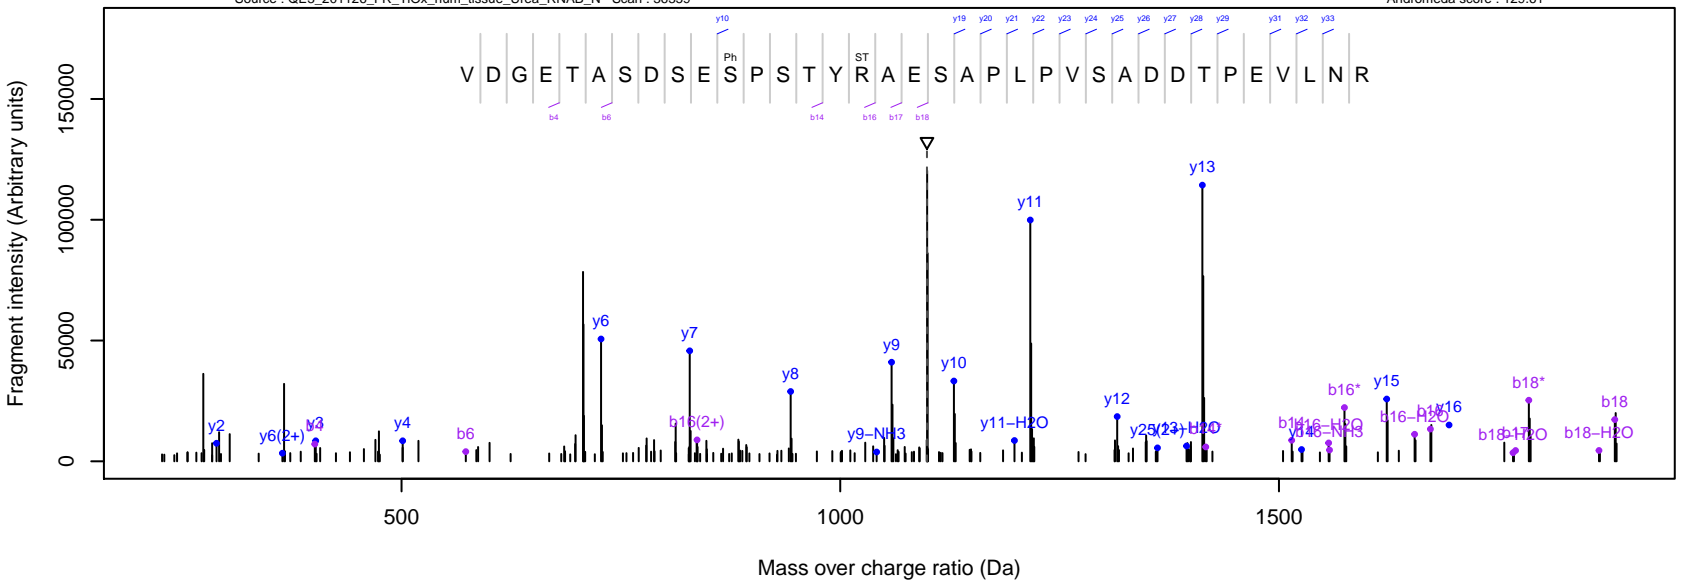

GNDPLTSS(Phospho (STY))PGR-2+

Source : QE3\_201126\_FR\_TiOx\_hum\_tissue\_Urea\_RNAB\_B Scan : 13296

Andromeda score : 129.54

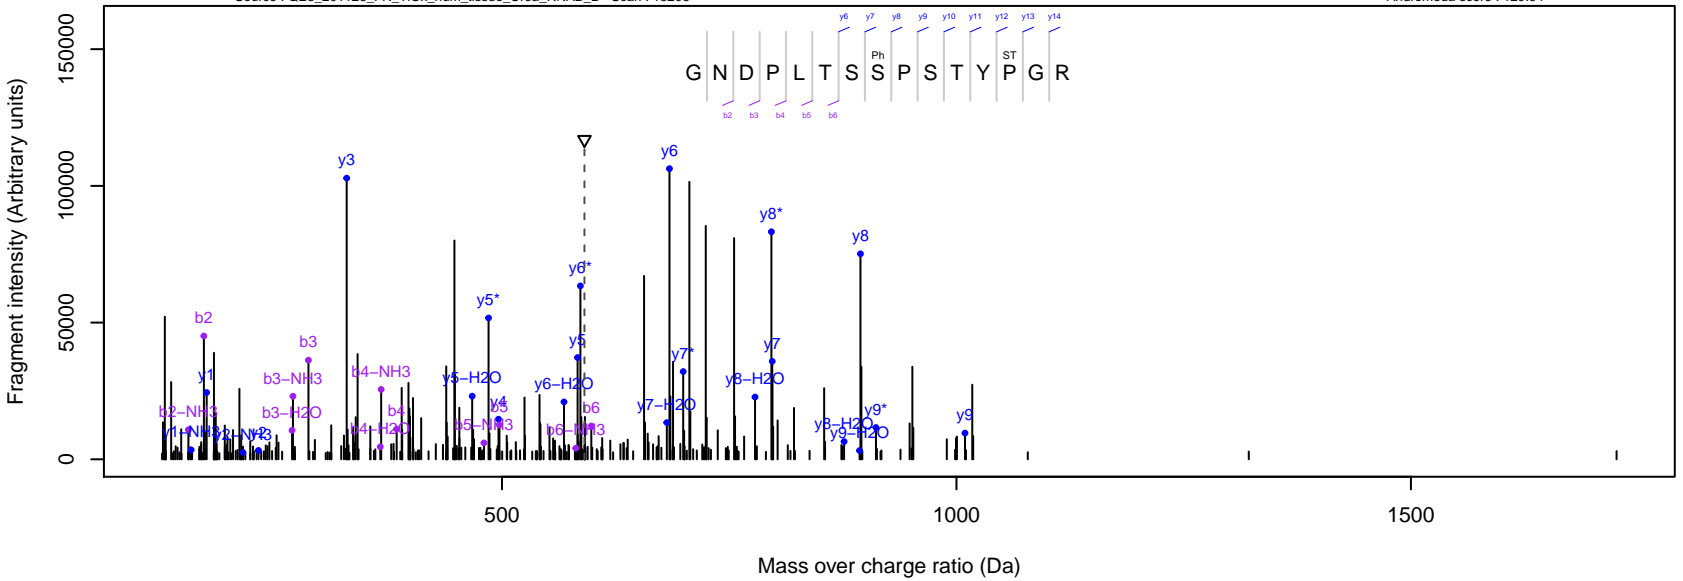

AGPAHAGHTAPMRPS(Phospho (STY))YSAQEGLAGYQR-4+

Source : QE3\_201126\_FR\_TiOx\_hum\_tissue\_Urea\_RNAB\_N Scan : 17051

Andromeda score : 129.51

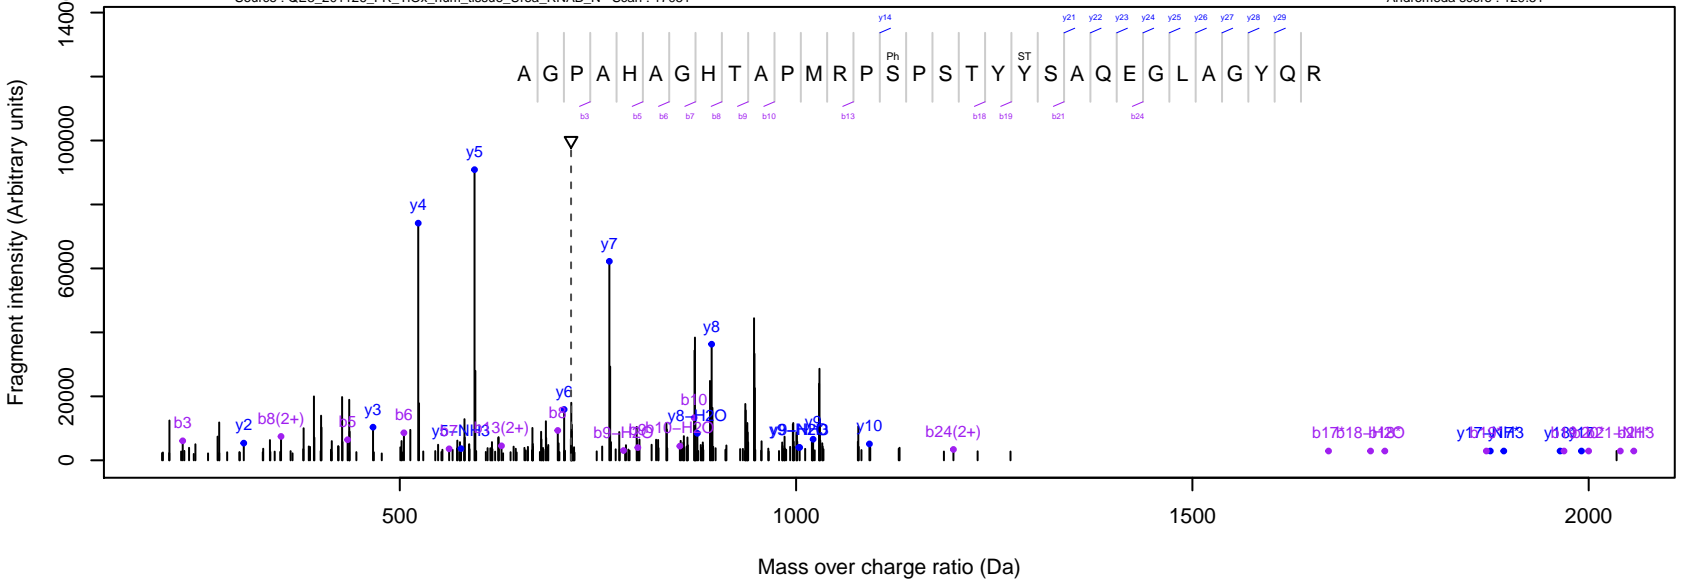

EIIDASKEGM(Oxidation (M))S(Phospho (STY))PAKR-3+

Source : QE3\_201126\_FR\_TiOx\_hum\_tissue\_Urea\_RNAB\_N Scan : 7955

Andromeda score : 129.51

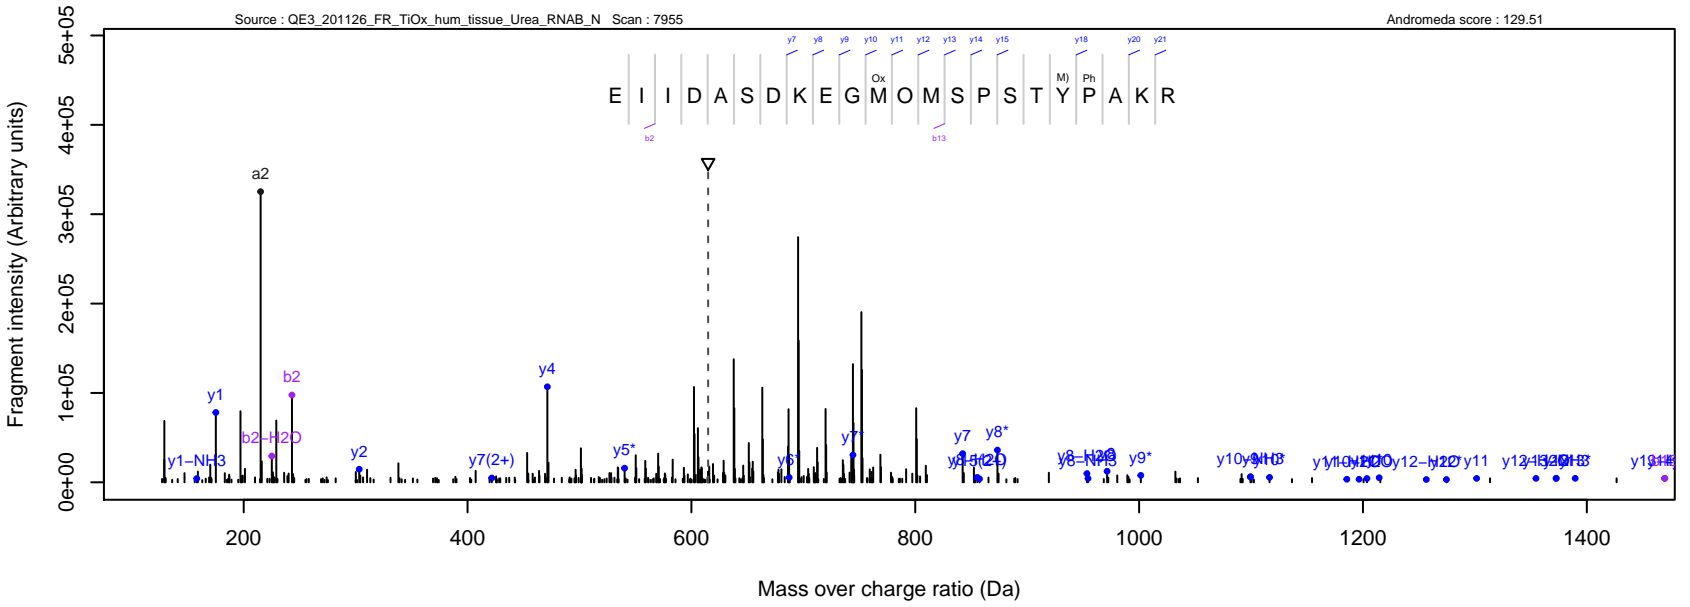

HPTGNSITKS(Phospho (STY))PPLM(Oxidation (M))AK-3+

Source : QE3\_201126\_FR\_TiOx\_hum\_tissue\_Urea\_RNAB\_N Scan : 9336

Andromeda score : 129.51

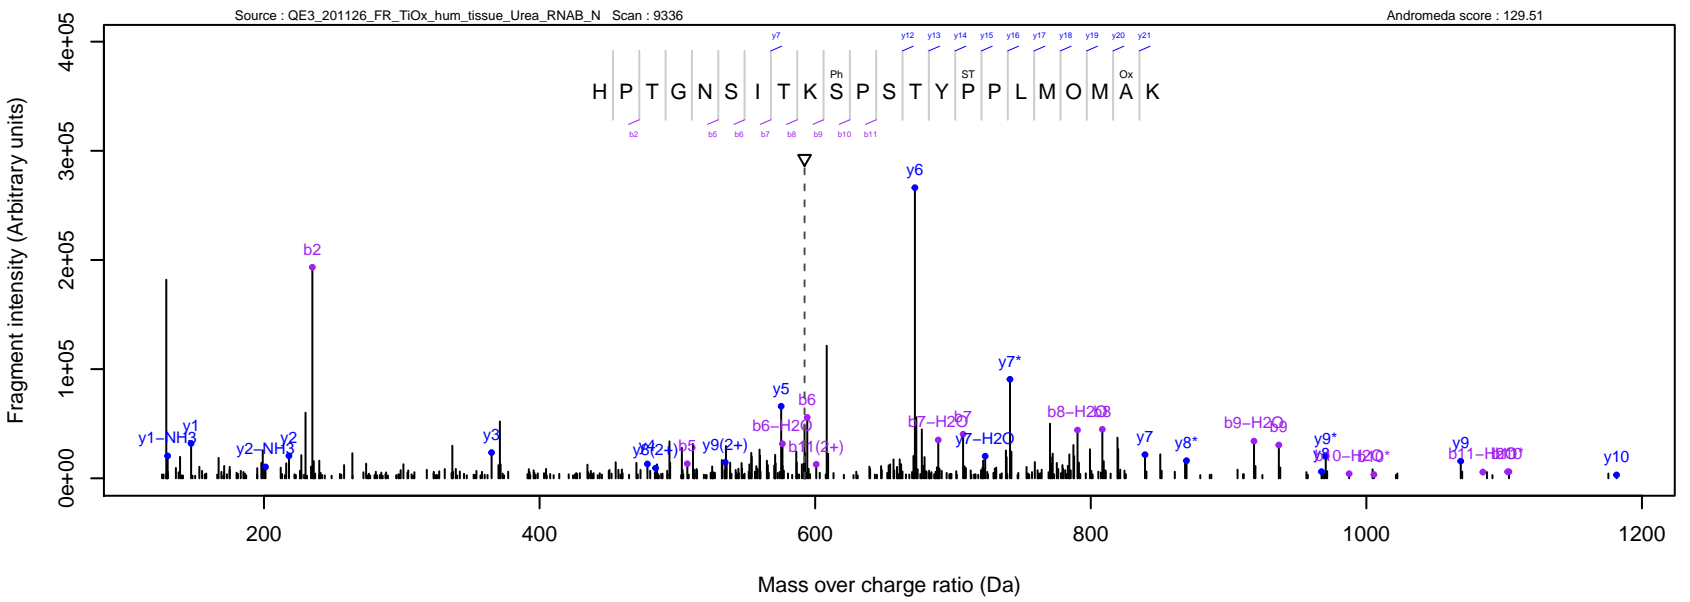

NPCHNGGLCEEIS(Phospho (STY))QEV-3+

Source : QE3\_201126\_FR\_TiOx\_hum\_tissue\_Urea\_RNAB\_B Scan : 21723

Andromeda score : 129.51

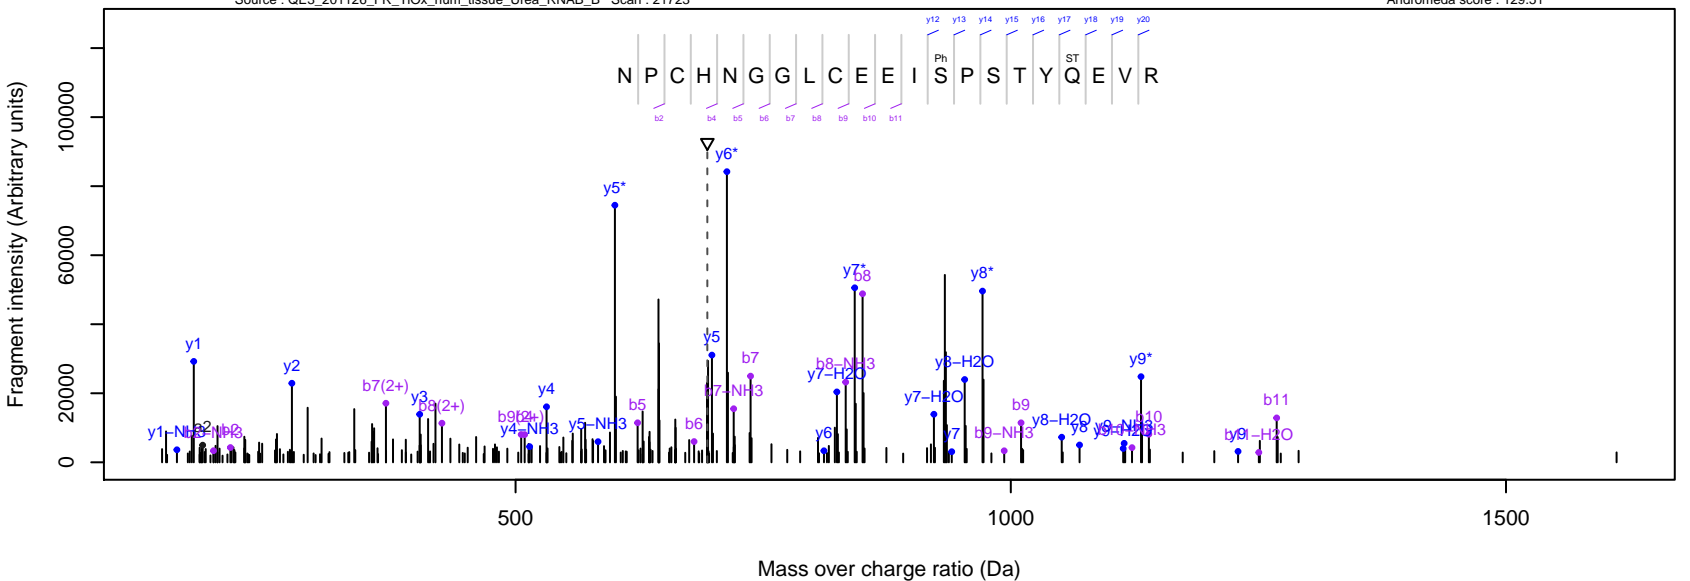

KAVPMAPAS(Phospho (STY))PGSSNDSSAR-3+

Source : QE3\_201126\_FR\_TIOx\_hum\_tissue\_Urea\_RNAB\_N Scan : 13148

Andromeda score : 129.5

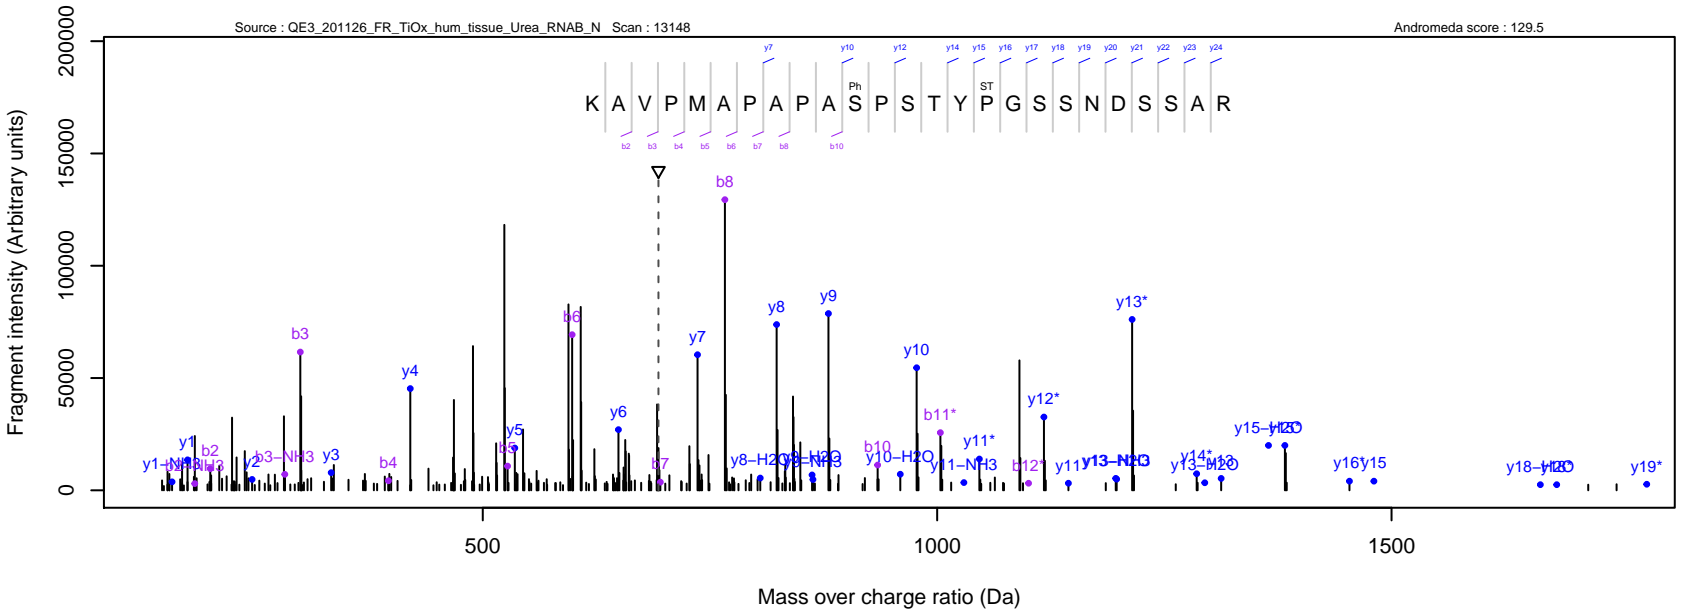

HFAAASGKVS(Phospho (STY))PTASR-3+

Source : QE3\_201126\_FR\_TIOx\_hum\_tissue\_Urea\_RNAB\_B Scan : 7231

Andromeda score : 129.46

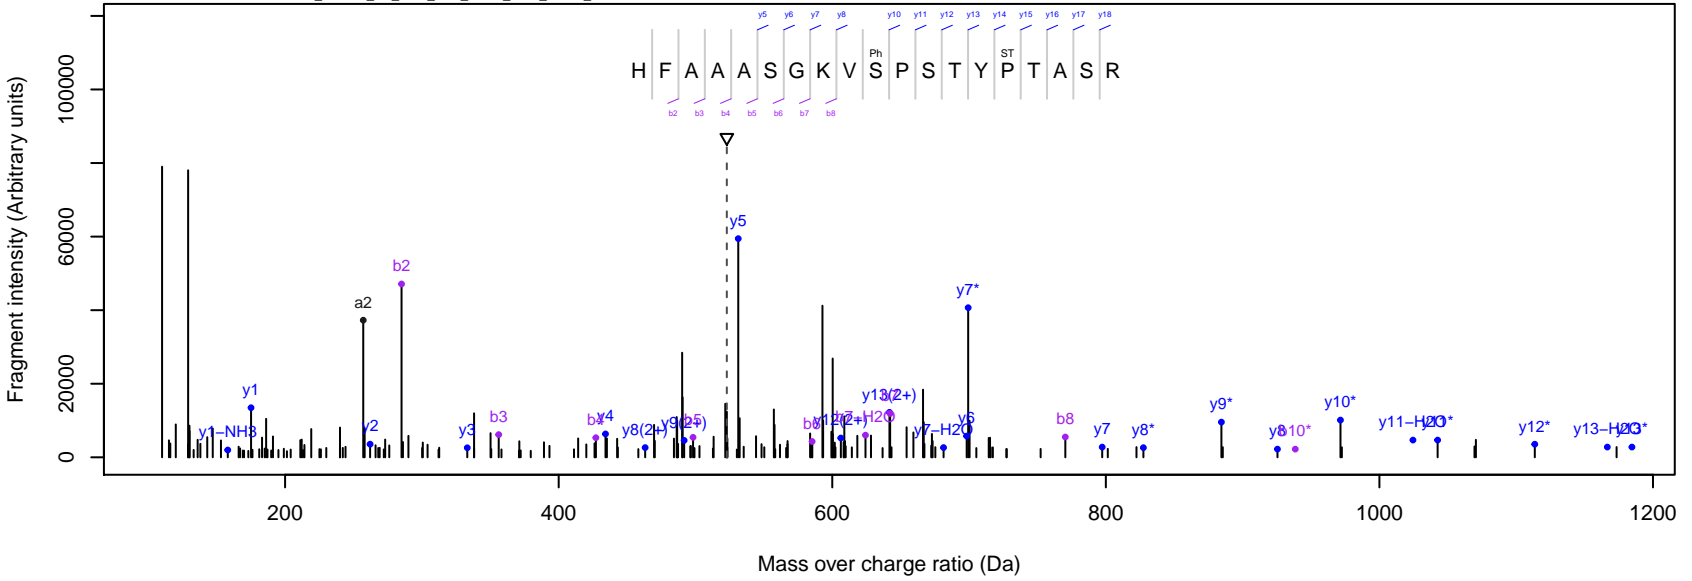

VLS(Phospho (STY))PPKLNVESSDANR-3+

Source : QE3\_201126\_FR\_TIOx\_hum\_tissue\_Urea\_RNAB\_N Scan : 25643

Andromeda score : 129.46

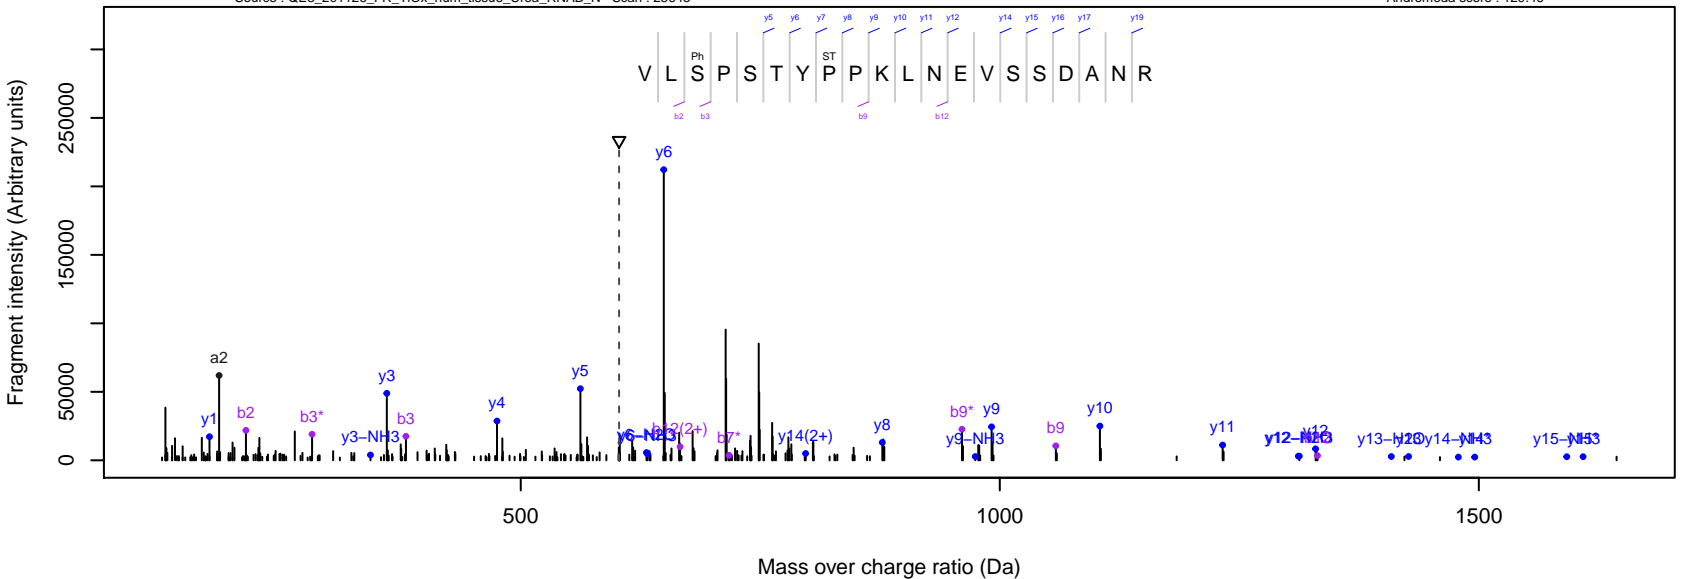



S(Phospho (STY))VENLPECGITHEQR-2+

Source : QE3\_201126\_FR\_TiOx\_hum\_tissue\_Urea\_RNAB\_B Scan : 18794

Andromeda score : 129.38

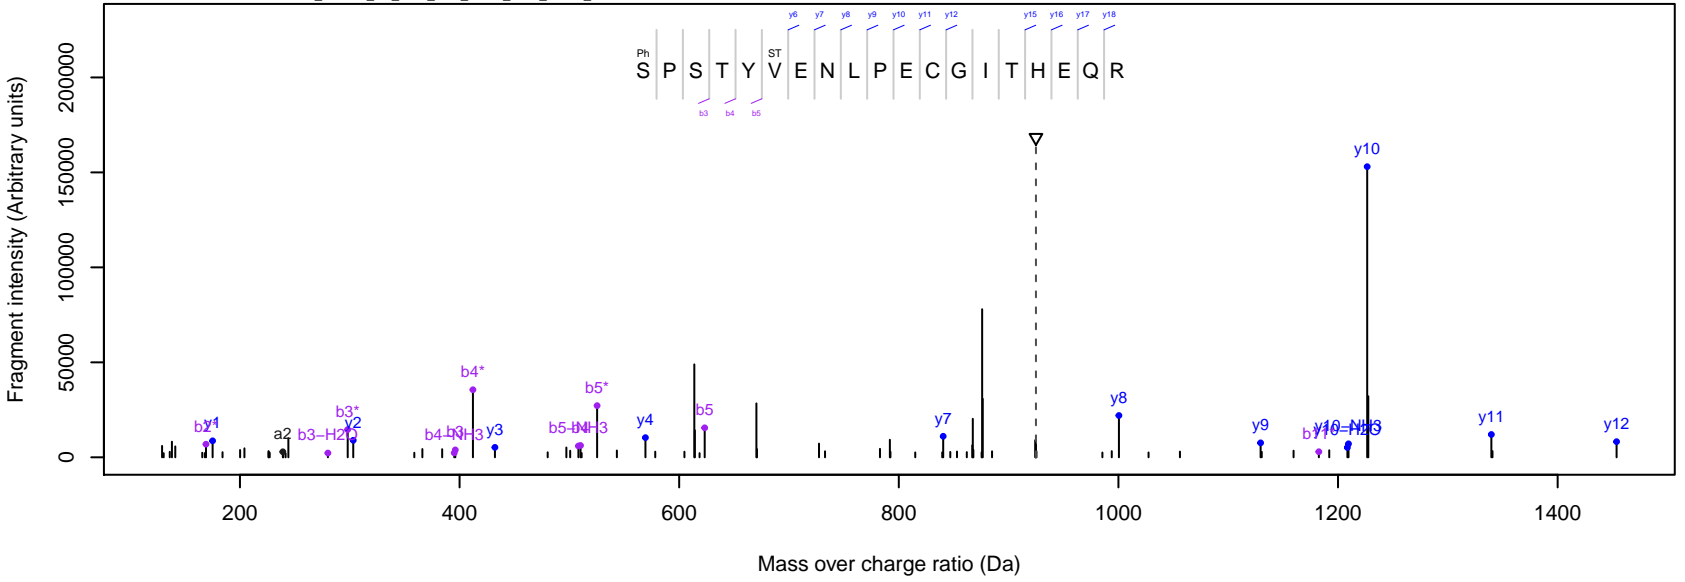

RPS(Phospho (STY))ADSESPGTPSPDGAWEPPAR-3+

Source : QE3\_201126\_FR\_TiOx\_hum\_tissue\_Urea\_RNAB\_B Scan : 24165

Andromeda score : 129.35

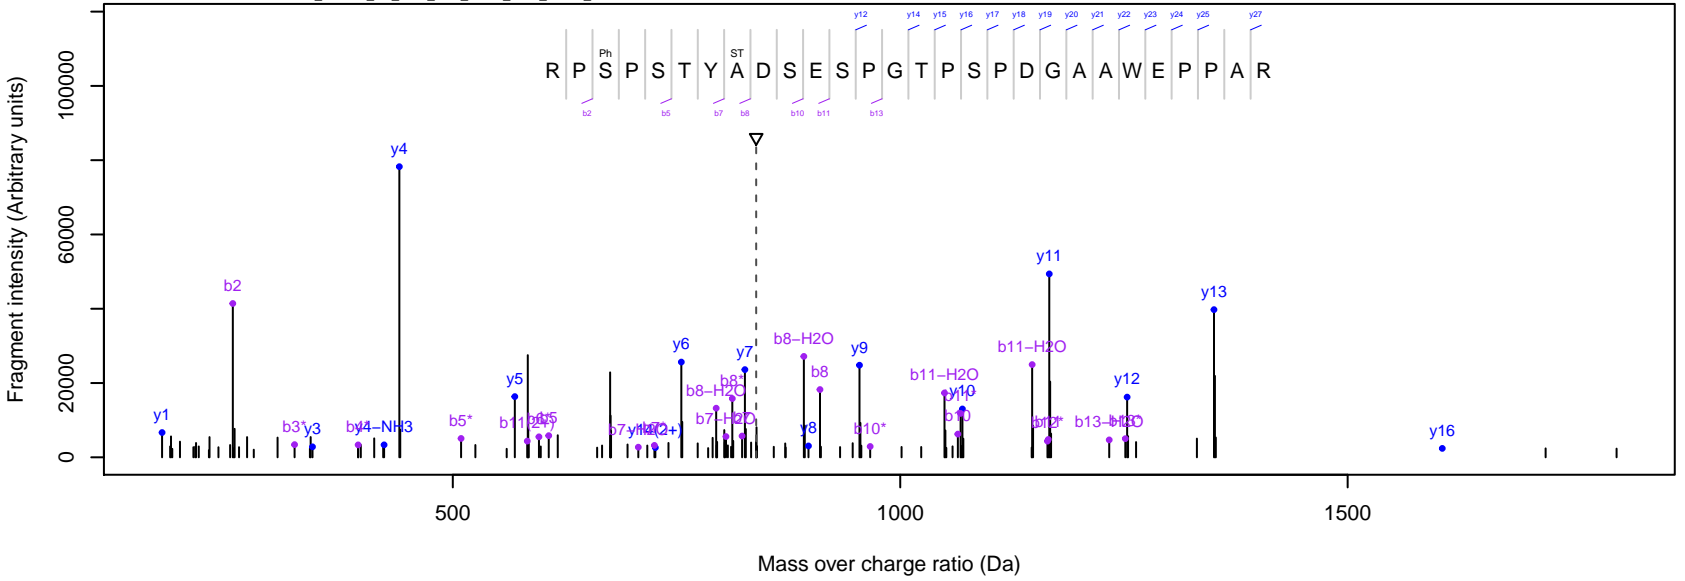

SSS(Phospho (STY))PVTELASR-2+

Source : QE3\_201126\_FR\_TiOx\_hum\_tissue\_Urea\_RNAB\_H Scan : 19243

Andromeda score : 129.34

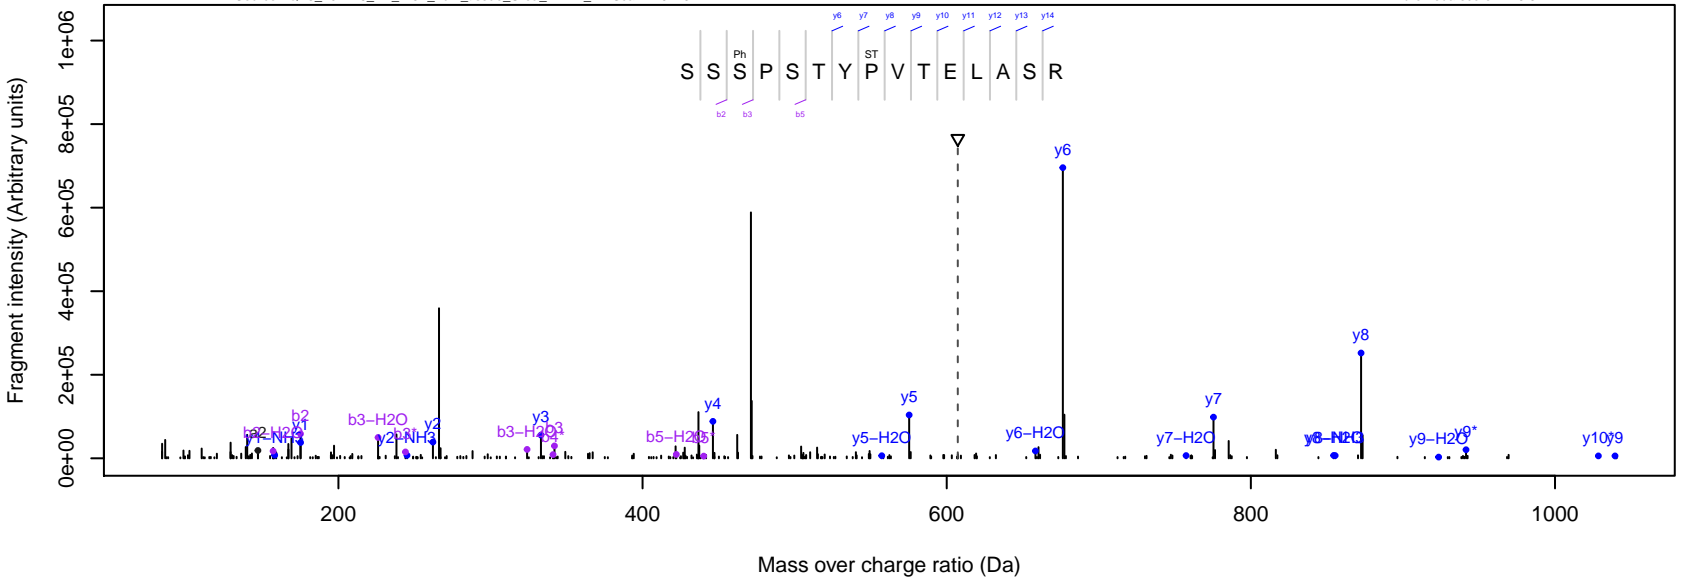

HPS(Phospho (STY))REQLIDYLMK-3+

Source : QE3\_201126\_FR\_TiOx\_hum\_tissue\_Urea\_RNAB\_N Scan : 44000

Andromeda score : 129.32

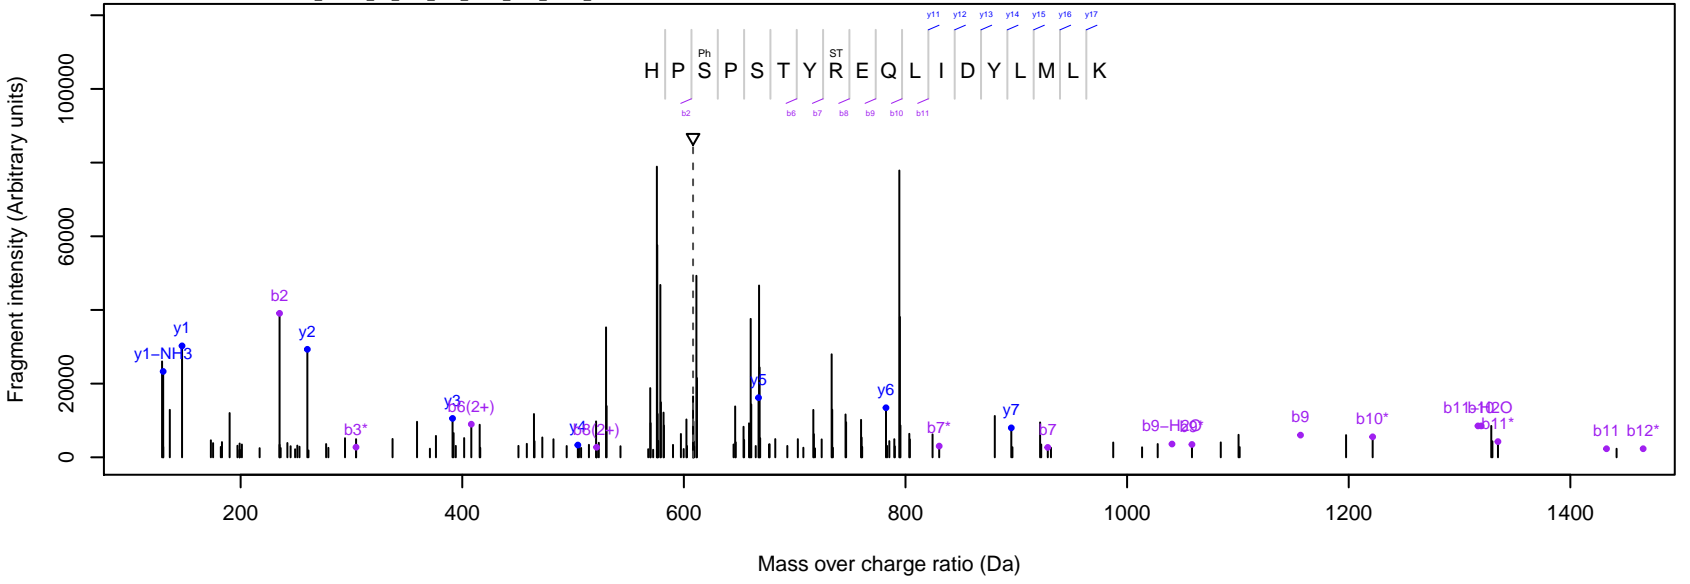

S(Phospho (STY))ESPEPGYVVTSSGLLLPVLPR-3+

Source : QE3\_201126\_FR\_TiOx\_hum\_tissue\_Urea\_RNAB\_N Scan : 62491

Andromeda score : 129.27

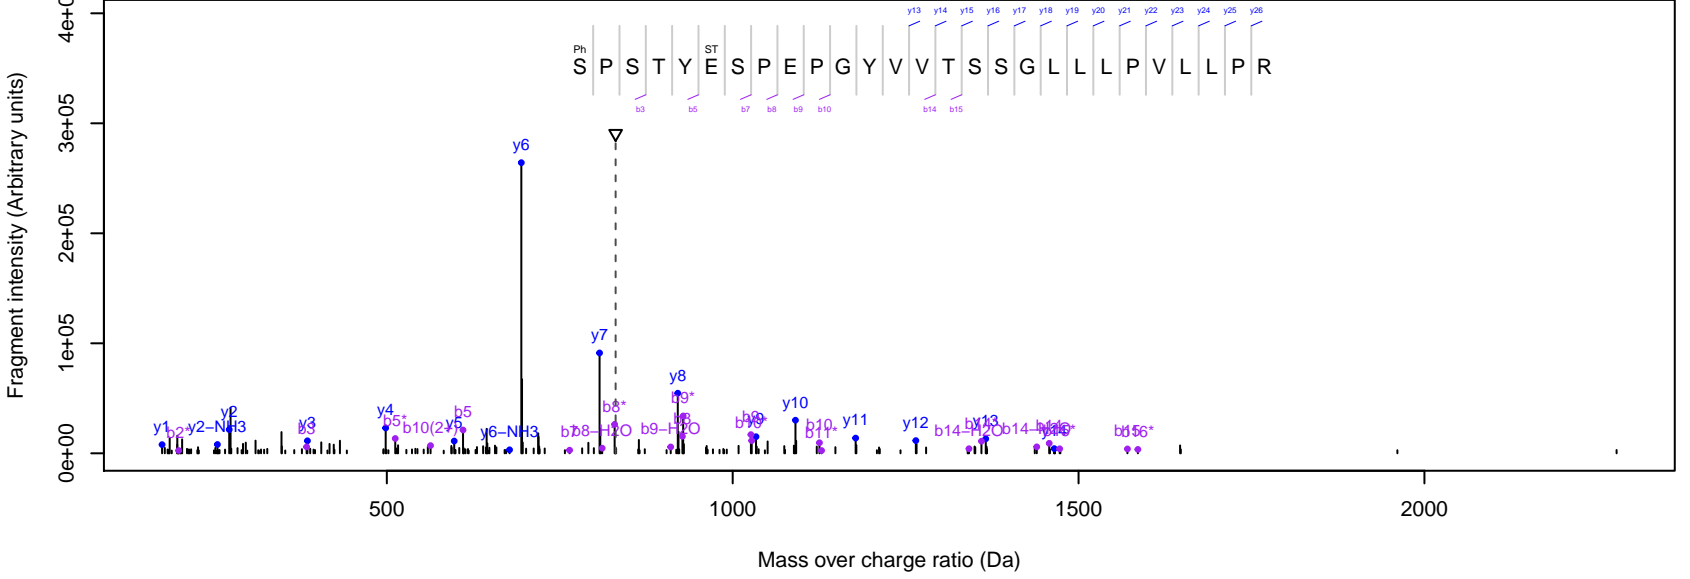

SRLS(Phospho (STY))PAGEMKPMPLSEK-3+

Source : QE3\_201126\_FR\_TiOx\_hum\_tissue\_Urea\_RNAB\_N Scan : 20477

Andromeda score : 129.27

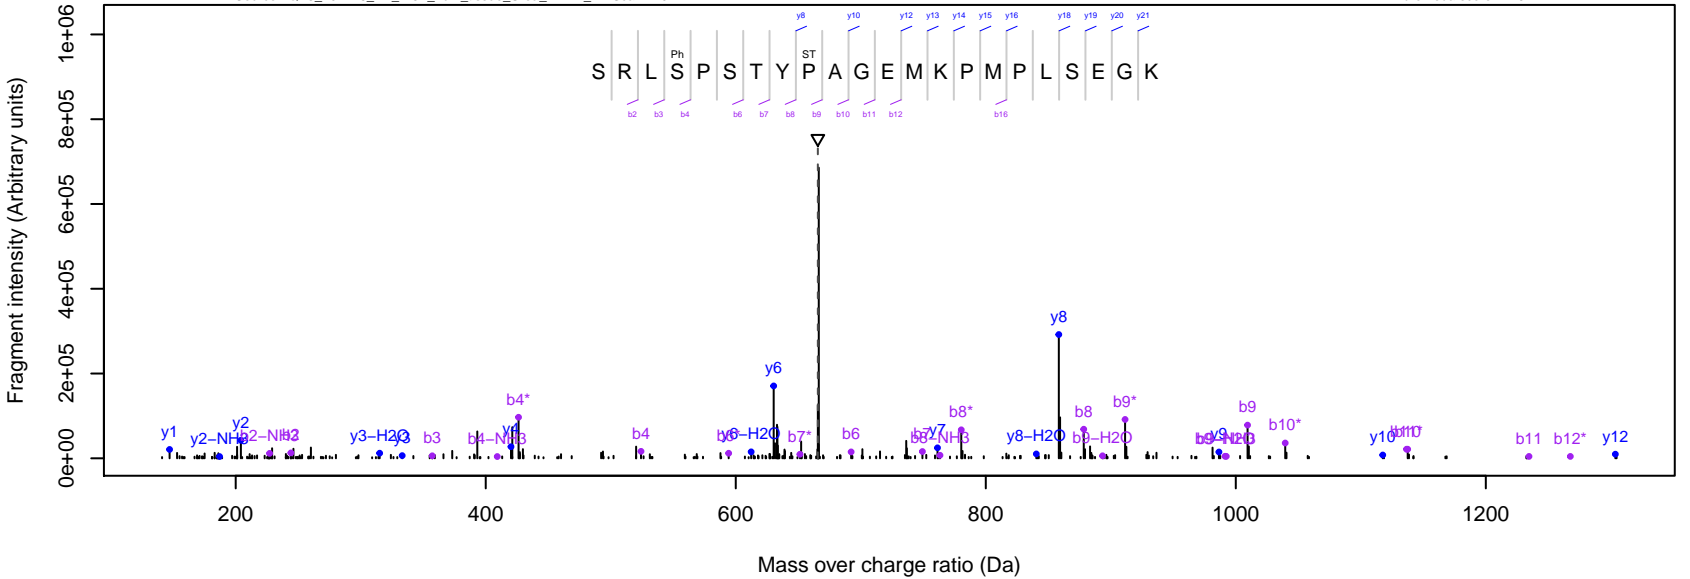

S(Phospho (STY))RSPHEAGFCVYLK-3+

Source : QE3\_201126\_FR\_TiOx\_hum\_tissue\_Urea\_RNAB\_N Scan : 21771

Andromeda score : 129.2

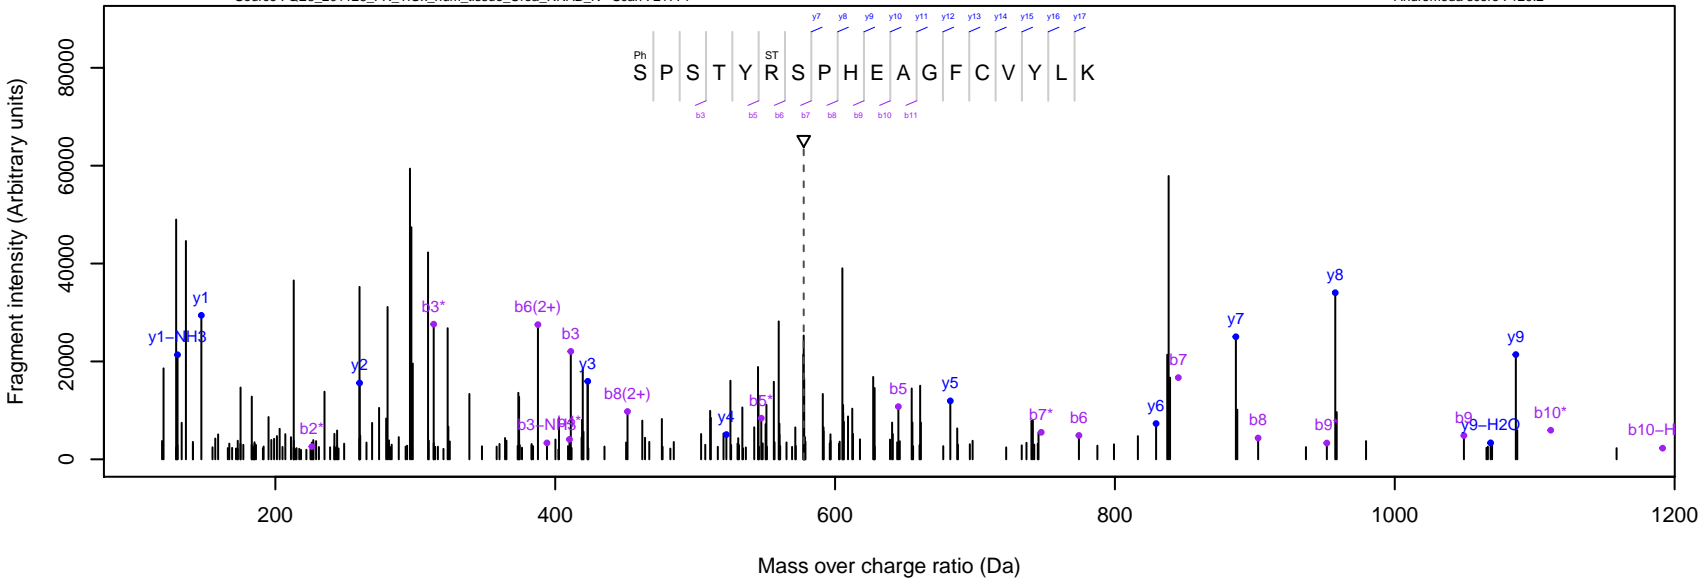

IADFGLSNMMSDGEFLRT(Phospho (STY))SCGSPNYAAPEVISGR-3+

Source : QE3\_201126\_FR\_TiOx\_hum\_tissue\_Urea\_RNAB\_H Scan : 56928

Andromeda score : 129.18

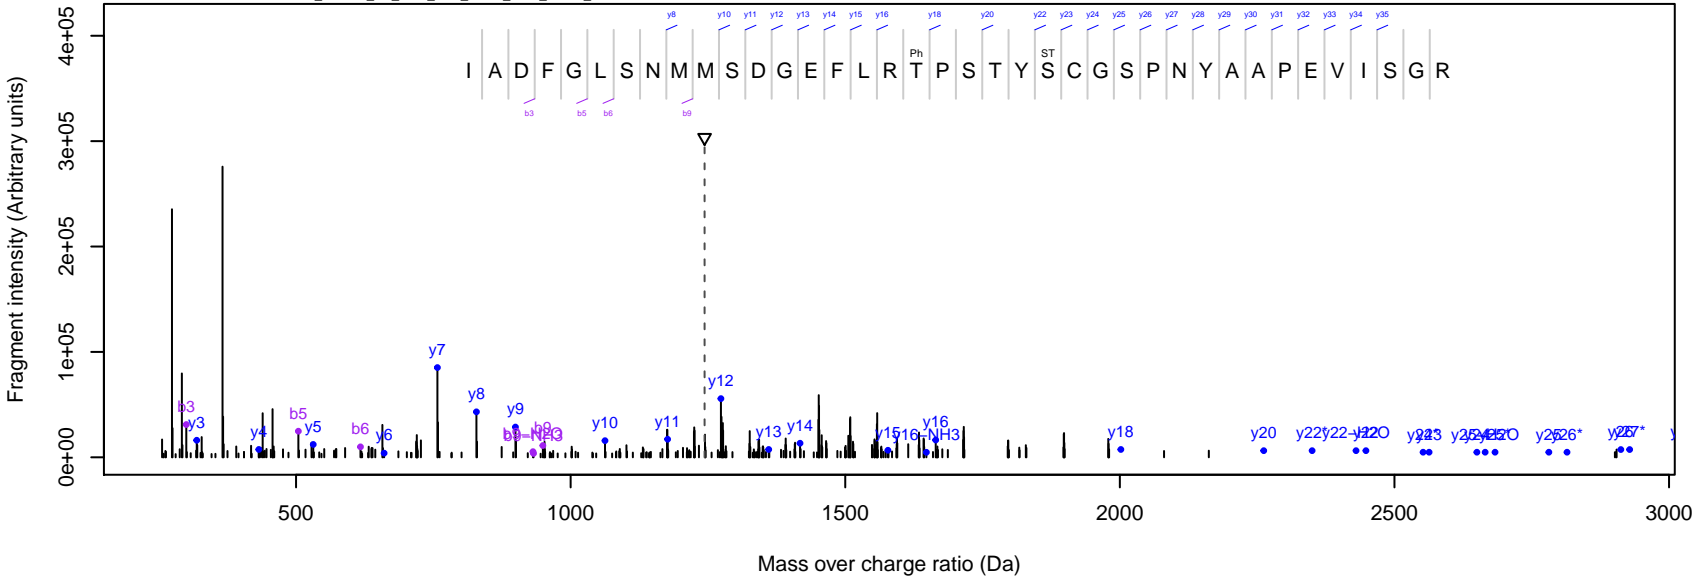

IDS(Phospho (STY))PGFKPASQQVYR-3+

Source : QE3\_201126\_FR\_TiOx\_hum\_tissue\_Urea\_RNAB\_N Scan : 20234

Andromeda score : 129.11

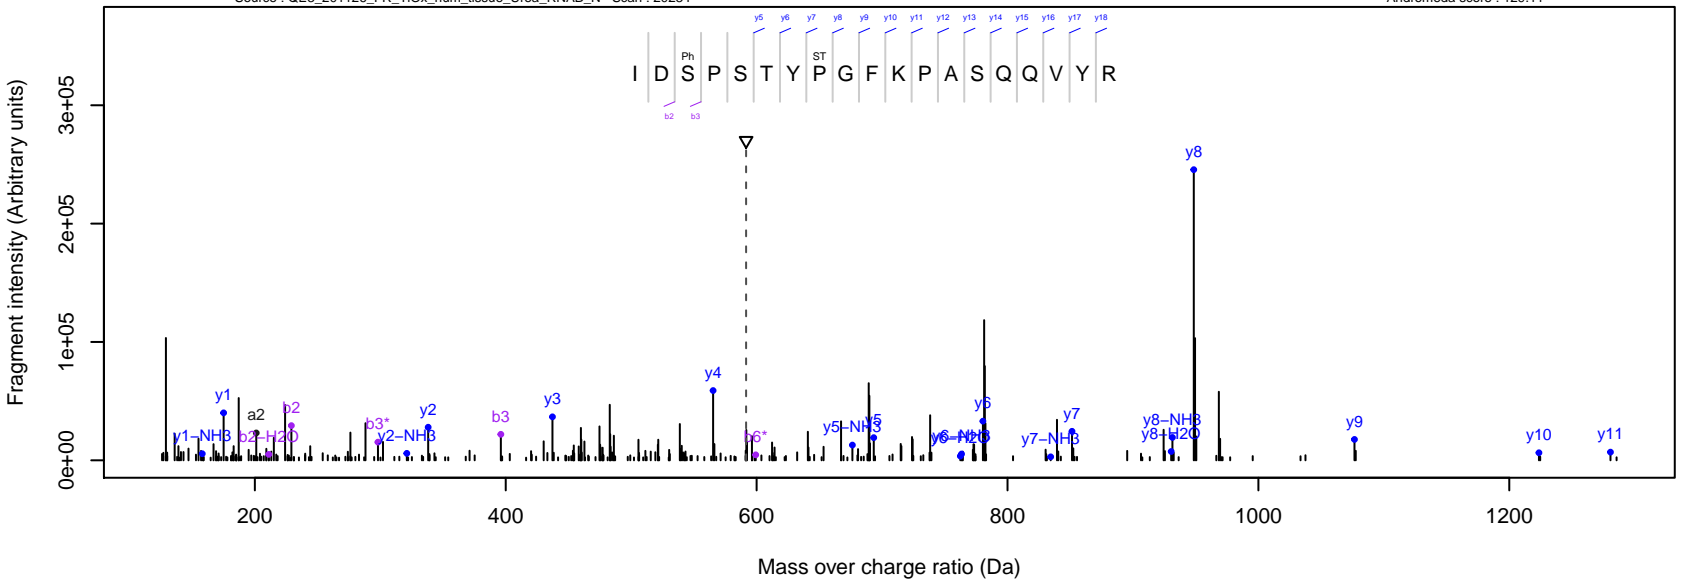

KQFS(Phospho (STY))LENVQEGEILHDAK-3+

Source : QE3\_201126\_FR\_TIOx\_hum\_tissue\_Urea\_RNAB\_H Scan : 29575

Andromeda score : 129.07

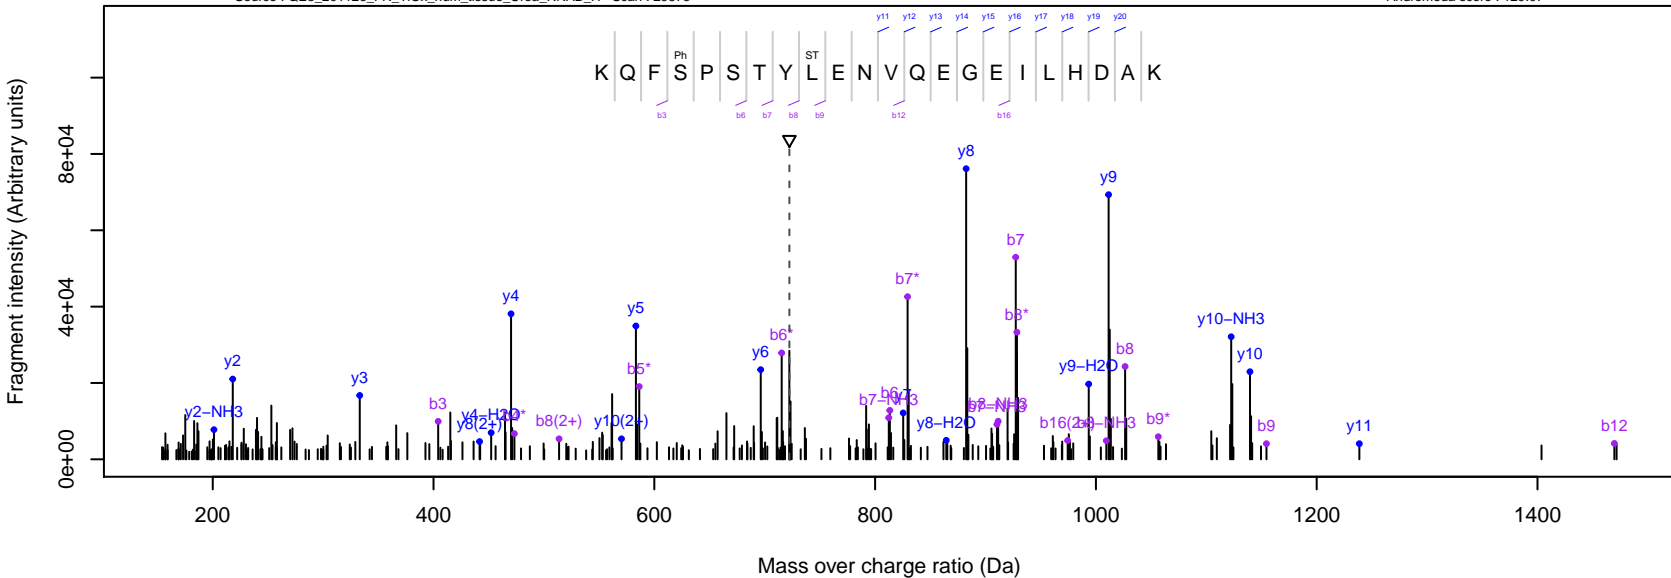

AEDGS(Phospho (STY))VIDYELIDQDAR-2+

Source : QE3\_201126\_FR\_TIOx\_hum\_tissue\_Urea\_RNAB\_H Scan : 44660

Andromeda score : 129.05

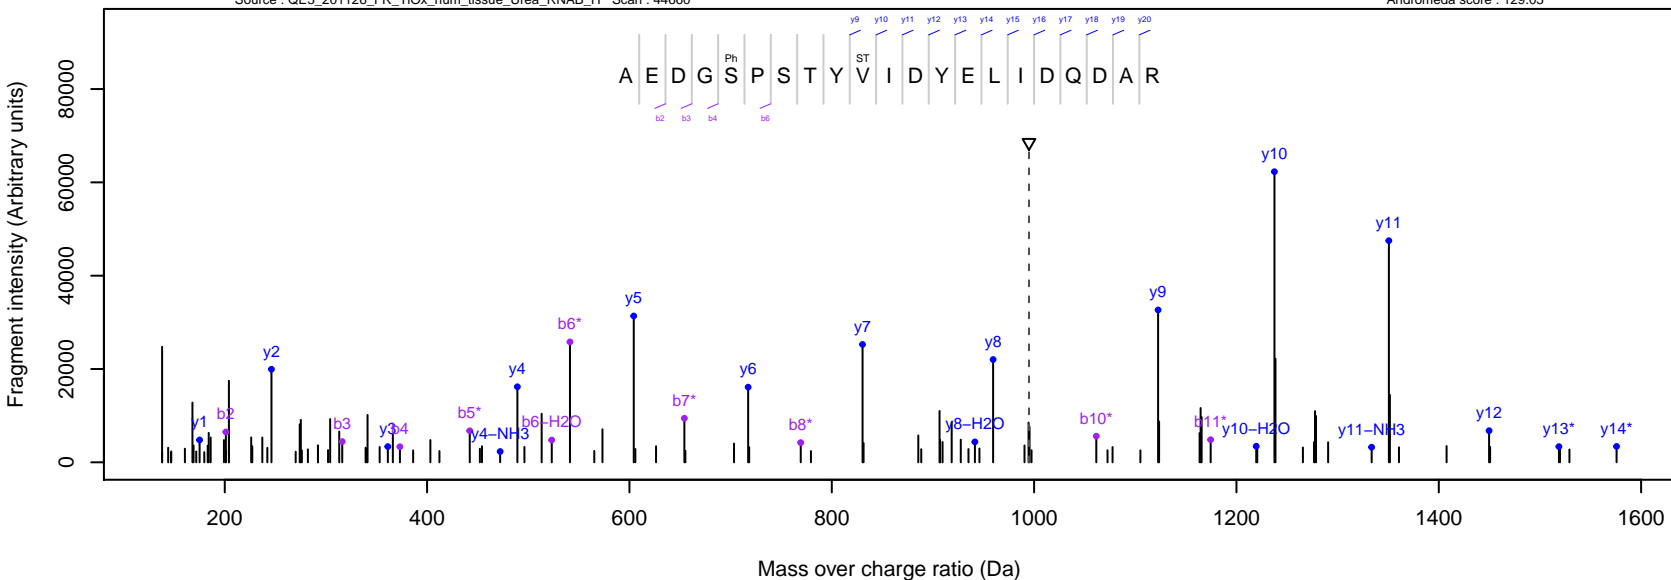

THAVSVSETDDY(Phospho (STY))AEIIDEEDTYTM(Oxidation (M))PSTR-3+

Source : QE3\_201126\_FR\_TIOx\_hum\_tissue\_Urea\_RNAB\_N Scan : 36851

Andromeda score : 129.04

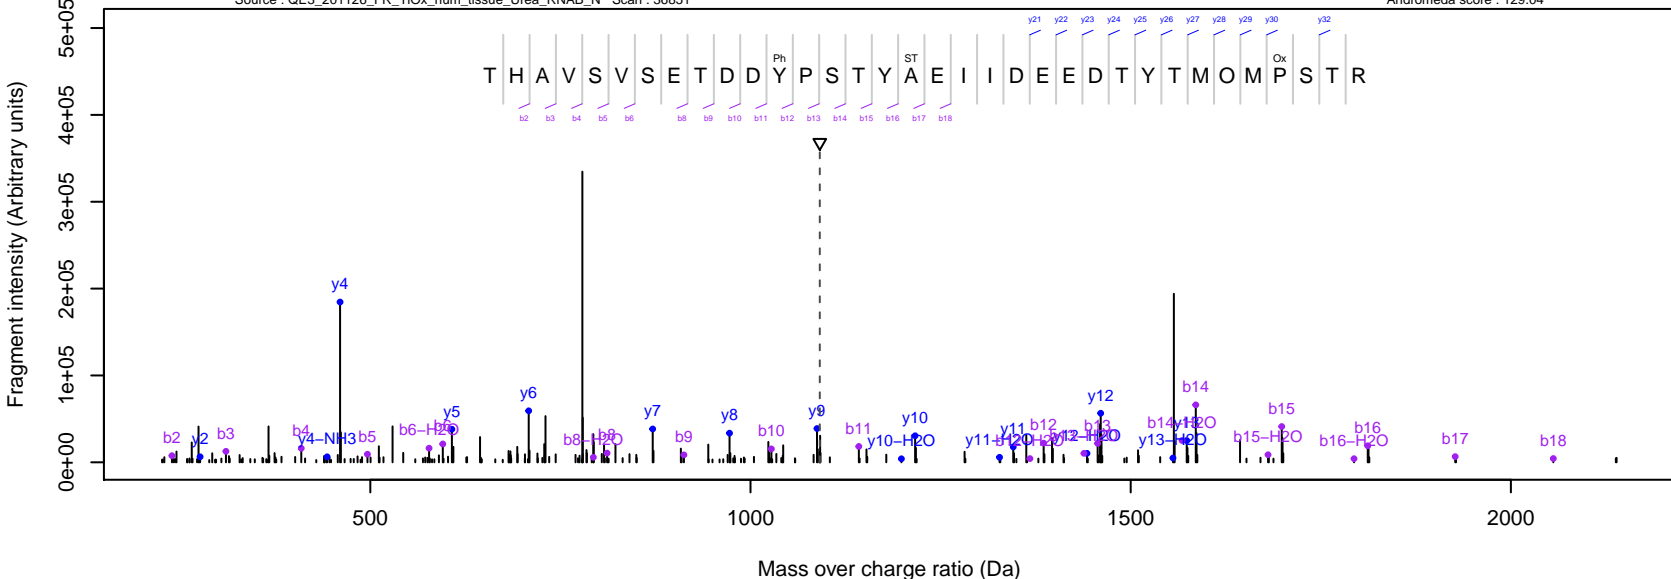

TGS(Phospho (STY))QEGTSM(Oxidation (M))EGSRPAAPEPGLK-3+

Source : QE3\_201126\_FR\_TiOx\_hum\_tissue\_Urea\_RNAB\_B Scan : 14064

Andromeda score : 129.01

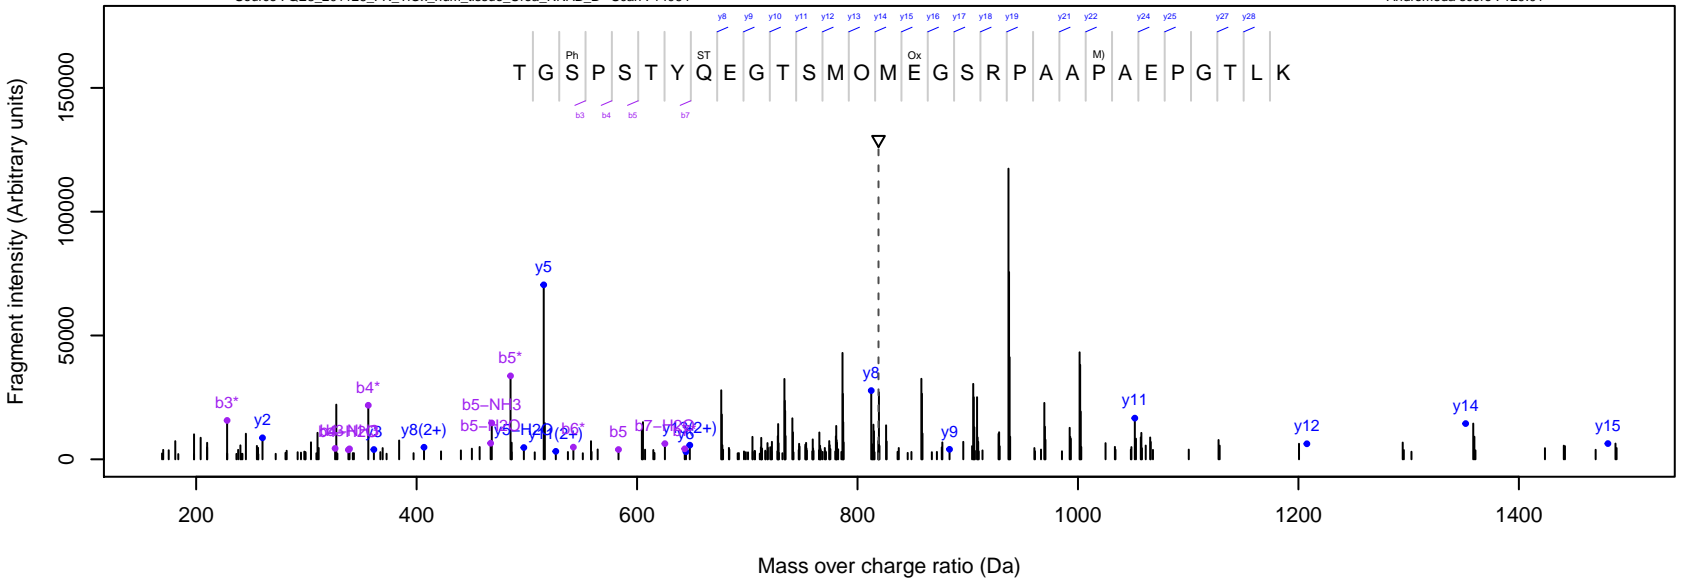

DLHQPSLS(Phospho (STY))PASPHSQGFER-3+

Source : QE3\_201126\_FR\_TiOx\_hum\_tissue\_Urea\_RNAB\_H Scan : 20164

Andromeda score : 128.98

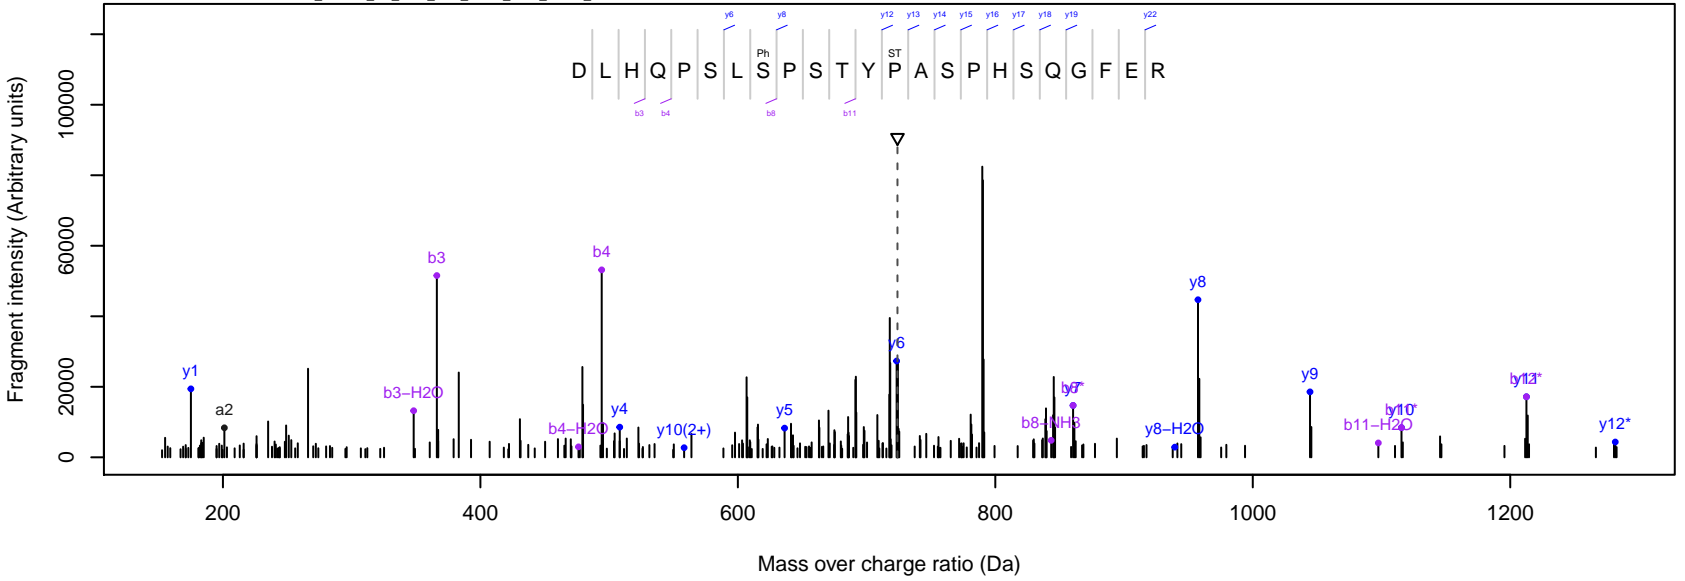

ILATPPQEDAPS(Phospho (STY))VDIANIR-3+

Source : QE3\_201126\_FR\_TiOx\_hum\_tissue\_Urea\_RNAB\_N Scan : 44050

Andromeda score : 128.98

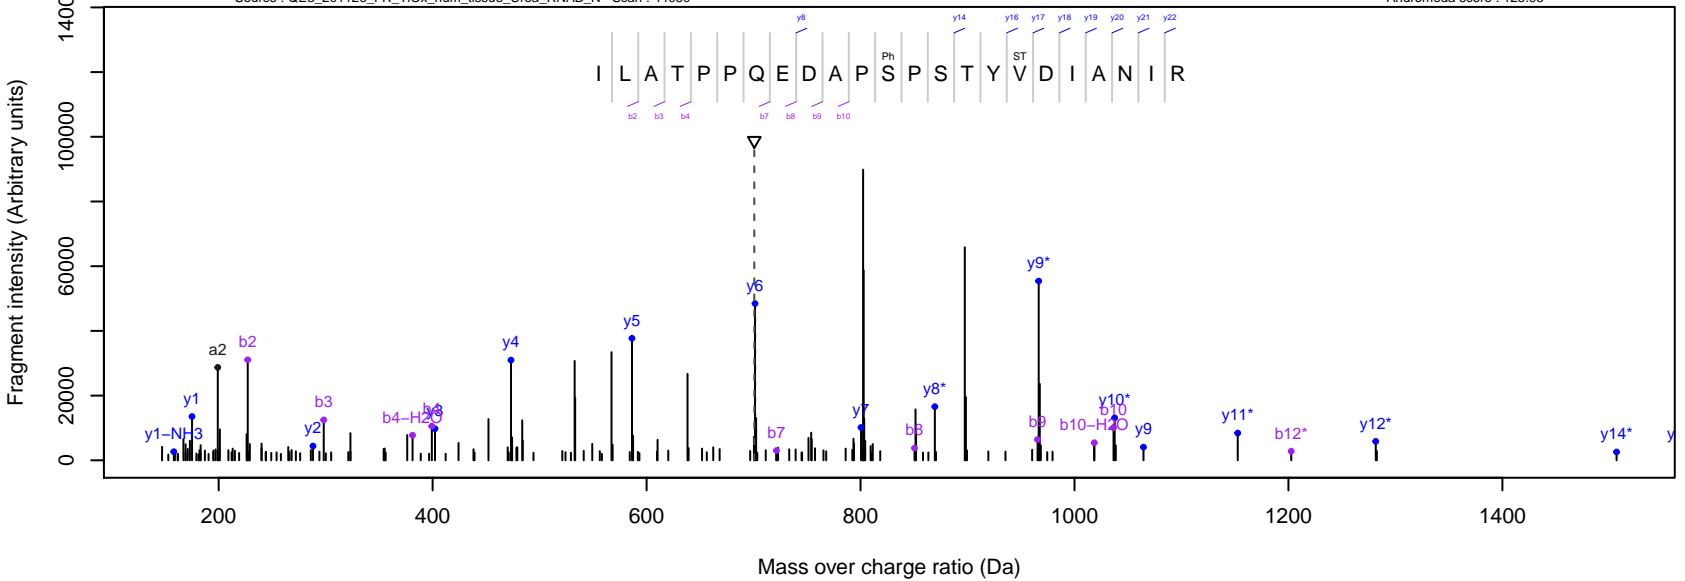

LVVPATQCGS(Phospho (STY))LIGK-2+

Source : QE3\_201126\_FR\_TIOx\_hum\_tissue\_Urea\_RNAB\_H Scan : 32590

Andromeda score : 128.96

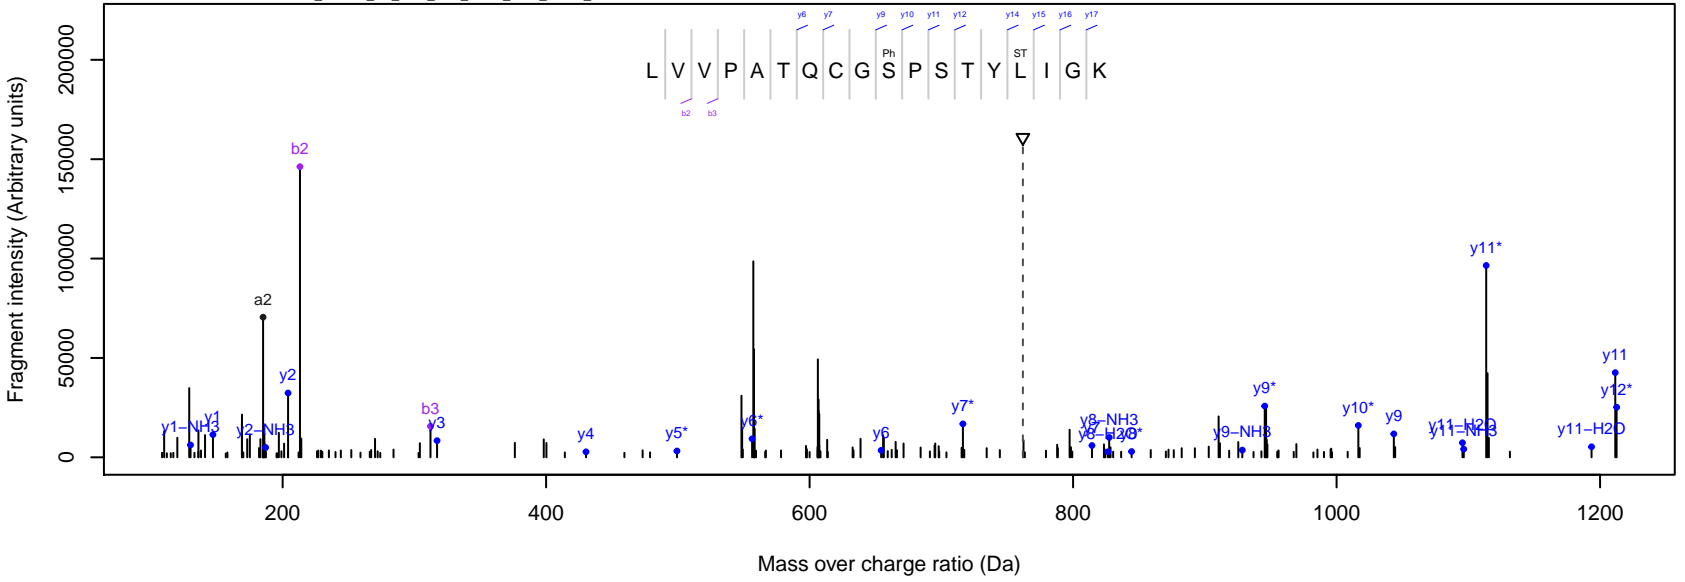

QKDFDIAEQNESS(Phospho (STY))DEESLR-3+

Source : QE3\_201126\_FR\_TIOx\_hum\_tissue\_Urea\_RNAB\_B Scan : 23452

Andromeda score : 128.95

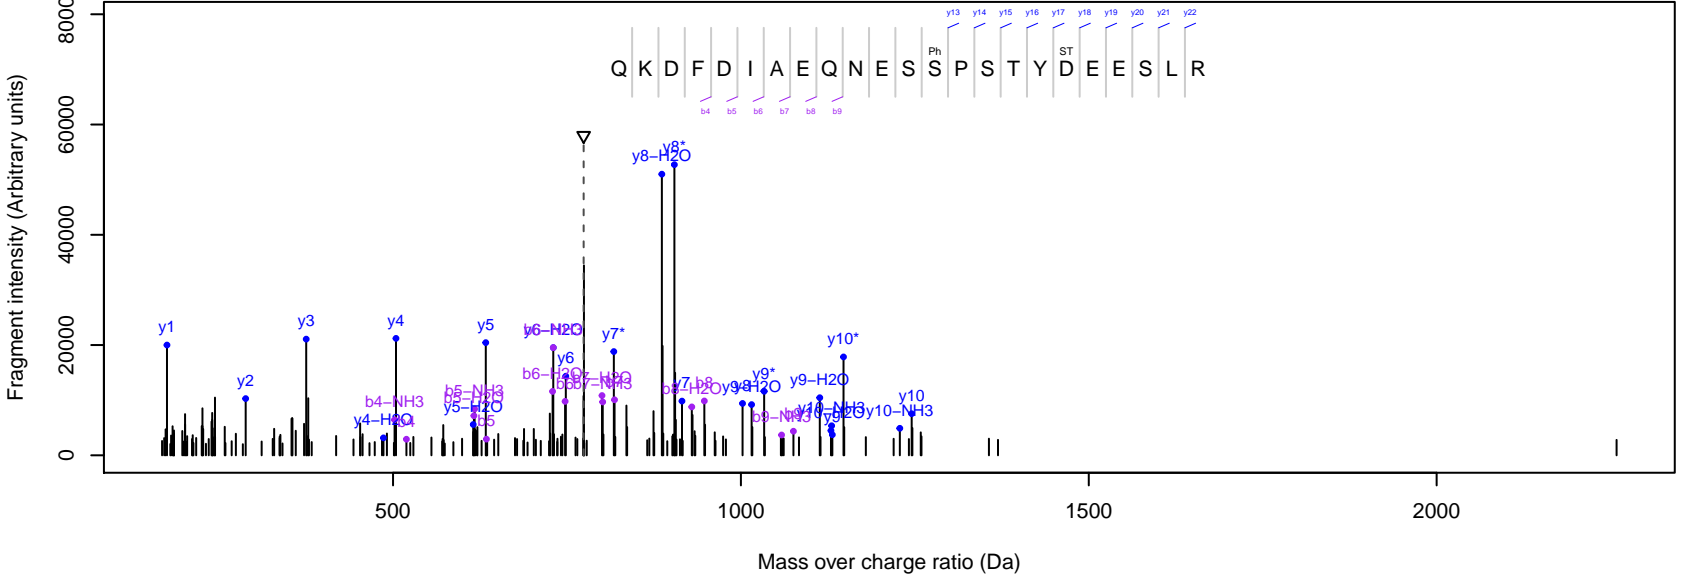

TLS(Phospho (STY))FGSDLNYATR-2+

Source : QE3\_201126\_FR\_TIOx\_hum\_tissue\_Urea\_RNAB\_H Scan : 42751

Andromeda score : 128.95

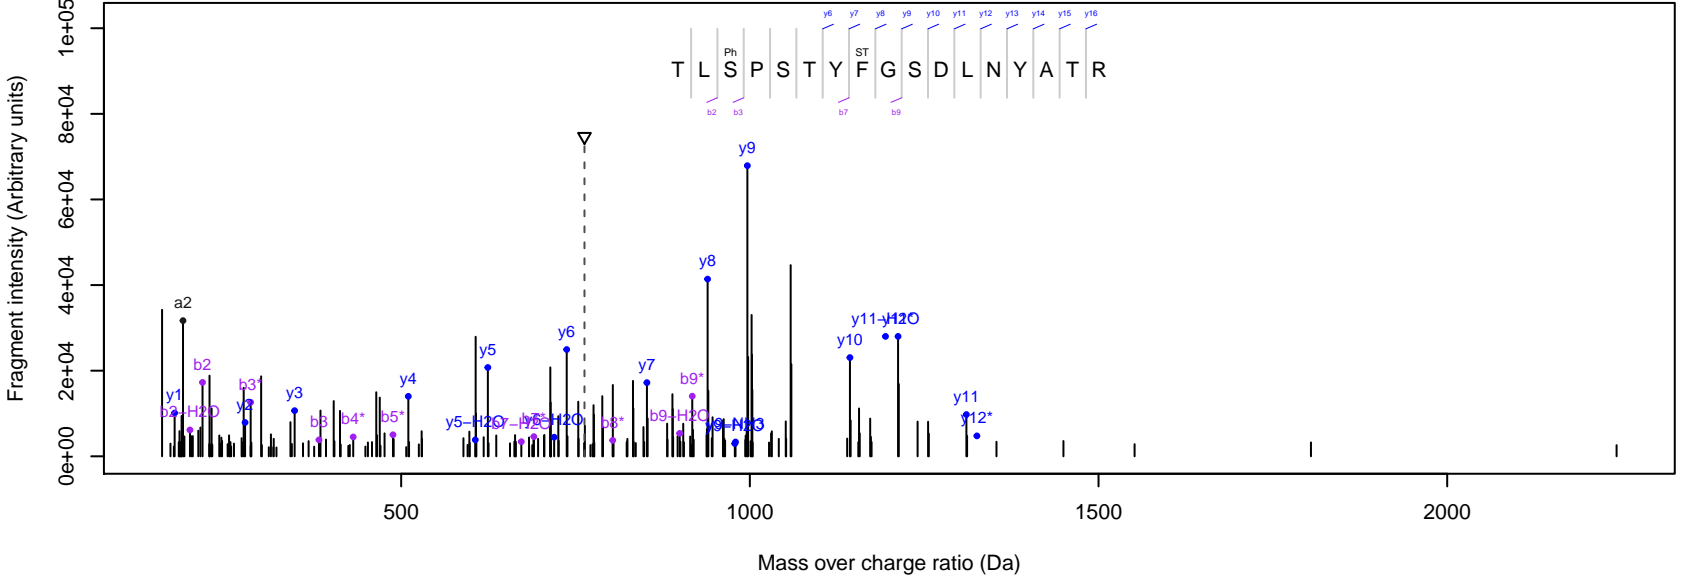

EMLMEDVGS(Phospho (STY))EEEQEEDEAPFQEK-3+

Source : QE3\_201126\_FR\_TiOx\_hum\_tissue\_Urea\_RNAB\_N Scan : 47655

Andromeda score : 128.91

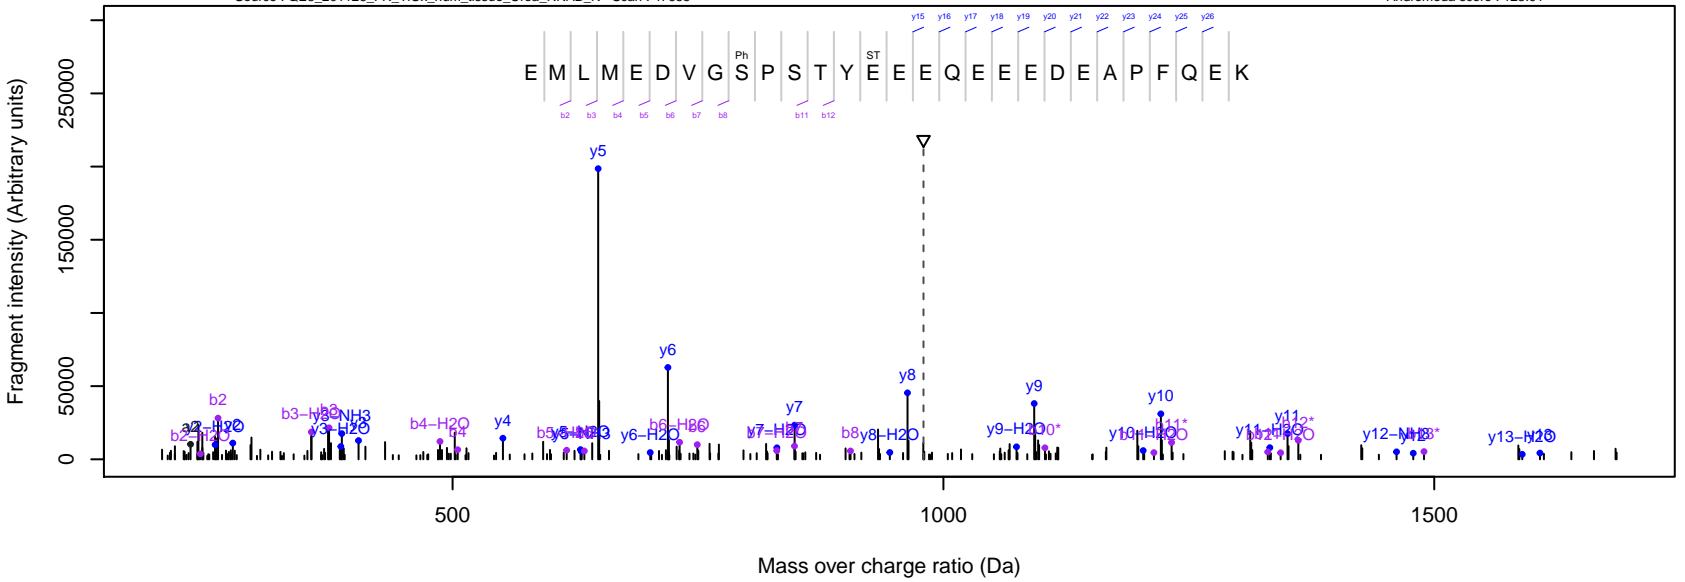

LSGFS(Phospho (STY))FKK-2+

Source : QE3\_201126\_FR\_TiOx\_hum\_tissue\_Urea\_RNAB\_H Scan : 20478

Andromeda score : 128.91

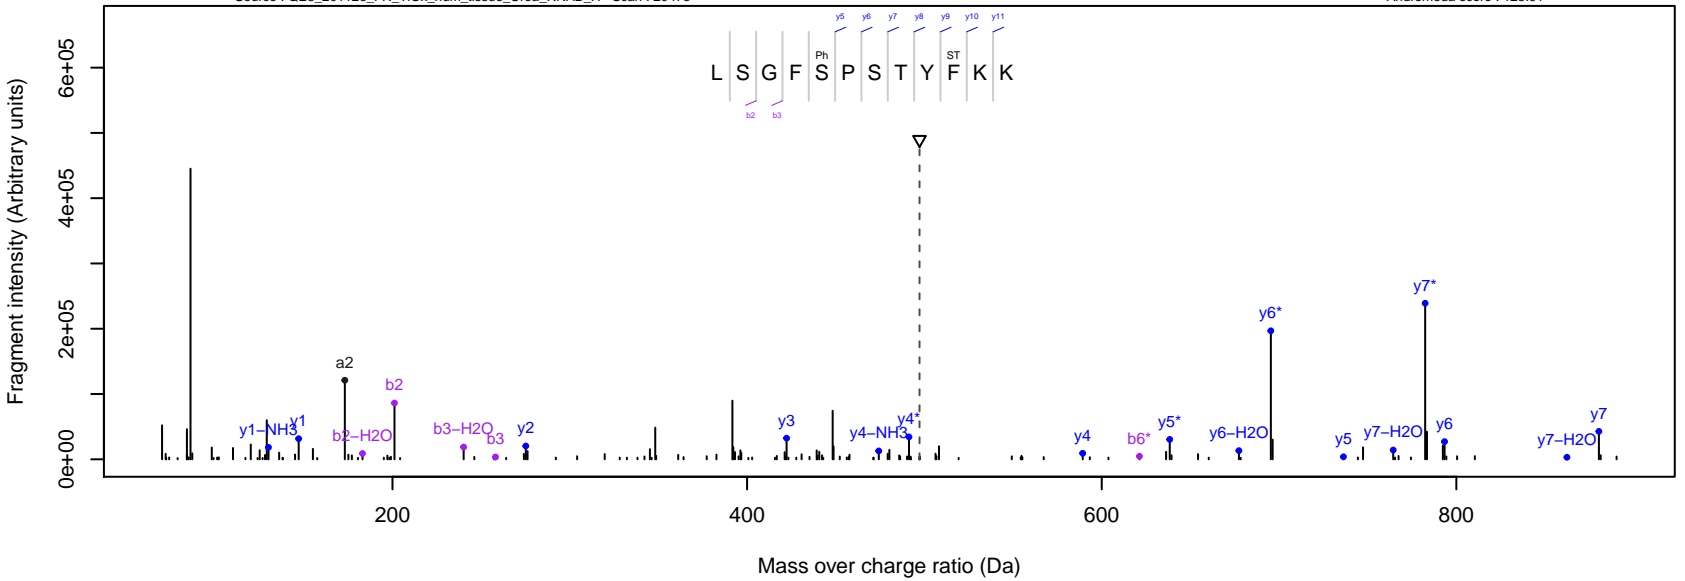

RS(Phospho (STY))PVPAQIAITVPK-2+

Source : QE3\_201126\_FR\_TiOx\_hum\_tissue\_Urea\_RNAB\_B Scan : 27735

Andromeda score : 128.9

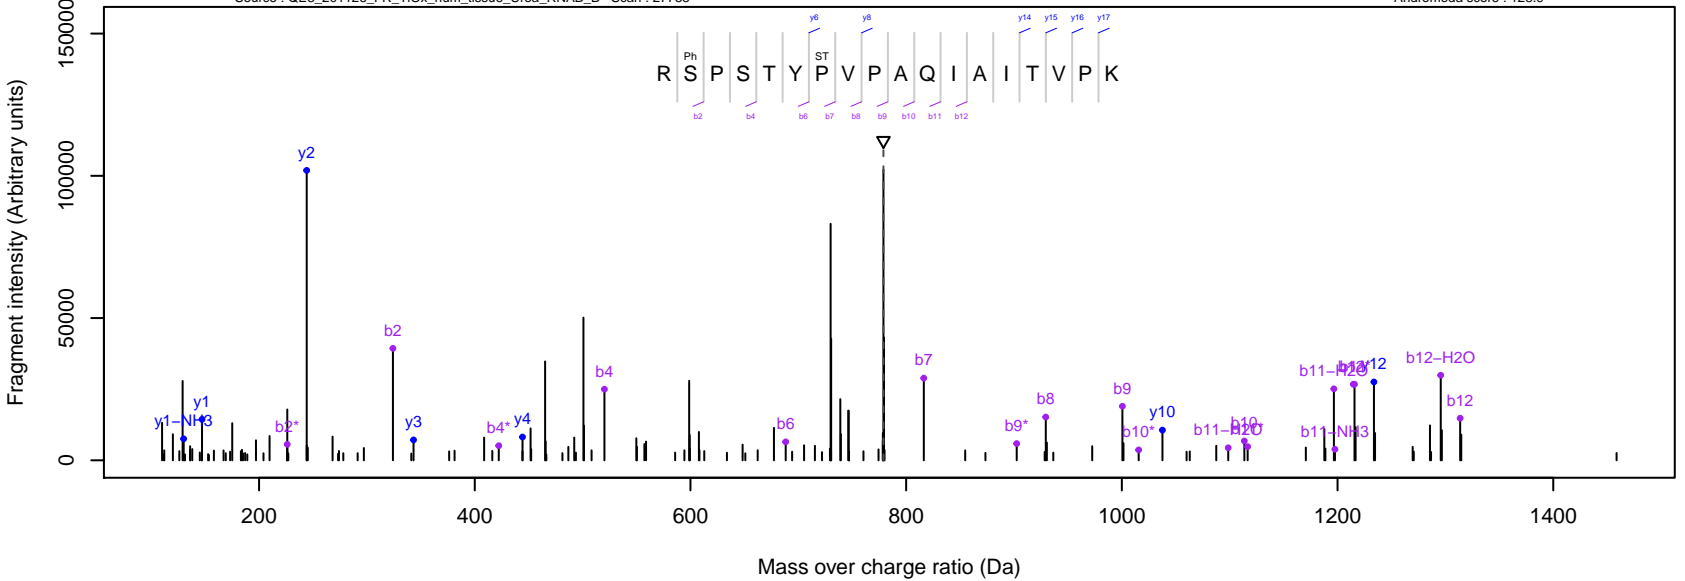

S(Phospho (STY))FSMHDLTTIQGDEPVGQRPYQPLPEAK-3+

Source : QE3\_201126\_FR\_TIOx\_hum\_tissue\_Urea\_RNAB\_B Scan : 40336

Andromeda score : 128.89

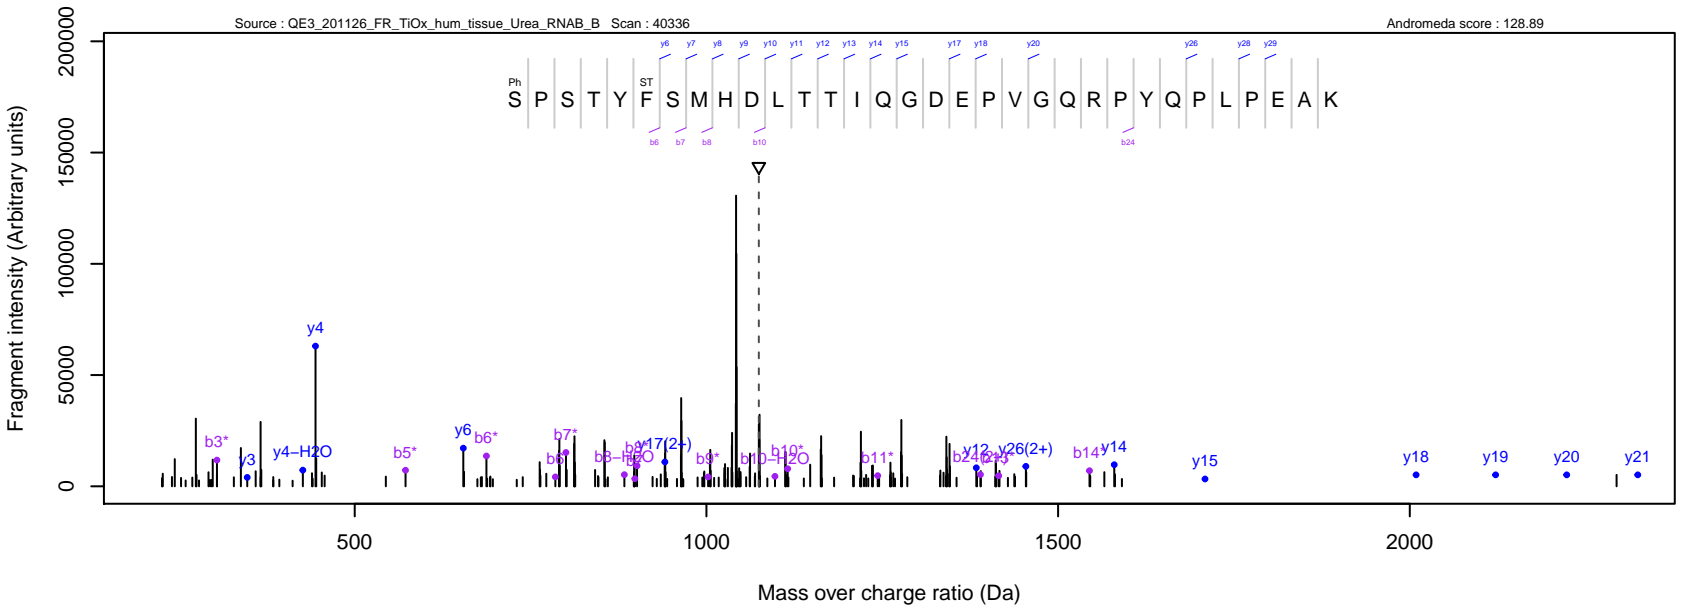

DQCCSGKGM(Oxidation (M))S(Phospho (STY))DEDDENEFFDAPEIITMPENLGHK-4+

Source : QE3\_201126\_FR\_TIOx\_hum\_tissue\_Urea\_RNAB\_N Scan : 53756

Andromeda score : 128.87

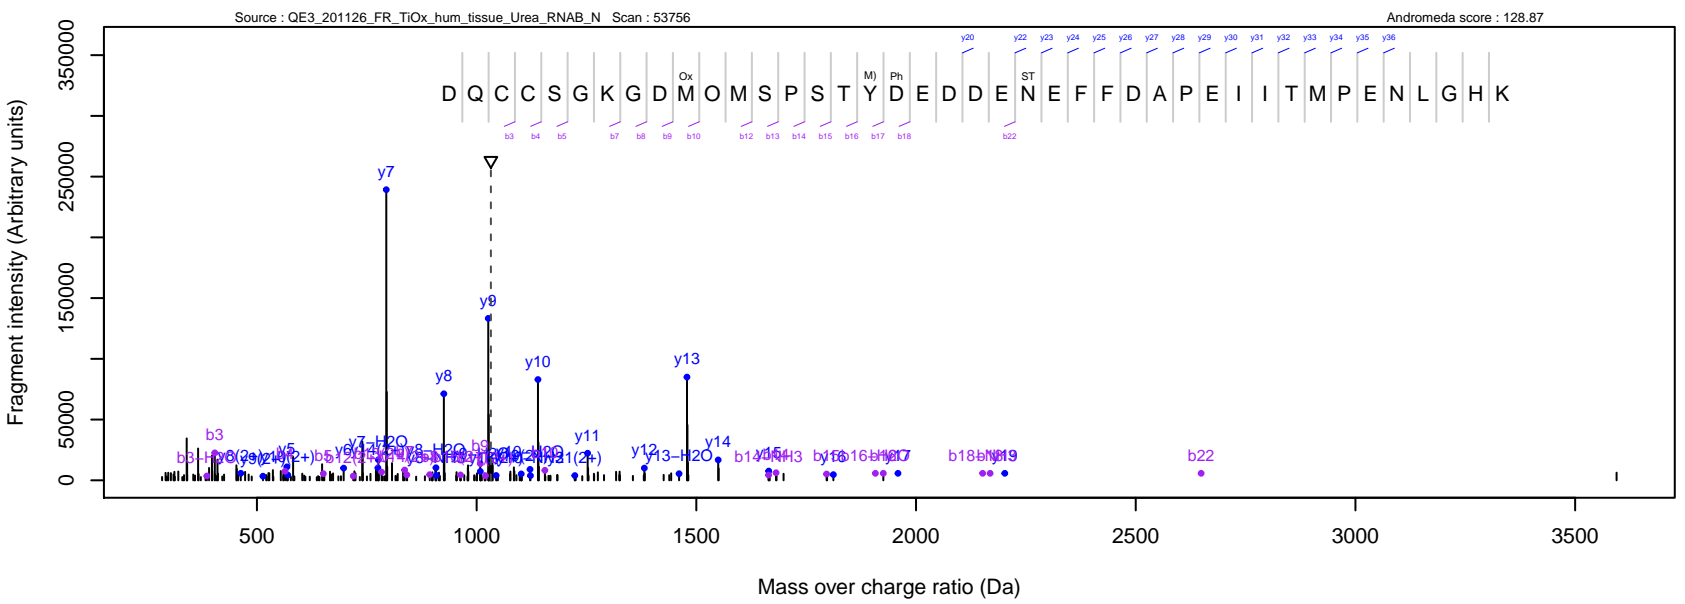

HLNT(Phospho (STY))EPMEIFR-2+

Source : QE3\_201126\_FR\_TIOx\_hum\_tissue\_Urea\_RNAB\_N Scan : 35752

Andromeda score : 128.85

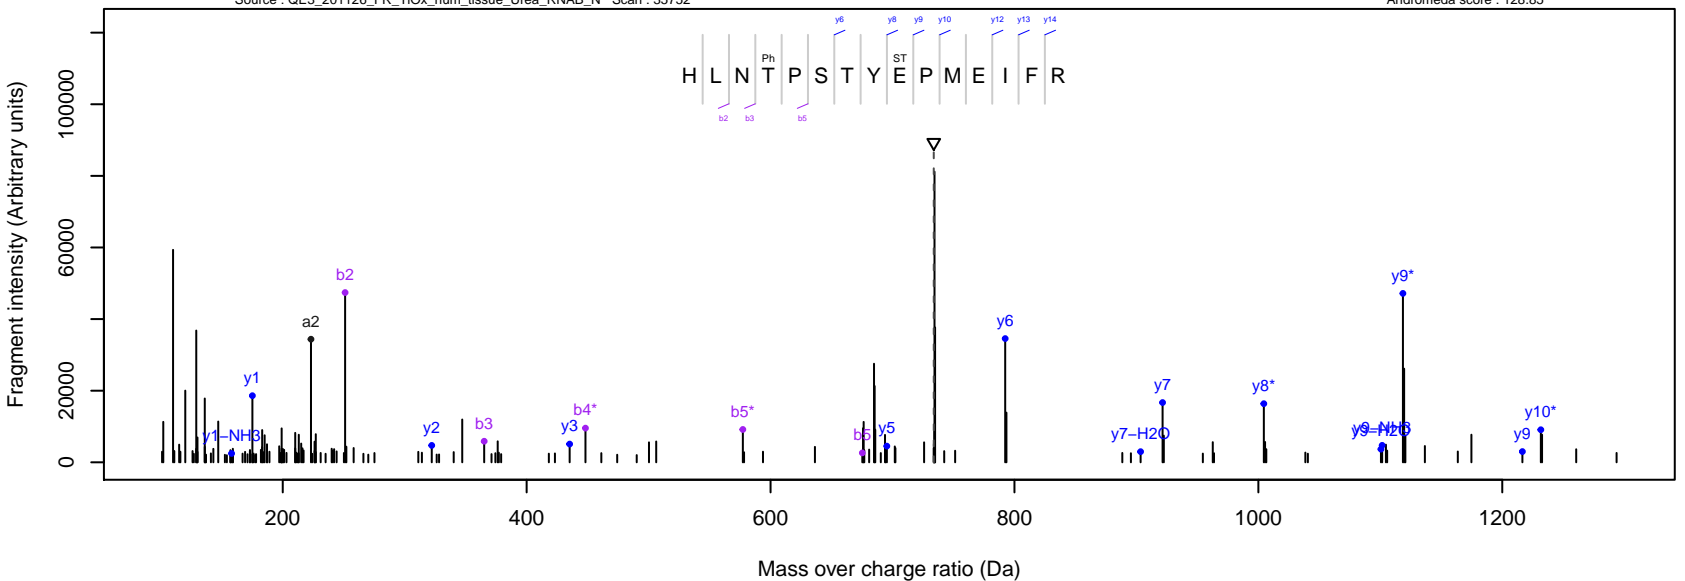



AIPVAQLNAPSDWDS(Phospho (STY))RGKDS(Phospho (STY))YETSQLDDQS(Phospho (STY))AETHSHK-4+

Source : QE3\_201126\_FR\_TIOx\_hum\_tissue\_Urea\_RNAB\_N Scan : 33202

Andromeda score : 128.83

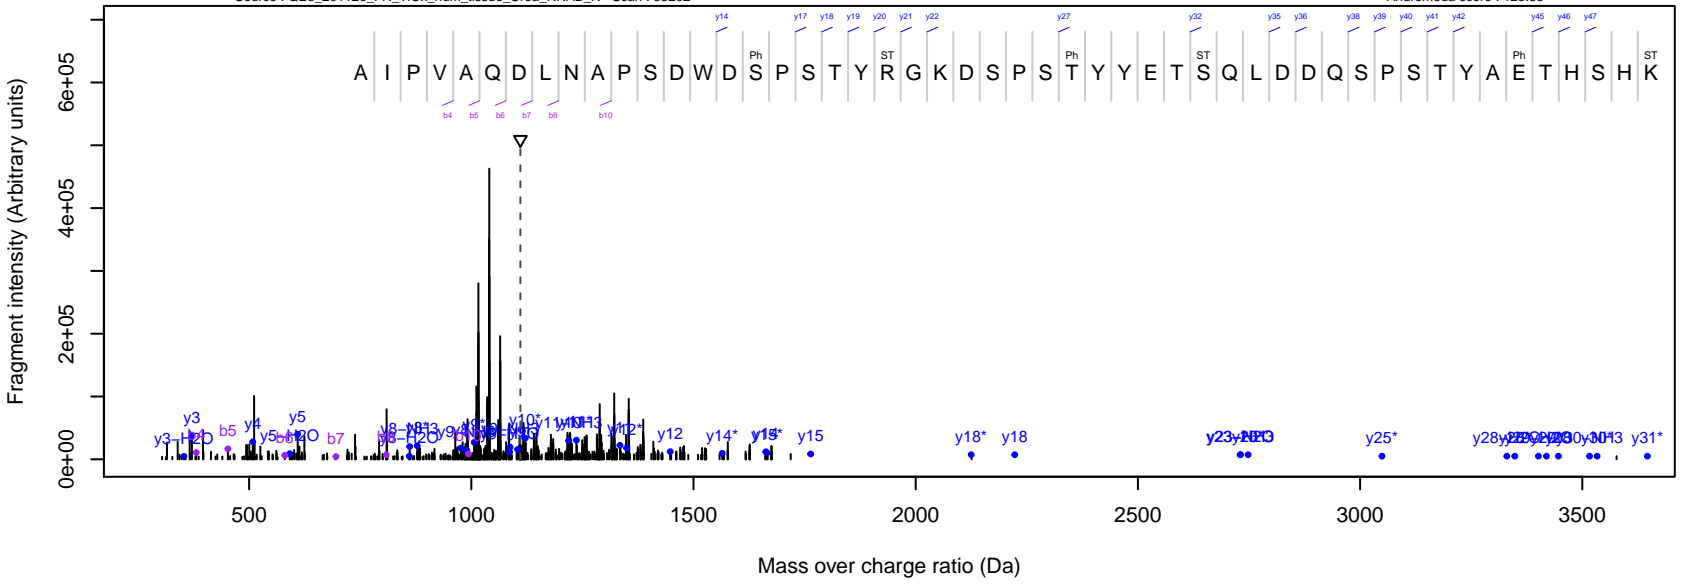

LGGS(Phospho (STY))AVISLEGKPL-2+

Source : QE3\_201126\_FR\_TIOx\_hum\_tissue\_Urea\_RNAB\_H Scan : 45842

Andromeda score : 128.76

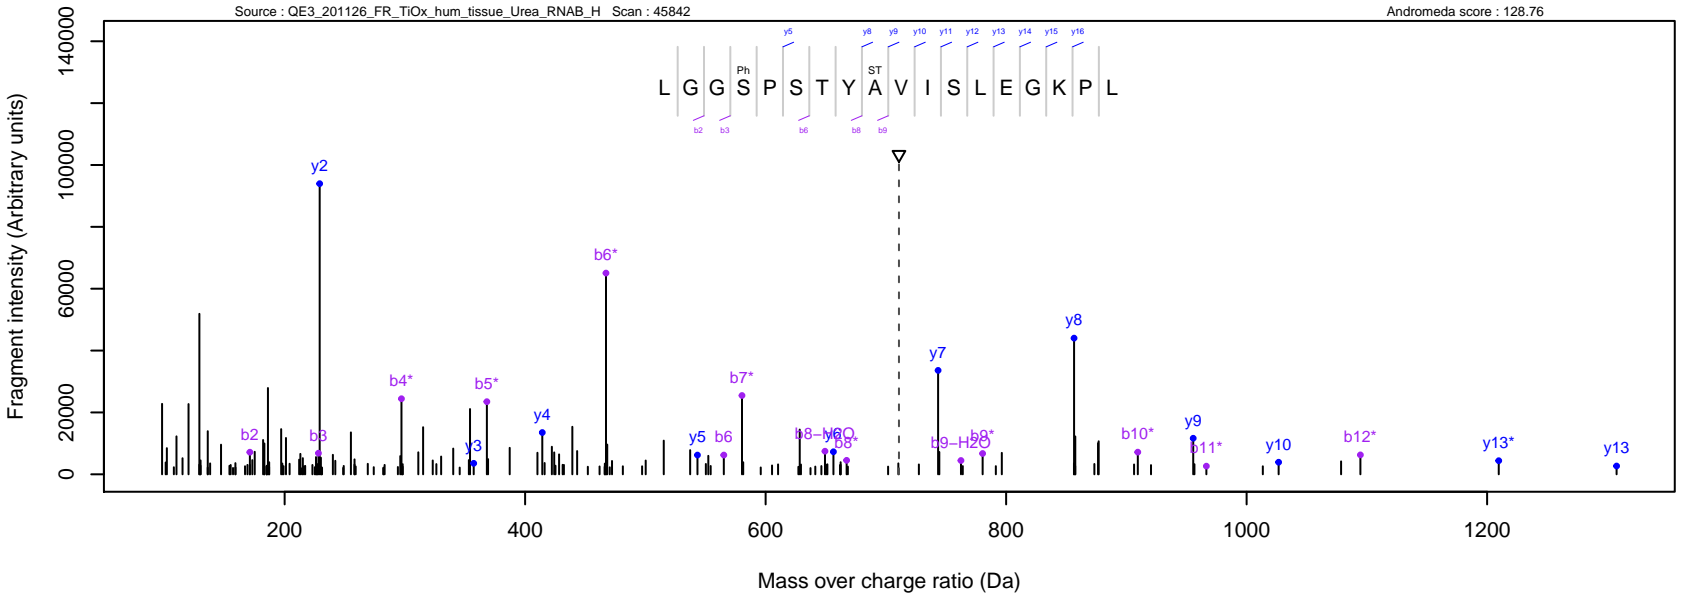

NLS(Phospho (STY))SDEATNPISR-2+

Source : QE3\_201126\_FR\_TIOx\_hum\_tissue\_Urea\_RNAB\_H Scan : 20351

Andromeda score : 128.76

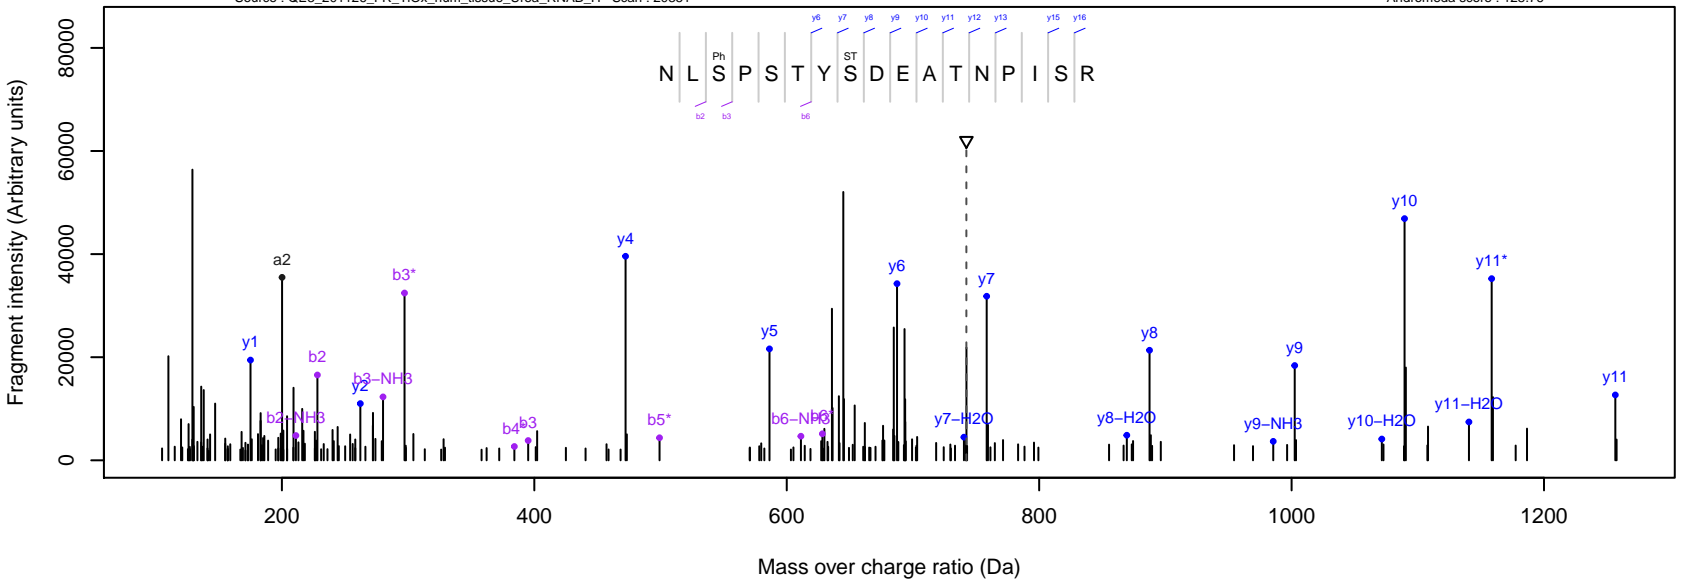

VPSPLEGS(Phospho (STY))EGDGD(TPhospho (STY))D-2+

Source : QE3\_201126\_FR\_TiOx\_hum\_tissue\_Urea\_RNAB\_B Scan : 43741

Andromeda score : 128.76

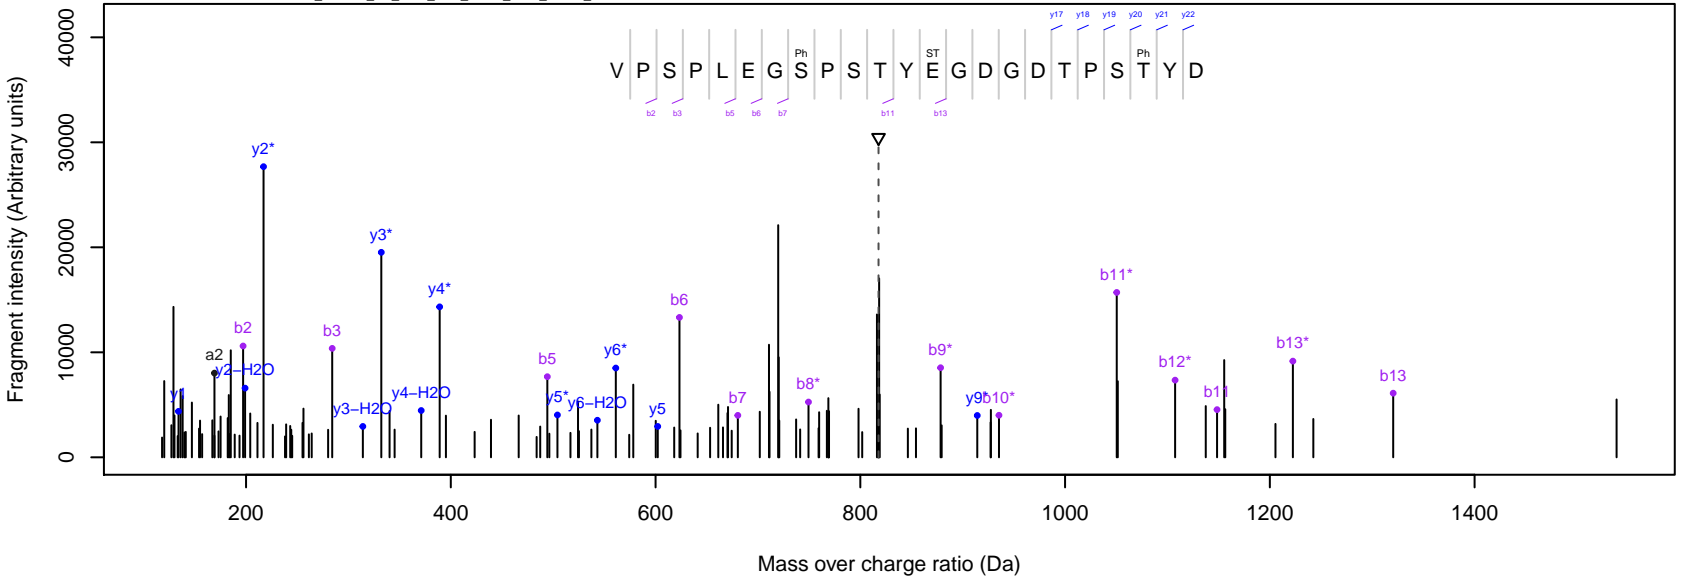

ARLDQS(Phospho (STY))DEDFKPR-3+

Source : QE3\_201126\_FR\_TiOx\_hum\_tissue\_Urea\_RNAB\_N Scan : 11369

Andromeda score : 128.74

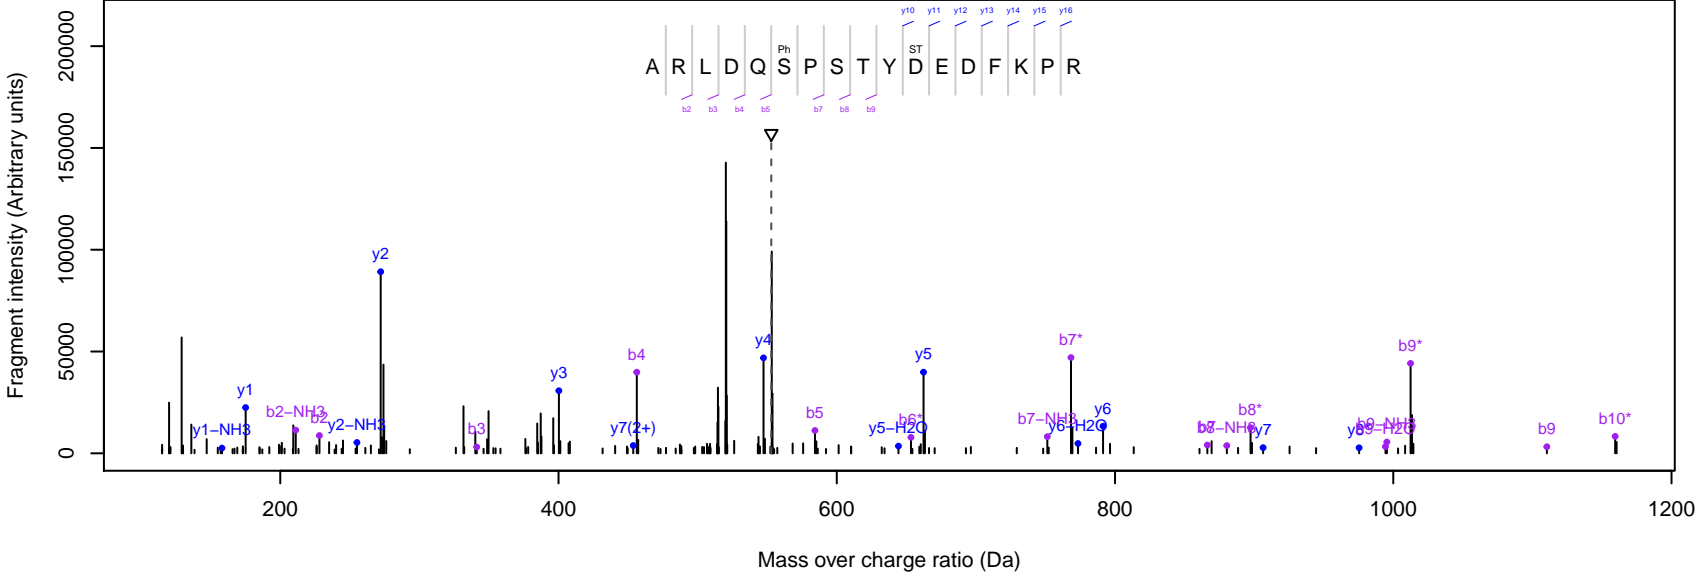

KVHS(Phospho (STY))PQQVDFR-3+

Source : QE3\_201126\_FR\_TiOx\_hum\_tissue\_Urea\_RNAB\_N Scan : 8418

Andromeda score : 128.73

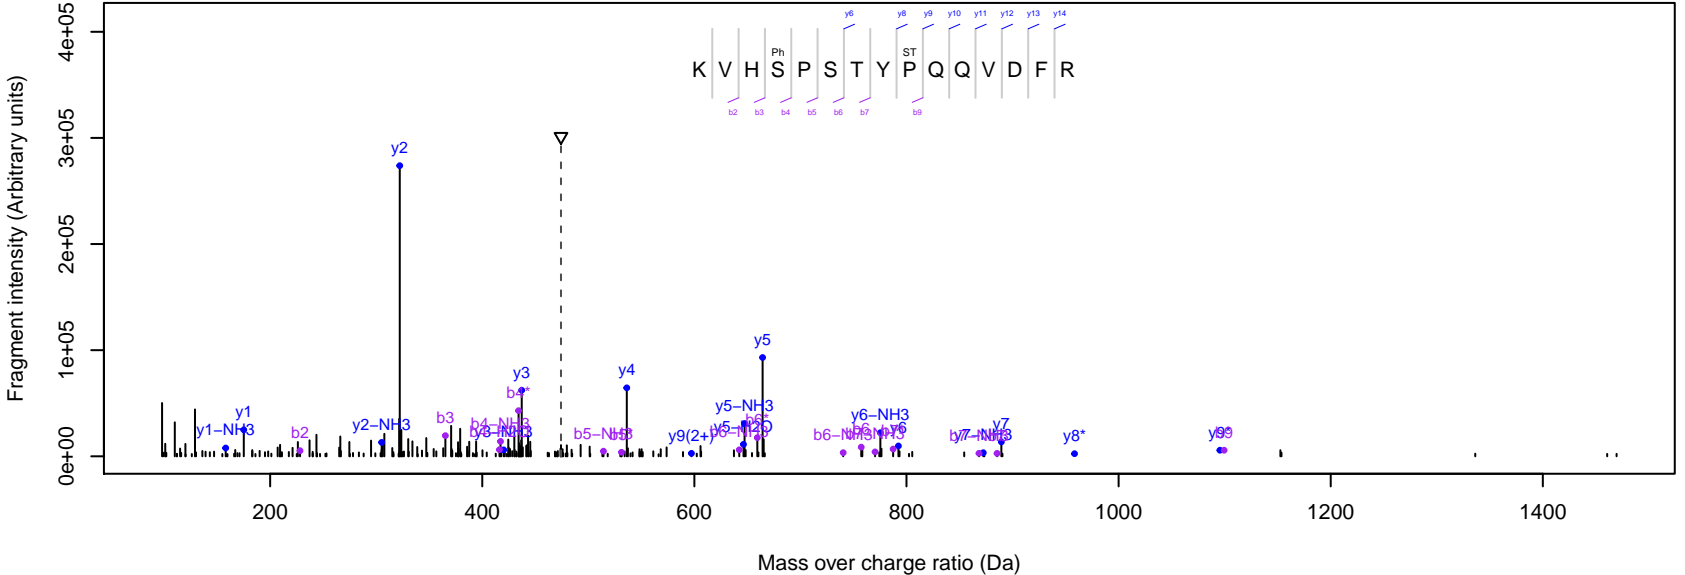

SIS(Phospho (STY))TSGPLDKEDTGR-2+

Source : QE3\_201126\_FR\_TiOx\_hum\_tissue\_Urea\_RNAB\_N Scan : 14700

Andromeda score : 128.71

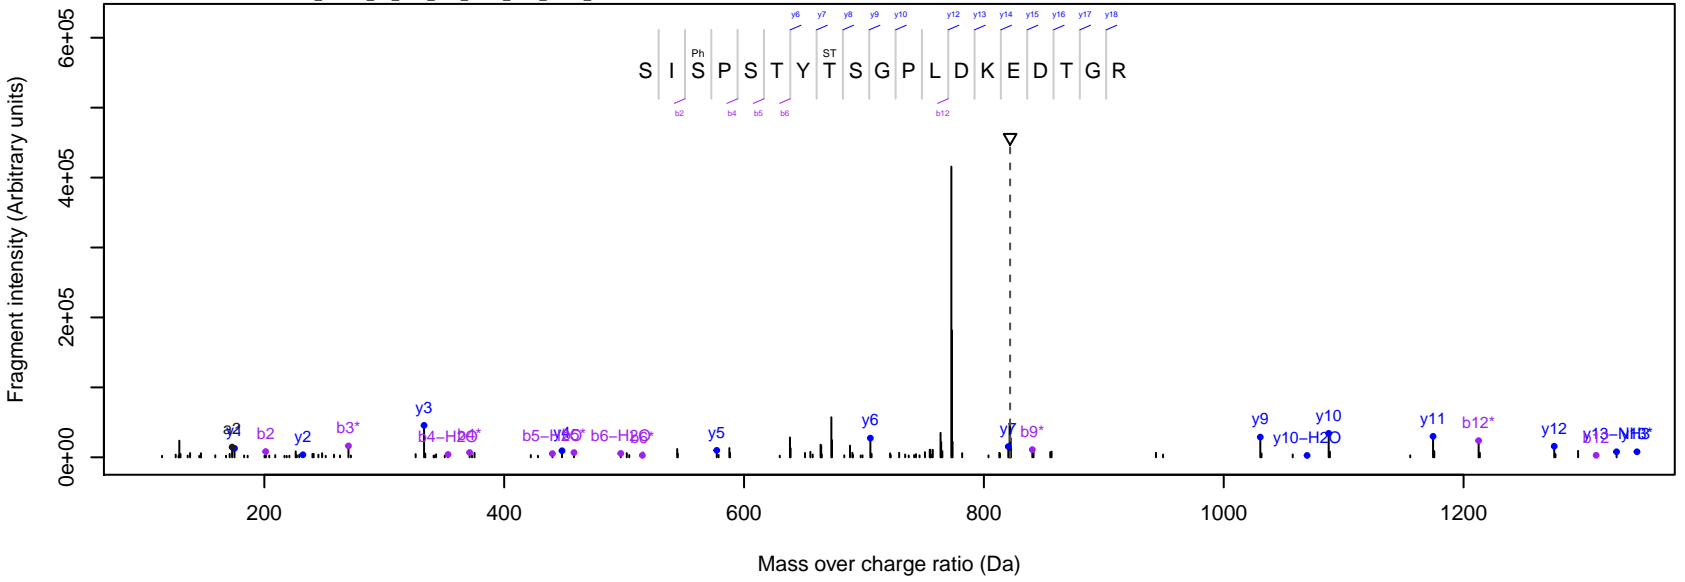

SISQSSTDSYSSAASYTDSS(Phospho (STY))DDEVSPR-3+

Source : QE3\_201126\_FR\_TiOx\_hum\_tissue\_Urea\_RNAB\_H Scan : 26451

Andromeda score : 128.65

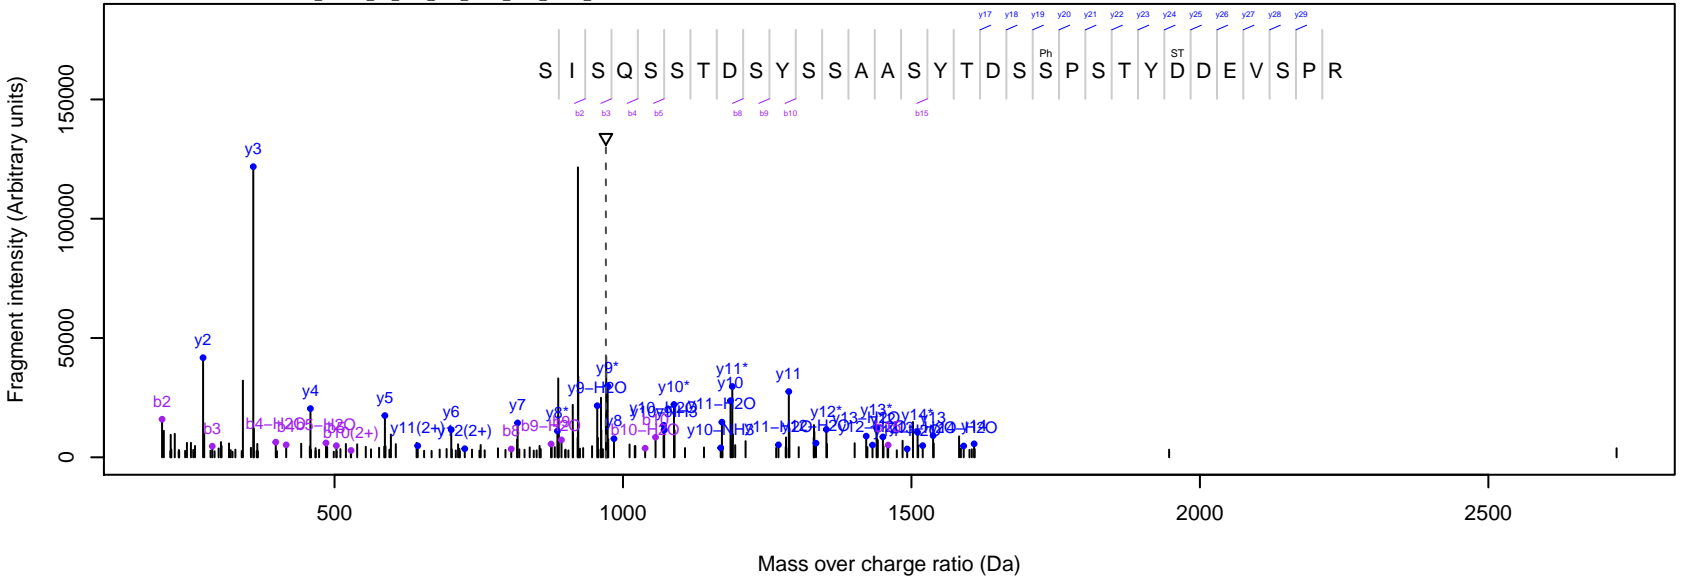

KES(Phospho (STY))YSVYVYK-2+

Source : QE3\_201126\_FR\_TiOx\_hum\_tissue\_Urea\_RNAB\_N Scan : 19865

Andromeda score : 128.61

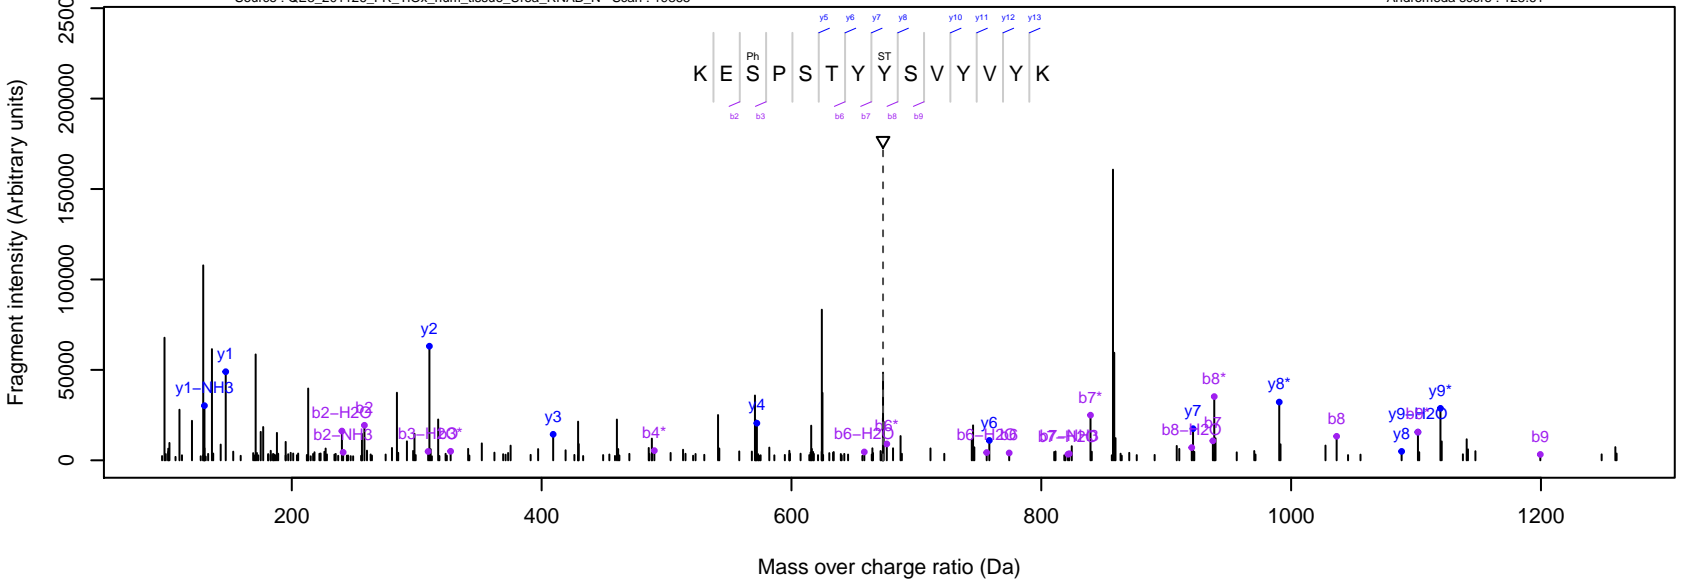

S(Phospho (STY))TAALEEDAQILK-2+

Source : QE3\_201126\_FR\_TiOx\_hum\_tissue\_Urea\_RNAB\_N Scan : 36465

Andromeda score : 128.54

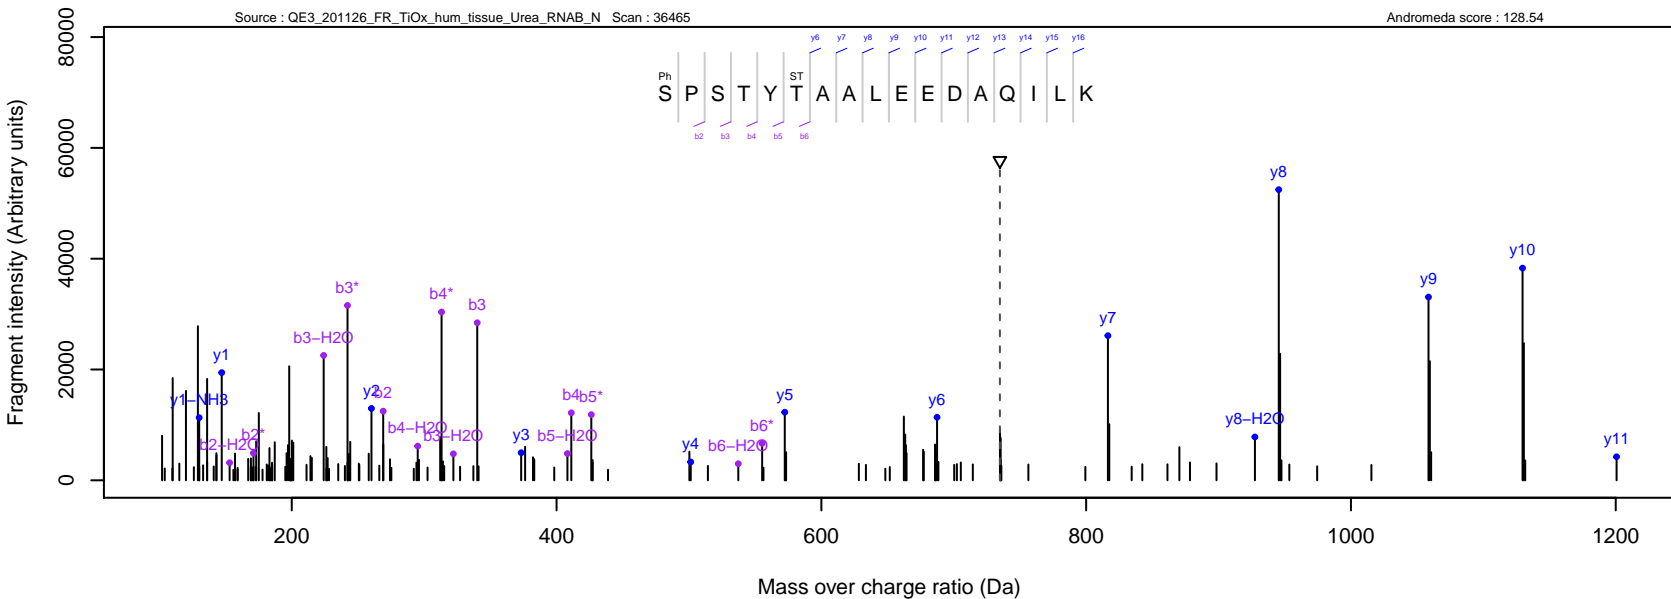

IQQEQS(Phospho (STY))SGEEDSDLSPEEREK-3+

Source : QE3\_201126\_FR\_TiOx\_hum\_tissue\_Urea\_RNAB\_N Scan : 13397

Andromeda score : 128.52

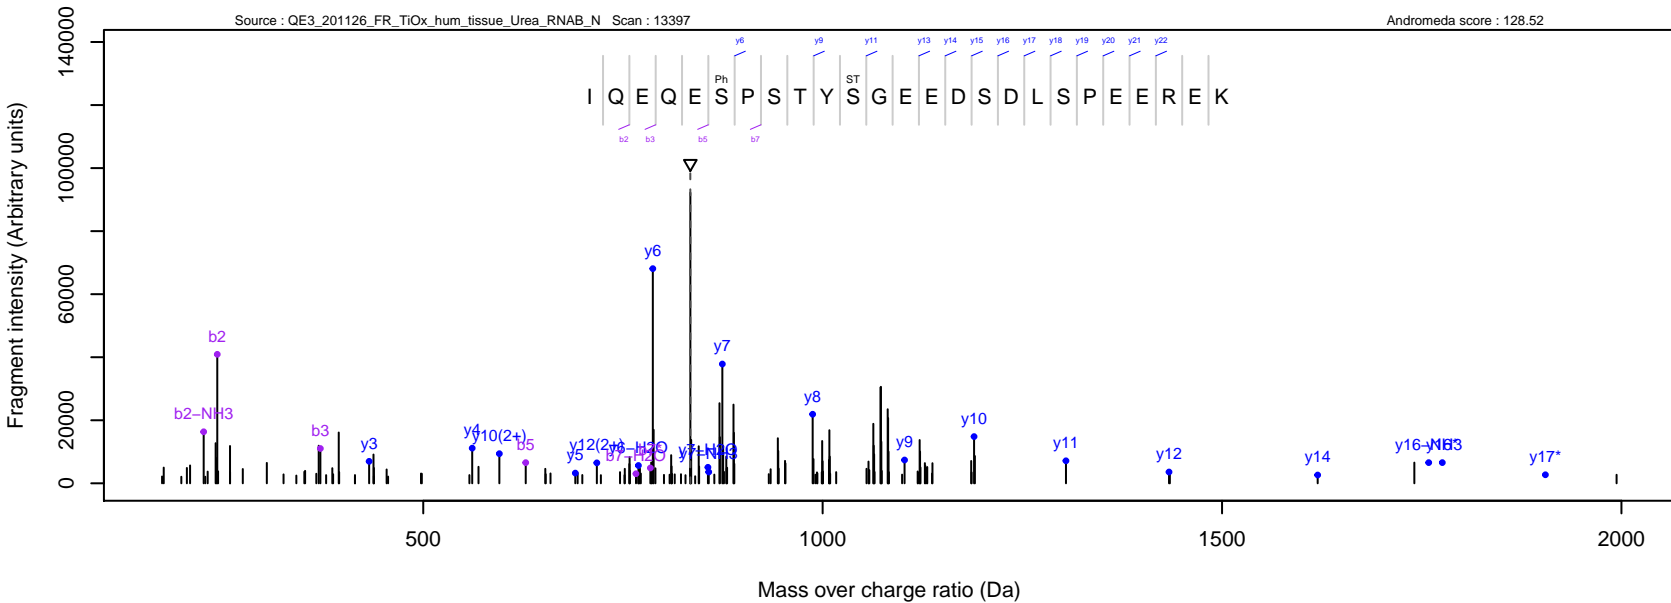

SGS(Phospho (STY))VYEPLK-2+

Source : QE3\_201126\_FR\_TiOx\_hum\_tissue\_Urea\_RNAB\_H Scan : 20542

Andromeda score : 128.51

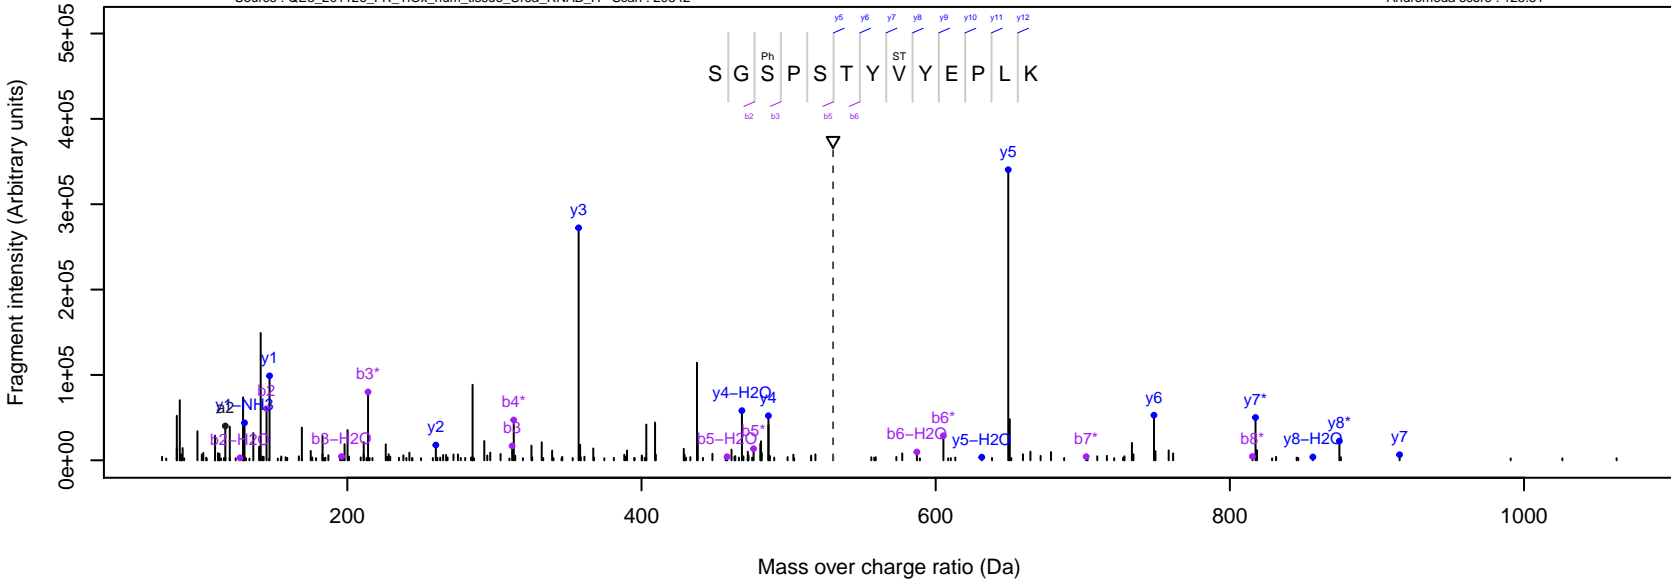

VATTPGS(Phospho (STY))PSLGR-2+

Source : QE3\_201126\_FR\_TIOx\_hum\_tissue\_Urea\_RNAB\_N Scan : 14555

Andromeda score : 128.46

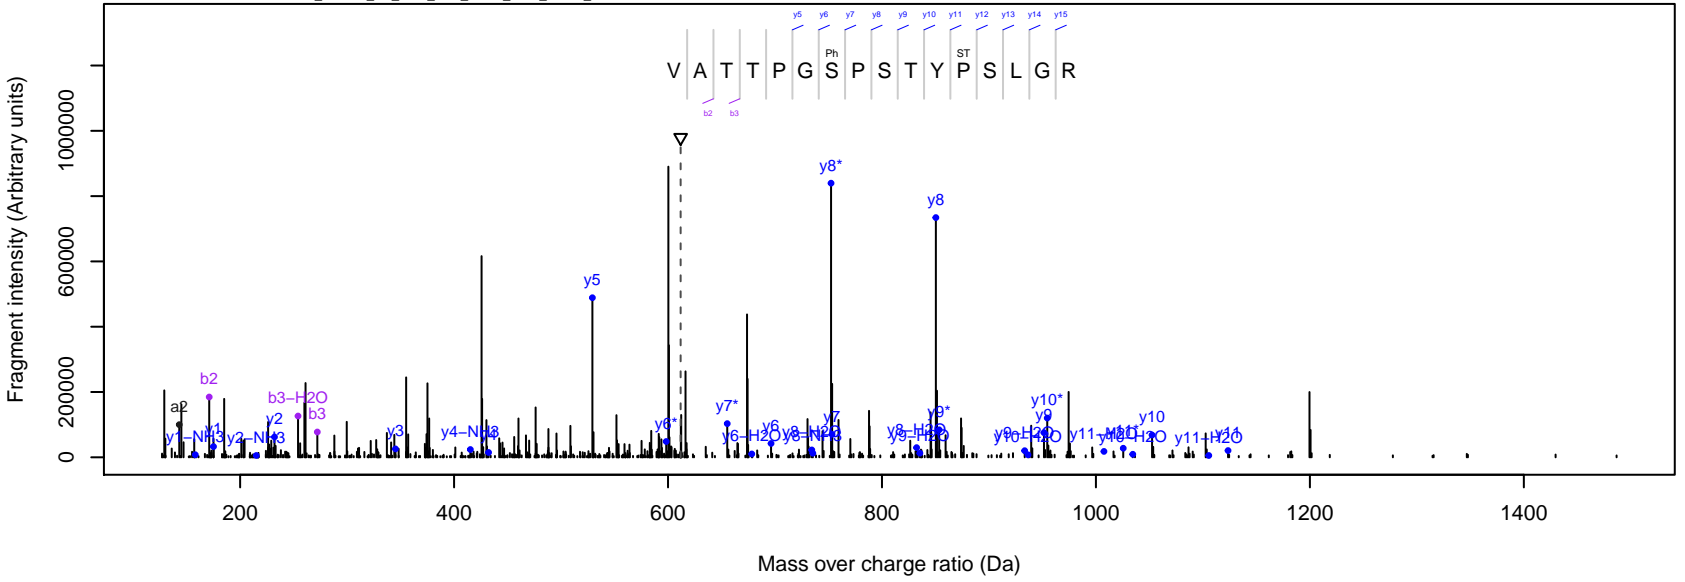

S(Phospho (STY))APAS(Phospho (STY))PTHPGLM(Oxidation (M))SPR-2+

Source : QE3\_201126\_FR\_TIOx\_hum\_tissue\_Urea\_RNAB\_N Scan : 15789

Andromeda score : 128.45

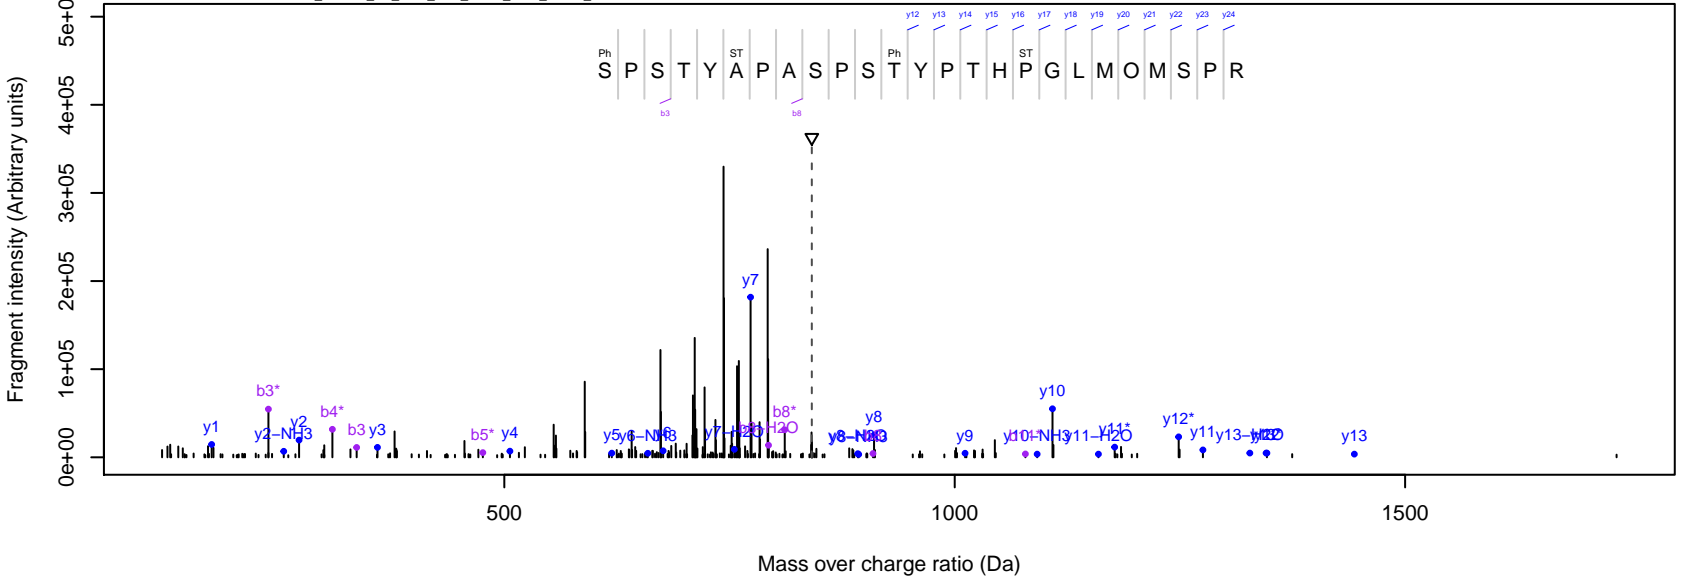

VSGLPDLSWQLDGK(Phospho (STY))AHP-4+

Source : QE3\_201126\_FR\_TIOx\_hum\_tissue\_Urea\_RNAB\_N Scan : 35708

Andromeda score : 128.43

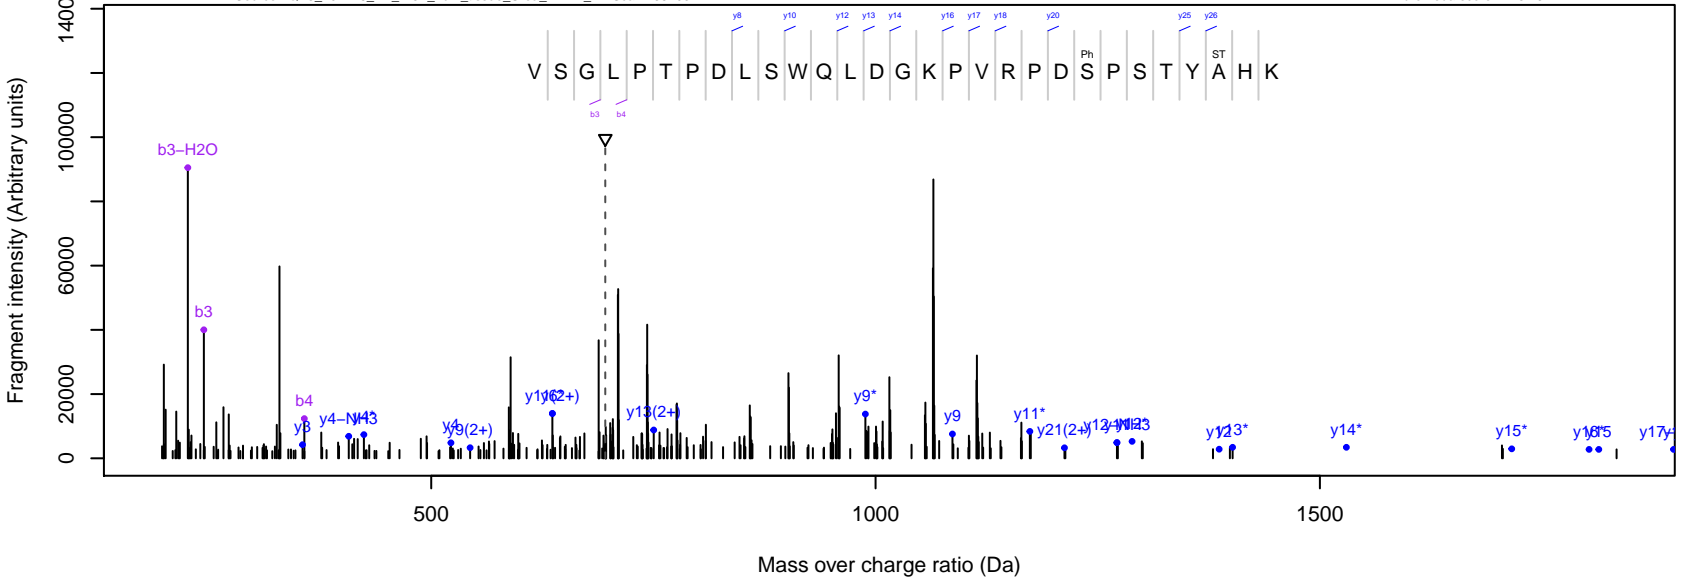

AEPYVAS(Phospho (STY))EYKTVHEELTK-3+

Source : QE3\_201126\_FR\_TIOx\_hum\_tissue\_Urea\_RNAB\_N Scan : 28224

Andromeda score : 128.41

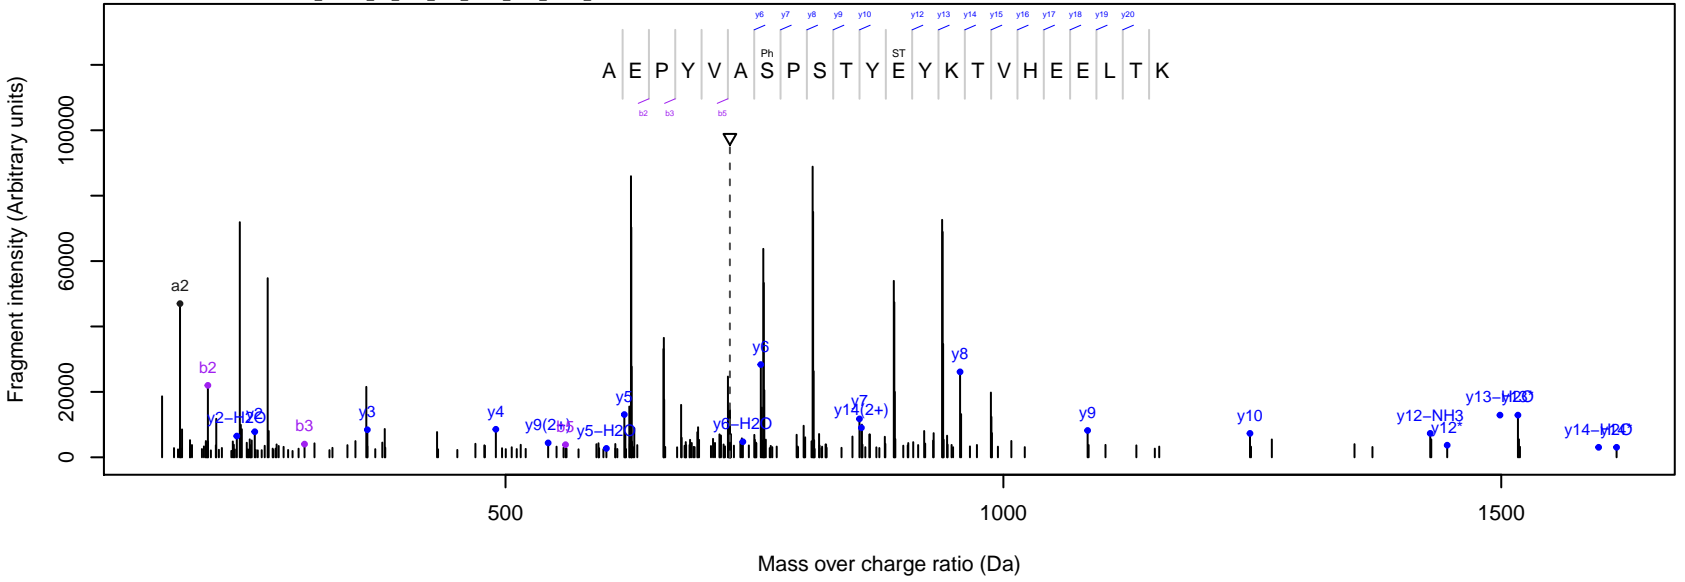

KPRPS(Phospho (STY))EGDEDCLPA SK-3+

Source : QE3\_201126\_FR\_TIOx\_hum\_tissue\_Urea\_RNAB\_B Scan : 7466

Andromeda score : 128.41

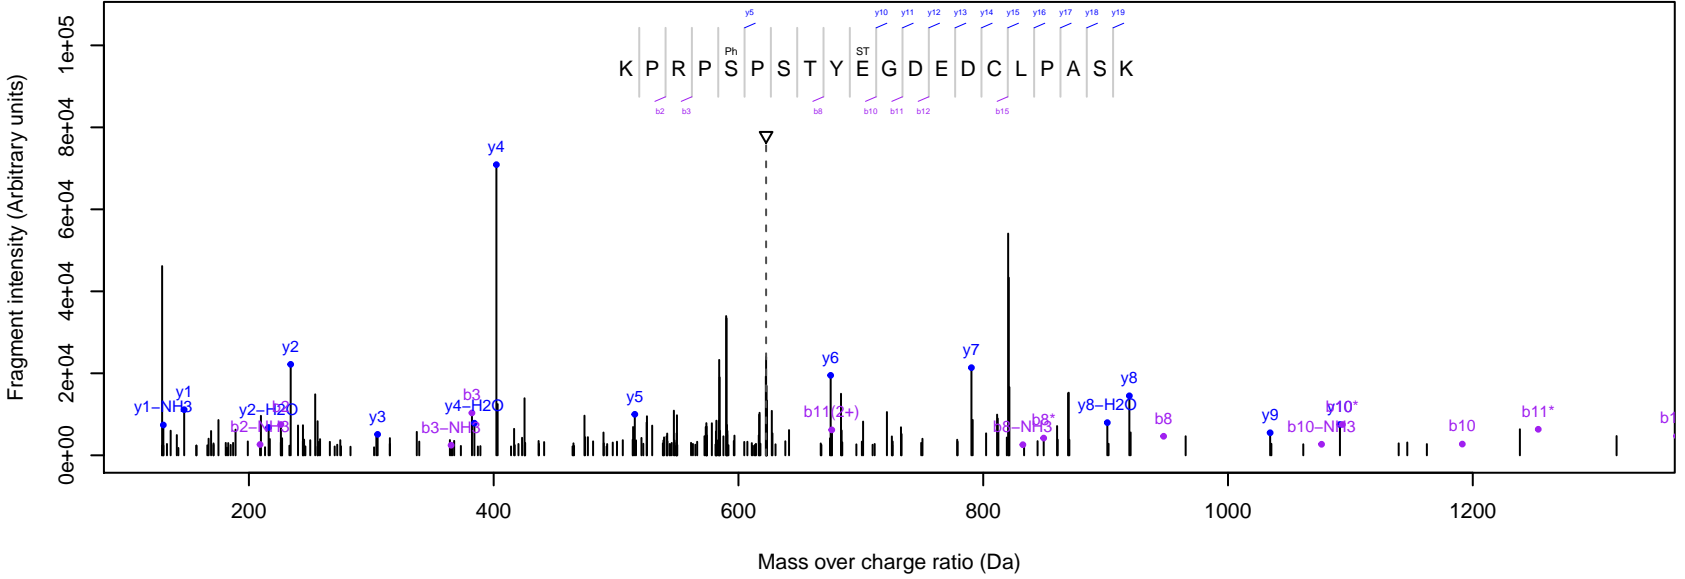

ILS(Phospho (STY))IQKDLANIAEVEVSIPAK-3+

Source : QE3\_201126\_FR\_TIOx\_hum\_tissue\_Urea\_RNAB\_N Scan : 58922

Andromeda score : 128.4

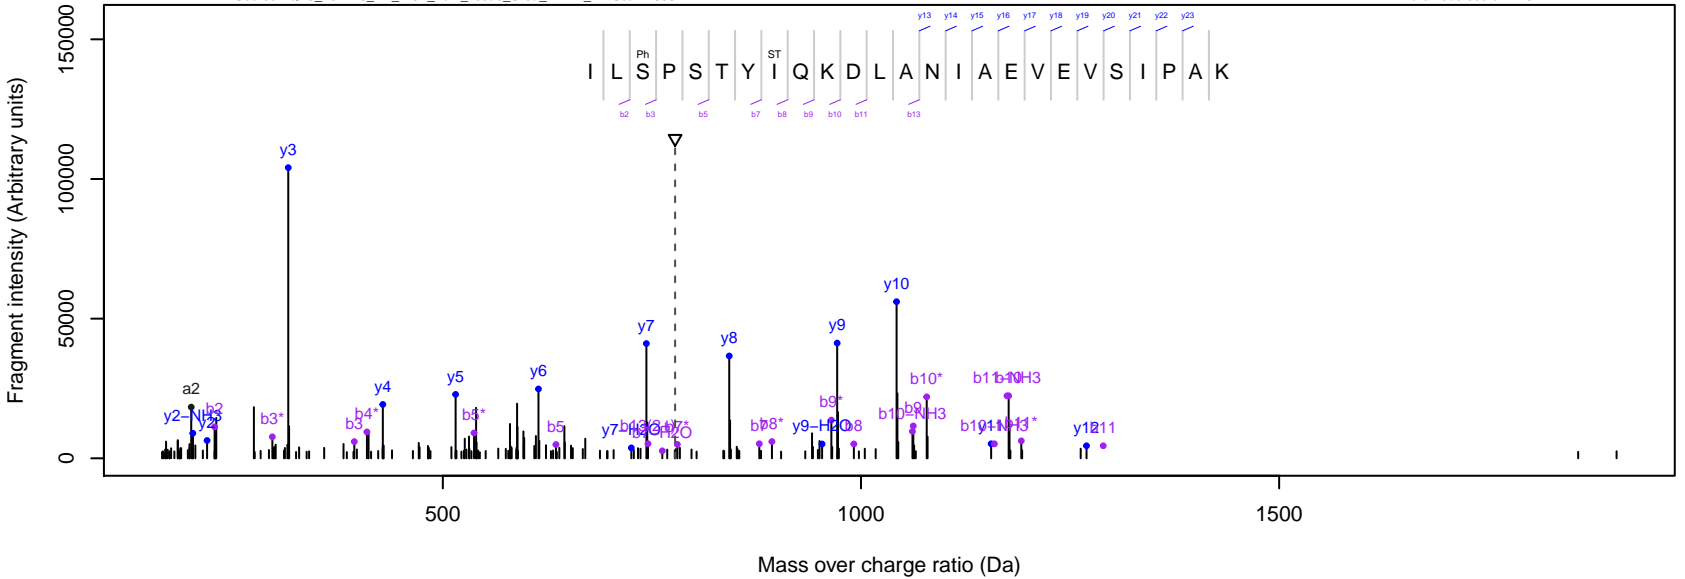

AAVTS(Phospho (STY))PPPTTAPHKER-3+

Source : QE3\_201126\_FR\_TiOx\_hum\_tissue\_Urea\_RNAB\_N Scan : 8497

Andromeda score : 128.38

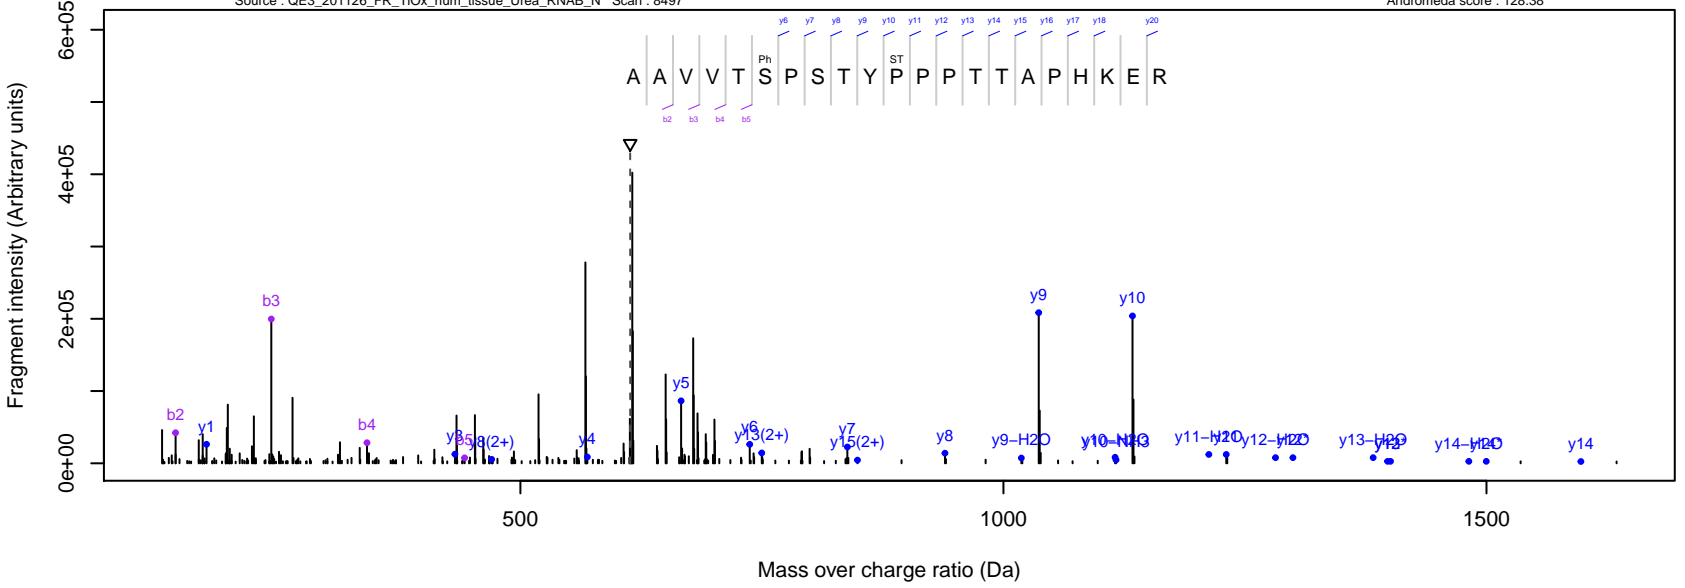

EPTPS(Phospho (STY))IAS(Phospho (STY))DIS(Phospho (STY))LPIATQELR-2+

Source : QE3\_201126\_FR\_TiOx\_hum\_tissue\_Urea\_RNAB\_B Scan : 64386

Andromeda score : 128.38

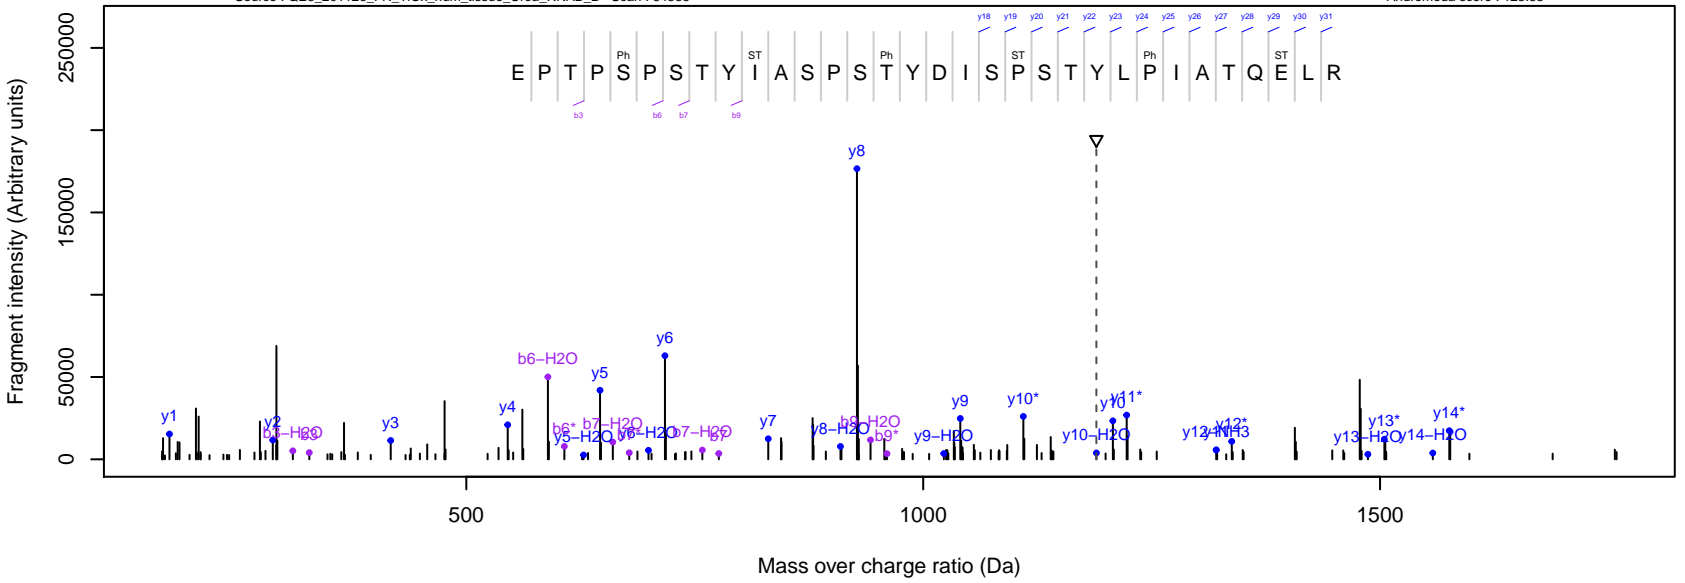

RSS(Phospho (STY))DPWSNSHFPHEN-3+

Source : QE3\_201126\_FR\_TiOx\_hum\_tissue\_Urea\_RNAB\_N Scan : 18602

Andromeda score : 128.38

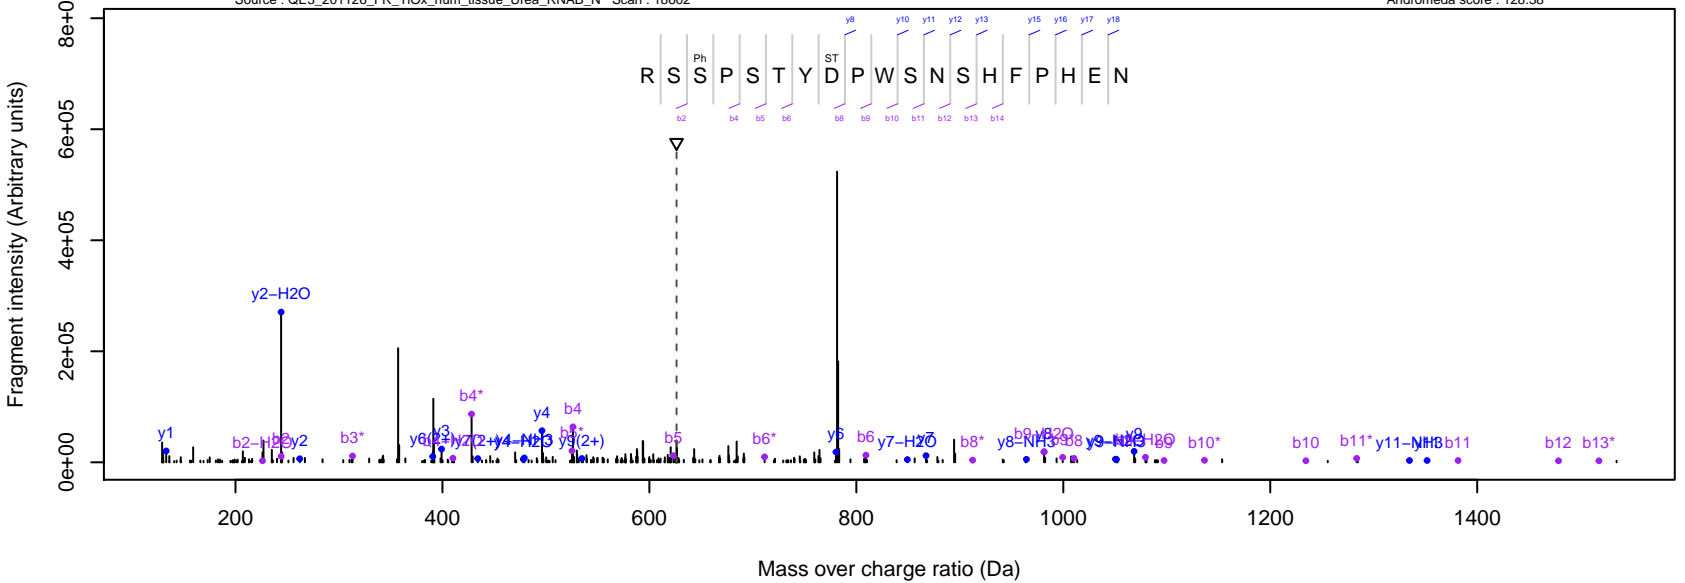

KHS(Phospho (STY))QTDLVSR-3+

Source : QE3\_201126\_FR\_TiOx\_hum\_tissue\_Urea\_RNAB\_H Scan : 5118

Andromeda score : 128.36

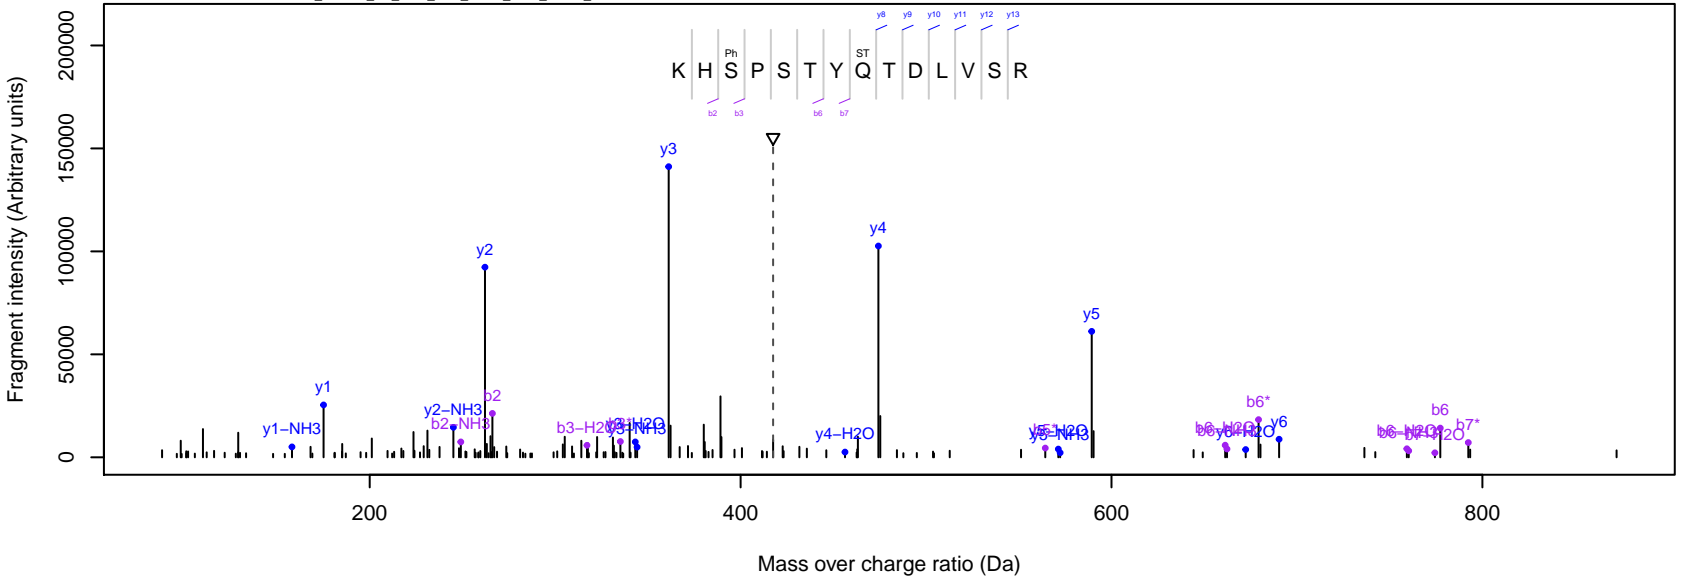

SATLLYDQPLQVFTGSSS(Phospho (STY))SSDLISGTK-3+

Source : QE3\_201126\_FR\_TiOx\_hum\_tissue\_Urea\_RNAB\_H Scan : 59284

Andromeda score : 128.35

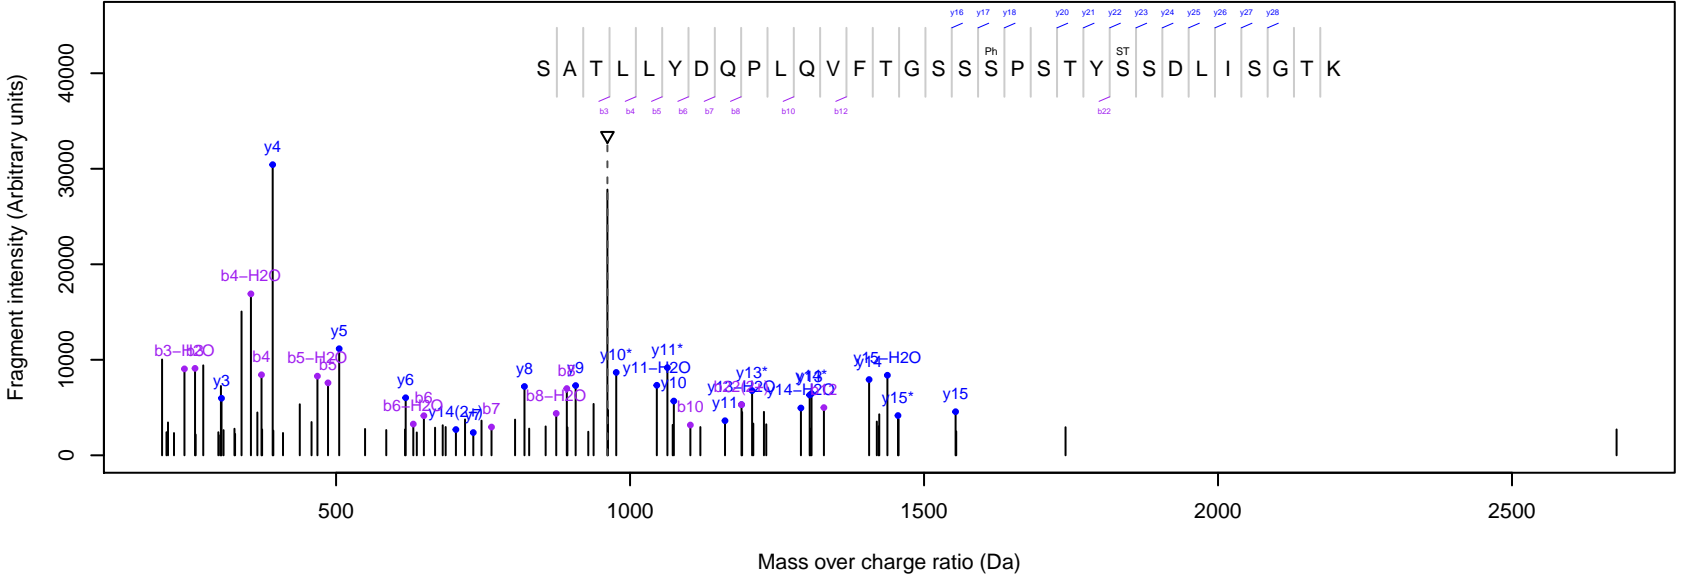

AISEDSGCDSVT(Phospho (STY))DTEPEDEKVVSYSK-3+

Source : QE3\_201126\_FR\_TiOx\_hum\_tissue\_Urea\_RNAB\_H Scan : 23256

Andromeda score : 128.33

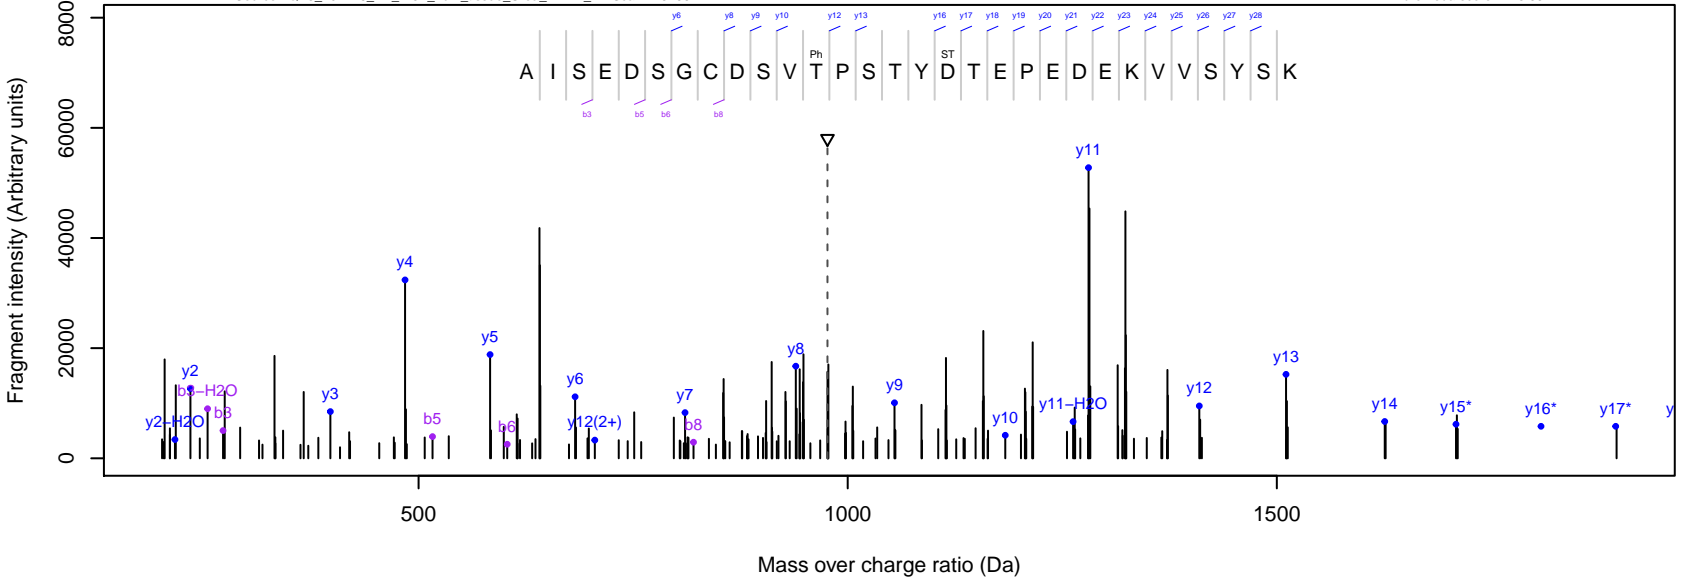



KPS(Phospho (STY))PSESPEPWKPFPAVSPPEPR-3+

Source : QE3\_201126\_FR\_TiOx\_hum\_tissue\_Urea\_RNAB\_H Scan : 31656

Andromeda score : 128.27

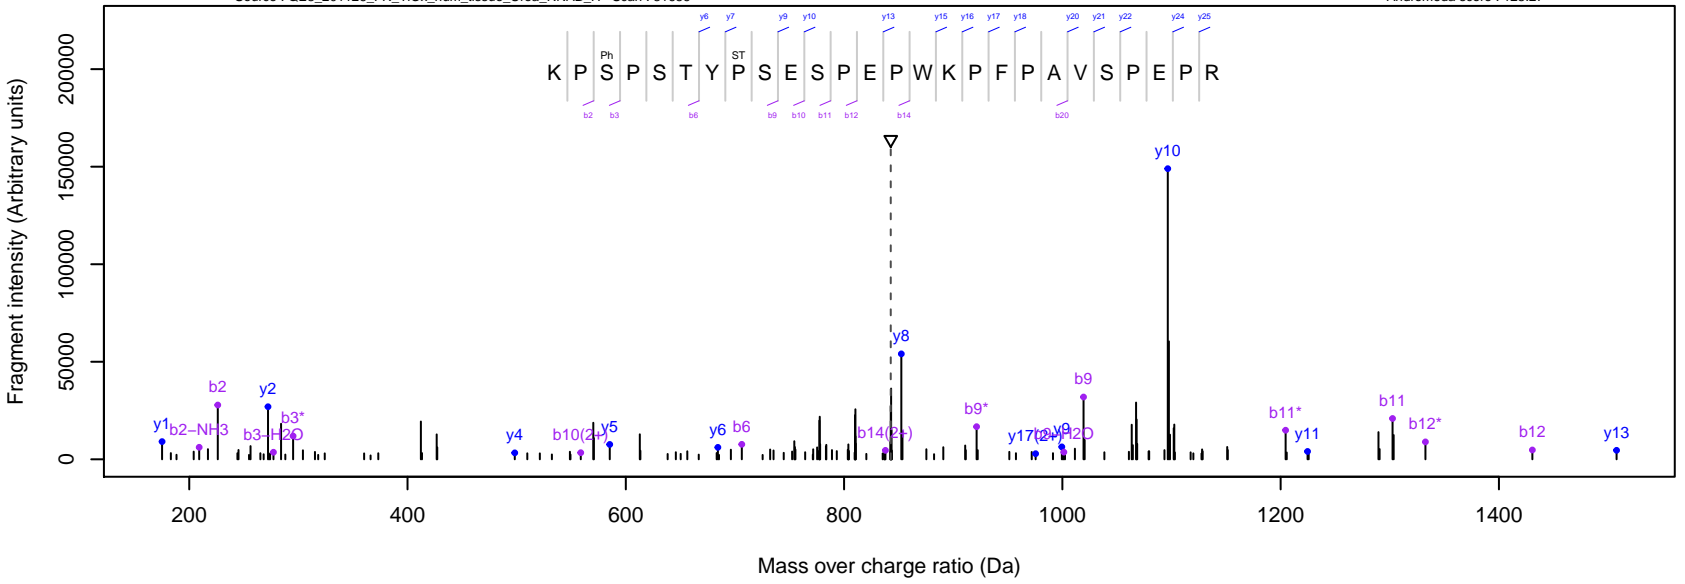

CGS(Phospho (STY))PREEKPAGEEAEM(Oxidation (M))EK-3+

Source : QE3\_201126\_FR\_TiOx\_hum\_tissue\_Urea\_RNAB\_B Scan : 4613

Andromeda score : 128.19

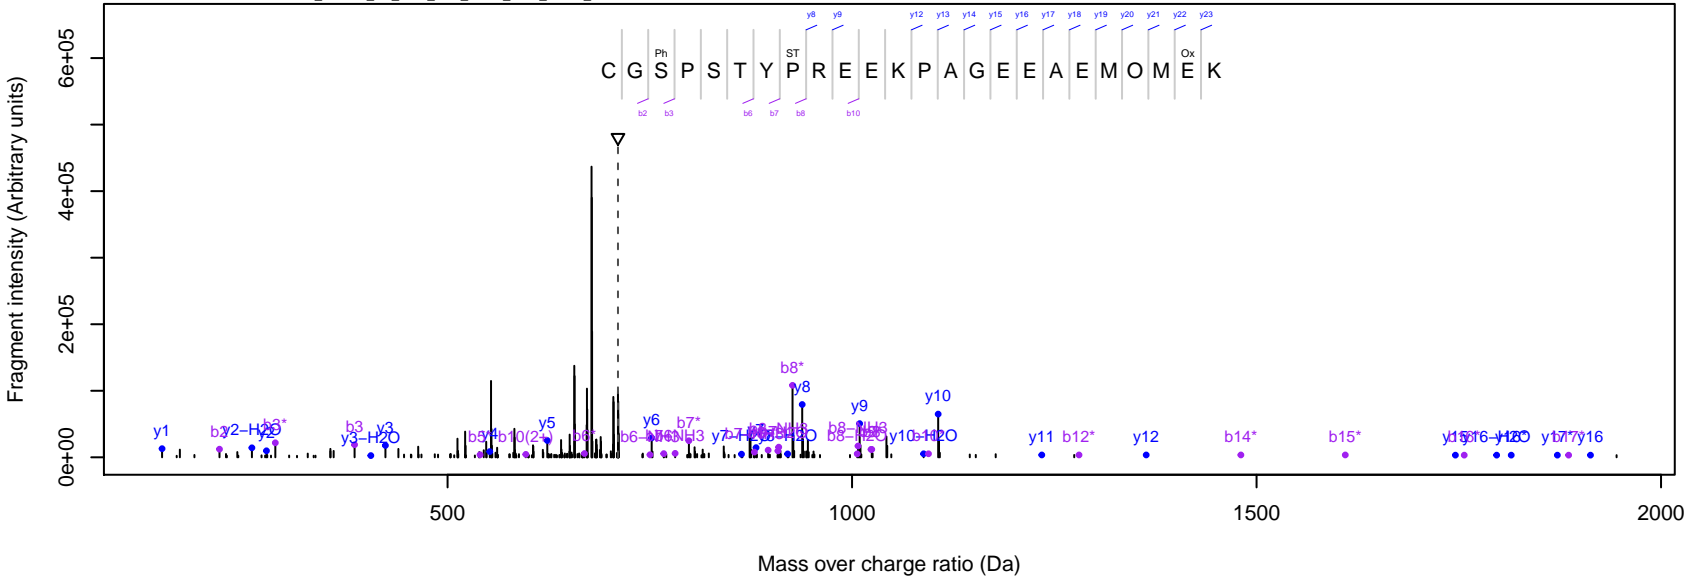

RGS(Phospho (STY))GHPAYAEVPEVGEK-3+

Source : QE3\_201126\_FR\_TiOx\_hum\_tissue\_Urea\_RNAB\_H Scan : 11735

Andromeda score : 128.19

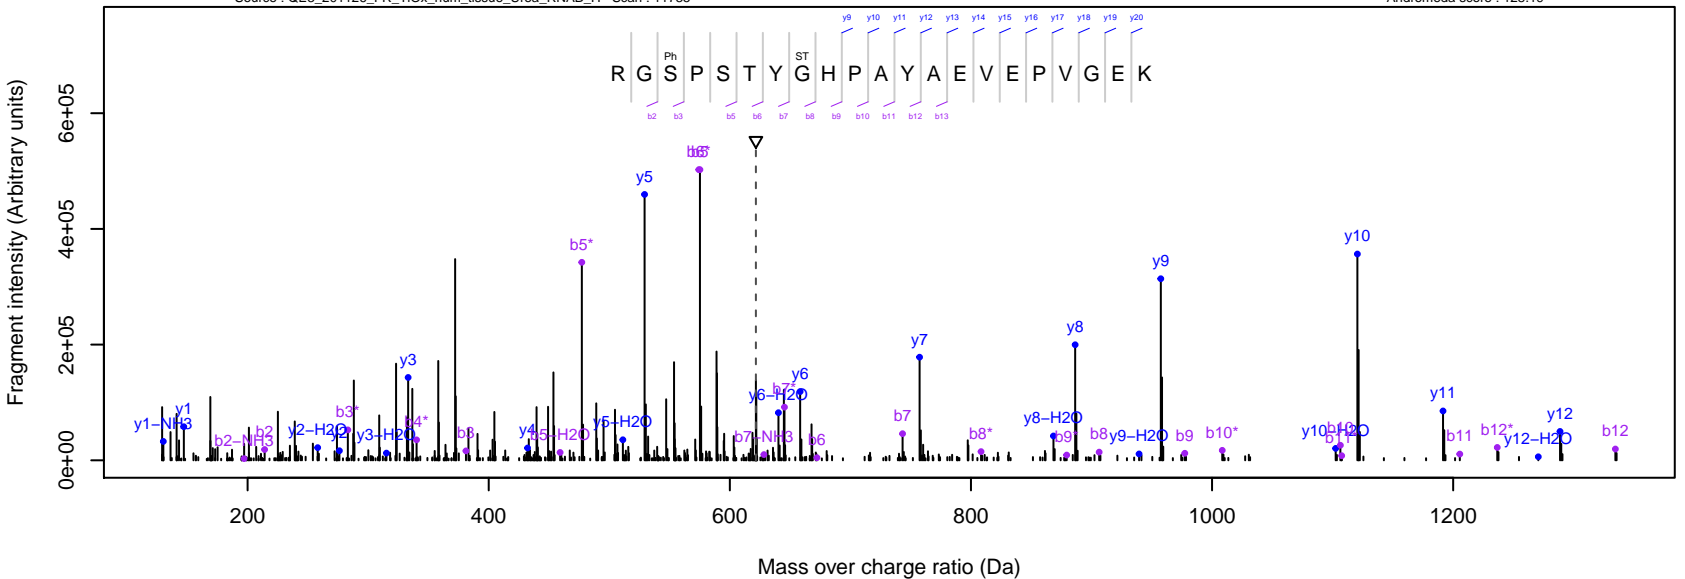

NESEDNKFSDS(Phospho (STY))DDDFVQPR-3+

Source : QE3\_201126\_FR\_TiOx\_hum\_tissue\_Urea\_RNAB\_N Scan : 23756

Andromeda score : 128.17

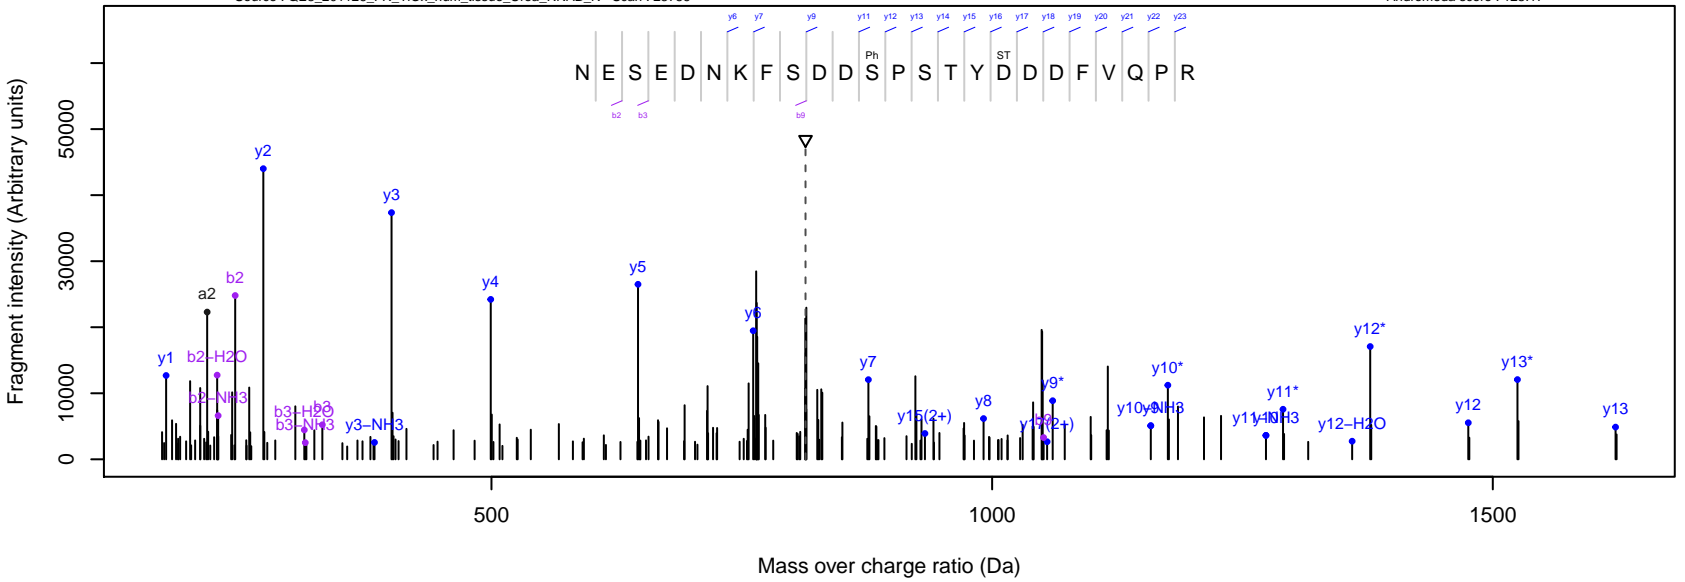

TFGGAPGFLGS(Phospho (STY))PLSS(Phospho (STY))PVFPR-2+

Source : QE3\_201126\_FR\_TiOx\_hum\_tissue\_Urea\_RNAB\_N Scan : 63081

Andromeda score : 128.14

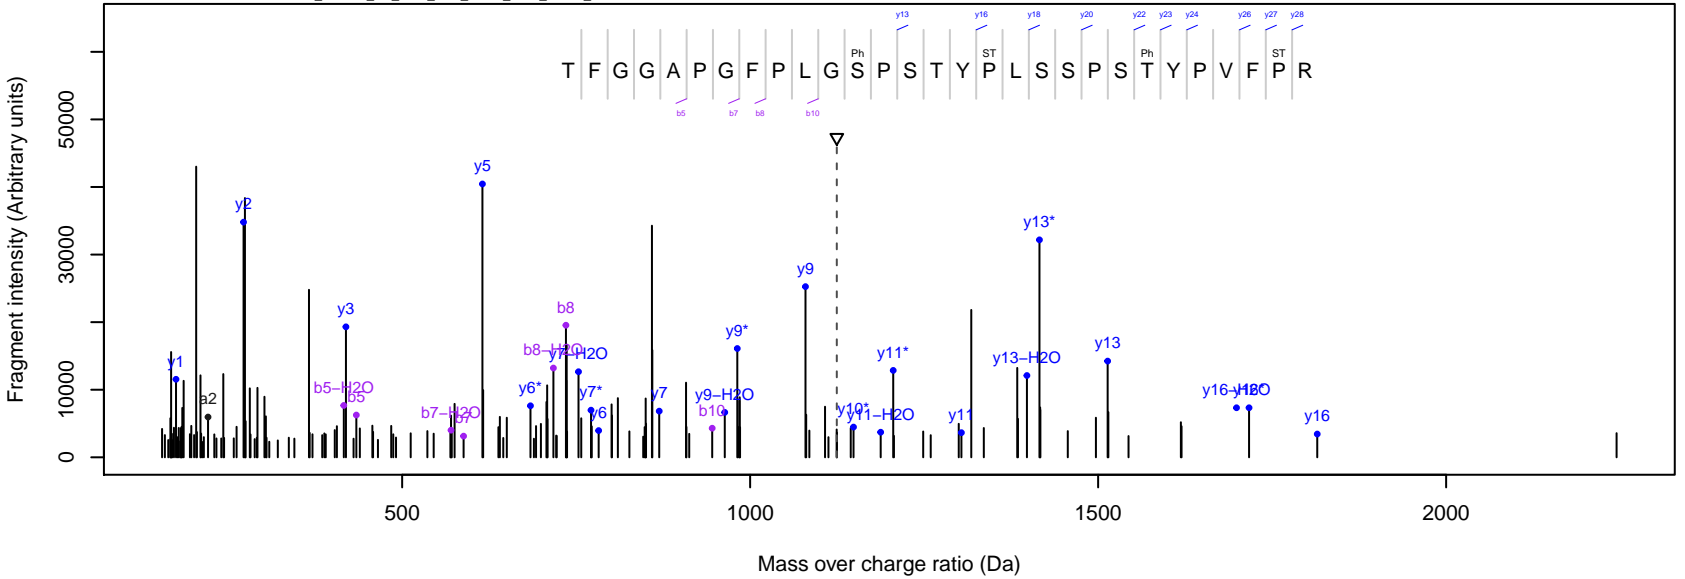

VM(Oxidation (M))TIPYQPM(Oxidation (M))PAS(Phospho (STY))SPVICAGGQDR-2+

Source : QE3\_201126\_FR\_TiOx\_hum\_tissue\_Urea\_RNAB\_B Scan : 34923

Andromeda score : 128.14

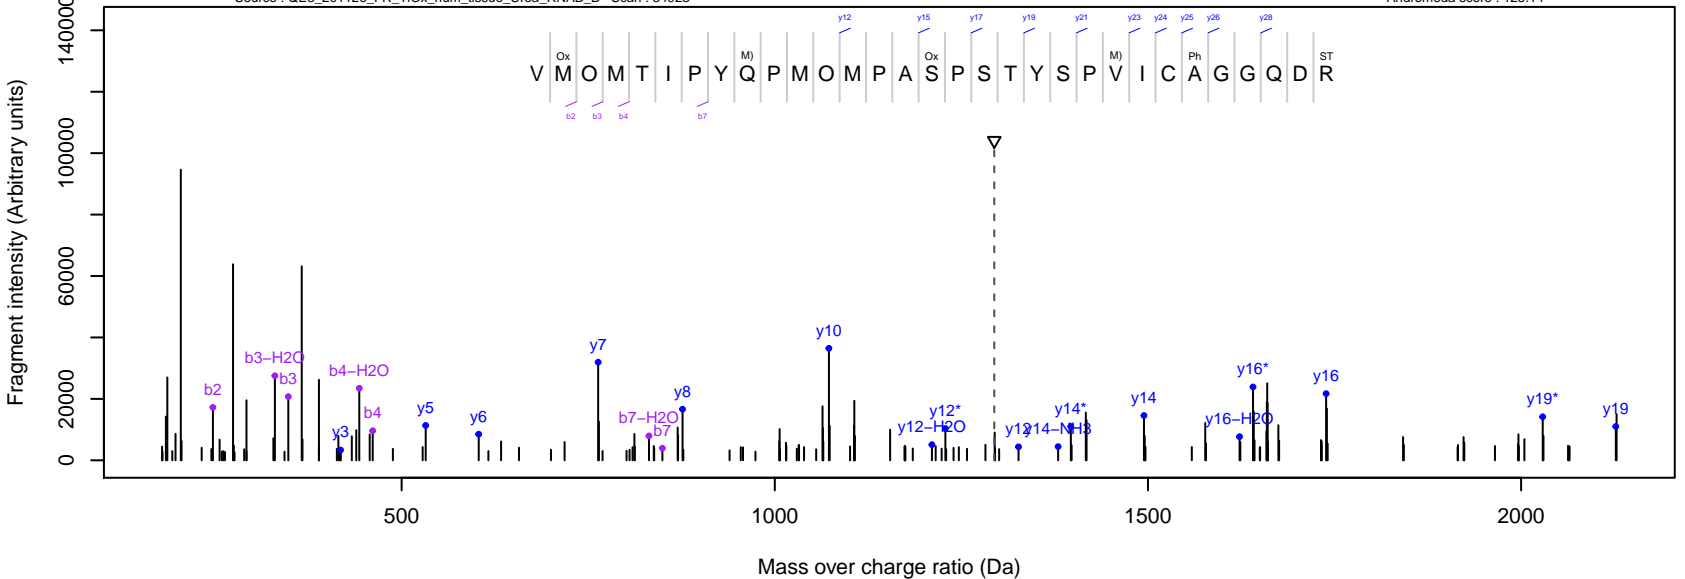

RDS(Phospho (STY))LDKSGLFPEWK-3+

Source : QE3\_201126\_FR\_TIOx\_hum\_tissue\_Urea\_RNAB\_N Scan : 34580

Andromeda score : 128.1

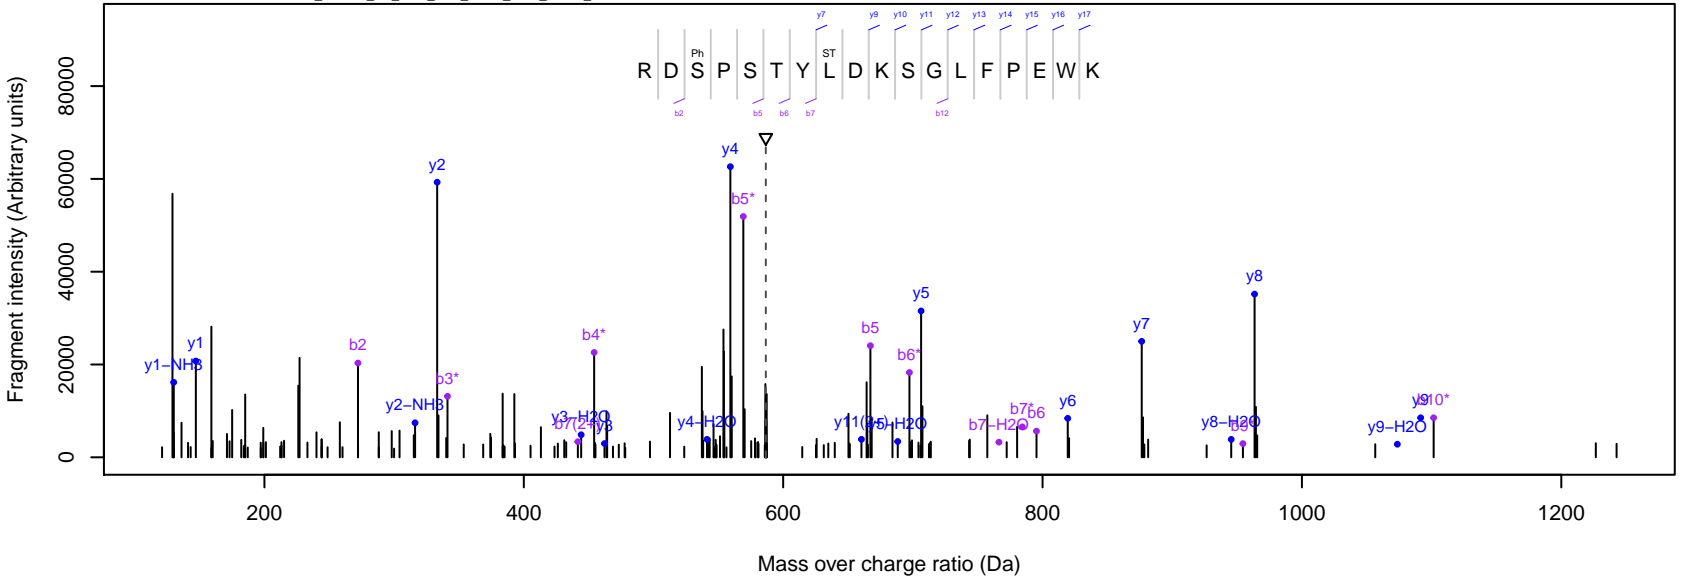

DGELPVEDDILS(Phospho (STY))DVELDDLKDEL-3+

Source : QE3\_201126\_FR\_TIOx\_hum\_tissue\_Urea\_RNAB\_B Scan : 62686

Andromeda score : 128.06

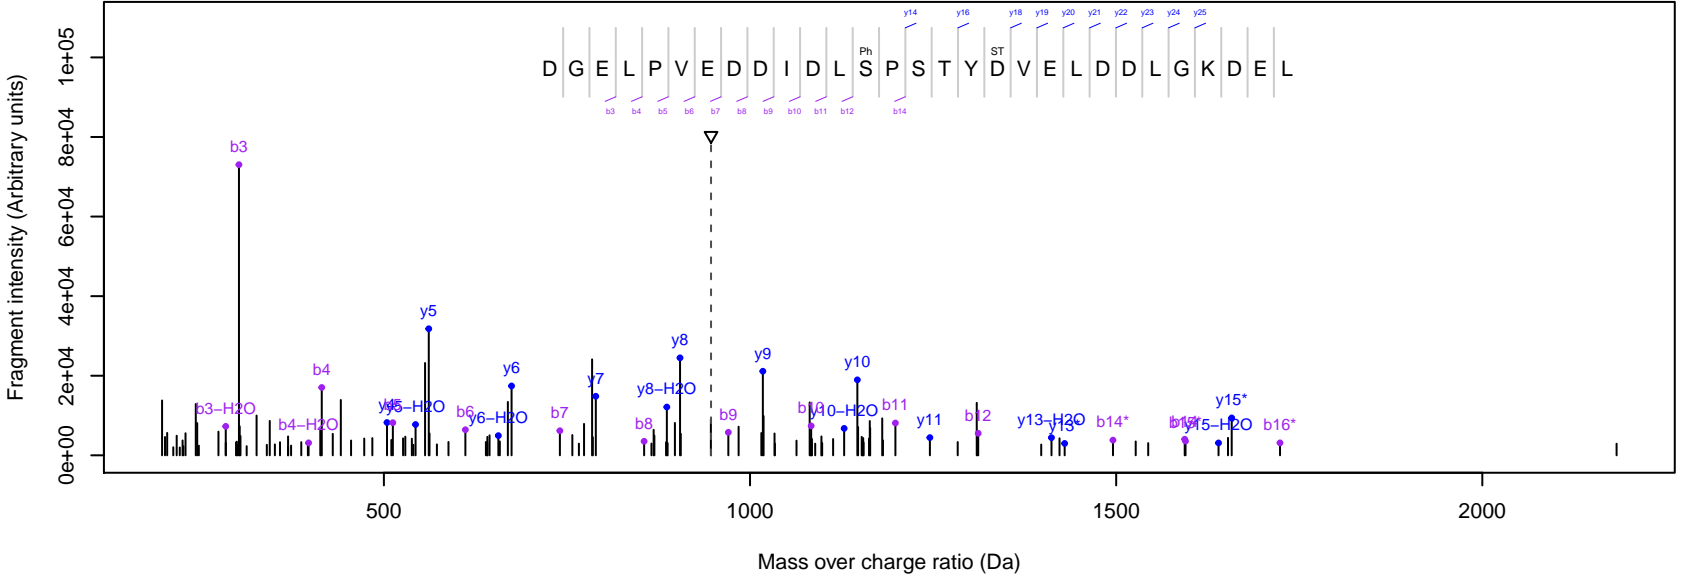

EQT(Phospho (STY))VSETLGGGEAVR-2+

Source : QE3\_201126\_FR\_TIOx\_hum\_tissue\_Urea\_RNAB\_B Scan : 25983

Andromeda score : 128.06

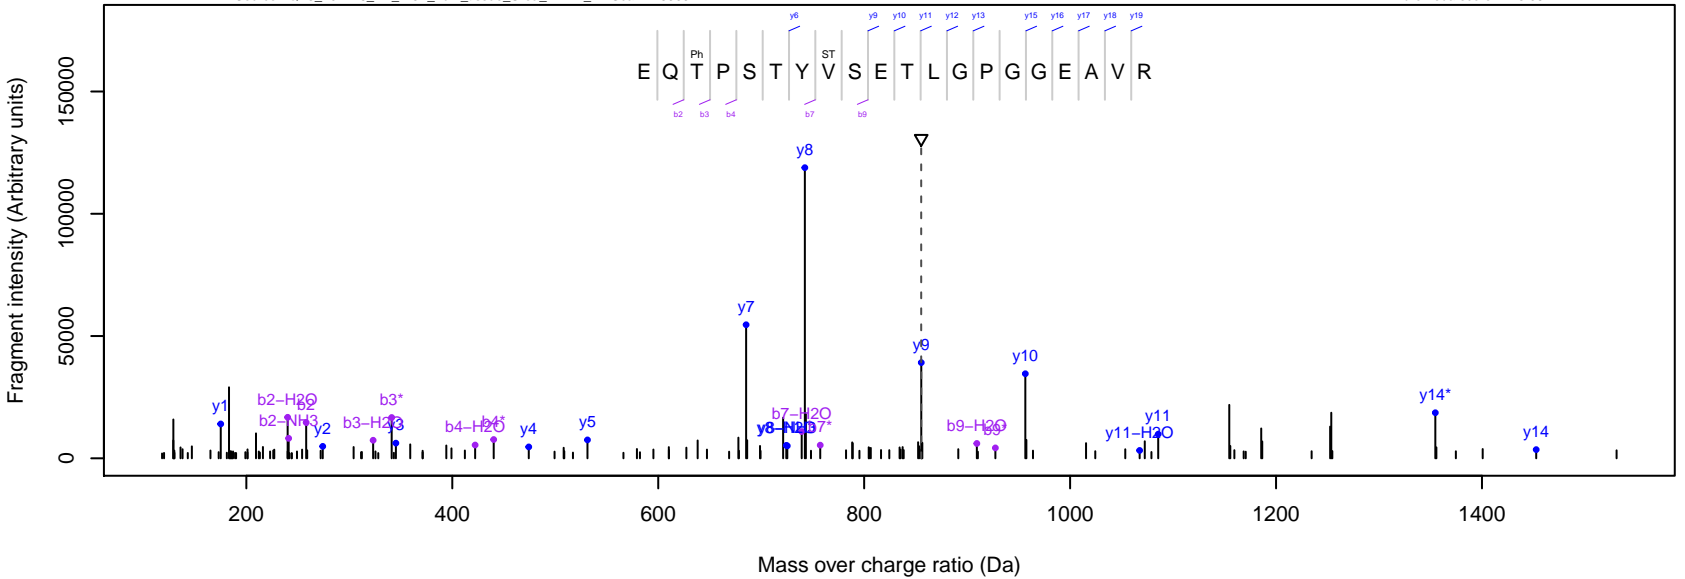

SRES(Phospho (STY))SPSHGLLK-3+

Source : QE3\_201126\_FR\_TiOx\_hum\_tissue\_Urea\_RNAB\_N Scan : 7389

Andromeda score : 128.06

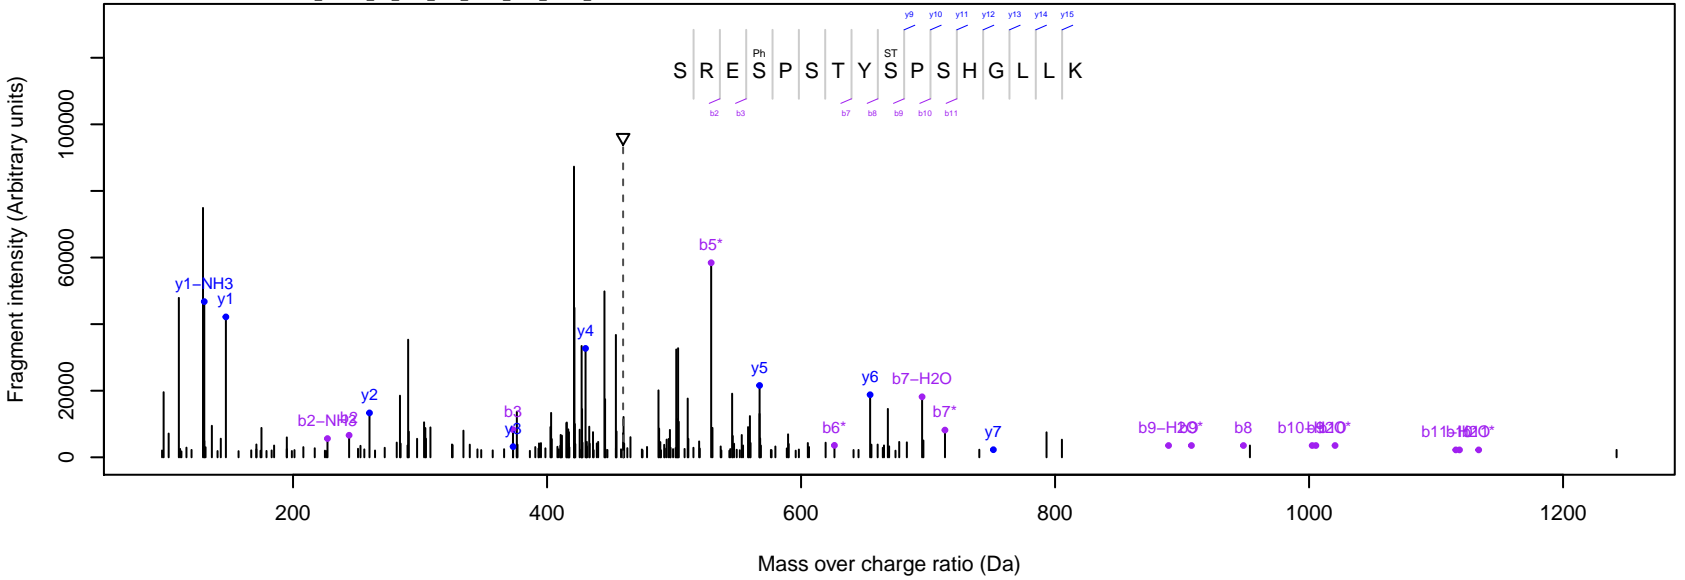

KGSS(Phospho (STY))TDISEDWEKDFLDMTTEEVQMA LSK-3+

Source : QE3\_201126\_FR\_TiOx\_hum\_tissue\_Urea\_RNAB\_H Scan : 58709

Andromeda score : 128

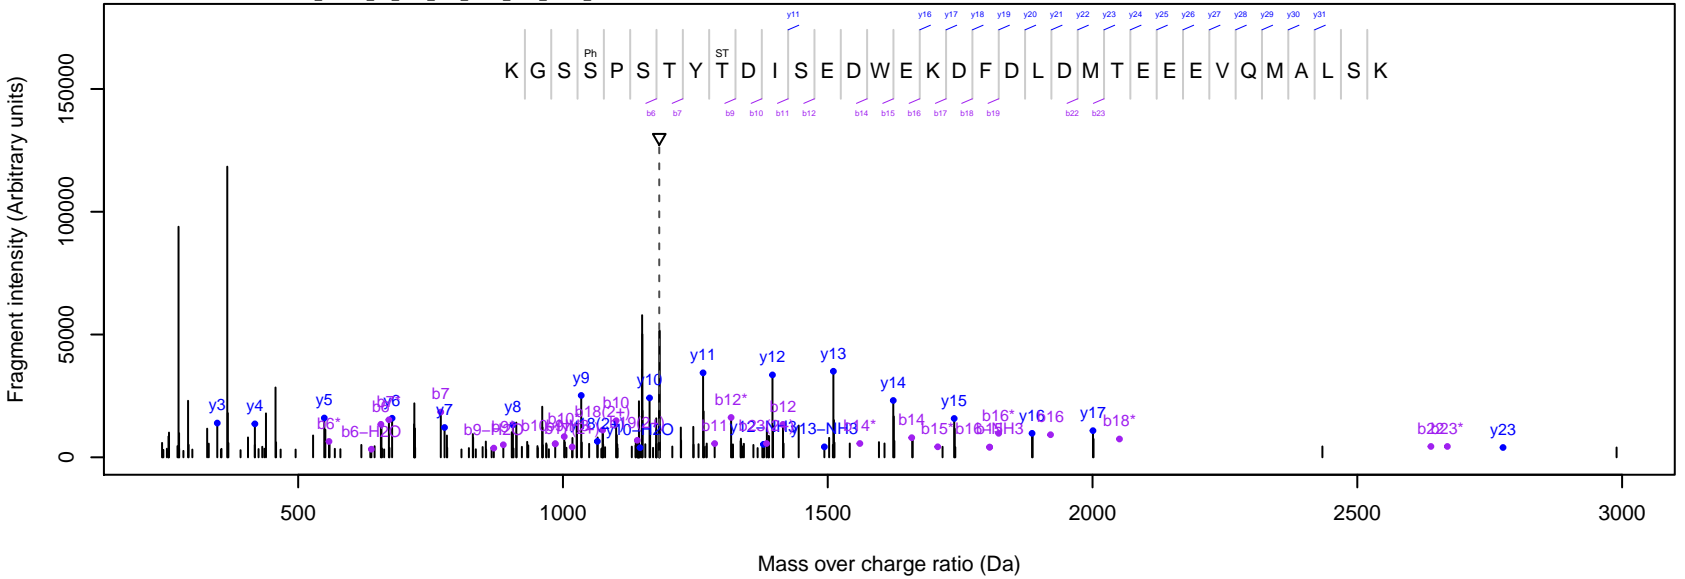

RRT(Phospho (STY))SDPSAAVNHVSTTSLGENYEDDDL VNSDEVMOMK-4+

Source : QE3\_201126\_FR\_TiOx\_hum\_tissue\_Urea\_RNAB\_B Scan : 25926

Andromeda score : 127.95

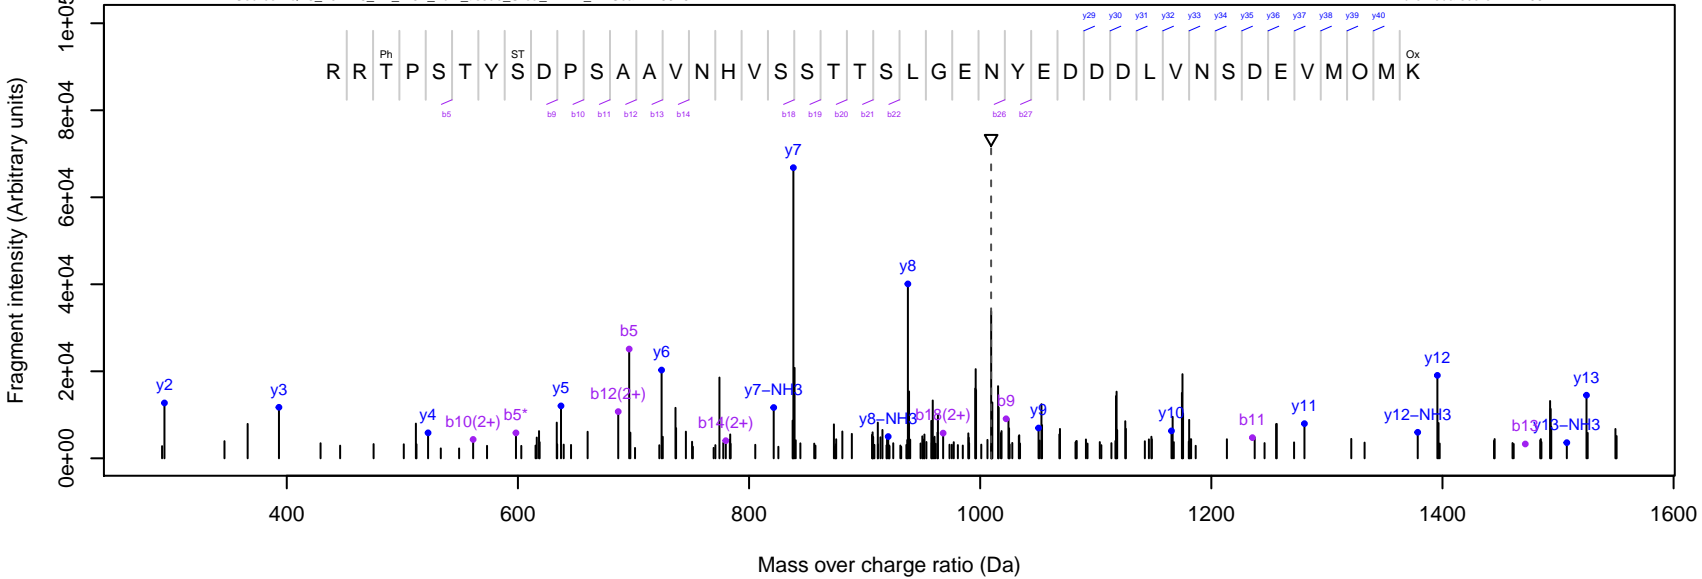

**SYS(Phospho (STY))FDEIRK-2+**

Source : QE3\_201126\_FR\_TiOx\_hum\_tissue\_Urea\_RNAB\_H Scan : 20013

Andromeda score : 127.93

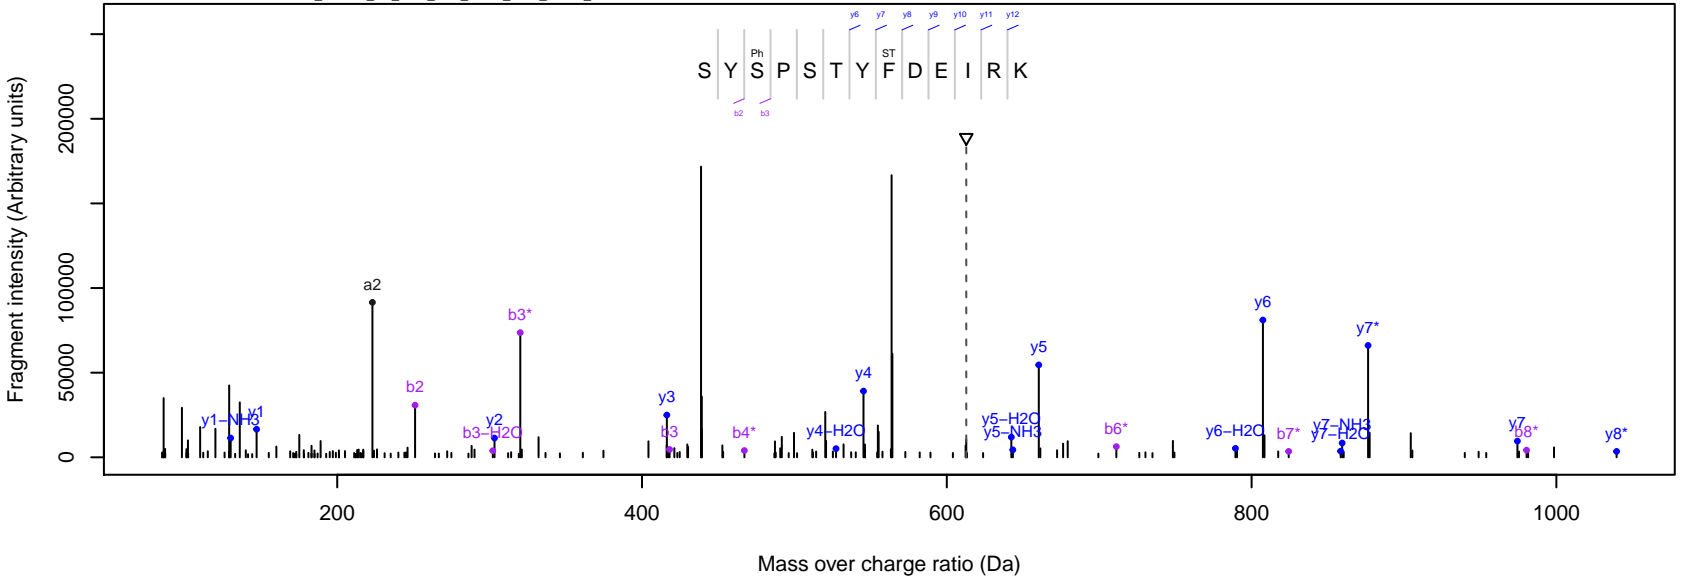

**SSS(Phospho (STY))PAELDLKDDLQQTQGK-3+**

Source : QE3\_201126\_FR\_TiOx\_hum\_tissue\_Urea\_RNAB\_H Scan : 27875

Andromeda score : 127.92

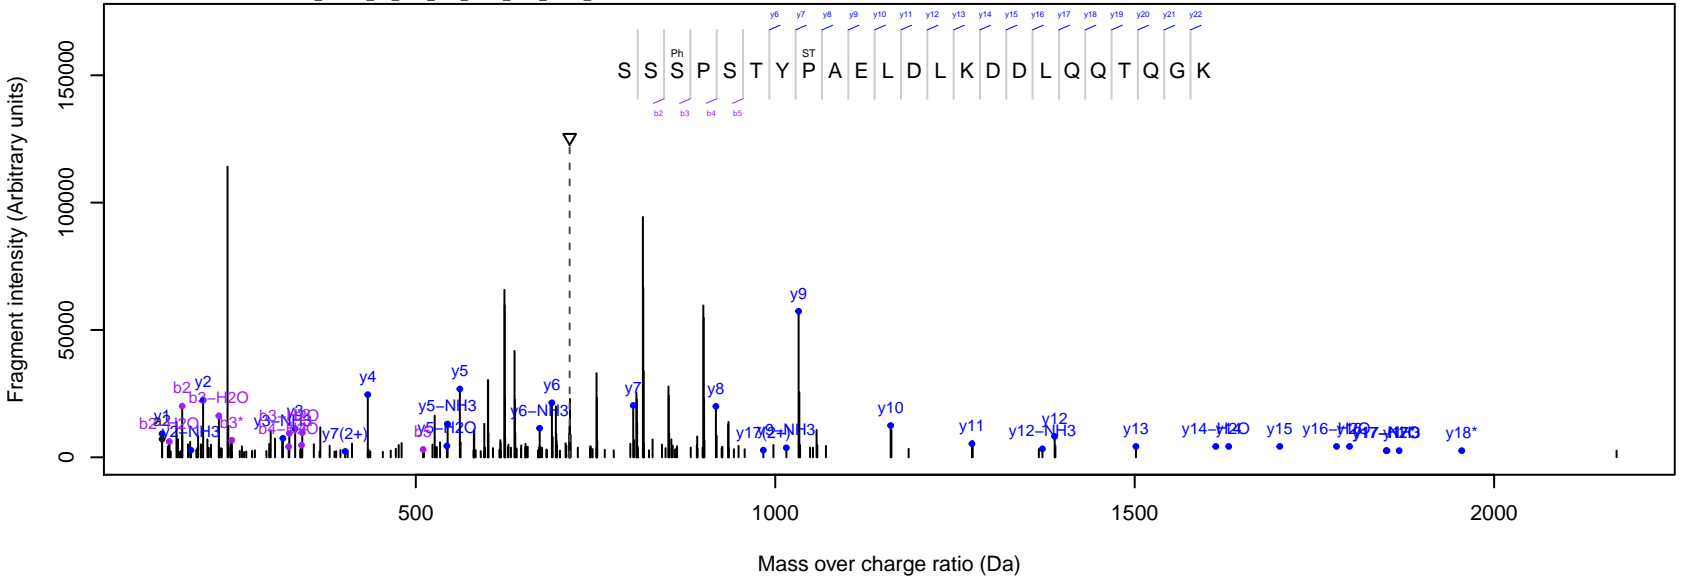

**EKVIS(Phospho (STY))FIENTSTPVD R-2+**

Source : QE3\_201126\_FR\_TiOx\_hum\_tissue\_Urea\_RNAB\_N Scan : 42990

Andromeda score : 127.88

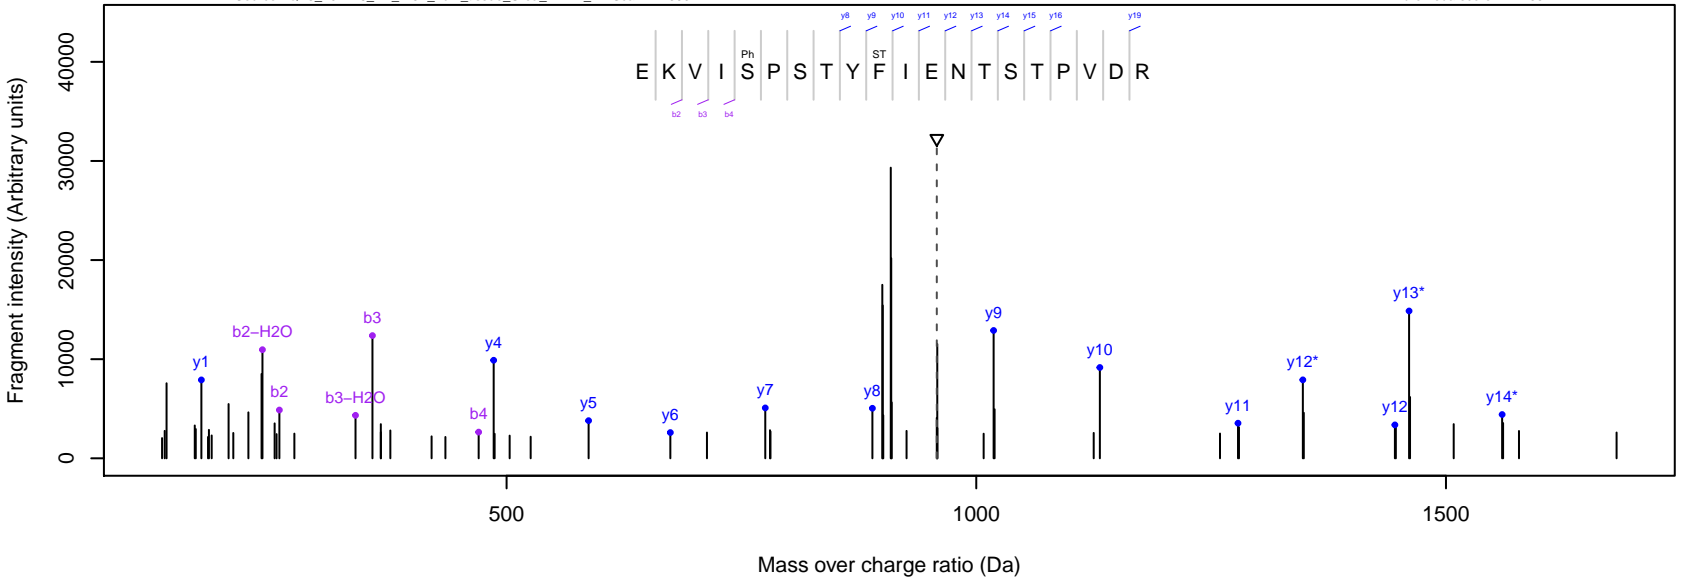

KLS(Phospho (STY))EPSSLQYLPYR-3+

Source : QE3\_201126\_FR\_TiOx\_hum\_tissue\_Urea\_RNAB\_N Scan : 34762

Andromeda score : 127.88

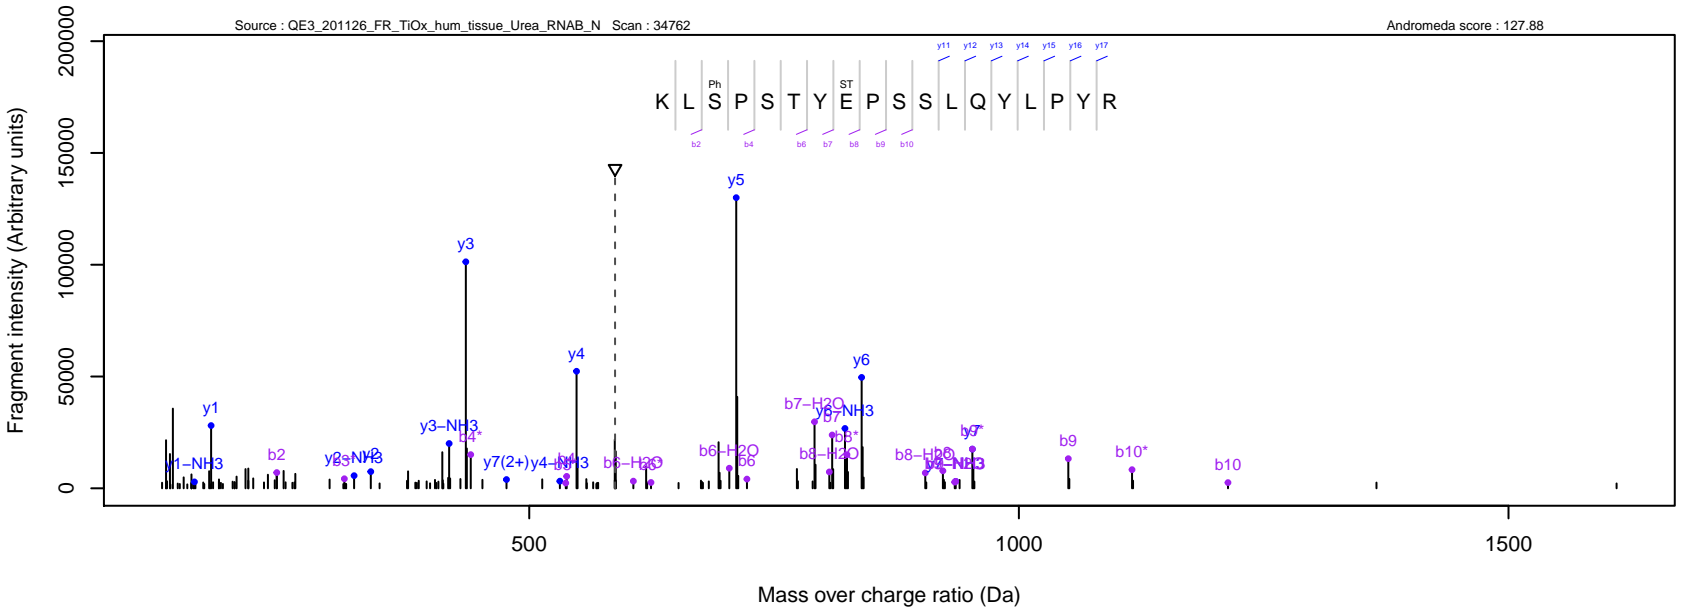

TQS(Phospho (STY))SASLAASYAAQHPQAAASYR-3+

Source : QE3\_201126\_FR\_TiOx\_hum\_tissue\_Urea\_RNAB\_B Scan : 23423

Andromeda score : 127.83

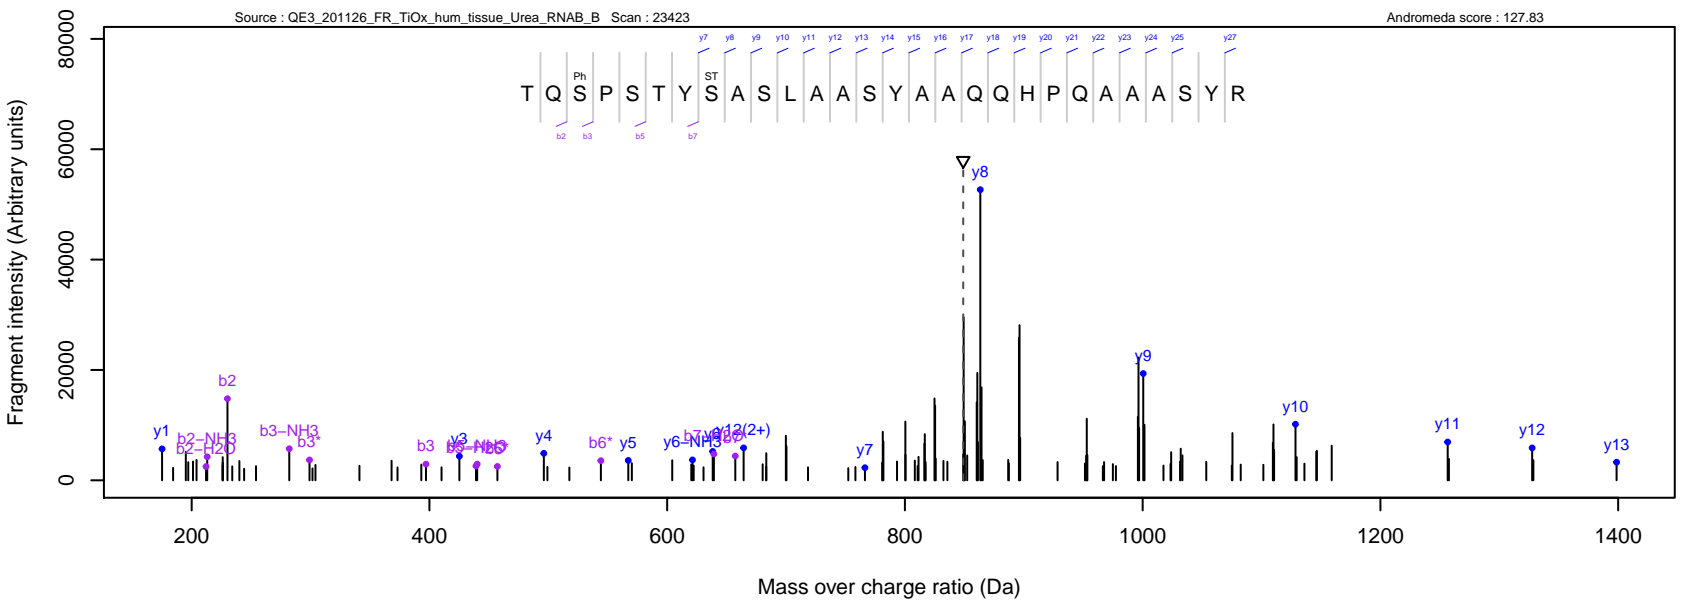

LEEGVAS(Phospho (STY))DEEAEEAQP GSGPS(Phospho (STY))PEPEGS(Phospho (STY))PPAHPQ-3+

Source : QE3\_201126\_FR\_TiOx\_hum\_tissue\_Urea\_RNAB\_N Scan : 36812

Andromeda score : 127.8

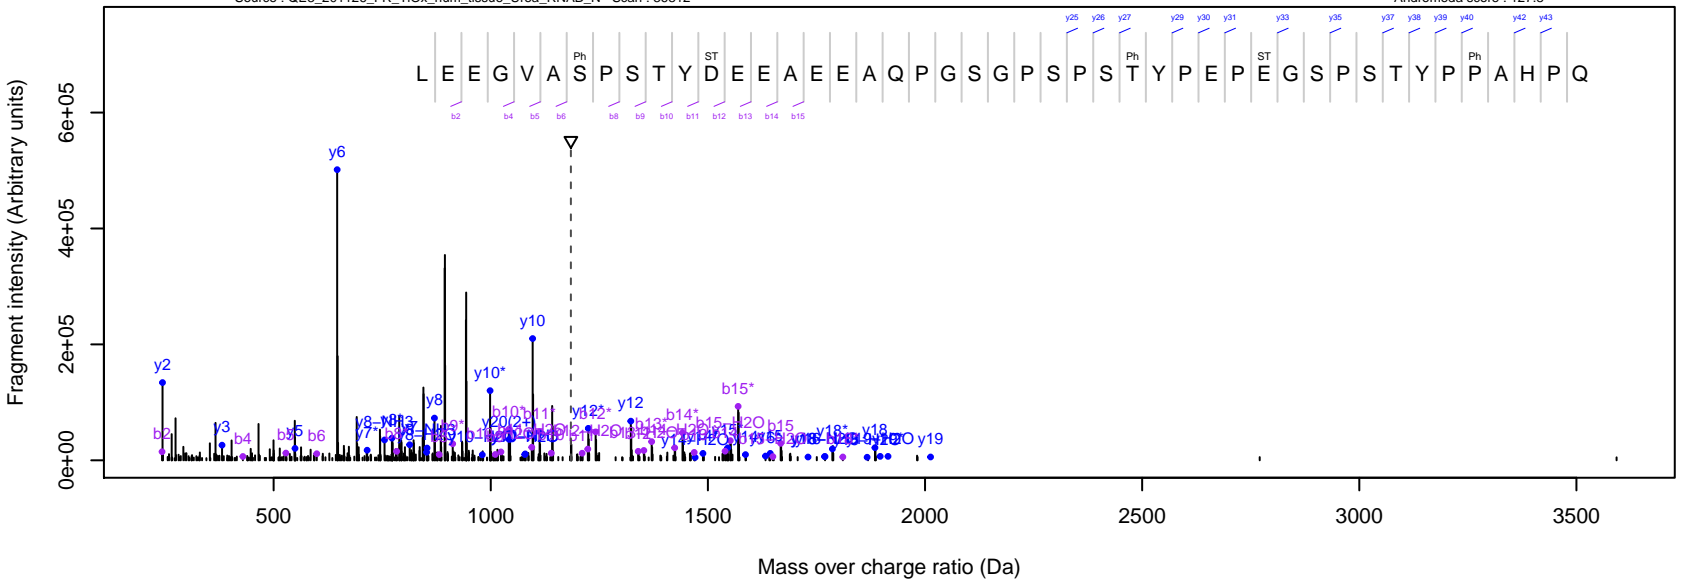

M(Oxidation (M))DS(Phospho (STY))FDEDLARPSGLLAQER-3+

Source : QE3\_201126\_FR\_TiOx\_hum\_tissue\_Urea\_RNAB\_H Scan : 39853

Andromeda score : 127.8

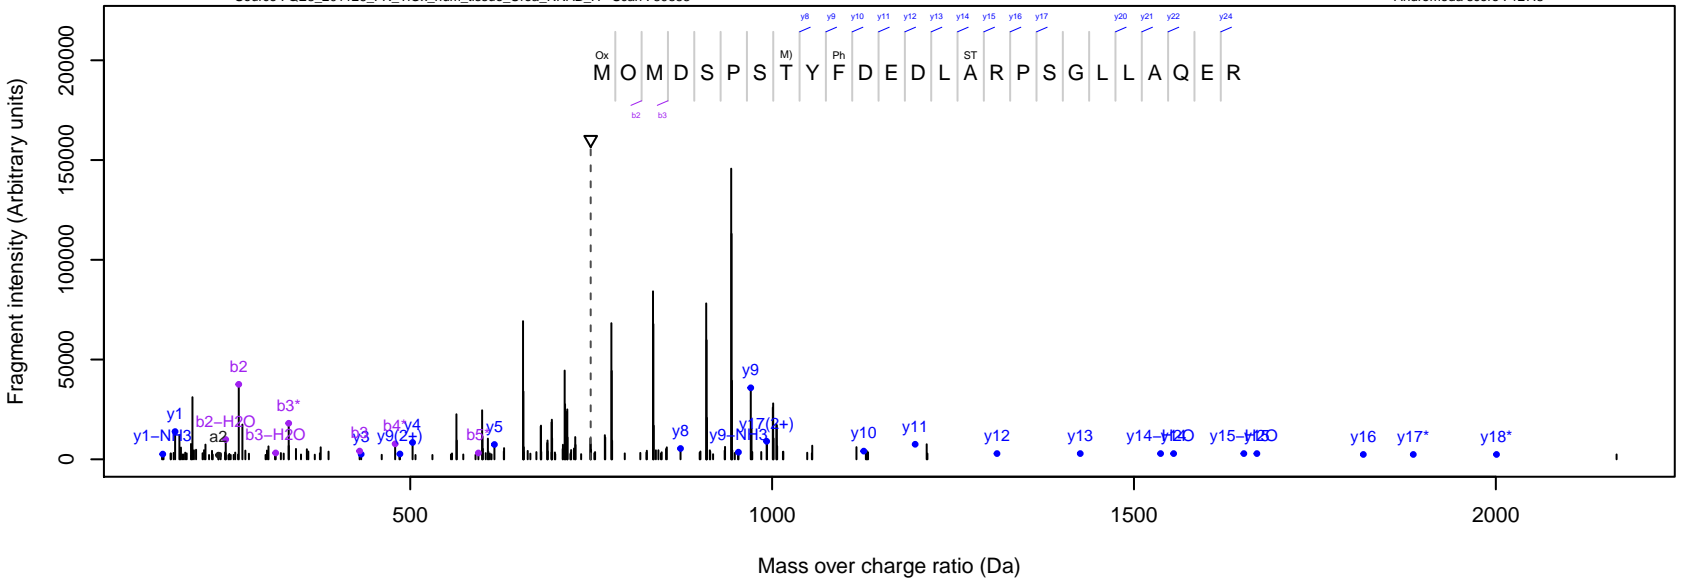

RAS(Phospho (STY))SASVPAVGASAEGR-3+

Source : QE3\_201126\_FR\_TiOx\_hum\_tissue\_Urea\_RNAB\_N Scan : 9242

Andromeda score : 127.79

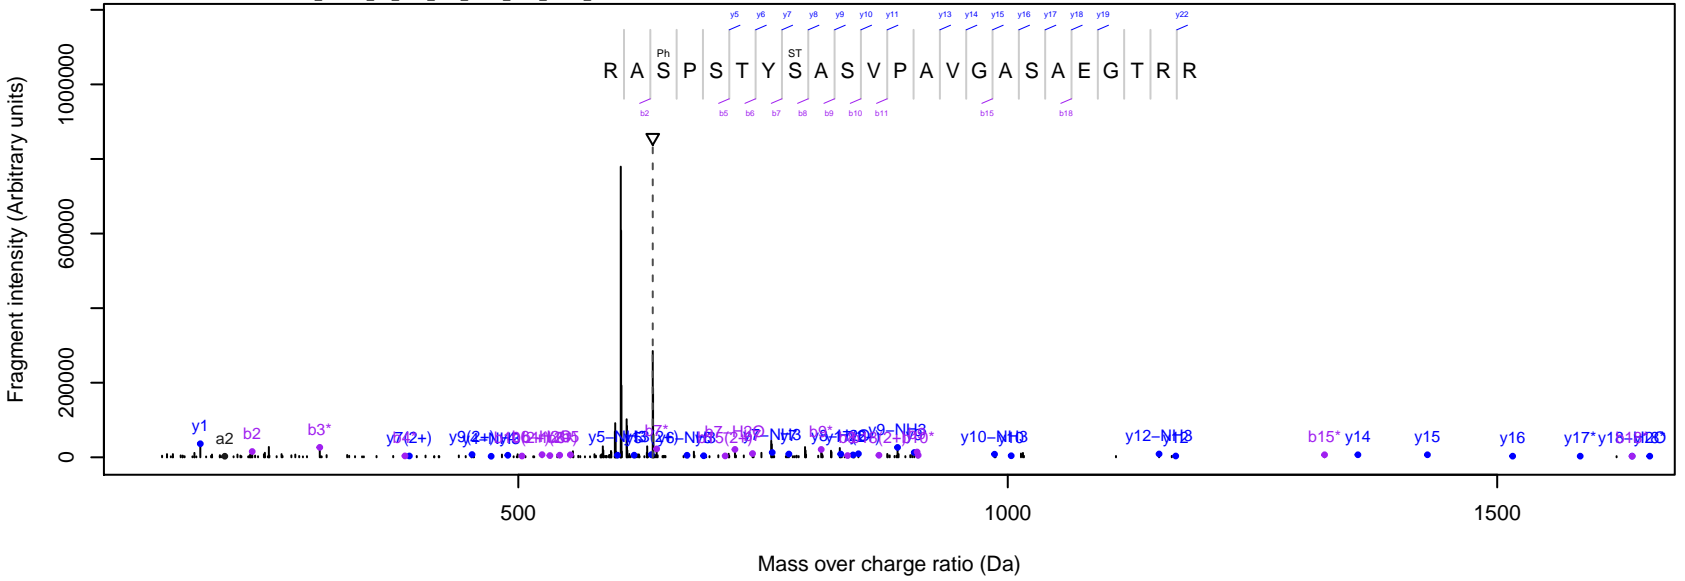

KYVIS(Phospho (STY))DEEEEDDD-2+

Source : QE3\_201126\_FR\_TiOx\_hum\_tissue\_Urea\_RNAB\_B Scan : 21621

Andromeda score : 127.78

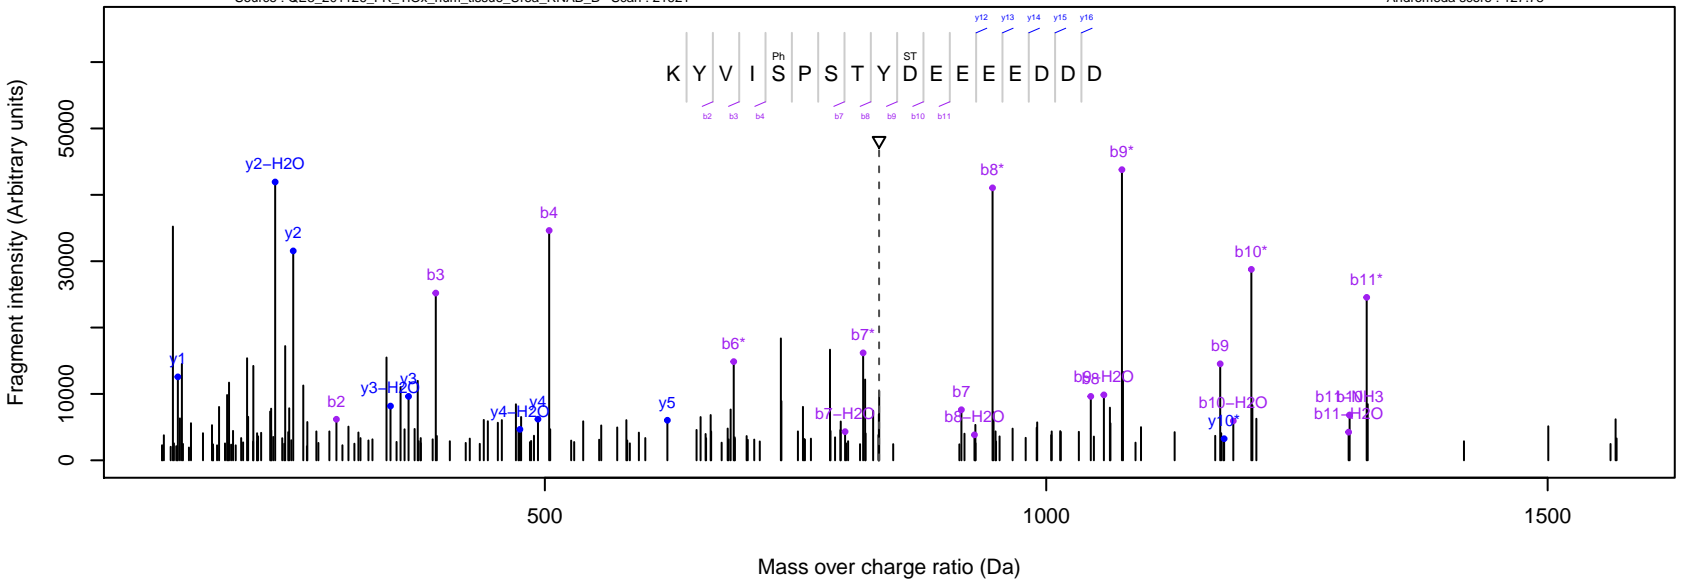

SPS(Phospho (STY))LNLQNK-2+

Source : QE3\_201126\_FR\_TiOx\_hum\_tissue\_Urea\_RNAB\_H Scan : 31018

Andromeda score : 127.78

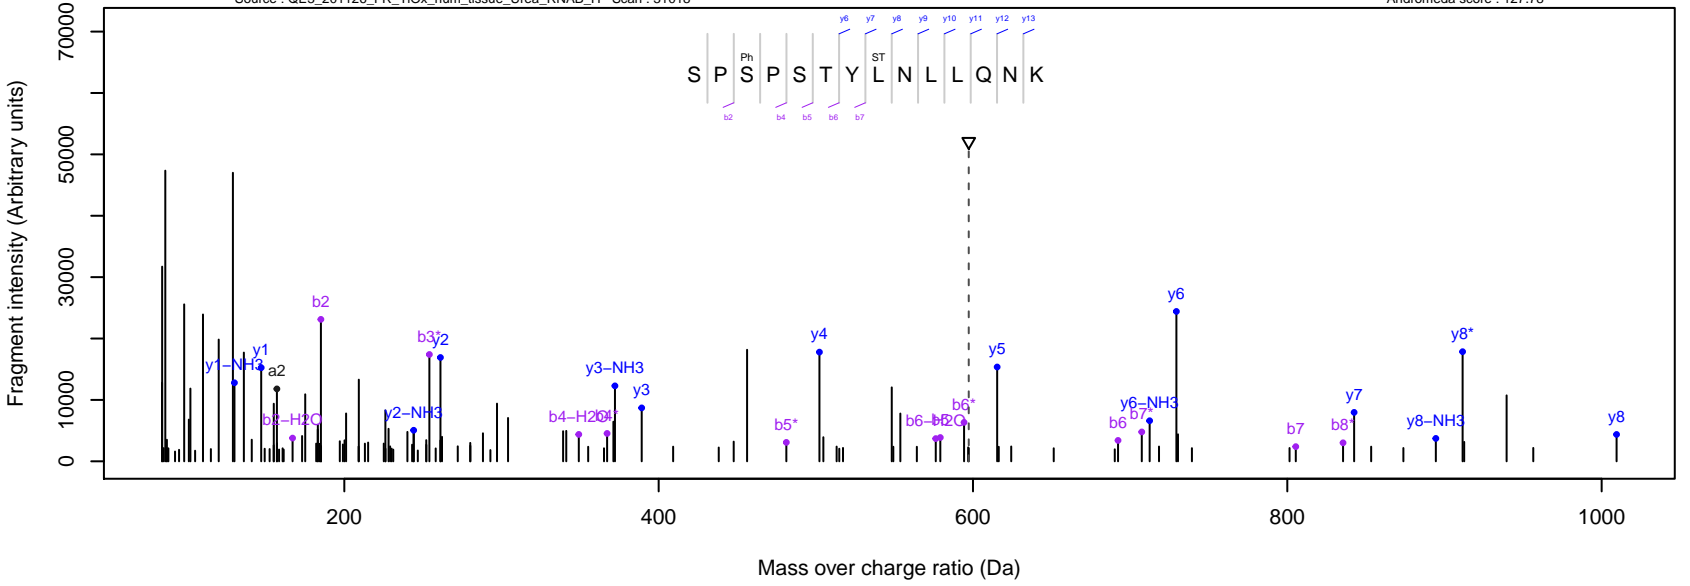

ELVGDTSQEGDHEPS(Phospho (STY))GSETEEDTSSSPHR-4+

Source : QE3\_201126\_FR\_TiOx\_hum\_tissue\_Urea\_RNAB\_H Scan : 12386

Andromeda score : 127.77

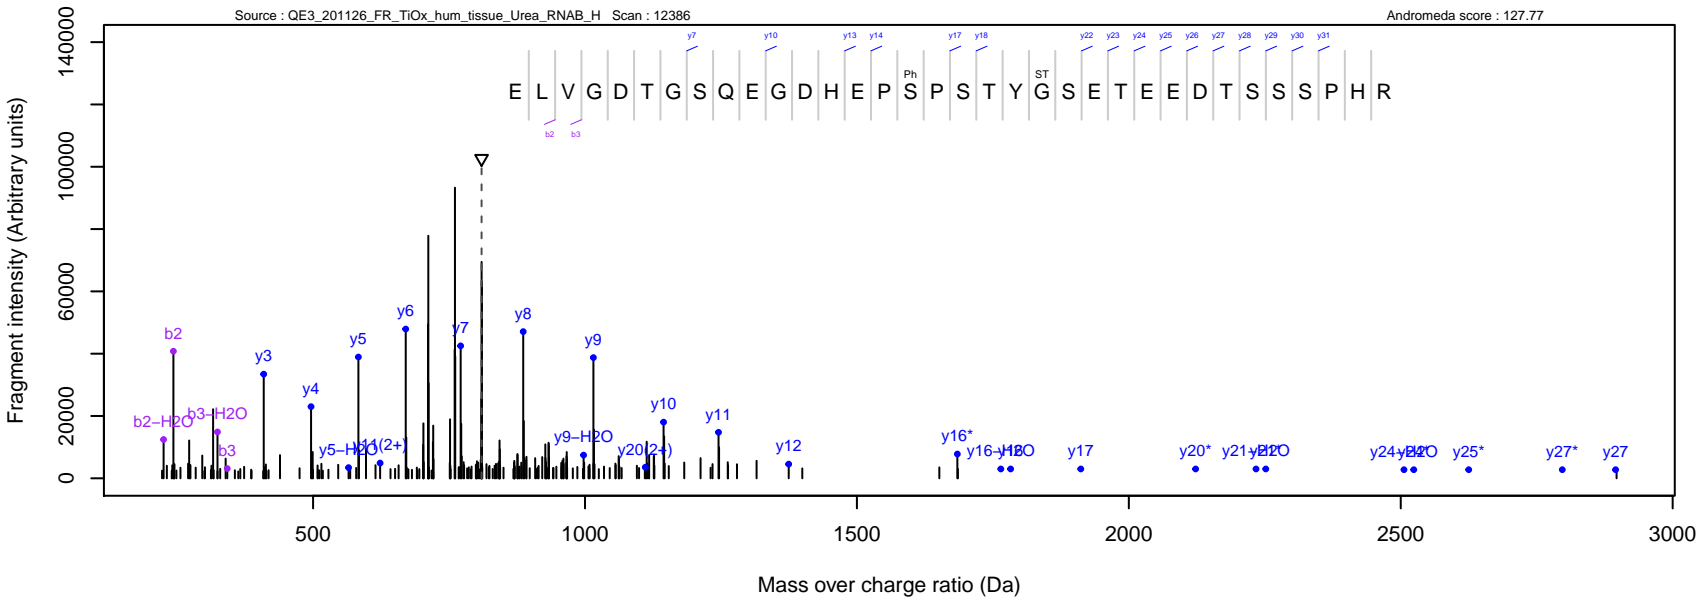

SHNVAAGSYEAPLPGPS(Phospho (STY))FHGDFAYGTYR-3+

Source : QE3\_201126\_FR\_TiOx\_hum\_tissue\_Urea\_RNAB\_B Scan : 37163

Andromeda score : 127.77

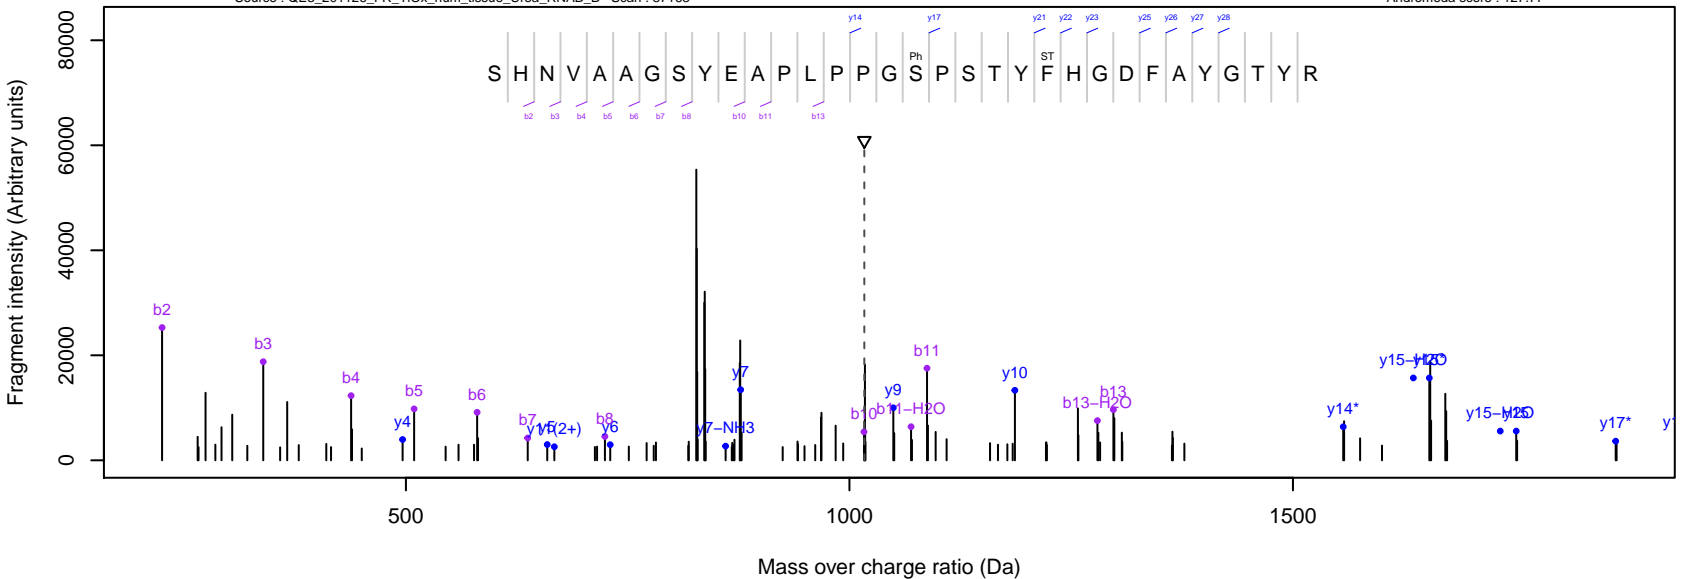



EFTGS(Phospho (STY))PPSSATKK-2+

Source : QE3\_201126\_FR\_TIOx\_hum\_tissue\_Urea\_RNAB\_H Scan : 8001

Andromeda score : 127.76

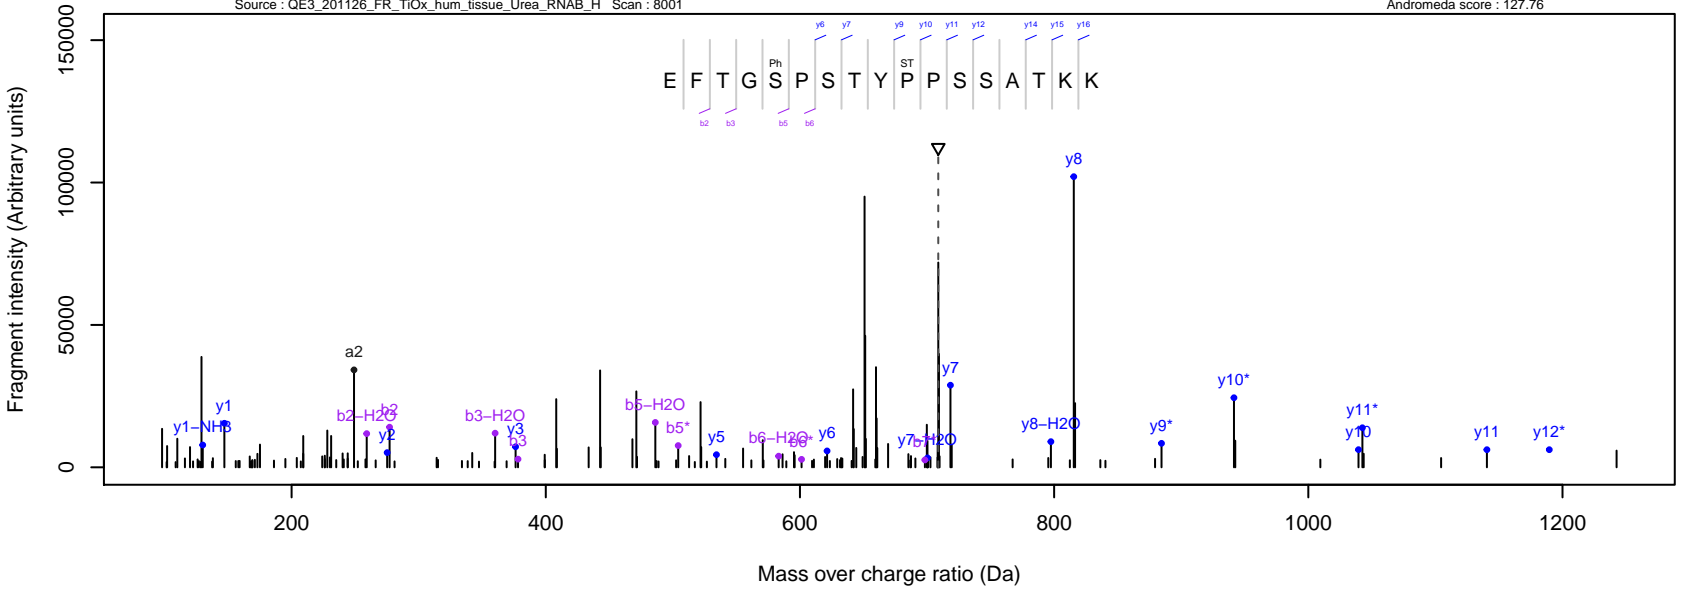

RFS(Phospho (STY))KADTIDTIK-3+

Source : QE3\_201126\_FR\_TIOx\_hum\_tissue\_Urea\_RNAB\_H Scan : 15801

Andromeda score : 127.75

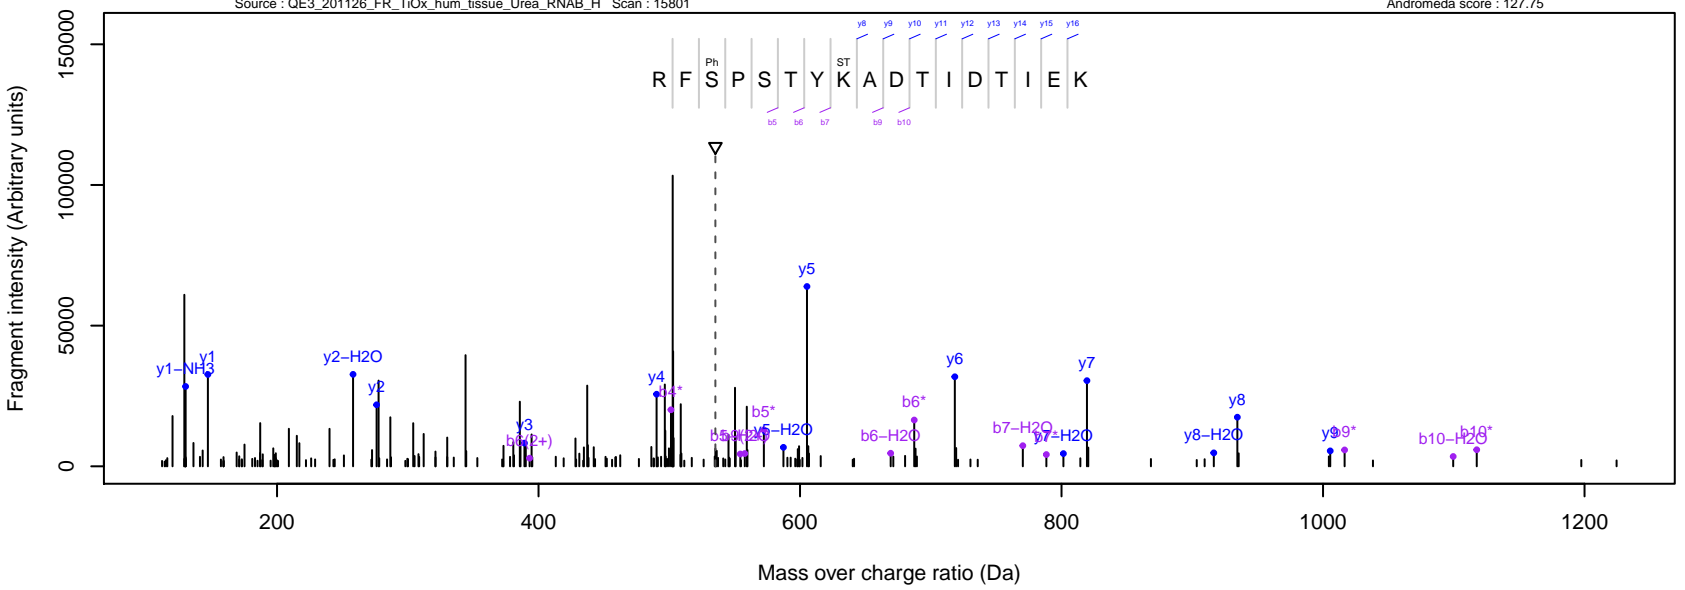

RES(Phospho (STY))DGAPGLTSENER-3+

Source : QE3\_201126\_FR\_TIOx\_hum\_tissue\_Urea\_RNAB\_N Scan : 24376

Andromeda score : 127.74

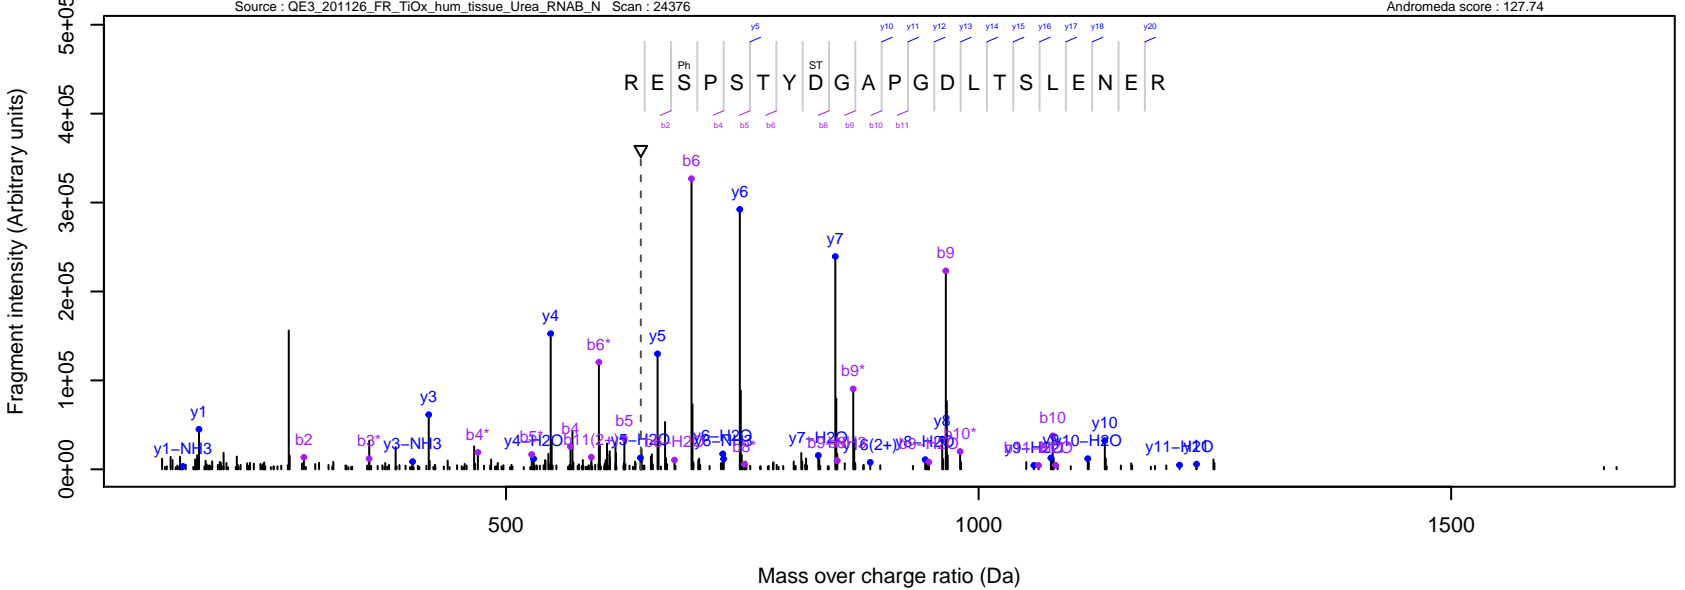

(Acetyl (Protein N-term))AAS(Phospho (STY))DTERDGLAPEK-2+

Source : QE3\_201126\_FR\_TiOx\_hum\_tissue\_Urea\_RNAB\_H Scan : 17257

Andromeda score : 127.71

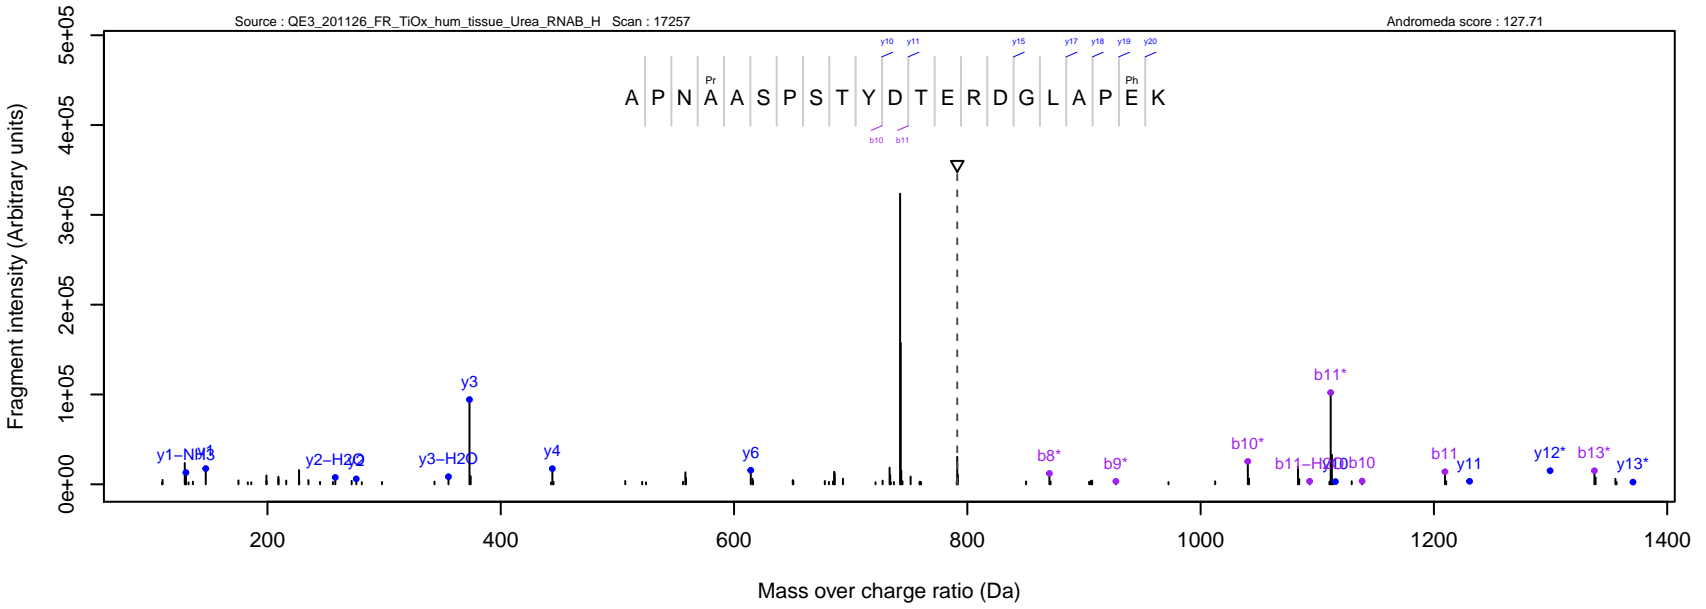

ATS(Phospho (STY))LPSLDTPGELR-2+

Source : QE3\_201126\_FR\_TiOx\_hum\_tissue\_Urea\_RNAB\_B Scan : 38022

Andromeda score : 127.71

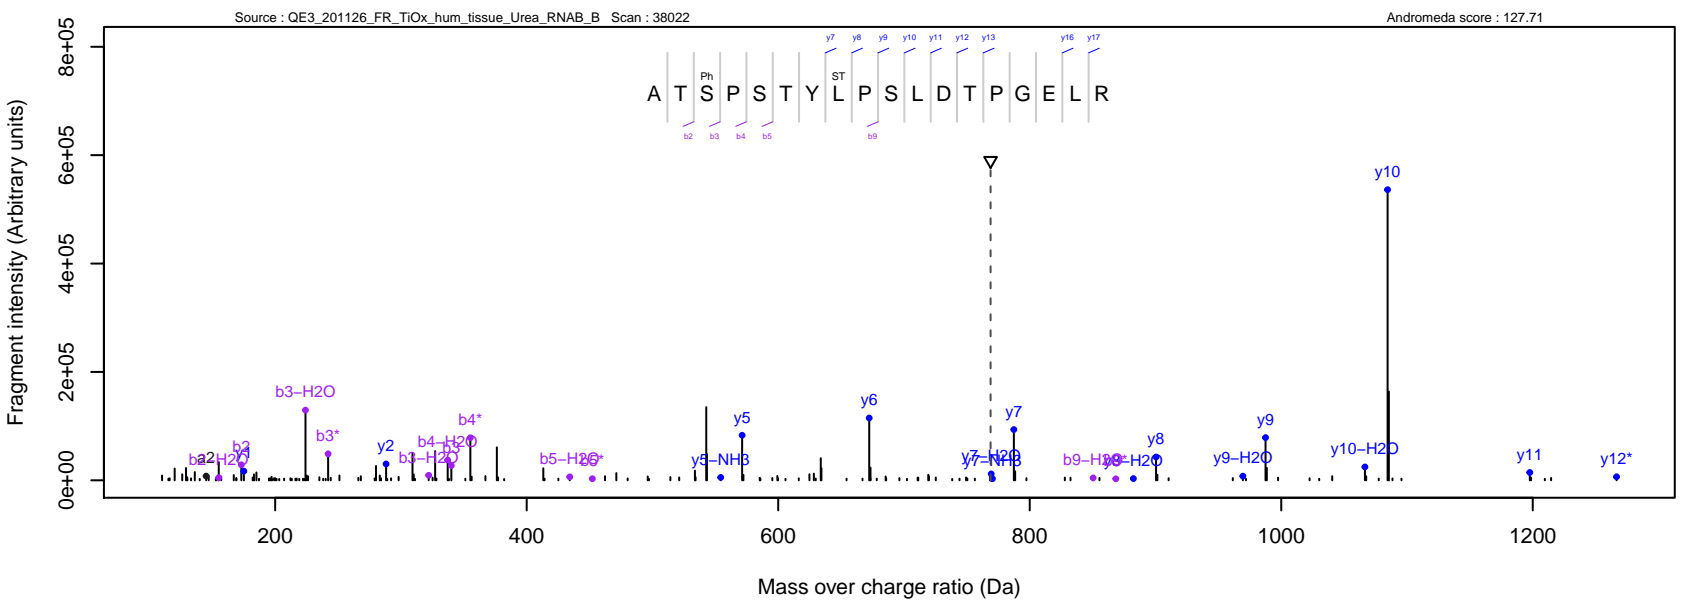

SPALKS(Phospho (STY))PLQSVVVR-2+

Source : QE3\_201126\_FR\_TiOx\_hum\_tissue\_Urea\_RNAB\_N Scan : 26423

Andromeda score : 127.71

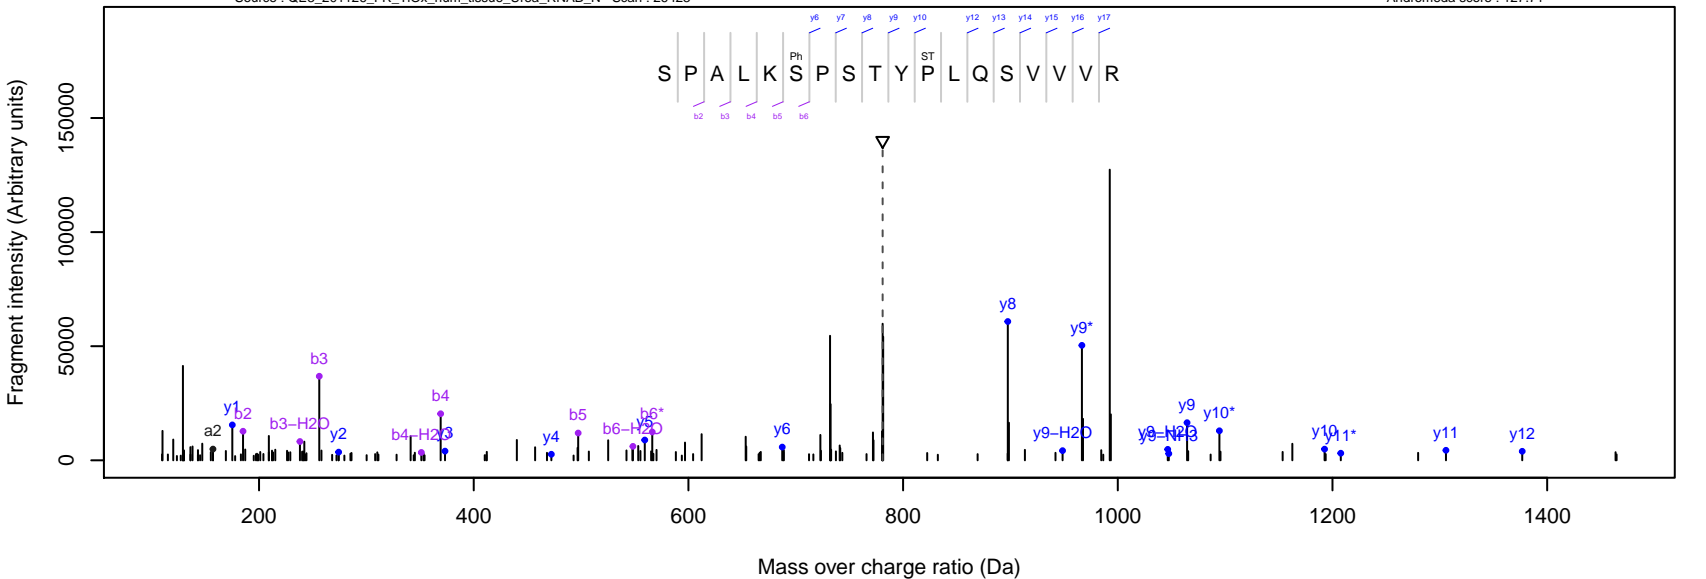

S(Phospho (STY))TQS(Phospho (STY))LSLQR-2+

Source : QE3\_201126\_FR\_TiOx\_hum\_tissue\_Urea\_RNAB\_H Scan : 22108

Andromeda score : 127.7

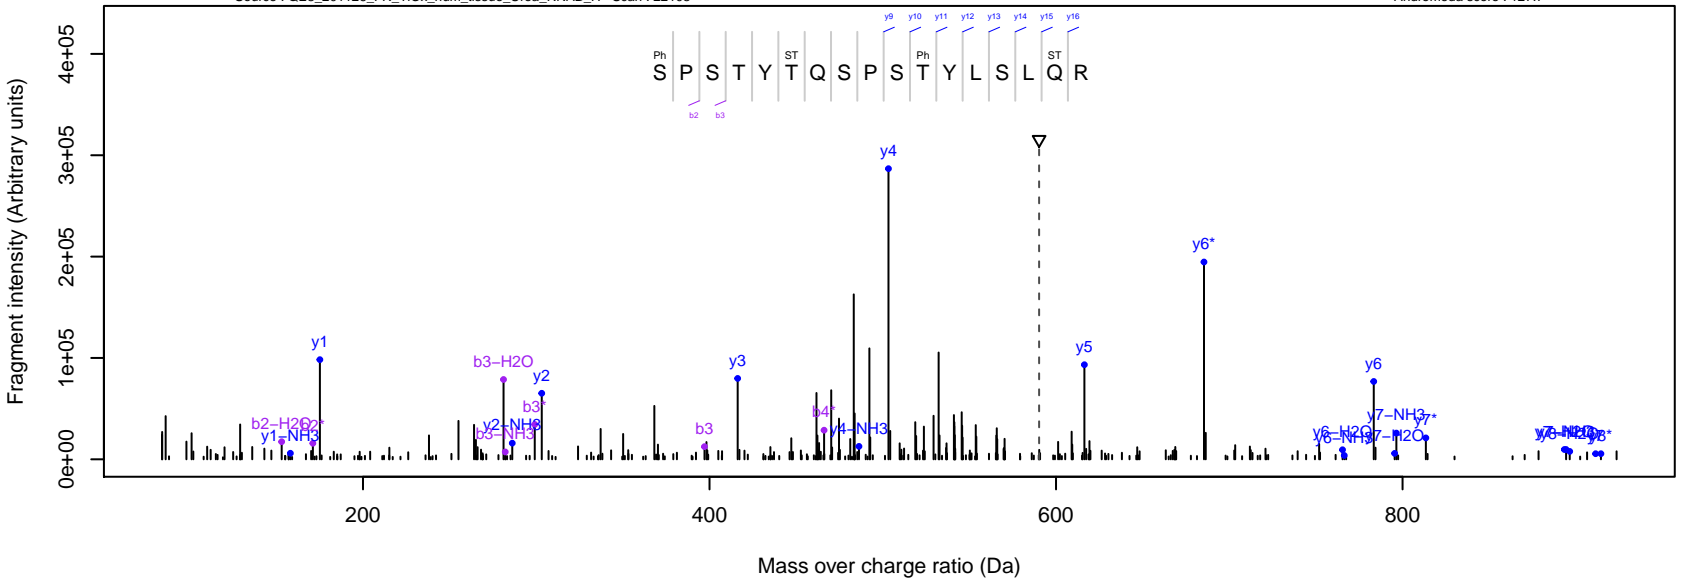

VPVPGPGS(Phospho (STY))GGNGPEREGPEEPGLAK-3+

Source : QE3\_201126\_FR\_TiOx\_hum\_tissue\_Urea\_RNAB\_H Scan : 21532

Andromeda score : 127.64

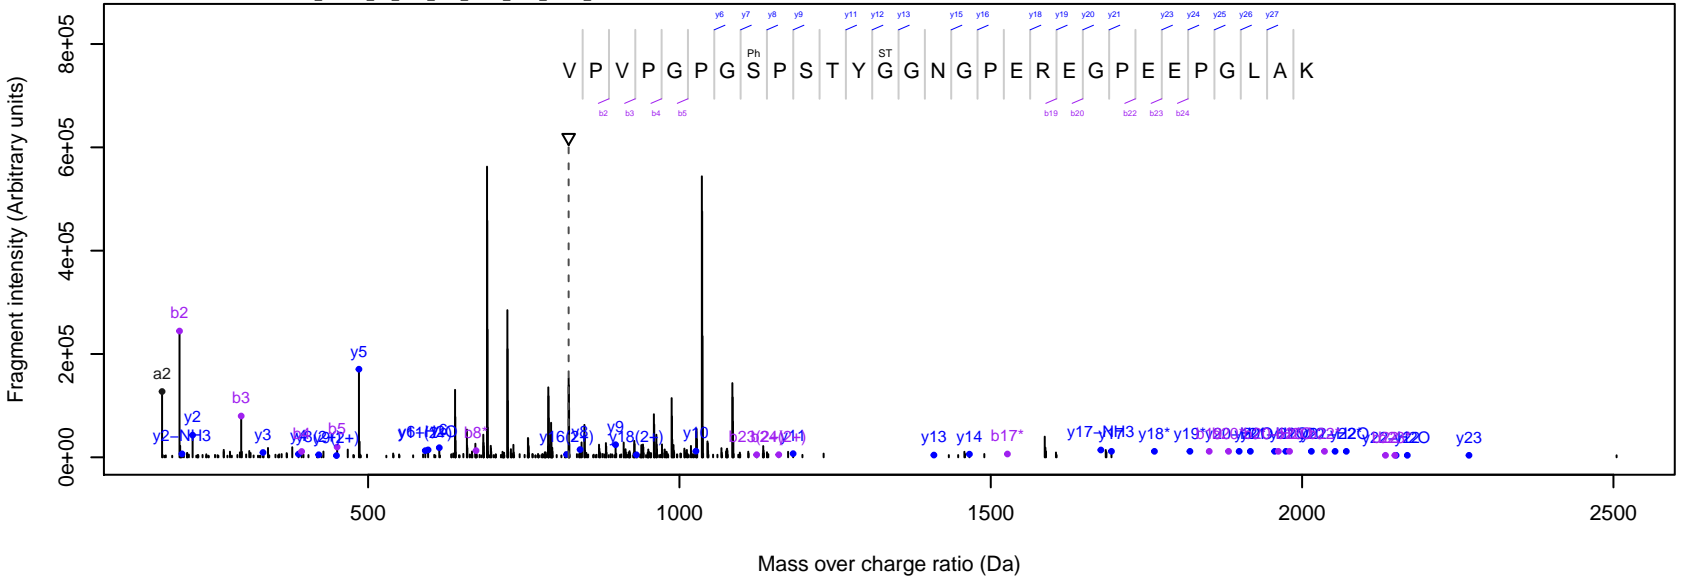

AS(Phospho (STY))LGS(Phospho (STY))LEGEAEAEASSPK-2+

Source : QE3\_201126\_FR\_TiOx\_hum\_tissue\_Urea\_RNAB\_H Scan : 50852

Andromeda score : 127.59

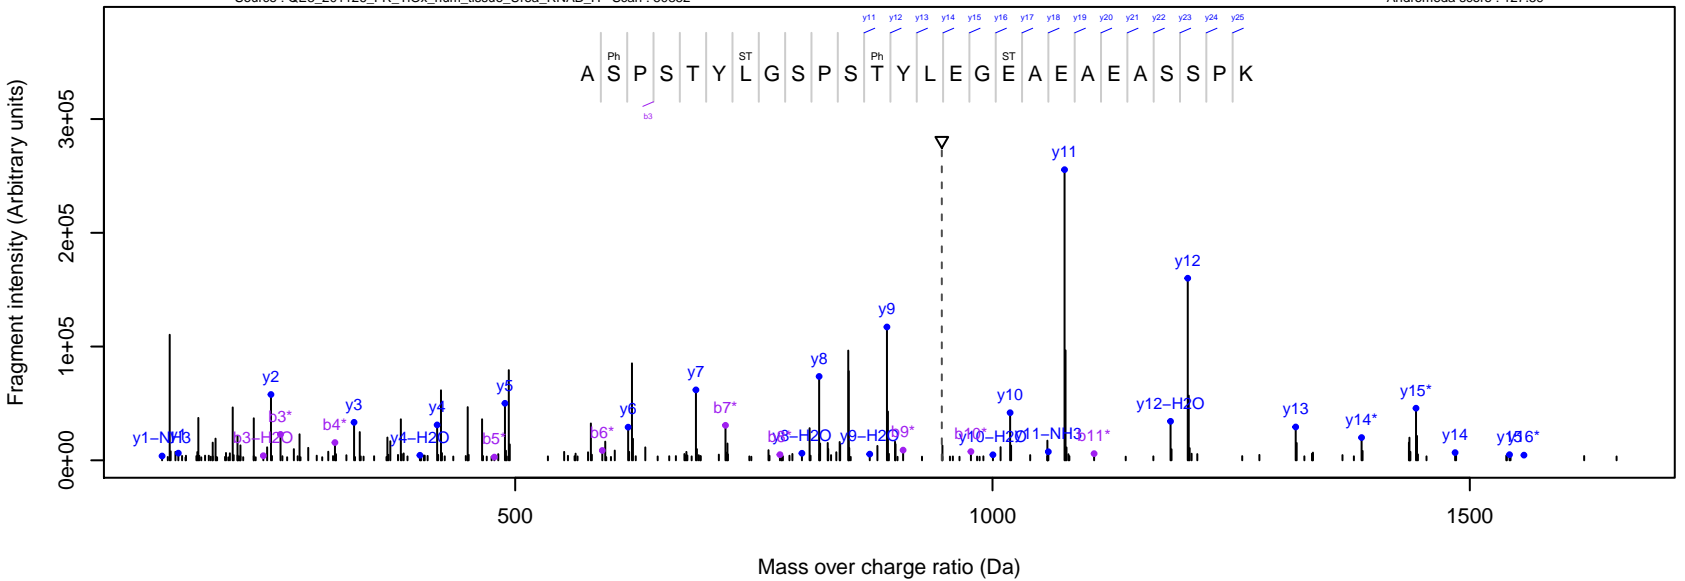

FSEM(Oxidation (M))MNNMGDEEDVLDPEVDGADDDSPSTYQD(SPhospho (STY))DDEKMPDL E-4+

Source : QE3\_201126\_FR\_TiOx\_hum\_tissue\_Urea\_RNAB\_N Scan : 60033

Andromeda score : 127.59

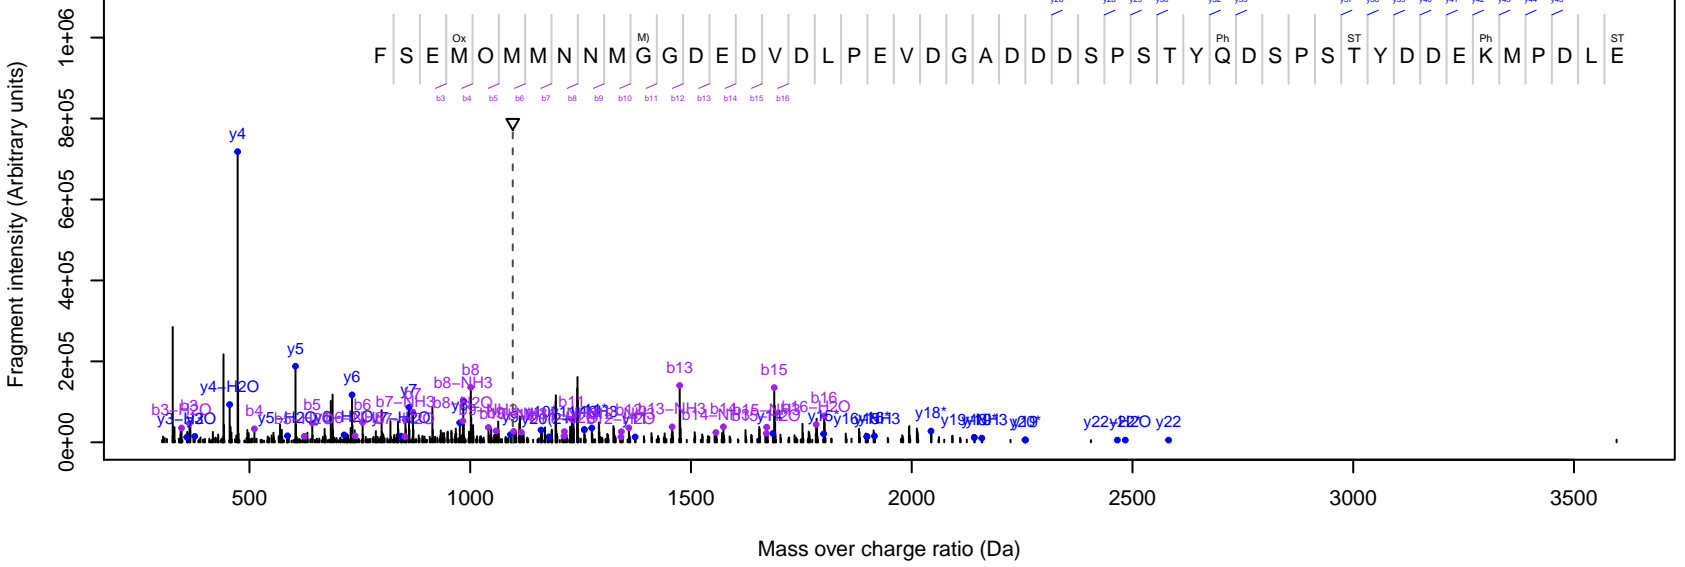

SPS(Phospho (STY))ASSLSSMSSVASSRPSR-3+

Source : QE3\_201126\_FR\_TiOx\_hum\_tissue\_Urea\_RNAB\_N Scan : 29078

Andromeda score : 127.53

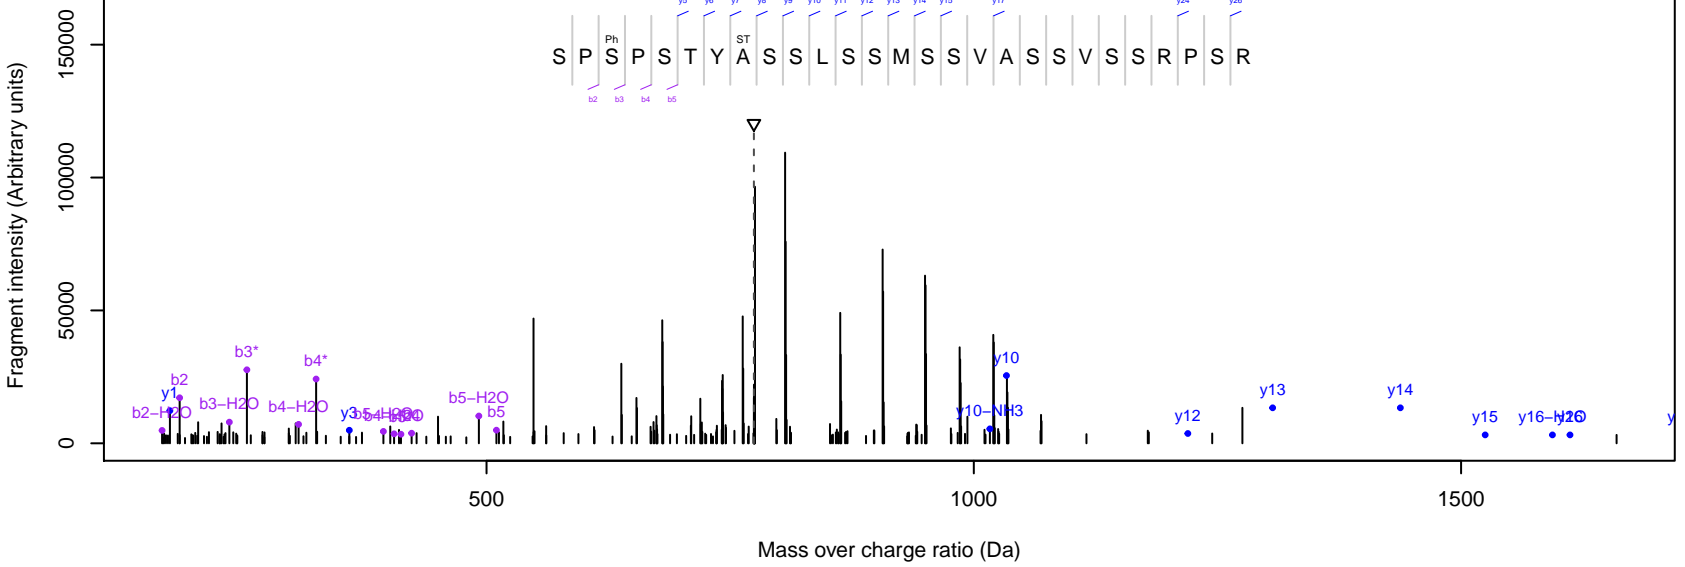

S(Phospho (STY))RS(Phospho (STY))PLAIR-2+

Source : QE3\_201126\_FR\_TiOx\_hum\_tissue\_Urea\_RNAB\_H Scan : 15588

Andromeda score : 127.51

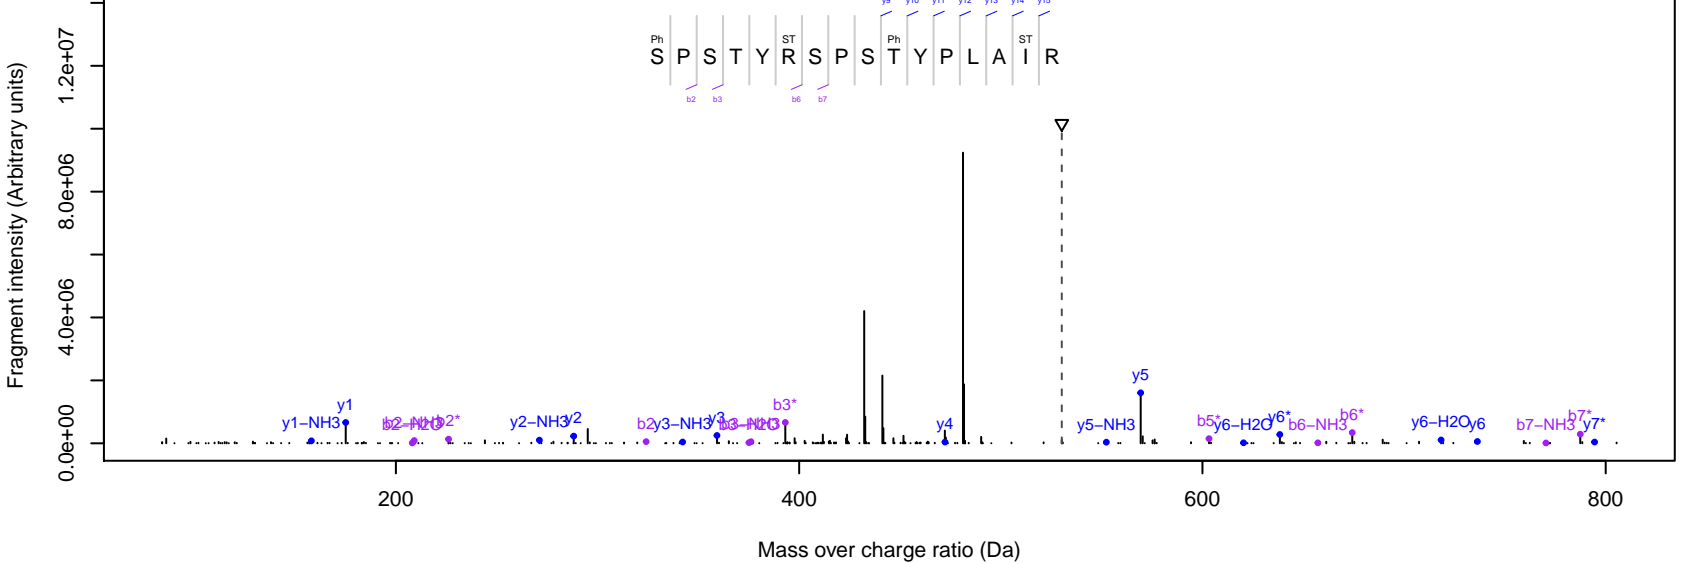

AQGISAEPQTYRS(Phospho (STY))FHDLR-3+

Source : QE3\_201126\_FR\_TIOx\_hum\_tissue\_Urea\_RNAB\_B Scan : 21118

Andromeda score : 127.5

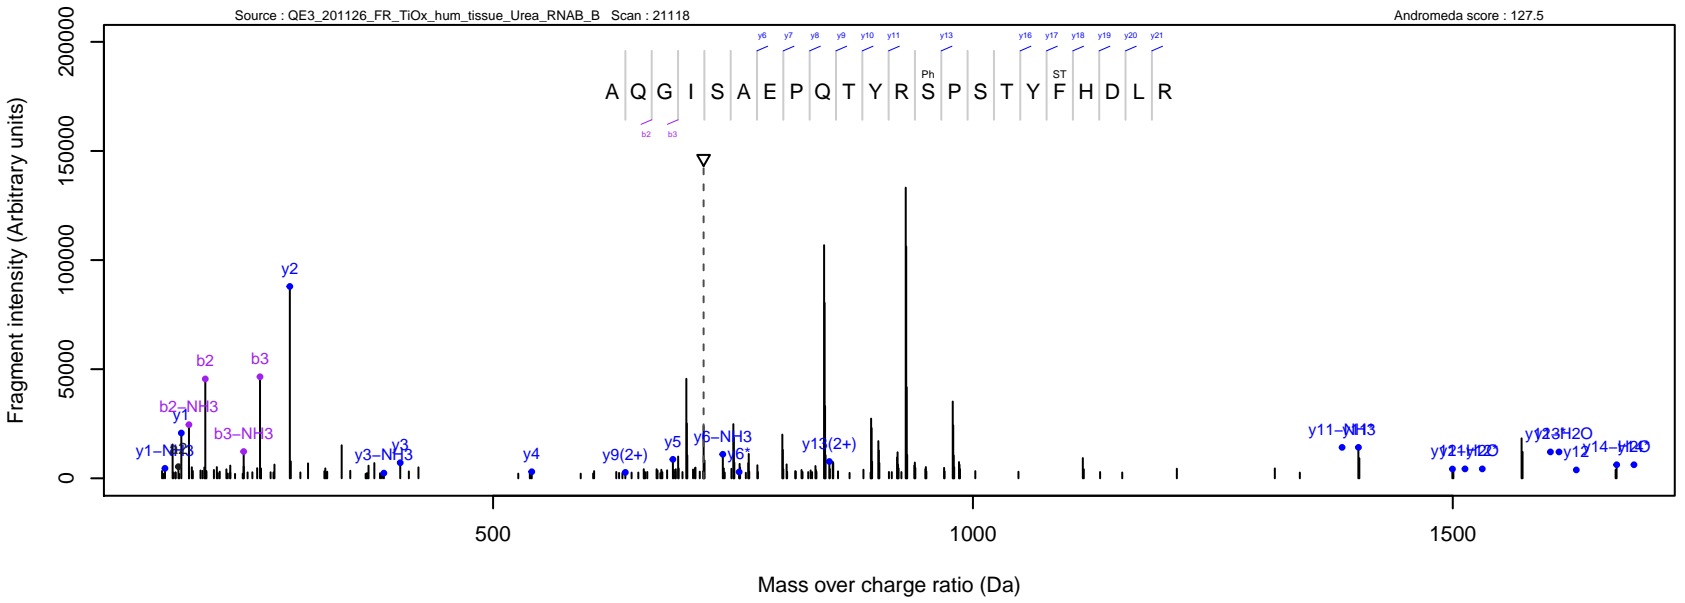

HS(Phospho (STY))QSM(Oxidation (M))IEDAQLPLEQK-3+

Source : QE3\_201126\_FR\_TIOx\_hum\_tissue\_Urea\_RNAB\_H Scan : 23230

Andromeda score : 127.5

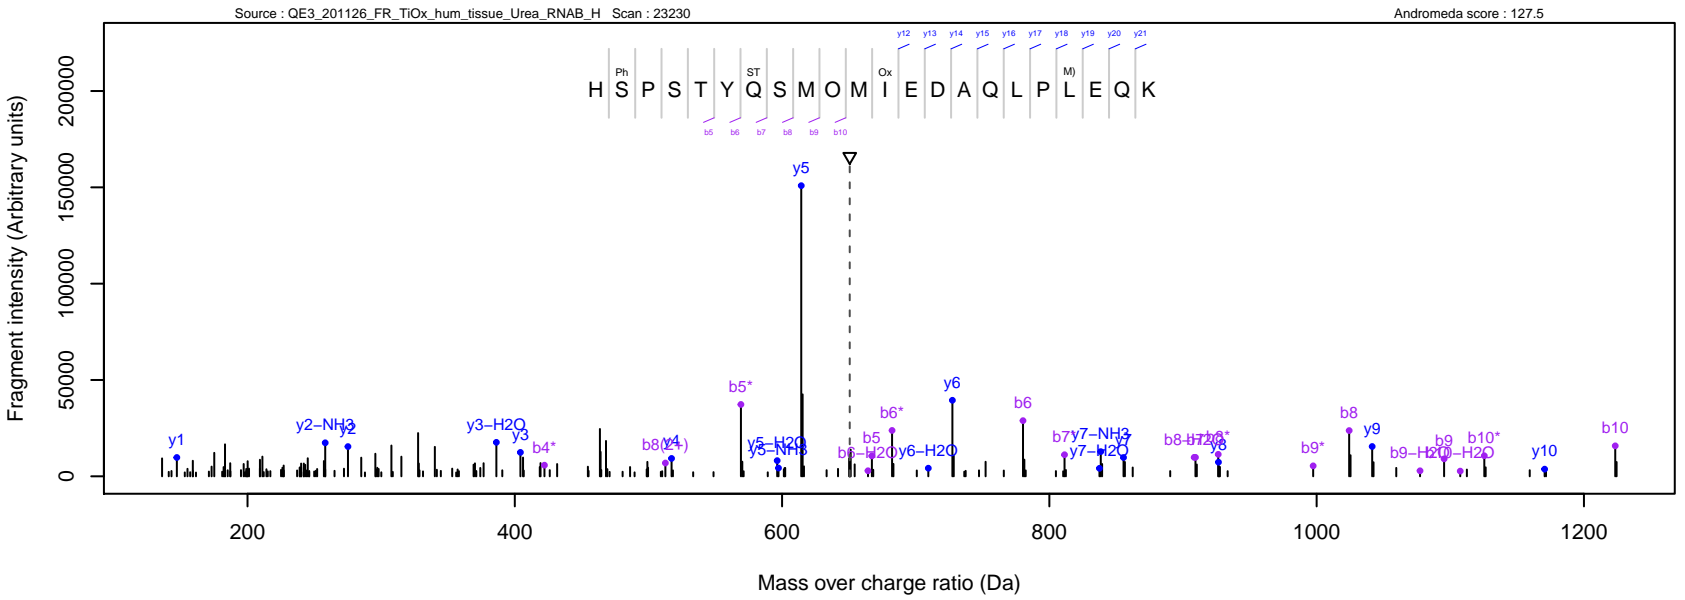

SPSSESS(Phospho (STY))PQHPTPPARPR-3+

Source : QE3\_201126\_FR\_TIOx\_hum\_tissue\_Urea\_RNAB\_H Scan : 6995

Andromeda score : 127.5

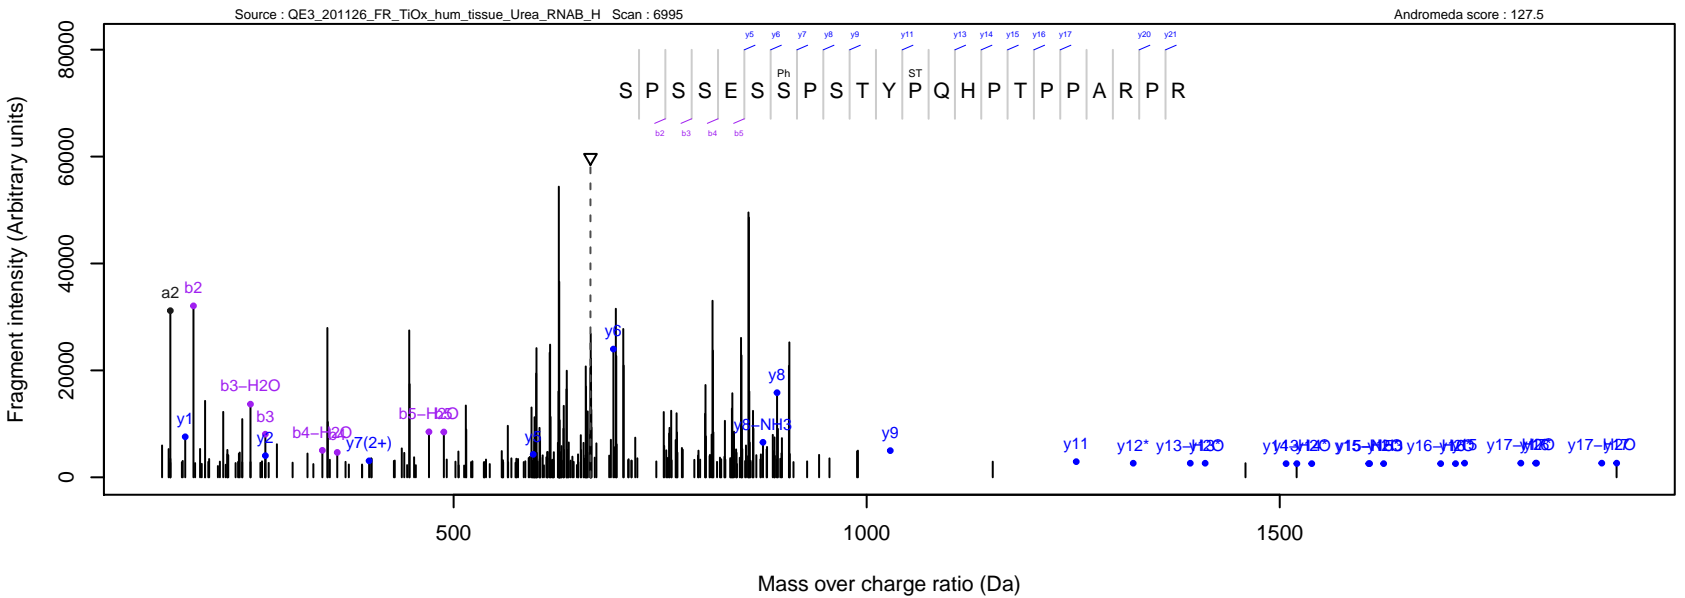

SKDAS(Phospho (STY))PINRWS(Phospho (STY))PTR-3+

Source : QE3\_201126\_FR\_TiOx\_hum\_tissue\_Urea\_RNAB\_H Scan : 15398

Andromeda score : 127.49

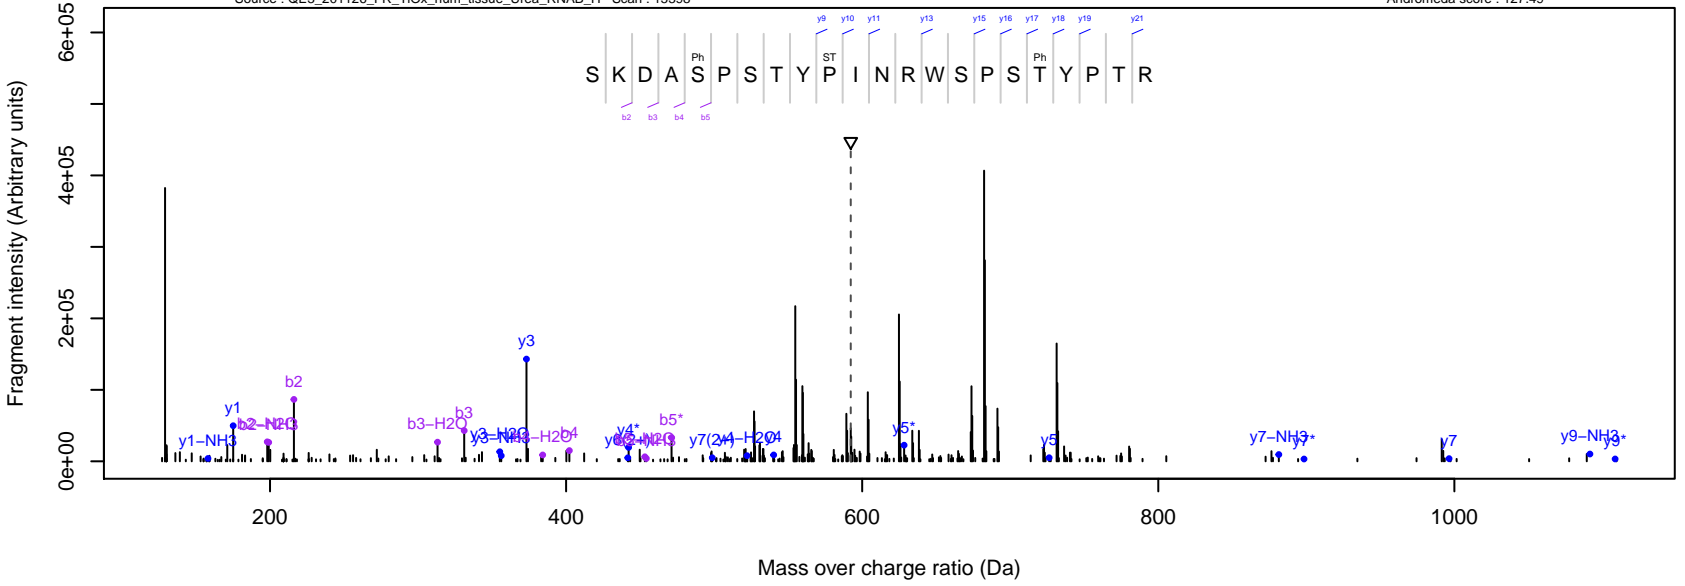

YSPS(Phospho (STY))QNSPIHHIPS(Phospho (STY))RRSPAK-4+

Source : QE3\_201126\_FR\_TiOx\_hum\_tissue\_Urea\_RNAB\_N Scan : 9163

Andromeda score : 127.38

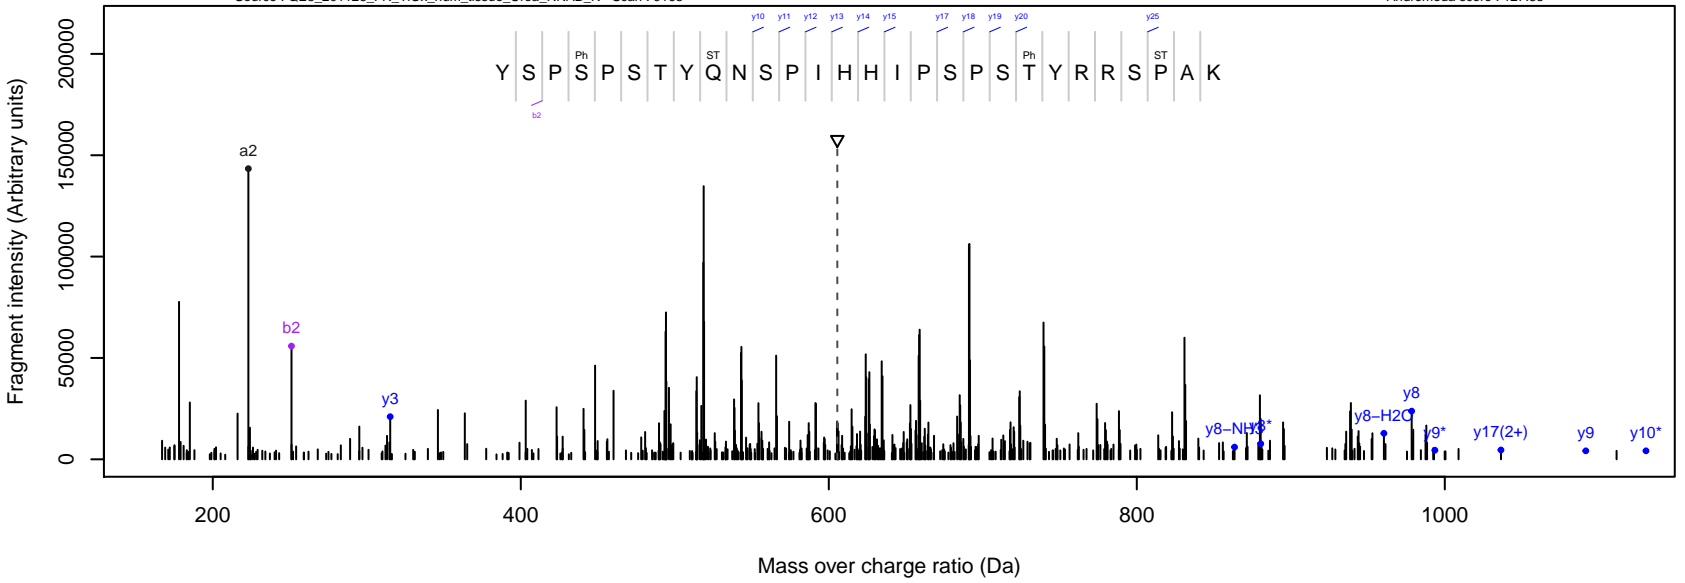

HIISATSLSTS(Phospho (STY))PTELGSR-3+

Source : QE3\_201126\_FR\_TiOx\_hum\_tissue\_Urea\_RNAB\_H Scan : 27338

Andromeda score : 127.37

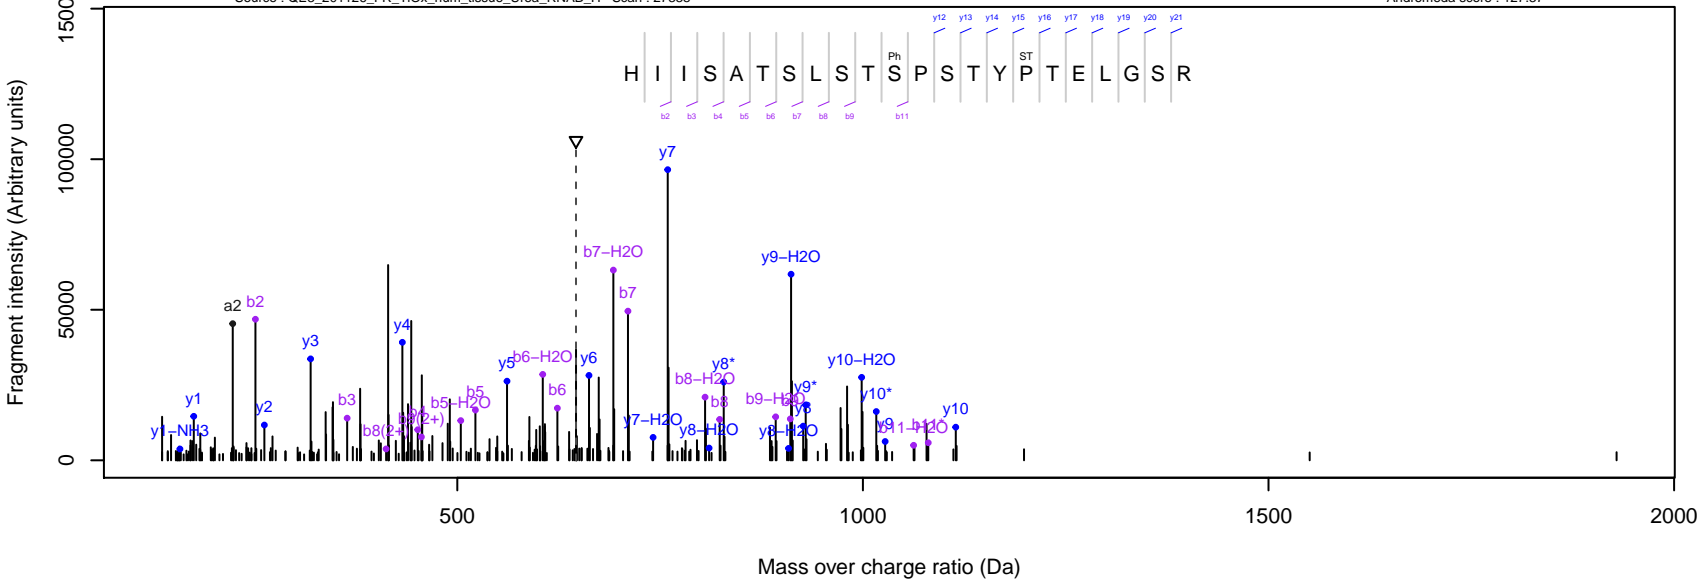

LSS(Phospho (STY))TDDGYIDLQFK-2+

Source : QE3\_201126\_FR\_TiOx\_hum\_tissue\_Urea\_RNAB\_H Scan : 46748

Andromeda score : 127.36

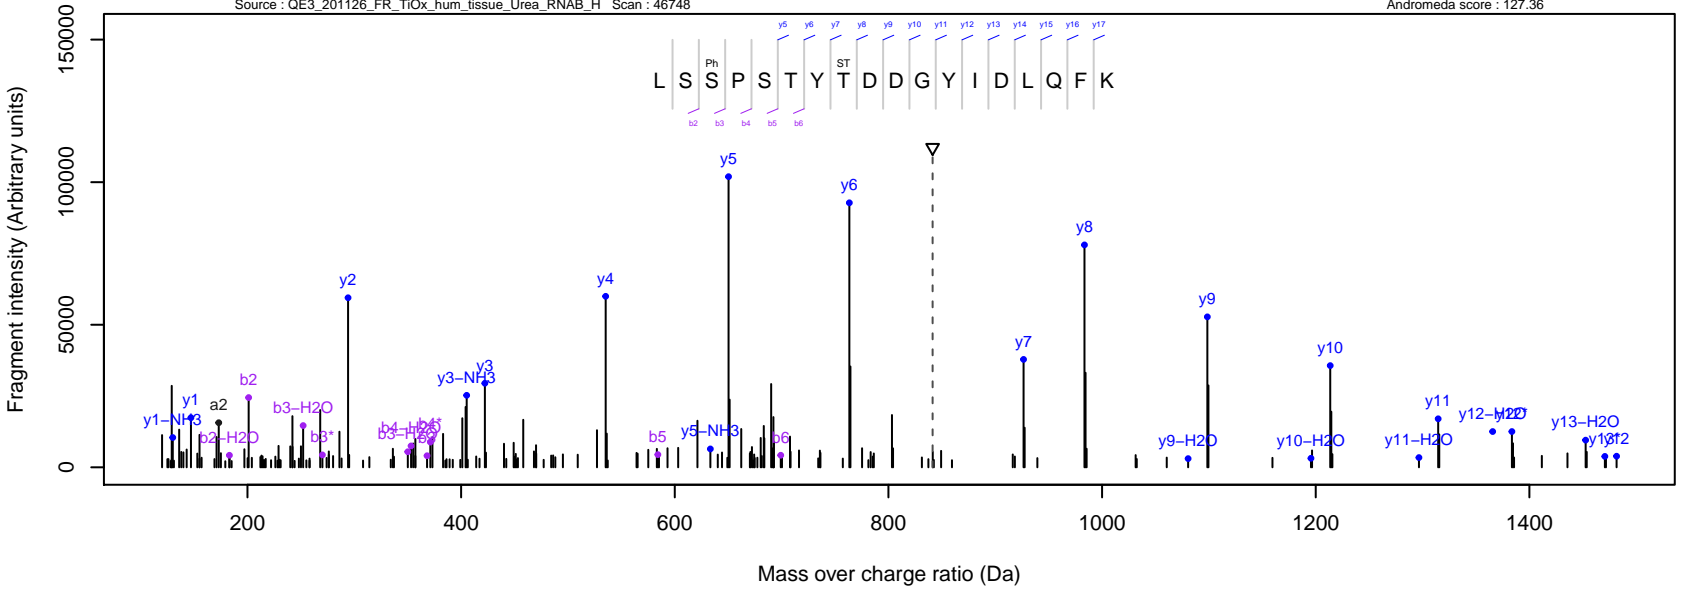

SGS(Phospho (STY))M(Oxidation (M))DPSGAHPSVR-2+

Source : QE3\_201126\_FR\_TiOx\_hum\_tissue\_Urea\_RNAB\_H Scan : 5991

Andromeda score : 127.36

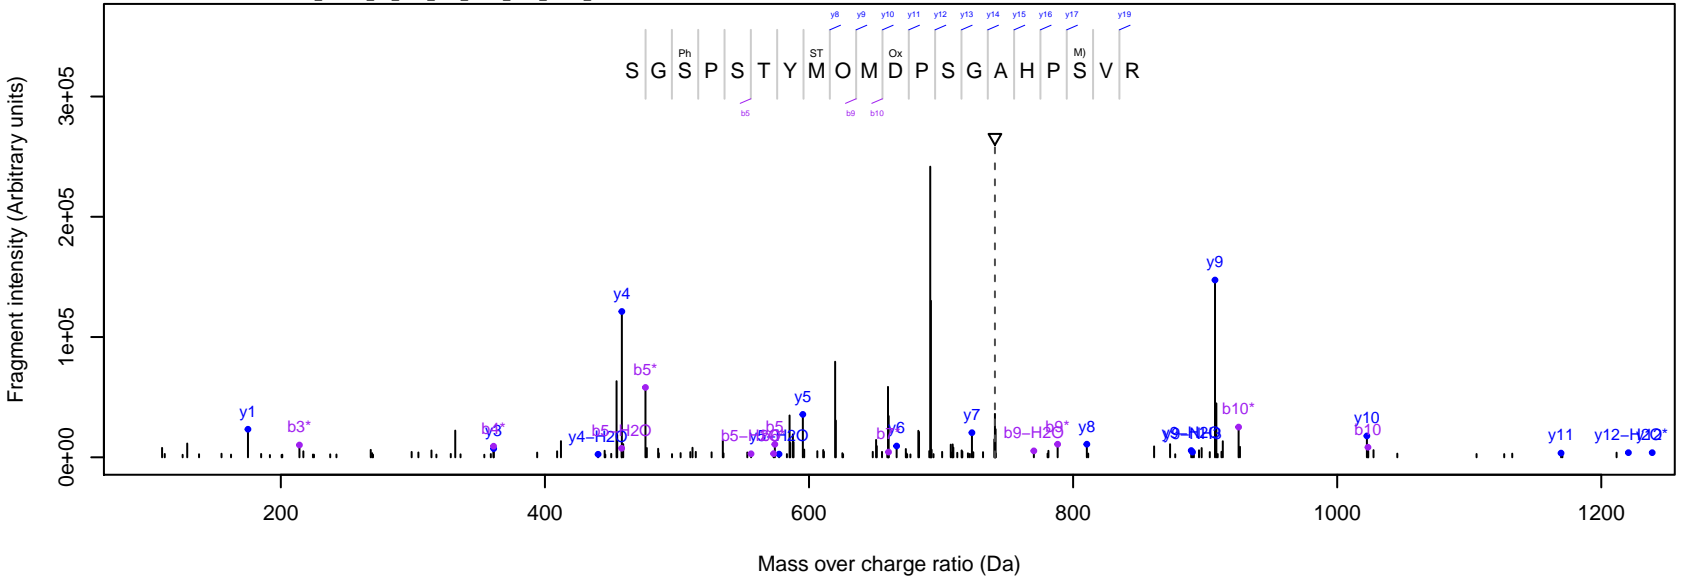

HSS(Phospho (STY))PTEERDEPAYPR-3+

Source : QE3\_201126\_FR\_TiOx\_hum\_tissue\_Urea\_RNAB\_H Scan : 8035

Andromeda score : 127.32

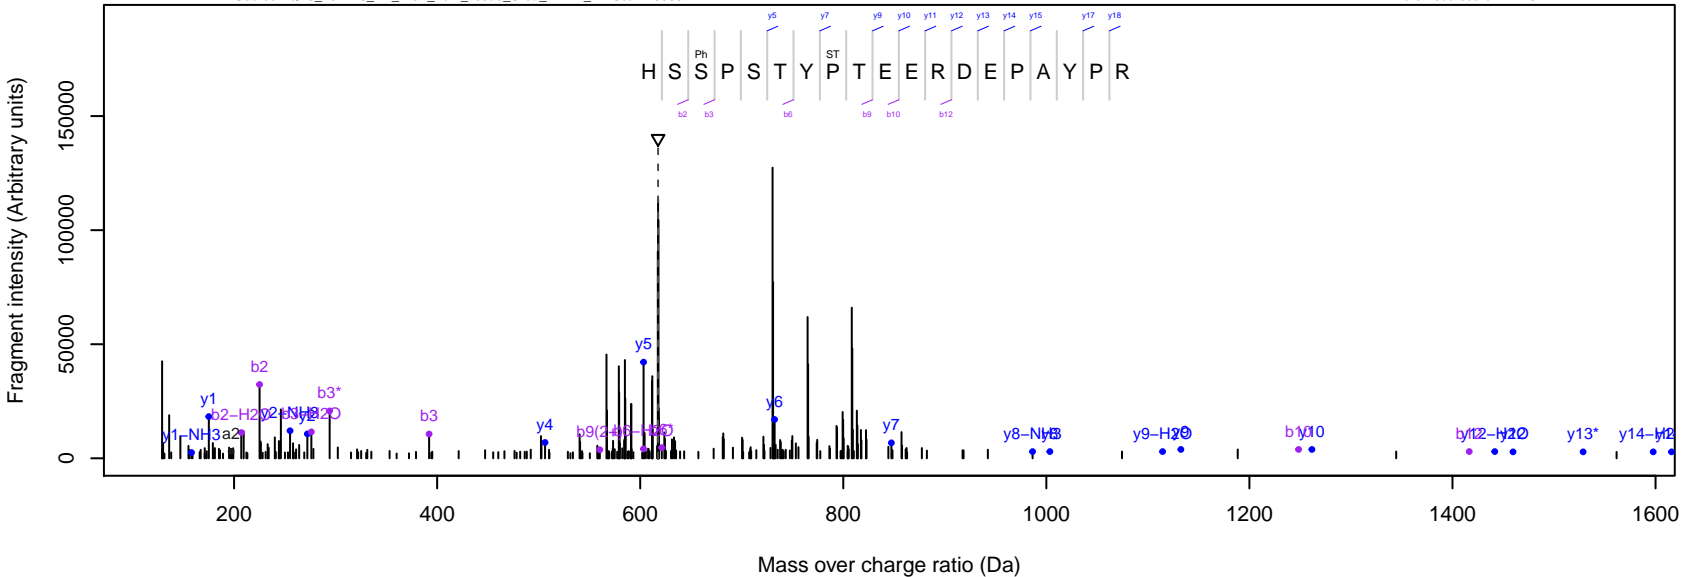

S(Phospho (STY))DSRAQVSEDAGGNEGR-3+

Source : QE3\_201126\_FR\_TiOx\_hum\_tissue\_Urea\_RNAB\_N Scan : 7581

Andromeda score : 127.31

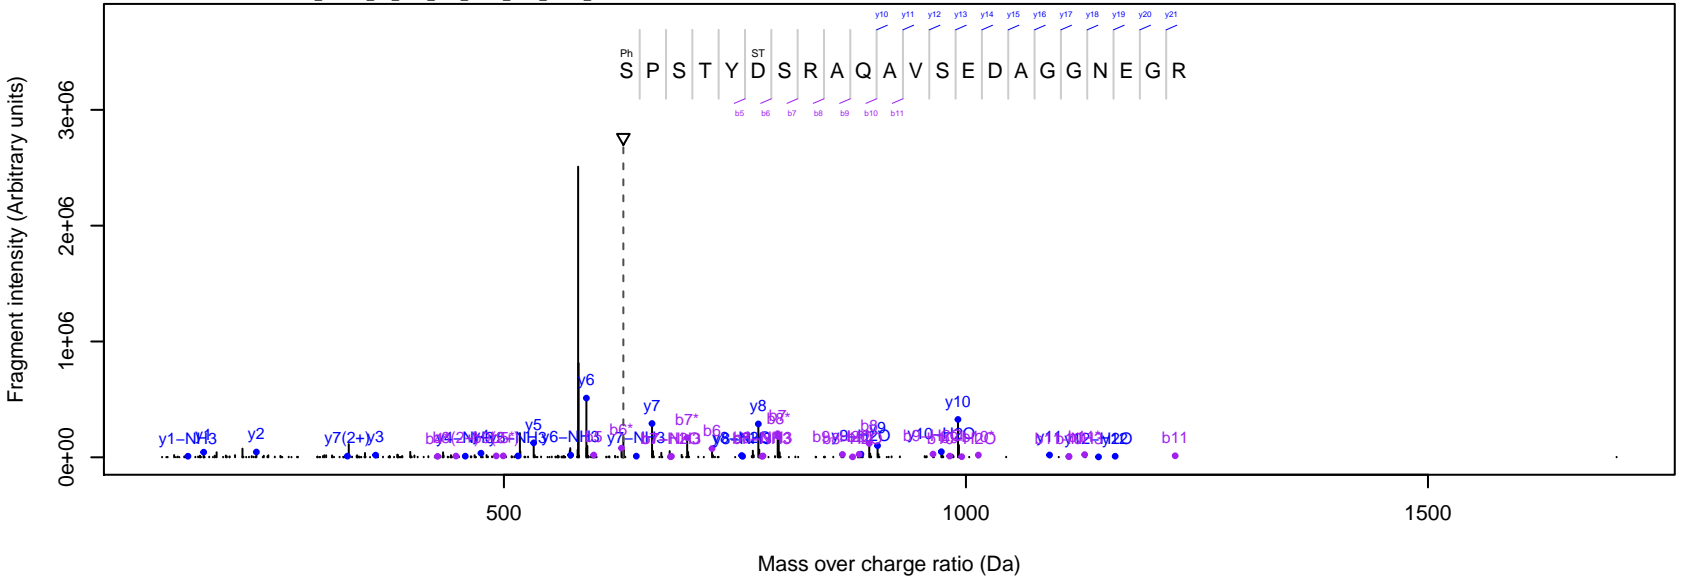

RAS(Phospho (STY))LSDIGFGK-2+

Source : QE3\_201126\_FR\_TiOx\_hum\_tissue\_Urea\_RNAB\_H Scan : 23868

Andromeda score : 127.3

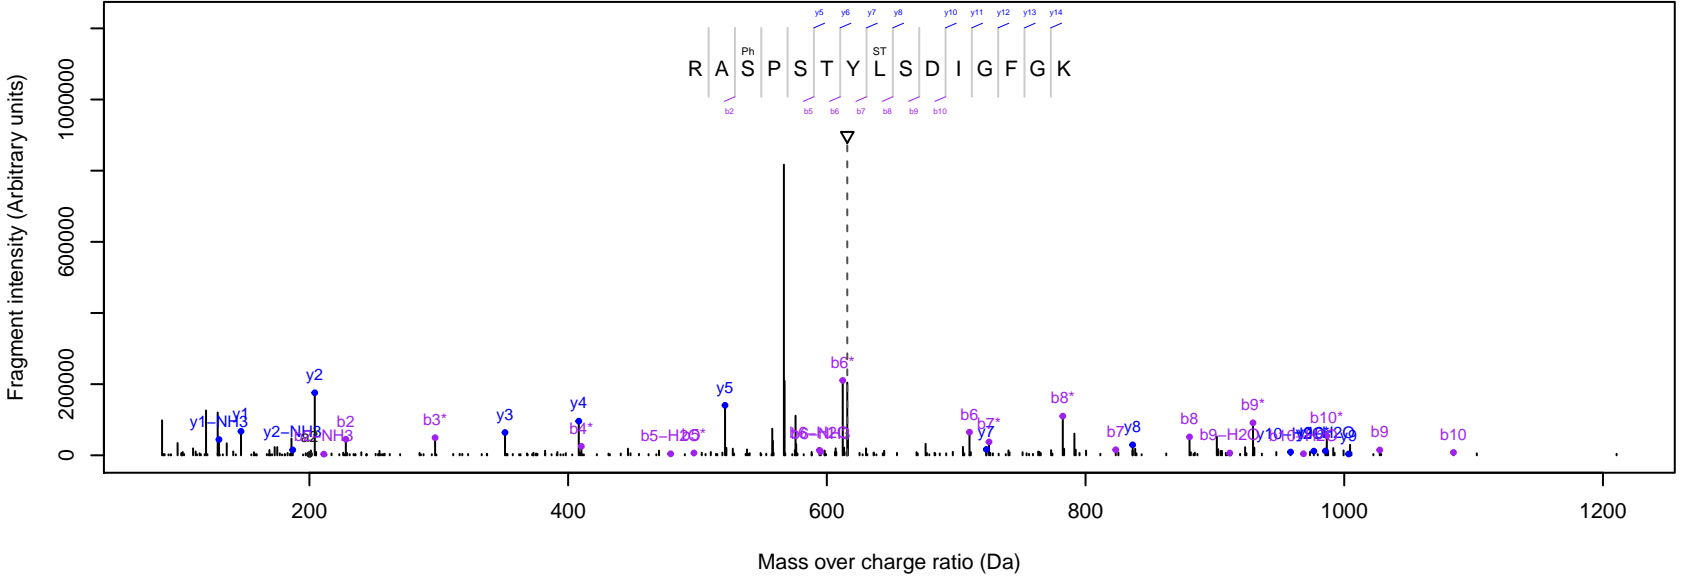

ADVVPQQADPEFPRAS(Phospho (STY))PR-3+

Source : QE3\_201126\_FR\_TiOx\_hum\_tissue\_Urea\_RNAB\_H Scan : 25056

Andromeda score : 127.28

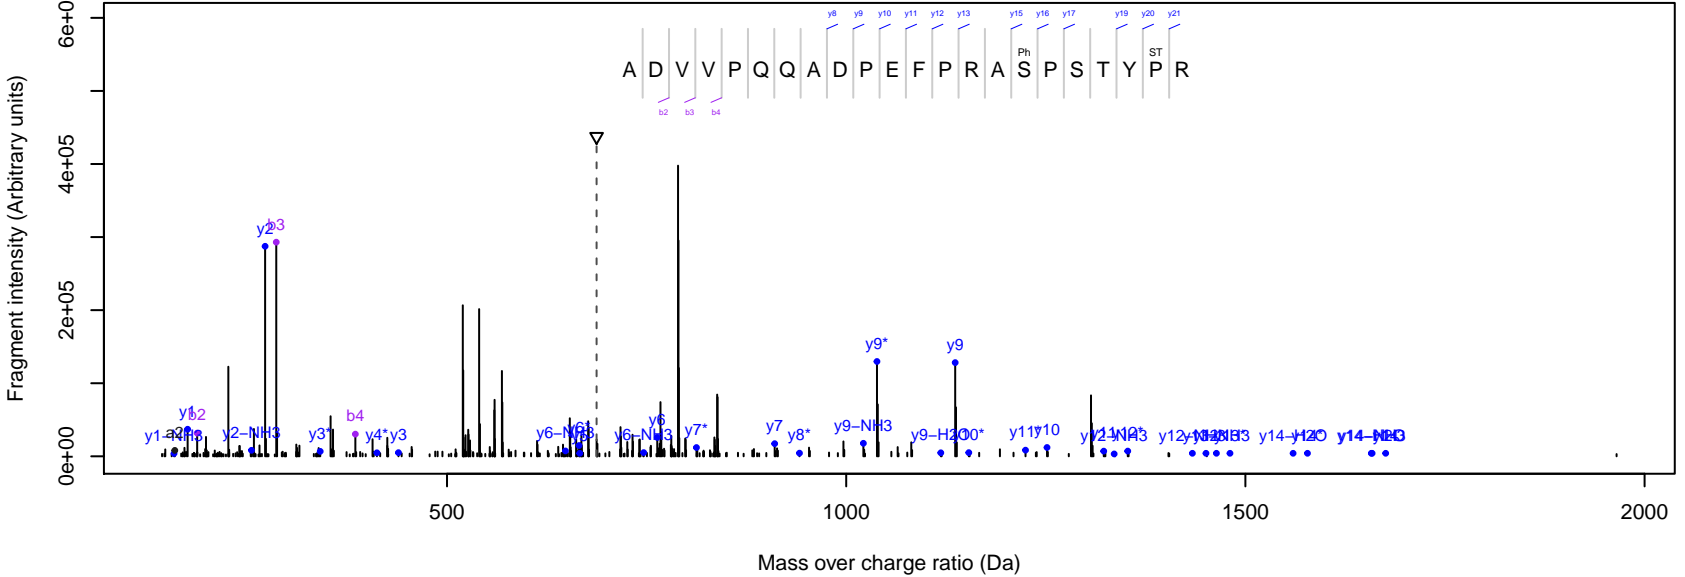





SNS(Phospho (STY))ISKSPGPSSPKPELLFSR-3+

Source : QE3\_201126\_FR\_TiOx\_hum\_tissue\_Urea\_RNAB\_H Scan : 23300

Andromeda score : 127.24

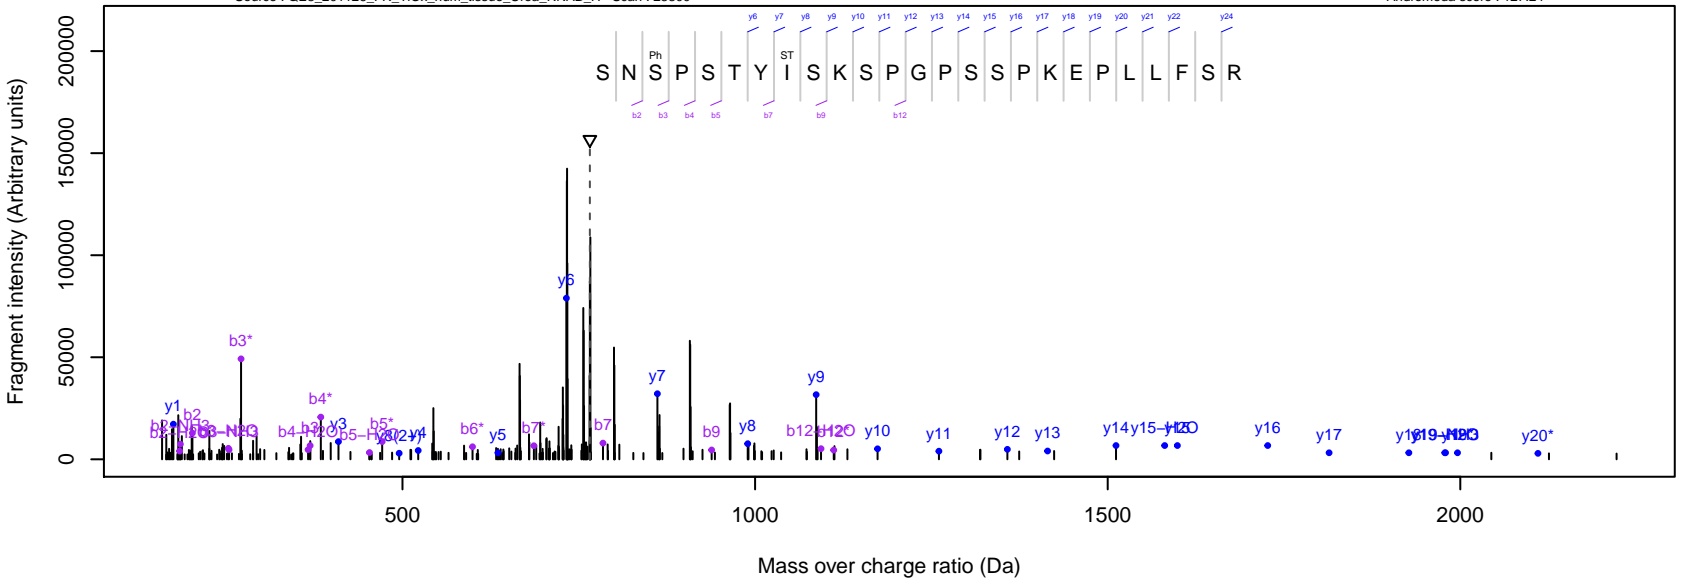

NVGESVAAALS(Phospho (STY))PLGIEVDIDVEHGGKR-4+

Source : QE3\_201126\_FR\_TiOx\_hum\_tissue\_Urea\_RNAB\_N Scan : 55481

Andromeda score : 127.23

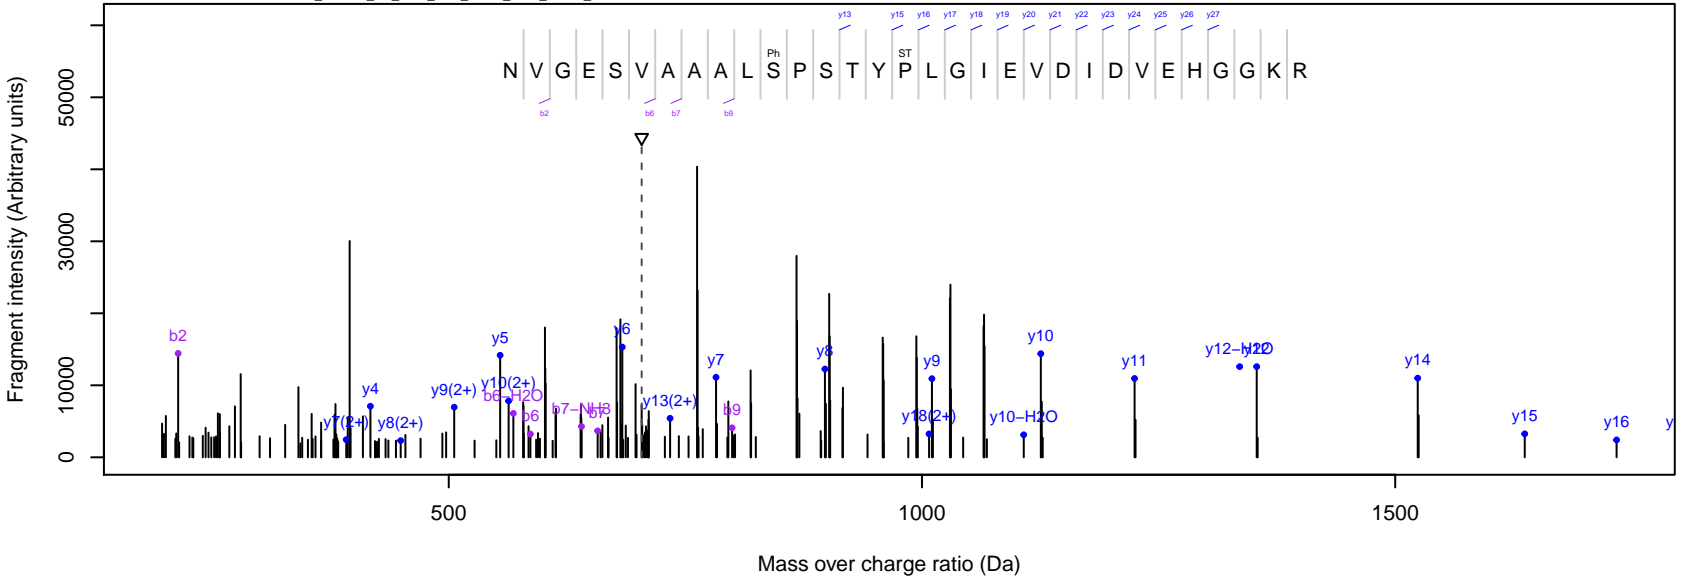

AADPPAENSS(Phospho (STY))APEAEQGGAE-2+

Source : QE3\_201126\_FR\_TiOx\_hum\_tissue\_Urea\_RNAB\_B Scan : 16630

Andromeda score : 127.22

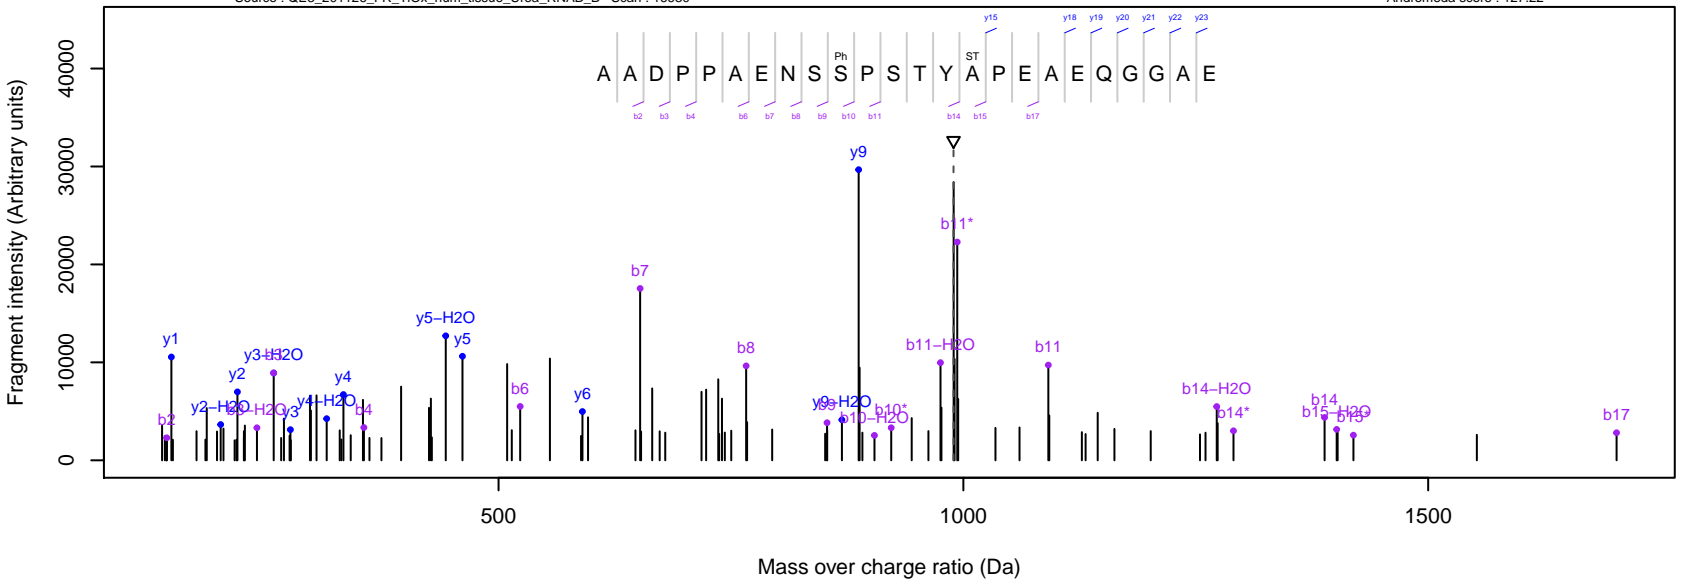

HRS(Phospho (STY))NS(Phospho (STY))FSDREFSGPS(Phospho (STY))TPTGTLEFEGEVSLEGGK-4+

Source : QE3\_201126\_FR\_TIOx\_hum\_tissue\_Urea\_RNAB\_H Scan : 43845

Andromeda score : 127.17

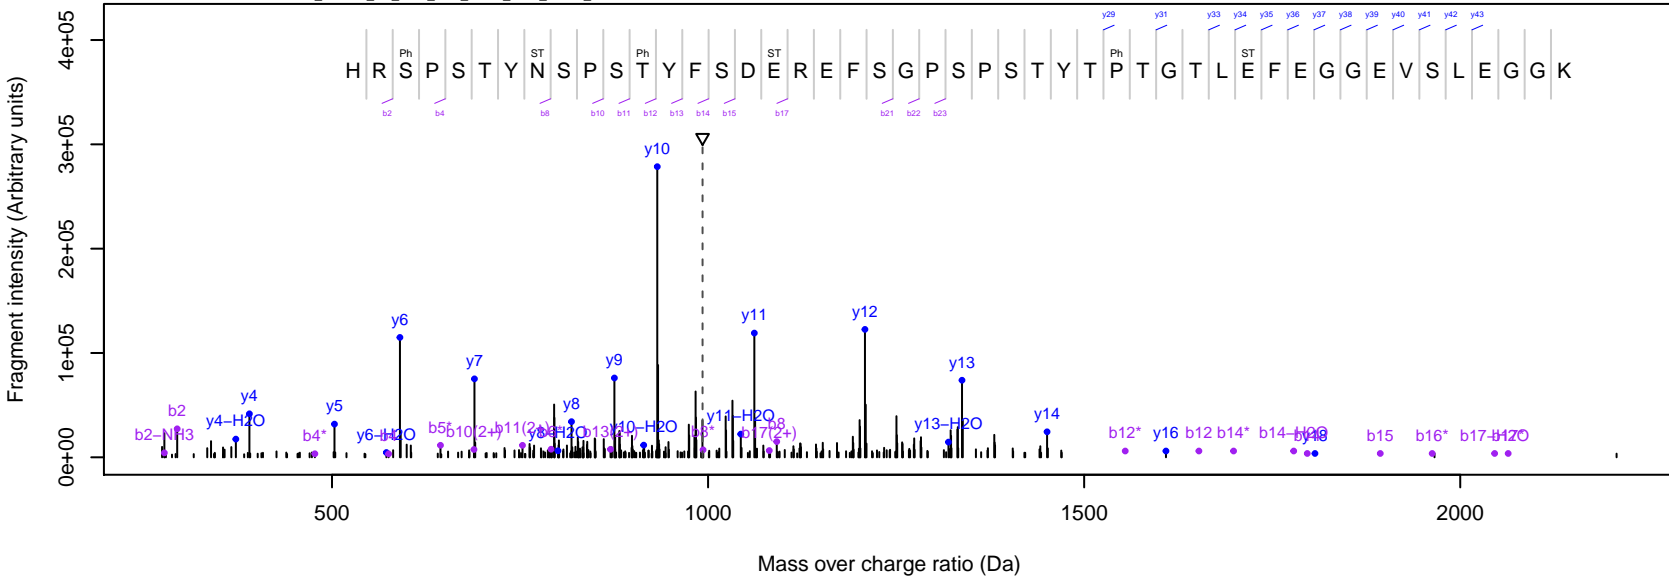

LSVSS(Phospho (STY))NDTQESGNSSGSPGAK-2+

Source : QE3\_201126\_FR\_TIOx\_hum\_tissue\_Urea\_RNAB\_N Scan : 14000

Andromeda score : 127.17

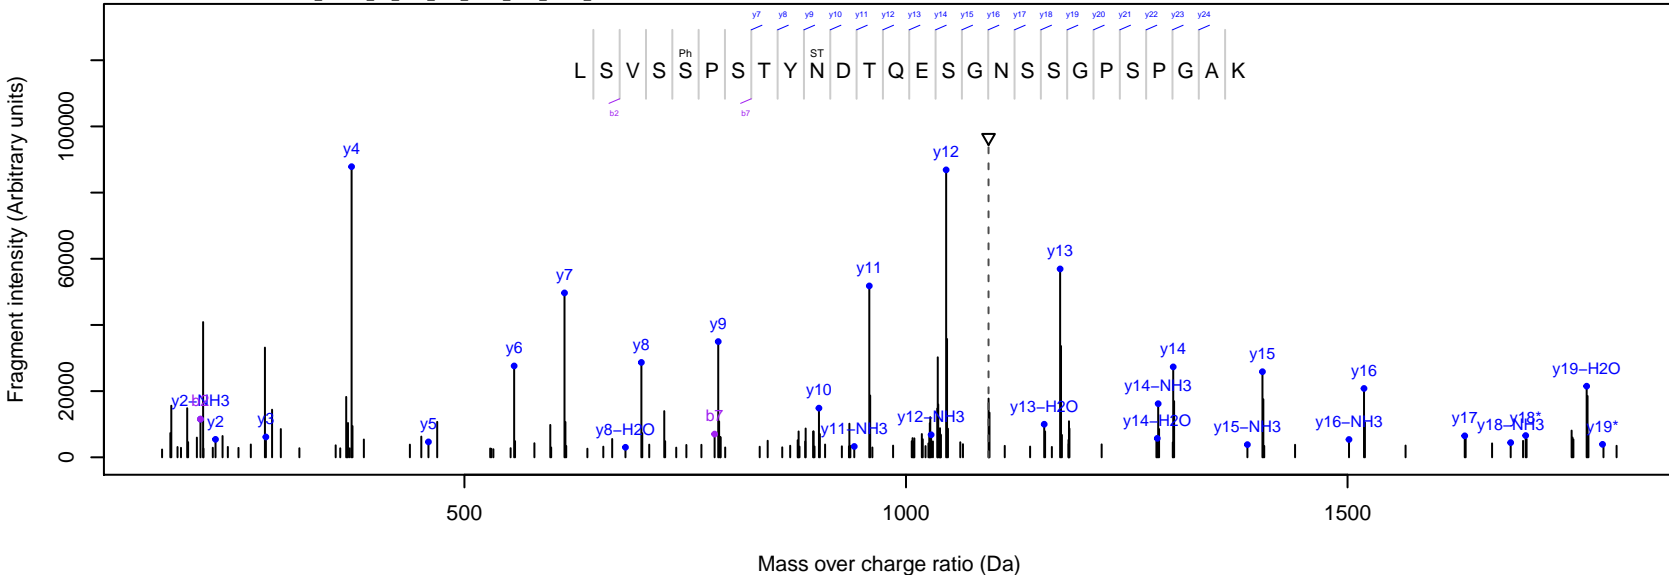

TISS(Phospho (STY))LEEIVEK-2+

Source : QE3\_201126\_FR\_TIOx\_hum\_tissue\_Urea\_RNAB\_H Scan : 44466

Andromeda score : 127.17

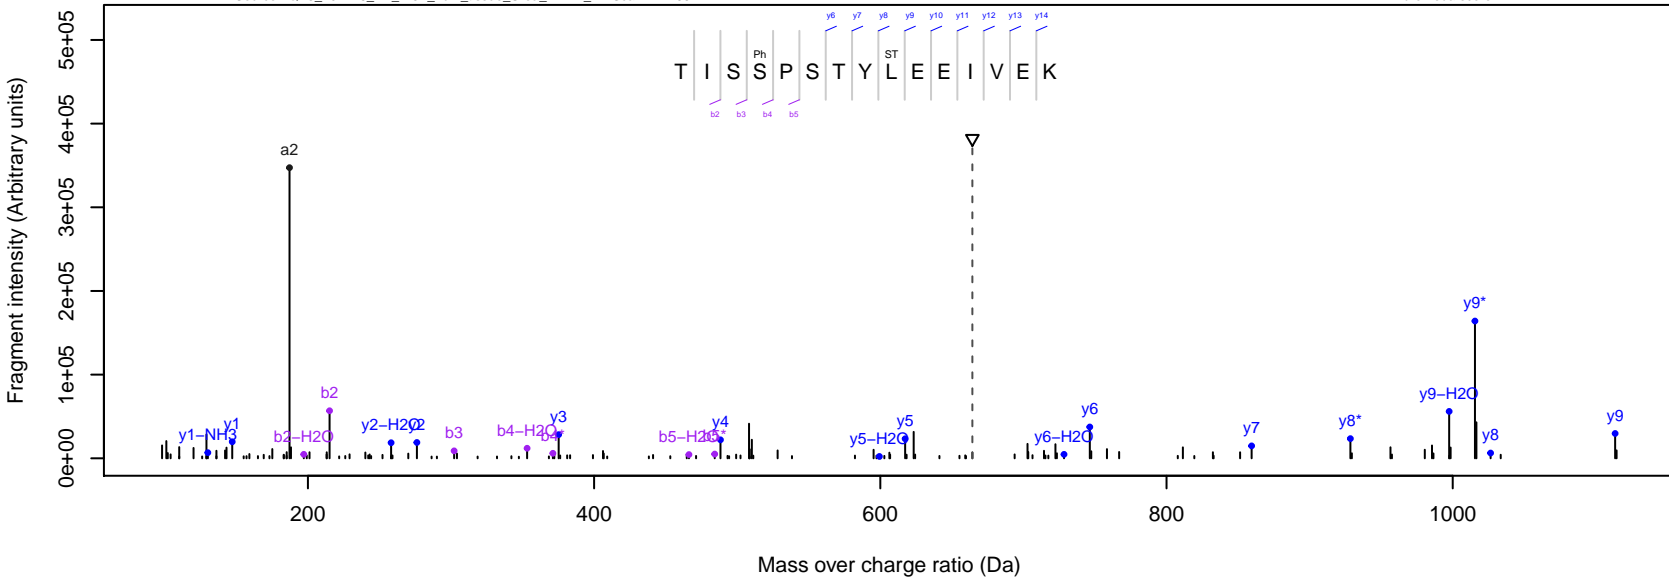

S(Phospho (STY))HAENPTASHVDNEYSQPPR-3+

Source : QE3\_201126\_FR\_TiOx\_hum\_tissue\_Urea\_RNAB\_N Scan : 10430

Andromeda score : 127.16

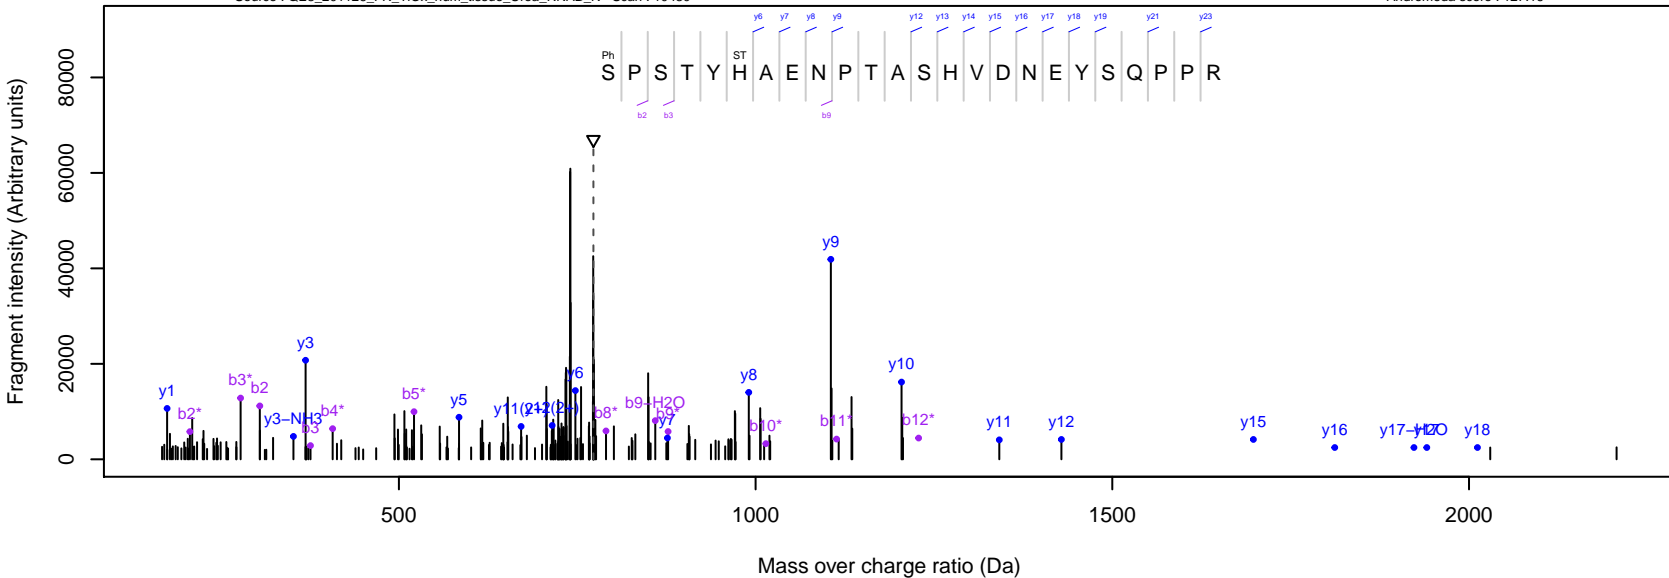

DELHIVEAEAMNYEGS(Phospho (STY))PIKVTLATLK-4+

Source : QE3\_201126\_FR\_TiOx\_hum\_tissue\_Urea\_RNAB\_H Scan : 56578

Andromeda score : 127.14

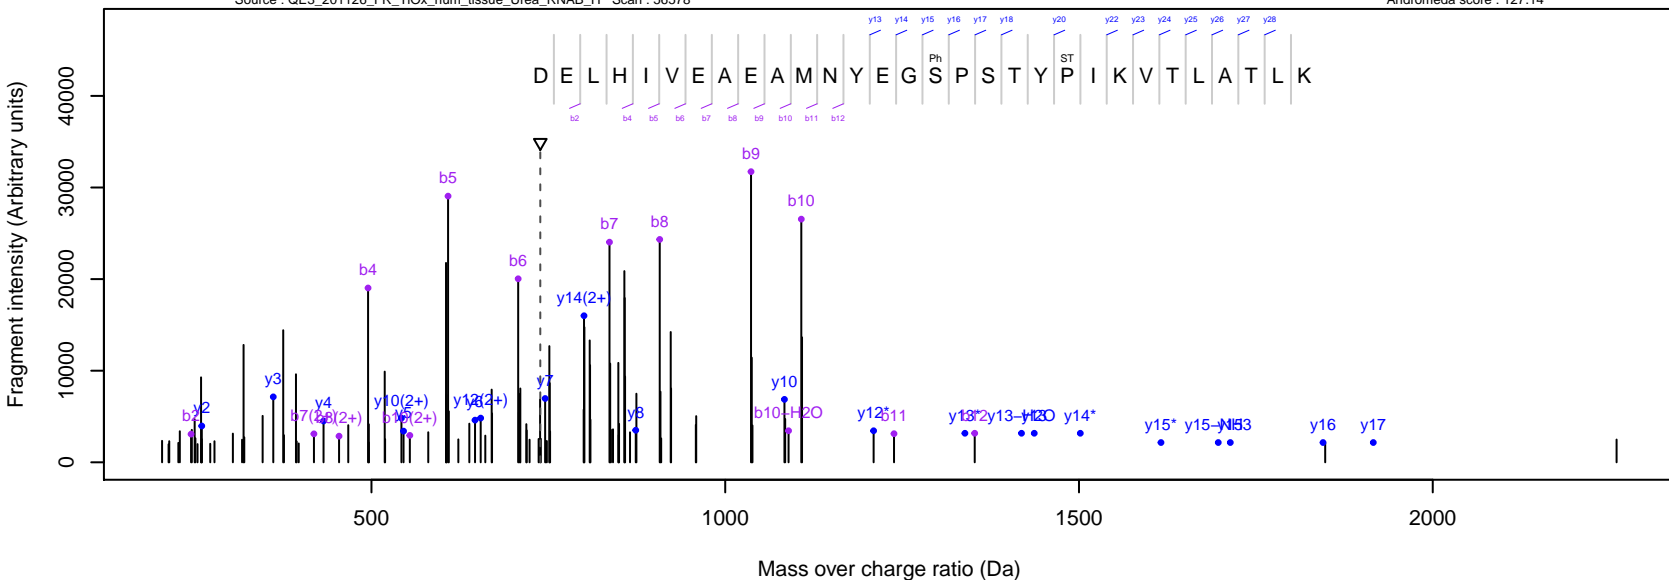

MAPPPKEVEEEDSEDEEMSEDEEDDS(Phospho (STY))S(Phospho (STY))GEEVIPQKK-4+

Source : QE3\_201126\_FR\_TiOx\_hum\_tissue\_Urea\_RNAB\_N Scan : 29405

Andromeda score : 127.14

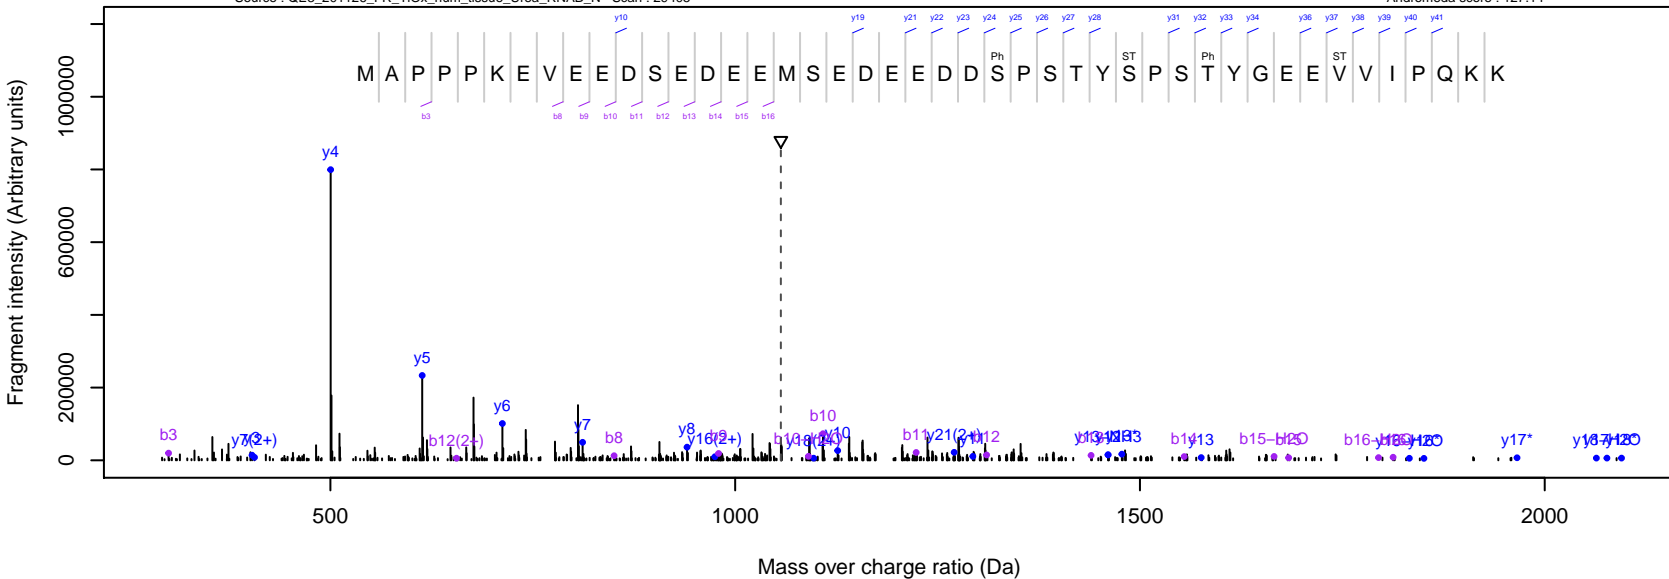

GGAS(Phospho (STY))EEALSAVAPR-2+

Source : QE3\_201126\_FR\_TiOx\_hum\_tissue\_Urea\_RNAB\_H Scan : 26580

Andromeda score : 127.02

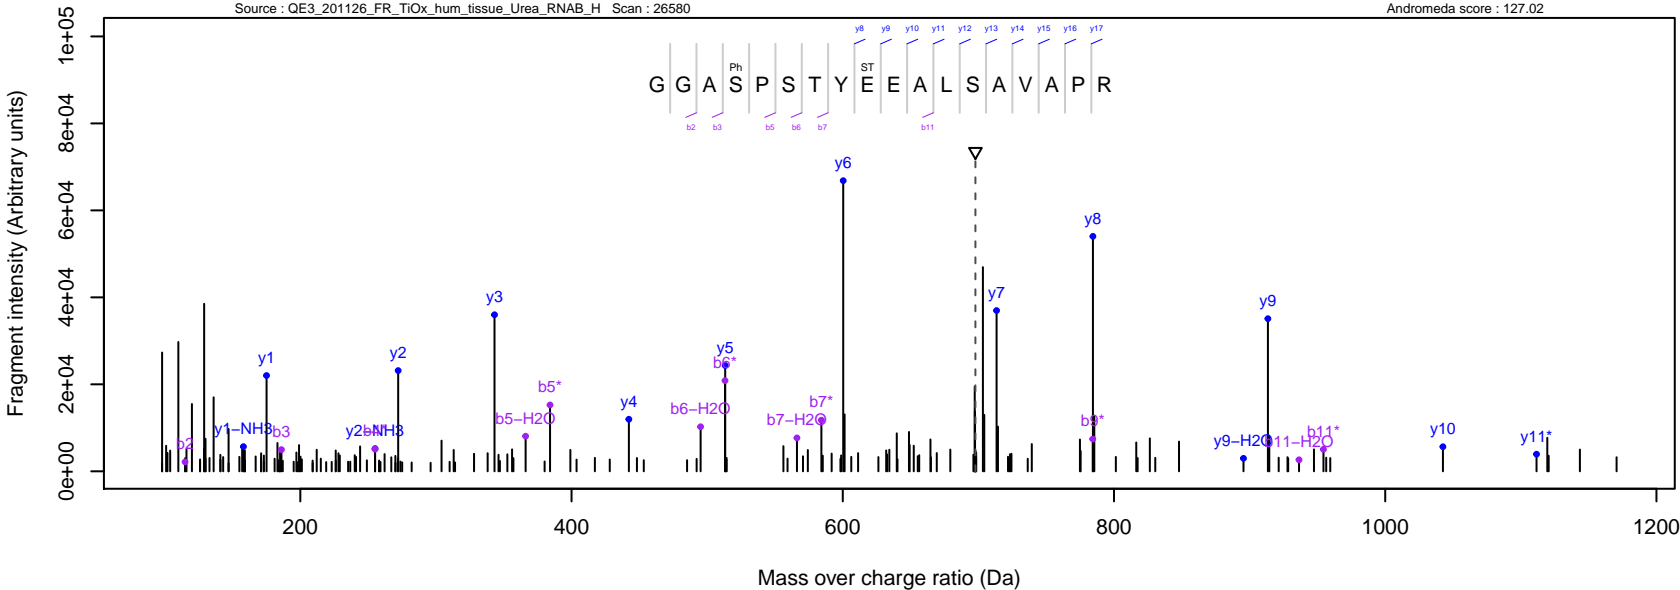

AAS(Phospho (STY))ADS(Phospho (STY))TTEGTPADGFTVLSTK-2+

Source : QE3\_201126\_FR\_TiOx\_hum\_tissue\_Urea\_RNAB\_B Scan : 50394

Andromeda score : 127.01

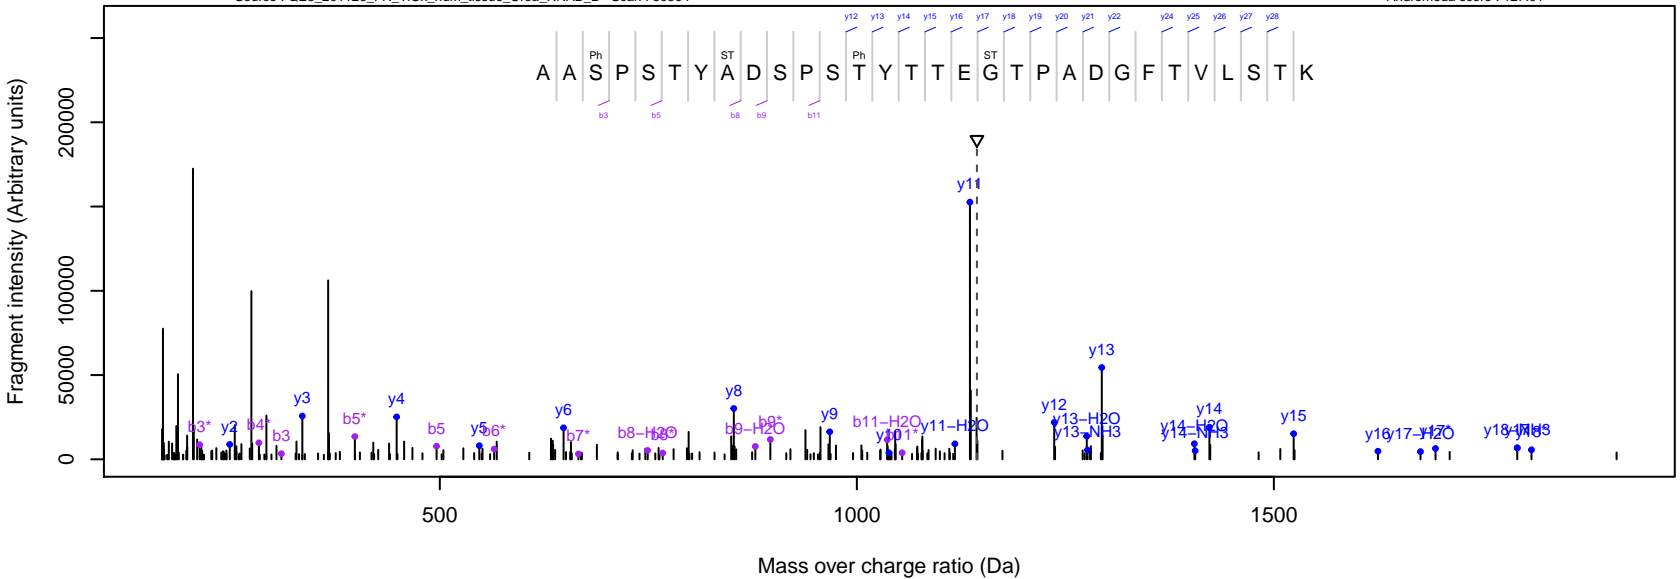

TQEDEEEIST(Phospho (STY))SPGVSEFVSDAFDACLNLQEDLR-3+

Source : QE3\_201126\_FR\_TiOx\_hum\_tissue\_Urea\_RNAB\_H Scan : 60071

Andromeda score : 127

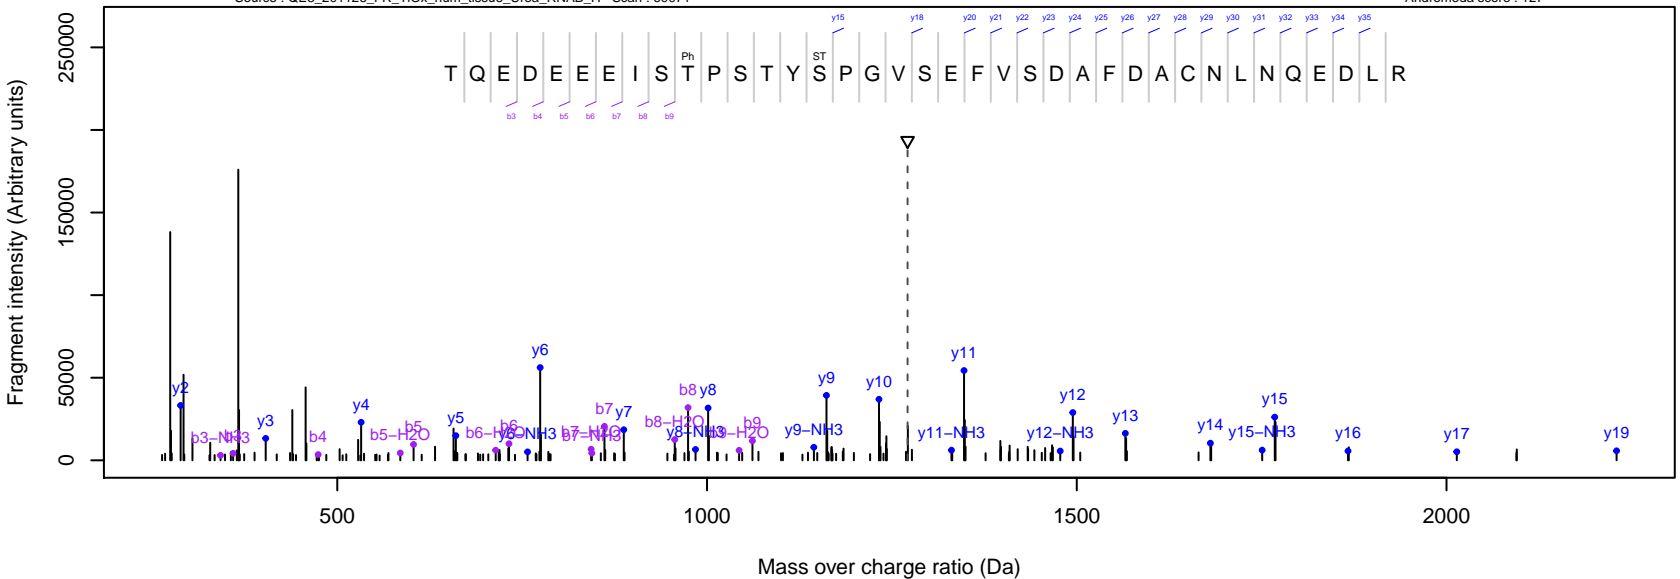

SHELDIDENPASDFDDSGS(Phospho (STY))LLGFK-3+

Source : QE3\_201126\_FR\_TiOx\_hum\_tissue\_Urea\_RNAB\_N Scan : 53583

Andromeda score : 126.99

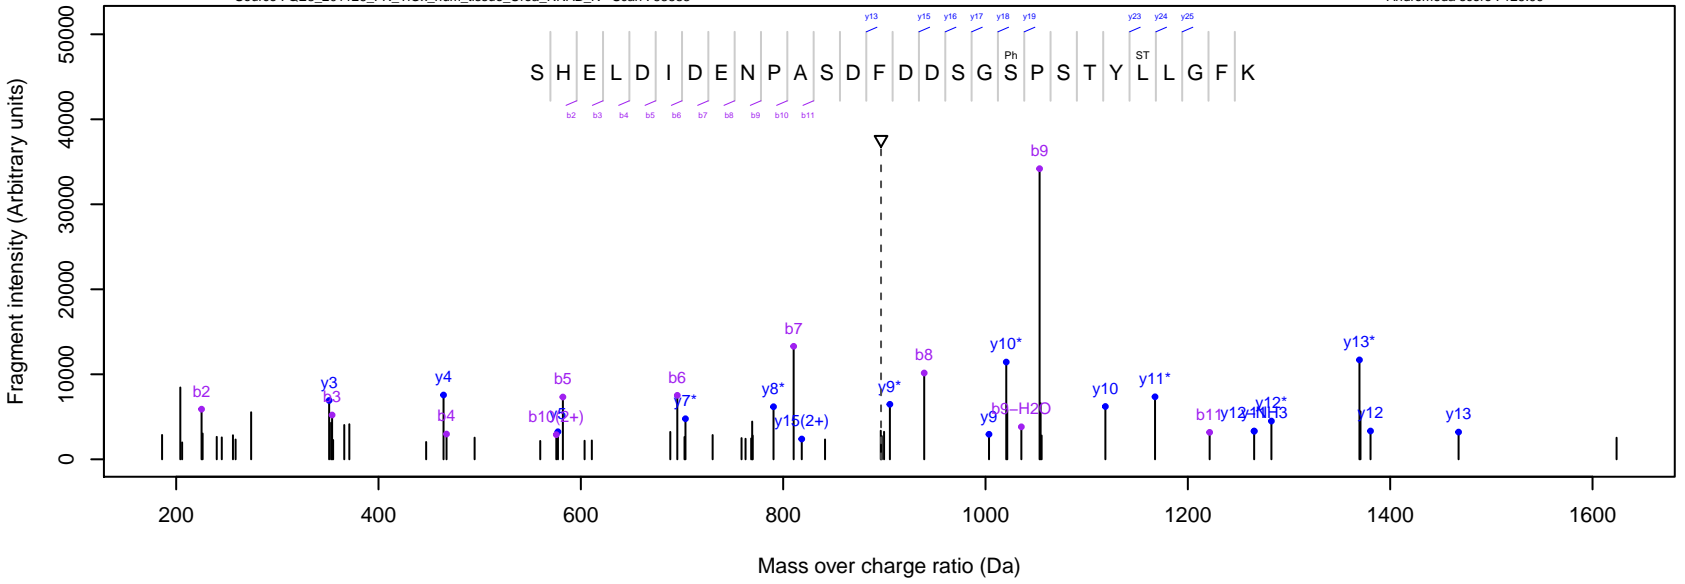

S(Phospho (STY))LDGIPFTVDAGGLIHCIEDFHKK-4+

Source : QE3\_201126\_FR\_TiOx\_hum\_tissue\_Urea\_RNAB\_N Scan : 56453

Andromeda score : 126.99

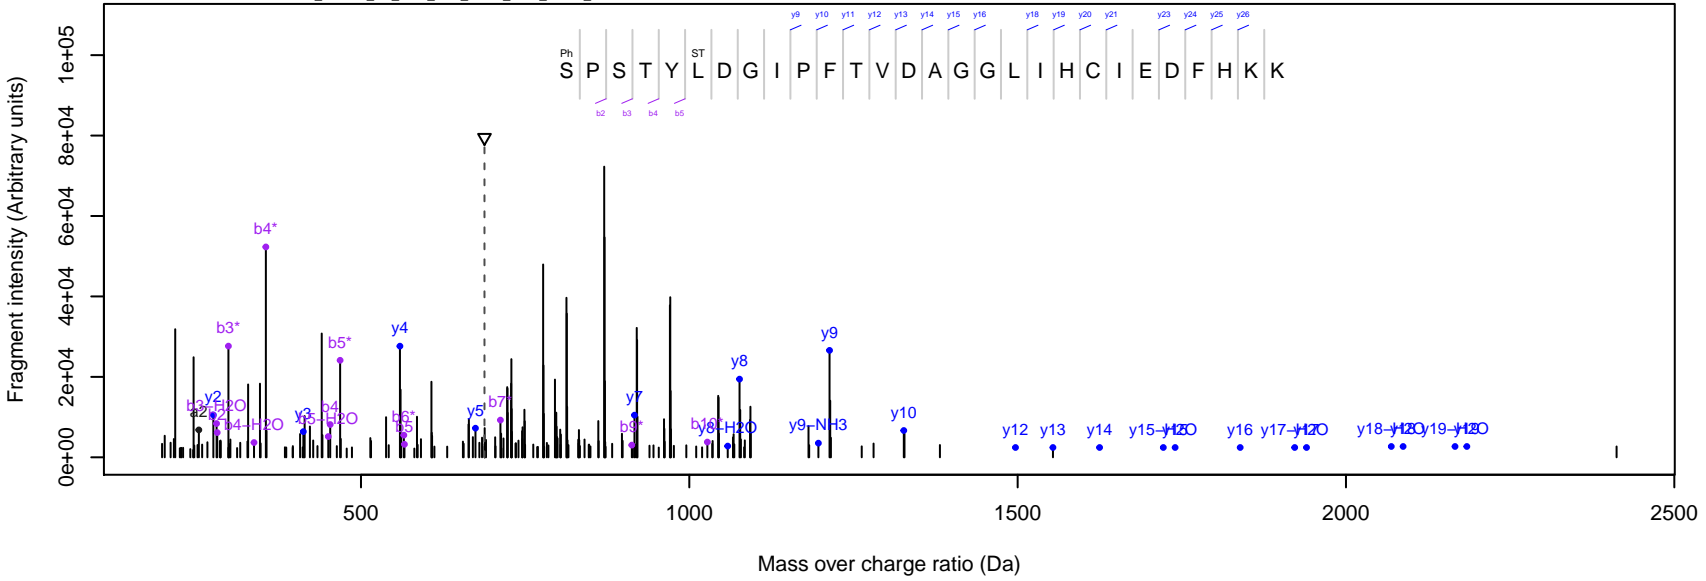

SPGHSDGAS(Phospho (STY))PRS(Phospho (STY))PVPTTLPLGR-3+

Source : QE3\_201126\_FR\_TiOx\_hum\_tissue\_Urea\_RNAB\_B Scan : 26790

Andromeda score : 126.99

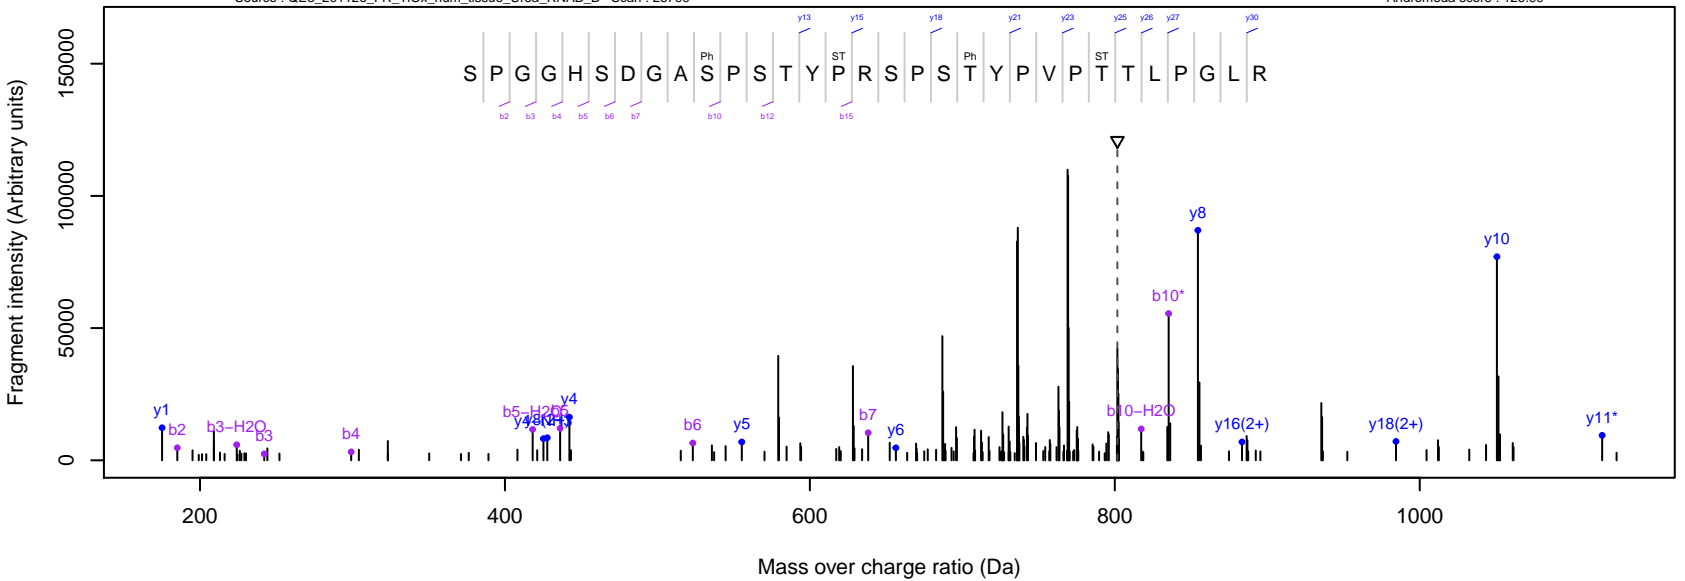

VEM(Oxidation (M))M(Oxidation (M))SEALNGNGDDLNNYDS(Phospho (STY))DDQEKQSK-3+

Source : QE3\_201126\_FR\_TIOx\_hum\_tissue\_Urea\_RNAB\_H Scan : 19208

Andromeda score : 126.98

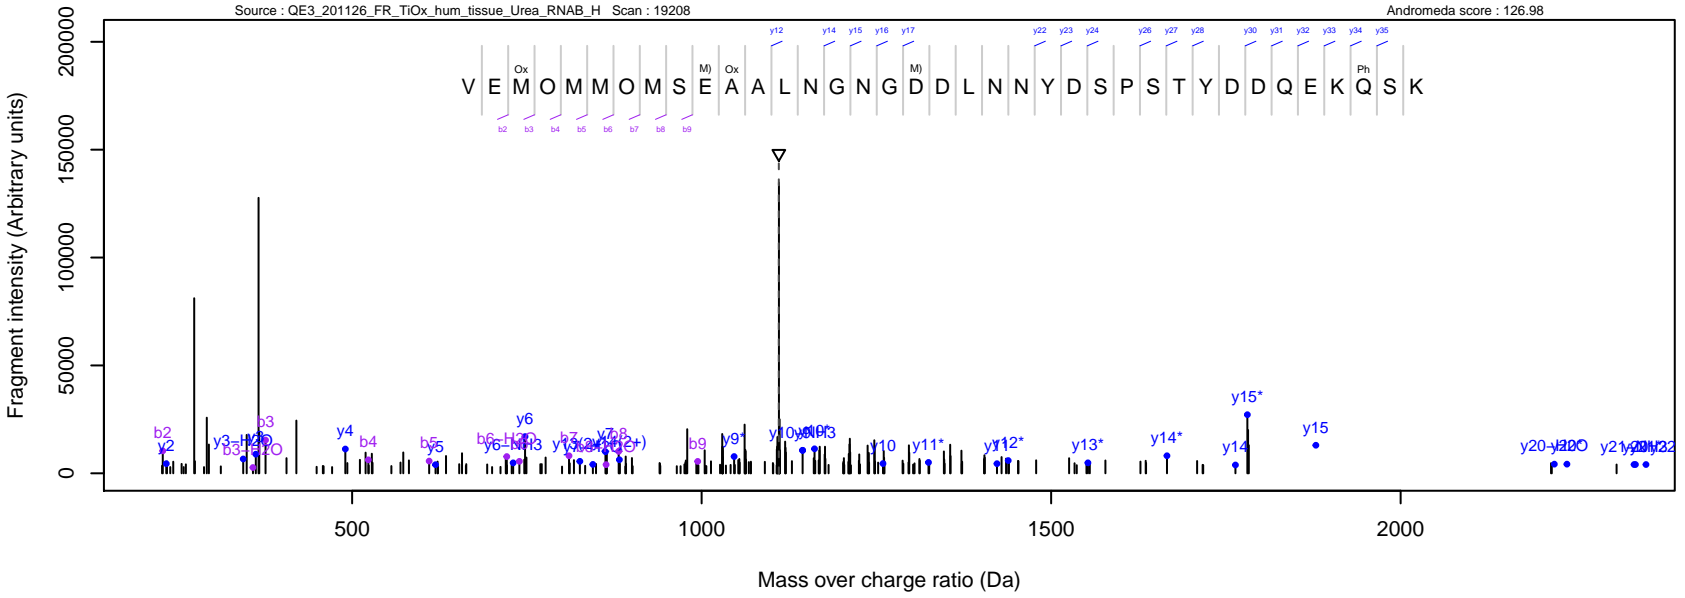

NLHQSGFS(Phospho (STY))LSGTQVDEGVR-3+

Source : QE3\_201126\_FR\_TIOx\_hum\_tissue\_Urea\_RNAB\_N Scan : 28446

Andromeda score : 126.97

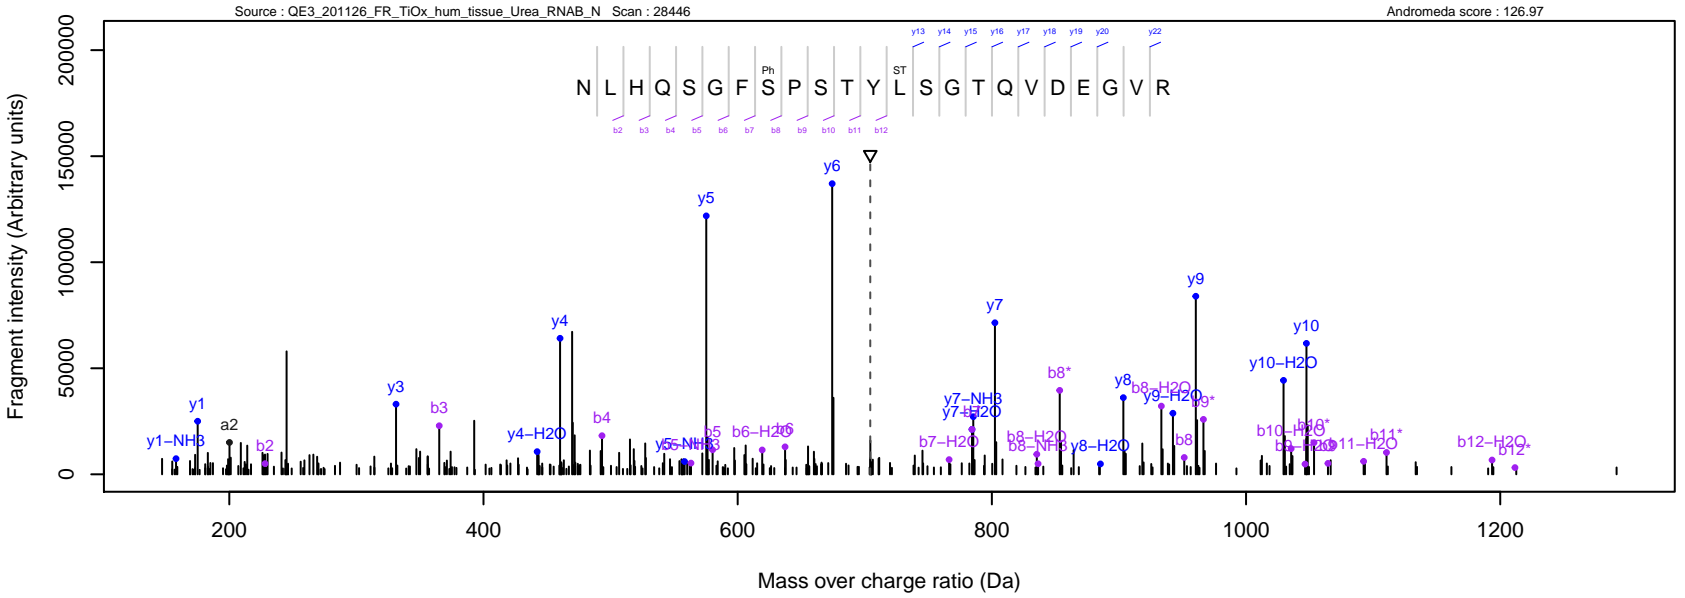

S(Phospho (STY))VM(Oxidation (M))TEEYKVPDGMVGFIIIGR-3+

Source : QE3\_201126\_FR\_TIOx\_hum\_tissue\_Urea\_RNAB\_H Scan : 53982

Andromeda score : 126.97

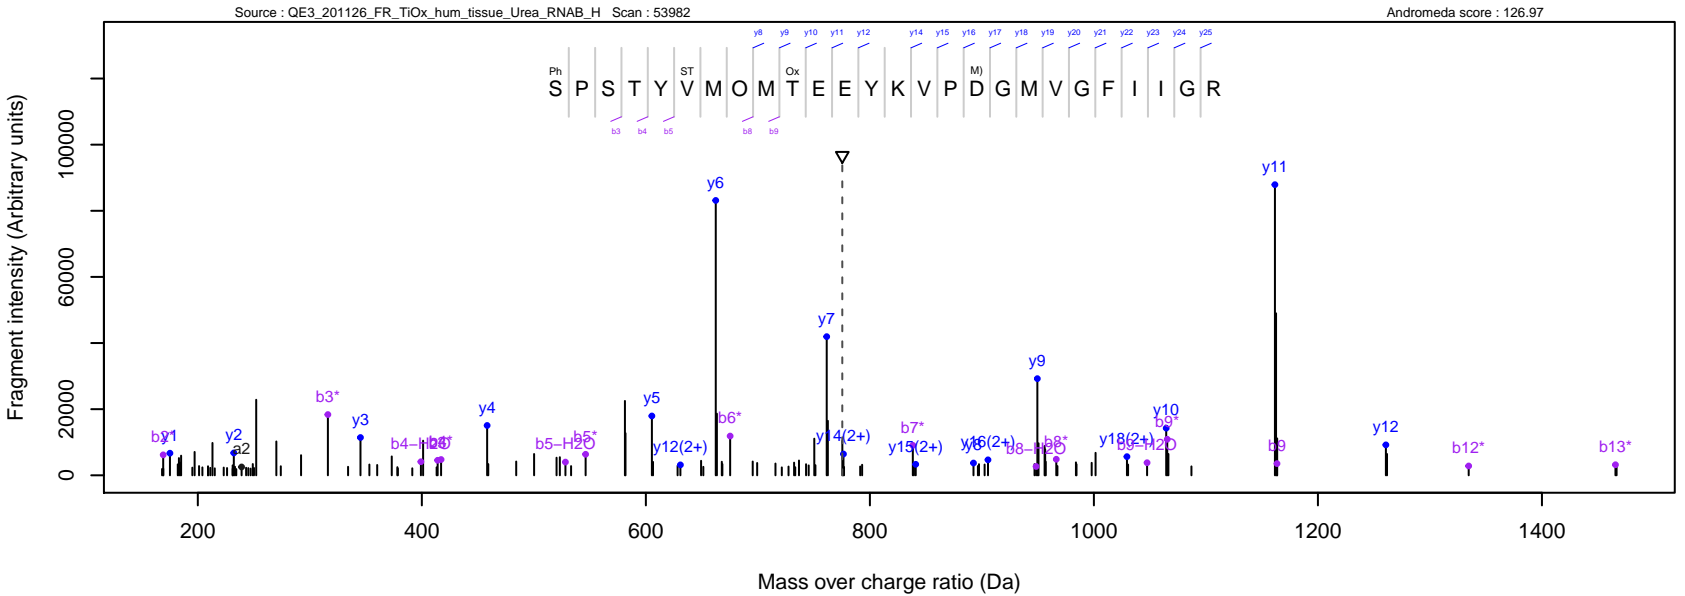

SSKS(Phospho (STY))AGALEEGTSEGQLCGR-3+

Source : QE3\_201126\_FR\_TiOx\_hum\_tissue\_Urea\_RNAB\_H Scan : 15408

Andromeda score : 126.96

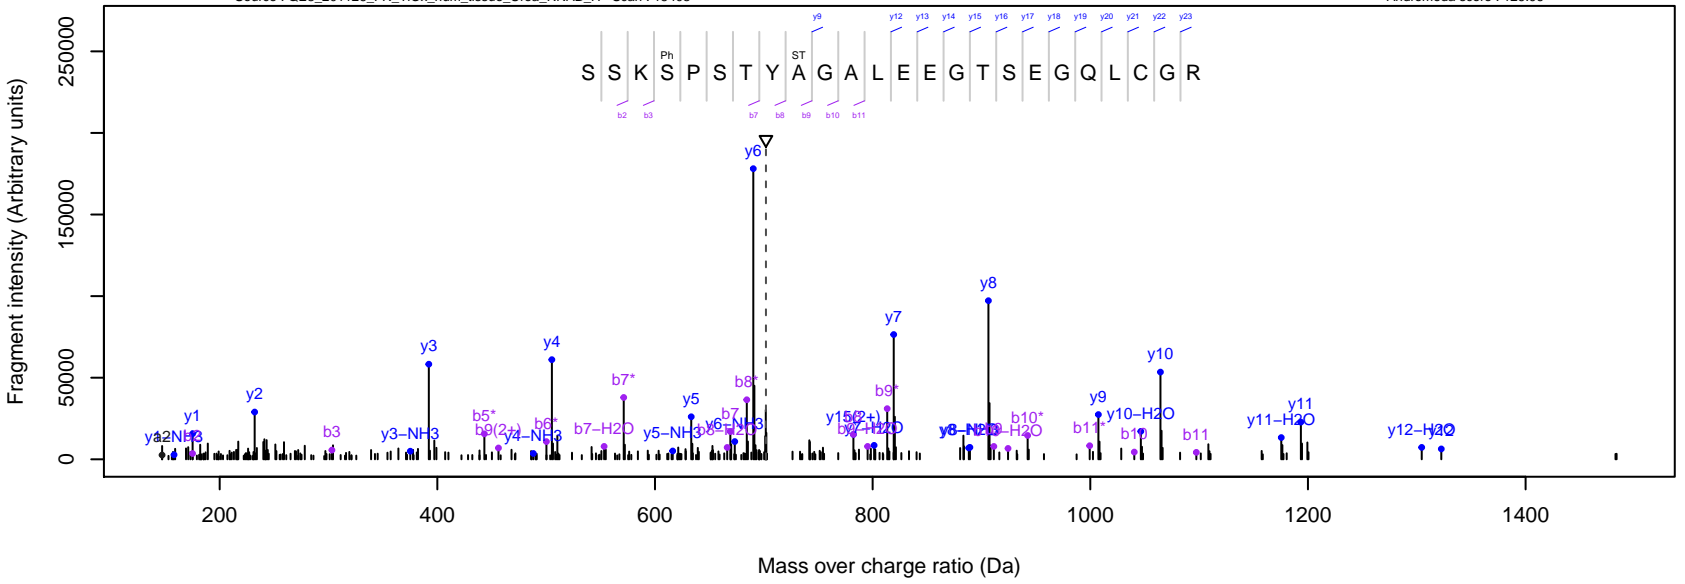

GLGTDEES(Phospho (STY))ILTLTISR-2+

Source : QE3\_201126\_FR\_TiOx\_hum\_tissue\_Urea\_RNAB\_H Scan : 60879

Andromeda score : 126.88

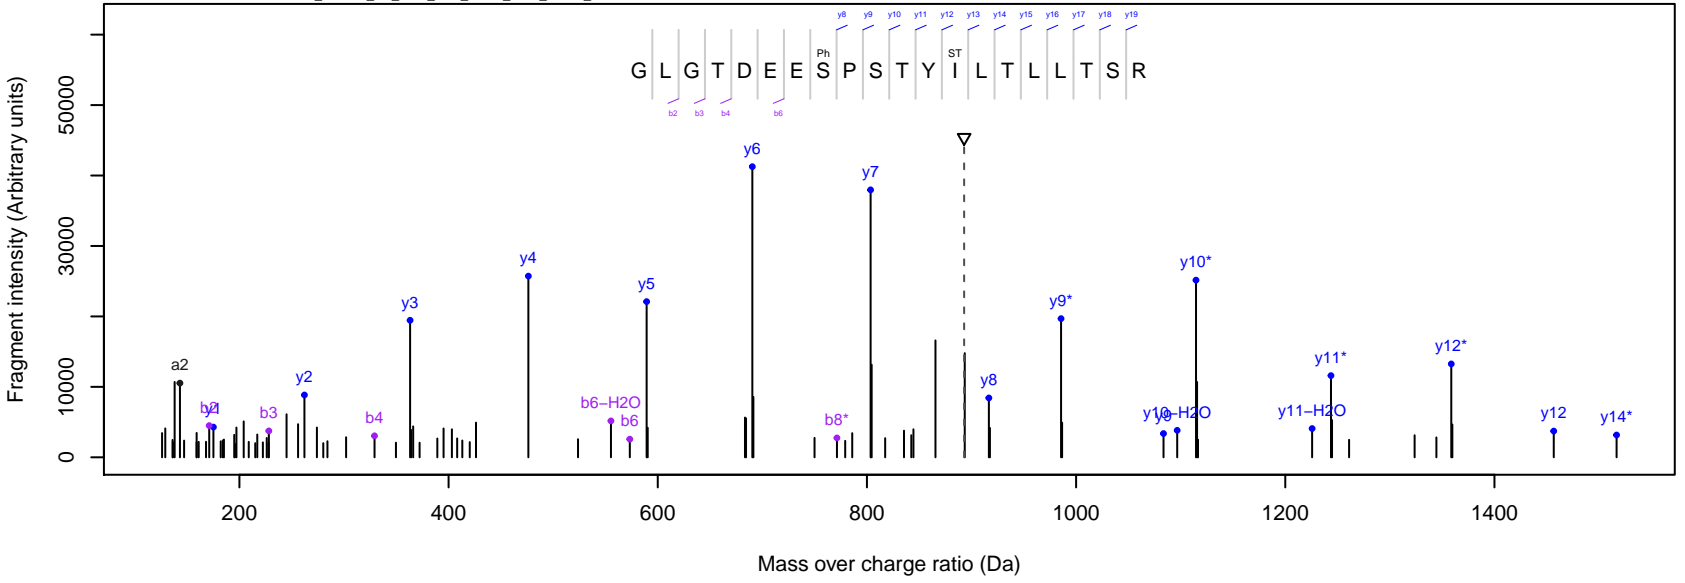

SAVHYDEES(Phospho (STY))GS(Phospho (STY))EEETLQYFSTVDPNYR-3+

Source : QE3\_201126\_FR\_TiOx\_hum\_tissue\_Urea\_RNAB\_H Scan : 52159

Andromeda score : 126.88

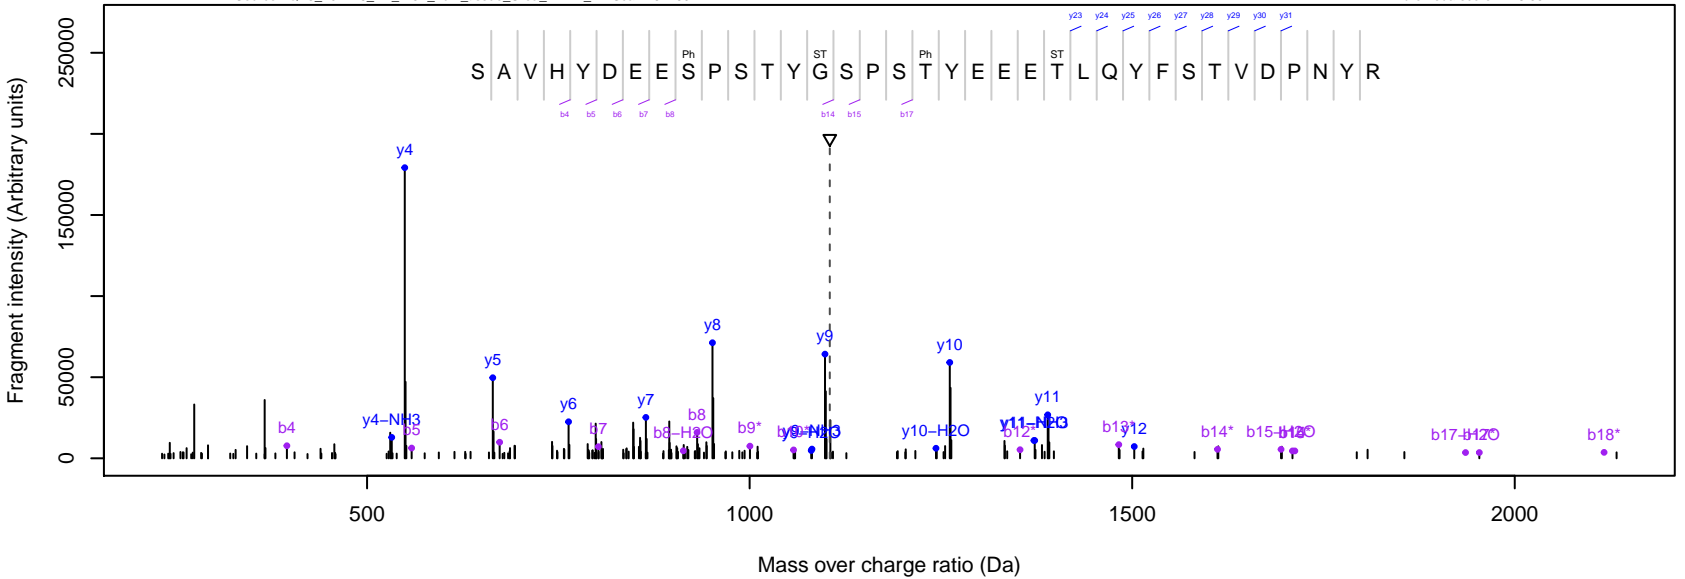



SDGVYTGLS(Phospho (STY))TR-2+

Source : QE3\_201126\_FR\_TiOx\_hum\_tissue\_Urea\_RNAB\_N Scan : 20834

Andromeda score : 126.83

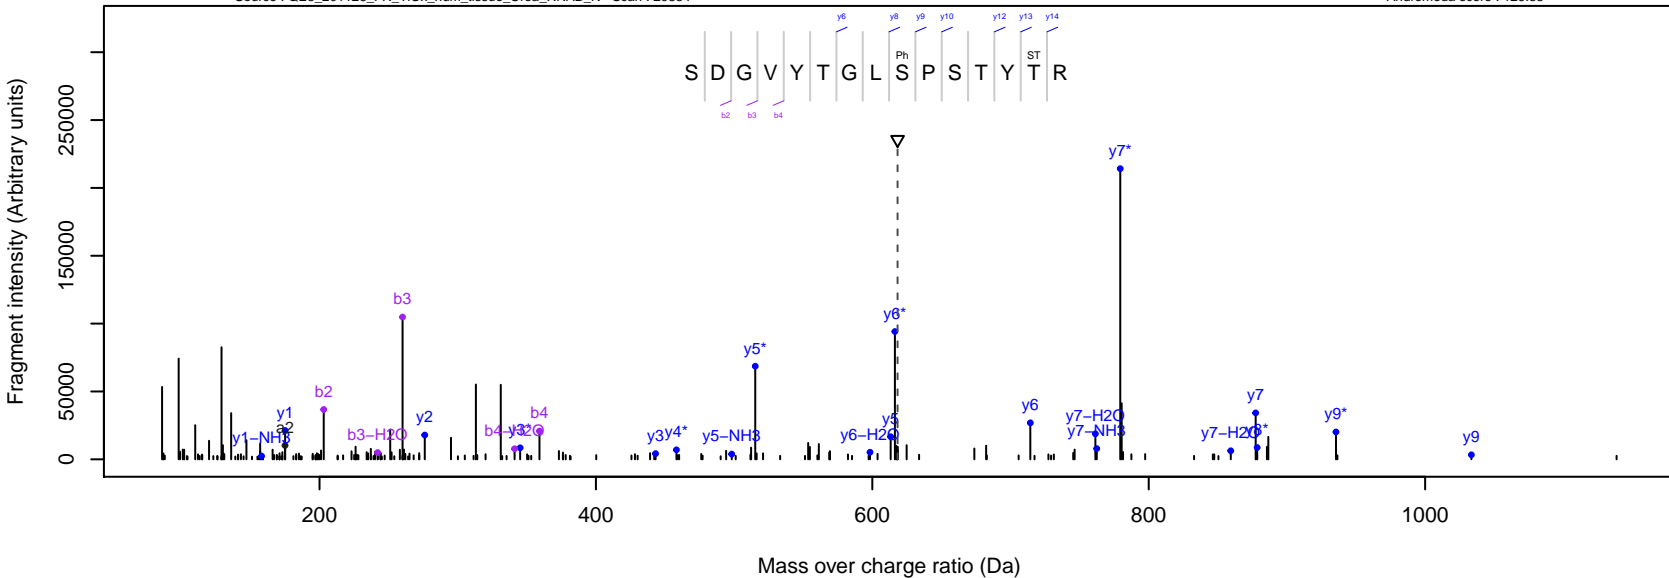

LSS(Phospho (STY))PVLHR-2+

Source : QE3\_201126\_FR\_TiOx\_hum\_tissue\_Urea\_RNAB\_B Scan : 9847

Andromeda score : 126.82

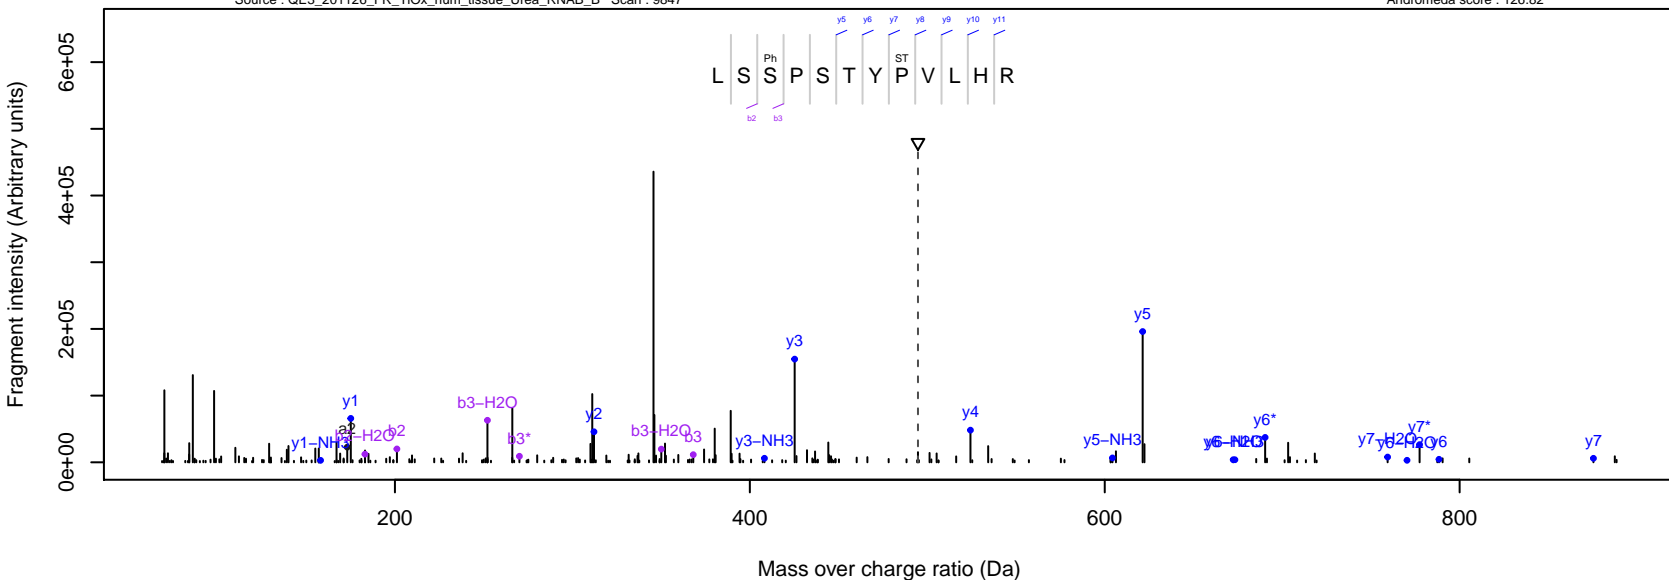

AGPAHAGHTAPM(Oxidation (M))RPSYS(Phospho (STY))AQEGLAGYQR-4+

Source : QE3\_201126\_FR\_TiOx\_hum\_tissue\_Urea\_RNAB\_B Scan : 13992

Andromeda score : 126.8

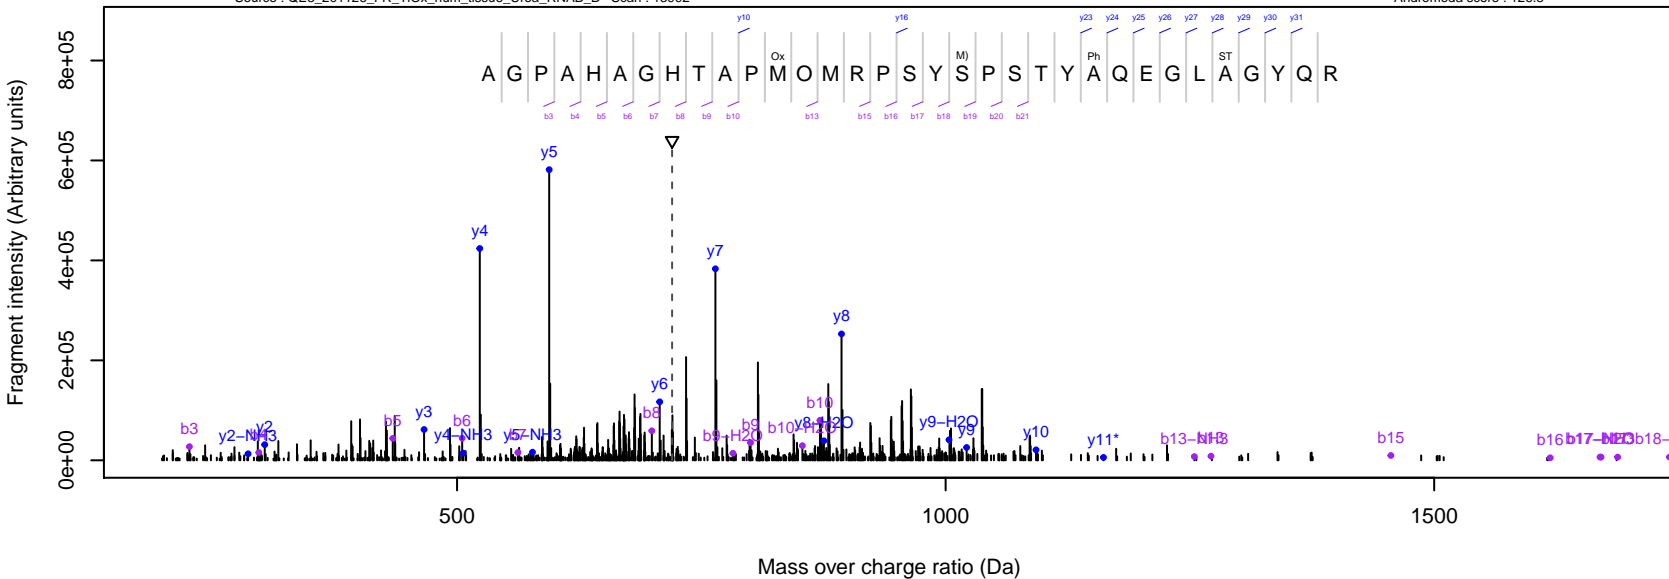

QLHLEGAS(Phospho (STY))LELS(Phospho (STY))DDTESKTSVDNETQPPQSE-3+

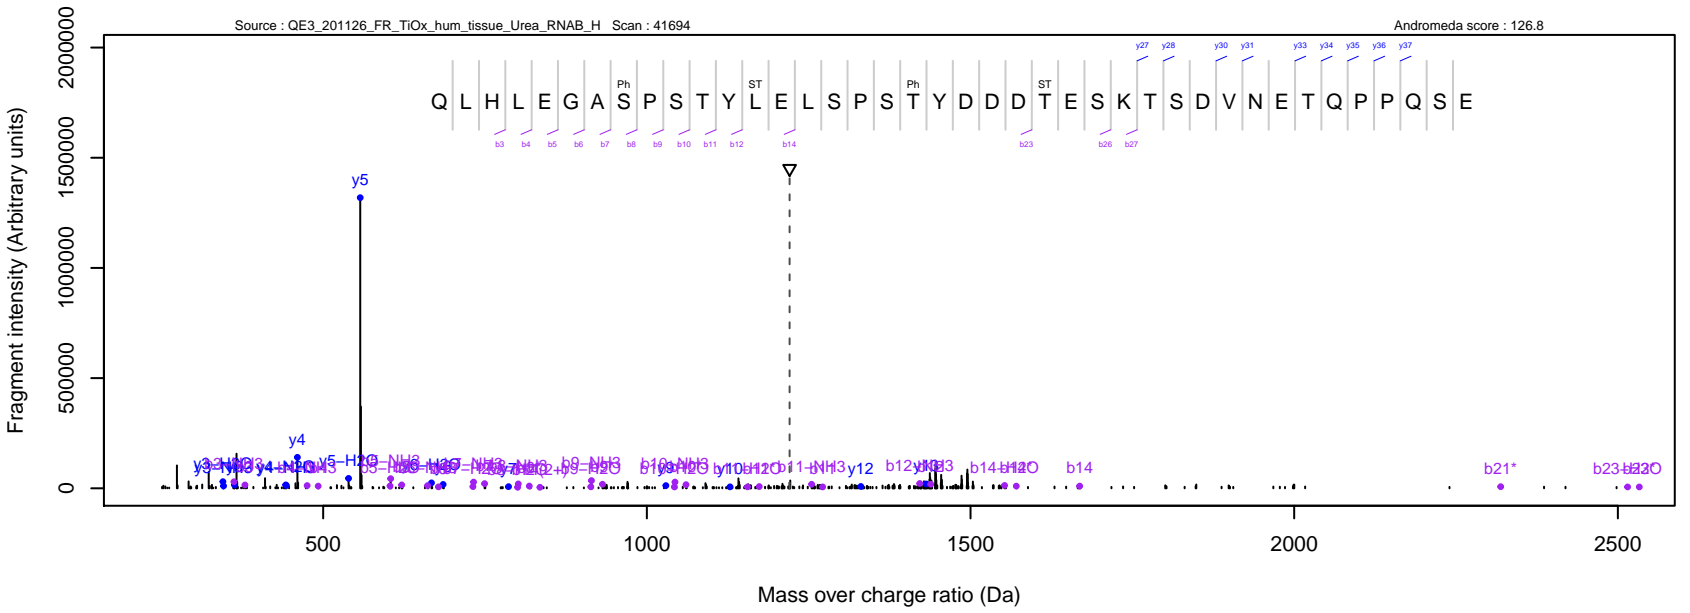

EQSEVS(Phospho (STY))VSPR-2+

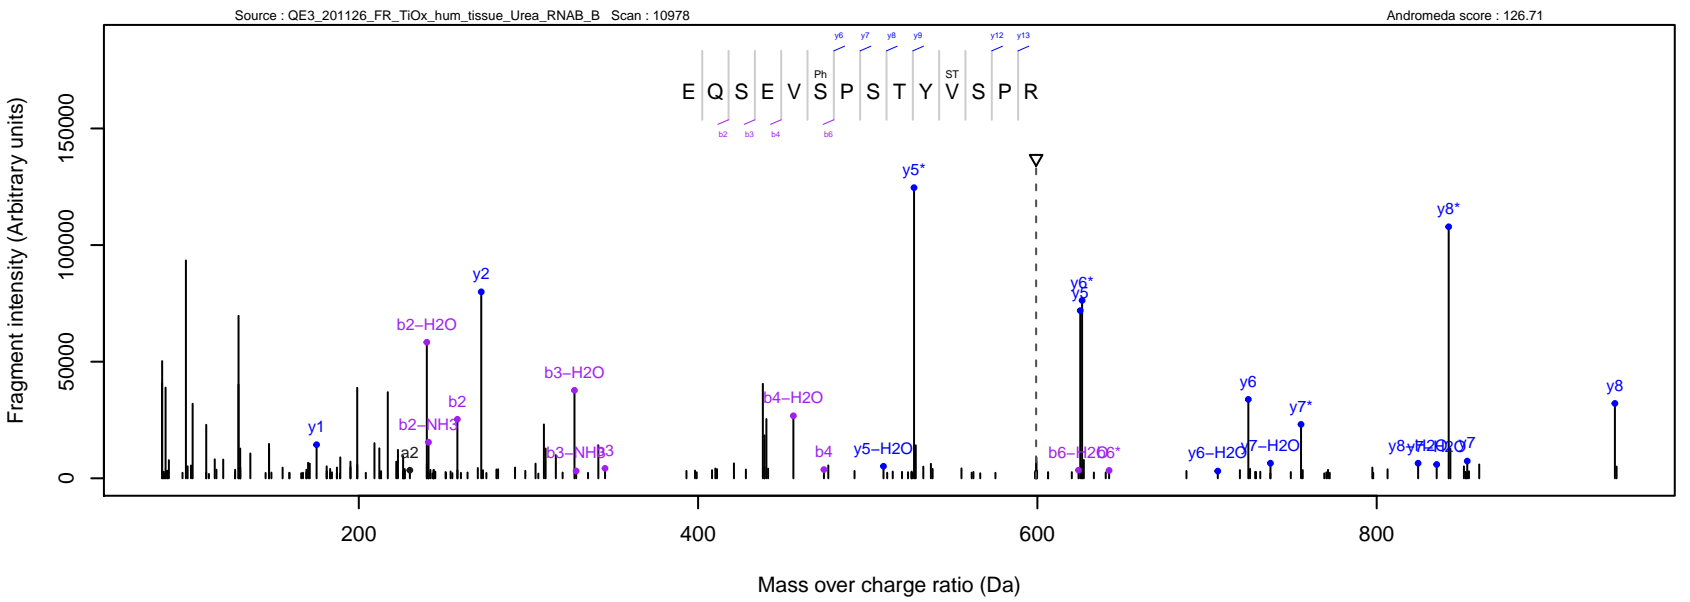

QITS(Phospho (STY))PVSGINGDIR-2+

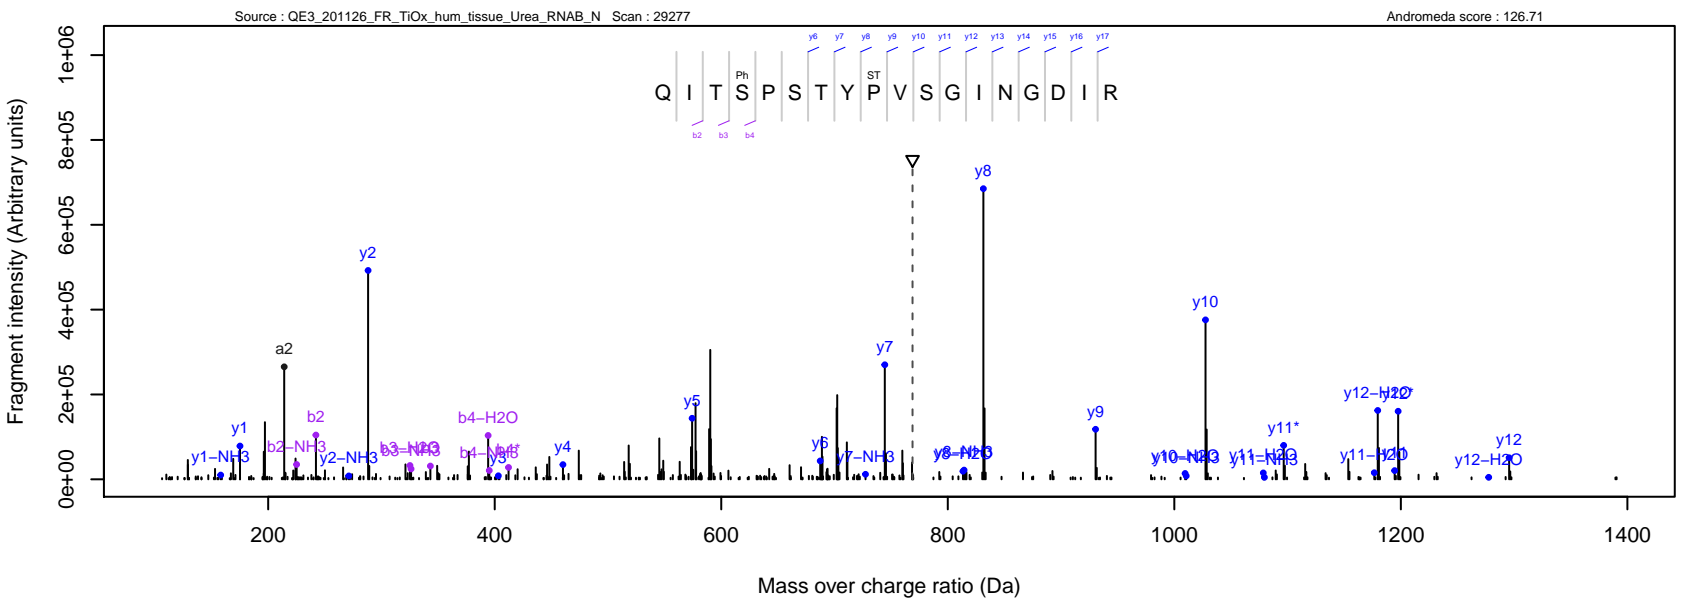

EADIDS(Phospho (STY))S(Phospho (STY))DES(Phospho (STY))DIEEDIDQPSAHK-3+

Source : QE3\_201126\_FR\_TiOx\_hum\_tissue\_Urea\_RNAB\_N Scan : 41633

Andromeda score : 126.68

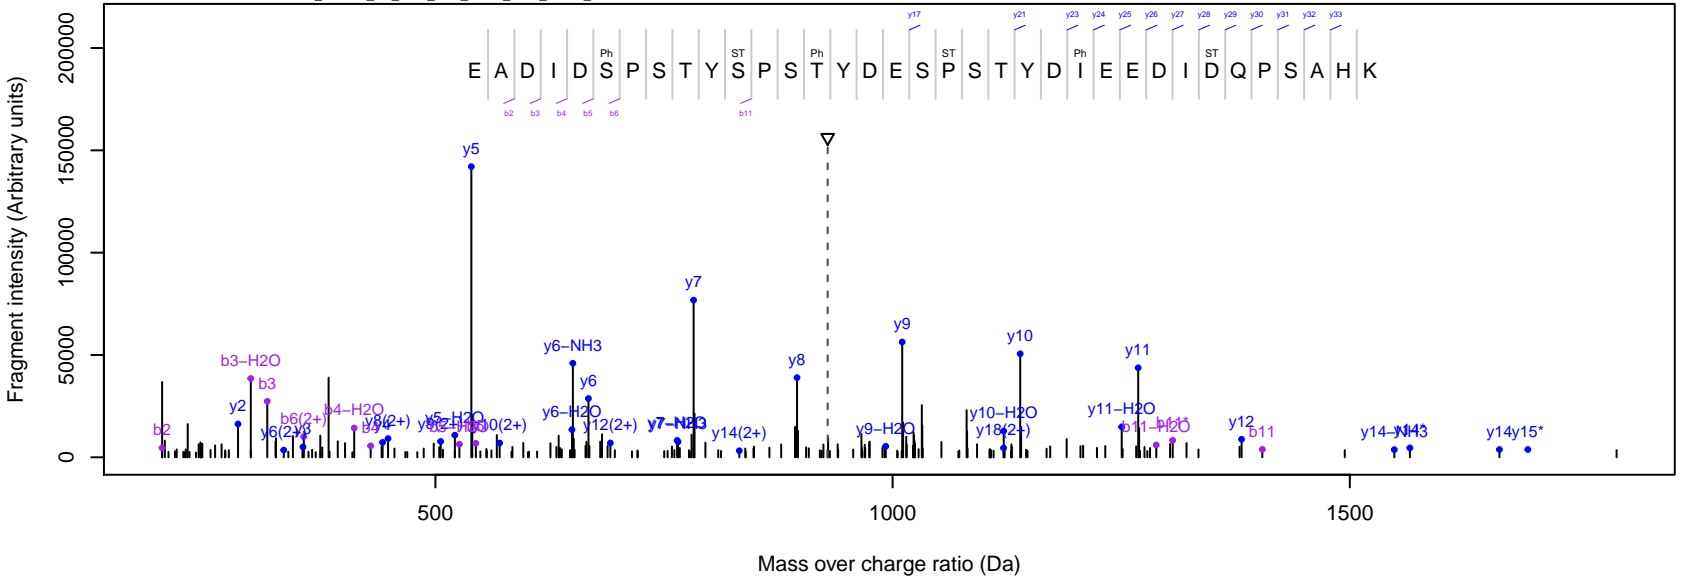

LNWLSVDFNNWKDVEDDS(Phospho (STY))DEDM(Oxidation (M))SNFDR-3+

Source : QE3\_201126\_FR\_TiOx\_hum\_tissue\_Urea\_RNAB\_N Scan : 61502

Andromeda score : 126.68

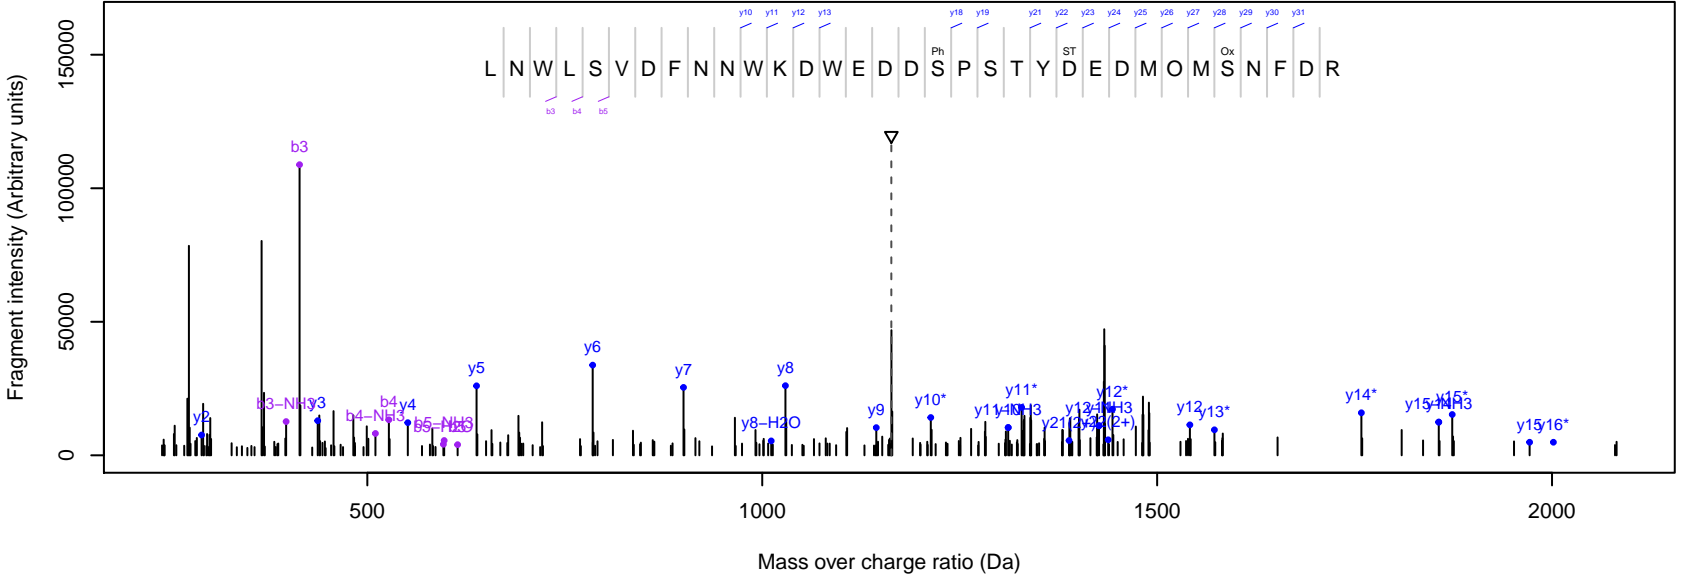

SRINSSGES(Phospho (STY))GDES(Phospho (STY))DEFLQSR-3+

Source : QE3\_201126\_FR\_TiOx\_hum\_tissue\_Urea\_RNAB\_B Scan : 24592

Andromeda score : 126.68

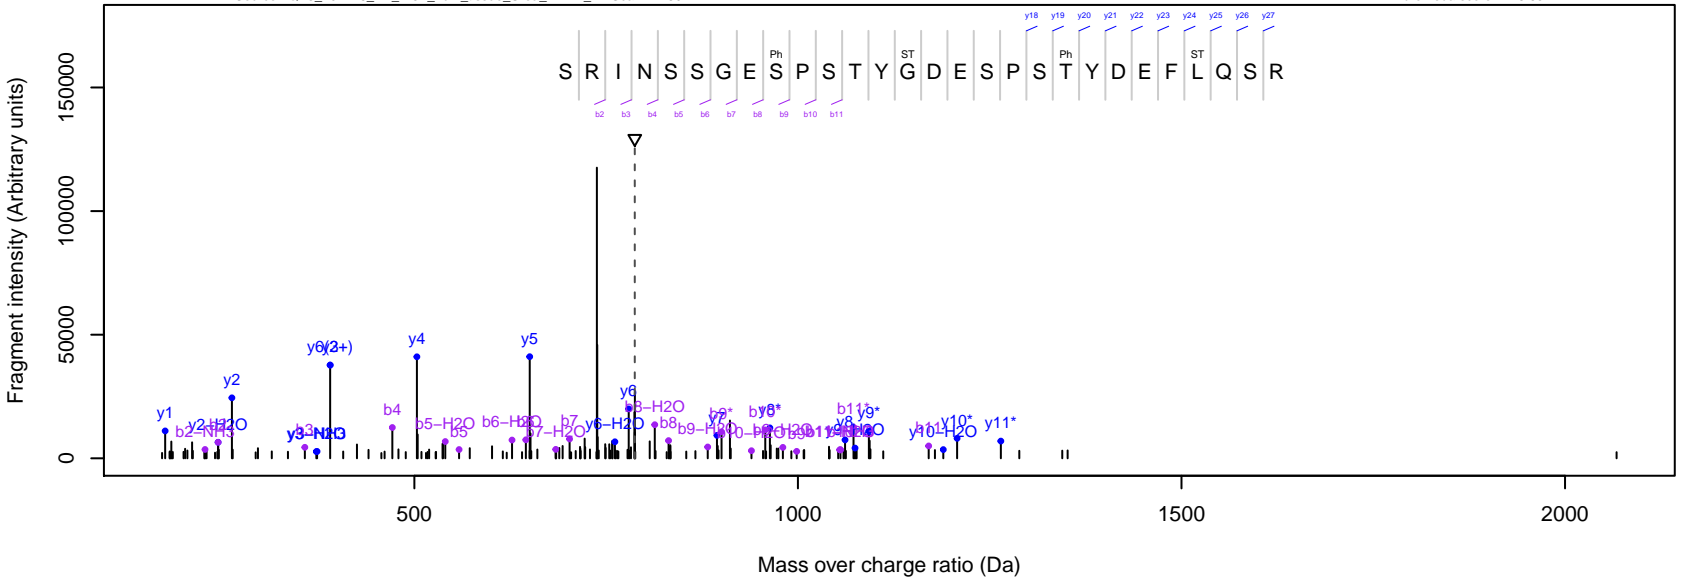

EVTKEVVTSPSTYEDGSDCPEAMD LGLTSLGIGTL DGF R-3+

Source : QE3\_201126\_FR\_TIOx\_hum\_tissue\_Urea\_RNAB\_H Scan : 56297

Andromeda score : 126.59

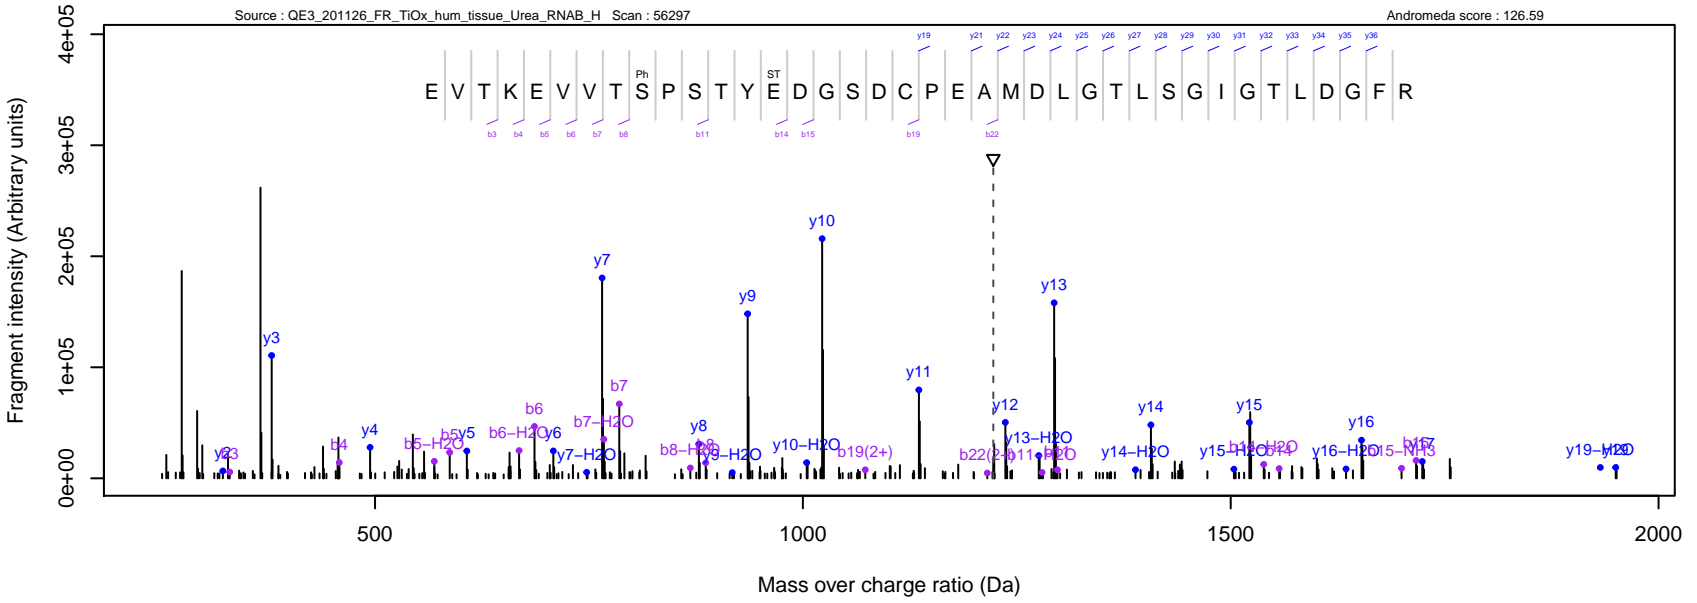

RRPGASPTGETPTIEEGEEDEEAS PhSPSTYEAEGAR-3+

Source : QE3\_201126\_FR\_TIOx\_hum\_tissue\_Urea\_RNAB\_N Scan : 18831

Andromeda score : 126.56

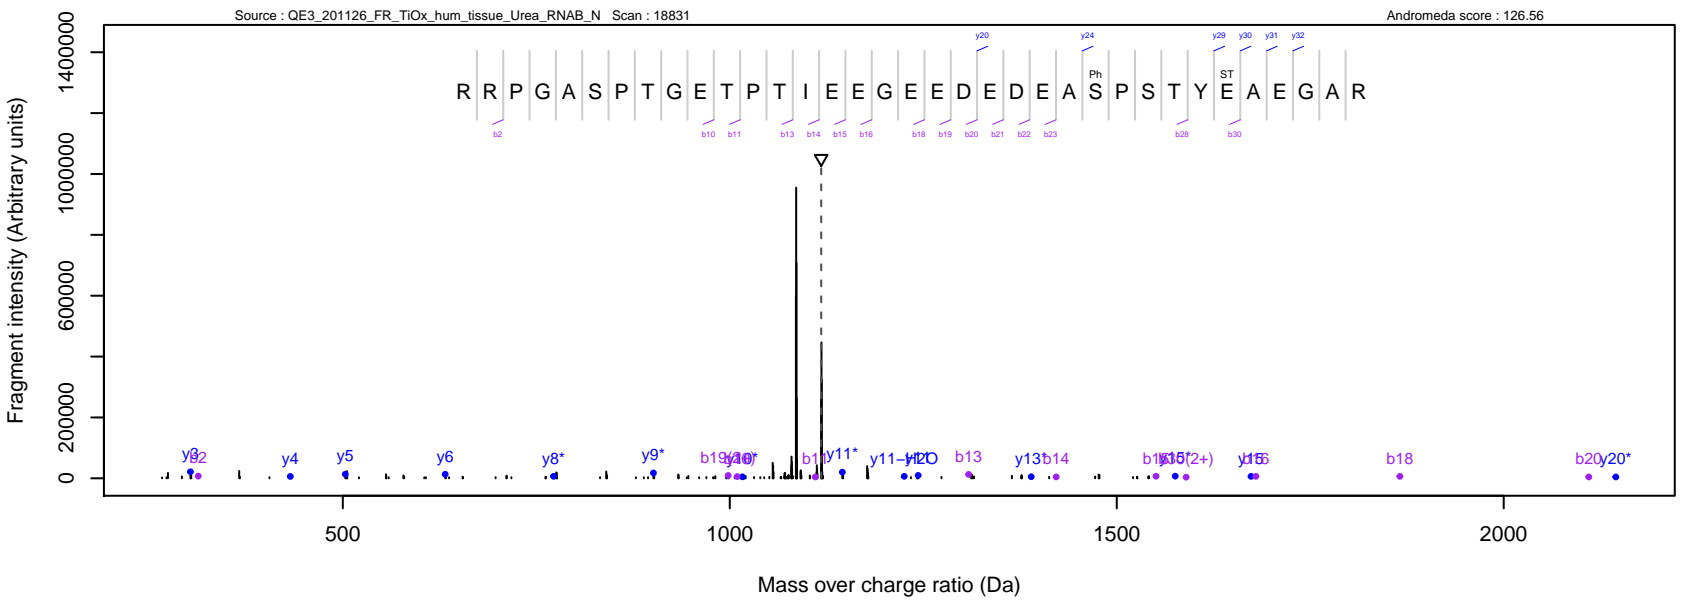

LSS PhSPSTYSWESLQPEPSHPY-2+

Source : QE3\_201126\_FR\_TIOx\_hum\_tissue\_Urea\_RNAB\_N Scan : 41900

Andromeda score : 126.51

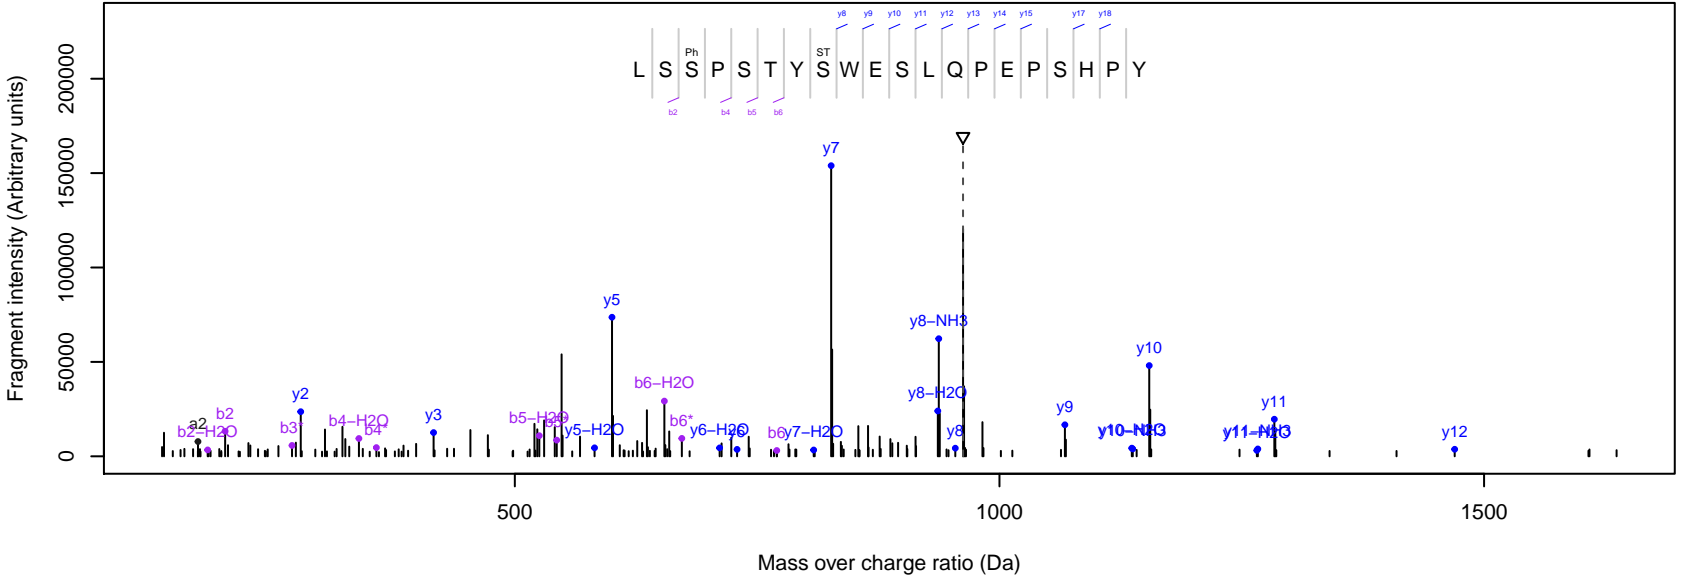

SQRY(S(Phospho (STY)))GAYGASVSDEELK-2+

Source : QE3\_201126\_FR\_TiOx\_hum\_tissue\_Urea\_RNAB\_H Scan : 20145

Andromeda score : 126.51

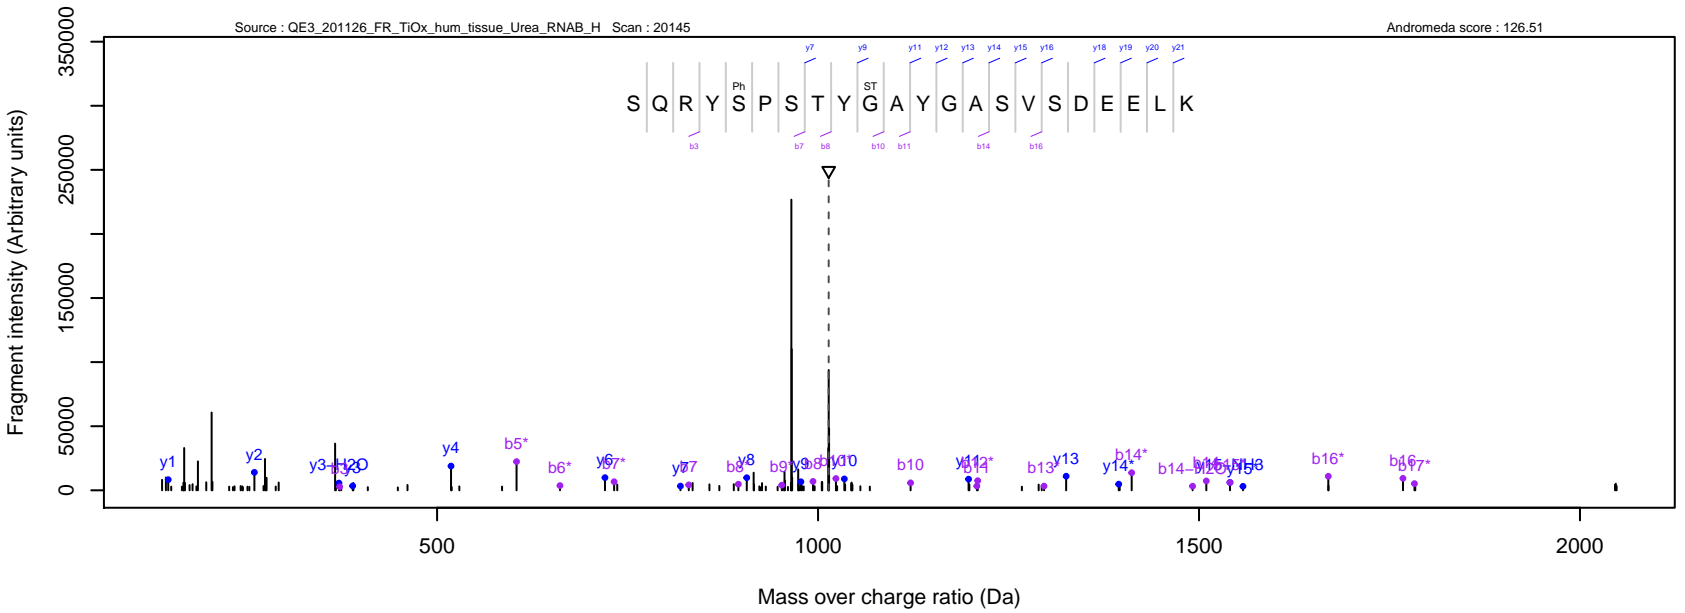

TEGYAAFQED(S(Phospho (STY)))S(Phospho (STY))GDEAESPSK-2+

Source : QE3\_201126\_FR\_TiOx\_hum\_tissue\_Urea\_RNAB\_N Scan : 32263

Andromeda score : 126.51

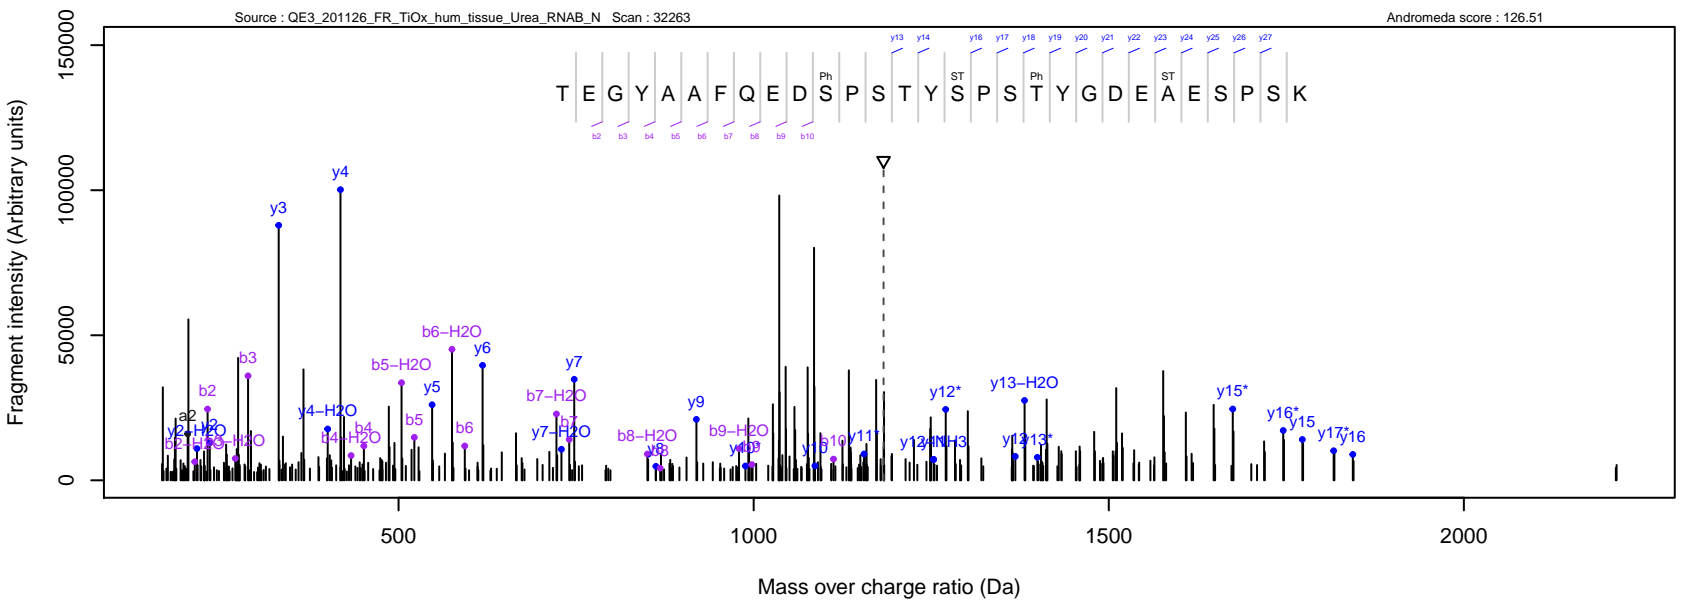

(Acetyl (Protein N-term))SET(Phospho (STY))APAAPAAPAEKAPVK-2+

Source : QE3\_201126\_FR\_TiOx\_hum\_tissue\_Urea\_RNAB\_B Scan : 20741

Andromeda score : 126.43

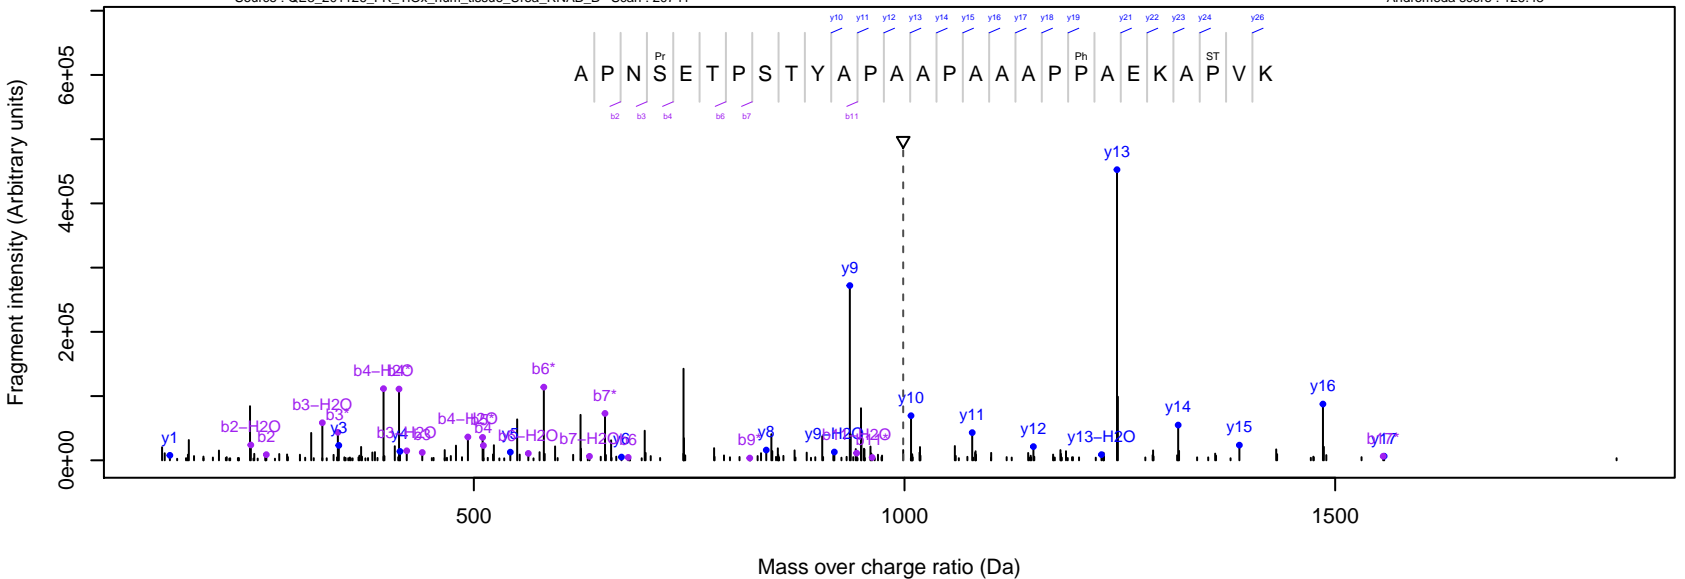

QRS(Phospho (STY))PS(Phospho (STY))PAPAPAAAAAGPPTR-2+

Source : QE3\_201126\_FR\_TiOx\_hum\_tissue\_Urea\_RNAB\_B Scan : 16748

Andromeda score : 126.4

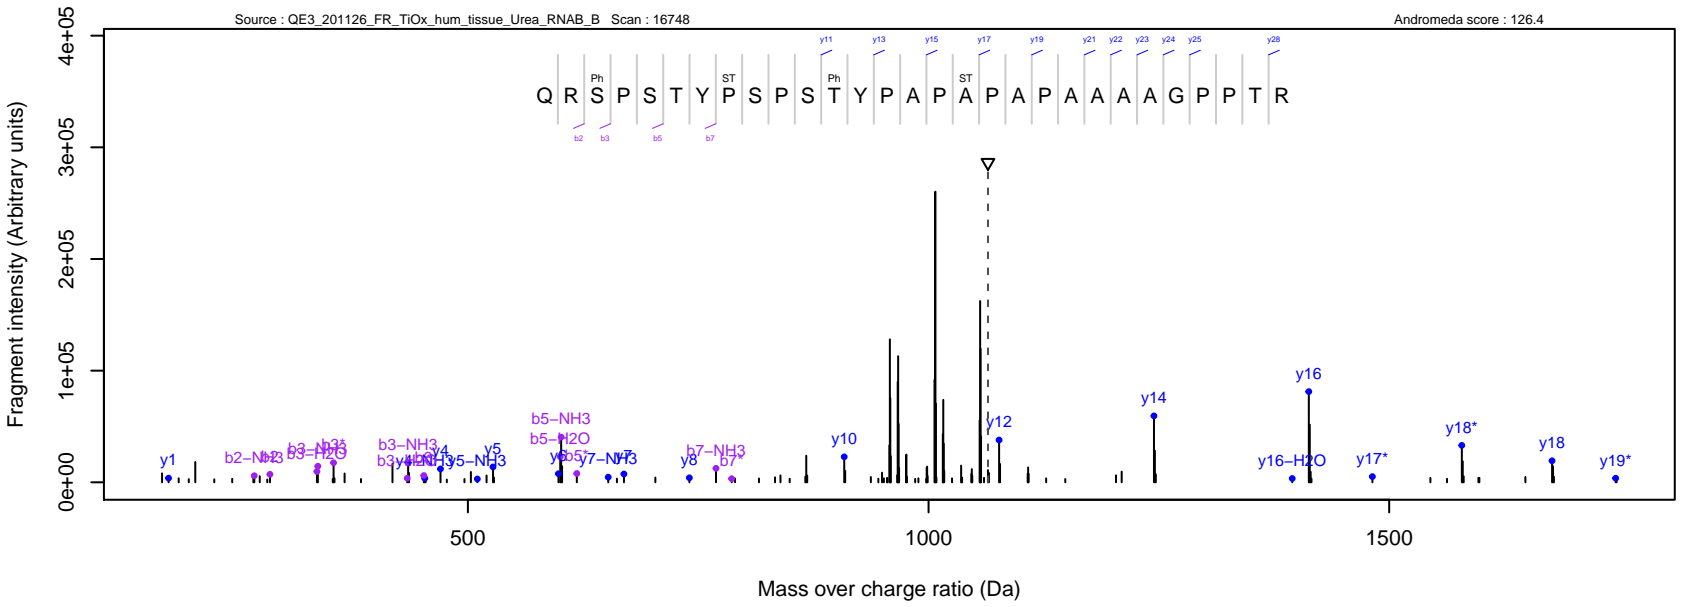

HQDGLPYIDDS(Phospho (STY))PSSSPHLSSK-3+

Source : QE3\_201126\_FR\_TiOx\_hum\_tissue\_Urea\_RNAB\_H Scan : 25610

Andromeda score : 126.36

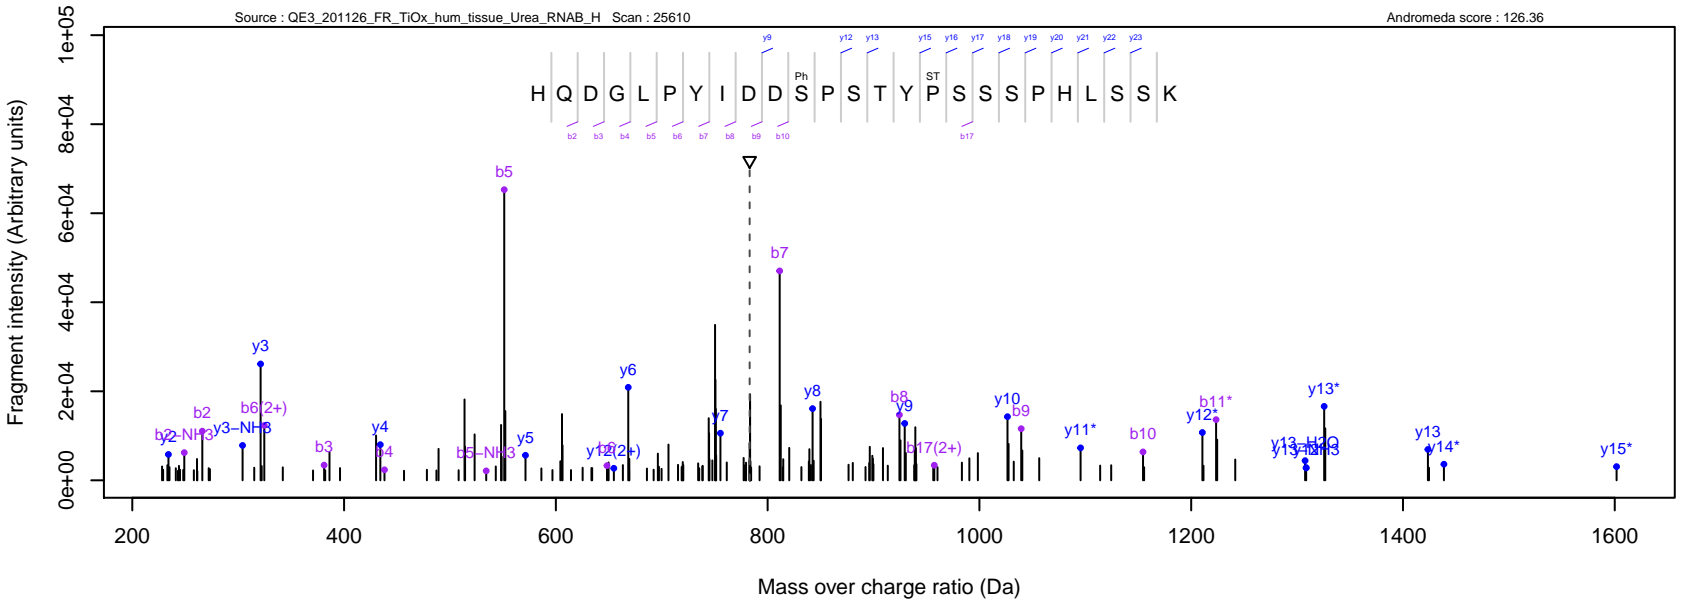

QSI(Phospho (STY))FSGLPSSGR-2+

Source : QE3\_201126\_FR\_TiOx\_hum\_tissue\_Urea\_RNAB\_H Scan : 34039

Andromeda score : 126.32

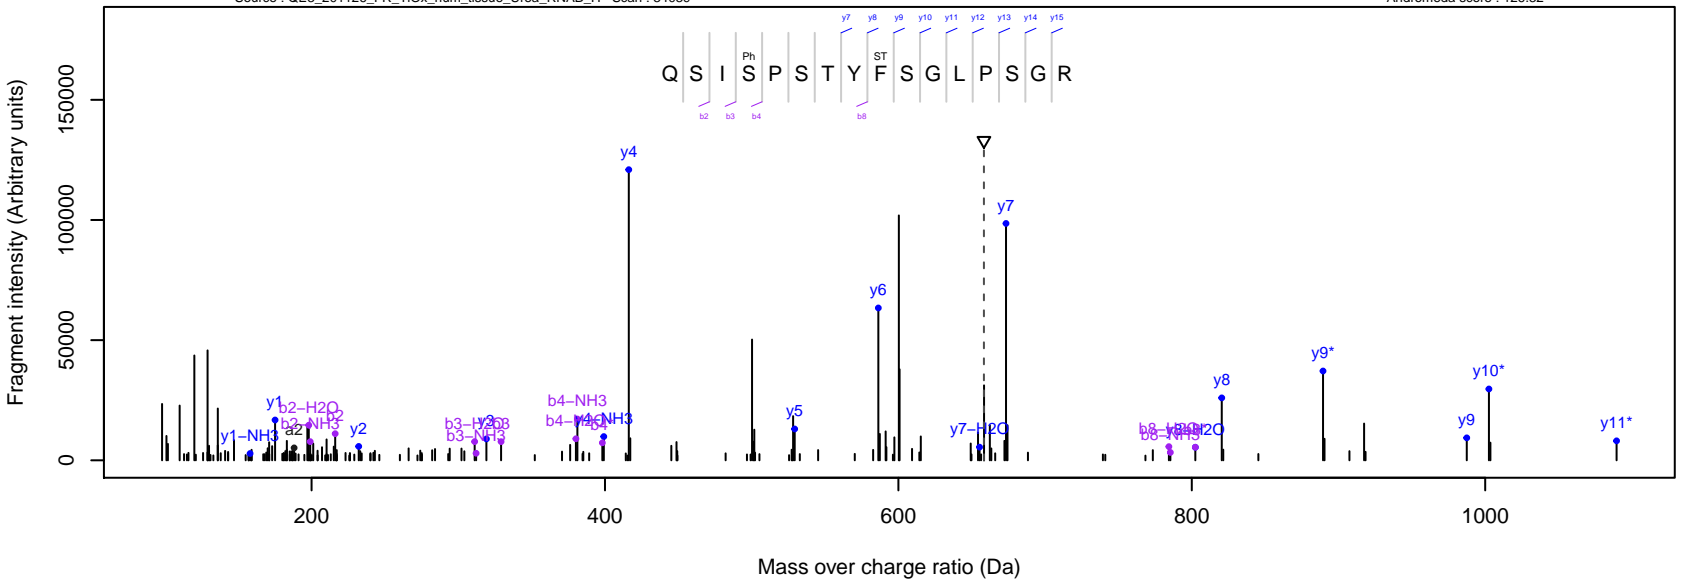

S(Phospho (STY))LM(Oxidation (M))S(Phospho (STY))SPEDLTKDFEELKAEEDVTK-3+

Source : QE3\_201126\_FR\_TiOx\_hum\_tissue\_Urea\_RNAB\_B Scan : 57029

Andromeda score : 126.31

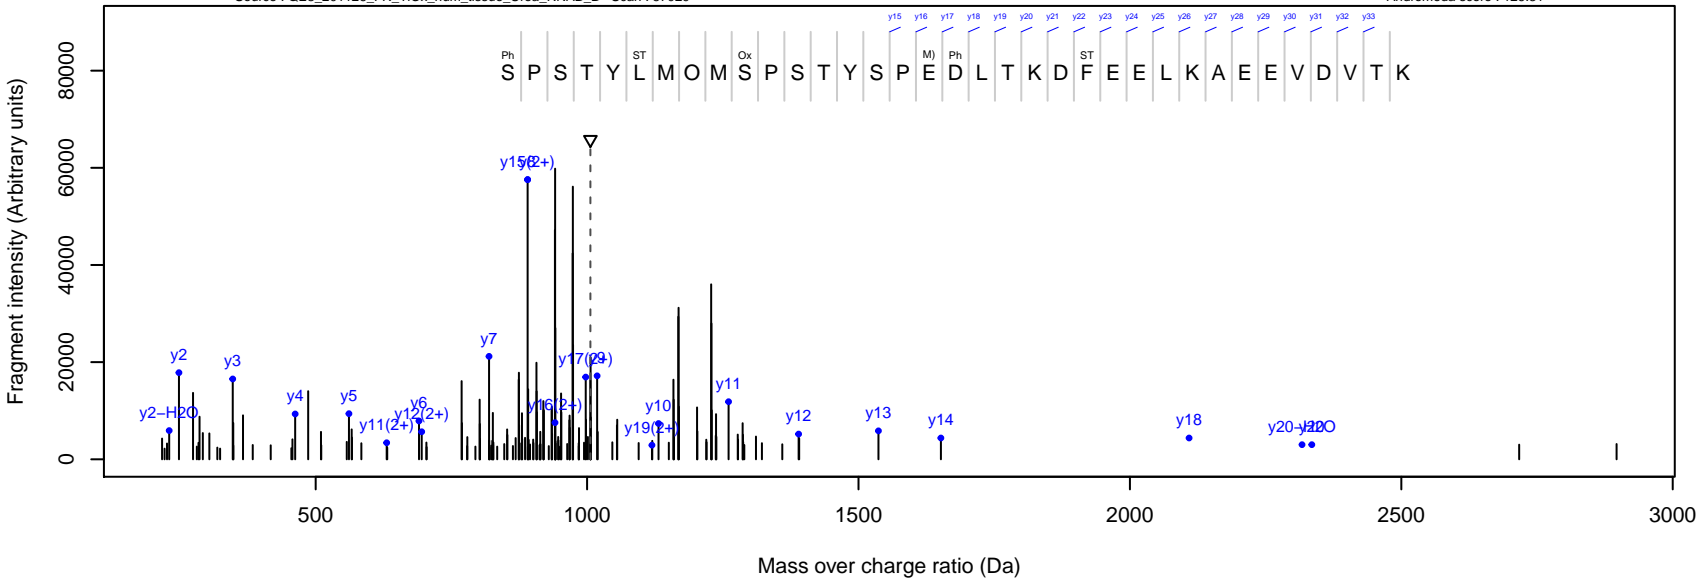

SPTEPM(Oxidation (M))PPRGS(Phospho (STY))LTGVQTCR-3+

Source : QE3\_201126\_FR\_TiOx\_hum\_tissue\_Urea\_RNAB\_N Scan : 18221

Andromeda score : 126.31

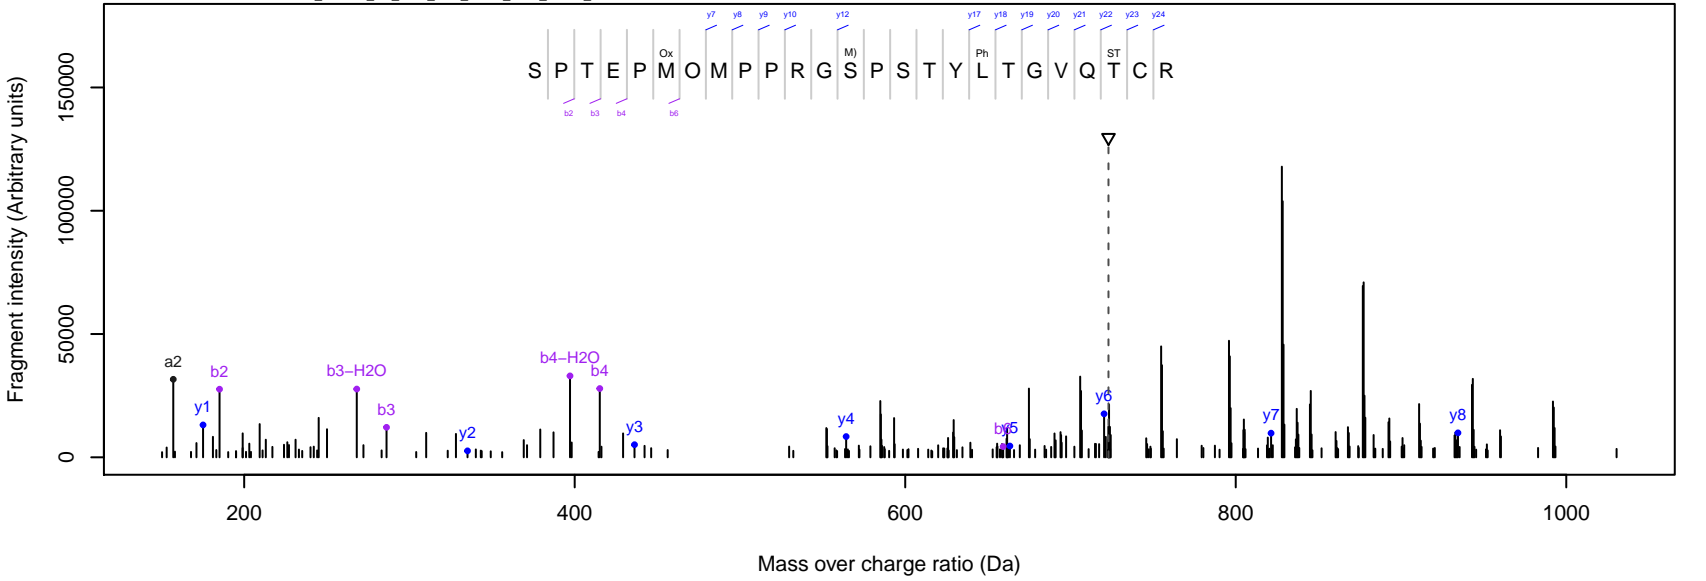

TADGRVS(Phospho (STY))PAGGLDDKPK-3+

Source : QE3\_201126\_FR\_TiOx\_hum\_tissue\_Urea\_RNAB\_B Scan : 8557

Andromeda score : 126.3

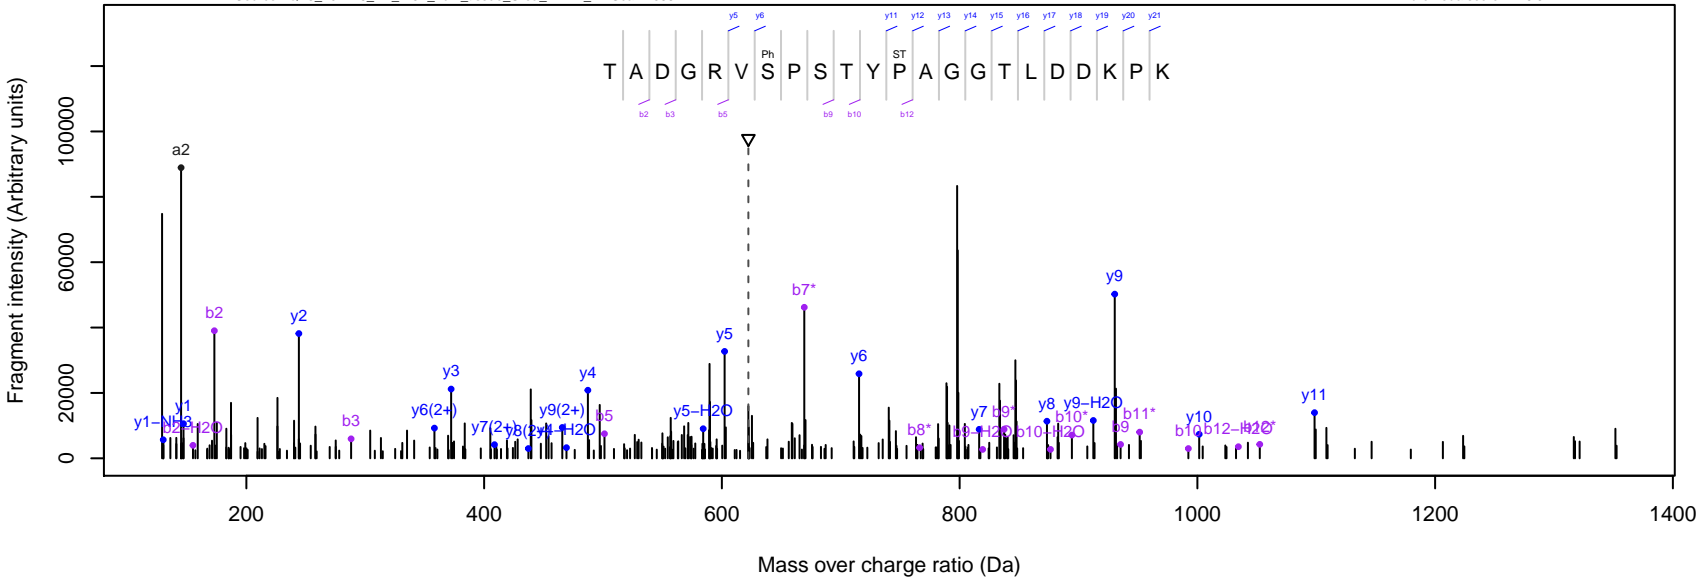

ATAPQTQHVS(Phospho (STY))PM(Oxidation (M))RQVEPPAK-3+

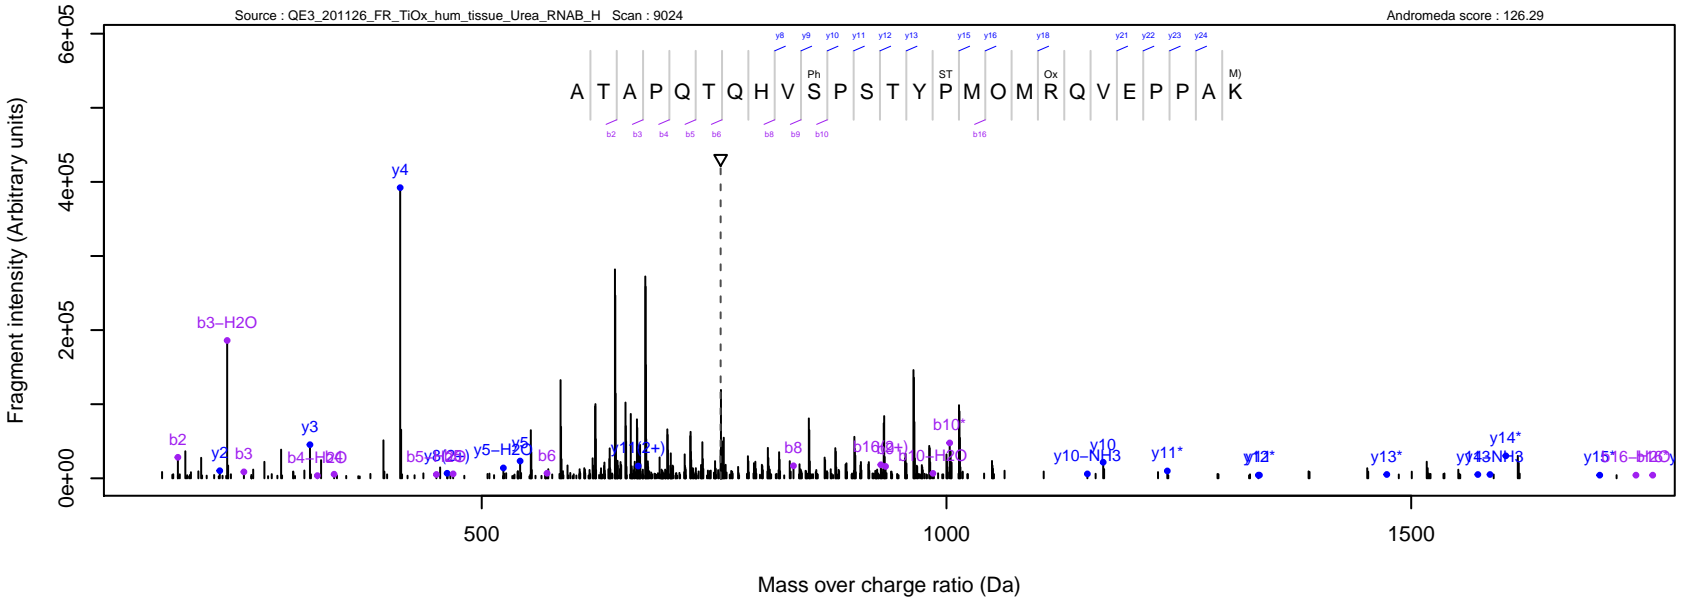

S(Phospho (STY))LGSTEGESRPGK-3+

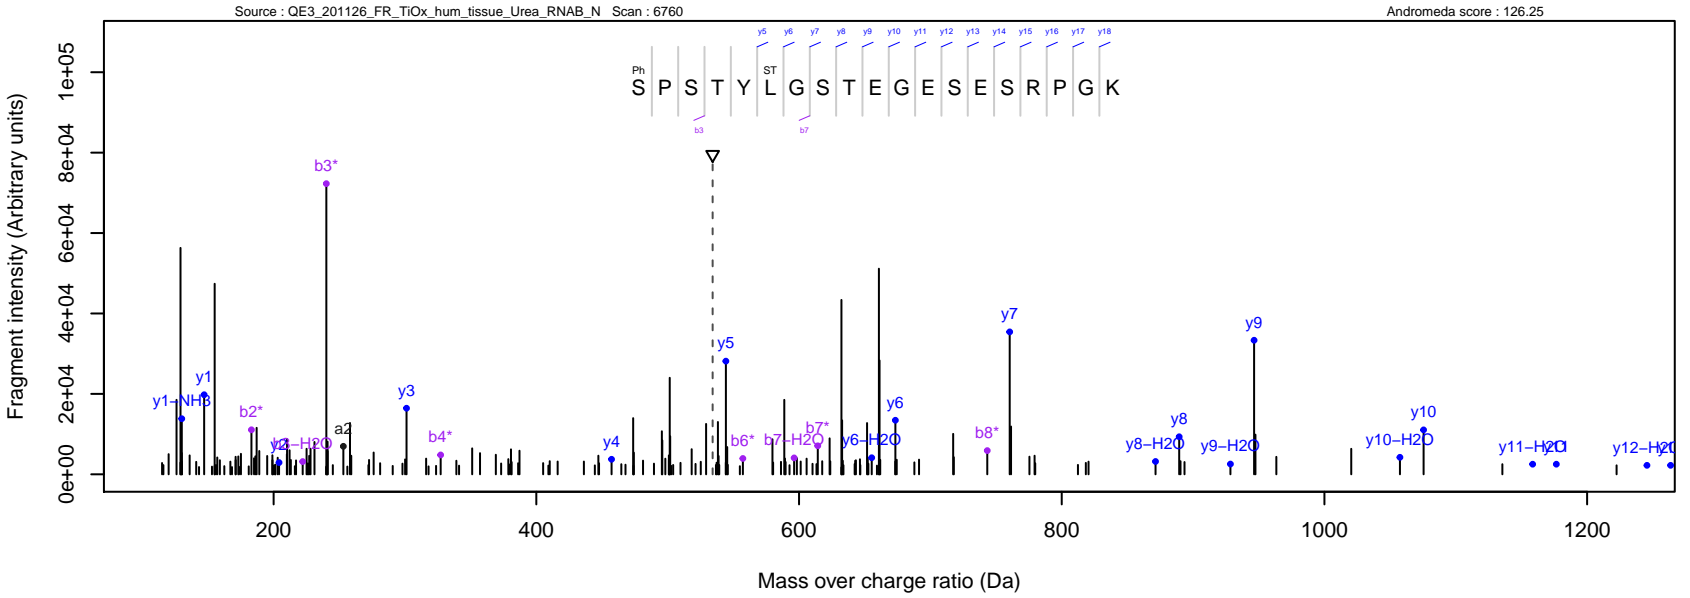

IRS(Phospho (STY))DLKAEALASAIATK-3+

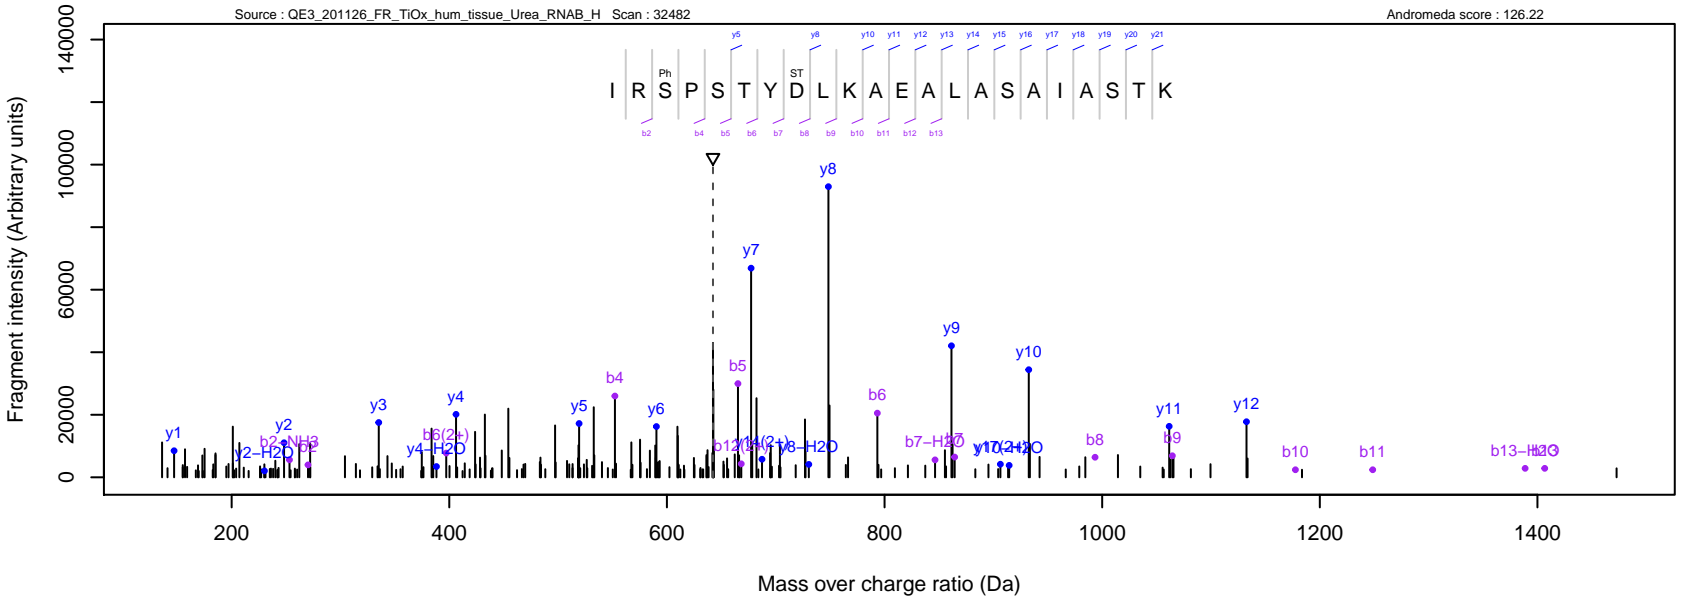



KALVVPEPEPDS(Phospho (STY))NQR-2+

Source : QE3\_201126\_FR\_TiOx\_hum\_tissue\_Urea\_RNAB\_N Scan : 19215

Andromeda score : 126.19

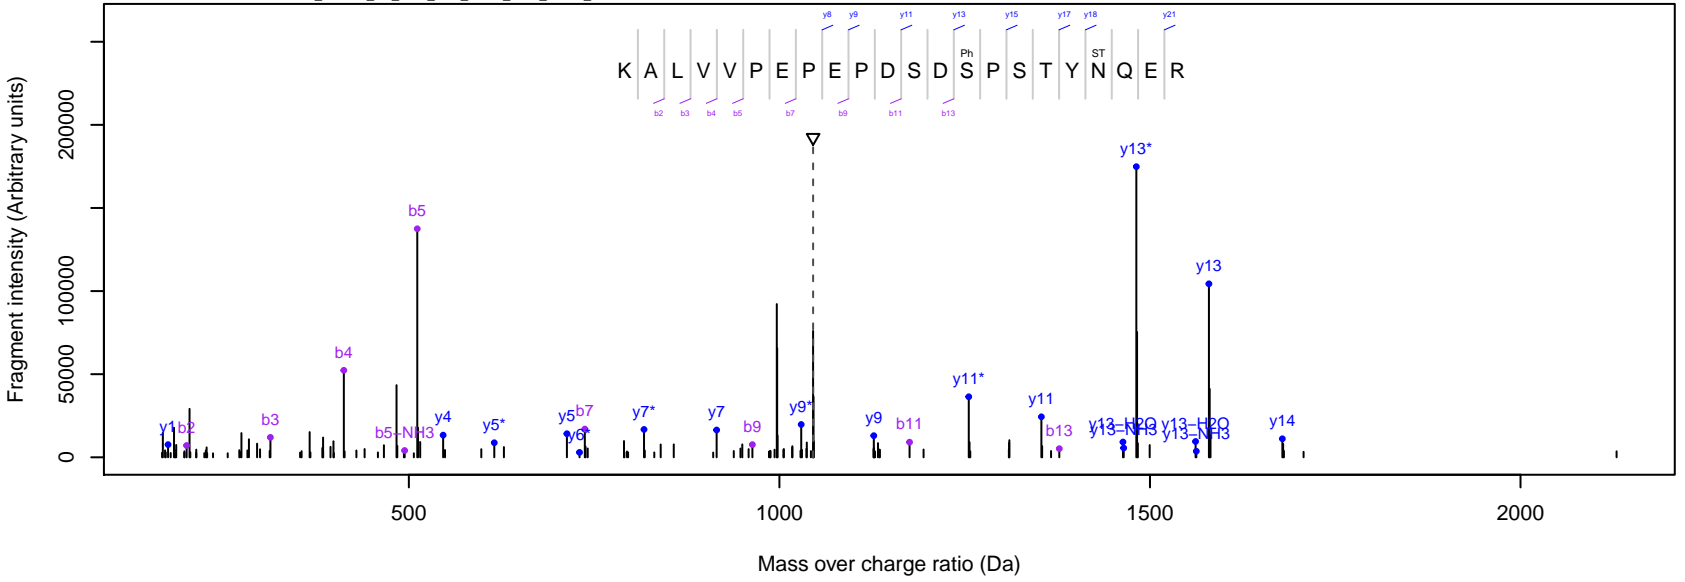

LGVSVS(Phospho (STY))PSR-2+

Source : QE3\_201126\_FR\_TiOx\_hum\_tissue\_Urea\_RNAB\_H Scan : 16159

Andromeda score : 126.19

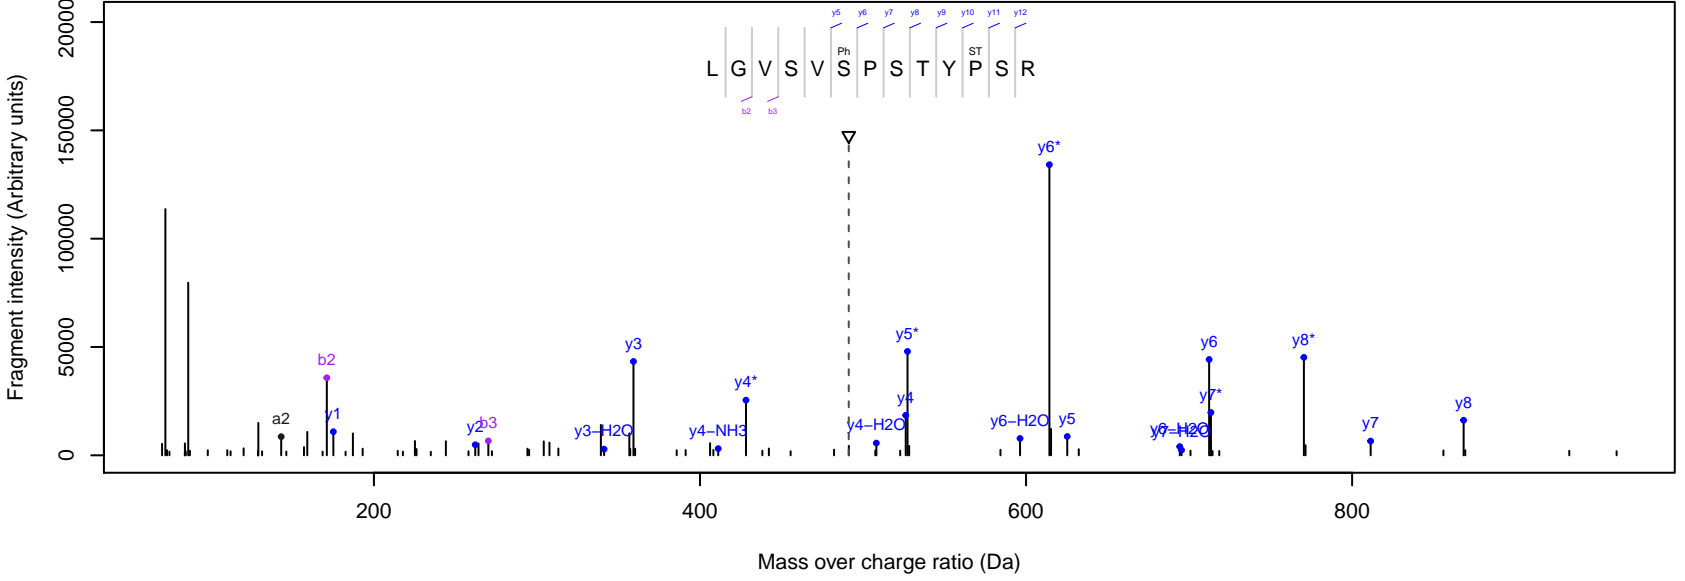

YGM(Oxidation (M))GTS(Phospho (STY))VER-2+

Source : QE3\_201126\_FR\_TiOx\_hum\_tissue\_Urea\_RNAB\_B Scan : 8088

Andromeda score : 126.19

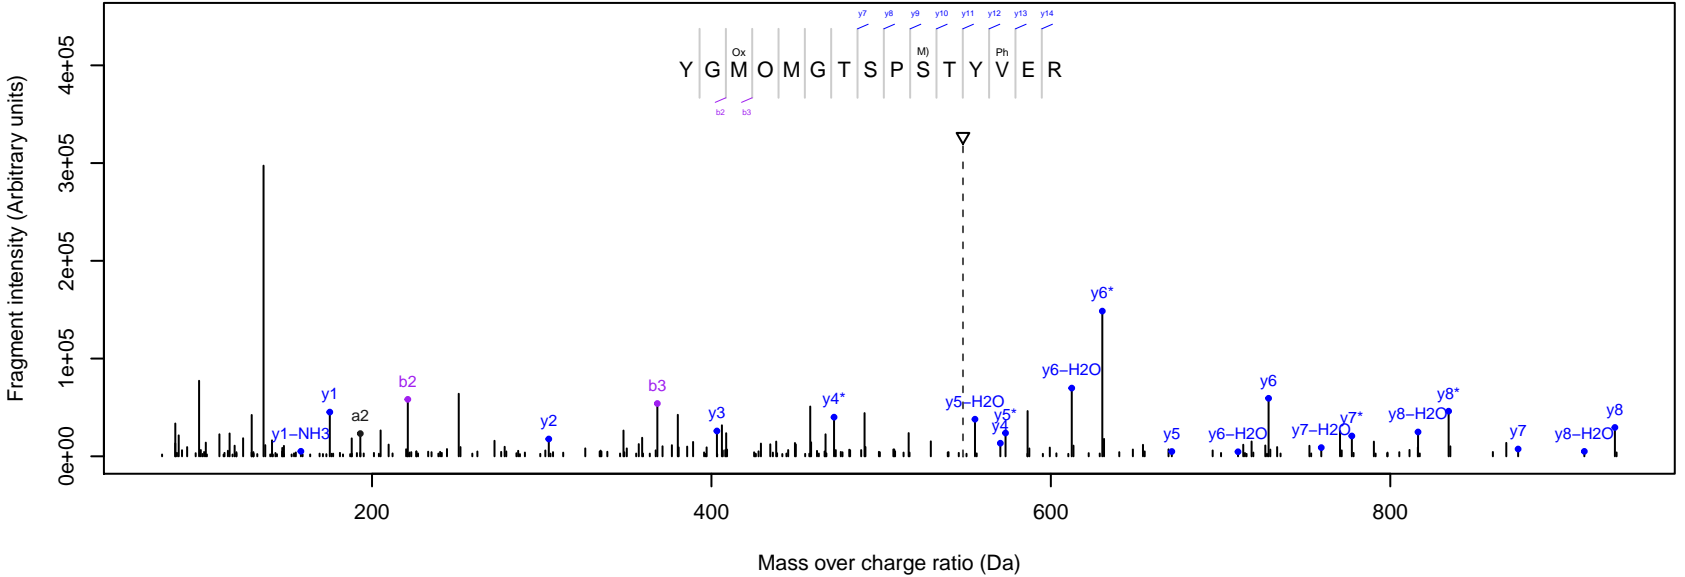

### EMEHTVCAAGT(Phospho (STY))SPVGEIGEEK-3+

Source : QE3\_201126\_FR\_TiOx\_hum\_tissue\_Urea\_RNAB\_N Scan : 21026

Andromeda score : 126.16

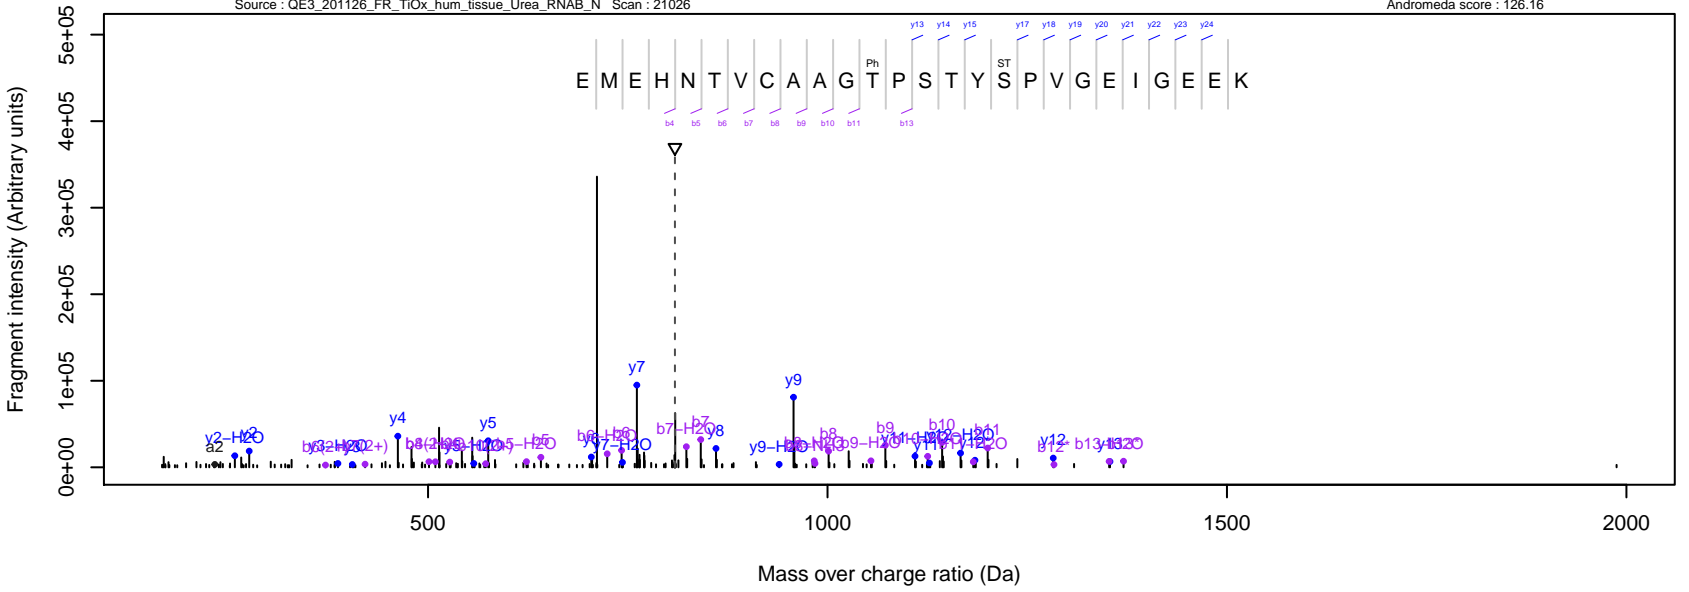

### IDFSSIAVPGT(Phospho (STY))SSPR-2+

Source : QE3\_201126\_FR\_TiOx\_hum\_tissue\_Urea\_RNAB\_H Scan : 46257

Andromeda score : 126.16

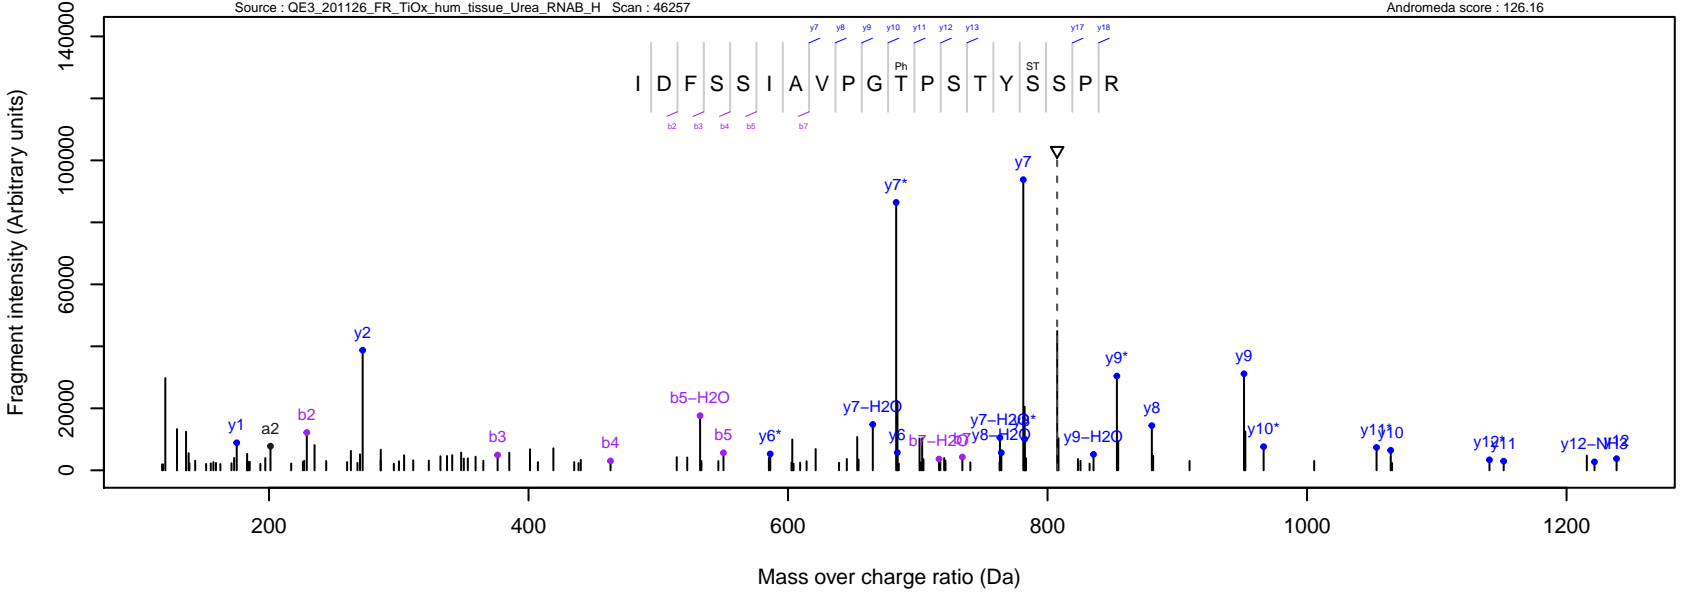

### QGS(Phospho (STY))FRGFALSK-2+

Source : QE3\_201126\_FR\_TiOx\_hum\_tissue\_Urea\_RNAB\_H Scan : 28242

Andromeda score : 126.1

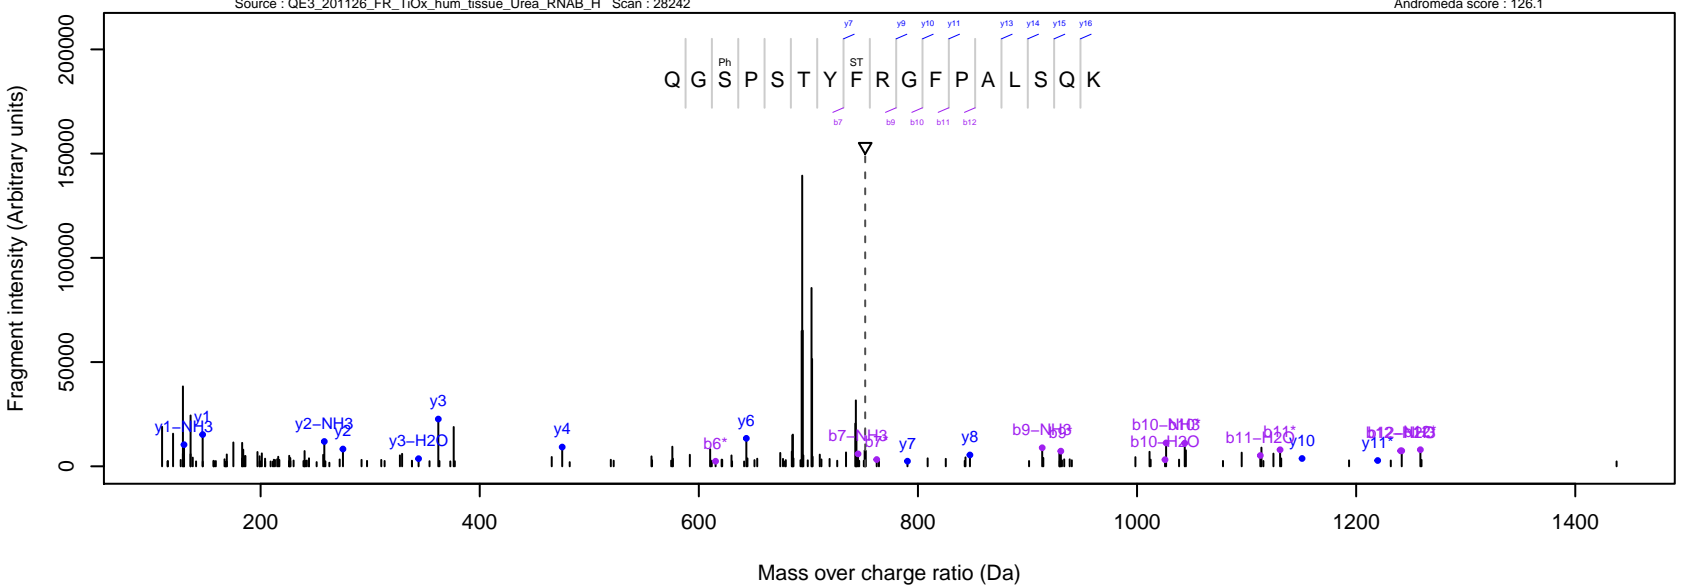

SS(Phospho (STY))LS(Phospho (STY))GDEEDELFK-2+

Source : QE3\_201126\_FR\_TiOx\_hum\_tissue\_Urea\_RNAB\_N Scan : 47526

Andromeda score : 126.1

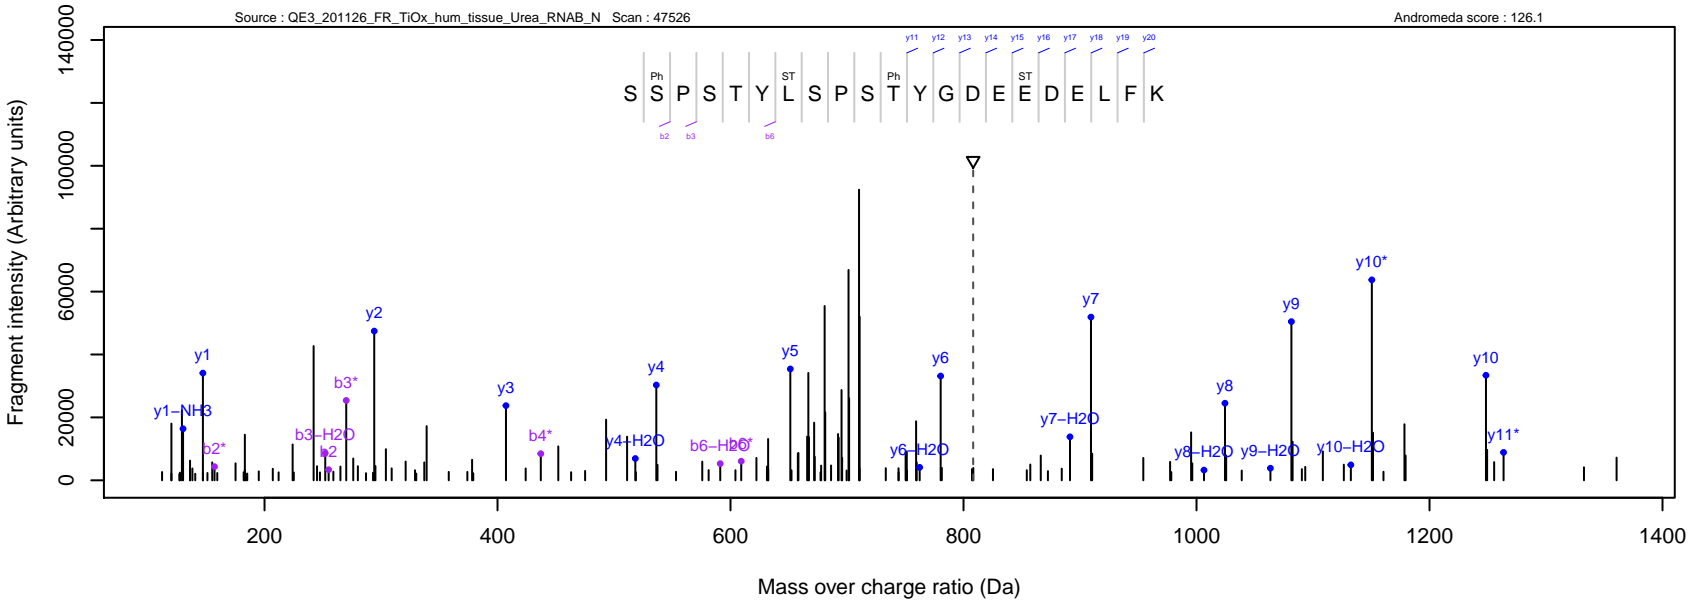

(Acetyl (Protein N-term))AAAAAAGPSGSGPGDS(Phospho (STY))PEGPEGEAPER-3+

Source : QE3\_201126\_FR\_TiOx\_hum\_tissue\_Urea\_RNAB\_N Scan : 29744

Andromeda score : 126.05

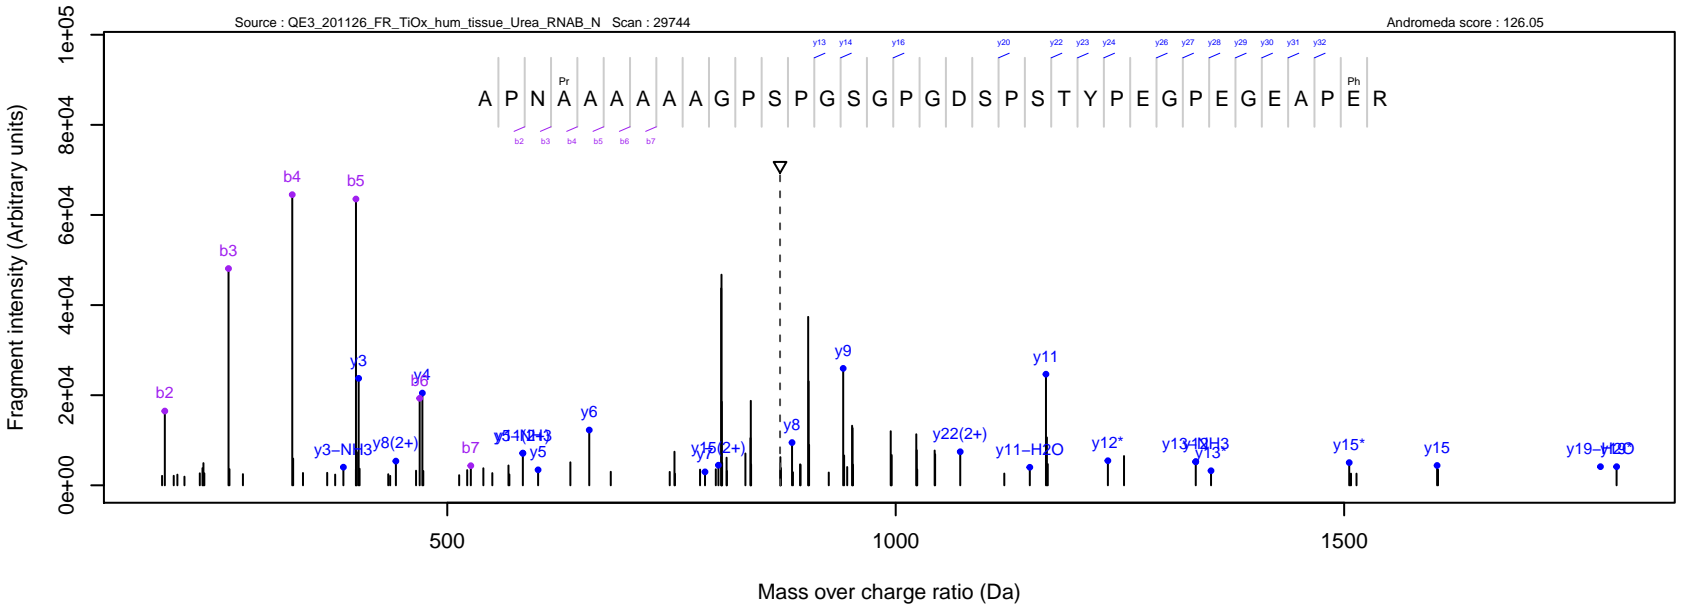

EAEES(Phospho (STY))S(Phospho (STY))GEEEDENIEVVYSK-3+

Source : QE3\_201126\_FR\_TiOx\_hum\_tissue\_Urea\_RNAB\_B Scan : 41130

Andromeda score : 126.04

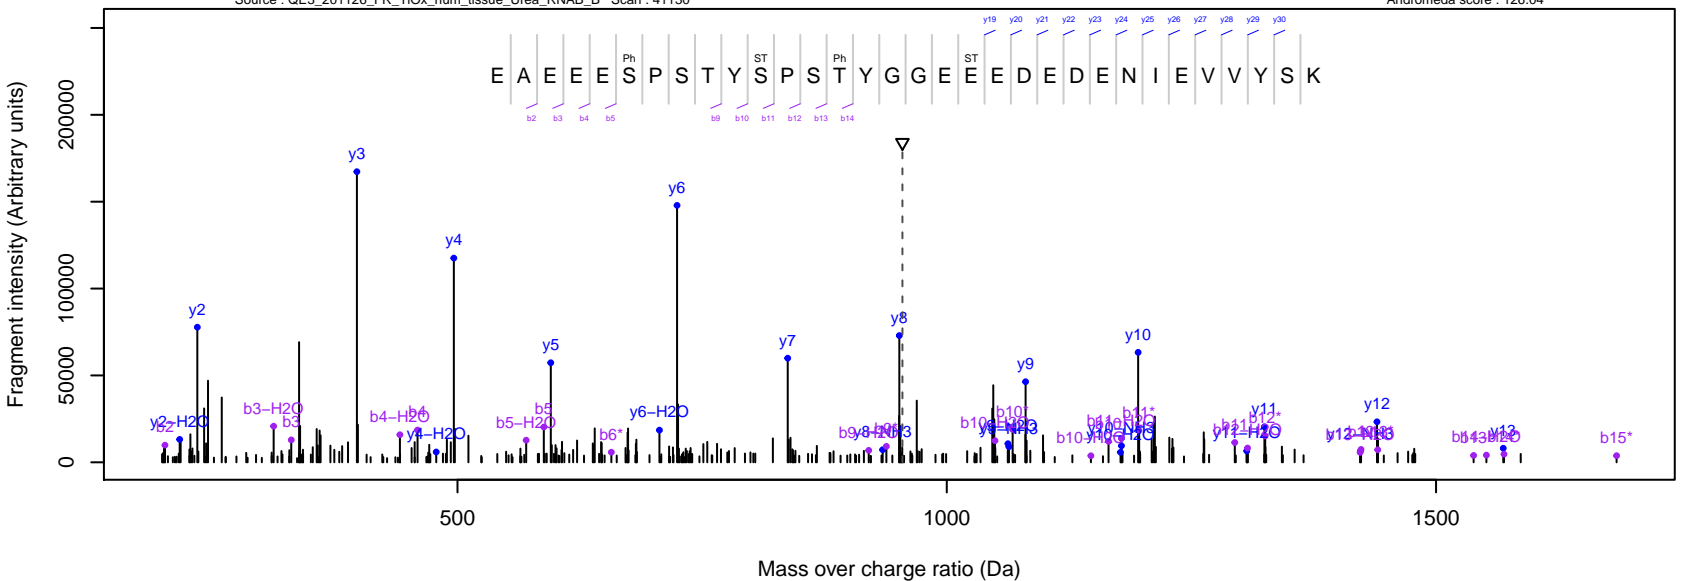

SVS(Phospho (STY))VATGLNM(Oxidation (M))M(Oxidation (M))KK-2+

Source : QE3\_201126\_FR\_TIOx\_hum\_tissue\_Urea\_RNAB\_H Scan : 11835

Andromeda score : 125.82

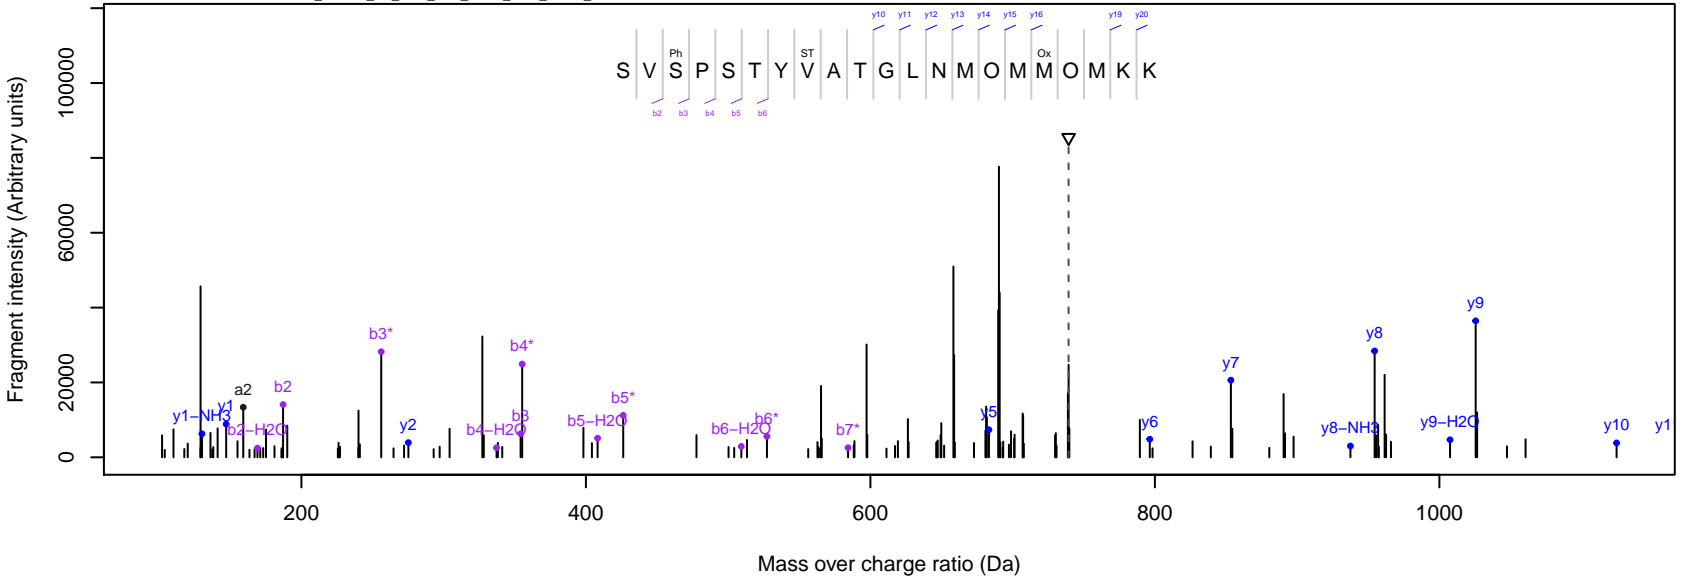

TSS(Phospho (STY))VPEYVYNLHLVENDFVGGR-3+

Source : QE3\_201126\_FR\_TIOx\_hum\_tissue\_Urea\_RNAB\_N Scan : 55507

Andromeda score : 125.82

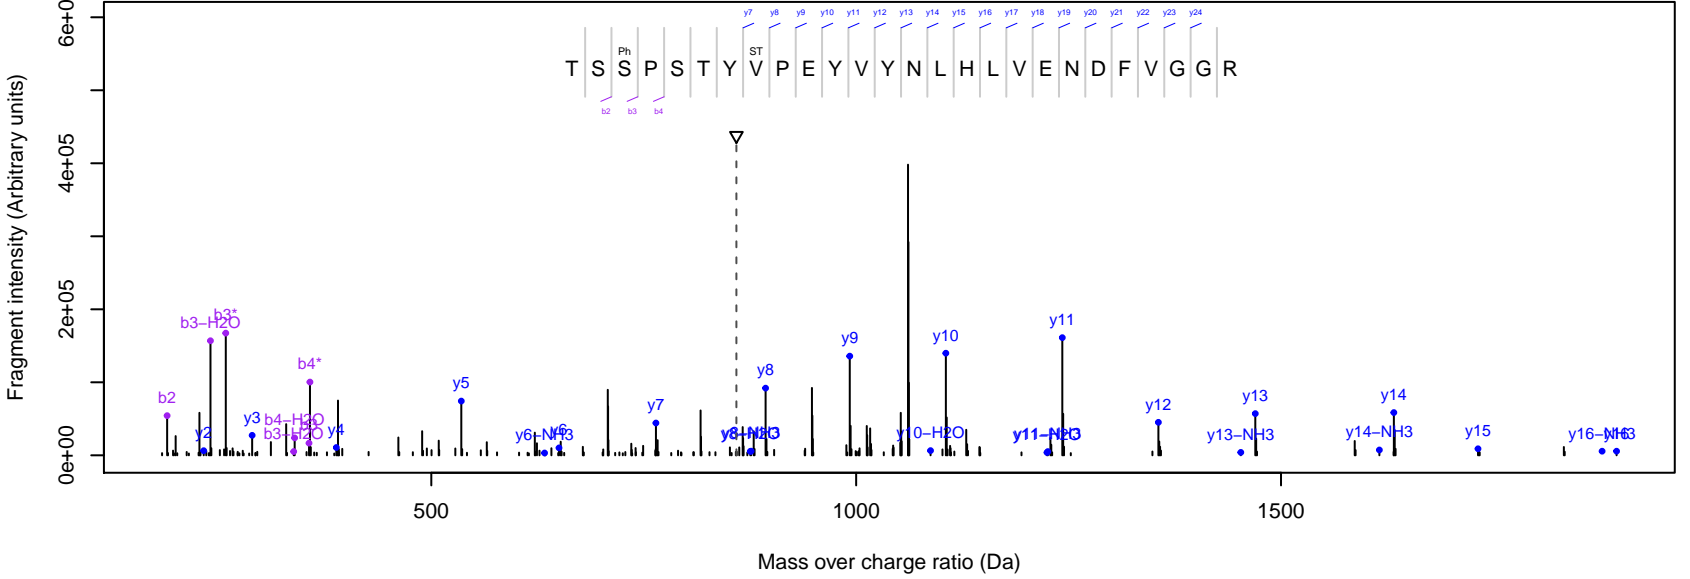

AQS(Phospho (STY))YPDNHQEFSDYDNP I F E K

Source : QE3\_201126\_FR\_TIOx\_hum\_tissue\_Urea\_RNAB\_H Scan : 37321

Andromeda score : 125.78

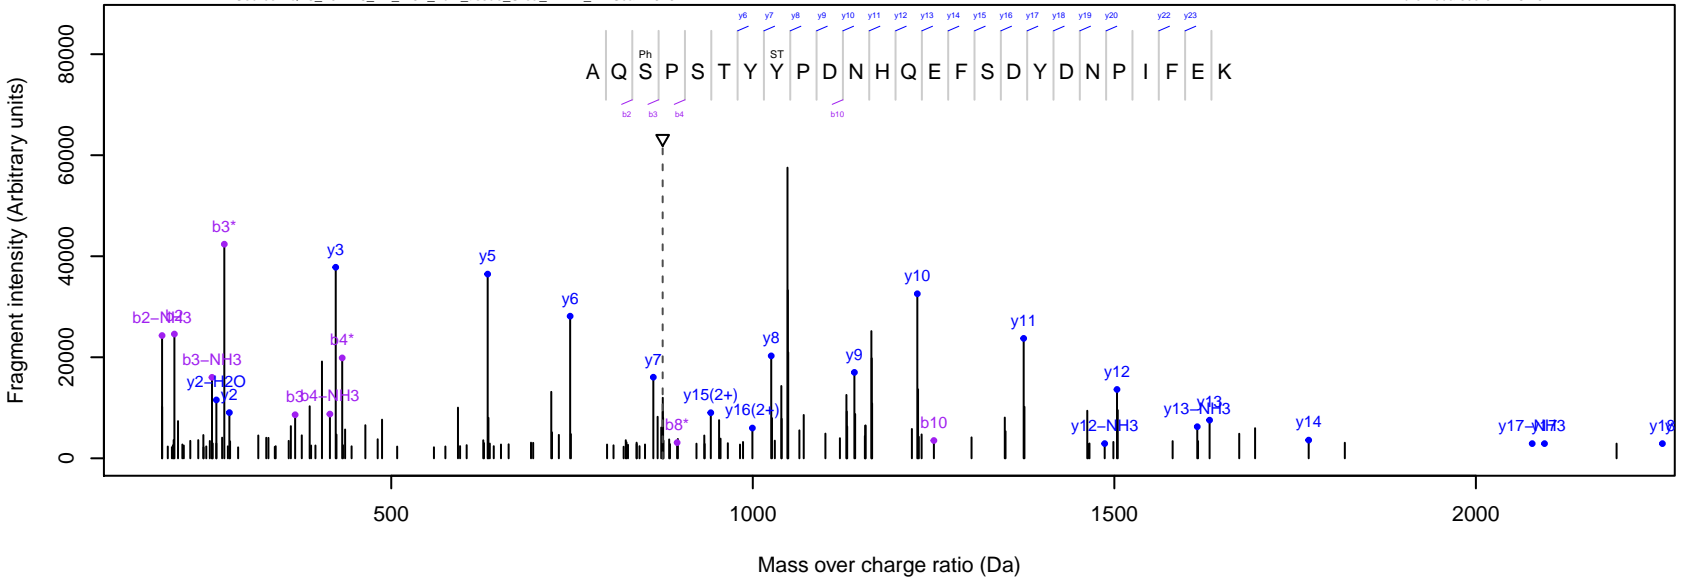

EKSTFREES(Phospho (STY))PLR-3+

Source : QE3\_201126\_FR\_TiOx\_hum\_tissue\_Urea\_RNAB\_B Scan : 9031

Andromeda score : 125.75

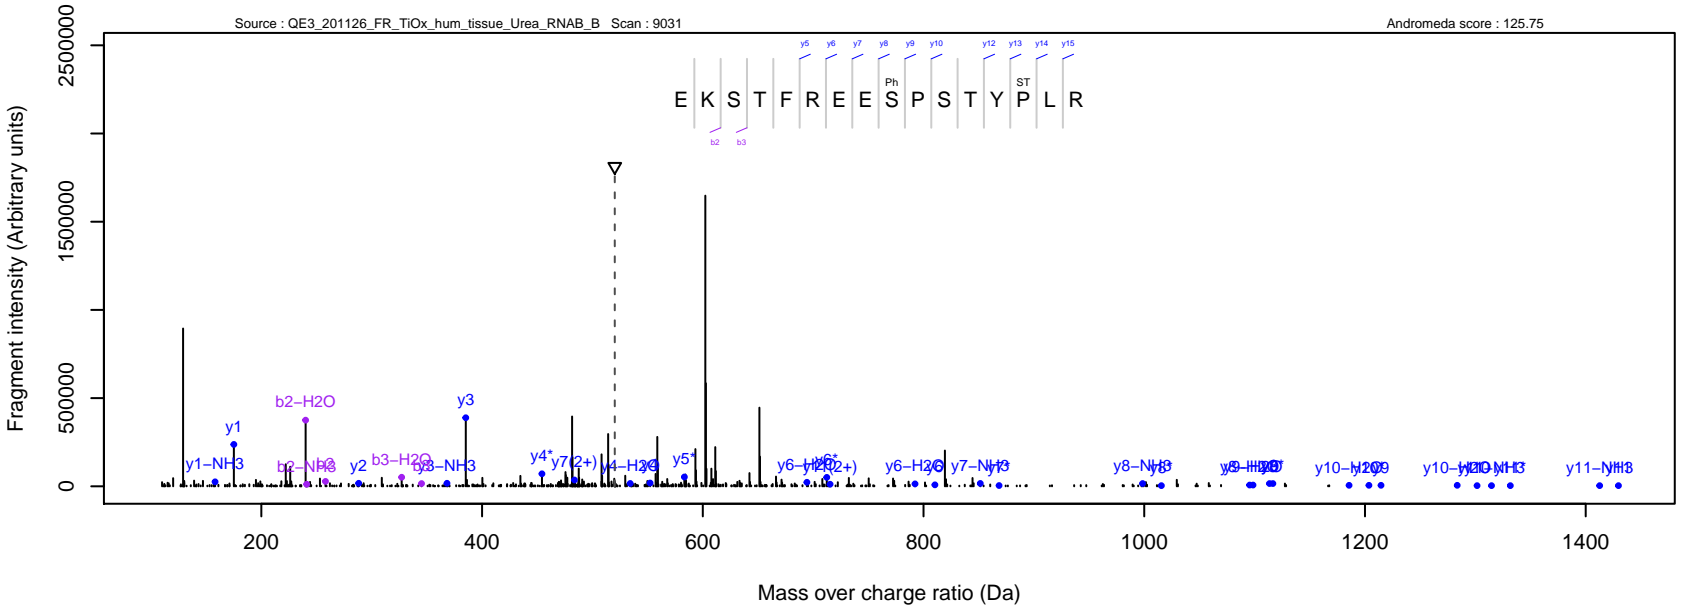

SDS(Phospho (STY))SQPM(Oxidation (M))LLR-2+

Source : QE3\_201126\_FR\_TiOx\_hum\_tissue\_Urea\_RNAB\_B Scan : 20132

Andromeda score : 125.75

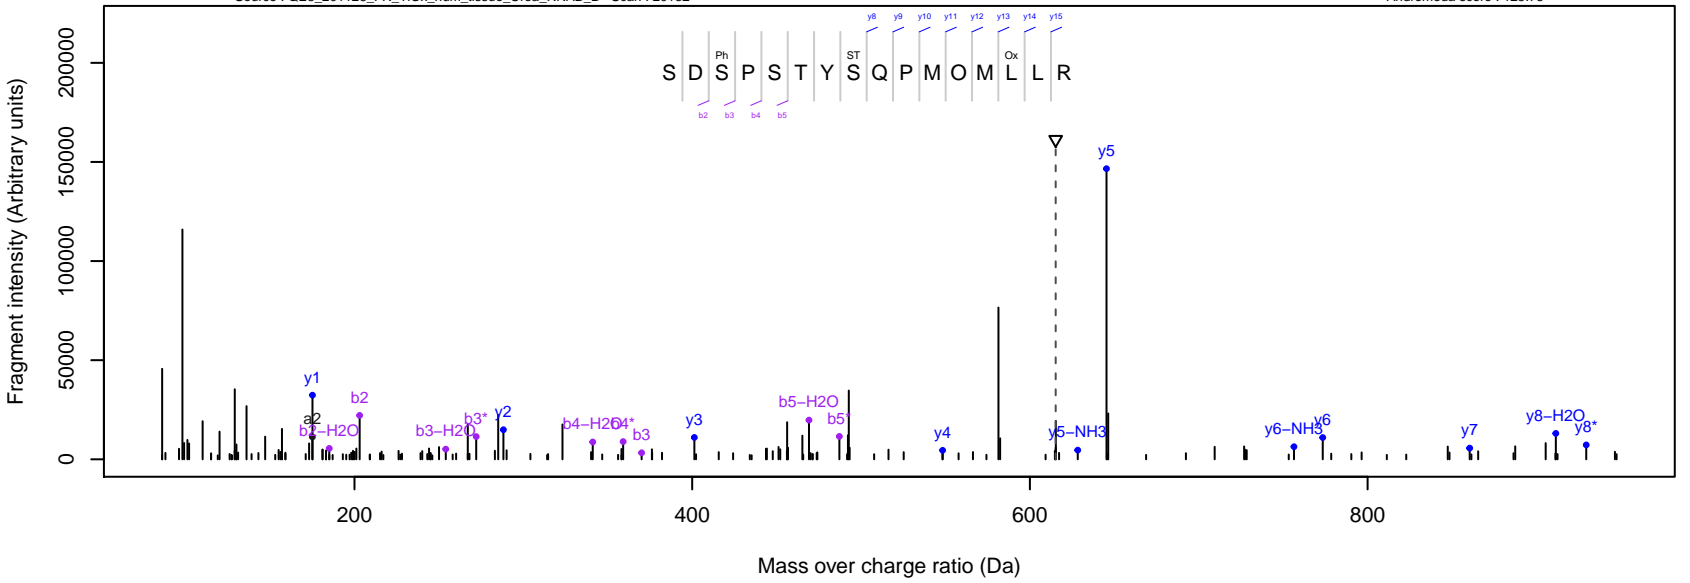

SWS(Phospho (STY))LATFR-2+

Source : QE3\_201126\_FR\_TiOx\_hum\_tissue\_Urea\_RNAB\_H Scan : 44181

Andromeda score : 125.71

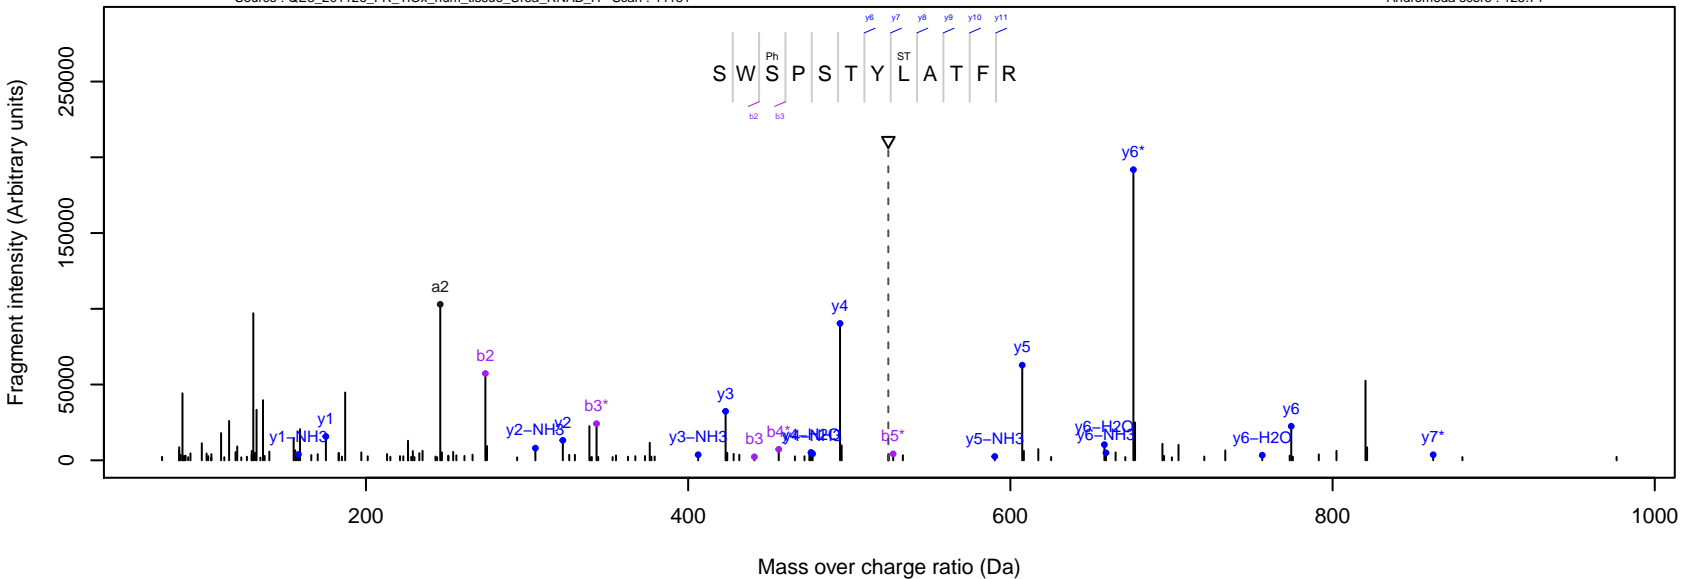

HRPS(Phospho (STY))PPATPPPK-3+

Source : QE3\_201126\_FR\_TiOx\_hum\_tissue\_Urea\_RNAB\_B Scan : 5068

Andromeda score : 125.67

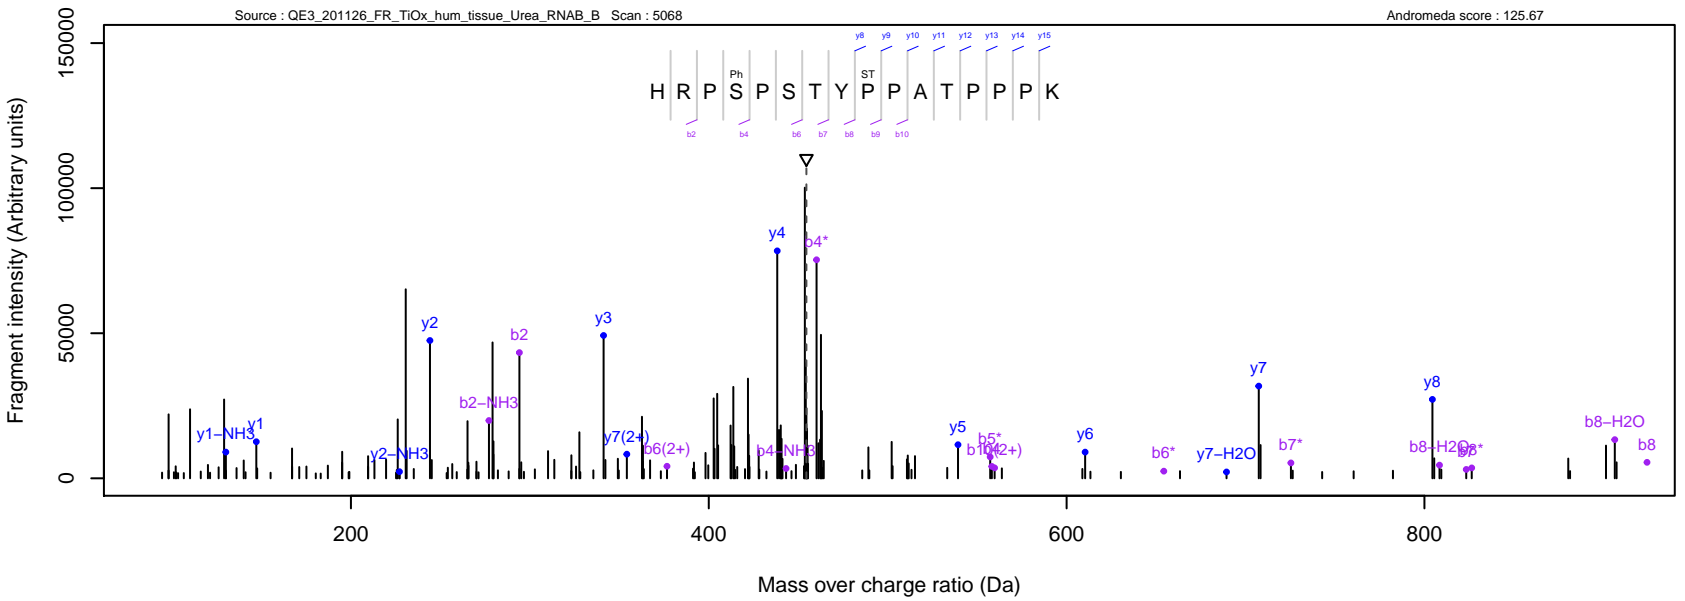

EDMAALEKDYEEVGADS(Phospho (STY))ADGEDEGEY-3+

Source : QE3\_201126\_FR\_TiOx\_hum\_tissue\_Urea\_RNAB\_N Scan : 48545

Andromeda score : 125.62

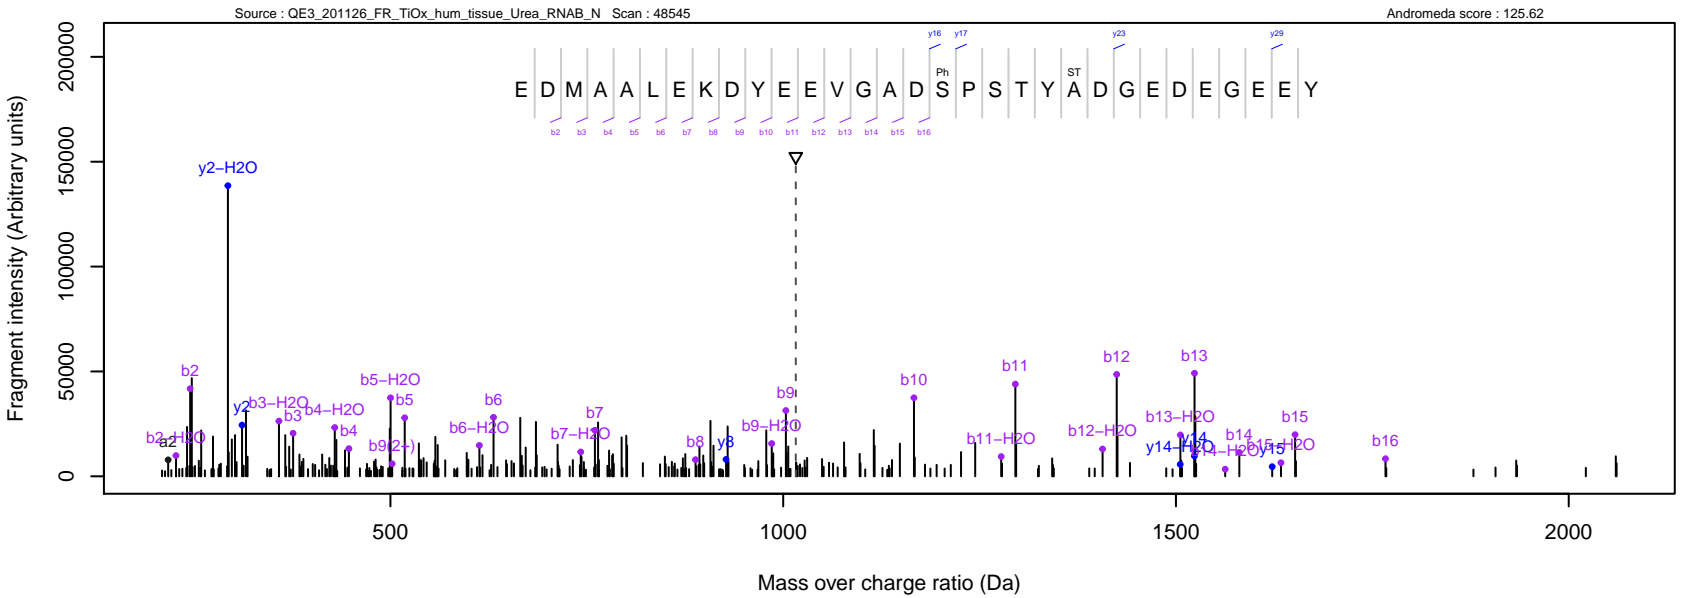

SSILQHERPAS(Phospho (STY))LYQSSIDR-3+

Source : QE3\_201126\_FR\_TiOx\_hum\_tissue\_Urea\_RNAB\_H Scan : 25143

Andromeda score : 125.62

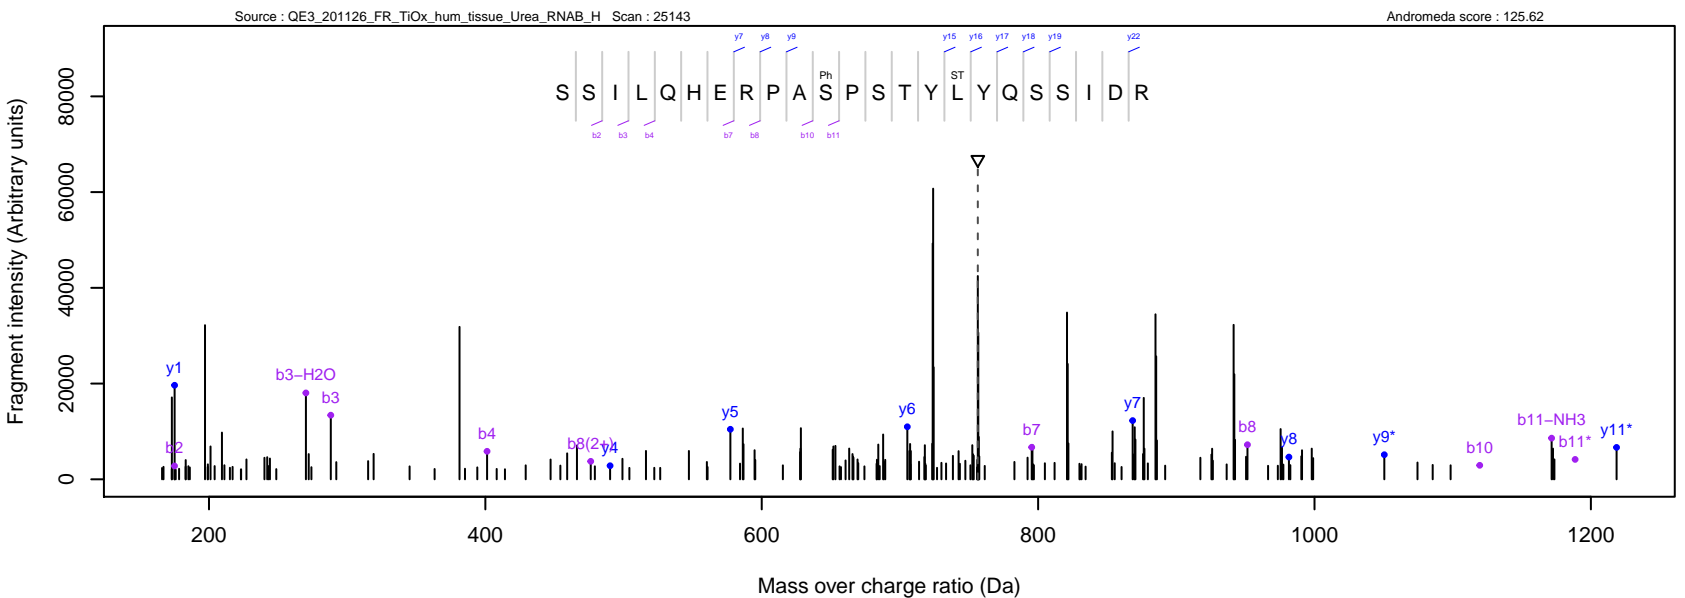

THTDSS(Phospho (STY))EKELEPEAAEEALENGPK-3+

Source : QE3\_201126\_FR\_TIOx\_hum\_tissue\_Urea\_RNAB\_B Scan : 27214

Andromeda score : 125.62

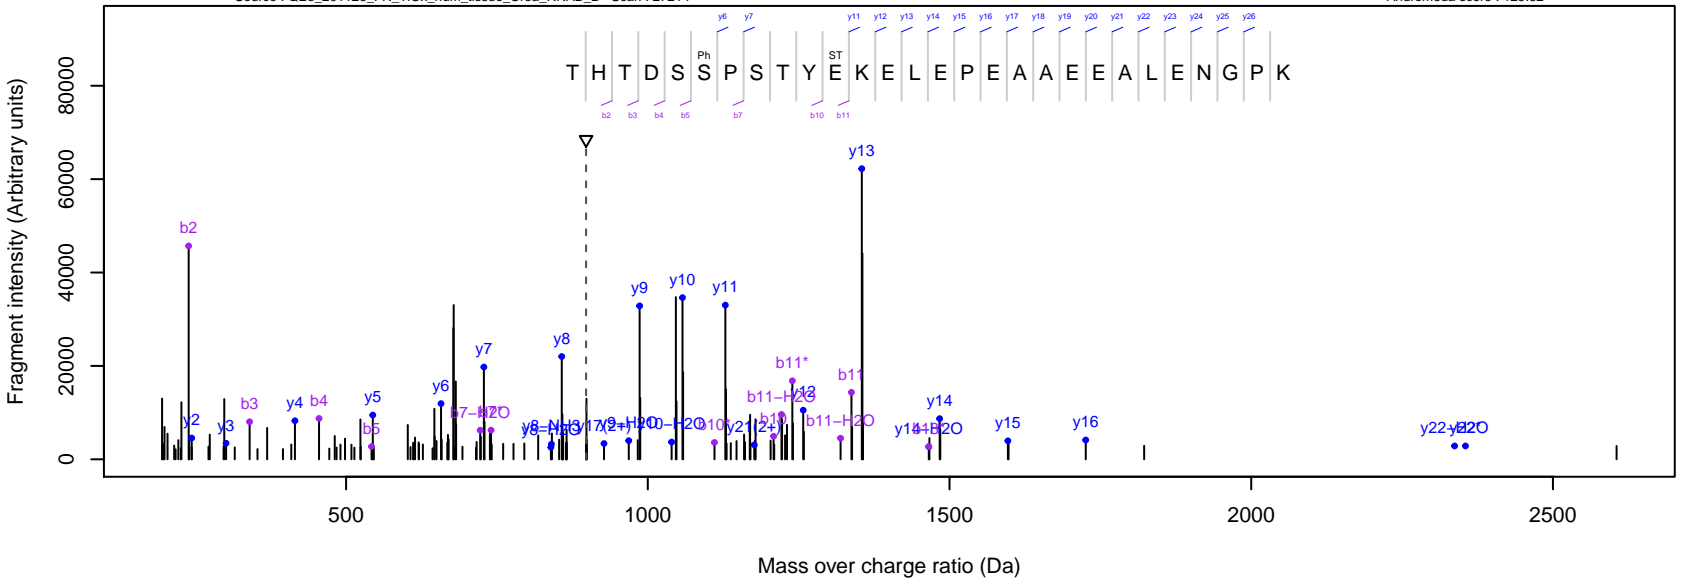

KTS(Phospho (STY))DDGGDS(Phospho (STY))PEHDTDIPEVDLFLQLQVNTLR-3+

Source : QE3\_201126\_FR\_TIOx\_hum\_tissue\_Urea\_RNAB\_H Scan : 57048

Andromeda score : 125.55

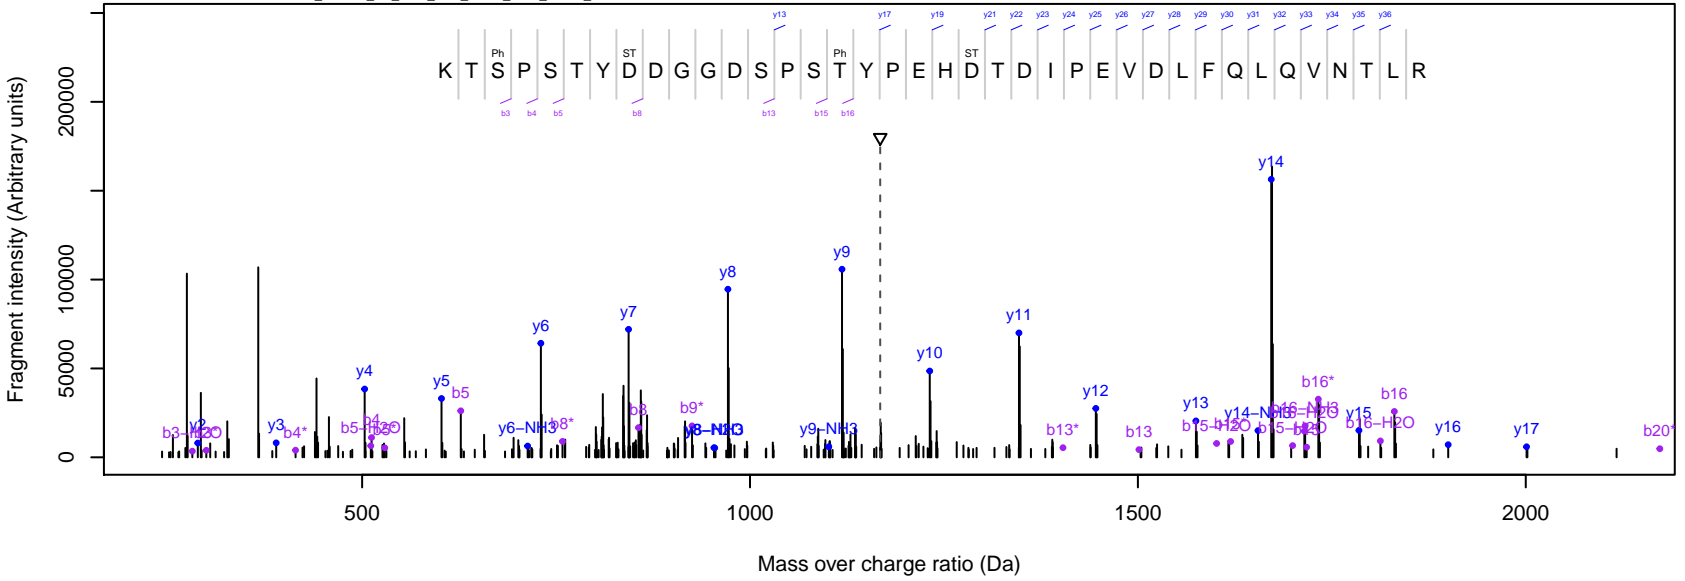

KS(Phospho (STY))FLHEQEENVVK-3+

Source : QE3\_201126\_FR\_TIOx\_hum\_tissue\_Urea\_RNAB\_N Scan : 15411

Andromeda score : 125.52

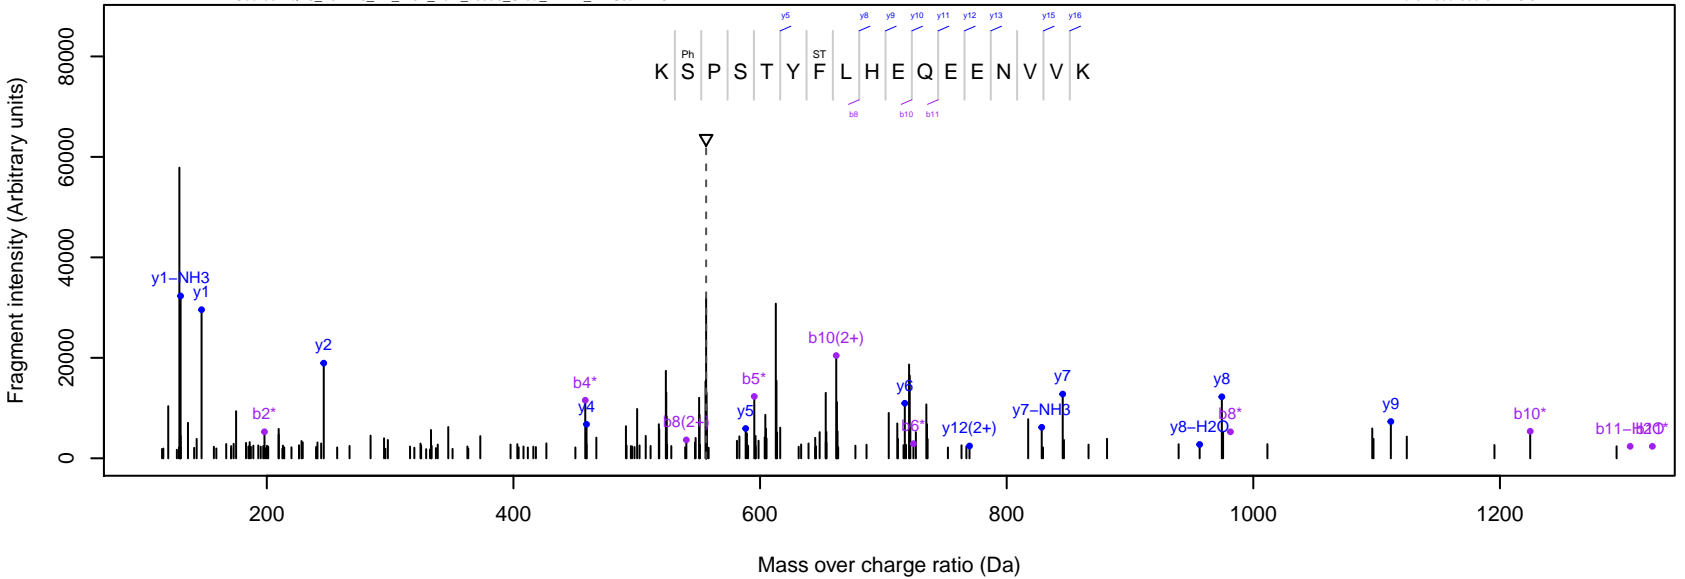

HST(Phospho (STY))ELFM(Oxidation (M))DSGFSPLCQR-3+

Source : QE3\_201126\_FR\_TiOx\_hum\_tissue\_Urea\_RNAB\_N Scan : 38389

Andromeda score : 125.51

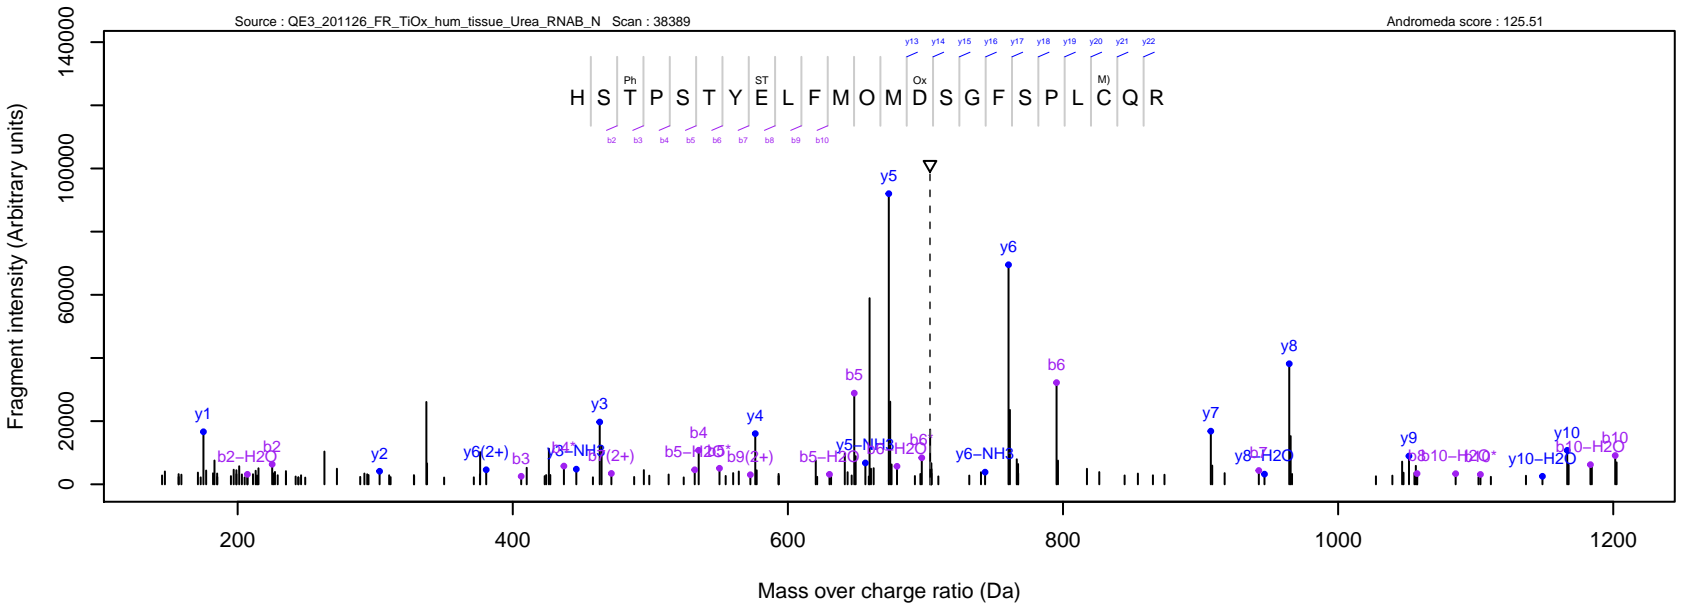

RAS(Phospho (STY))DDGKLTDPK-3+

Source : QE3\_201126\_FR\_TiOx\_hum\_tissue\_Urea\_RNAB\_H Scan : 4857

Andromeda score : 125.5

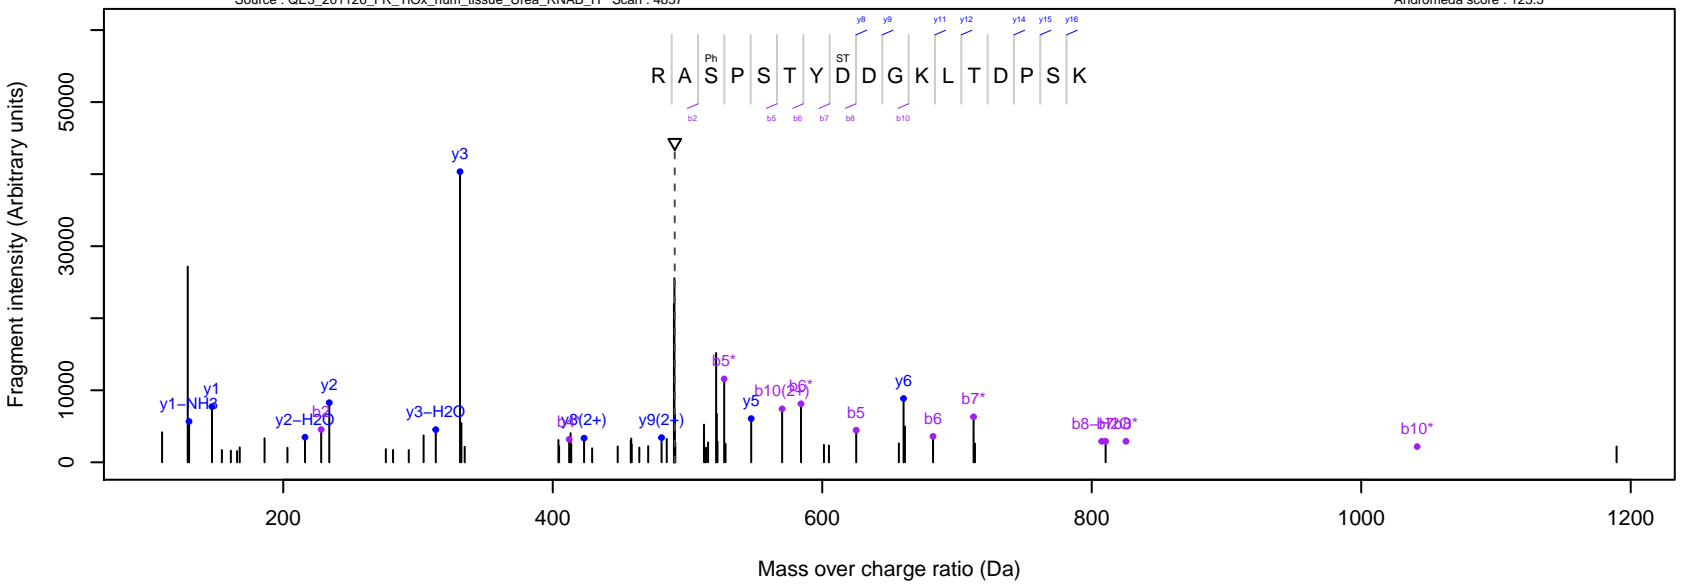

VQEKPDS(Phospho (STY))PGGSTQIQR-3+

Source : QE3\_201126\_FR\_TiOx\_hum\_tissue\_Urea\_RNAB\_B Scan : 8359

Andromeda score : 125.45

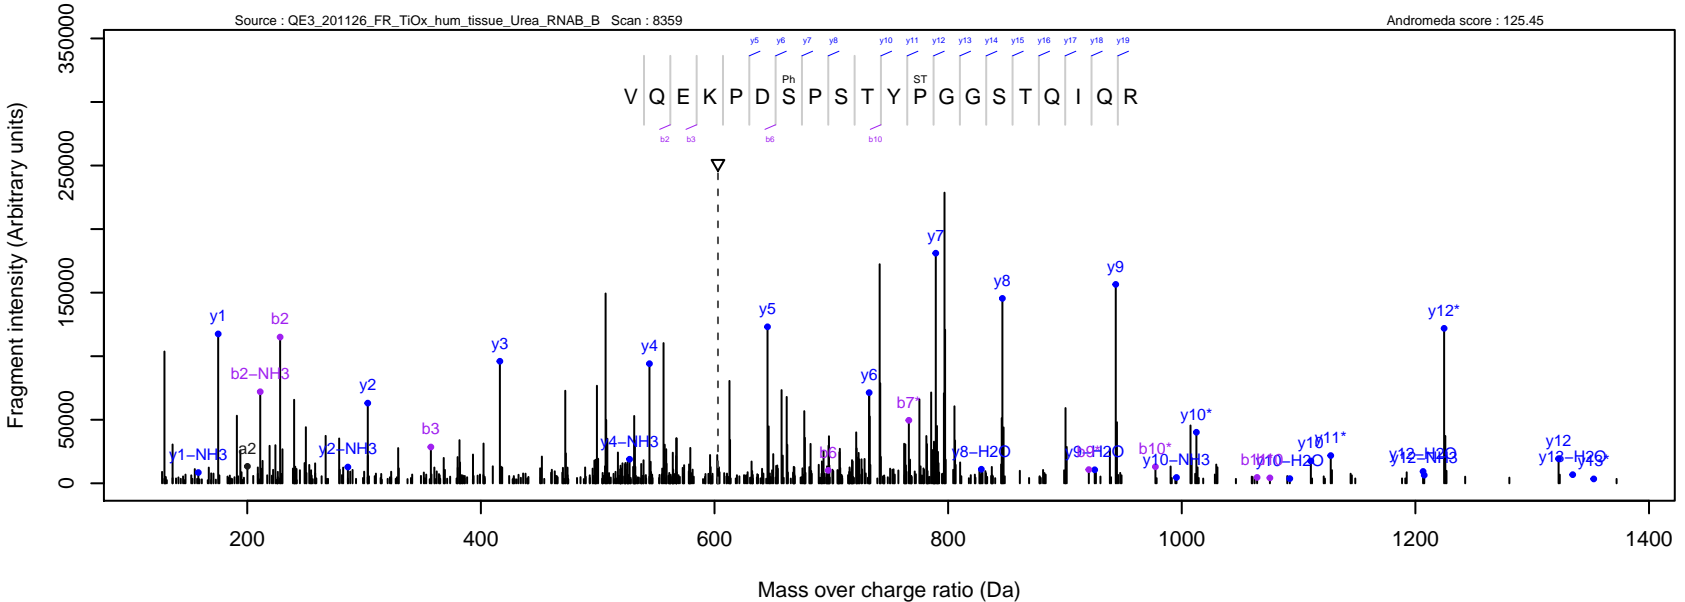



VVEAVNS(Phospho (STY))DS(Phospho (STY))DSEFGIPKK-2+

Source : QE3\_201126\_FR\_TIOx\_hum\_tissue\_Urea\_RNAB\_H Scan : 30263

Andromeda score : 125.45

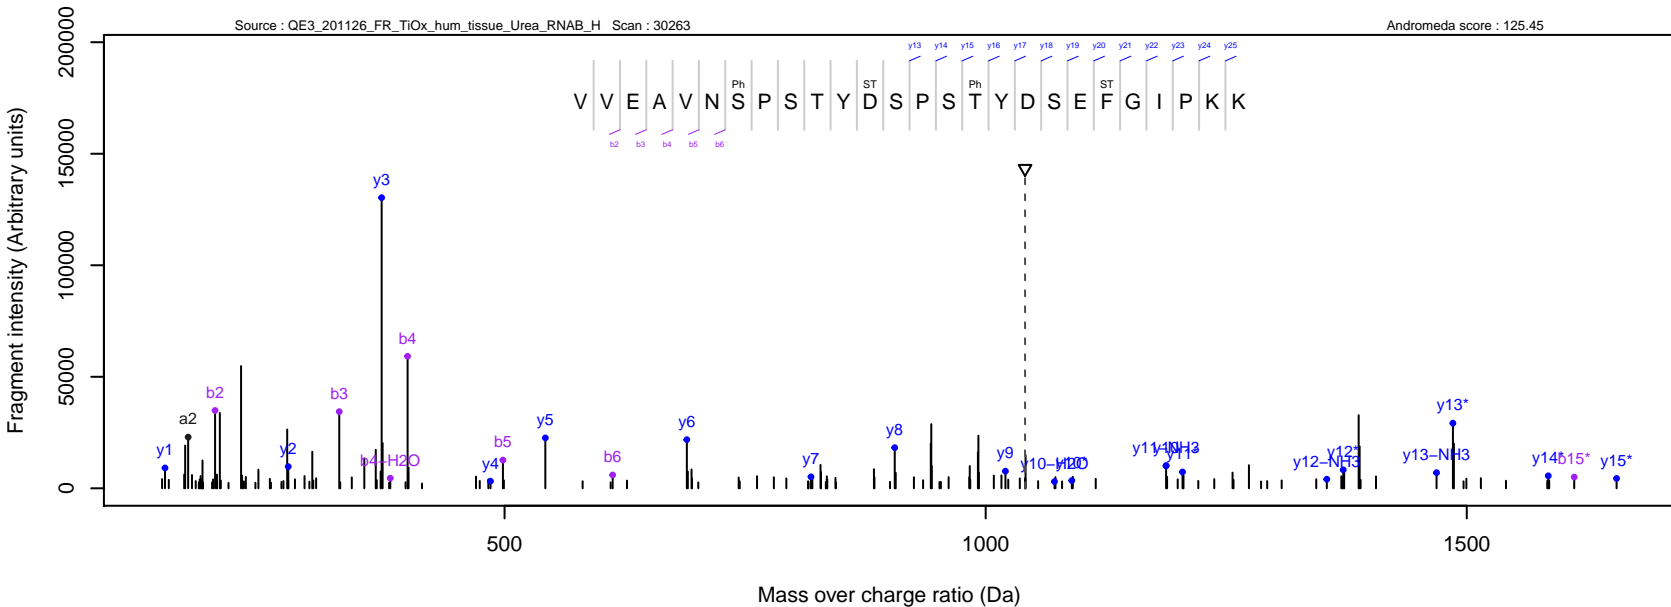

AHLESLVASRSPQPLAET(Phospho (STY))PIPS(Phospho (STY))LPEFPR-3+

Source : QE3\_201126\_FR\_TIOx\_hum\_tissue\_Urea\_RNAB\_N Scan : 52232

Andromeda score : 125.42

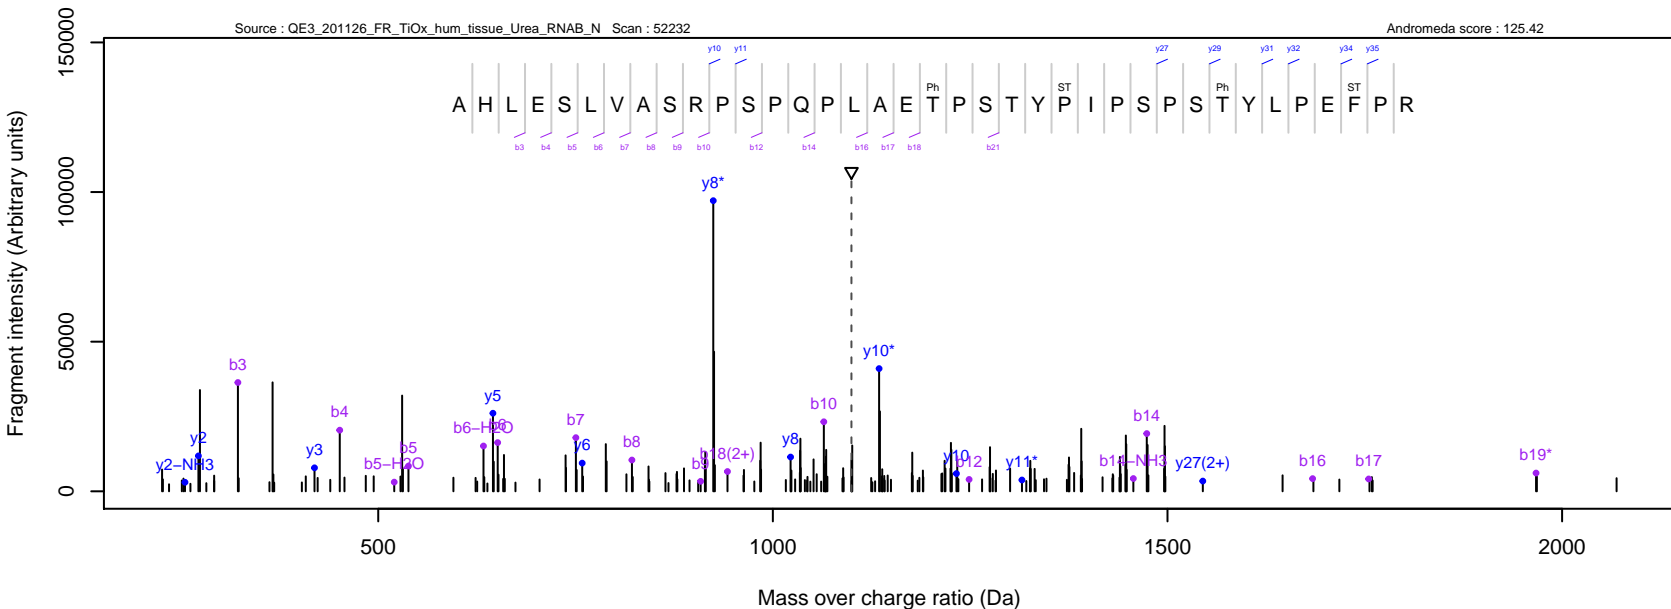

ARTDEVPAAGGS(Phospho (STY))RS(Phospho (STY))EAEDDEDYVPYVPLR-3+

Source : QE3\_201126\_FR\_TIOx\_hum\_tissue\_Urea\_RNAB\_B Scan : 41053

Andromeda score : 125.42

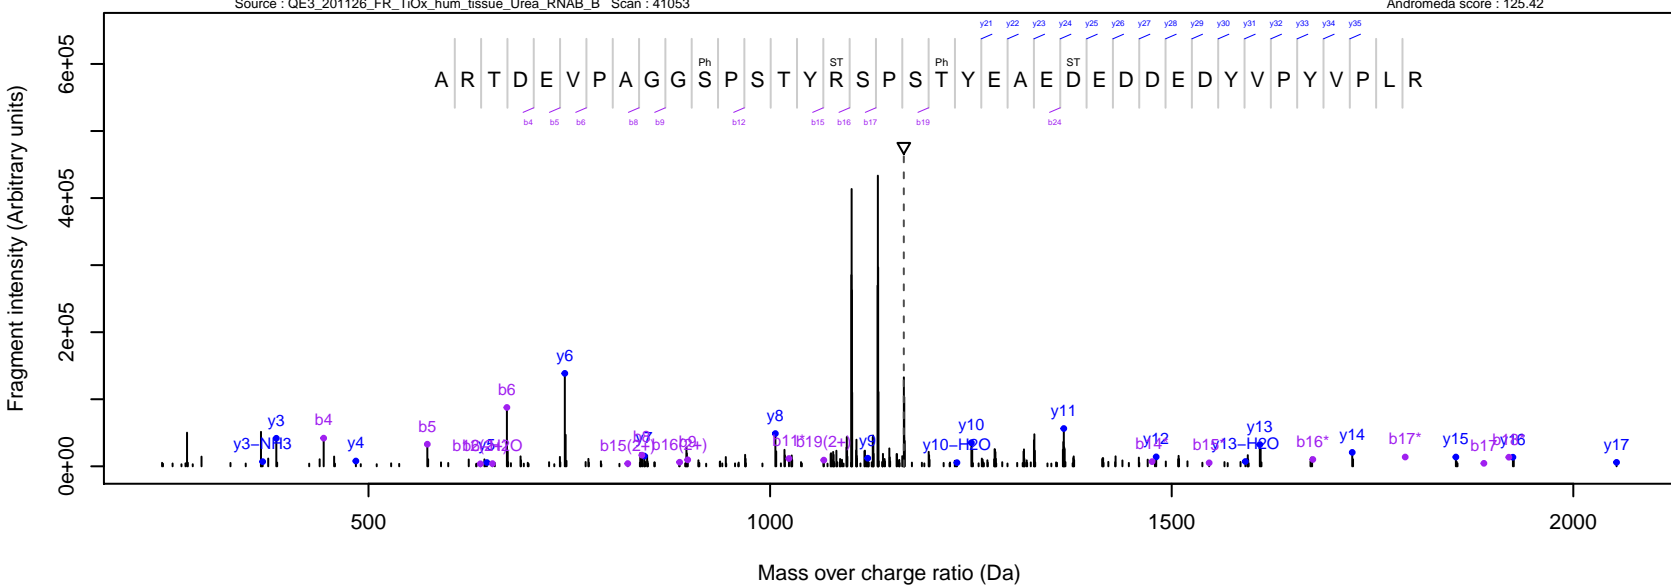

NSVLSDPGLDS(Phospho (STY))PRT(Phospho (STY))SPVIM(Oxidation (M))AR-3+

Source : QE3\_201126\_FR\_TIOx\_hum\_tissue\_Urea\_RNAB\_B Scan : 35251

Andromeda score : 125.39

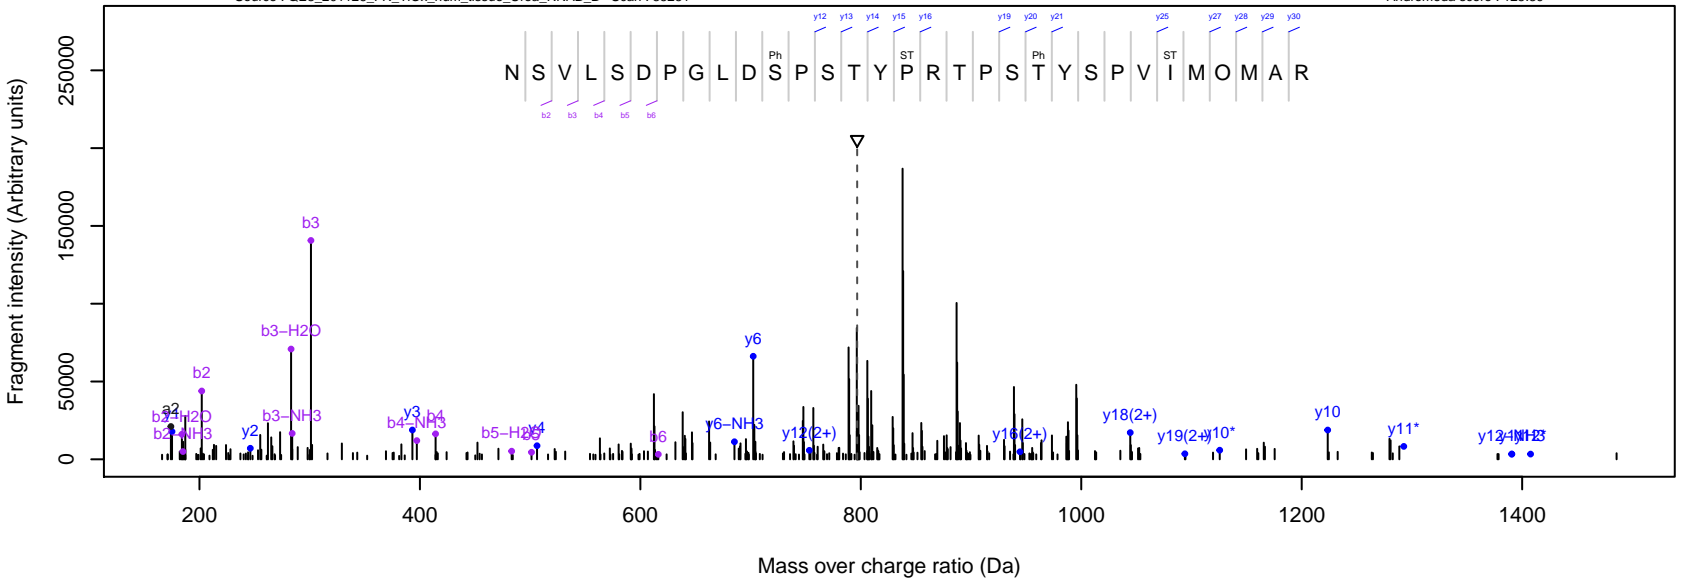

RHS(Phospho (STY))FAT(Phospho (STY))EGAGAVENFAAAR-3+

Source : QE3\_201126\_FR\_TIOx\_hum\_tissue\_Urea\_RNAB\_N Scan : 32935

Andromeda score : 125.39

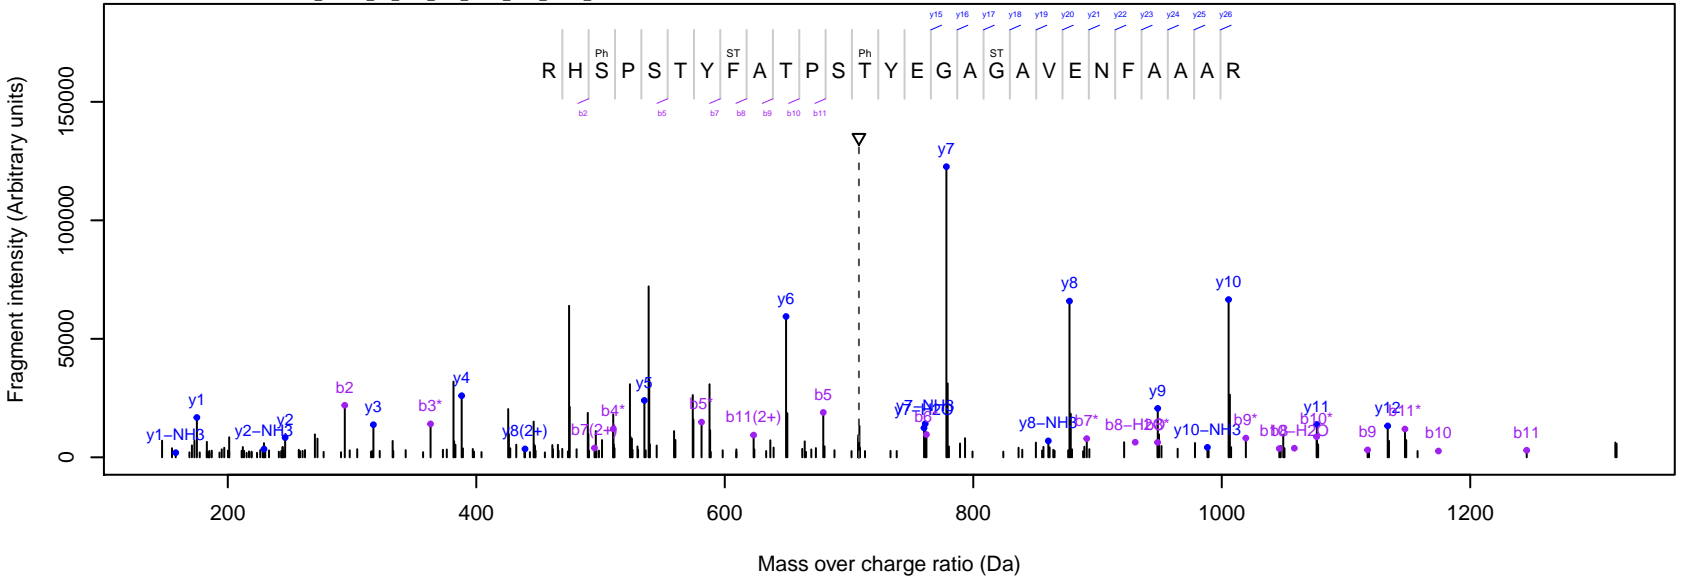

GNEAVAS(Phospho (STY))RDLENNQDR-3+

Source : QE3\_201126\_FR\_TIOx\_hum\_tissue\_Urea\_RNAB\_H Scan : 9118

Andromeda score : 125.35

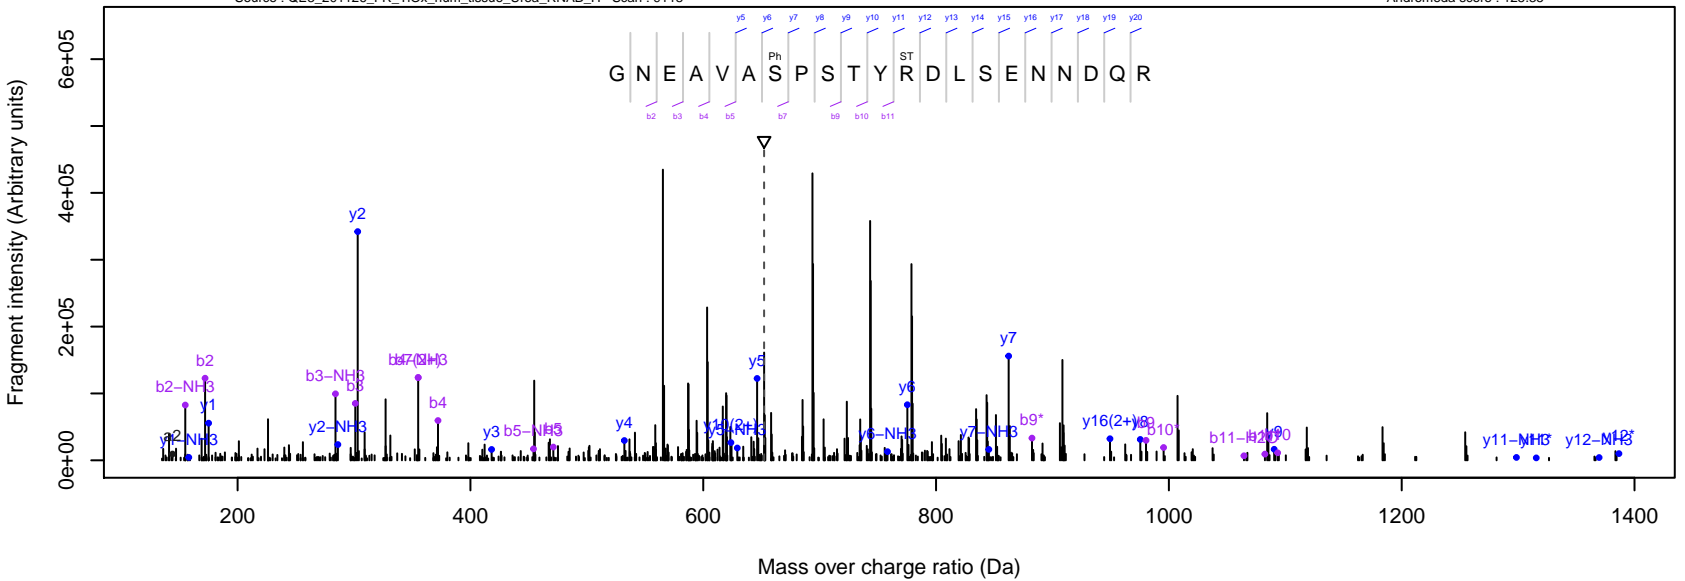

YSDEQLNSGRQS(Phospho (STY))PSQNER-3+

Source : QE3\_201126\_FR\_TiOx\_hum\_tissue\_Urea\_RNAB\_H Scan : 9052

Andromeda score : 125.31

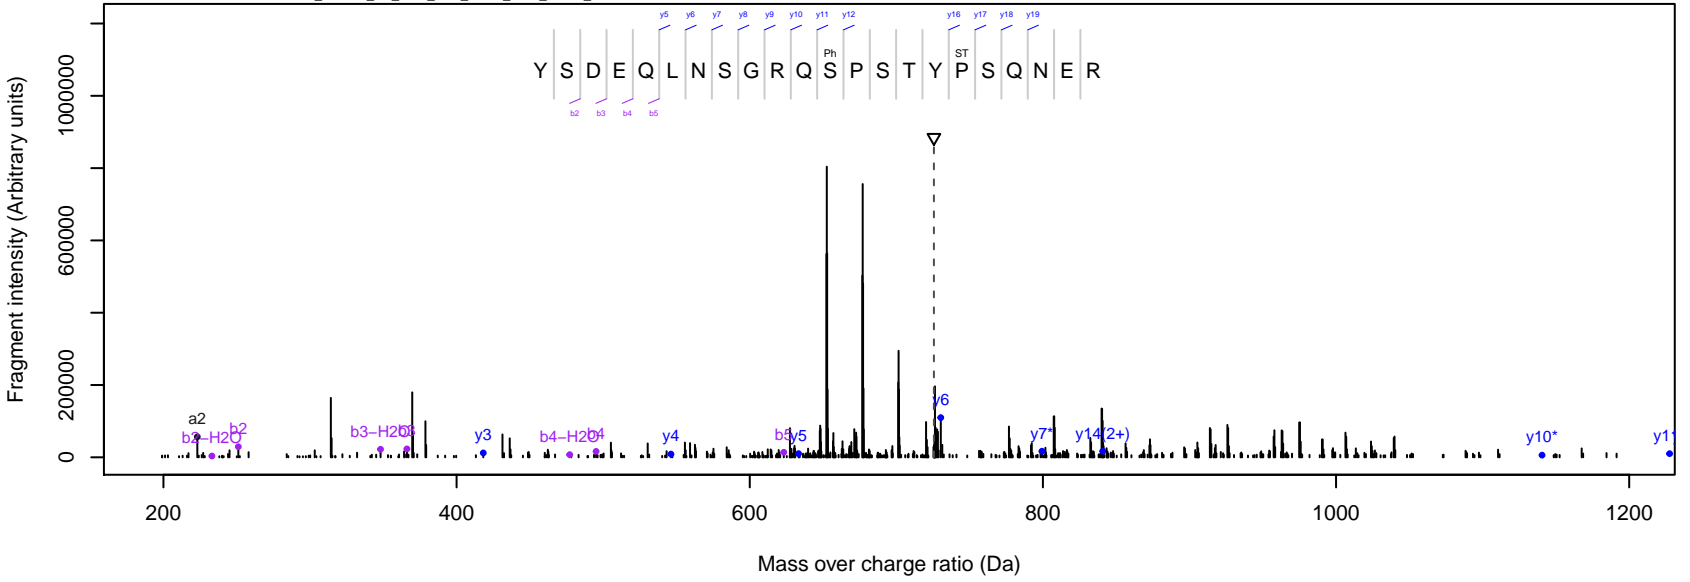

HGLAHDEMKS(Phospho (STY))PREPGYK-4+

Source : QE3\_201126\_FR\_TiOx\_hum\_tissue\_Urea\_RNAB\_N Scan : 8805

Andromeda score : 125.28

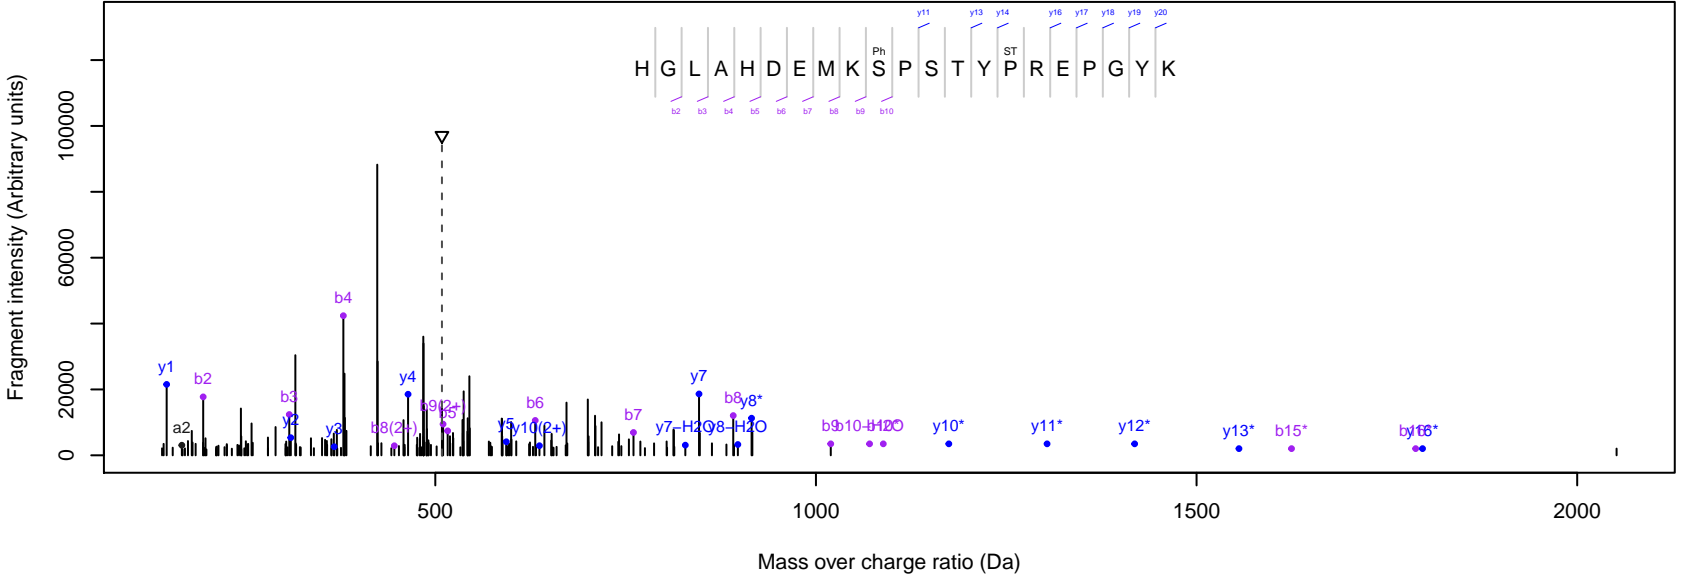

TPLSFTNPLHSDDS(Phospho (STY))DSDERNSDGAVTQNK-4+

Source : QE3\_201126\_FR\_TiOx\_hum\_tissue\_Urea\_RNAB\_H Scan : 28550

Andromeda score : 125.26

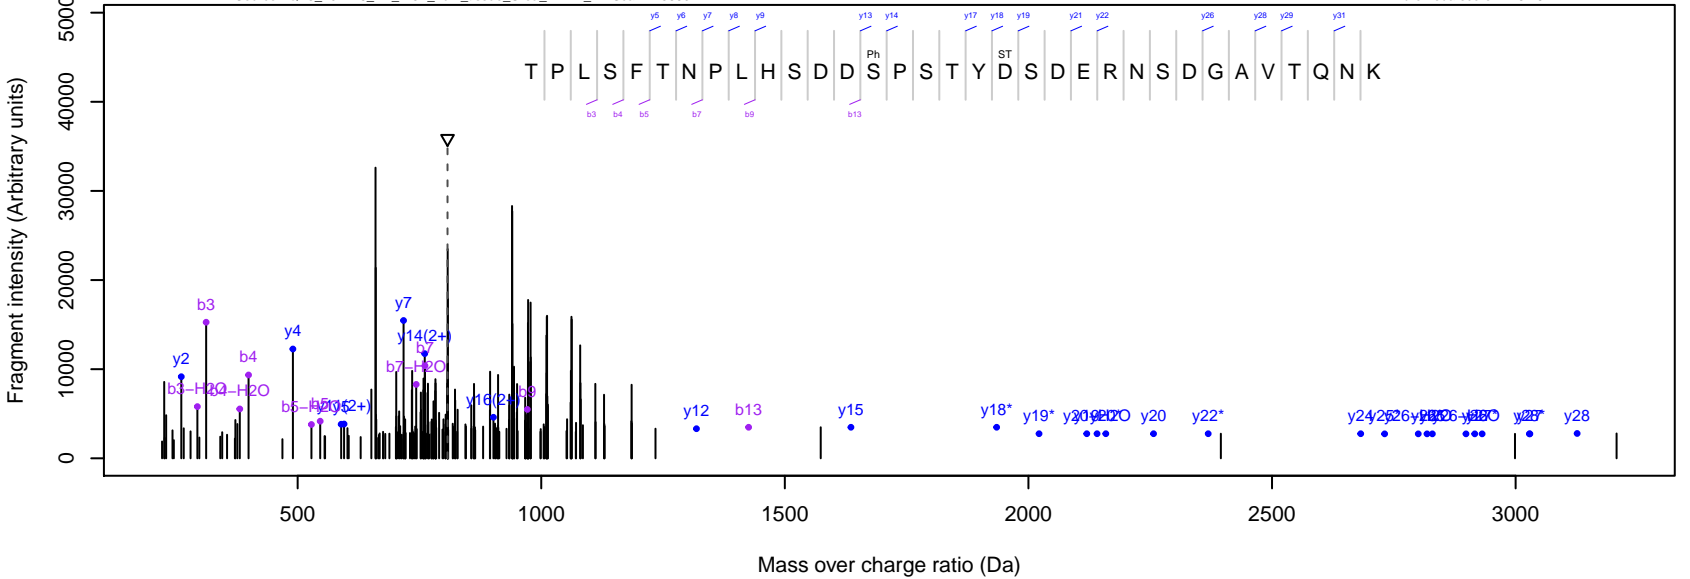

NSNFSVQHPS(Phospho (STY))STSPTEK-3+

Source : QE3\_201126\_FR\_TiOx\_hum\_tissue\_Urea\_RNAB\_B Scan : 11059

Andromeda score : 125.23

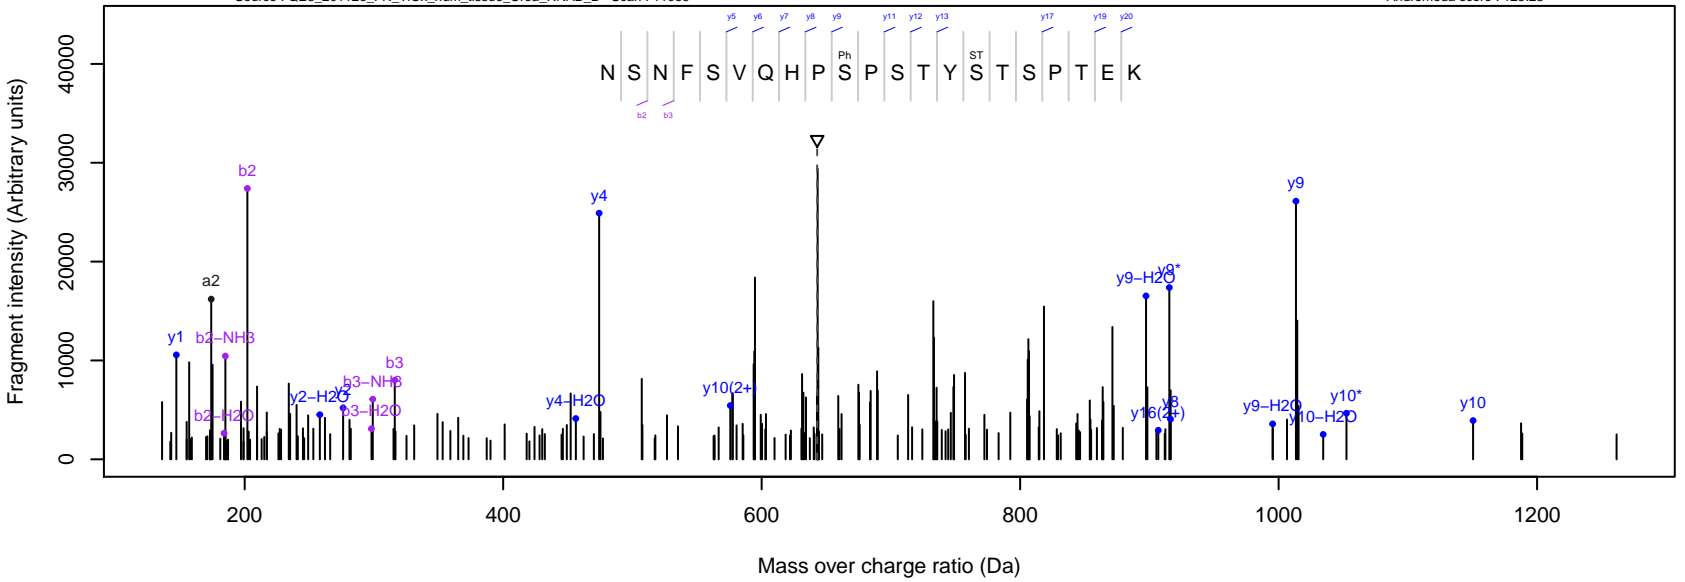

SAS(Phospho (STY))TEKLEQGTSALIR-3+

Source : QE3\_201126\_FR\_TiOx\_hum\_tissue\_Urea\_RNAB\_B Scan : 24423

Andromeda score : 125.23

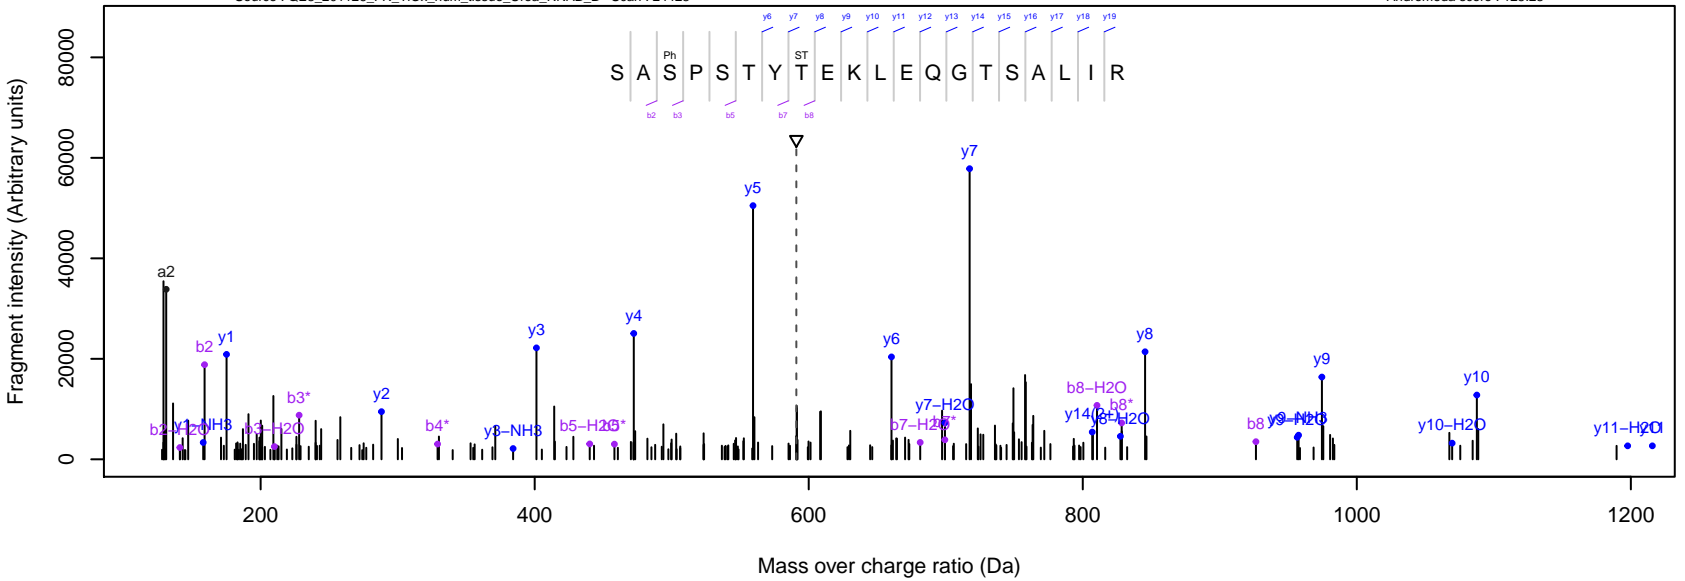

SLPAPVAQRPS(Phospho (STY))PGGLQAPGQK-3+

Source : QE3\_201126\_FR\_TiOx\_hum\_tissue\_Urea\_RNAB\_N Scan : 23046

Andromeda score : 125.16

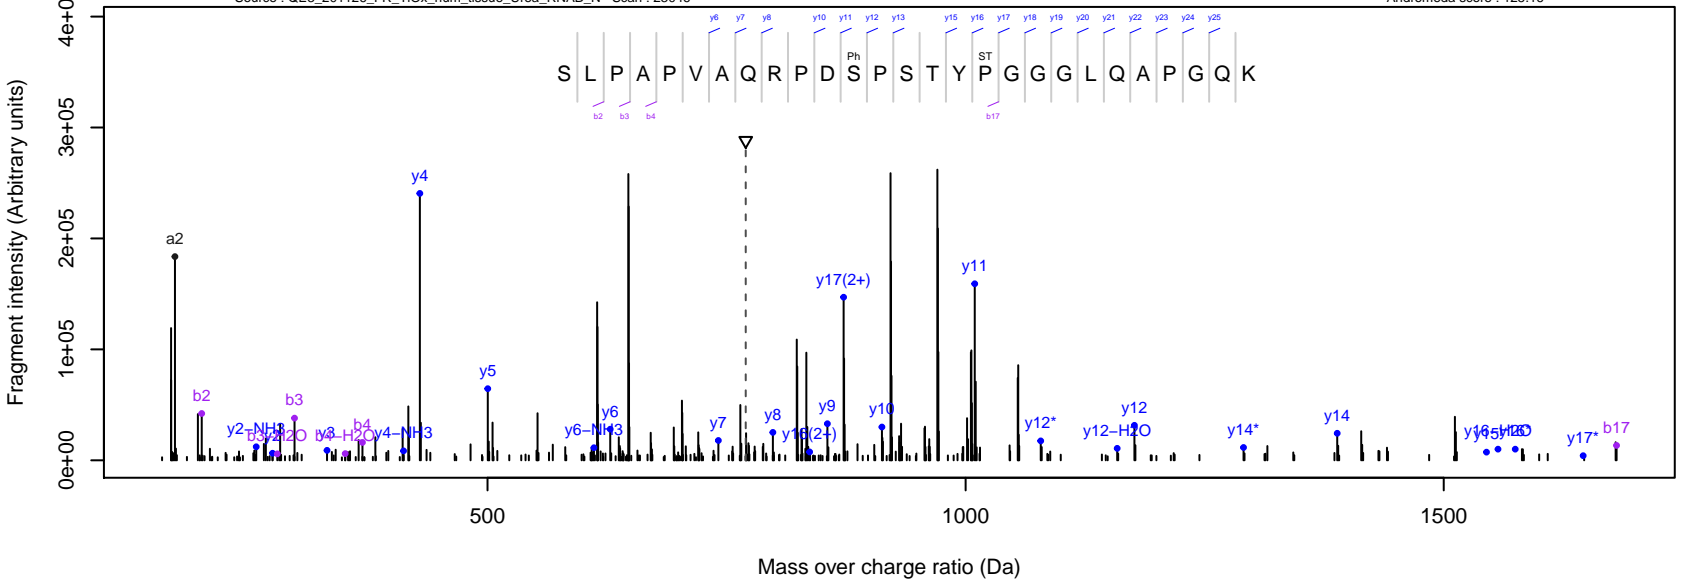

I LEGDNGM(Oxidation (M))DS(Phospho (STY))DM(Oxidation (M))EEEADDGSK-2+

Source : QE3\_201126\_FR\_TiOx\_hum\_tissue\_Urea\_RNAB\_B Scan : 16473

Andromeda score : 125.12

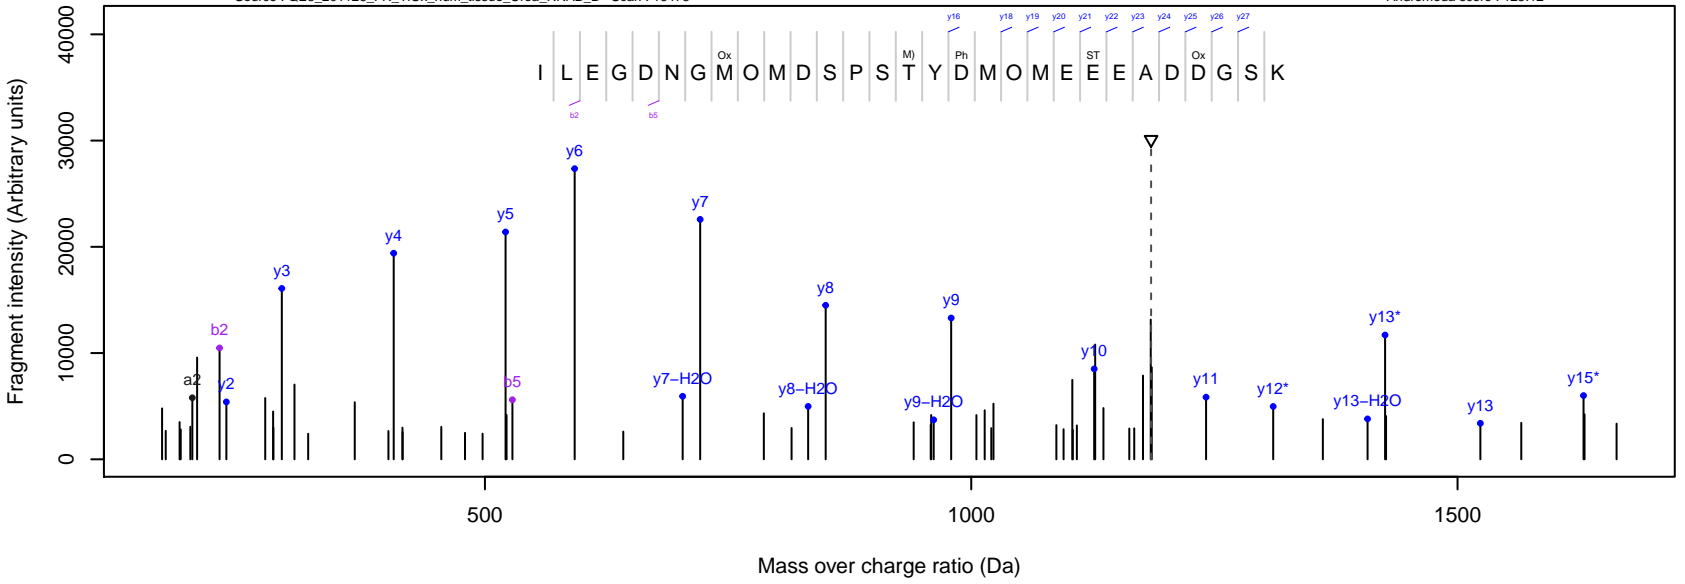

M(Oxidation (M))CDFGISGLVDS(Phospho (STY))VAK-2+

Source : QE3\_201126\_FR\_TiOx\_hum\_tissue\_Urea\_RNAB\_B Scan : 50262

Andromeda score : 125.12

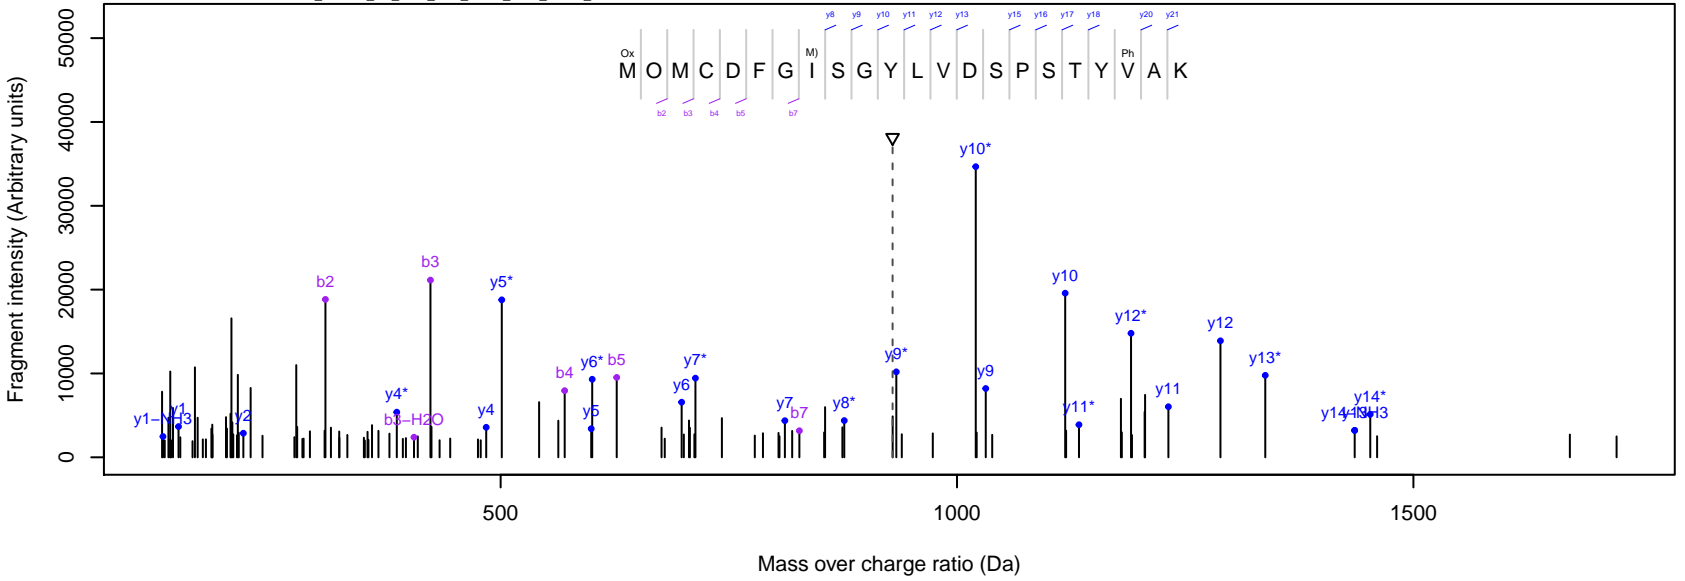

EHYPVSSP(Phospho (STY))SPS(Phospho (STY))PPAQPGGVSR-3+

Source : QE3\_201126\_FR\_TiOx\_hum\_tissue\_Urea\_RNAB\_N Scan : 21630

Andromeda score : 125.11

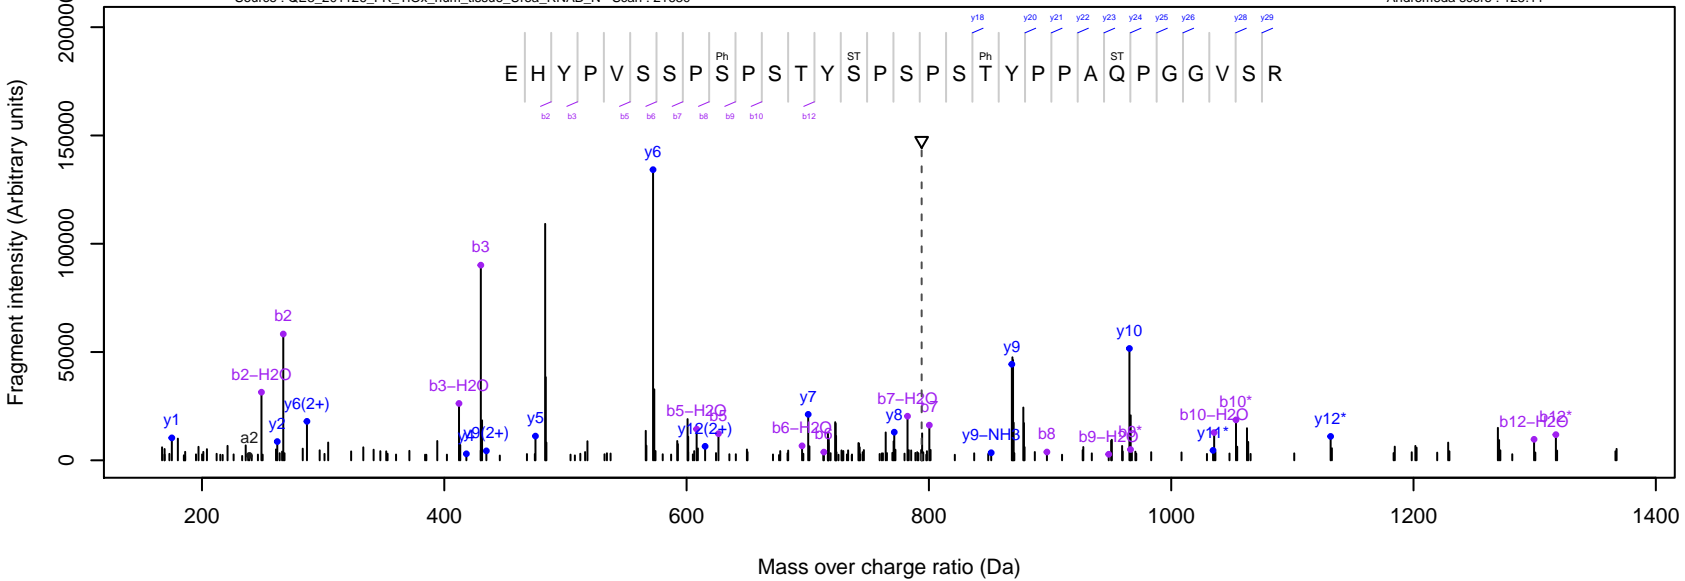

NSVLSDPGLDS(Phospho (STY))PRT(Phospho (STY))SPVIMAR-3+

Source : QE3\_201126\_FR\_TiOx\_hum\_tissue\_Urea\_RNAB\_N Scan : 40770

Andromeda score : 125.05

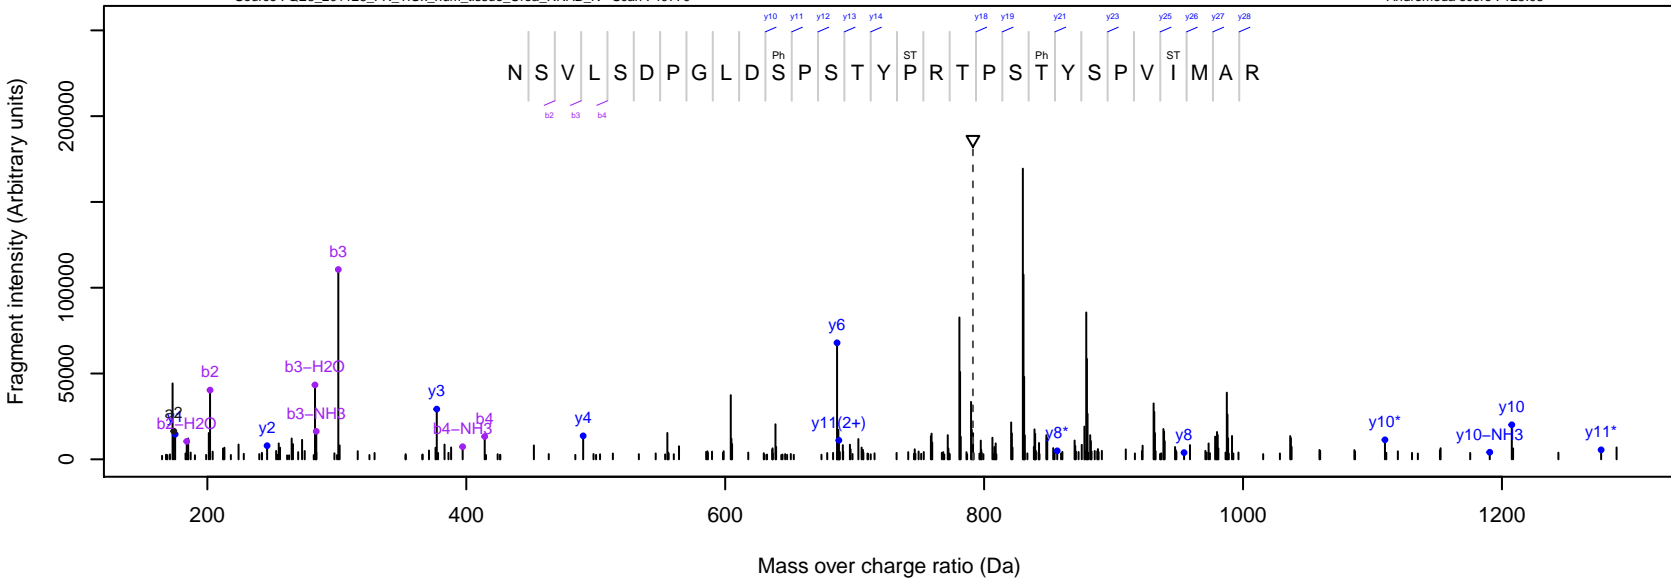

KKS(Phospho (STY))SSDPGIPGGQAIPATNSPDHSDHTLSVSSDSGHSTASAR-4+

Source : QE3\_201126\_FR\_TiOx\_hum\_tissue\_Urea\_RNAB\_H Scan : 16588

Andromeda score : 125.04

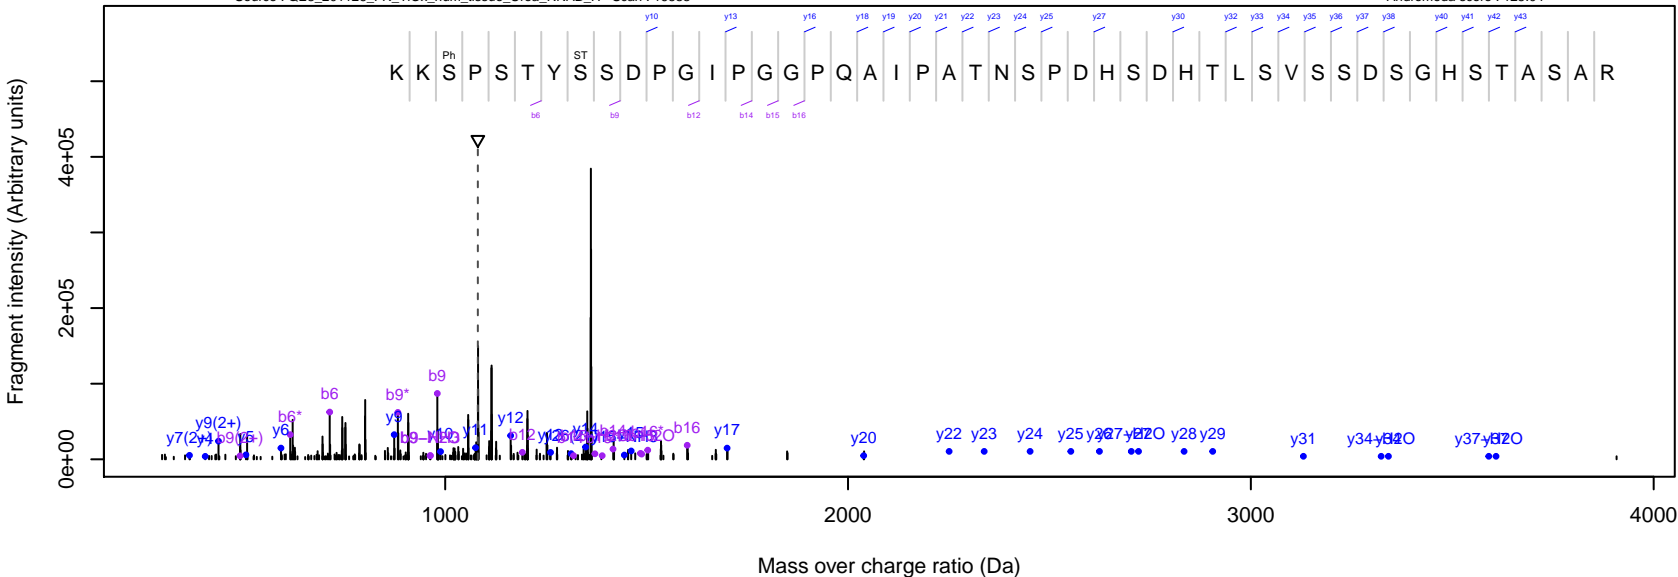

ASSRS(Phospho (STY))PVFTPR-2+

Source : QE3\_201126\_FR\_TiOx\_hum\_tissue\_Urea\_RNAB\_N Scan : 10968

Andromeda score : 125.03

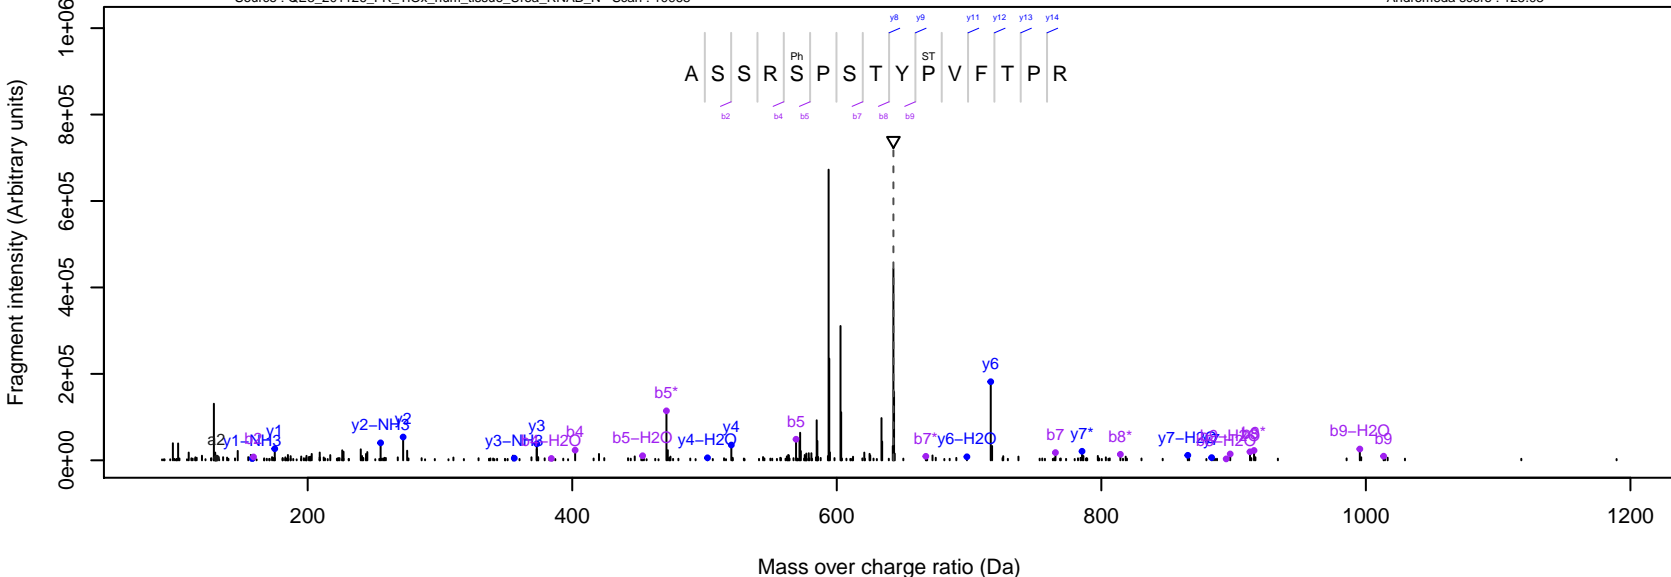

GLRDSHS(Phospho (STY))SEEDAEASSQTDLSTISK-3+

Source : QE3\_201126\_FR\_TiOx\_hum\_tissue\_Urea\_RNAB\_H Scan : 17309

Andromeda score : 124.98

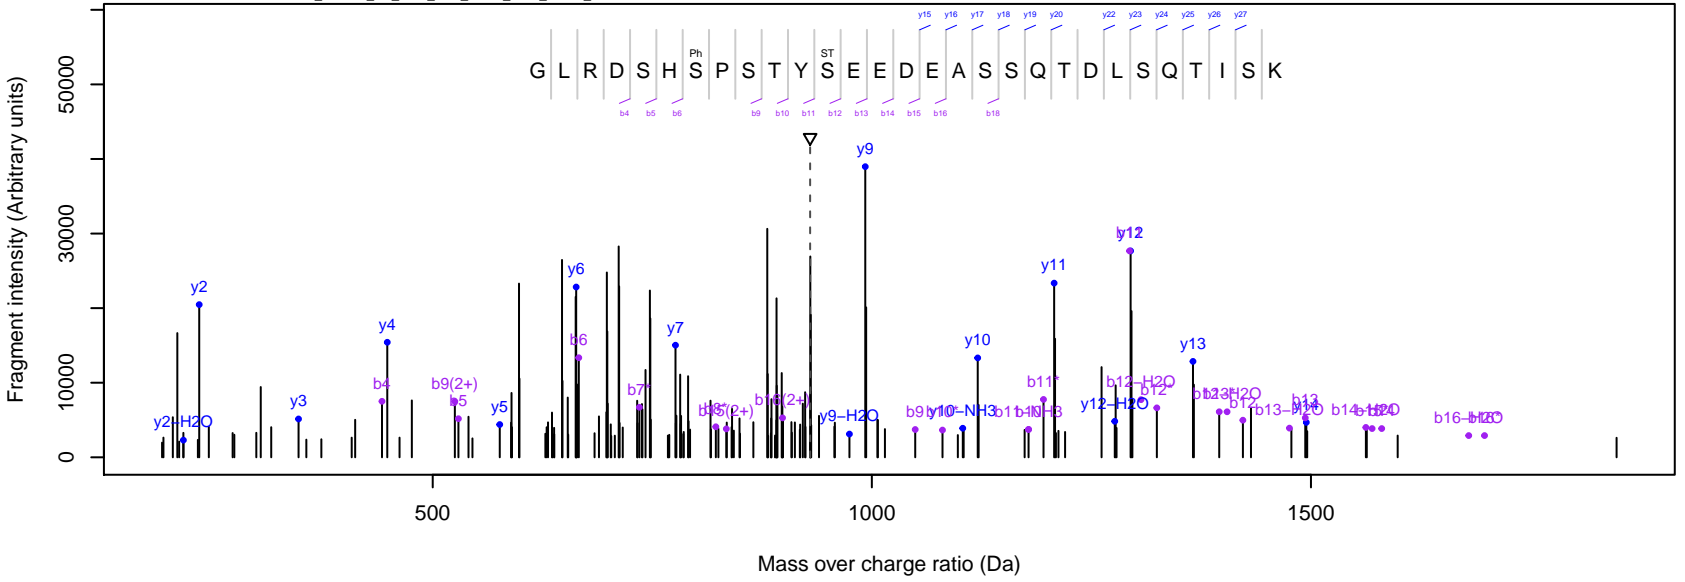

HEPVQPSAHHSAPAEAGKAETSEGGSSAPAVPEASAS(Phospho (STY))PK-4+

Source : QE3\_201126\_FR\_TiOx\_hum\_tissue\_Urea\_RNAB\_N Scan : 12318

Andromeda score : 124.9

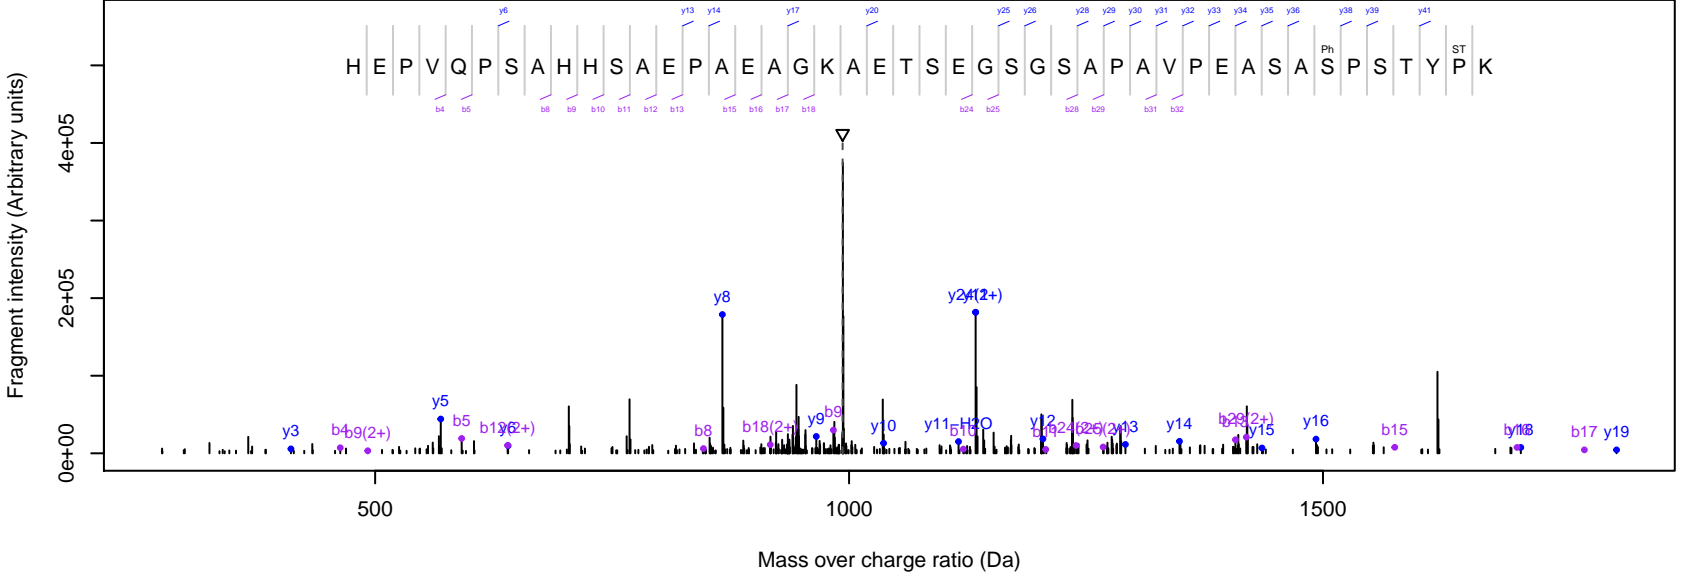

ELAIT(Phospho (STY))DSEHSDAEVSCTDNGTFNLSR-3+

Source : QE3\_201126\_FR\_TiOx\_hum\_tissue\_Urea\_RNAB\_N Scan : 35159

Andromeda score : 124.86

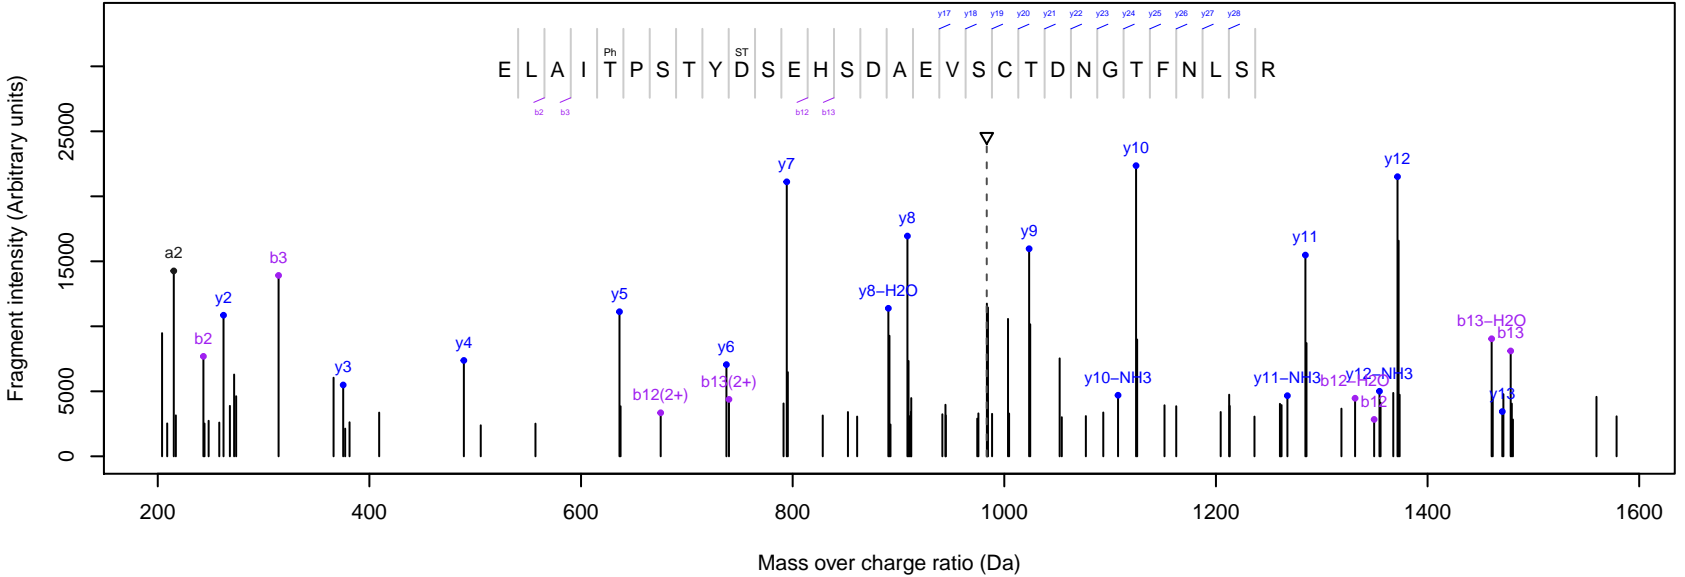

LGS(Phospho (STY))LSARS(Phospho (STY))DSEATISR-3+

Source : QE3\_201126\_FR\_TiOx\_hum\_tissue\_Urea\_RNAB\_H Scan : 21517

Andromeda score : 124.86

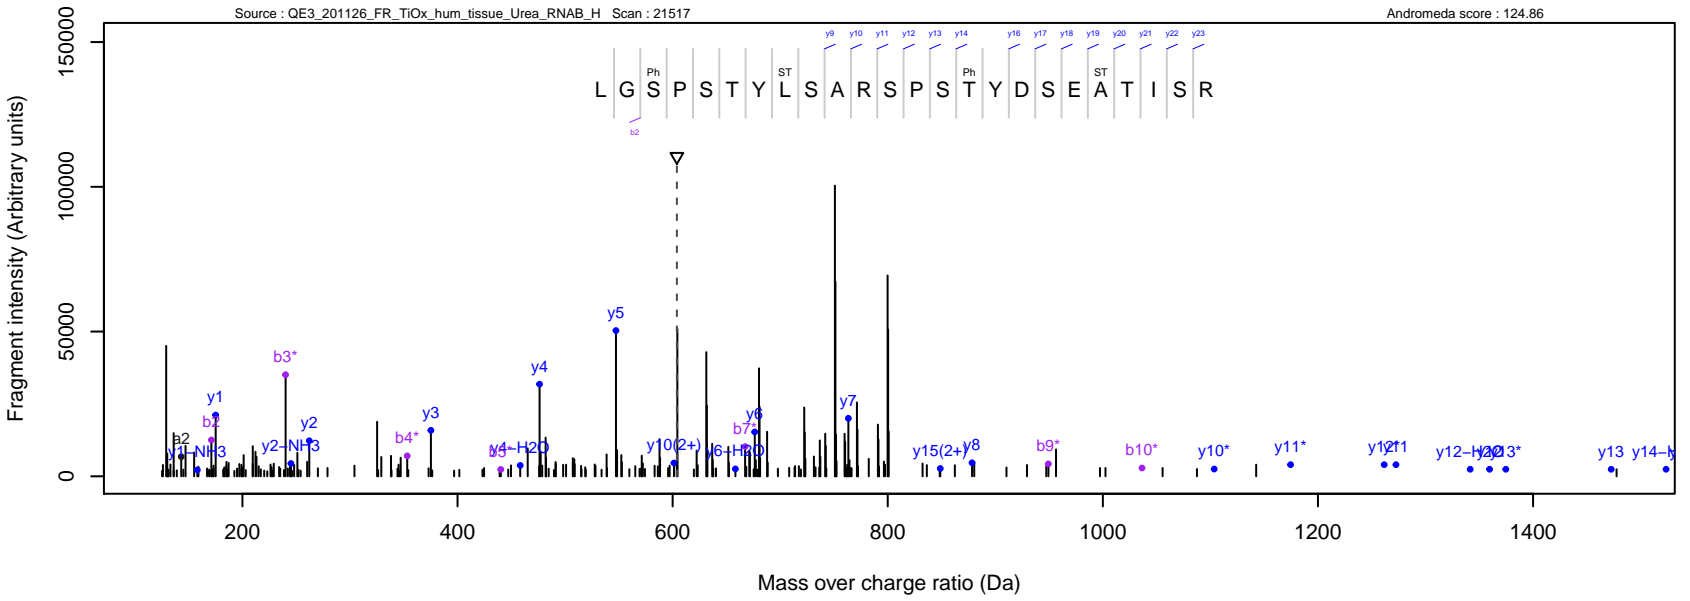

RAQS(Phospho (STY))TDS(Phospho (STY))LGTSGSLQSK-2+

Source : QE3\_201126\_FR\_TiOx\_hum\_tissue\_Urea\_RNAB\_N Scan : 13629

Andromeda score : 124.84

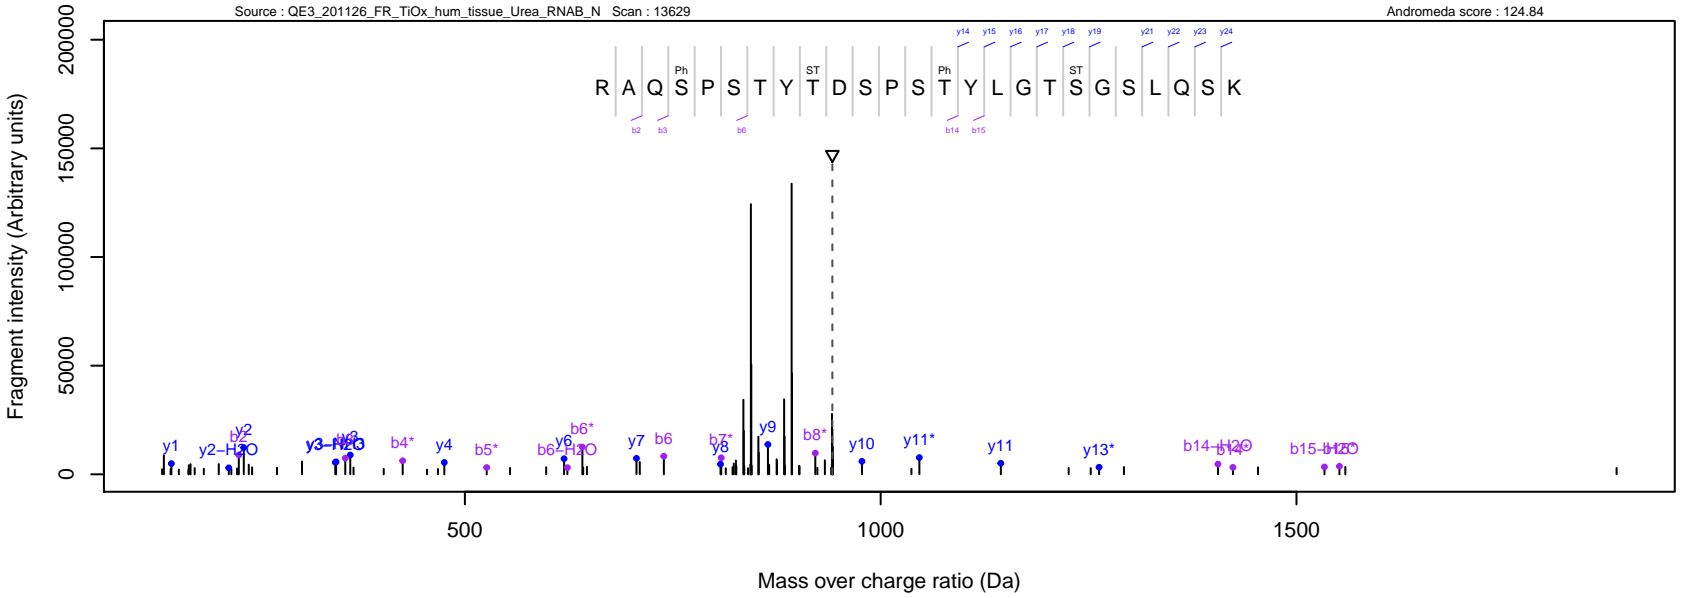

S(Phospho (STY))DSPEIPFQAAAGPSDGLDASSPGNSFVGLR-3+

Source : QE3\_201126\_FR\_TiOx\_hum\_tissue\_Urea\_RNAB\_N Scan : 56857

Andromeda score : 124.82

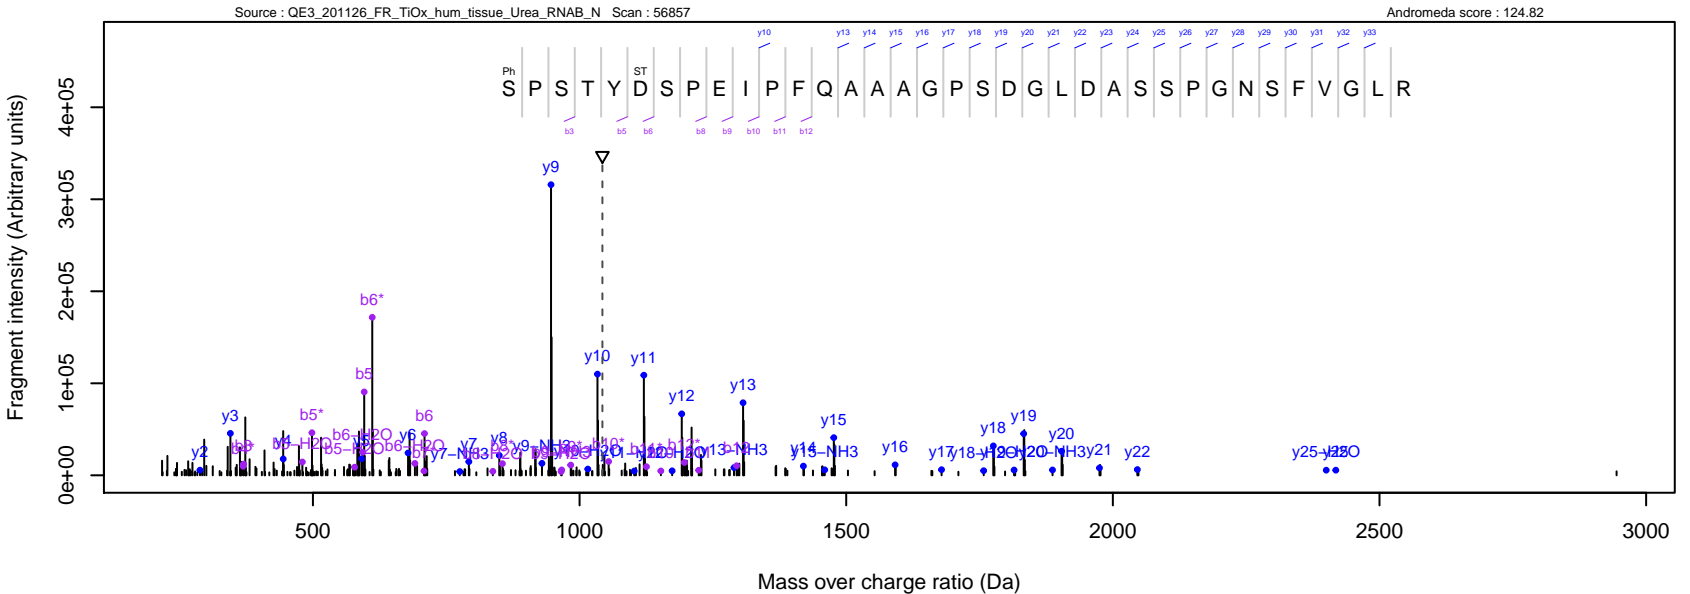



GAVAAEGAS(Phospho (STY))DTEREPTESQGLAAR-3+

Source : QE3\_201126\_FR\_TiOx\_hum\_tissue\_Urea\_RNAB\_B Scan : 17075

Andromeda score : 124.8

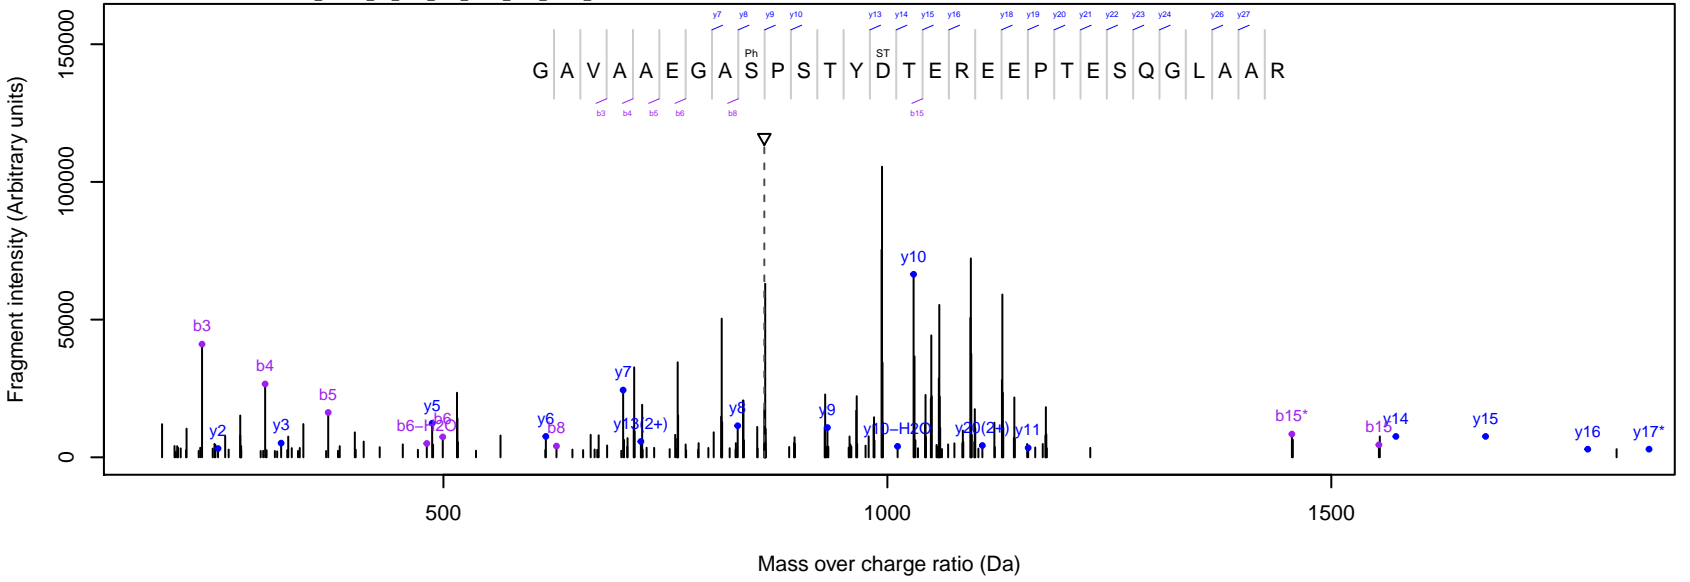

GNS(Phospho (STY))VEELEEMDSQDAEMTNTTEPMDHS-3+

Source : QE3\_201126\_FR\_TiOx\_hum\_tissue\_Urea\_RNAB\_N Scan : 44735

Andromeda score : 124.8

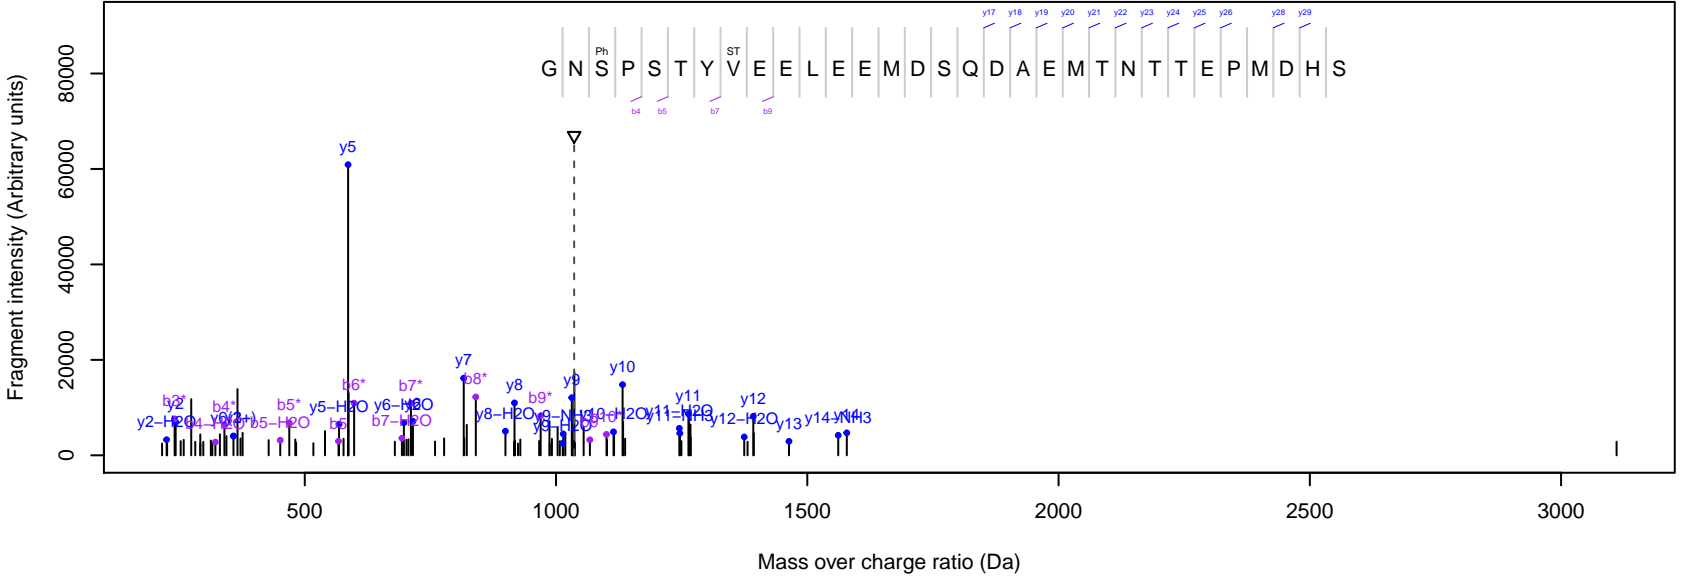

S(Phospho (STY))LESVLSLGPRTGGSS(Phospho (STY))PPEIR-3+

Source : QE3\_201126\_FR\_TiOx\_hum\_tissue\_Urea\_RNAB\_B Scan : 50820

Andromeda score : 124.8

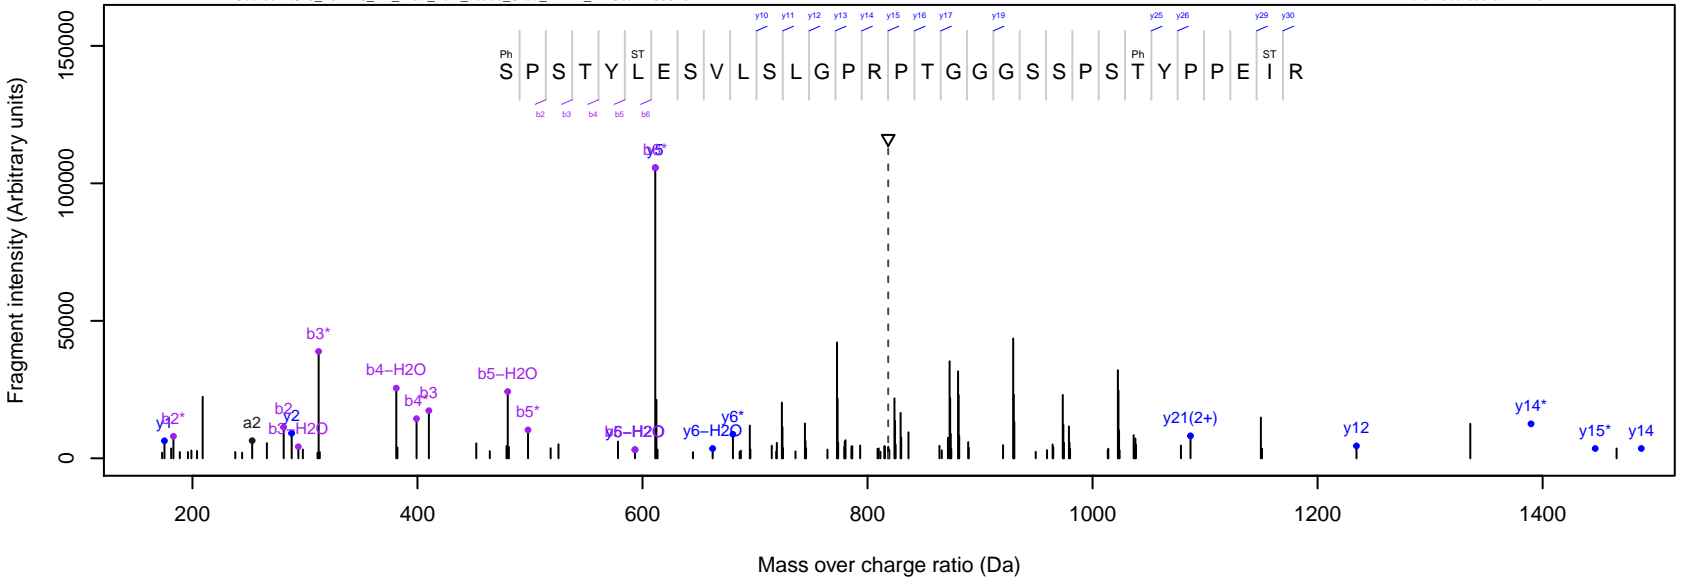

KGS(Phospho (STY))VVNVNPTNTRPQSDTPEIR-3+

Source : QE3\_201126\_FR\_TiOx\_hum\_tissue\_Urea\_RNAB\_B Scan : 16947

Andromeda score : 124.79

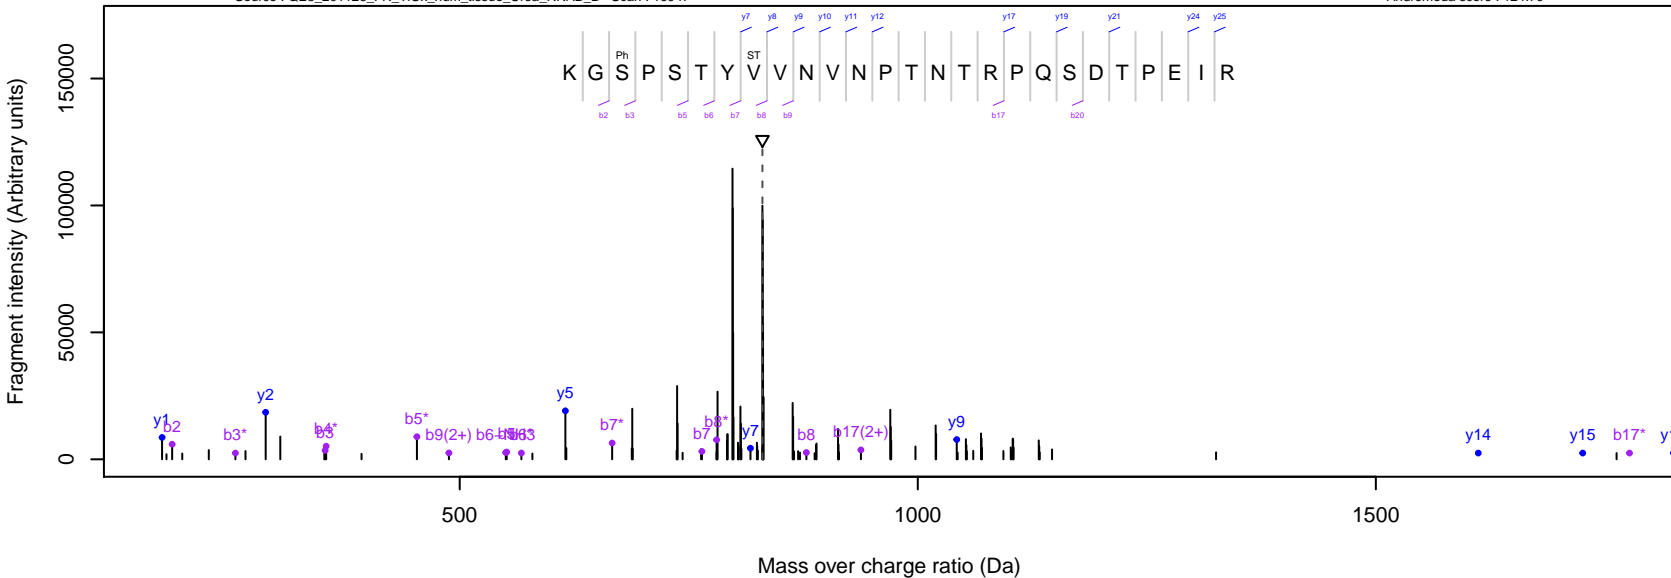

ESSTESSQSAKPVSGQDTSGNTEGS(Phospho (STY))PAAEK-3+

Source : QE3\_201126\_FR\_TiOx\_hum\_tissue\_Urea\_RNAB\_N Scan : 7214

Andromeda score : 124.76

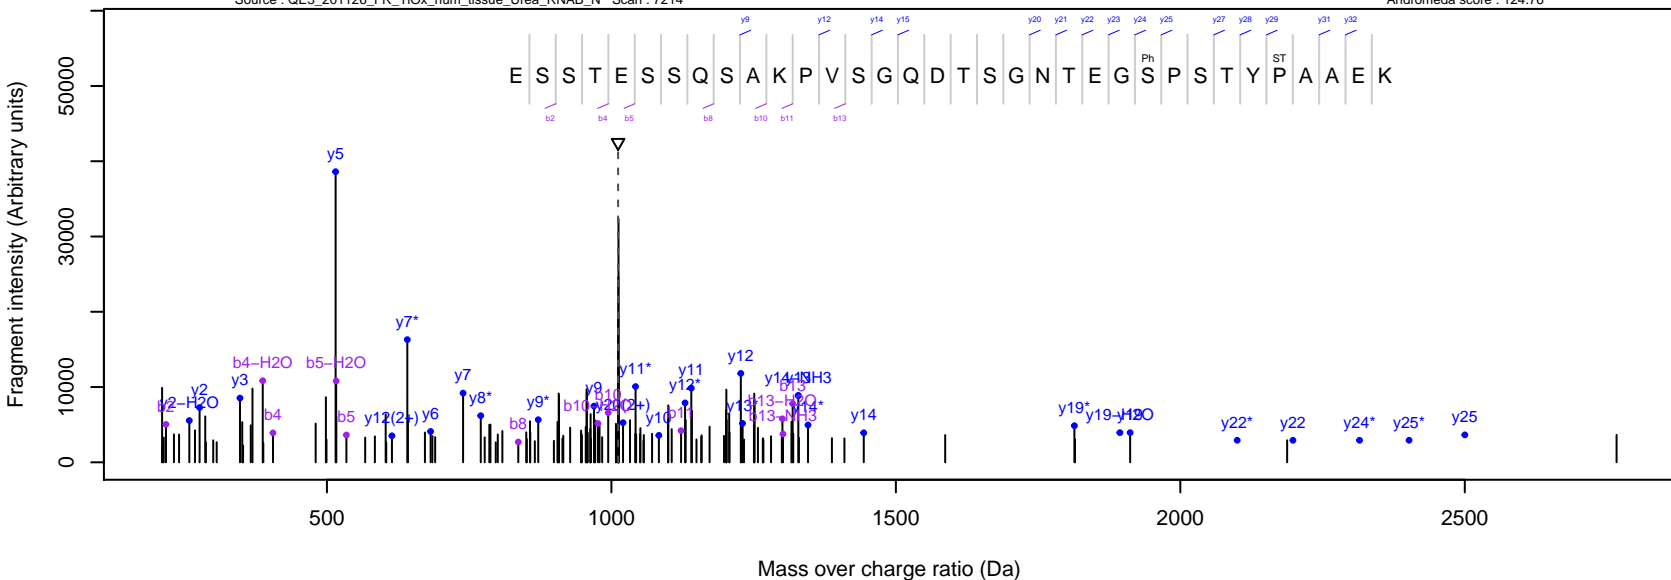

NMTS(Phospho (STY))PIADFPAPPYSAVT(Phospho (STY))PPDAFSR-3+

Source : QE3\_201126\_FR\_TiOx\_hum\_tissue\_Urea\_RNAB\_H Scan : 61835

Andromeda score : 124.7

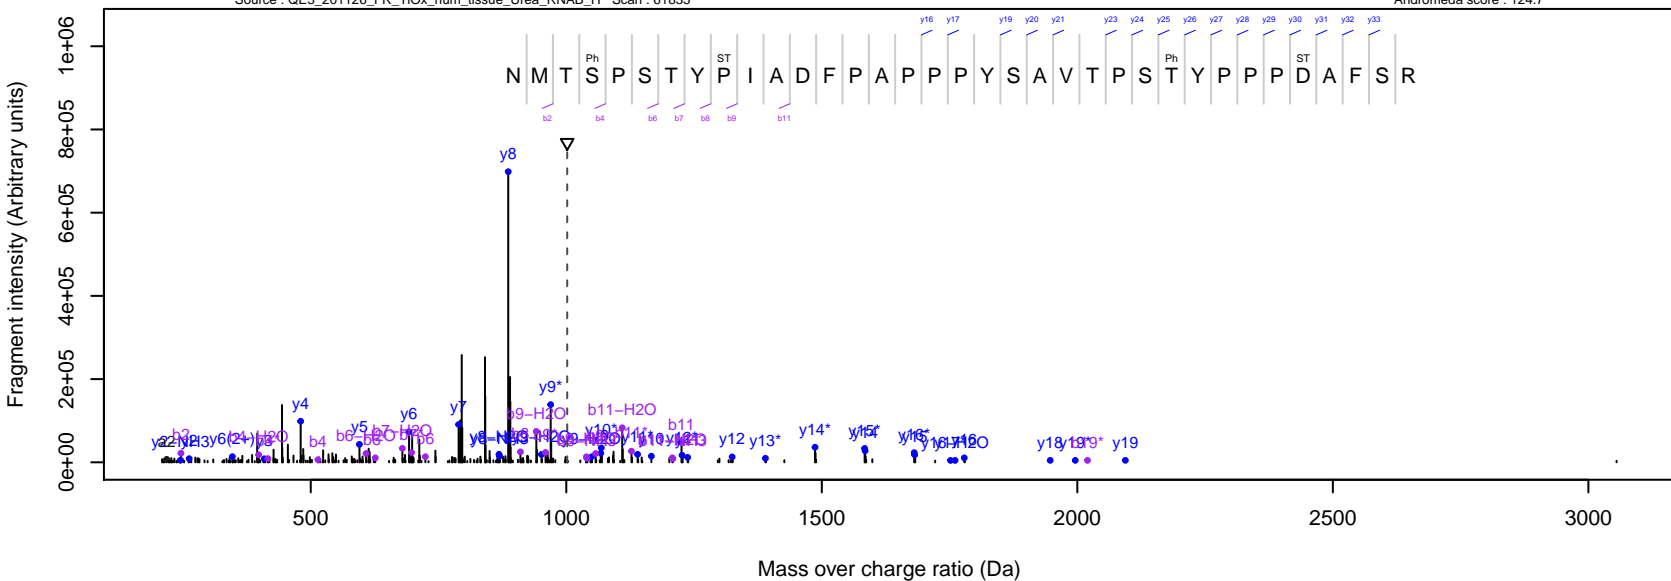

LES(Phospho (STY))GGSNPTTSDSYGDR-2+

Source : QE3\_201126\_FR\_TiOx\_hum\_tissue\_Urea\_RNAB\_N Scan : 14062

Andromeda score : 124.68

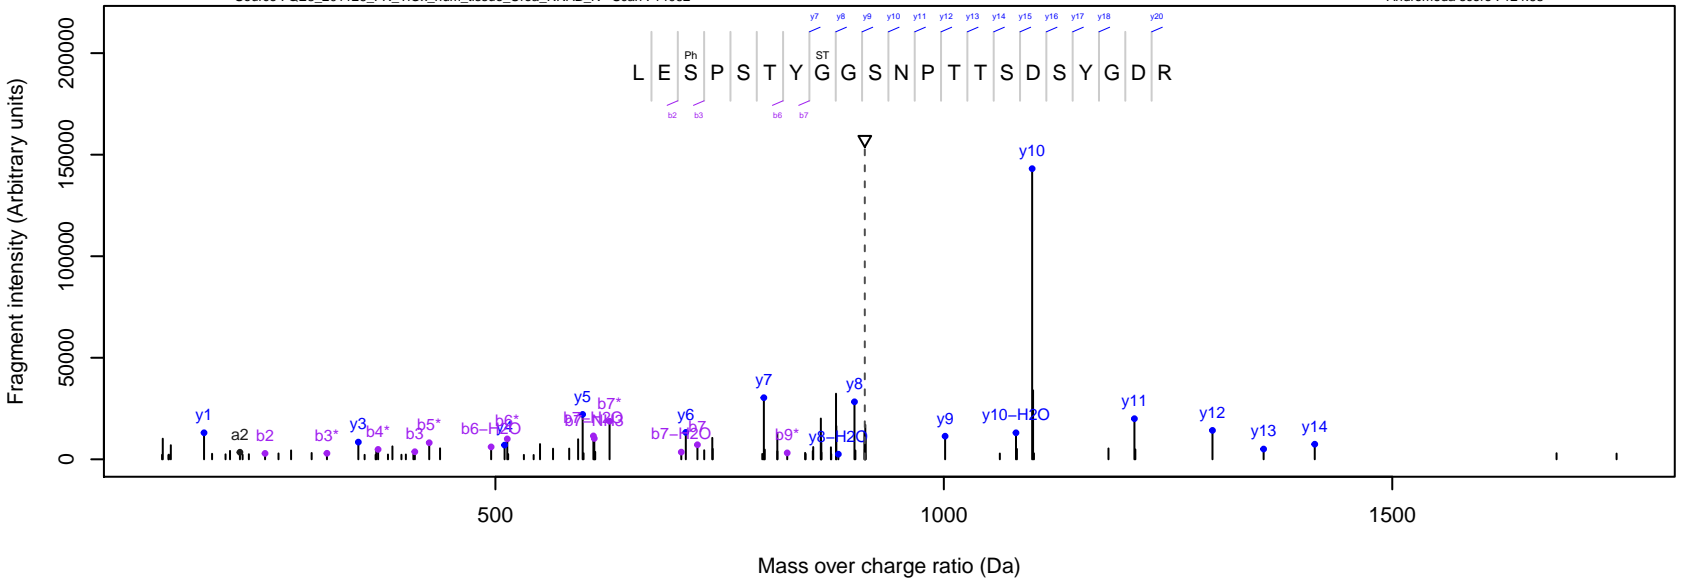

GSDALS(Phospho (STY))ETSS(Phospho (STY))VSHIEDLEK-2+

Source : QE3\_201126\_FR\_TiOx\_hum\_tissue\_Urea\_RNAB\_N Scan : 35223

Andromeda score : 124.63

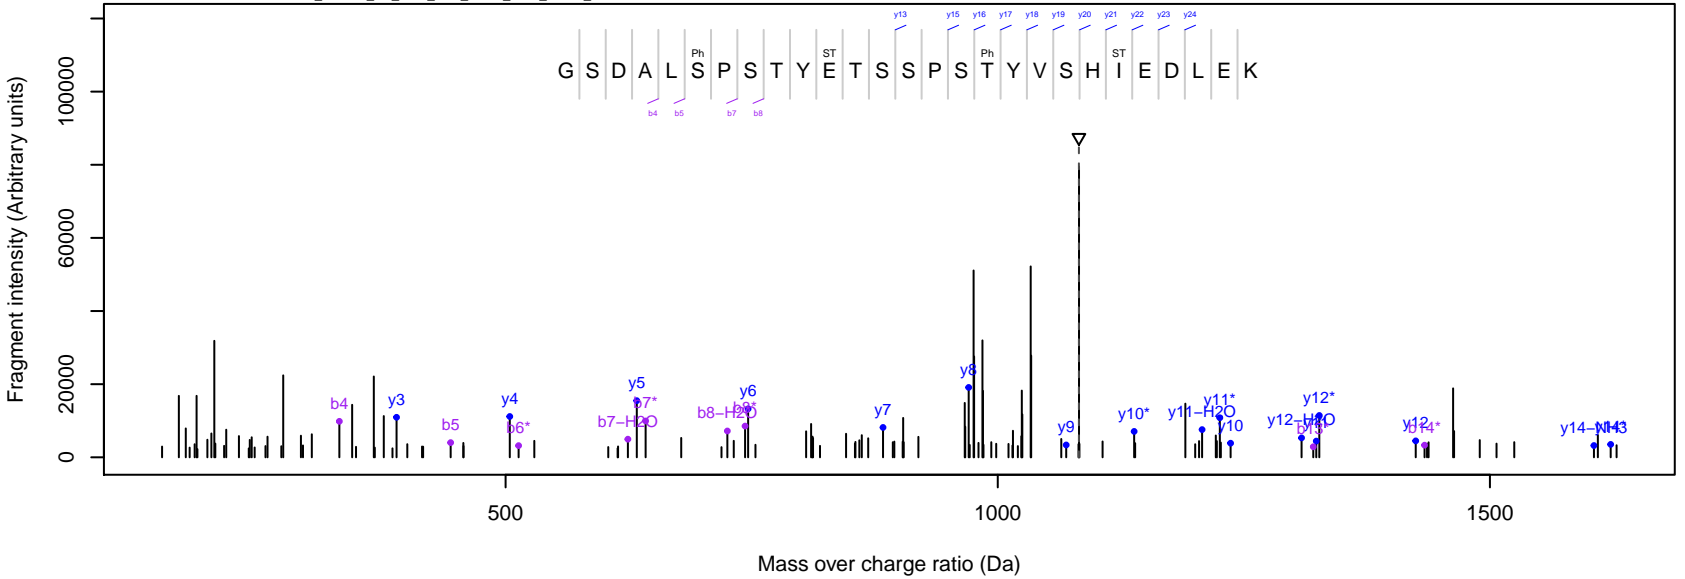

EVVTS(Phospho (STY))EDGSDCPEAMDGLTSLGIGTLDGFR-3+

Source : QE3\_201126\_FR\_TiOx\_hum\_tissue\_Urea\_RNAB\_H Scan : 61239

Andromeda score : 124.57

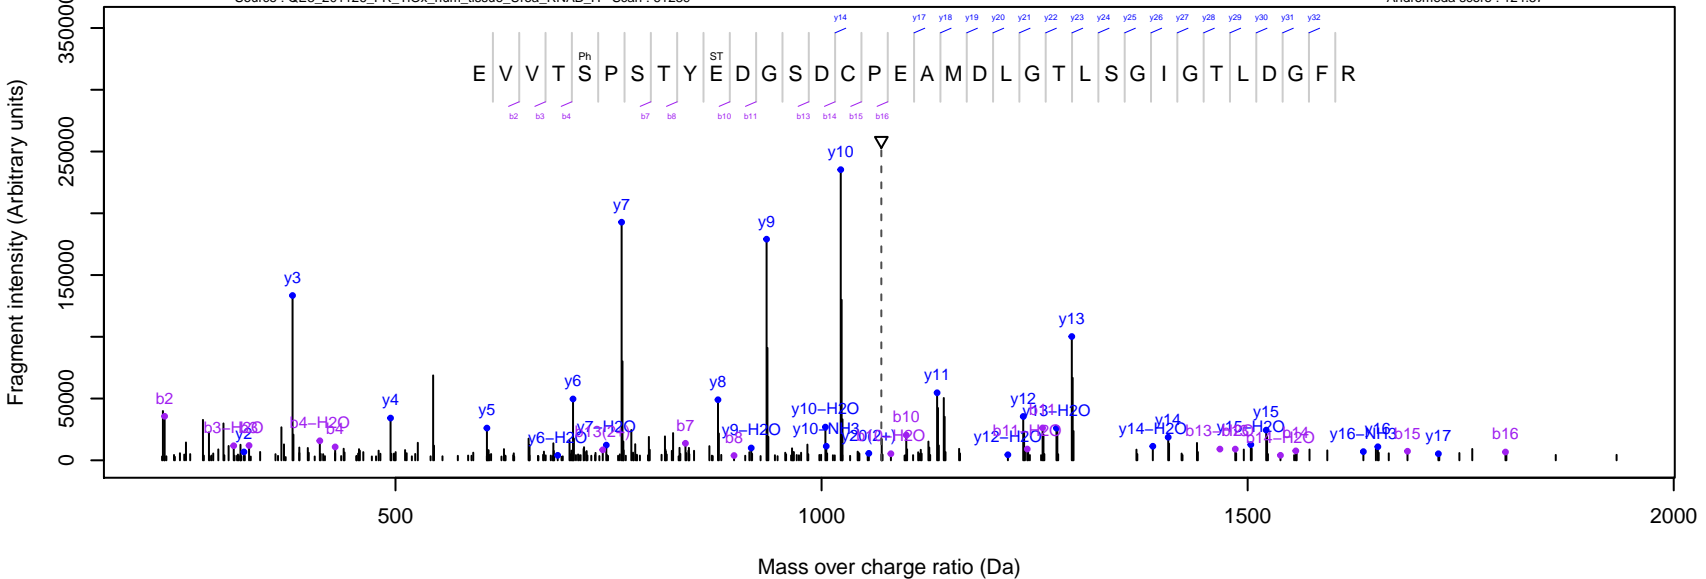

YRQRS(Phospho (STY))PS(Phospho (STY))PAPAPAAAAGPPTR-3+

Source : QE3\_201126\_FR\_TiOx\_hum\_tissue\_Urea\_RNAB\_H Scan : 13445

Andromeda score : 124.57

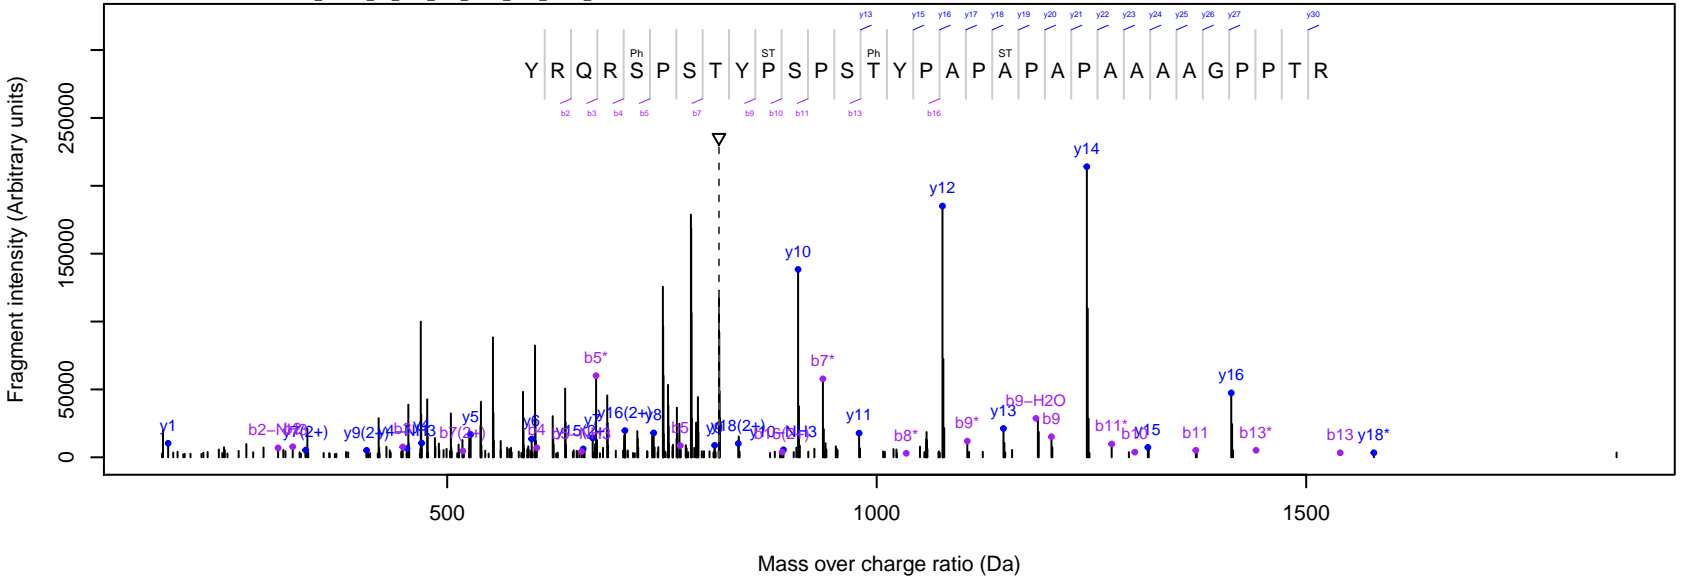

IEIQPLLDMAAGTSNAAPVAENVNTNEGS(Phospho (STY))PPPPVK-3+

Source : QE3\_201126\_FR\_TiOx\_hum\_tissue\_Urea\_RNAB\_H Scan : 60846

Andromeda score : 124.53

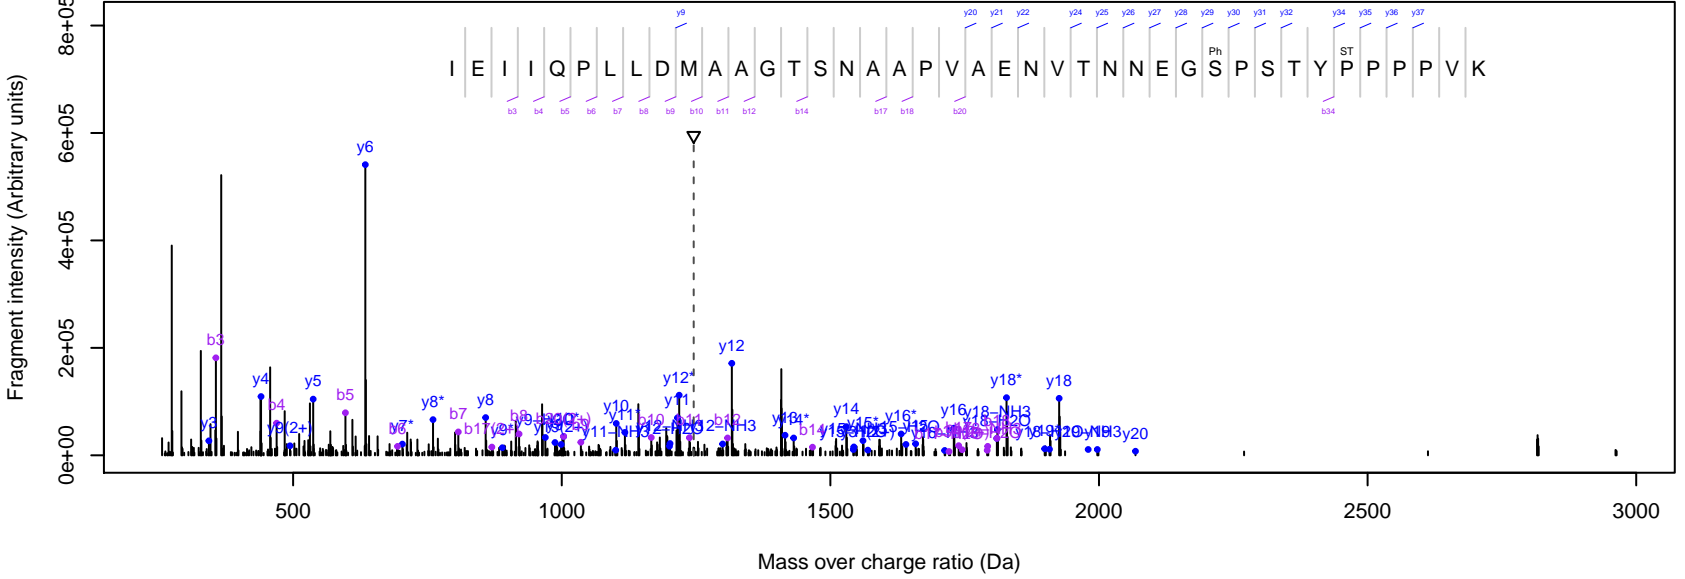

ISNLS(Phospho (STY))PEEEQLWK-2+

Source : QE3\_201126\_FR\_TiOx\_hum\_tissue\_Urea\_RNAB\_N Scan : 38330

Andromeda score : 124.45

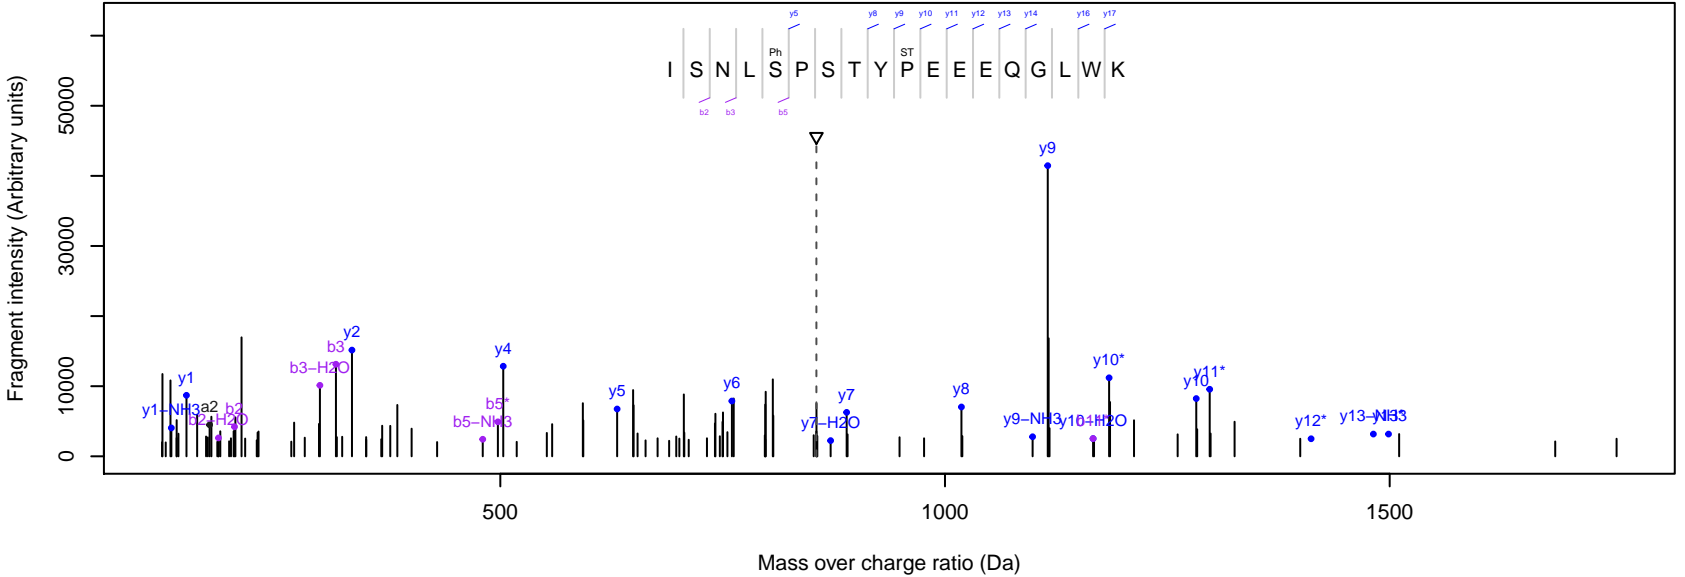

**KNS(Phospho (STY))ITEIS(Phospho (STY))DNEDDLLEYHR-3+**

Source : QE3\_201126\_FR\_TIOx\_hum\_tissue\_Urea\_RNAB\_N Scan : 34741

Andromeda score : 124.45

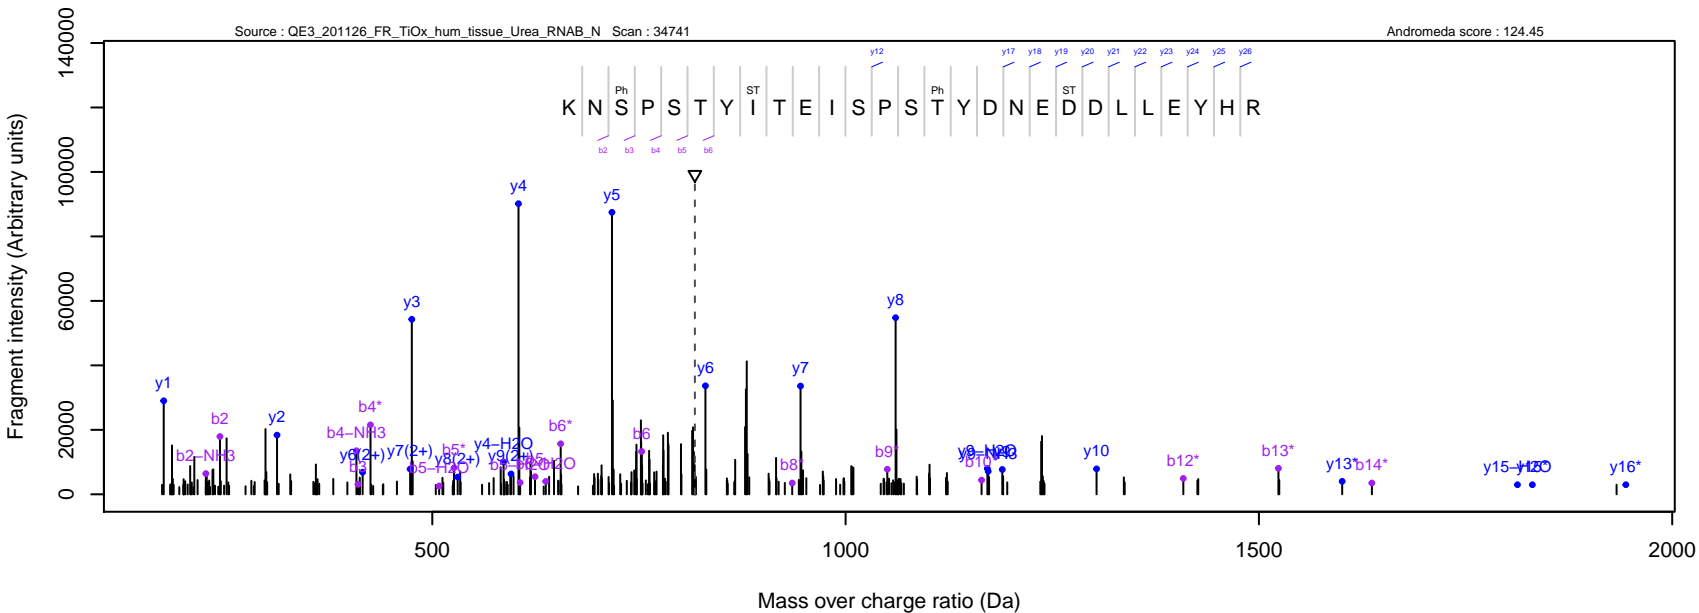

**RVIHVSGETM(Oxidation (M))EEYS(Phospho (STY))T(Phospho (STY))DEDEVGLEKK-4+**

Source : QE3\_201126\_FR\_TIOx\_hum\_tissue\_Urea\_RNAB\_H Scan : 29449

Andromeda score : 124.45

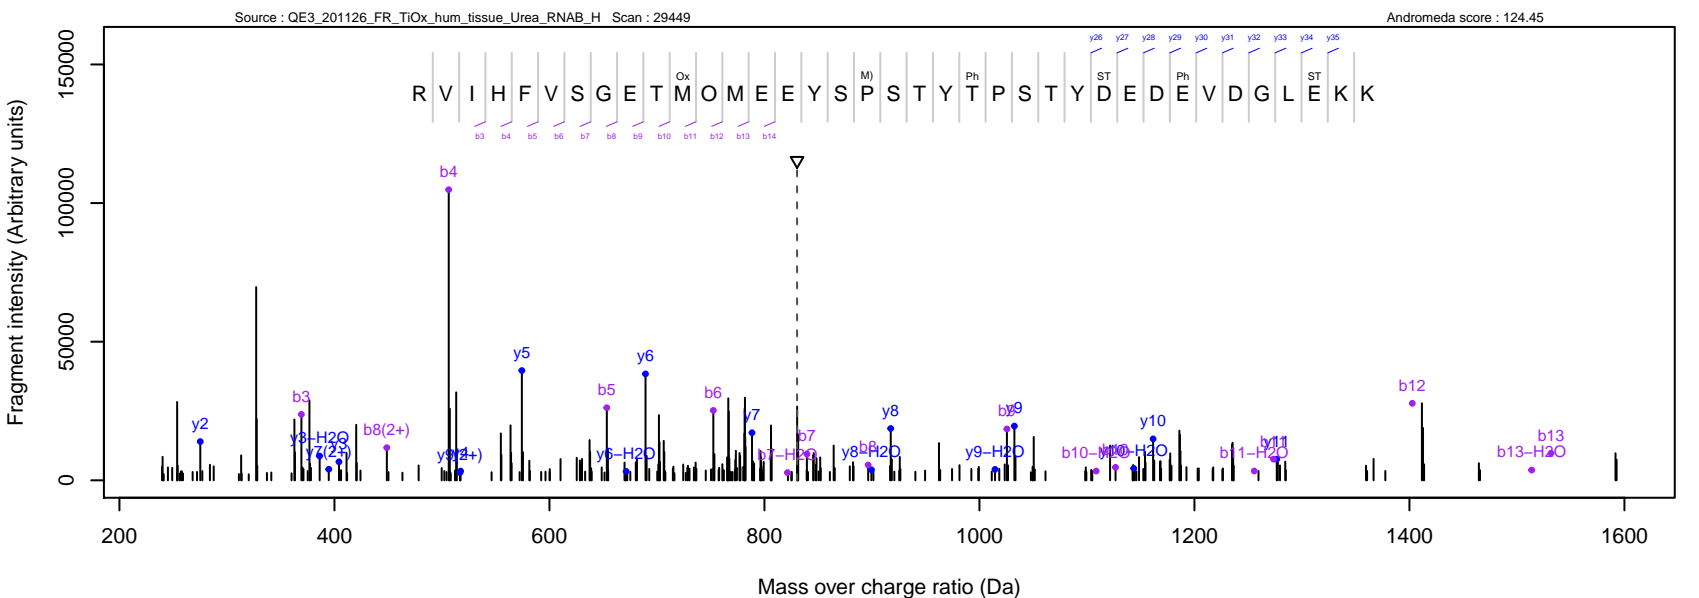

**ALS(Phospho (STY))LEENGVSNFK-2+**

Source : QE3\_201126\_FR\_TIOx\_hum\_tissue\_Urea\_RNAB\_N Scan : 33527

Andromeda score : 124.42

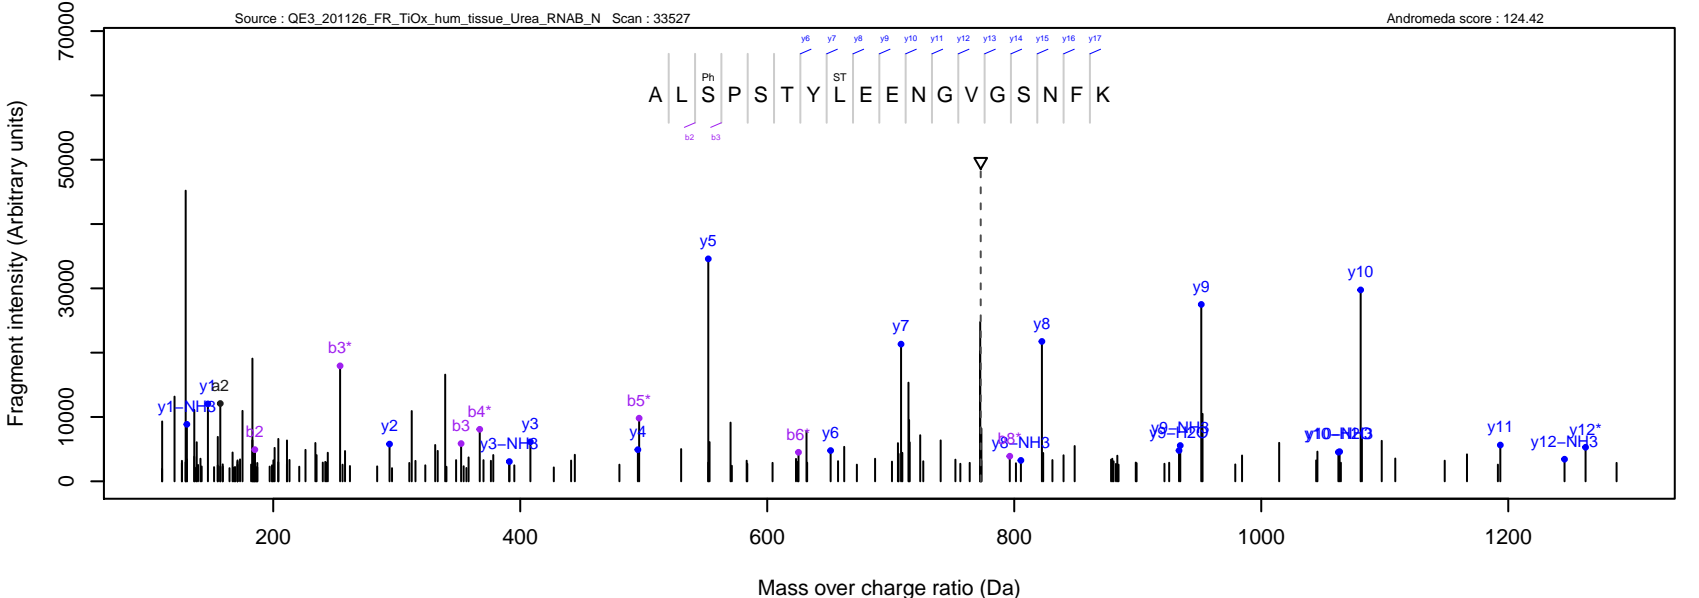

IS(Phospho (STY))M(Oxidation (M))SEVDLNVAAPK-2+

Source : QE3\_201126\_FR\_TiOx\_hum\_tissue\_Urea\_RNAB\_N Scan : 30472

Andromeda score : 124.42

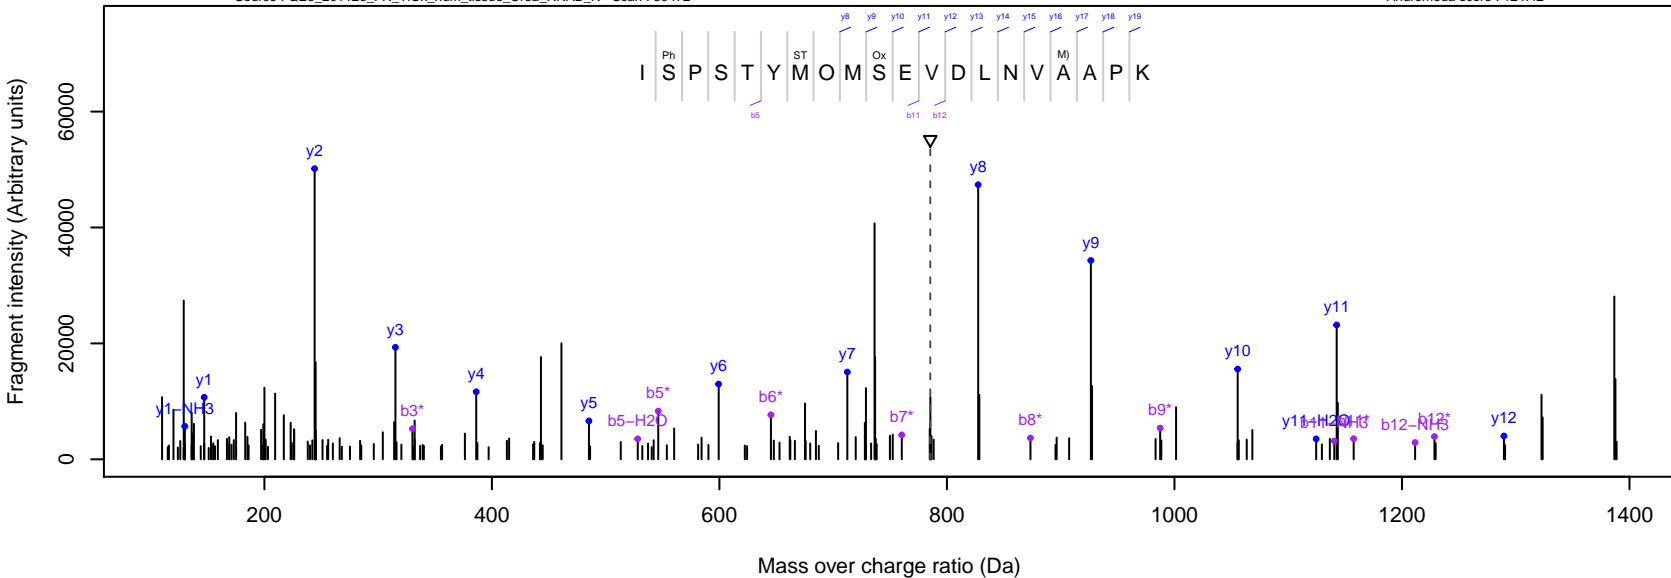

RS(Phospho (STY))DSPEIPFQAAAGPSDGLDASSPGNSFVGLR-3+

Source : QE3\_201126\_FR\_TiOx\_hum\_tissue\_Urea\_RNAB\_H Scan : 50533

Andromeda score : 124.37

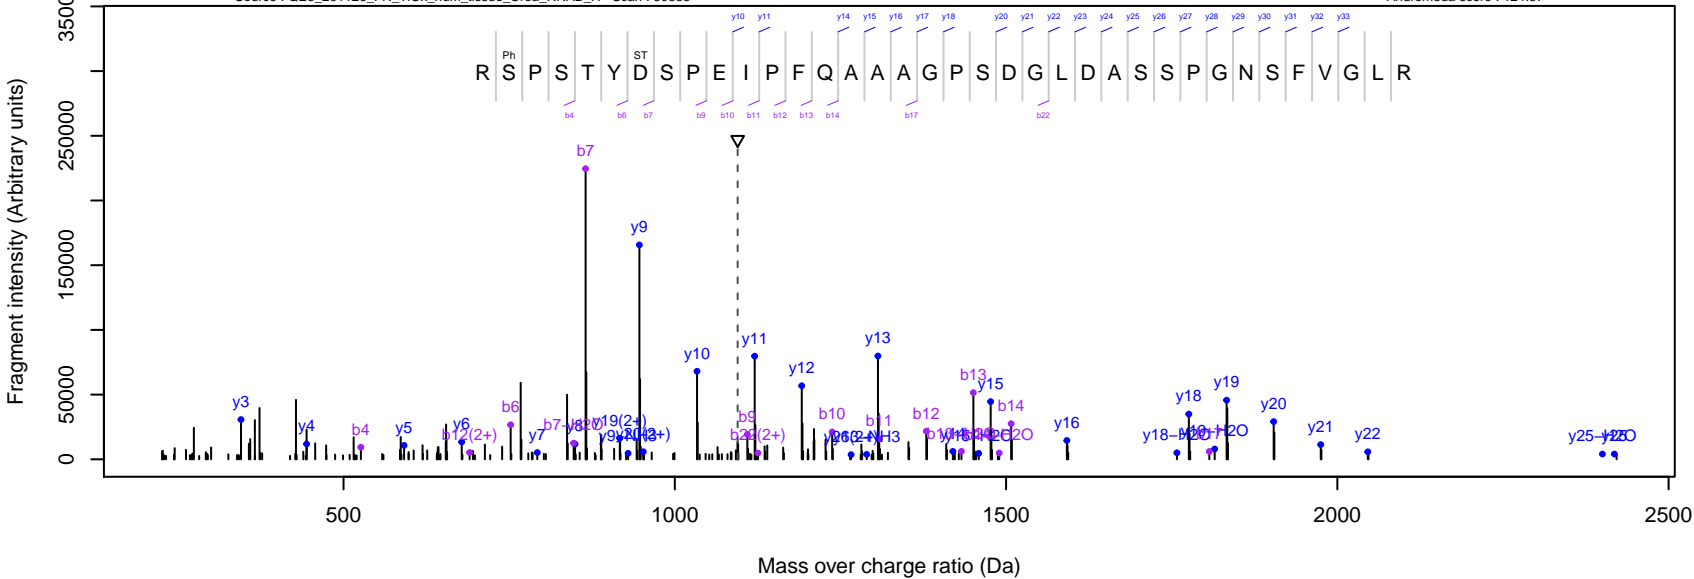

STQAATASS(Phospho (STY))RNSCAADDKATEPLPK-3+

Source : QE3\_201126\_FR\_TiOx\_hum\_tissue\_Urea\_RNAB\_H Scan : 9254

Andromeda score : 124.32

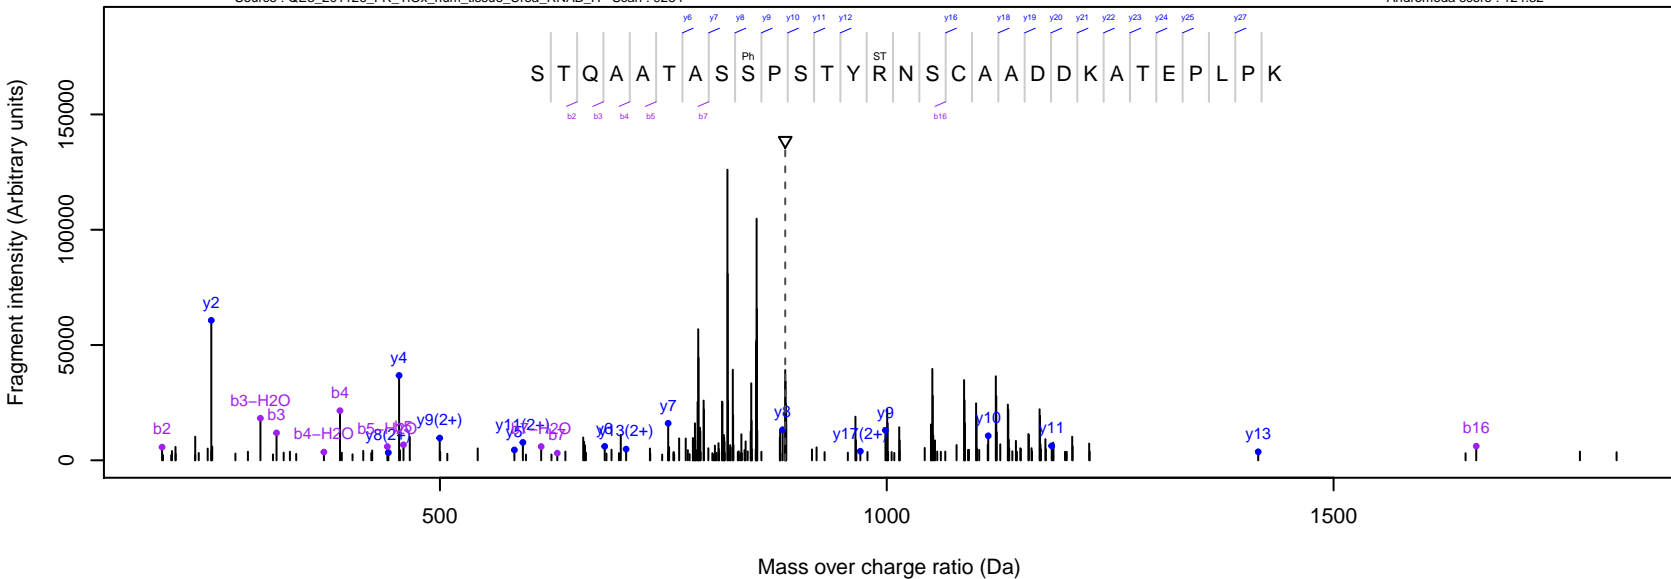

TASISS(Phospho (STY))SPSEGTPVGSYGCTPQSLPK-2+

Source : QE3\_201126\_FR\_TiOx\_hum\_tissue\_Urea\_RNAB\_B Scan : 32491

Andromeda score : 124.29

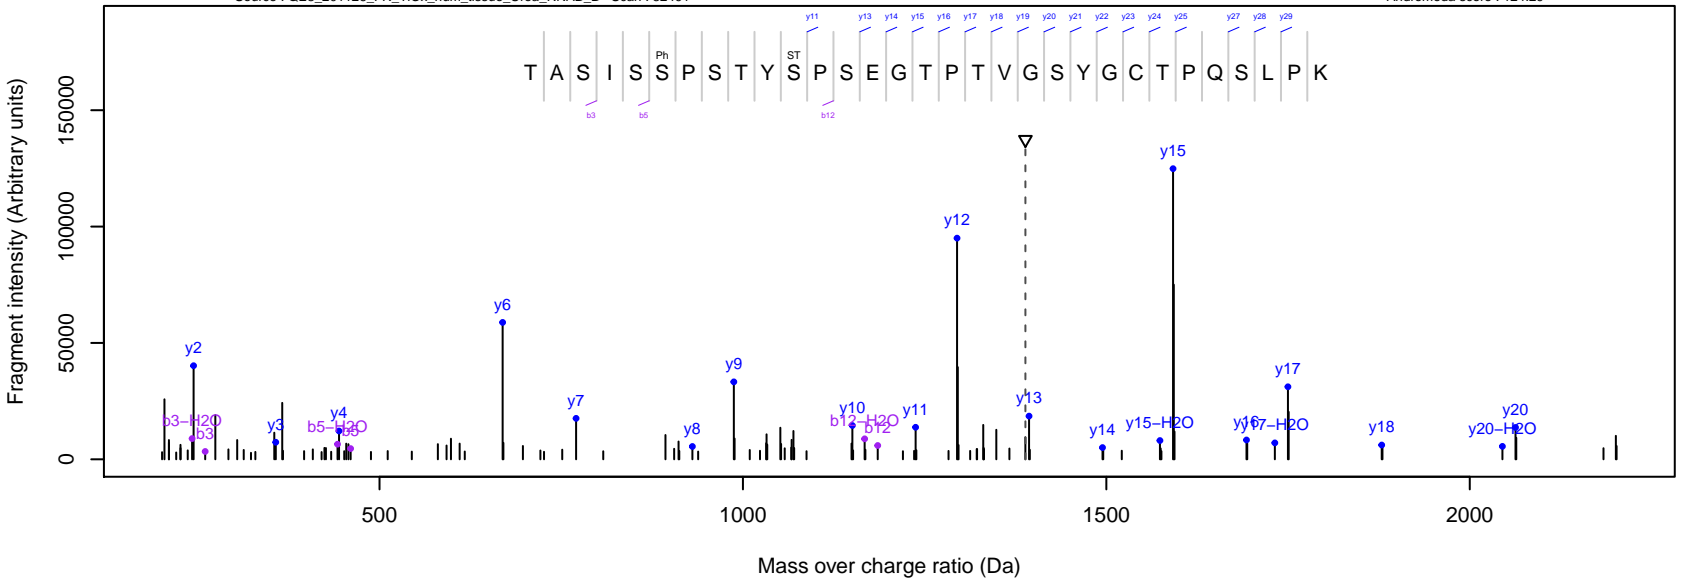

(Acetyl (Protein N-term))ARGS(Phospho (STY))VSDEEMM(Oxidation (M))ELR-2+

Source : QE3\_201126\_FR\_TiOx\_hum\_tissue\_Urea\_RNAB\_N Scan : 27148

Andromeda score : 124.25

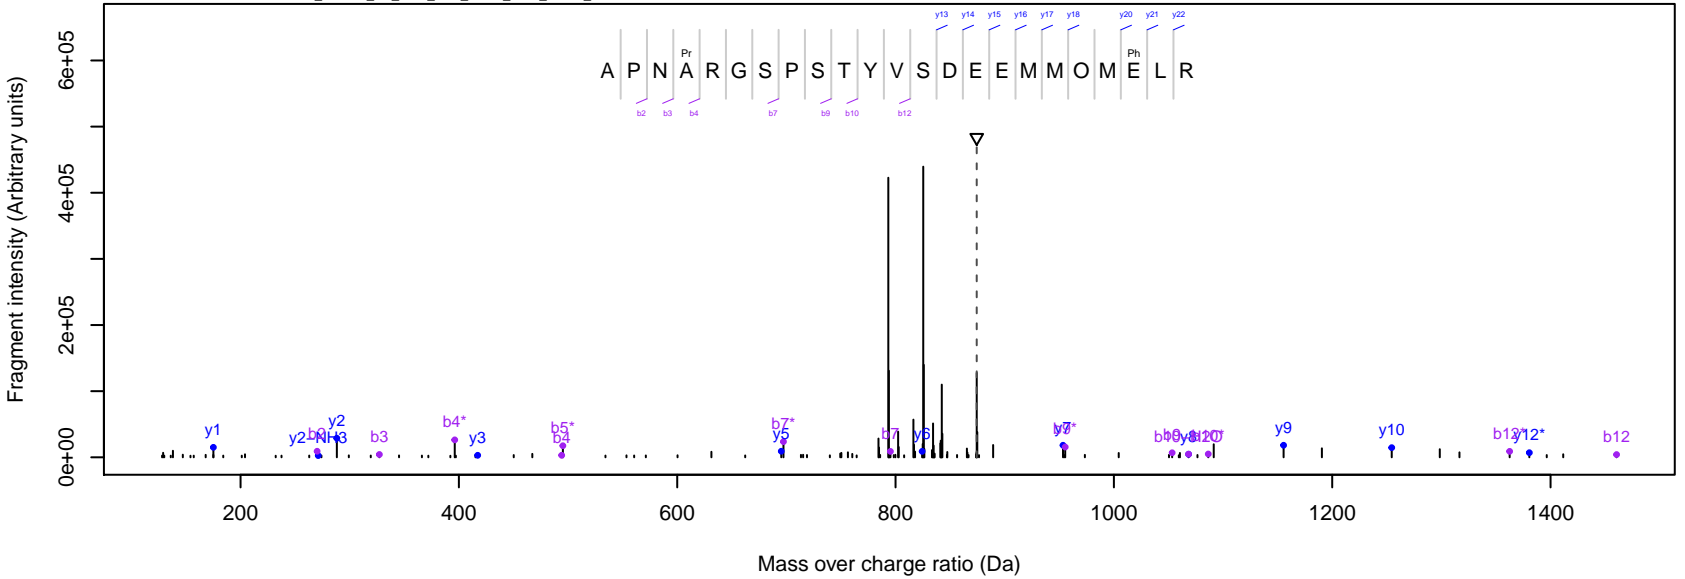

HPS(Phospho (STY))REQLIDYLMOMLK-3+

Source : QE3\_201126\_FR\_TiOx\_hum\_tissue\_Urea\_RNAB\_H Scan : 37958

Andromeda score : 124.18

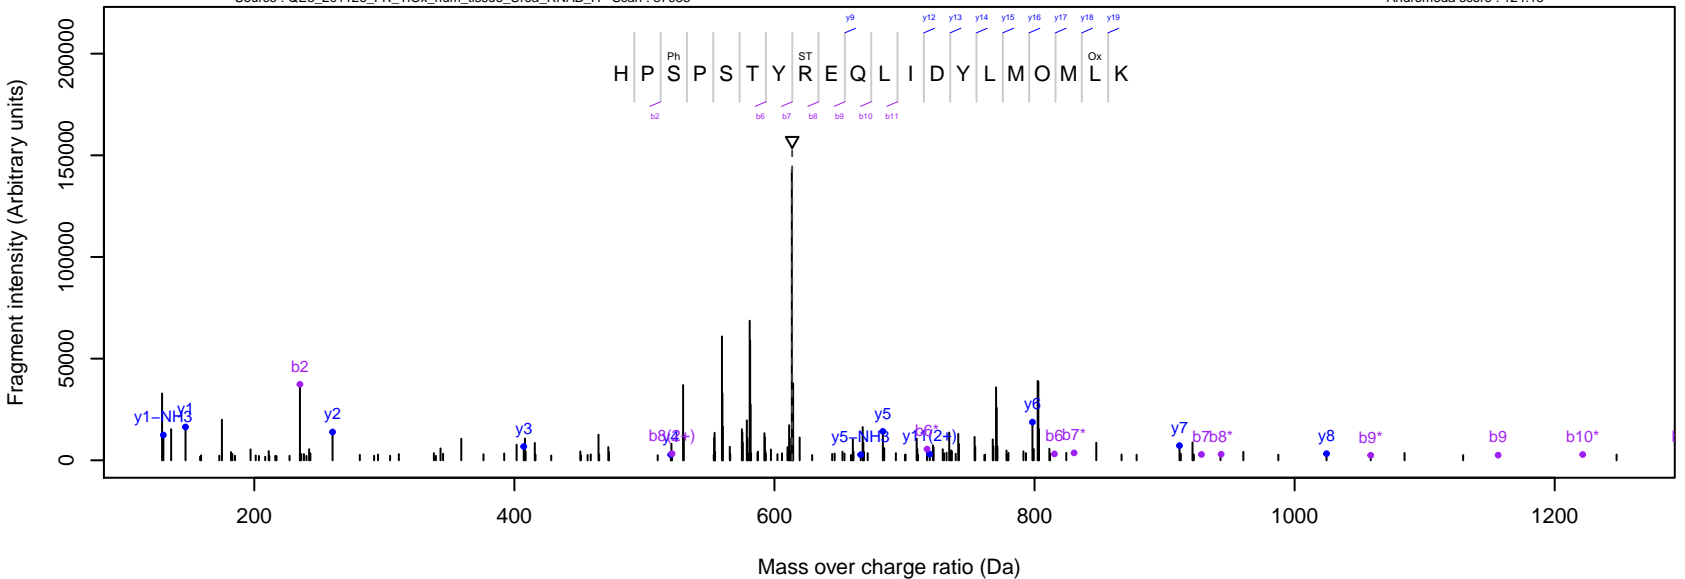

HERPAGGT(Phospho (STY))PPDMSGPLAKDDR-4+

Source : QE3\_201126\_FR\_TiOx\_hum\_tissue\_Urea\_RNAB\_H Scan : 9825

Andromeda score : 124.17

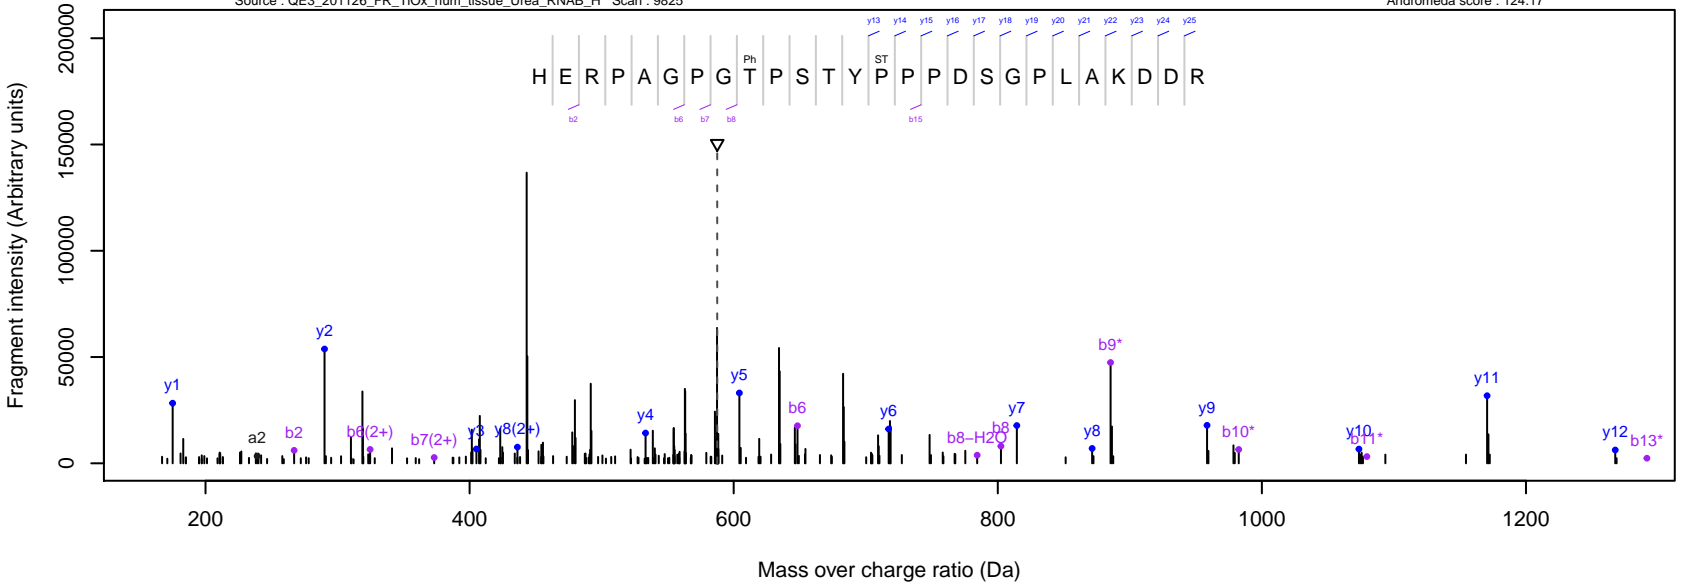

LGEVTGS(Phospho (STY))PS(Phospho (STY))PPPR-2+

Source : QE3\_201126\_FR\_TiOx\_hum\_tissue\_Urea\_RNAB\_H Scan : 21125

Andromeda score : 124.09

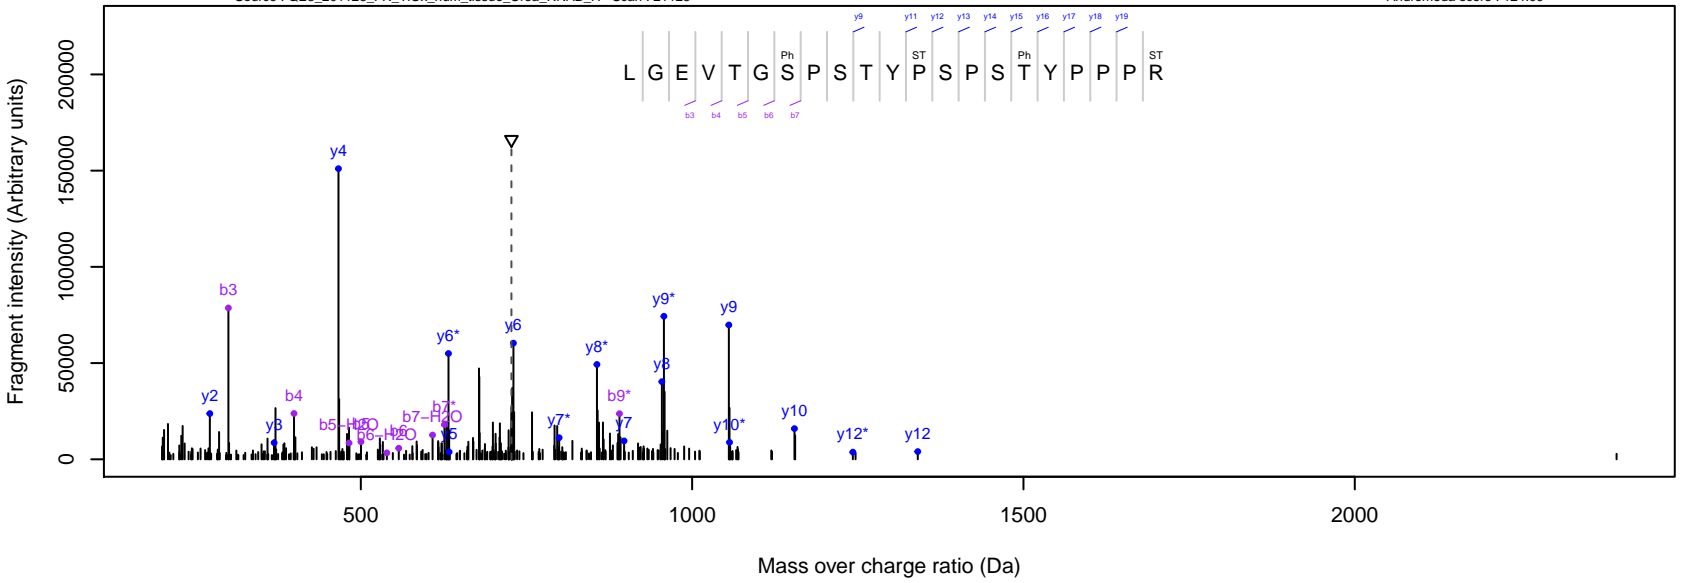

S(Phospho (STY))SDEENGPPSPDLDR-2+

Source : QE3\_201126\_FR\_TiOx\_hum\_tissue\_Urea\_RNAB\_N Scan : 17977

Andromeda score : 124.09

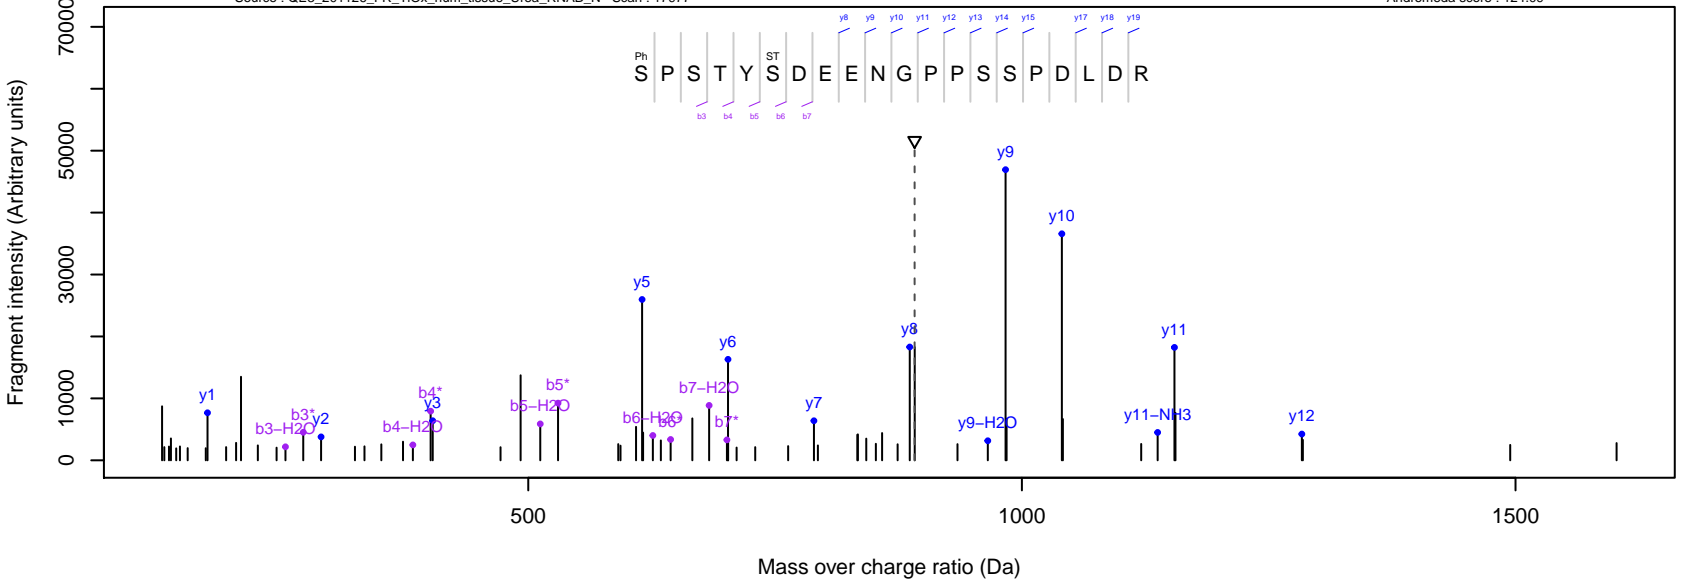



S(Phospho (STY))SEGLGGQNSGIGGR-2+

Source : QE3\_201126\_FR\_TiOx\_hum\_tissue\_Urea\_RNAB\_N Scan : 14129

Andromeda score : 124.09

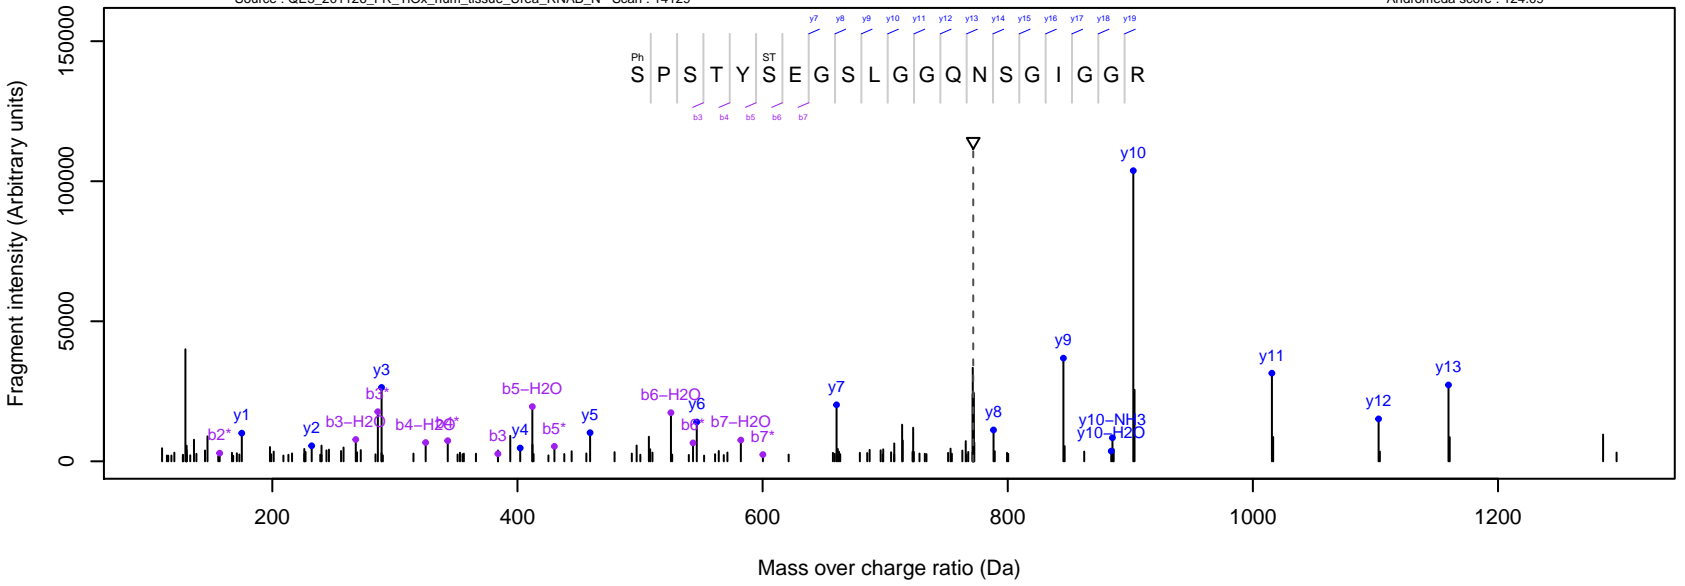

S(Phospho (STY))FDNYR-2+

Source : QE3\_201126\_FR\_TiOx\_hum\_tissue\_Urea\_RNAB\_N Scan : 23298

Andromeda score : 124.08

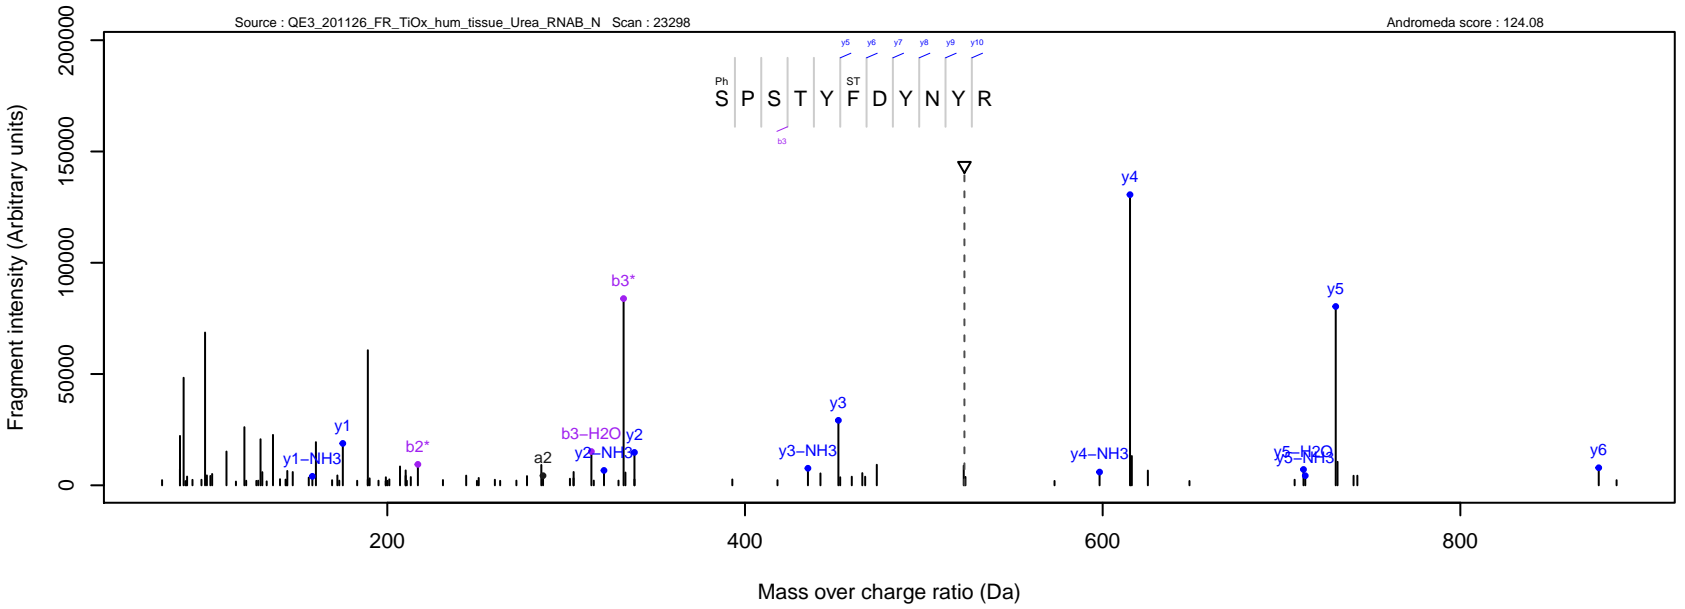

S(Phospho (STY))LELSSLAGPGEDPLSADSLGKPTR-3+

Source : QE3\_201126\_FR\_TiOx\_hum\_tissue\_Urea\_RNAB\_N Scan : 48520

Andromeda score : 124.08

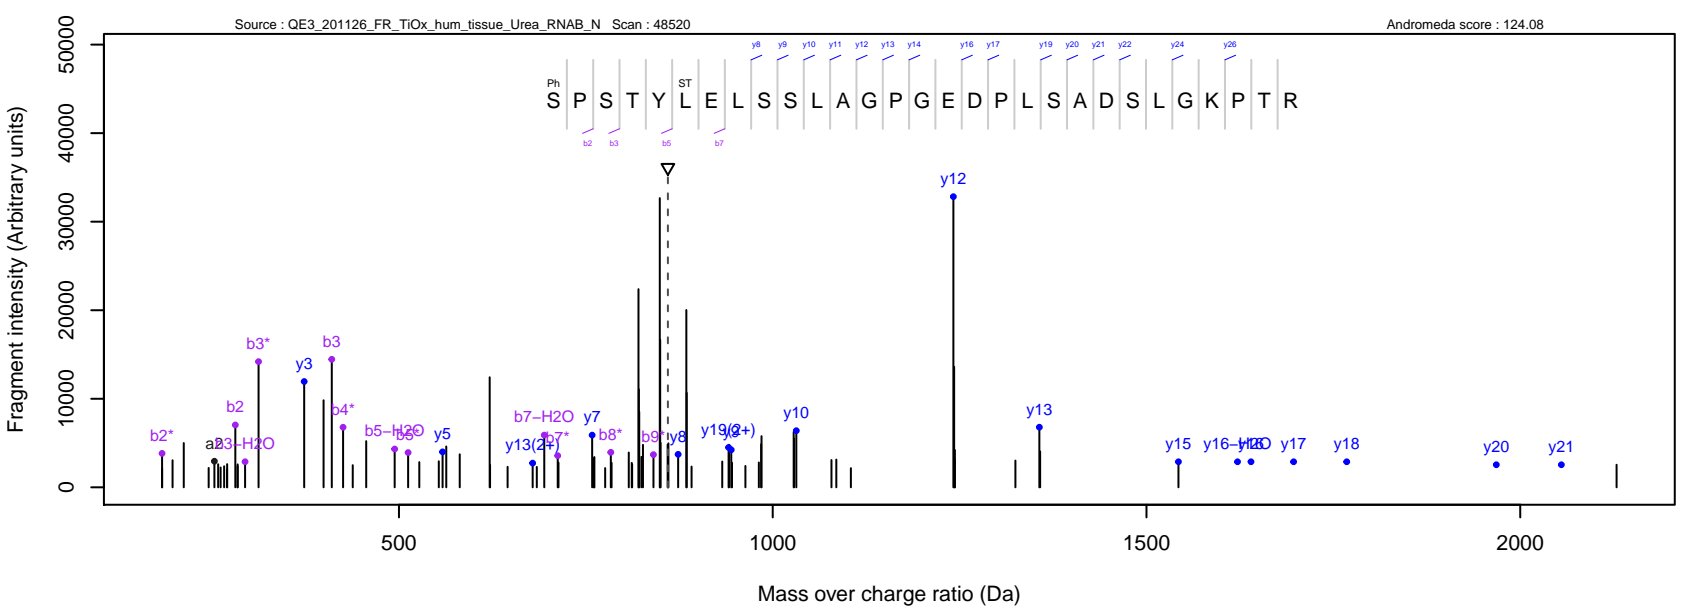

**GAS(Phospho (STY))QAGMTGYGRPR-2+**

Source : QE3\_2011126\_FR\_TiOx\_hum\_tissue\_Urea\_RNAB\_H Scan : 10909

Andromeda score : 124.07

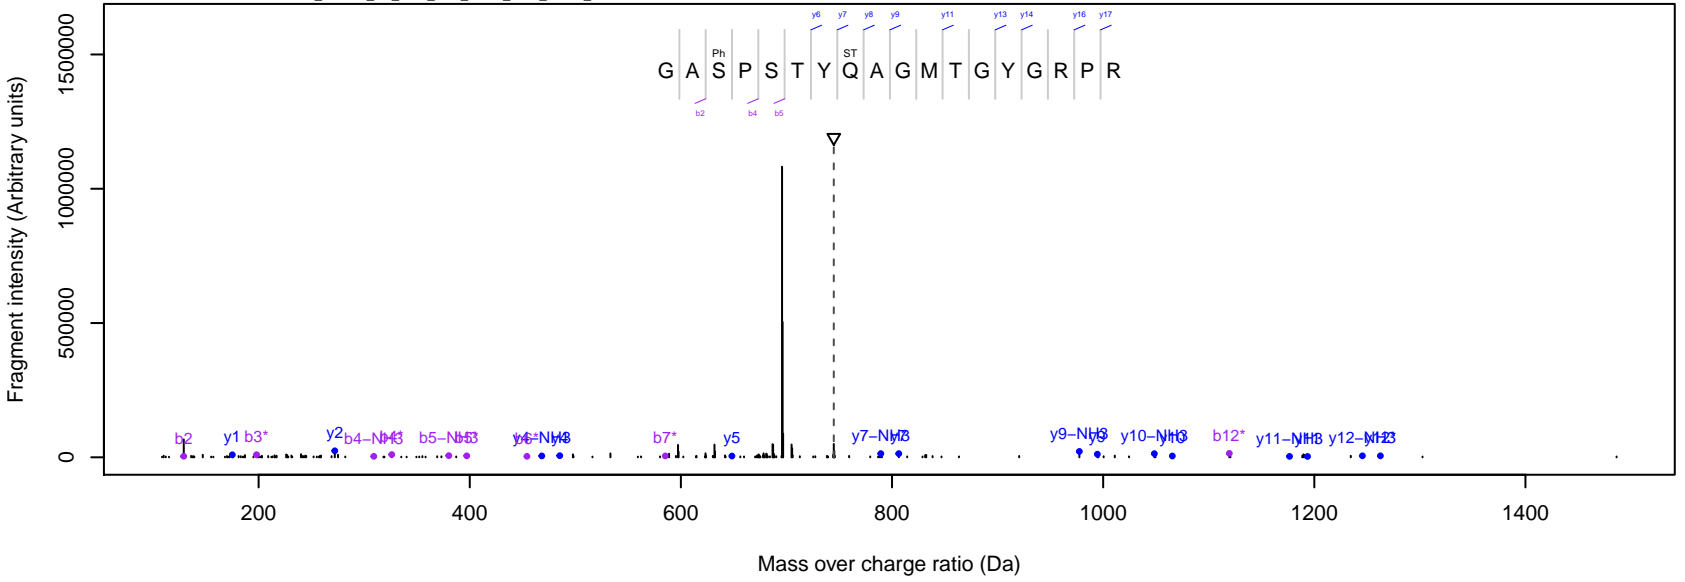

**SRSWEDS(Phospho (STY))PER-2+**

Source : QE3\_2011126\_FR\_TiOx\_hum\_tissue\_Urea\_RNAB\_N Scan : 8508

Andromeda score : 124.07

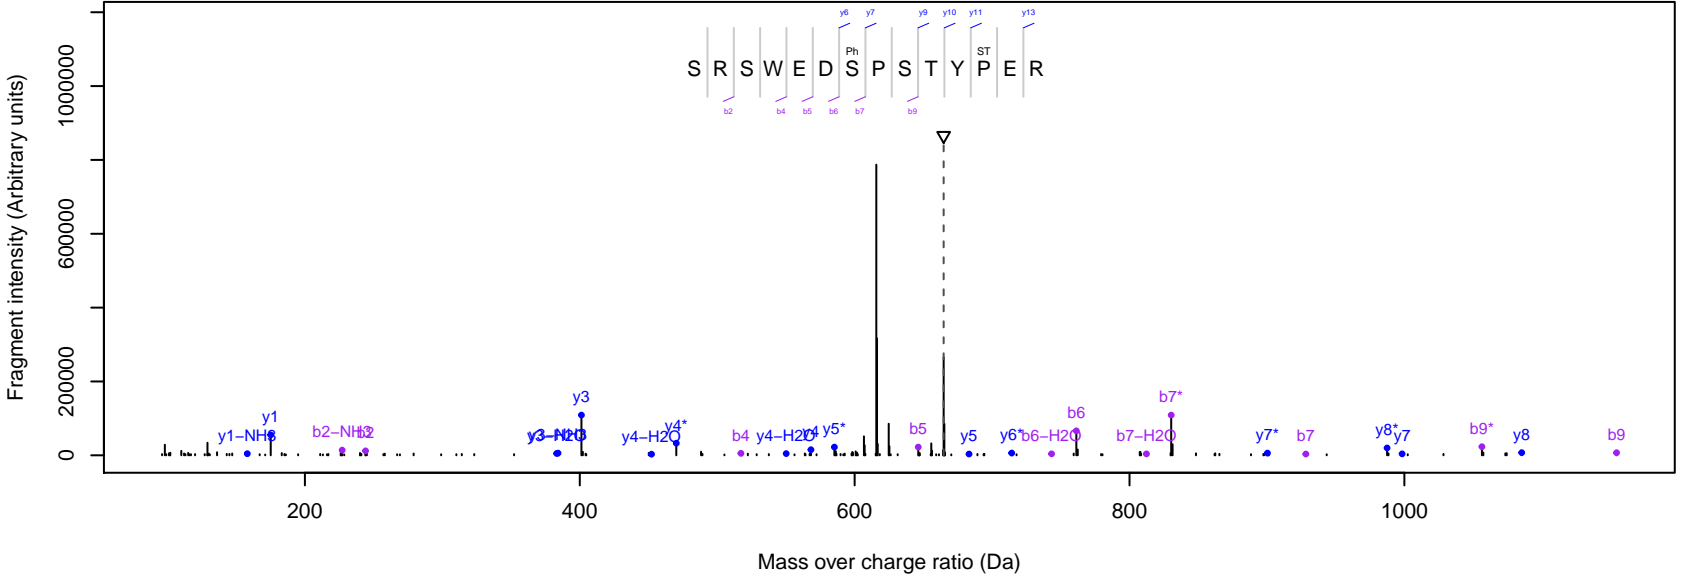

**RLS(Phospho (STY))FEASNPPFDVGRPFDLR-3+**

Source : QE3\_2011126\_FR\_TiOx\_hum\_tissue\_Urea\_RNAB\_N Scan : 48080

Andromeda score : 124

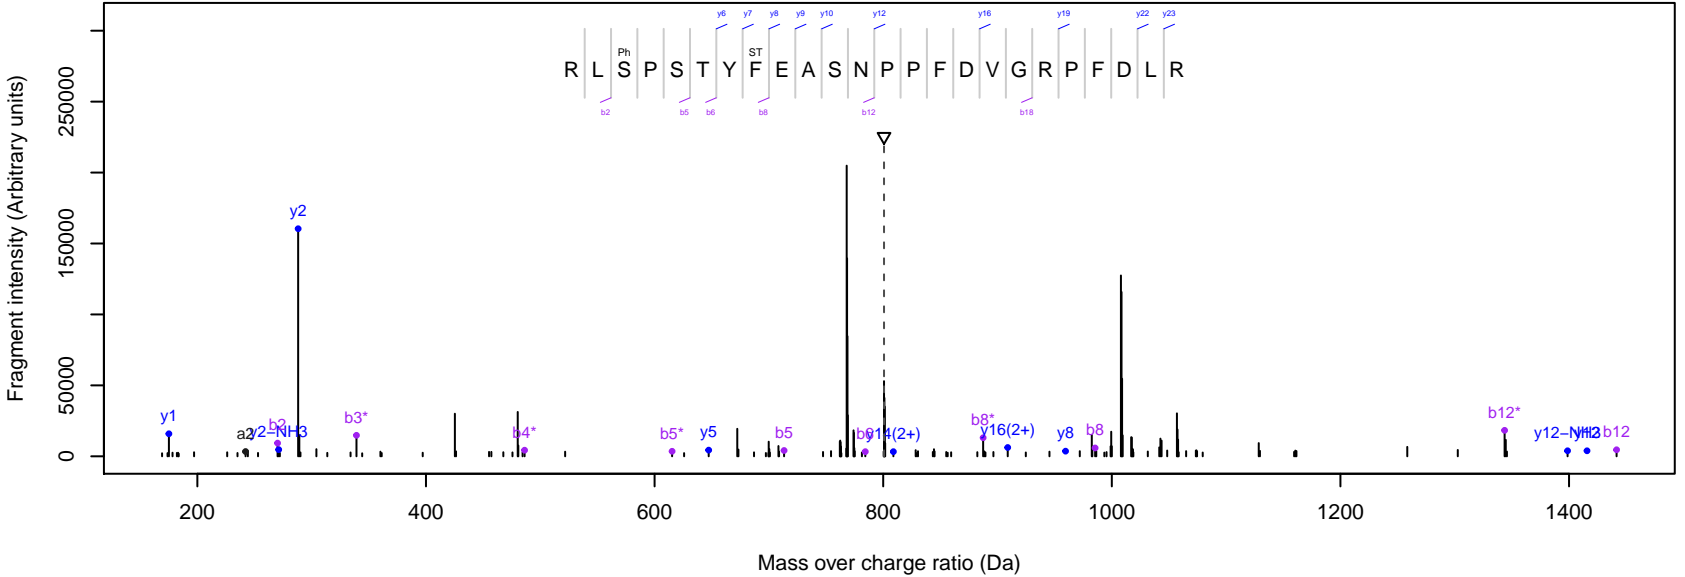

VLMSVQYFLEDVCKQS(Phospho (STY))MR-3+

Source : QE3\_201126\_FR\_TiOx\_hum\_tissue\_Urea\_RNAB\_H Scan : 55267

Andromeda score : 124

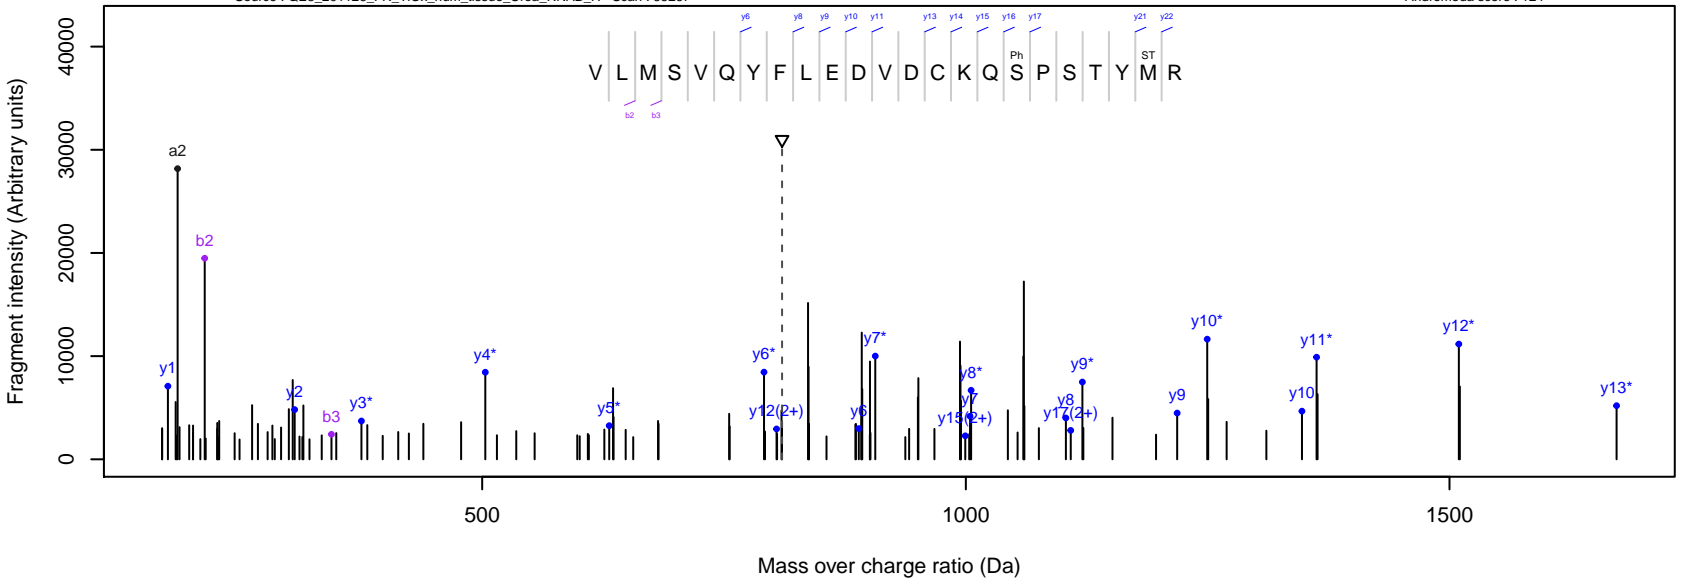

LAS(Phospho (STY))TSDIEEKENR-2+

Source : QE3\_201126\_FR\_TiOx\_hum\_tissue\_Urea\_RNAB\_N Scan : 10598

Andromeda score : 123.99

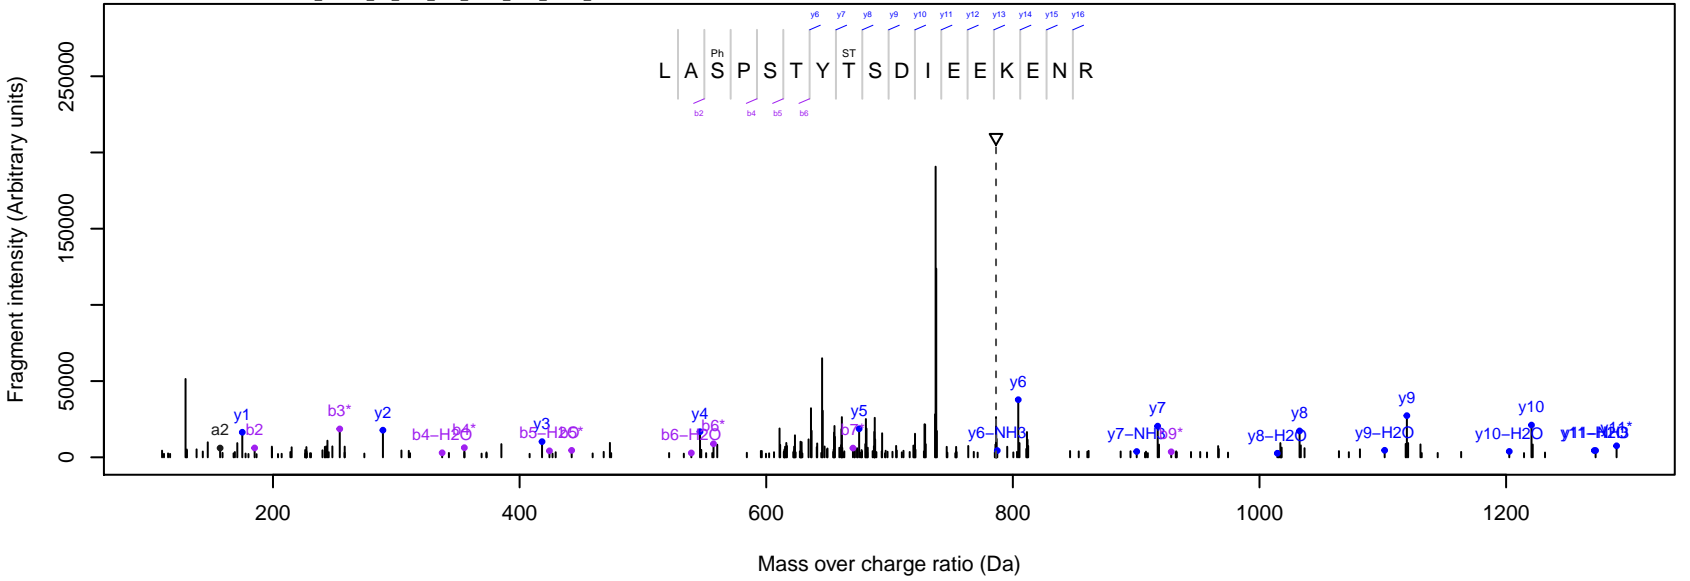

SILQEENRRDS(Phospho (STY))WSYINSK-3+

Source : QE3\_201126\_FR\_TiOx\_hum\_tissue\_Urea\_RNAB\_N Scan : 24990

Andromeda score : 123.99

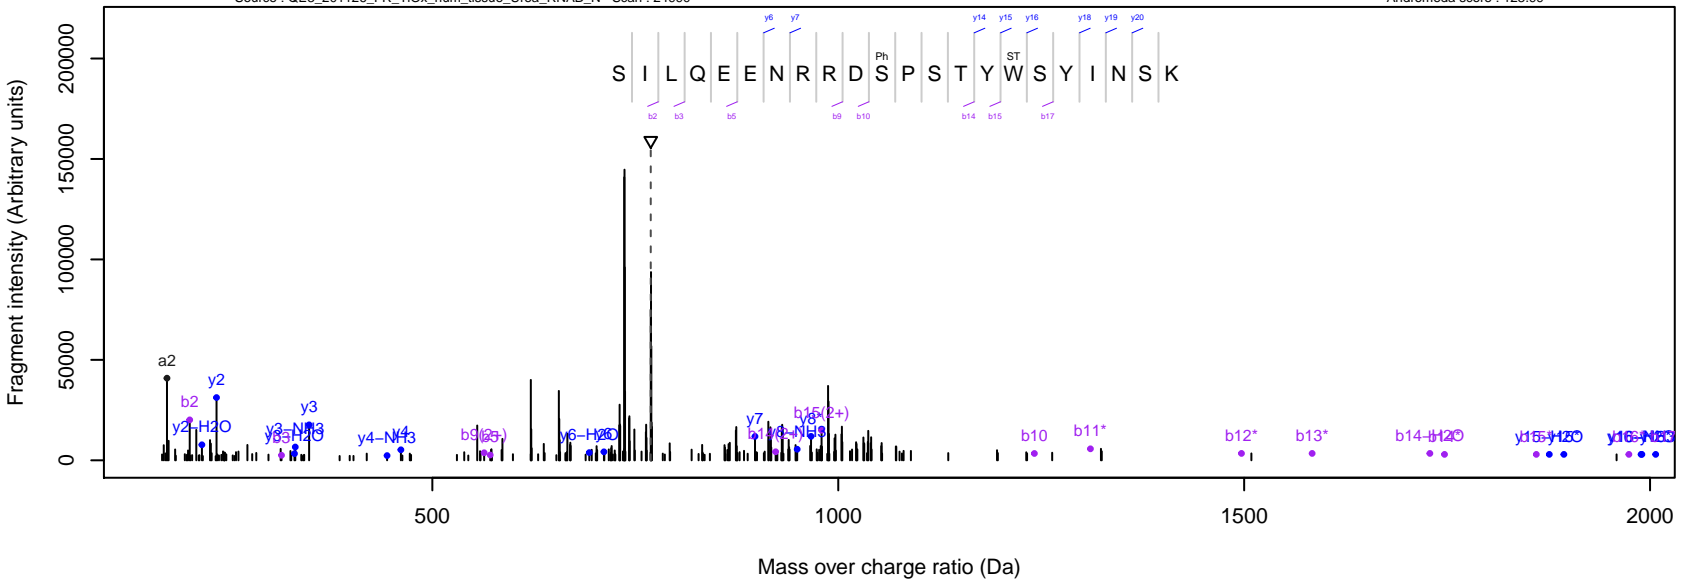

TQT(Phospho (STY))PPVSPAPQPTTEER-2+

Source : QE3\_201126\_FR\_TiOx\_hum\_tissue\_Urea\_RNAB\_N Scan : 17161

Andromeda score : 123.97

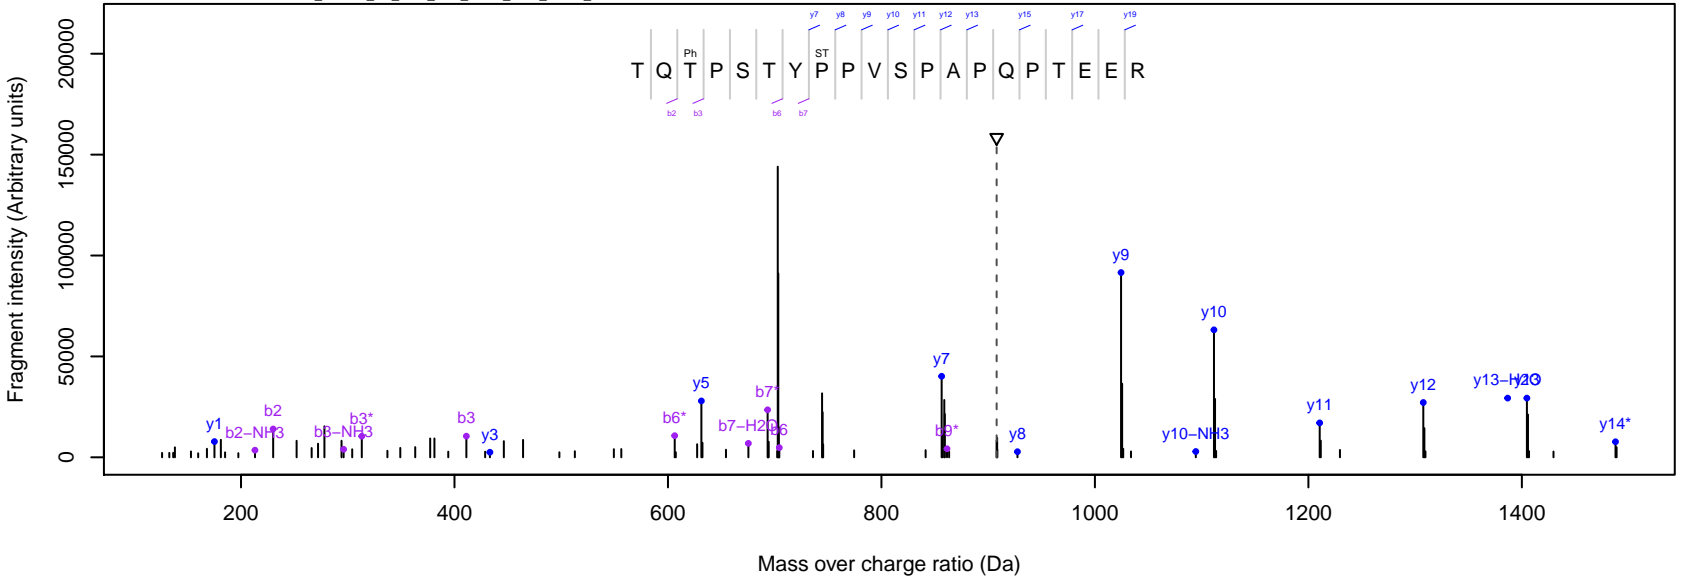

HSLS(Phospho (STY))LLDLEQK-2+

Source : QE3\_201126\_FR\_TiOx\_hum\_tissue\_Urea\_RNAB\_N Scan : 34033

Andromeda score : 123.92

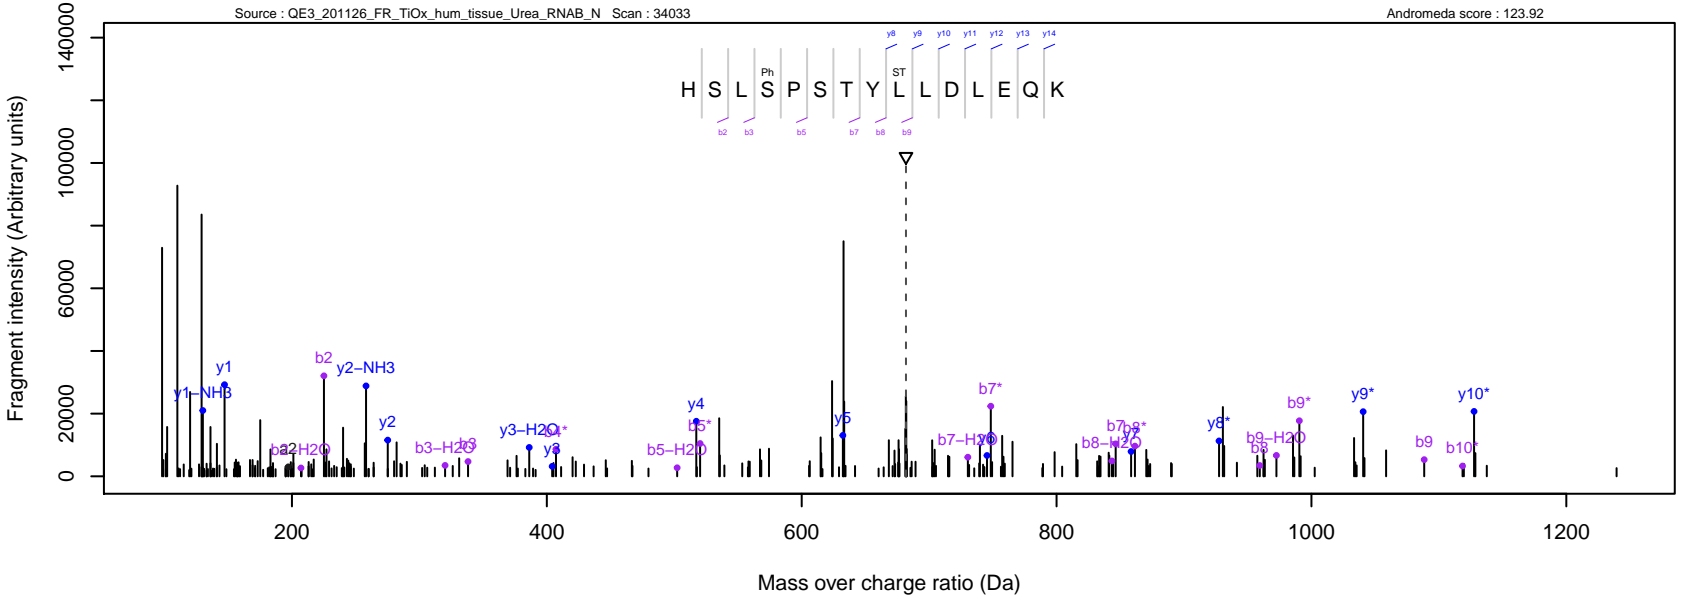

PEEMDKPLISLHLVDS(Phospho (STY))DSSLAKVPDEAPK-4+

Source : QE3\_201126\_FR\_TiOx\_hum\_tissue\_Urea\_RNAB\_N Scan : 43047

Andromeda score : 123.86

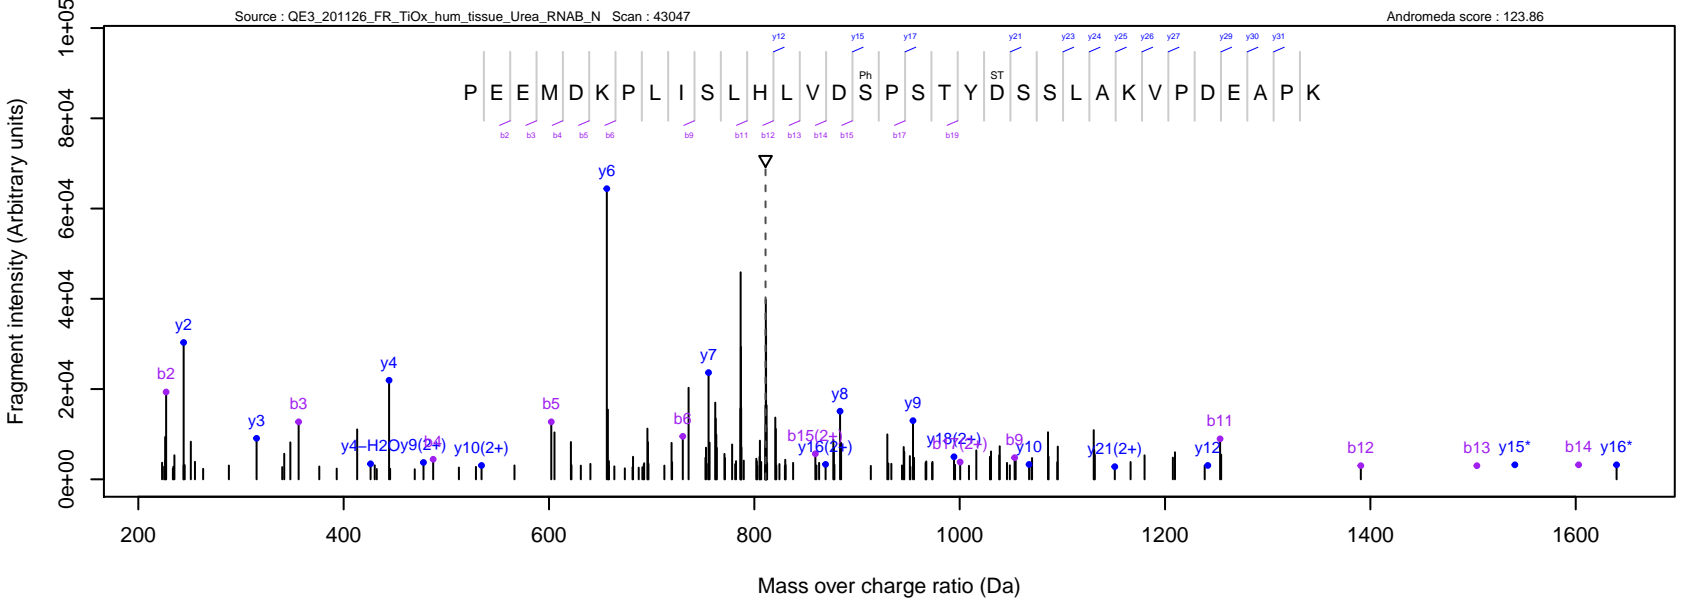

### KYS(Phospho (STY))SCSTIFLDDSTVSPNLK-3+

Source : QE3\_201126\_FR\_TiOx\_hum\_tissue\_Urea\_RNAB\_H Scan : 36170

Andromeda score : 123.85

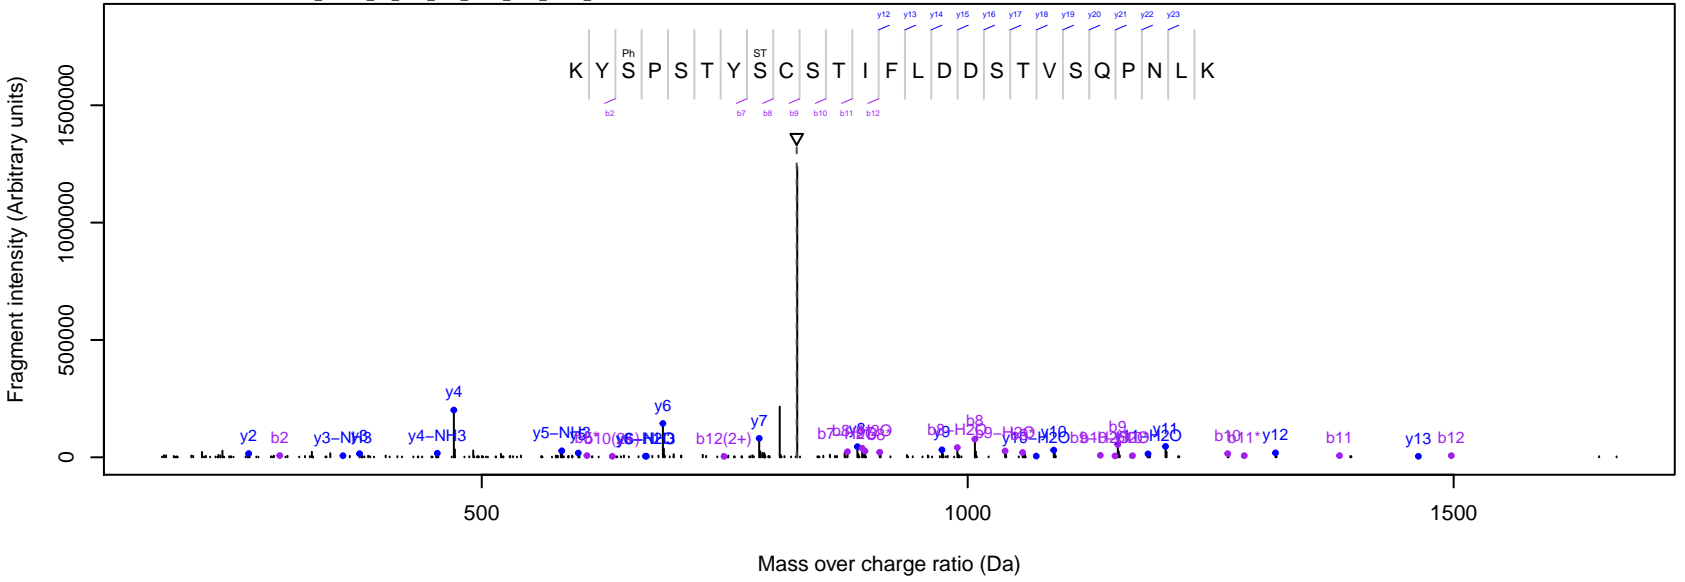

### GNRS(Phospho (STY))PVPDVEDPATEEPGESFCDKVMR-3+

Source : QE3\_201126\_FR\_TiOx\_hum\_tissue\_Urea\_RNAB\_H Scan : 30736

Andromeda score : 123.73

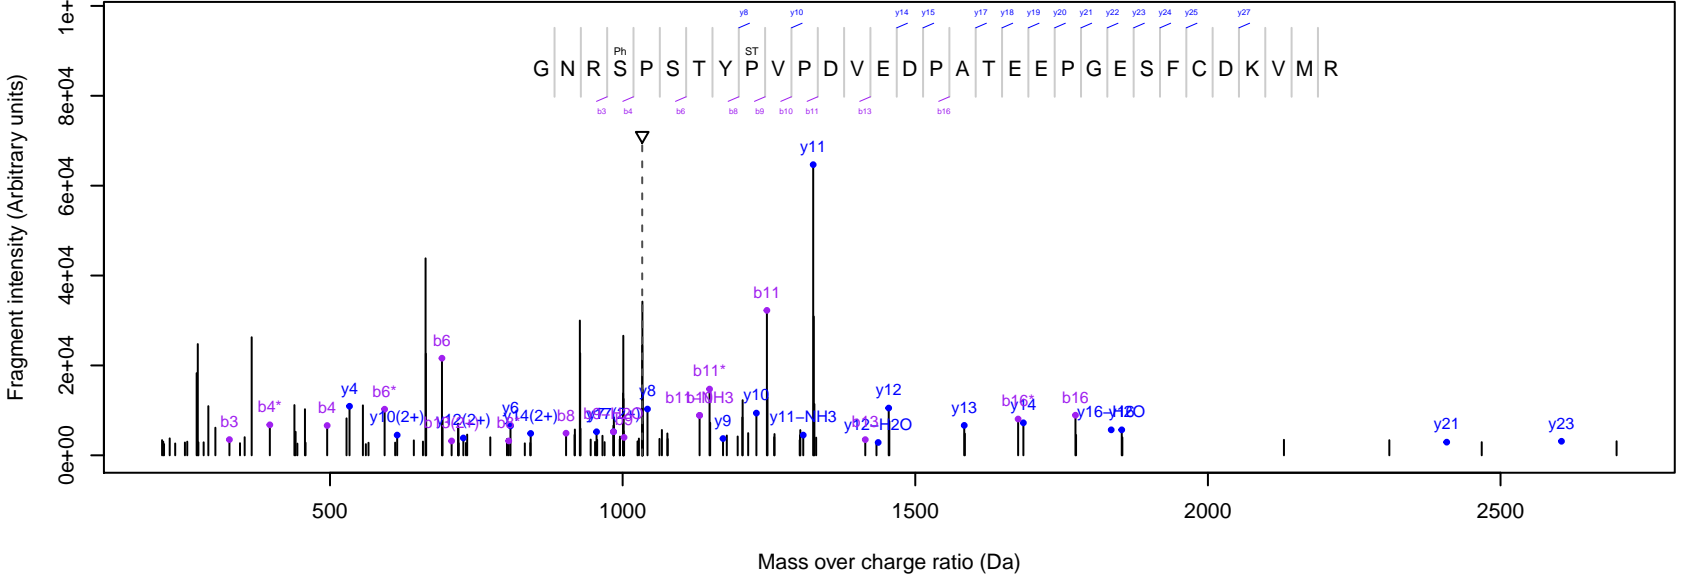

### FRIS(Phospho (STY))HELDSASSEVN-2+

Source : QE3\_201126\_FR\_TiOx\_hum\_tissue\_Urea\_RNAB\_H Scan : 27392

Andromeda score : 123.72

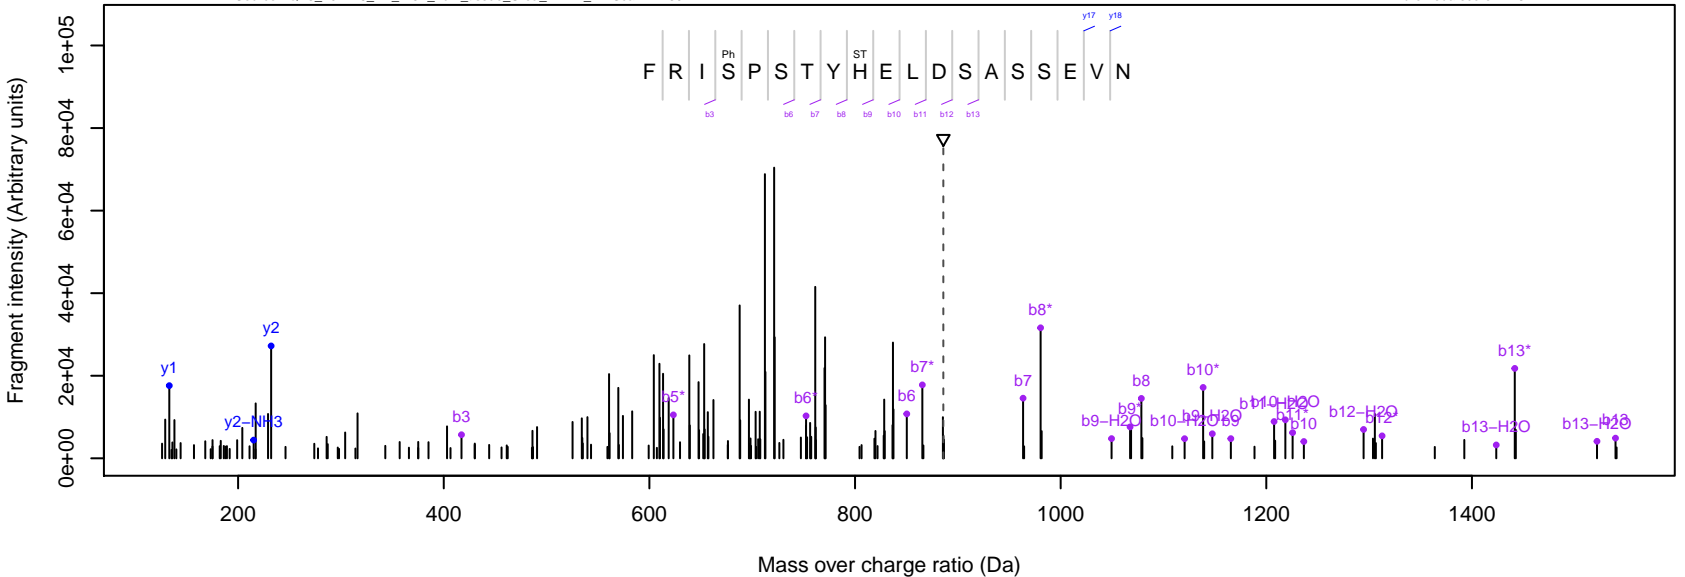

S(Phospho (STY))LQEEHVAVAVQLR-2+

Source : QE3\_201126\_FR\_TiOx\_hum\_tissue\_Urea\_RNAB\_B Scan : 21669

Andromeda score : 123.63

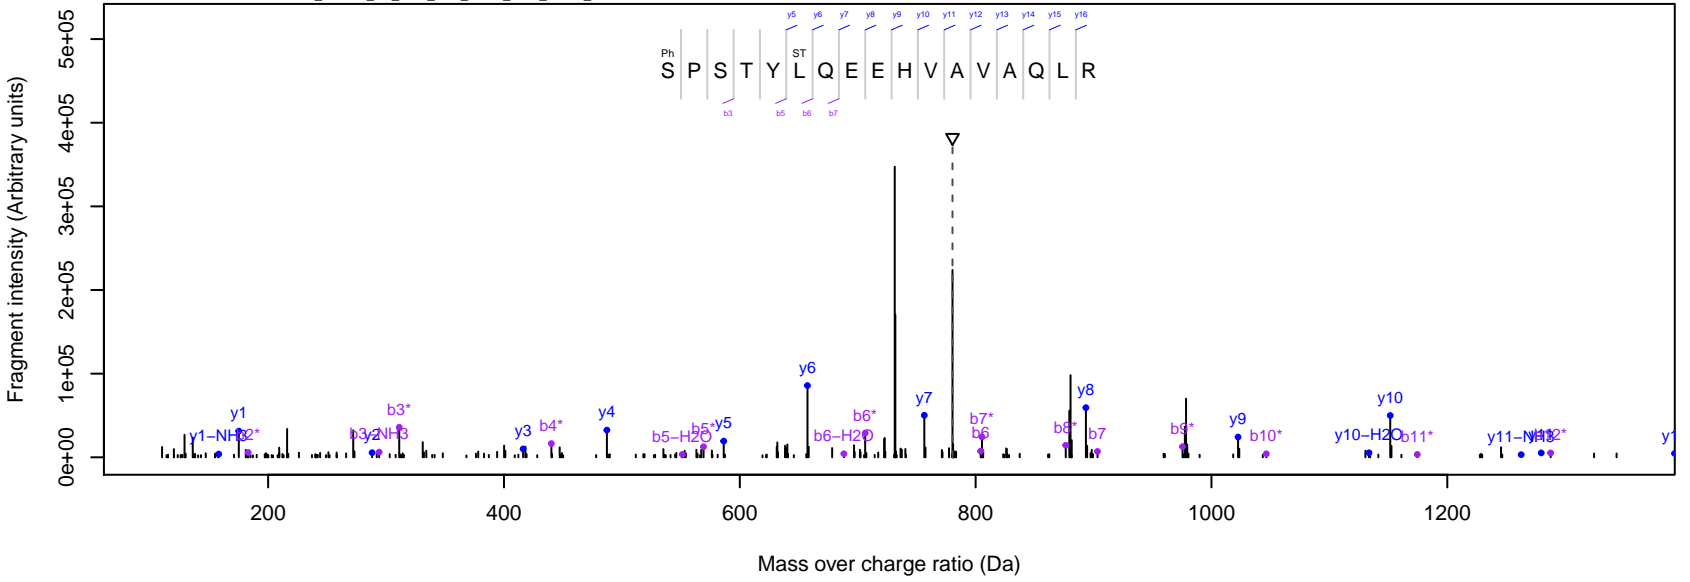

YLEES(Phospho (STY))DEDDL F-2+

Source : QE3\_201126\_FR\_TiOx\_hum\_tissue\_Urea\_RNAB\_B Scan : 59009

Andromeda score : 123.63

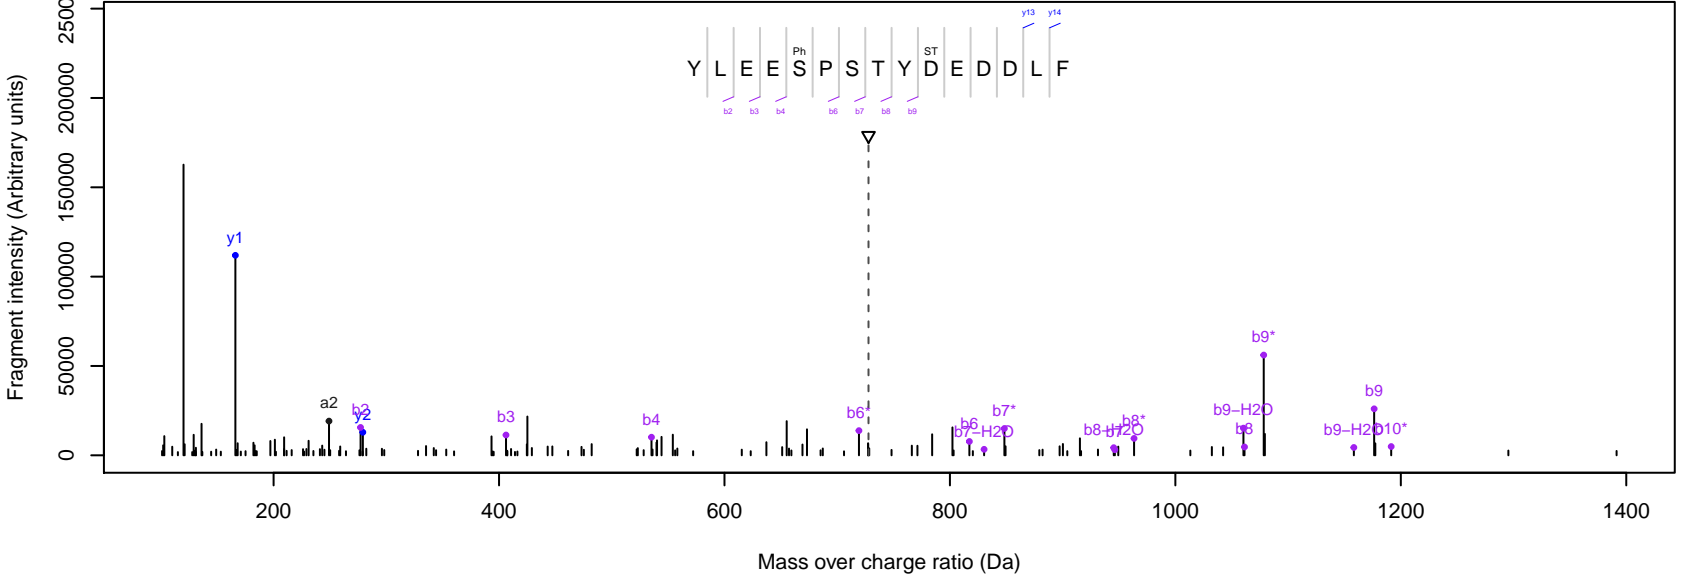

IHLAQS(Phospho (STY))LHK-3+

Source : QE3\_201126\_FR\_TiOx\_hum\_tissue\_Urea\_RNAB\_N Scan : 8936

Andromeda score : 123.62

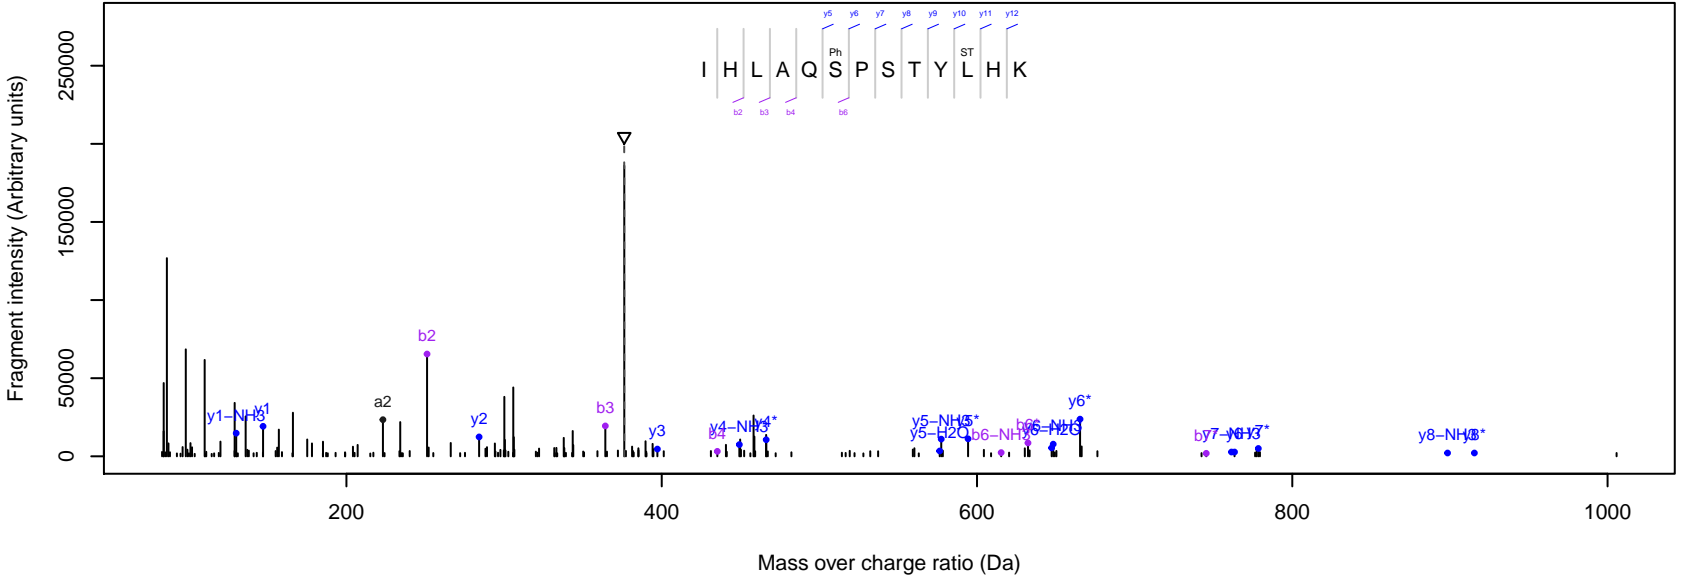

KHS(Phospho (STY))PS(Phospho (STY))PPPTPTESR-3+

Source : QE3\_201126\_FR\_TiOx\_hum\_tissue\_Urea\_RNAB\_B Scan : 6679

Andromeda score : 123.6

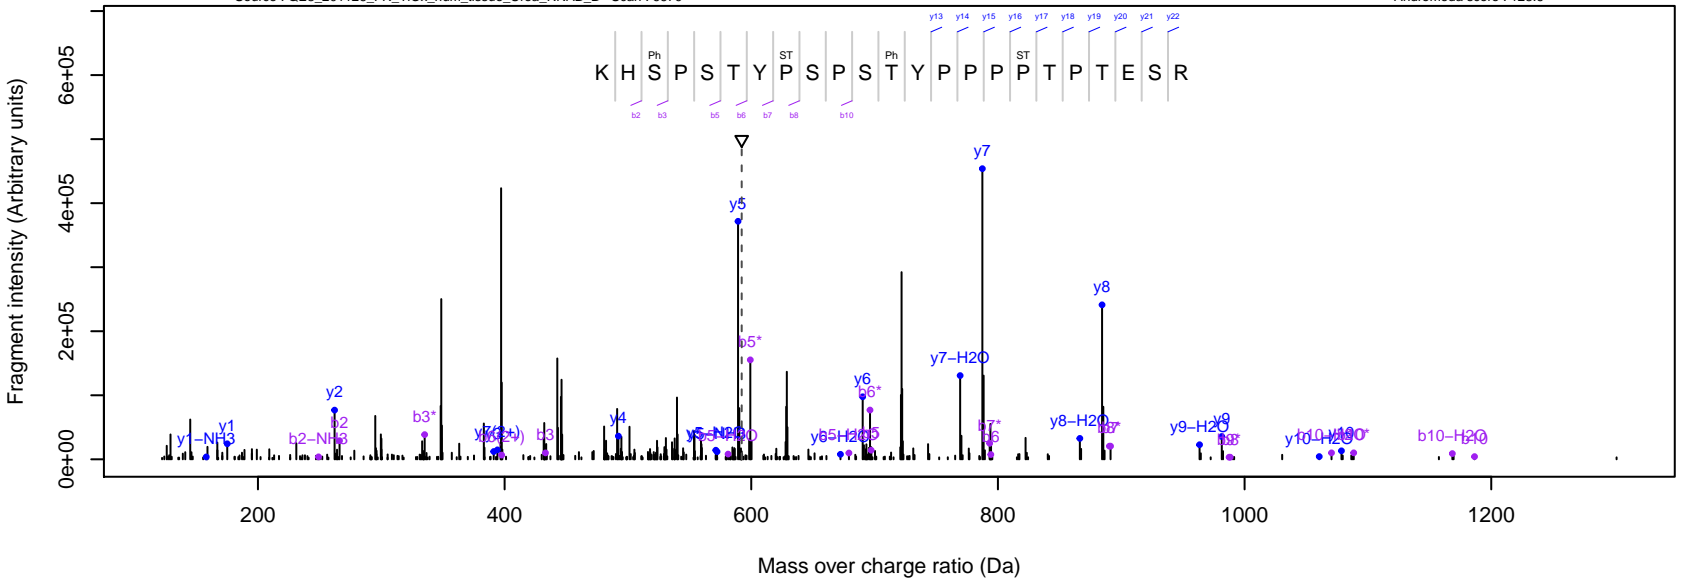

RAS(Phospho (STY))DTSLTQGIVAFR-3+

Source : QE3\_201126\_FR\_TiOx\_hum\_tissue\_Urea\_RNAB\_B Scan : 33924

Andromeda score : 123.59

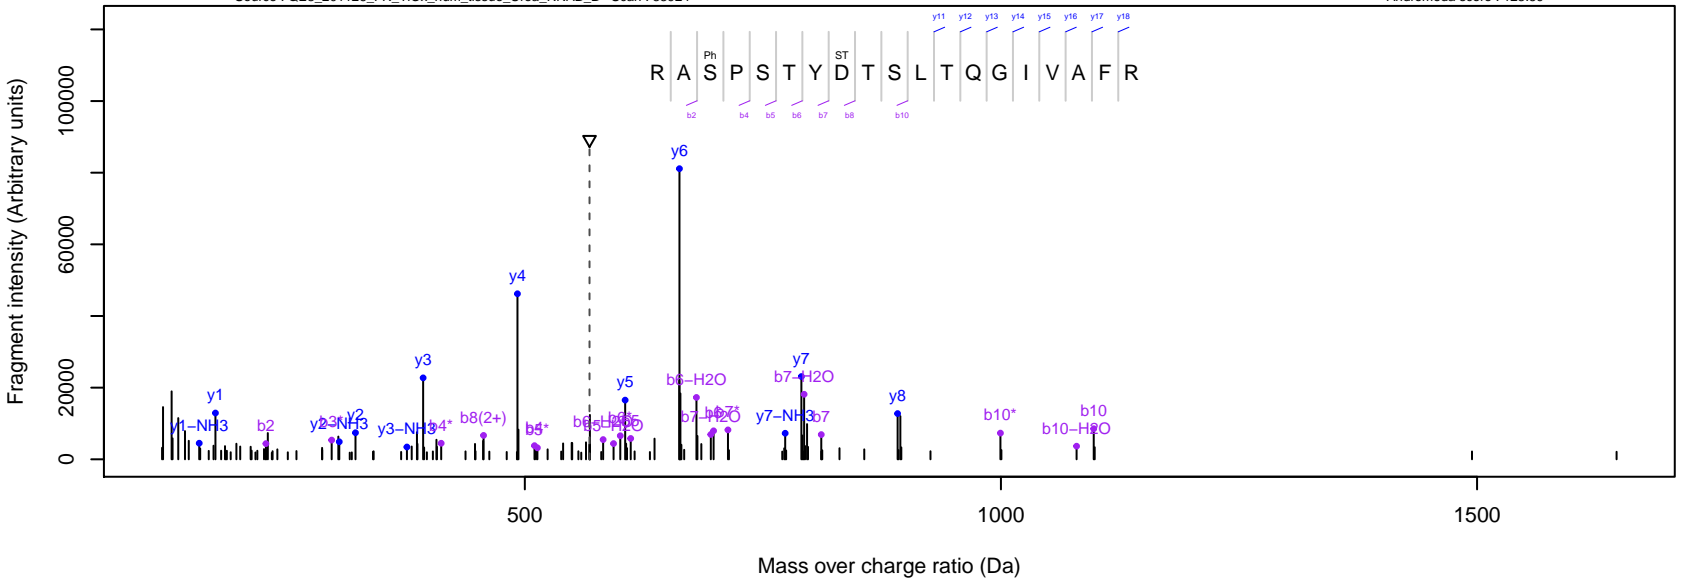

SGSALLQSQSS(Phospho (STY))TEDPKDEPAELKPDSEDLSSQSSASK-3+

Source : QE3\_201126\_FR\_TiOx\_hum\_tissue\_Urea\_RNAB\_H Scan : 25256

Andromeda score : 123.55

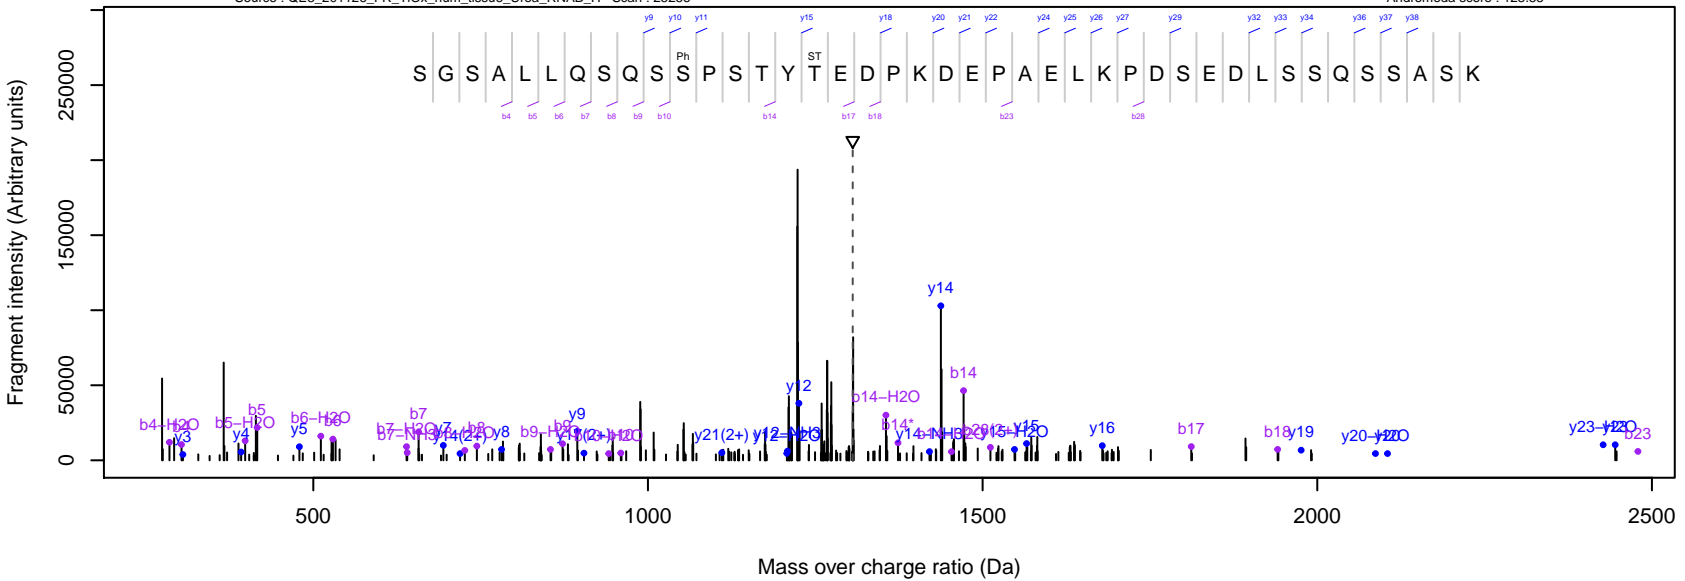

ST(Phospho (STY))S(Phospho (STY))FRGGMGS(Phospho (STY))GGLATGIAGGLAGMGGIQQNEK(Phospho (STY))MQLNDR-4+

Source : QE3\_201126\_FR\_TiOx\_hum\_tissue\_Urea\_RNAB\_N Scan : 57300

Andromeda score : 123.55

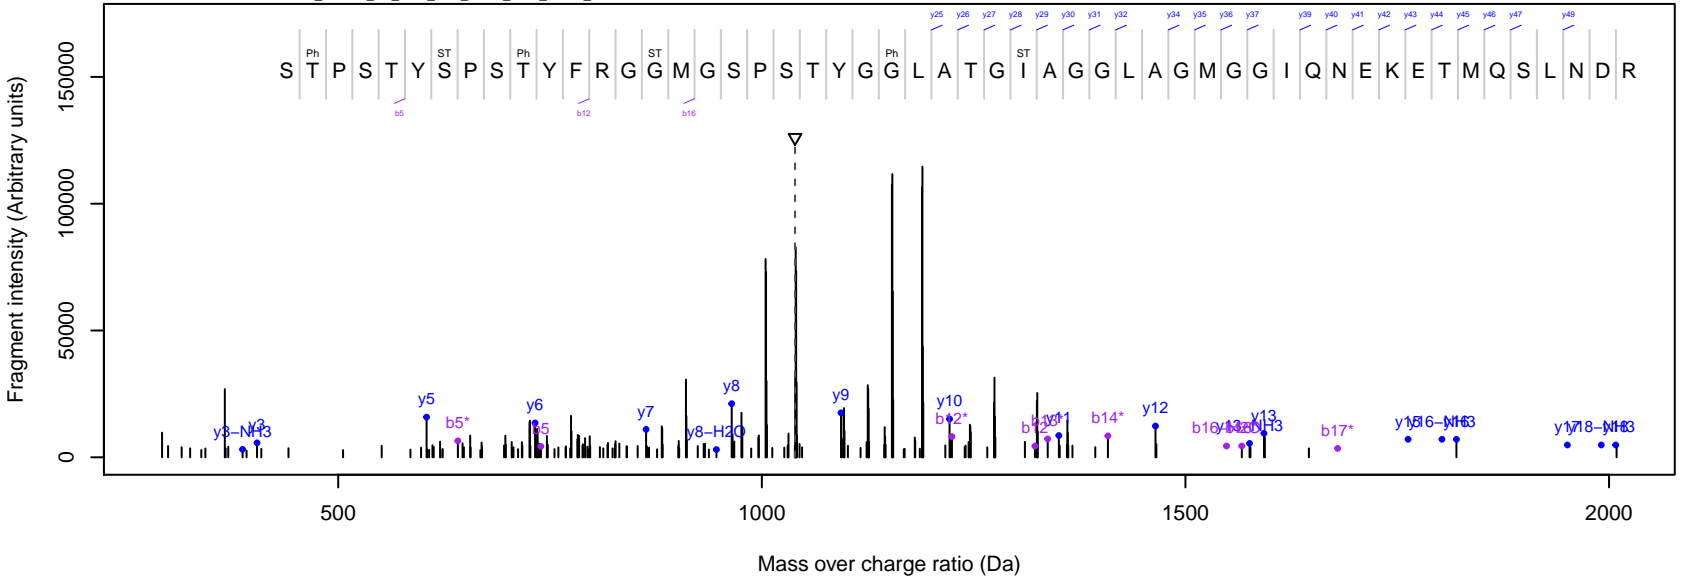

KES(Phospho (STY))ES(Phospho (STY))EDS(Phospho (STY))S(Phospho (STY))DDEPLIKK-2+

Source : QE3\_201126\_FR\_TiOx\_hum\_tissue\_Urea\_RNAB\_N Scan : 23787

Andromeda score : 123.54

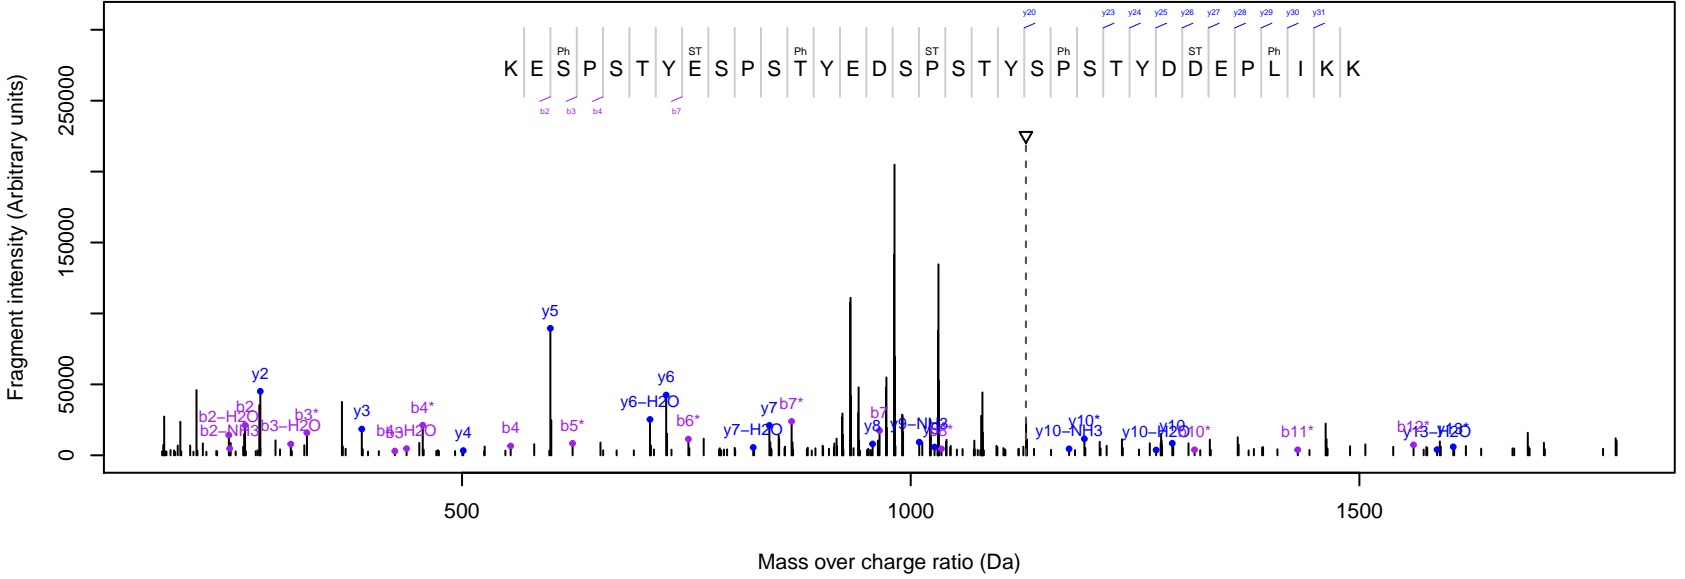

ST(Phospho (STY))FS(Phospho (STY))TNYRS(Phospho (STY))LGSVQAPSYGAR-3+

Source : QE3\_201126\_FR\_TiOx\_hum\_tissue\_Urea\_RNAB\_N Scan : 43316

Andromeda score : 123.53

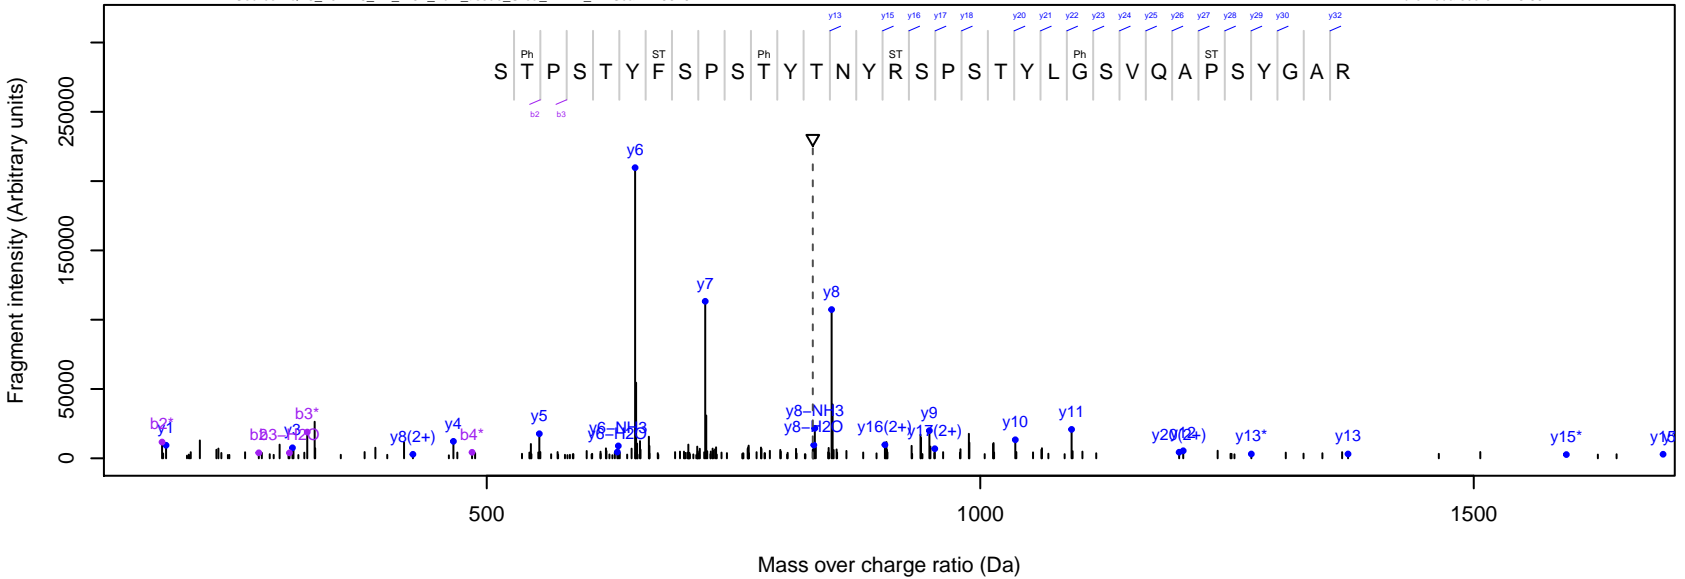



ETMQS(Phospho (STY))LNDR-2+

Source : QE3\_201126\_FR\_TiOx\_hum\_tissue\_Urea\_RNAB\_N Scan : 12628

Andromeda score : 123.51

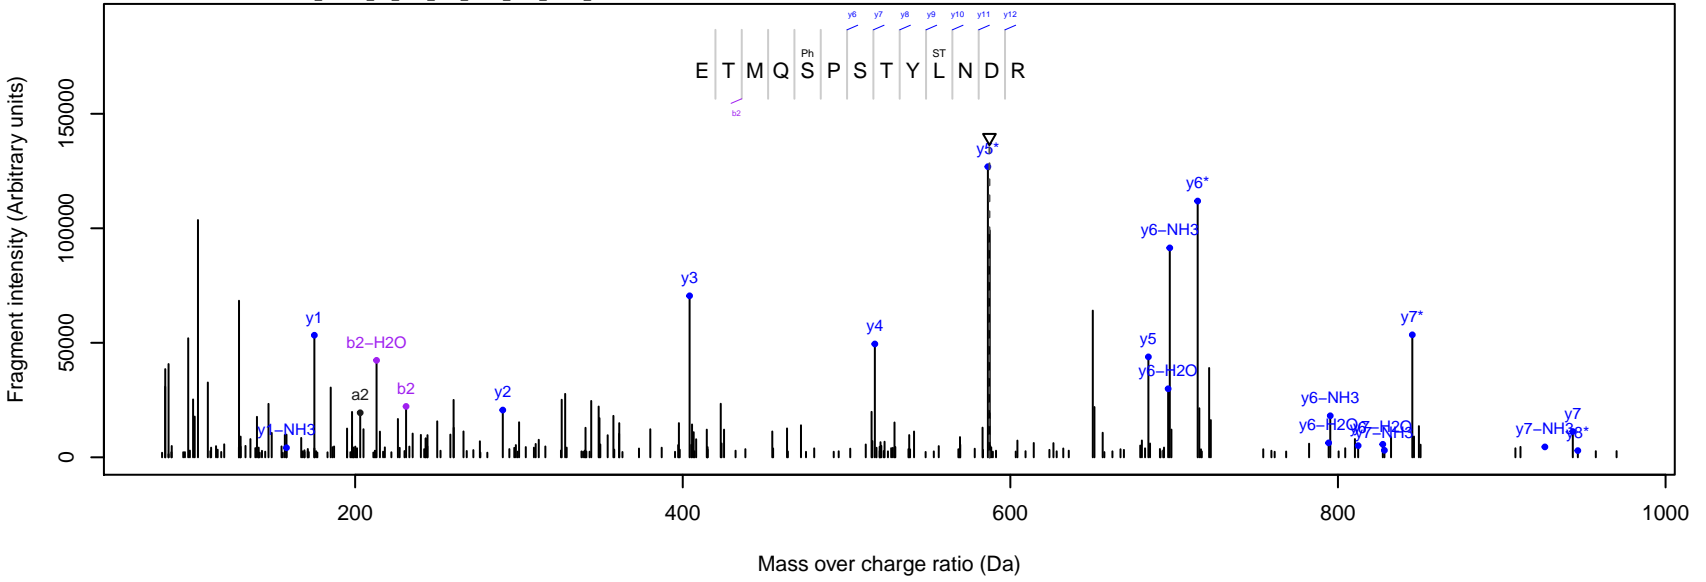

TKS(Phospho (STY))VGEDEKLASLLEGR-3+

Source : QE3\_201126\_FR\_TiOx\_hum\_tissue\_Urea\_RNAB\_N Scan : 33120

Andromeda score : 123.44

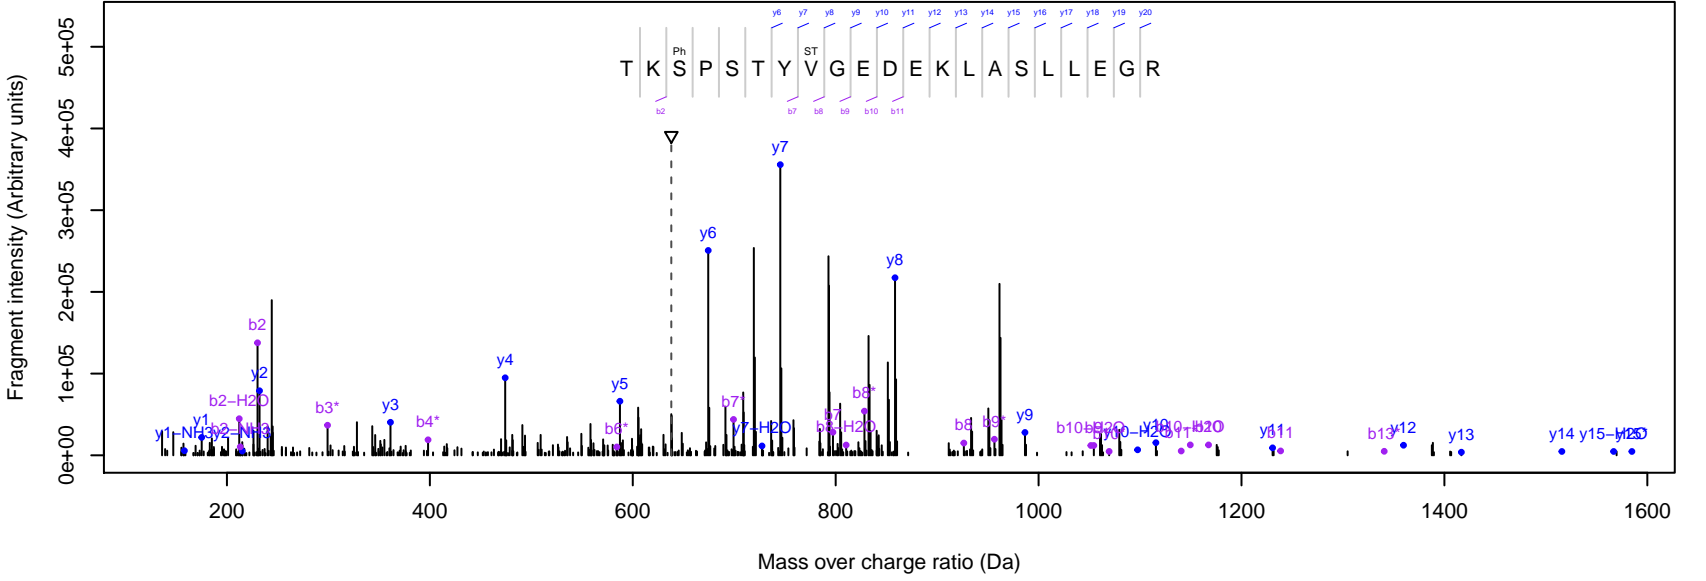

VAHSDKPGSTS(Phospho (STY))TASFR-3+

Source : QE3\_201126\_FR\_TiOx\_hum\_tissue\_Urea\_RNAB\_H Scan : 6867

Andromeda score : 123.43

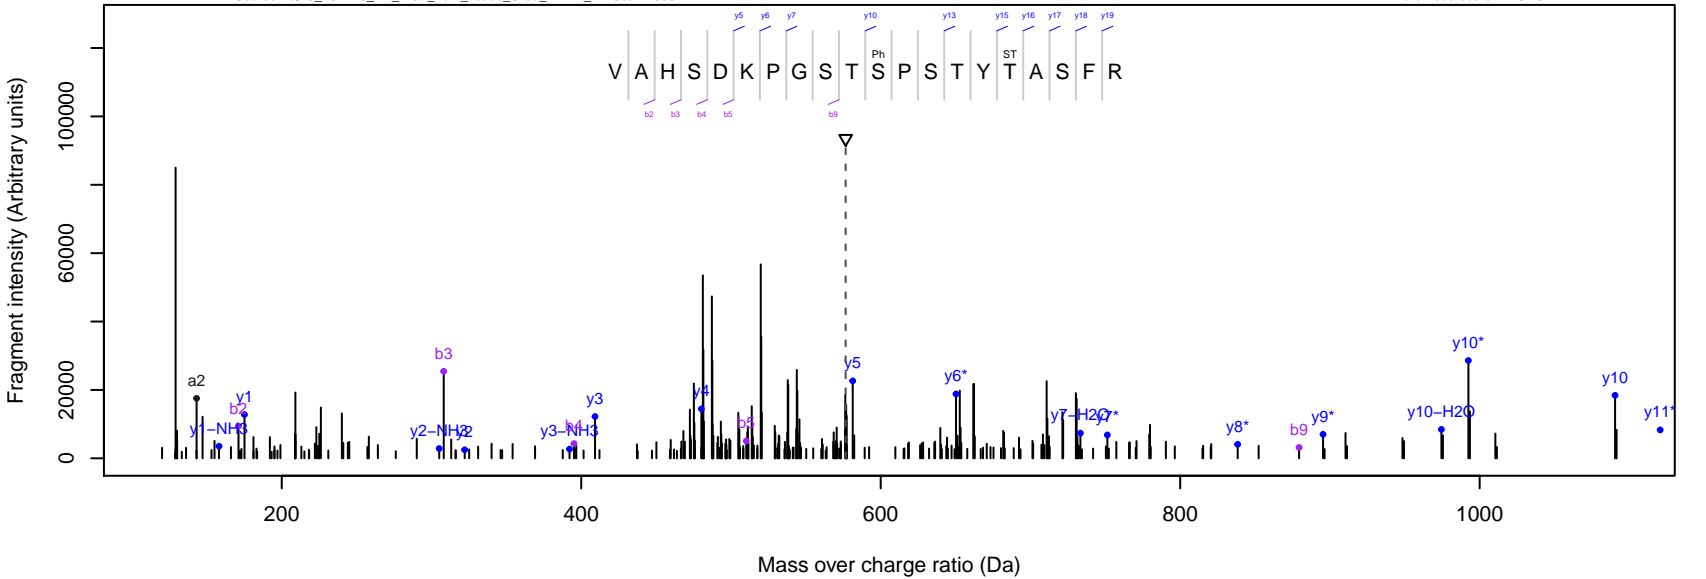

AQLEPVAS(Phospho (STY))PAKKPK-3+

Source : QE3\_201126\_FR\_TIOx\_hum\_tissue\_Urea\_RNAB\_B Scan : 6962

Andromeda score : 123.4

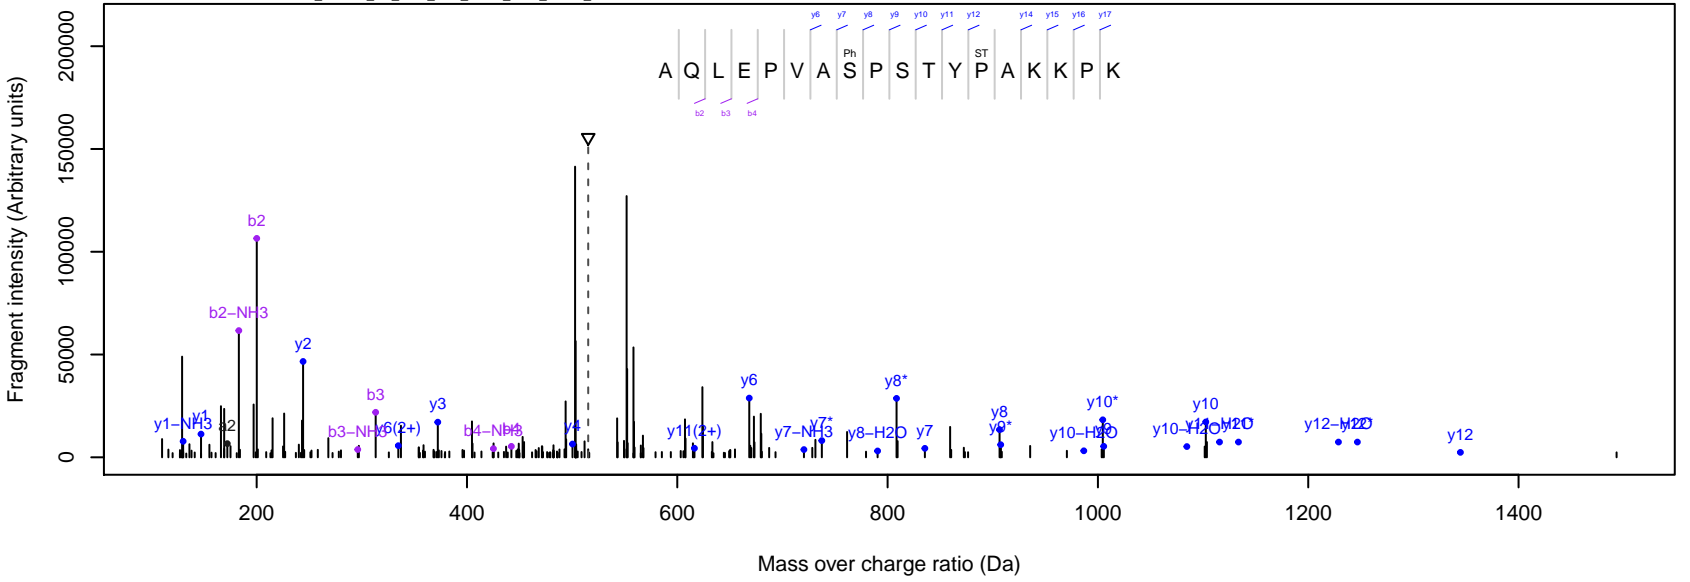

NYILDQTNVYGS(Phospho (STY))AQR-2+

Source : QE3\_201126\_FR\_TIOx\_hum\_tissue\_Urea\_RNAB\_B Scan : 33399

Andromeda score : 123.38

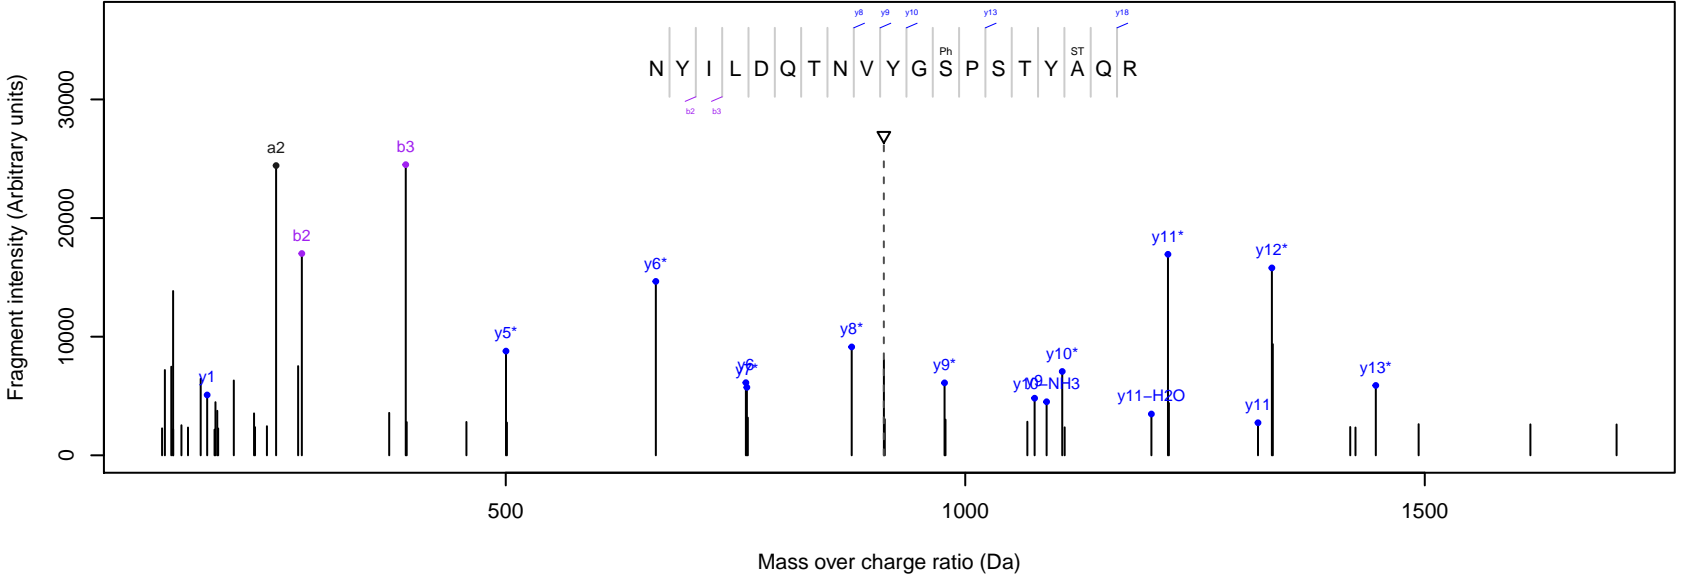

TAS(Phospho (STY))L TSAAS(Phospho (STY))VDG NR-2+

Source : QE3\_201126\_FR\_TIOx\_hum\_tissue\_Urea\_RNAB\_B Scan : 21120

Andromeda score : 123.36

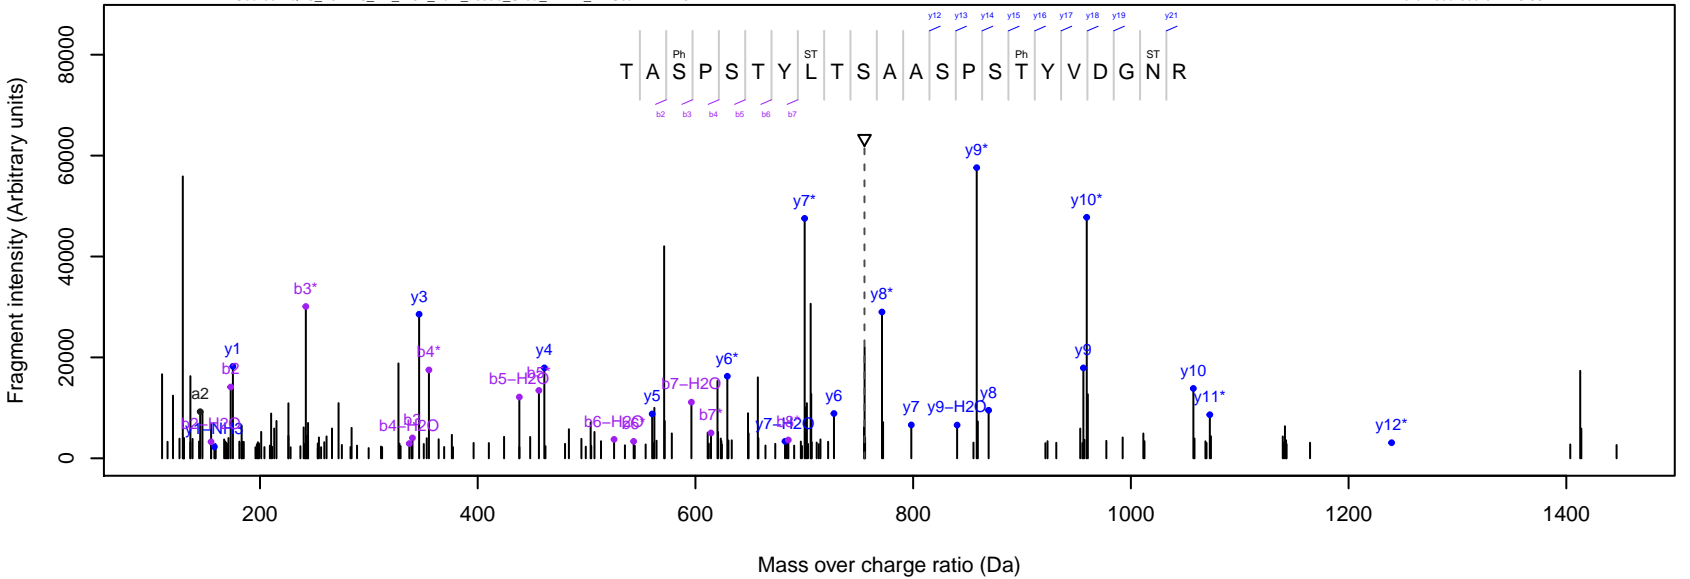

PET(Phospho (STY))PPRQSHSGSISPYPKV-4+

Source : QE3\_201126\_FR\_TiOx\_hum\_tissue\_Urea\_RNAB\_H Scan : 9292

Andromeda score : 123.32

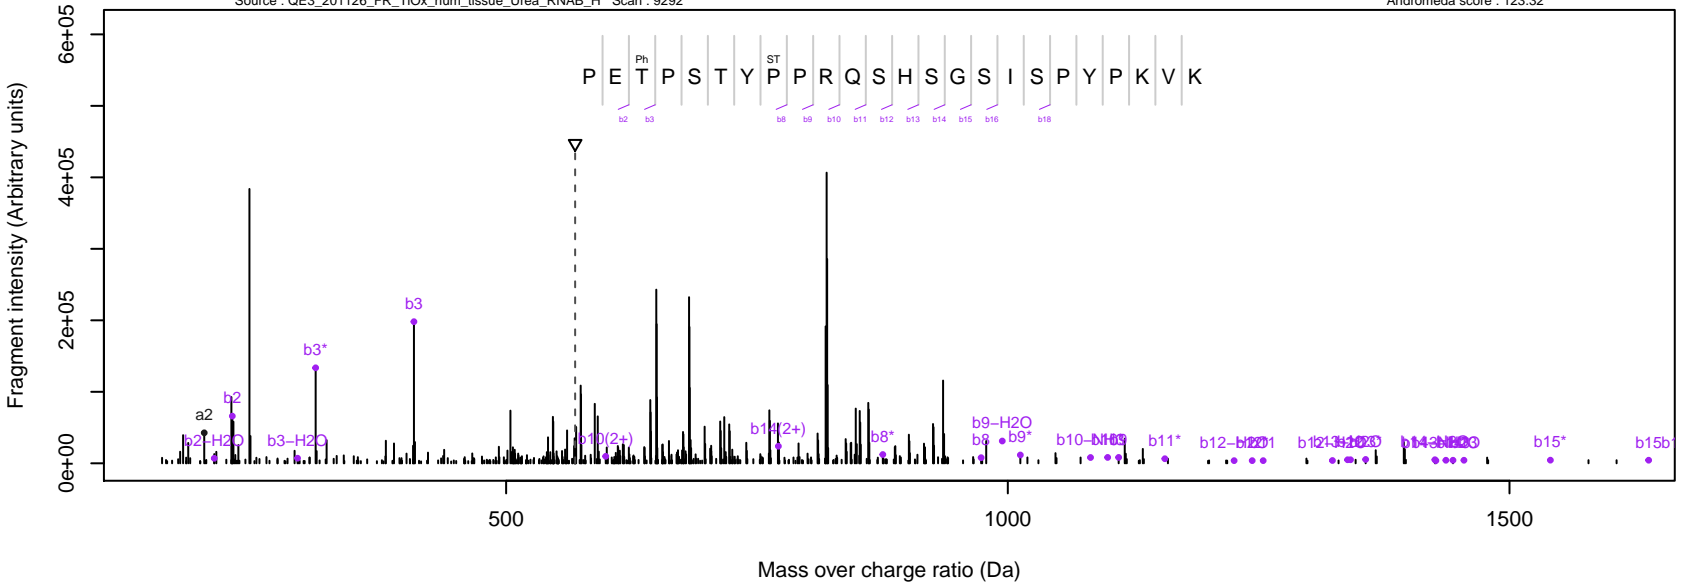

SPPRAS(Phospho (STY))YVAPLTAQPATYR-3+

Source : QE3\_201126\_FR\_TiOx\_hum\_tissue\_Urea\_RNAB\_H Scan : 27746

Andromeda score : 123.32

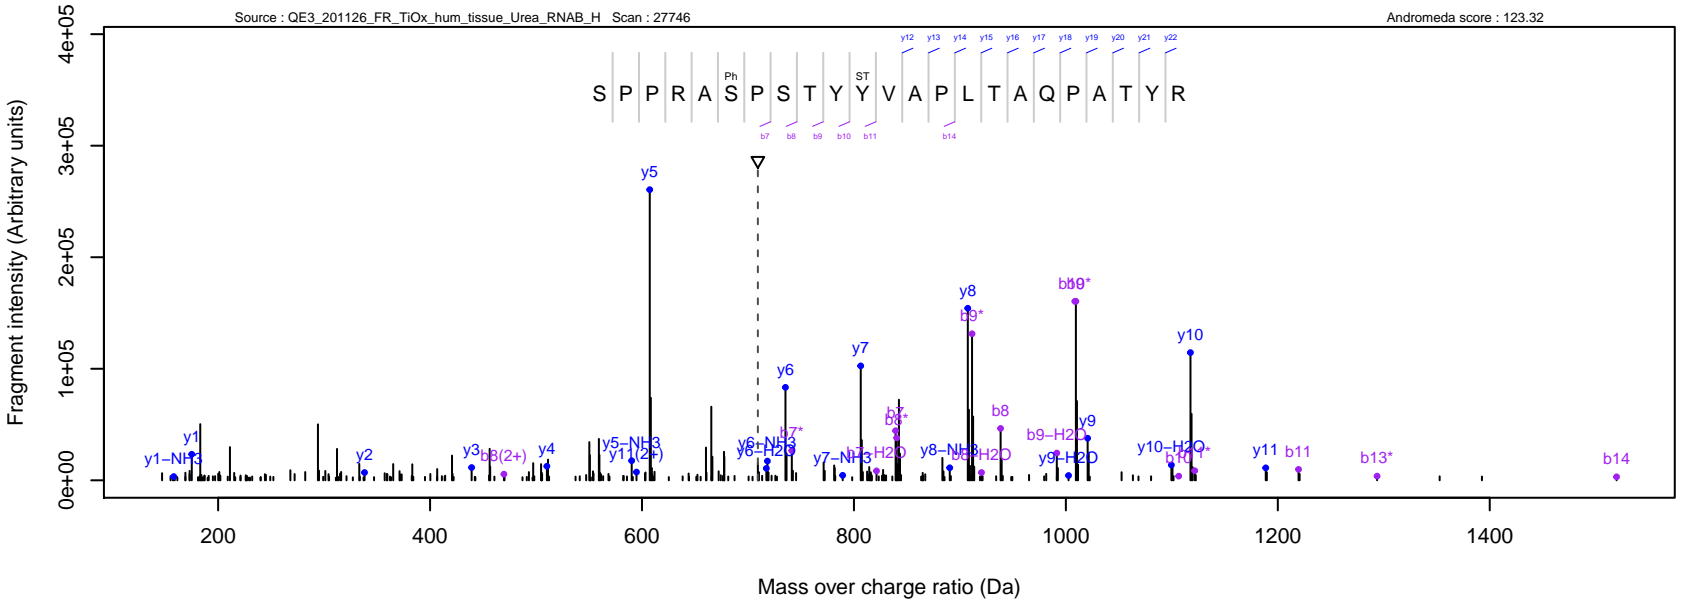

KPPAPPS(Phospho (STY))PVQSQSPSTNWSPAVPVK-4+

Source : QE3\_201126\_FR\_TiOx\_hum\_tissue\_Urea\_RNAB\_N Scan : 23770

Andromeda score : 123.31

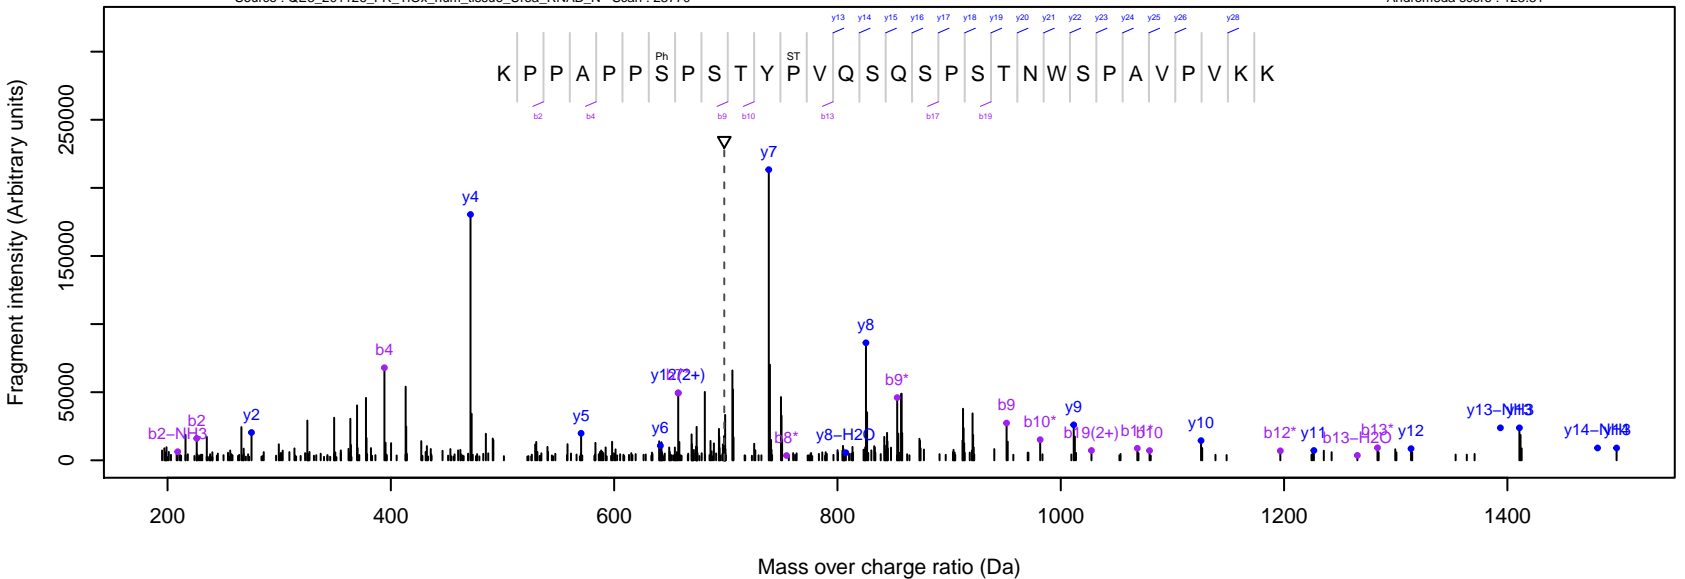

KRLS(Phospho (STY))QSDVDVIR-3+

Source : QE3\_201126\_FR\_TiOx\_hum\_tissue\_Urea\_RNAB\_N Scan : 9529

Andromeda score : 123.29

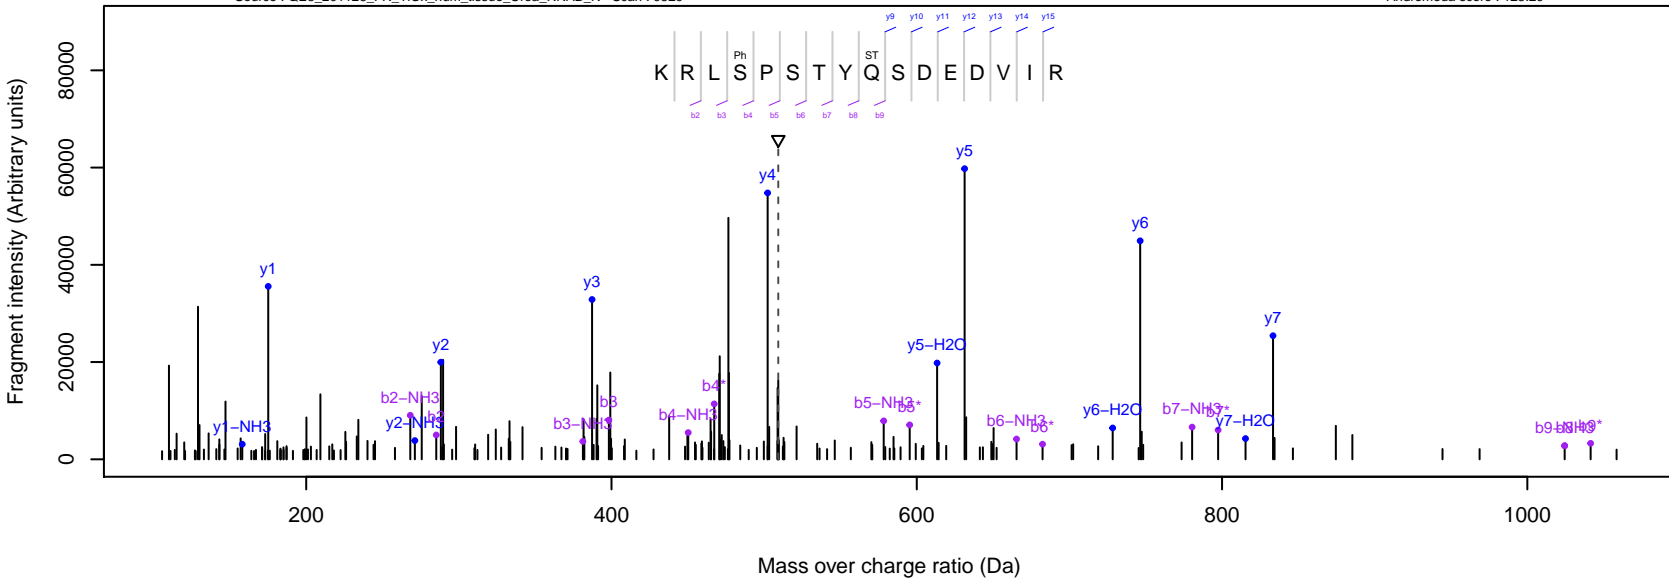

ADGYEPPVES(Phospho (STY))V-2+

Source : QE3\_201126\_FR\_TiOx\_hum\_tissue\_Urea\_RNAB\_H Scan : 32315

Andromeda score : 123.26

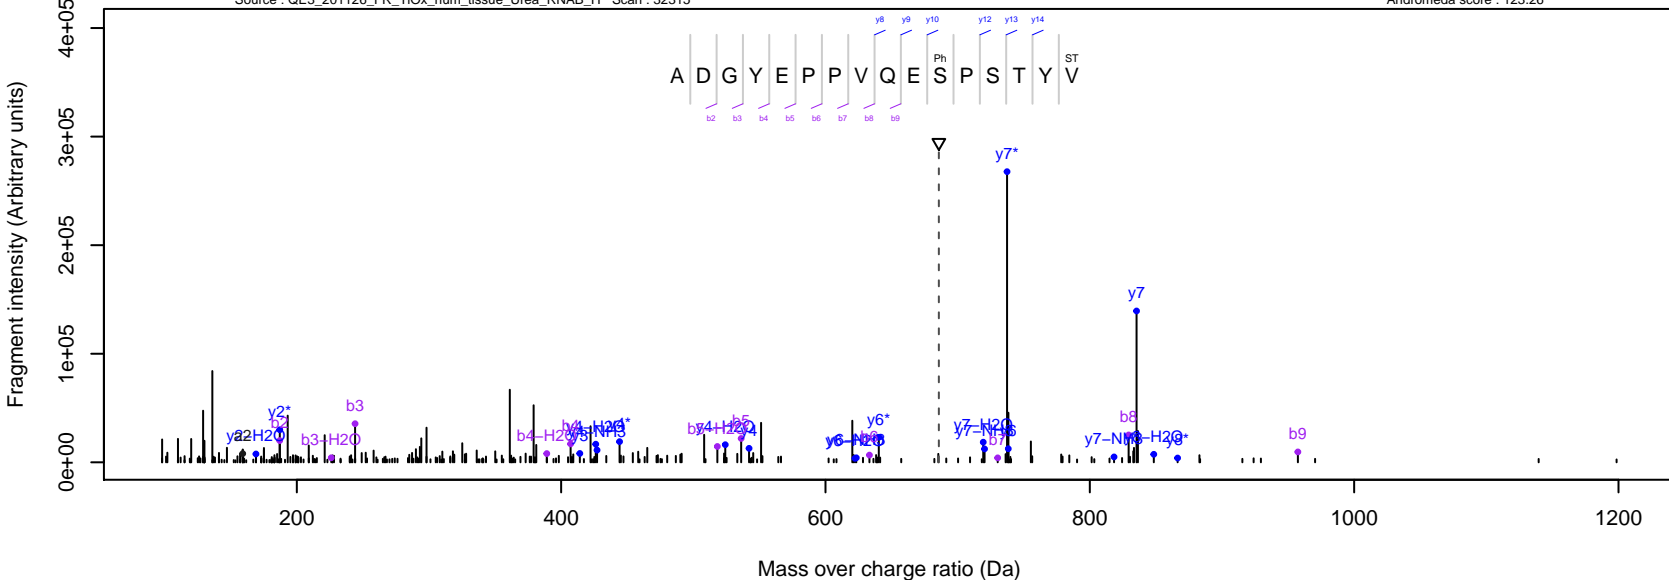

SVTQATQTS(Phospho (STY))PGVPWPSQSANPEFSFDFTIR-3+

Source : QE3\_201126\_FR\_TiOx\_hum\_tissue\_Urea\_RNAB\_N Scan : 61818

Andromeda score : 123.24

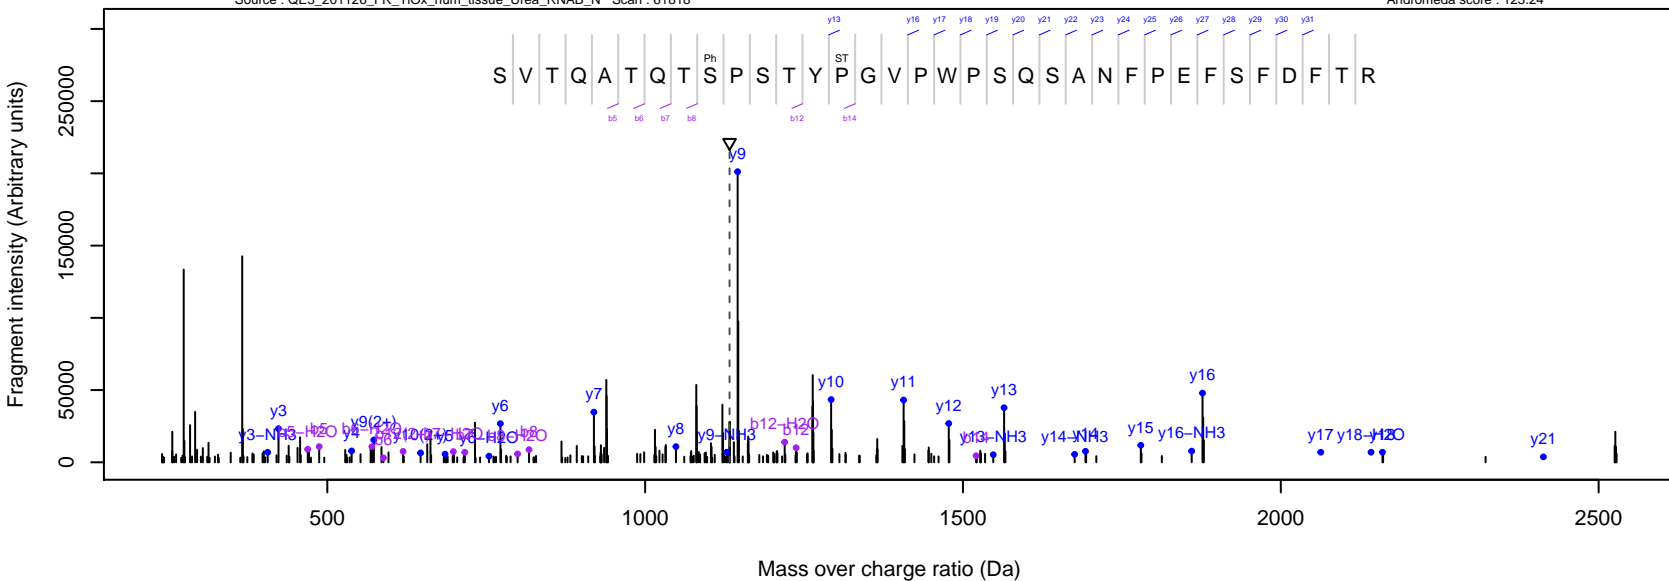

AAKPGPAEAPSPTASPSGDAS(SPhospho(STY))PPATAPYDPR-3+

Source : QE3\_201126\_FR\_TiOx\_hum\_tissue\_Urea\_RNAB\_N Scan : 22298

Andromeda score : 123.21

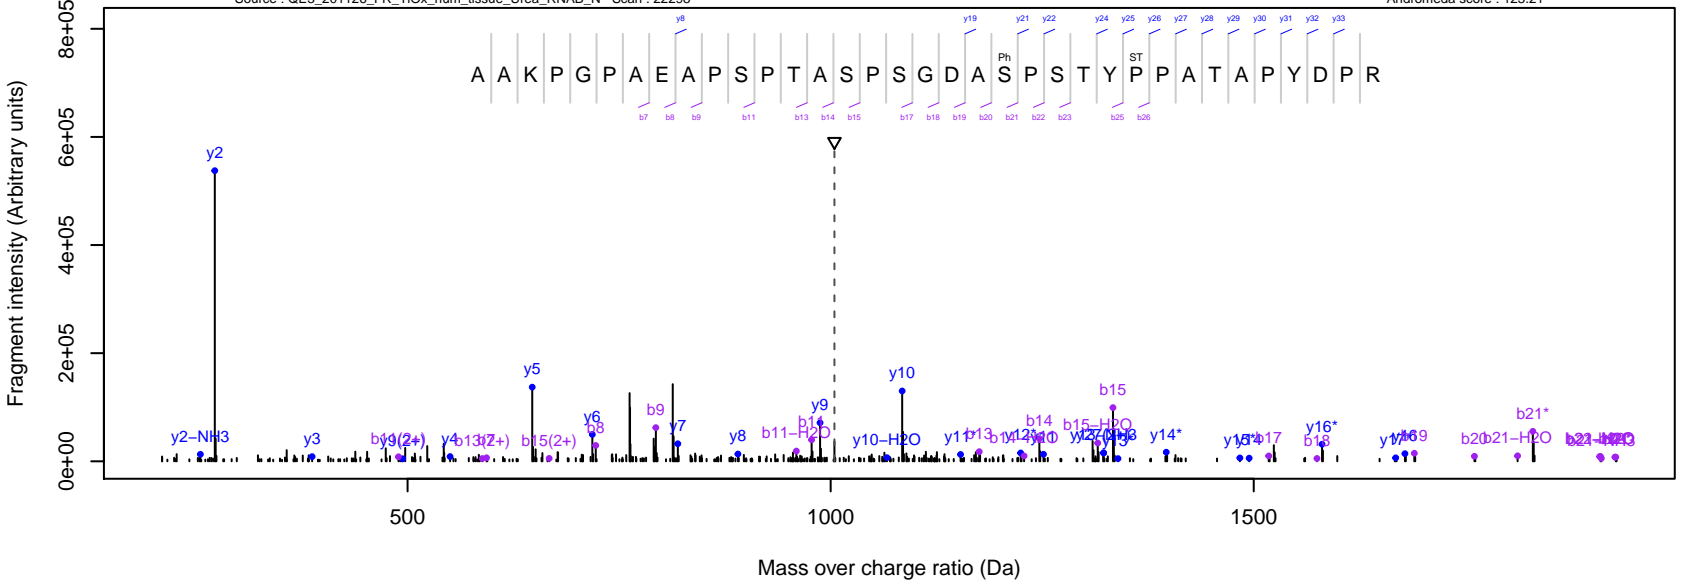

AAYGDL(SPhospho(STY))S(SPhospho(STY))EEEEENEPESLGVVYK-3+

Source : QE3\_201126\_FR\_TiOx\_hum\_tissue\_Urea\_RNAB\_H Scan : 51844

Andromeda score : 123.19

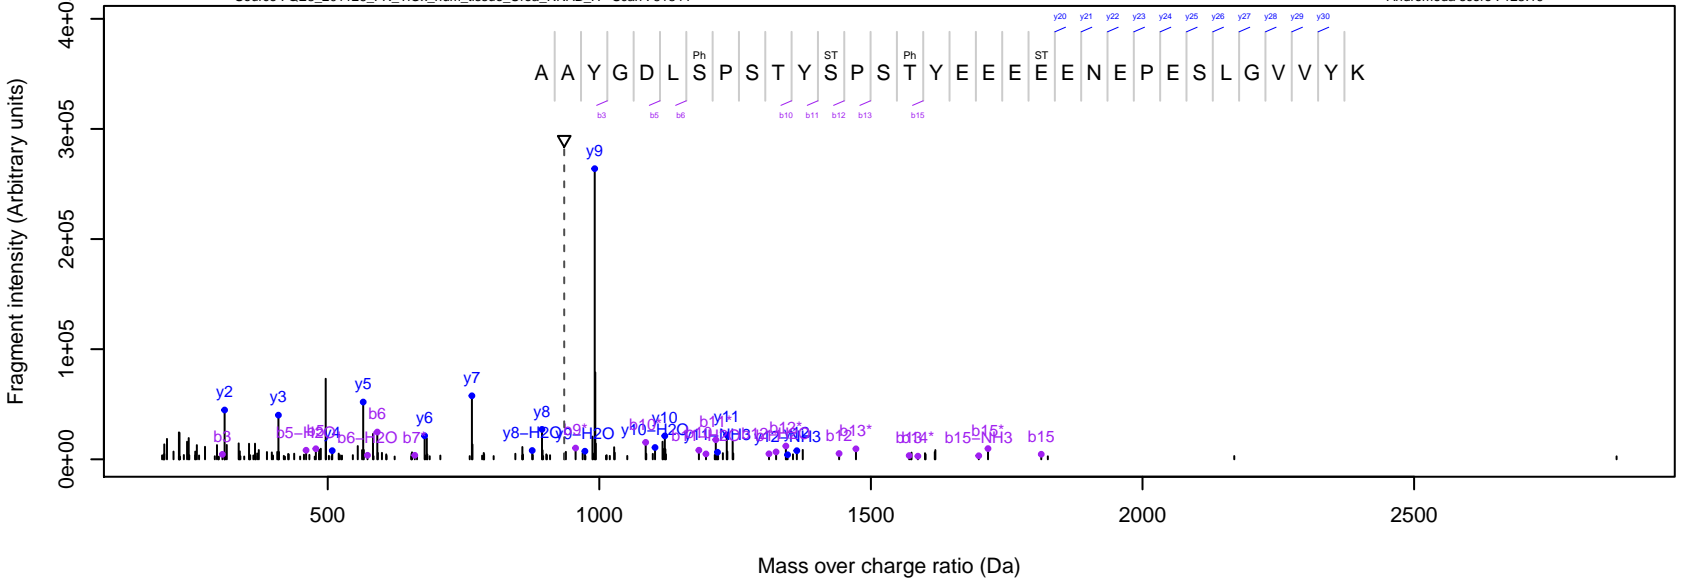

FSEM(Oxidation(M))MNMN(Oxidation(M))GGDEDVLDPEVDGADDD(SPhospho(STY))QD(SPhospho(STY))DDEKMPDLE-4+

Source : QE3\_201126\_FR\_TiOx\_hum\_tissue\_Urea\_RNAB\_N Scan : 57686

Andromeda score : 123.19

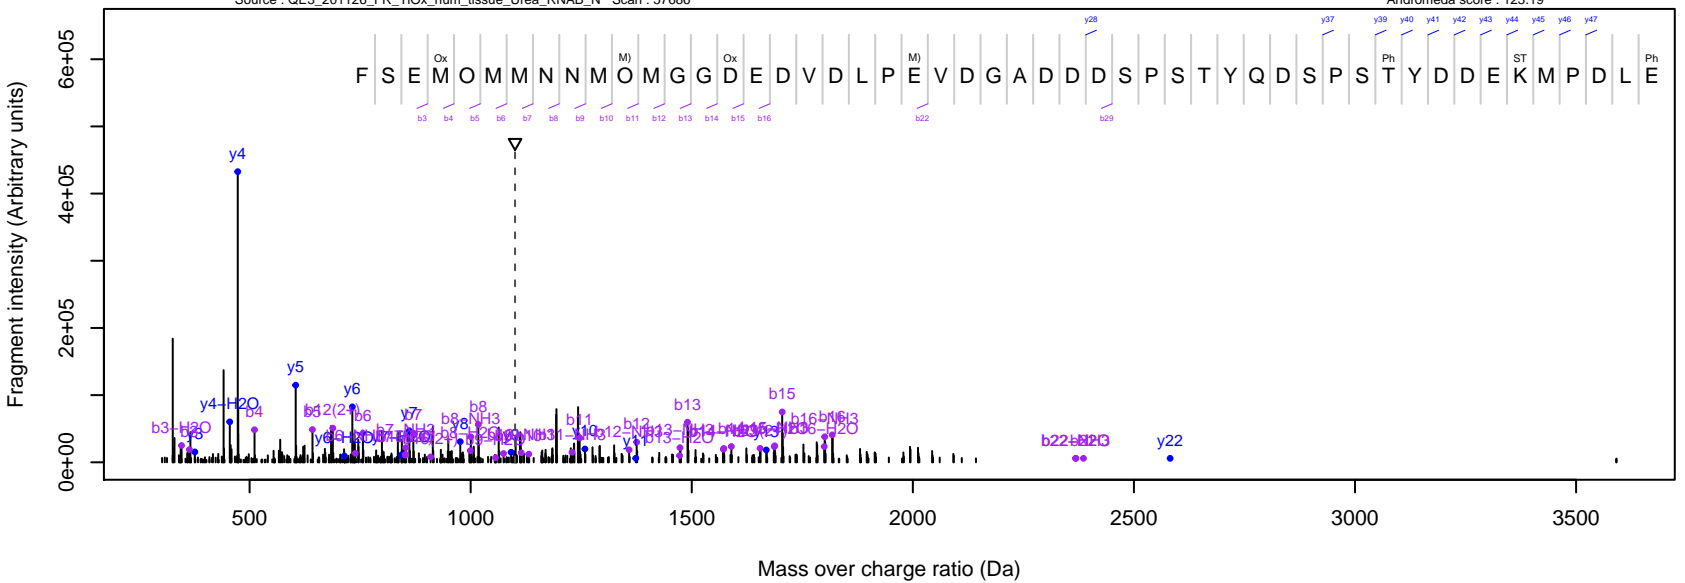

RSS(Phospho (STY))M(Oxidation (M))SLYTAASVIDTASK-3+

Source : QE3\_201126\_FR\_TiOx\_hum\_tissue\_Urea\_RNAB\_B Scan : 31594

Andromeda score : 123.19

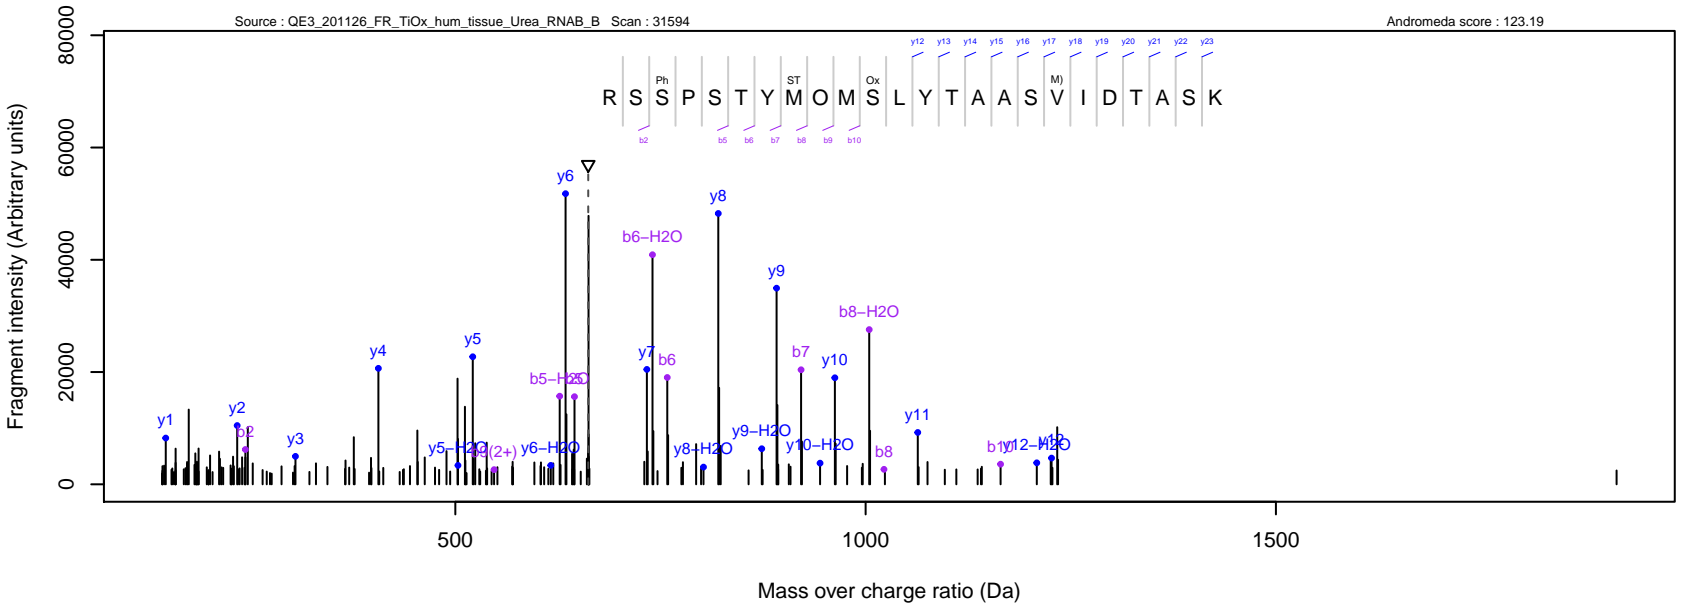

HSQS(Phospho (STY))MIEDAQLPLEQK-3+

Source : QE3\_201126\_FR\_TiOx\_hum\_tissue\_Urea\_RNAB\_H Scan : 29790

Andromeda score : 123.16

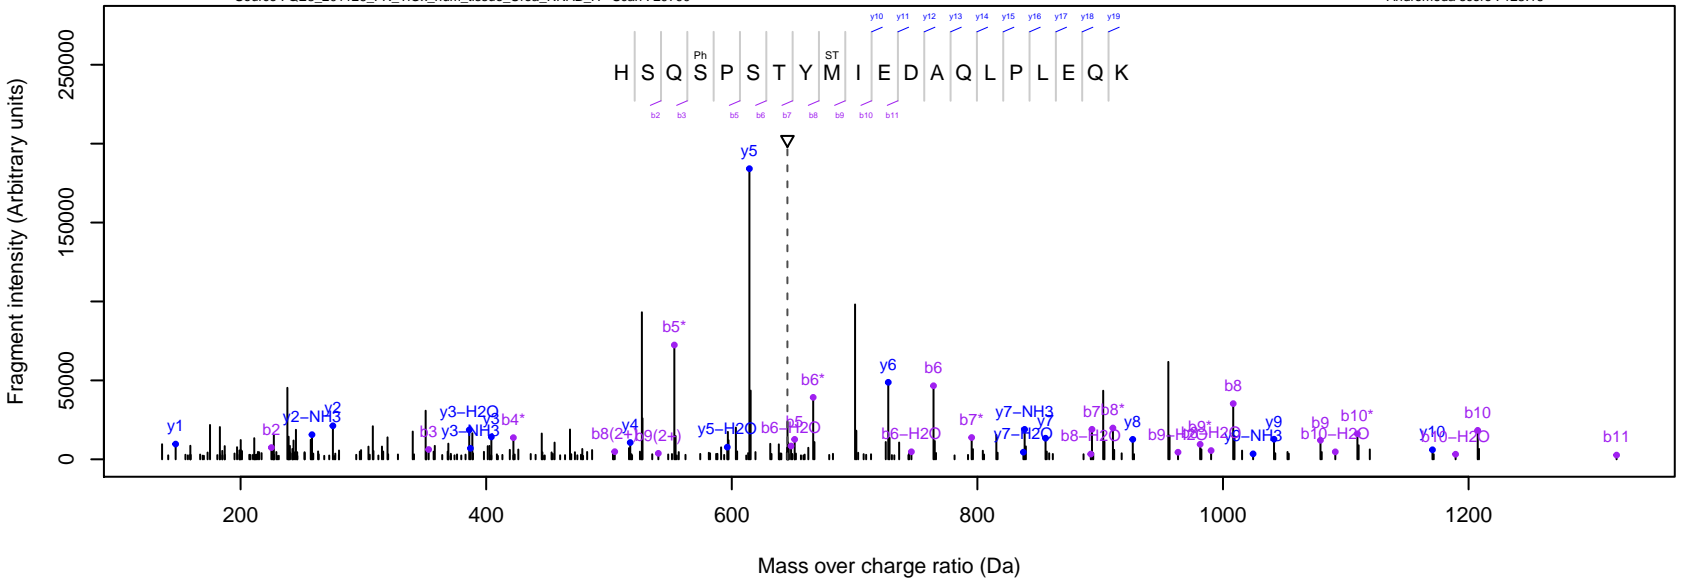

ETPLPHLTSDVDKALQNSPSTYPR-3+

Source : QE3\_201126\_FR\_TiOx\_hum\_tissue\_Urea\_RNAB\_H Scan : 30511

Andromeda score : 123.14

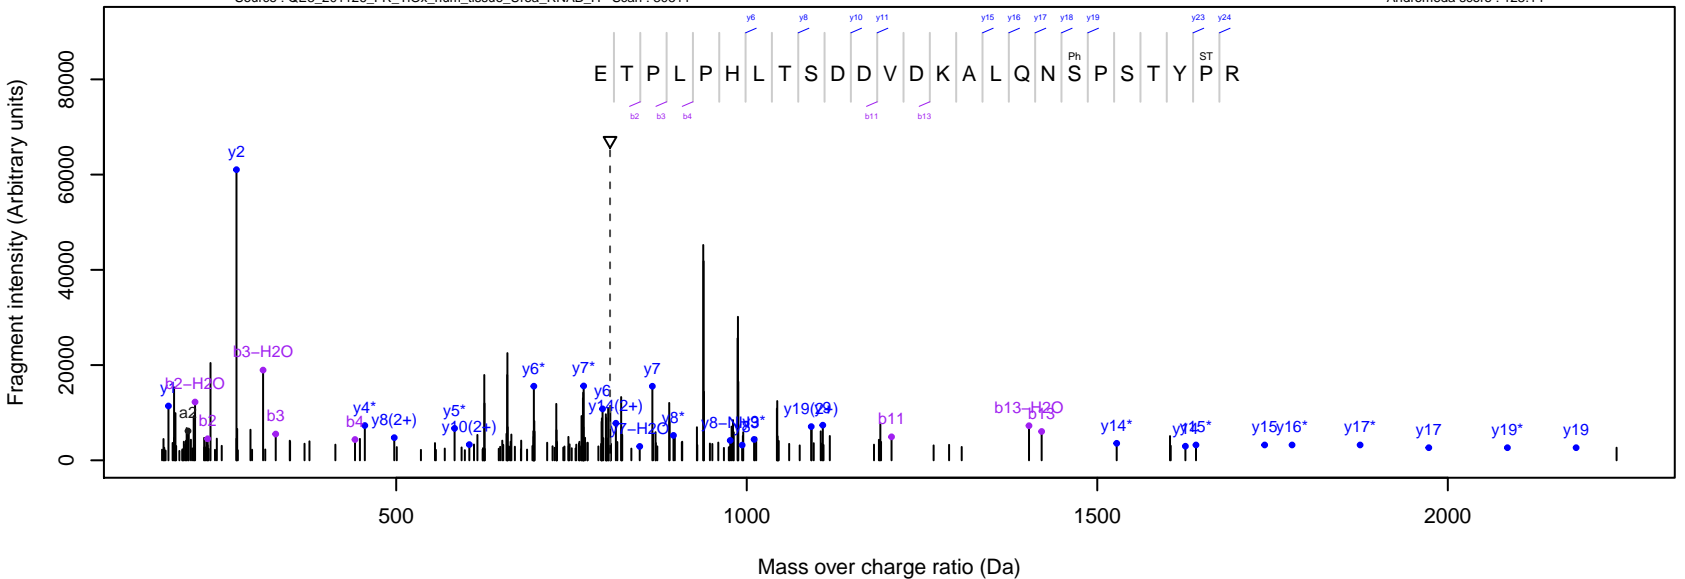

YRSQS(Phospho (STY))GEDESMOMNQPGPIK-3+

Source : QE3\_201126\_FR\_TiOx\_hum\_tissue\_Urea\_RNAB\_H Scan : 9504

Andromeda score : 123.14

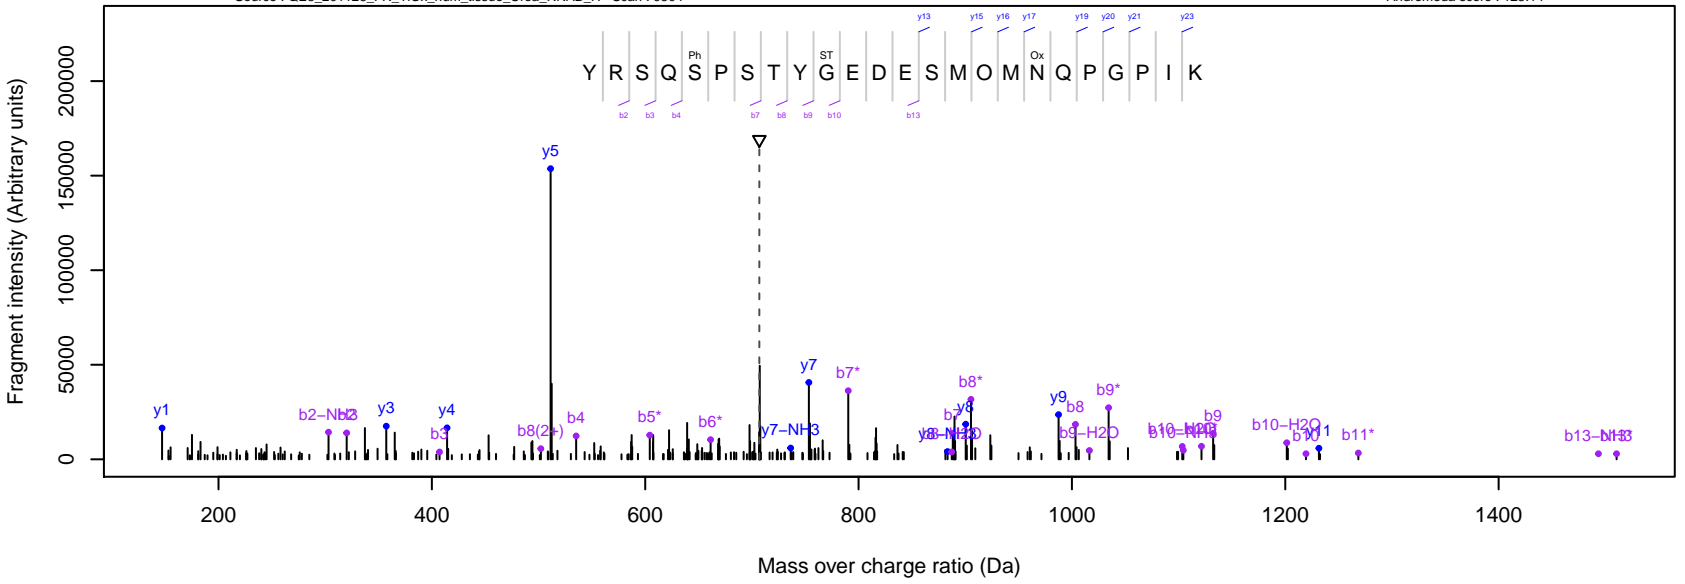

AYS(Phospho (STY))GSDLPSSSSGGANGTAGGGGAR-2+

Source : QE3\_201126\_FR\_TiOx\_hum\_tissue\_Urea\_RNAB\_B Scan : 16664

Andromeda score : 123.12

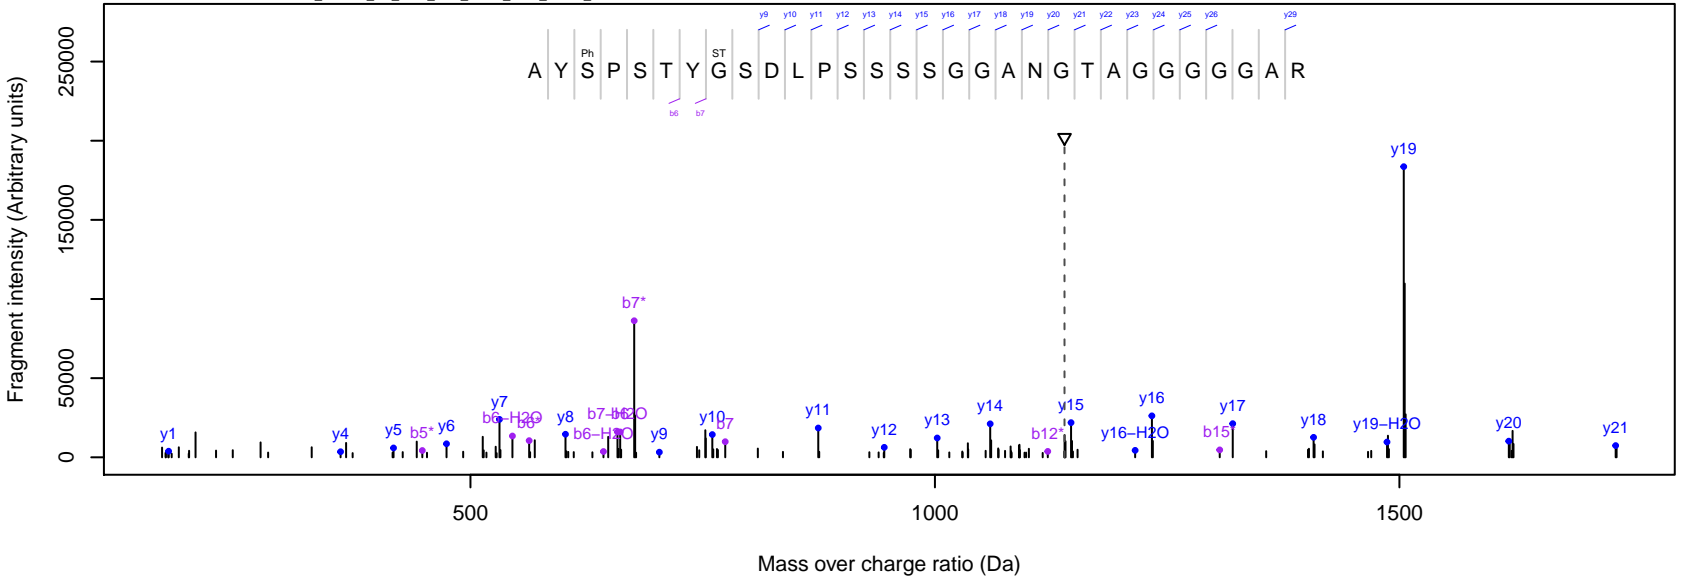

S(Phospho (STY))TSATDTHHVEMOMAR-2+

Source : QE3\_201126\_FR\_TiOx\_hum\_tissue\_Urea\_RNAB\_H Scan : 3964

Andromeda score : 123.1

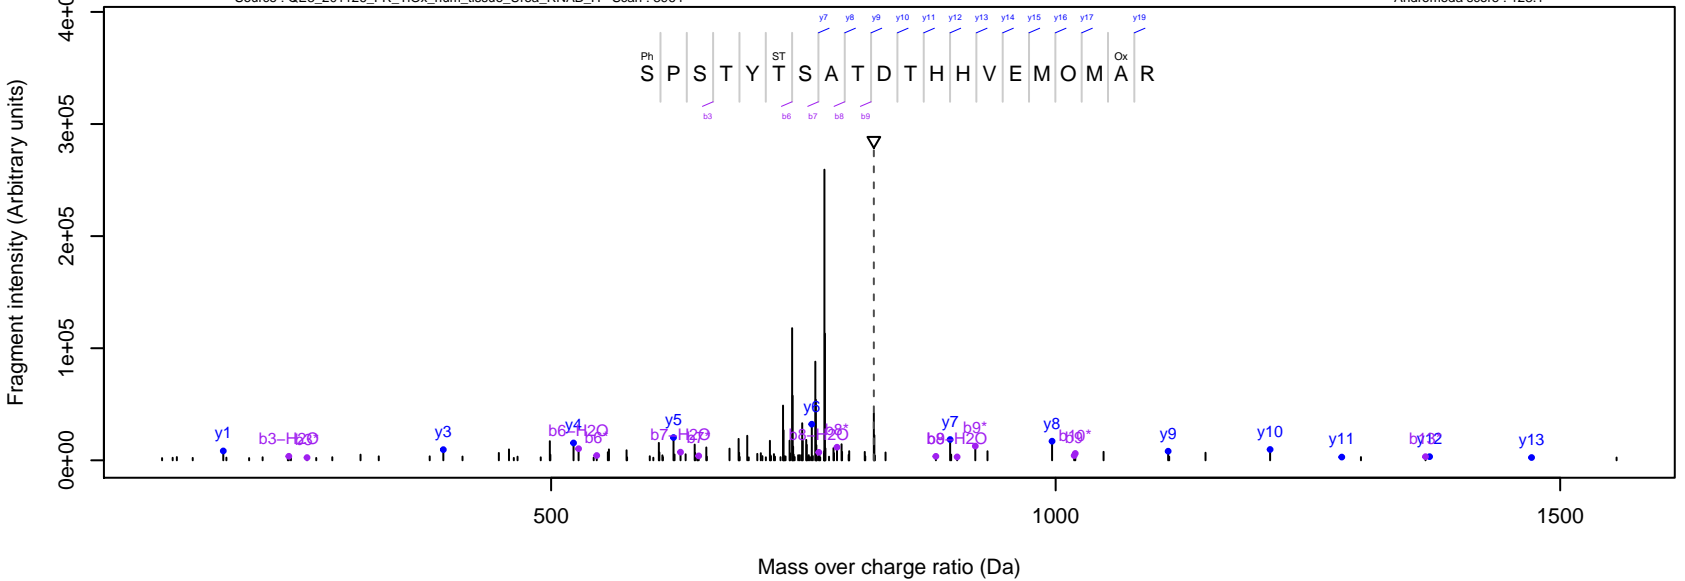

QVEDLQATFSSIHS(Phospho (STY))FQDLSSSLAQRS-3+

Source : QE3\_201126\_FR\_TiOx\_hum\_tissue\_Urea\_RNAB\_B Scan : 58483

Andromeda score : 123.09

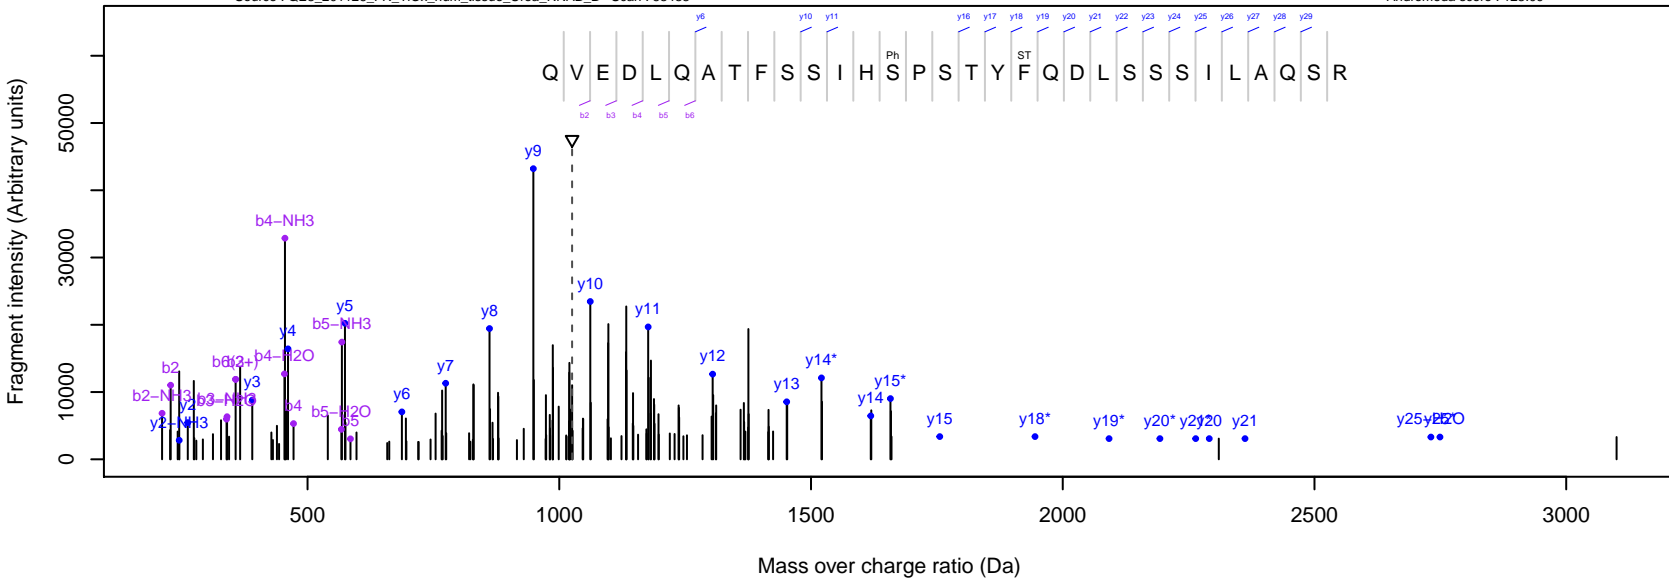

TVIRLPS(Phospho (STY))GSGAAS(Phospho (STY))PTGSAVDIR-3+

Source : QE3\_201126\_FR\_TiOx\_hum\_tissue\_Urea\_RNAB\_B Scan : 38040

Andromeda score : 123.07

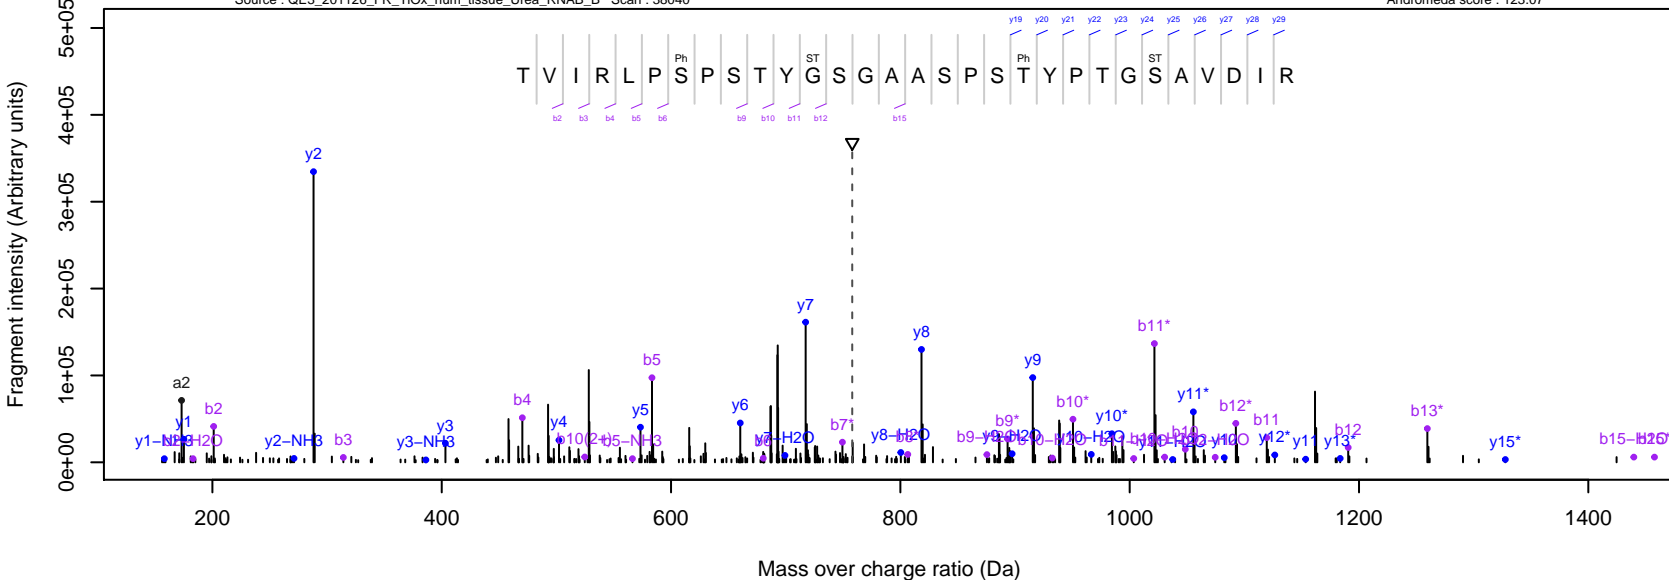

SYEDMIGEEVPSDQYYWAPLAQHERGS(Phospho (STY))LAS(Phospho (STY))LDS(Phospho (STY))LRK-4+

Source : QE3\_201126\_FR\_TiOx\_hum\_tissue\_Urea\_RNAB\_B Scan : 56164

Andromeda score : 123.06

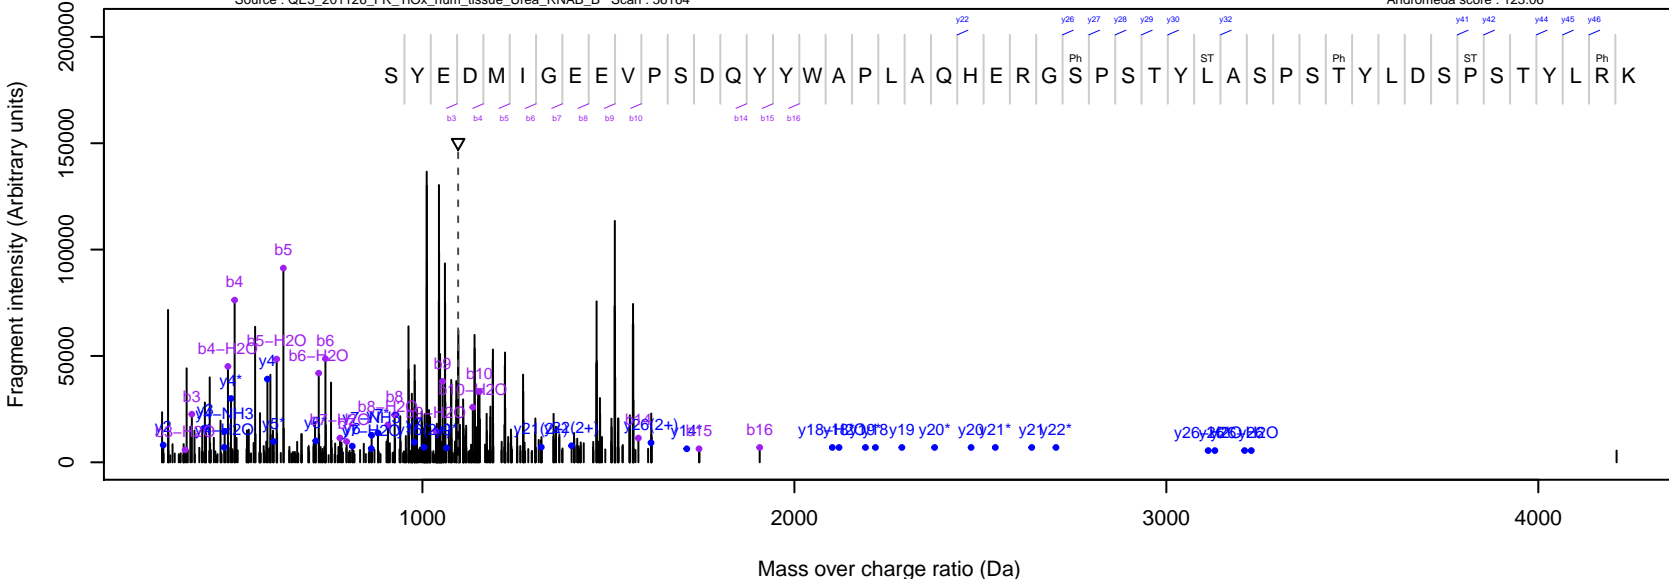



FLEESVSM(Oxidation (M))S(Phospho (STY))PEER-2+

Source : QE3\_201126\_FR\_TiOx\_hum\_tissue\_Urea\_RNAB\_B Scan : 22685

Andromeda score : 123.02

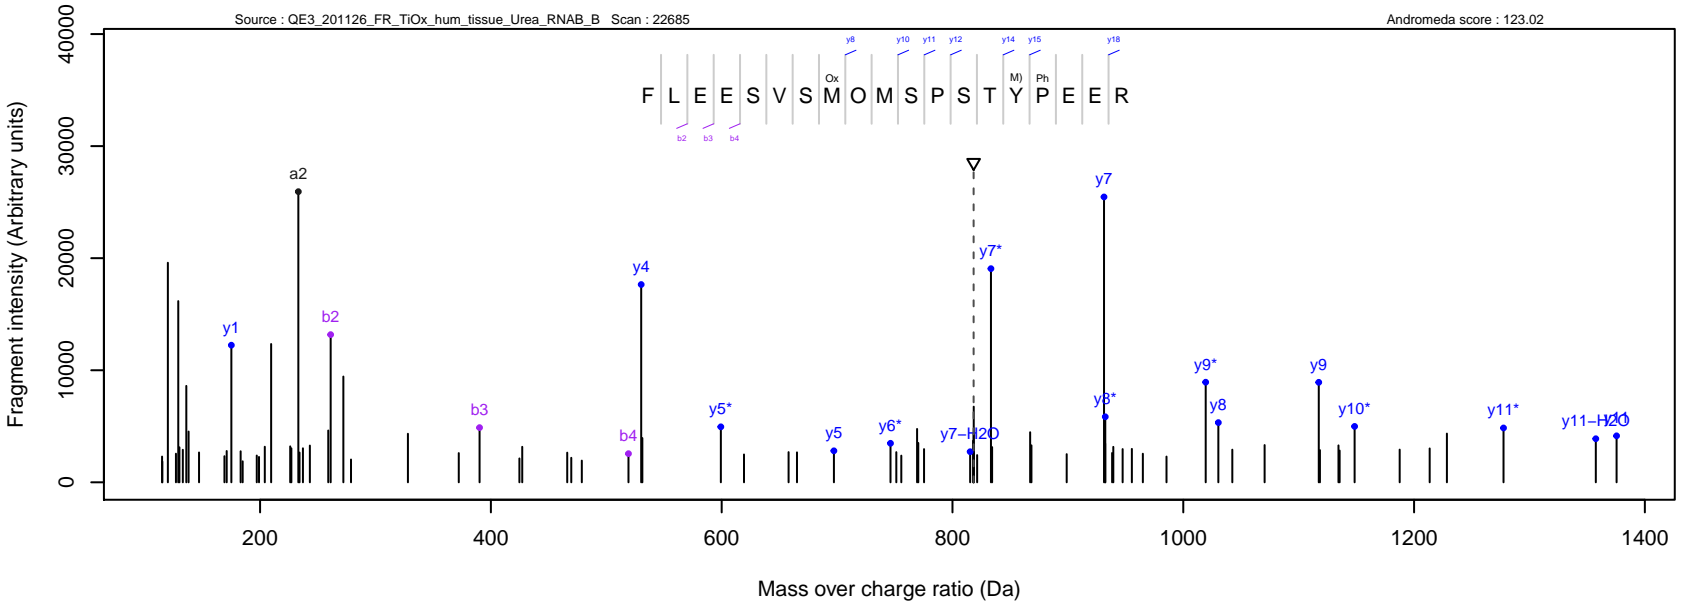

SGS(Phospho (STY))PKLDPSEVYLK-2+

Source : QE3\_201126\_FR\_TiOx\_hum\_tissue\_Urea\_RNAB\_H Scan : 27412

Andromeda score : 123.02

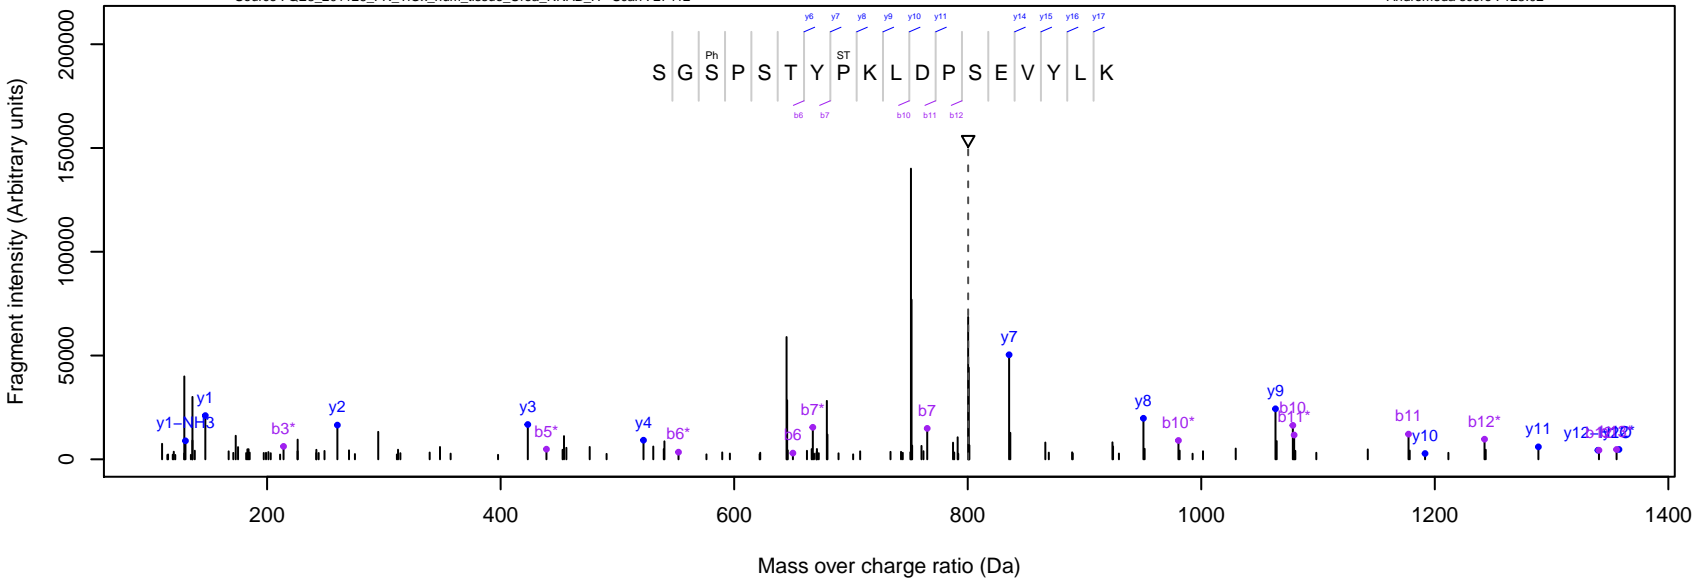

YQLQS(Phospho (STY))QENFEAFMK-2+

Source : QE3\_201126\_FR\_TiOx\_hum\_tissue\_Urea\_RNAB\_B Scan : 48298

Andromeda score : 123.02

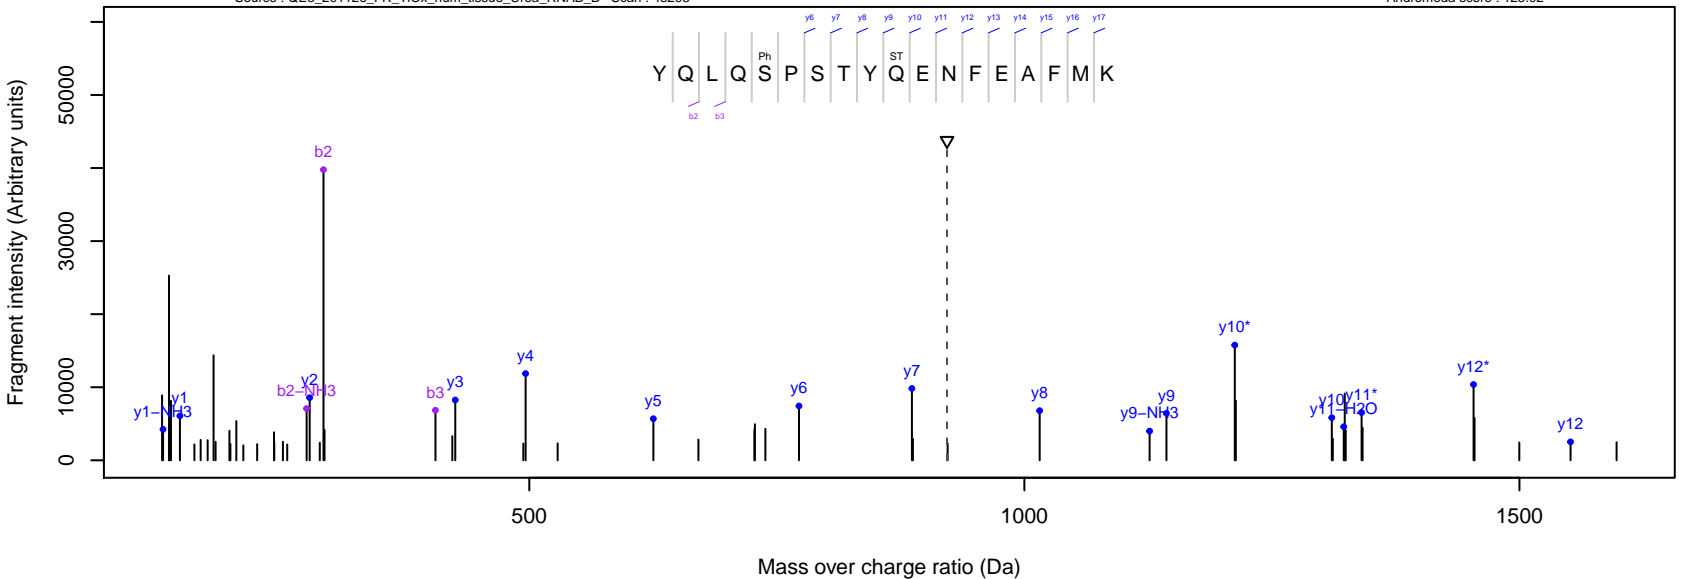

S(Phospho (STY))SELLGQAAR-2+

Source : QE3\_201126\_FR\_TiOx\_hum\_tissue\_Urea\_RNAB\_B Scan : 18905

Andromeda score : 122.98

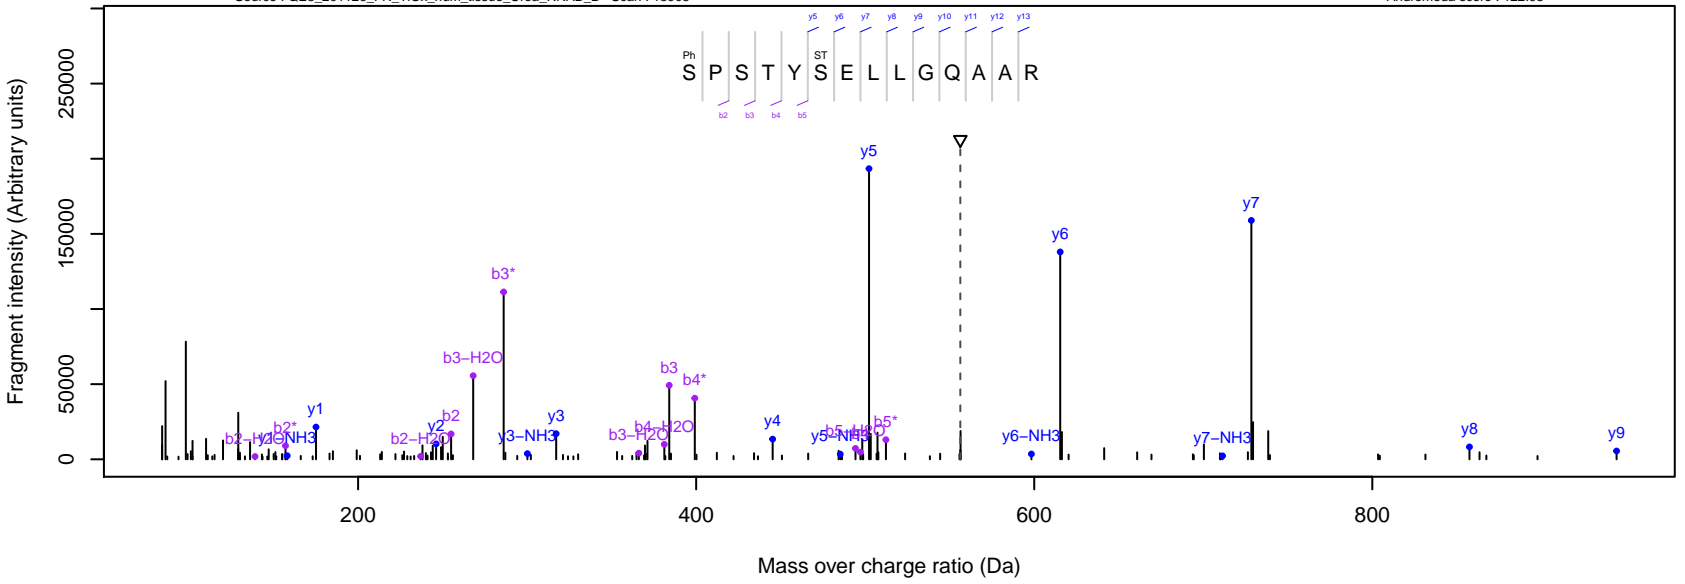

AAVVTS(Phospho (STY))PPPTTAPHK-2+

Source : QE3\_201126\_FR\_TiOx\_hum\_tissue\_Urea\_RNAB\_B Scan : 11353

Andromeda score : 122.97

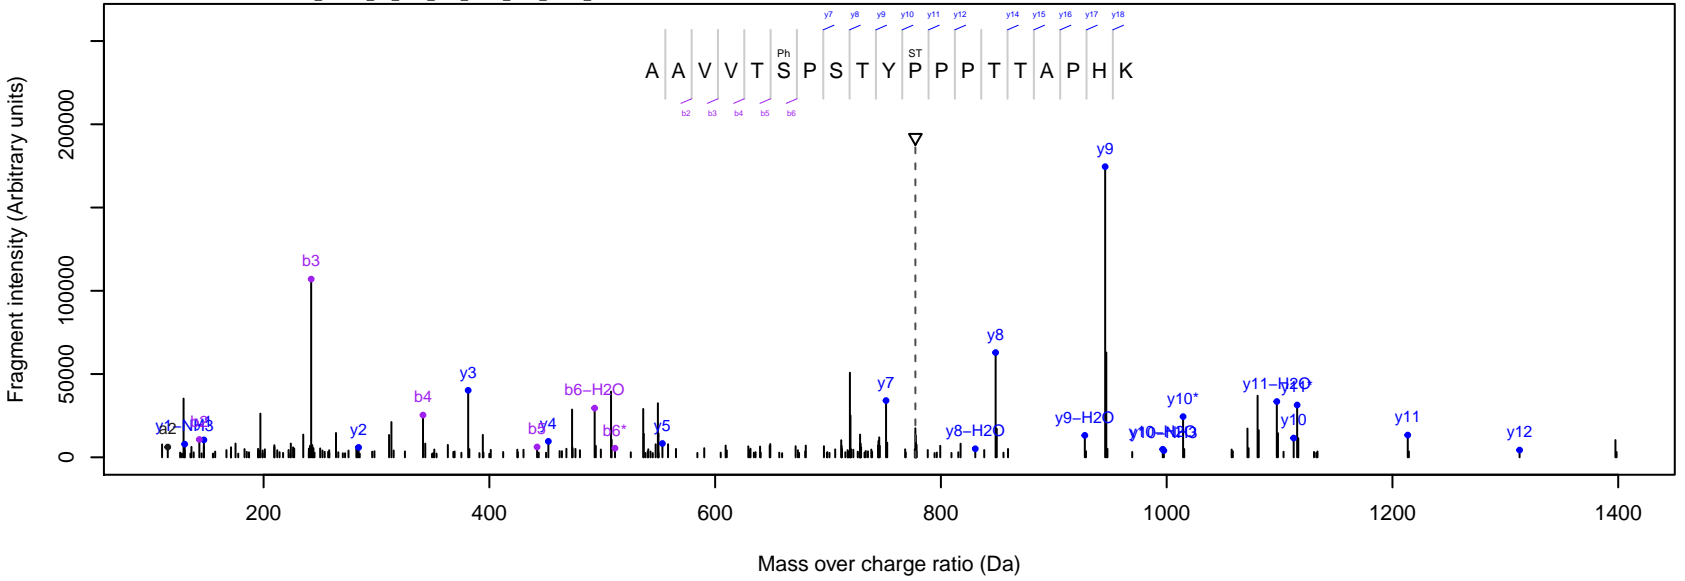

LDS(Phospho (STY))PPSPITEASEAAEAAEAGNLAVSSR-3+

Source : QE3\_201126\_FR\_TiOx\_hum\_tissue\_Urea\_RNAB\_B Scan : 57506

Andromeda score : 122.95

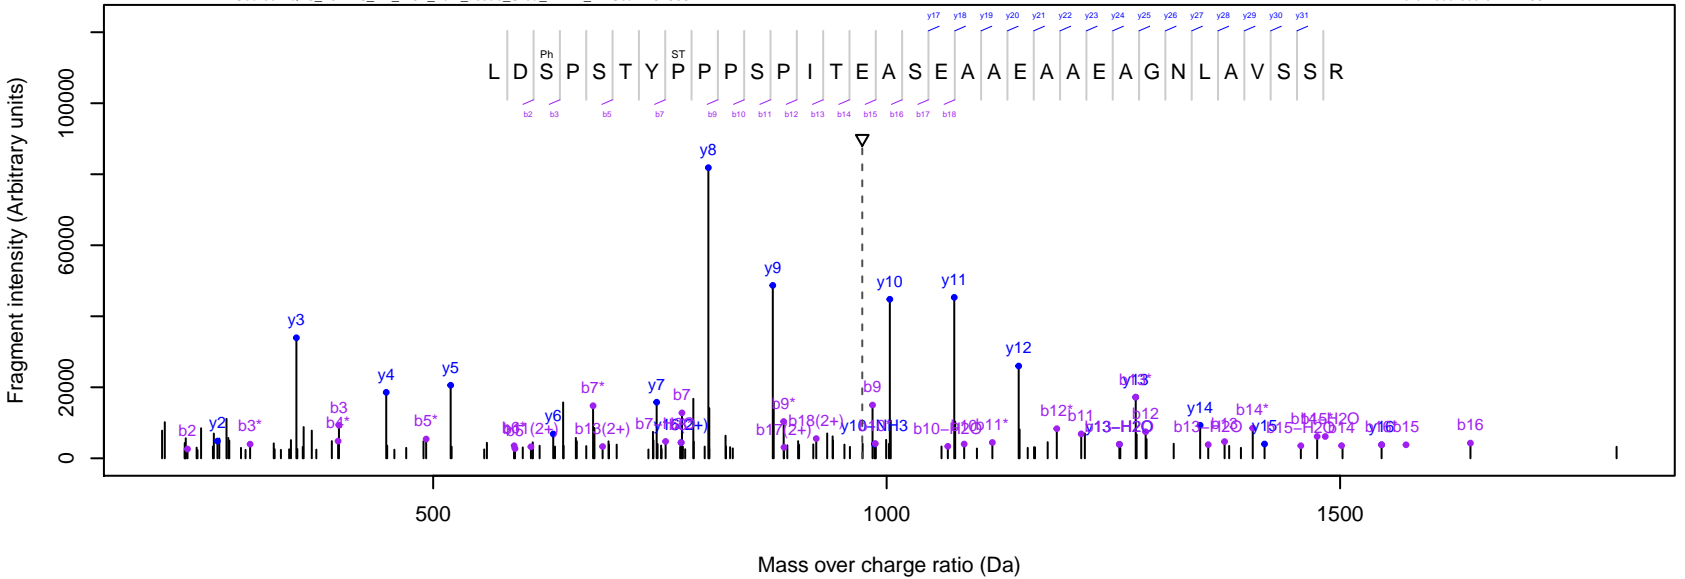

SGS(Phospho (STY))TESLNPRPQTTSIPADLHGMWYPTVR-3+

Source : QE3\_201126\_FR\_TiOx\_hum\_tissue\_Urea\_RNAB\_N Scan : 44196

Andromeda score : 122.95

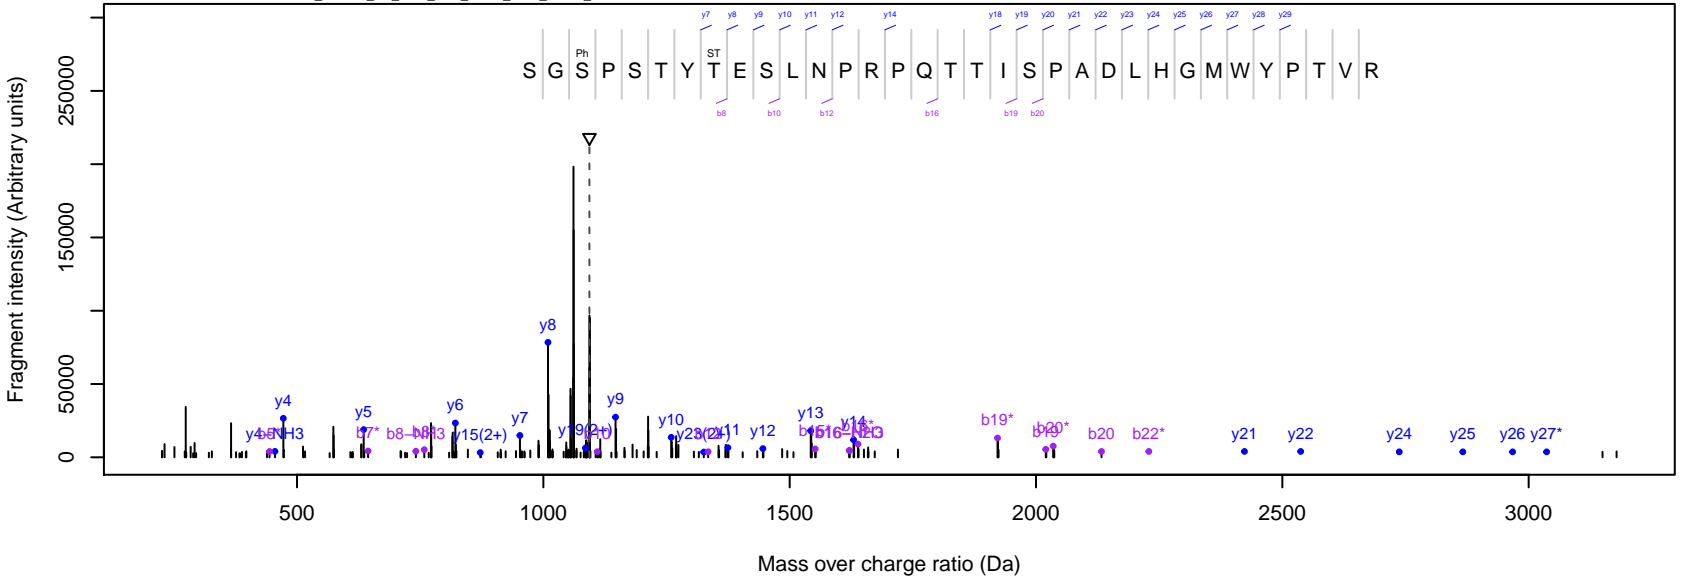

IEDVGS(Phospho (STY))DEEDDSGK-2+

Source : QE3\_201126\_FR\_TiOx\_hum\_tissue\_Urea\_RNAB\_H Scan : 11661

Andromeda score : 122.93

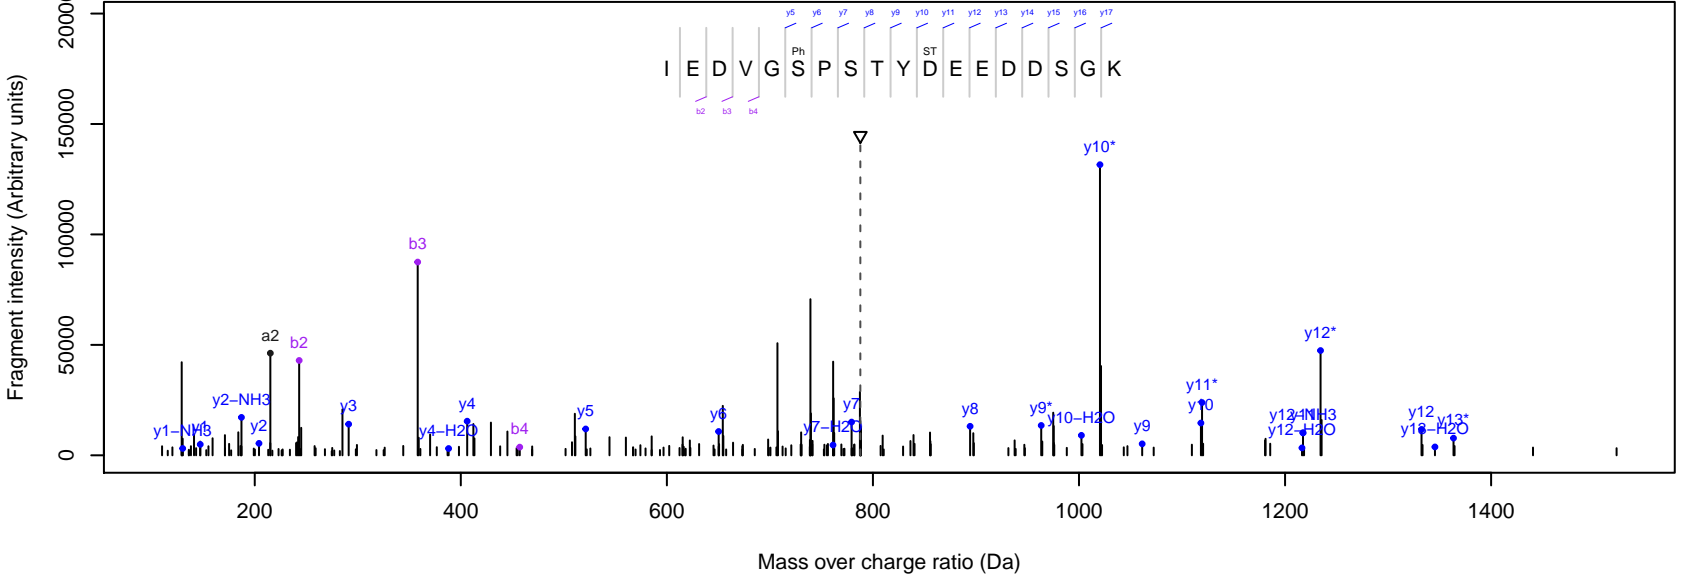

(Acetyl (Protein N-term))MITSELPVLQDSTNETTAHS(Phospho (STY))DAGS(Phospho (STY))ELEETE VK-3+

Source : QE3\_201126\_FR\_TiOx\_hum\_tissue\_Urea\_RNAB\_H Scan : 62459

Andromeda score : 122.88

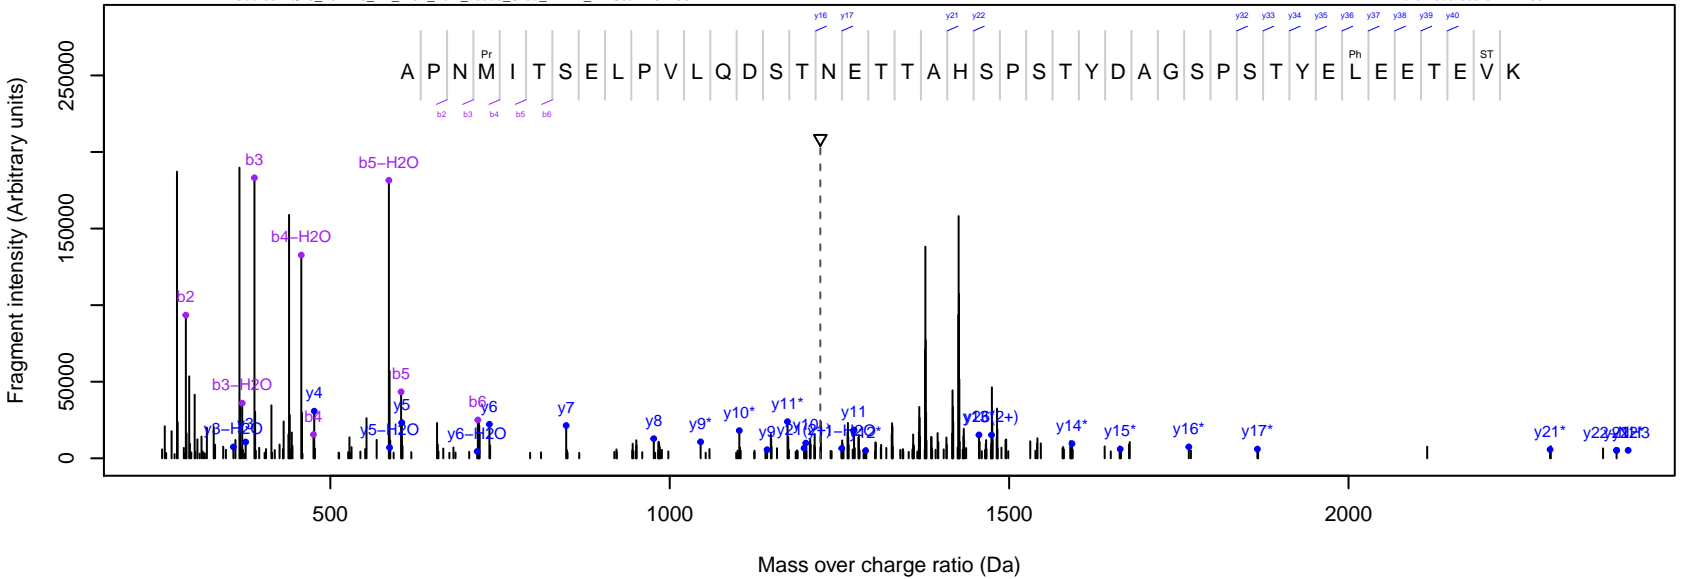

FLSAQSHST(Phospho (STY))SPQGLDPSLPLEGGAHQVLHNEK-4+

Source : QE3\_201126\_FR\_TiOx\_hum\_tissue\_Urea\_RNAB\_N Scan : 30087

Andromeda score : 122.81

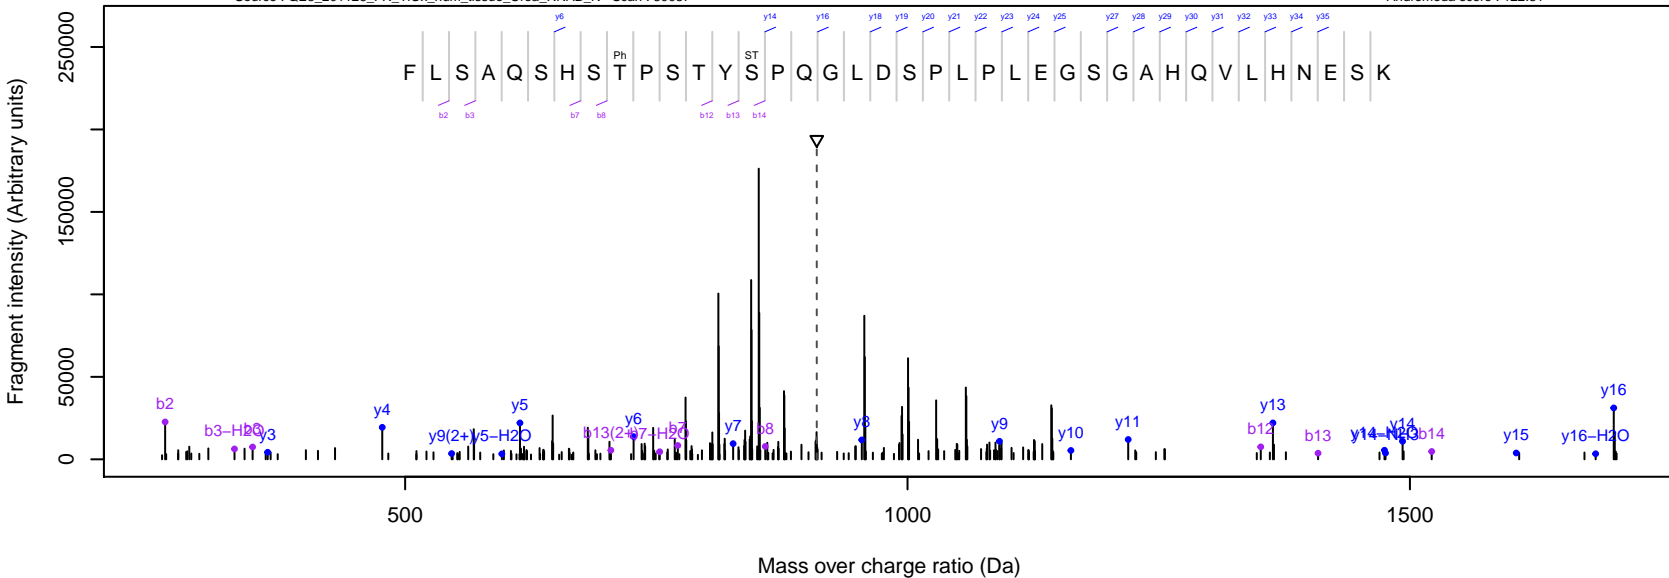

VSAGEPGSHPS(Phospho (STY))PAPRRS(Phospho (STY))PAGNK-3+

Source : QE3\_201126\_FR\_TiOx\_hum\_tissue\_Urea\_RNAB\_B Scan : 5160

Andromeda score : 122.79

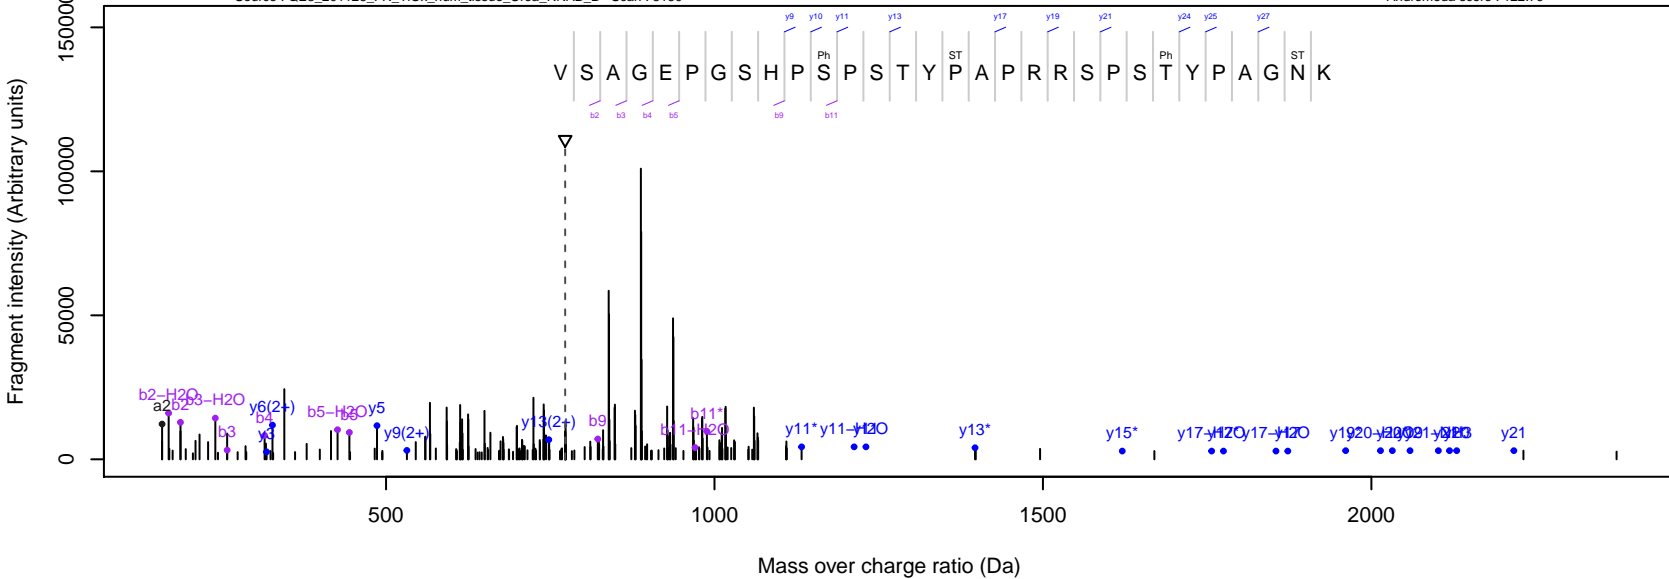

QLS(Phospho (STY))EYEGILDASK-2+

Source : QE3\_201126\_FR\_TiOx\_hum\_tissue\_Urea\_RNAB\_N Scan : 45368

Andromeda score : 122.78

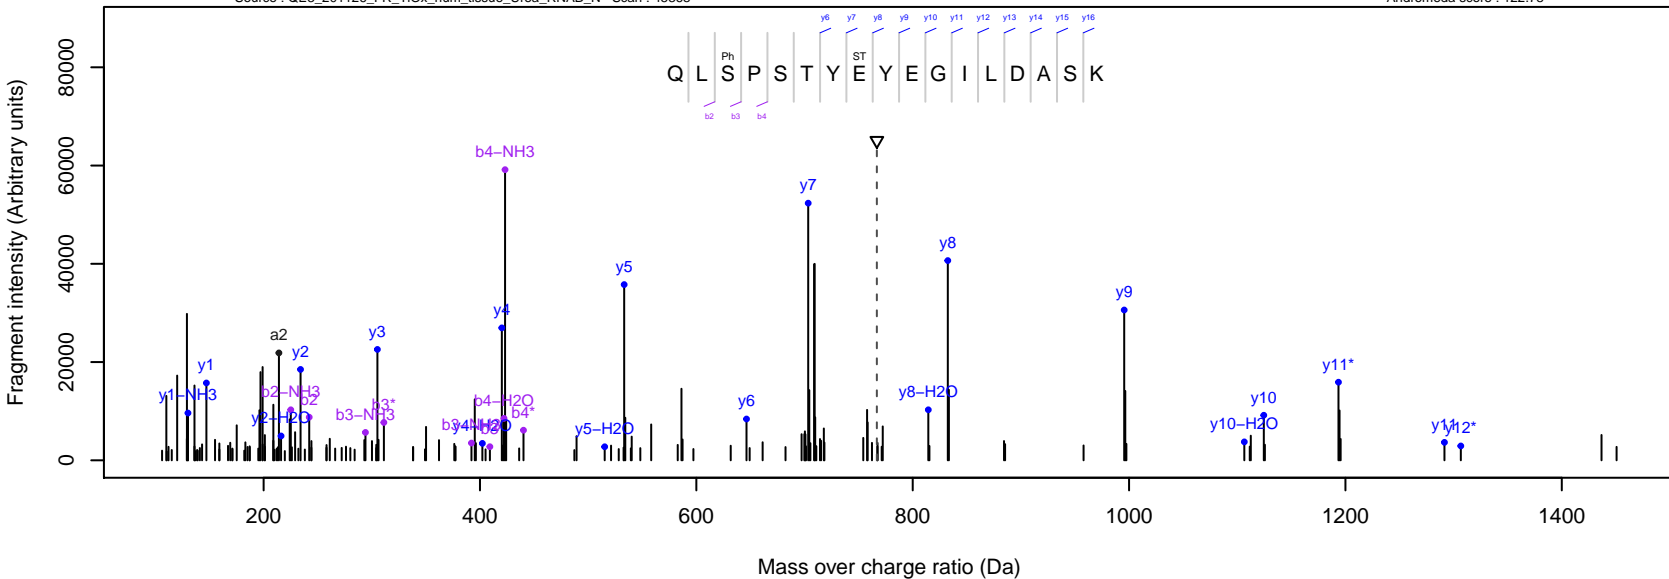

DRS(Phospho (STY))SSAPNVHINTIEPVNIDDLIR-4+

Source : QE3\_201126\_FR\_TiOx\_hum\_tissue\_Urea\_RNAB\_N Scan : 49221

Andromeda score : 122.66

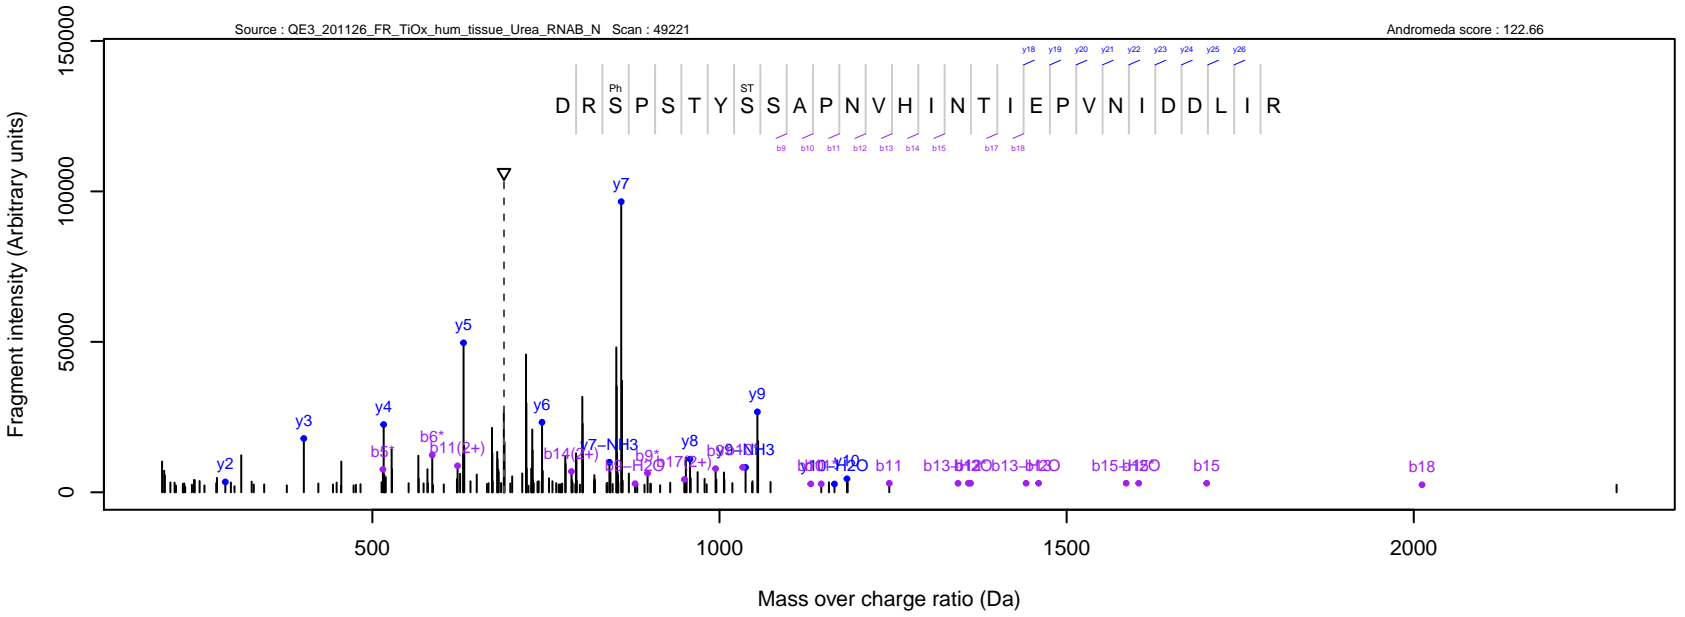

NALPPVLTTVNGQS(Phospho (STY))PPEHSAPAK-3+

Source : QE3\_201126\_FR\_TiOx\_hum\_tissue\_Urea\_RNAB\_N Scan : 29357

Andromeda score : 122.66

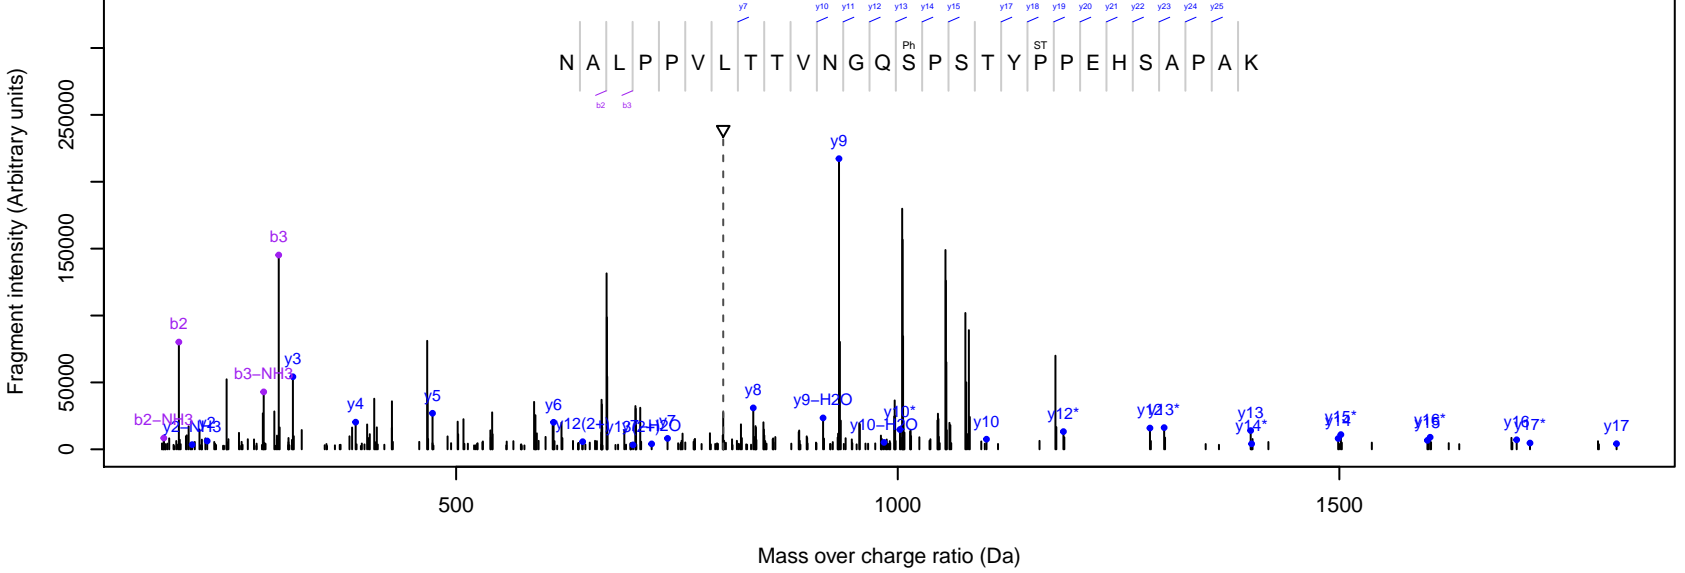

RES(Phospho (STY))VVNLENFR-2+

Source : QE3\_201126\_FR\_TiOx\_hum\_tissue\_Urea\_RNAB\_N Scan : 26975

Andromeda score : 122.64

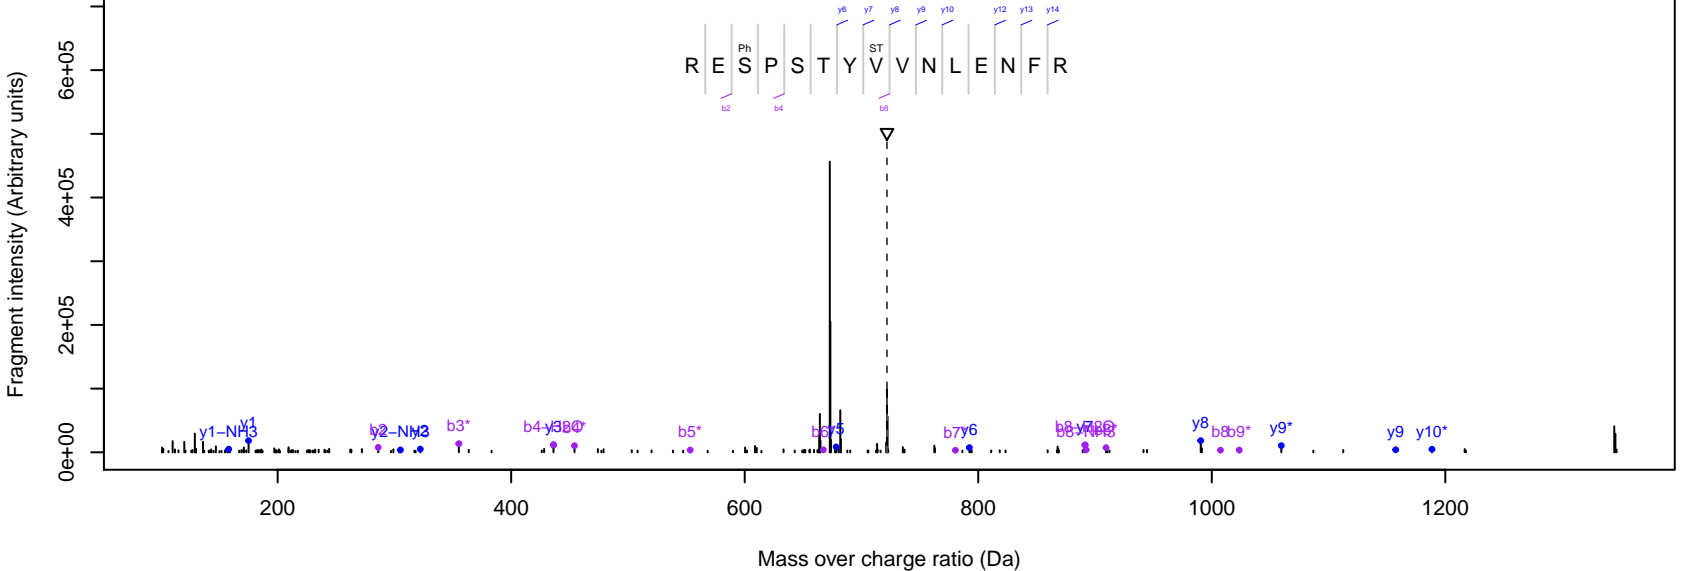

GS(Phospho (STY))SLSGTDDGAQEVVKDILEDVVTSIAIK-4+

Source : QE3\_201126\_FR\_TiOx\_hum\_tissue\_Urea\_RNAB\_H Scan : 62950

Andromeda score : 122.63

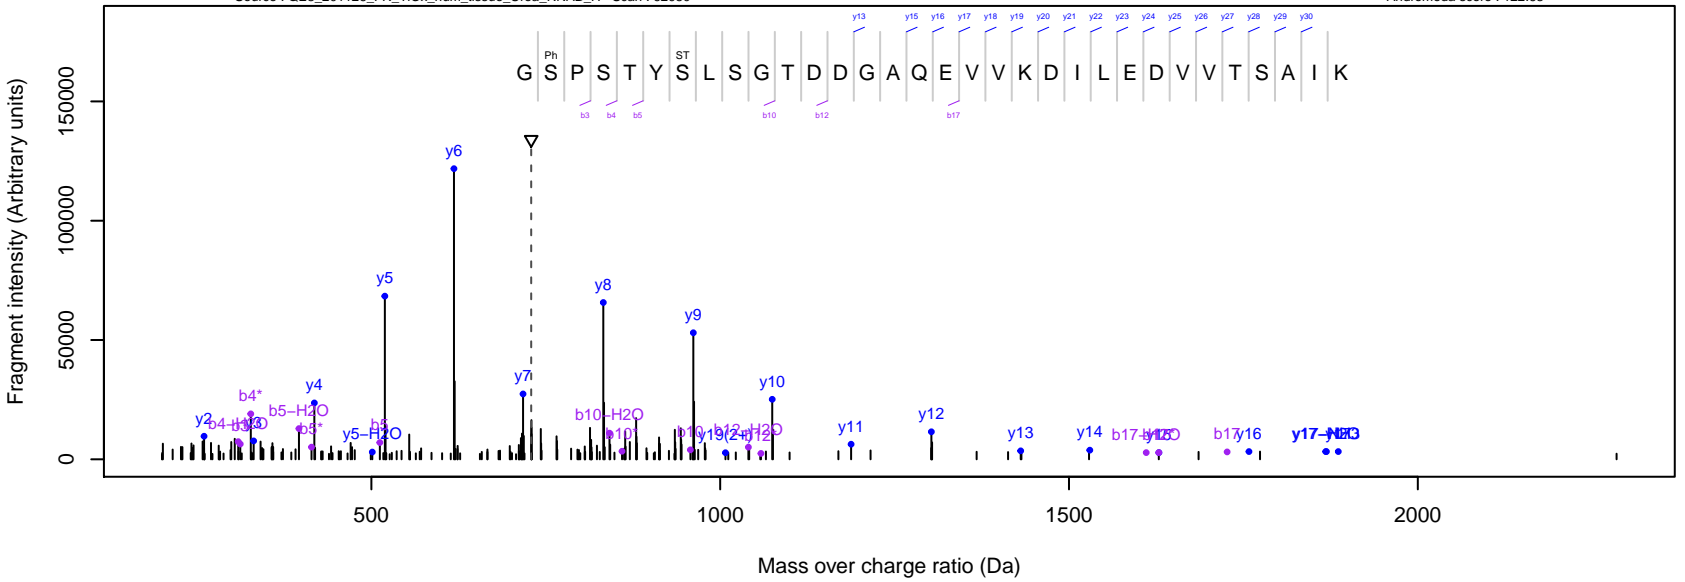

KDS(Phospho (STY))LPDADLASCGLSQSSASFFTPR-3+

Source : QE3\_201126\_FR\_TiOx\_hum\_tissue\_Urea\_RNAB\_N Scan : 47669

Andromeda score : 122.63

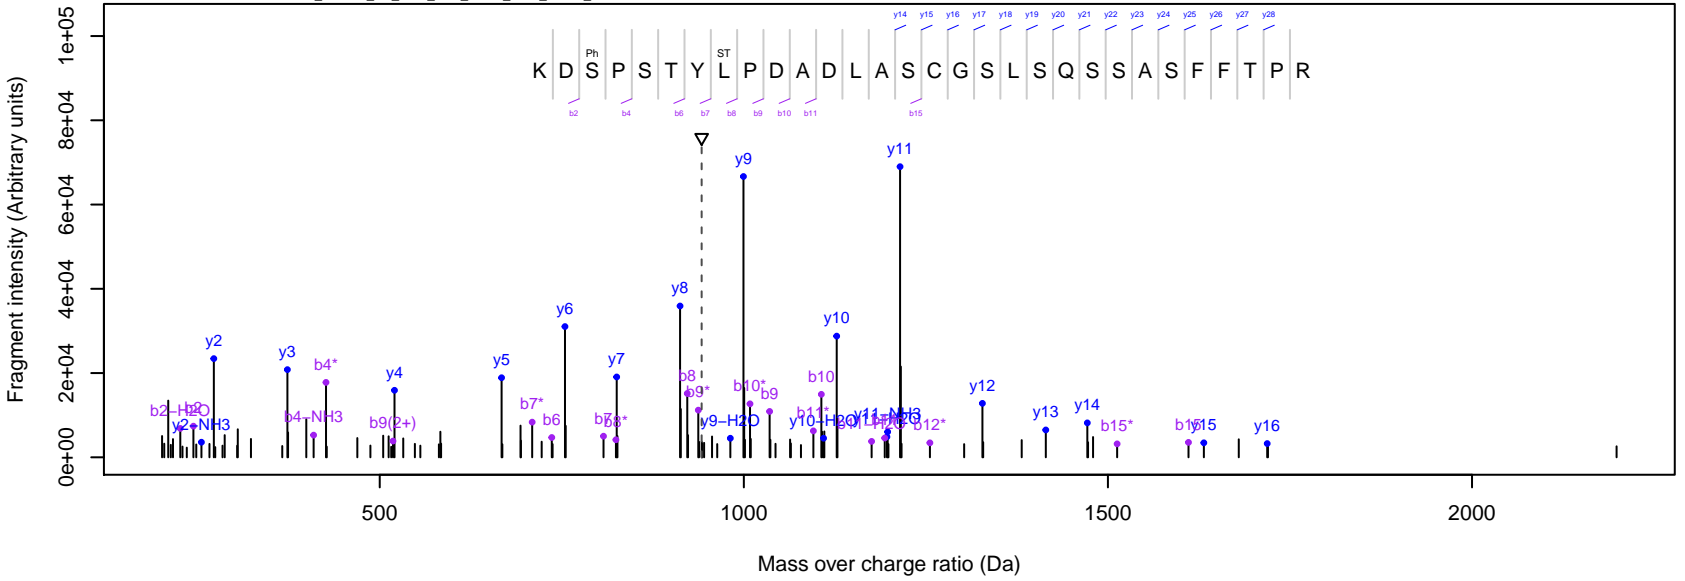

GLQAQIASSGLTVEVDAPK(Phospho (STY))QDLAK-3+

Source : QE3\_201126\_FR\_TiOx\_hum\_tissue\_Urea\_RNAB\_H Scan : 38205

Andromeda score : 122.57

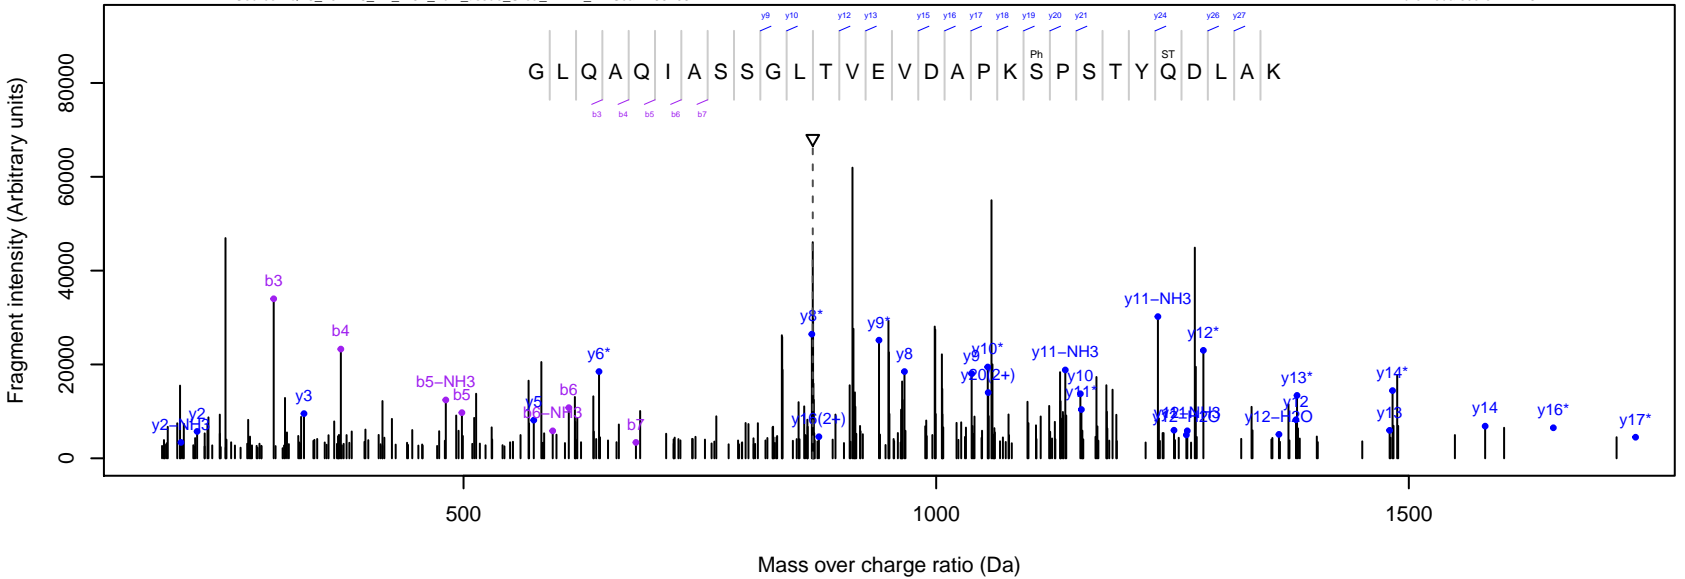

TQSYPTDWS(Phospho (STY))DDESNNPFSSTDANGSDSNPFDDDDATSGTEVR-4+

Source : QE3\_201126\_FR\_TiOx\_hum\_tissue\_Urea\_RNAB\_H Scan : 53887

Andromeda score : 122.57

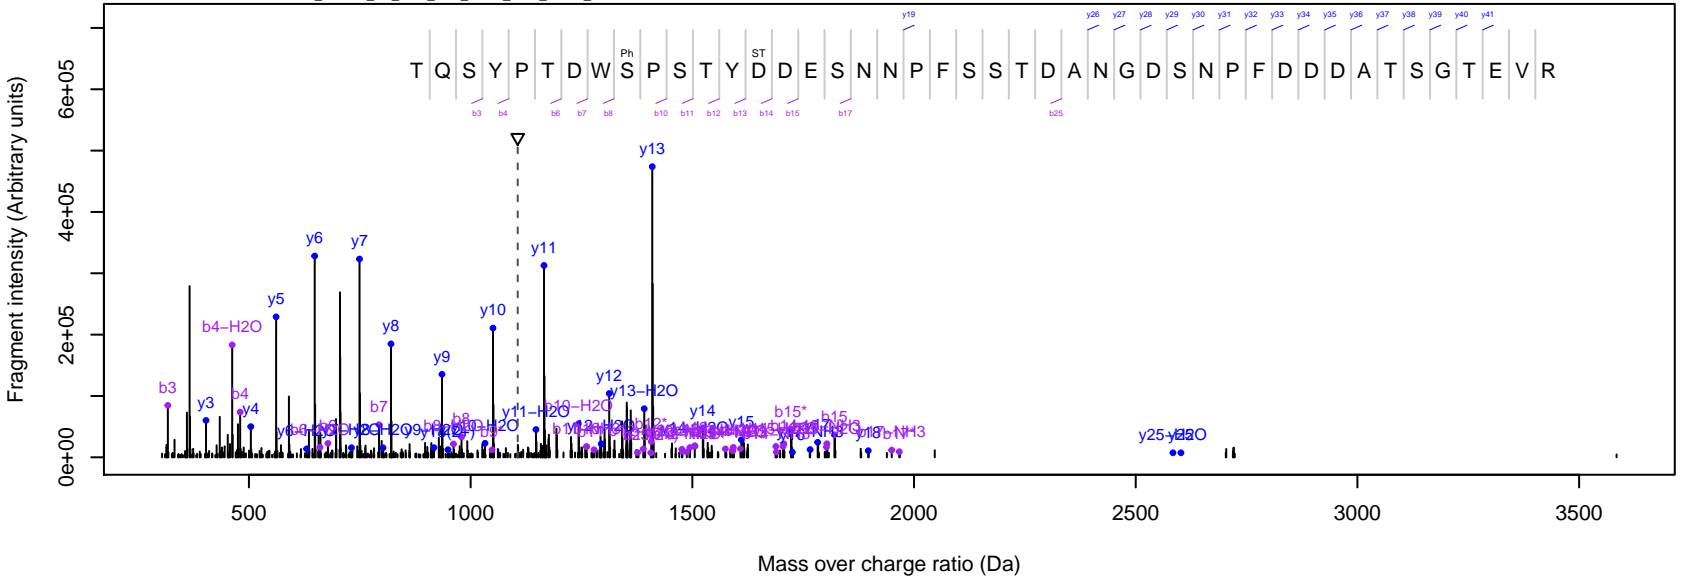

DDGS(Phospho (STY))WEVIEGYR-2+

Source : QE3\_201126\_FR\_TiOx\_hum\_tissue\_Urea\_RNAB\_N Scan : 45737

Andromeda score : 122.55

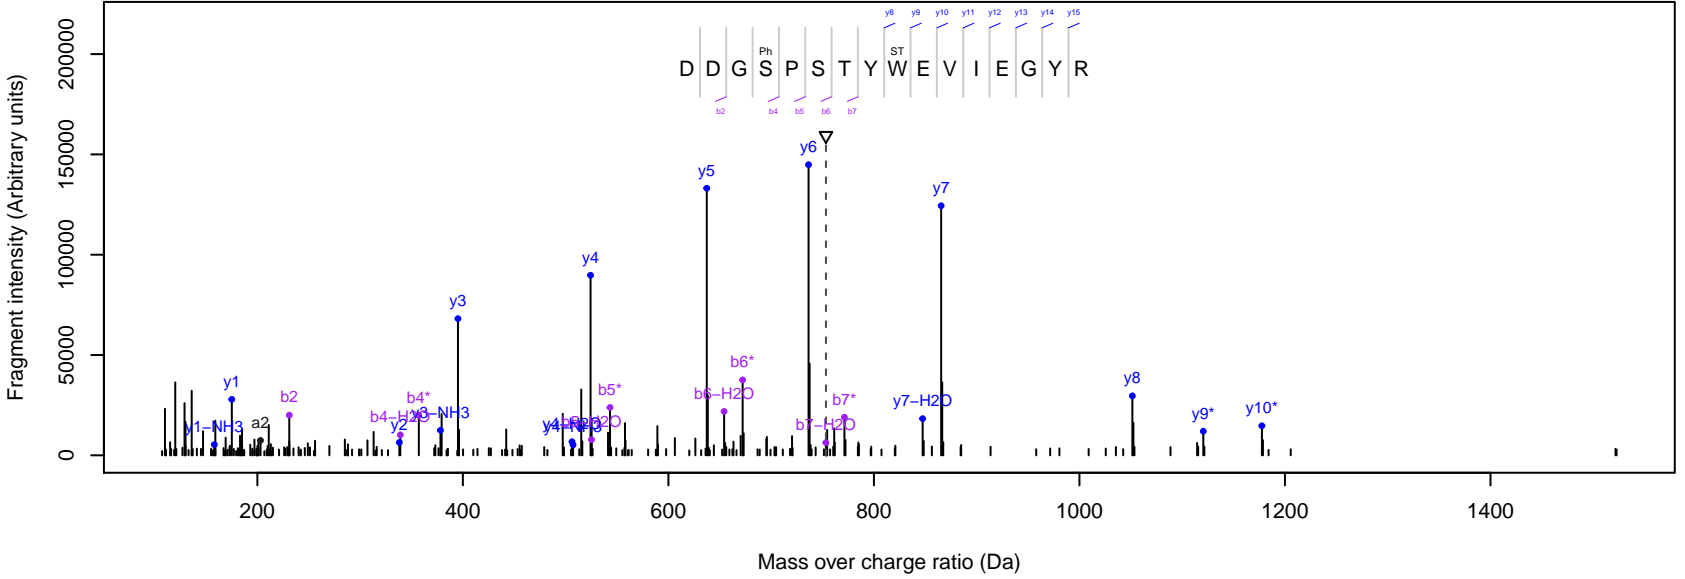

NFS(Phospho (STY))SLHLNSR-2+

Source : QE3\_201126\_FR\_TiOx\_hum\_tissue\_Urea\_RNAB\_H Scan : 21629

Andromeda score : 122.55

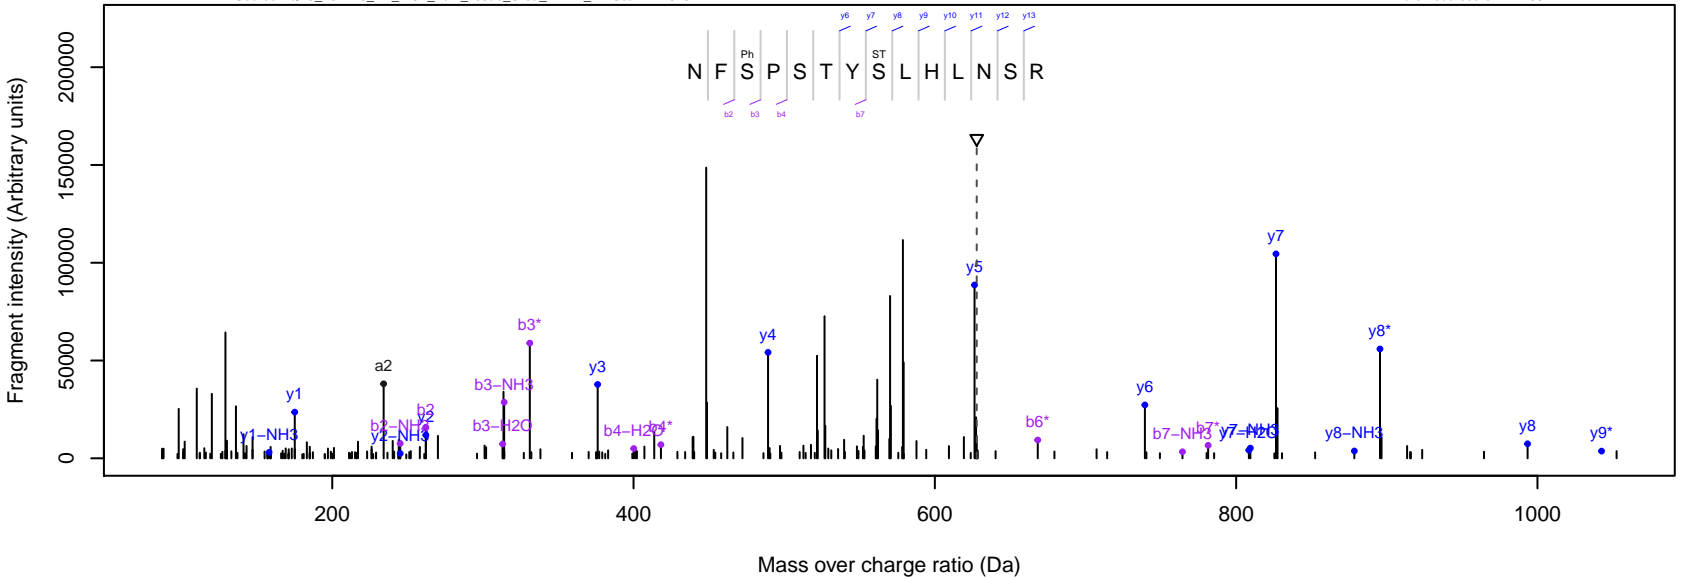

SSGS(Phospho (STY))ETEQQVVDFSDRETK-3+

Source : QE3\_201126\_FR\_TiOx\_hum\_tissue\_Urea\_RNAB\_N Scan : 22696

Andromeda score : 122.53

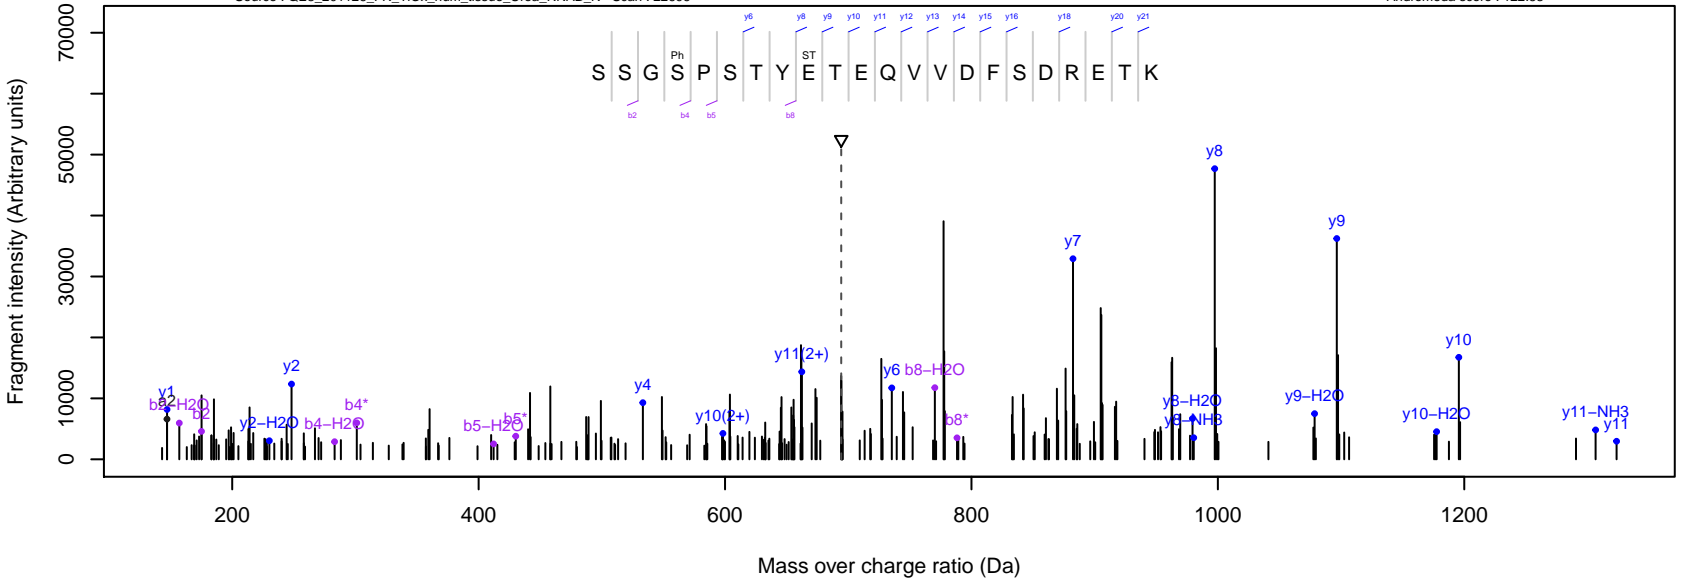

T(Phospho (STY))SSFAEPGGGGGGGGGGPGGSASGPGGTGGGK-2+

Source : QE3\_201126\_FR\_TiOx\_hum\_tissue\_Urea\_RNAB\_H Scan : 16390

Andromeda score : 122.53

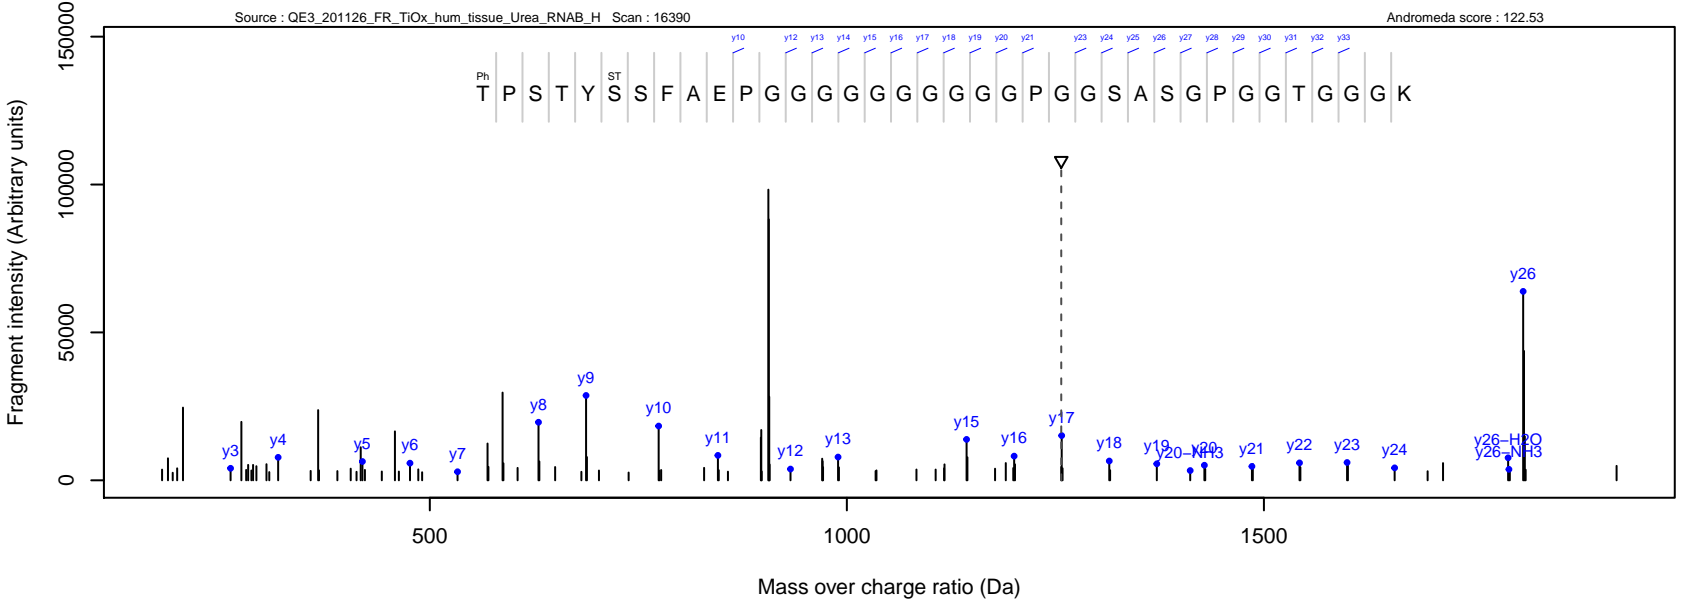

(Acetyl (Protein N-term))VLS(Phospho (STY))PADKTNVK-2+

Source : QE3\_201126\_FR\_TiOx\_hum\_tissue\_Urea\_RNAB\_B Scan : 21203

Andromeda score : 122.52

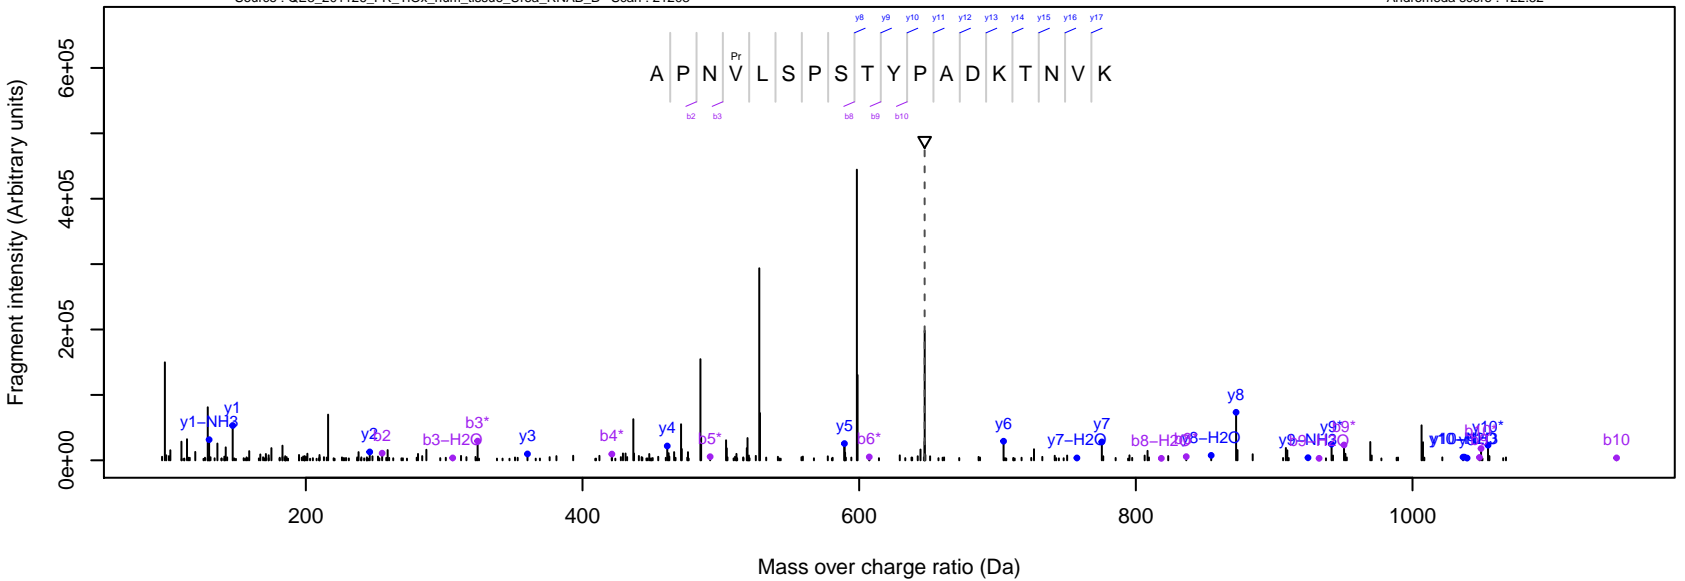



RKS(Phospho (STY))VPSETVEDSR-3+

Source : QE3\_201126\_FR\_TiOx\_hum\_tissue\_Urea\_RNAB\_N Scan : 8726

Andromeda score : 122.49

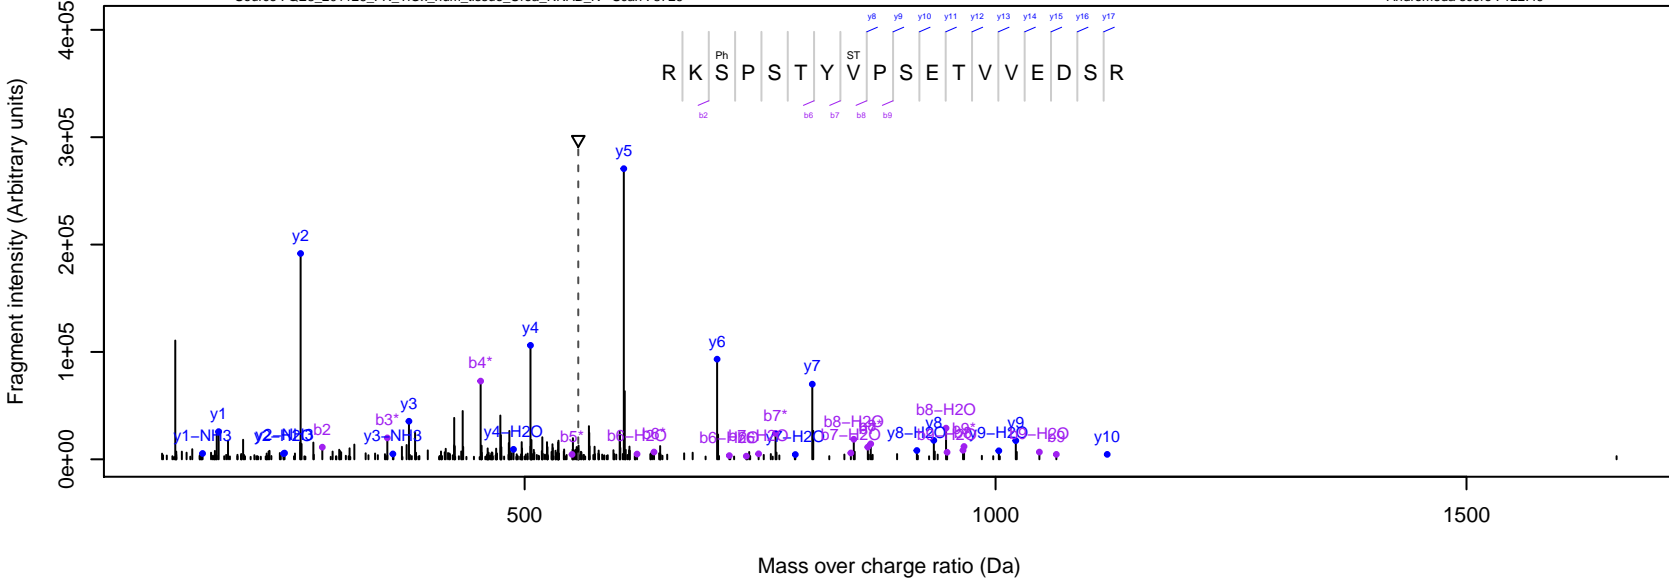

TSSSEIISVPAS(Phospho (STY))STSGSPSR-2+

Source : QE3\_201126\_FR\_TiOx\_hum\_tissue\_Urea\_RNAB\_H Scan : 27390

Andromeda score : 122.46

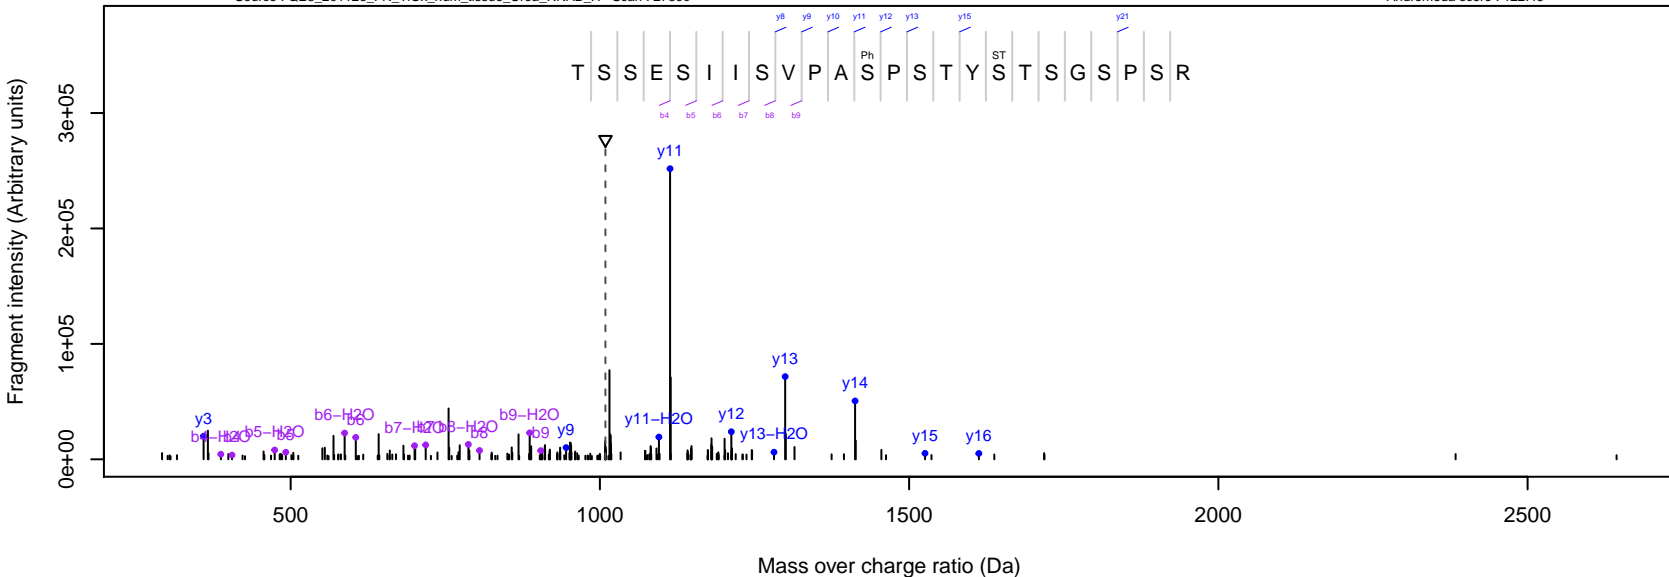

AGS(Phospho (STY))LPNYATINGK-2+

Source : QE3\_201126\_FR\_TiOx\_hum\_tissue\_Urea\_RNAB\_N Scan : 26862

Andromeda score : 122.45

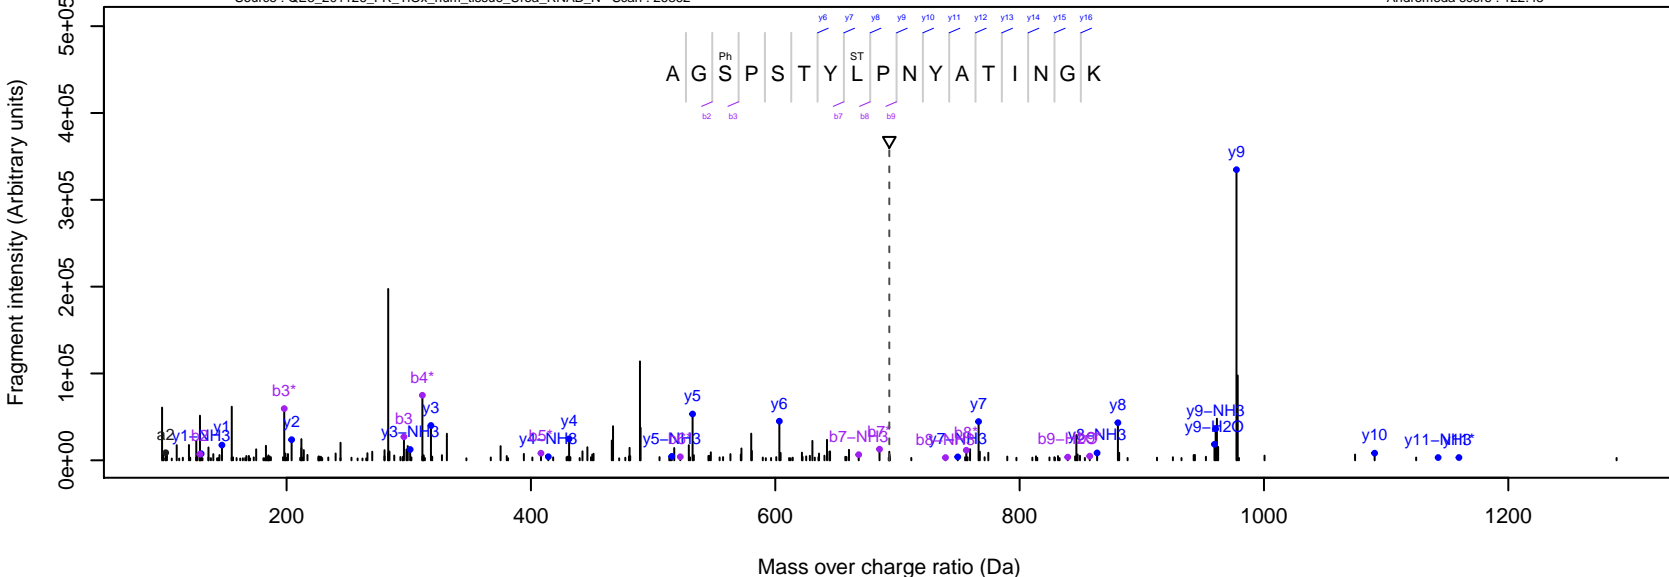

LEDSEVRS(Phospho (STY))VASPSTYNQSPSTYEMEFSSSLQDMPK-3+

Source : QE3\_201126\_FR\_TiOx\_hum\_tissue\_Urea\_RNAB\_N Scan : 53439

Andromeda score : 122.45

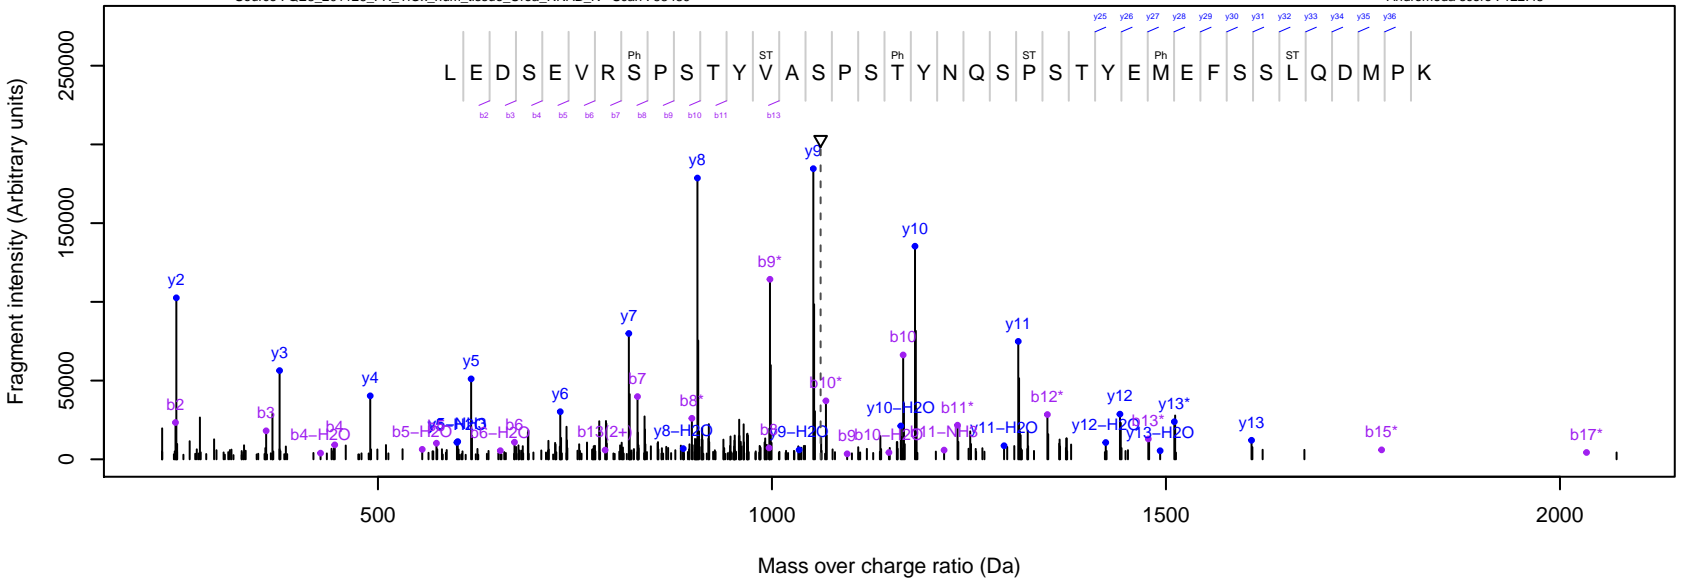

RLGYIS(Phospho (STY))VTDVLK-2+

Source : QE3\_201126\_FR\_TiOx\_hum\_tissue\_Urea\_RNAB\_H Scan : 42411

Andromeda score : 122.45

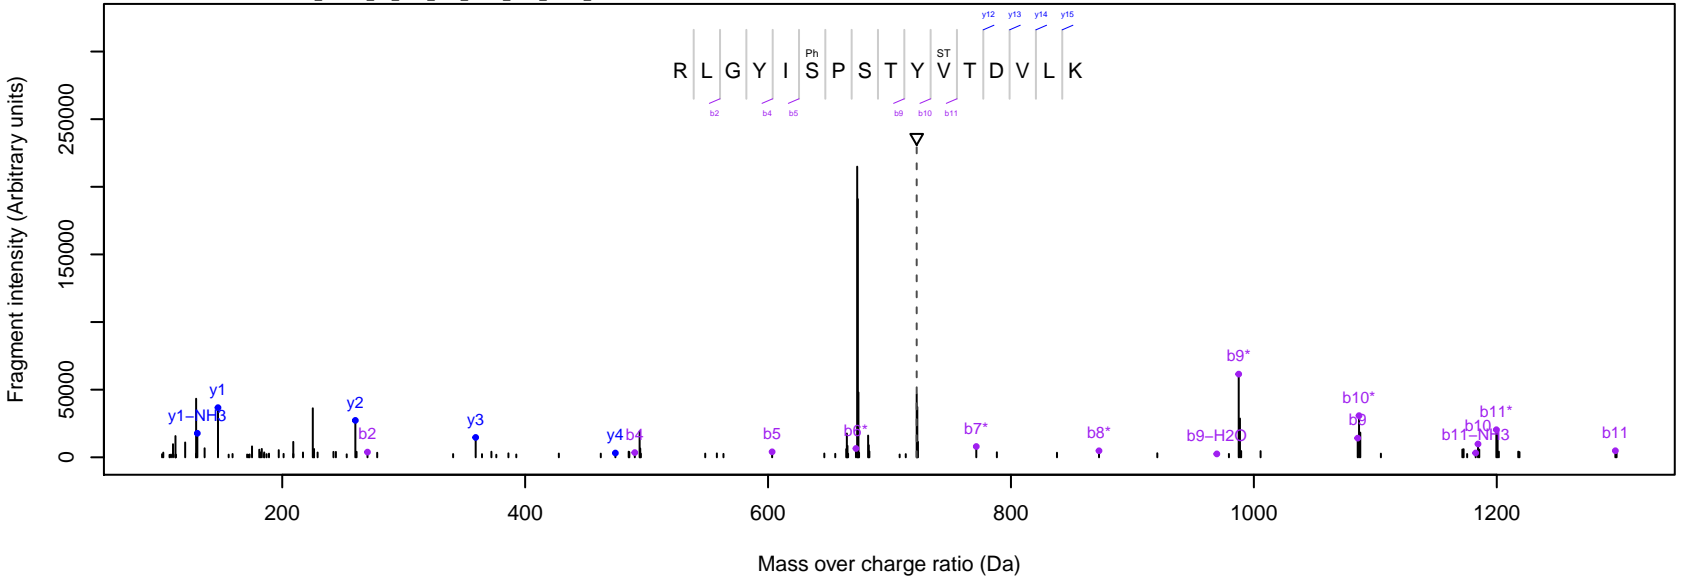

NPSDSAVHS(Phospho (STY))PFTKR-3+

Source : QE3\_201126\_FR\_TiOx\_hum\_tissue\_Urea\_RNAB\_H Scan : 8946

Andromeda score : 122.44

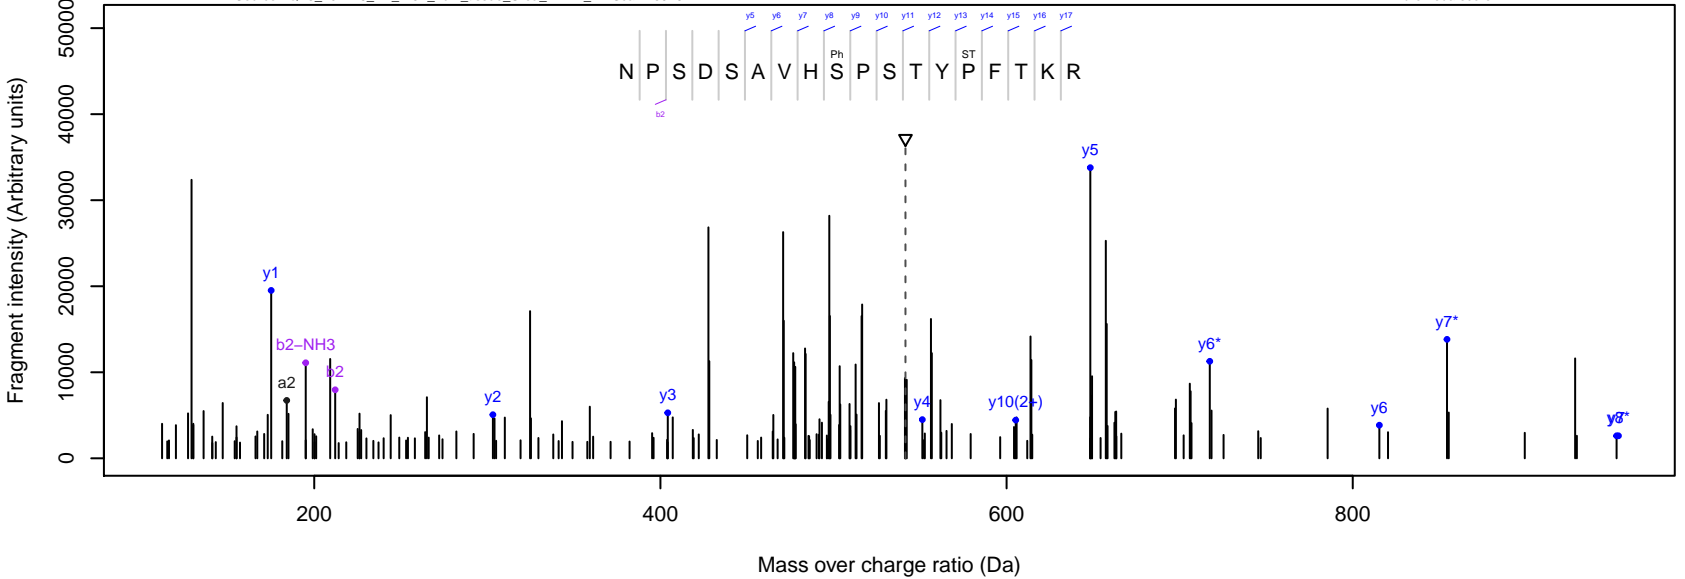



GFS(Phospho (STY))DSGGGPPAK-2+

Source : QE3\_201126\_FR\_TiOx\_hum\_tissue\_Urea\_RNAB\_H Scan : 11277

Andromeda score : 122.33

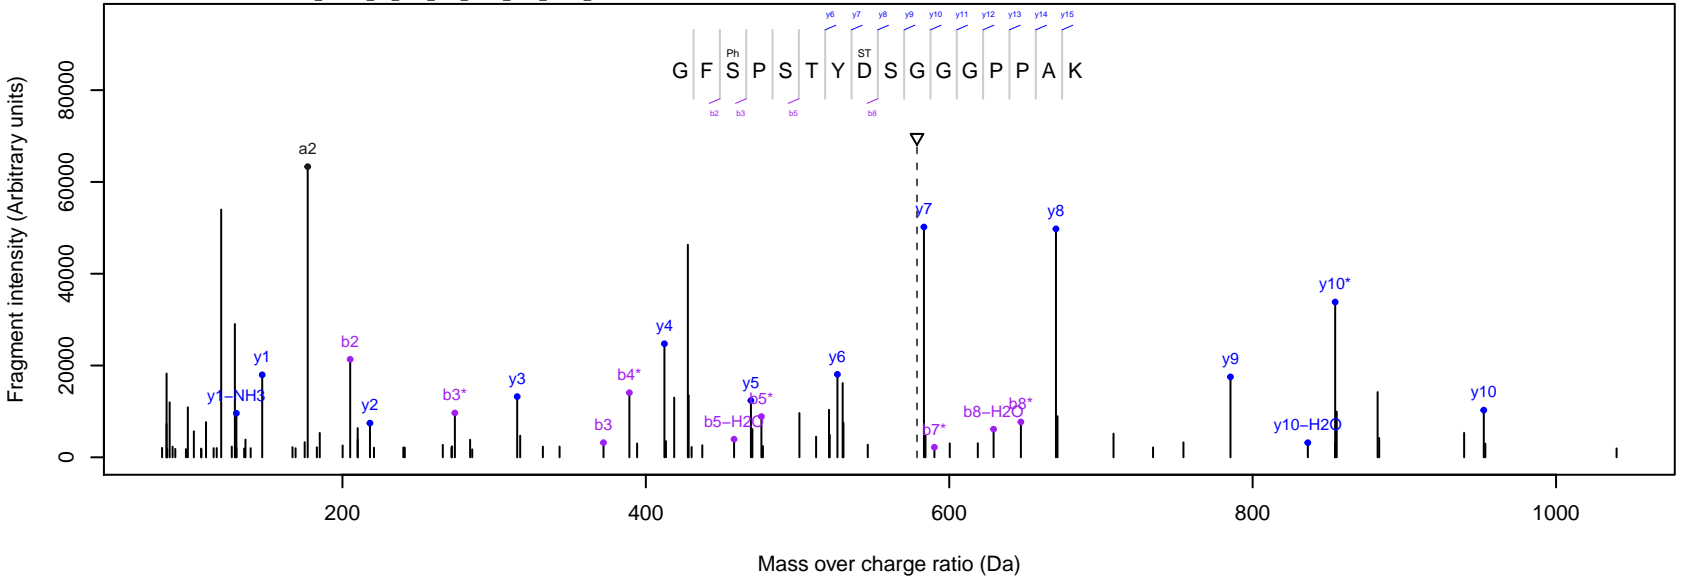

KS(Phospho (STY))QENLGNPSKNEKNV-3+

Source : QE3\_201126\_FR\_TiOx\_hum\_tissue\_Urea\_RNAB\_N Scan : 5048

Andromeda score : 122.3

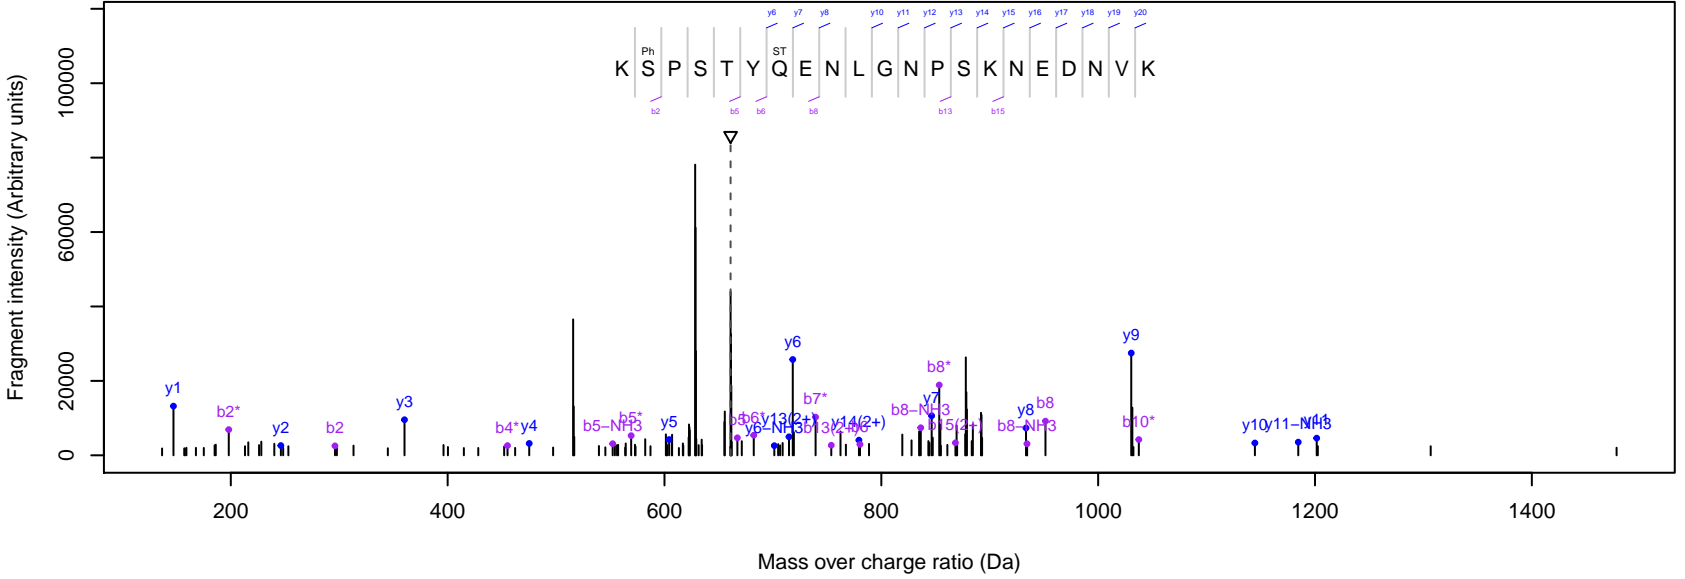

QNS(Phospho (STY))ATESADSIYVPEAQTR-2+

Source : QE3\_201126\_FR\_TiOx\_hum\_tissue\_Urea\_RNAB\_N Scan : 43517

Andromeda score : 122.27

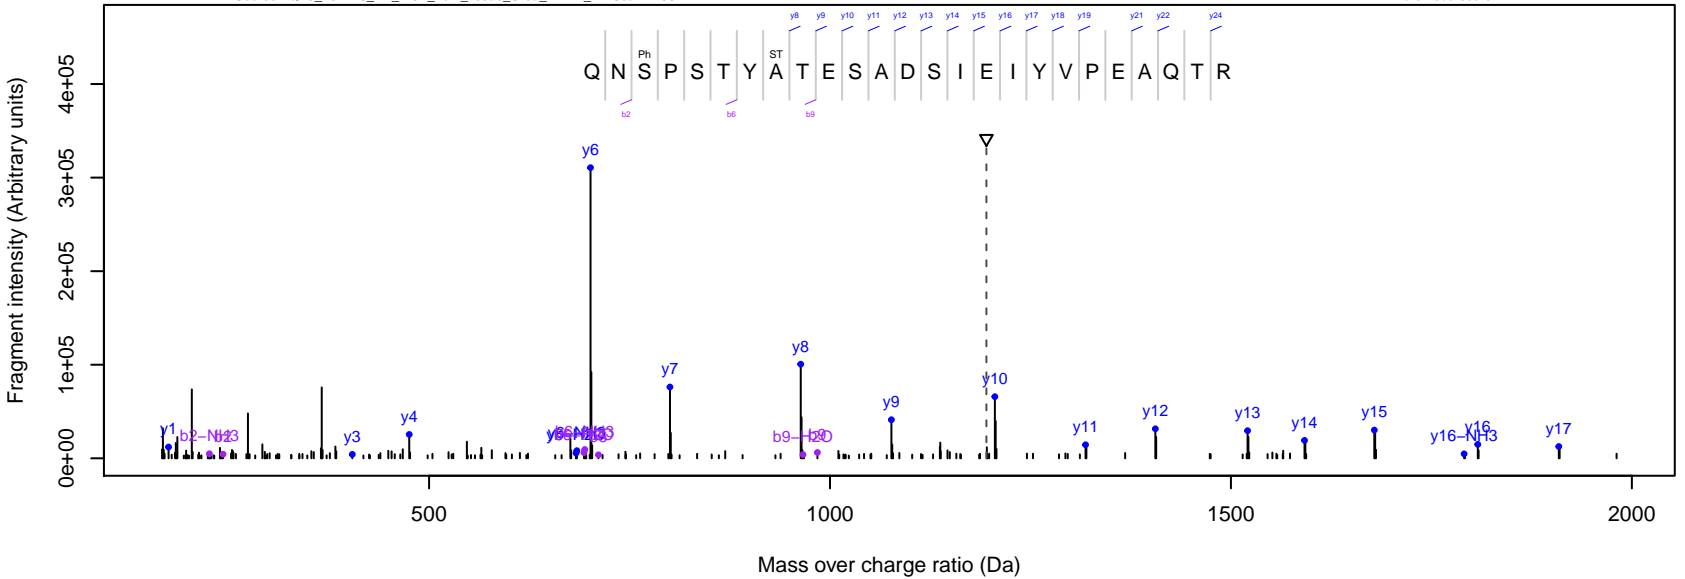

SPGKAEES(Phospho (STY))DALPDDTVIESEALPSDIAAEAR-3+

Source : QE3\_201126\_FR\_TiOx\_hum\_tissue\_Urea\_RNAB\_H Scan : 48507

Andromeda score : 122.24

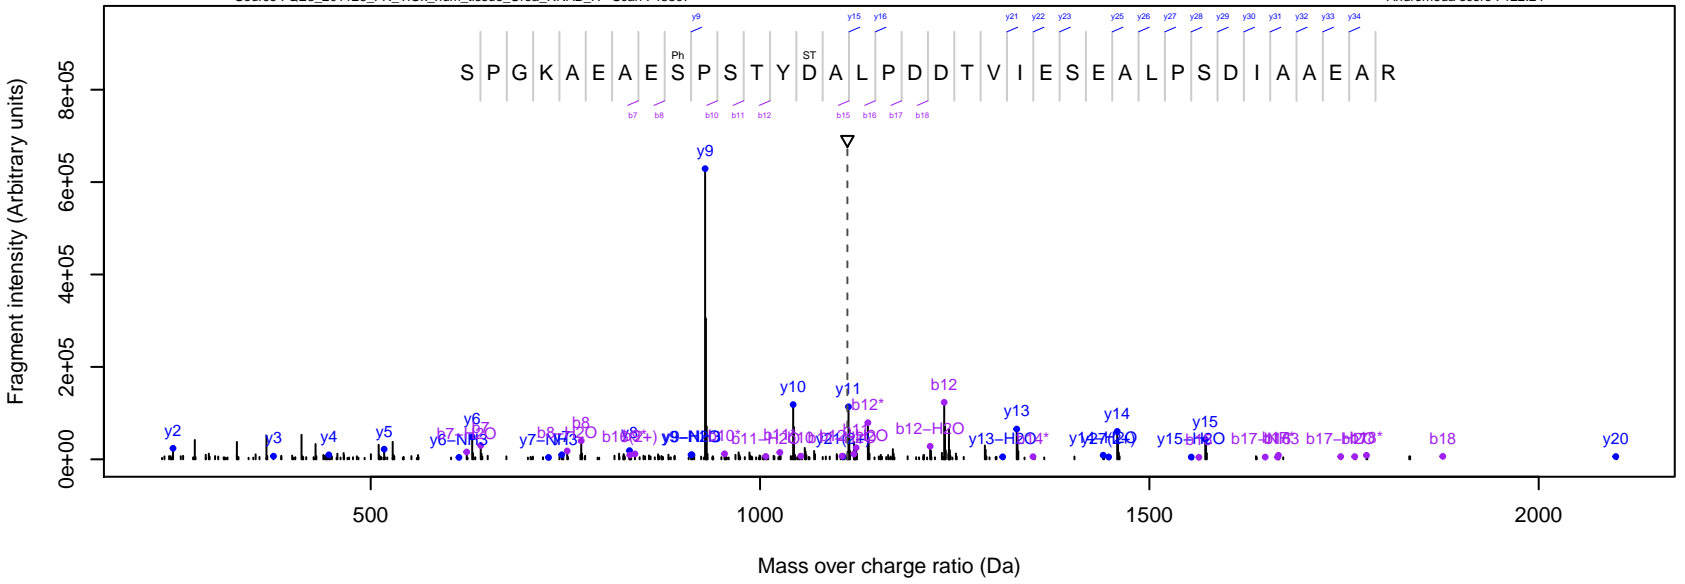

GGPGSAVS(Phospho (STY))PYPTFNPSDDVAALHK-3+

Source : QE3\_201126\_FR\_TiOx\_hum\_tissue\_Urea\_RNAB\_H Scan : 37688

Andromeda score : 122.22

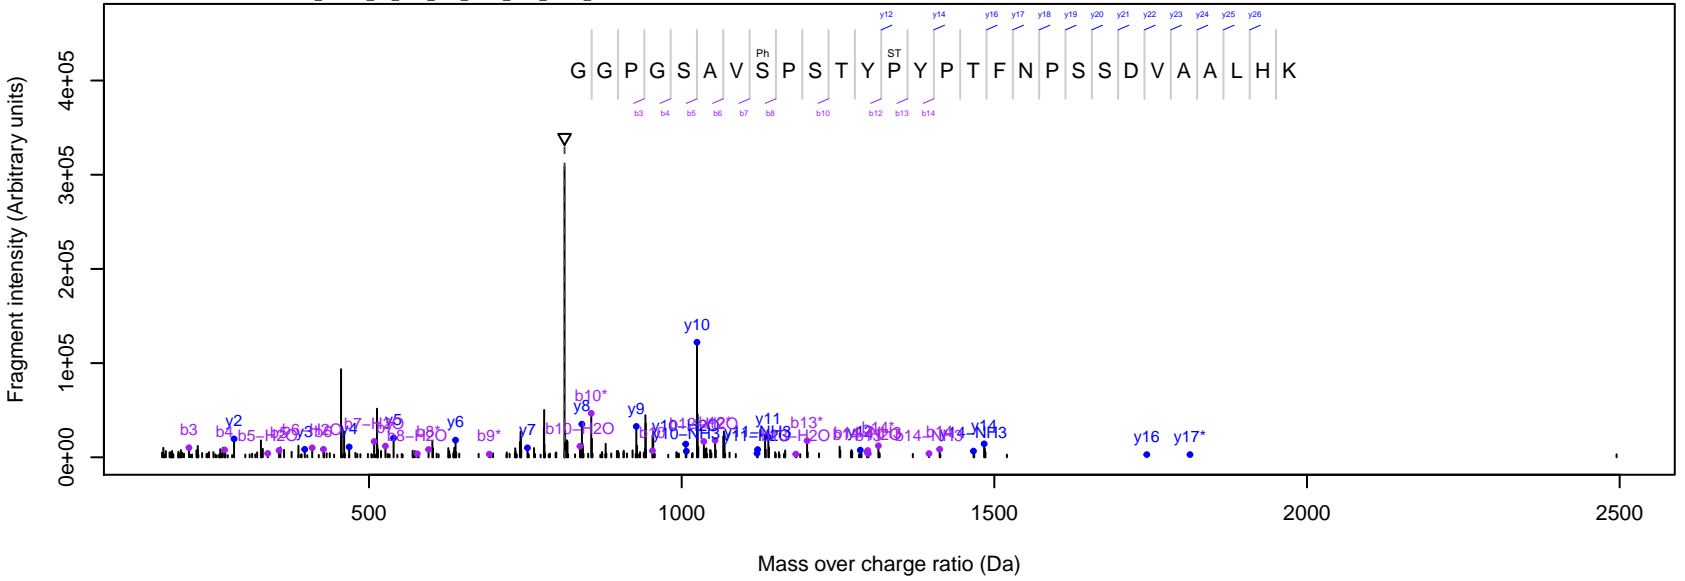

HLS(Phospho (STY))PYATLTVGDSSHK-3+

Source : QE3\_201126\_FR\_TiOx\_hum\_tissue\_Urea\_RNAB\_B Scan : 19662

Andromeda score : 122.19

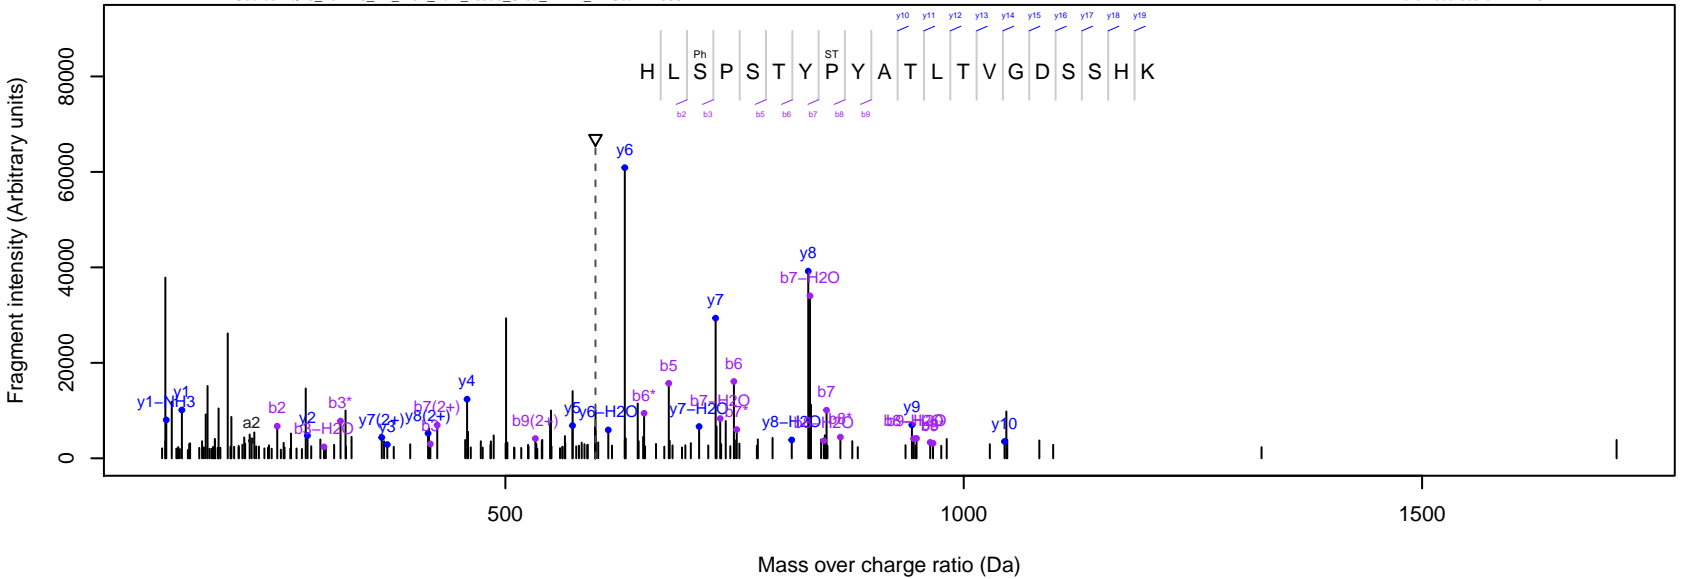

IEVLPVDTGAGGYS(Phospho (STY))GNSGSPK-2+

Source : QE3\_201126\_FR\_TiOx\_hum\_tissue\_Urea\_RNAB\_B Scan : 36270

Andromeda score : 122.19

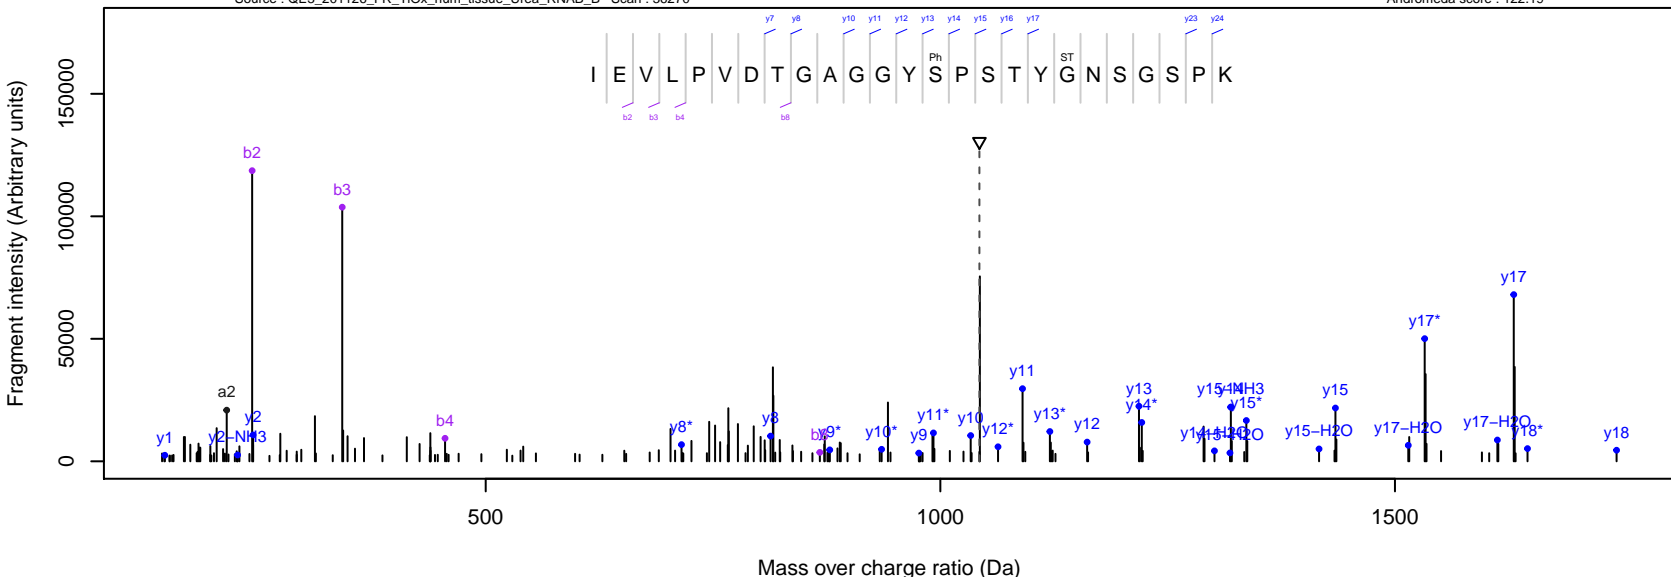

IYQY(Phospho (STY))IQSR-2+

Source : QE3\_201126\_FR\_TiOx\_hum\_tissue\_Urea\_RNAB\_B Scan : 15713

Andromeda score : 122.18

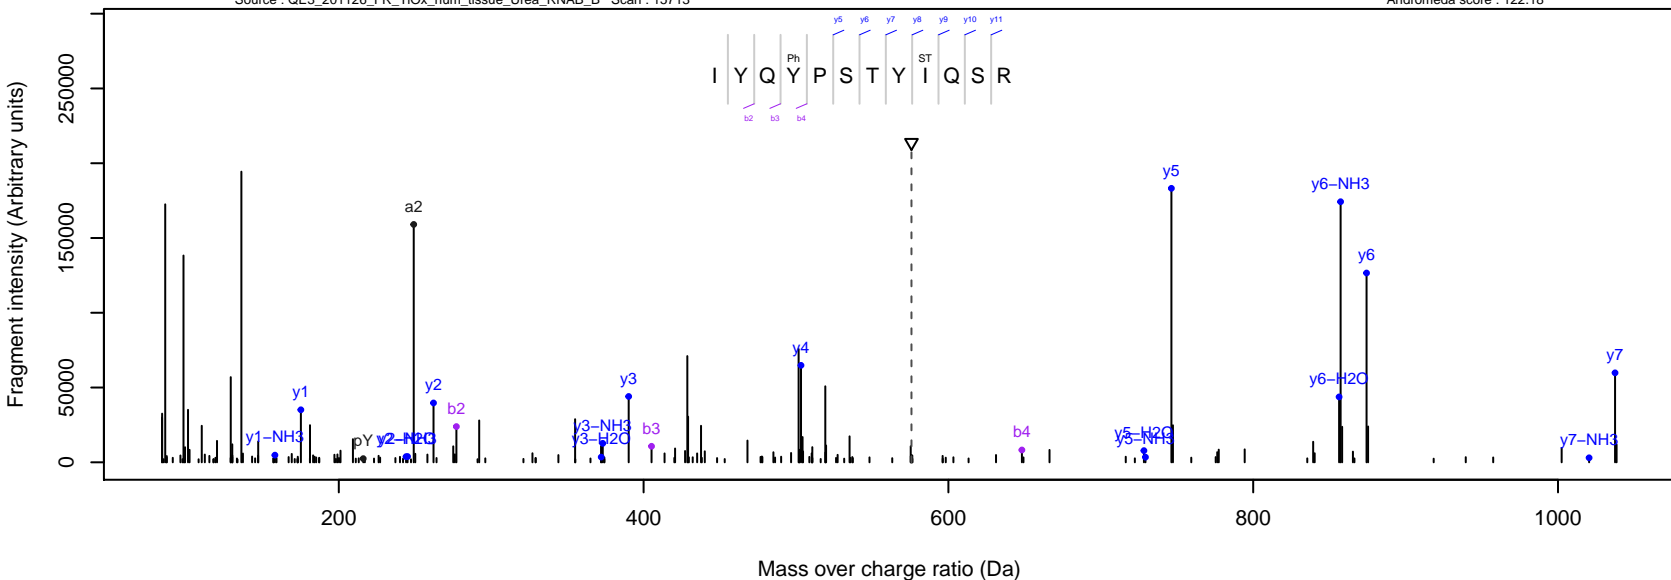

LQEEQDGG(S(Phospho (STY))S(Phospho (STY))DEDRA G P A P P G A S D G V D I Q D V K-3+

Source : QE3\_201126\_FR\_TiOx\_hum\_tissue\_Urea\_RNAB\_H Scan : 32370

Andromeda score : 122.11

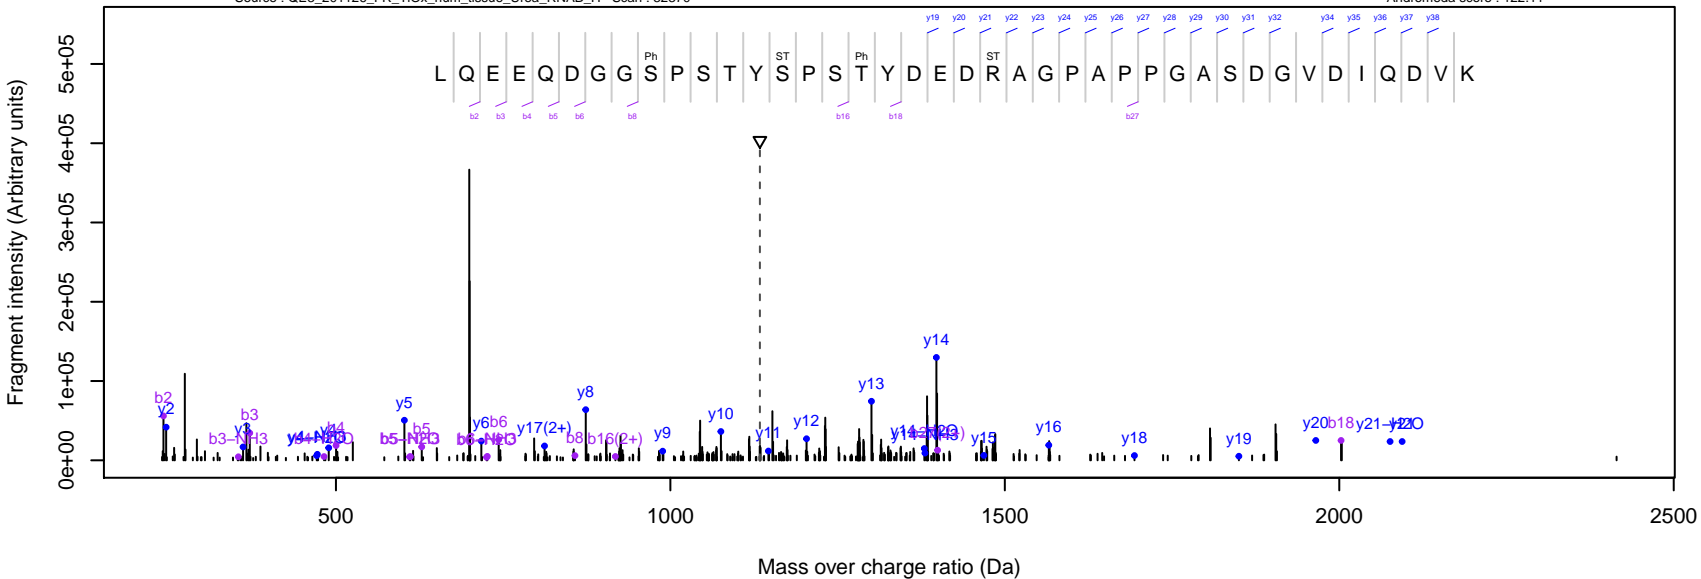

MLGTPEEAES(Phospho (STY))S(Phospho (STY))EDEAGPWILLSDDKGDHPPPEESK-4+

Source : QE3\_201126\_FR\_TiOx\_hum\_tissue\_Urea\_RNAB\_N Scan : 54113

Andromeda score : 122.11

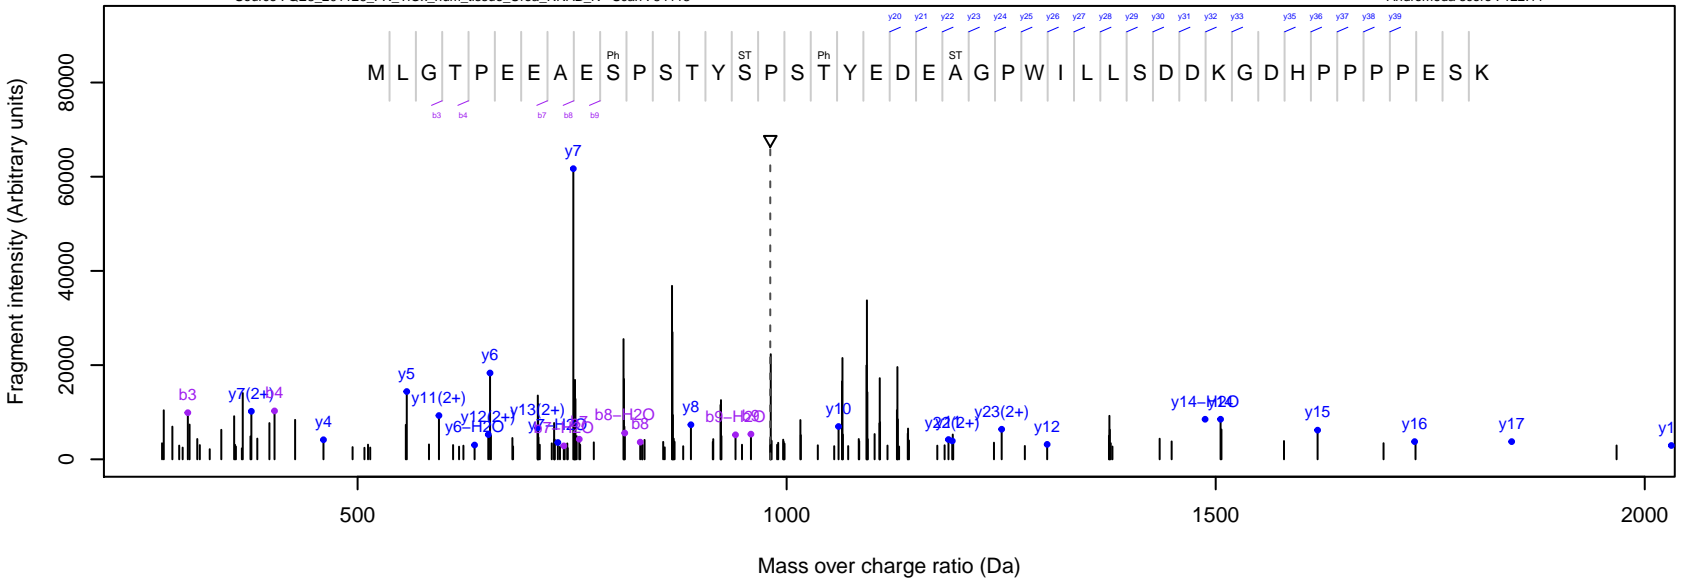

KPGDGEVS(Phospho (STY))PSTEDAPFQHSPLGK-3+

Source : QE3\_201126\_FR\_TiOx\_hum\_tissue\_Urea\_RNAB\_H Scan : 23232

Andromeda score : 122.09

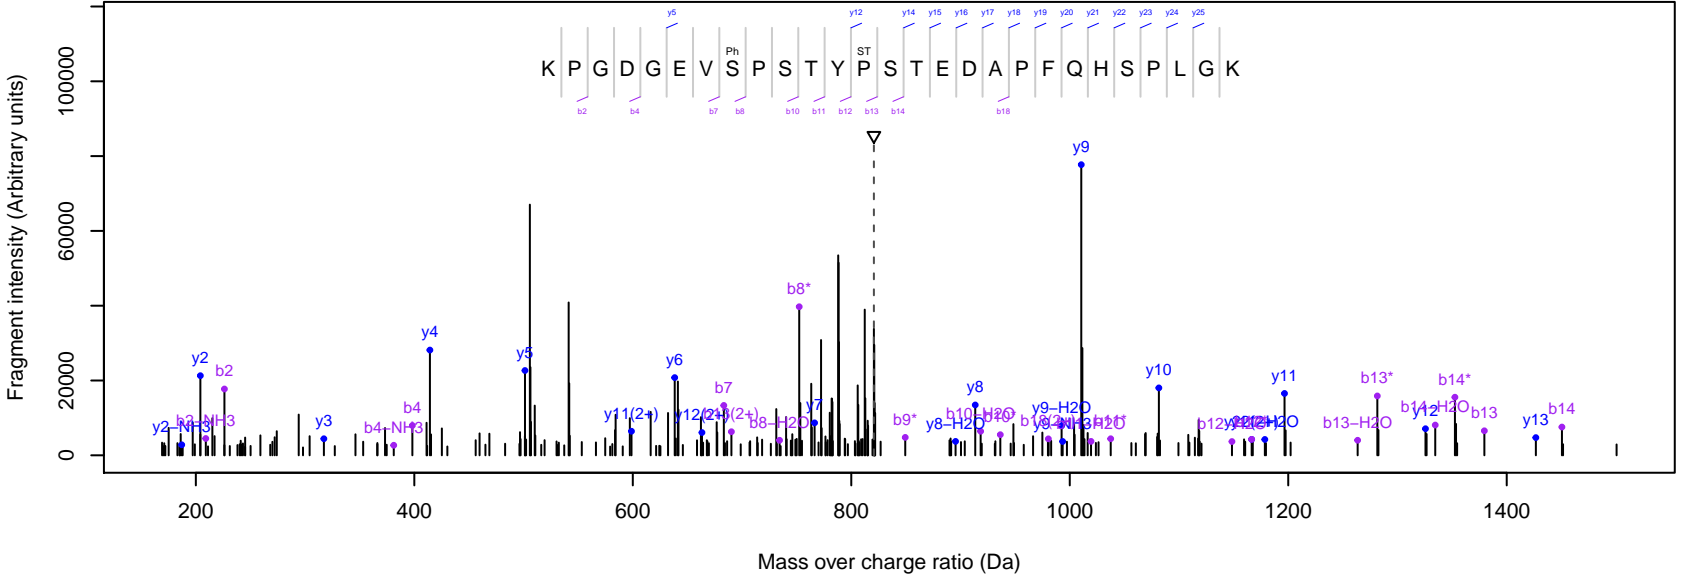

YNSHLENES(Phospho (STY))IKR-3+

Source : QE3\_201126\_FR\_TiOx\_hum\_tissue\_Urea\_RNAB\_N Scan : 8917

Andromeda score : 122.08

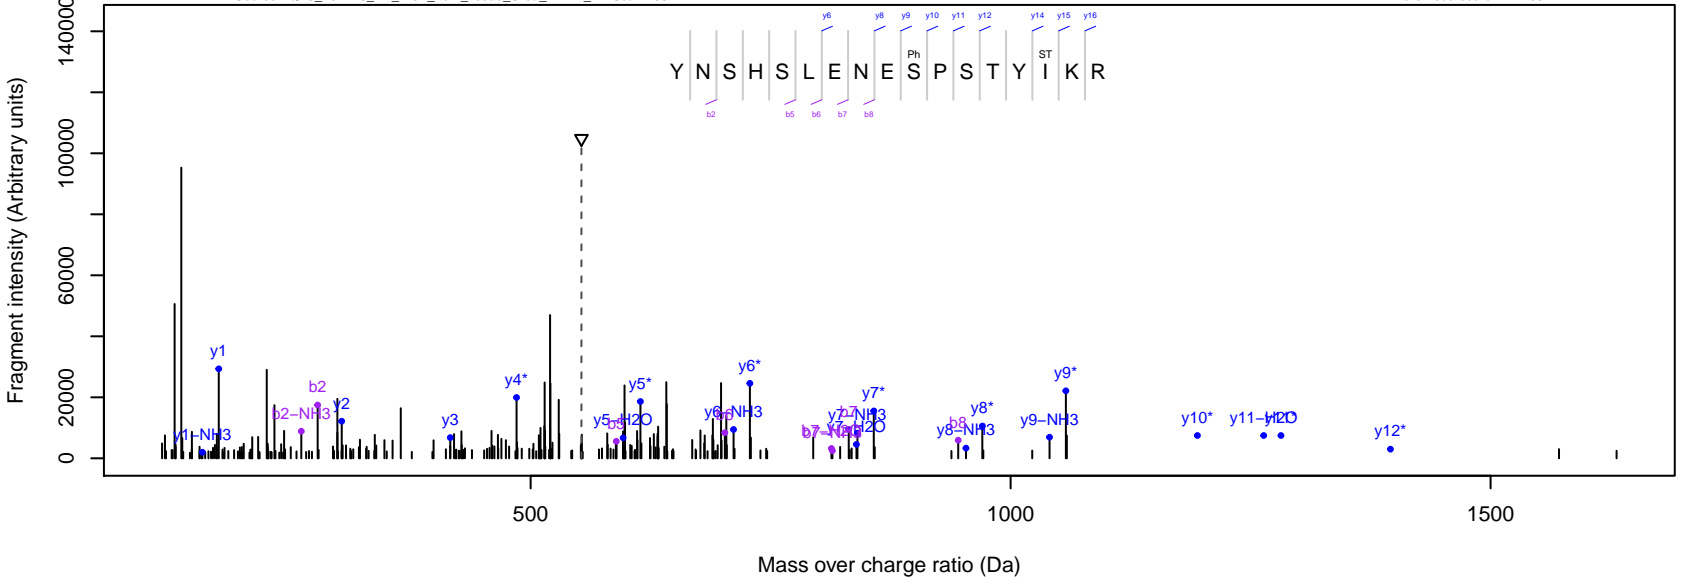

ESENSGDSGYPS Ph STY EKRGE LDDPEPR

Source : QE3\_201126\_FR\_TiOx\_hum\_tissue\_Urea\_RNAB\_B Scan : 13387

Andromeda score : 122.04

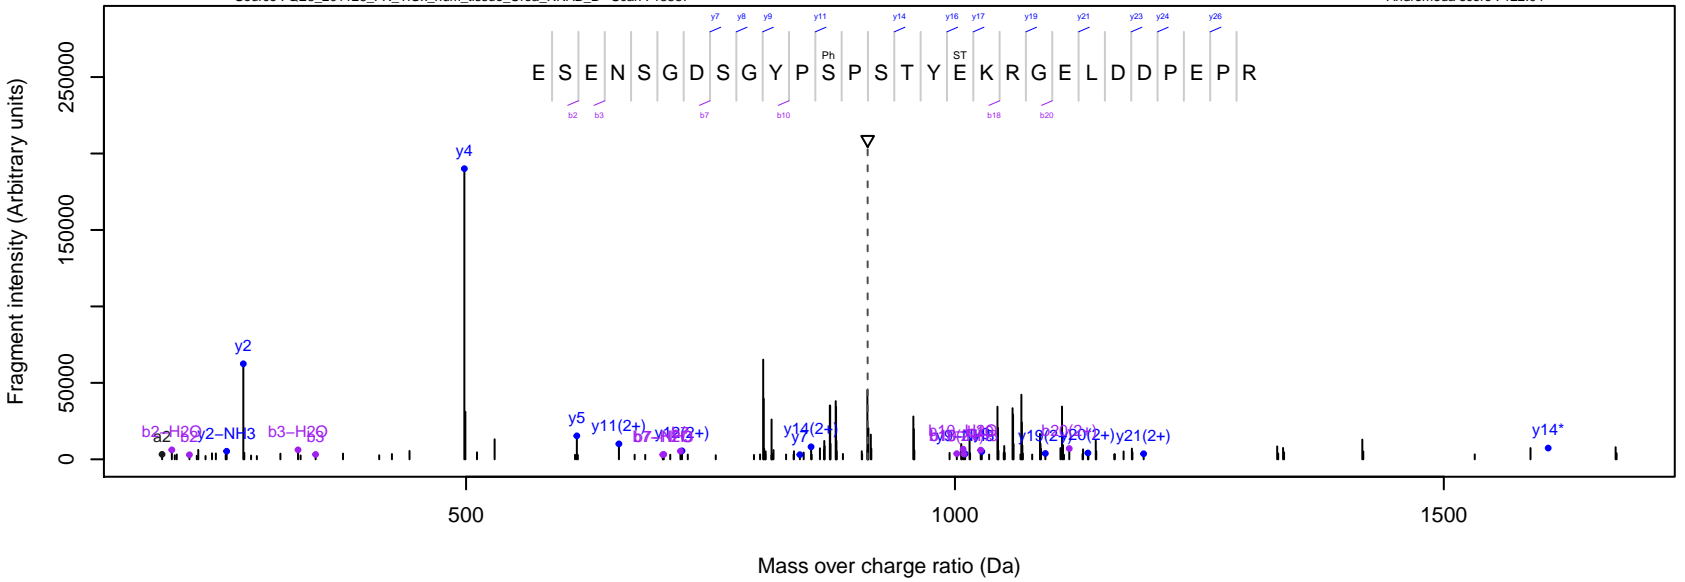

GGSGSHNWGTVKDELTE S Ph STY P K

Source : QE3\_201126\_FR\_TiOx\_hum\_tissue\_Urea\_RNAB\_H Scan : 18769

Andromeda score : 122.04

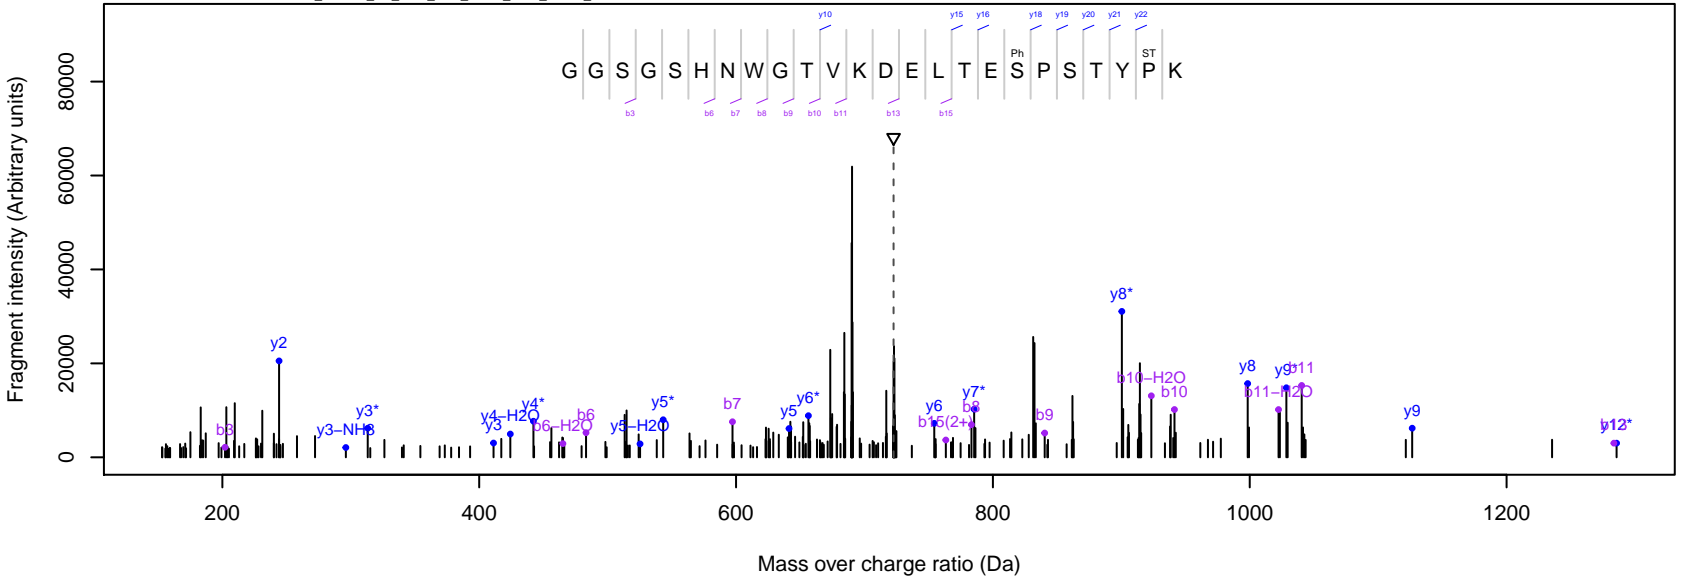

(Acetyl (Protein N-term))ATAAETS Ph STY ASEPEAESK

Source : QE3\_201126\_FR\_TiOx\_hum\_tissue\_Urea\_RNAB\_B Scan : 17930

Andromeda score : 121.99

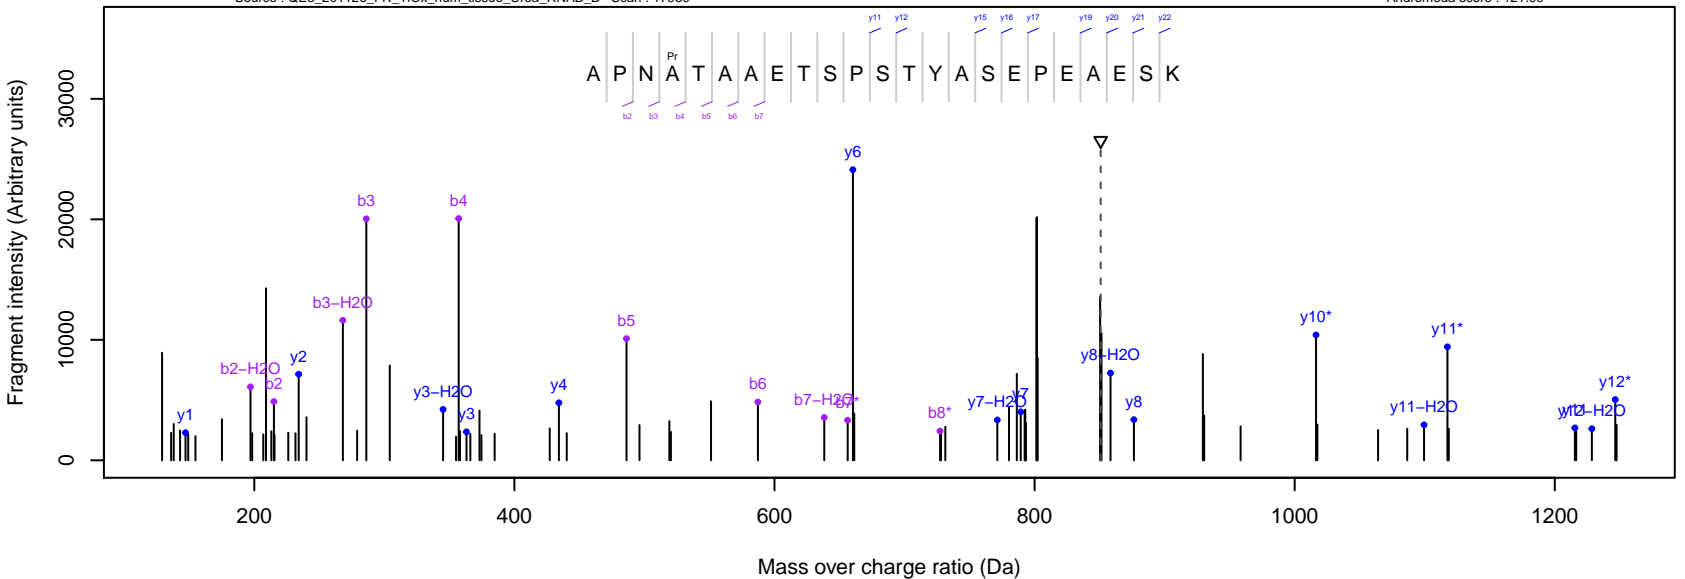







M(Oxidation (M))S(Phospho (STY))LPDVLDLKGPK-3+

Source : QE3\_201126\_FR\_TIOx\_hum\_tissue\_Urea\_RNAB\_B Scan : 34192

Andromeda score : 121.82

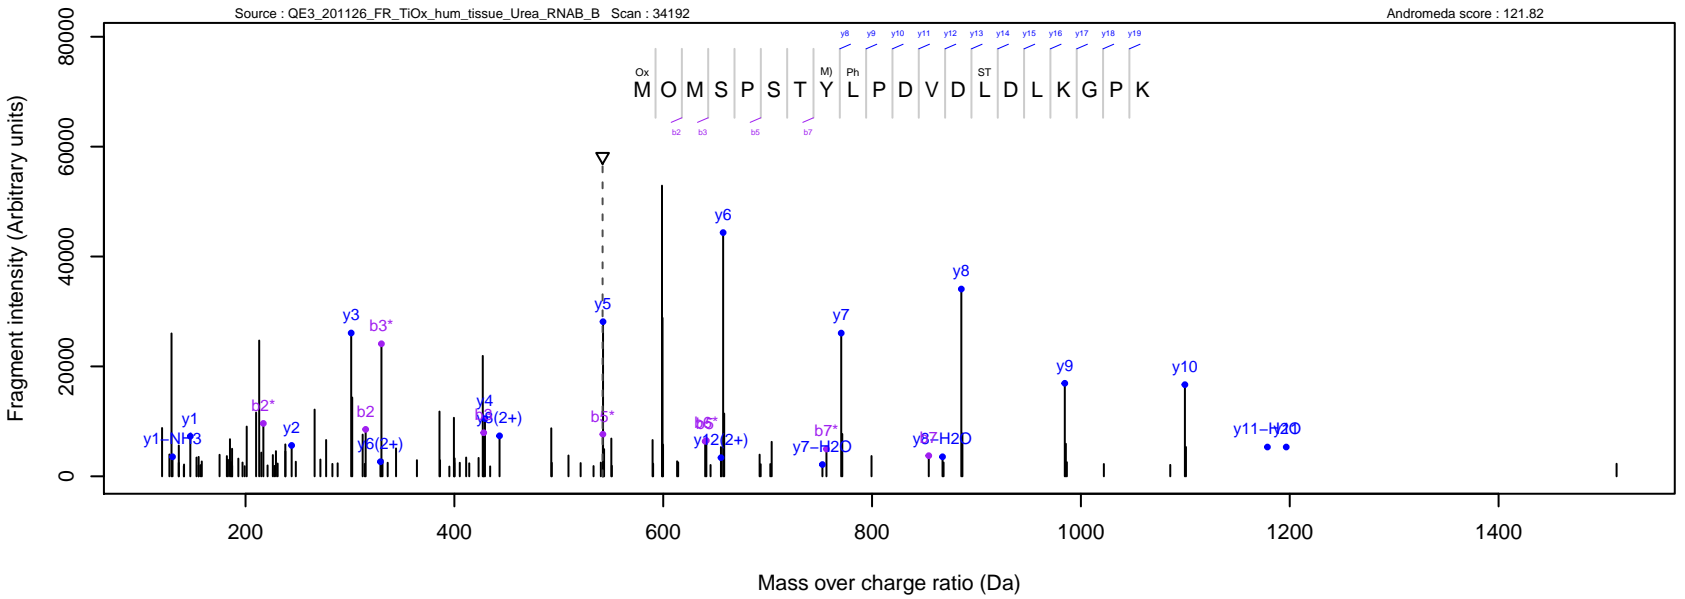

RHQYSDYDYHSS(Phospho (STY))SEK-3+

Source : QE3\_201126\_FR\_TIOx\_hum\_tissue\_Urea\_RNAB\_B Scan : 6746

Andromeda score : 121.82

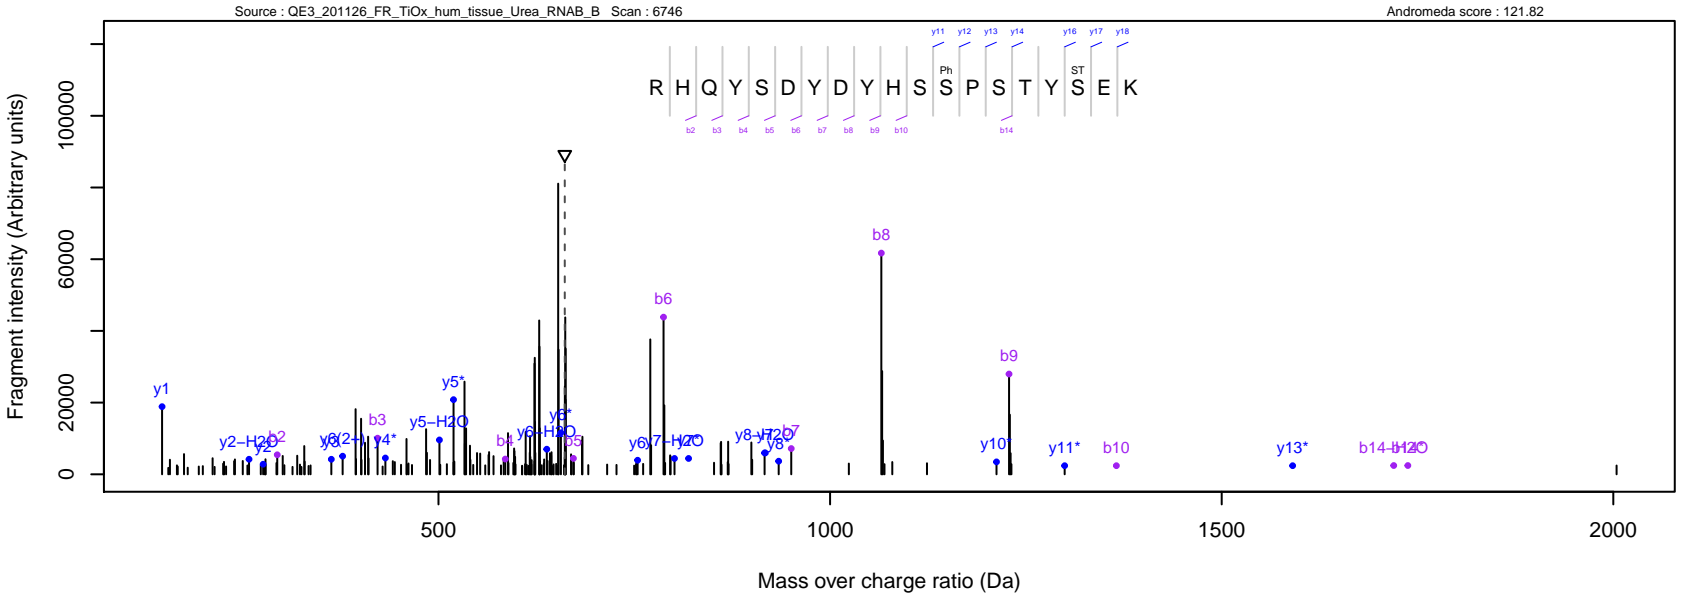

(Acetyl (Protein N-term))SGDHLHNS(Phospho (STY))QIEADFR-3+

Source : QE3\_201126\_FR\_TIOx\_hum\_tissue\_Urea\_RNAB\_N Scan : 25294

Andromeda score : 121.82

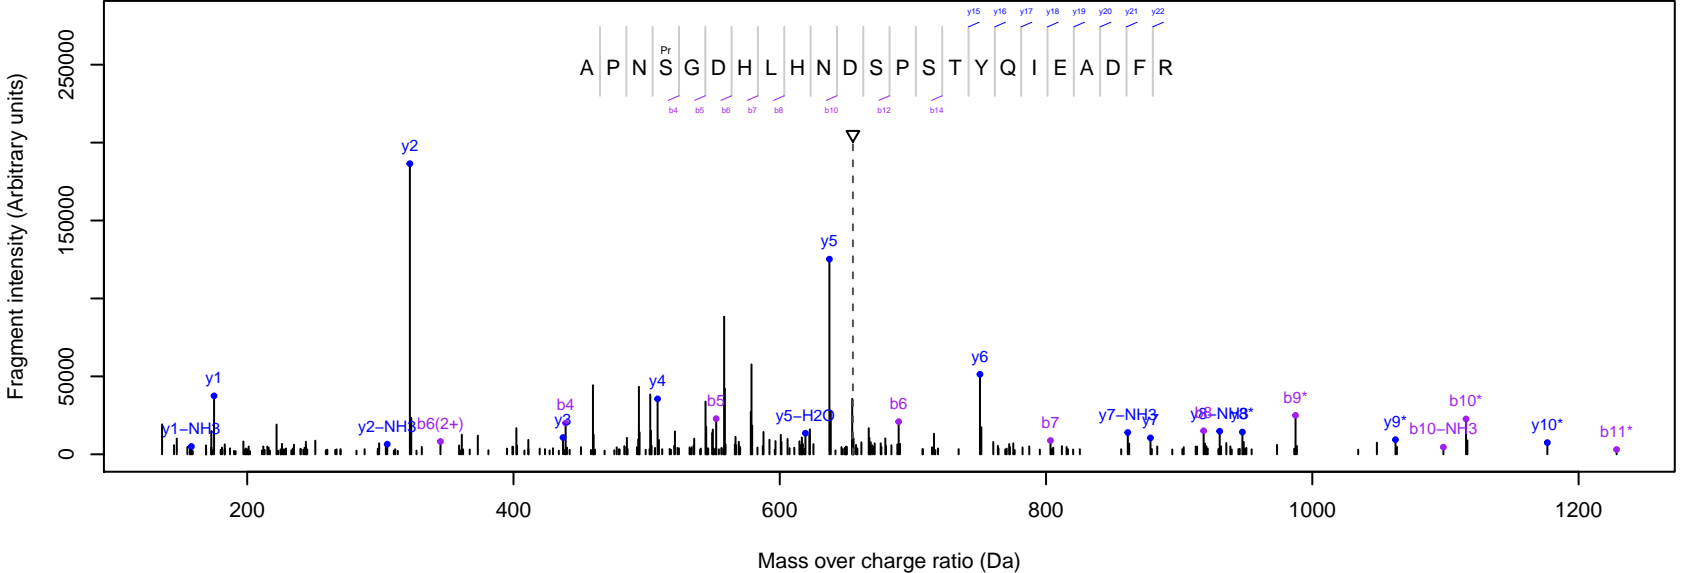

LLTAAELLLDYDT(Phospho (STY))GS(Phospho (STY))EEAEEGAESSQEPVAHTVSEPK-4+

Source : QE3\_201126\_FR\_TIOx\_hum\_tissue\_Urea\_RNAB\_H Scan : 58420

Andromeda score : 121.78

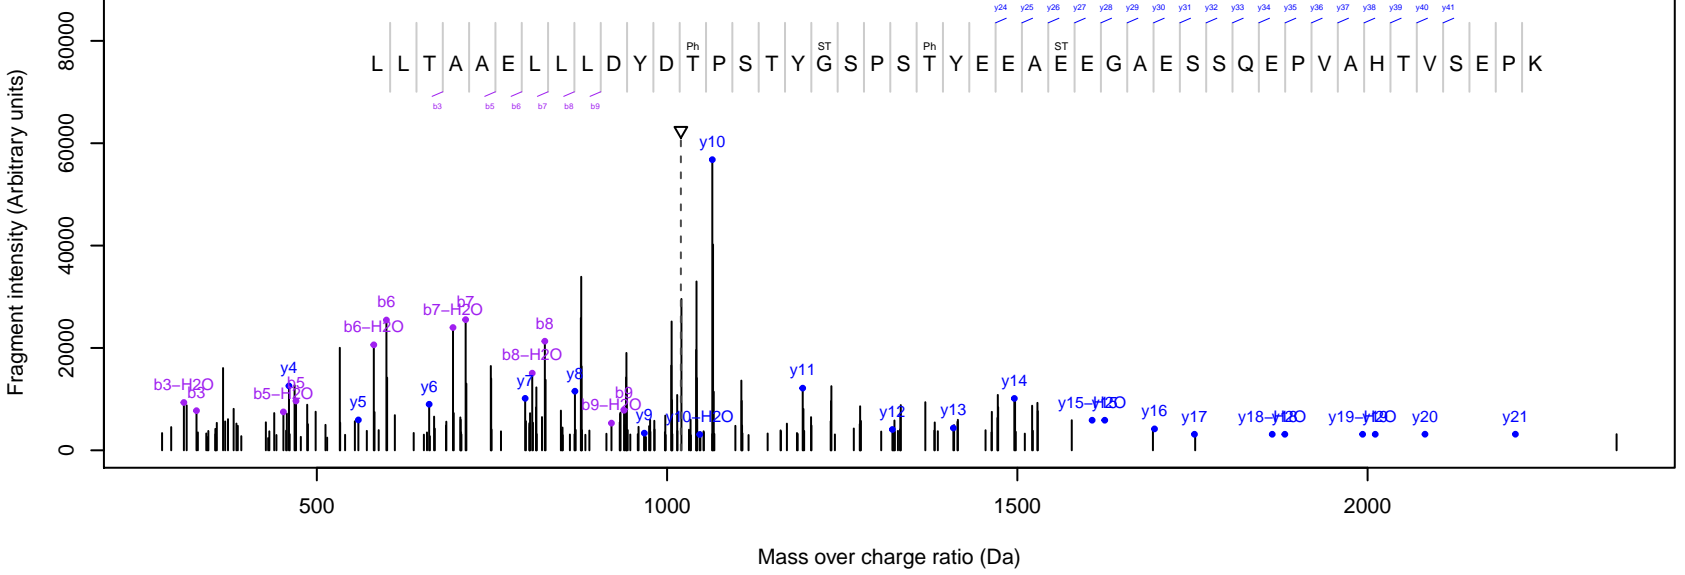

(Acetyl (Protein N-term))M(Oxidation (M))EES(Phospho (STY))DSEKTEKENLGPR-3+

Source : QE3\_201126\_FR\_TIOx\_hum\_tissue\_Urea\_RNAB\_B Scan : 11940

Andromeda score : 121.63

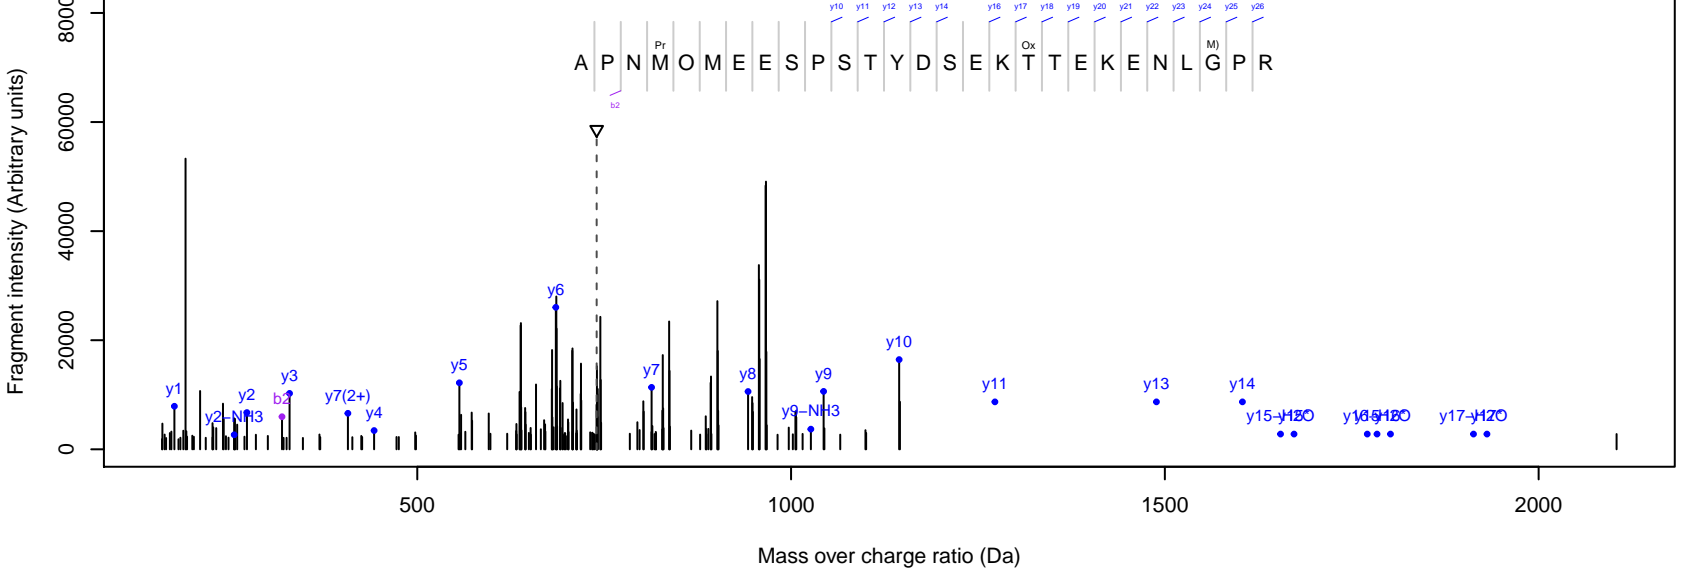

AS(Phospho (STY))VDTKEAEGAPQVEAGKR-3+

Source : QE3\_201126\_FR\_TIOx\_hum\_tissue\_Urea\_RNAB\_N Scan : 9812

Andromeda score : 121.56

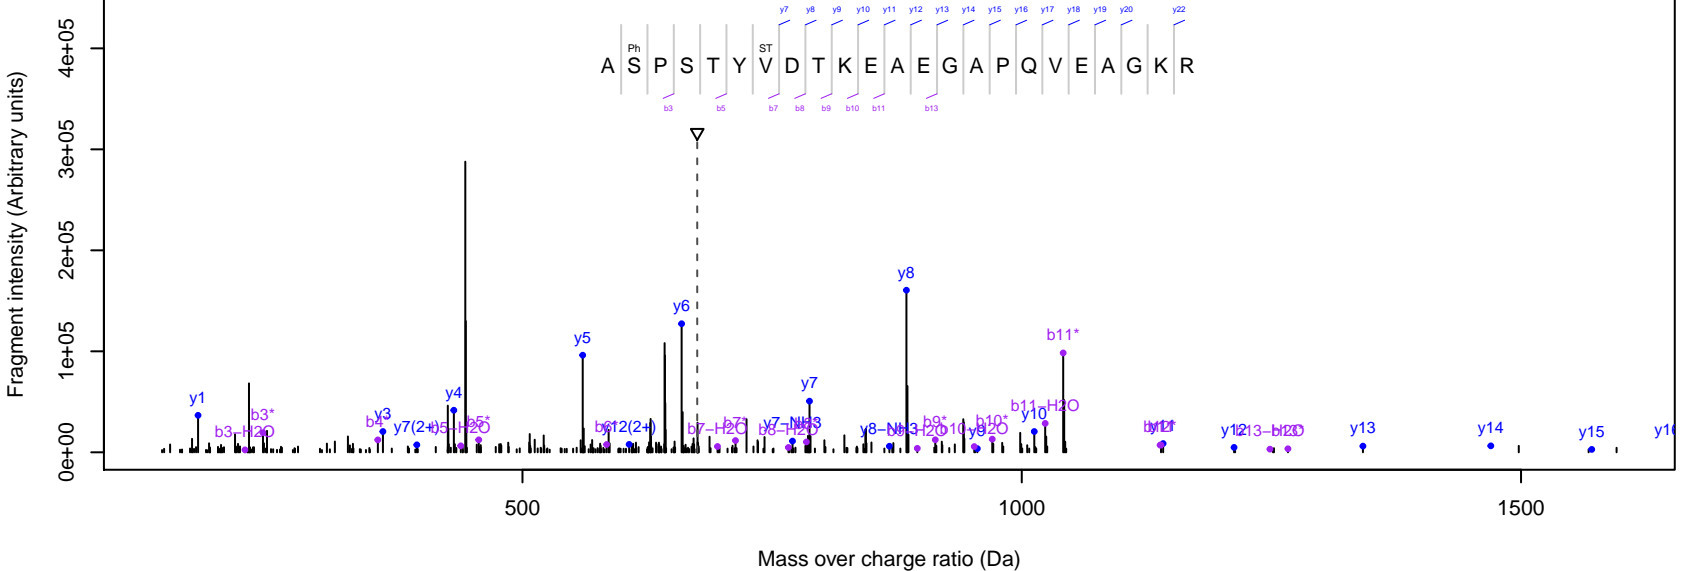





LHKTEDGGWEWS(Phospho (STY))DDEFDEESEEGK-3+

Source : QE3\_201126\_FR\_TiOx\_hum\_tissue\_Urea\_RNAB\_N Scan : 35032

Andromeda score : 121.26

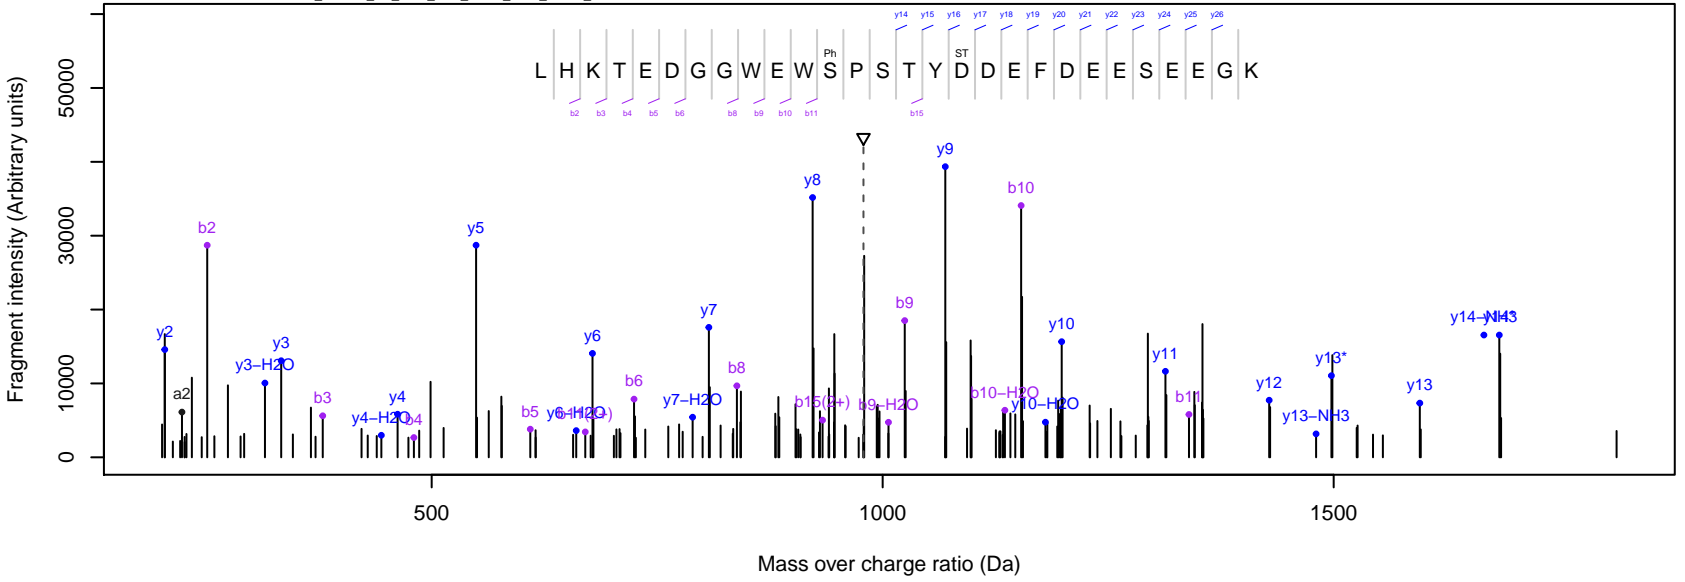

RS(Phospho (STY))PEAPQPVIAMEEPAVPAPLPK-3+

Source : QE3\_201126\_FR\_TiOx\_hum\_tissue\_Urea\_RNAB\_H Scan : 41828

Andromeda score : 121.26

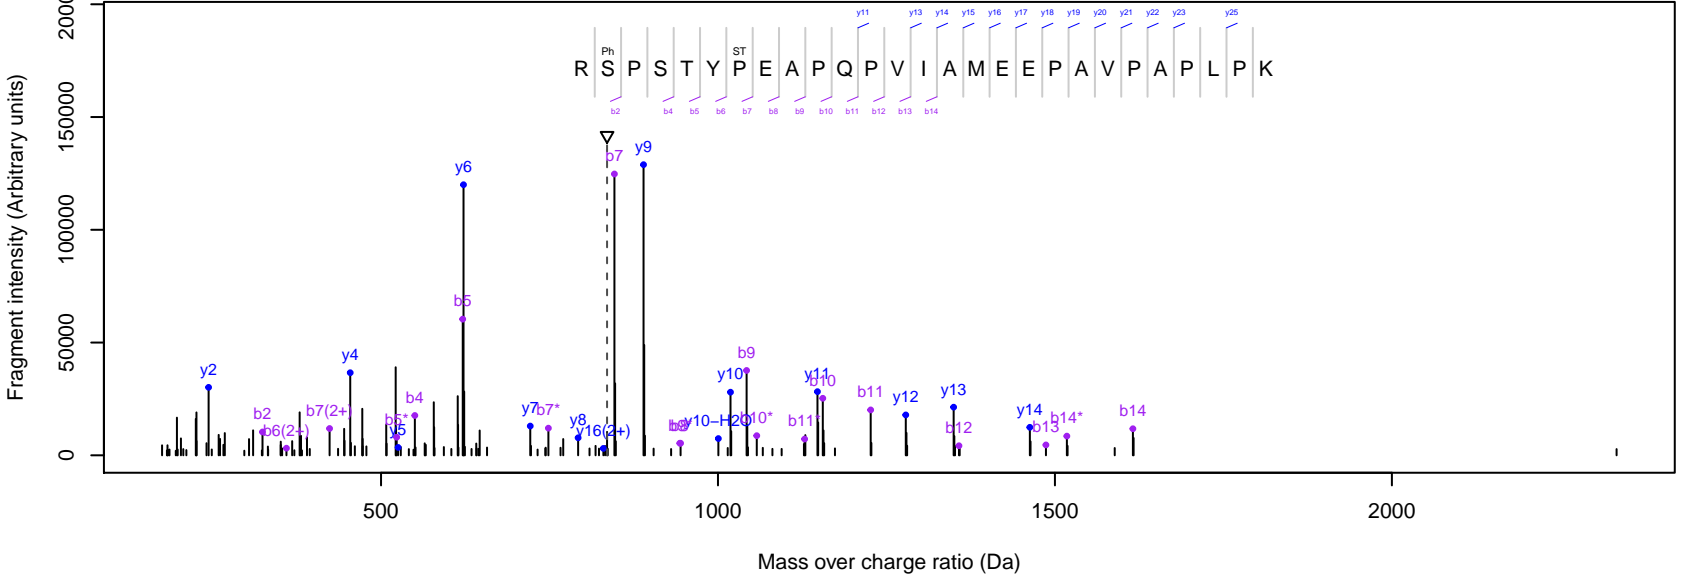

IEEVLSPEGSPSKS(Phospho (STY))PSK-3+

Source : QE3\_201126\_FR\_TiOx\_hum\_tissue\_Urea\_RNAB\_H Scan : 15878

Andromeda score : 121.25

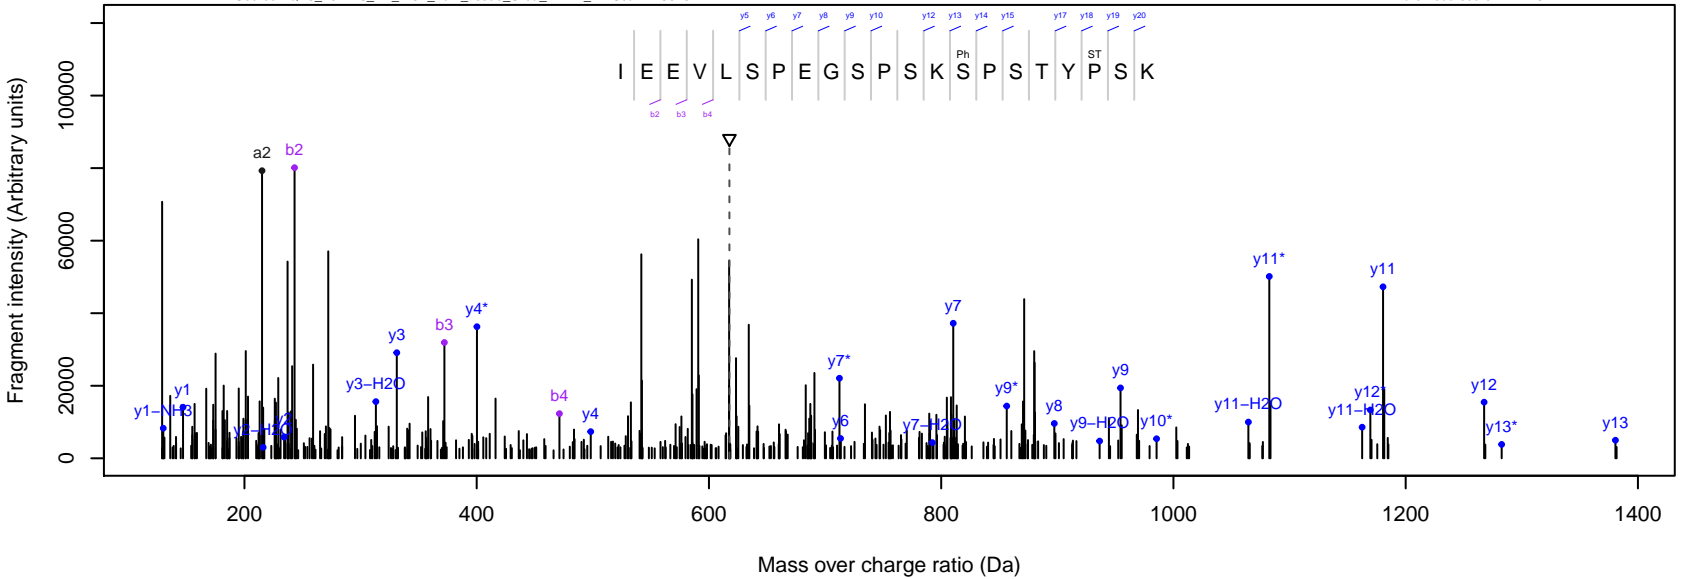

SS(Phospho (STY))SVGS(Phospho (STY))SSYPIS(Phospho (STY))PAVSR-2+

Source : QE3\_201126\_FR\_TiOx\_hum\_tissue\_Urea\_RNAB\_N Scan : 40111

Andromeda score : 121.21

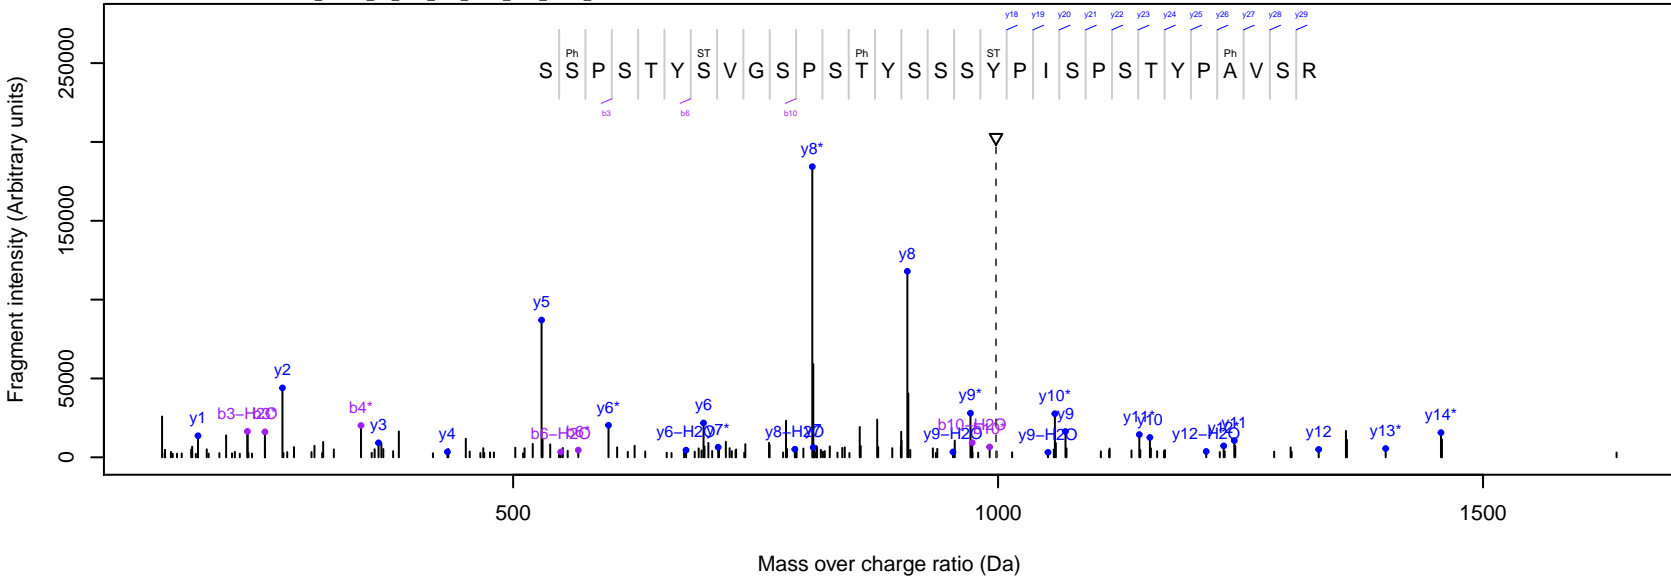

KANDES(Phospho (STY))NEHSDVIDS(Phospho (STY))QELSKVS(Phospho (STY))R-3+

Source : QE3\_201126\_FR\_TiOx\_hum\_tissue\_Urea\_RNAB\_H Scan : 18929

Andromeda score : 121.2

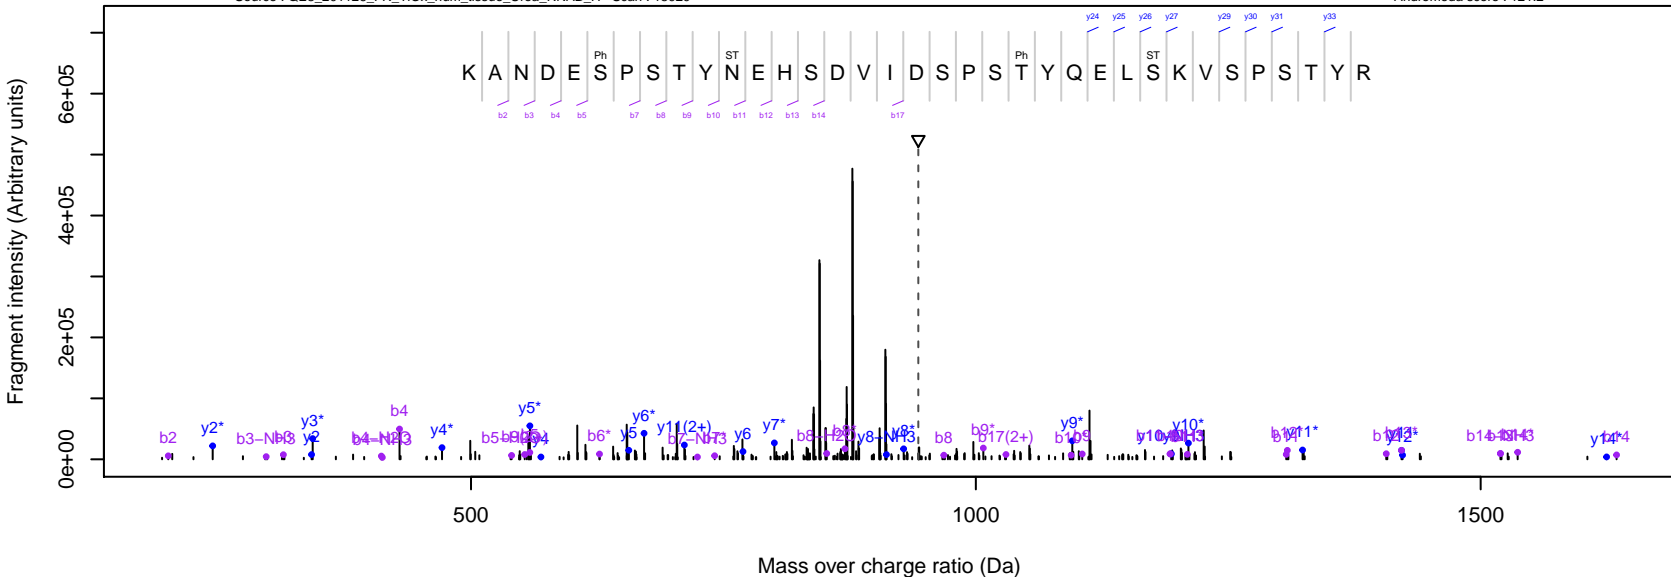

SGT(Phospho (STY))PPRQGSITSPQANEQSVT(Phospho (STY))PQRR-3+

Source : QE3\_201126\_FR\_TiOx\_hum\_tissue\_Urea\_RNAB\_N Scan : 13436

Andromeda score : 121.2

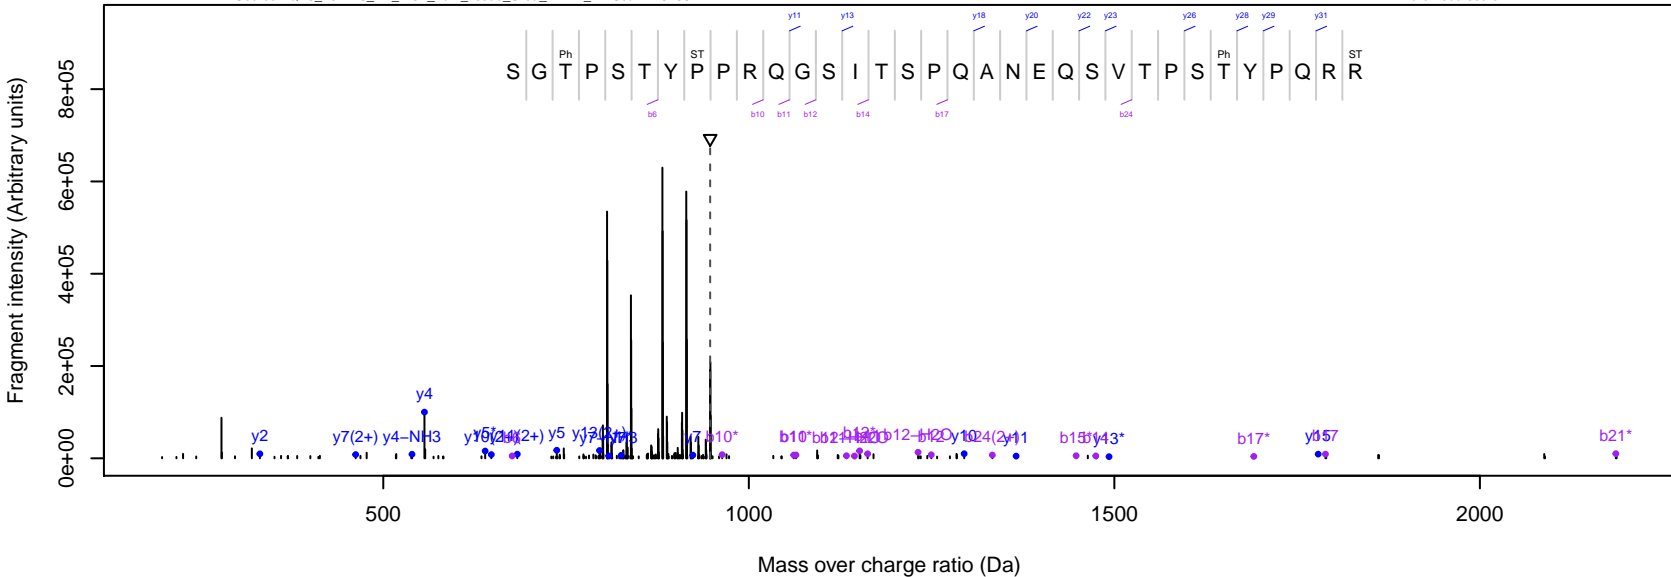



VLS(Phospho (STY))PLRS(Phospho (STY))PPLIGSESAYESFLSADDK-3+

Source : QE3\_201126\_FR\_TiOx\_hum\_tissue\_Urea\_RNAB\_N Scan : 60466

Andromeda score : 121.2

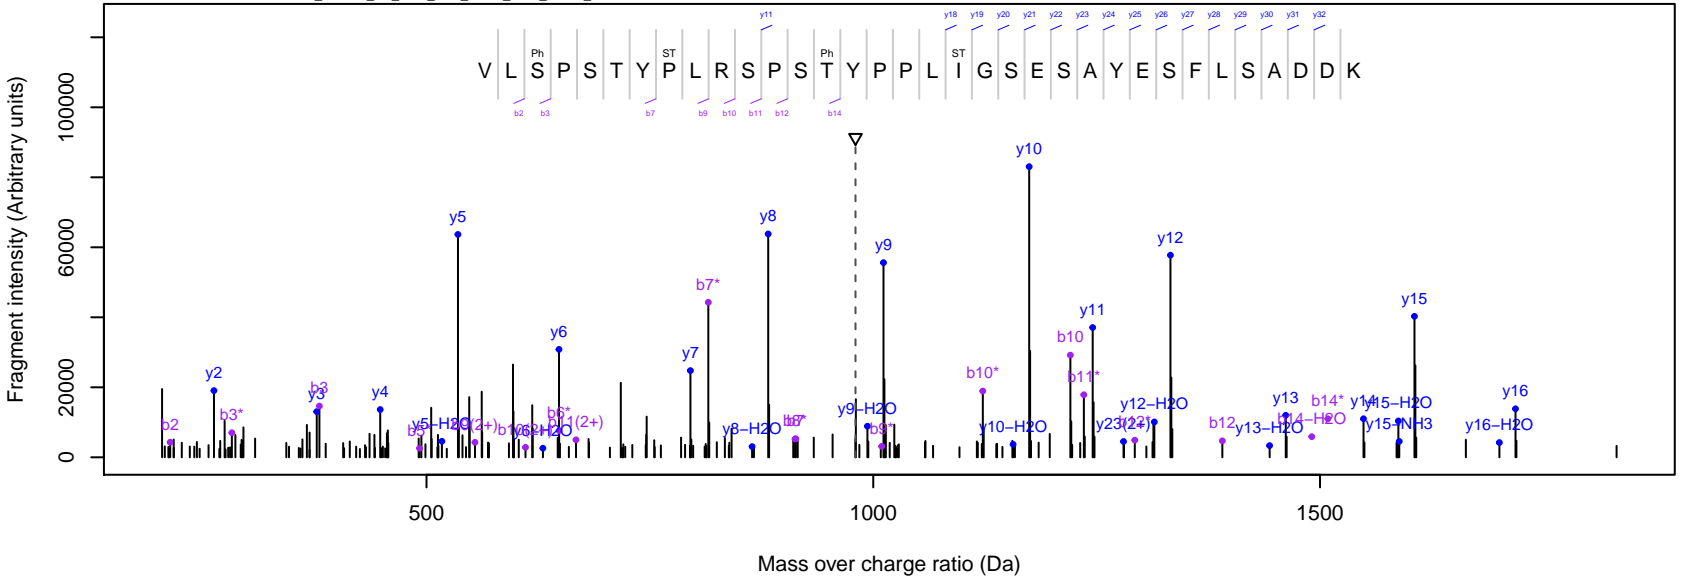

ETSFGSS(Phospho (STY))ENITM(Oxidation (M))TSLSK-2+

Source : QE3\_201126\_FR\_TiOx\_hum\_tissue\_Urea\_RNAB\_N Scan : 28835

Andromeda score : 121.19

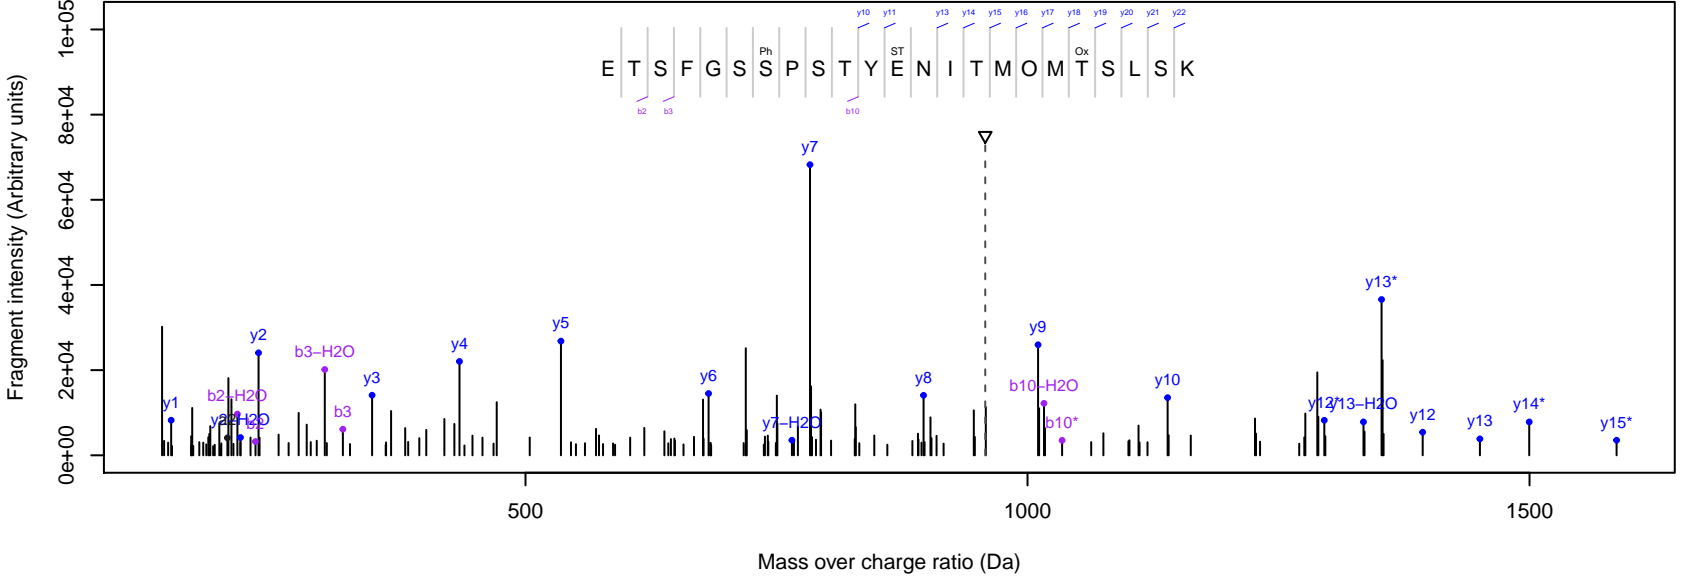

AVPIA VADEGES(Phospho (STY))ES(Phospho (STY))EDDLKPR-3+

Source : QE3\_201126\_FR\_TiOx\_hum\_tissue\_Urea\_RNAB\_N Scan : 33934

Andromeda score : 121.1

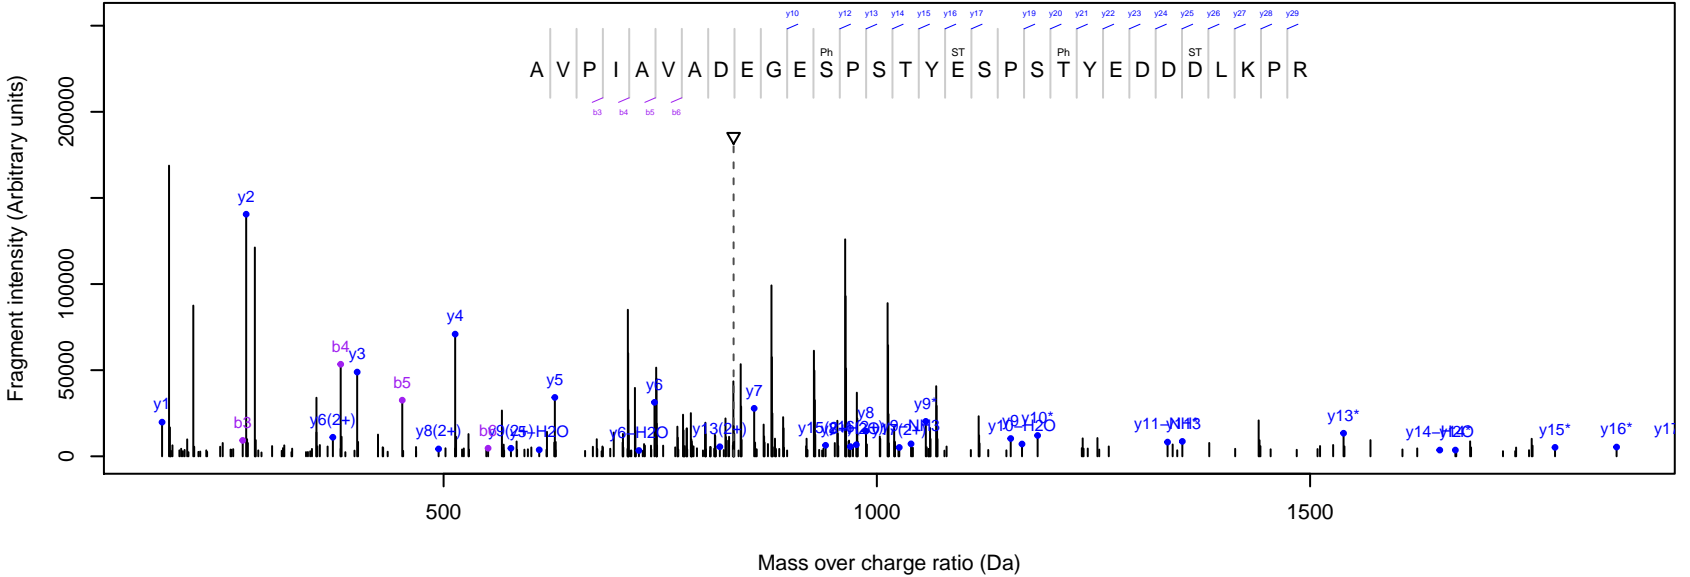

SVTHFDS(Phospho (STY))LAVIDIPGADTLDKLFDHAVSK-4+

Source : QE3\_201126\_FR\_TiOx\_hum\_tissue\_Urea\_RNAB\_H Scan : 59319

Andromeda score : 121.1

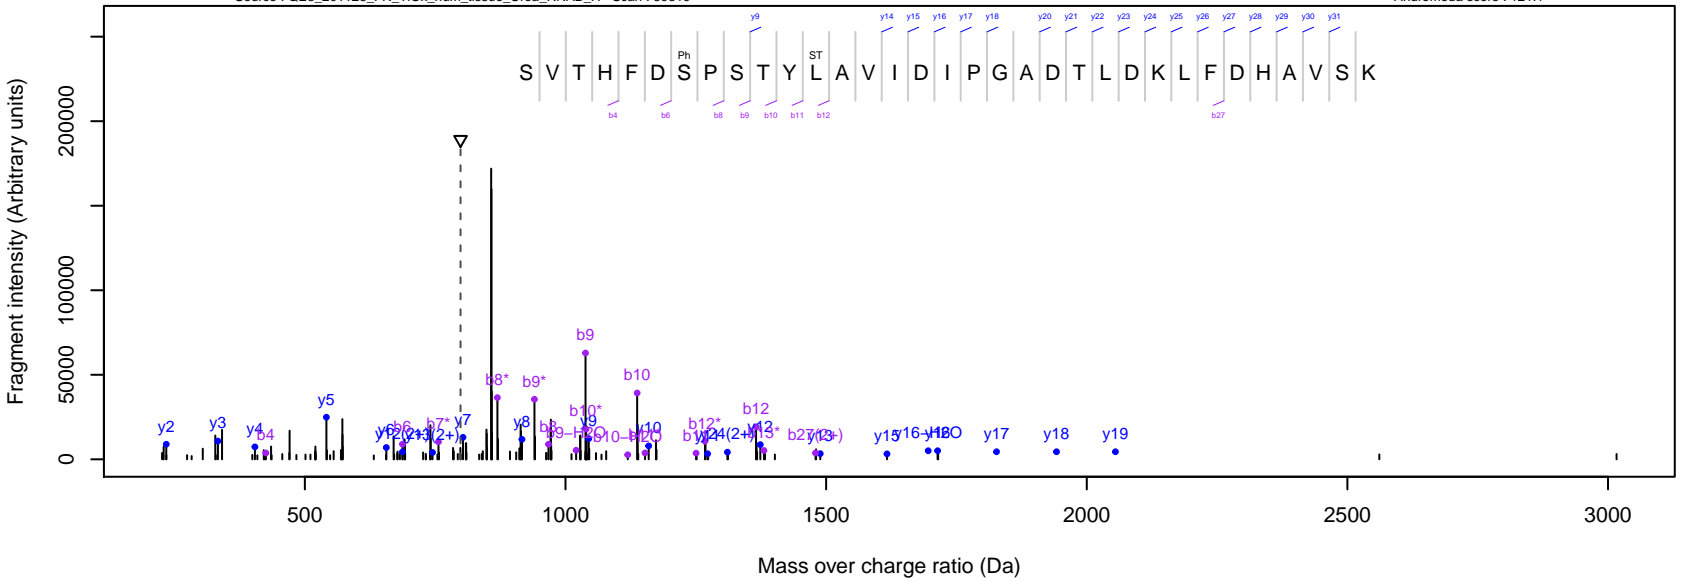

HVIGLQMG(Phospho (STY))NR-2+

Source : QE3\_201126\_FR\_TiOx\_hum\_tissue\_Urea\_RNAB\_N Scan : 18587

Andromeda score : 121.02

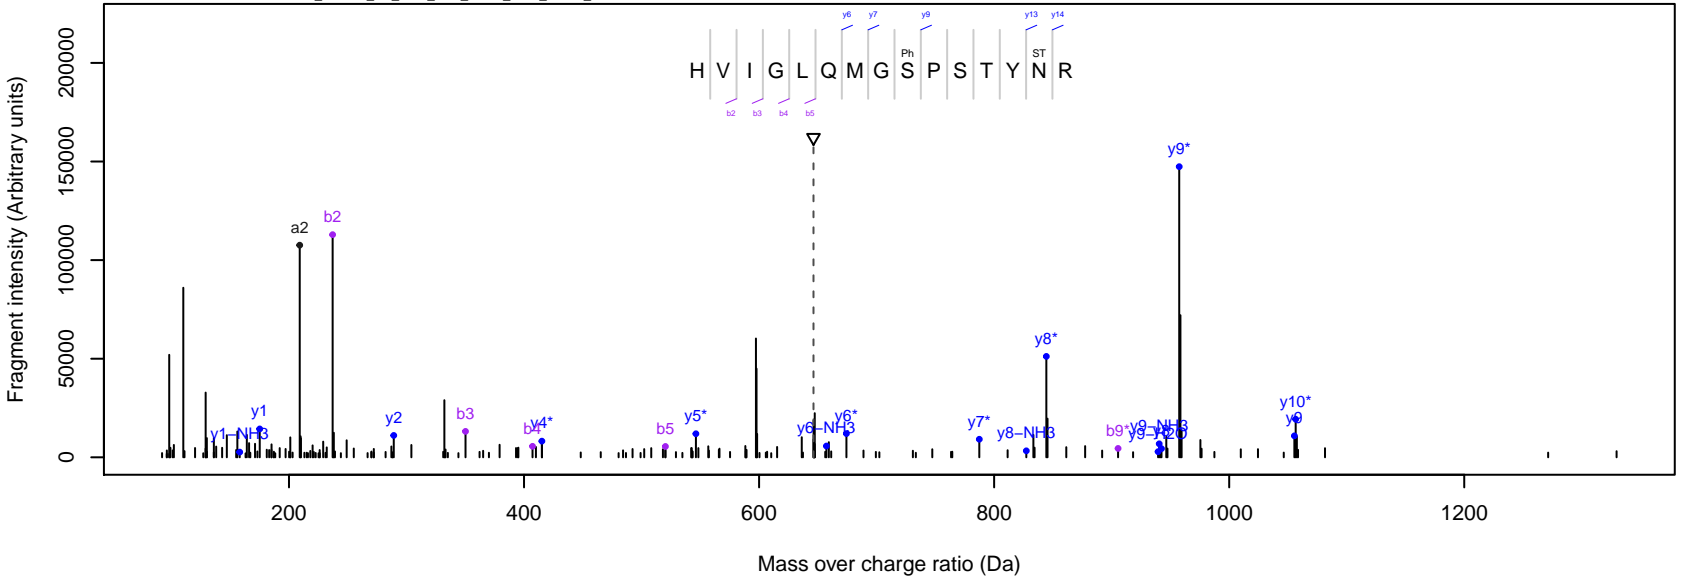

VSIGNITLSPAISRHS(Phospho (STY))PVQMNR-3+

Source : QE3\_201126\_FR\_TiOx\_hum\_tissue\_Urea\_RNAB\_H Scan : 33166

Andromeda score : 121.02

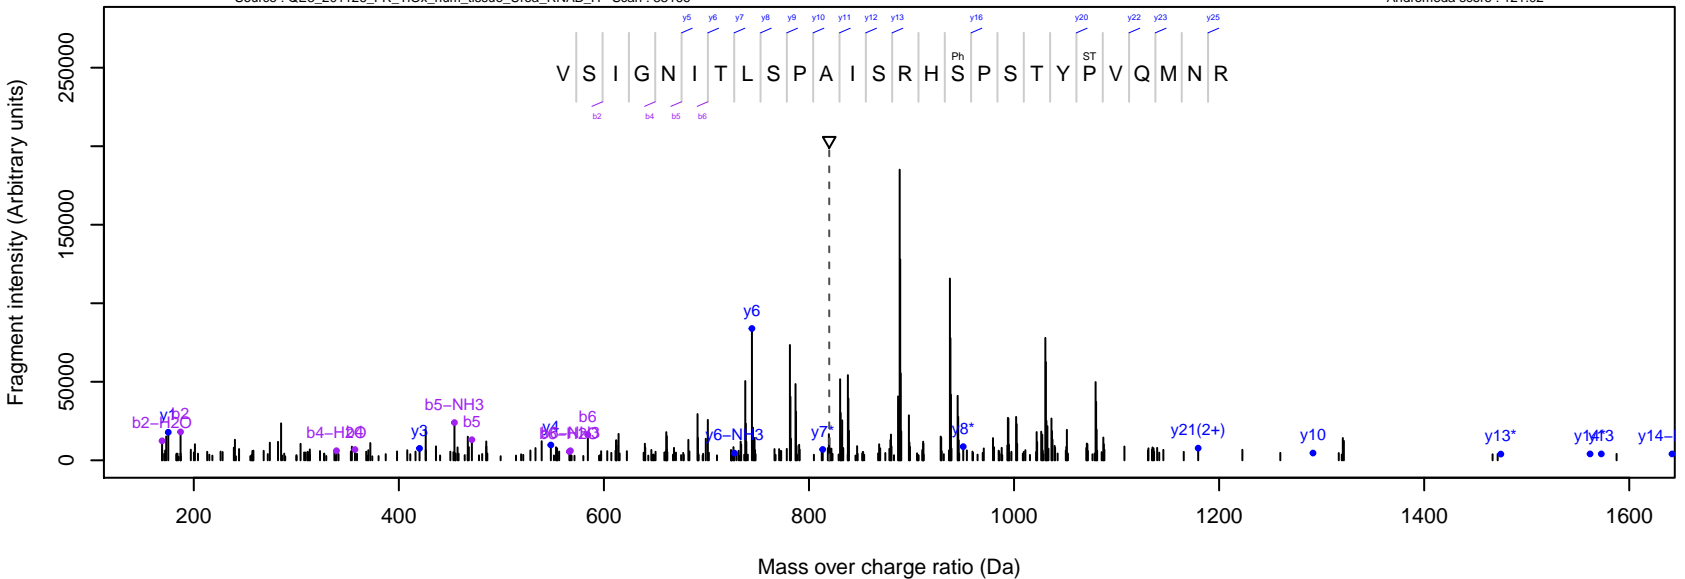

**KS(Phospho (STY))S(Phospho (STY))TGSISNVLFSTQDPVEDAVFGEATNLKK-3+**

Source : QE3\_201126\_FR\_TIOx\_hum\_tissue\_Urea\_RNAB\_H Scan : 56774

Andromeda score : 120.98

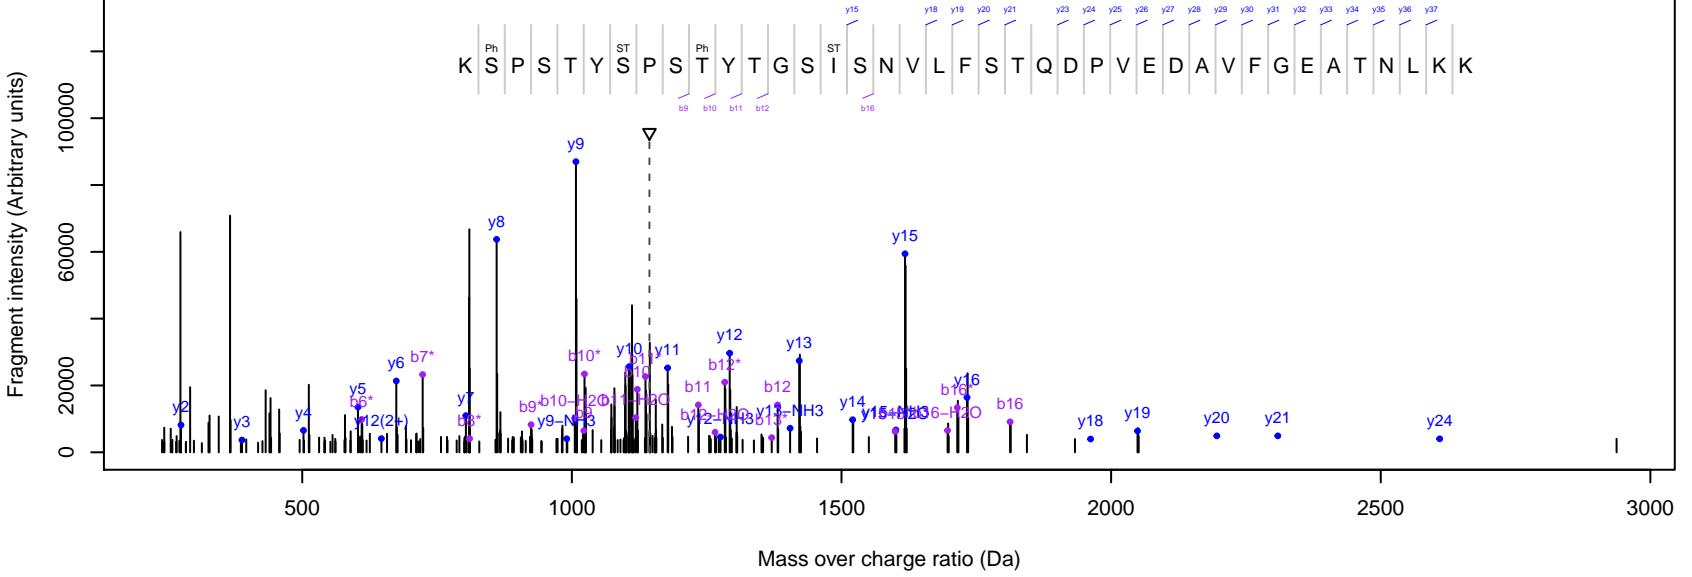

**VATLNS(Phospho (STY))EEEESDPPTYKDAFPPLPEK-3+**

Source : QE3\_201126\_FR\_TIOx\_hum\_tissue\_Urea\_RNAB\_H Scan : 39688

Andromeda score : 120.93

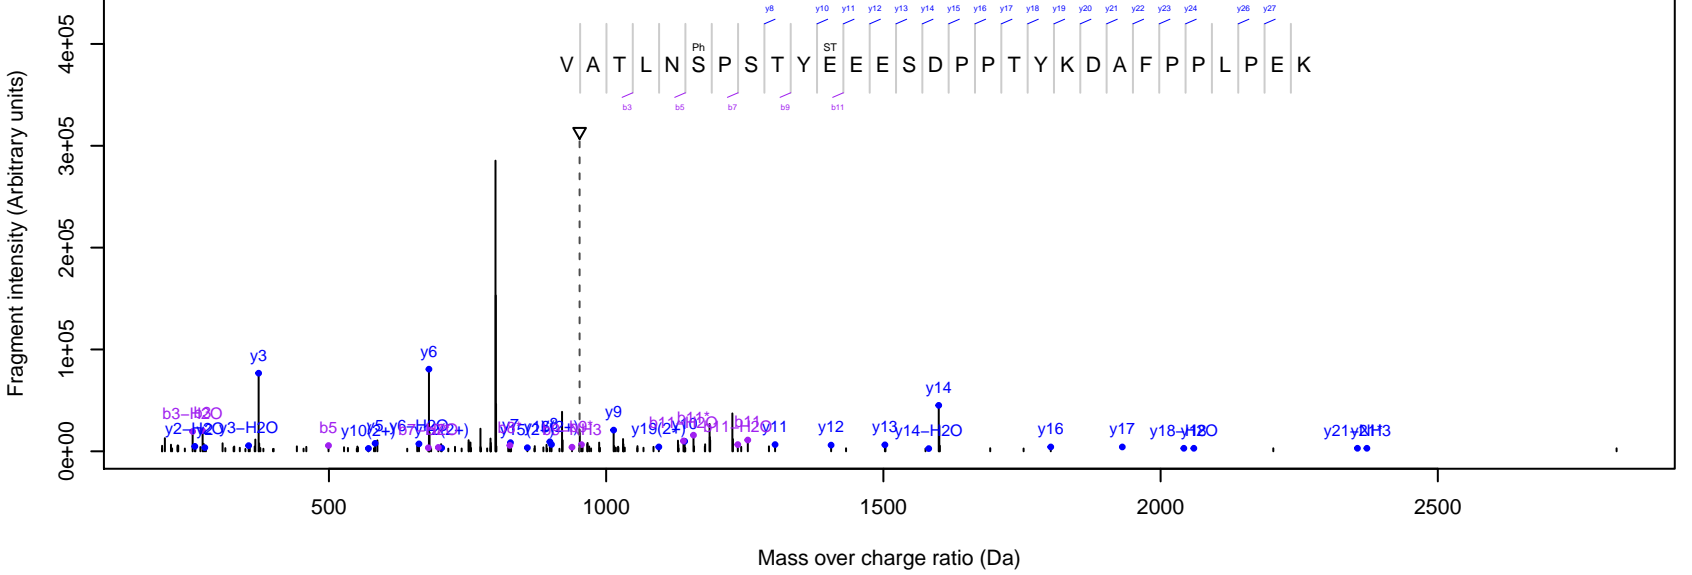

**AEGEPQES(Phospho (STY))PLKSK-2+**

Source : QE3\_201126\_FR\_TIOx\_hum\_tissue\_Urea\_RNAB\_H Scan : 8391

Andromeda score : 120.92

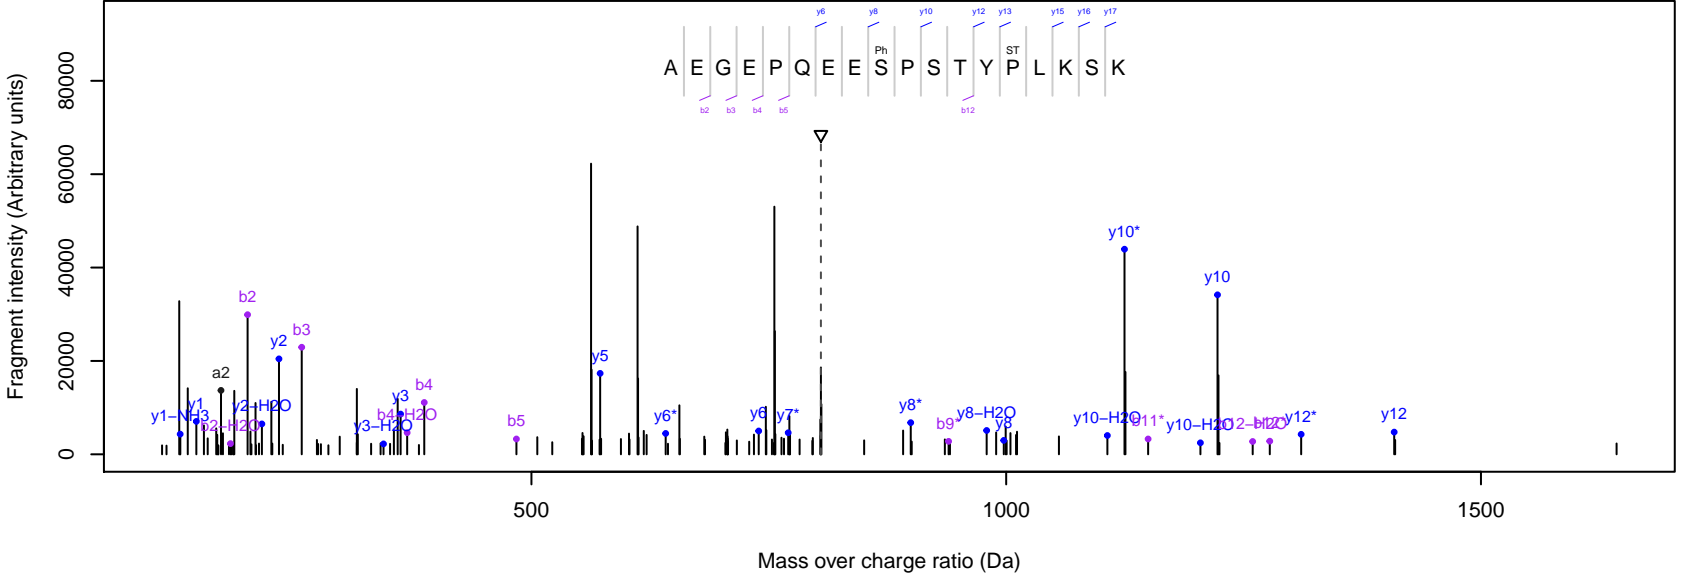

DSAYQSITHYRPVS(Phospho (STY))ASR-3+

Source : QE3\_201126\_FR\_TiOx\_hum\_tissue\_Urea\_RNAB\_H Scan : 22046

Andromeda score : 120.92

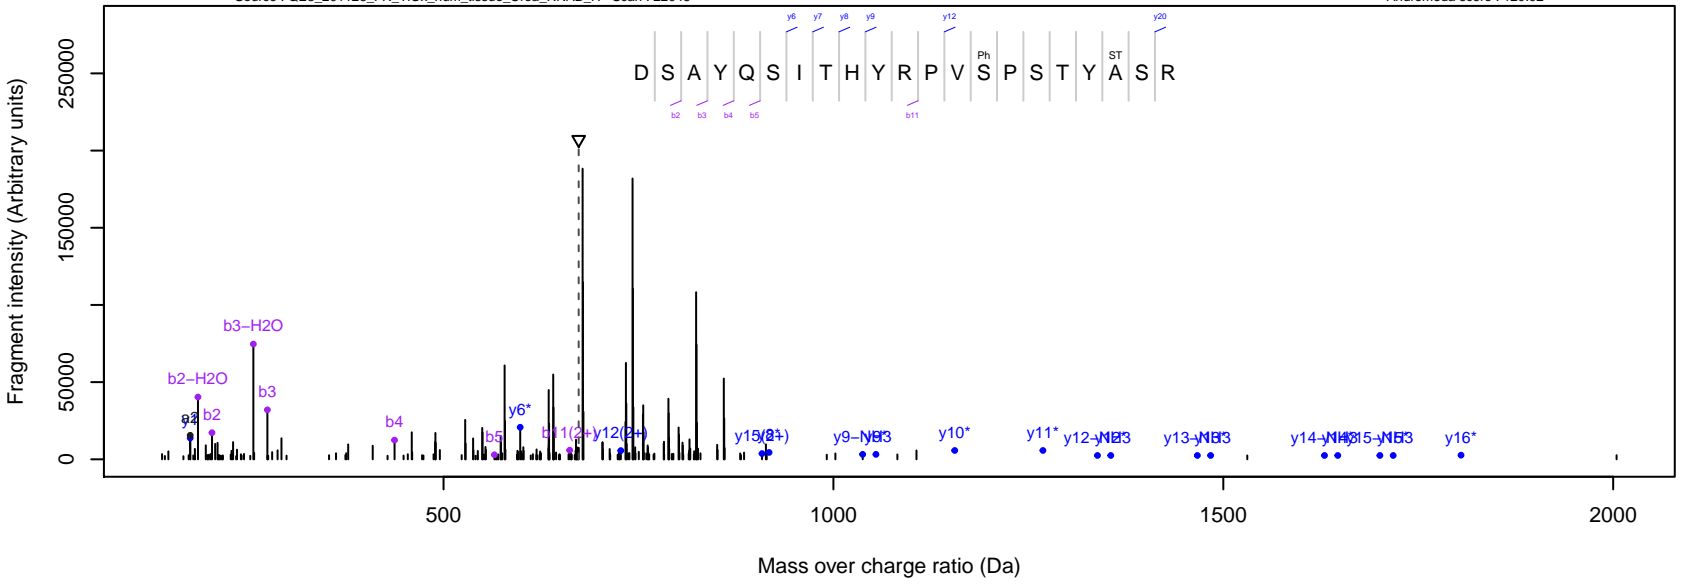

TAPPALPTGYDS(Phospho (STY))EEEEERPMSEYDEKR-4+

Source : QE3\_201126\_FR\_TiOx\_hum\_tissue\_Urea\_RNAB\_H Scan : 26041

Andromeda score : 120.91

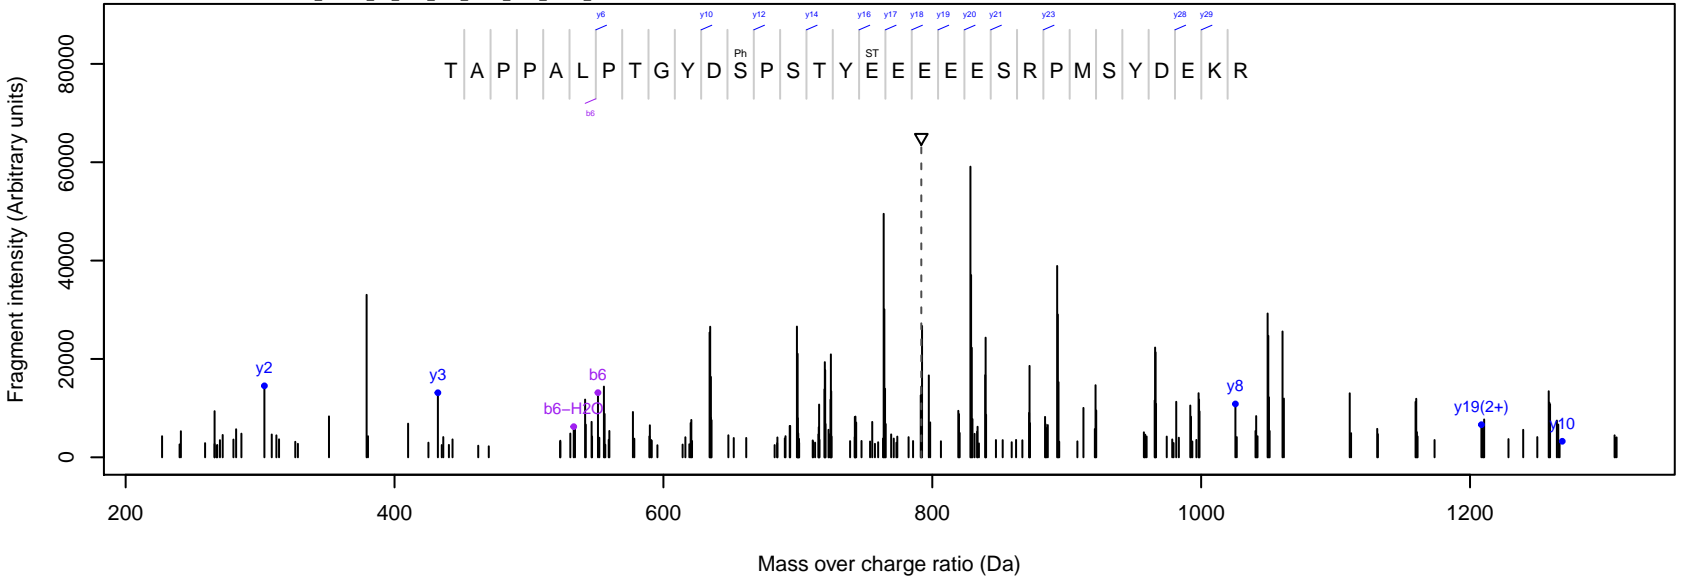

RSS(Phospho (STY))DGS(Phospho (STY))LSHEEDLAK-2+

Source : QE3\_201126\_FR\_TiOx\_hum\_tissue\_Urea\_RNAB\_N Scan : 11897

Andromeda score : 120.9

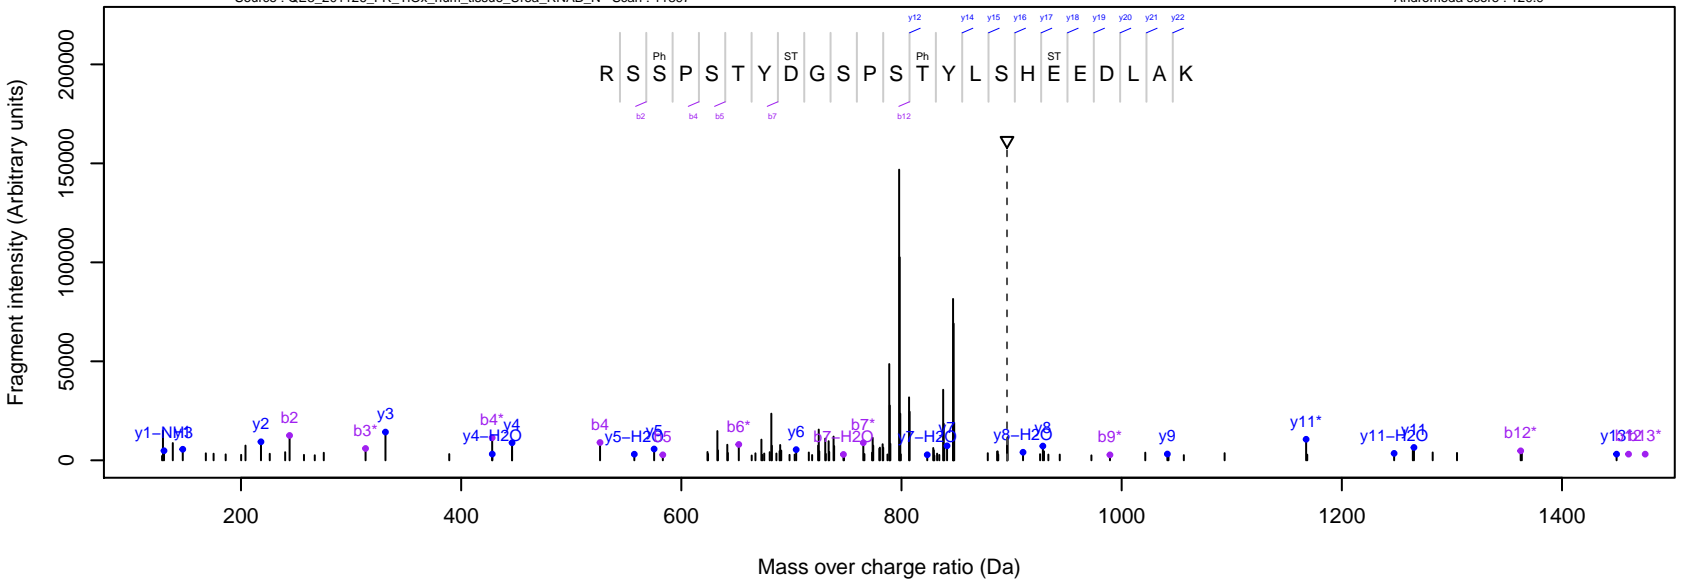

TFS(Phospho (STY))ATVR-2+

Source : QE3\_201126\_FR\_TiOx\_hum\_tissue\_Urea\_RNAB\_N Scan : 15004

Andromeda score : 120.87

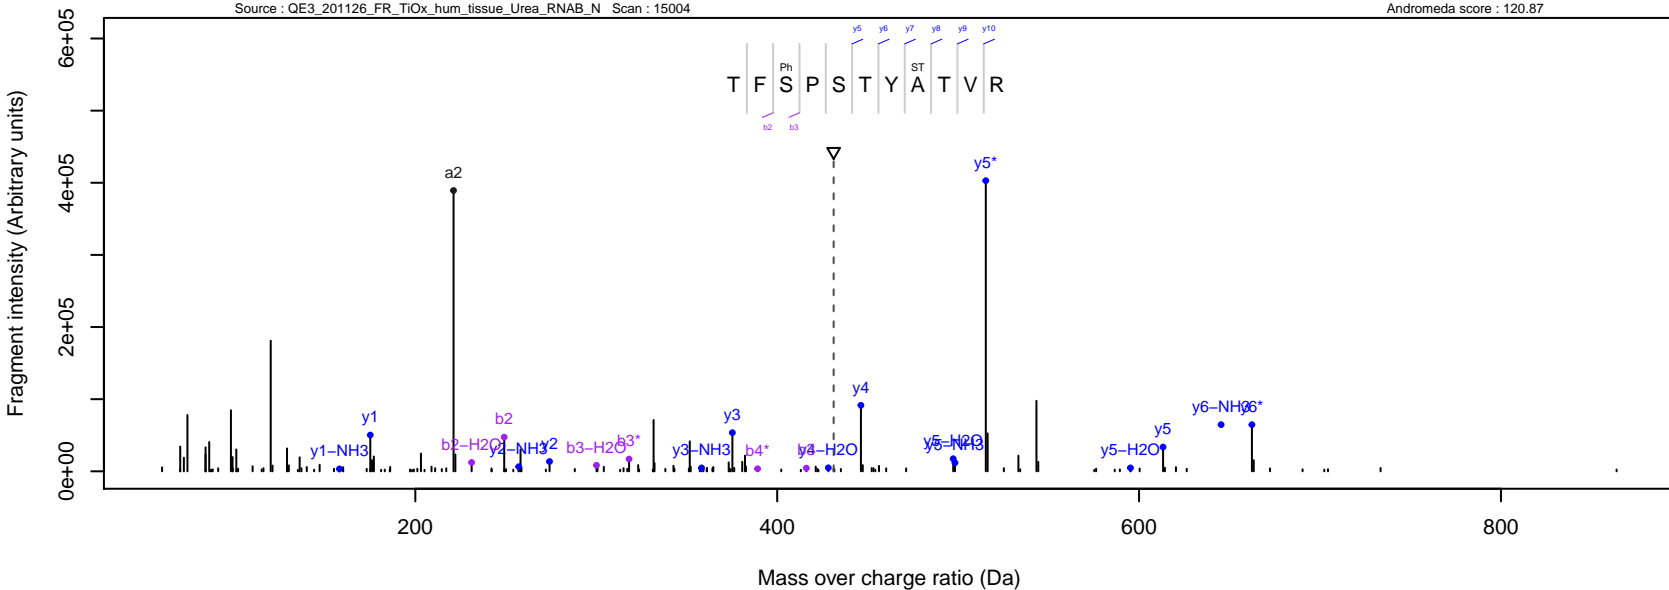

M(Oxidation (M))DRT(Phospho (STY))PPPTLS(Phospho (STY))PAAITVGR-3+

Source : QE3\_201126\_FR\_TiOx\_hum\_tissue\_Urea\_RNAB\_B Scan : 36251

Andromeda score : 120.85

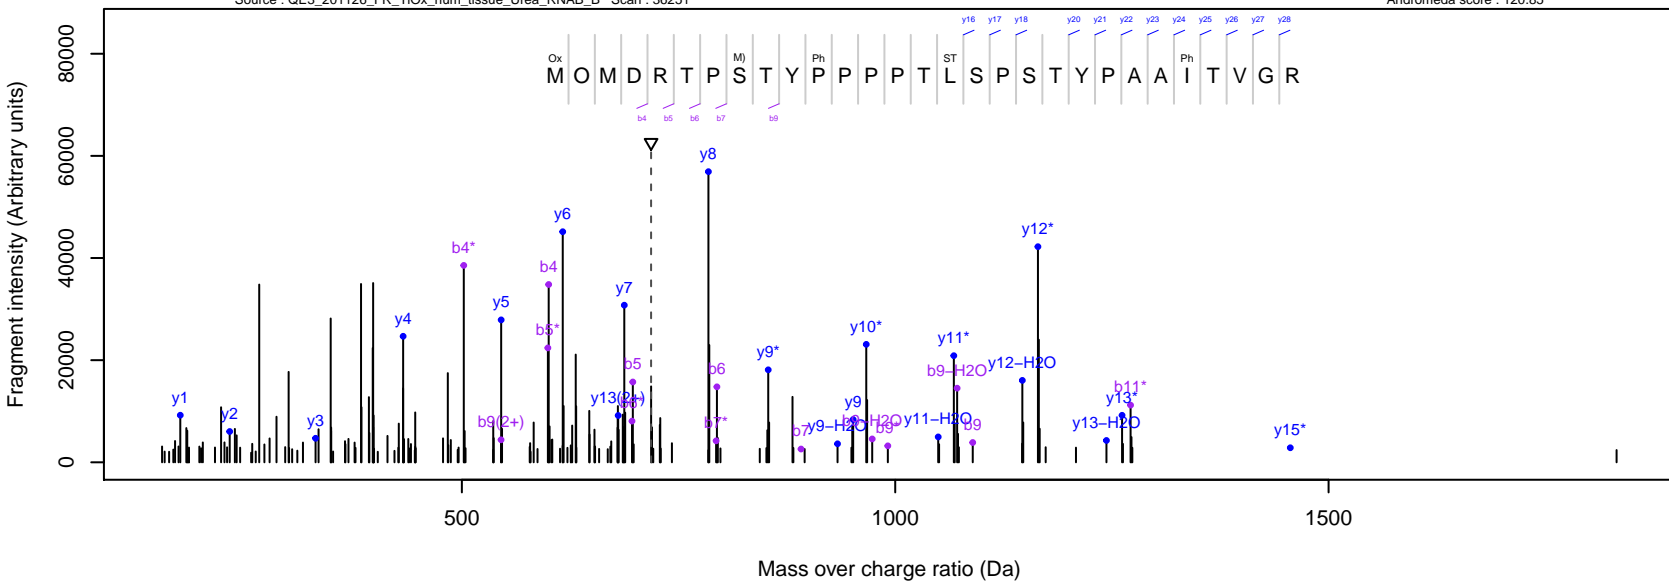

NQEASLGM(Oxidation (M))KT(Phospho (STY))PEAPAHSEKPR-4+

Source : QE3\_201126\_FR\_TiOx\_hum\_tissue\_Urea\_RNAB\_N Scan : 6744

Andromeda score : 120.85

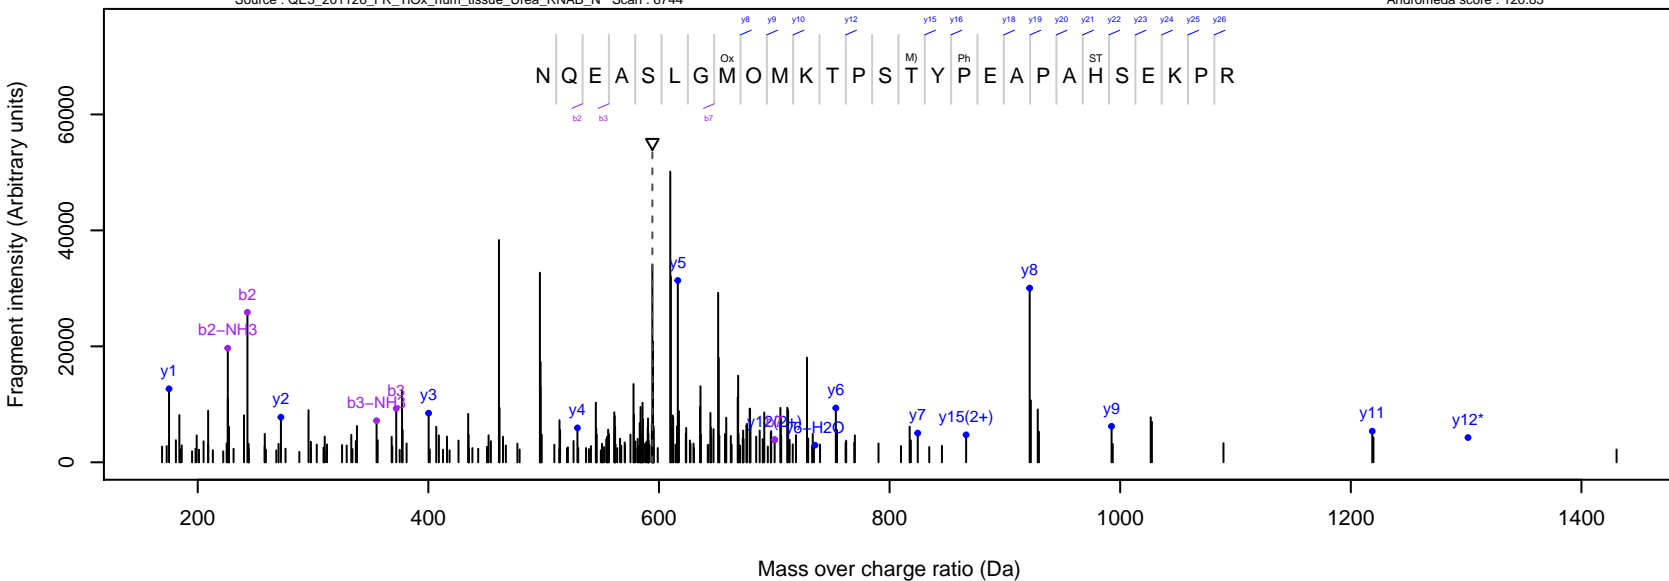

AQS(Phospho (STY))LEPYGTGLR-2+

Source : QE3\_201126\_FR\_TiOx\_hum\_tissue\_Urea\_RNAB\_N Scan : 26389

Andromeda score : 120.84

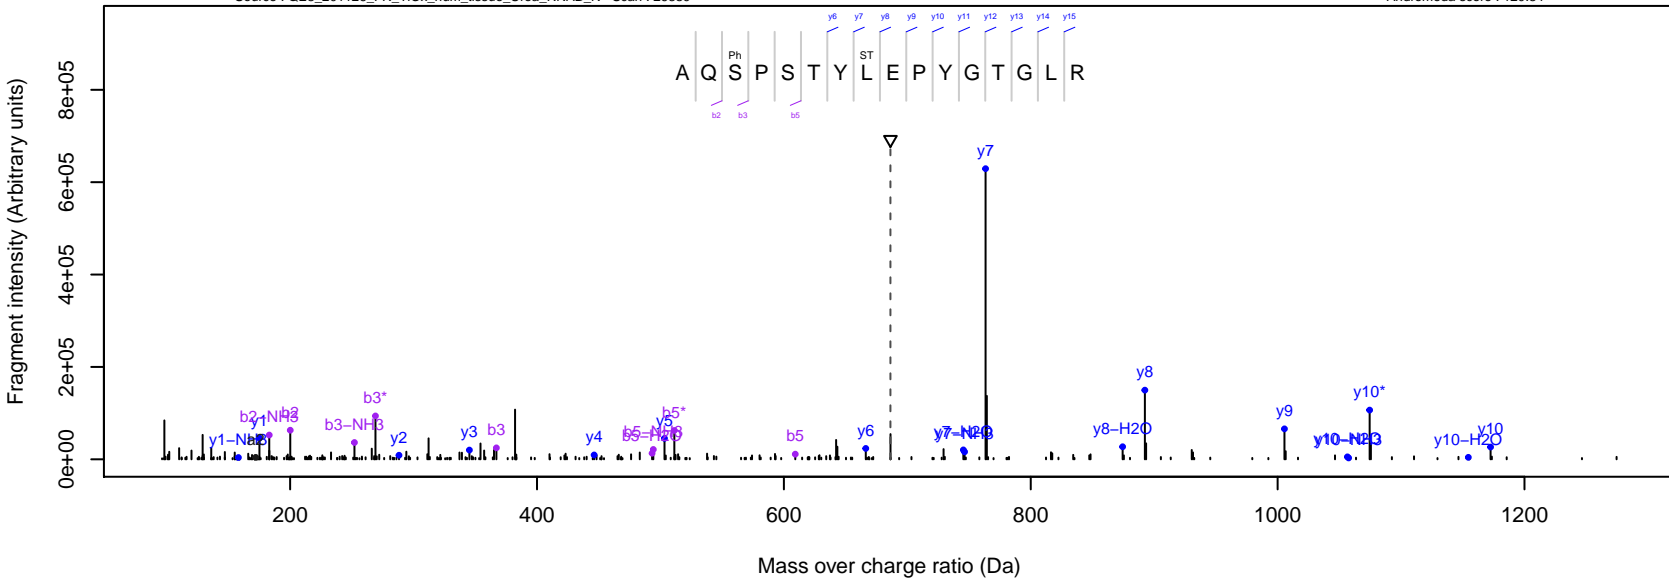

SLSSS(Phospho (STY))PQAQPPRPAELSDEEVAELFQR-3+

Source : QE3\_201126\_FR\_TiOx\_hum\_tissue\_Urea\_RNAB\_H Scan : 50387

Andromeda score : 120.8

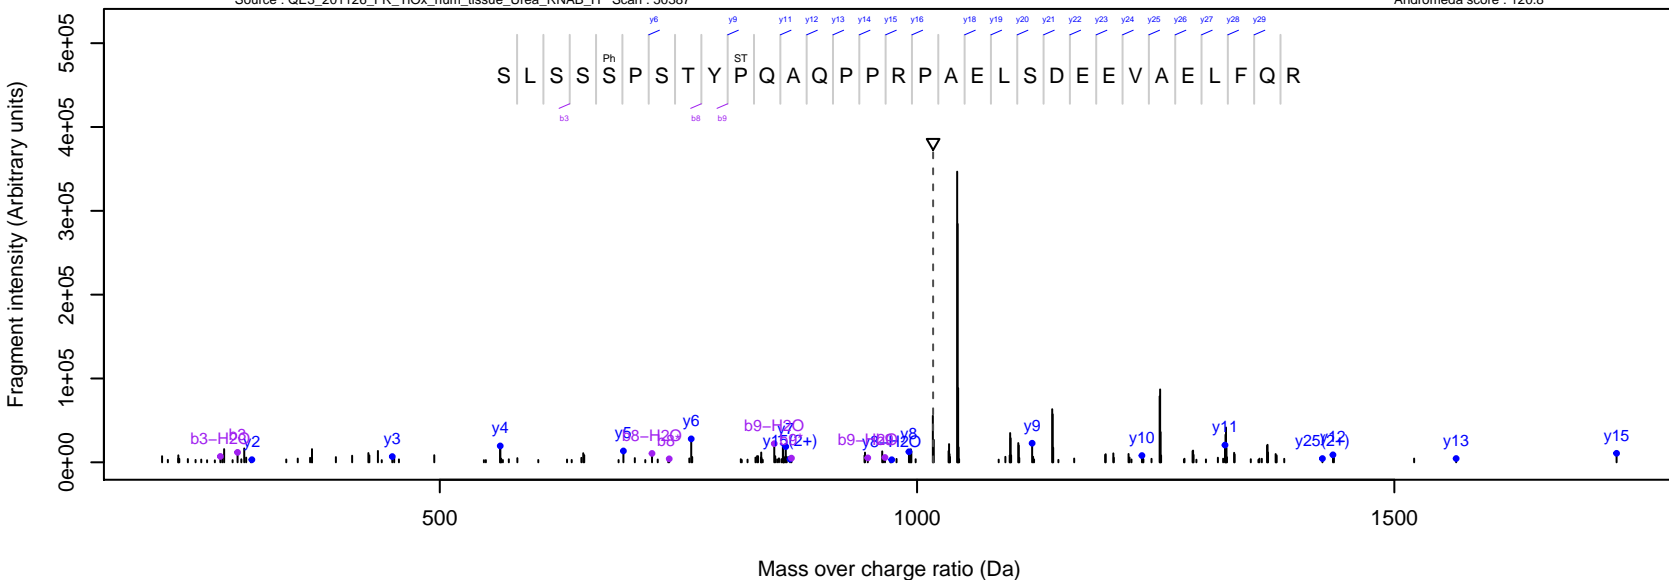

KTS(Phospho (STY))LDVNSAEPGFAPGAR-2+

Source : QE3\_201126\_FR\_TiOx\_hum\_tissue\_Urea\_RNAB\_H Scan : 31179

Andromeda score : 120.71

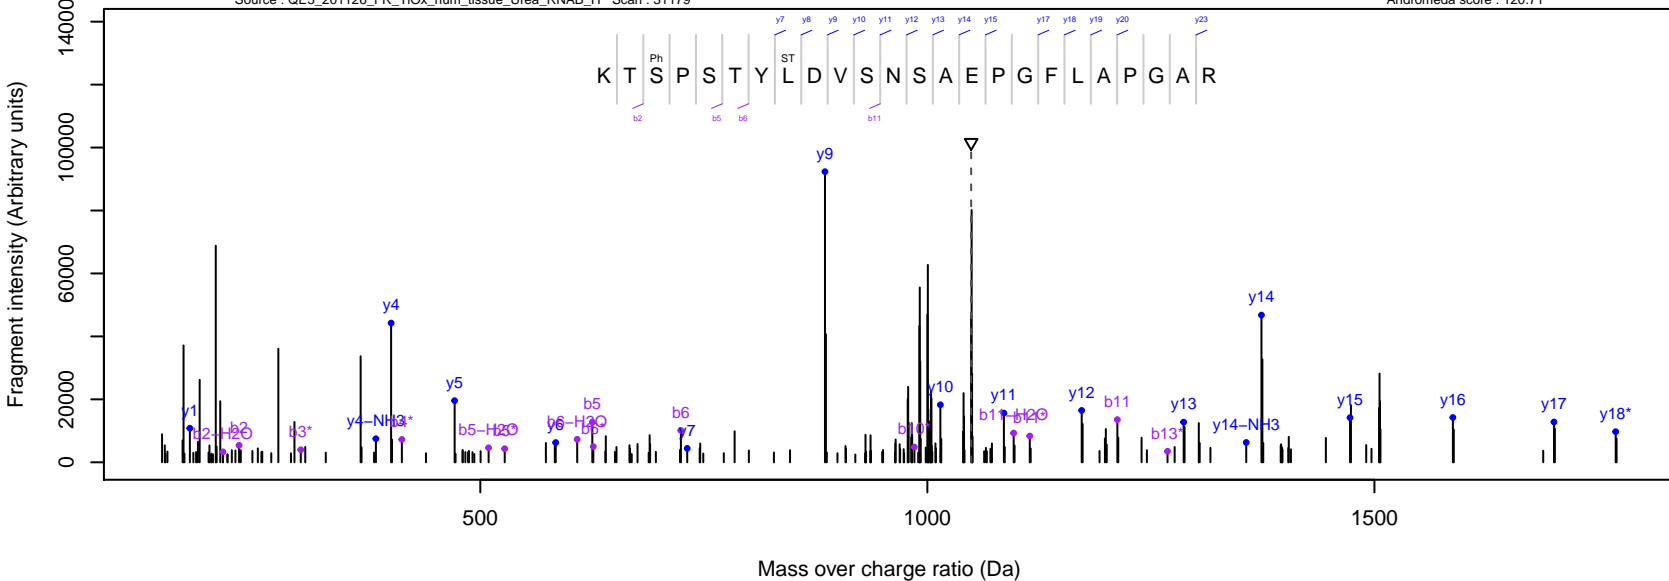

NES(Phospho (STY))LESPMGEGFQK-2+

Source : QE3\_201126\_FR\_TIOx\_hum\_tissue\_Urea\_RNAB\_H Scan : 49263

Andromeda score : 120.7

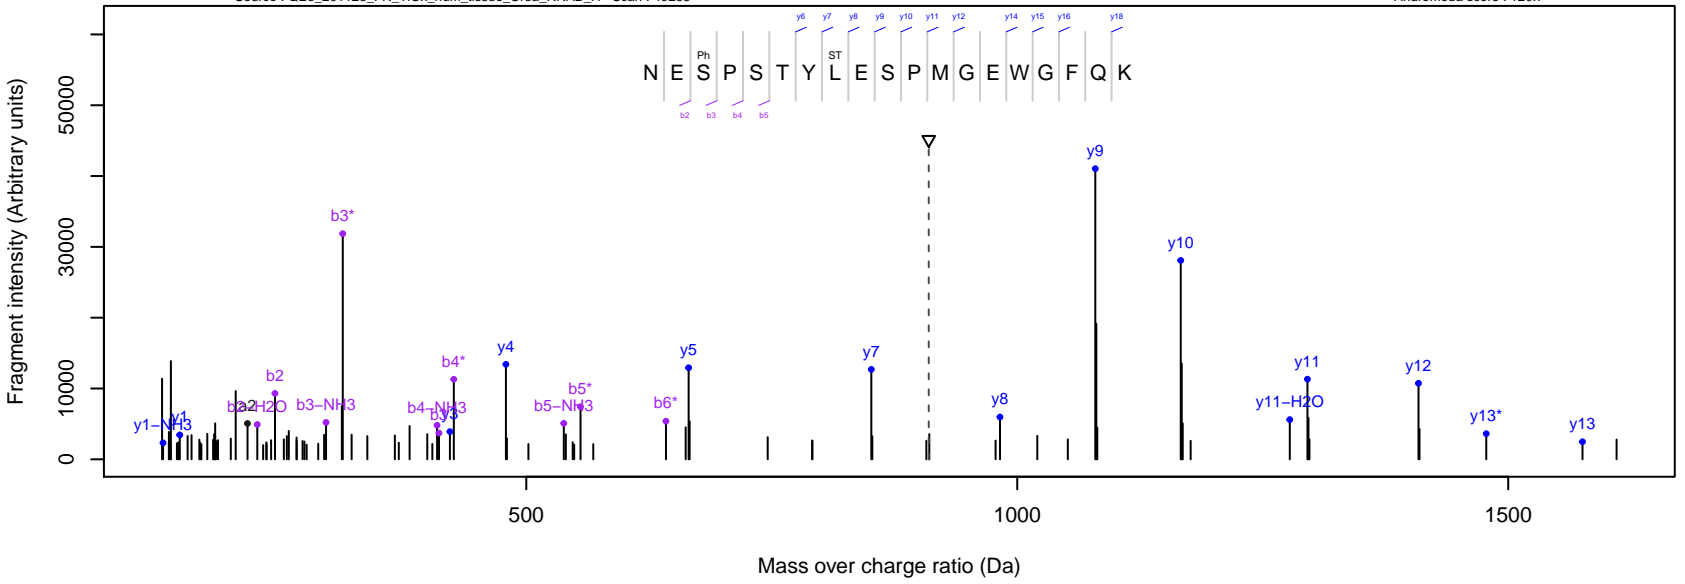

NSGSFSPS(Phospho (STY))ISPR-2+

Source : QE3\_201126\_FR\_TIOx\_hum\_tissue\_Urea\_RNAB\_B Scan : 25901

Andromeda score : 120.7

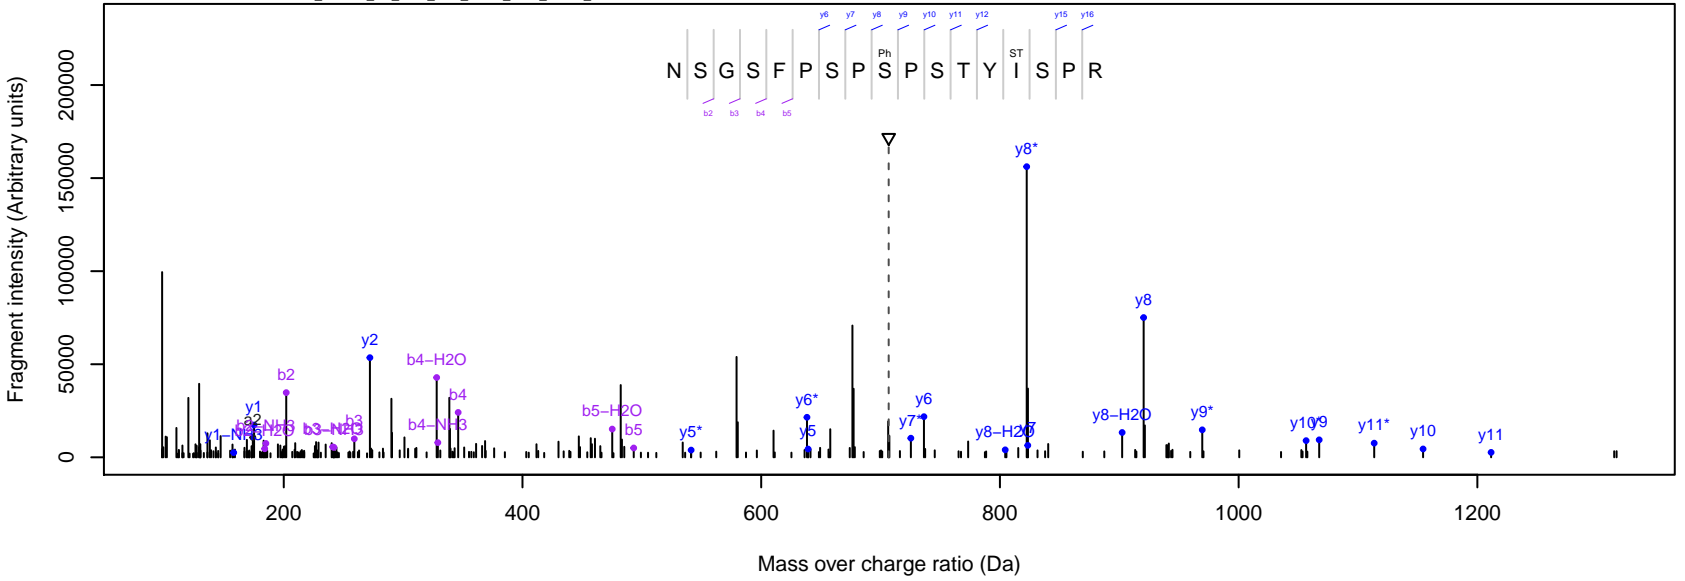

SEAPAEVTHFS(Phospho (STY))PK-2+

Source : QE3\_201126\_FR\_TIOx\_hum\_tissue\_Urea\_RNAB\_N Scan : 16280

Andromeda score : 120.7

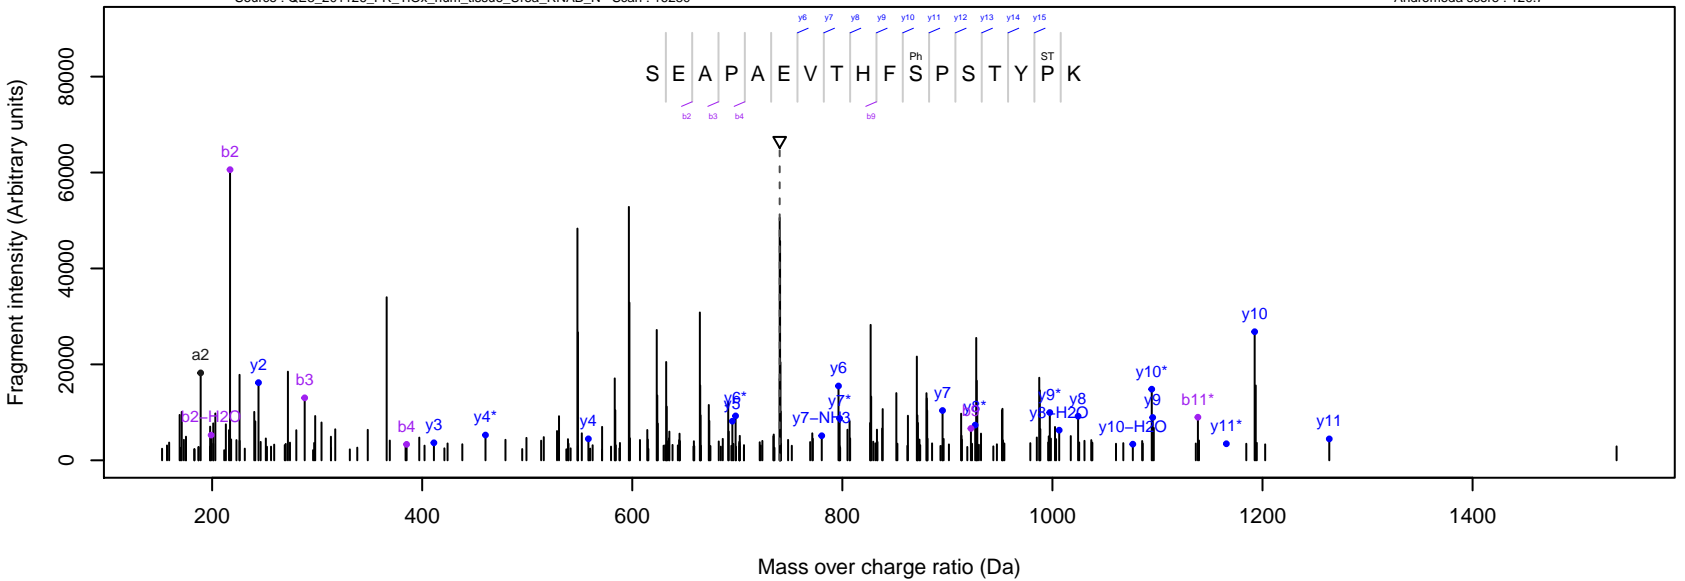

AT(Phospho (STY))NESEDEIPLVPIGKK-2+

Source : QE3\_201126\_FR\_TiOx\_hum\_tissue\_Urea\_RNAB\_B Scan : 34429

Andromeda score : 120.66

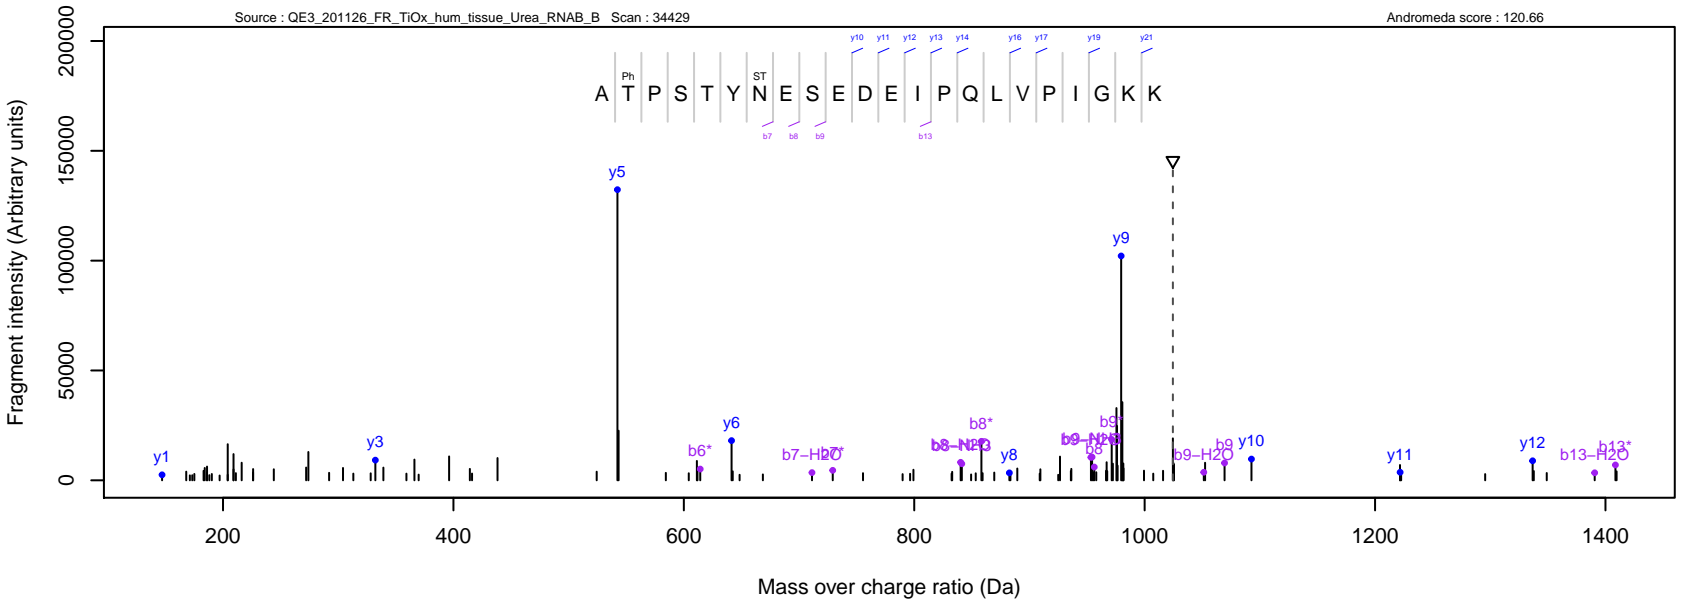

RQQDPS(Phospho (STY))PGSNLGGDDLKLR-3+

Source : QE3\_201126\_FR\_TiOx\_hum\_tissue\_Urea\_RNAB\_H Scan : 18031

Andromeda score : 120.66

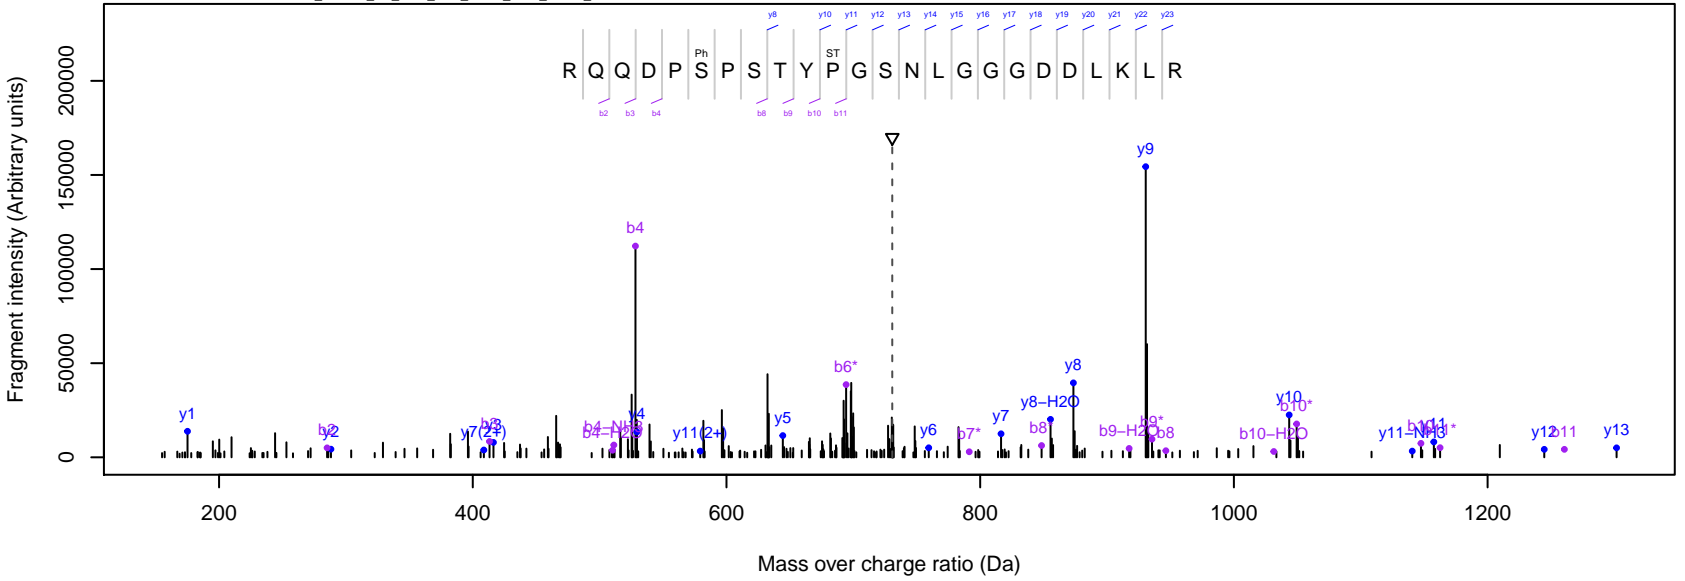

FNDS(Phospho (STY))EGDDT(Phospho (STY))EETEDYRQFR-3+

Source : QE3\_201126\_FR\_TiOx\_hum\_tissue\_Urea\_RNAB\_N Scan : 29267

Andromeda score : 120.64

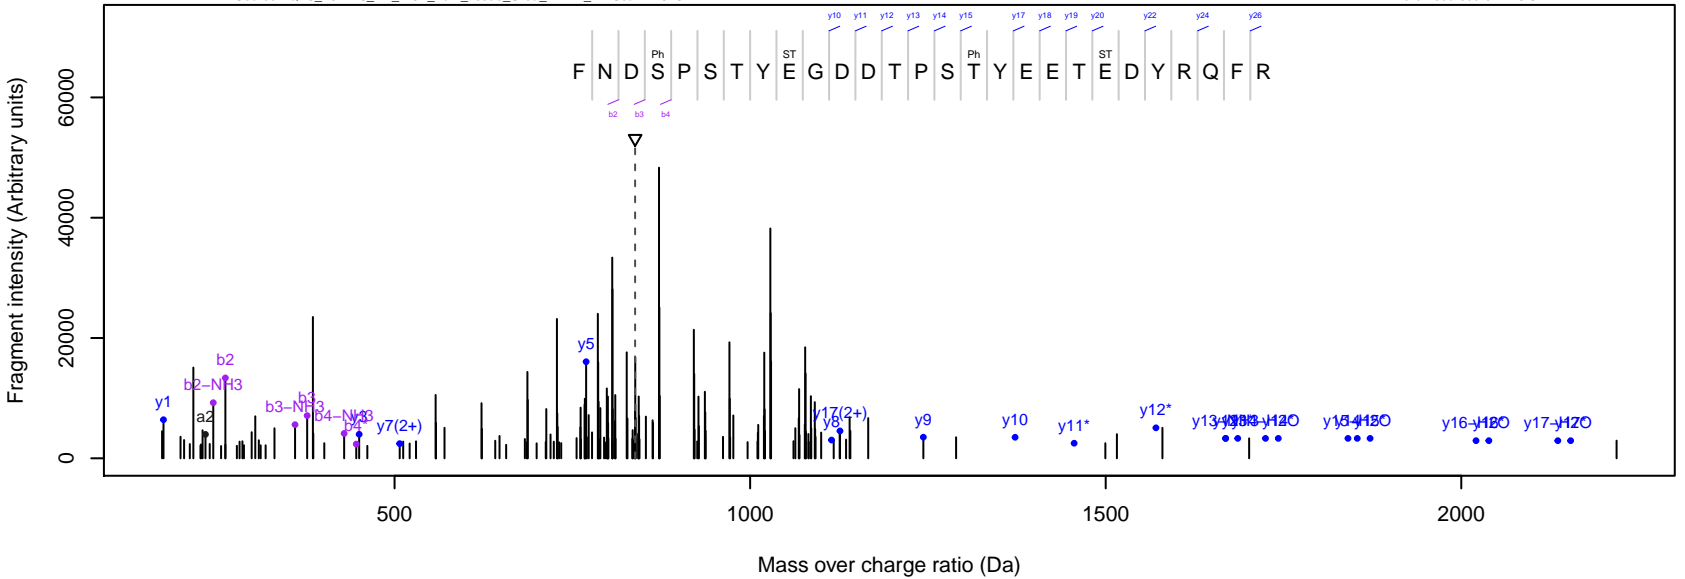



(Acetyl (Protein N-term))ADHS(Phospho (STY))FSDGVPSDSVEAAK-2+

Source : QE3\_201126\_FR\_TIOx\_hum\_tissue\_Urea\_RNAB\_N Scan : 27236

Andromeda score : 120.63

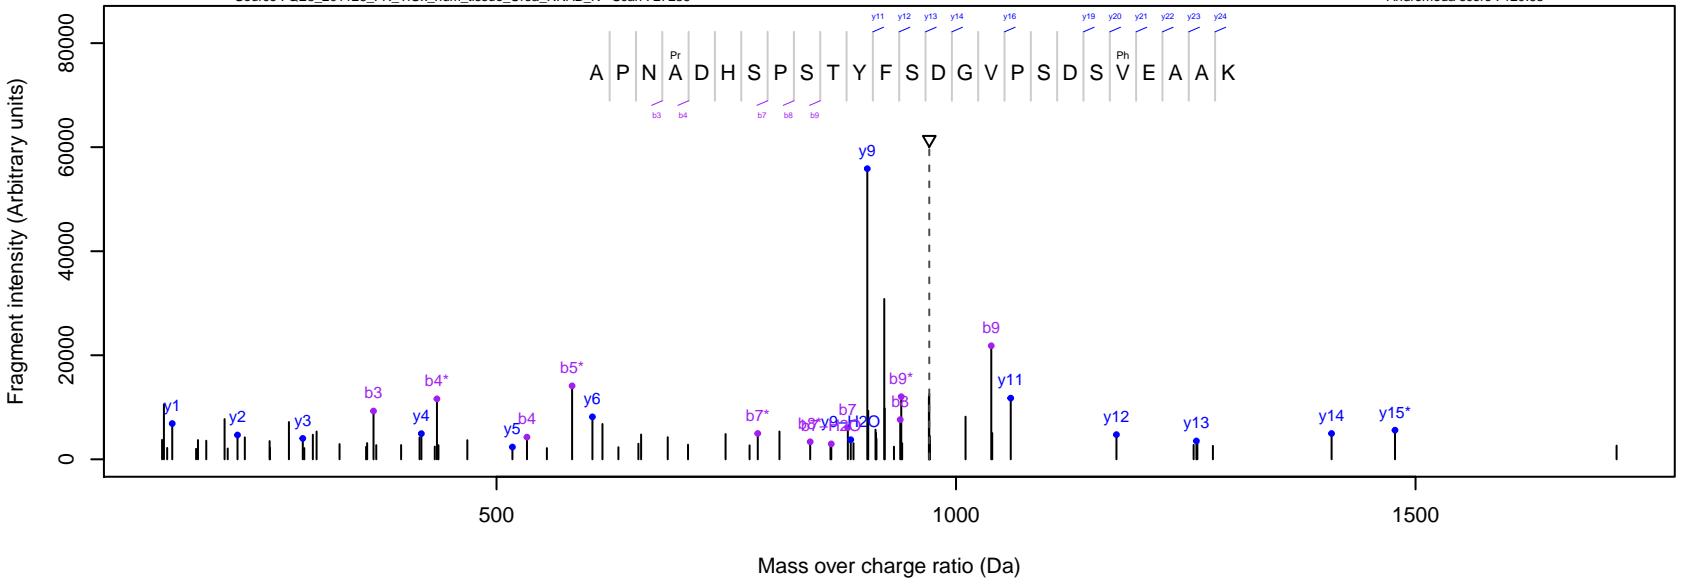

FIHQPPQS(Phospho (STY))SSPVYSSAK-2+

Source : QE3\_201126\_FR\_TIOx\_hum\_tissue\_Urea\_RNAB\_N Scan : 13095

Andromeda score : 120.63

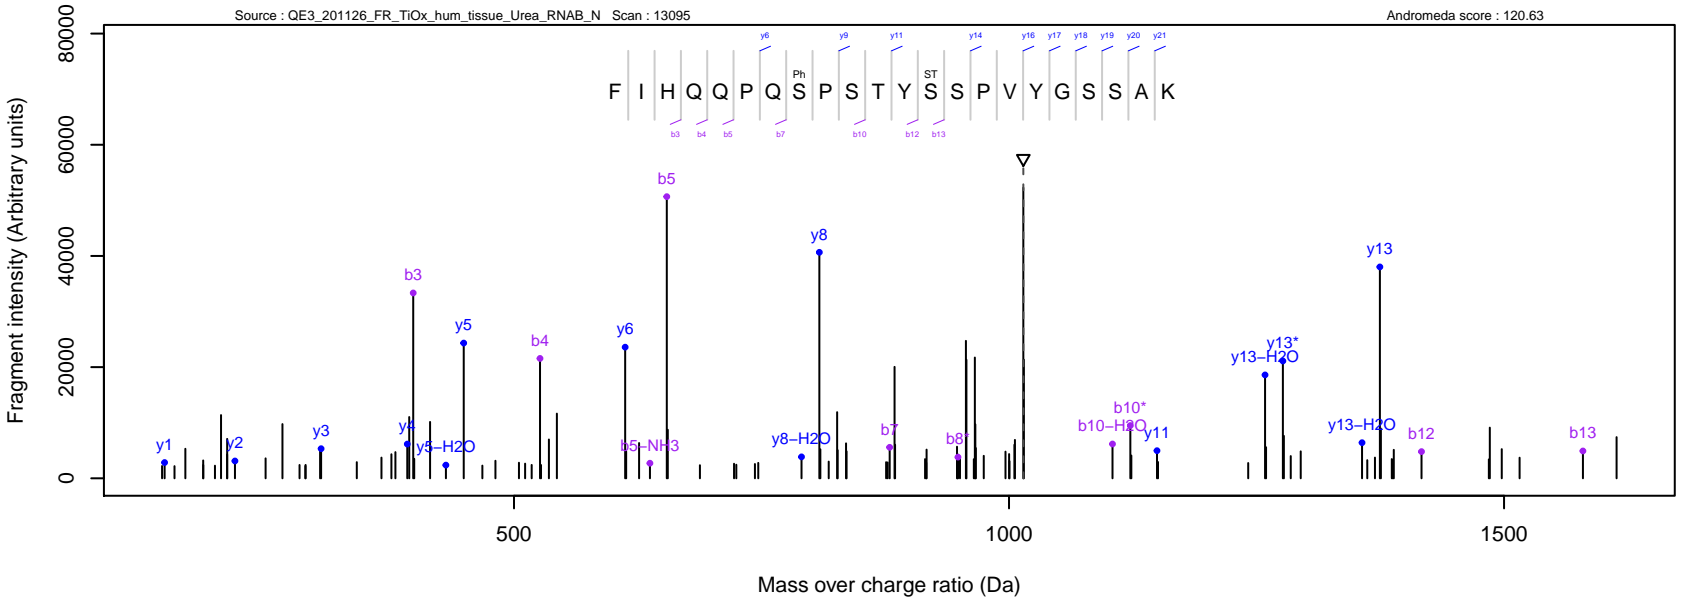

ANS(Phospho (STY))DIISLNFR-2+

Source : QE3\_201126\_FR\_TIOx\_hum\_tissue\_Urea\_RNAB\_N Scan : 45810

Andromeda score : 120.59

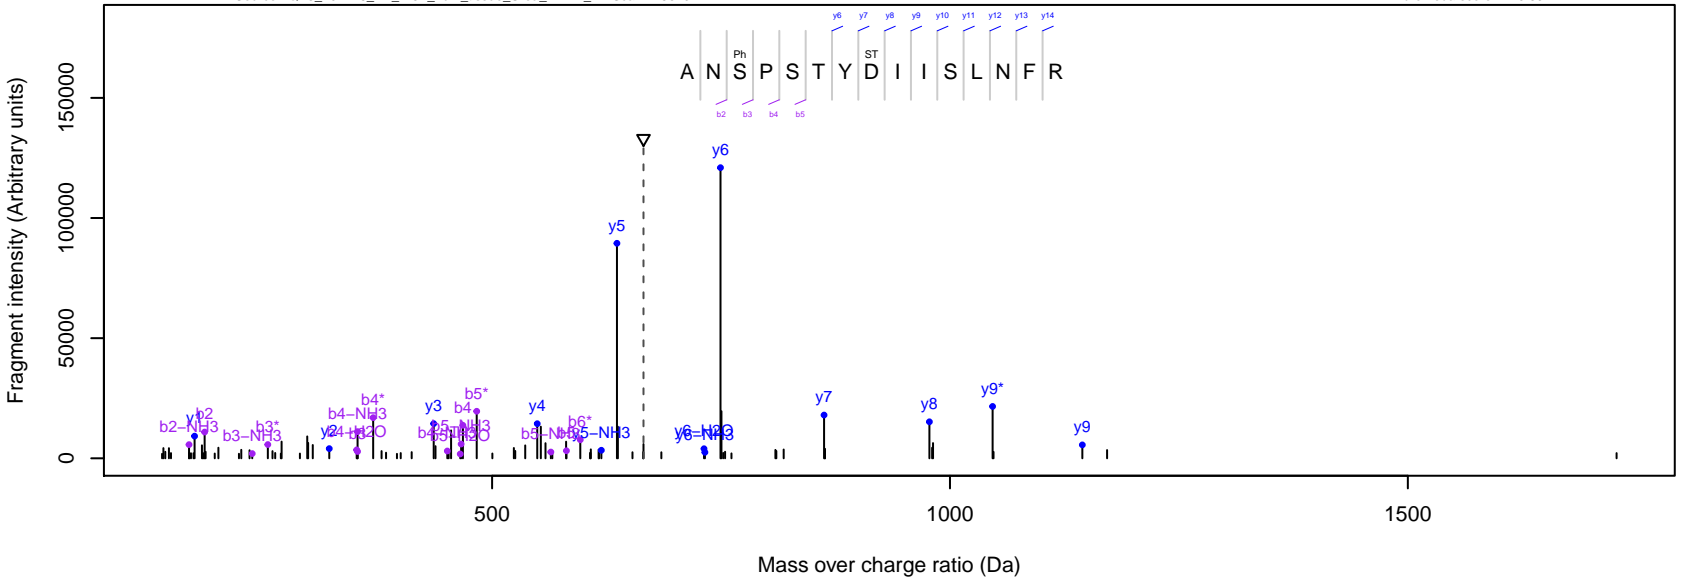

VSSQS(Phospho (STY))FSEIER-2+

Source : QE3\_201126\_FR\_TiOx\_hum\_tissue\_Urea\_RNAB\_B Scan : 23083

Andromeda score : 120.59

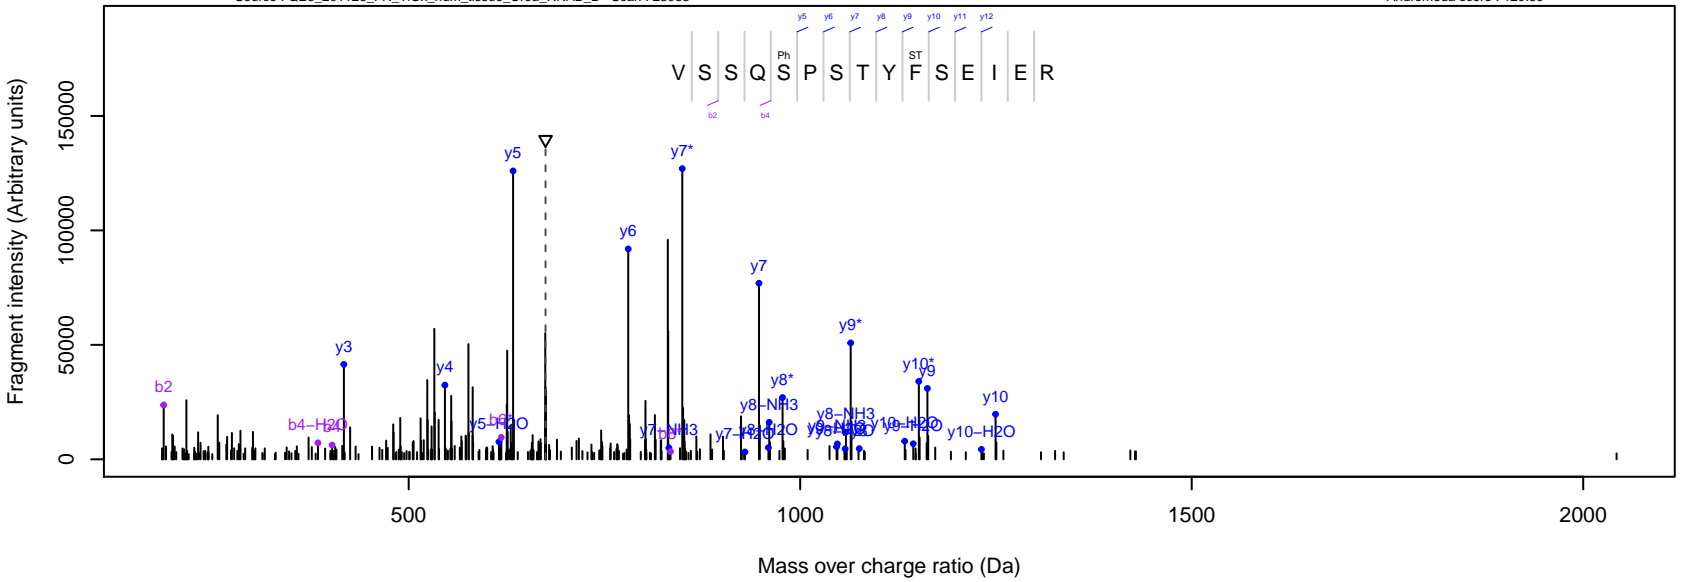

KIVEPEVVGES(Phospho (STY))DSEVEGD AWR-3+

Source : QE3\_201126\_FR\_TiOx\_hum\_tissue\_Urea\_RNAB\_H Scan : 34002

Andromeda score : 120.57

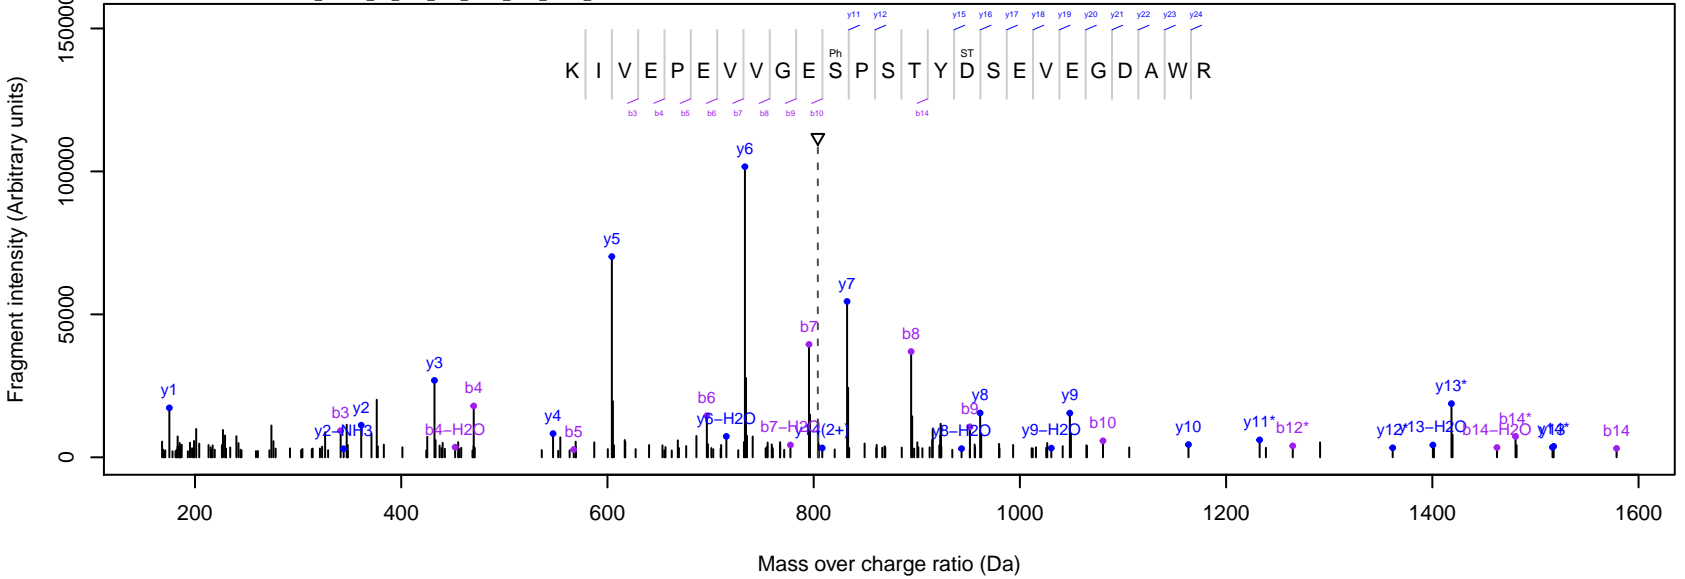

NNLS(Phospho (STY))LGDALAK-2+

Source : QE3\_201126\_FR\_TiOx\_hum\_tissue\_Urea\_RNAB\_B Scan : 32414

Andromeda score : 120.55

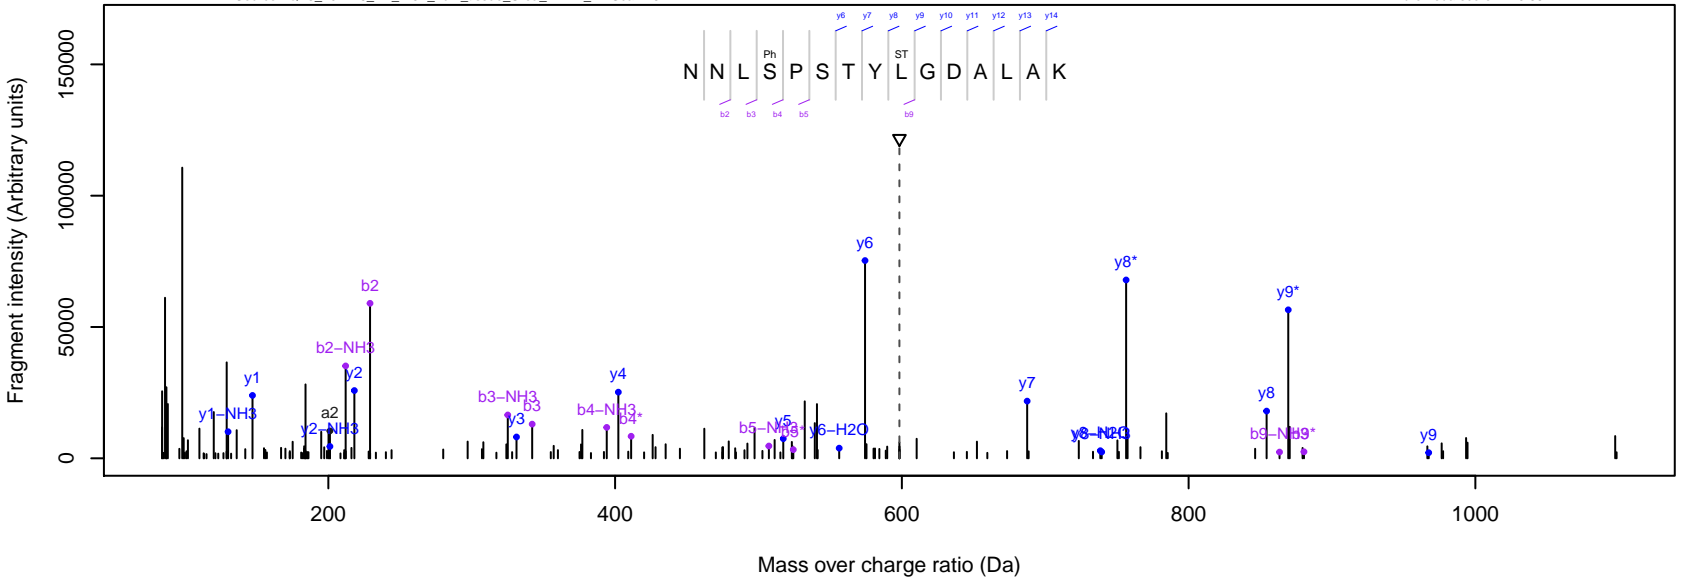

KKPT(Phospho (STY))PVLLPQSK-3+

Source : QE3\_201126\_FR\_TiOx\_hum\_tissue\_Urea\_RNAB\_H Scan : 10229

Andromeda score : 120.54

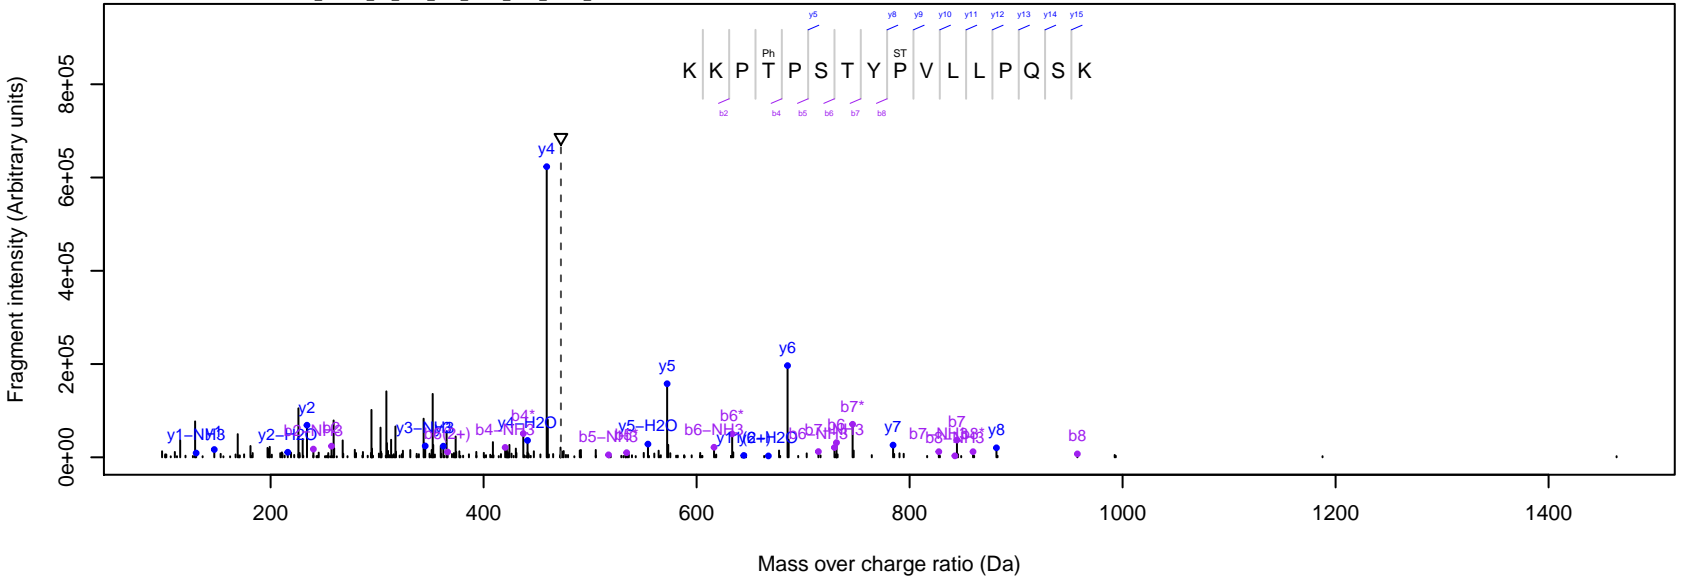

LTPVS(Phospho (STY))PESSS(Phospho (STY))TEEK-2+

Source : QE3\_201126\_FR\_TiOx\_hum\_tissue\_Urea\_RNAB\_N Scan : 19325

Andromeda score : 120.54

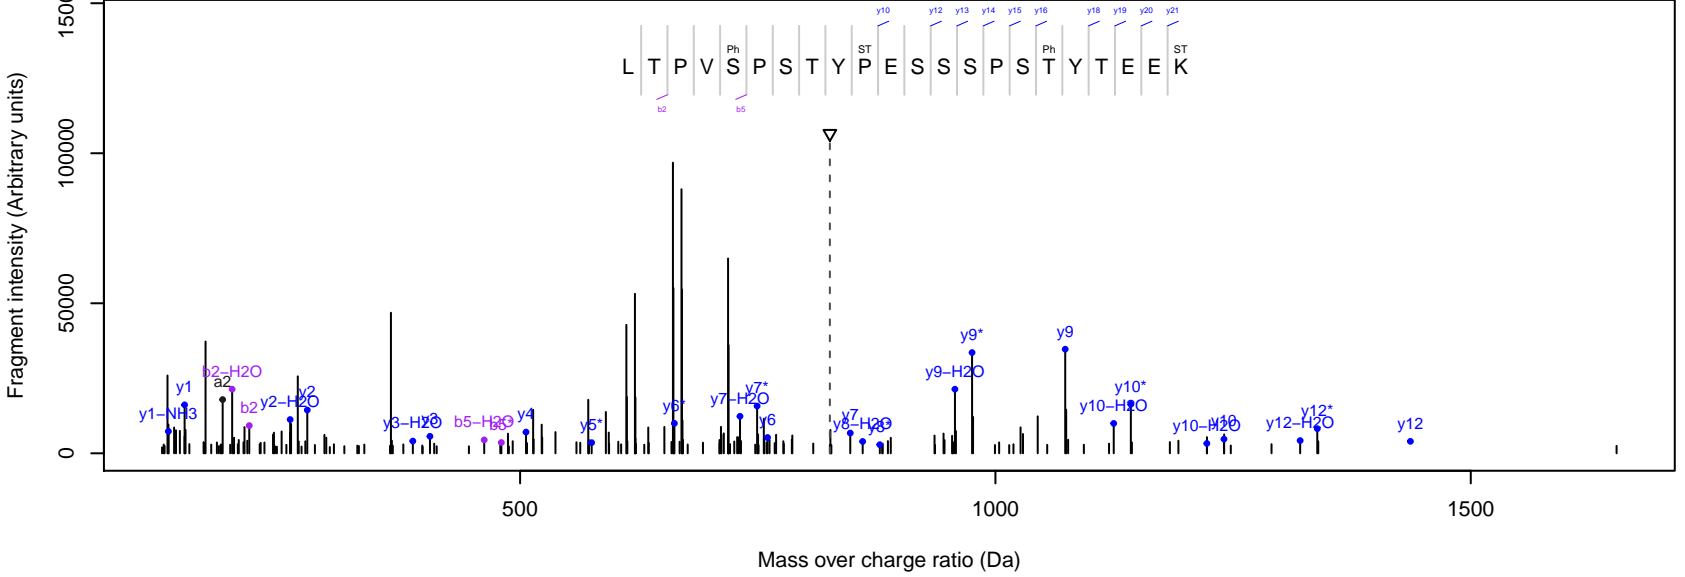

S(Phospho (STY))LTLDAAPDHNPPCR-2+

Source : QE3\_201126\_FR\_TiOx\_hum\_tissue\_Urea\_RNAB\_B Scan : 19948

Andromeda score : 120.53

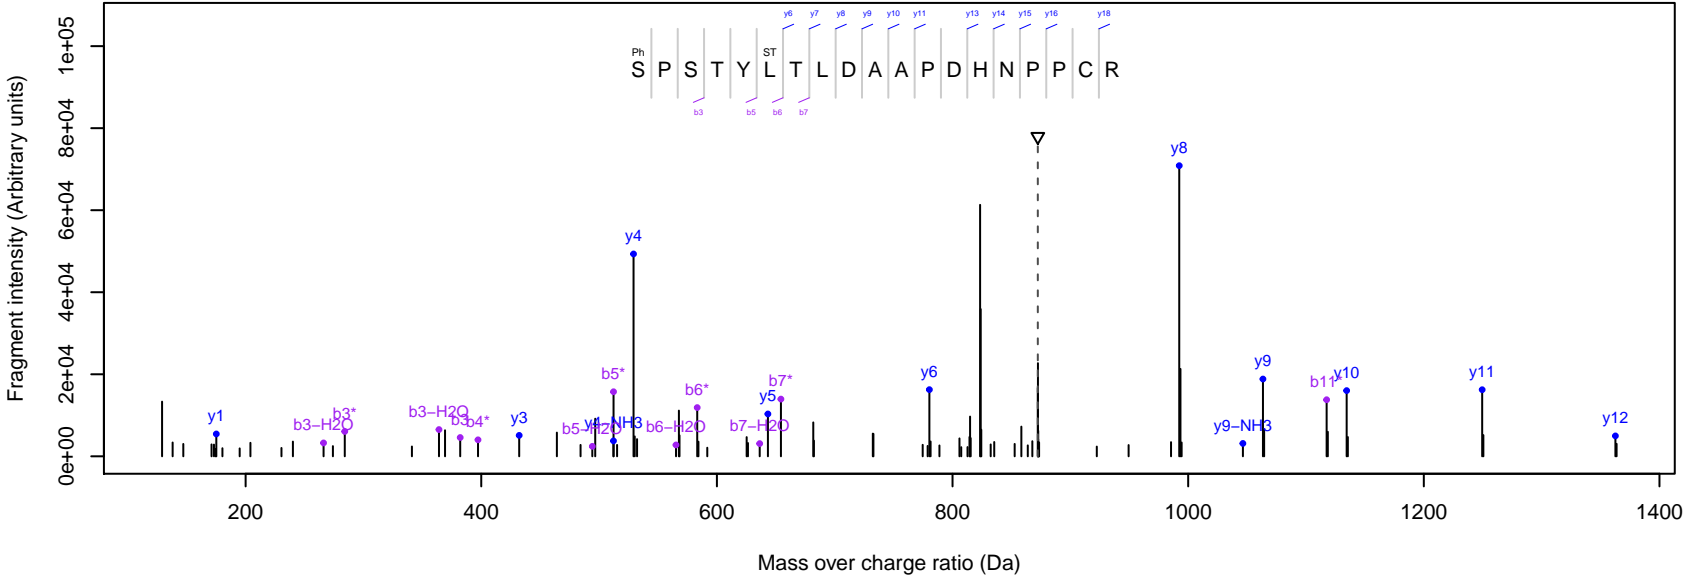

(Acetyl (Protein N-term))AAAAAAGDS(Phospho (STY))DSWDADAFSVEDPV-3+

Source : QE3\_201126\_FR\_TIOx\_hum\_tissue\_Urea\_RNAB\_H Scan : 61319

Andromeda score : 120.52

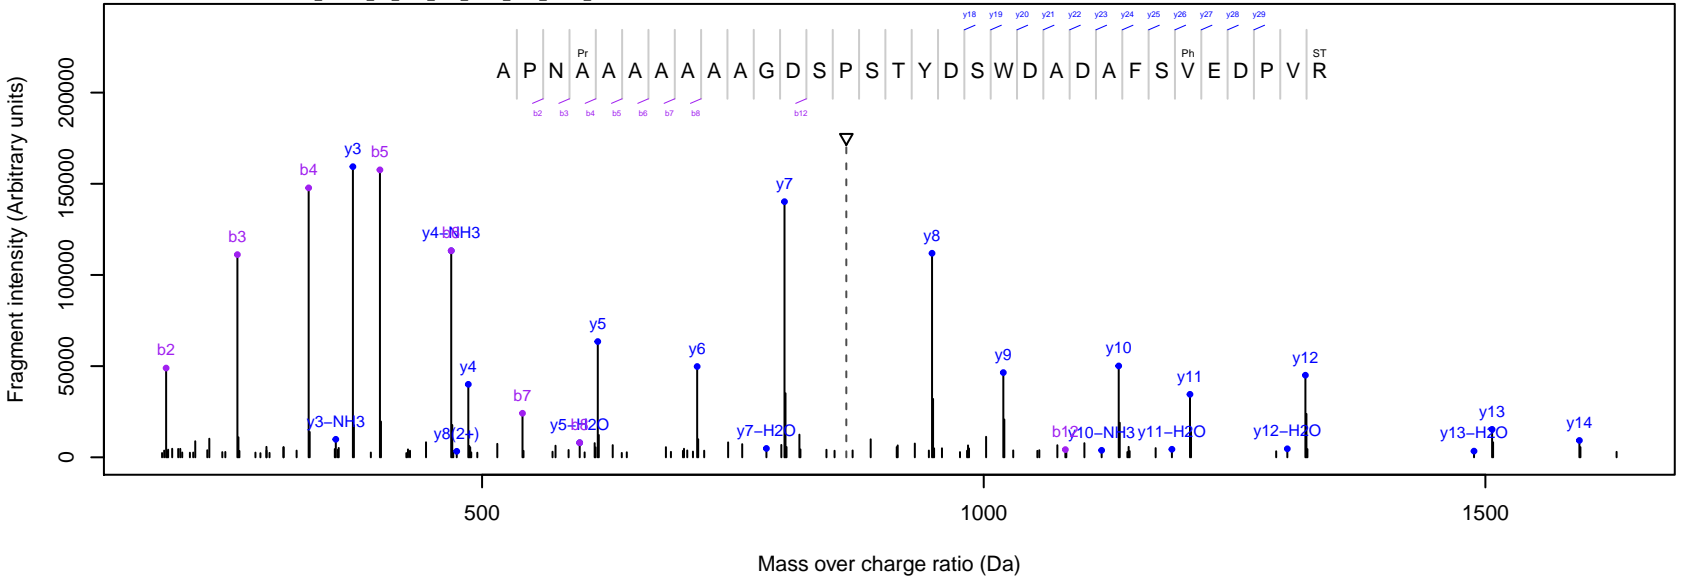

LKGQEDSLASAVDAATEQKTCDS(Phospho (STY))D-3+

Source : QE3\_201126\_FR\_TIOx\_hum\_tissue\_Urea\_RNAB\_N Scan : 31783

Andromeda score : 120.52

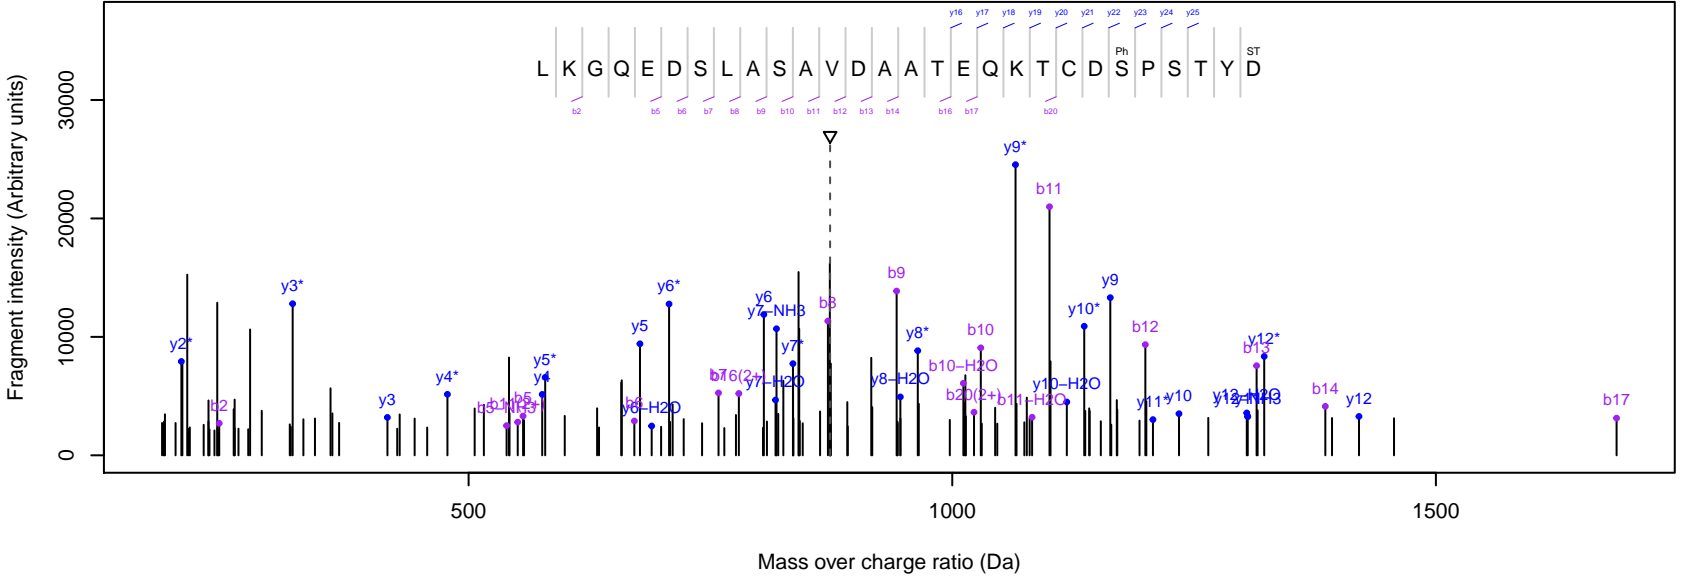

RAEQIEDINNTGTES(Phospho (STY))AS(Phospho (STY))EEGDDSLITVVPK-3+

Source : QE3\_201126\_FR\_TIOx\_hum\_tissue\_Urea\_RNAB\_H Scan : 56438

Andromeda score : 120.47

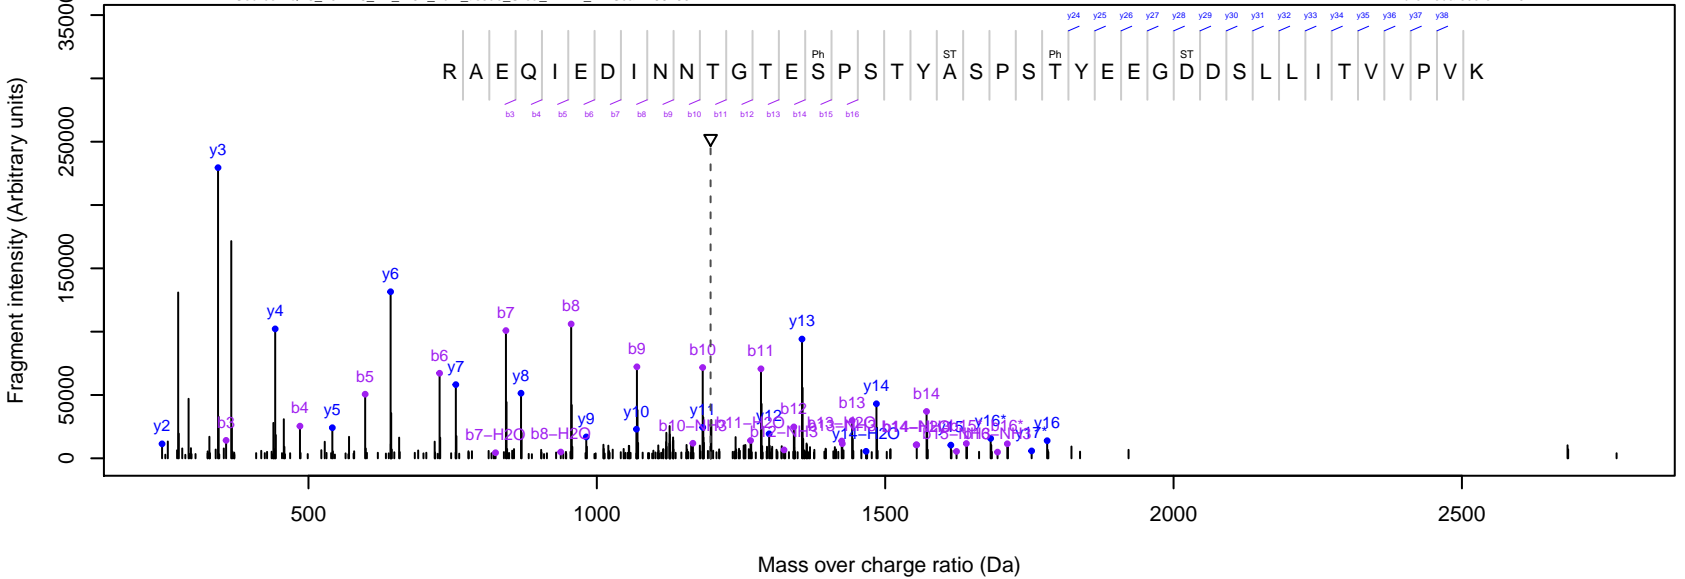

KLS(Phospho (STY))DFGQETS YIEDNCNQNGAISLIFSLK-3+

Source : QE3\_201126\_FR\_TiOx\_hum\_tissue\_Urea\_RNAB\_N Scan : 60072

Andromeda score : 120.45

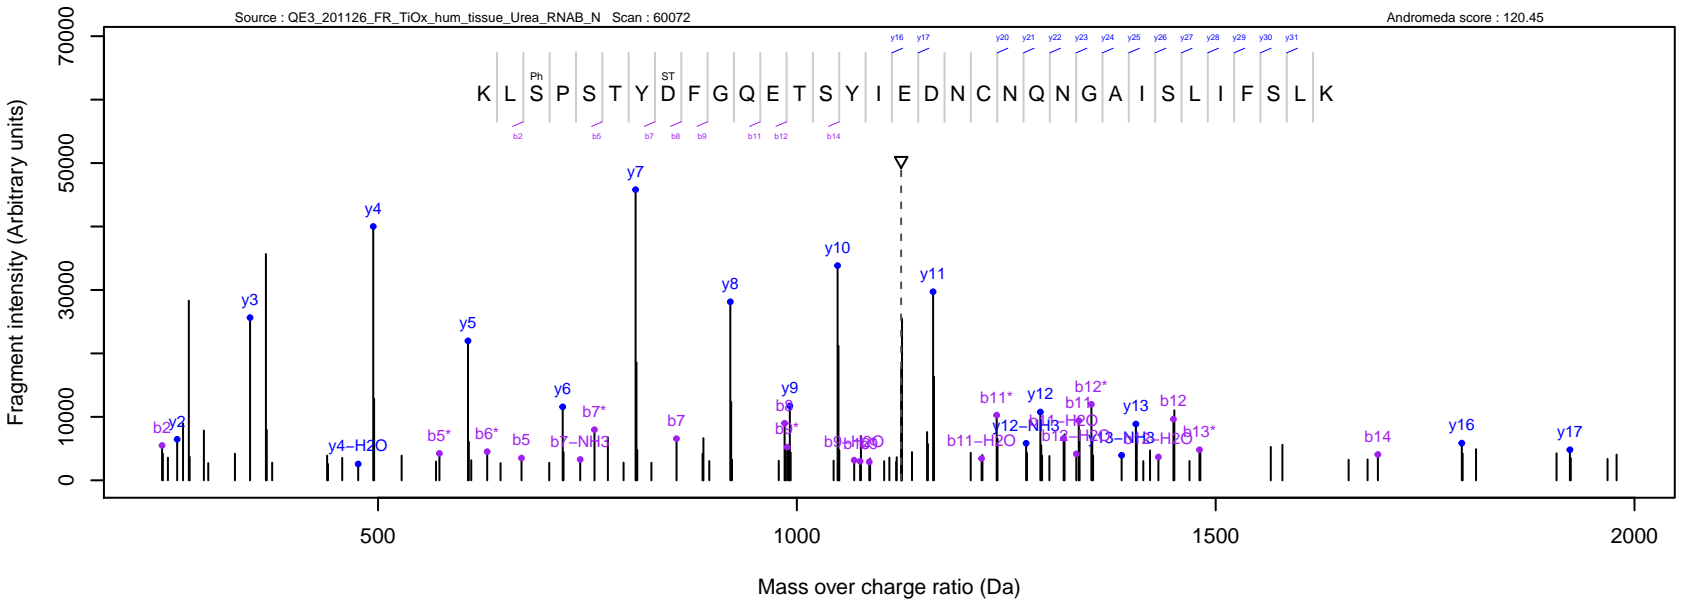

GKEGTHATCASEEGGTESSSESGSSLQPLSADSTPDVNQS(Phospho (STY))PR-4+

Source : QE3\_201126\_FR\_TiOx\_hum\_tissue\_Urea\_RNAB\_N Scan : 20178

Andromeda score : 120.42

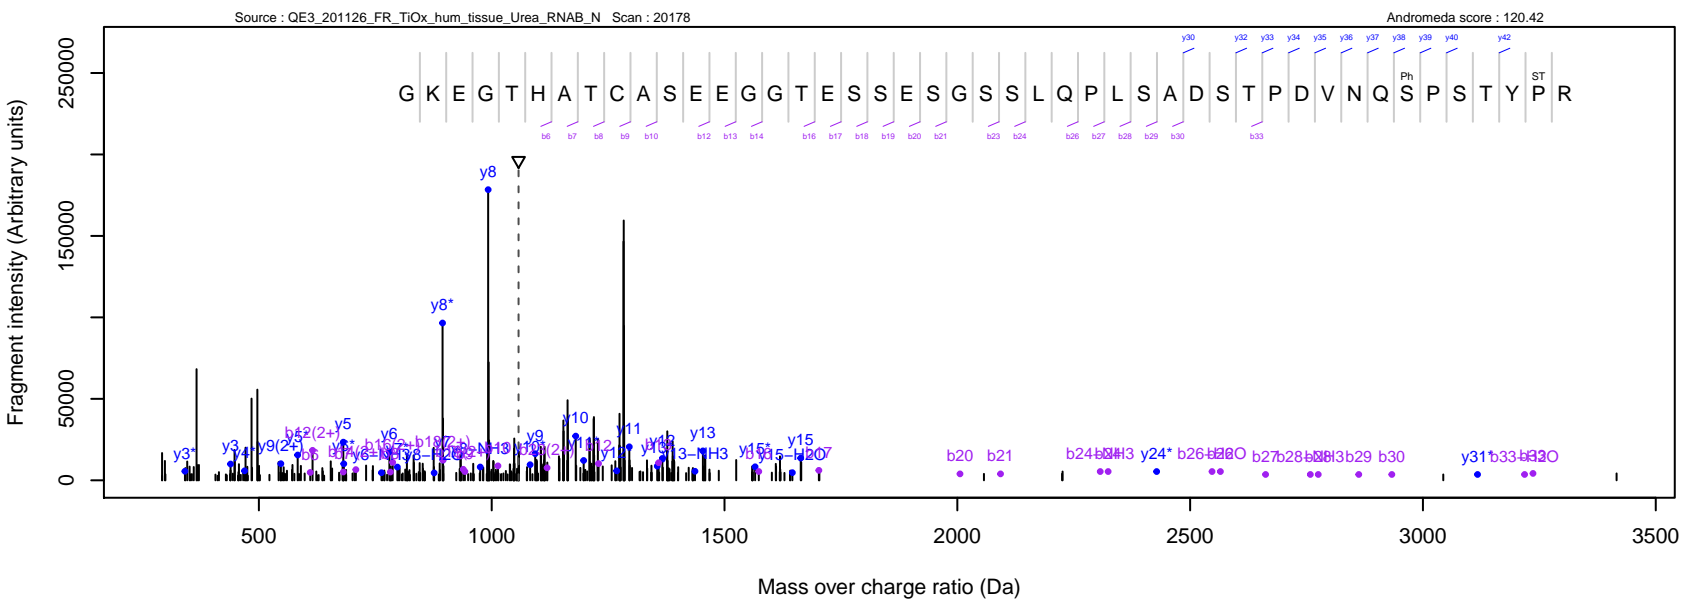

APPAPGASGG(Phospho (STY))GEVDELFDVK-2+

Source : QE3\_201126\_FR\_TiOx\_hum\_tissue\_Urea\_RNAB\_H Scan : 49129

Andromeda score : 120.4

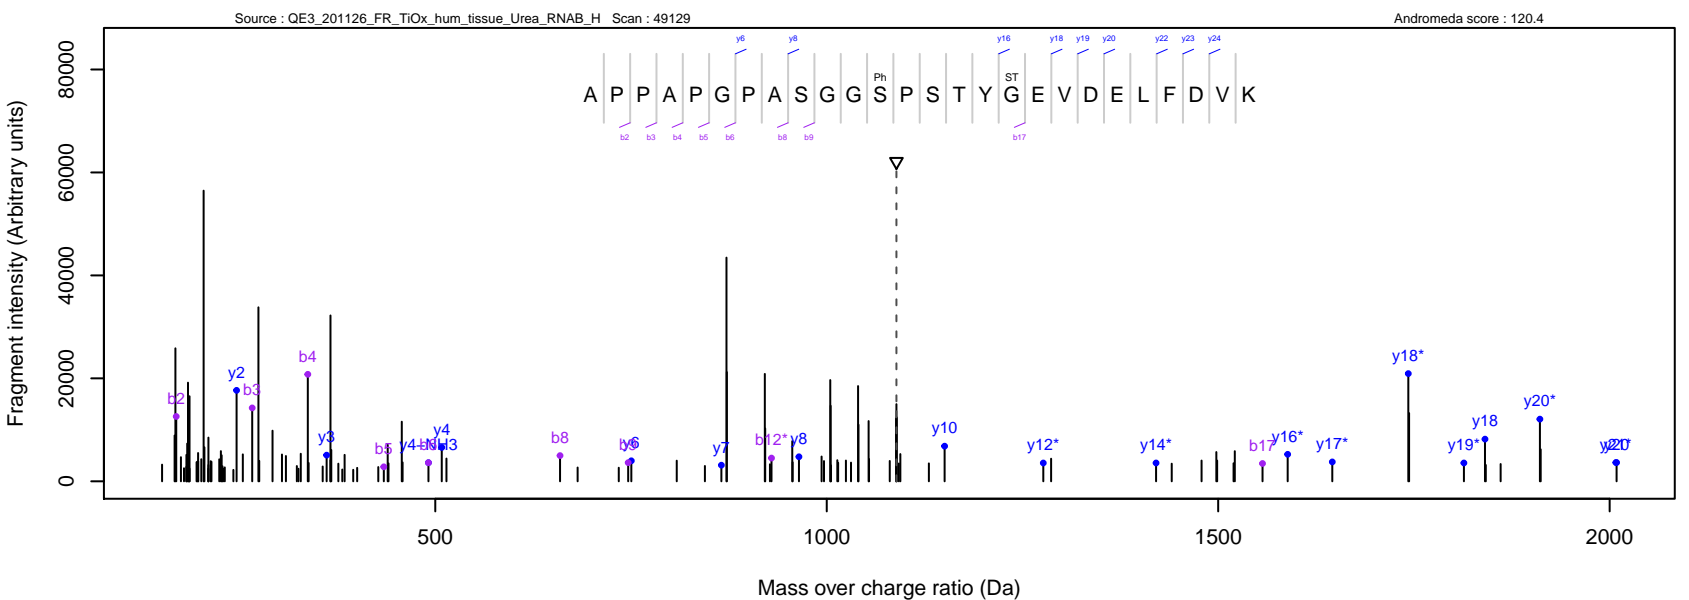

GHKHEDGTQS(Phospho (STY))DSEDPLAK-3+

Source : QE3\_2011126\_FR\_TiOx\_hum\_tissue\_Urea\_RNAB\_N Scan : 6166

Andromeda score : 120.33

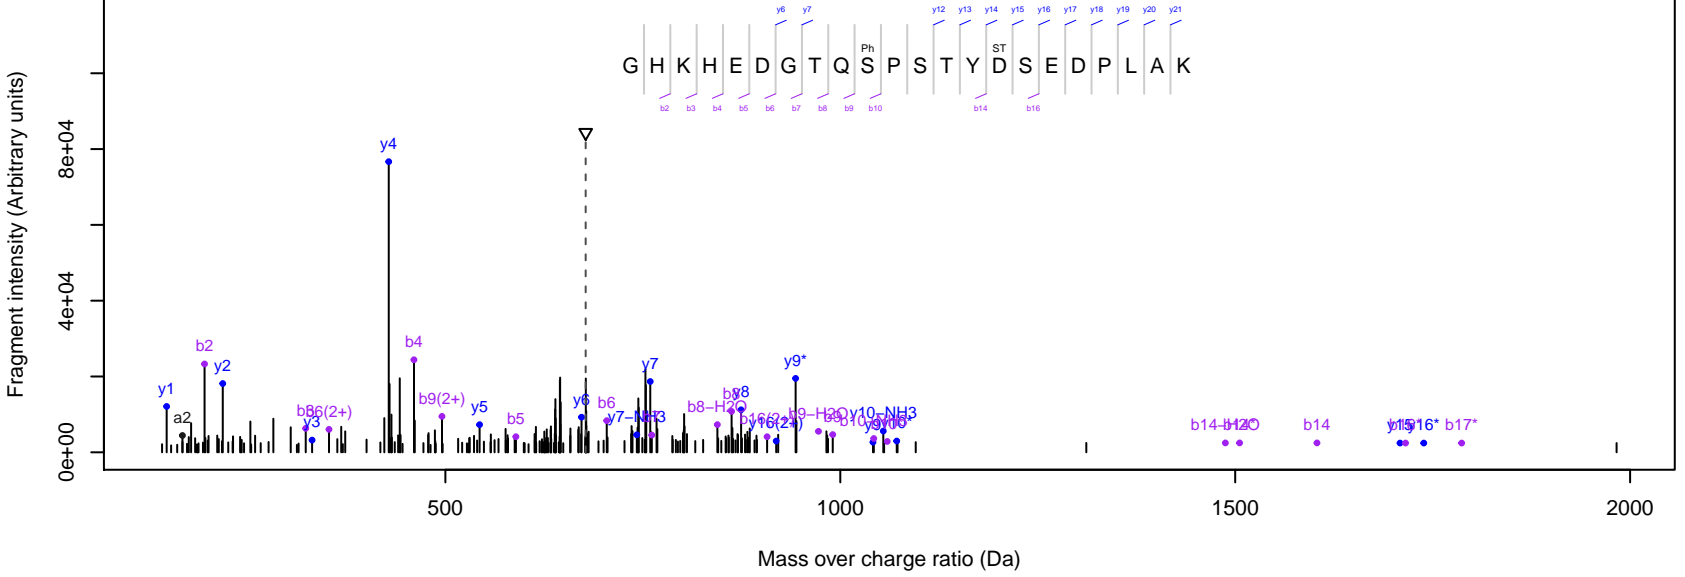

SKS(Phospho (STY))YDEGLDDYREDAK-3+

Source : QE3\_2011126\_FR\_TiOx\_hum\_tissue\_Urea\_RNAB\_H Scan : 14747

Andromeda score : 120.32

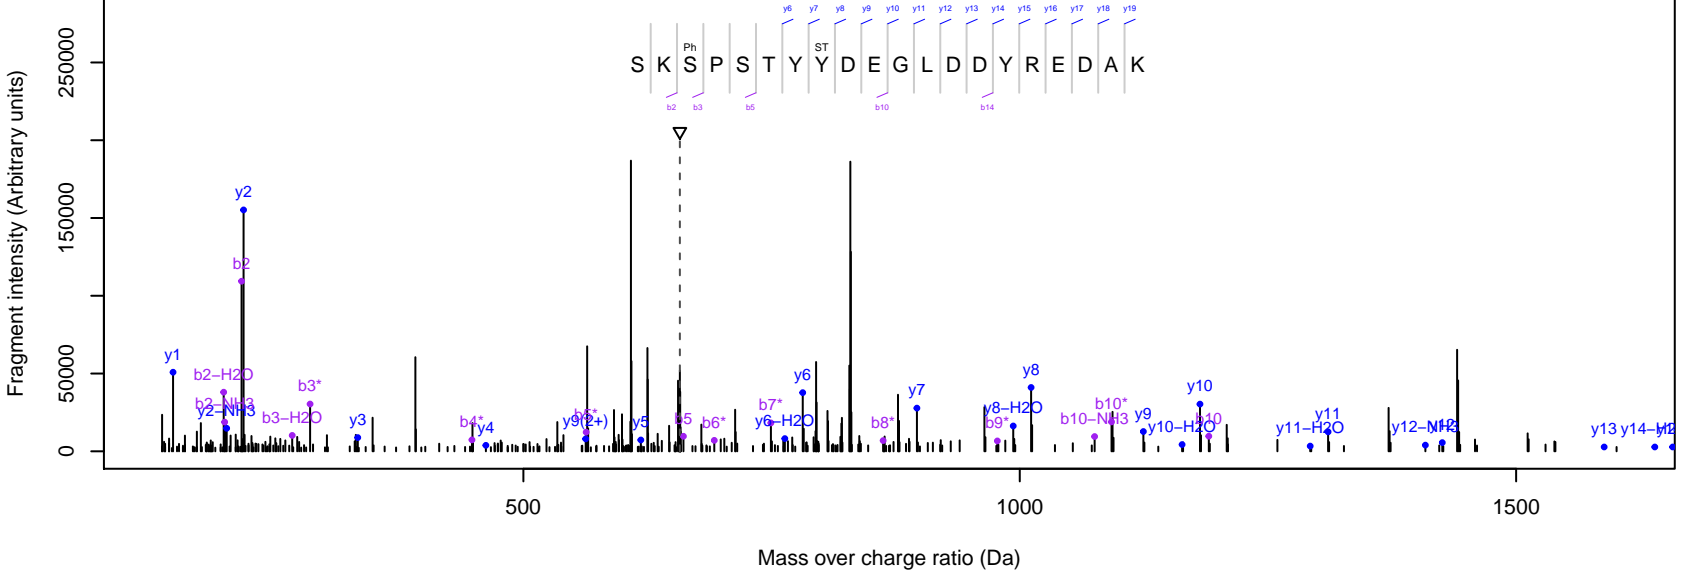

SSMS(Phospho (STY))GLHLVK-2+

Source : QE3\_2011126\_FR\_TiOx\_hum\_tissue\_Urea\_RNAB\_N Scan : 20235

Andromeda score : 120.32

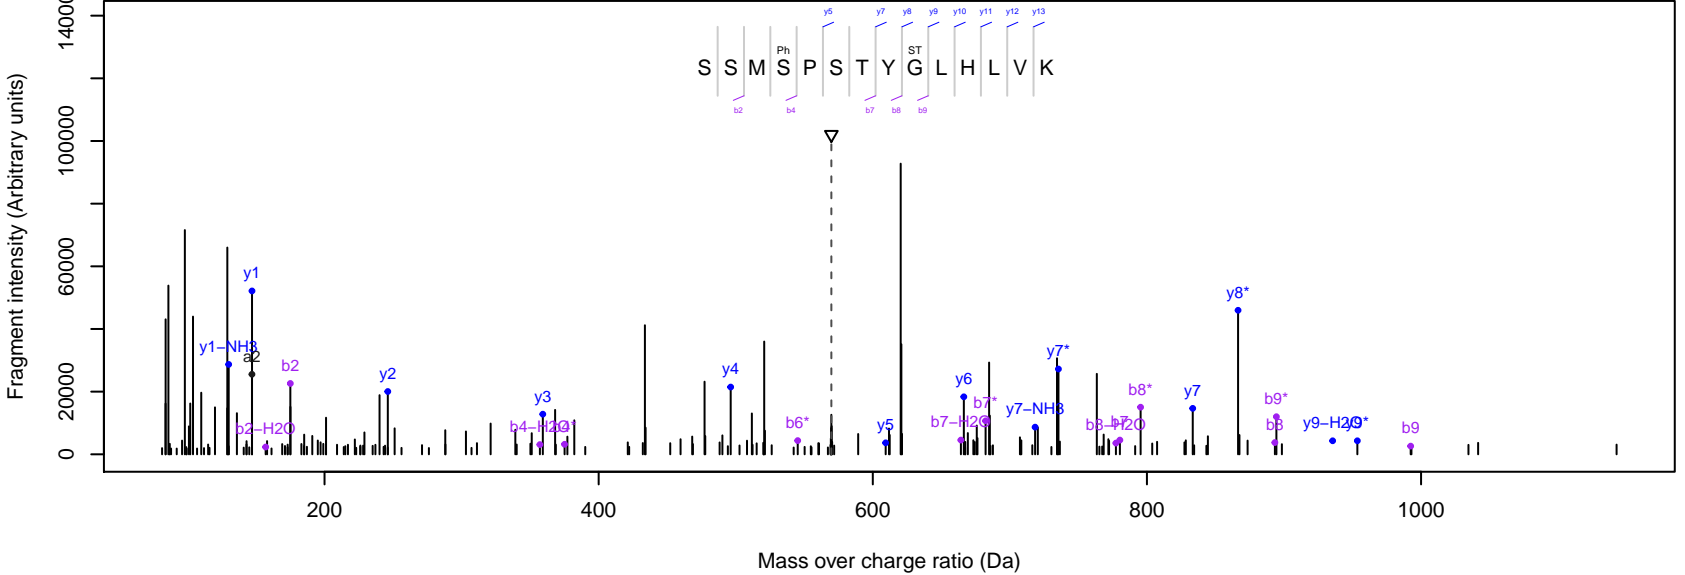

GSES(Phospho (STY))PNSFLDQESR-2+

Source : QE3\_201126\_FR\_TiOx\_hum\_tissue\_Urea\_RNAB\_N Scan : 28607

Andromeda score : 120.3

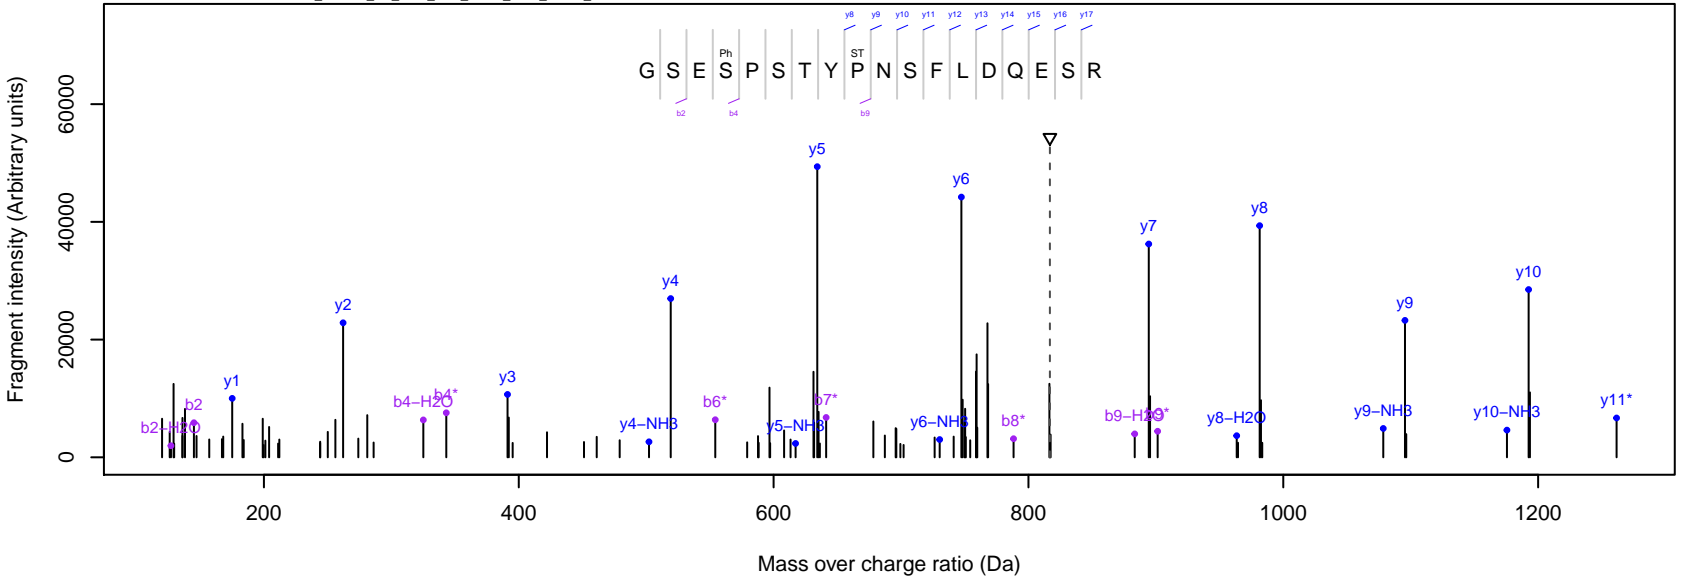

ADAASLTVDVT(Phospho (STY))PPTAK-2+

Source : QE3\_201126\_FR\_TiOx\_hum\_tissue\_Urea\_RNAB\_B Scan : 31879

Andromeda score : 120.24

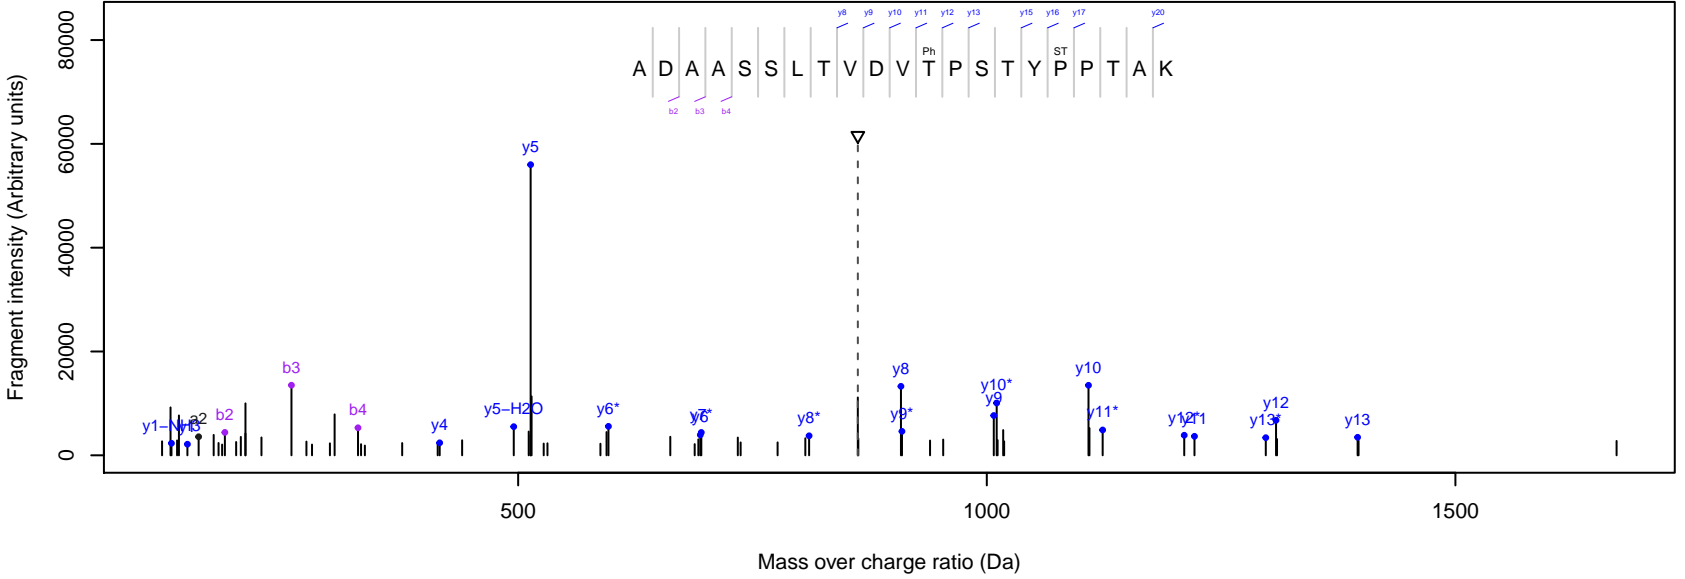

AQT(Phospho (STY))PPGPLSGSK-2+

Source : QE3\_201126\_FR\_TiOx\_hum\_tissue\_Urea\_RNAB\_H Scan : 13997

Andromeda score : 120.21

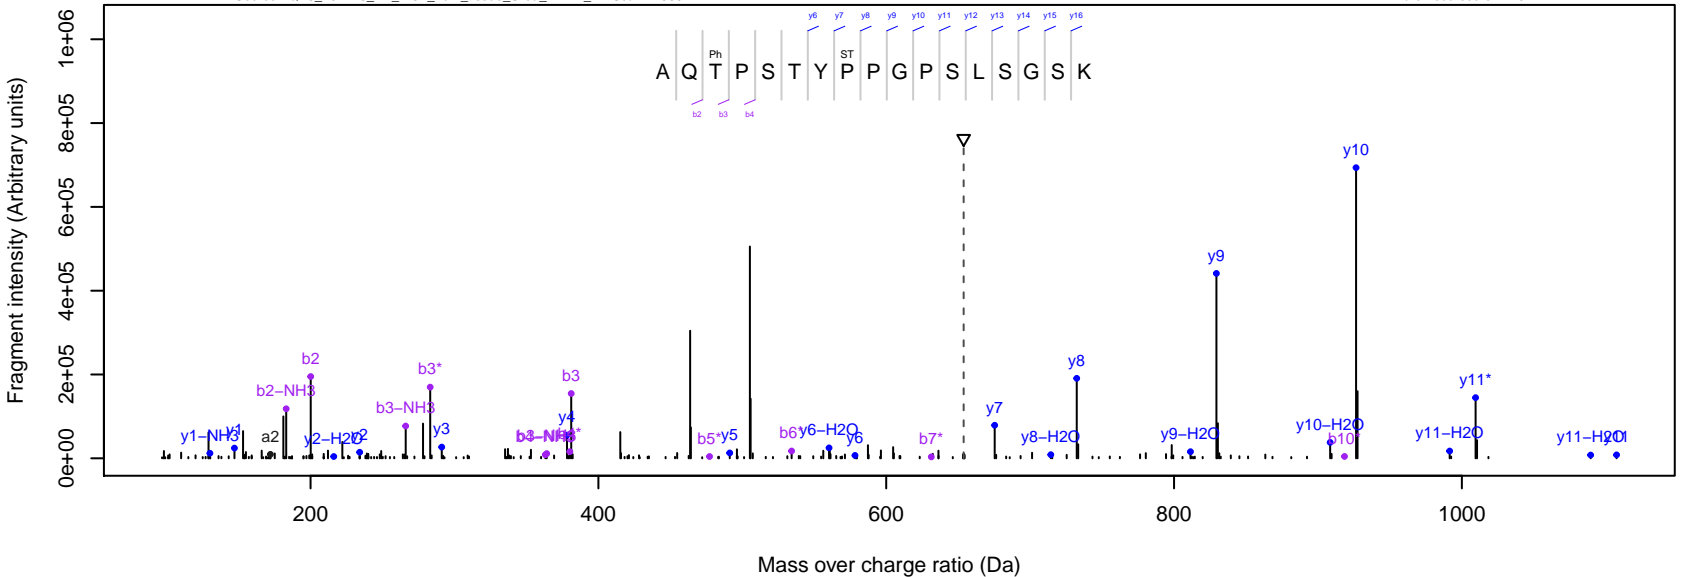

RQS(Phospho (STY))SPSCGPVAETSSINGNDGISK-3+

Source : QE3\_201126\_FR\_TiOx\_hum\_tissue\_Urea\_RNAB\_H Scan : 18917

Andromeda score : 120.18

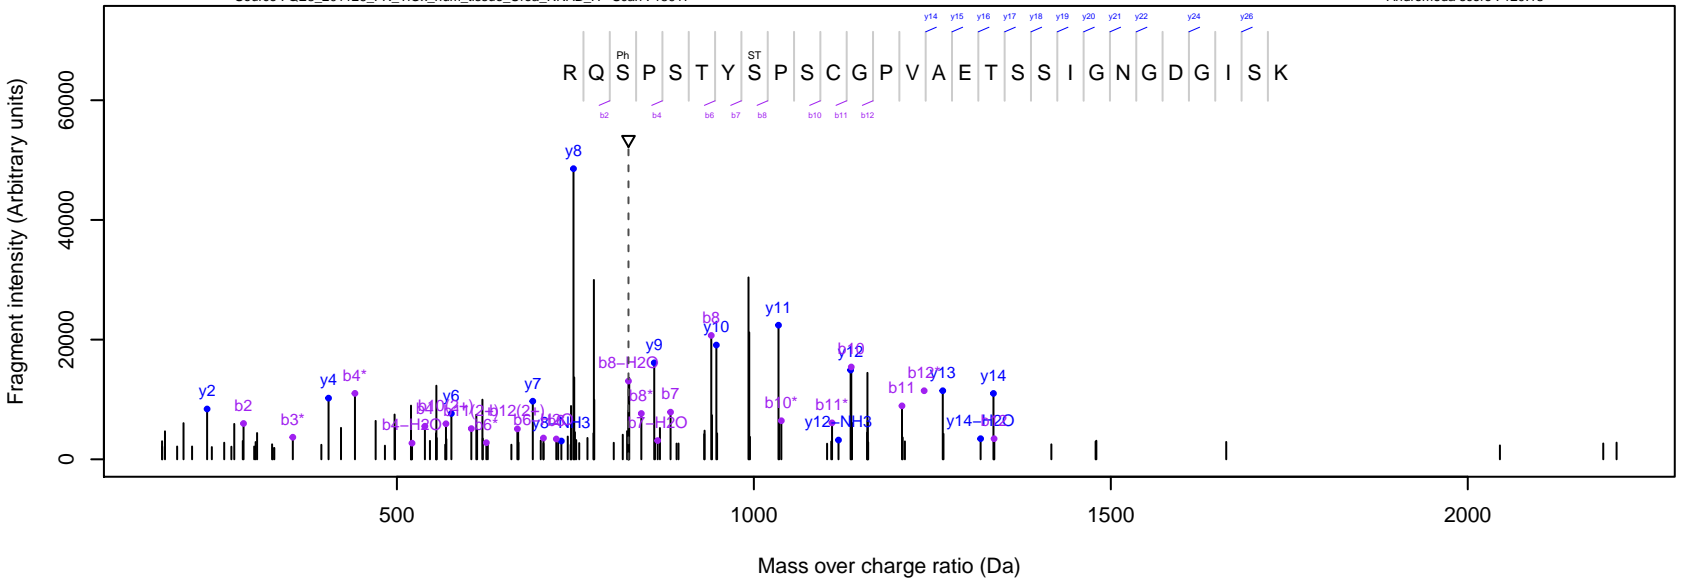

SPEKIEEVLSPGSPSTYPSKSPSTYPSK-3+

Source : QE3\_201126\_FR\_TiOx\_hum\_tissue\_Urea\_RNAB\_N Scan : 23596

Andromeda score : 120.15

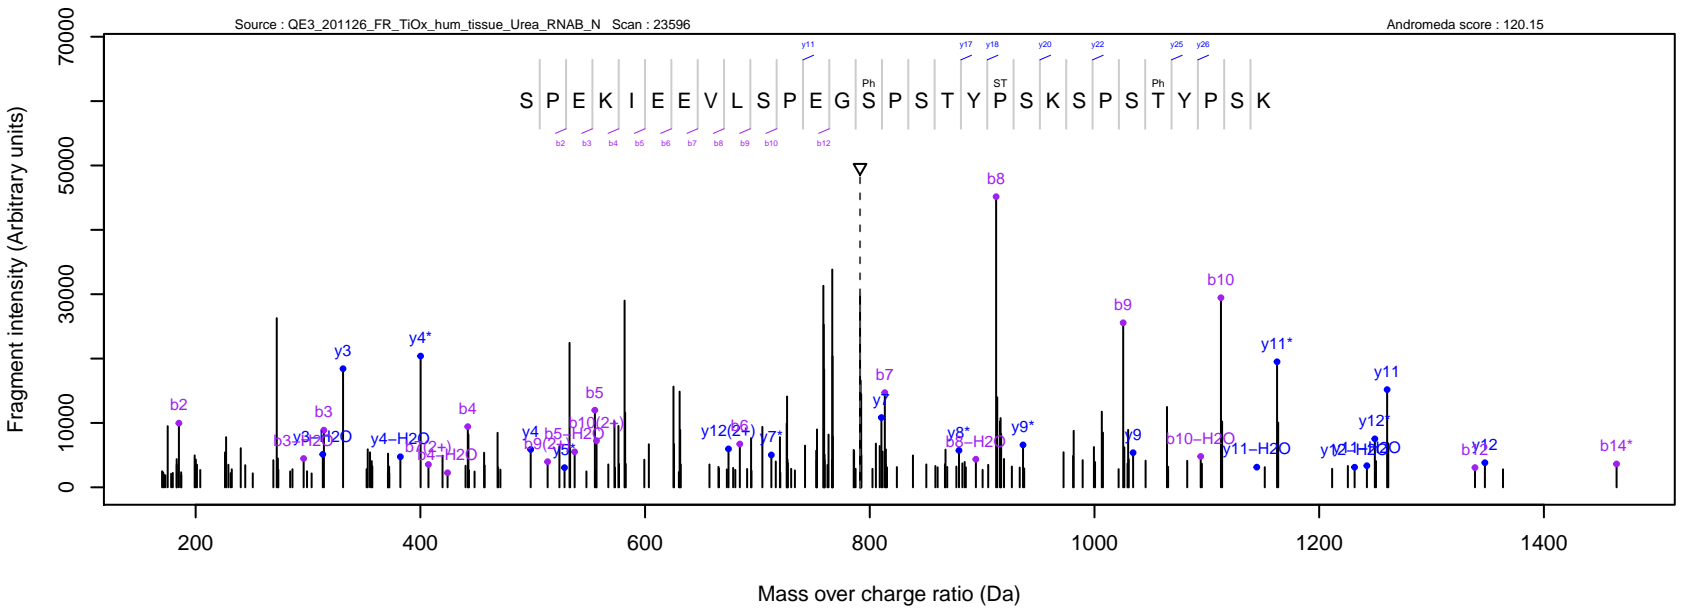

TPNNVSTPAPS(Phospho (STY))PDASQLASSLSQK-3+

Source : QE3\_201126\_FR\_TiOx\_hum\_tissue\_Urea\_RNAB\_N Scan : 37905

Andromeda score : 120.15

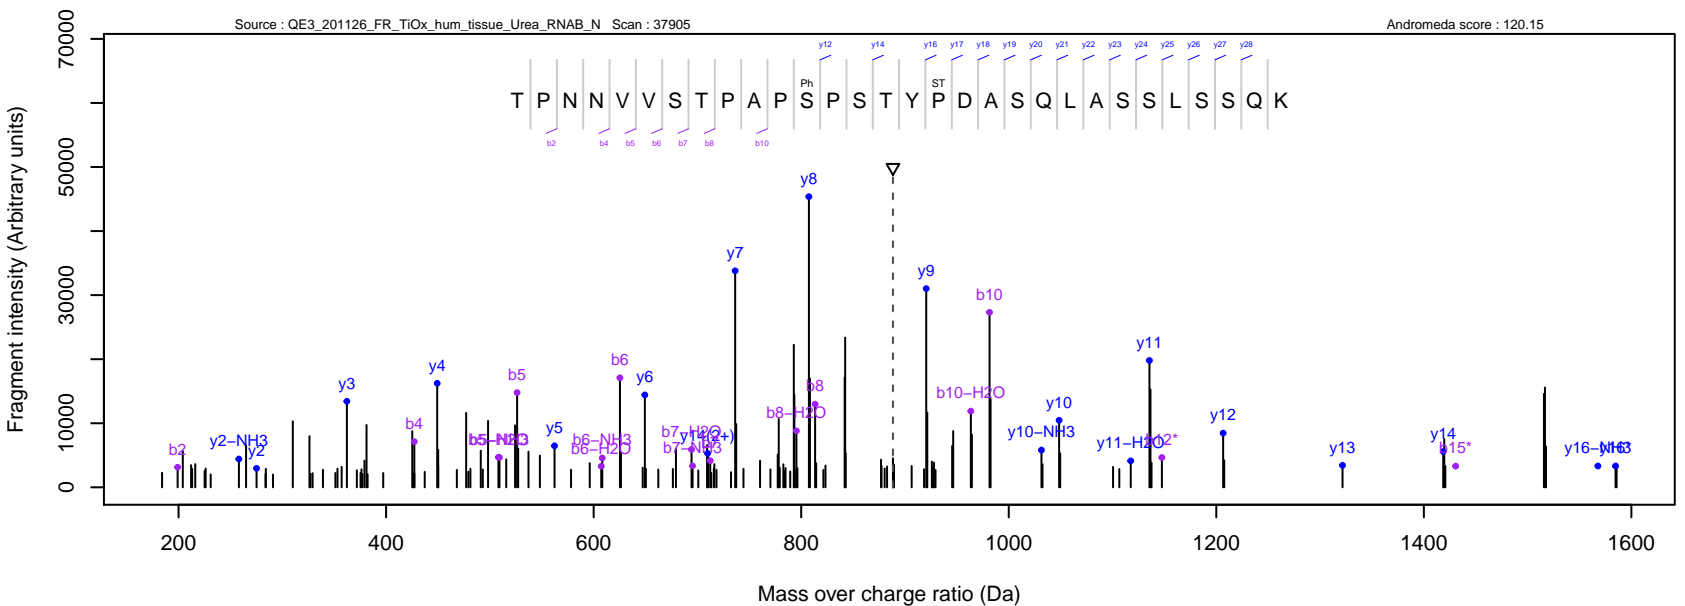



**EVYLSGS(Phospho (STY))FNNWSK-2+**

Source : QE3\_201126\_FR\_TiOx\_hum\_tissue\_Urea\_RNAB\_B Scan : 42290

Andromeda score : 120.14

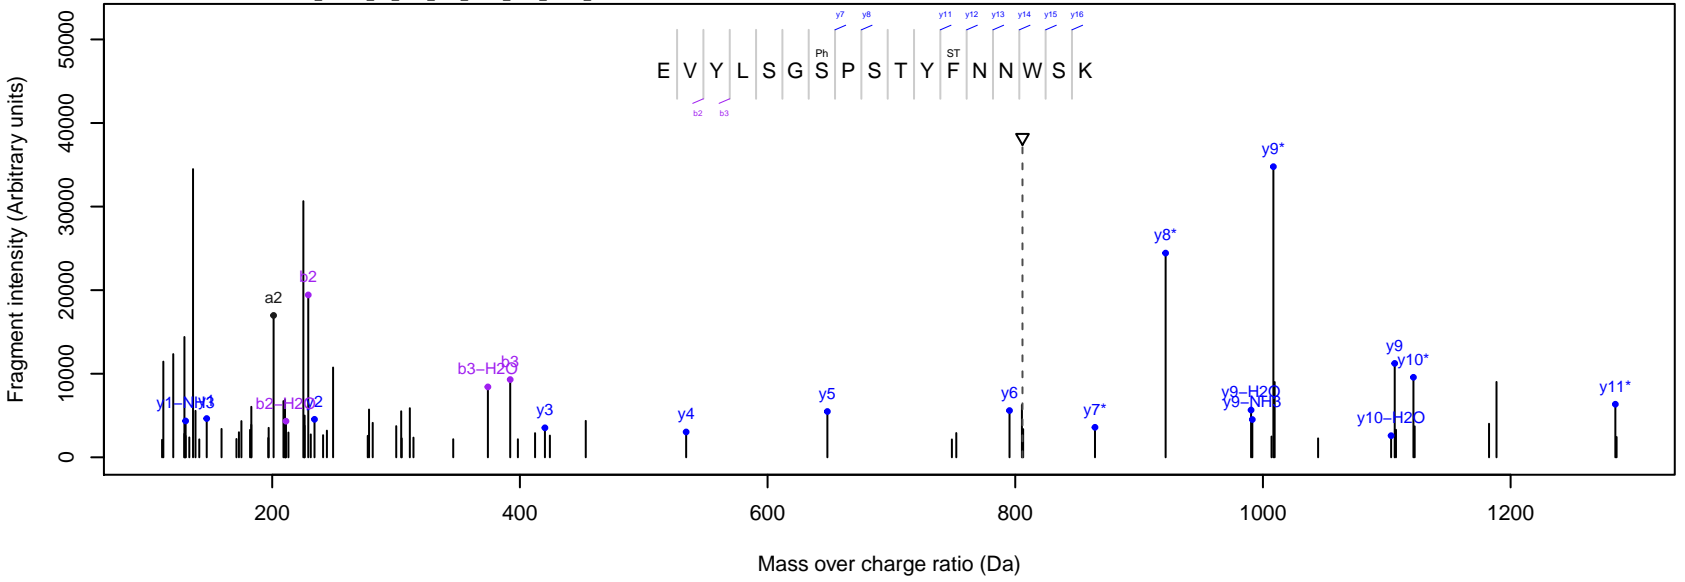

**TFDQLTPDES(Phospho (STY))KER-2+**

Source : QE3\_201126\_FR\_TiOx\_hum\_tissue\_Urea\_RNAB\_H Scan : 17874

Andromeda score : 120.14

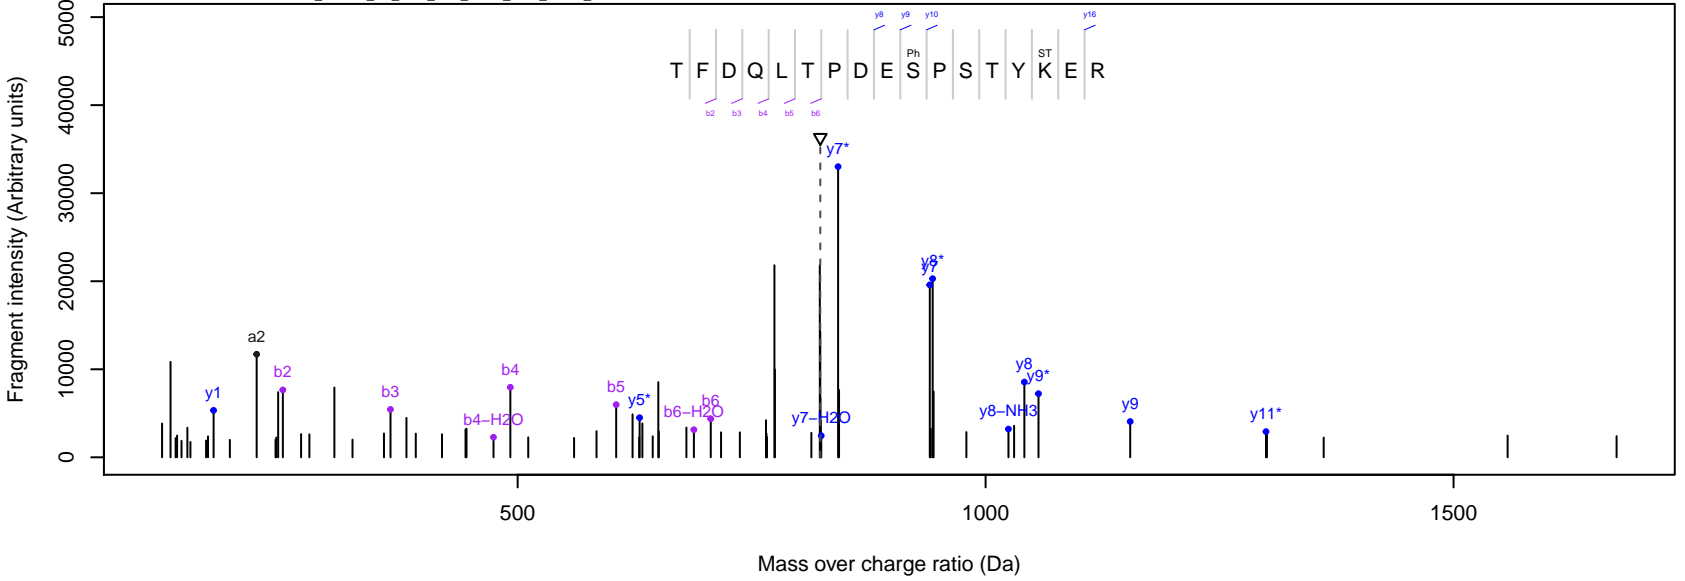

**RPDYAPMESS(Phospho (STY))DEEDEFQFIKK-3+**

Source : QE3\_201126\_FR\_TiOx\_hum\_tissue\_Urea\_RNAB\_H Scan : 35338

Andromeda score : 120.08

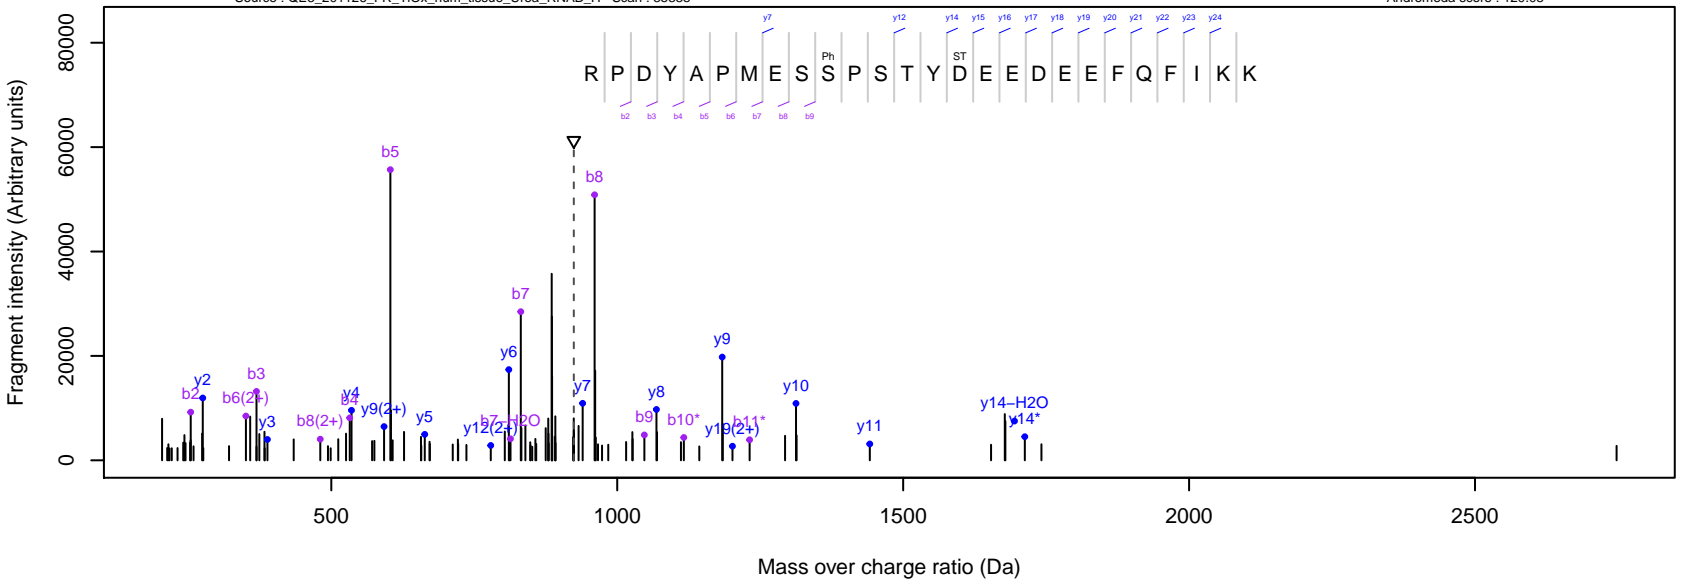

YS(Phospho (STY))PPRDDDKVDNQAQ-3+

Source : QE3\_201126\_FR\_TIOx\_hum\_tissue\_Urea\_RNAB\_B Scan : 7662

Andromeda score : 120.08

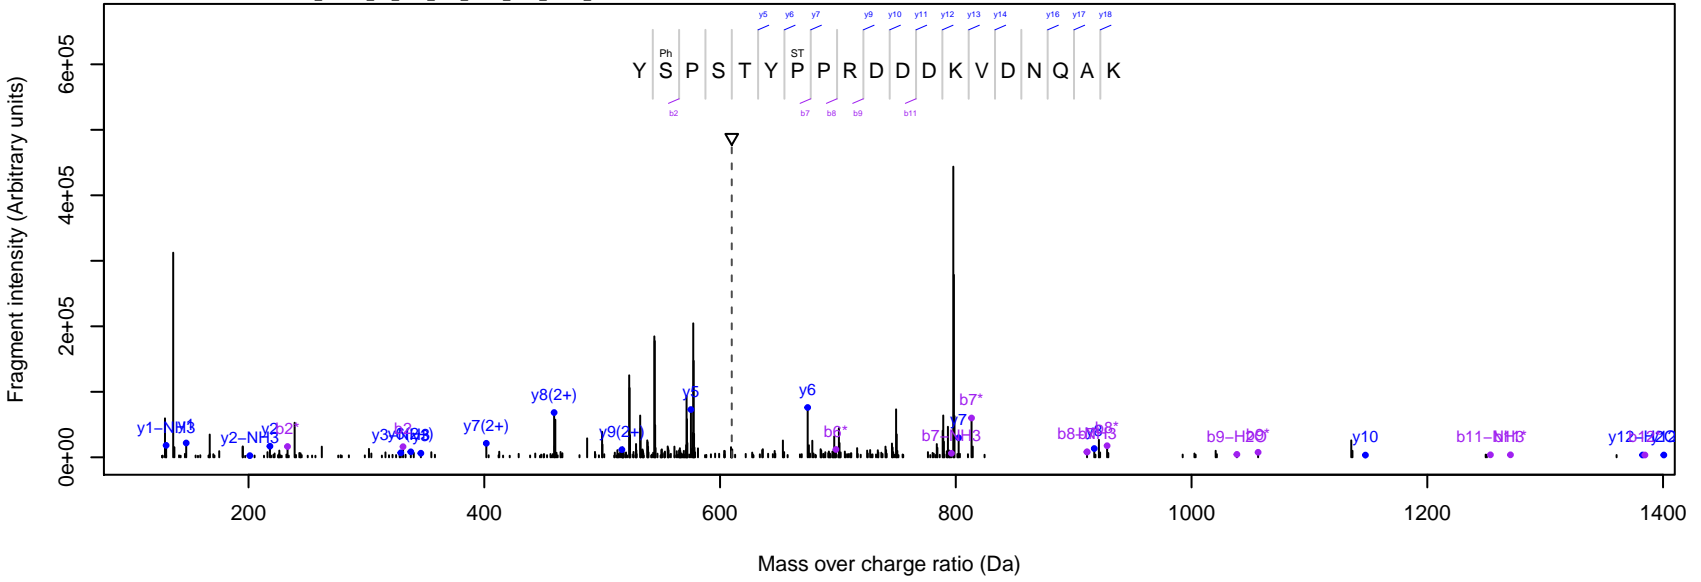

ESESALM(Oxidation (M))EDRDESEVS(Phospho (STY))DEGGSPISSEGEQPR-3+

Source : QE3\_201126\_FR\_TIOx\_hum\_tissue\_Urea\_RNAB\_H Scan : 22174

Andromeda score : 119.97

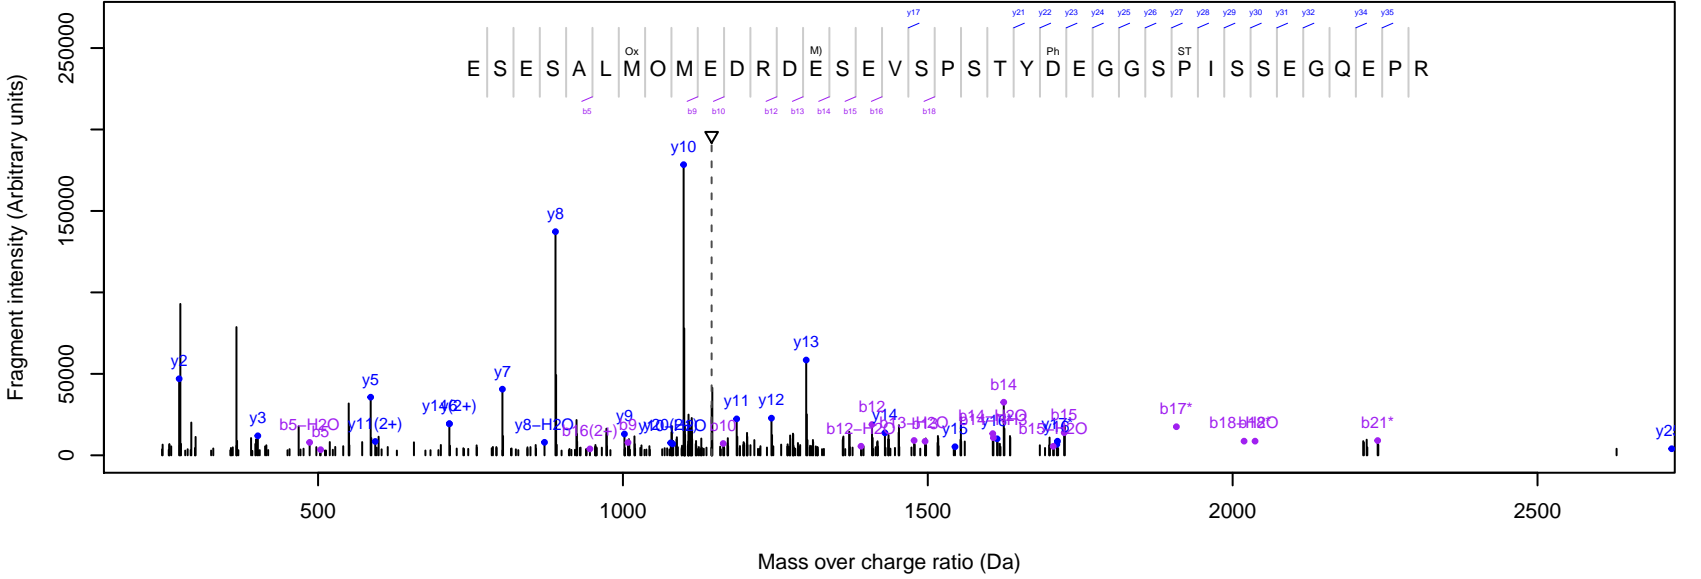

KLEQSKEADIDS(Phospho (STY))S(Phospho (STY))DES(Phospho (STY))DIEEDIDQPSAHK-3+

Source : QE3\_201126\_FR\_TIOx\_hum\_tissue\_Urea\_RNAB\_N Scan : 29900

Andromeda score : 119.97

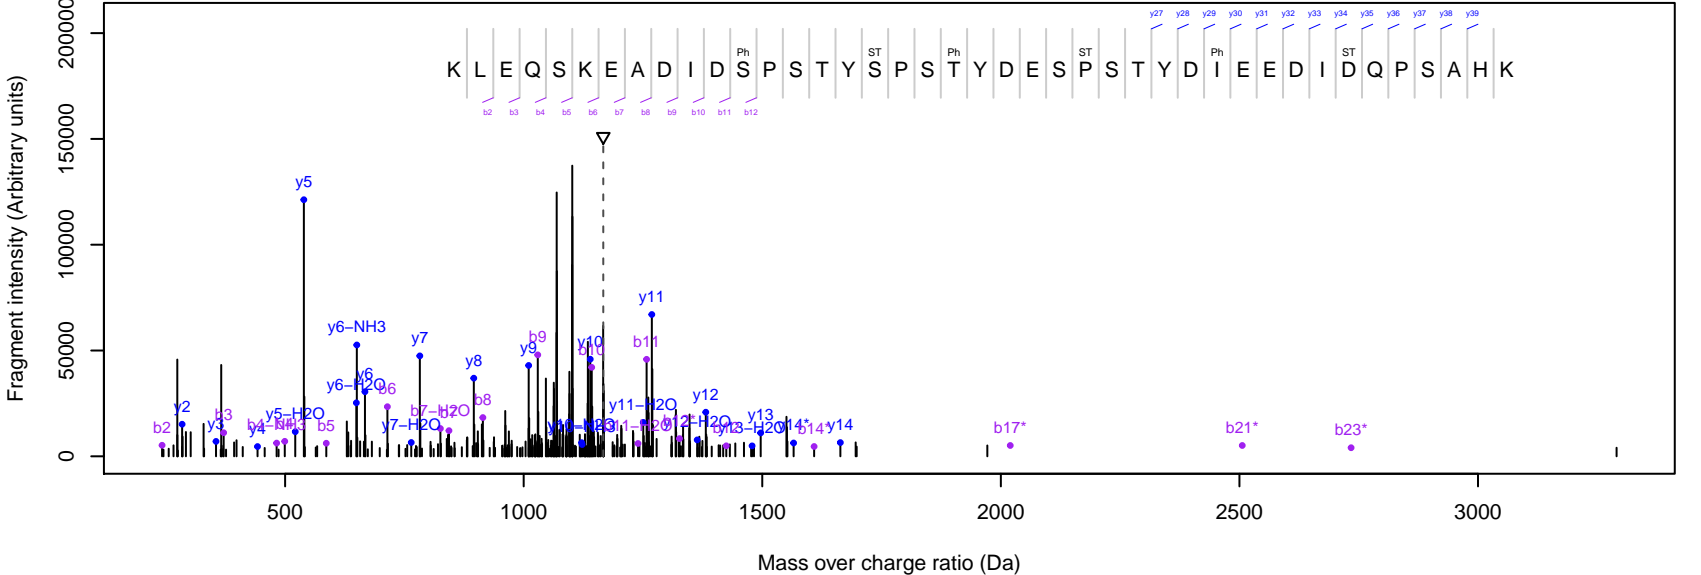



HIKEEPLS(Phospho (STY))EEEPCTSTAIAS(Phospho (STY))PEKK-3+

Source : QE3\_201126\_FR\_TIOx\_hum\_tissue\_Urea\_RNAB\_H Scan : 18274

Andromeda score : 119.89

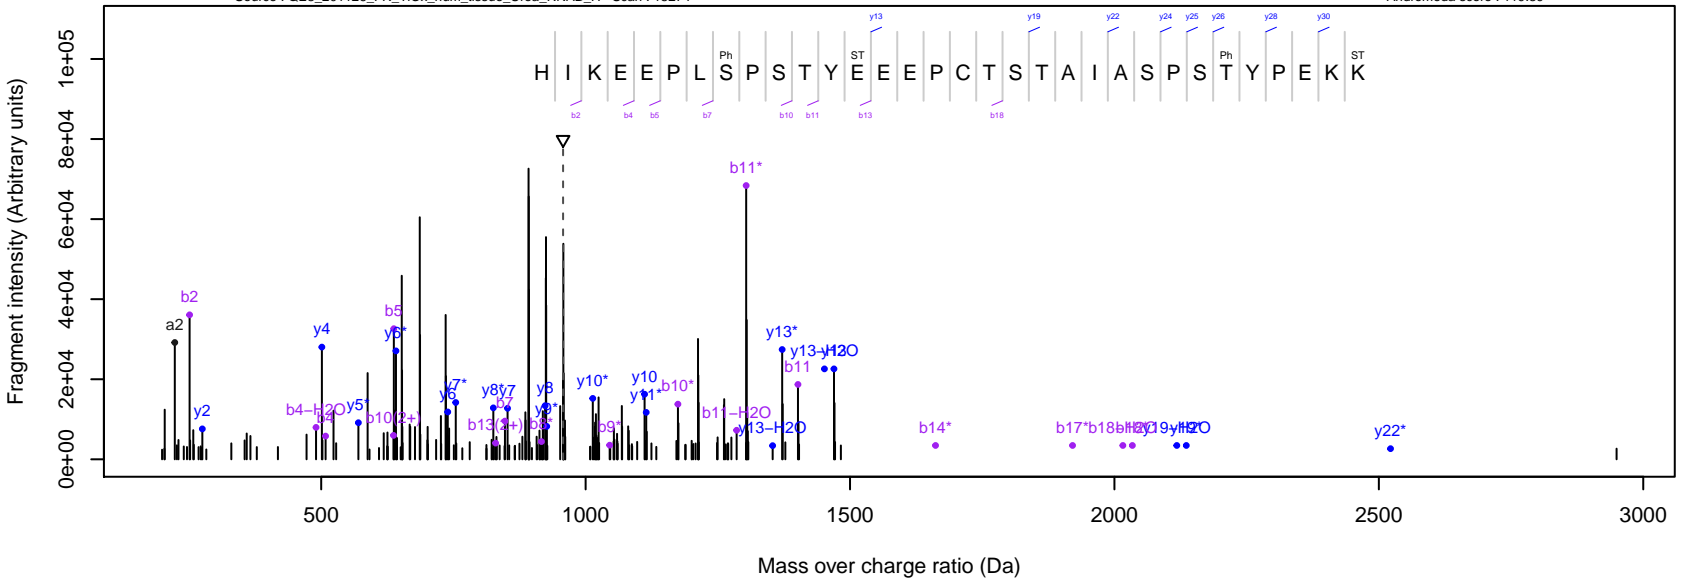

RRS(Phospho (STY))PSPYYSR-3+

Source : QE3\_201126\_FR\_TIOx\_hum\_tissue\_Urea\_RNAB\_H Scan : 6027

Andromeda score : 119.88

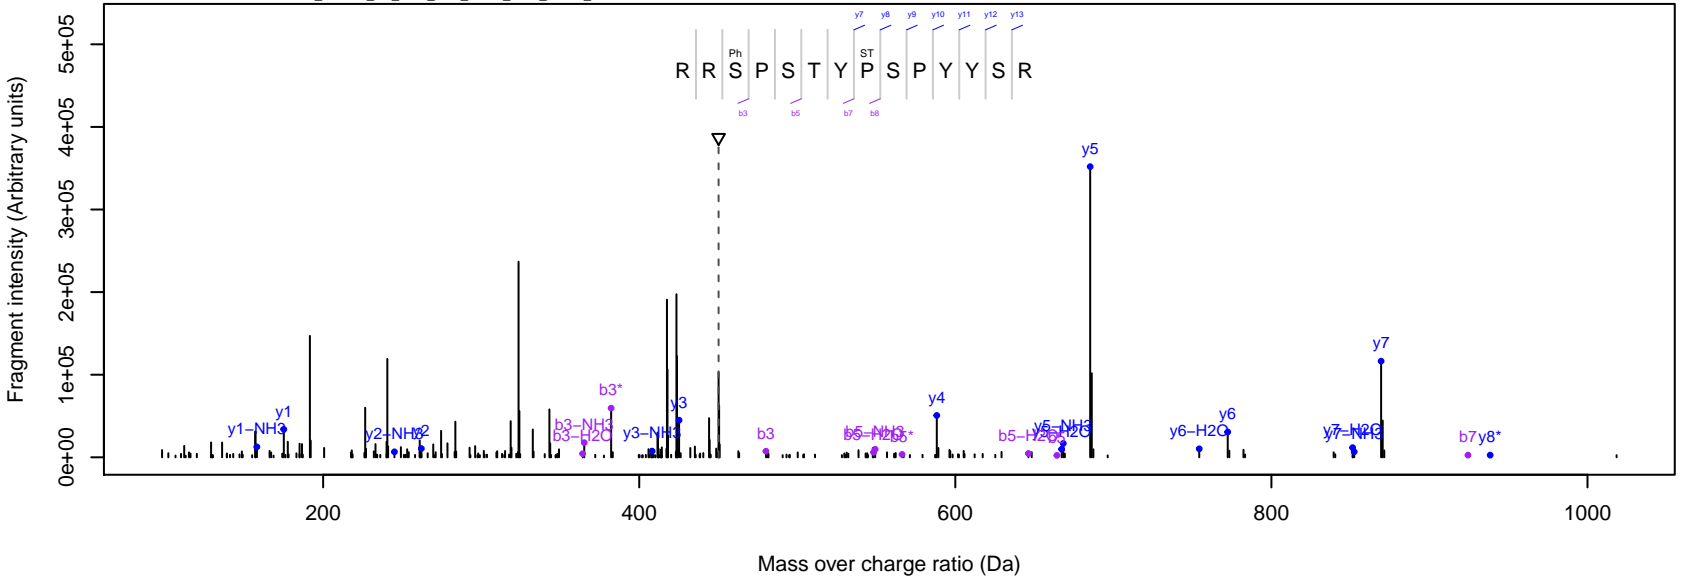

SPS(Phospho (STY))FGGASEASAR-2+

Source : QE3\_201126\_FR\_TIOx\_hum\_tissue\_Urea\_RNAB\_N Scan : 15520

Andromeda score : 119.87

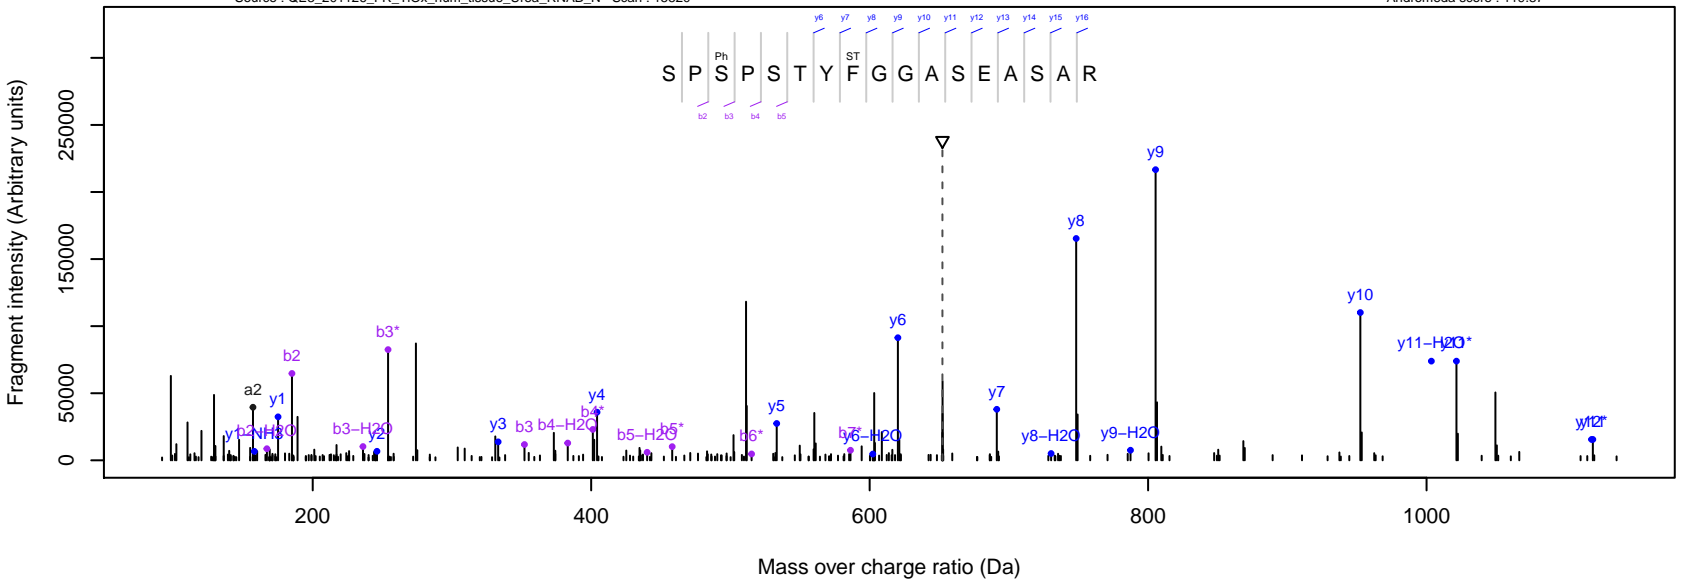

S(Phospho (STY))VAaftADPLSLLR-2+

Source : QE3\_201126\_FR\_TiOx\_hum\_tissue\_Urea\_RNAB\_H Scan : 60861

Andromeda score : 119.87

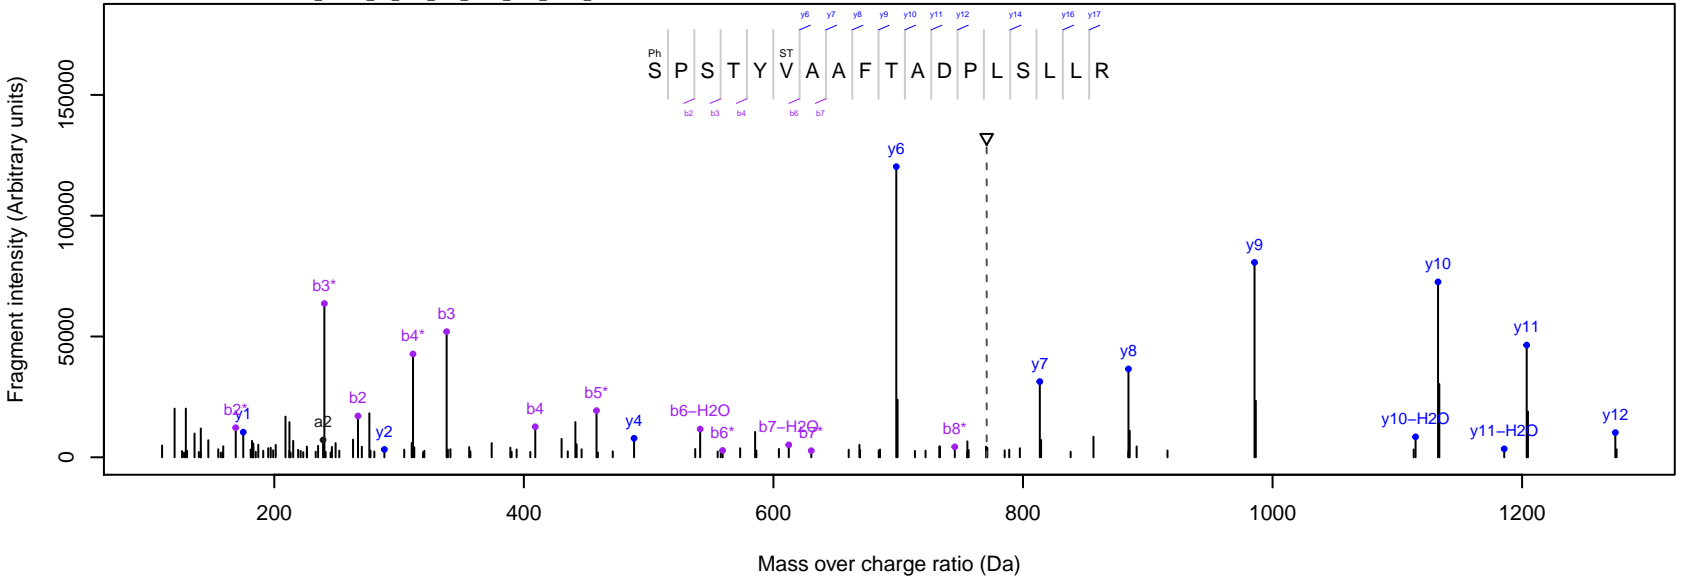

FTPVASKFS(Phospho (STY))PGAPGGSGSQPNQK-3+

Source : QE3\_201126\_FR\_TiOx\_hum\_tissue\_Urea\_RNAB\_N Scan : 20389

Andromeda score : 119.85

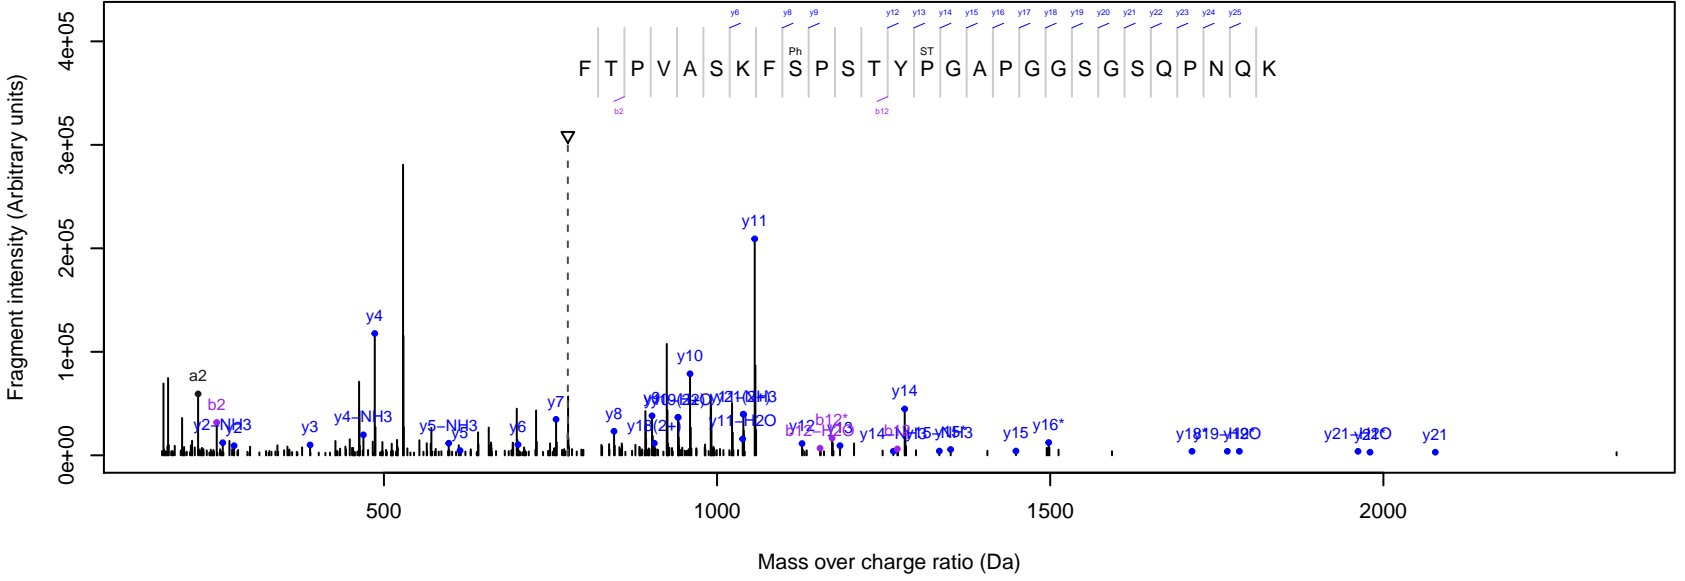

QREESETRSES(Phospho (STY))SDFEVVPK-3+

Source : QE3\_201126\_FR\_TiOx\_hum\_tissue\_Urea\_RNAB\_B Scan : 15560

Andromeda score : 119.83

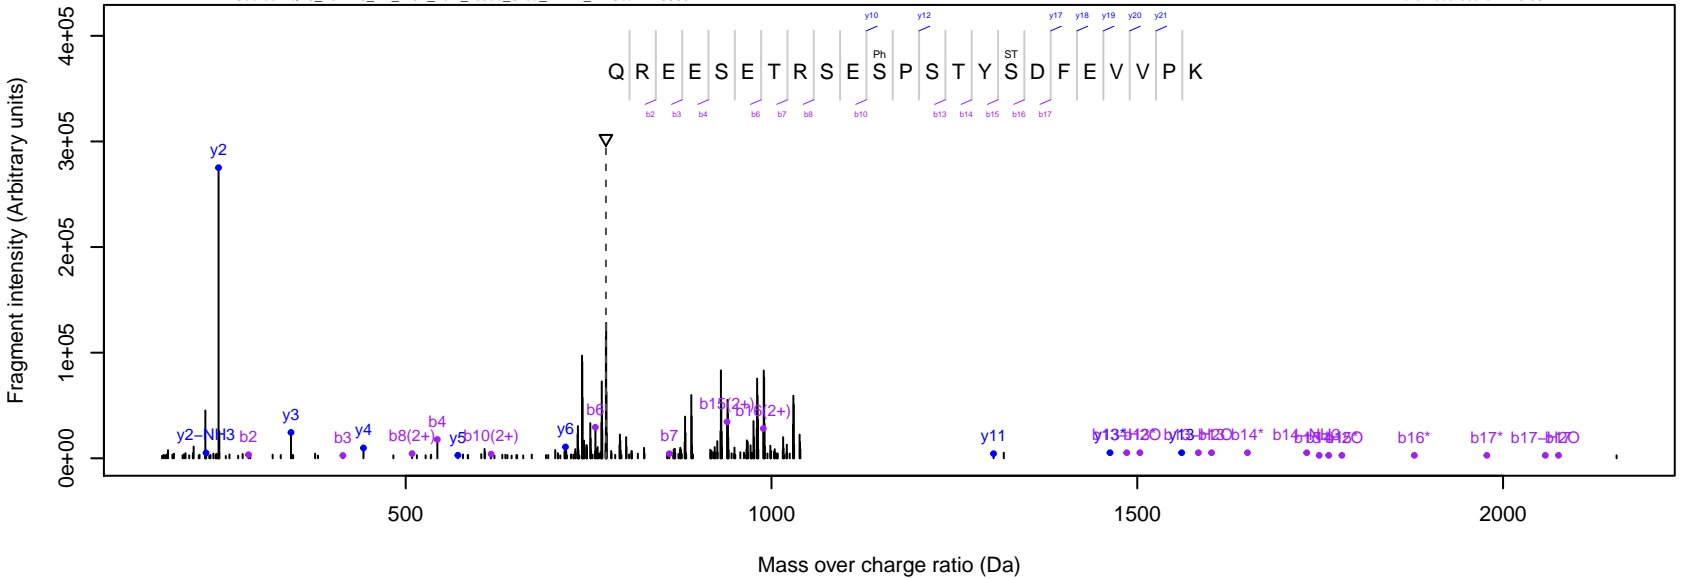

S(Phospho (STY))YEDLTESEDAAGDSHK-3+

Source : QE3\_201126\_FR\_TiOx\_hum\_tissue\_Urea\_RNAB\_N Scan : 16302

Andromeda score : 119.83

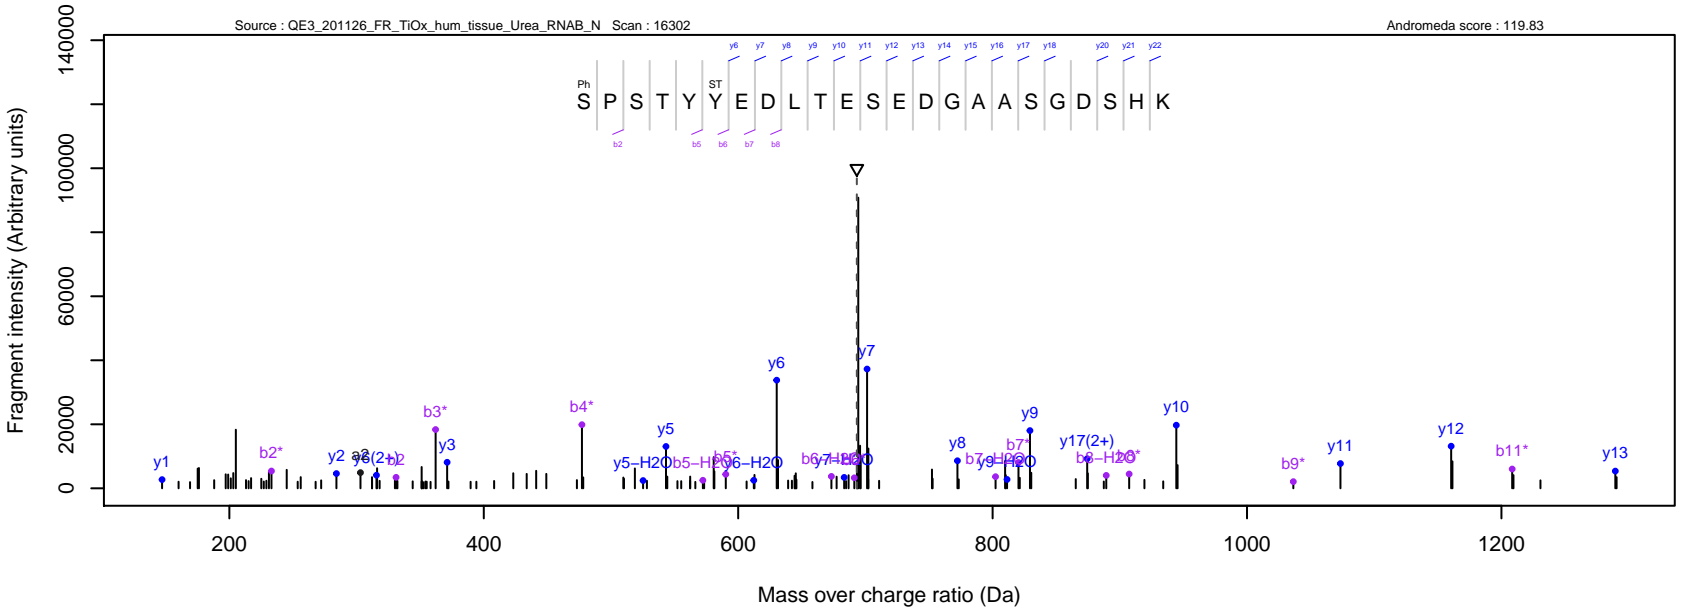

HSPEEDFRQS(Phospho (STY))PQEHFR-4+

Source : QE3\_201126\_FR\_TiOx\_hum\_tissue\_Urea\_RNAB\_H Scan : 13203

Andromeda score : 119.8

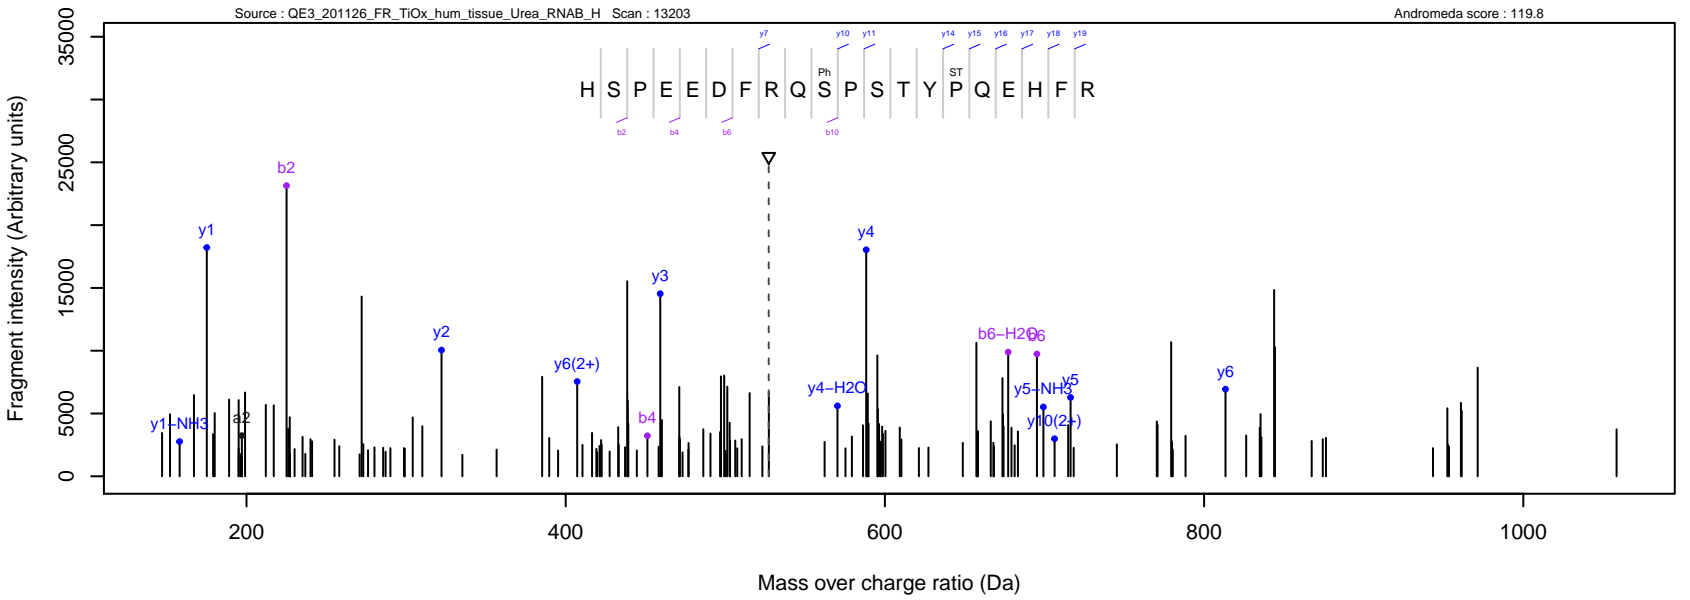

SKS(Phospho (STY))PPKS(Phospho (STY))PEEEGAVS(Phospho (STY))S-2+

Source : QE3\_201126\_FR\_TiOx\_hum\_tissue\_Urea\_RNAB\_H Scan : 11677

Andromeda score : 119.8

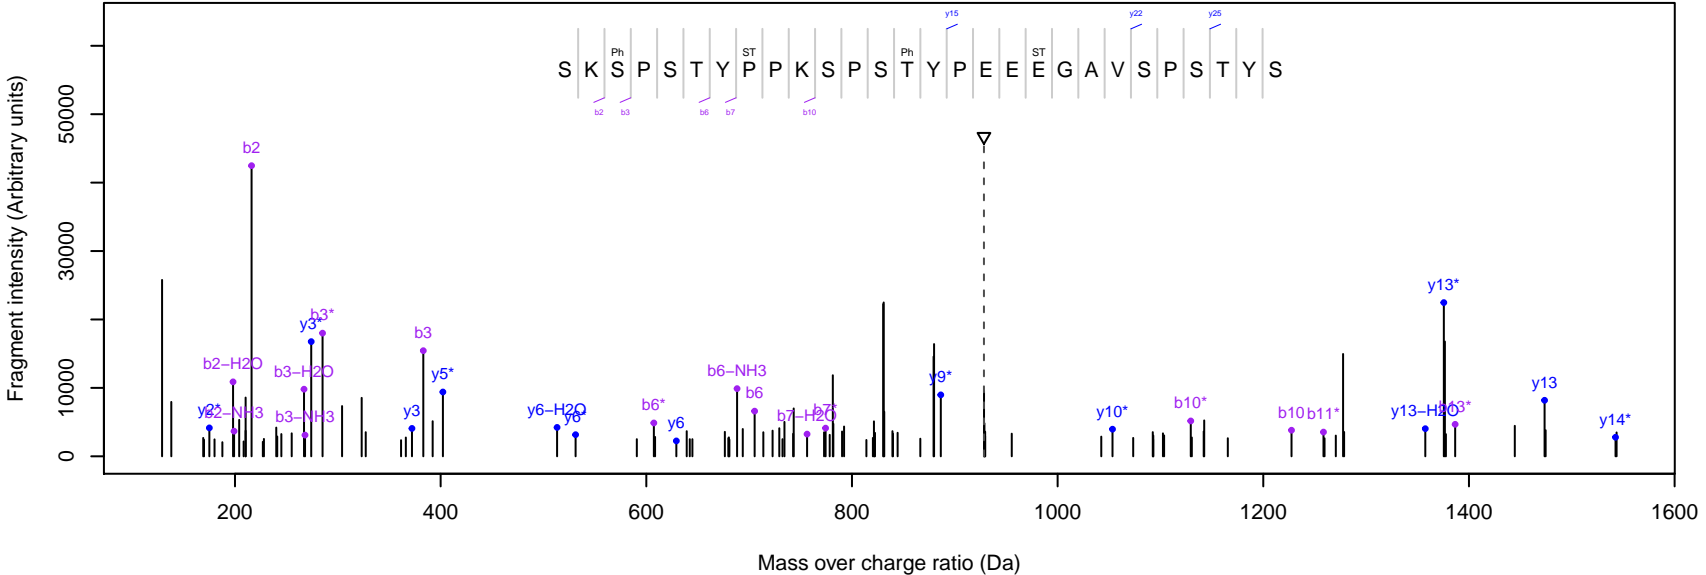

VLLLEANRHS(Phospho (STY))PGPER-3+

Source : QE3\_201126\_FR\_TIOx\_hum\_tissue\_Urea\_RNAB\_H Scan : 15645

Andromeda score : 119.8

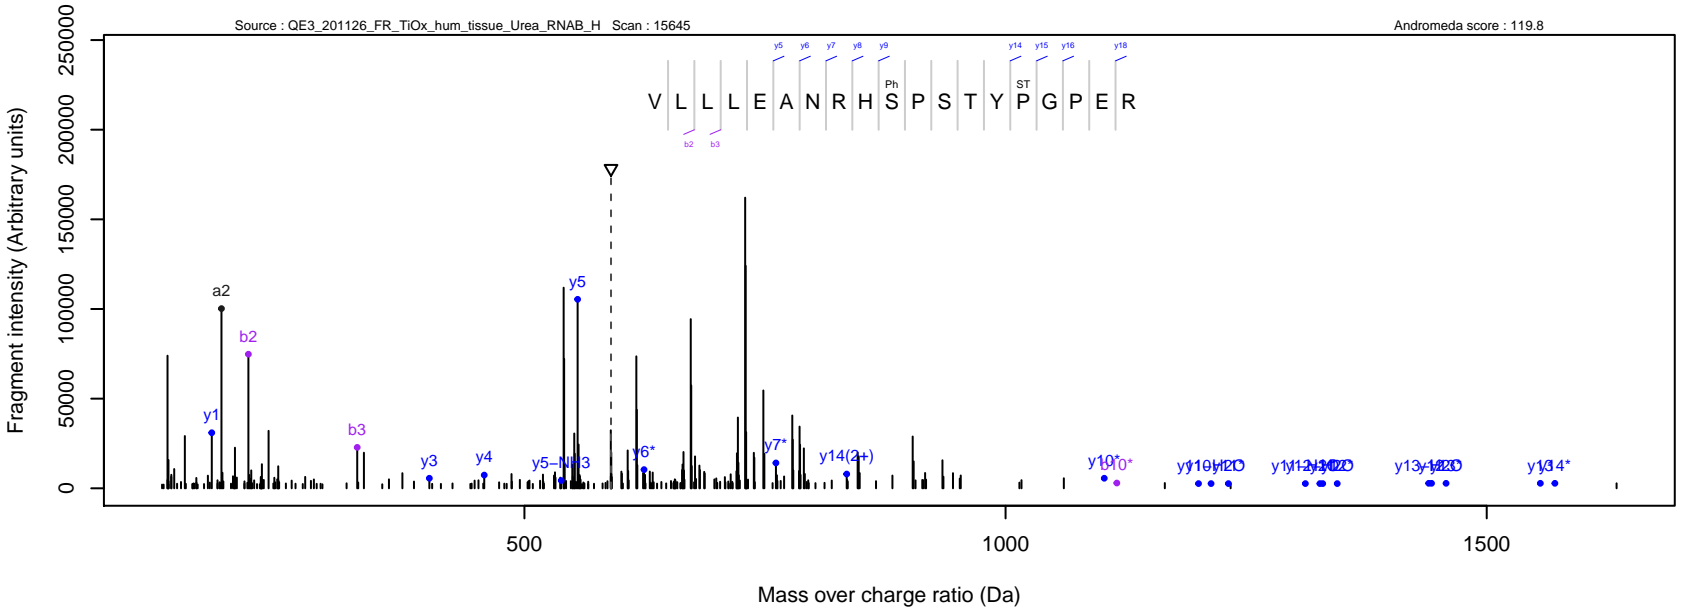

LRLCDDGPQLPTS(Phospho (STY))PR-3+

Source : QE3\_201126\_FR\_TIOx\_hum\_tissue\_Urea\_RNAB\_N Scan : 27791

Andromeda score : 119.76

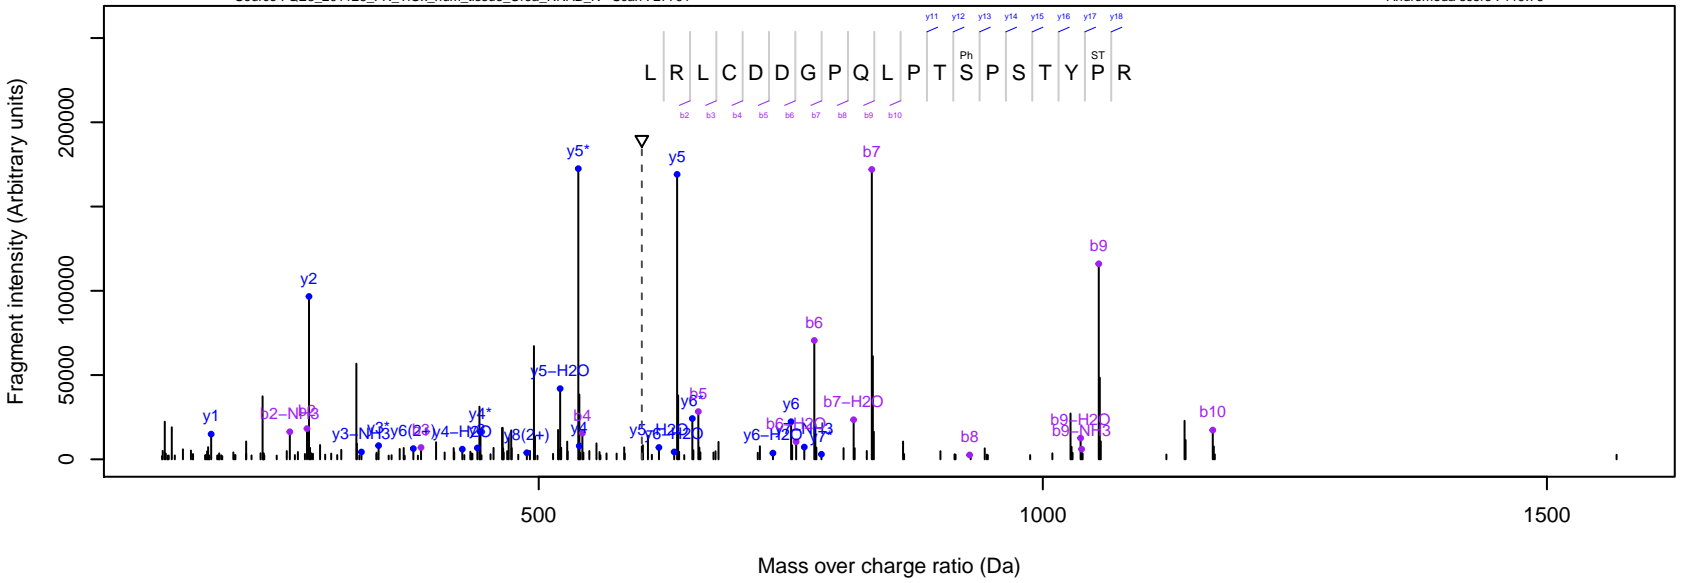

(Acetyl (Protein N-term))ALVTVRS(Phospho (STY))PPGSGASTPVGPDQAVQR-3+

Source : QE3\_201126\_FR\_TIOx\_hum\_tissue\_Urea\_RNAB\_H Scan : 52453

Andromeda score : 119.65

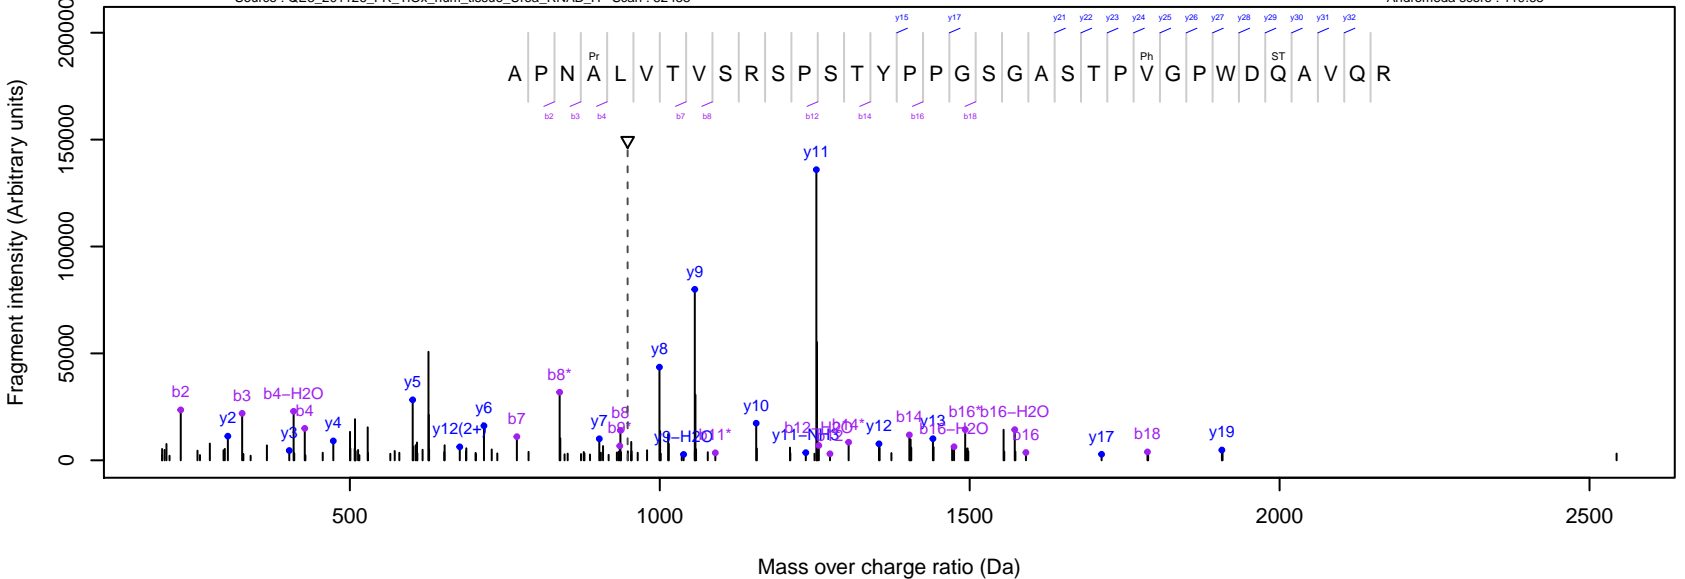

LKATVTPS(Phospho (STY))PVK-2+

Source : QE3\_201126\_FR\_TIOx\_hum\_tissue\_Urea\_RNAB\_B Scan : 11011

Andromeda score : 119.62

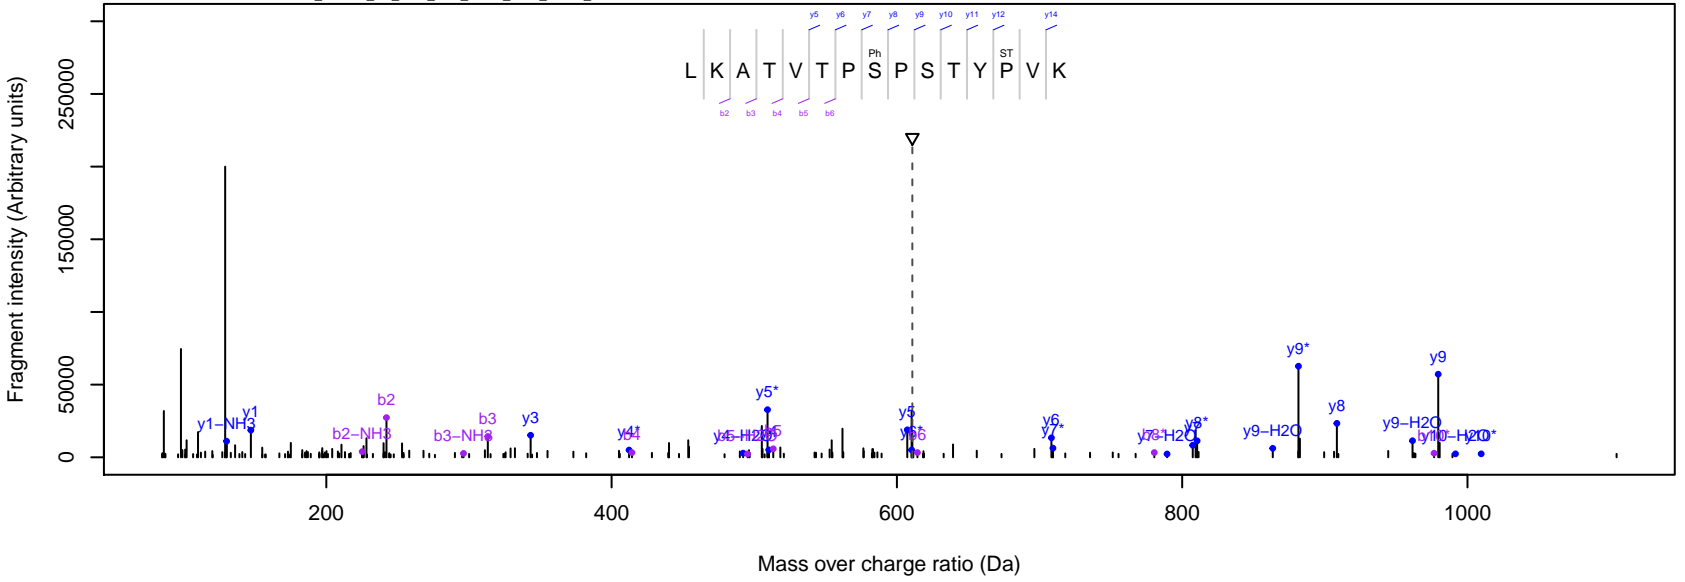

RIDIS(Phospho (STY))PSTLRK-3+

Source : QE3\_201126\_FR\_TIOx\_hum\_tissue\_Urea\_RNAB\_H Scan : 15540

Andromeda score : 119.62

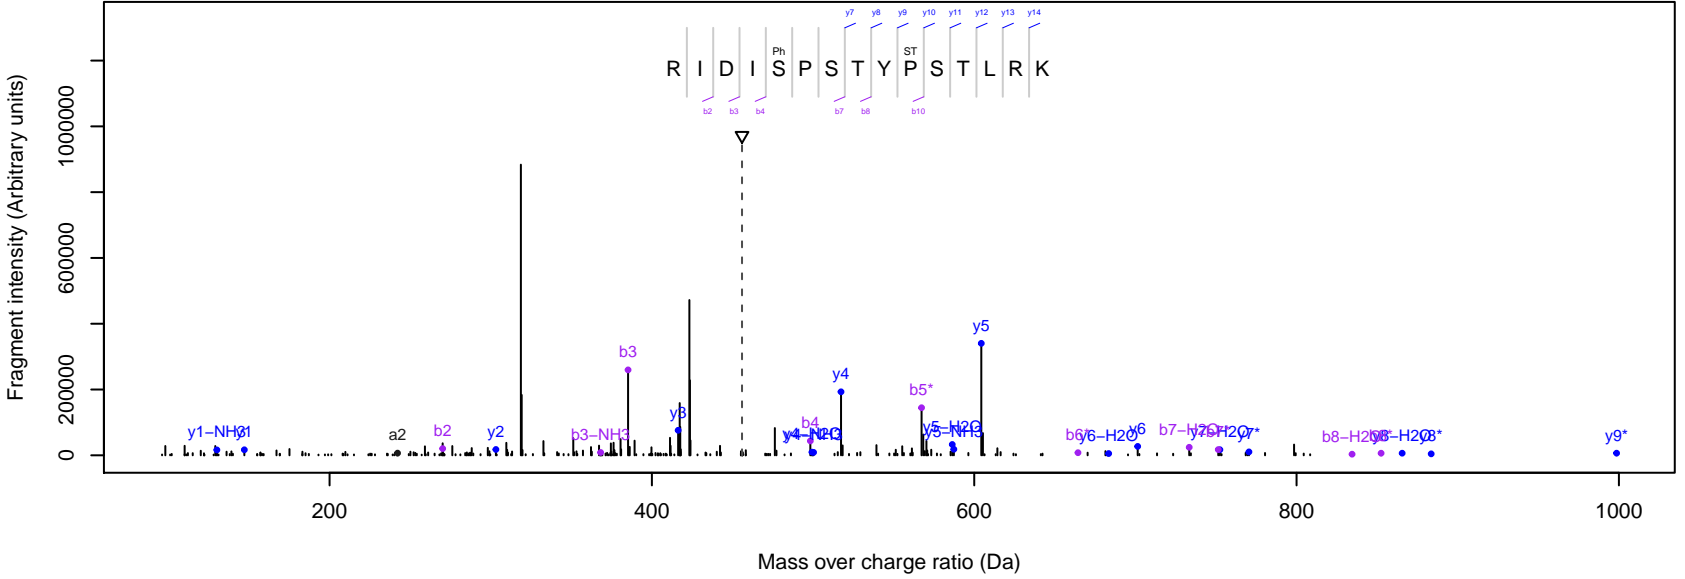

S(Phospho (STY))T(Phospho (STY))SFRGGM(Oxidation (M))GSGGLATGIAGGLAGM(Oxidation (M))GGIQNEKETM(Oxidation (M))QSLNDR-4+

Source : QE3\_201126\_FR\_TIOx\_hum\_tissue\_Urea\_RNAB\_N Scan : 37842

Andromeda score : 119.59

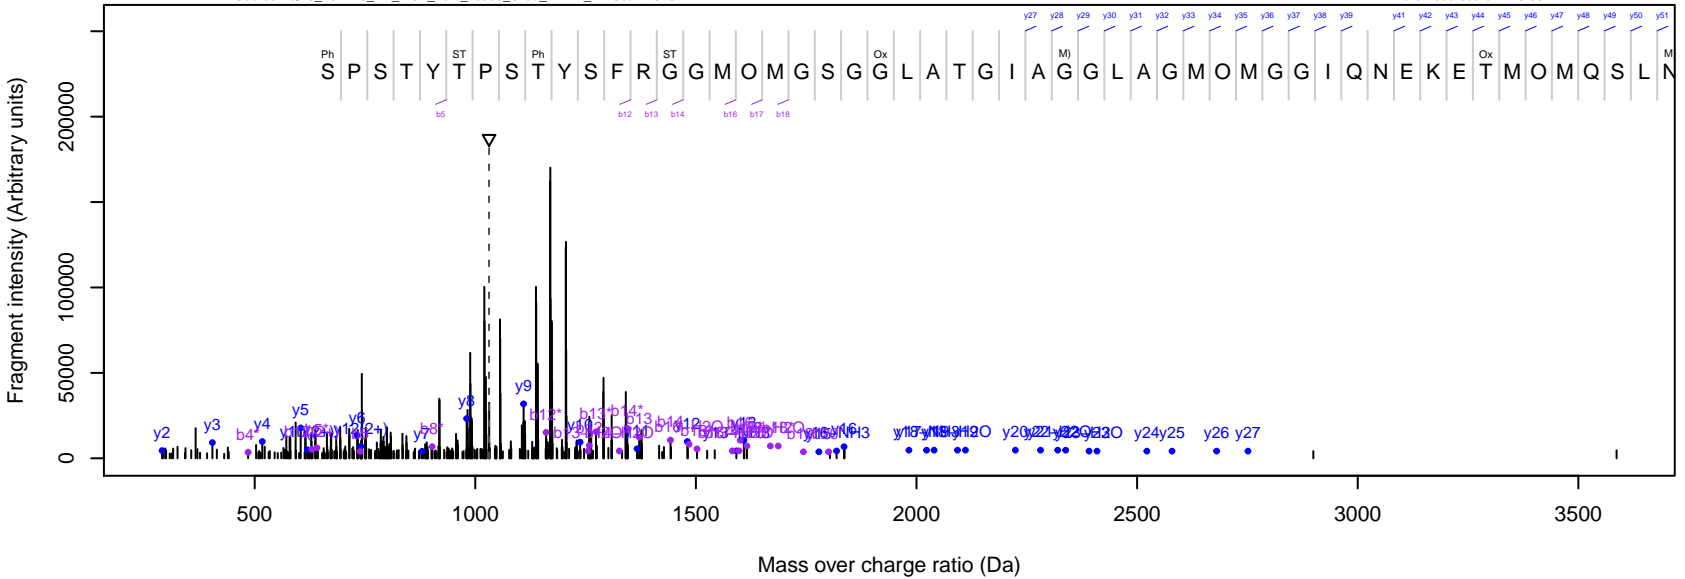



KPEKPLFSSAS(Phospho (STY))PQDSSPR-3+

Source : QE3\_201126\_FR\_TIOx\_hum\_tissue\_Urea\_RNAB\_N Scan : 12931

Andromeda score : 119.52

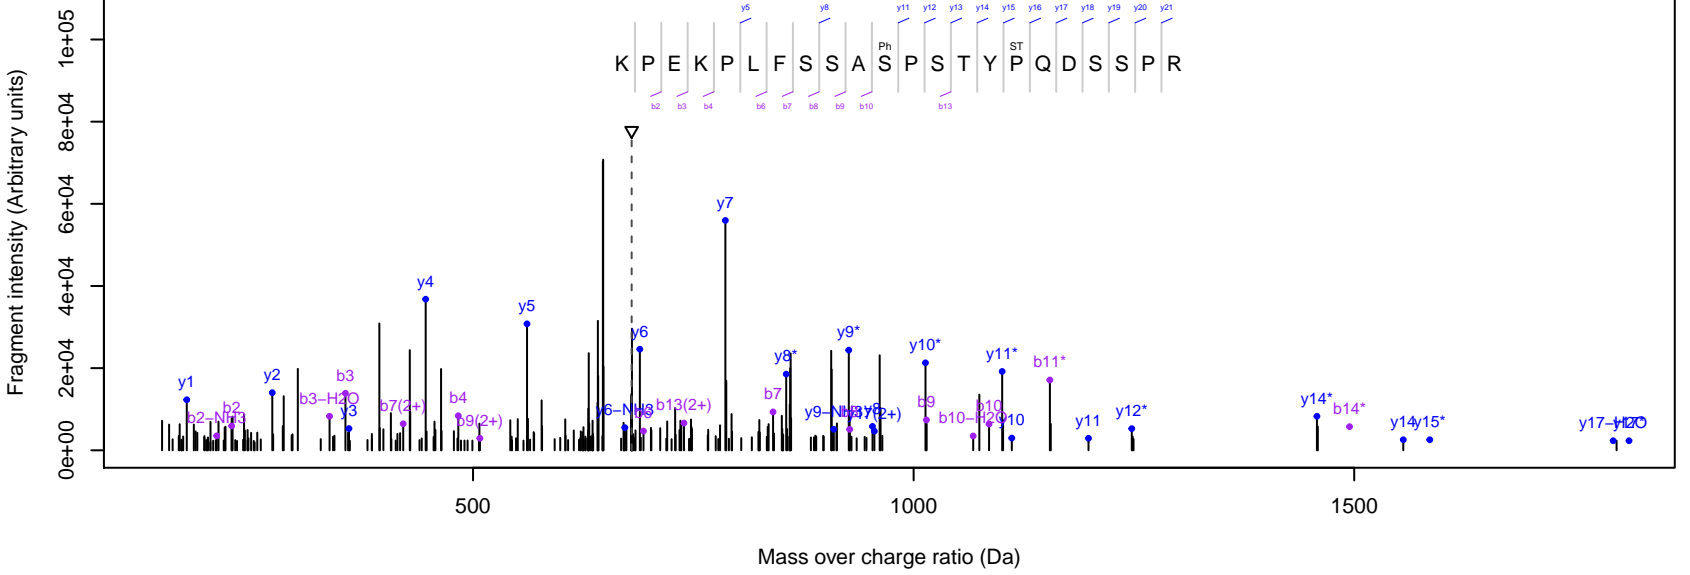

AEAPSS(Phospho (STY))PDVAPAGKEDS(Phospho (STY))PSASGR-3+

Source : QE3\_201126\_FR\_TIOx\_hum\_tissue\_Urea\_RNAB\_B Scan : 14664

Andromeda score : 119.5

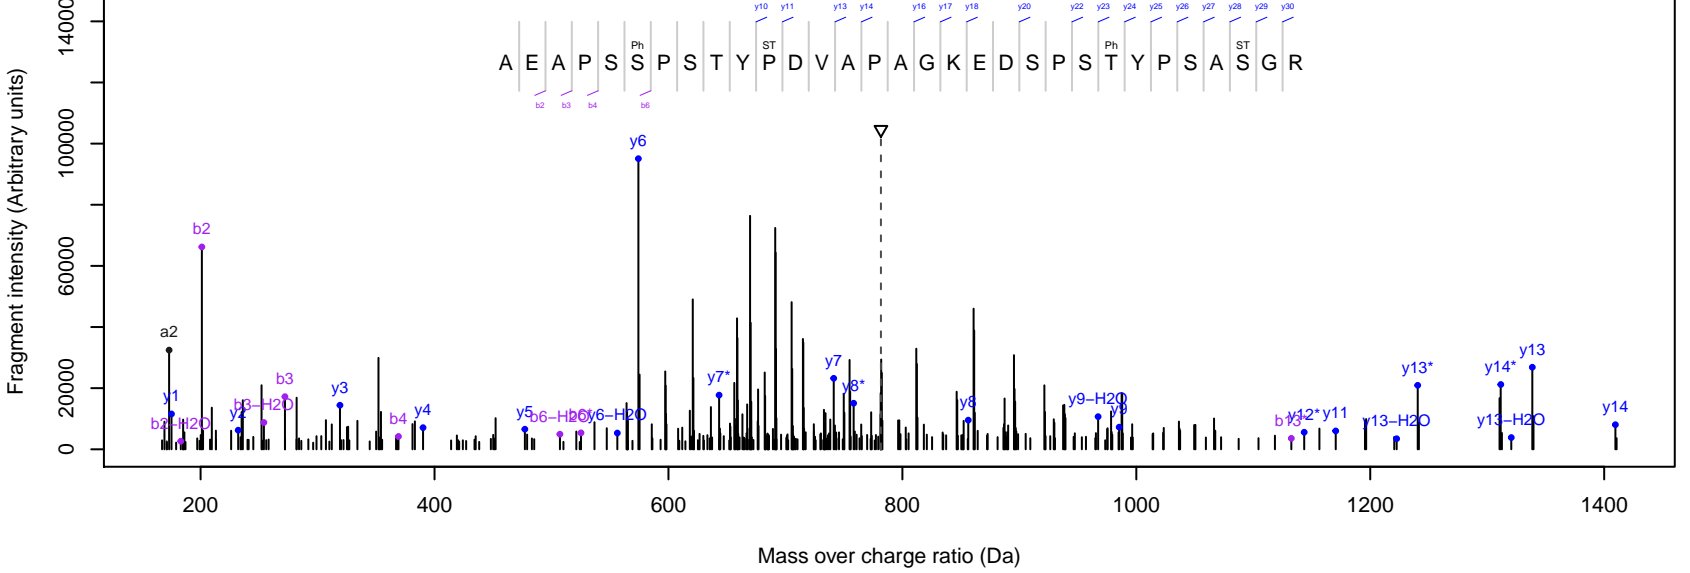

NGFPHPEDCNPSEAASEE(Phospho (STY))NSEIEQIPEVQK-3+

Source : QE3\_201126\_FR\_TIOx\_hum\_tissue\_Urea\_RNAB\_N Scan : 36568

Andromeda score : 119.5

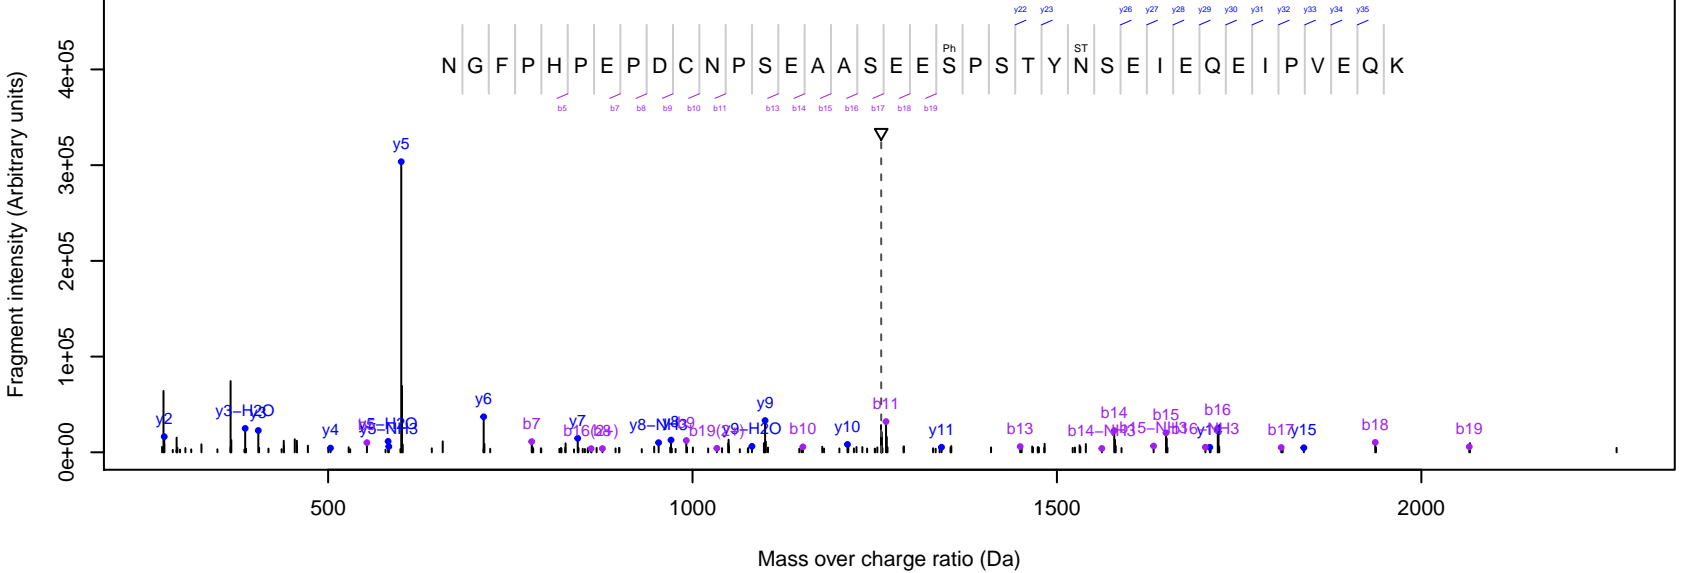

AGTFQAFEQFGQQLLAHGHYAS(Phospho (STY))PEIK-4+

Source : QE3\_201126\_FR\_TiOx\_hum\_tissue\_Urea\_RNAB\_H Scan : 55705

Andromeda score : 119.47

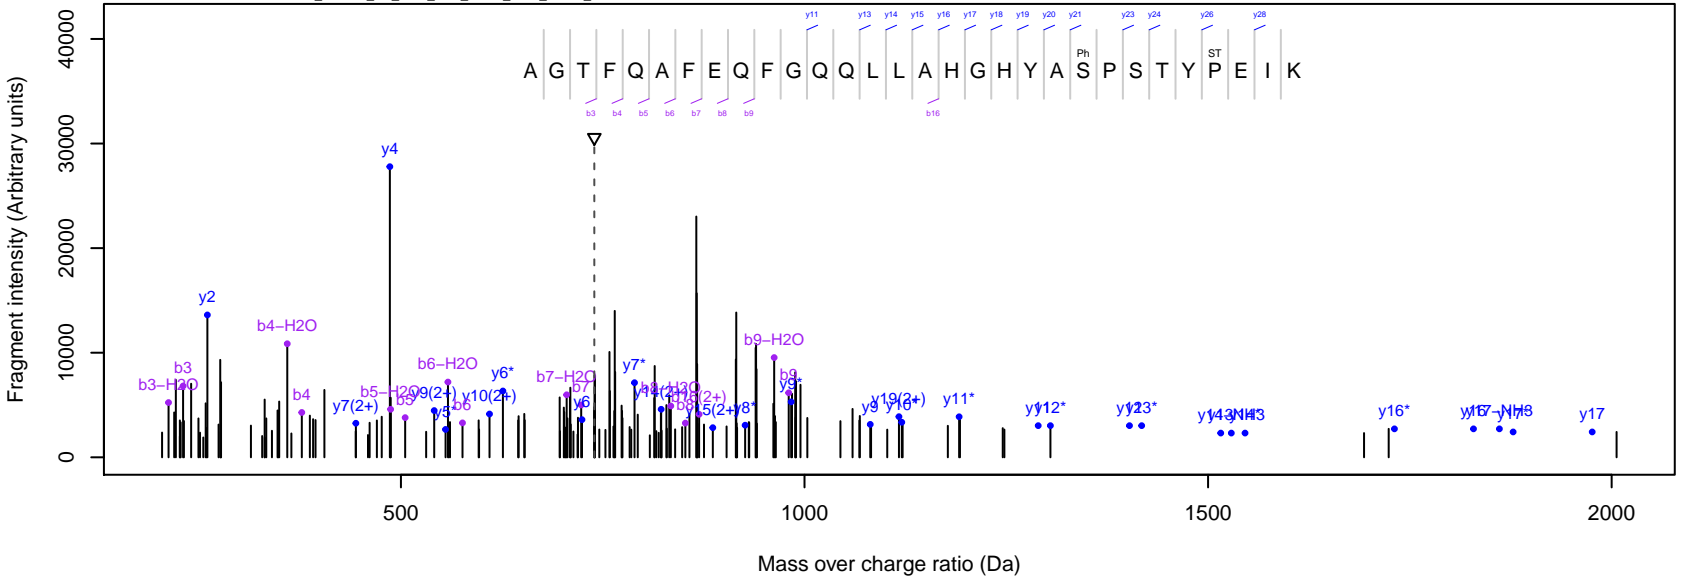

QSVVYGKS(Phospho (STY))TIRDR-3+

Source : QE3\_201126\_FR\_TiOx\_hum\_tissue\_Urea\_RNAB\_H Scan : 9183

Andromeda score : 119.47

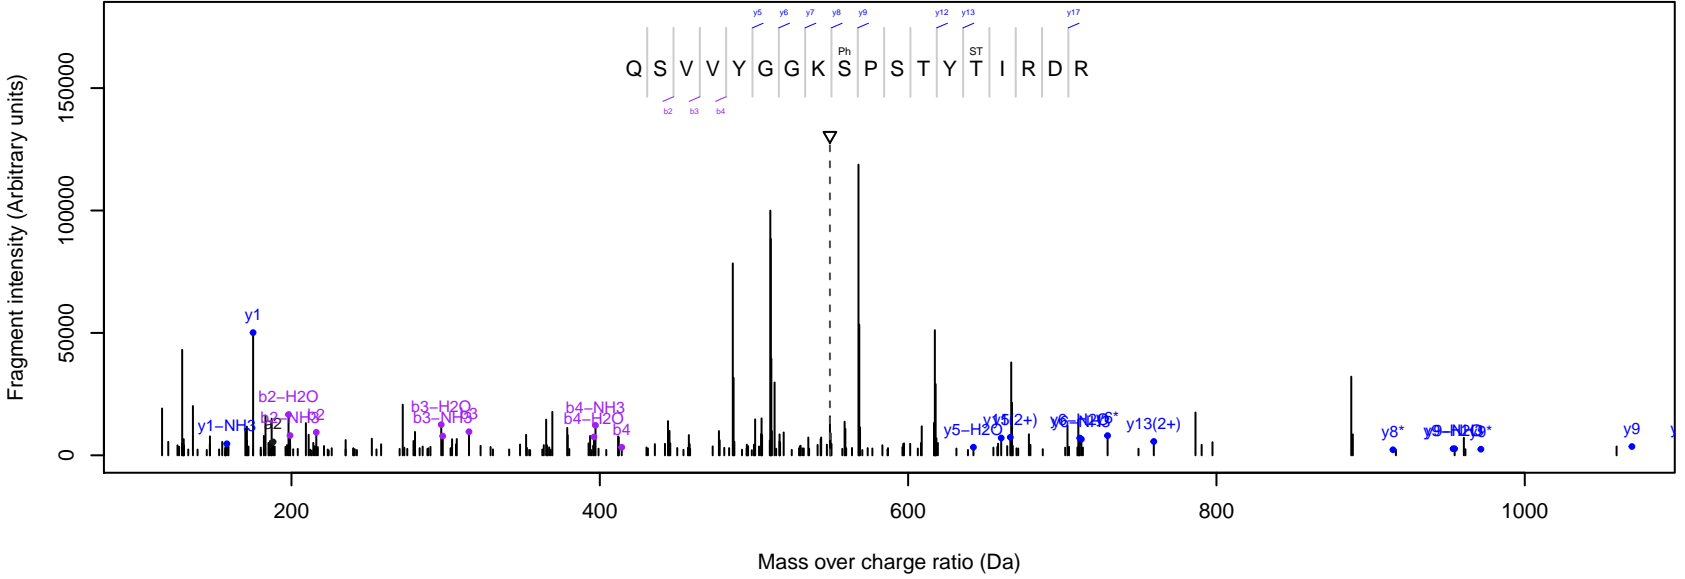

HDT(Phospho (STY))PDPS(Phospho (STY))PLR-2+

Source : QE3\_201126\_FR\_TiOx\_hum\_tissue\_Urea\_RNAB\_H Scan : 13104

Andromeda score : 119.45

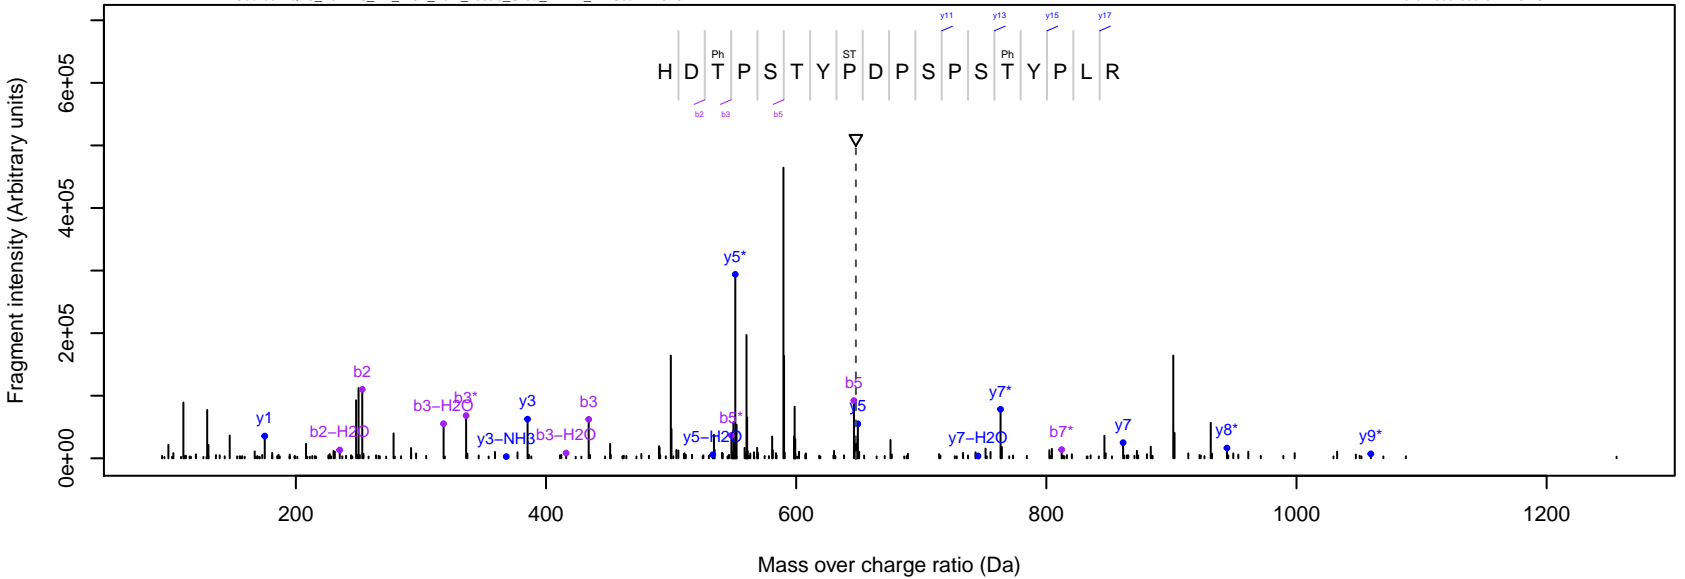

S(Phospho (STY))RSPESQVIGENTKQP-2+

Source : QE3\_201126\_FR\_TiOx\_hum\_tissue\_Urea\_RNAB\_H Scan : 13041

Andromeda score : 119.4

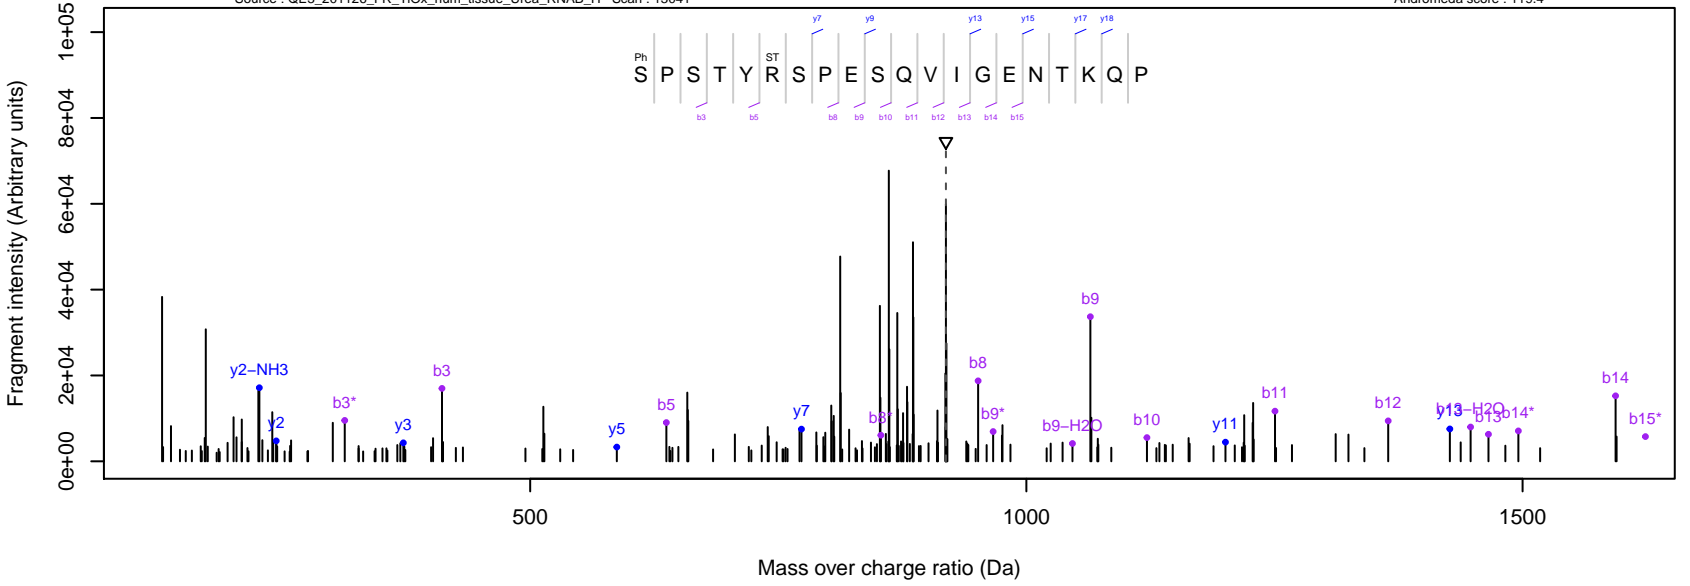

(Acetyl (Protein N-term))S(Phospho (STY))ASSLLEQRPK-2+

Source : QE3\_201126\_FR\_TiOx\_hum\_tissue\_Urea\_RNAB\_N Scan : 28032

Andromeda score : 119.39

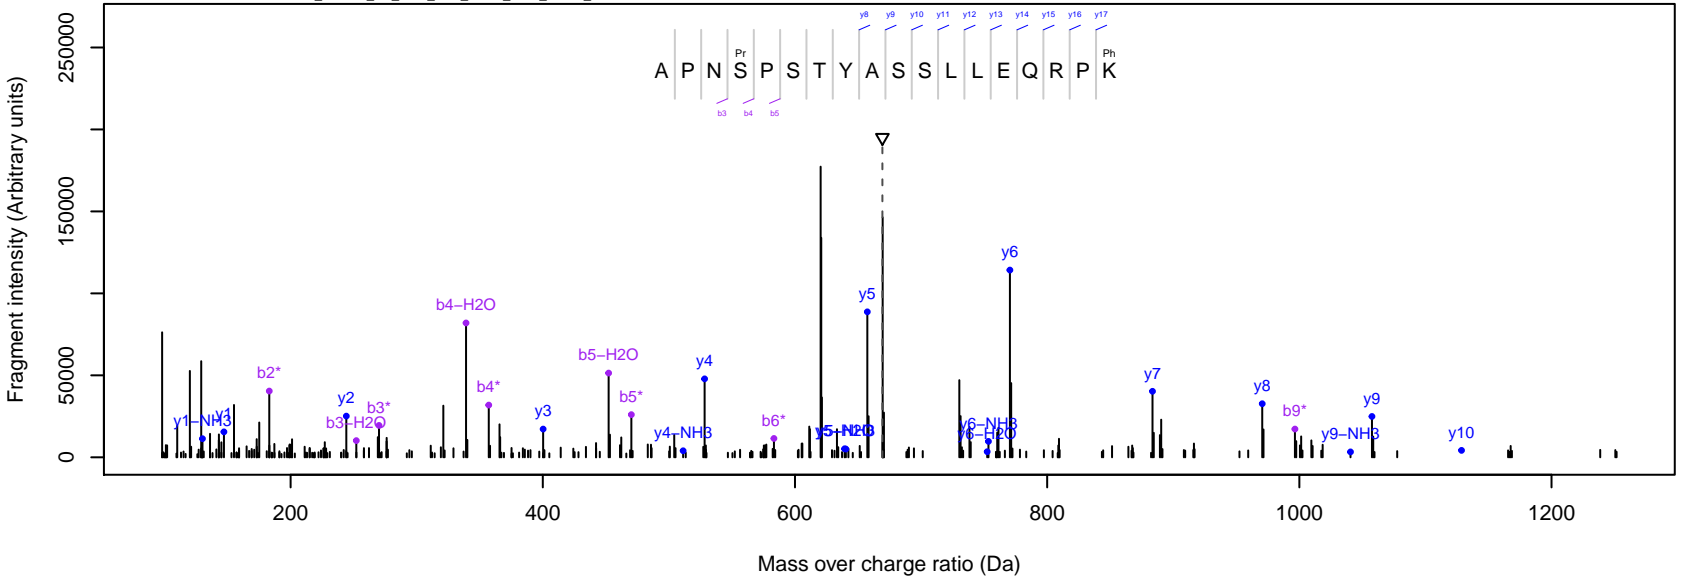

SVS(Phospho (STY))PCSNVESR-2+

Source : QE3\_201126\_FR\_TiOx\_hum\_tissue\_Urea\_RNAB\_B Scan : 10099

Andromeda score : 119.39

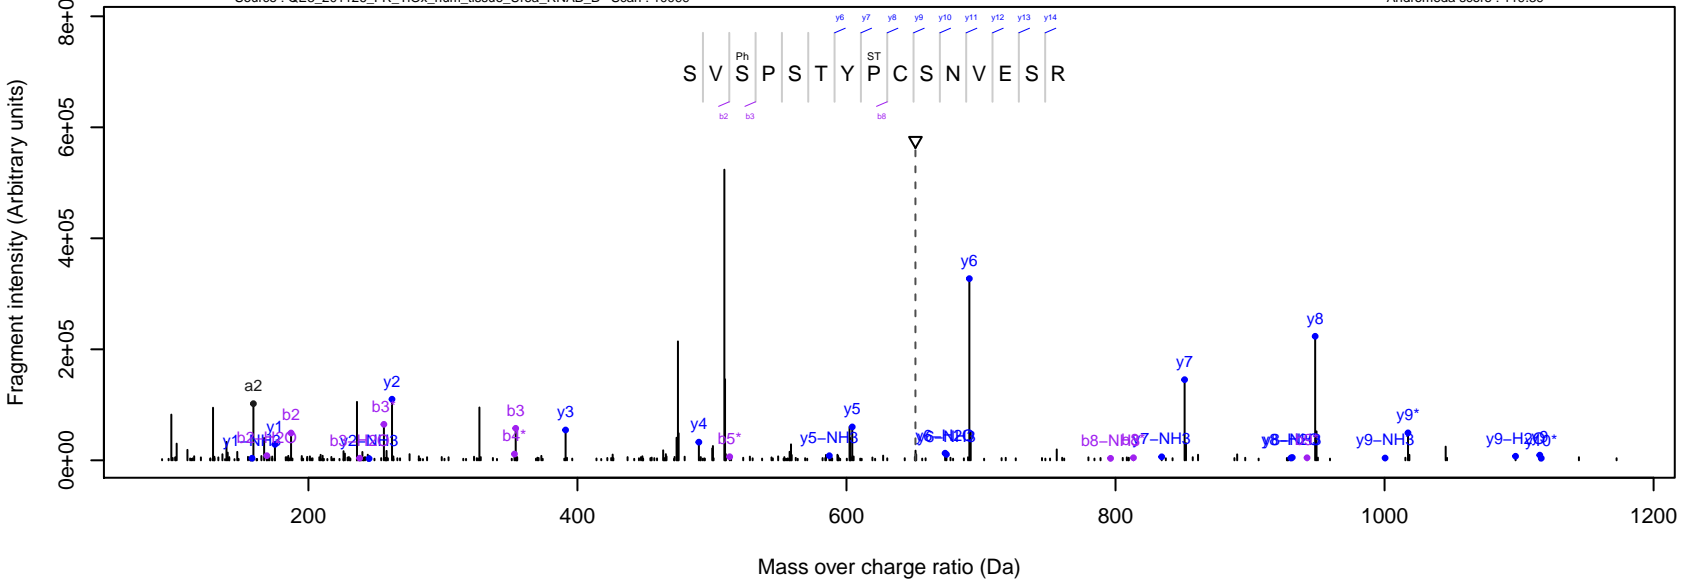

EPTPS(Phospho (STY))IASDIS(Phospho (STY))LPIATQELR-2+

Source : QE3\_201126\_FR\_TiOx\_hum\_tissue\_Urea\_RNAB\_H Scan : 60414

Andromeda score : 119.38

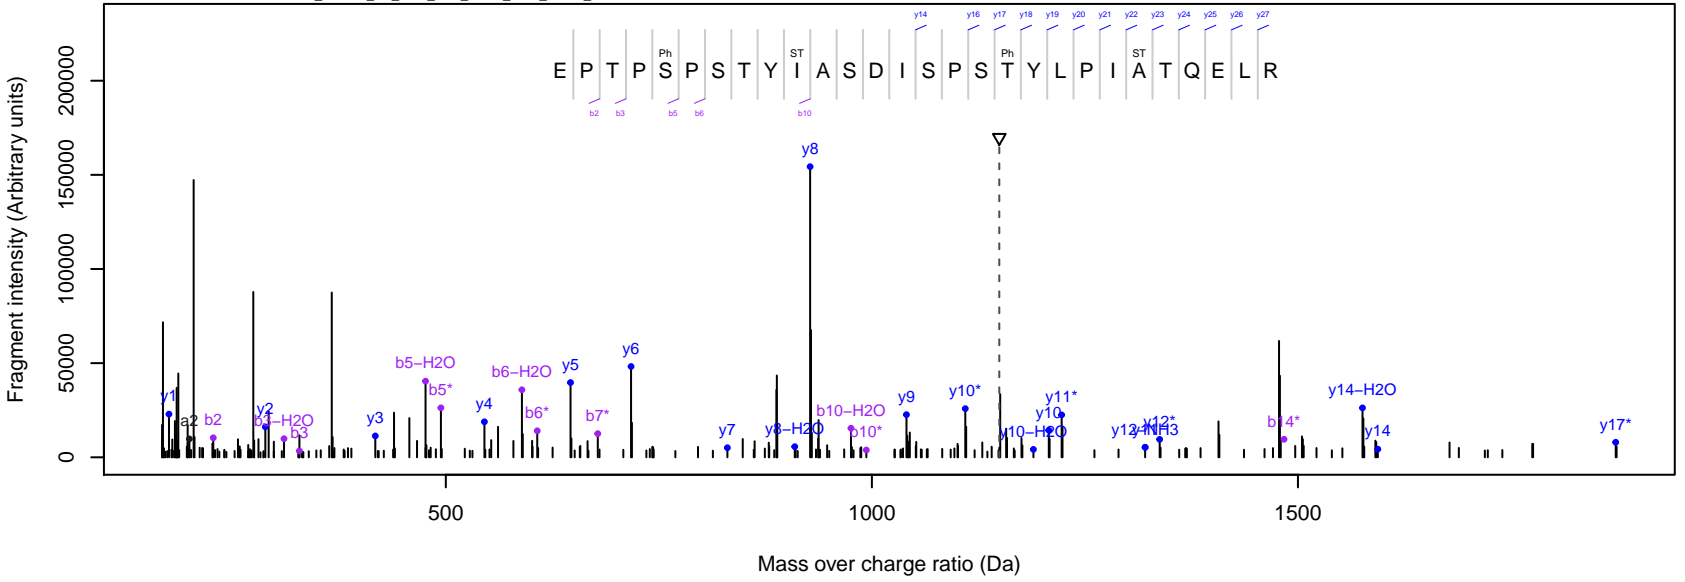

LQAANAEDIKSGKLS(Phospho (STY))R-3+

Source : QE3\_201126\_FR\_TiOx\_hum\_tissue\_Urea\_RNAB\_H Scan : 11765

Andromeda score : 119.38

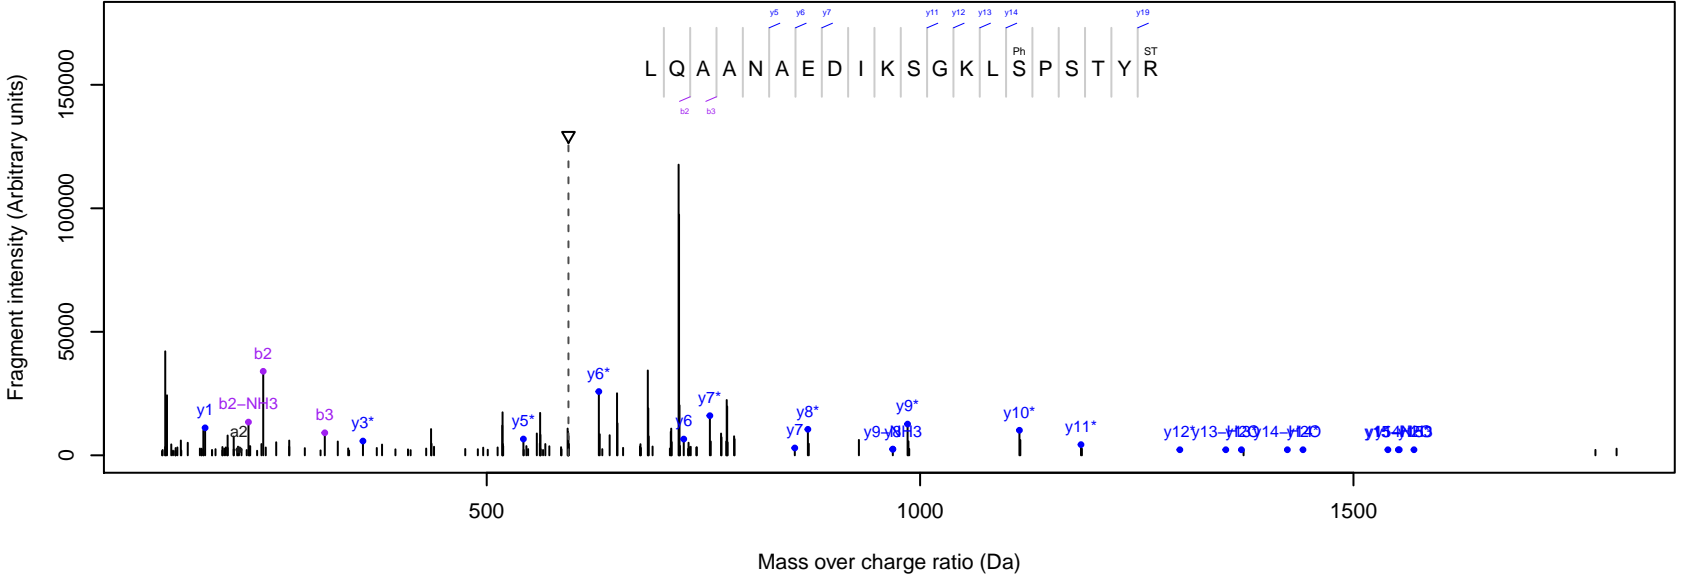

VITDPSLSKTDSPSTYK(Phospho (STY))YKR-3+

Source : QE3\_201126\_FR\_TiOx\_hum\_tissue\_Urea\_RNAB\_N Scan : 12428

Andromeda score : 119.38

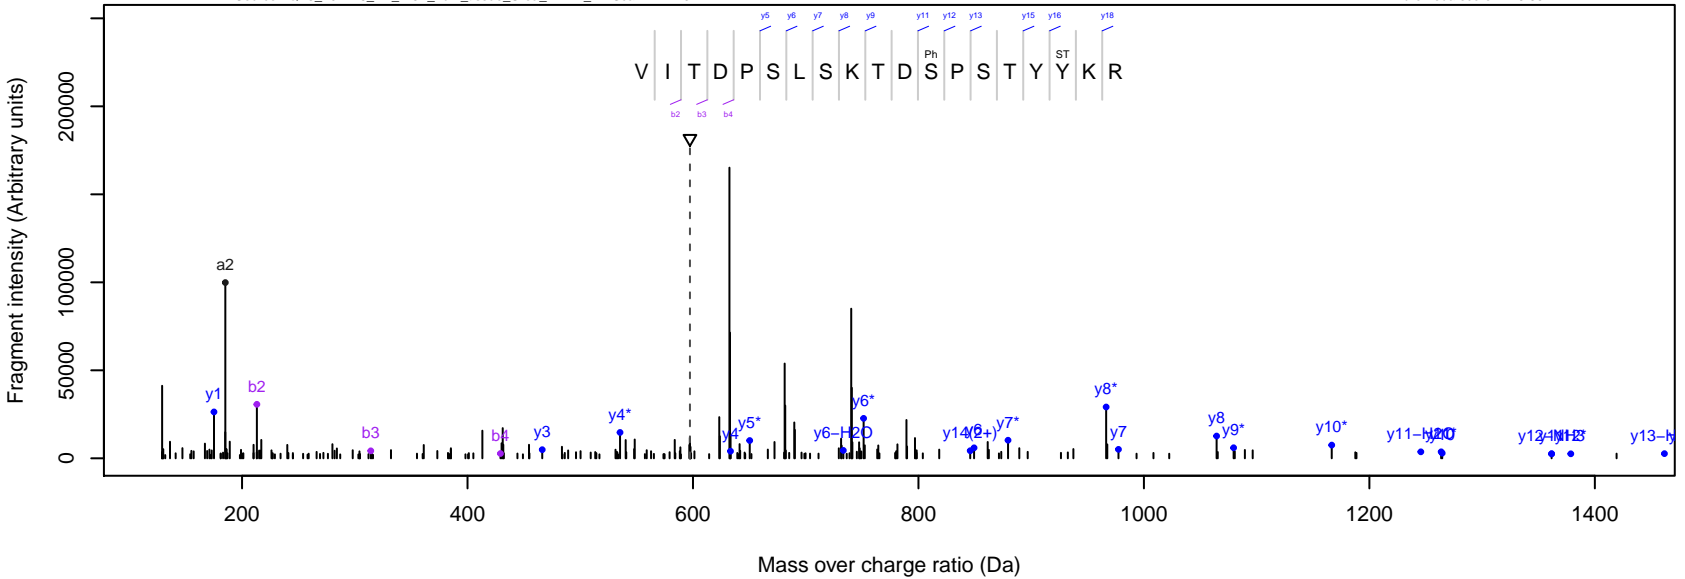

VPETVADARQS(Phospho (STY))IDVGK-3+

Source : QE3\_201126\_FR\_TiOx\_hum\_tissue\_Urea\_RNAB\_B Scan : 18555

Andromeda score : 119.38

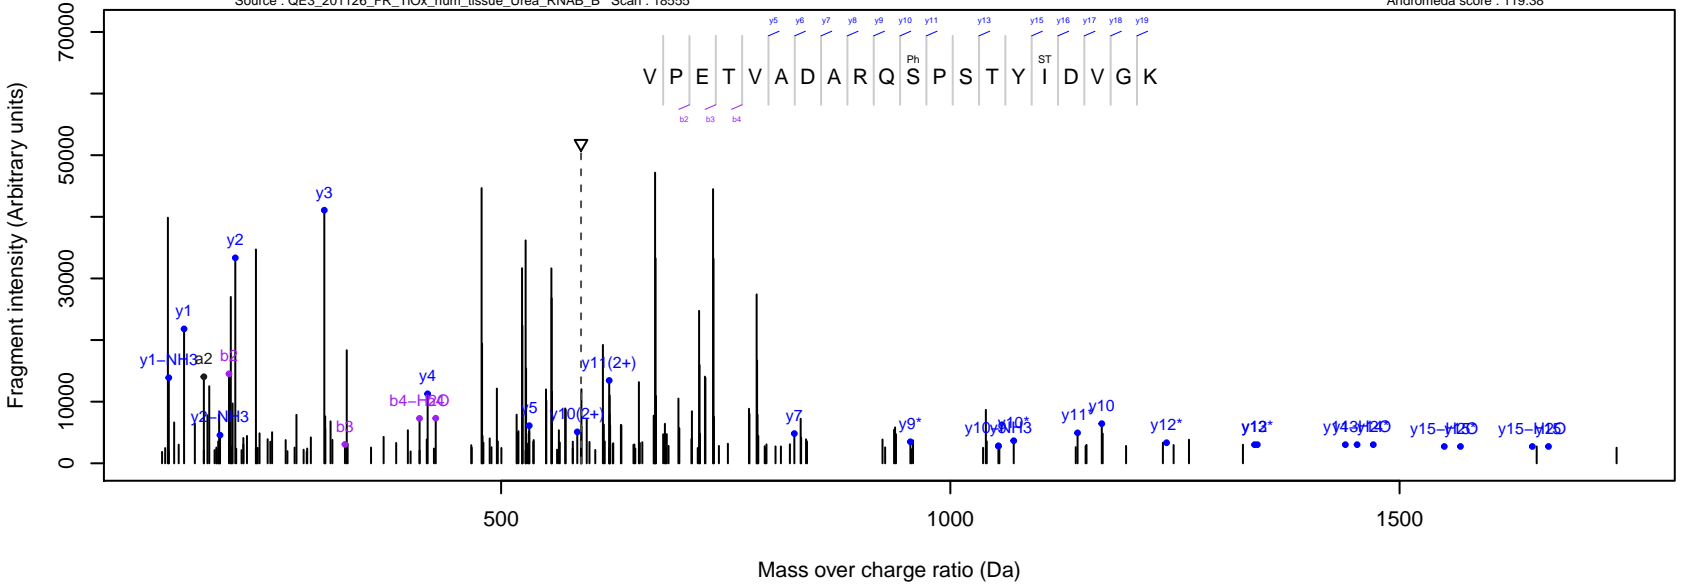

NFS(Phospho (STY))DNQLQEGKNVIGLQMGNTNR-3+

Source : QE3\_201126\_FR\_TiOx\_hum\_tissue\_Urea\_RNAB\_H Scan : 38488

Andromeda score : 119.37

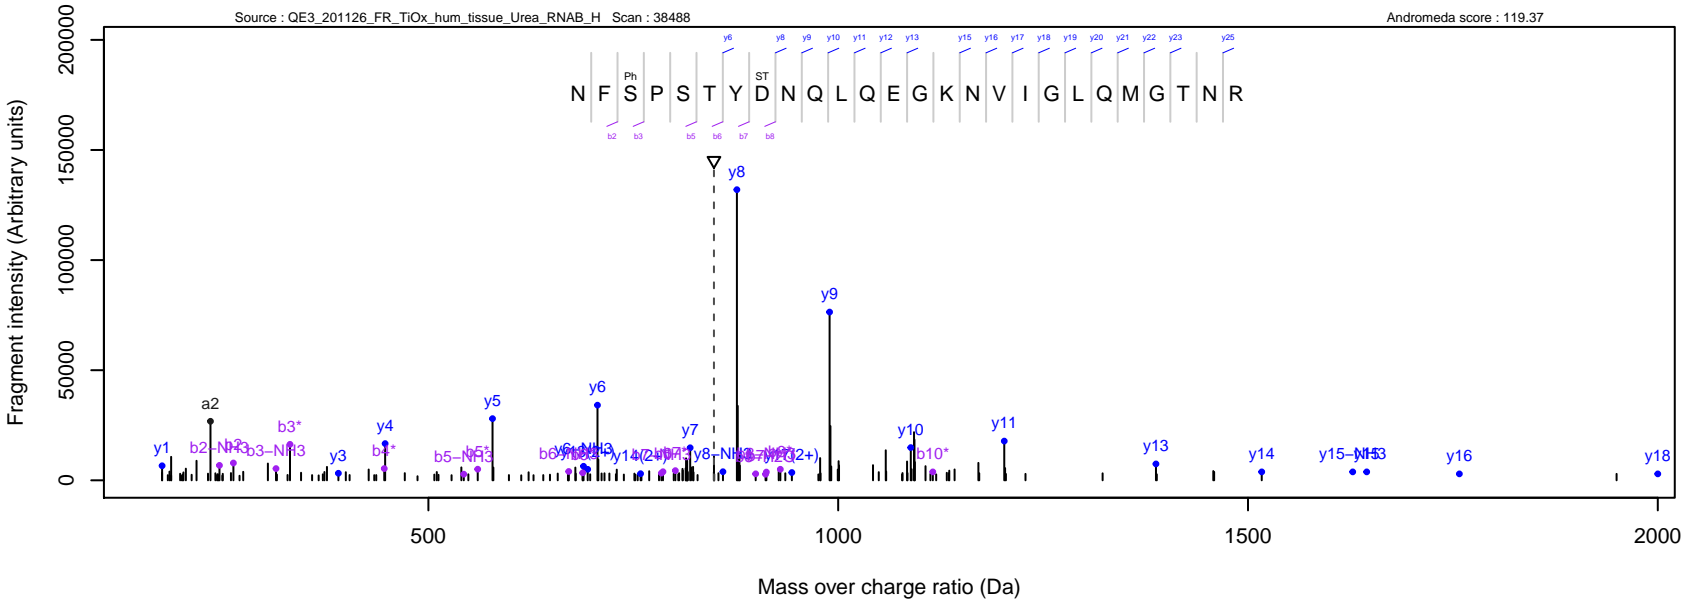

TGS(Phospho (STY))NIS(Phospho (STY))GAS(Phospho (STY))SDISLDEQYKHQLEETKK-3+

Source : QE3\_201126\_FR\_TiOx\_hum\_tissue\_Urea\_RNAB\_N Scan : 30124

Andromeda score : 119.35

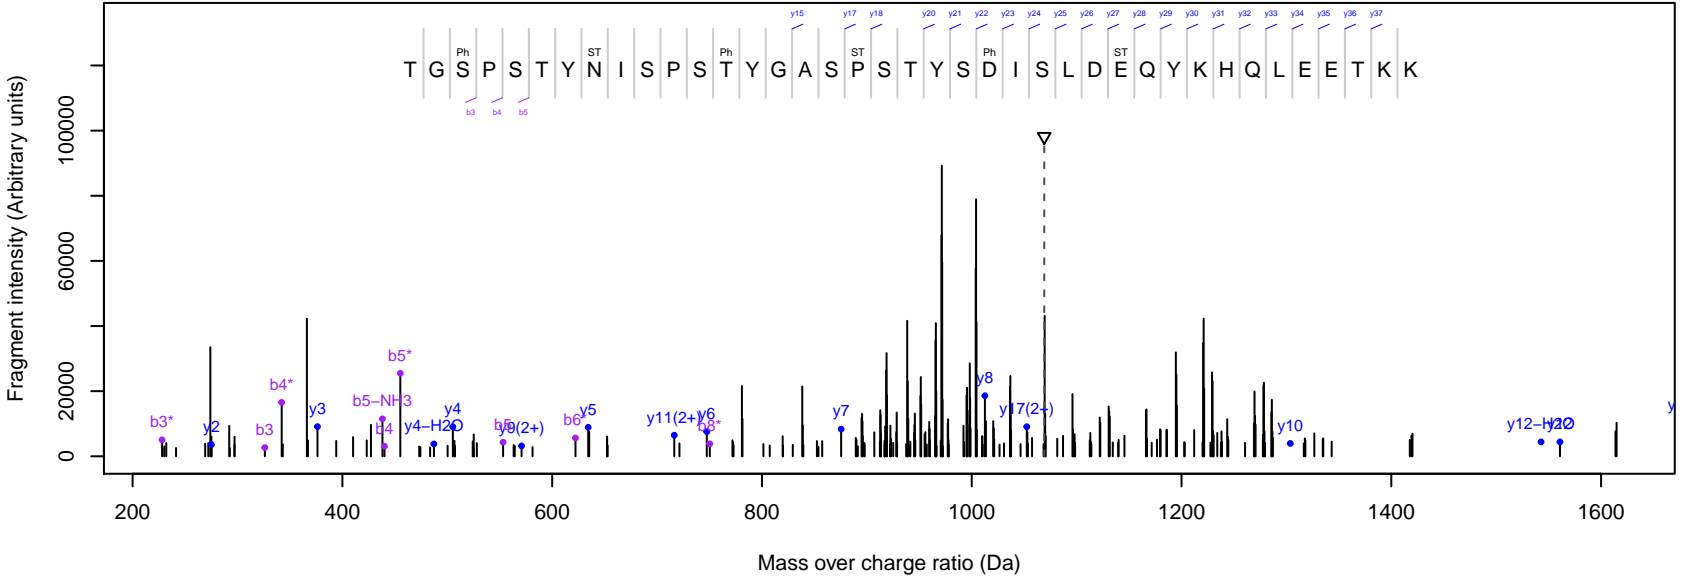

ASVRGS(Phospho (STY))S(Phospho (STY))EEDEDARTPDR-3+

Source : QE3\_201126\_FR\_TiOx\_hum\_tissue\_Urea\_RNAB\_B Scan : 7706

Andromeda score : 119.34

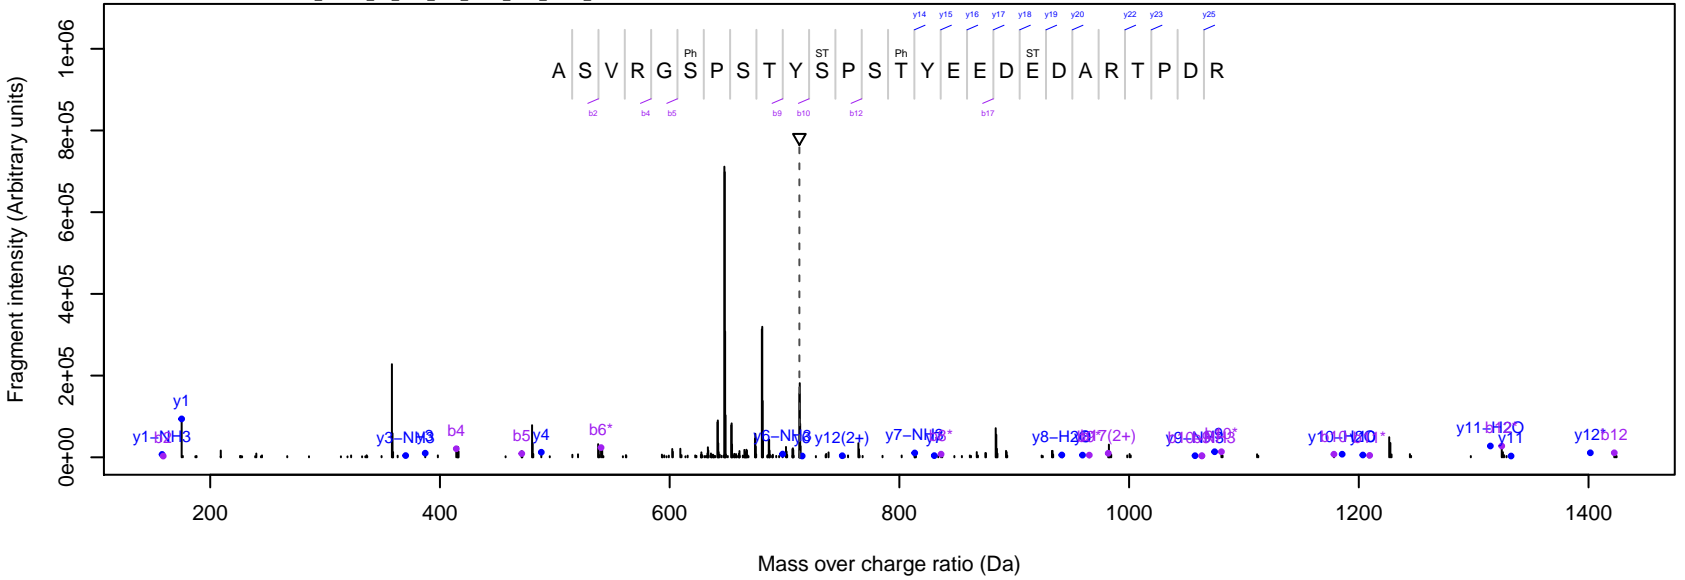

SYQNS(Phospho (STY))PSSDDGIRLPEYSTEK-3+

Source : QE3\_201126\_FR\_TiOx\_hum\_tissue\_Urea\_RNAB\_B Scan : 25452

Andromeda score : 119.33

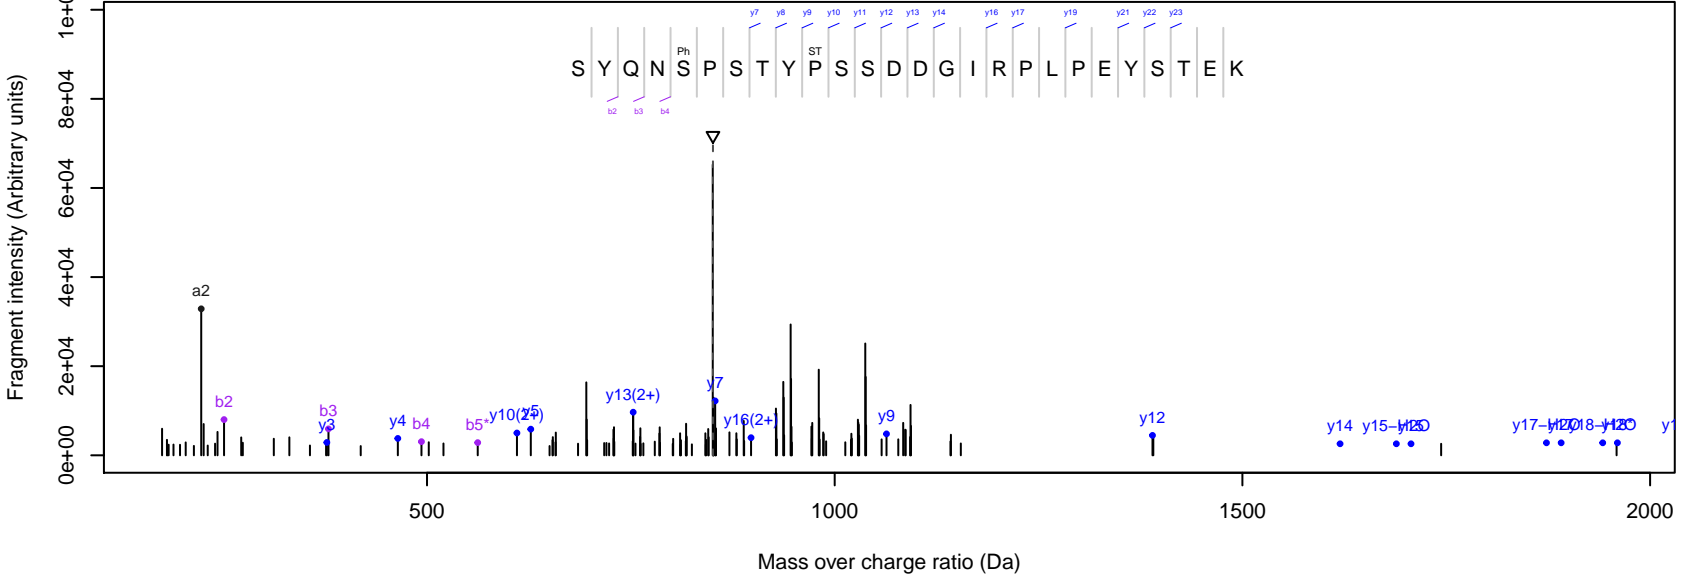

AVEYLLTGIPGSPPEHGSVQES(Phospho (STY))QVSEQPATEAGENPLEFLR-4+

Source : QE3\_201126\_FR\_TiOx\_hum\_tissue\_Urea\_RNAB\_N Scan : 58140

Andromeda score : 119.3

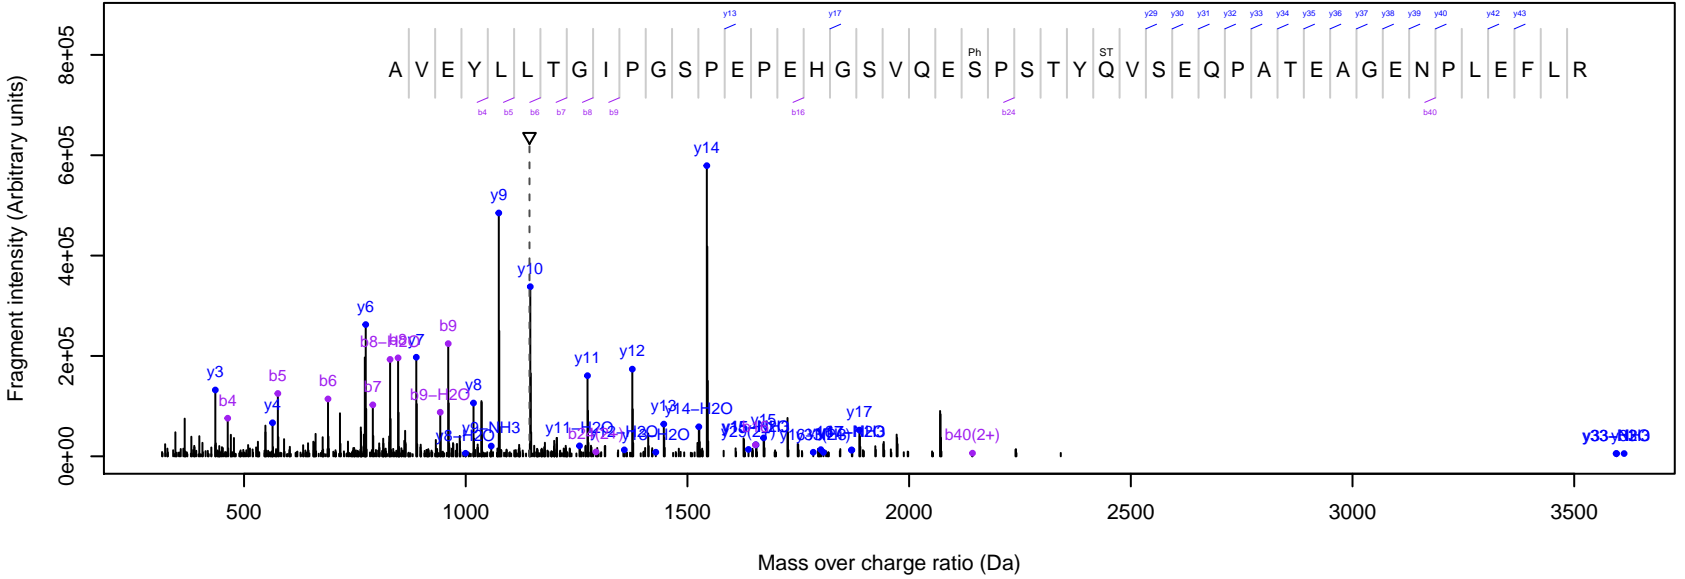

DRPGS(Phospho (STY))PESPLLDAPFSR-3+

Source : QE3\_201126\_FR\_TiOx\_hum\_tissue\_Urea\_RNAB\_H Scan : 39774

Andromeda score : 119.27

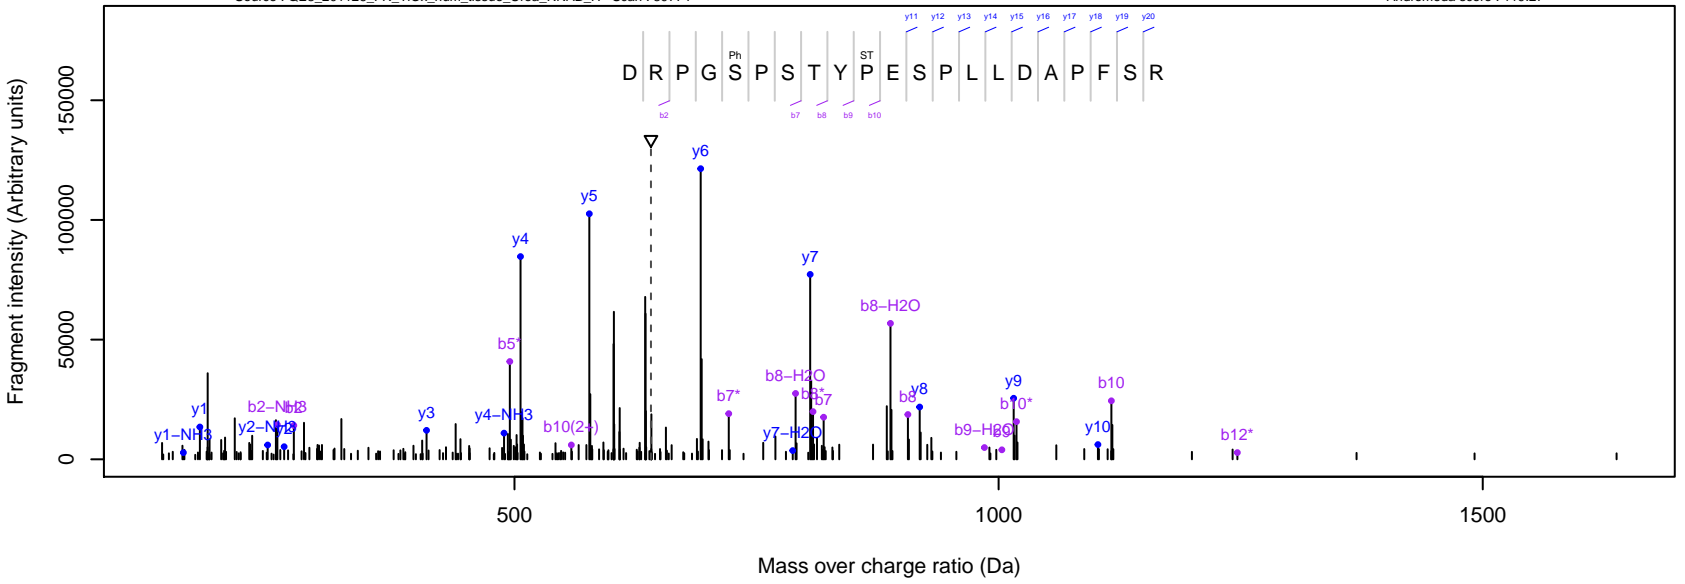

TIQEVLEEQS(Phospho (STY))EDEDREAK-3+

Source : QE3\_201126\_FR\_TiOx\_hum\_tissue\_Urea\_RNAB\_N Scan : 23473

Andromeda score : 119.27

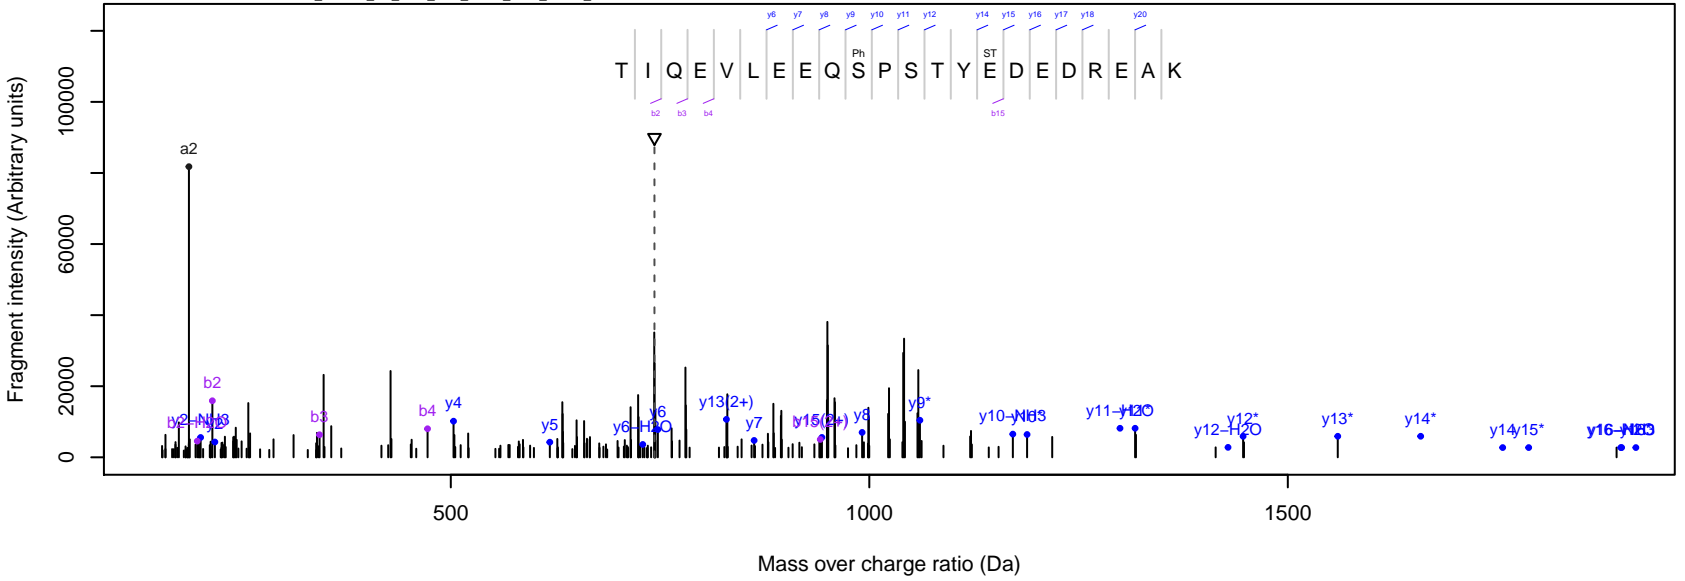

HSS(Phospho (STY))TGDSADAGPPAAGSAR-2+

Source : QE3\_201126\_FR\_TiOx\_hum\_tissue\_Urea\_RNAB\_H Scan : 6116

Andromeda score : 119.23

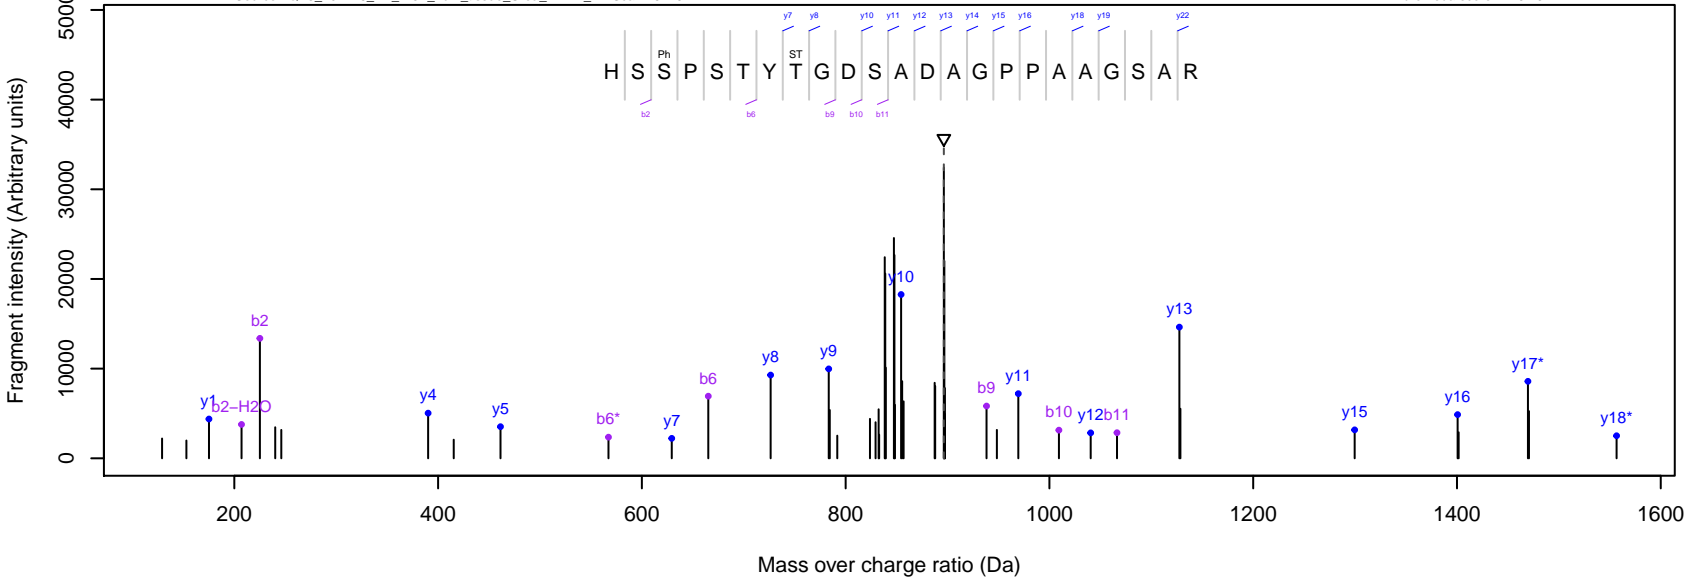

RKAEDS(Phospho (STY))DSEPEPEDNVR-3+

Source : QE3\_201126\_FR\_TiOx\_hum\_tissue\_Urea\_RNAB\_H Scan : 6549

Andromeda score : 119.18

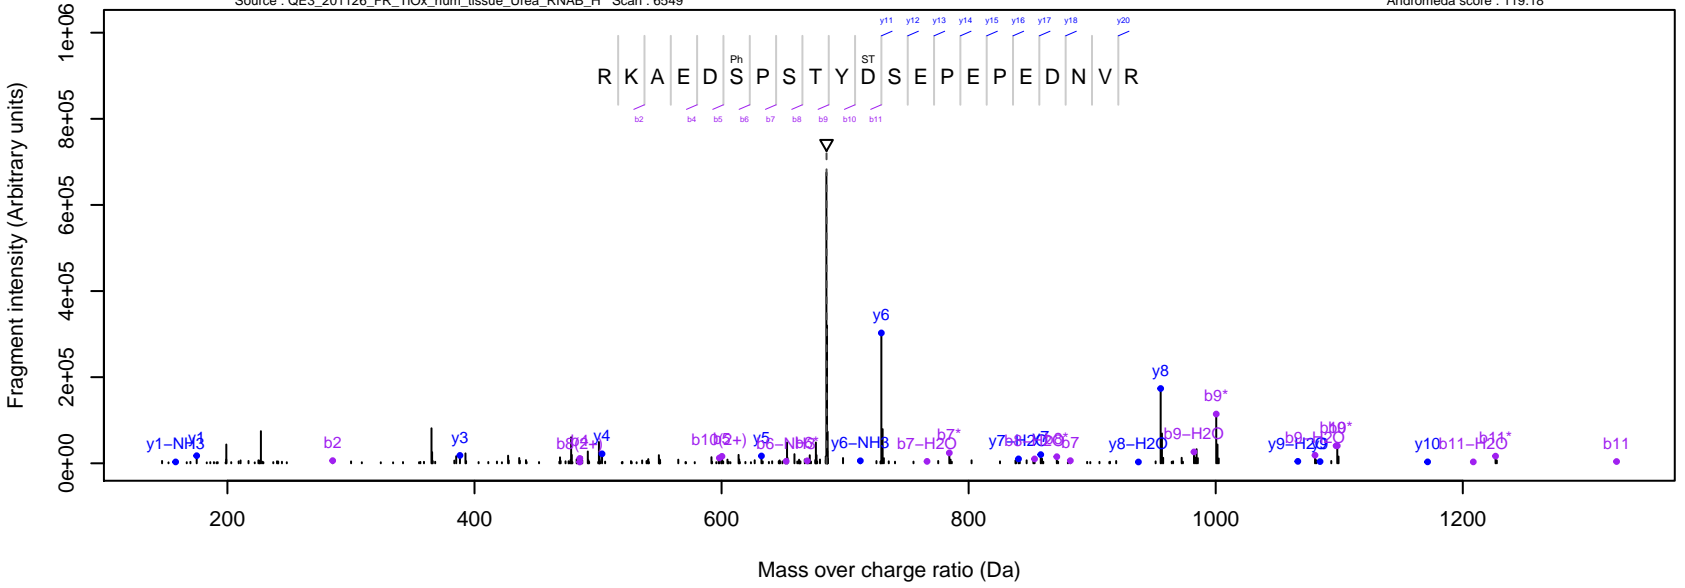

SHS(Phospho (STY))LAQPPEFDSGVETFSIHAEKPK-4+

Source : QE3\_201126\_FR\_TiOx\_hum\_tissue\_Urea\_RNAB\_H Scan : 30262

Andromeda score : 119.18

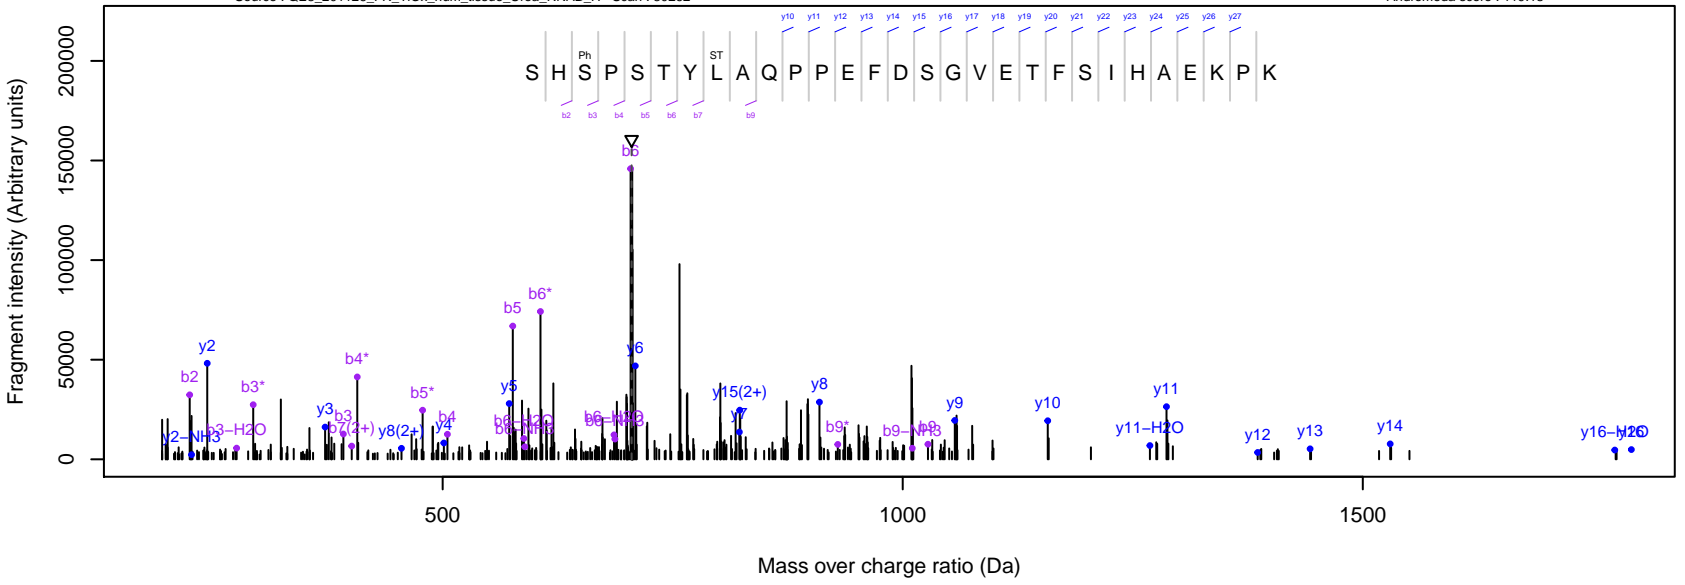

ETPAATEAPS(Phospho (STY))STPK-2+

Source : QE3\_201126\_FR\_TiOx\_hum\_tissue\_Urea\_RNAB\_N Scan : 9181

Andromeda score : 119.16

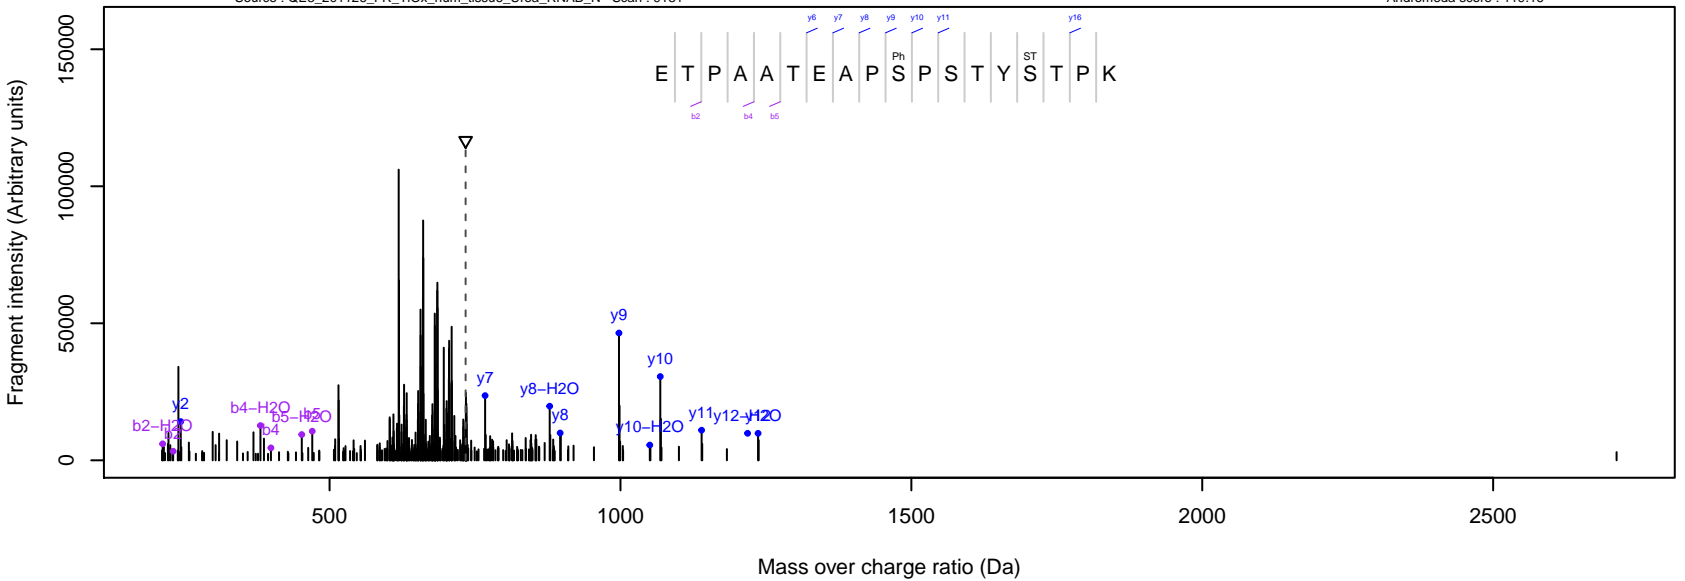



ERHPS(Phospho (STY))WR-2+

Source : QE3\_201126\_FR\_TIOx\_hum\_tissue\_Urea\_RNAB\_H Scan : 5357

Andromeda score : 119.07

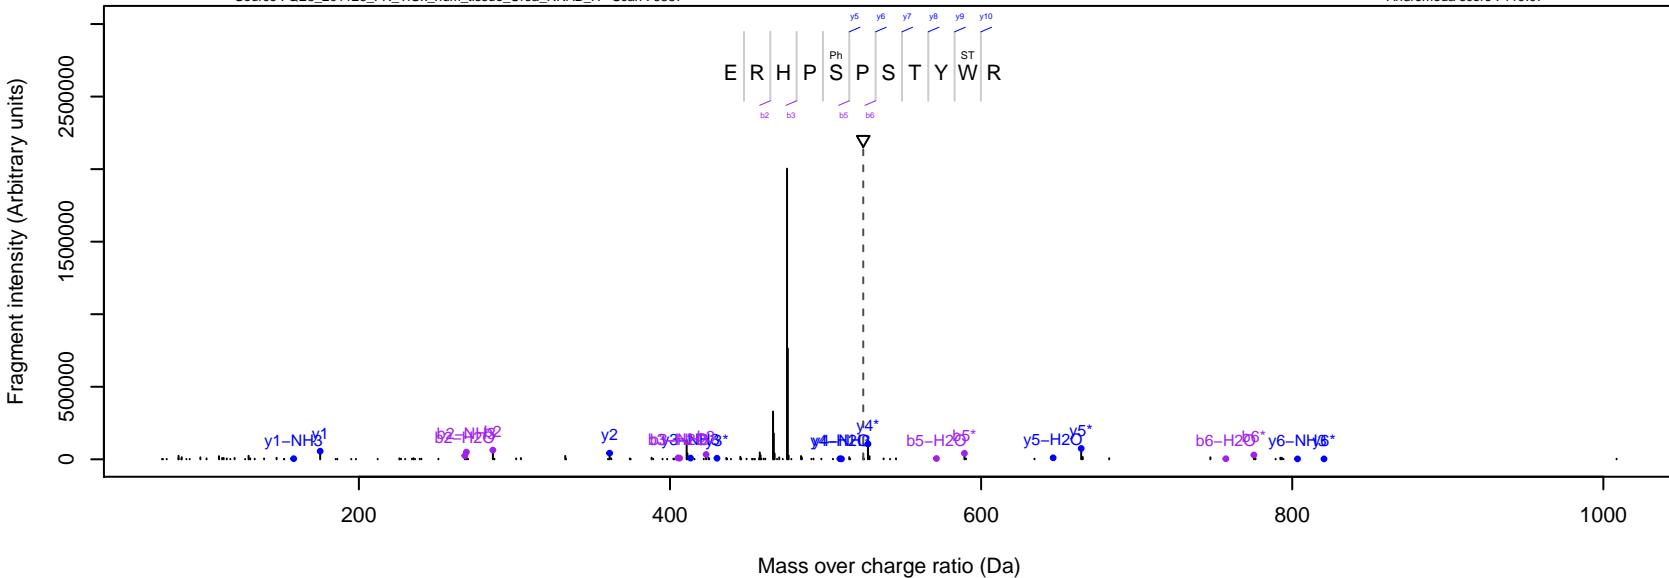

RAS(Phospho (STY))MQPIQIAEGTITR-3+

Source : QE3\_201126\_FR\_TIOx\_hum\_tissue\_Urea\_RNAB\_H Scan : 31657

Andromeda score : 119.02

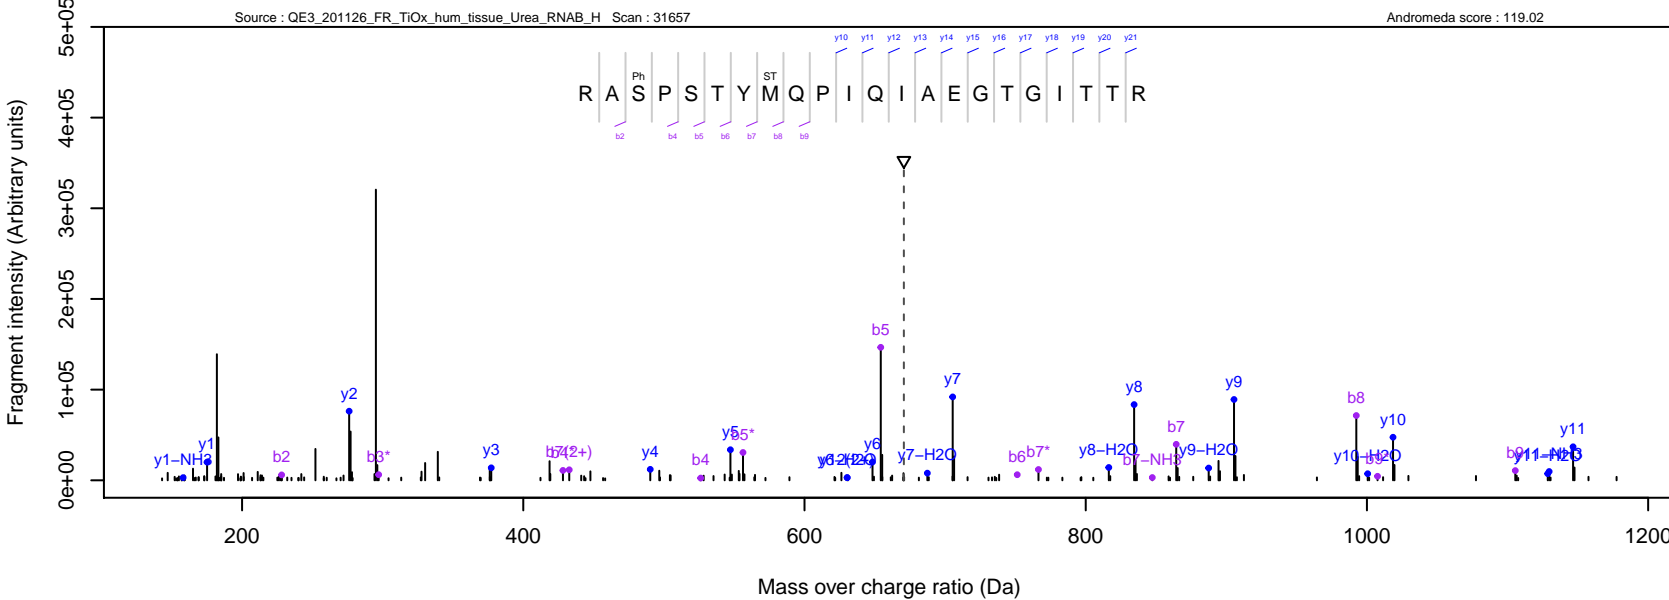

SQS(Phospho (STY))LPNS(Phospho (STY))LDYTQTSDPGR-2+

Source : QE3\_201126\_FR\_TIOx\_hum\_tissue\_Urea\_RNAB\_N Scan : 33303

Andromeda score : 118.96

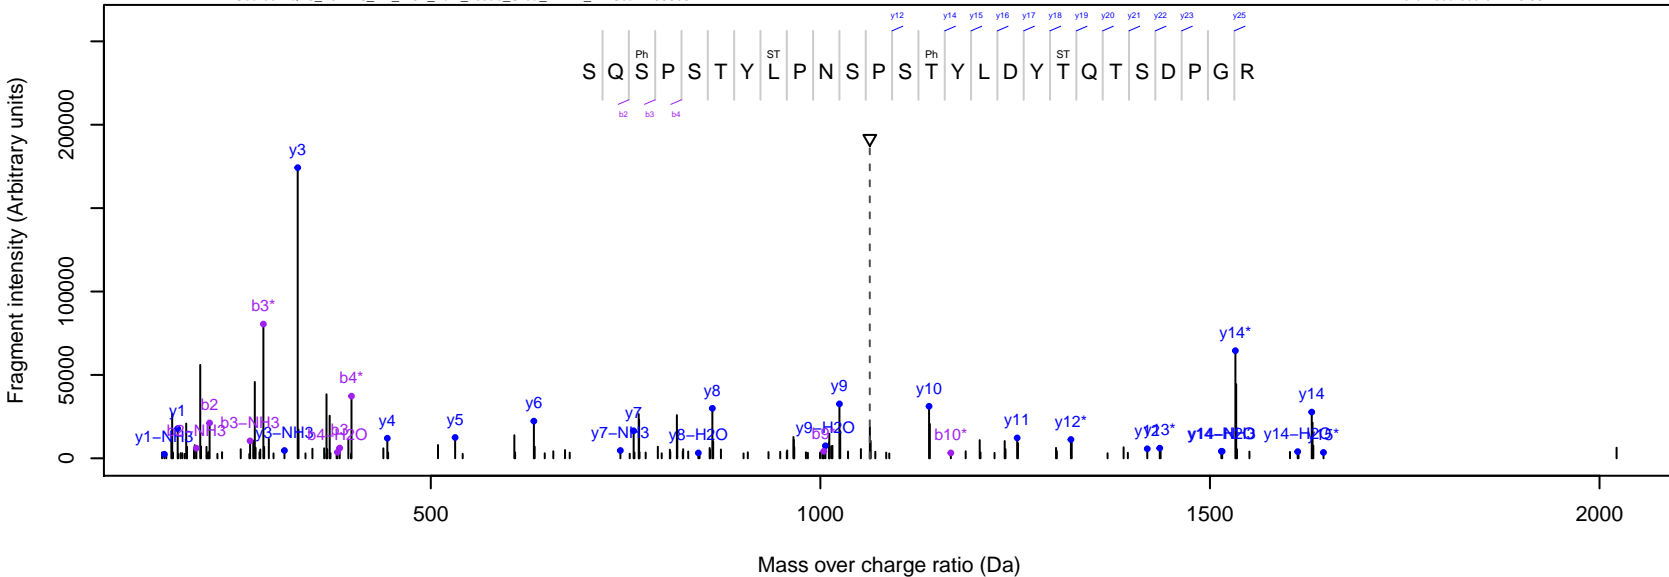

LDVKS(Phospho (STY))IDDEDVDENEDDVGNSSGR-3+

Source : QE3\_201126\_FR\_TiOx\_hum\_tissue\_Urea\_RNAB\_N Scan : 31181

Andromeda score : 118.93

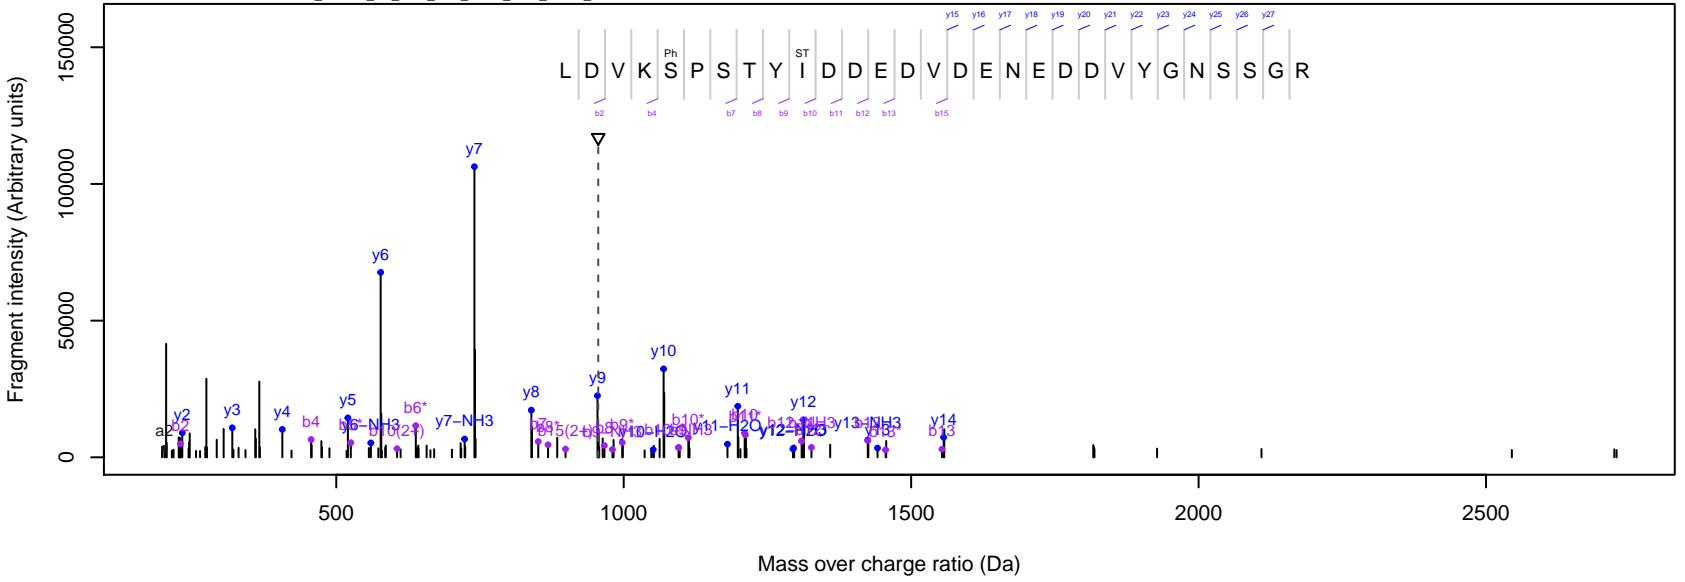

YGLLANTDPTEMAS(Phospho (STY))LDS(Phospho (STY))DEETVFESR-3+

Source : QE3\_201126\_FR\_TiOx\_hum\_tissue\_Urea\_RNAB\_H Scan : 62248

Andromeda score : 118.93

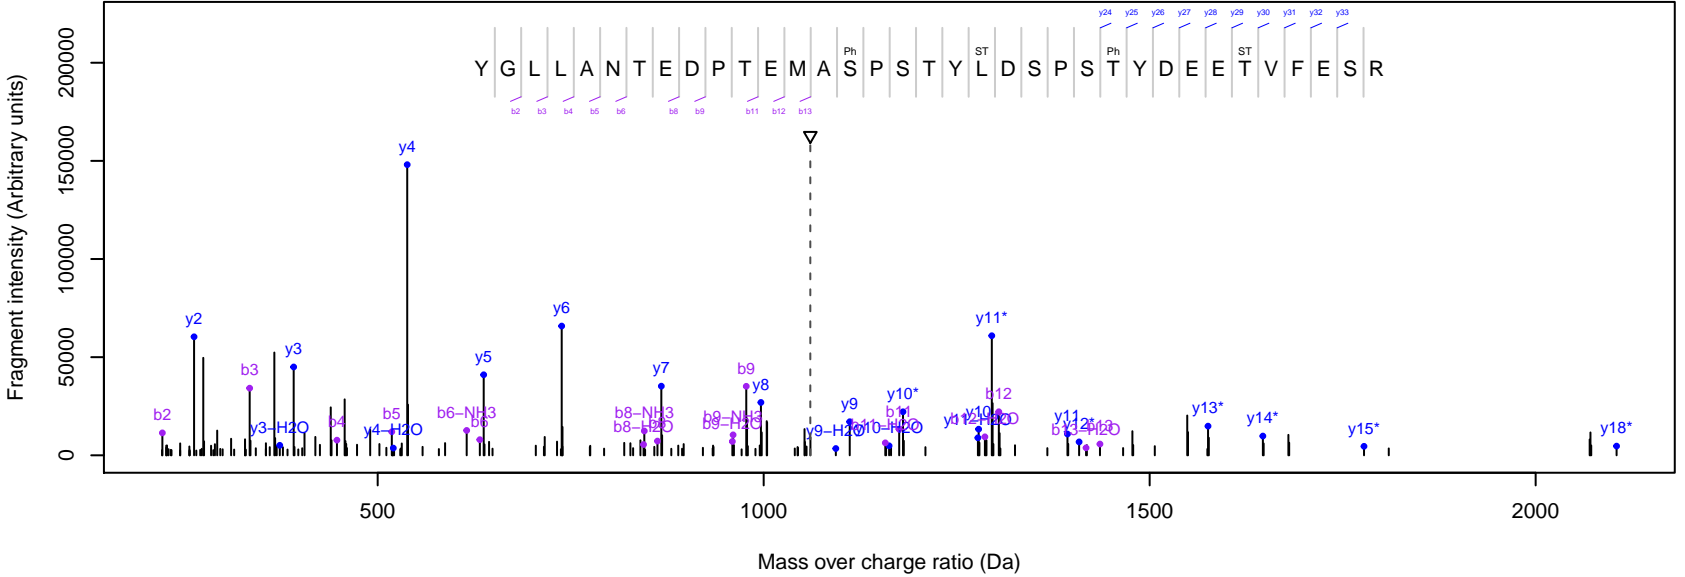

S(Phospho (STY))VS(Phospho (STY))PCSNVESR-2+

Source : QE3\_201126\_FR\_TiOx\_hum\_tissue\_Urea\_RNAB\_H Scan : 15077

Andromeda score : 118.88

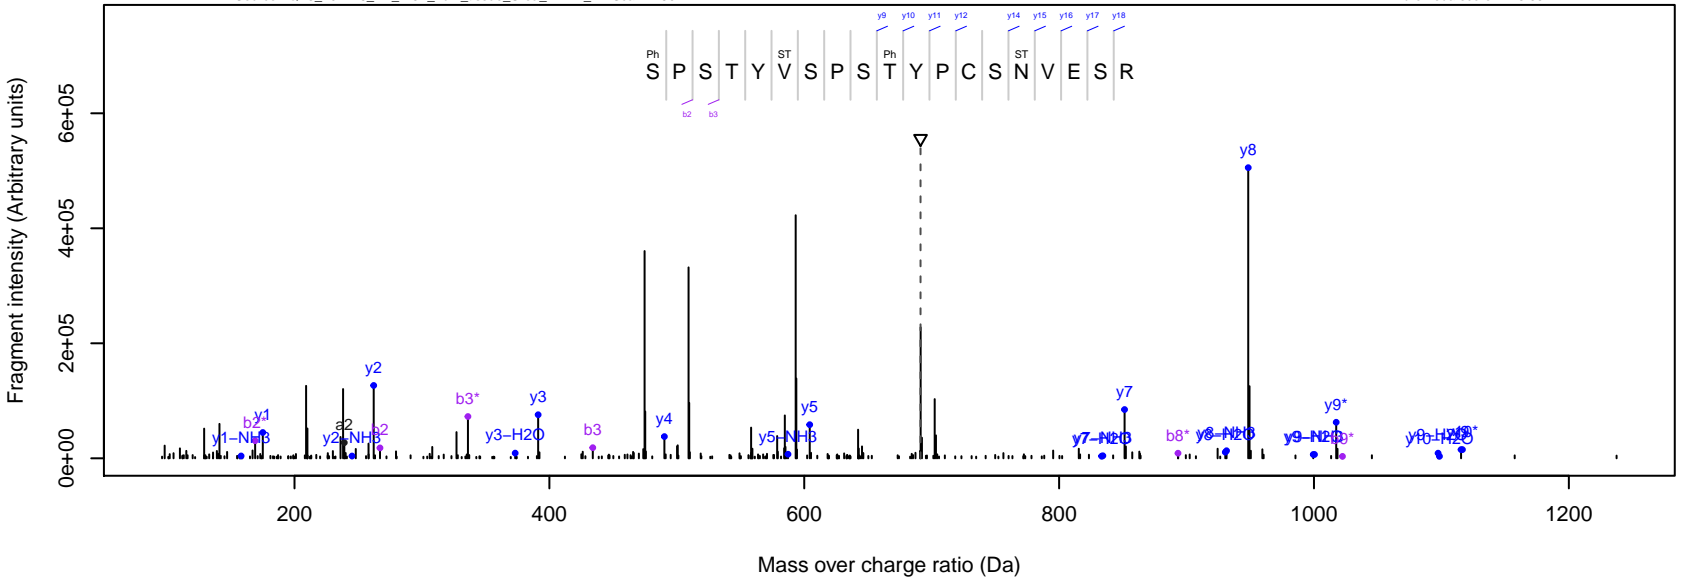

FSEM(Oxidation (M))MNNM(Oxidation (M))GGDEEDVLDPEVDGADDD(Phospho (STY))QDS(Phospho (STY))DDEKM(Oxidation (M))PDLE-4+

Source : QE3\_201126\_FR\_TIOx\_hum\_tissue\_Urea\_RNAB\_H Scan : 53315

Andromeda score : 118.83

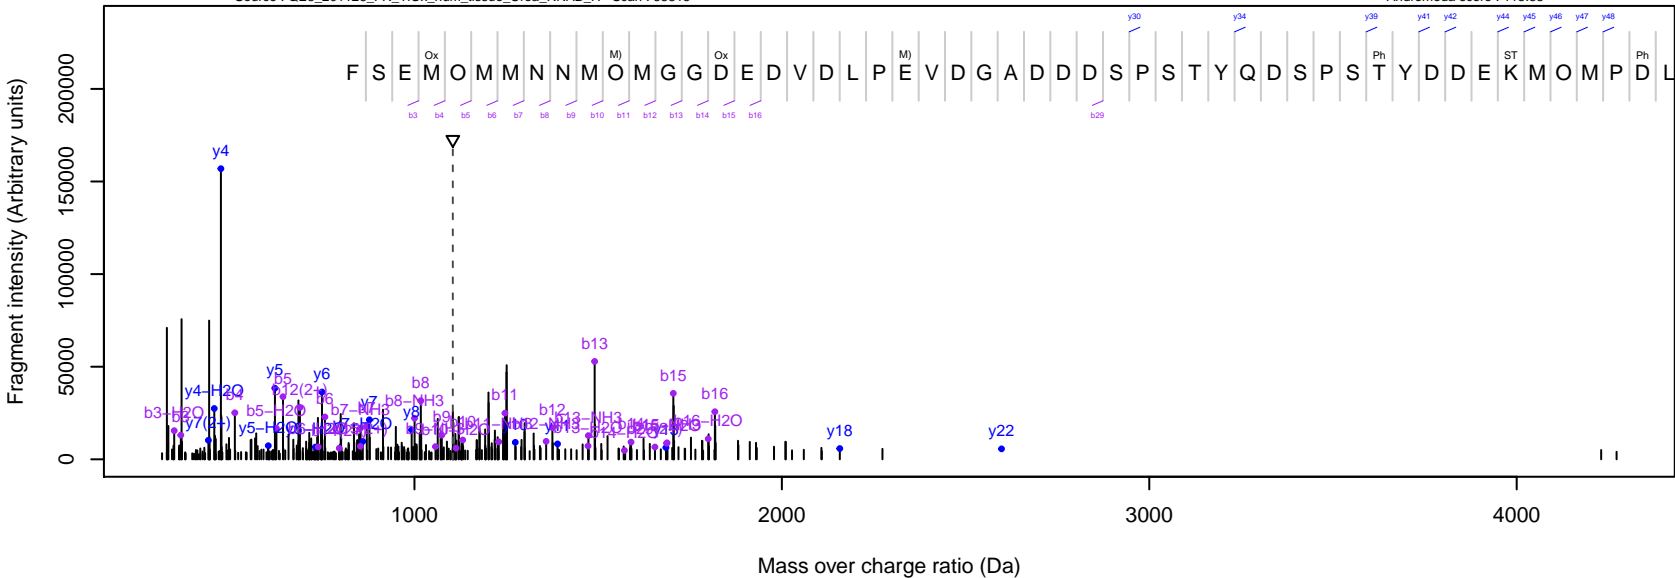

SDS(Phospho (STY))VELSQYR-2+

Source : QE3\_201126\_FR\_TIOx\_hum\_tissue\_Urea\_RNAB\_H Scan : 30107

Andromeda score : 118.77

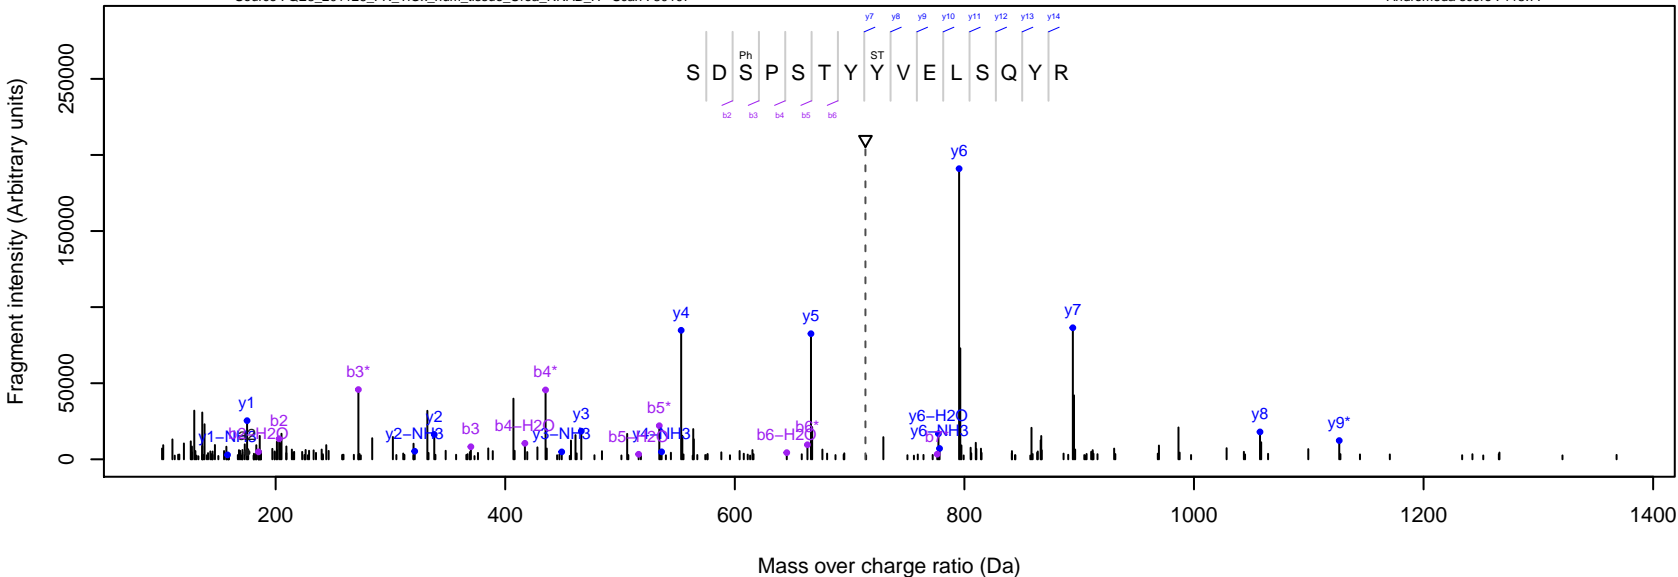

ADRDQS(Phospho (STY))PFSK-2+

Source : QE3\_201126\_FR\_TIOx\_hum\_tissue\_Urea\_RNAB\_H Scan : 6573

Andromeda score : 118.76

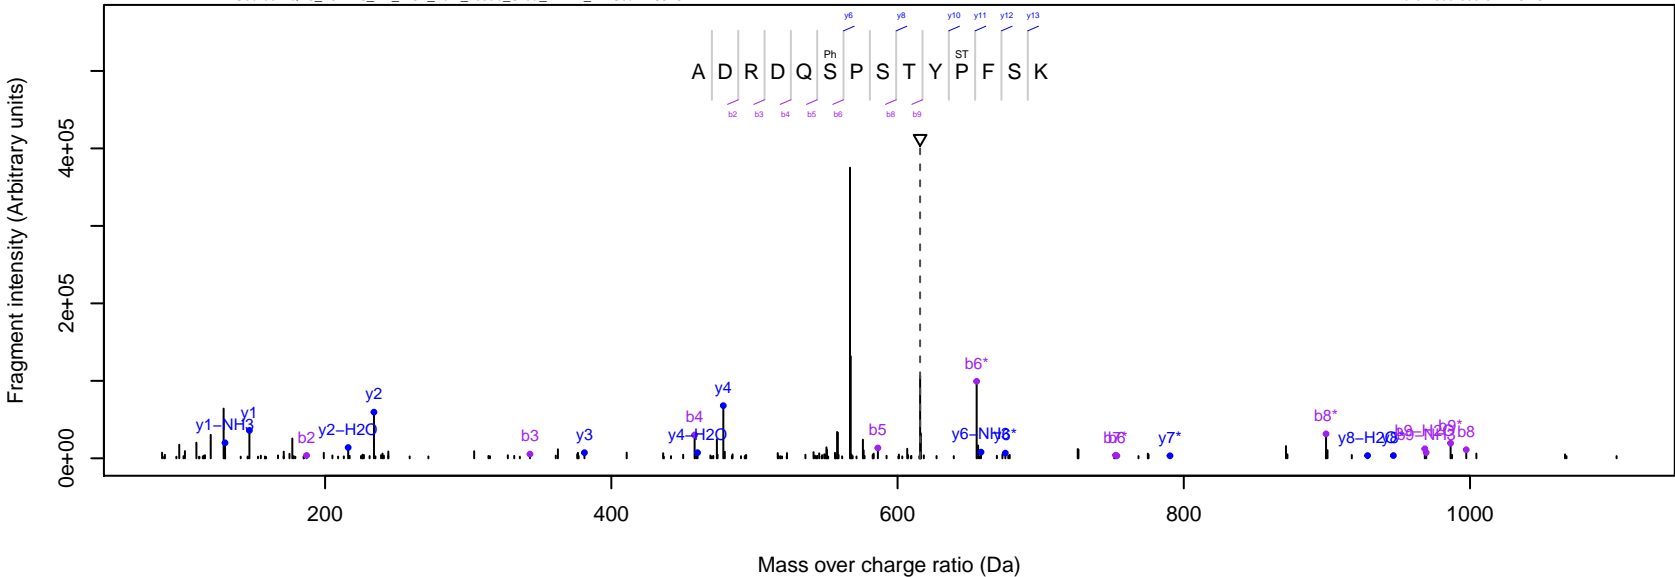

AGGPATPLS(Phospho (STY))PTR-2+

Source : QE3\_201126\_FR\_TiOx\_hum\_tissue\_Urea\_RNAB\_N Scan : 15445

Andromeda score : 118.76

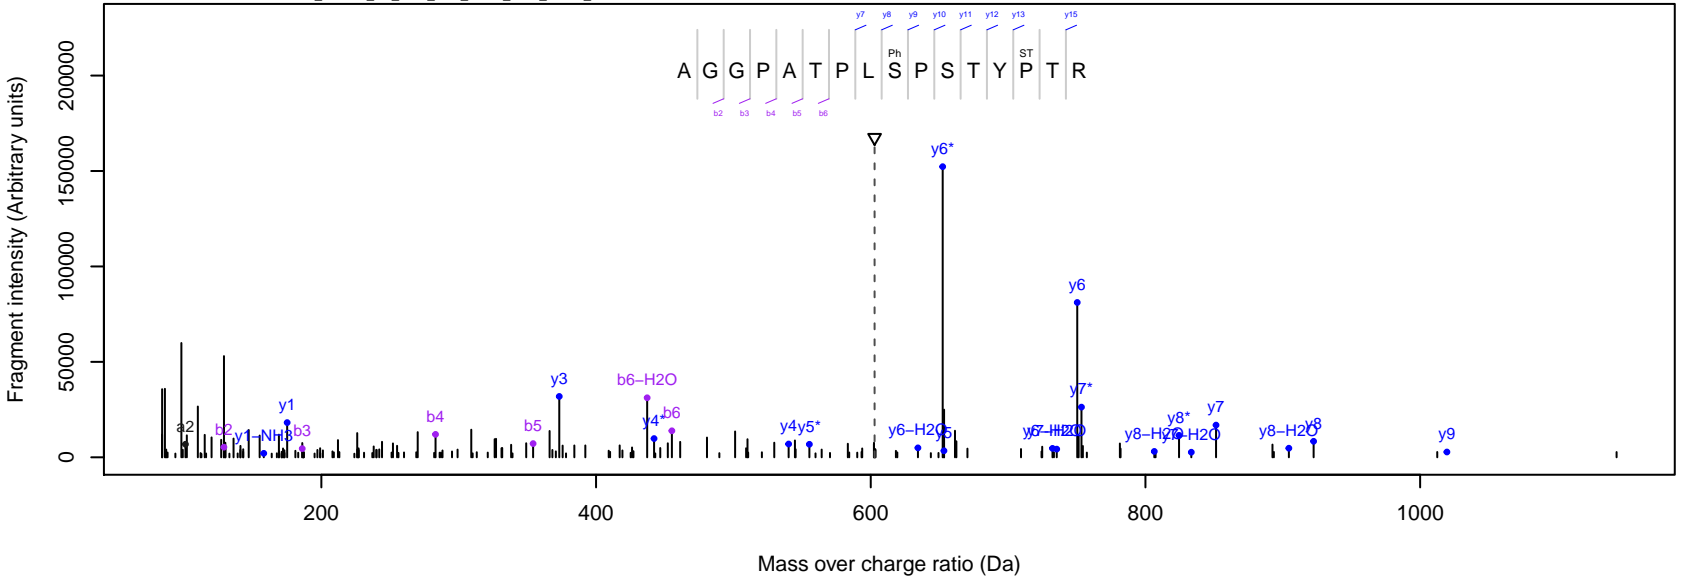

TPT(Phospho (STY))PEPAEVETR-2+

Source : QE3\_201126\_FR\_TiOx\_hum\_tissue\_Urea\_RNAB\_N Scan : 15182

Andromeda score : 118.76

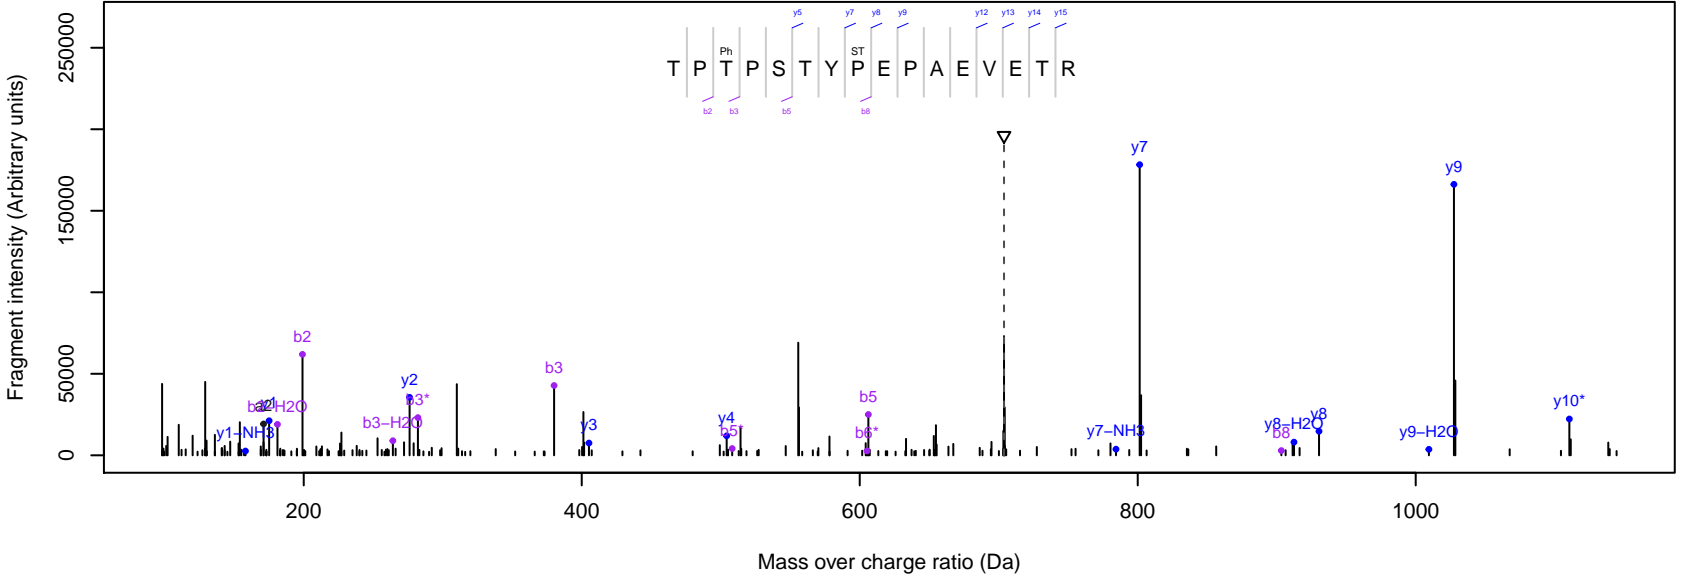

T(Phospho (STY))SPKPAVVETVTTAKPQQIQALMDEVTK-4+

Source : QE3\_201126\_FR\_TiOx\_hum\_tissue\_Urea\_RNAB\_H Scan : 47876

Andromeda score : 118.75

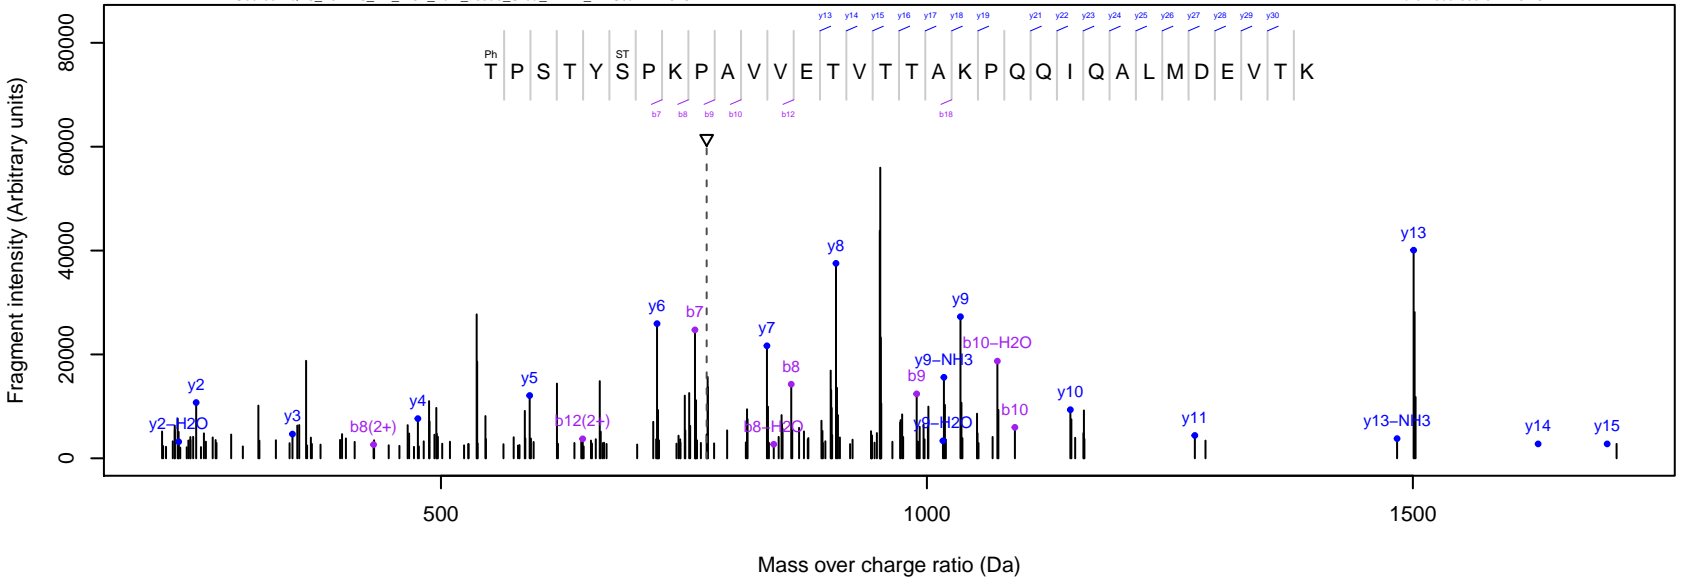

GTLS(Phospho (STY))DSEIETNSATSTIFGK-2+

Source : QE3\_201126\_FR\_TiOx\_hum\_tissue\_Urea\_RNAB\_H Scan : 45546

Andromeda score : 118.72

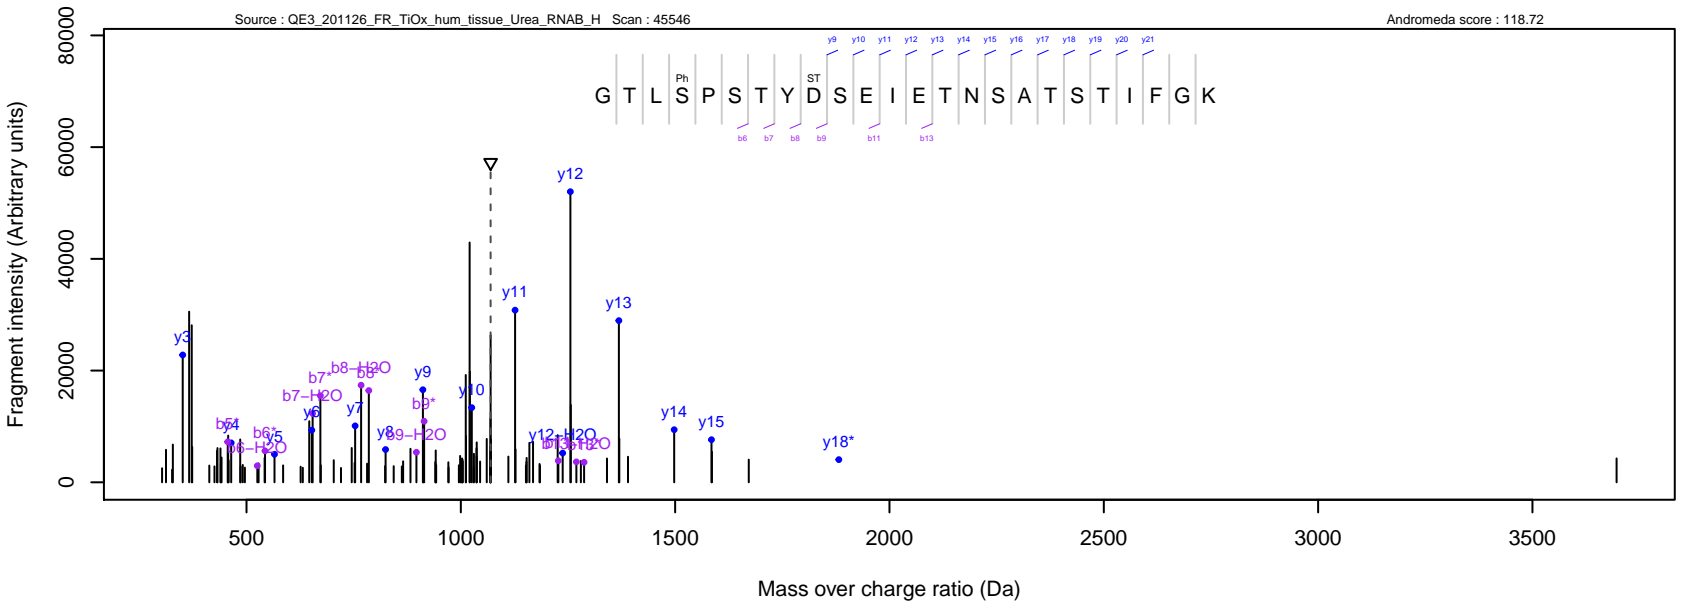

ENKDRLS(Phospho (STY))DSTTGADSLDISSEADQQDLLSLQAK-3+

Source : QE3\_201126\_FR\_TiOx\_hum\_tissue\_Urea\_RNAB\_H Scan : 58727

Andromeda score : 118.69

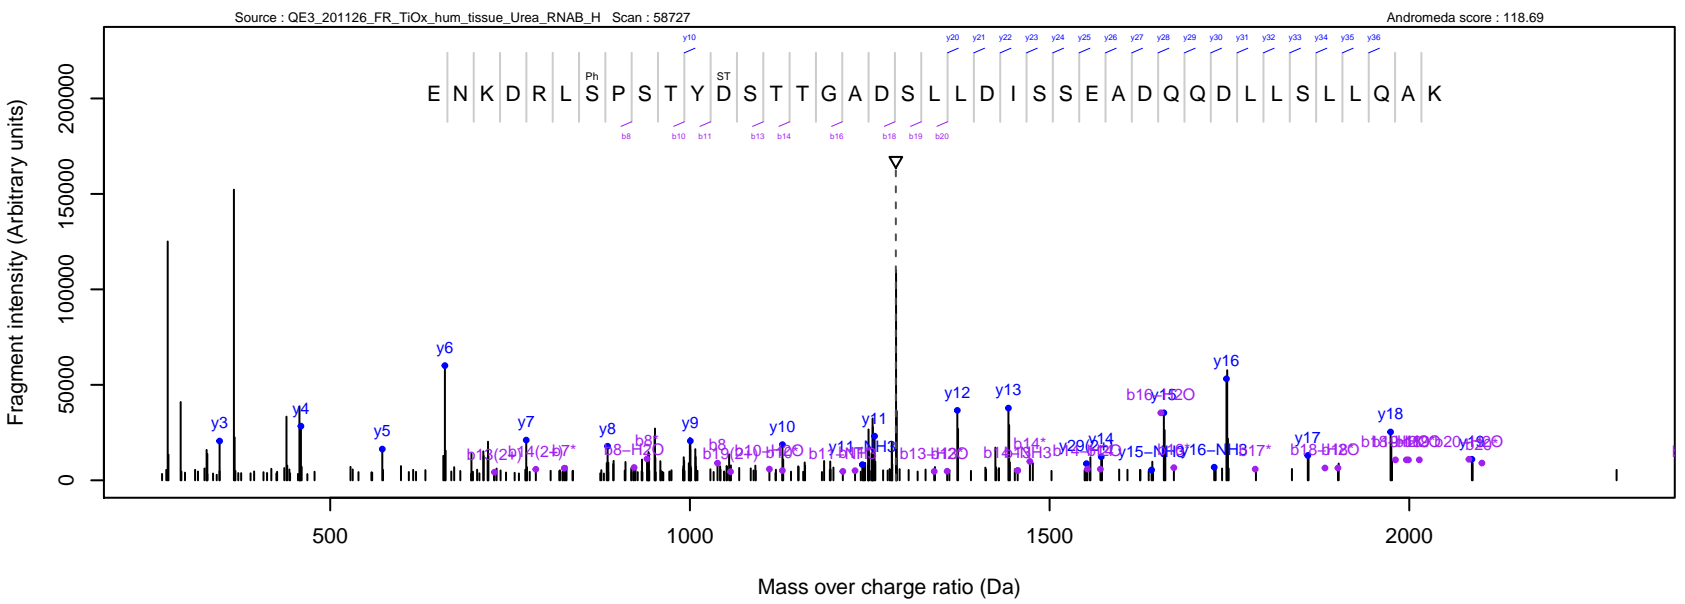

KSLPAPVAQRPS(Phospho (STY))PGGLQAPGQK-3+

Source : QE3\_201126\_FR\_TiOx\_hum\_tissue\_Urea\_RNAB\_B Scan : 16892

Andromeda score : 118.68

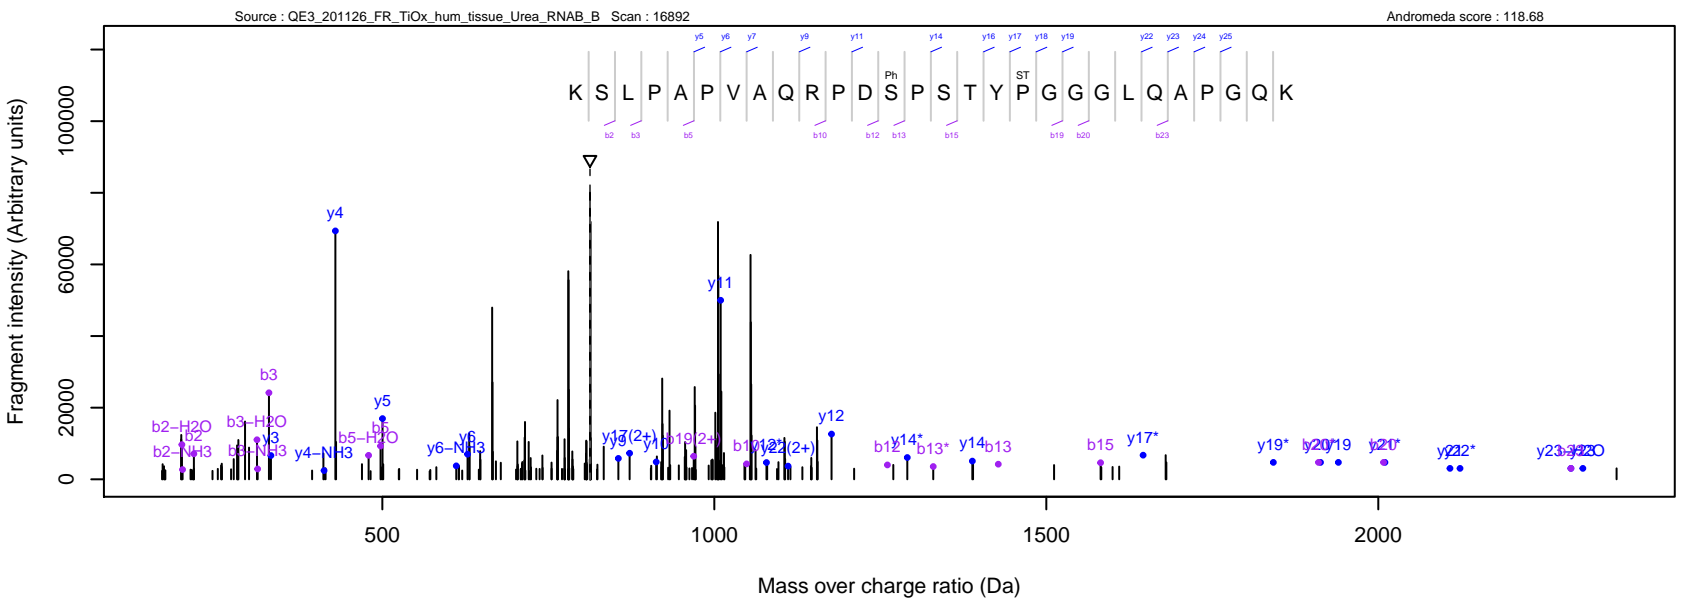

SIS(Phospho (STY))SPSVSSETMDKPVLDLSTR-3+

Source : QE3\_201126\_FR\_TiOx\_hum\_tissue\_Urea\_RNAB\_B Scan : 28003

Andromeda score : 118.67

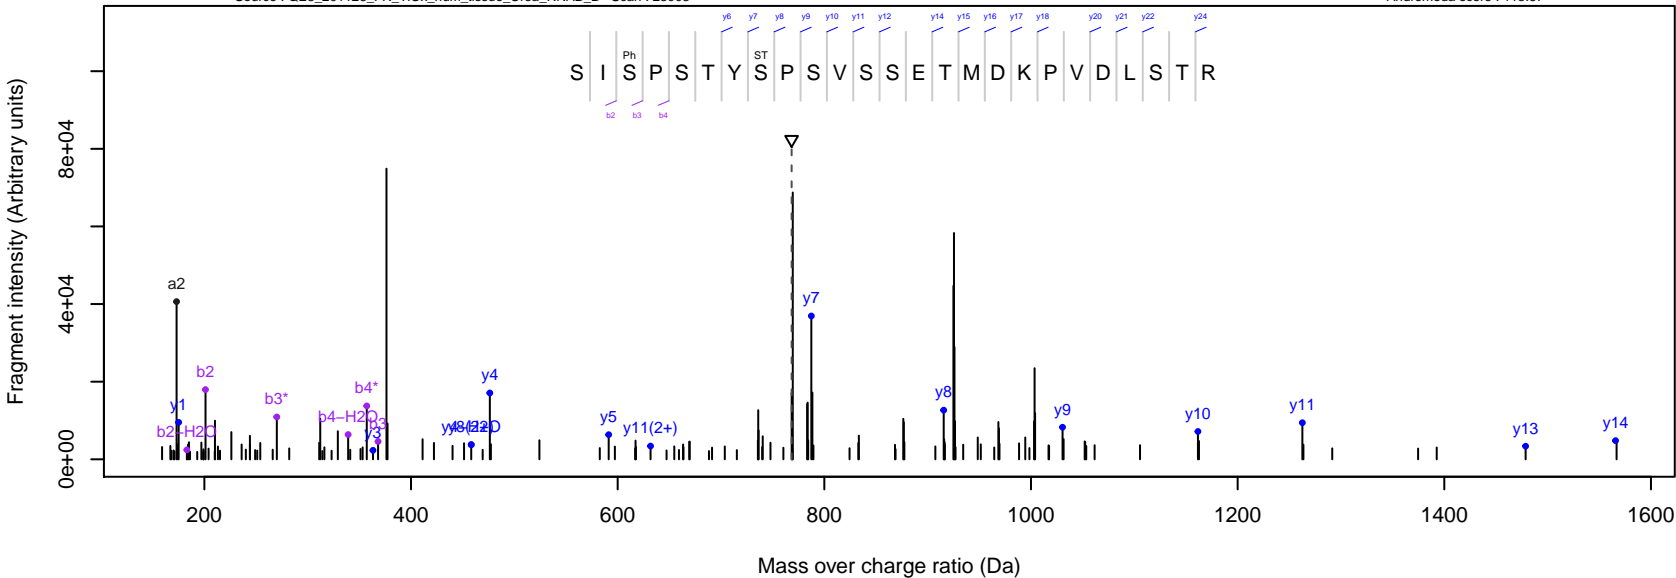

HSTPSNSSNPS(Phospho (STY))GPPS(Phospho (STY))PNSPHR-3+

Source : QE3\_201126\_FR\_TiOx\_hum\_tissue\_Urea\_RNAB\_N Scan : 6049

Andromeda score : 118.63

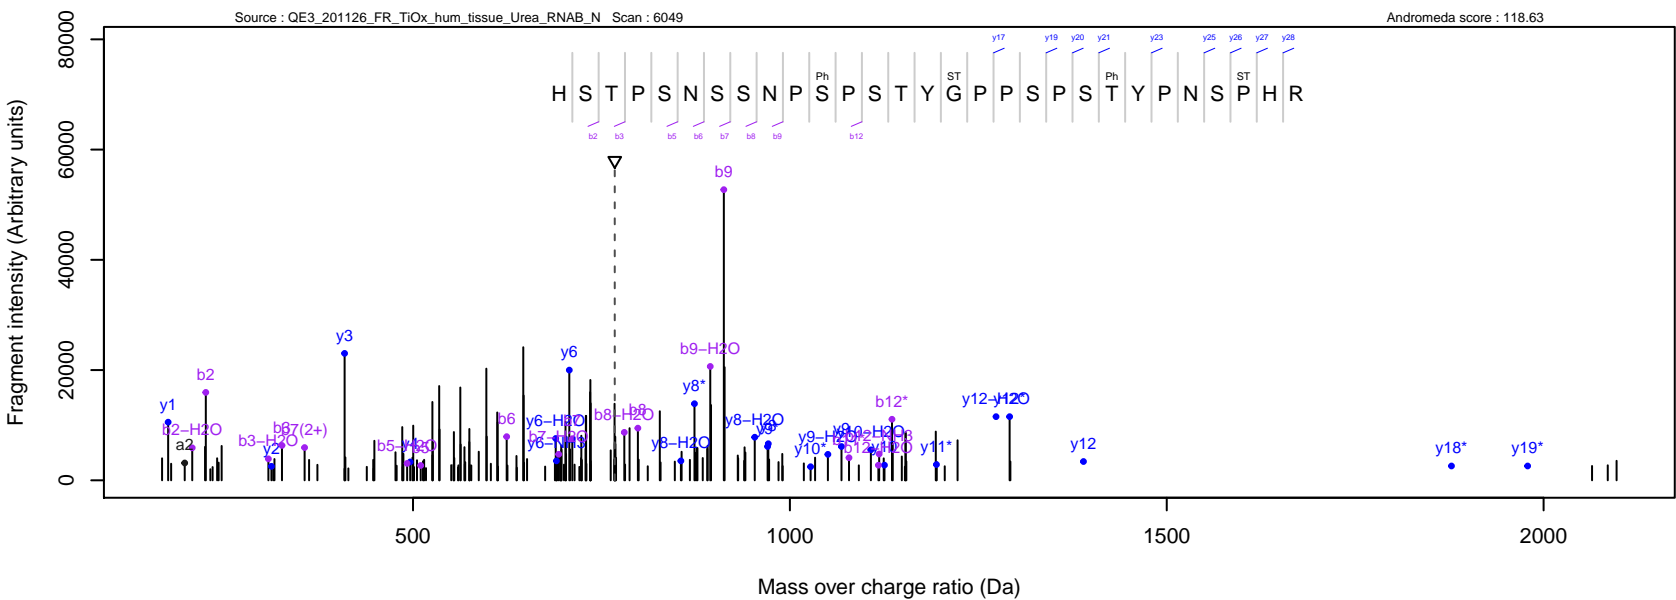

TCS(Phospho (STY))FGFDLTNR-2+

Source : QE3\_201126\_FR\_TiOx\_hum\_tissue\_Urea\_RNAB\_H Scan : 41005

Andromeda score : 118.61

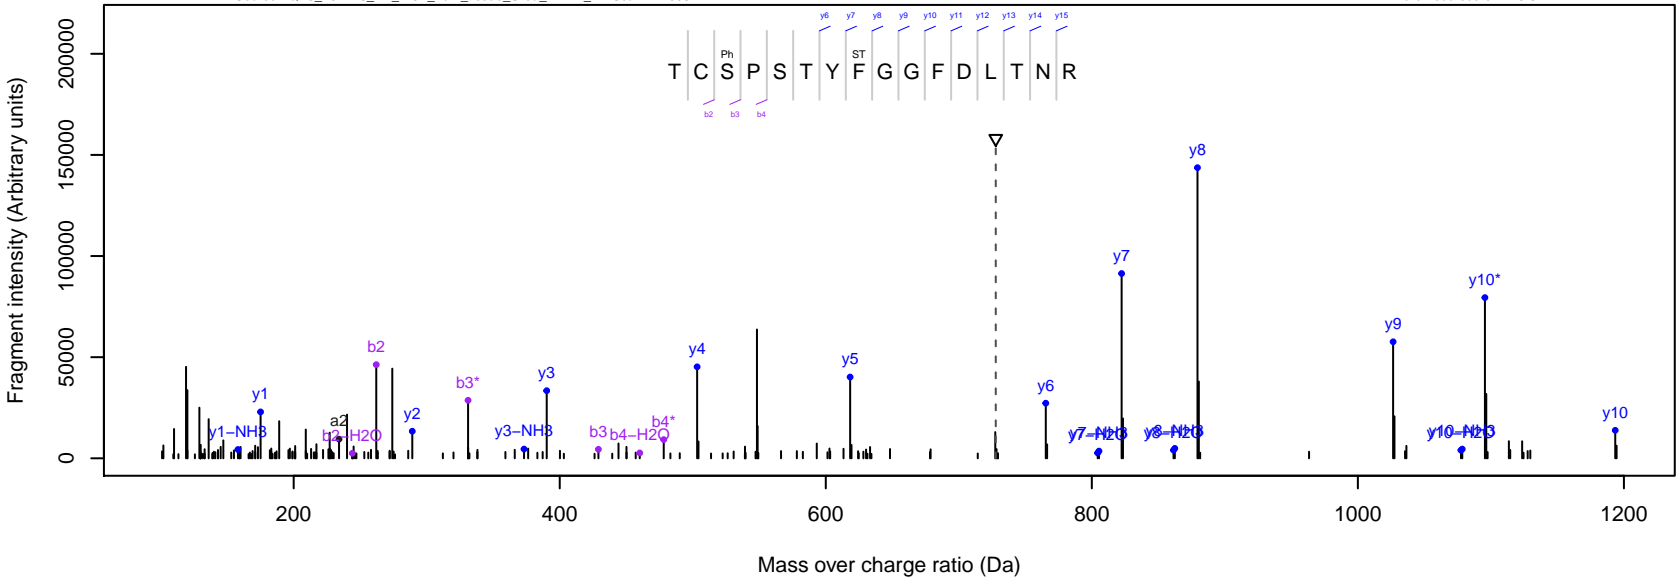

DSQS(Phospho (STY))PDSAWR-2+

Source : QE3\_201126\_FR\_TIOx\_hum\_tissue\_Urea\_RNAB\_N Scan : 18842

Andromeda score : 118.6

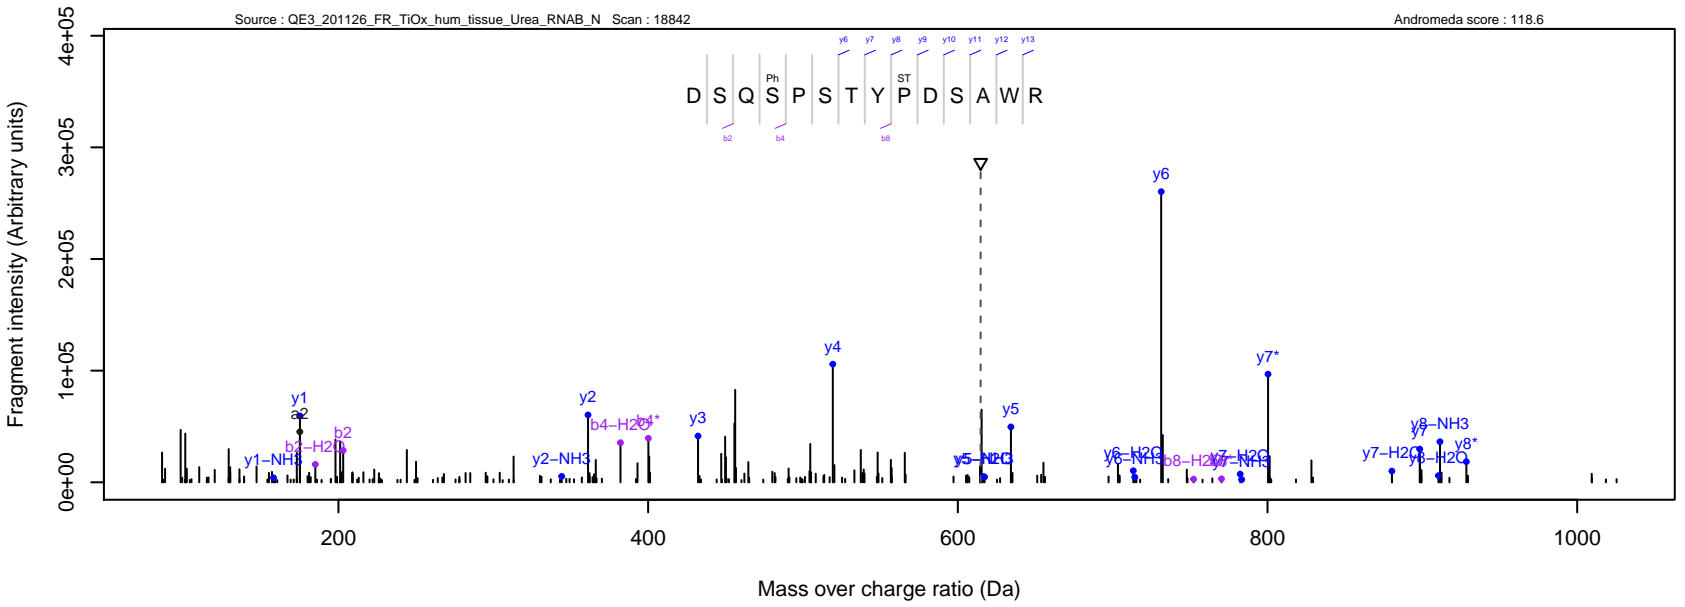

RAPQAFEHSDVDGVVTSTDPVPEPEPS(Phospho (STY))PLESK-3+

Source : QE3\_201126\_FR\_TIOx\_hum\_tissue\_Urea\_RNAB\_H Scan : 33298

Andromeda score : 118.58

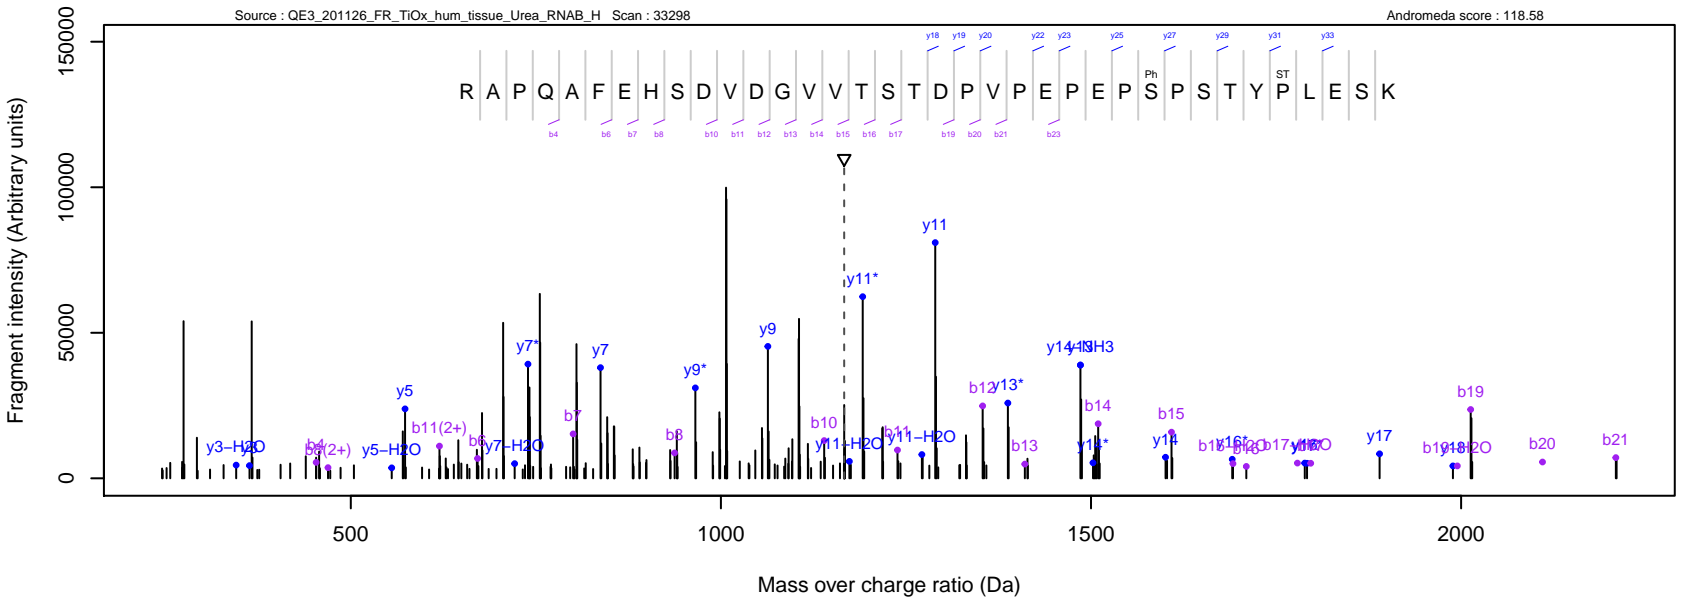

RRS(Phospho (STY))PPADAIPK-3+

Source : QE3\_201126\_FR\_TIOx\_hum\_tissue\_Urea\_RNAB\_B Scan : 6758

Andromeda score : 118.58

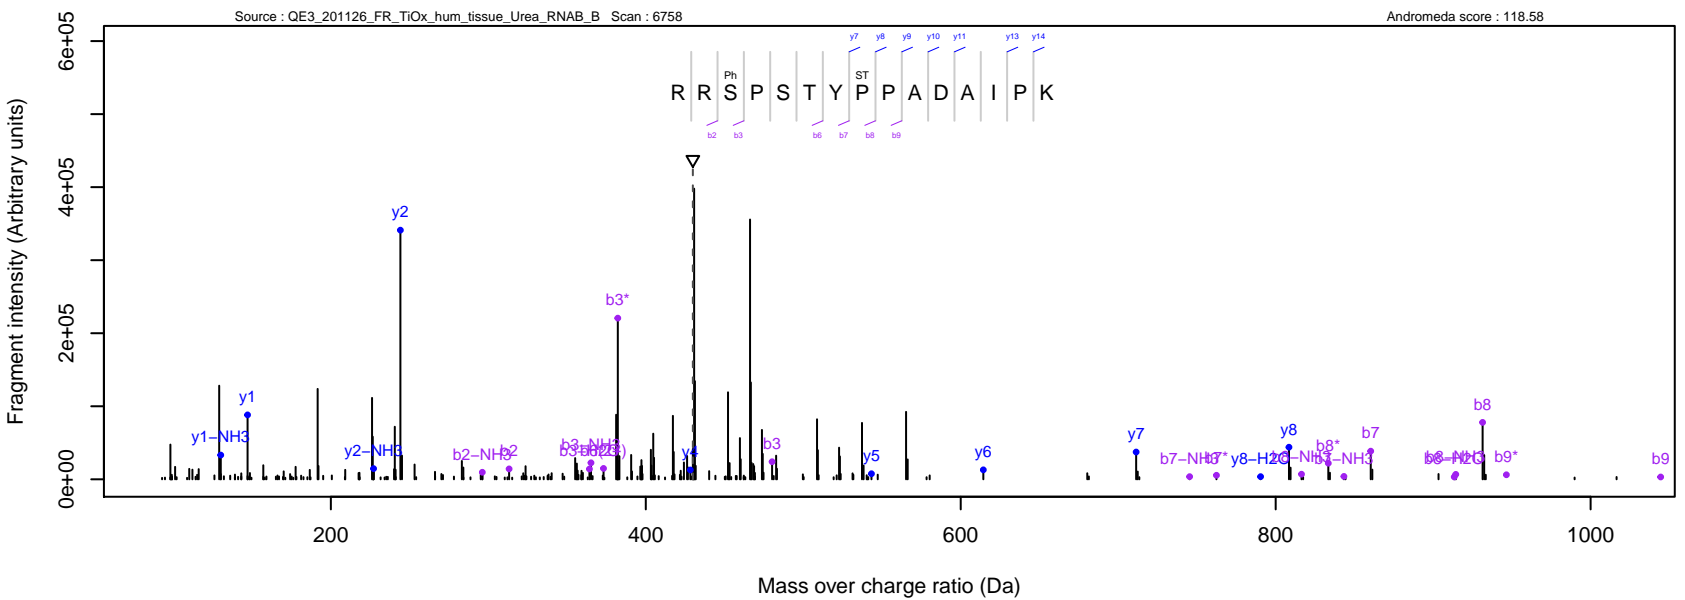

**EQDLPLAEAVRPKT(Phospho (STY))PPVVIK-4+**

Source : QE3\_201126\_FR\_TiOx\_hum\_tissue\_Urea\_RNAB\_H Scan : 34857

Andromeda score : 118.57

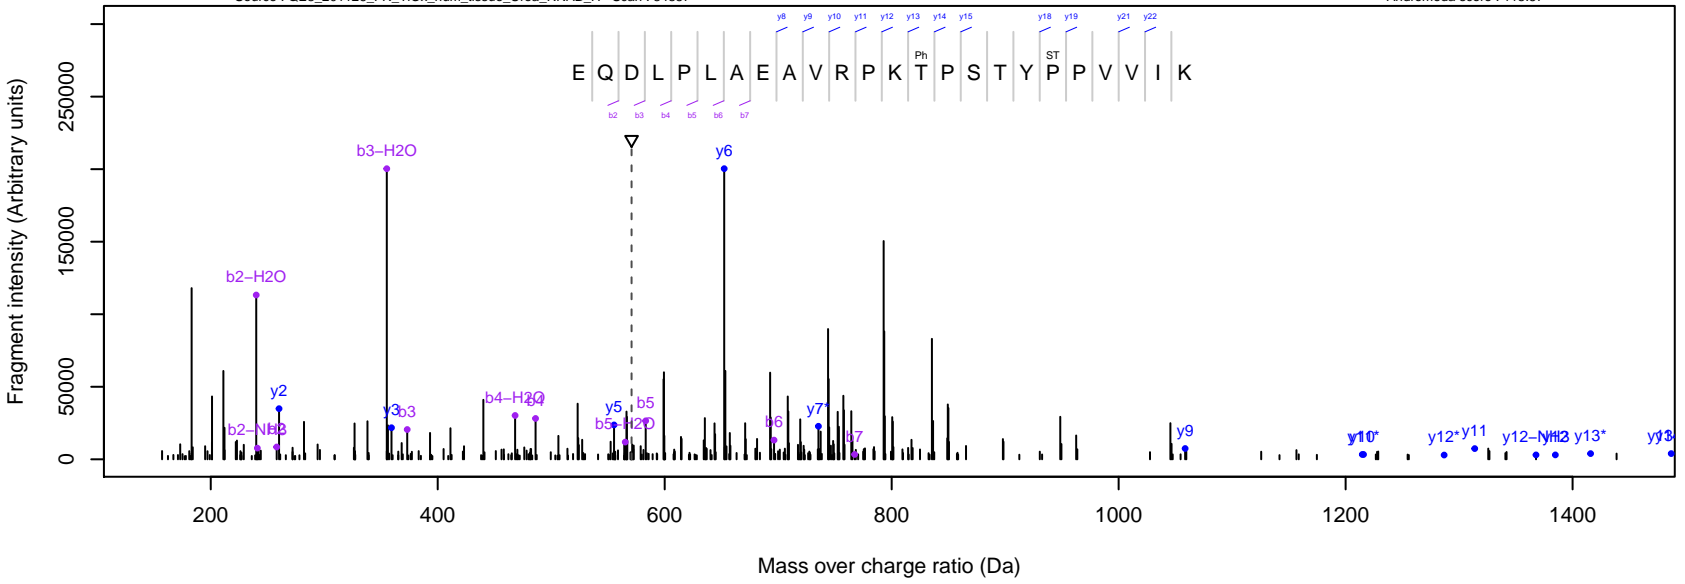

**HSQSPPEPHS(Phospho (STY))PTEPPAWGSSIVK-3+**

Source : QE3\_201126\_FR\_TiOx\_hum\_tissue\_Urea\_RNAB\_N Scan : 23208

Andromeda score : 118.55

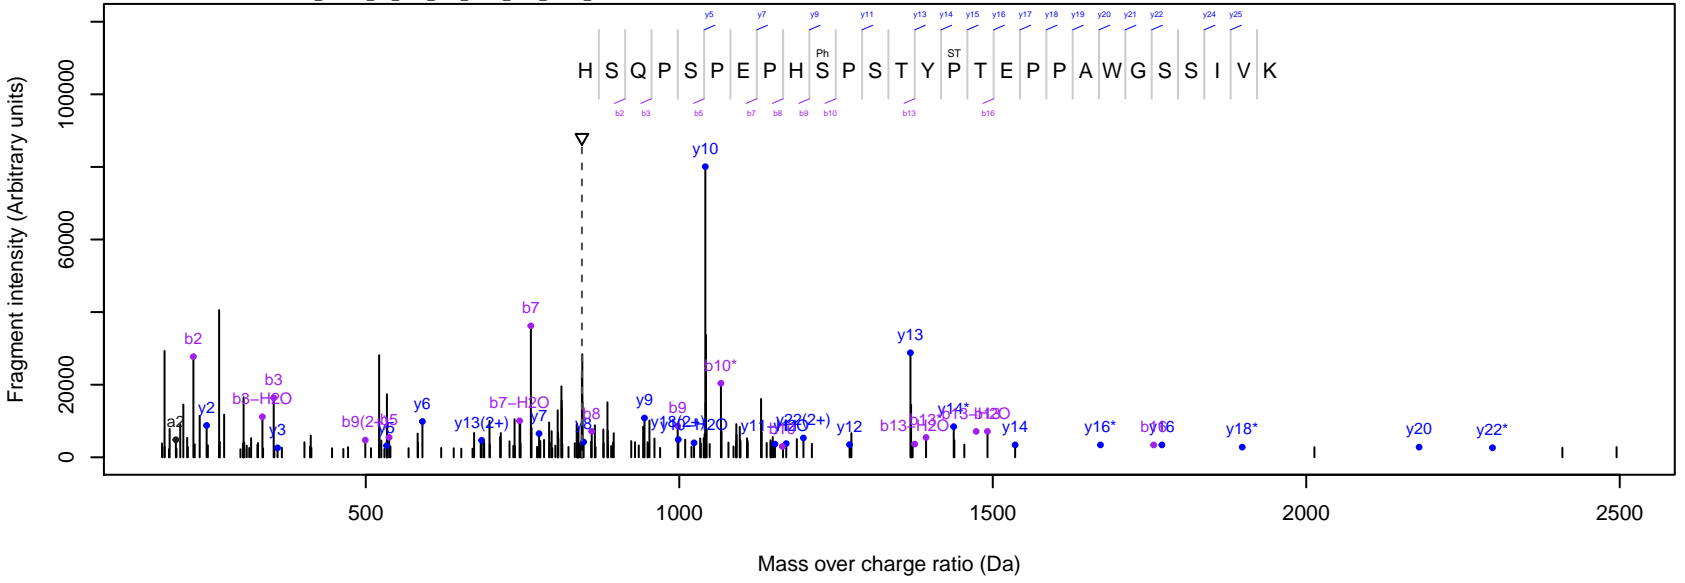

**AEDGHEEAMETEAS(Phospho (STY))TSGEVAEVAEEAMETESSEK-3+**

Source : QE3\_201126\_FR\_TiOx\_hum\_tissue\_Urea\_RNAB\_H Scan : 51944

Andromeda score : 118.53

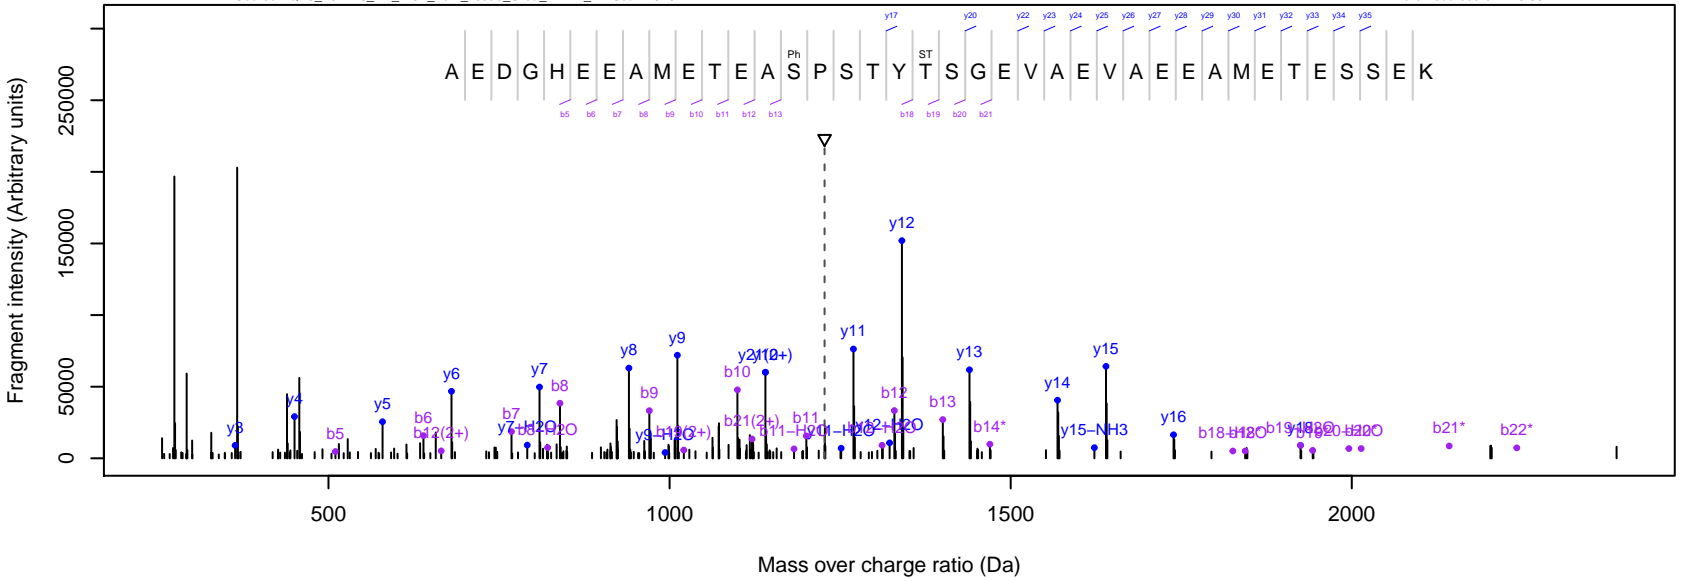



LTFDTTFS(Phospho (STY))PNTGKK-3+

Source : QE3\_201126\_FR\_TiOx\_hum\_tissue\_Urea\_RNAB\_H Scan : 27057

Andromeda score : 118.5

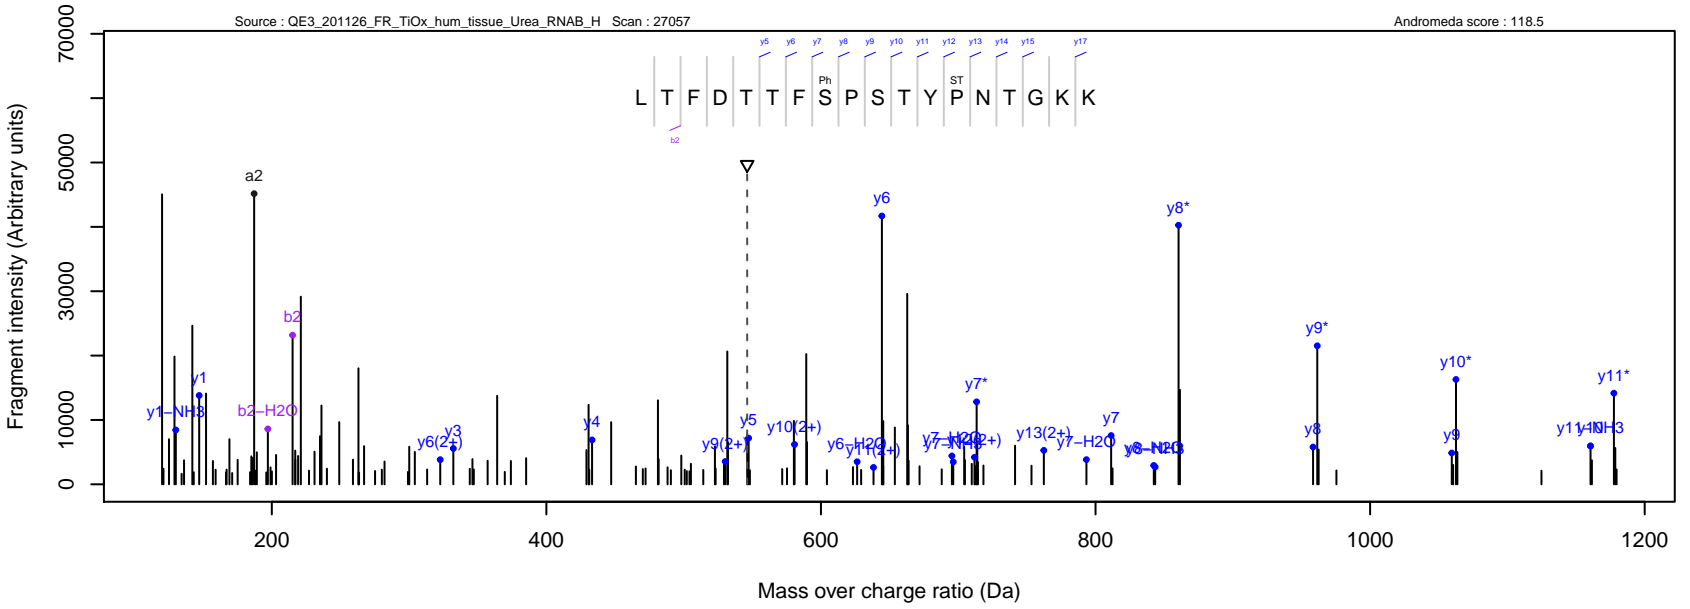

VKLDDDS(Phospho (STY))DDDEESKEGQESSSSAANTNPAVAPPVVVEEK-4+

Source : QE3\_201126\_FR\_TiOx\_hum\_tissue\_Urea\_RNAB\_N Scan : 27809

Andromeda score : 118.48

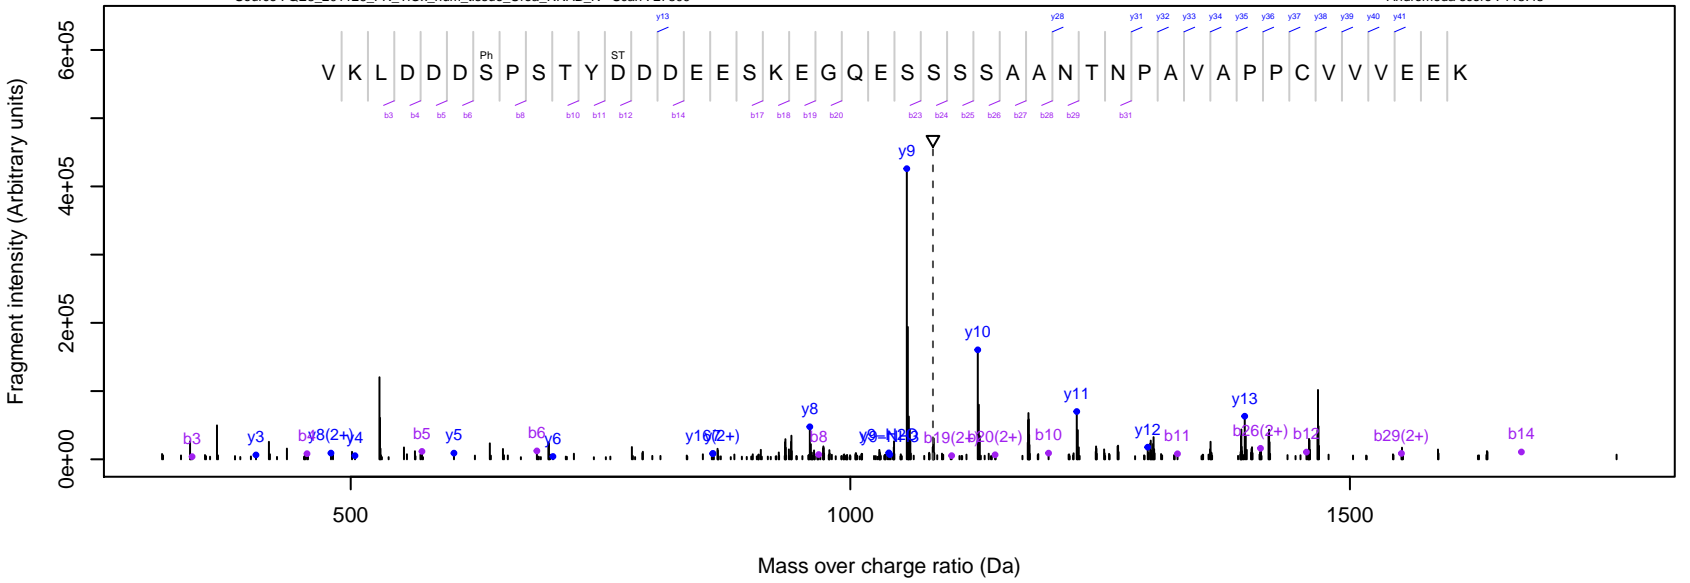

TKDSGS(Phospho (STY))ISLQETR-2+

Source : QE3\_201126\_FR\_TiOx\_hum\_tissue\_Urea\_RNAB\_H Scan : 10791

Andromeda score : 118.47

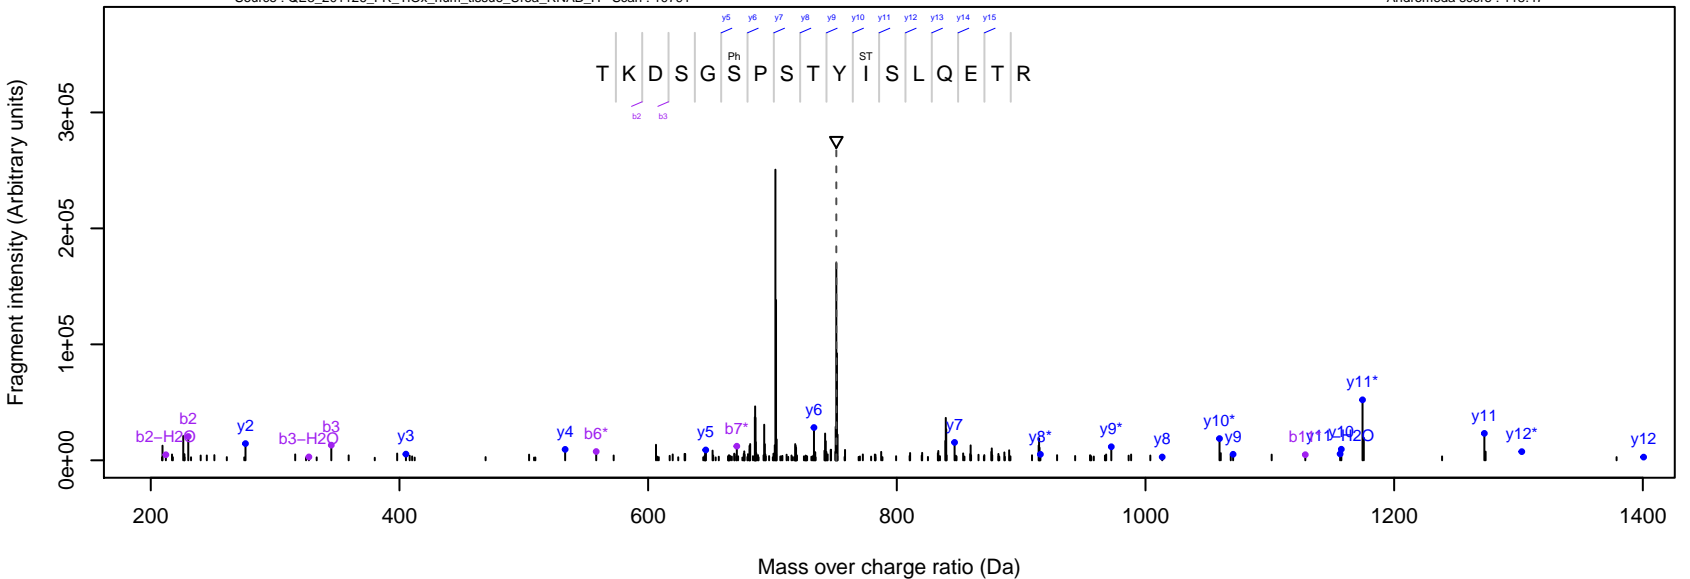

TVQS(Phospho (STY))LEILDLS(Phospho (STY))MR-2+

Source : QE3\_201126\_FR\_TiOx\_hum\_tissue\_Urea\_RNAB\_B Scan : 55633

Andromeda score : 118.47

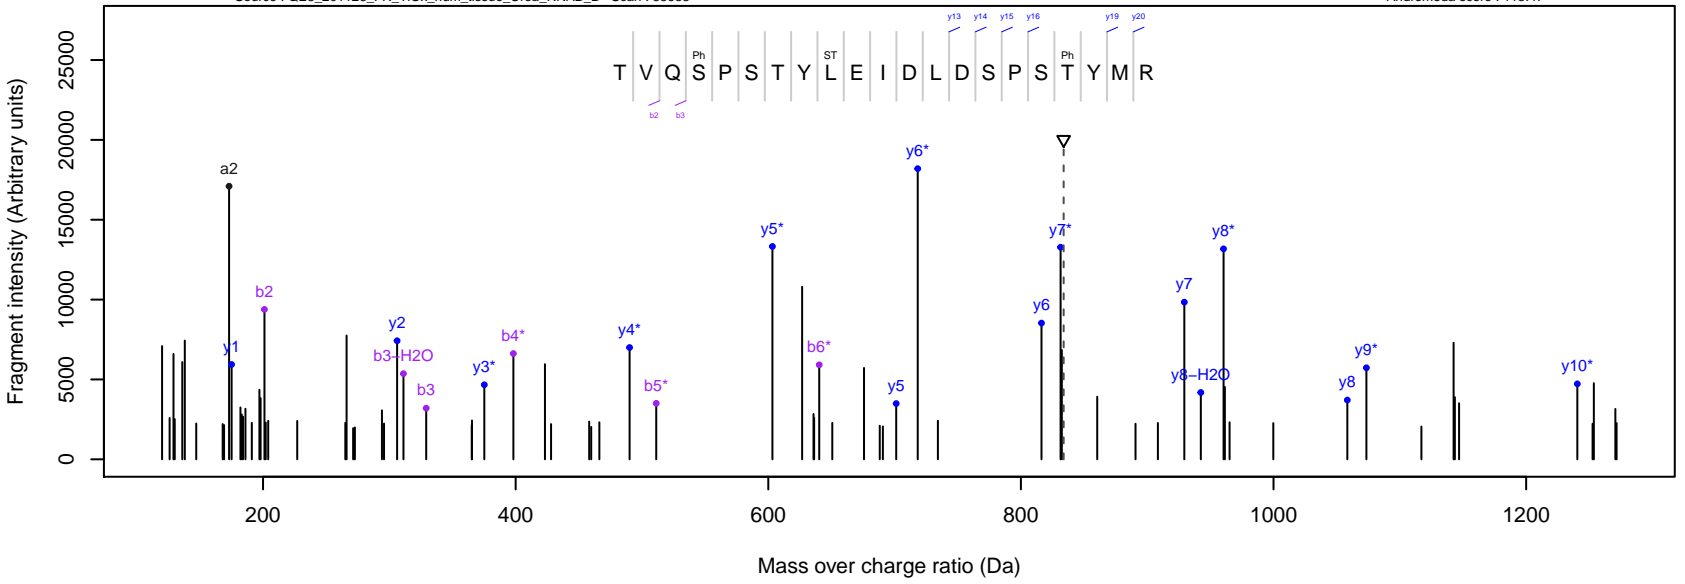

RGS(Phospho (STY))SGSVDETLFALPAASEPVIR-3+

Source : QE3\_201126\_FR\_TiOx\_hum\_tissue\_Urea\_RNAB\_B Scan : 49965

Andromeda score : 118.44

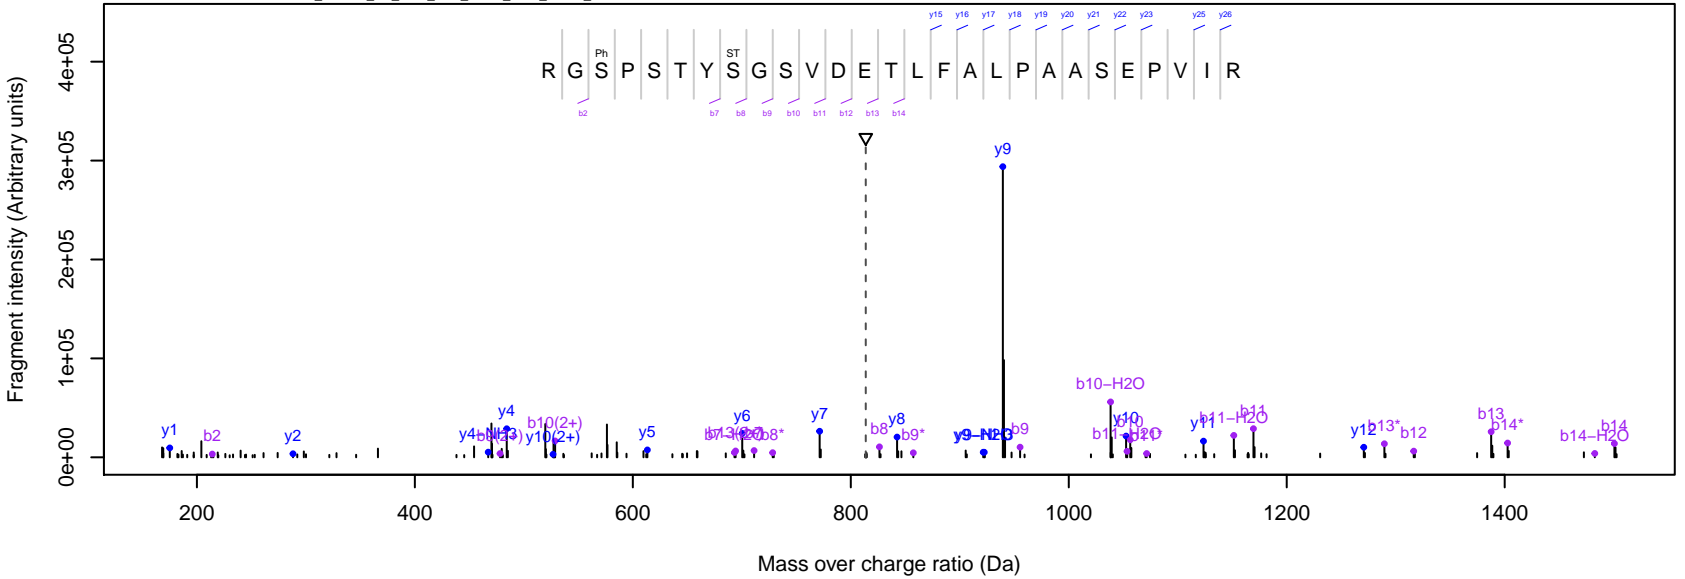

TTTAAAVASTGPS(Phospho (STY))SRSPSTLLPK-3+

Source : QE3\_201126\_FR\_TiOx\_hum\_tissue\_Urea\_RNAB\_N Scan : 25319

Andromeda score : 118.44

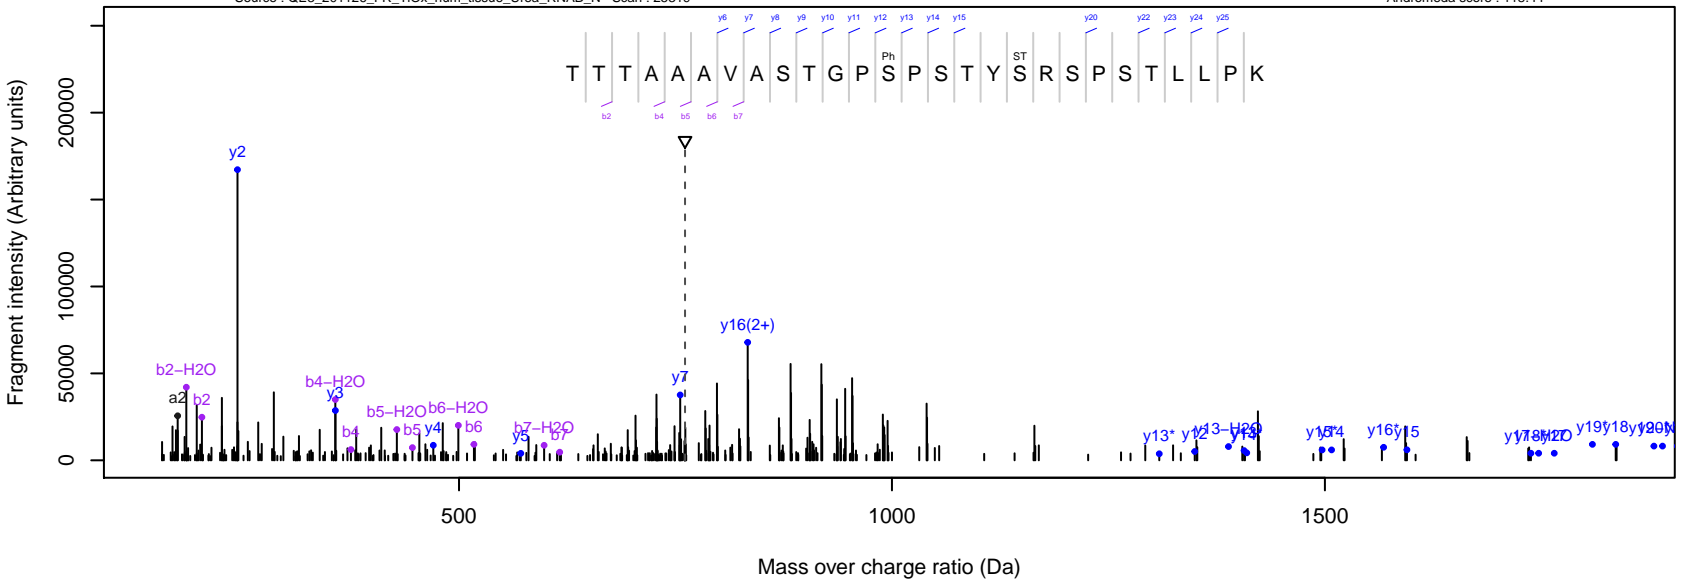

HQGVM(Oxidation (M))VGM(Oxidation (M))GQKDS(Phospho (STY))YVGDEAQS<sup>K</sup>-3+

Source : QE3\_201126\_FR\_TiOx\_hum\_tissue\_Urea\_RNAB\_B Scan : 10114

Andromeda score : 118.43

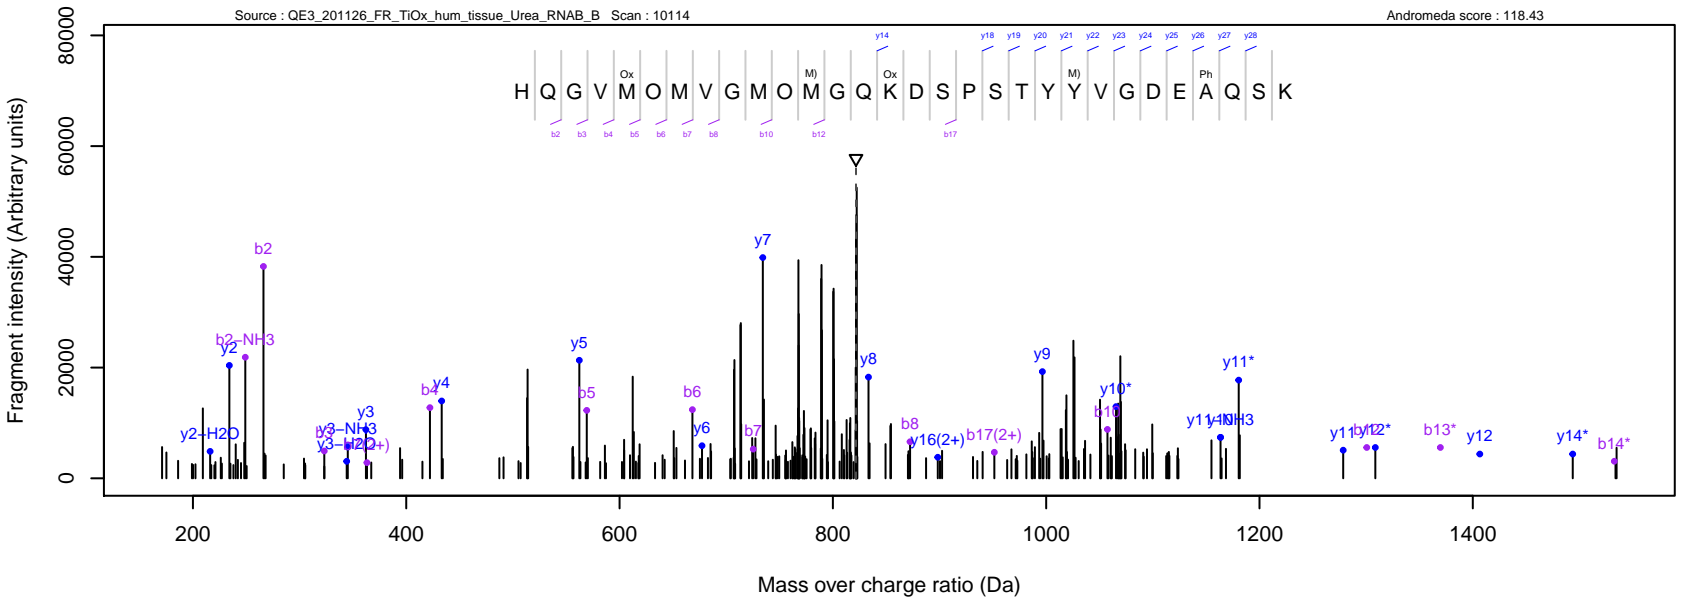

MS(Phospho (STY))GFIYQGK-2+

Source : QE3\_201126\_FR\_TiOx\_hum\_tissue\_Urea\_RNAB\_H Scan : 28146

Andromeda score : 118.4

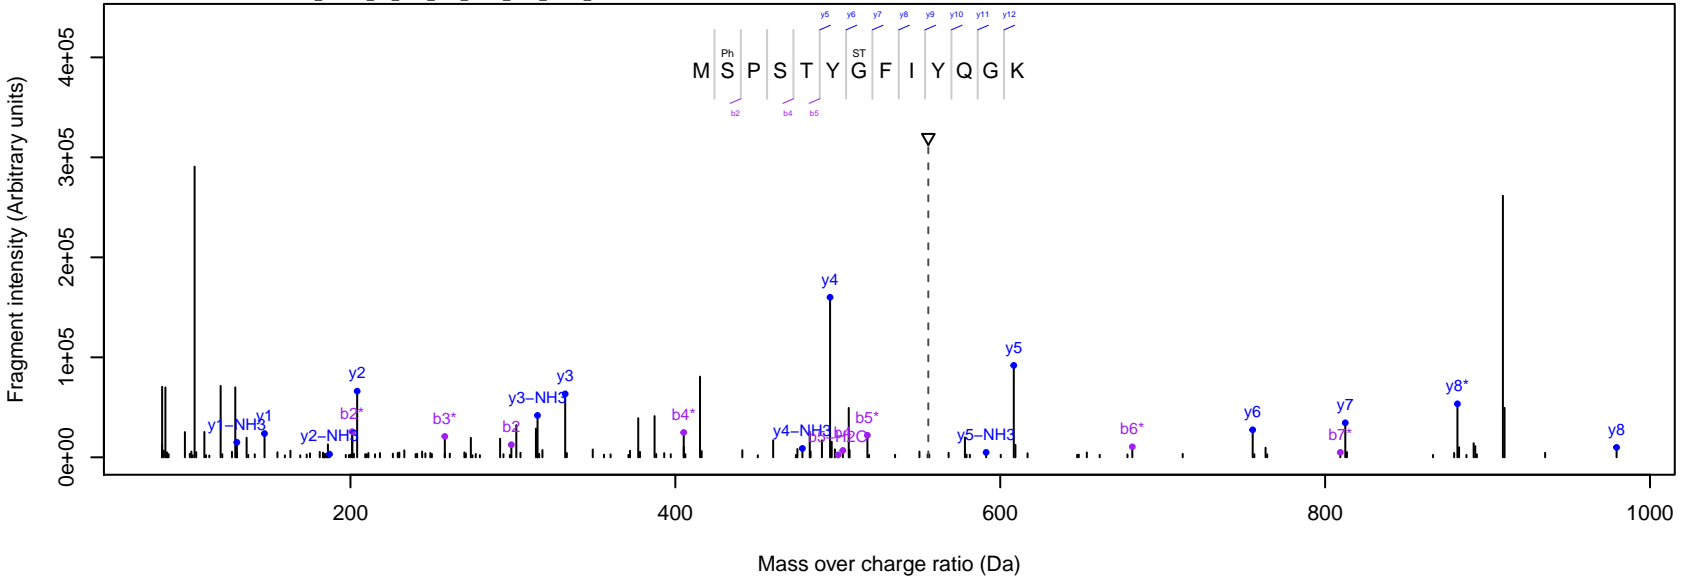

EAS(Phospho (STY))PAPLAQGE<sup>P</sup>GRE<sup>D</sup>LDLPT<sup>R</sup>-3+

Source : QE3\_201126\_FR\_TiOx\_hum\_tissue\_Urea\_RNAB\_N Scan : 22182

Andromeda score : 118.37

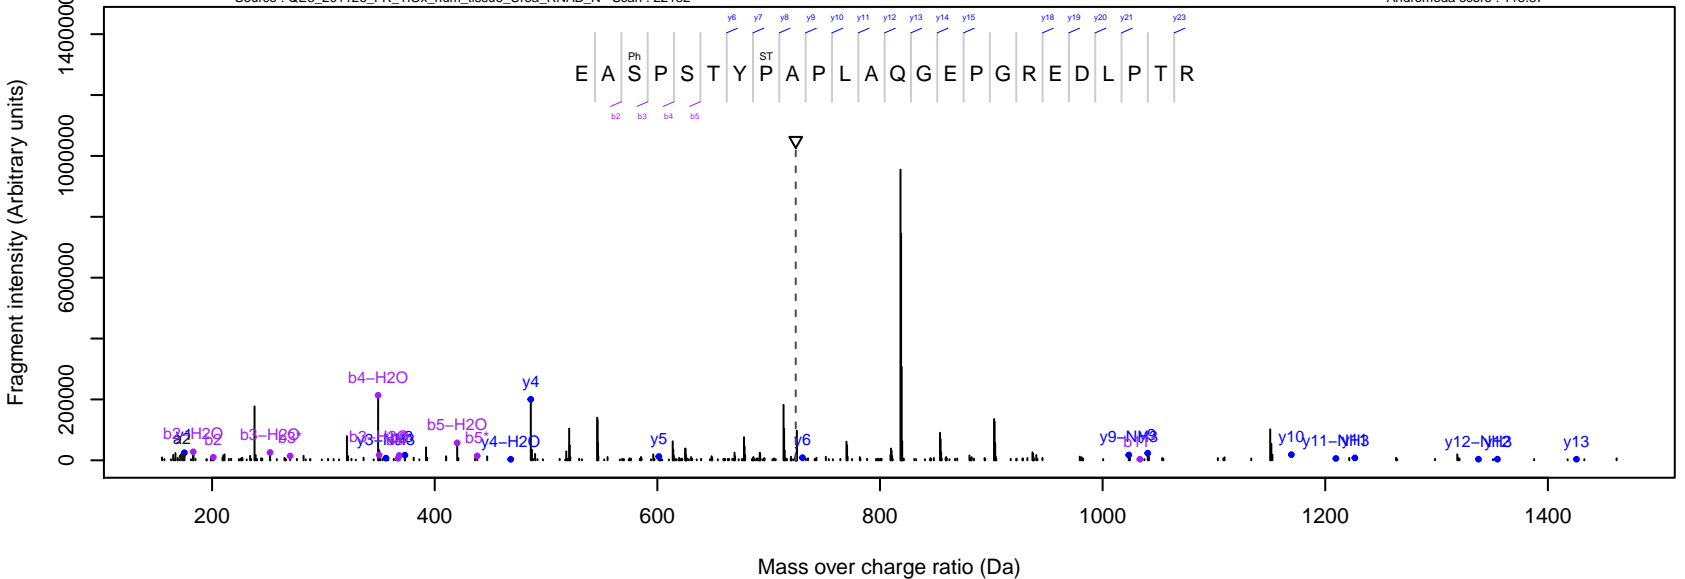

ILS(Phospho (STY))DVTHSAVFGVPASK-3+

Source : QE3\_201126\_FR\_TiOx\_hum\_tissue\_Urea\_RNAB\_N Scan : 45588

Andromeda score : 118.37

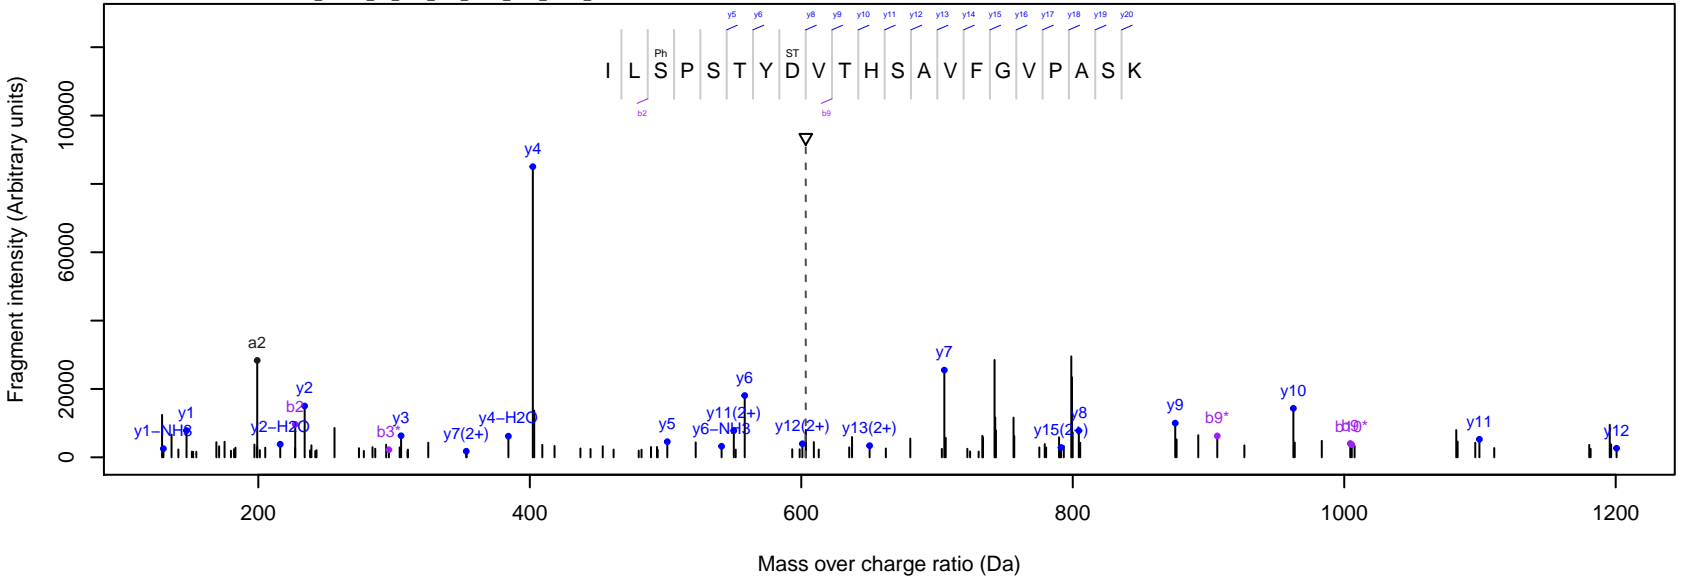

NVGCLQEALQLATS(Phospho (STY))FAQLR-3+

Source : QE3\_201126\_FR\_TiOx\_hum\_tissue\_Urea\_RNAB\_H Scan : 62233

Andromeda score : 118.36

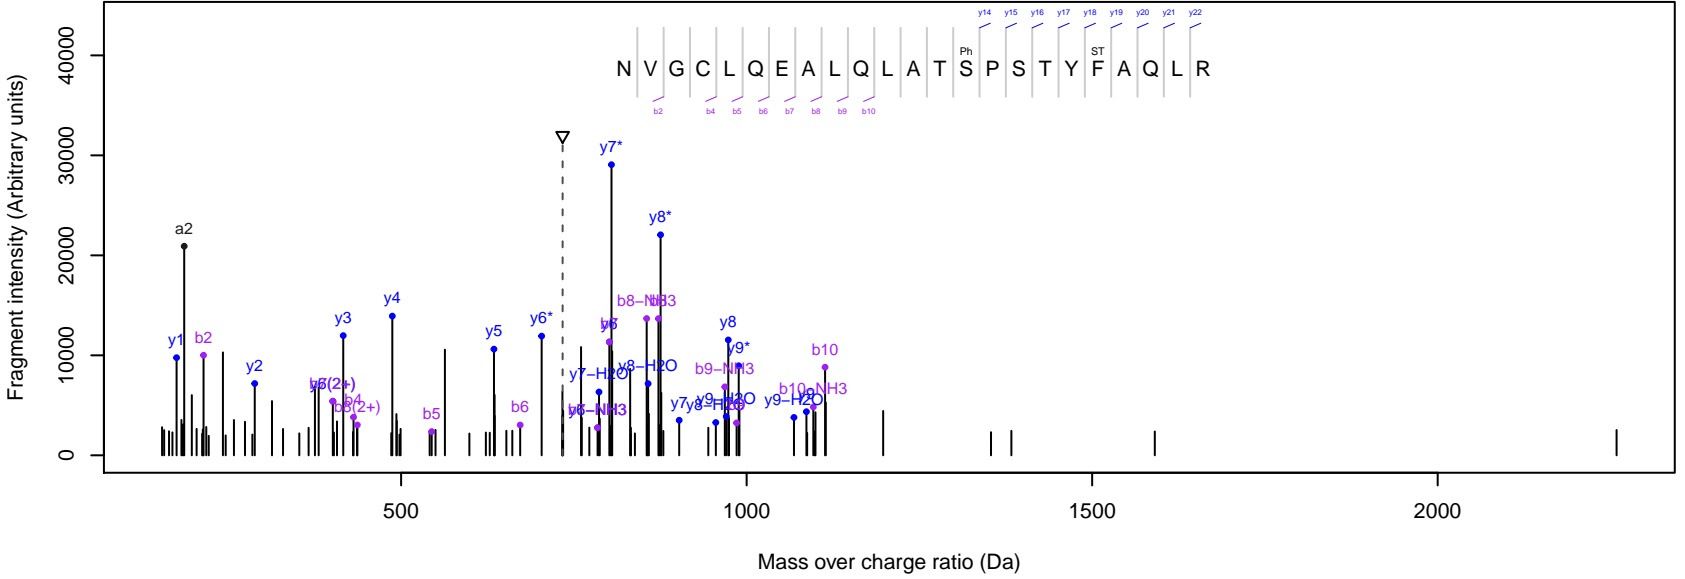

VKPET(Phospho (STY))PPRQSHSGSISPYPK-4+

Source : QE3\_201126\_FR\_TiOx\_hum\_tissue\_Urea\_RNAB\_N Scan : 9616

Andromeda score : 118.35

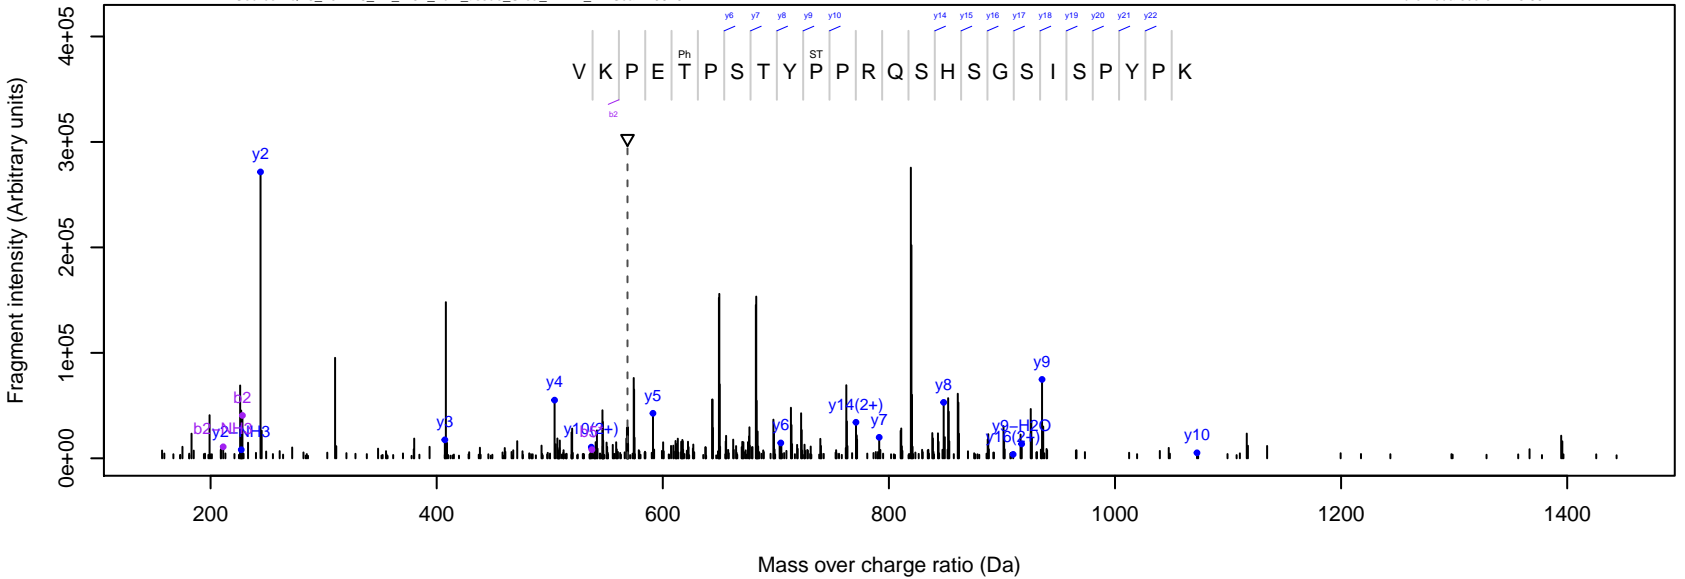



EAEALLQSMGLTPESPIVPPMPSPSTYPSK-3+

Source : QE3\_201126\_FR\_TiOx\_hum\_tissue\_Urea\_RNAB\_H Scan : 59367

Andromeda score : 118.22

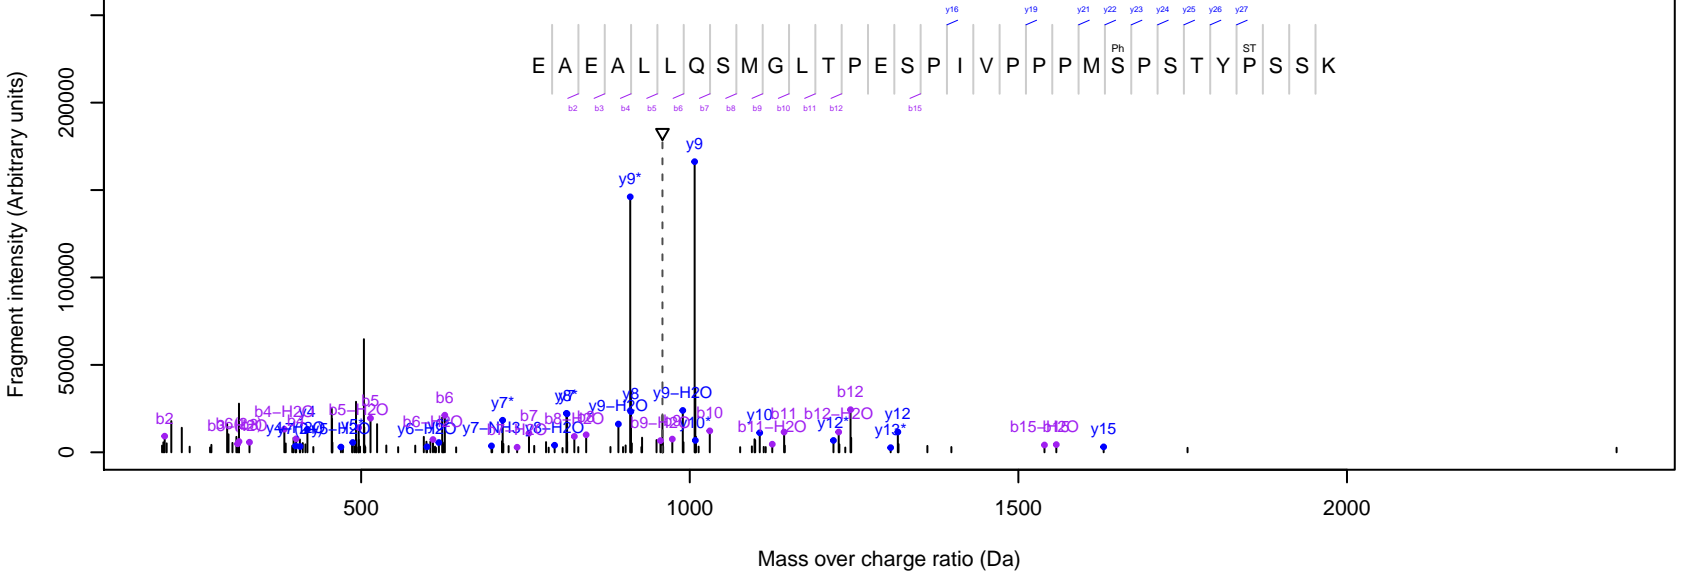

M(Oxidation (M))REDYDS(Phospho (STY))VEQDGDPEGPQR-3+

Source : QE3\_201126\_FR\_TiOx\_hum\_tissue\_Urea\_RNAB\_B Scan : 14288

Andromeda score : 118.22

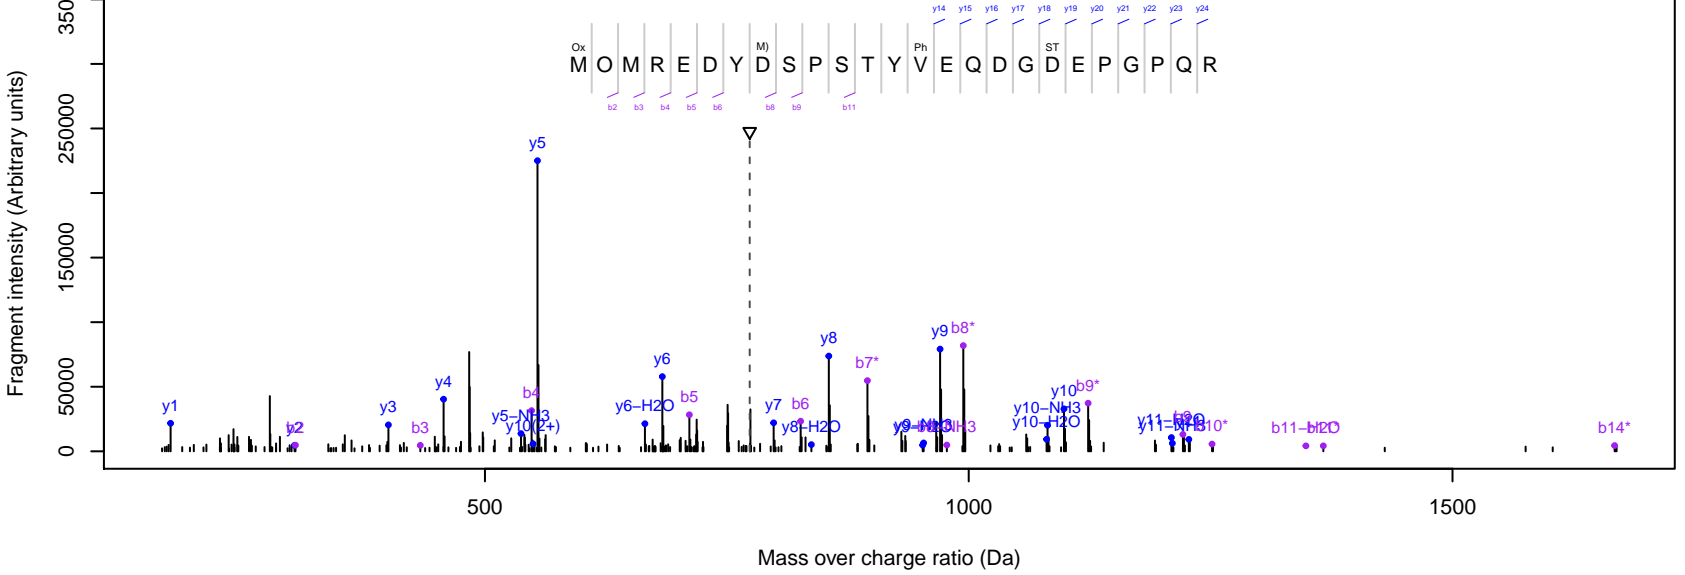

RQS(Phospho (STY))S(Phospho (STY))SYDDPWKITDEQR-3+

Source : QE3\_201126\_FR\_TiOx\_hum\_tissue\_Urea\_RNAB\_N Scan : 30350

Andromeda score : 118.22

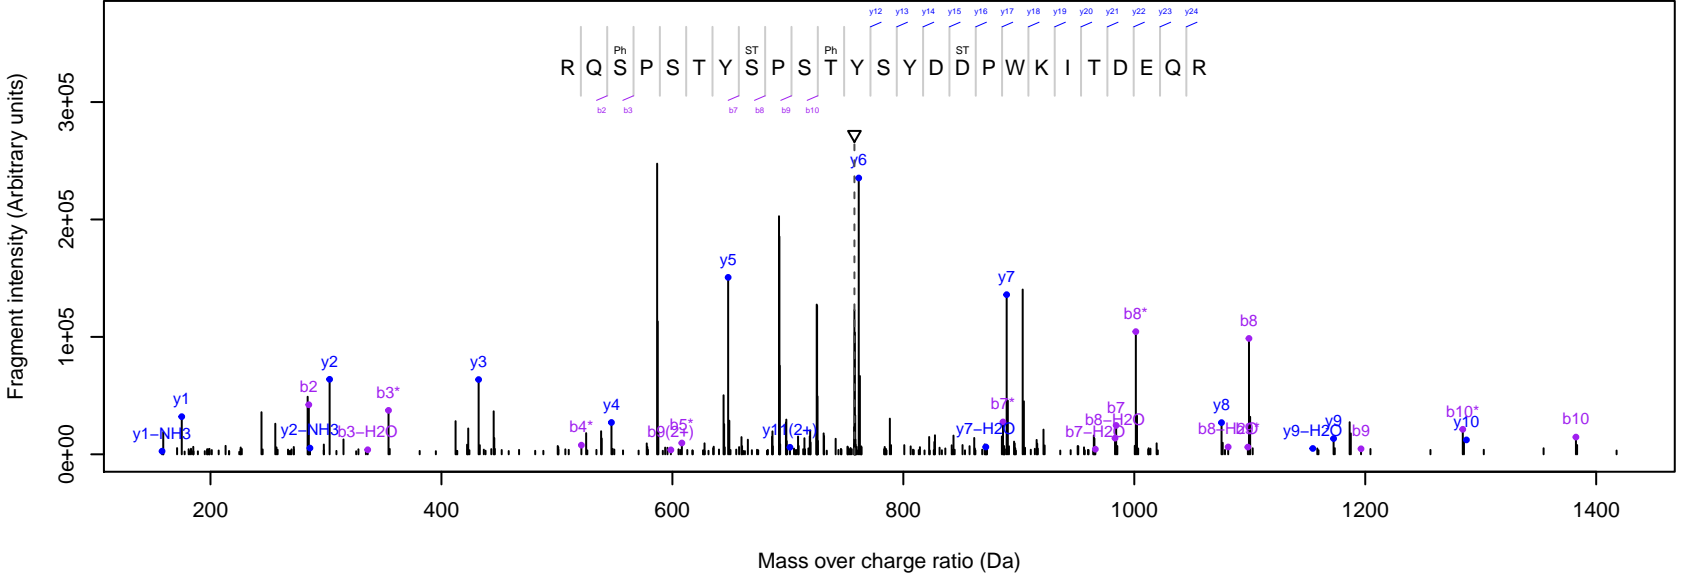

KNS(Phospho (STY))LVAVPSTVSAK-2+

Source : QE3\_201126\_FR\_TiOx\_hum\_tissue\_Urea\_RNAB\_B Scan : 18969

Andromeda score : 118.21

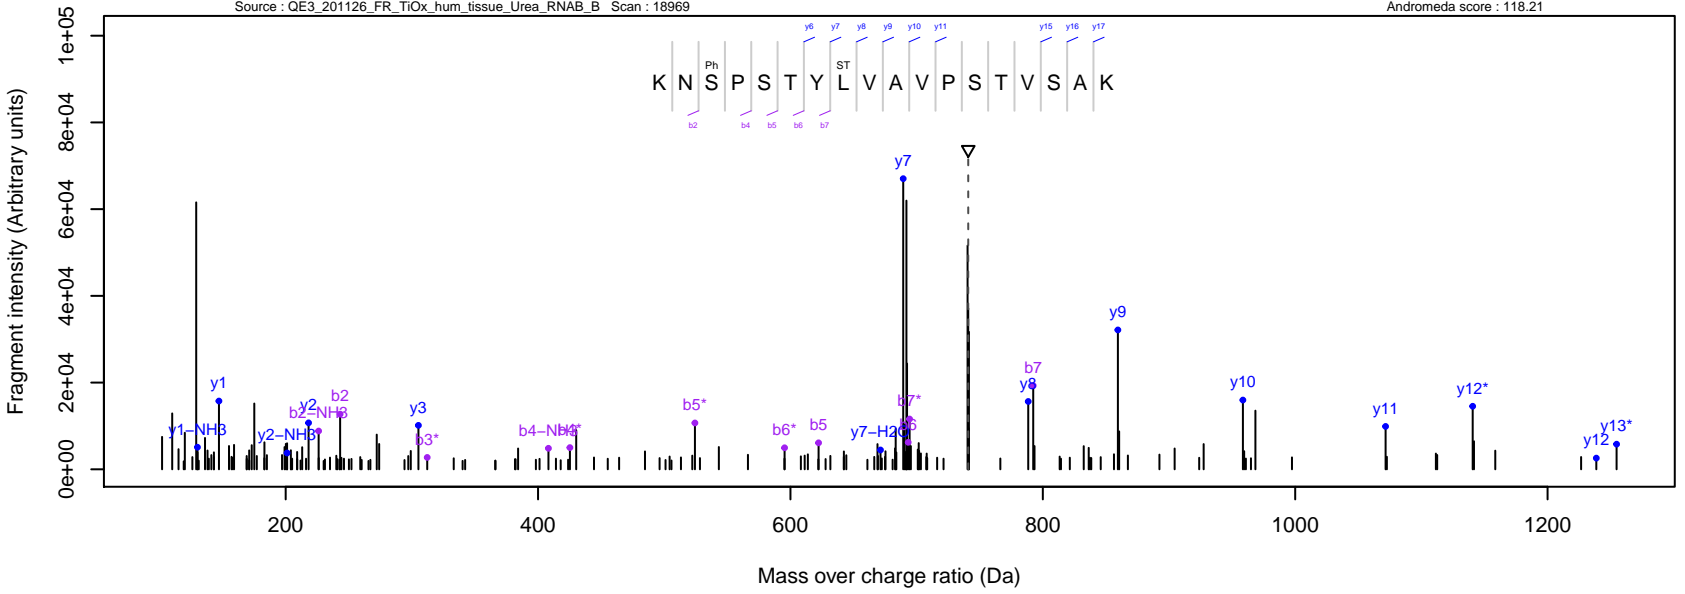

SQT(Phospho (STY))PPGVATPIPK-2+

Source : QE3\_201126\_FR\_TiOx\_hum\_tissue\_Urea\_RNAB\_N Scan : 27933

Andromeda score : 118.19

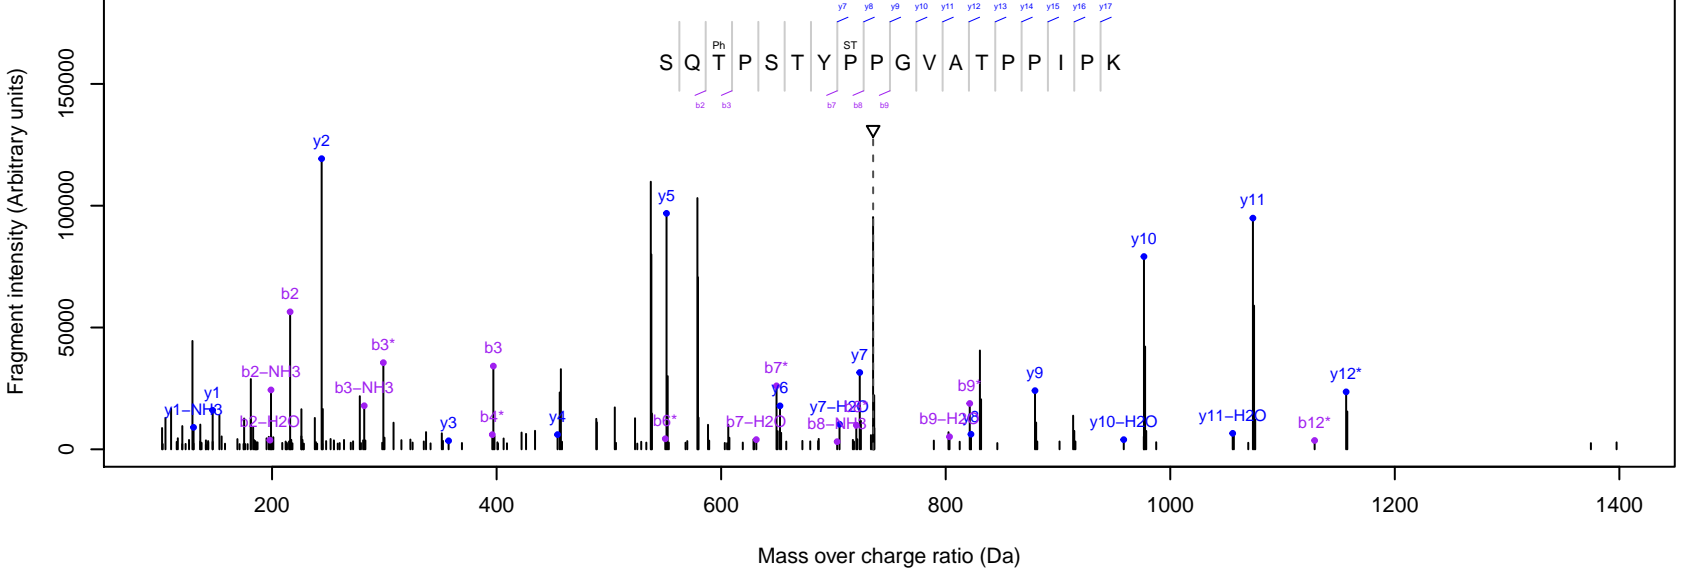

MGQAPSQSLPPAQDQPRS(Phospho (STY))PVPSAFSDQSR-3+

Source : QE3\_201126\_FR\_TiOx\_hum\_tissue\_Urea\_RNAB\_N Scan : 36486

Andromeda score : 118.14

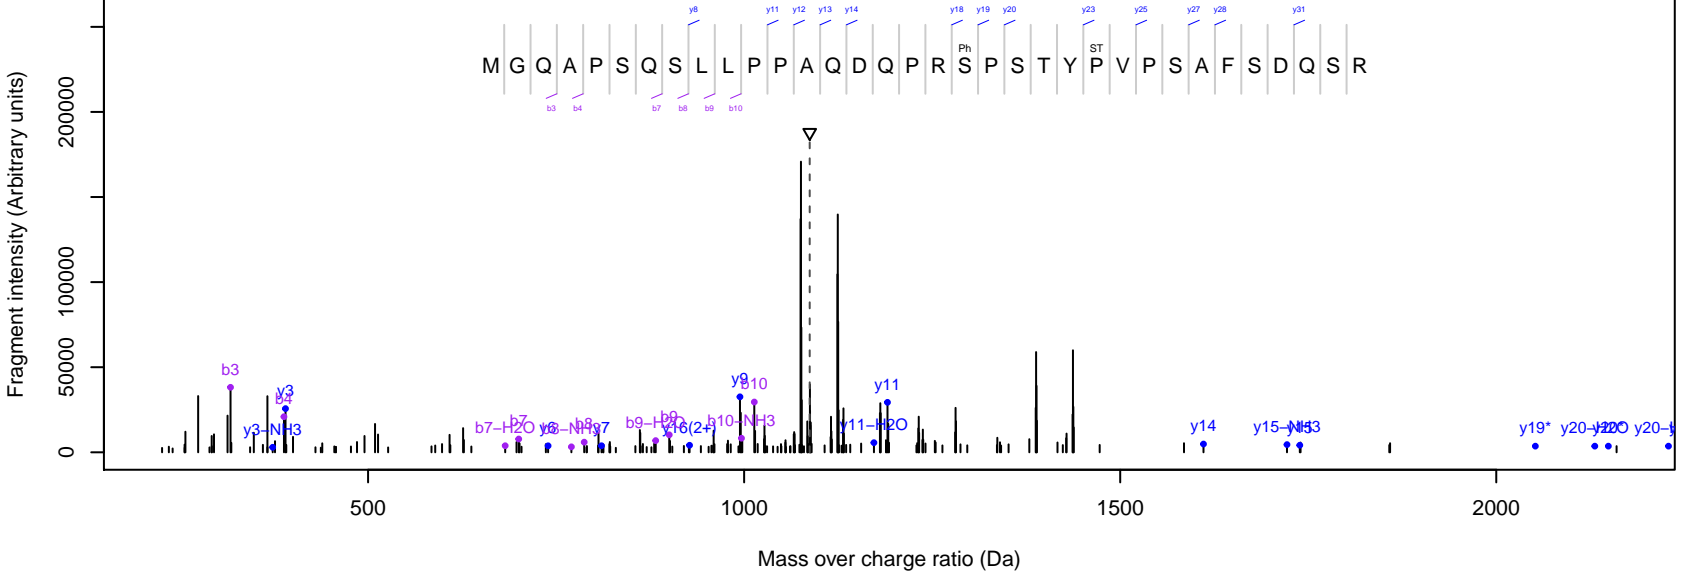

QRQPPGTQSSH(SPhospho (STY))SPGEITSSPQGLDNPALLR-4+

Source : QE3\_201126\_FR\_TIOx\_hum\_tissue\_Urea\_RNAB\_H Scan : 26392

Andromeda score : 118.14

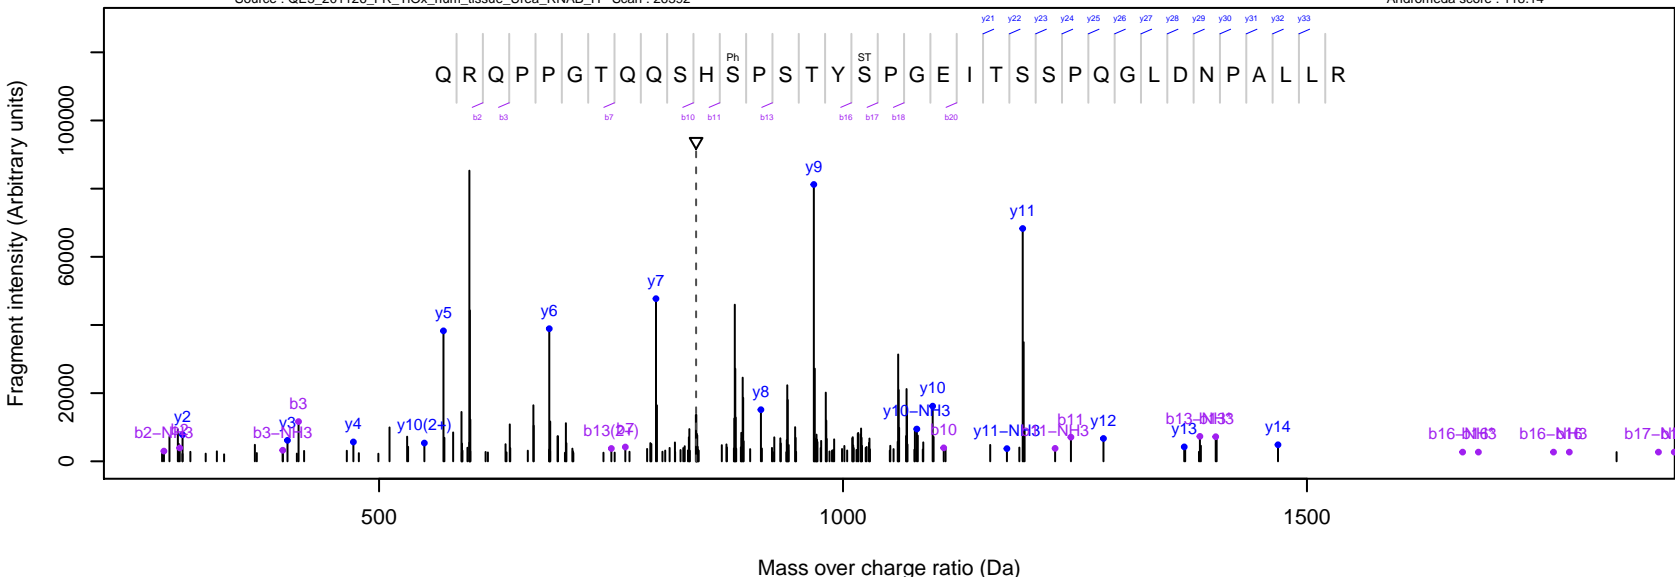

VPPPRS(Phospho (STY))PQAQEA PVNIDEGLTGCTIQLLP AQDK-3+

Source : QE3\_201126\_FR\_TIOx\_hum\_tissue\_Urea\_RNAB\_H Scan : 48564

Andromeda score : 118.14

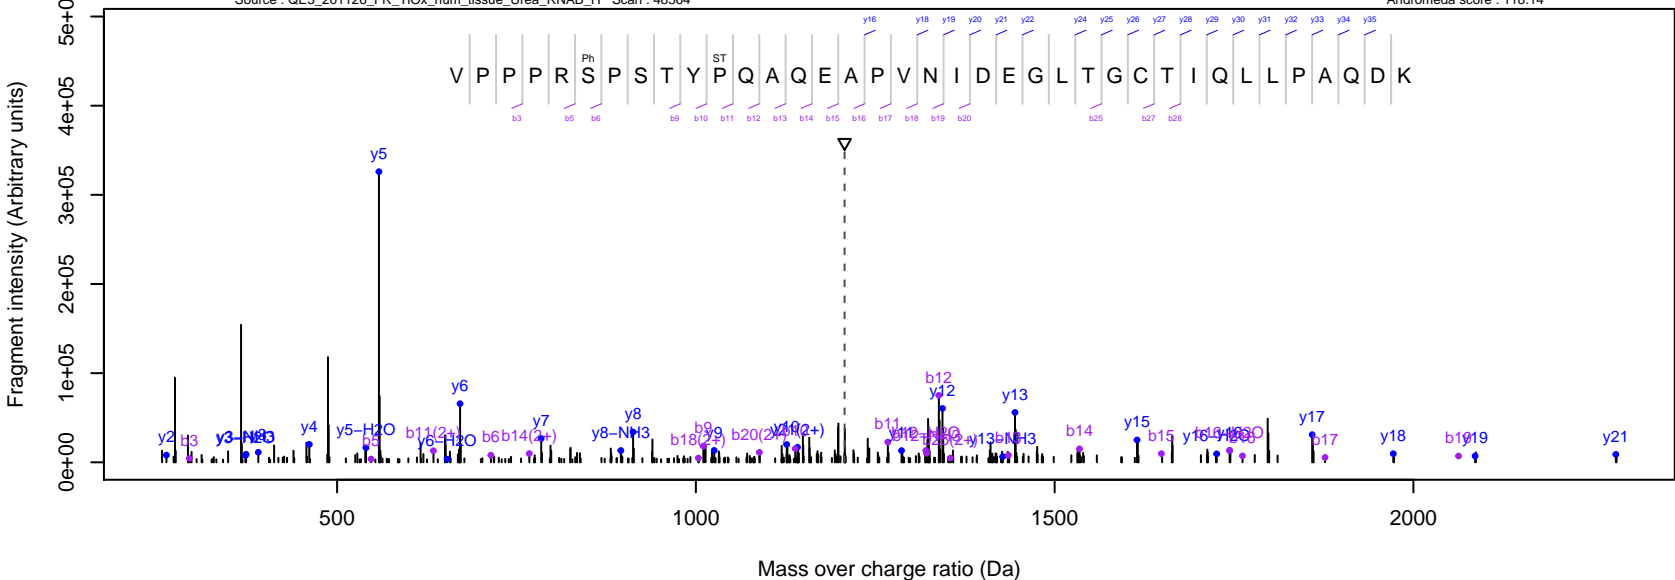

KFS(Phospho (STY))QPEPSAVLK-2+

Source : QE3\_201126\_FR\_TIOx\_hum\_tissue\_Urea\_RNAB\_N Scan : 20542

Andromeda score : 118.13

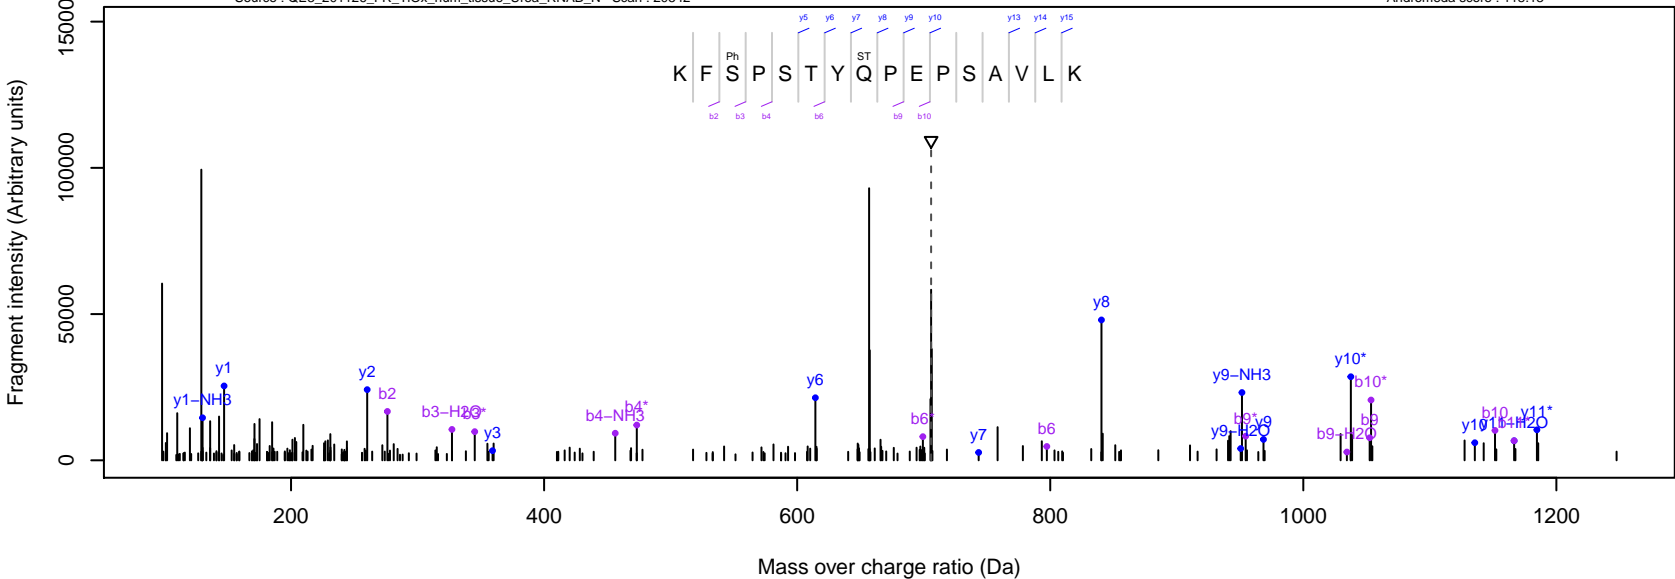



(Acetyl (Protein N-term))S(Phospho (STY))SSEEVSWISWFCGLR-2+

Source : QE3\_201126\_FR\_TiOx\_hum\_tissue\_Urea\_RNAB\_B Scan : 63406

Andromeda score : 118.13

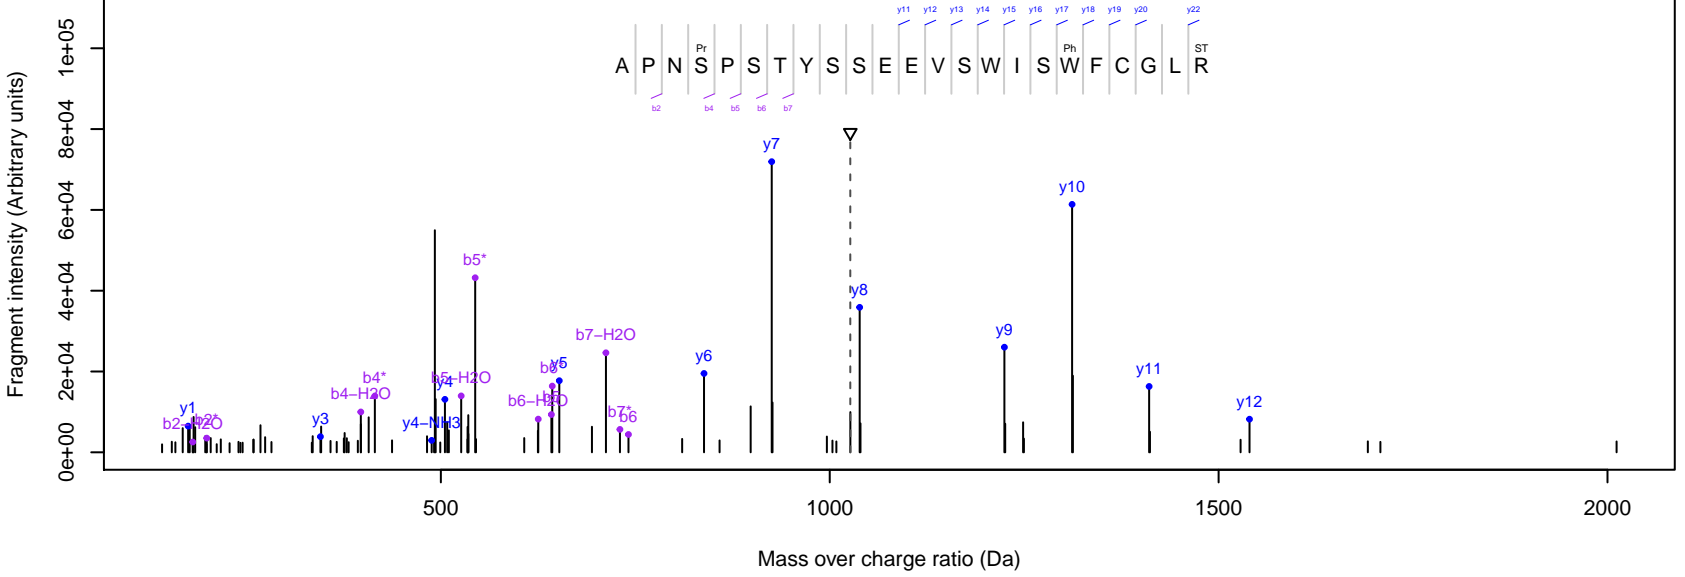

SSVASGPIS(Phospho (STY))PTNYR-2+

Source : QE3\_201126\_FR\_TiOx\_hum\_tissue\_Urea\_RNAB\_N Scan : 22235

Andromeda score : 118.13

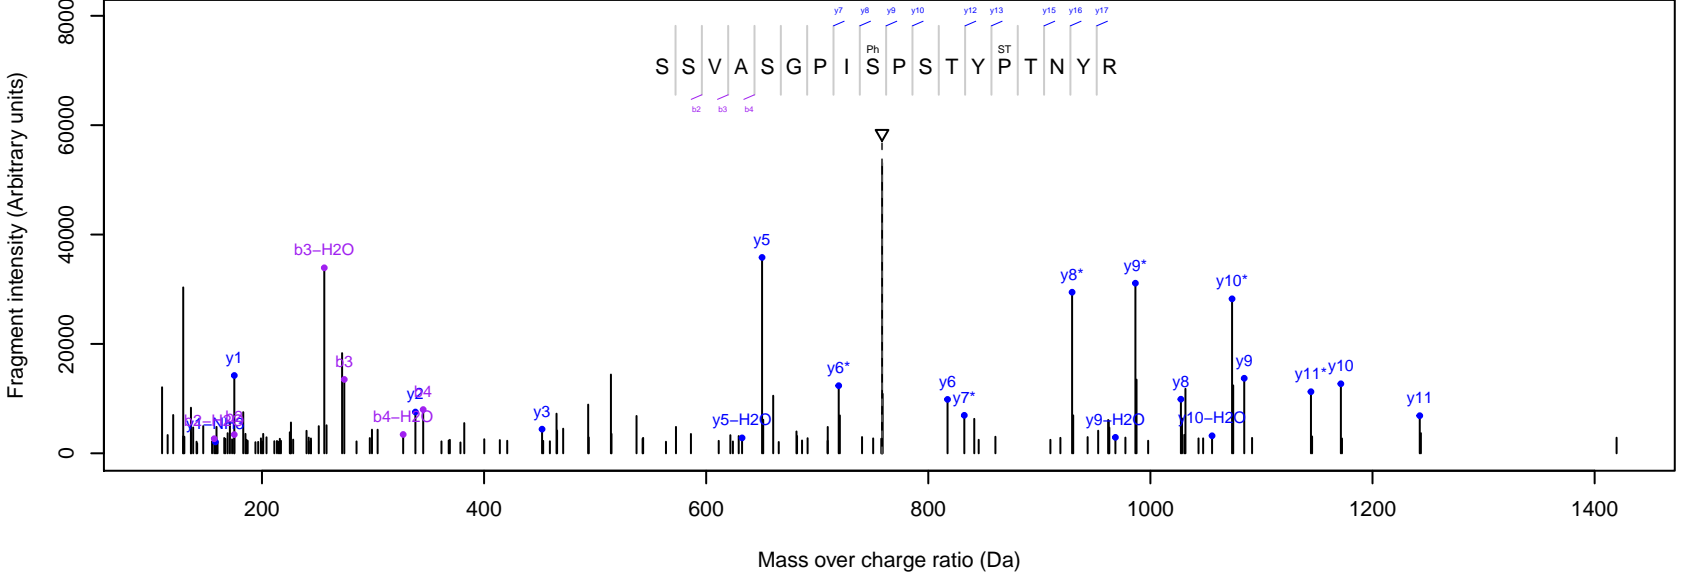

DPSVDITQDLVDES(Phospho (STY))EEERFDDMSSPGLLELPSELSR-3+

Source : QE3\_201126\_FR\_TiOx\_hum\_tissue\_Urea\_RNAB\_N Scan : 59457

Andromeda score : 118.11

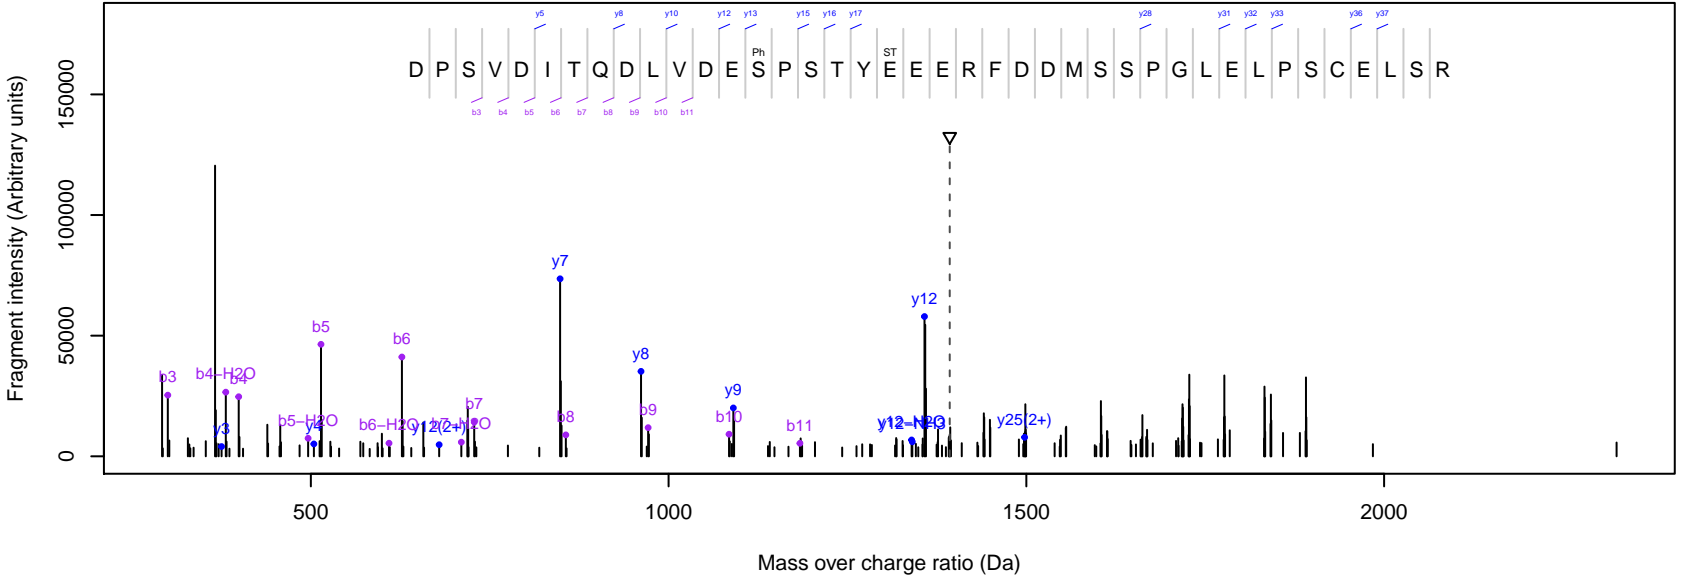

SRS(Phospho (STY))PGPPQVDGTPTM(Oxidation (M))SLERPPR-4+

Source : QE3\_201126\_FR\_TIOx\_hum\_tissue\_Urea\_RNAB\_N Scan : 17232

Andromeda score : 117.96

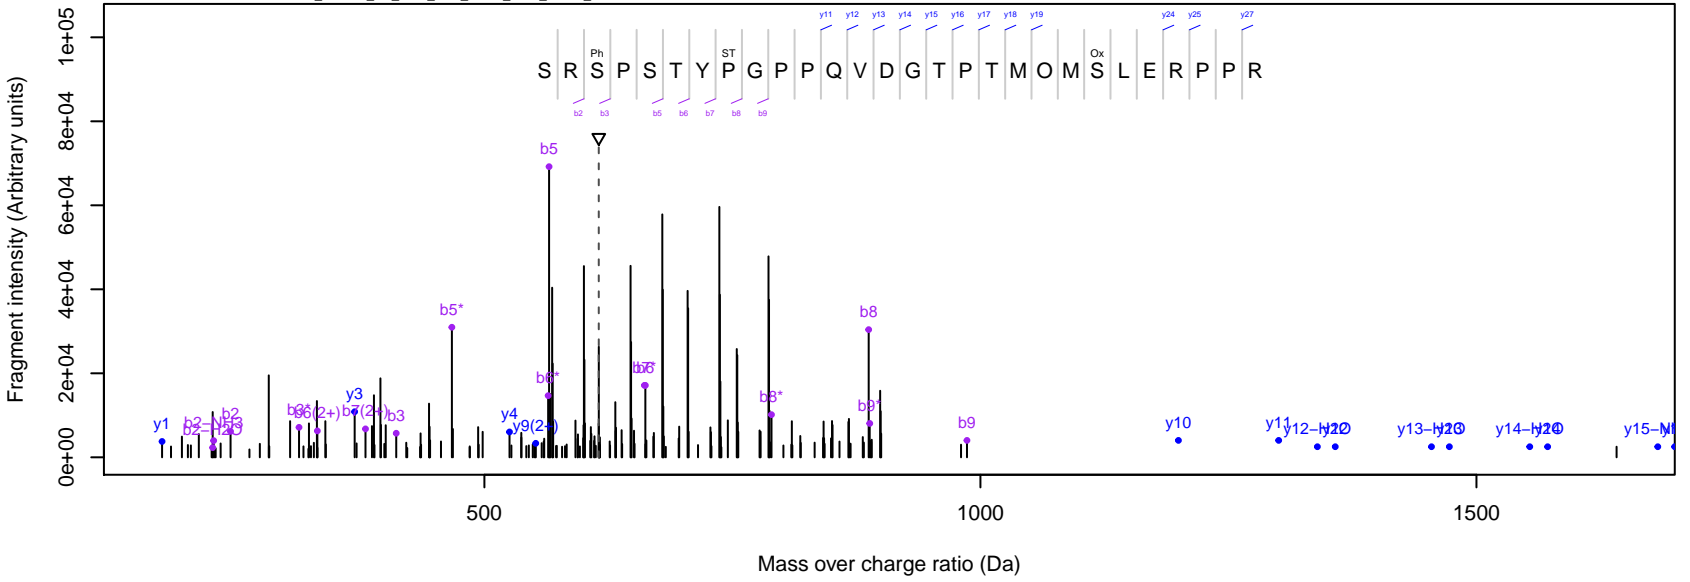

QGVDDIEKFEDEGAGFEES(Phospho (STY))ETGDYEEK-3+

Source : QE3\_201126\_FR\_TIOx\_hum\_tissue\_Urea\_RNAB\_N Scan : 42447

Andromeda score : 117.94

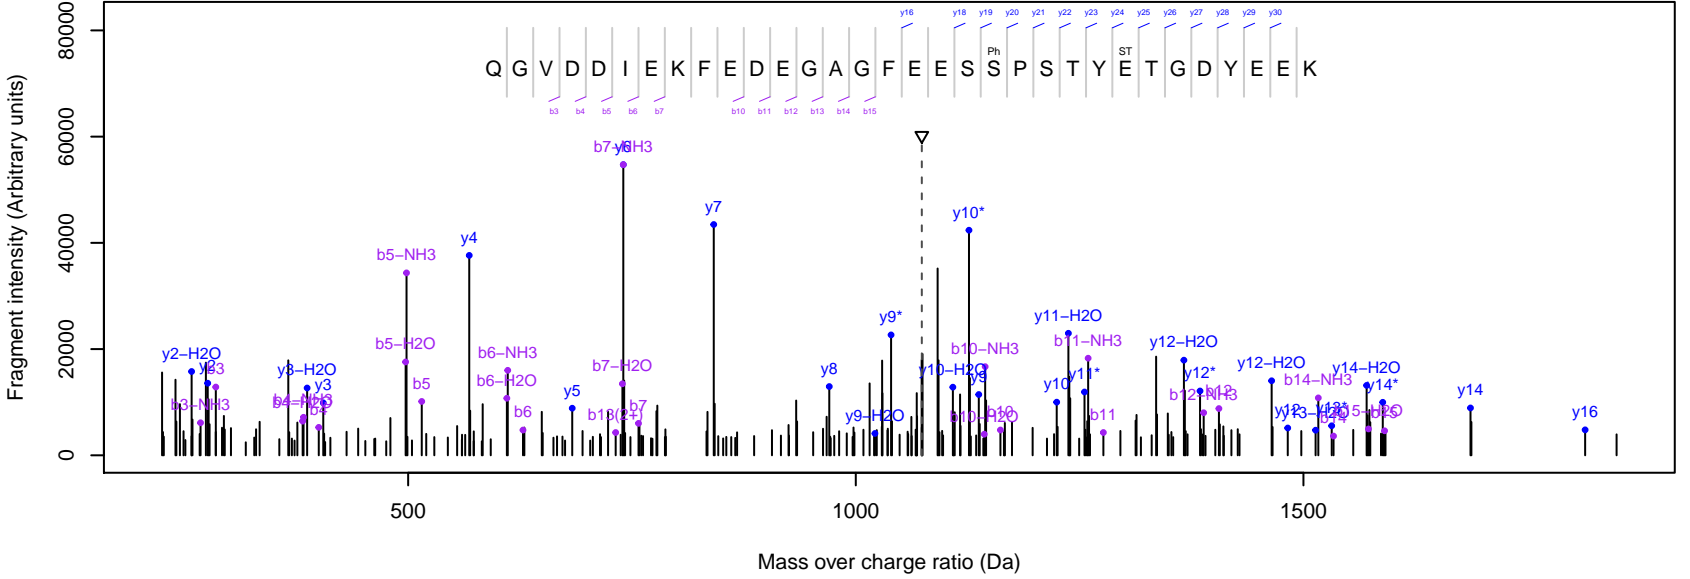

NRPGS(Phospho (STY))ALEKEVESMG AHLNAYSTR-4+

Source : QE3\_201126\_FR\_TIOx\_hum\_tissue\_Urea\_RNAB\_H Scan : 42890

Andromeda score : 117.88

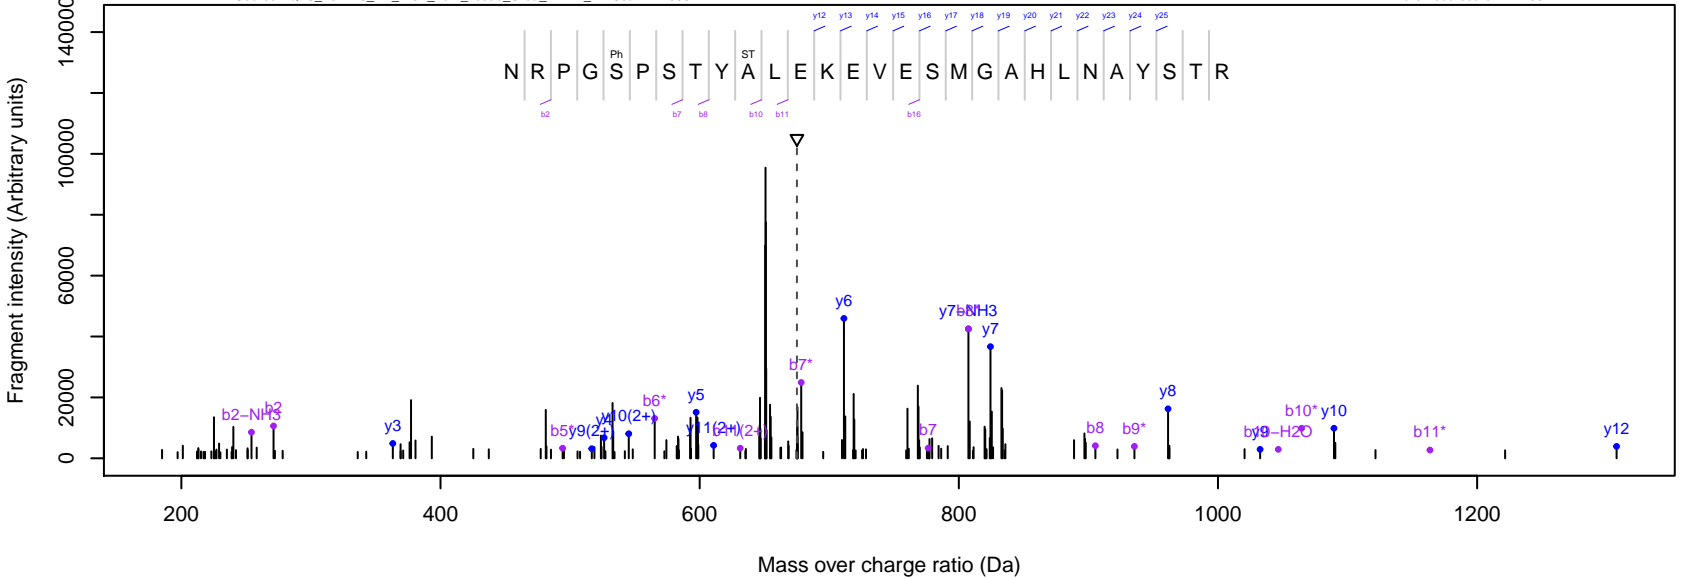

IPEESSDKS(Phospho (STY))PETVNR-3+

Source : QE3\_201126\_FR\_TiOx\_hum\_tissue\_Urea\_RNAB\_N Scan : 8550

Andromeda score : 117.84

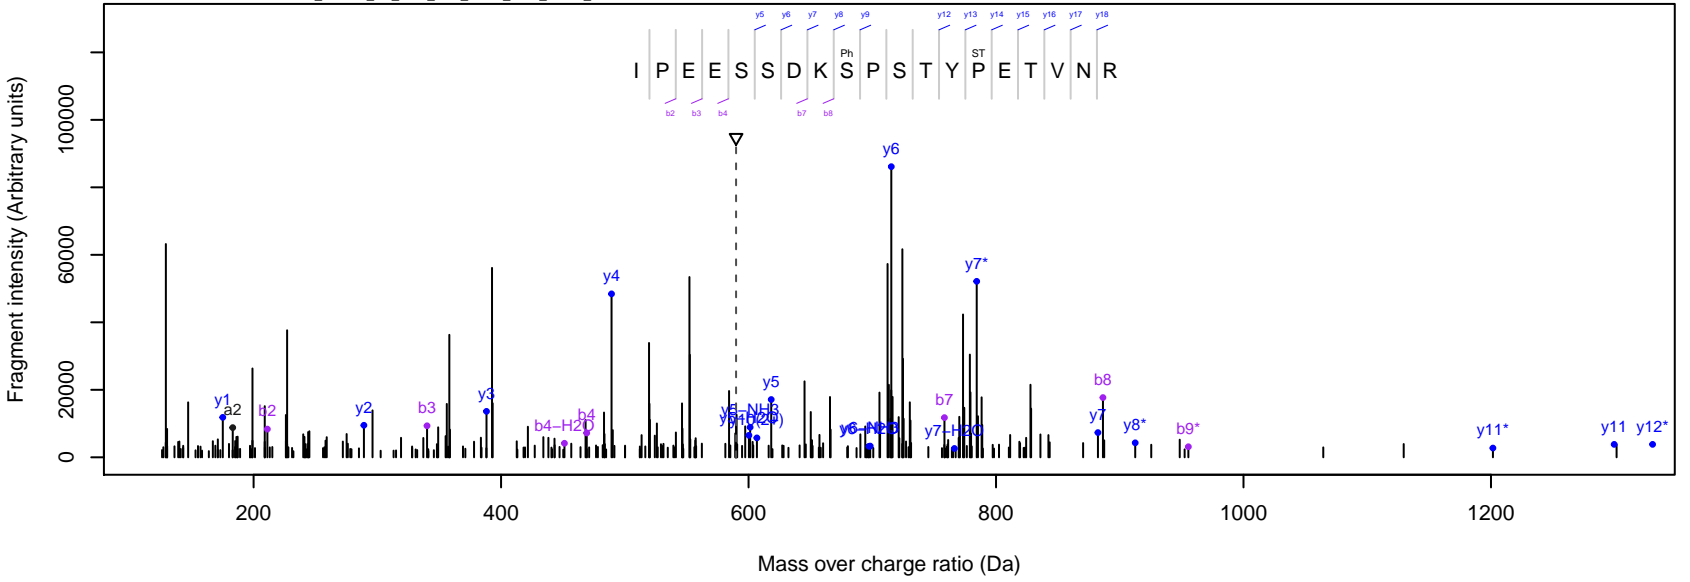

TVS(Phospho (STY))PGSVS(Phospho (STY))PIHGQQVVENLK-3+

Source : QE3\_201126\_FR\_TiOx\_hum\_tissue\_Urea\_RNAB\_H Scan : 31707

Andromeda score : 117.82

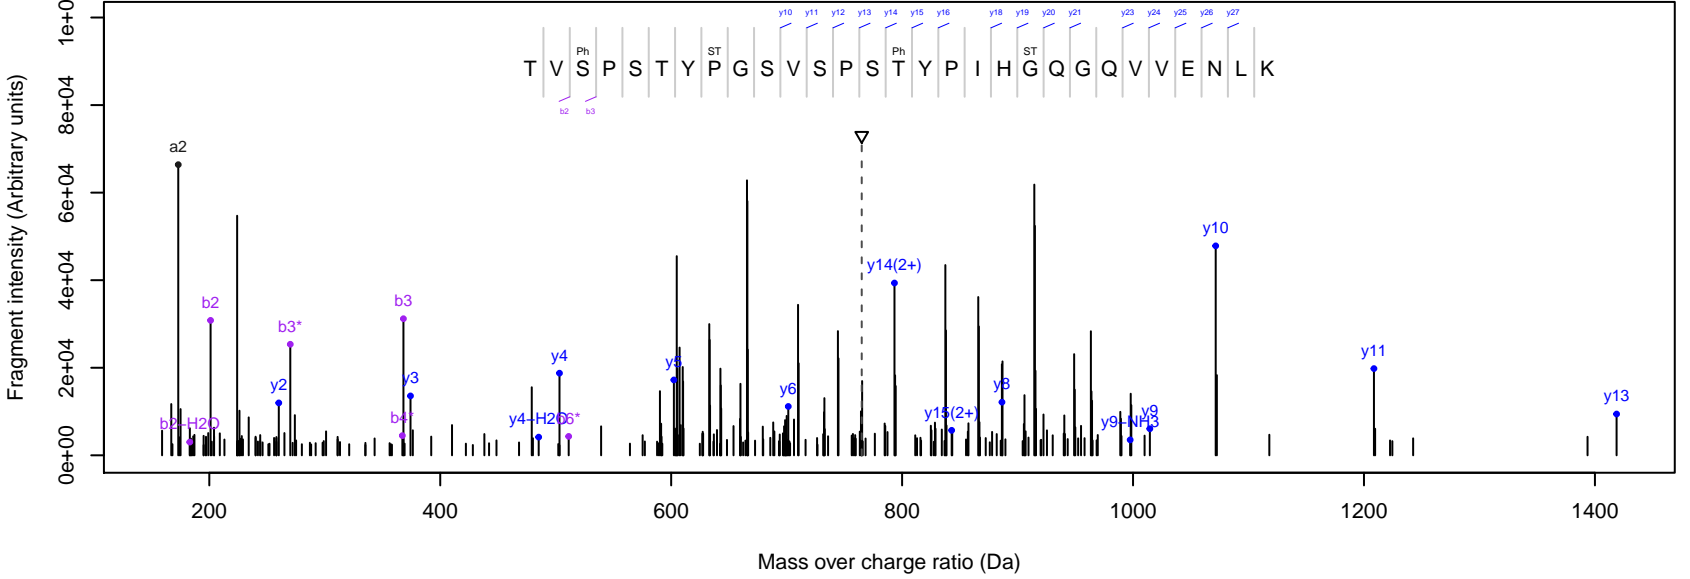

SS(Phospho (STY))TPSS(Phospho (STY))PTGTSSSDSGGHHIGWGER-3+

Source : QE3\_201126\_FR\_TiOx\_hum\_tissue\_Urea\_RNAB\_H Scan : 17117

Andromeda score : 117.73

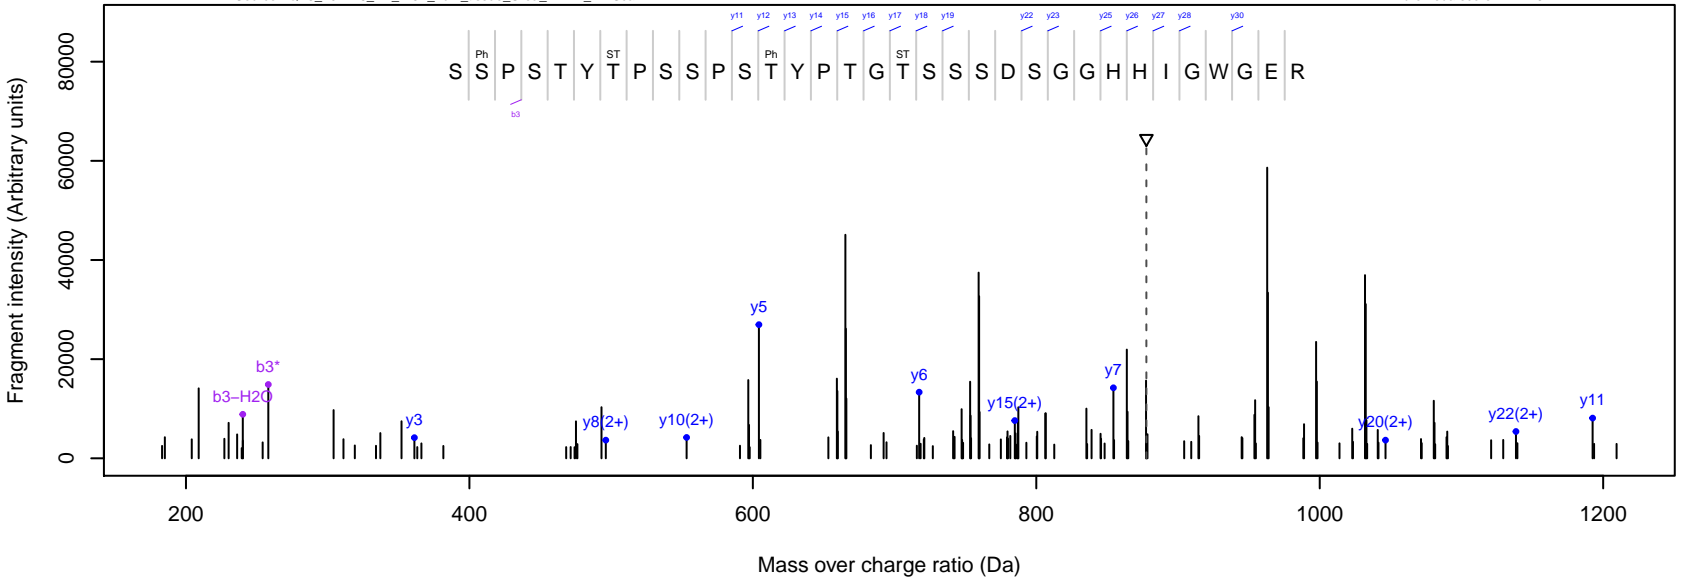

EVDEDS(Phospho (STY))EPEREV-2+

Source : QE3\_201126\_FR\_TiOx\_hum\_tissue\_Urea\_RNAB\_H Scan : 9830

Andromeda score : 117.7

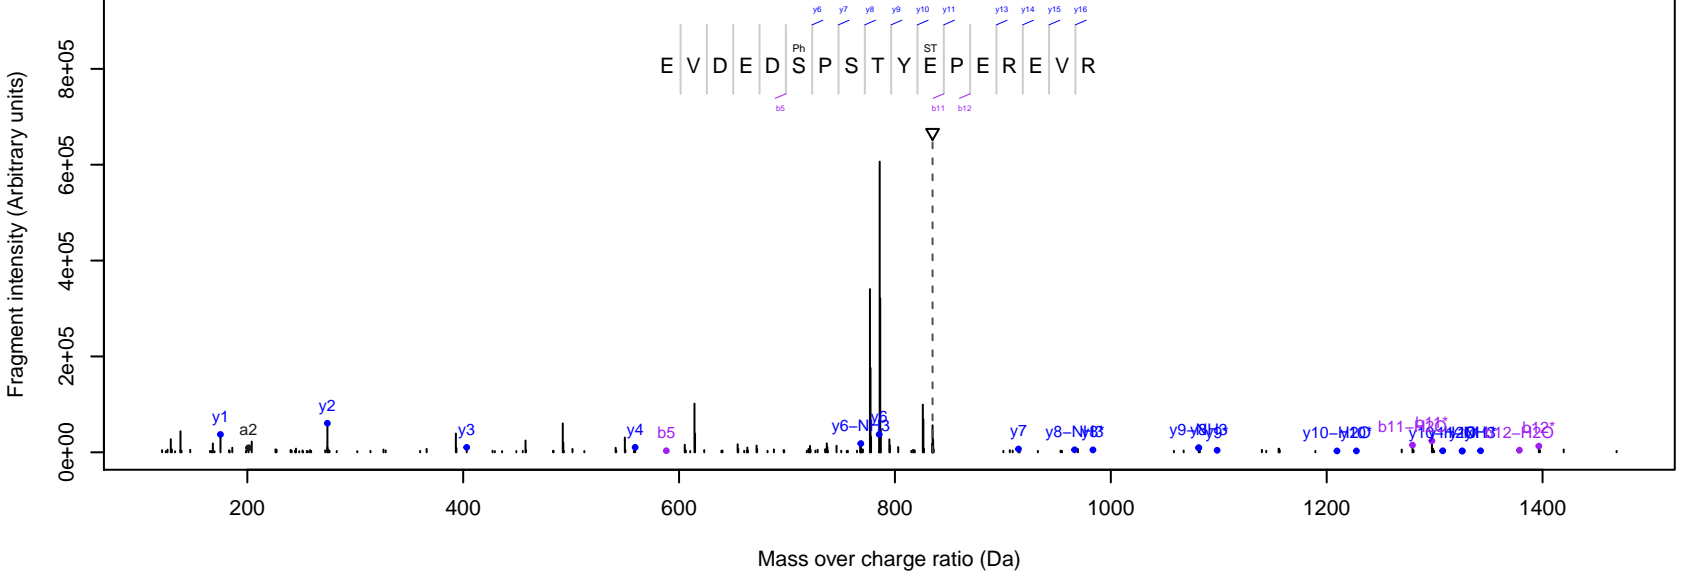

NLS(Phospho (STY))FEIK-1+

Source : QE3\_201126\_FR\_TiOx\_hum\_tissue\_Urea\_RNAB\_N Scan : 33905

Andromeda score : 117.7

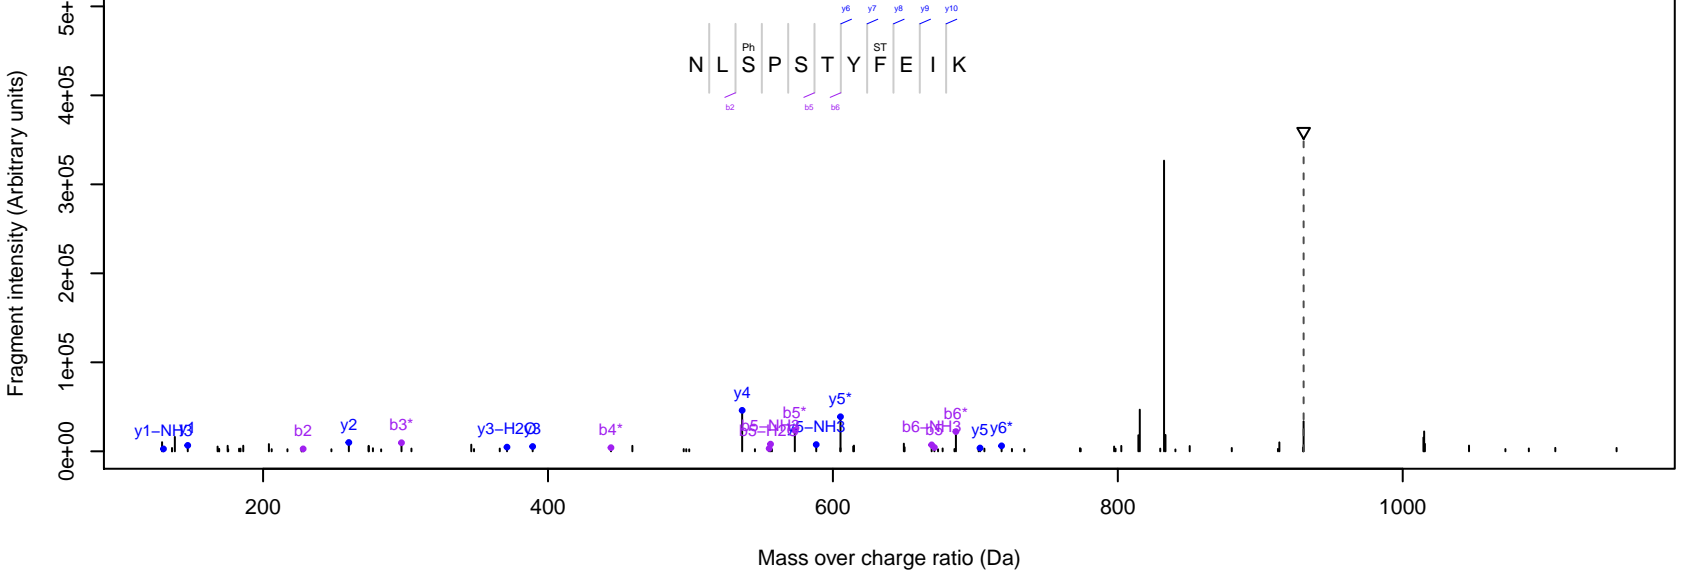

NNS(Phospho (STY))FTAPSTVGK-2+

Source : QE3\_201126\_FR\_TiOx\_hum\_tissue\_Urea\_RNAB\_H Scan : 17388

Andromeda score : 117.7

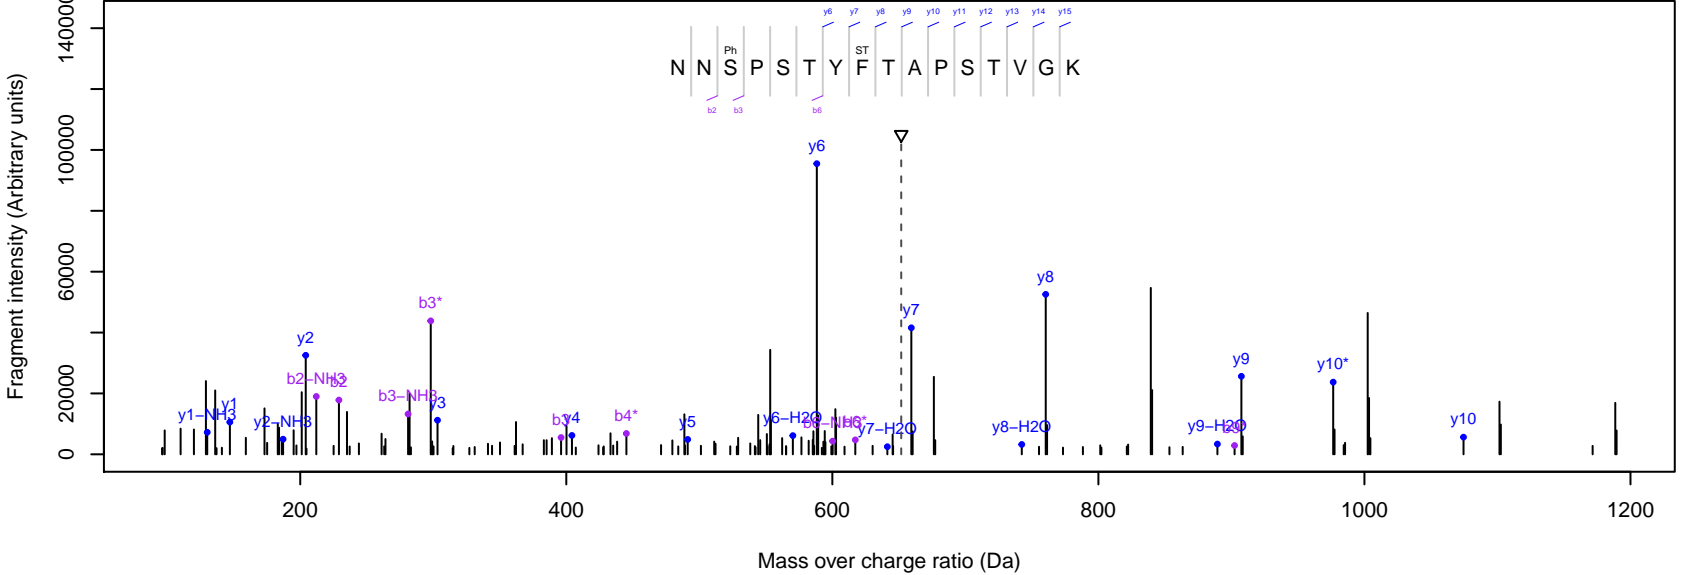

EKGS(Phospho (STY))TLDLSDLEAEKLVMFQR-3+

Source : QE3\_201126\_FR\_TiOx\_hum\_tissue\_Urea\_RNAB\_N Scan : 49786

Andromeda score : 117.66

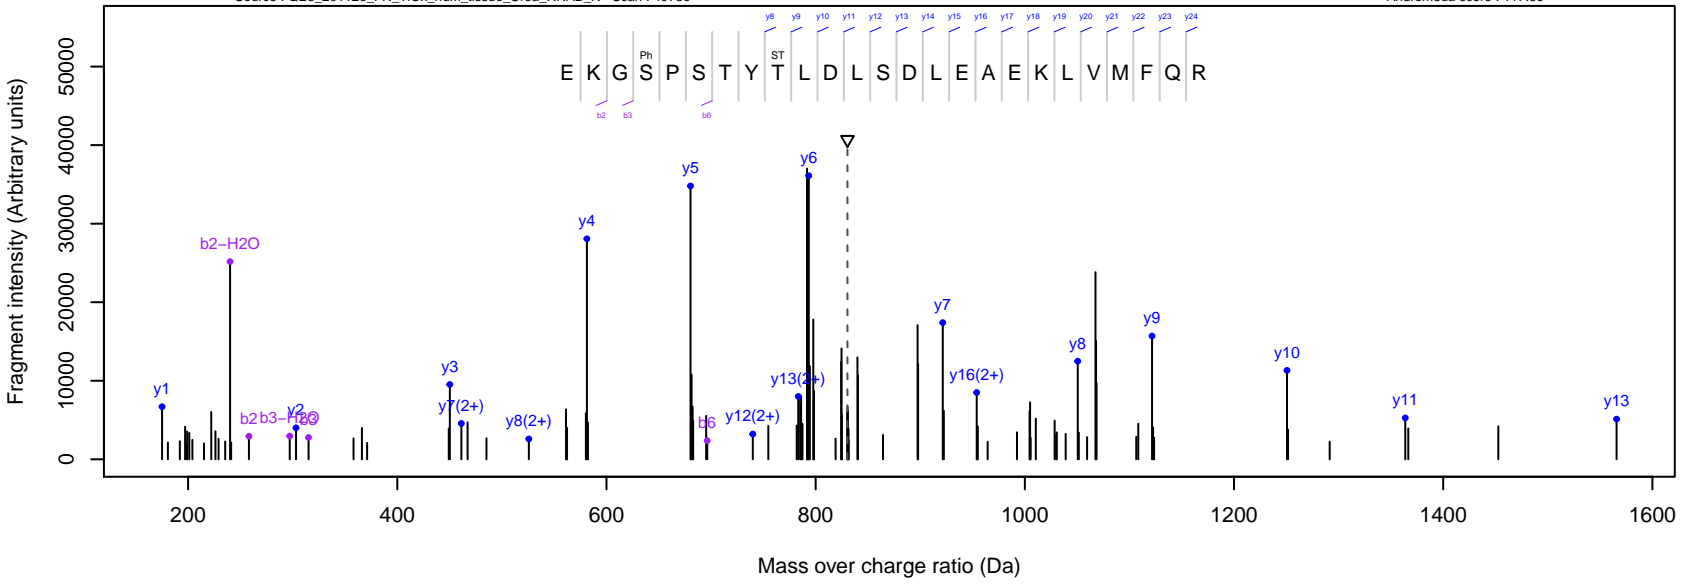

LTEERDGS(Phospho (STY))LNQSSGYR-3+

Source : QE3\_201126\_FR\_TiOx\_hum\_tissue\_Urea\_RNAB\_B Scan : 11081

Andromeda score : 117.65

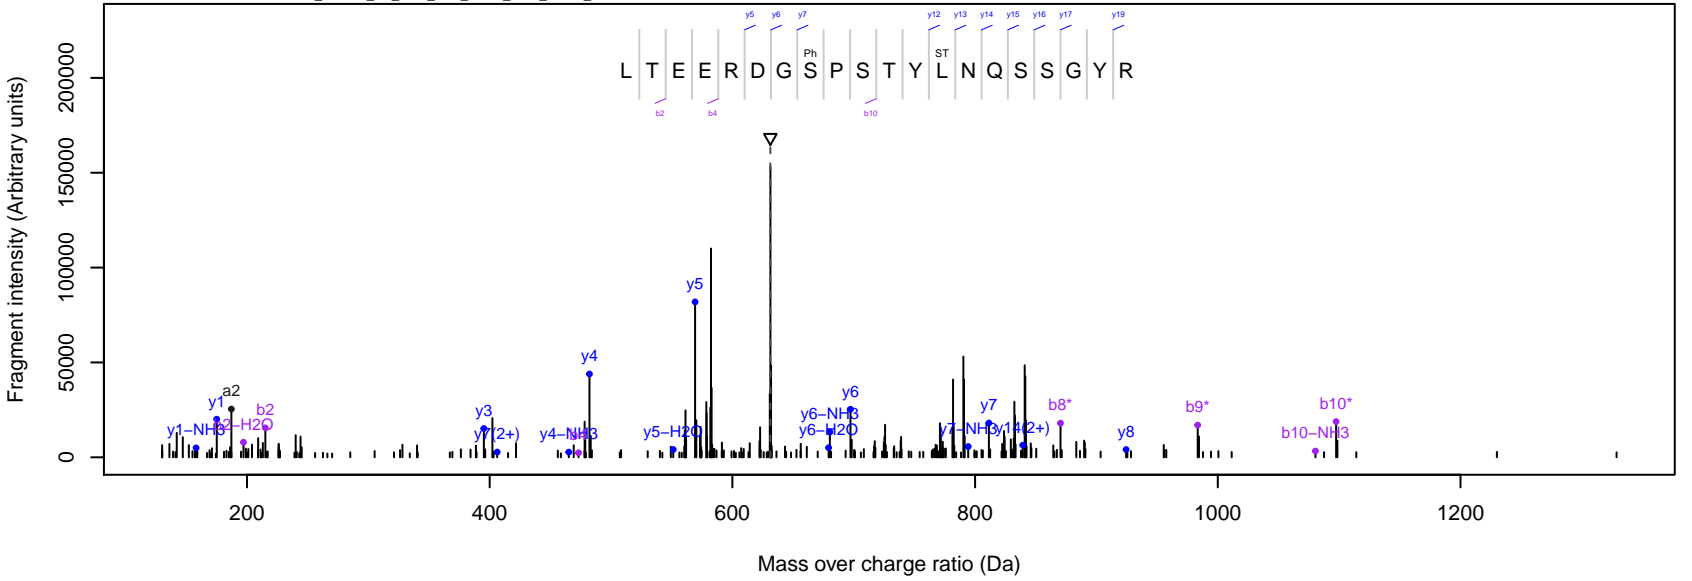

RYS(Phospho (STY))DFEWLKNELER-3+

Source : QE3\_201126\_FR\_TiOx\_hum\_tissue\_Urea\_RNAB\_B Scan : 46766

Andromeda score : 117.65

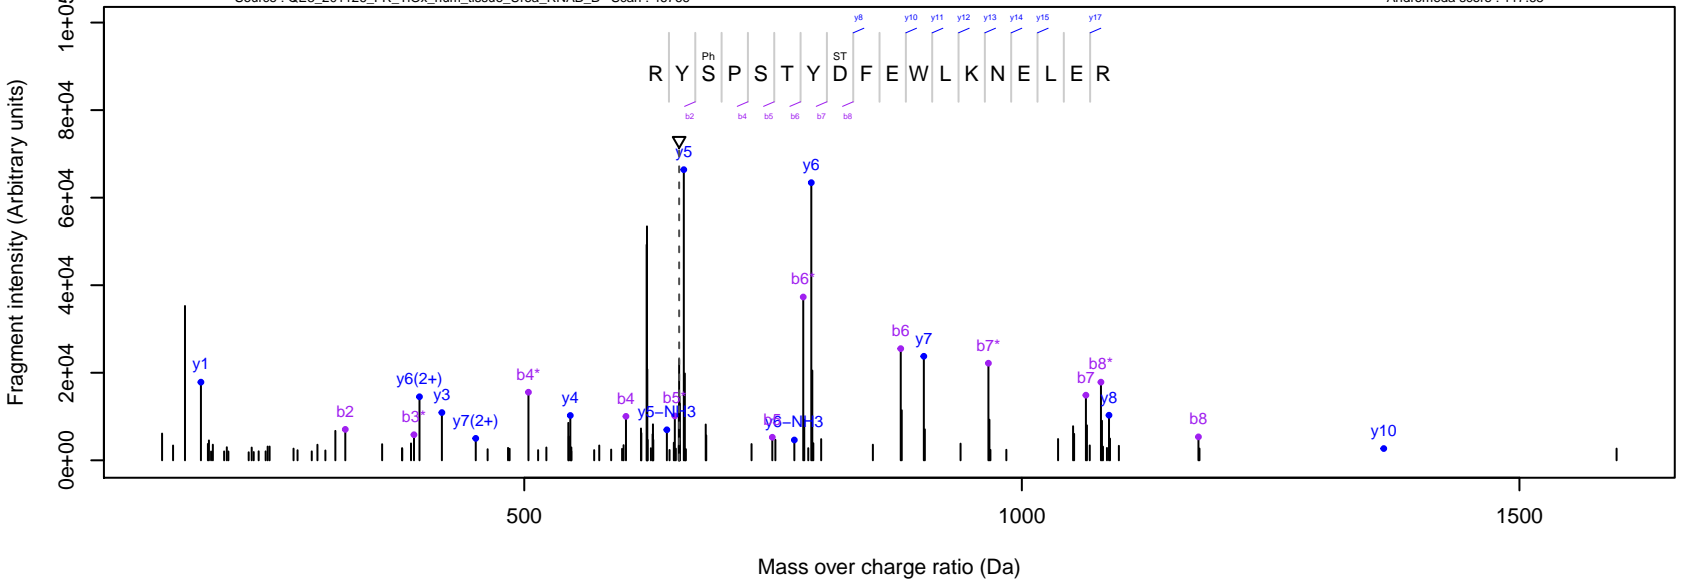

RSSYEDSS(Phospho (STY))LPSINALQAEVLSR-3+

Source : QE3\_201126\_FR\_TIOx\_hum\_tissue\_Urea\_RNAB\_H Scan : 57344

Andromeda score : 117.64

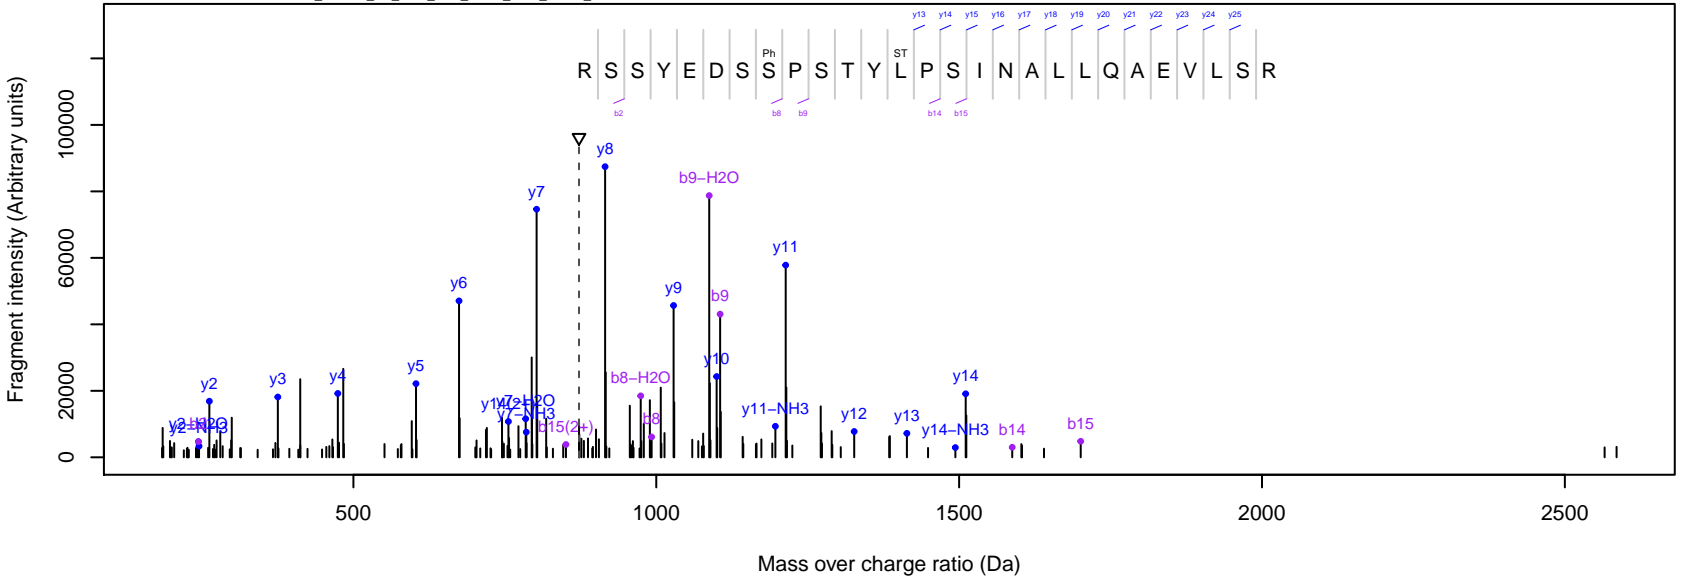

RGS(Phospho (STY))S(Phospho (STY))GSVDETLFALPAASEPVI R-3+

Source : QE3\_201126\_FR\_TIOx\_hum\_tissue\_Urea\_RNAB\_H Scan : 56463

Andromeda score : 117.57

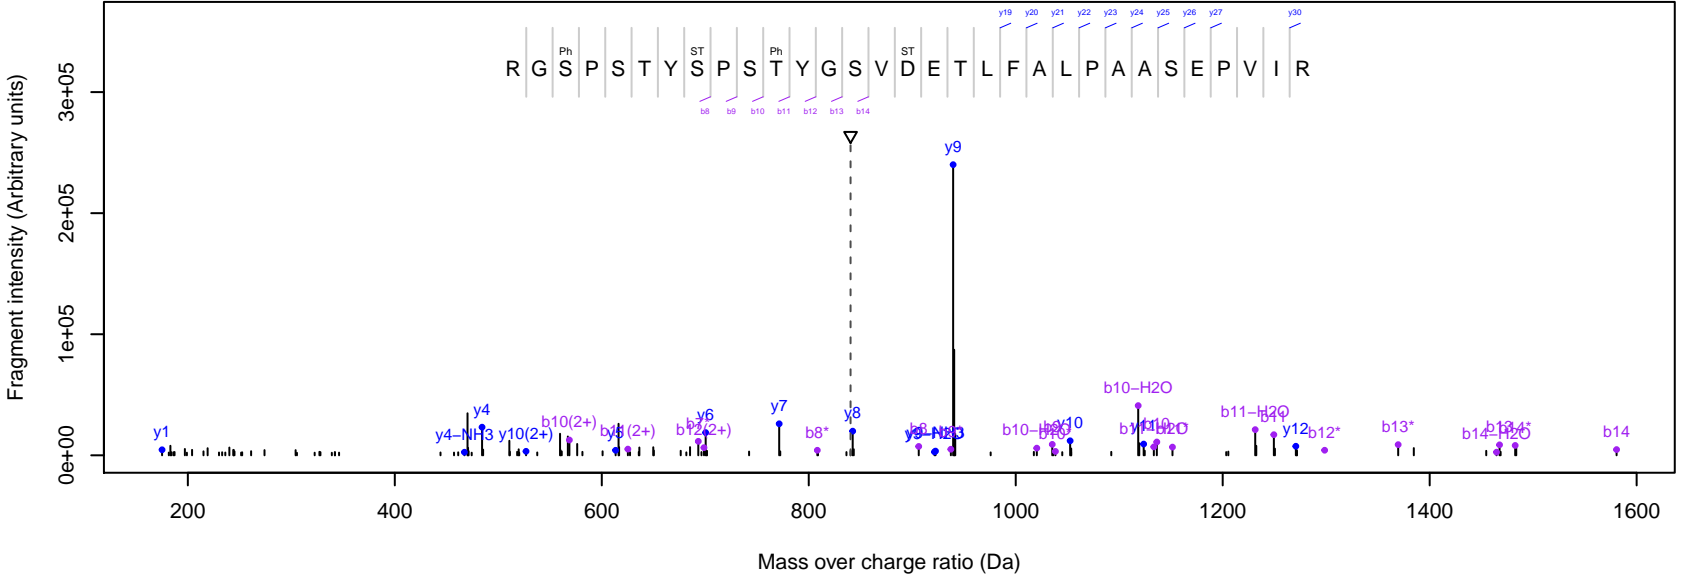

(Acetyl (Protein N-term))M(Oxidation (M))NSS(Phospho (STY))DEEKQLQILITSLK-3+

Source : QE3\_201126\_FR\_TIOx\_hum\_tissue\_Urea\_RNAB\_H Scan : 51246

Andromeda score : 117.55

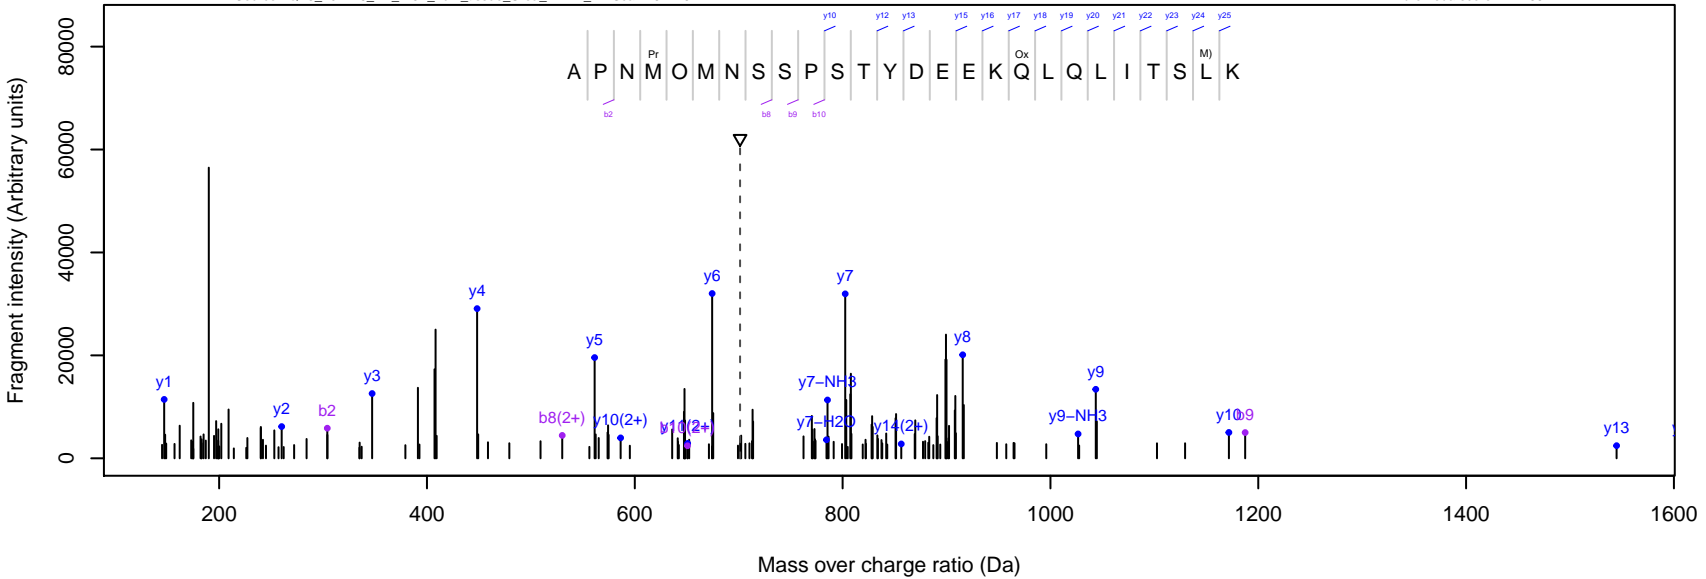

GDS(Phospho (STY))LILEHQWELEKLELLHEVEK-4+

Source : QE3\_201126\_FR\_TiOx\_hum\_tissue\_Urea\_RNAB\_N Scan : 51250

Andromeda score : 117.54

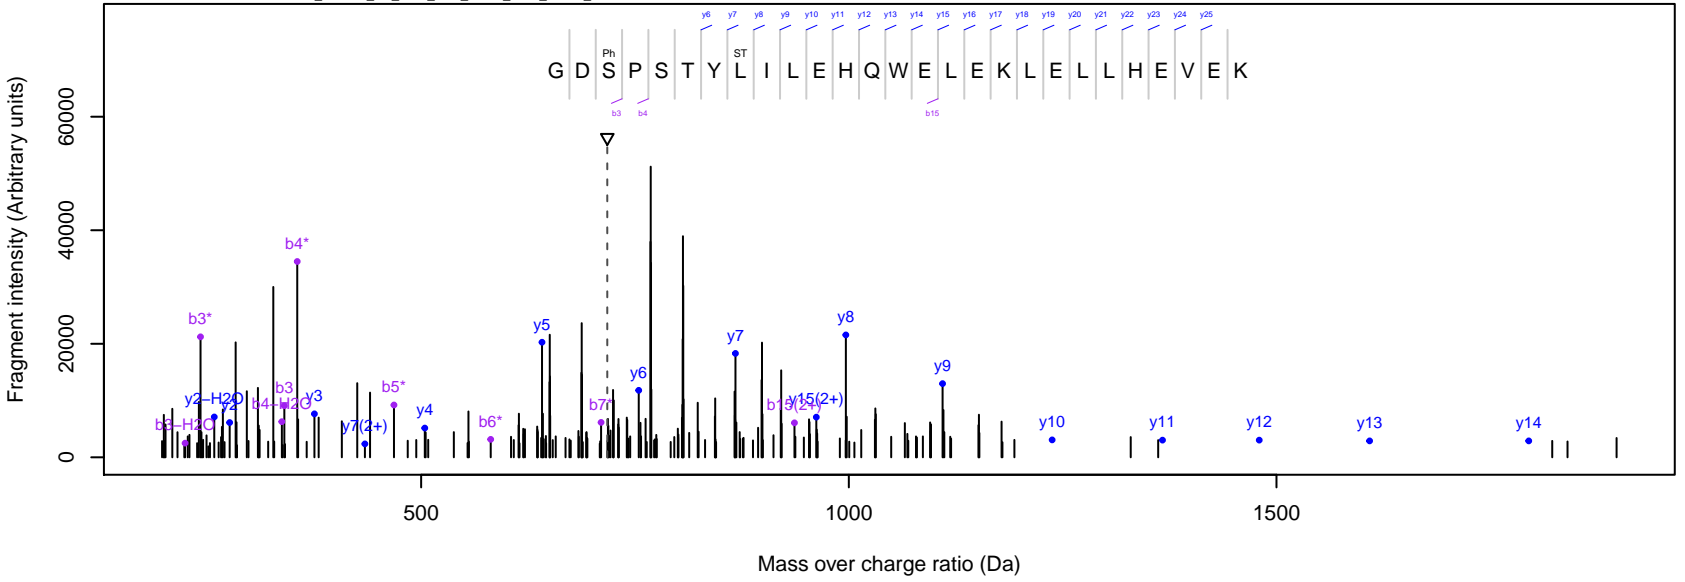

SNS(Phospho (STY))ISK(Phospho (STY))PGPSSPKEPLLFSR-3+

Source : QE3\_201126\_FR\_TiOx\_hum\_tissue\_Urea\_RNAB\_N Scan : 28707

Andromeda score : 117.52

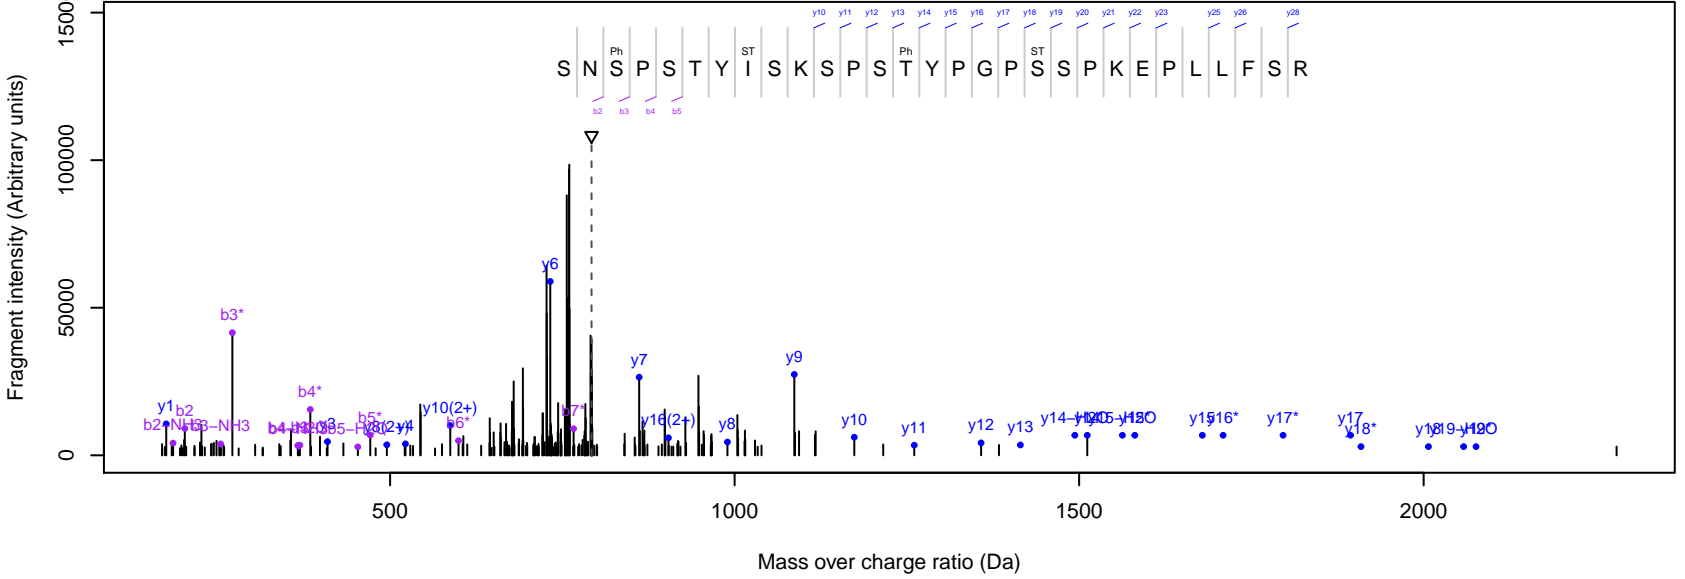

DHS(Phospho (STY))PT(Phospho (STY))PSVFNS(Phospho (STY))DEERYR-3+

Source : QE3\_201126\_FR\_TiOx\_hum\_tissue\_Urea\_RNAB\_H Scan : 28583

Andromeda score : 117.48

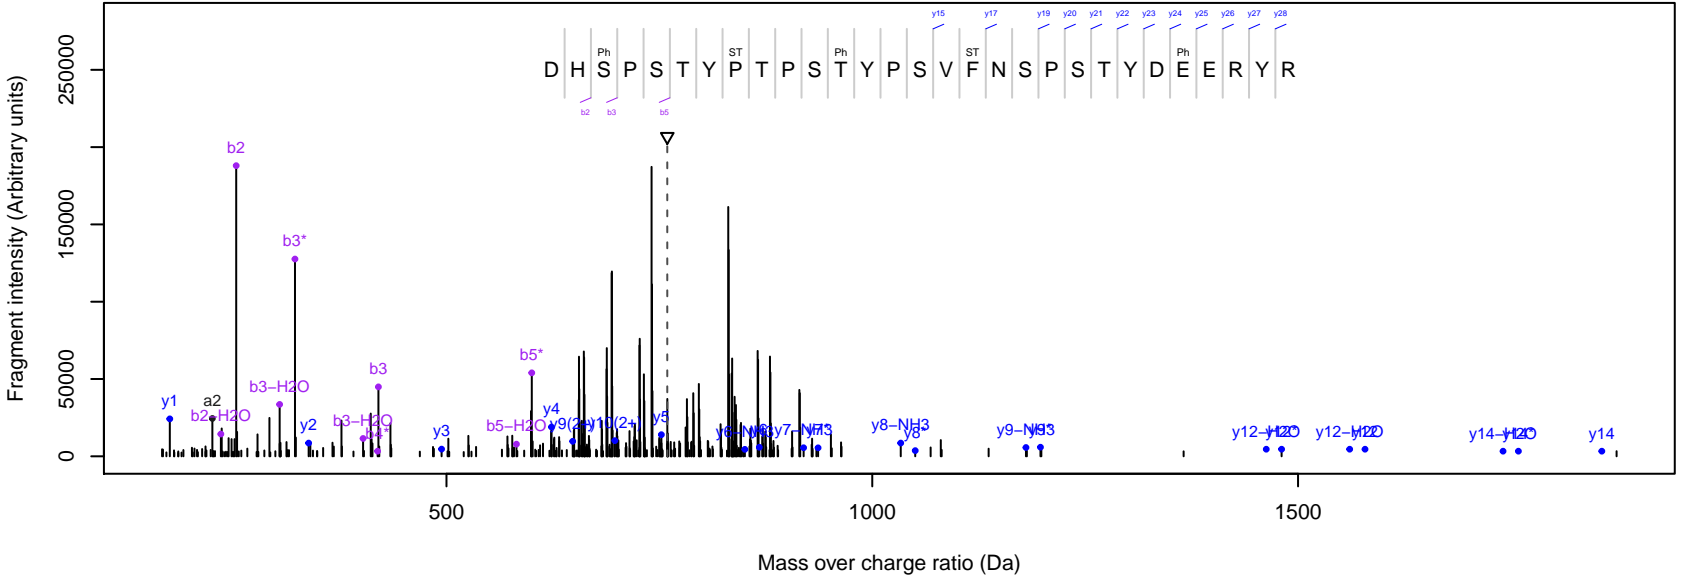

**RAS(Phospho (STY))LSEIGFGK-2+**

Source : QE3\_201126\_FR\_TiOx\_hum\_tissue\_Urea\_RNAB\_B Scan : 23571

Andromeda score : 117.48

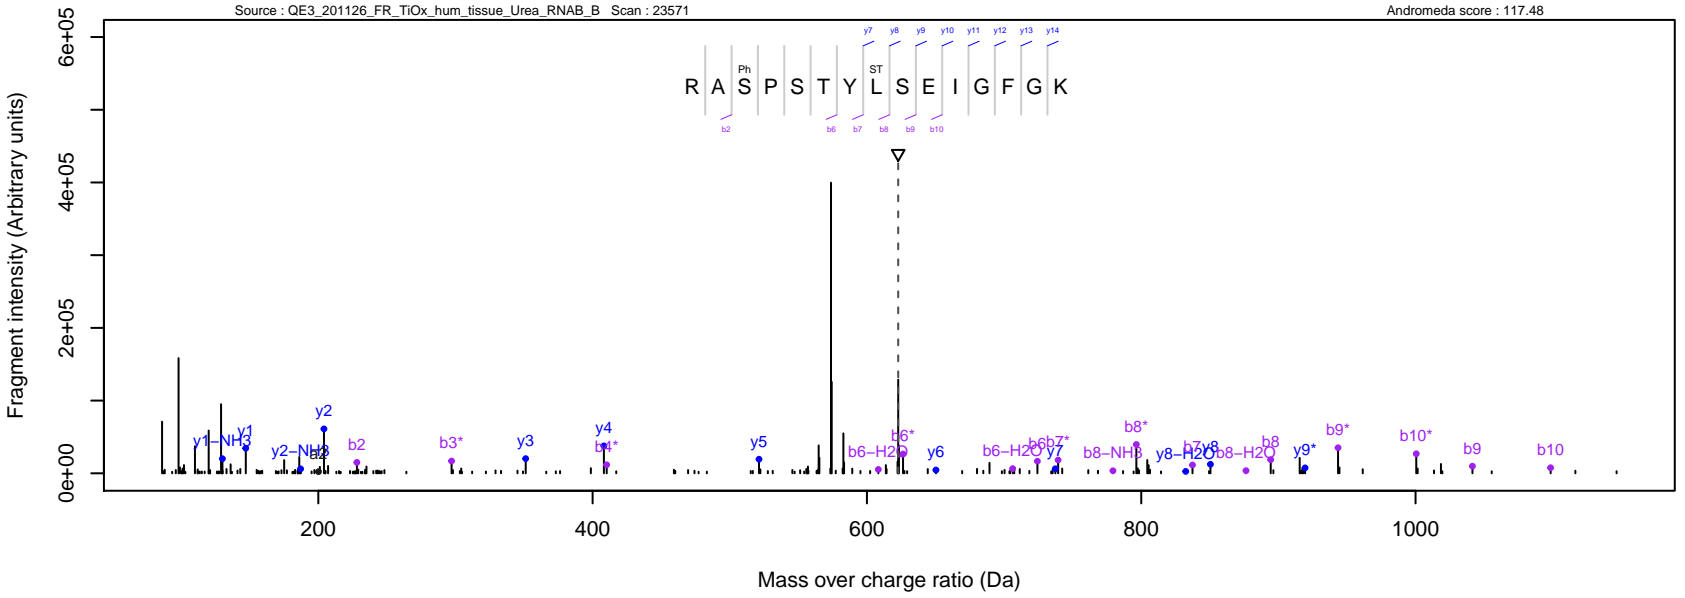

**ASS(Phospho (STY))EDTLNKP GSTAASGVVR-3+**

Source : QE3\_201126\_FR\_TiOx\_hum\_tissue\_Urea\_RNAB\_N Scan : 14541

Andromeda score : 117.43

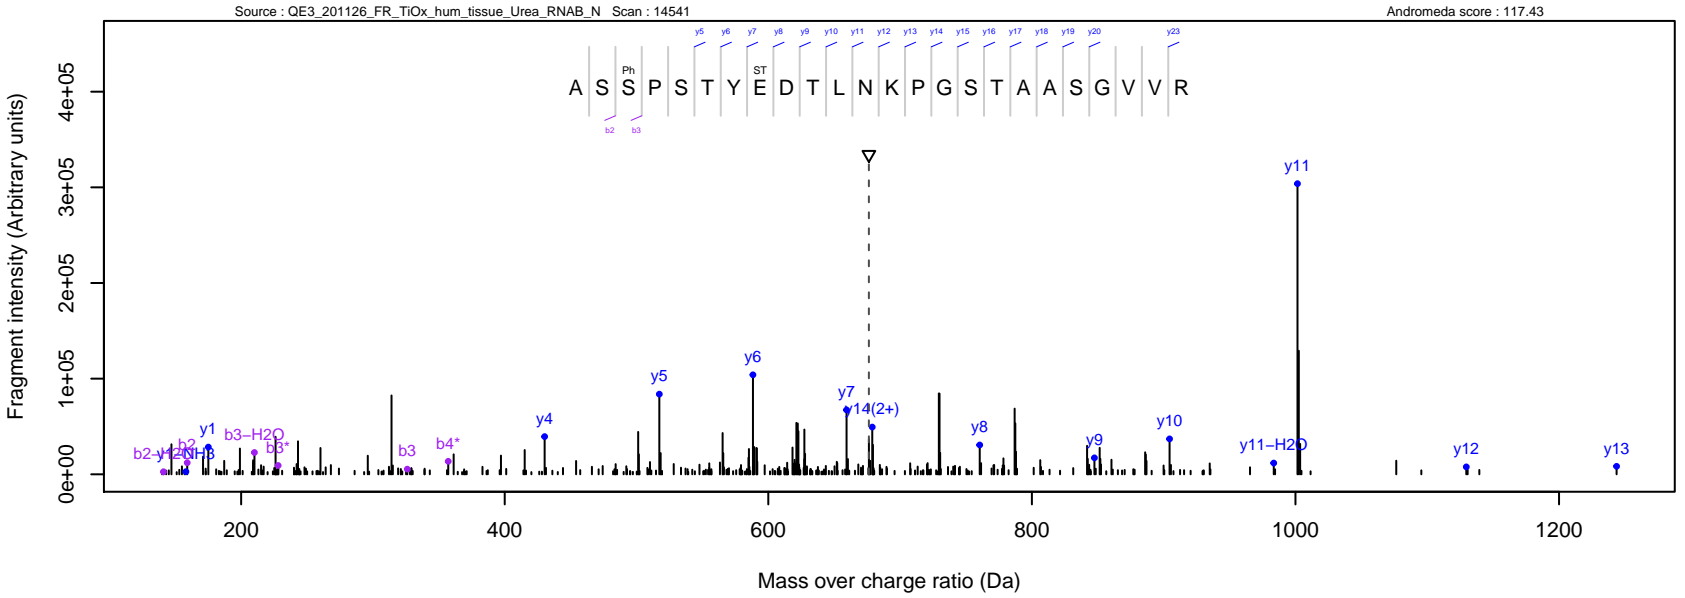

**QQS(Phospho (STY))EEAFPEQQK-2+**

Source : QE3\_201126\_FR\_TiOx\_hum\_tissue\_Urea\_RNAB\_B Scan : 14574

Andromeda score : 117.41

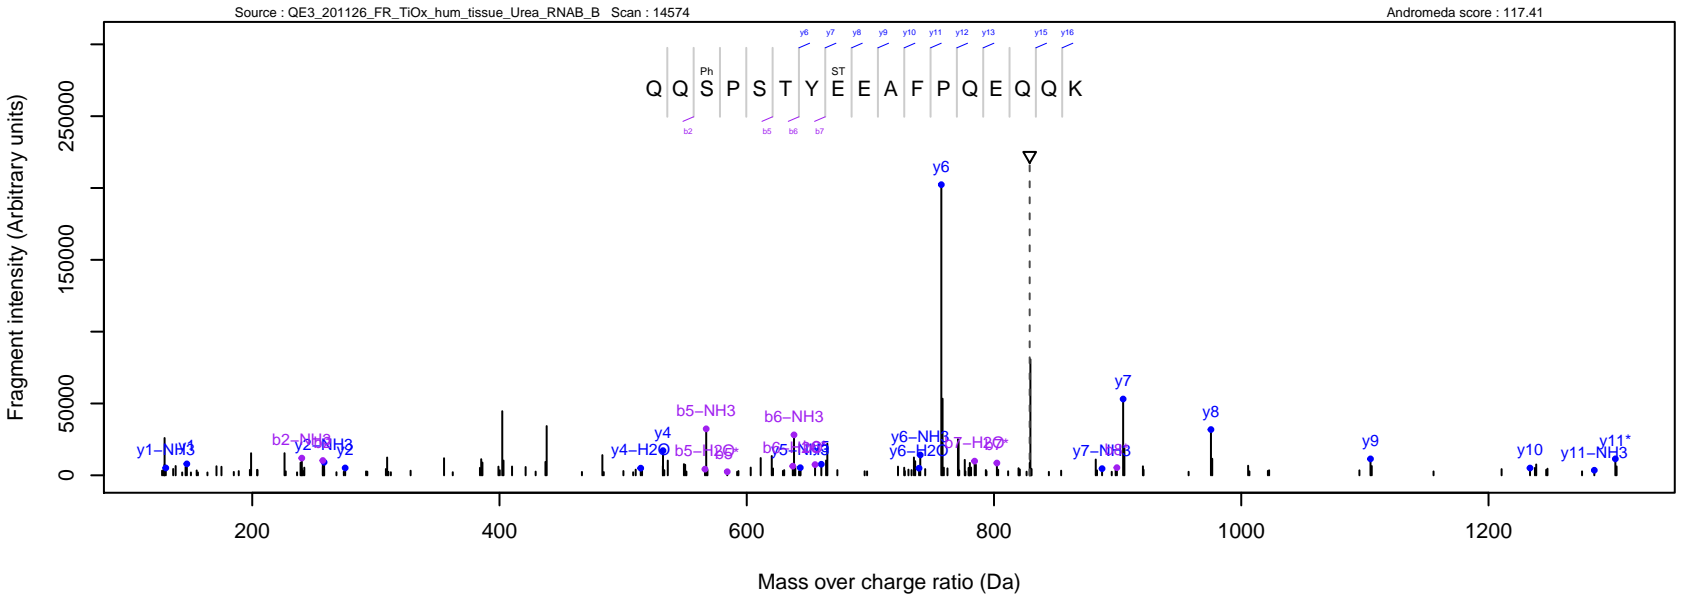



APKIS(Phospho (STY))IPDVLDLKGPK-3+

Source : QE3\_201126\_FR\_TiOx\_hum\_tissue\_Urea\_RNAB\_H Scan : 38001

Andromeda score : 117.38

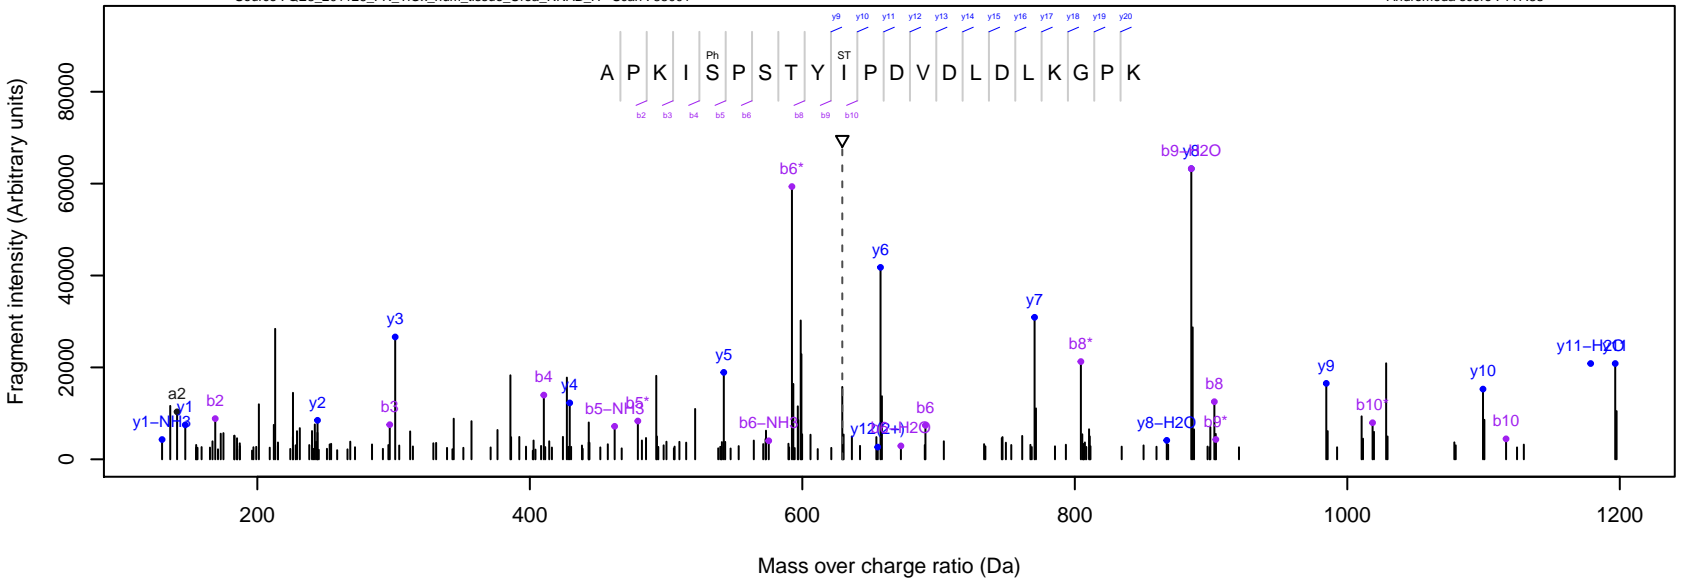

ARRS(Phospho (STY))SEEVDGQHPAQEEVPESPTSGPEAENR-4+

Source : QE3\_201126\_FR\_TiOx\_hum\_tissue\_Urea\_RNAB\_B Scan : 12371

Andromeda score : 117.32

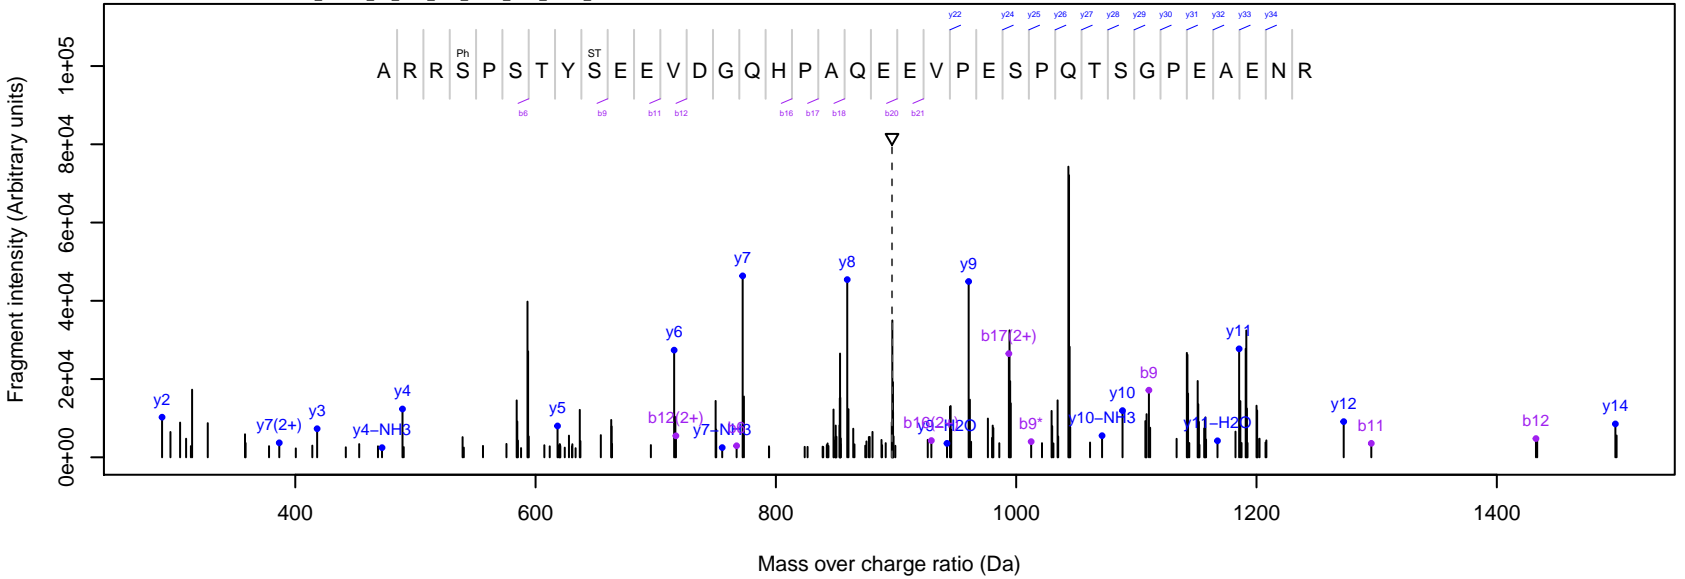

RAS(Phospho (STY))LSDIGFGKLETYVK-3+

Source : QE3\_201126\_FR\_TiOx\_hum\_tissue\_Urea\_RNAB\_B Scan : 39981

Andromeda score : 117.31

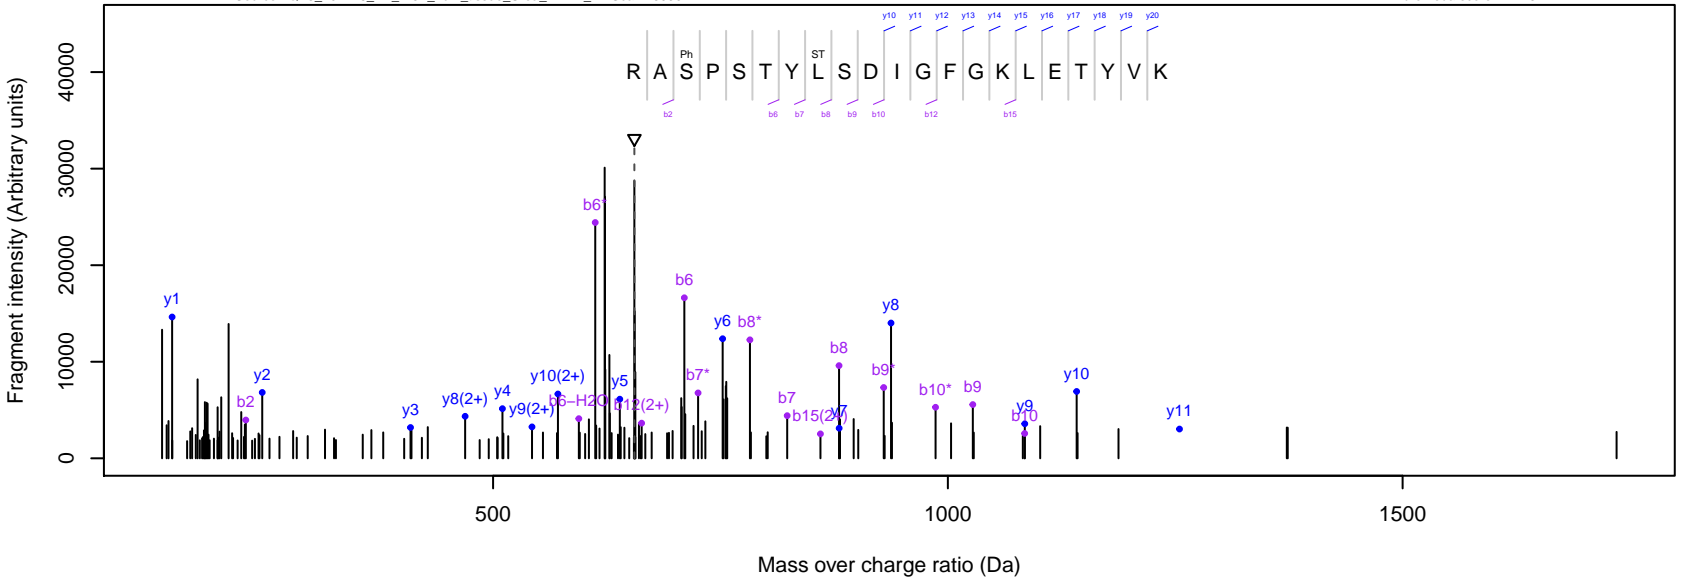



T(Phospho (STY))SM(Oxidation (M))GGTQQQFVEGV R-2+

Source : QE3\_201126\_FR\_TIOx\_hum\_tissue\_Urea\_RNAB\_H Scan : 21869

Andromeda score : 117.25

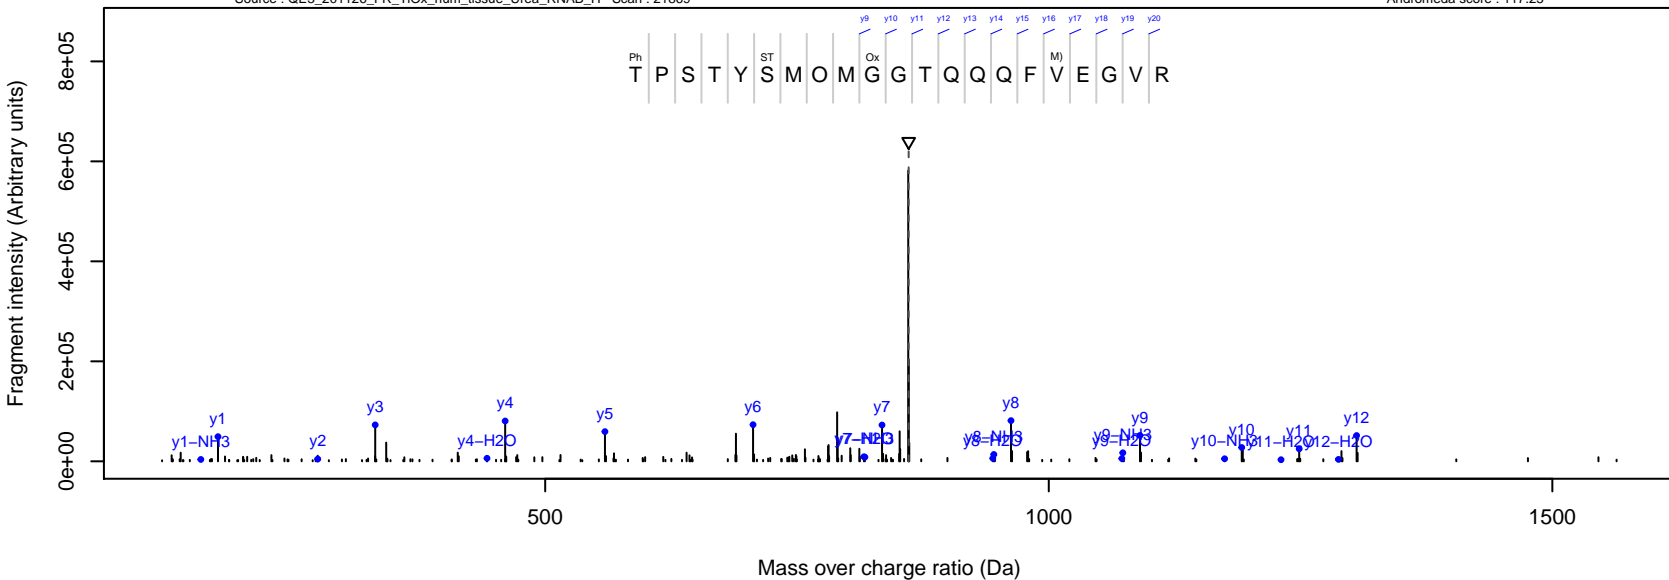

ENQGSHEPTLNPETVA INLSPSTYD VDL SK-3+

Source : QE3\_201126\_FR\_TIOx\_hum\_tissue\_Urea\_RNAB\_H Scan : 47340

Andromeda score : 117.24

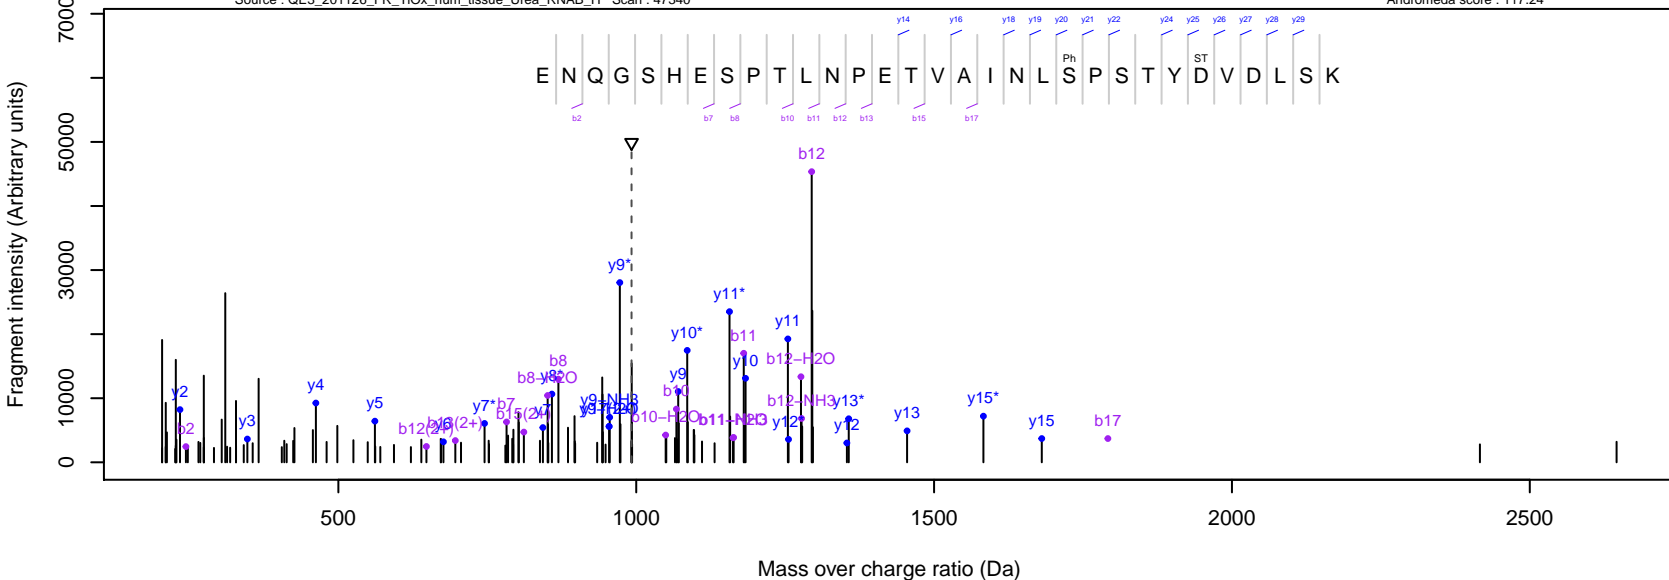

GRLT(Phospho (STY))PS(Phospho (STY))PDIIVLSDNEASS(Phospho (STY))PR-3+

Source : QE3\_201126\_FR\_TIOx\_hum\_tissue\_Urea\_RNAB\_B Scan : 52688

Andromeda score : 117.23

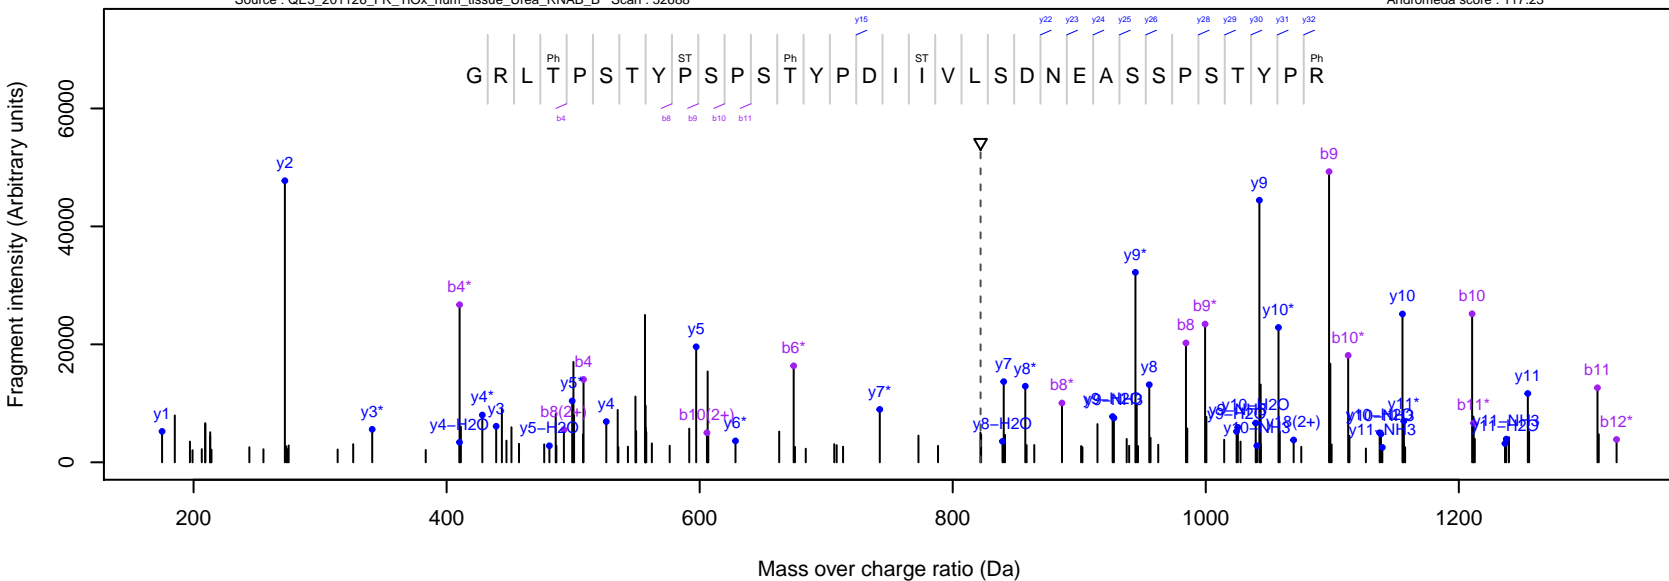

VGNES(Phospho (STY))PVQELK-2+

Source : QE3\_201126\_FR\_TIOx\_hum\_tissue\_Urea\_RNAB\_N Scan : 16891

Andromeda score : 117.21

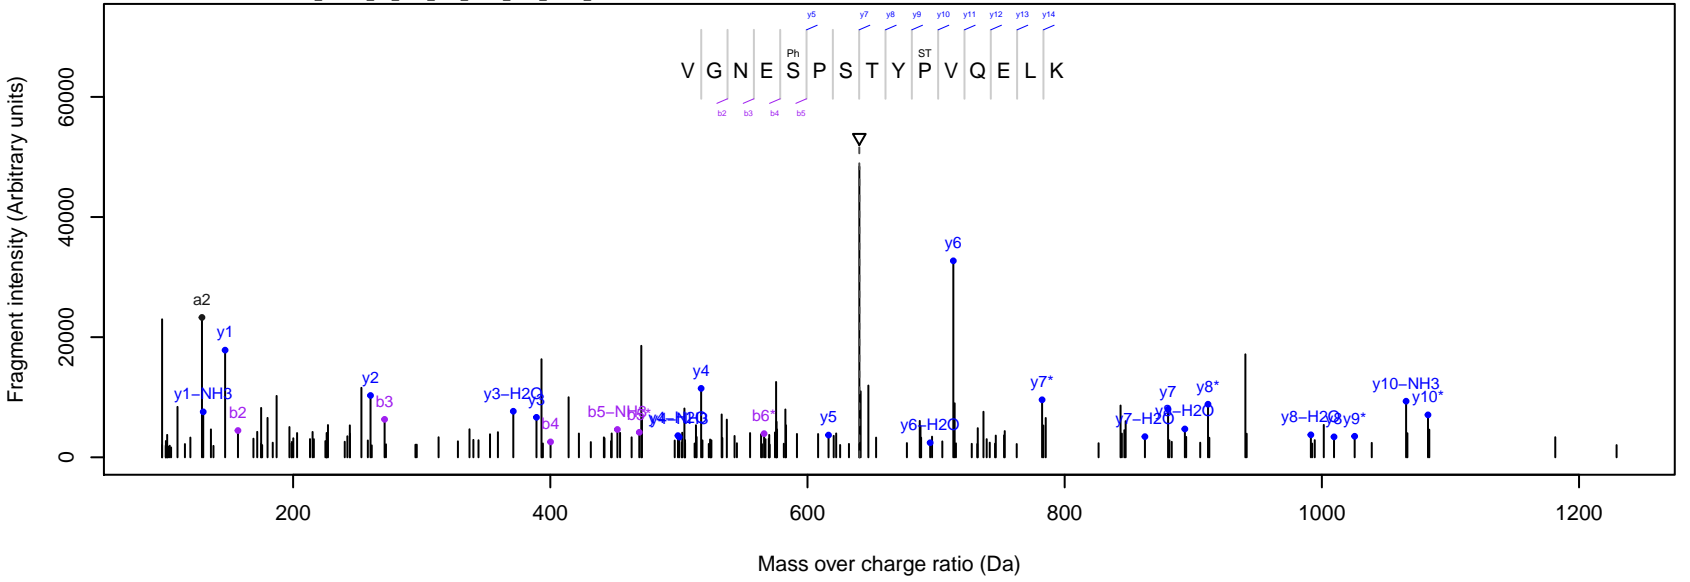

LTPAEEENNSFQRLS(Phospho (STY))P-2+

Source : QE3\_201126\_FR\_TIOx\_hum\_tissue\_Urea\_RNAB\_N Scan : 30653

Andromeda score : 117.18

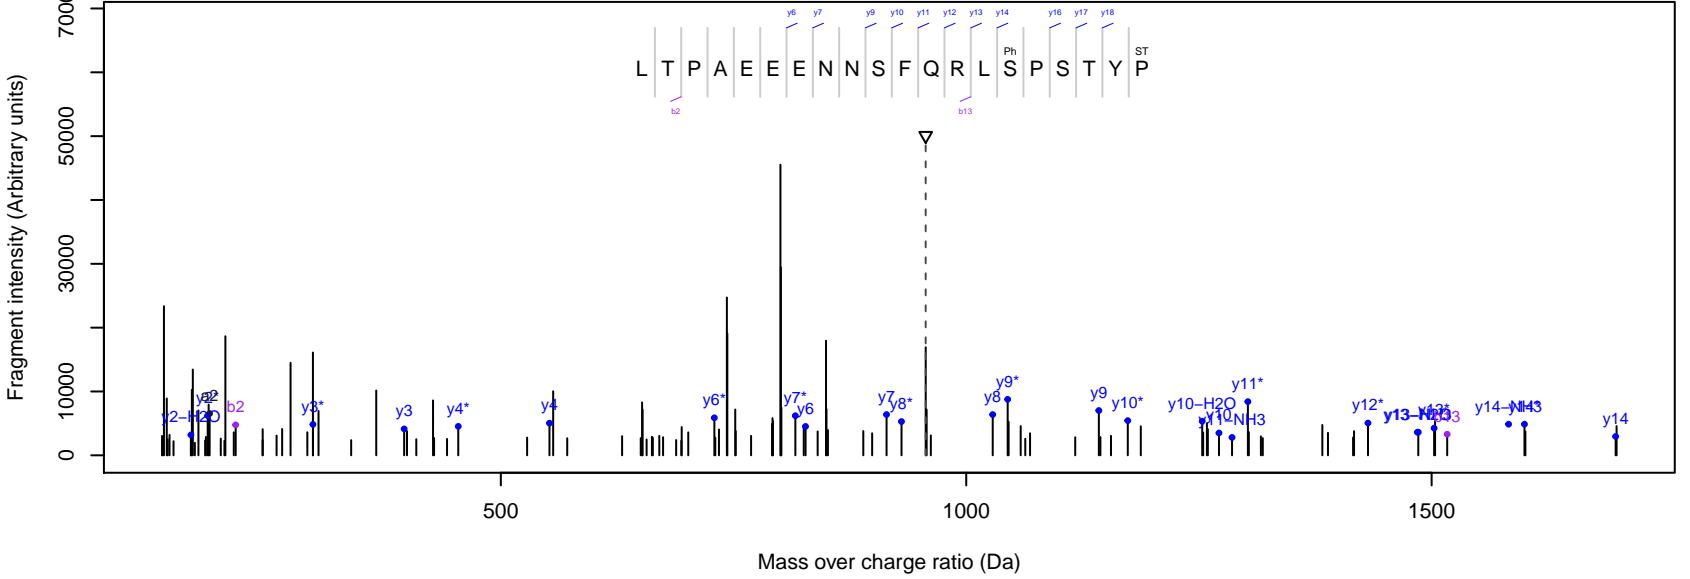

VQRPKEES(Phospho (STY))S(Phospho (STY))EDENEVSNILR-3+

Source : QE3\_201126\_FR\_TIOx\_hum\_tissue\_Urea\_RNAB\_N Scan : 26365

Andromeda score : 117.08

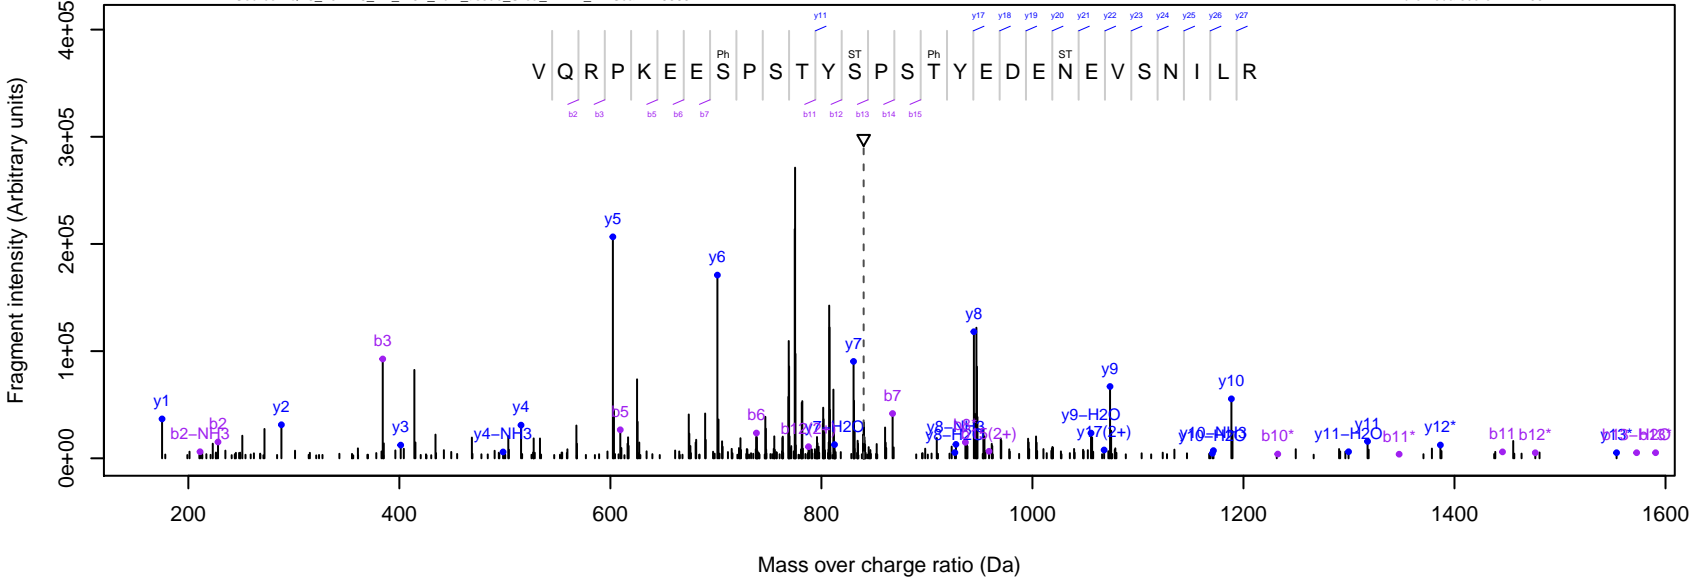

HGS(Phospho (STY))GADS(Phospho (STY))DYENTQSGDPLLGLGK-3+

Source : QE3\_201126\_FR\_TiOx\_hum\_tissue\_Urea\_RNAB\_N Scan : 43571

Andromeda score : 117.04

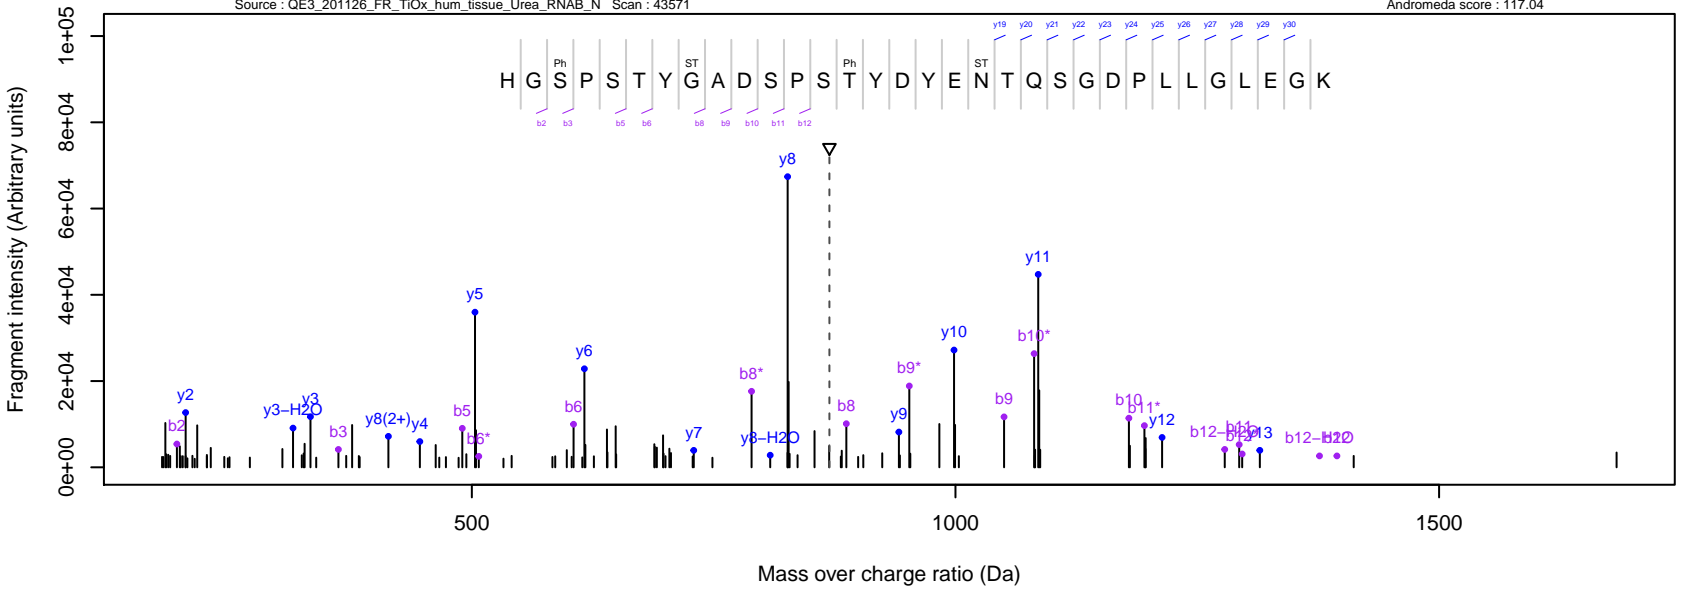

DAVQSLQLS(Phospho (STY))PR-2+

Source : QE3\_201126\_FR\_TiOx\_hum\_tissue\_Urea\_RNAB\_H Scan : 28532

Andromeda score : 117.03

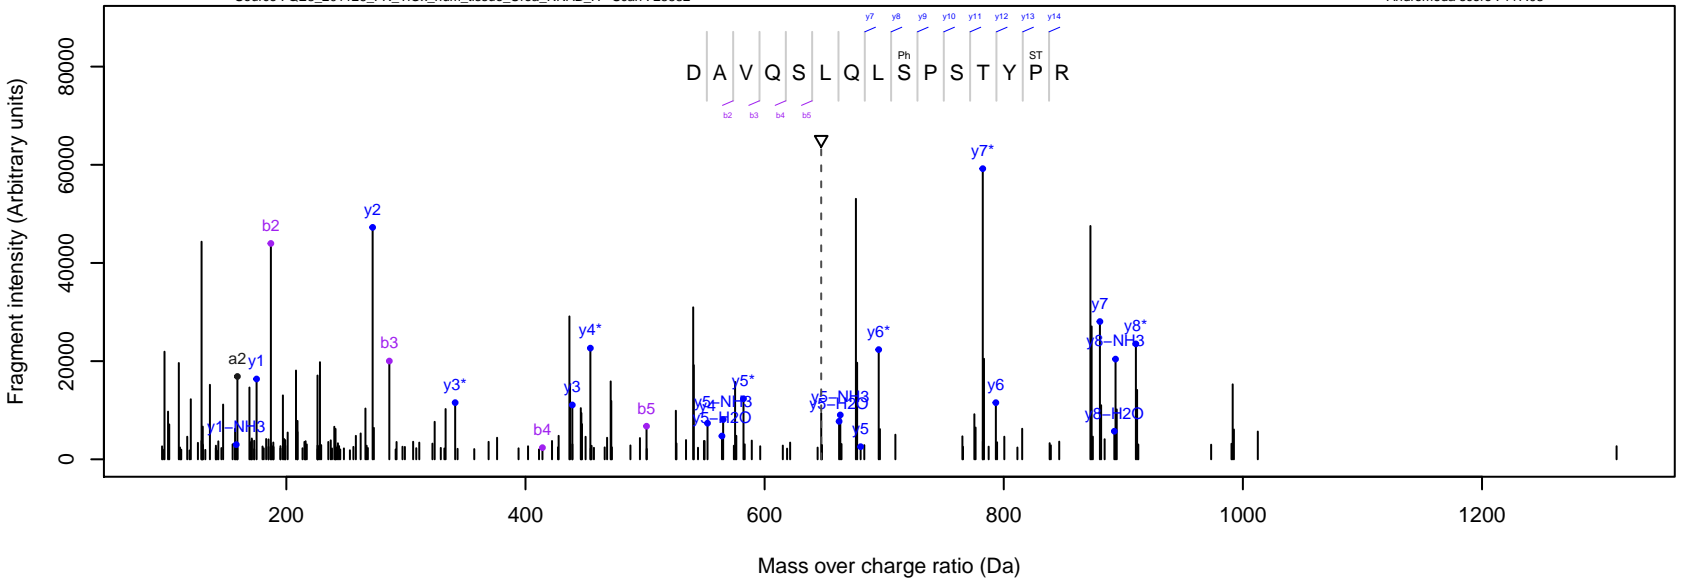

LEIS(Phospho (STY))PDSS(Phospho (STY))PERAHYTHSDYQYSQR-4+

Source : QE3\_201126\_FR\_TiOx\_hum\_tissue\_Urea\_RNAB\_H Scan : 19923

Andromeda score : 117.03

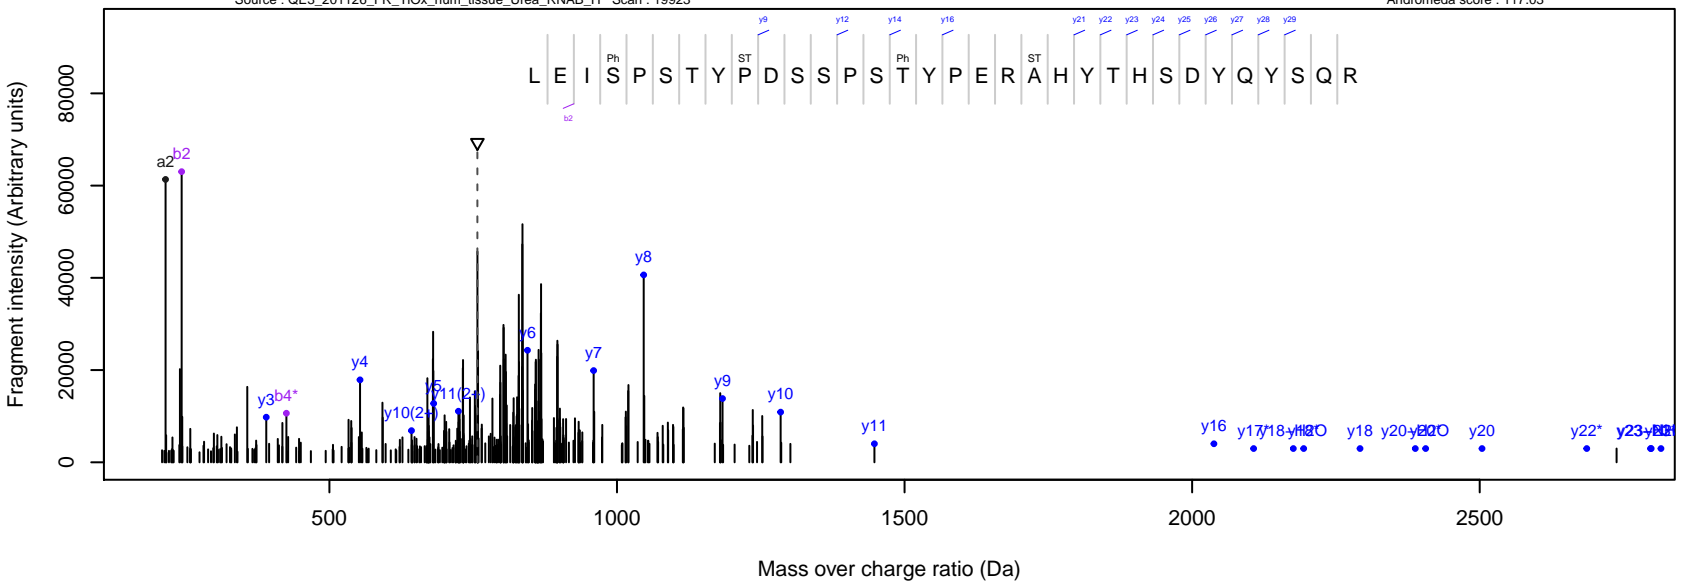

SCTPS(Phospho (STY))PDQISHR-2+

Source : QE3\_201126\_FR\_TiOx\_hum\_tissue\_Urea\_RNAB\_N Scan : 10467

Andromeda score : 117.03

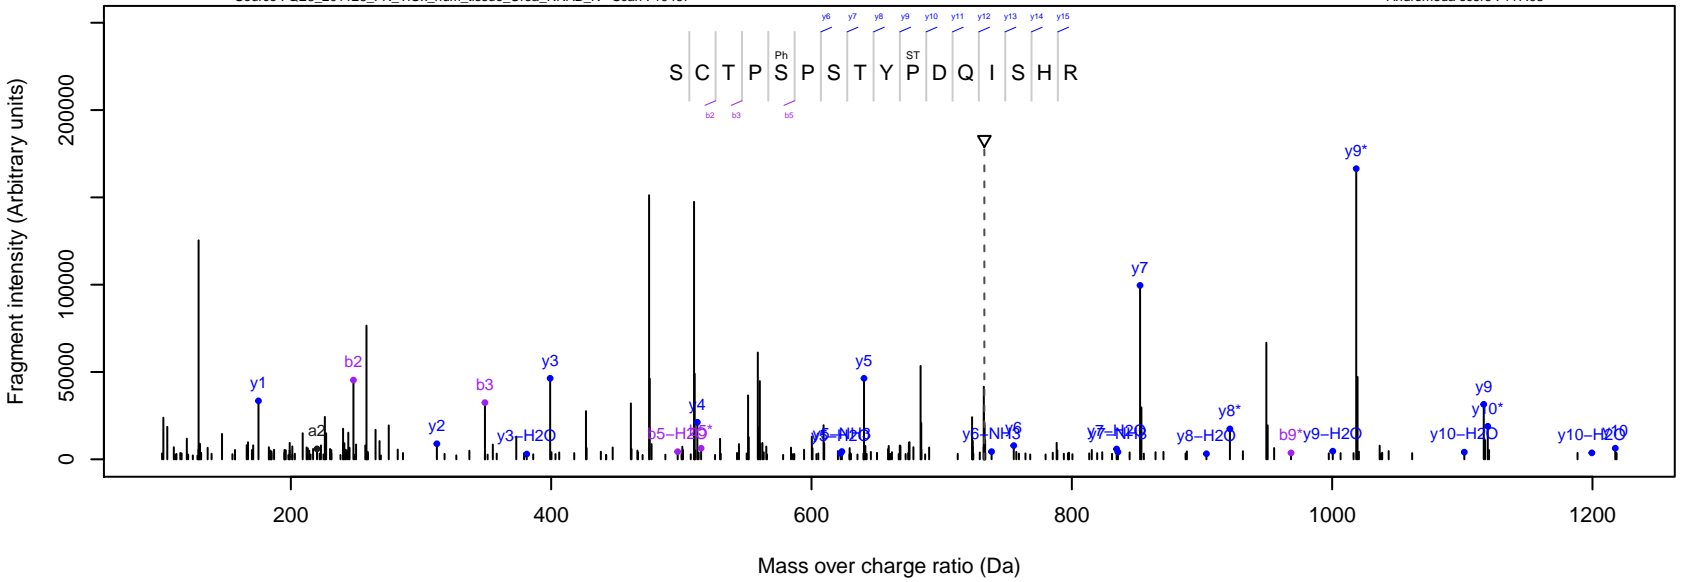

SSS(Phospho (STY))ETILSSLAGSDIVK-2+

Source : QE3\_201126\_FR\_TiOx\_hum\_tissue\_Urea\_RNAB\_N Scan : 53151

Andromeda score : 117

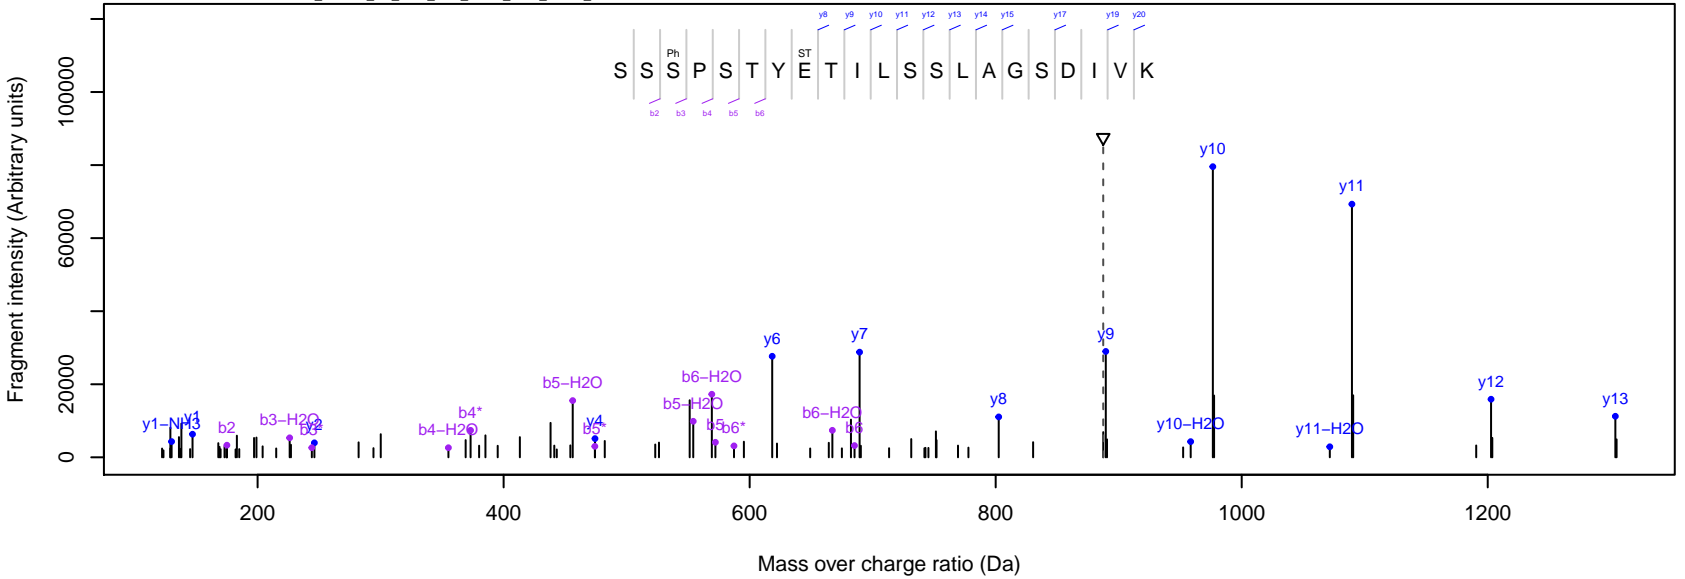

GAS(Phospho (STY))QAGM(Oxidation (M))TGYGRPR-2+

Source : QE3\_201126\_FR\_TiOx\_hum\_tissue\_Urea\_RNAB\_H Scan : 7133

Andromeda score : 116.98

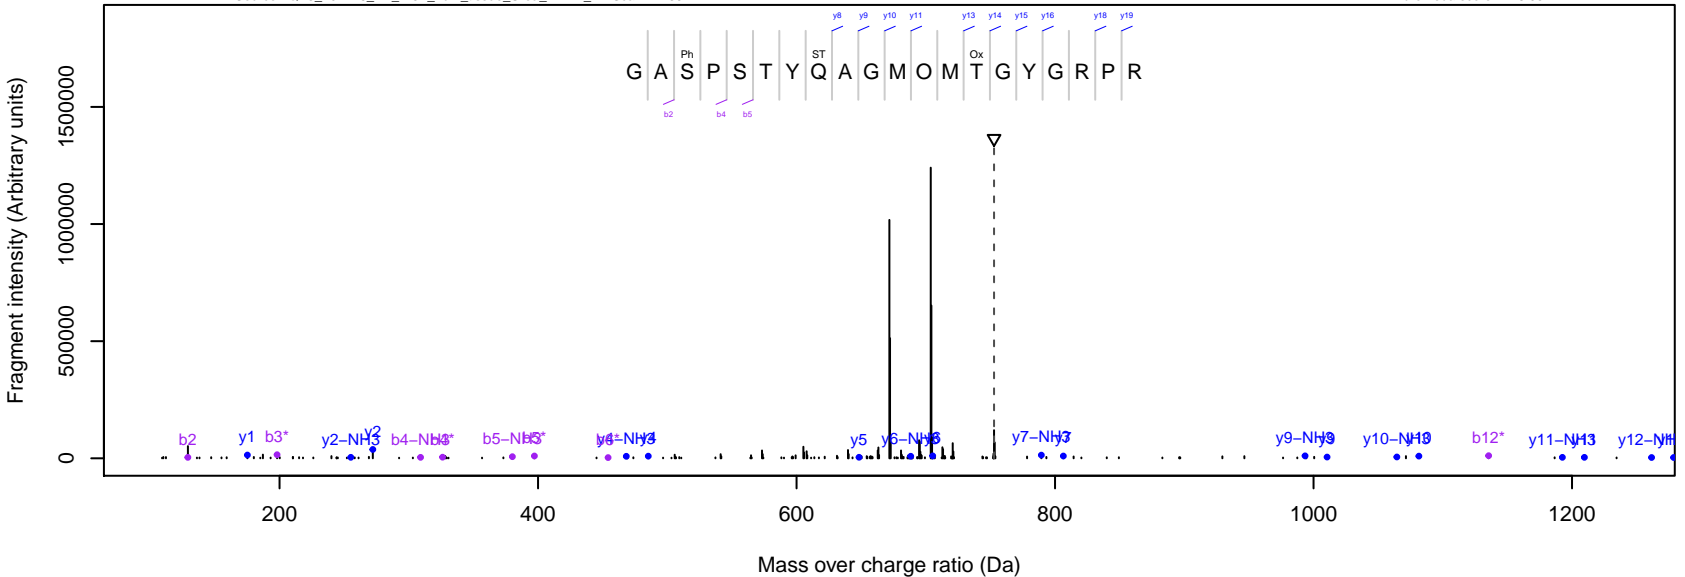

GDLKSS(Phospho (STY))KAS(Phospho (STY))LGS(Phospho (STY))LEGEAEAEASSPK-3+

Source : QE3\_201126\_FR\_TiOx\_hum\_tissue\_Urea\_RNAB\_H Scan : 38422

Andromeda score : 116.98

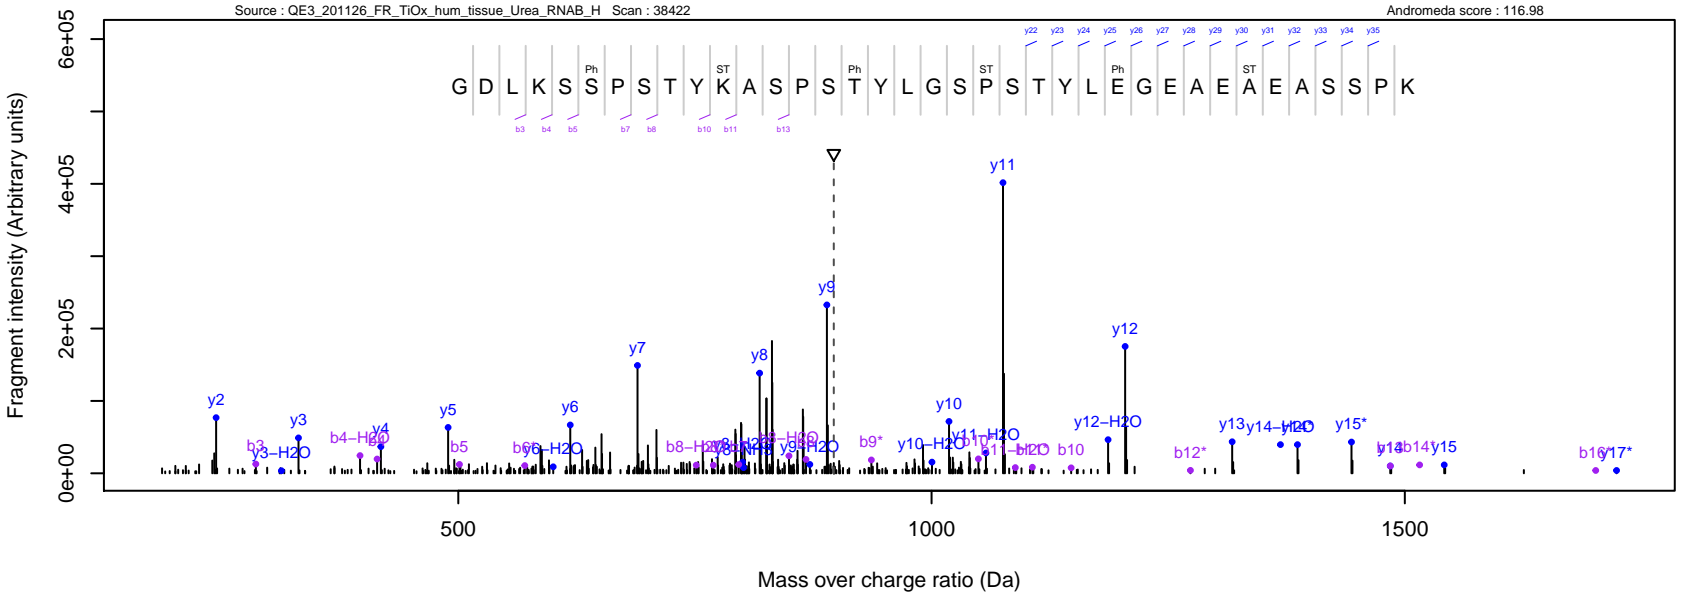

GREDVSNFDDEFTSEAPILT(Phospho (STY))PPREPR-4+

Source : QE3\_201126\_FR\_TiOx\_hum\_tissue\_Urea\_RNAB\_B Scan : 40173

Andromeda score : 116.97

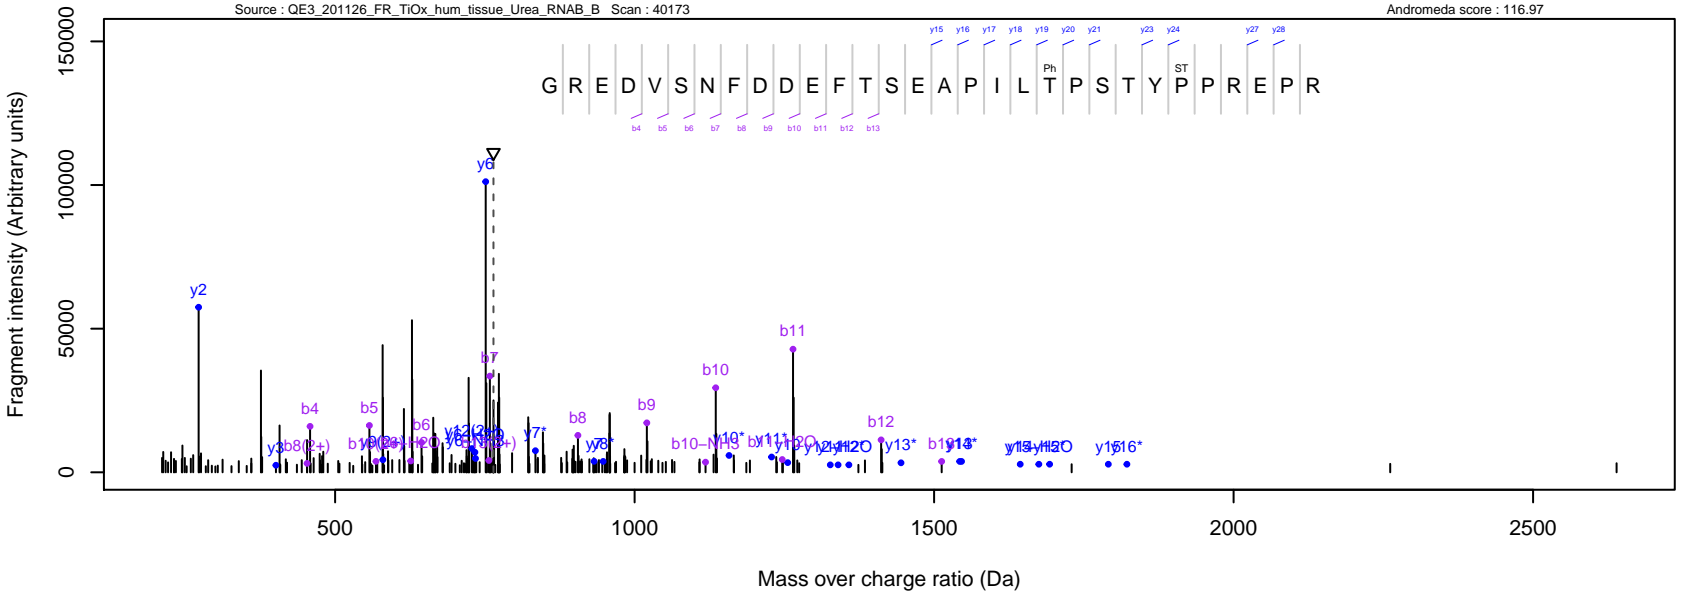

SHVEDGDIAGAPAS(Phospho (STY))S(Phospho (STY))PEAPPAEQDPVQLK-3+

Source : QE3\_201126\_FR\_TiOx\_hum\_tissue\_Urea\_RNAB\_B Scan : 34757

Andromeda score : 116.97

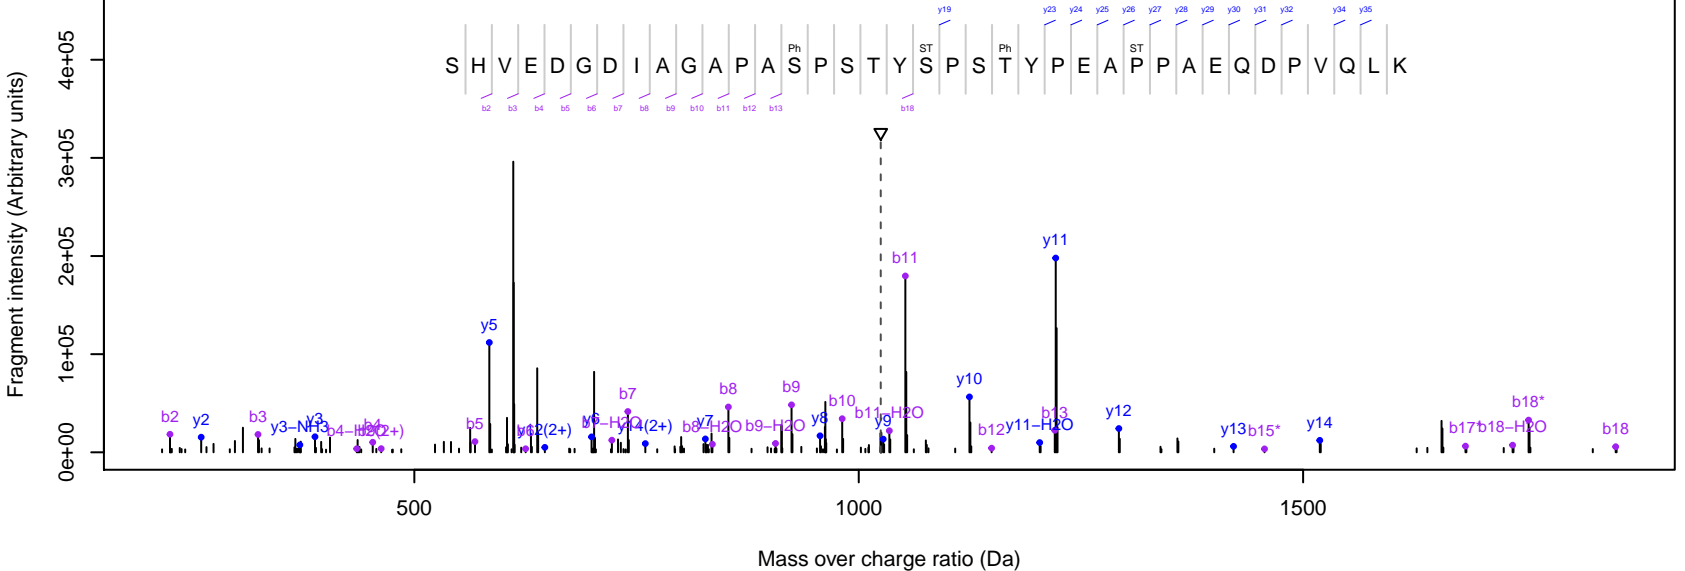

AGQS(Phospho (STY))VIGLQMGTK-2+

Source : QE3\_201126\_FR\_TiOx\_hum\_tissue\_Urea\_RNAB\_N Scan : 29262

Andromeda score : 116.96

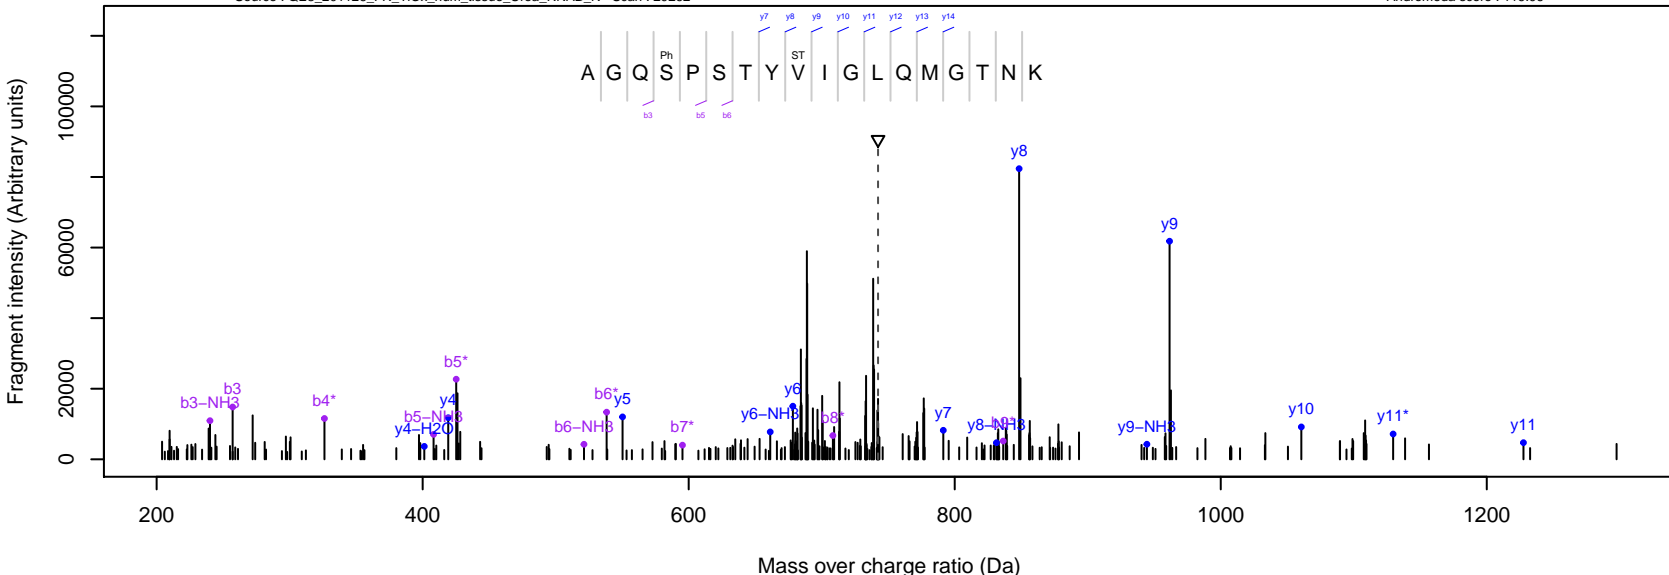

ASLENS(Phospho (STY))LREVEAR-2+

Source : QE3\_201126\_FR\_TiOx\_hum\_tissue\_Urea\_RNAB\_B Scan : 18729

Andromeda score : 116.96

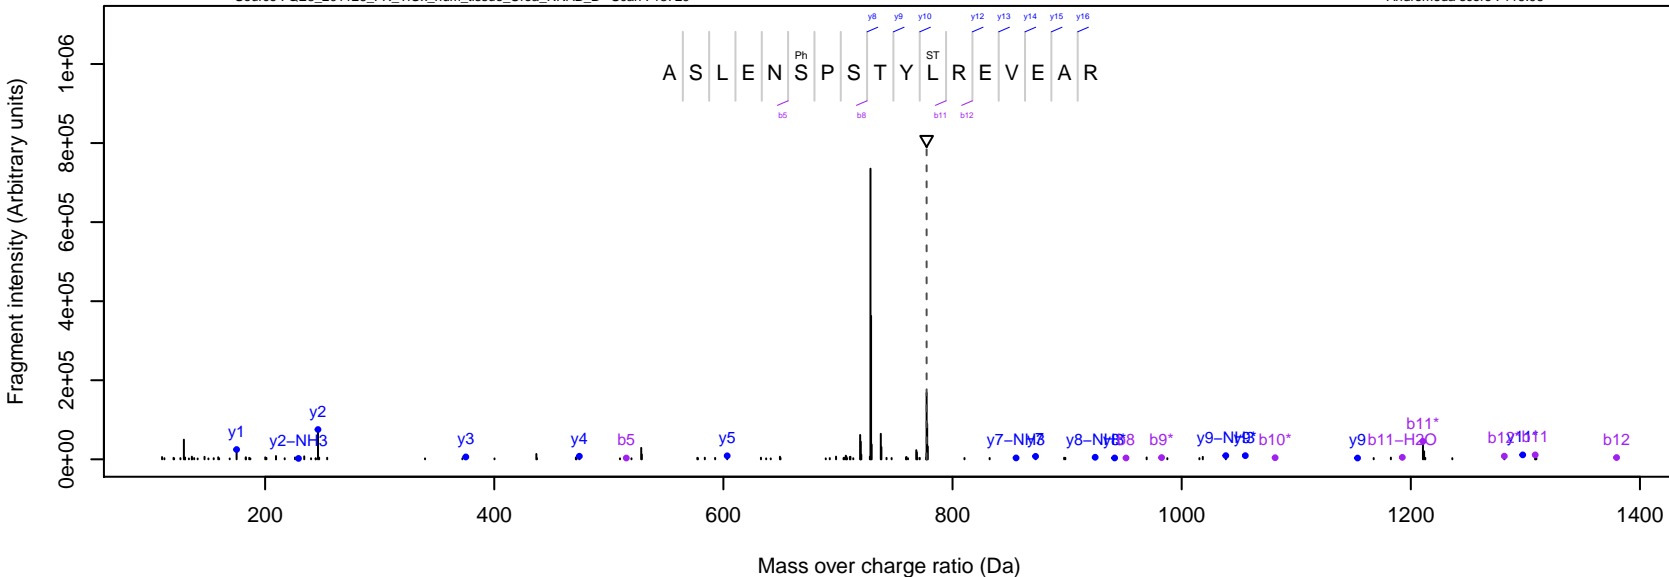

SSS(Phospho (STY))SLLASPGHISVK-2+

Source : QE3\_201126\_FR\_TiOx\_hum\_tissue\_Urea\_RNAB\_N Scan : 24009

Andromeda score : 116.96

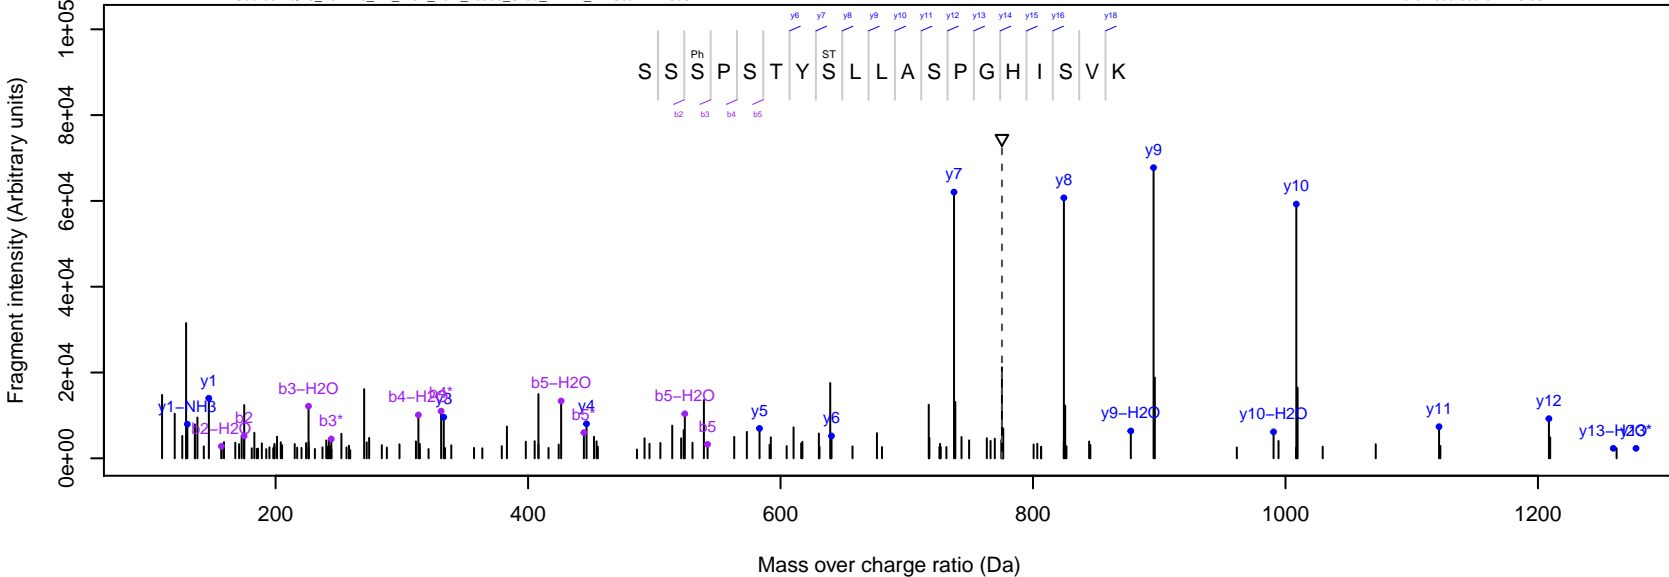



SST(Phospho (STY))VTEAPIAVVTSR-2+

Source : QE3\_201126\_FR\_TiOx\_hum\_tissue\_Urea\_RNAB\_H Scan : 34257

Andromeda score : 116.96

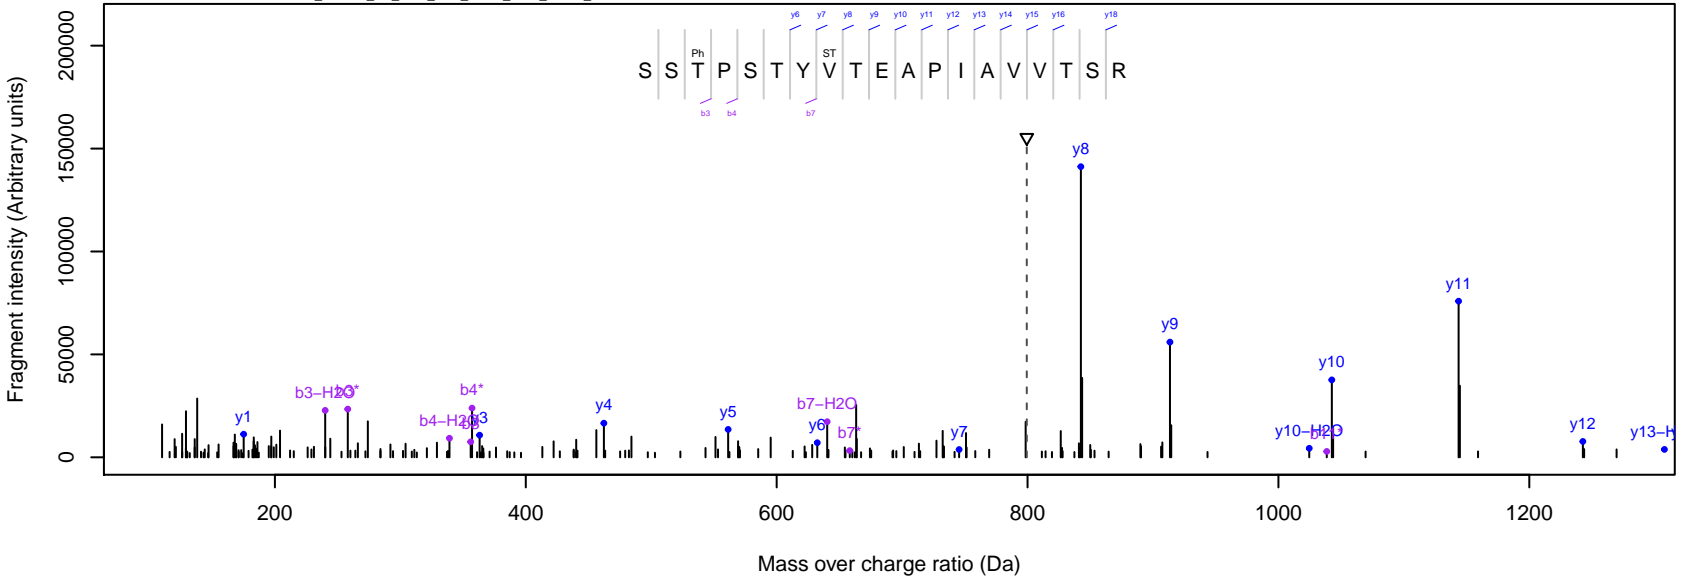

RRAPS(Phospho (STY))VANVGSCHDLSLK-4+

Source : QE3\_201126\_FR\_TiOx\_hum\_tissue\_Urea\_RNAB\_H Scan : 14522

Andromeda score : 116.94

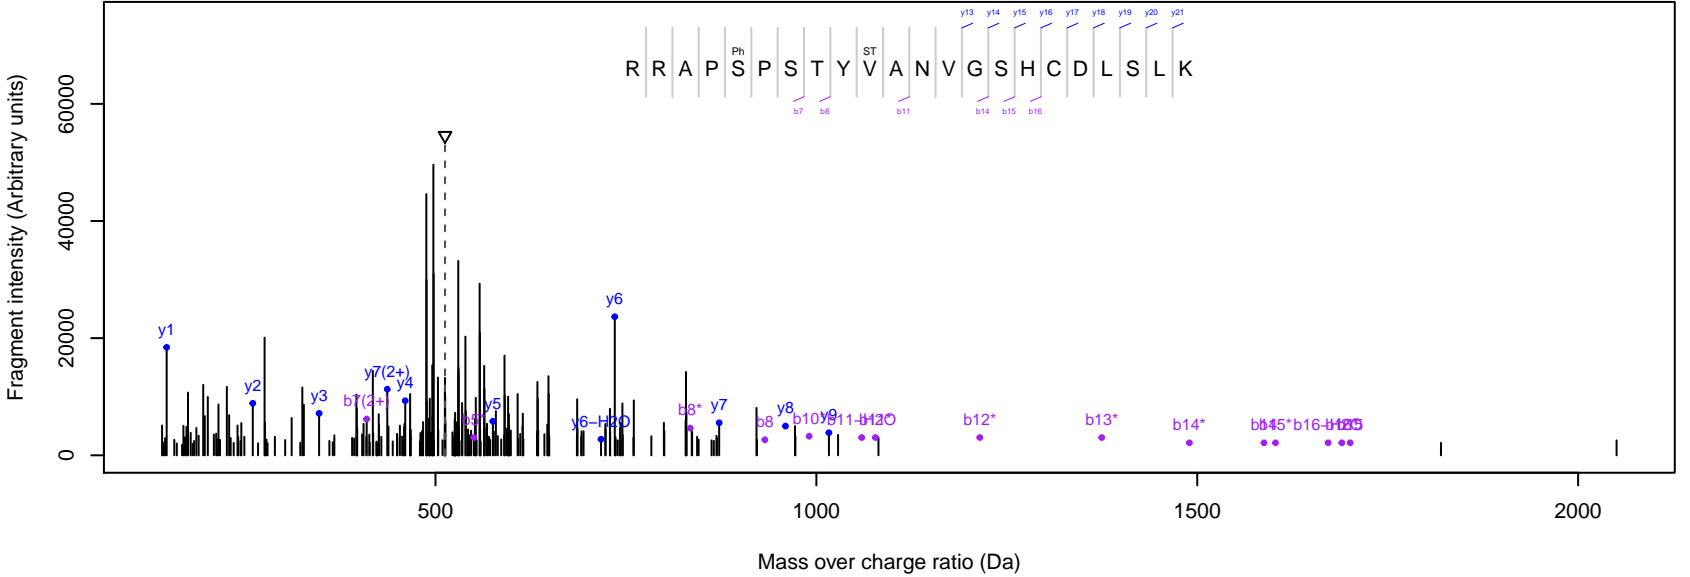

S(Phospho (STY))SPPLRTPDVLESSGPAVR-3+

Source : QE3\_201126\_FR\_TiOx\_hum\_tissue\_Urea\_RNAB\_N Scan : 30893

Andromeda score : 116.94

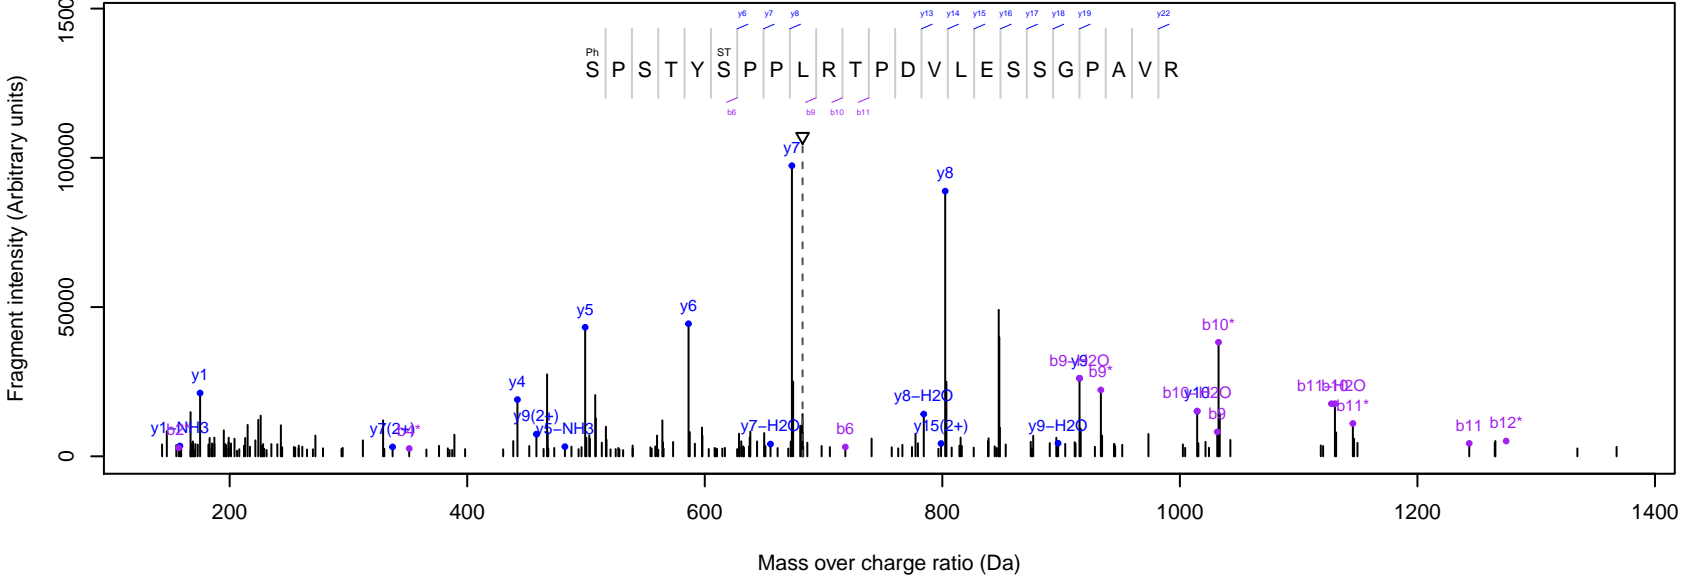

GELAEPLNGLETGRG(SPhospho(STY))EDET(Phospho(STY))DDGDGEDFTPPILK-3+

Source : QE3\_201126\_FR\_TiOx\_hum\_tissue\_Urea\_RNAB\_N Scan : 58141

Andromeda score : 116.84

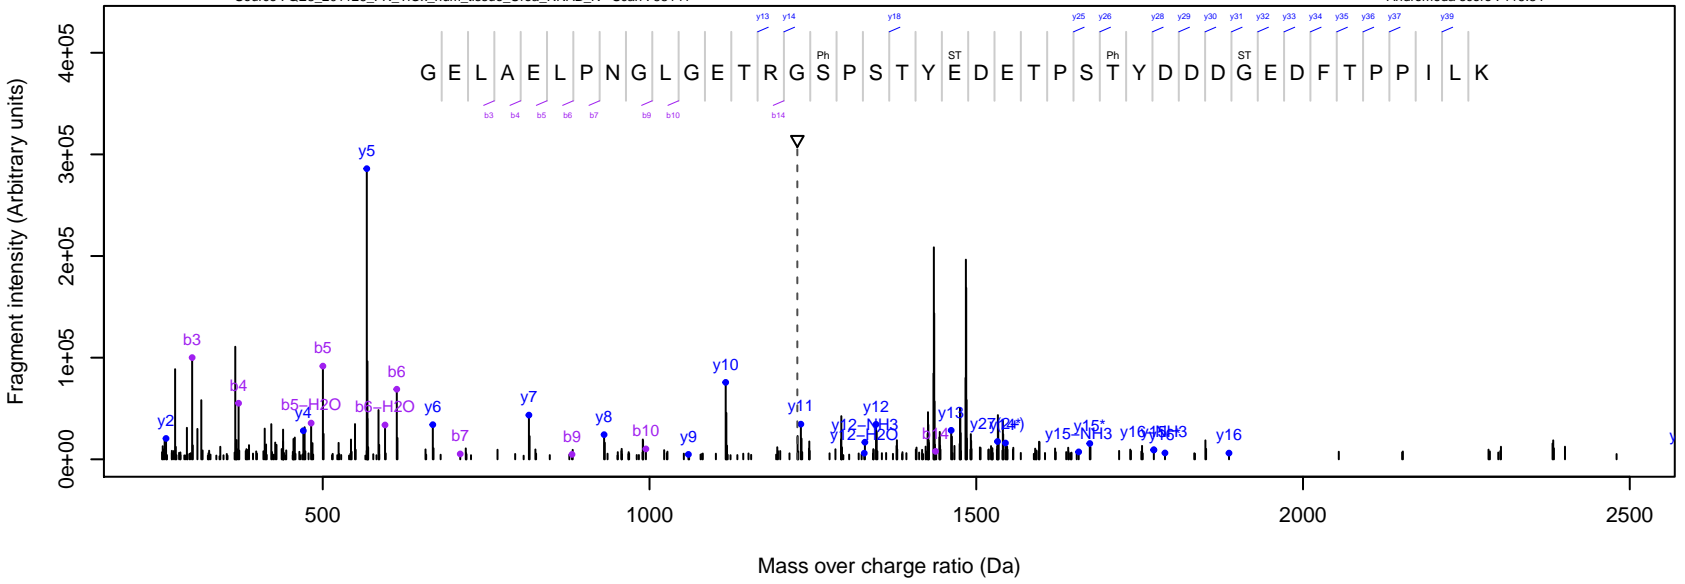

S(Phospho(STY))T(Phospho(STY))SFRGGM(Oxidation(M))GSGGLATGIAGGLAGM(Oxidation(M))GGIQNEK-3+

Source : QE3\_201126\_FR\_TiOx\_hum\_tissue\_Urea\_RNAB\_N Scan : 41570

Andromeda score : 116.84

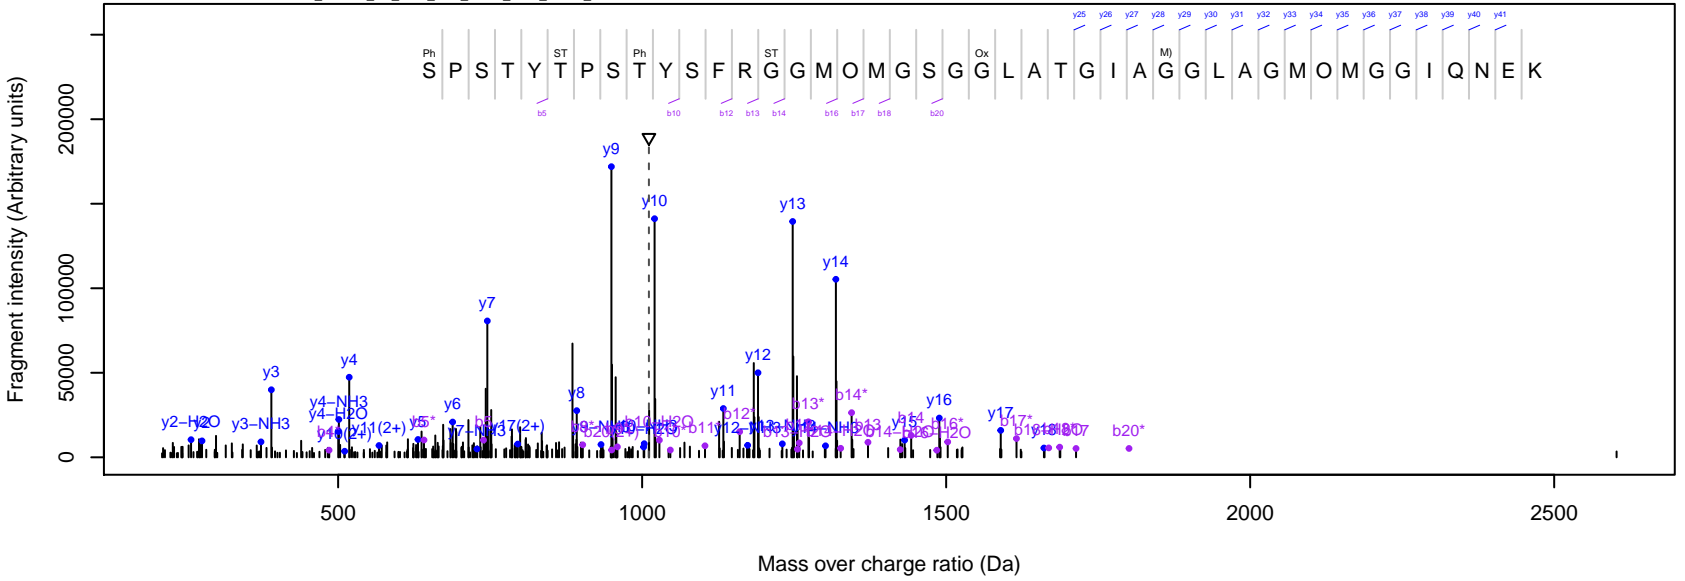

(Acetyl(Protein N-term))ANNS(Phospho(STY))PALTGNSQPQHAAAAAAQQQQCGGGGATKPAVSGK-4+

Source : QE3\_201126\_FR\_TiOx\_hum\_tissue\_Urea\_RNAB\_N Scan : 18451

Andromeda score : 116.77

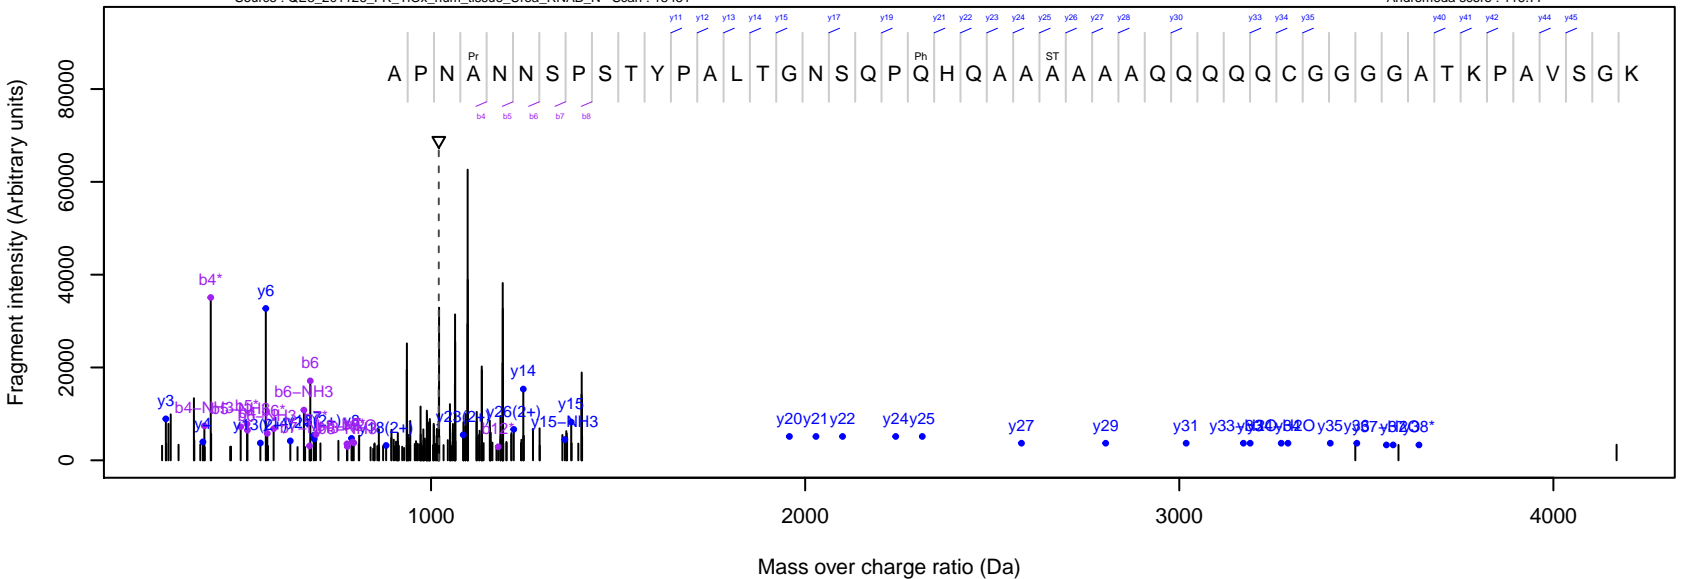

S(Phospho (STY))LEDLRAPK-2+

Source : QE3\_201126\_FR\_TiOx\_hum\_tissue\_Urea\_RNAB\_B Scan : 15317

Andromeda score : 116.77

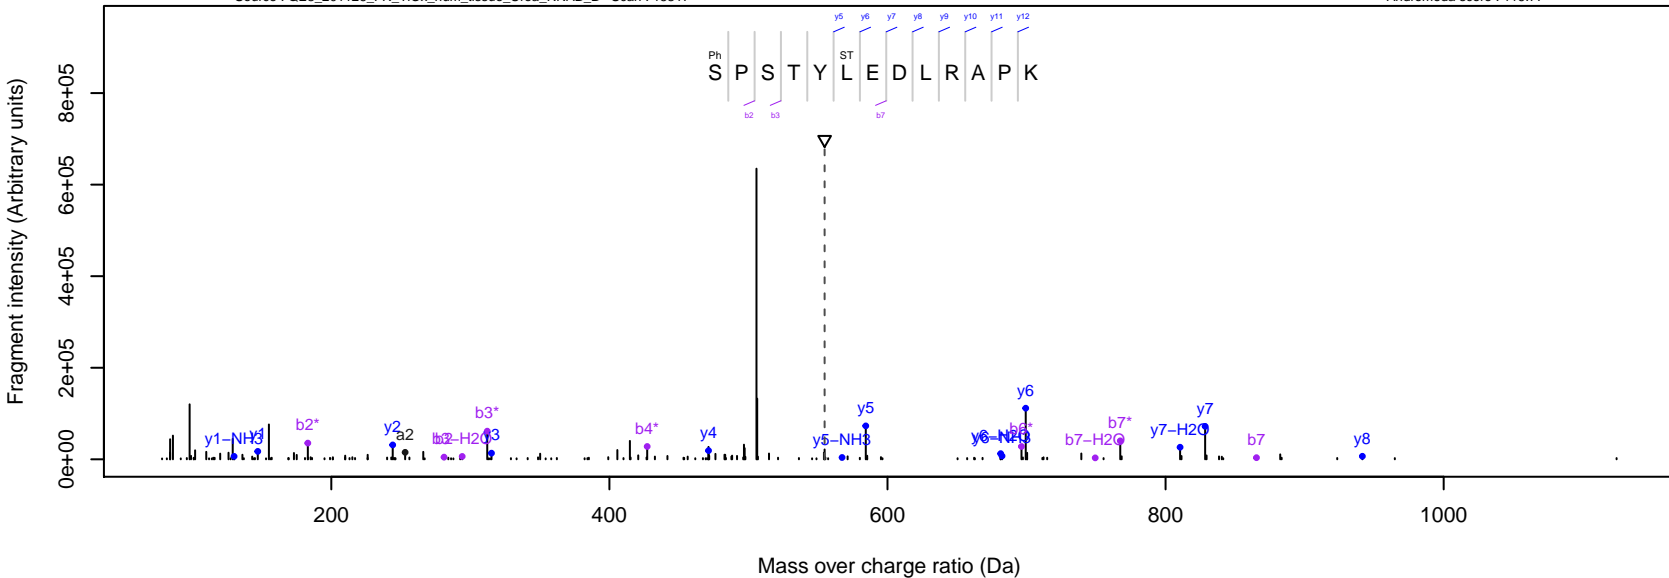

NSATFKS(Phospho (STY))FEDRVGTIK-3+

Source : QE3\_201126\_FR\_TiOx\_hum\_tissue\_Urea\_RNAB\_N Scan : 28112

Andromeda score : 116.73

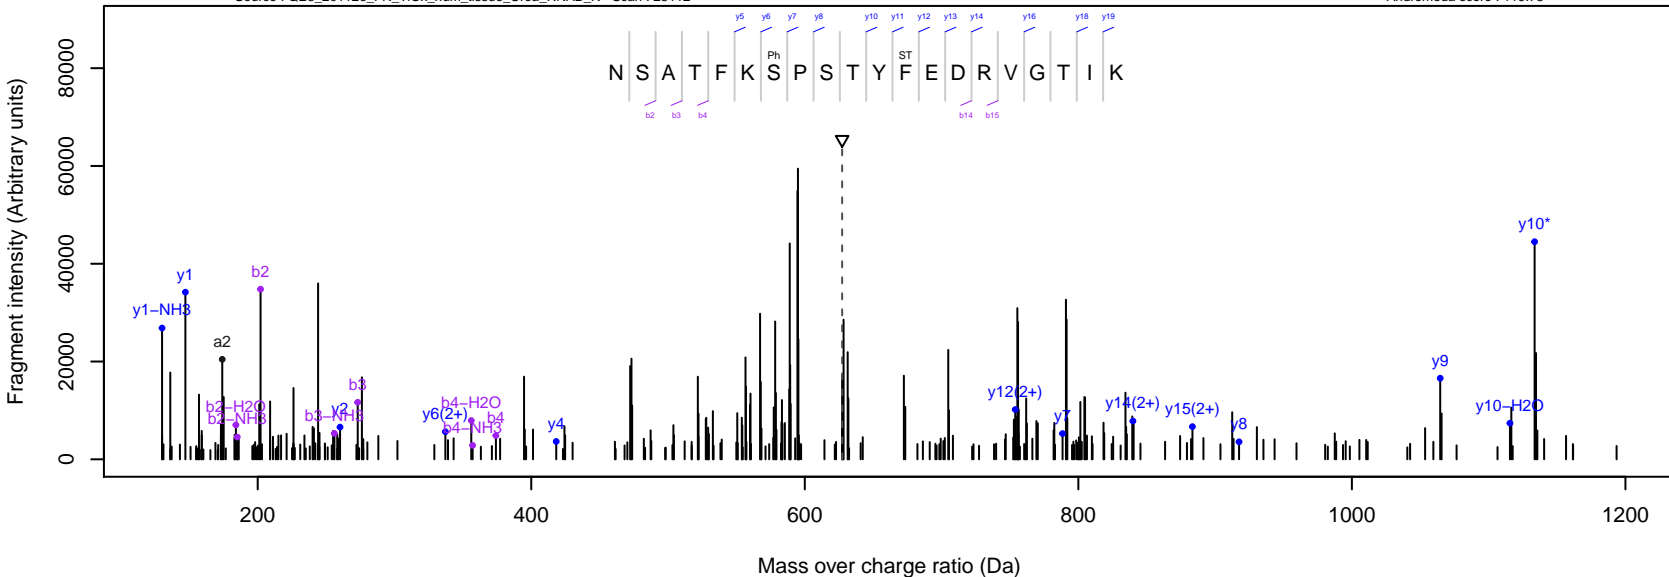

KTS(Phospho (STY))S(Phospho (STY))DDES(Phospho (STY))EEDEDLLQR-2+

Source : QE3\_201126\_FR\_TiOx\_hum\_tissue\_Urea\_RNAB\_N Scan : 33800

Andromeda score : 116.65

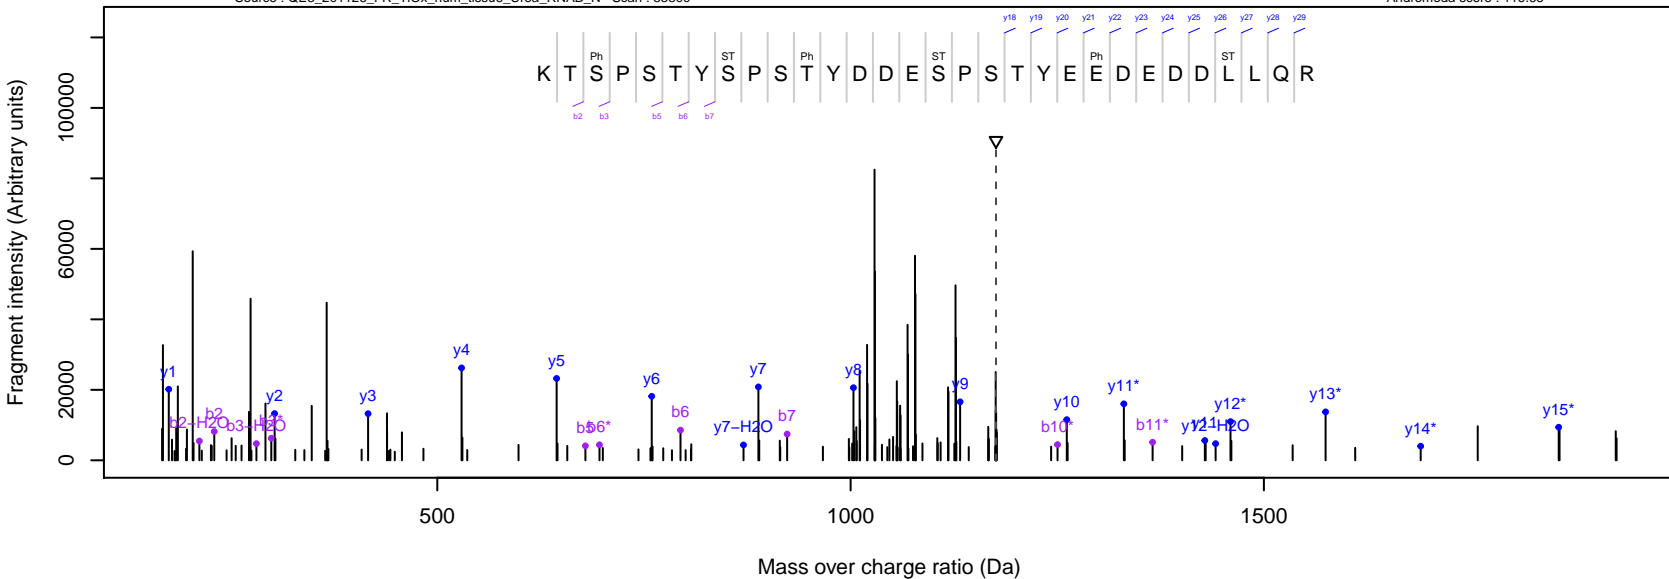

VS(Phospho (STY))ESEGLKLEGQATAVTPNK-2+

Source : QE3\_201126\_FR\_TiOx\_hum\_tissue\_Urea\_RNAB\_H Scan : 16432

Andromeda score : 116.6

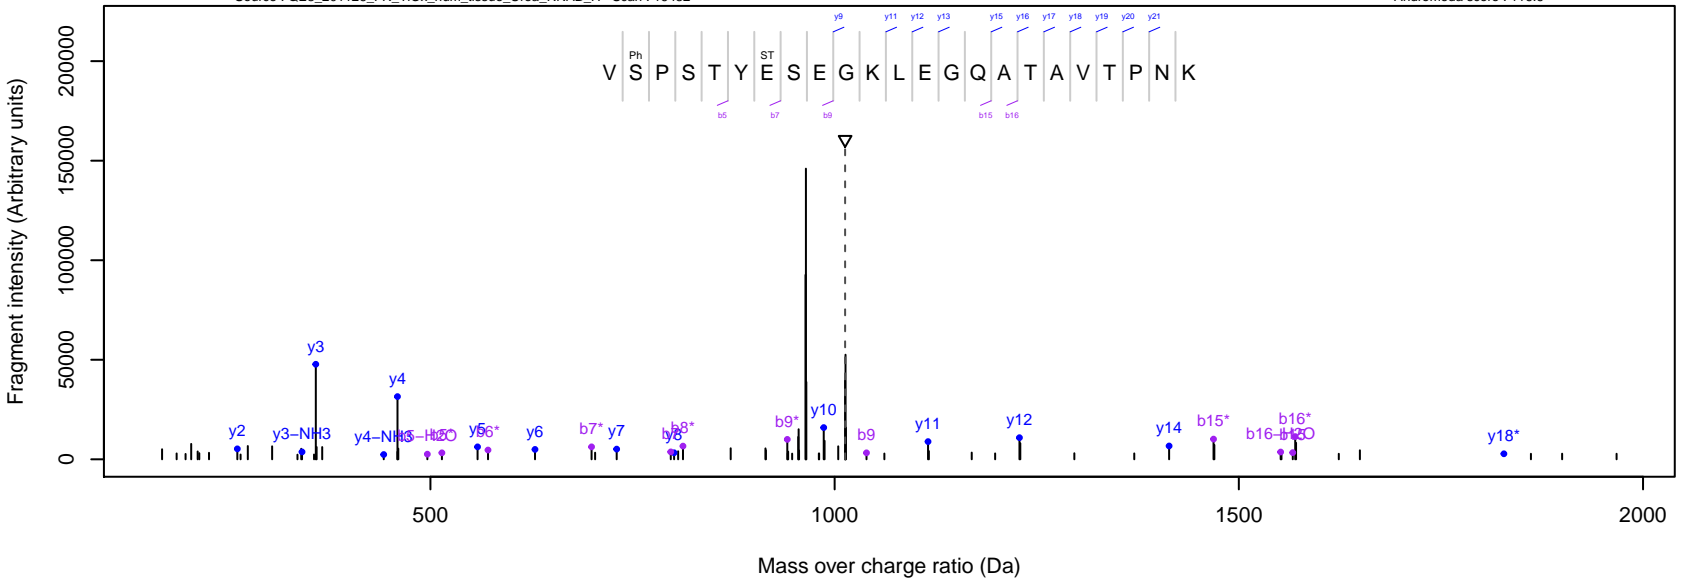

FFTT(Phospho (STY))GSDSESESS(Phospho (STY))LS(Phospho (STY))GEELVTKPVGNGYK-3+

Source : QE3\_201126\_FR\_TiOx\_hum\_tissue\_Urea\_RNAB\_N Scan : 52582

Andromeda score : 116.59

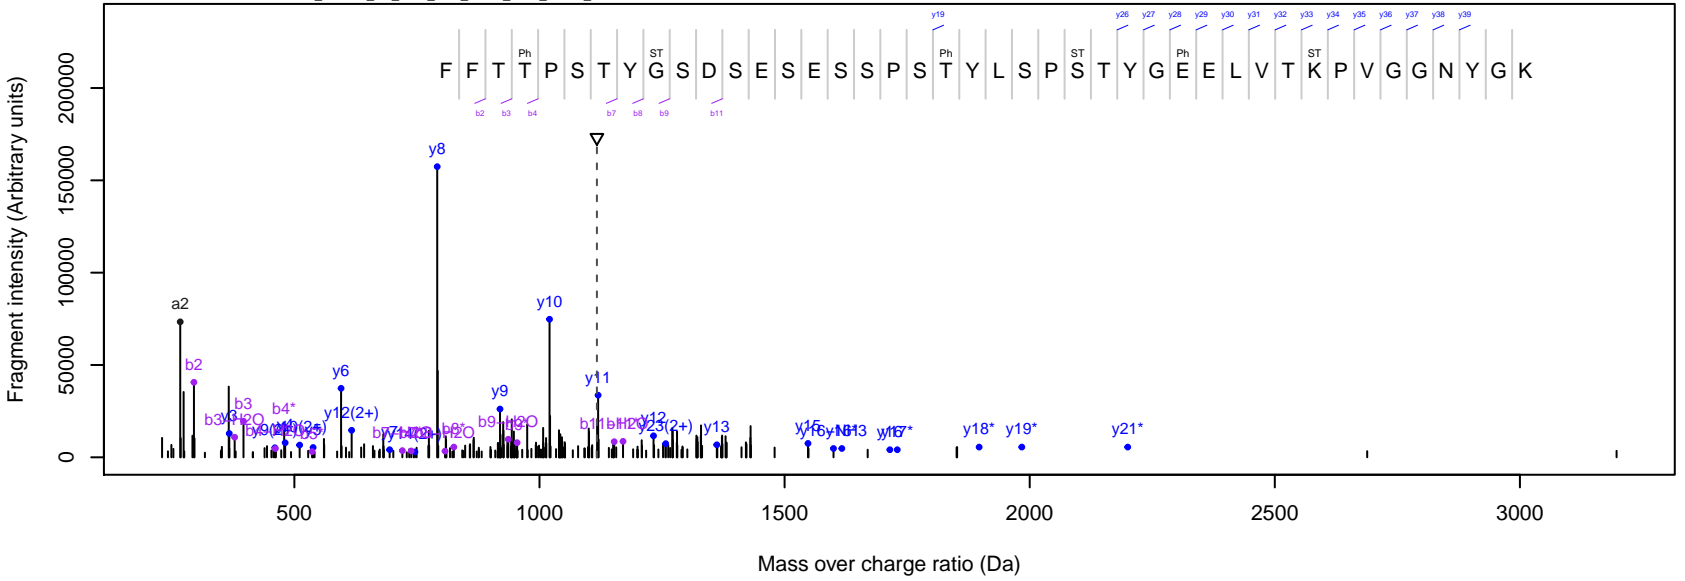

DLTHSDS(Phospho (STY))ES(Phospho (STY))SLHMSTR-2+

Source : QE3\_201126\_FR\_TiOx\_hum\_tissue\_Urea\_RNAB\_N Scan : 17440

Andromeda score : 116.58

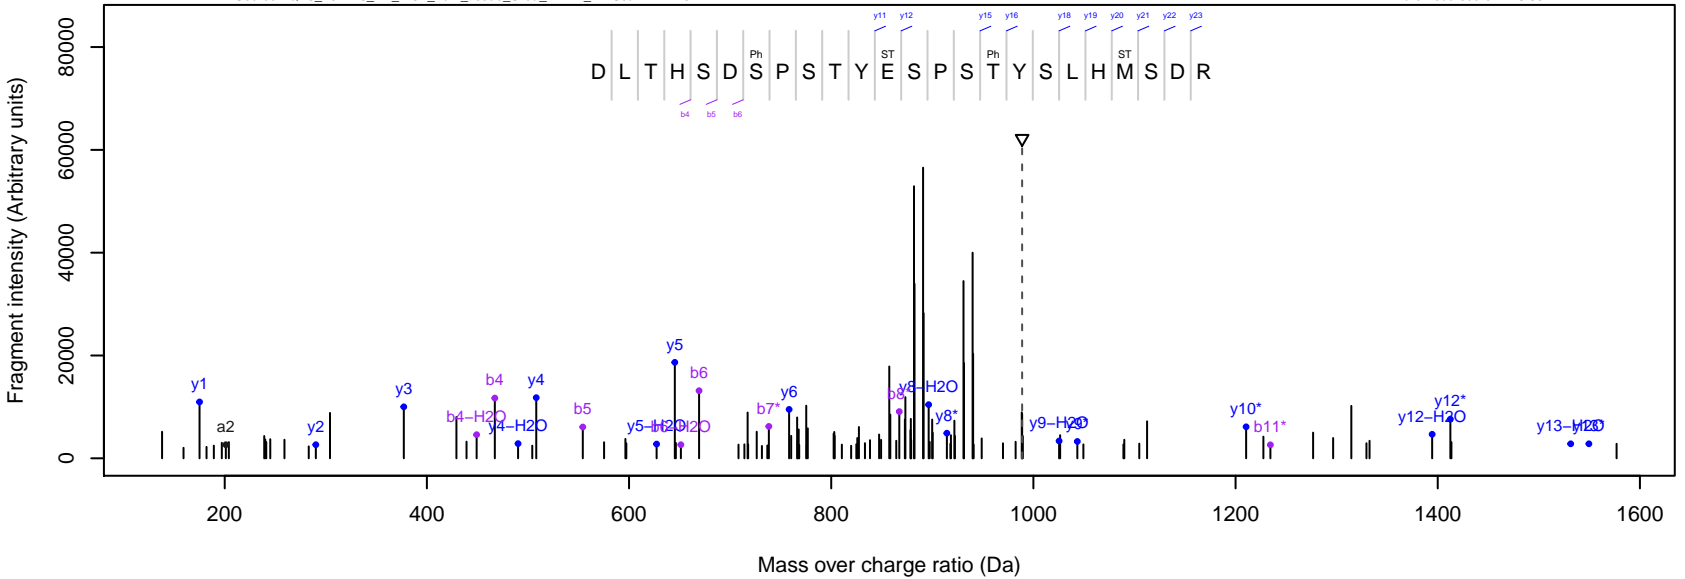



FGTFGGLGS(Phospho (STY))K-2+

Source : QE3\_201126\_FR\_TiOx\_hum\_tissue\_Urea\_RNAB\_H Scan : 31561

Andromeda score : 116.54

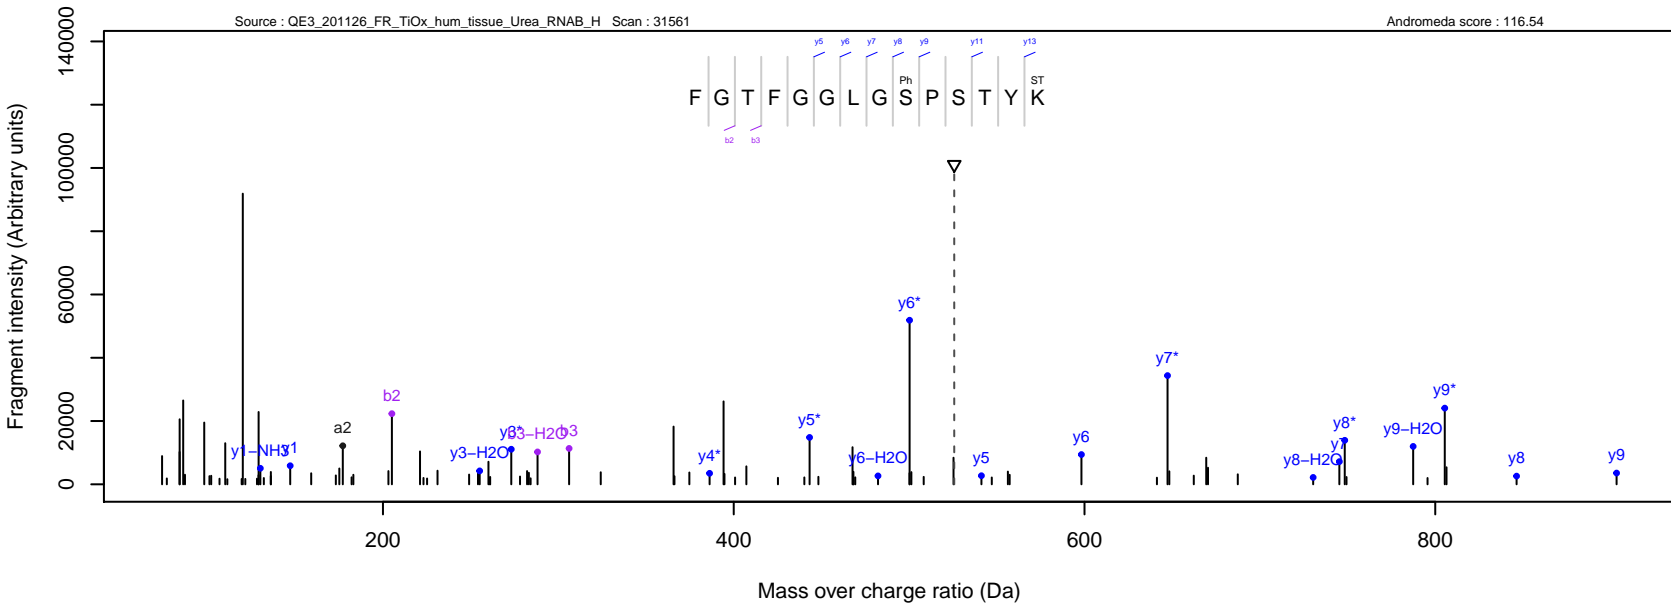

AGQNQPAEPDASACTPES(Phospho (STY))PQEELLSRPAPADVPR-3+

Source : QE3\_201126\_FR\_TiOx\_hum\_tissue\_Urea\_RNAB\_B Scan : 32577

Andromeda score : 116.53

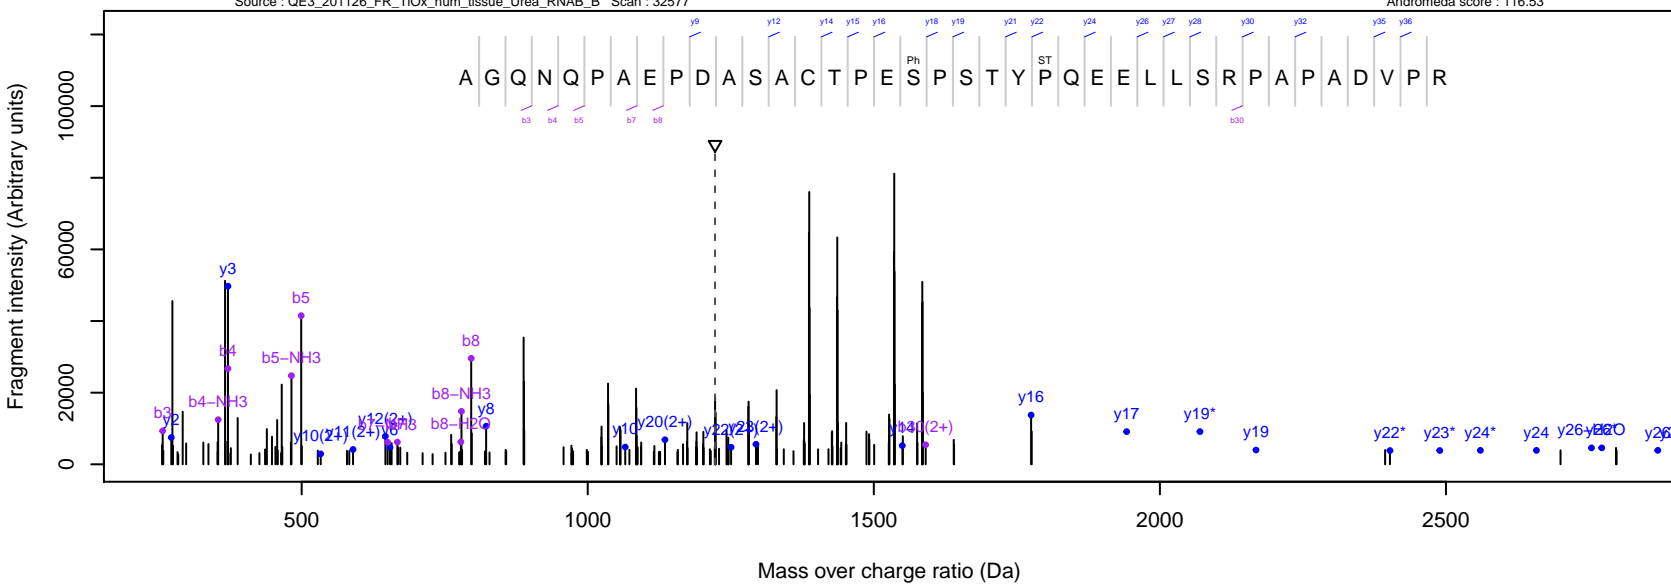

AS(Phospho (STY))PITNDGEDEFVPS(Phospho (STY))DGLDKDEYTFSPGK-3+

Source : QE3\_201126\_FR\_TiOx\_hum\_tissue\_Urea\_RNAB\_B Scan : 50415

Andromeda score : 116.53

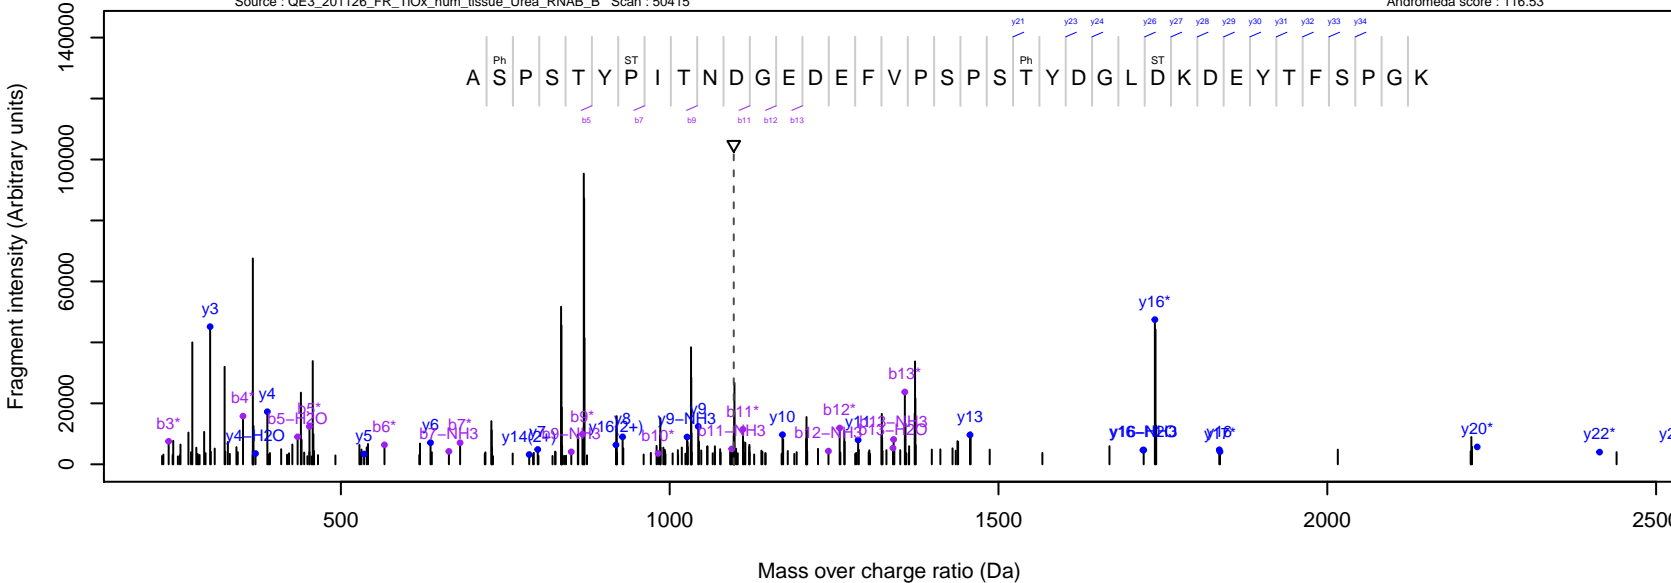

SCT(Phospho (STY))PS(Phospho (STY))PDQISHR-2+

Source : QE3\_201126\_FR\_TiOx\_hum\_tissue\_Urea\_RNAB\_N Scan : 12940

Andromeda score : 116.51

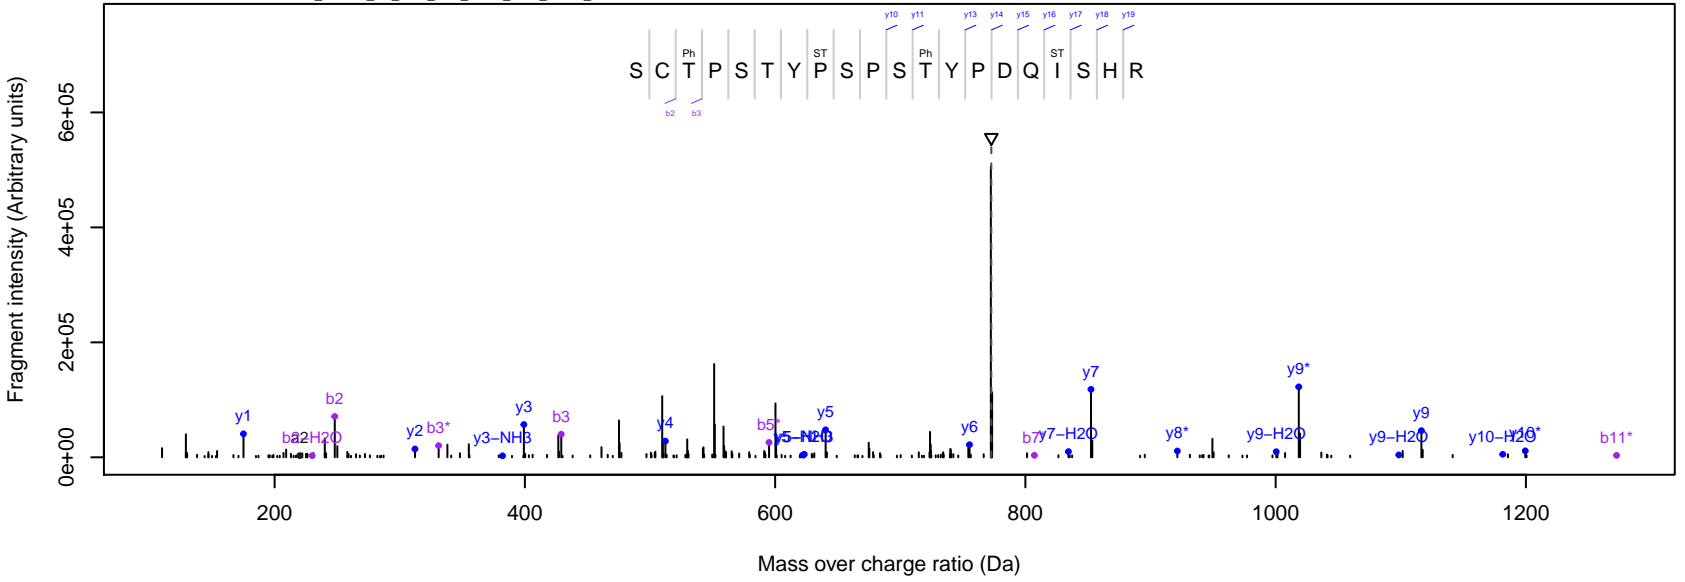

ERPTPSLNNNCTT(Phospho (STY))SEDSLVLNLR-3+

Source : QE3\_201126\_FR\_TiOx\_hum\_tissue\_Urea\_RNAB\_N Scan : 31108

Andromeda score : 116.48

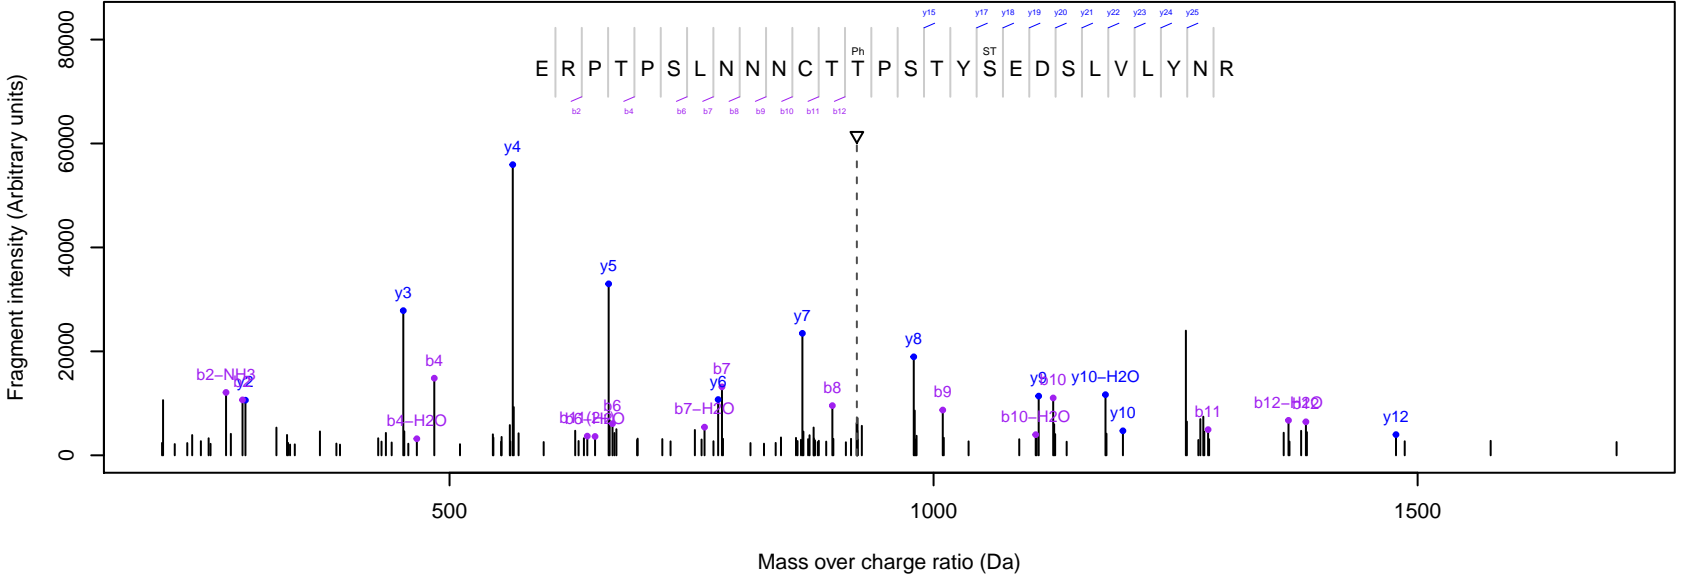

(Acetyl (Protein N-term))S(Phospho (STY))REM(Oxidation (M))QDVDLAEVKPLVEK-3+

Source : QE3\_201126\_FR\_TiOx\_hum\_tissue\_Urea\_RNAB\_H Scan : 33833

Andromeda score : 116.45

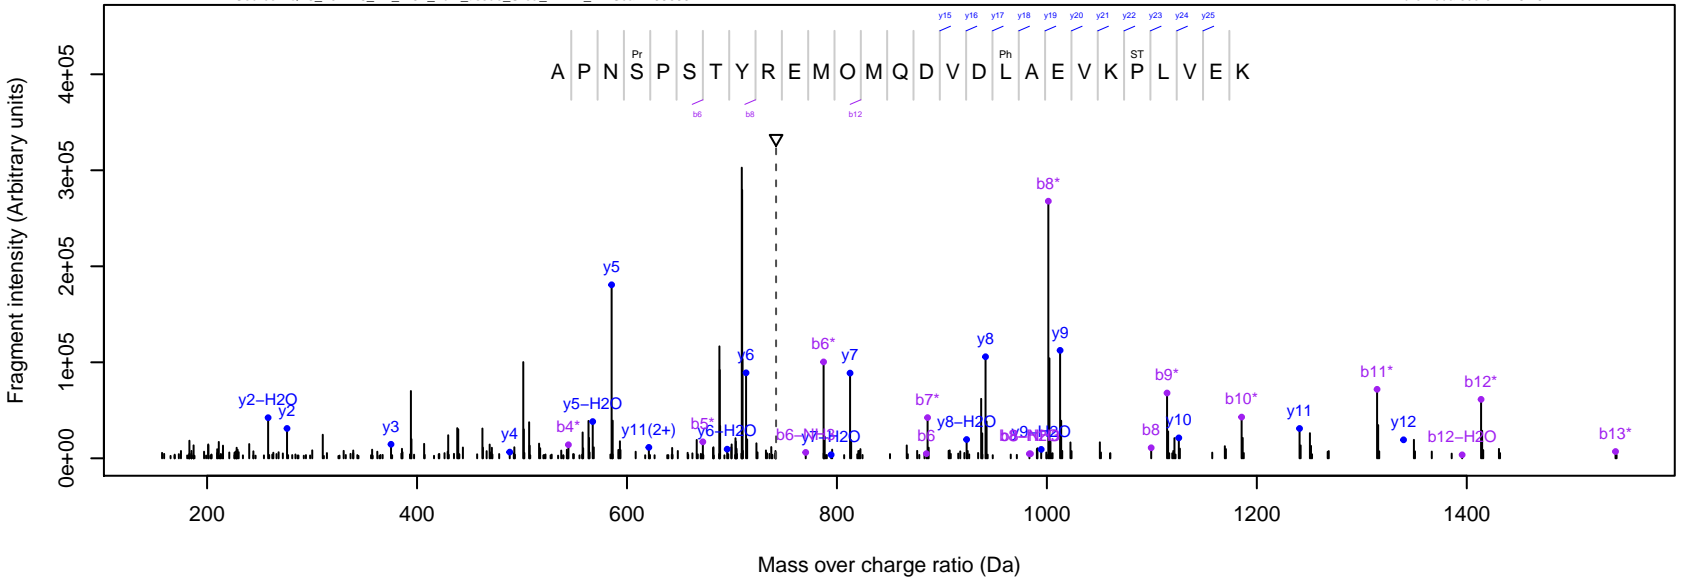

SDREETESS(Phospho (STY))EGEEAAGGGAK-3+

Source : QE3\_201126\_FR\_TiOx\_hum\_tissue\_Urea\_RNAB\_B Scan : 7360

Andromeda score : 116.44

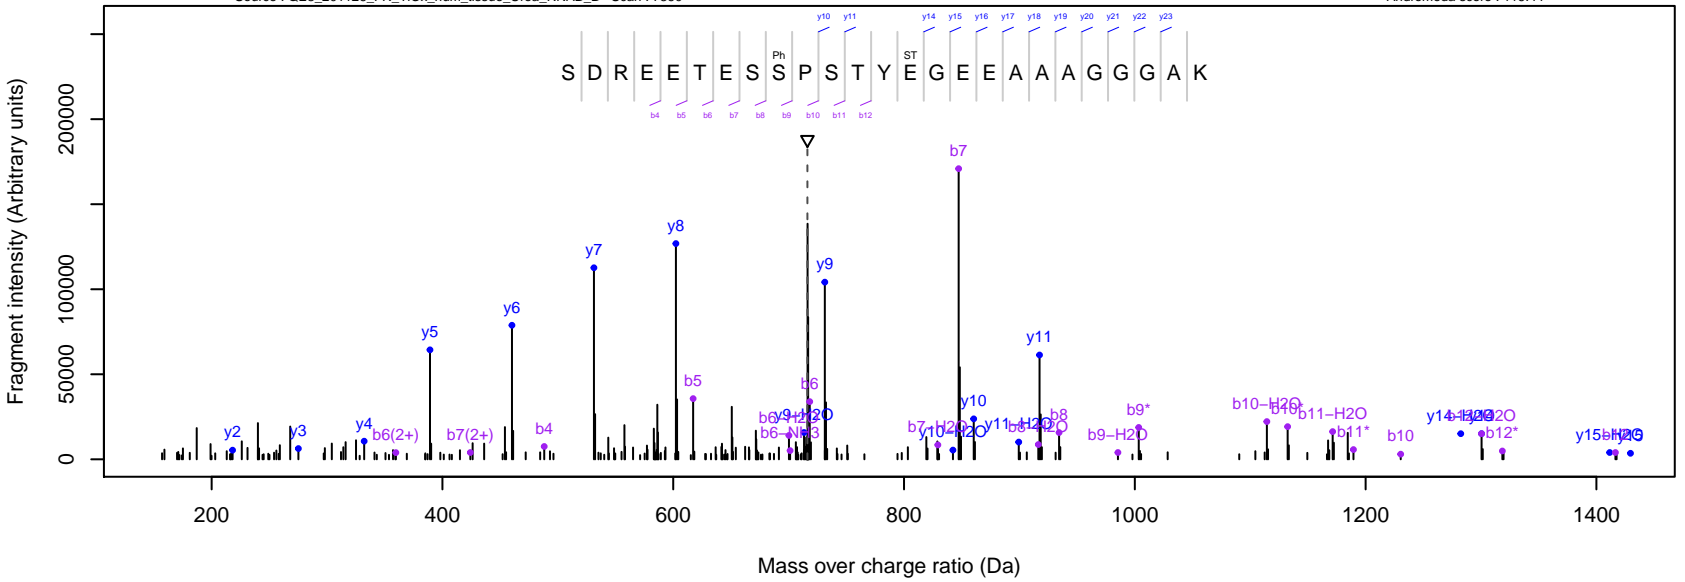

GGKDPLS(Phospho (STY))SPGGGSR-2+

Source : QE3\_201126\_FR\_TiOx\_hum\_tissue\_Urea\_RNAB\_N Scan : 9885

Andromeda score : 116.43

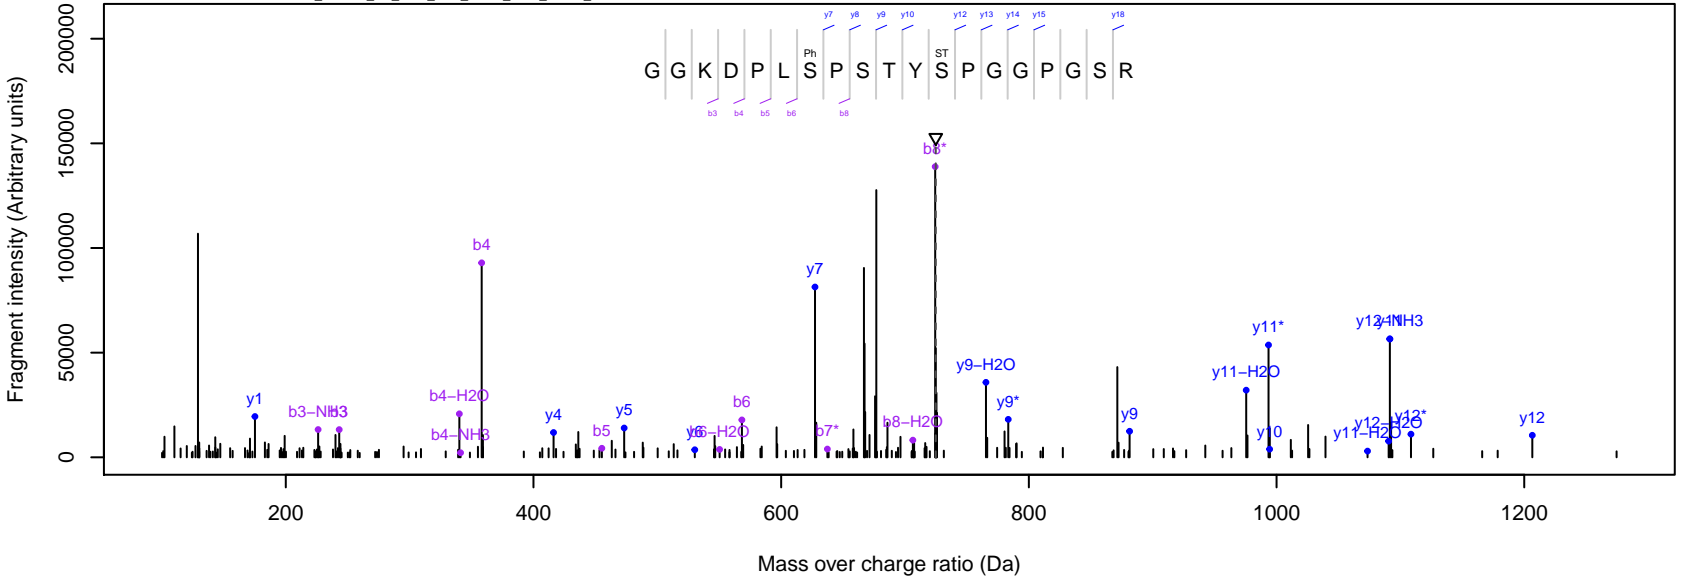

ICAEKPADPVDLS(Phospho (STY))PR-3+

Source : QE3\_201126\_FR\_TiOx\_hum\_tissue\_Urea\_RNAB\_H Scan : 21280

Andromeda score : 116.39

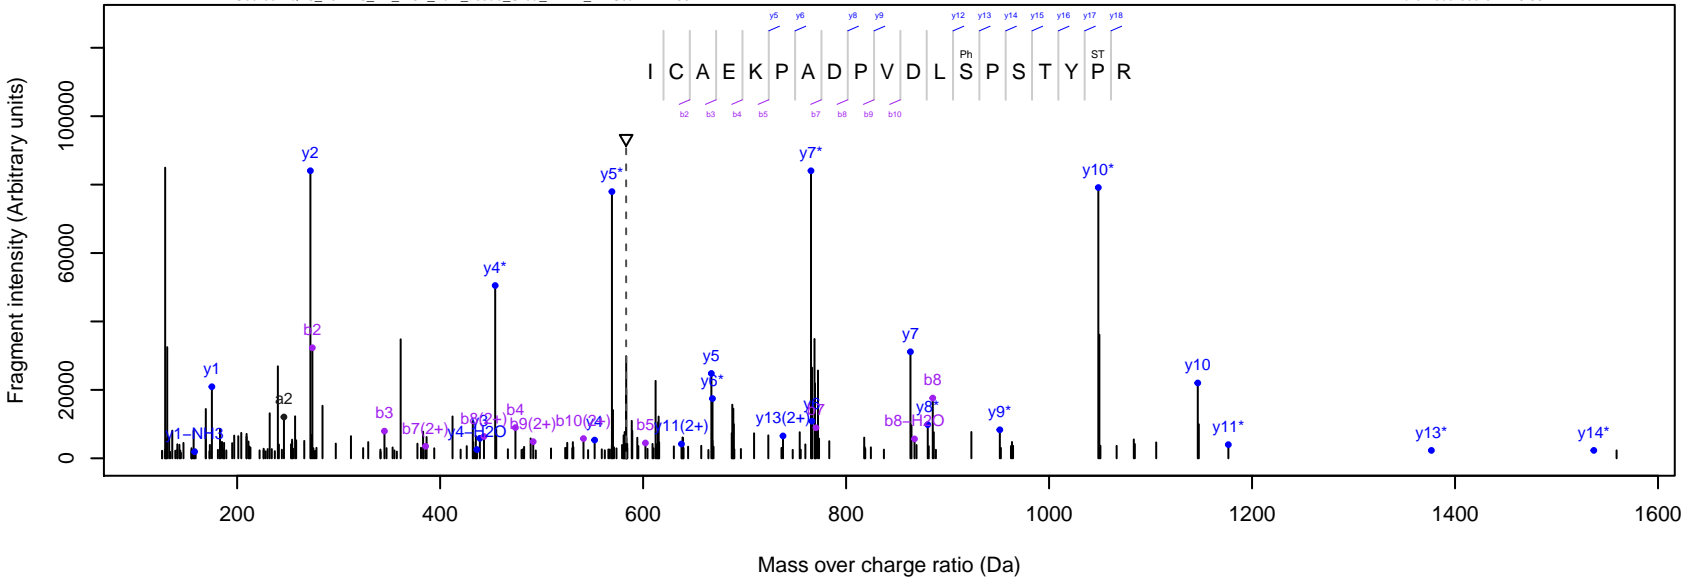



LENVSQLSLDKS(Phospho (STY))PTEK-3+

Source : QE3\_201126\_FR\_TIOx\_hum\_tissue\_Urea\_RNAB\_N Scan : 22238

Andromeda score : 116.39

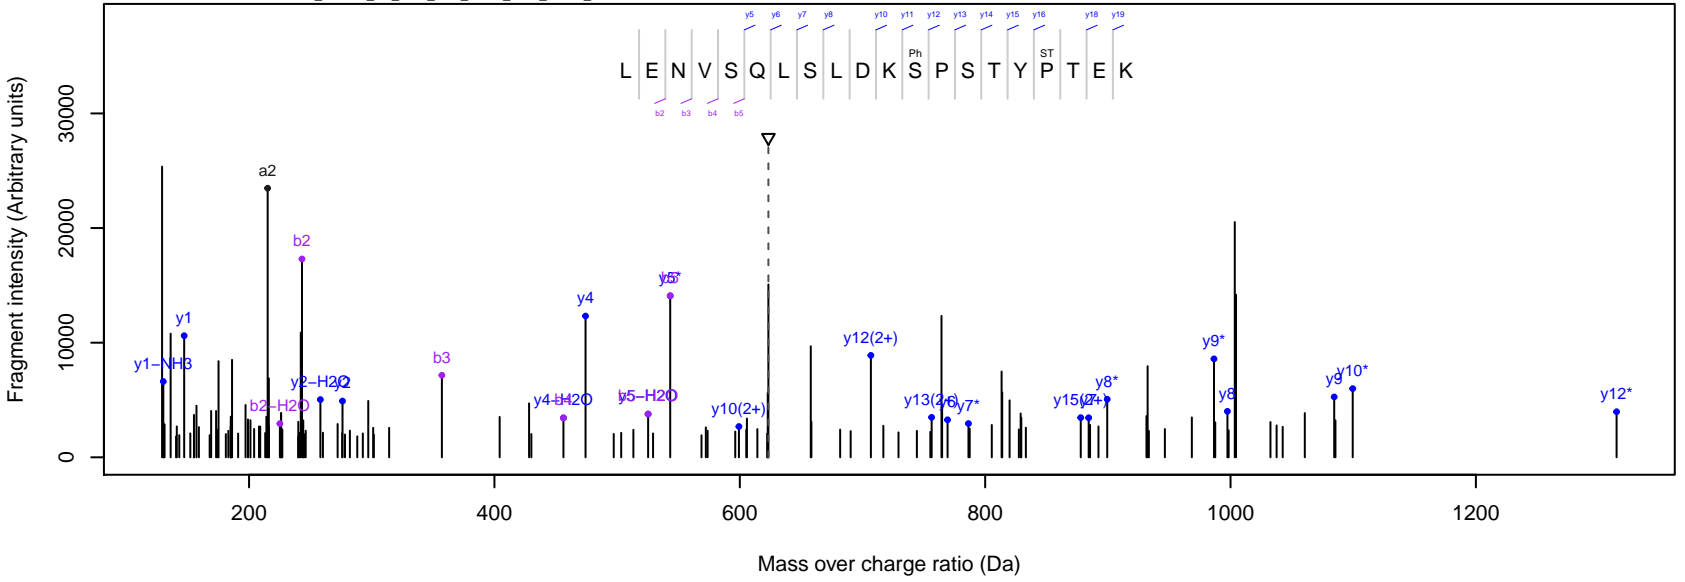

KLS(Phospho (STY))YEIPTEEGGDRYLPGLHASAGPLASAESLEPVSWR-4+

Source : QE3\_201126\_FR\_TIOx\_hum\_tissue\_Urea\_RNAB\_H Scan : 51560

Andromeda score : 116.36

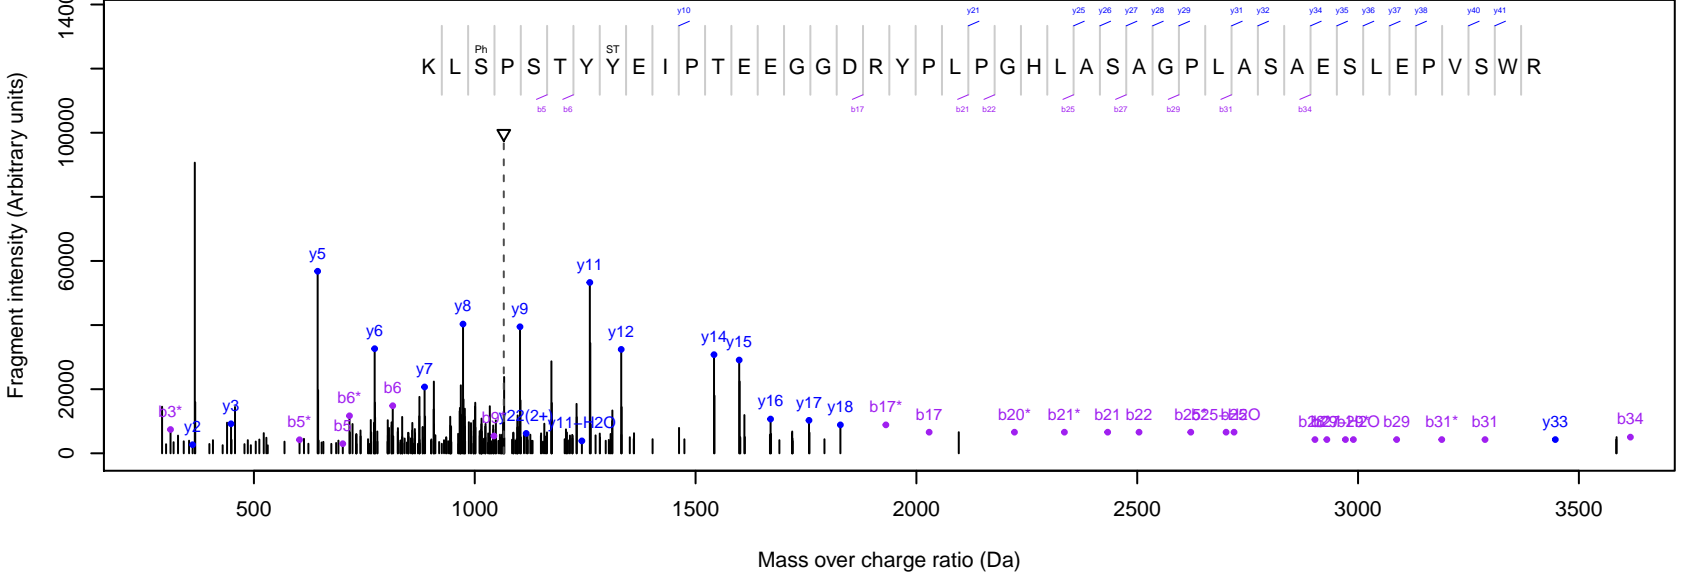

M(Oxidation (M))SSAIS(Phospho (STY))PTPEISSETPGYIYSSNFHAVK-3+

Source : QE3\_201126\_FR\_TIOx\_hum\_tissue\_Urea\_RNAB\_N Scan : 41571

Andromeda score : 116.36

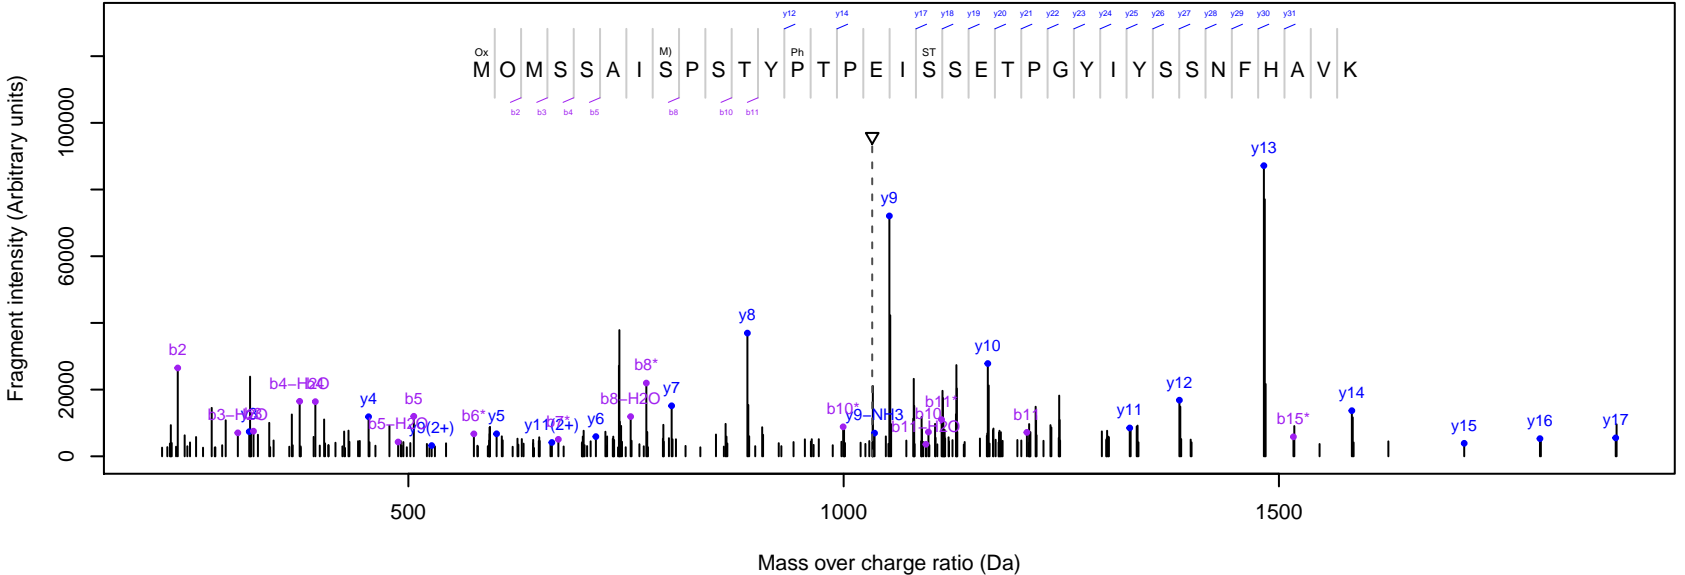

GEIKDSSPSSPS(Phospho (STY))PK-2+

Source : QE3\_201126\_FR\_TiOx\_hum\_tissue\_Urea\_RNAB\_B Scan : 5579

Andromeda score : 116.35

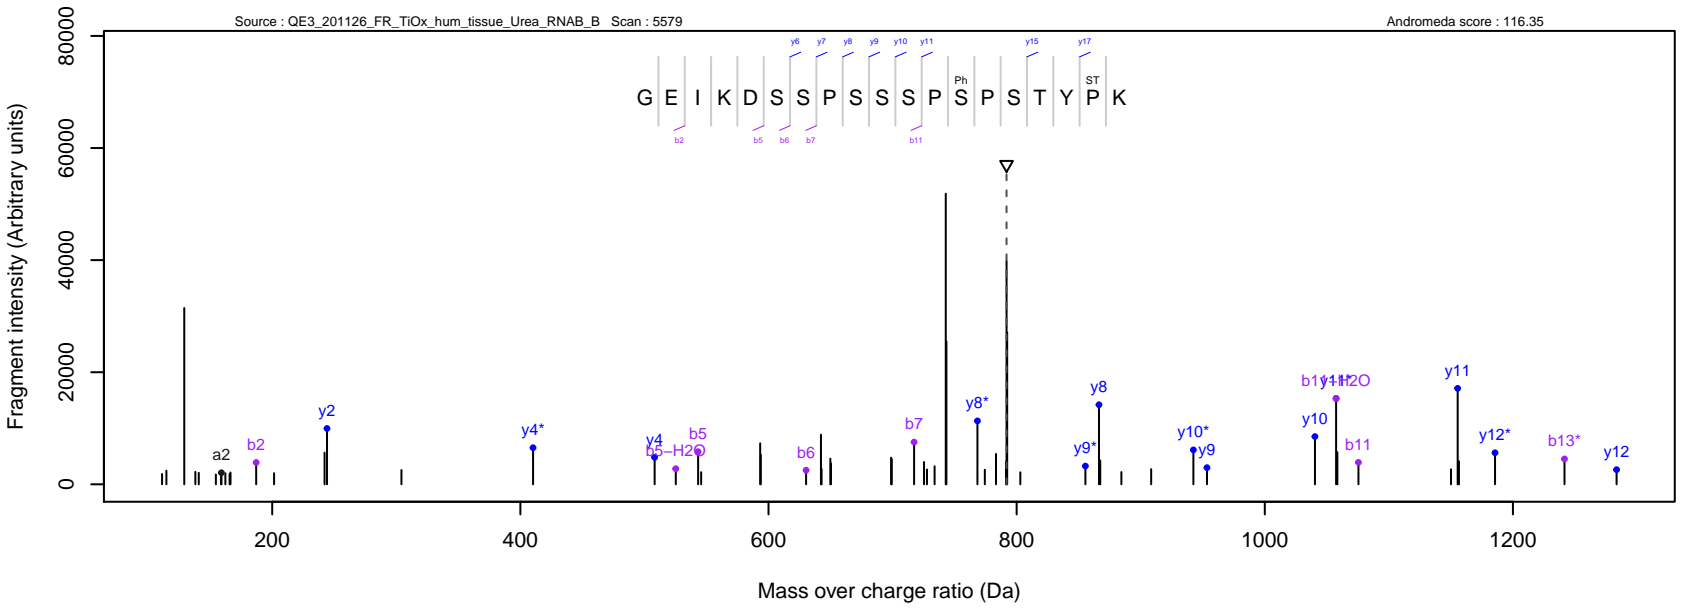

NNTAAETEDDES(Phospho (STY))DGEDRGGGTSGVRR-3+

Source : QE3\_201126\_FR\_TiOx\_hum\_tissue\_Urea\_RNAB\_N Scan : 6220

Andromeda score : 116.35

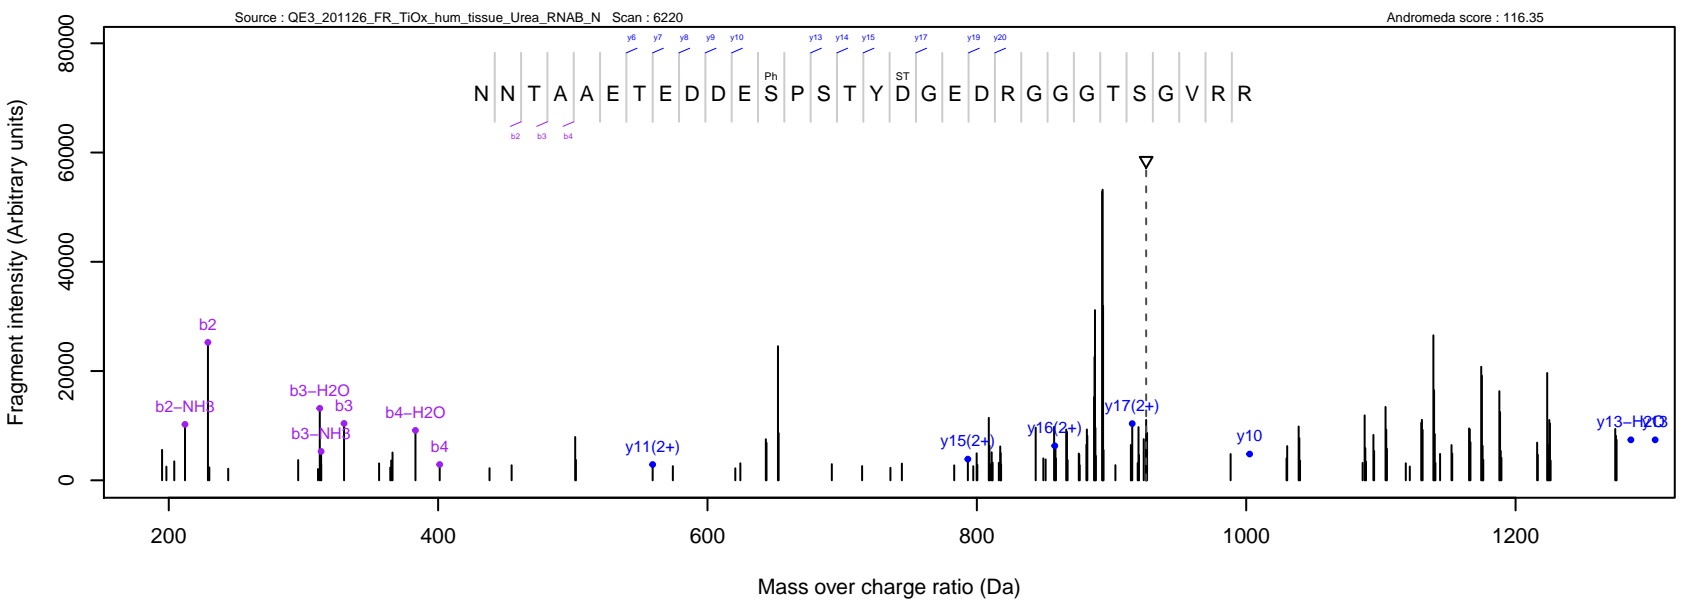

SHS(Phospho (STY))LPSSIIIF-2+

Source : QE3\_201126\_FR\_TiOx\_hum\_tissue\_Urea\_RNAB\_H Scan : 48049

Andromeda score : 116.3

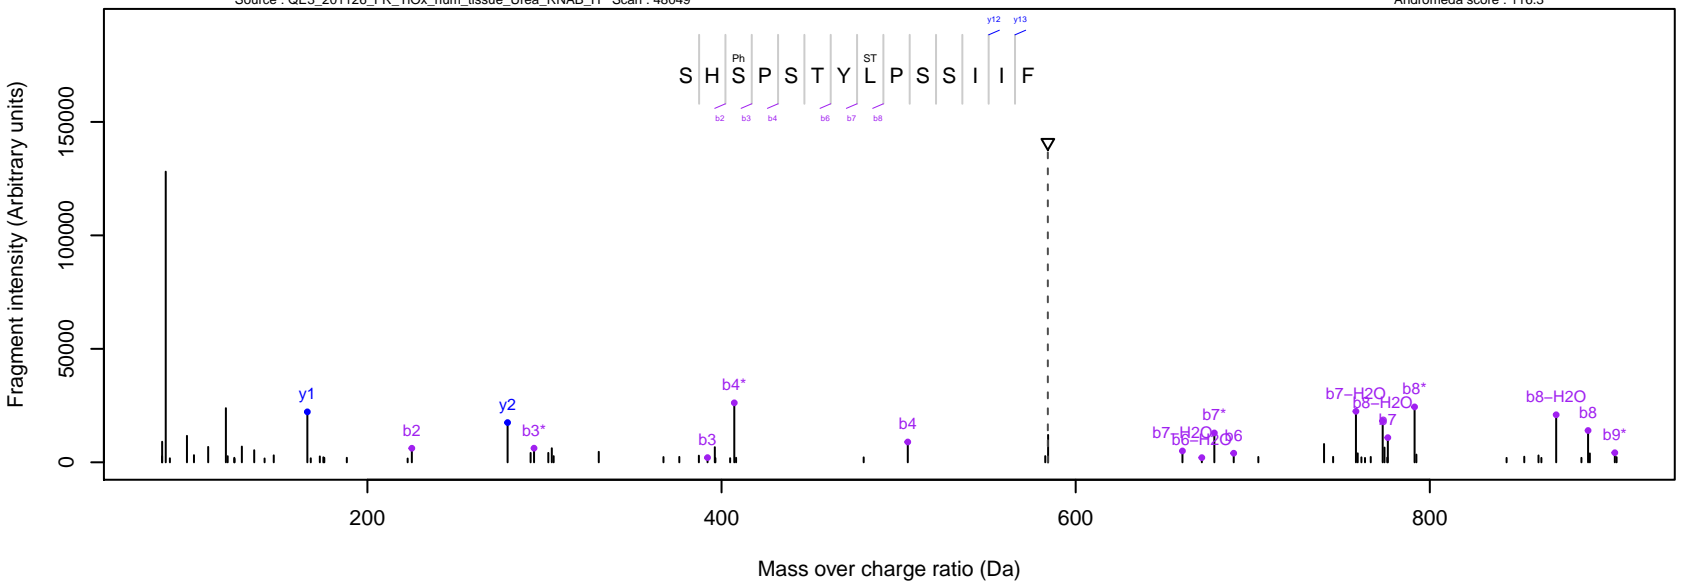

S(Phospho (STY))TSTPNVHMVSTTAPMDSNLQLTQGSFSTDAAGSR-3+

Source : QE3\_201126\_FR\_TiOx\_hum\_tissue\_Urea\_RNAB\_N Scan : 51816

Andromeda score : 116.3

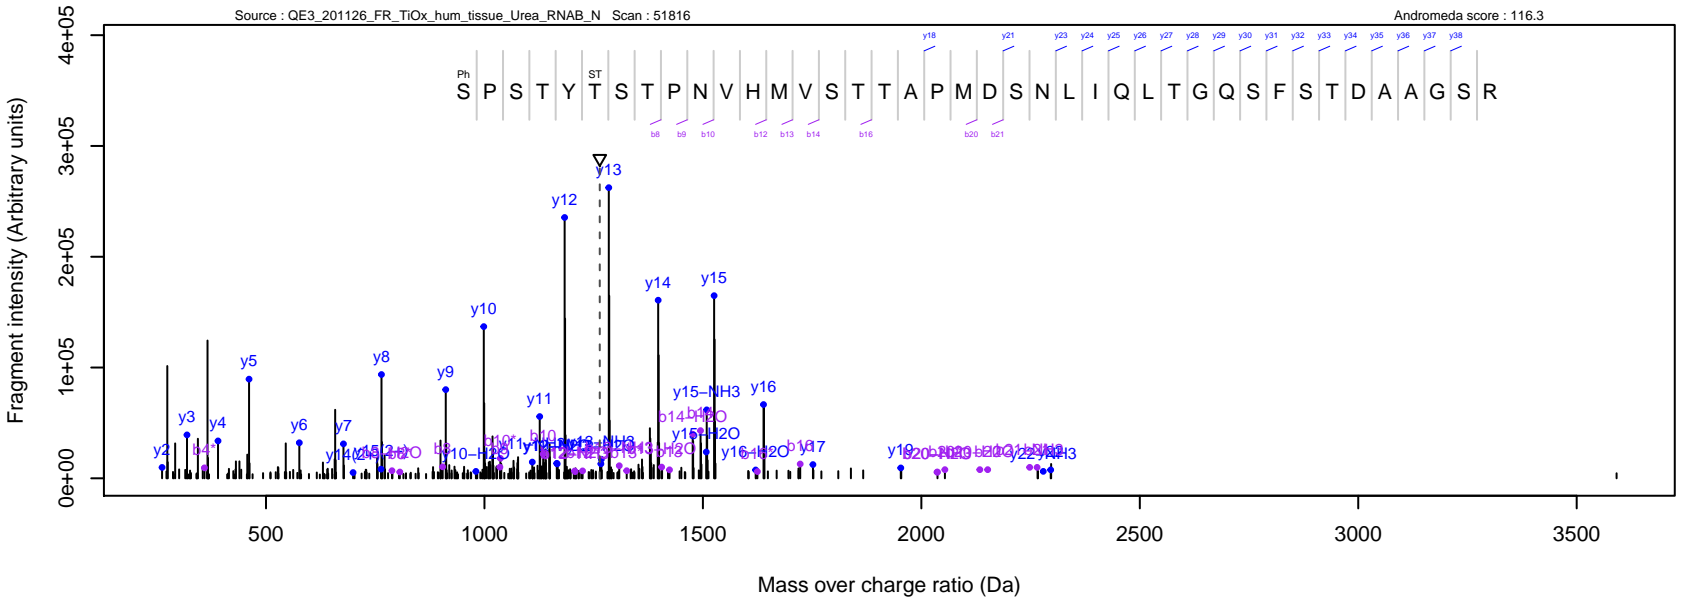

SLGNLQAKPT(Phospho (STY))SSPAKPPPQK-3+

Source : QE3\_201126\_FR\_TiOx\_hum\_tissue\_Urea\_RNAB\_B Scan : 18145

Andromeda score : 116.24

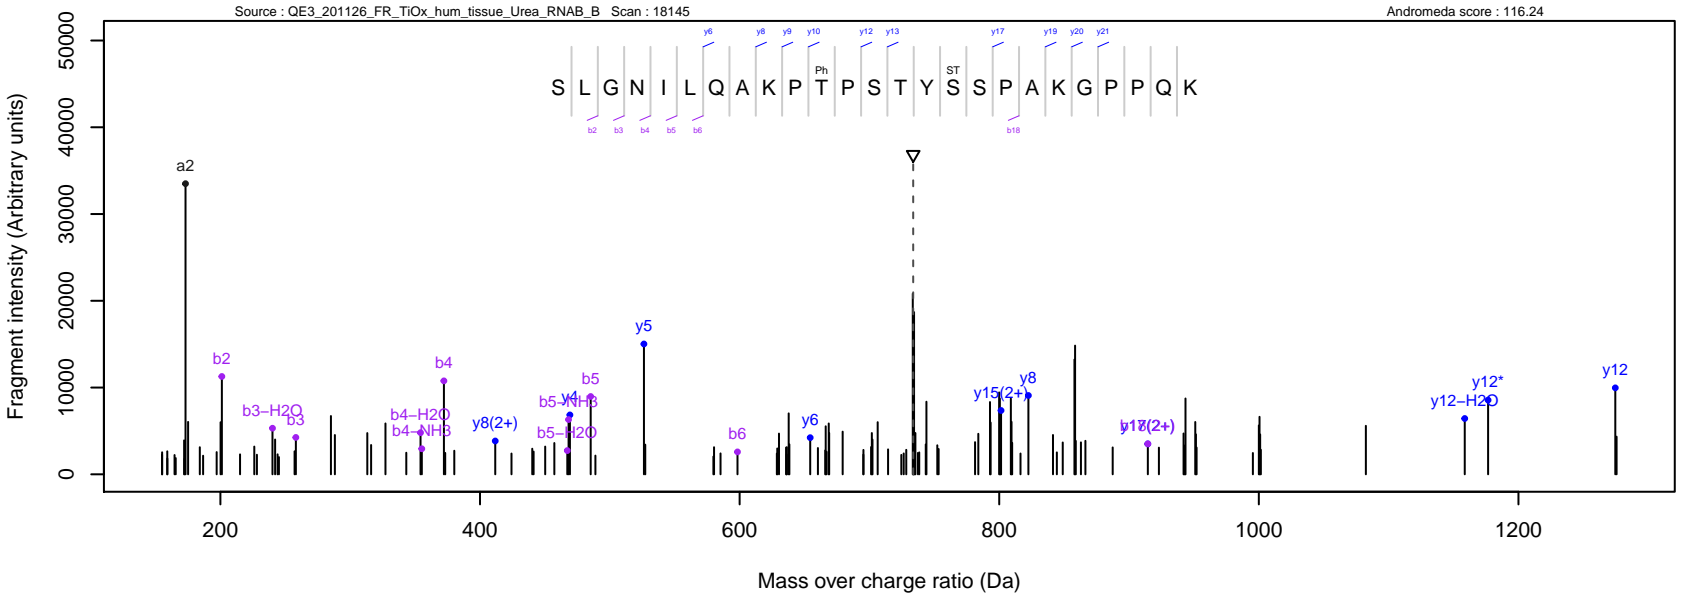

TSS(Phospho (STY))EPEFNSLPR-2+

Source : QE3\_201126\_FR\_TiOx\_hum\_tissue\_Urea\_RNAB\_B Scan : 28249

Andromeda score : 116.24

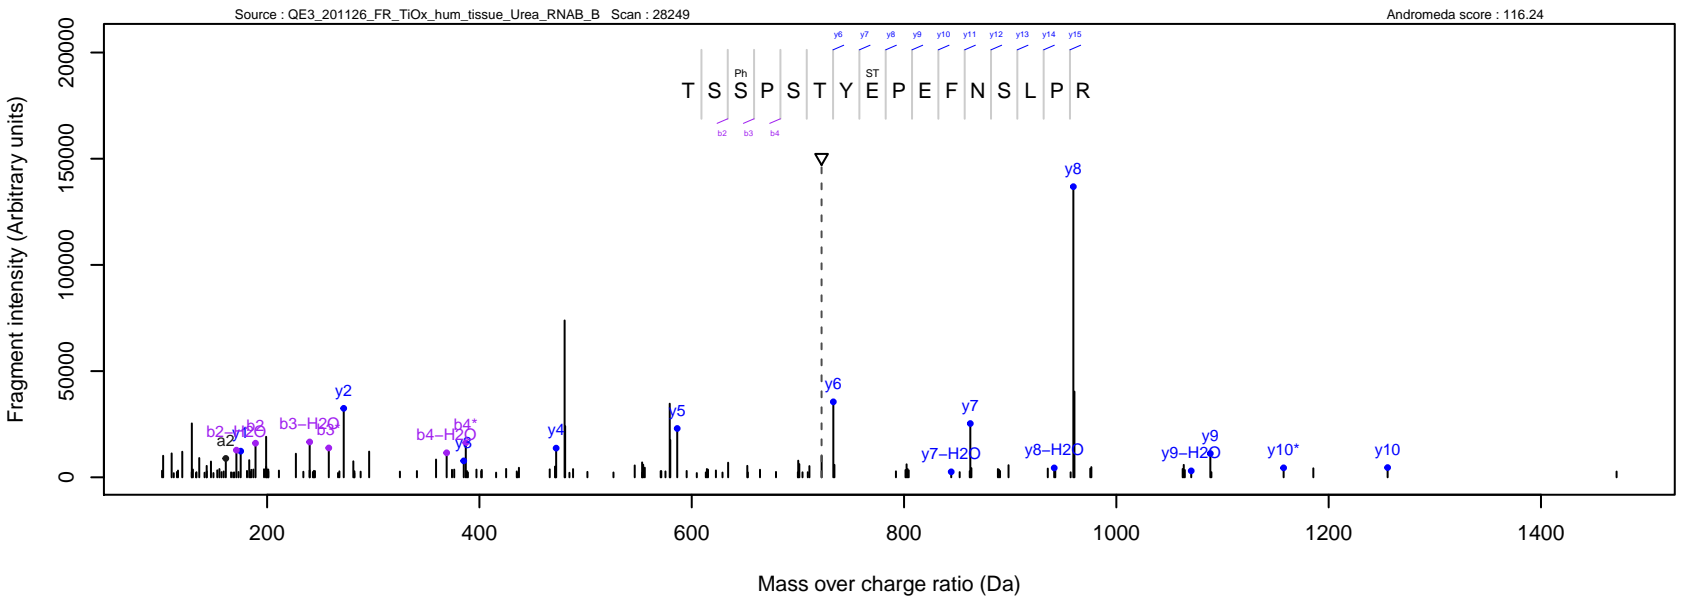

T(Phospho (STY))PS(Phospho (STY))PLVLEGITIEQSS(Phospho (STY))PPLSPPTTK-2+

Source : QE3\_201126\_FR\_TiOx\_hum\_tissue\_Urea\_RNAB\_N Scan : 62454

Andromeda score : 116.2

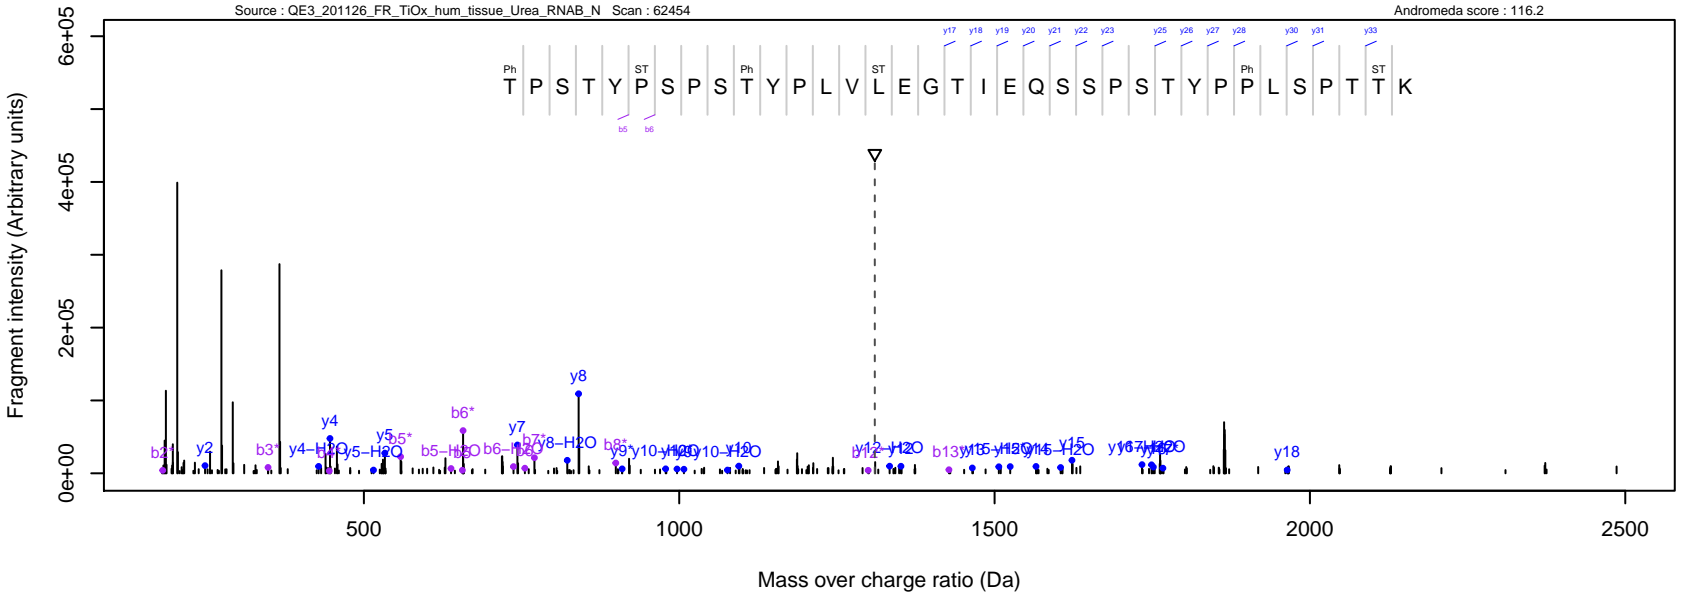

TDS(Phospho (STY))QTIGDFATR-2+

Source : QE3\_201126\_FR\_TiOx\_hum\_tissue\_Urea\_RNAB\_N Scan : 26982

Andromeda score : 116.19

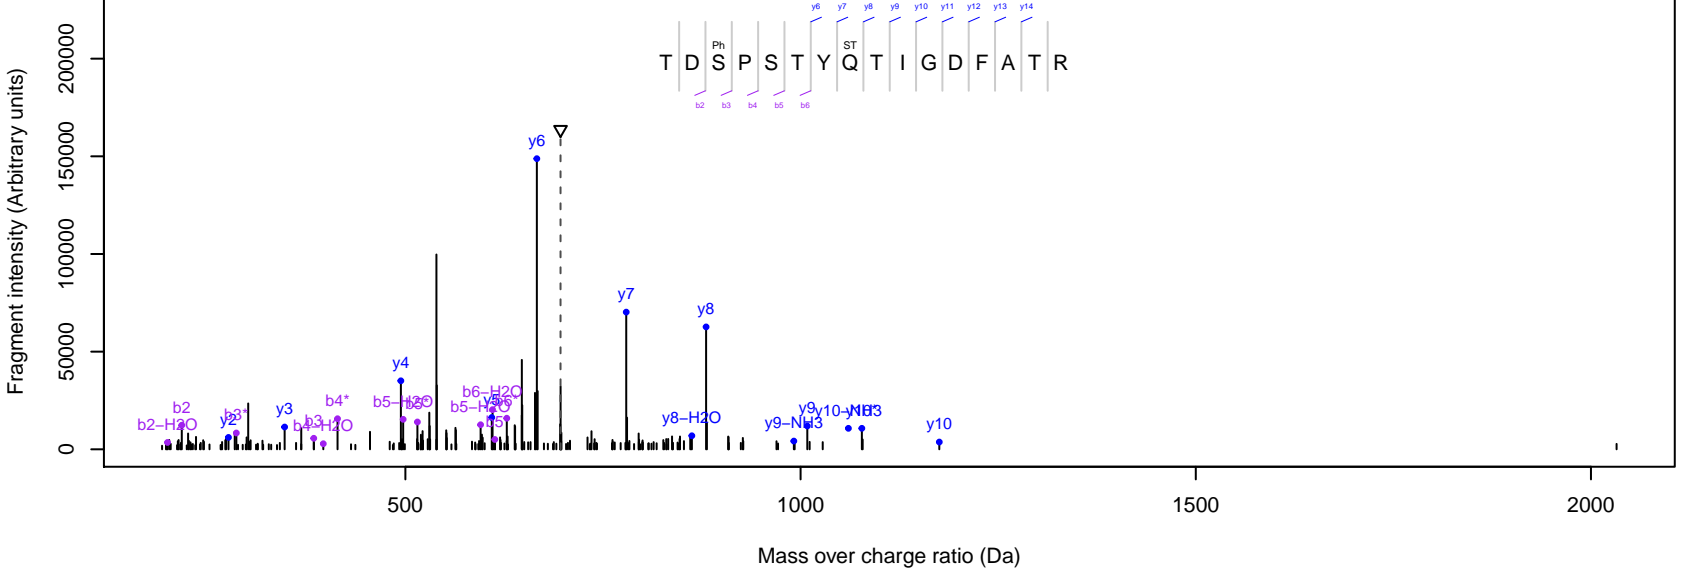

DRPHASGT(Phospho (STY))DGDES(Phospho (STY))EEDPPEHKPSK-4+

Source : QE3\_201126\_FR\_TiOx\_hum\_tissue\_Urea\_RNAB\_N Scan : 4206

Andromeda score : 116.13

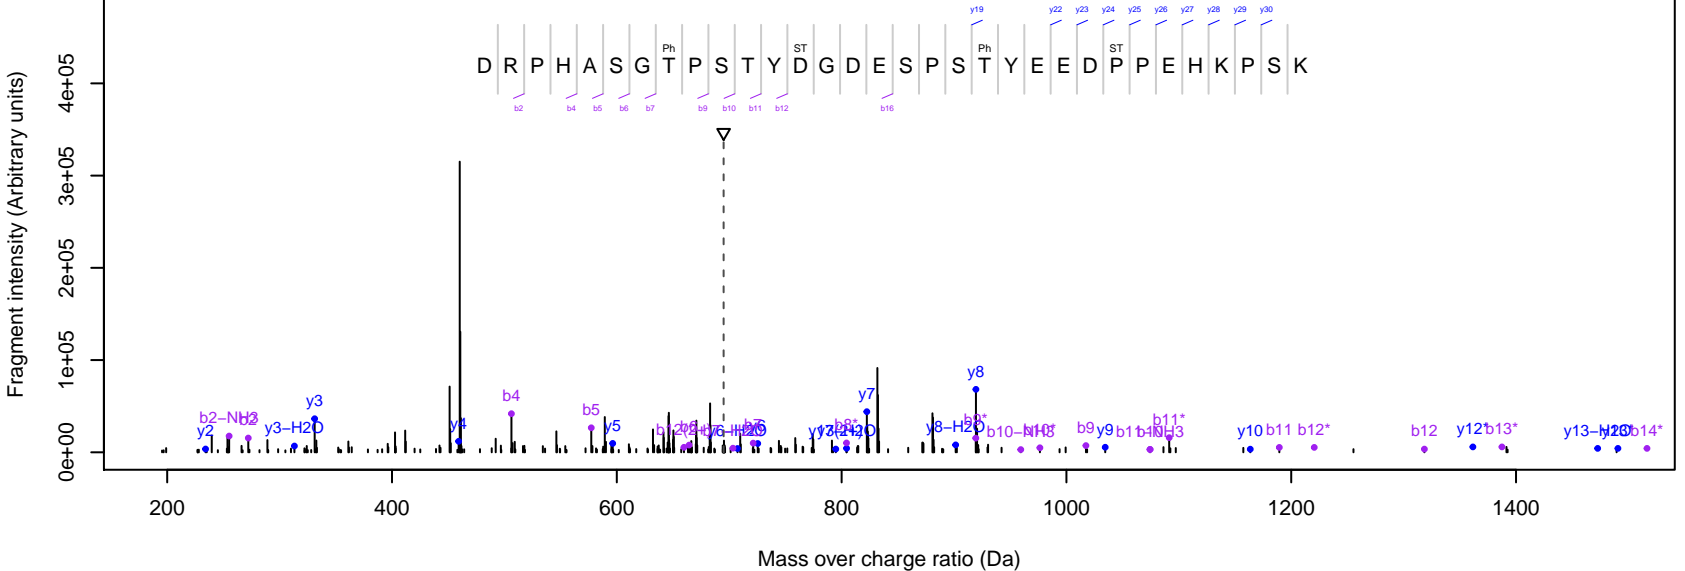

TLS(Phospho (STY))DESLCSGR-2+

Source : QE3\_2011126\_FR\_TiOx\_hum\_tissue\_Urea\_RNAB\_H Scan : 18127

Andromeda score : 116.03

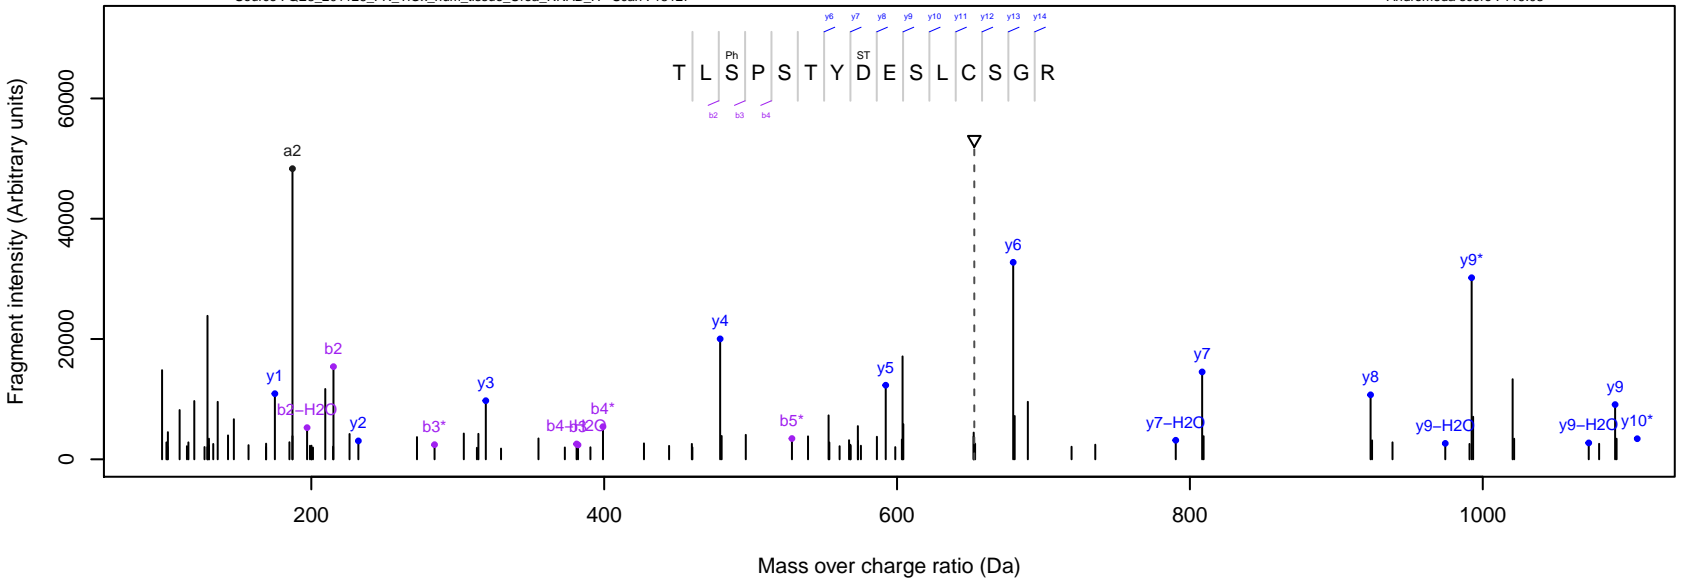

ILEQQNSS(Phospho (STY))RTLEK-3+

Source : QE3\_2011126\_FR\_TiOx\_hum\_tissue\_Urea\_RNAB\_H Scan : 9350

Andromeda score : 116

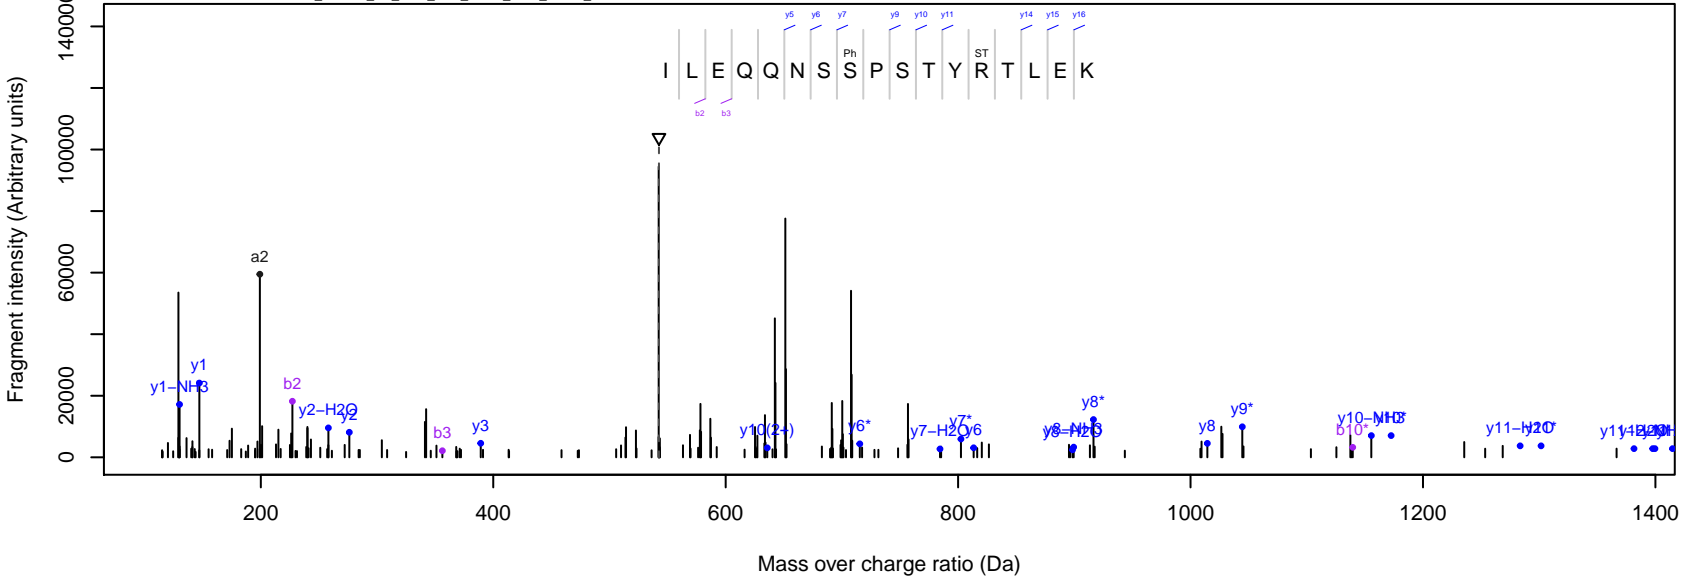

NIEATHMYDNAEACSTTEEVFNS(Phospho (STY))PR-3+

Source : QE3\_2011126\_FR\_TiOx\_hum\_tissue\_Urea\_RNAB\_N Scan : 43158

Andromeda score : 115.93

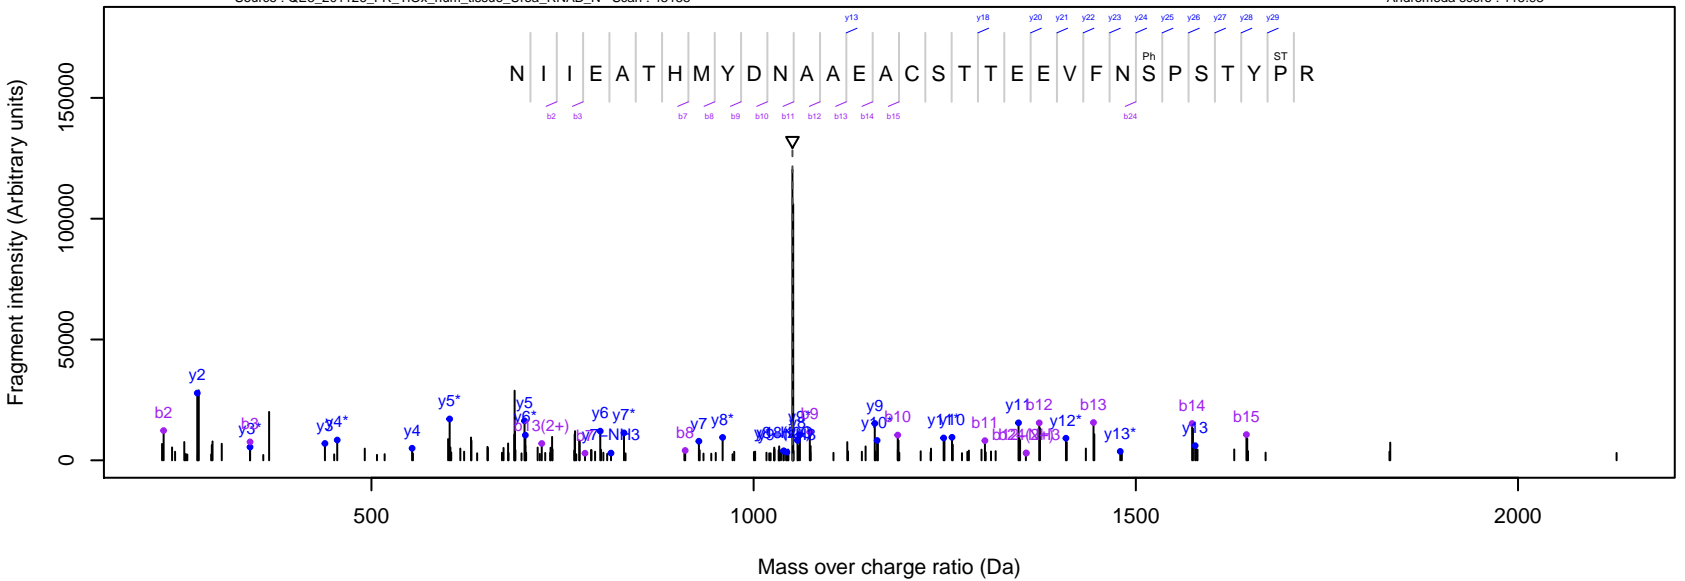

S(Phospho (STY))KSYNTPLLNPVQEHEAEGAAAGGTSIR-4+

Source : QE3\_201126\_FR\_TiOx\_hum\_tissue\_Urea\_RNAB\_H Scan : 28038

Andromeda score : 115.93

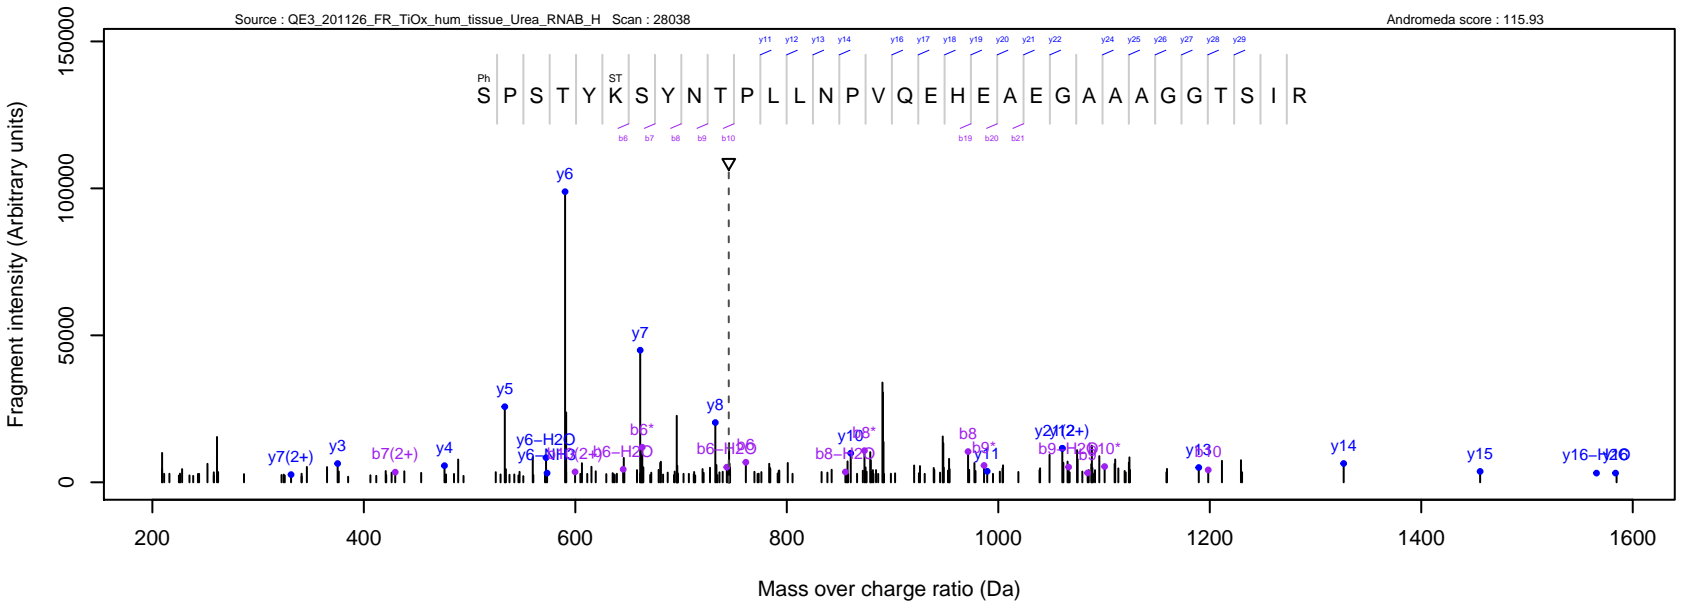

S(Phospho (STY))T(Phospho (STY))SFRGGM(Oxidation (M))GSGGLATGIAGGLAGMGGIQNEK-3+

Source : QE3\_201126\_FR\_TiOx\_hum\_tissue\_Urea\_RNAB\_N Scan : 50467

Andromeda score : 115.93

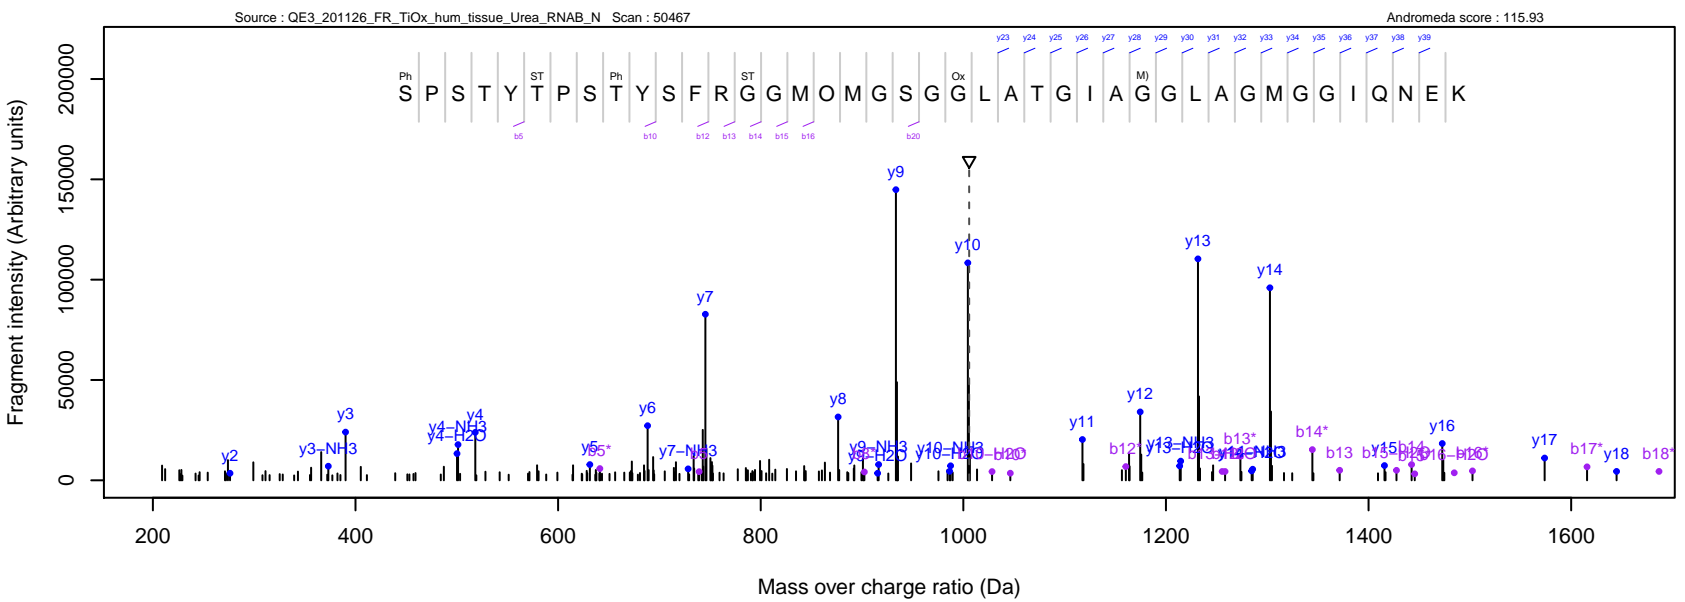

IVDGKVVS(Phospho (STY))ETNDTK-2+

Source : QE3\_201126\_FR\_TiOx\_hum\_tissue\_Urea\_RNAB\_H Scan : 15215

Andromeda score : 115.91

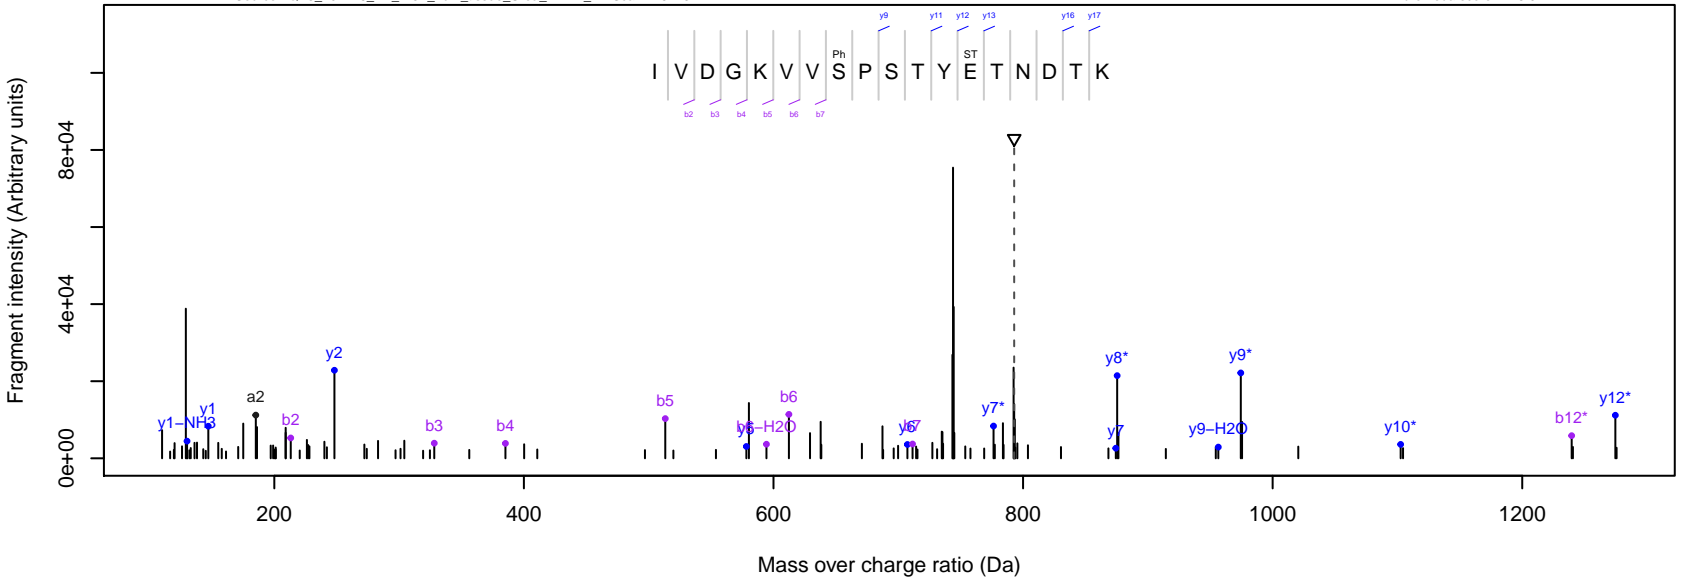

AGSATVLSGS(Phospho (STY))IAGLEGGSQLALR-2+

Source : QE3\_201126\_FR\_TiOx\_hum\_tissue\_Urea\_RNAB\_N Scan : 50703

Andromeda score : 115.88

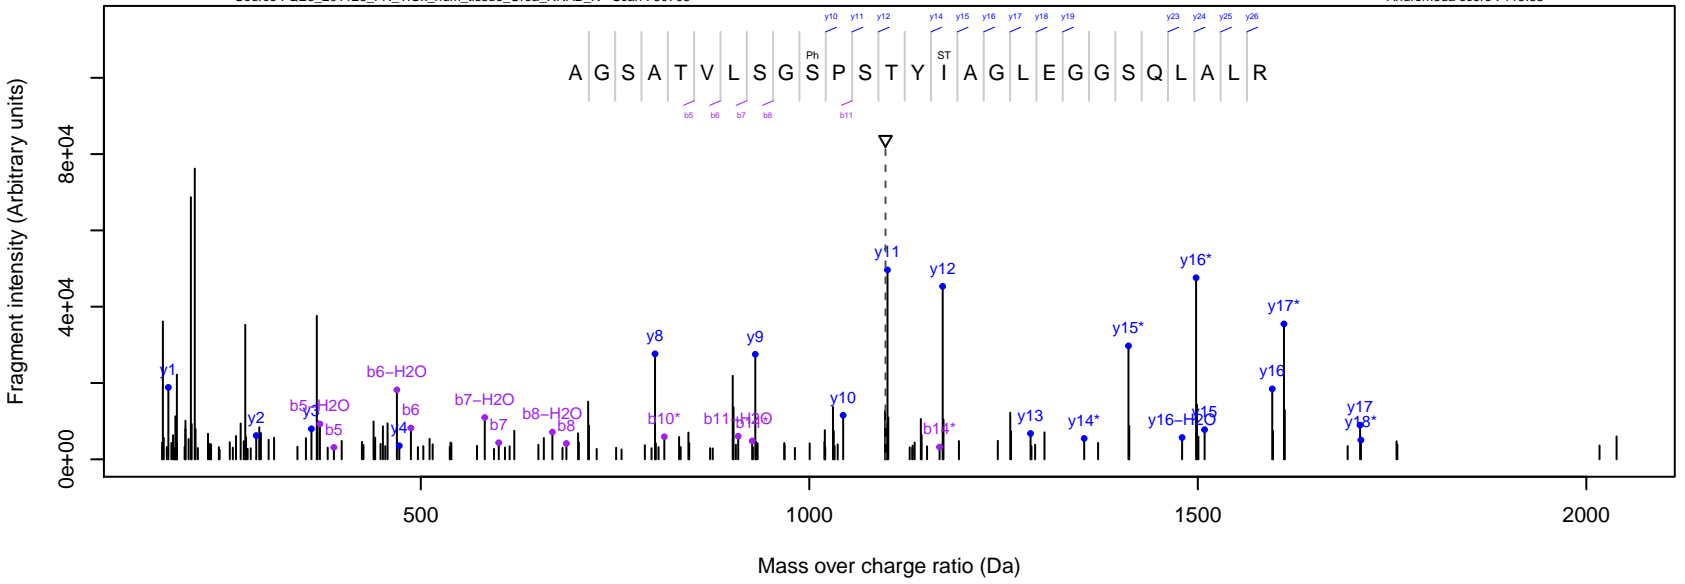

QSLSS(Phospho (STY))ADNLESDAQGHQVAAR-3+

Source : QE3\_201126\_FR\_TiOx\_hum\_tissue\_Urea\_RNAB\_H Scan : 20114

Andromeda score : 115.88

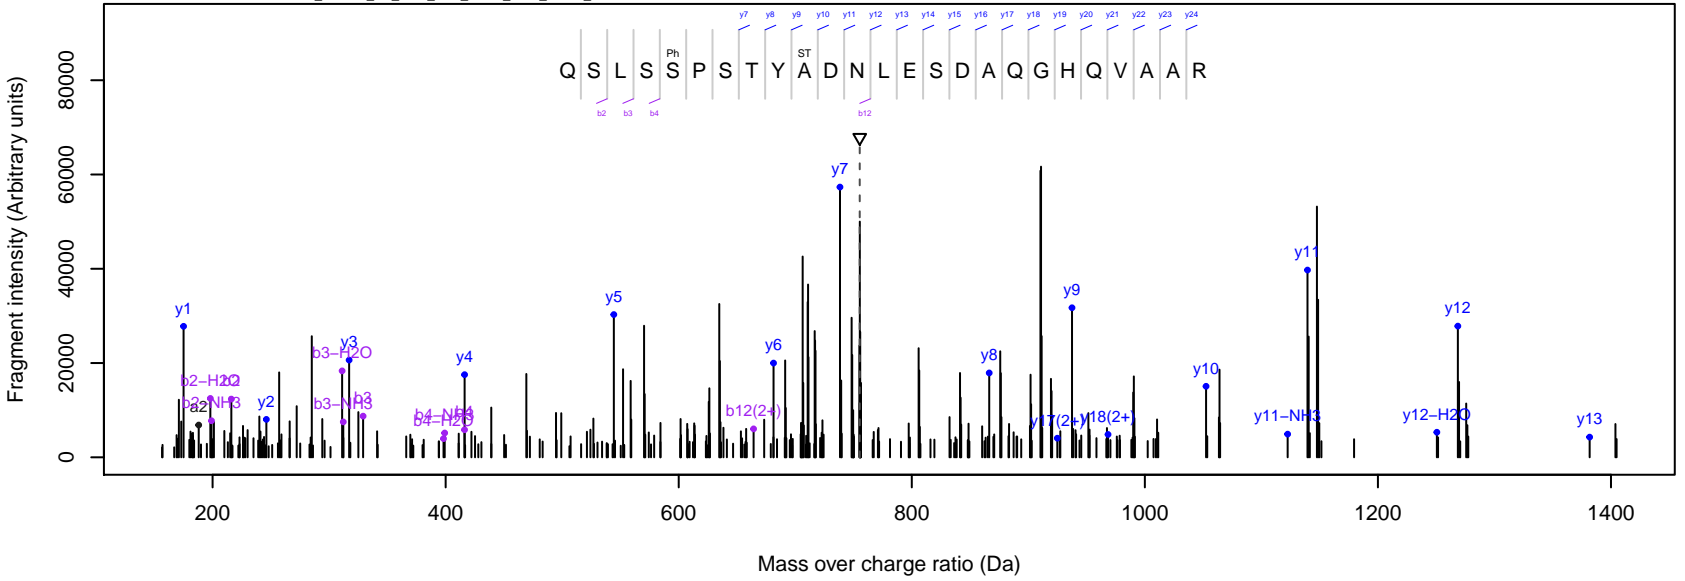

SEVQQPVHPKPLS(Phospho (STY))PDSR-3+

Source : QE3\_201126\_FR\_TiOx\_hum\_tissue\_Urea\_RNAB\_B Scan : 11283

Andromeda score : 115.88

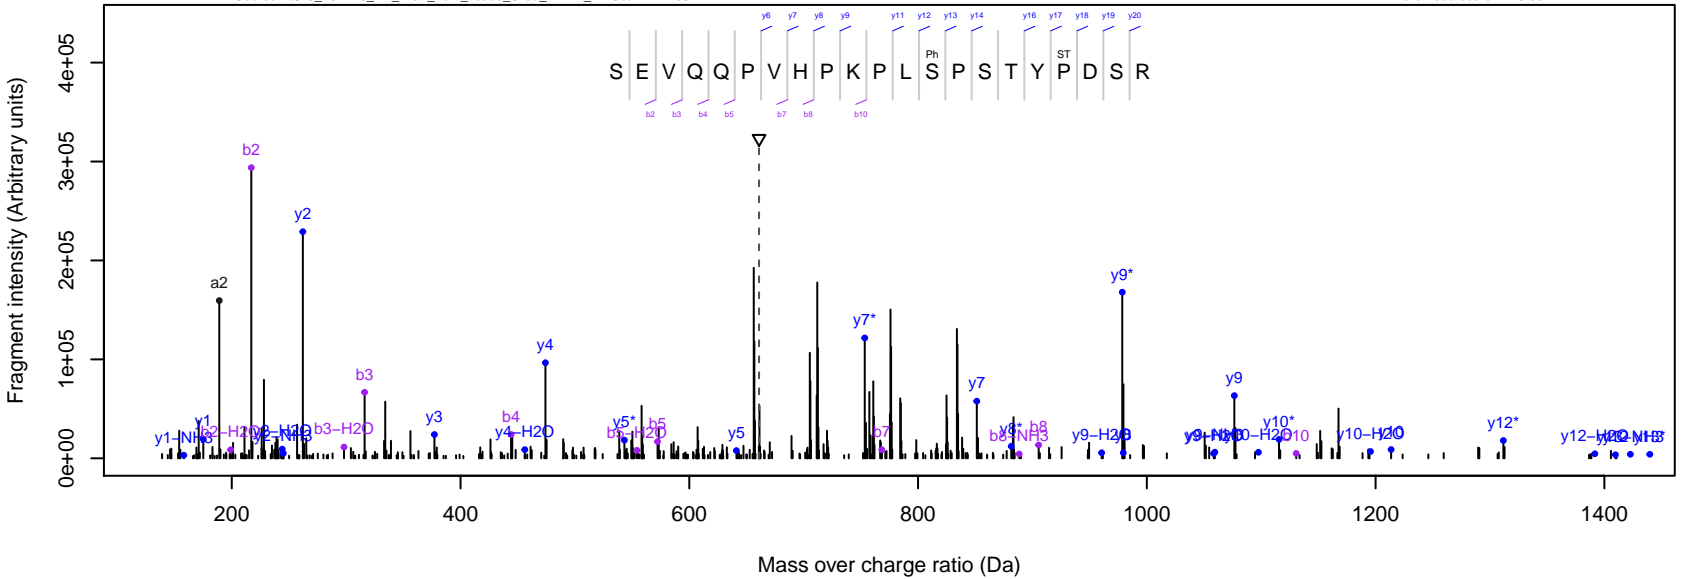

DSAIPVES(Phospho (STY))DT(Phospho (STY))DDEGAPR-2+

Source : QE3\_201126\_FR\_TIOx\_hum\_tissue\_Urea\_RNAB\_N Scan : 29389

Andromeda score : 115.87

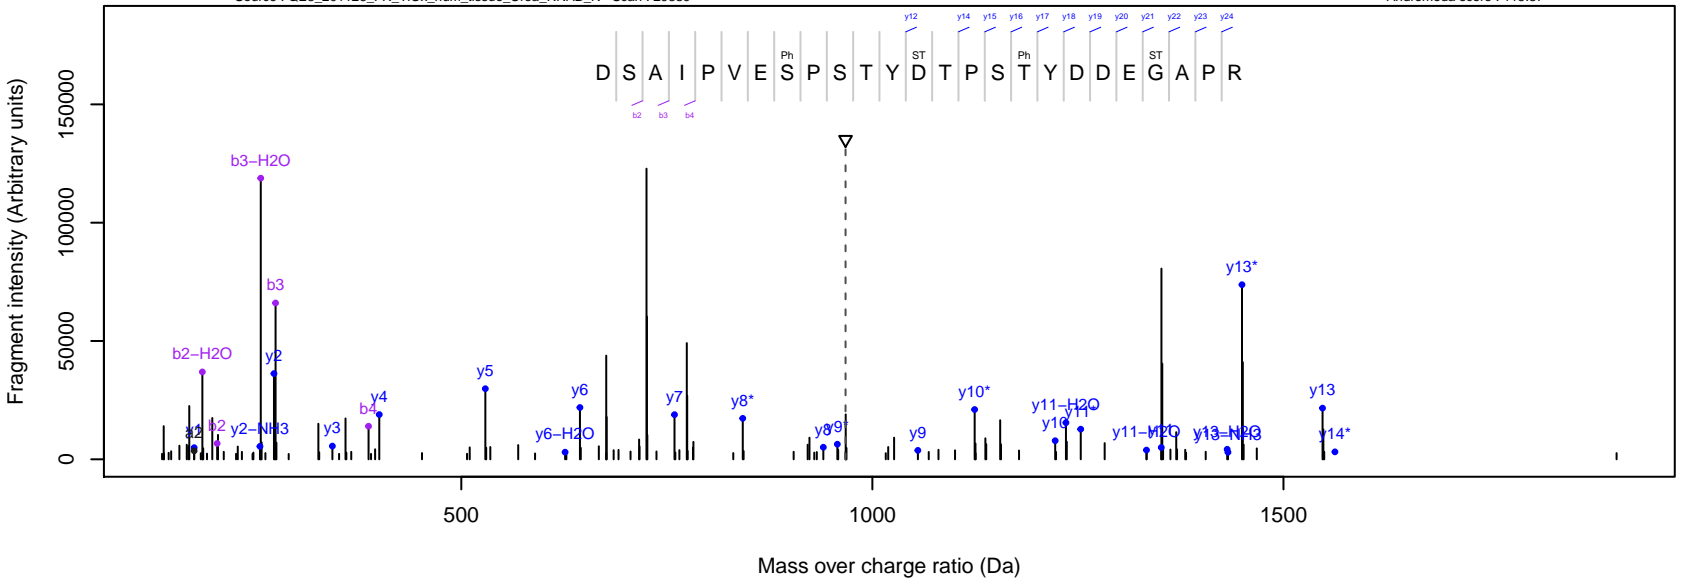

PGLRPAPNS(Phospho (STY))VDVDFINTR-3+

Source : QE3\_201126\_FR\_TIOx\_hum\_tissue\_Urea\_RNAB\_H Scan : 40049

Andromeda score : 115.87

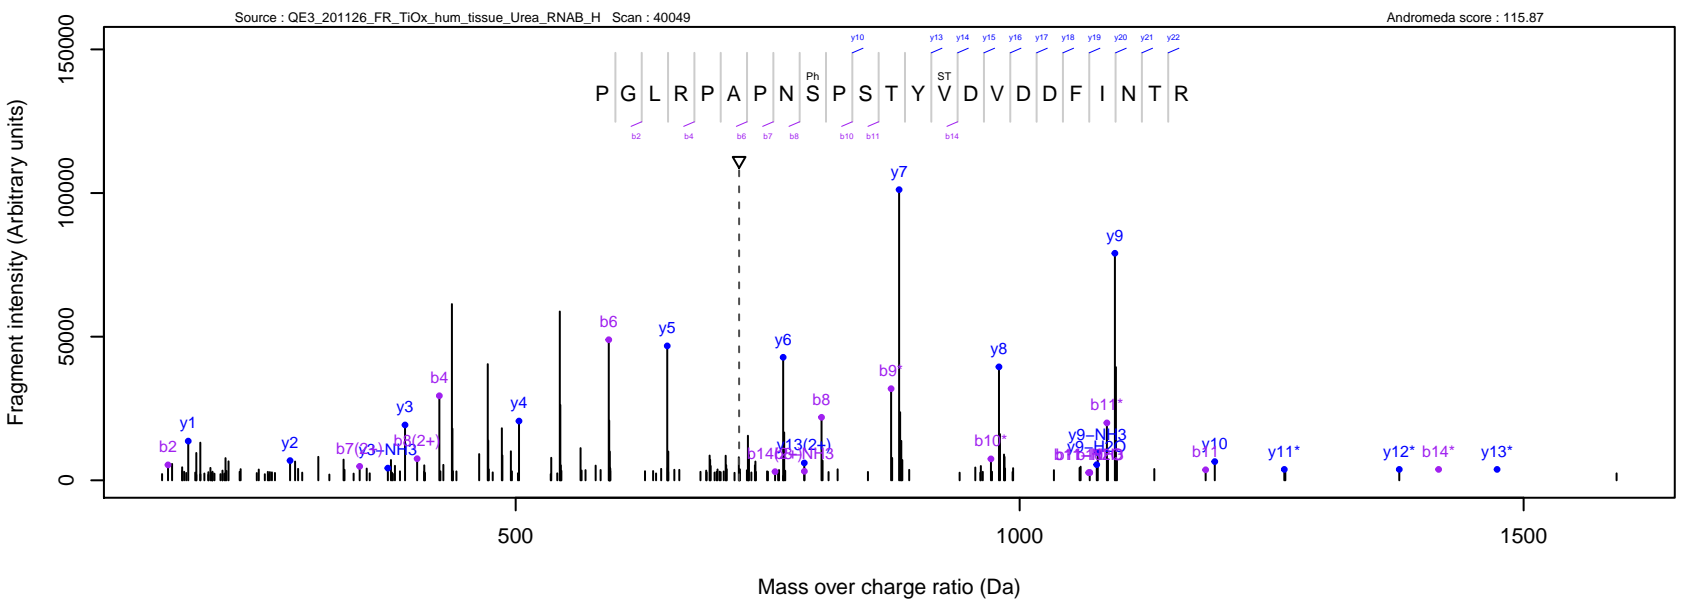

(Acetyl (Protein N-term))S(Phospho (STY))TLLSAFYDVFDFLCK-2+

Source : QE3\_201126\_FR\_TIOx\_hum\_tissue\_Urea\_RNAB\_N Scan : 63296

Andromeda score : 115.82

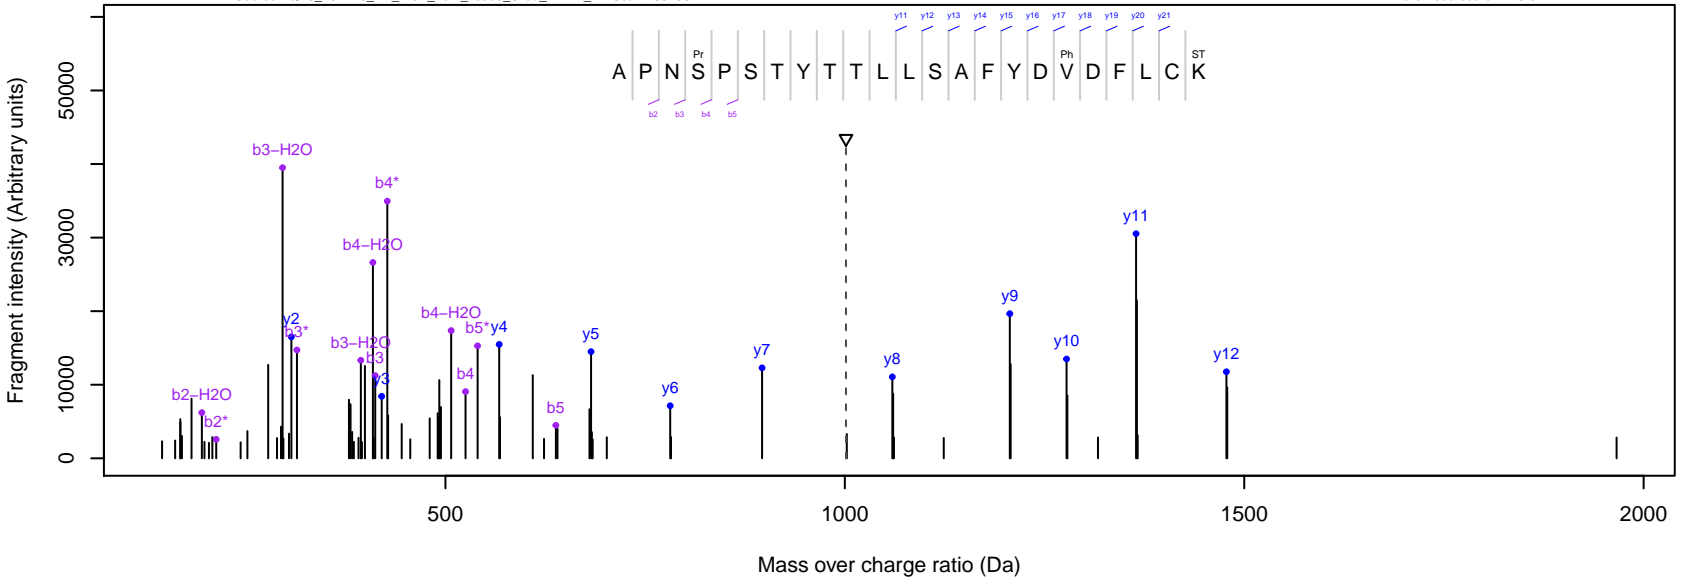



EKEVDGLLTSEPM(Oxidation (M))GS(Phospho (STY))PVSSK-3+

Source : QE3\_201126\_FR\_TiOx\_hum\_tissue\_Urea\_RNAB\_H Scan : 23340

Andromeda score : 115.81

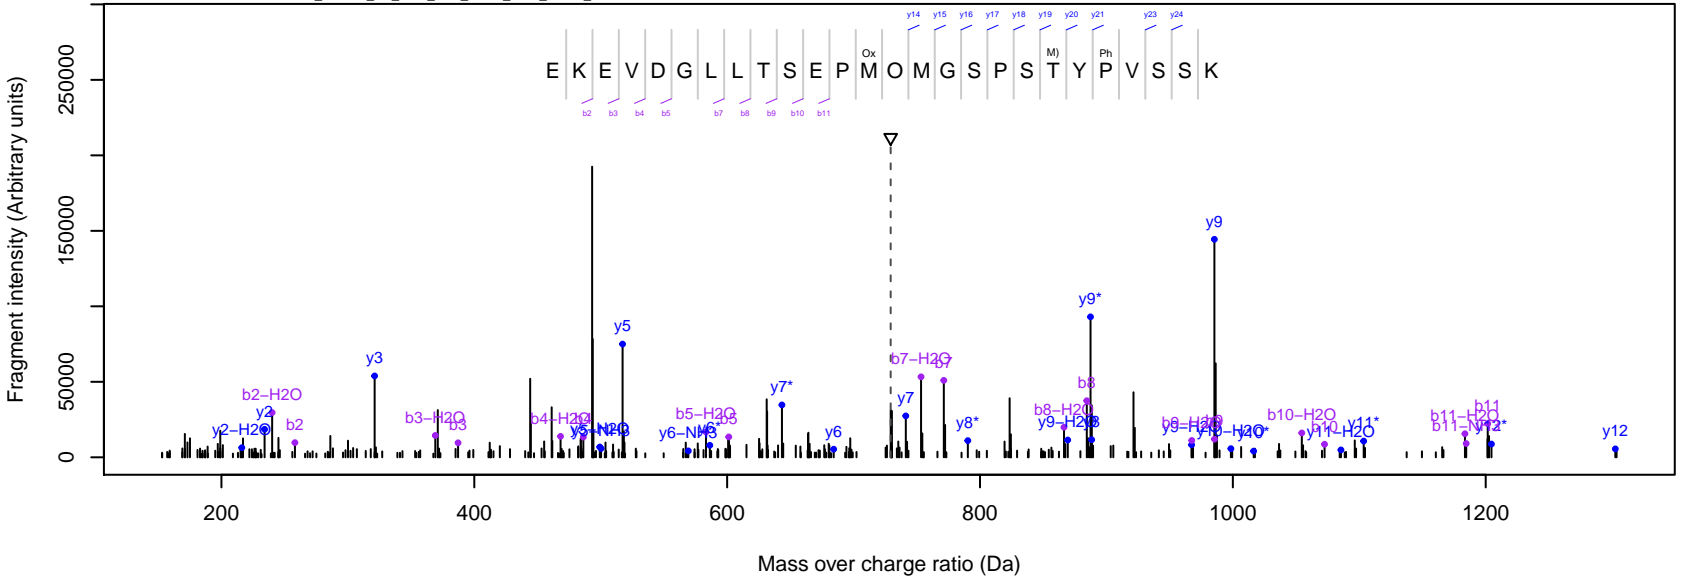

GLPSPYNM(Oxidation (M))SSAPGS(Phospho (STY))R-2+

Source : QE3\_201126\_FR\_TiOx\_hum\_tissue\_Urea\_RNAB\_B Scan : 21528

Andromeda score : 115.8

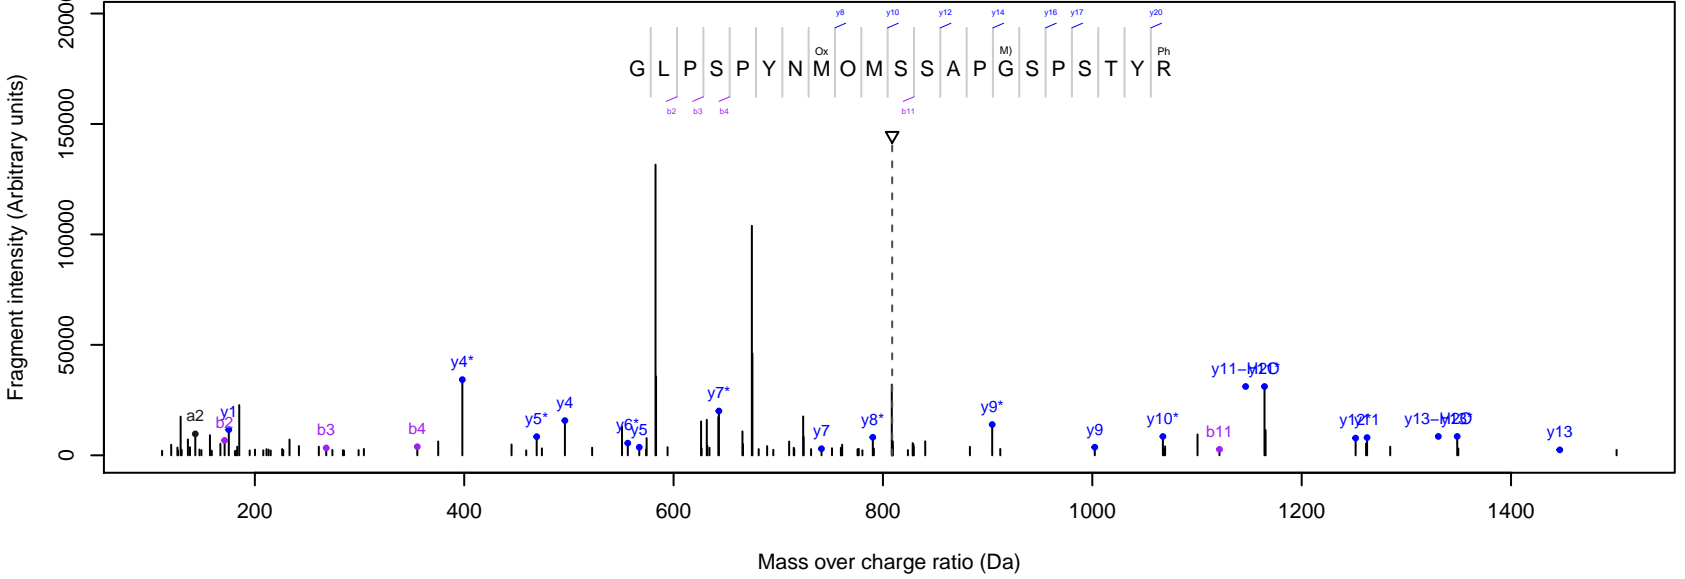

HQAS(Phospho (STY))INELKR-3+

Source : QE3\_201126\_FR\_TiOx\_hum\_tissue\_Urea\_RNAB\_N Scan : 6882

Andromeda score : 115.8

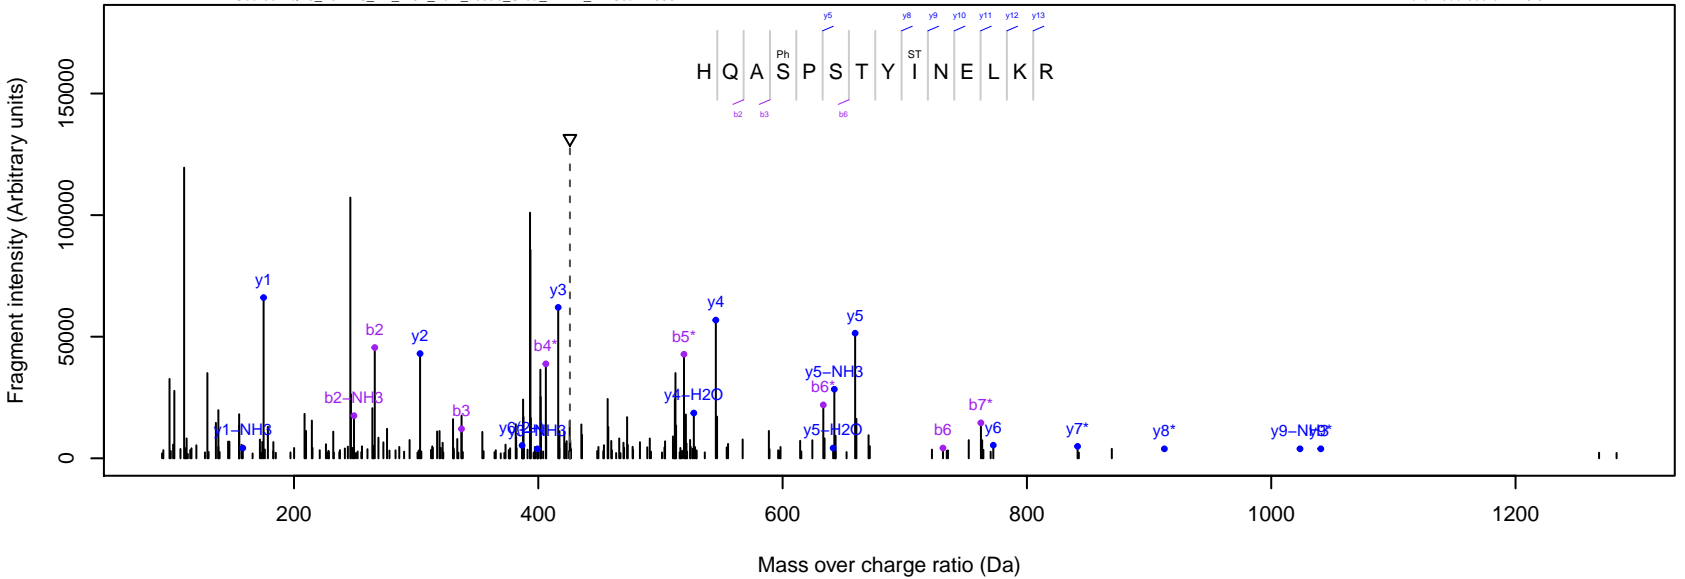

KM(Oxidation (M))S(Phospho (STY))IQDSLALQPK-2+

Source : QE3\_201126\_FR\_TiOx\_hum\_tissue\_Urea\_RNAB\_N Scan : 20501

Andromeda score : 115.8

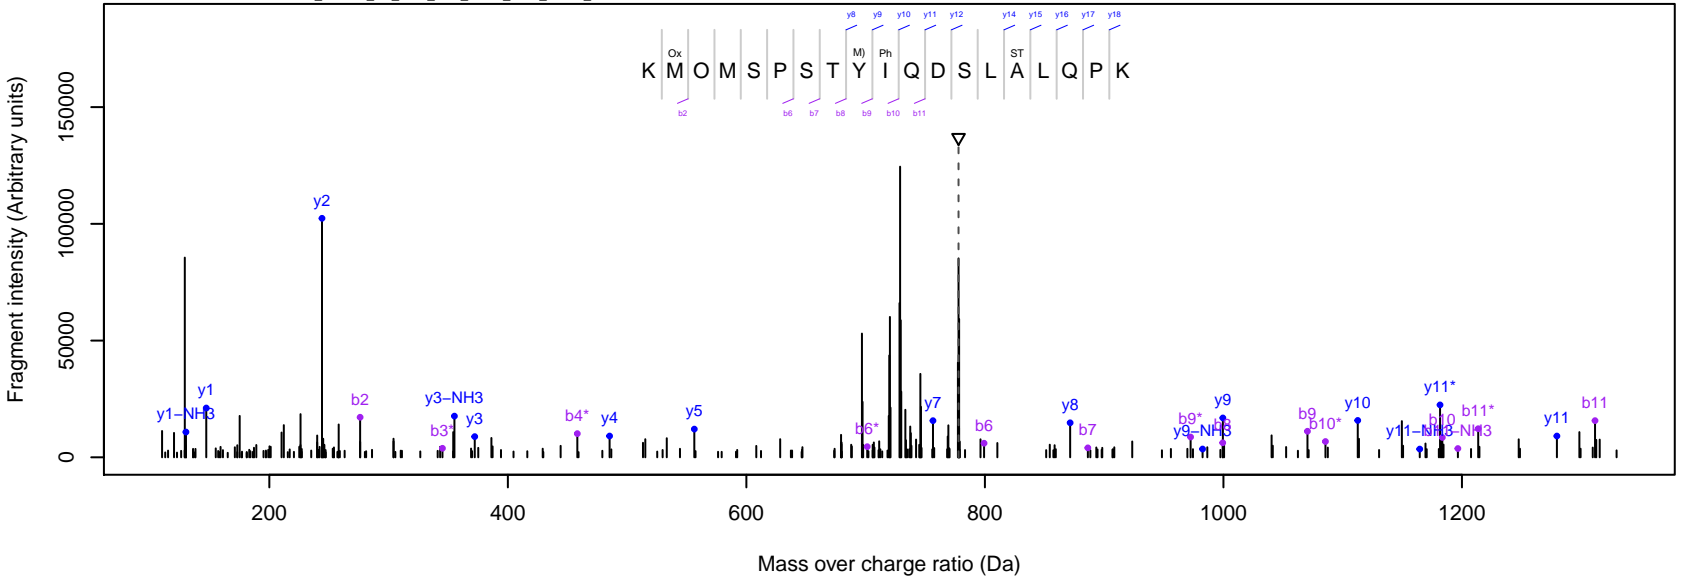

RS(Phospho (STY))SLLSLMTGK-2+

Source : QE3\_201126\_FR\_TiOx\_hum\_tissue\_Urea\_RNAB\_B Scan : 35782

Andromeda score : 115.8

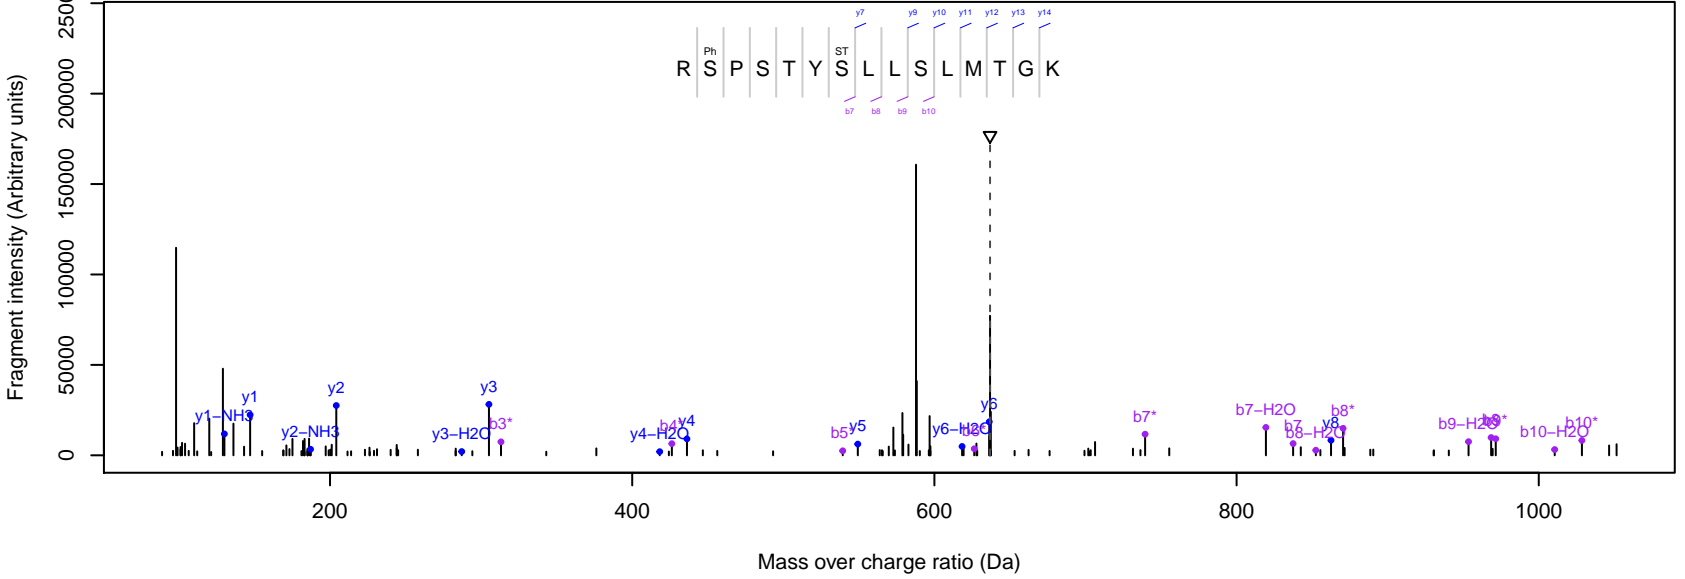

T(Phospho (STY))STFCGTPEFLAPEVLTETSYTR-3+

Source : QE3\_201126\_FR\_TiOx\_hum\_tissue\_Urea\_RNAB\_H Scan : 58880

Andromeda score : 115.79

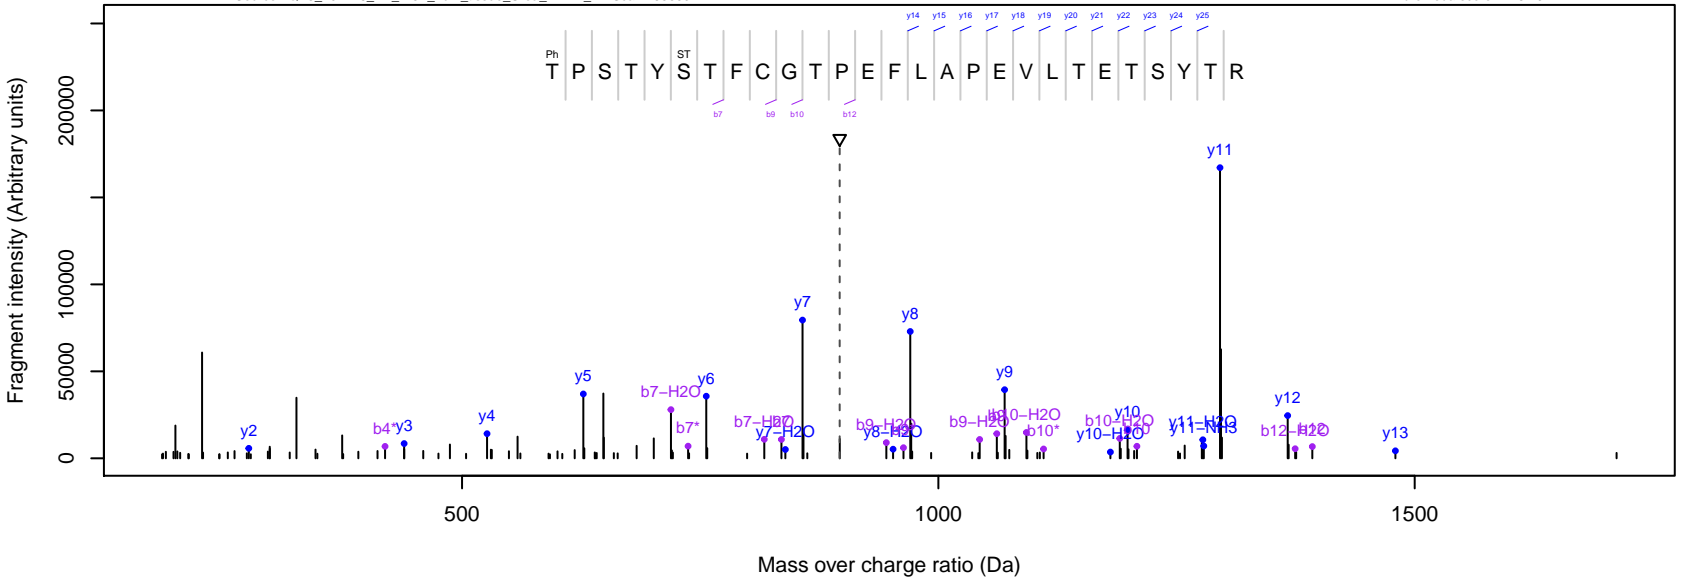

TES(Phospho (STY))VPSDINNVPDR-2+

Source : QE3\_201126\_FR\_TiOx\_hum\_tissue\_Urea\_RNAB\_B Scan : 22971

Andromeda score : 115.78

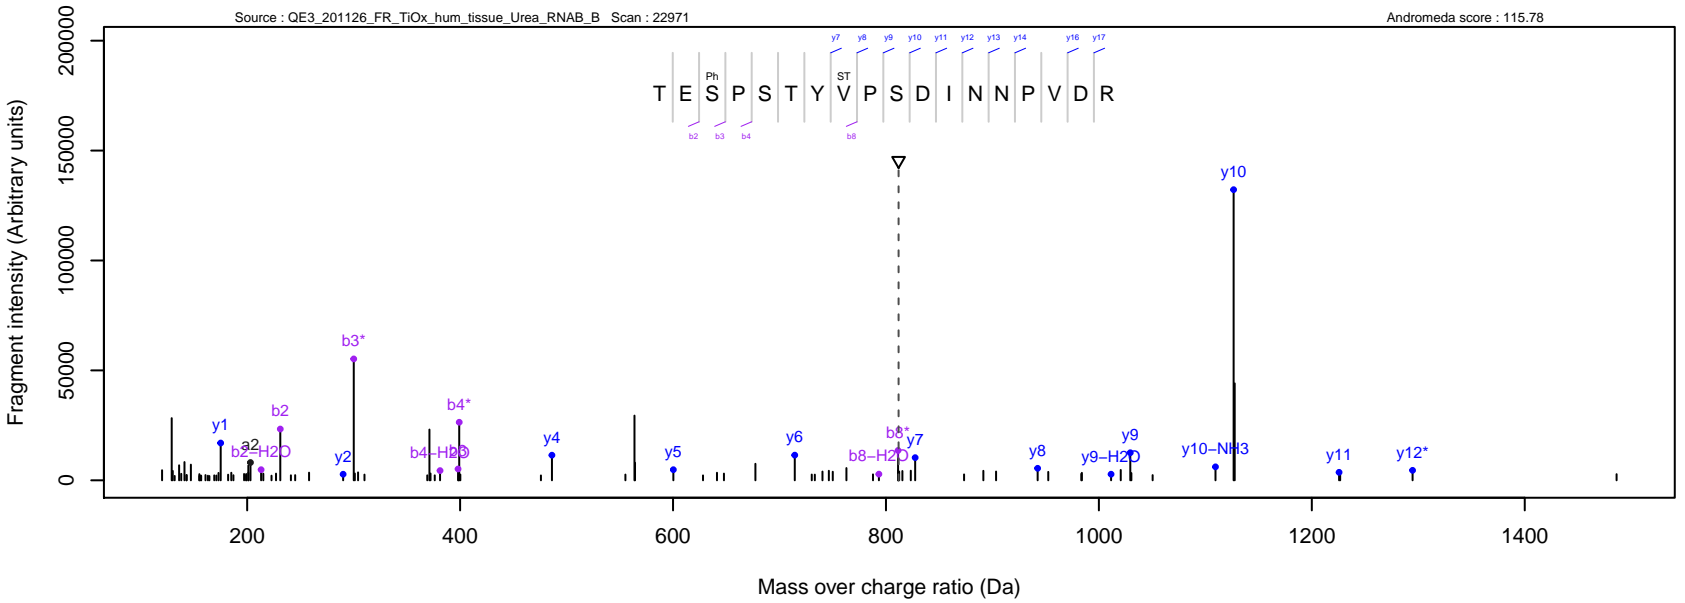

RPWRPEEAVEDPDEEEDNT(Phospho (STY))SEAENGFSLEEVL-3+

Source : QE3\_201126\_FR\_TiOx\_hum\_tissue\_Urea\_RNAB\_H Scan : 51337

Andromeda score : 115.77

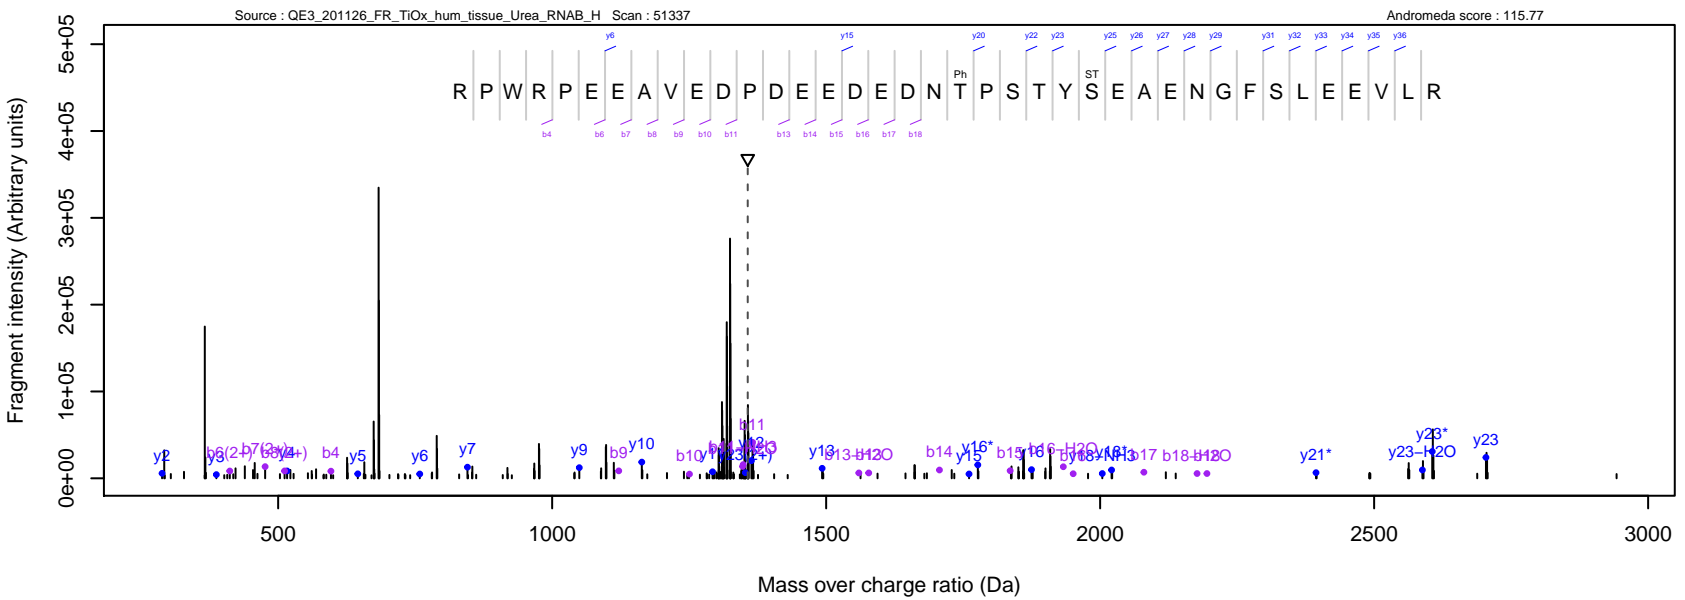

SQGDEAGGHGEDRPEPLS(Phospho (STY))PKESK-3+

Source : QE3\_201126\_FR\_TiOx\_hum\_tissue\_Urea\_RNAB\_H Scan : 7044

Andromeda score : 115.77

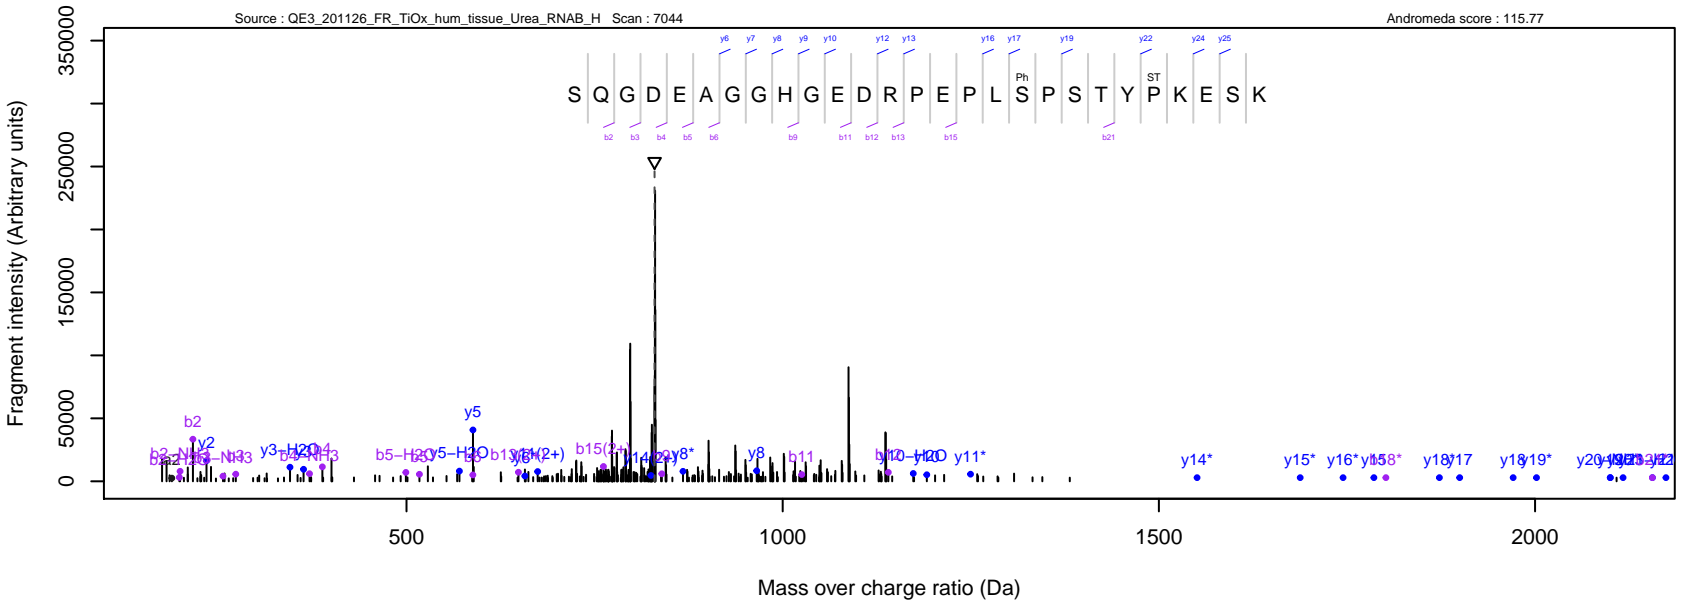

SGSPRPT(Phospho (STY))EPTDFLMLFEGSPSGK-3+

Source : QE3\_201126\_FR\_TiOx\_hum\_tissue\_Urea\_RNAB\_H Scan : 57153

Andromeda score : 115.76

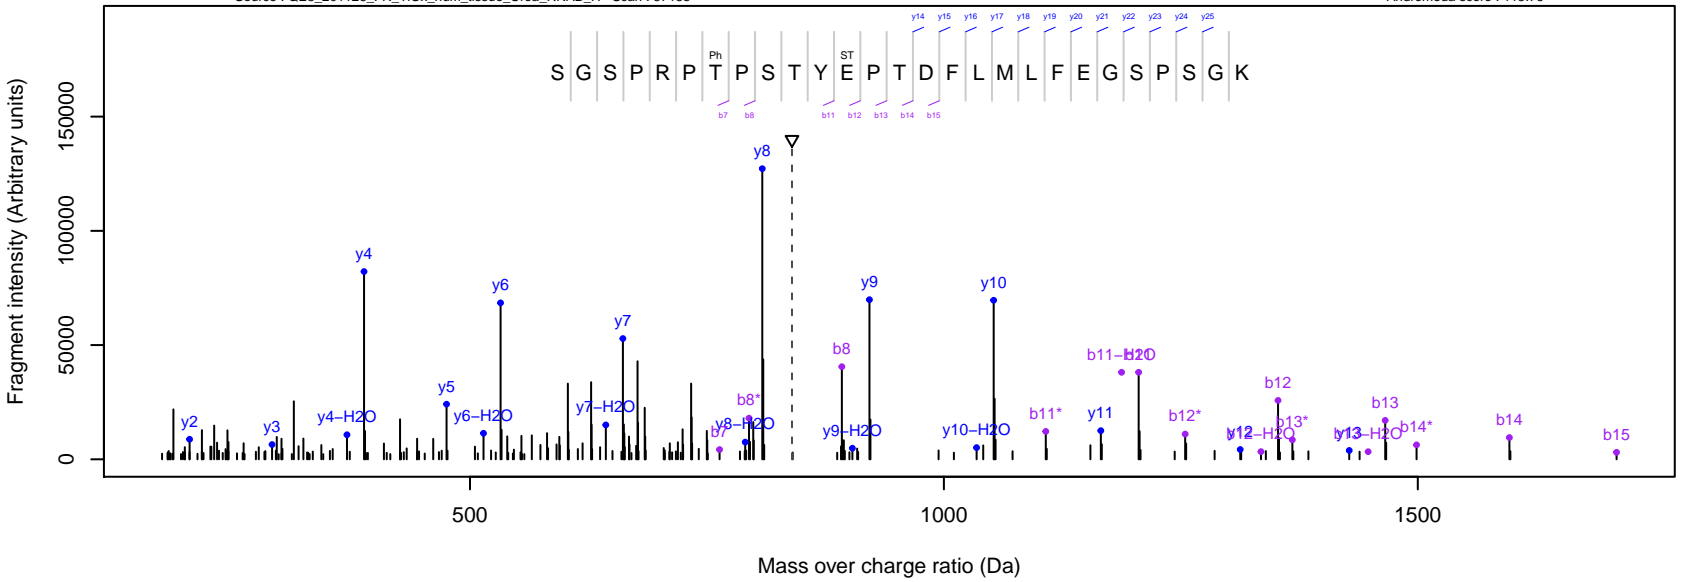

NS(Phospho (STY))QKHSPTSEPTPPGDALPPVSSPHTHR-4+

Source : QE3\_201126\_FR\_TiOx\_hum\_tissue\_Urea\_RNAB\_N Scan : 12319

Andromeda score : 115.74

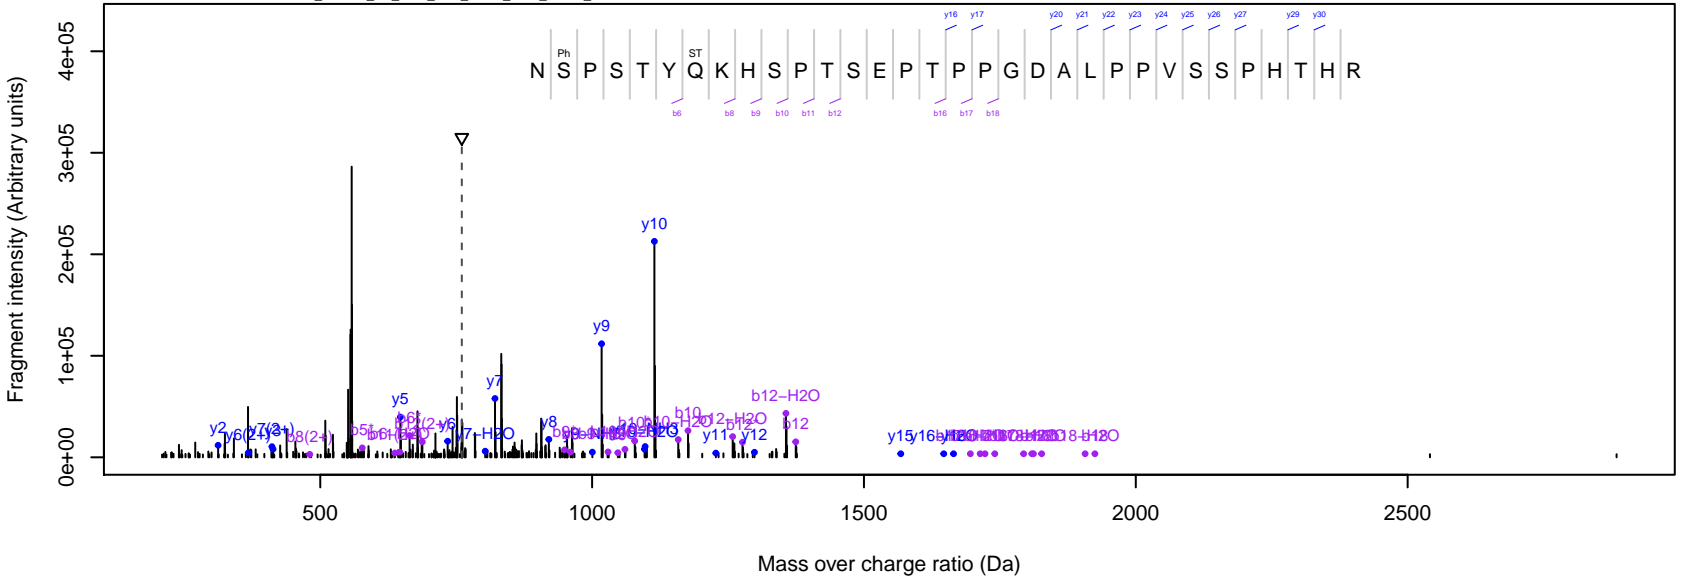

RSAS(Phospho (STY))PDDLGSNNWEAADLGNEER-3+

Source : QE3\_201126\_FR\_TiOx\_hum\_tissue\_Urea\_RNAB\_N Scan : 32239

Andromeda score : 115.67

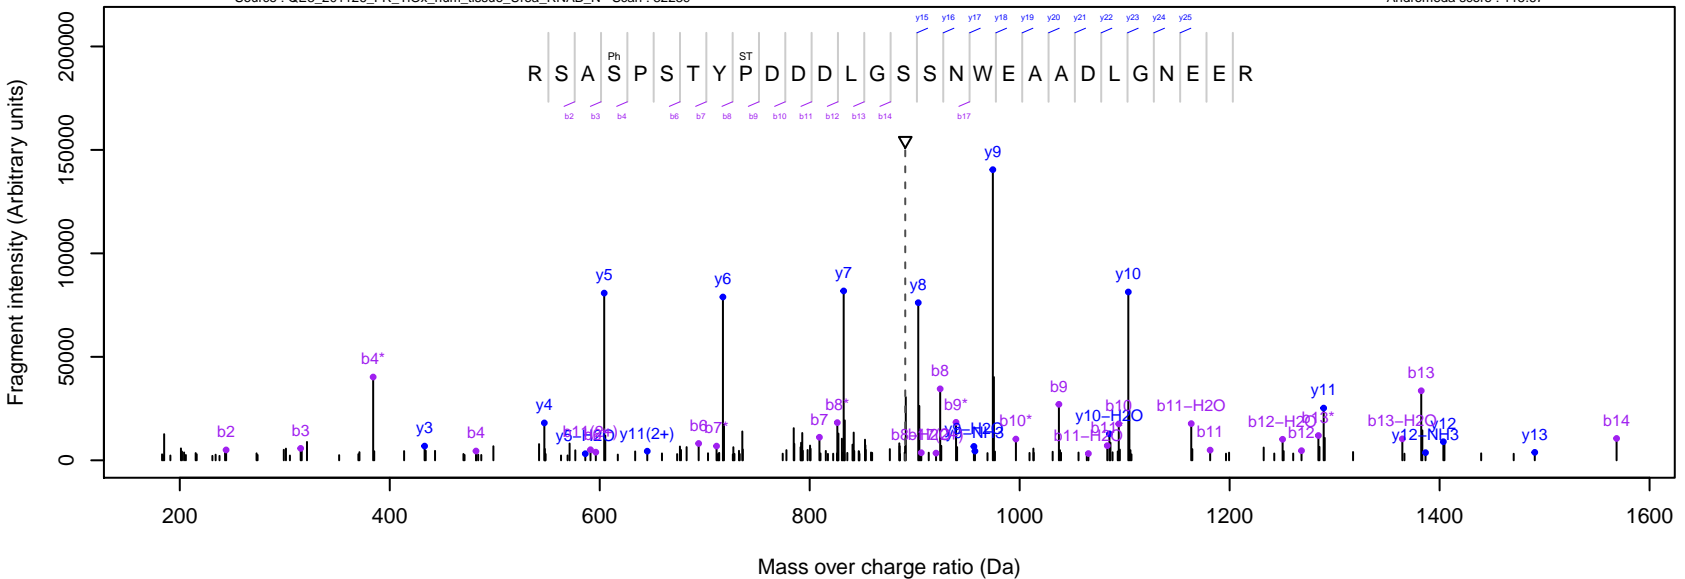

SGS(Phospho (STY))PSDNS(Phospho (STY))GAEEM(Oxidation (M))EVSLAKPK-3+

Source : QE3\_201126\_FR\_TIOx\_hum\_tissue\_Urea\_RNAB\_N Scan : 20273

Andromeda score : 115.63

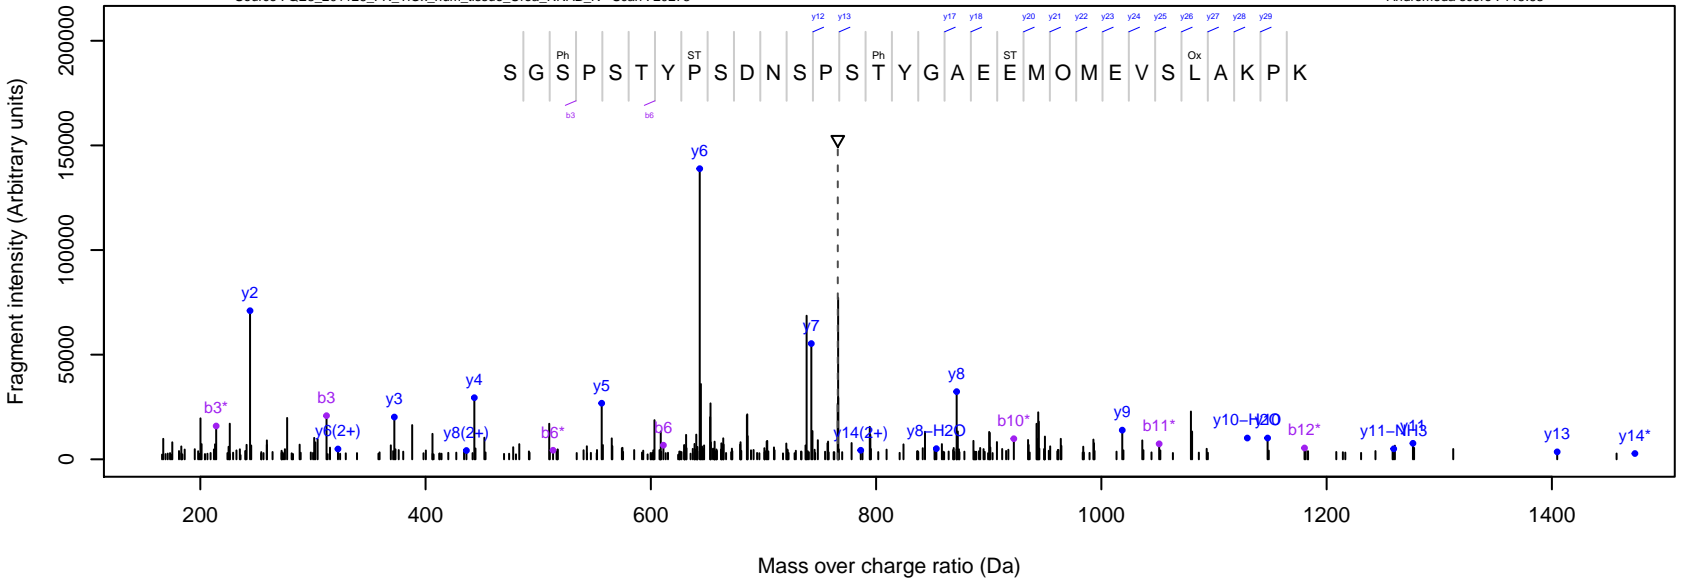

ANS(Phospho (STY))GGVLDSSGEFASIEK-2+

Source : QE3\_201126\_FR\_TIOx\_hum\_tissue\_Urea\_RNAB\_B Scan : 38677

Andromeda score : 115.57

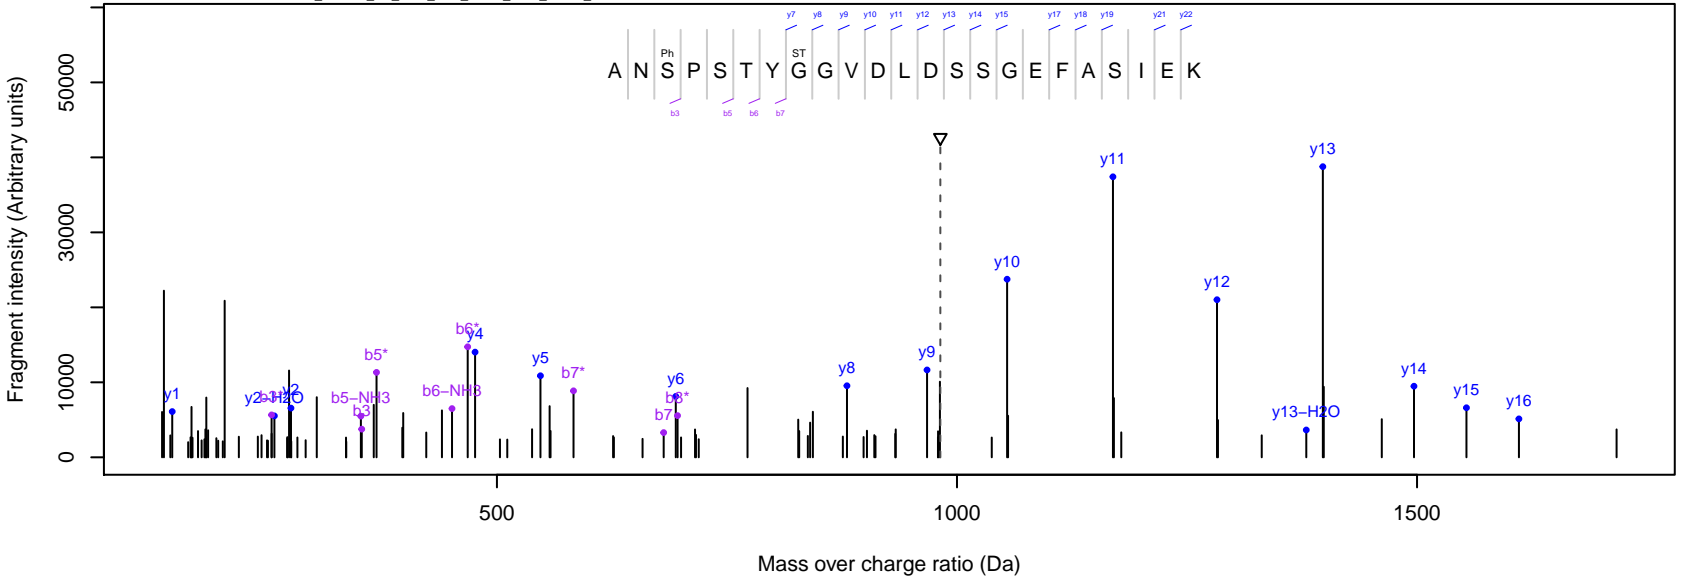

S(Phospho (STY))APAS(Phospho (STY))PTHPGLMSPR-3+

Source : QE3\_201126\_FR\_TIOx\_hum\_tissue\_Urea\_RNAB\_H Scan : 21264

Andromeda score : 115.57

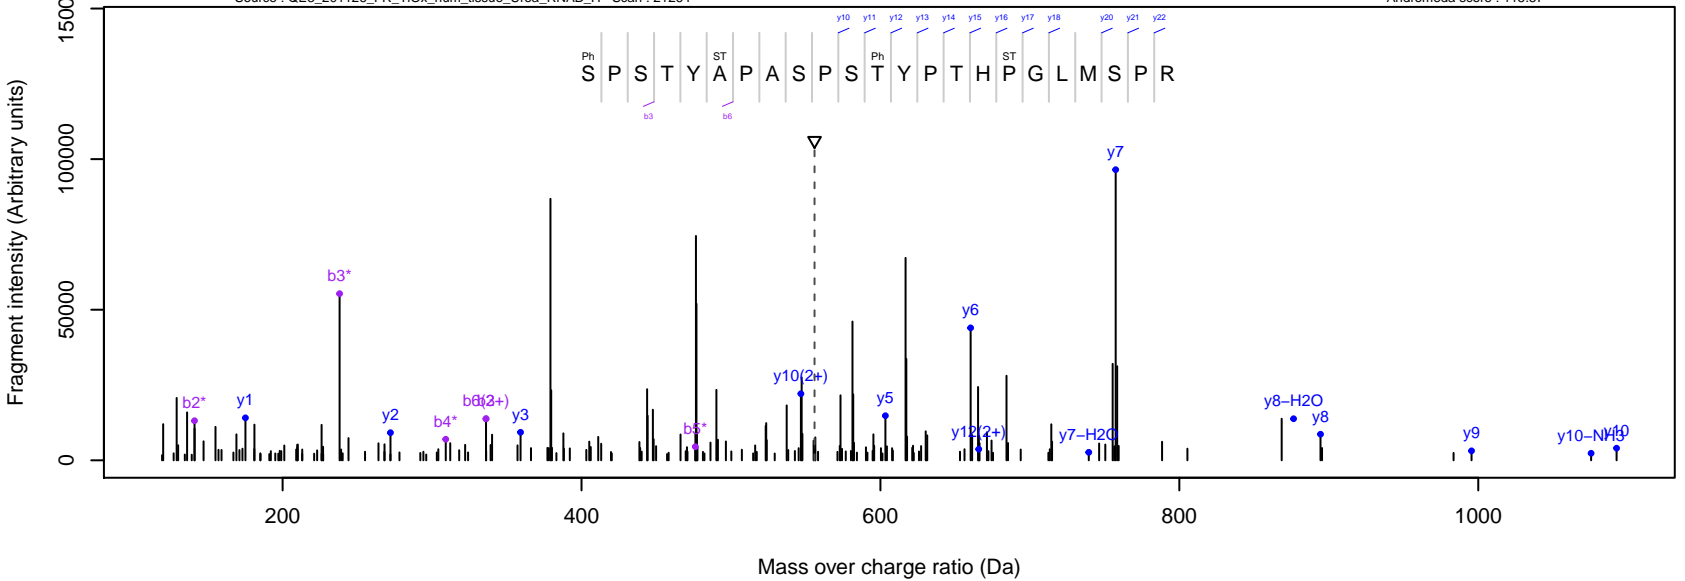

SEEVPAFGVAS(Phospho (STY))PPPLTDPDTTANAEGDLPTTM(Oxidation (M))GGPLPPLALK-4+

Source : QE3\_201126\_FR\_TIOx\_hum\_tissue\_Urea\_RNAB\_H Scan : 54651

Andromeda score : 115.55

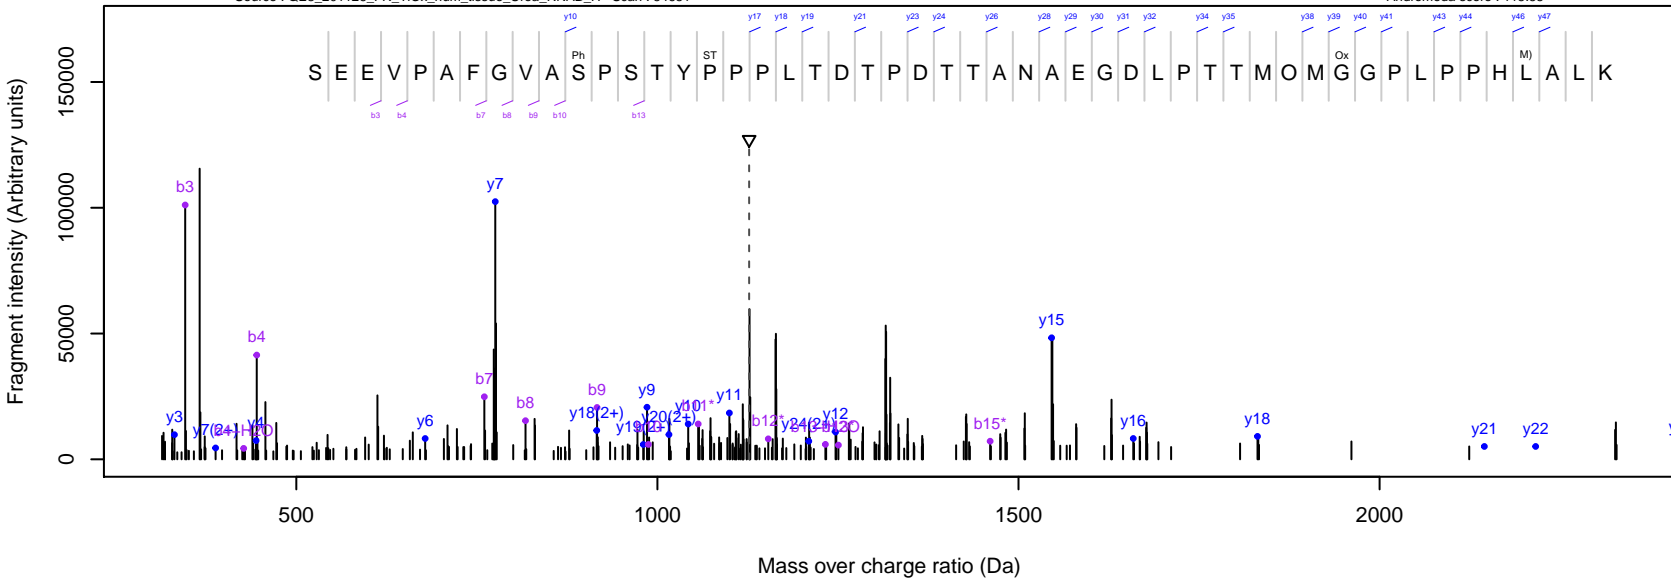

TLSVAAFNEDEDS(Phospho (STY))EPEEM(Oxidation (M))PPEAK-2+

Source : QE3\_201126\_FR\_TIOx\_hum\_tissue\_Urea\_RNAB\_N Scan : 39766

Andromeda score : 115.54

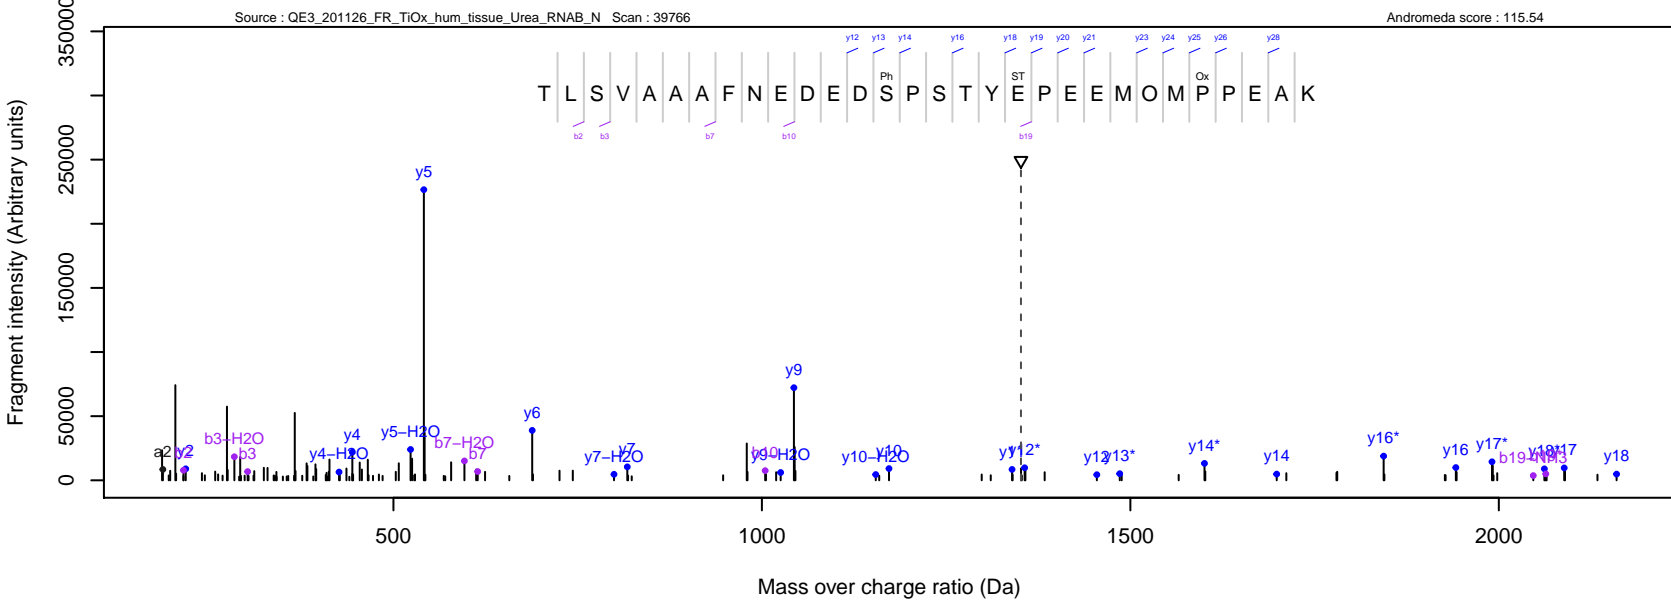

GLYDGPVCEVSVTPSTYPK-2+

Source : QE3\_201126\_FR\_TIOx\_hum\_tissue\_Urea\_RNAB\_B Scan : 36012

Andromeda score : 115.5

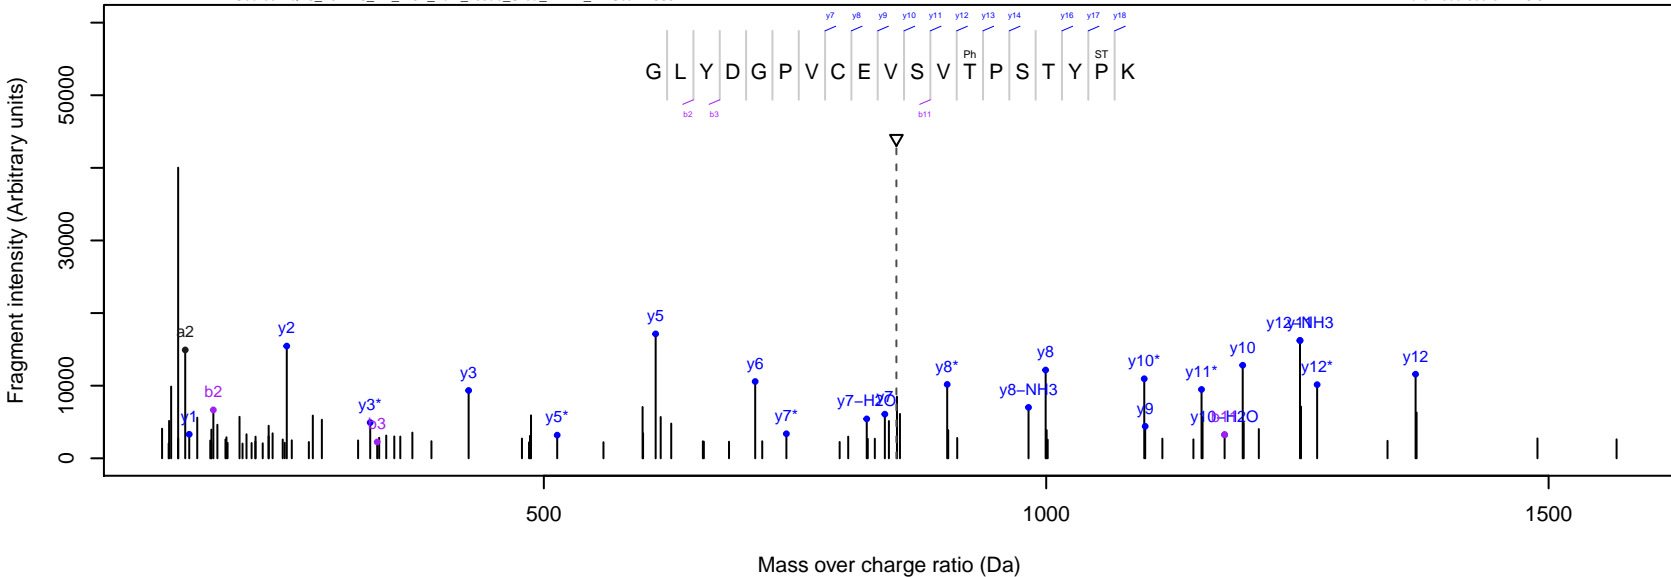

TTKS(Phospho (STY))PSDSGYSYETIGK-2+

Source : QE3\_2011126\_FR\_TiOx\_hum\_tissue\_Urea\_RNAB\_H Scan : 16804

Andromeda score : 115.5

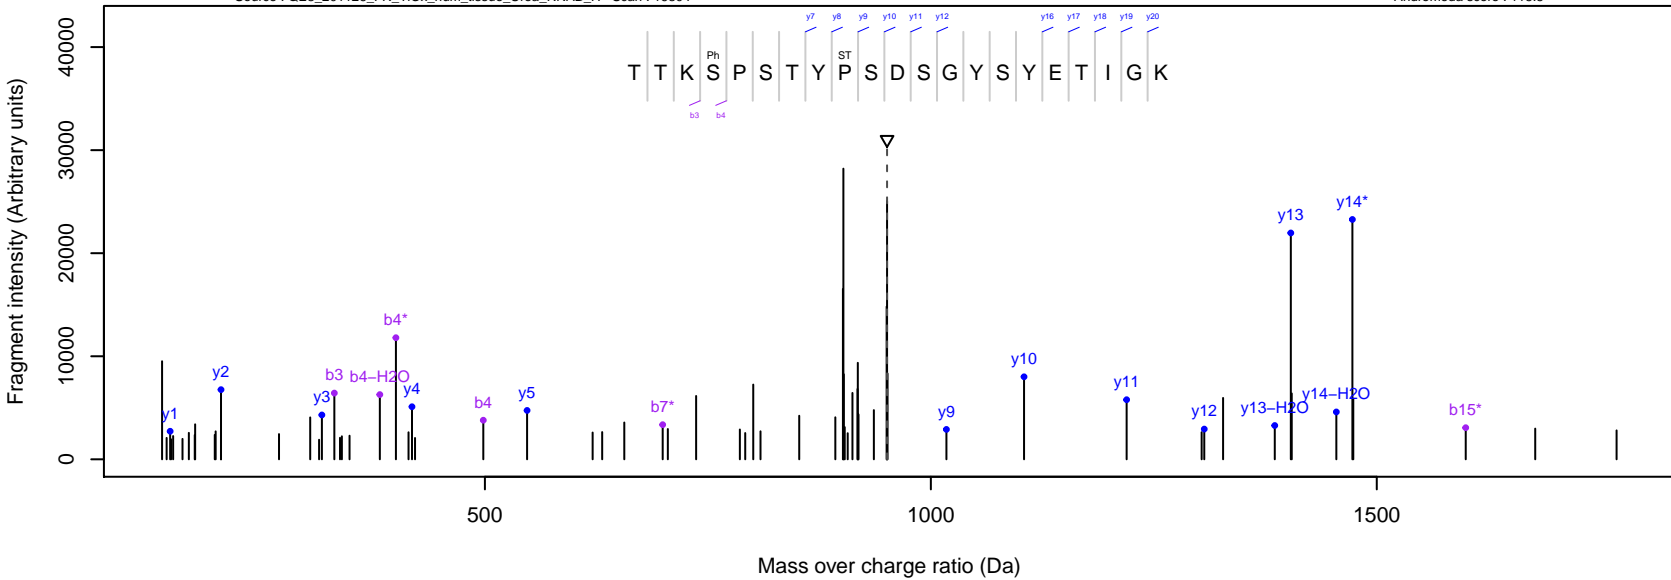

GSTES(Phospho (STY))CNTTTEEDLKVR-3+

Source : QE3\_2011126\_FR\_TiOx\_hum\_tissue\_Urea\_RNAB\_N Scan : 13615

Andromeda score : 115.46

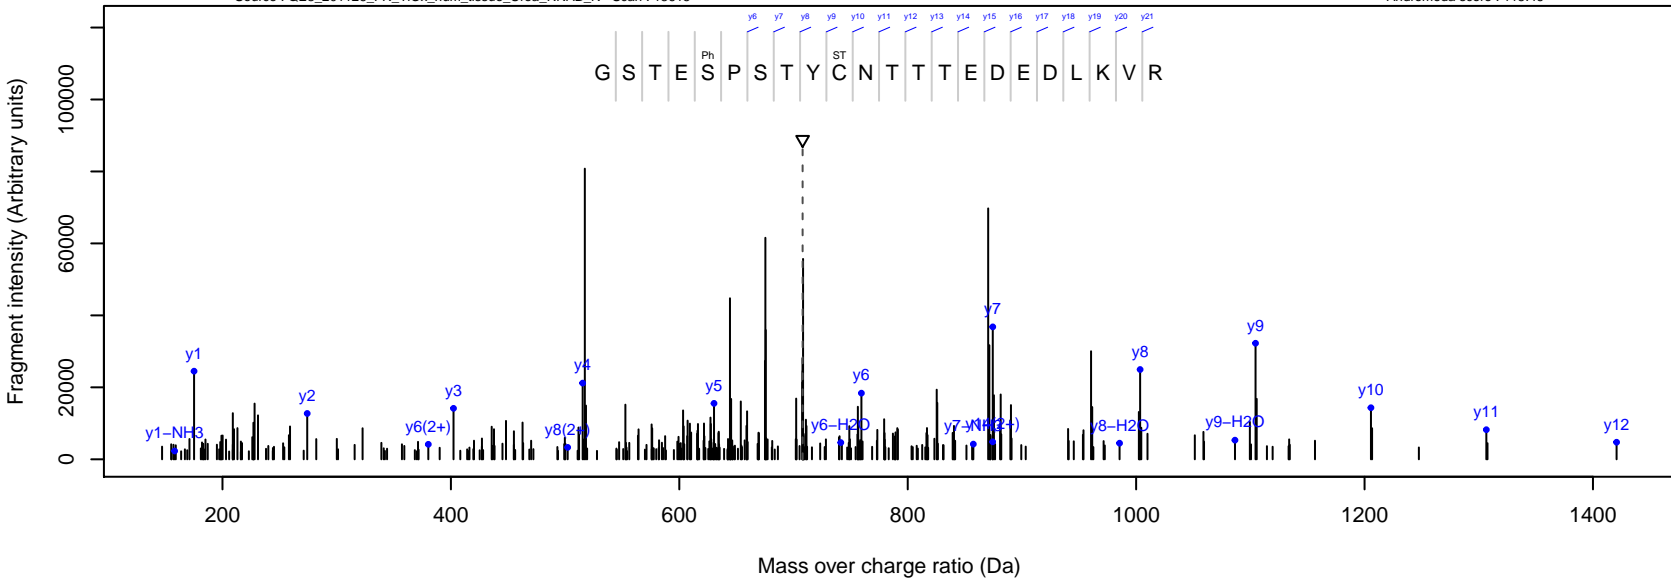

VFPEPTES(Phospho (STY))GDEGEELGLPLLSTR-2+

Source : QE3\_2011126\_FR\_TiOx\_hum\_tissue\_Urea\_RNAB\_N Scan : 60029

Andromeda score : 115.46

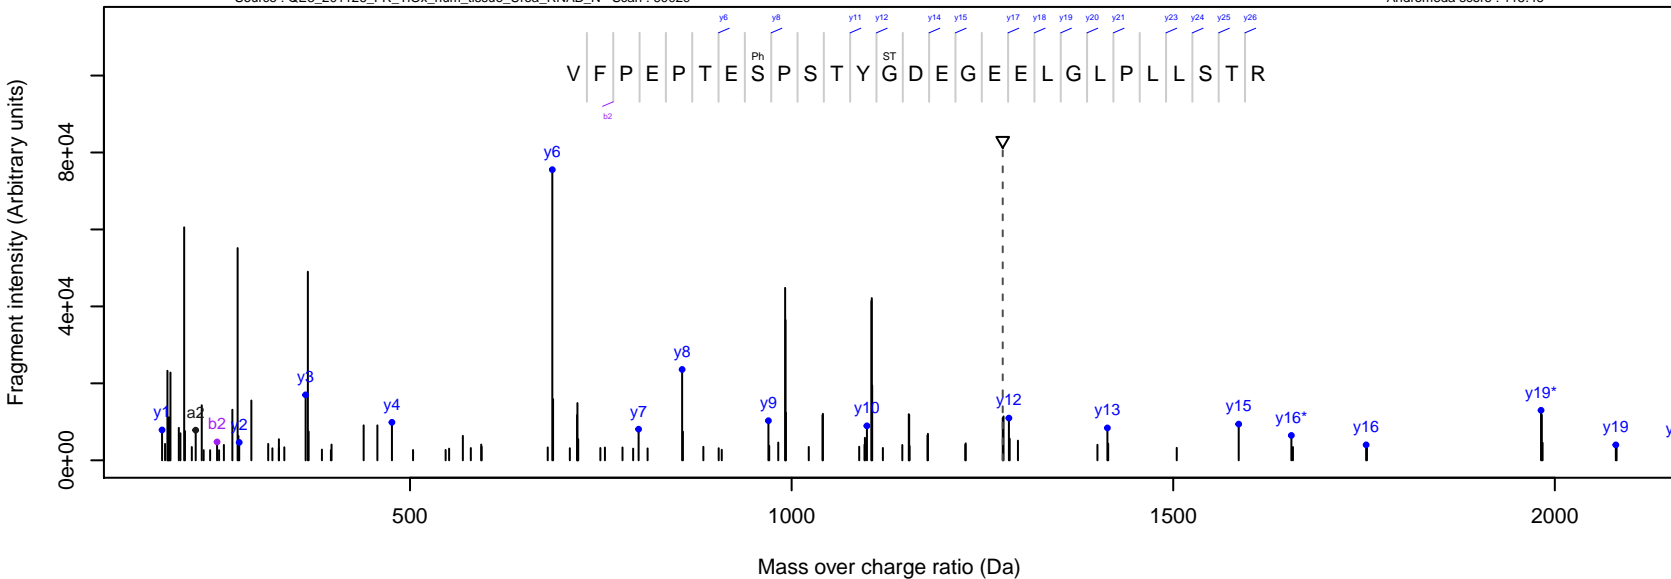

RPQRAT(Phospho (STY))S(Phospho (STY))NVFAMFDQSQIQEFK-3+

Source : QE3\_201126\_FR\_TiOx\_hum\_tissue\_Urea\_RNAB\_H Scan : 51879

Andromeda score : 115.45

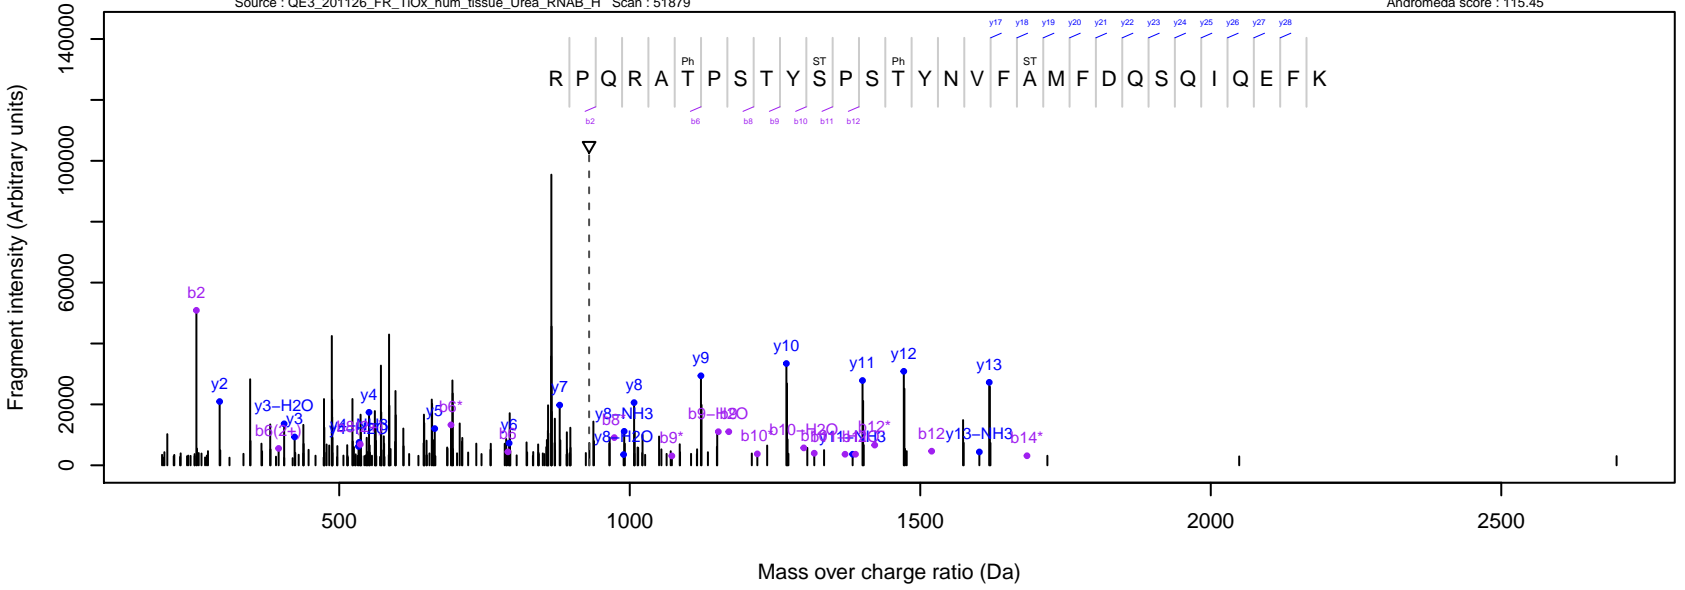

S(Phospho (STY))LGEQDM(Oxidation (M))TLRPEKVDLEPLK-3+

Source : QE3\_201126\_FR\_TiOx\_hum\_tissue\_Urea\_RNAB\_B Scan : 31604

Andromeda score : 115.45

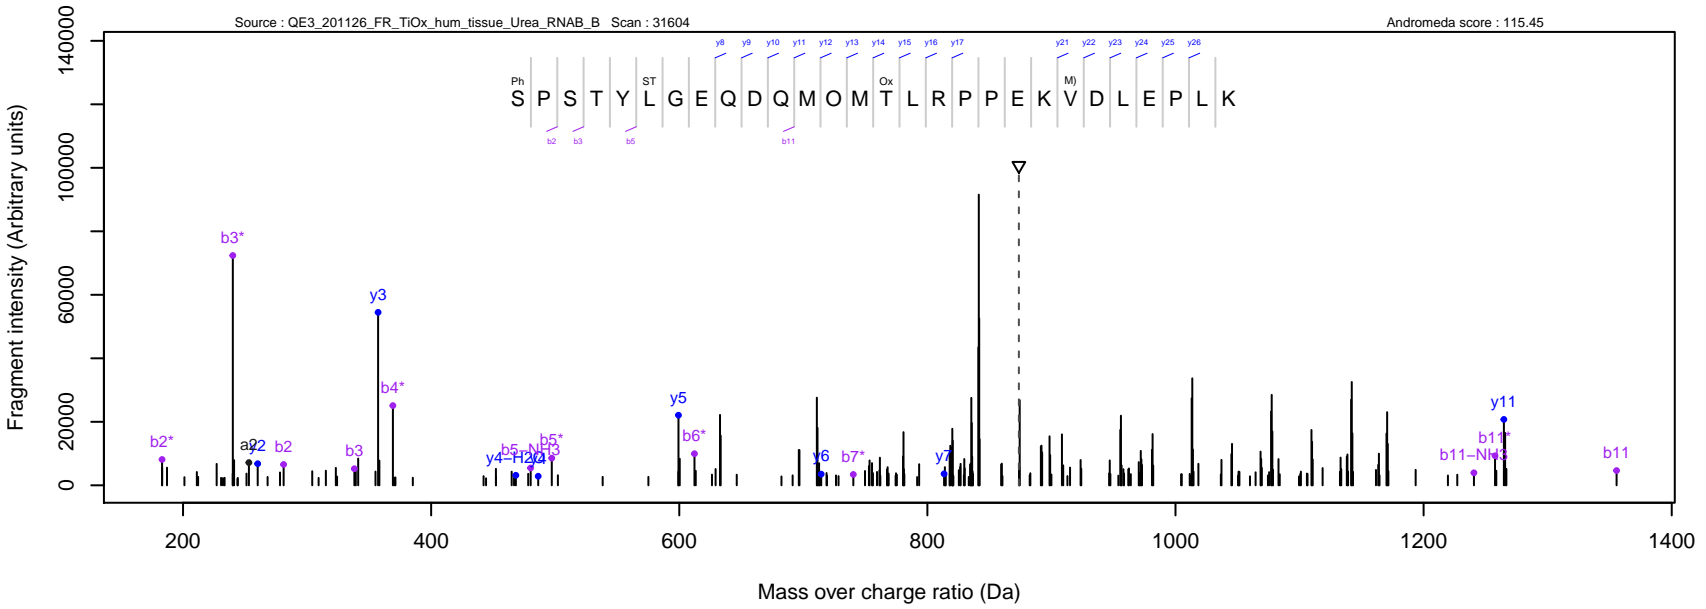

SSS(Phospho (STY))TELLSHYDSDIKEKPEHR-4+

Source : QE3\_201126\_FR\_TiOx\_hum\_tissue\_Urea\_RNAB\_N Scan : 17046

Andromeda score : 115.45

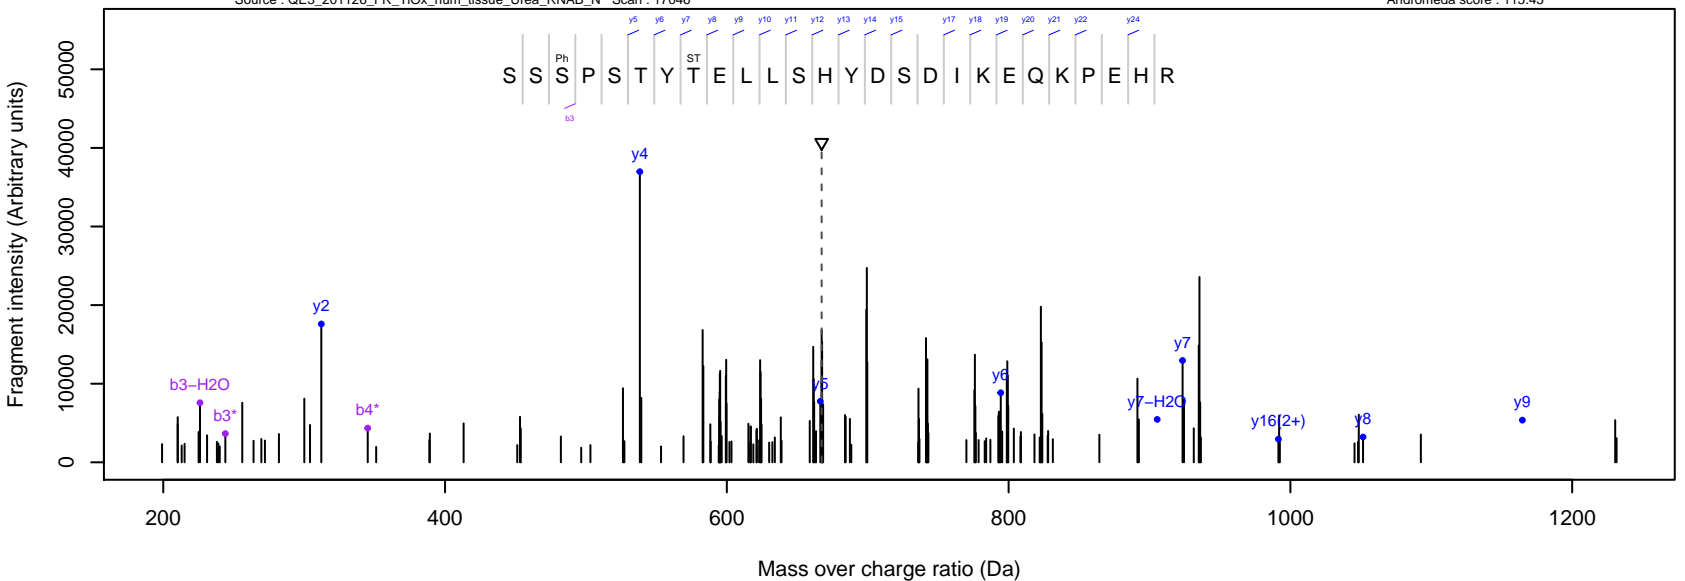



DGAEQQGPEATEVVEEAEEAFGSEKPKQSMFEPQVS(Phospho (STY))SPVQEKR-4+

Source : QE3\_201126\_FR\_TiOx\_hum\_tissue\_Urea\_RNAB\_H Scan : 53350

Andromeda score : 115.44

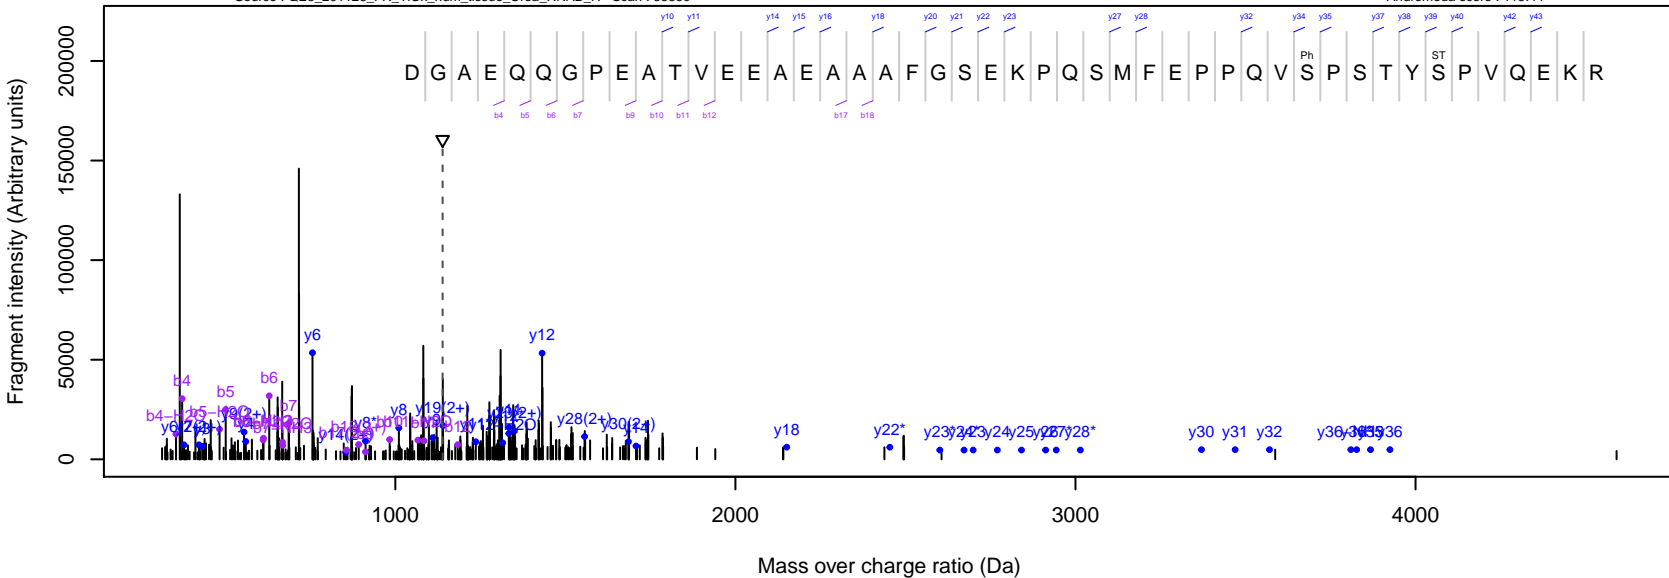

AKS(Phospho (STY))QEEVLPSTTPSPGGALSPSGQPSSSATEVVL-3+

Source : QE3\_201126\_FR\_TiOx\_hum\_tissue\_Urea\_RNAB\_N Scan : 37185

Andromeda score : 115.42

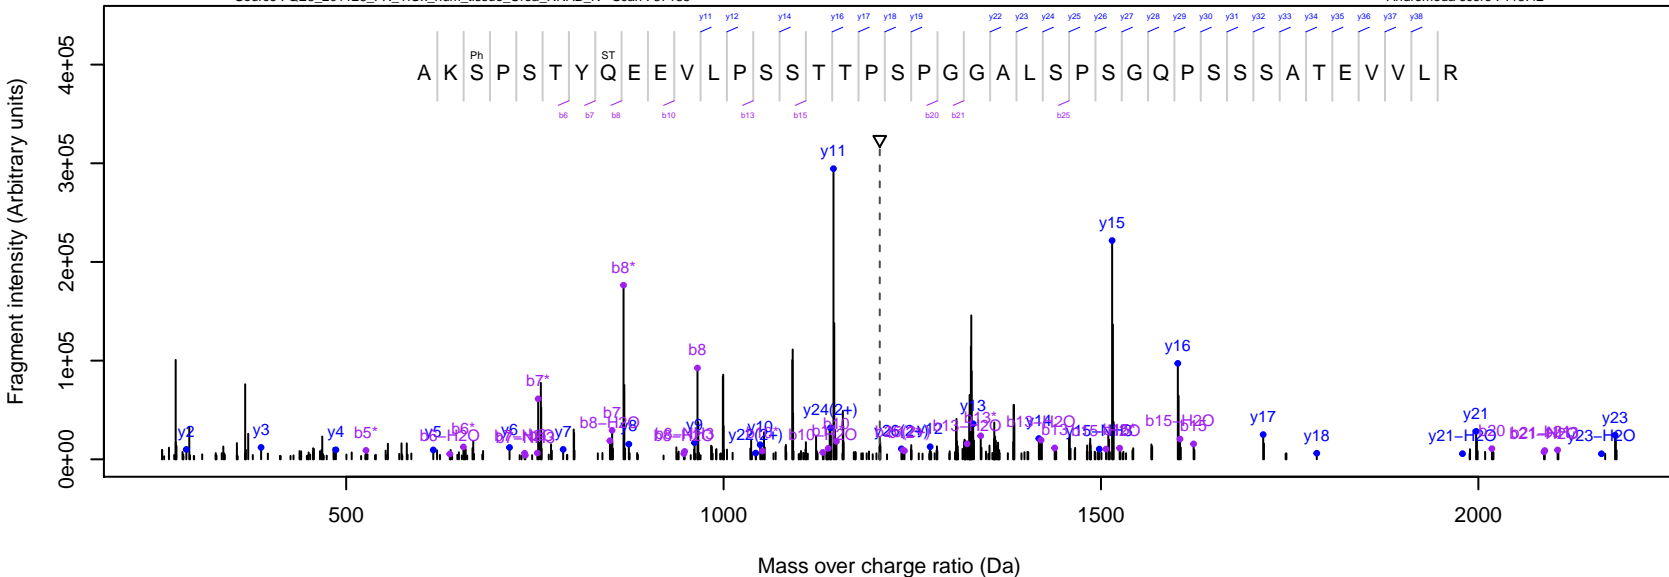

HYS(Phospho (STY))PEDEPSPEAQPIAAYK-3+

Source : QE3\_201126\_FR\_TiOx\_hum\_tissue\_Urea\_RNAB\_B Scan : 23019

Andromeda score : 115.42

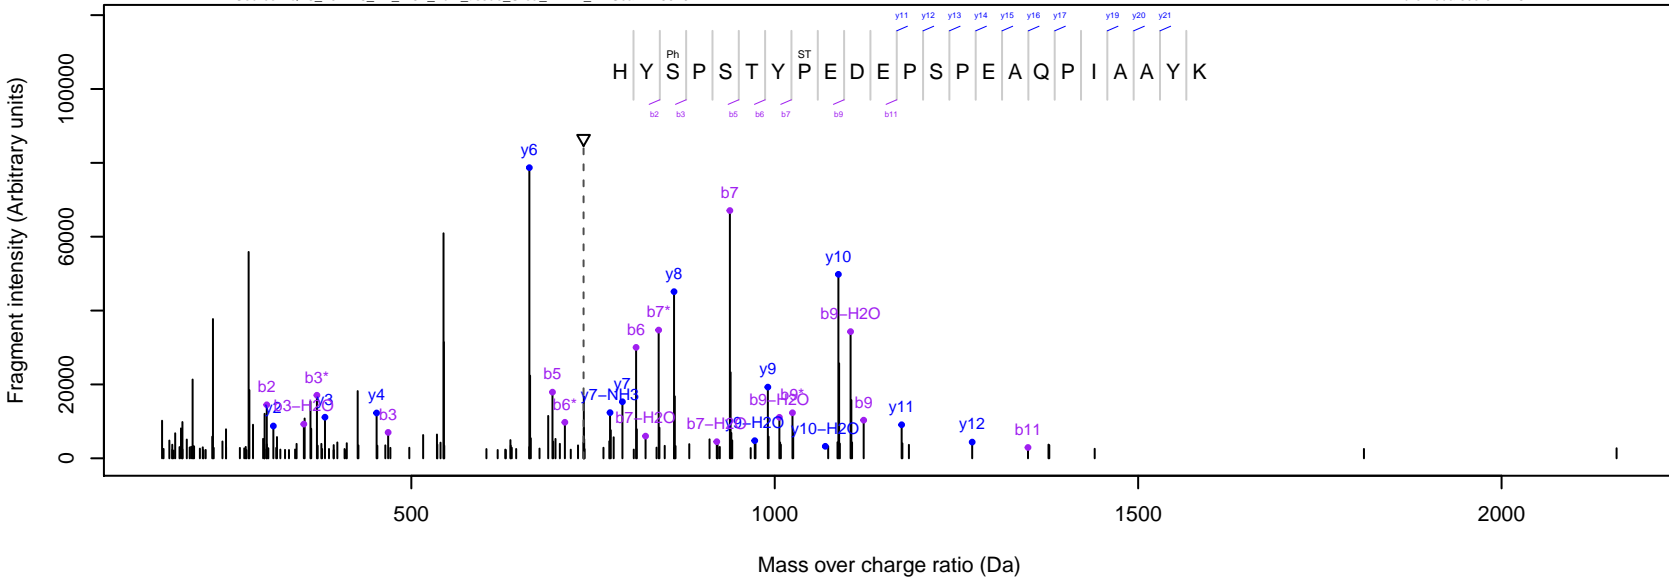

REDIFY(Phospho (STY))TSK-2+

Source : QE3\_201126\_FR\_TIOx\_hum\_tissue\_Urea\_RNAB\_H Scan : 15085

Andromeda score : 115.42

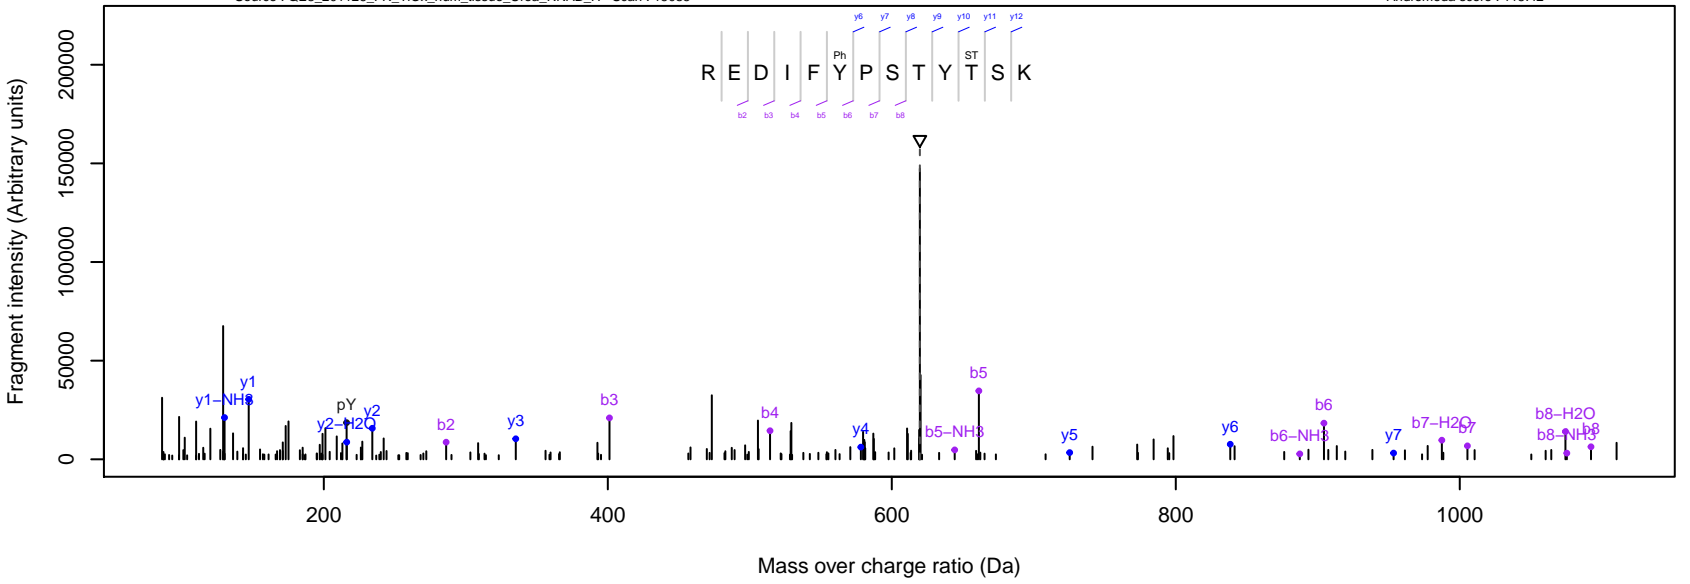

KYT(Phospho (STY))LPPGVDPTQVSSLSPEGLTVEAPM(Oxidation (M))PK-3+

Source : QE3\_201126\_FR\_TIOx\_hum\_tissue\_Urea\_RNAB\_N Scan : 48968

Andromeda score : 115.4

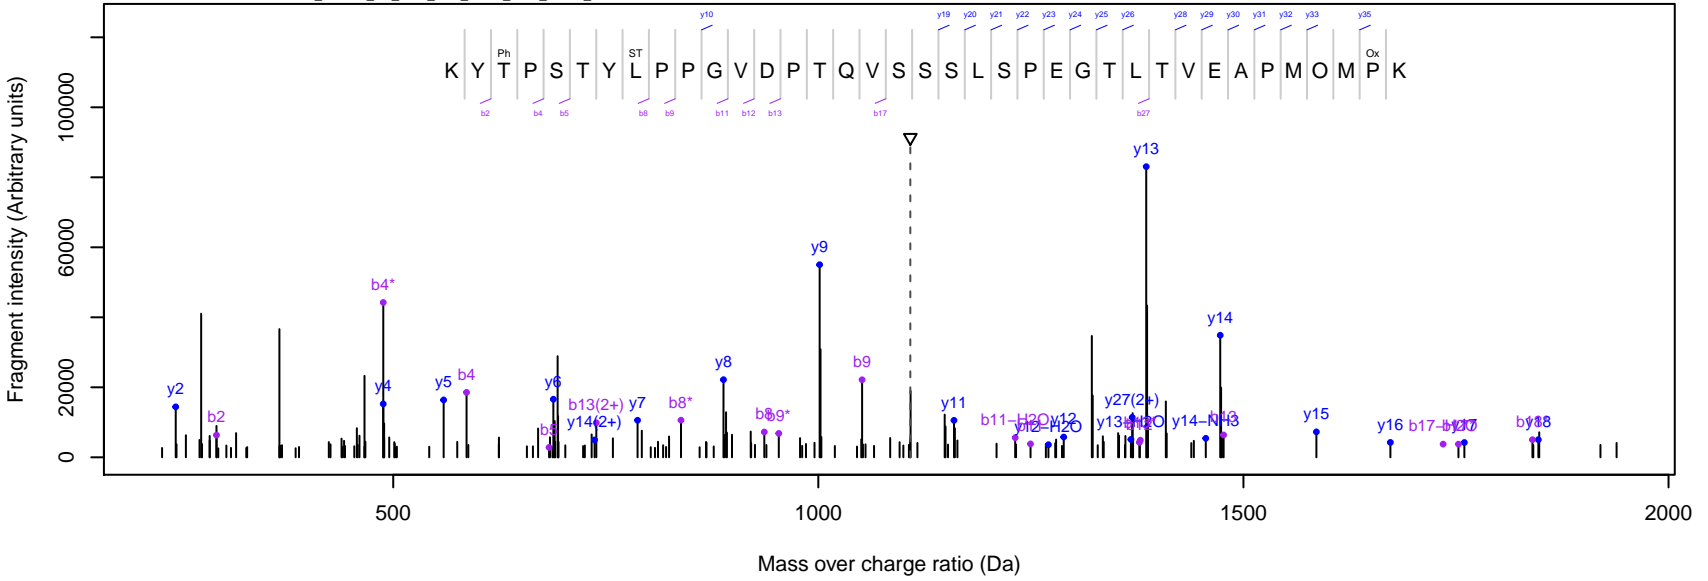

LADLEEESESWDNS(Phospho (STY))EAE E E E KAPVLP ESTEGR-3+

Source : QE3\_201126\_FR\_TIOx\_hum\_tissue\_Urea\_RNAB\_H Scan : 41995

Andromeda score : 115.4

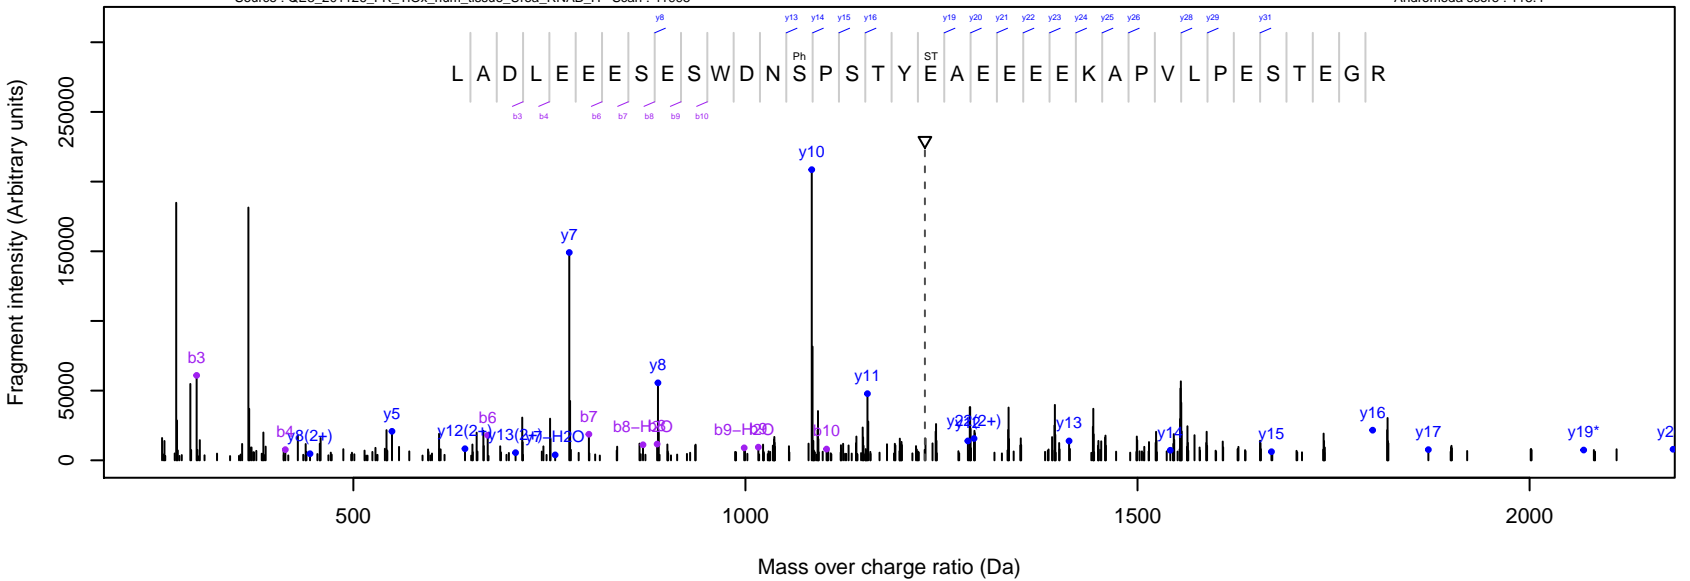

NQETYET(Phospho (STY))LKHEKPPQ-3+

Source : QE3\_201126\_FR\_TIOx\_hum\_tissue\_Urea\_RNAB\_N Scan : 10132

Andromeda score : 115.34

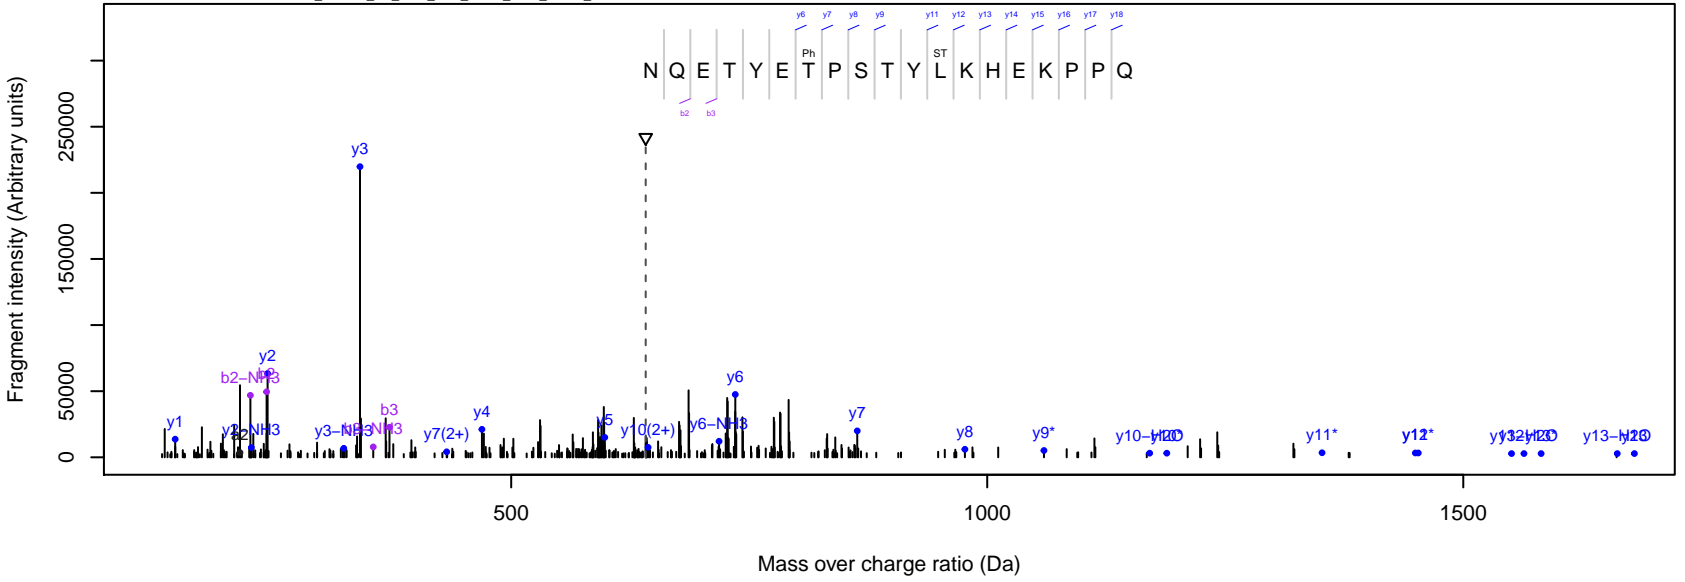

SRT(Phospho (STY))AS(Phospho (STY))GSS(Phospho (STY))VTSLDGTR-2+

Source : QE3\_201126\_FR\_TIOx\_hum\_tissue\_Urea\_RNAB\_H Scan : 19780

Andromeda score : 115.34

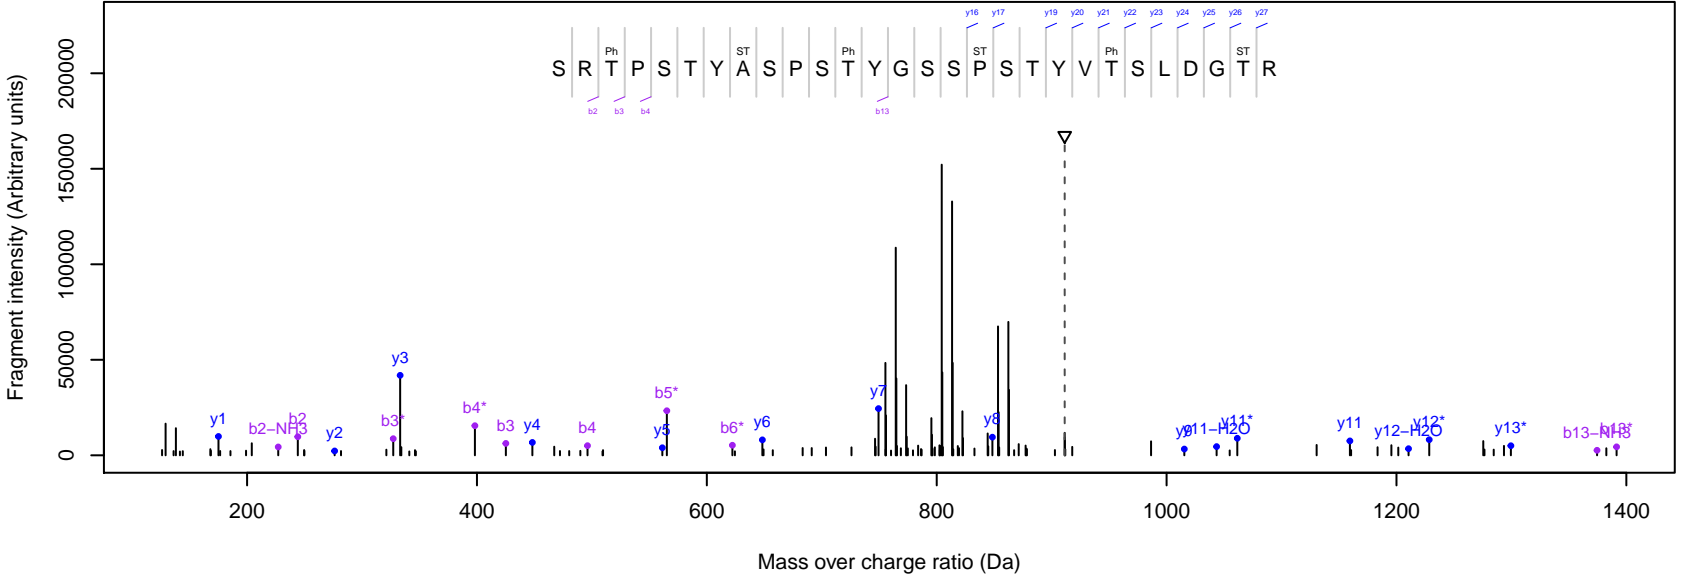

AEEAAS(Phospho (STY))ALADADADLEER-2+

Source : QE3\_201126\_FR\_TIOx\_hum\_tissue\_Urea\_RNAB\_N Scan : 41537

Andromeda score : 115.31

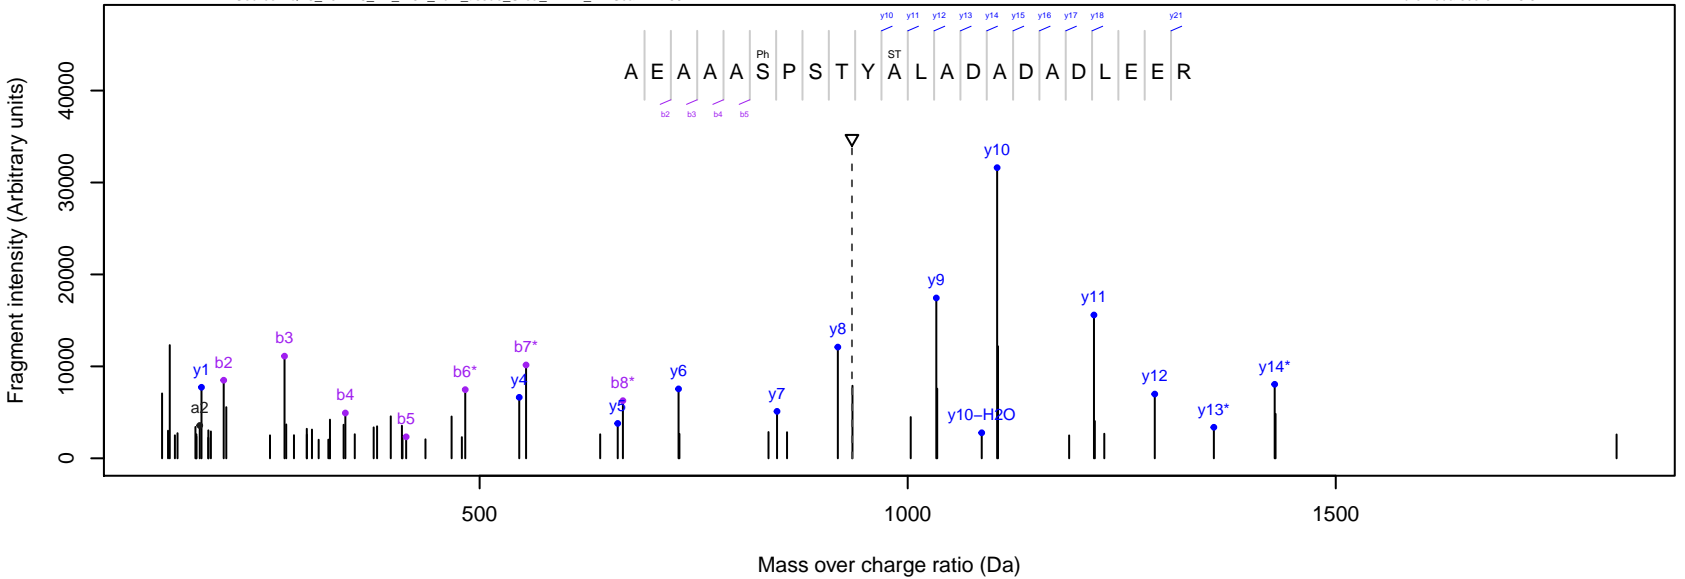

FQARS(Phospho (STY))QELEQK-2+

Source : QE3\_201126\_FR\_TiOx\_hum\_tissue\_Urea\_RNAB\_H Scan : 21541

Andromeda score : 115.29

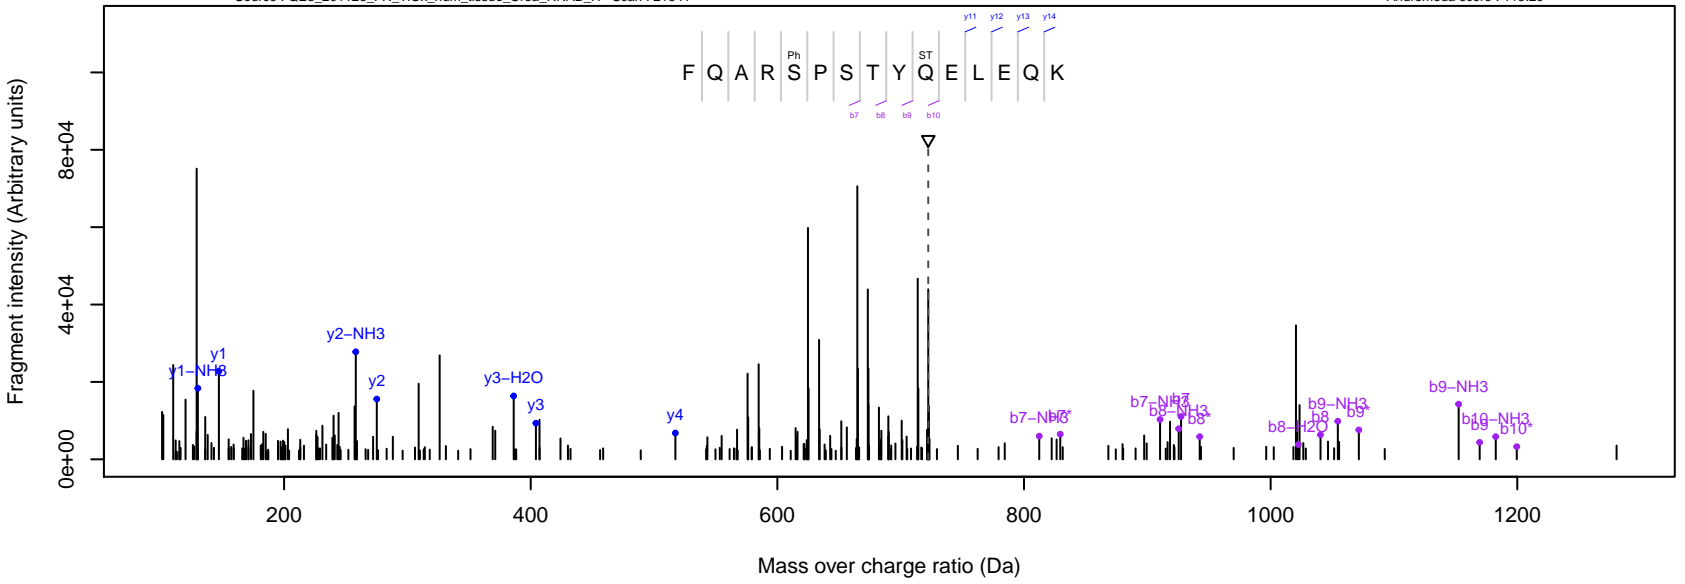

RRLS(Phospho (STY))ELLR-3+

Source : QE3\_201126\_FR\_TiOx\_hum\_tissue\_Urea\_RNAB\_N Scan : 19176

Andromeda score : 115.29

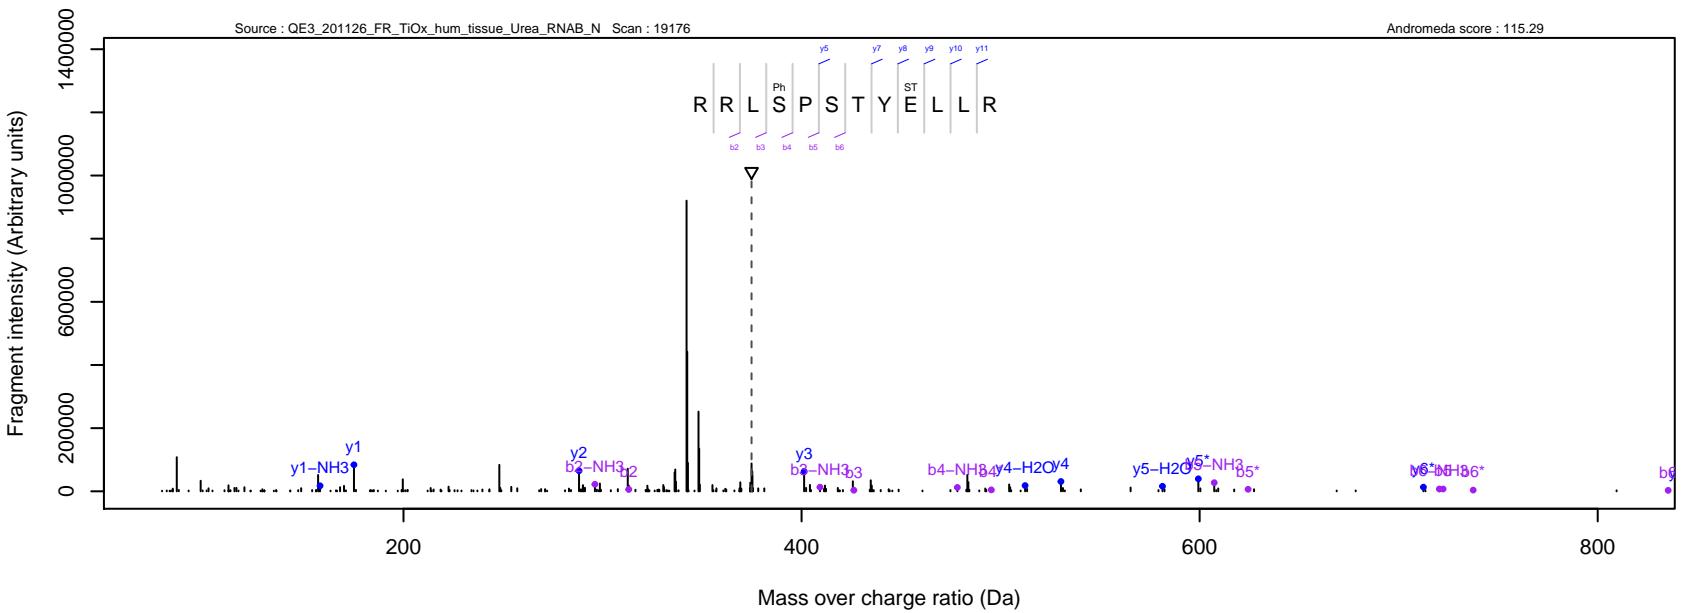

TLS(Phospho (STY))M(Oxidation (M))IEEEIR-2+

Source : QE3\_201126\_FR\_TiOx\_hum\_tissue\_Urea\_RNAB\_B Scan : 43359

Andromeda score : 115.29

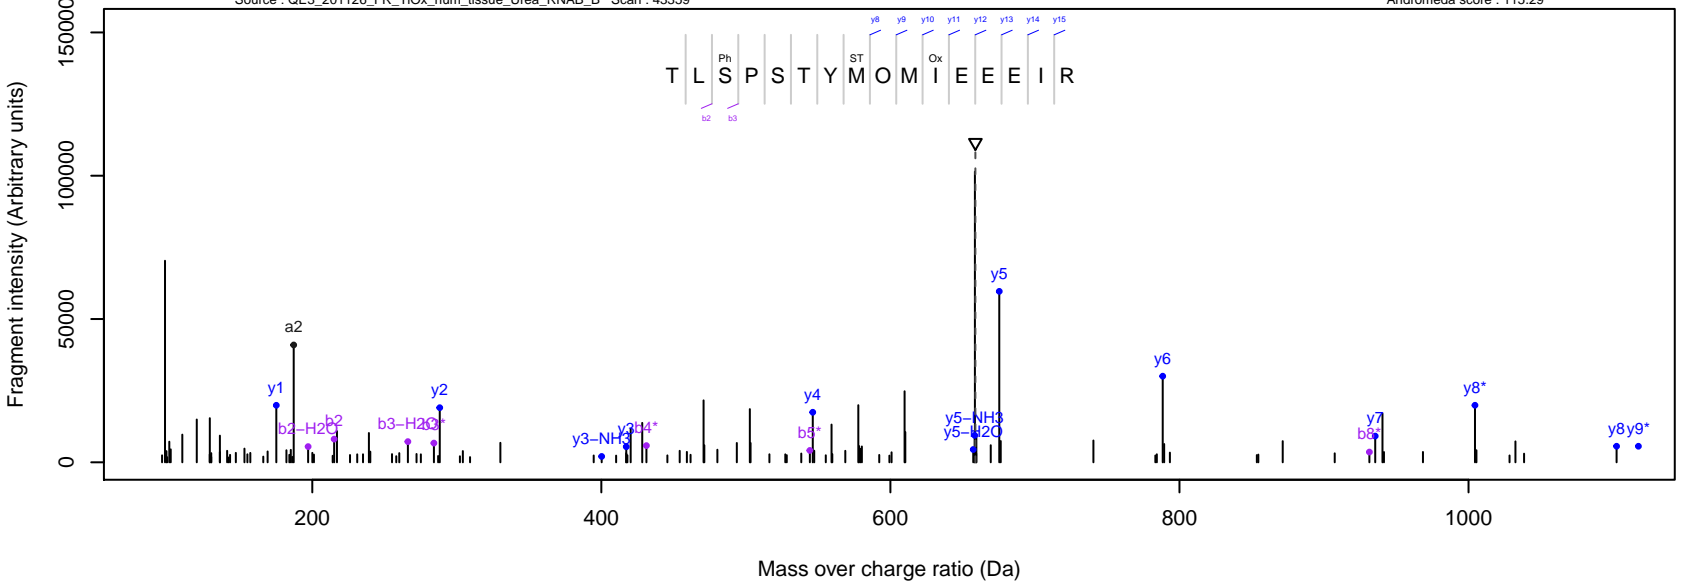

ADVQLFM(Oxidation (M))DDDSYS(Phospho (STY))HHS(Phospho (STY))GLEADPEK-3+

Source : QE3\_201126\_FR\_TiOx\_hum\_tissue\_Urea\_RNAB\_H Scan : 37719

Andromeda score : 115.27

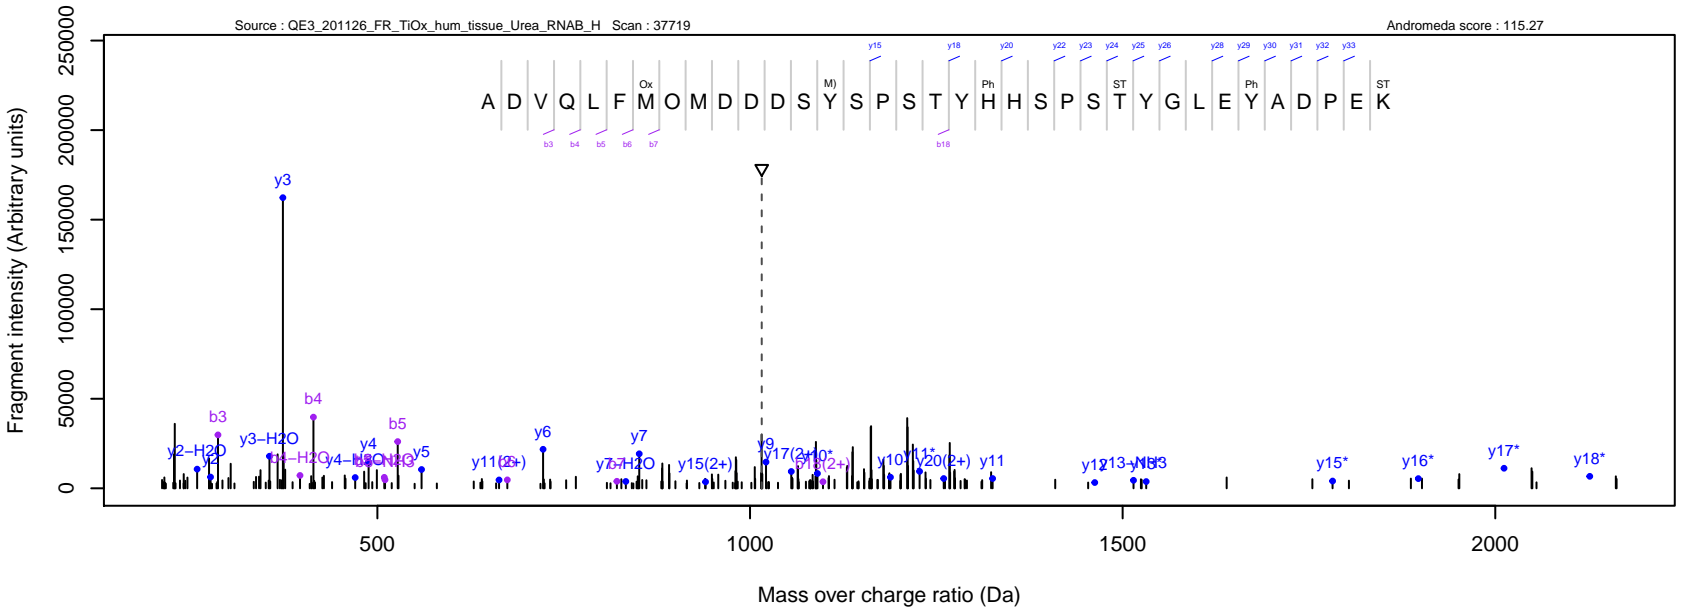

S(Phospho (STY))KSATLLYDQLQVFTGSSSSDLSIGTK-3+

Source : QE3\_201126\_FR\_TiOx\_hum\_tissue\_Urea\_RNAB\_H Scan : 53422

Andromeda score : 115.27

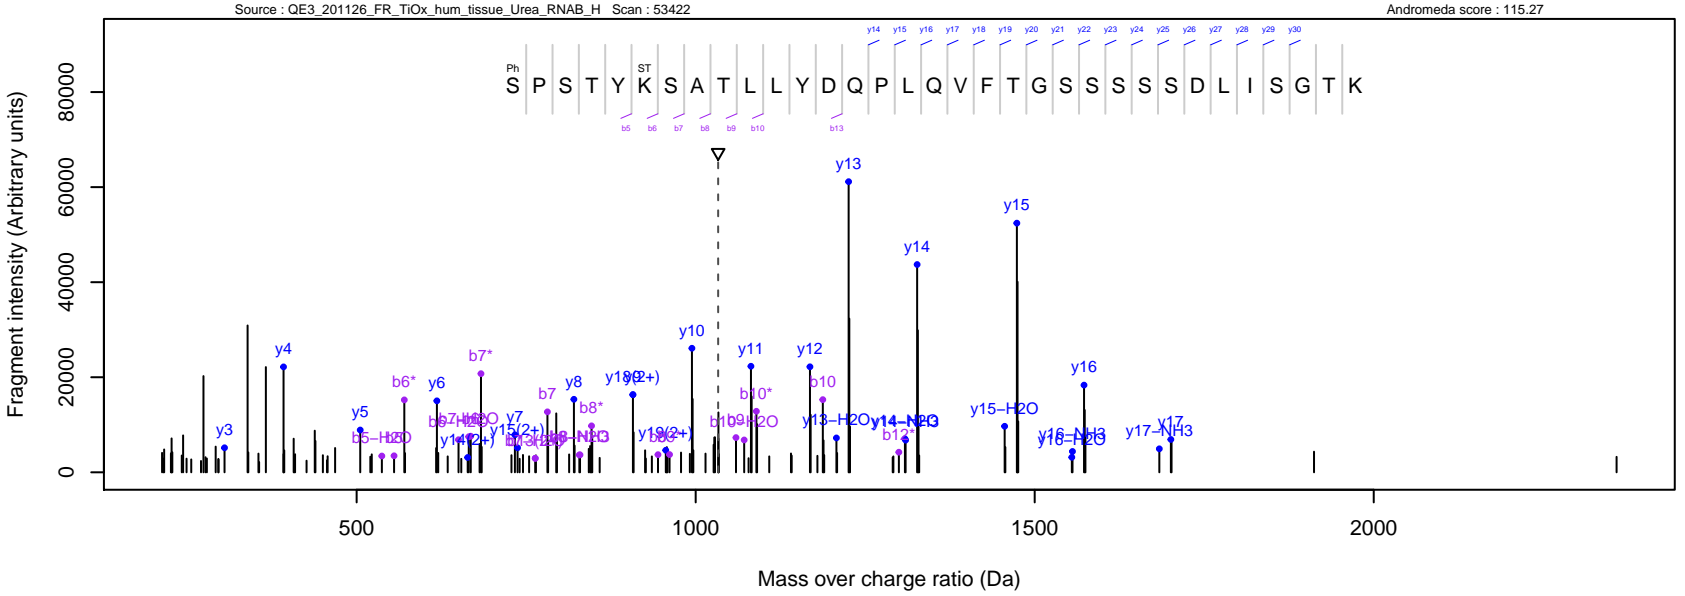

QLEDGRTLSPSTYDYNIQK-3+

Source : QE3\_201126\_FR\_TiOx\_hum\_tissue\_Urea\_RNAB\_N Scan : 22491

Andromeda score : 115.26

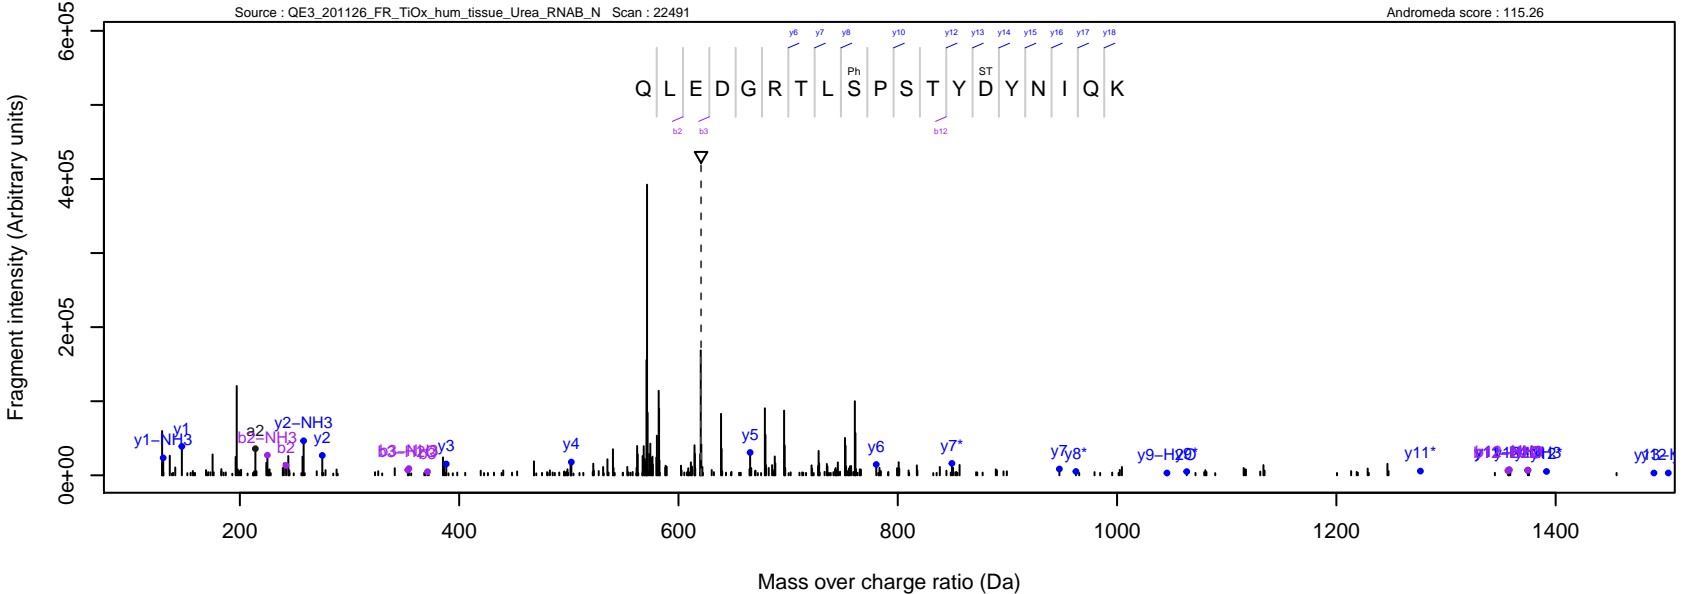



ADDADEFGYS(Phospho (STY))R-2+

Source : QE3\_201126\_FR\_TiOx\_hum\_tissue\_Urea\_RNAB\_B Scan : 21111

Andromeda score : 115.12

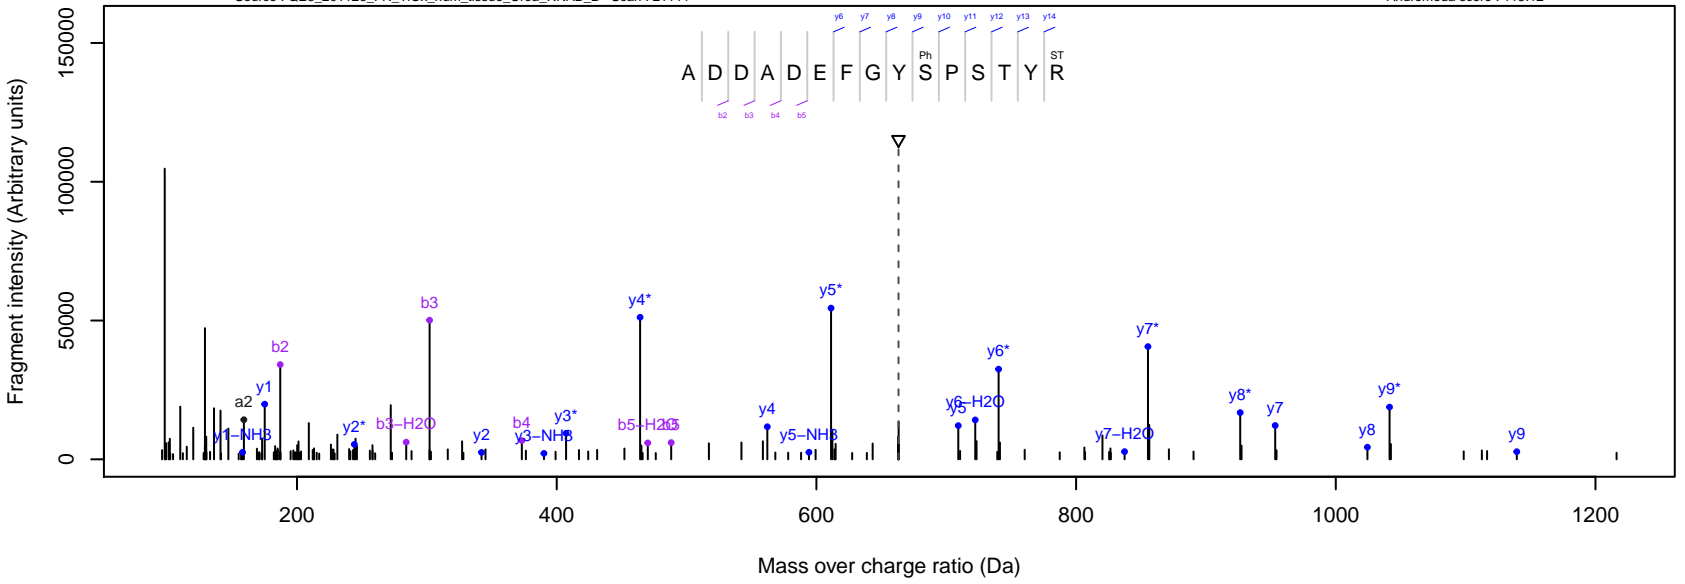

NLLLSTS(Phospho (STY))EEQIEK-2+

Source : QE3\_201126\_FR\_TiOx\_hum\_tissue\_Urea\_RNAB\_H Scan : 35261

Andromeda score : 115.12

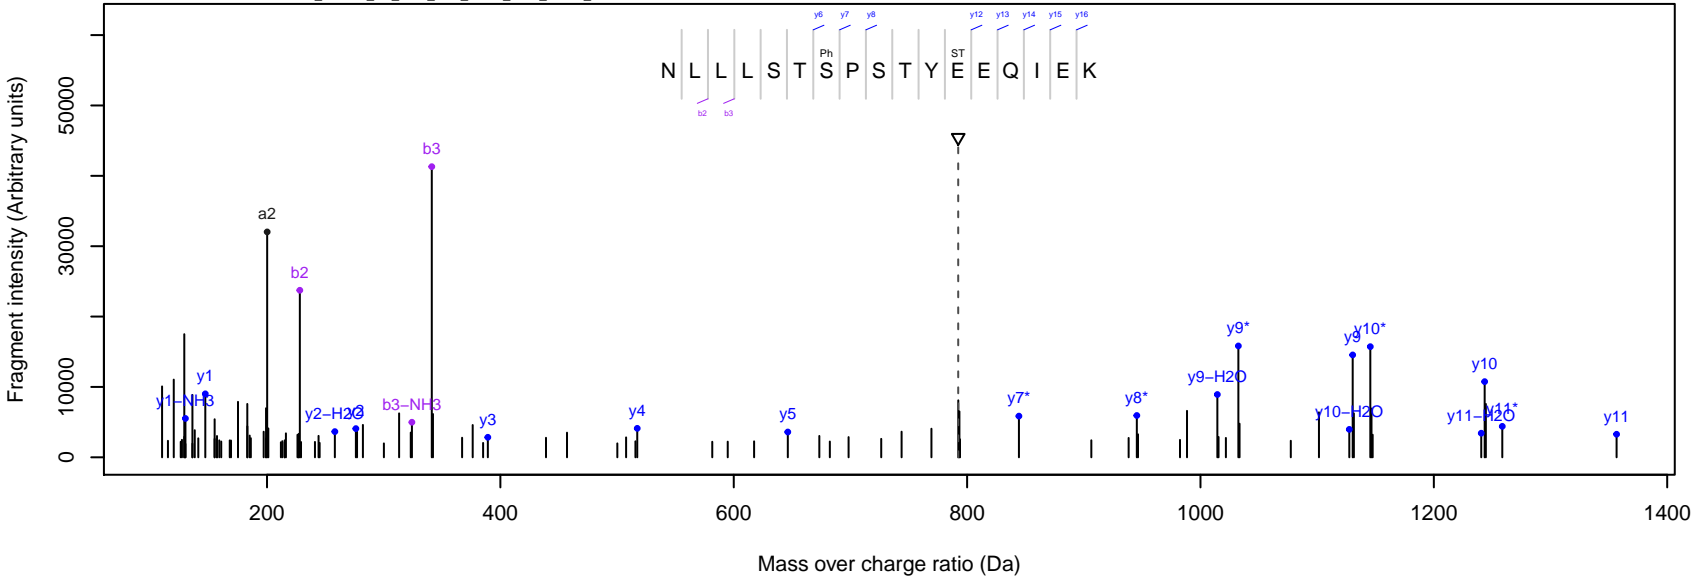

GGSGS(Phospho (STY))PGPEPPGRPDGPSLLYR-3+

Source : QE3\_201126\_FR\_TiOx\_hum\_tissue\_Urea\_RNAB\_N Scan : 27854

Andromeda score : 115.11

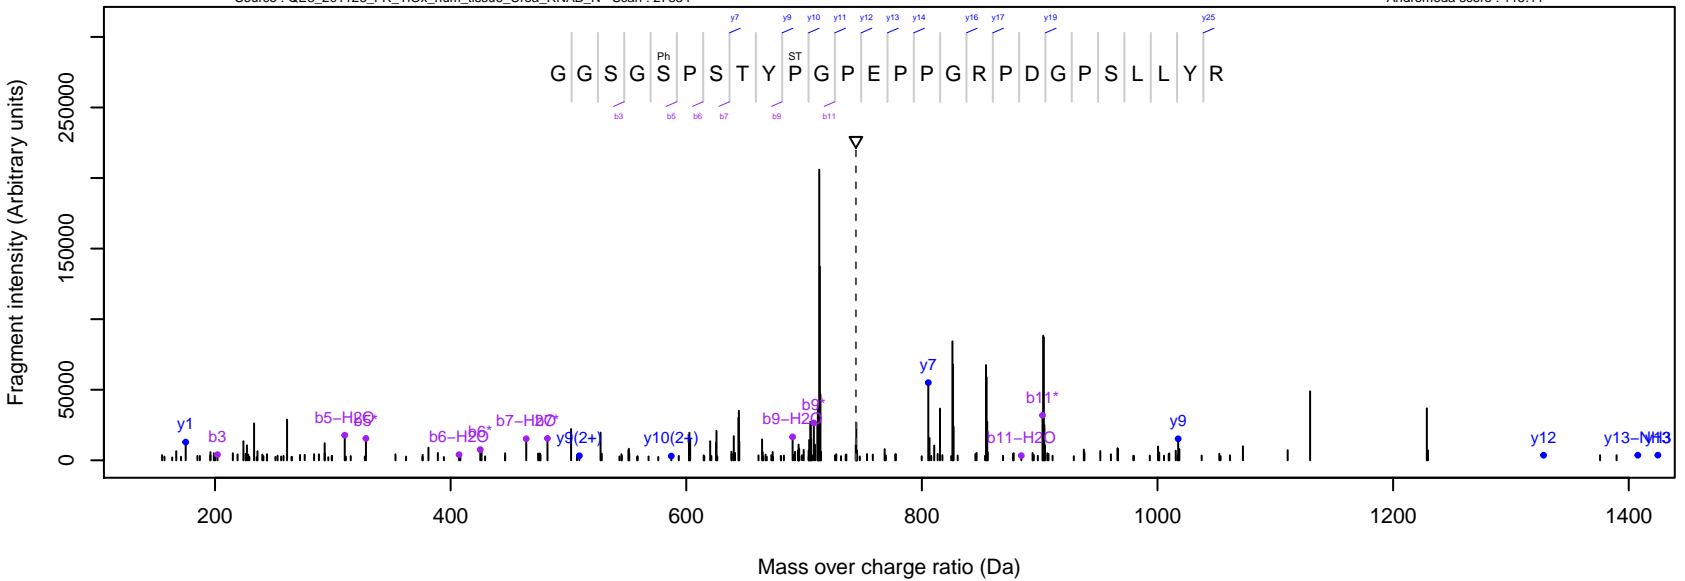

GTEASPPQNNSSGSS(Phospho (STY))SPVFTR-3+

Source : QE3\_201126\_FR\_TiOx\_hum\_tissue\_Urea\_RNAB\_H Scan : 33744

Andromeda score : 115.11

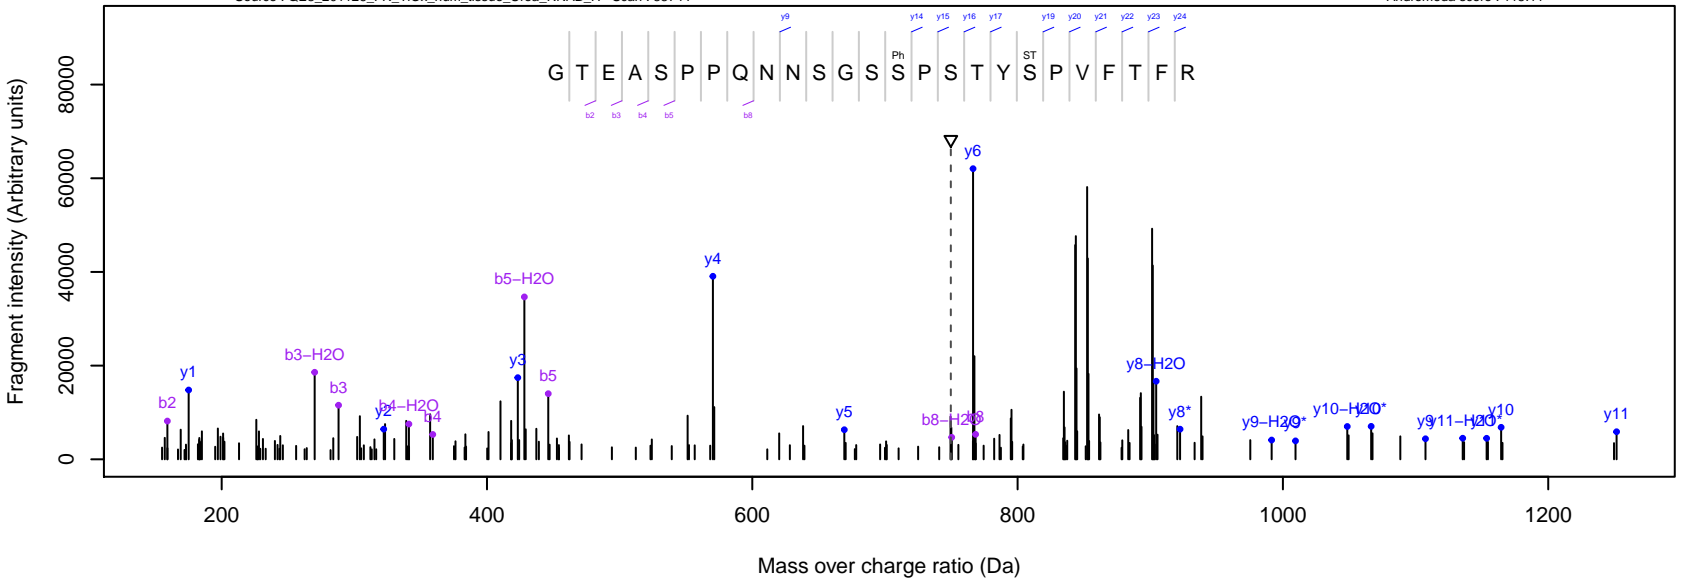

RAEDGS(Phospho (STY))VIDYELIQDAR-3+

Source : QE3\_201126\_FR\_TiOx\_hum\_tissue\_Urea\_RNAB\_H Scan : 35630

Andromeda score : 115.11

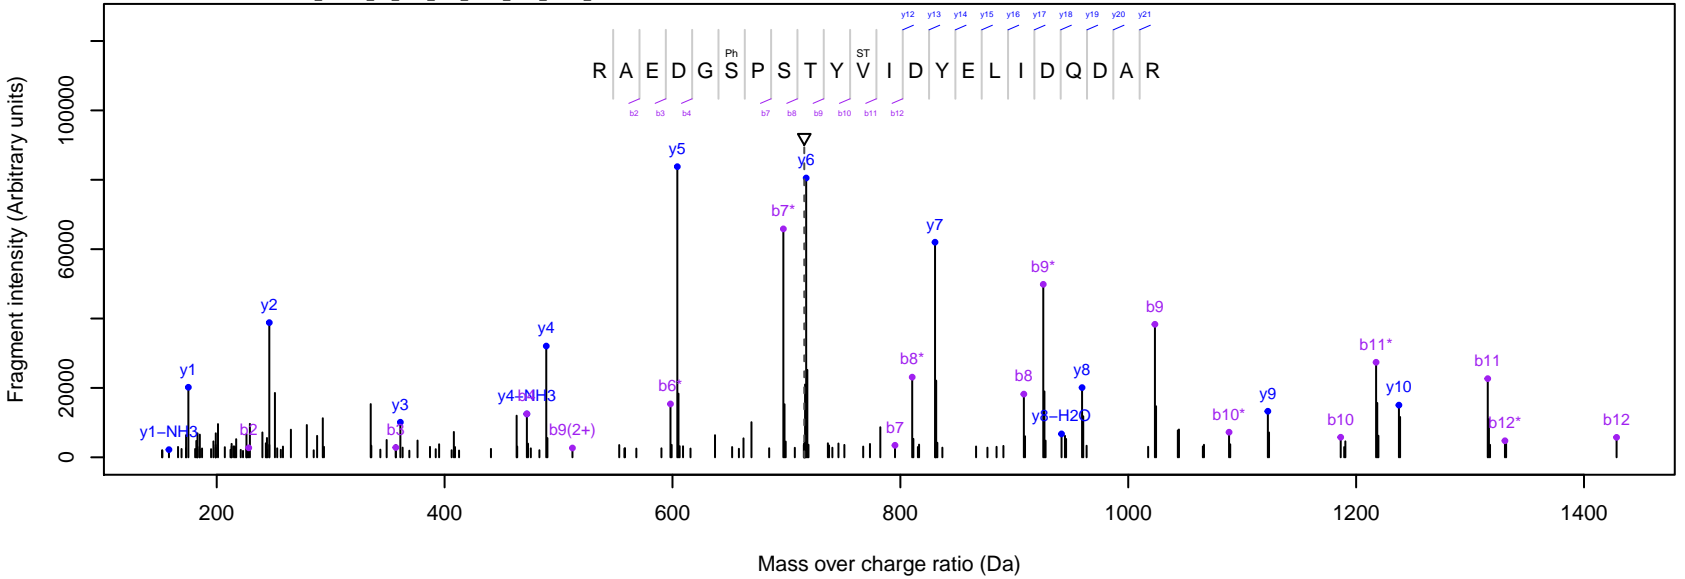

KS(Phospho (STY))DFEVDALK-2+

Source : QE3\_201126\_FR\_TiOx\_hum\_tissue\_Urea\_RNAB\_H Scan : 39391

Andromeda score : 115.1

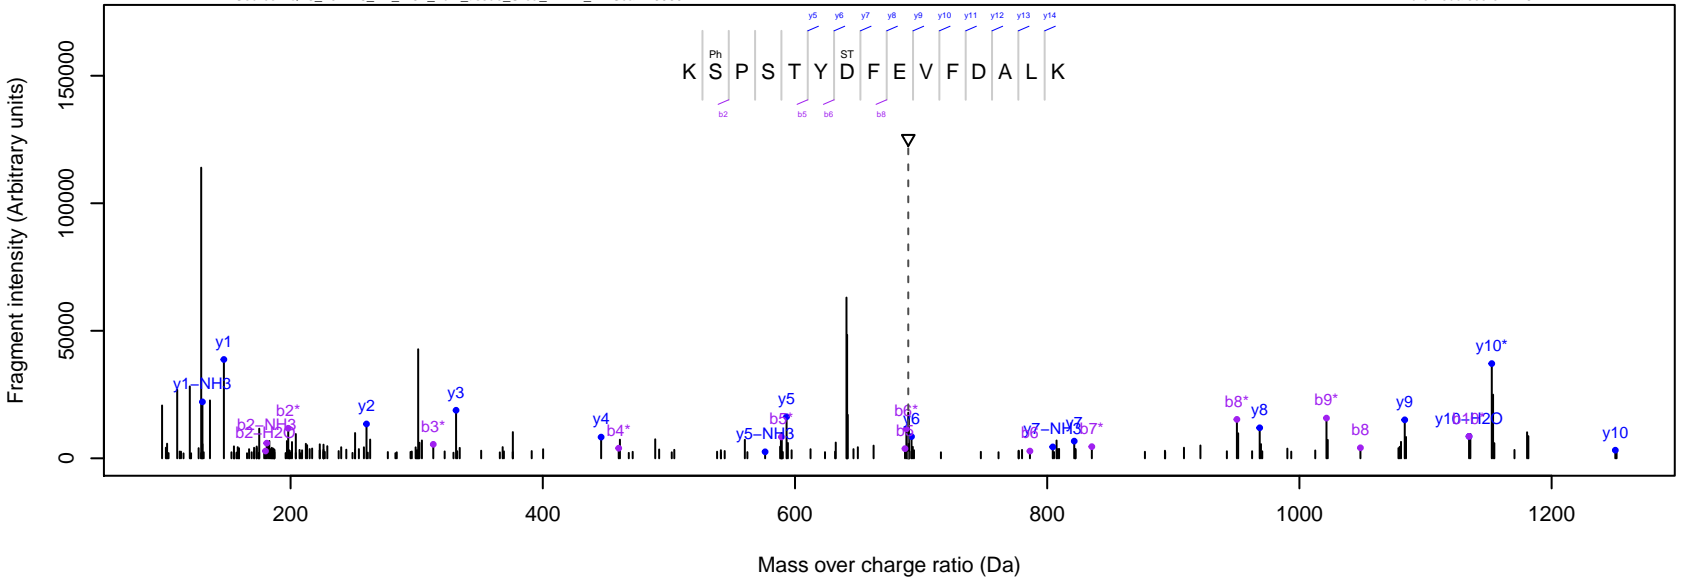



NGT(Phospho (STY))LNKHSGLDFK-2+

Source : QE3\_201126\_FR\_TIOx\_hum\_tissue\_Urea\_RNAB\_N Scan : 11426

Andromeda score : 115.1

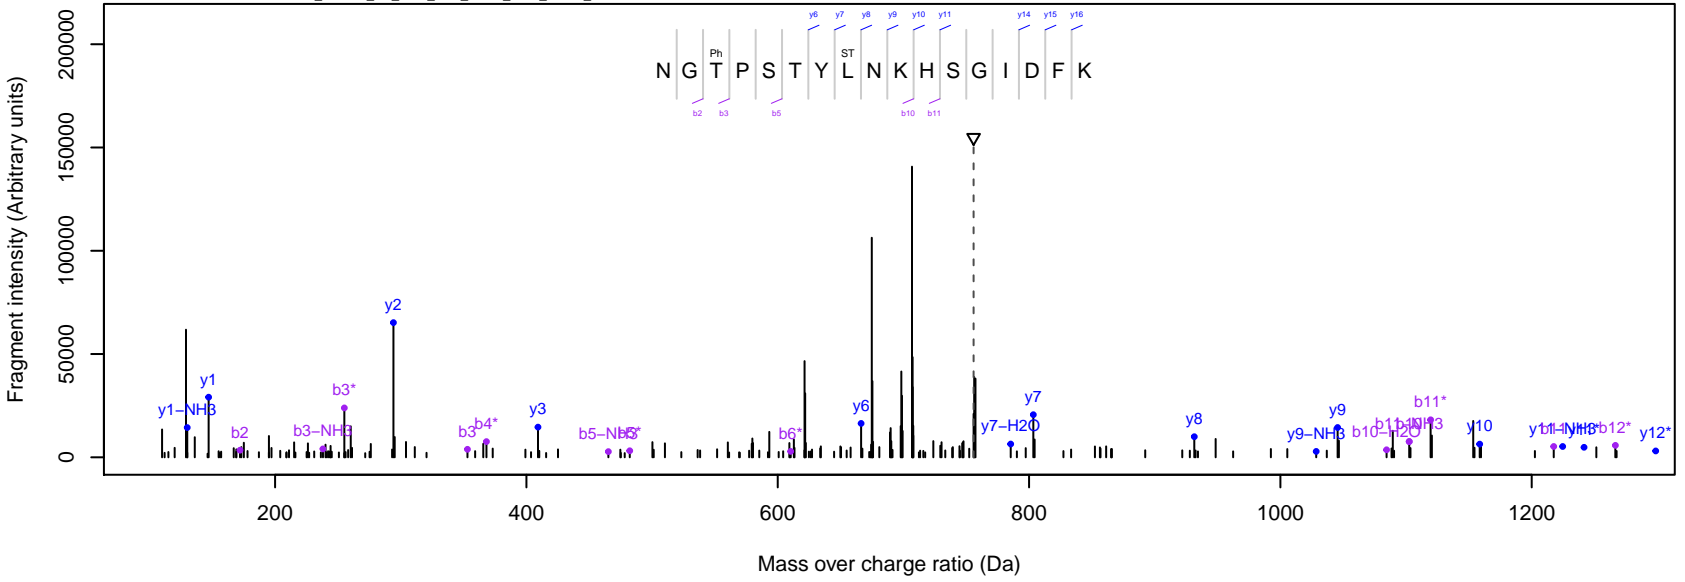

(Acetyl (Protein N-term))ATSPQKS(Phospho (STY))PSVPK-2+

Source : QE3\_201126\_FR\_TIOx\_hum\_tissue\_Urea\_RNAB\_H Scan : 11335

Andromeda score : 115.09

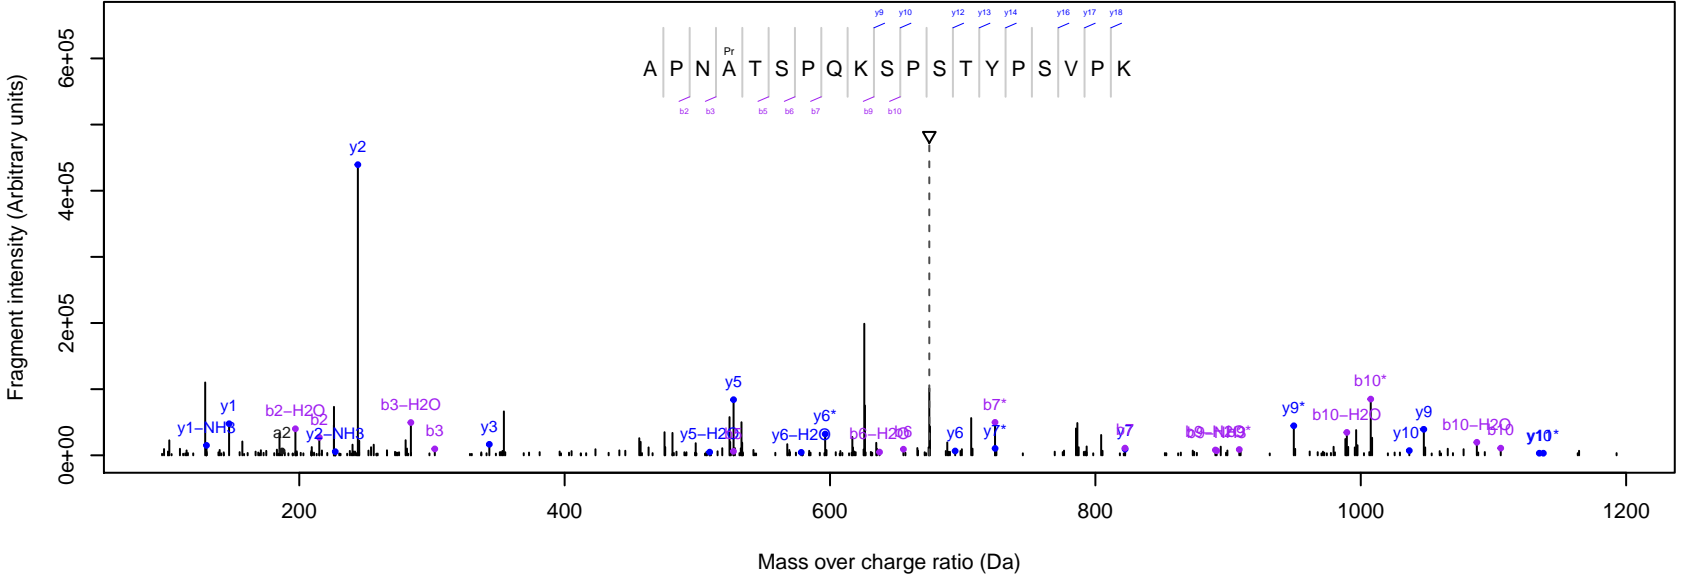

S(Phospho (STY))SSSPELQLDILGDPGDKADVGR-3+

Source : QE3\_201126\_FR\_TIOx\_hum\_tissue\_Urea\_RNAB\_N Scan : 55273

Andromeda score : 114.98

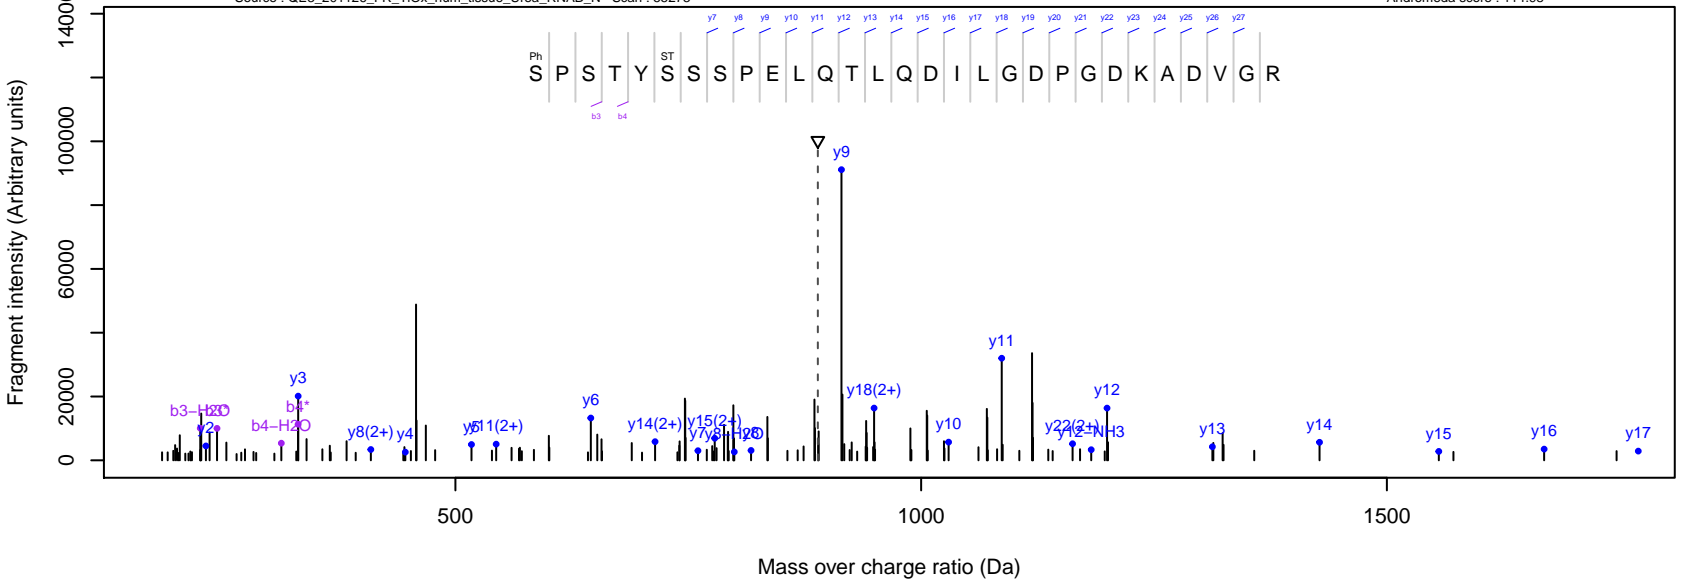

ASS(Phospho (STY))LNFLNK-2+

Source : QE3\_201126\_FR\_TiOx\_hum\_tissue\_Urea\_RNAB\_H Scan : 30167

Andromeda score : 114.97

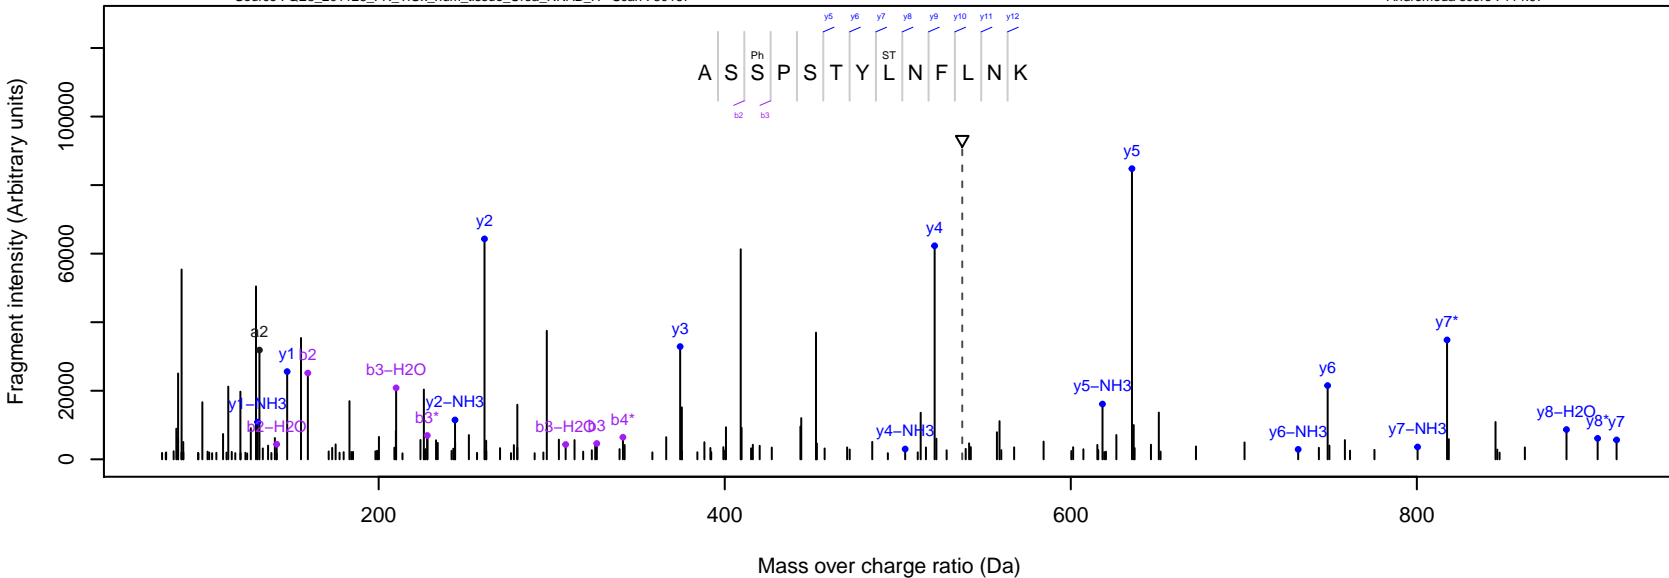

RQS(Phospho (STY))KGHLTDSPEEA-3+

Source : QE3\_201126\_FR\_TiOx\_hum\_tissue\_Urea\_RNAB\_N Scan : 6106

Andromeda score : 114.96

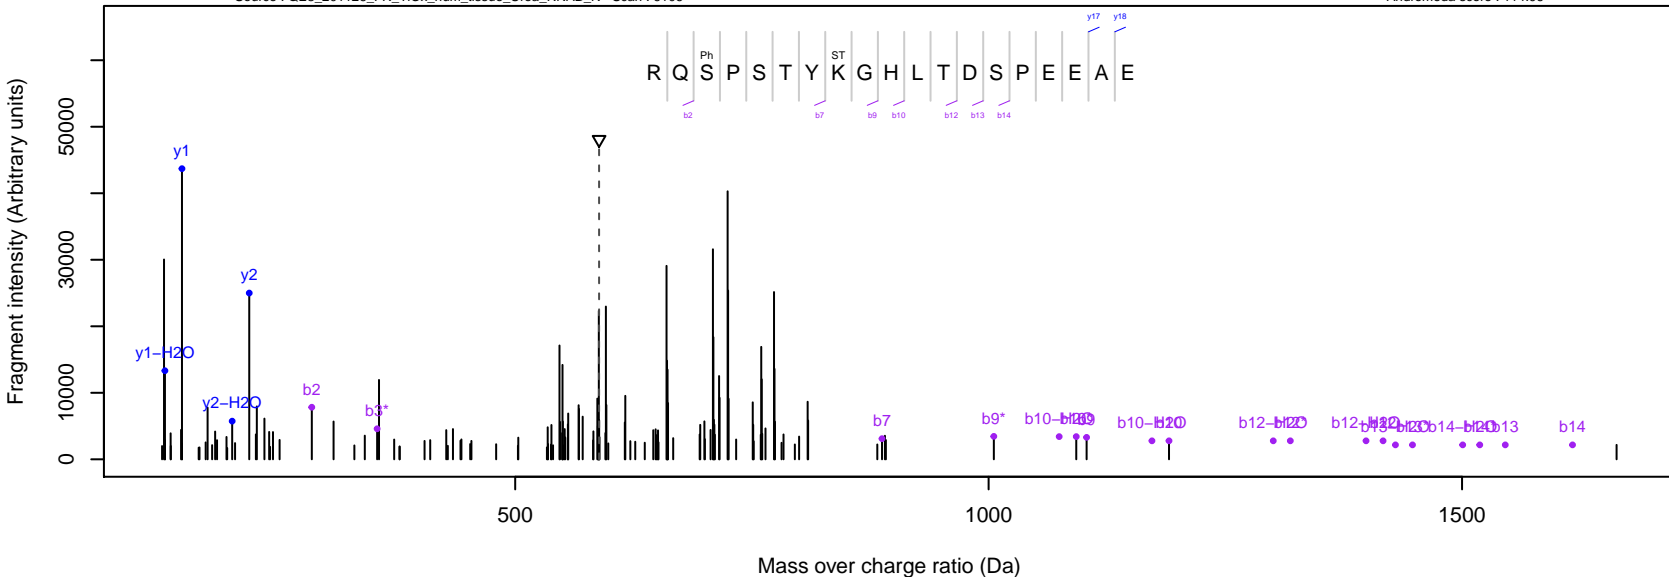

QQDS(Phospho (STY))QPEEVMVDVLEMVENVK-3+

Source : QE3\_201126\_FR\_TiOx\_hum\_tissue\_Urea\_RNAB\_H Scan : 62432

Andromeda score : 114.92

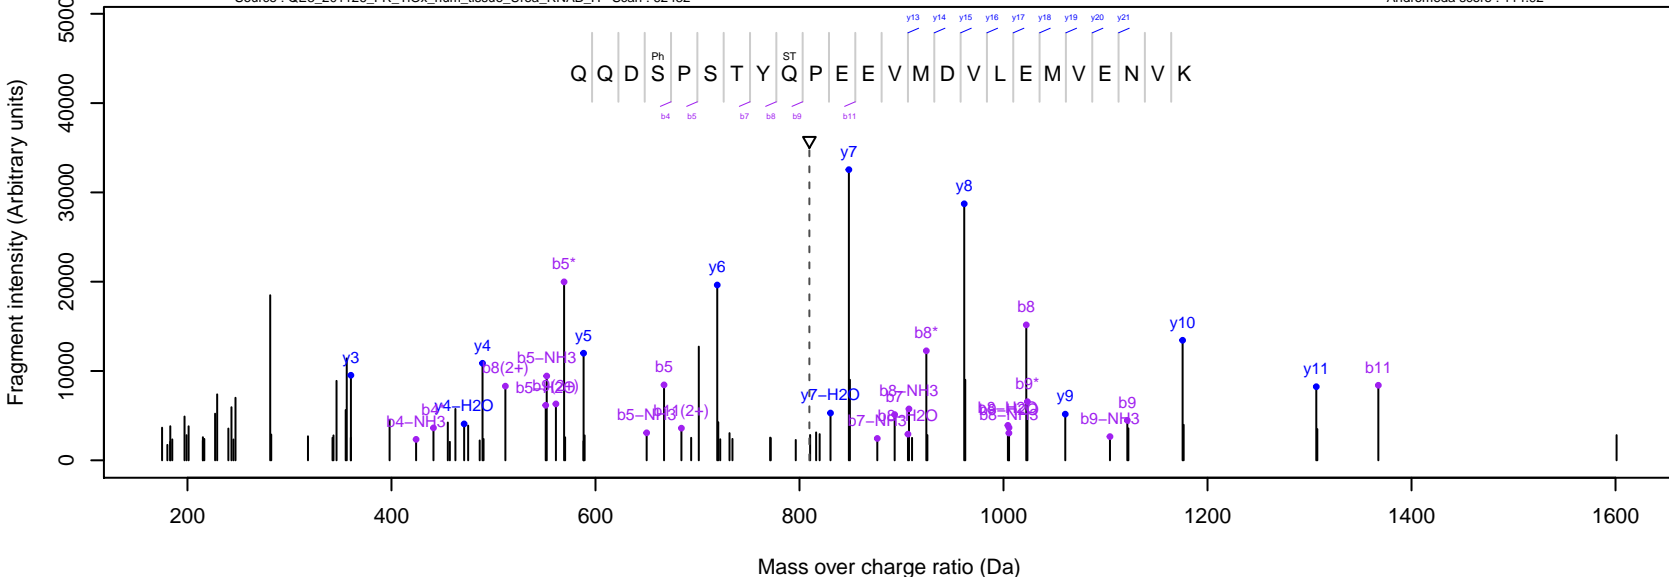

S(Phospho (STY))RSVDSAFPFLQGNSEYLIEFSR-3+

Source : QE3\_201126\_FR\_TiOx\_hum\_tissue\_Urea\_RNAB\_H Scan : 57404

Andromeda score : 114.92

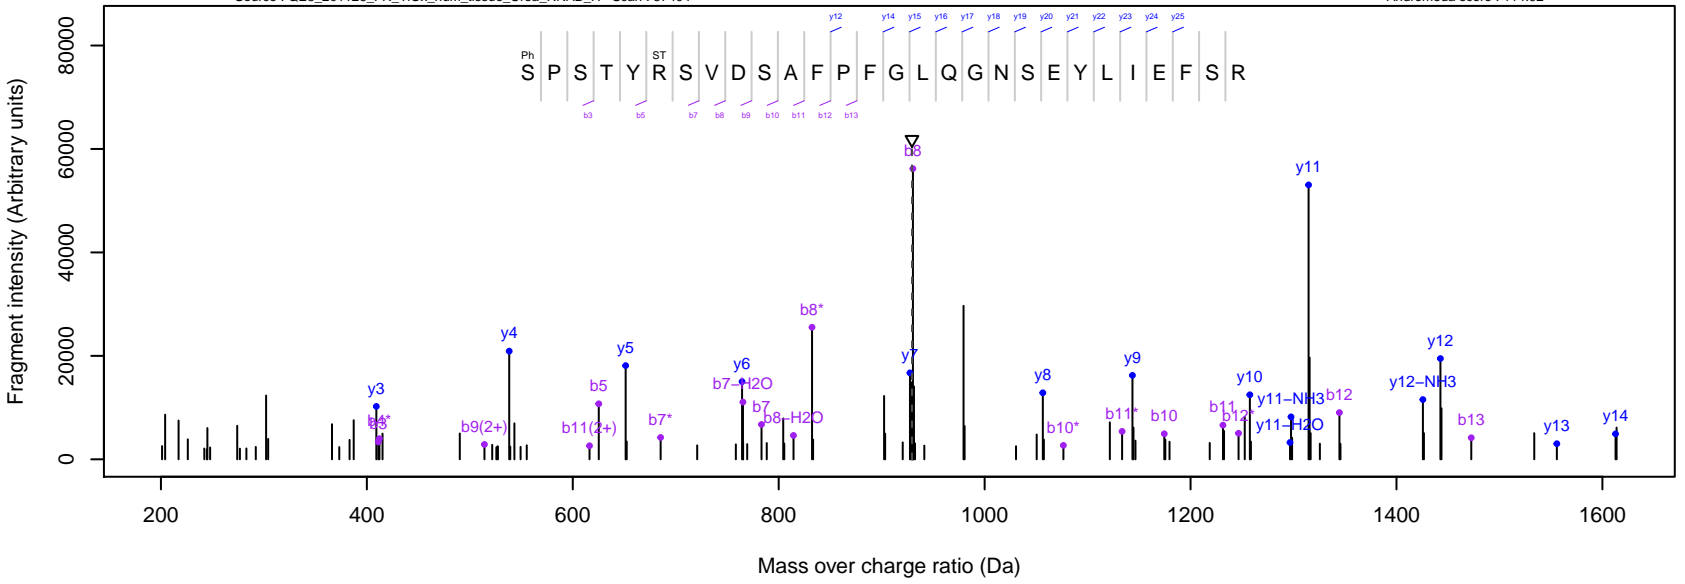

KKS(Phospho (STY))DPEGPALLFPESELSIR-3+

Source : QE3\_201126\_FR\_TiOx\_hum\_tissue\_Urea\_RNAB\_H Scan : 43210

Andromeda score : 114.91

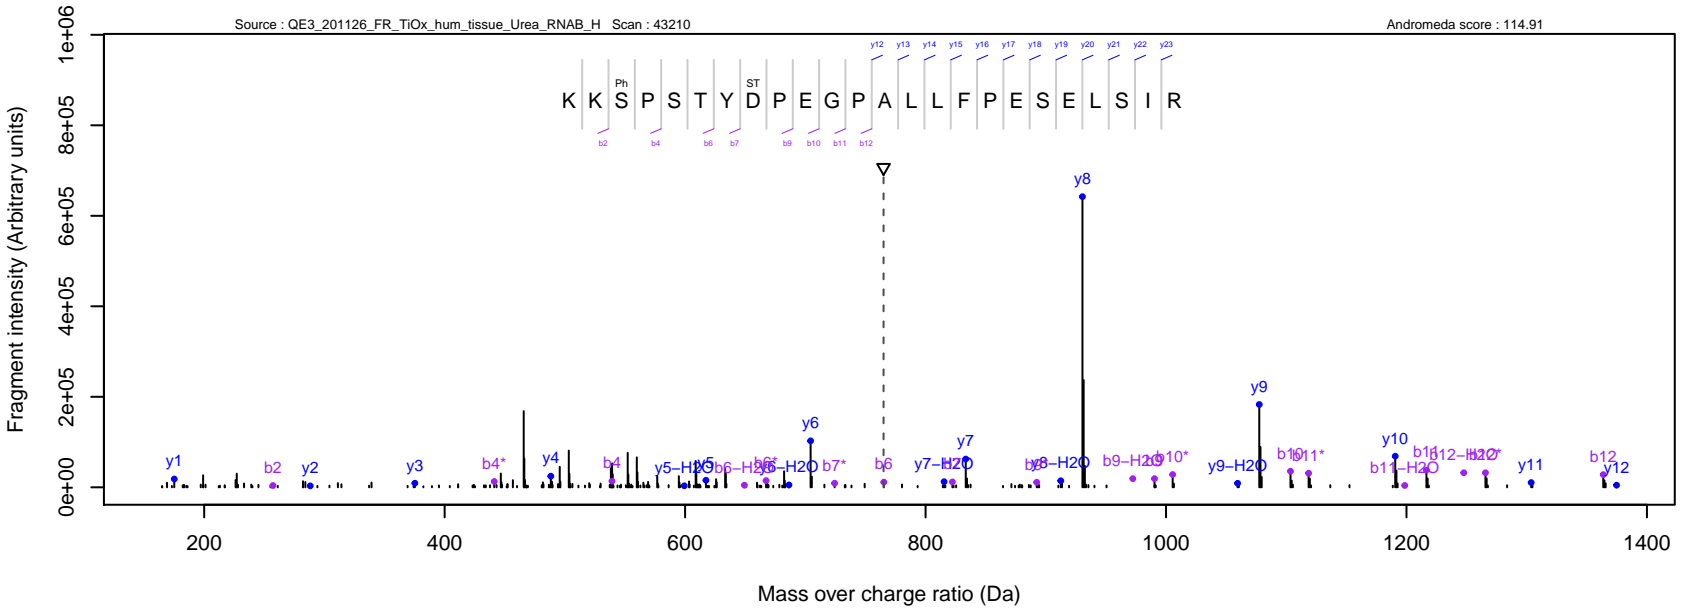

KRS(Phospho (STY))VQEGENPDDGVR-3+

Source : QE3\_201126\_FR\_TiOx\_hum\_tissue\_Urea\_RNAB\_H Scan : 5362

Andromeda score : 114.9

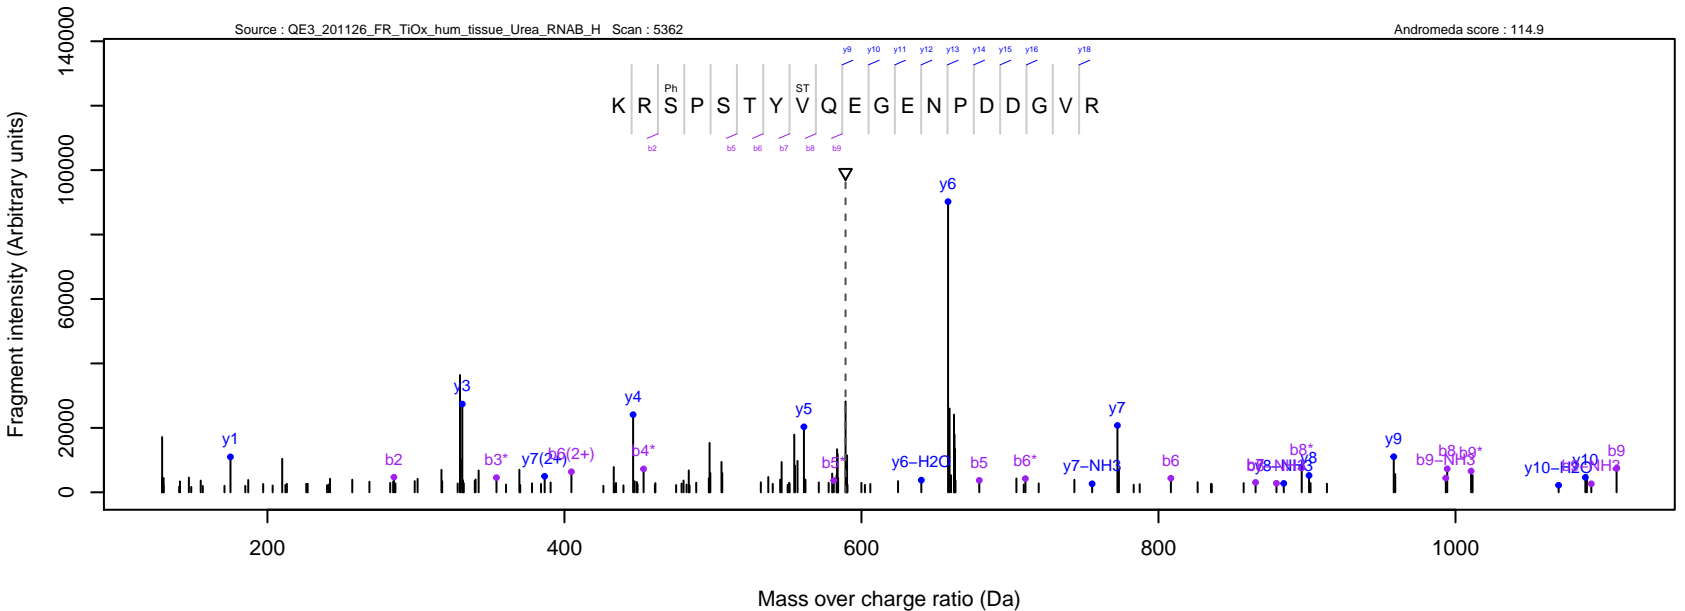

(Acetyl (Protein N-term))MEQLS(Phospho (STY))DEEIDHGAEDS(Phospho (STY))DKEDQLDKMFGAWLGELDK-4+

Source : QE3\_201126\_FR\_TIOx\_hum\_tissue\_Urea\_RNAB\_H Scan : 62633

Andromeda score : 114.85

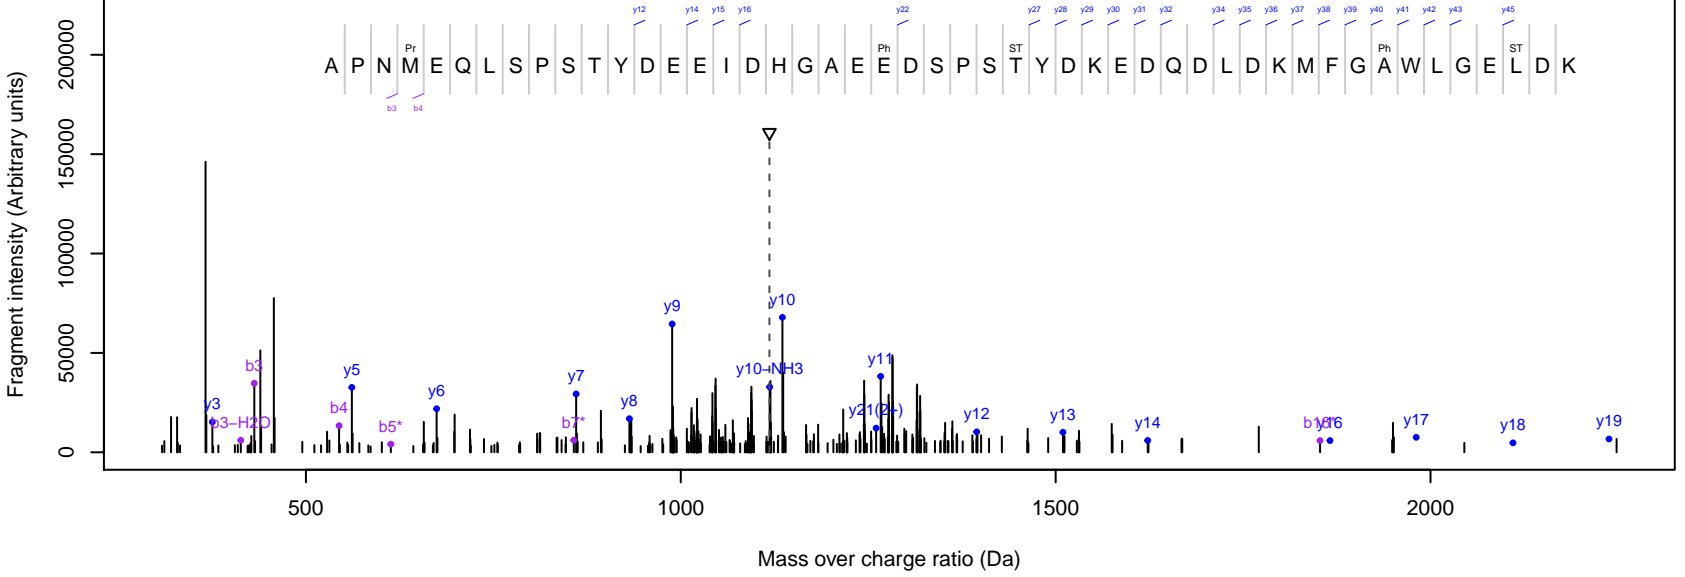

RPT(Phospho (STY))LTTFFGR-2+

Source : QE3\_201126\_FR\_TIOx\_hum\_tissue\_Urea\_RNAB\_H Scan : 34460

Andromeda score : 114.76

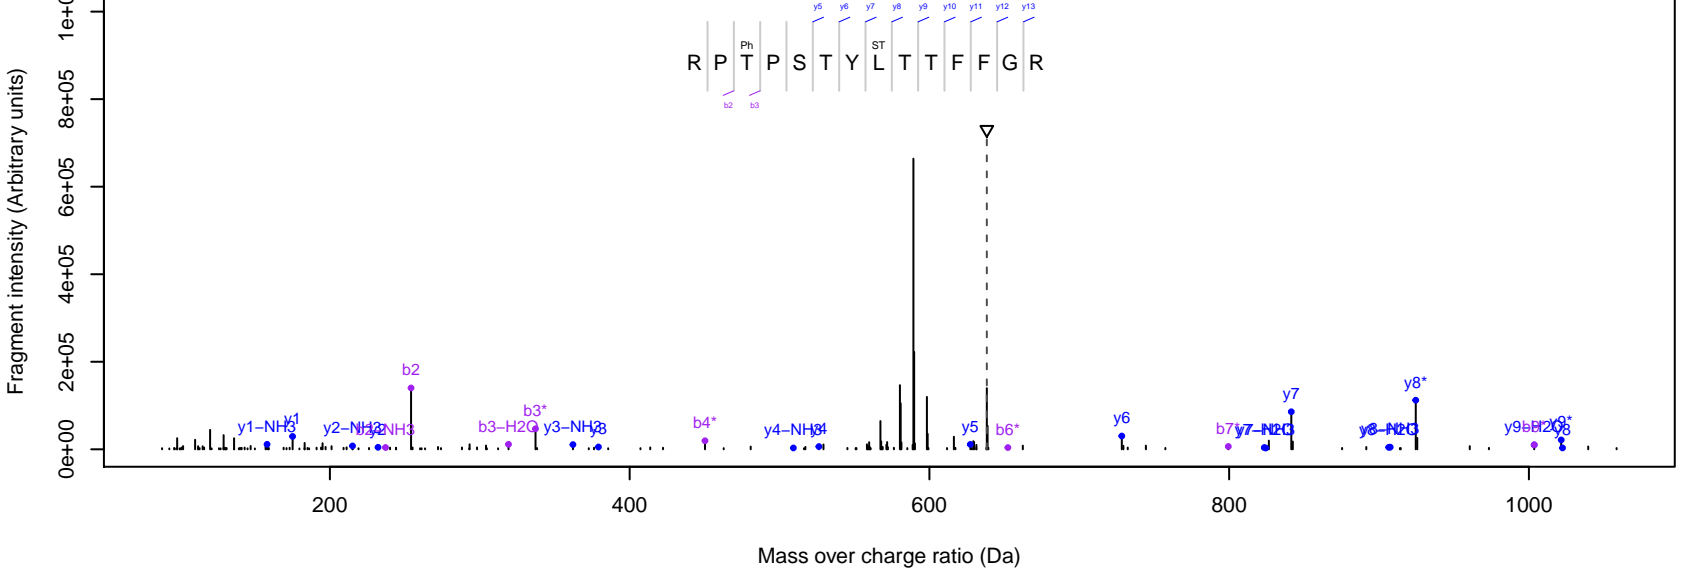

YRGS(Phospho (STY))IHDFPGFDPNQDAEALYTAMOMK-4+

Source : QE3\_201126\_FR\_TIOx\_hum\_tissue\_Urea\_RNAB\_B Scan : 42090

Andromeda score : 114.76

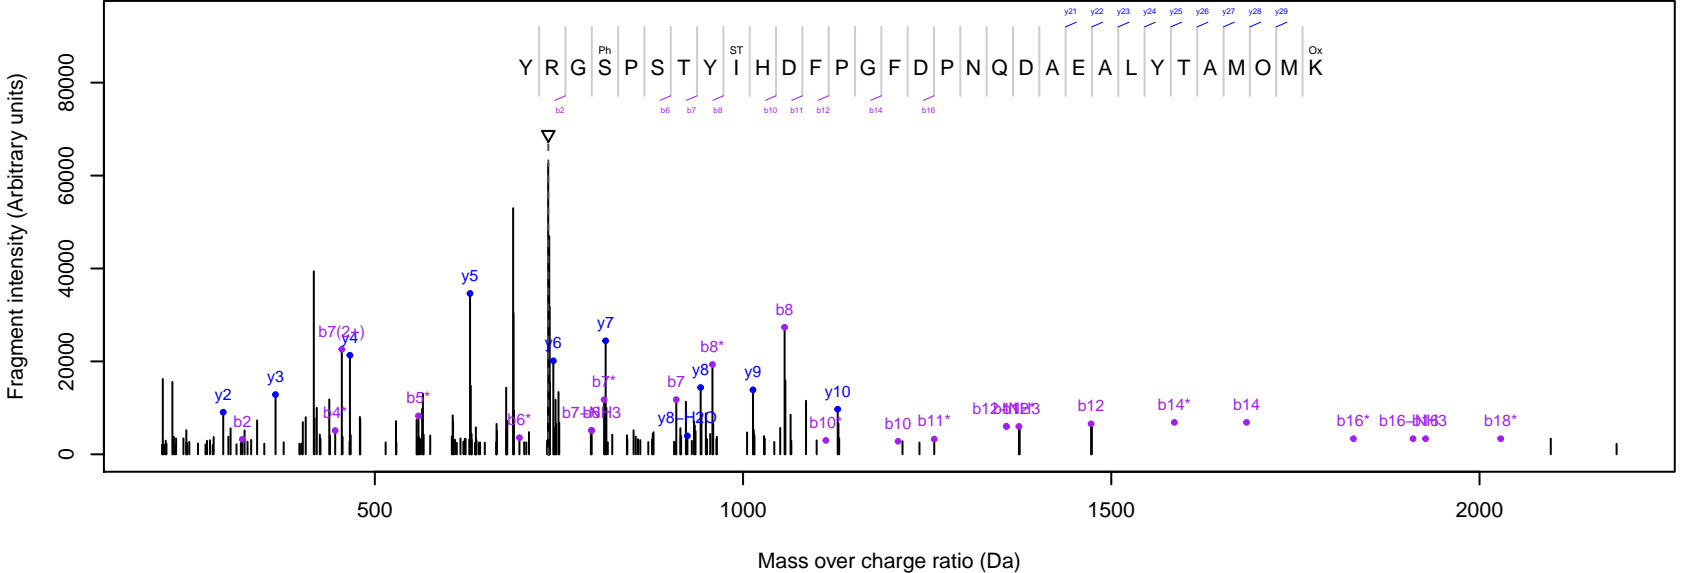

GSIS(Phospho (STY))LKELNAR-2+

Source : QE3\_201126\_FR\_TIOx\_hum\_tissue\_Urea\_RNAB\_H Scan : 20713

Andromeda score : 114.72

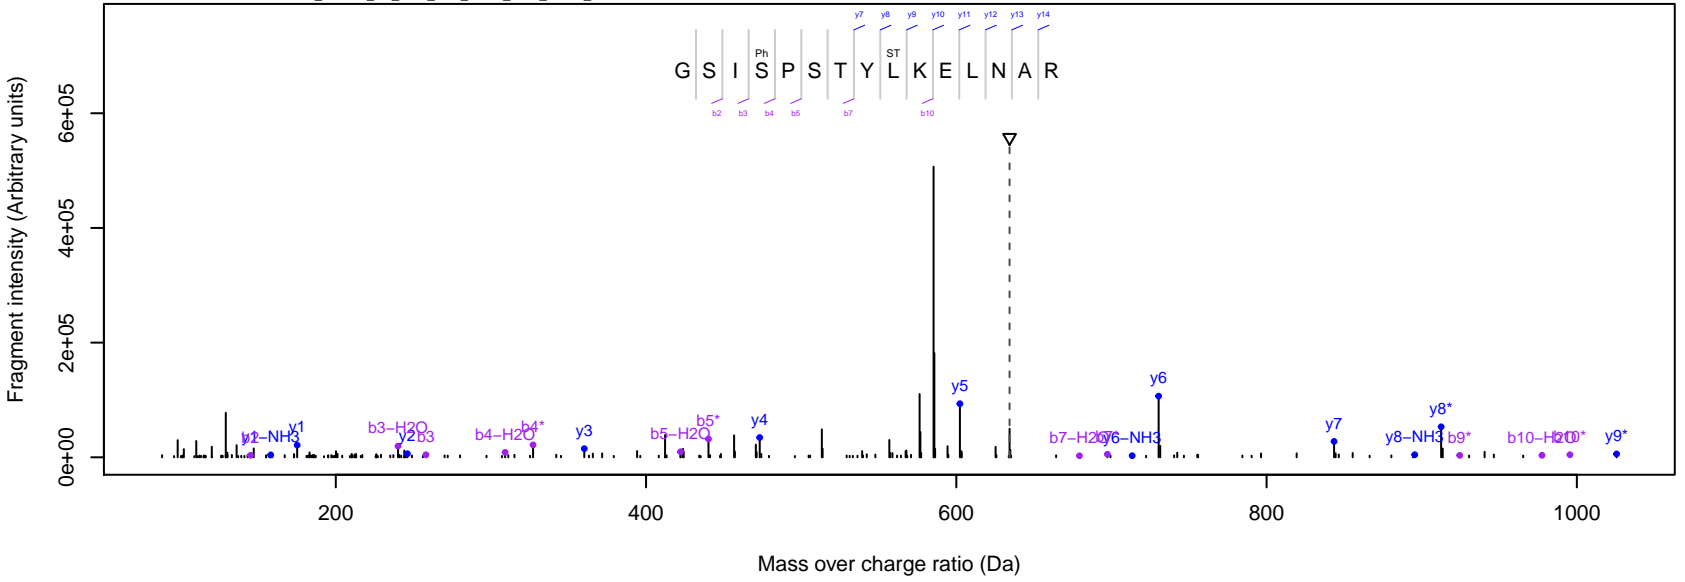

AT(Phospho (STY))S(Phospho (STY))NVFAM(Oxidation (M))FDQSQIQEFKEAFNMIDQNR-3+

Source : QE3\_201126\_FR\_TIOx\_hum\_tissue\_Urea\_RNAB\_N Scan : 62786

Andromeda score : 114.7

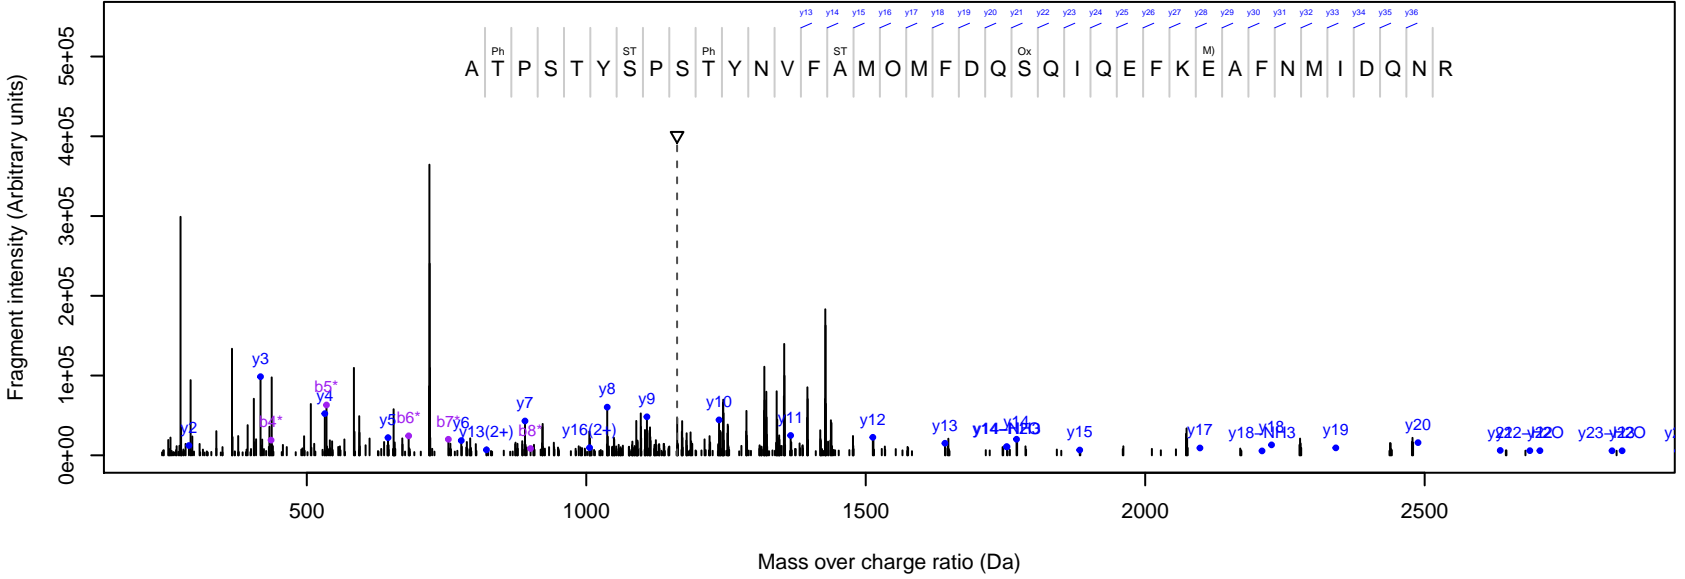

GHREEEQEDLTKDM(Oxidation (M))DEPS(Phospho (STY))PVPNVEEVTLPK-4+

Source : QE3\_201126\_FR\_TIOx\_hum\_tissue\_Urea\_RNAB\_N Scan : 29509

Andromeda score : 114.7

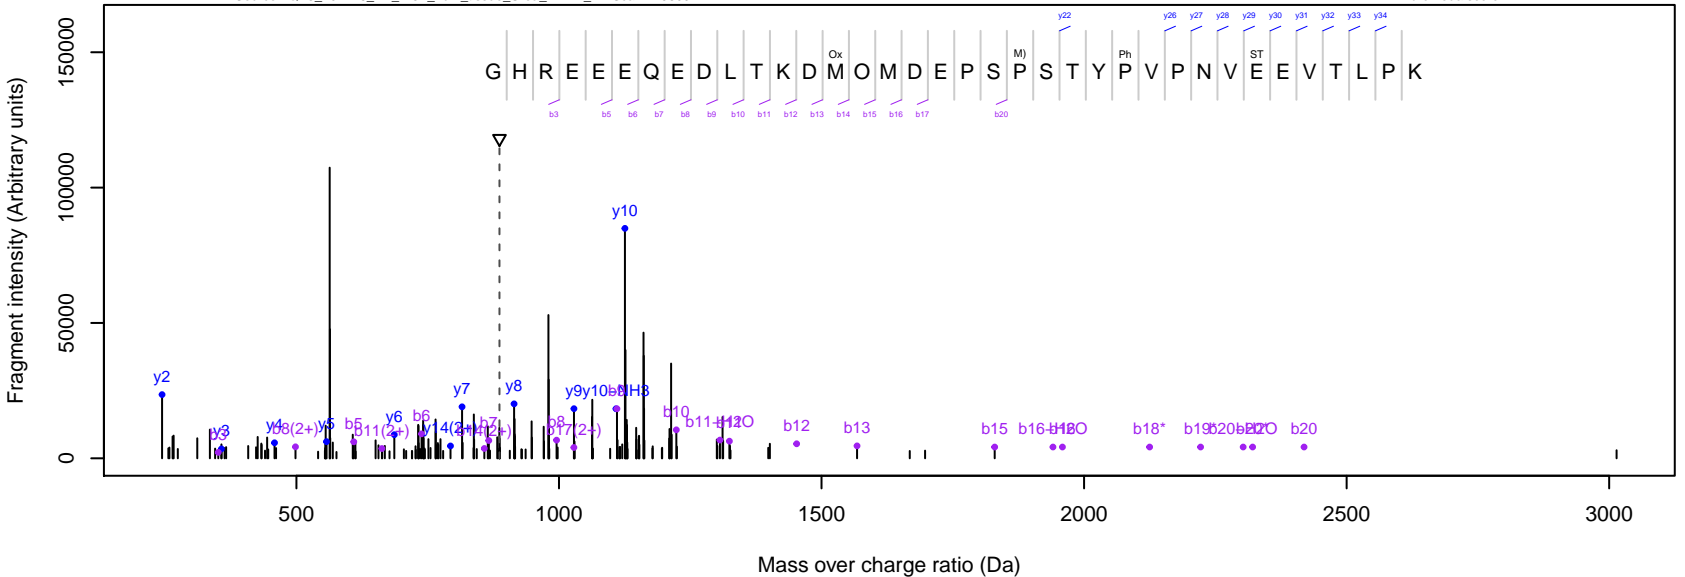

DRPS(Phospho (STY))FSEIASALGDSTVDSKP-3+

Source : QE3\_201126\_FR\_TiOx\_hum\_tissue\_Urea\_RNAB\_H Scan : 49628

Andromeda score : 114.68

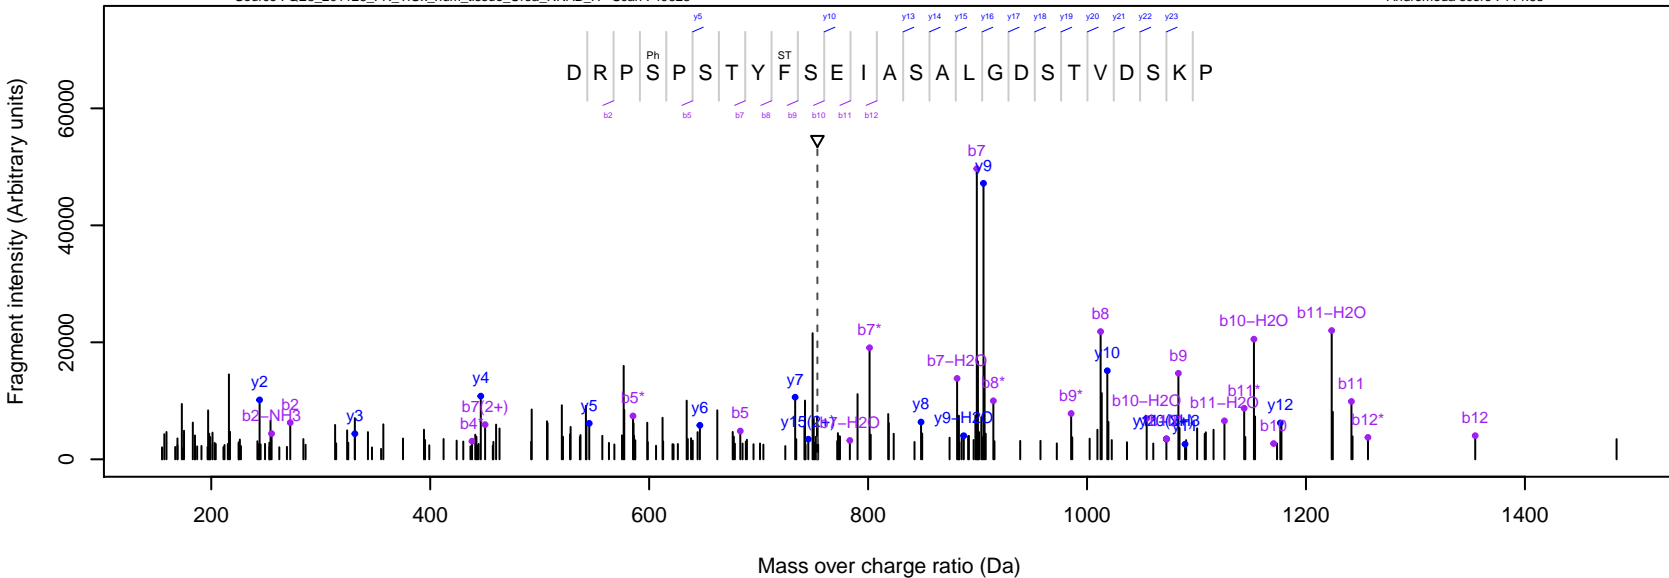

KVEPVPVKQPT(Phospho (STY))PPSEAAASK-3+

Source : QE3\_201126\_FR\_TiOx\_hum\_tissue\_Urea\_RNAB\_N Scan : 13646

Andromeda score : 114.68

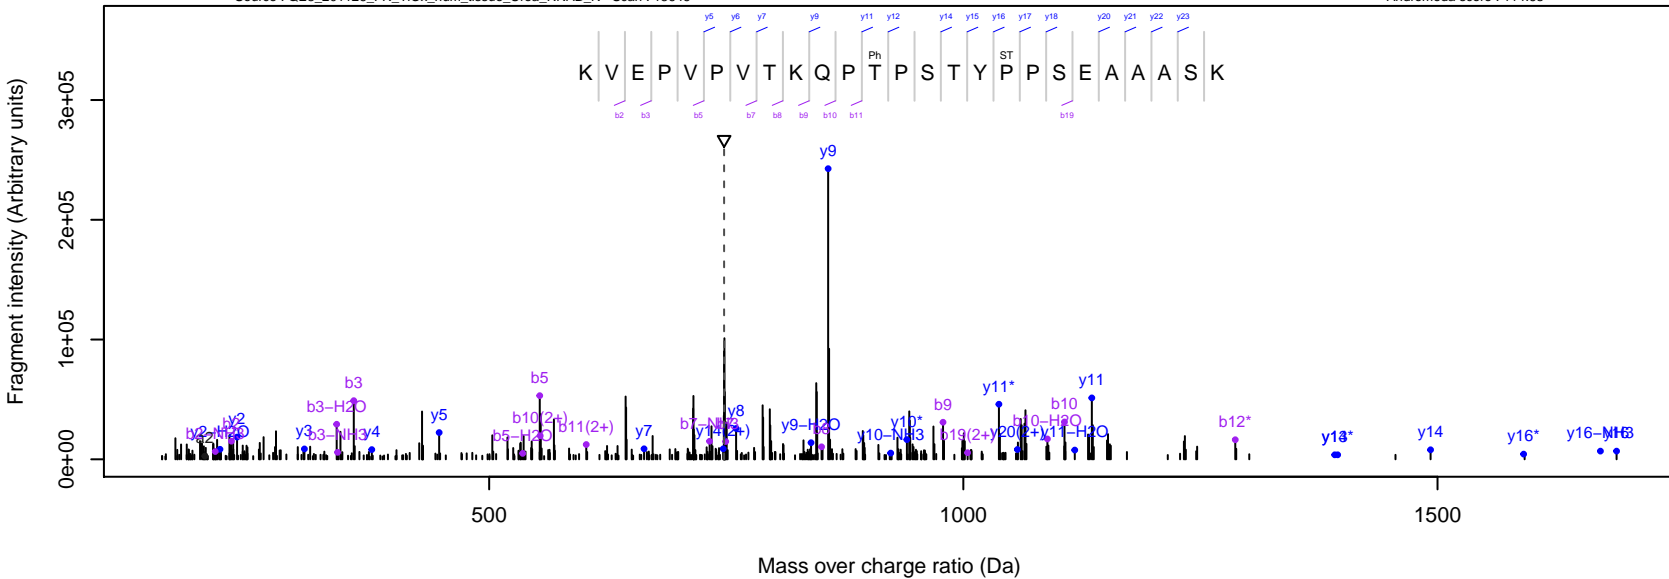

AGS(Phospho (STY))PLCNSNLQDSEEDIEPSYSLFR-3+

Source : QE3\_201126\_FR\_TiOx\_hum\_tissue\_Urea\_RNAB\_H Scan : 53710

Andromeda score : 114.63

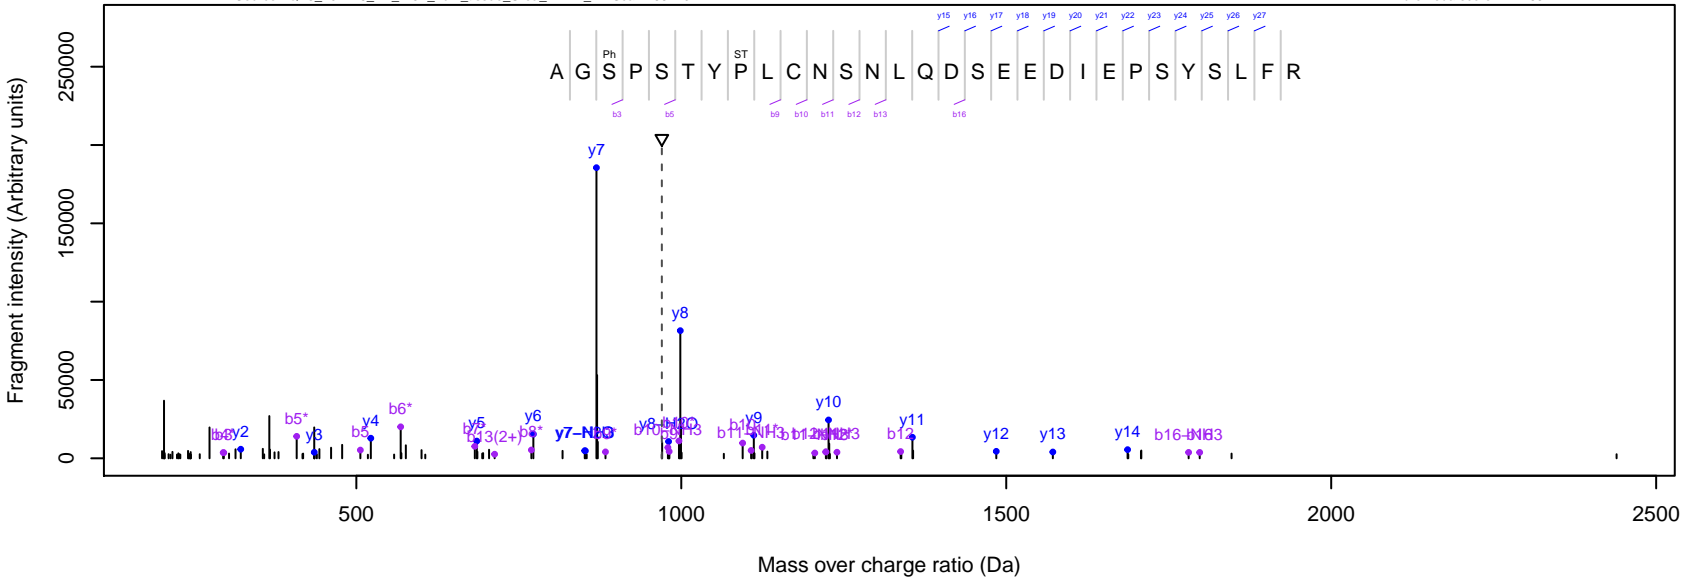

DRS(Phospho (STY))PSRLDTFLK-3+

Source : QE3\_201126\_FR\_TIOx\_hum\_tissue\_Urea\_RNAB\_H Scan : 22939

Andromeda score : 114.63

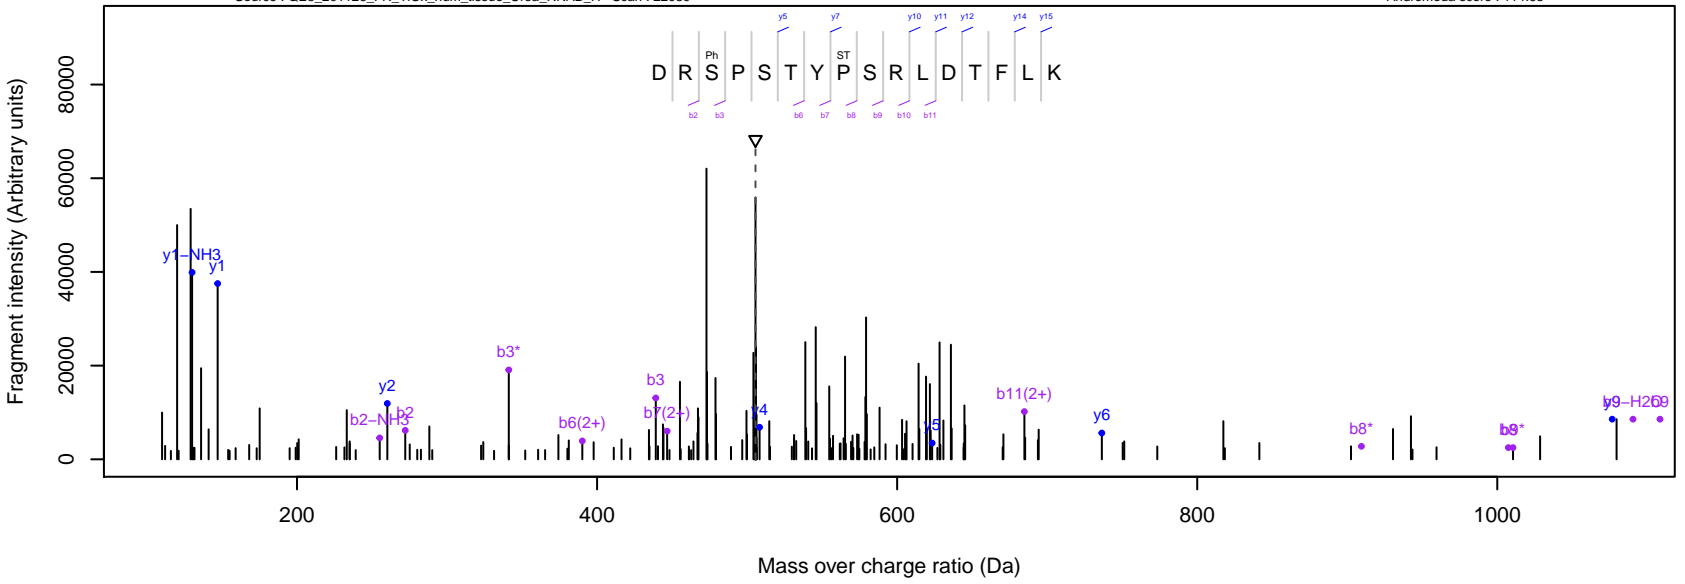

AKPAM(Oxidation (M))PQDSVPS(Phospho (STY))PR-2+

Source : QE3\_201126\_FR\_TIOx\_hum\_tissue\_Urea\_RNAB\_B Scan : 9144

Andromeda score : 114.58

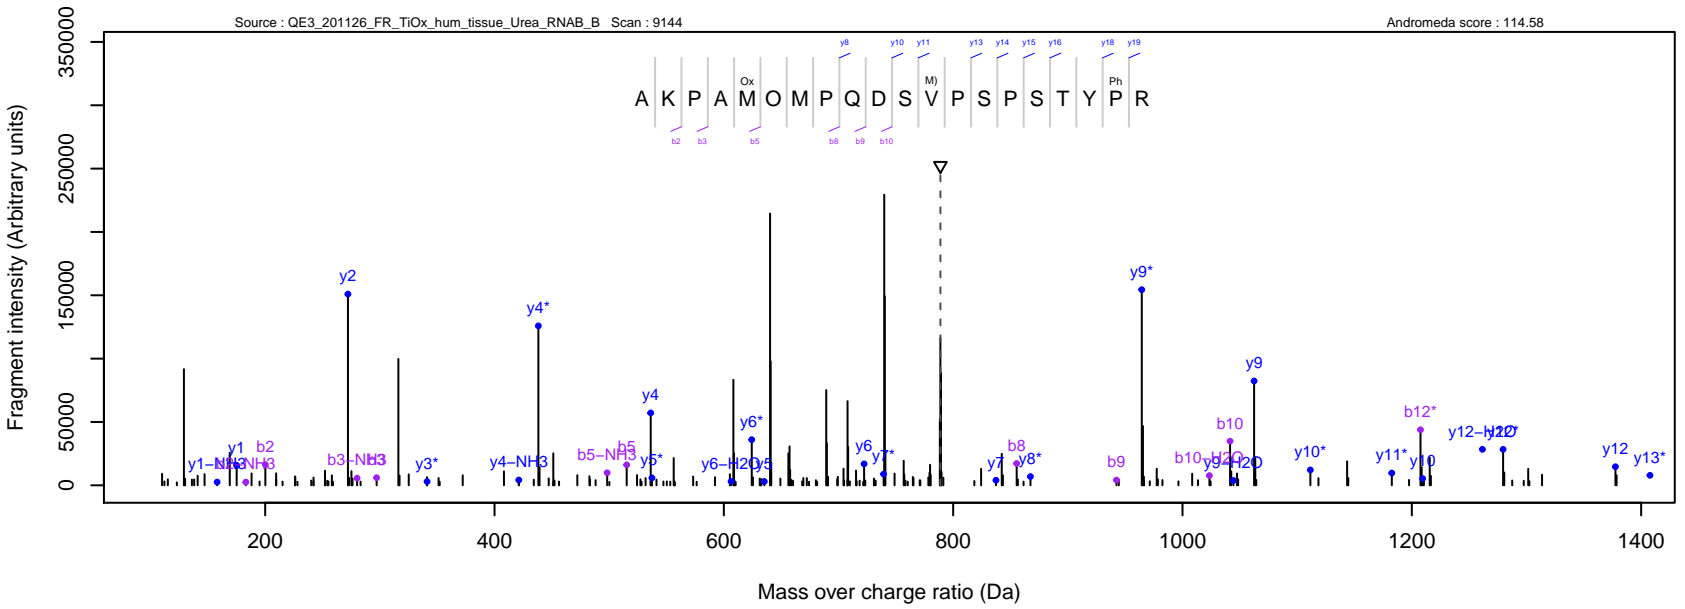

LPLLPES(Phospho (STY))PGPLR-2+

Source : QE3\_201126\_FR\_TIOx\_hum\_tissue\_Urea\_RNAB\_B Scan : 46752

Andromeda score : 114.56

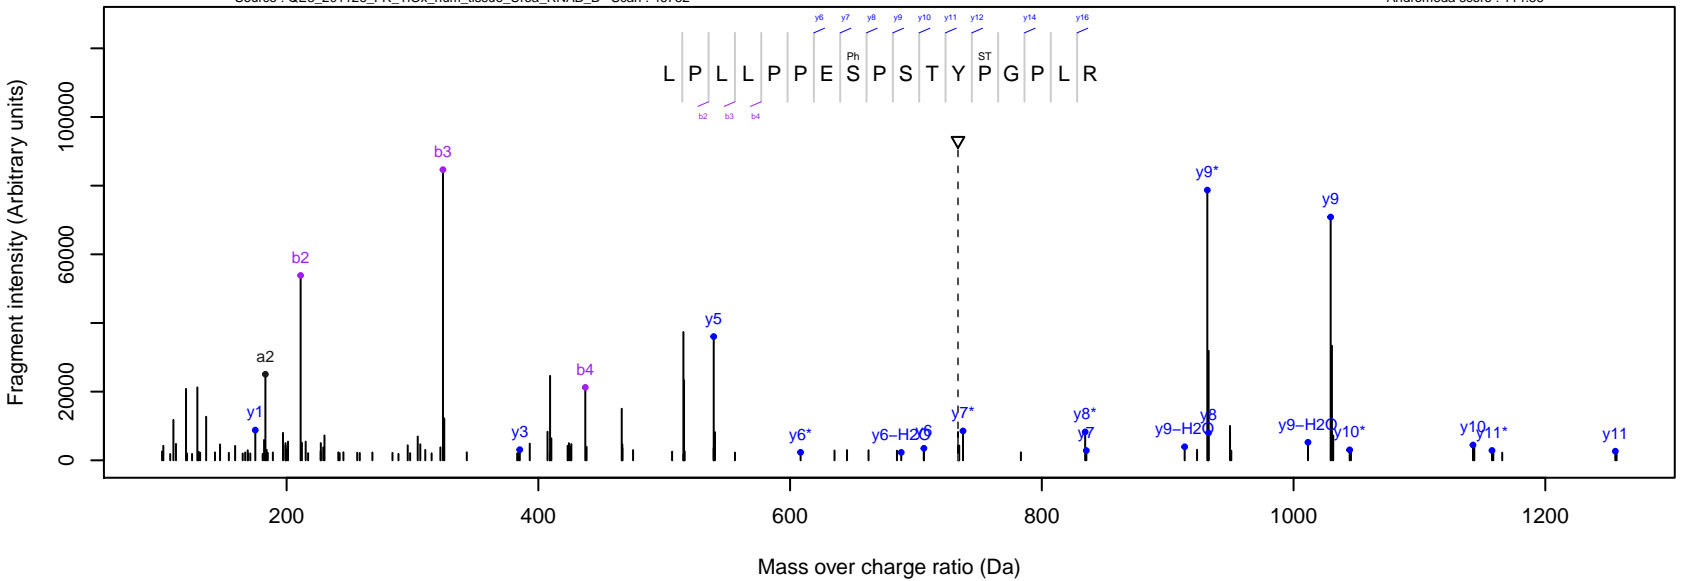

MYFPDVEFDIKS(Phospho (STY))PK-3+

Source : QE3\_2011126\_FR\_TiOx\_hum\_tissue\_Urea\_RNAB\_H Scan : 48056

Andromeda score : 114.55

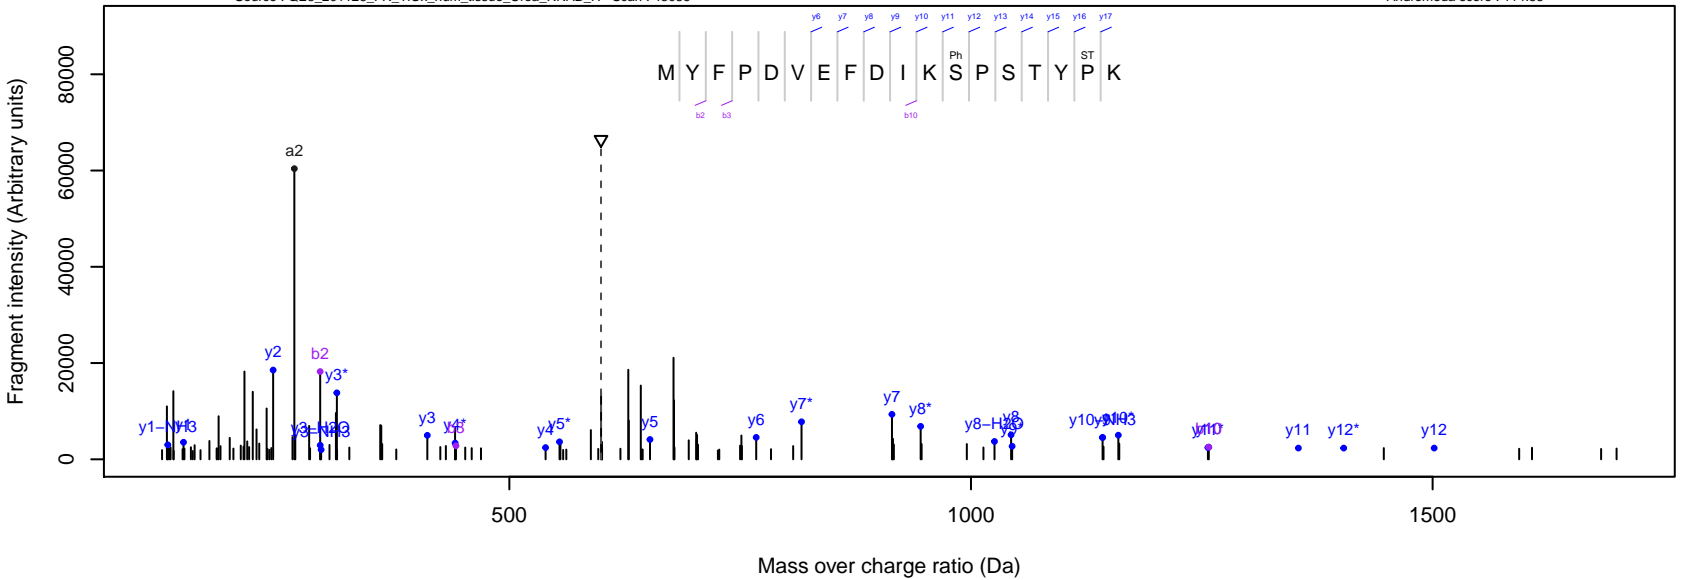

RDS(Phospho (STY))DGVDFEAE GKK-3+

Source : QE3\_2011126\_FR\_TiOx\_hum\_tissue\_Urea\_RNAB\_N Scan : 10295

Andromeda score : 114.55

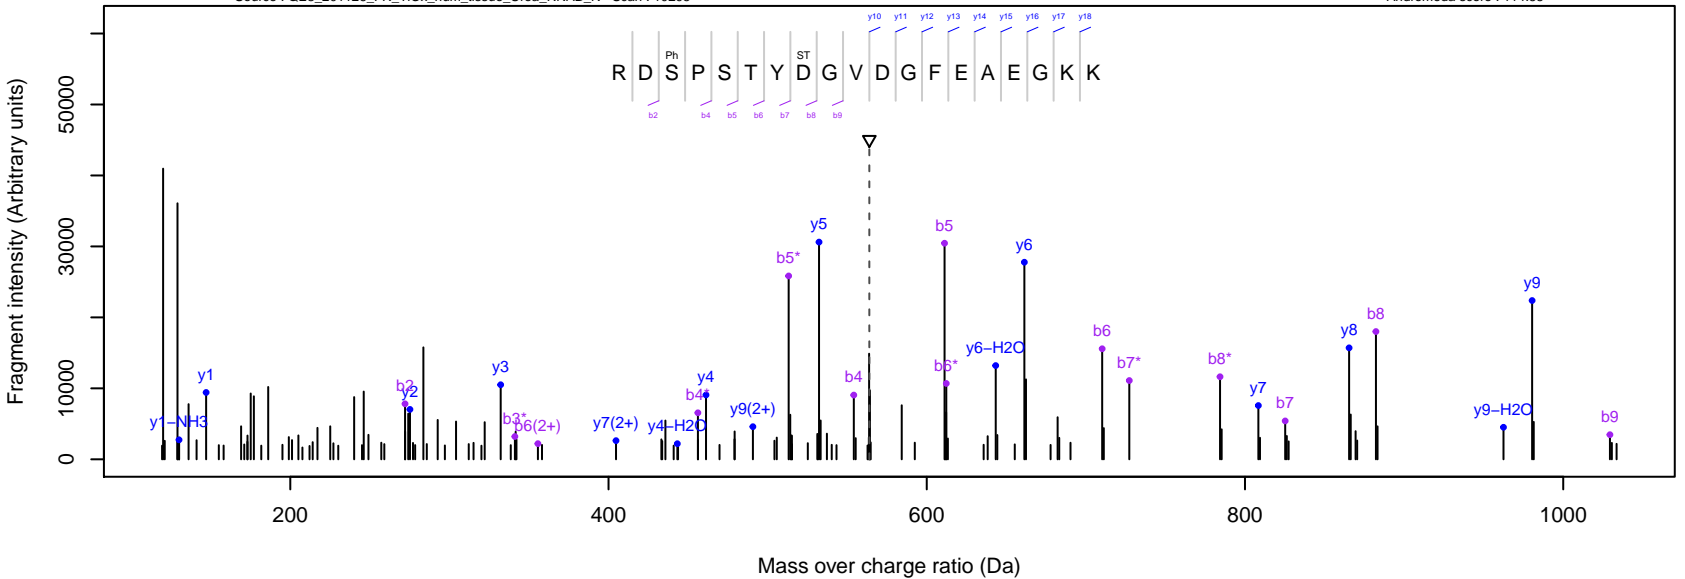

SSS(Phospho (STY))PCRTPEPDND AHLR-3+

Source : QE3\_2011126\_FR\_TiOx\_hum\_tissue\_Urea\_RNAB\_N Scan : 8806

Andromeda score : 114.46

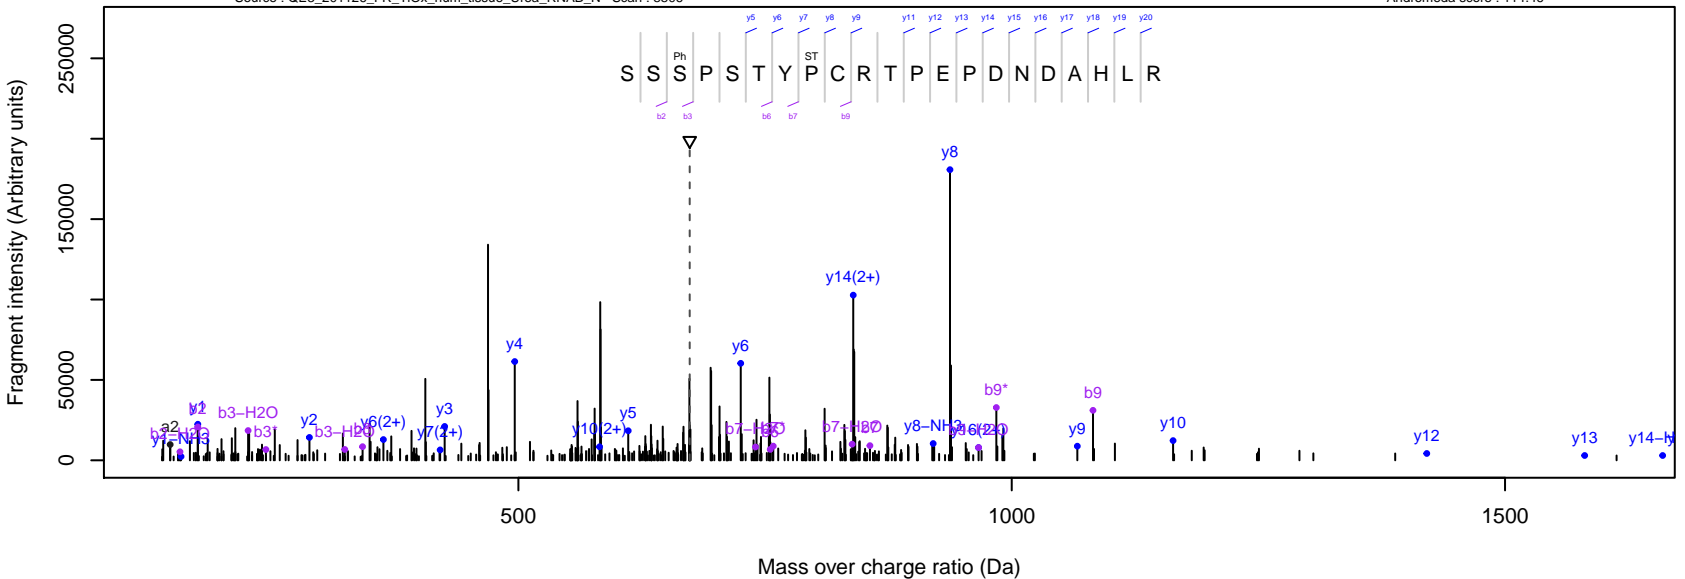



RAS(Phospho (STY))GQAFELILSPR-3+

Source : QE3\_201126\_FR\_TIOx\_hum\_tissue\_Urea\_RNAB\_H Scan : 40093

Andromeda score : 114.4

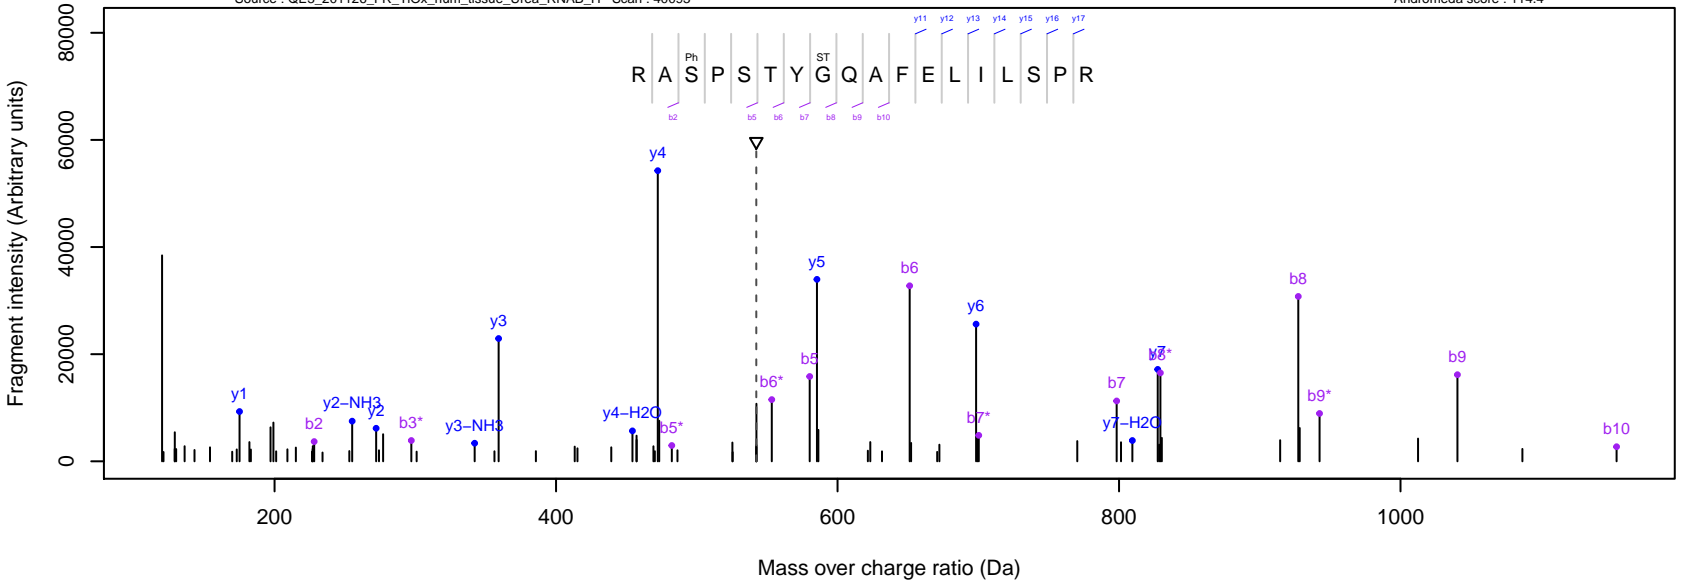

RSS(Phospho (STY))PAADVQEENLYAAVK-2+

Source : QE3\_201126\_FR\_TIOx\_hum\_tissue\_Urea\_RNAB\_H Scan : 25986

Andromeda score : 114.4

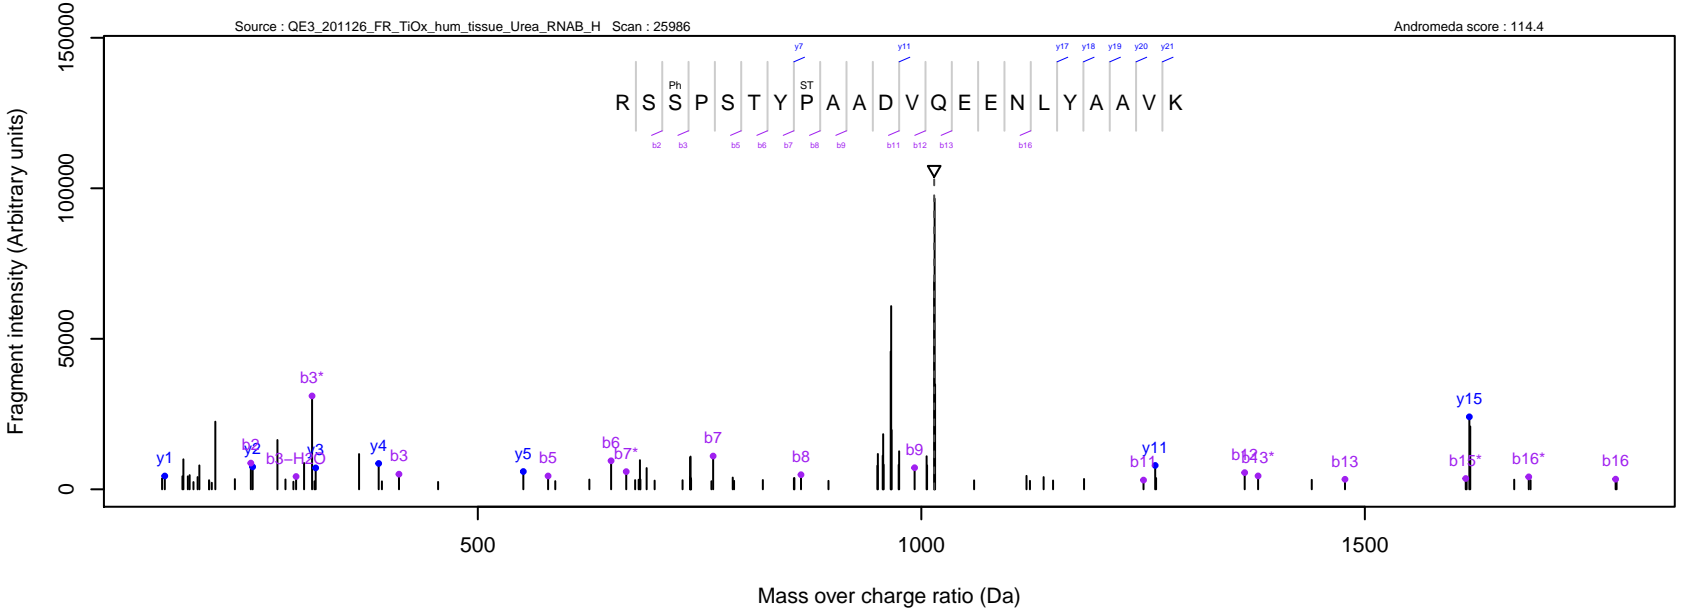

SLS(Phospho (STY))EQPVM D T A T A T E Q A K-2+

Source : QE3\_201126\_FR\_TIOx\_hum\_tissue\_Urea\_RNAB\_N Scan : 27209

Andromeda score : 114.4

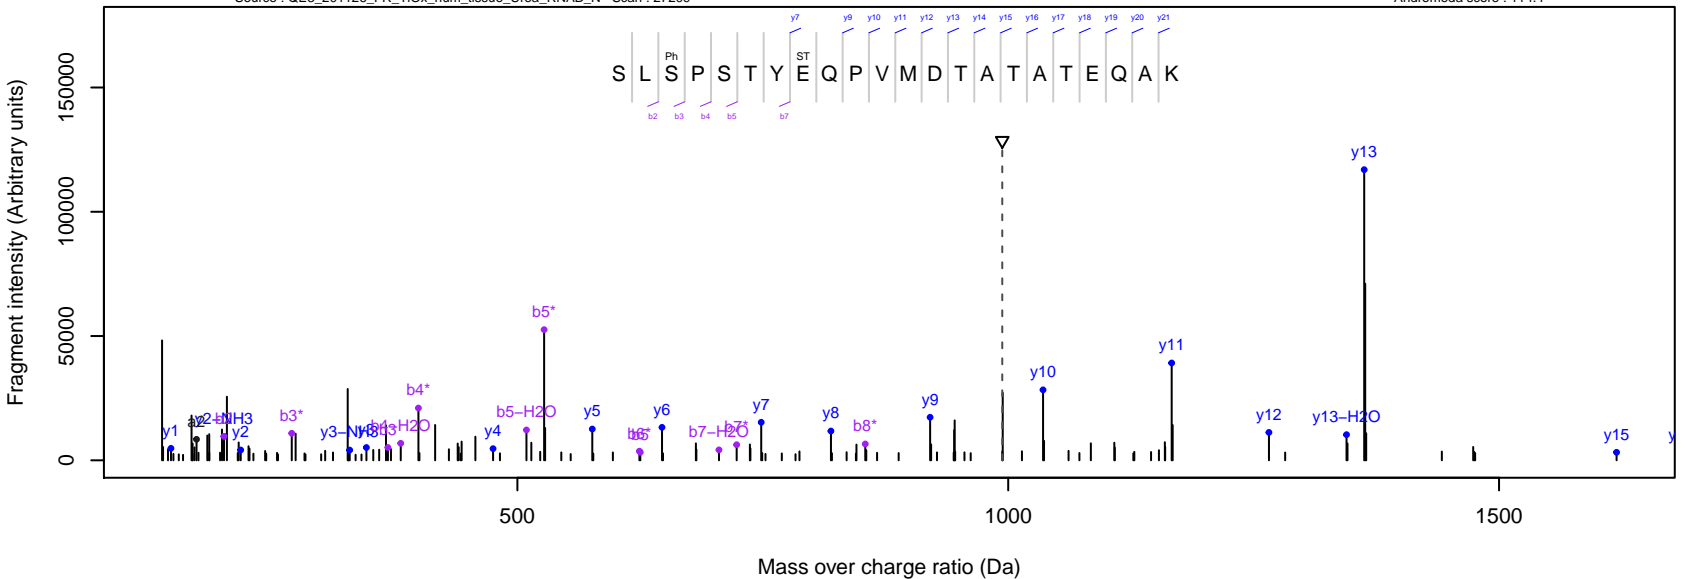

KMLGEDS(Phospho (STY))DEEEMDTSER-3+

Source : QE3\_201126\_FR\_TiOx\_hum\_tissue\_Urea\_RNAB\_H Scan : 19553

Andromeda score : 114.39

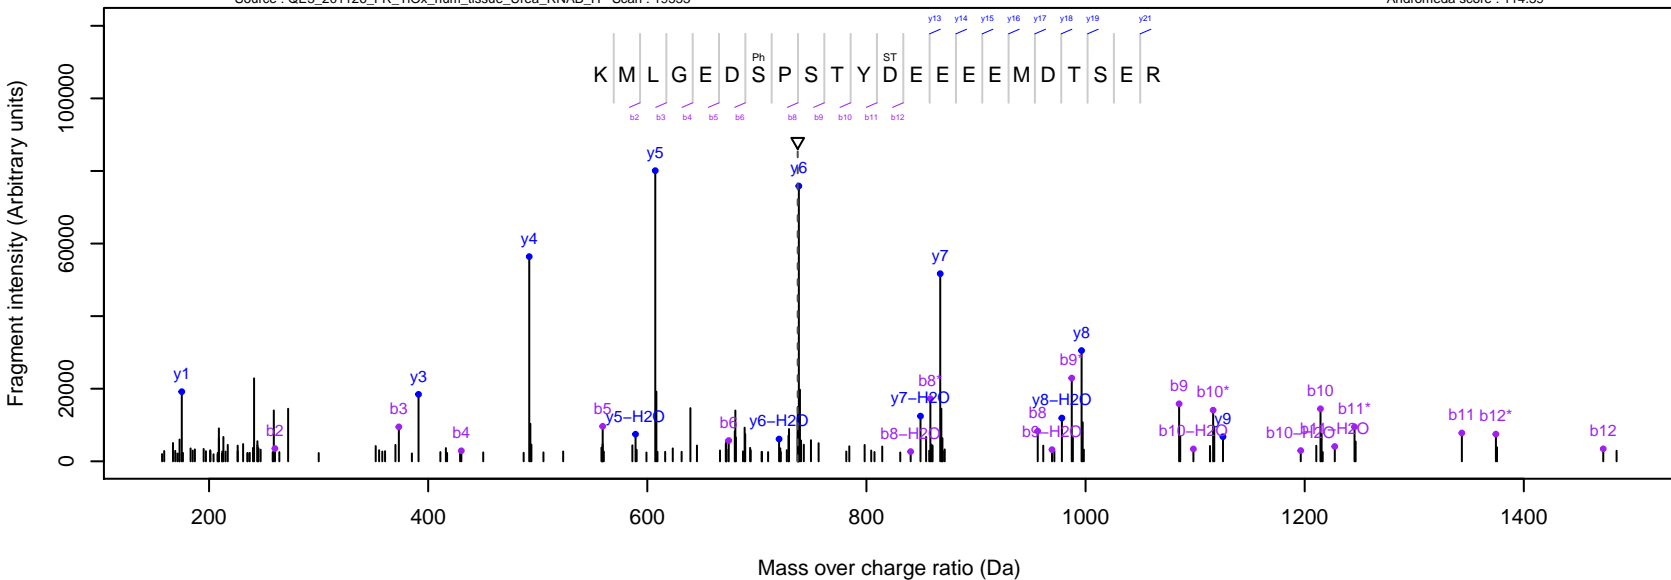

GYSSPEPDIQDS(Phospho (STY))S(Phospho (STY))GSEAQSVKPTR-3+

Source : QE3\_201126\_FR\_TiOx\_hum\_tissue\_Urea\_RNAB\_N Scan : 21944

Andromeda score : 114.31

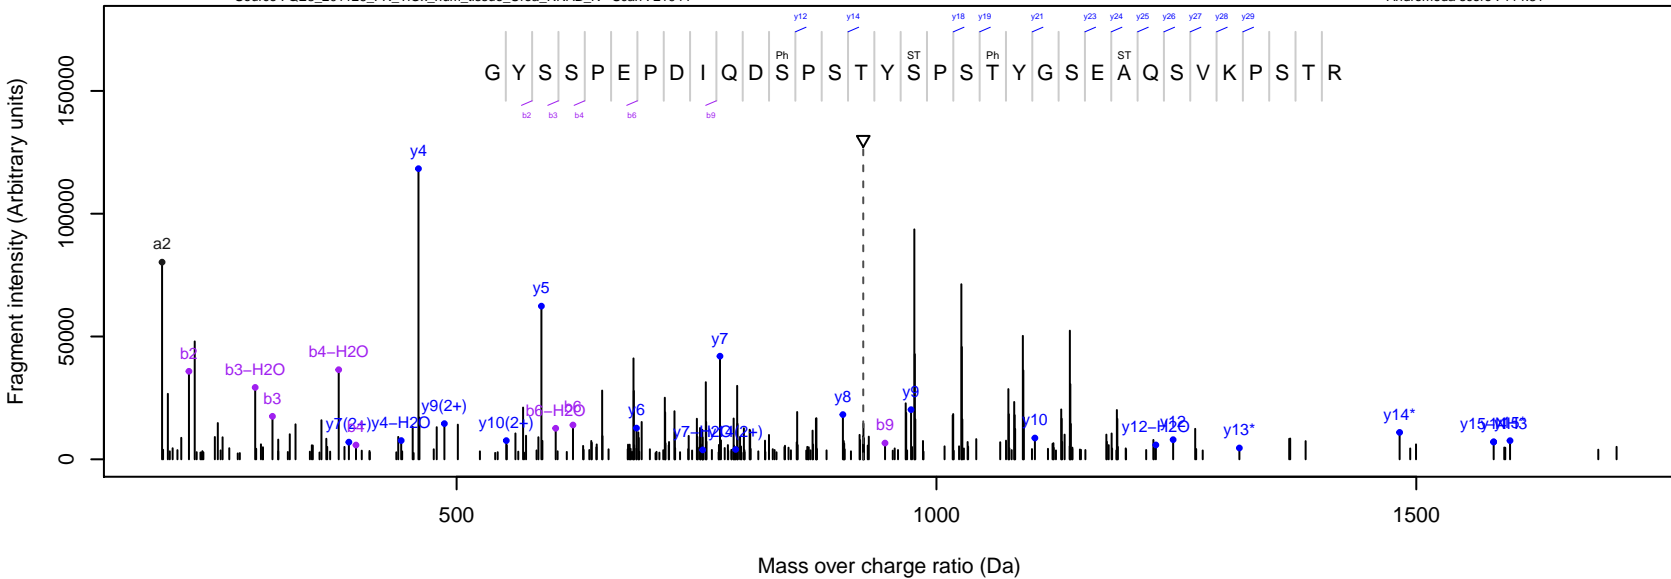

HKSGSMEEDVDTS(Phospho (STY))PSPTSSSR-3+

Source : QE3\_201126\_FR\_TiOx\_hum\_tissue\_Urea\_RNAB\_N Scan : 19380

Andromeda score : 114.31

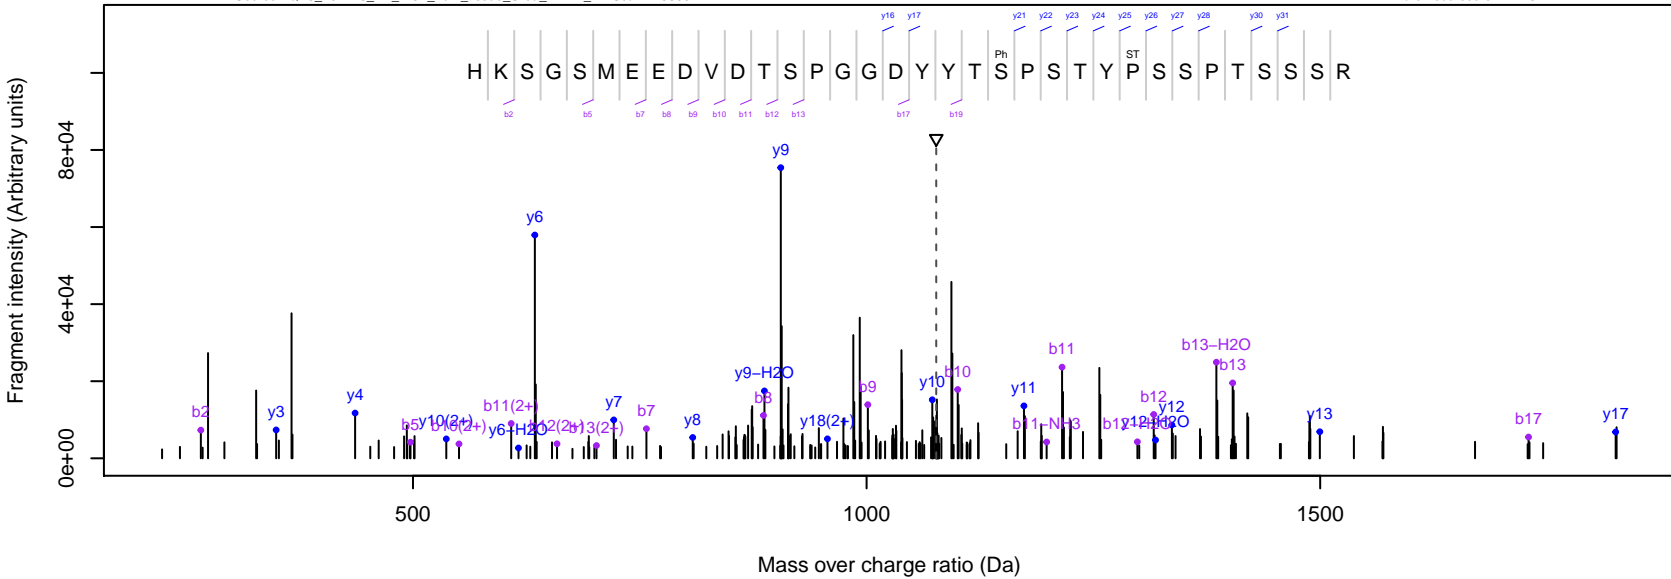

(Acetyl (Protein N-term))ASGADS(Phospho (STY))KGDDLSTAILK-2+

Source : QE3\_201126\_FR\_TiOx\_hum\_tissue\_Urea\_RNAB\_B Scan : 36999

Andromeda score : 114.29

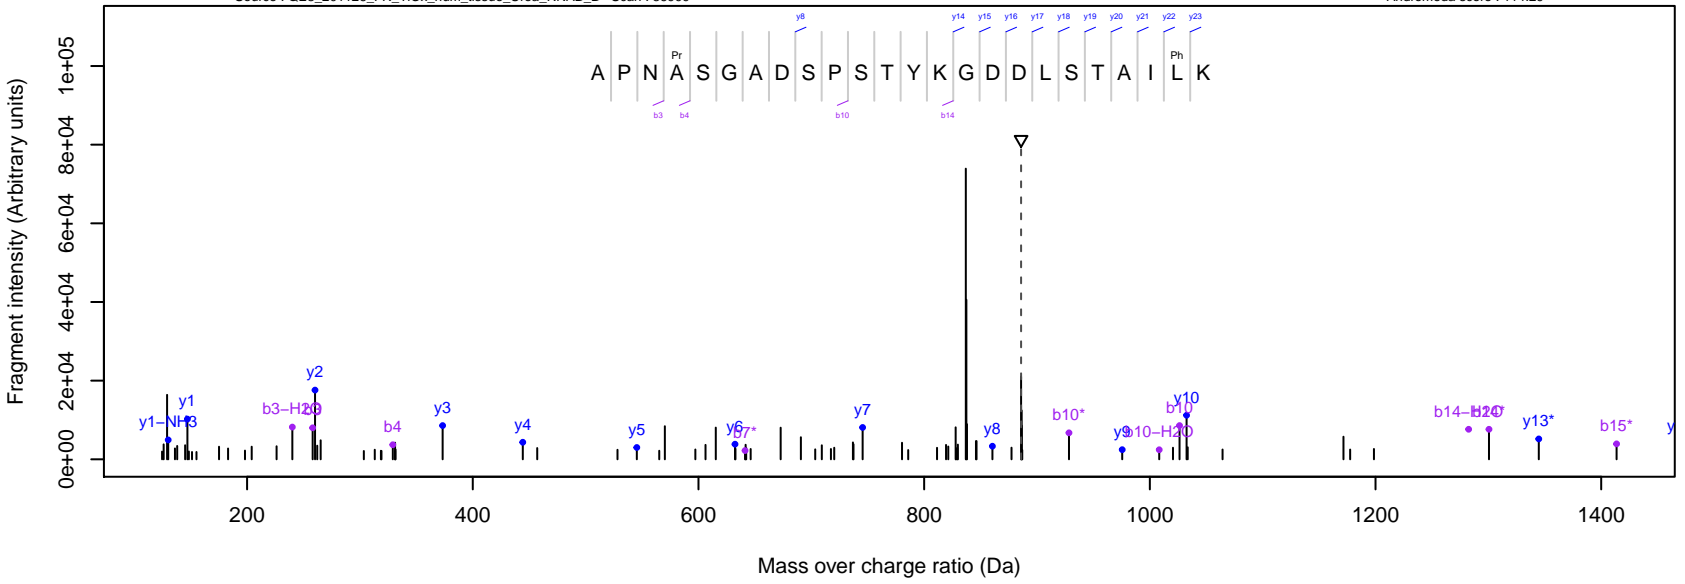

RFS(Phospho (STY))DS(Phospho (STY))EGEETVPEPR-2+

Source : QE3\_201126\_FR\_TiOx\_hum\_tissue\_Urea\_RNAB\_B Scan : 21287

Andromeda score : 114.29

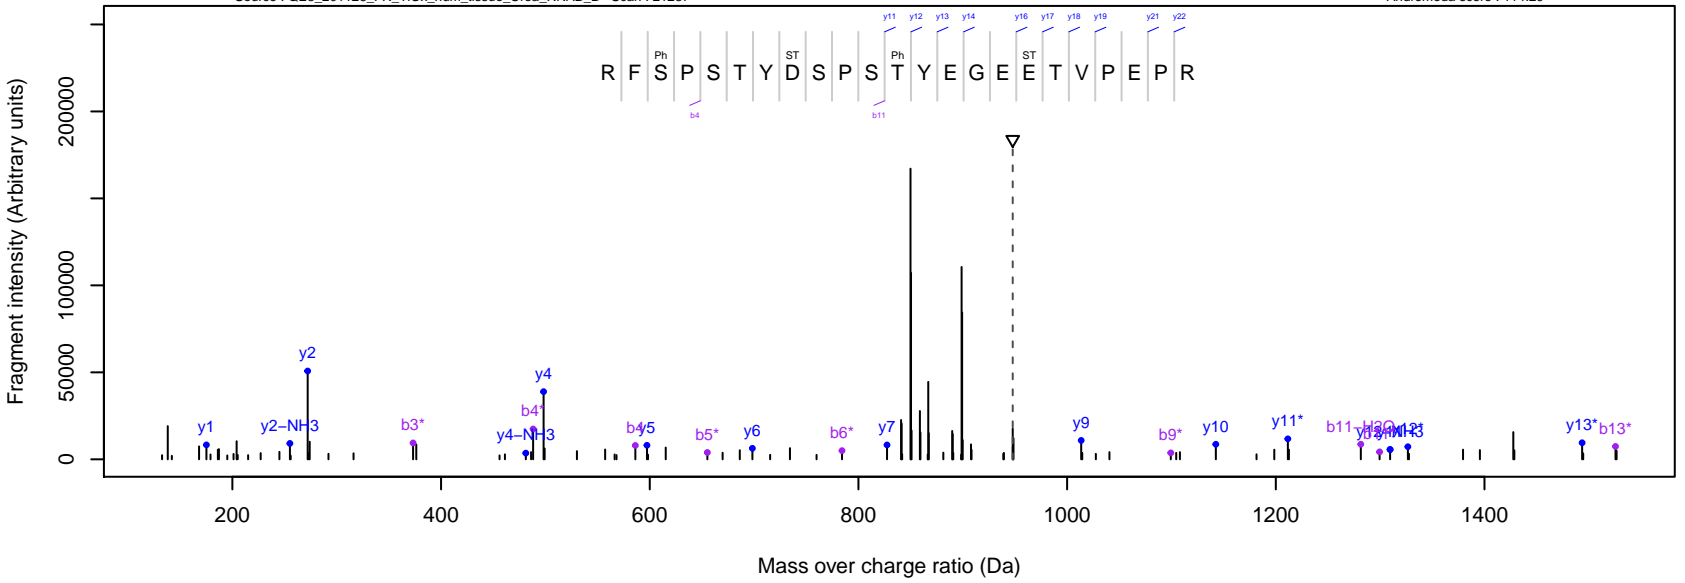

TAQVPS(Phospho (STY))PPRGK-2+

Source : QE3\_201126\_FR\_TiOx\_hum\_tissue\_Urea\_RNAB\_N Scan : 8627

Andromeda score : 114.24

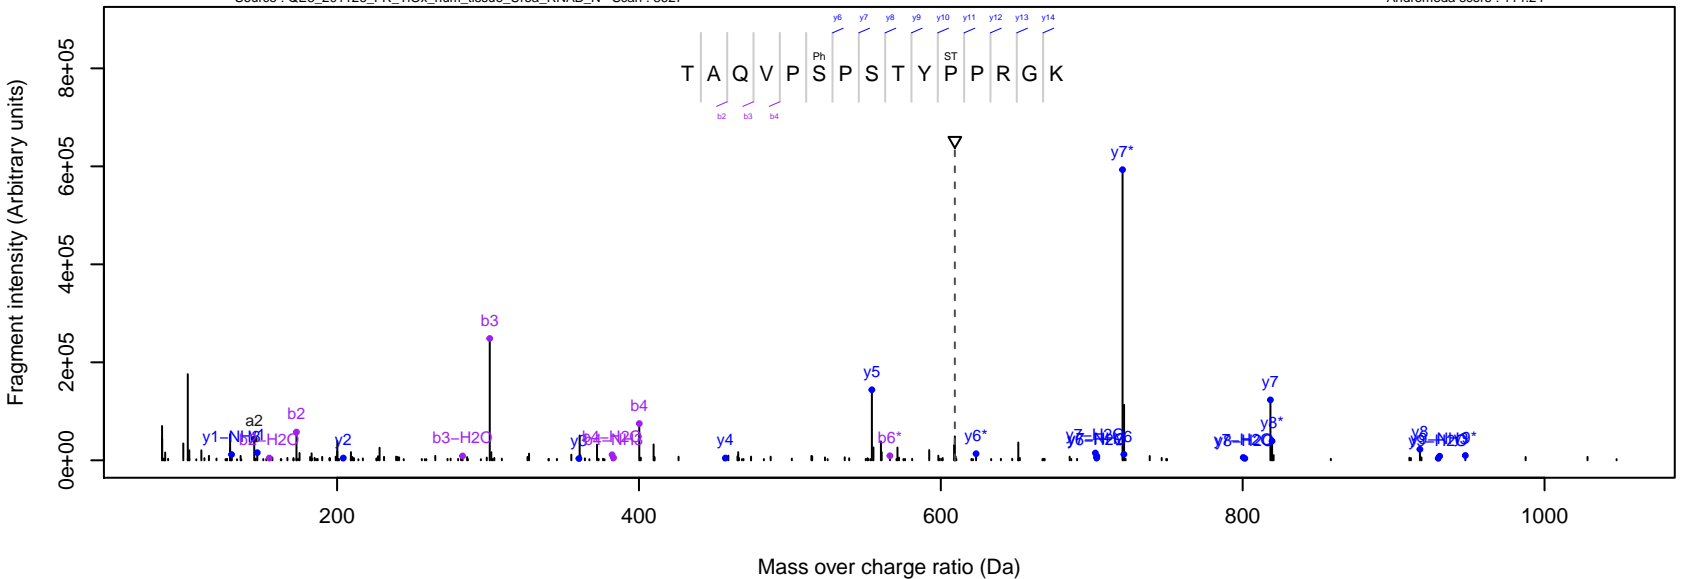

VAENVADKNEEPS(Phospho (STY))NHIPHGK-4+

Source : QE3\_201126\_FR\_TIOx\_hum\_tissue\_Urea\_RNAB\_H Scan : 7855

Andromeda score : 114.21

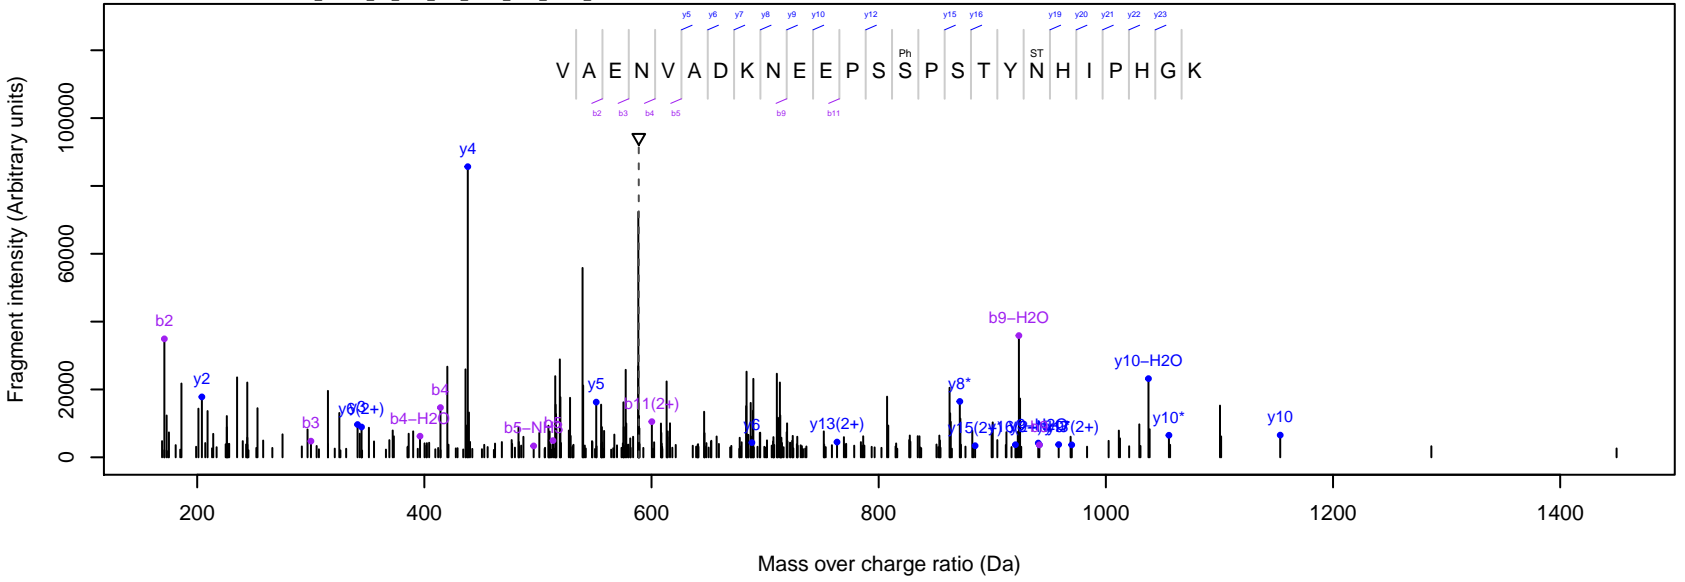

GGLLTSEEDSGFST(Phospho (STY))SPKDNSLPK-3+

Source : QE3\_201126\_FR\_TIOx\_hum\_tissue\_Urea\_RNAB\_N Scan : 32036

Andromeda score : 114.2

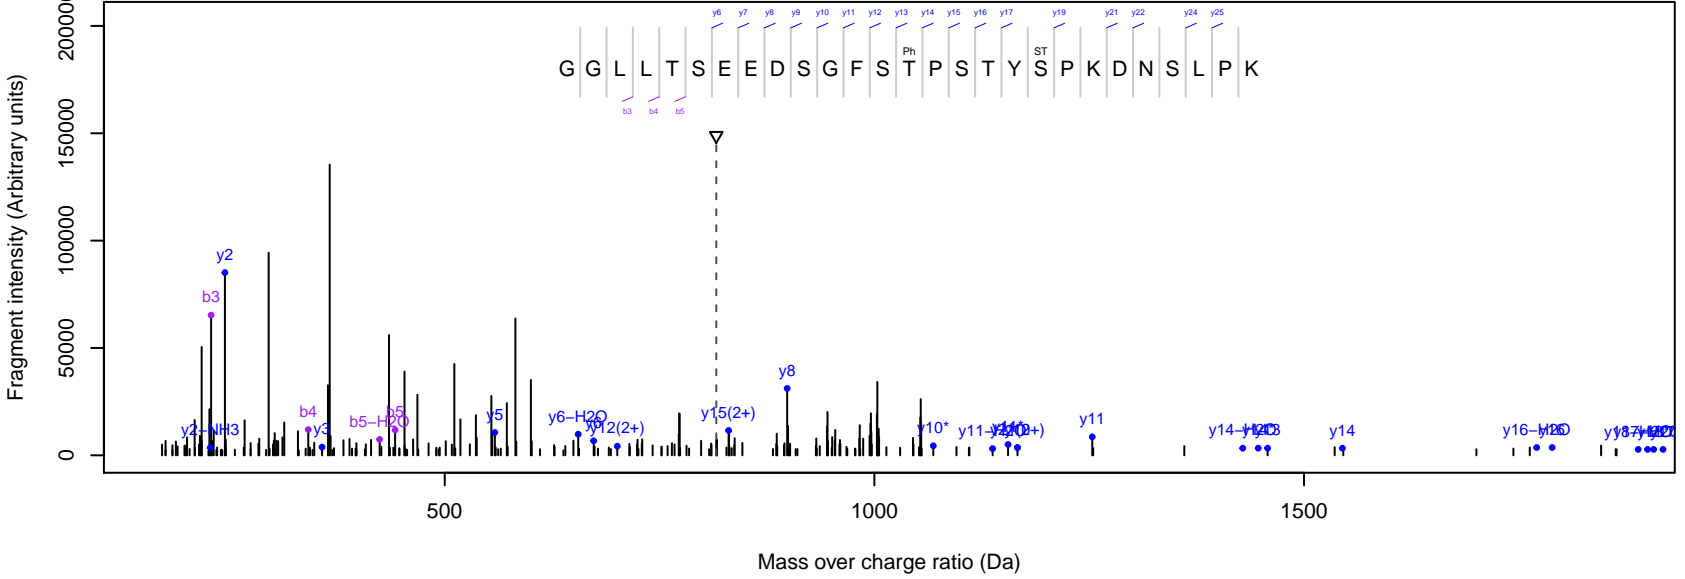

SVS(Phospho (STY))TTNIAGHFNDESPLGLR-3+

Source : QE3\_201126\_FR\_TIOx\_hum\_tissue\_Urea\_RNAB\_H Scan : 38685

Andromeda score : 114.2

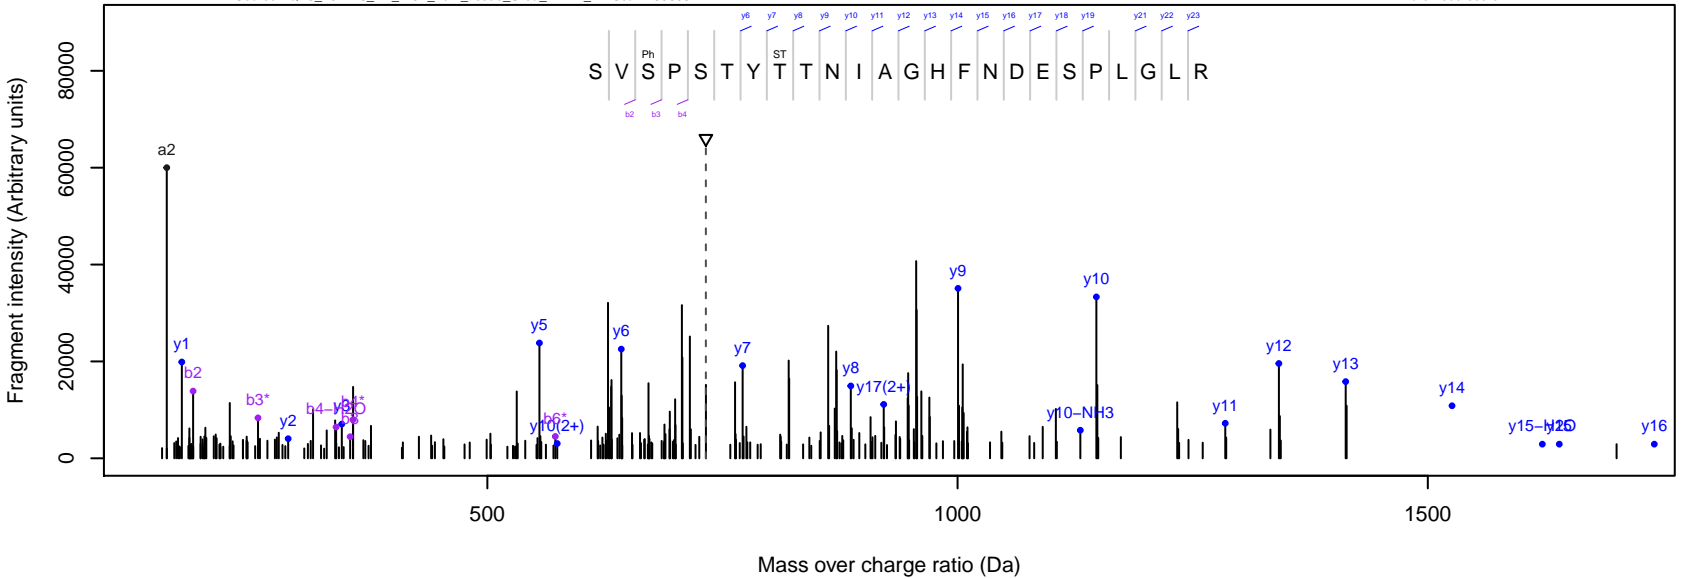

AMDNHS(Phospho (STY))DS(Phospho (STY))EEELAAFCPLDDSTVAR-3+

Source : QE3\_201126\_FR\_TIOx\_hum\_tissue\_Urea\_RNAB\_H Scan : 49860

Andromeda score : 114.08

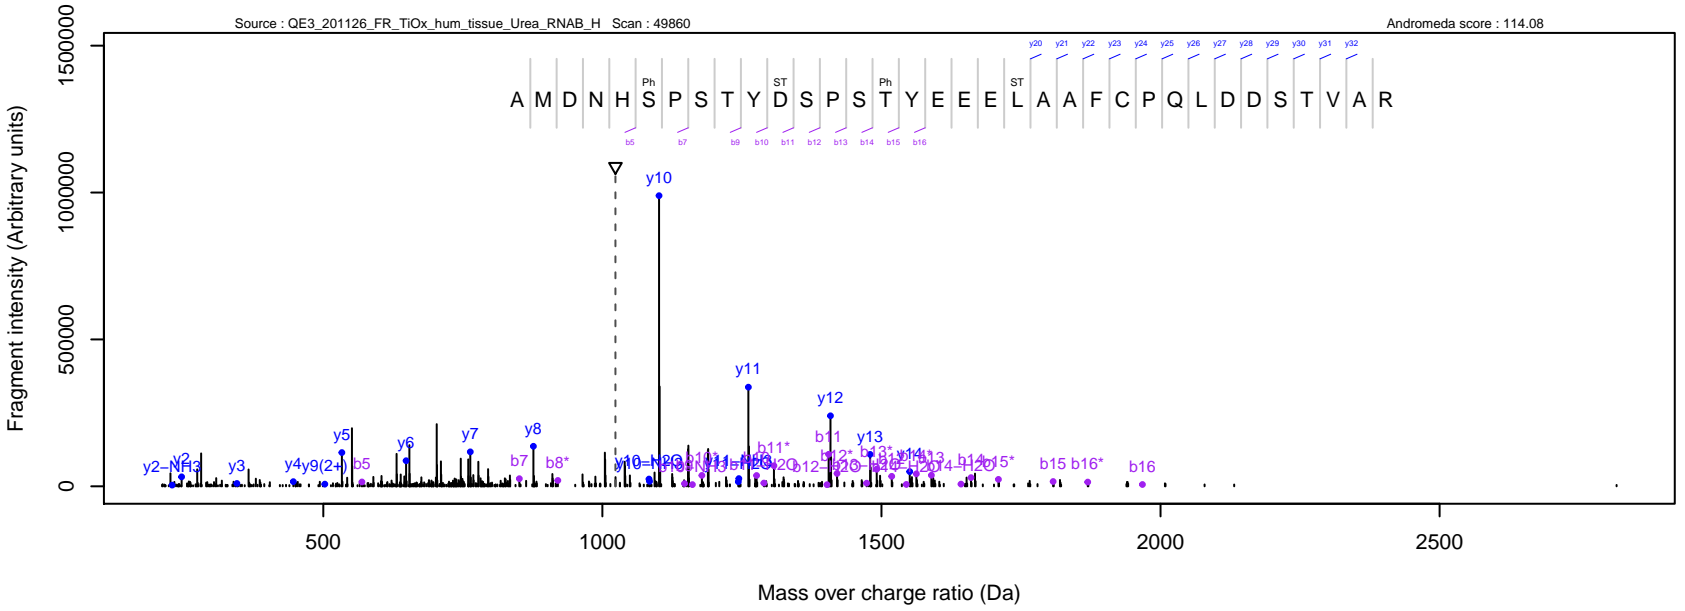

M(Oxidation (M))KNFETLSFS(Phospho (STY))PEENFGDDSLAAYVAK-3+

Source : QE3\_201126\_FR\_TIOx\_hum\_tissue\_Urea\_RNAB\_H Scan : 53086

Andromeda score : 114.08

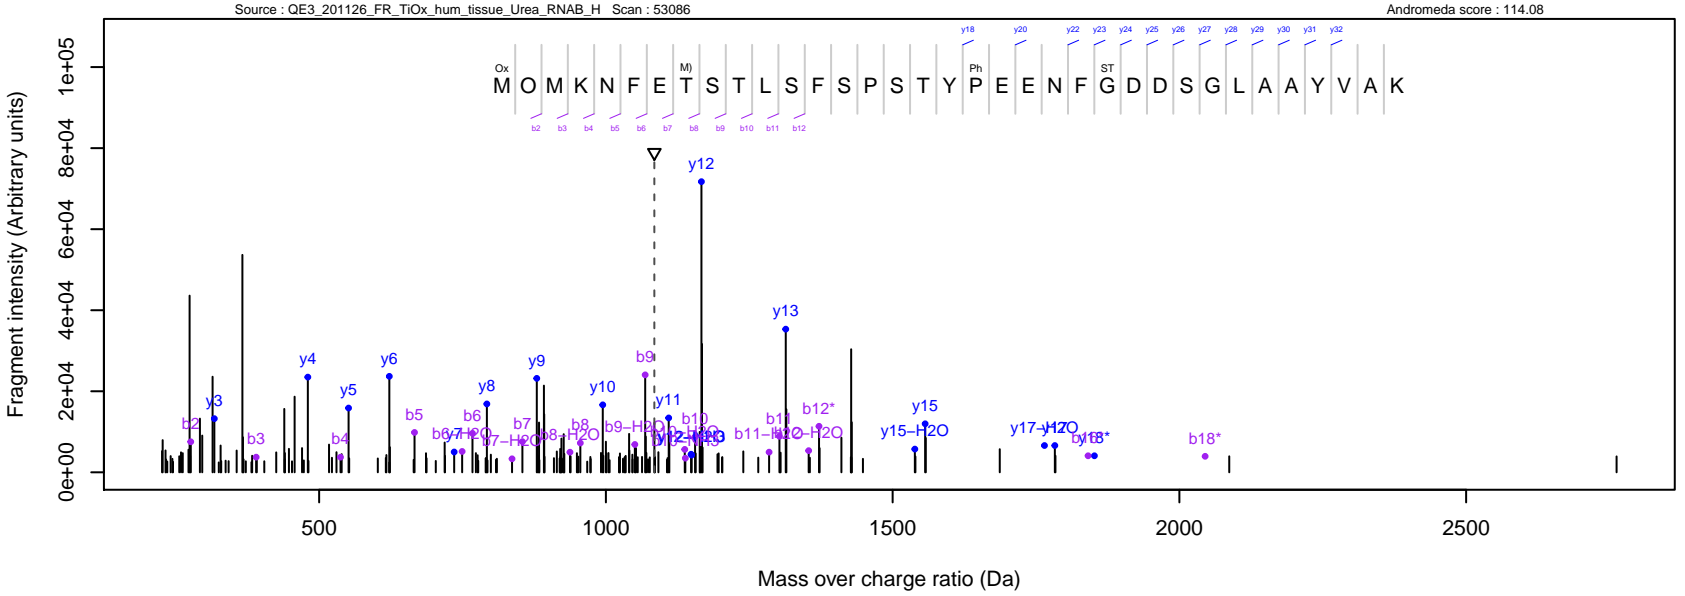

KFS(Phospho (STY))AACNFSNLVNQER-3+

Source : QE3\_201126\_FR\_TIOx\_hum\_tissue\_Urea\_RNAB\_B Scan : 40092

Andromeda score : 114.04

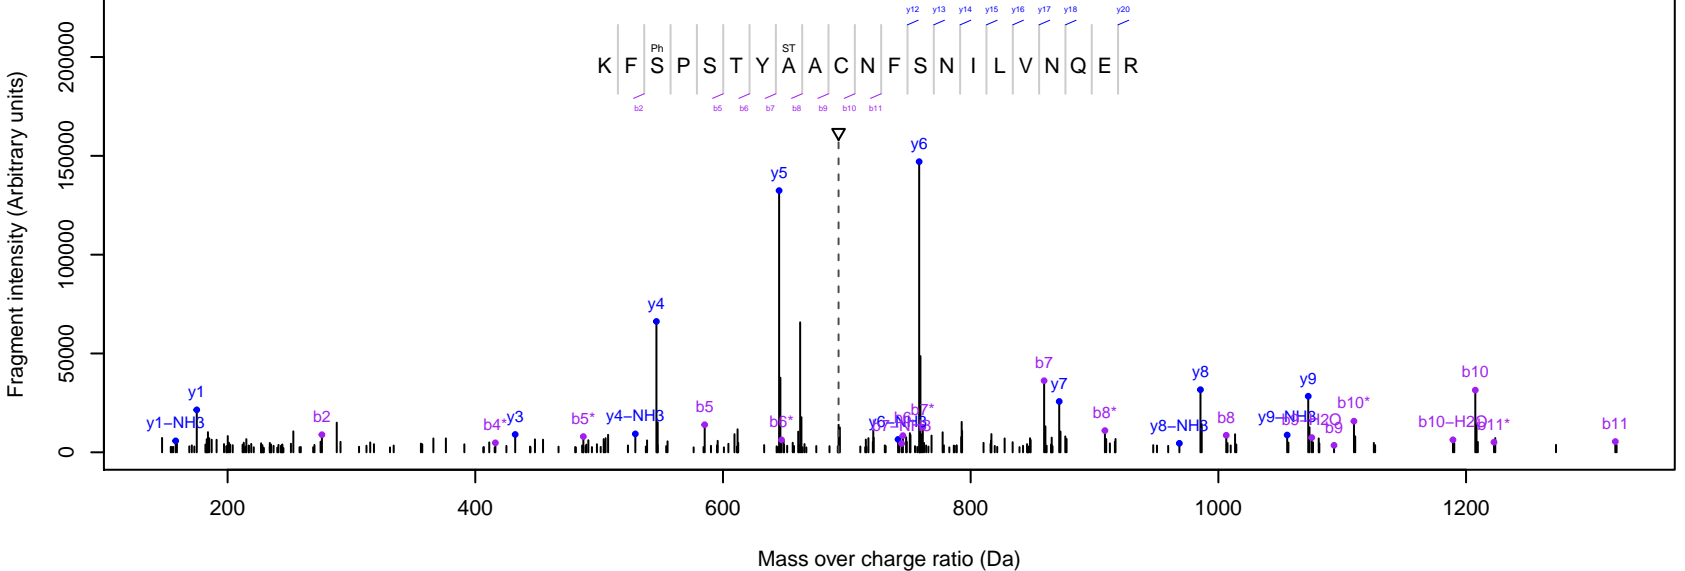

ADVQLFMDDDSYS(Phospho (STY))HHS(Phospho (STY))GLEADPEK-3+

Source : QE3\_201126\_FR\_TiOx\_hum\_tissue\_Urea\_RNAB\_N Scan : 43157

Andromeda score : 114

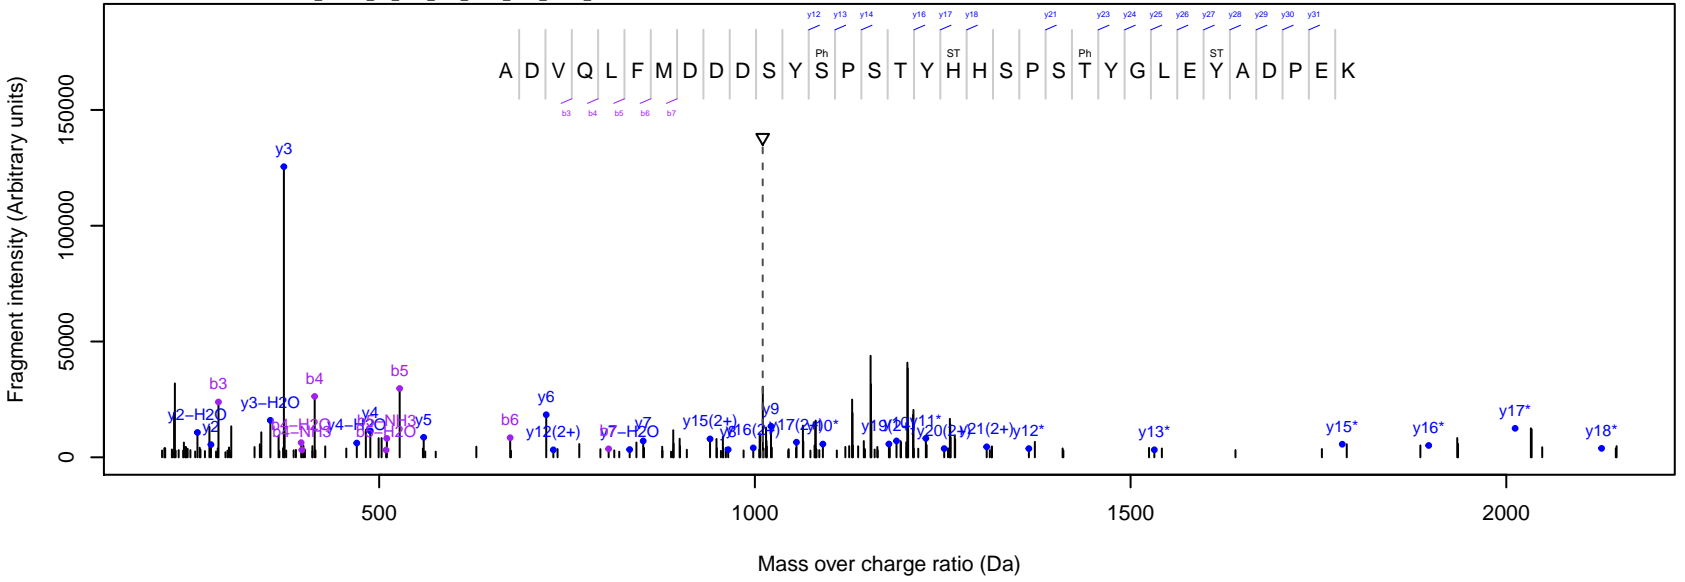

VEPPHS(Phospho (STY))SHEDLTDLSTR-3+

Source : QE3\_201126\_FR\_TiOx\_hum\_tissue\_Urea\_RNAB\_H Scan : 17211

Andromeda score : 113.99

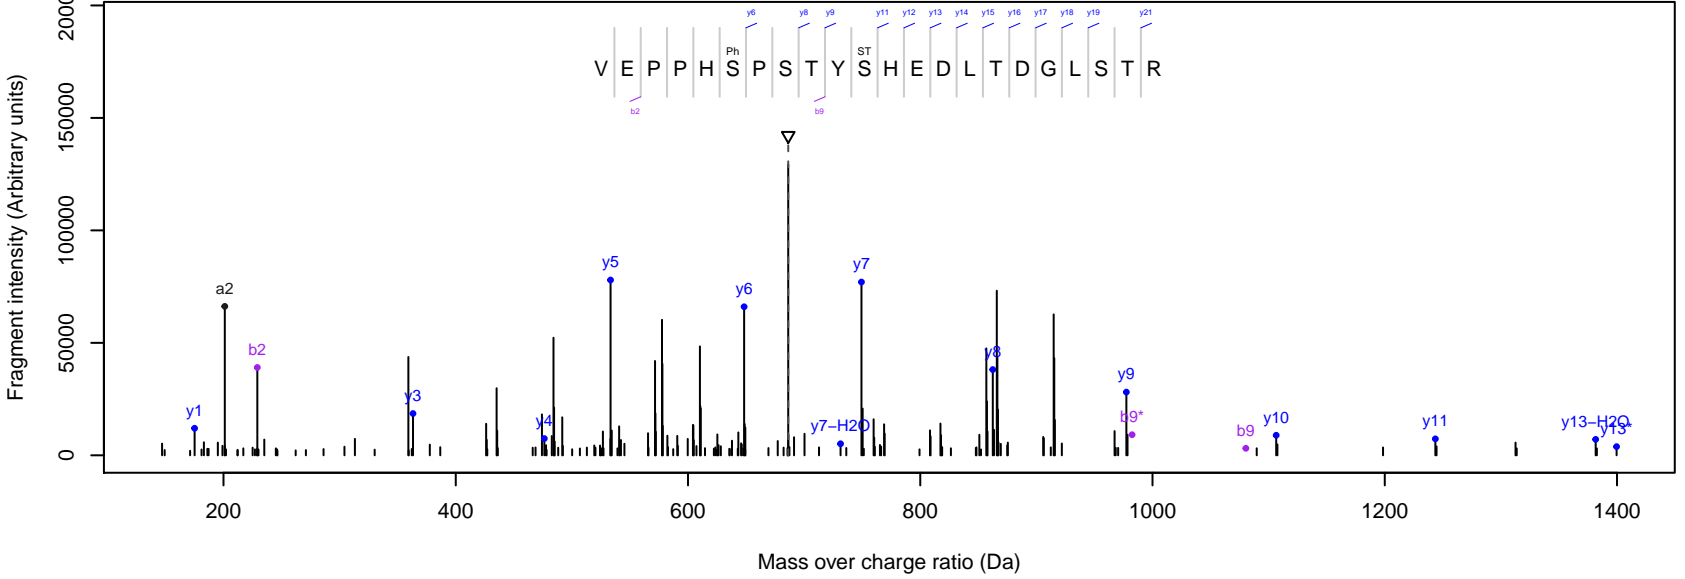

AETASQSQRS(Phospho (STY))PISDNSGCDAPGNSNPSSLVPSSEAESEK-3+

Source : QE3\_201126\_FR\_TiOx\_hum\_tissue\_Urea\_RNAB\_N Scan : 21536

Andromeda score : 113.88

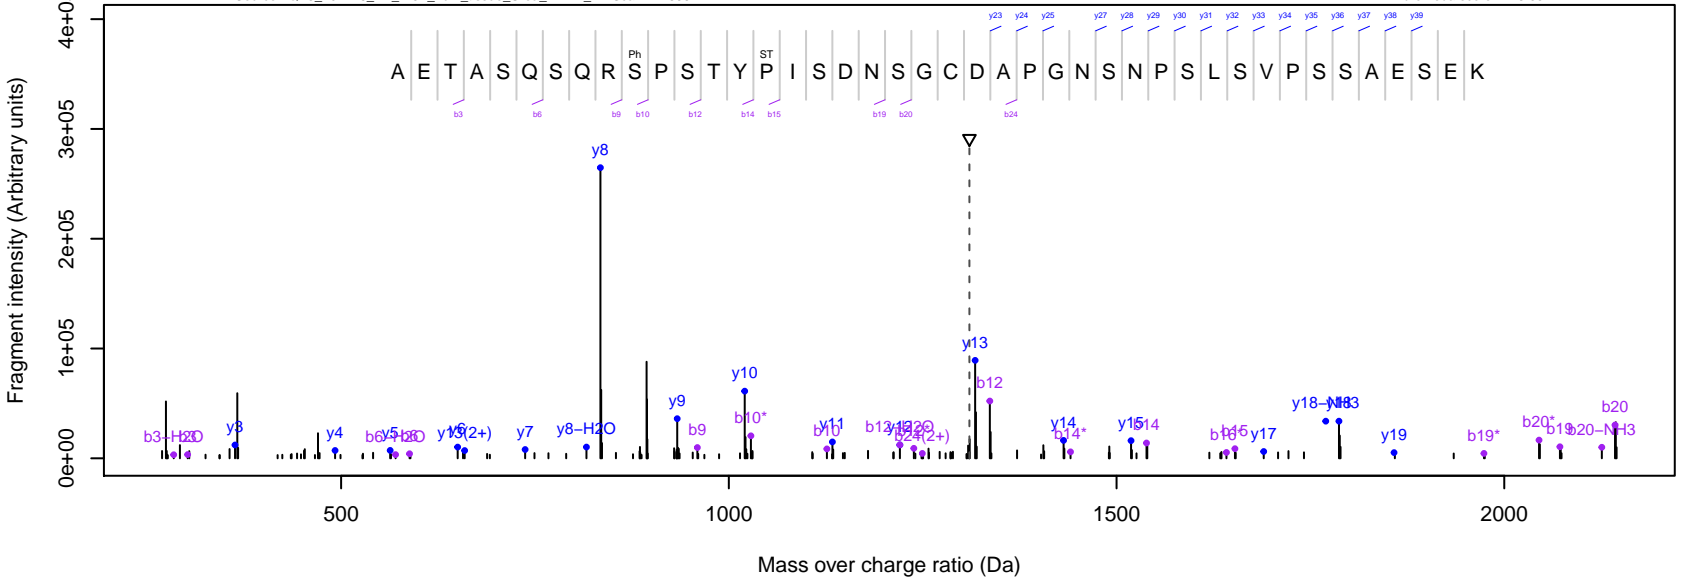

GYYPYSVSGSGSTAGSPSTYRTGSPSTYR-3+

Source : QE3\_201126\_FR\_TIOx\_hum\_tissue\_Urea\_RNAB\_N Scan : 23468

Andromeda score : 113.87

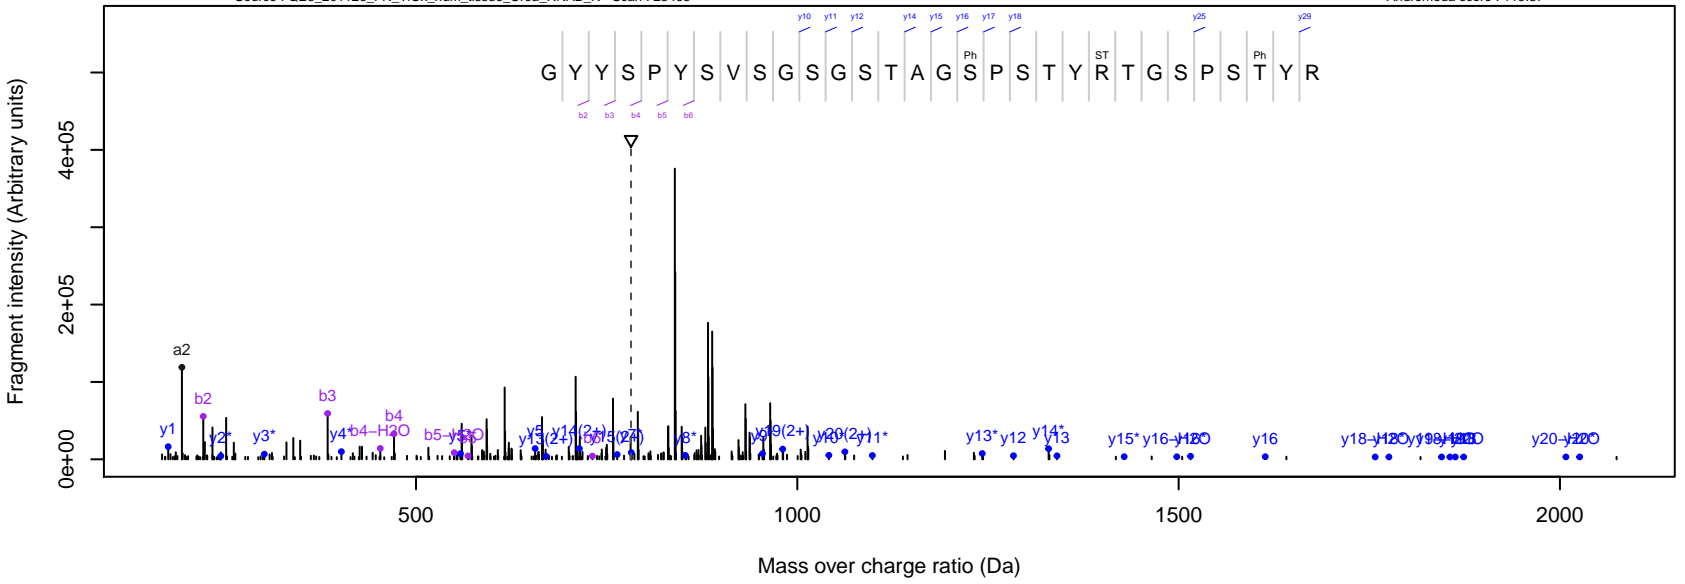

ATASGKVS(Phospho (STY))PDHLDPER-3+

Source : QE3\_201126\_FR\_TIOx\_hum\_tissue\_Urea\_RNAB\_B Scan : 10224

Andromeda score : 113.86

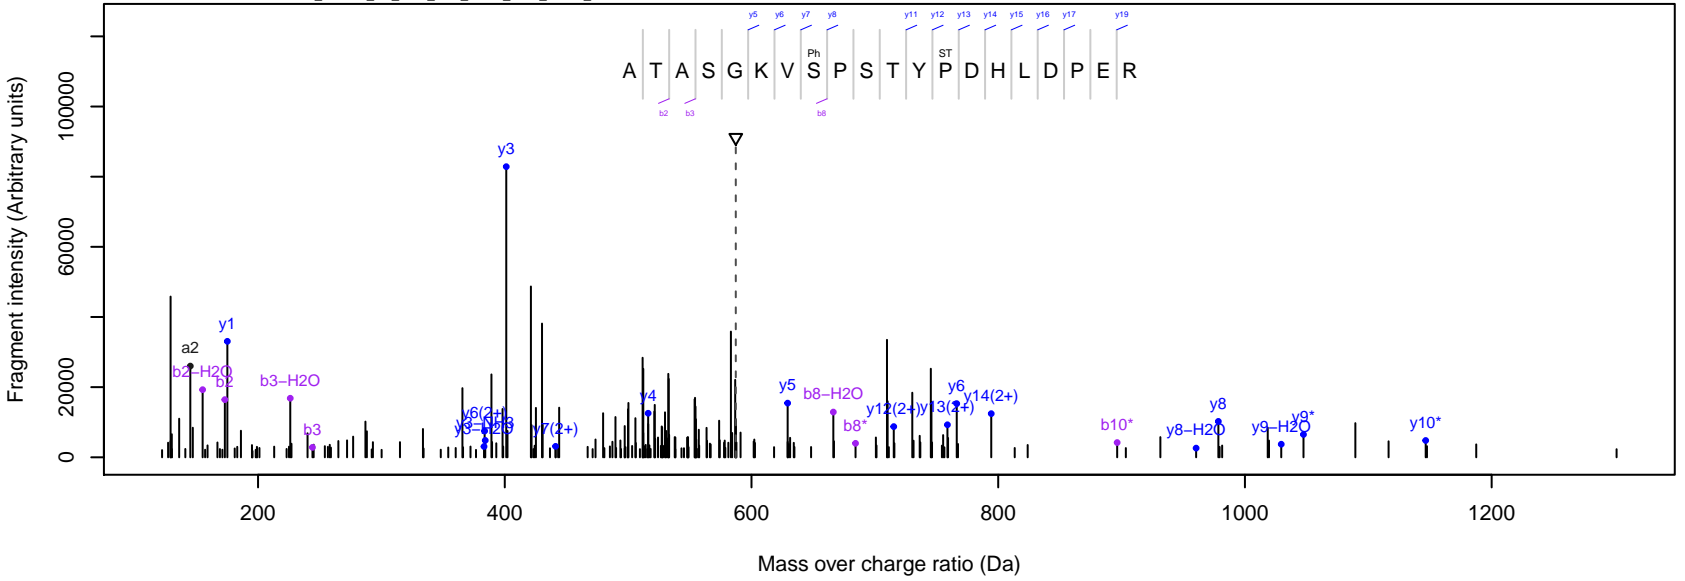

S(Phospho (STY))IAAELELADDR-2+

Source : QE3\_201126\_FR\_TIOx\_hum\_tissue\_Urea\_RNAB\_B Scan : 50760

Andromeda score : 113.76

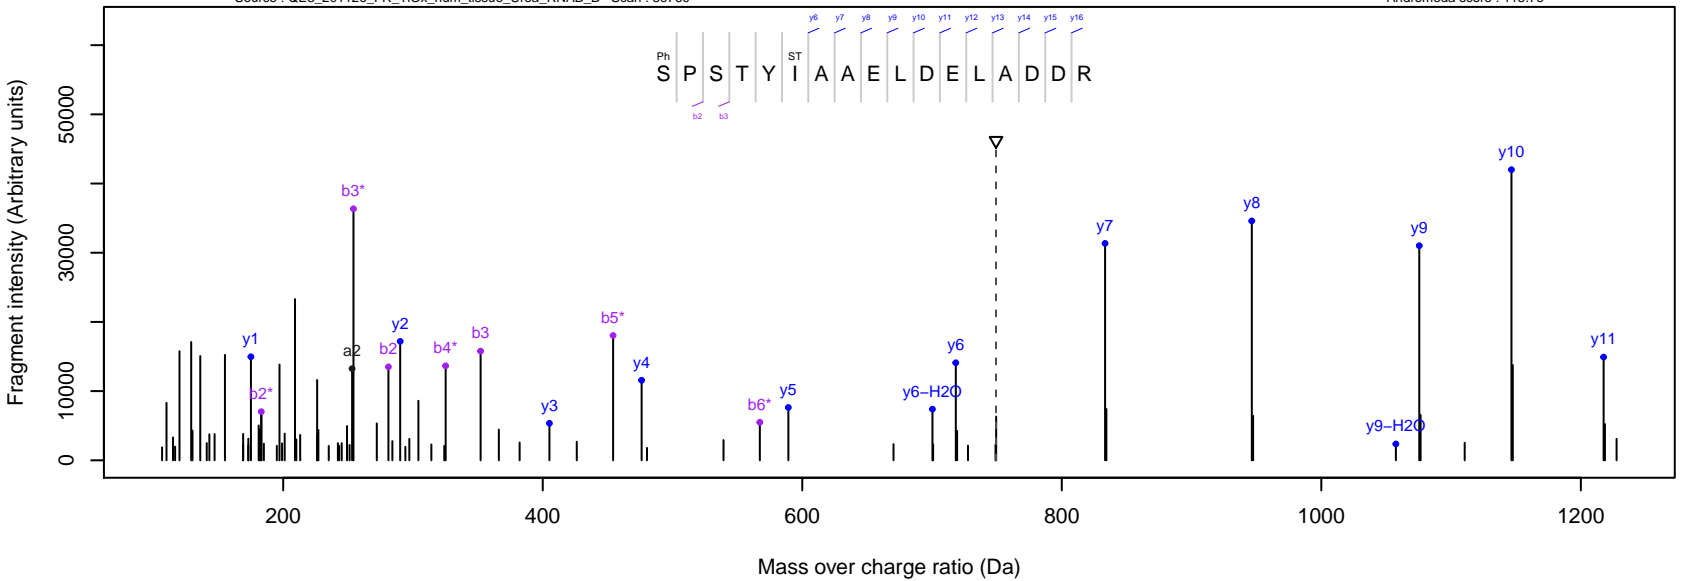

DQCCSGKGDMS(Phospho (STY))DEDDENEFFDAPEIITMPENLGHK-4+

Source : QE3\_201126\_FR\_TiOx\_hum\_tissue\_Urea\_RNAB\_B Scan : 54250

Andromeda score : 113.75

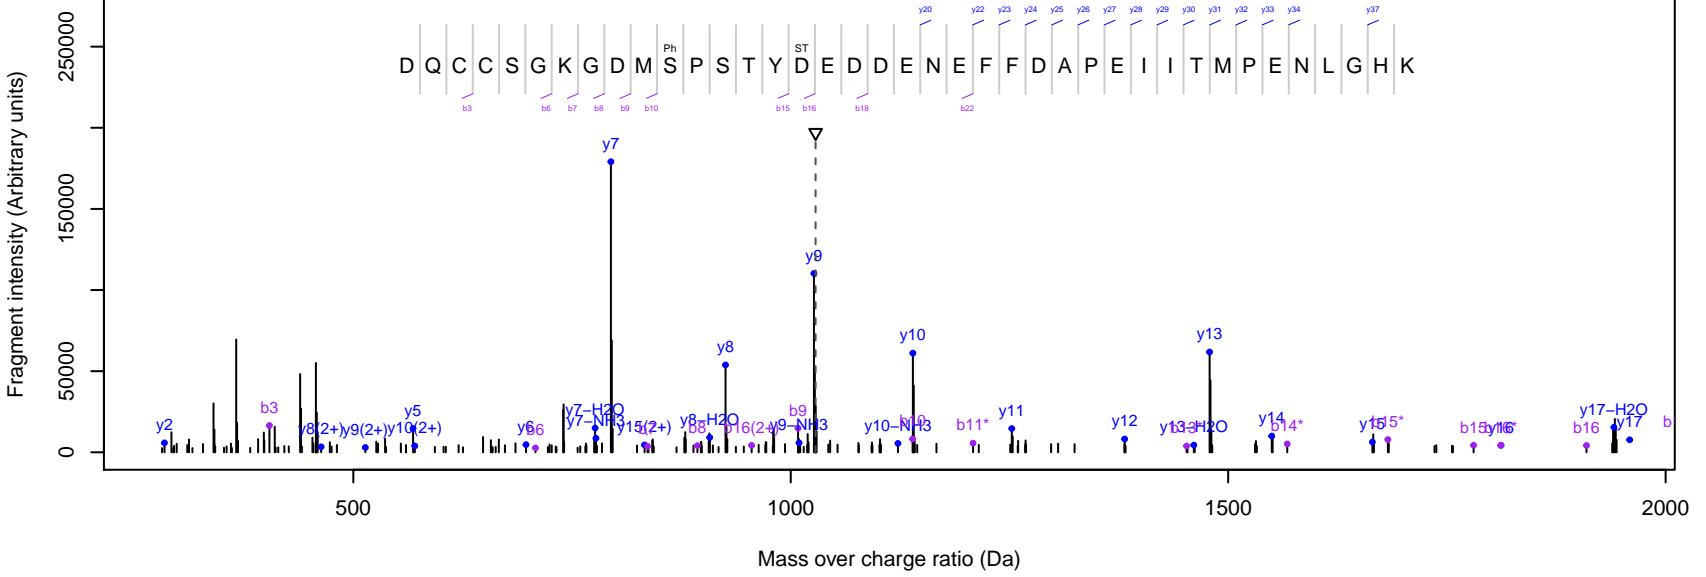

HS(Phospho (STY))FATEGAGAVENFAAR-3+

Source : QE3\_201126\_FR\_TiOx\_hum\_tissue\_Urea\_RNAB\_B Scan : 31465

Andromeda score : 113.73

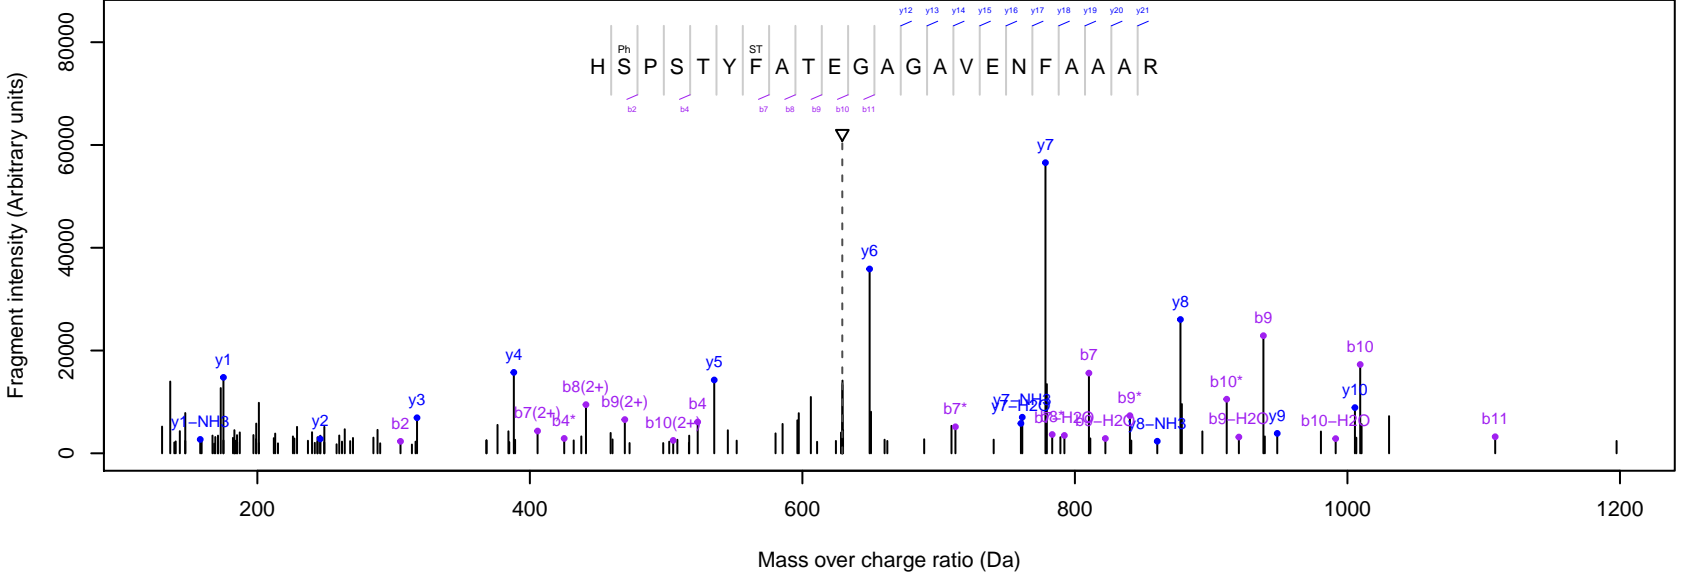

GLS(Phospho (STY))VDSAQEVKR-2+

Source : QE3\_201126\_FR\_TiOx\_hum\_tissue\_Urea\_RNAB\_N Scan : 13010

Andromeda score : 113.69

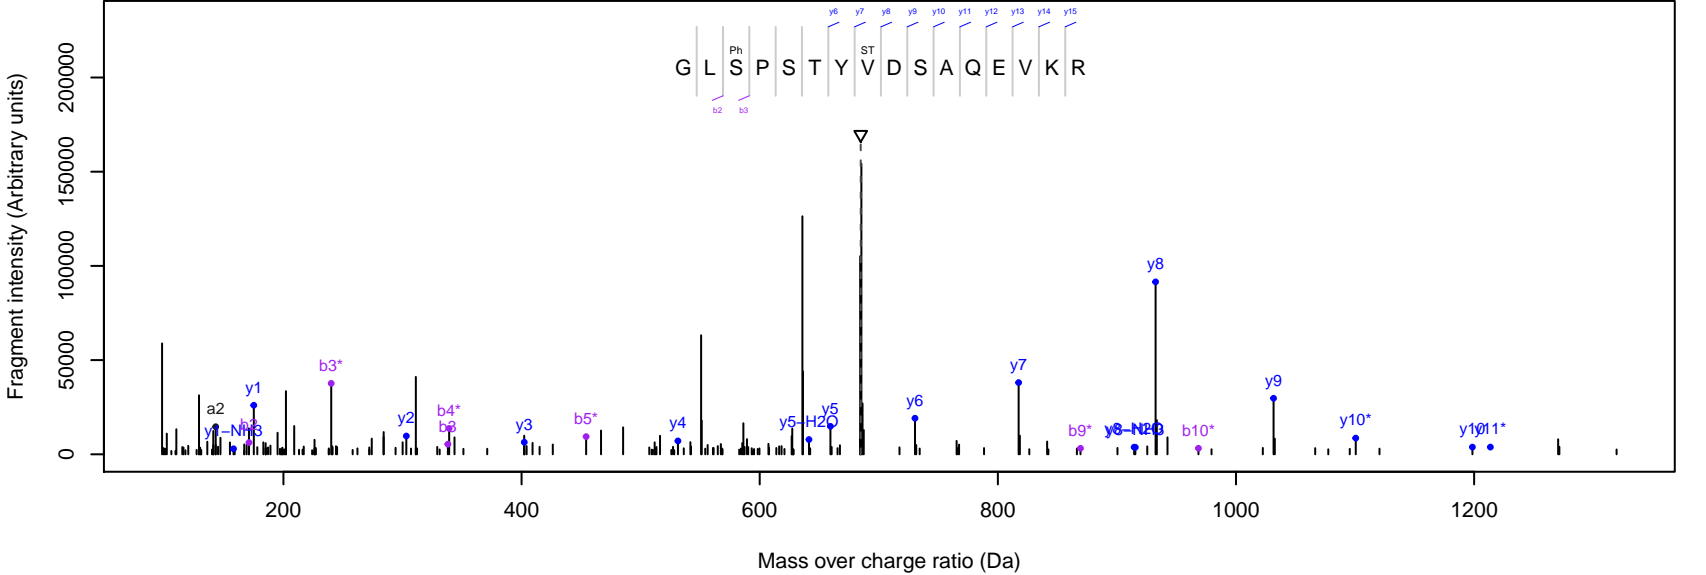



GS(Phospho (STY))LAS(Phospho (STY))LDSLRL-2+

Source : QE3\_201126\_FR\_TiOx\_hum\_tissue\_Urea\_RNAB\_N Scan : 43917

Andromeda score : 113.61

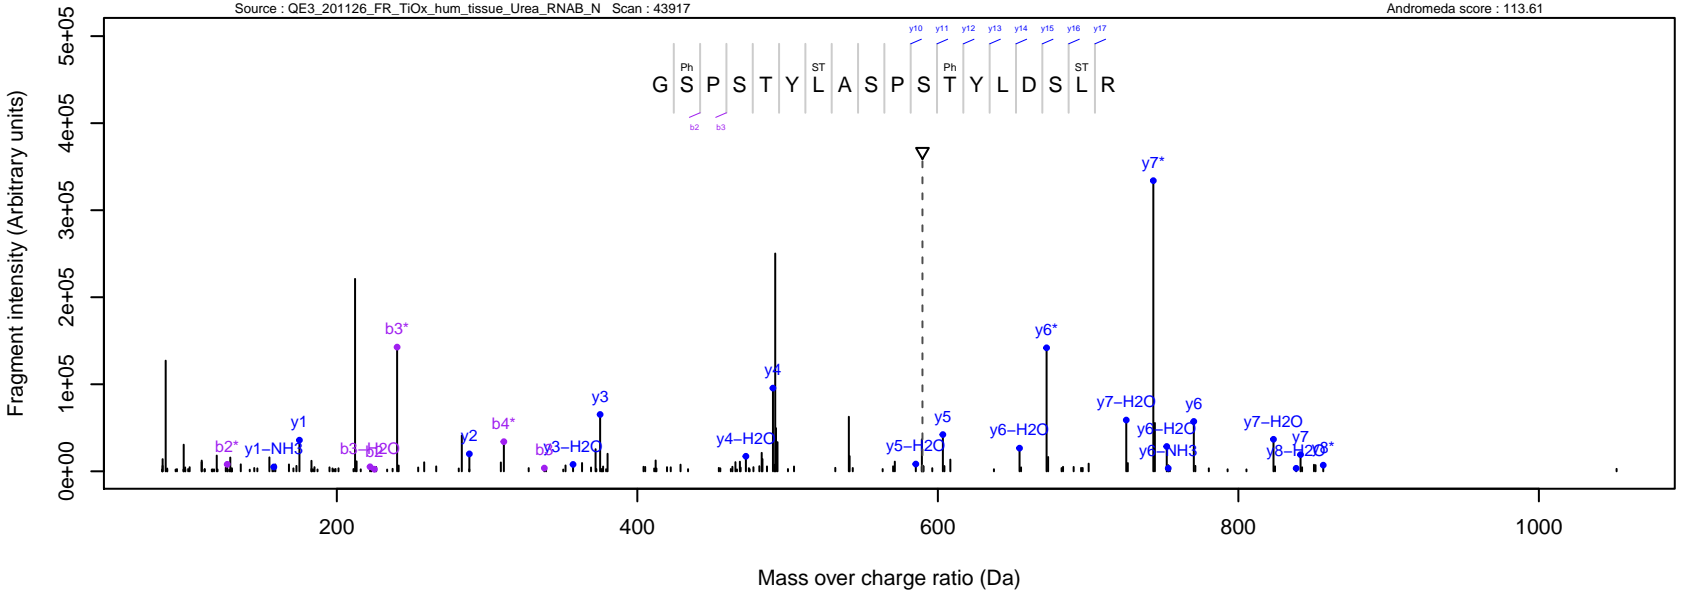

NVT(Phospho (STY))LQNIIDR-2+

Source : QE3\_201126\_FR\_TiOx\_hum\_tissue\_Urea\_RNAB\_H Scan : 37850

Andromeda score : 113.61

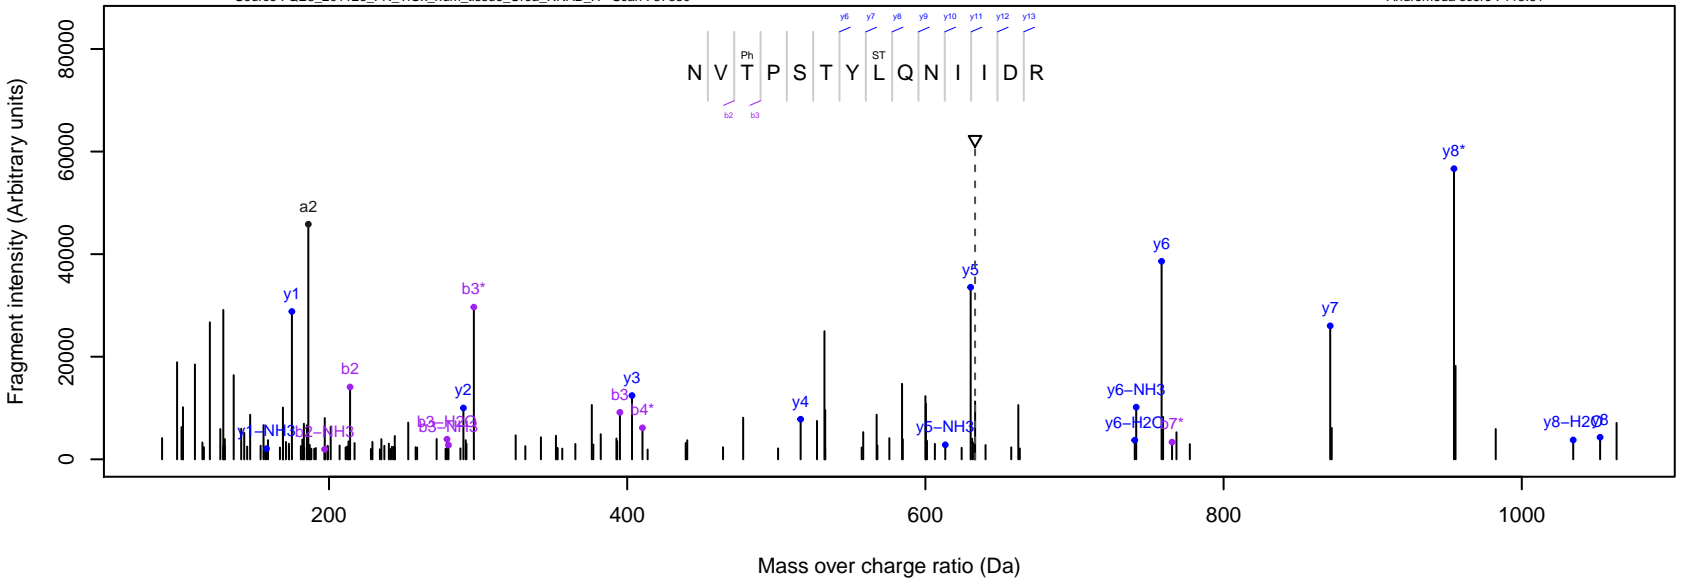

VAGQDGS(Phospho (STY))VVQFK-2+

Source : QE3\_201126\_FR\_TiOx\_hum\_tissue\_Urea\_RNAB\_N Scan : 21500

Andromeda score : 113.54

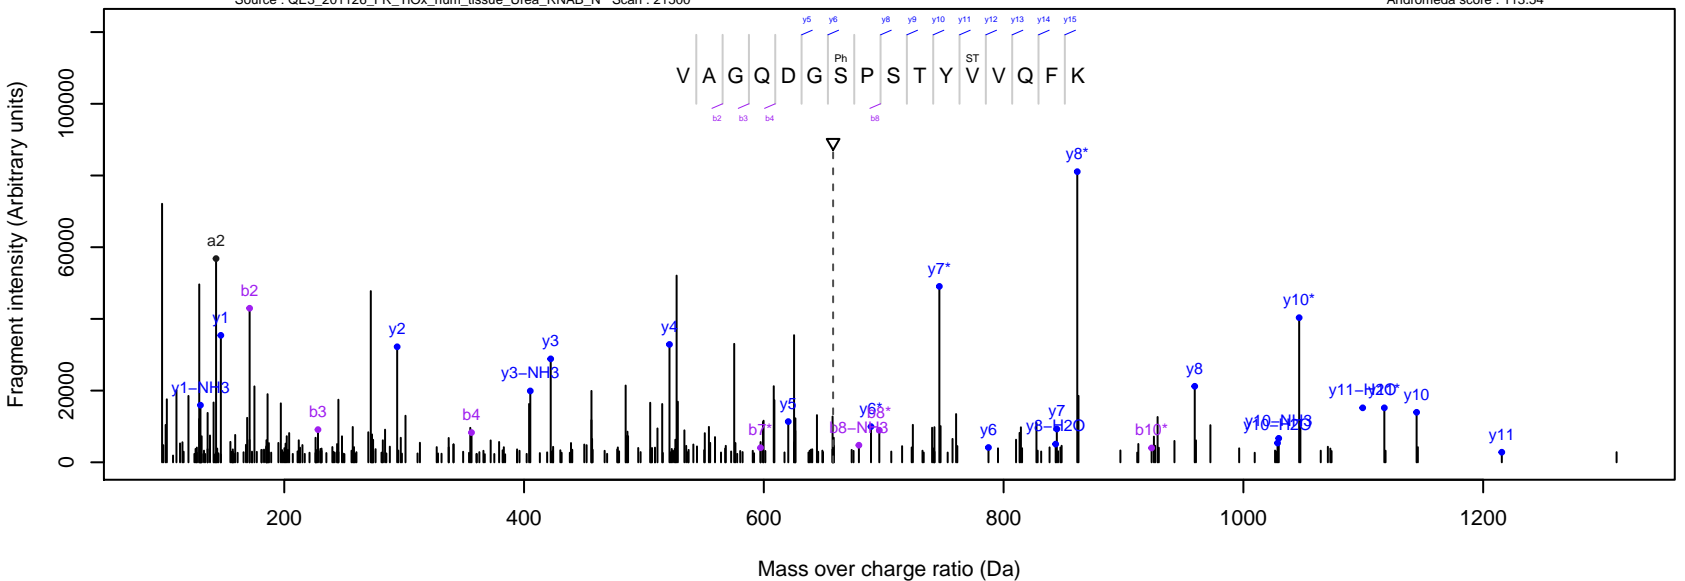

S(Phospho (STY))SIHNF(M)THPEFR-3+

Source : QE3\_201126\_FR\_TiOx\_hum\_tissue\_Urea\_RNAB\_H Scan : 15950

Andromeda score : 113.52

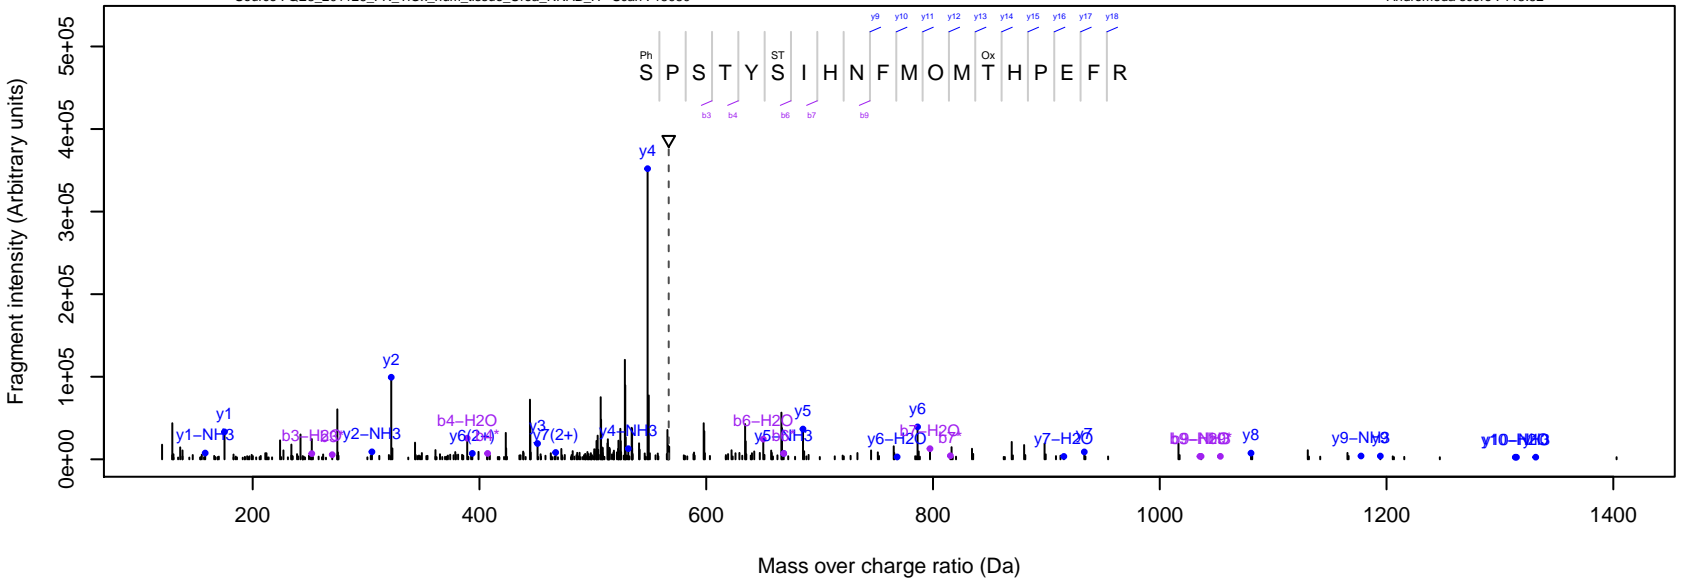

KVLS(Phospho (STY))PTAAKPSPFEGK-3+

Source : QE3\_201126\_FR\_TiOx\_hum\_tissue\_Urea\_RNAB\_N Scan : 15311

Andromeda score : 113.51

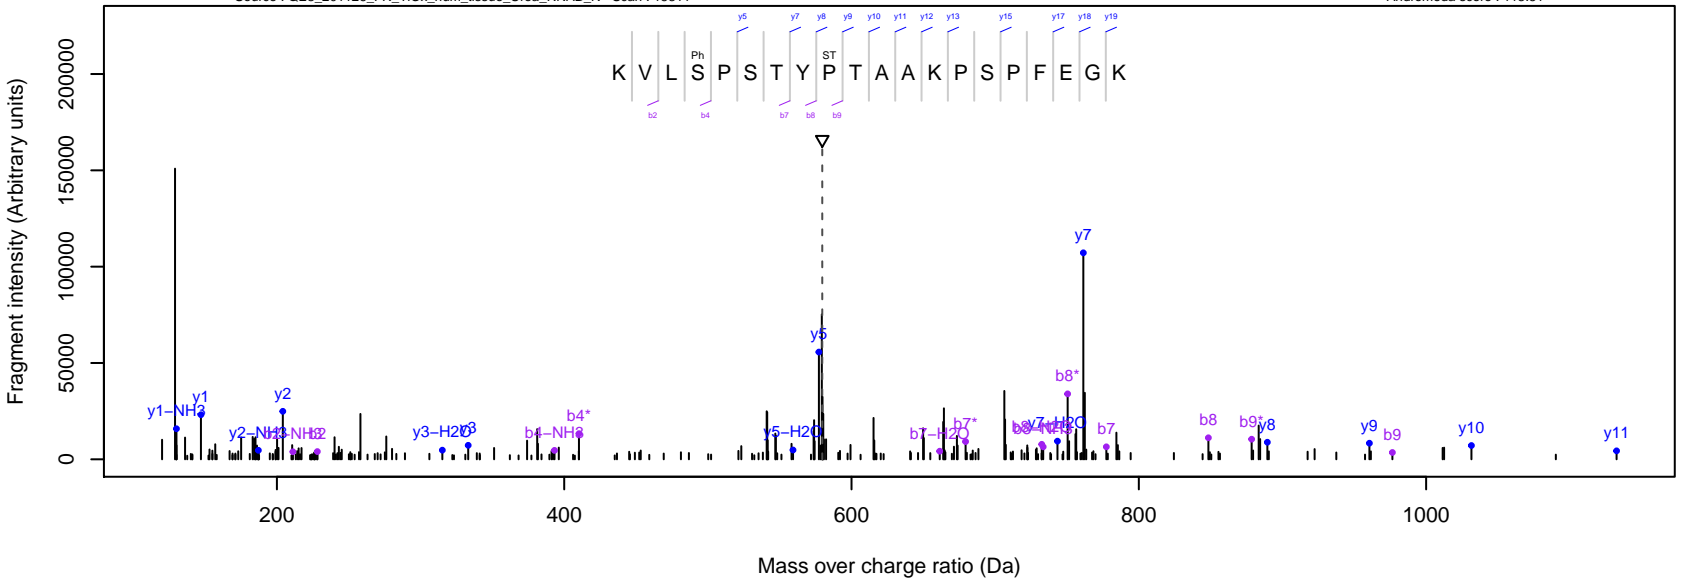

SLEQYDQVLDGAGAS(Phospho (STY))LTDLANLSEGVSLAER-3+

Source : QE3\_201126\_FR\_TiOx\_hum\_tissue\_Urea\_RNAB\_B Scan : 57563

Andromeda score : 113.51

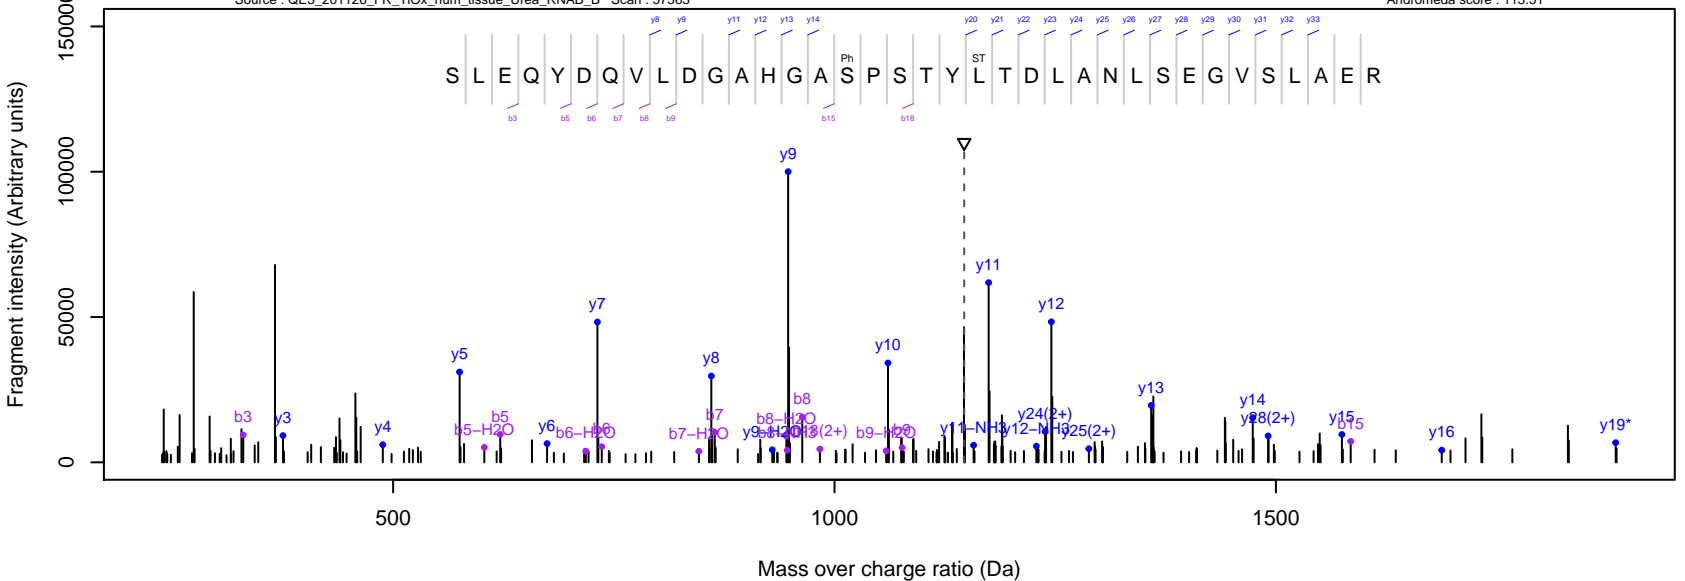

DVKGS(Phospho (STY))YVSIHSSGFR-3+

Source : QE3\_201126\_FR\_TIOx\_hum\_tissue\_Urea\_RNAB\_H Scan : 19074

Andromeda score : 113.47

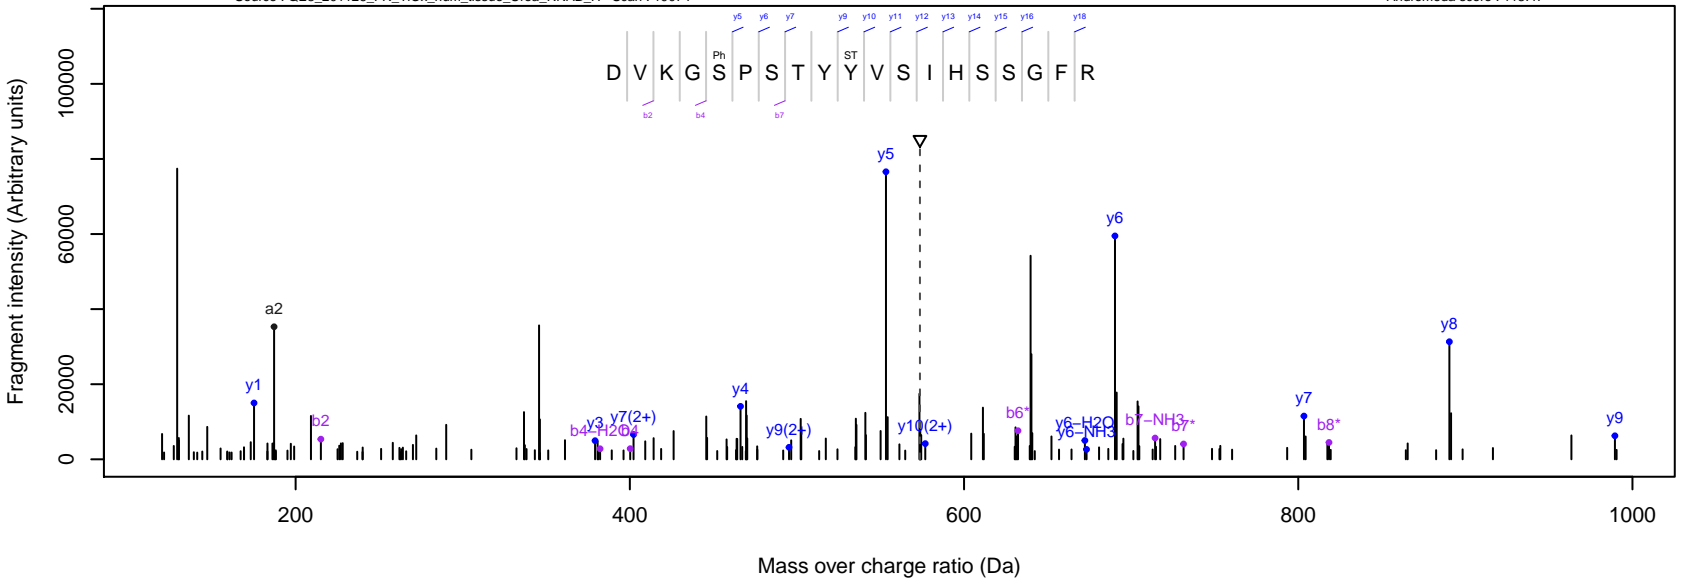

GAAAADLLSSS(Phospho (STY))PESQHGGTQSPGGGQLLPQTKVDAAEGR-4+

Source : QE3\_201126\_FR\_TIOx\_hum\_tissue\_Urea\_RNAB\_H Scan : 31550

Andromeda score : 113.47

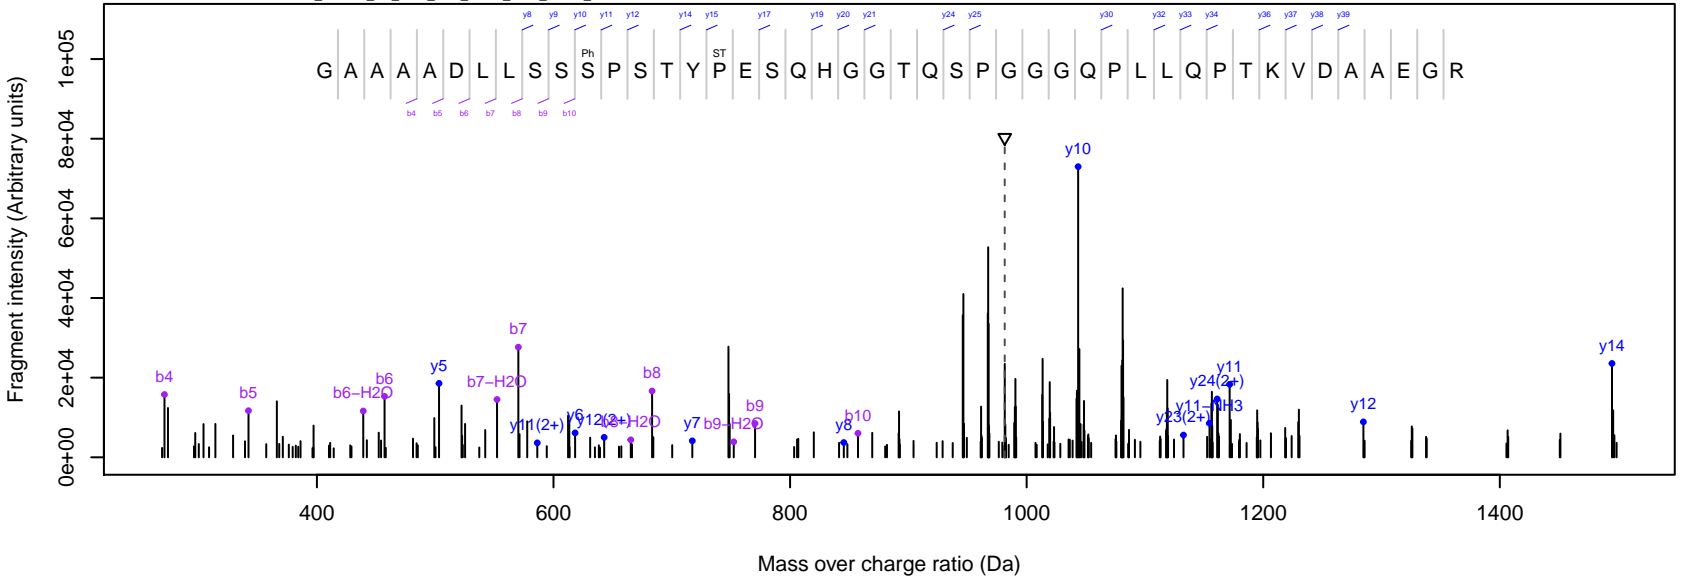

IGELGAPEVWGLS(Phospho (STY))PK-2+

Source : QE3\_201126\_FR\_TIOx\_hum\_tissue\_Urea\_RNAB\_H Scan : 52387

Andromeda score : 113.47

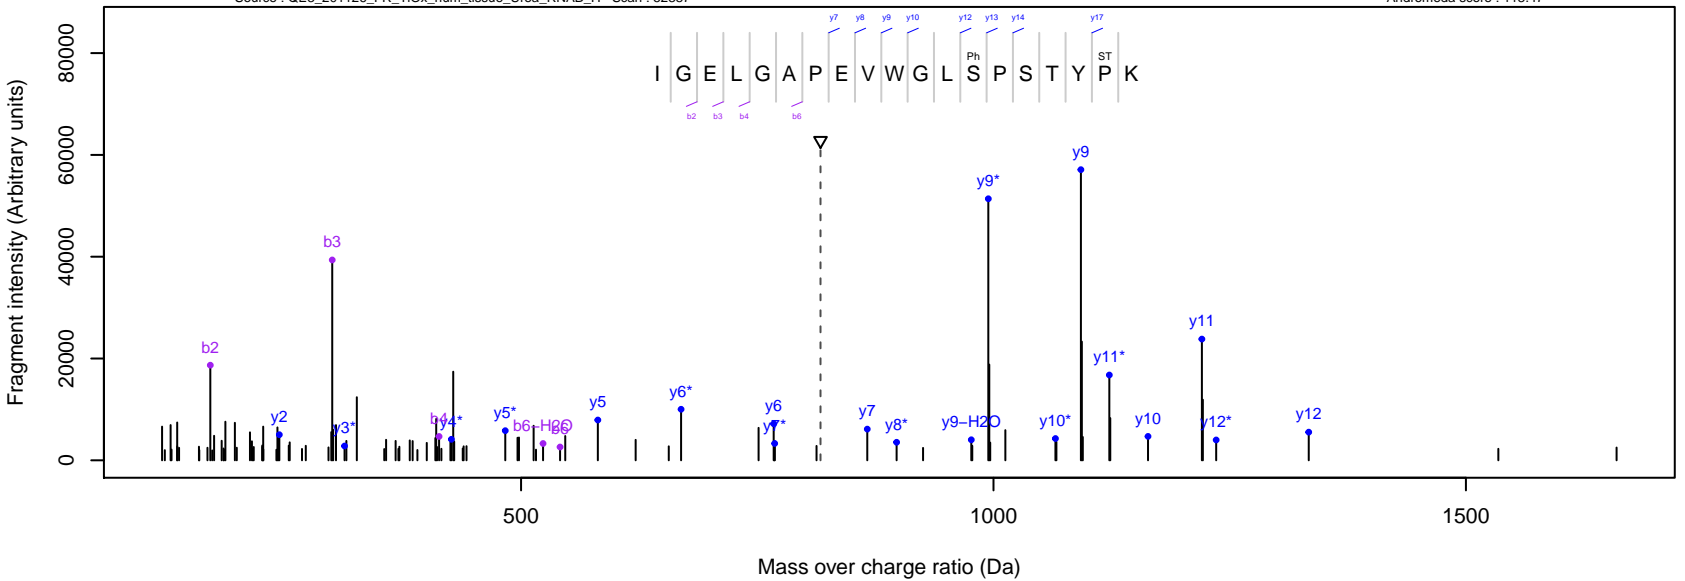



RLNECIS(Phospho (STY))PVANEMNHLPAHSHDLQR-4+

Source : QE3\_201126\_FR\_TIOx\_hum\_tissue\_Urea\_RNAB\_N Scan : 24127

Andromeda score : 113.37

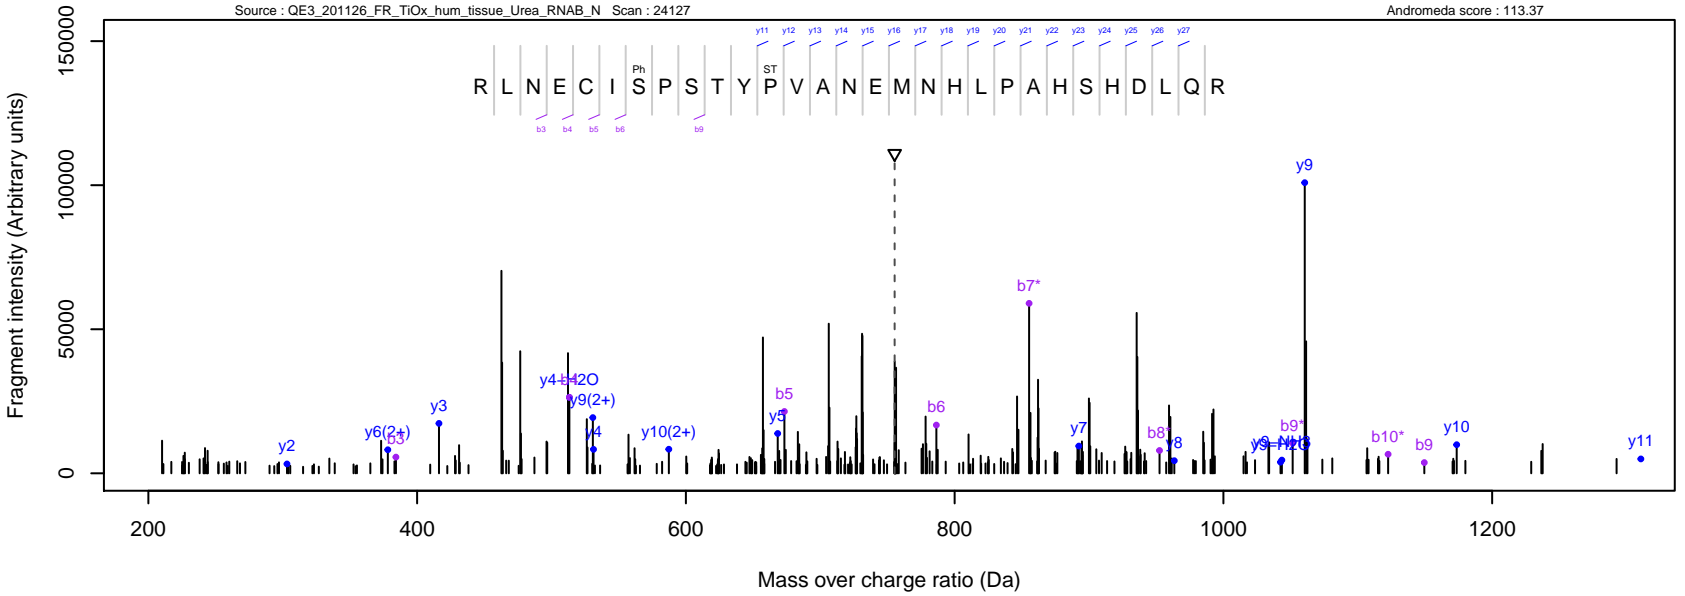

SKLS(Phospho (STY))PS(Phospho (STY))PSLR-2+

Source : QE3\_201126\_FR\_TIOx\_hum\_tissue\_Urea\_RNAB\_B Scan : 14612

Andromeda score : 113.34

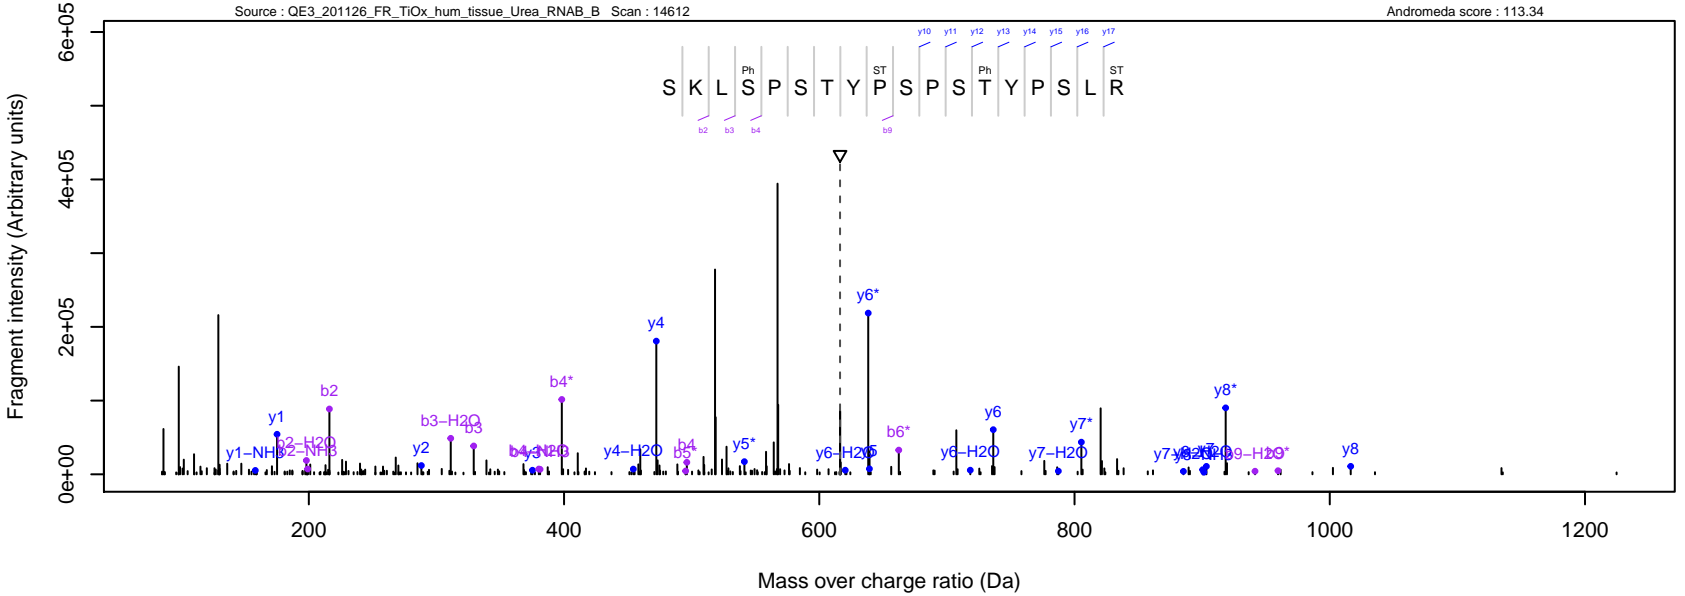

IISNASCT(Phospho (STY))TNCLAPLAK-2+

Source : QE3\_201126\_FR\_TIOx\_hum\_tissue\_Urea\_RNAB\_B Scan : 30306

Andromeda score : 113.33

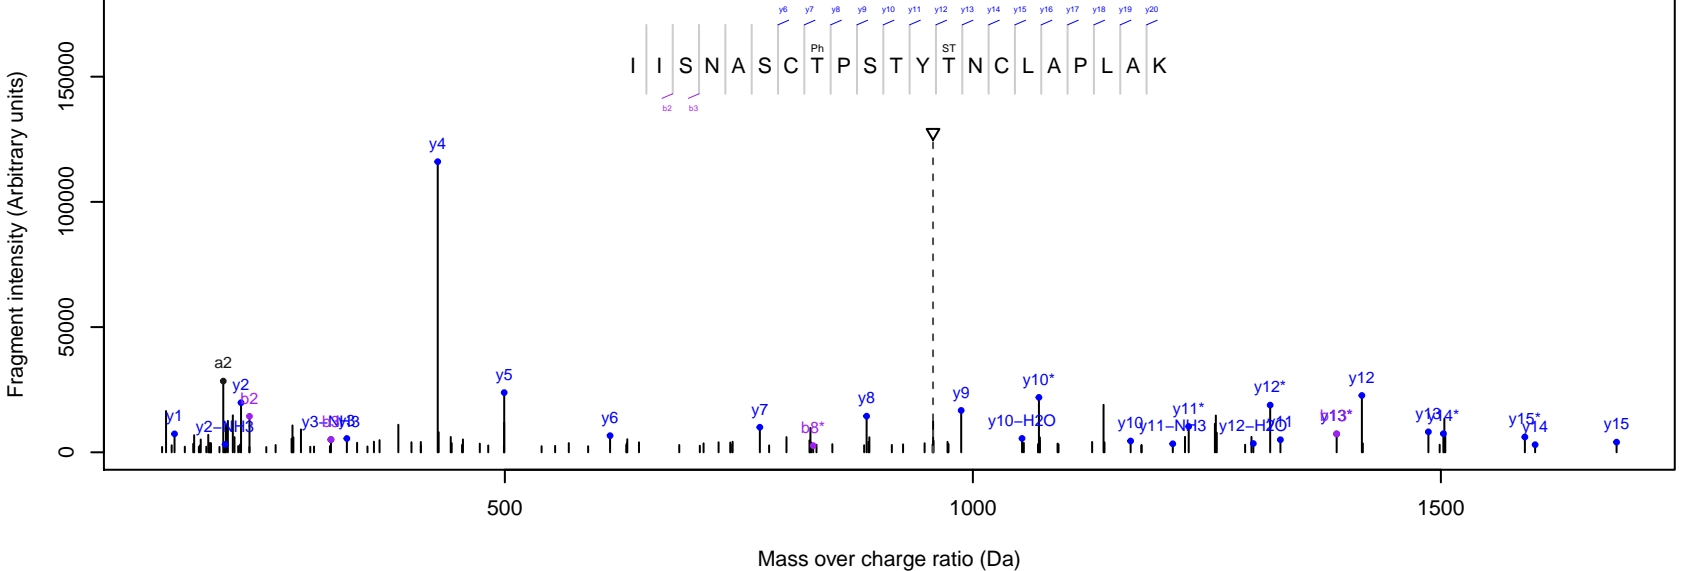

IYLEENPEKSETIQD TDTQS(Phospho (STY))LVGSPSTR-3+

Source : QE3\_201126\_FR\_TiOx\_hum\_tissue\_Urea\_RNAB\_H Scan : 32916

Andromeda score : 113.33

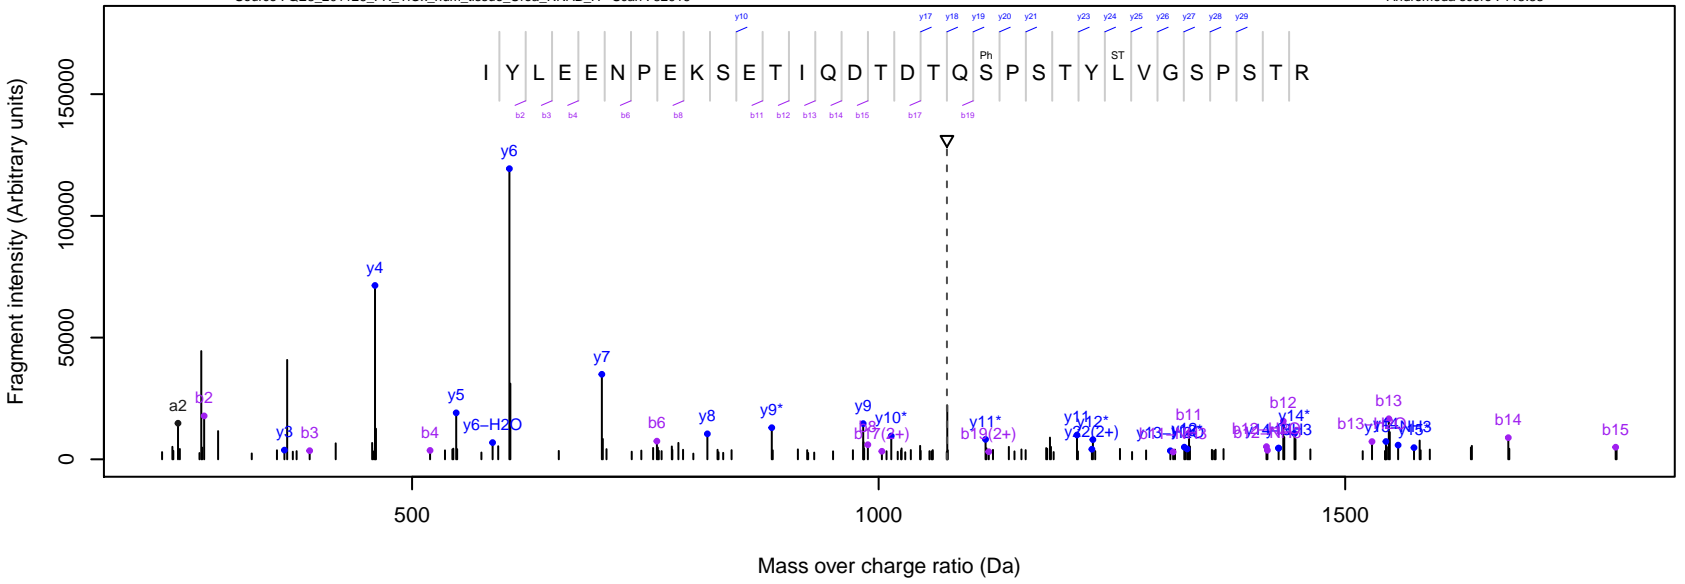

KRS(Phospho (STY))SITEPEGPNQK-3+

Source : QE3\_201126\_FR\_TiOx\_hum\_tissue\_Urea\_RNAB\_N Scan : 10602

Andromeda score : 113.33

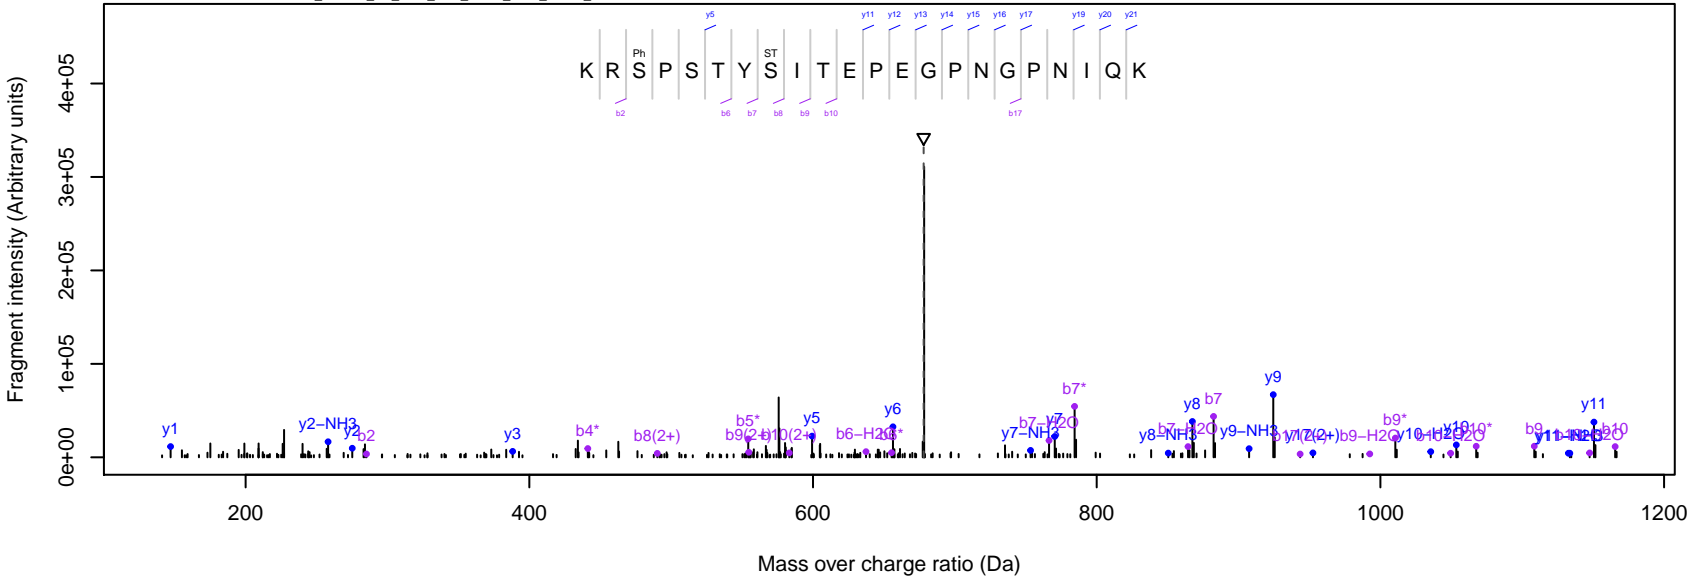

SIDDEITEAKS(Phospho (STY))GTAT(Phospho (STY))PQR-3+

Source : QE3\_201126\_FR\_TiOx\_hum\_tissue\_Urea\_RNAB\_H Scan : 21207

Andromeda score : 113.31

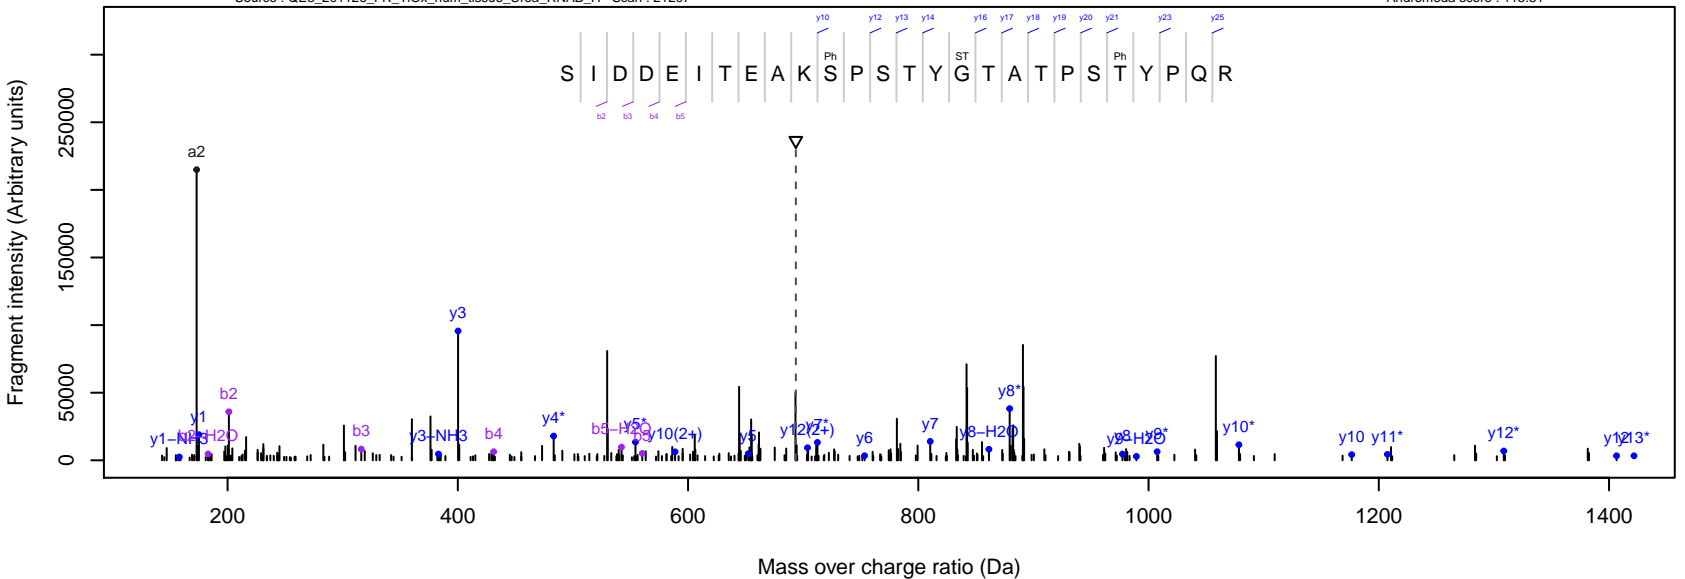

AAS(Phospho (STY))PPASADLIEQQQR-3+

Source : QE3\_201126\_FR\_TiOx\_hum\_tissue\_Urea\_RNAB\_H Scan : 21918

Andromeda score : 113.29

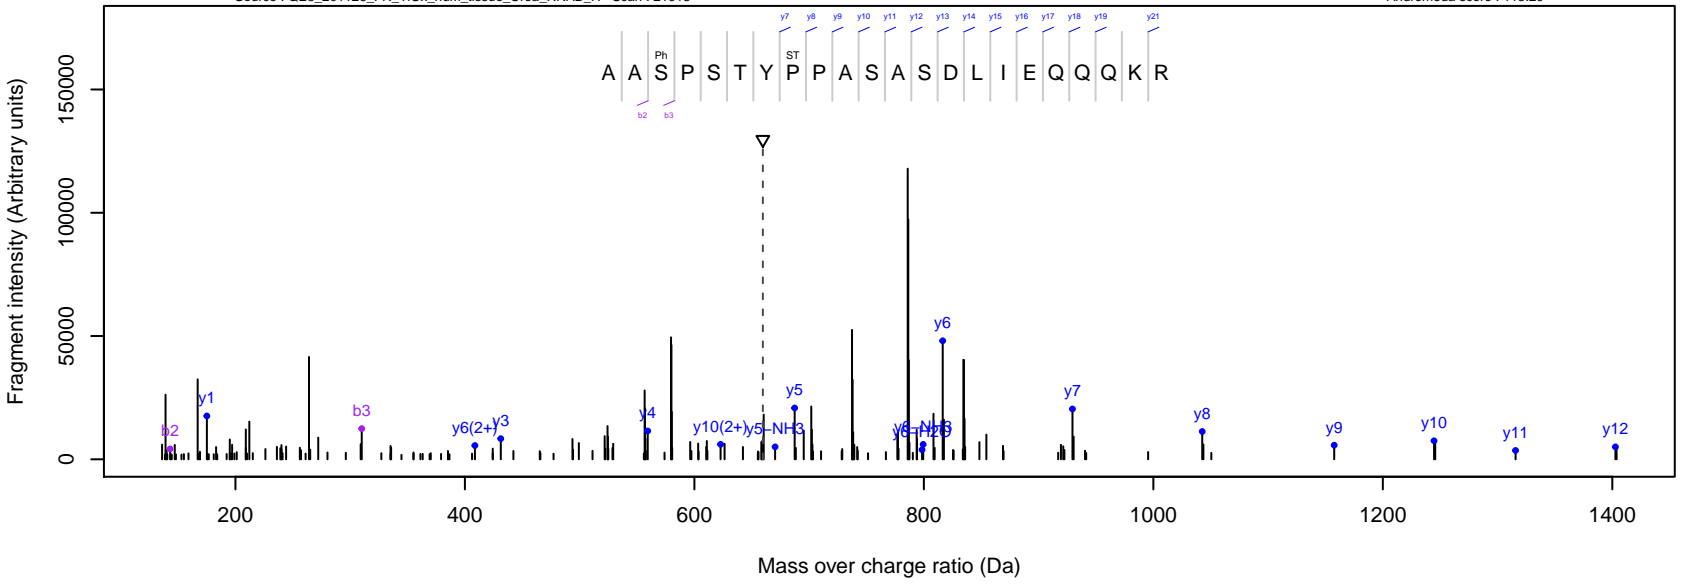

FDQLFDES(Phospho (STY))DPFEVLK-2+

Source : QE3\_201126\_FR\_TiOx\_hum\_tissue\_Urea\_RNAB\_B Scan : 61469

Andromeda score : 113.29

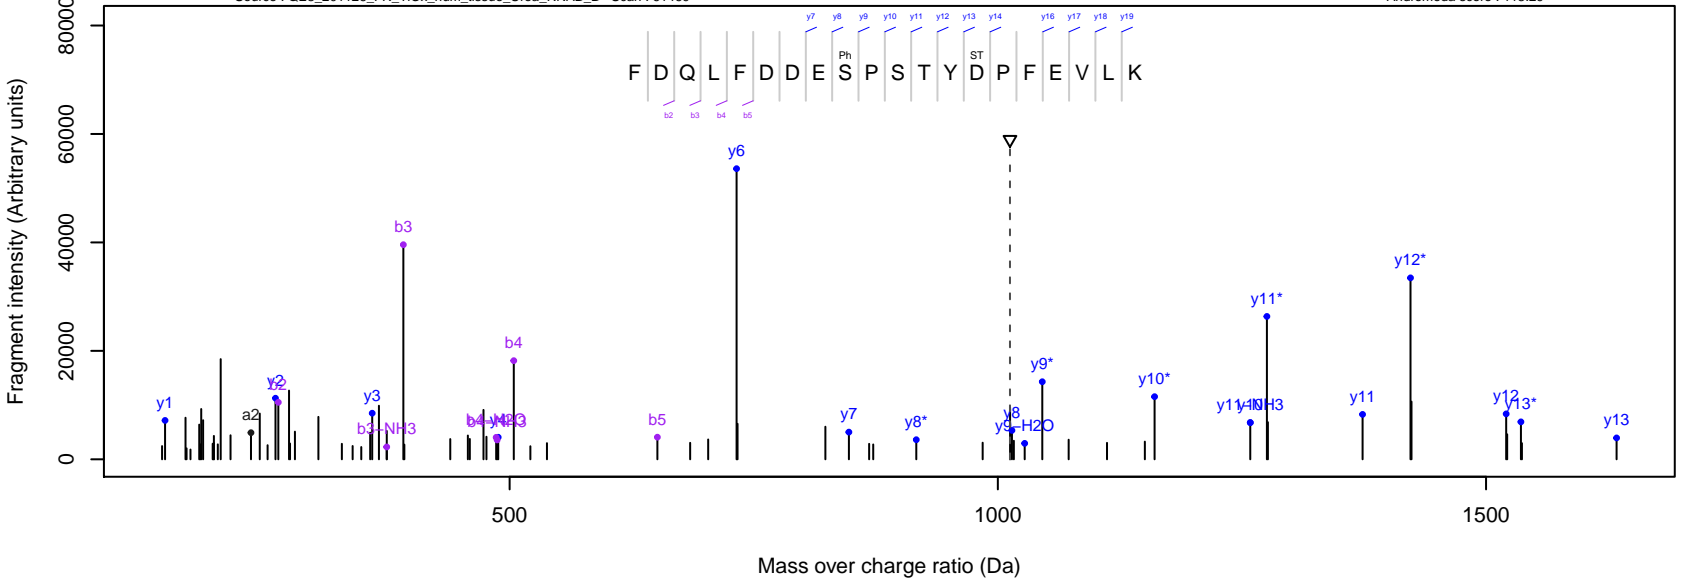

AGS(Phospho (STY))ISTLSDLDFAR-2+

Source : QE3\_201126\_FR\_TiOx\_hum\_tissue\_Urea\_RNAB\_H Scan : 48125

Andromeda score : 113.25

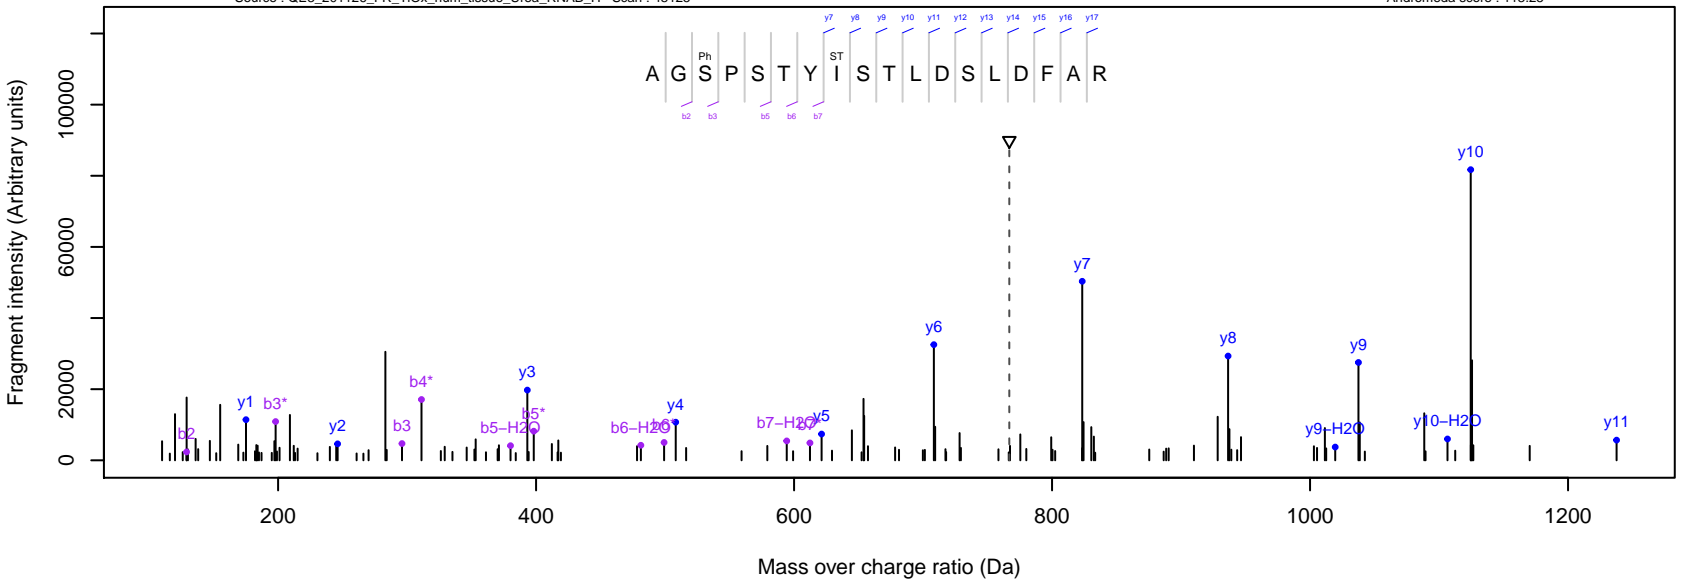

SPS(Phospho (STY))LGSDLTFATR-2+

Source : QE3\_201126\_FR\_TiOx\_hum\_tissue\_Urea\_RNAB\_N Scan : 40963

Andromeda score : 113.25

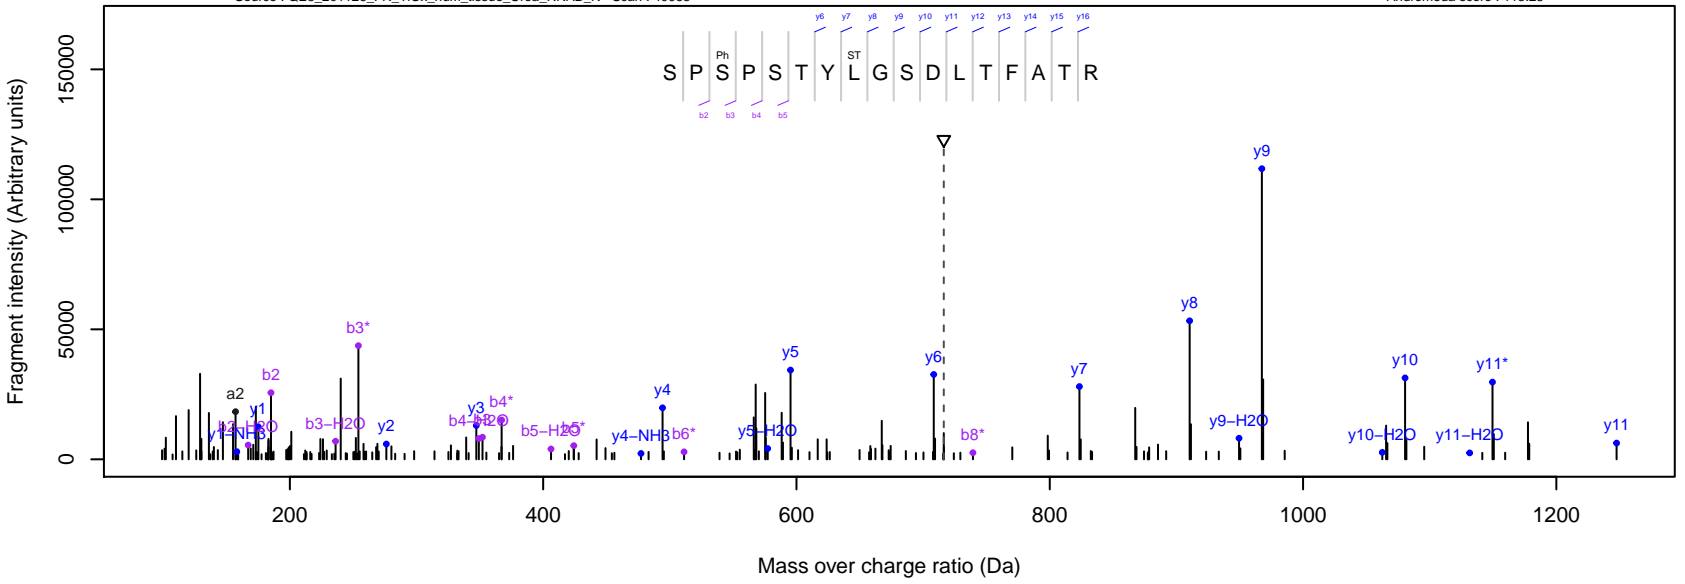

S(Phospho (STY))SPVEFECINEK-2+

Source : QE3\_201126\_FR\_TiOx\_hum\_tissue\_Urea\_RNAB\_N Scan : 27040

Andromeda score : 113.24

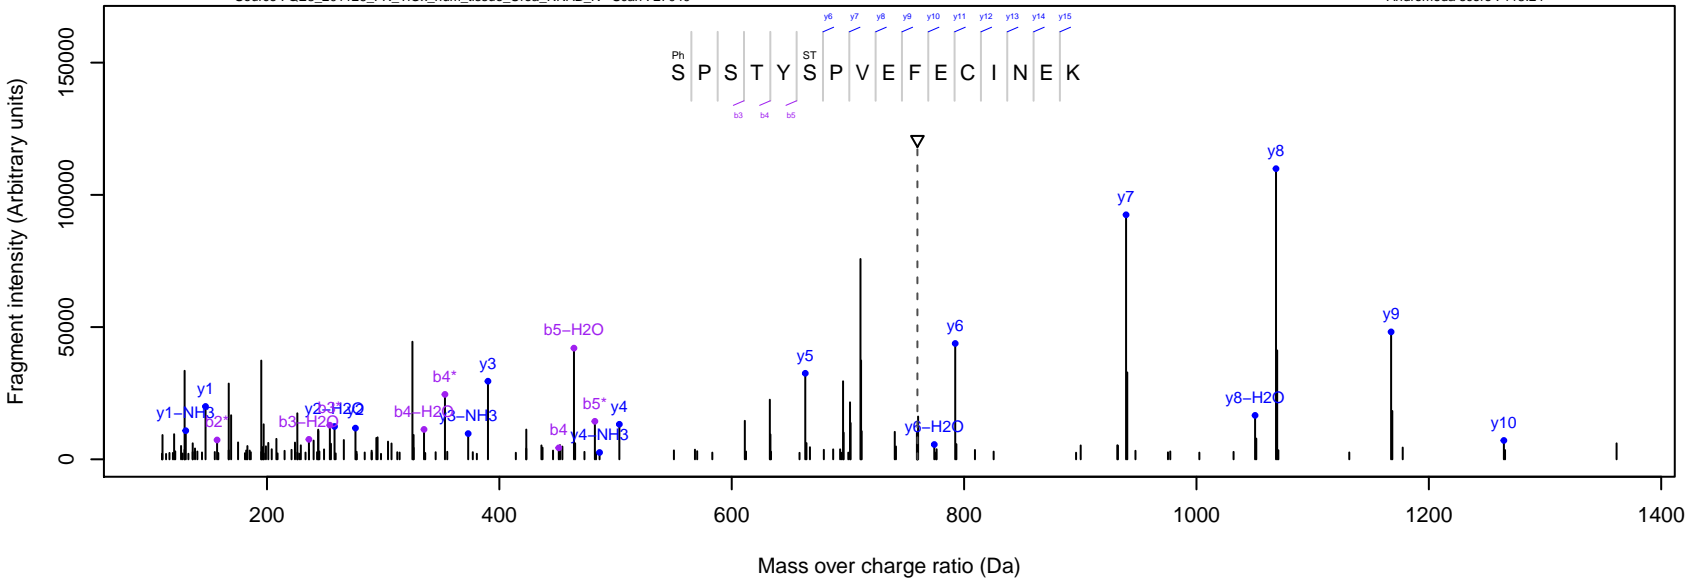

KLSSNC SGVEGDV T P S T Y D E D E G A E M O M S Q R

Source : QE3\_201126\_FR\_TiOx\_hum\_tissue\_Urea\_RNAB\_H Scan : 14760

Andromeda score : 113.17

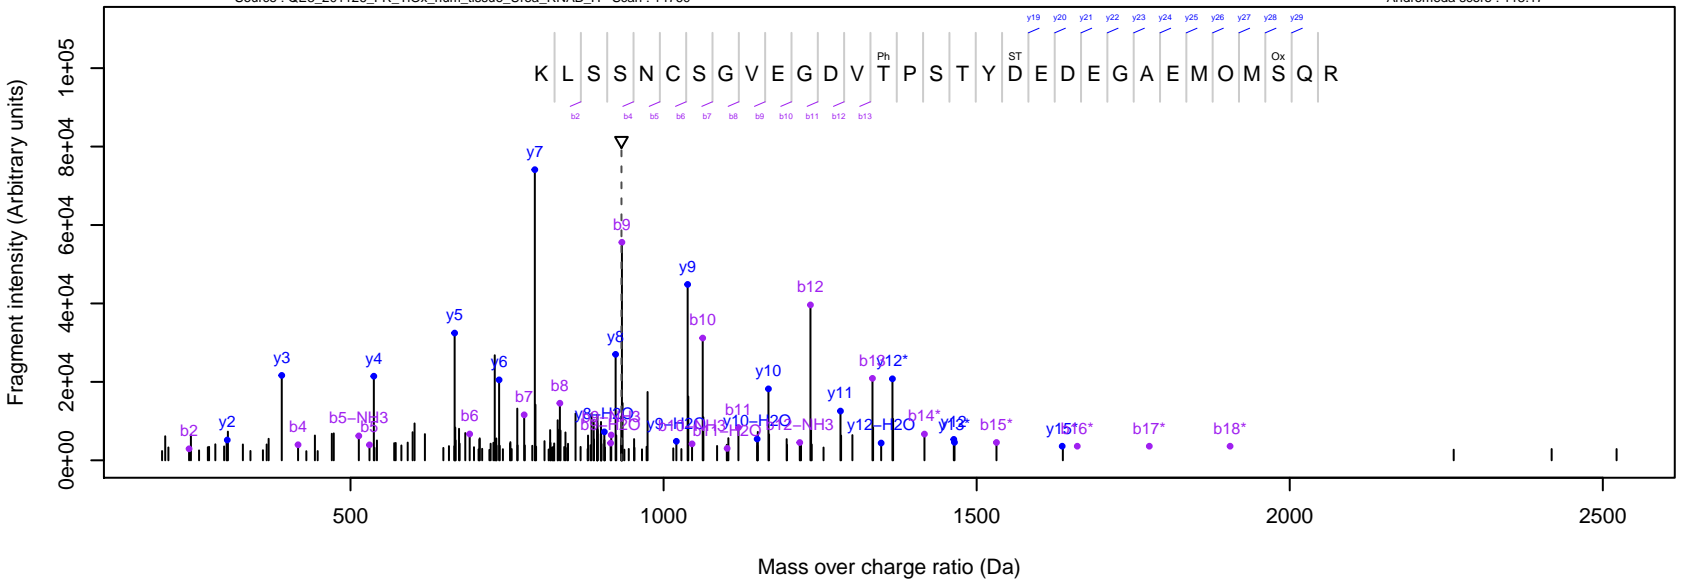



LVNALS(Phospho (STY))EDT(Phospho (STY))GHSSYP SHR-3+

Source : QE3\_201126\_FR\_TiOx\_hum\_tissue\_Urea\_RNAB\_H Scan : 16800

Andromeda score : 113.17

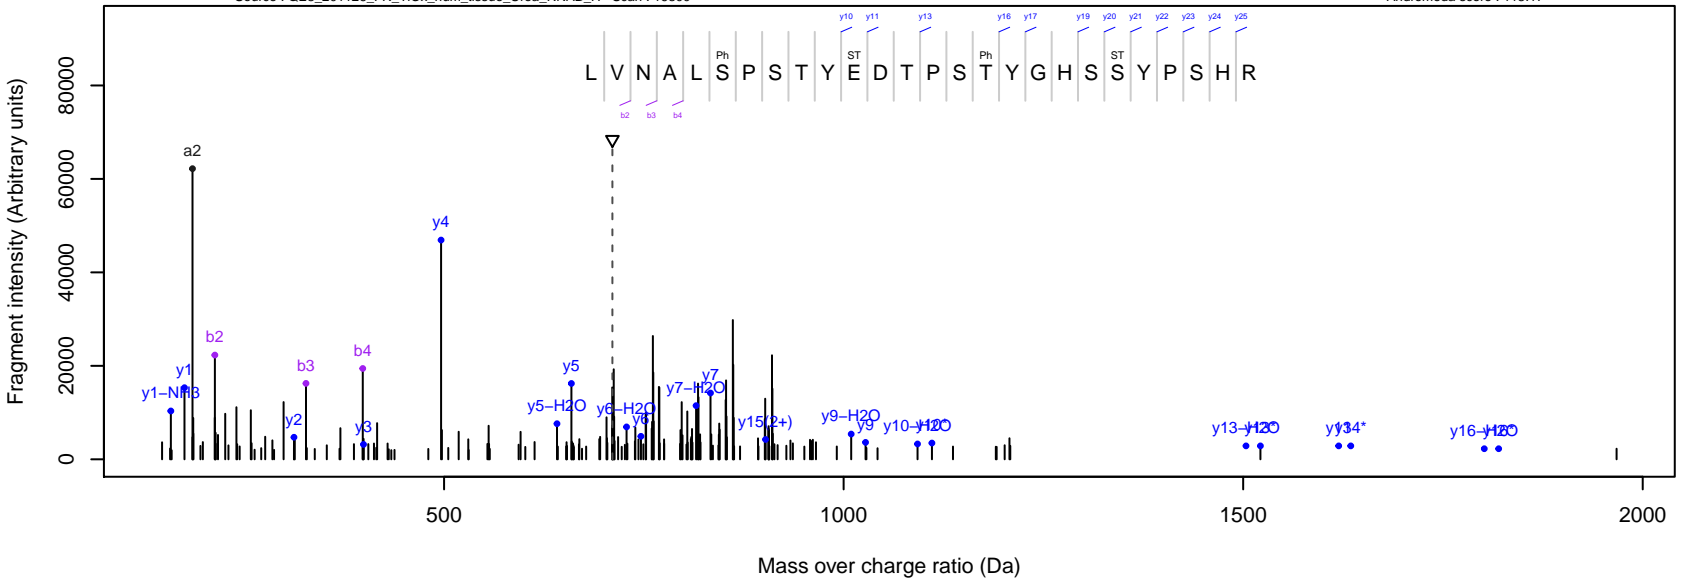

SVS(Phospho (STY))PSPSVLSEGRDEPQR-3+

Source : QE3\_201126\_FR\_TiOx\_hum\_tissue\_Urea\_RNAB\_N Scan : 19044

Andromeda score : 113.17

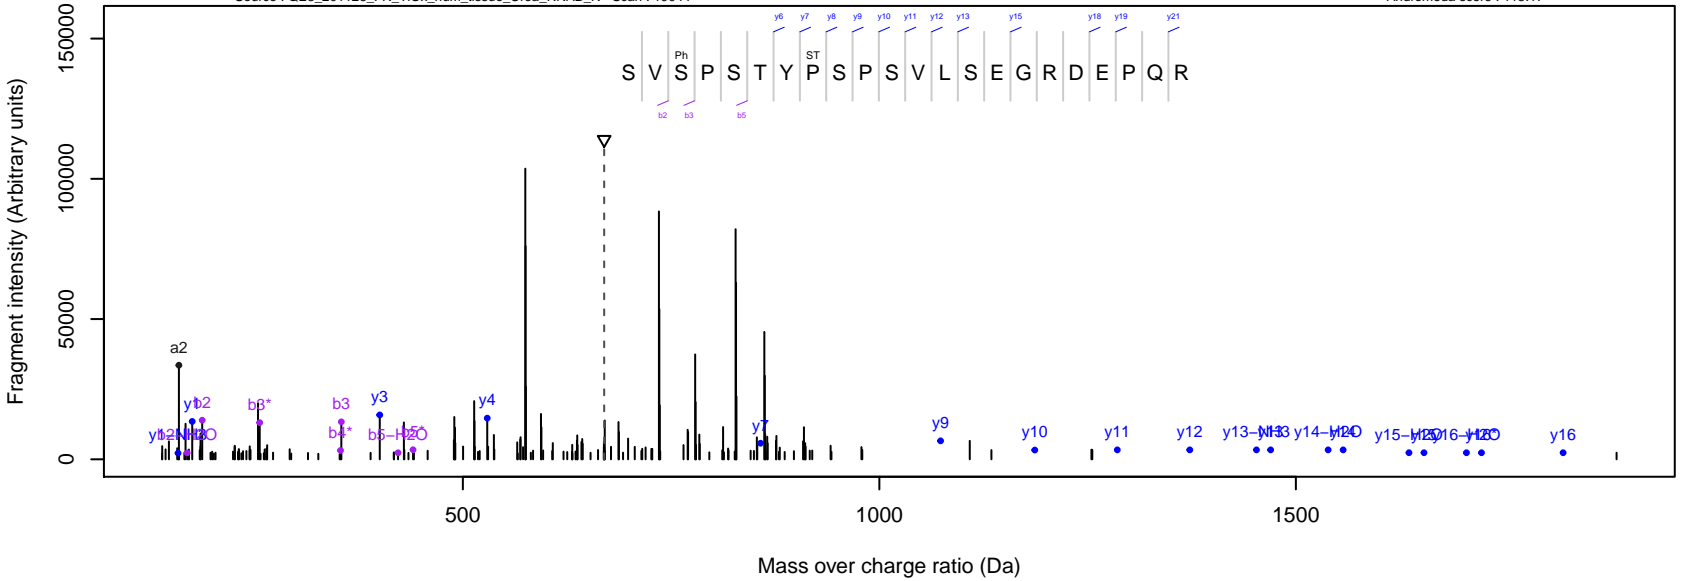

TVS(Phospho (STY))SPPT(Phospho (STY))SPRPGSAATVSASTSNIPPR-3+

Source : QE3\_201126\_FR\_TiOx\_hum\_tissue\_Urea\_RNAB\_N Scan : 32929

Andromeda score : 113.17

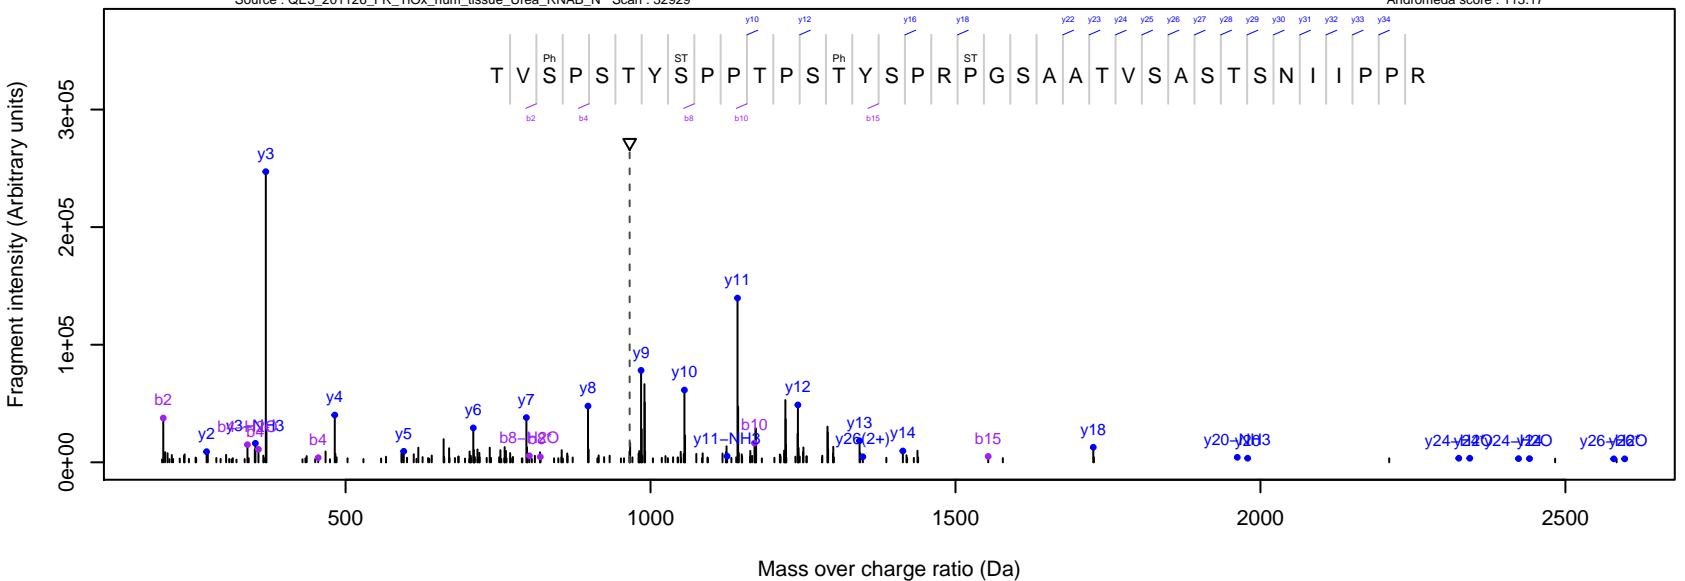

QRIDEFES(Phospho (STY))M-2+

Source : QE3\_201126\_FR\_TiOx\_hum\_tissue\_Urea\_RNAB\_H Scan : 30207

Andromeda score : 113.15

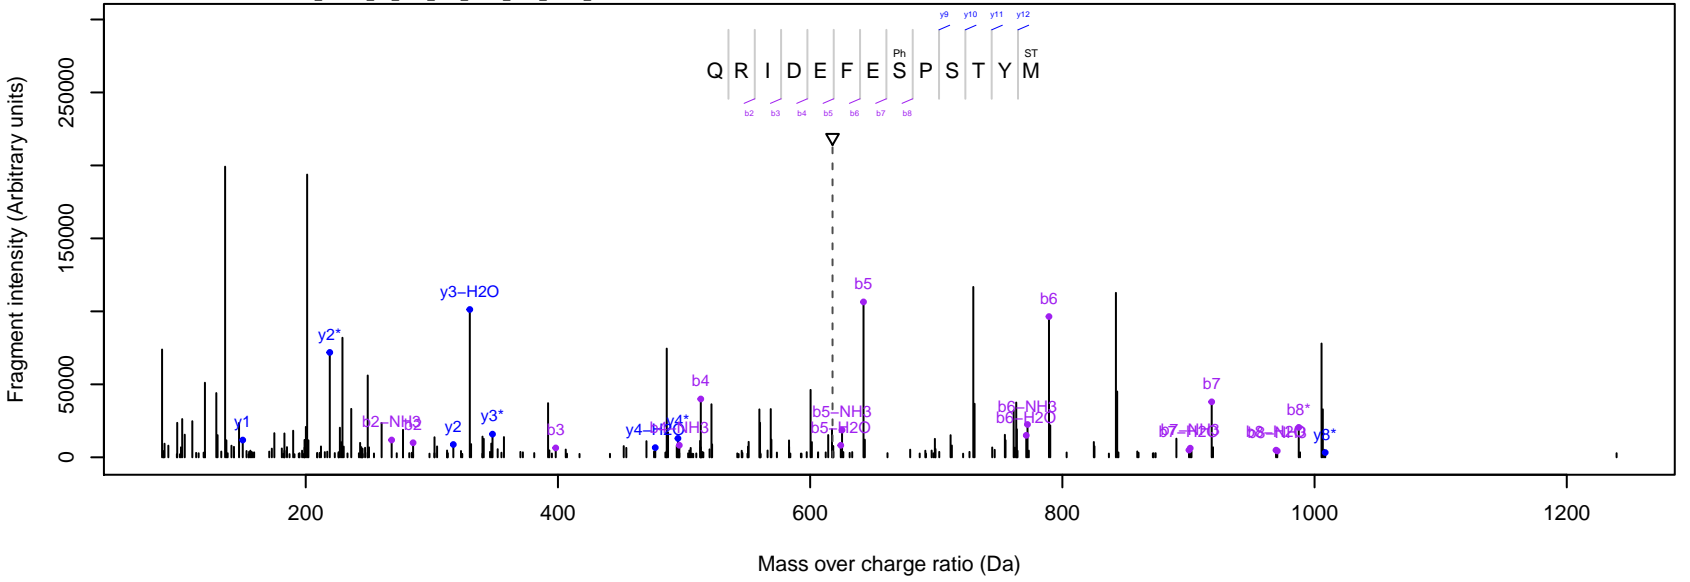

TEARS(Phospho (STY))S(Phospho (STY))DEENGPPSS(Phospho (STY))PDLDR-3+

Source : QE3\_201126\_FR\_TiOx\_hum\_tissue\_Urea\_RNAB\_N Scan : 20580

Andromeda score : 113.15

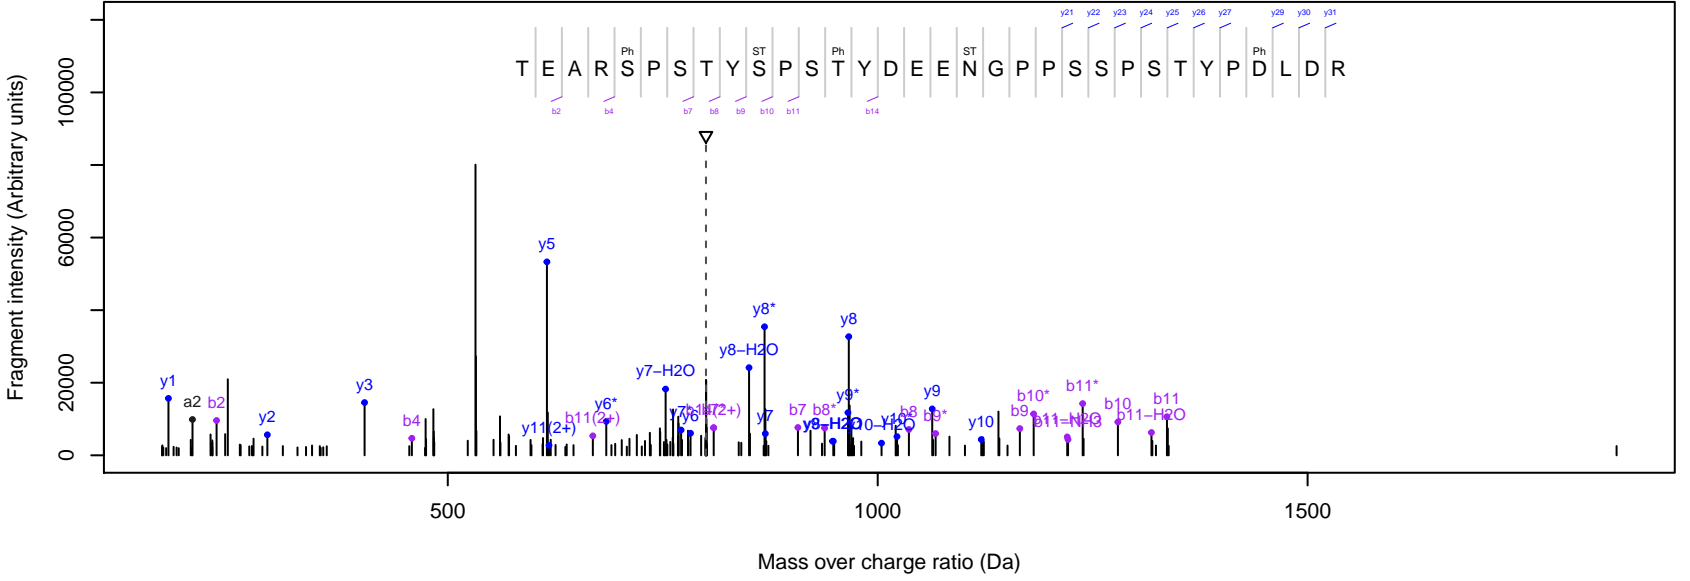

ALASIDS(Phospho (STY))KLNQAK-2+

Source : QE3\_201126\_FR\_TiOx\_hum\_tissue\_Urea\_RNAB\_B Scan : 19577

Andromeda score : 113.07

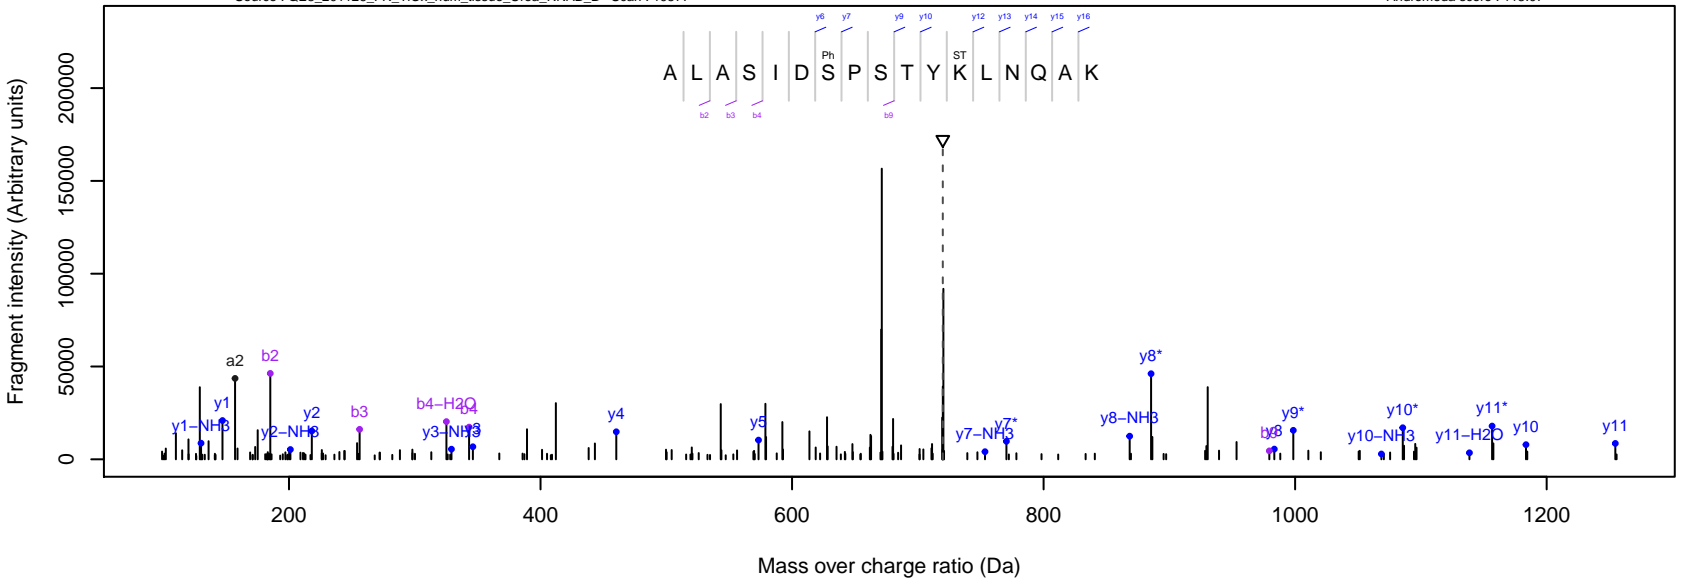

LLVDSQGLSGCS(Phospho (STY))PR-2+

Source : QE3\_201126\_FR\_TiOx\_hum\_tissue\_Urea\_RNAB\_N Scan : 28328

Andromeda score : 112.96

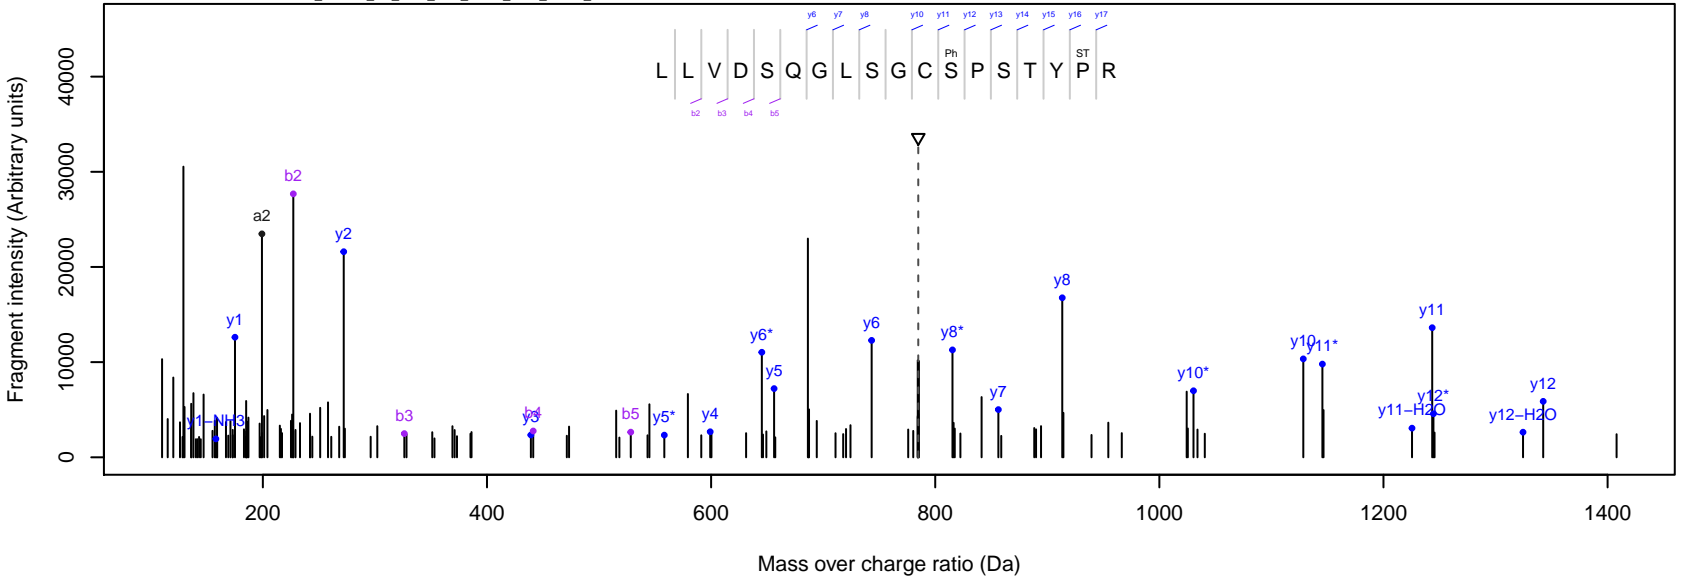

QH Y Q K E T E S P S T Y A P G S P S T Y P R-2+

Source : QE3\_201126\_FR\_TiOx\_hum\_tissue\_Urea\_RNAB\_H Scan : 5353

Andromeda score : 112.96

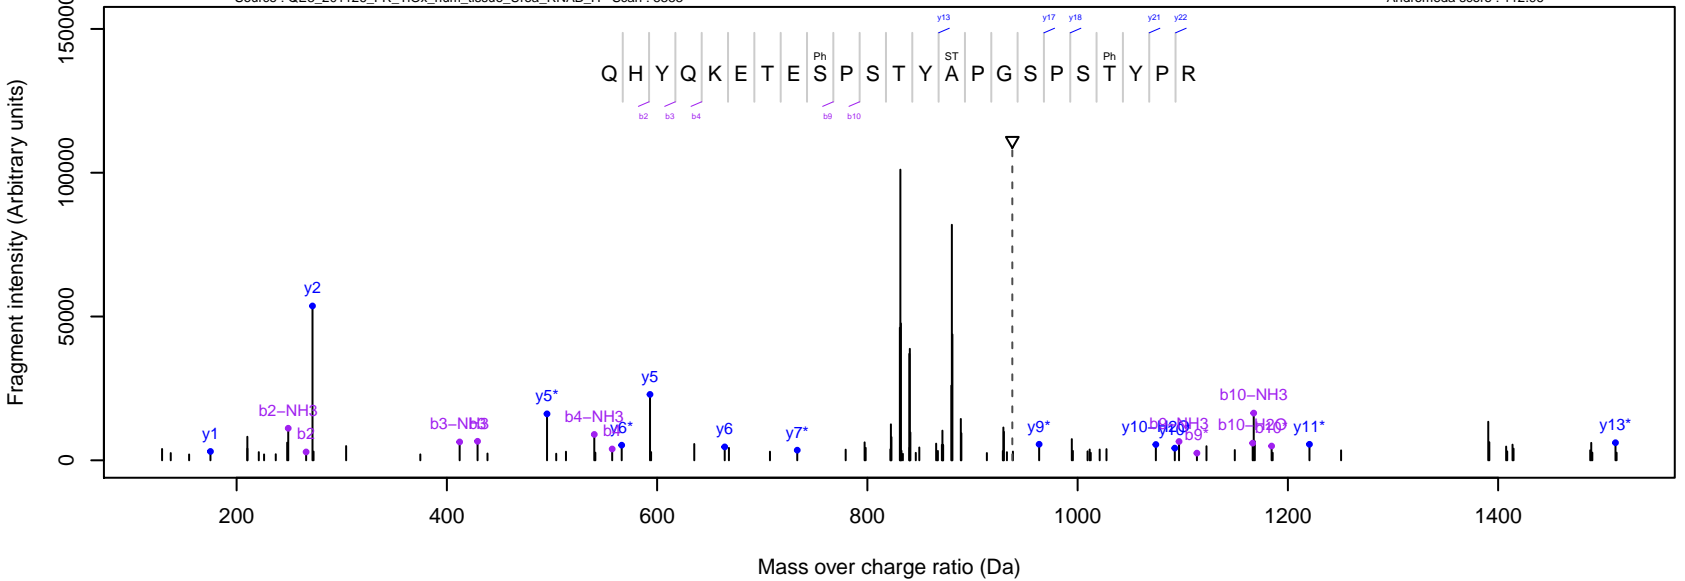

VEM(Oxidation (M))Y(Phospho (STY))SGS(Phospho (STY))DDDDDFNKLPKK-3+

Source : QE3\_201126\_FR\_TIOx\_hum\_tissue\_Urea\_RNAB\_H Scan : 20260

Andromeda score : 112.93

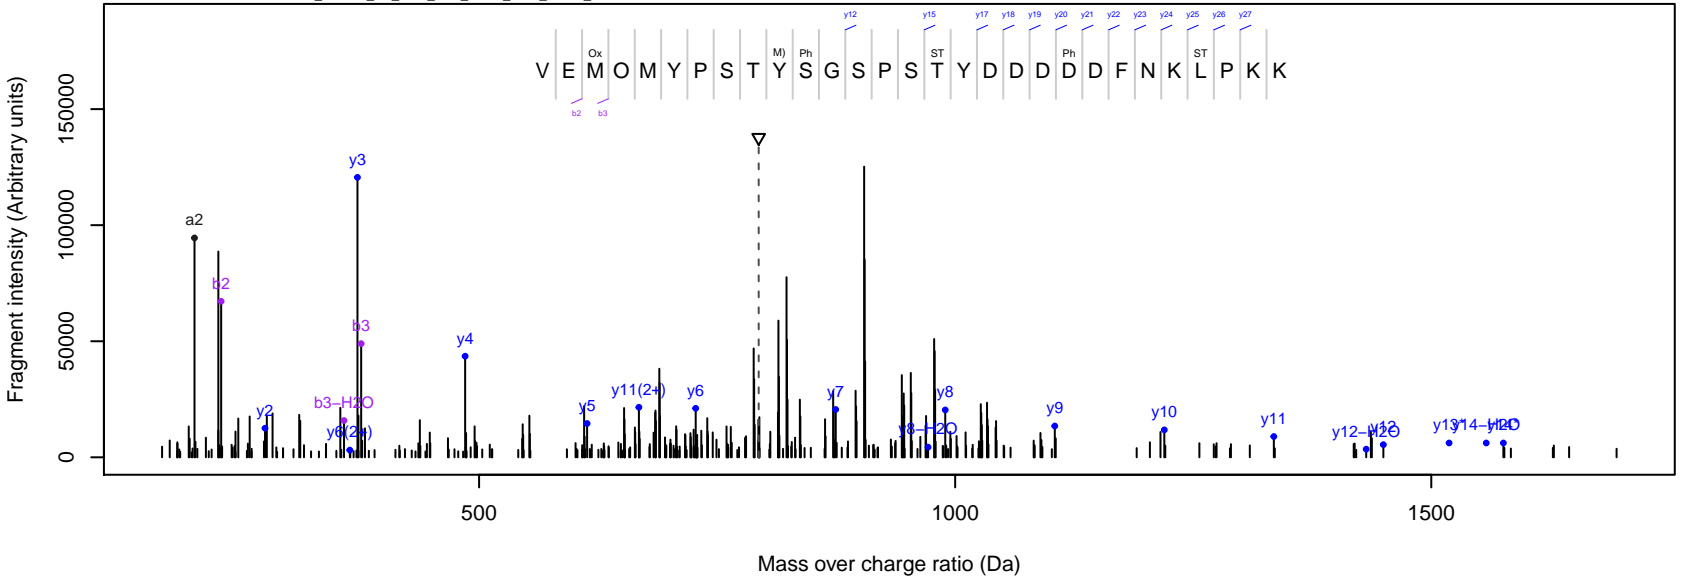

EGS(Phospho (STY))FRVTTATEQAEREEMK-3+

Source : QE3\_201126\_FR\_TIOx\_hum\_tissue\_Urea\_RNAB\_N Scan : 26694

Andromeda score : 112.88

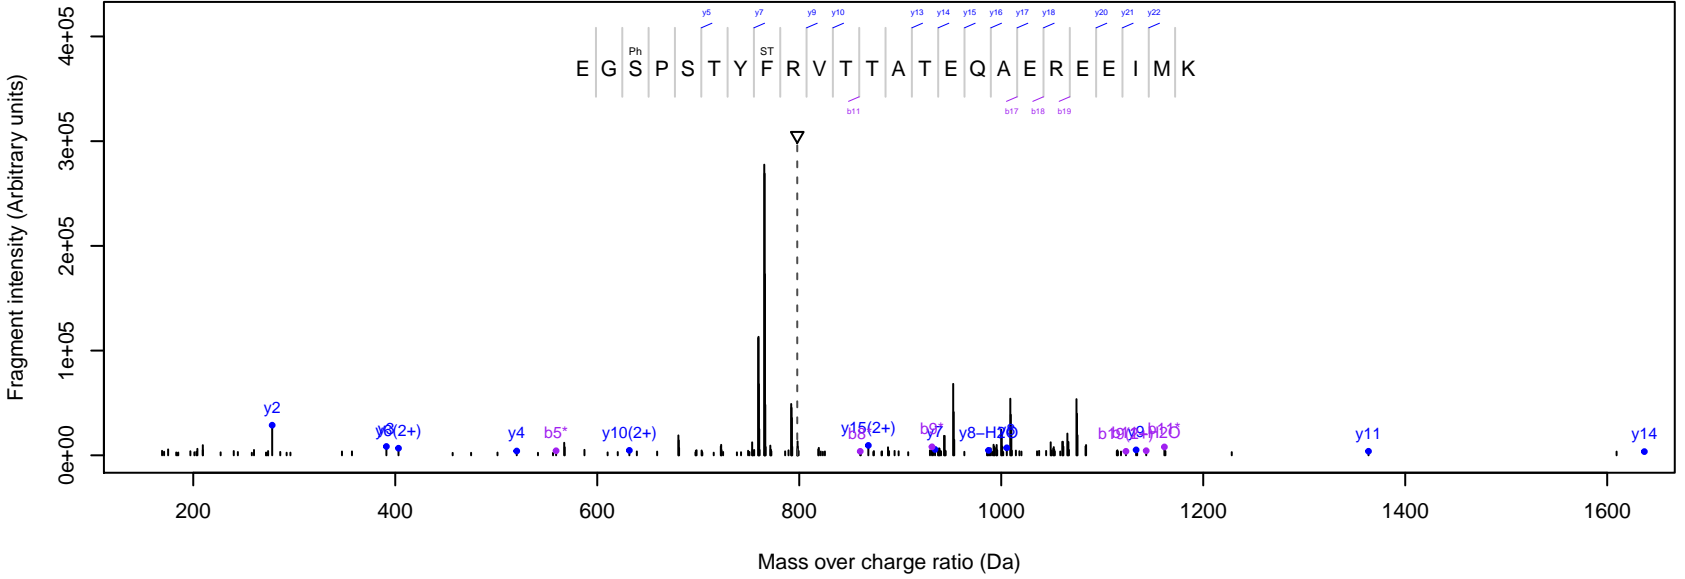

RS(Phospho (STY))SFLQVFNNSPDESSYYR-3+

Source : QE3\_201126\_FR\_TIOx\_hum\_tissue\_Urea\_RNAB\_H Scan : 41986

Andromeda score : 112.86

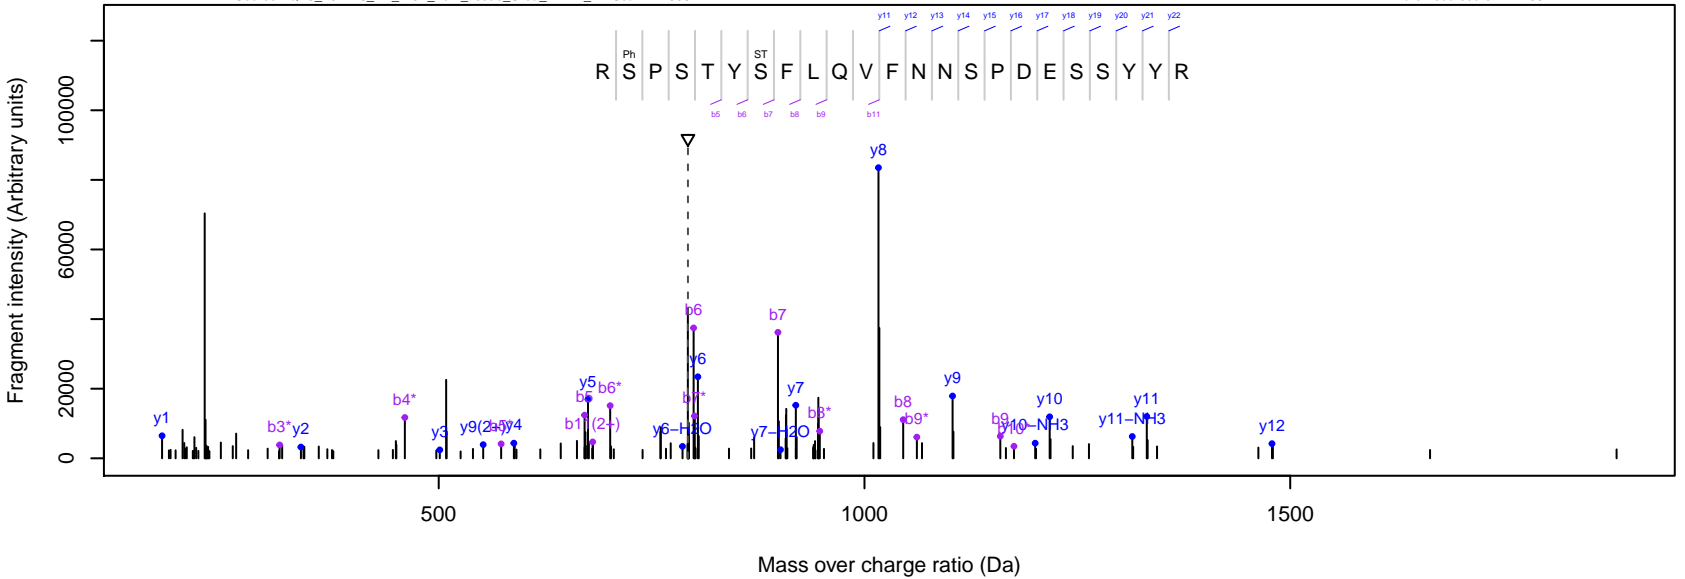

STS(Phospho (STY))TLEIQPSRASPTSDIESVER-3+

Source : QE3\_201126\_FR\_TIOx\_hum\_tissue\_Urea\_RNAB\_H Scan : 30049

Andromeda score : 112.86

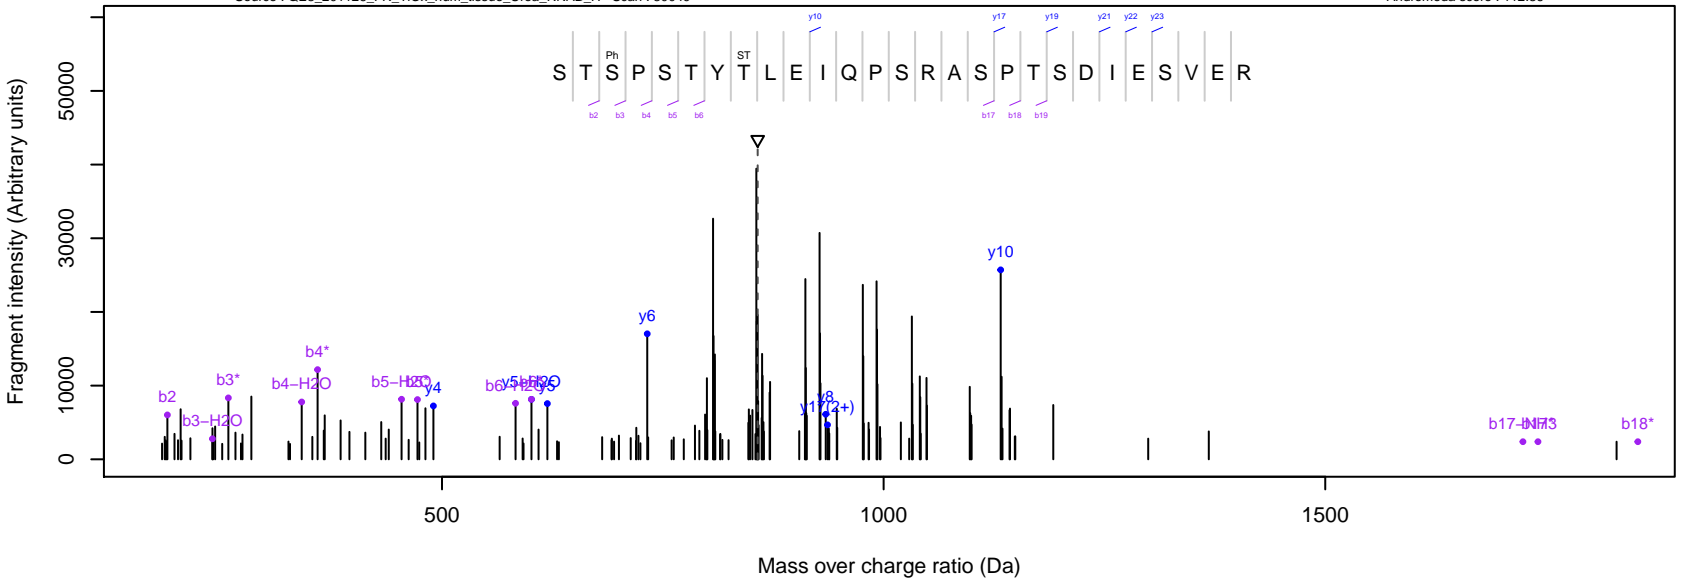

SVS(Phospho (STY))VATGLNMM(Oxidation (M))K-2+

Source : QE3\_201126\_FR\_TIOx\_hum\_tissue\_Urea\_RNAB\_N Scan : 25468

Andromeda score : 112.84

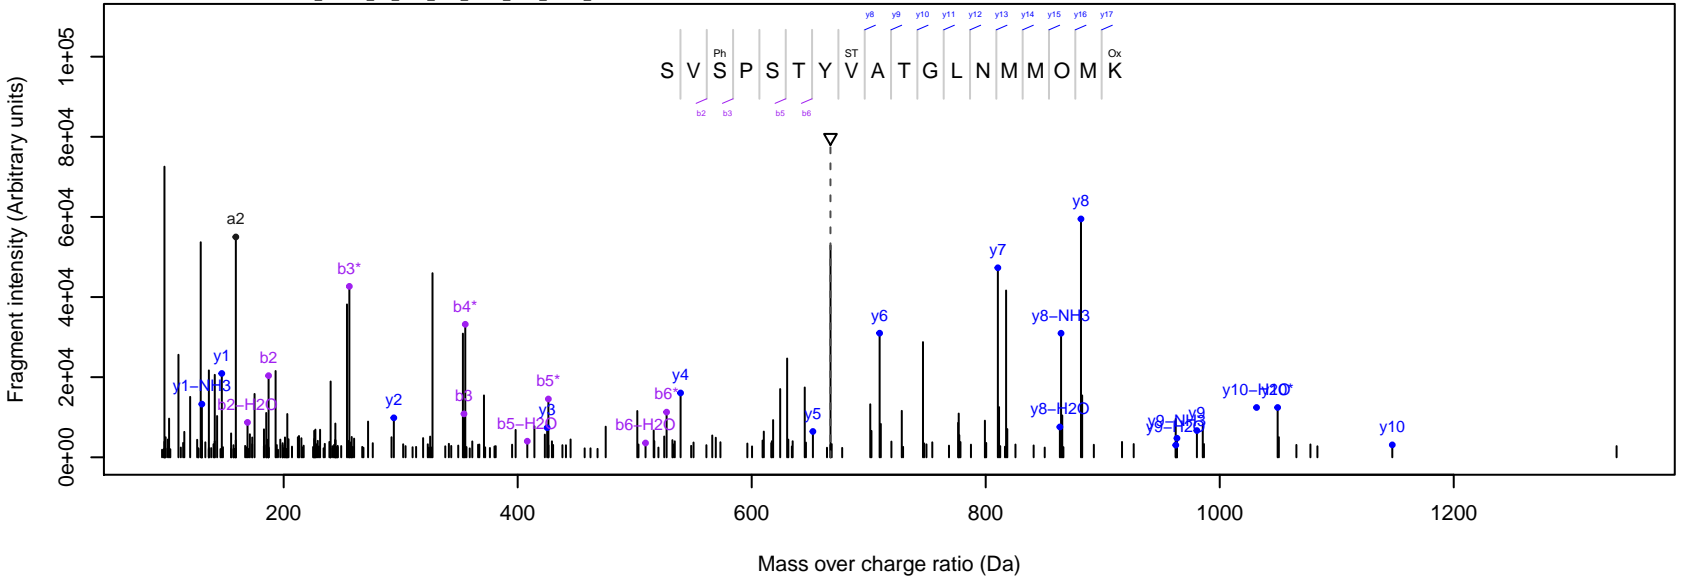

VGVPVGS(Phospho (STY))DPDFQPELSGAGSR-3+

Source : QE3\_201126\_FR\_TIOx\_hum\_tissue\_Urea\_RNAB\_N Scan : 30023

Andromeda score : 112.8

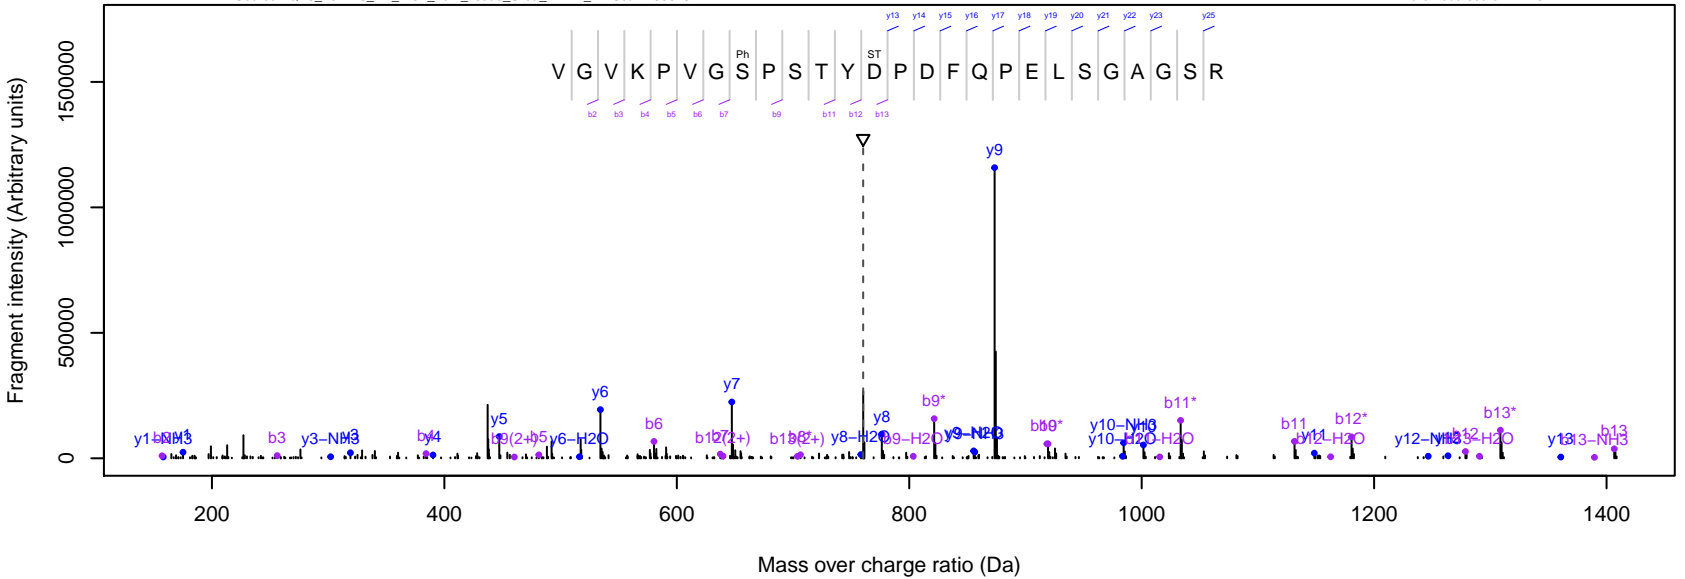

KRT(Phospho (STY))S(Phospho (STY))SEDNLYLAVLR-3+

Source : QE3\_201126\_FR\_TiOx\_hum\_tissue\_Urea\_RNAB\_N Scan : 38928

Andromeda score : 112.74

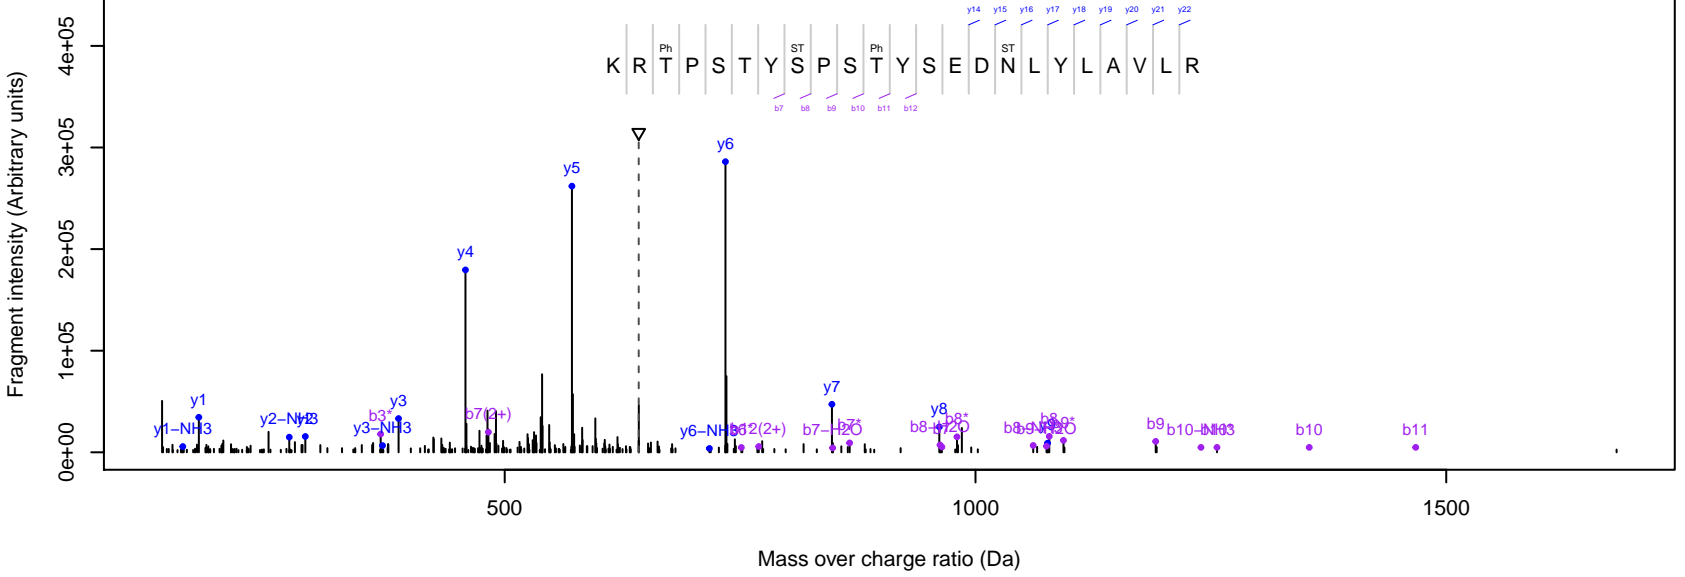

SST(Phospho (STY))SFANIQENS-2+

Source : QE3\_201126\_FR\_TiOx\_hum\_tissue\_Urea\_RNAB\_N Scan : 27390

Andromeda score : 112.73

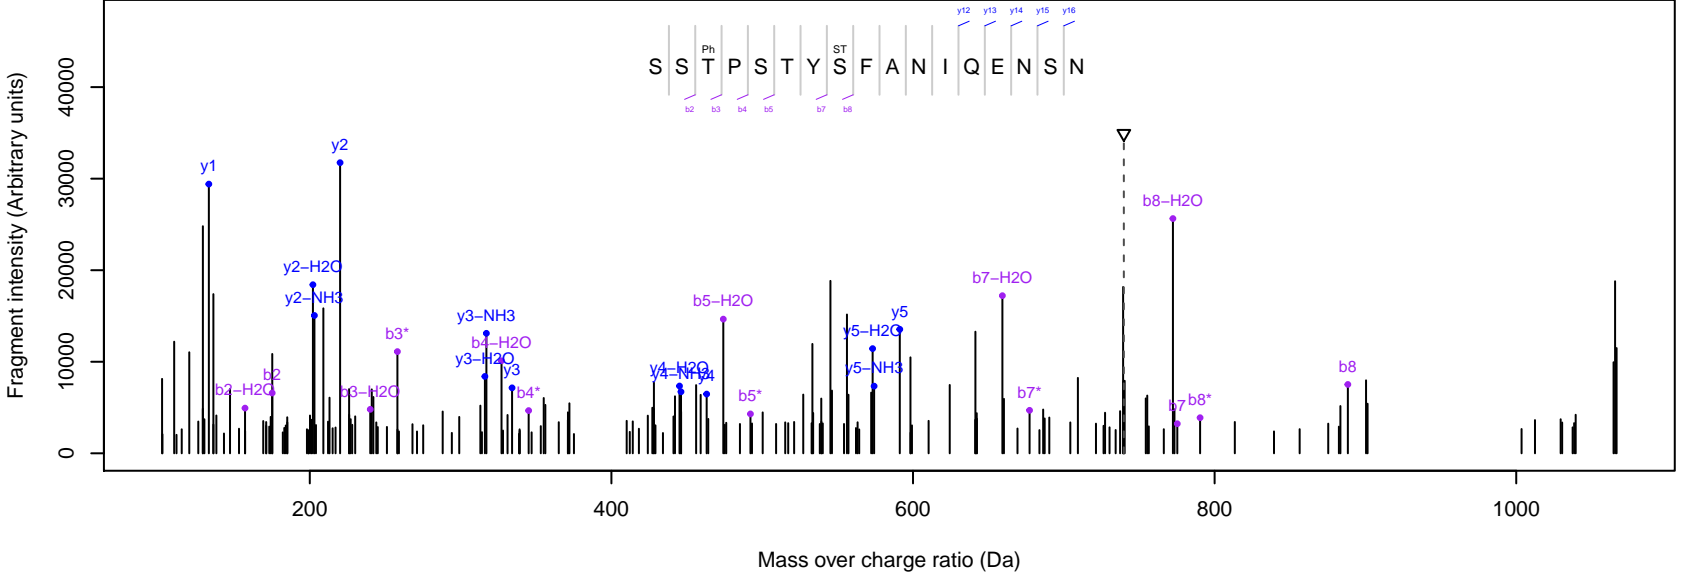

ELVGTGSQEGDHEPS(Phospho (STY))GS(Phospho (STY))ETEEDTSSSPHR-3+

Source : QE3\_201126\_FR\_TiOx\_hum\_tissue\_Urea\_RNAB\_H Scan : 14712

Andromeda score : 112.72

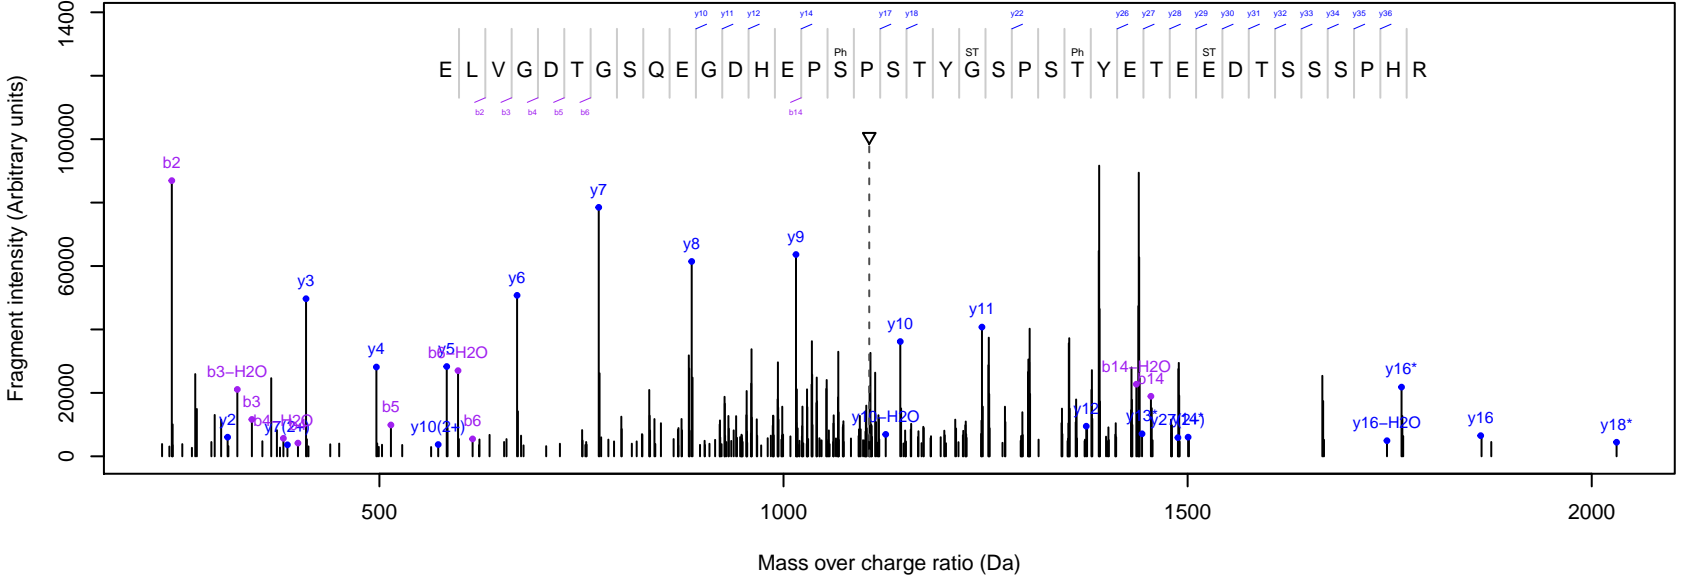

KYT(Phospho (STY))LPPGVDPQTQVSSLSPEGLTVEAMPK-3+

Source : QE3\_201126\_FR\_TiOx\_hum\_tissue\_Urea\_RNAB\_H Scan : 51688

Andromeda score : 112.68

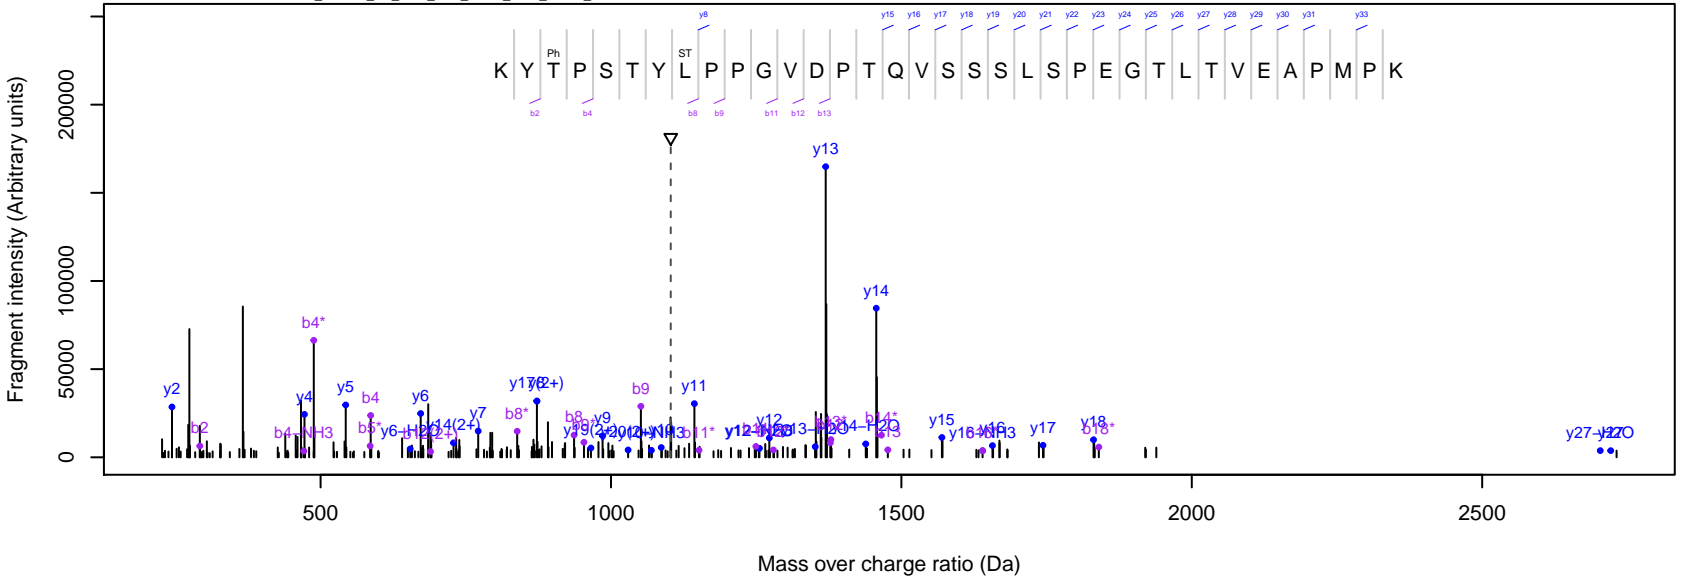

S(Phospho (STY))RTPPSAPSQR-3+

Source : QE3\_201126\_FR\_TiOx\_hum\_tissue\_Urea\_RNAB\_H Scan : 4855

Andromeda score : 112.68

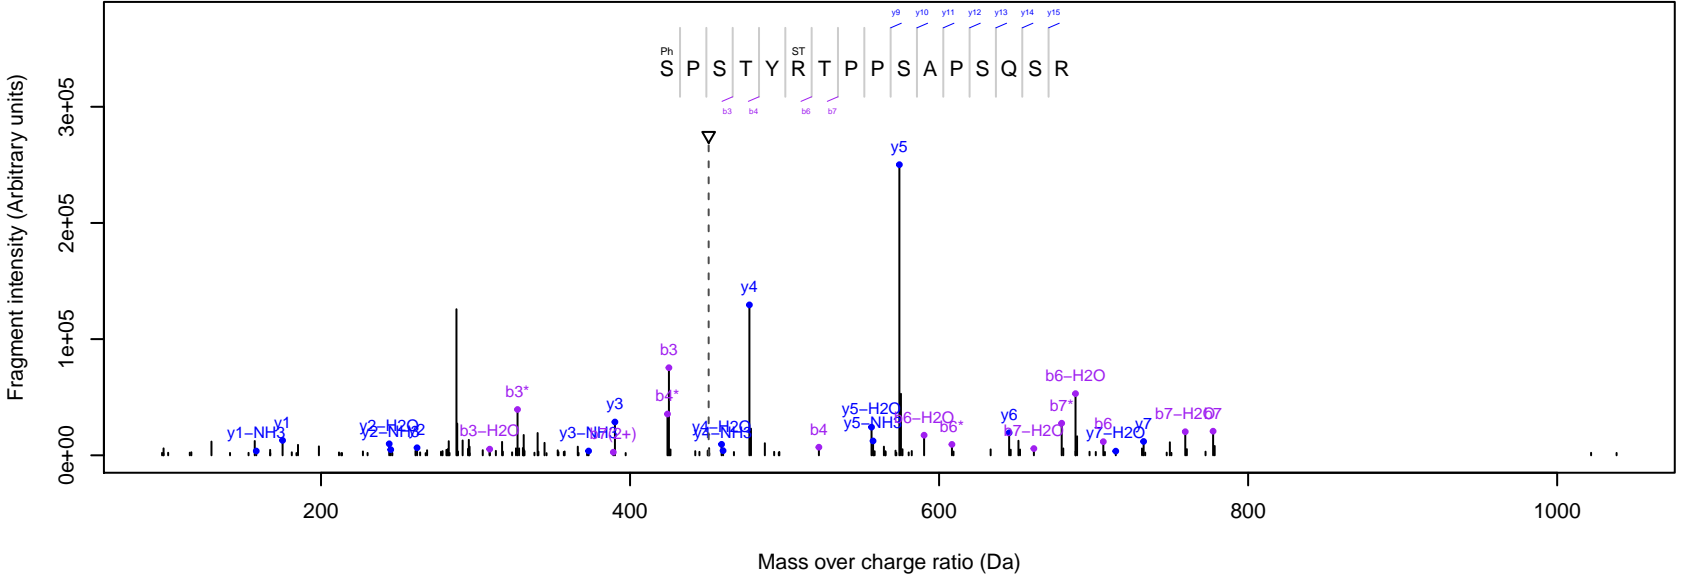

SSASSS(Phospho (STY))PKRPSVER-3+

Source : QE3\_201126\_FR\_TiOx\_hum\_tissue\_Urea\_RNAB\_H Scan : 4099

Andromeda score : 112.67

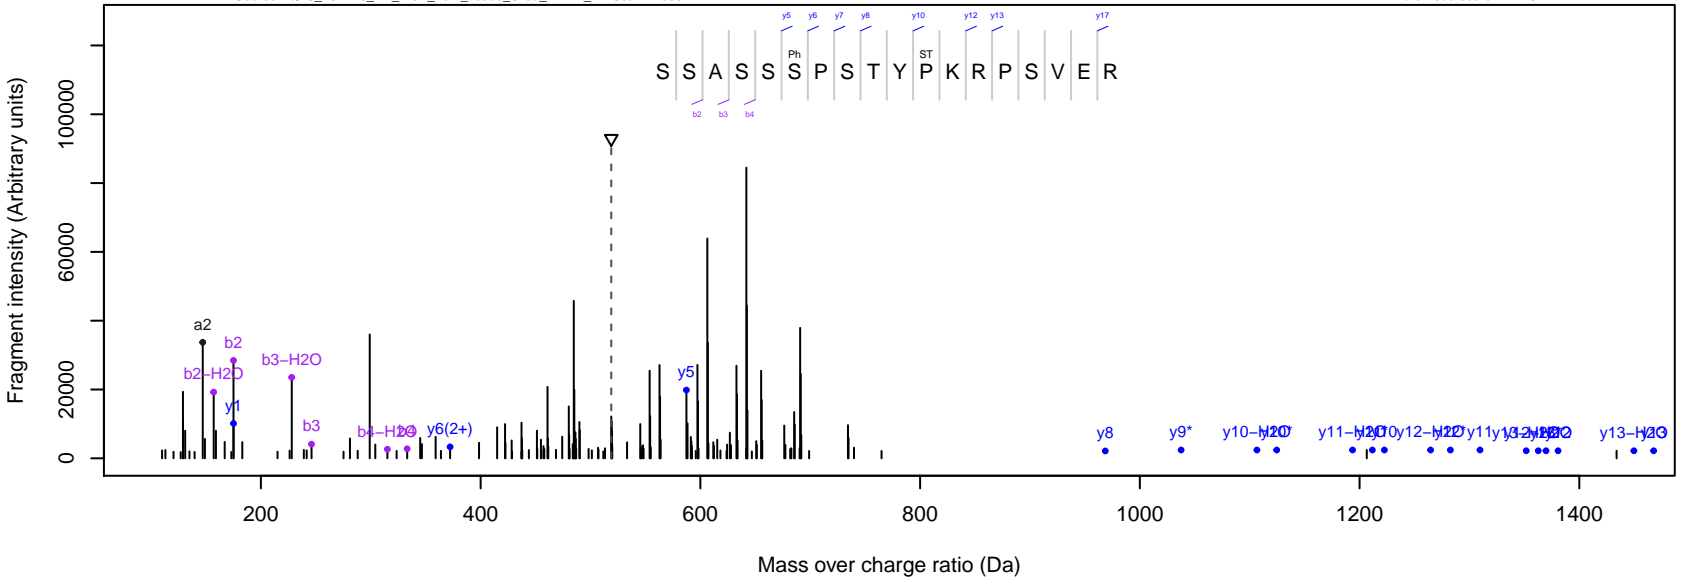

TASLTSAASVDGNRS(Phospho (STY))R-2+

Source : QE3\_201126\_FR\_TiOx\_hum\_tissue\_Urea\_RNAB\_H Scan : 11981

Andromeda score : 112.67

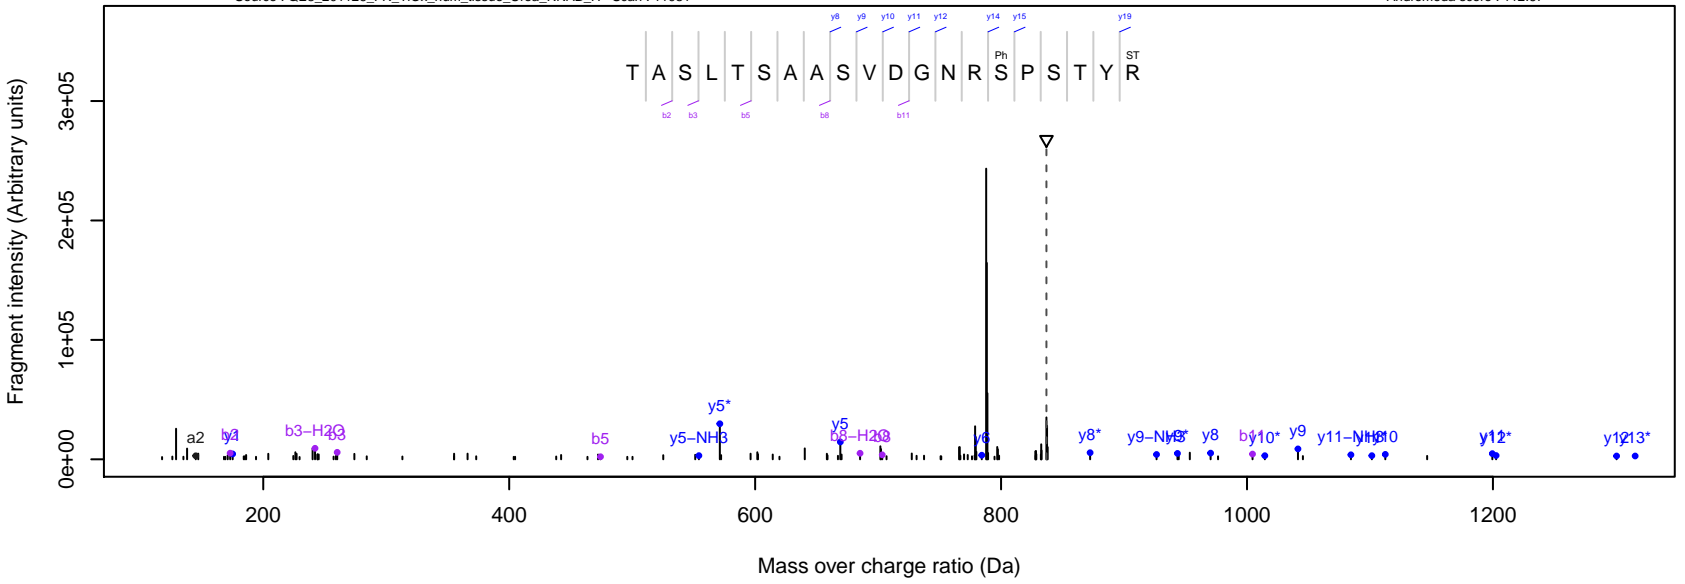

HTTQMS(Phospho (STY))DEEEDDGGCDFADSEKEEEDIEIEENTRPK-4+

Source : QE3\_201126\_FR\_TiOx\_hum\_tissue\_Urea\_RNAB\_H Scan : 46356

Andromeda score : 112.64

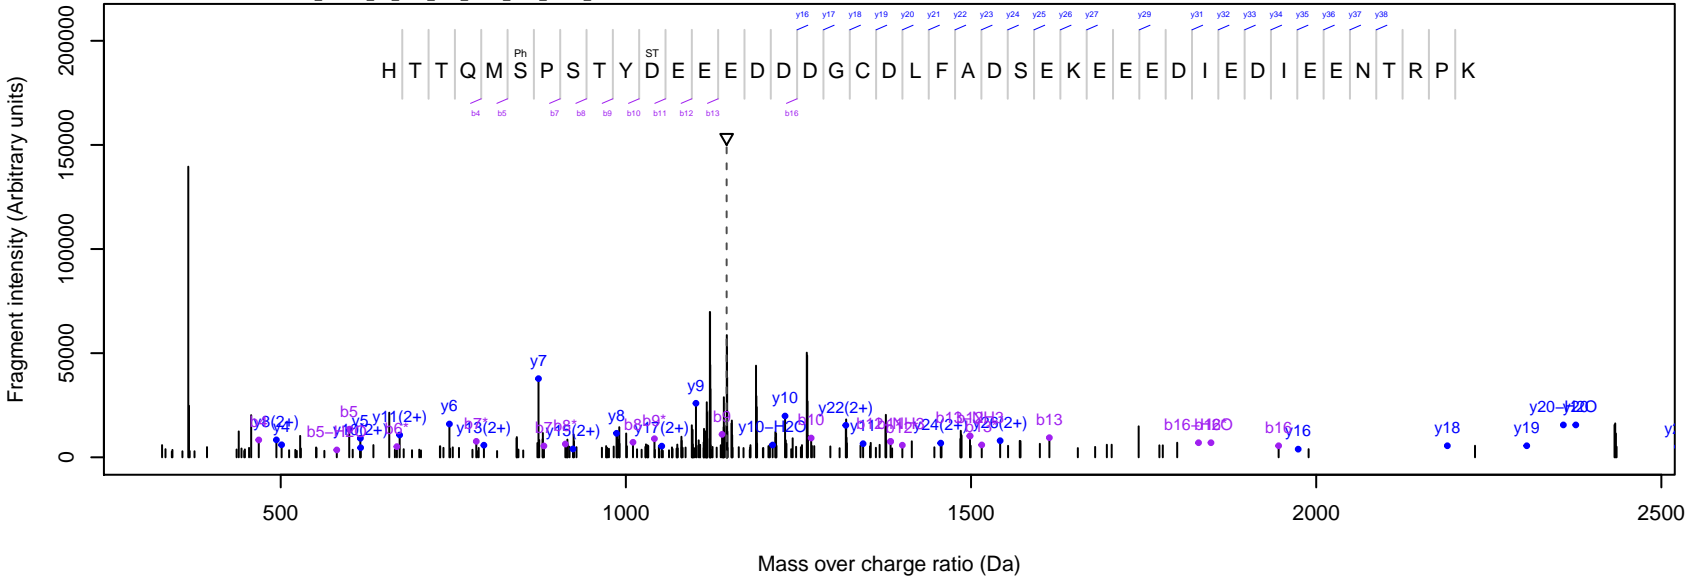

IPS(Phospho (STY))TPKLIPK-2+

Source : QE3\_201126\_FR\_TiOx\_hum\_tissue\_Urea\_RNAB\_H Scan : 22491

Andromeda score : 112.64

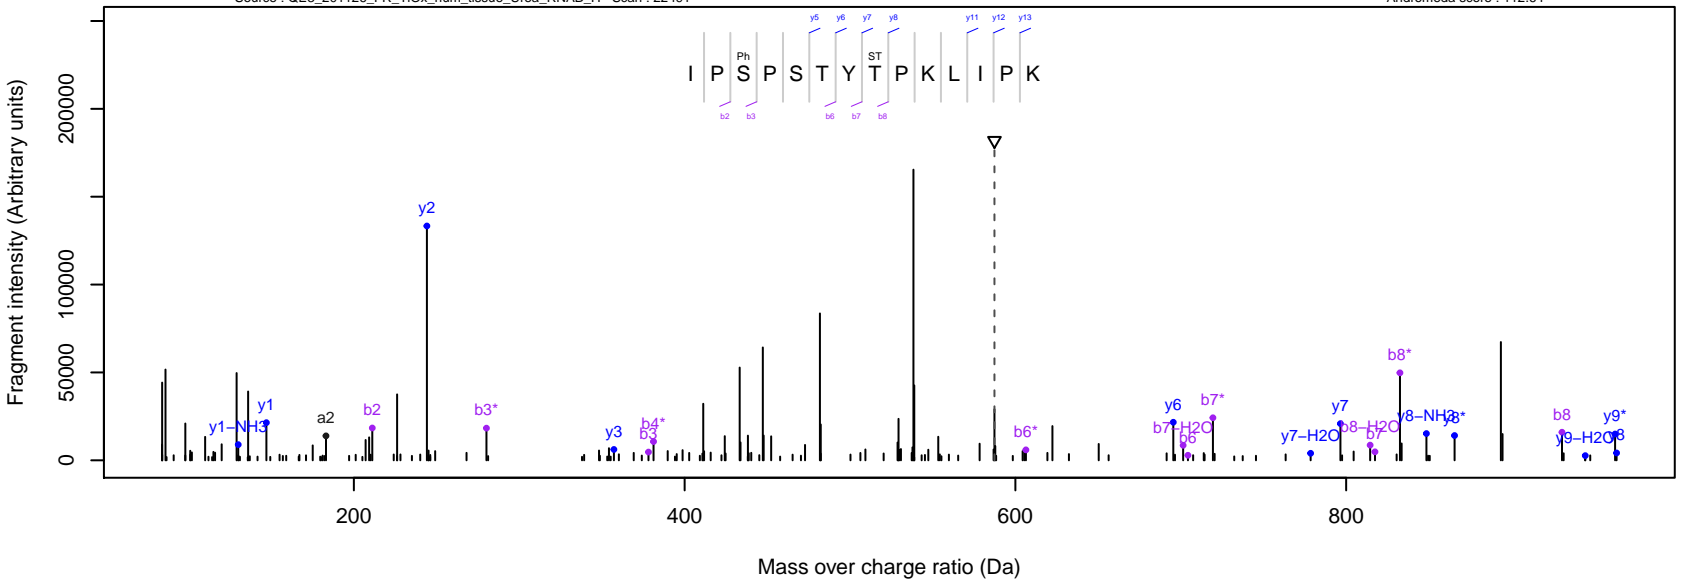



**RVPSPT(Phospho (STY))PAPK-2+**

Source : QE3\_201126\_FR\_TIOx\_hum\_tissue\_Urea\_RNAB\_H Scan : 6397

Andromeda score : 112.64

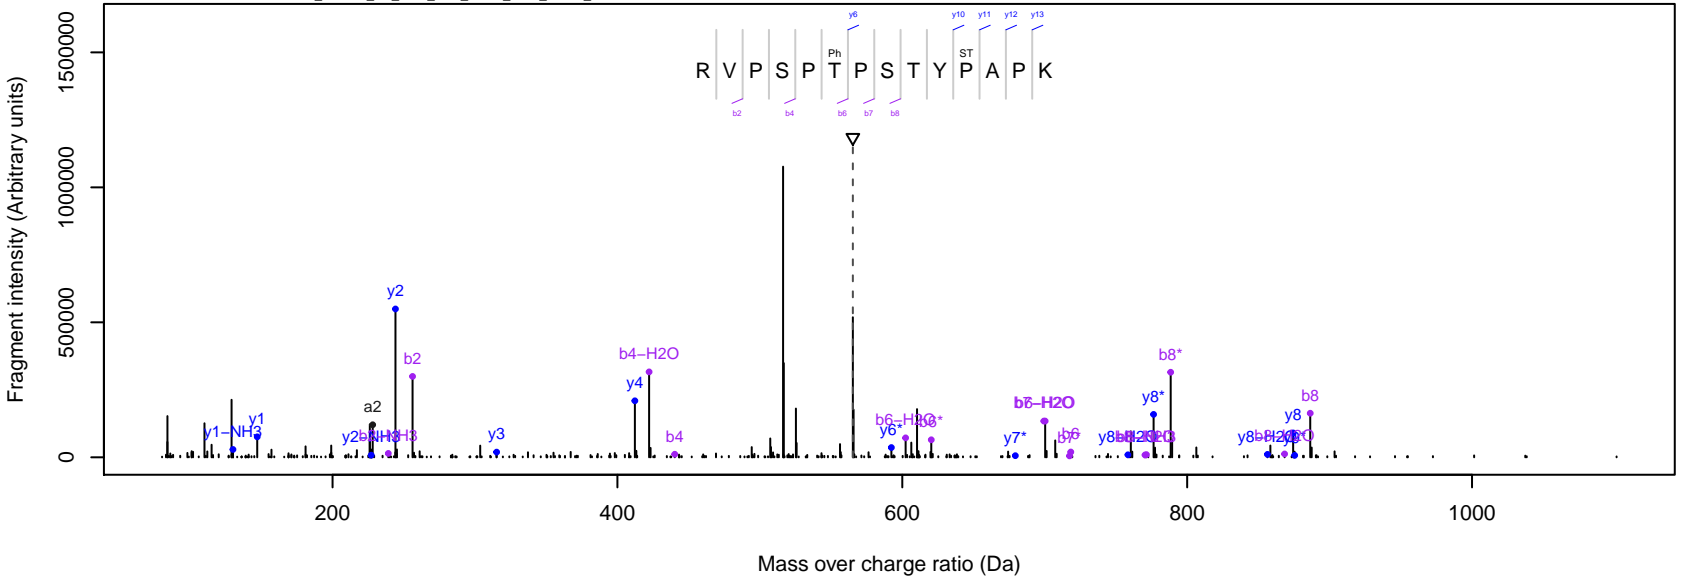

**S(Phospho (STY))GEGEVSGLMR-2+**

Source : QE3\_201126\_FR\_TIOx\_hum\_tissue\_Urea\_RNAB\_N Scan : 24012

Andromeda score : 112.64

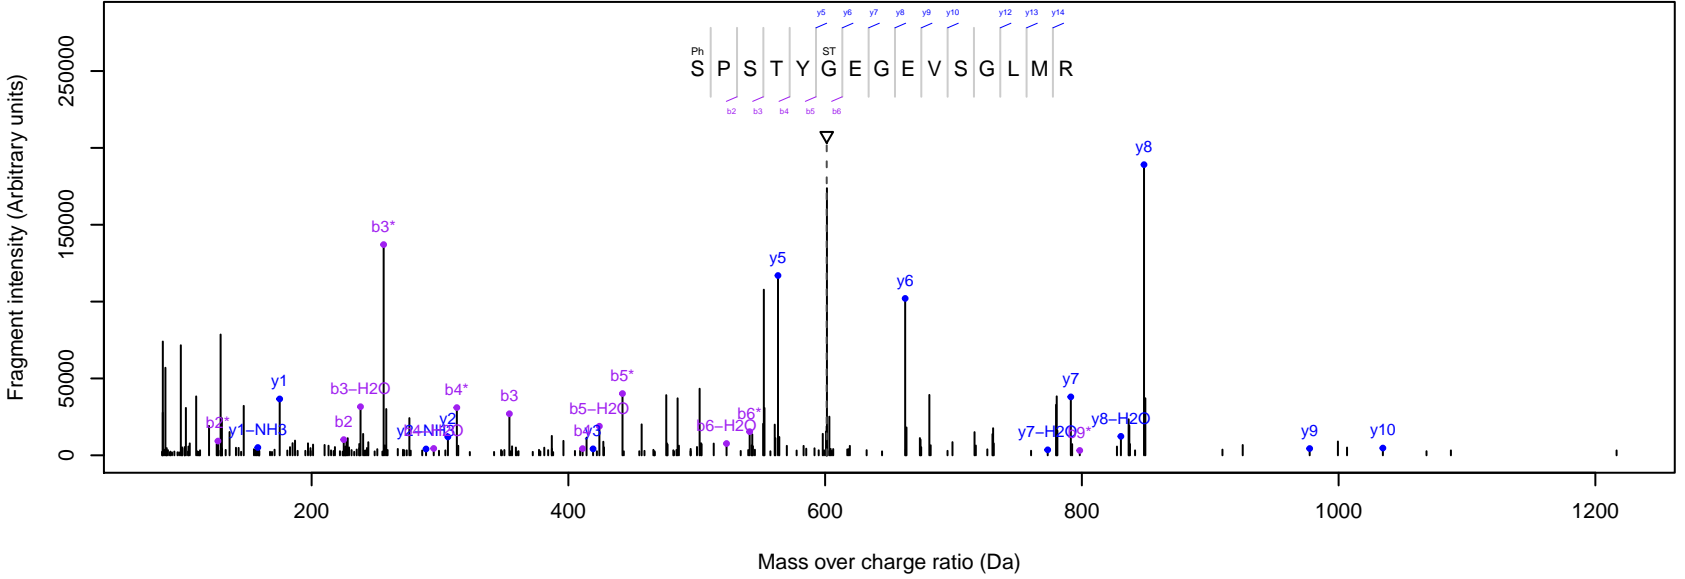

**NDARS(Phospho (STY))PGSISYLPSTFK-3+**

Source : QE3\_201126\_FR\_TIOx\_hum\_tissue\_Urea\_RNAB\_B Scan : 49582

Andromeda score : 112.61

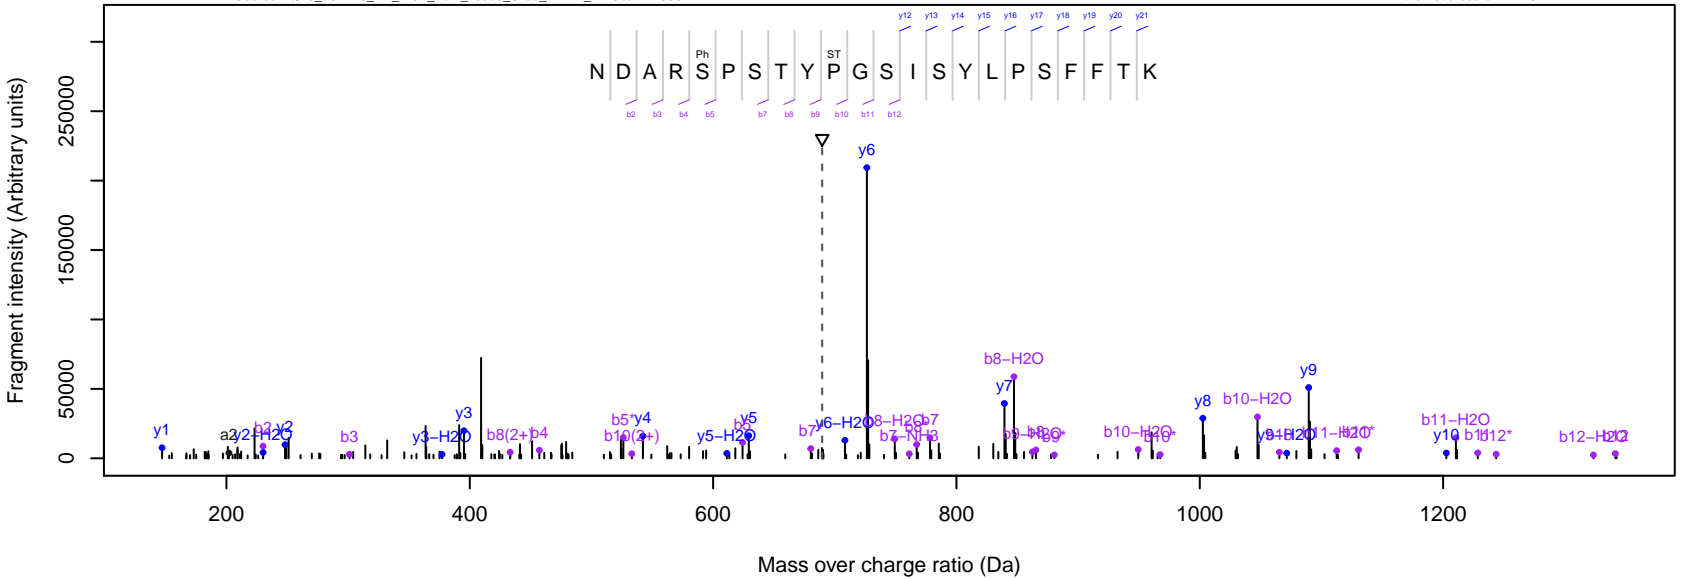

AYS(Phospho (STY))FCGTVEYMAPEVVNR-3+

Source : QE3\_201126\_FR\_TiOx\_hum\_tissue\_Urea\_RNAB\_N Scan : 45630

Andromeda score : 112.58

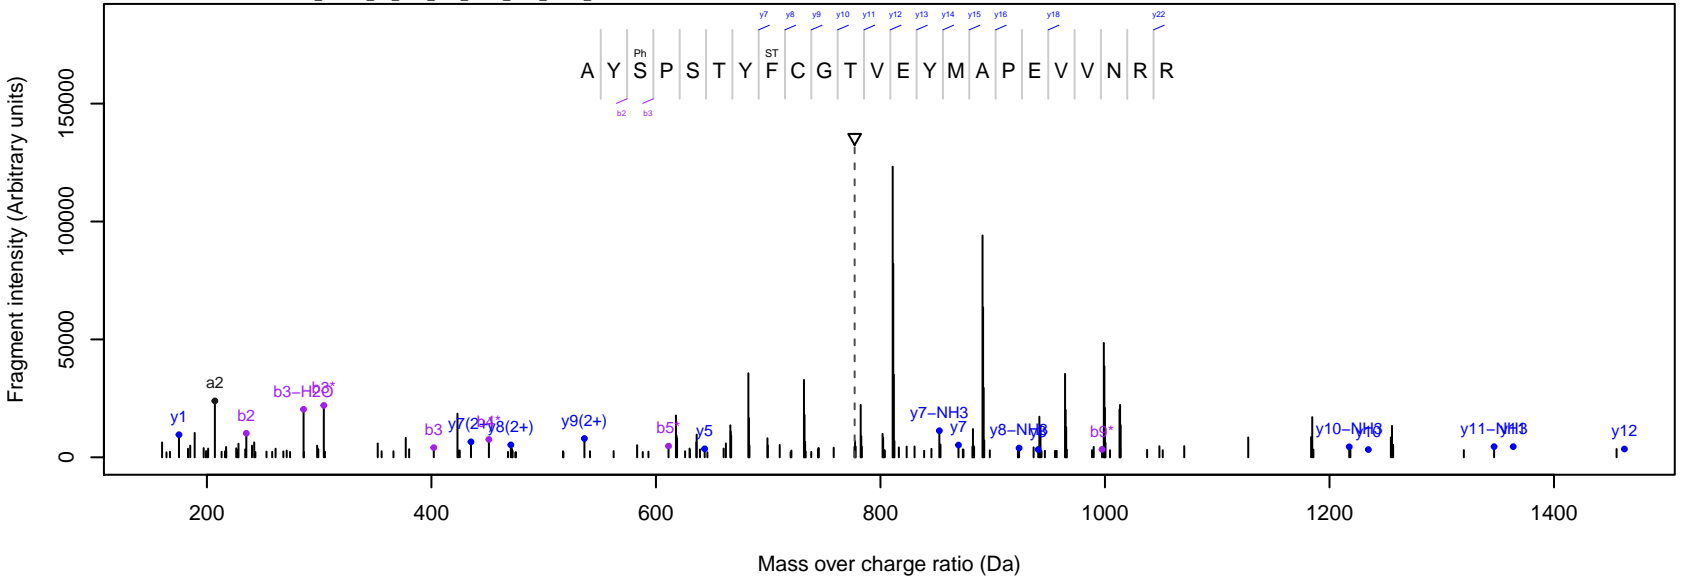

SPLAM(Oxidation (M))SHASGVKT(Phospho (STY))SPDPR-3+

Source : QE3\_201126\_FR\_TiOx\_hum\_tissue\_Urea\_RNAB\_B Scan : 8461

Andromeda score : 112.57

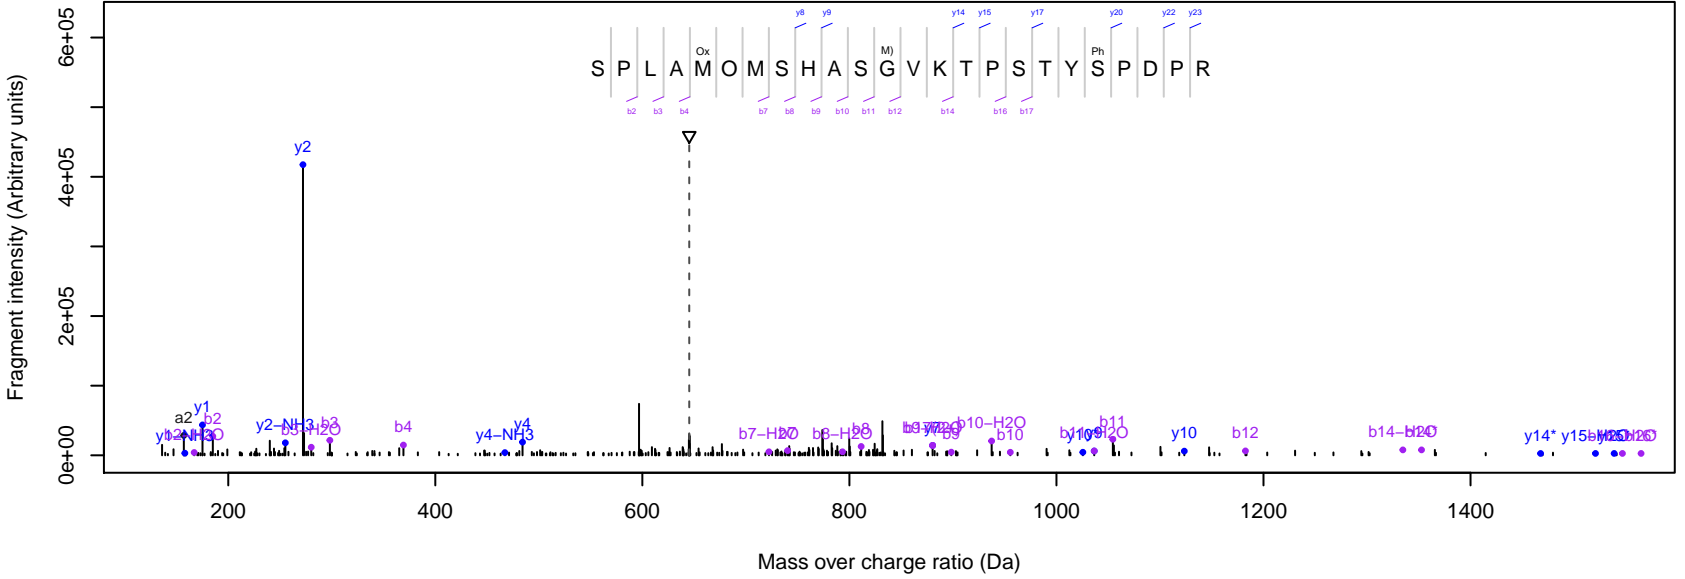

SES(Phospho (STY))APTLHPYSPLSPK-3+

Source : QE3\_201126\_FR\_TiOx\_hum\_tissue\_Urea\_RNAB\_N Scan : 26407

Andromeda score : 112.56

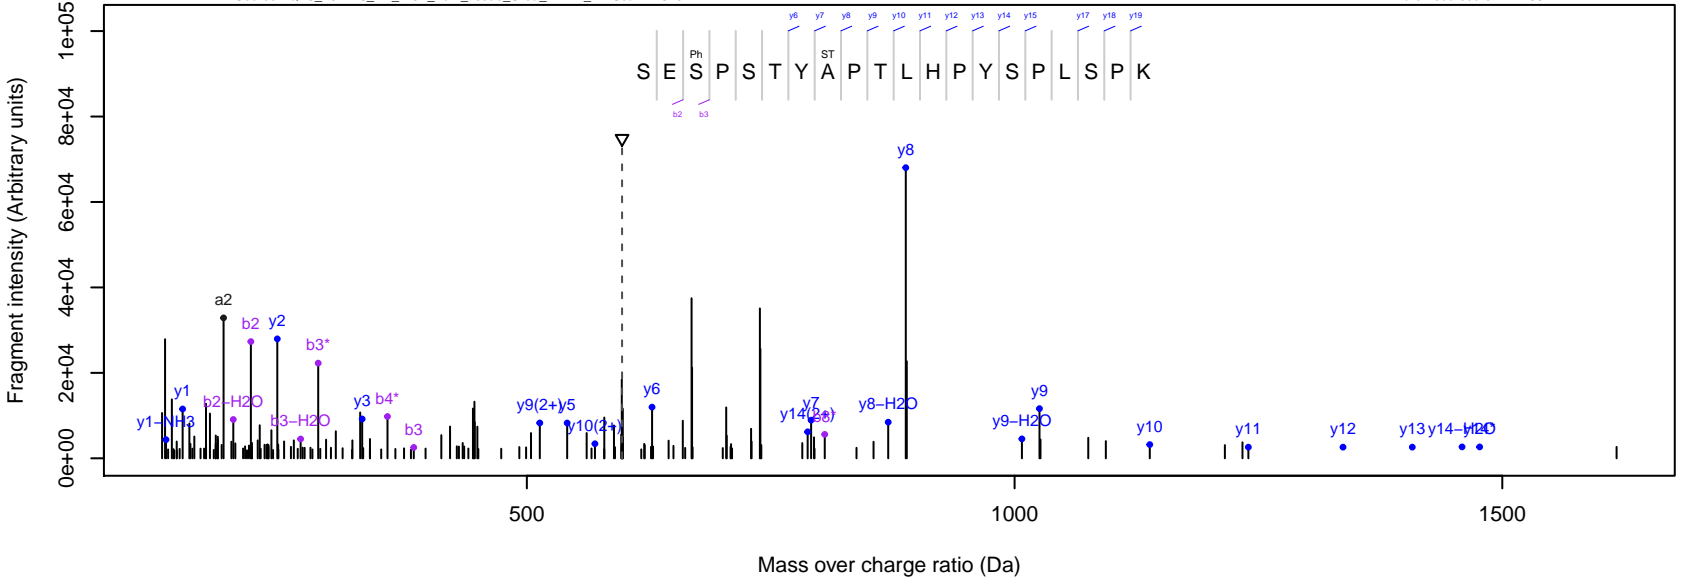

SKGKDSL(Phospho (STY))DDGVDLK-3+

Source : QE3\_201126\_FR\_TIOx\_hum\_tissue\_Urea\_RNAB\_H Scan : 11880

Andromeda score : 112.56

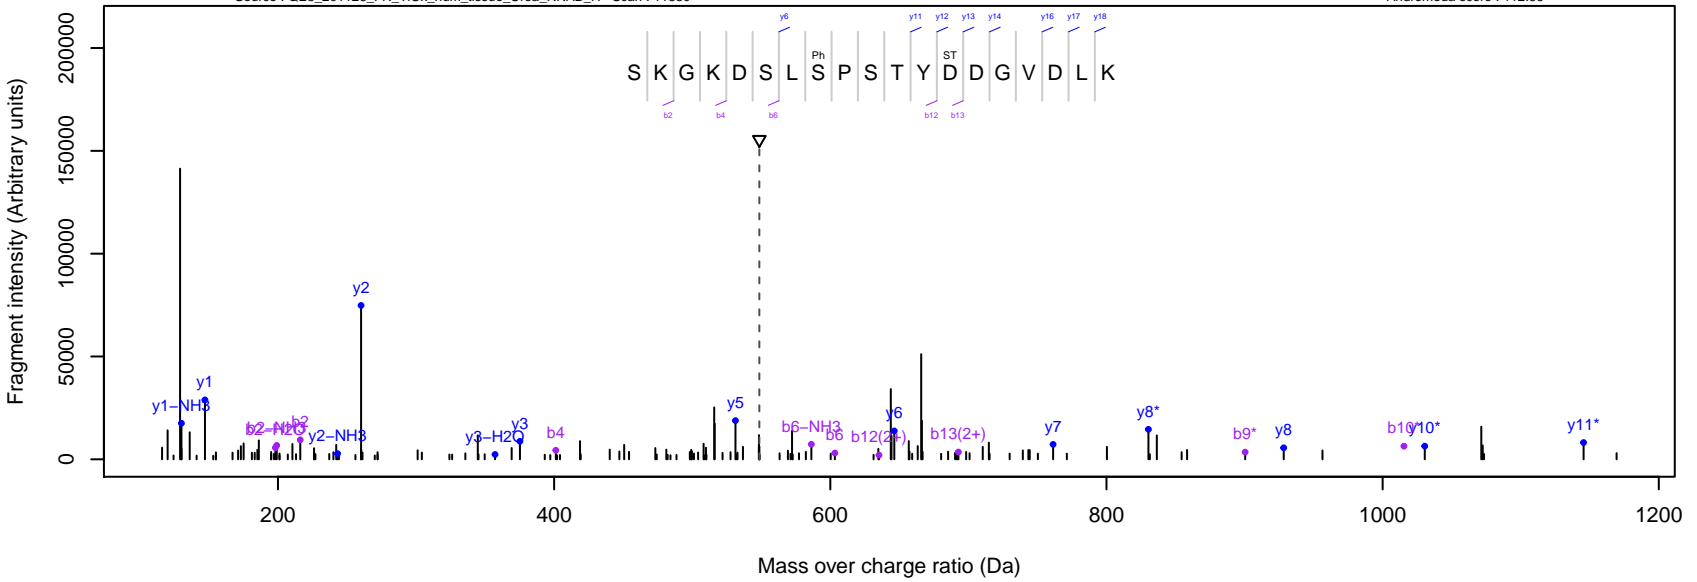

KAEVCS(Phospho (STY))DFLK-2+

Source : QE3\_201126\_FR\_TIOx\_hum\_tissue\_Urea\_RNAB\_N Scan : 19934

Andromeda score : 112.5

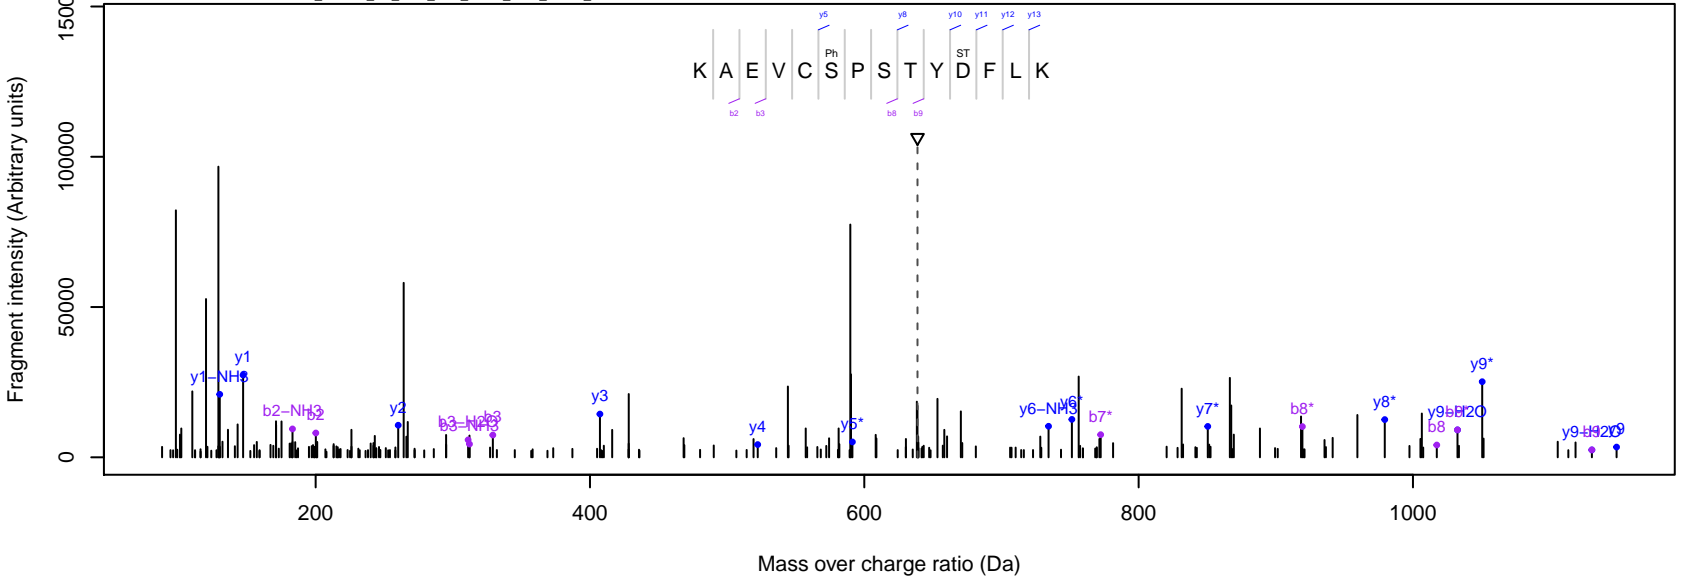

HQAS(Phospho (STY))ISELKR-3+

Source : QE3\_201126\_FR\_TIOx\_hum\_tissue\_Urea\_RNAB\_B Scan : 7562

Andromeda score : 112.44

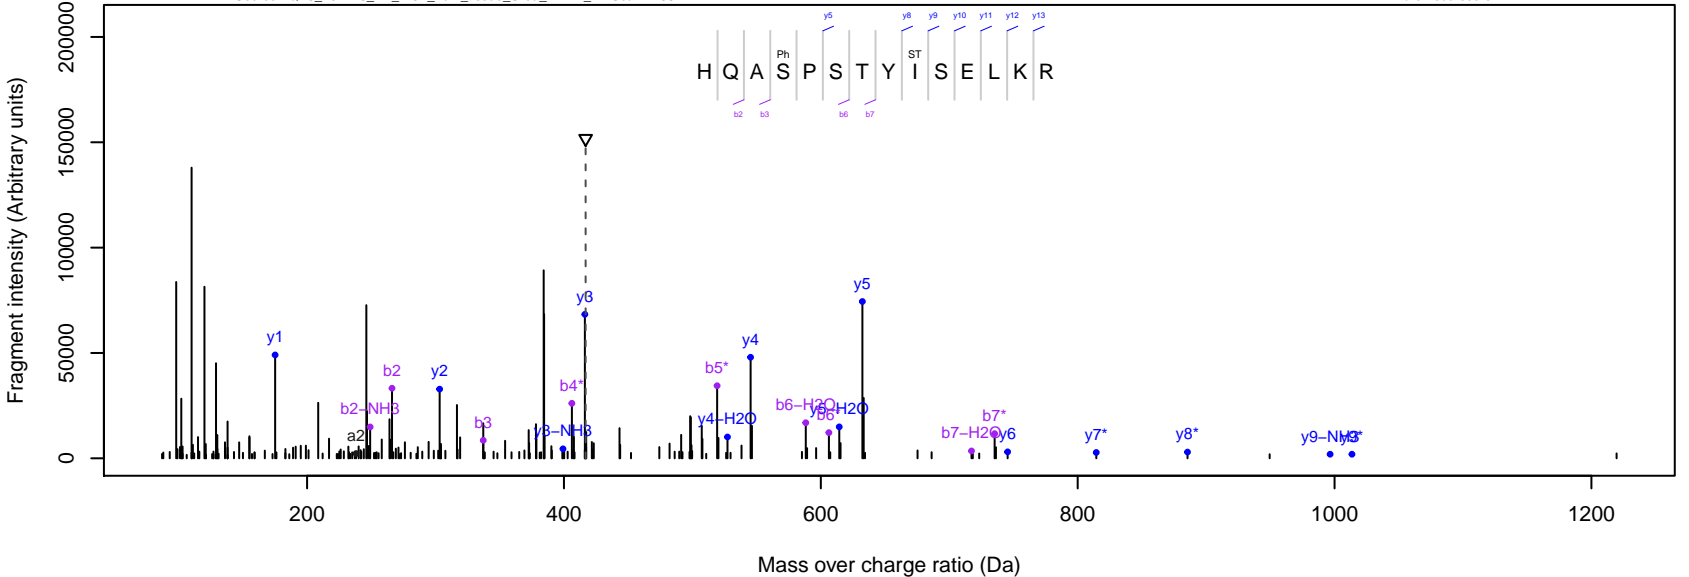

VLIAAHGNS(Phospho (STY))LR-2+

Source : QE3\_201126\_FR\_TIOx\_hum\_tissue\_Urea\_RNAB\_H Scan : 13938

Andromeda score : 112.43

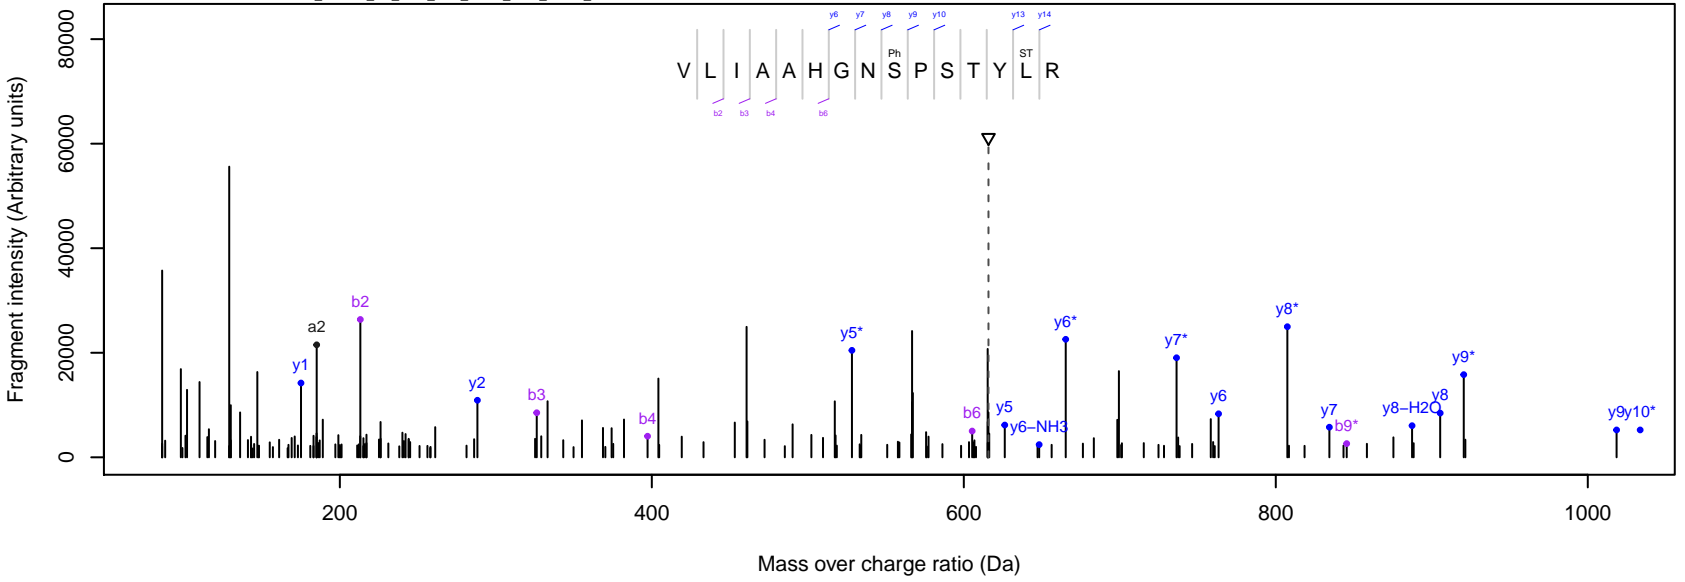

YAALS(Phospho (STY))DQGLDIK-2+

Source : QE3\_201126\_FR\_TIOx\_hum\_tissue\_Urea\_RNAB\_N Scan : 33367

Andromeda score : 112.42

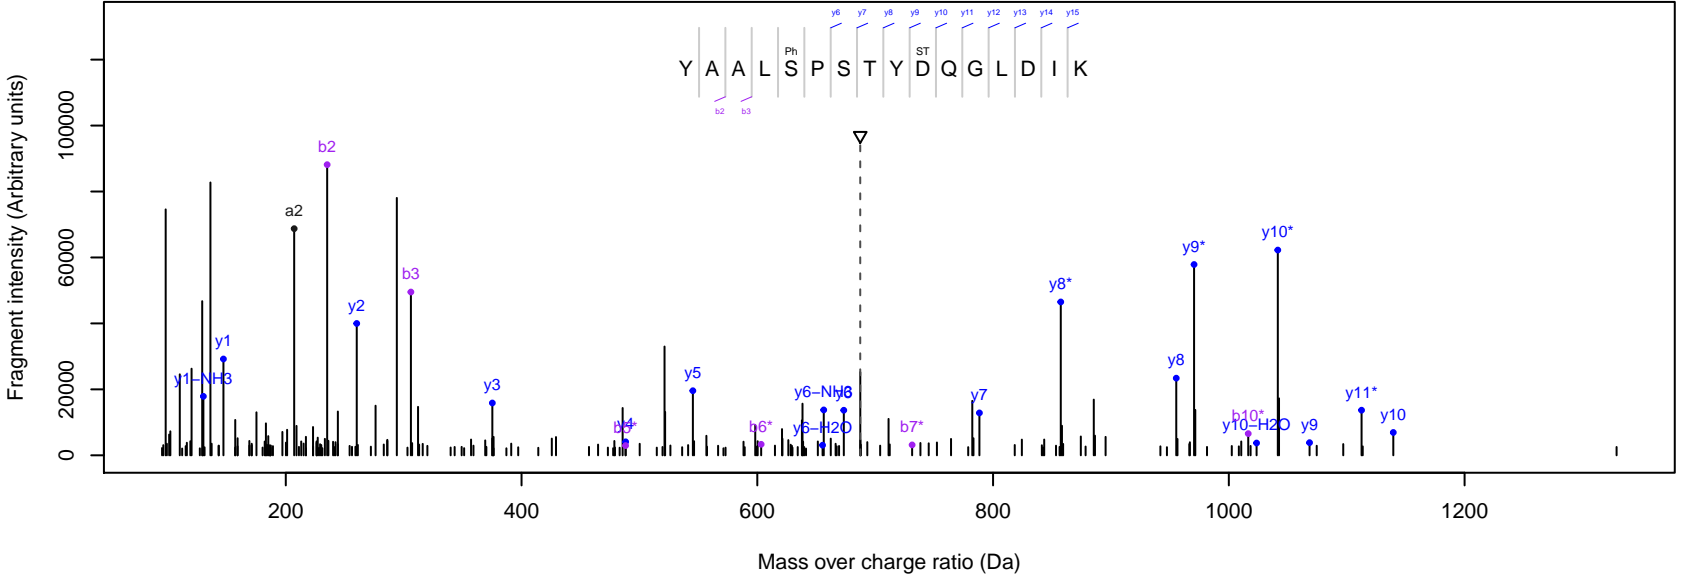

AQS(Phospho (STY))PVSGPNVAHLTDGATLNDLR-3+

Source : QE3\_201126\_FR\_TIOx\_hum\_tissue\_Urea\_RNAB\_H Scan : 27734

Andromeda score : 112.39

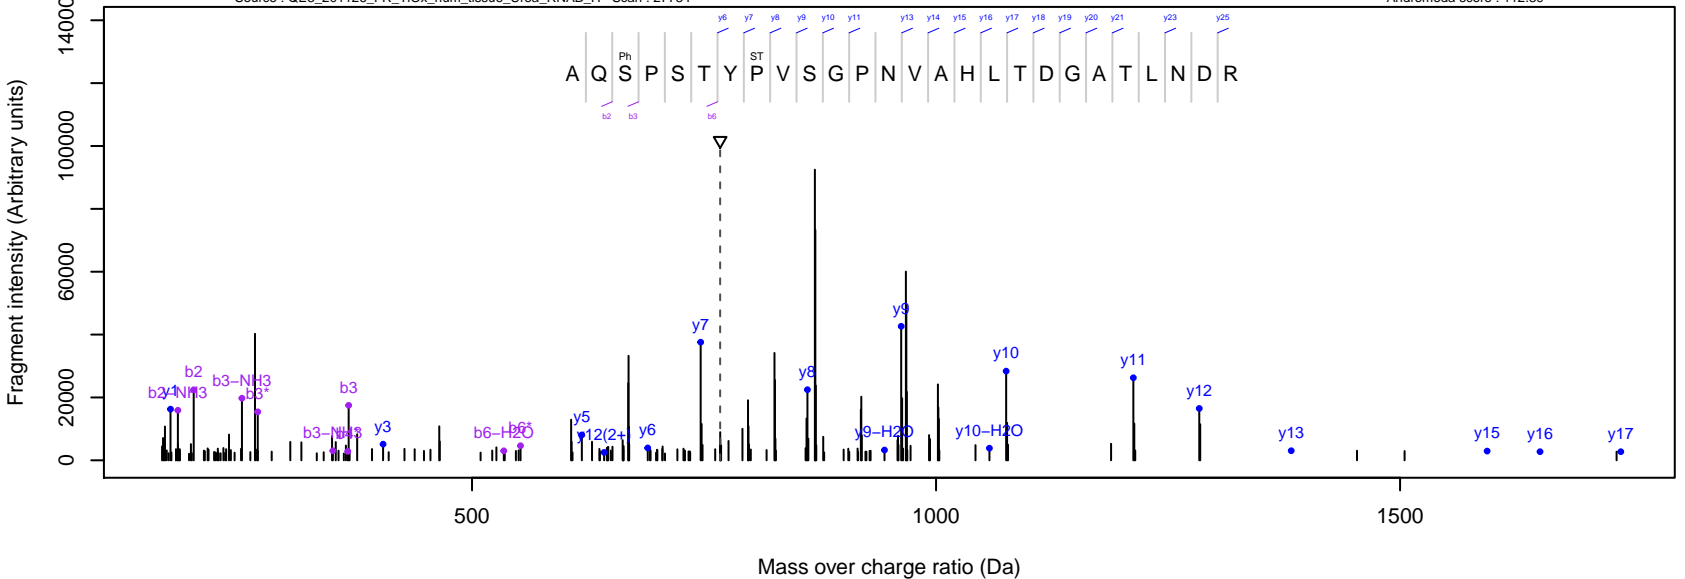

DVMSDETNNREETES(Phospho (STY))PSQEFVNITK-3+

Source : QE3\_201126\_FR\_TiOx\_hum\_tissue\_Urea\_RNAB\_H Scan : 46705

Andromeda score : 112.39

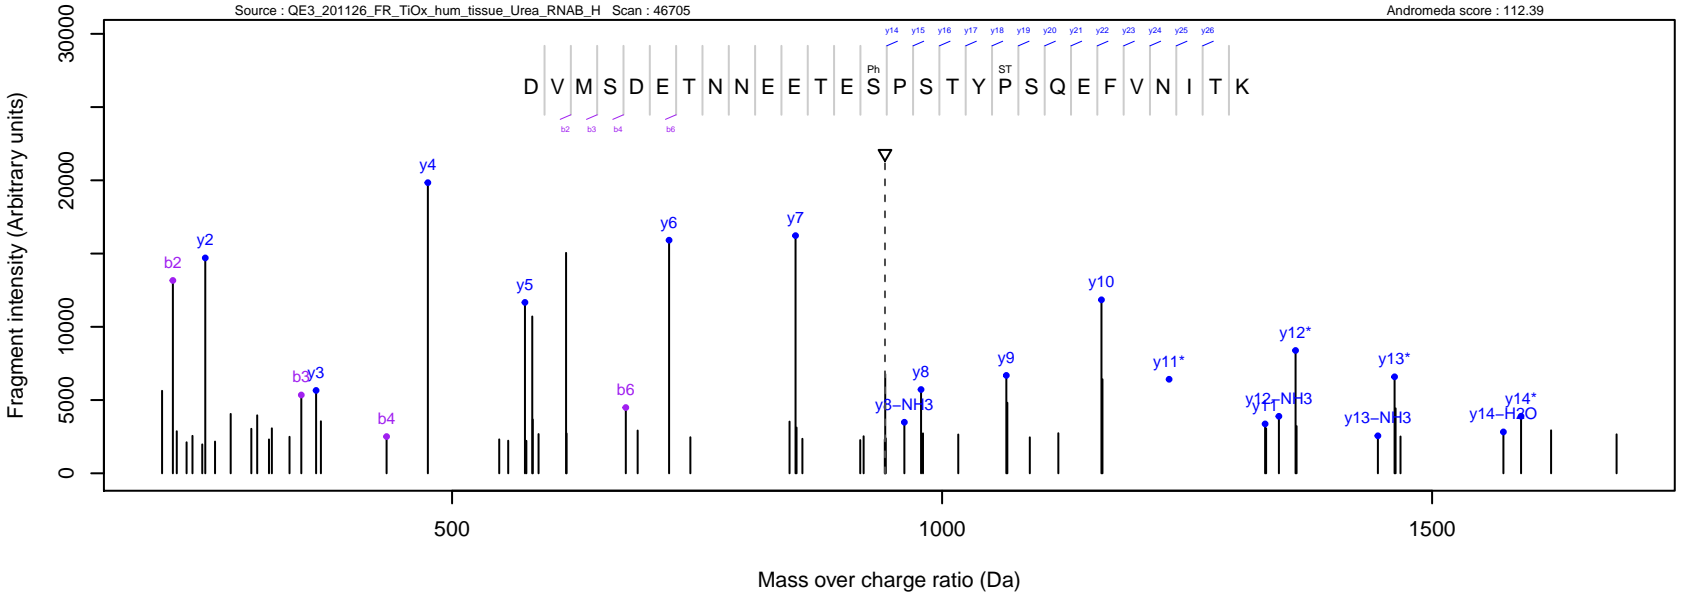

GDSIEILADS(Phospho (STY))EDEDNEEEERS-3+

Source : QE3\_201126\_FR\_TiOx\_hum\_tissue\_Urea\_RNAB\_H Scan : 35399

Andromeda score : 112.39

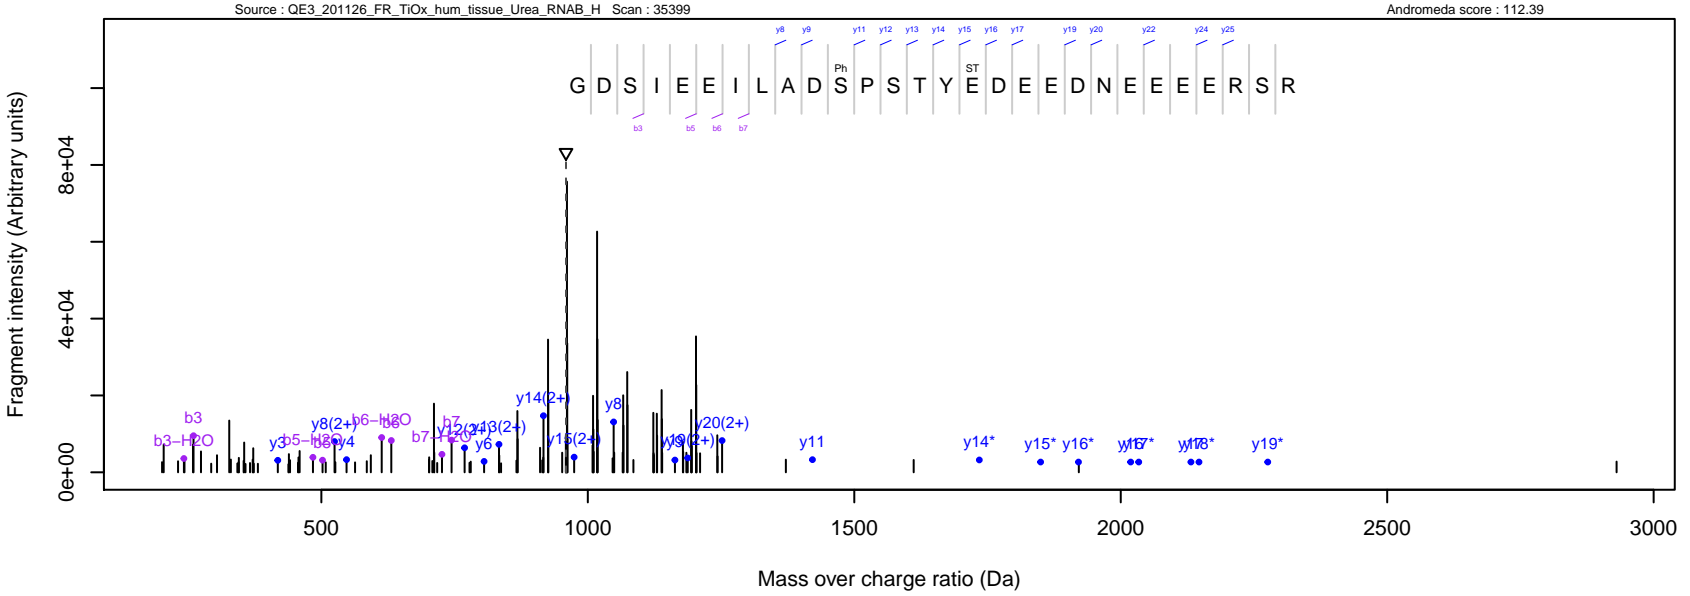

KEEPS(Phospho (STY))PLNLSHHTPDHQEGEGR-4+

Source : QE3\_201126\_FR\_TiOx\_hum\_tissue\_Urea\_RNAB\_H Scan : 9465

Andromeda score : 112.39

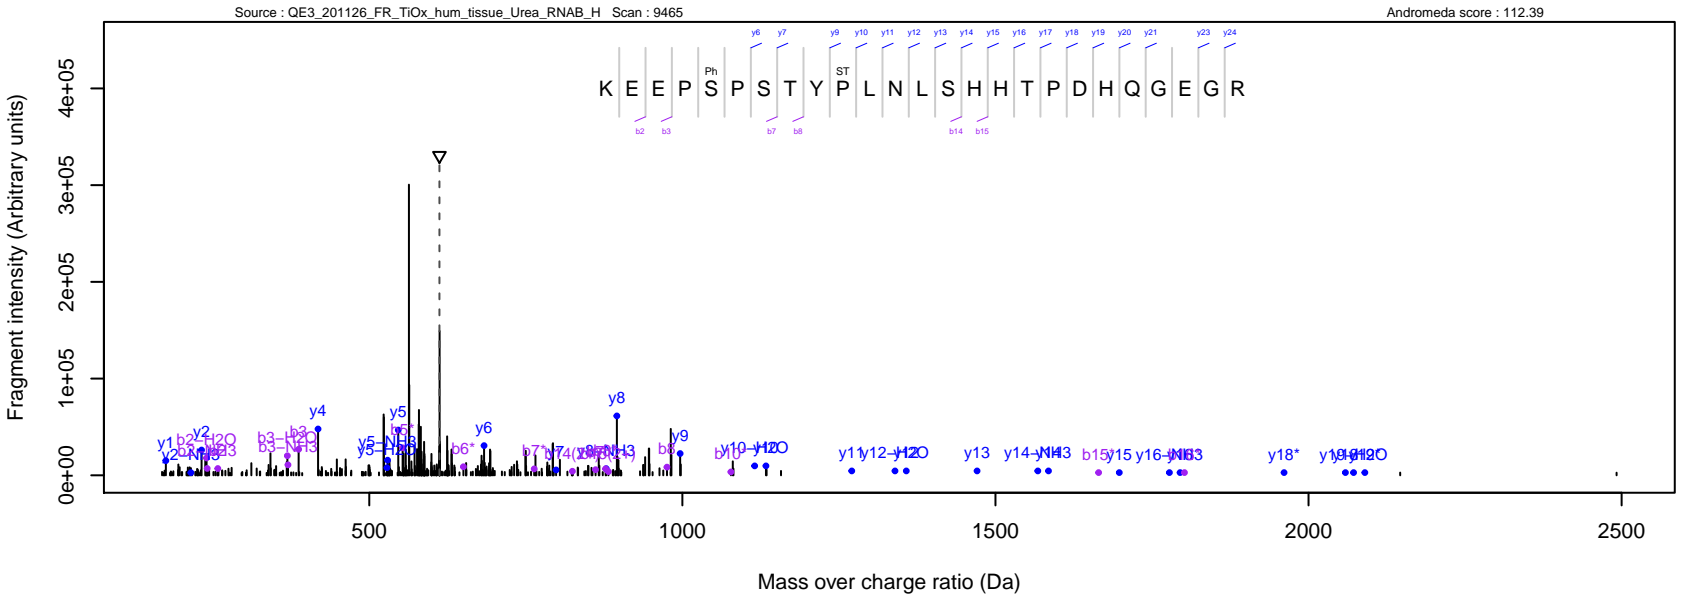

KLELESRGS(Phospho (STY))AEK-3+

Source : QE3\_201126\_FR\_TiOx\_hum\_tissue\_Urea\_RNAB\_N Scan : 6675

Andromeda score : 112.36

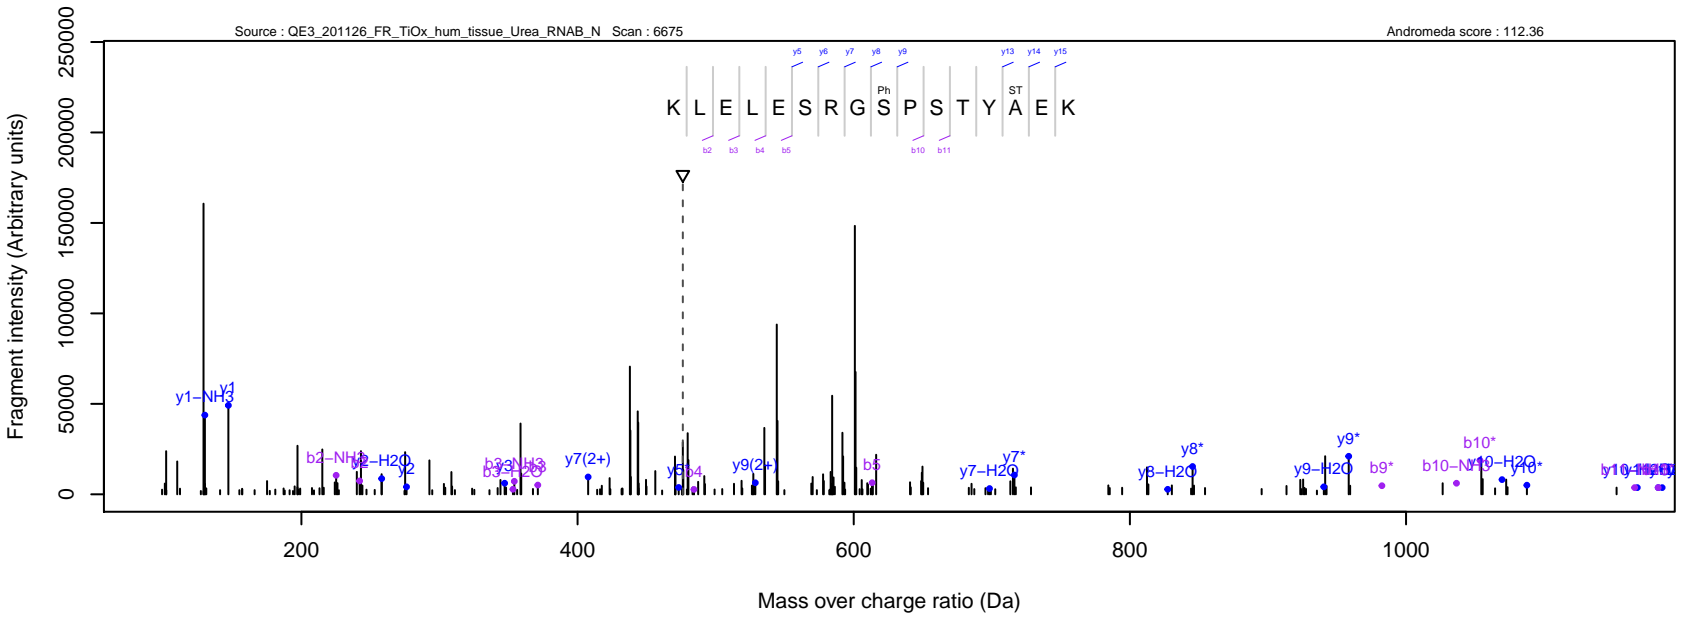

S(Phospho (STY))LQLTPTDSSFTDFTDTCPPRPKPVAR-4+

Source : QE3\_201126\_FR\_TiOx\_hum\_tissue\_Urea\_RNAB\_H Scan : 36316

Andromeda score : 112.36

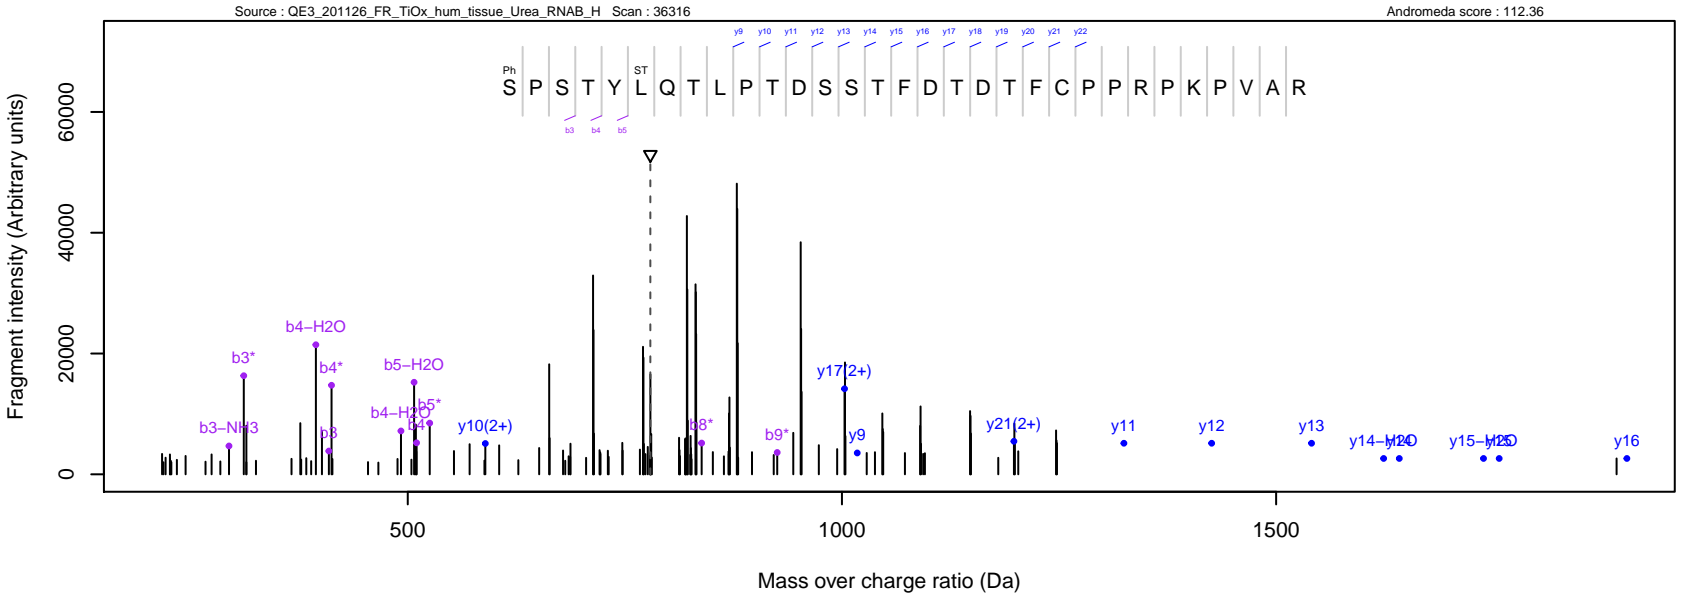

VWTSGQVEEYDLDDINS(Phospho (STY))RVEM(Oxidation (M))KPK-4+

Source : QE3\_201126\_FR\_TiOx\_hum\_tissue\_Urea\_RNAB\_N Scan : 33093

Andromeda score : 112.35

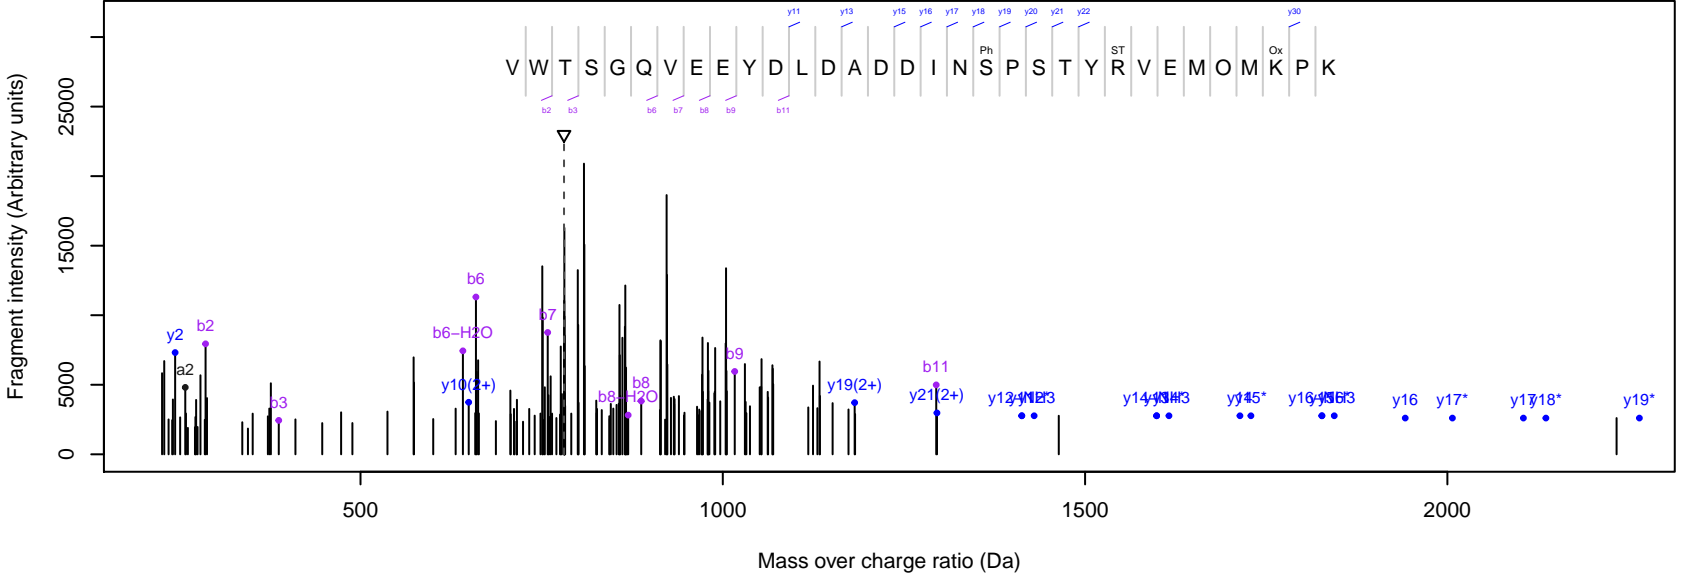

QDRENEEGDTGNWYSS(Phospho (STY))DEDEGSSVTSILK-3+

Source : QE3\_201126\_FR\_TiOx\_hum\_tissue\_Urea\_RNAB\_B Scan : 40062

Andromeda score : 112.34

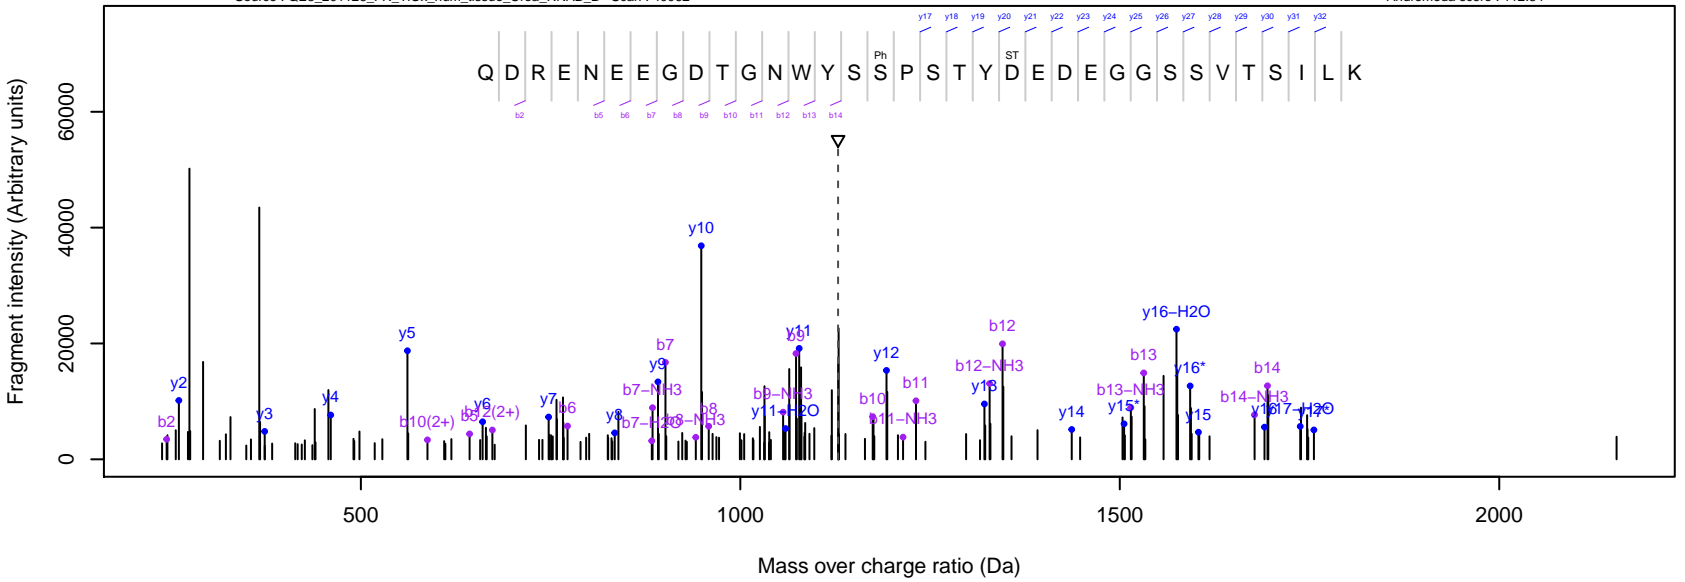

RES(Phospho (STY))LSTSSDLYKR-3+

Source : QE3\_201126\_FR\_TiOx\_hum\_tissue\_Urea\_RNAB\_N Scan : 11665

Andromeda score : 112.3

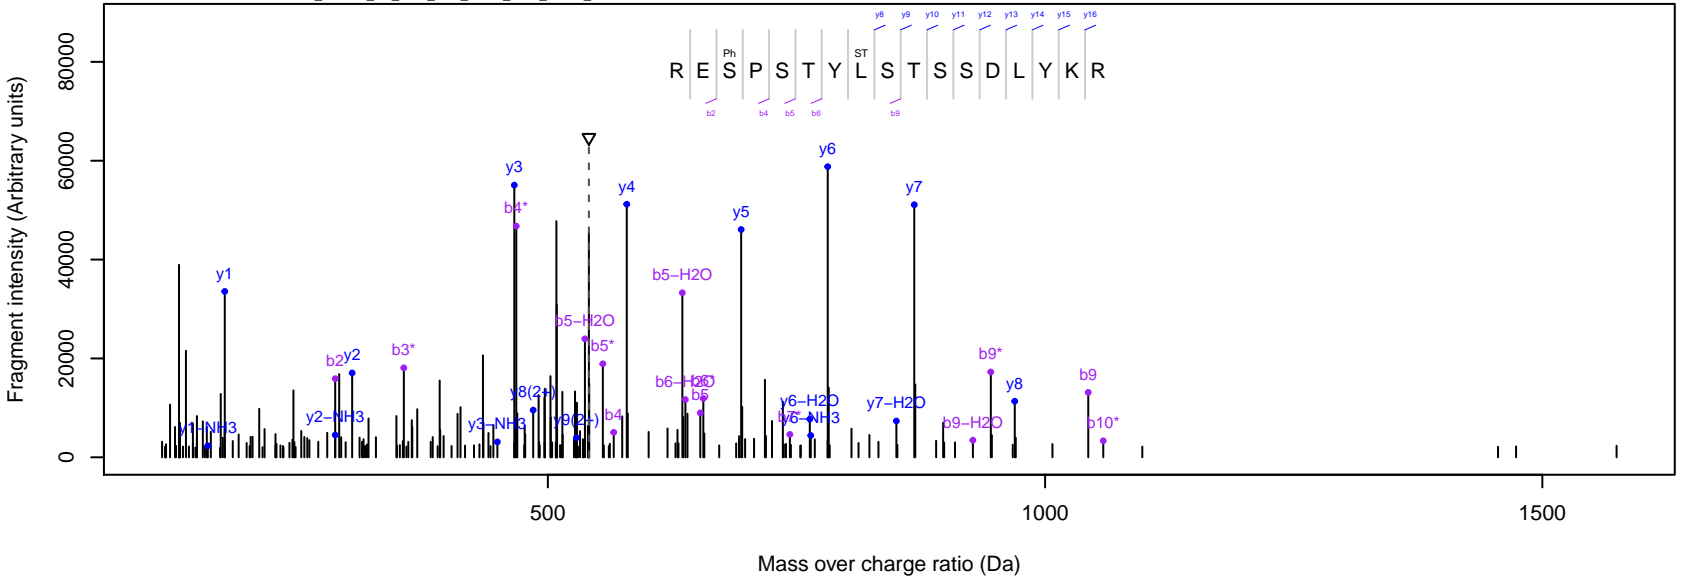

TPS(Phospho (STY))PKEEDEEPES(Phospho (STY))PPEKK-3+

Source : QE3\_201126\_FR\_TiOx\_hum\_tissue\_Urea\_RNAB\_N Scan : 8499

Andromeda score : 112.18

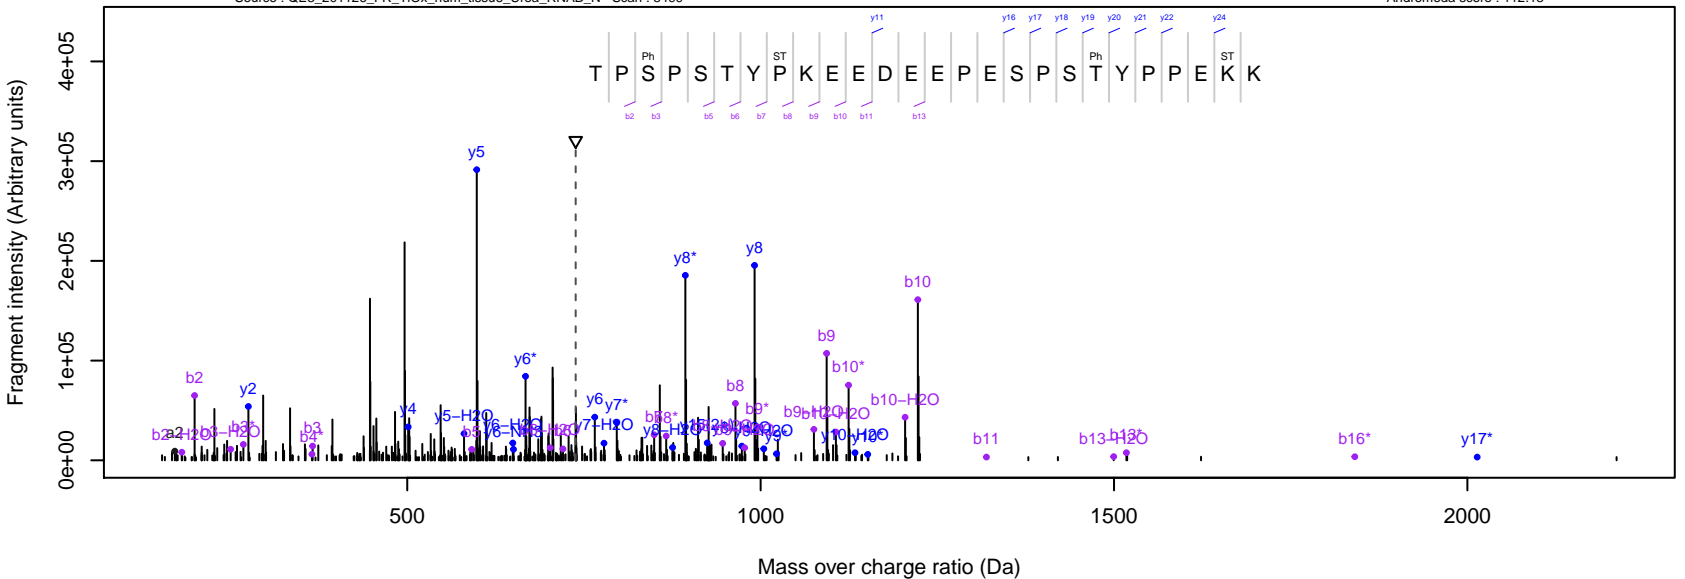

GKDS(Phospho (STY))LS(Phospho (STY))DDGVLDK-2+

Source : QE3\_201126\_FR\_TIOx\_hum\_tissue\_Urea\_RNAB\_H Scan : 22024

Andromeda score : 112.17

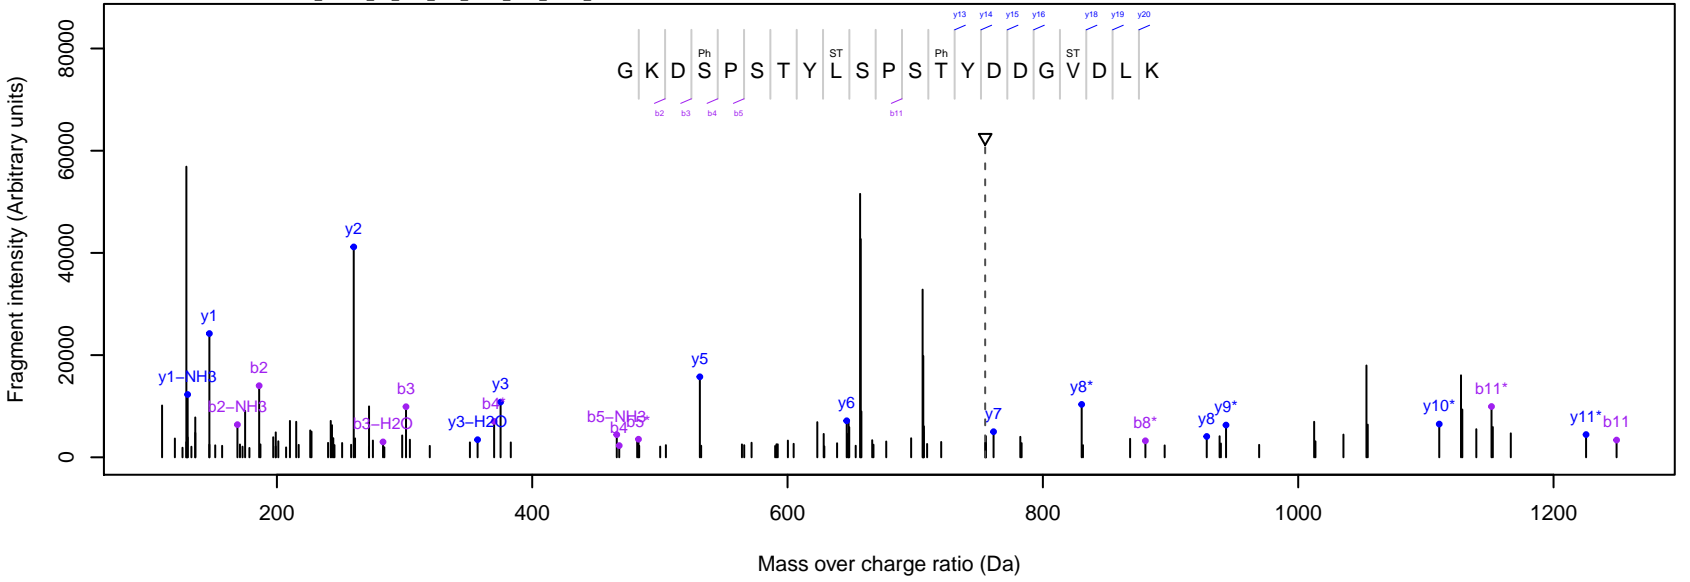

LYNSEERSPYT(Phospho (STY))NK-3+

Source : QE3\_201126\_FR\_TIOx\_hum\_tissue\_Urea\_RNAB\_B Scan : 9536

Andromeda score : 112.17

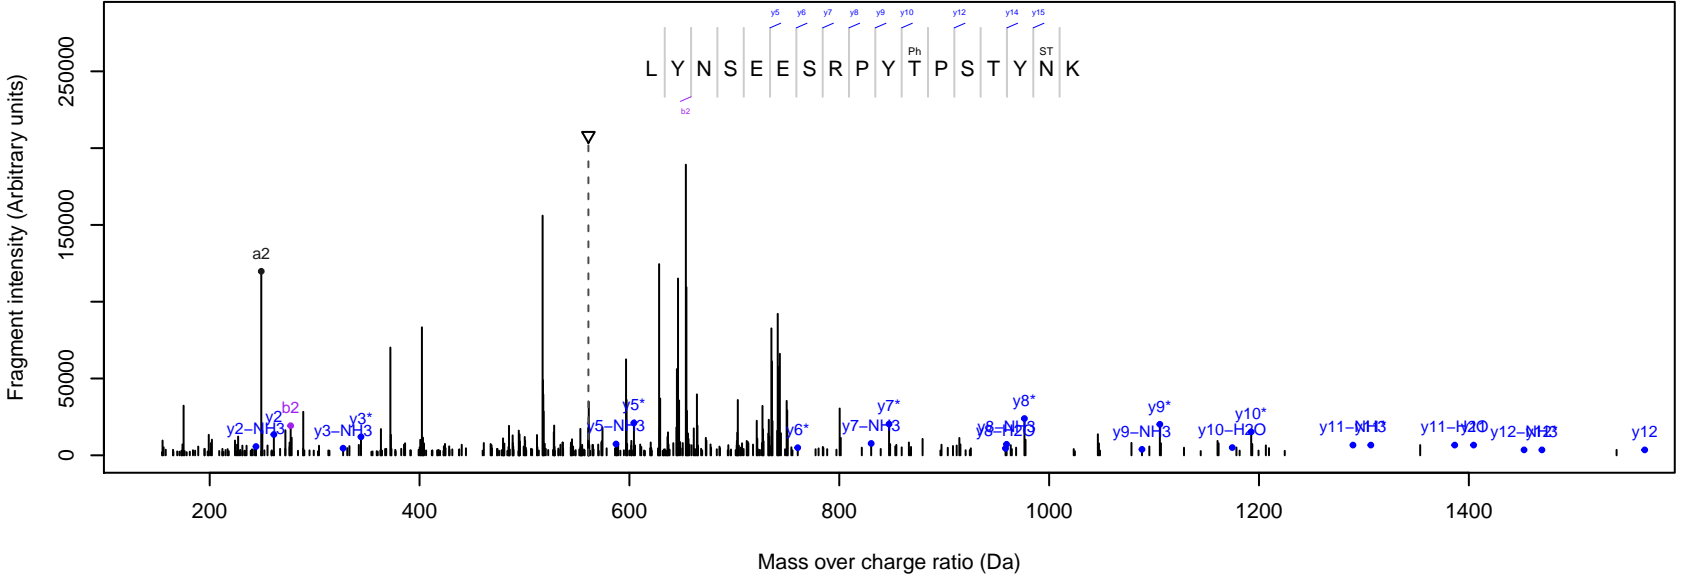

(Acetyl (Protein N-term))S(Phospho (STY))DSEKLNLDIIGR-2+

Source : QE3\_201126\_FR\_TIOx\_hum\_tissue\_Urea\_RNAB\_N Scan : 50999

Andromeda score : 112.15

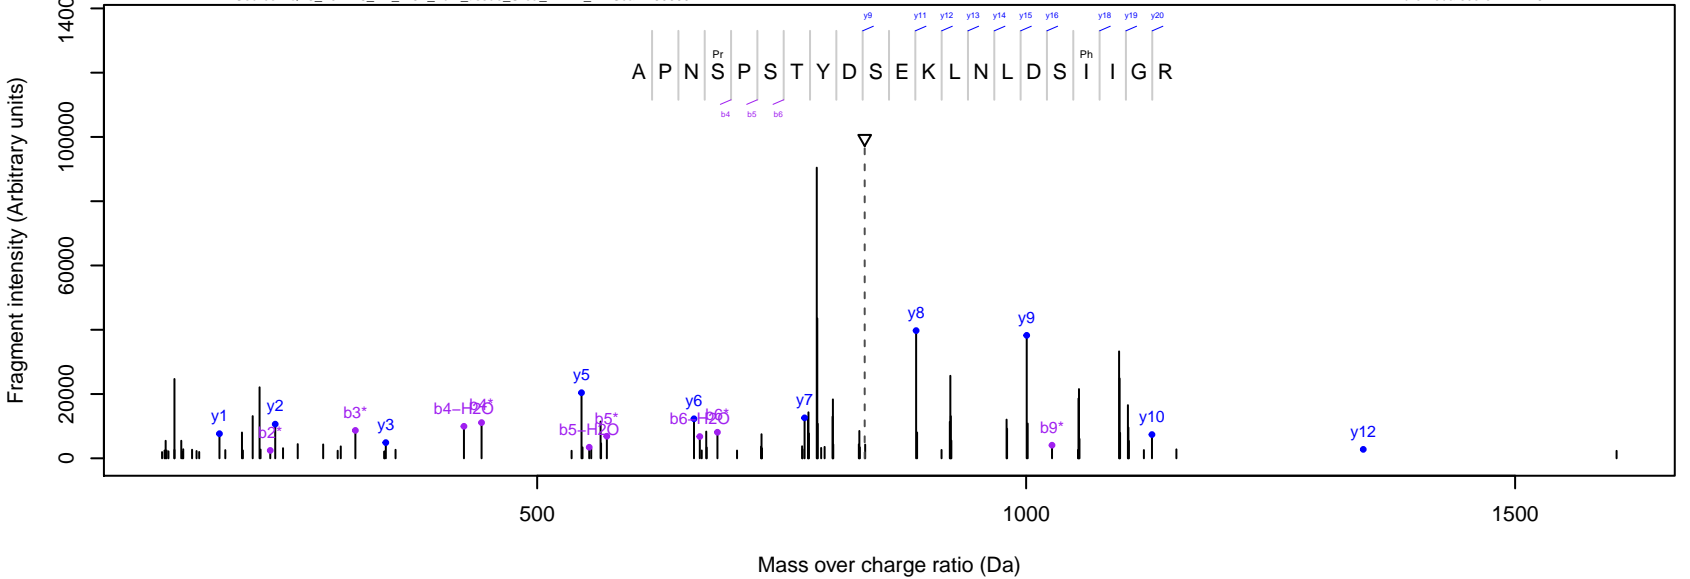



DSGNWDT(Phospho (STY))SGSELS(Phospho (STY))EGELEKR-3+

Source : QE3\_201126\_FR\_TiOx\_hum\_tissue\_Urea\_RNAB\_B Scan : 34331

Andromeda score : 112.13

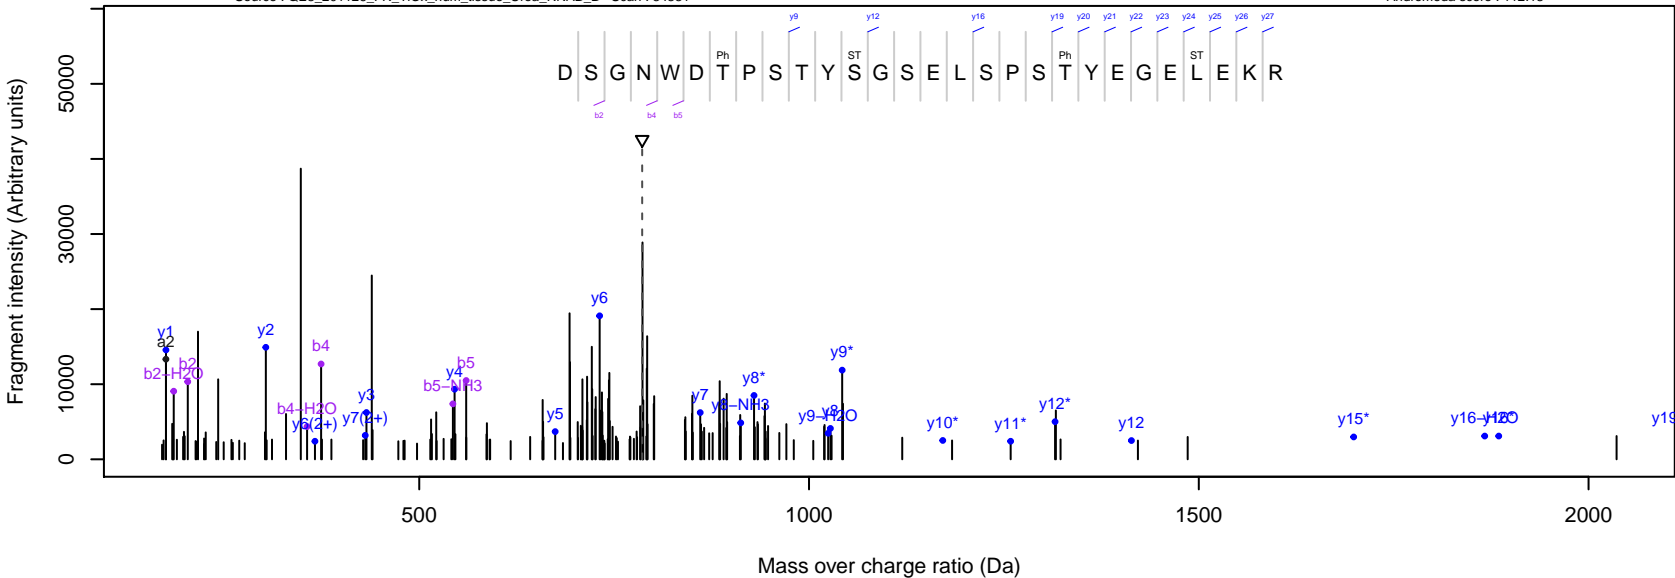

KQPPVSPGTALVGSQKEPSEVPT(Phospho (STY))PK-4+

Source : QE3\_201126\_FR\_TiOx\_hum\_tissue\_Urea\_RNAB\_H Scan : 20368

Andromeda score : 112.13

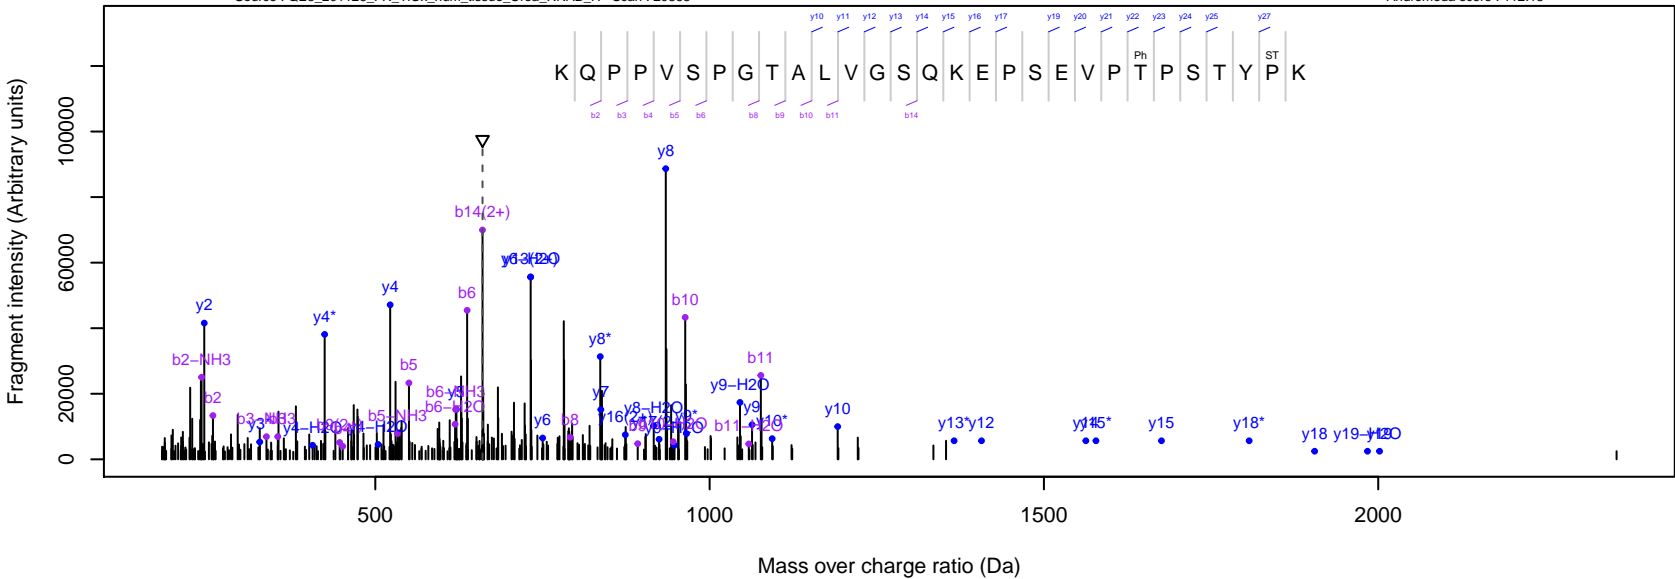

KTEM(Oxidation (M))DKSPFNSPSPSTY(Phospho (STY))PQDSPR-3+

Source : QE3\_201126\_FR\_TiOx\_hum\_tissue\_Urea\_RNAB\_N Scan : 11835

Andromeda score : 112.13

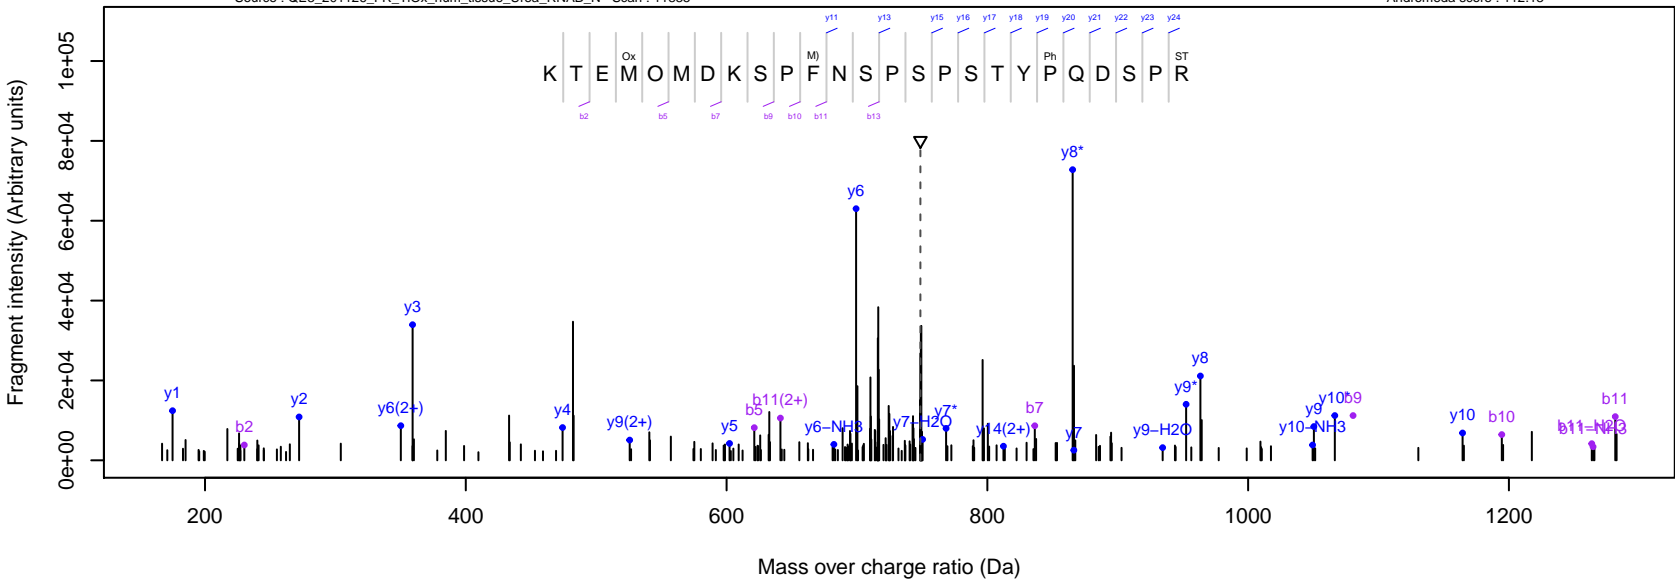



GS(Phospho (STY))LAS(Phospho (STY))LDS(Phospho (STY))LRK-2+

Source : QE3\_201126\_FR\_TIOx\_hum\_tissue\_Urea\_RNAB\_N Scan : 33981

Andromeda score : 111.95

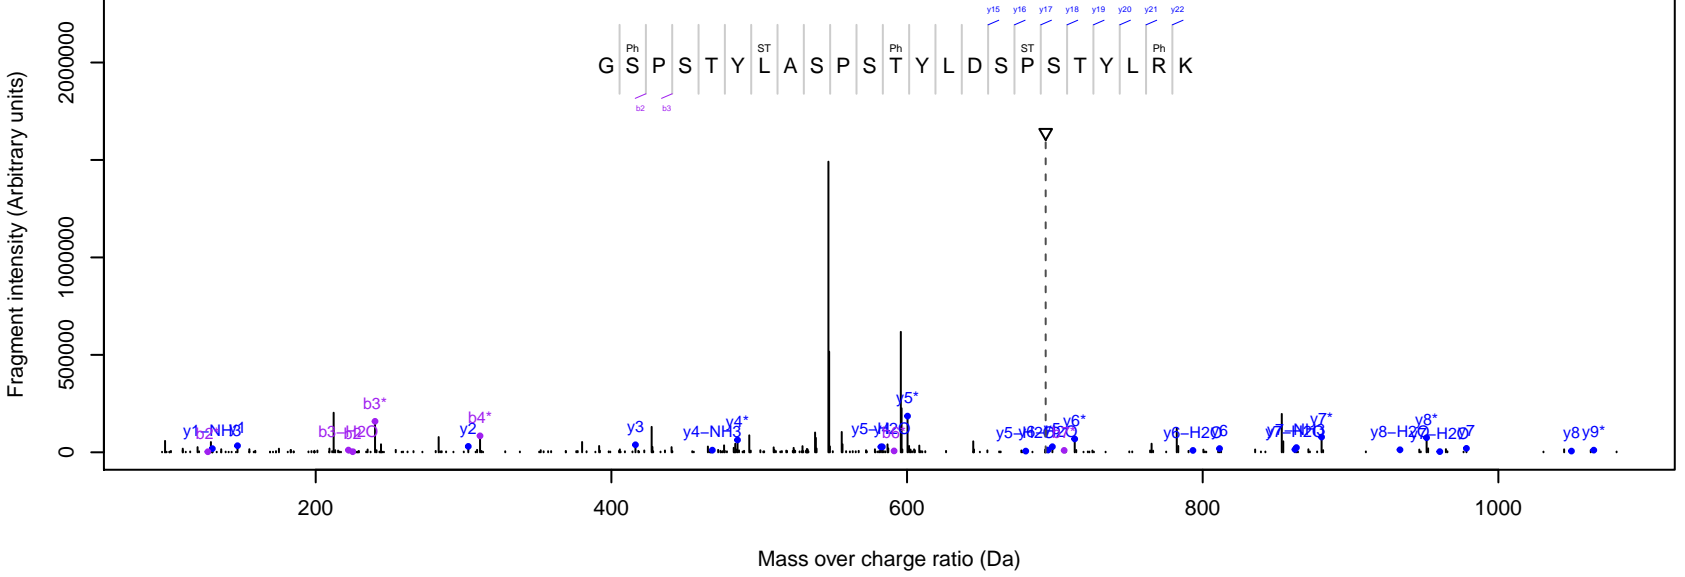

QDVNDAS(Phospho (STY))LAR-2+

Source : QE3\_201126\_FR\_TIOx\_hum\_tissue\_Urea\_RNAB\_H Scan : 11091

Andromeda score : 111.94

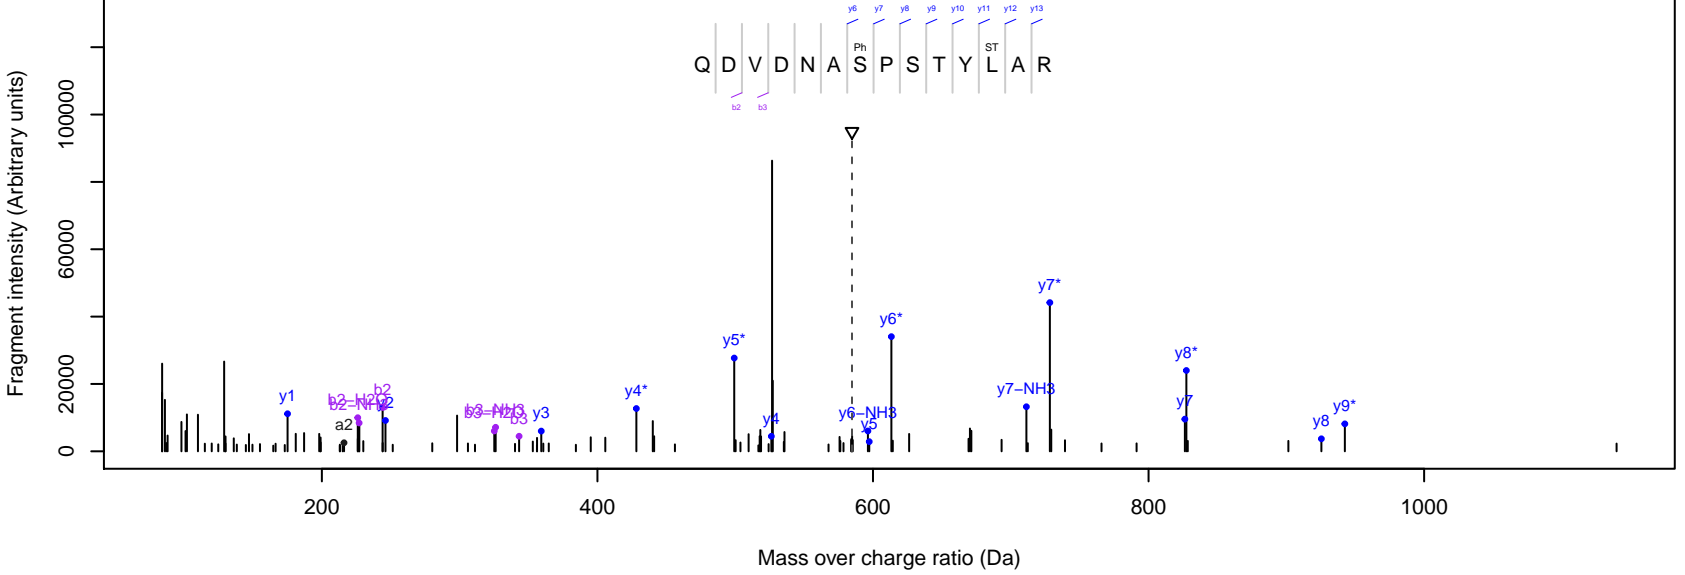

YRS(Phospho (STY))PYSGPK-2+

Source : QE3\_201126\_FR\_TIOx\_hum\_tissue\_Urea\_RNAB\_H Scan : 7085

Andromeda score : 111.94

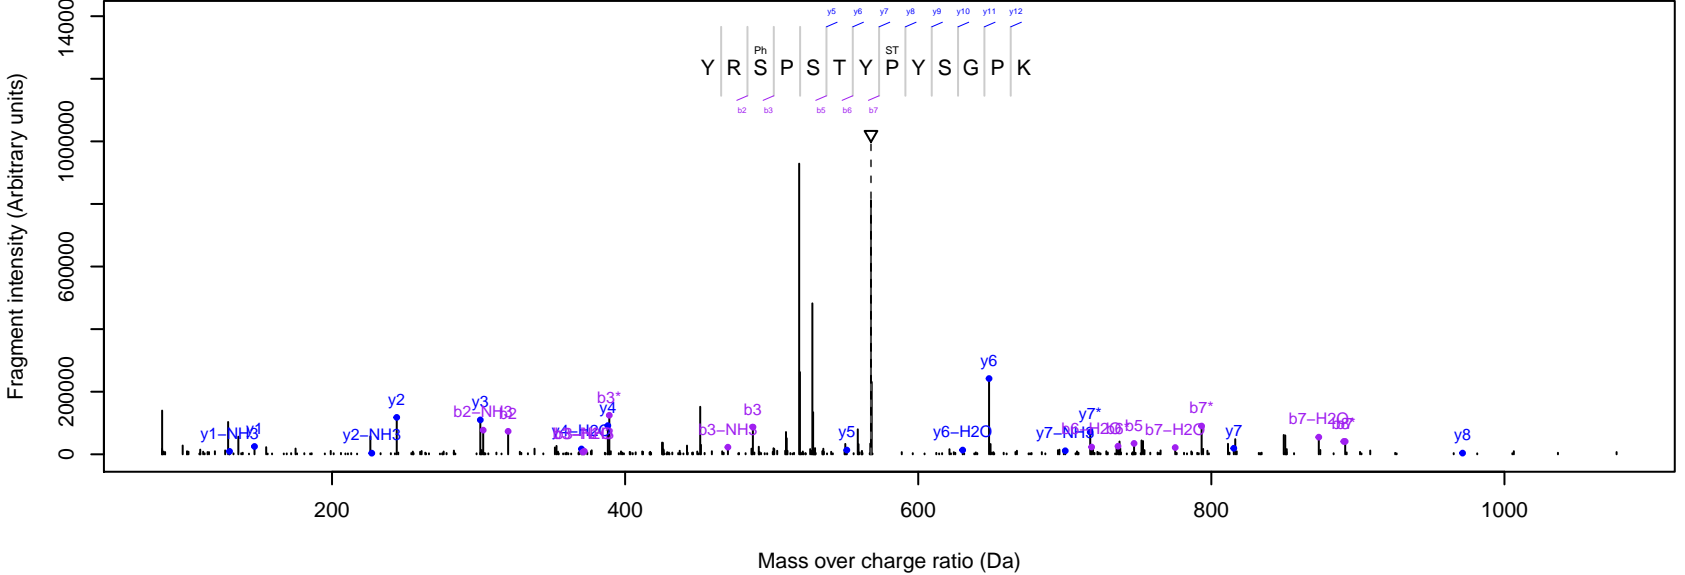

LSS(Phospho (STY))MAMISGLSGR-2+

Source : QE3\_201126\_FR\_TiOx\_hum\_tissue\_Urea\_RNAB\_N Scan : 41978

Andromeda score : 111.88

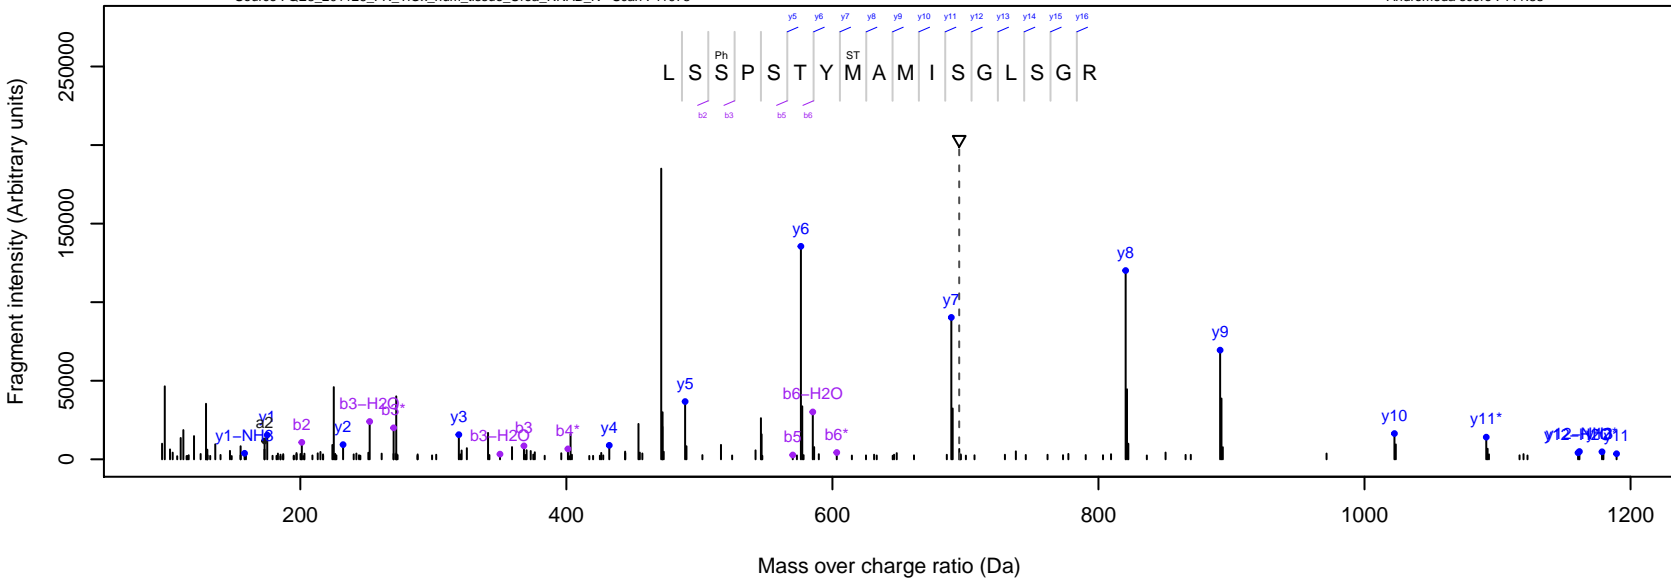

SLKES(Phospho (STY))EQES(Phospho (STY))EEEILAQKK-3+

Source : QE3\_201126\_FR\_TiOx\_hum\_tissue\_Urea\_RNAB\_N Scan : 17669

Andromeda score : 111.88

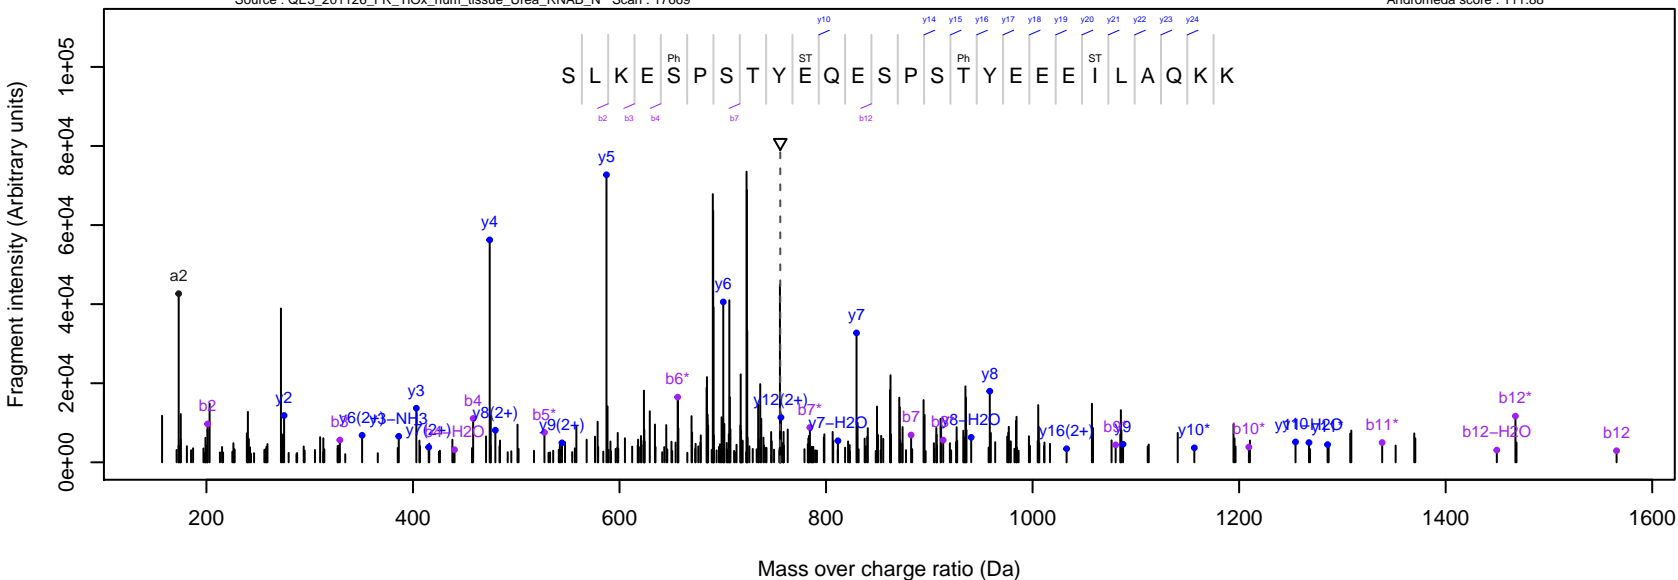

NSDLLTS(Phospho (STY))PDVGLLK-2+

Source : QE3\_201126\_FR\_TiOx\_hum\_tissue\_Urea\_RNAB\_H Scan : 48350

Andromeda score : 111.83

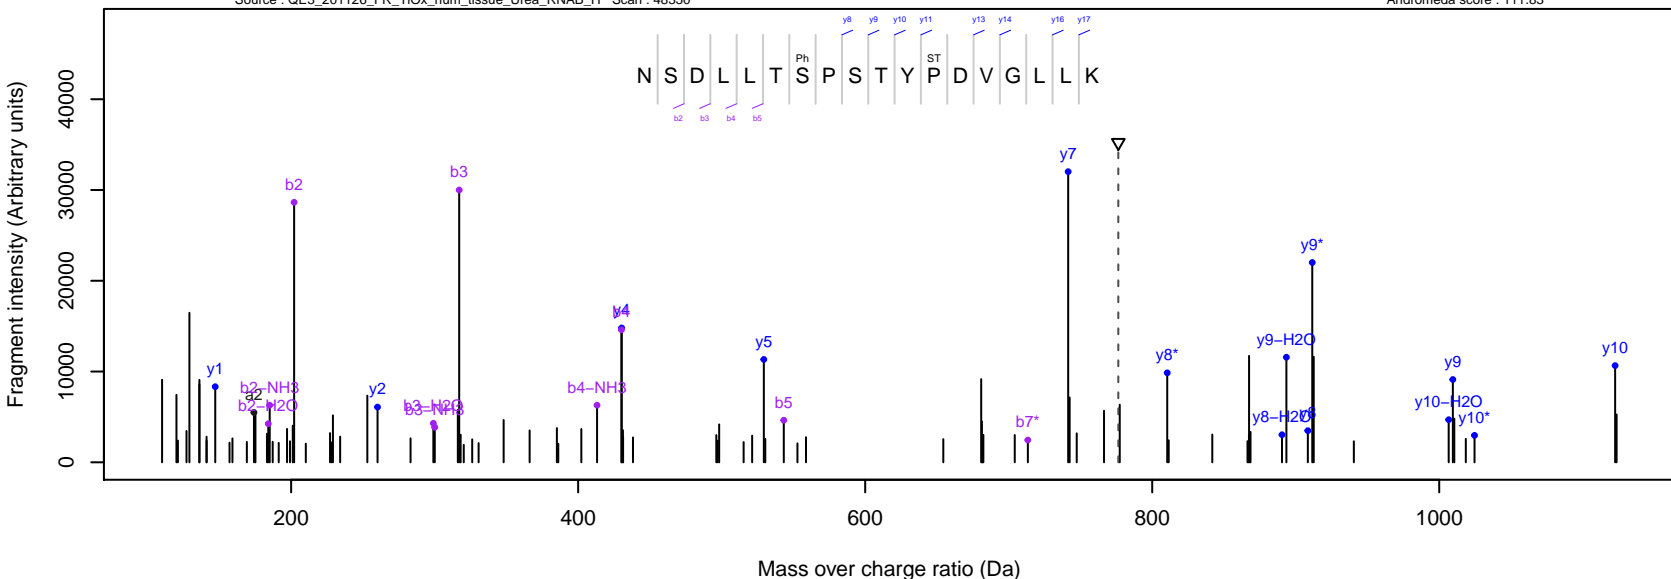

LPIFSRLS(Phospho (STY))ISDD-2+

Source : QE3\_201126\_FR\_TIOx\_hum\_tissue\_Urea\_RNAB\_H Scan : 51815

Andromeda score : 111.79

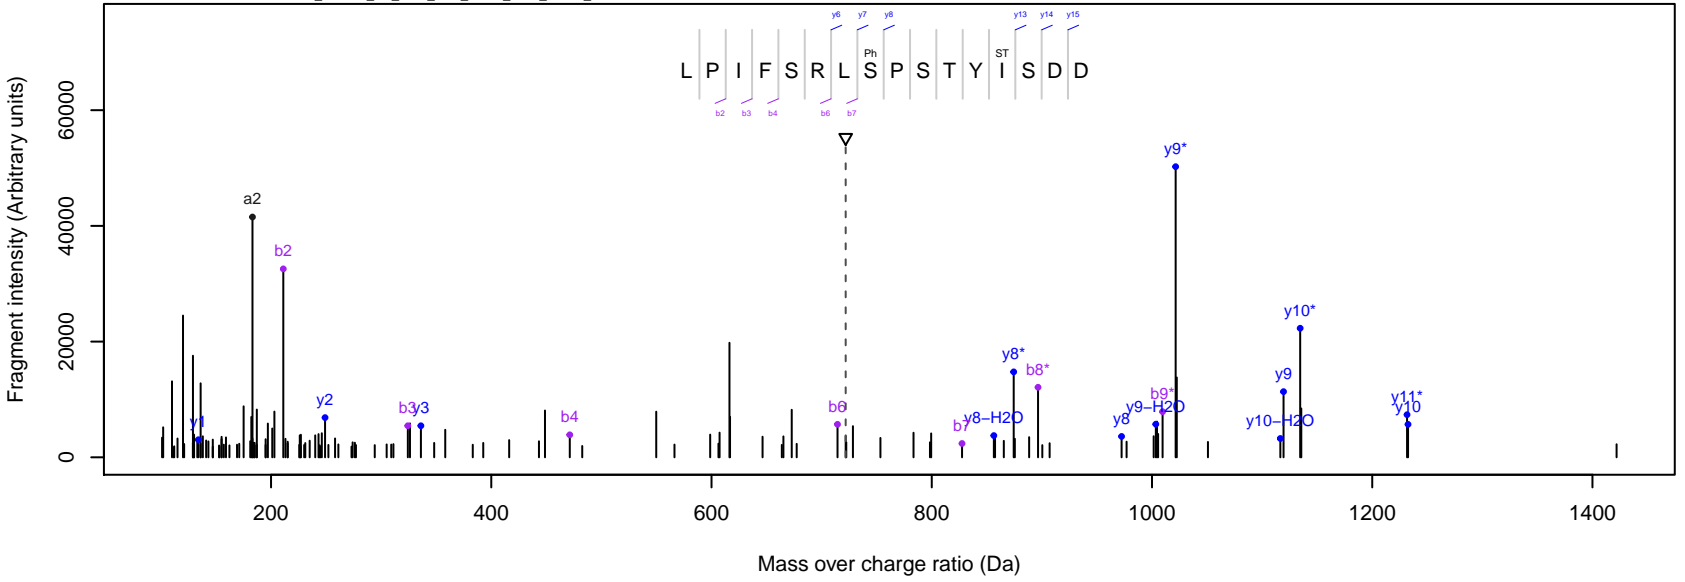

M(Oxidation (M))VIQGPSS(Phospho (STY))PQGEAMVTDVLEdqKEGR-3+

Source : QE3\_201126\_FR\_TIOx\_hum\_tissue\_Urea\_RNAB\_H Scan : 42448

Andromeda score : 111.79

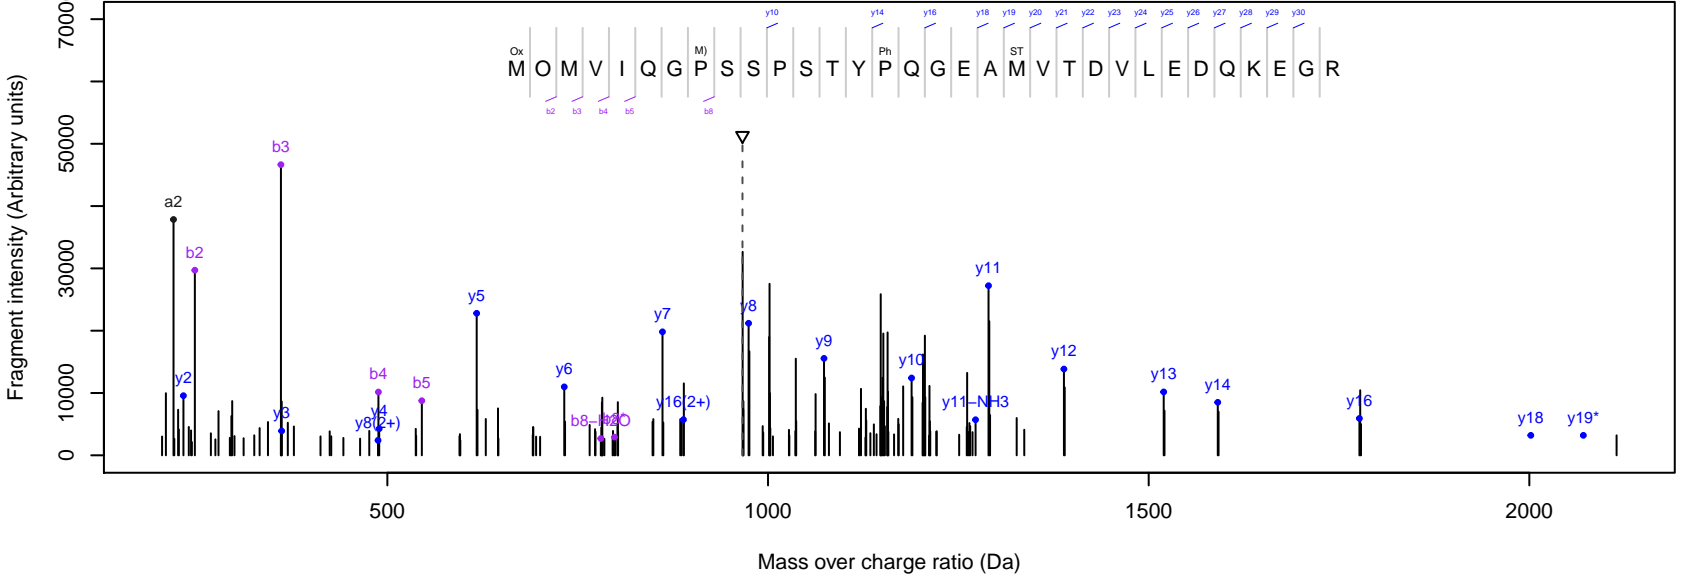

SHS(Phospho (STY))GT(Phospho (STY))SPDNTAPPpPPpPPRPPQPSHSR-3+

Source : QE3\_201126\_FR\_TIOx\_hum\_tissue\_Urea\_RNAB\_N Scan : 8862

Andromeda score : 111.79

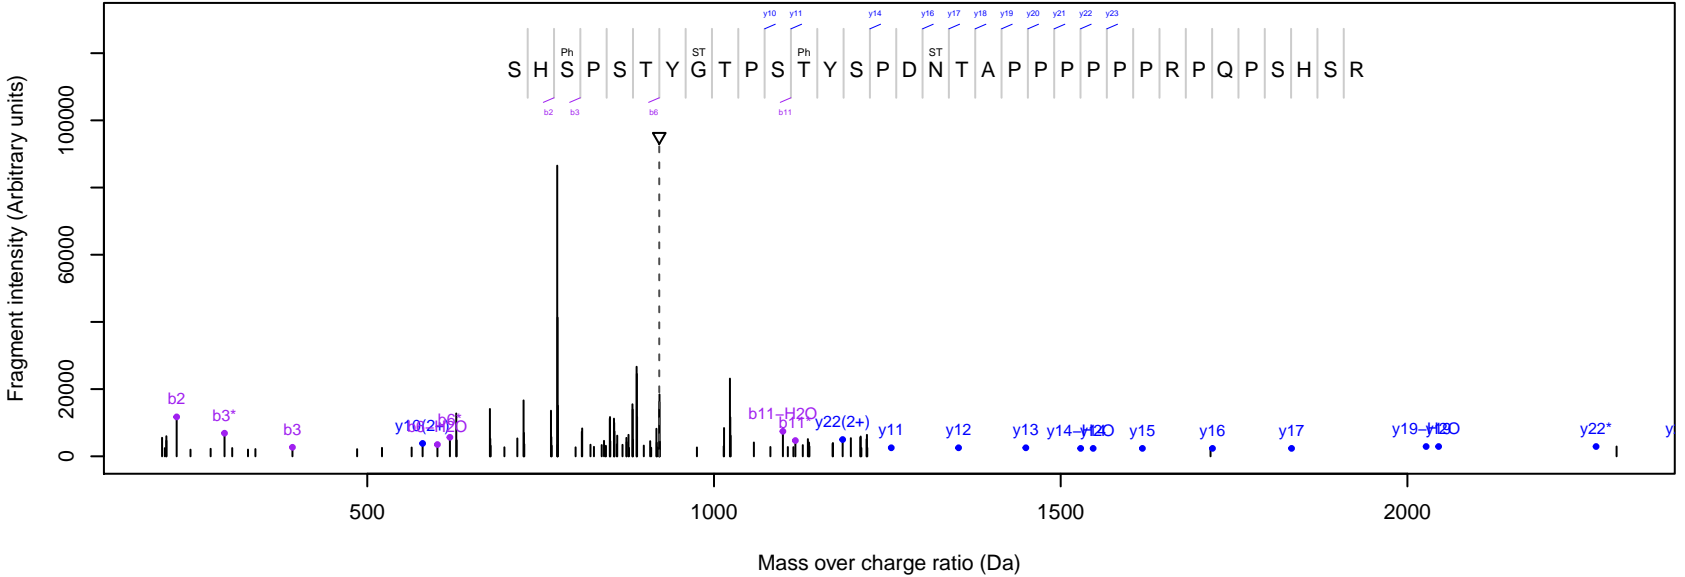

ALAM(Oxidation (M))PGRPES(Phospho (STY))PPVFR-3+

Source : QE3\_201126\_FR\_TiOx\_hum\_tissue\_Urea\_RNAB\_N Scan : 23524

Andromeda score : 111.77

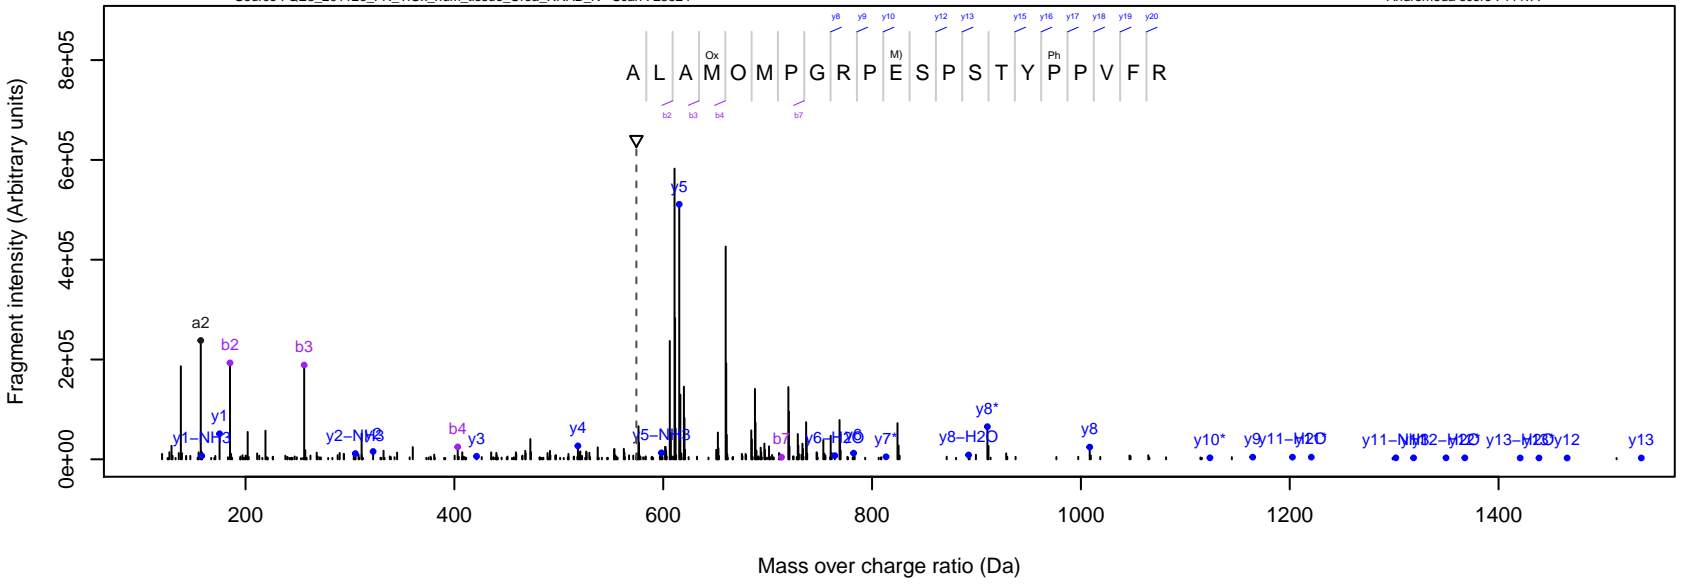

NTSAEKELSSPIS(Phospho (STY))PK-2+

Source : QE3\_201126\_FR\_TiOx\_hum\_tissue\_Urea\_RNAB\_H Scan : 16366

Andromeda score : 111.77

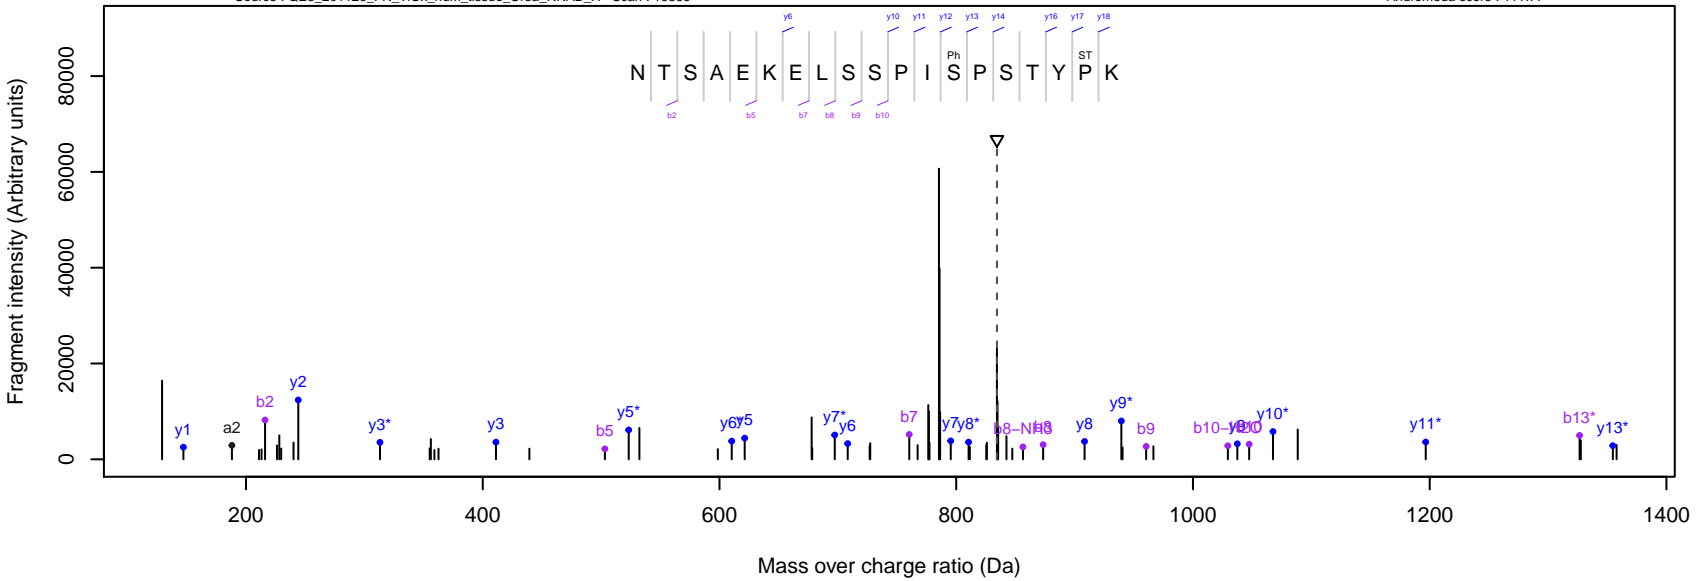

EYIPGQPPLSQS(Phospho (STY))SDSPSTYS(Phospho (STY))SPTRNSEPAGLETPEAK-3+

Source : QE3\_201126\_FR\_TiOx\_hum\_tissue\_Urea\_RNAB\_B Scan : 38835

Andromeda score : 111.75

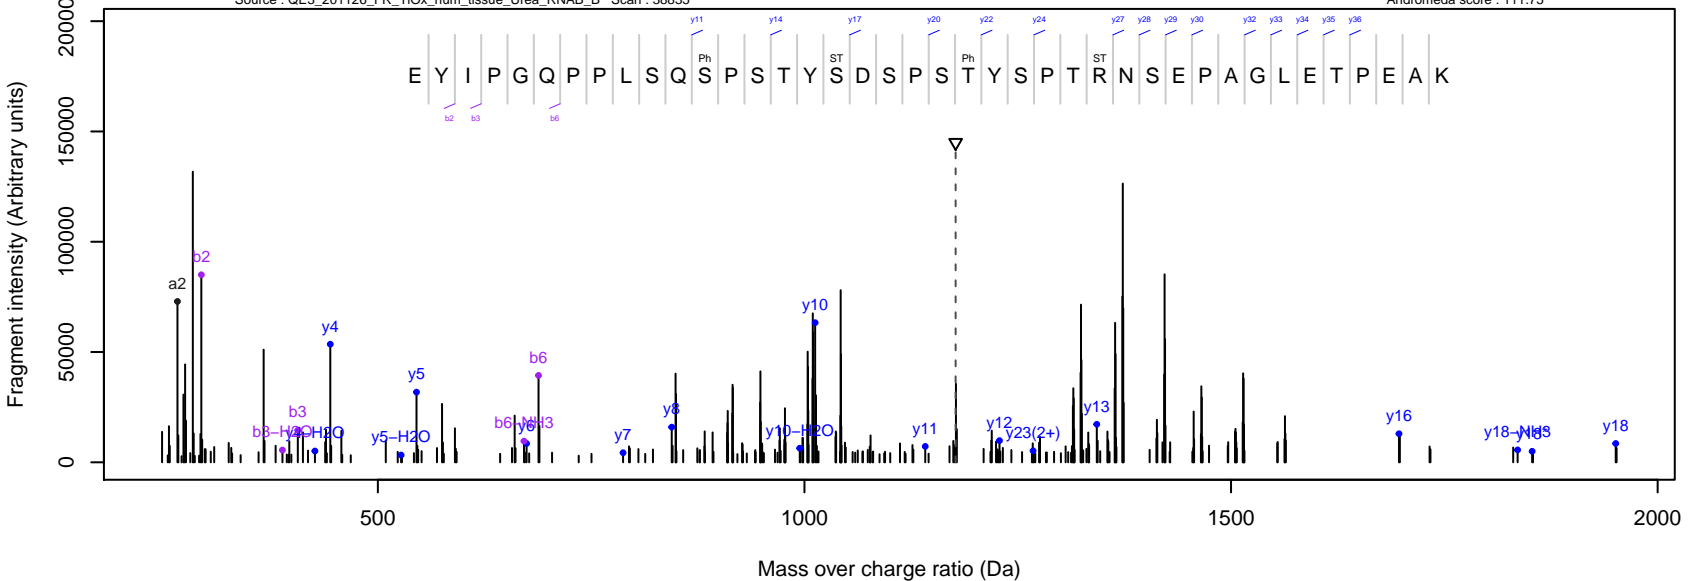

TVGT(Phospho (STY))PIASVPGSTNTGTVPGSEKDSDSM(Oxidation (M))ETEEK-3+

Source : QE3\_201126\_FR\_TIOx\_hum\_tissue\_Urea\_RNAB\_H Scan : 22979

Andromeda score : 111.75

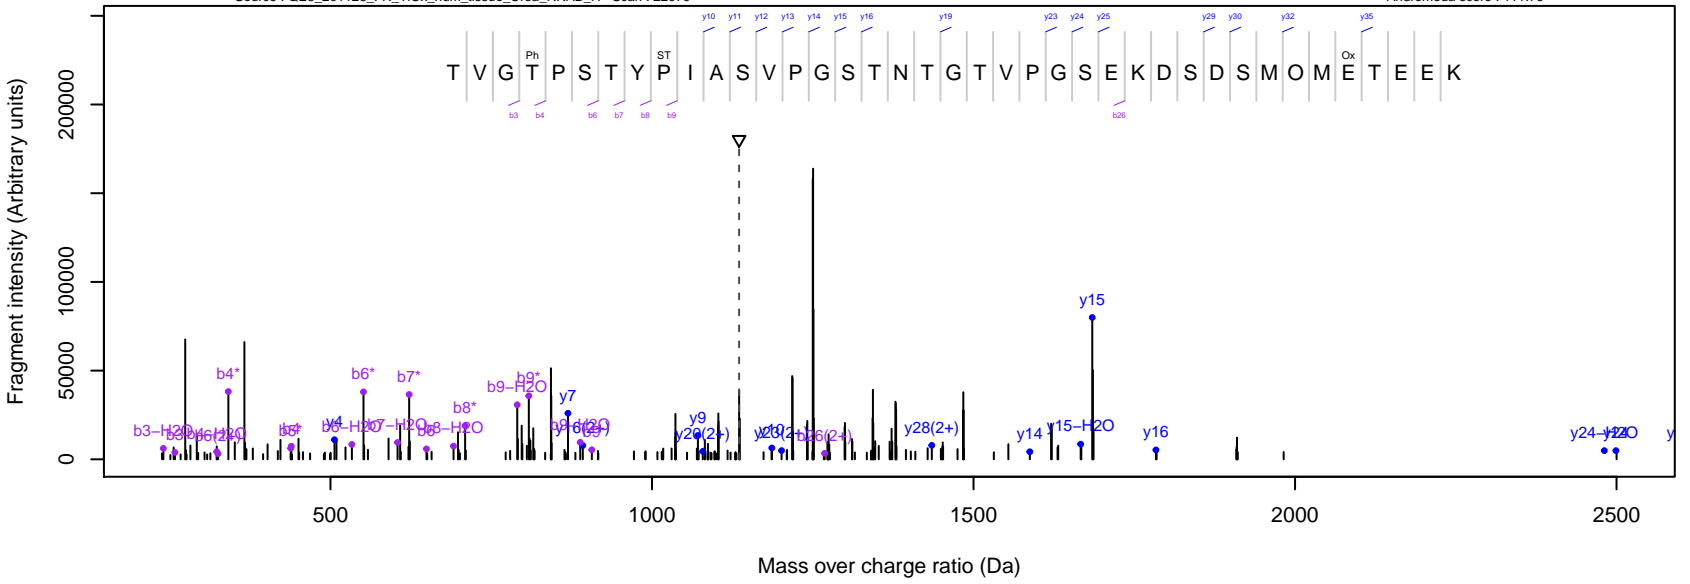

AEAGAGS(Phospho (STY))ATEFQFR-2+

Source : QE3\_201126\_FR\_TIOx\_hum\_tissue\_Urea\_RNAB\_N Scan : 29709

Andromeda score : 111.74

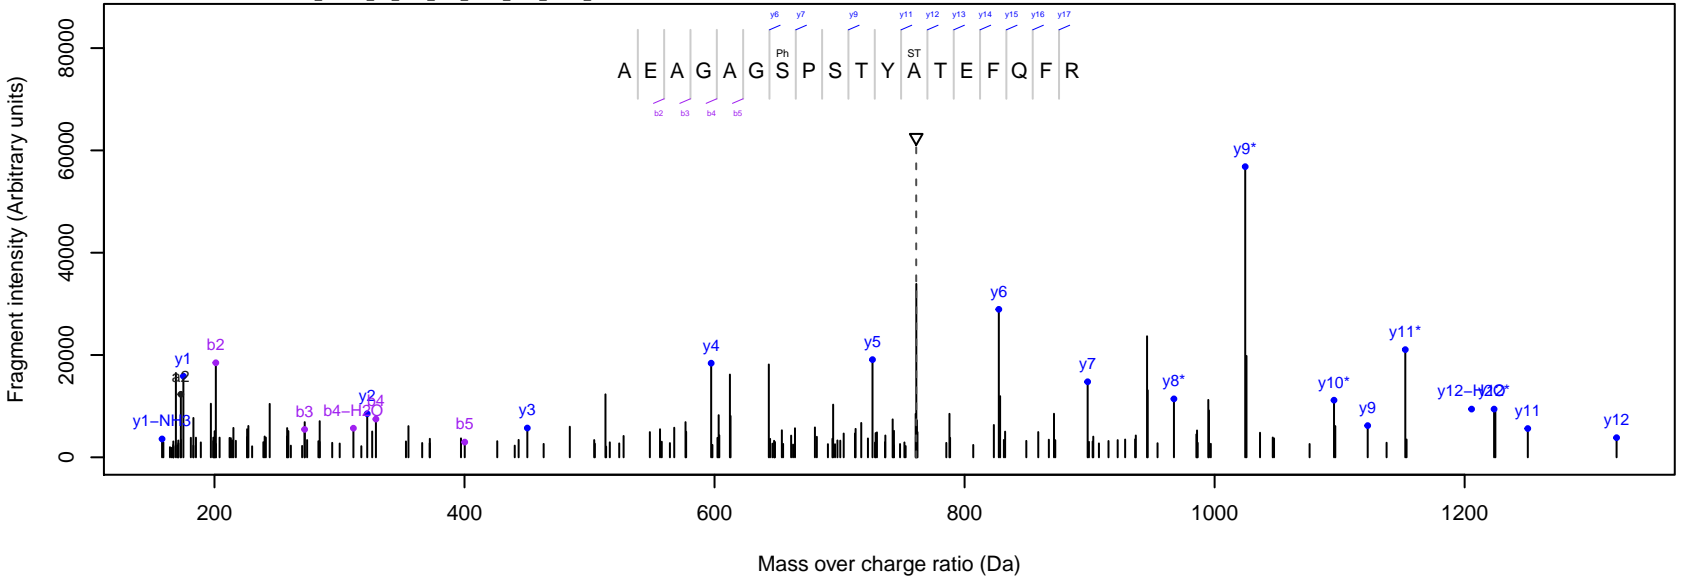

GDS(Phospho (STY))LKEPTSI AESSR-2+

Source : QE3\_201126\_FR\_TIOx\_hum\_tissue\_Urea\_RNAB\_N Scan : 16729

Andromeda score : 111.74

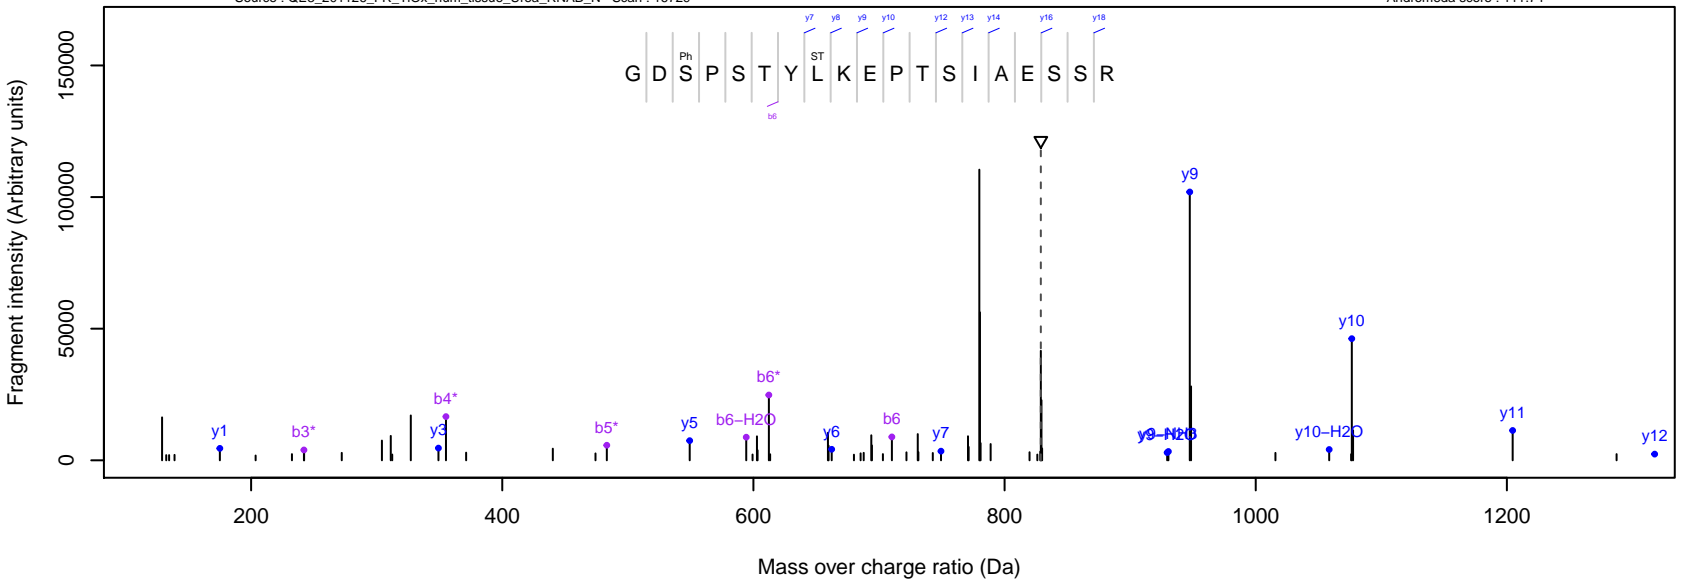

NIQES(Phospho (STY))IVANVVSAAAR-2+

Source : QE3\_201126\_FR\_TiOx\_hum\_tissue\_Urea\_RNAB\_H Scan : 52642

Andromeda score : 111.74

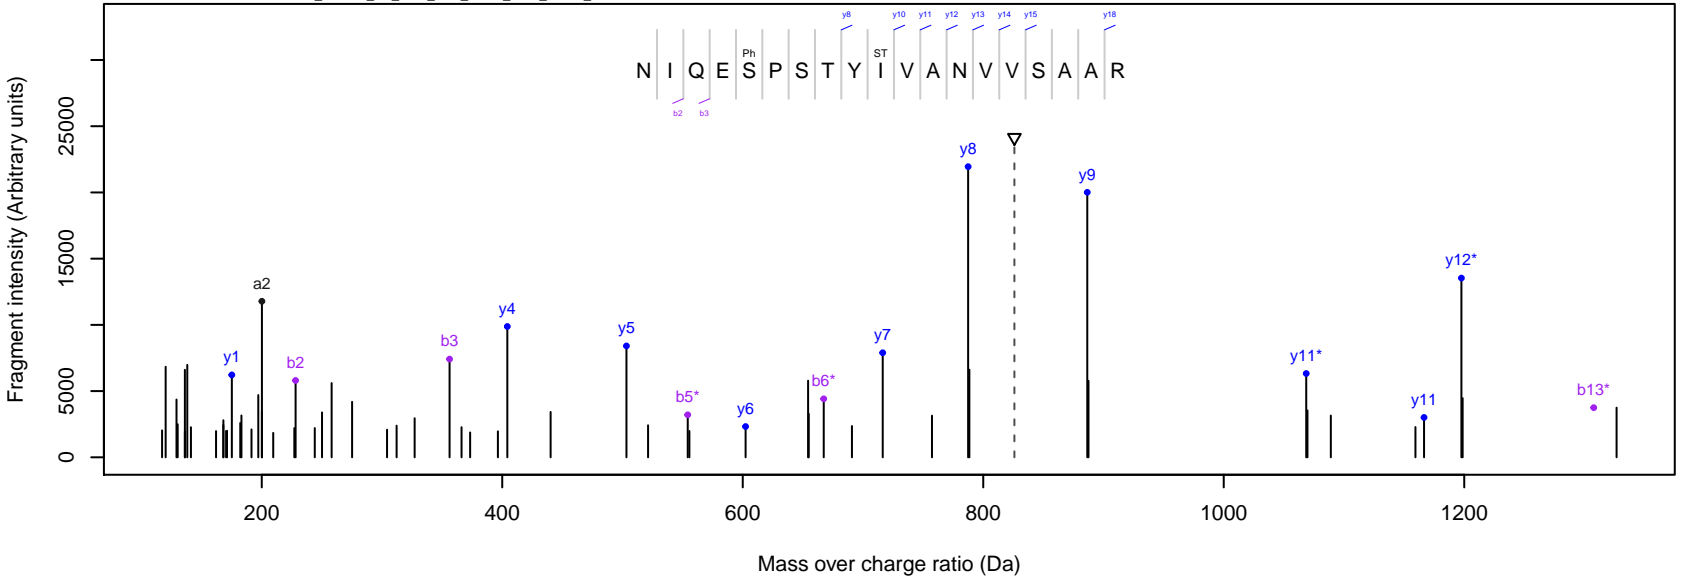

ETMQS(Phospho (STY))LNDRLASYLDR-3+

Source : QE3\_201126\_FR\_TiOx\_hum\_tissue\_Urea\_RNAB\_N Scan : 49900

Andromeda score : 111.66

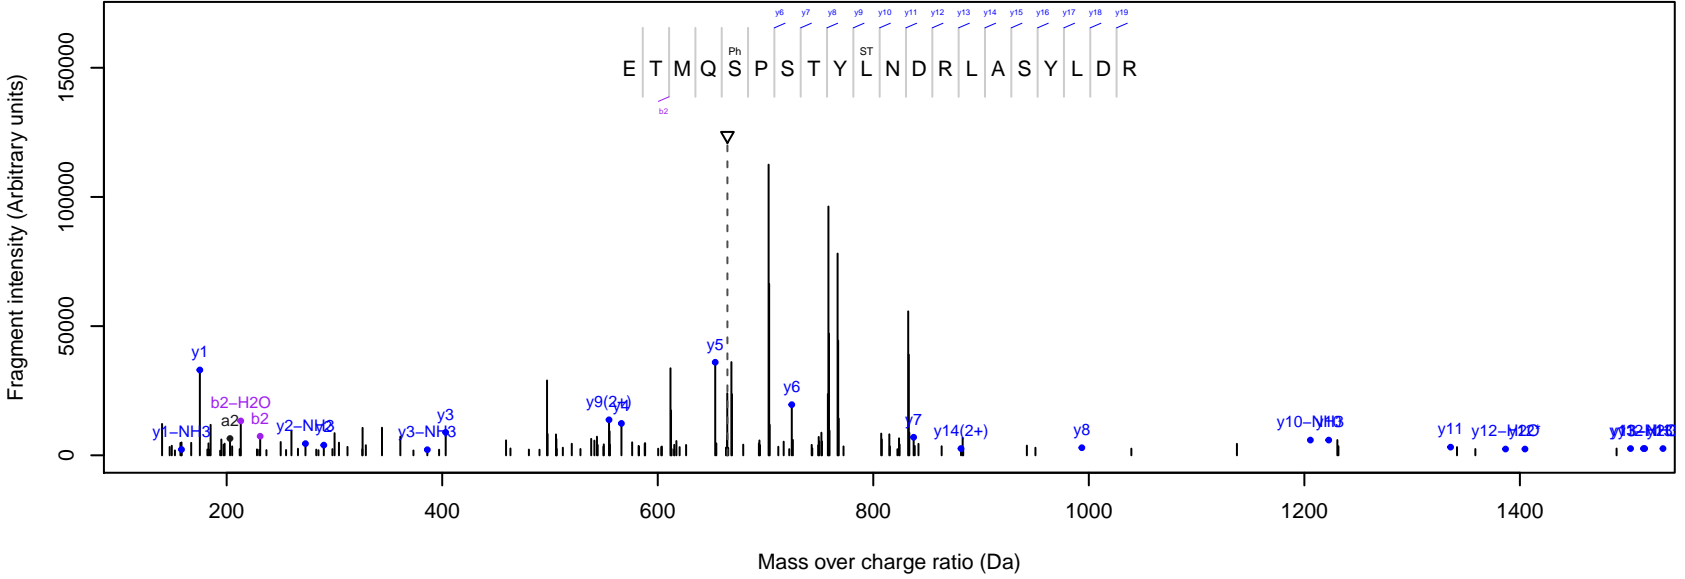

HES(Phospho (STY))LRPAAGQSRPPTAR-4+

Source : QE3\_201126\_FR\_TiOx\_hum\_tissue\_Urea\_RNAB\_B Scan : 6140

Andromeda score : 111.66

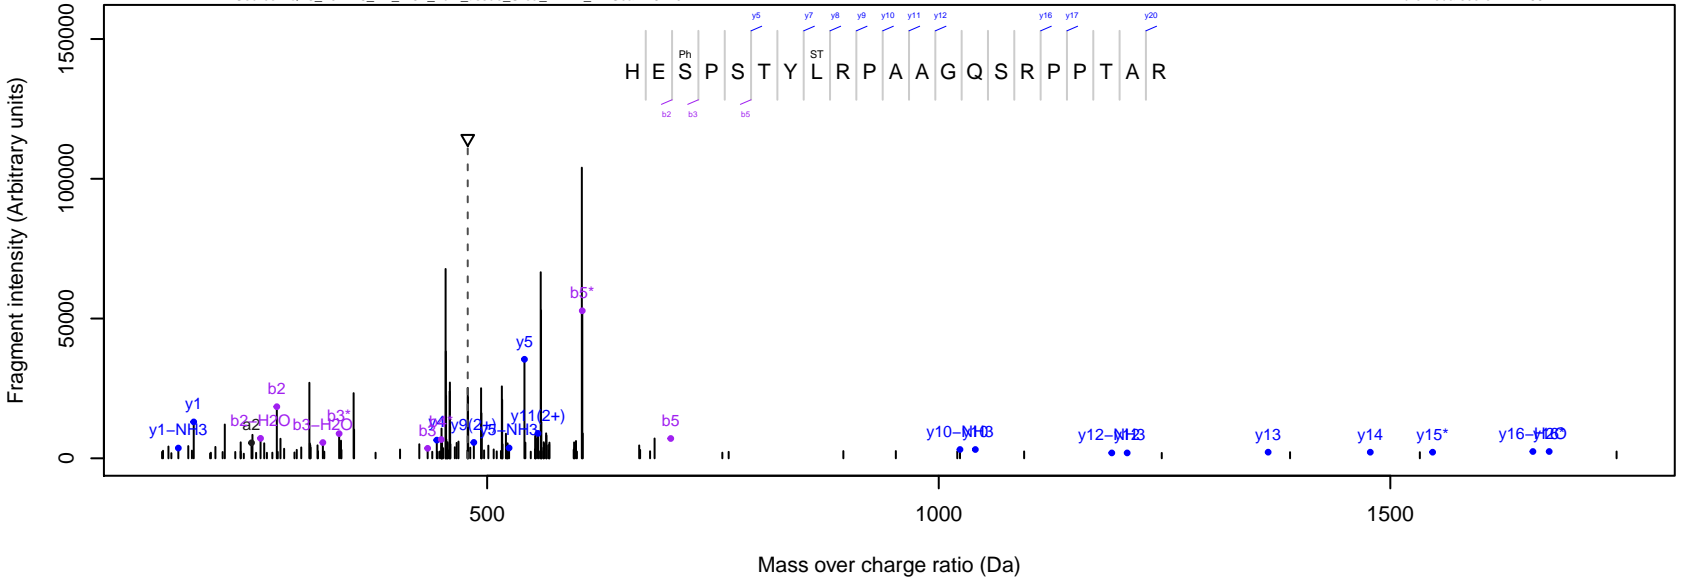



VAAQSPPS(Phospho (STY))PASAEALLPALPLR-3+

Source : QE3\_201126\_FR\_TiOx\_hum\_tissue\_Urea\_RNAB\_N Scan : 57730

Andromeda score : 111.66

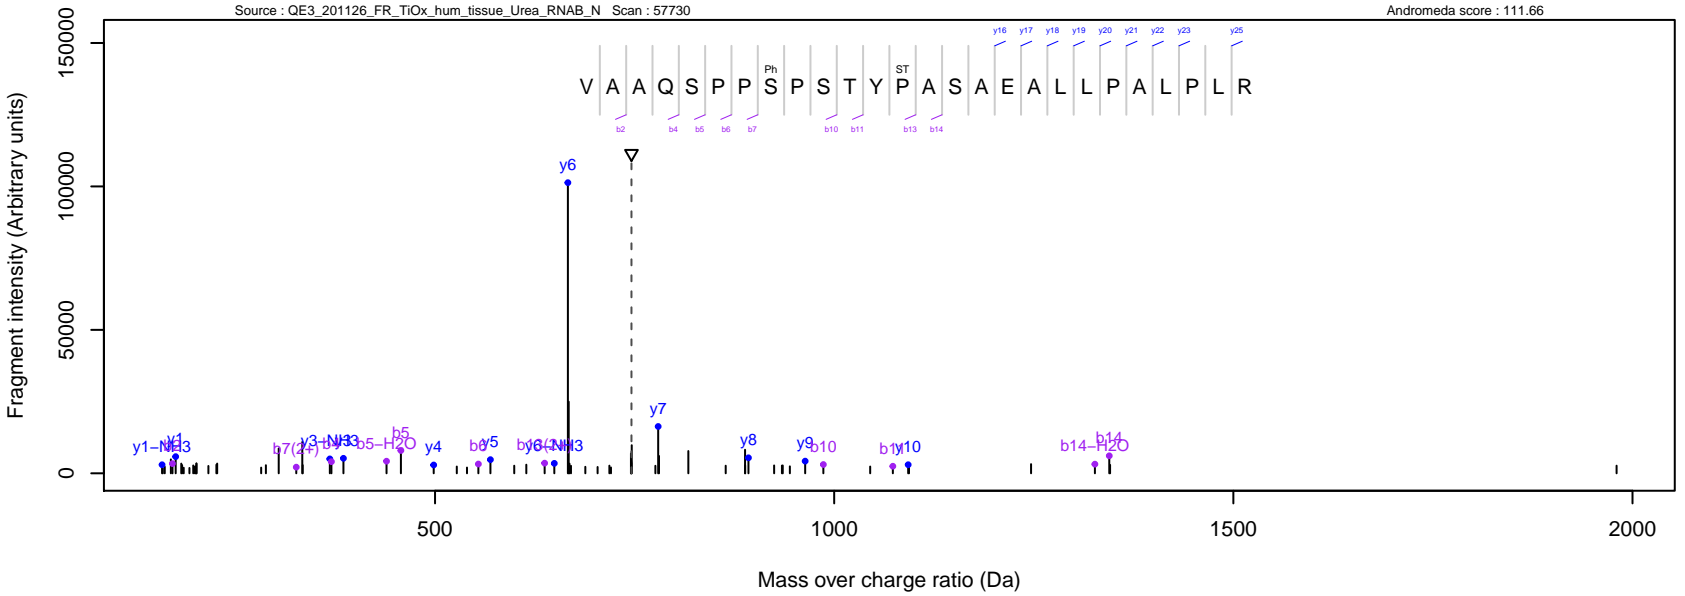

QDFLKTDS(Phospho (STY))DSDLQLYK-3+

Source : QE3\_201126\_FR\_TiOx\_hum\_tissue\_Urea\_RNAB\_B Scan : 35883

Andromeda score : 111.65

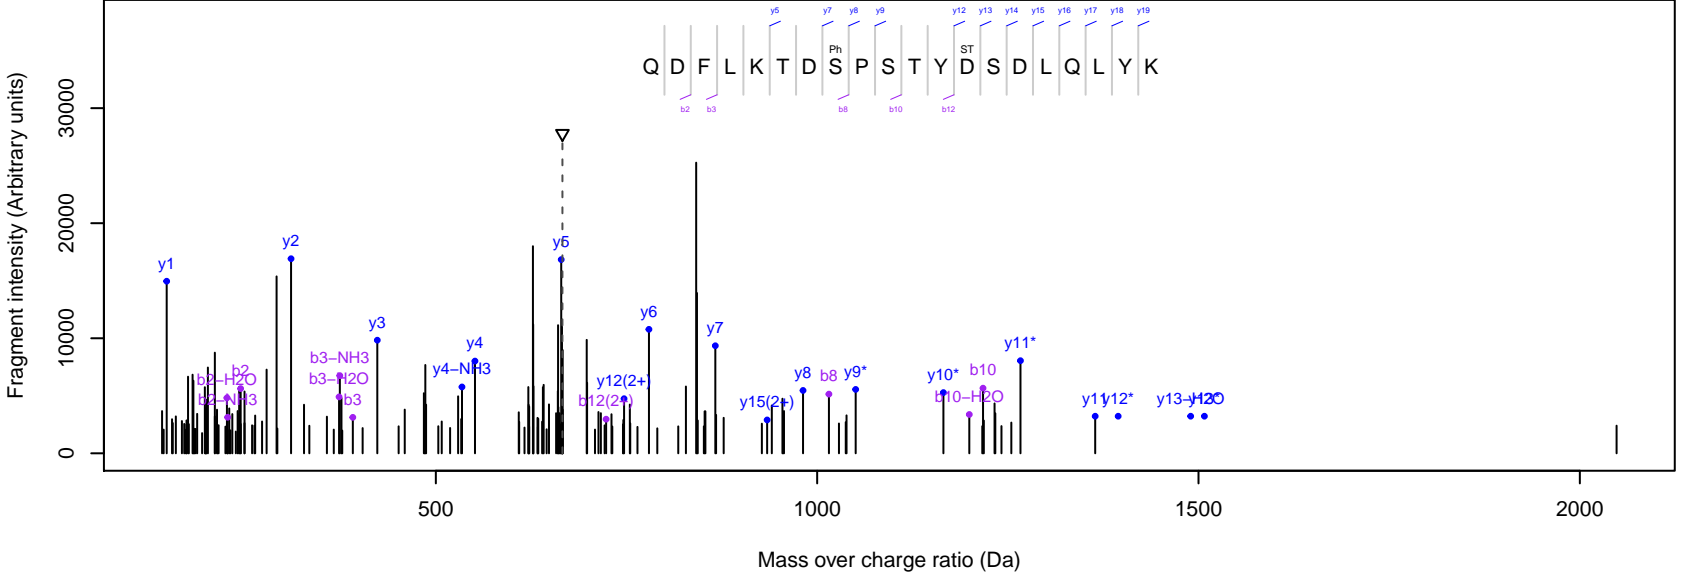

SPGS(Phospho (STY))PVGEGTGSPPKWQIGEQEFELMR-3+

Source : QE3\_201126\_FR\_TiOx\_hum\_tissue\_Urea\_RNAB\_H Scan : 54857

Andromeda score : 111.61

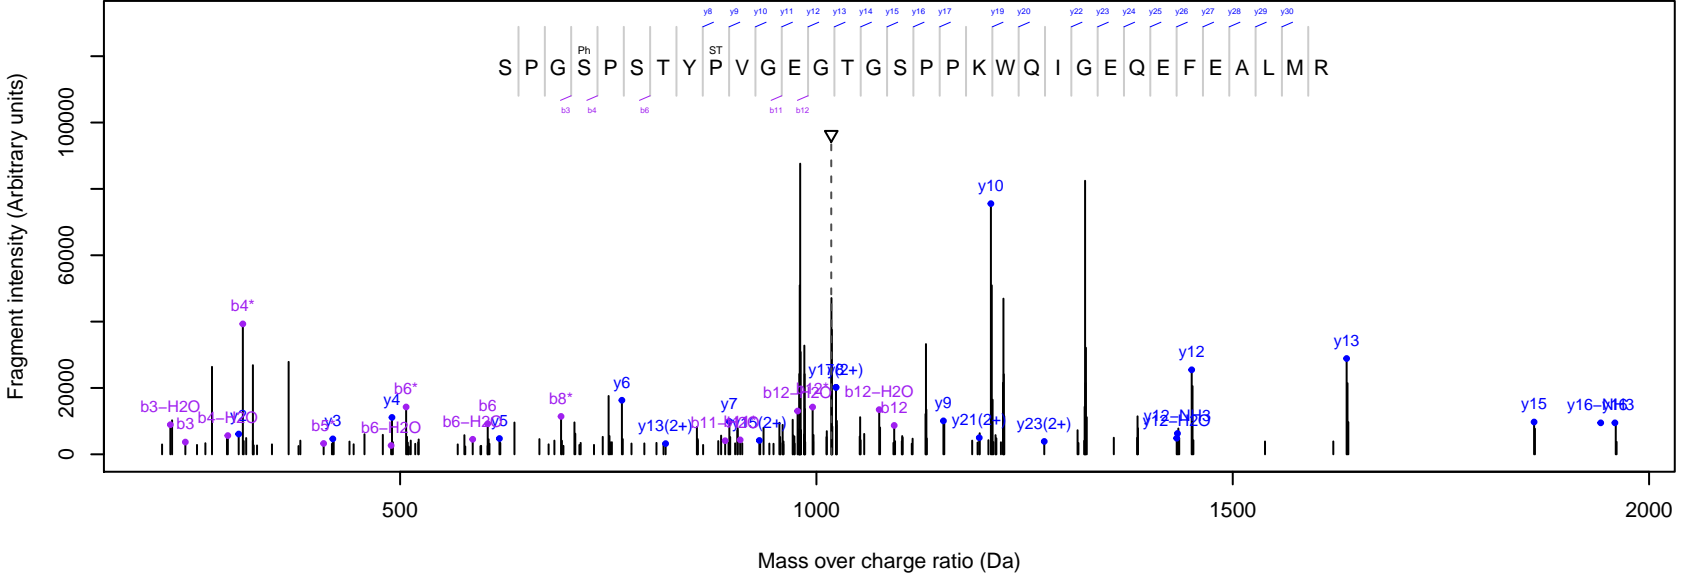

SPS(Phospho (STY))PPDGS(Phospho (STY))PAATPEIR-2+

Source : QE3\_201126\_FR\_TiOx\_hum\_tissue\_Urea\_RNAB\_N Scan : 26825

Andromeda score : 111.58

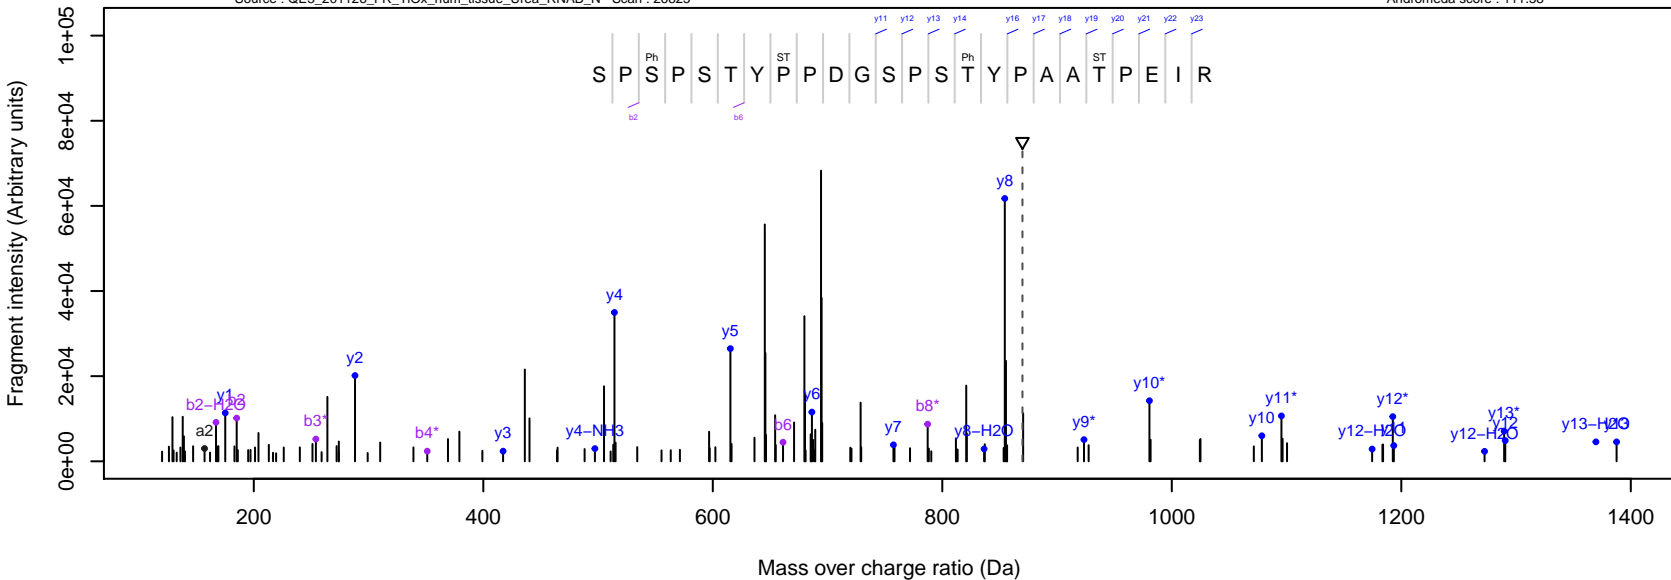

RALS(Phospho (STY))SDSILSPADAR-3+

Source : QE3\_201126\_FR\_TiOx\_hum\_tissue\_Urea\_RNAB\_B Scan : 24191

Andromeda score : 111.57

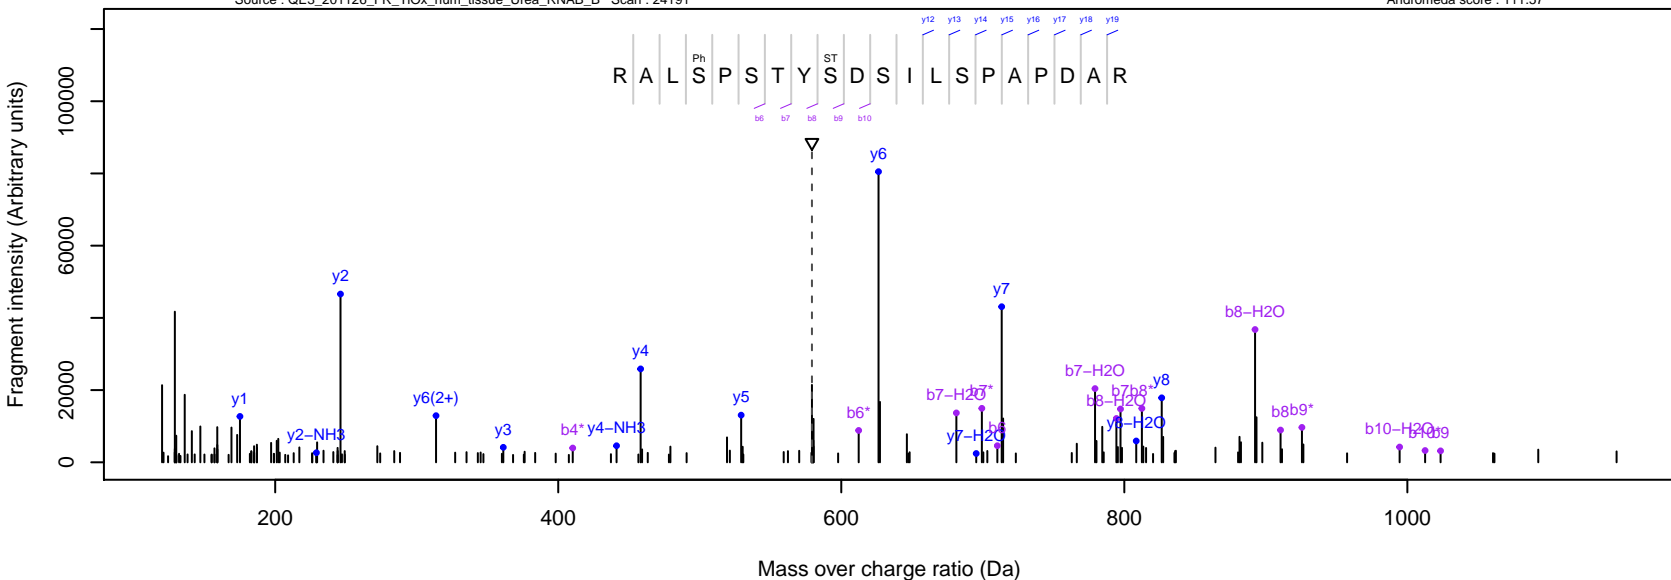

DSQQLINIPS(Phospho (STY))LNDS(Phospho (STY))DSEIEDISEIESNR-3+

Source : QE3\_201126\_FR\_TiOx\_hum\_tissue\_Urea\_RNAB\_B Scan : 63250

Andromeda score : 111.56

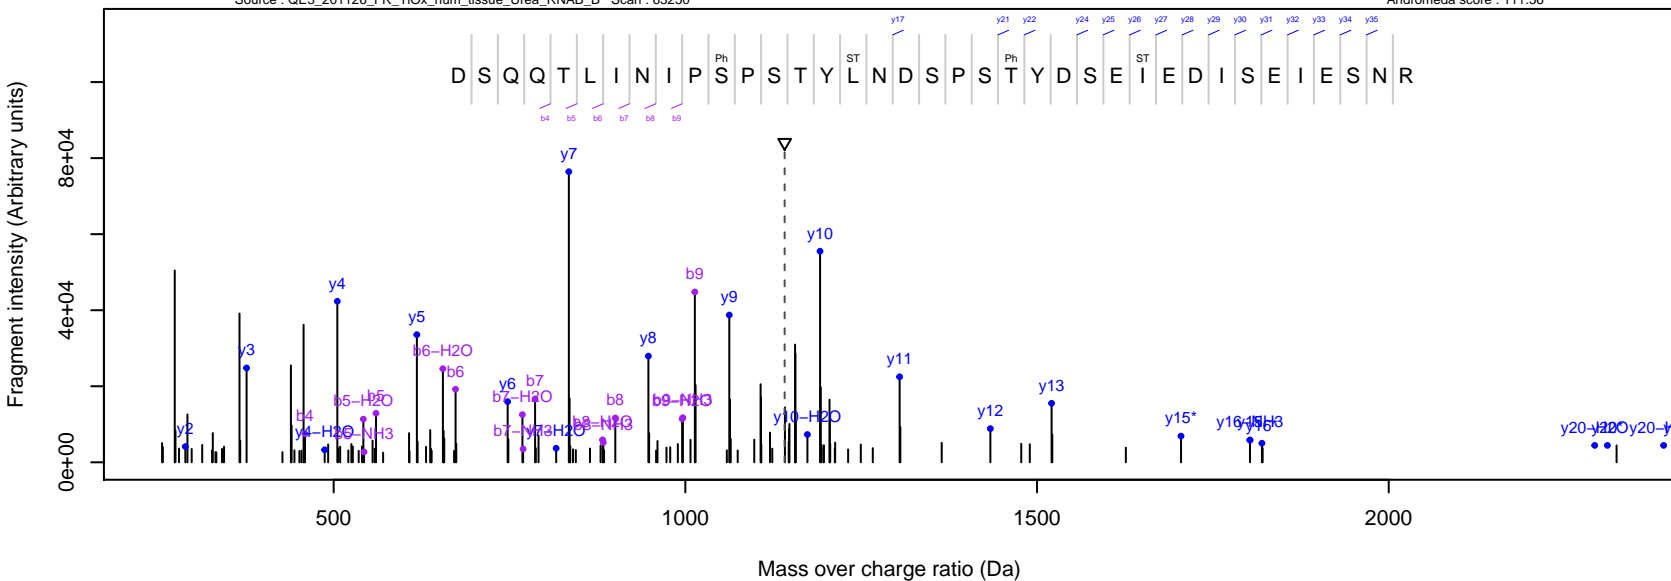

QGS(Phospho (STY))LAM(Oxidation (M))EELK-2+

Source : QE3\_201126\_FR\_TiOx\_hum\_tissue\_Urea\_RNAB\_H Scan : 16489

Andromeda score : 111.5

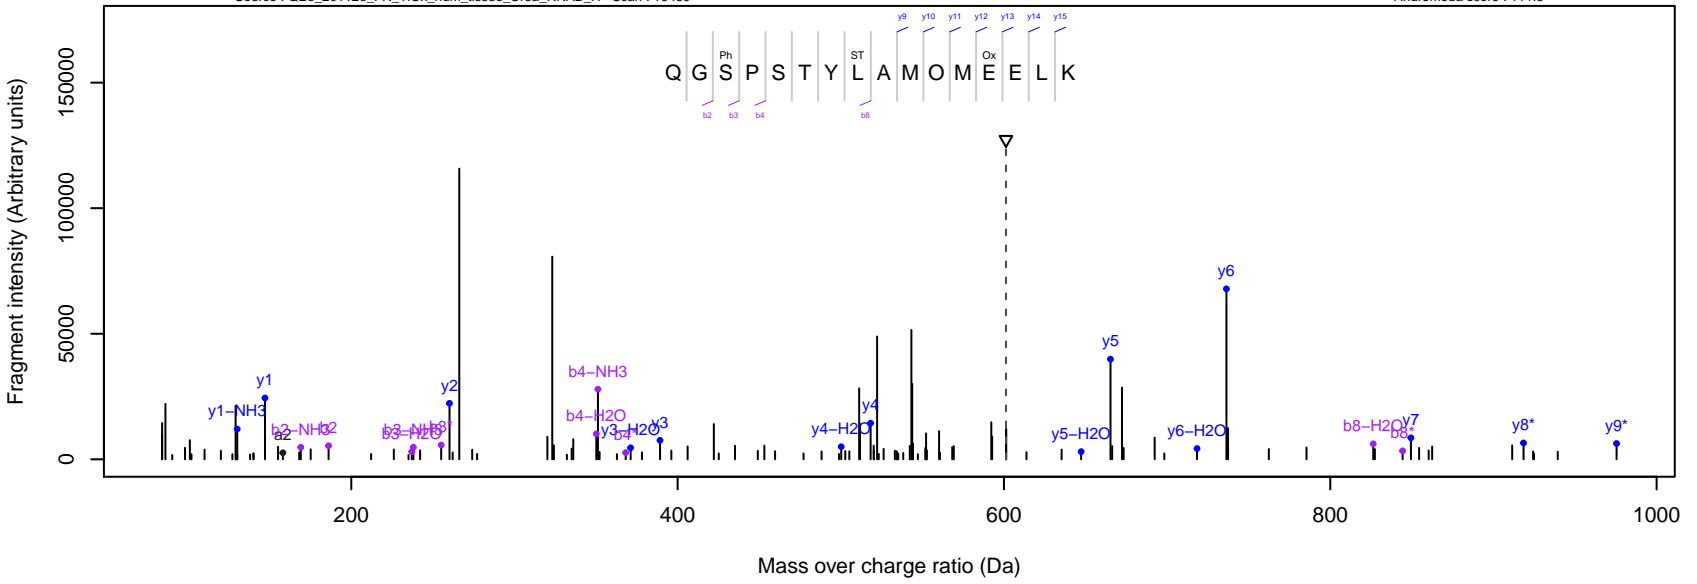

IAASS(Phospho (STY))SFR-2+

Source : QE3\_201126\_FR\_TiOx\_hum\_tissue\_Urea\_RNAB\_N Scan : 11749

Andromeda score : 111.46

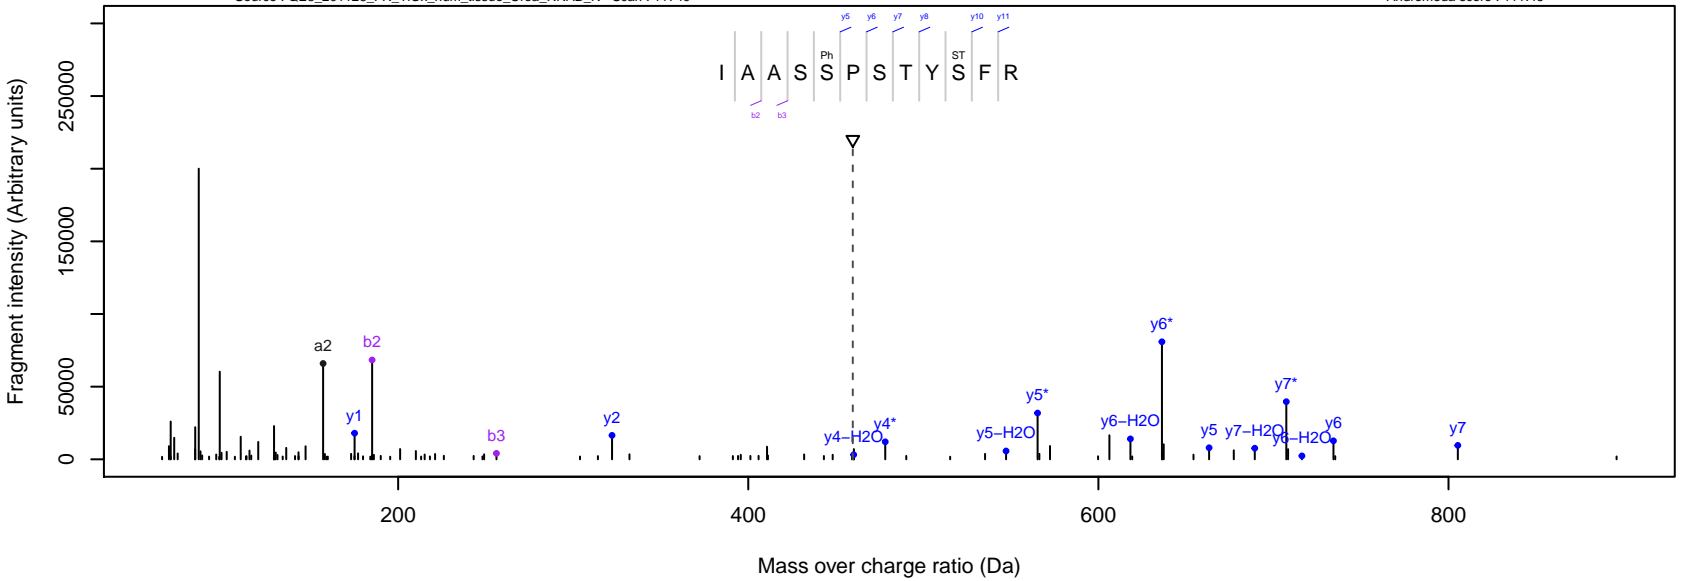

EFHS(Phospho (STY))HEFHS(Phospho (STY))HEDM(Oxidation (M))LVVDPK-4+

Source : QE3\_201126\_FR\_TiOx\_hum\_tissue\_Urea\_RNAB\_B Scan : 17182

Andromeda score : 111.45

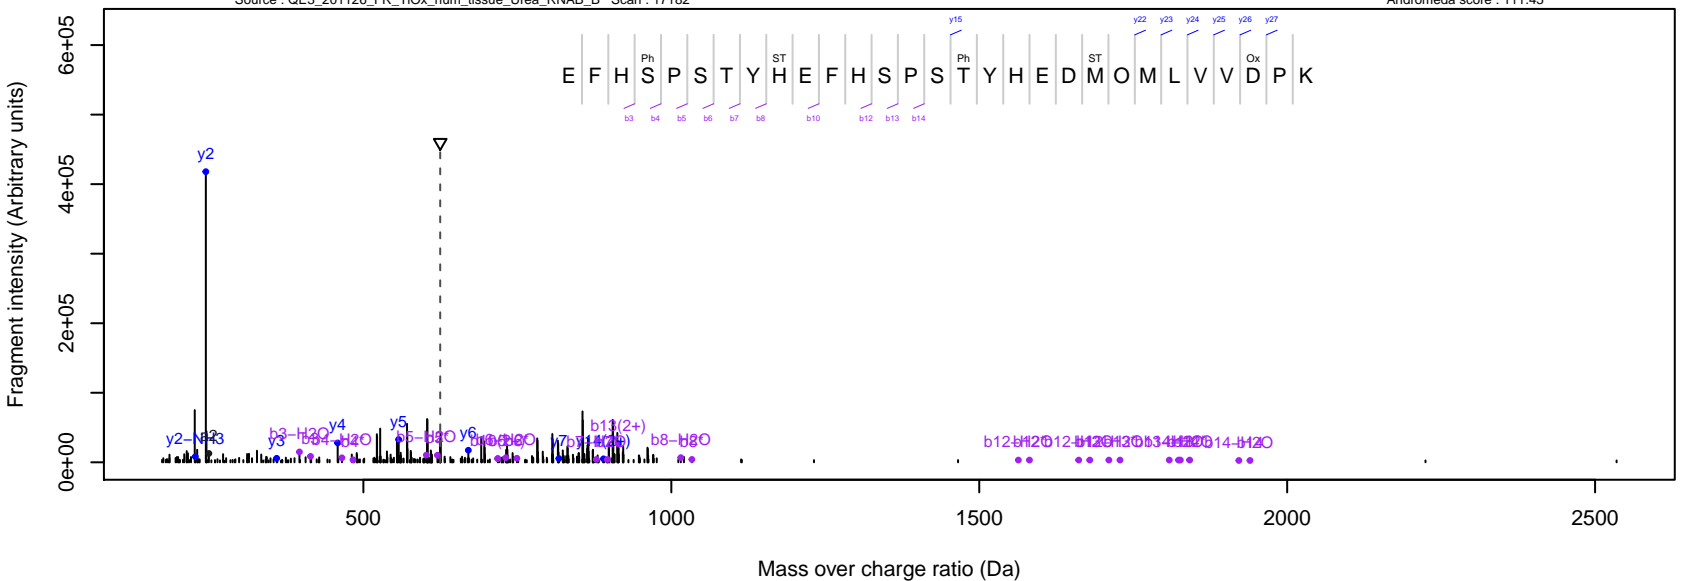

S(Phospho (STY))IQEIQELDKDESRLR-3+

Source : QE3\_201126\_FR\_TiOx\_hum\_tissue\_Urea\_RNAB\_H Scan : 31547

Andromeda score : 111.45

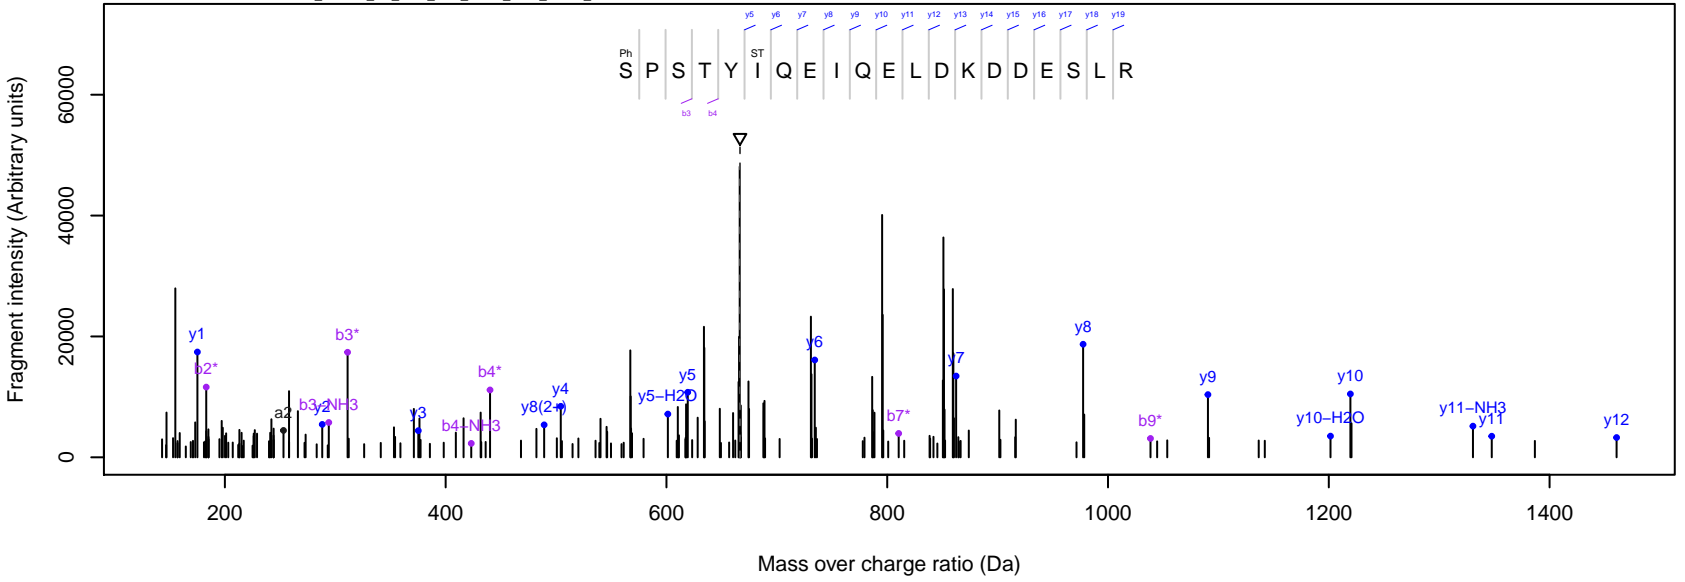

M(Oxidation (M))ESEGADDS(Phospho (STY))AEEGLDDDDNEDR-3+

Source : QE3\_201126\_FR\_TiOx\_hum\_tissue\_Urea\_RNAB\_N Scan : 29089

Andromeda score : 111.43

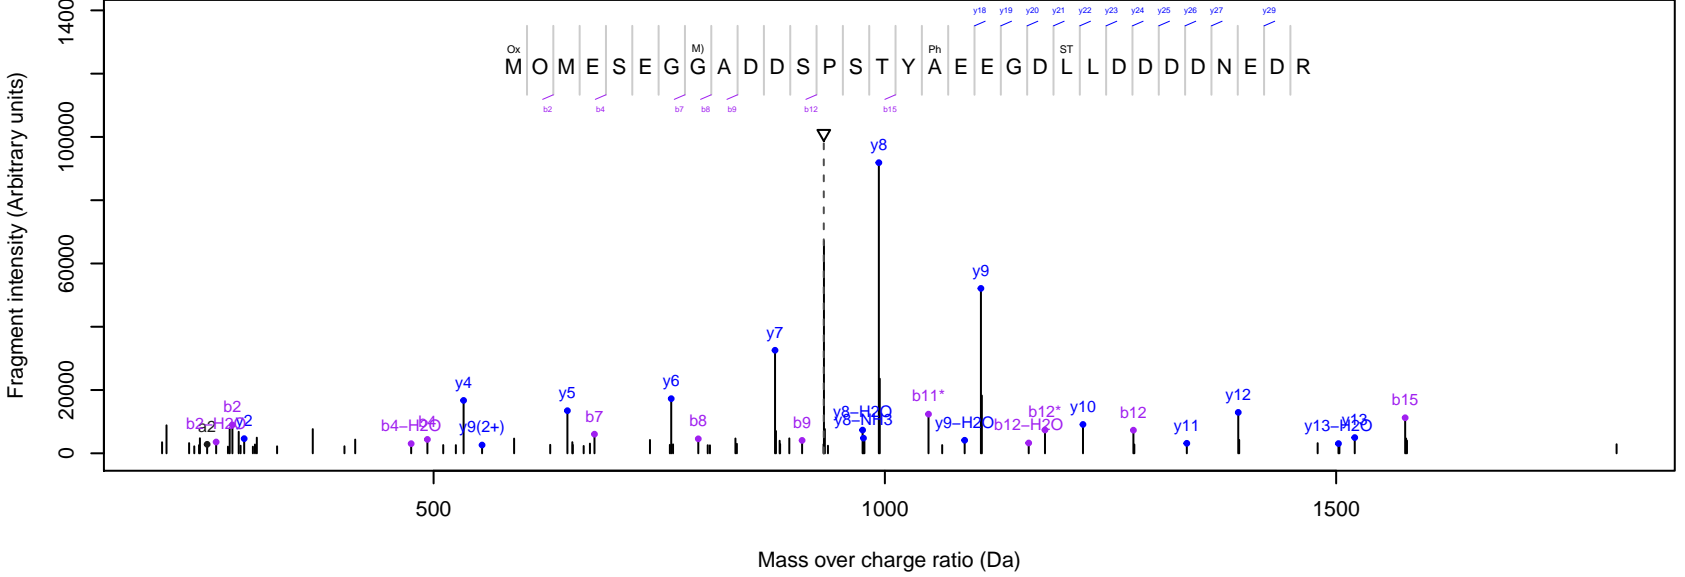

M(Oxidation (M))GSPALLPGDLLGGSDS(Phospho (STY))I-2+

Source : QE3\_201126\_FR\_TiOx\_hum\_tissue\_Urea\_RNAB\_B Scan : 63228

Andromeda score : 111.43

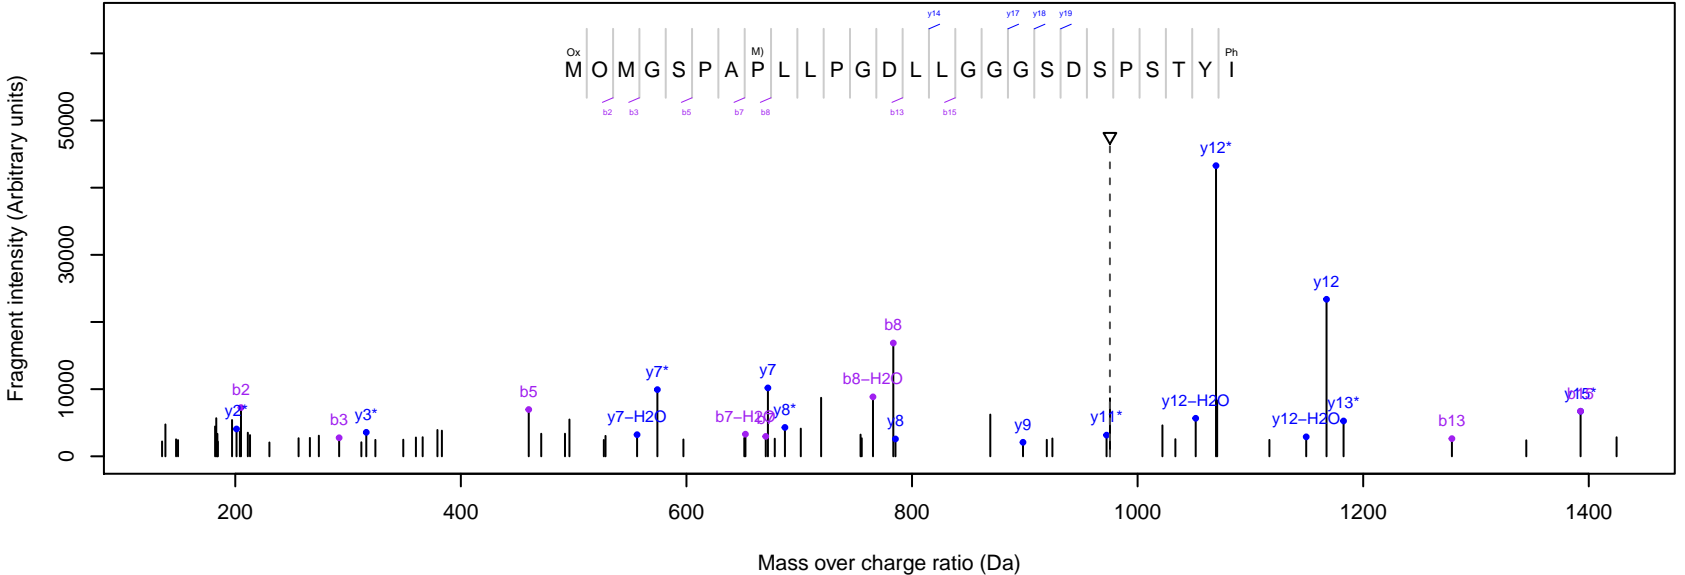

HLSVSSQNPGRS(Phospho (STY))SPPPGYVPER-3+

Source : QE3\_201126\_FR\_TiOx\_hum\_tissue\_Urea\_RNAB\_H Scan : 15759

Andromeda score : 111.4

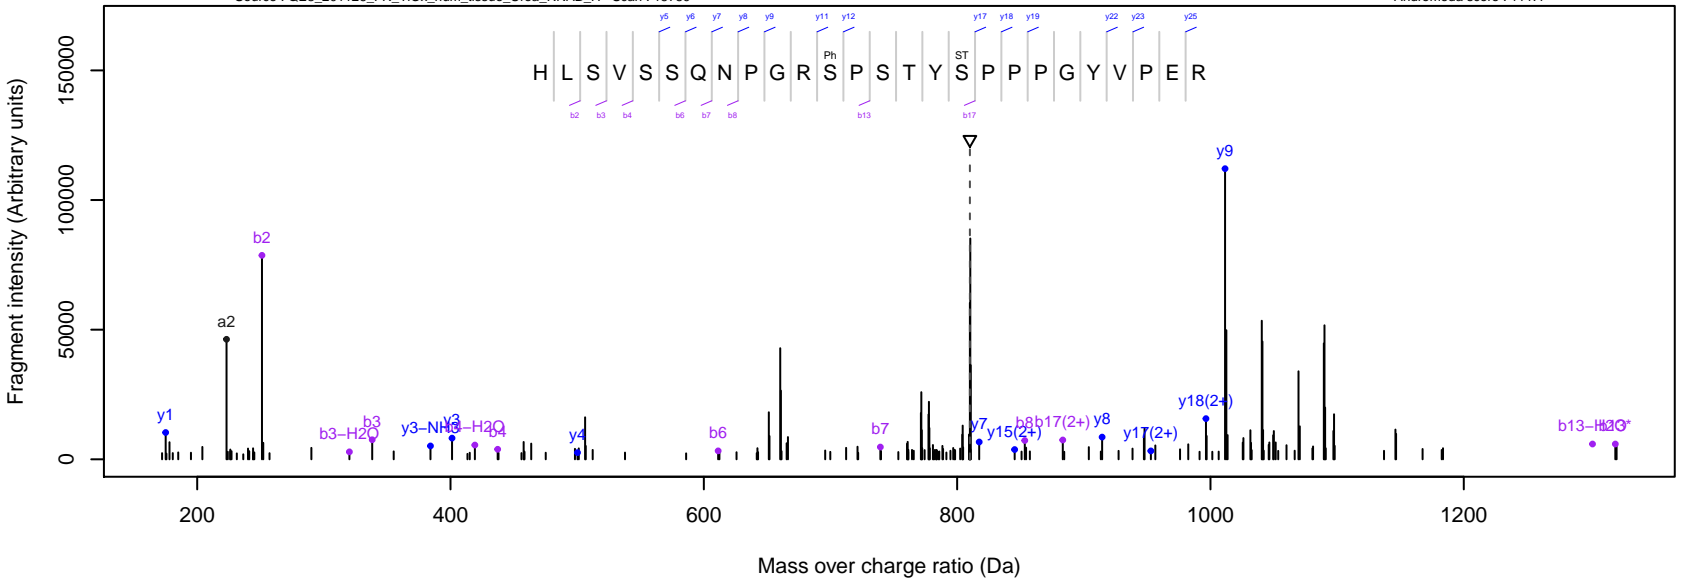

GFGYKGS(Phospho (STY))CFHR-3+

Source : QE3\_201126\_FR\_TiOx\_hum\_tissue\_Urea\_RNAB\_N Scan : 13323

Andromeda score : 111.39

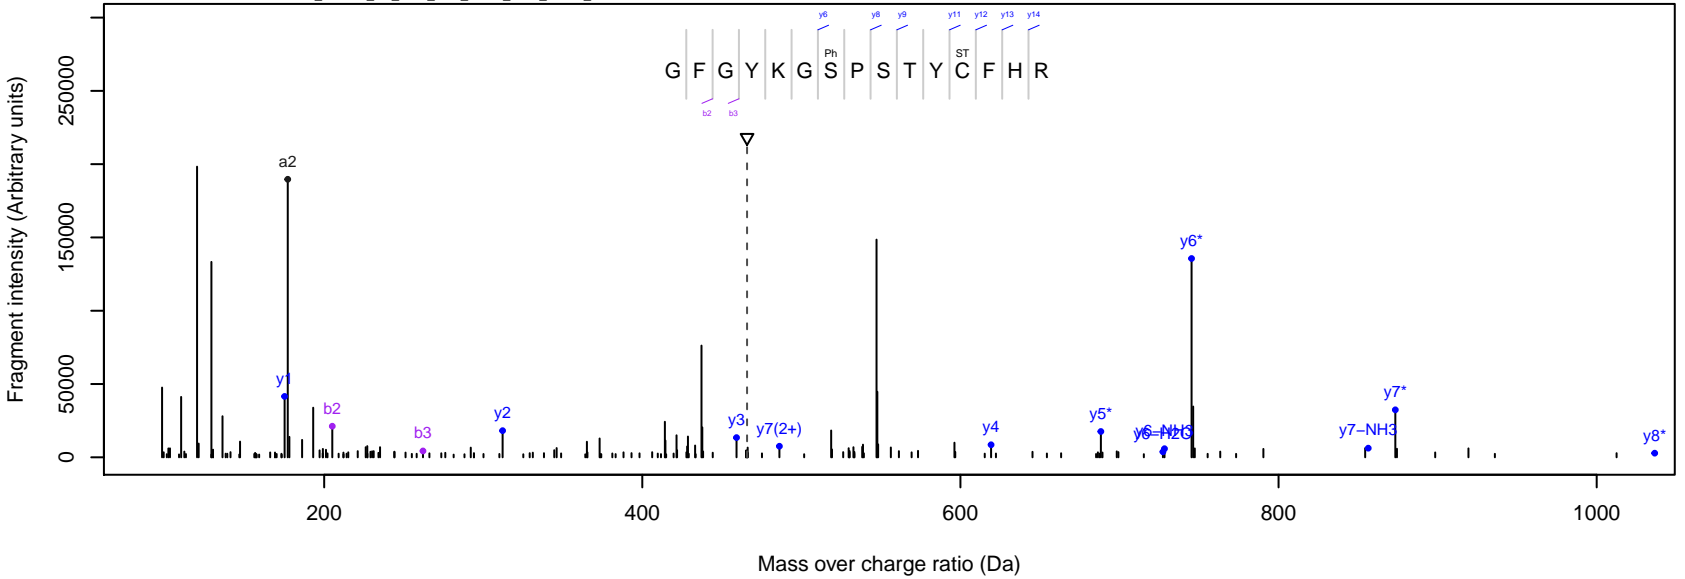

LRRPS(Phospho (STY))VNGEPGSPVPPR-3+

Source : QE3\_201126\_FR\_TiOx\_hum\_tissue\_Urea\_RNAB\_H Scan : 12902

Andromeda score : 111.38

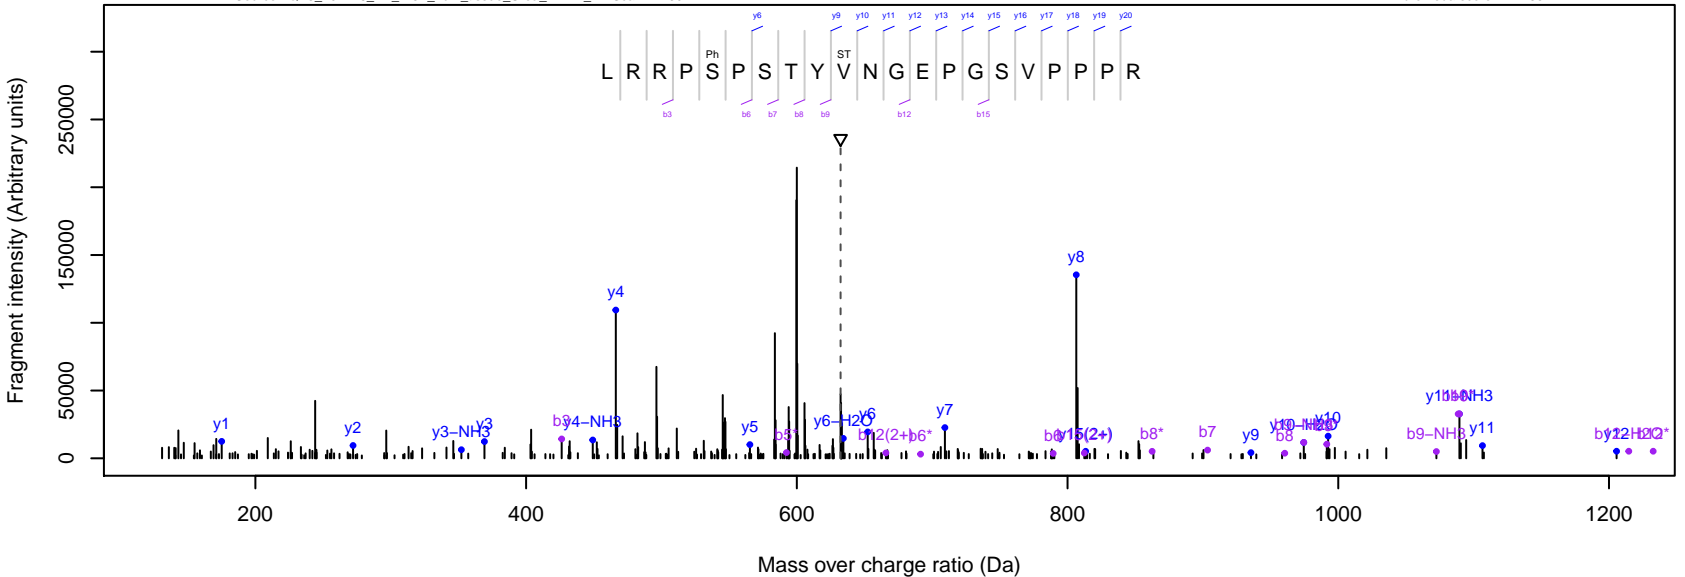

RRS(Phospho (STY))FS(Phospho (STY))IS(Phospho (STY))PVR-2+

Source : QE3\_201126\_FR\_TIOx\_hum\_tissue\_Urea\_RNAB\_H Scan : 20876

Andromeda score : 111.38

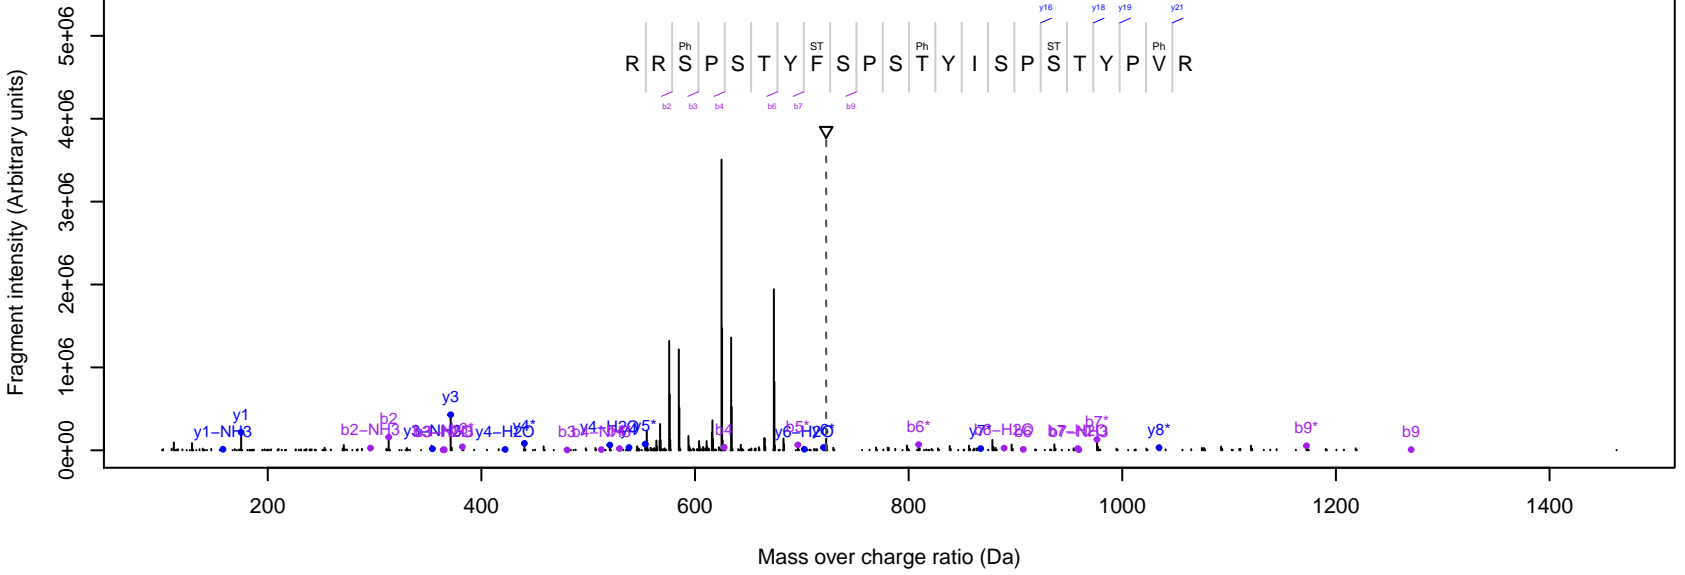

GGGGDM(Oxidation (M))AEPS(Phospho (STY))EAGDAPPDDGPPGELGPDGPDGPEEK-3+

Source : QE3\_201126\_FR\_TIOx\_hum\_tissue\_Urea\_RNAB\_N Scan : 30333

Andromeda score : 111.35

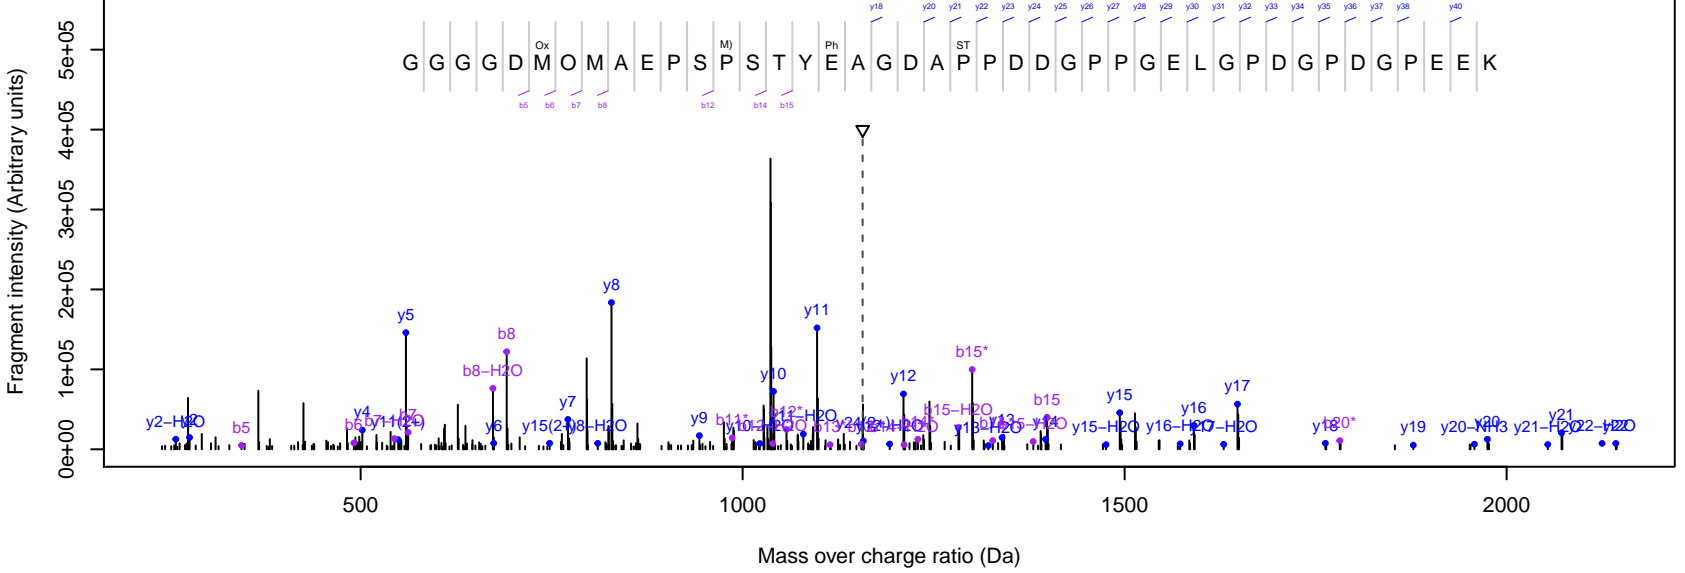

TEVALAKDM(Oxidation (M))ES(Phospho (STY))PTKLDVTLAK-3+

Source : QE3\_201126\_FR\_TIOx\_hum\_tissue\_Urea\_RNAB\_N Scan : 26012

Andromeda score : 111.3

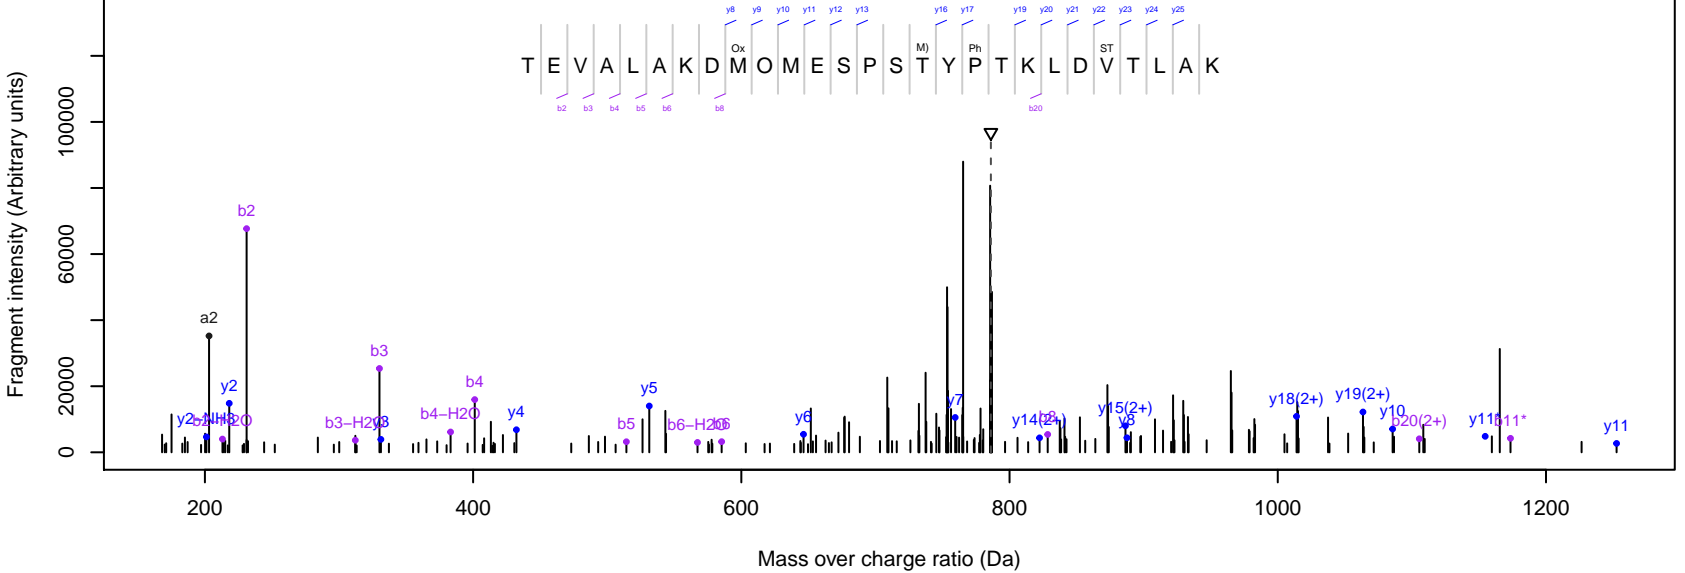

AES(Phospho (STY))S(Phospho (STY))DS(Phospho (STY))GAES(Phospho (STY))EEEEAQEEVKGAEQSDNDKK-3+

Source : QE3\_201126\_FR\_TiOx\_hum\_tissue\_Urea\_RNAB\_N Scan : 31658

Andromeda score : 111.27

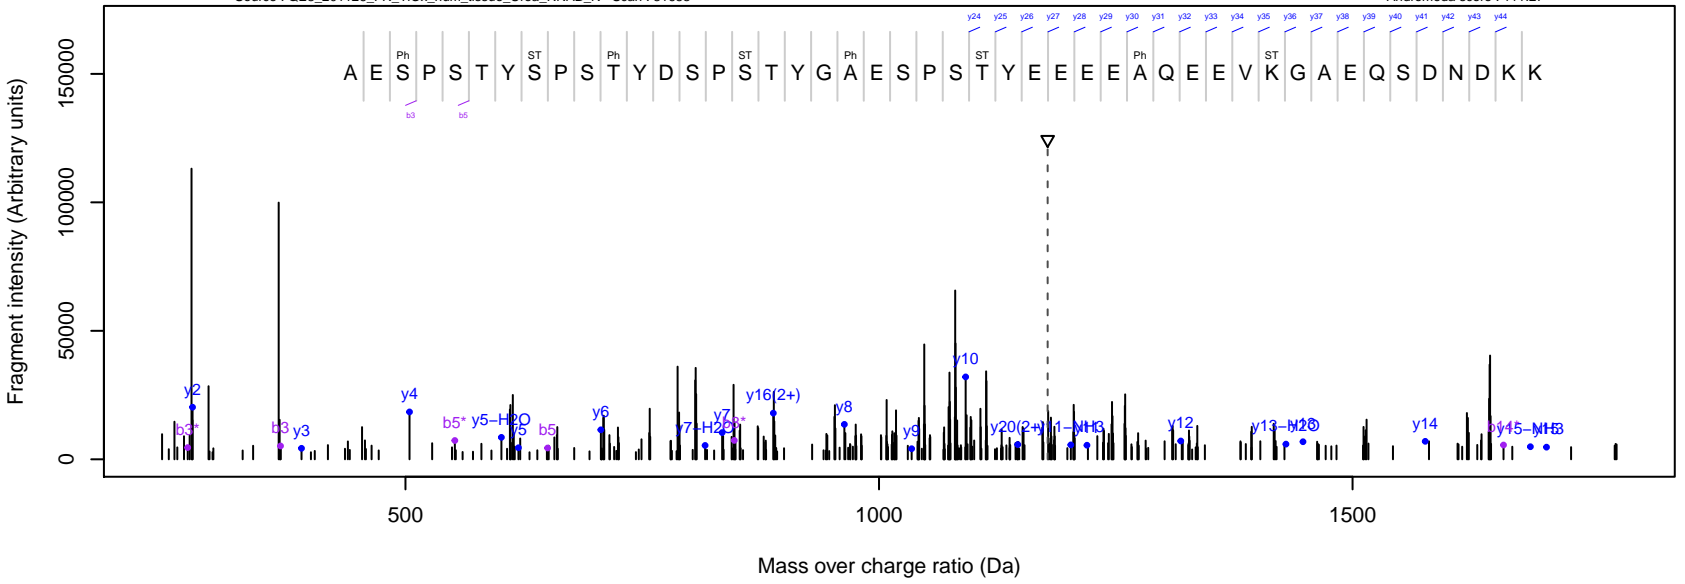

GGs(Phospho (STY))PQMDDIKVFQNEVLGLQR-3+

Source : QE3\_201126\_FR\_TiOx\_hum\_tissue\_Urea\_RNAB\_B Scan : 56900

Andromeda score : 111.26

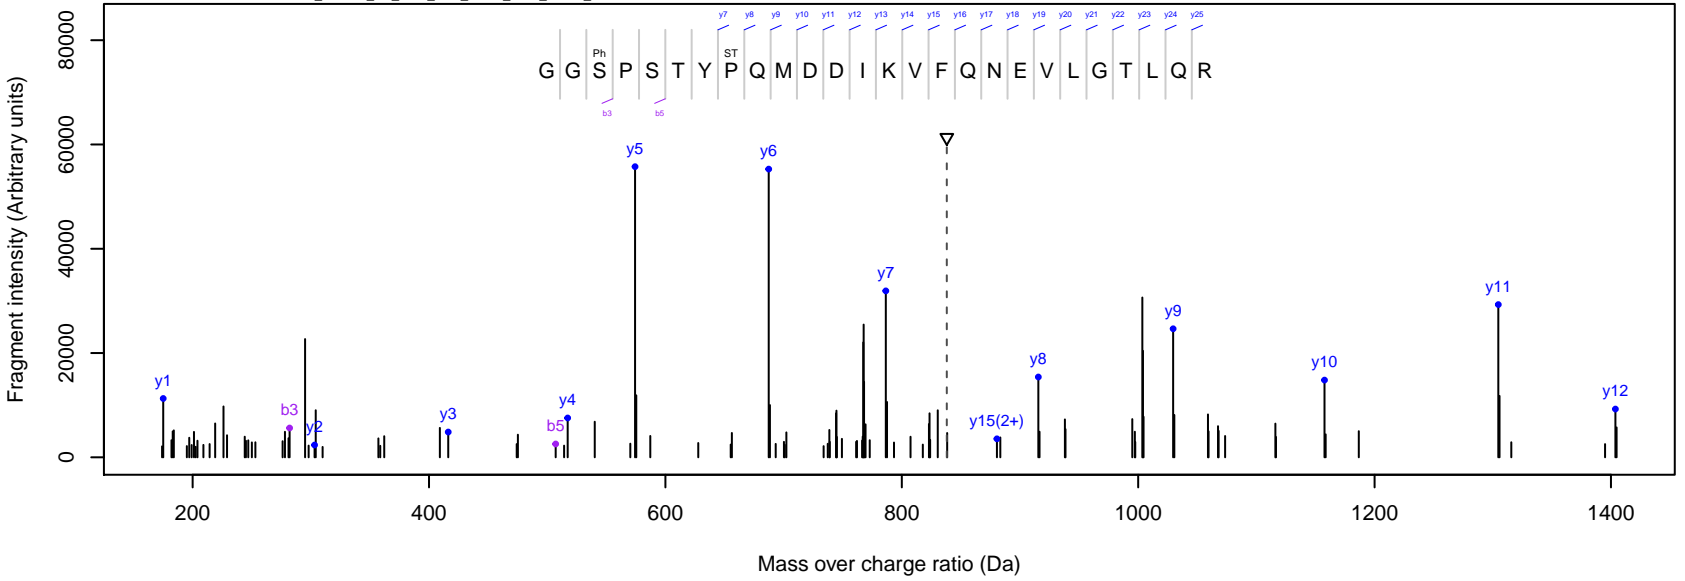

YRIQEES(Phospho (STY))S(Phospho (STY))GEEDSLSPEEREK-3+

Source : QE3\_201126\_FR\_TiOx\_hum\_tissue\_Urea\_RNAB\_N Scan : 18832

Andromeda score : 111.2

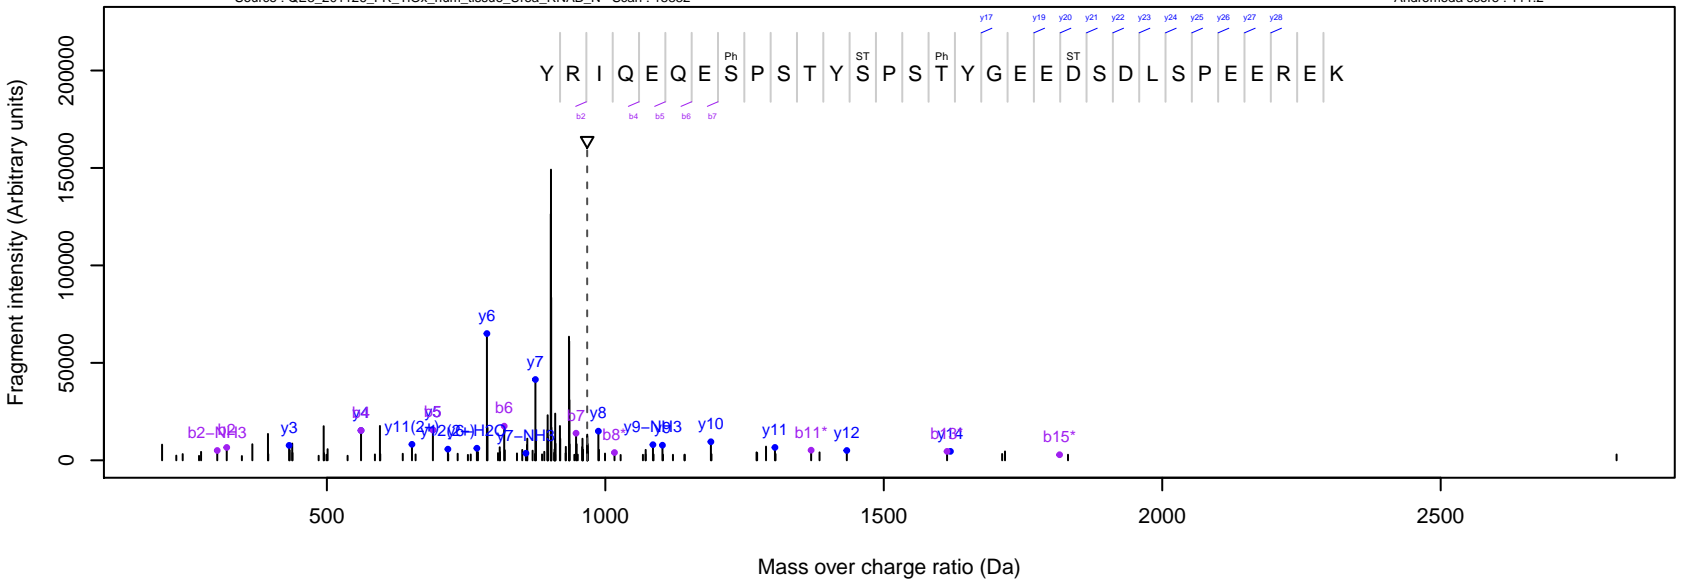

ALMGS(Phospho (STY))PQLVAAVVR-2+

Source : QE3\_201126\_FR\_TiOx\_hum\_tissue\_Urea\_RNAB\_H Scan : 48032

Andromeda score : 111.12

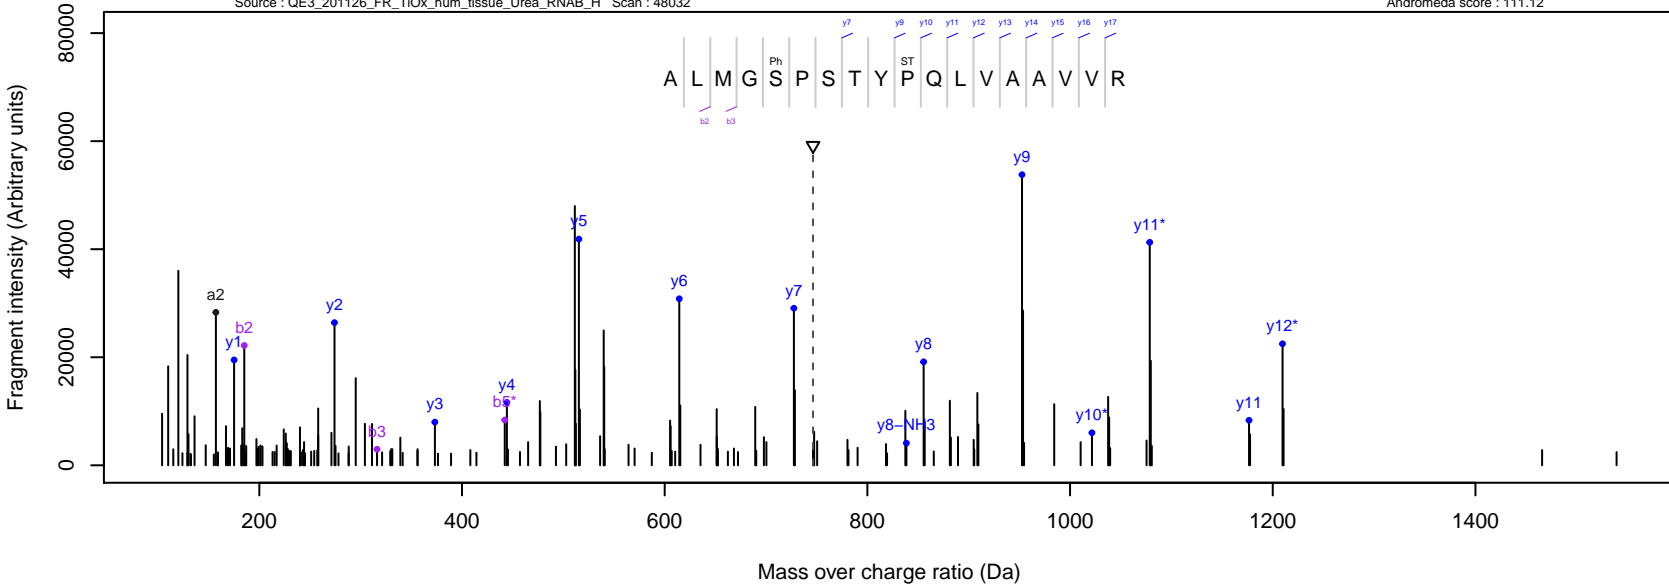

ILSQS(Phospho (STY))TDSLNM(Oxidation (M))R-2+

Source : QE3\_201126\_FR\_TiOx\_hum\_tissue\_Urea\_RNAB\_B Scan : 18862

Andromeda score : 111.12

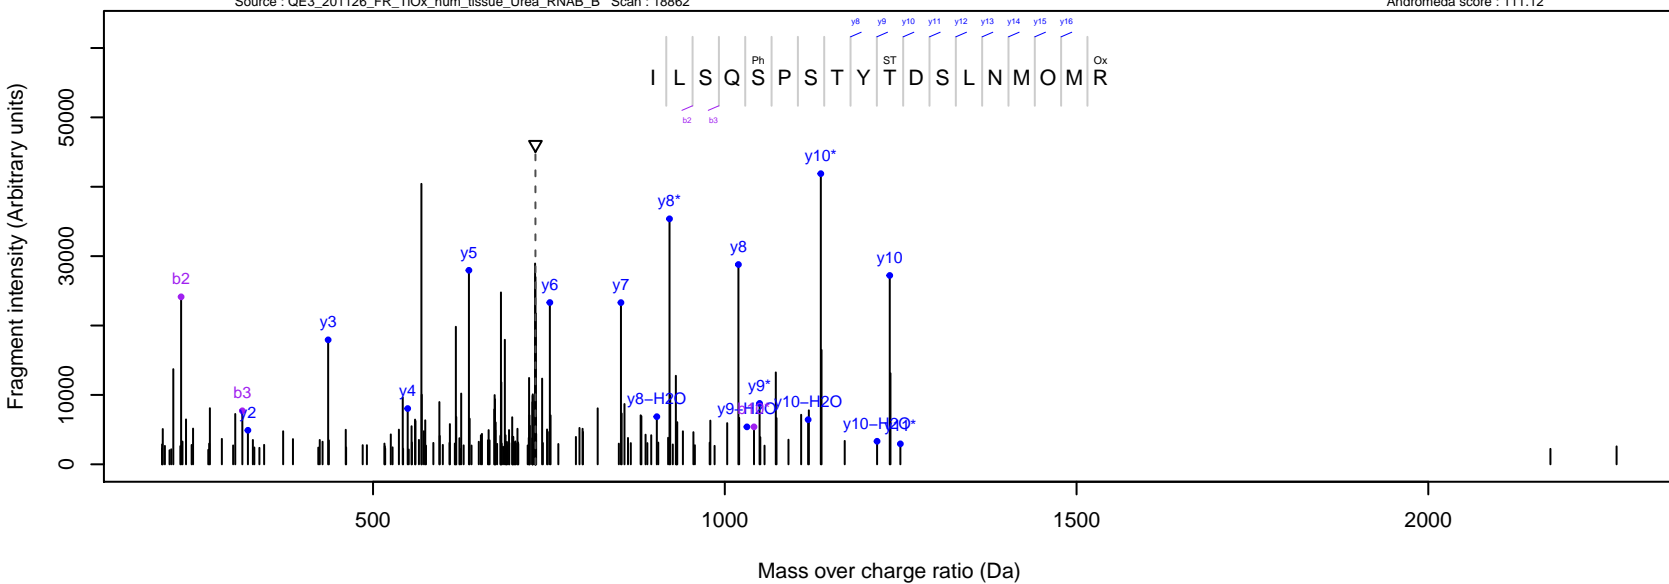

KAAS(Phospho (STY))PSPQSVR-2+

Source : QE3\_201126\_FR\_TiOx\_hum\_tissue\_Urea\_RNAB\_H Scan : 4674

Andromeda score : 111.12

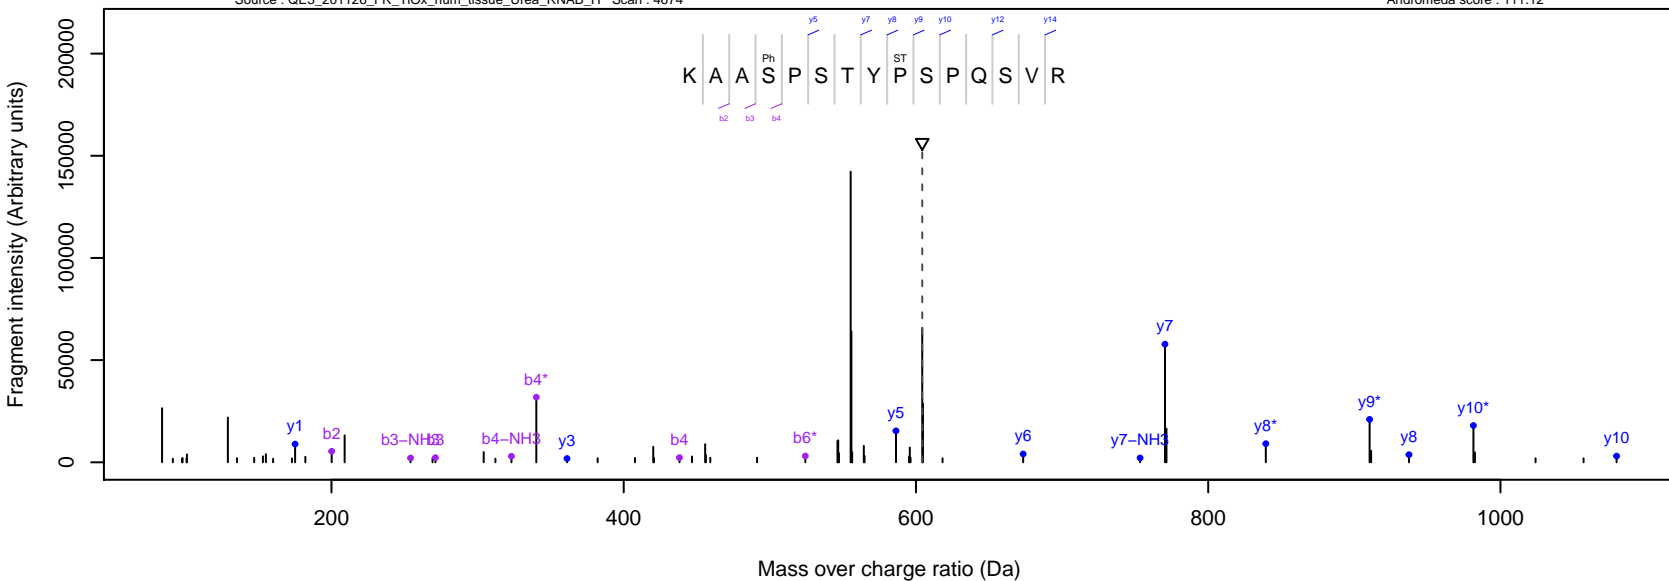



LDQPVSAPP(Phospho (STY))PR-2+

Source : QE3\_201126\_FR\_TIOx\_hum\_tissue\_Urea\_RNAB\_H Scan : 17130

Andromeda score : 111.07

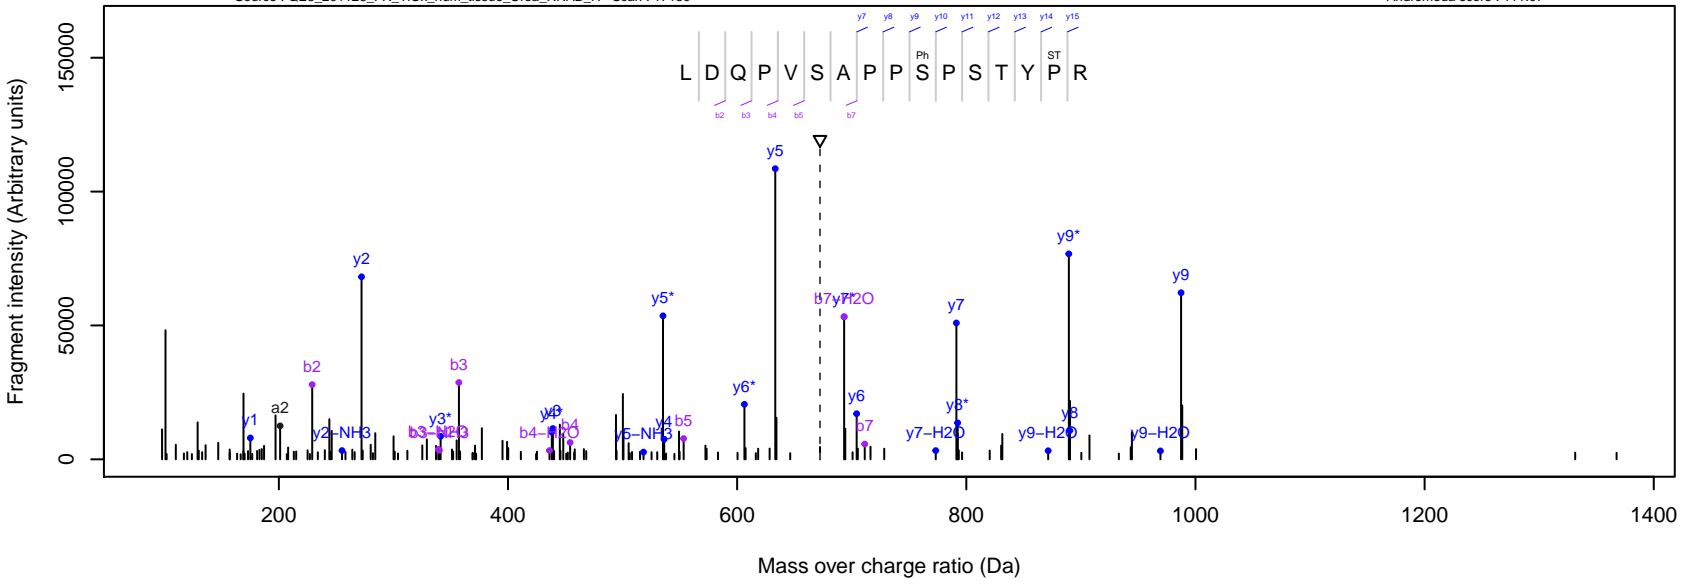

EIIDAS(Phospho (STY))DKEGM(Oxidation (M))S(Phospho (STY))PAKR-3+

Source : QE3\_201126\_FR\_TIOx\_hum\_tissue\_Urea\_RNAB\_N Scan : 10034

Andromeda score : 110.98

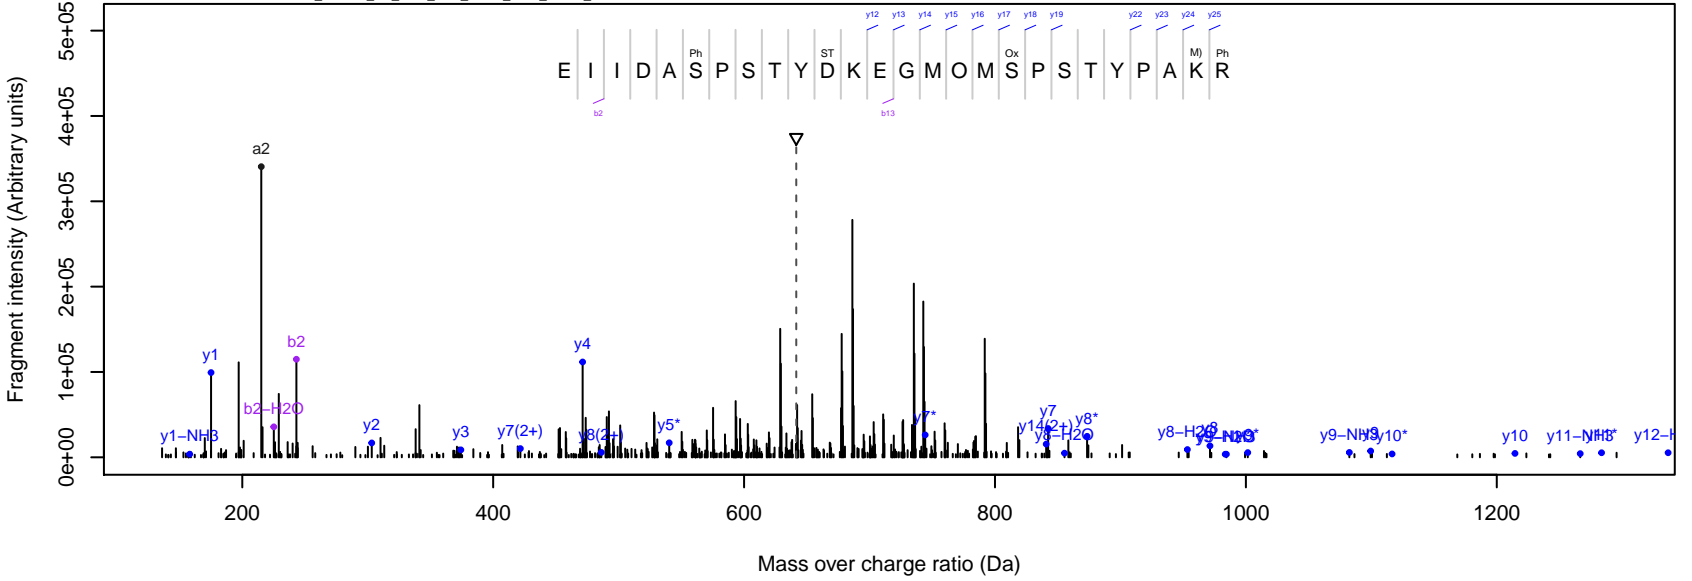

NQS(Phospho (STY))DADLEALR-2+

Source : QE3\_201126\_FR\_TIOx\_hum\_tissue\_Urea\_RNAB\_N Scan : 24377

Andromeda score : 110.98

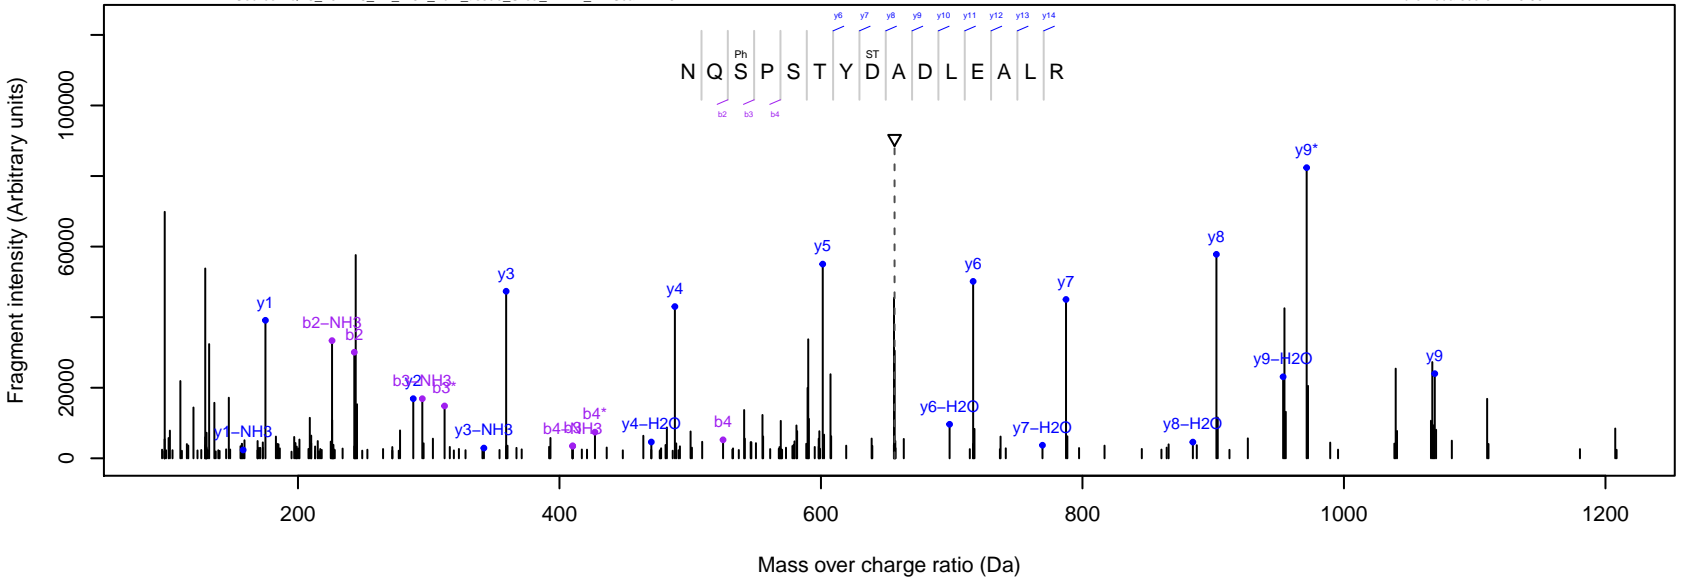

GLPWQSS(Phospho (STY))DQDVAR-2+

Source : QE3\_201126\_FR\_TIOx\_hum\_tissue\_Urea\_RNAB\_B Scan : 34696

Andromeda score : 110.92

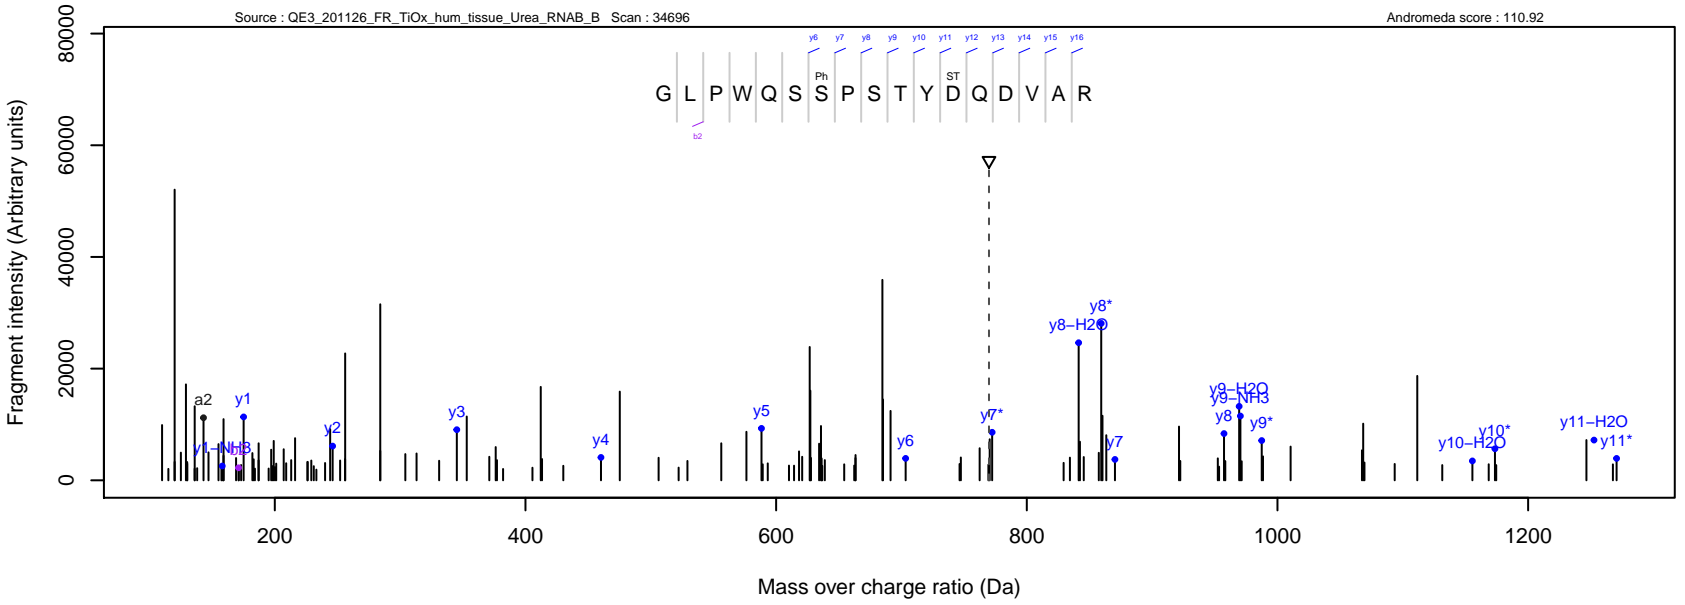

(Acetyl (Protein N-term))SETAPAAPAAPAETK(Phospho (STY))PVKK-3+

Source : QE3\_201126\_FR\_TIOx\_hum\_tissue\_Urea\_RNAB\_N Scan : 14252

Andromeda score : 110.89

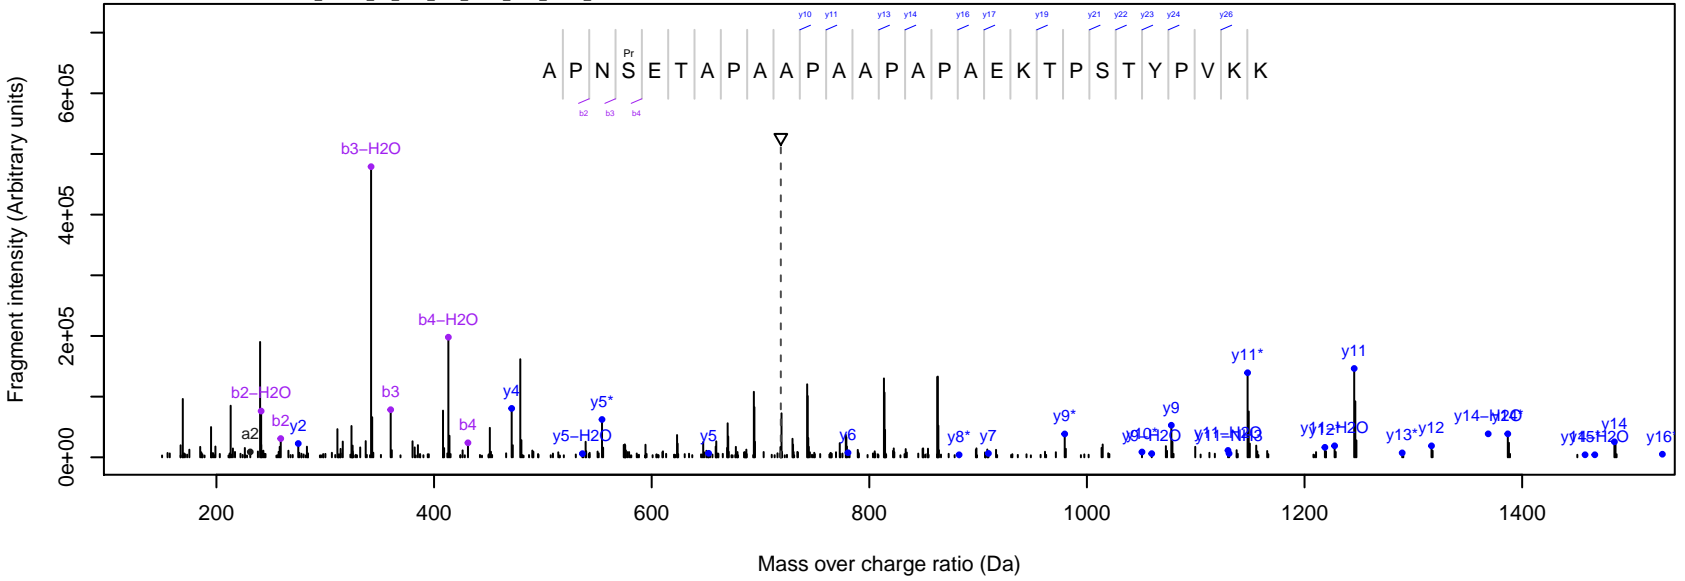

VQAYEESPVASS(Phospho (STY))PNGK-2+

Source : QE3\_201126\_FR\_TIOx\_hum\_tissue\_Urea\_RNAB\_N Scan : 17468

Andromeda score : 110.84

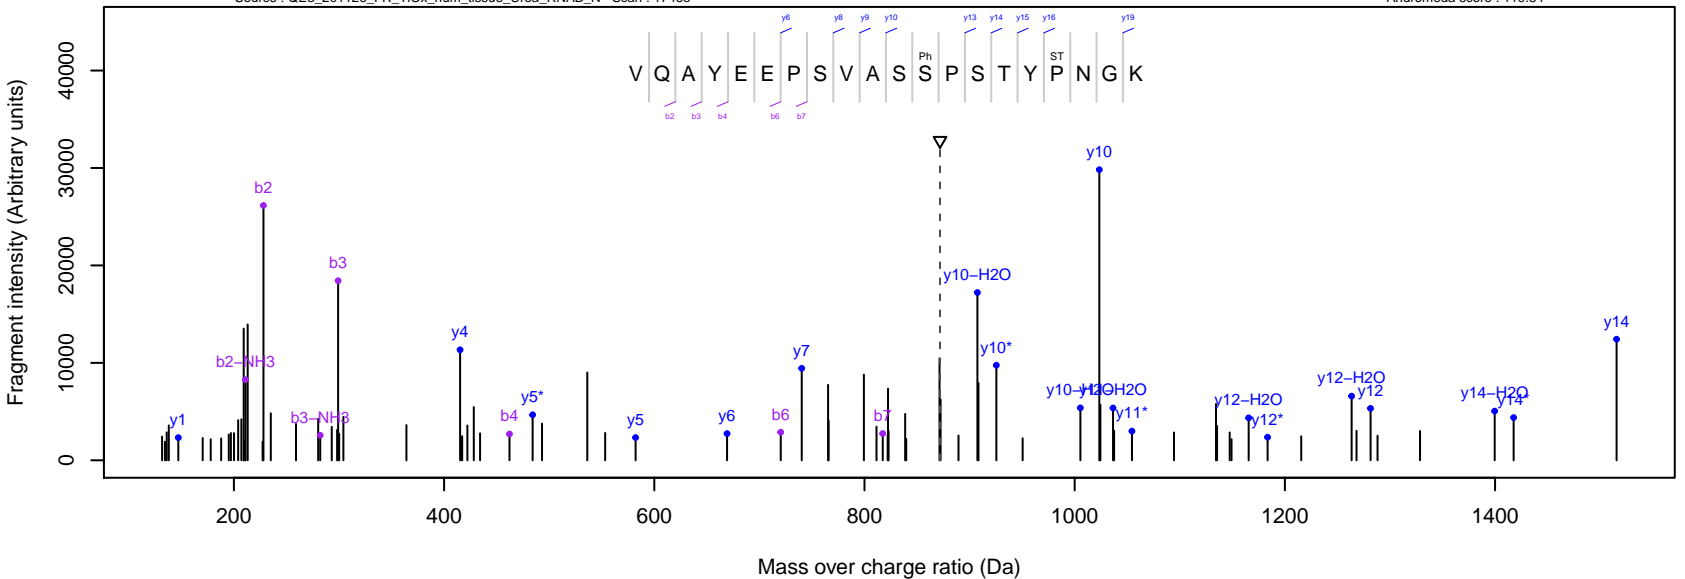

S(Phospho (STY))PTGSPNSFLANMGGTVAHK-3+

Source : QE3\_201126\_FR\_TIOx\_hum\_tissue\_Urea\_RNAB\_N Scan : 34170

Andromeda score : 110.83

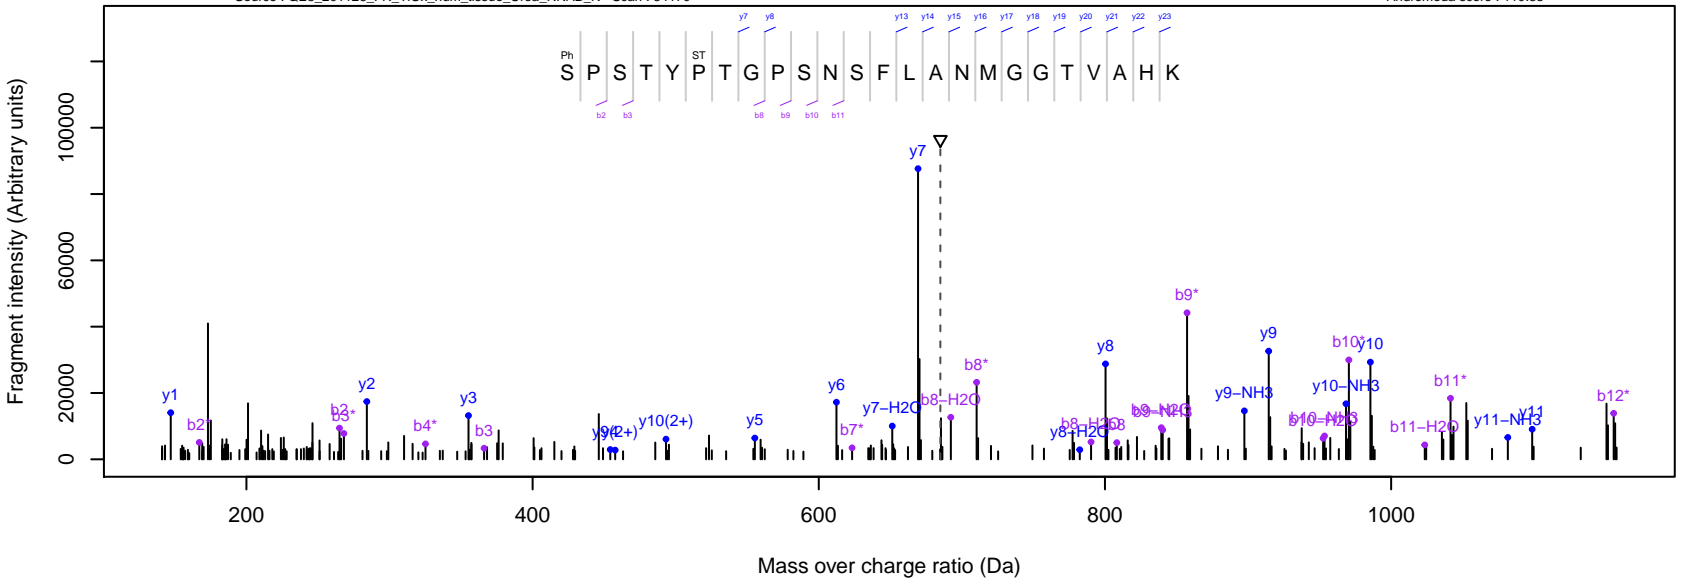

IFDEVM(Oxidation (M))GCFSDS(Phospho (STY))PPQS(Phospho (STY))PTFPEAGHTSLYDEDKVP-4+

Source : QE3\_201126\_FR\_TIOx\_hum\_tissue\_Urea\_RNAB\_B Scan : 48457

Andromeda score : 110.78

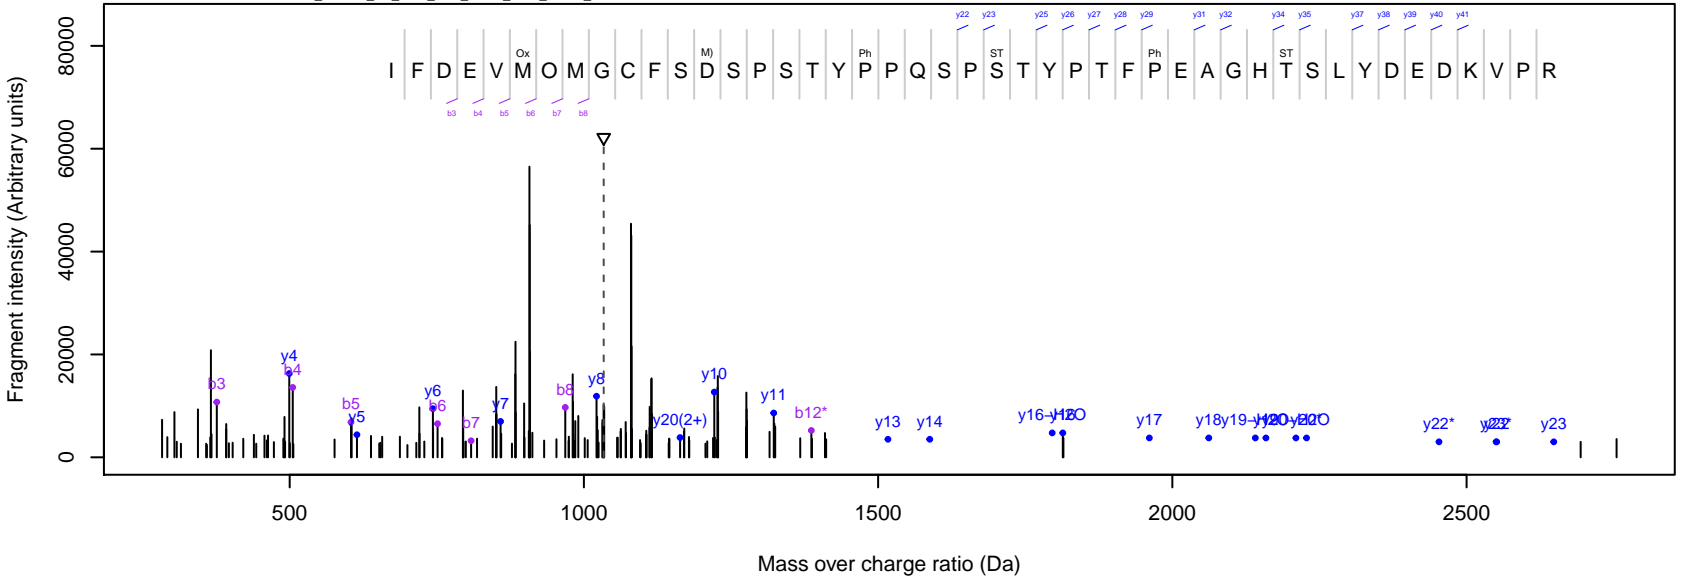

AAATGNAS(Phospho (STY))PGKLEHSK-3+

Source : QE3\_201126\_FR\_TIOx\_hum\_tissue\_Urea\_RNAB\_N Scan : 5400

Andromeda score : 110.77

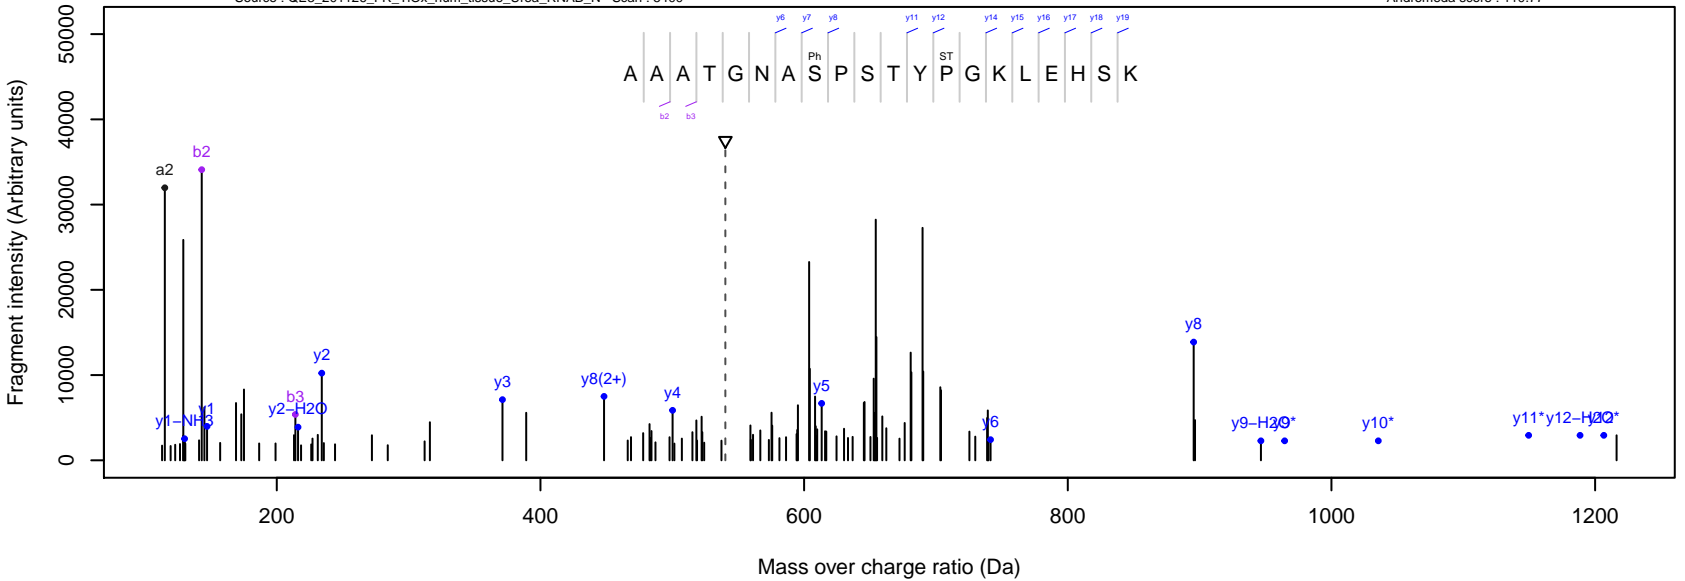

SVAS(Phospho (STY))NQS(Phospho (STY))EMEFSSLQDMPK-2+

Source : QE3\_201126\_FR\_TiOx\_hum\_tissue\_Urea\_RNAB\_N Scan : 52414

Andromeda score : 110.77

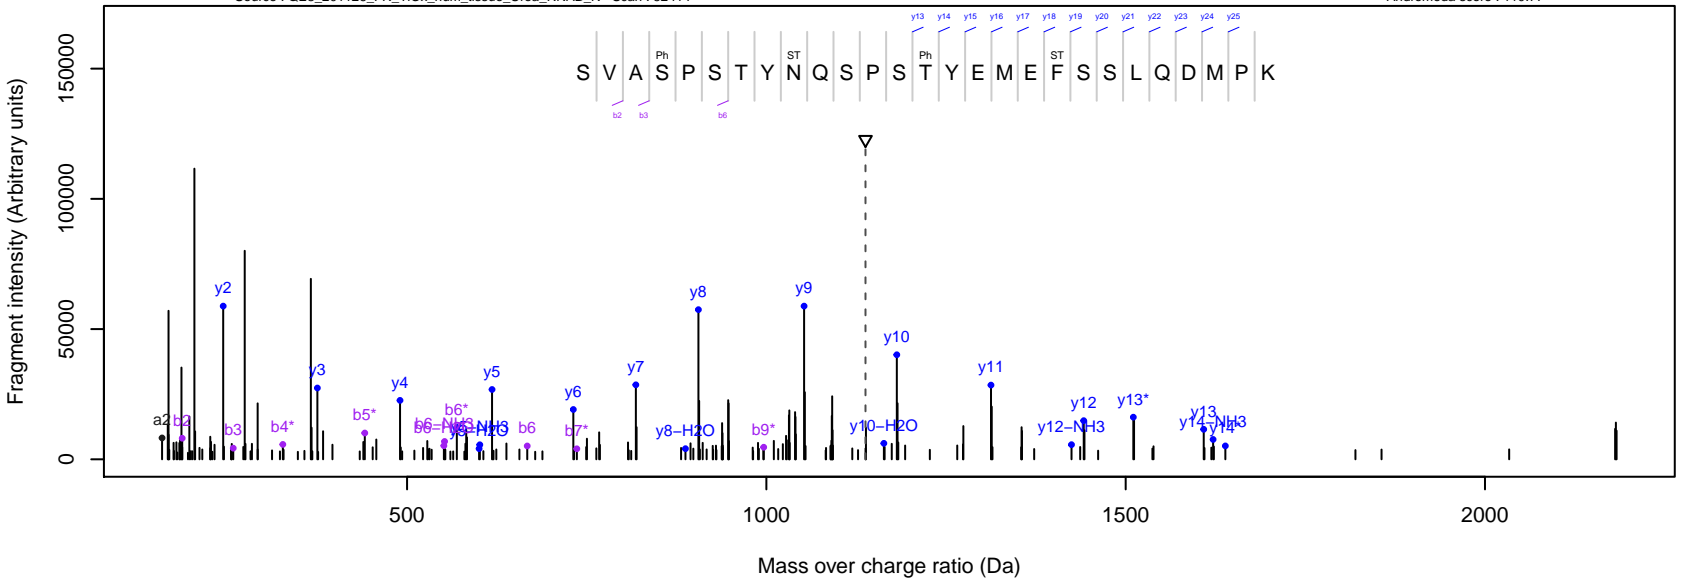

APS(Phospho (STY))RQDVYGPQPQR-3+

Source : QE3\_201126\_FR\_TiOx\_hum\_tissue\_Urea\_RNAB\_H Scan : 14114

Andromeda score : 110.74

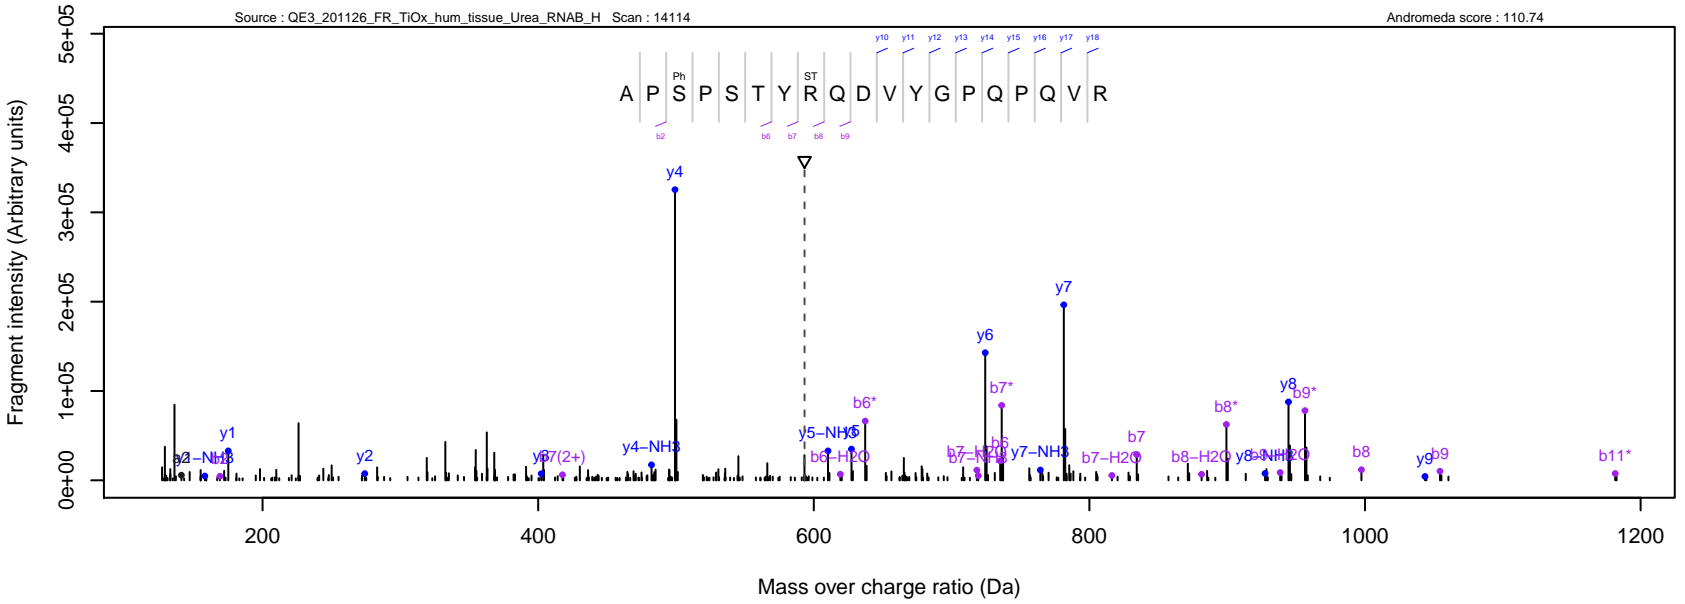

SLS(Phospho (STY))YS(Phospho (STY))PVER-2+

Source : QE3\_201126\_FR\_TiOx\_hum\_tissue\_Urea\_RNAB\_H Scan : 25743

Andromeda score : 110.74

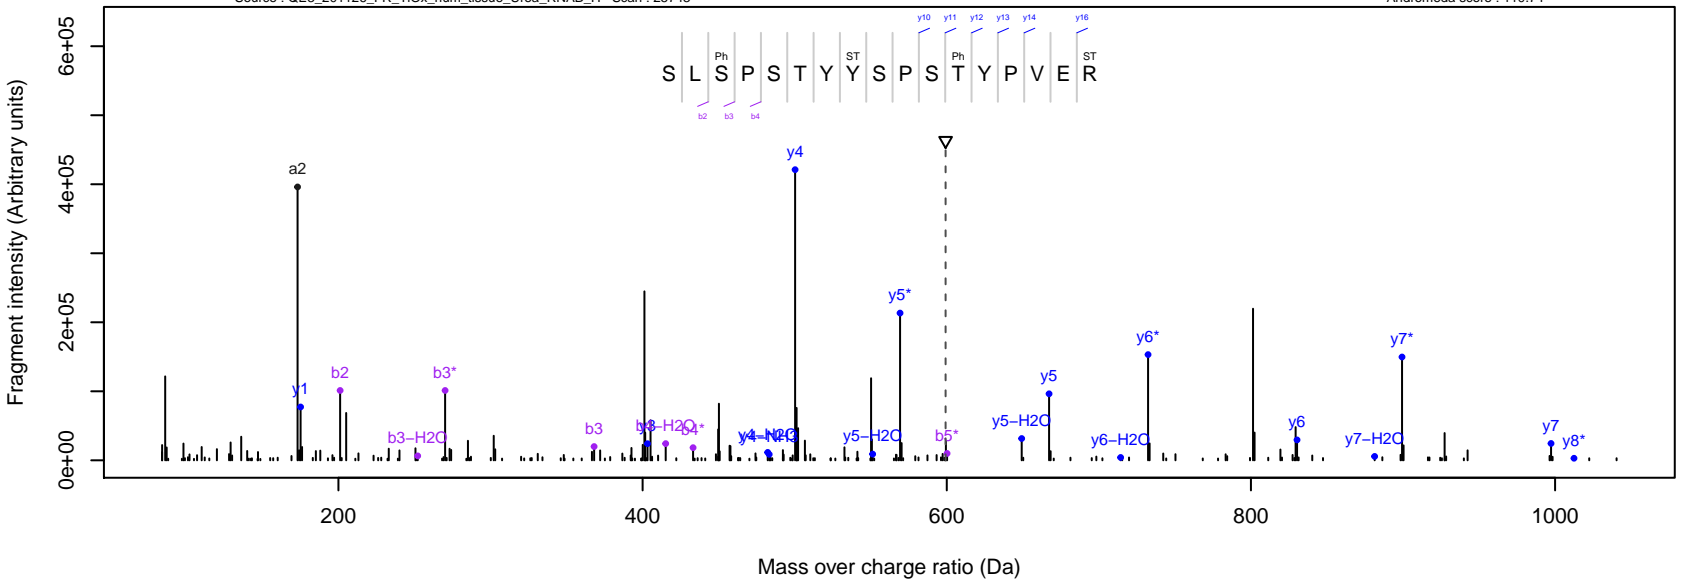

SNS(Phospho (STY))QSYIGRPIHLDK-3+

Source : QE3\_201126\_FR\_TiOx\_hum\_tissue\_Urea\_RNAB\_N Scan : 17921

Andromeda score : 110.74

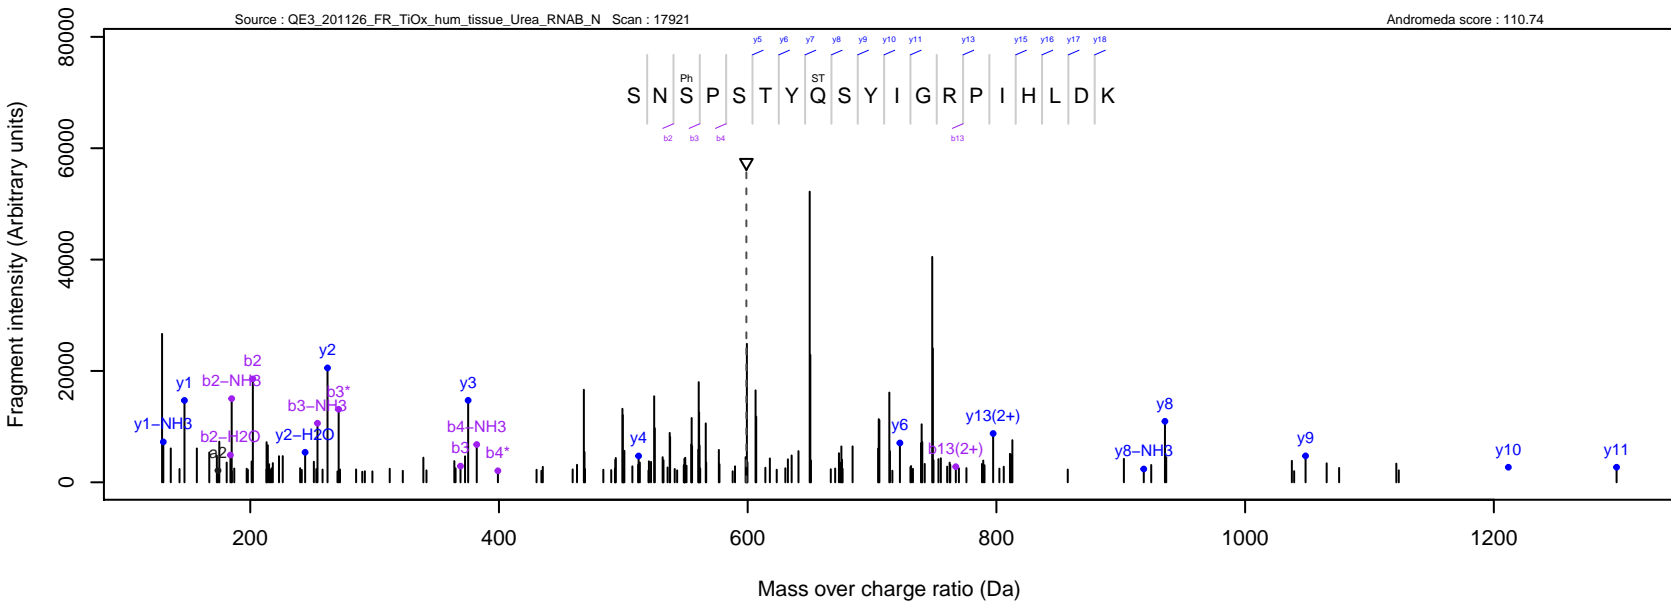

AAAAAPASEDEDEDDEDDEDDDEEDDS(Phospho (STY))EEEAAMETTPAK-4+

Source : QE3\_201126\_FR\_TiOx\_hum\_tissue\_Urea\_RNAB\_H Scan : 26721

Andromeda score : 110.71

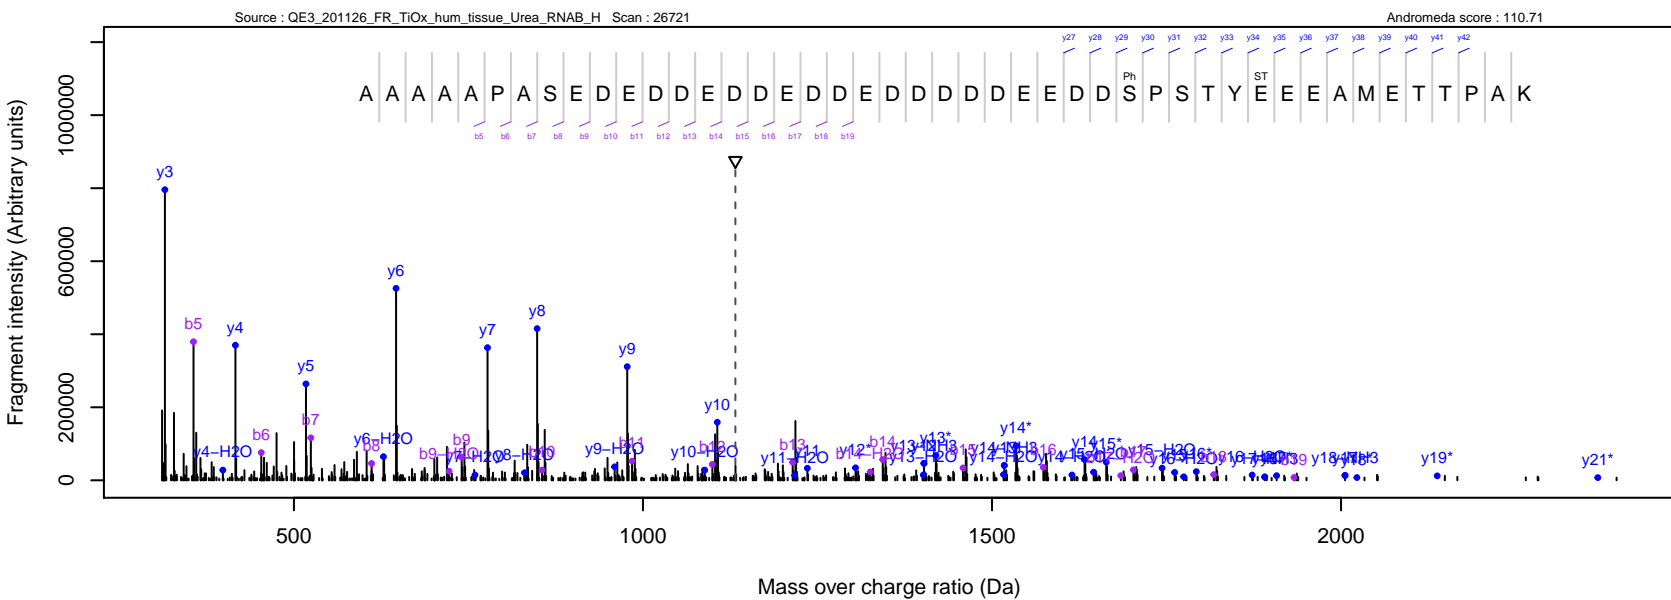

KDSSGSV(Phospho (STY))PNTLSQEEGDQICLYHIR-3+

Source : QE3\_201126\_FR\_TiOx\_hum\_tissue\_Urea\_RNAB\_B Scan : 33520

Andromeda score : 110.7

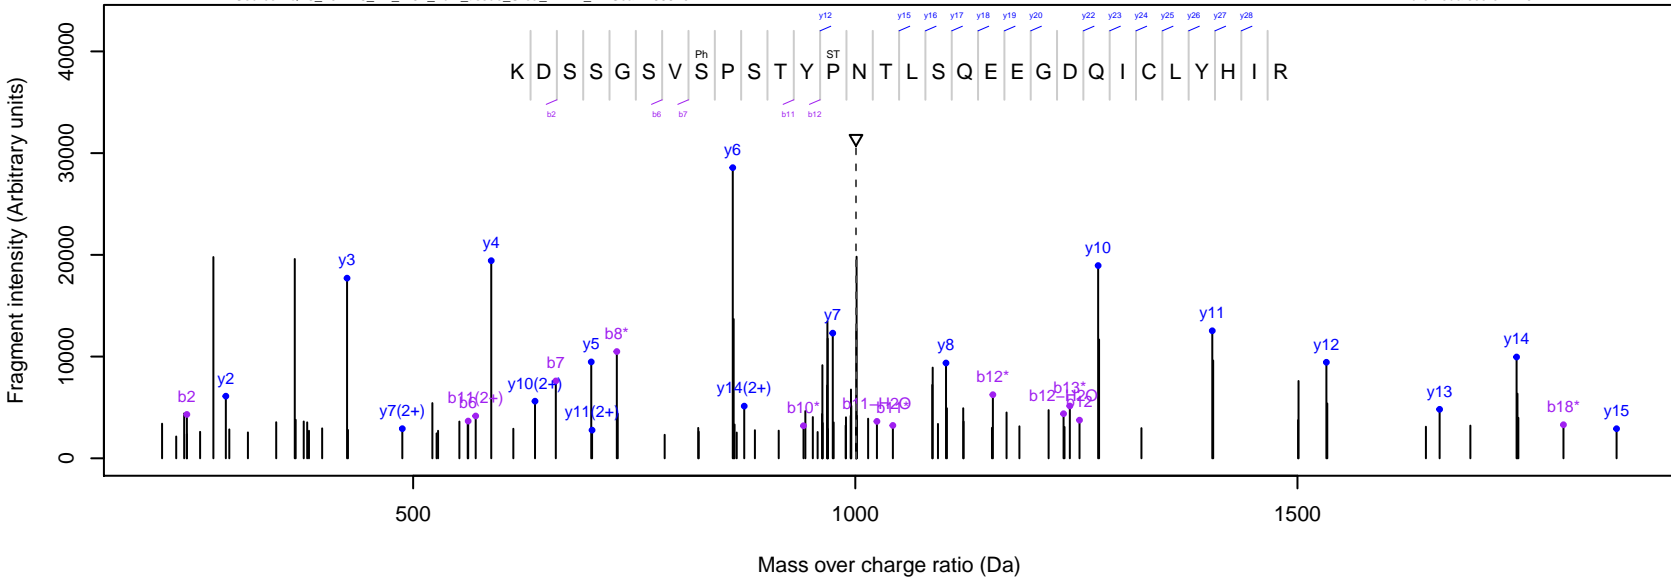

GS(Phospho (STY))VSQPST(Phospho (STY))PS(Phospho (STY))PPKPTGIFQTSANSSSFEPVK-3+

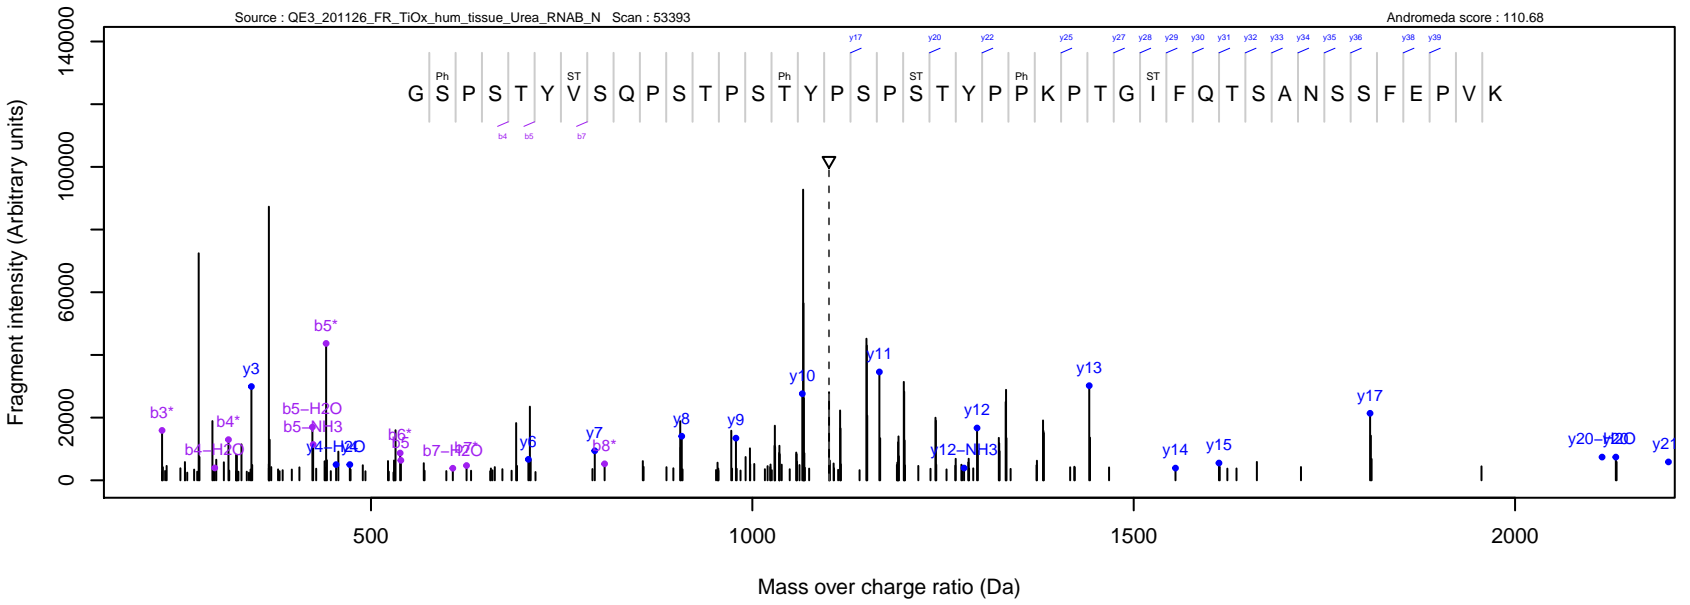

M(Oxidation (M))VEPENAVTITPLRPEDDYS(Phospho (STY))PR-3+

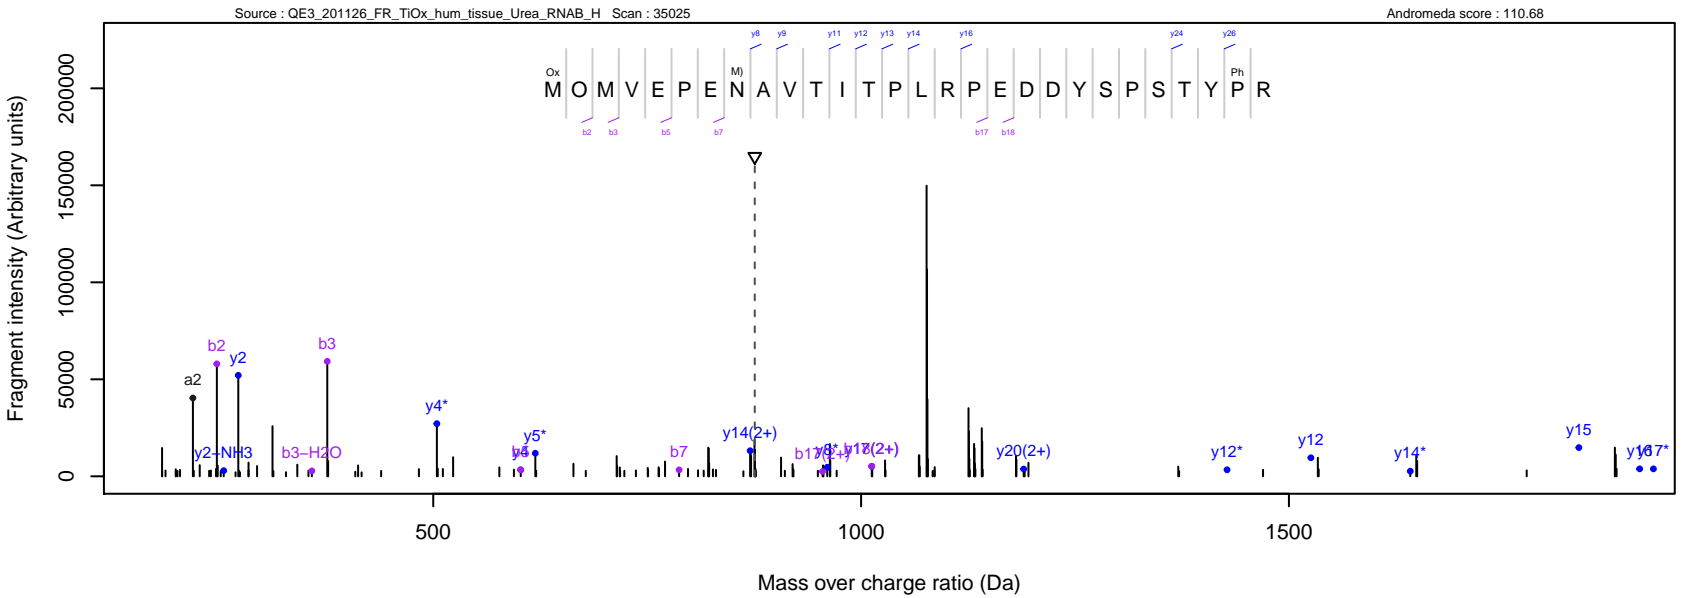

SWDSSSPVDRPEPEEA(Phospho (STY))PTTR-3+

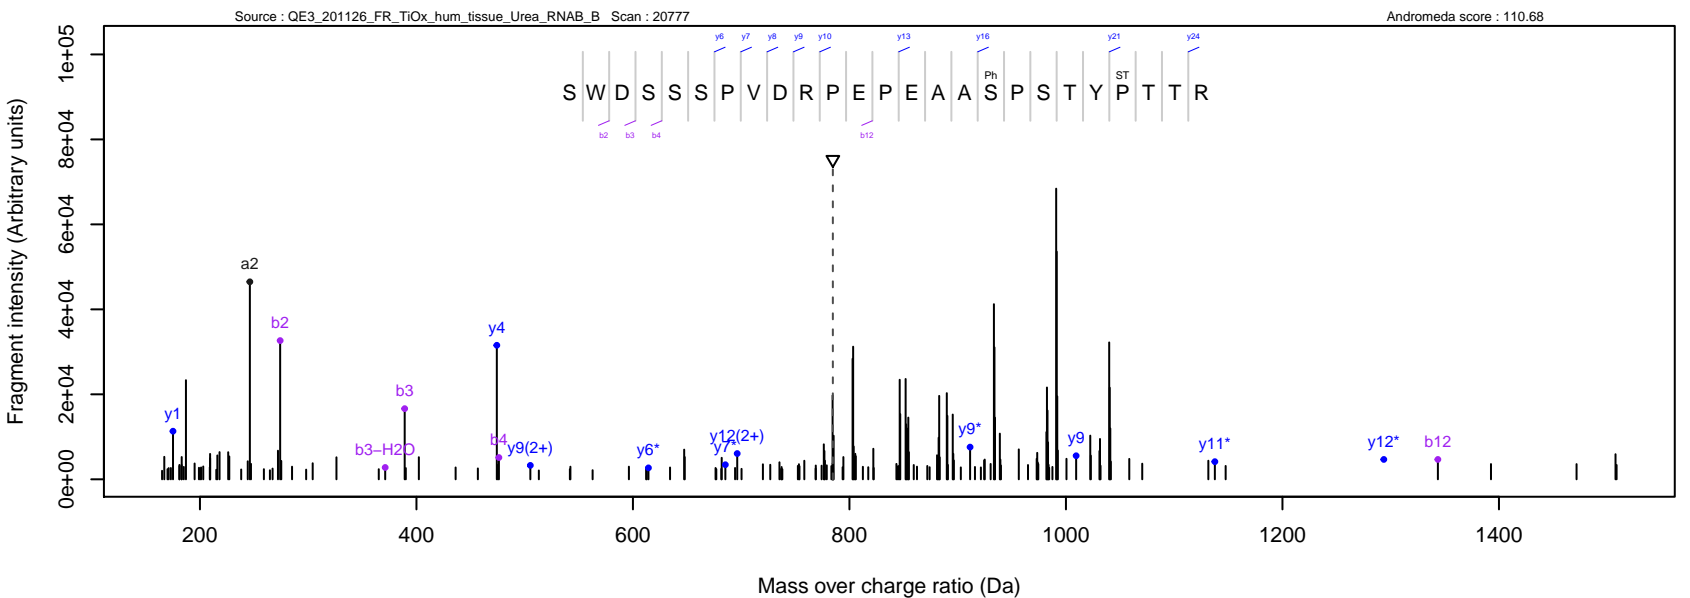

GGs(Phospho (STY))GVLQDEEVLASLER-3+

Source : QE3\_201126\_FR\_TiOx\_hum\_tissue\_Urea\_RNAB\_H Scan : 54193

Andromeda score : 110.67

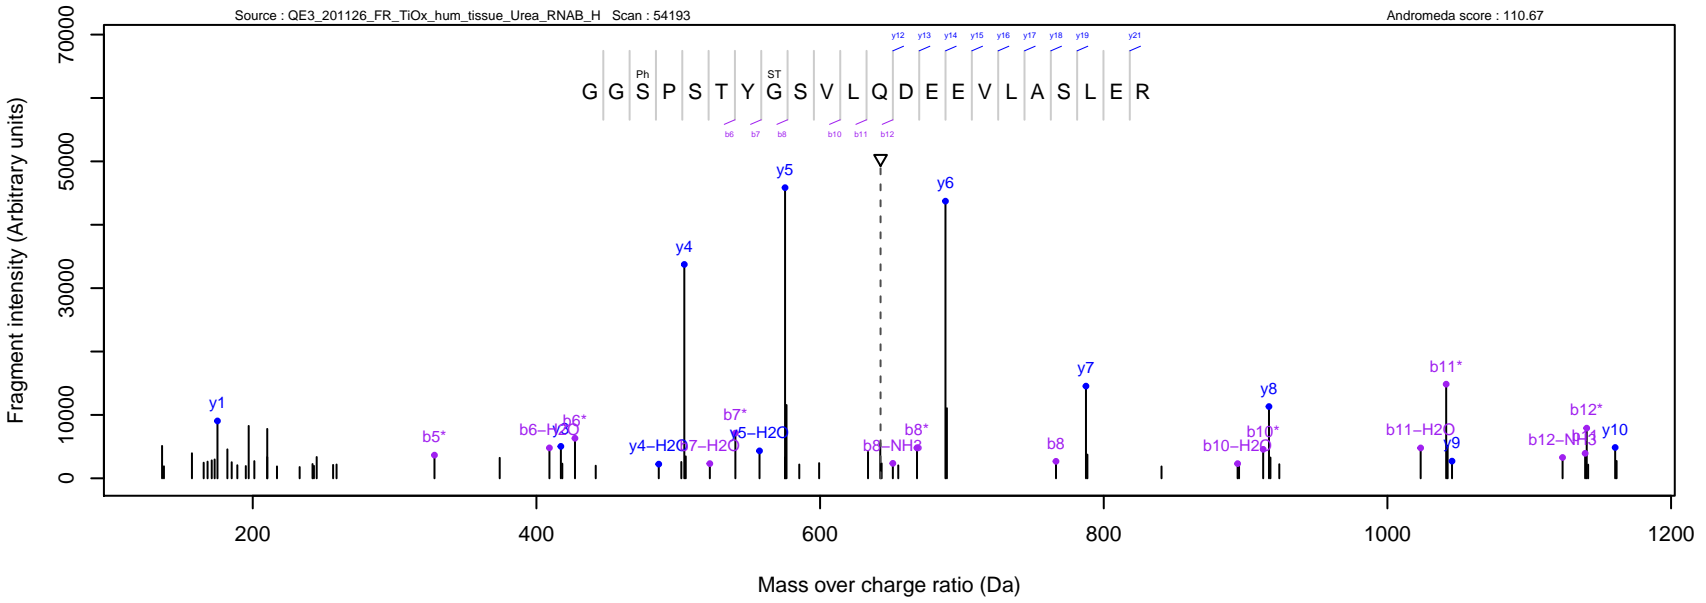

KVS(Phospho (STY))LVLEK-2+

Source : QE3\_201126\_FR\_TiOx\_hum\_tissue\_Urea\_RNAB\_N Scan : 16077

Andromeda score : 110.64

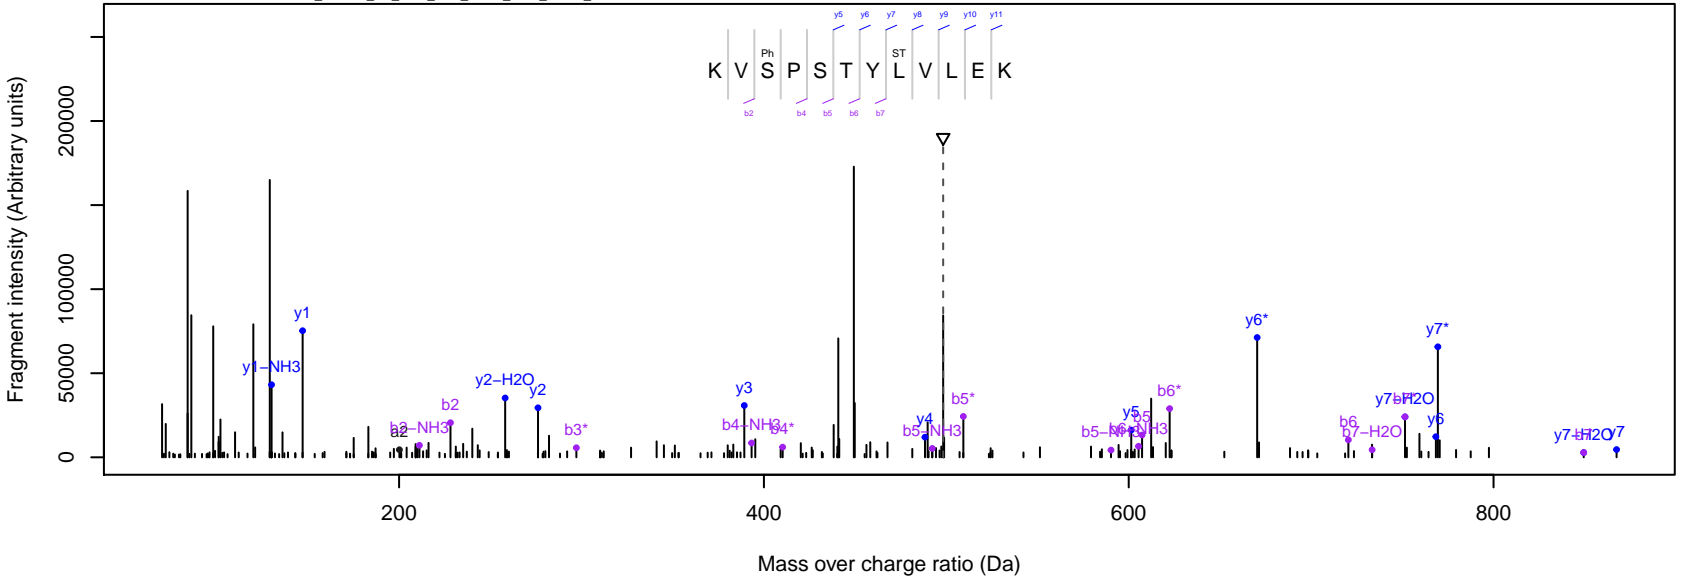

NSAAEIPVTSNGEVDDSDREHSPSTYFNR-3+

Source : QE3\_201126\_FR\_TiOx\_hum\_tissue\_Urea\_RNAB\_N Scan : 18925

Andromeda score : 110.61

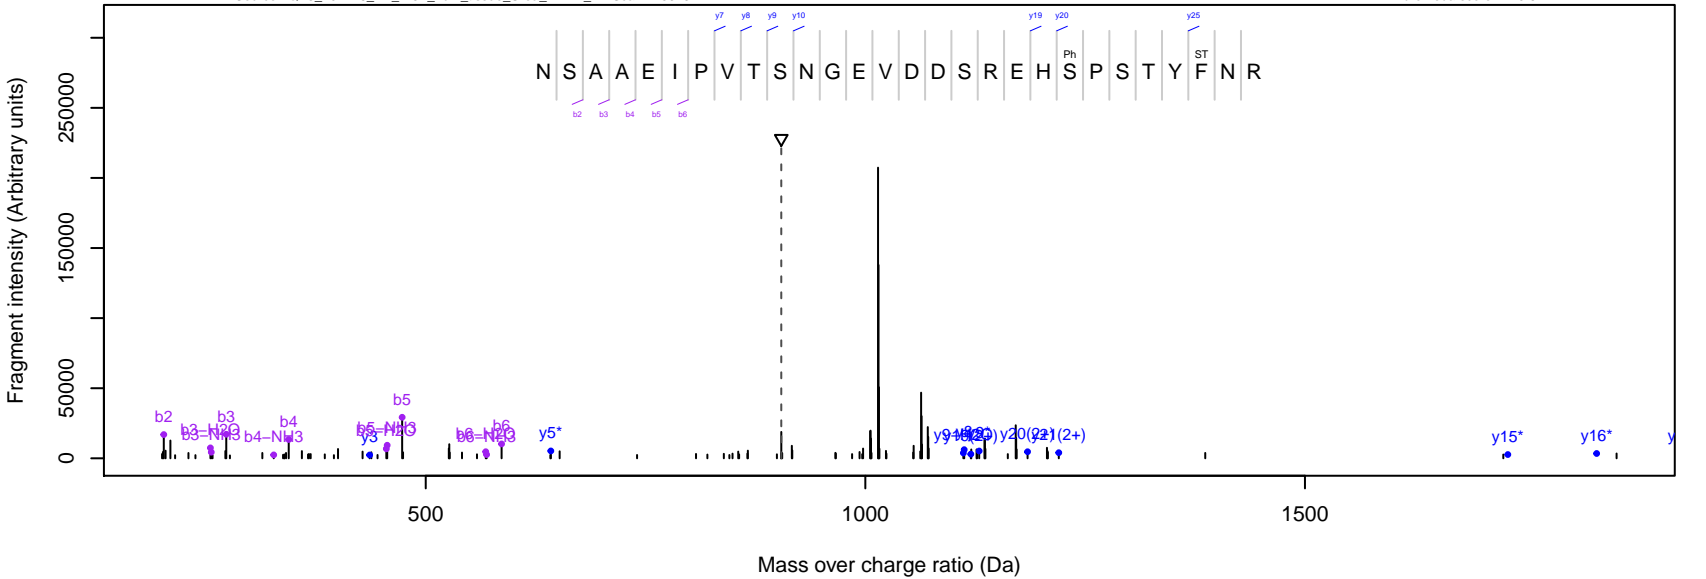

RDS(Phospho (STY))S(Phospho (STY))ESQLASTESDKPTTGR-3+

Source : QE3\_201126\_FR\_TiOx\_hum\_tissue\_Urea\_RNAB\_N Scan : 10366

Andromeda score : 110.61

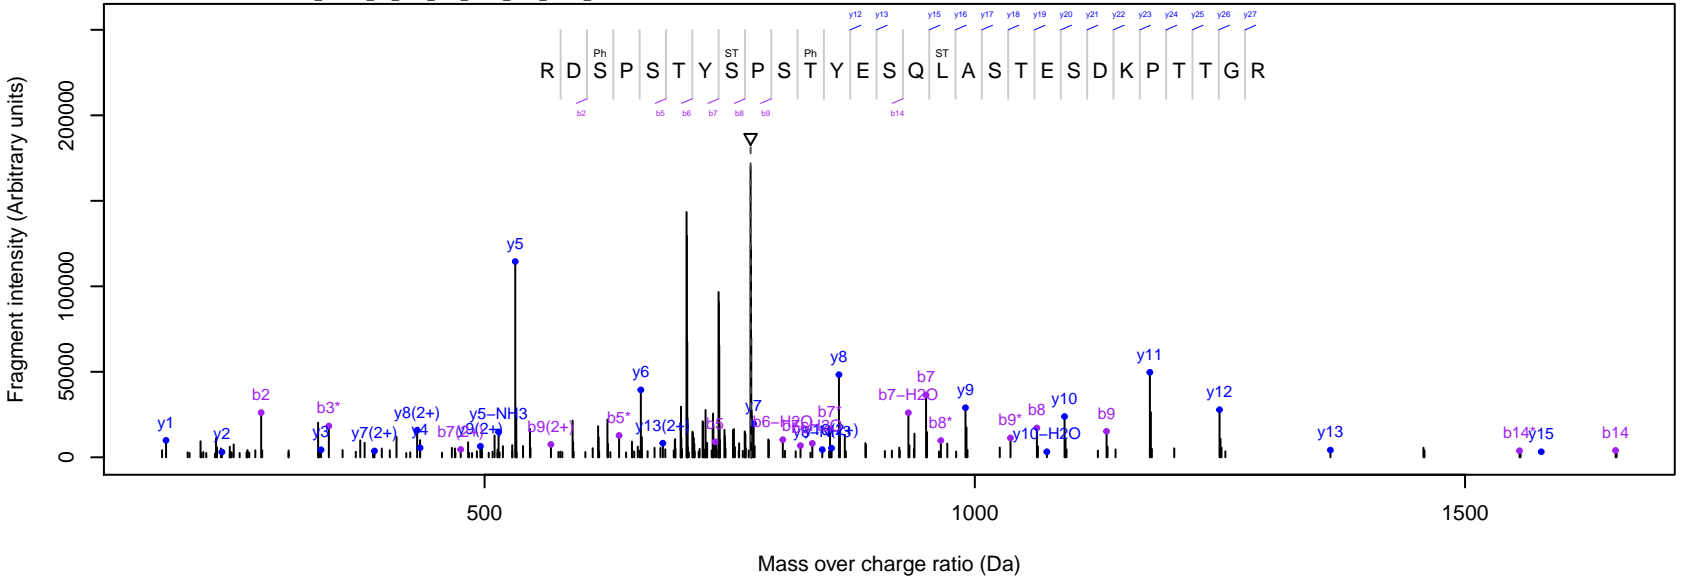

SQTT(Phospho (STY))T(Phospho (STY))ERDSDTDVEEEELPVENR-3+

Source : QE3\_201126\_FR\_TiOx\_hum\_tissue\_Urea\_RNAB\_H Scan : 25870

Andromeda score : 110.61

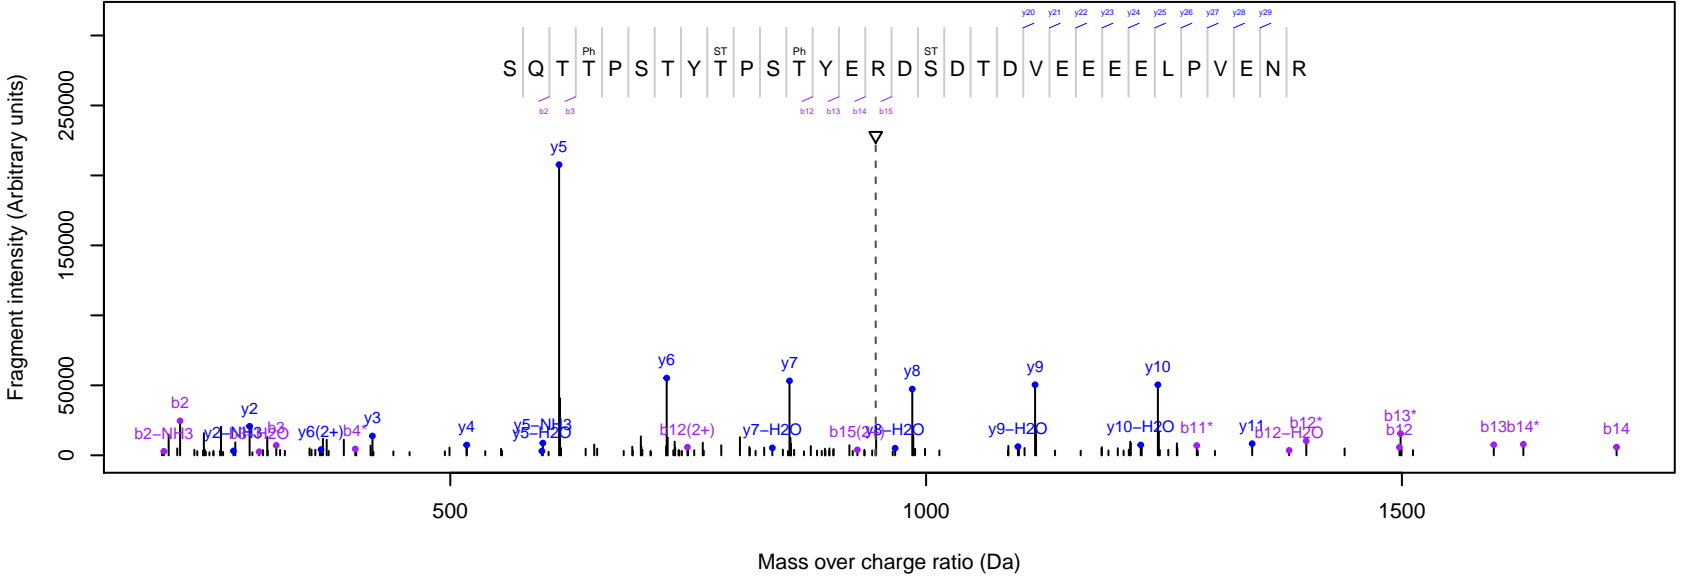

SAS(Phospho (STY))VNKEPVS L P G I M R-3+

Source : QE3\_201126\_FR\_TiOx\_hum\_tissue\_Urea\_RNAB\_H Scan : 32423

Andromeda score : 110.6

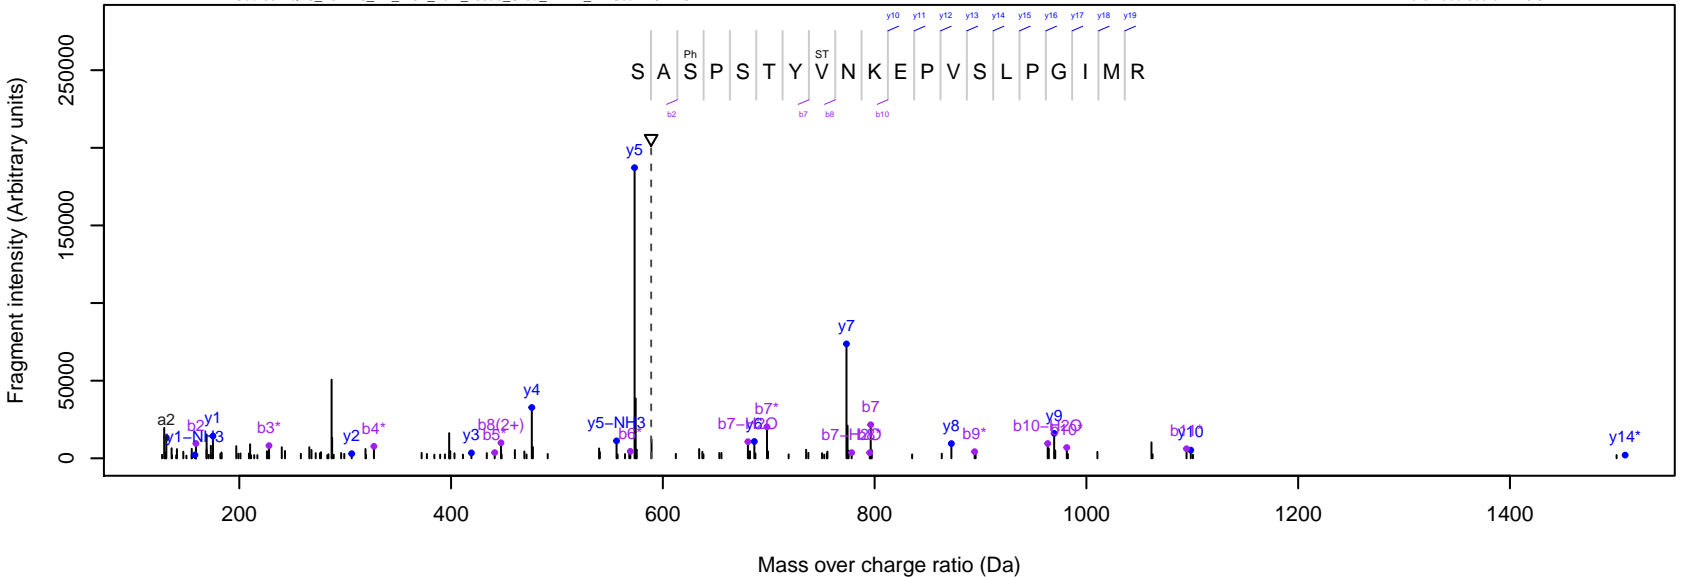



SSSSQPVTPVS(Phospho (STY))PVWSPGVAPTQPPAFPTSNPSK-3+

Source : QE3\_201126\_FR\_TiOx\_hum\_tissue\_Urea\_RNAB\_H Scan : 50674

Andromeda score : 110.57

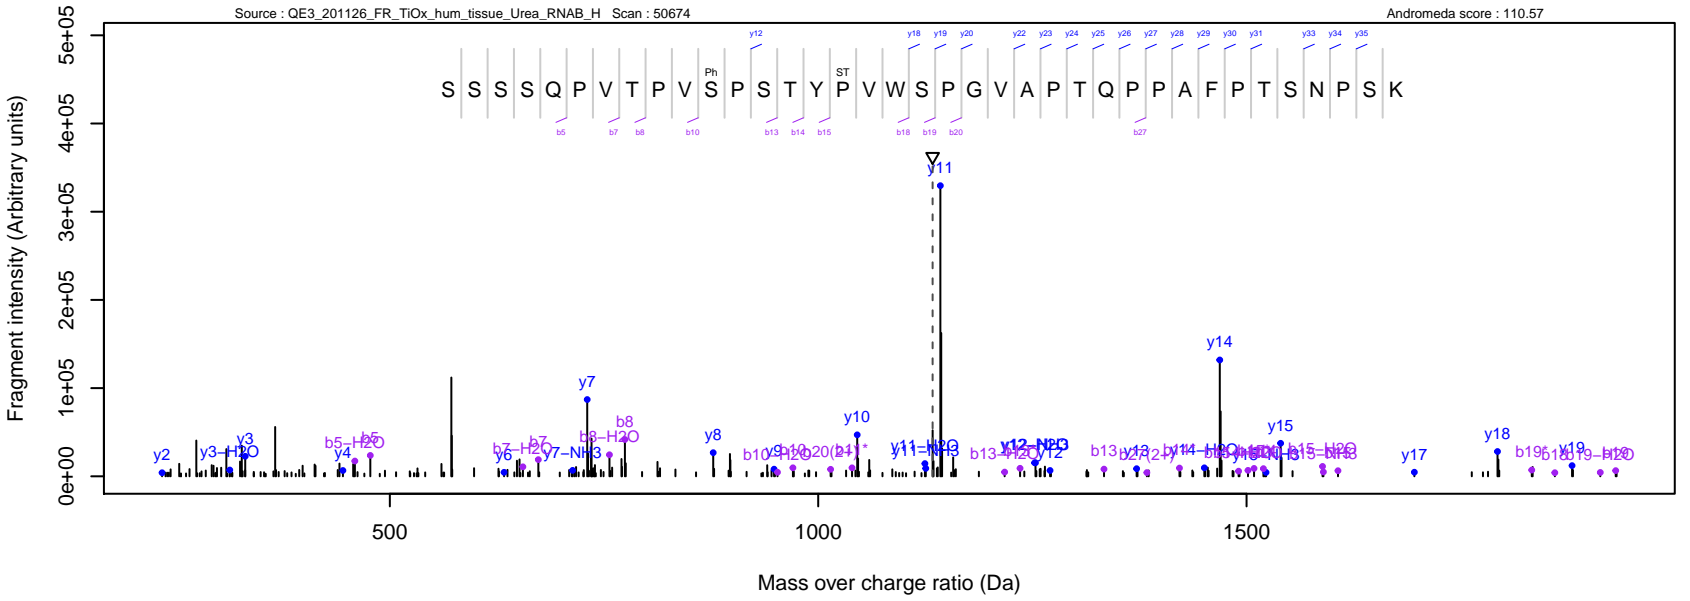

AYLGQAVPSGSSGLSTSSSSS(Phospho (STY))PPGTPSPADAK-3+

Source : QE3\_201126\_FR\_TiOx\_hum\_tissue\_Urea\_RNAB\_B Scan : 36075

Andromeda score : 110.56

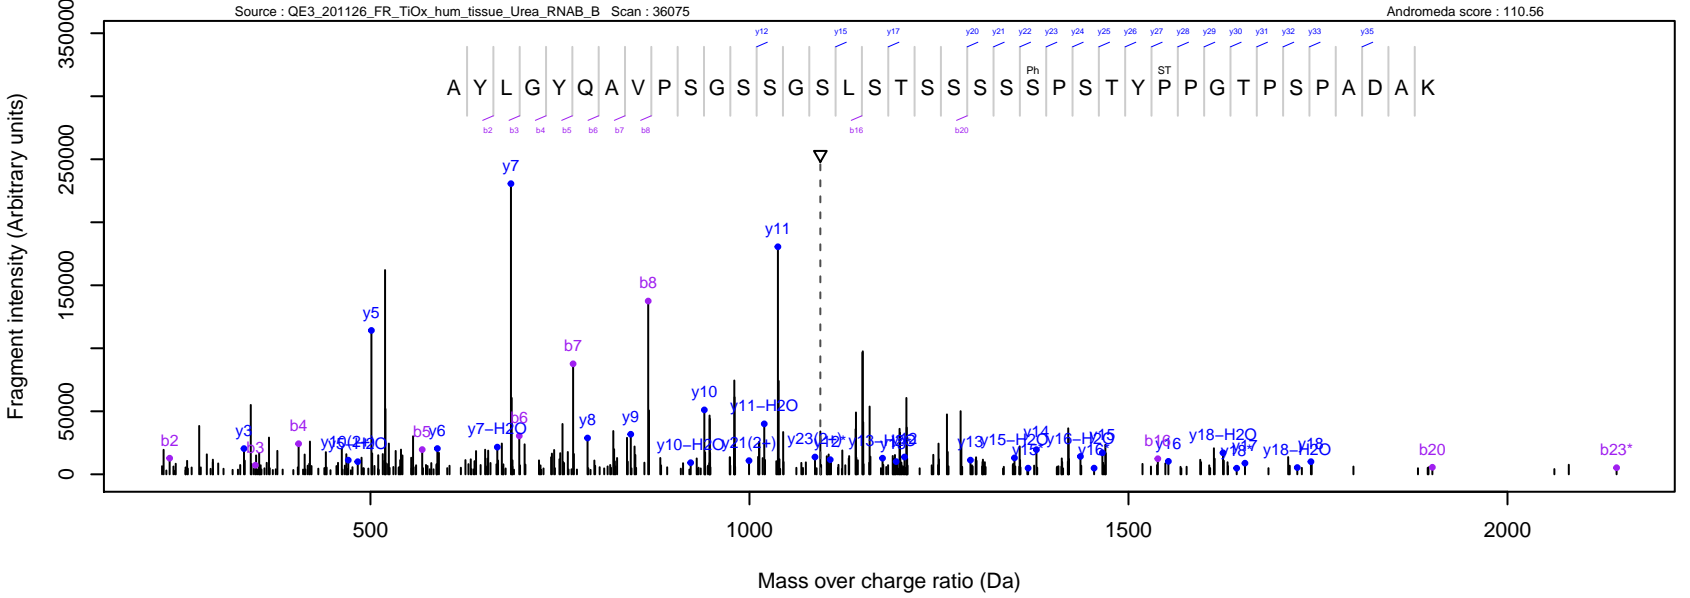

QIDSGSNLTT(Phospho (STY))DLIVQR-2+

Source : QE3\_201126\_FR\_TiOx\_hum\_tissue\_Urea\_RNAB\_N Scan : 38888

Andromeda score : 110.56

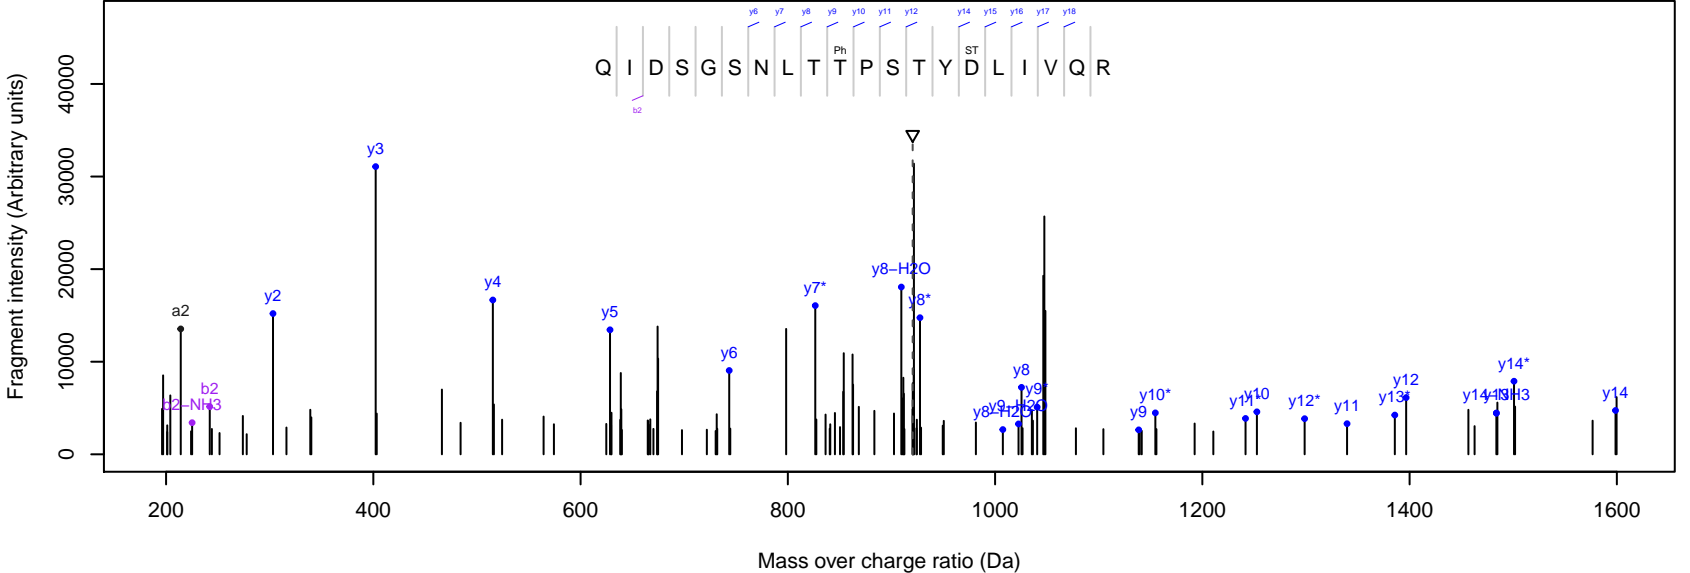

AGGPTTPLS(Phospho (STY))PTR-2+

Source : QE3\_201126\_FR\_TiOx\_hum\_tissue\_Urea\_RNAB\_B Scan : 15667

Andromeda score : 110.51

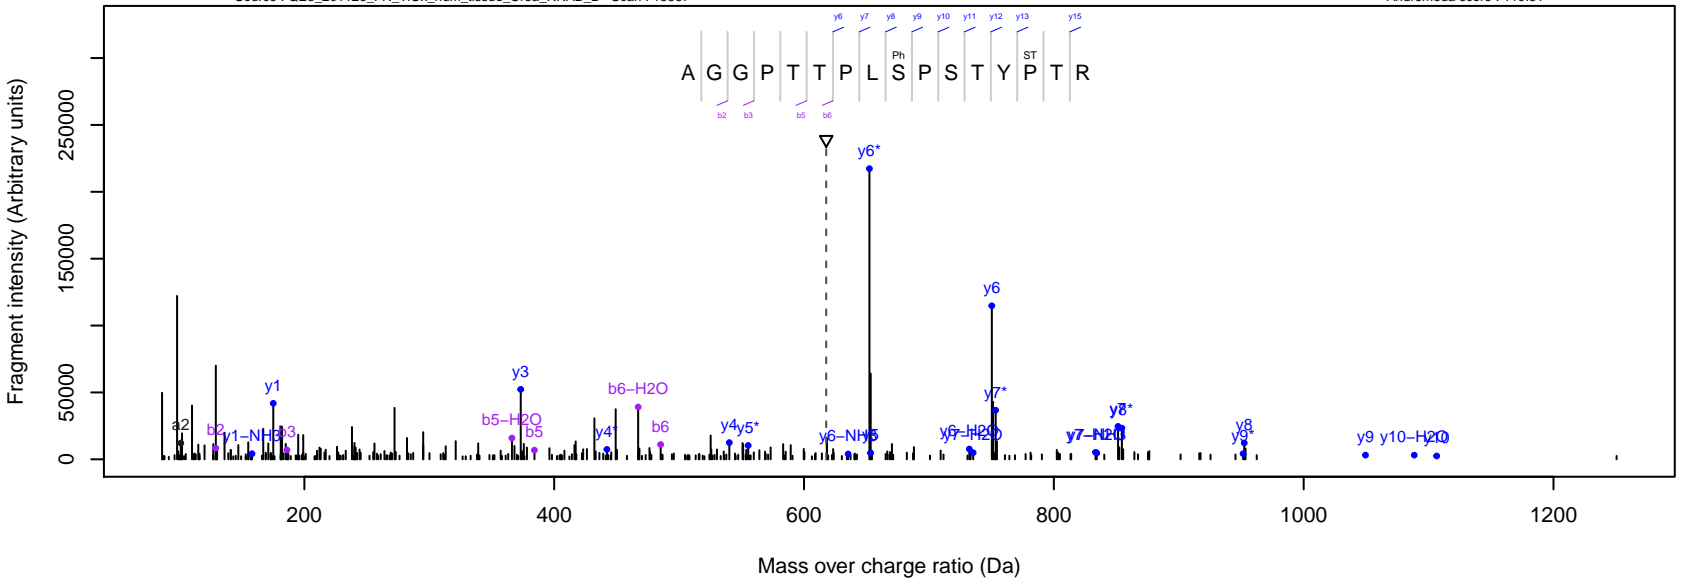

SSS(Phospho (STY))PTSYWK-2+

Source : QE3\_201126\_FR\_TiOx\_hum\_tissue\_Urea\_RNAB\_N Scan : 22630

Andromeda score : 110.47

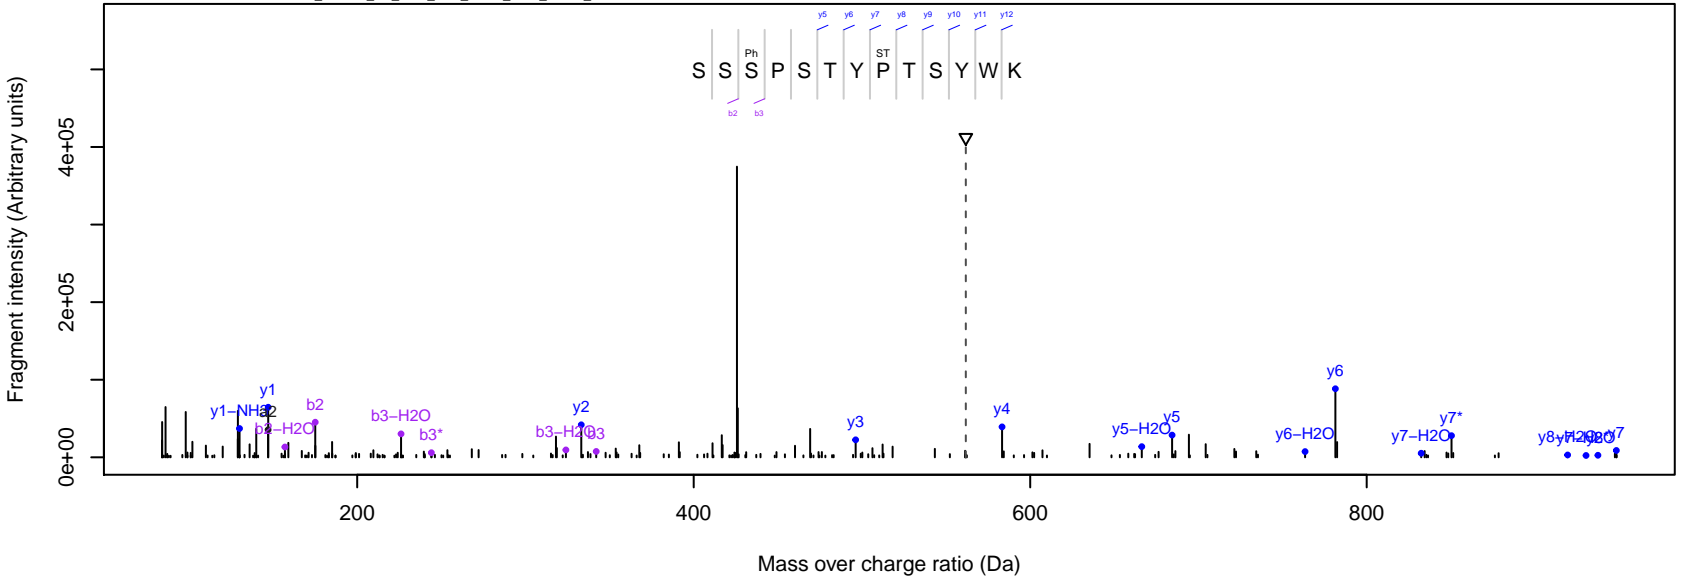

AES(Phospho (STY))PEEVACRKEEEER-3+

Source : QE3\_201126\_FR\_TiOx\_hum\_tissue\_Urea\_RNAB\_B Scan : 9386

Andromeda score : 110.44

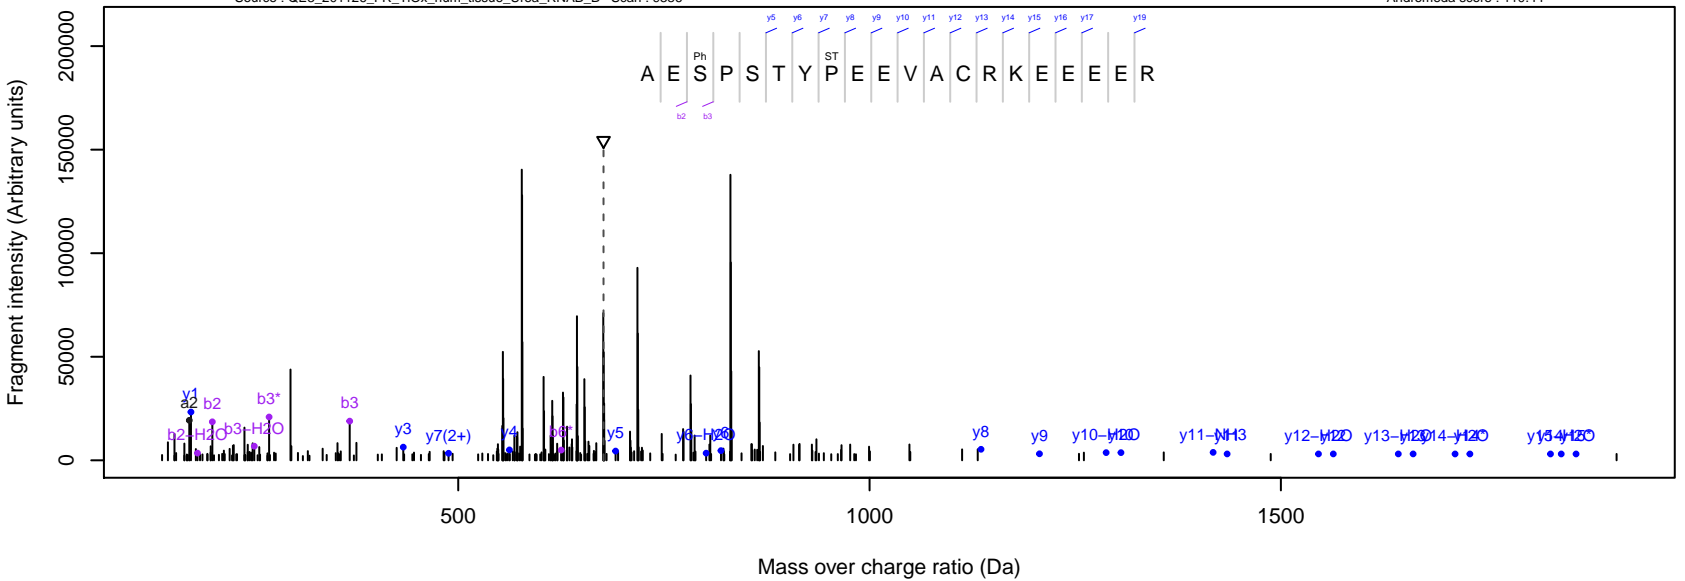

VRGEVAPDAKS(Phospho (STY))FVLNLGK-3+

Source : QE3\_201126\_FR\_TIOx\_hum\_tissue\_Urea\_RNAB\_N Scan : 35140

Andromeda score : 110.44

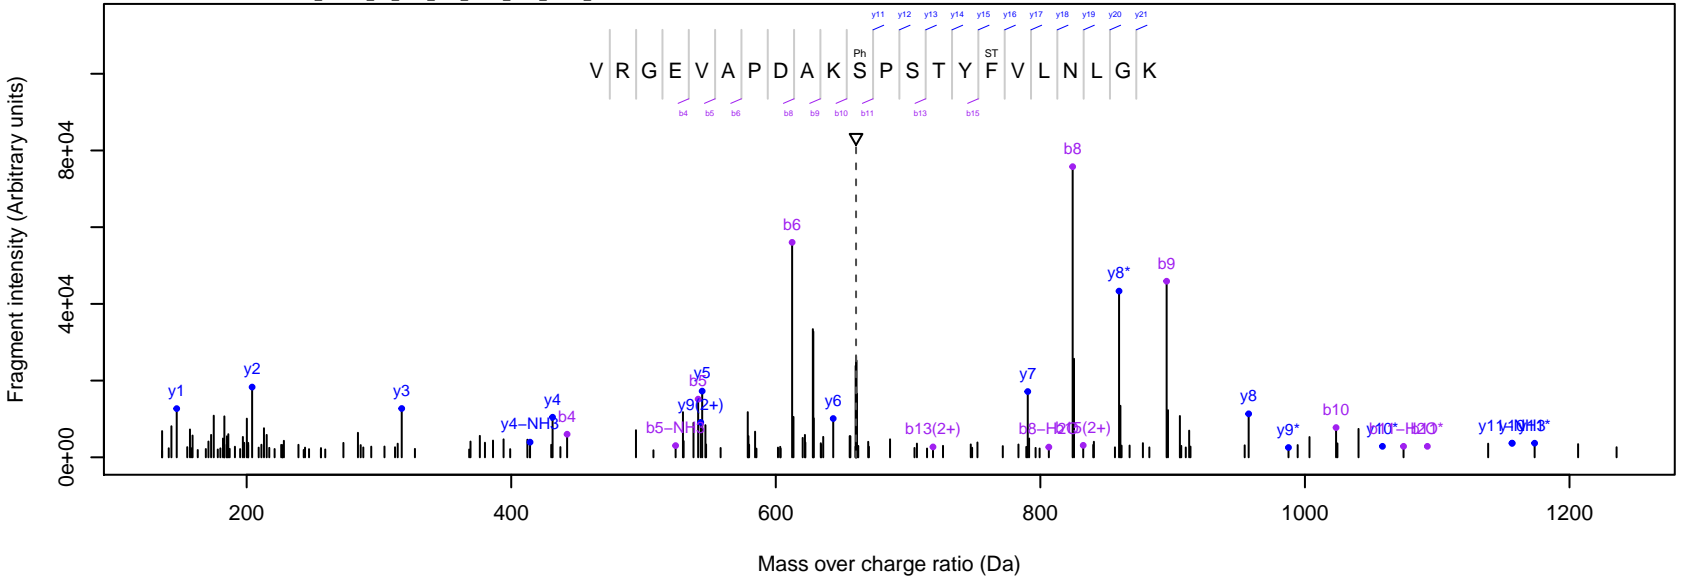

YGS(Phospho (STY))IVDDERLSAEEMDERR-3+

Source : QE3\_201126\_FR\_TIOx\_hum\_tissue\_Urea\_RNAB\_N Scan : 26705

Andromeda score : 110.44

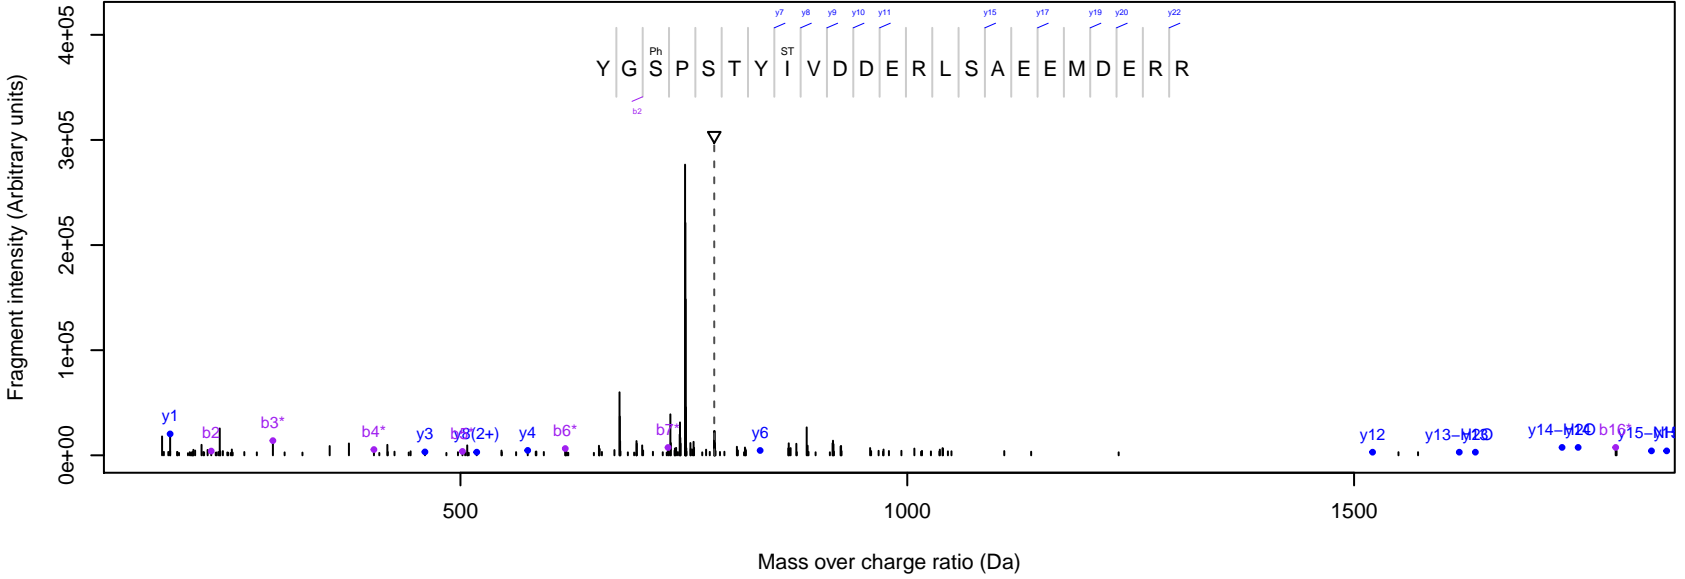

RYLLANTDPTM(Oxidation (M))AS(Phospho (STY))LDS(Phospho (STY))DEETVFESR-3+

Source : QE3\_201126\_FR\_TIOx\_hum\_tissue\_Urea\_RNAB\_H Scan : 53000

Andromeda score : 110.41

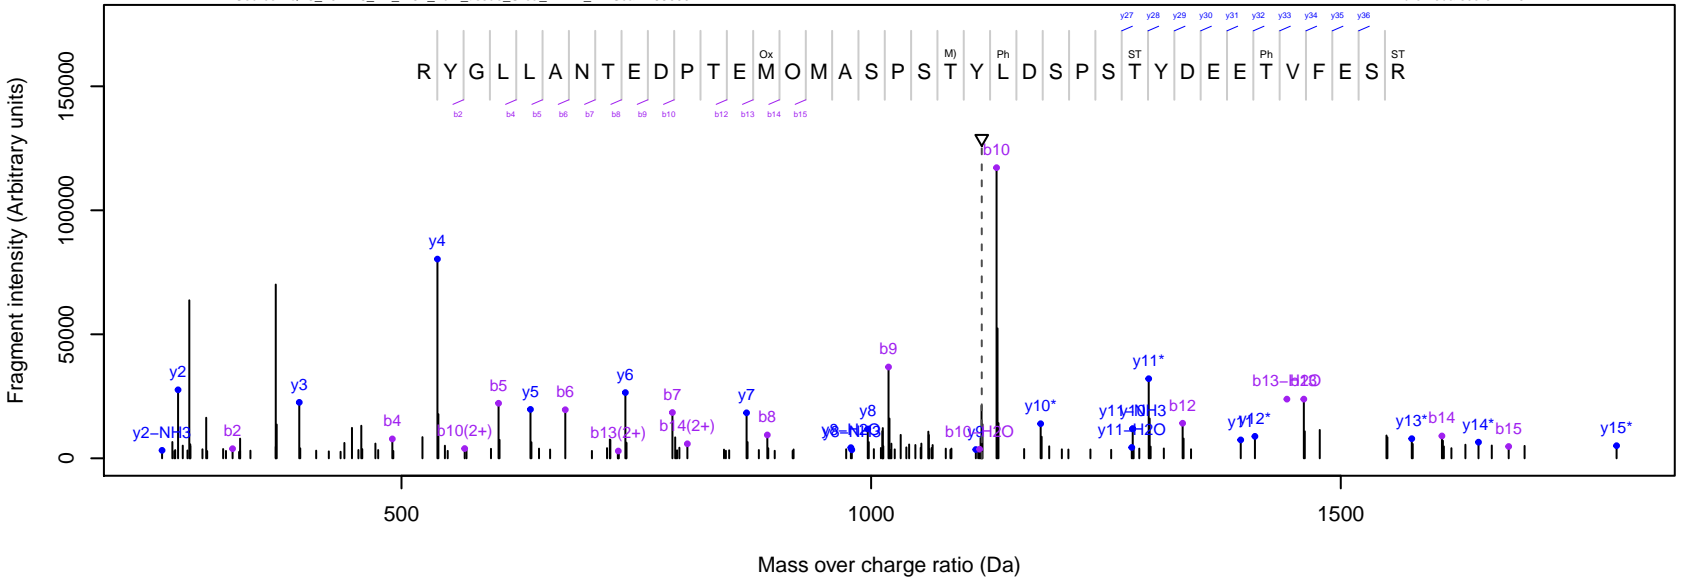

APS(Phospho (STY))PSGLMSPSR-2+

Source : QE3\_201126\_FR\_TiOx\_hum\_tissue\_Urea\_RNAB\_H Scan : 22670

Andromeda score : 110.38

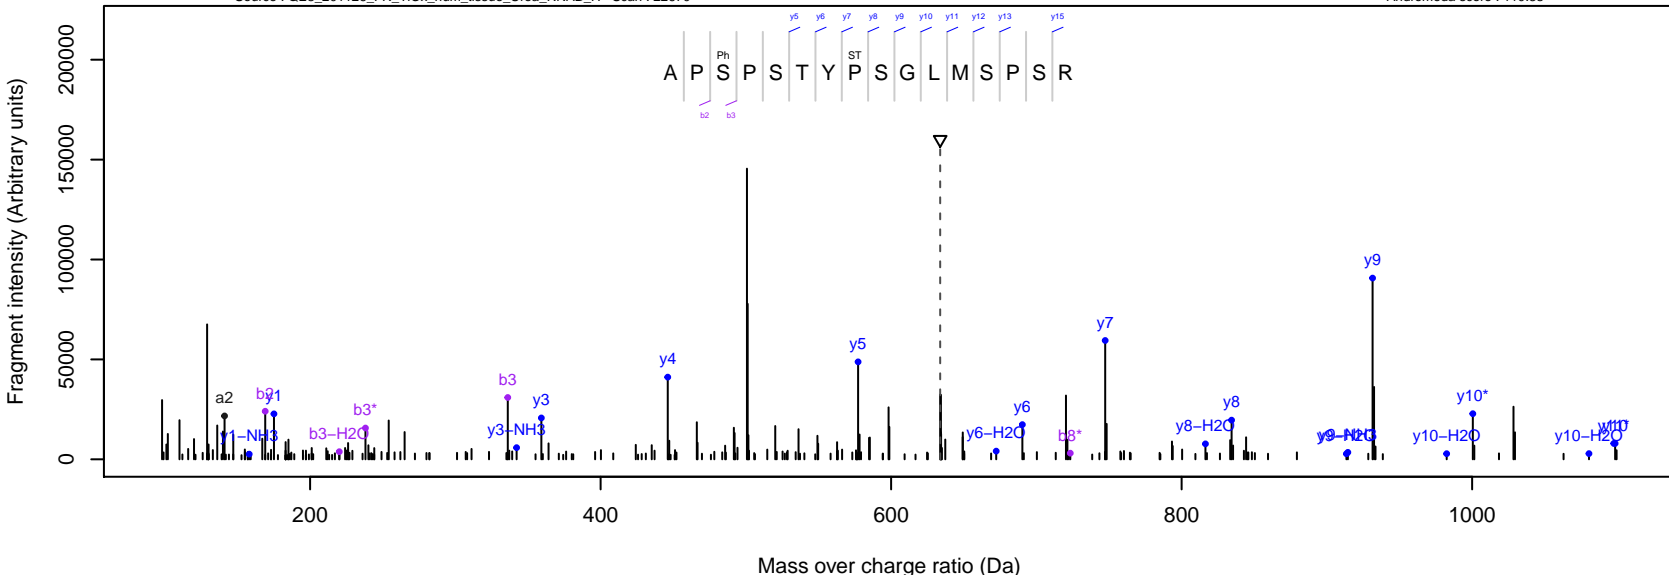

DFDIAEQNES(Phospho (STY))S(Phospho (STY))DEESLRK-3+

Source : QE3\_201126\_FR\_TiOx\_hum\_tissue\_Urea\_RNAB\_N Scan : 32653

Andromeda score : 110.38

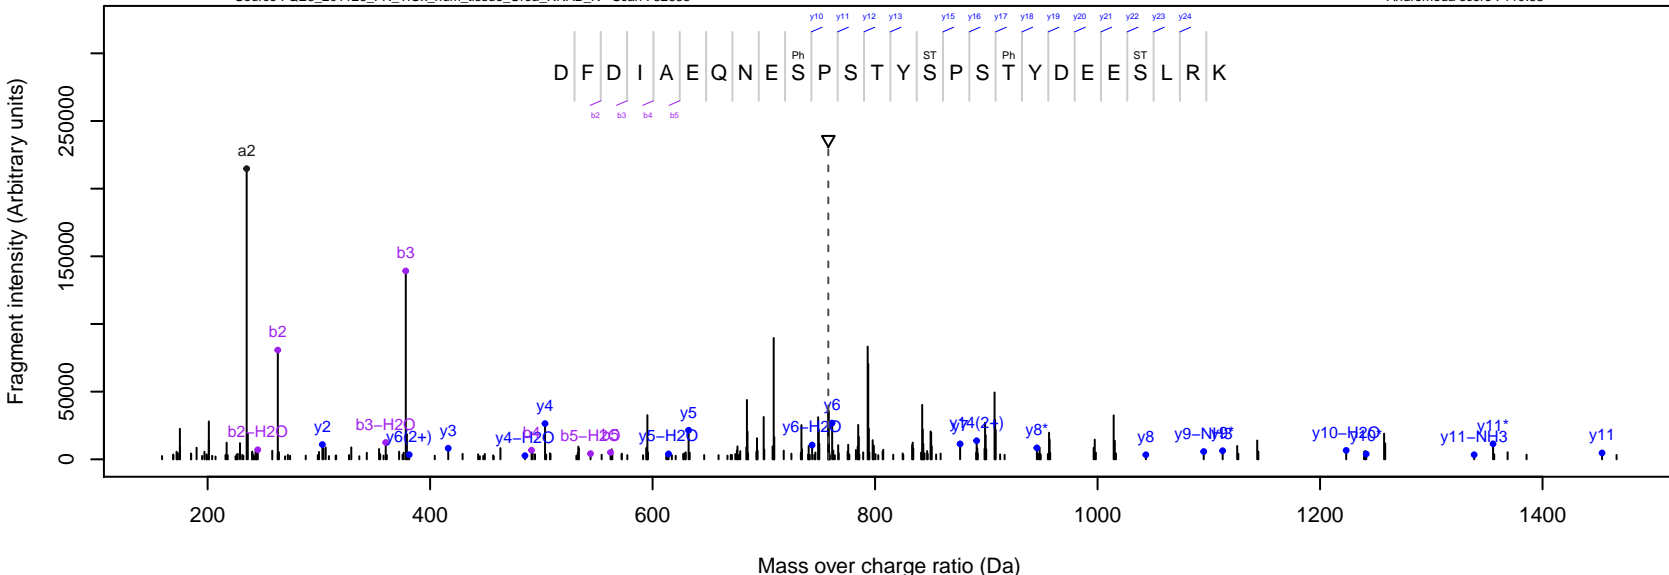

RSS(Phospho (STY))VFAAEIMDAFDR-3+

Source : QE3\_201126\_FR\_TiOx\_hum\_tissue\_Urea\_RNAB\_H Scan : 54225

Andromeda score : 110.38

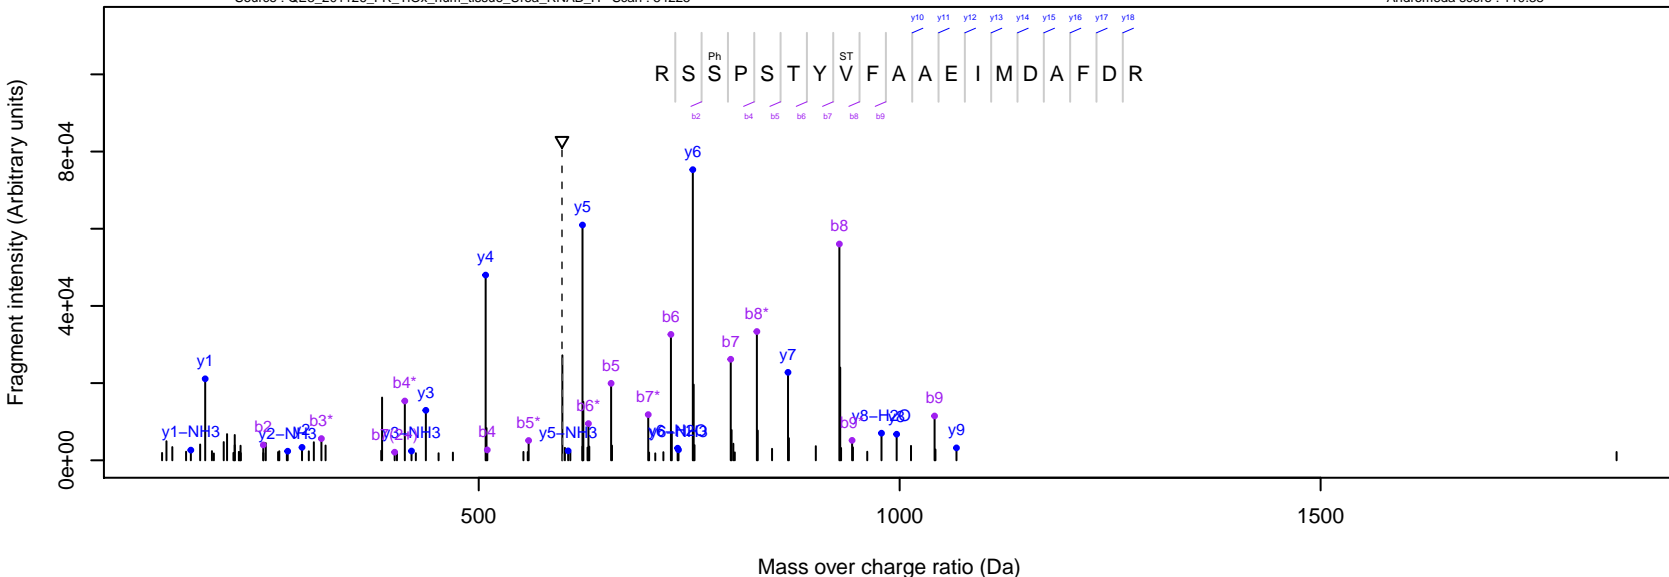

NEEENIY(Phospho (STY))SVPHDSTQGK-3+

Source : QE3\_201126\_FR\_TiOx\_hum\_tissue\_Urea\_RNAB\_N Scan : 13692

Andromeda score : 110.37

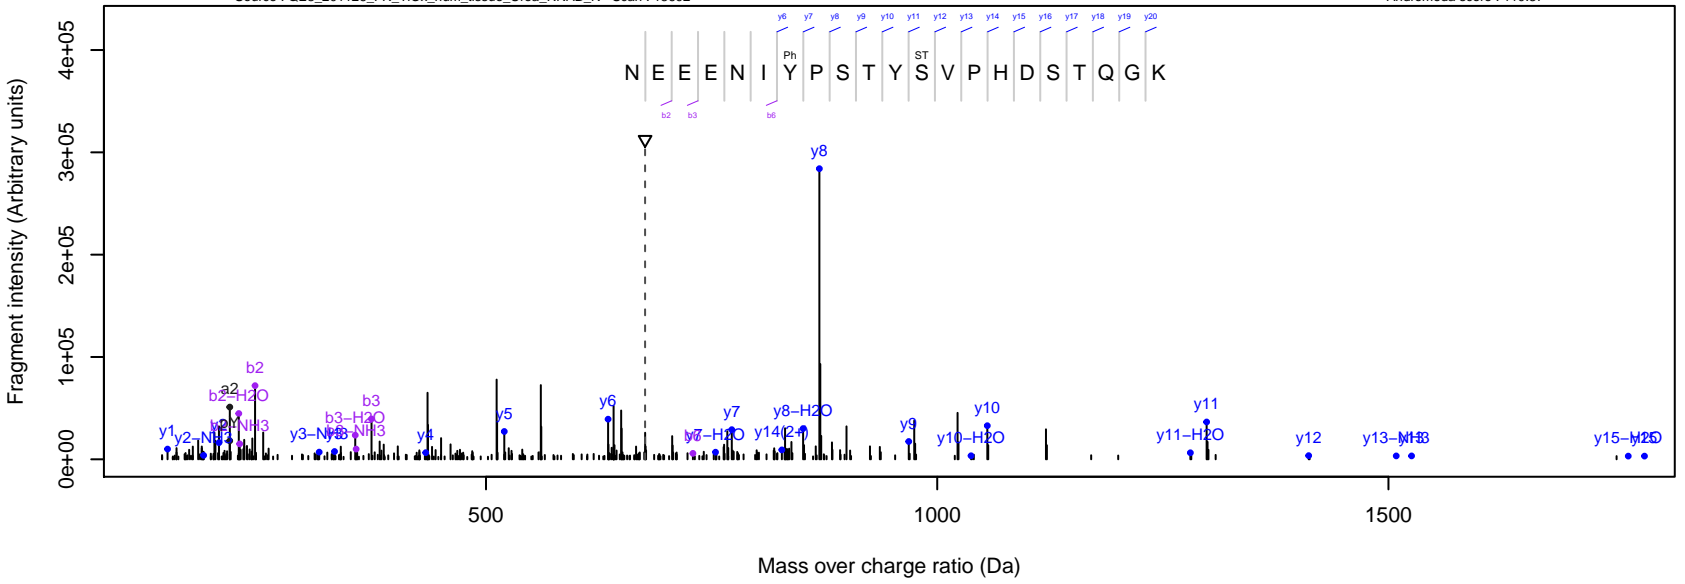

IGDEYAEDS(Phospho (STY))S(Phospho (STY))DEEDIR-2+

Source : QE3\_201126\_FR\_TiOx\_hum\_tissue\_Urea\_RNAB\_H Scan : 29671

Andromeda score : 110.35

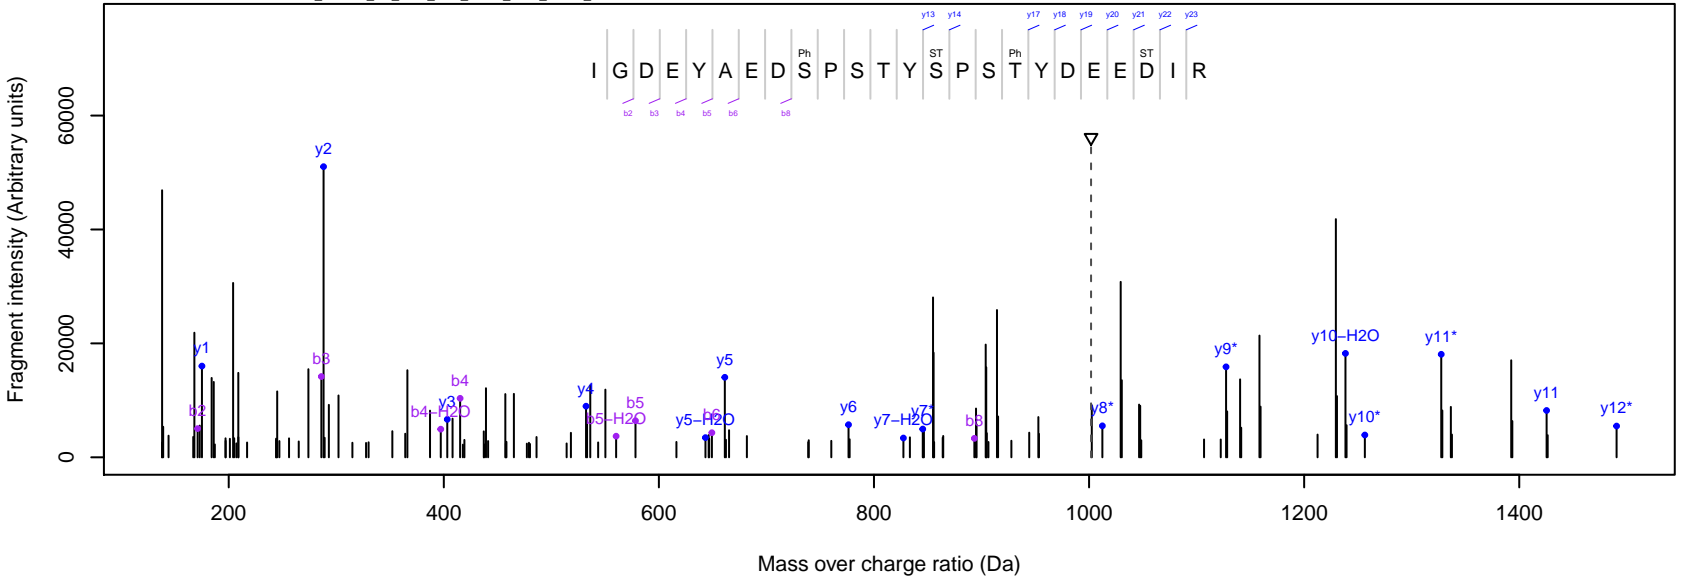

KRT(Phospho (STY))SSEDNLYLAVLR-3+

Source : QE3\_201126\_FR\_TiOx\_hum\_tissue\_Urea\_RNAB\_B Scan : 30095

Andromeda score : 110.34

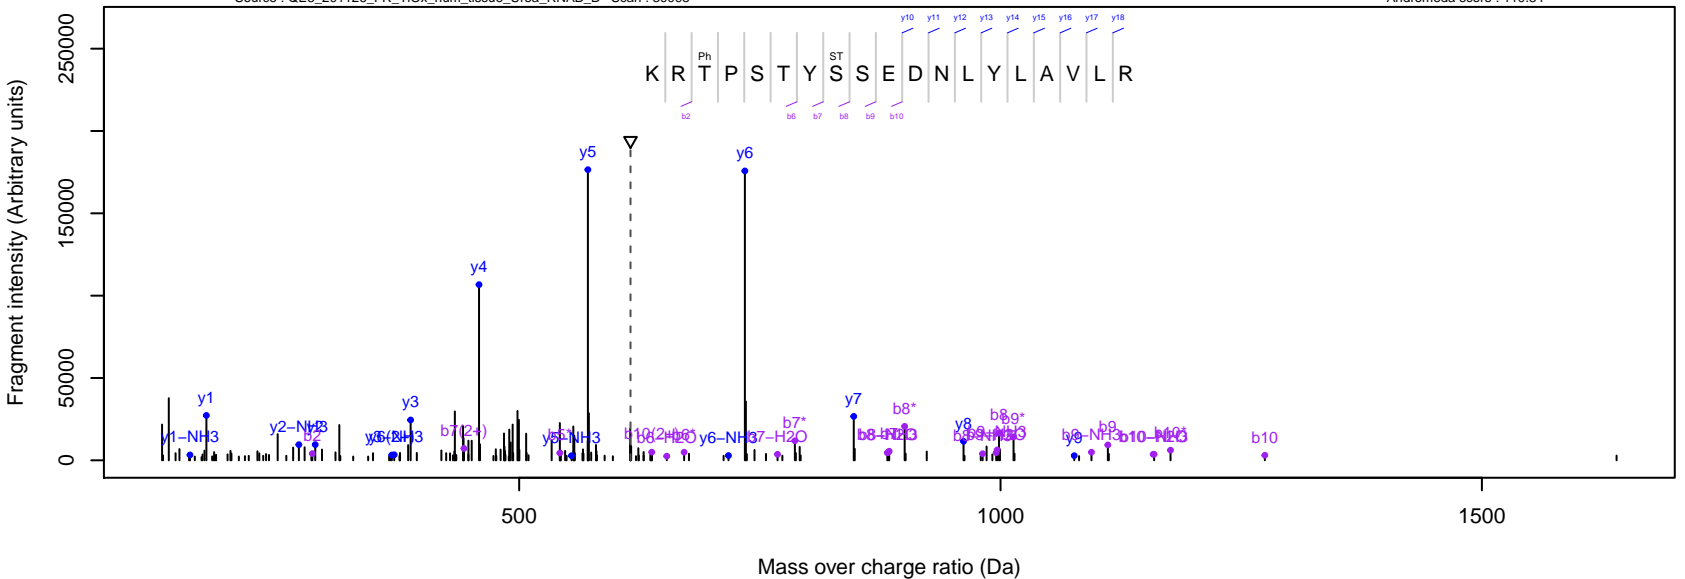

DFT(Phospho (STY))PVCTTELGR-2+

Source : QE3\_201126\_FR\_TiOx\_hum\_tissue\_Urea\_RNAB\_H Scan : 34682

Andromeda score : 110.31

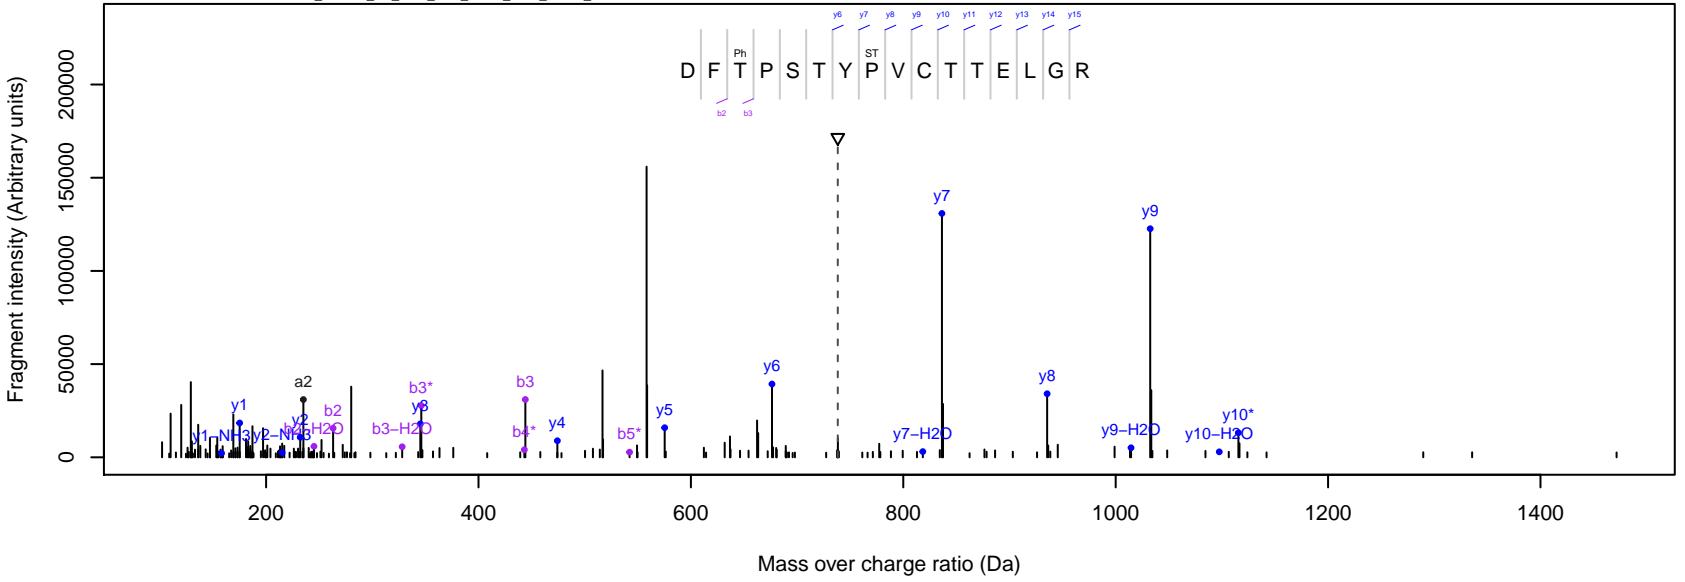

EDS(Phospho (STY))RGLIPEGATGFPDQGNTGENTR-3+

Source : QE3\_201126\_FR\_TiOx\_hum\_tissue\_Urea\_RNAB\_H Scan : 32672

Andromeda score : 110.29

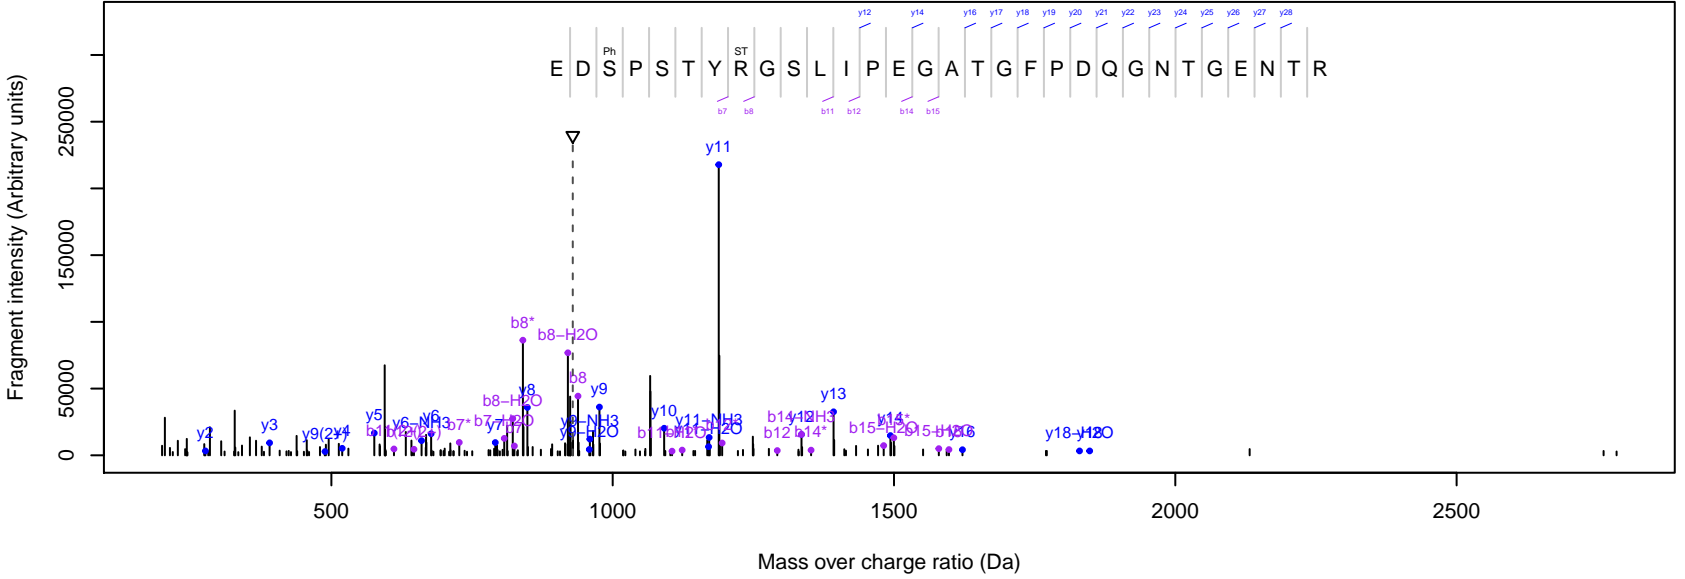

GPPS(Phospho (STY))PPAPVM(Oxidation (M))HSPSR-3+

Source : QE3\_201126\_FR\_TiOx\_hum\_tissue\_Urea\_RNAB\_H Scan : 11444

Andromeda score : 110.26

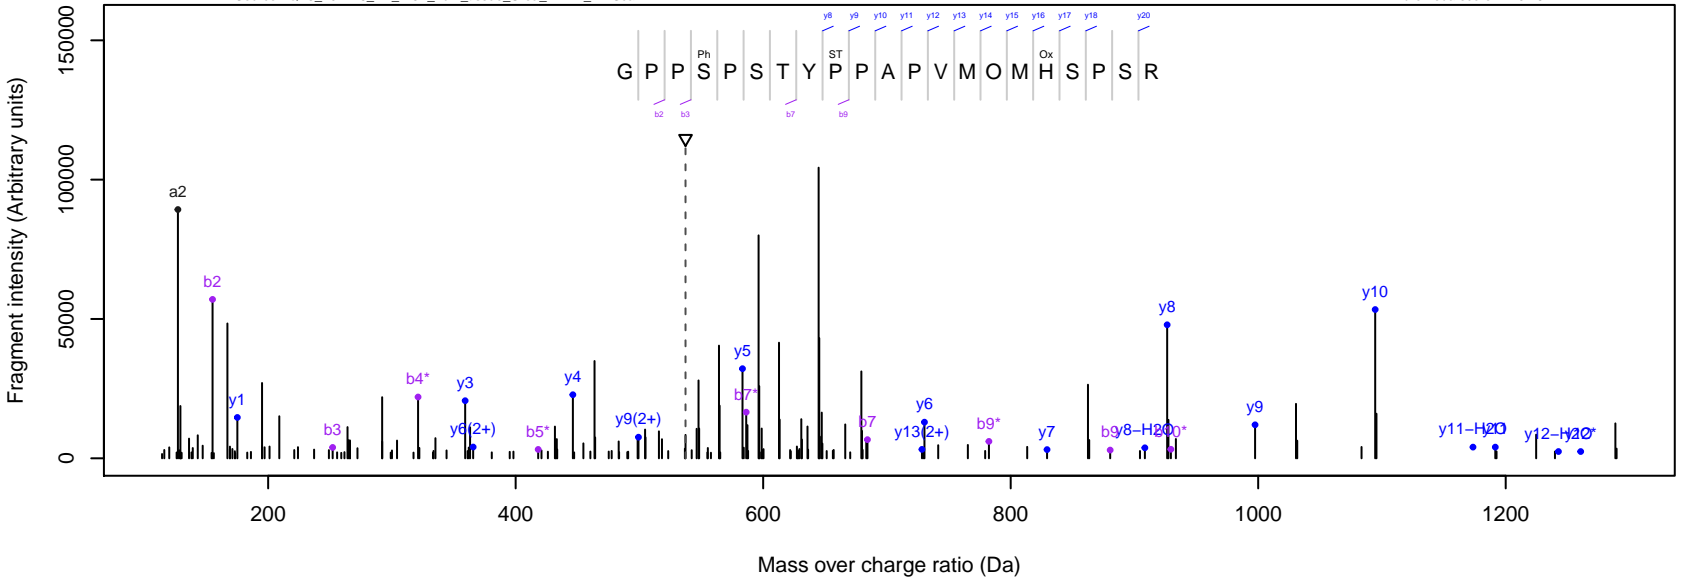

(Acetyl (Protein N-term))ADDQGCIEEQGVEDS(Phospho (STY))ANEDSVDAKPDR-3+

Source : QE3\_201126\_FR\_TIOx\_hum\_tissue\_Urea\_RNAB\_B Scan : 25897

Andromeda score : 110.23

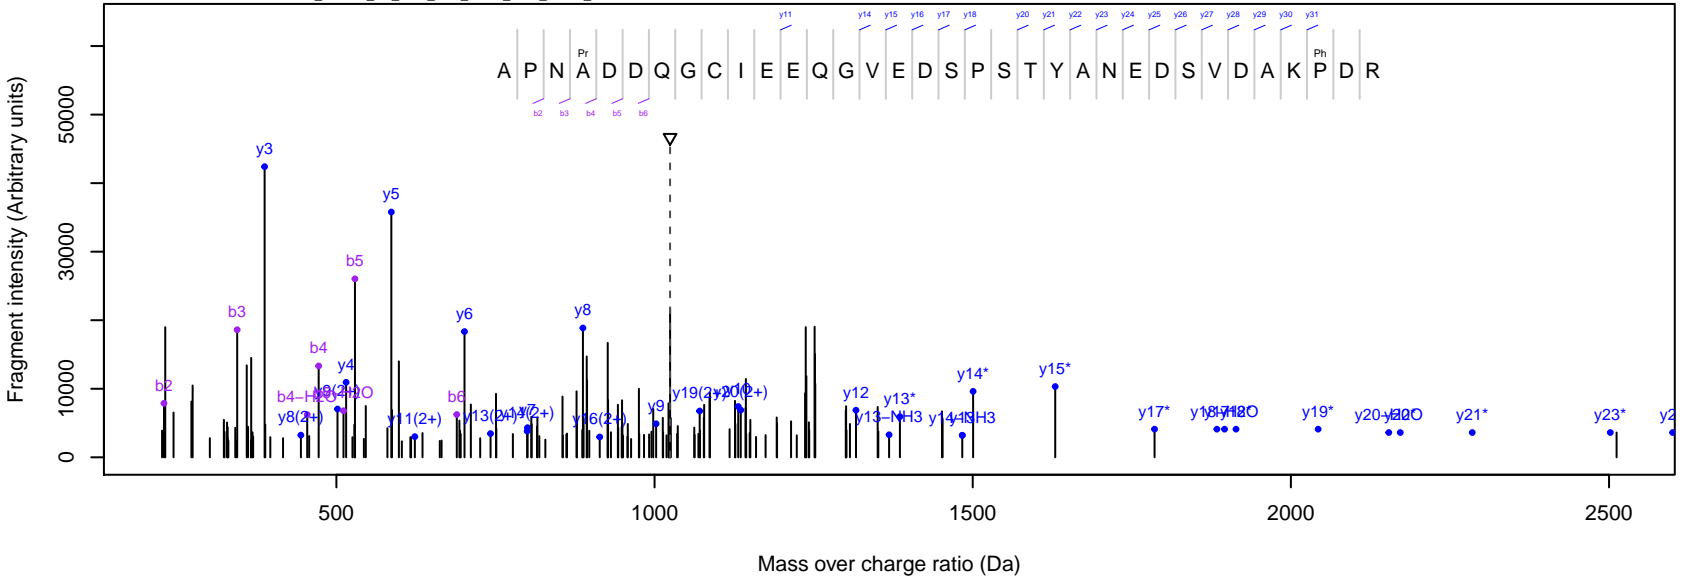

ELVLS(Phospho (STY))S(Phospho (STY))PEDLTQDFEEM(Oxidation (M))KR-3+

Source : QE3\_201126\_FR\_TIOx\_hum\_tissue\_Urea\_RNAB\_N Scan : 53160

Andromeda score : 110.22

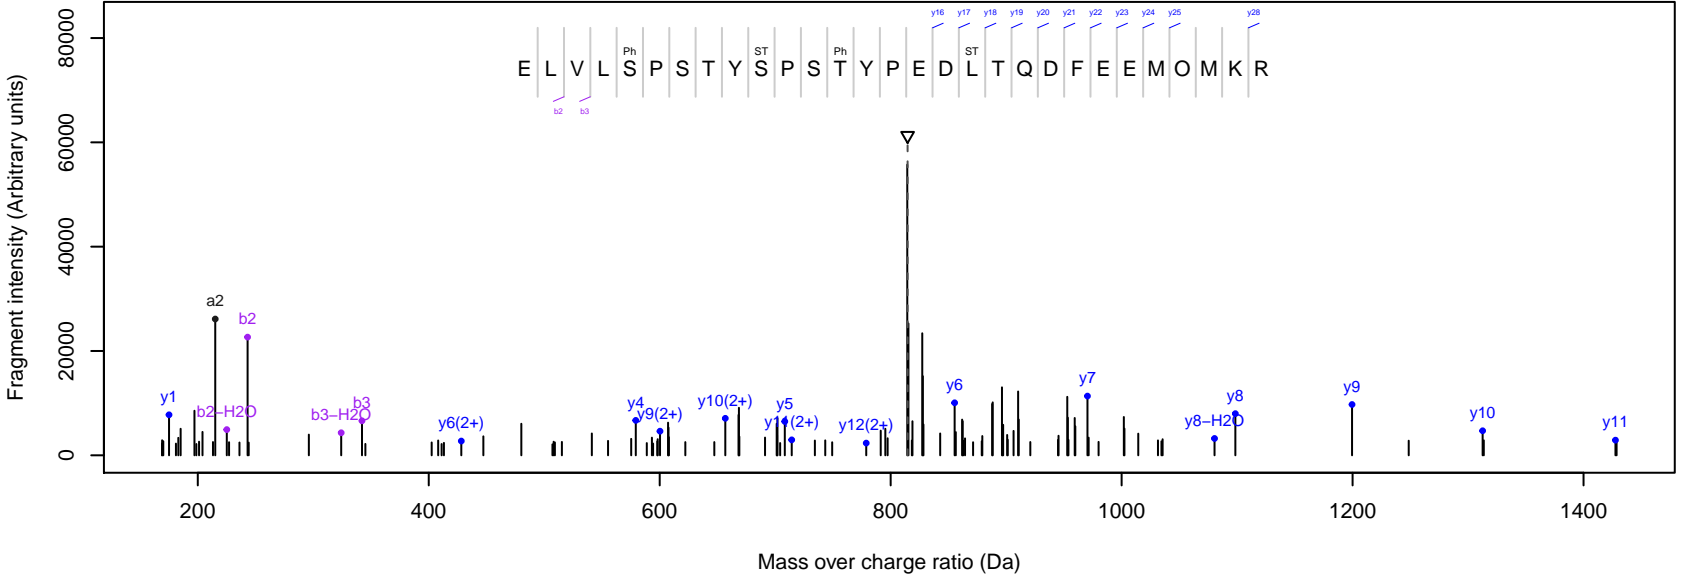

KQS(Phospho (STY))EGLTKEYDR-3+

Source : QE3\_201126\_FR\_TIOx\_hum\_tissue\_Urea\_RNAB\_N Scan : 6920

Andromeda score : 110.22

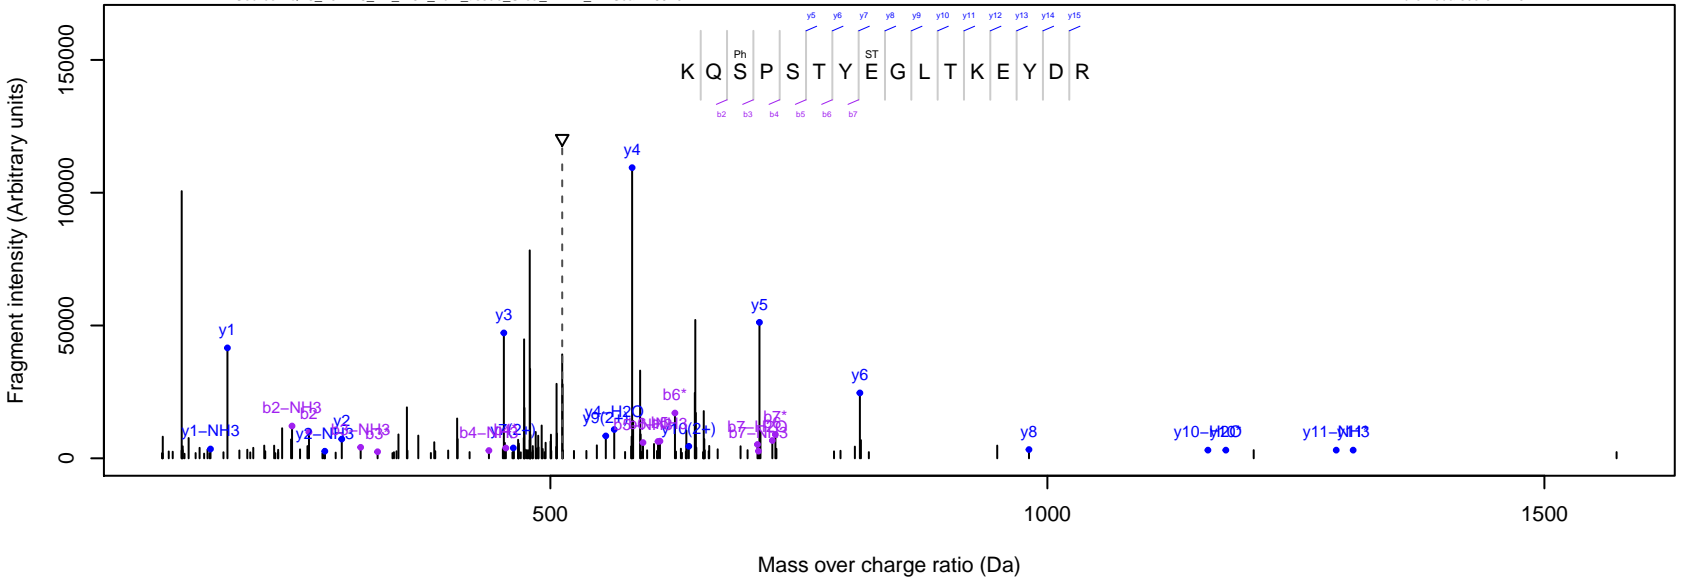

(Acetyl (Protein N-term))ARGS(Phospho (STY))VSDEEMMELR-2+

Source : QE3\_201126\_FR\_TIOx\_hum\_tissue\_Urea\_RNAB\_B Scan : 34967

Andromeda score : 110.12

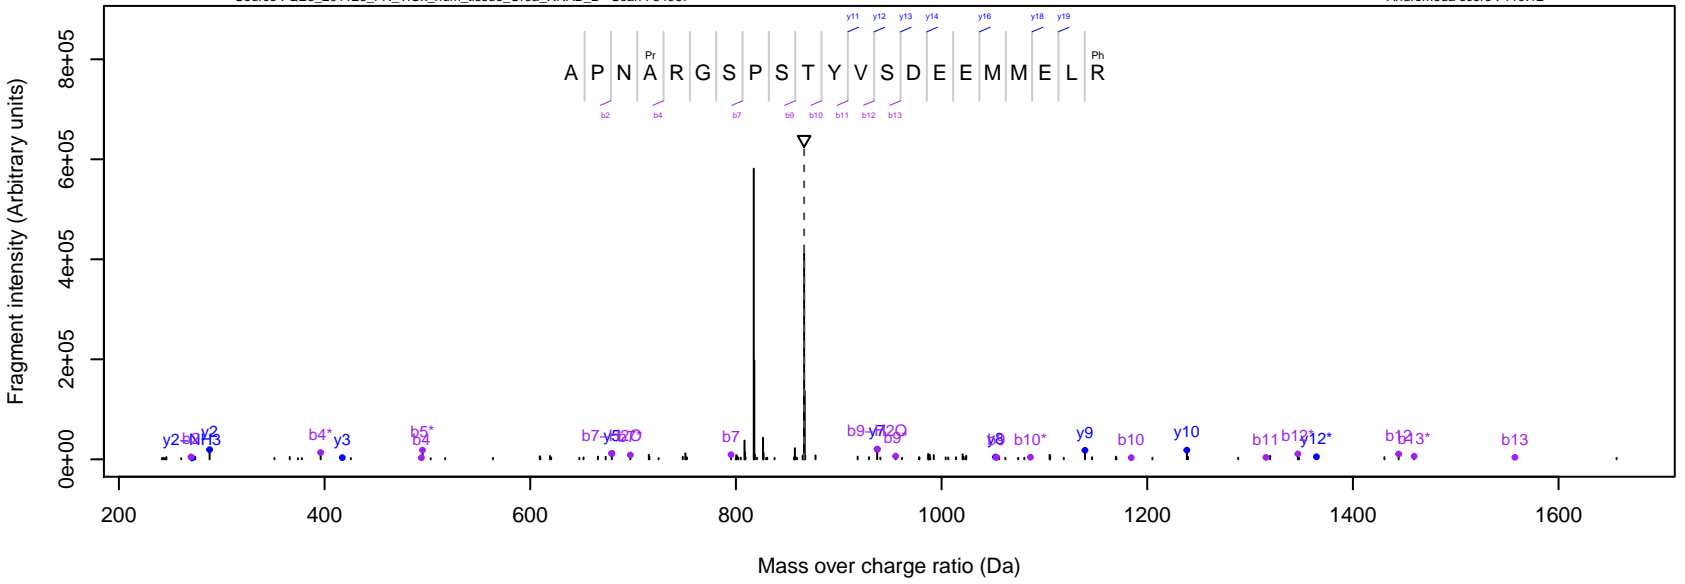

ATDDMQSLASLMSVKPSDVGNLDDFAES(Phospho (STY))DEDEAHGPGAPEAR-4+

Source : QE3\_201126\_FR\_TIOx\_hum\_tissue\_Urea\_RNAB\_H Scan : 54923

Andromeda score : 110.07

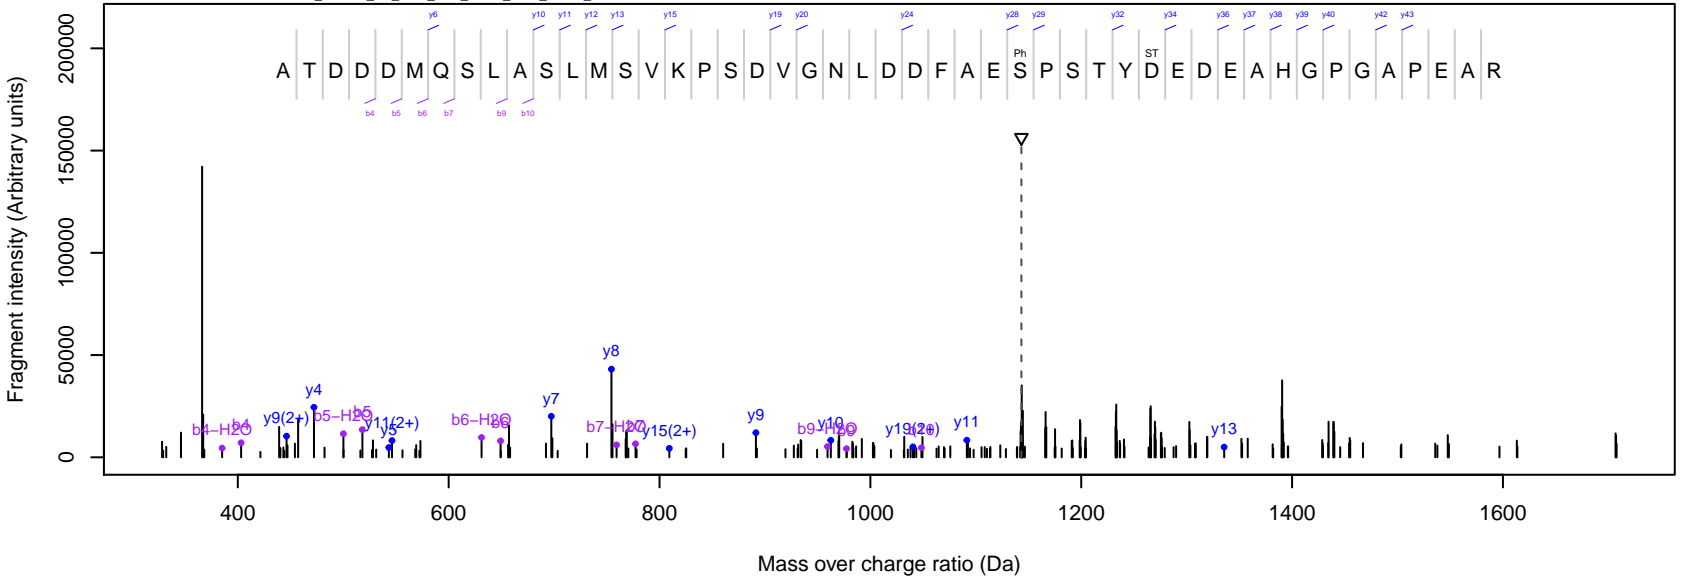

AFGESES(Phospho (STY))TES(Phospho (STY))DEEEEGCGHTHCVR-3+

Source : QE3\_201126\_FR\_TIOx\_hum\_tissue\_Urea\_RNAB\_N Scan : 14837

Andromeda score : 110.03

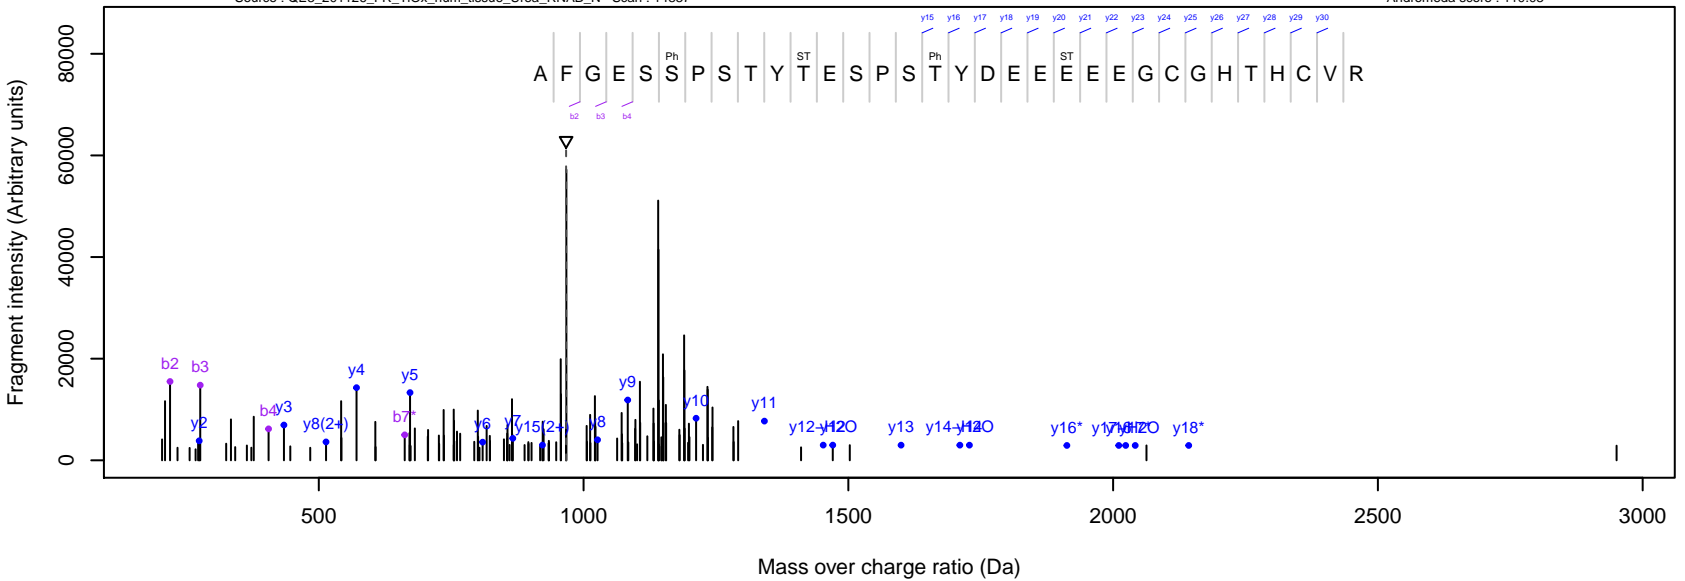



RTNSDS(Phospho (STY))ALHQSTM(Oxidation (M))TPTQPESFSSGSQDVHQK-4+

Source : QE3\_201126\_FR\_TIOx\_hum\_tissue\_Urea\_RNAB\_N Scan : 13316

Andromeda score : 110.03

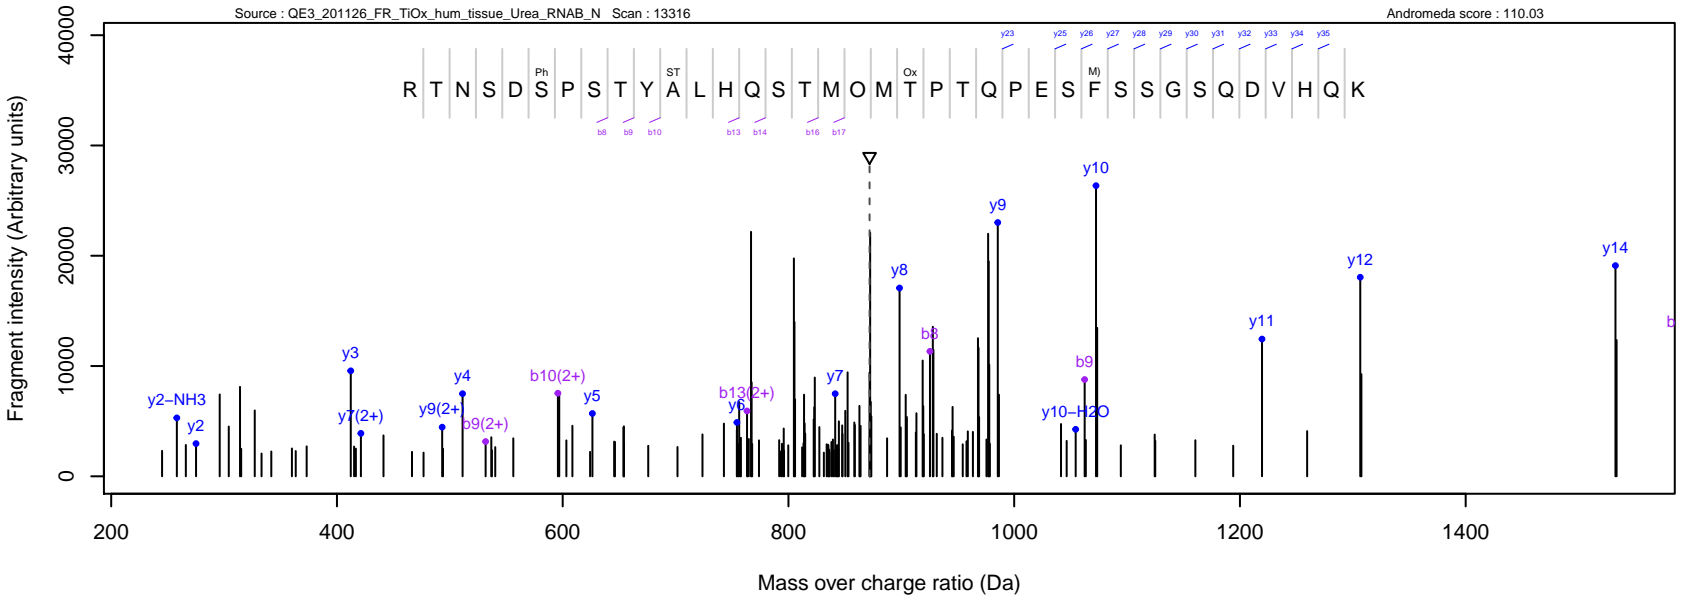

SGS(Phospho (STY))PSDNS(Phospho (STY))GAEEMVSLAKPK-3+

Source : QE3\_201126\_FR\_TIOx\_hum\_tissue\_Urea\_RNAB\_N Scan : 29594

Andromeda score : 110.03

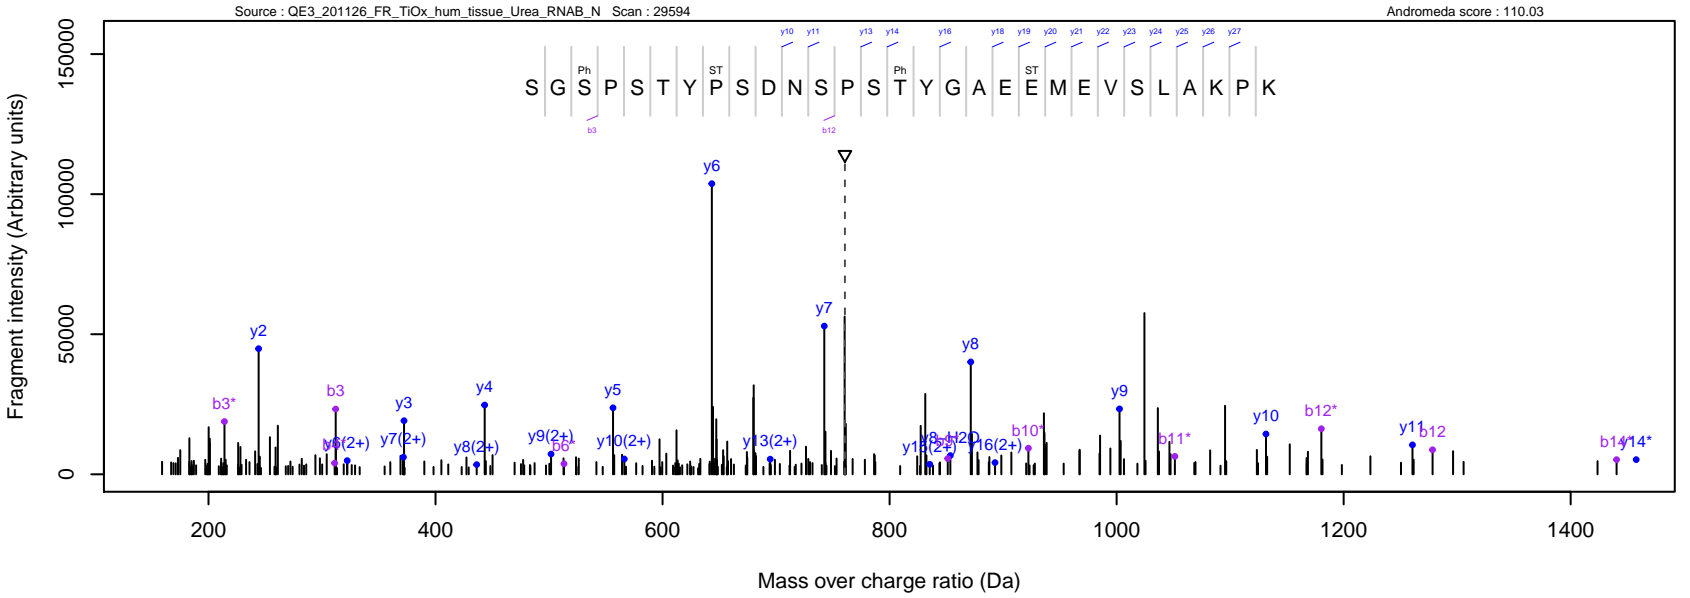

SDS(Phospho (STY))NQYIGELKDQIAELNHELRL-3+

Source : QE3\_201126\_FR\_TIOx\_hum\_tissue\_Urea\_RNAB\_N Scan : 54132

Andromeda score : 110.02

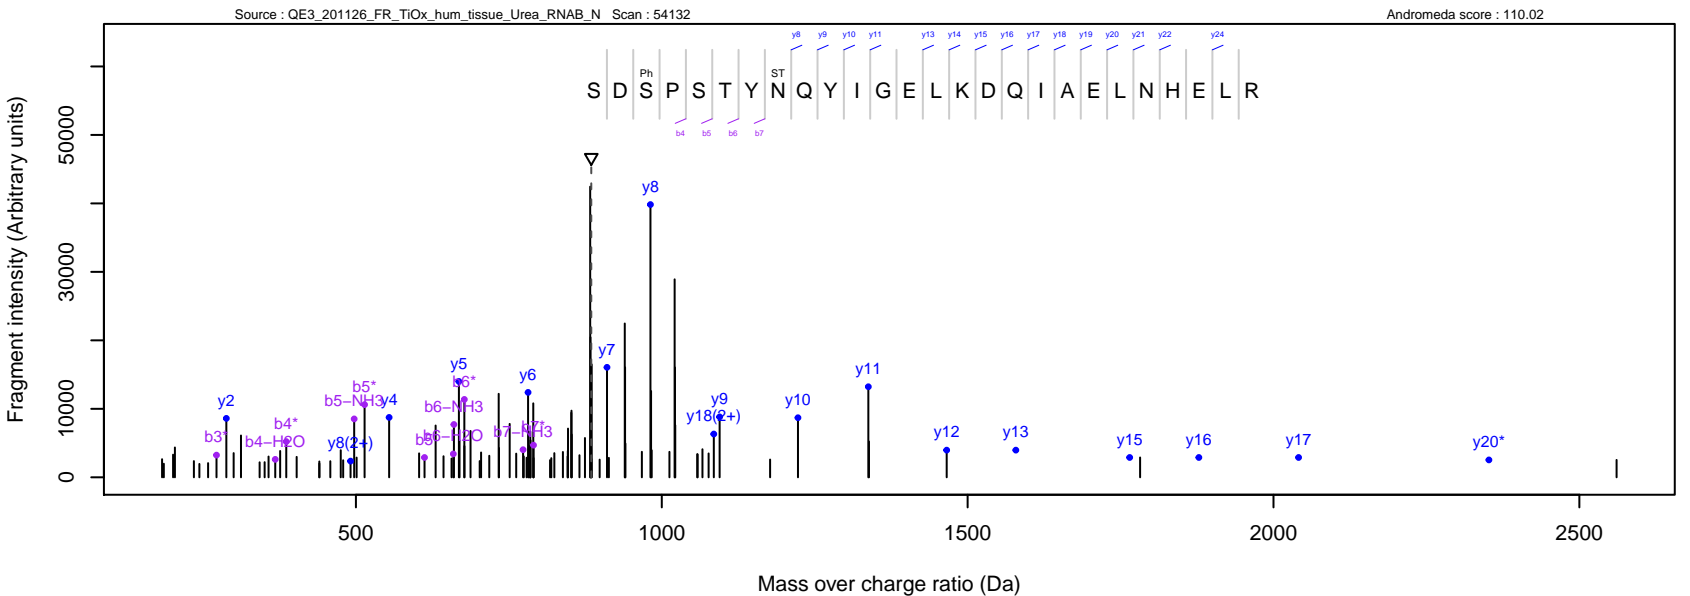

S(Phospho (STY))RS(Phospho (STY))RT(Phospho (STY))PLISR-2+

Source : QE3\_201126\_FR\_TIOx\_hum\_tissue\_Urea\_RNAB\_N Scan : 11919

Andromeda score : 109.99

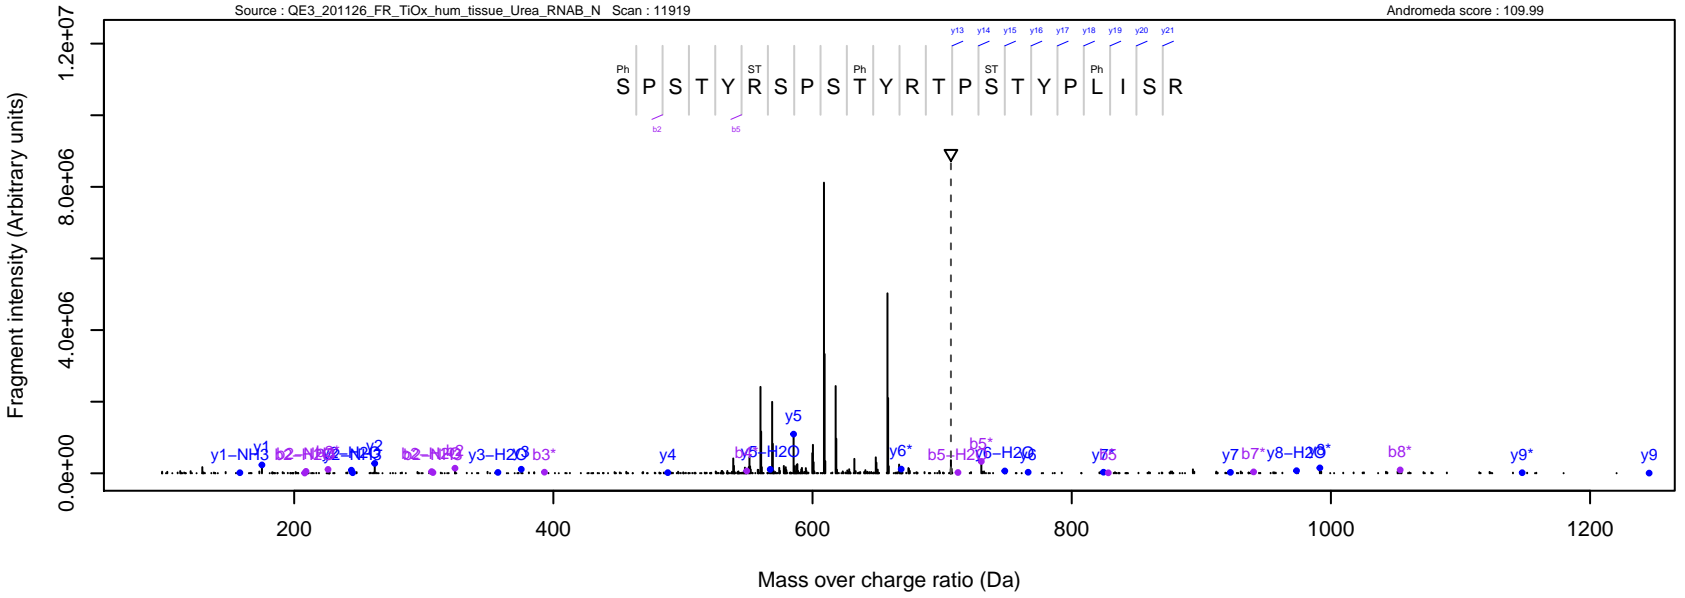

KSFLQS(Phospho (STY))LECLR-2+

Source : QE3\_201126\_FR\_TIOx\_hum\_tissue\_Urea\_RNAB\_N Scan : 42332

Andromeda score : 109.95

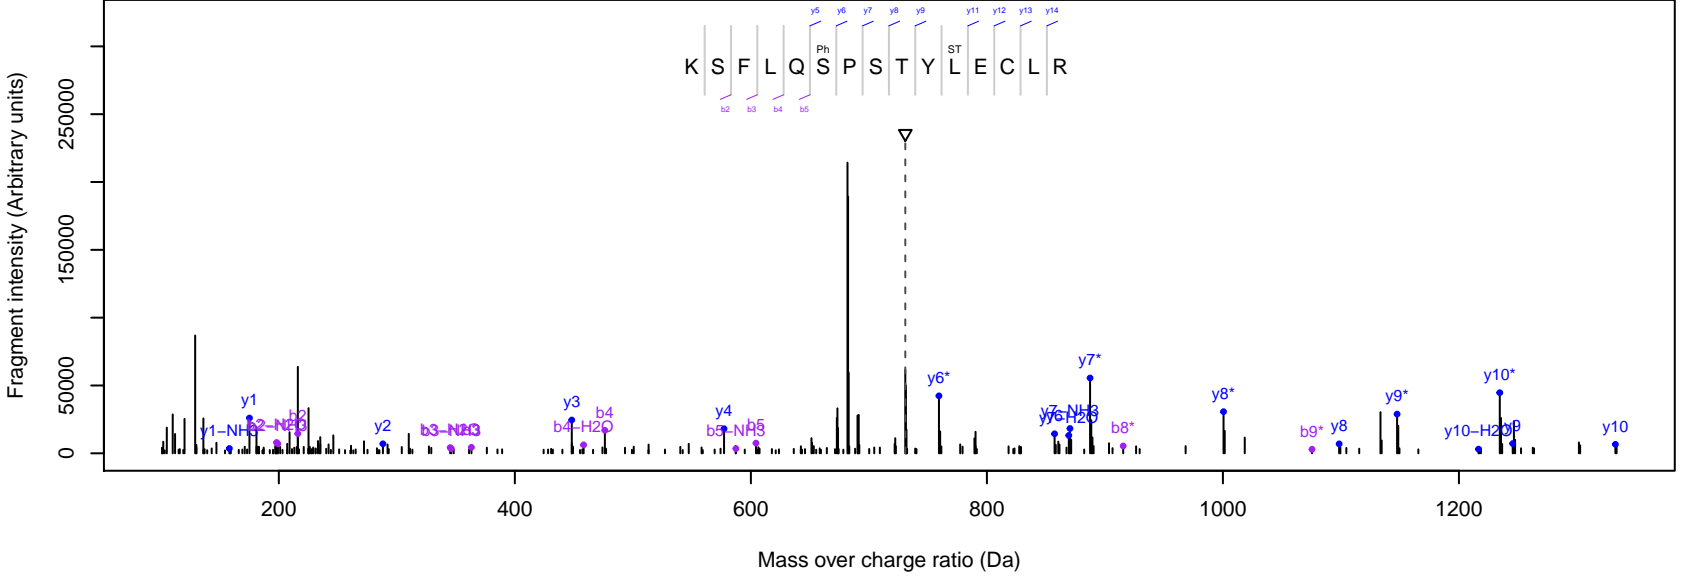

GVDFESS(Phospho (STY))EDDDDDPFMNTSSLR-2+

Source : QE3\_201126\_FR\_TIOx\_hum\_tissue\_Urea\_RNAB\_N Scan : 51781

Andromeda score : 109.89

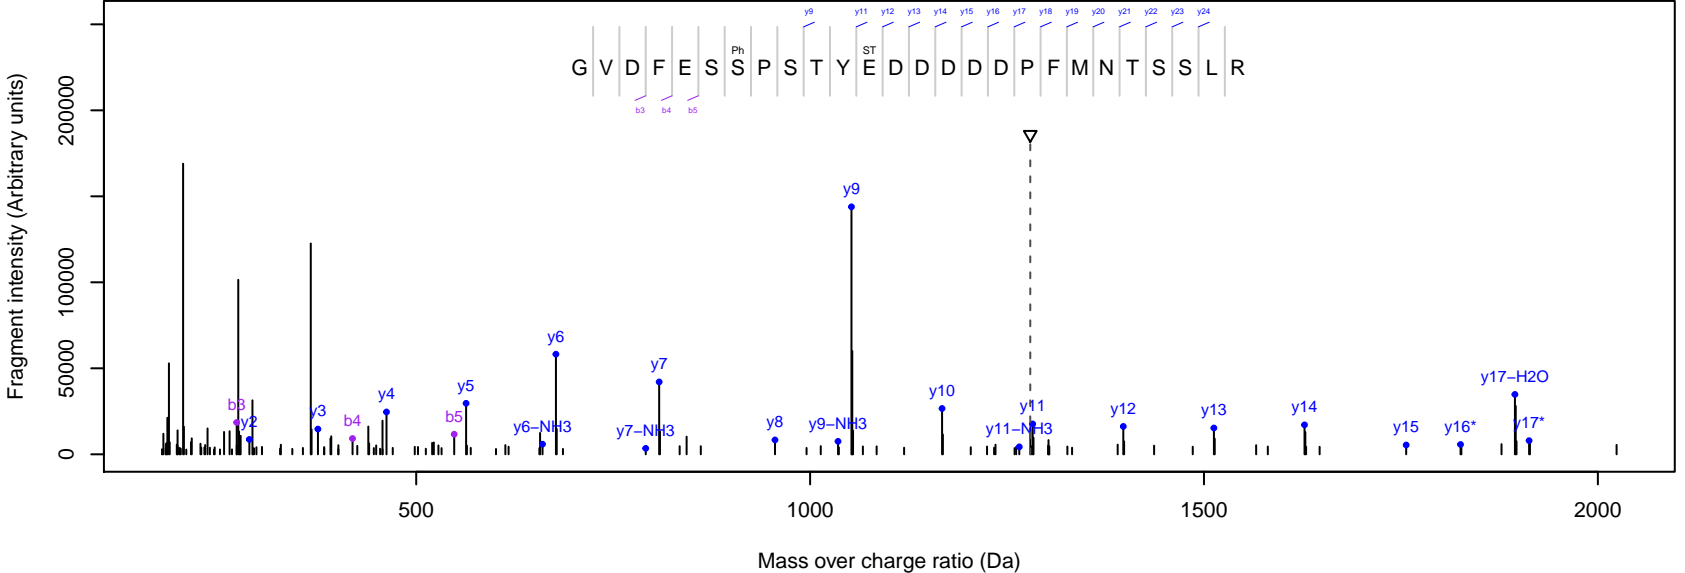

GRES(Phospho (STY))DEDT(Phospho (STY))EDAS(Phospho (STY))ETDLAKHDEEDYVEMK-3+

Source : QE3\_201126\_FR\_TiOx\_hum\_tissue\_Urea\_RNAB\_H Scan : 28439

Andromeda score : 109.85

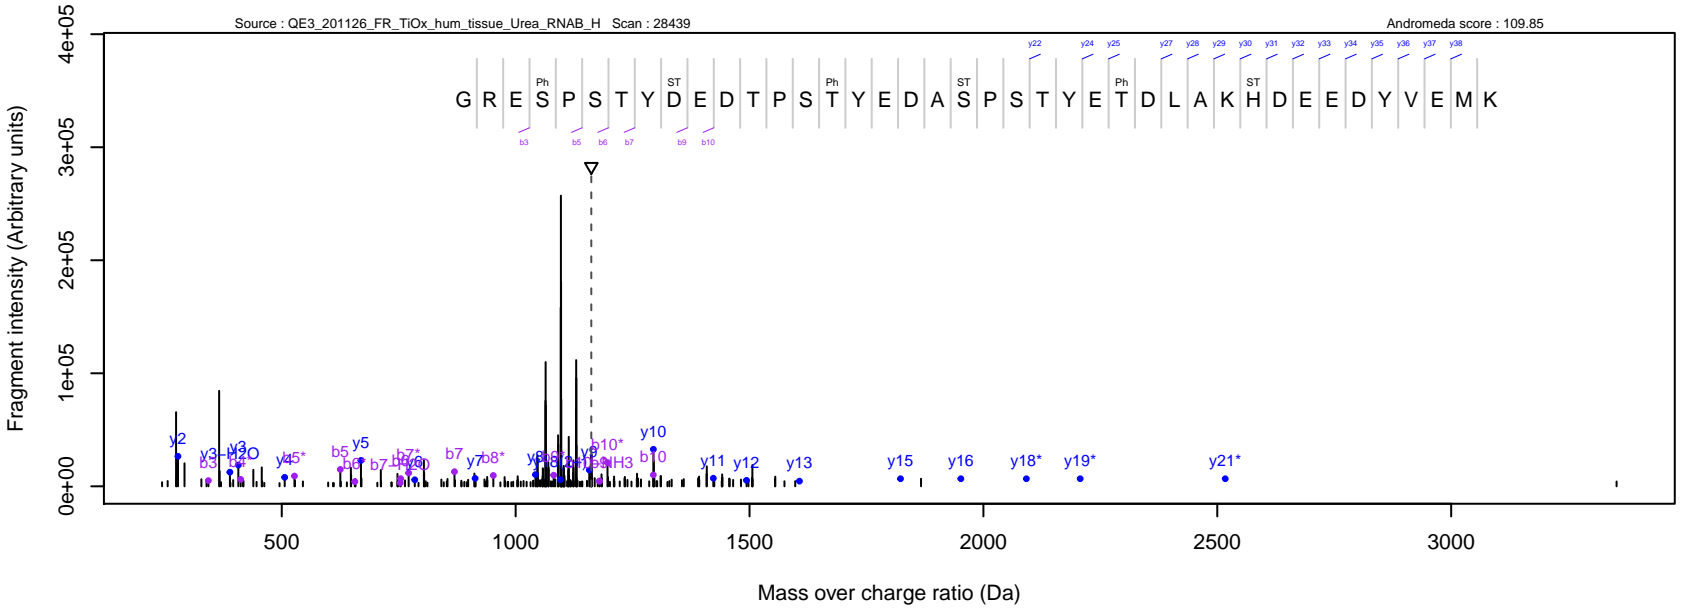

S(Phospho (STY))SLSGDEEDELFGKATLK-3+

Source : QE3\_201126\_FR\_TiOx\_hum\_tissue\_Urea\_RNAB\_H Scan : 36869

Andromeda score : 109.85

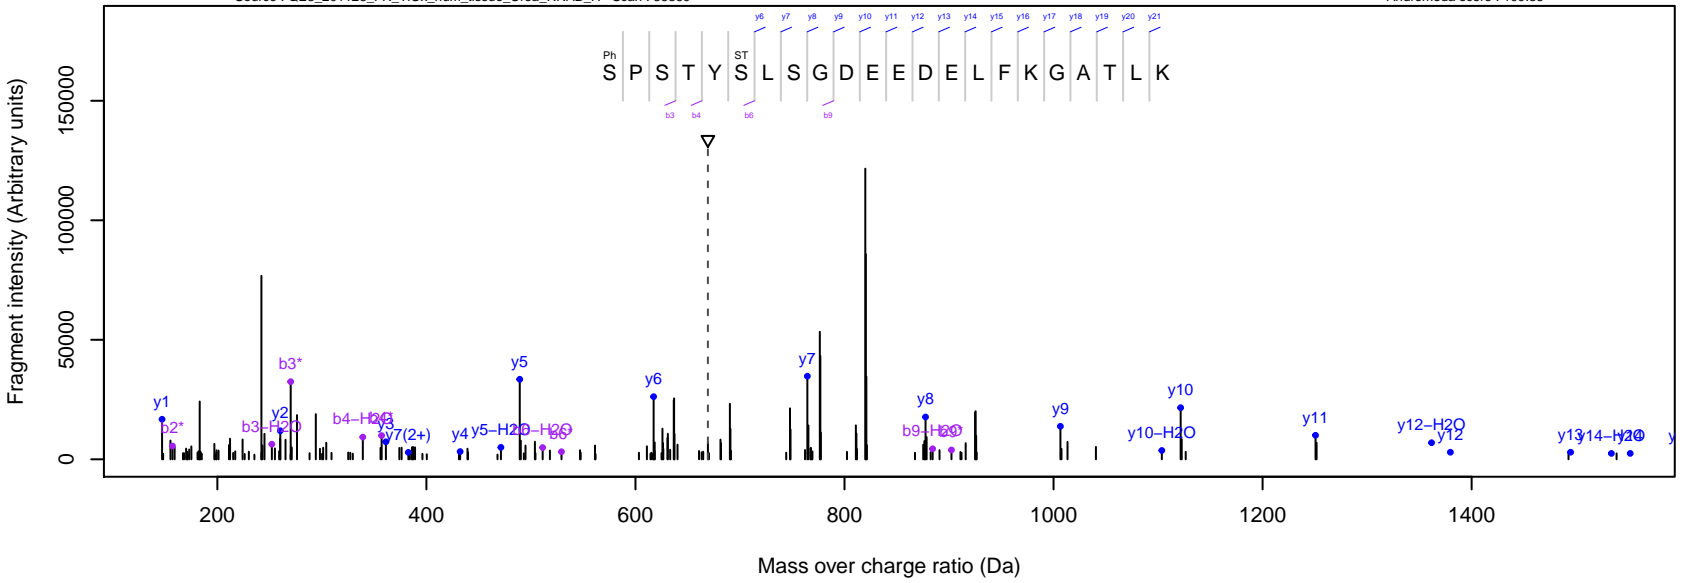

AS(Phospho (STY))FETLPNISDLCLR-2+

Source : QE3\_201126\_FR\_TiOx\_hum\_tissue\_Urea\_RNAB\_H Scan : 56799

Andromeda score : 109.84

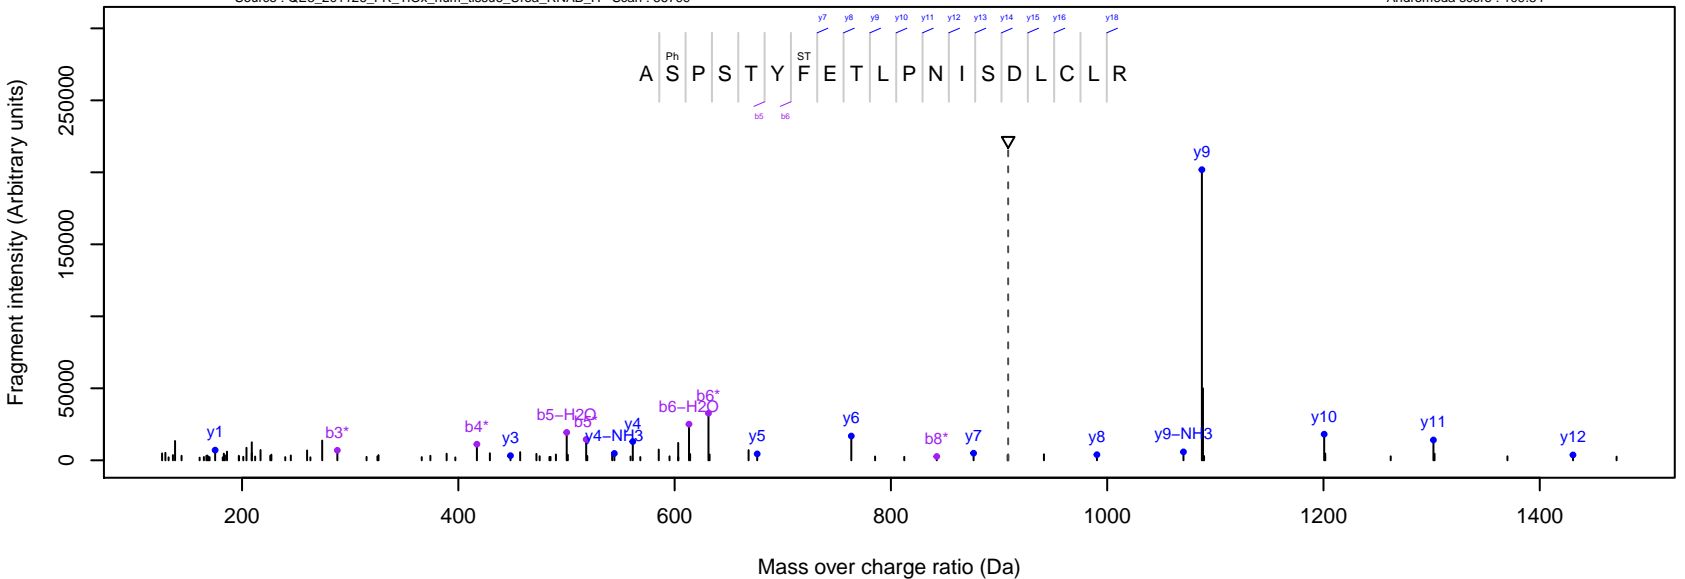

SPLPAGPS(Phospho (STY))SCTSPR-2+

Source : QE3\_201126\_FR\_TiOx\_hum\_tissue\_Urea\_RNAB\_H Scan : 17058

Andromeda score : 109.84

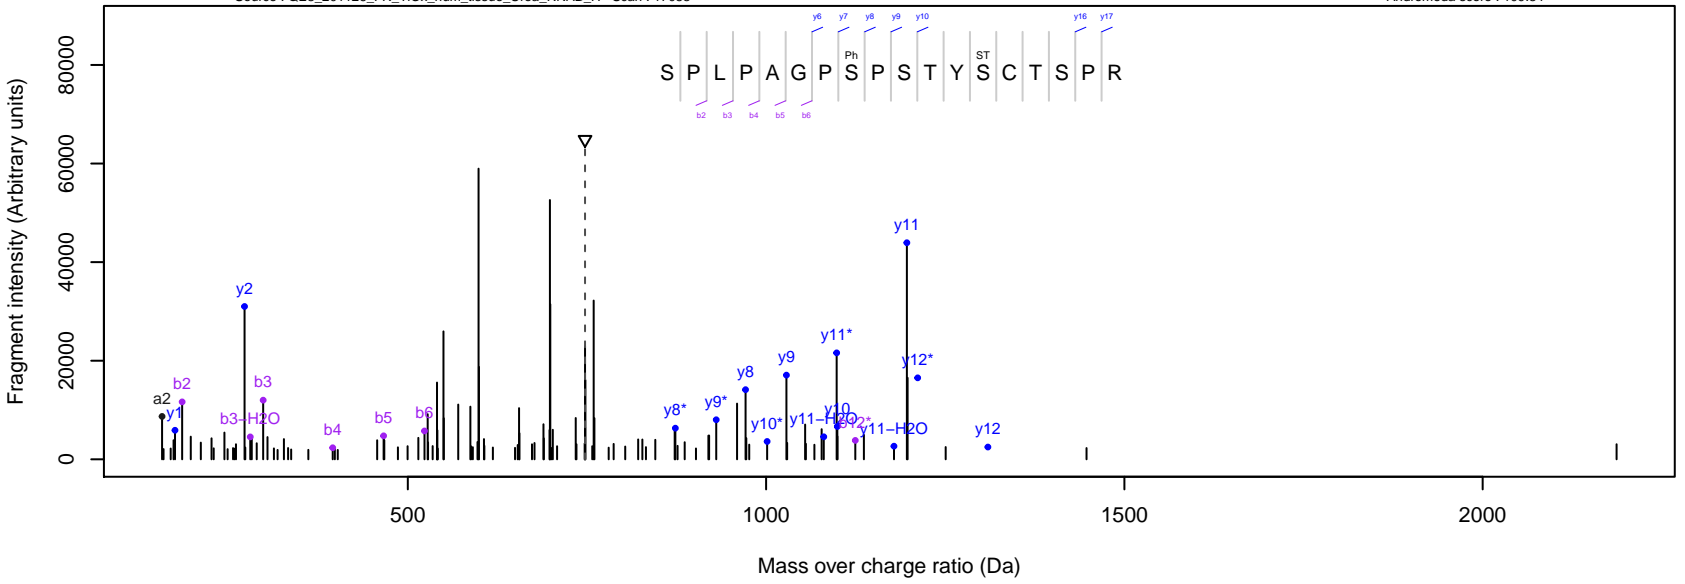

SRS(Phospho (STY))FDYNYRR-3+

Source : QE3\_201126\_FR\_TiOx\_hum\_tissue\_Urea\_RNAB\_B Scan : 10249

Andromeda score : 109.84

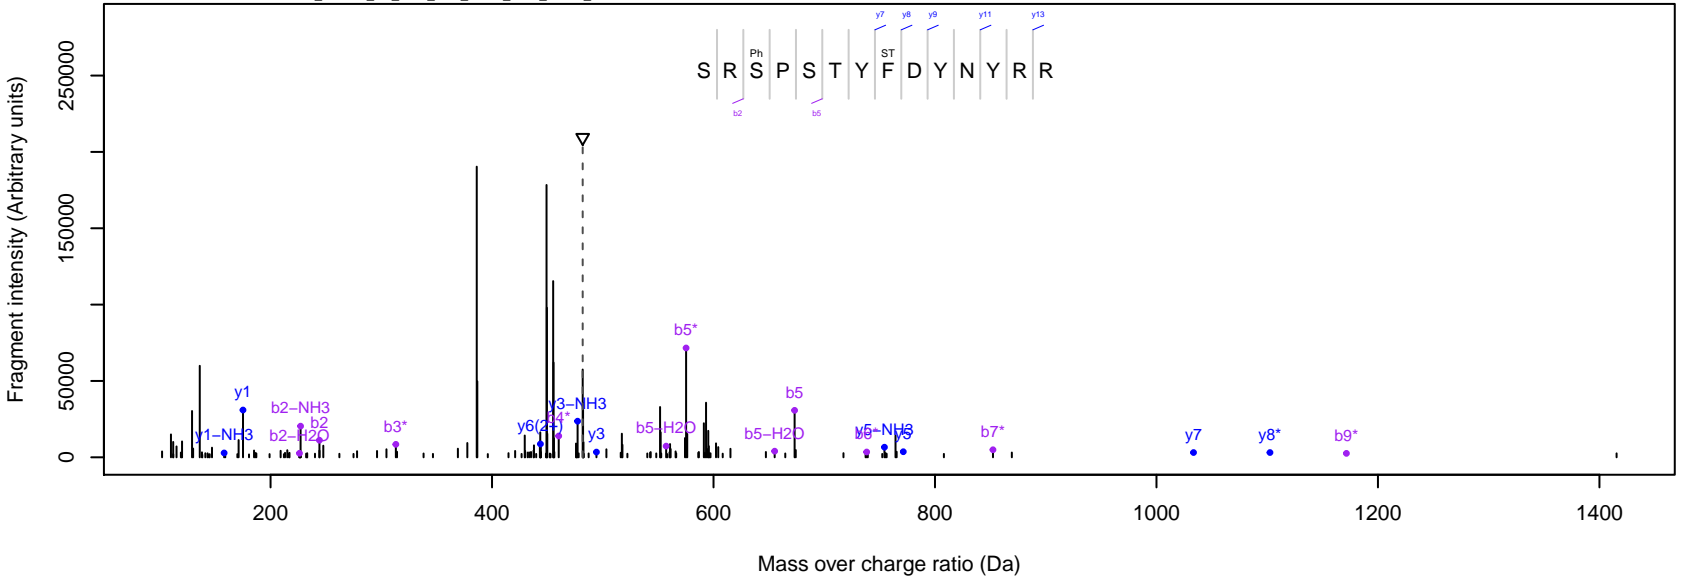

LYSSEESRPYT(Phospho (STY))NK-2+

Source : QE3\_201126\_FR\_TiOx\_hum\_tissue\_Urea\_RNAB\_N Scan : 9724

Andromeda score : 109.83

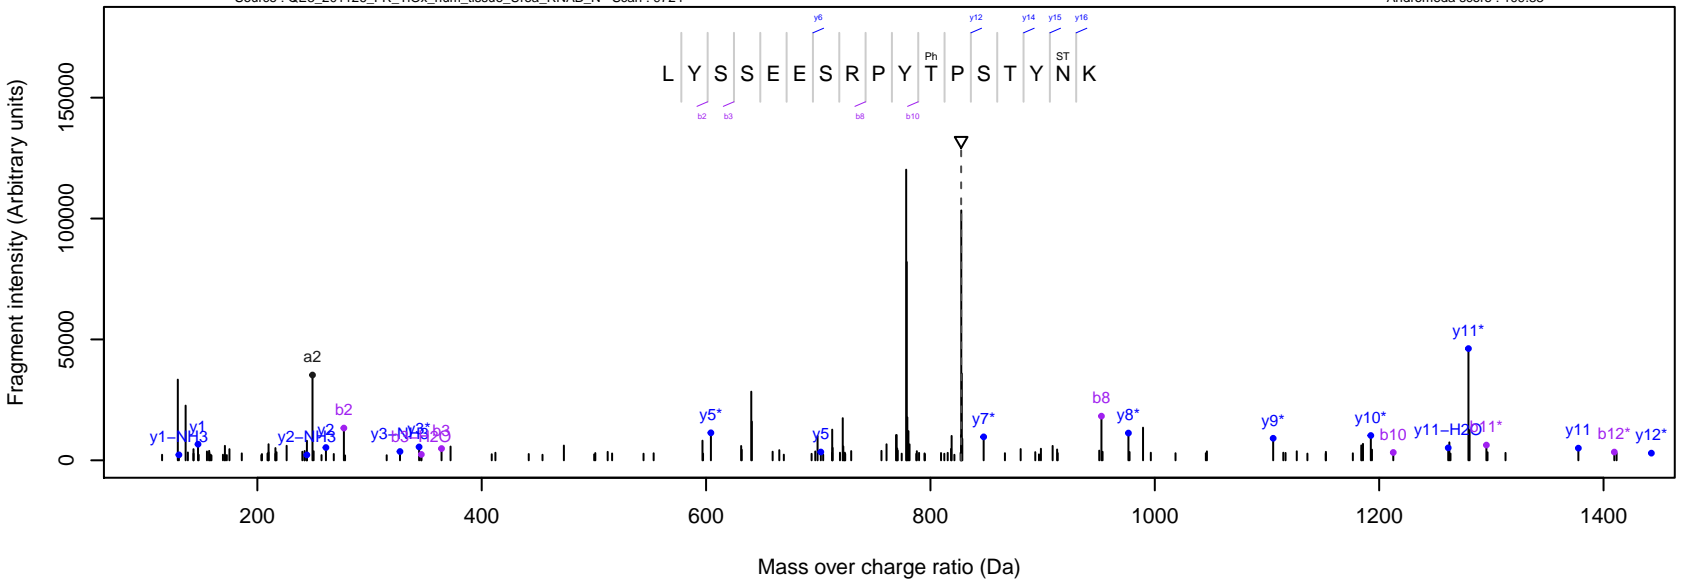

RSS(Phospho (STY))DGSL SHEEDLAK-3+

Source : QE3\_201126\_FR\_TiOx\_hum\_tissue\_Urea\_RNAB\_B Scan : 9383

Andromeda score : 109.83

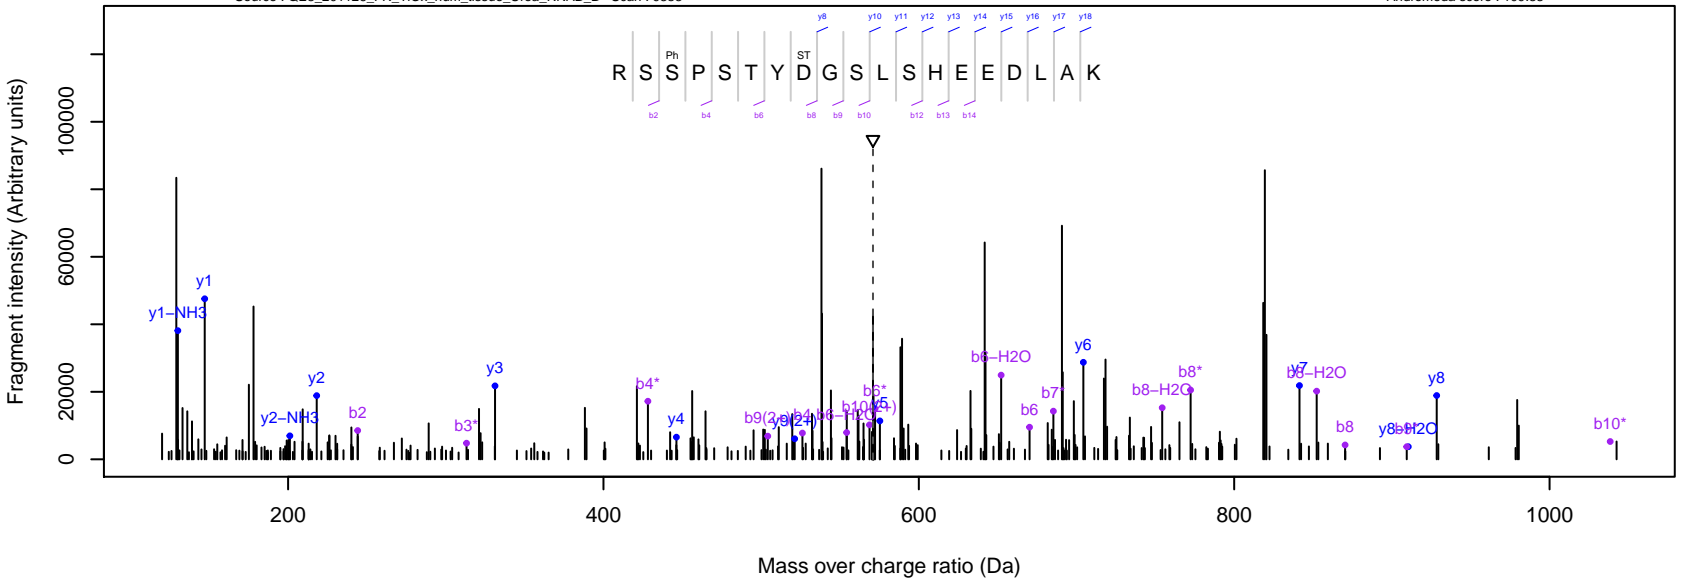

S(Phospho (STY))VVGTPAYLAPEVLR-2+

Source : QE3\_201126\_FR\_TiOx\_hum\_tissue\_Urea\_RNAB\_B Scan : 49496

Andromeda score : 109.83

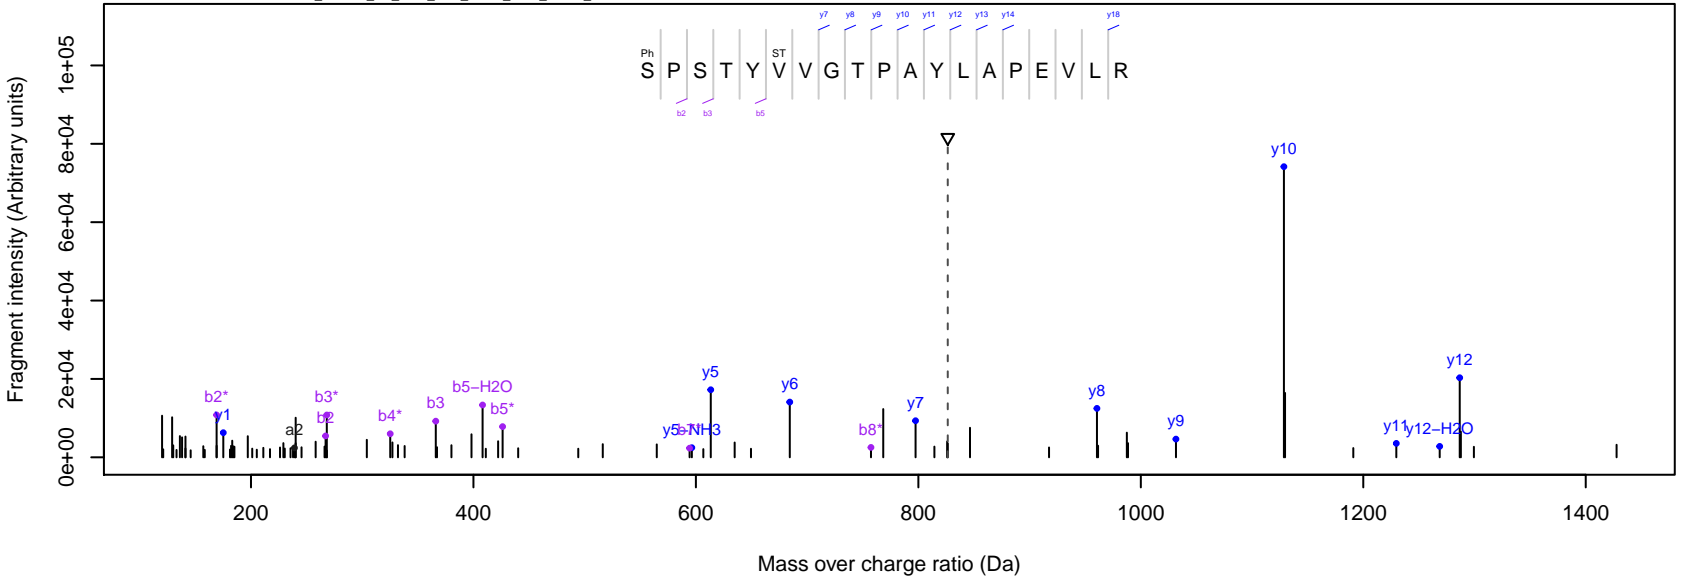

LGS GGS(Phospho (STY))GDGPSVSWSR-2+

Source : QE3\_201126\_FR\_TiOx\_hum\_tissue\_Urea\_RNAB\_B Scan : 26346

Andromeda score : 109.79

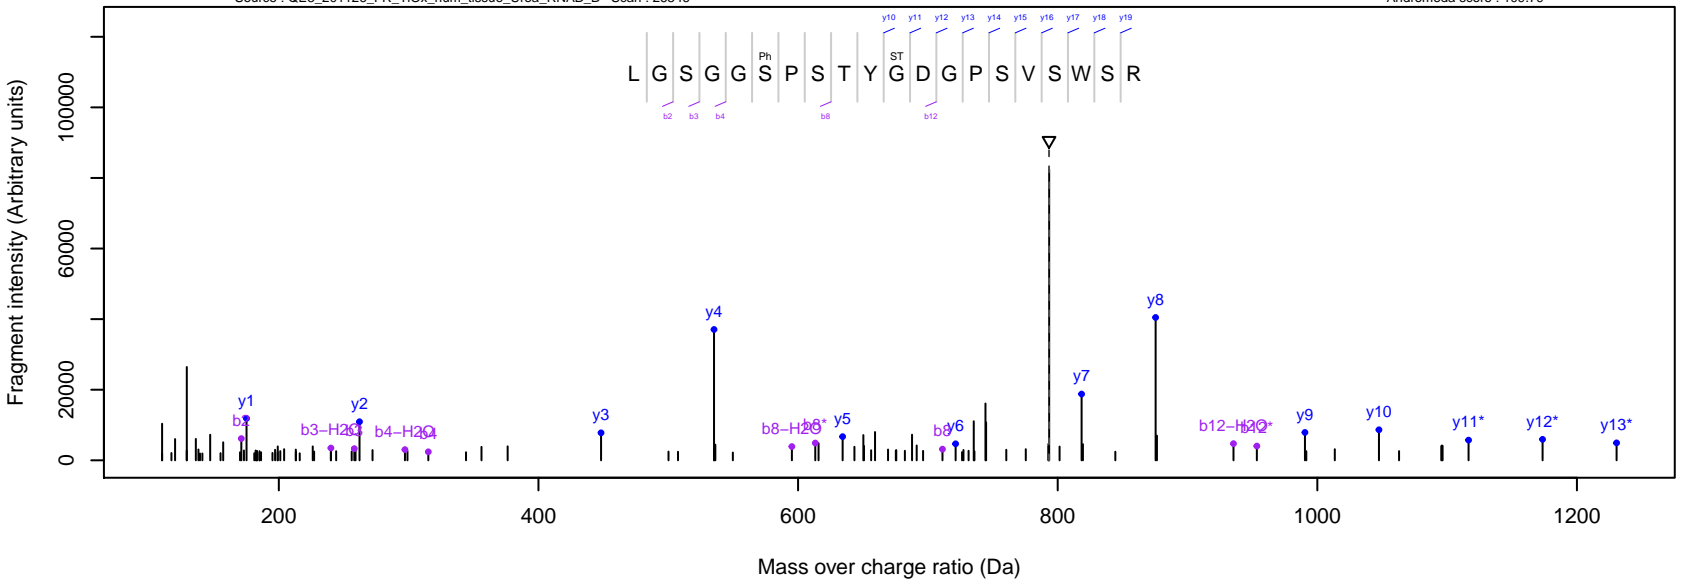

S(Phospho (STY))LGSVQAPS(Phospho (STY))YGARPVSSAASVYAGAGGS(Phospho (STY))GSR-3+

Source : QE3\_201126\_FR\_TIOx\_hum\_tissue\_Urea\_RNAB\_N Scan : 43953

Andromeda score : 109.79

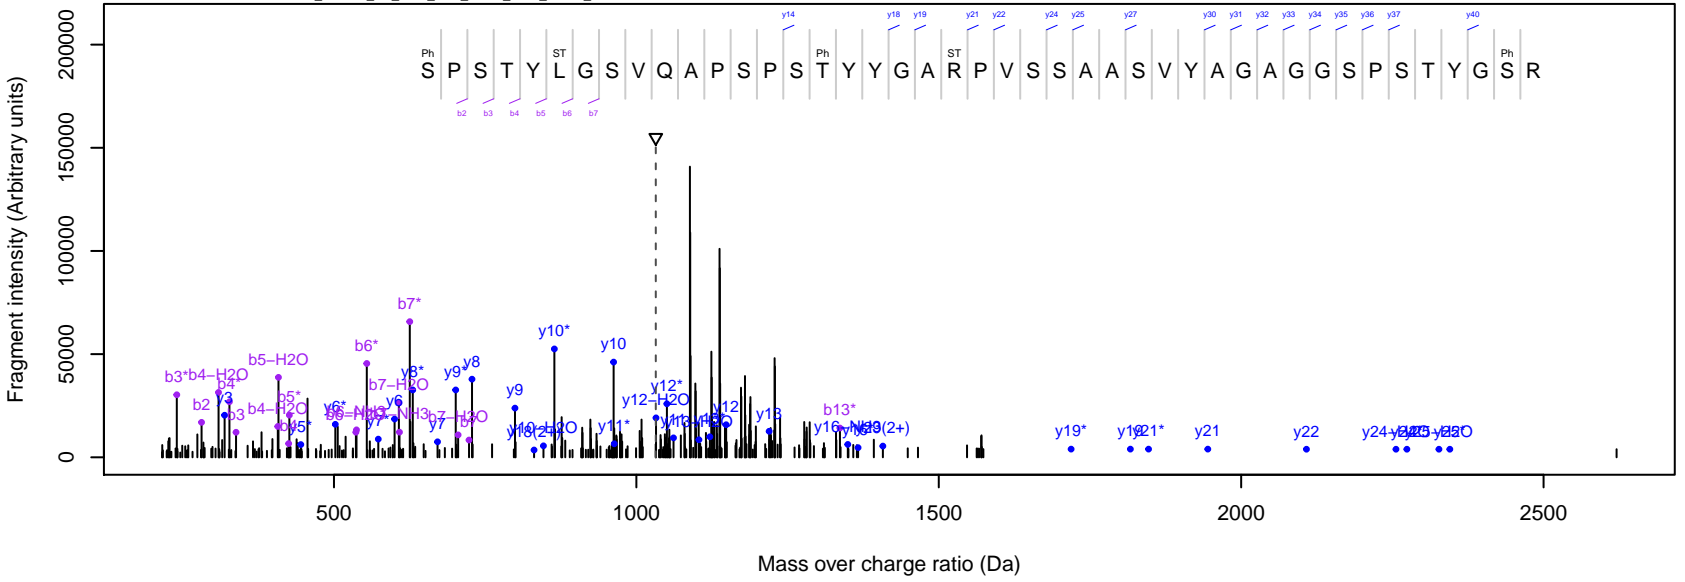

AKS(Phospho (STY))VEDDAEGHLIYHVGDLQER-4+

Source : QE3\_201126\_FR\_TIOx\_hum\_tissue\_Urea\_RNAB\_H Scan : 40189

Andromeda score : 109.75

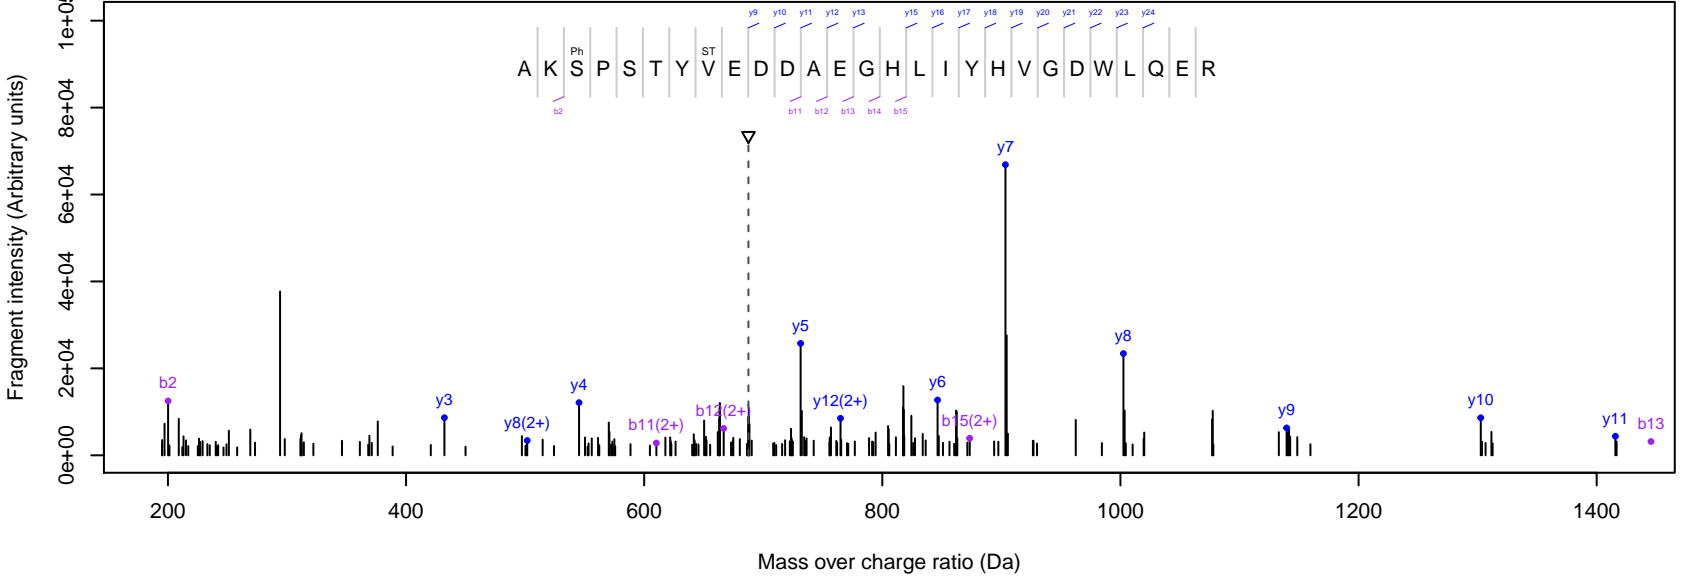

ETM(Oxidation (M))TIENPKLEDTAGDTGHSSLEAPRS(Phospho (STY))PDTLAPVASER-4+

Source : QE3\_201126\_FR\_TIOx\_hum\_tissue\_Urea\_RNAB\_H Scan : 26921

Andromeda score : 109.74

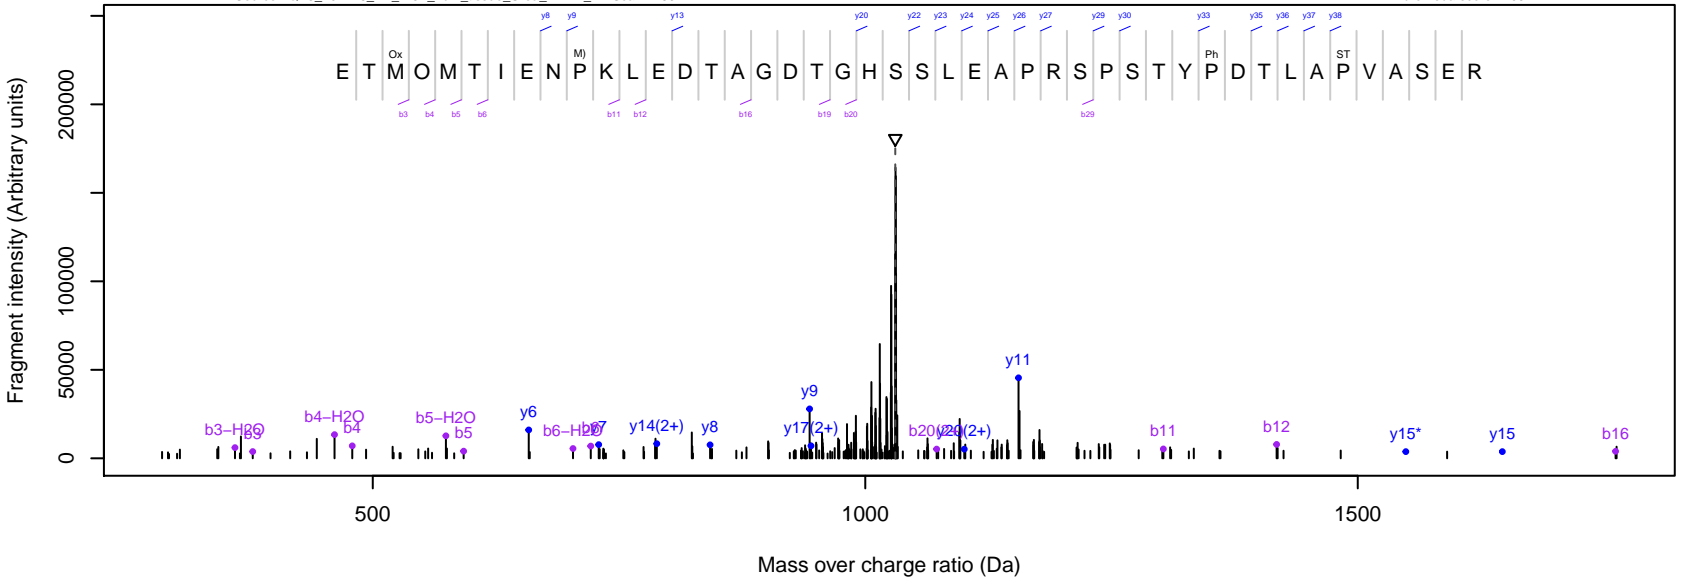

HCAPS(Phospho (STY))PDRSPELSSSR-3+

Source : QE3\_201126\_FR\_TiOx\_hum\_tissue\_Urea\_RNAB\_H Scan : 7748

Andromeda score : 109.72

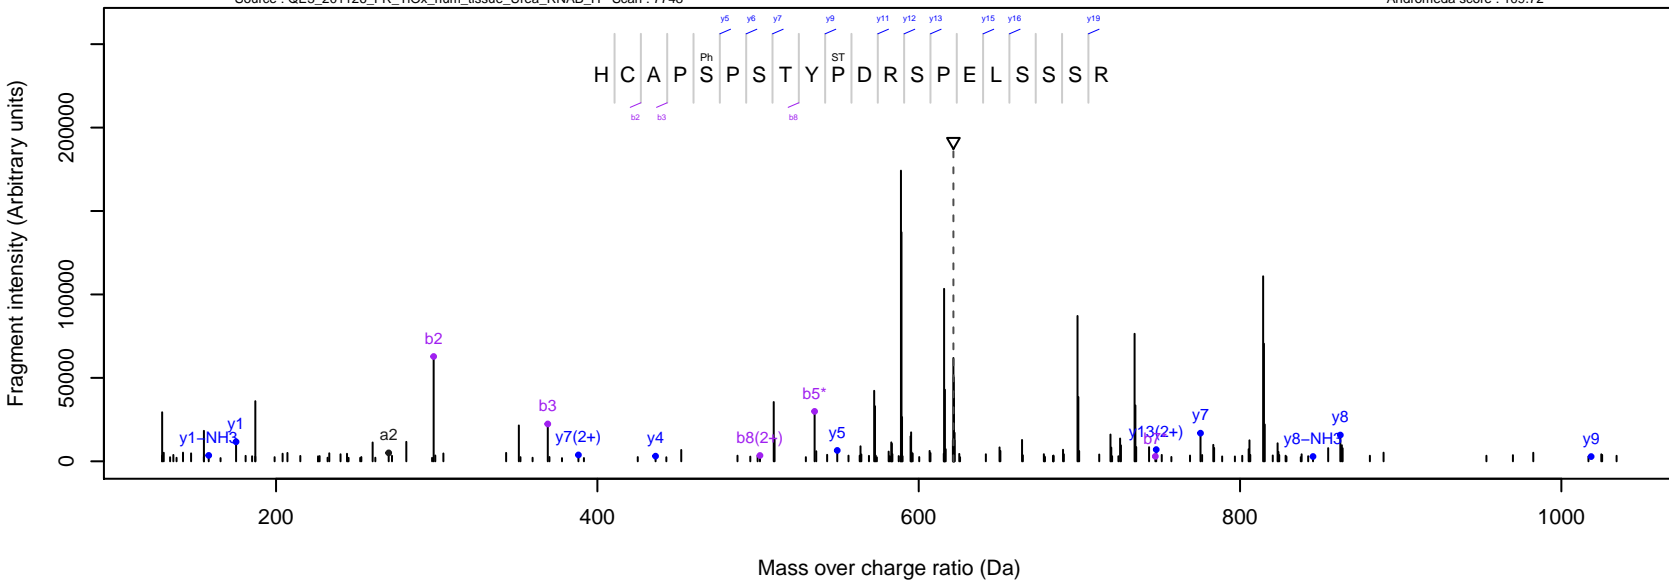

DM(Oxidation (M))SPLSETEM(Oxidation (M))ALGKDVTPSTYPPPETEVVLIK-3+

Source : QE3\_201126\_FR\_TiOx\_hum\_tissue\_Urea\_RNAB\_B Scan : 53784

Andromeda score : 109.71

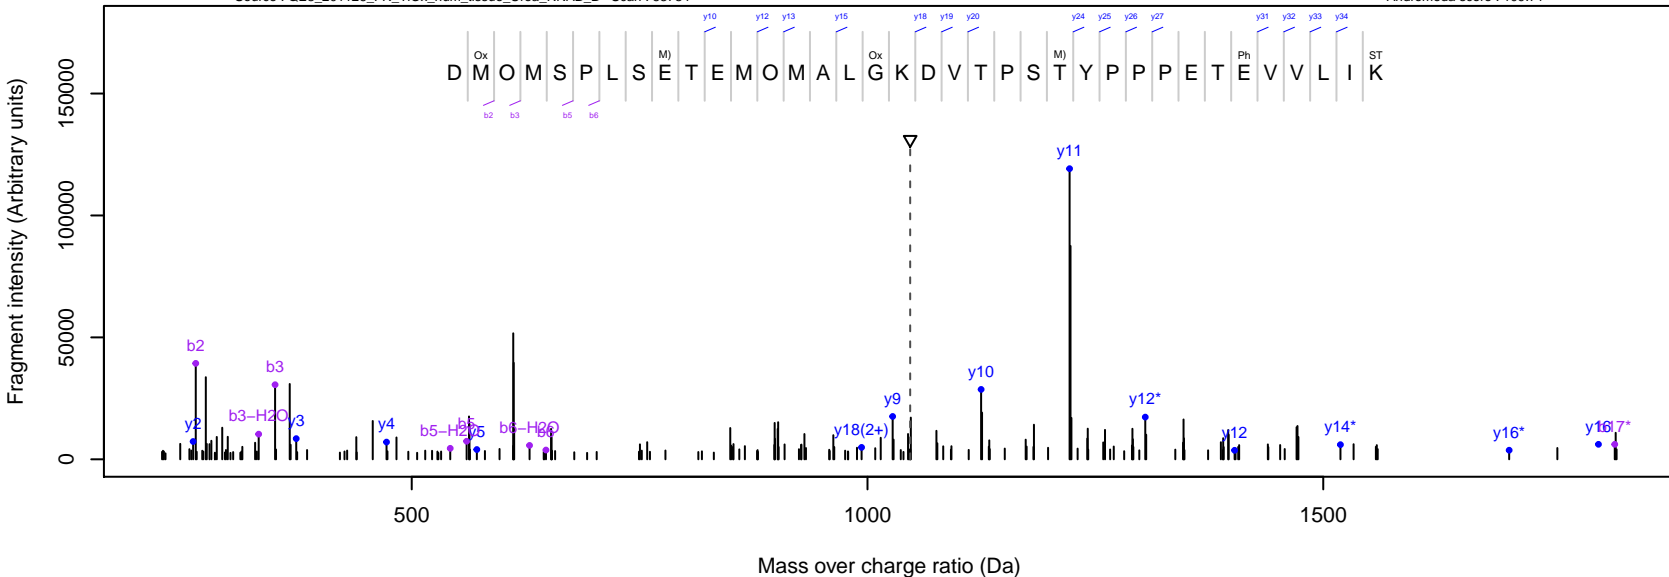

GNRS(Phospho (STY))PVPDVEDPATEEPGESFCDKVM(Oxidation (M))R-3+

Source : QE3\_201126\_FR\_TiOx\_hum\_tissue\_Urea\_RNAB\_H Scan : 26099

Andromeda score : 109.71

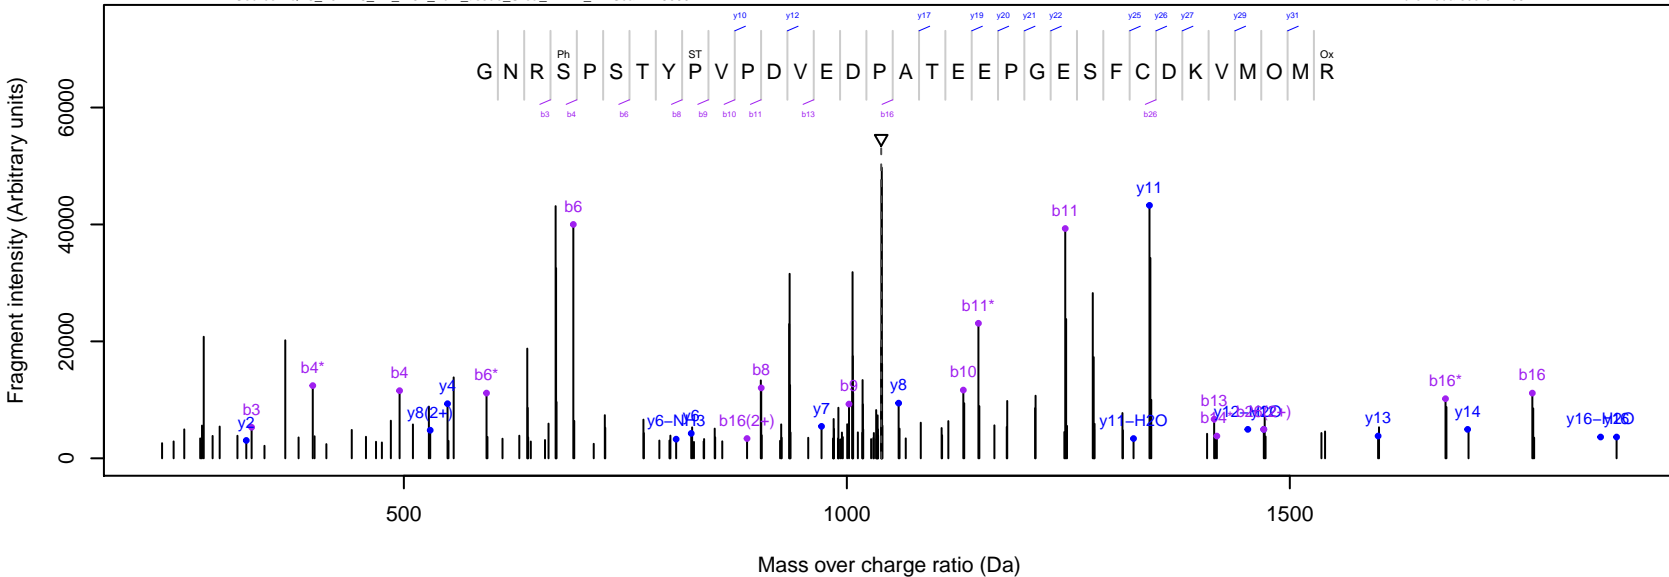

RATSPS(Phospho (STY))SS(Phospho (STY))VSGDFDDGHSVSTPGPSR-4+

Source : QE3\_201126\_FR\_TiOx\_hum\_tissue\_Urea\_RNAB\_N Scan : 15474

Andromeda score : 109.71

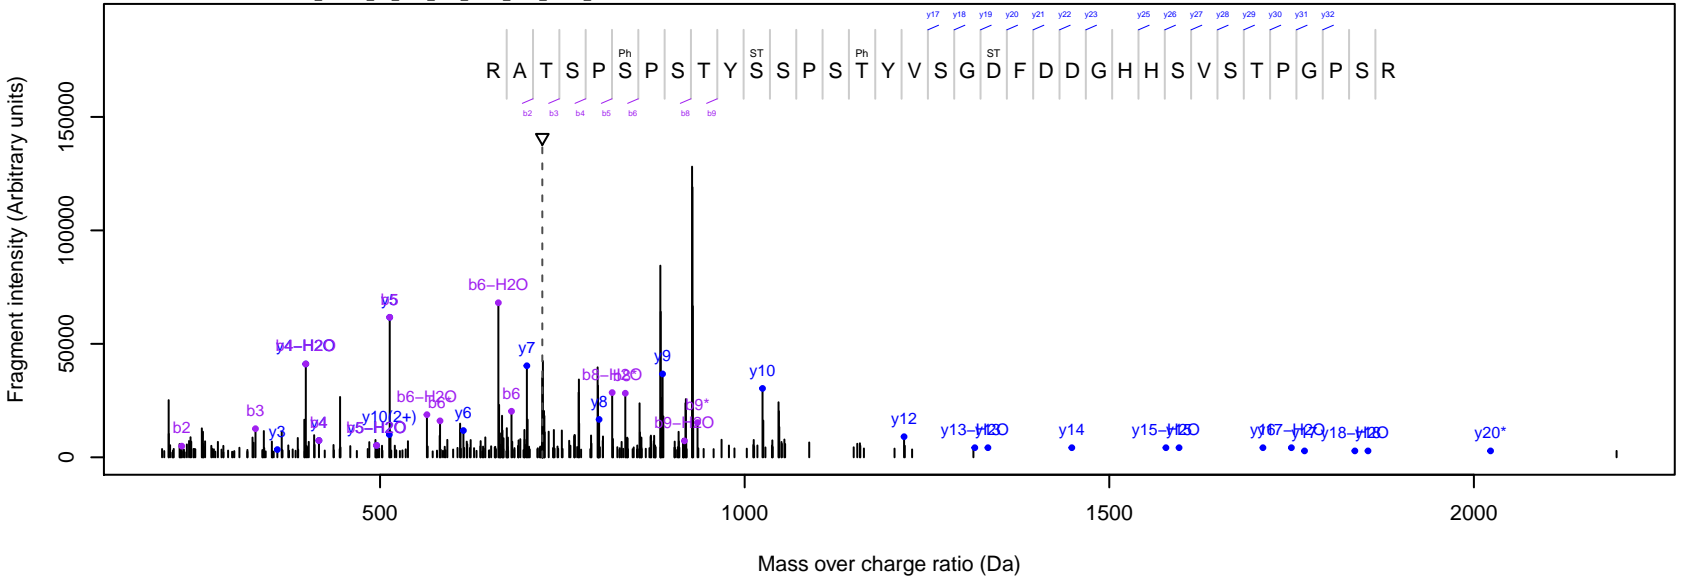

GHYEVTS(Phospho (STY))DDETGLQGSVSLASKK-4+

Source : QE3\_201126\_FR\_TiOx\_hum\_tissue\_Urea\_RNAB\_H Scan : 16545

Andromeda score : 109.62

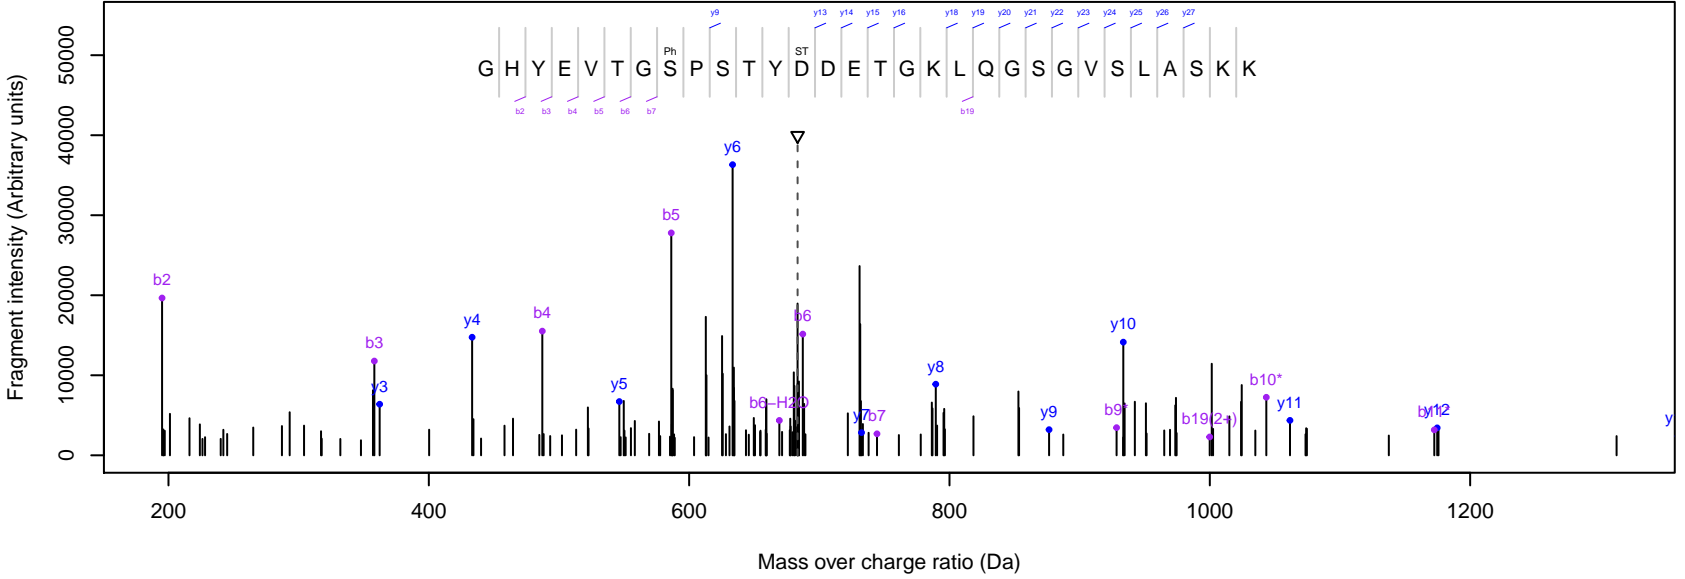

GAVENEEDLPELS(Phospho (STY))DSGDEAAWEDEDDADLPHGK-3+

Source : QE3\_201126\_FR\_TiOx\_hum\_tissue\_Urea\_RNAB\_H Scan : 43850

Andromeda score : 109.59

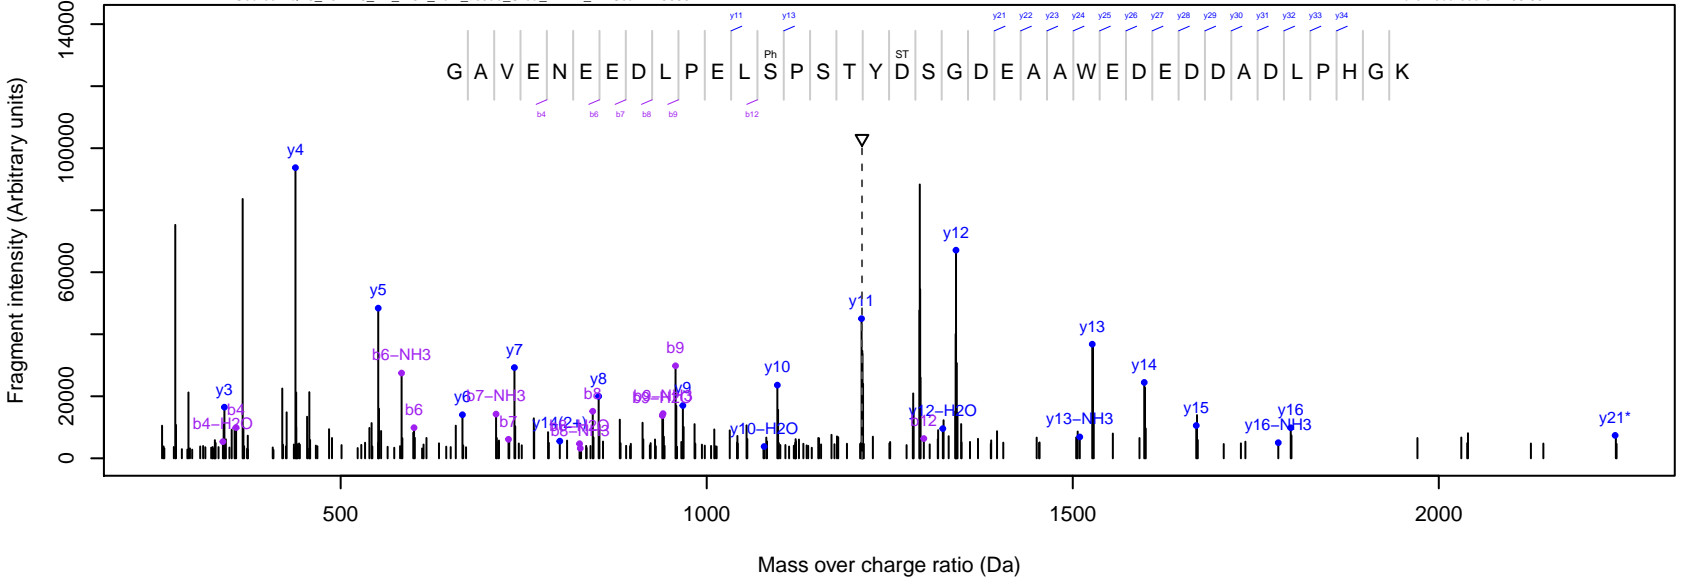



GFGGAGELGQTPQVQAALSVS(Phospho(STY))QENPEM(Oxidation(M))EGPER-3+

Source : QE3\_201126\_FR\_TIOx\_hum\_tissue\_Urea\_RNAB\_B Scan : 44337

Andromeda score : 109.55

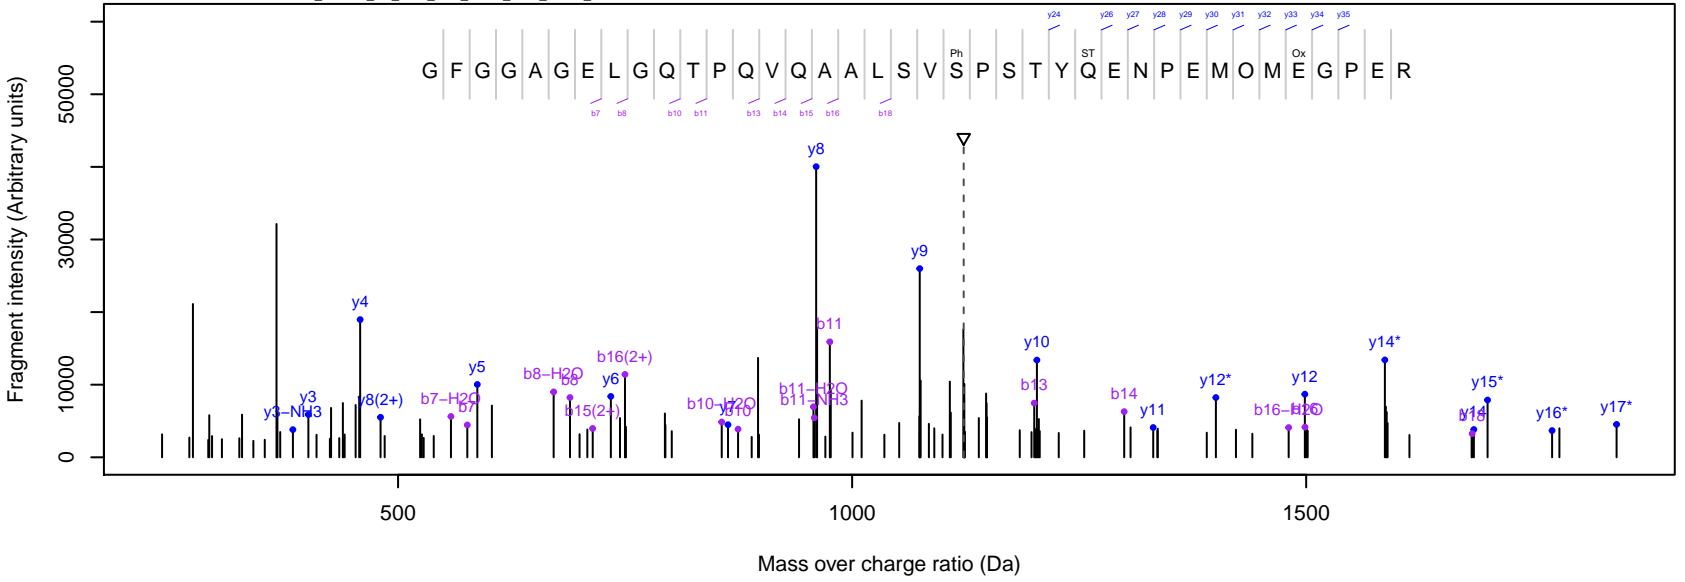

RAS(Phospho(STY))AGPAPGPVVTAEGLHPSLPSTGNSTPLGSSK-4+

Source : QE3\_201126\_FR\_TIOx\_hum\_tissue\_Urea\_RNAB\_B Scan : 35146

Andromeda score : 109.52

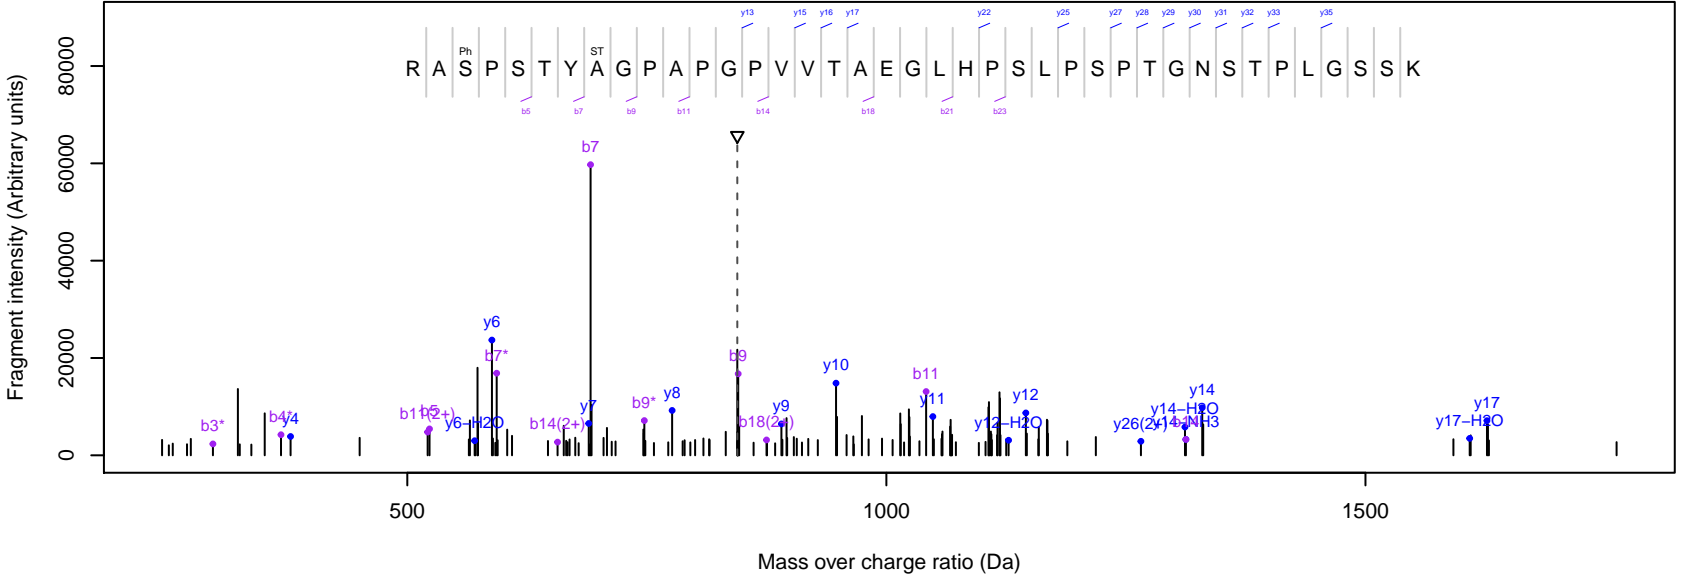

VSHQGY(SPhospho(STY))TEAEFEEPR-3+

Source : QE3\_201126\_FR\_TIOx\_hum\_tissue\_Urea\_RNAB\_H Scan : 19264

Andromeda score : 109.5

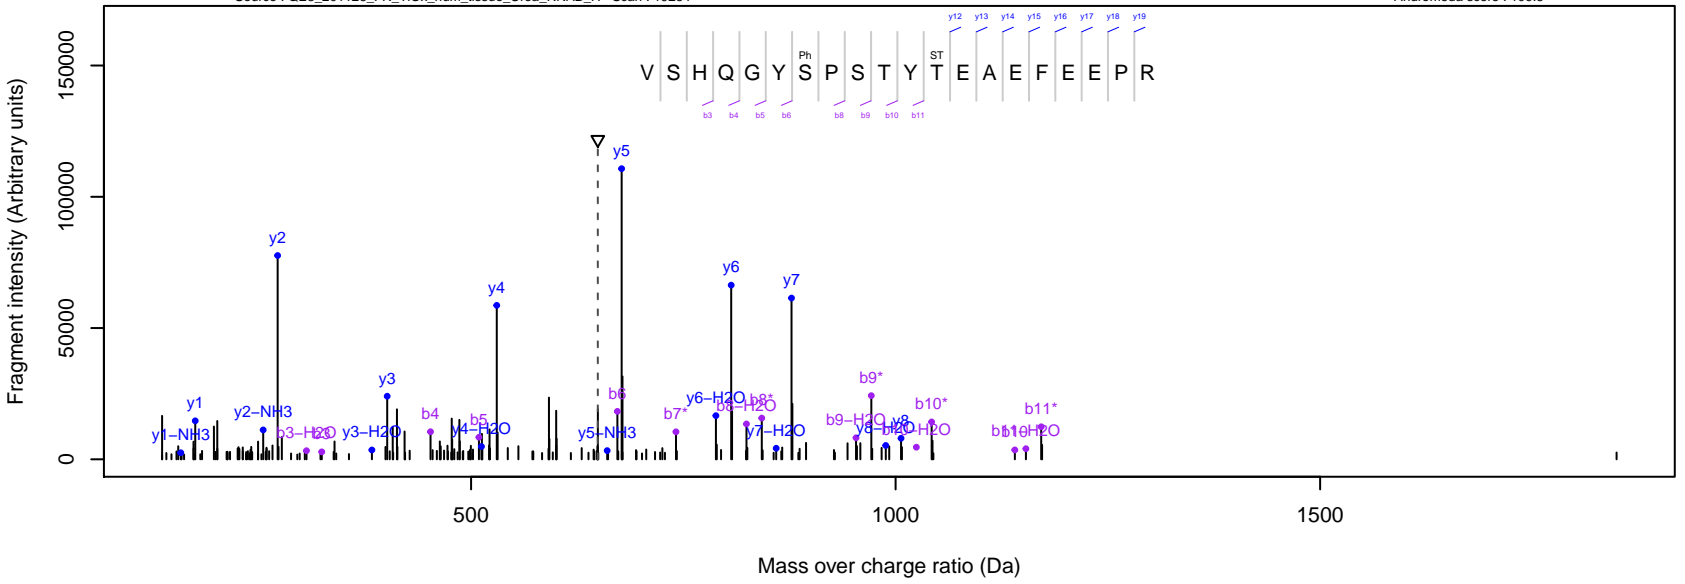

(Acetyl (Protein N-term))S(Phospho(STY))AAEVDGLGVARPHYGSVLDNER-3+

Source : QE3\_201126\_FR\_TIOx\_hum\_tissue\_Urea\_RNAB\_H Scan : 38688

Andromeda score : 109.45

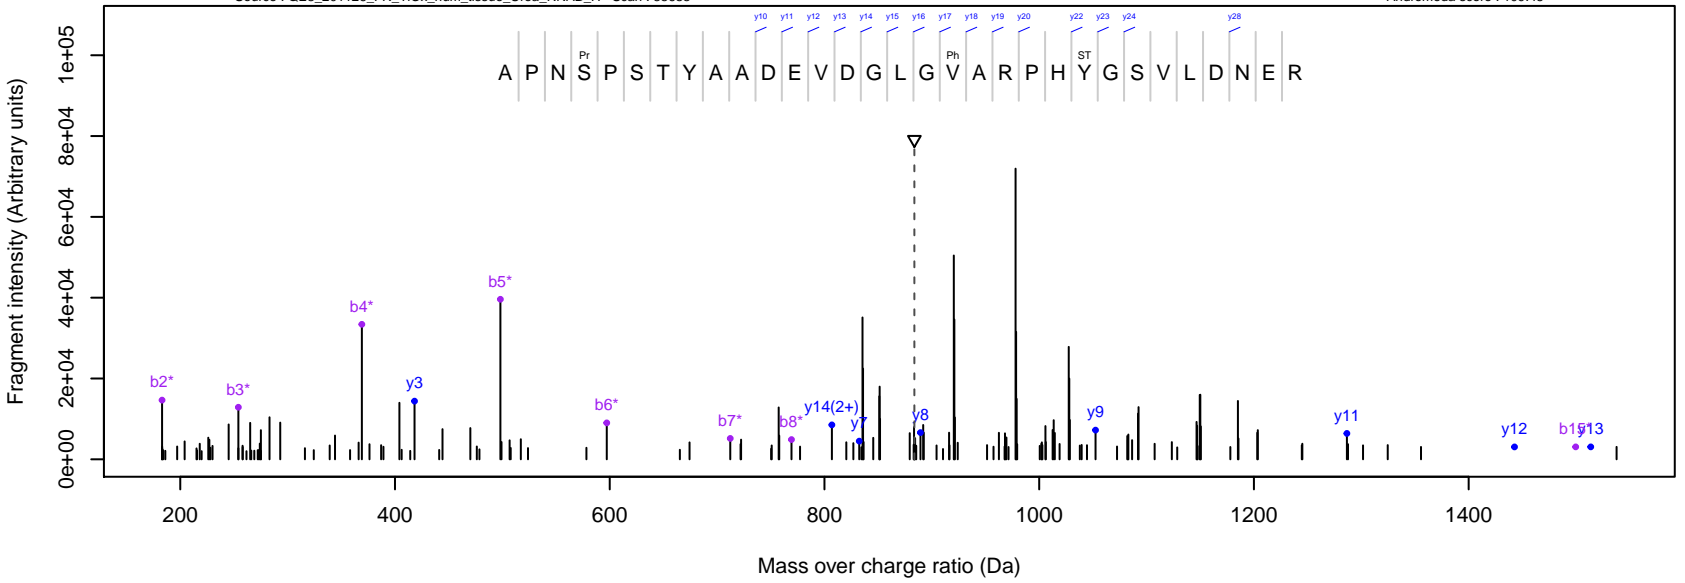

DKRPLS(Phospho(STY))GPDVGTQPAGLASGAK-3+

Source : QE3\_201126\_FR\_TIOx\_hum\_tissue\_Urea\_RNAB\_B Scan : 21194

Andromeda score : 109.44

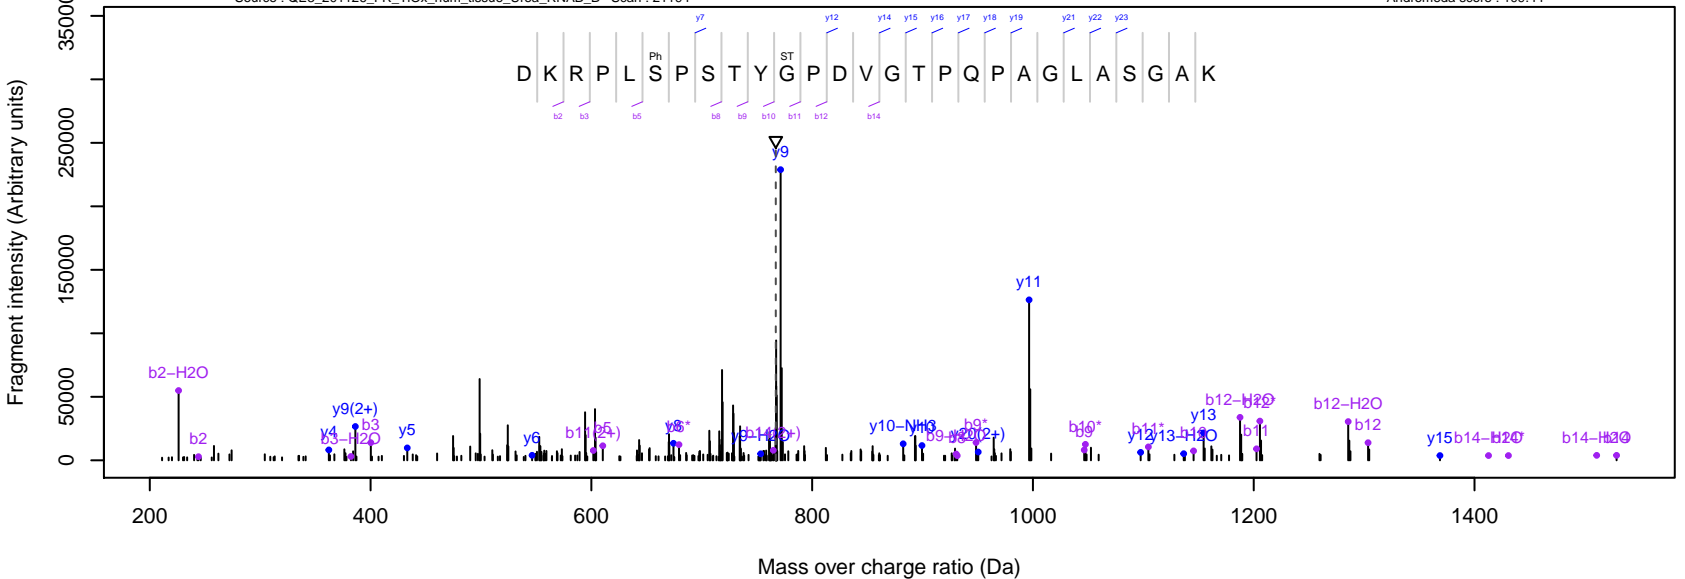

RILS(Phospho (STY))DVTHSAVFGVPASK-3+

Source : QE3\_201126\_FR\_TiOx\_hum\_tissue\_Urea\_RNAB\_B Scan : 37327

Andromeda score : 109.44

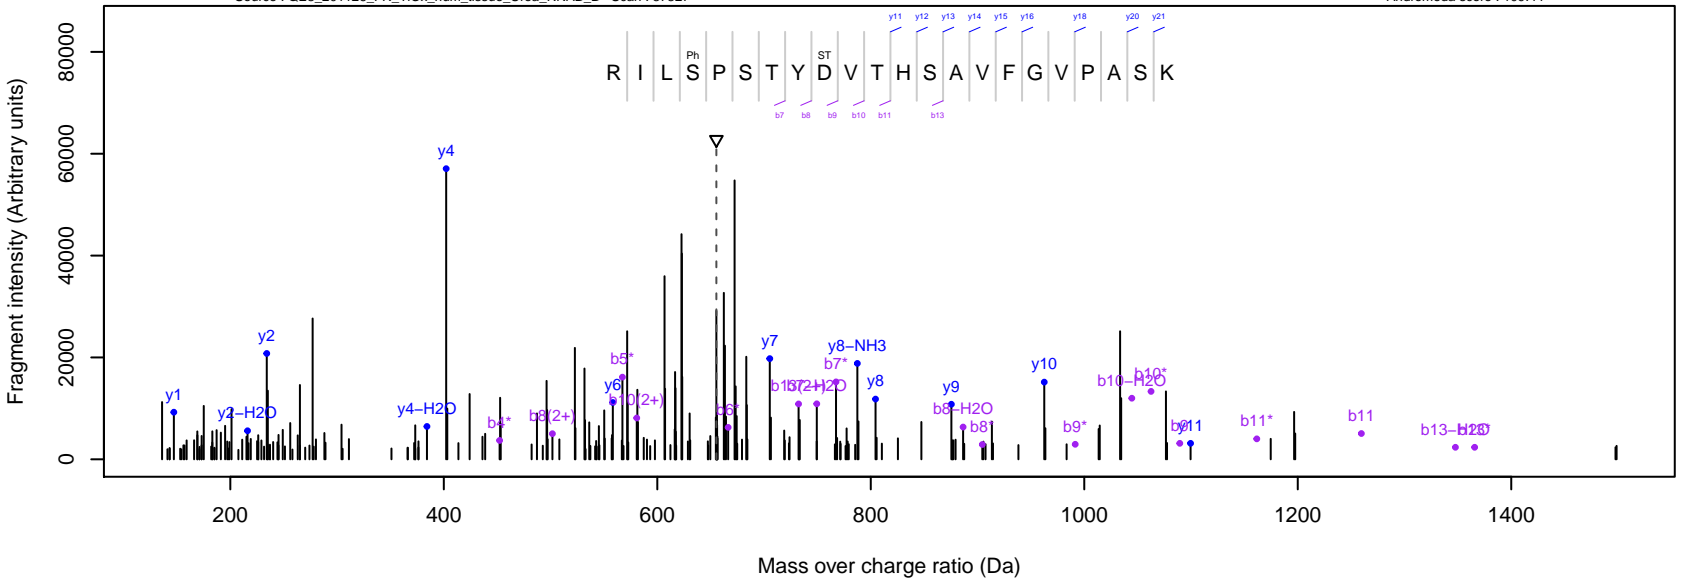

AAAGAQASQAQLGEAAGPASETPAGTES(Phospho (STY))PHSSASPCQEHKR-4+

Source : QE3\_201126\_FR\_TiOx\_hum\_tissue\_Urea\_RNAB\_H Scan : 13498

Andromeda score : 109.42

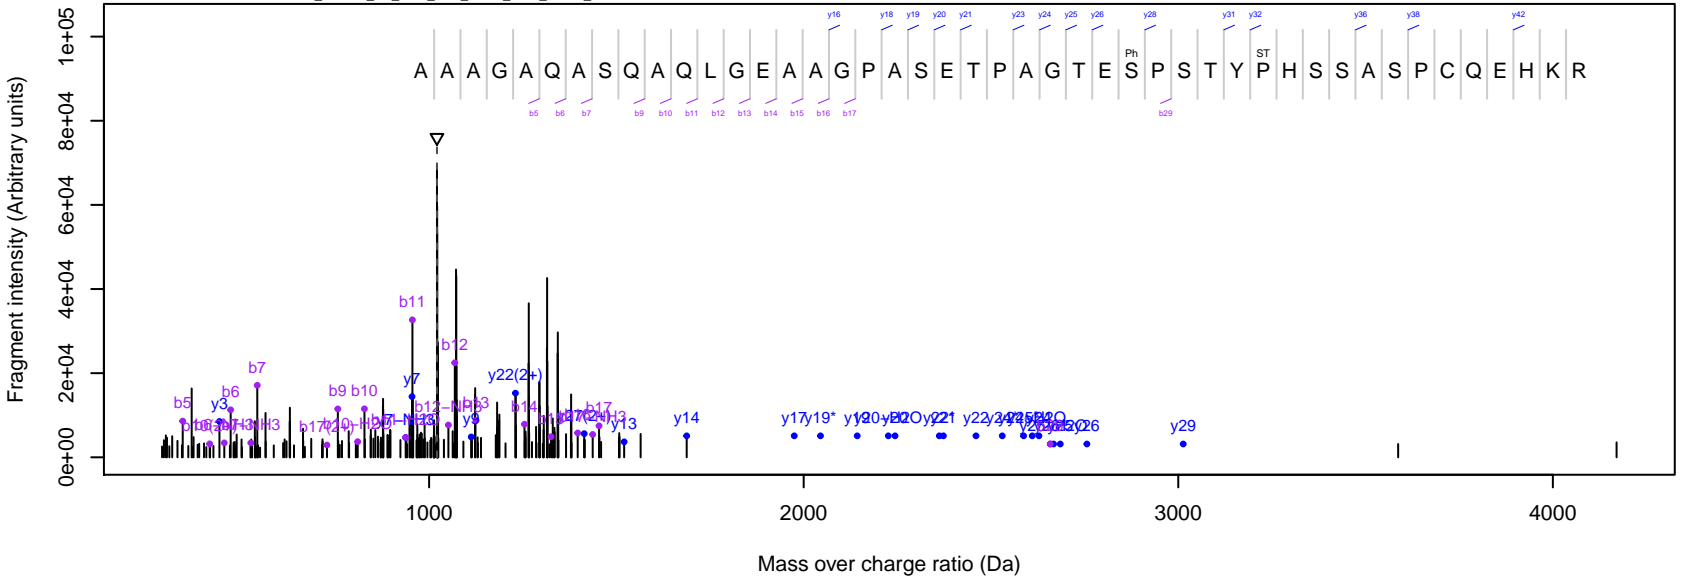

AKAGLESGAEPGDGDS(Phospho (STY))DTTKK-3+

Source : QE3\_201126\_FR\_TiOx\_hum\_tissue\_Urea\_RNAB\_B Scan : 6075

Andromeda score : 109.41

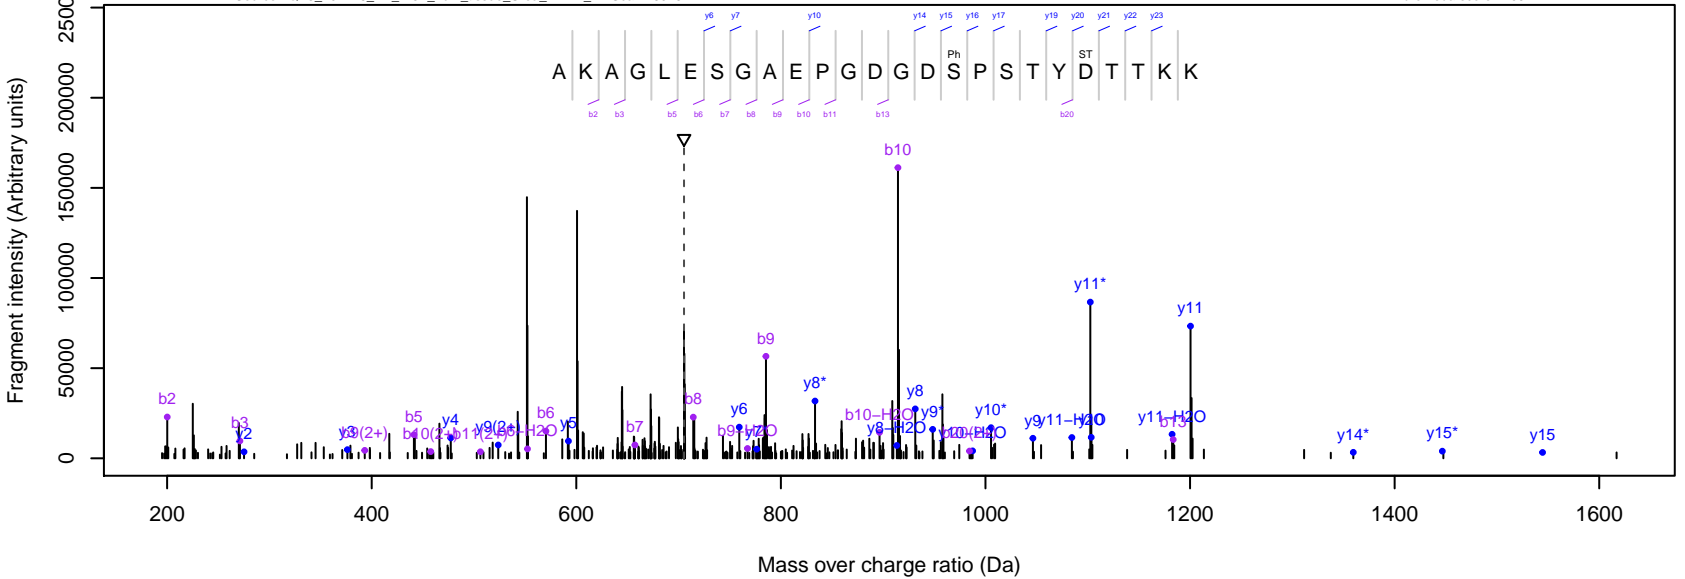

FPELEAEDIFS(Phospho (STY))DKEVPIESTFVR-3+

Source : QE3\_201126\_FR\_TIOx\_hum\_tissue\_Urea\_RNAB\_H Scan : 57386

Andromeda score : 109.41

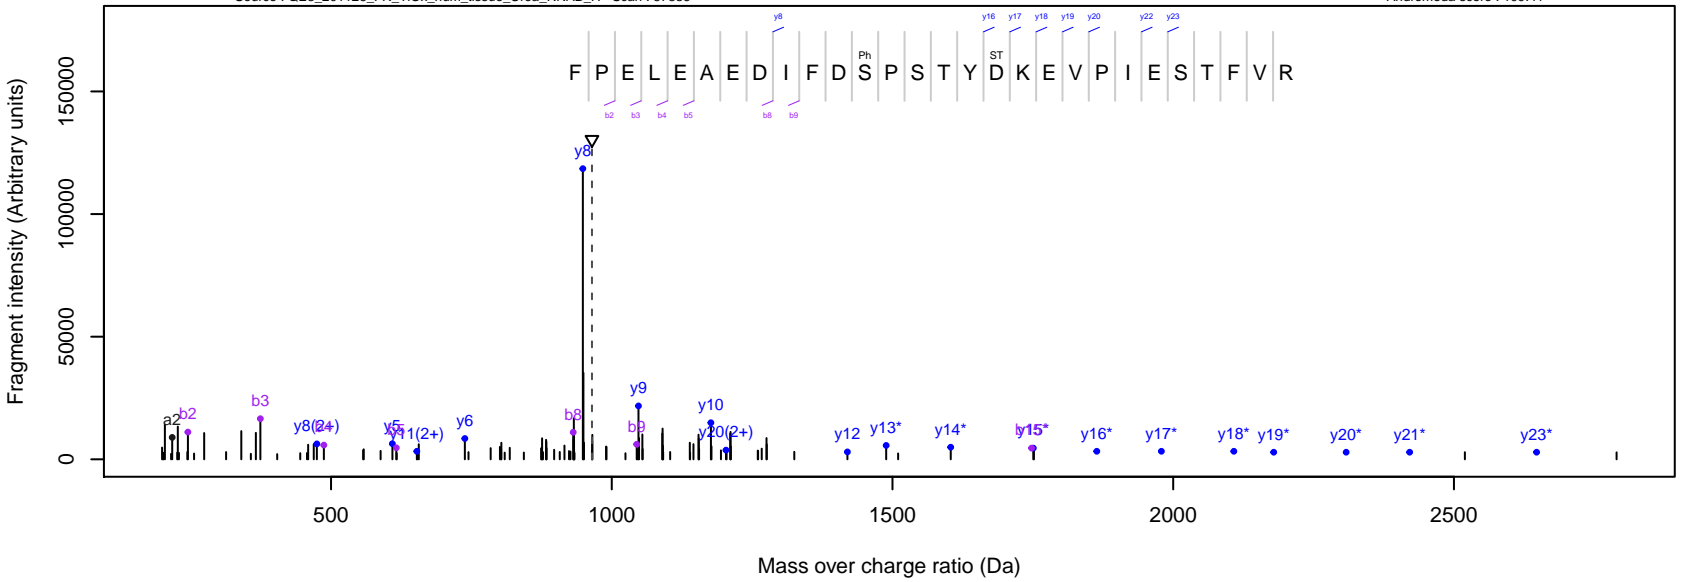

SSS(Phospho (STY))APNVHINTIEPVNIDDLIR-3+

Source : QE3\_201126\_FR\_TIOx\_hum\_tissue\_Urea\_RNAB\_H Scan : 52143

Andromeda score : 109.41

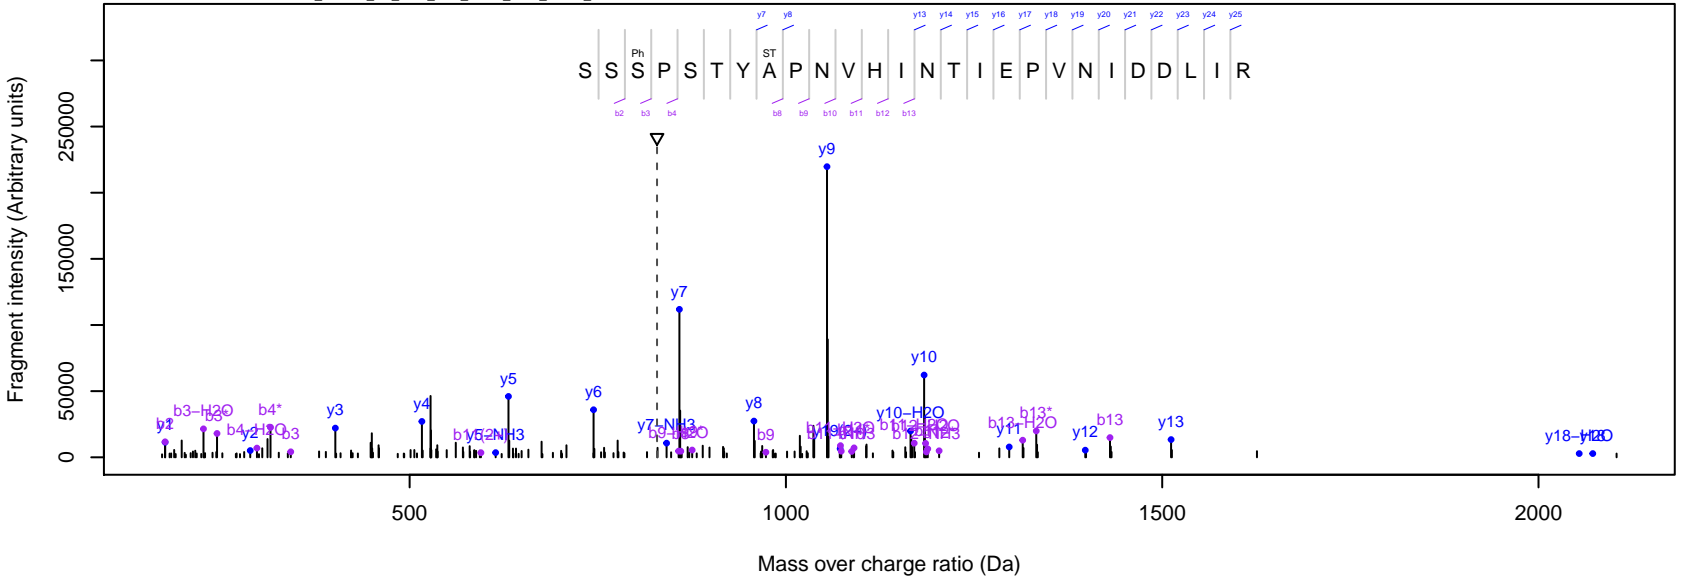

(Acetyl (Protein N-term))AGGEAGVTLGQPHLS(Phospho (STY))R-2+

Source : QE3\_201126\_FR\_TIOx\_hum\_tissue\_Urea\_RNAB\_B Scan : 30947

Andromeda score : 109.35

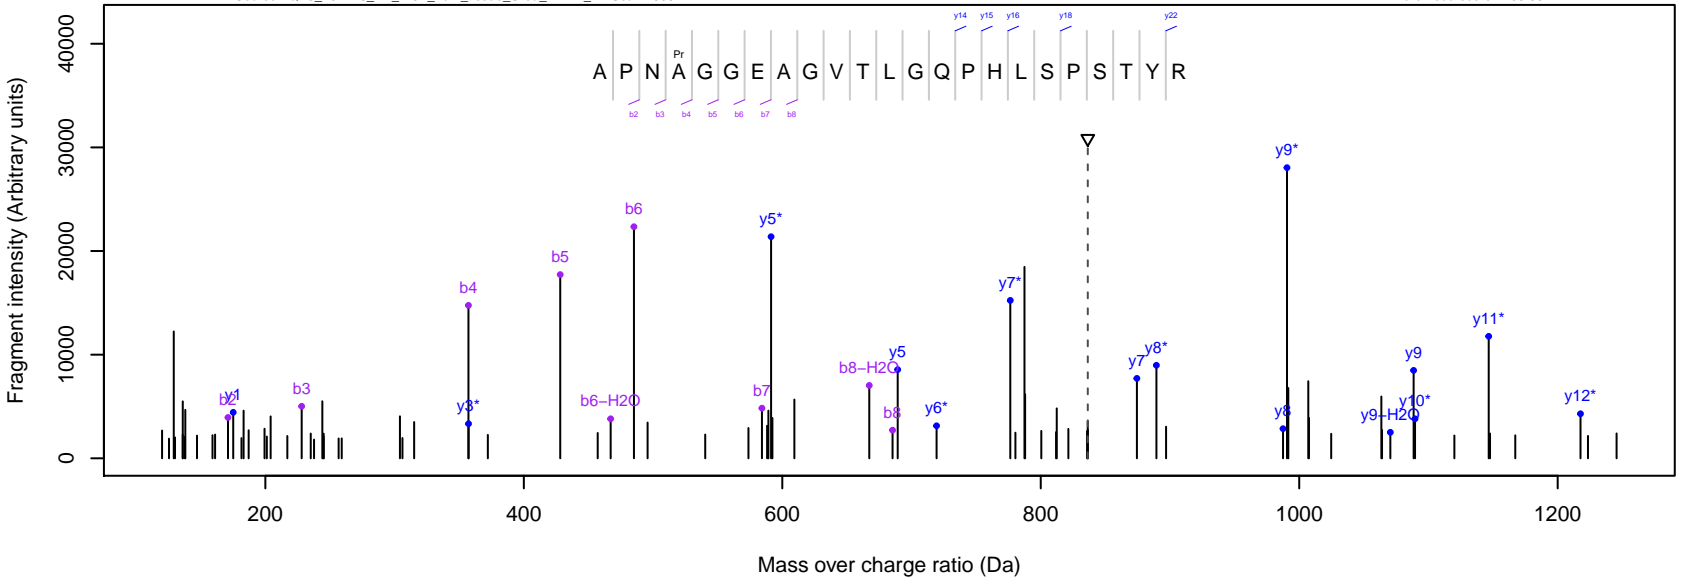

LKATVT(Phospho (STY))PS(Phospho (STY))PVKGGK-2+

Source : QE3\_201126\_FR\_TiOx\_hum\_tissue\_Urea\_RNAB\_H Scan : 9714

Andromeda score : 109.35

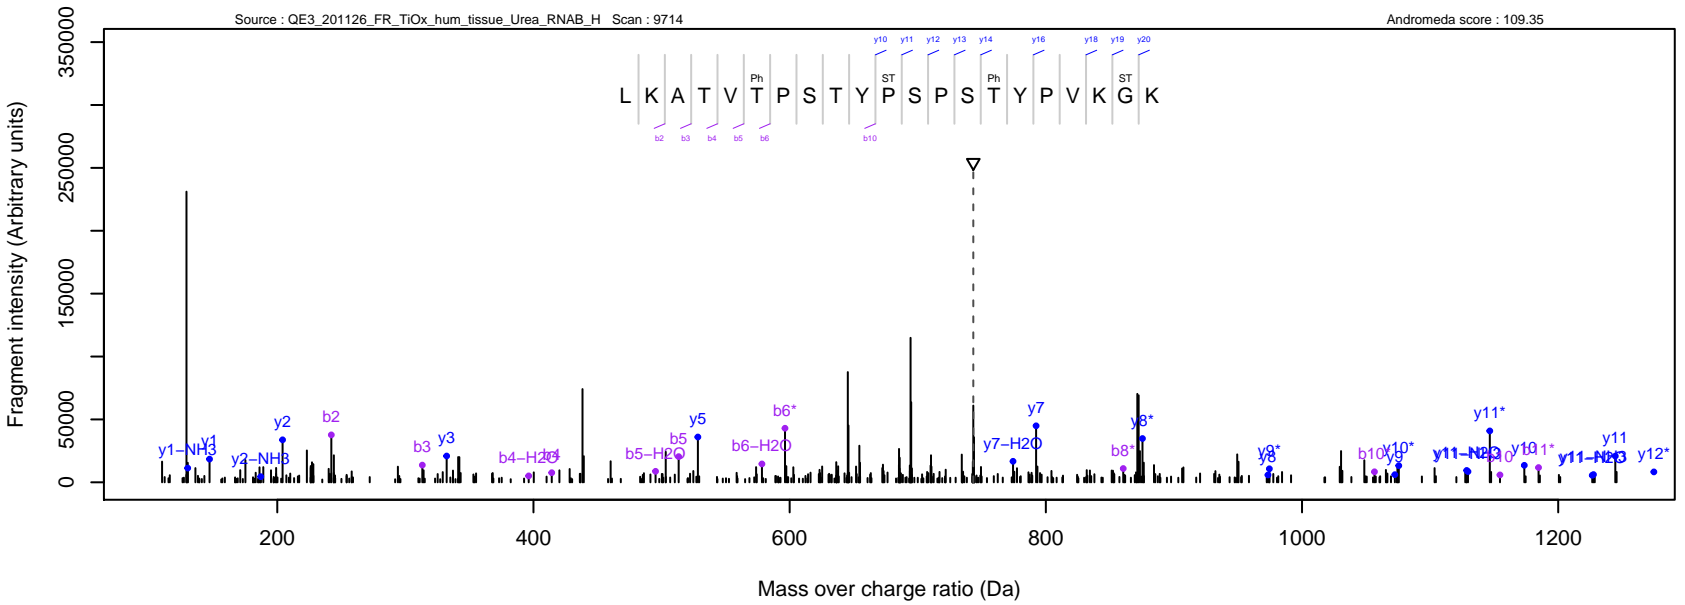

RAS(Phospho (STY))AAAAAGGGATGHPGGGGAENPAGLK-3+

Source : QE3\_201126\_FR\_TiOx\_hum\_tissue\_Urea\_RNAB\_H Scan : 9887

Andromeda score : 109.27

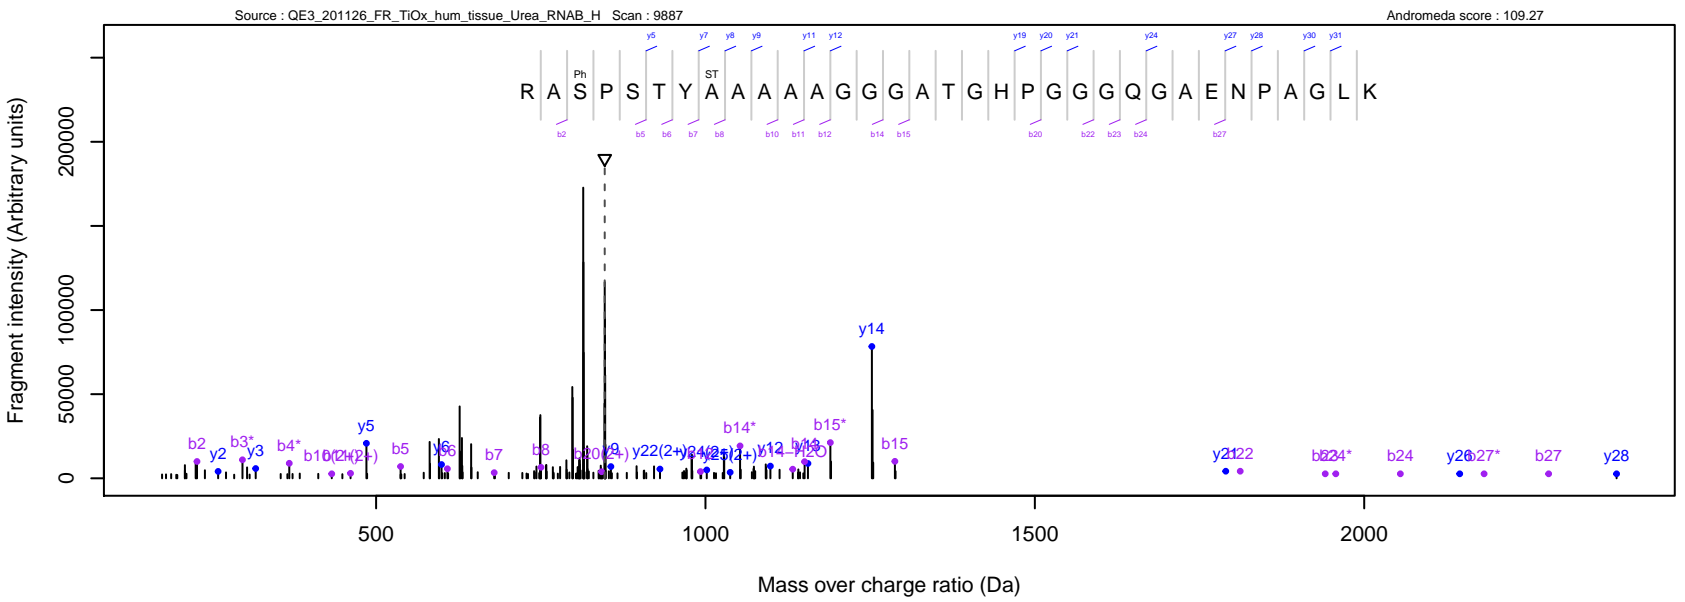

S(Phospho (STY))SPELLPSGVTDENEVTTAVTEK-3+

Source : QE3\_201126\_FR\_TiOx\_hum\_tissue\_Urea\_RNAB\_B Scan : 44273

Andromeda score : 109.26

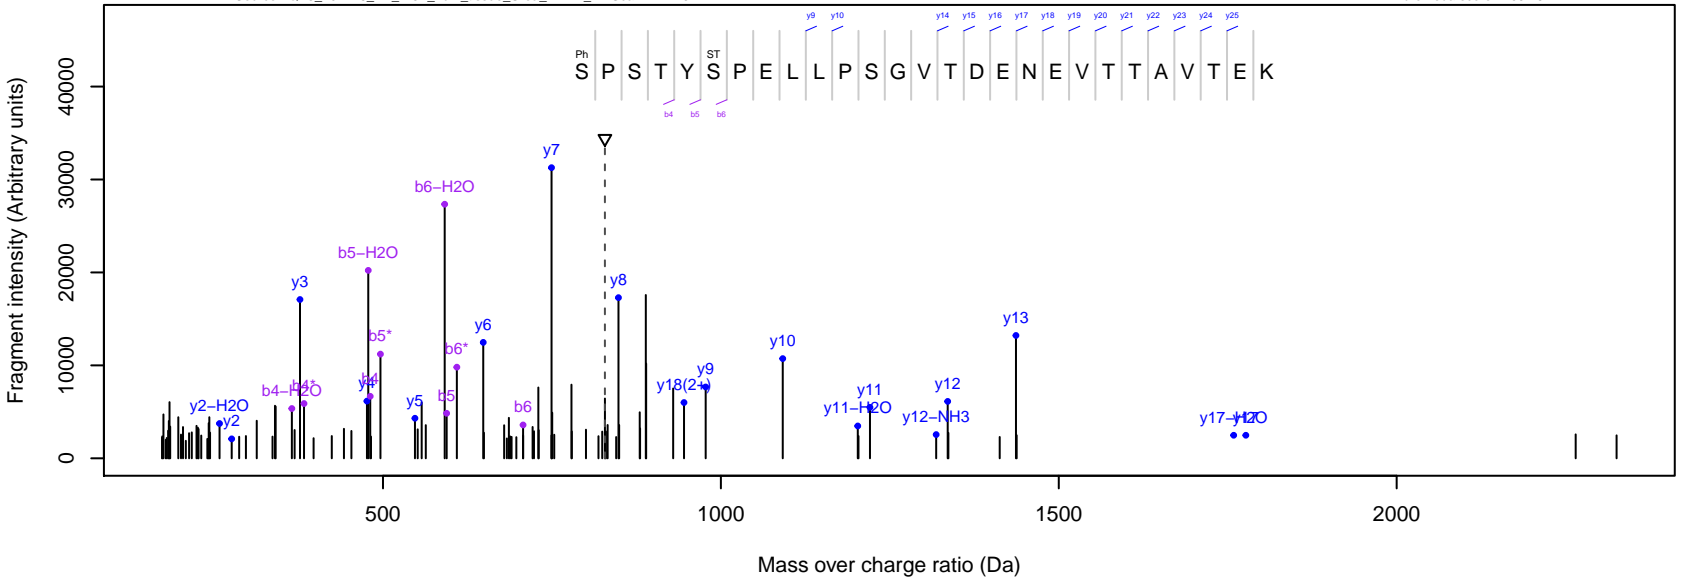

LDEGT(Pospho(STY))PPEPK-2+

Source : QE3\_201126\_FR\_TiOx\_hum\_tissue\_Urea\_RNAB\_B Scan : 12430

Andromeda score : 109.24

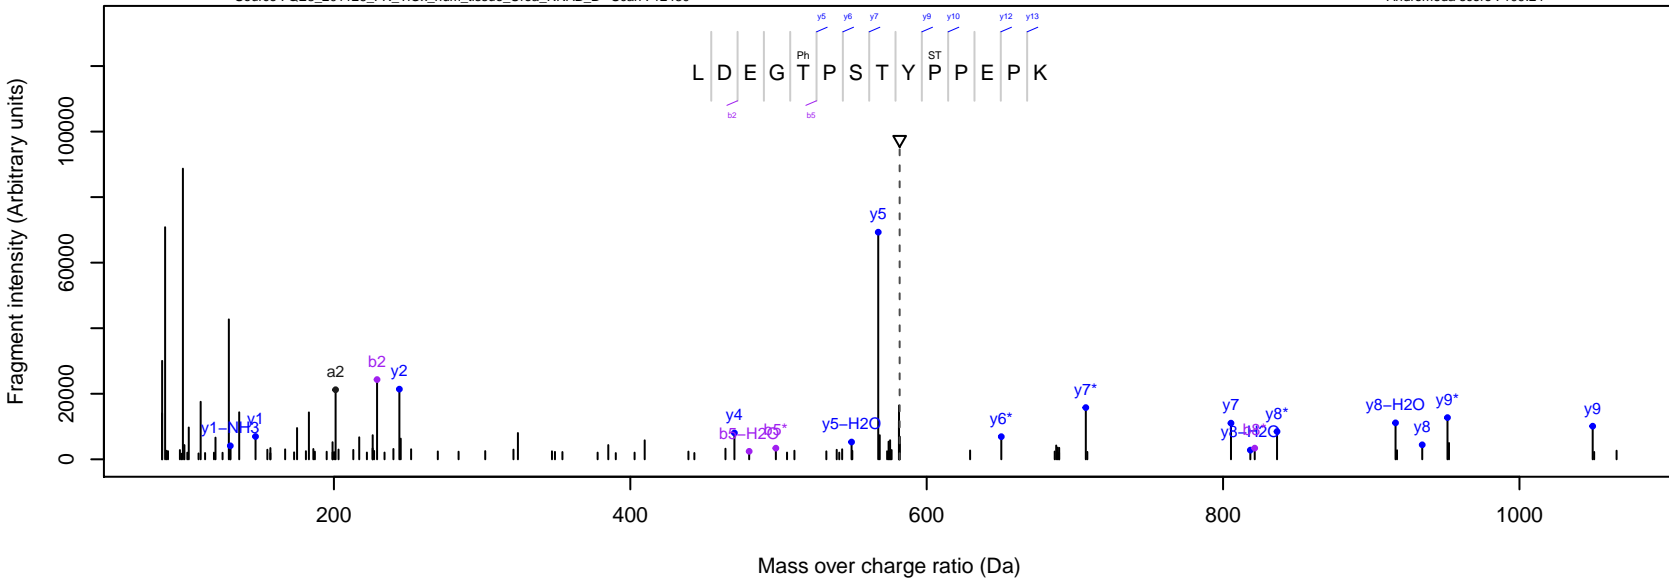

S(Phospho(STY))SSLESQTAVAEVR-2+

Source : QE3\_201126\_FR\_TiOx\_hum\_tissue\_Urea\_RNAB\_B Scan : 43078

Andromeda score : 109.24

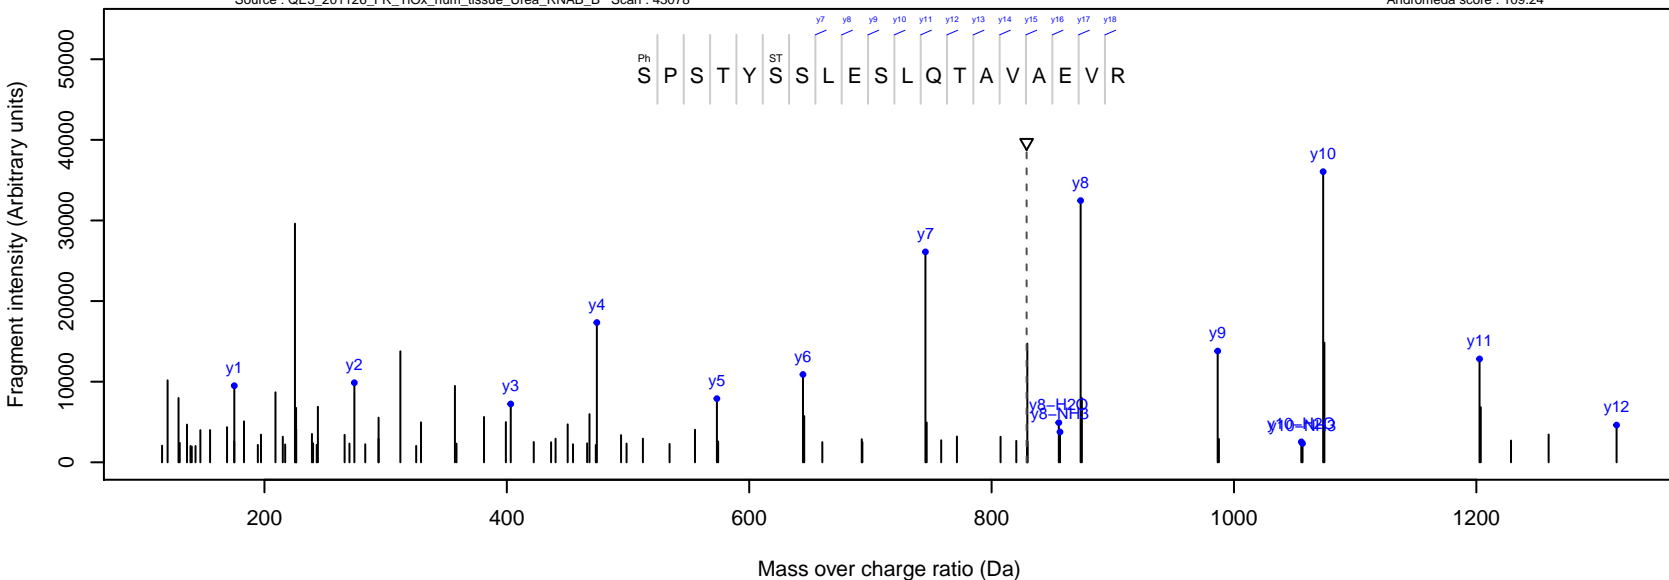

S(Phospho(STY))IEDLQPPSALSAPFTNSLAR-3+

Source : QE3\_201126\_FR\_TiOx\_hum\_tissue\_Urea\_RNAB\_N Scan : 56493

Andromeda score : 109.23

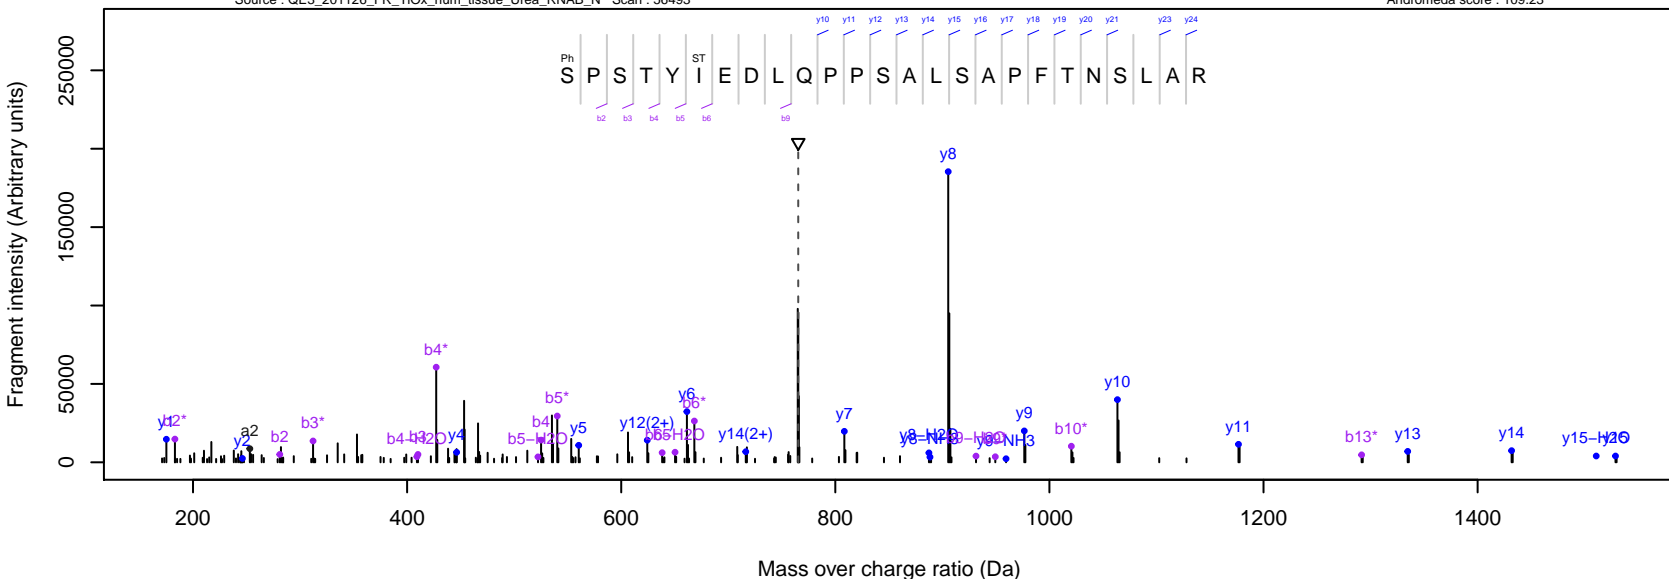

FGQAATMEGIGGT(Phospho (STY))PPAFNR-3+

Source : QE3\_201126\_FR\_TiOx\_hum\_tissue\_Urea\_RNAB\_H Scan : 49180

Andromeda score : 109.19

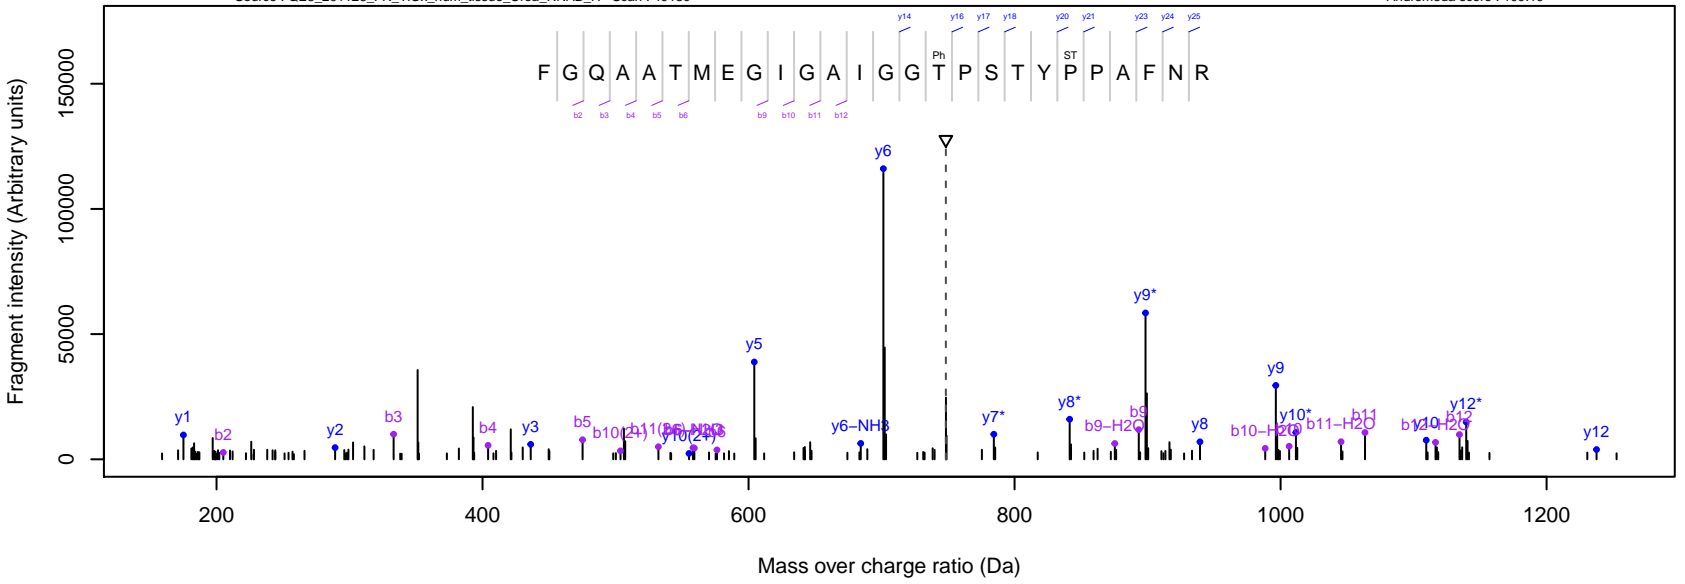

DLFDYS(Phospho (STY))PPLHK-2+

Source : QE3\_201126\_FR\_TiOx\_hum\_tissue\_Urea\_RNAB\_H Scan : 40015

Andromeda score : 109.16

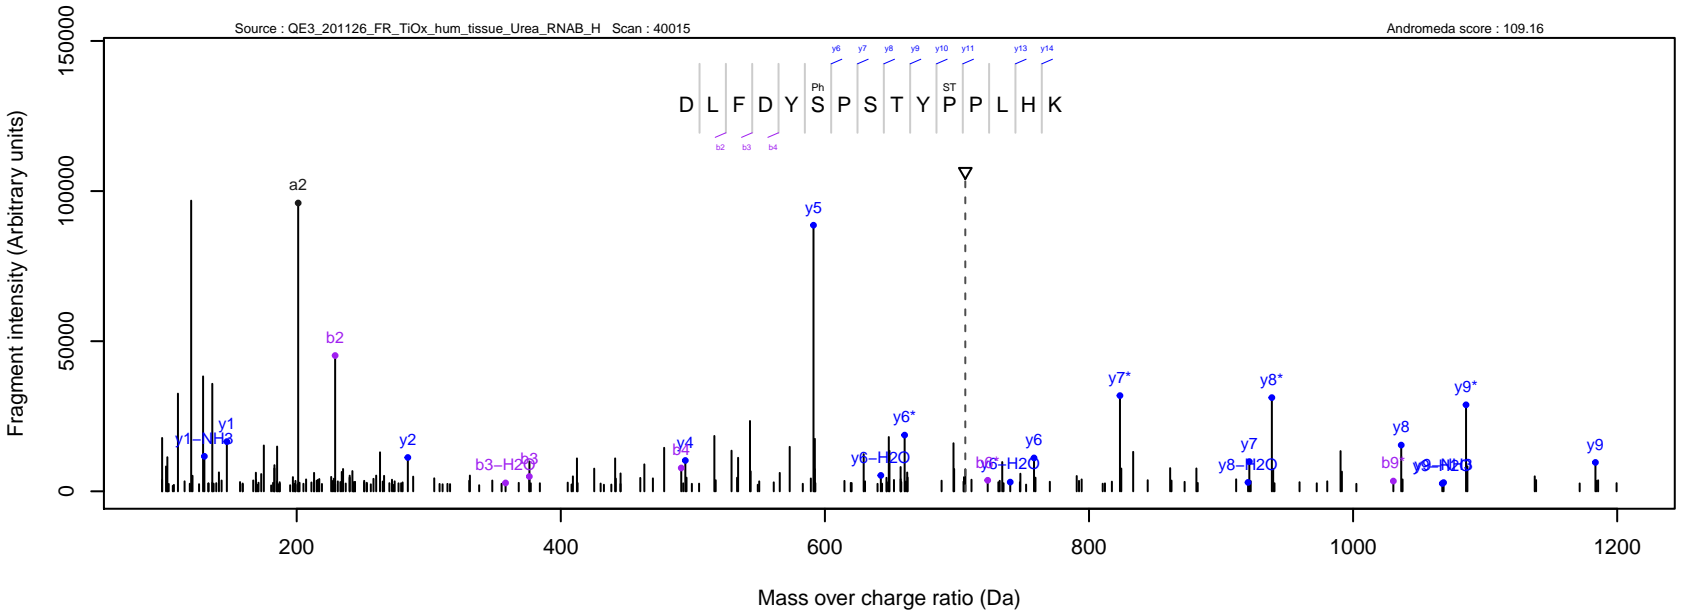

TIVM(Oxidation (M))GAS(Phospho (STY))FR-2+

Source : QE3\_201126\_FR\_TiOx\_hum\_tissue\_Urea\_RNAB\_H Scan : 21276

Andromeda score : 109.16

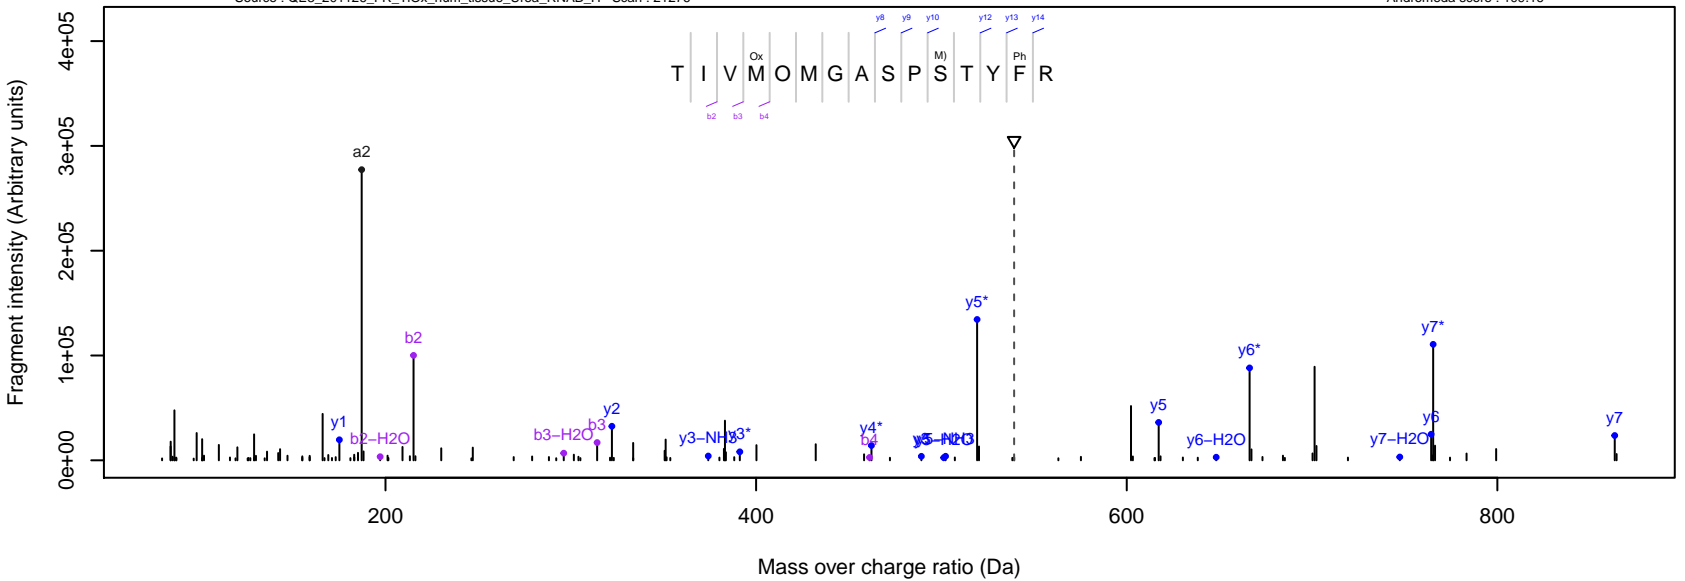

AAS(Phospho (STY))LSSIPSGIER-2+

Source : QE3\_201126\_FR\_TiOx\_hum\_tissue\_Urea\_RNAB\_N Scan : 31176

Andromeda score : 109.15

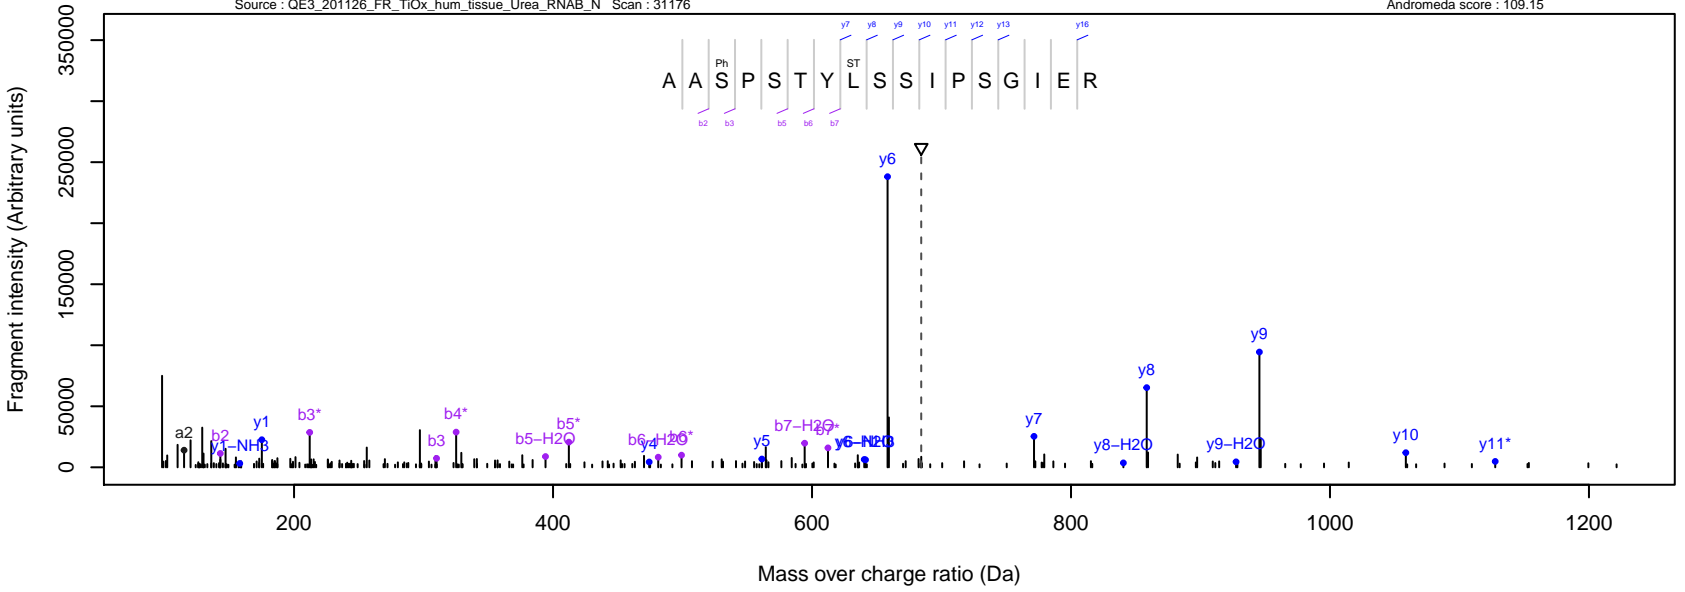

HSLS(Phospho (STY))FNDCFVK-2+

Source : QE3\_201126\_FR\_TiOx\_hum\_tissue\_Urea\_RNAB\_N Scan : 28722

Andromeda score : 109.15

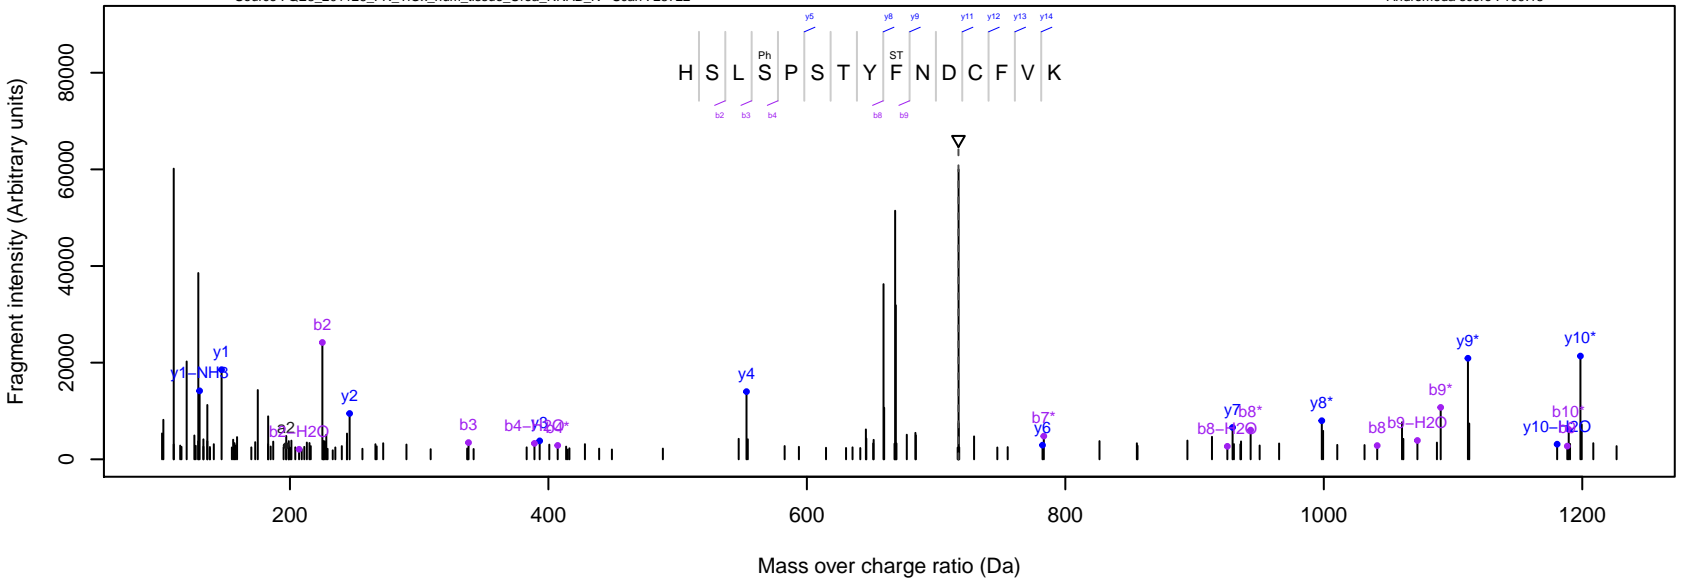

KKPGDASSLPDAGL(Phospho (STY))PGSQVDSK-3+

Source : QE3\_201126\_FR\_TiOx\_hum\_tissue\_Urea\_RNAB\_N Scan : 17952

Andromeda score : 109.14

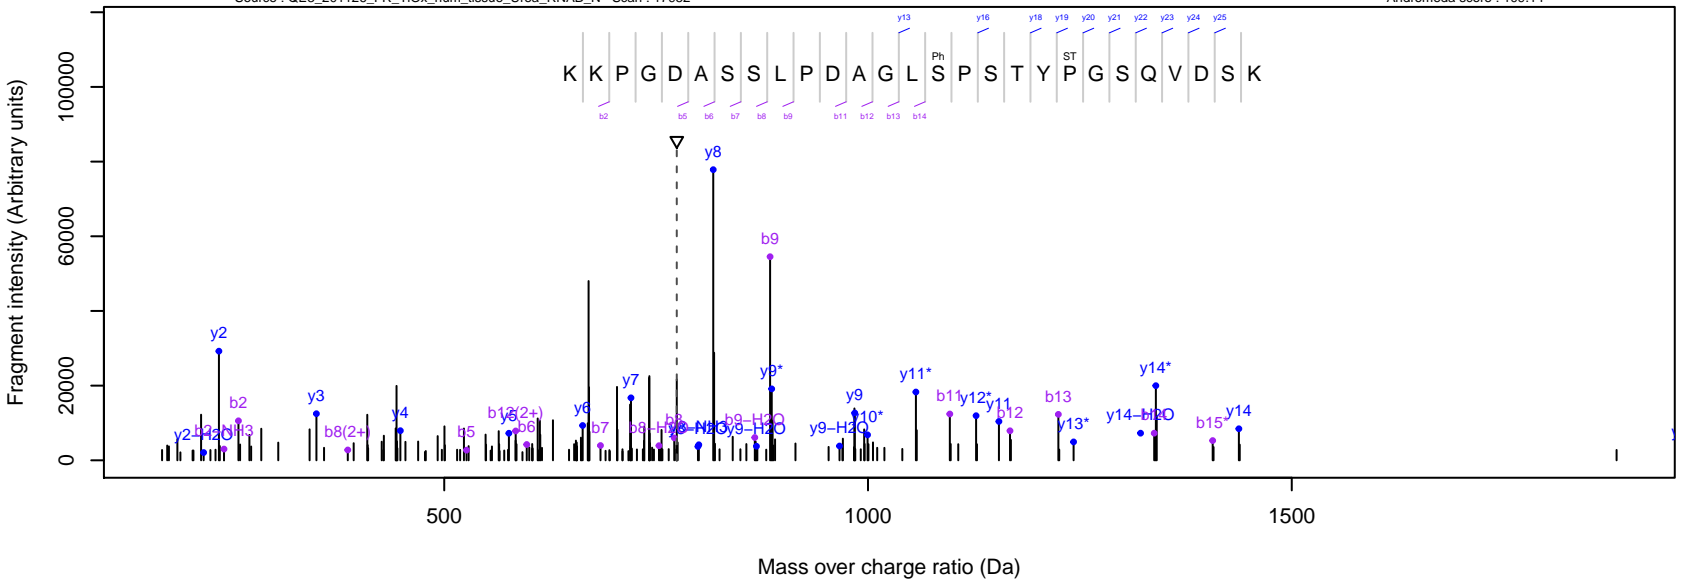



DLQDQLS(Phospho (STY))EMHDELDSAKR-3+

Source : QE3\_201126\_FR\_TiOx\_hum\_tissue\_Urea\_RNAB\_H Scan : 39166

Andromeda score : 109.08

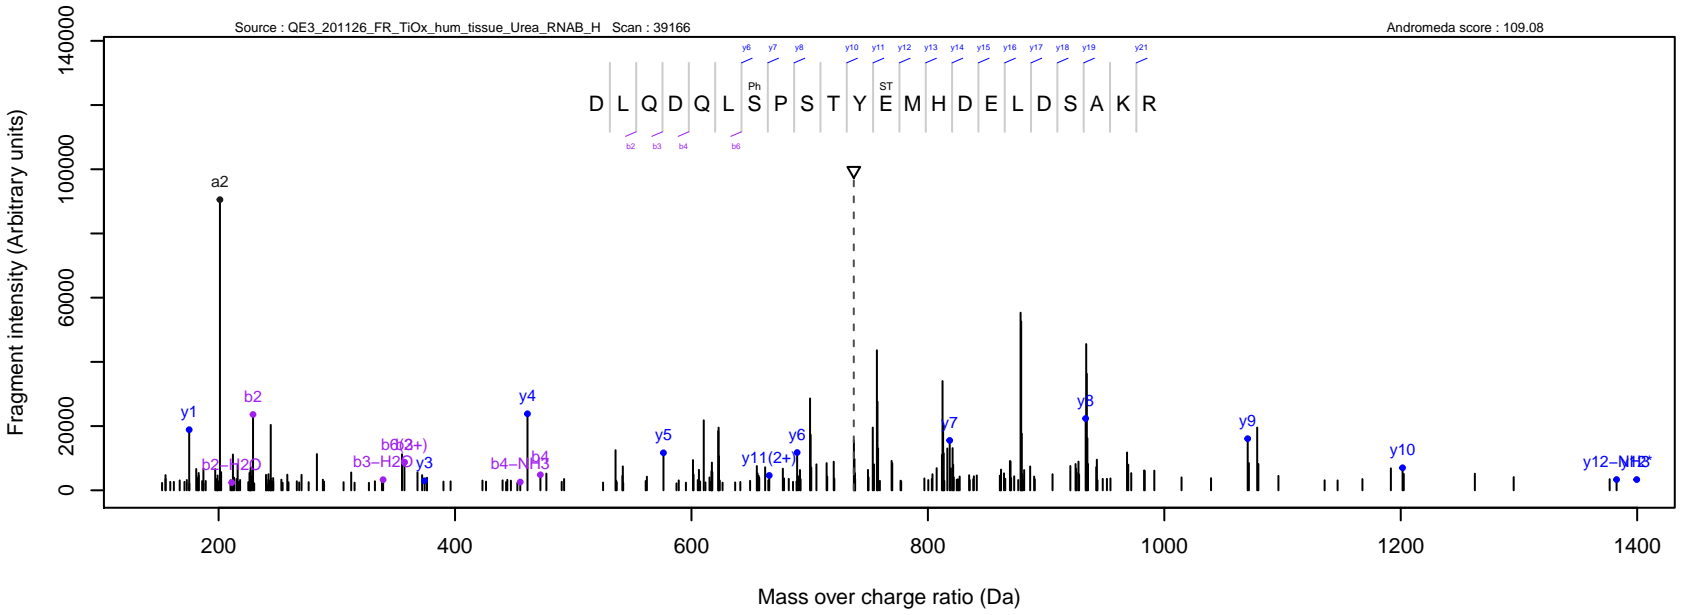

KIS(Phospho (STY))SDLDGHPVK-3+

Source : QE3\_201126\_FR\_TiOx\_hum\_tissue\_Urea\_RNAB\_B Scan : 10988

Andromeda score : 109.07

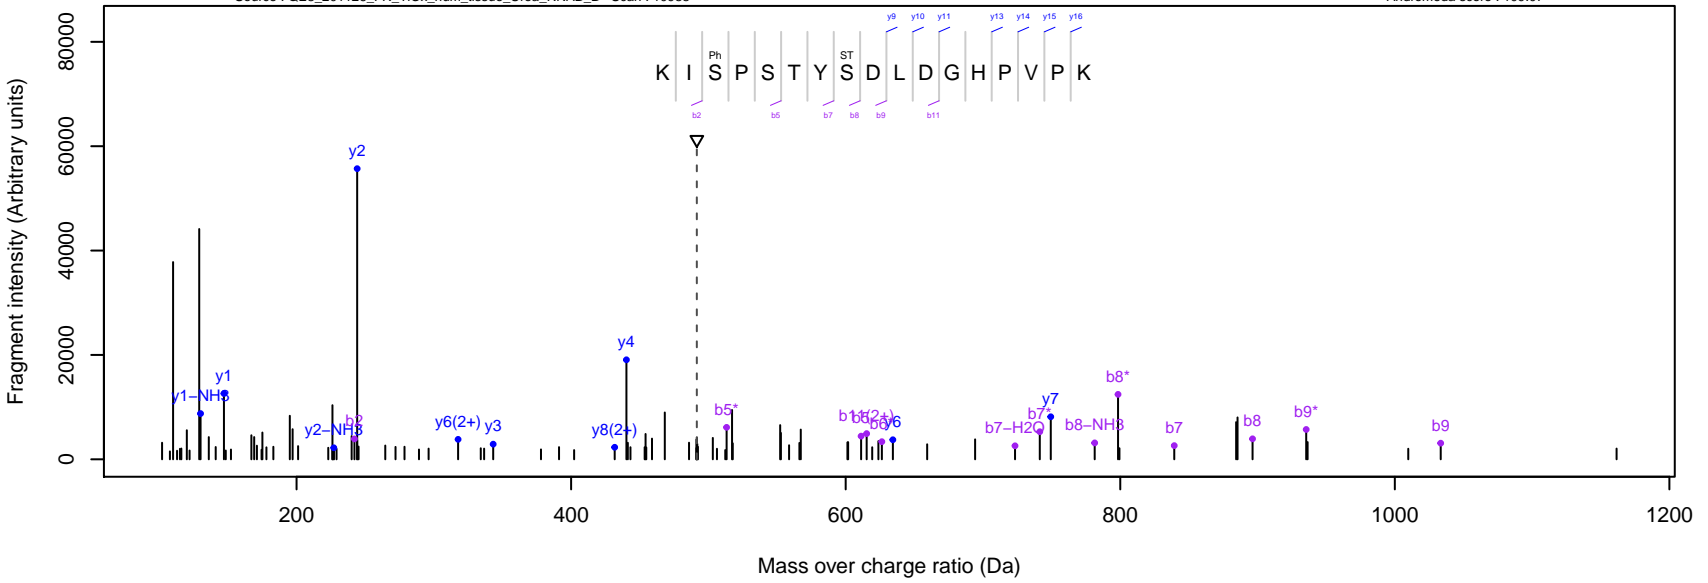

SETSWES(Phospho (STY))PKQIKK-3+

Source : QE3\_201126\_FR\_TiOx\_hum\_tissue\_Urea\_RNAB\_B Scan : 9720

Andromeda score : 109.07

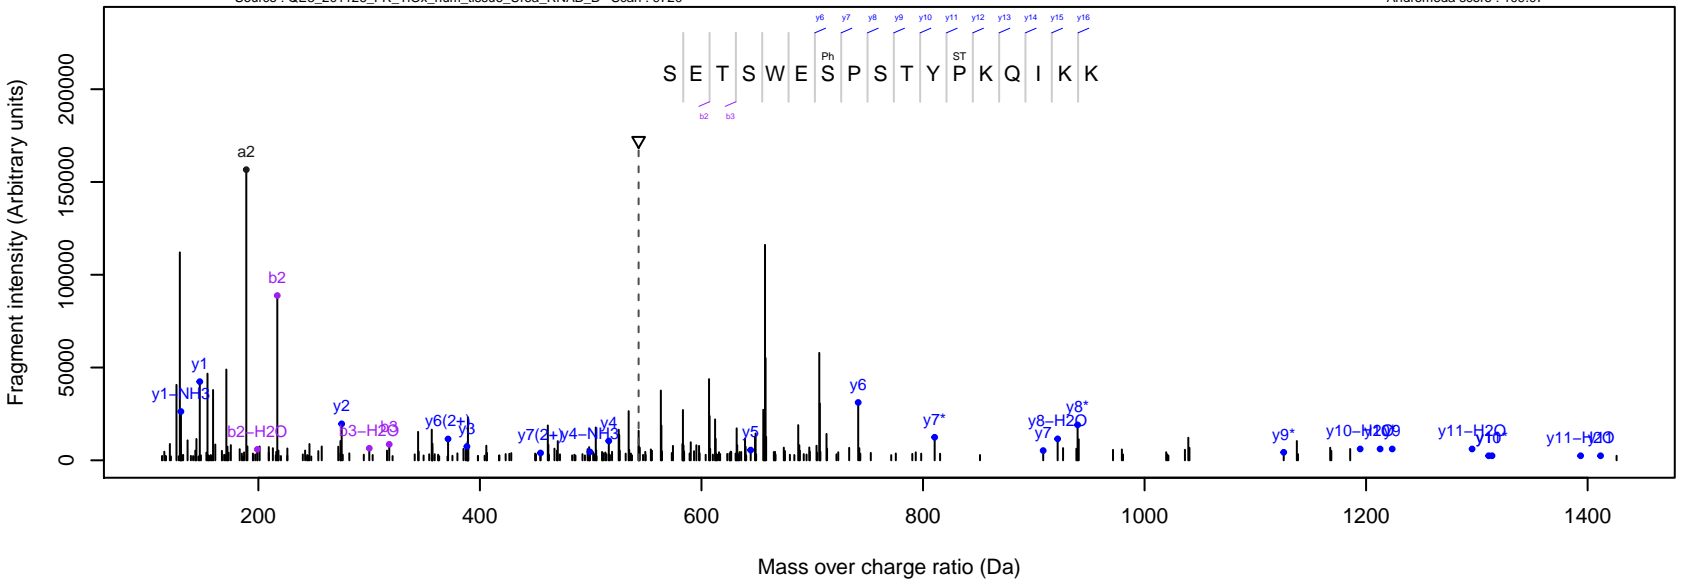

YGS(Phospho (STY))FEEAEASYPILNR-2+

Source : QE3\_201126\_FR\_TiOx\_hum\_tissue\_Urea\_RNAB\_H Scan : 46860

Andromeda score : 109.07

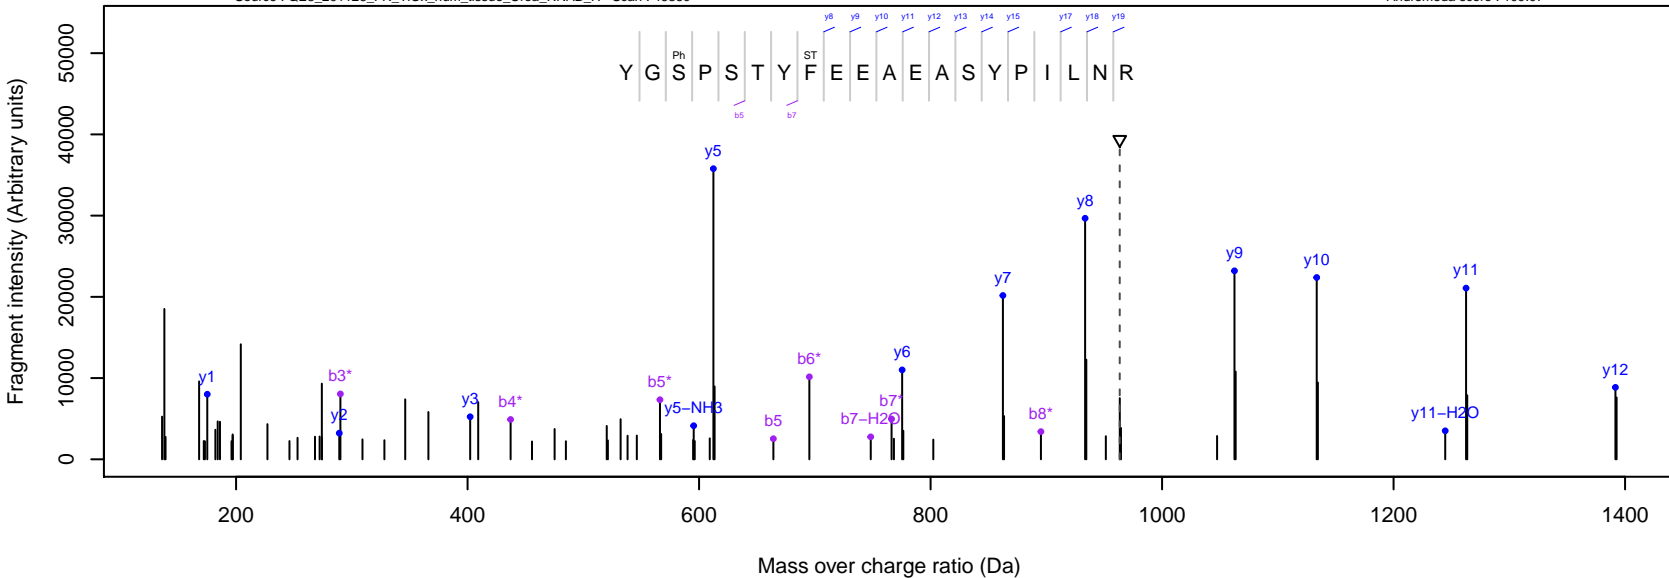

ARS(Phospho (STY))PPQPLGELKR-3+

Source : QE3\_201126\_FR\_TiOx\_hum\_tissue\_Urea\_RNAB\_H Scan : 14013

Andromeda score : 109.04

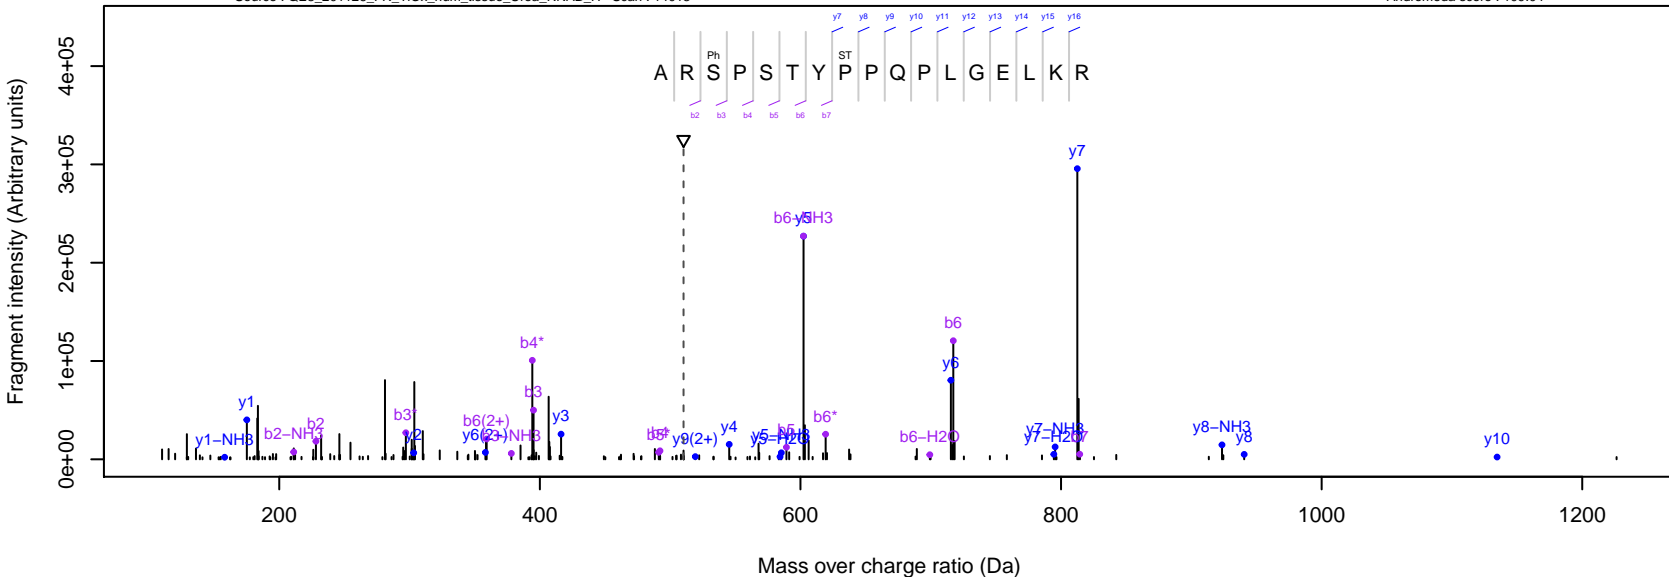

DYGHSS(Phospho (STY))SRDDYPSR-3+

Source : QE3\_201126\_FR\_TiOx\_hum\_tissue\_Urea\_RNAB\_H Scan : 7010

Andromeda score : 109.04

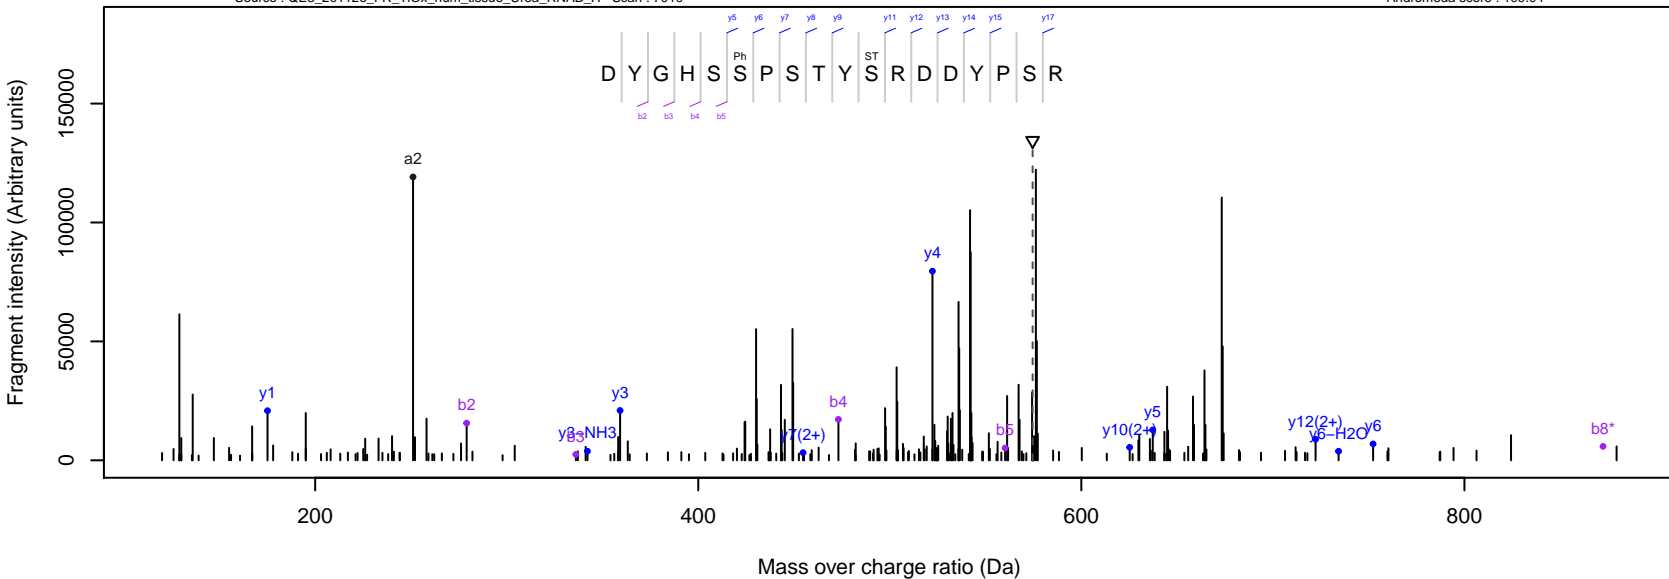

STS(Phospho (STY))FGVNPANSIK-2+

Source : QE3\_201126\_FR\_TIOx\_hum\_tissue\_Urea\_RNAB\_N Scan : 28832

Andromeda score : 109.02

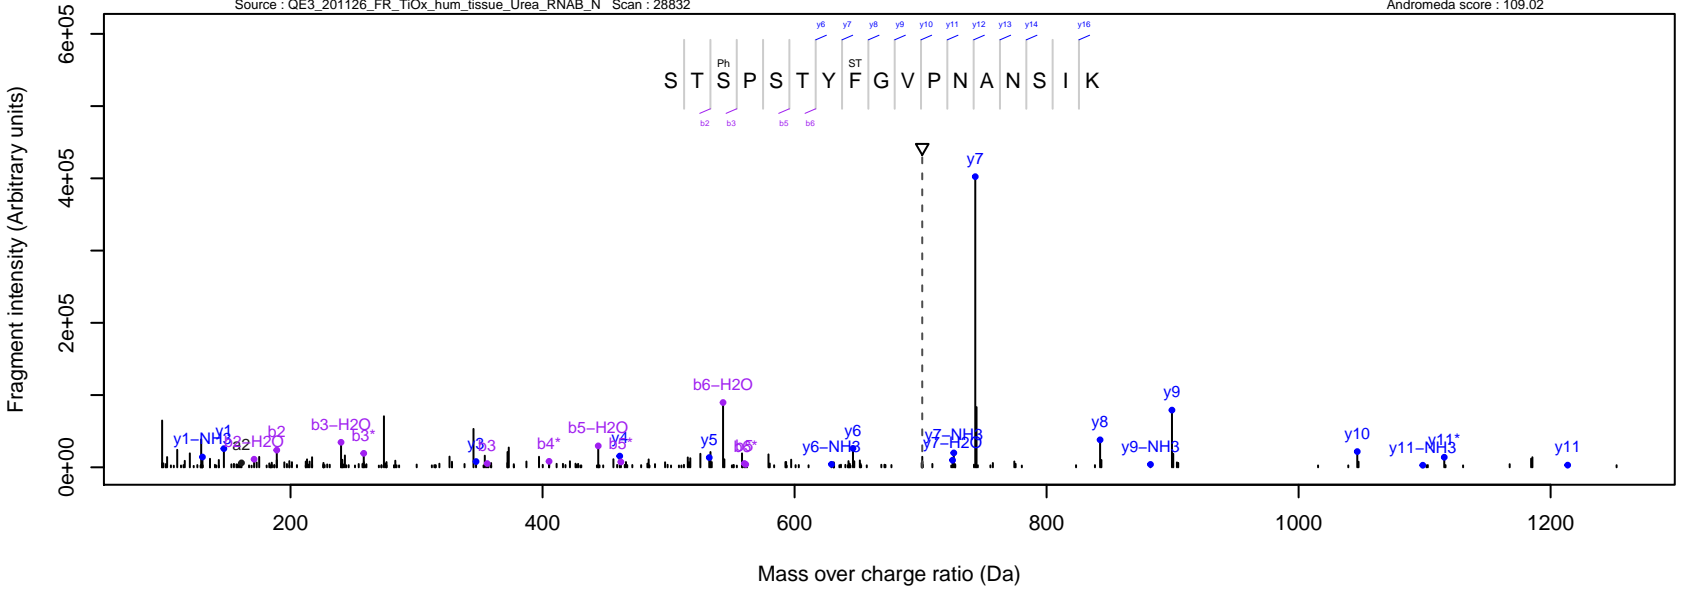

PSM(Oxidation (M))S(Phospho (STY))PTPLDR-2+

Source : QE3\_201126\_FR\_TIOx\_hum\_tissue\_Urea\_RNAB\_N Scan : 11778

Andromeda score : 108.98

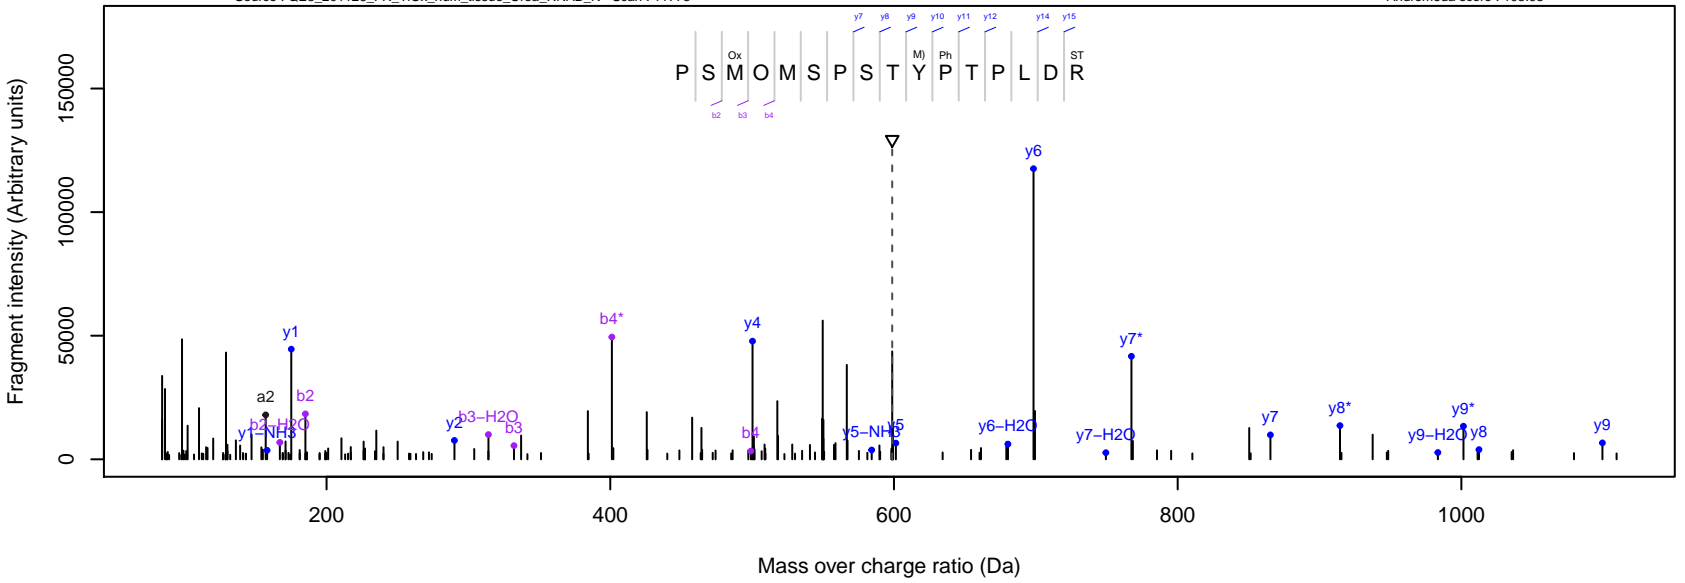

HGS(Phospho (STY))GADSDYENTQSGDPLLGLGK-3+

Source : QE3\_201126\_FR\_TIOx\_hum\_tissue\_Urea\_RNAB\_N Scan : 35124

Andromeda score : 108.88

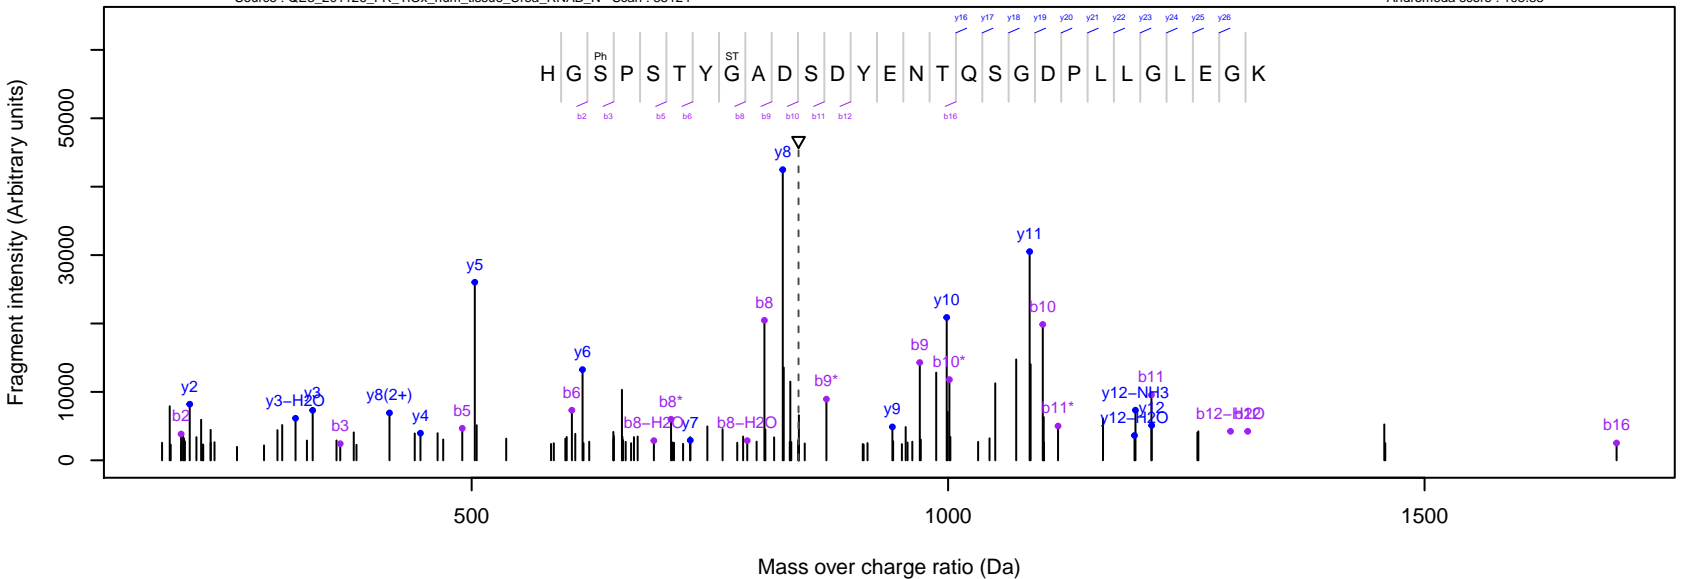

KVPS(Phospho (STY))EASFSDVHLEEGESNSLTk-3+

Source : QE3\_201126\_FR\_TiOx\_hum\_tissue\_Urea\_RNAB\_B Scan : 27322

Andromeda score : 108.88

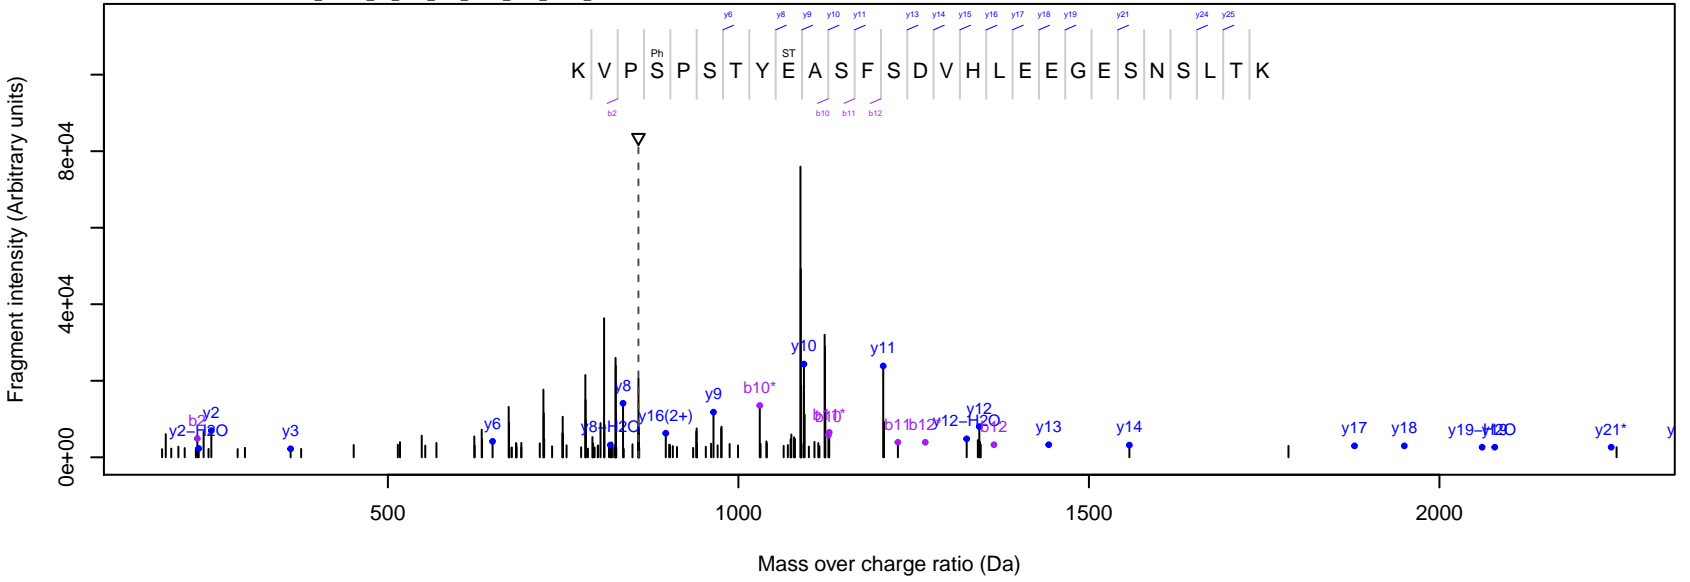

ASRVPS(Phospho (STY))DEEVVEEPQSR-3+

Source : QE3\_201126\_FR\_TiOx\_hum\_tissue\_Urea\_RNAB\_H Scan : 15940

Andromeda score : 108.77

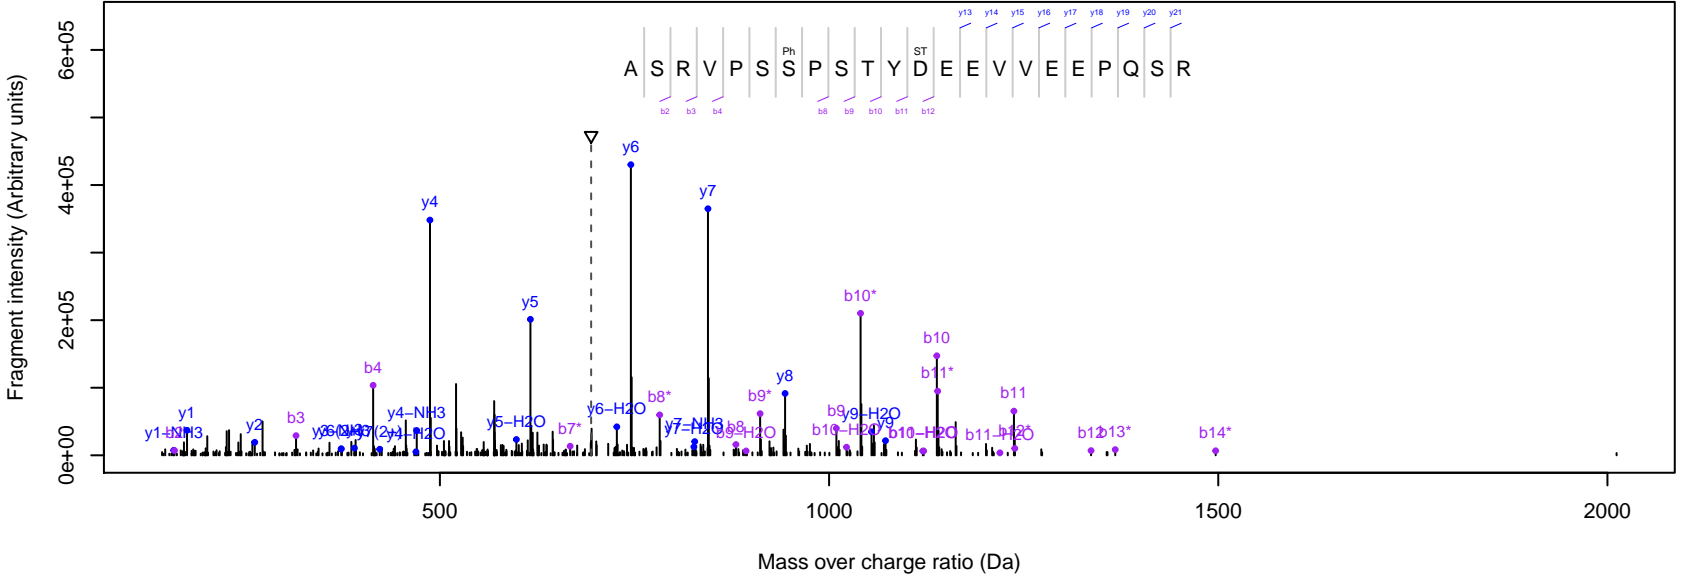

S(Phospho (STY))ASPHDVLCLVSPCEFEHRk-4+

Source : QE3\_201126\_FR\_TiOx\_hum\_tissue\_Urea\_RNAB\_N Scan : 29655

Andromeda score : 108.77

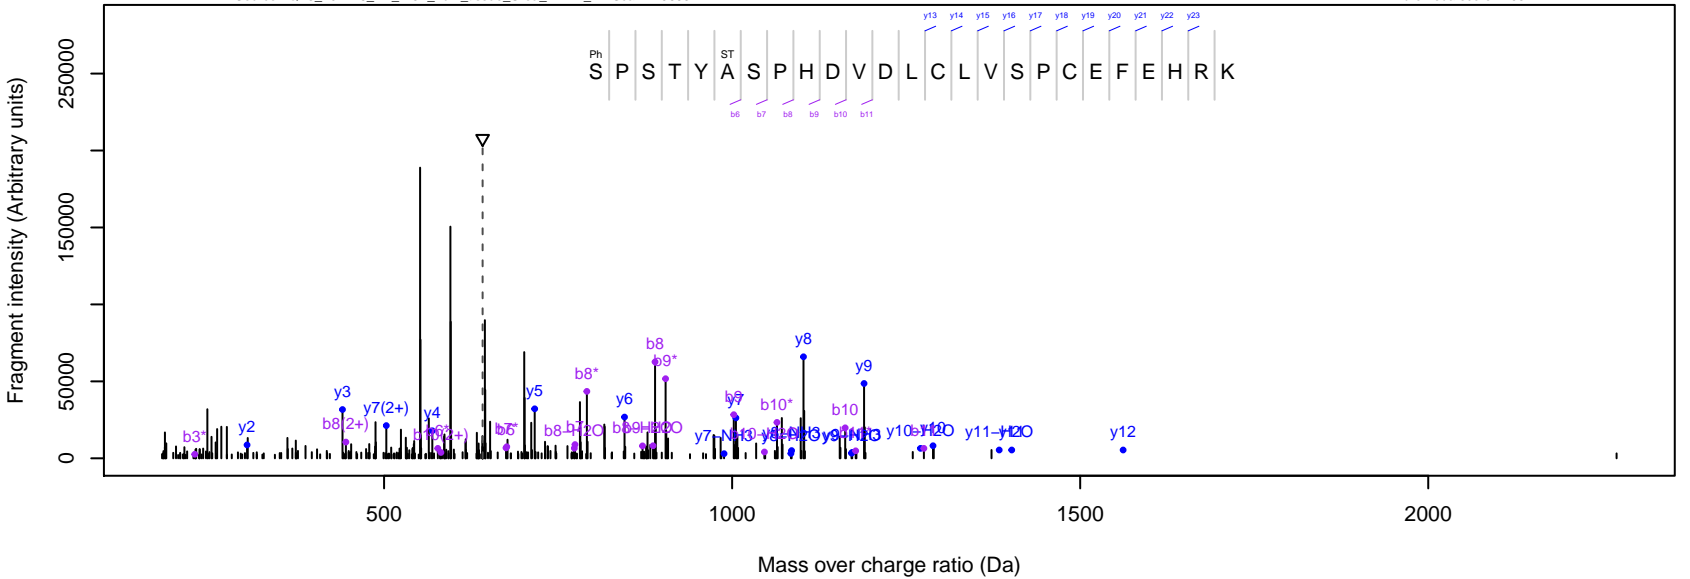

DAS(Phospho (STY))VPLIDVTNLPTPR-3+

Source : QE3\_201126\_FR\_TiOx\_hum\_tissue\_Urea\_RNAB\_H Scan : 54891

Andromeda score : 108.75

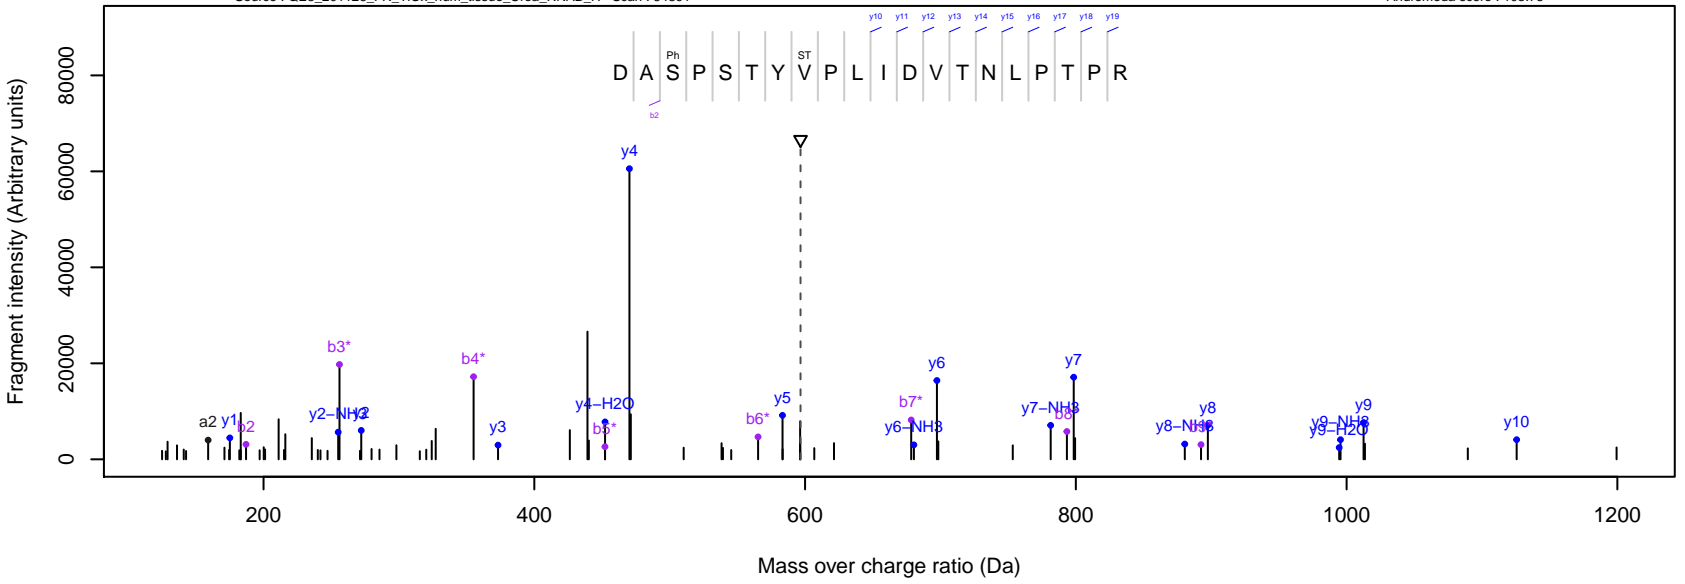

S(Phospho (STY))LGEQDQM(Oxidation (M))TLRPPEK-3+

Source : QE3\_201126\_FR\_TiOx\_hum\_tissue\_Urea\_RNAB\_N Scan : 15916

Andromeda score : 108.75

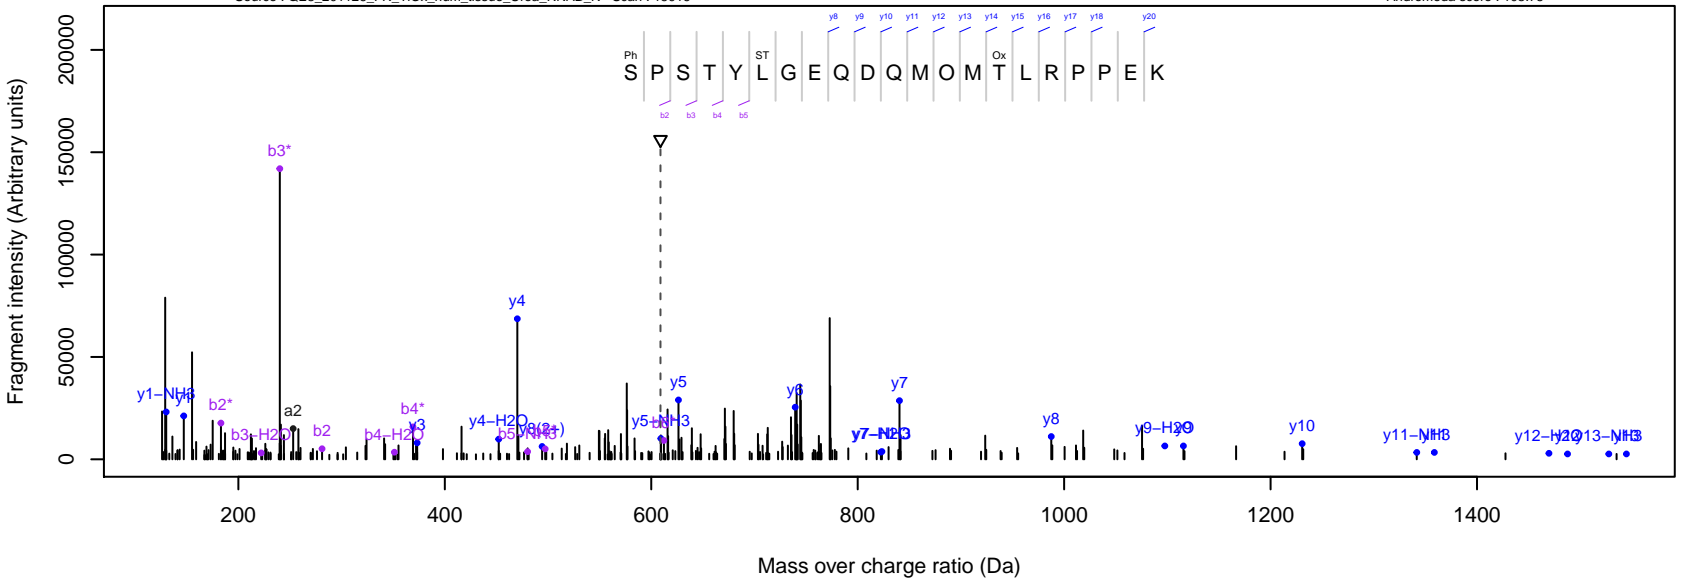

DNS(Phospho (STY))PEPNDPEEPQEVSSSTPSDKK-3+

Source : QE3\_201126\_FR\_TiOx\_hum\_tissue\_Urea\_RNAB\_N Scan : 13697

Andromeda score : 108.72

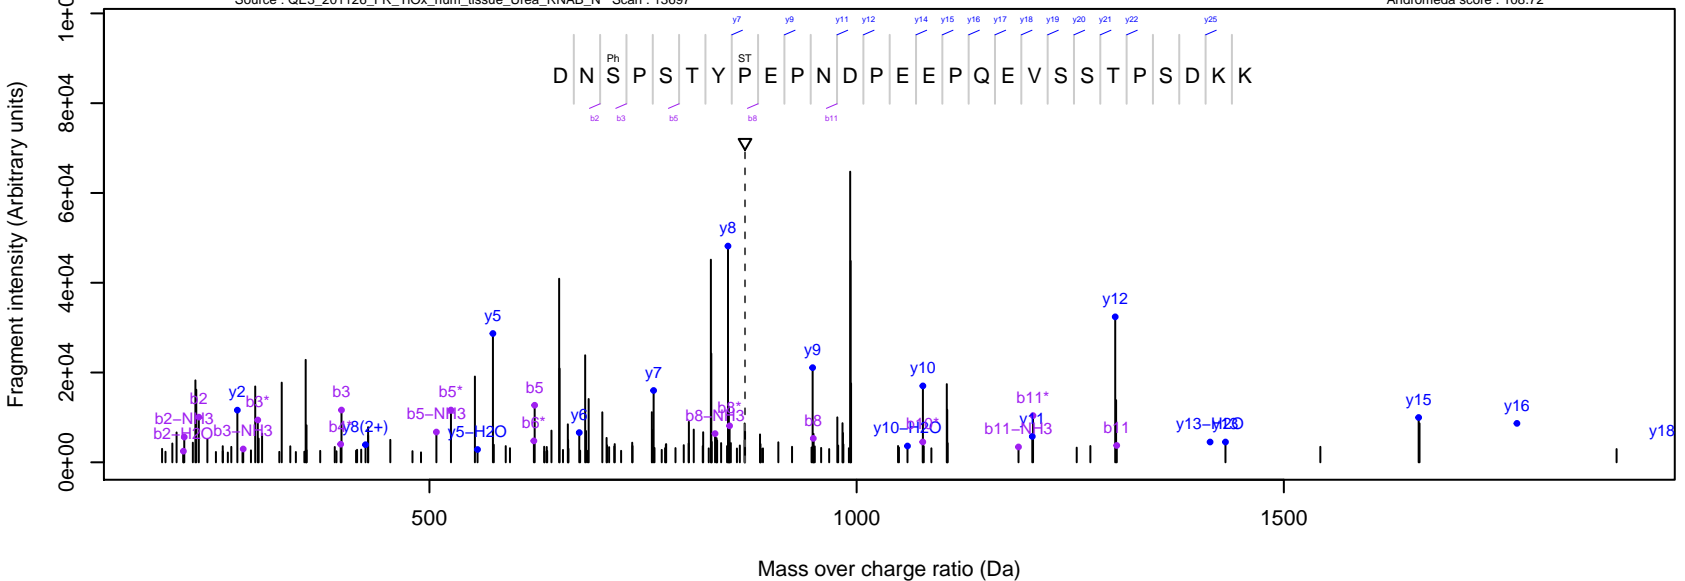

LGYIS(Phospho (STY))VTDVLK-2+

Source : QE3\_201126\_FR\_TiOx\_hum\_tissue\_Urea\_RNAB\_H Scan : 52670

Andromeda score : 108.72

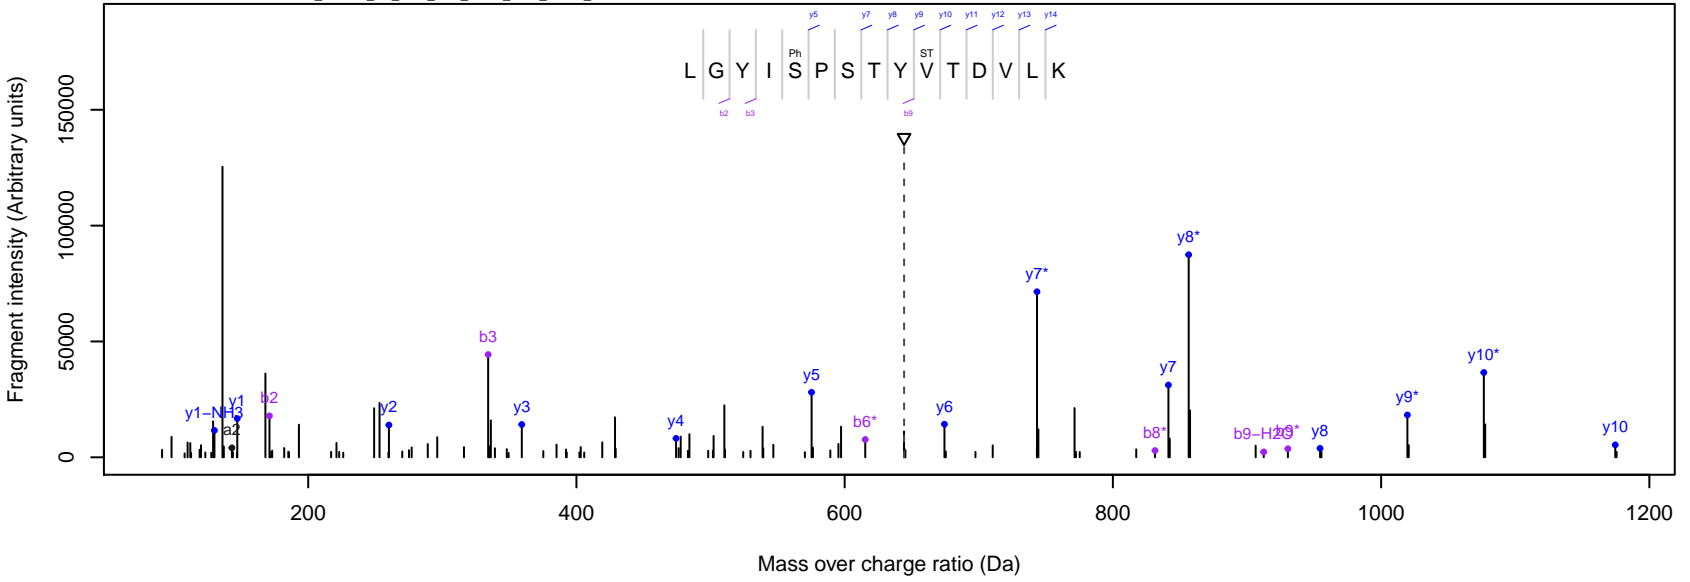

SAS(Phospho (STY))ITNLSLDR-2+

Source : QE3\_201126\_FR\_TiOx\_hum\_tissue\_Urea\_RNAB\_H Scan : 28760

Andromeda score : 108.72

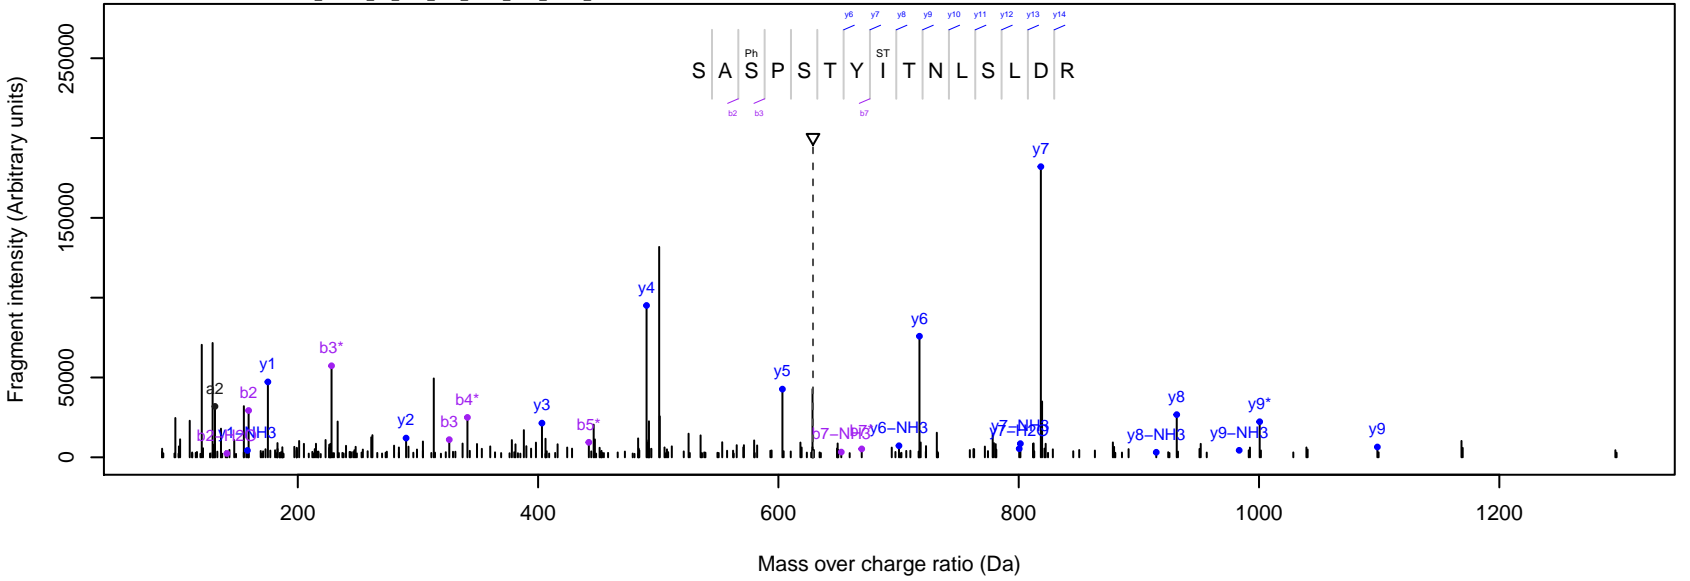

SVS(Phospho (STY))ELS(Phospho (STY))LQGR-2+

Source : QE3\_201126\_FR\_TiOx\_hum\_tissue\_Urea\_RNAB\_H Scan : 28657

Andromeda score : 108.72

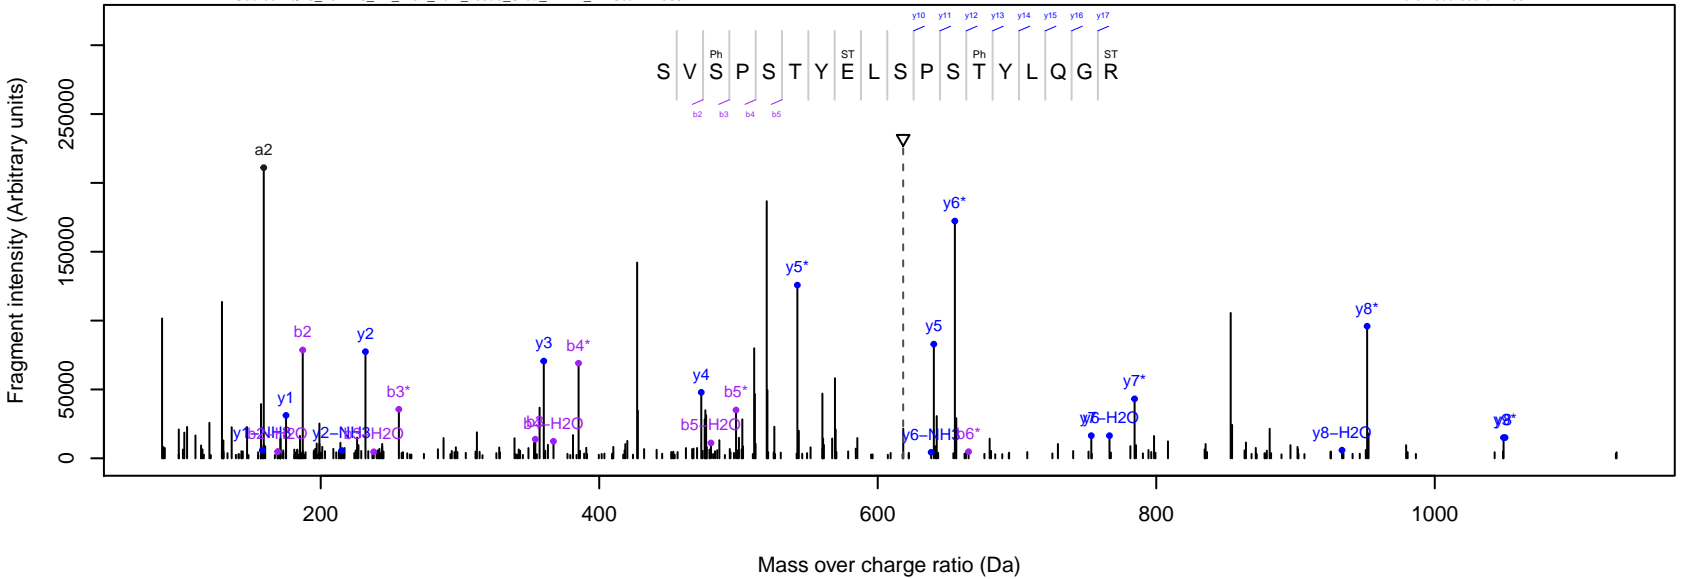

**KAEENAS(Phospho (STY))QEEEEAAEDEGGEEDLASELR-3+**

Source : QE3\_201126\_FR\_TiOx\_hum\_tissue\_Urea\_RNAB\_H Scan : 31968

Andromeda score : 108.71

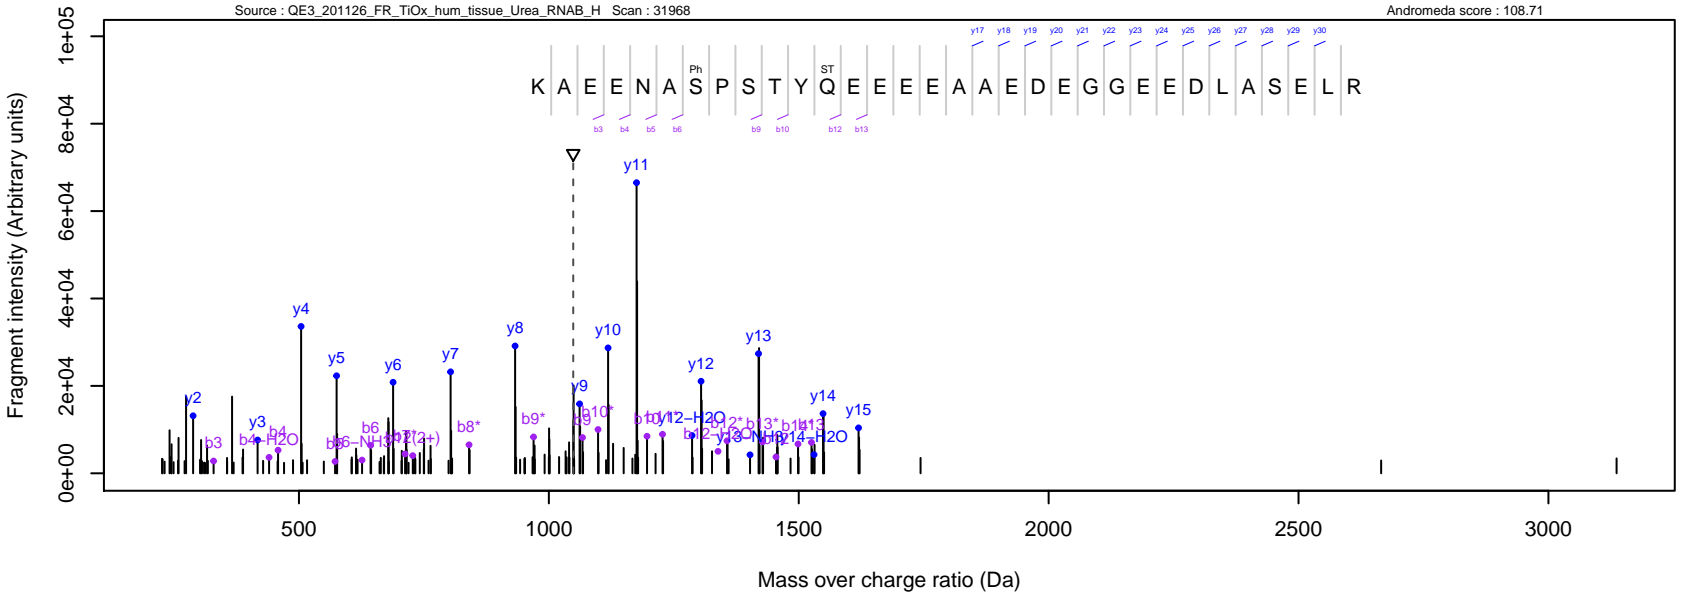

**LFIRGS(Phospho (STY))PQQIDHAK-3+**

Source : QE3\_201126\_FR\_TiOx\_hum\_tissue\_Urea\_RNAB\_H Scan : 23085

Andromeda score : 108.71

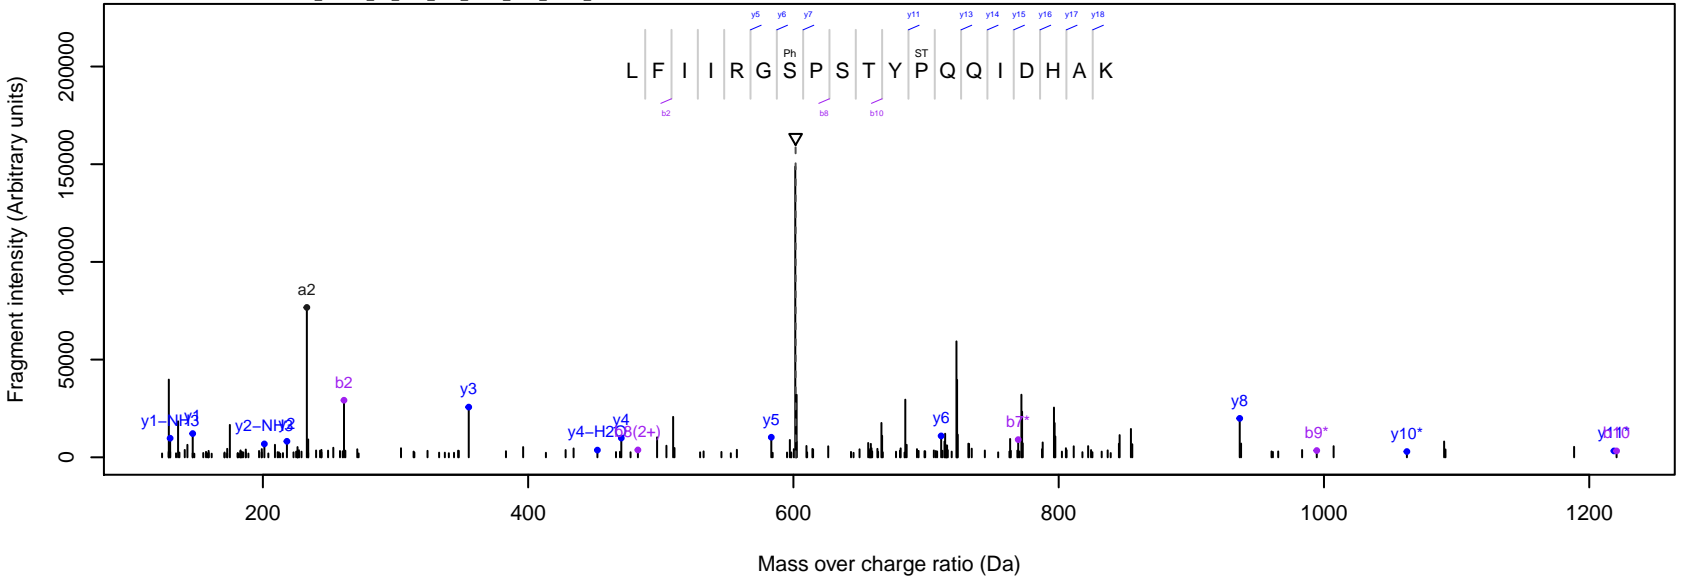

**RKS(Phospho (STY))EPAVGPPR-3+**

Source : QE3\_201126\_FR\_TiOx\_hum\_tissue\_Urea\_RNAB\_H Scan : 5516

Andromeda score : 108.71

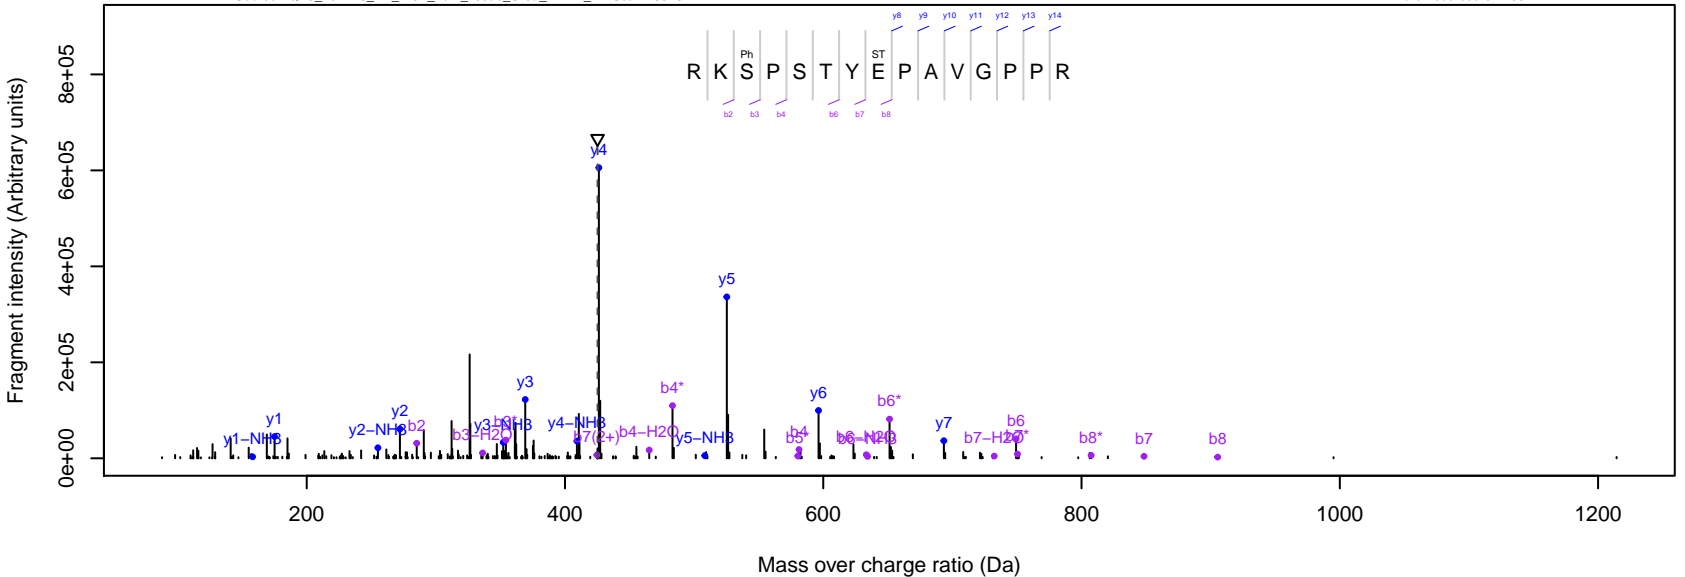

(Acetyl (Protein N-term))SCINLPTVLPGS(Phospho (STY))PSK-2+

Source : QE3\_201126\_FR\_TiOx\_hum\_tissue\_Urea\_RNAB\_H Scan : 56847

Andromeda score : 108.71

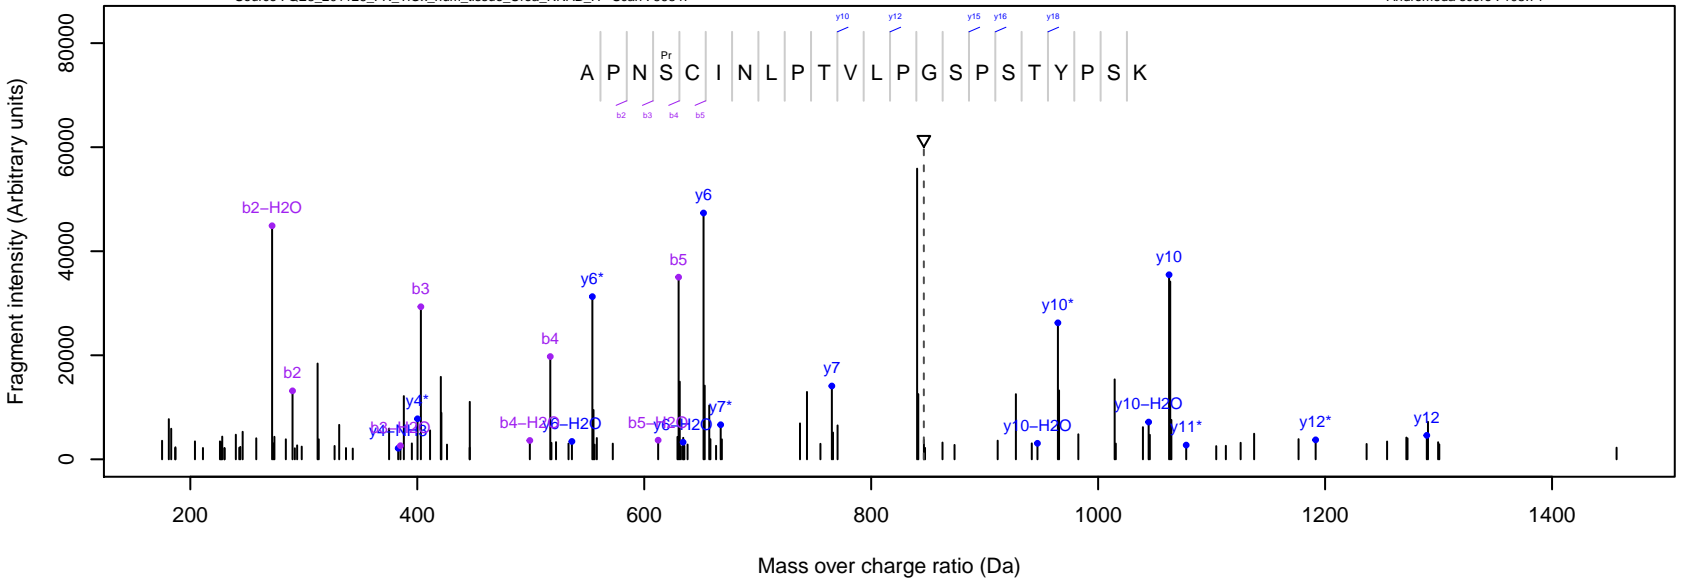

SPFNSPS(Phospho (STY))PQDSPR-2+

Source : QE3\_201126\_FR\_TiOx\_hum\_tissue\_Urea\_RNAB\_B Scan : 18510

Andromeda score : 108.71

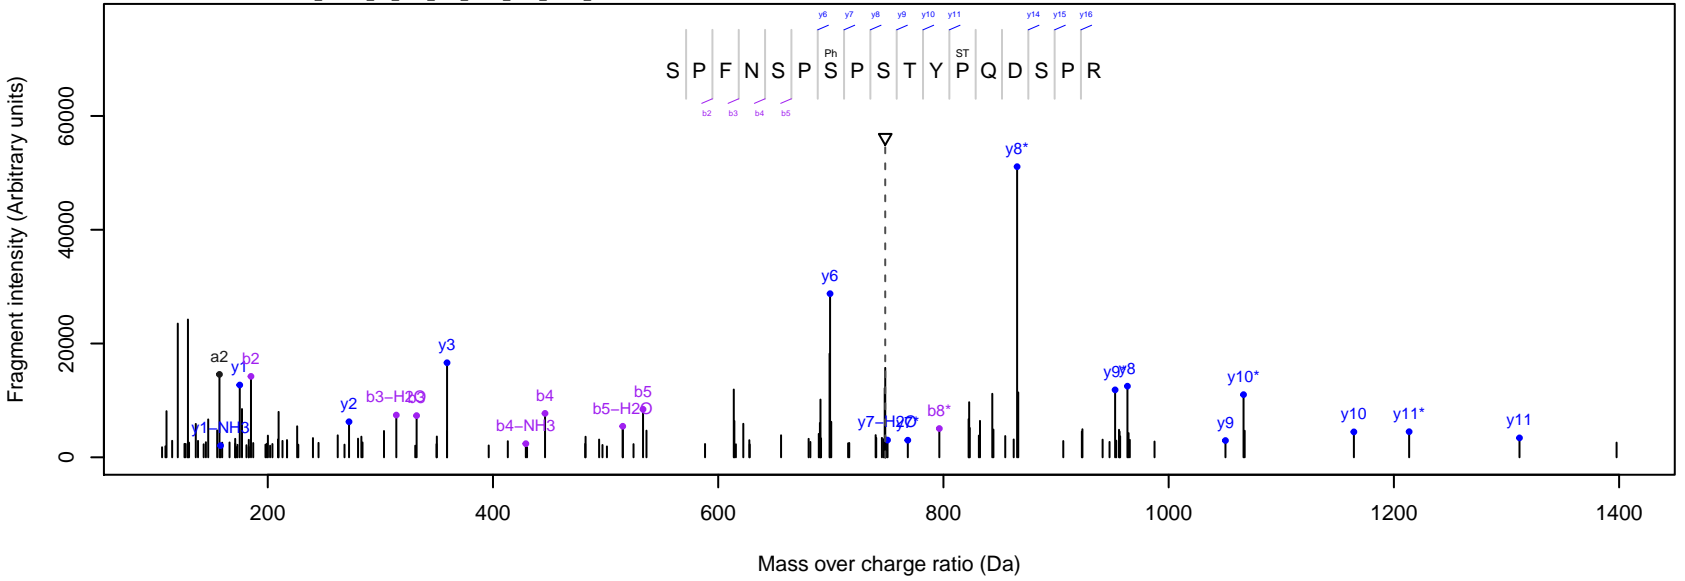

TLTDEVNS(Phospho (STY))PDSDRR-3+

Source : QE3\_201126\_FR\_TiOx\_hum\_tissue\_Urea\_RNAB\_H Scan : 10934

Andromeda score : 108.63

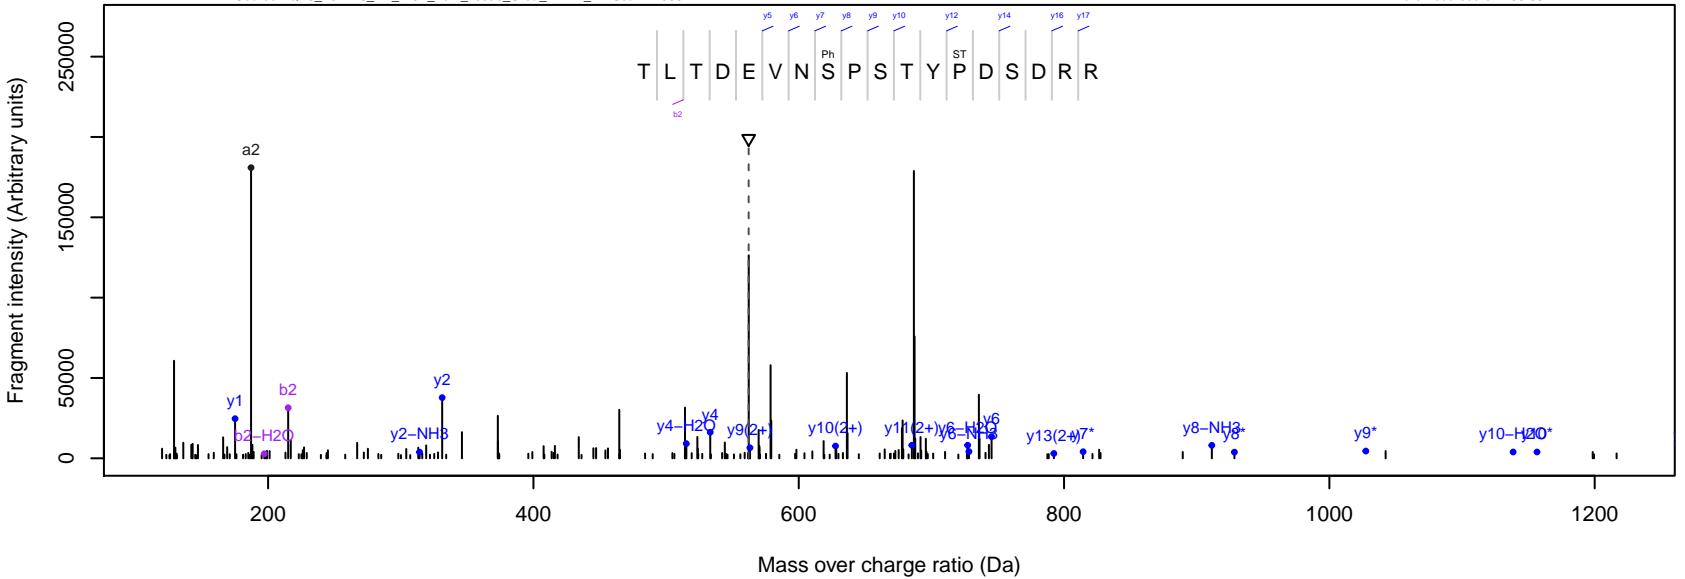



TPEELDDSPSTYDFETEDFDVRSSTYRTPTSTYSVQTEDDQLIAGQSAR-4+

Source : QE3\_201126\_FR\_TiOx\_hum\_tissue\_Urea\_RNAB\_H Scan : 50708

Andromeda score : 108.61

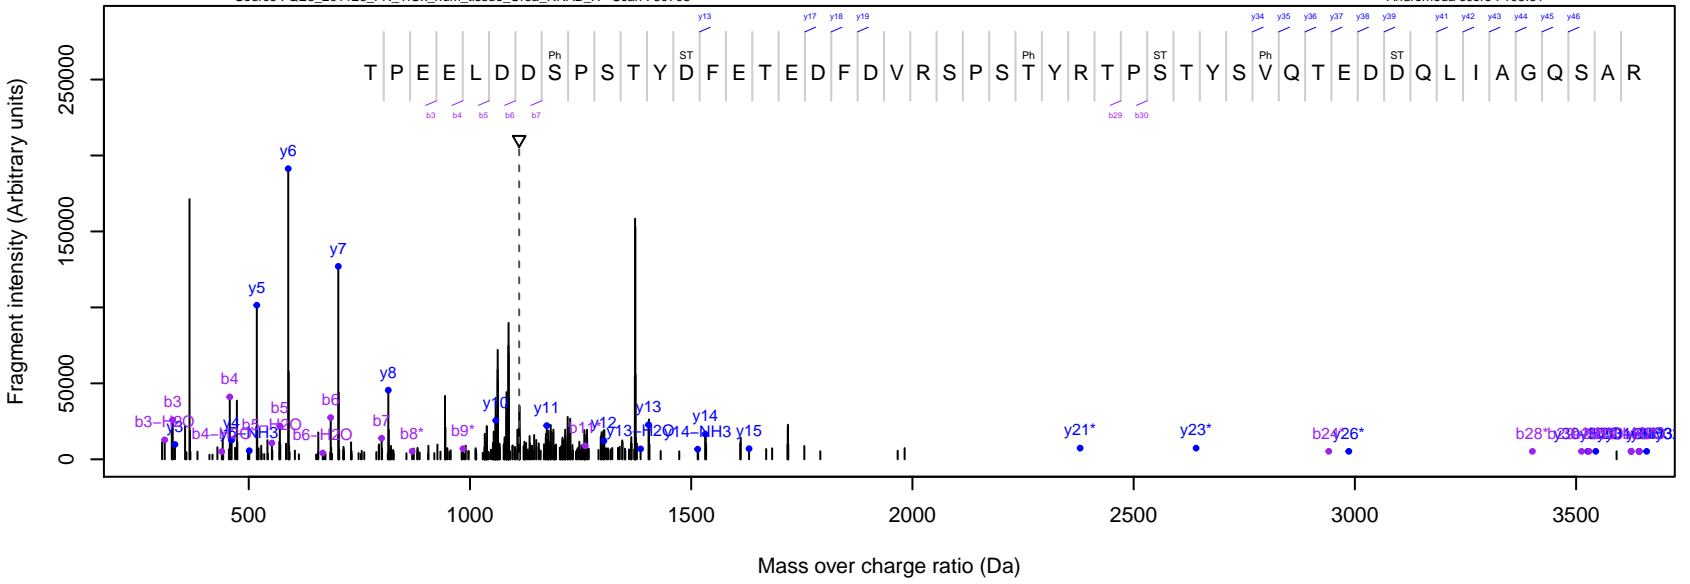

RKS(Phospho (STY))YTSDLQK-3+

Source : QE3\_201126\_FR\_TiOx\_hum\_tissue\_Urea\_RNAB\_H Scan : 5646

Andromeda score : 108.59

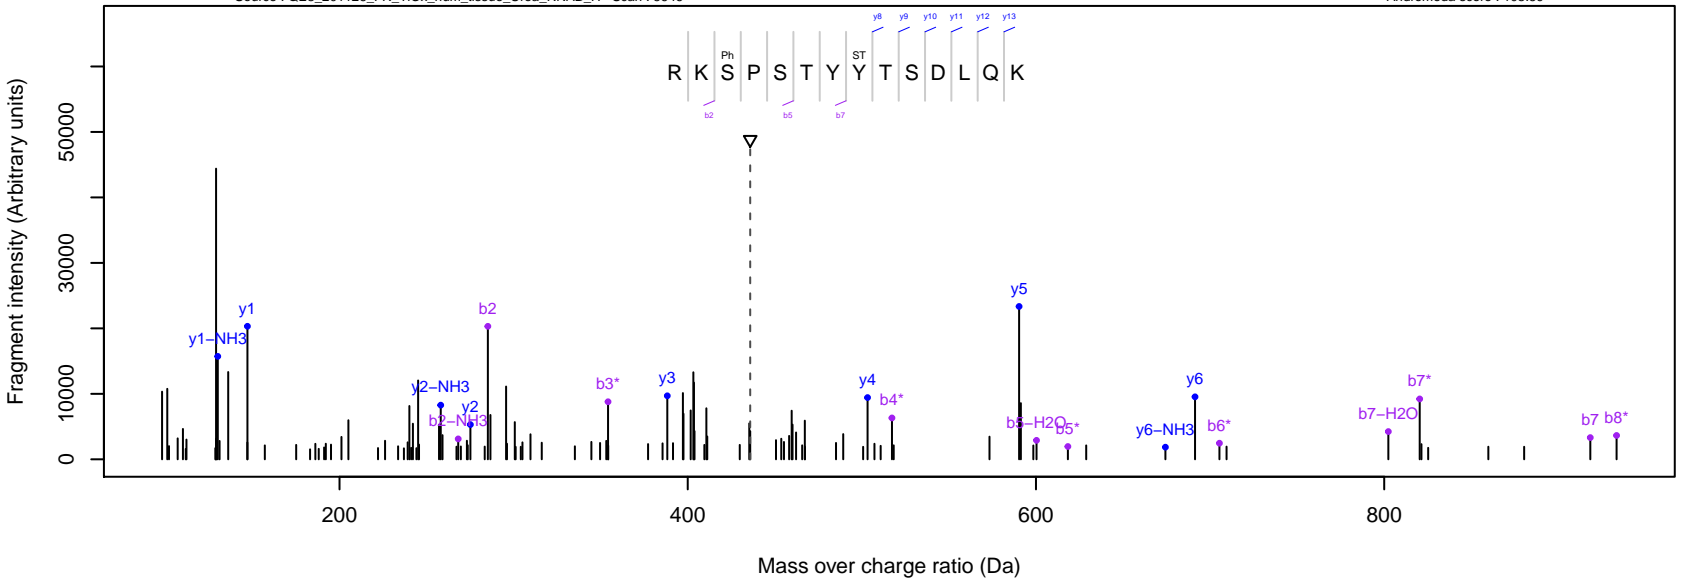

YHGHS(Phospho (STY))M(Oxidation (M))SDPGVSPSTYR-2+

Source : QE3\_201126\_FR\_TiOx\_hum\_tissue\_Urea\_RNAB\_N Scan : 9444

Andromeda score : 108.58

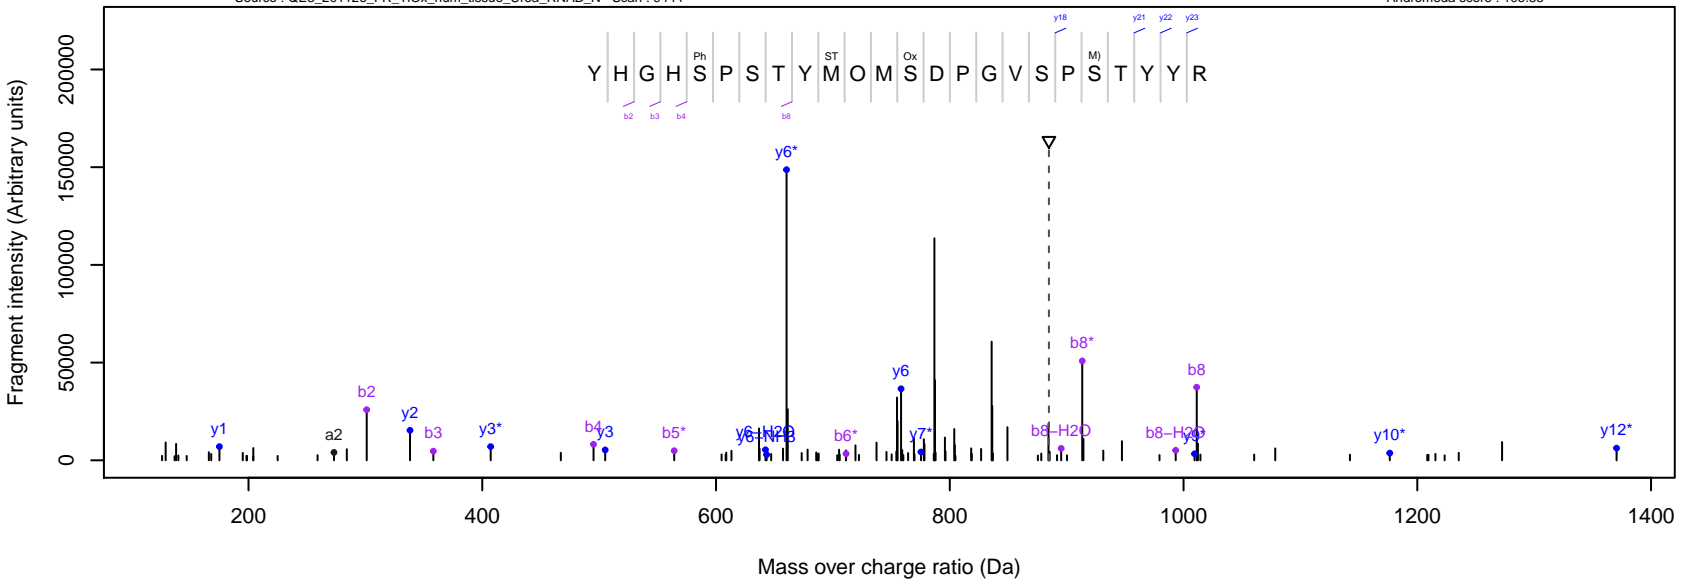

LAPVPS(Phospho (STY))PEPQKPAVPSPESVK-3+

Source : QE3\_201126\_FR\_TiOx\_hum\_tissue\_Urea\_RNAB\_N Scan : 23253

Andromeda score : 108.57

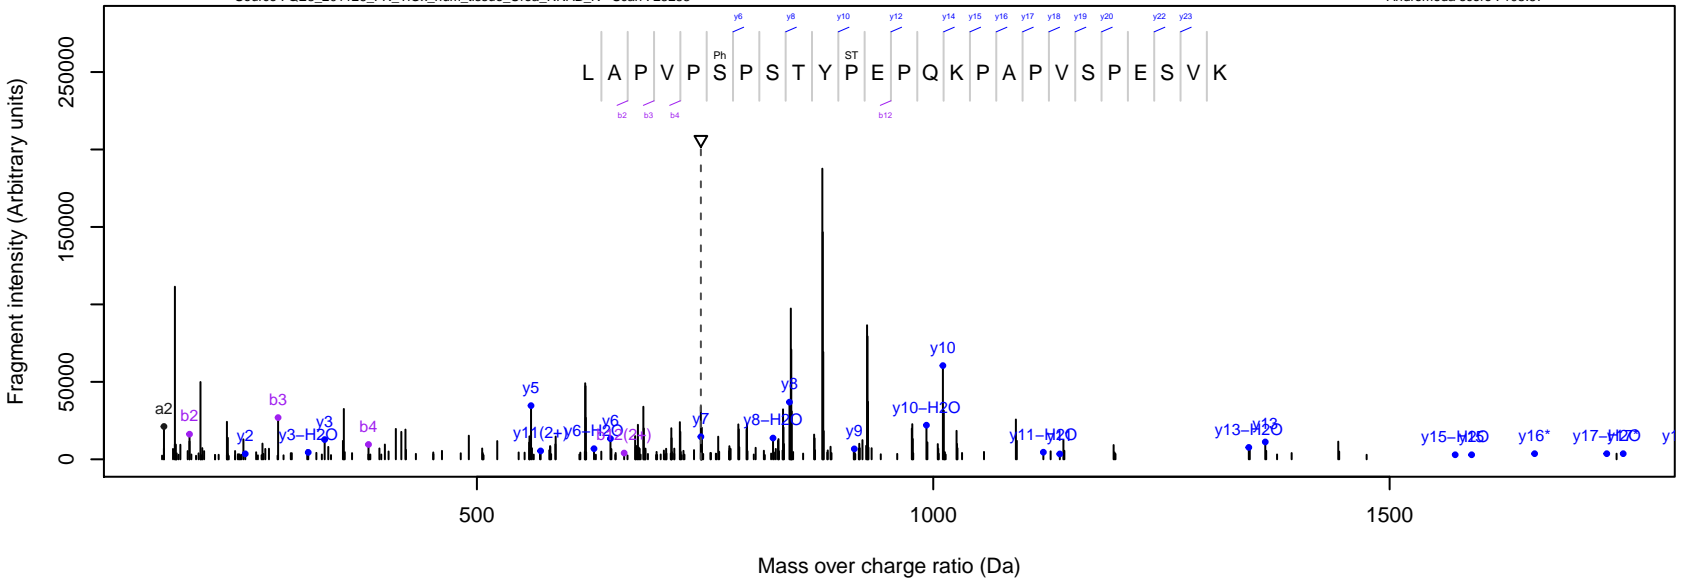

EAATQEDPEQLPELEAHGVS(Phospho (STY))ES(Phospho (STY))EGEERPVAEEILLR-4+

Source : QE3\_201126\_FR\_TiOx\_hum\_tissue\_Urea\_RNAB\_H Scan : 50033

Andromeda score : 108.52

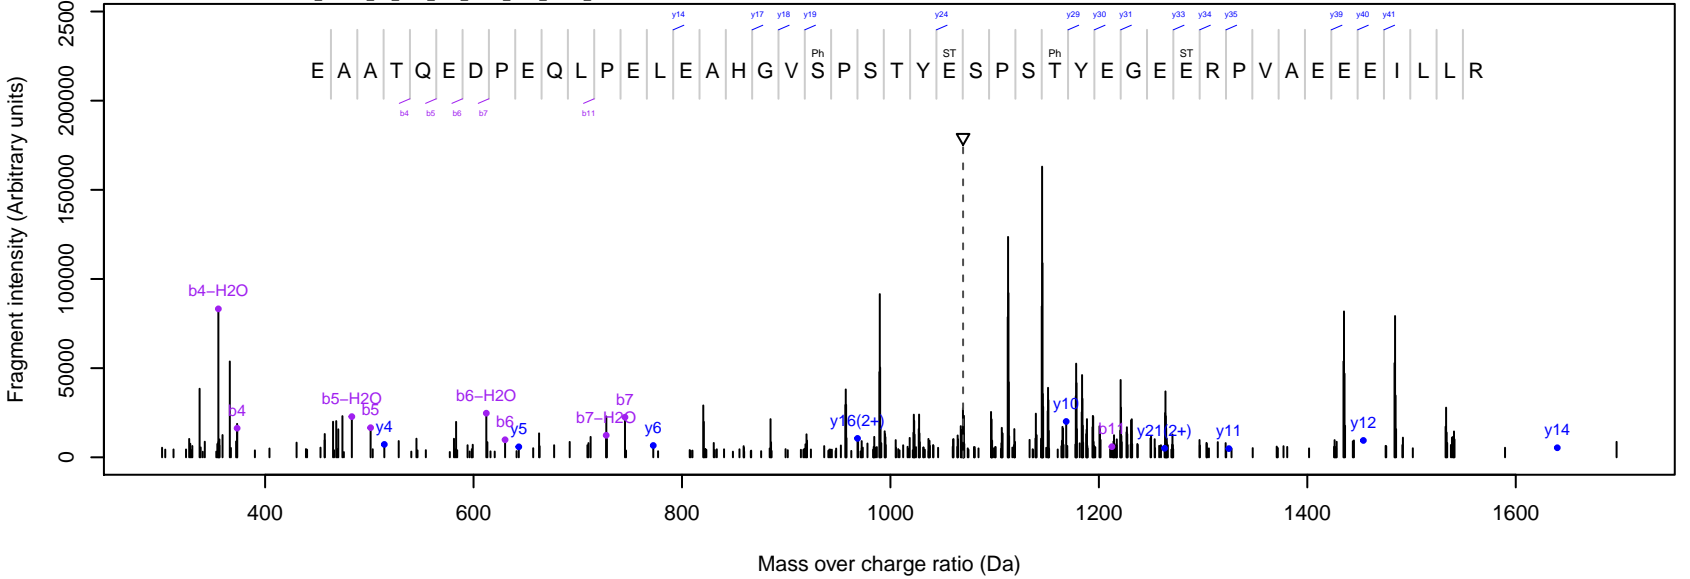

GQTPLTEGS(Phospho (STY))EDLDGHS(Phospho (STY))DPEESFAR-3+

Source : QE3\_201126\_FR\_TiOx\_hum\_tissue\_Urea\_RNAB\_N Scan : 35294

Andromeda score : 108.52

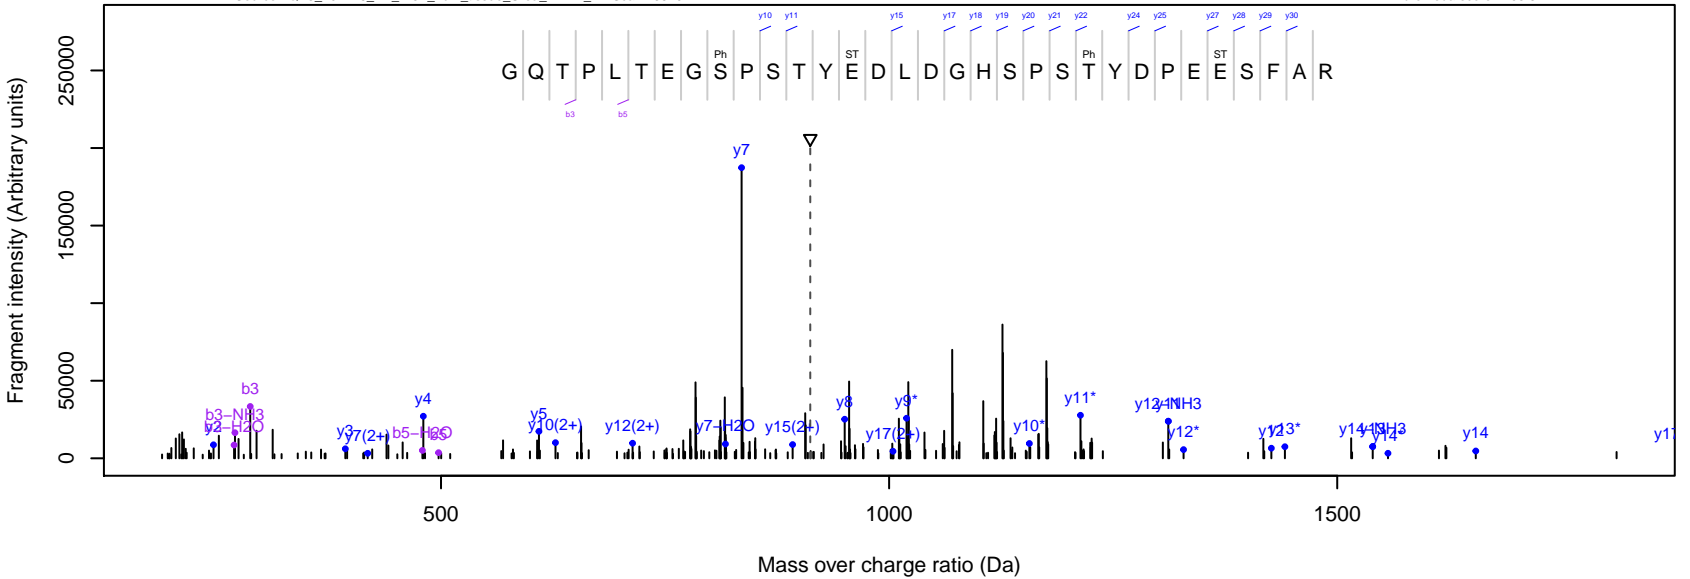

KLSSNCSGVEGDVT(Phospho (STY))DEDEGAEMSQR-3+

Source : QE3\_201126\_FR\_TIOx\_hum\_tissue\_Urea\_RNAB\_B Scan : 18735

Andromeda score : 108.52

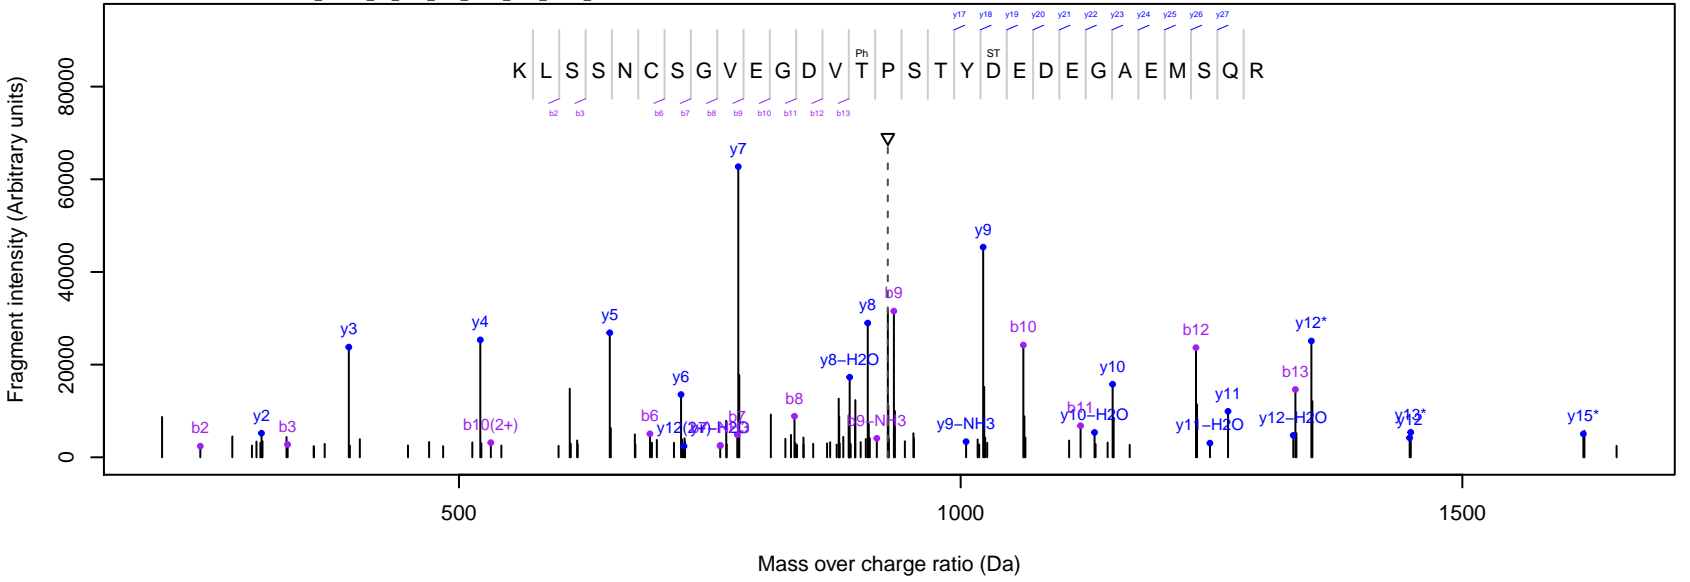

THNHDPQPGDPS(Phospho (STY))RPS(Phospho (STY))SPKPAQPALK-4+

Source : QE3\_201126\_FR\_TIOx\_hum\_tissue\_Urea\_RNAB\_N Scan : 8557

Andromeda score : 108.52

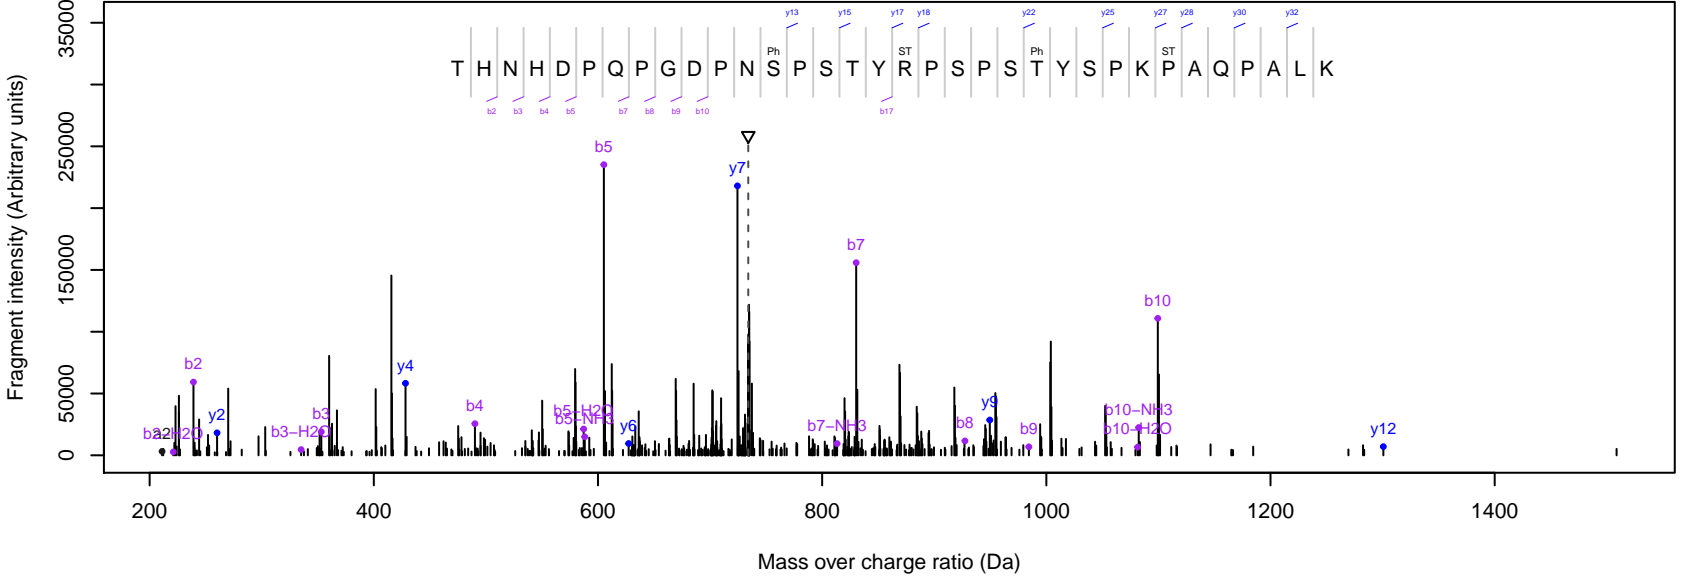

AGAGM(Oxidation (M))ITQHSSNASPSTYPINR-3+

Source : QE3\_201126\_FR\_TIOx\_hum\_tissue\_Urea\_RNAB\_B Scan : 9215

Andromeda score : 108.5

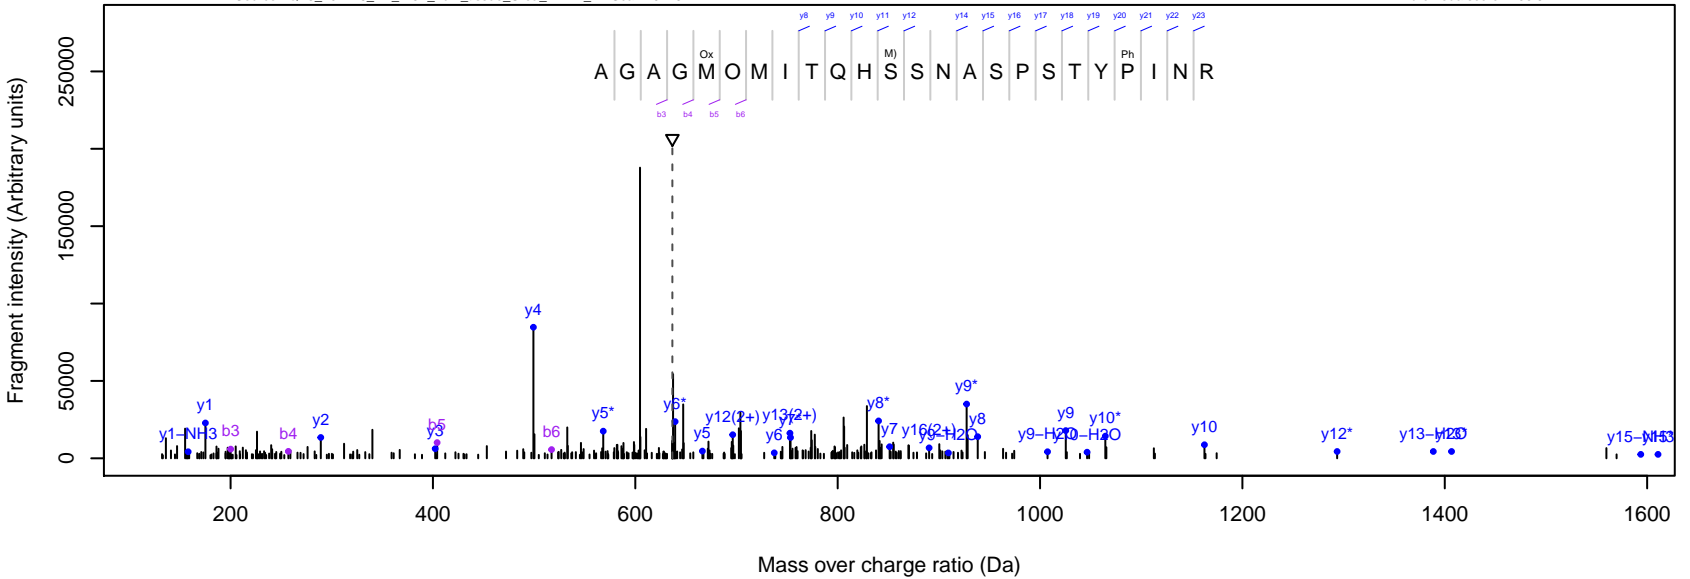



STS(Phospho (STY))TPNVHVMVSTTLPVDSR-3+

Source : QE3\_201126\_FR\_TiOx\_hum\_tissue\_Urea\_RNAB\_B Scan : 28697

Andromeda score : 108.4

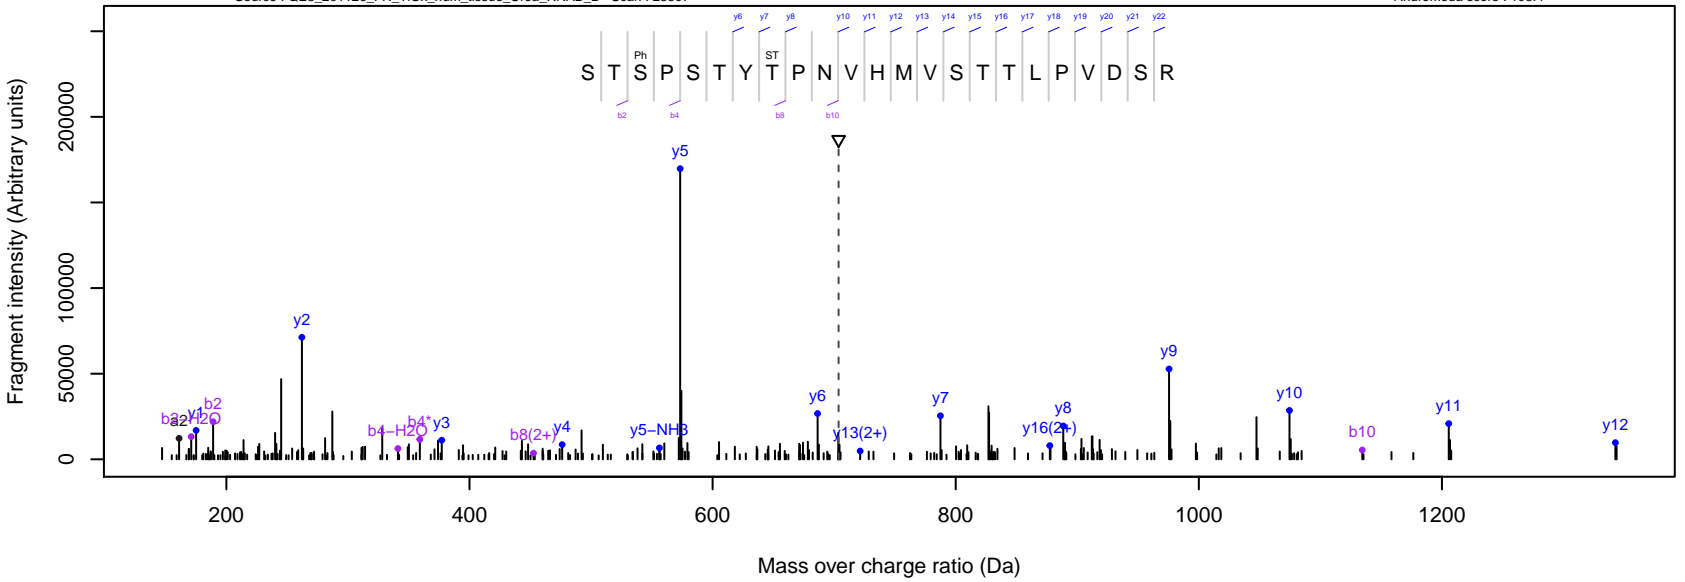

S(Phospho (STY))SSDPGIPGGPQAIPATNSPDHSDHTLSVSSDSGHSTASAR-4+

Source : QE3\_201126\_FR\_TiOx\_hum\_tissue\_Urea\_RNAB\_N Scan : 22561

Andromeda score : 108.38

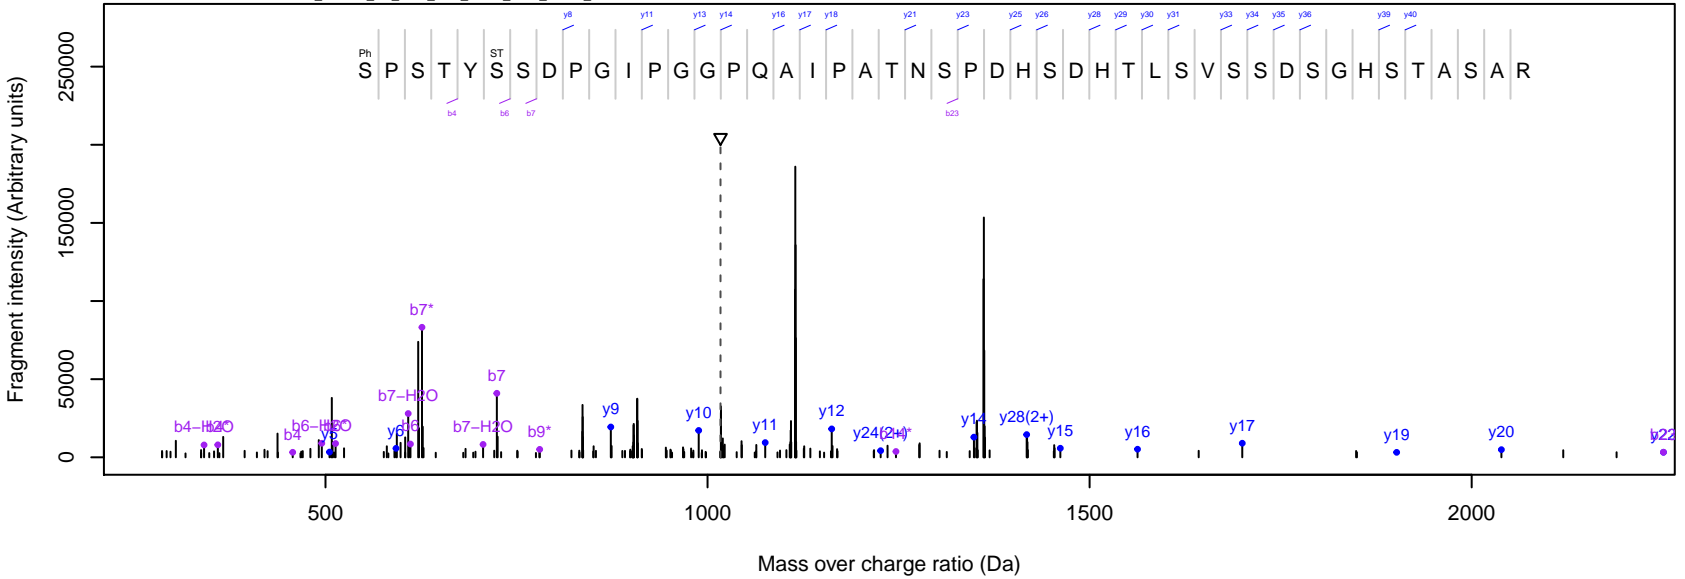

LGS(Phospho (STY))GGS(Phospho (STY))GDGPSVSWSR-2+

Source : QE3\_201126\_FR\_TiOx\_hum\_tissue\_Urea\_RNAB\_N Scan : 37730

Andromeda score : 108.34

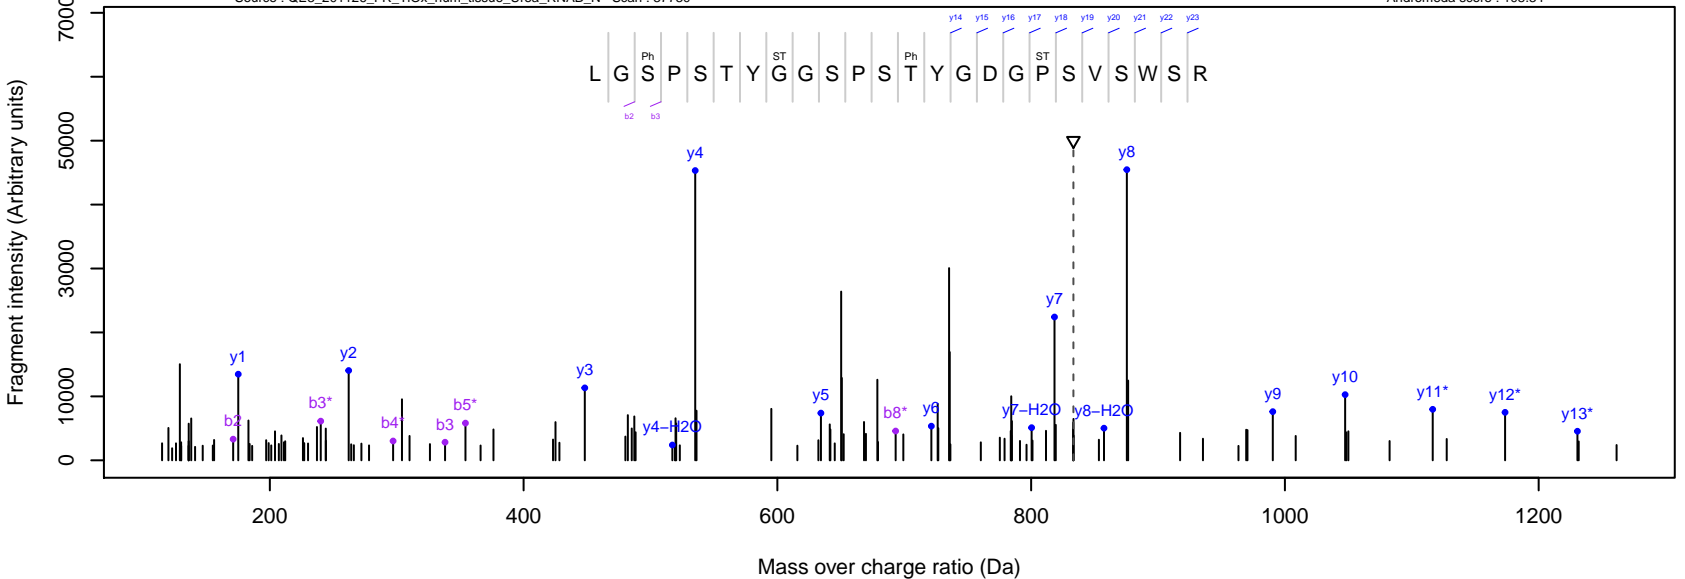



(Acetyl (Protein N-term))AADVSVTHRPPLS(Phospho (STY))PK-3+

Source : QE3\_201126\_FR\_TIOx\_hum\_tissue\_Urea\_RNAB\_H Scan : 20462

Andromeda score : 108.25

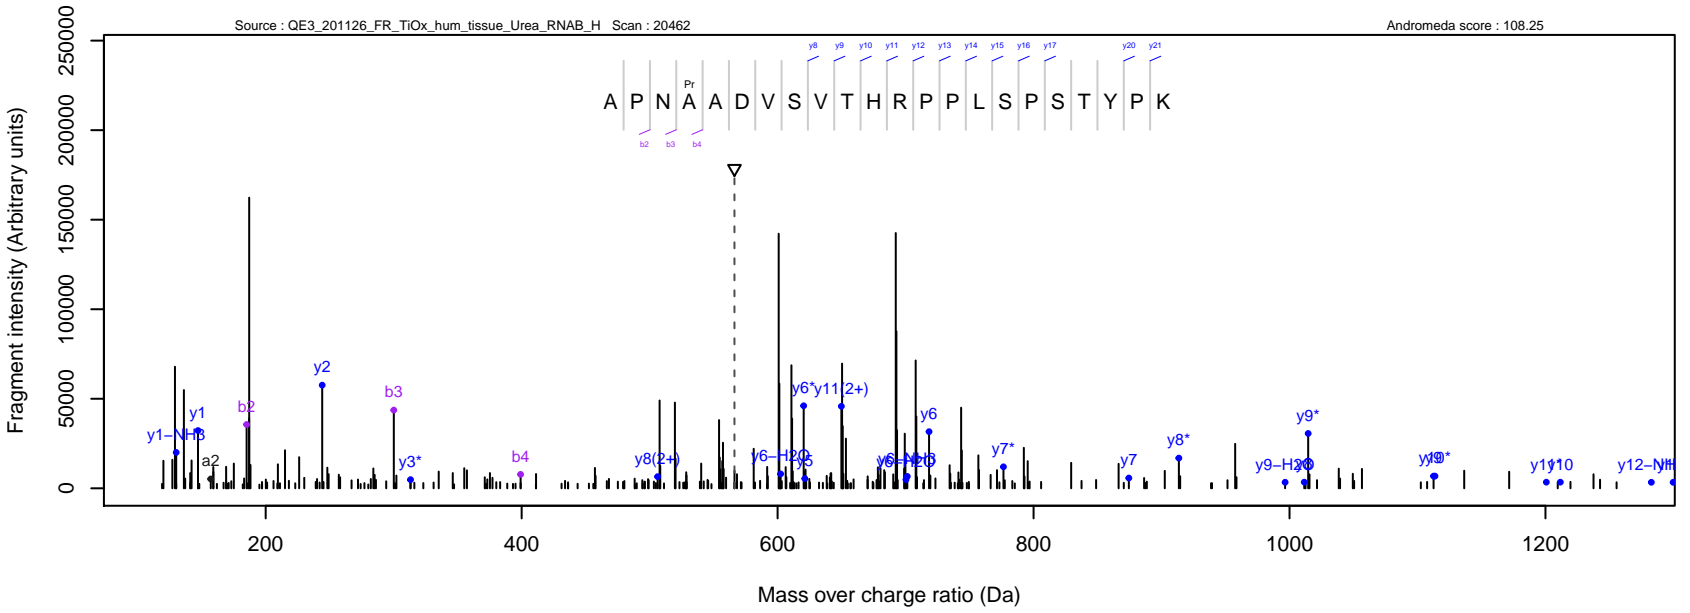

LLS(Phospho (STY))DSLPPSTGTQEAQSR-3+

Source : QE3\_201126\_FR\_TIOx\_hum\_tissue\_Urea\_RNAB\_H Scan : 43280

Andromeda score : 108.25

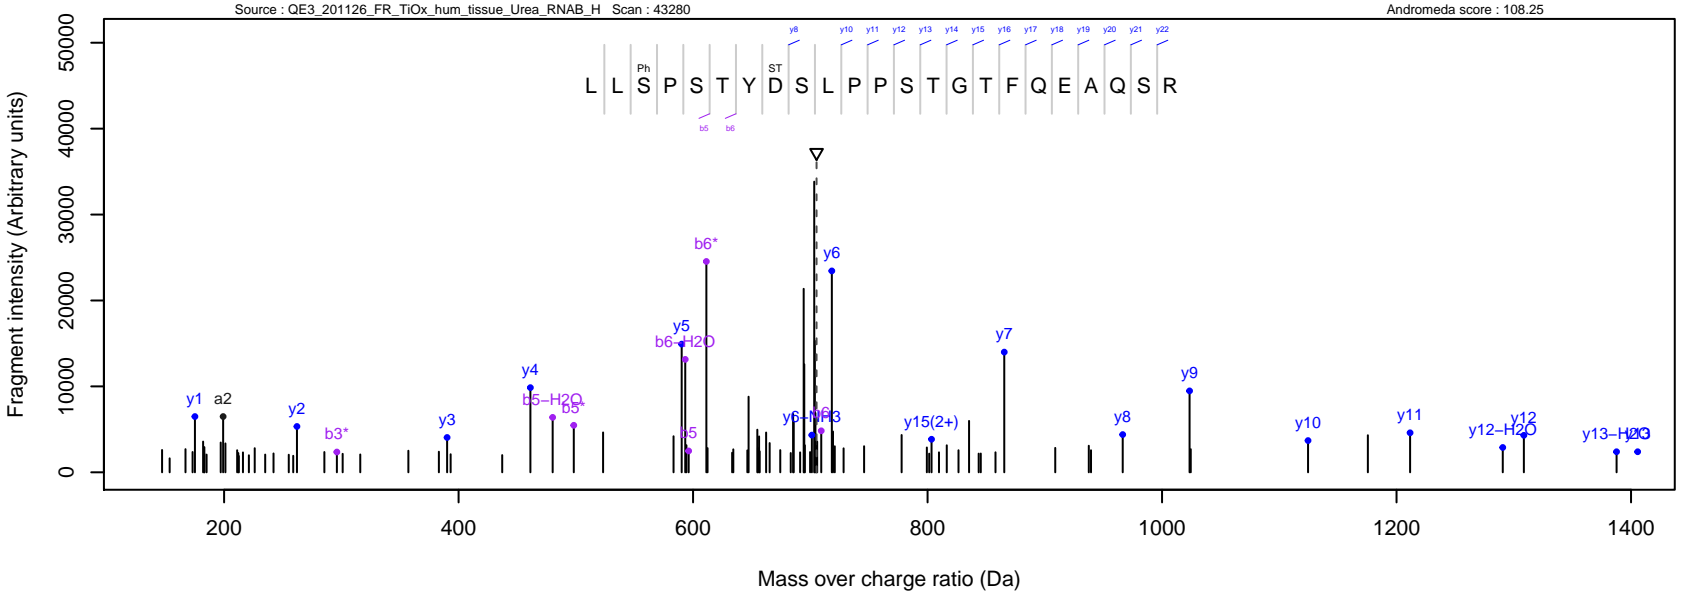

SEEVPAFGVAS(Phospho (STY))PPPLTDTPTTANAEGDLPTTMGGPLPHLALK-4+

Source : QE3\_201126\_FR\_TIOx\_hum\_tissue\_Urea\_RNAB\_H Scan : 56637

Andromeda score : 108.25

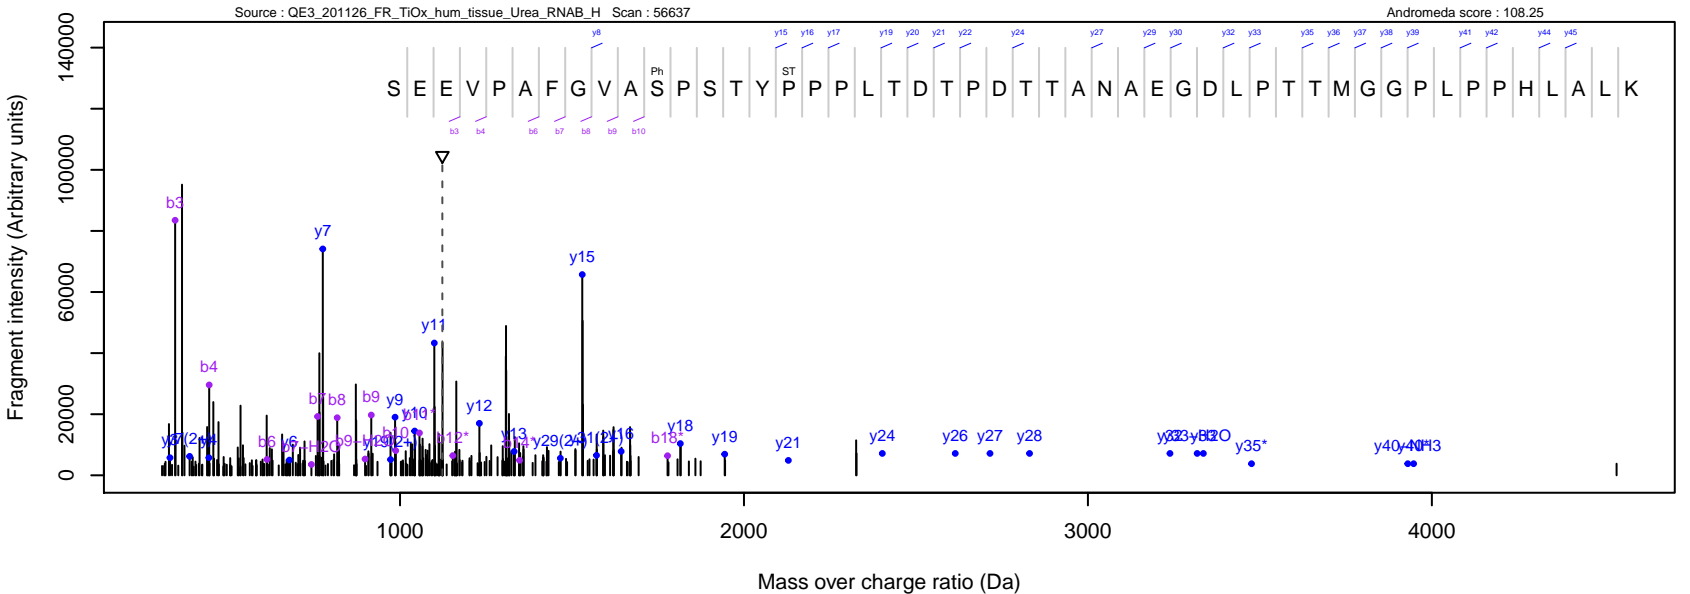

SEWLDPSQKS(Phospho (STY))PLHVGETR-3+

Source : QE3\_201126\_FR\_TiOx\_hum\_tissue\_Urea\_RNAB\_N Scan : 26410

Andromeda score : 108.25

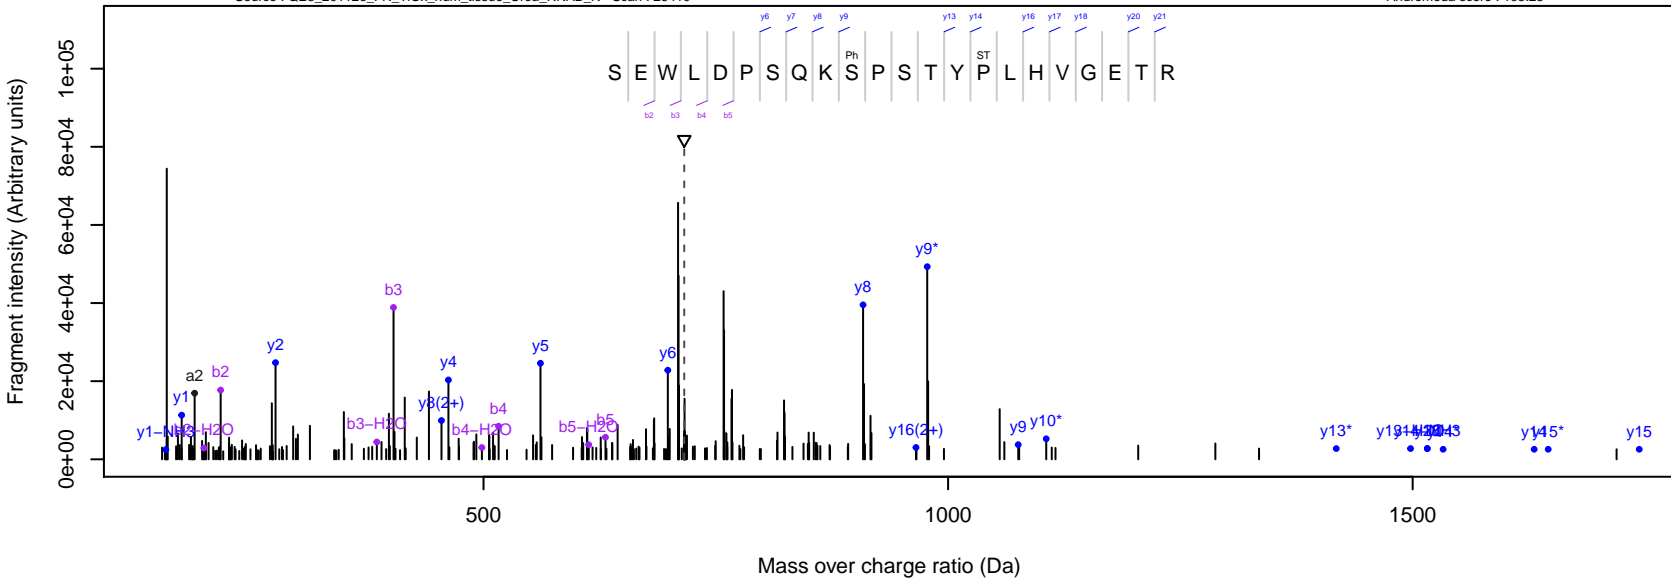

IQEQES(Phospho (STY))S(Phospho (STY))GEEDSDLSPEEREK-3+

Source : QE3\_201126\_FR\_TiOx\_hum\_tissue\_Urea\_RNAB\_H Scan : 17098

Andromeda score : 108.18

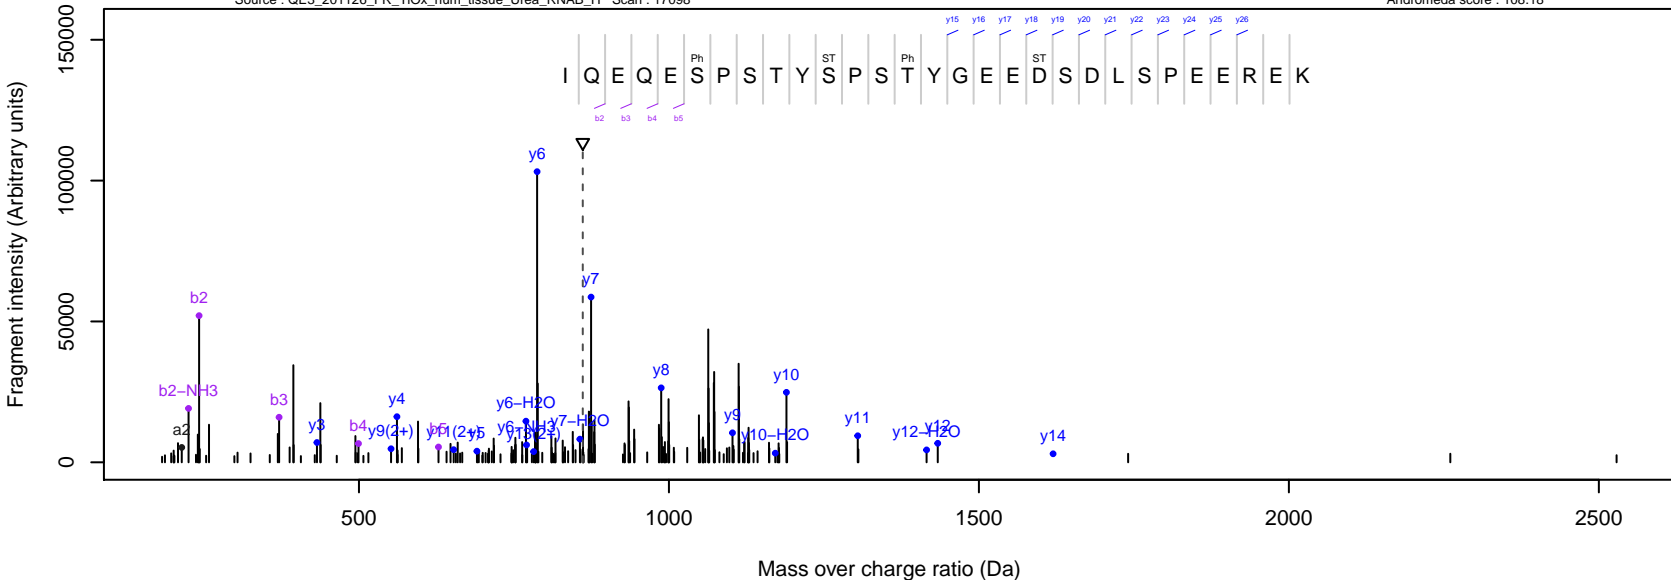

IYEFPET(Phospho (STY))DDEEENKLVK-3+

Source : QE3\_201126\_FR\_TiOx\_hum\_tissue\_Urea\_RNAB\_H Scan : 31602

Andromeda score : 108.18

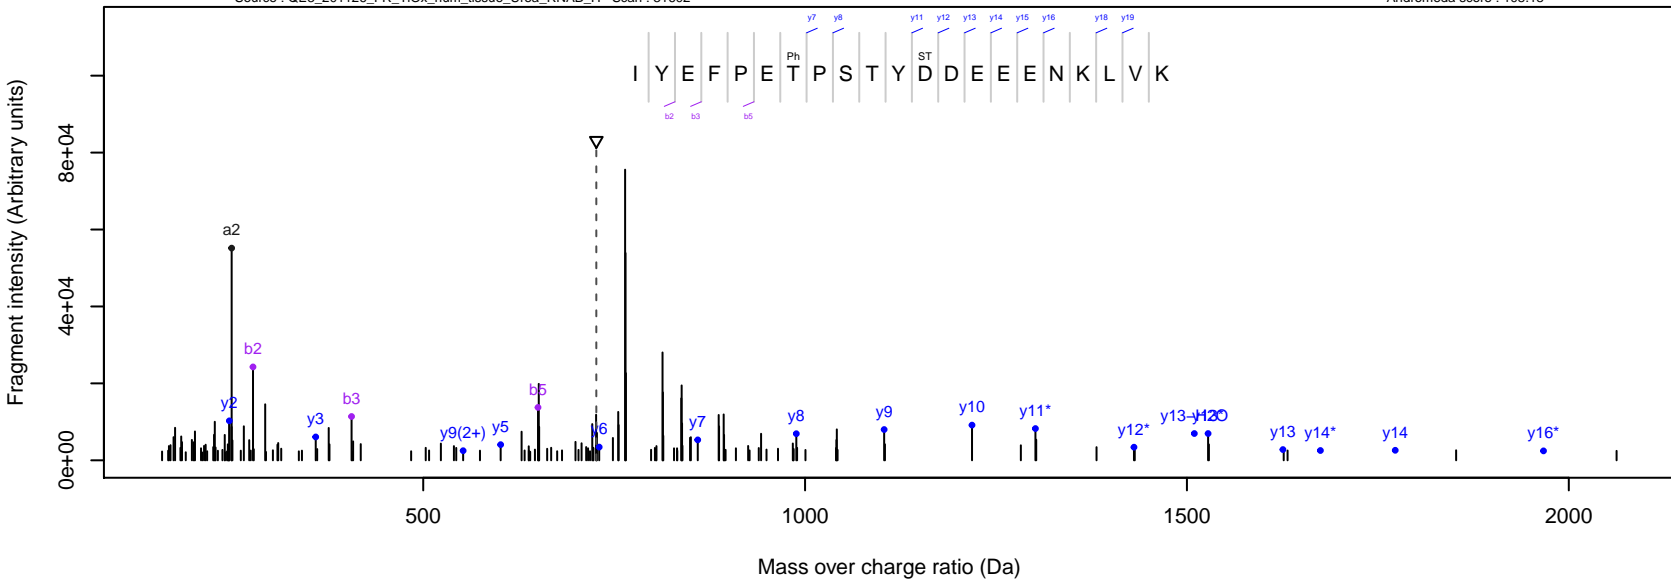



SS(Phospho (STY))PSLSDSYSHLSGRPIR-3+

Source : QE3\_201126\_FR\_TiOx\_hum\_tissue\_Urea\_RNAB\_B Scan : 21456

Andromeda score : 108.17

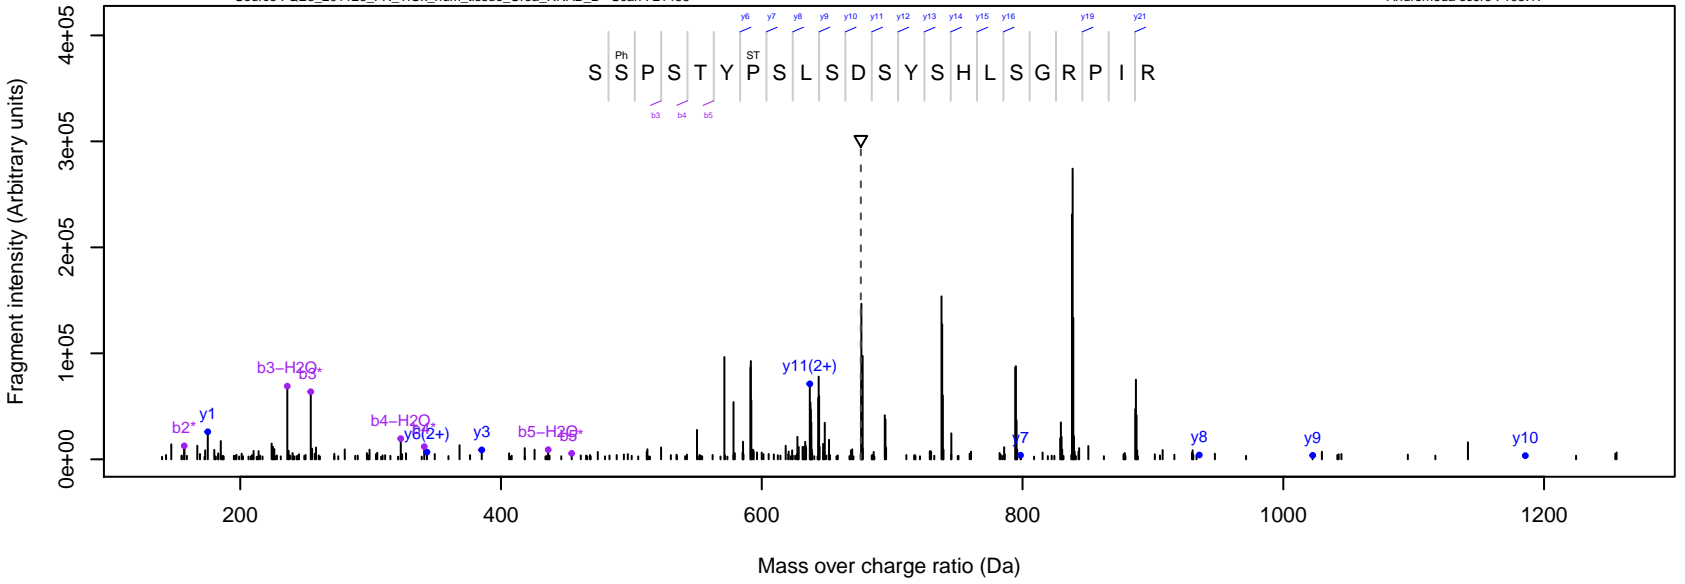

TGEPDEEEGT(Phospho (STY))FRSSIRR-3+

Source : QE3\_201126\_FR\_TiOx\_hum\_tissue\_Urea\_RNAB\_N Scan : 12244

Andromeda score : 108.17

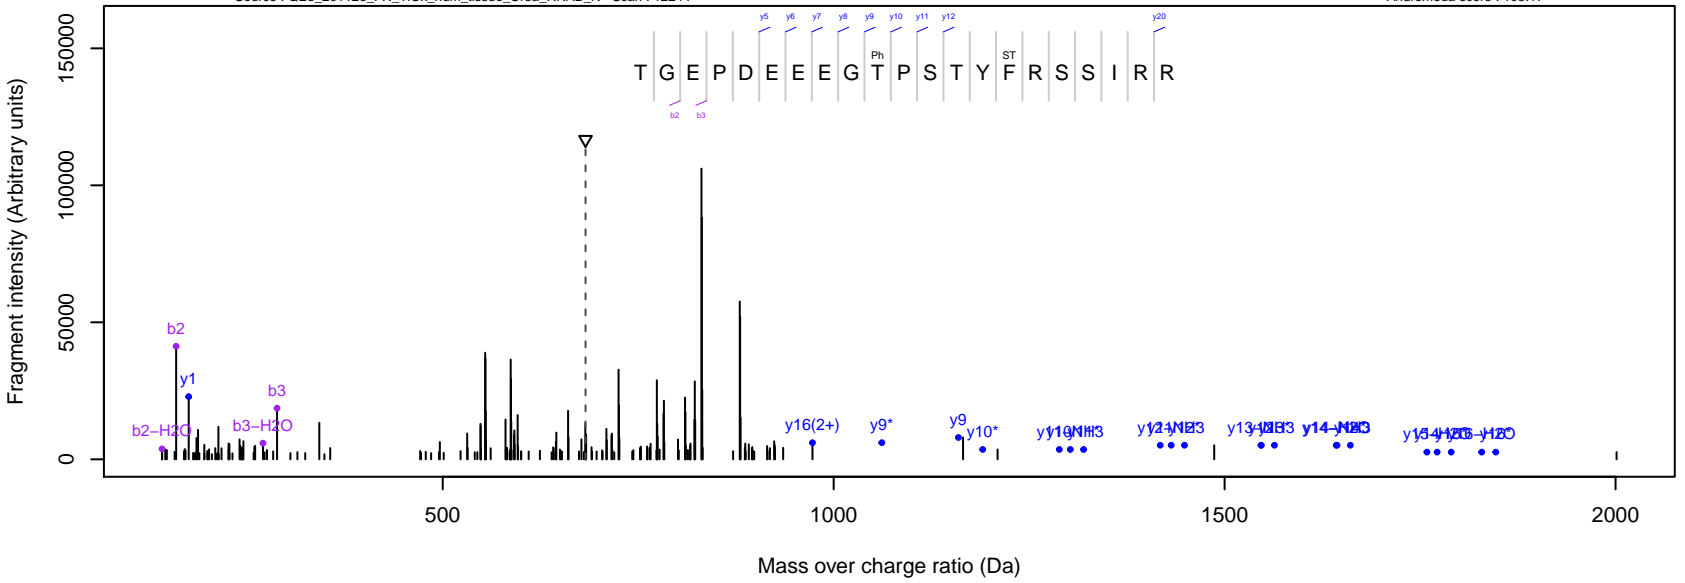

GASATGIPLS(Phospho (STY))DEDSNDNDNDIENCMHTN-3+

Source : QE3\_201126\_FR\_TiOx\_hum\_tissue\_Urea\_RNAB\_N Scan : 35733

Andromeda score : 108.11

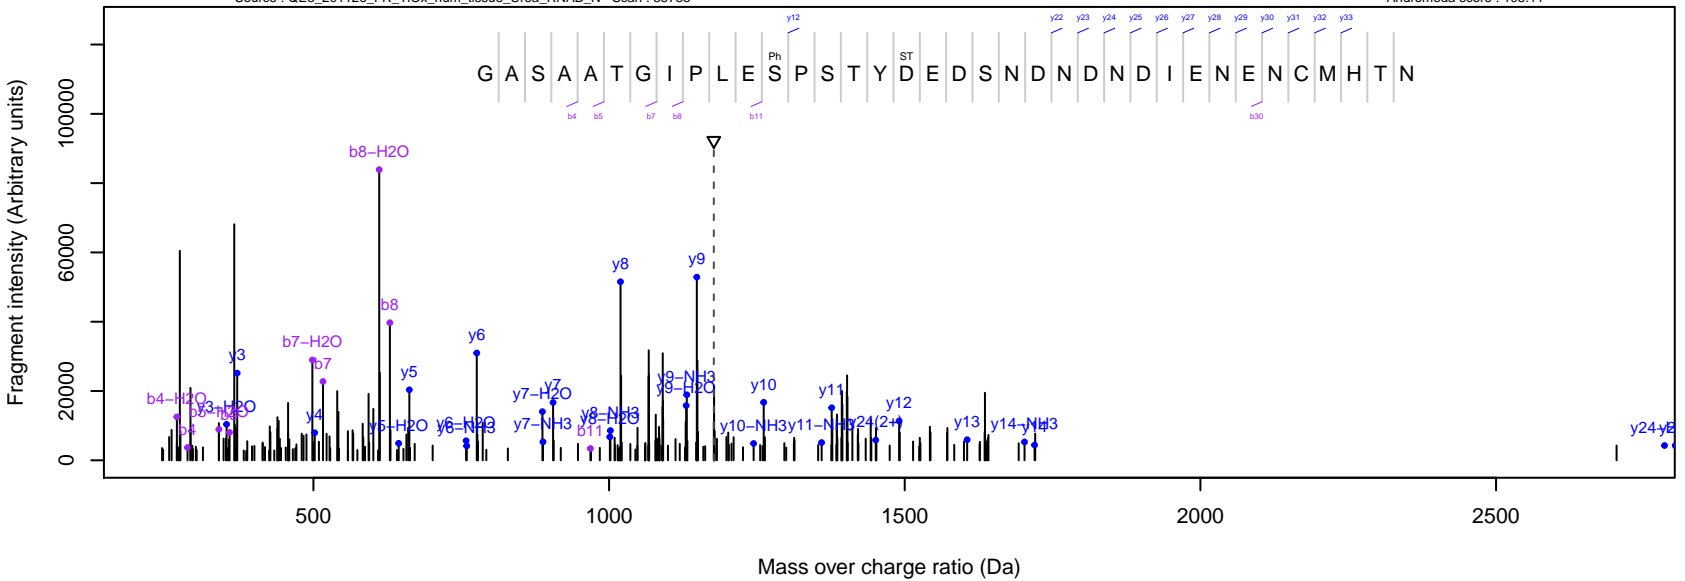

SFSKEELMSS(Phospho (STY))DLEETAGSTSIPKR-4+

Source : QE3\_201126\_FR\_TiOx\_hum\_tissue\_Urea\_RNAB\_N Scan : 30332

Andromeda score : 108.1

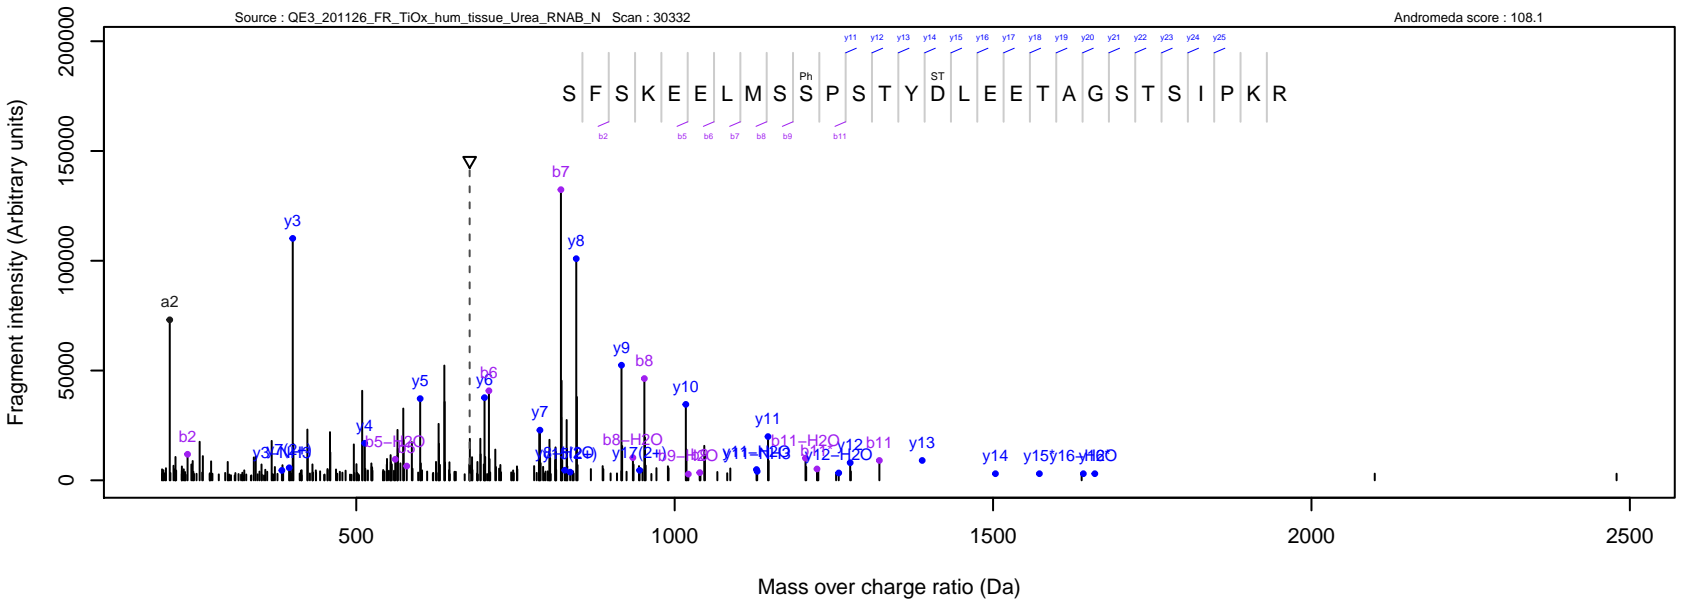

LKSYS(Phospho (STY))EPEKM(Oxidation (M))NEVGLTR-3+

Source : QE3\_201126\_FR\_TiOx\_hum\_tissue\_Urea\_RNAB\_N Scan : 13829

Andromeda score : 108.08

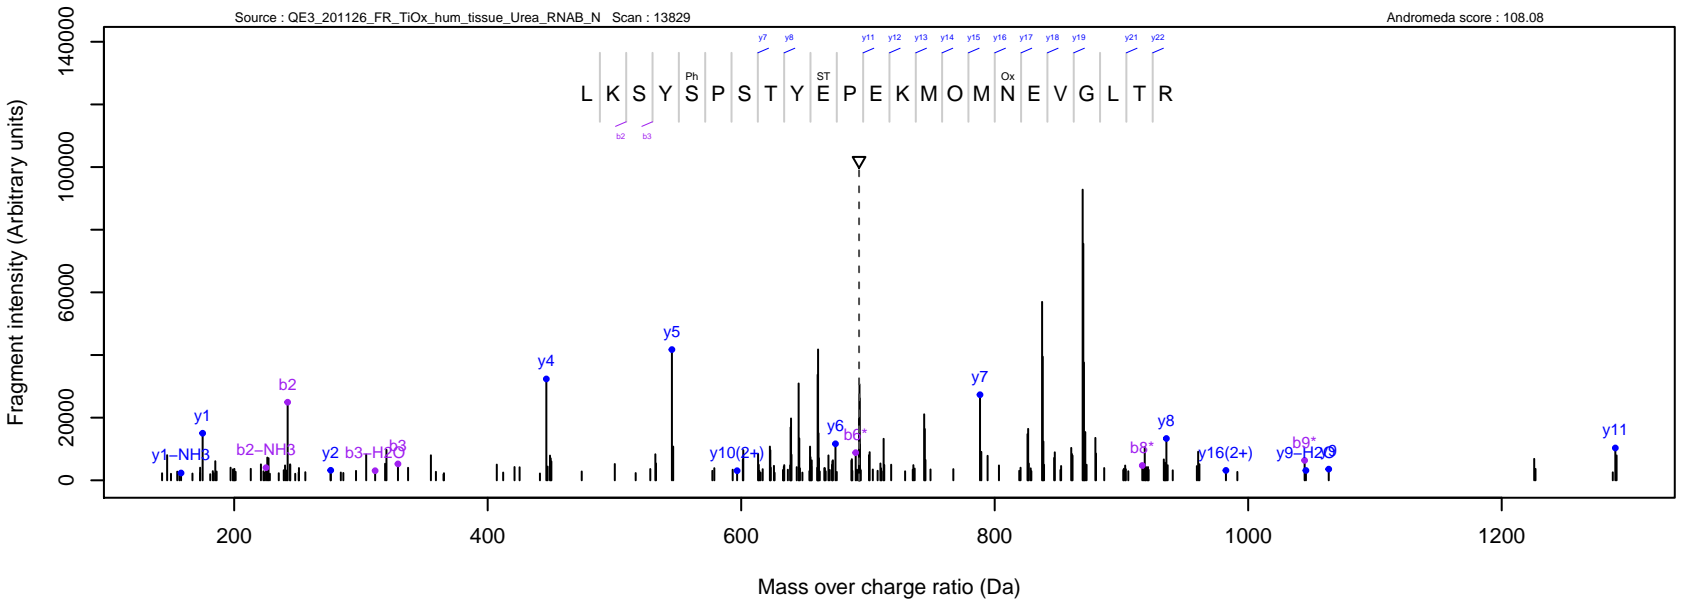

QFTPCQLLADHANS(Phospho (STY))PNKK-3+

Source : QE3\_201126\_FR\_TiOx\_hum\_tissue\_Urea\_RNAB\_N Scan : 24044

Andromeda score : 108.08

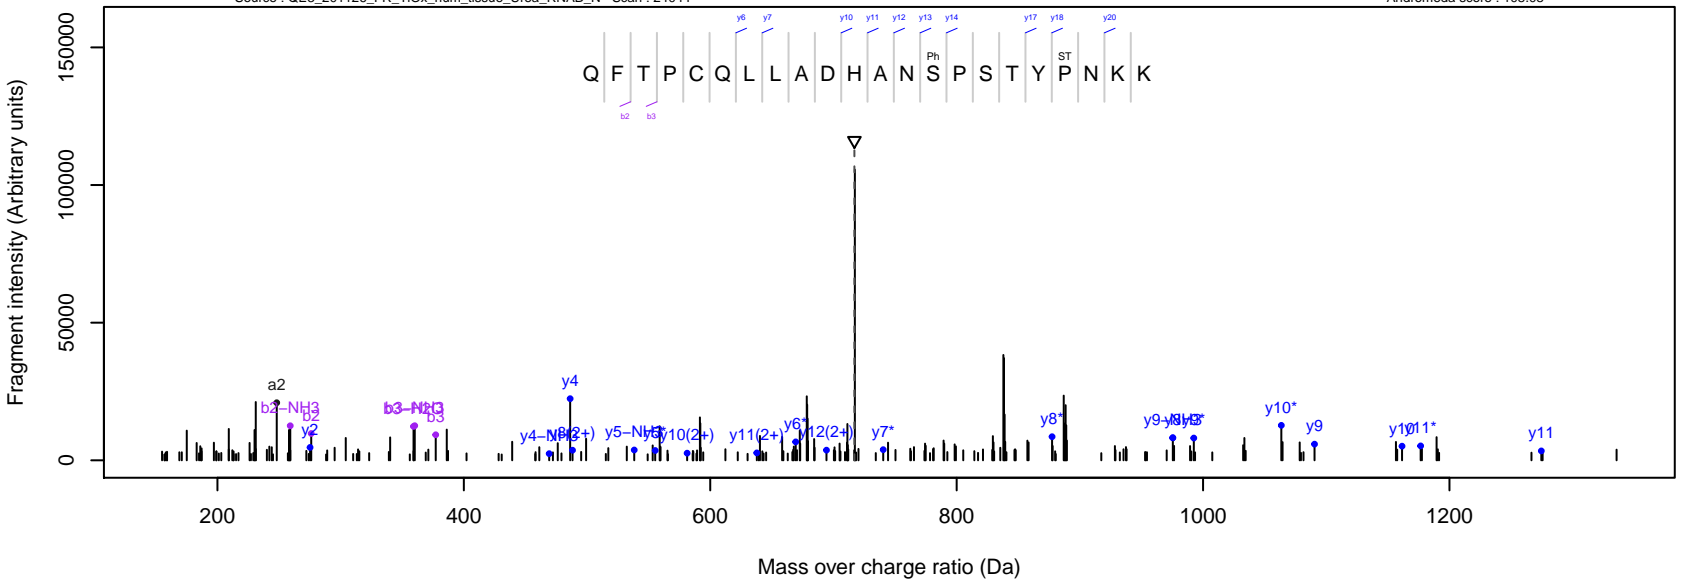

APS(Phospho (STY))VATVGSICDLNLK-2+

Source : QE3\_201126\_FR\_TiOx\_hum\_tissue\_Urea\_RNAB\_H Scan : 43381

Andromeda score : 108.06

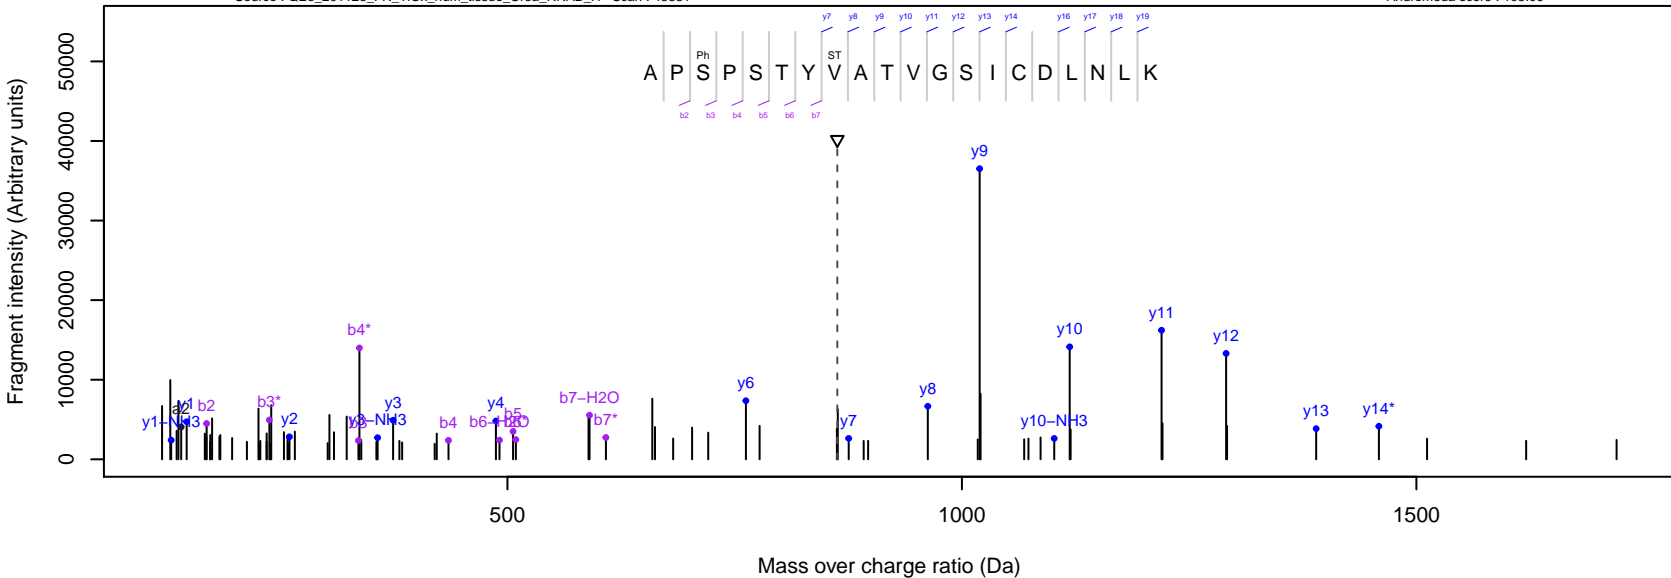

LLRQS(Phospho (STY))PPLPGREEEPLGDSGIQSTPGSGHAPR-4+

Source : QE3\_201126\_FR\_TiOx\_hum\_tissue\_Urea\_RNAB\_H Scan : 23441

Andromeda score : 108

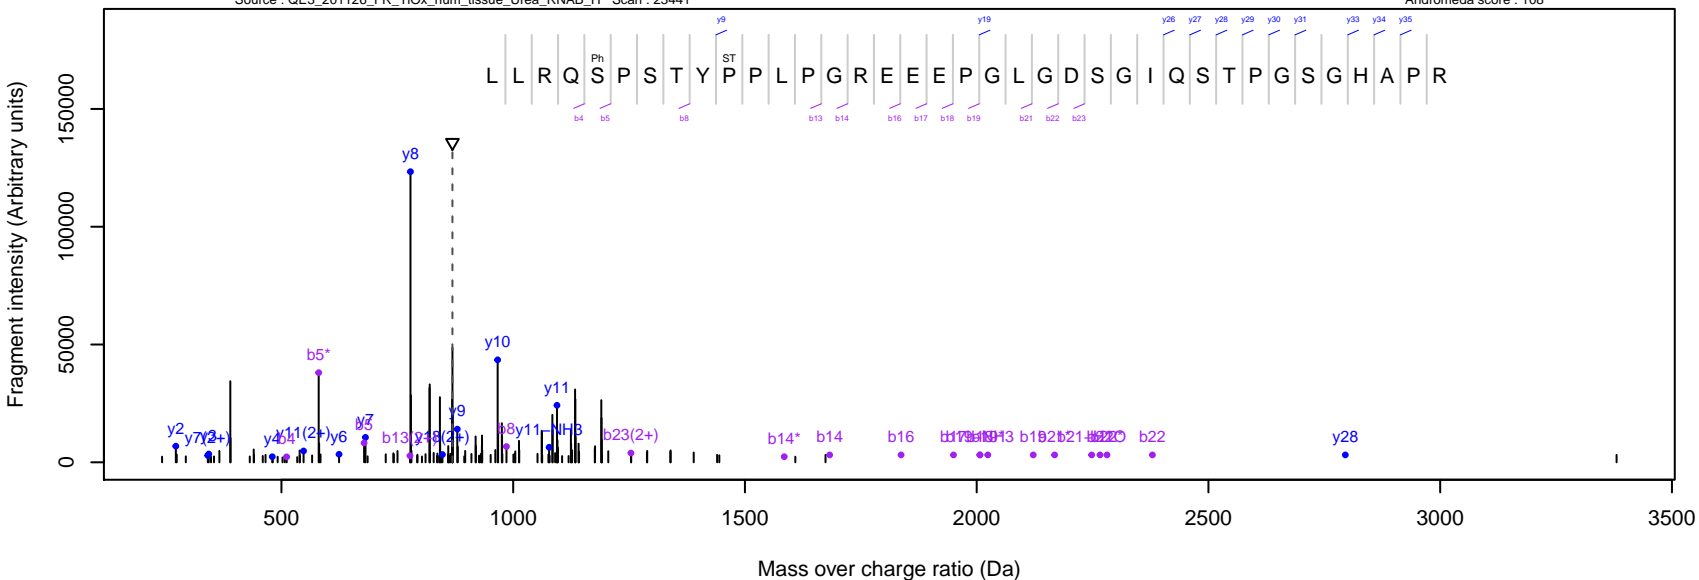

NVLSSLAVYAEDS(Phospho (STY))EPES(Phospho (STY))DGEAGIEAVGSAEEK-3+

Source : QE3\_201126\_FR\_TiOx\_hum\_tissue\_Urea\_RNAB\_B Scan : 61520

Andromeda score : 107.96

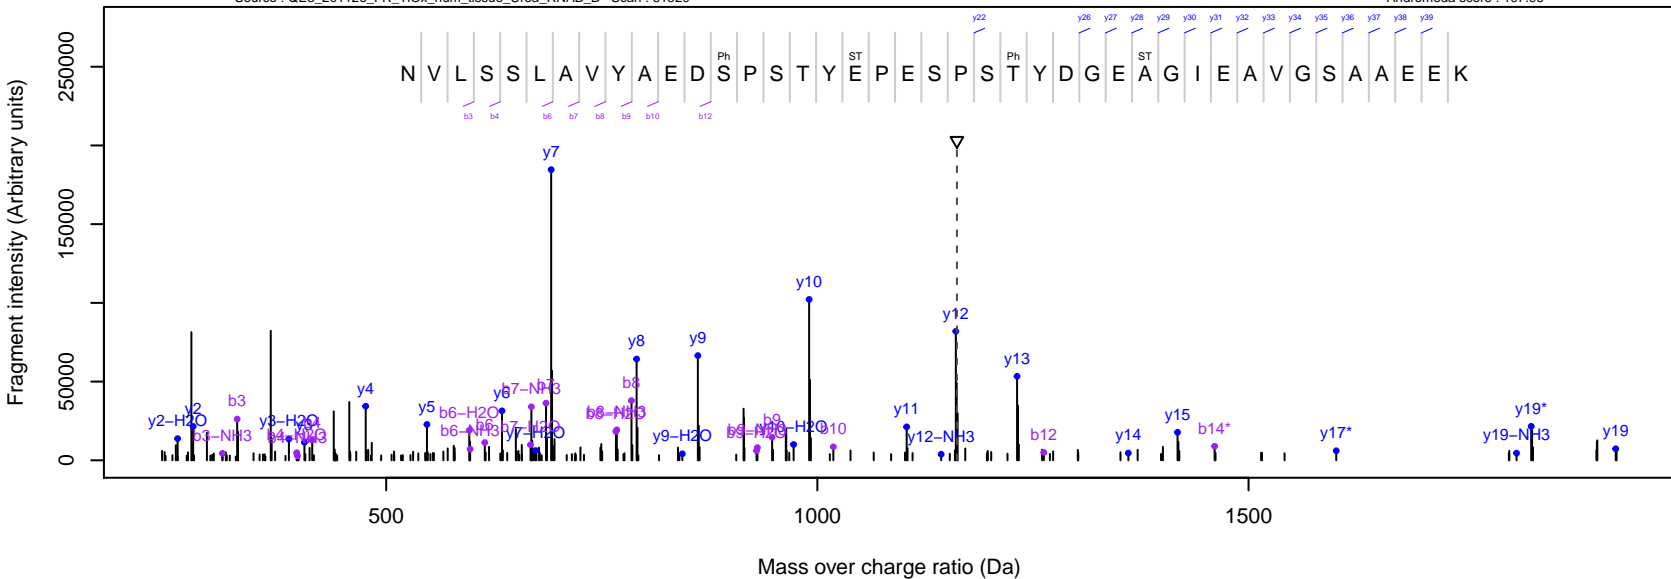

VQSGMGLILQGYE(Phospho (STY))GS(Phospho (STY))EEEEIHEK-3+

Source : QE3\_201126\_FR\_TiOx\_hum\_tissue\_Urea\_RNAB\_B Scan : 47930

Andromeda score : 107.95

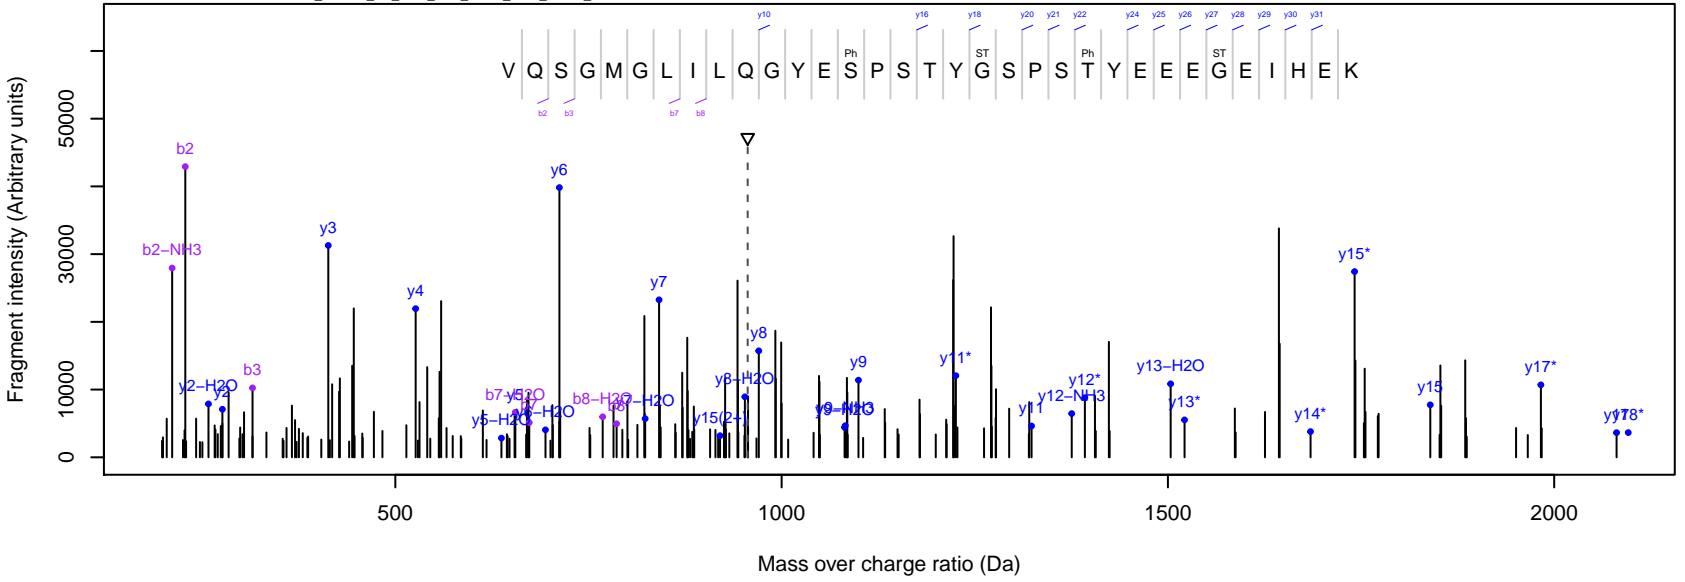

VLNTGS(Phospho (STY))DVVEAVADALKKPAR-3+

Source : QE3\_201126\_FR\_TiOx\_hum\_tissue\_Urea\_RNAB\_N Scan : 42659

Andromeda score : 107.9

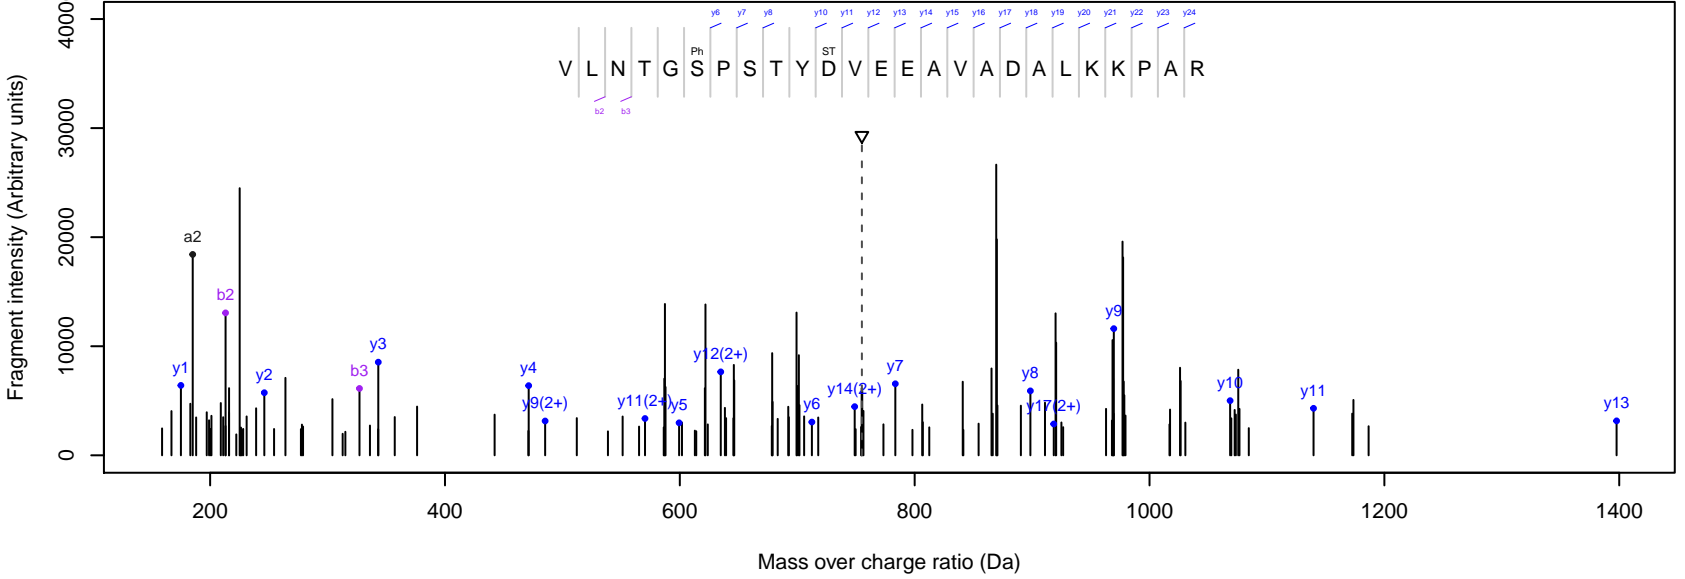

RQLHLEGAS(Phospho (STY))LELS(Phospho (STY))DDDTESK-3+

Source : QE3\_201126\_FR\_TiOx\_hum\_tissue\_Urea\_RNAB\_B Scan : 30348

Andromeda score : 107.87

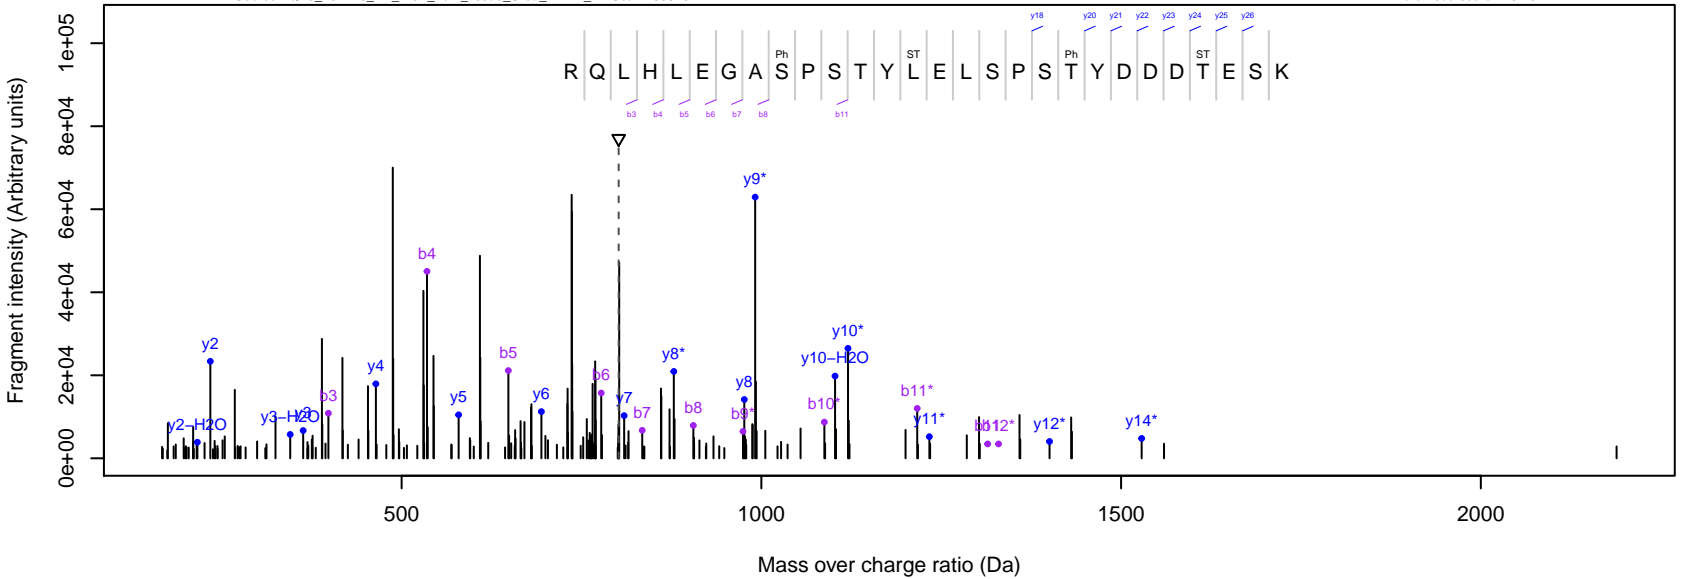

RS(Phospho (STY))SVSTIQVEWPEPDLAPAIAK-3+

Source : QE3\_201126\_FR\_TiOx\_hum\_tissue\_Urea\_RNAB\_N Scan : 49819

Andromeda score : 107.87

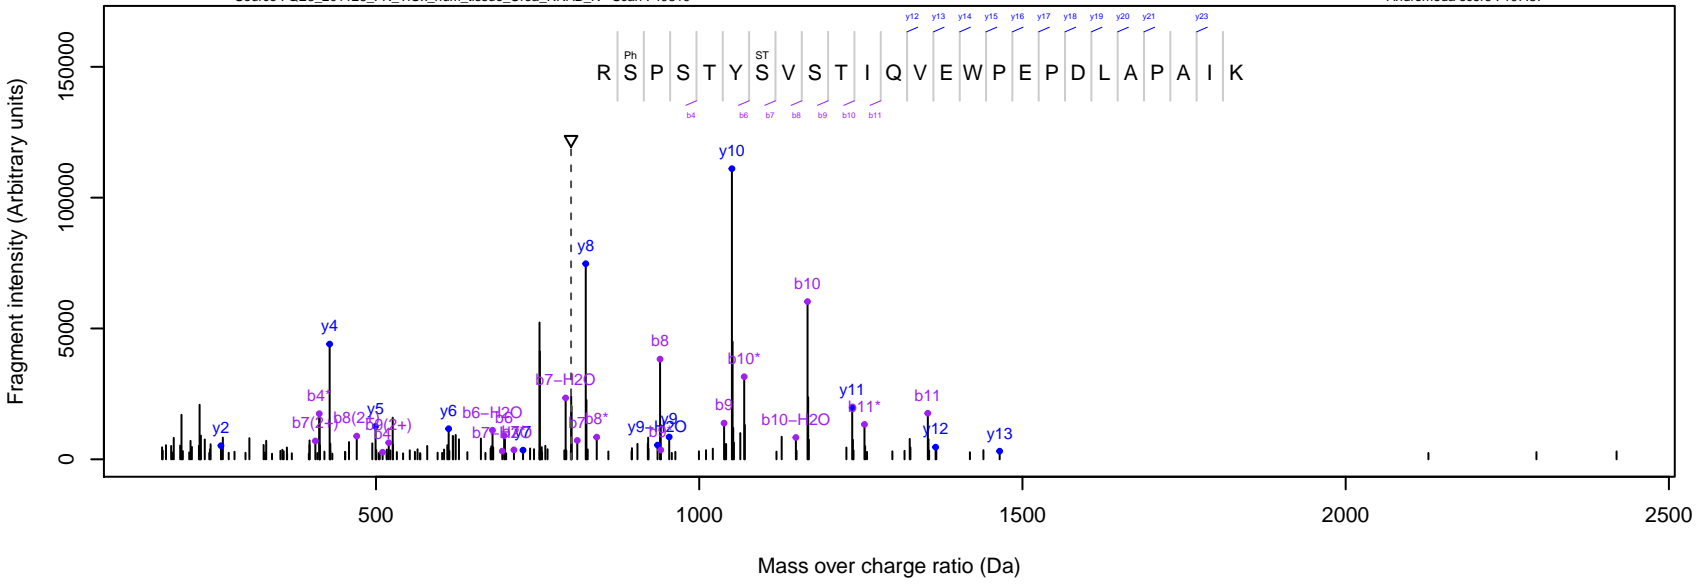

EQIS(Phospho (STY))DIDDAVR-2+

Source : QE3\_201126\_FR\_TiOx\_hum\_tissue\_Urea\_RNAB\_N Scan : 27865

Andromeda score : 107.85

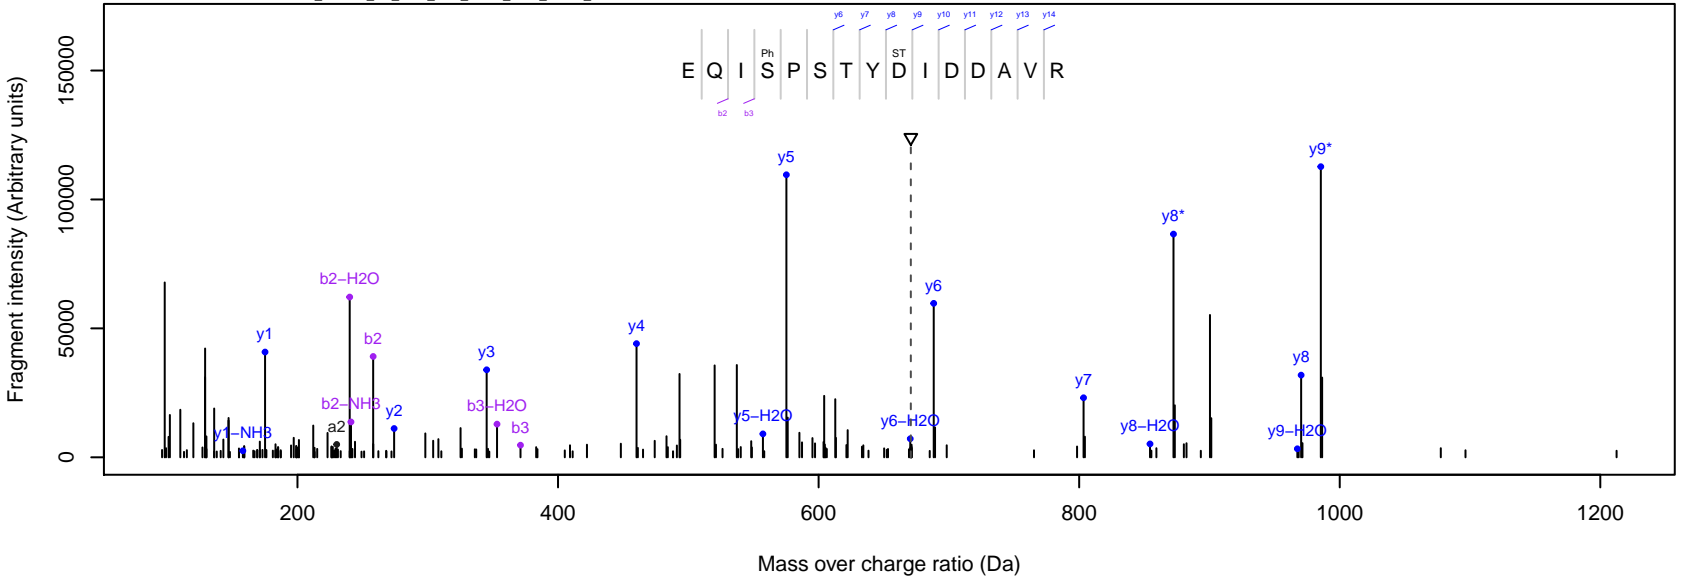

GIITDS(Phospho (STY))FGR-2+

Source : QE3\_201126\_FR\_TiOx\_hum\_tissue\_Urea\_RNAB\_H Scan : 29751

Andromeda score : 107.83

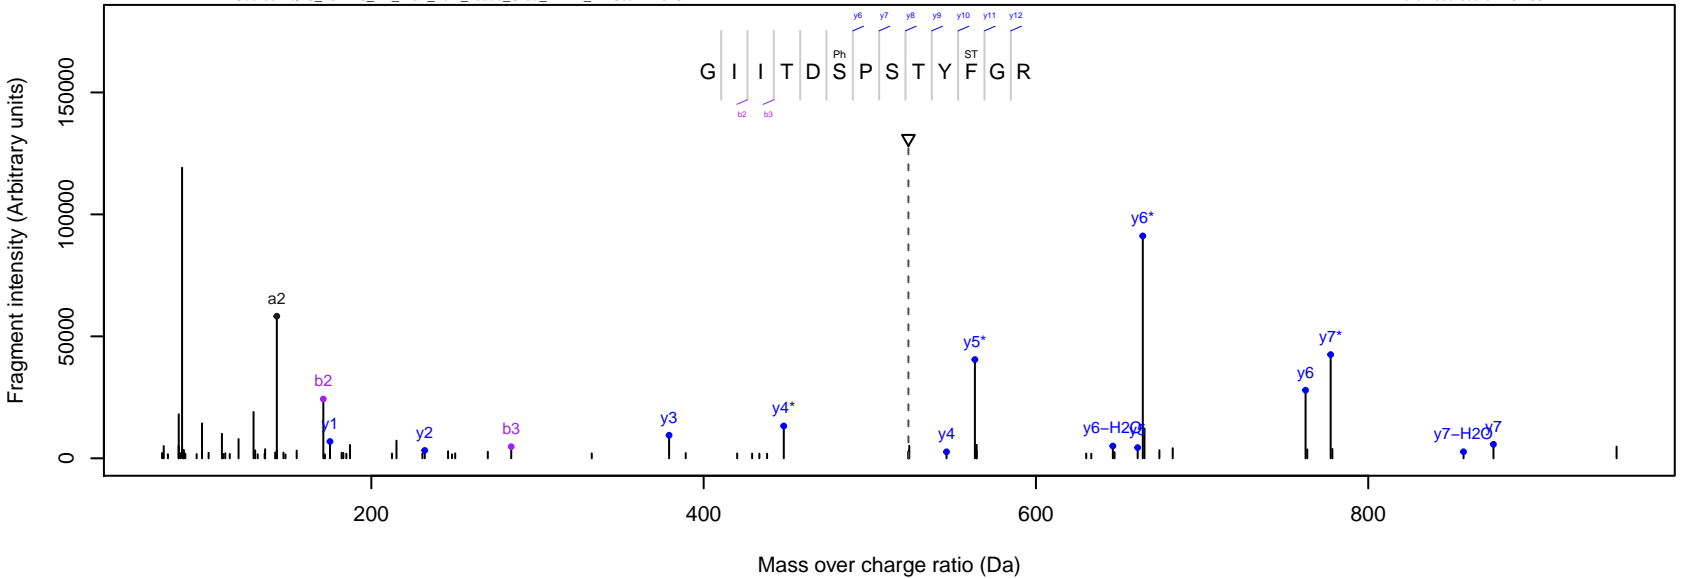

LIVENLS(Phospho (STY))SR-2+

Source : QE3\_201126\_FR\_TiOx\_hum\_tissue\_Urea\_RNAB\_H Scan : 24532

Andromeda score : 107.83

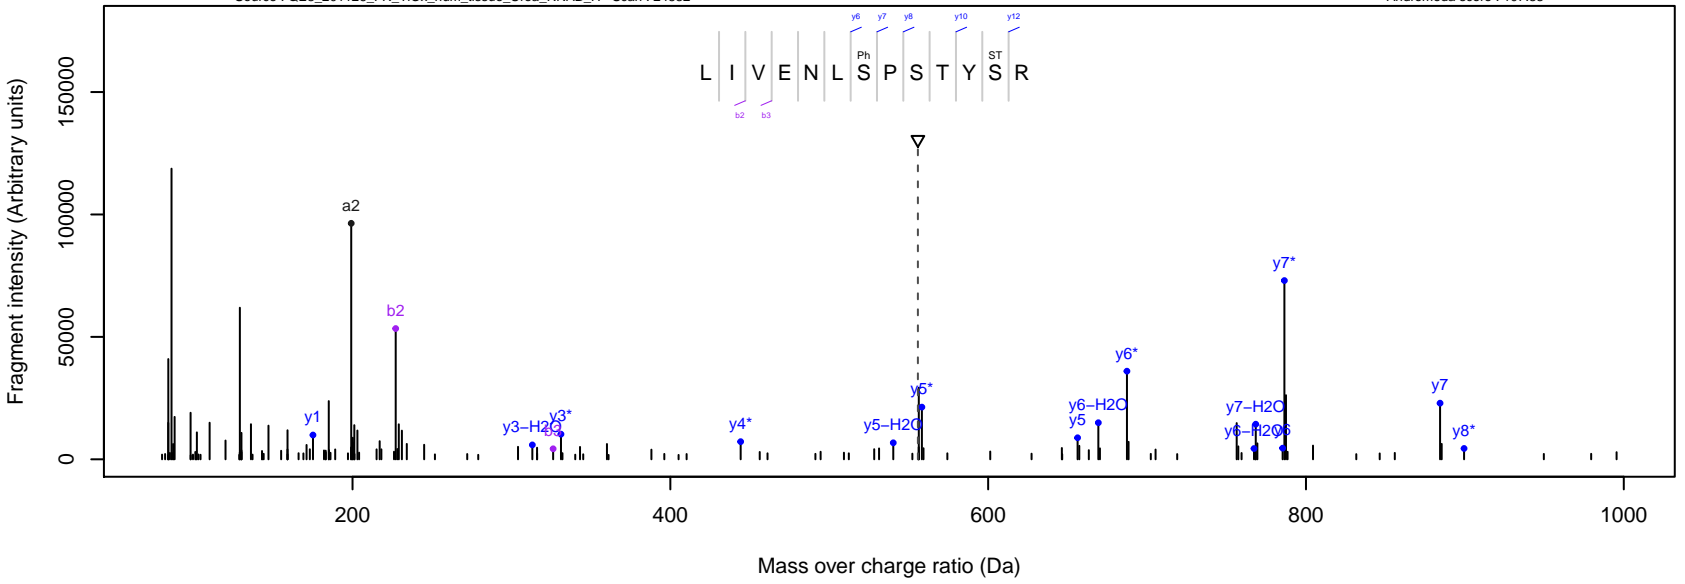

FKVAS(Phospho (STY))FR-2+

Source : QE3\_201126\_FR\_TiOx\_hum\_tissue\_Urea\_RNAB\_H Scan : 19053

Andromeda score : 107.79

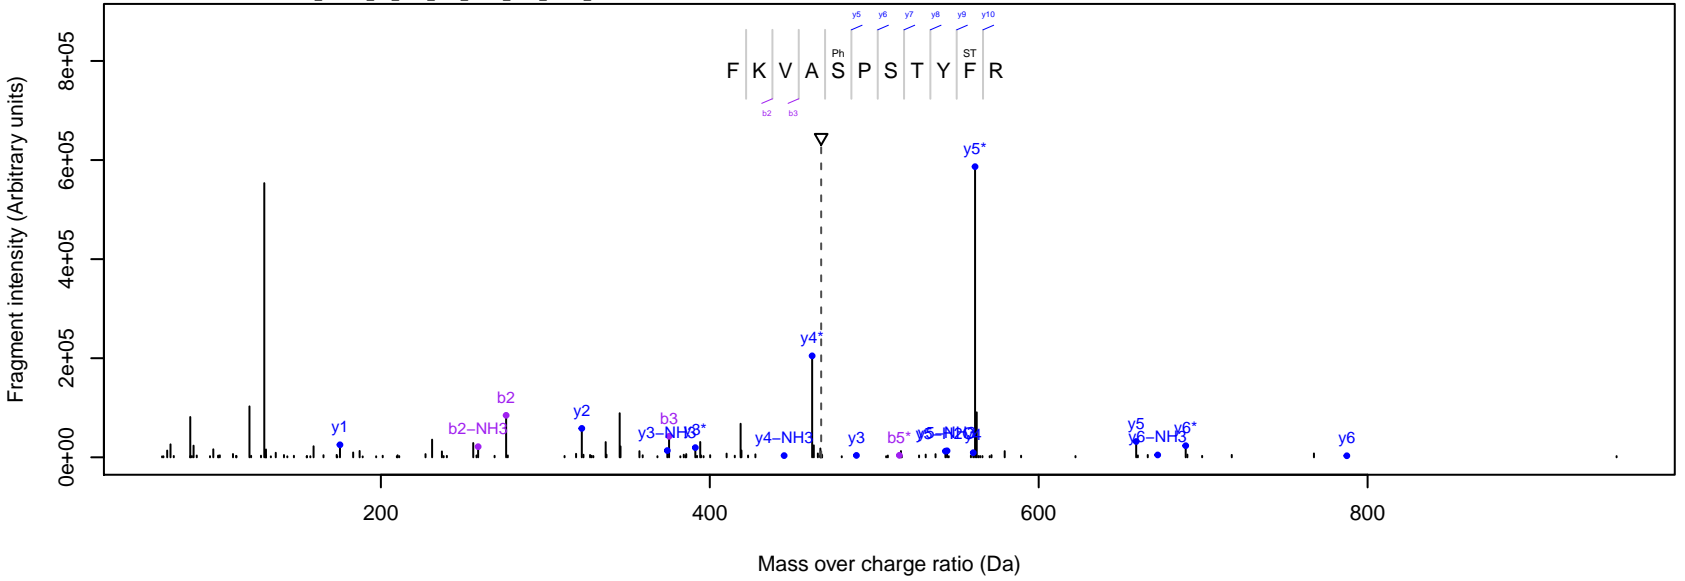

AATCFAEKLPSSTYNNLLK-3+

Source : QE3\_201126\_FR\_TiOx\_hum\_tissue\_Urea\_RNAB\_H Scan : 33866

Andromeda score : 107.78

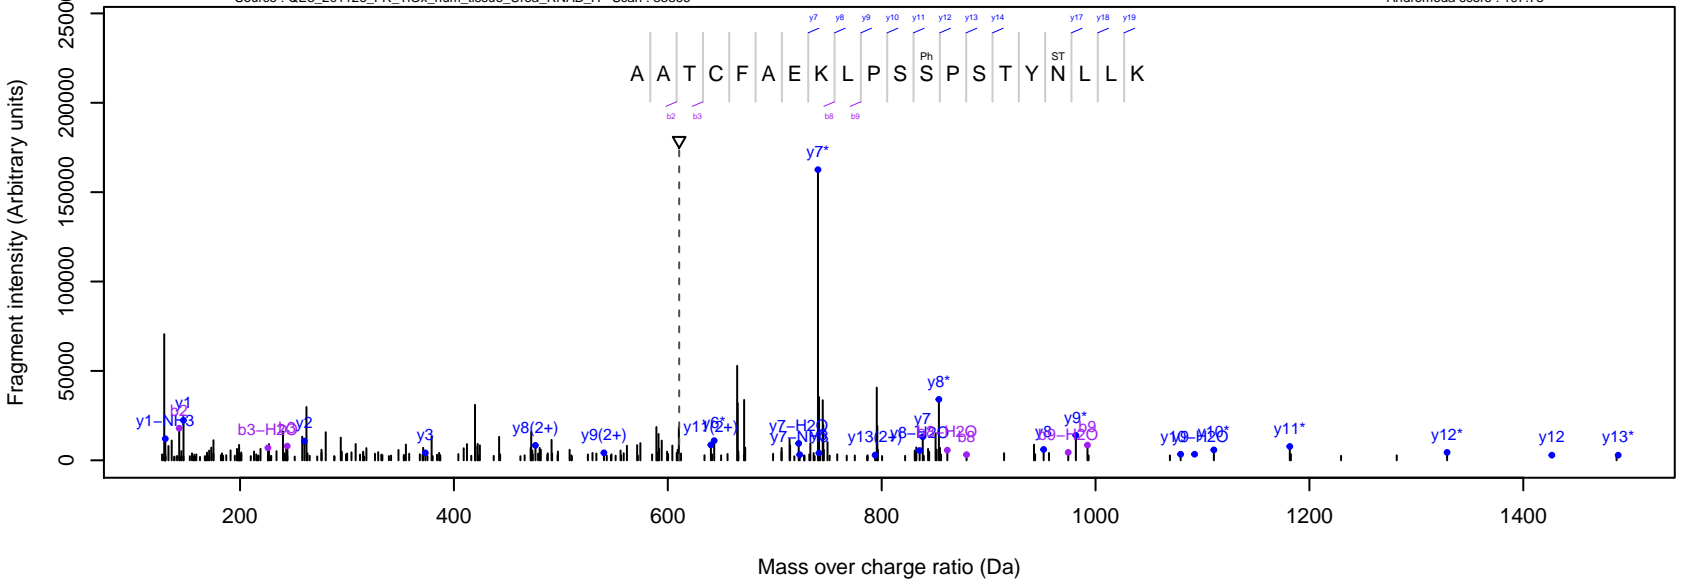

DLPQTMQIQDQFNDLVISDGSSPSTYLEDLVVK

Source : QE3\_201126\_FR\_TIOx\_hum\_tissue\_Urea\_RNAB\_N Scan : 63104

Andromeda score : 107.78

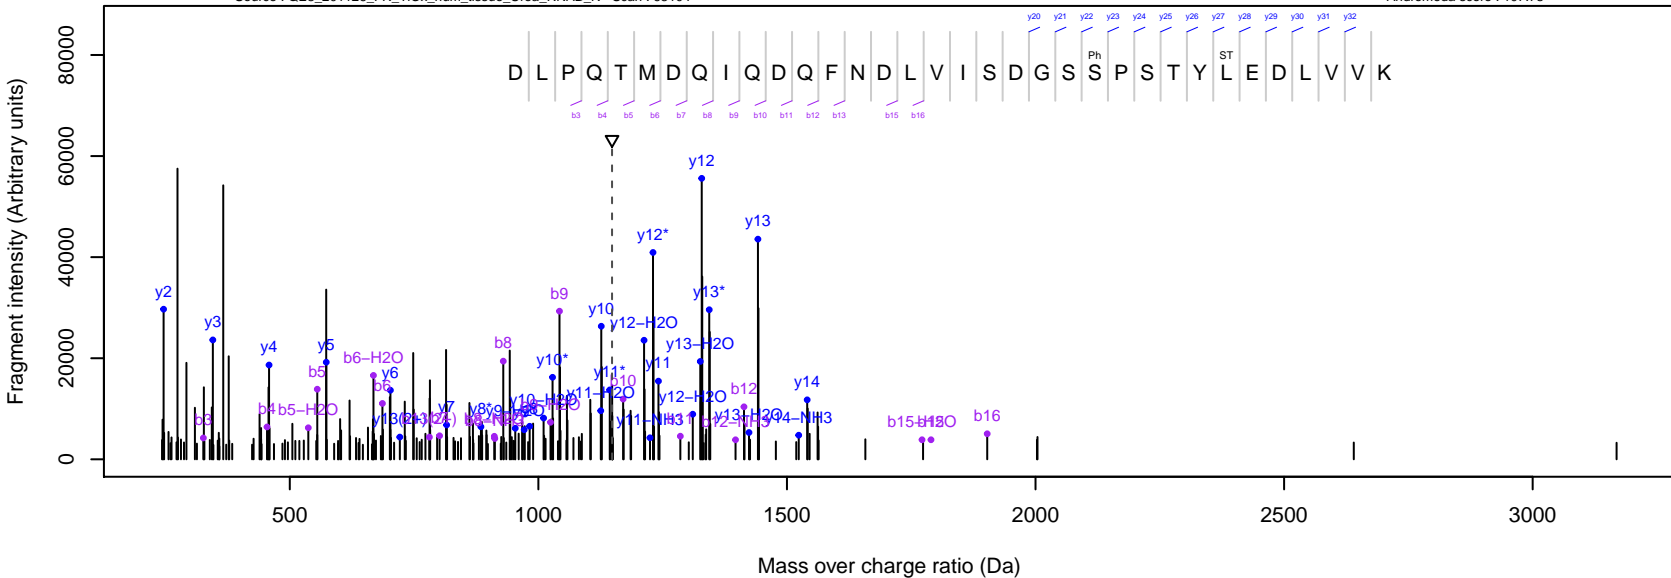

MDS(Phospho (STY))FDEDLARPSGLLAQER

Source : QE3\_201126\_FR\_TIOx\_hum\_tissue\_Urea\_RNAB\_N Scan : 42851

Andromeda score : 107.74

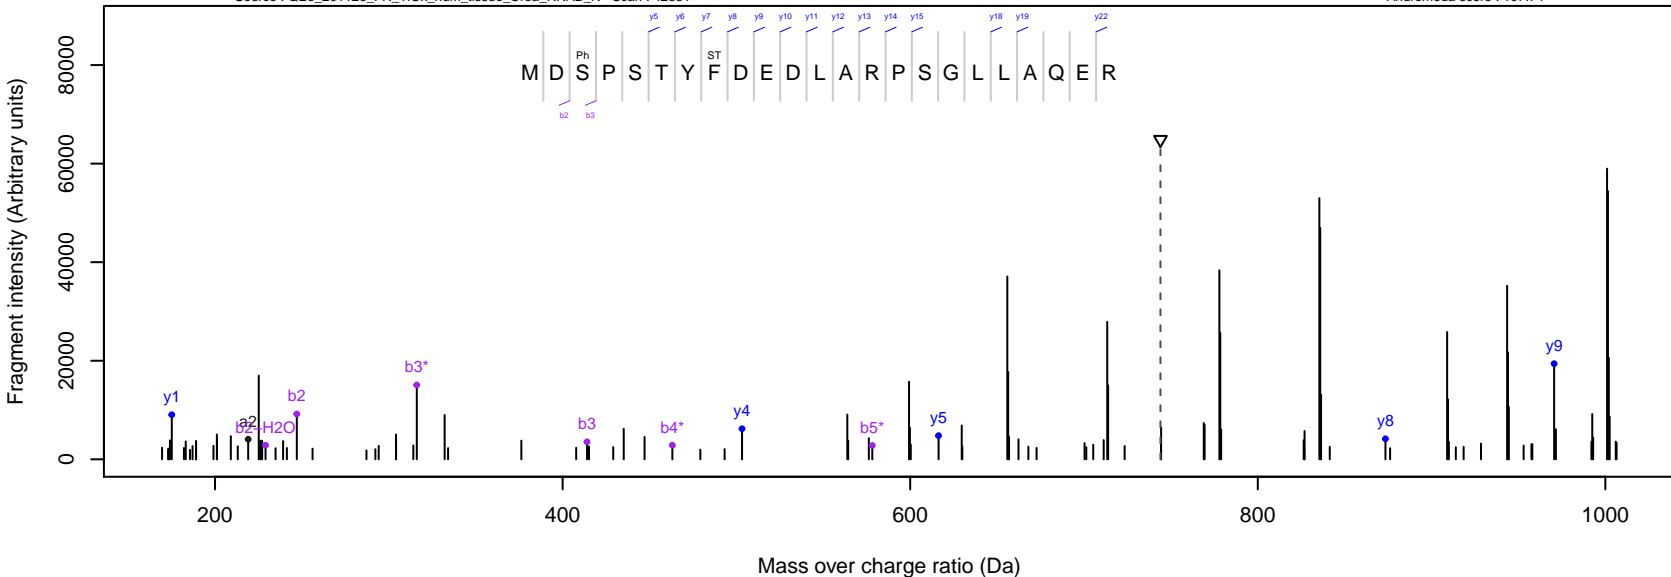

RIDIS(Phospho (STY))PSTFRK

Source : QE3\_201126\_FR\_TIOx\_hum\_tissue\_Urea\_RNAB\_N Scan : 18825

Andromeda score : 107.74

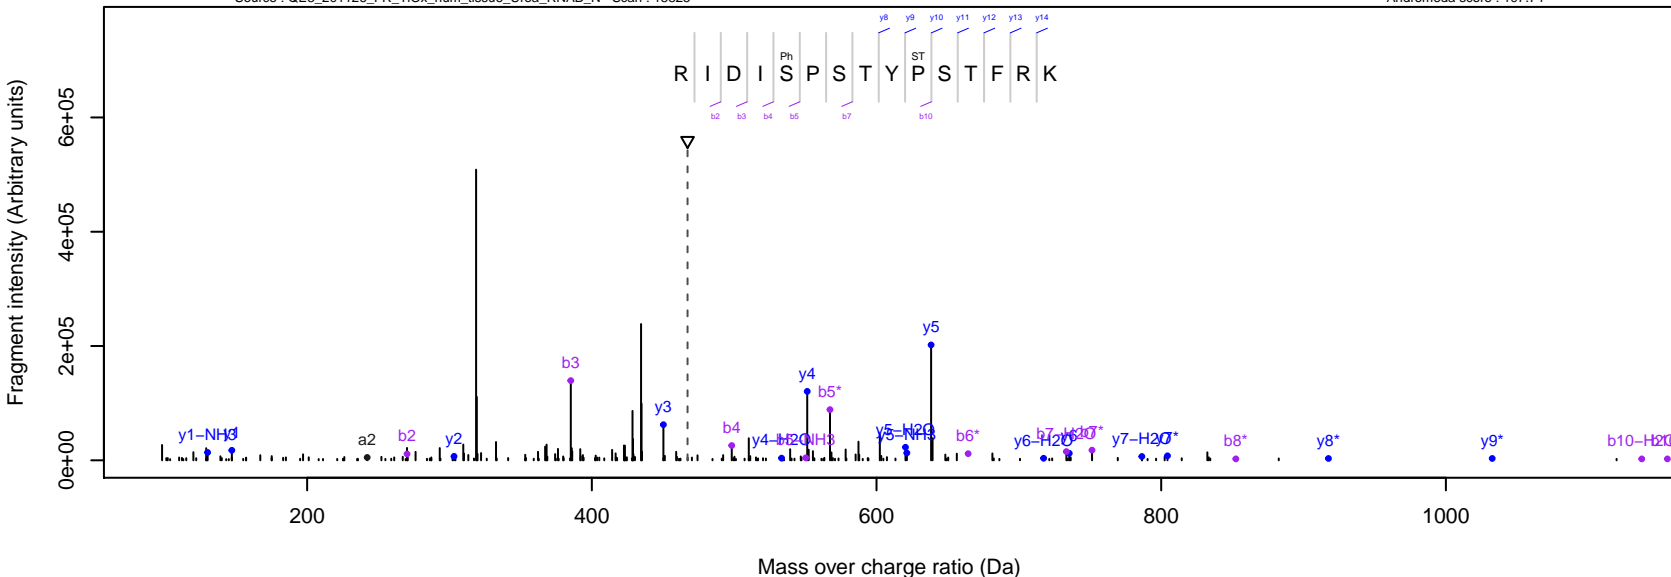

SAYQEYDS(Phospho (STY))DSDVPEELK-3+

Source : QE3\_201126\_FR\_TiOx\_hum\_tissue\_Urea\_RNAB\_H Scan : 25186

Andromeda score : 107.74

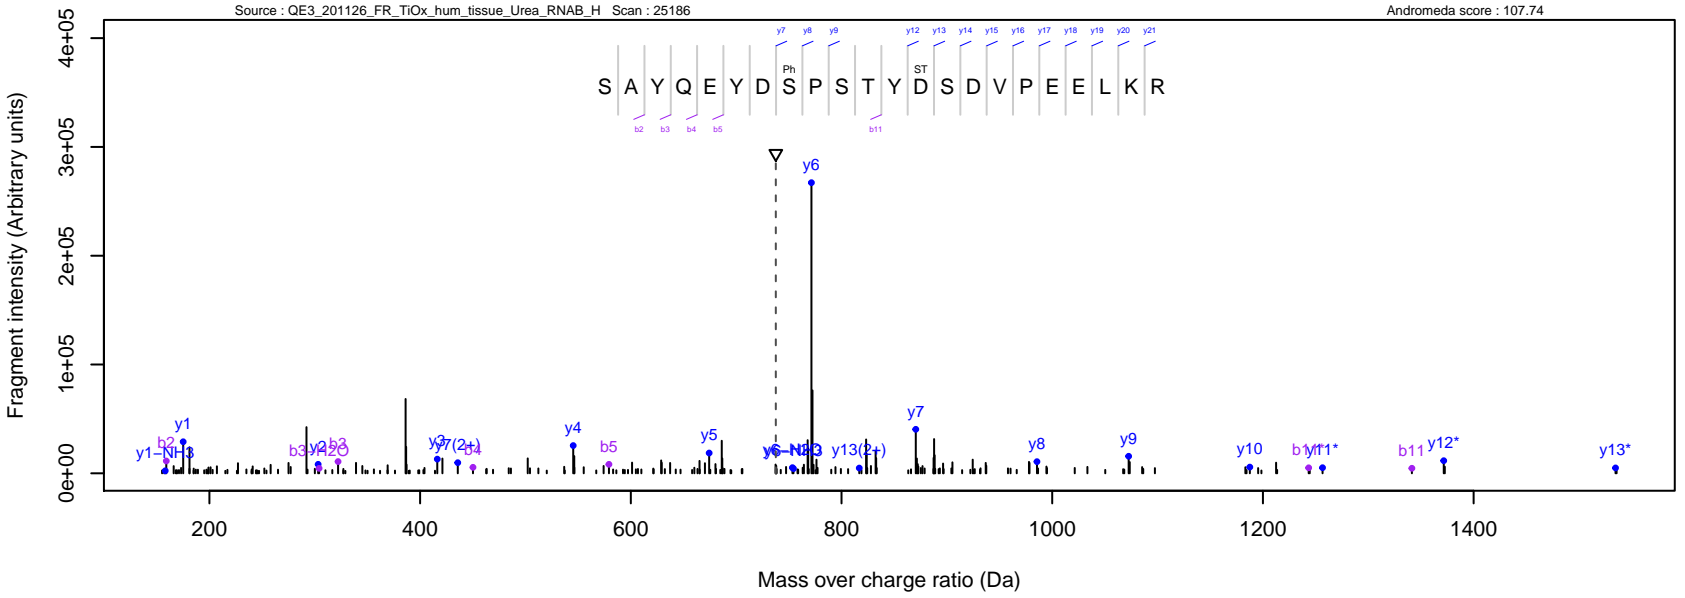

SSYSS(Phospho (STY))PTLS(Phospho (STY))PR-2+

Source : QE3\_201126\_FR\_TiOx\_hum\_tissue\_Urea\_RNAB\_N Scan : 22137

Andromeda score : 107.74

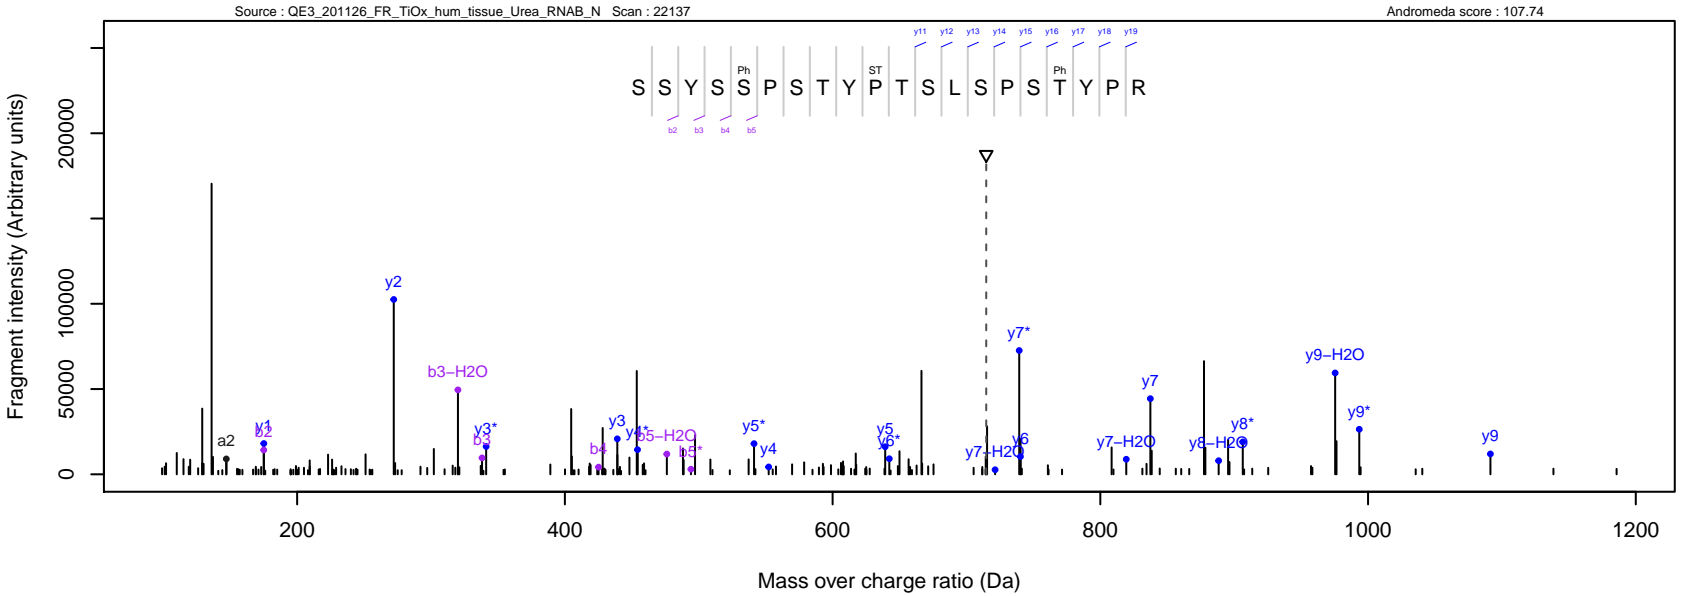

LPS(Phospho (STY))GSGAAS(Phospho (STY))PTGS(Phospho (STY))AVDIR-2+

Source : QE3\_201126\_FR\_TiOx\_hum\_tissue\_Urea\_RNAB\_N Scan : 38291

Andromeda score : 107.72

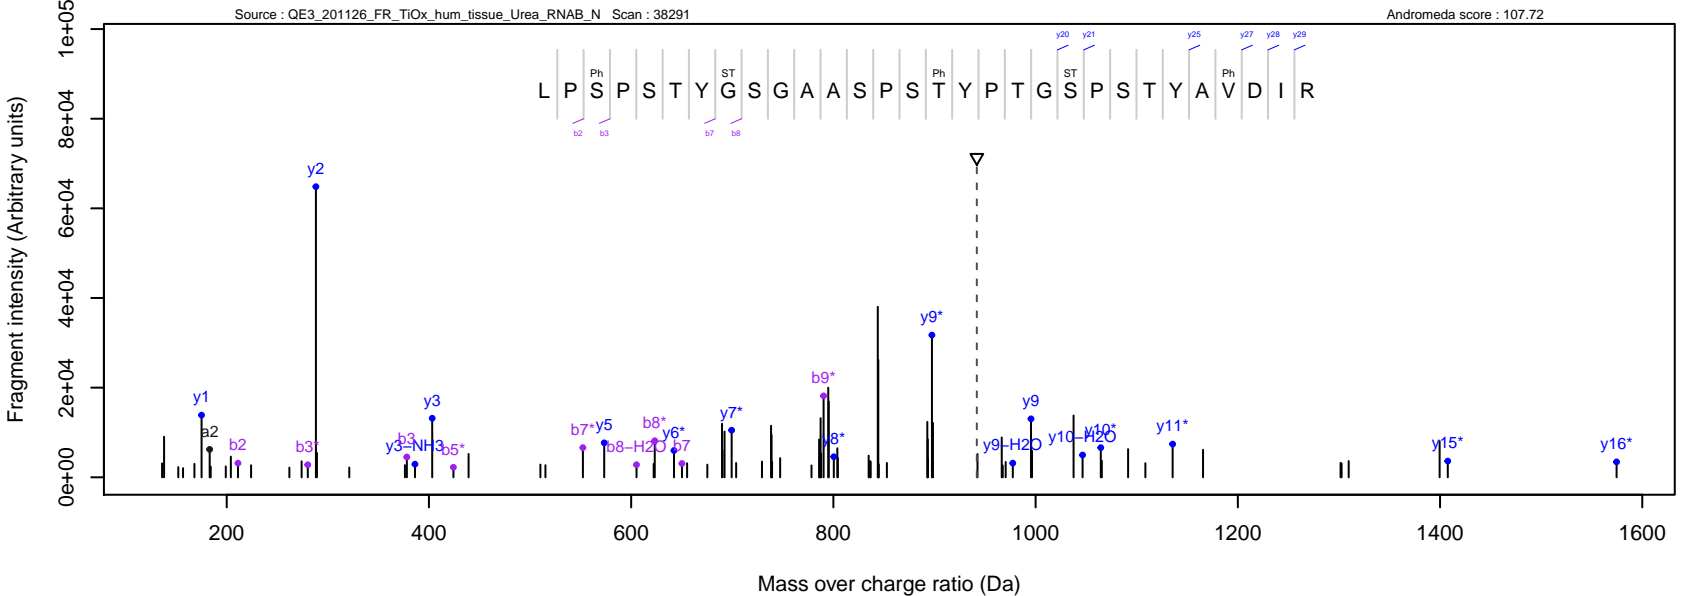



GGGGDMAEPS(Phospho (STY))EAGDAPPDDGPPGELGPDGDPGPEEK-3+

Source : QE3\_201126\_FR\_TIOx\_hum\_tissue\_Urea\_RNAB\_N Scan : 33854

Andromeda score : 107.71

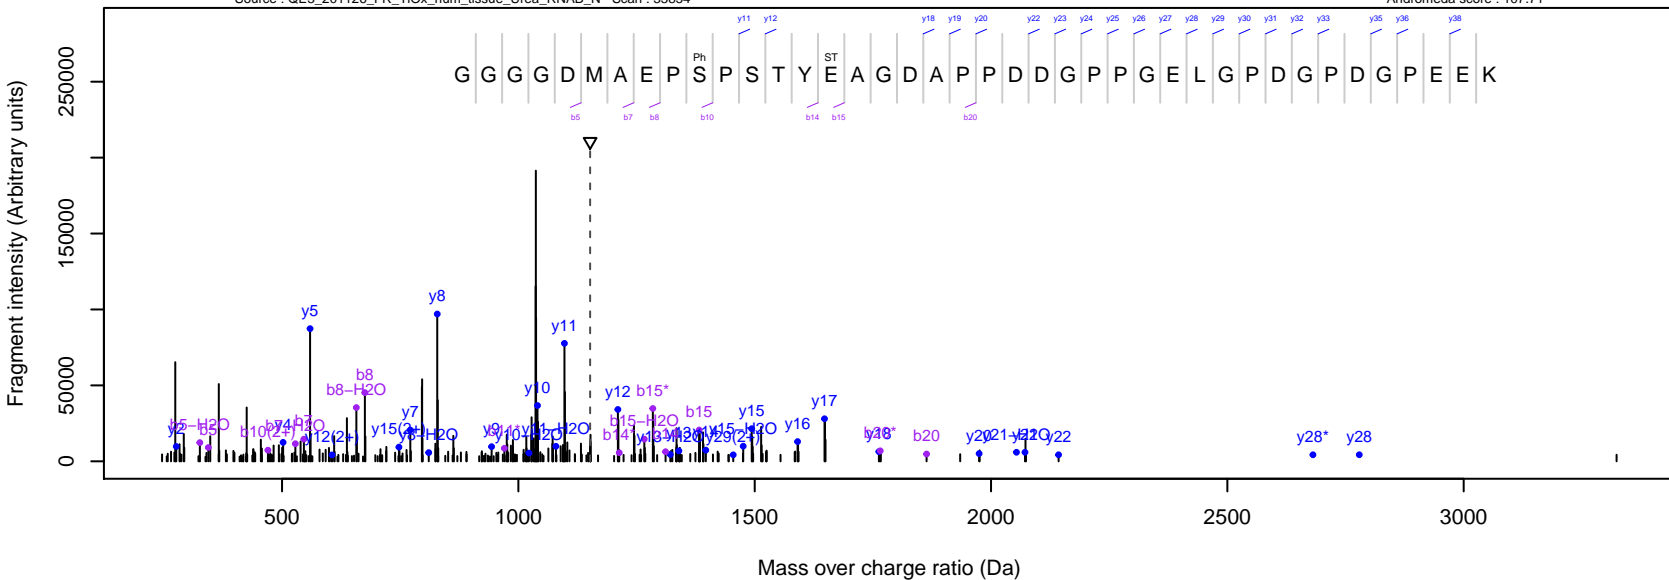

IRIDS(Phospho (STY))LSAQLSQLQK-3+

Source : QE3\_201126\_FR\_TIOx\_hum\_tissue\_Urea\_RNAB\_H Scan : 44403

Andromeda score : 107.69

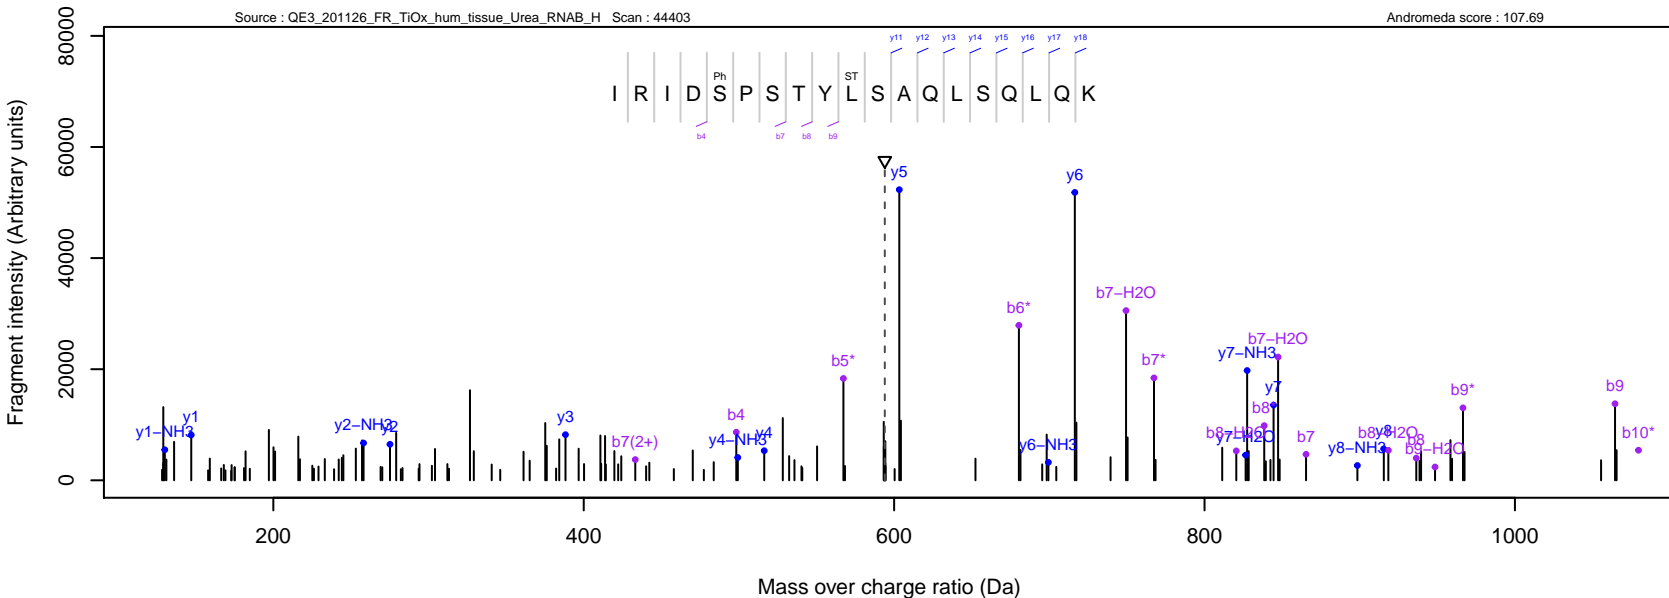

S(Phospho (STY))KINLQDLQGACTK-3+

Source : QE3\_201126\_FR\_TIOx\_hum\_tissue\_Urea\_RNAB\_H Scan : 21584

Andromeda score : 107.69

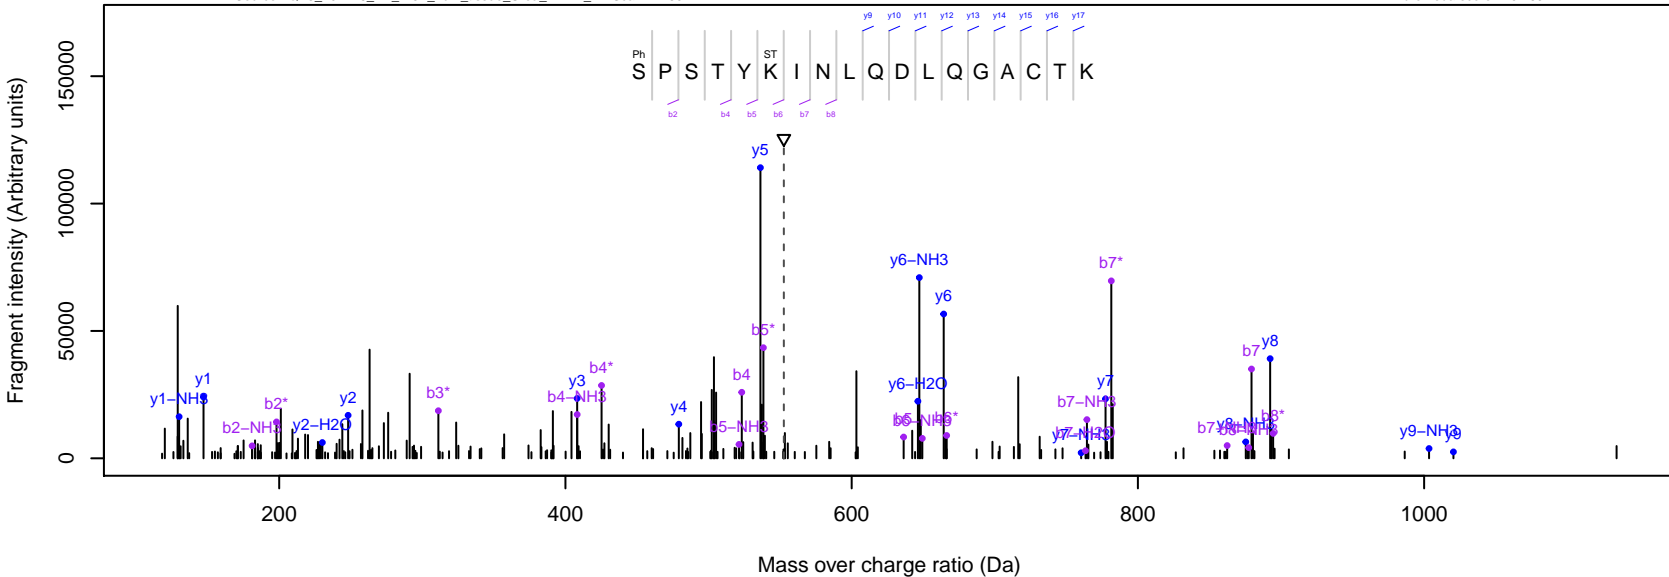

FSSSIENS(Phospho (STY))DSPVR-2+

Source : QE3\_2011126\_FR\_TiOx\_hum\_tissue\_Urea\_RNAB\_N Scan : 17988

Andromeda score : 107.65

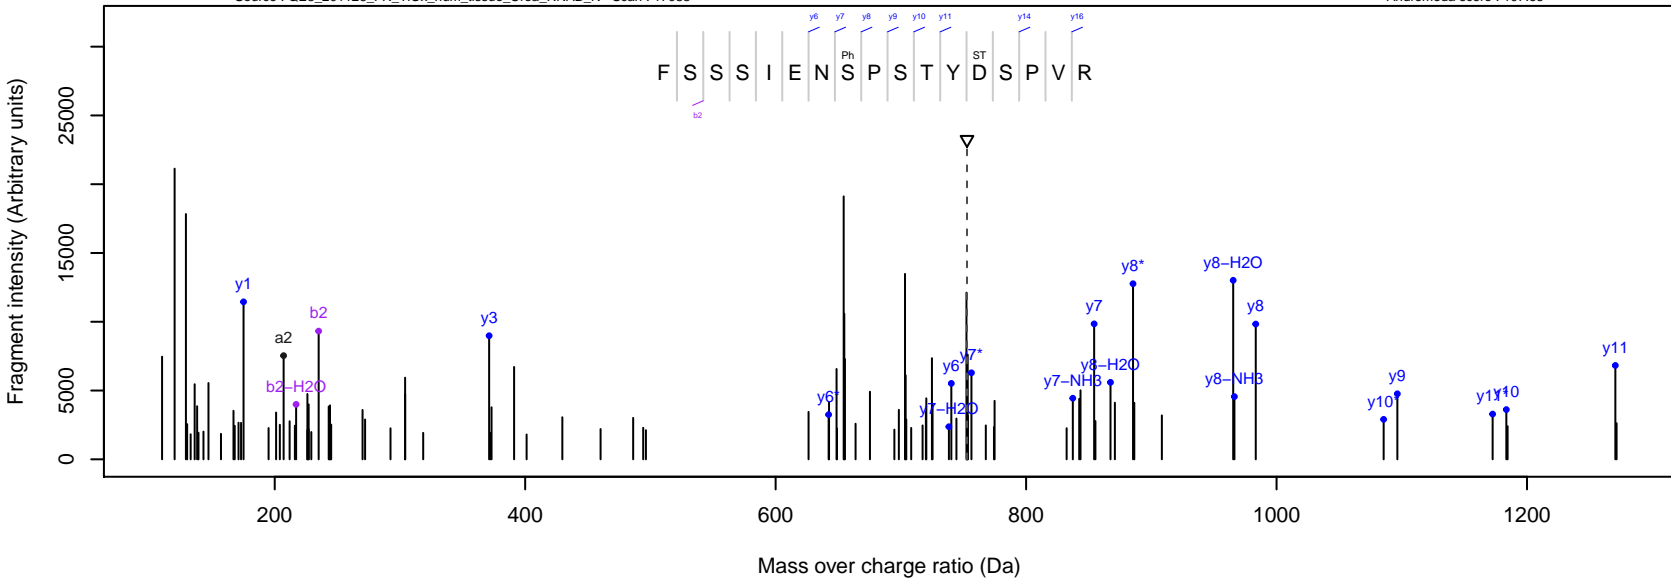

ITPLSLQTQGS(Phospho (STY))SHETLNIVEEK-3+

Source : QE3\_2011126\_FR\_TiOx\_hum\_tissue\_Urea\_RNAB\_N Scan : 38822

Andromeda score : 107.65

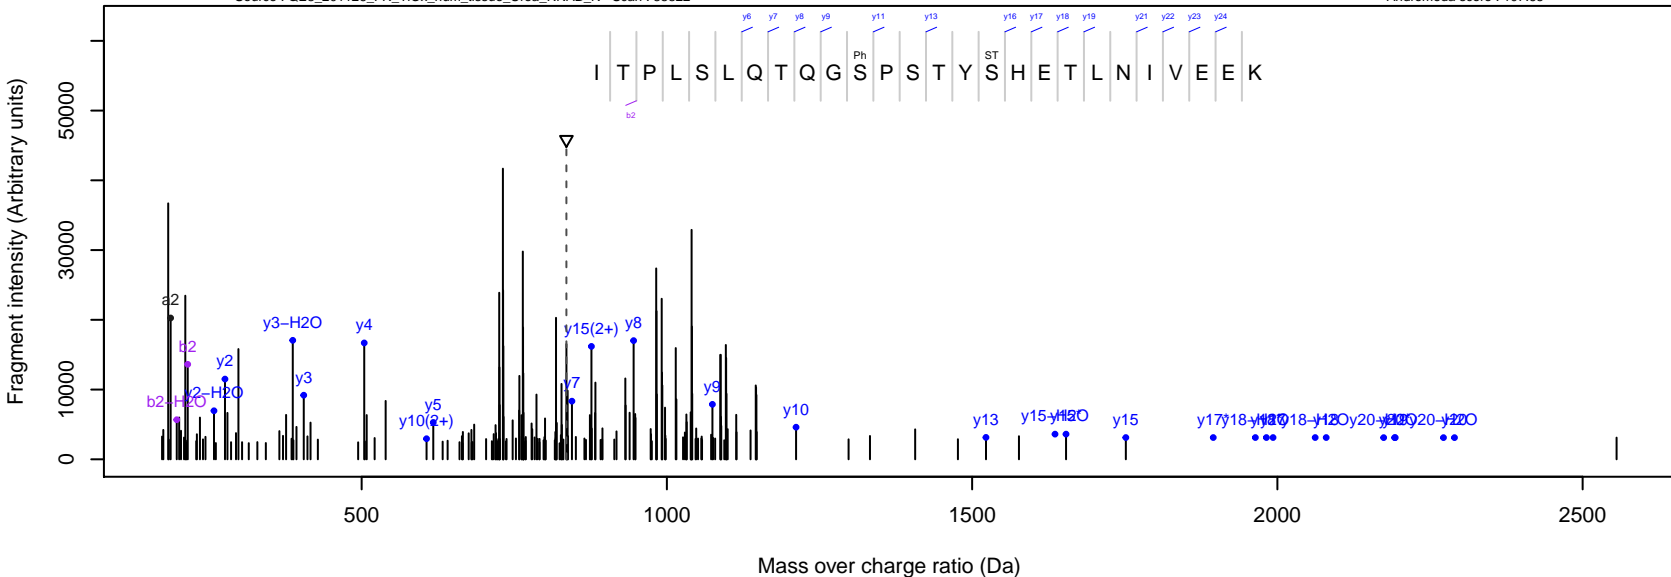

KRPS(Phospho (STY))LPSSPSGLPK-3+

Source : QE3\_2011126\_FR\_TiOx\_hum\_tissue\_Urea\_RNAB\_B Scan : 16005

Andromeda score : 107.65

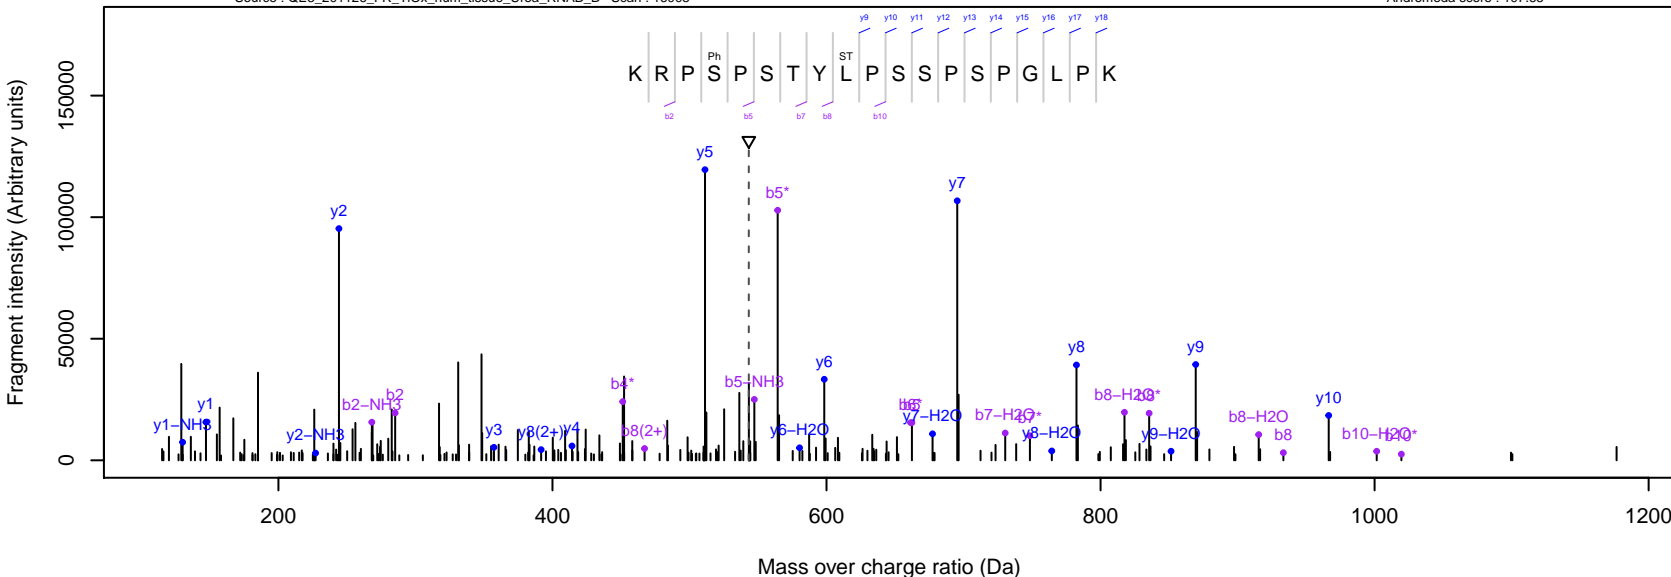



NWPSDEMPDFPKSDDSKS(Phospho (STY))SPELVTHLK-4+

Source : QE3\_201126\_FR\_TiOx\_hum\_tissue\_Urea\_RNAB\_H Scan : 36919

Andromeda score : 107.52

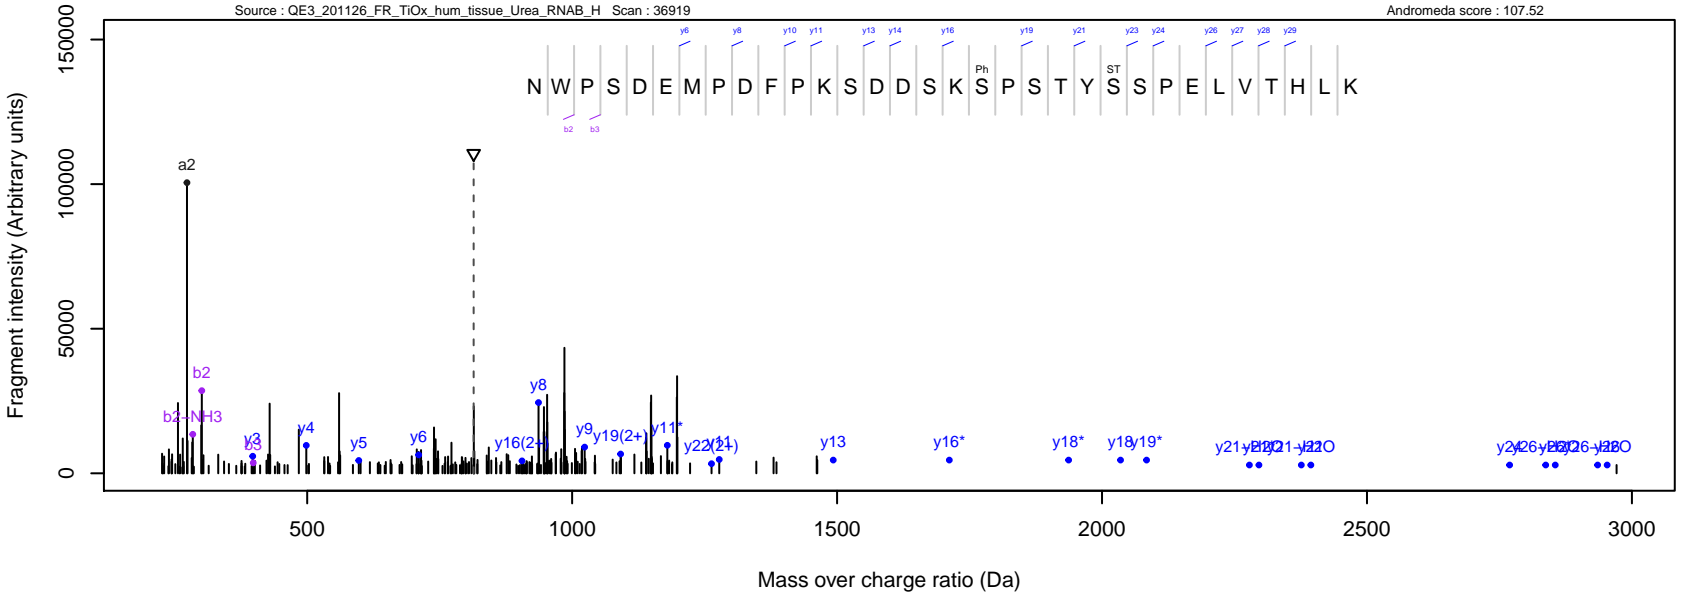

NYSEVIEVES(Phospho (STY))DVEEDIFPTTSK-3+

Source : QE3\_201126\_FR\_TiOx\_hum\_tissue\_Urea\_RNAB\_H Scan : 57342

Andromeda score : 107.47

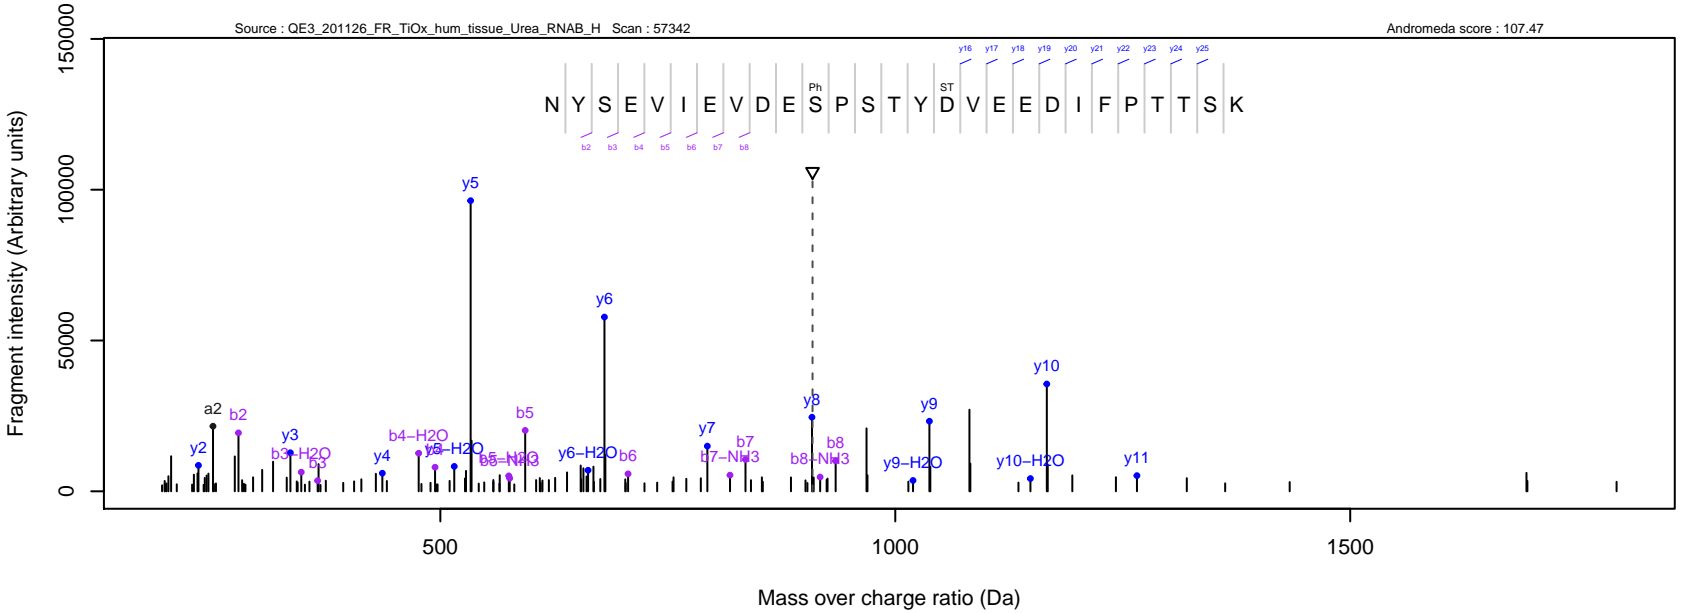

HPS(Phospho (STY))SPSALR-2+

Source : QE3\_201126\_FR\_TiOx\_hum\_tissue\_Urea\_RNAB\_H Scan : 5803

Andromeda score : 107.45

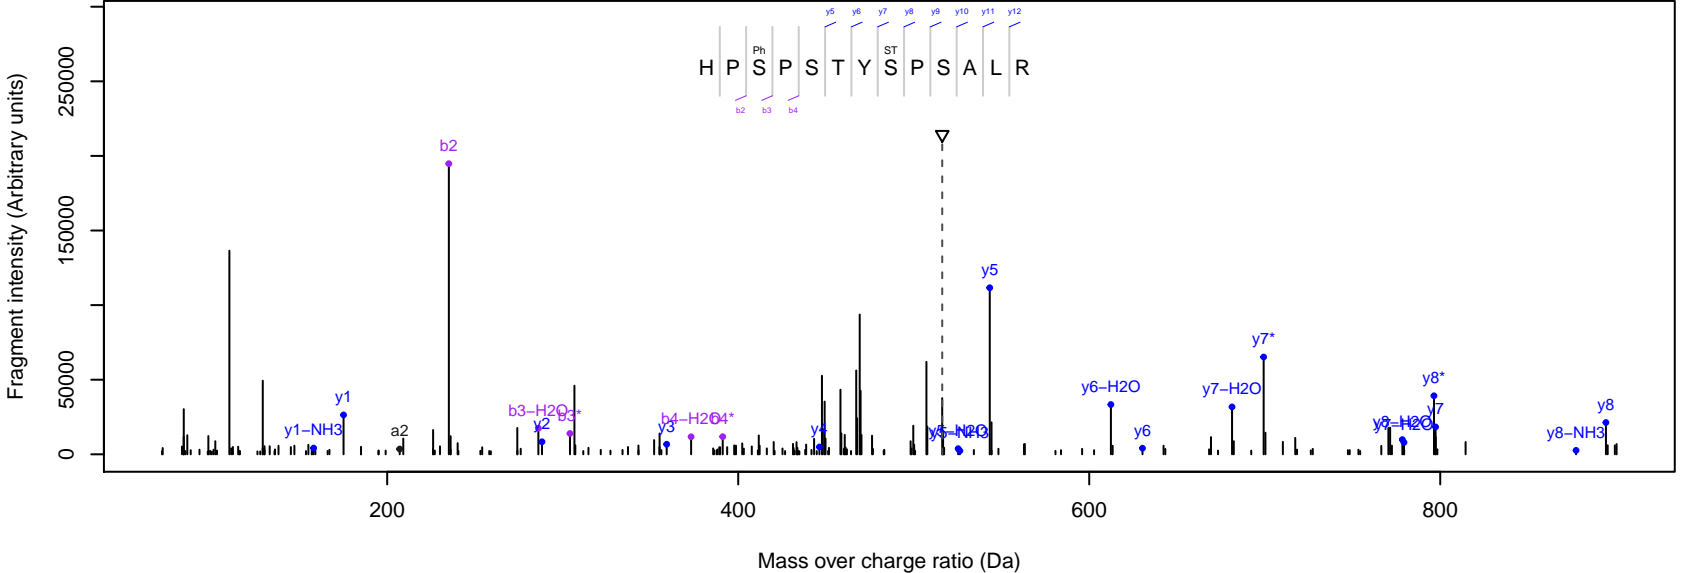

LDVYTQWHQQS(Phospho (STY))QSTKPK-3+

Source : QE3\_201126\_FR\_TiOx\_hum\_tissue\_Urea\_RNAB\_N Scan : 18490

Andromeda score : 107.45

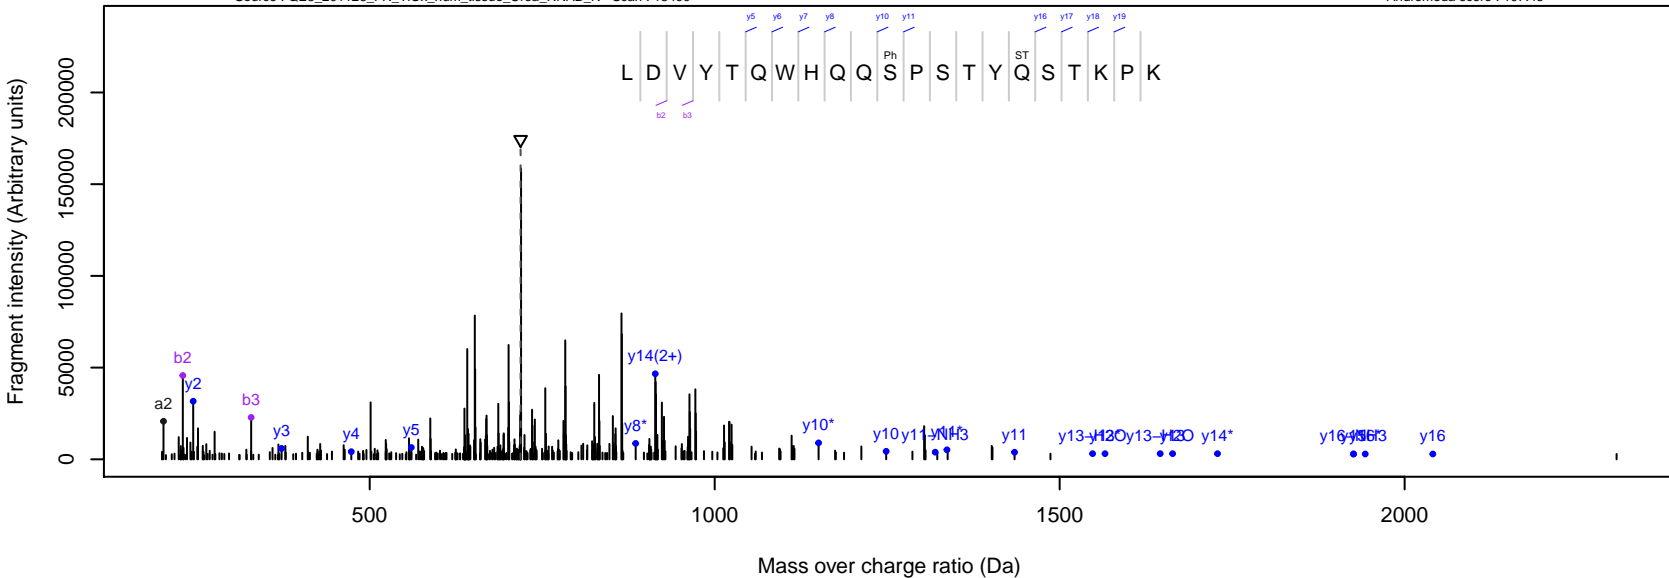

FVEWLQNAEEES(Phospho (STY))ES(Phospho (STY))EGEEN-2+

Source : QE3\_201126\_FR\_TiOx\_hum\_tissue\_Urea\_RNAB\_H Scan : 64367

Andromeda score : 107.43

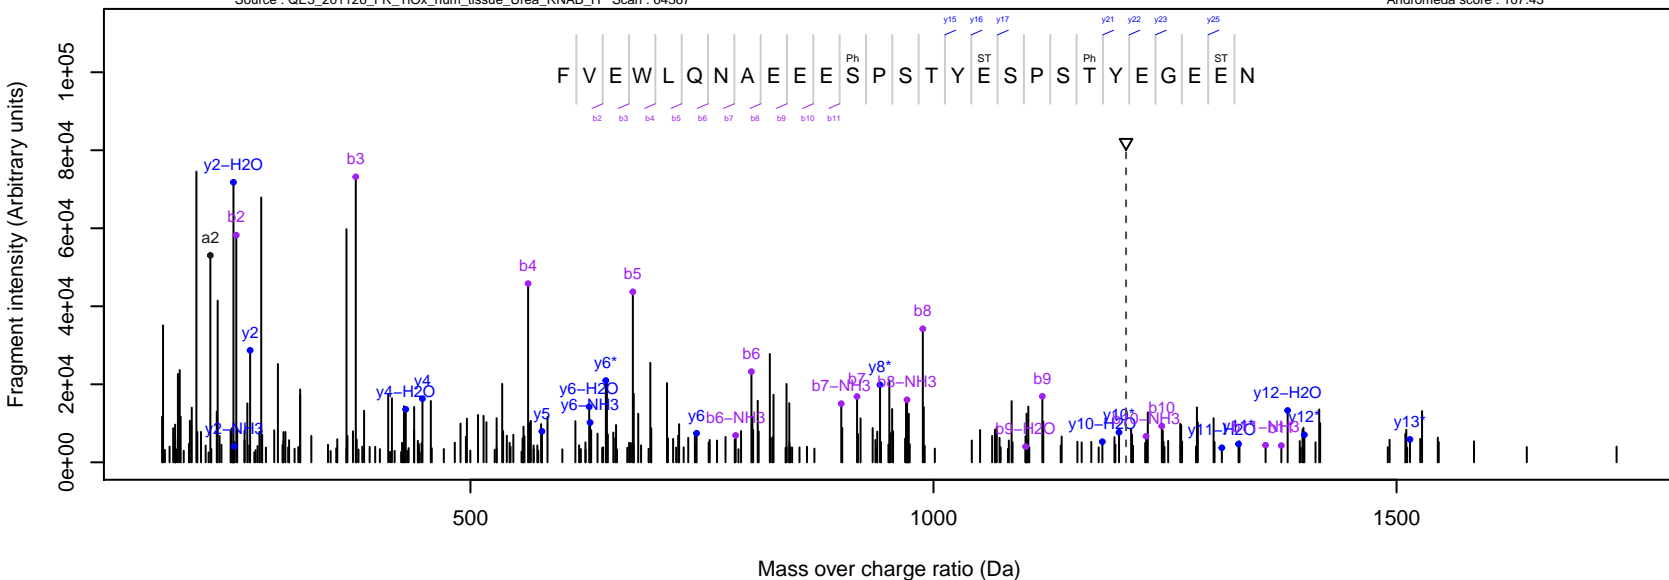

ELESQIS(Phospho (STY))ELQEDLESER-3+

Source : QE3\_201126\_FR\_TiOx\_hum\_tissue\_Urea\_RNAB\_N Scan : 54154

Andromeda score : 107.41

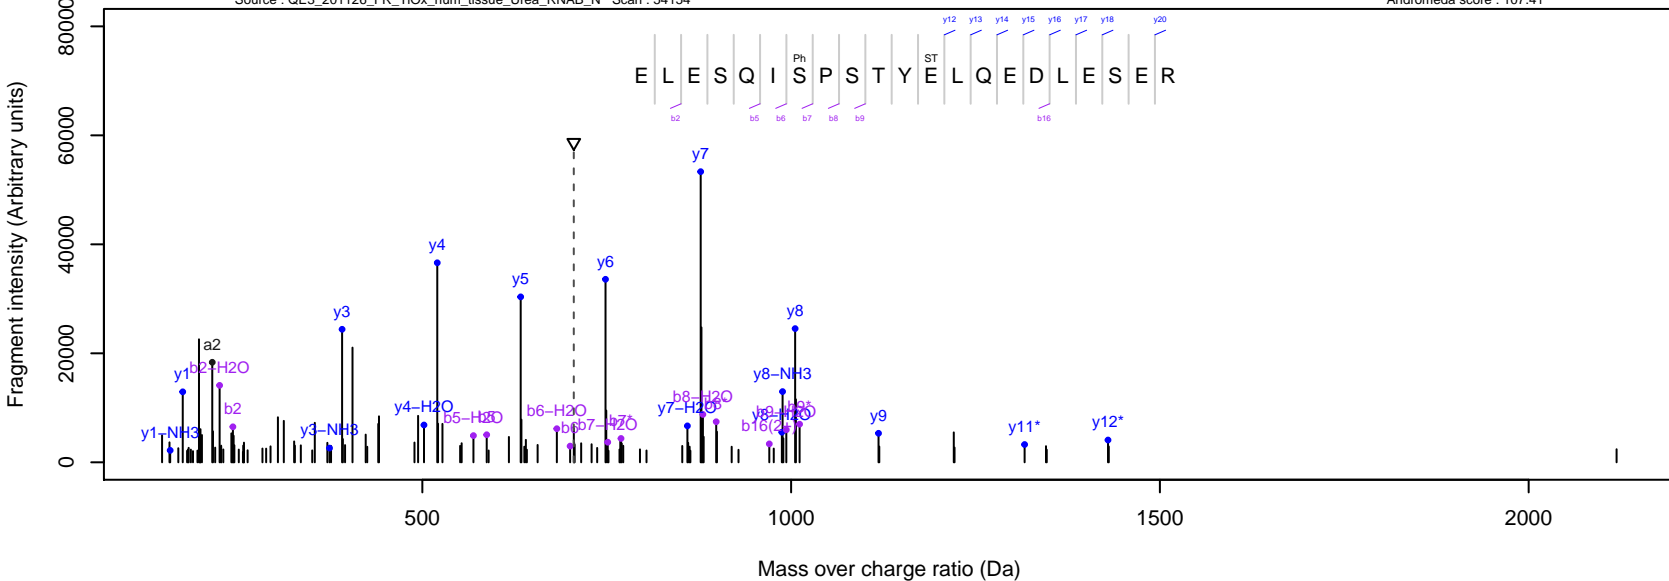

KVVEAVNSDS(Phospho (STY))DSEFGIPK-2+

Source : QE3\_201126\_FR\_TiOx\_hum\_tissue\_Urea\_RNAB\_N Scan : 27159

Andromeda score : 107.41

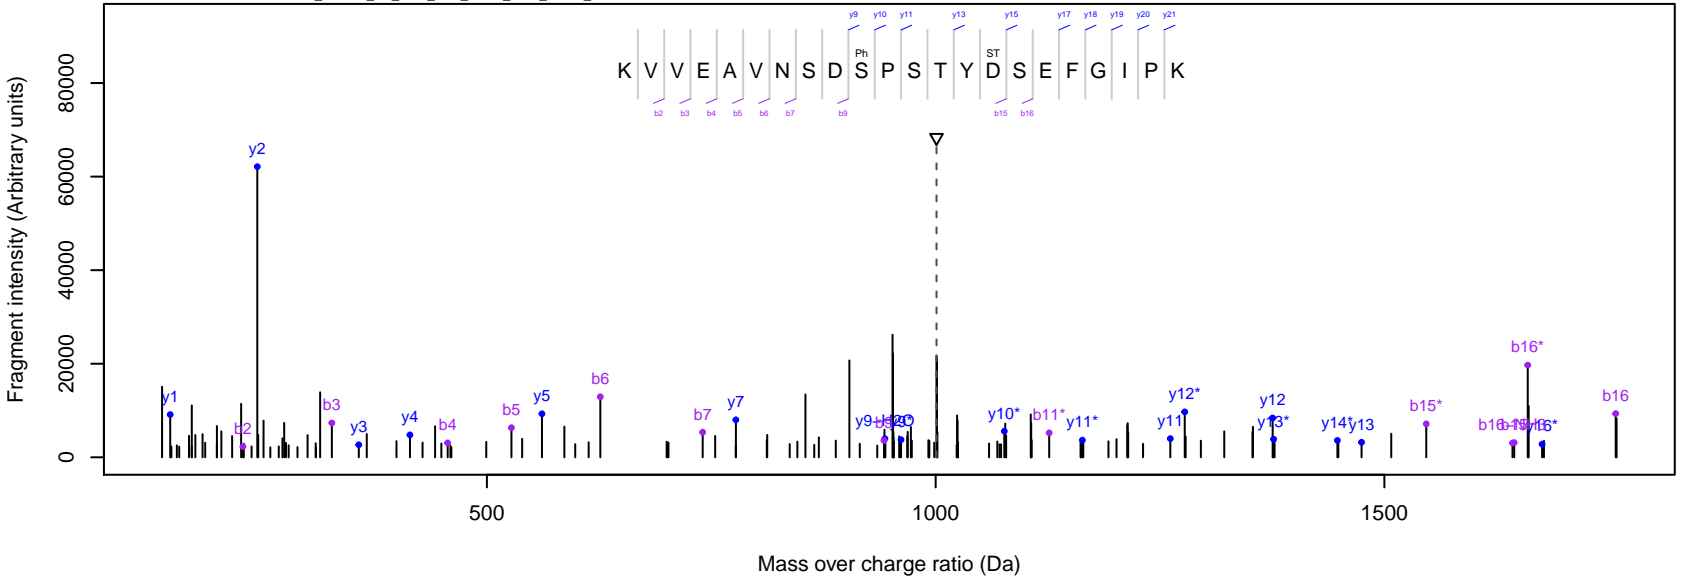

FLAS(Phospho (STY))VSTVLTSK-2+

Source : QE3\_201126\_FR\_TiOx\_hum\_tissue\_Urea\_RNAB\_H Scan : 47326

Andromeda score : 107.37

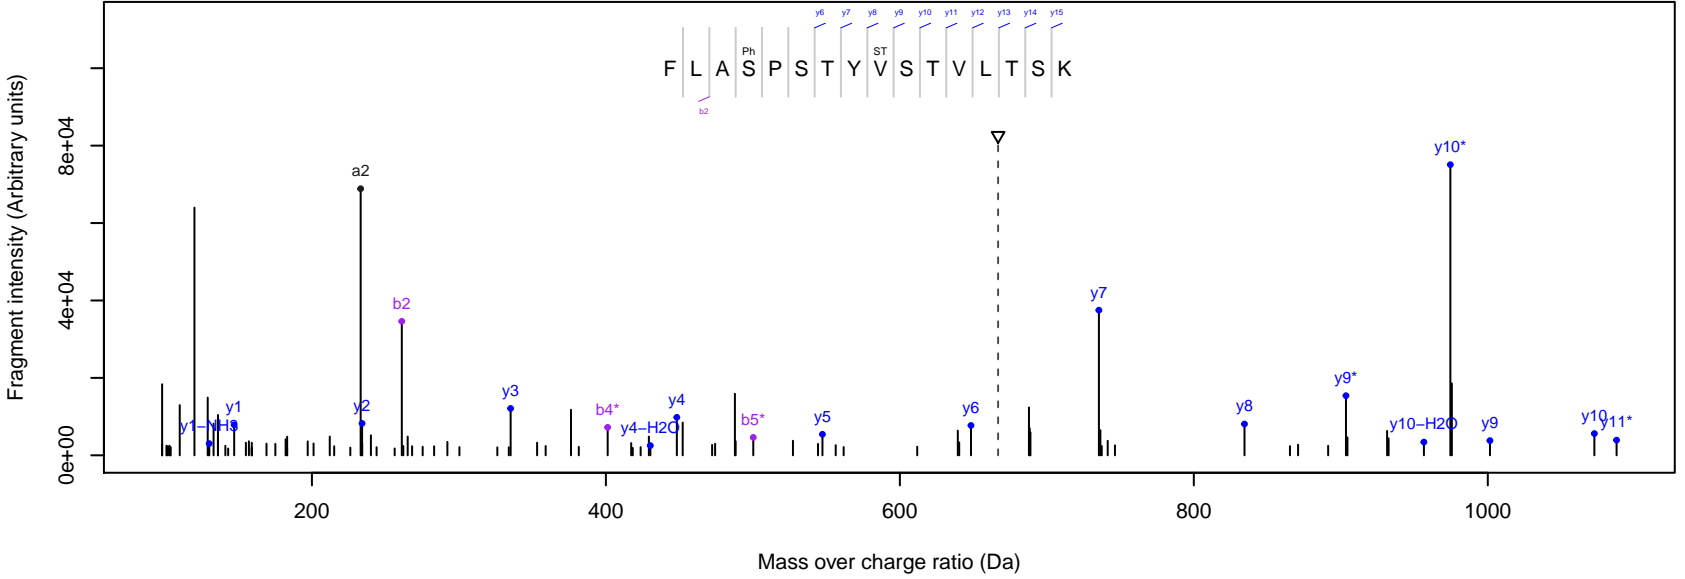

KAQEAEAQ(SPhospho (STY))EDDED(Phospho (STY))EEEQGEEKEK-3+

Source : QE3\_201126\_FR\_TiOx\_hum\_tissue\_Urea\_RNAB\_N Scan : 6986

Andromeda score : 107.36

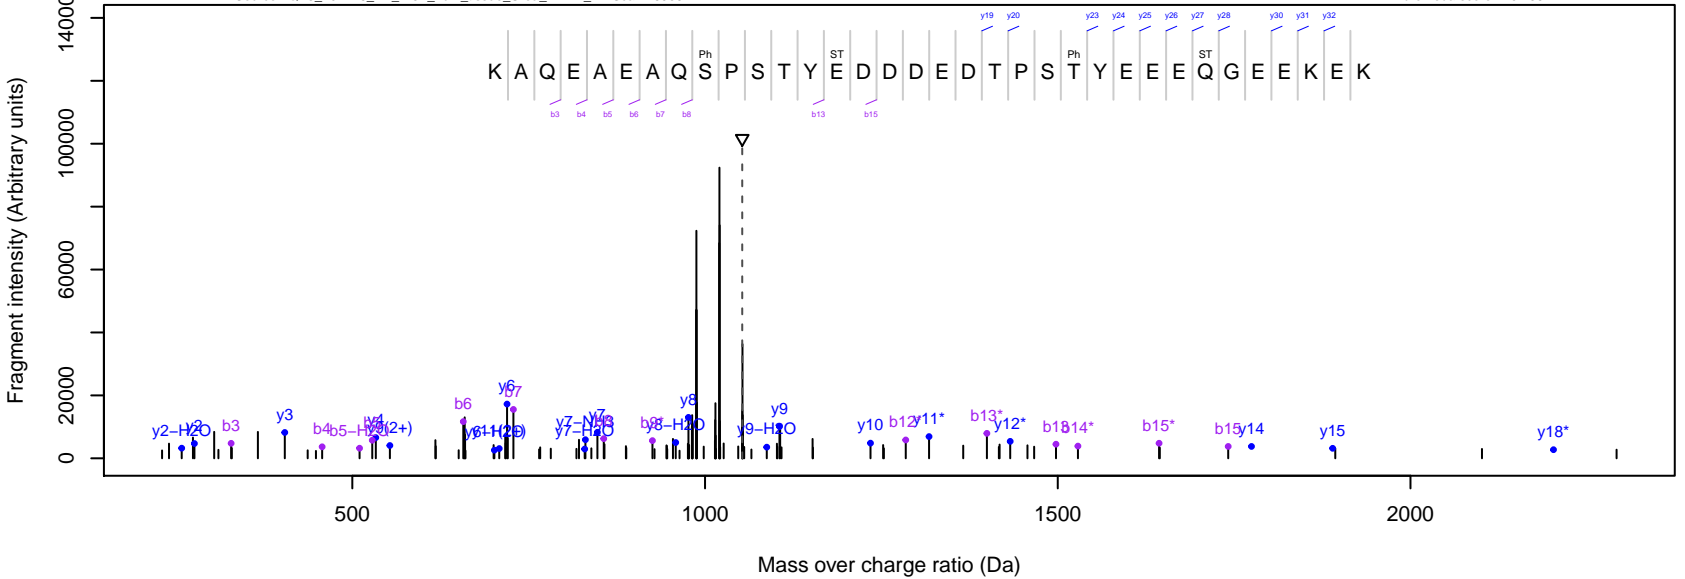

YHT(Phospho (STY))INGHNAEVR-3+

Source : QE3\_201126\_FR\_TiOx\_hum\_tissue\_Urea\_RNAB\_N Scan : 6117

Andromeda score : 107.35

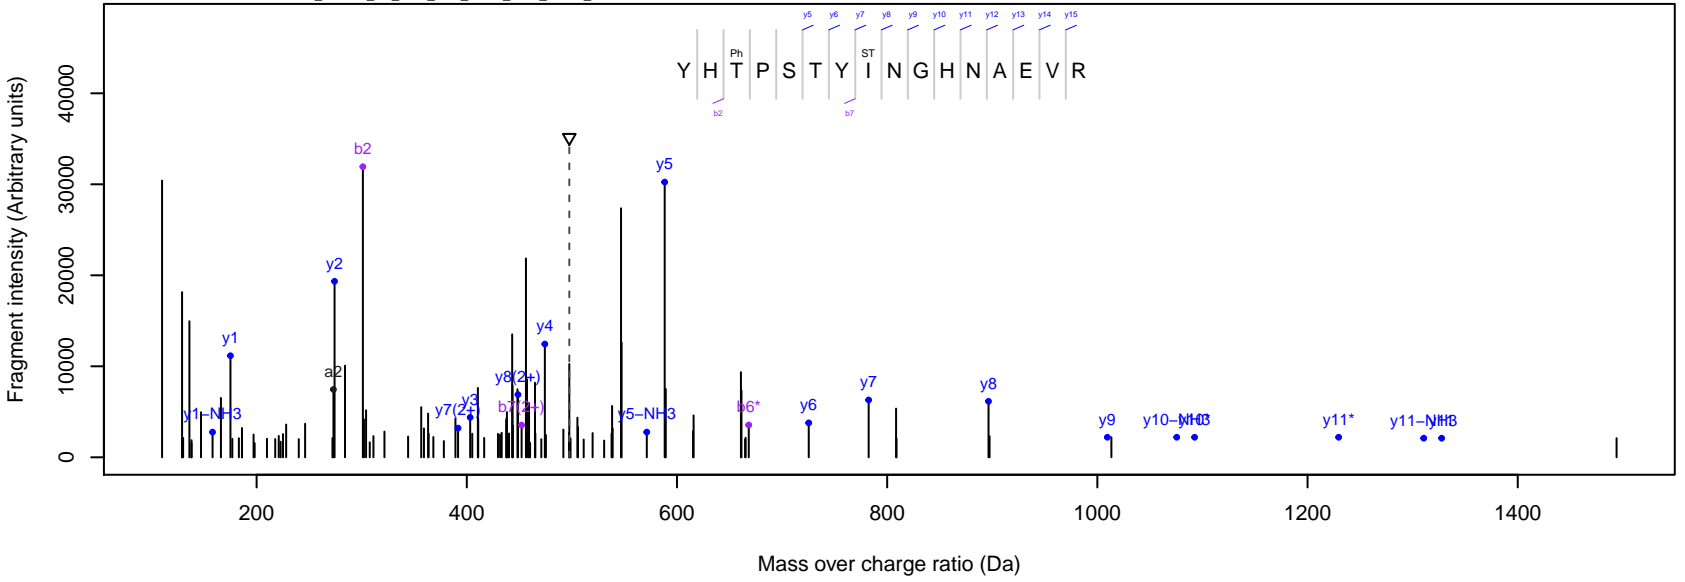

GGs(Phospho (STY))PPWAANSQPQPPR-2+

Source : QE3\_201126\_FR\_TiOx\_hum\_tissue\_Urea\_RNAB\_N Scan : 25681

Andromeda score : 107.34

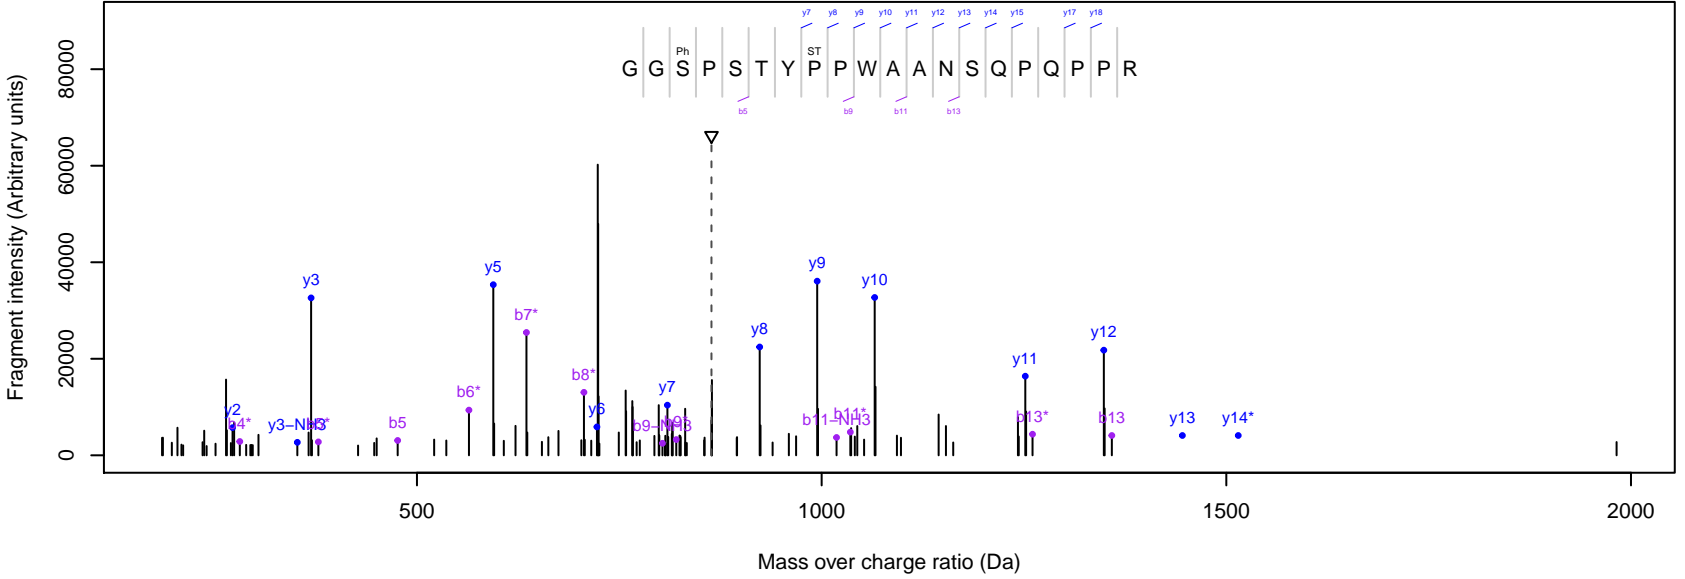

S(Phospho (STY))TQLLQAAAAEASLNK-2+

Source : QE3\_201126\_FR\_TiOx\_hum\_tissue\_Urea\_RNAB\_N Scan : 42668

Andromeda score : 107.34

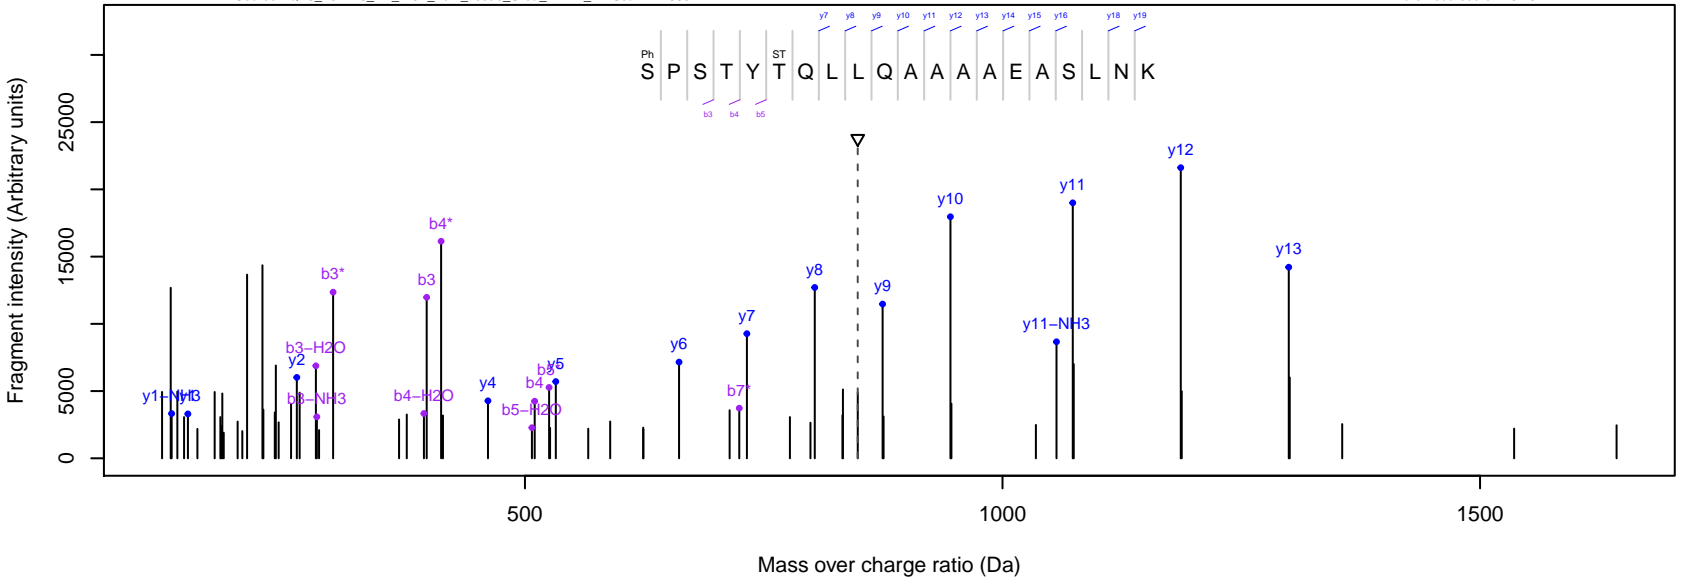





S(Phospho (STY))HESLLSPCSTVECLDLGR-3+

Source : QE3\_201126\_FR\_TiOx\_hum\_tissue\_Urea\_RNAB\_H Scan : 42803

Andromeda score : 107.21

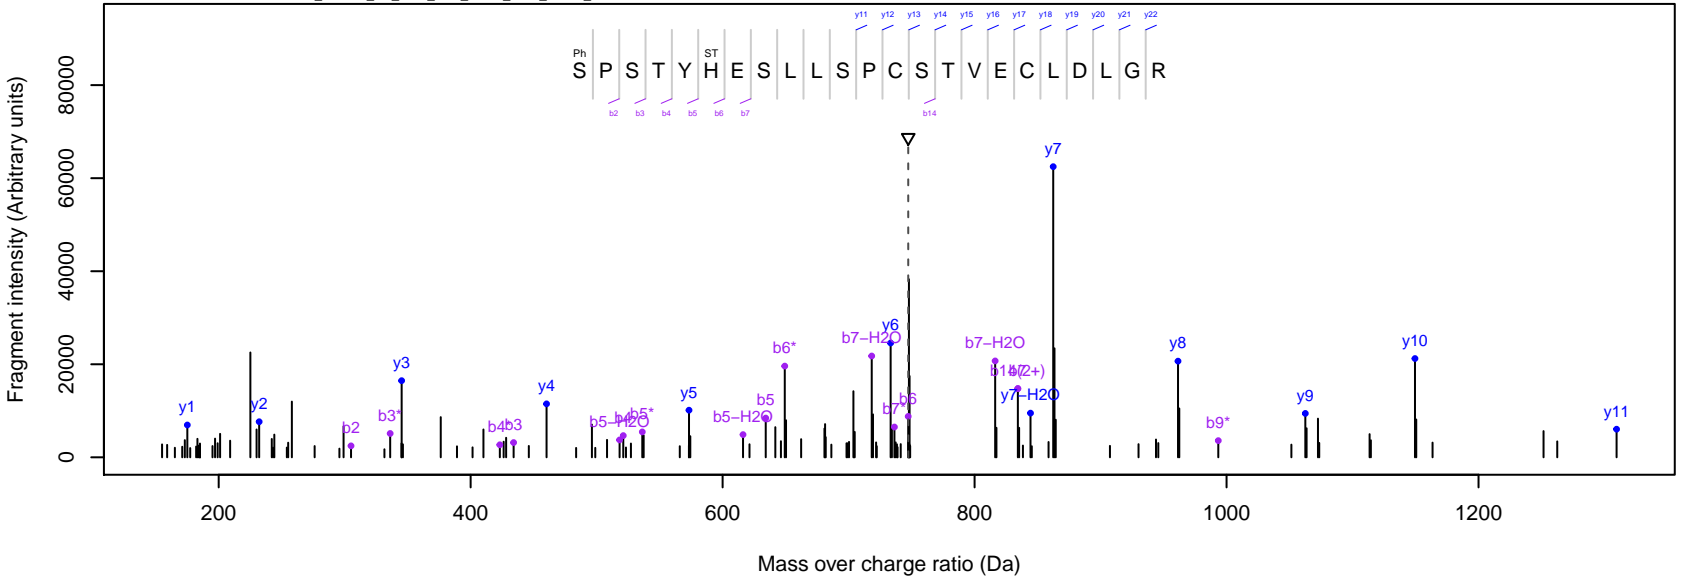

RHS(Phospho (STY))ASNLHALAHPAPSPGSCSPK-4+

Source : QE3\_201126\_FR\_TiOx\_hum\_tissue\_Urea\_RNAB\_H Scan : 9683

Andromeda score : 107.19

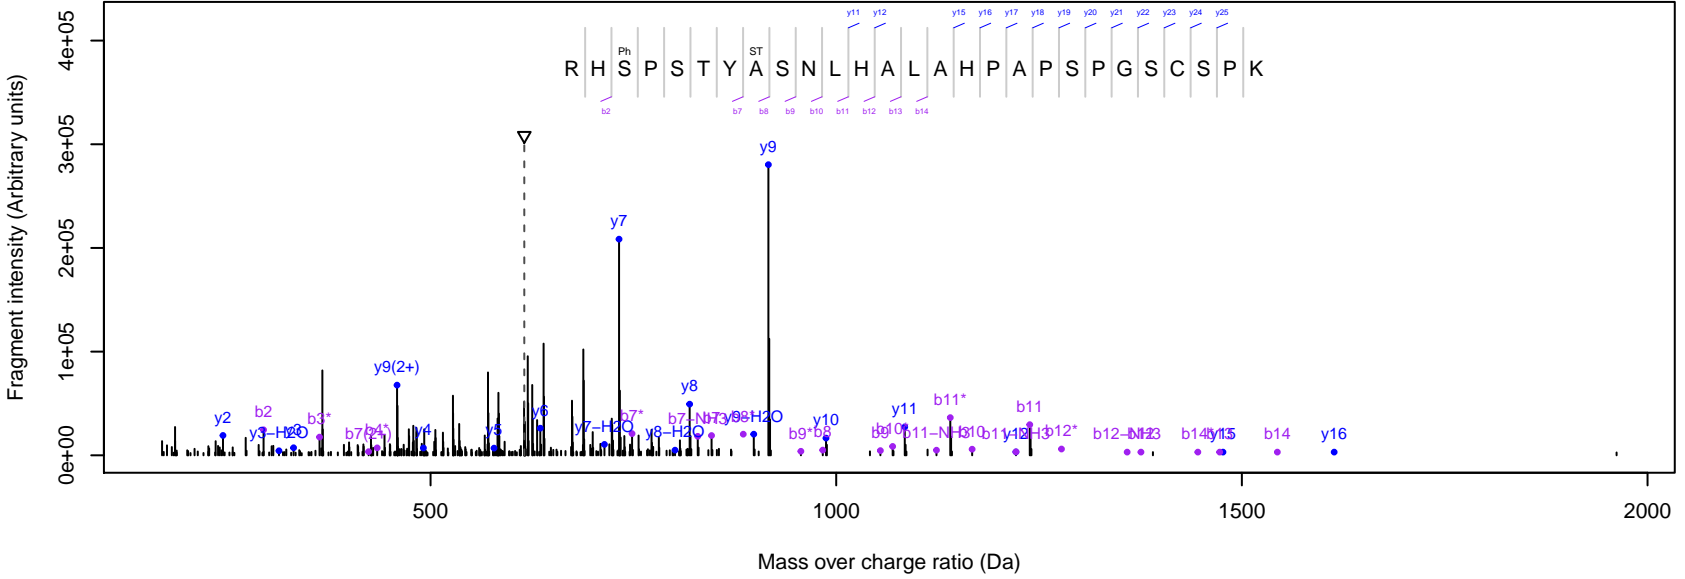

DAAQGEVEAES(Phospho (STY))PGVPVPAKPK-3+

Source : QE3\_201126\_FR\_TiOx\_hum\_tissue\_Urea\_RNAB\_H Scan : 15154

Andromeda score : 107.17

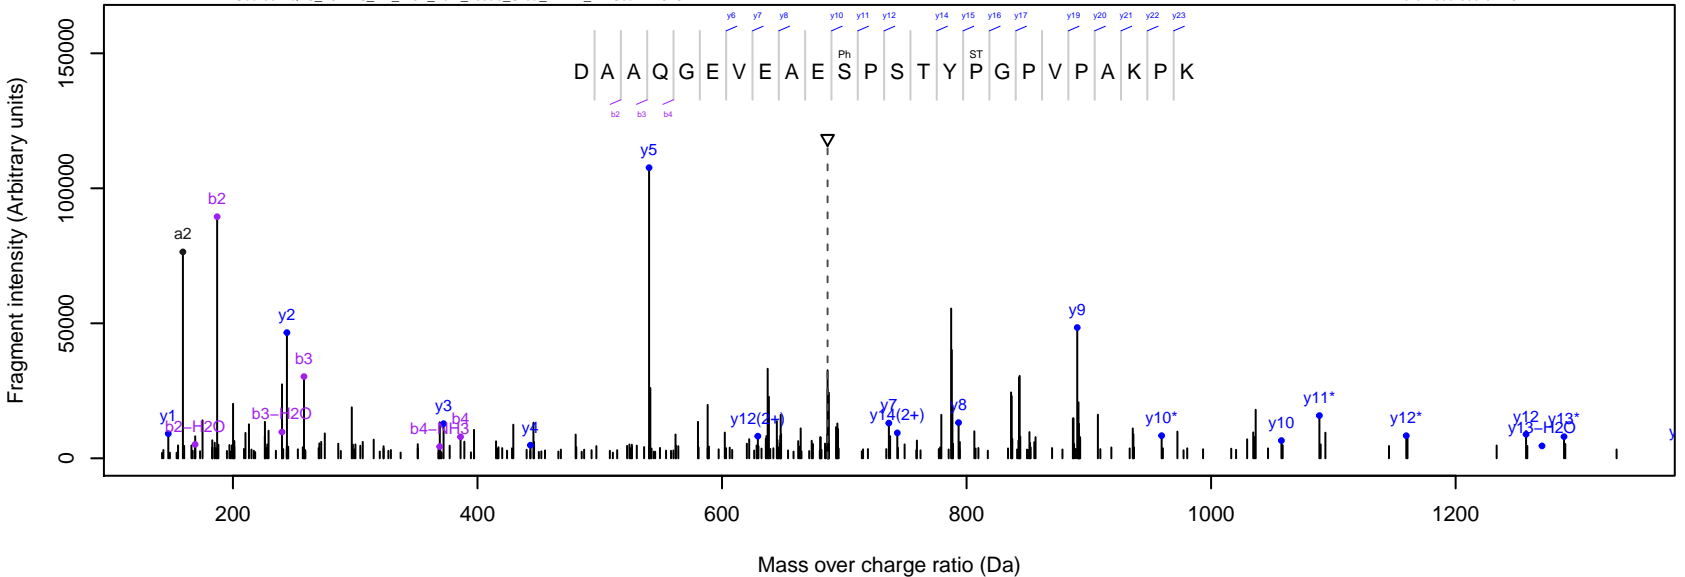

(Acetyl (Protein N-term))SLYPS(Phospho (STY))LEDLKVDK-2+

Source : QE3\_201126\_FR\_TiOx\_hum\_tissue\_Urea\_RNAB\_H Scan : 49739

Andromeda score : 107.14

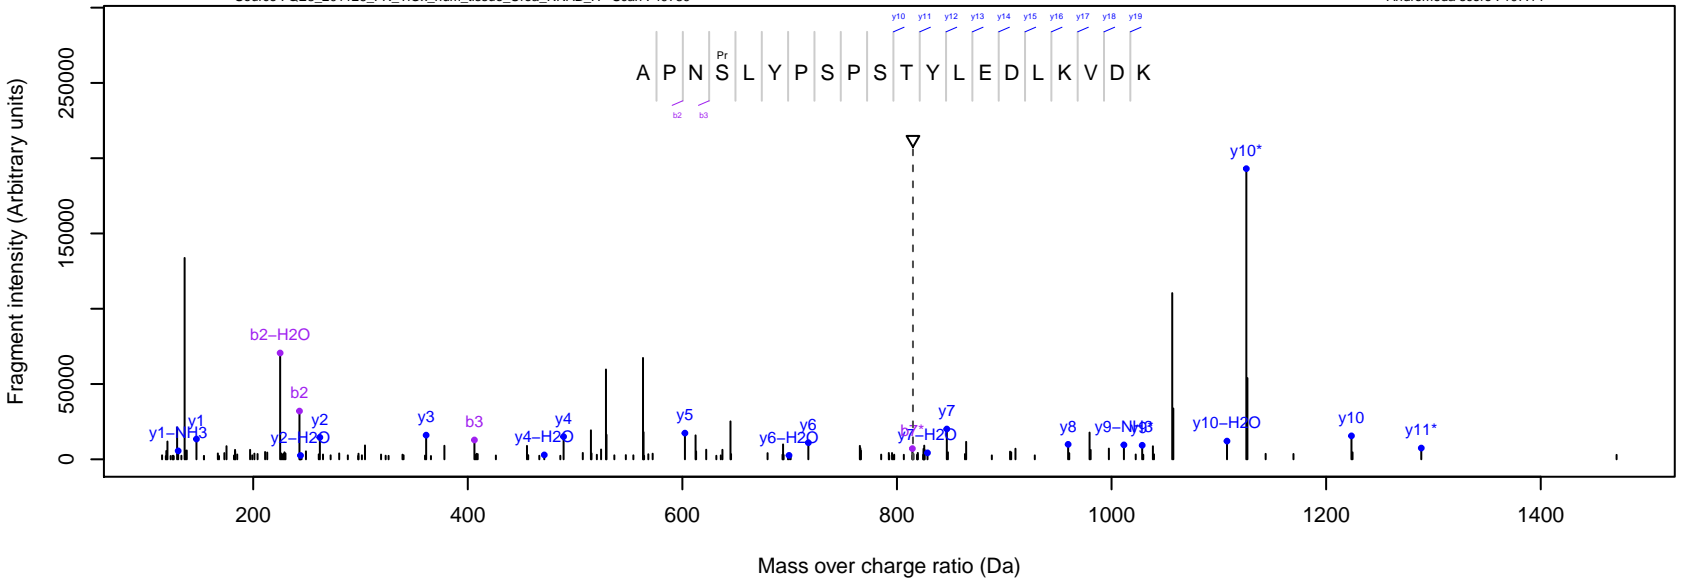

S(Phospho (STY))SPKEELHPAAPSQLAPSFSSSSSSSSSGPR-4+

Source : QE3\_201126\_FR\_TiOx\_hum\_tissue\_Urea\_RNAB\_H Scan : 24263

Andromeda score : 107.14

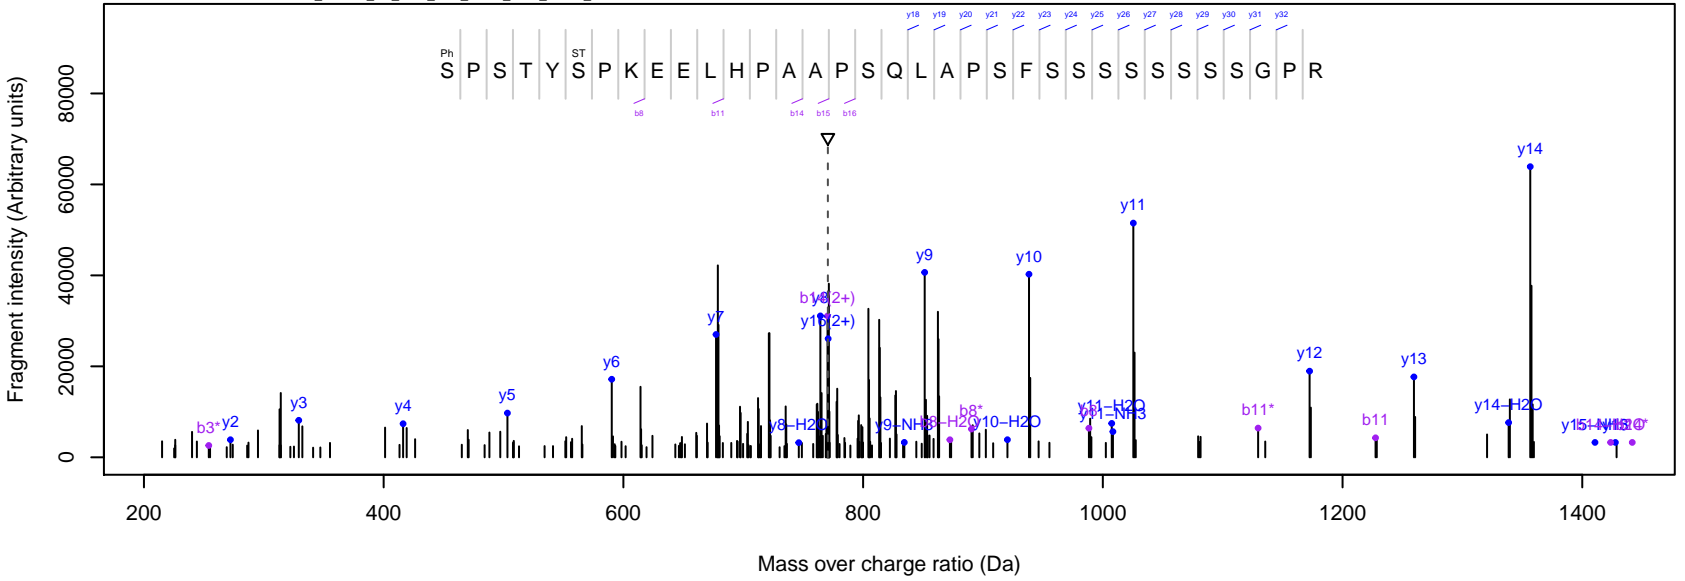

LGS(Phospho (STY))FGSITR-2+

Source : QE3\_201126\_FR\_TiOx\_hum\_tissue\_Urea\_RNAB\_N Scan : 29517

Andromeda score : 107.06

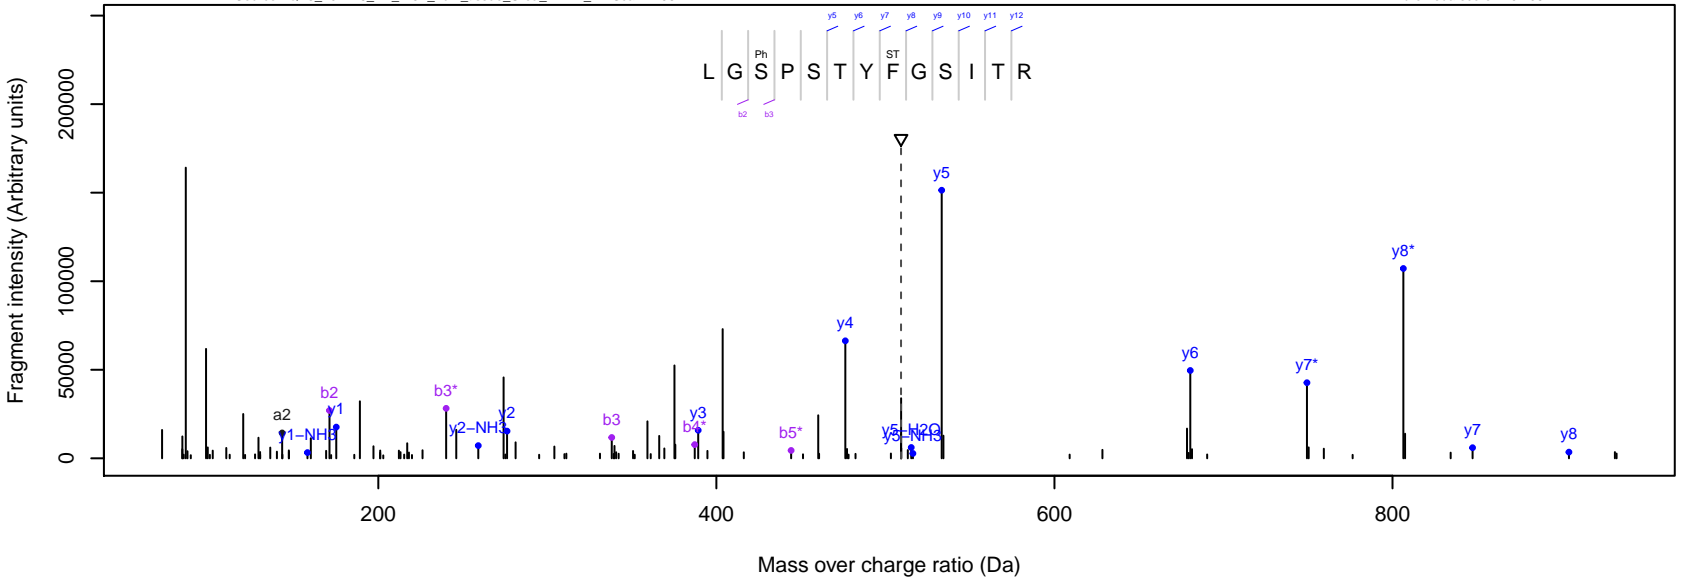

RS(Phospho (STY))SAIGIENIQEVQEK-3+

Source : QE3\_201126\_FR\_TiOx\_hum\_tissue\_Urea\_RNAB\_N Scan : 24731

Andromeda score : 107.06

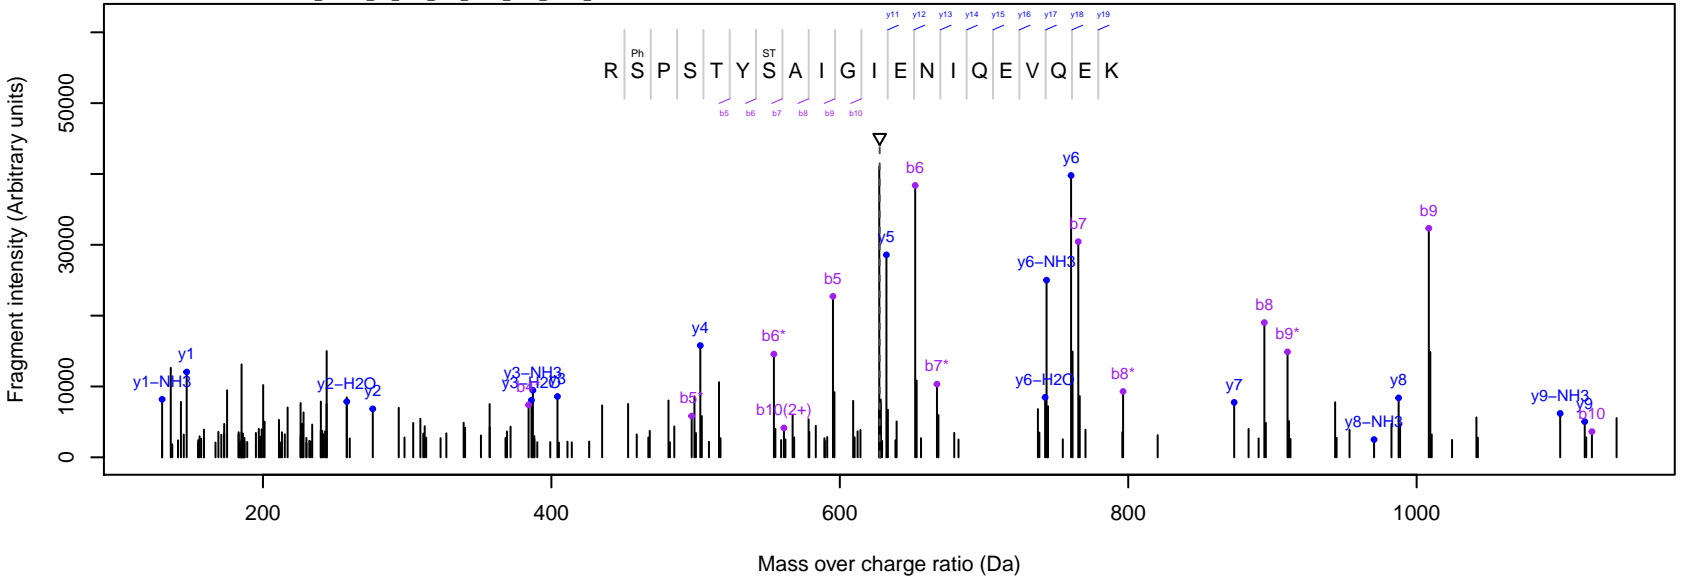

SAS(Phospho (STY))VNKEPVS L P G I M O M R-3+

Source : QE3\_201126\_FR\_TiOx\_hum\_tissue\_Urea\_RNAB\_N Scan : 25723

Andromeda score : 107.06

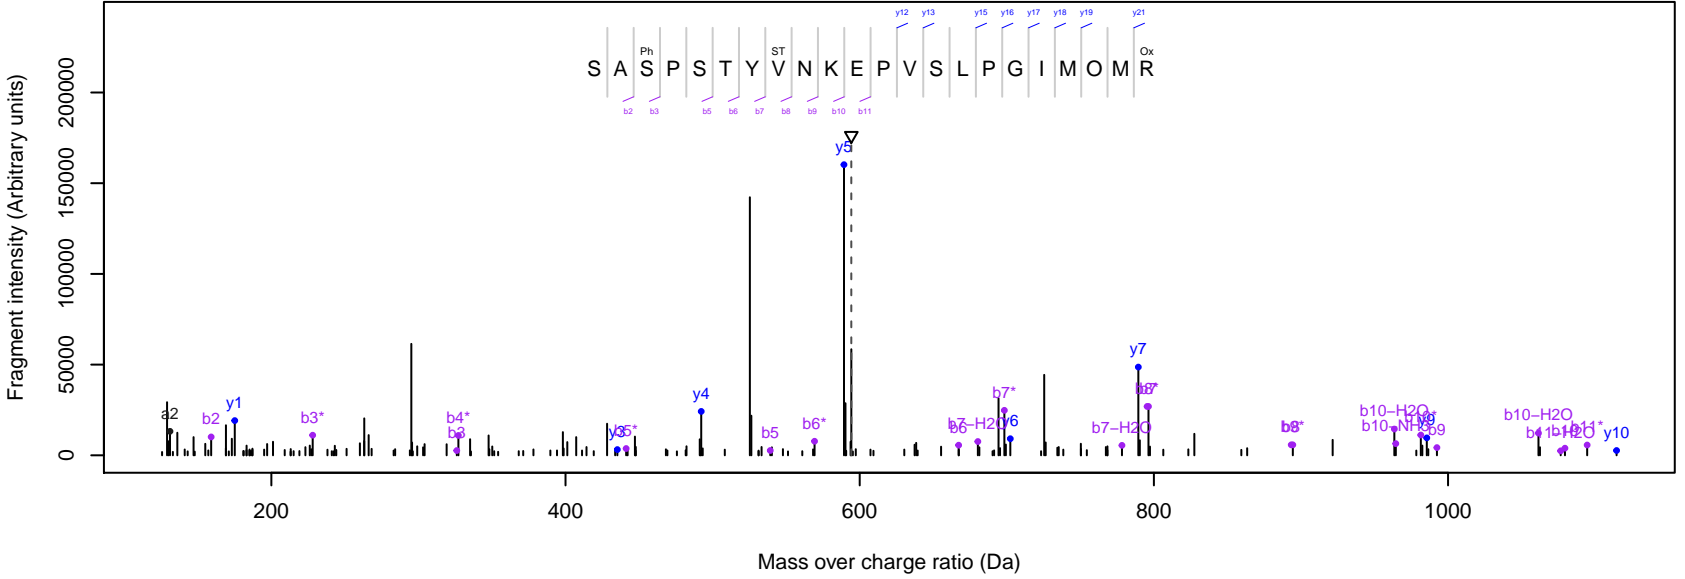

GEFSAS(Phospho (STY))PMLK-2+

Source : QE3\_201126\_FR\_TiOx\_hum\_tissue\_Urea\_RNAB\_H Scan : 29753

Andromeda score : 107.03

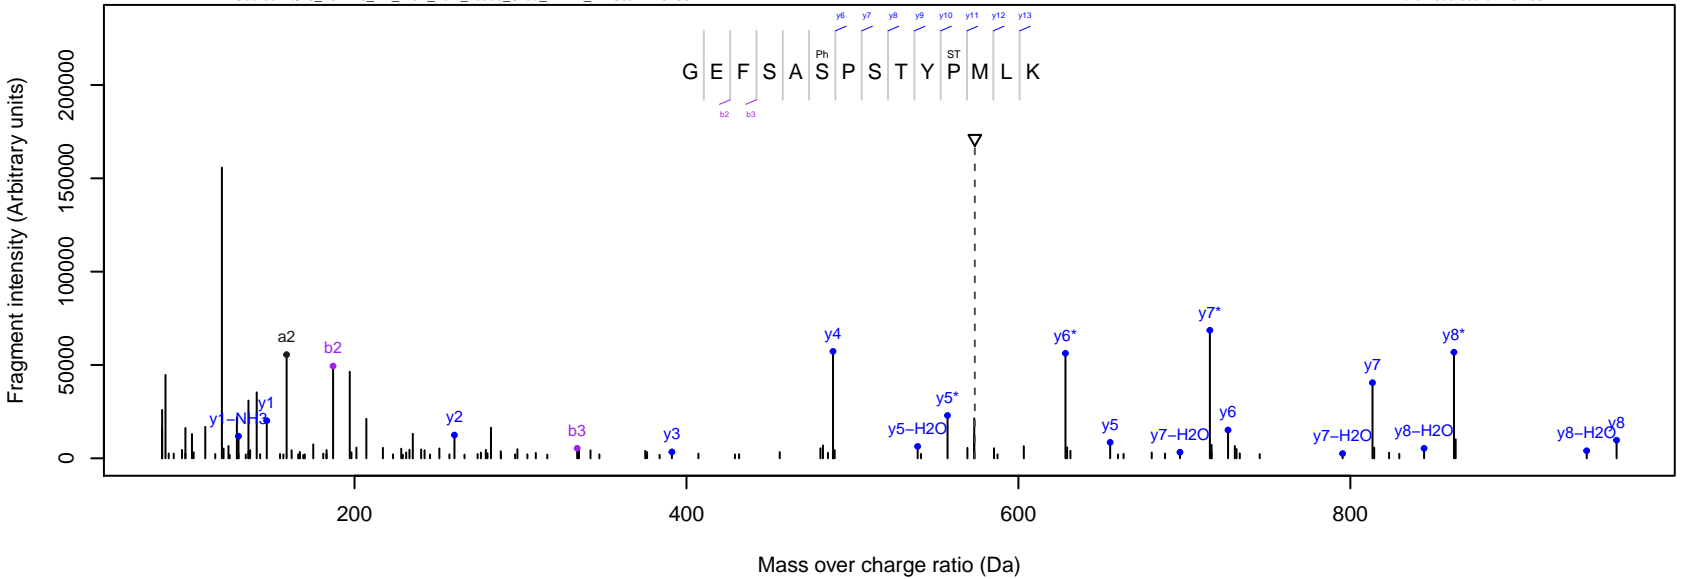

## ITPPAAKPGS(Phospho (STY))PQAK-3+

Source : QE3\_201126\_FR\_TiOx\_hum\_tissue\_Urea\_RNAB\_H Scan : 8192

Andromeda score : 107.03

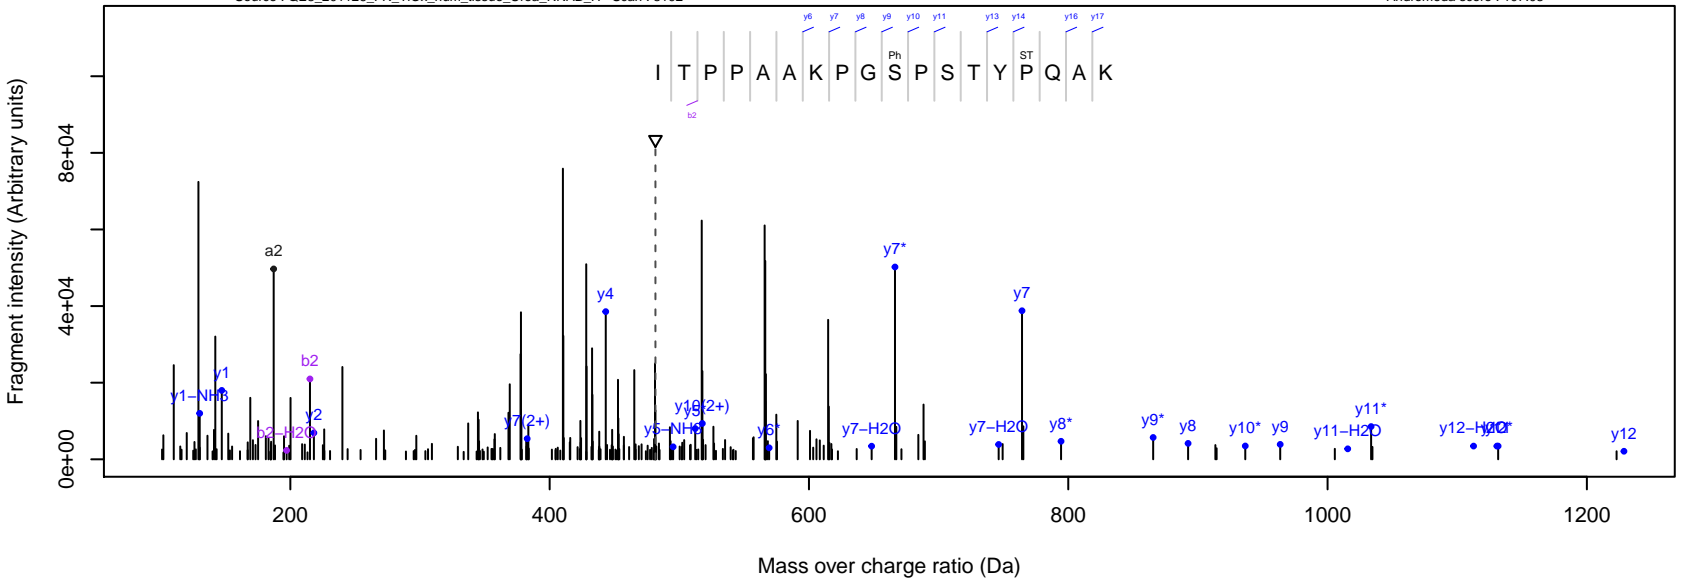

## VKAQT(Phospho (STY))PPGPSLGSK-3+

Source : QE3\_201126\_FR\_TiOx\_hum\_tissue\_Urea\_RNAB\_H Scan : 10527

Andromeda score : 107.02

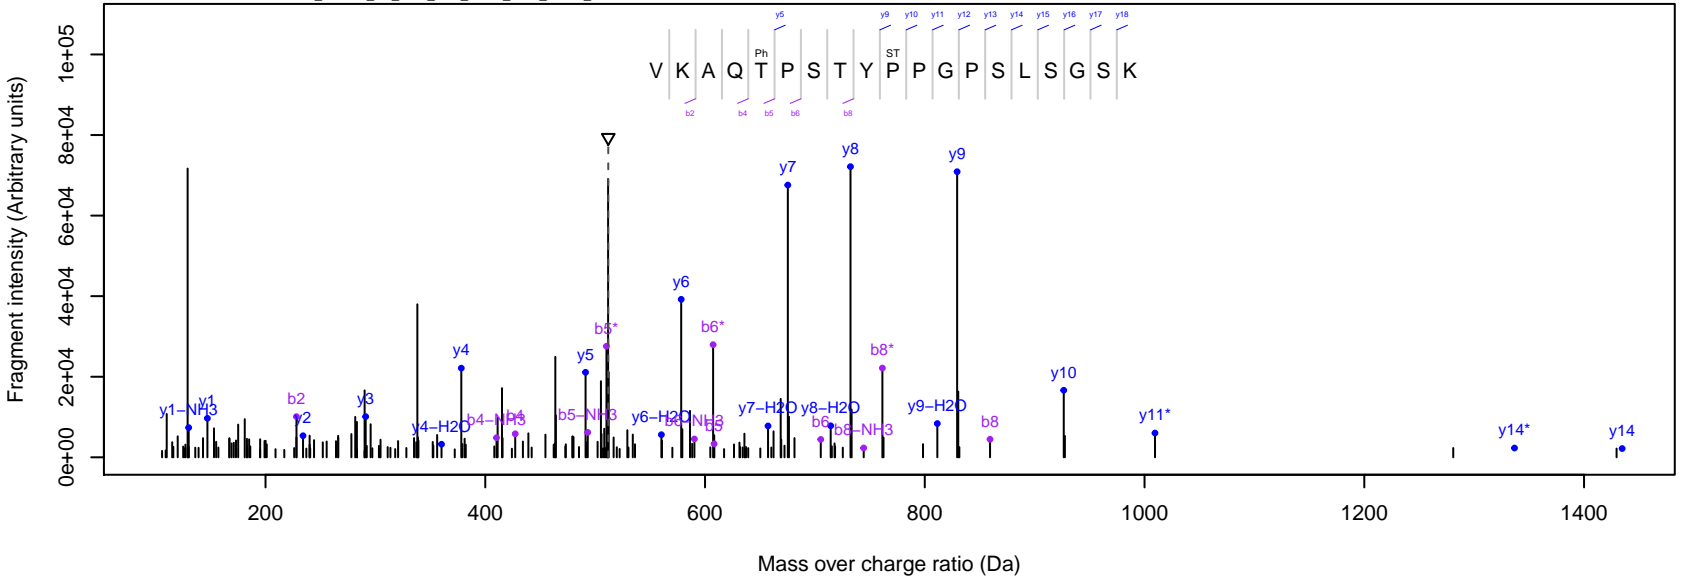

## EEGPYEVEVTDGVPVPGS(Phospho (STY))PPLEAVAPTKPSK-3+

Source : QE3\_201126\_FR\_TiOx\_hum\_tissue\_Urea\_RNAB\_N Scan : 56053

Andromeda score : 106.97

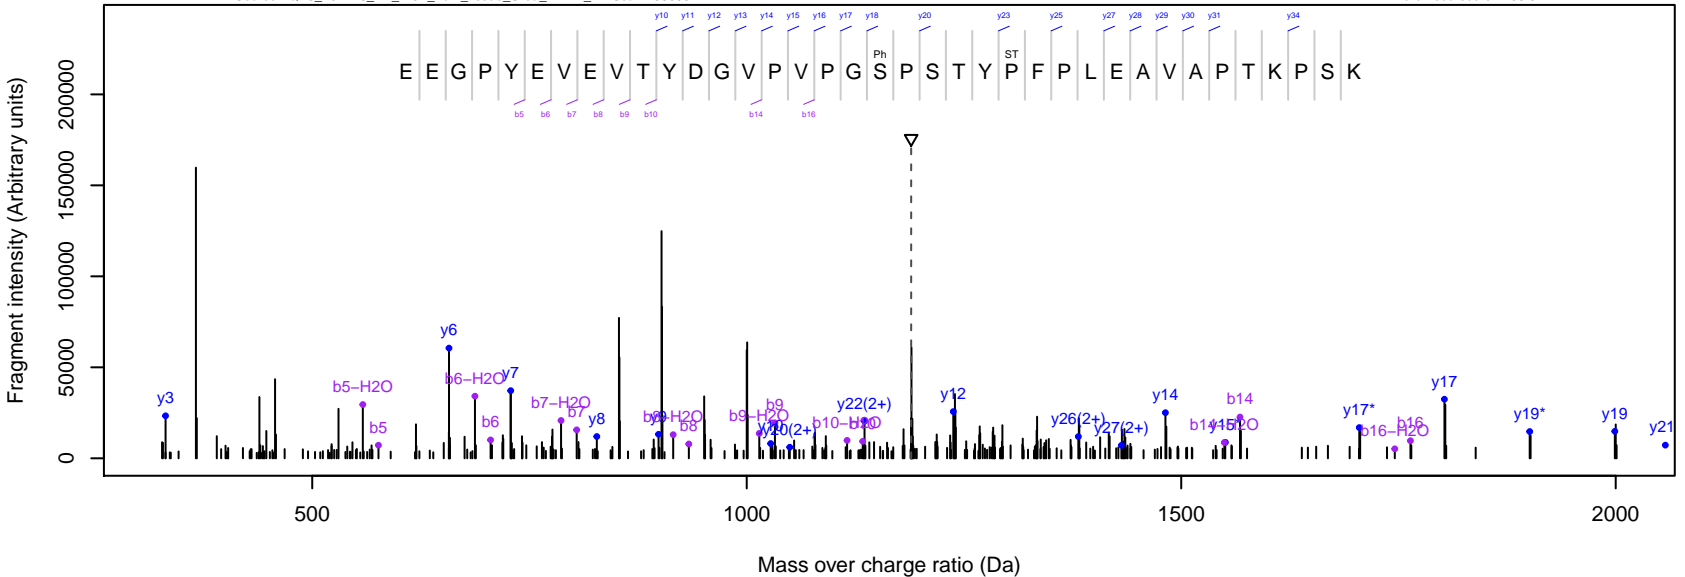

TSAVSS(Phospho (STY))PLLDQQR-2+

Source : QE3\_201126\_FR\_TIOx\_hum\_tissue\_Urea\_RNAB\_H Scan : 21582

Andromeda score : 106.97

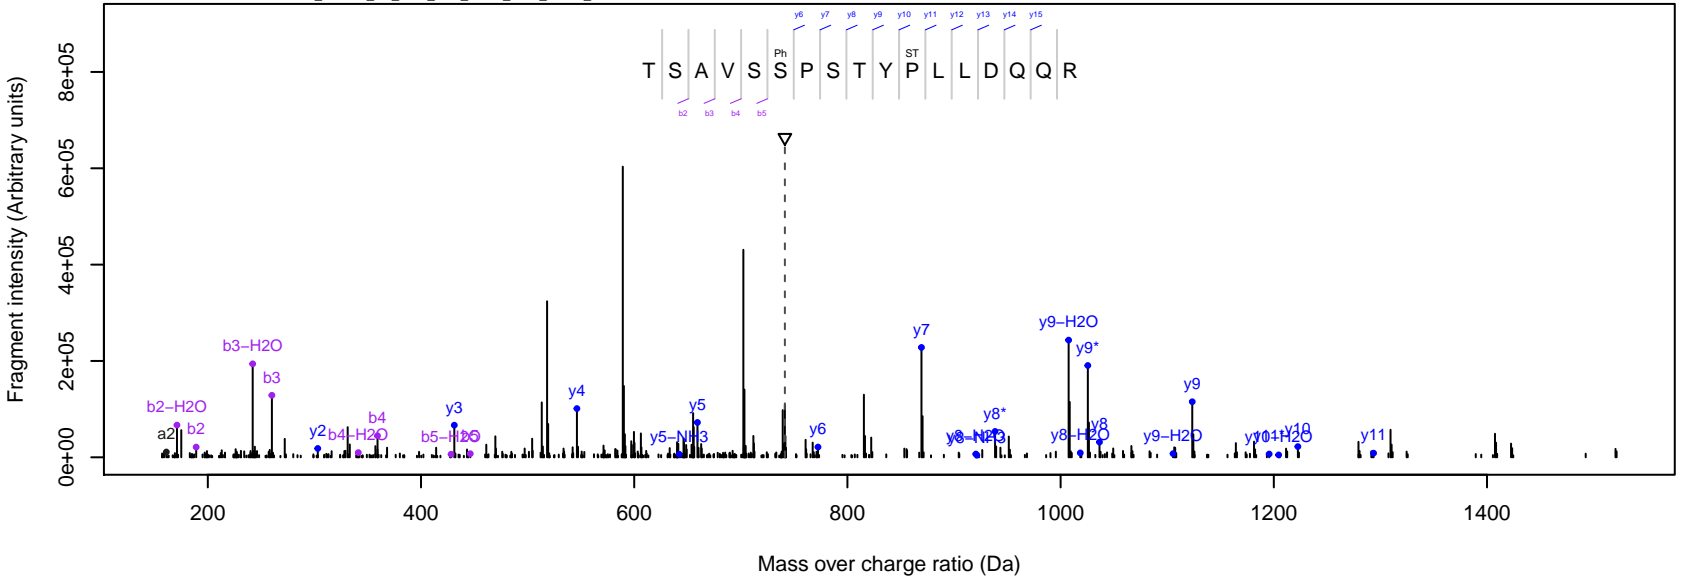

VASEAPLEHKPQVEAS(Phospho (STY))SPR-3+

Source : QE3\_201126\_FR\_TIOx\_hum\_tissue\_Urea\_RNAB\_N Scan : 11189

Andromeda score : 106.88

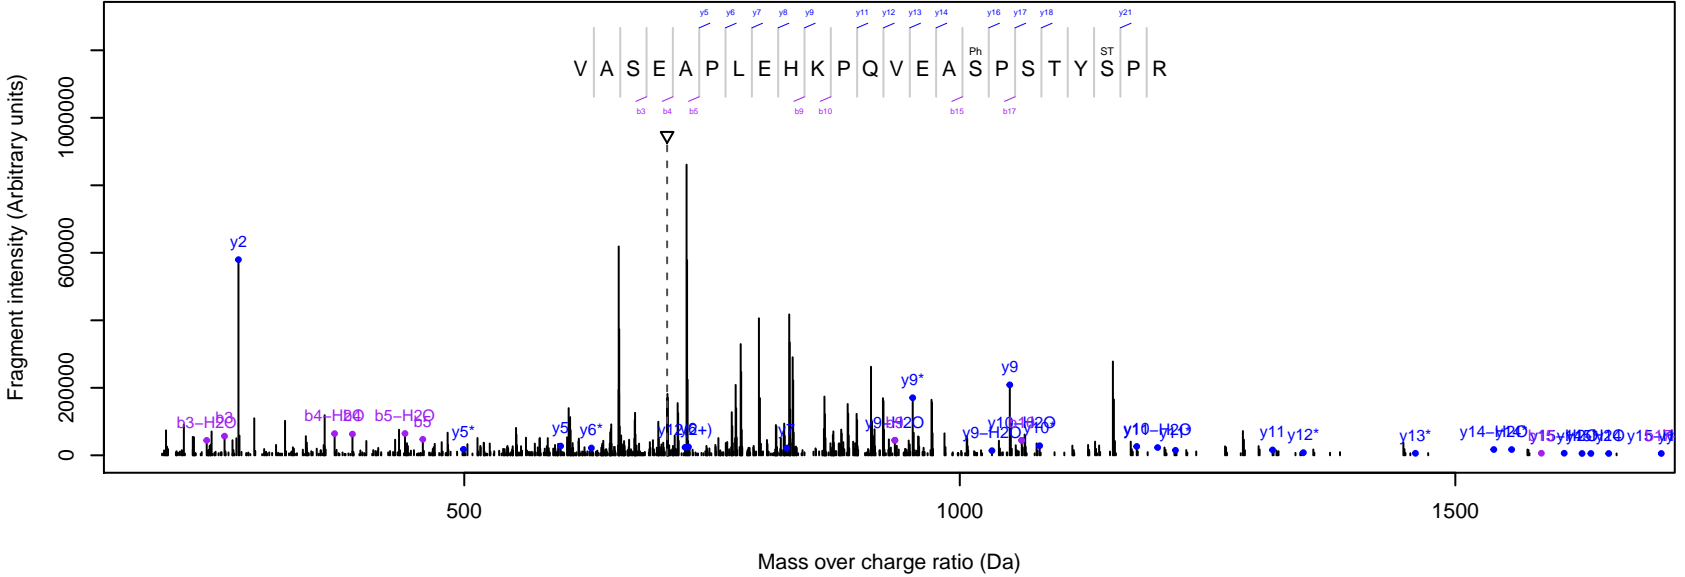

AS(Phospho (STY))WES(Phospho (STY))LDEEWRA PQAGSR-3+

Source : QE3\_201126\_FR\_TIOx\_hum\_tissue\_Urea\_RNAB\_B Scan : 47119

Andromeda score : 106.69

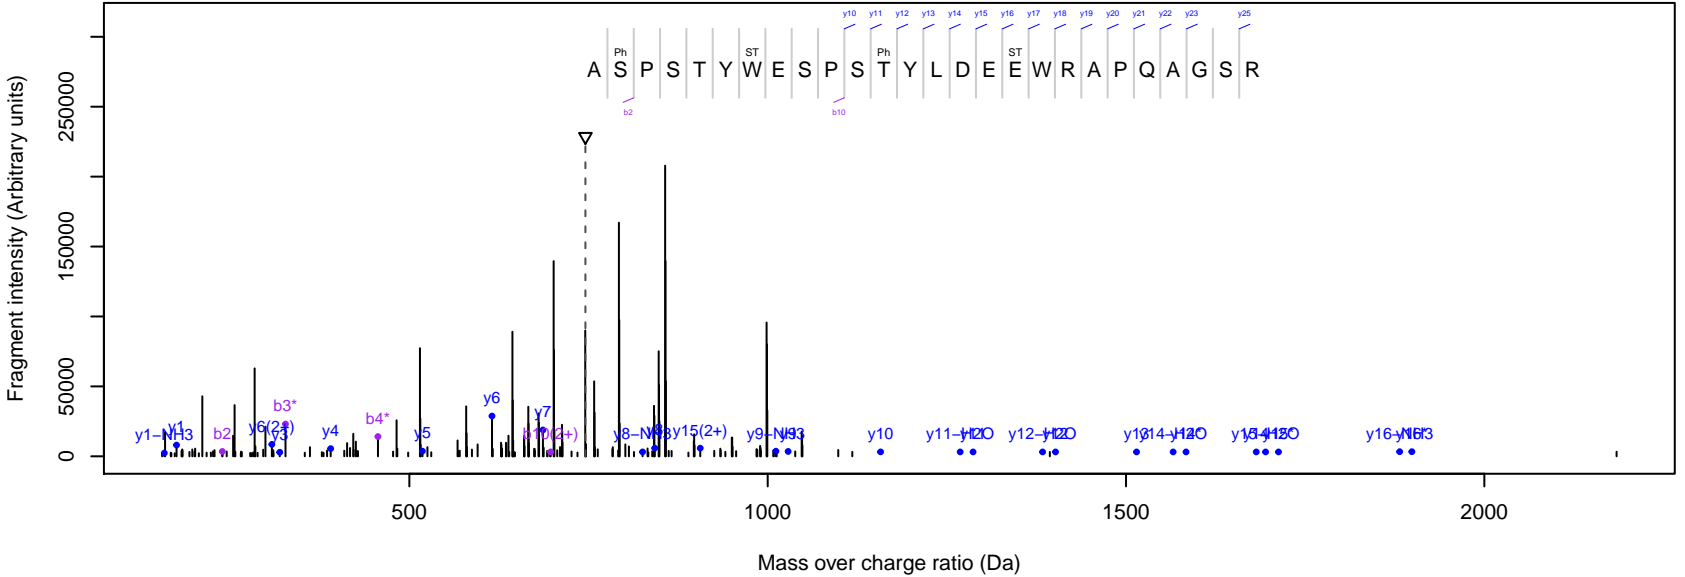

DFLSGPDYDHTGS(Phospho (STY))DS(Phospho (STY))EDEDVEEVEPR-3+

Source : QE3\_201126\_FR\_TiOx\_hum\_tissue\_Urea\_RNAB\_N Scan : 47289

Andromeda score : 106.69

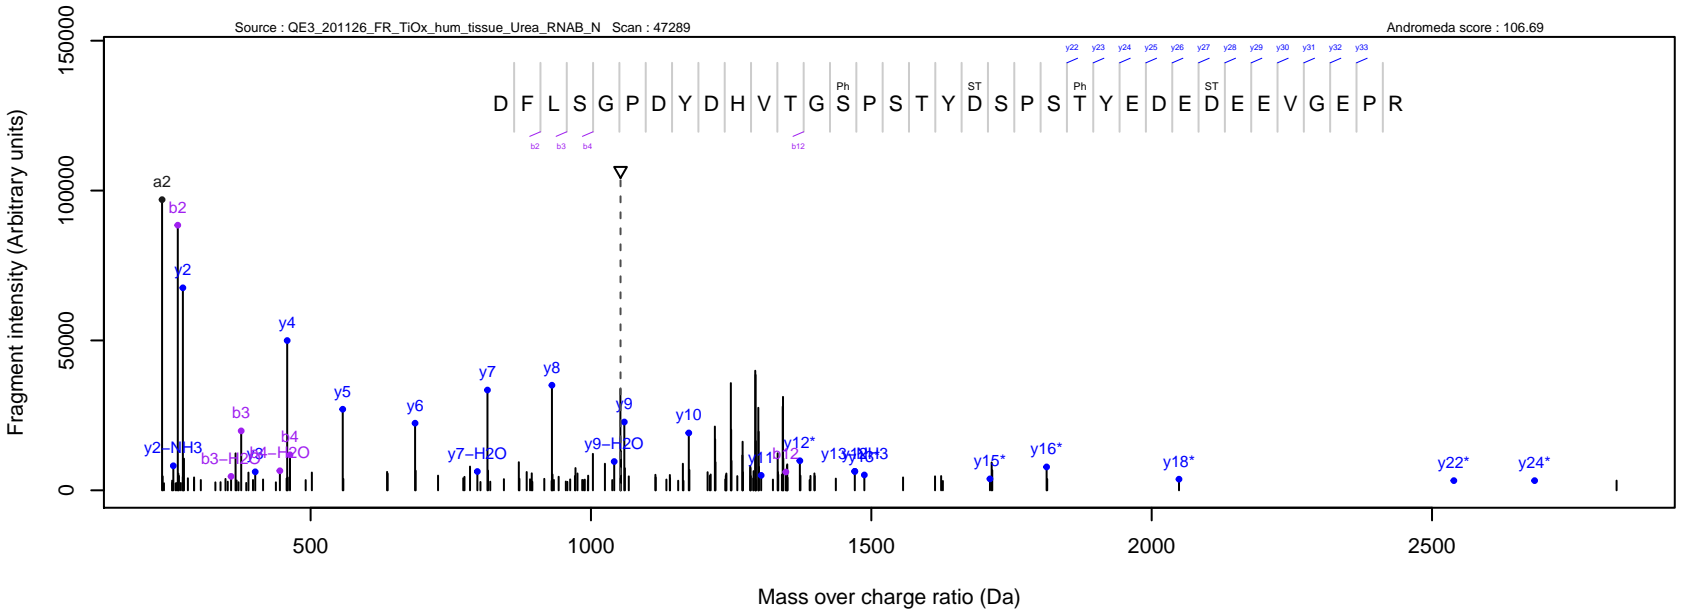

HSQPS(Phospho (STY))PEPHS(Phospho (STY))PTEPPAWGSSIVK-3+

Source : QE3\_201126\_FR\_TiOx\_hum\_tissue\_Urea\_RNAB\_N Scan : 27895

Andromeda score : 106.69

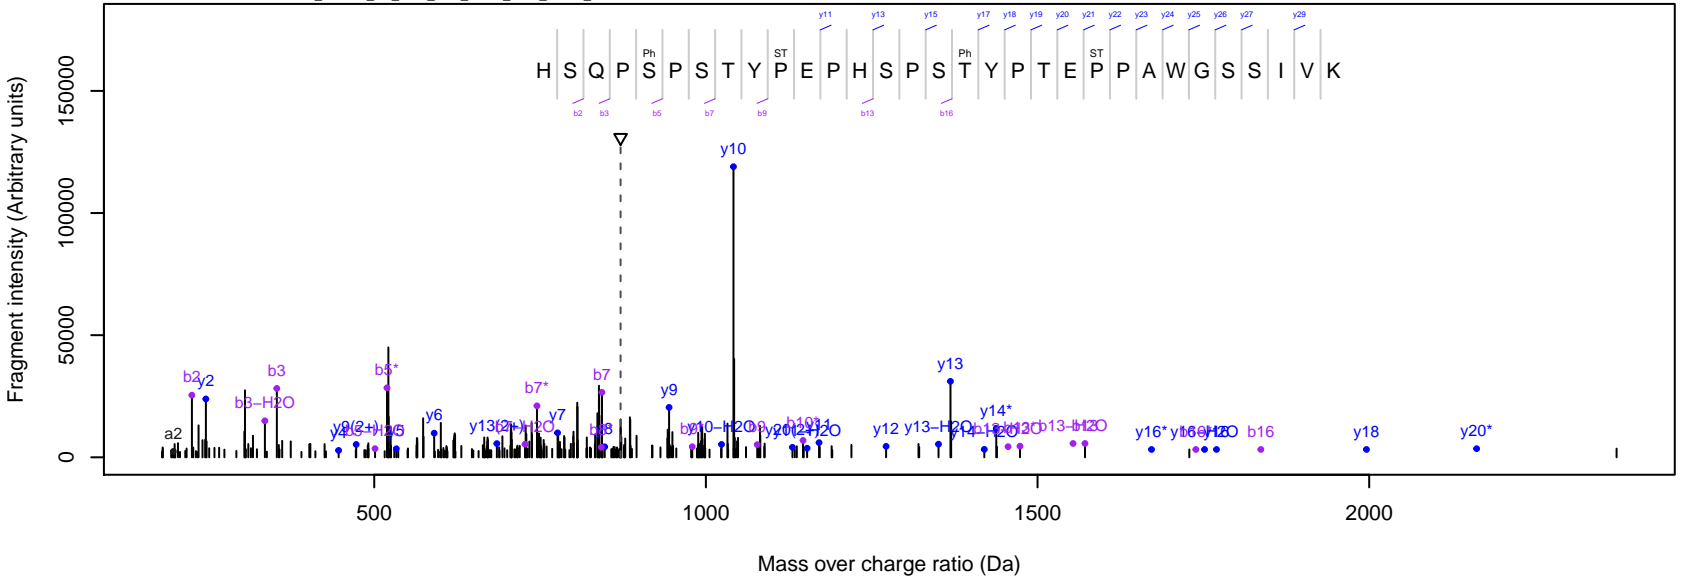

RGEGDAFPSEPGTTSTQRPS(Phospho (STY))S(Phospho (STY))PETATK-3+

Source : QE3\_201126\_FR\_TiOx\_hum\_tissue\_Urea\_RNAB\_H Scan : 17863

Andromeda score : 106.69

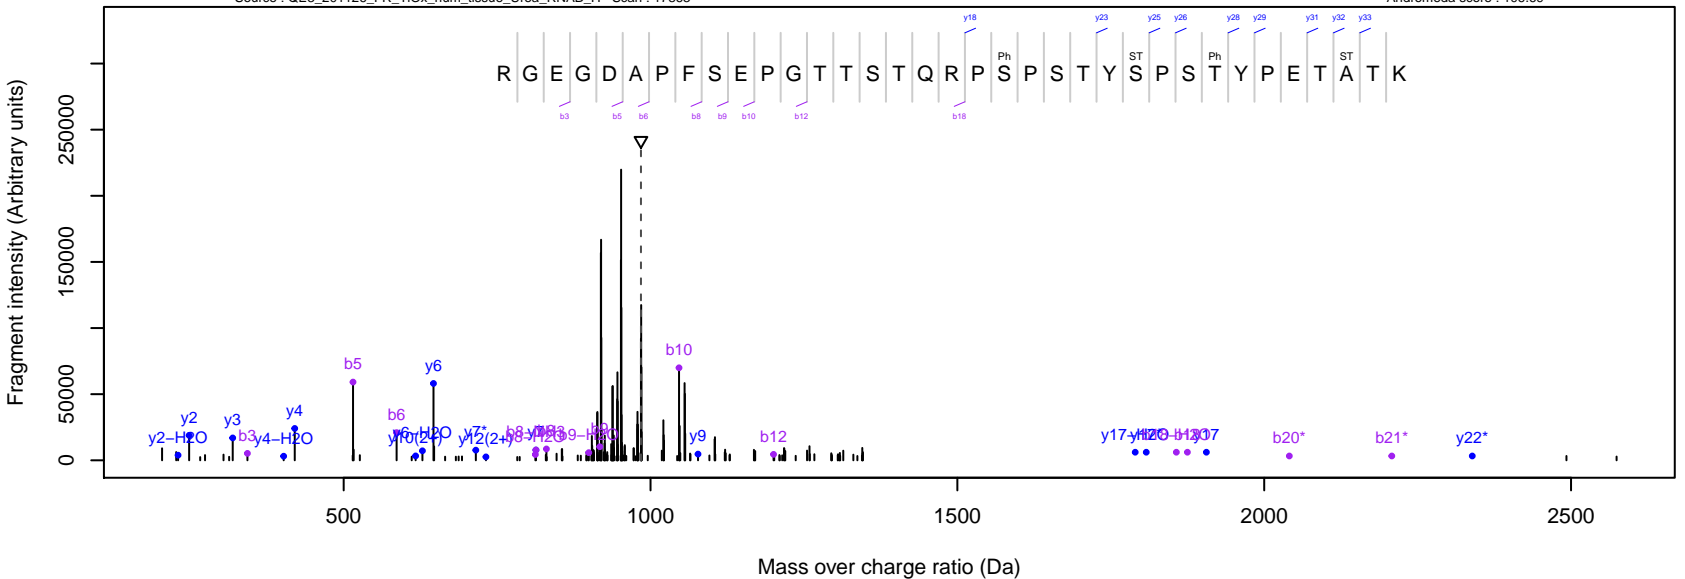

SS(Phospho (STY))GLST(Phospho (STY))PVPPSAGHLAHR-3+

Source : QE3\_201126\_FR\_TiOx\_hum\_tissue\_Urea\_RNAB\_N Scan : 21480

Andromeda score : 106.69

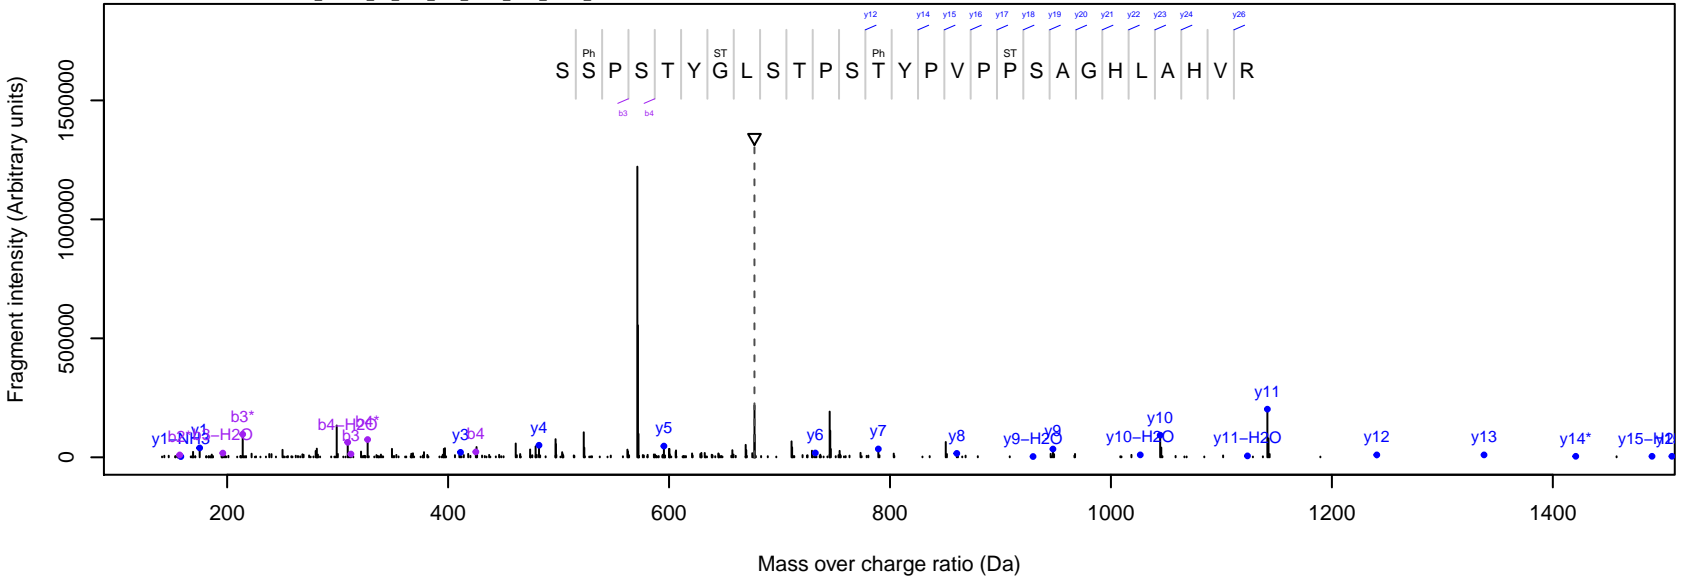

SKELVSSSSSGSDS(Phospho (STY))DSEVDK-3+

Source : QE3\_201126\_FR\_TiOx\_hum\_tissue\_Urea\_RNAB\_N Scan : 8845

Andromeda score : 106.67

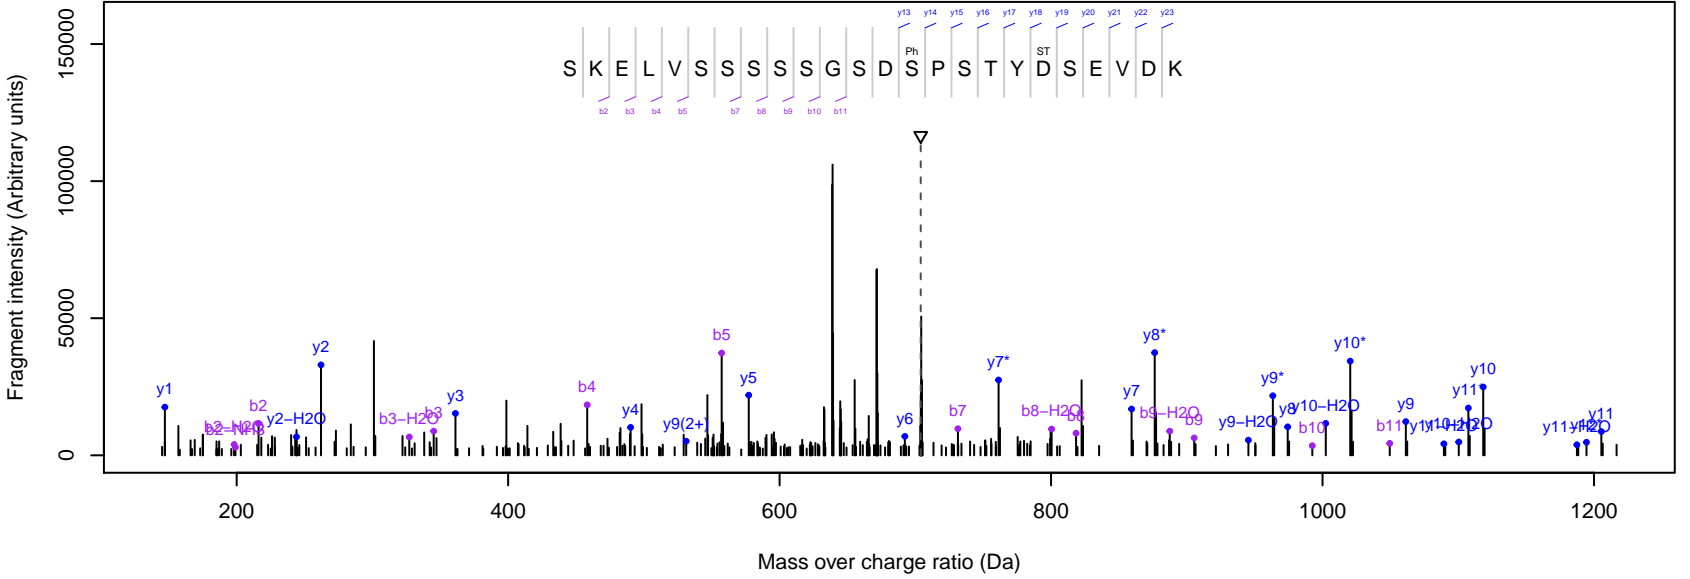

GLNTSQES(Phospho (STY))DDDILDESSPEGTQKVDATIVVK-3+

Source : QE3\_201126\_FR\_TiOx\_hum\_tissue\_Urea\_RNAB\_N Scan : 38599

Andromeda score : 106.64

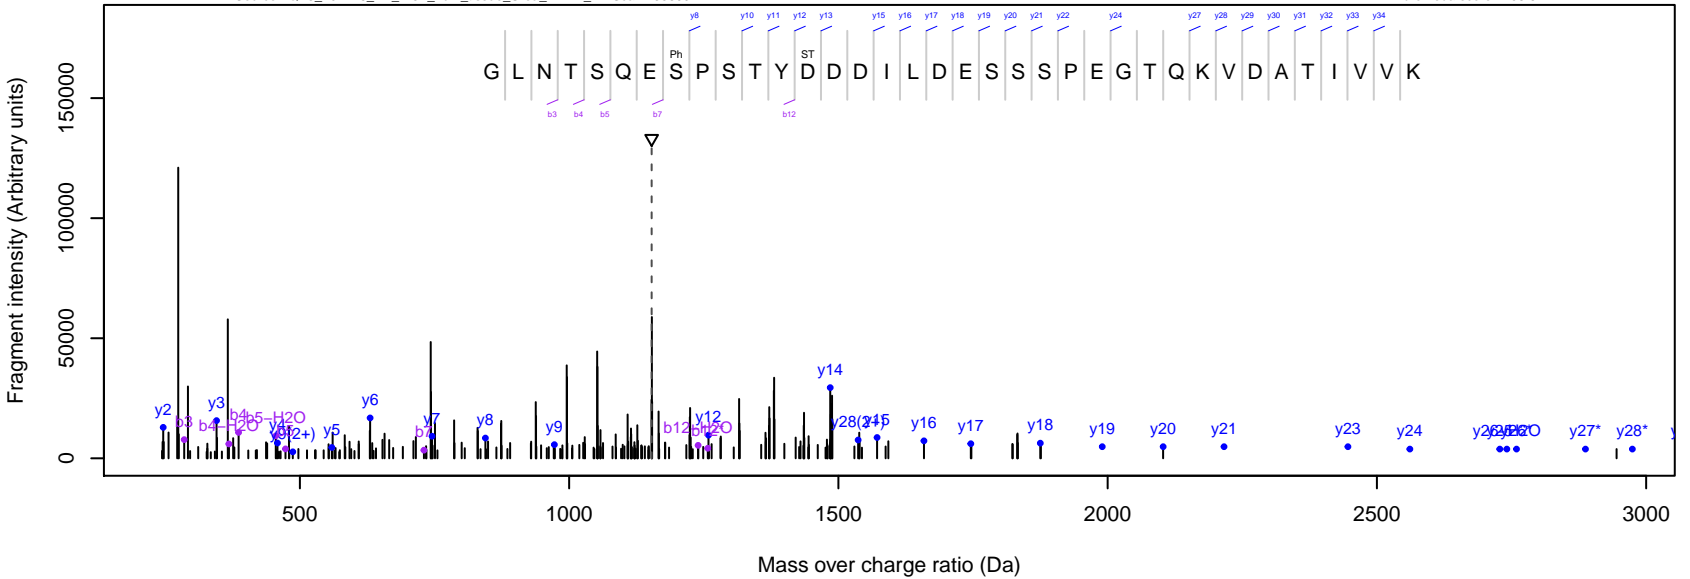

GLST(Phospho (STY))SLPDLSEPWIEVK-2+

Source : QE3\_201126\_FR\_TiOx\_hum\_tissue\_Urea\_RNAB\_N Scan : 57922

Andromeda score : 106.61

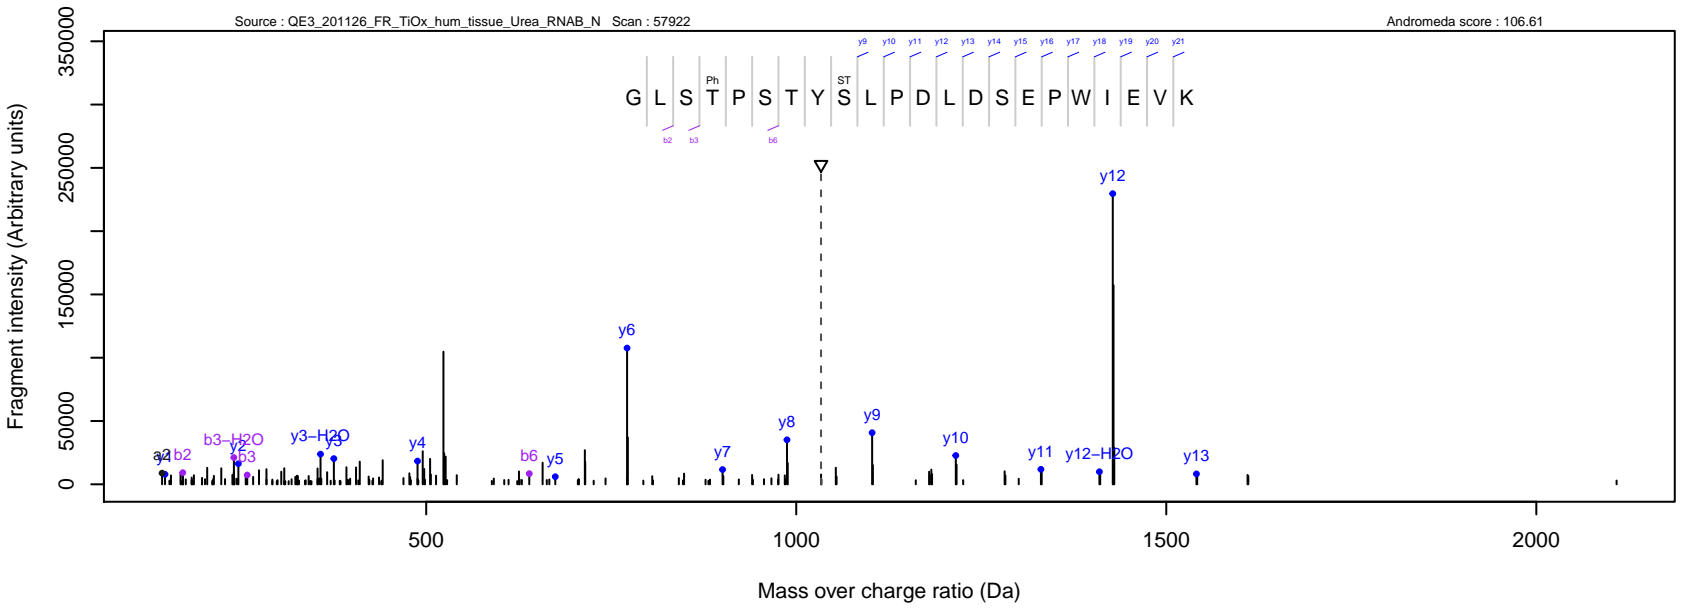

RQS(Phospho (STY))S(Phospho (STY))SYDDPWK-2+

Source : QE3\_201126\_FR\_TiOx\_hum\_tissue\_Urea\_RNAB\_N Scan : 23831

Andromeda score : 106.55

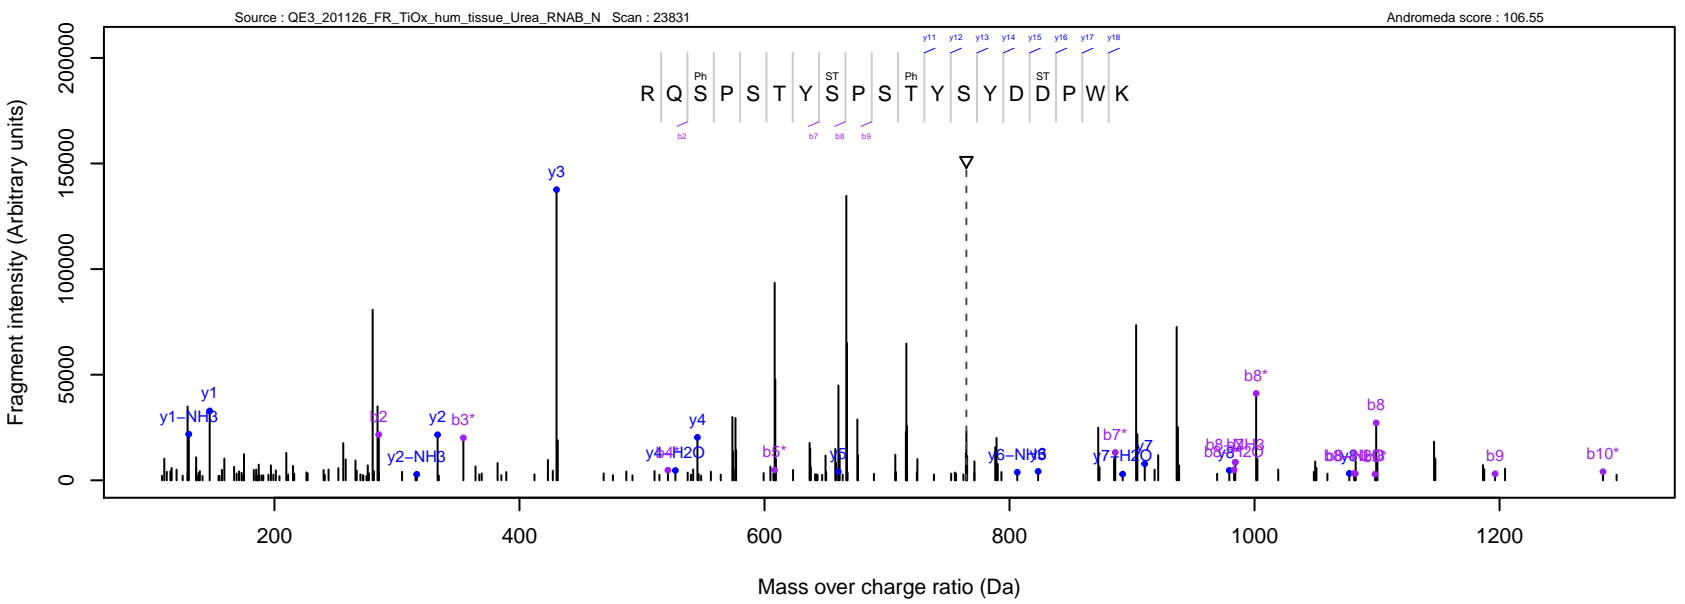

GVDFES(Phospho (STY))S(Phospho (STY))EDDDDDPFMNTSSLR-2+

Source : QE3\_201126\_FR\_TiOx\_hum\_tissue\_Urea\_RNAB\_N Scan : 59355

Andromeda score : 106.52

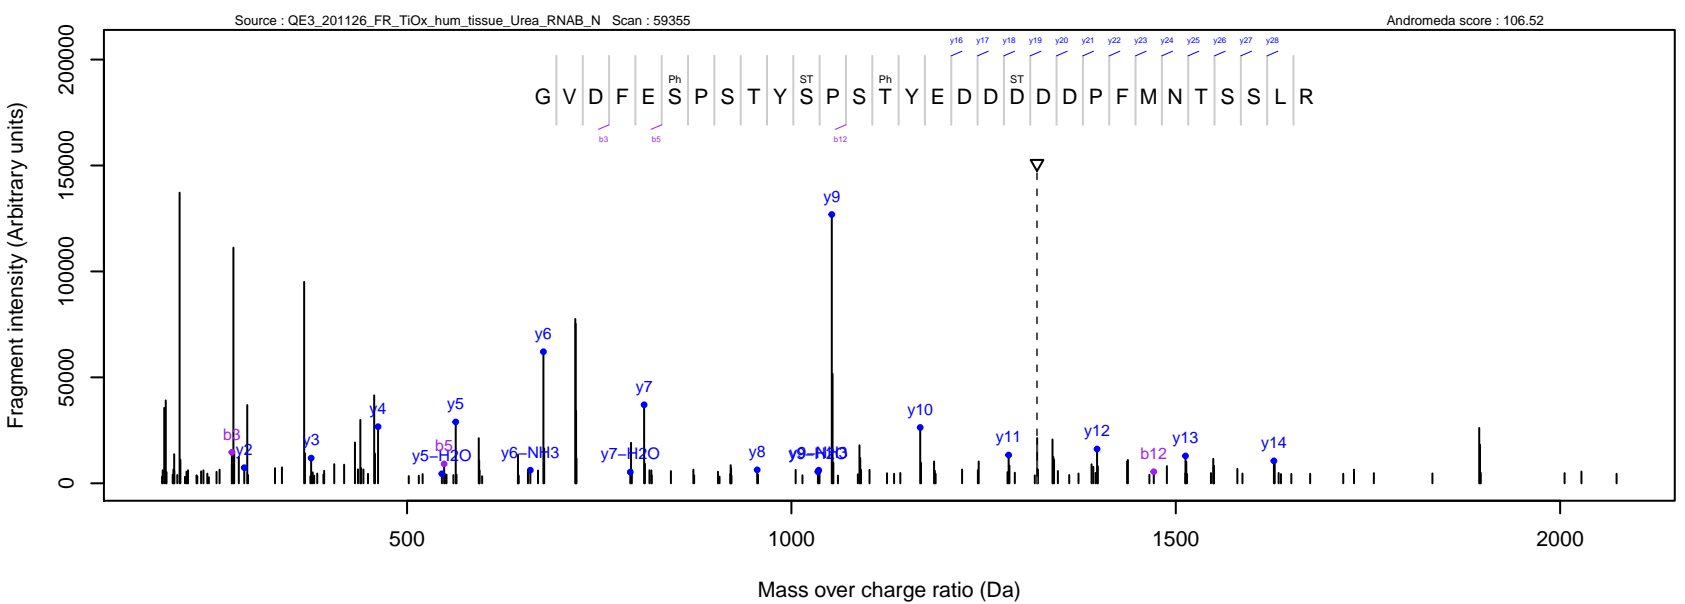



RGS(Phospho (STY))MSYLAAVEEEESSVK-3+

Source : QE3\_201126\_FR\_TiOx\_hum\_tissue\_Urea\_RNAB\_N Scan : 54032

Andromeda score : 106.49

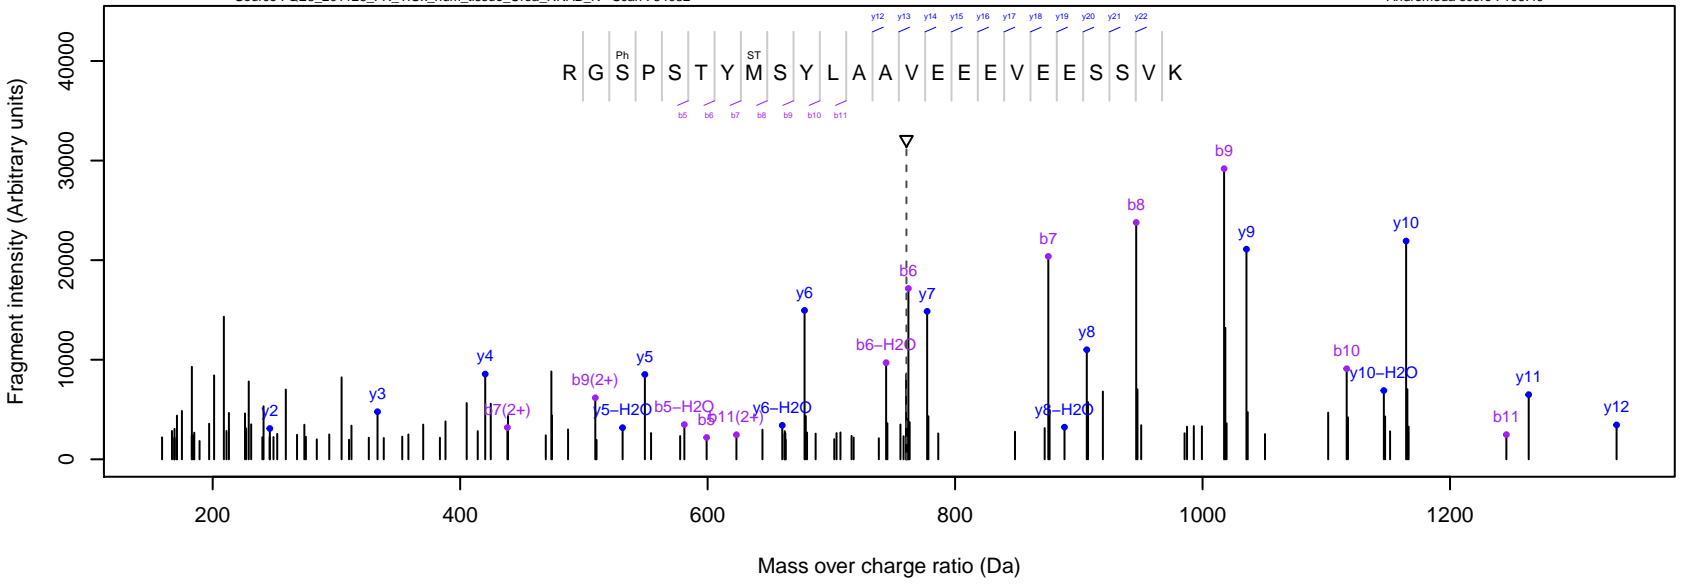

SESS(Phospho (STY))DFEVVPK-2+

Source : QE3\_201126\_FR\_TiOx\_hum\_tissue\_Urea\_RNAB\_H Scan : 27030

Andromeda score : 106.49

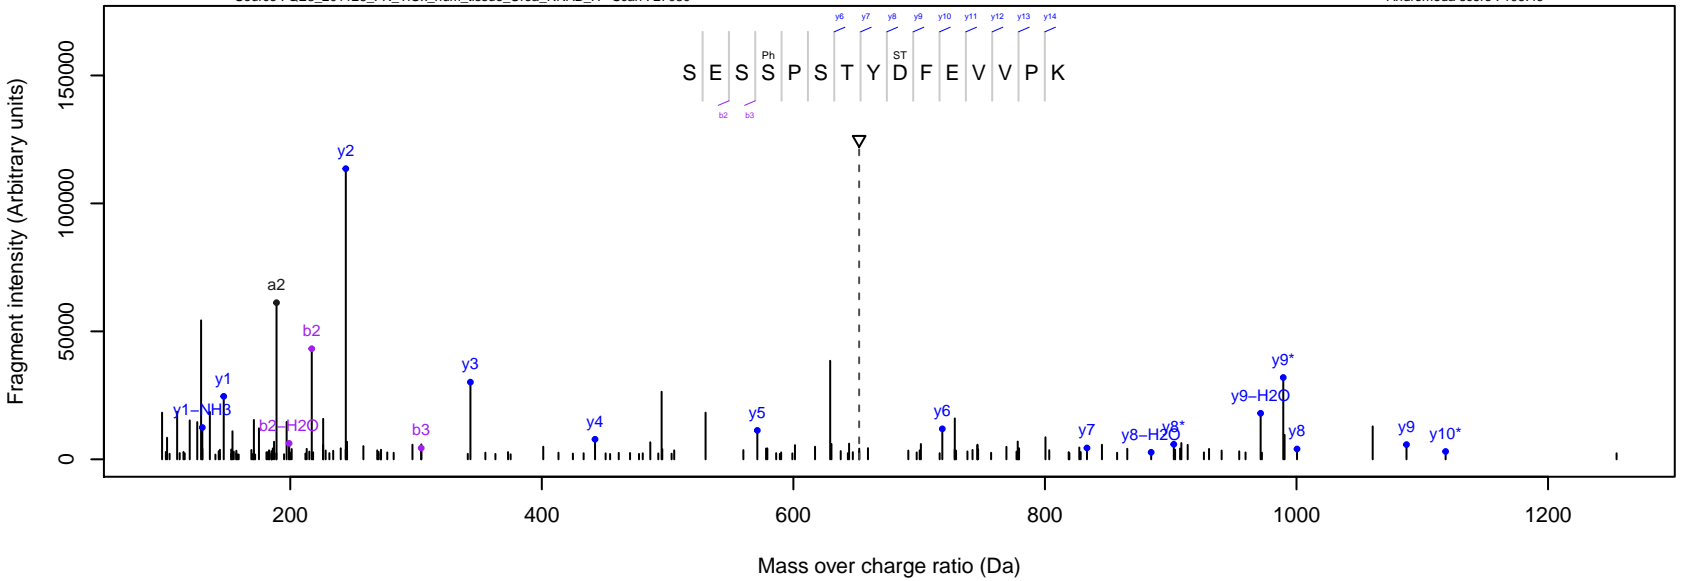

LGSLTPEIVSTPSS(Phospho (STY))PEEEDKSILNAVVLIDDSVPPTTK-3+

Source : QE3\_201126\_FR\_TiOx\_hum\_tissue\_Urea\_RNAB\_H Scan : 61560

Andromeda score : 106.47

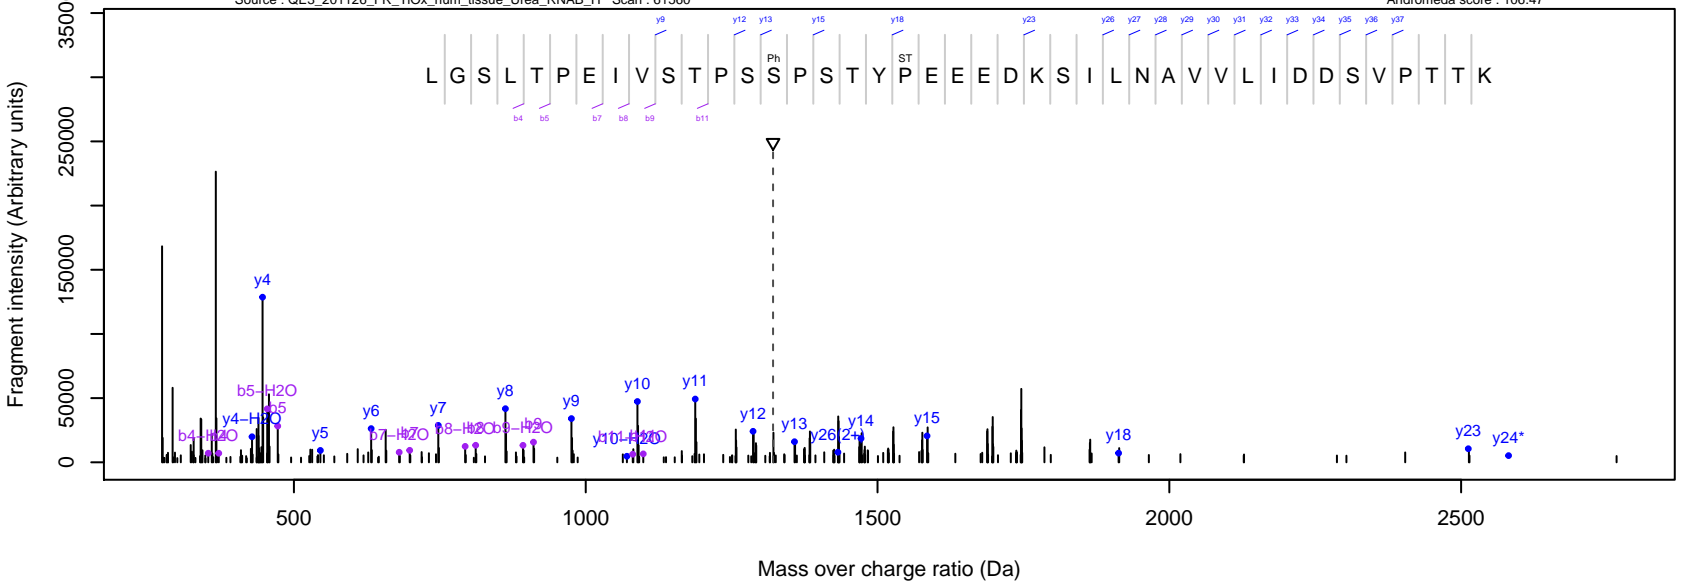

QAS(Phospho (STY))FLEAEGGAK-2+

Source : QE3\_201126\_FR\_TiOx\_hum\_tissue\_Urea\_RNAB\_H Scan : 22749

Andromeda score : 106.47

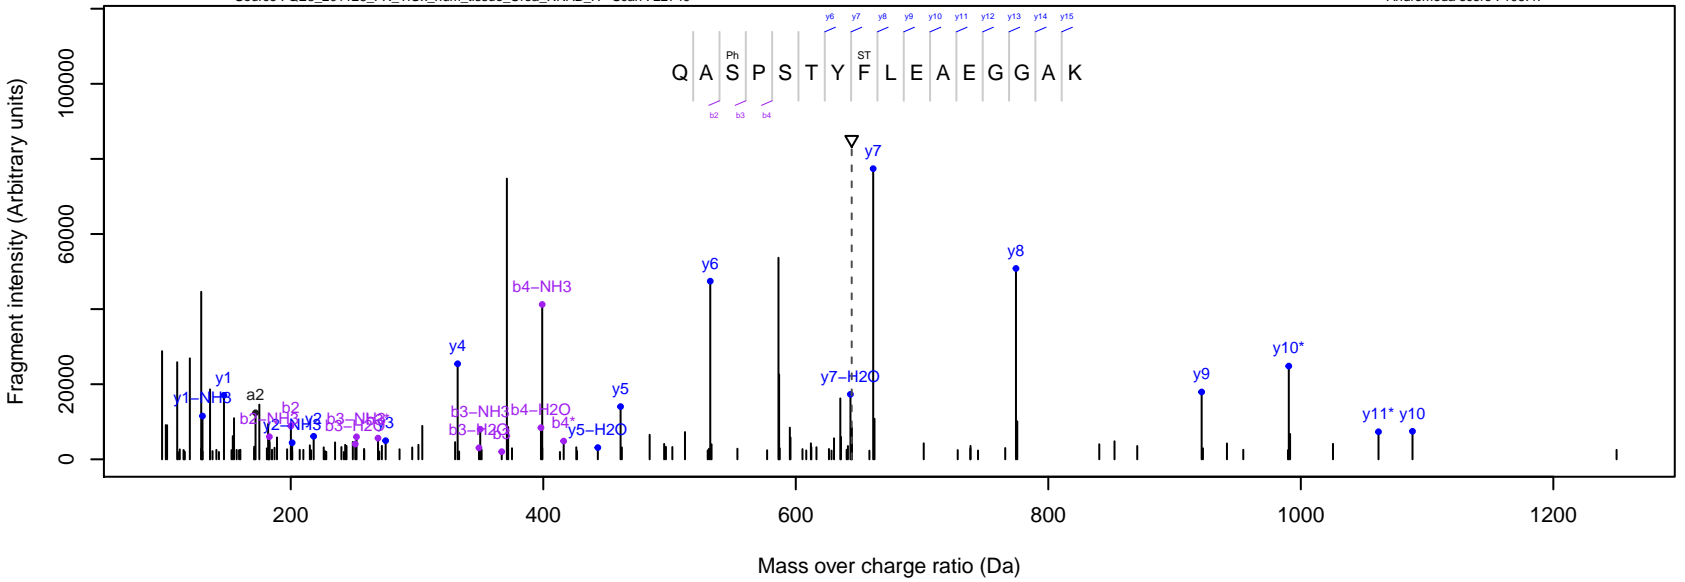

YKDLDEDELLGNLS(Phospho (STY))ETELK-3+

Source : QE3\_201126\_FR\_TiOx\_hum\_tissue\_Urea\_RNAB\_N Scan : 45505

Andromeda score : 106.45

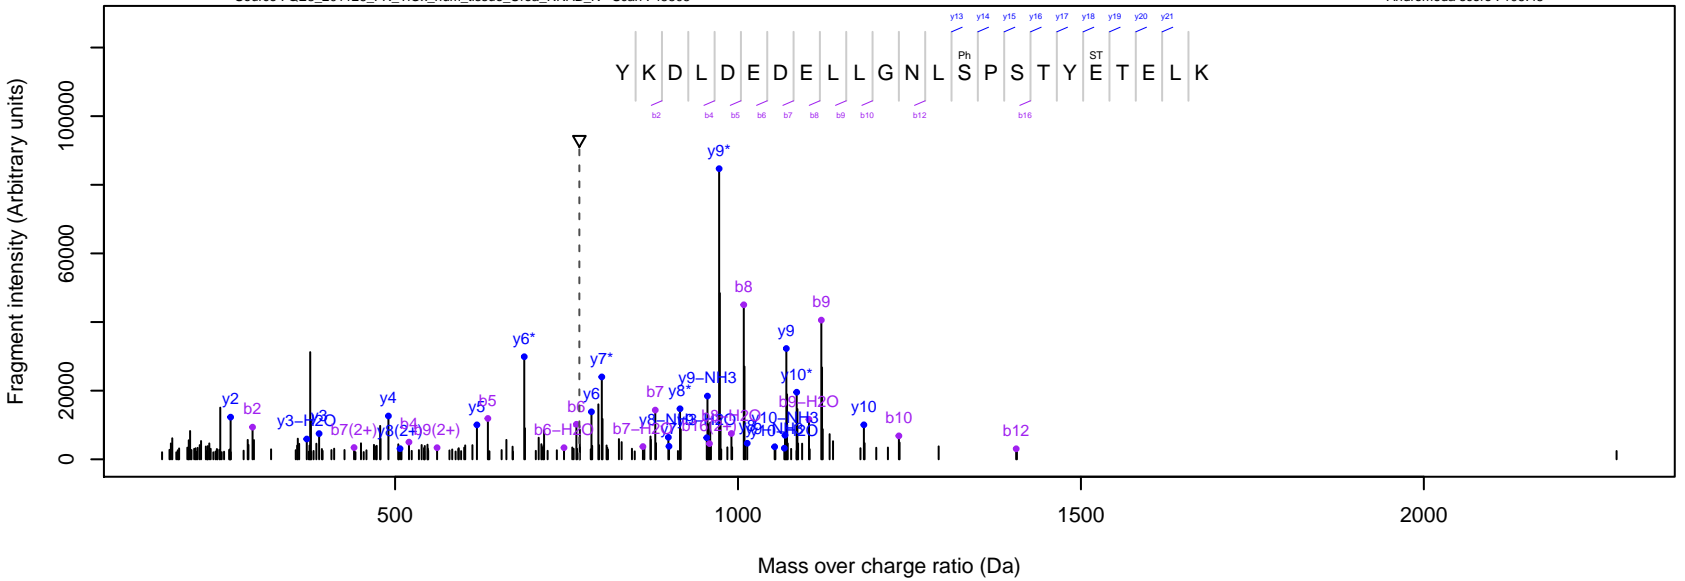

(Acetyl (Protein N-term))PGPTSPGTNVGSSGRS(Phospho (STY))PSKAVAAAR-3+

Source : QE3\_201126\_FR\_TiOx\_hum\_tissue\_Urea\_RNAB\_H Scan : 15010

Andromeda score : 106.44

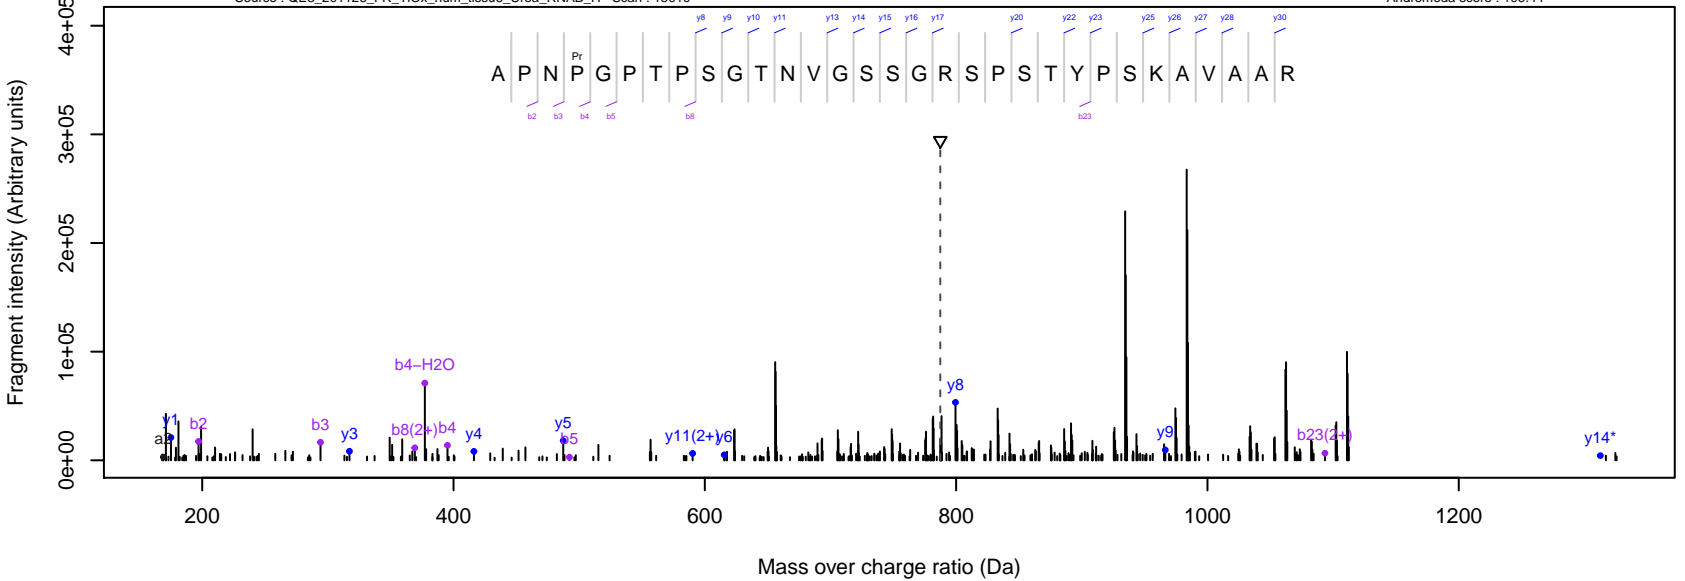

RLS(Phospho (STY))NSSLCSIEEEHR-3+

Source : QE3\_2011126\_FR\_TIOx\_hum\_tissue\_Urea\_RNAB\_H Scan : 16405

Andromeda score : 106.44

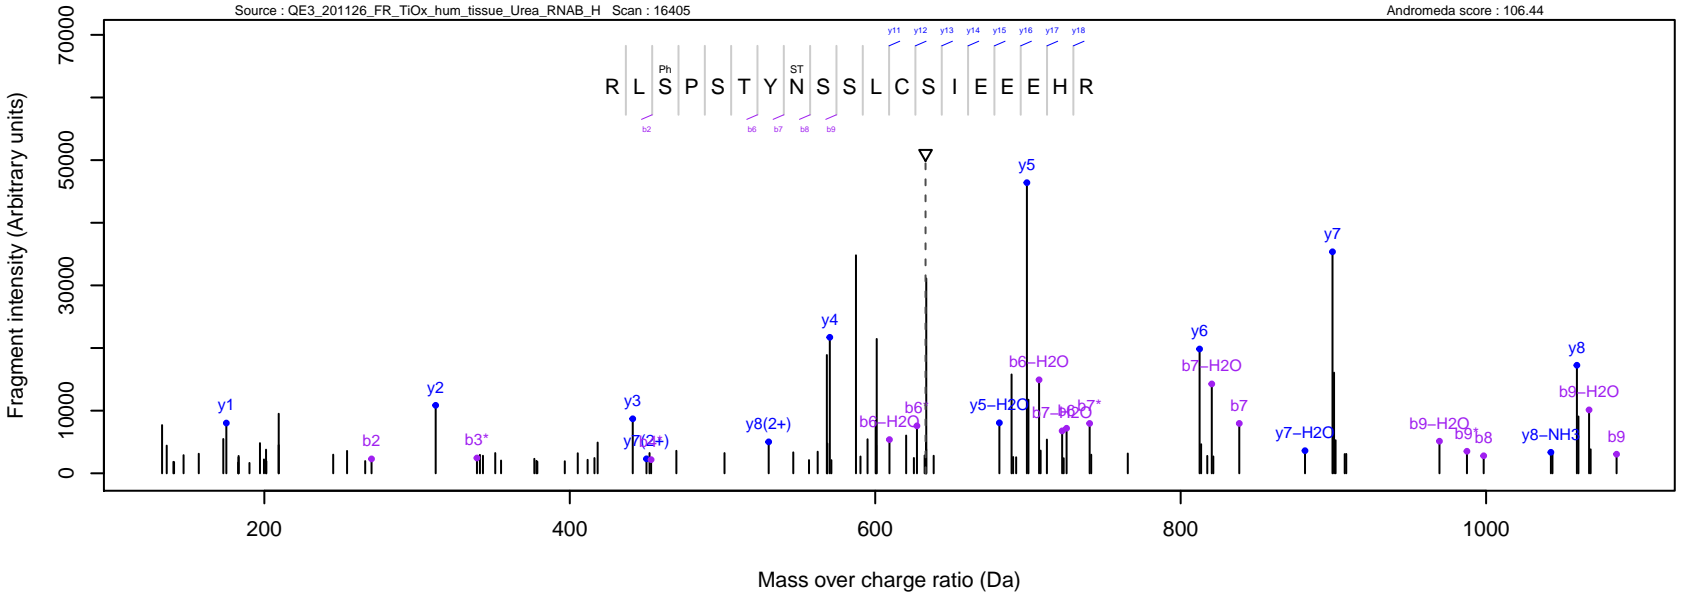

S(Phospho (STY))PGGSEANGLALVSGFKR-3+

Source : QE3\_2011126\_FR\_TIOx\_hum\_tissue\_Urea\_RNAB\_H Scan : 35285

Andromeda score : 106.43

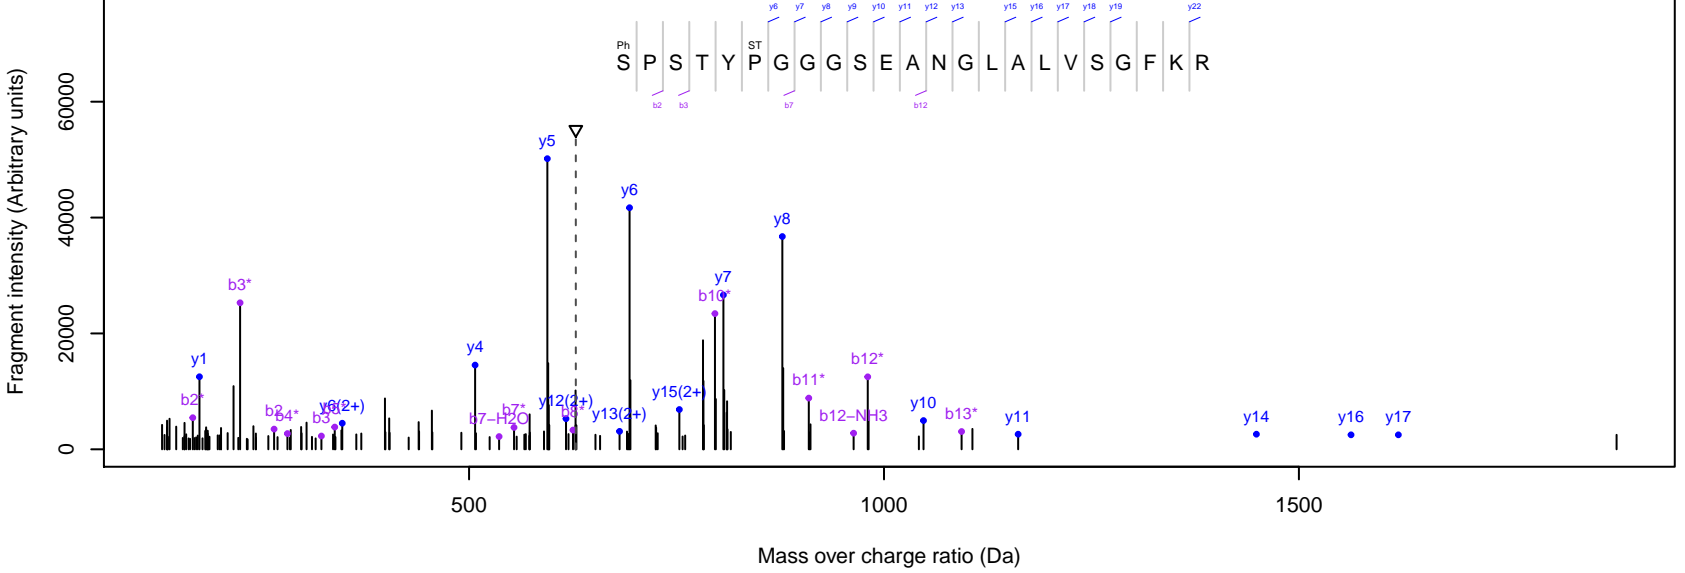

DLGQS(Phospho (STY))NSDLDM(Oxidation (M))PFAK-2+

Source : QE3\_2011126\_FR\_TIOx\_hum\_tissue\_Urea\_RNAB\_N Scan : 34641

Andromeda score : 106.42

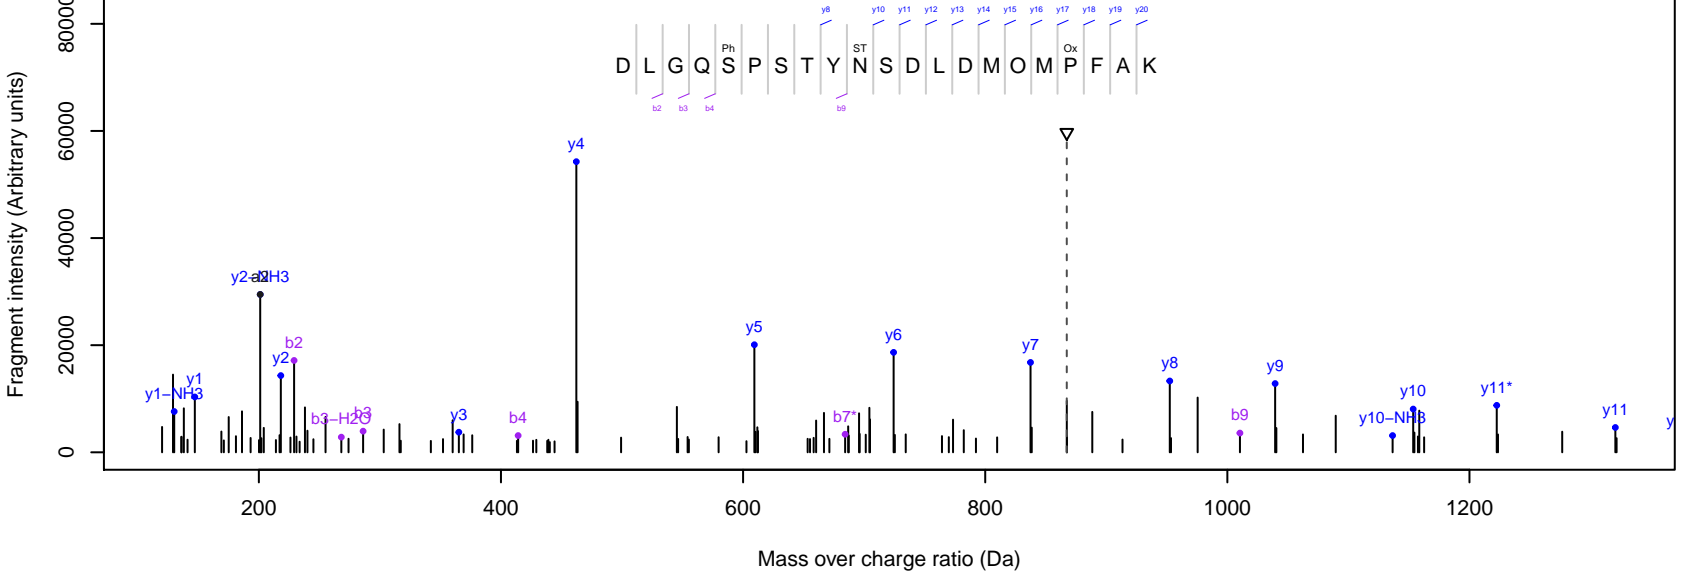

LDQPVS(Phospho (STY))APPS(Phospho (STY))PR-2+

Source : QE3\_201126\_FR\_TiOx\_hum\_tissue\_Urea\_RNAB\_B Scan : 21000

Andromeda score : 106.38

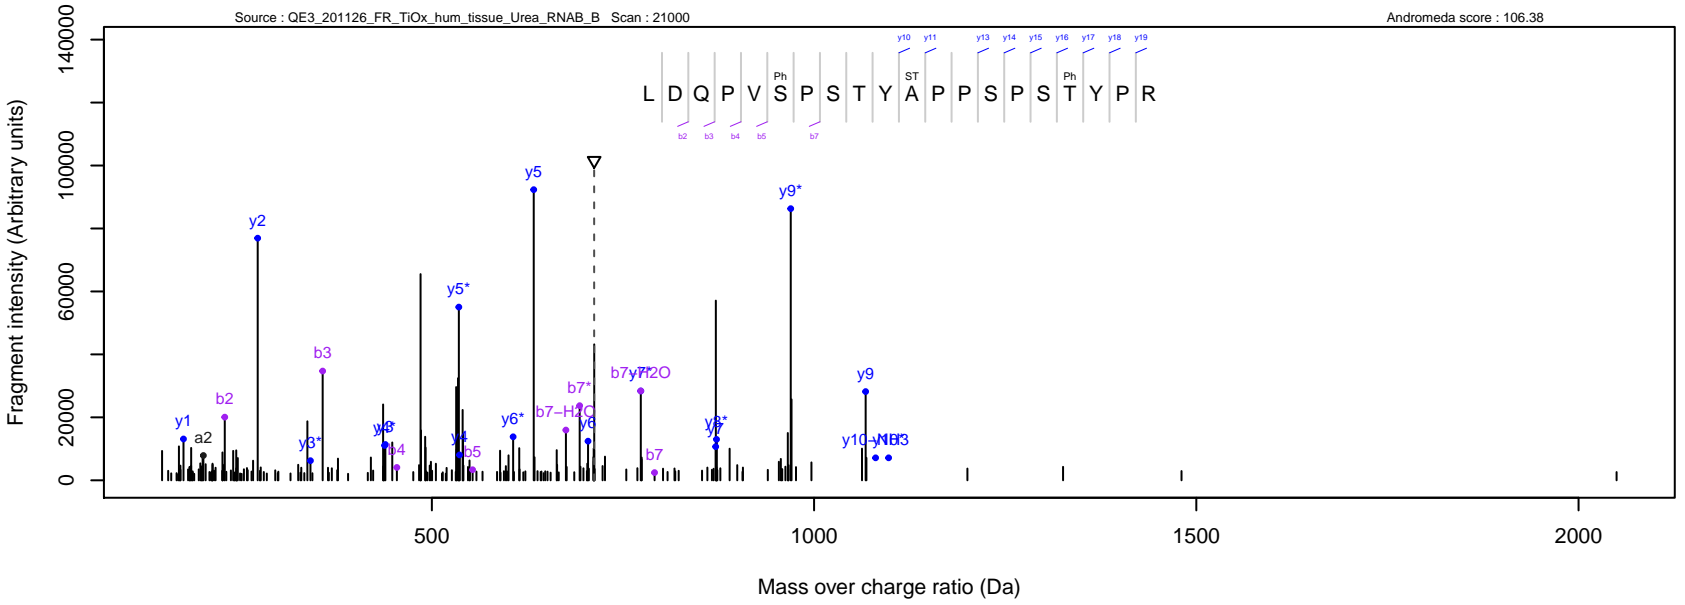

SLS(Phospho (STY))SPTDNLLESLR-2+

Source : QE3\_201126\_FR\_TiOx\_hum\_tissue\_Urea\_RNAB\_N Scan : 43380

Andromeda score : 106.35

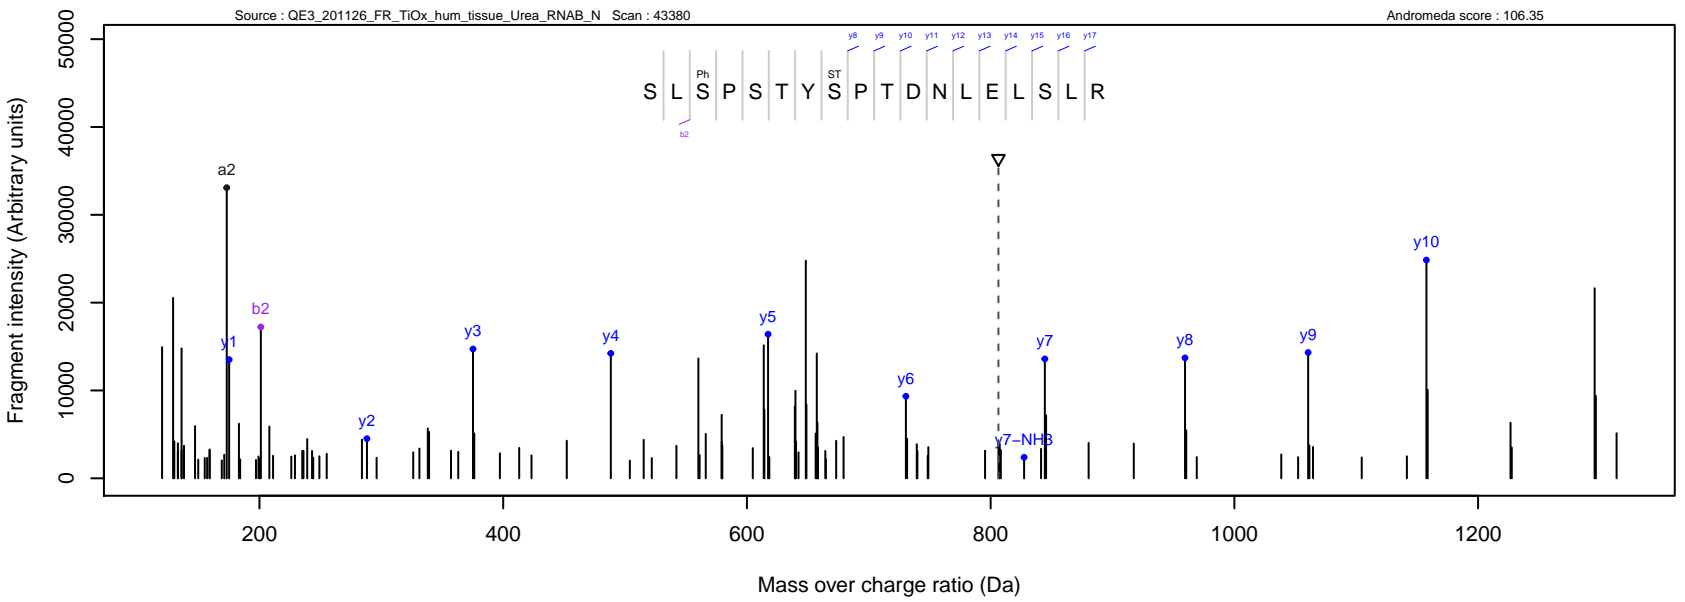

AS(Phospho (STY))GPPVSELITK-2+

Source : QE3\_201126\_FR\_TiOx\_hum\_tissue\_Urea\_RNAB\_B Scan : 31841

Andromeda score : 106.32

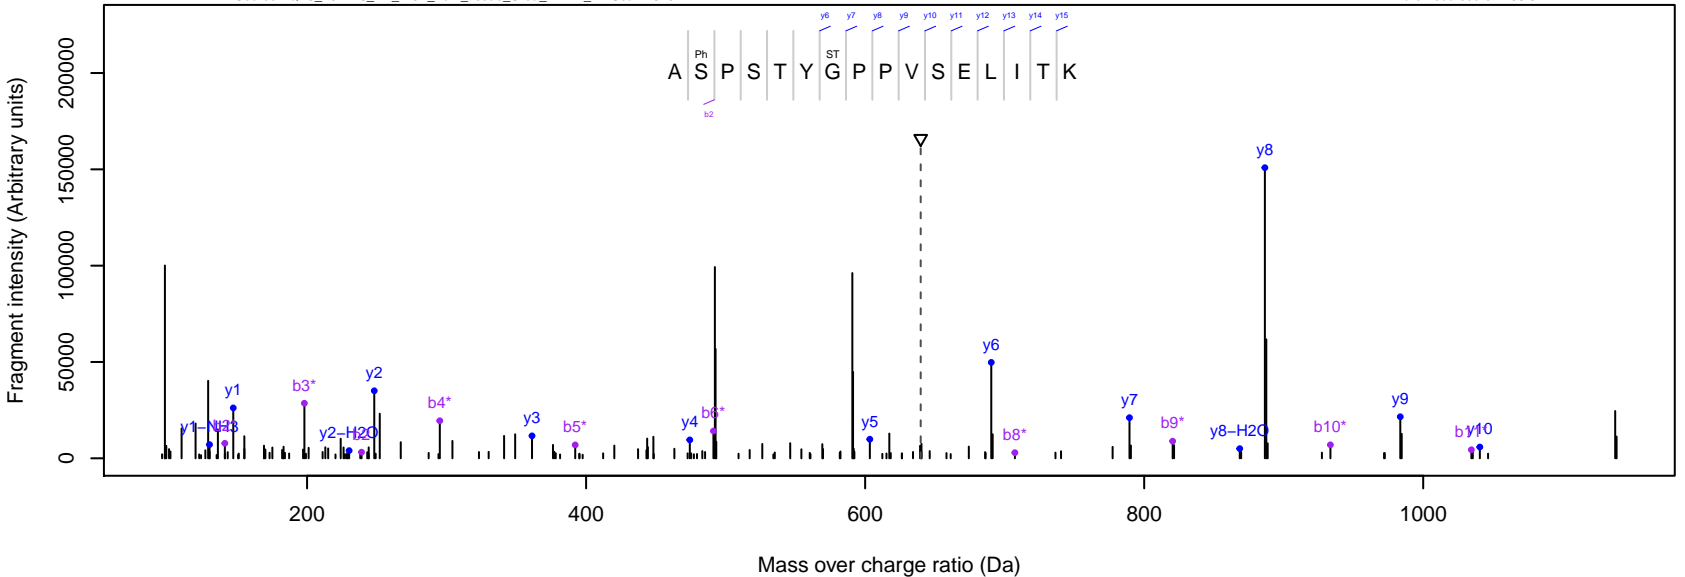

NLS(Phospho (STY))DSEKELYIQHAK-3+

Source : QE3\_201126\_FR\_TIOx\_hum\_tissue\_Urea\_RNAB\_N Scan : 20282

Andromeda score : 106.31

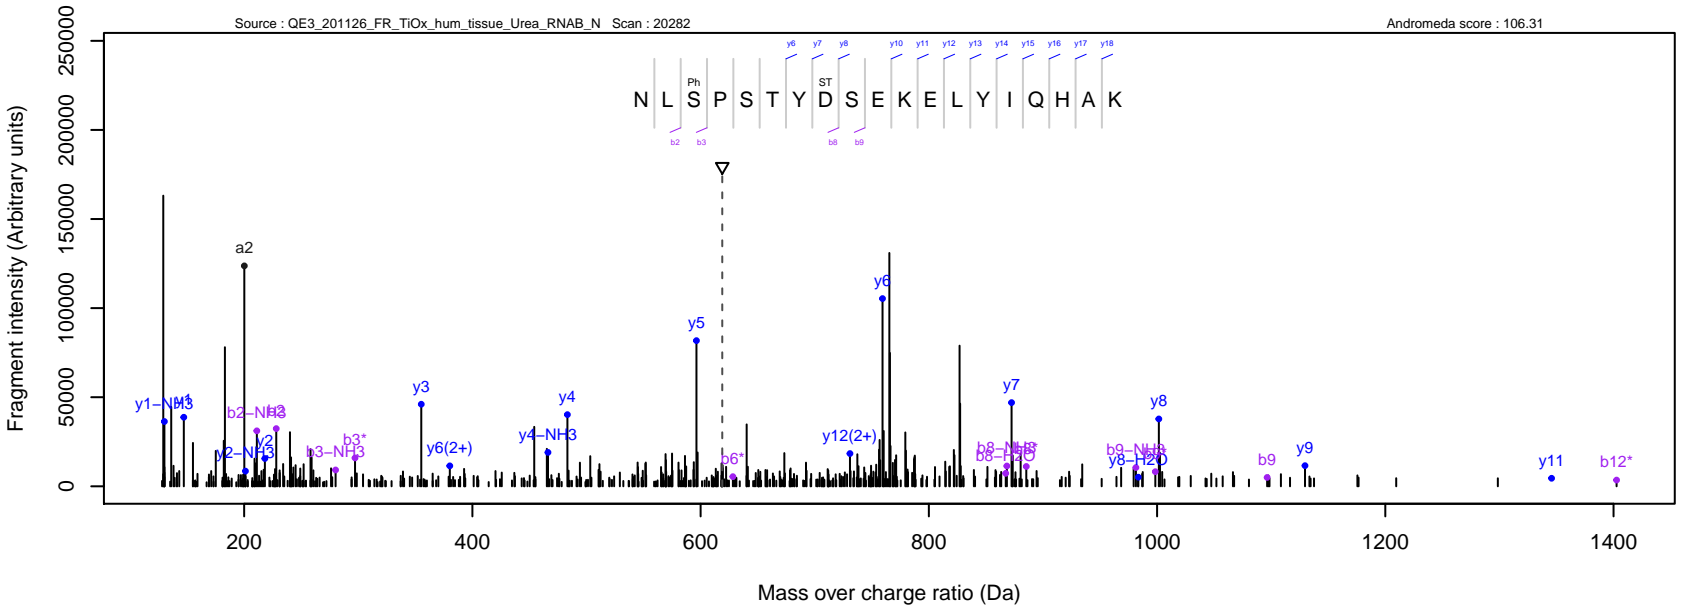

VLTDAVDDITS(Phospho (STY))IDDFLAVSENHILEDVNVK-3+

Source : QE3\_201126\_FR\_TIOx\_hum\_tissue\_Urea\_RNAB\_H Scan : 62166

Andromeda score : 106.3

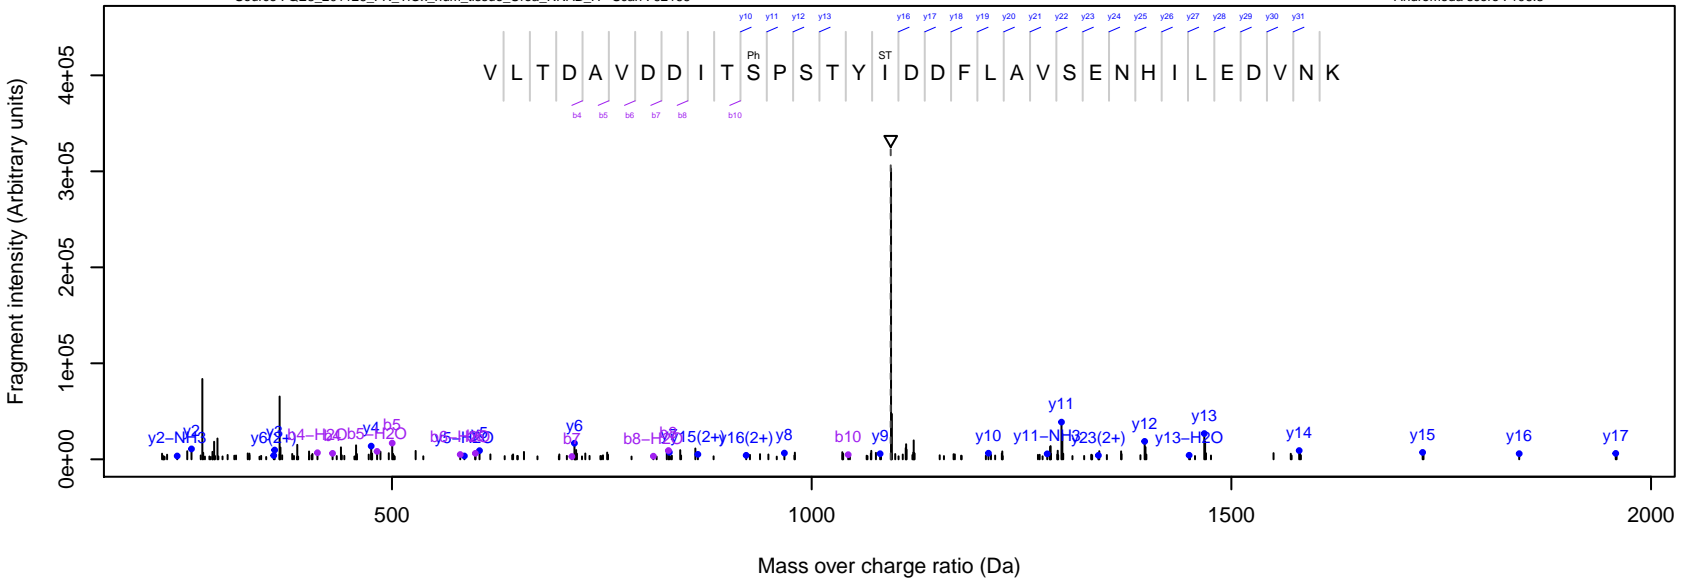

NKTEDLEATS(Phospho (STY))EHFK-3+

Source : QE3\_201126\_FR\_TIOx\_hum\_tissue\_Urea\_RNAB\_H Scan : 10522

Andromeda score : 106.29

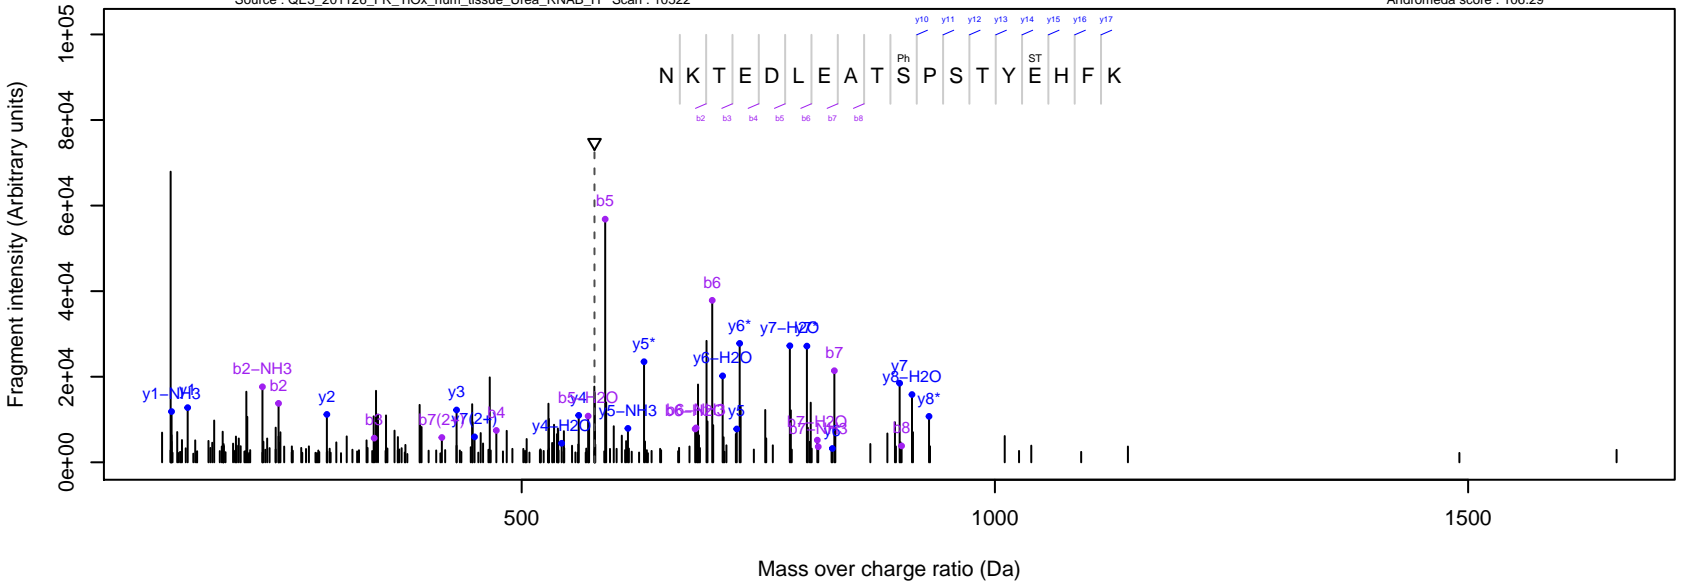

S(Phospho (STY))M(Oxidation (M))PVLGSVSSVTK--2+

Source : QE3\_201126\_FR\_TiOx\_hum\_tissue\_Urea\_RNAB\_B Scan : 25460

Andromeda score : 106.29

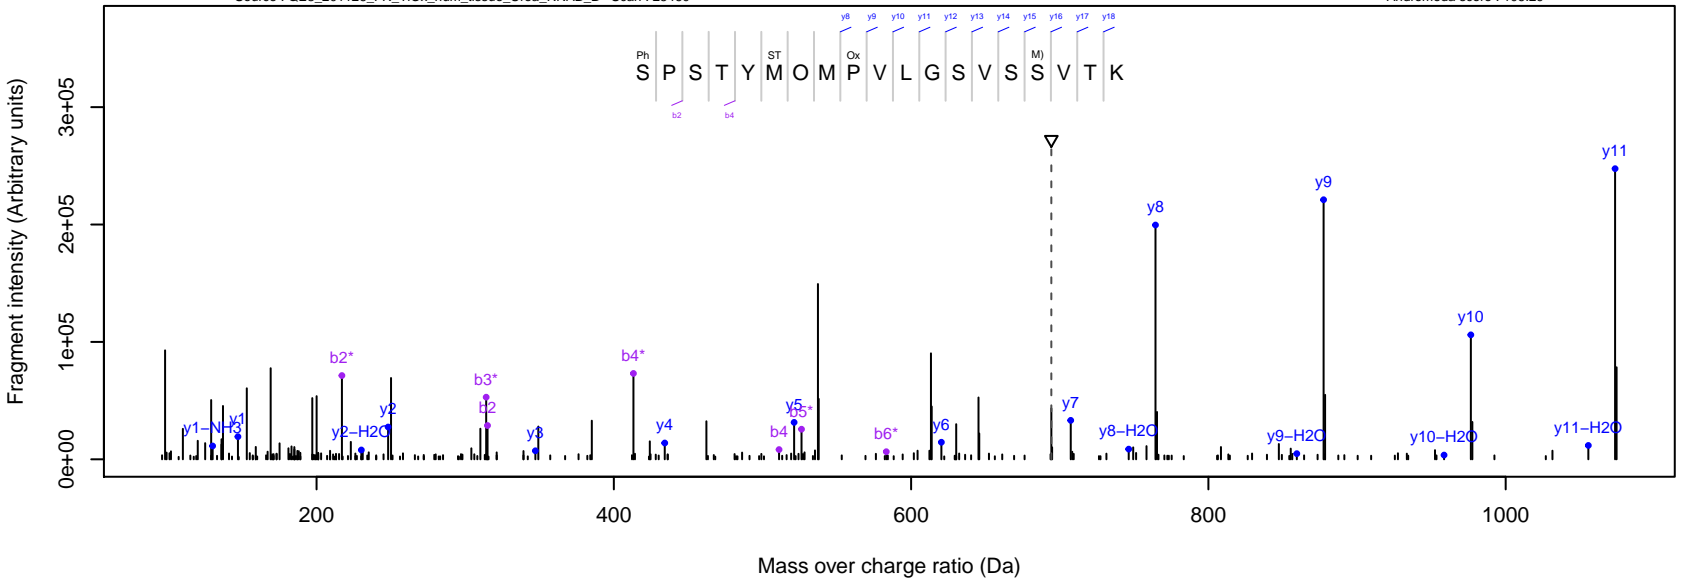

EM(Oxidation (M))PQLDRS(Phospho (STY))PART(Phospho (STY))PPSEEDSAEAE--4+

Source : QE3\_201126\_FR\_TiOx\_hum\_tissue\_Urea\_RNAB\_H Scan : 15212

Andromeda score : 106.28

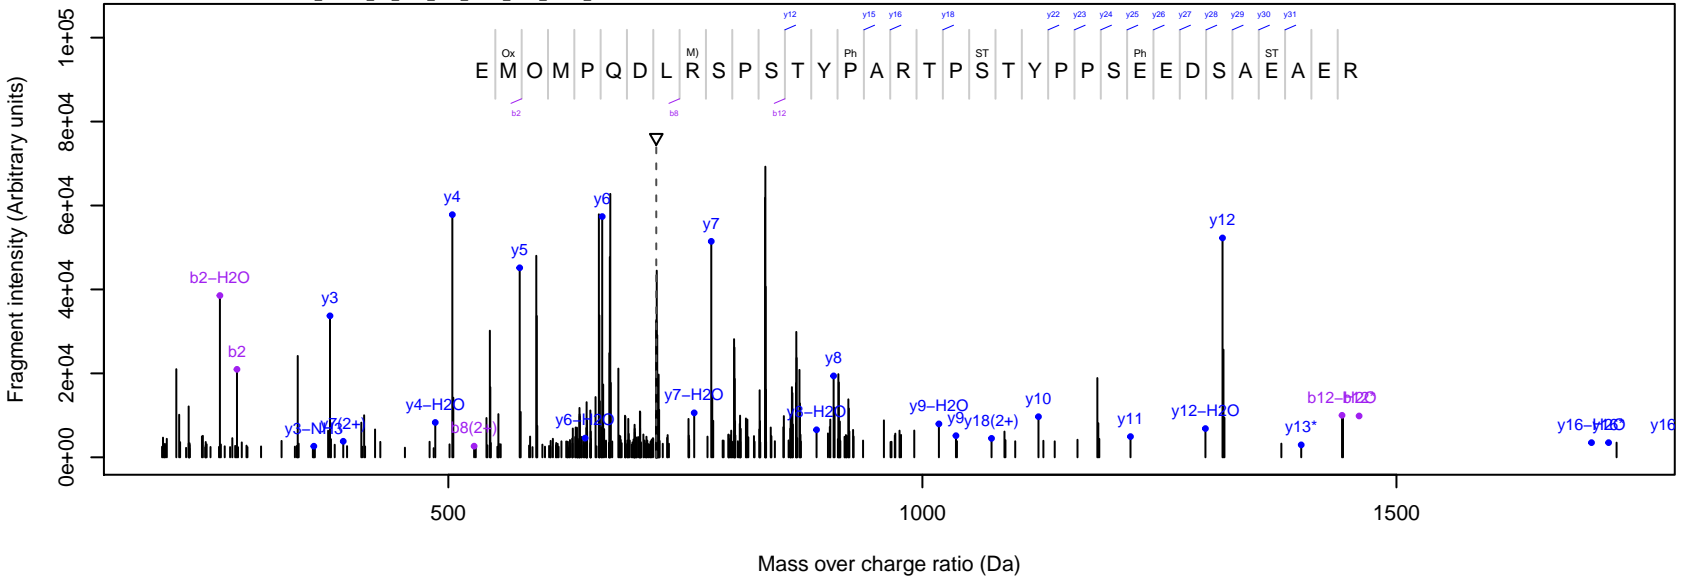

S(Phospho (STY))TELVLPDM(Oxidation (M))PR--2+

Source : QE3\_201126\_FR\_TiOx\_hum\_tissue\_Urea\_RNAB\_H Scan : 29388

Andromeda score : 106.26

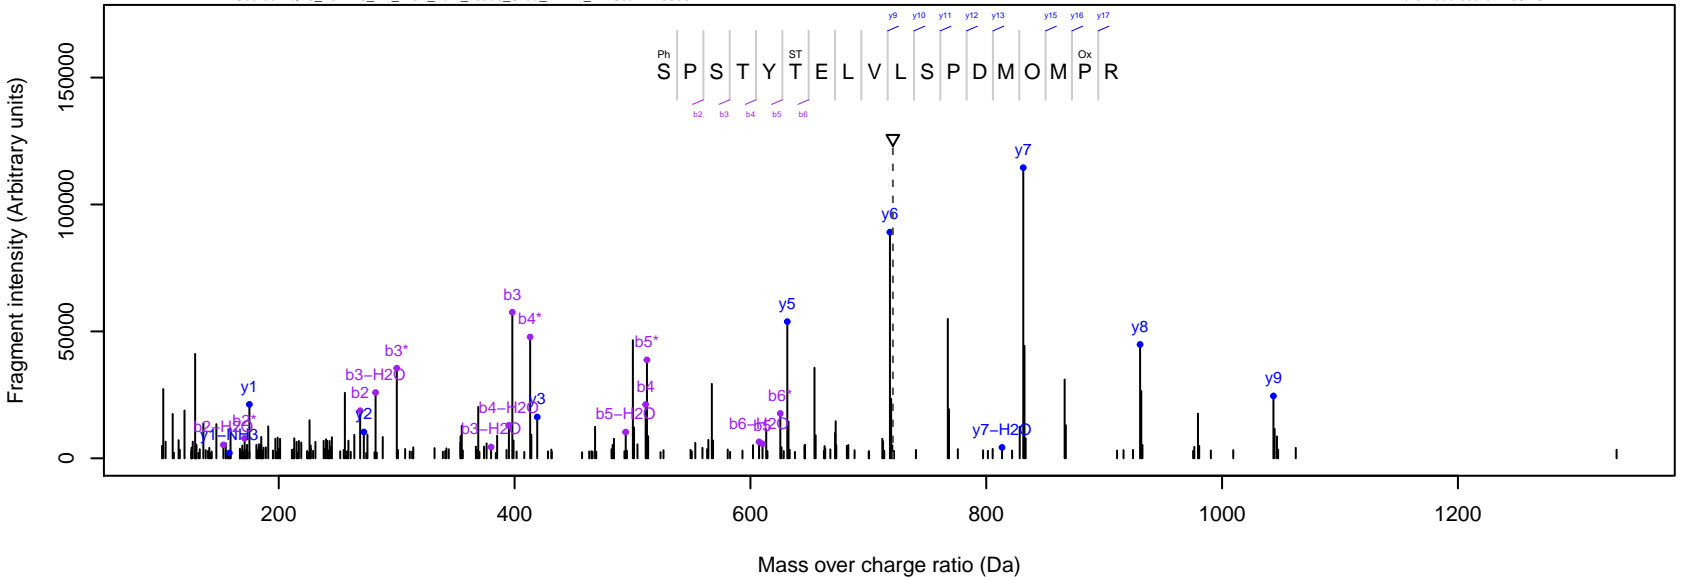

RYS(Phospho (STY))DGWCEGVSSSEGTGFFPGNYVEPSC-3+

Source : QE3\_201126\_FR\_TiOx\_hum\_tissue\_Urea\_RNAB\_N Scan : 56816

Andromeda score : 106.21

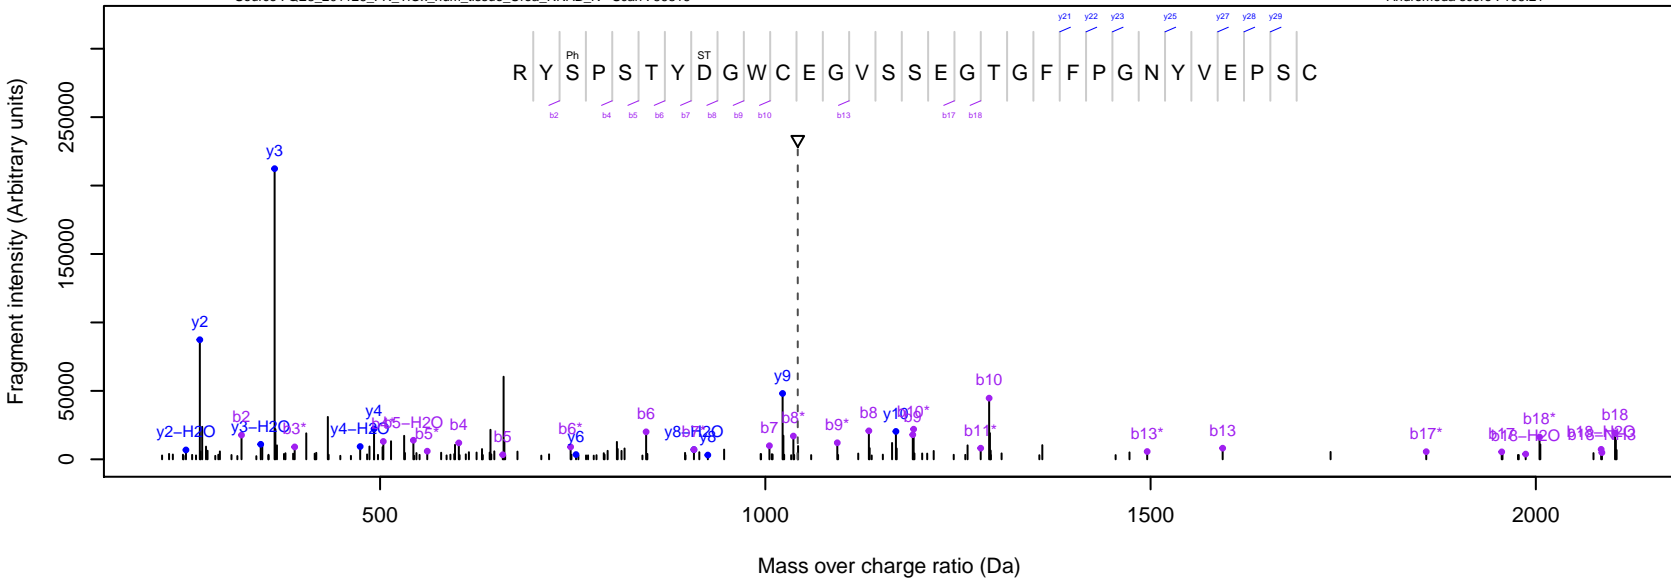

TFAPLPEFEQEEDDGEVTEDESPSTYDEDFIQPR-3+

Source : QE3\_201126\_FR\_TiOx\_hum\_tissue\_Urea\_RNAB\_N Scan : 57967

Andromeda score : 106.21

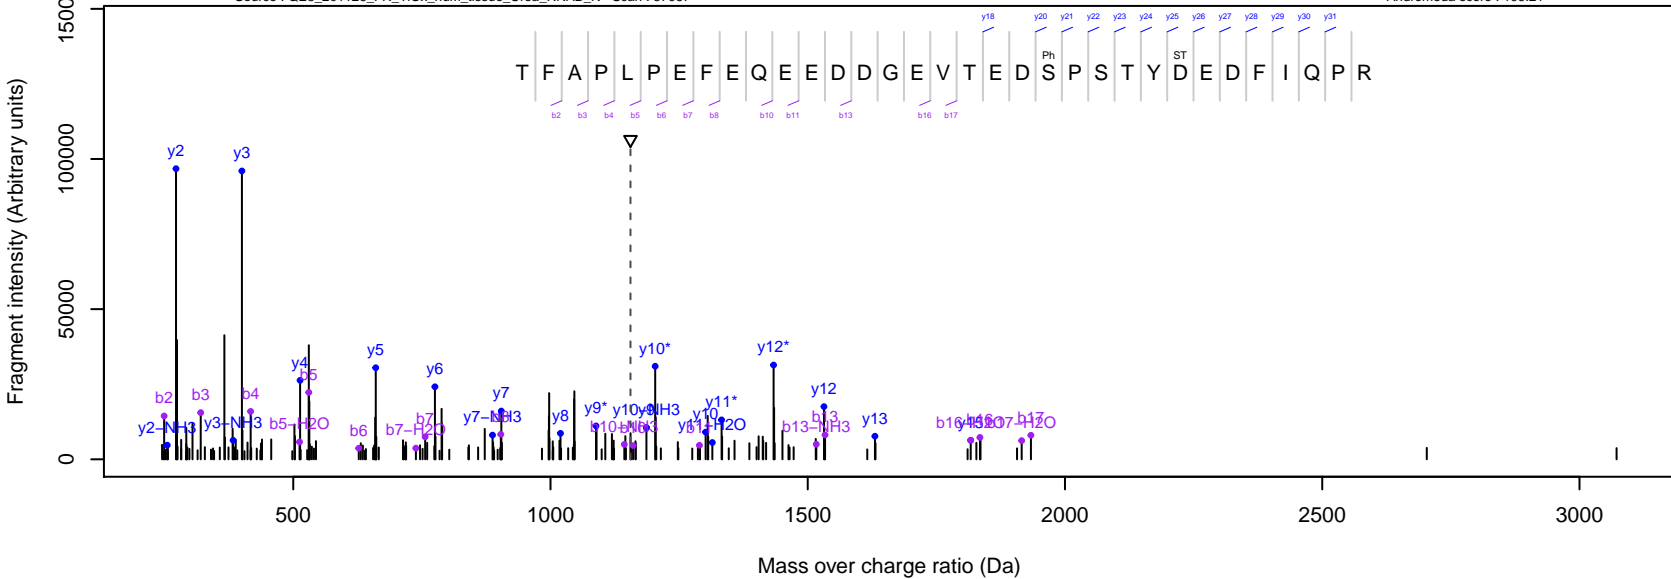

E EI Q D E E D D D D Y P S T Y V E E G E E E E E E G G L R G E K-3+

Source : QE3\_201126\_FR\_TiOx\_hum\_tissue\_Urea\_RNAB\_B Scan : 31866

Andromeda score : 106.17

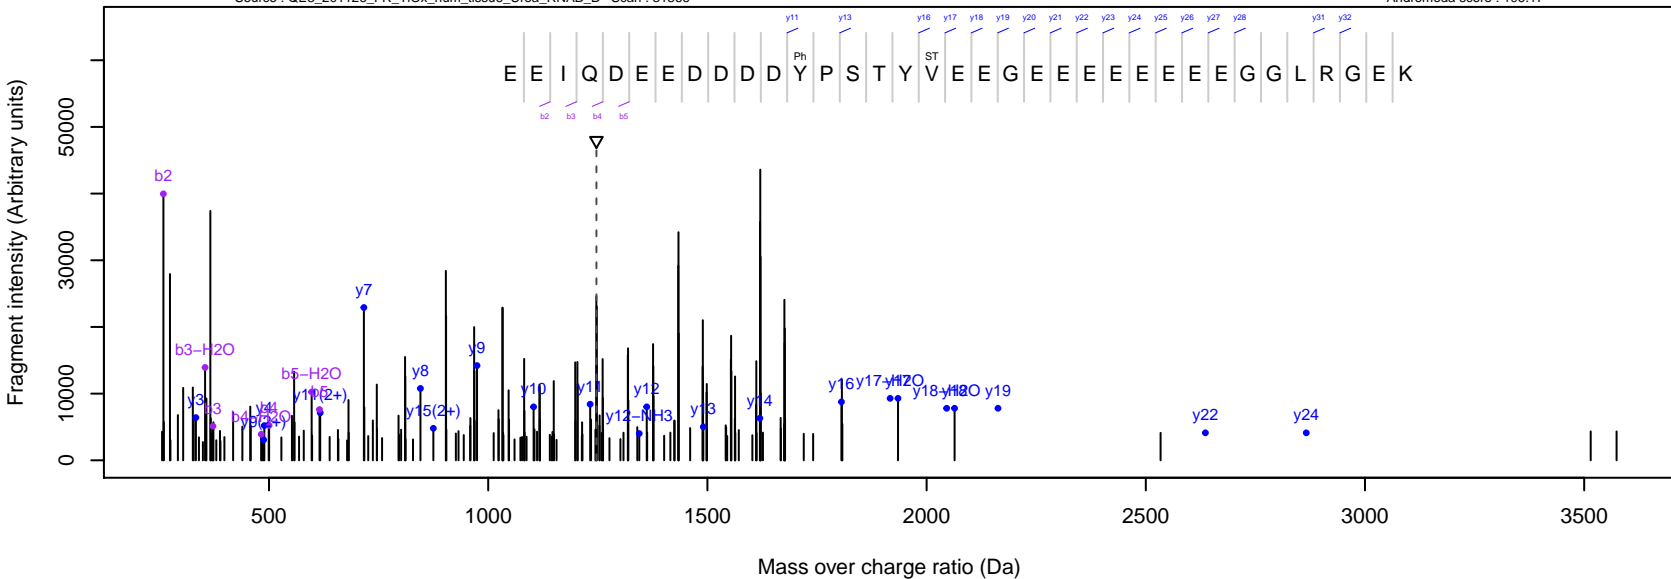

HSSS(Phospho (STY))PLSPGGPHTLTKPTTTSSSER-4+

Source : QE3\_201126\_FR\_TiOx\_hum\_tissue\_Urea\_RNAB\_H Scan : 10345

Andromeda score : 106.17

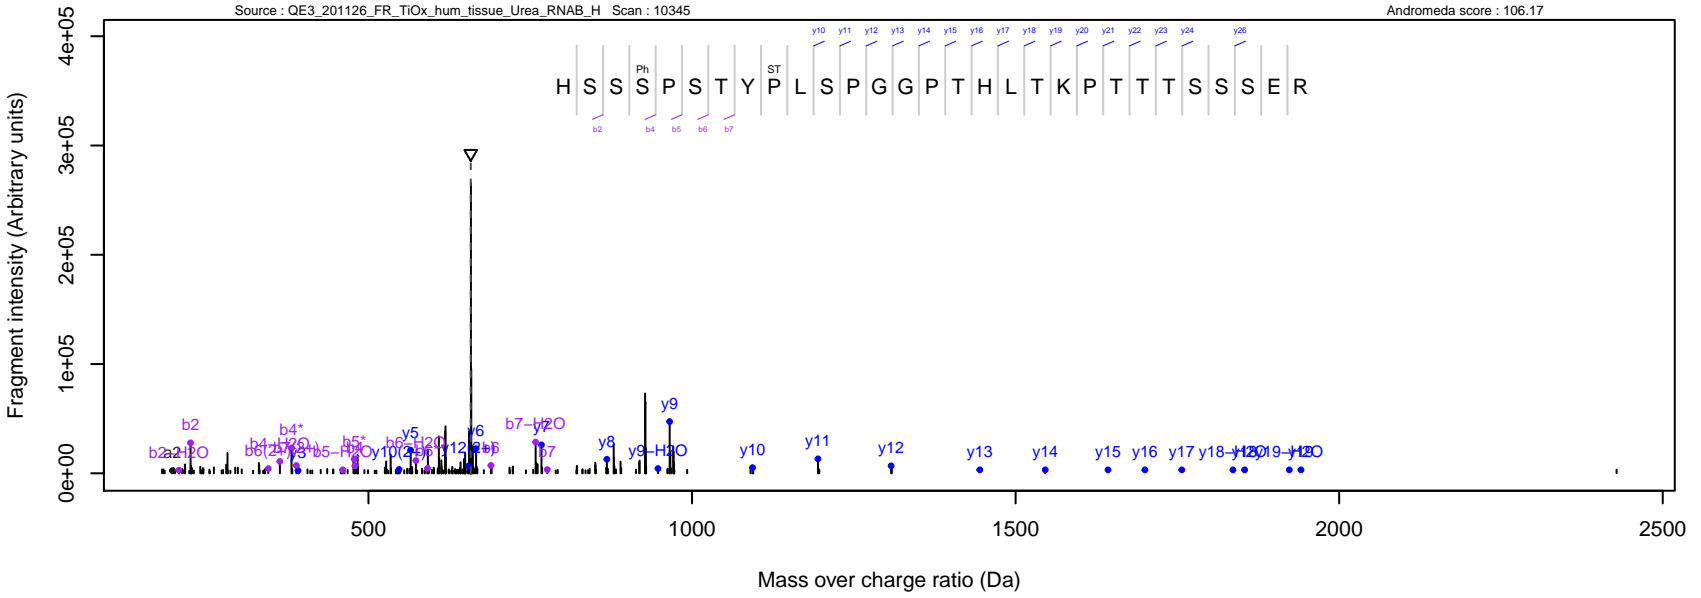

SSS(Phospho (STY))PVQVEEEPVR-2+

Source : QE3\_201126\_FR\_TiOx\_hum\_tissue\_Urea\_RNAB\_N Scan : 18011

Andromeda score : 106.17

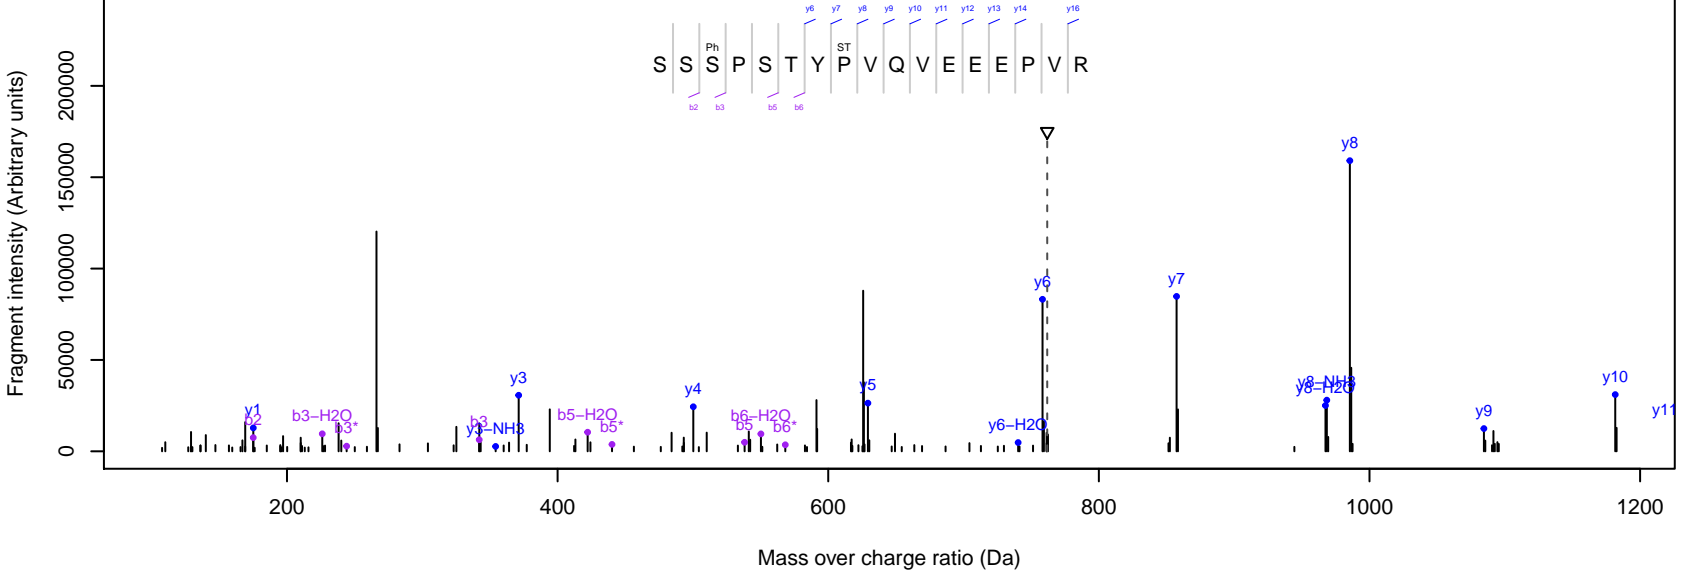

EIPSATQS(Phospho (STY))PISK-2+

Source : QE3\_201126\_FR\_TiOx\_hum\_tissue\_Urea\_RNAB\_H Scan : 15949

Andromeda score : 106.13

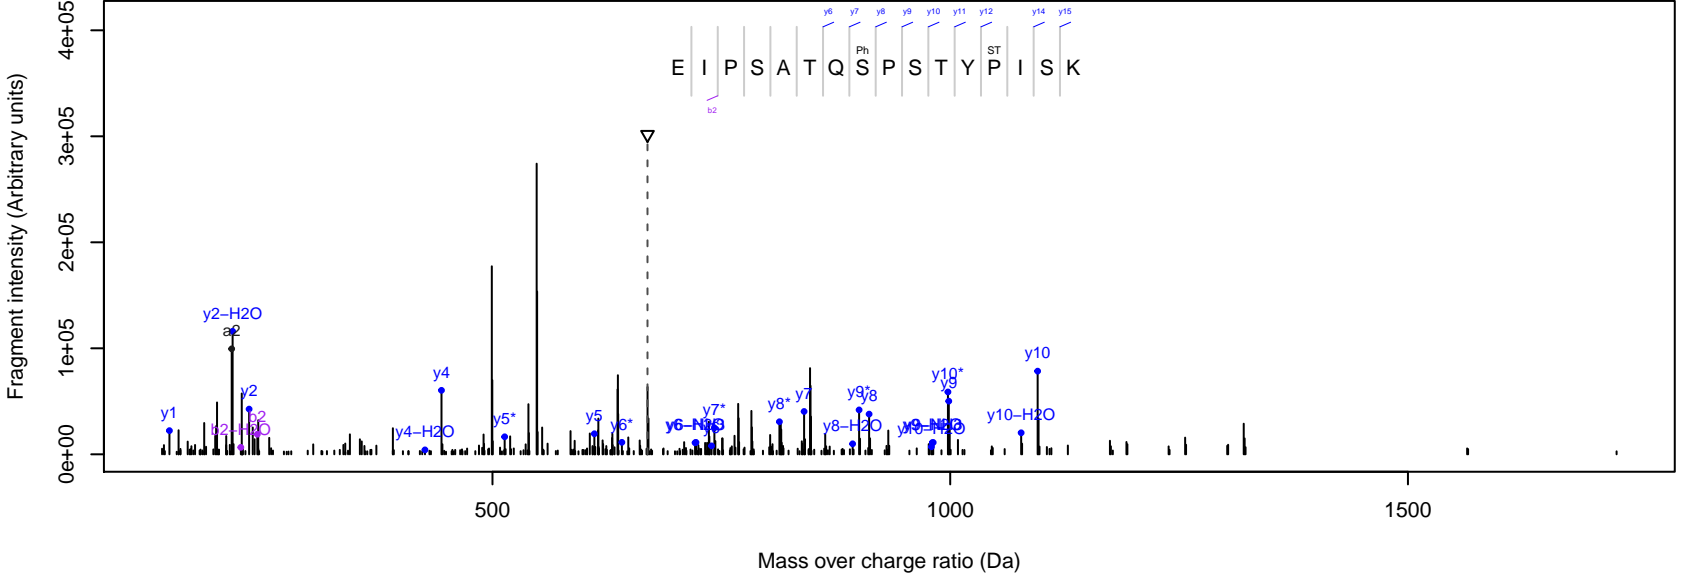



SAAS(Phospho (STY))PVVSSMPER-2+

Source : QE3\_201126\_FR\_TiOx\_hum\_tissue\_Urea\_RNAB\_H Scan : 19799

Andromeda score : 106.13

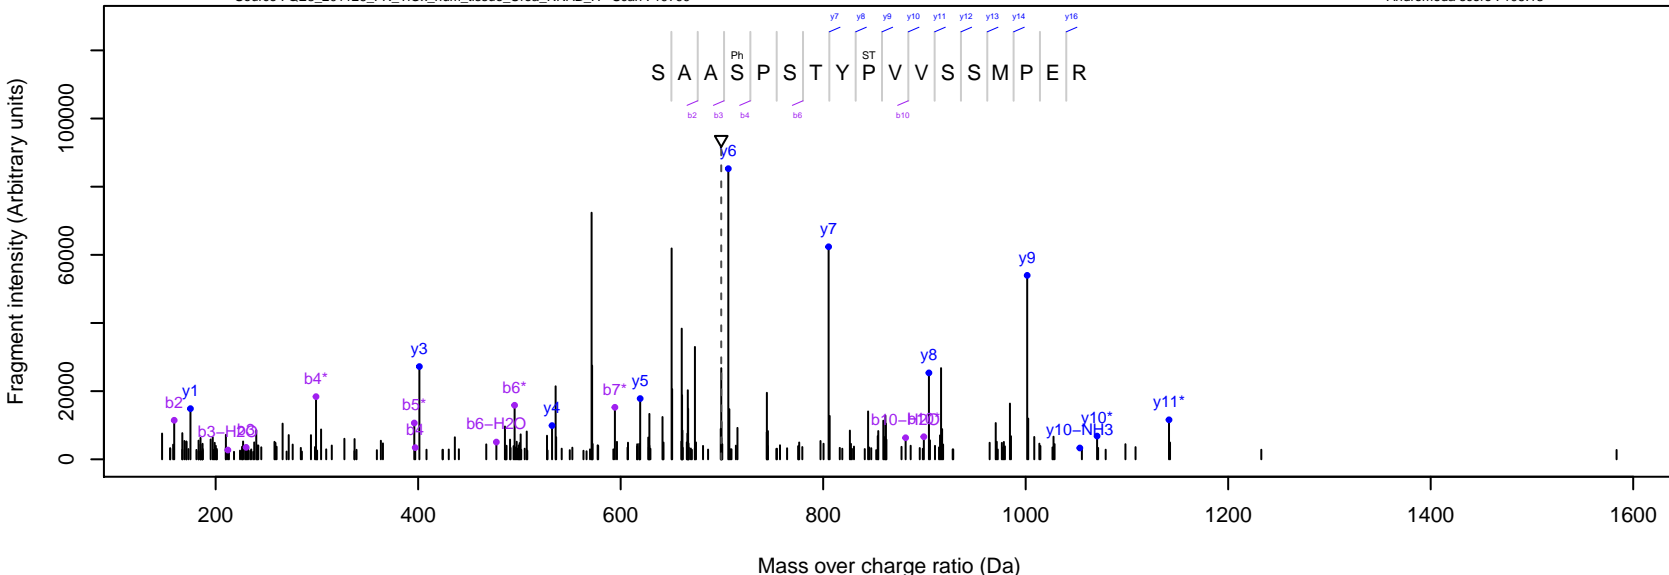

TTS(Phospho (STY))FAESCKPVQQP S A F G S M O M K-3+

Source : QE3\_201126\_FR\_TiOx\_hum\_tissue\_Urea\_RNAB\_H Scan : 21124

Andromeda score : 106.12

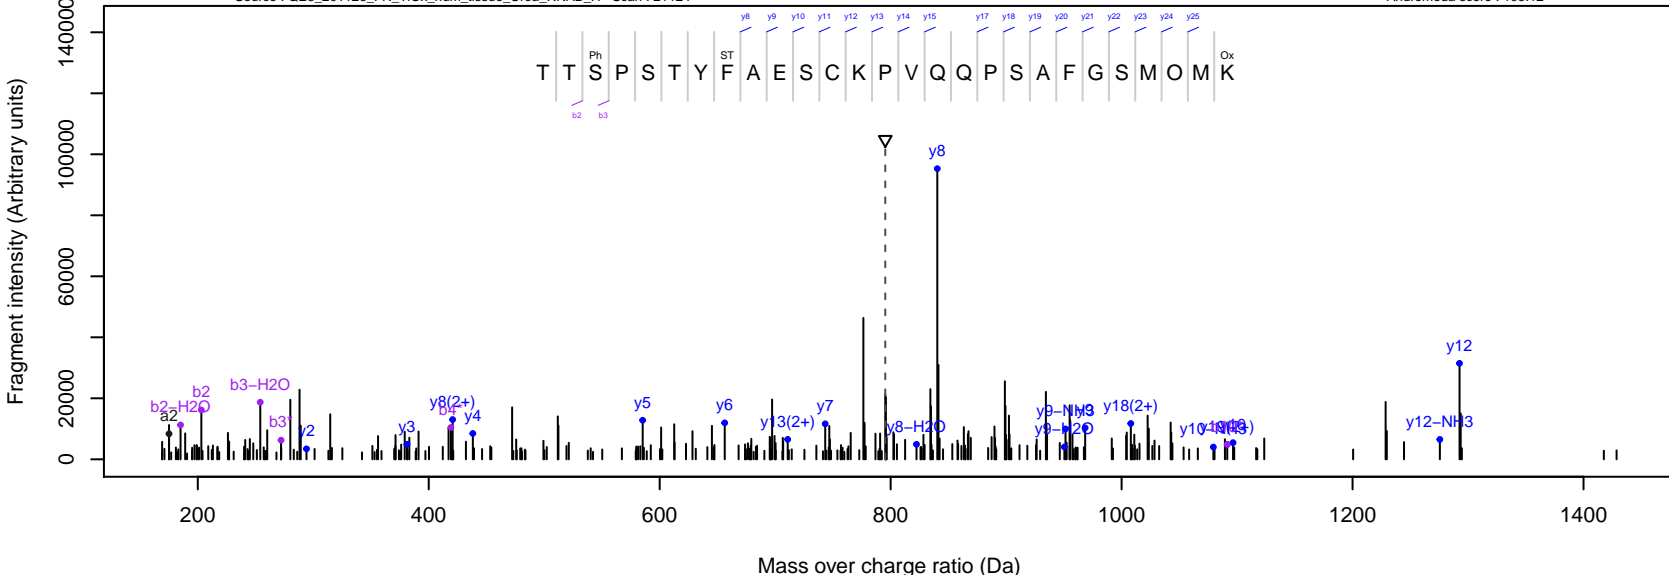

GDLS(Phospho (STY))DV E E E E E E M(Oxidation (M))DVDEATGAVKK-3+

Source : QE3\_201126\_FR\_TiOx\_hum\_tissue\_Urea\_RNAB\_H Scan : 36140

Andromeda score : 106.1

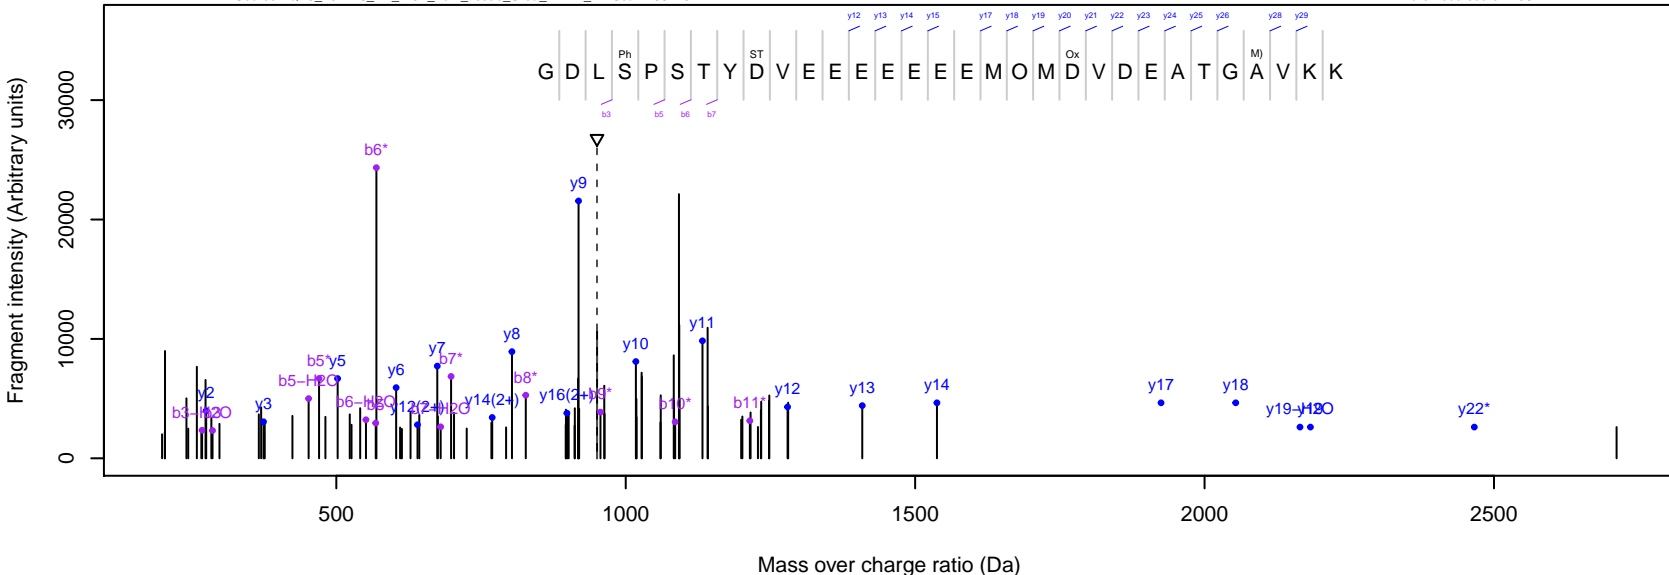

VHLRPDEDLRNCES(PSTY)DTEEDIAR-4+

Source : QE3\_201126\_FR\_TiOx\_hum\_tissue\_Urea\_RNAB\_H Scan : 20950

Andromeda score : 106.04

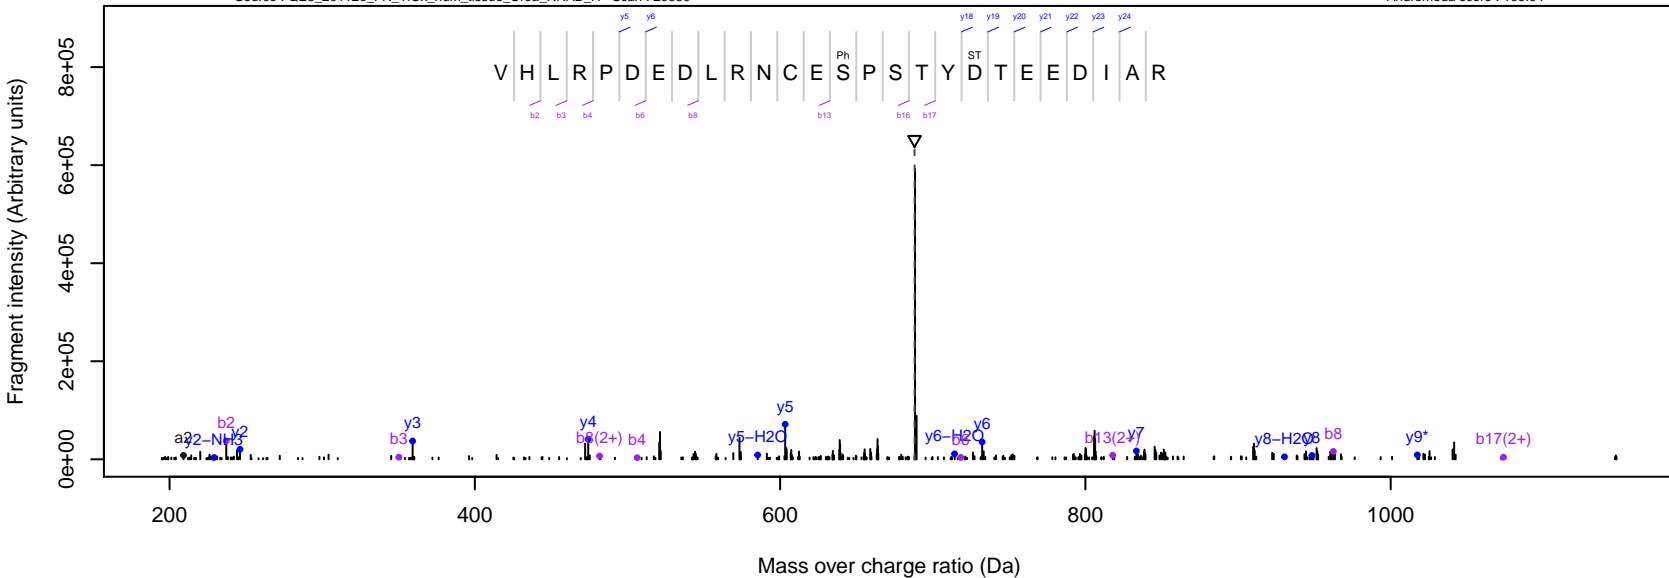

RLS(Phospho (STY))S(Phospho (STY))LRASTSK-2+

Source : QE3\_201126\_FR\_TiOx\_hum\_tissue\_Urea\_RNAB\_N Scan : 10386

Andromeda score : 105.99

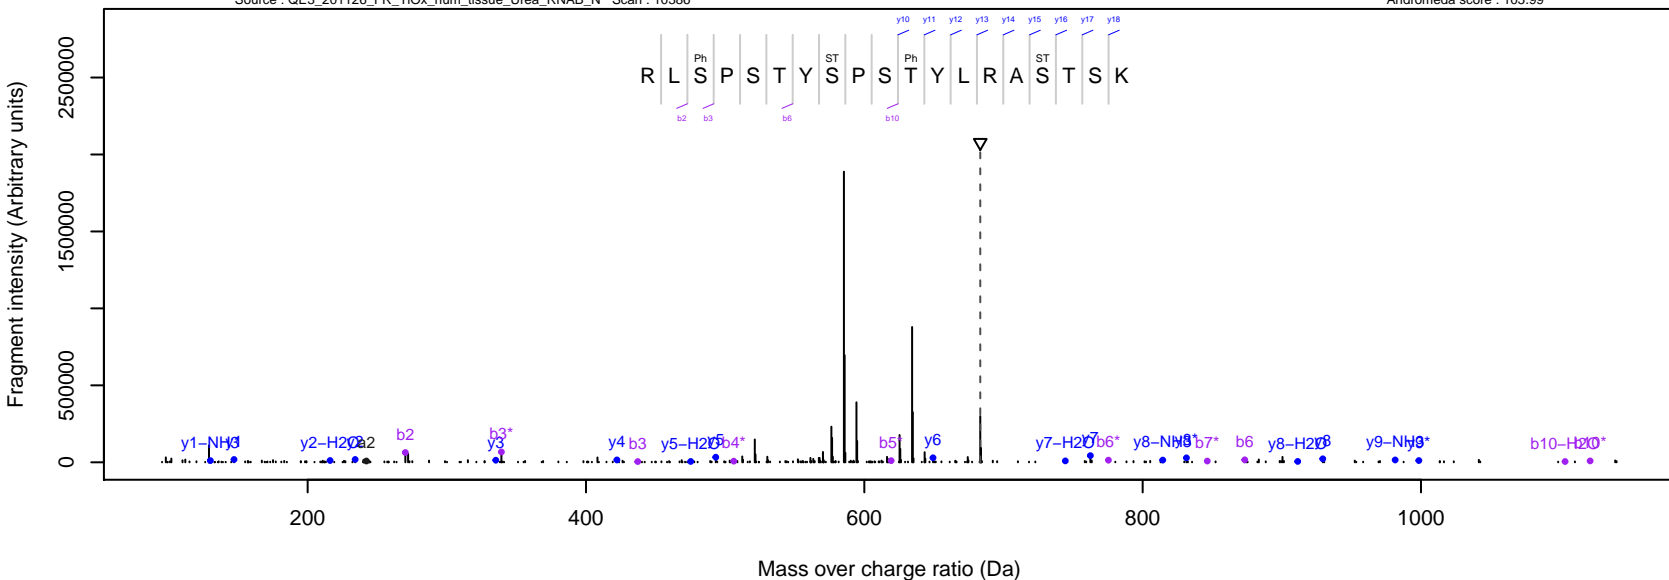

AAS(Phospho (STY))DDGS(Phospho (STY))LKSSS(Phospho (STY))PTS YWK-2+

Source : QE3\_201126\_FR\_TiOx\_hum\_tissue\_Urea\_RNAB\_N Scan : 38290

Andromeda score : 105.95

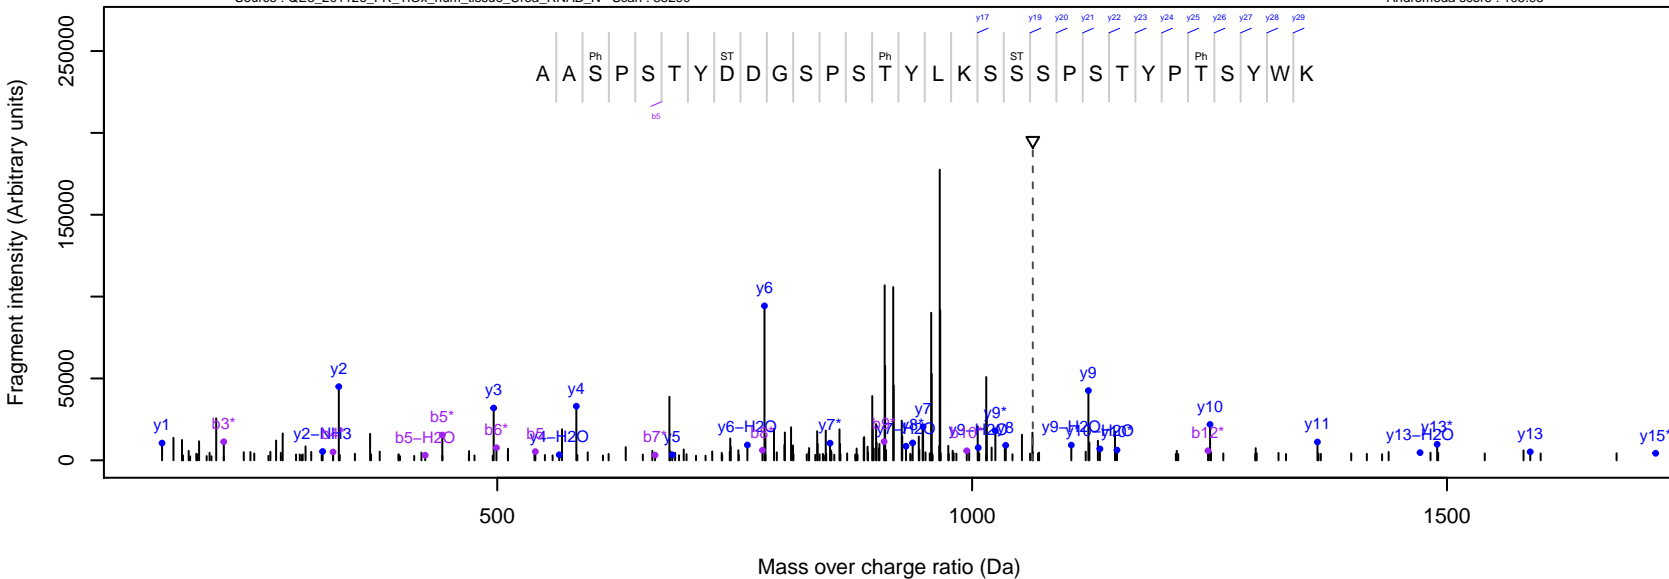

S(Phospho (STY))LNLVDSPQLLEKVPESDFQWPR-3+

Source : QE3\_201126\_FR\_TiOx\_hum\_tissue\_Urea\_RNAB\_N Scan : 57285

Andromeda score : 105.95

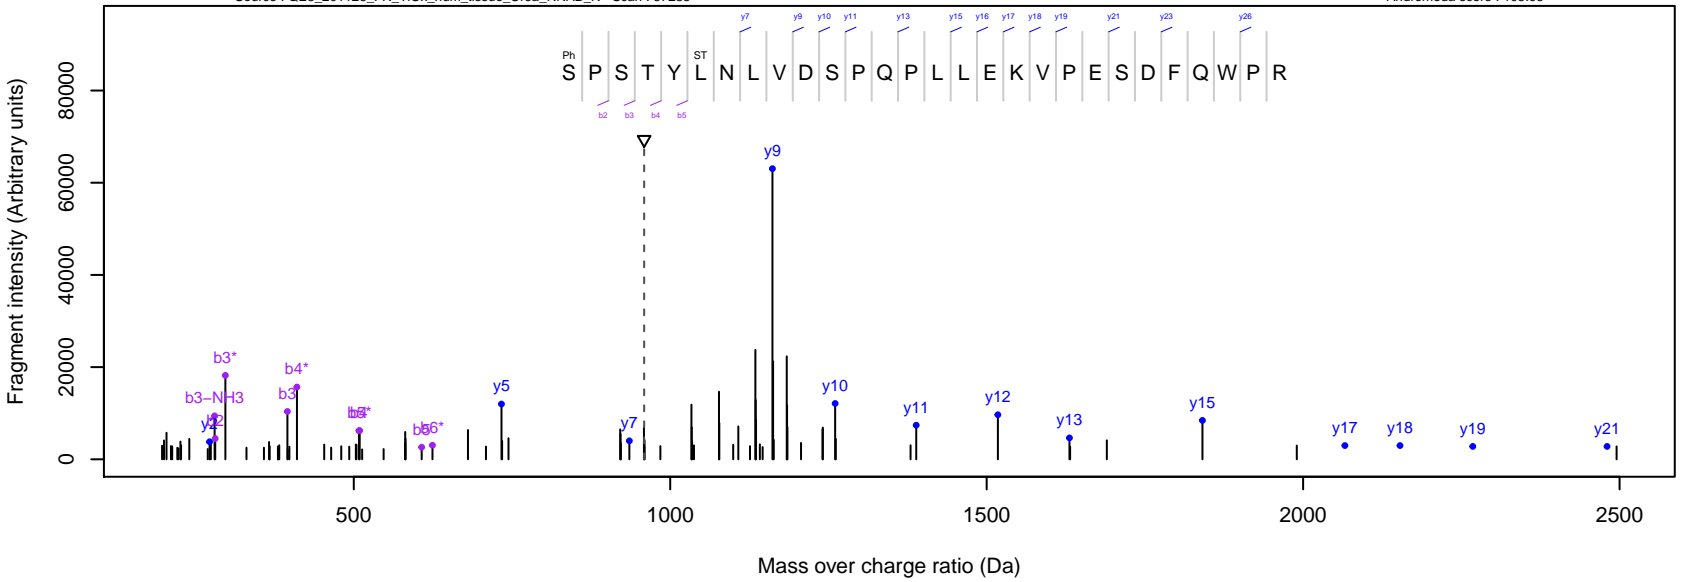

S(Phospho (STY))RSFTSSYAISAANHVK-3+

Source : QE3\_201126\_FR\_TiOx\_hum\_tissue\_Urea\_RNAB\_H Scan : 19039

Andromeda score : 105.95

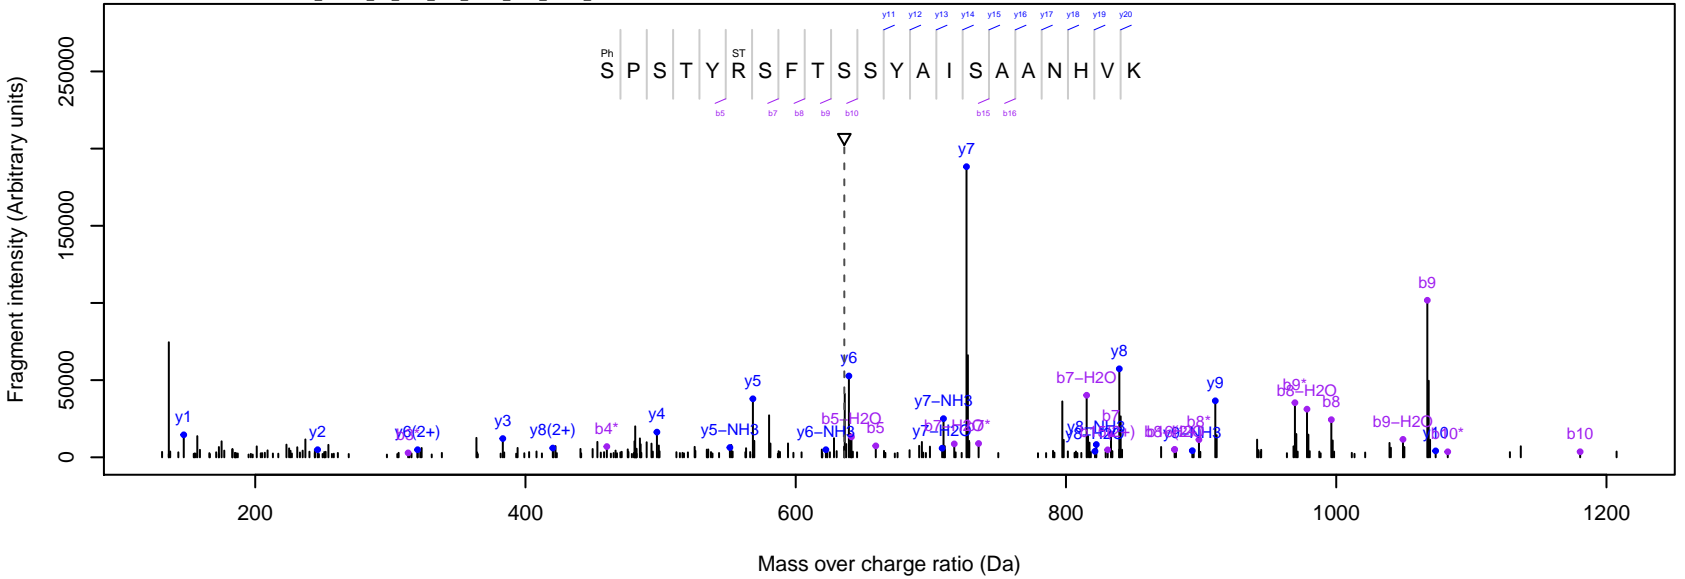

WDSY(Phospho (STY))ENFNQHEDS(Phospho (STY))VDGSLTHTR-4+

Source : QE3\_201126\_FR\_TiOx\_hum\_tissue\_Urea\_RNAB\_H Scan : 25524

Andromeda score : 105.95

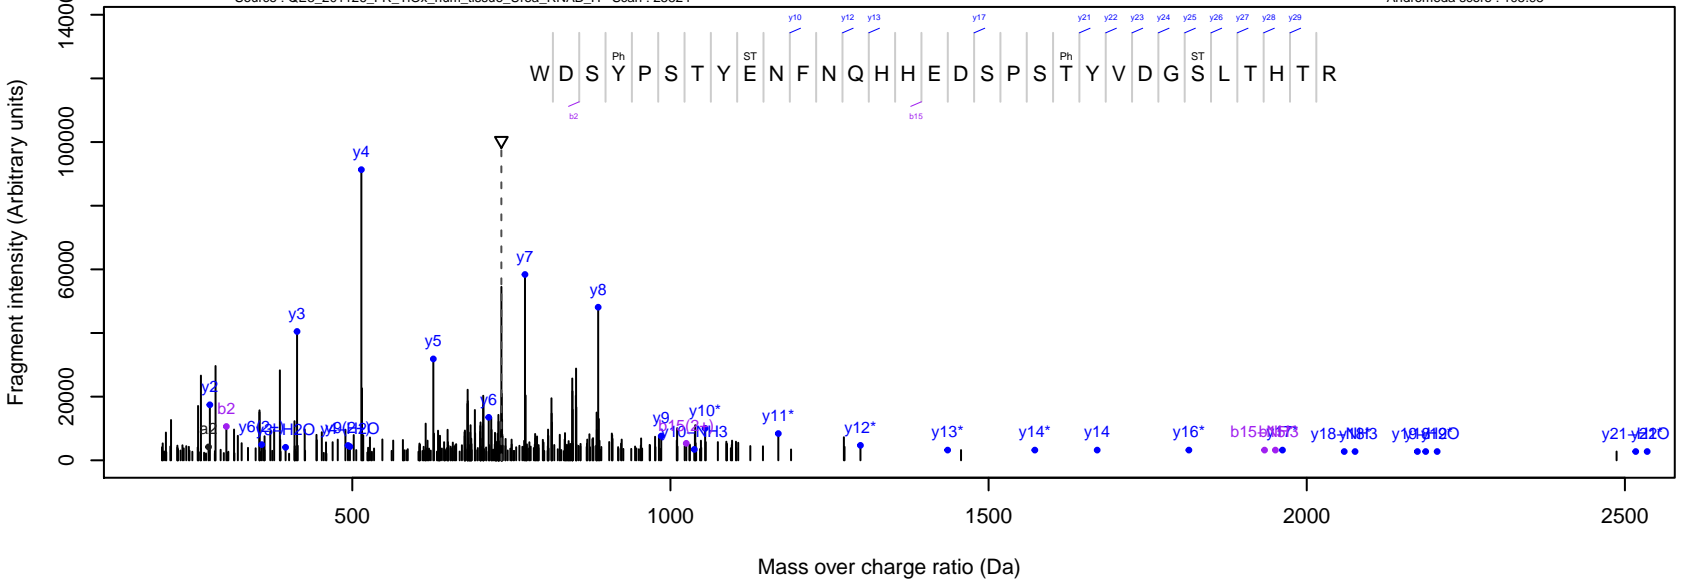

EKPSFIDLETFNAGS(Phospho (STY))DVGSPSTYDVGSPSTYDSEYESEPFMGGAR

Source : QE3\_201126\_FR\_TIOx\_hum\_tissue\_Urea\_RNAB\_N Scan : 60761

Andromeda score : 105.9

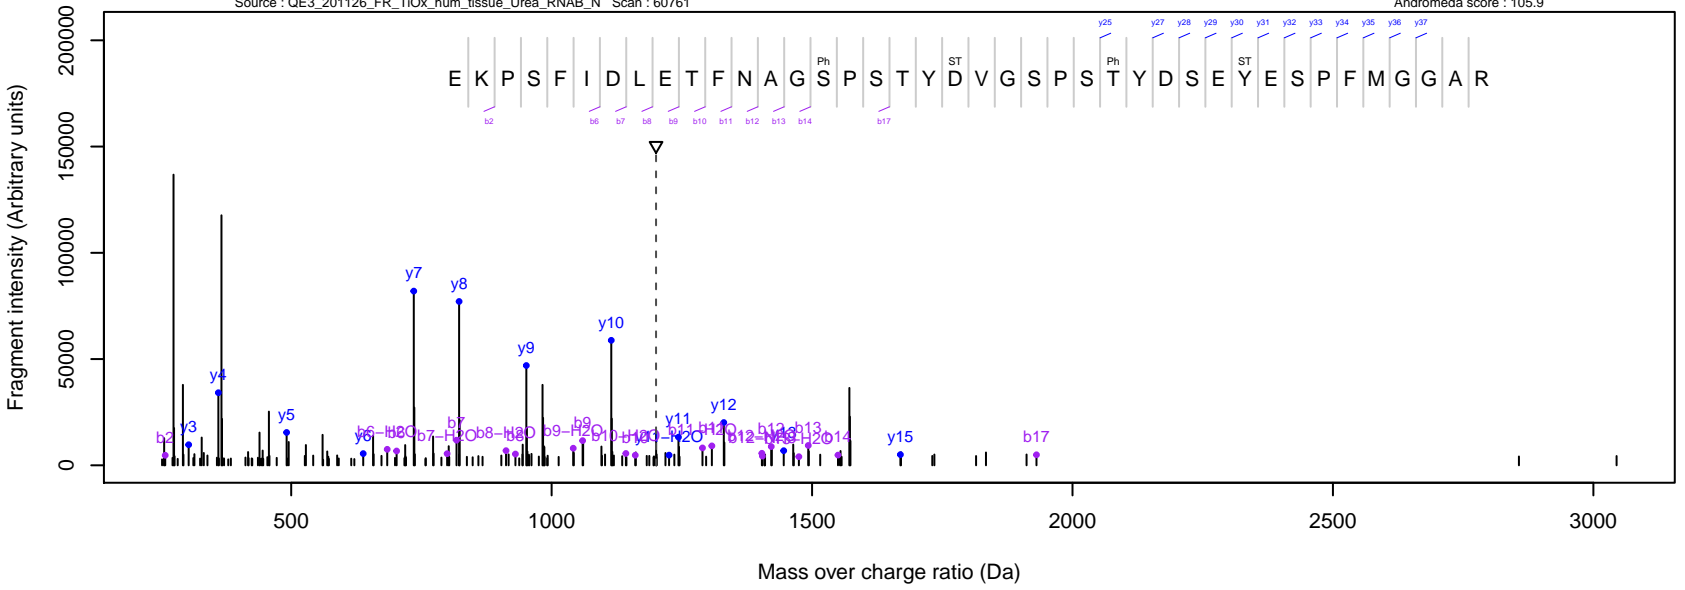

RLS(Phospho (STY))STSLASGHSVR

Source : QE3\_201126\_FR\_TIOx\_hum\_tissue\_Urea\_RNAB\_B Scan : 9223

Andromeda score : 105.79

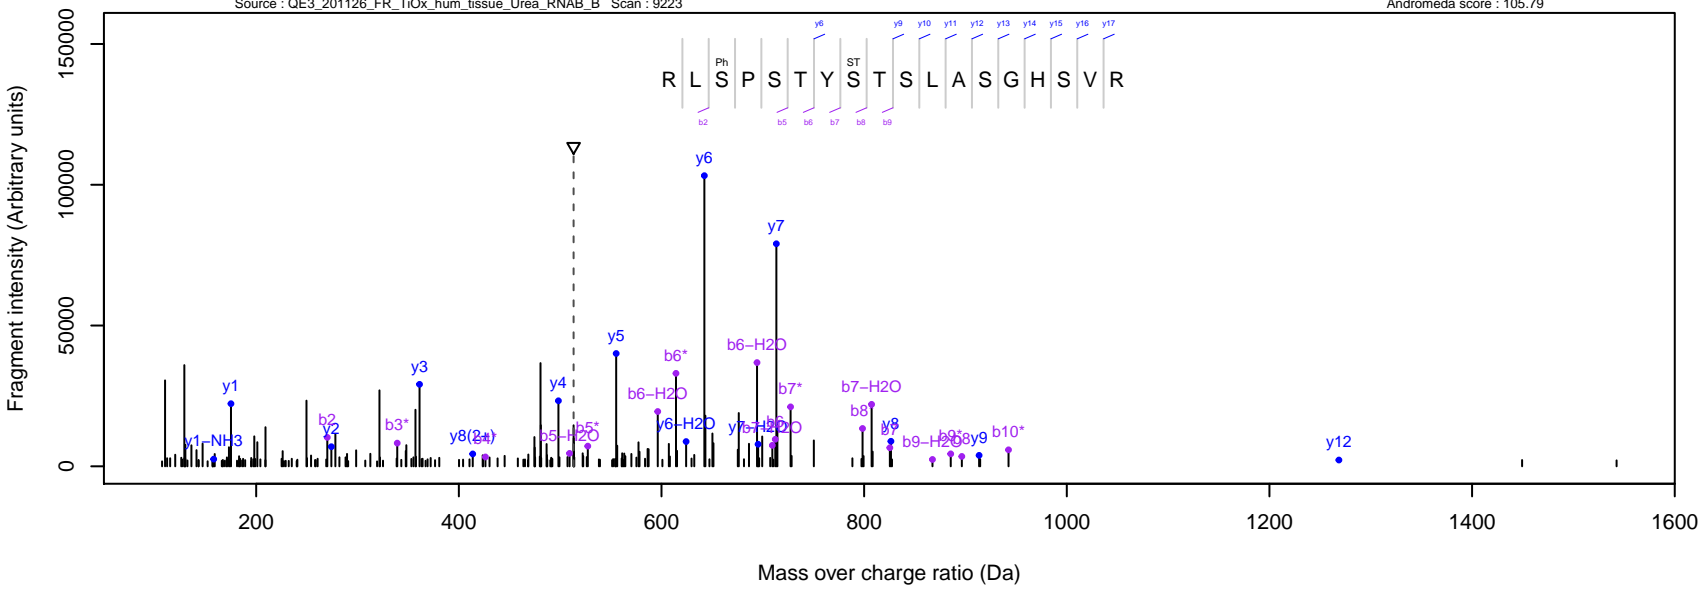

GPPS(Phospho (STY))PPAPVMHSPSRK

Source : QE3\_201126\_FR\_TIOx\_hum\_tissue\_Urea\_RNAB\_H Scan : 11863

Andromeda score : 105.77

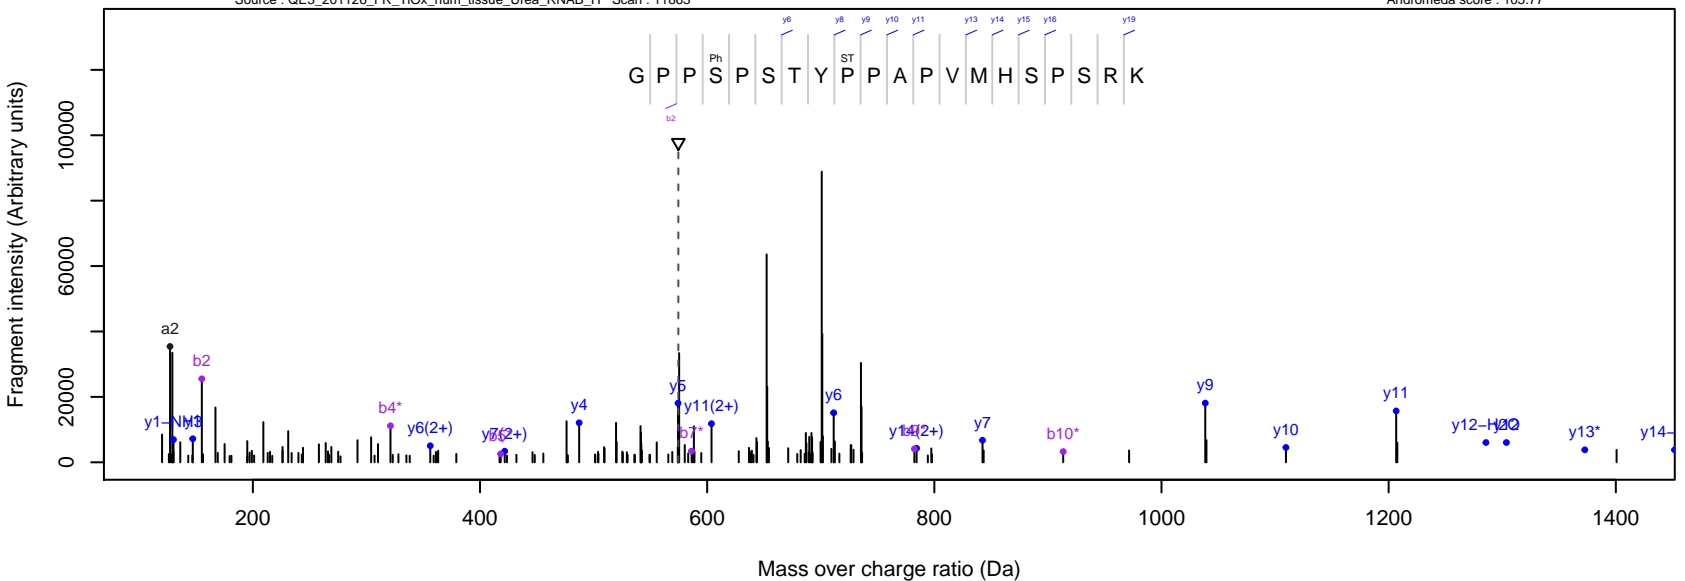

FSEM(Oxidation (M))MNNMGDEVDLPEVDGADDDSPSTYQDSDEKMPDLE-4+

Source : QE3\_201126\_FR\_TIOx\_hum\_tissue\_Urea\_RNAB\_H Scan : 54422

Andromeda score : 105.75

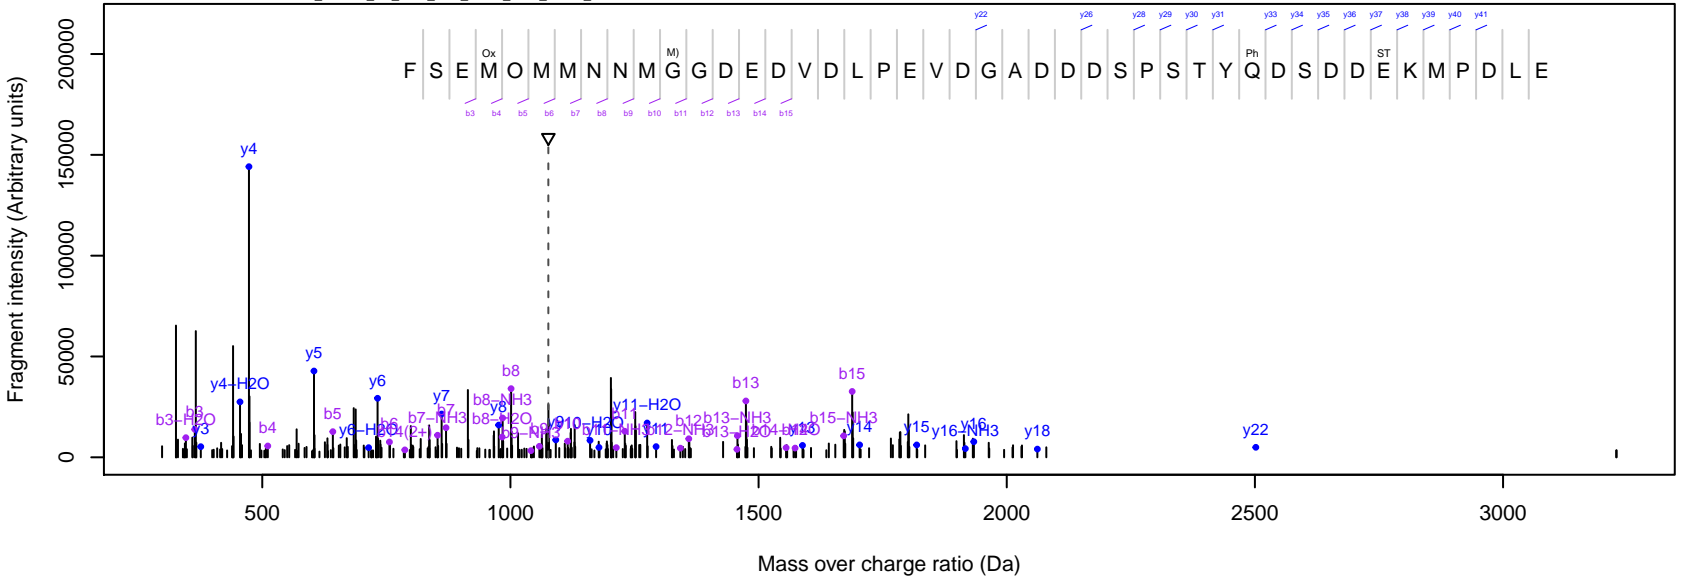

NHETDGGG(SPhospho (STY))AHGDDDDGPHFEPVPLPKIEVK-4+

Source : QE3\_201126\_FR\_TIOx\_hum\_tissue\_Urea\_RNAB\_N Scan : 33970

Andromeda score : 105.75

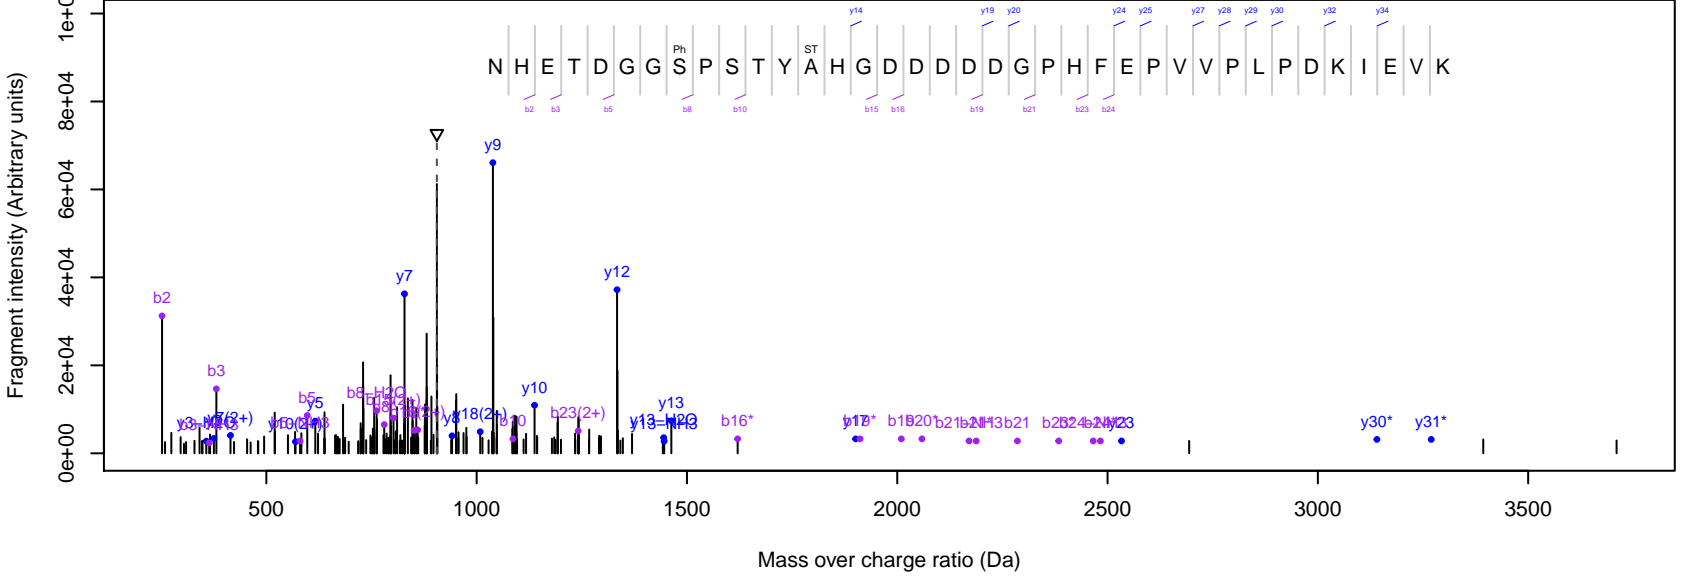

S(Phospho (STY))KSEANLIPSEPFASDNSGETPQR-3+

Source : QE3\_201126\_FR\_TIOx\_hum\_tissue\_Urea\_RNAB\_B Scan : 30195

Andromeda score : 105.71

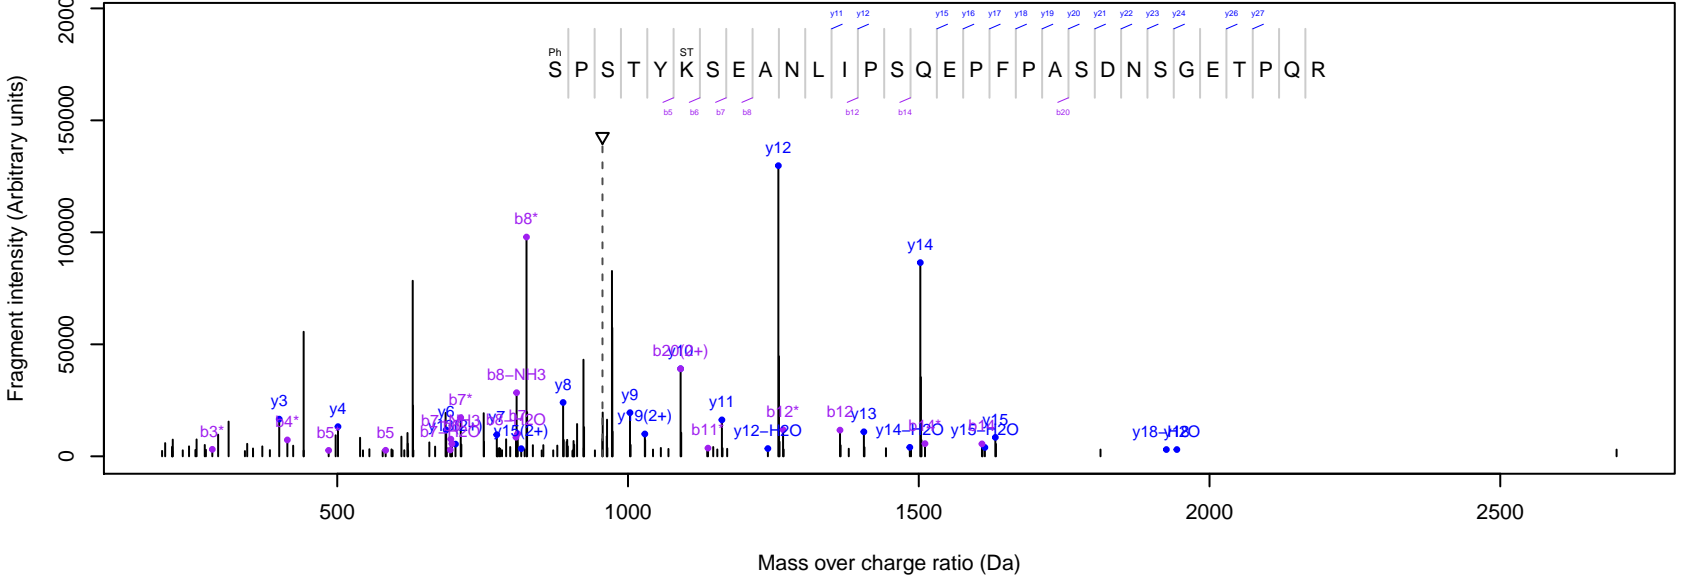

EDEIS(Phospho (STY))PPPNPVVK-2+

Source : QE3\_201126\_FR\_TiOx\_hum\_tissue\_Urea\_RNAB\_B Scan : 26157

Andromeda score : 105.66

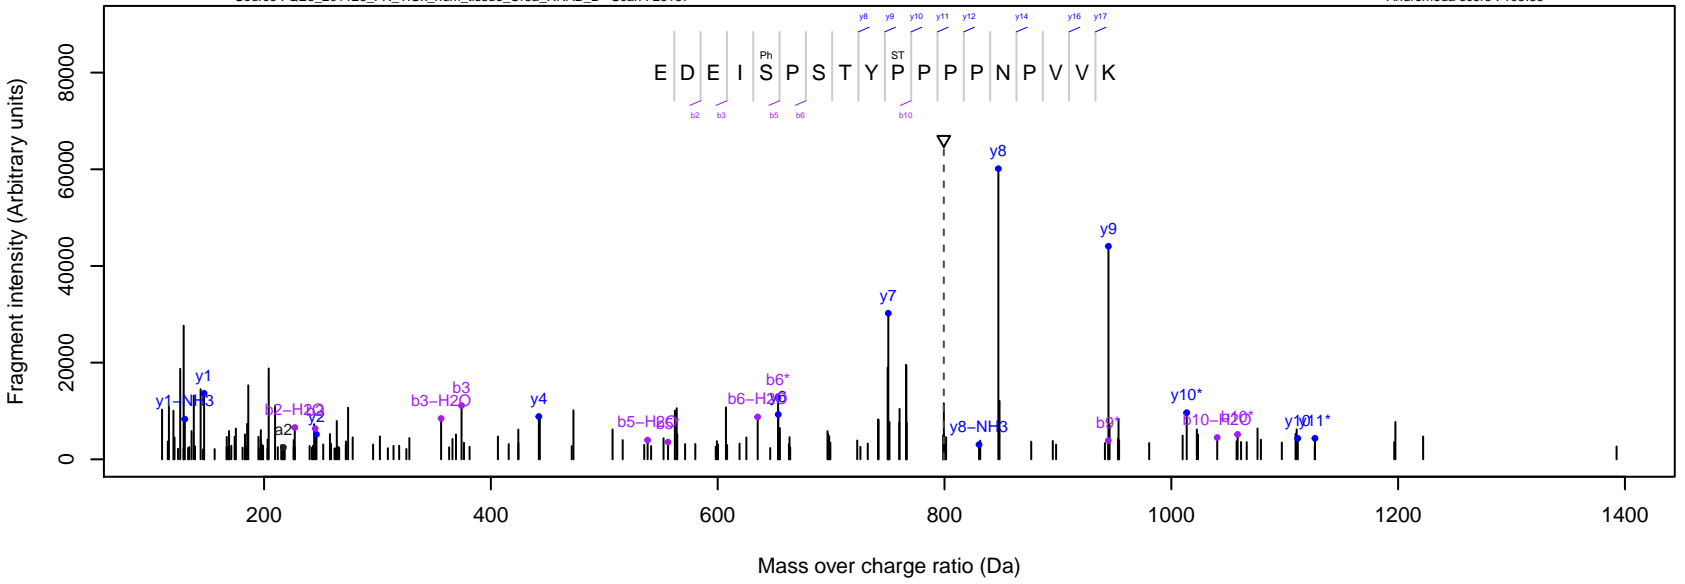

KADTTTPTAILAPGS(Phospho (STY))PAS(Phospho (STY))PPGSLEPK-3+

Source : QE3\_201126\_FR\_TiOx\_hum\_tissue\_Urea\_RNAB\_N Scan : 43952

Andromeda score : 105.66

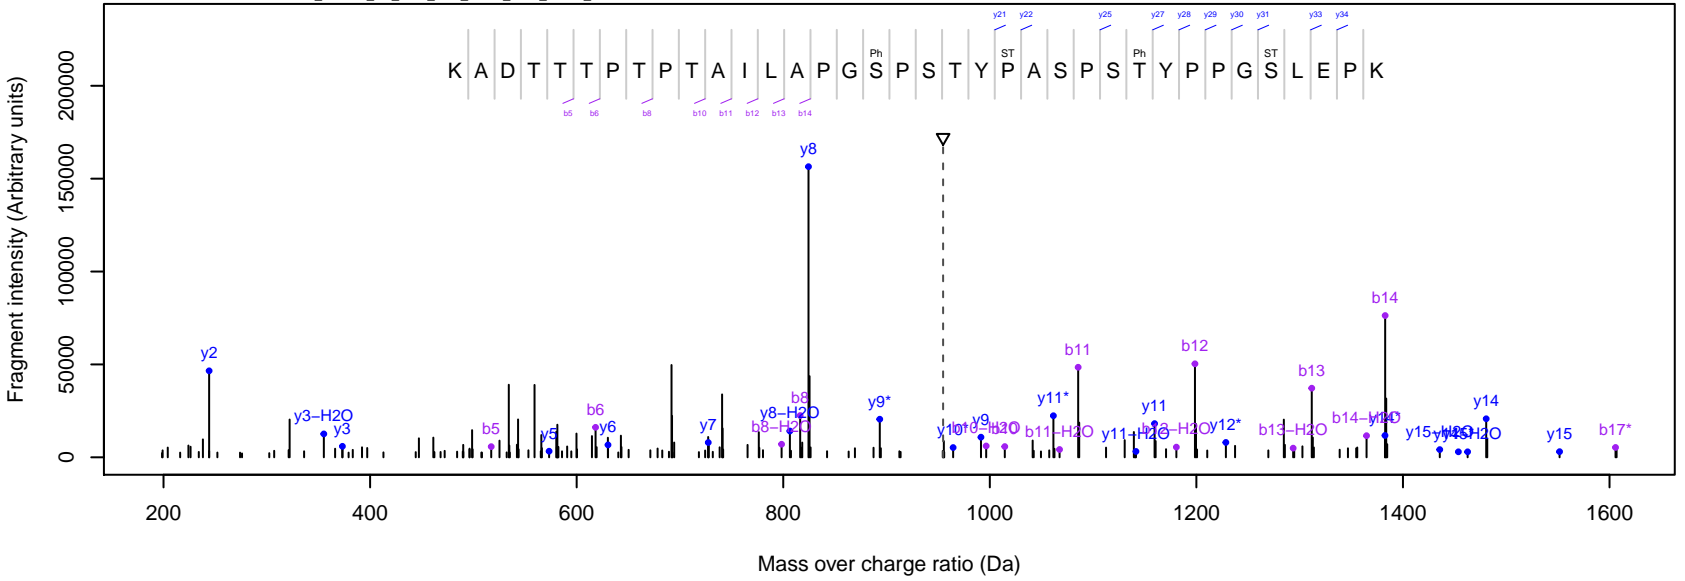

LPDLS(Phospho (STY))PVENK-2+

Source : QE3\_201126\_FR\_TiOx\_hum\_tissue\_Urea\_RNAB\_N Scan : 27667

Andromeda score : 105.65

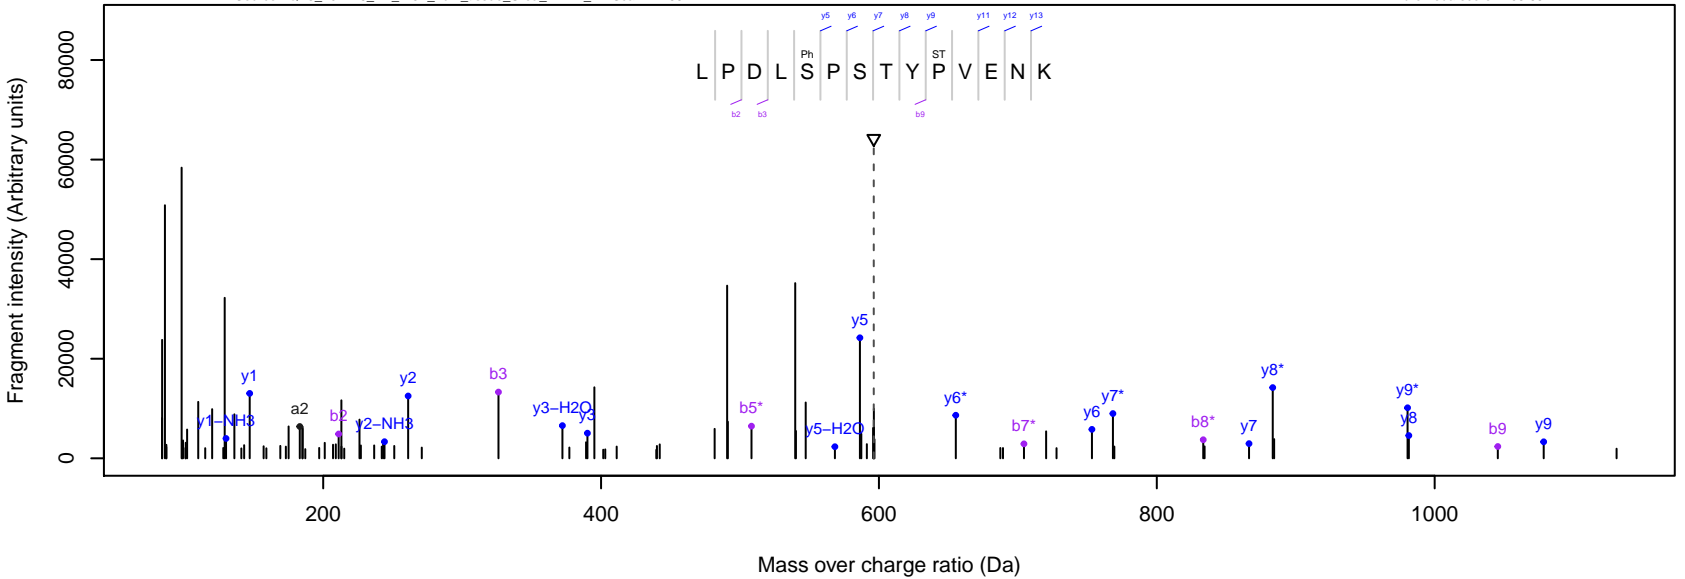

SPSLS(Phospho (STY))PSPPS(Phospho (STY))PLEK-2+

Source : QE3\_201126\_FR\_TiOx\_hum\_tissue\_Urea\_RNAB\_B Scan : 32822

Andromeda score : 105.58

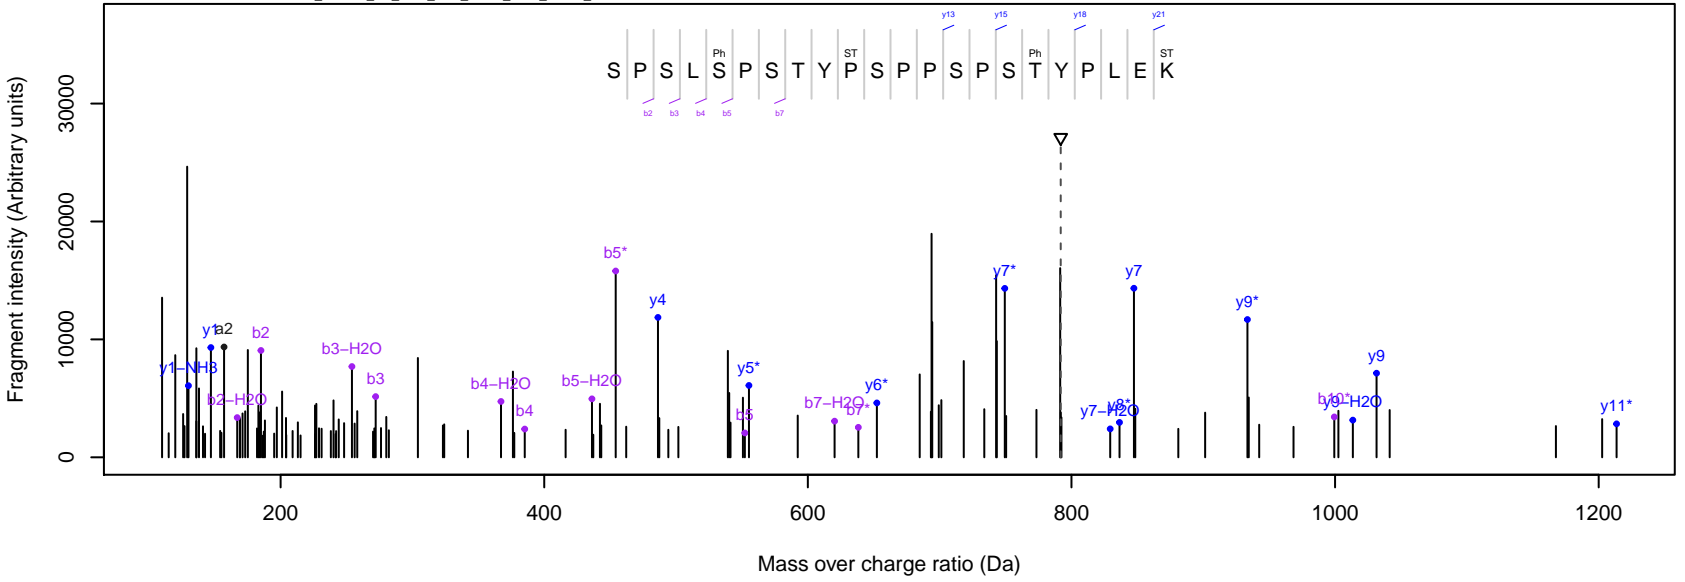

TRS(Phospho (STY))PS(Phospho (STY))PTLGESLAPHK-3+

Source : QE3\_201126\_FR\_TiOx\_hum\_tissue\_Urea\_RNAB\_H Scan : 18477

Andromeda score : 105.57

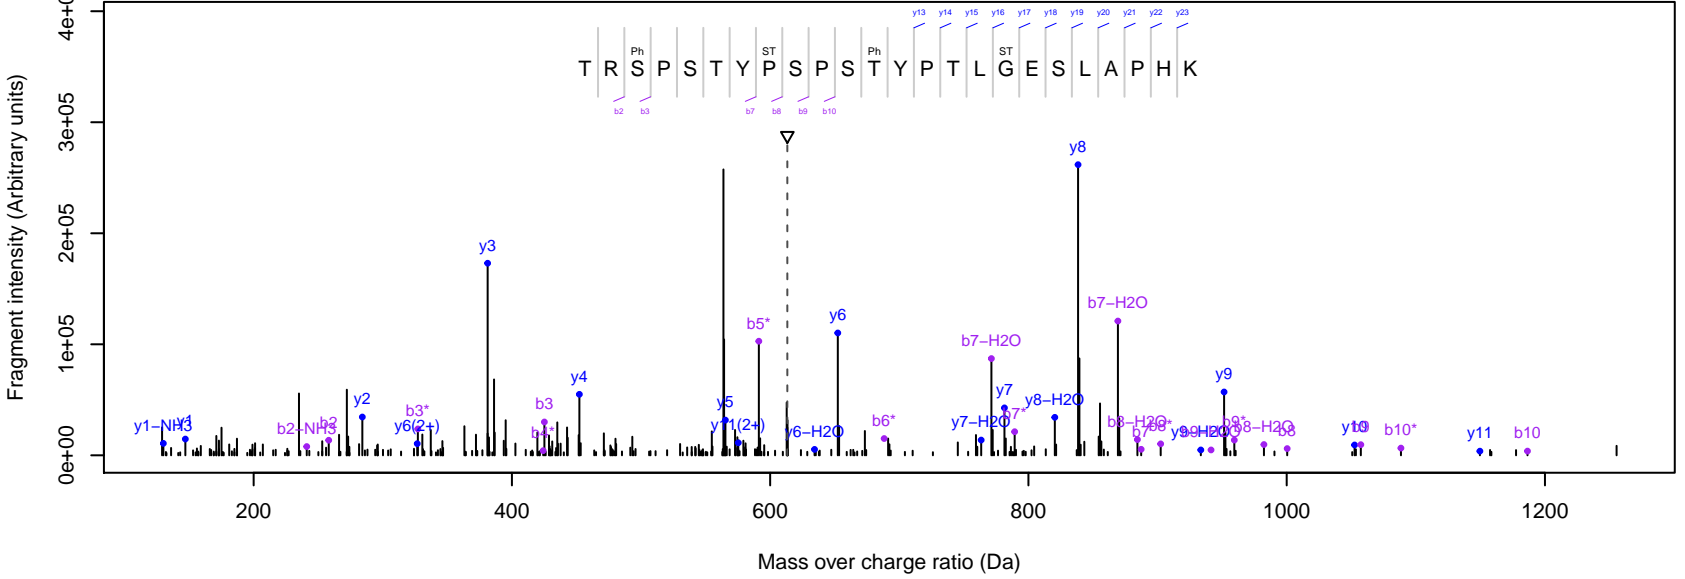

SPS(Phospho (STY))GSAFGS(Phospho (STY))QENLR-2+

Source : QE3\_201126\_FR\_TiOx\_hum\_tissue\_Urea\_RNAB\_H Scan : 26905

Andromeda score : 105.53

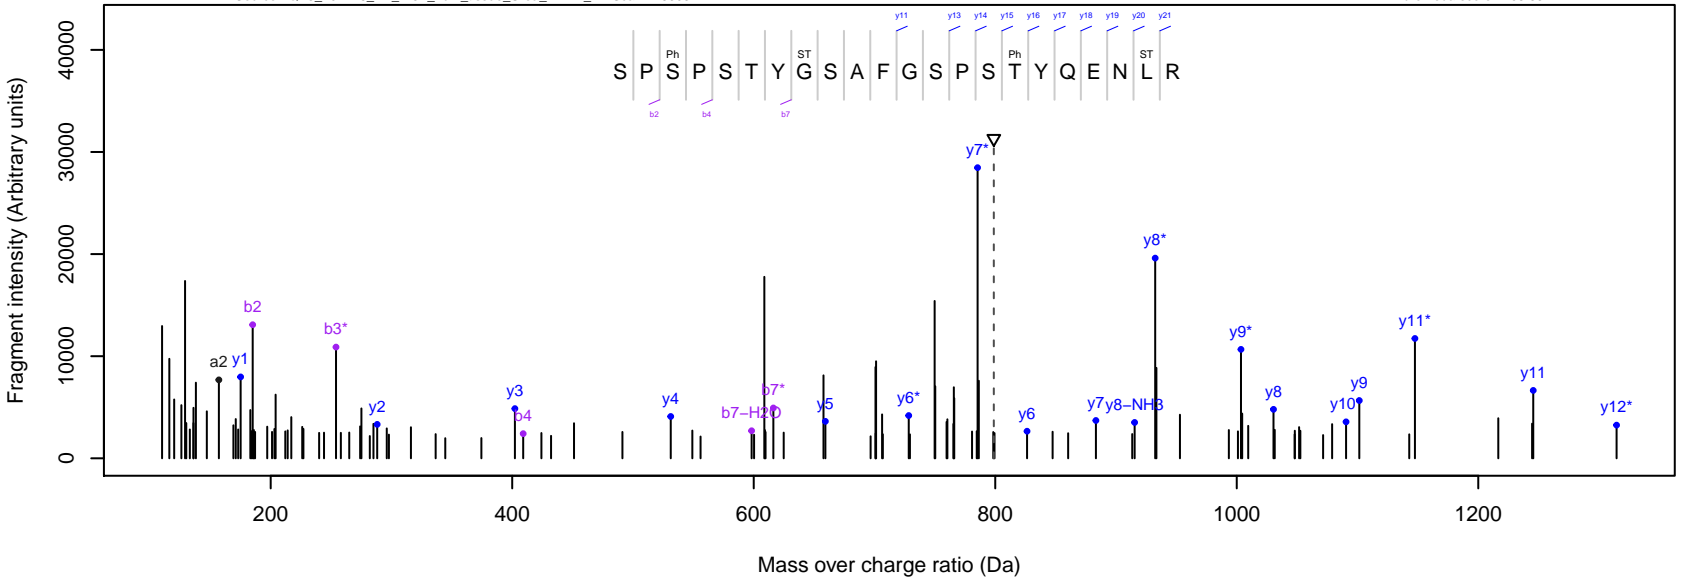

EVS(Phospho (STY))PEVVR-2+

Source : QE3\_201126\_FR\_TiOx\_hum\_tissue\_Urea\_RNAB\_H Scan : 13077

Andromeda score : 105.52

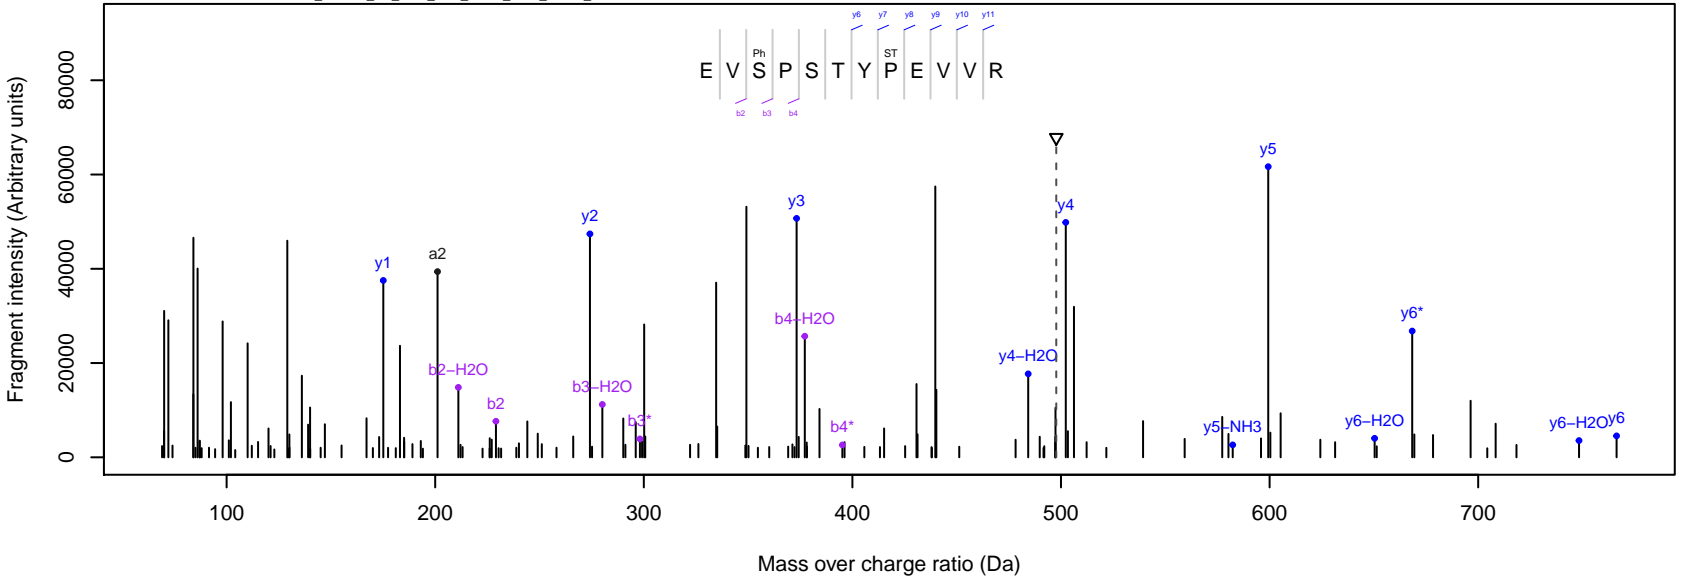

IRTS(Phospho (STY))PTFR-2+

Source : QE3\_201126\_FR\_TiOx\_hum\_tissue\_Urea\_RNAB\_N Scan : 10354

Andromeda score : 105.52

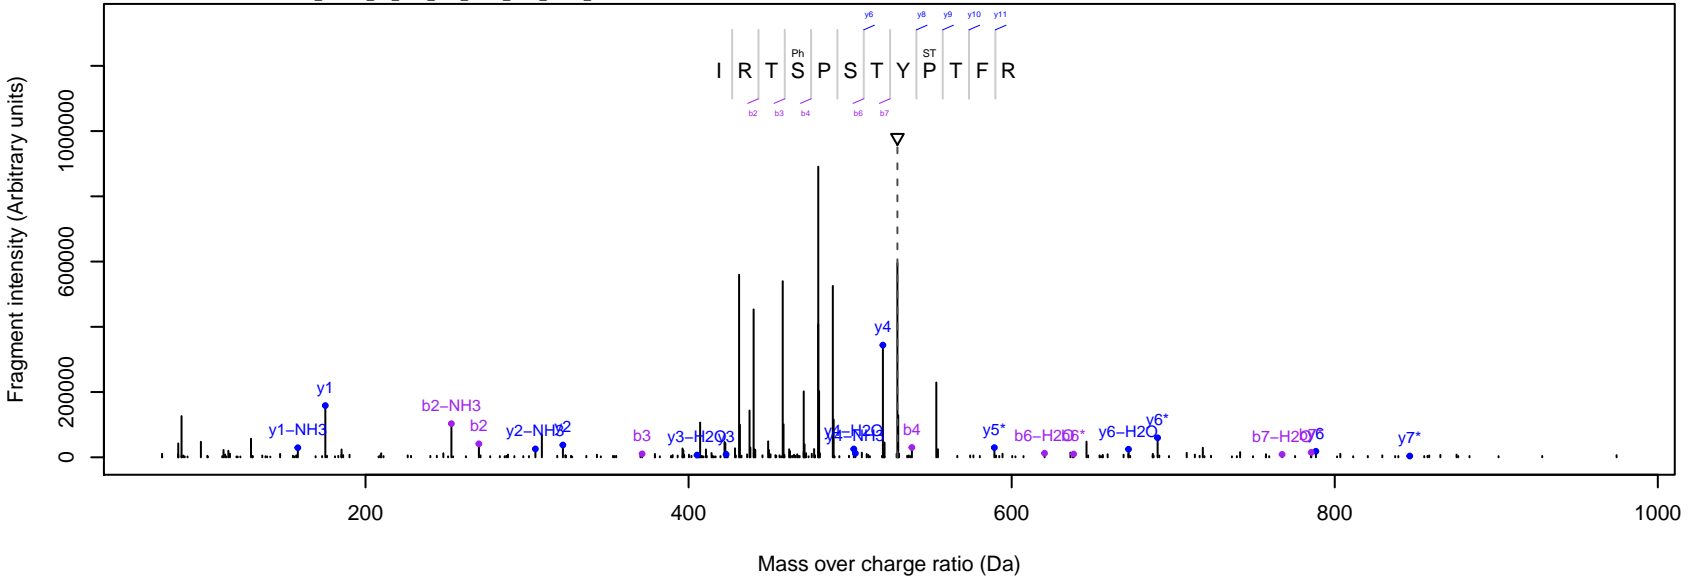

YFQS(Phospho (STY))PSR-2+

Source : QE3\_201126\_FR\_TiOx\_hum\_tissue\_Urea\_RNAB\_H Scan : 10424

Andromeda score : 105.52

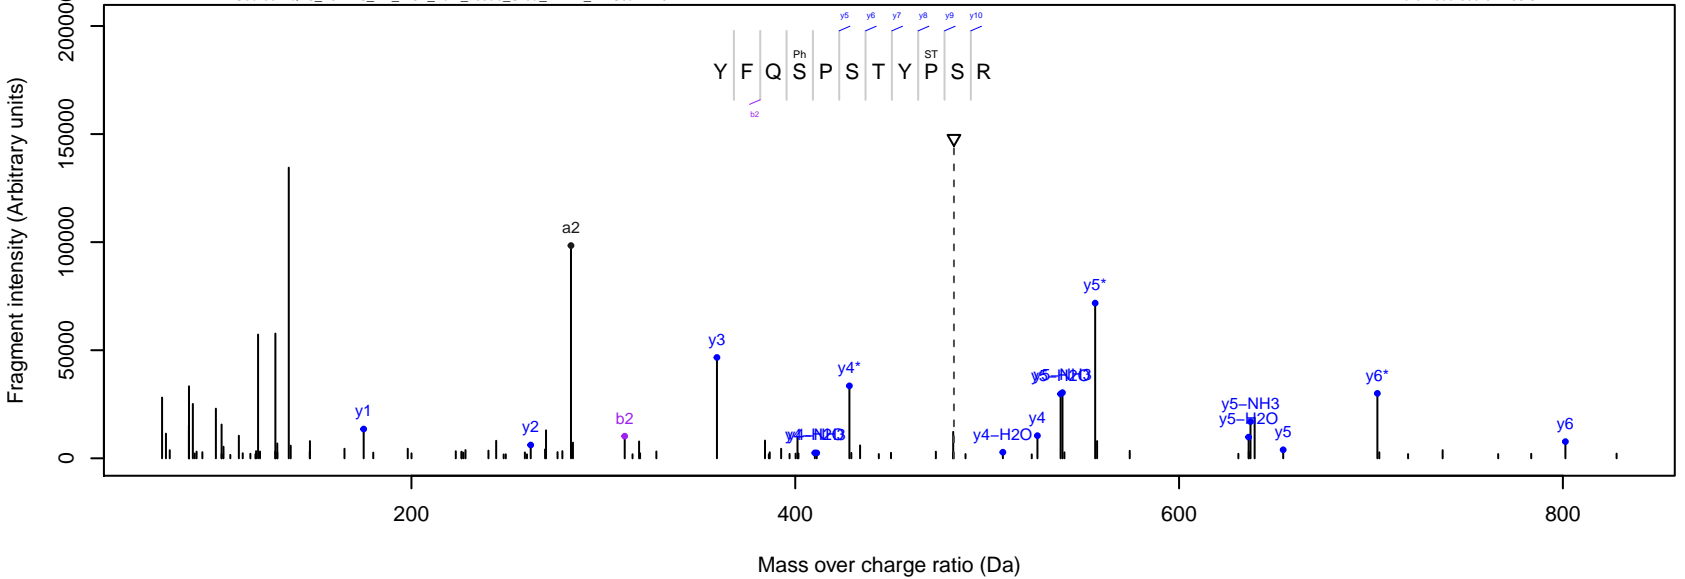



LASVLLLYSDYGI G E V P V E P L D V P L P S P S T Y T I R P A S P V A G S P K

Source : QE3\_201126\_FR\_TiOx\_hum\_tissue\_Urea\_RNAB\_H Scan : 60771

Andromeda score : 105.51

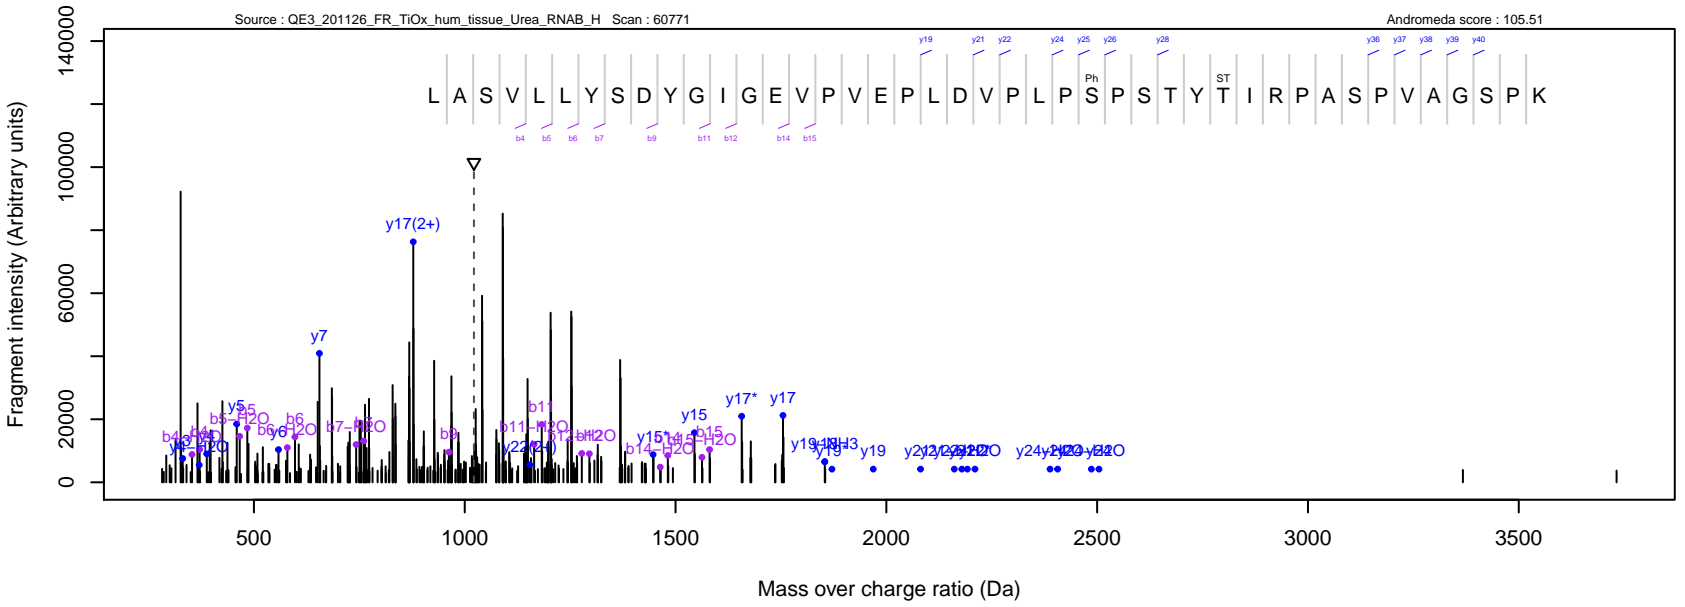

RGS(Phospho (STY))ISSGVSYEEFQVLVR

Source : QE3\_201126\_FR\_TiOx\_hum\_tissue\_Urea\_RNAB\_B Scan : 45142

Andromeda score : 105.51

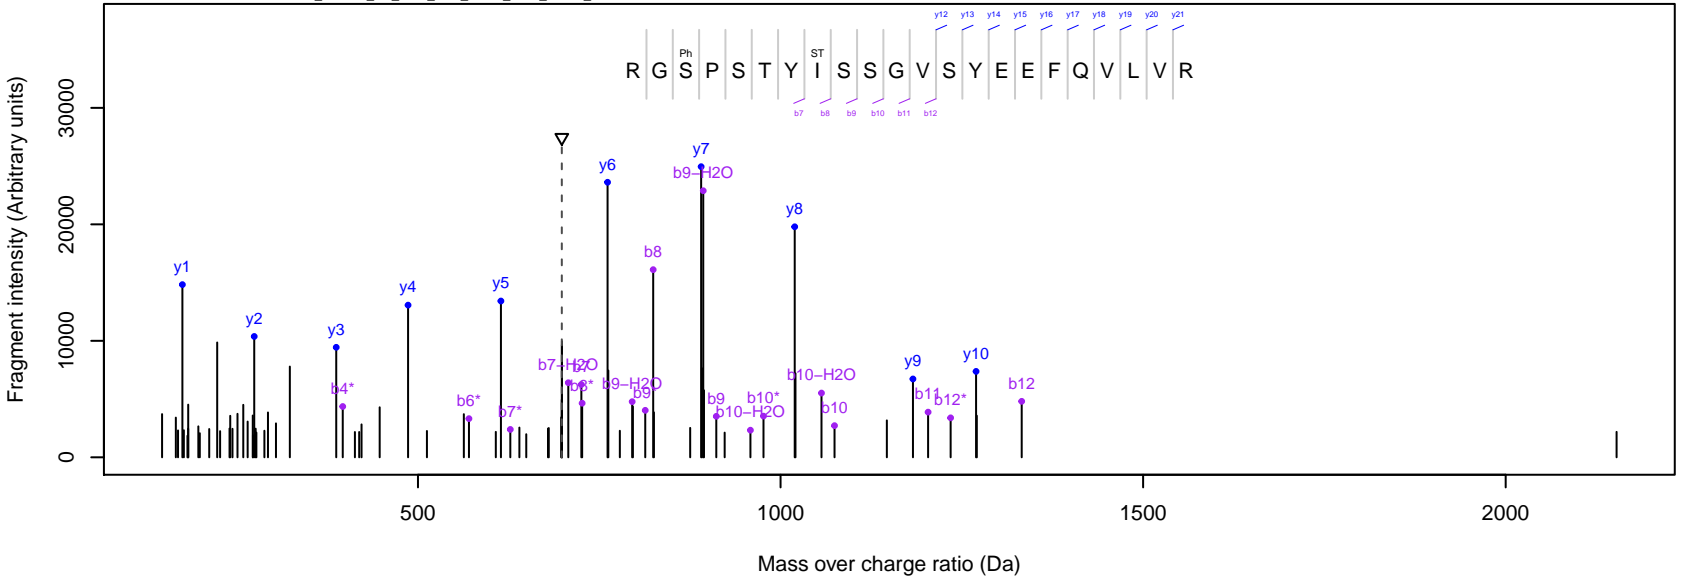

RGS(Phospho (STY))LSQEMAKGEEK

Source : QE3\_201126\_FR\_TiOx\_hum\_tissue\_Urea\_RNAB\_N Scan : 7847

Andromeda score : 105.5

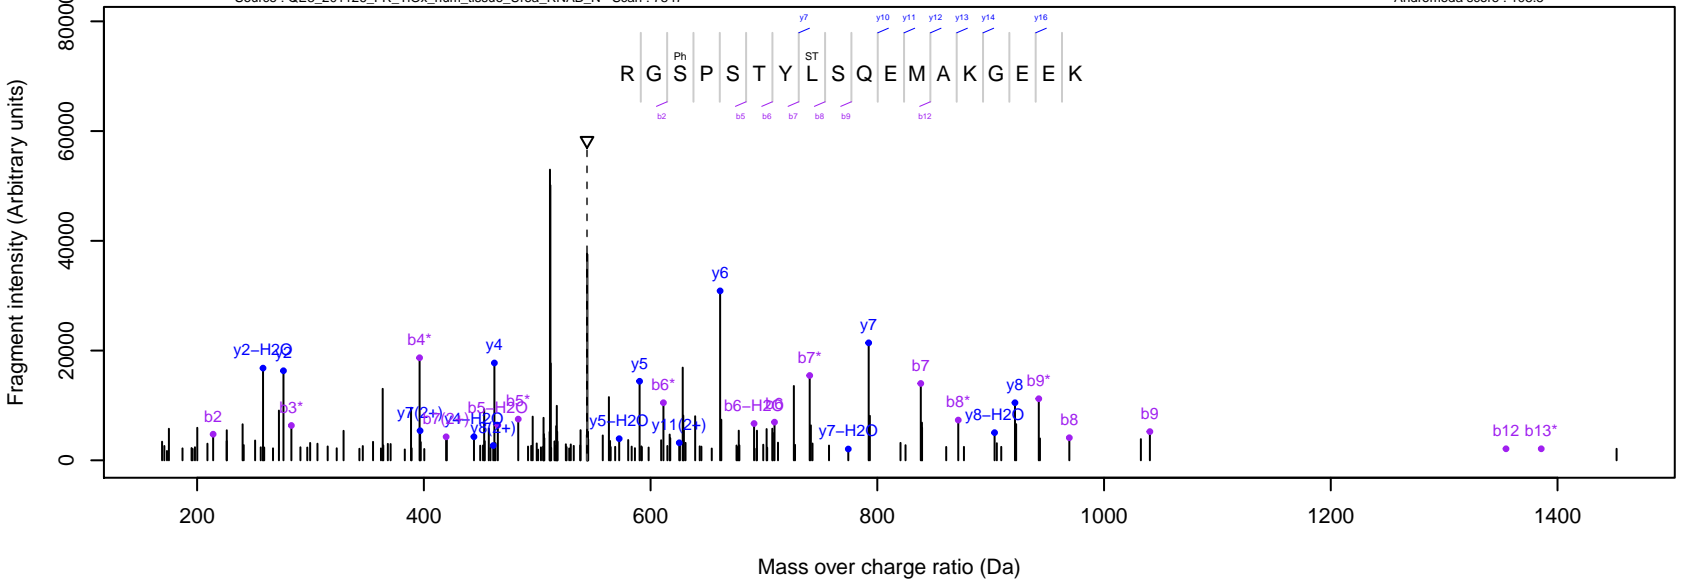

SETAPAETATPAPVEKS(Phospho (STY))PAK-2+

Source : QE3\_201126\_FR\_TIOx\_hum\_tissue\_Urea\_RNAB\_H Scan : 11518

Andromeda score : 105.5

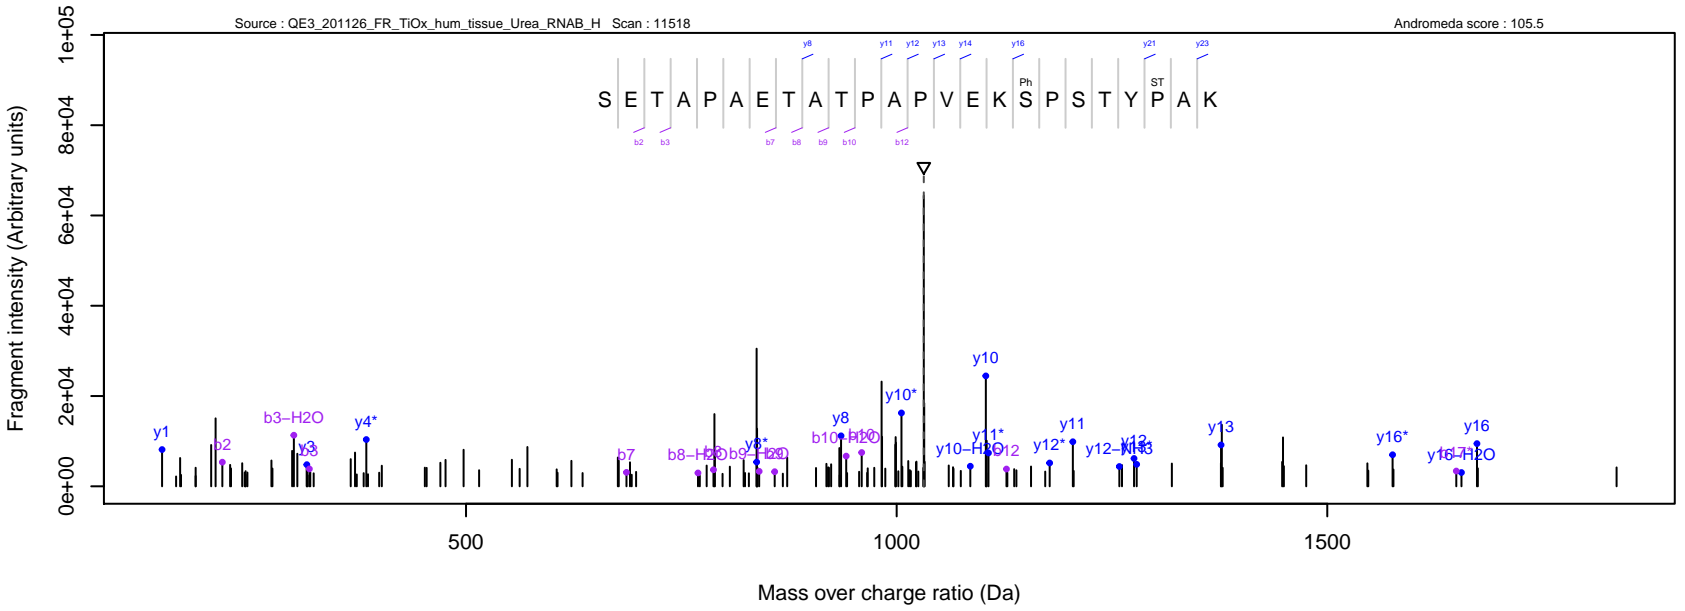

GRLDS(Phospho (STY))SEM(Oxidation (M))DHS(Phospho (STY))ENEDYTM(Oxidation (M))SSPLPGKK-4+

Source : QE3\_201126\_FR\_TIOx\_hum\_tissue\_Urea\_RNAB\_N Scan : 15735

Andromeda score : 105.49

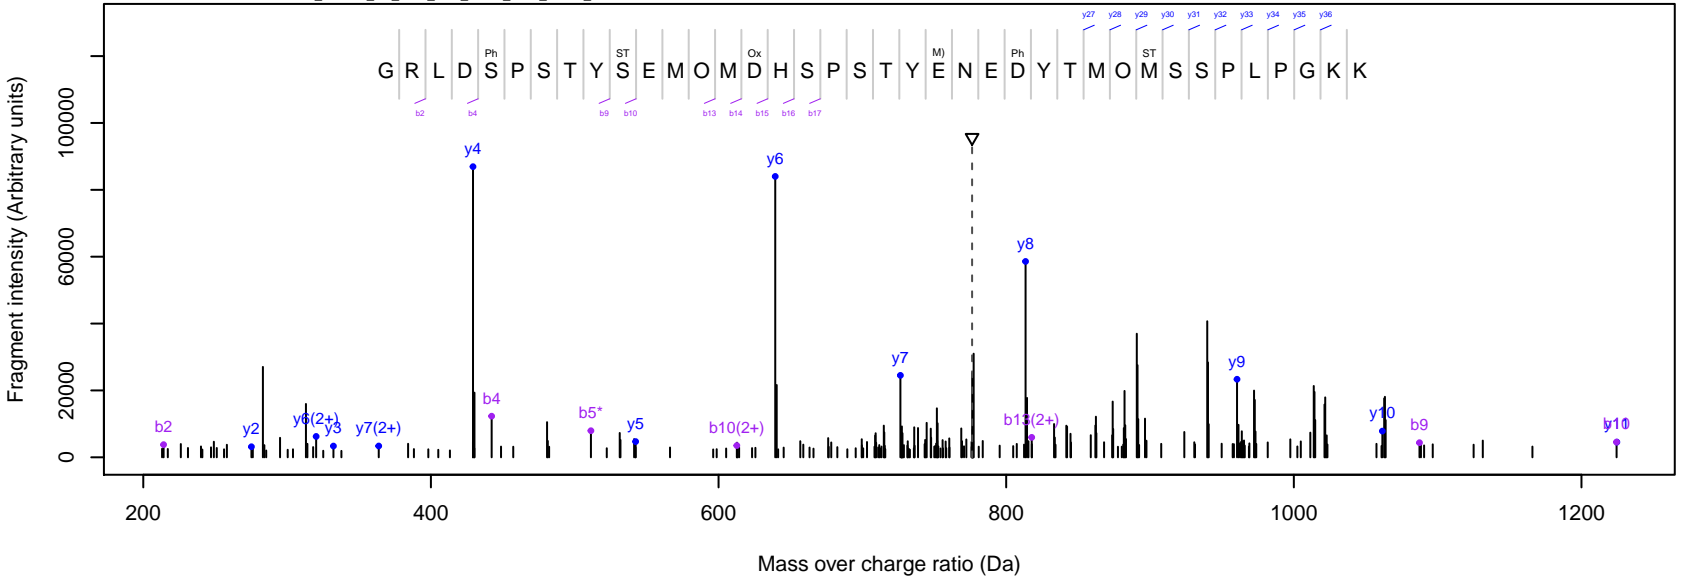

HPELTKPPLMAAEPTAPLSHSASSDPADRLS(Phospho (STY))PFLAAR-4+

Source : QE3\_201126\_FR\_TIOx\_hum\_tissue\_Urea\_RNAB\_N Scan : 42311

Andromeda score : 105.48

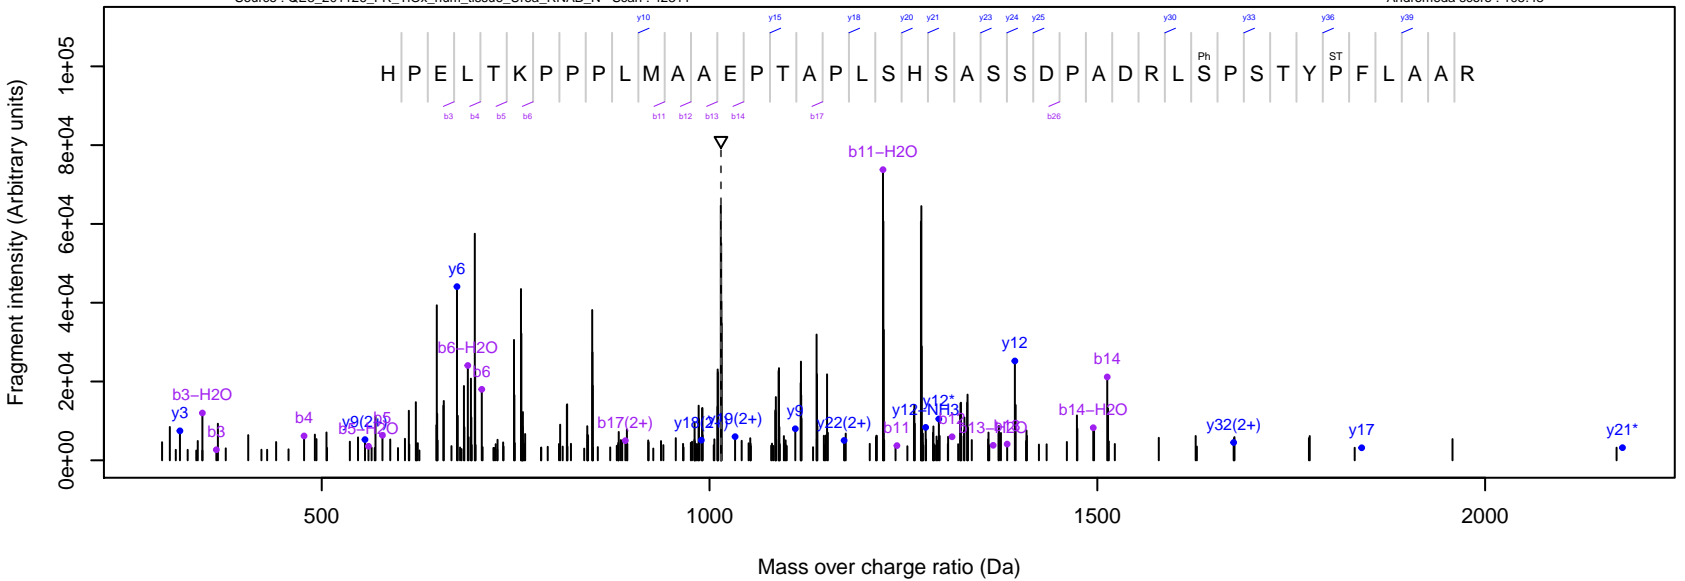

LEPVS(Phospho (STY))PPS(Phospho (STY))PPHTDPELELVPPR-3+

Source : QE3\_201126\_FR\_TiOx\_hum\_tissue\_Urea\_RNAB\_N Scan : 50040

Andromeda score : 105.46

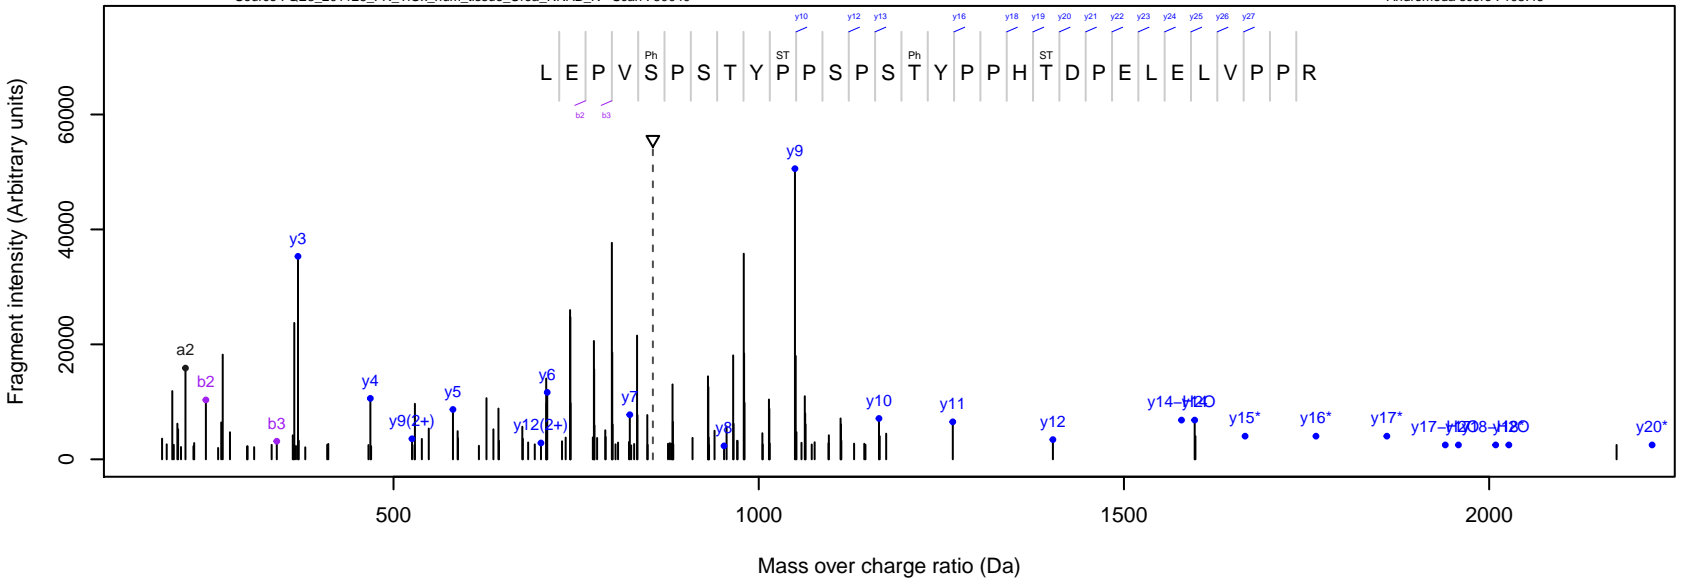

S(Phospho (STY))GKYDLDFK-2+

Source : QE3\_201126\_FR\_TiOx\_hum\_tissue\_Urea\_RNAB\_H Scan : 20704

Andromeda score : 105.46

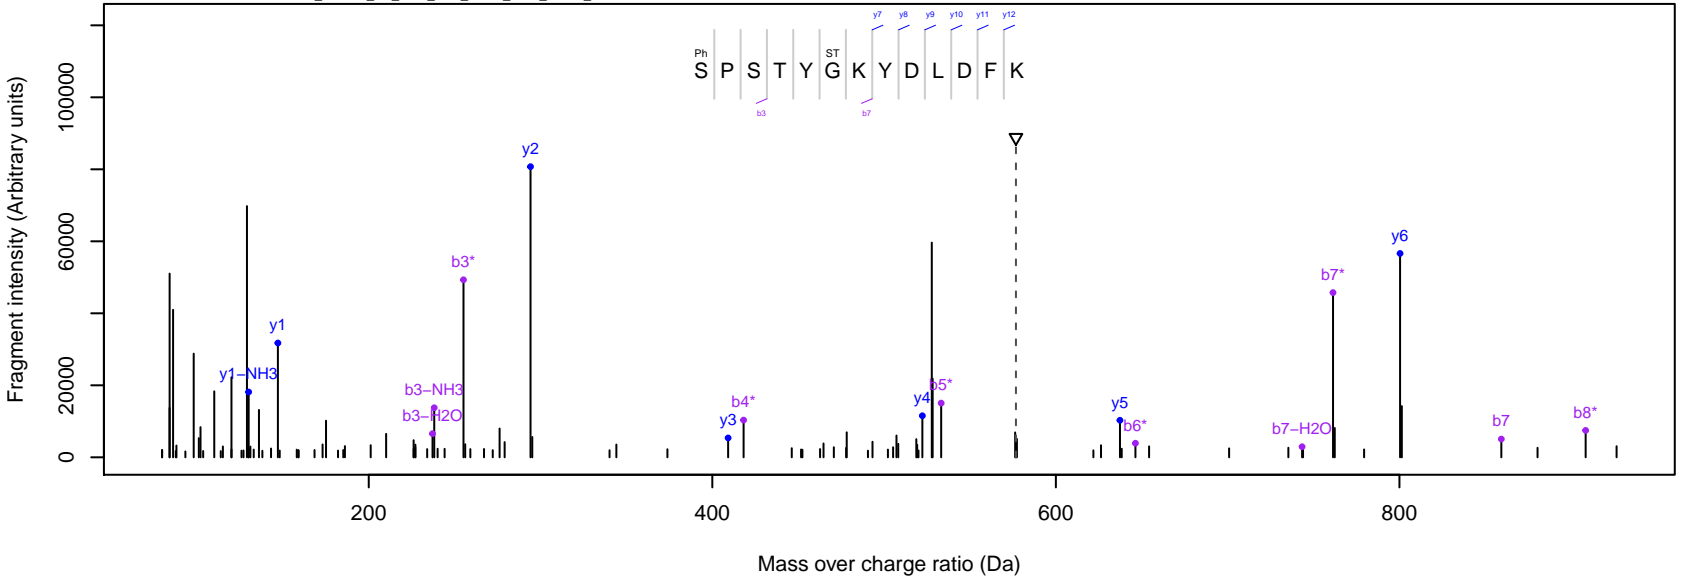

CAPSAGSPAAVGRES(Phospho (STY))PGAAATSSSGPQAQQHR-4+

Source : QE3\_201126\_FR\_TiOx\_hum\_tissue\_Urea\_RNAB\_H Scan : 12933

Andromeda score : 105.42

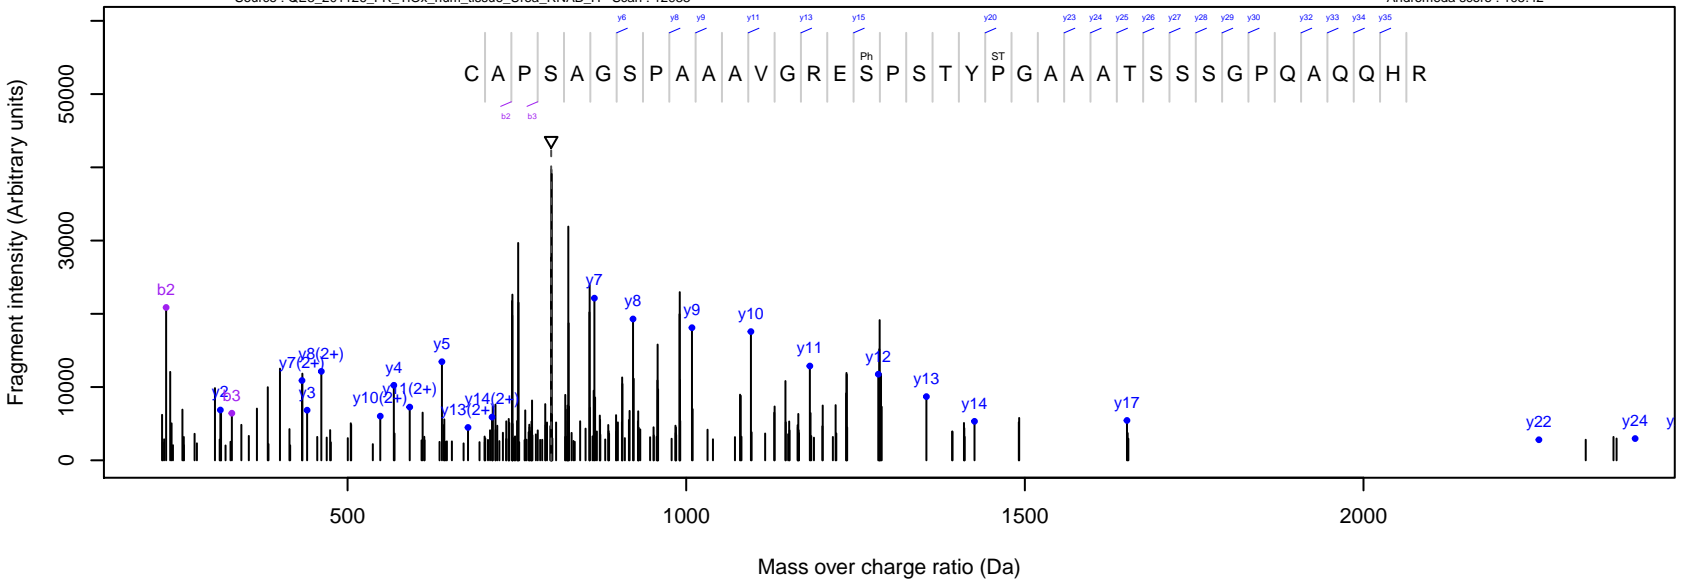



GPTSTSIDNIDGT(PSTY)PVRDER-3+

Source : QE3\_201126\_FR\_TiOx\_hum\_tissue\_Urea\_RNAB\_H Scan : 19094

Andromeda score : 105.32

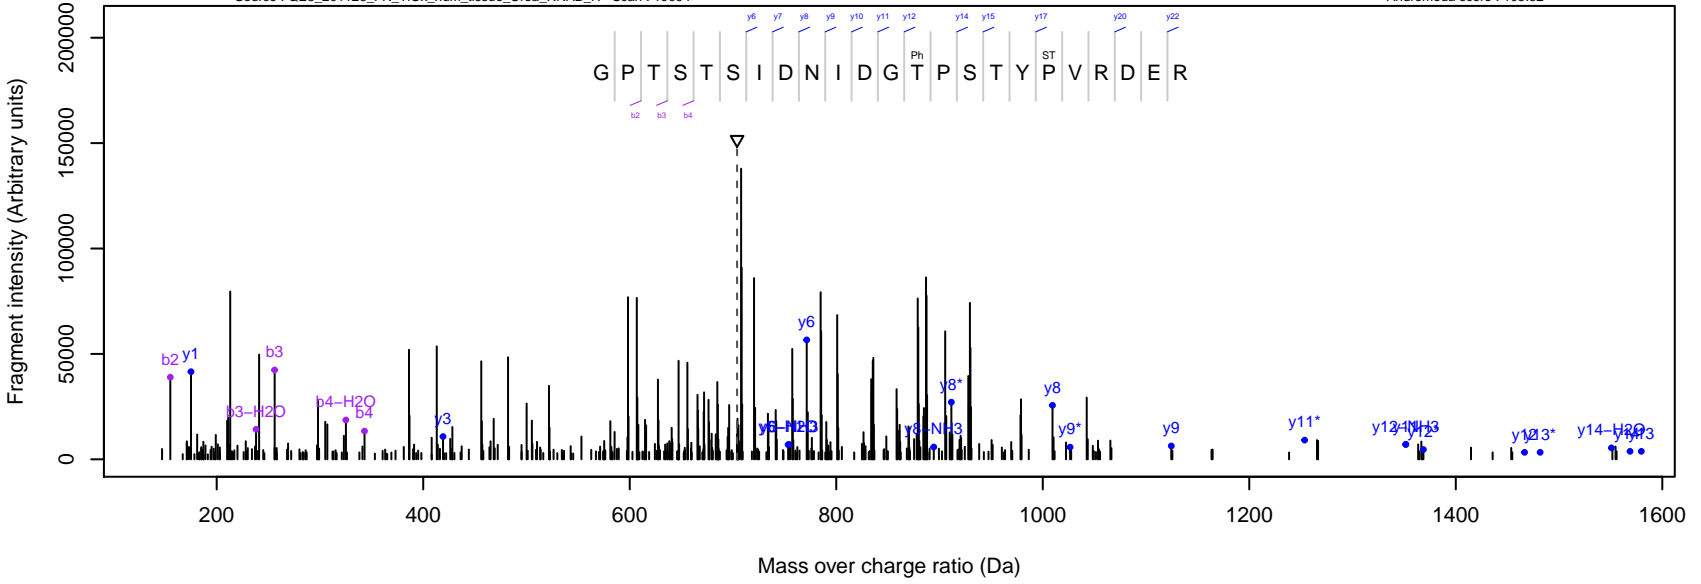

ISSLPVSRPIS(Phospho (STY))PS(Phospho (STY))PSAILER-3+

Source : QE3\_201126\_FR\_TiOx\_hum\_tissue\_Urea\_RNAB\_N Scan : 47382

Andromeda score : 105.32

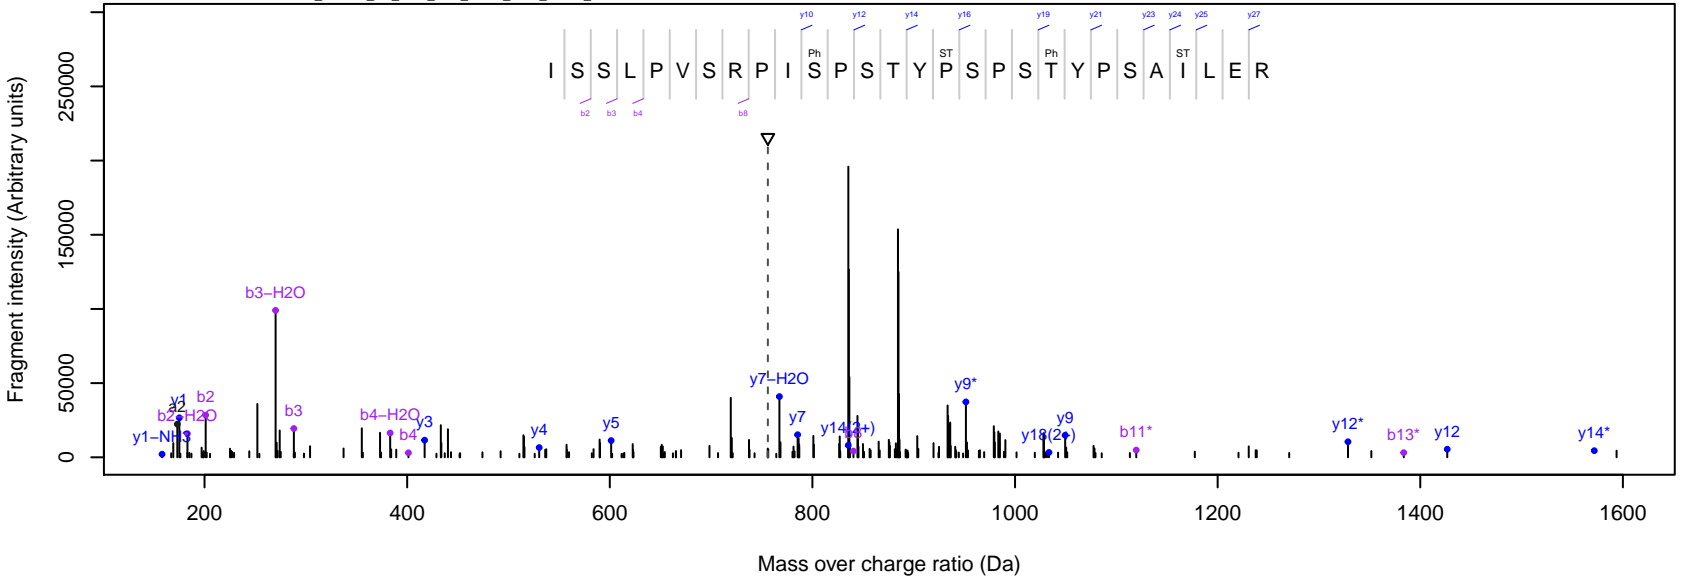

ADVLEAHEAEAEPEAGKS(Phospho (STY))EAEDDEVDLPSR-4+

Source : QE3\_201126\_FR\_TiOx\_hum\_tissue\_Urea\_RNAB\_H Scan : 28453

Andromeda score : 105.31

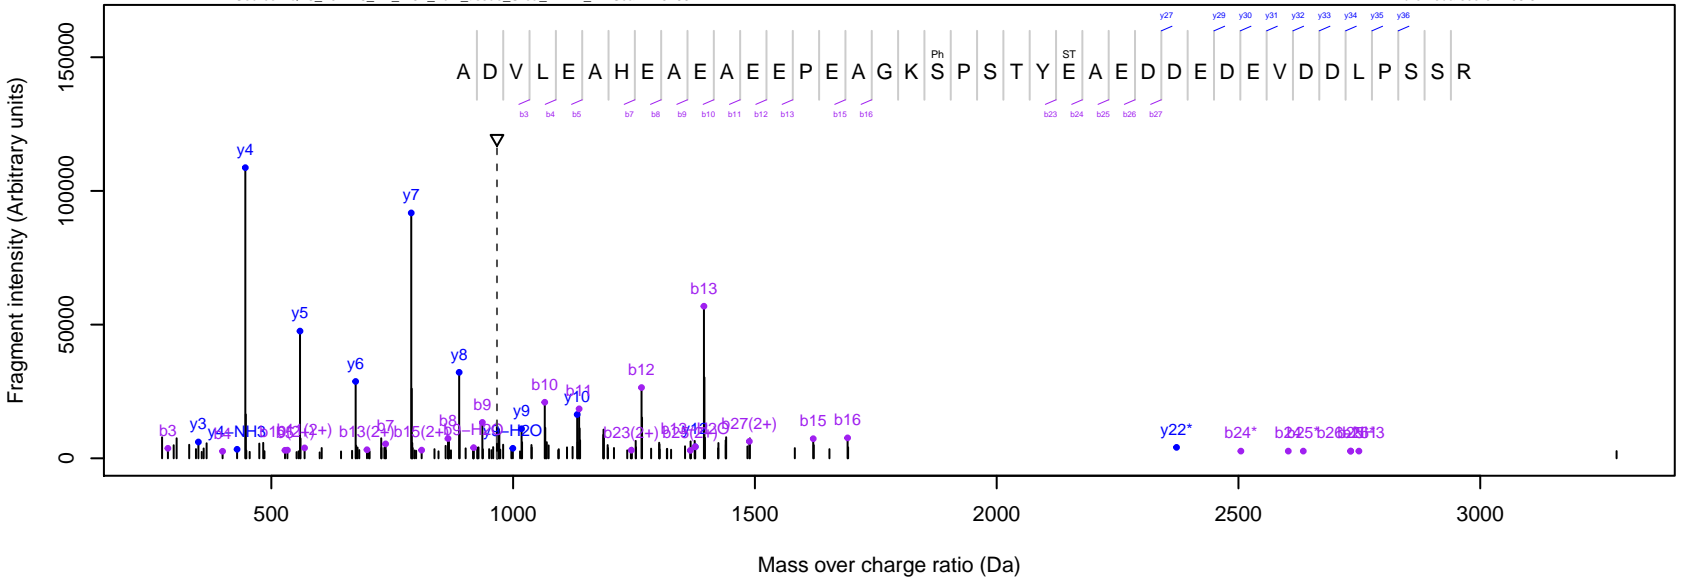

ALFKPPEDSDDESPSTYDPSSTYDAEEEQTTK-3+

Source : QE3\_201126\_FR\_TiOx\_hum\_tissue\_Urea\_RNAB\_N Scan : 28611

Andromeda score : 105.21

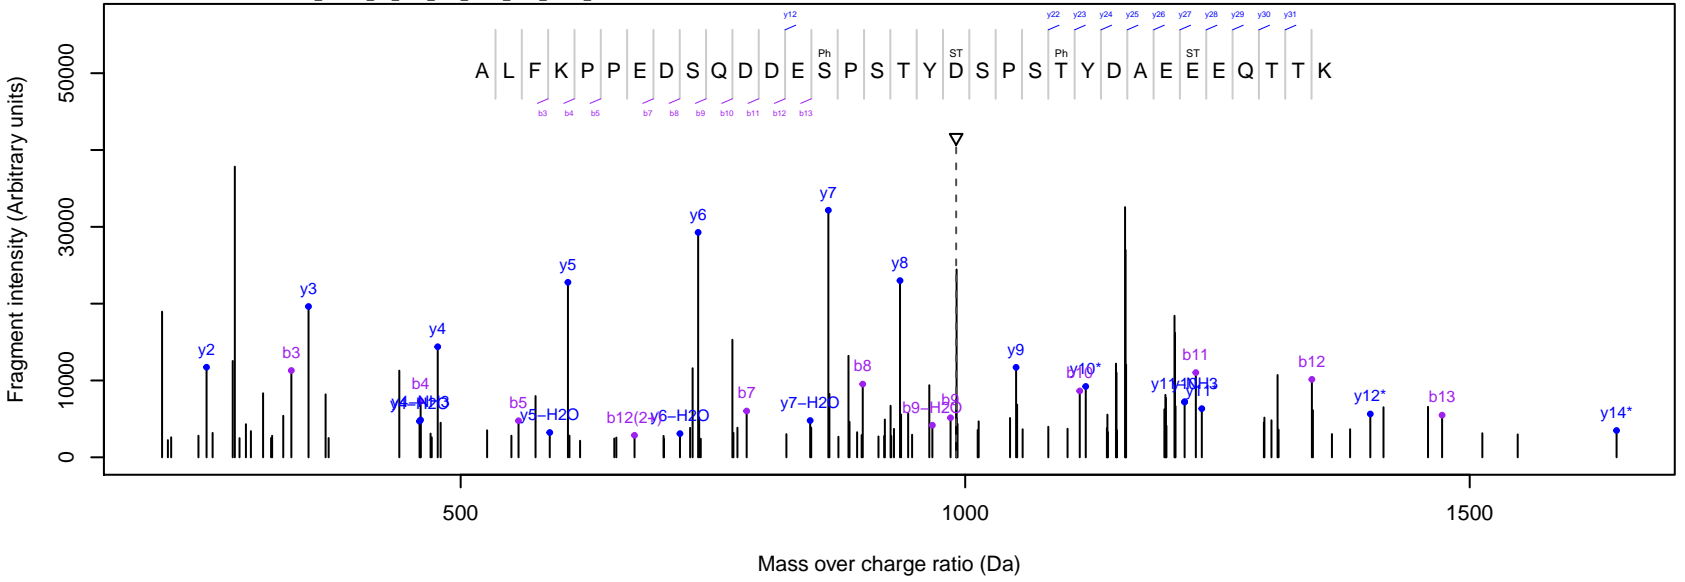

RSS(Phospho (STY))PVPPPER-2+

Source : QE3\_201126\_FR\_TiOx\_hum\_tissue\_Urea\_RNAB\_B Scan : 11088

Andromeda score : 105.19

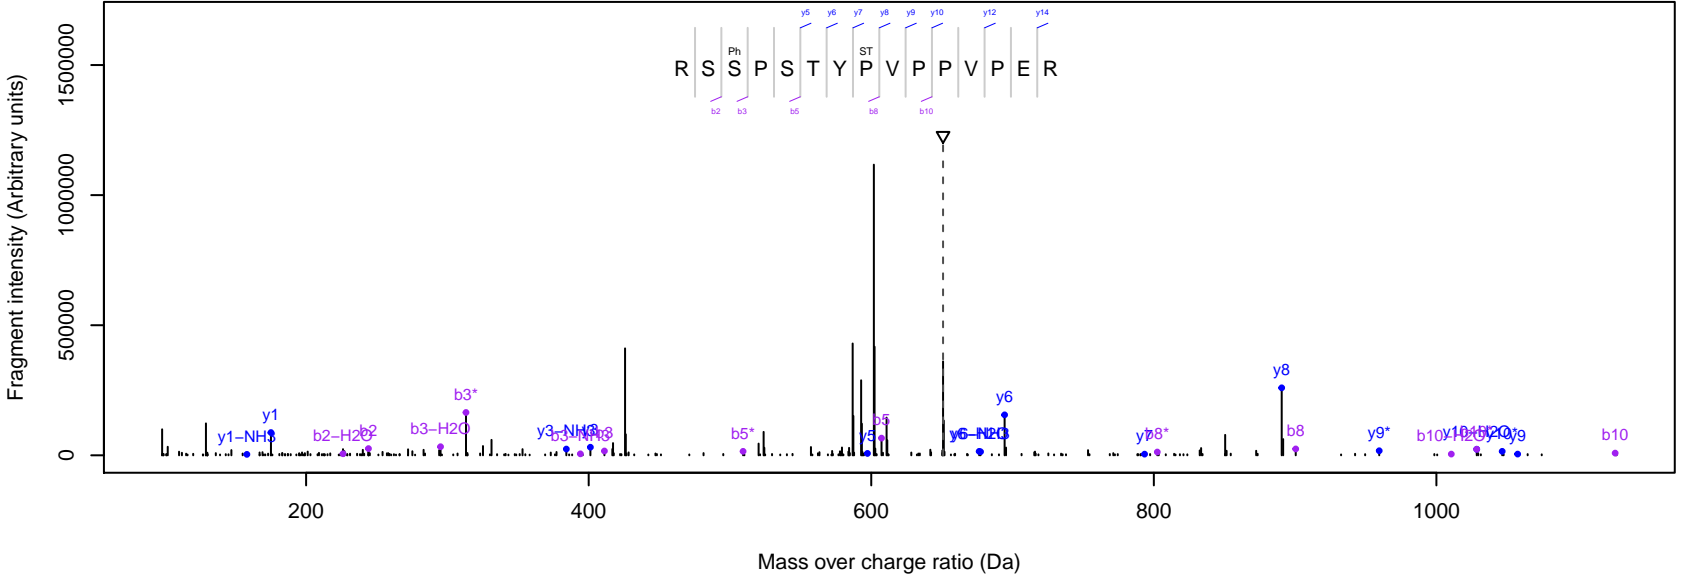

QGLGPASTTSPSPGPRS(Phospho (STY))PK-3+

Source : QE3\_201126\_FR\_TIOx\_hum\_tissue\_Urea\_RNAB\_H Scan : 12059

Andromeda score : 105.16

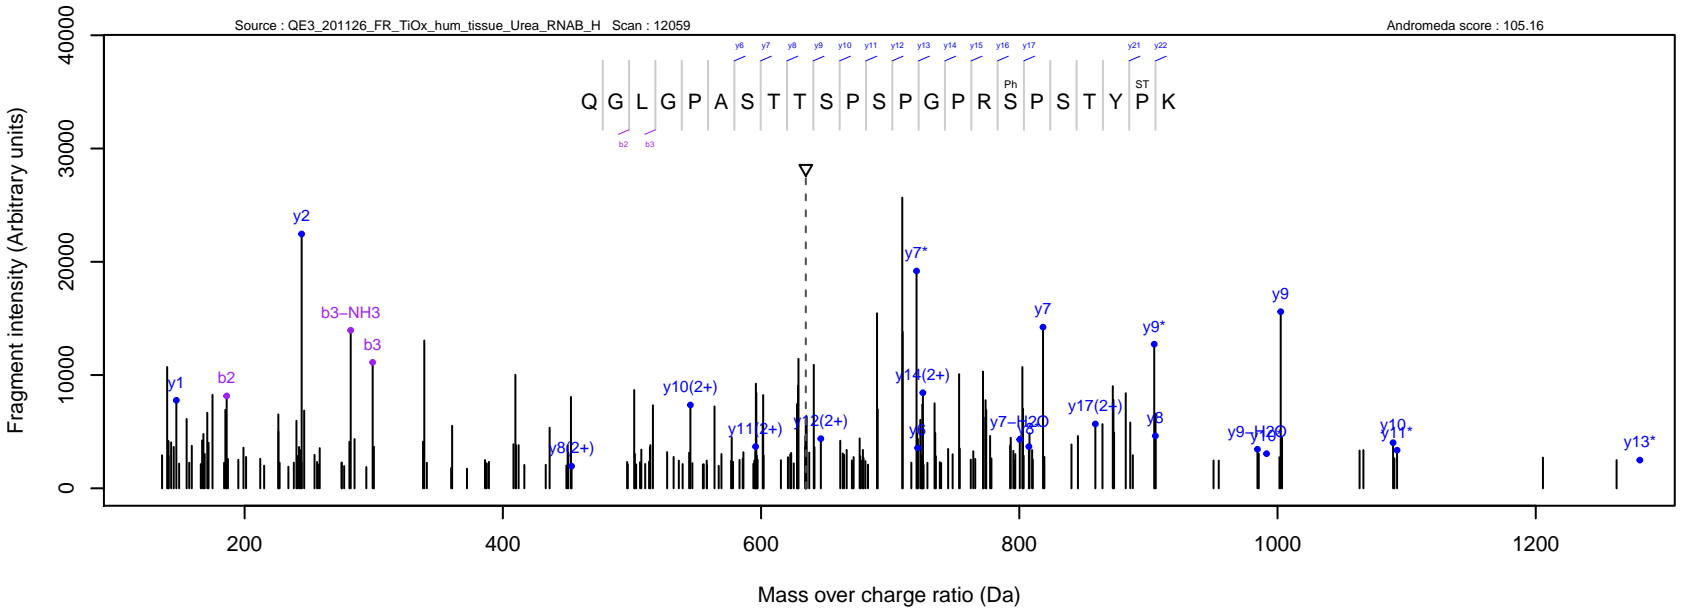

DIS(Phospho (STY))PEEIDLK-2+

Source : QE3\_201126\_FR\_TIOx\_hum\_tissue\_Urea\_RNAB\_N Scan : 34230

Andromeda score : 105.13

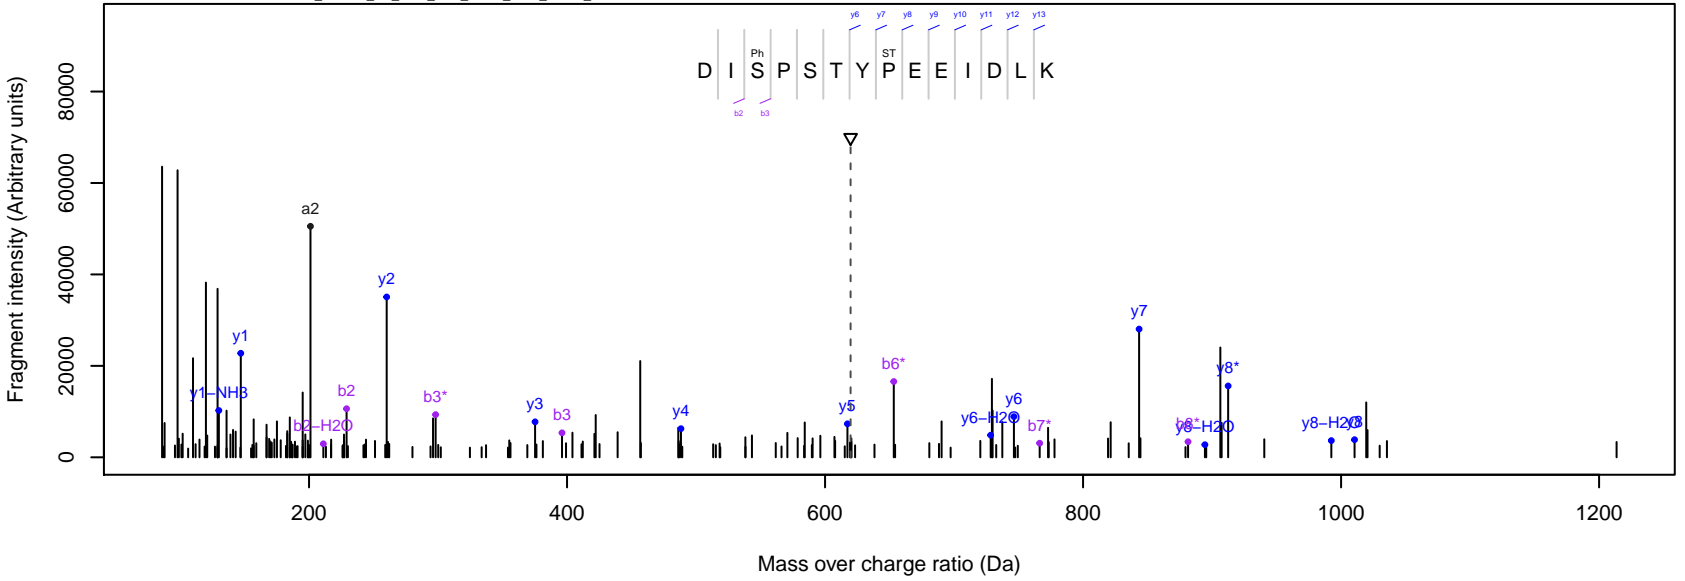

FRTPS(Phospho (STY))FLKK-2+

Source : QE3\_201126\_FR\_TIOx\_hum\_tissue\_Urea\_RNAB\_N Scan : 20743

Andromeda score : 105.13

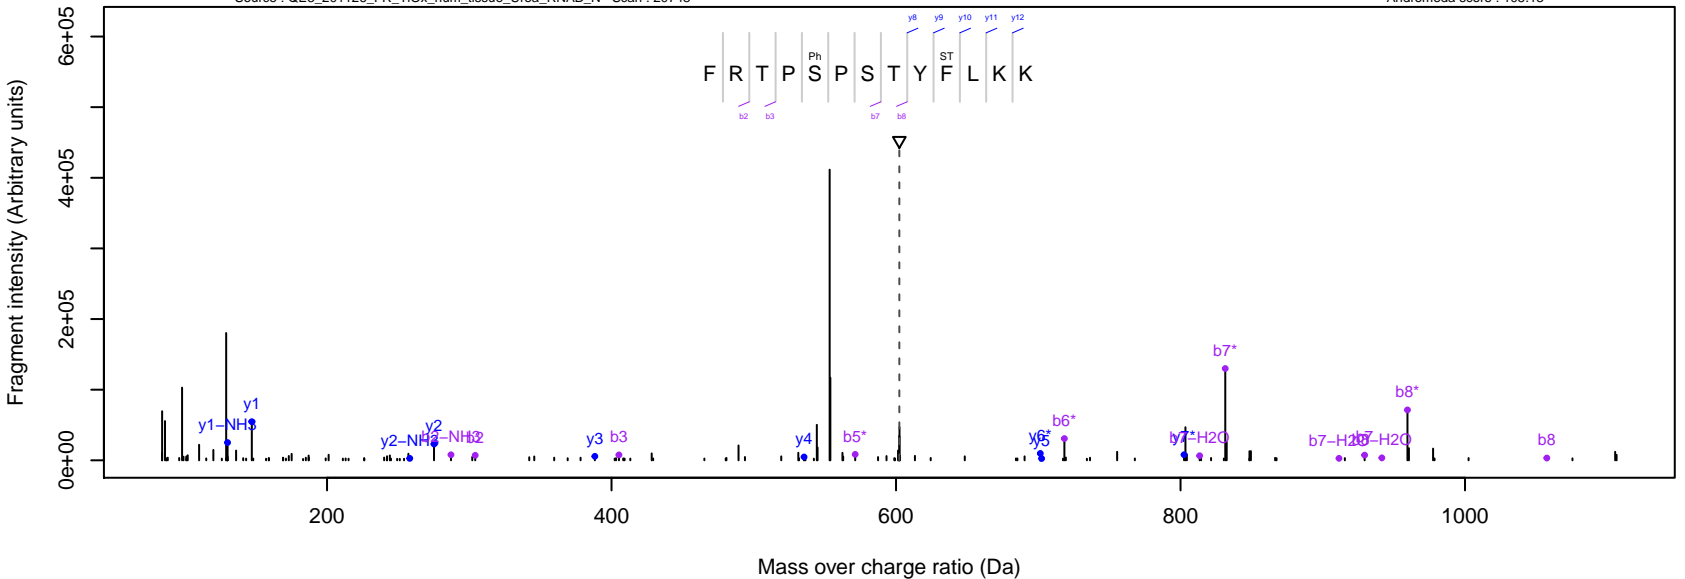

NAGVEGS(Phospho (STY))LIVEK-2+

Source : QE3\_201126\_FR\_TiOx\_hum\_tissue\_Urea\_RNAB\_B Scan : 23846

Andromeda score : 105.08

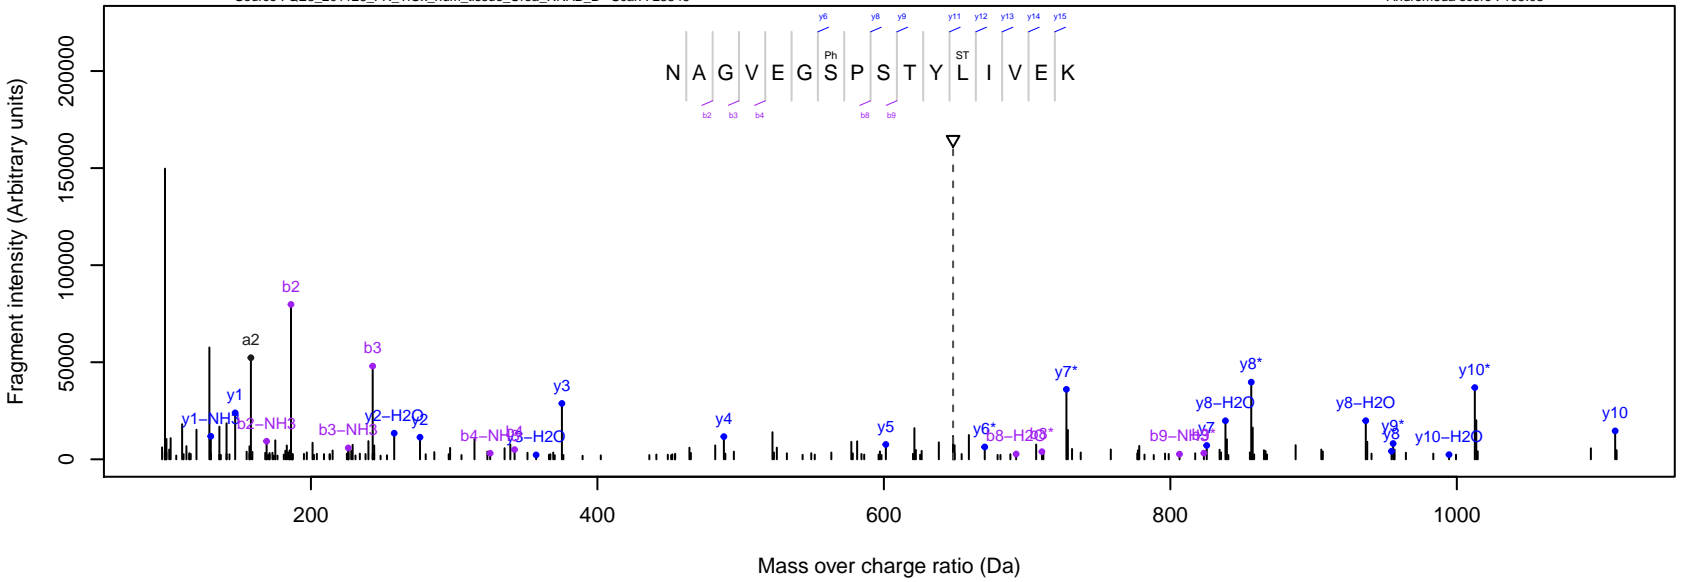

KIT(Phospho (STY))IADCGQLE-2+

Source : QE3\_201126\_FR\_TiOx\_hum\_tissue\_Urea\_RNAB\_B Scan : 26961

Andromeda score : 105.03

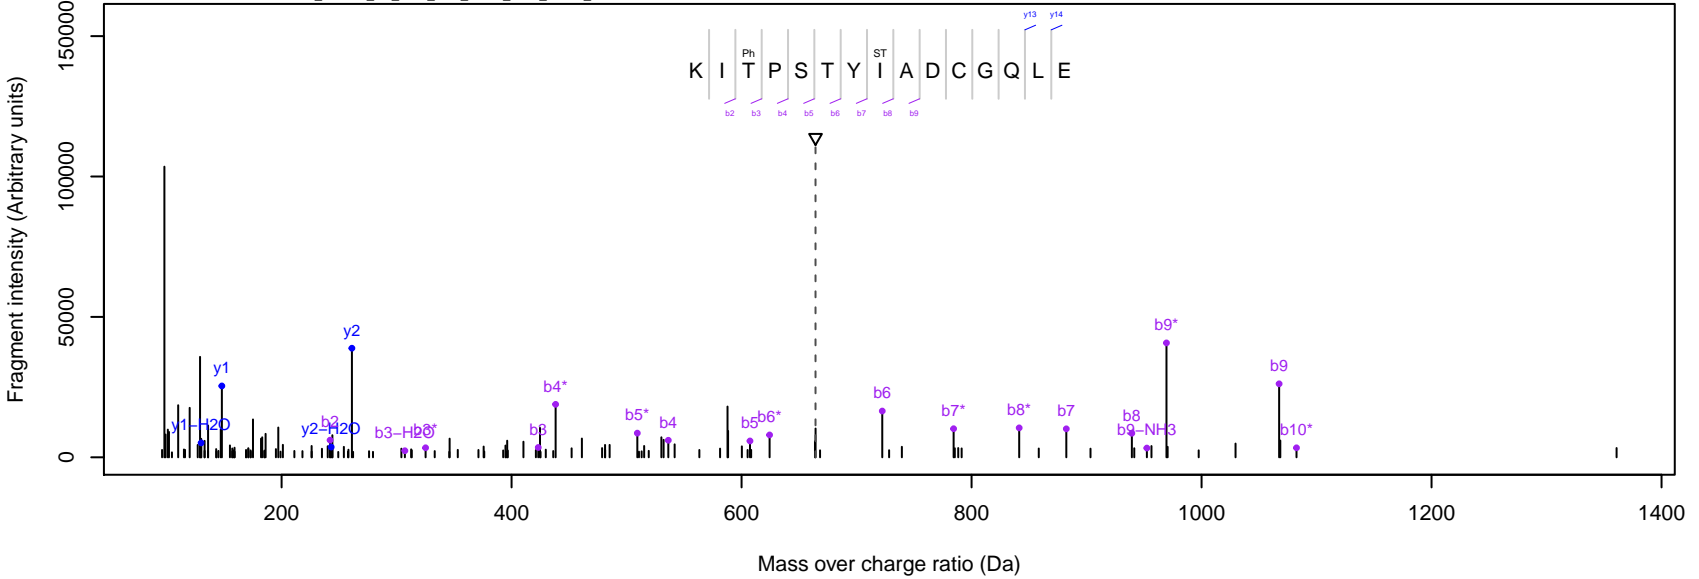

S(Phospho (STY))PGHMVILDQTK-2+

Source : QE3\_201126\_FR\_TiOx\_hum\_tissue\_Urea\_RNAB\_N Scan : 20322

Andromeda score : 105.03

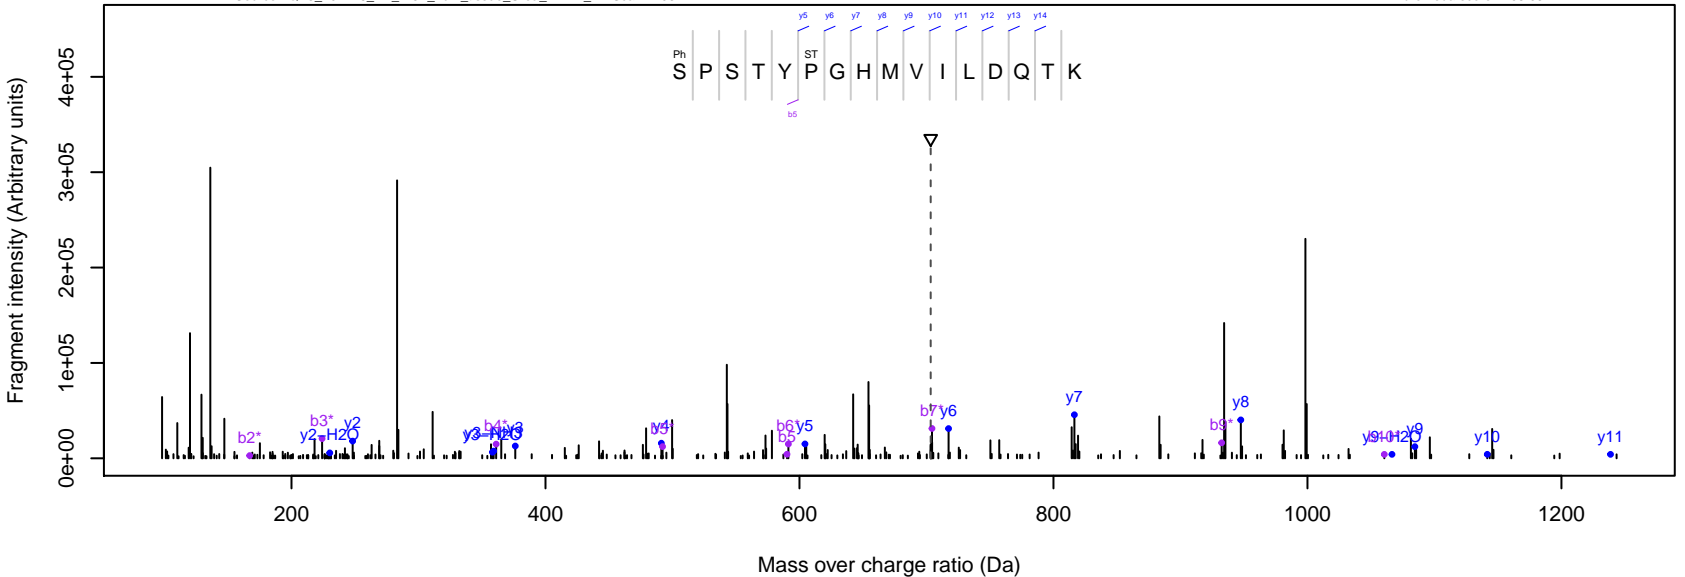



ADIDVSGPKVIDIDTPSTYPDIDIHGPEGK-4+

Source : QE3\_201126\_FR\_TiOx\_hum\_tissue\_Urea\_RNAB\_N Scan : 36341

Andromeda score : 105.02

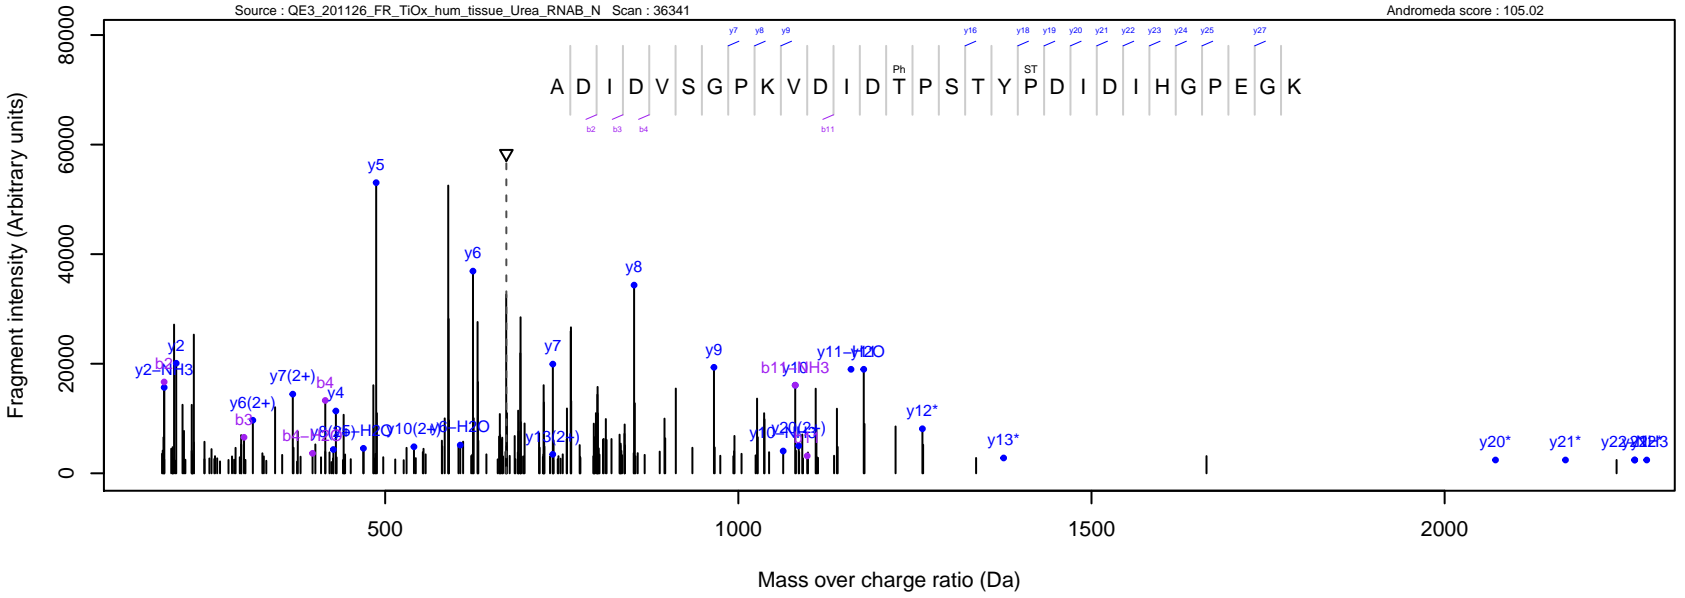

VSPAS(Phospho (STY))PAGS(Phospho (STY))PSADFAVHGESLGDR-3+

Source : QE3\_201126\_FR\_TiOx\_hum\_tissue\_Urea\_RNAB\_B Scan : 35506

Andromeda score : 105.02

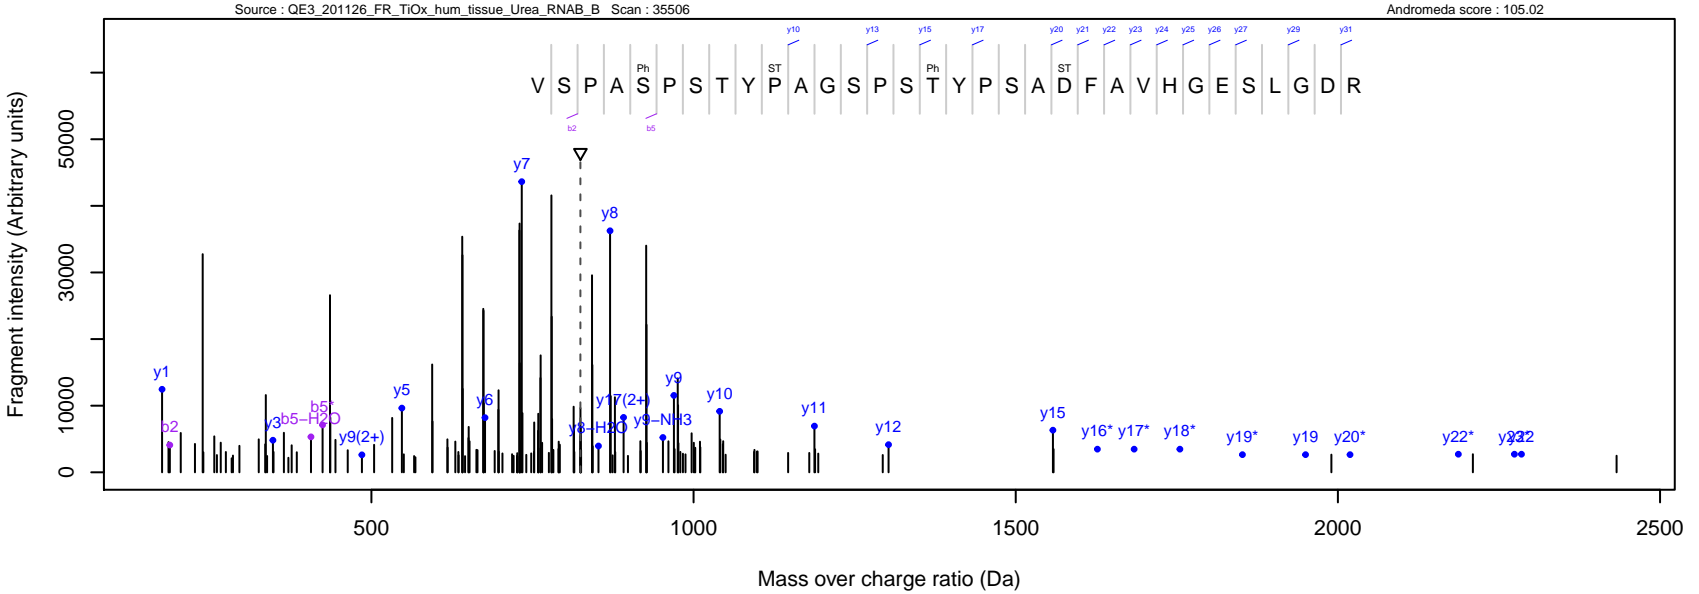

NHLS(Phospho (STY))PQQGGATPQVSPCCR-3+

Source : QE3\_201126\_FR\_TiOx\_hum\_tissue\_Urea\_RNAB\_N Scan : 17997

Andromeda score : 104.96

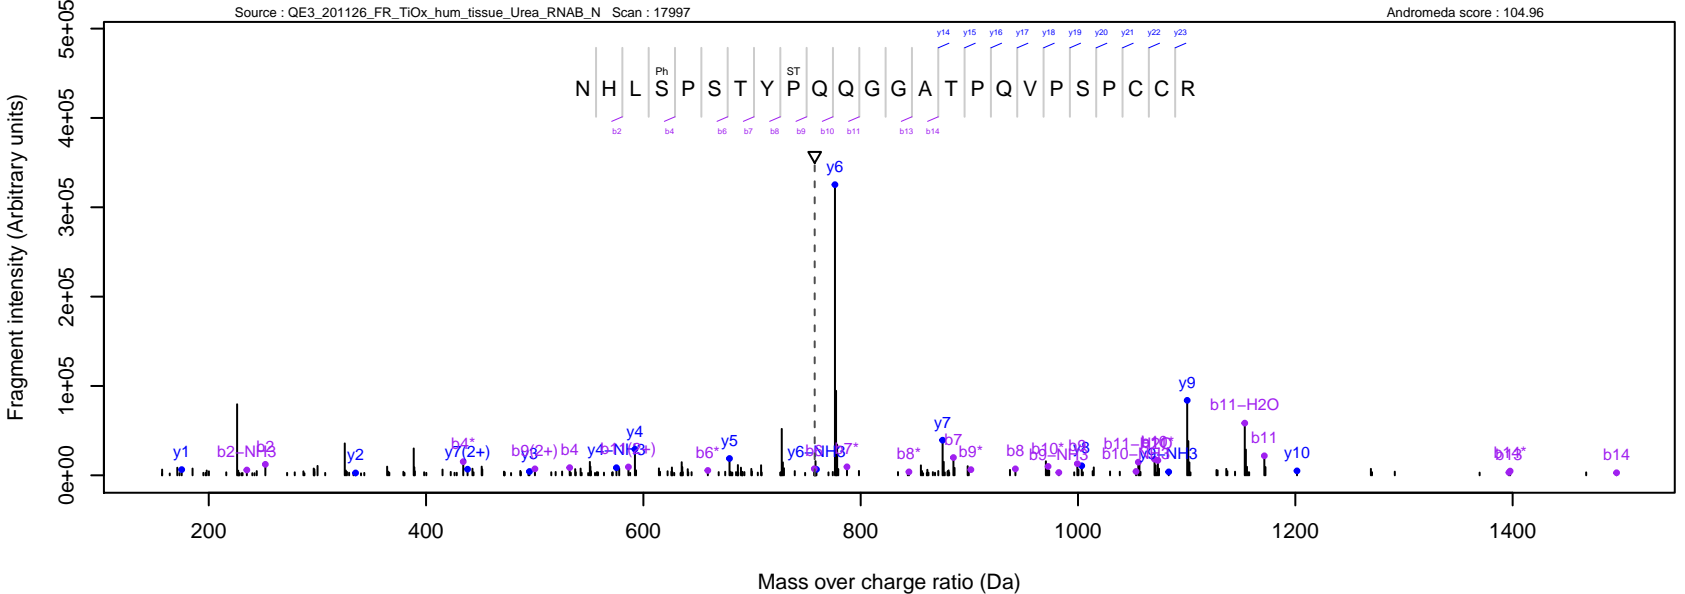

EM(Oxidation (M))LMEDVGS(Phospho (STY))EEEEEEDEAPFQEK-3+

Source : QE3\_201126\_FR\_TiOx\_hum\_tissue\_Urea\_RNAB\_N Scan : 41871

Andromeda score : 104.95

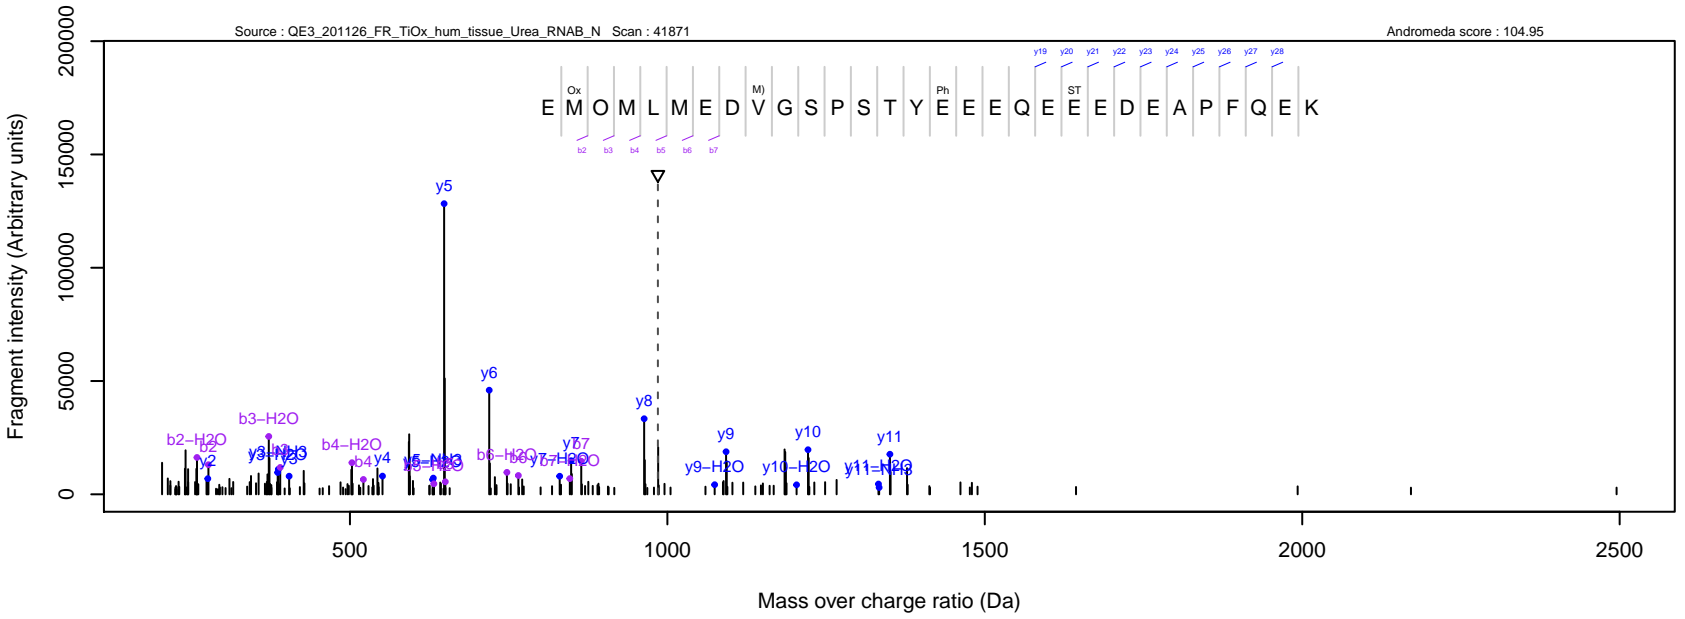

SKS(Phospho (STY))PRDPDANWDSPSR-3+

Source : QE3\_201126\_FR\_TiOx\_hum\_tissue\_Urea\_RNAB\_B Scan : 10138

Andromeda score : 104.95

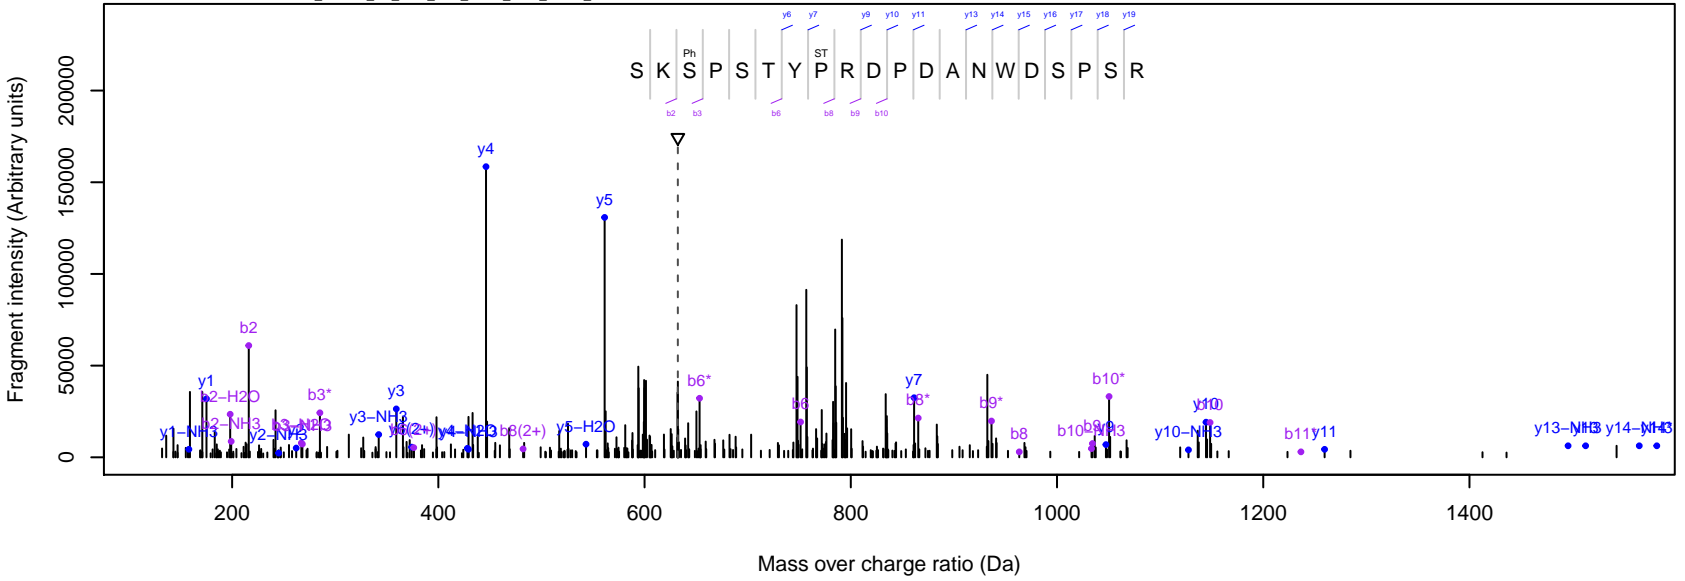

HEDEQALLDQNSQT(Phospho (STY))PPSPFSVQAFNK-3+

Source : QE3\_201126\_FR\_TiOx\_hum\_tissue\_Urea\_RNAB\_H Scan : 45364

Andromeda score : 104.9

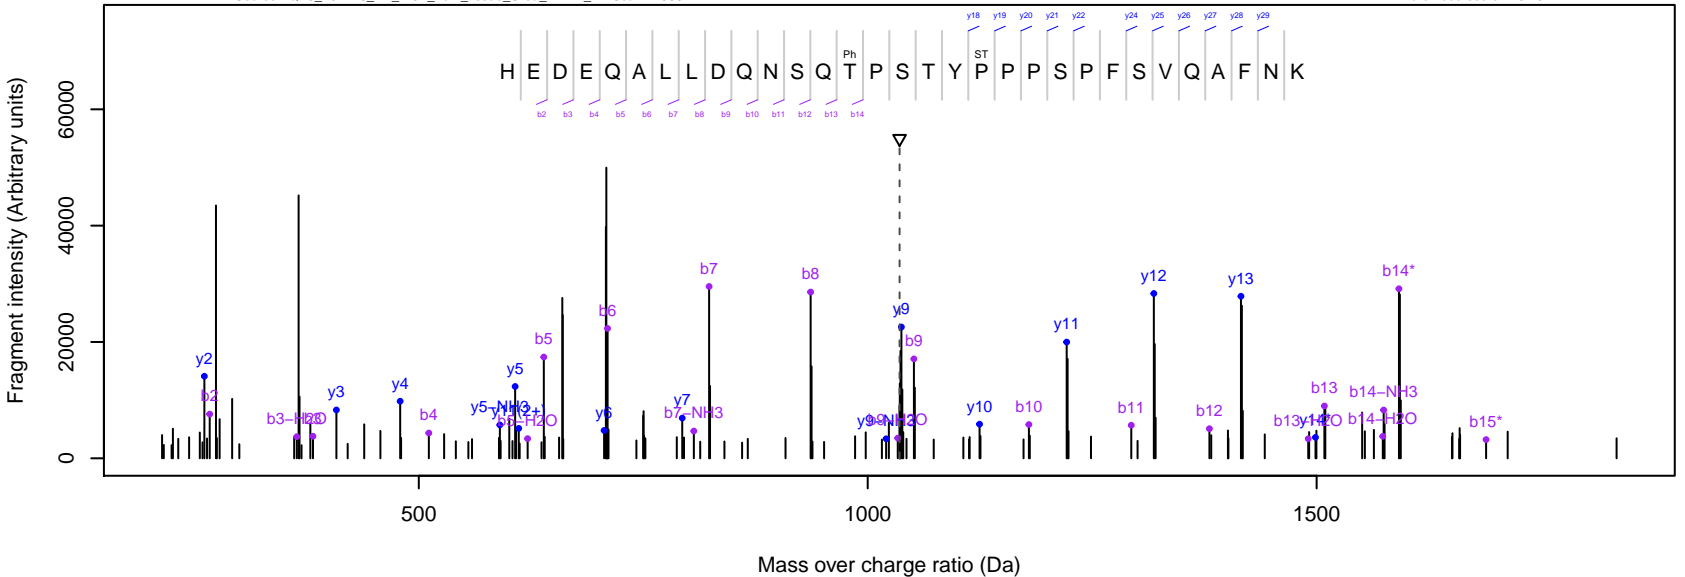

HLLTDLPLPELPGGDLS(Phospho (STY))PPDS(Phospho (STY))PEPK-3+

Source : QE3\_201126\_FR\_TiOx\_hum\_tissue\_Urea\_RNAB\_H Scan : 60843

Andromeda score : 104.9

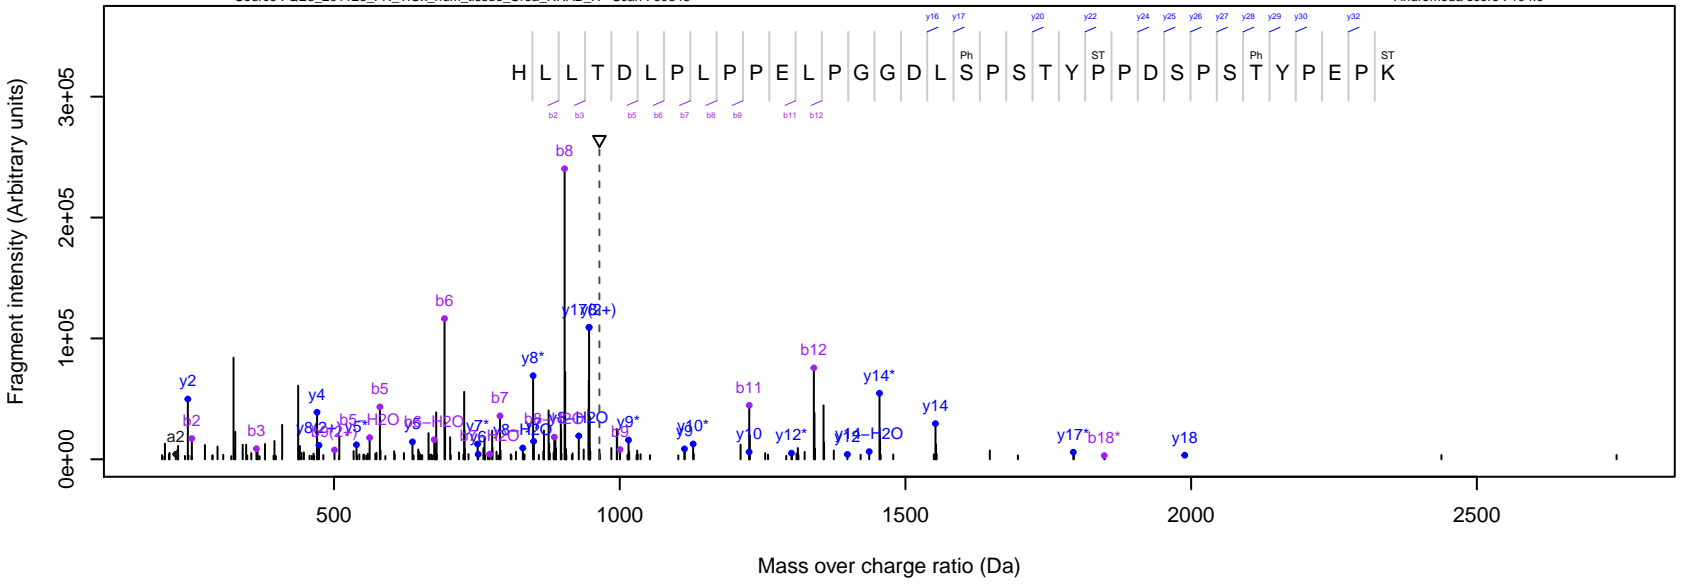

KVLAVTDS(Phospho (STY))PAR-2+

Source : QE3\_201126\_FR\_TiOx\_hum\_tissue\_Urea\_RNAB\_B Scan : 10881

Andromeda score : 104.9

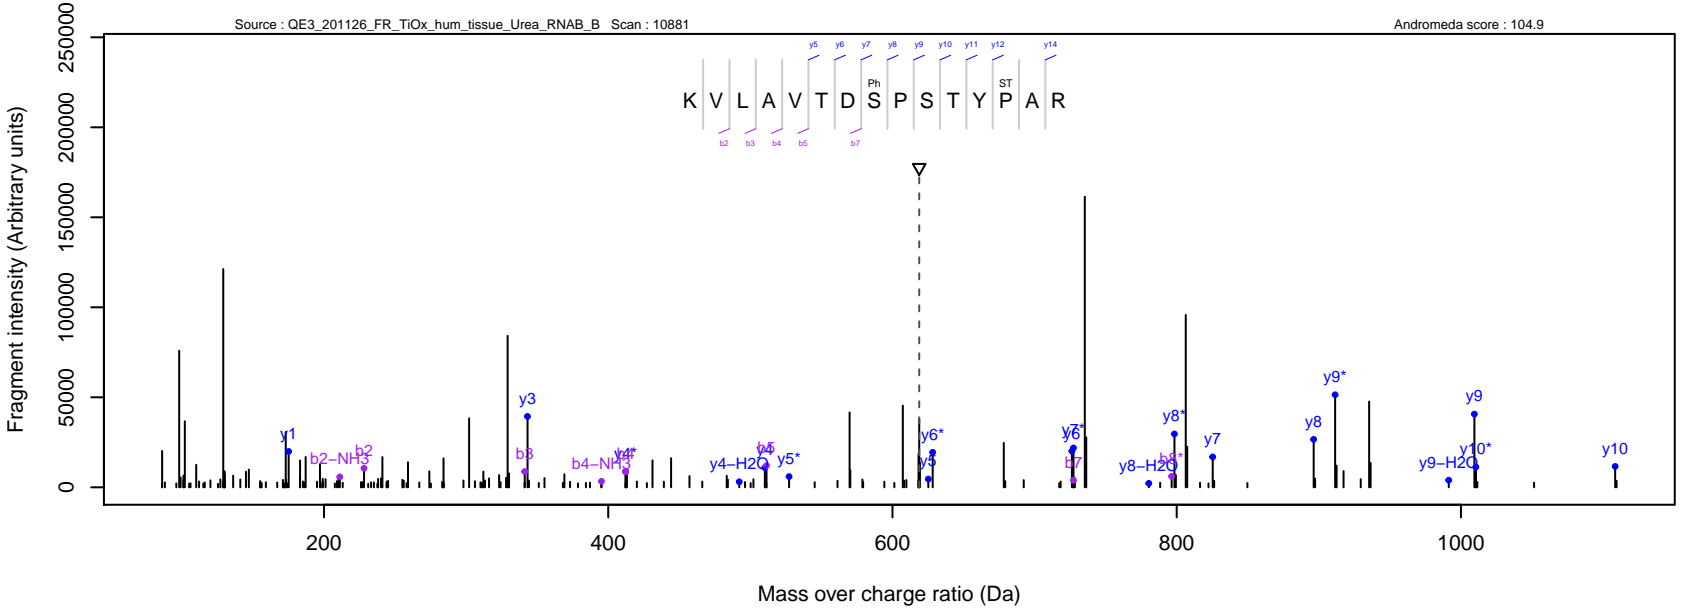

RM(Oxidation (M))EDEGGFPVQENGQPES(Phospho (STY))PR-3+

Source : QE3\_201126\_FR\_TiOx\_hum\_tissue\_Urea\_RNAB\_N Scan : 21957

Andromeda score : 104.89

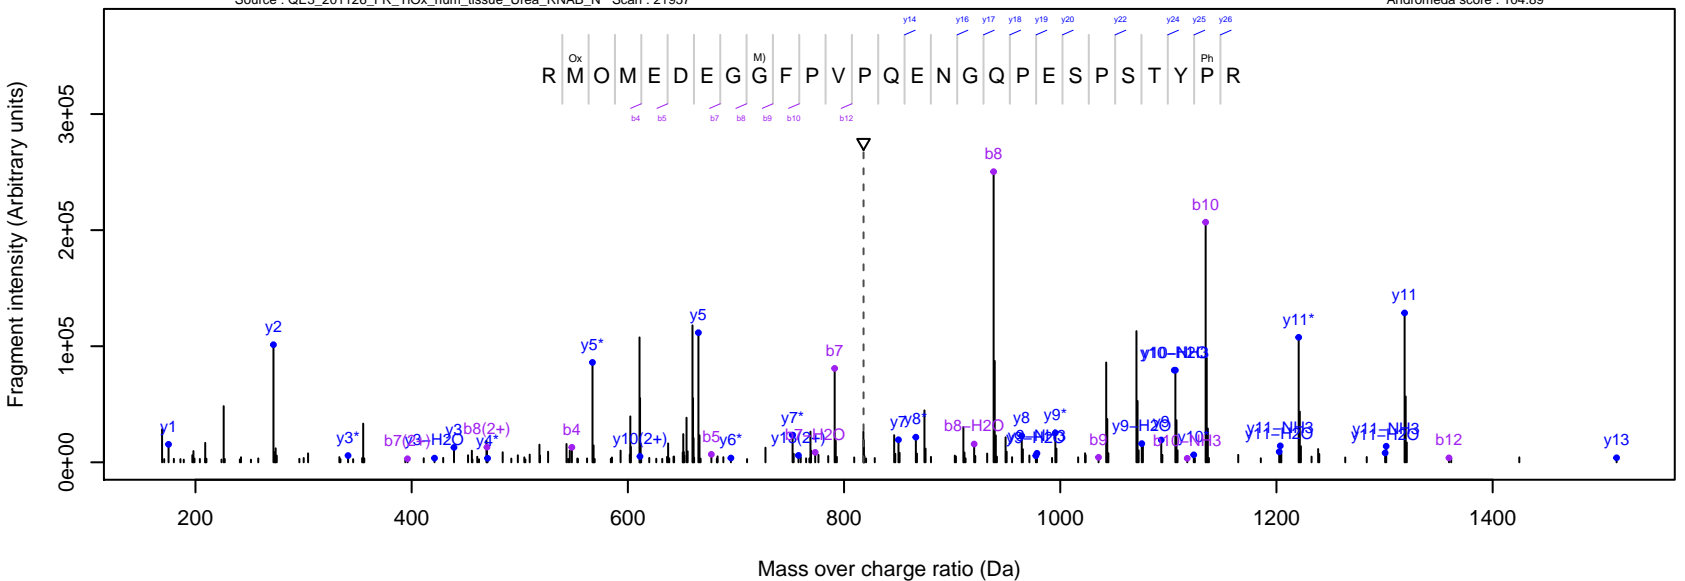

S(Phospho (STY))NSGRELTDDEILASVM(Oxidation (M))IK-2+

Source : QE3\_201126\_FR\_TiOx\_hum\_tissue\_Urea\_RNAB\_B Scan : 44063

Andromeda score : 104.89

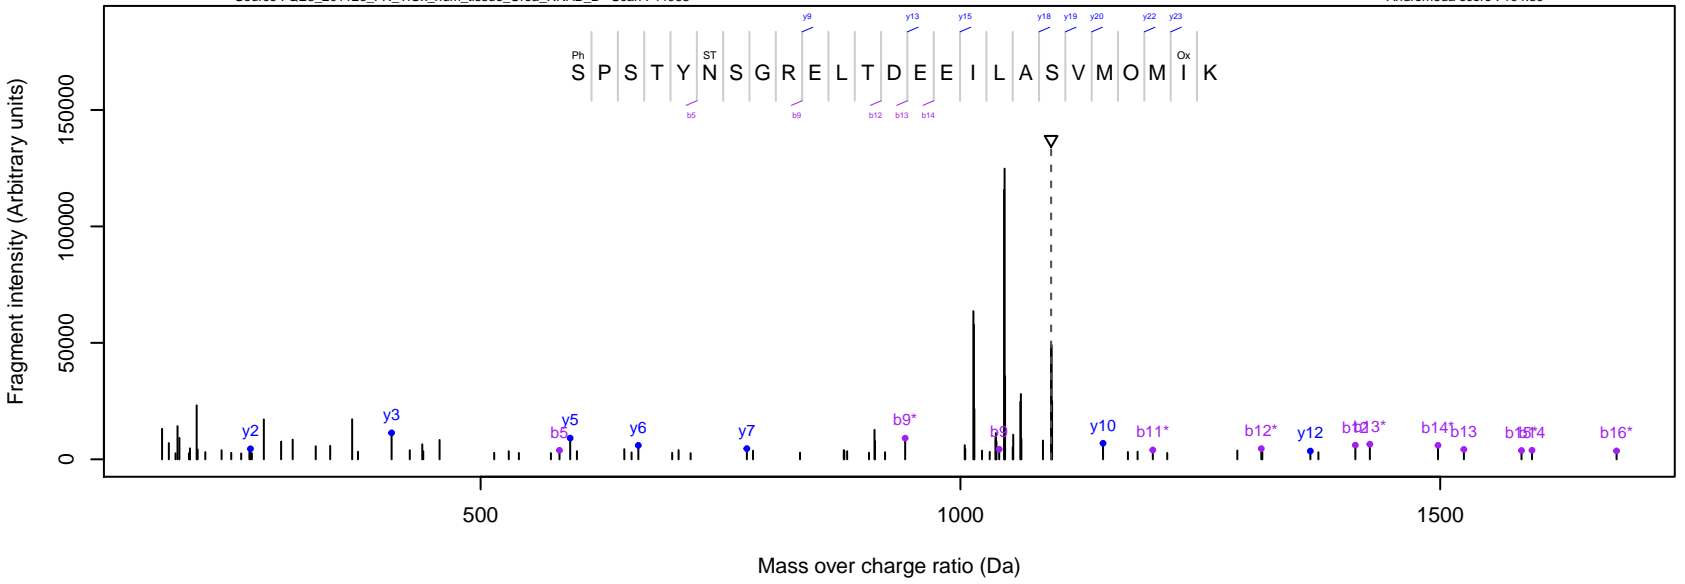

STT(Phospho (STY))PANLDESEHFFR-3+

Source : QE3\_201126\_FR\_TiOx\_hum\_tissue\_Urea\_RNAB\_H Scan : 31662

Andromeda score : 104.89

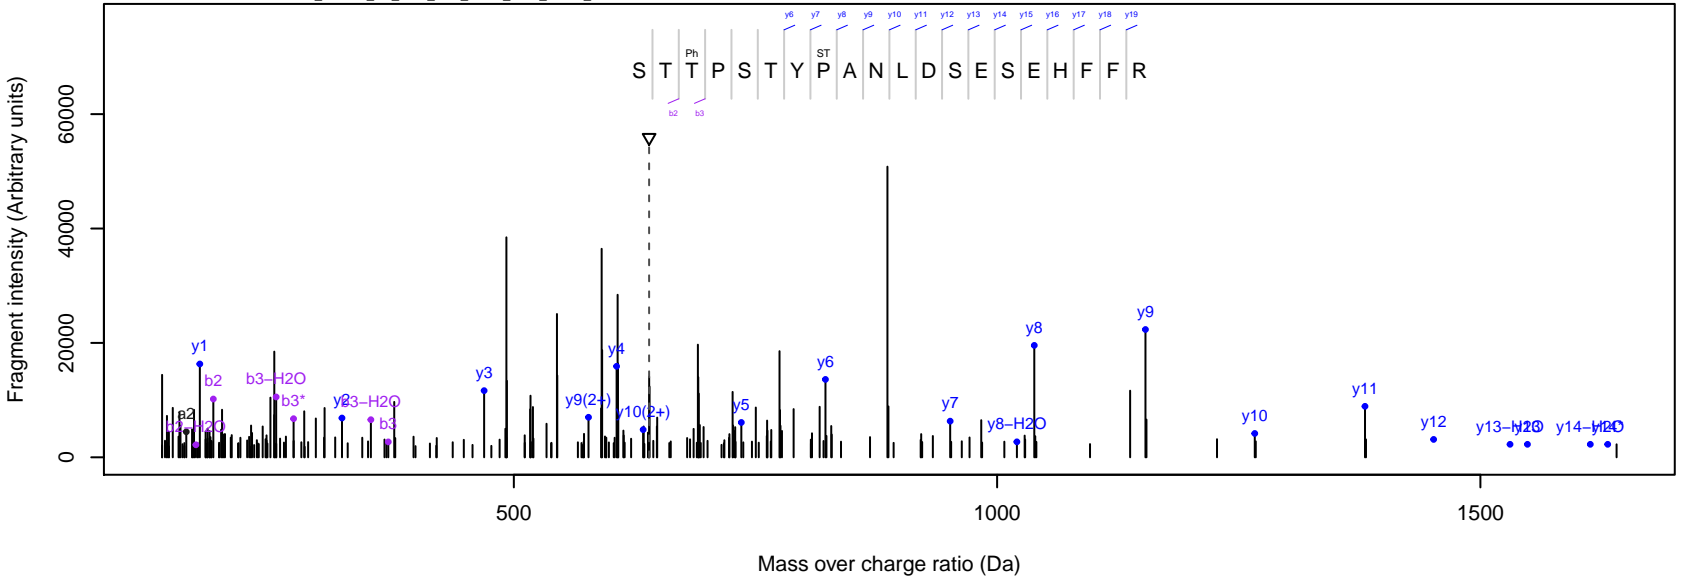

S(Phospho (STY))ESDYSDGDNDSINSTNSNDTINCSESSSR-3+

Source : QE3\_201126\_FR\_TiOx\_hum\_tissue\_Urea\_RNAB\_N Scan : 19564

Andromeda score : 104.88

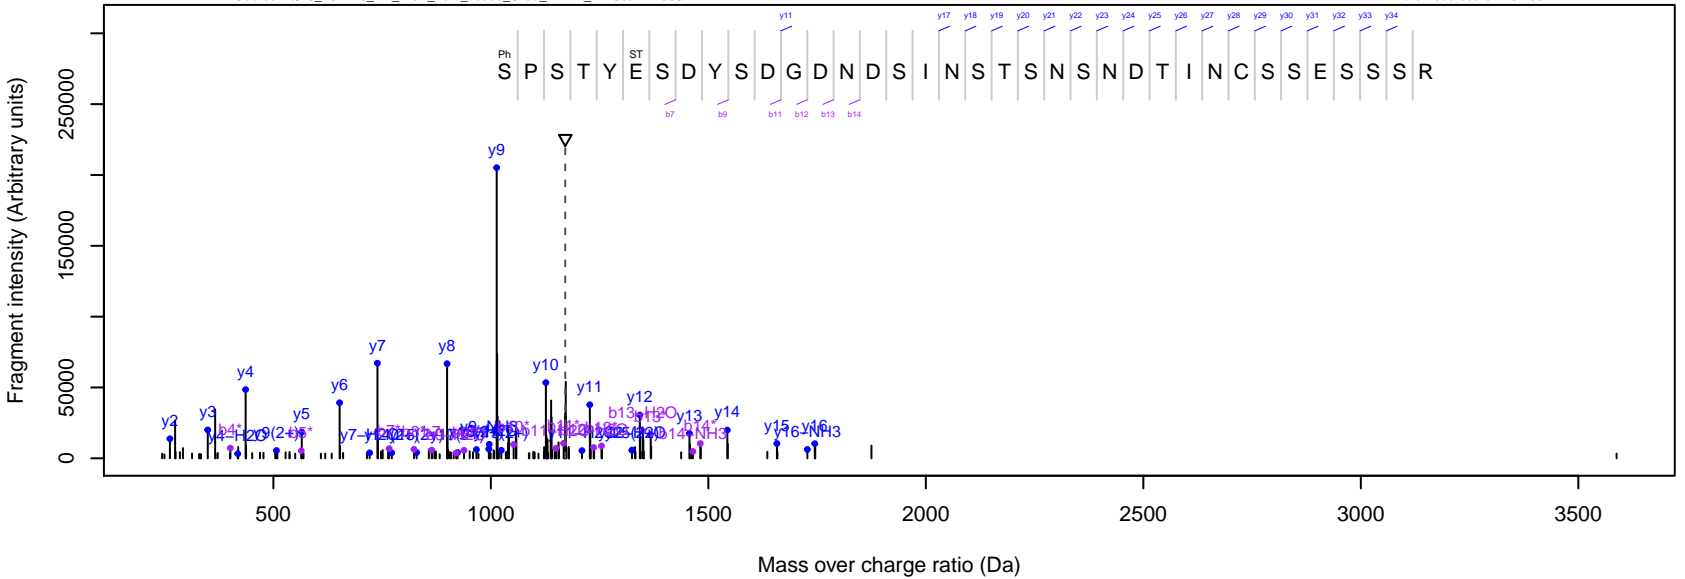

SPSDVKPLPSPDTPVLSSEIENPETS(Phospho (STY))DQ-3+

Source : QE3\_201126\_FR\_TIOx\_hum\_tissue\_Urea\_RNAB\_H Scan : 49955

Andromeda score : 104.88

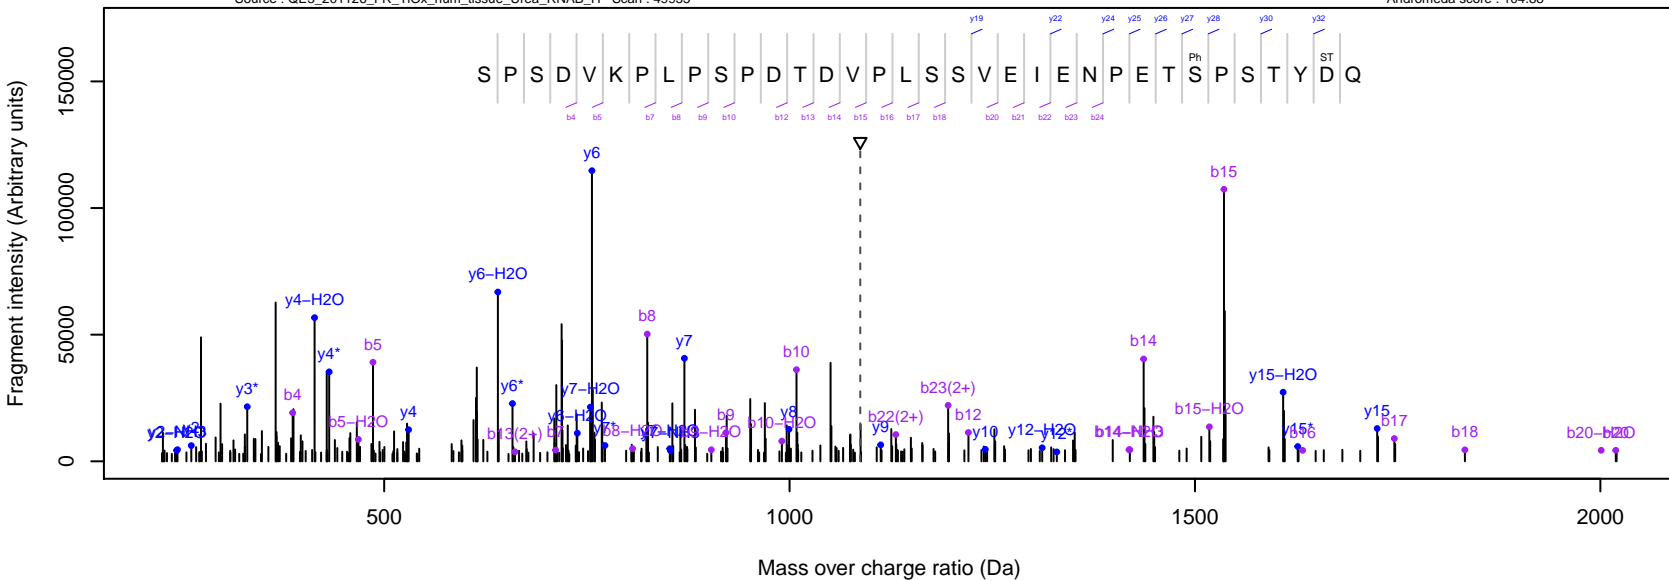

VALVNDLS(Phospho (STY))DVTSTSSR-2+

Source : QE3\_201126\_FR\_TIOx\_hum\_tissue\_Urea\_RNAB\_N Scan : 36710

Andromeda score : 104.88

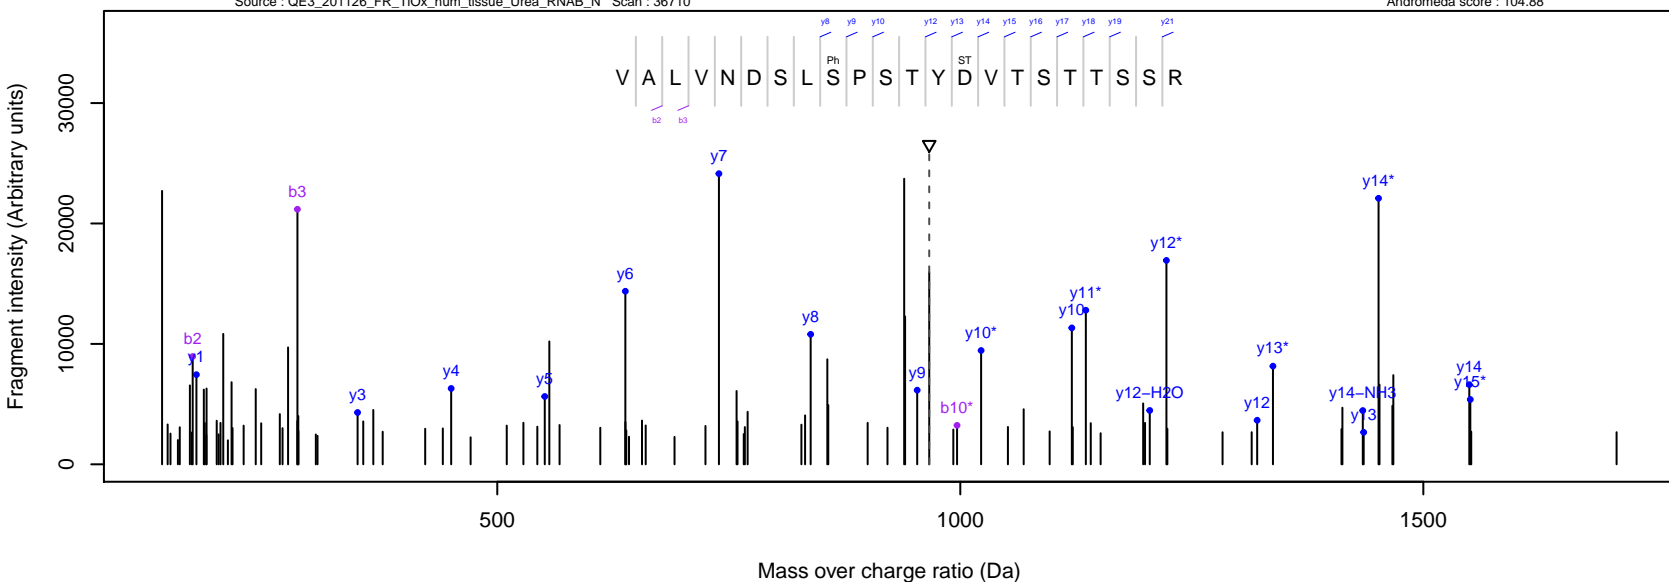

VLS(Phospho (STY))PTAAKPSPEFGK-3+

Source : QE3\_201126\_FR\_TIOx\_hum\_tissue\_Urea\_RNAB\_N Scan : 20707

Andromeda score : 104.88

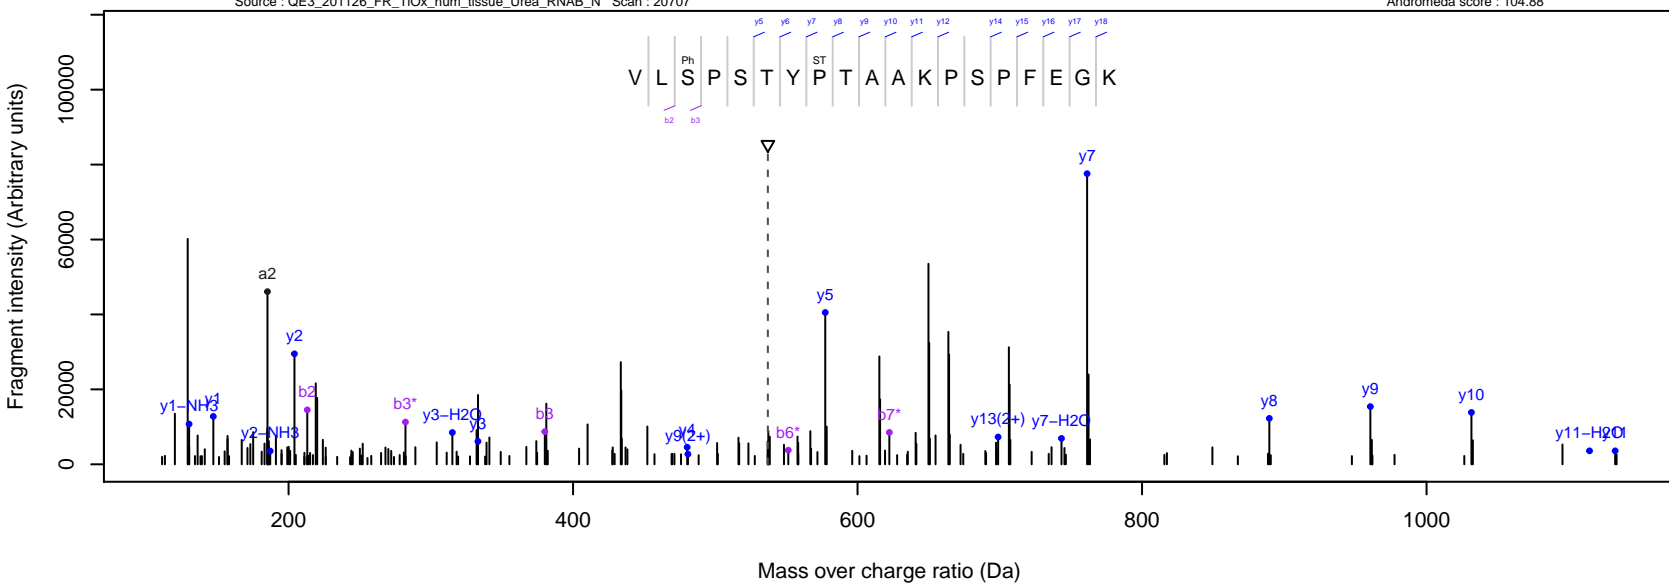

GVDLLLEGVQGES(Phospho (STY))SPTRR-3+

Source : QE3\_201126\_FR\_TiOx\_hum\_tissue\_Urea\_RNAB\_N Scan : 36834

Andromeda score : 104.86

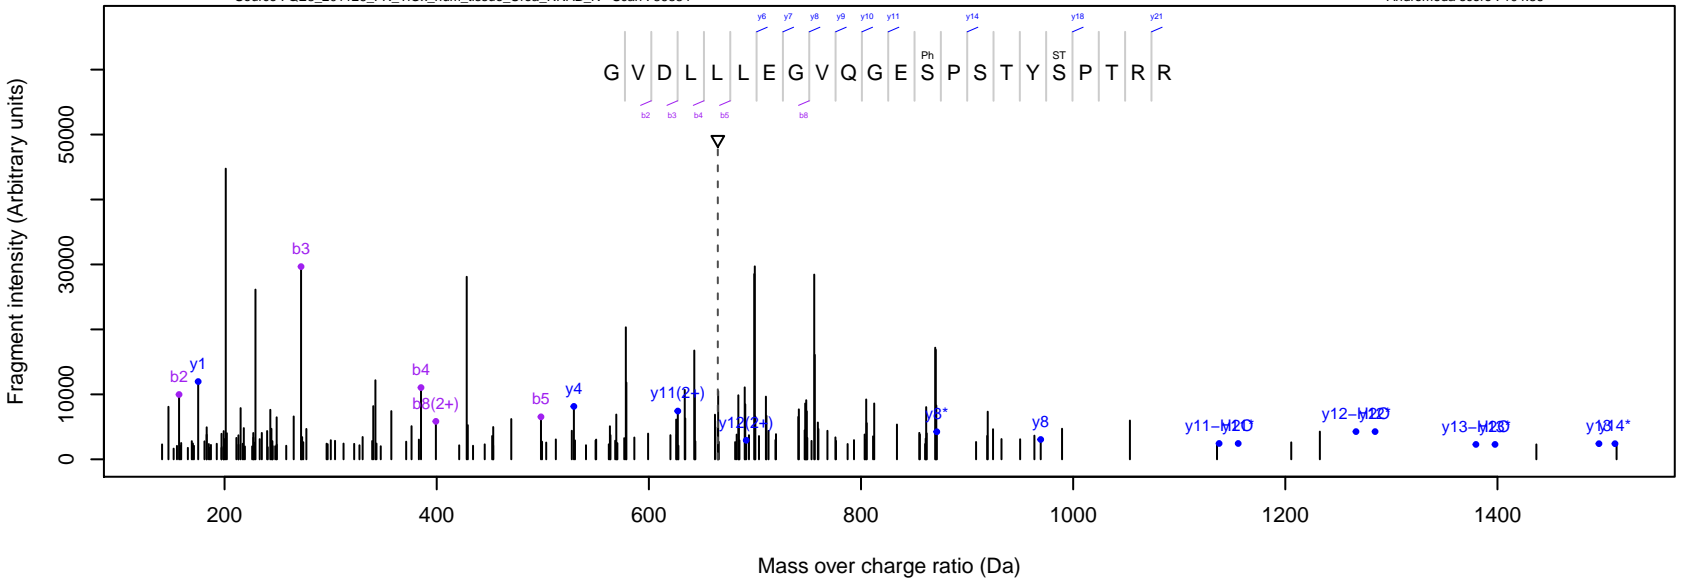

RYQSSPAKPDSPSTYSFYK

Source : QE3\_201126\_FR\_TiOx\_hum\_tissue\_Urea\_RNAB\_H Scan : 12089

Andromeda score : 104.81

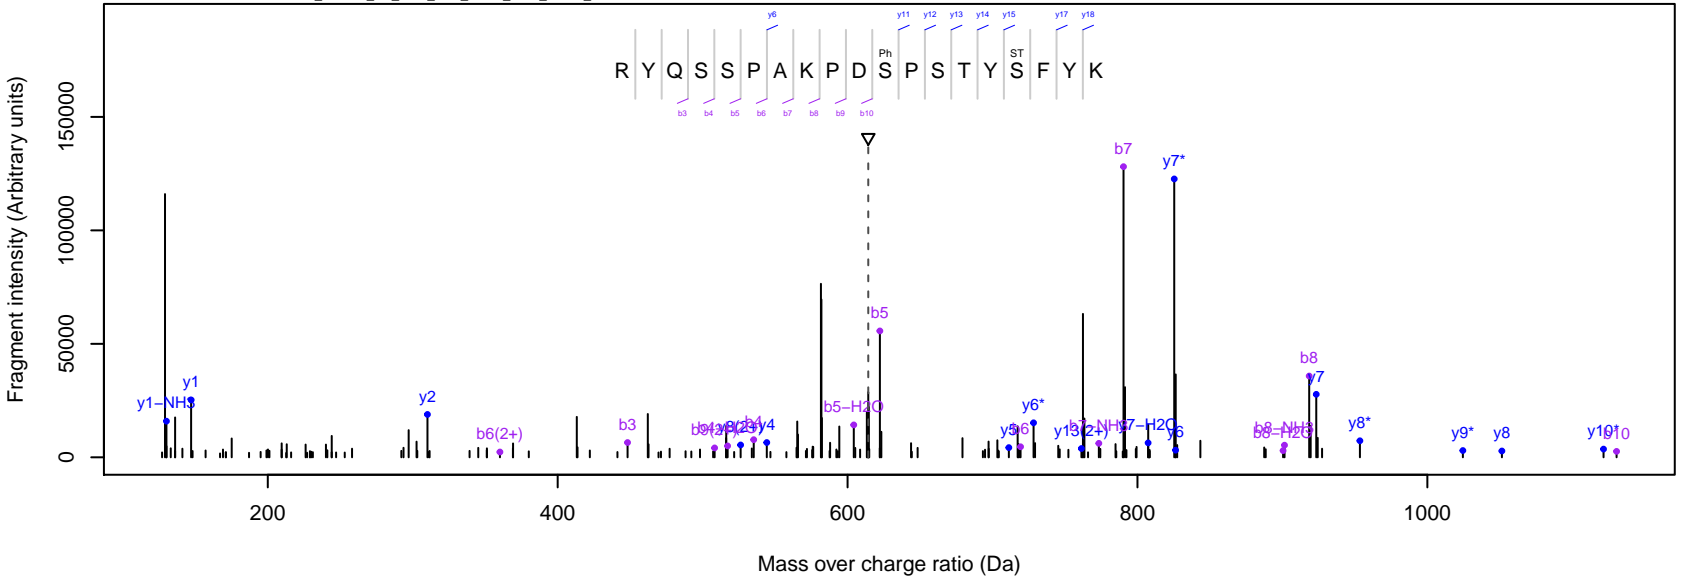

RQS(Phospho (STY))FAVLR-2+

Source : QE3\_201126\_FR\_TiOx\_hum\_tissue\_Urea\_RNAB\_N Scan : 16362

Andromeda score : 104.79

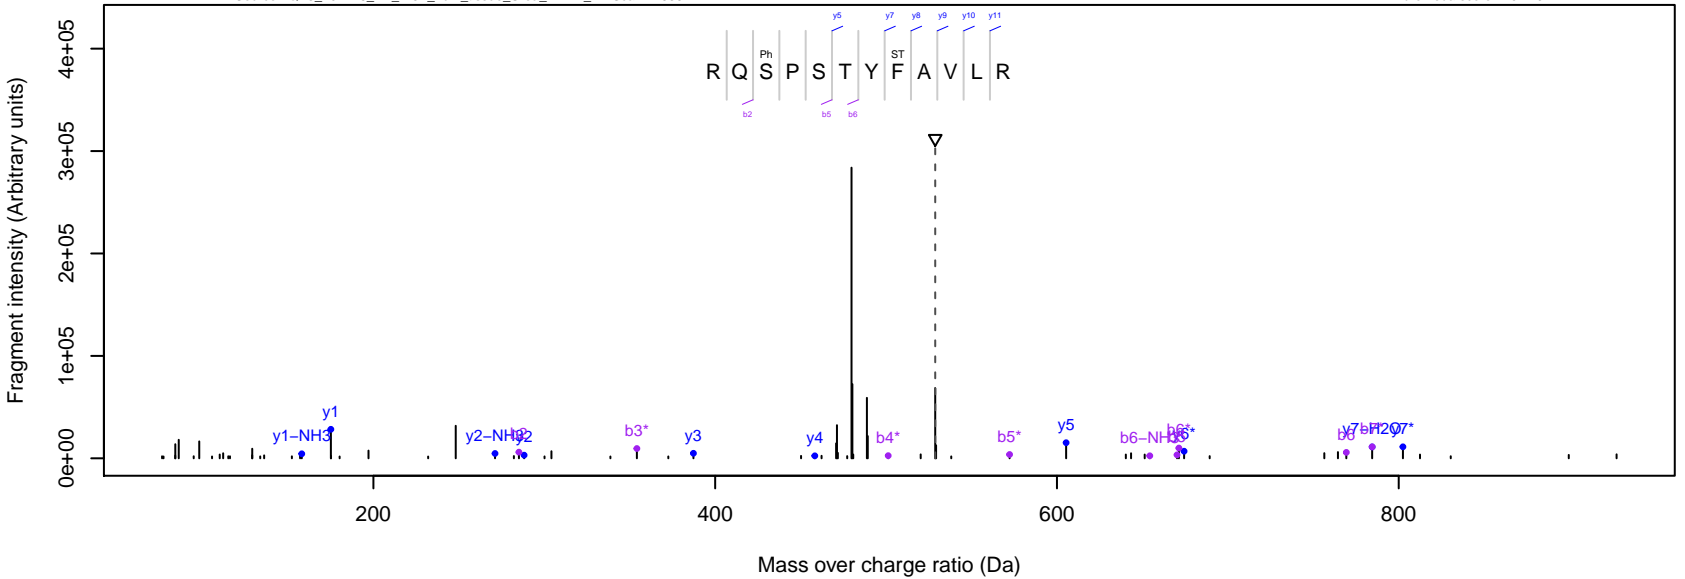

KDS(Phospho (STY))VWGGGGQSQVNHLLVK-3+

Source : QE3\_201126\_FR\_TiOx\_hum\_tissue\_Urea\_RNAB\_N Scan : 18321

Andromeda score : 104.67

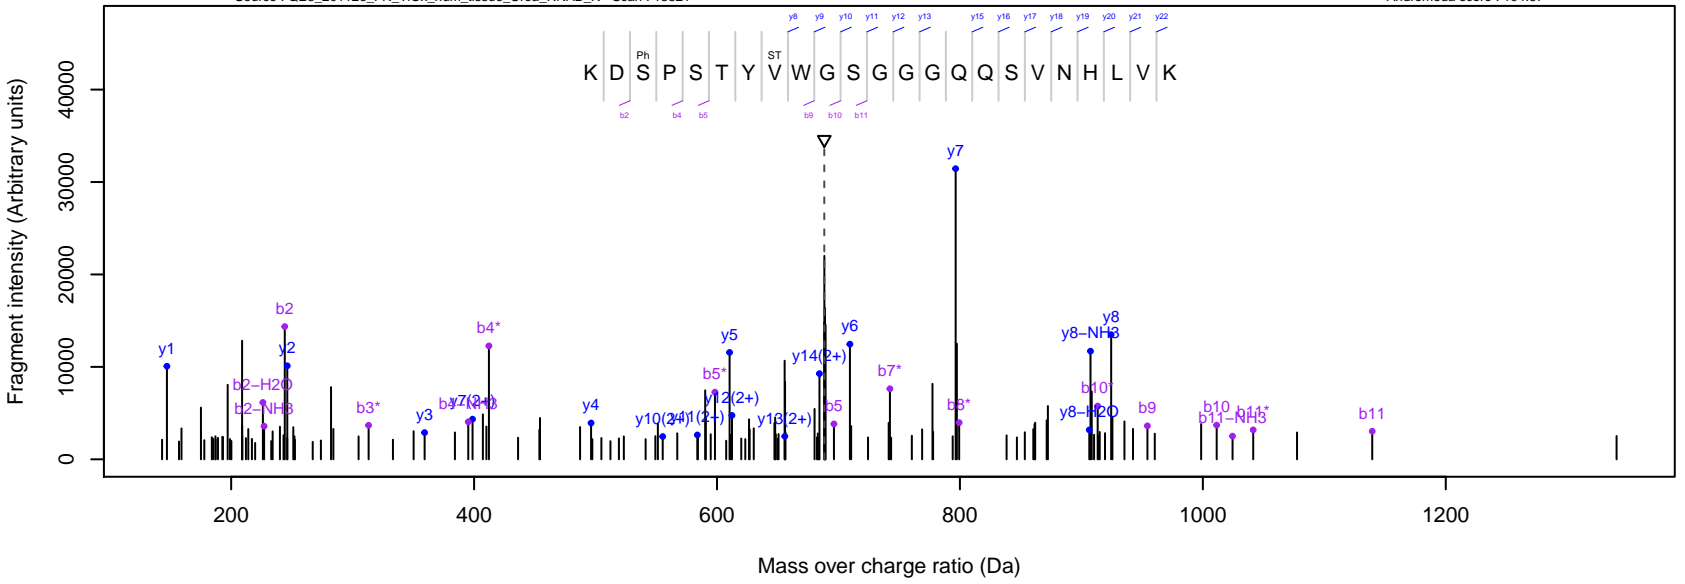

S(Phospho (STY))TELVLS PDMPR-2+

Source : QE3\_201126\_FR\_TiOx\_hum\_tissue\_Urea\_RNAB\_N Scan : 39282

Andromeda score : 104.59

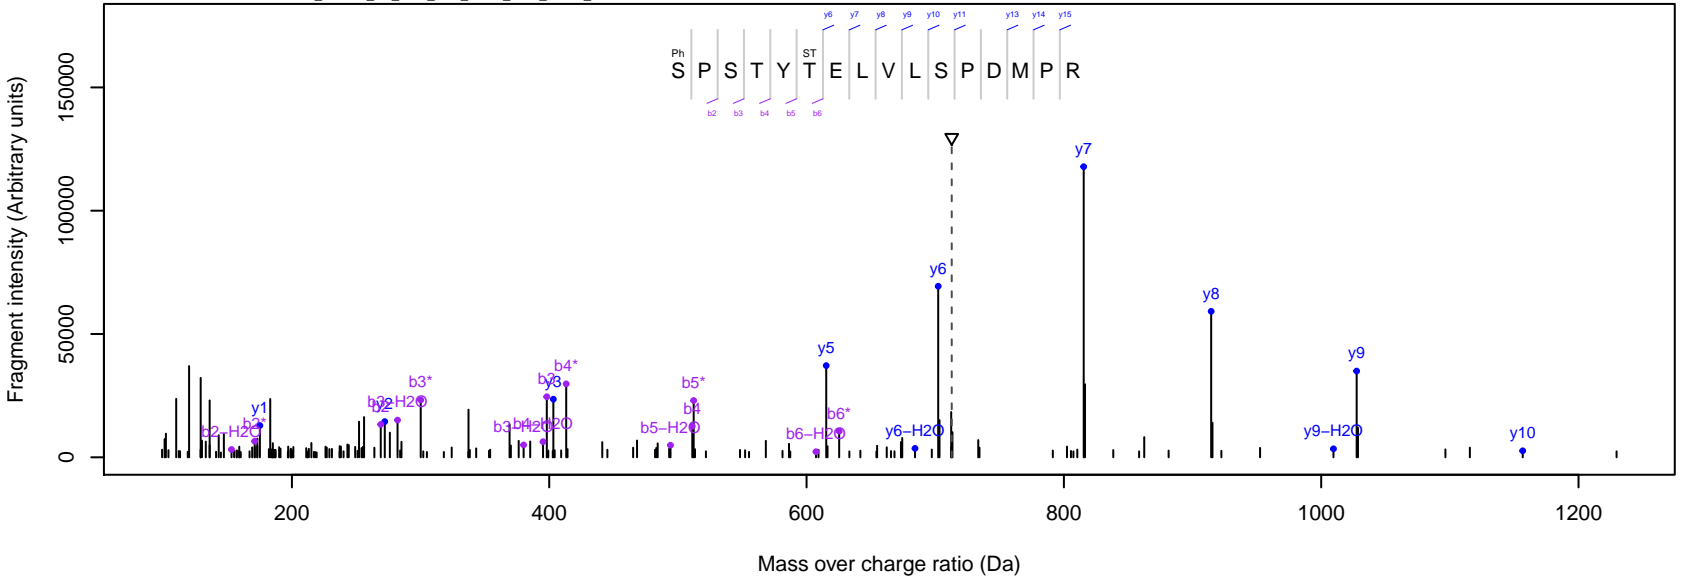

QNS(Phospho (STY))DPTSENPPLPTR-2+

Source : QE3\_201126\_FR\_TiOx\_hum\_tissue\_Urea\_RNAB\_N Scan : 19893

Andromeda score : 104.55

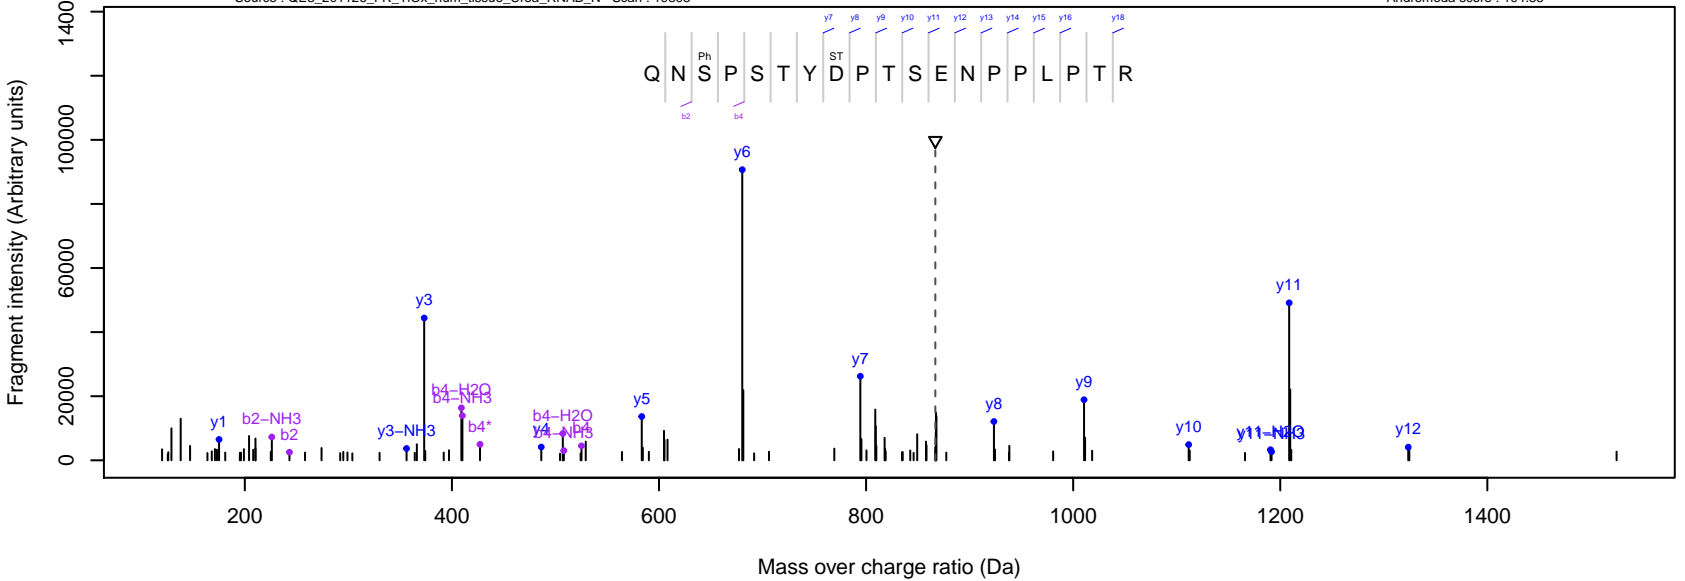

LETGAPRPAT(Phospho (STY))VTNAVSWR-3+

Source : QE3\_201126\_FR\_TiOx\_hum\_tissue\_Urea\_RNAB\_H Scan : 32679

Andromeda score : 104.53

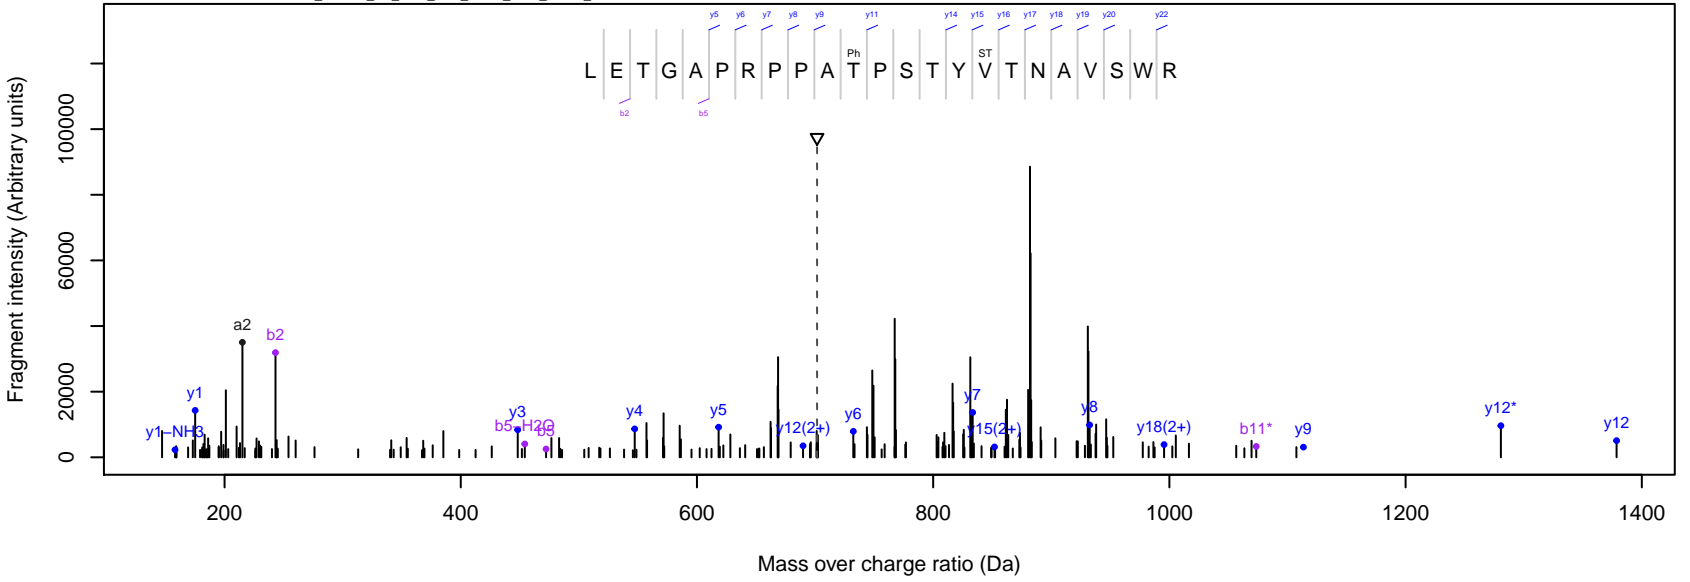

SPS(Phospho (STY))PTLGESLAPHKGS(Phospho (STY))FSGR-3+

Source : QE3\_201126\_FR\_TiOx\_hum\_tissue\_Urea\_RNAB\_B Scan : 23834

Andromeda score : 104.51

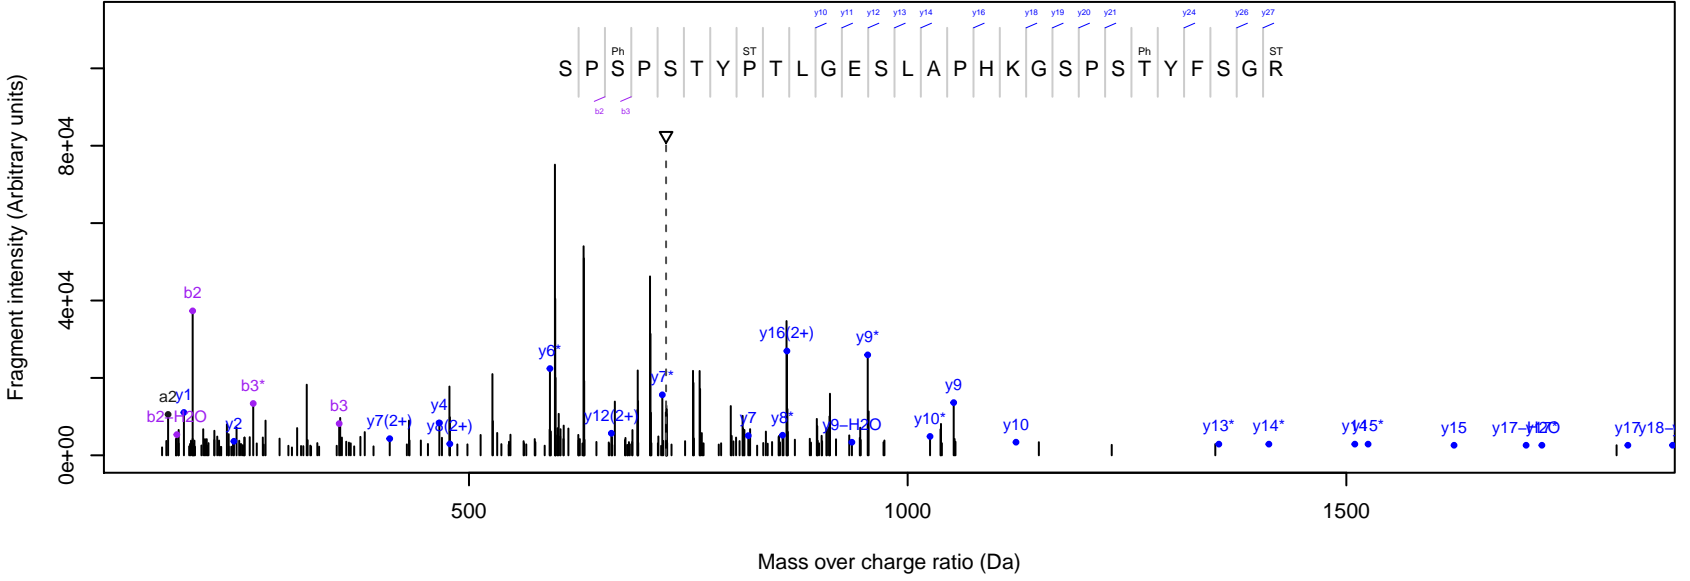

IPSKEEEADMSS(Phospho (STY))PTQR-3+

Source : QE3\_201126\_FR\_TiOx\_hum\_tissue\_Urea\_RNAB\_H Scan : 10204

Andromeda score : 104.49

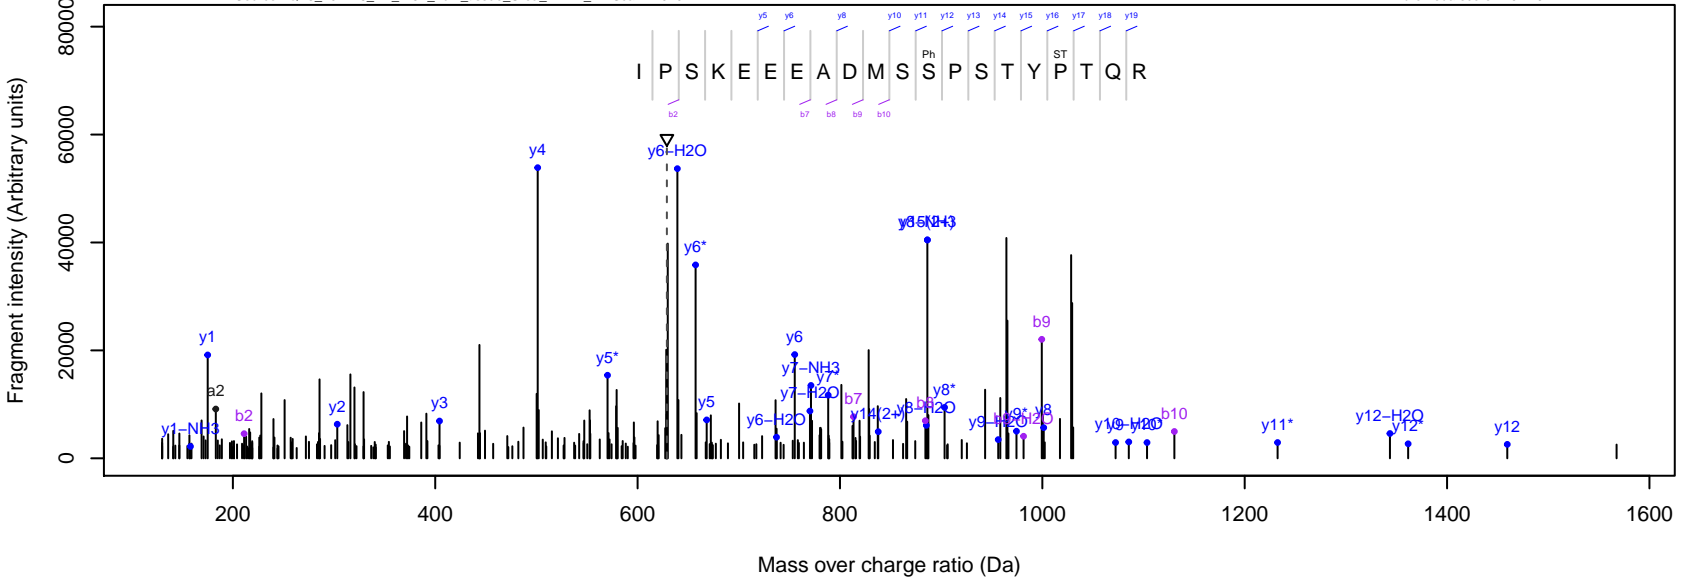



DSLGD<sup>F</sup>IEHYAQLGPSS(Phospho (STY))PEQLAAGAEEGGGR-3+

Source : QE3\_201126\_FR\_TiOx\_hum\_tissue\_Urea\_RNAB\_H Scan : 59287

Andromeda score : 104.48

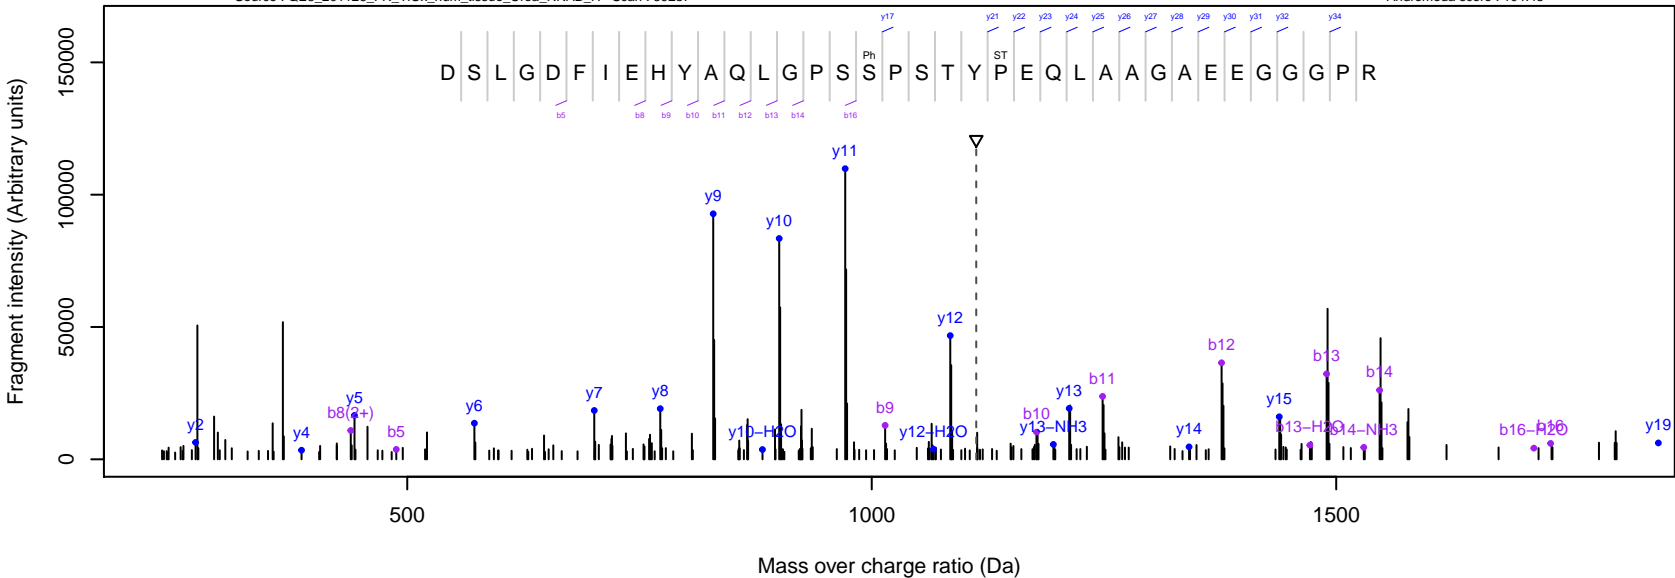

LLSVKGS(Phospho (STY))PKVDEK-3+

Source : QE3\_201126\_FR\_TiOx\_hum\_tissue\_Urea\_RNAB\_H Scan : 9944

Andromeda score : 104.45

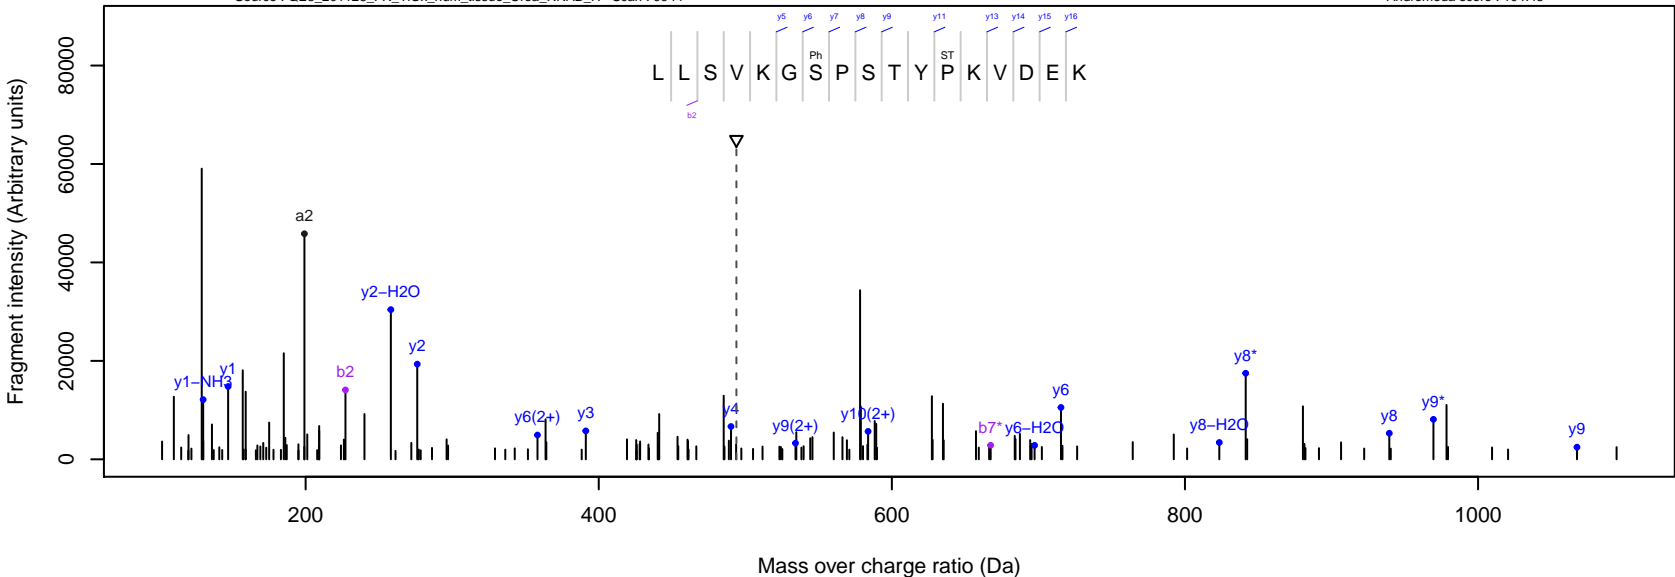

RQS(Phospho (STY))SGSATNVASTPDNR-2+

Source : QE3\_201126\_FR\_TiOx\_hum\_tissue\_Urea\_RNAB\_H Scan : 6081

Andromeda score : 104.45

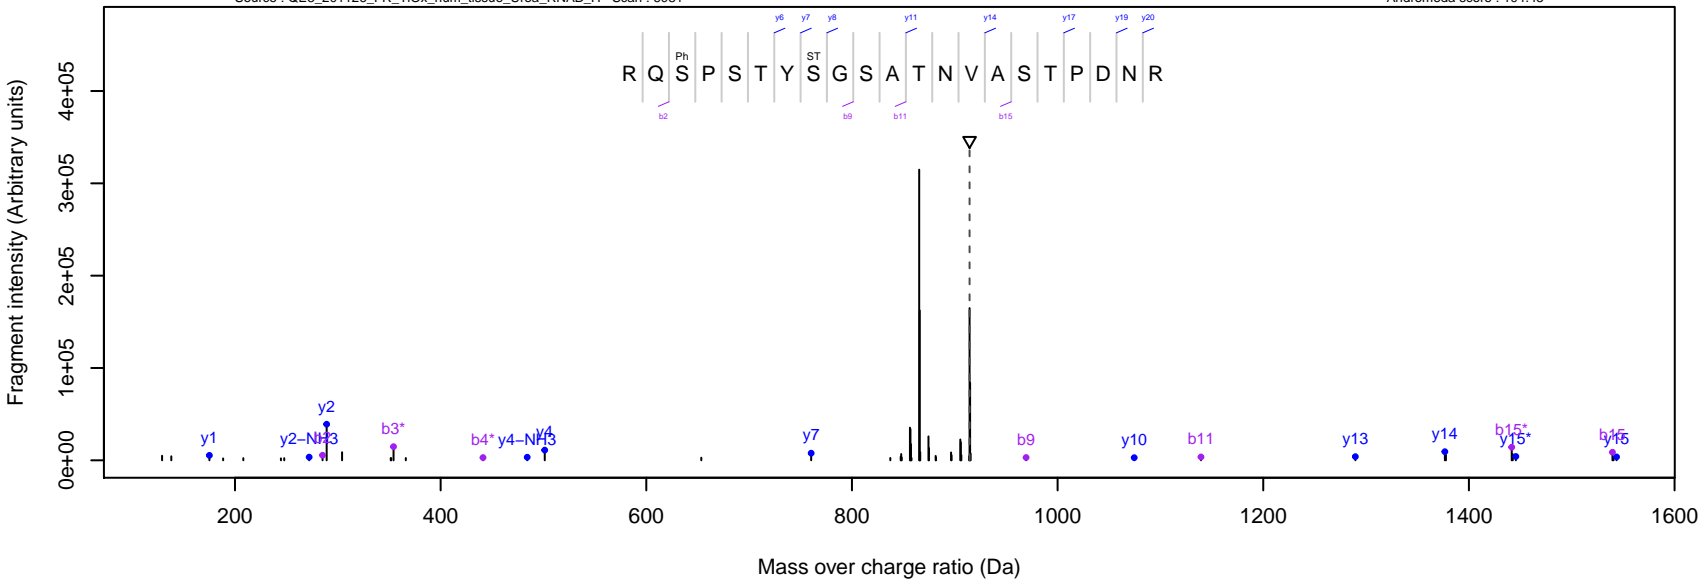

RES(Phospho (STY))AAS(Phospho (STY))GLGLLEEEGAGAGAAQEEVLEPGR-3+

Source : QE3\_201126\_FR\_TIOx\_hum\_tissue\_Urea\_RNAB\_N Scan : 54893

Andromeda score : 104.43

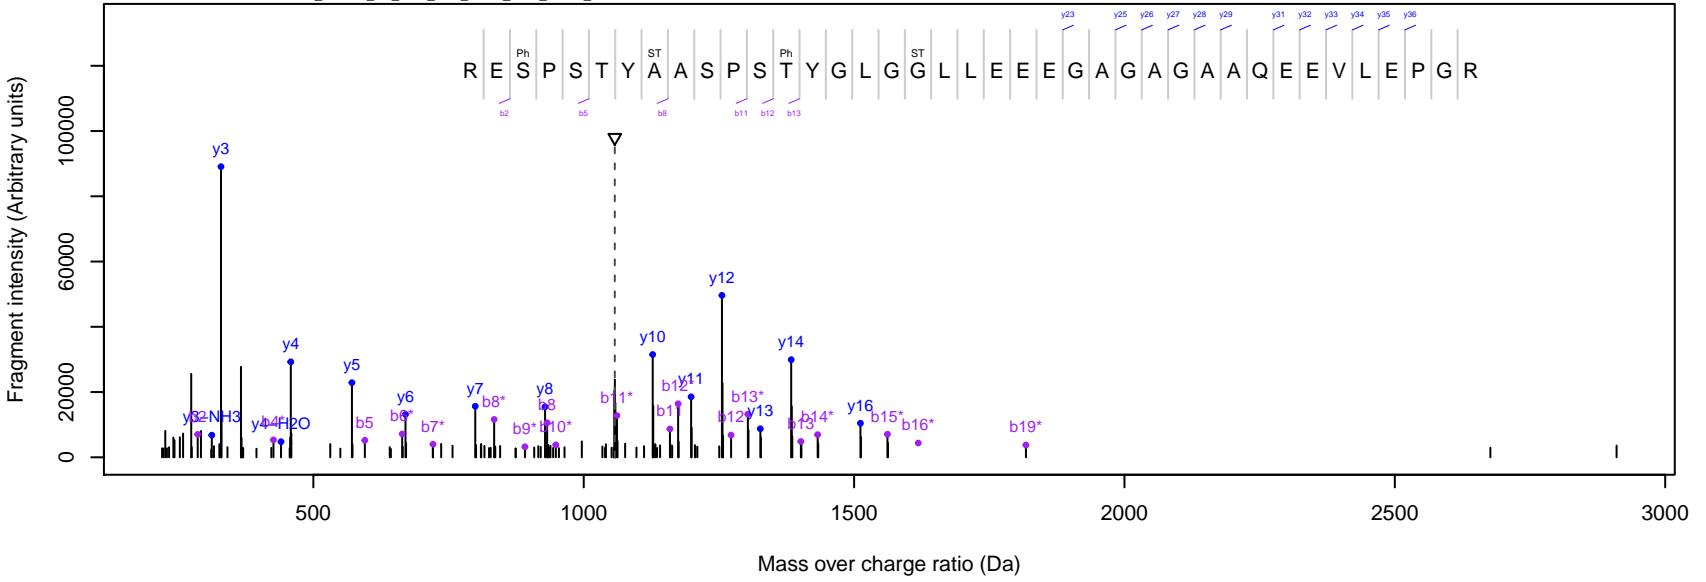

RKVDEGAGDSAAVASGGAQTLALAGSPSTYPAPSGHPK-4+

Source : QE3\_201126\_FR\_TIOx\_hum\_tissue\_Urea\_RNAB\_H Scan : 19656

Andromeda score : 104.42

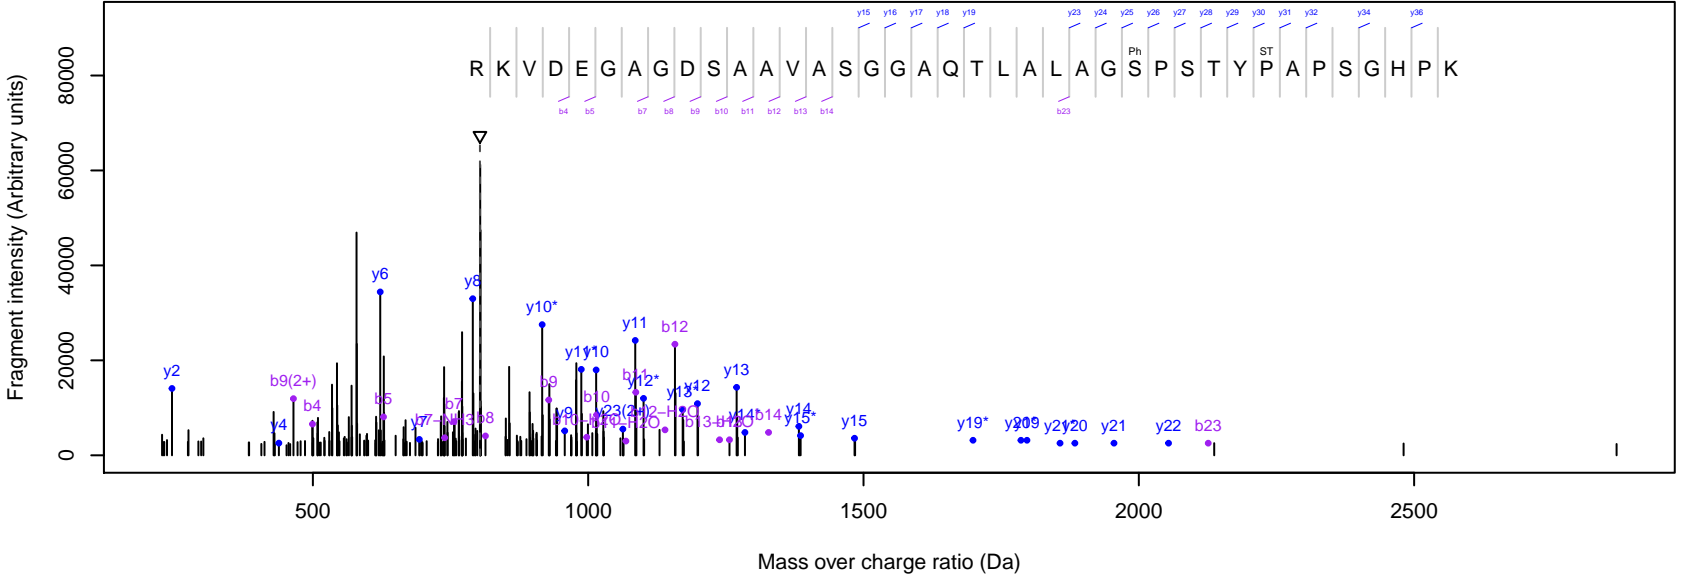

AS(Phospho (STY))PS(Phospho (STY))PQPSSQLQIHR-2+

Source : QE3\_201126\_FR\_TIOx\_hum\_tissue\_Urea\_RNAB\_N Scan : 21004

Andromeda score : 104.41

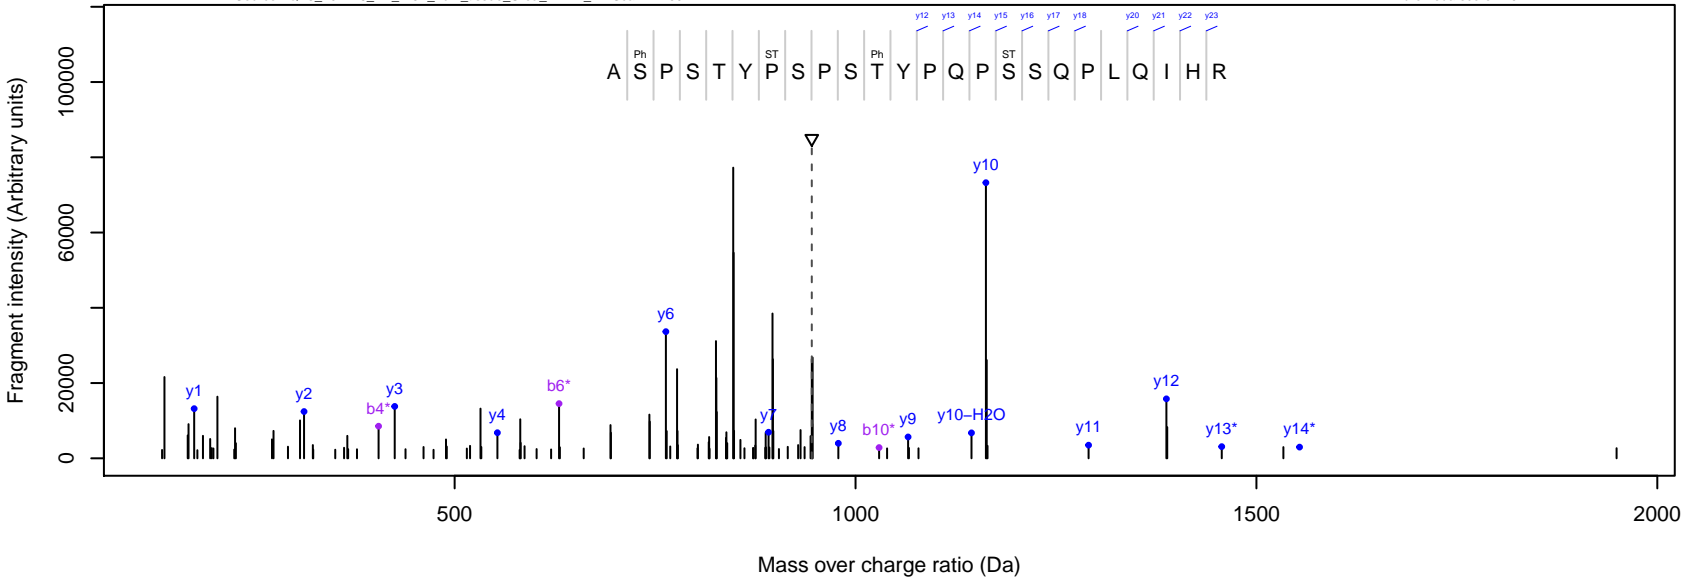

ESDQTLAALLS(Phospho (STY))PK-2+

Source : QE3\_201126\_FR\_TiOx\_hum\_tissue\_Urea\_RNAB\_H Scan : 47213

Andromeda score : 104.41

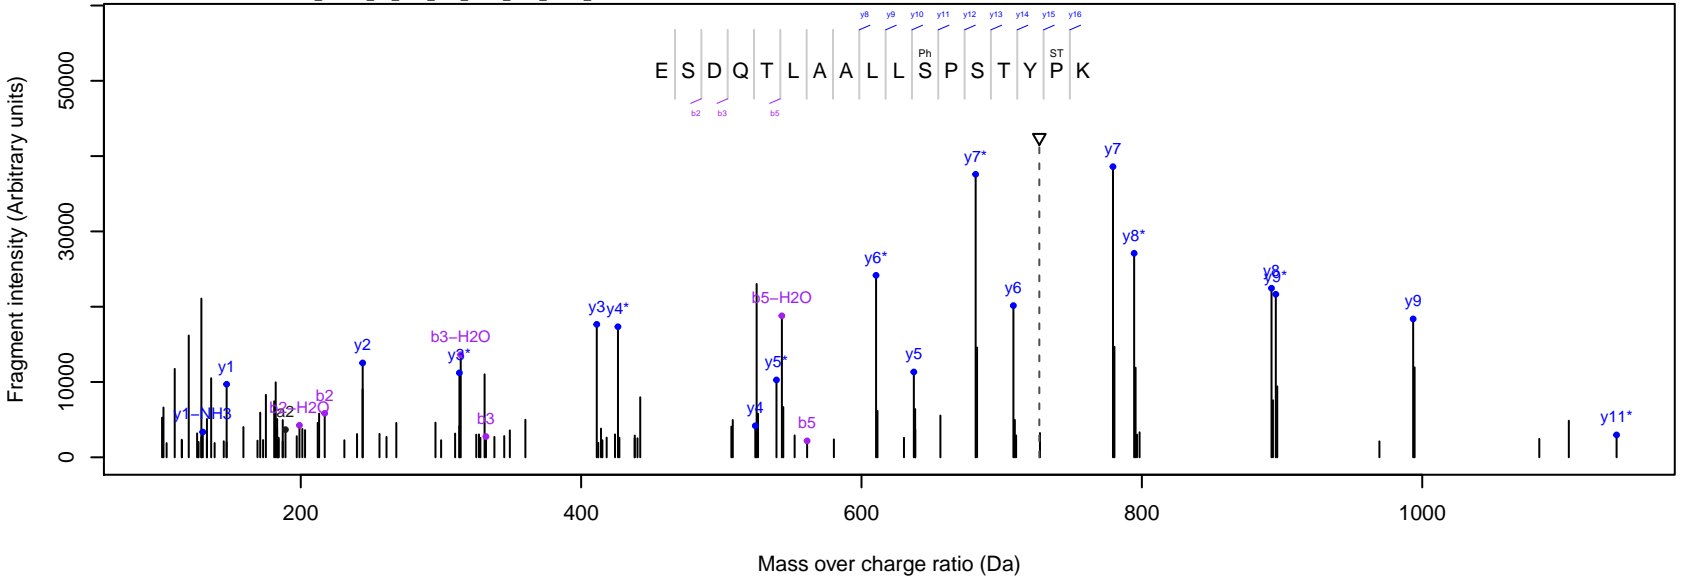

GADS(Phospho (STY))GEEKEGINR-2+

Source : QE3\_201126\_FR\_TiOx\_hum\_tissue\_Urea\_RNAB\_H Scan : 6543

Andromeda score : 104.41

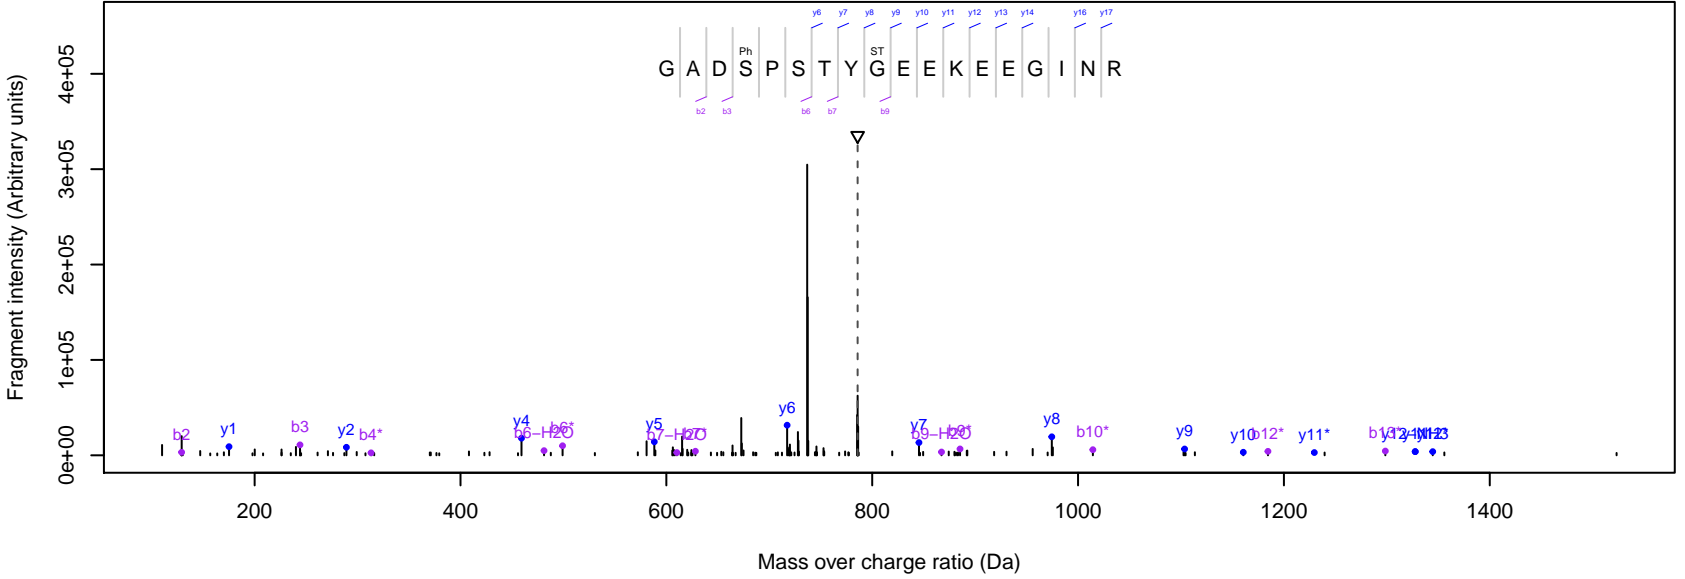

M(Oxidation (M))ESSFGS(Phospho (STY))PSKQESSESLPK-3+

Source : QE3\_201126\_FR\_TiOx\_hum\_tissue\_Urea\_RNAB\_H Scan : 15948

Andromeda score : 104.41

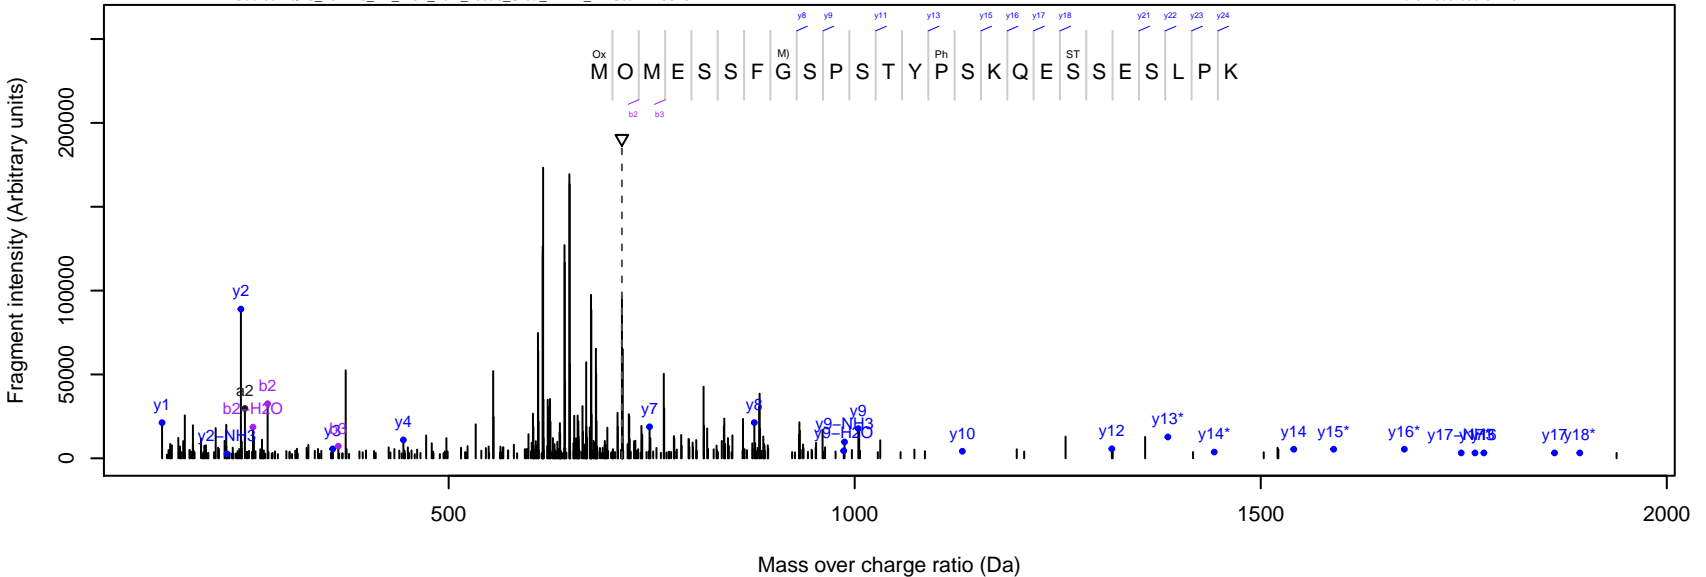

SFSLASSNS(Phospho (STY))PISQR-2+

Source : QE3\_201126\_FR\_TiOx\_hum\_tissue\_Urea\_RNAB\_B Scan : 26699

Andromeda score : 104.41

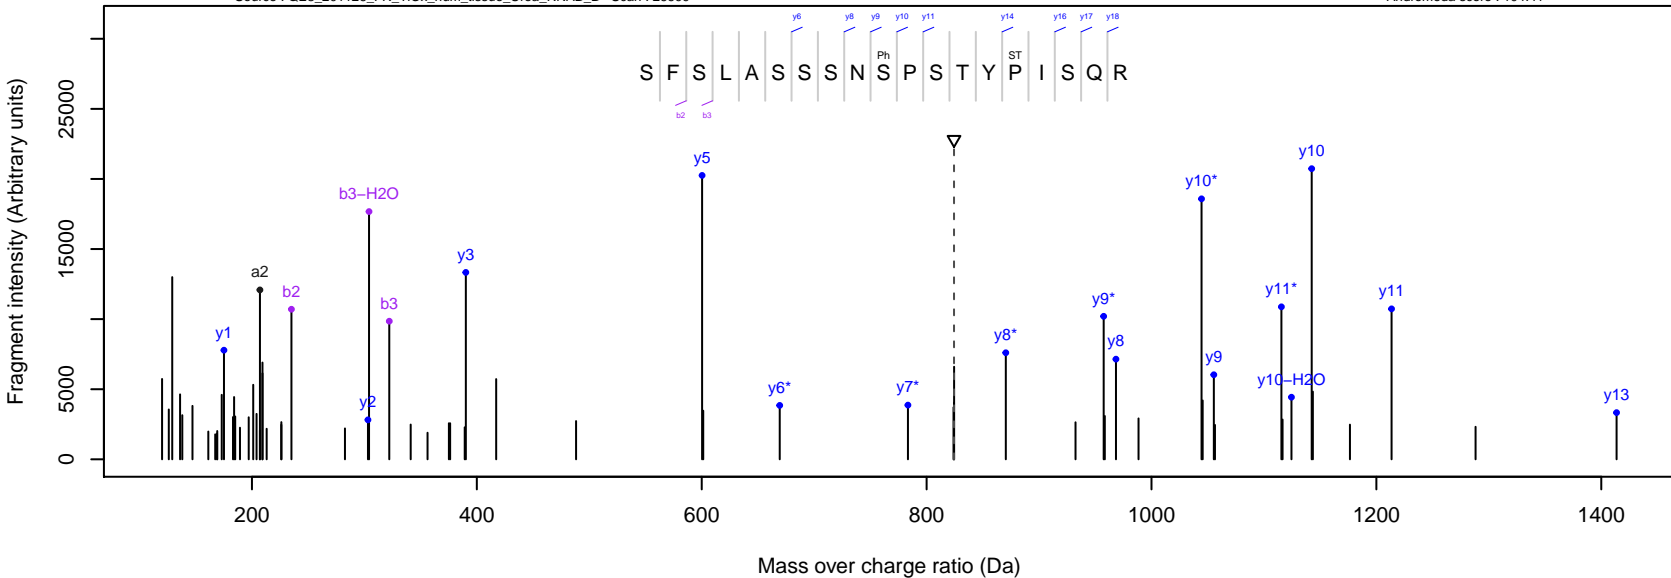

RFGDS(Phospho (STY))S(Phospho (STY))DS(Phospho (STY))DNGFSSTGSPAKPTVEK-3+

Source : QE3\_201126\_FR\_TiOx\_hum\_tissue\_Urea\_RNAB\_N Scan : 24476

Andromeda score : 104.39

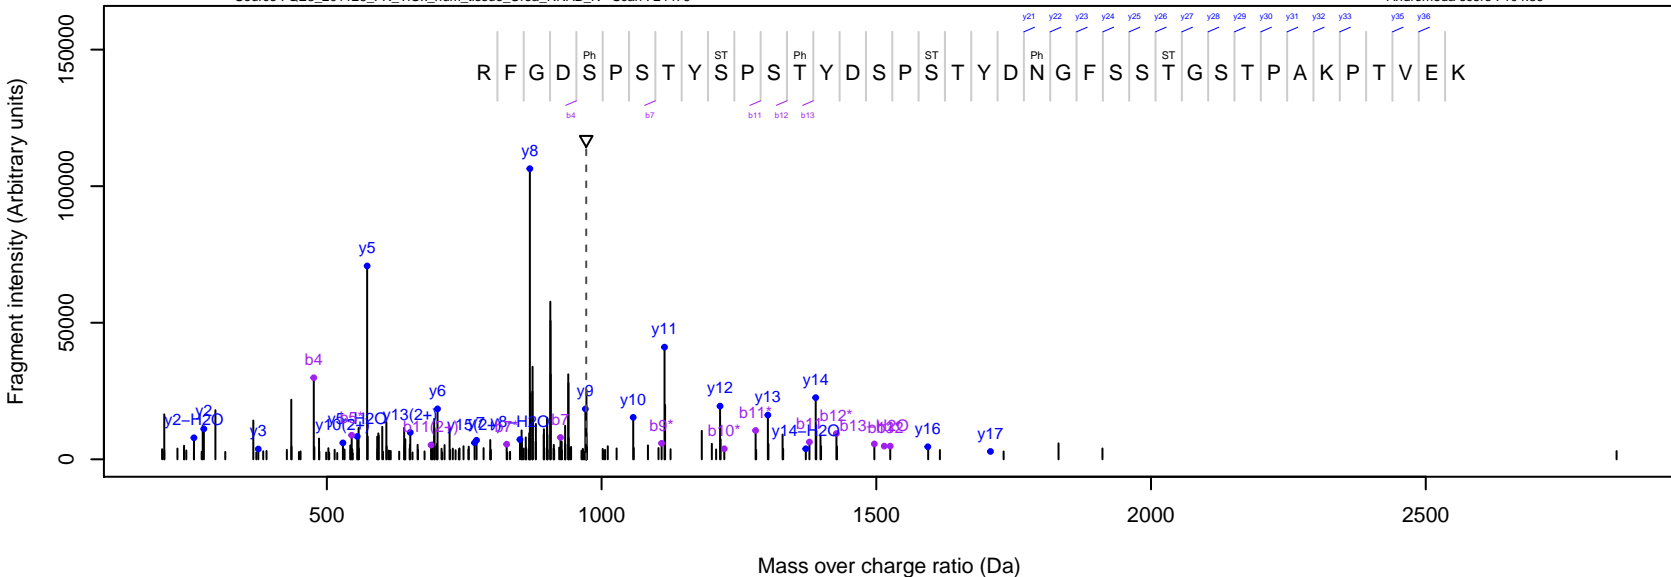

NFTKPDGDVIAPLIT(Phospho (STY))PQKK-3+

Source : QE3\_201126\_FR\_TiOx\_hum\_tissue\_Urea\_RNAB\_N Scan : 27485

Andromeda score : 104.38

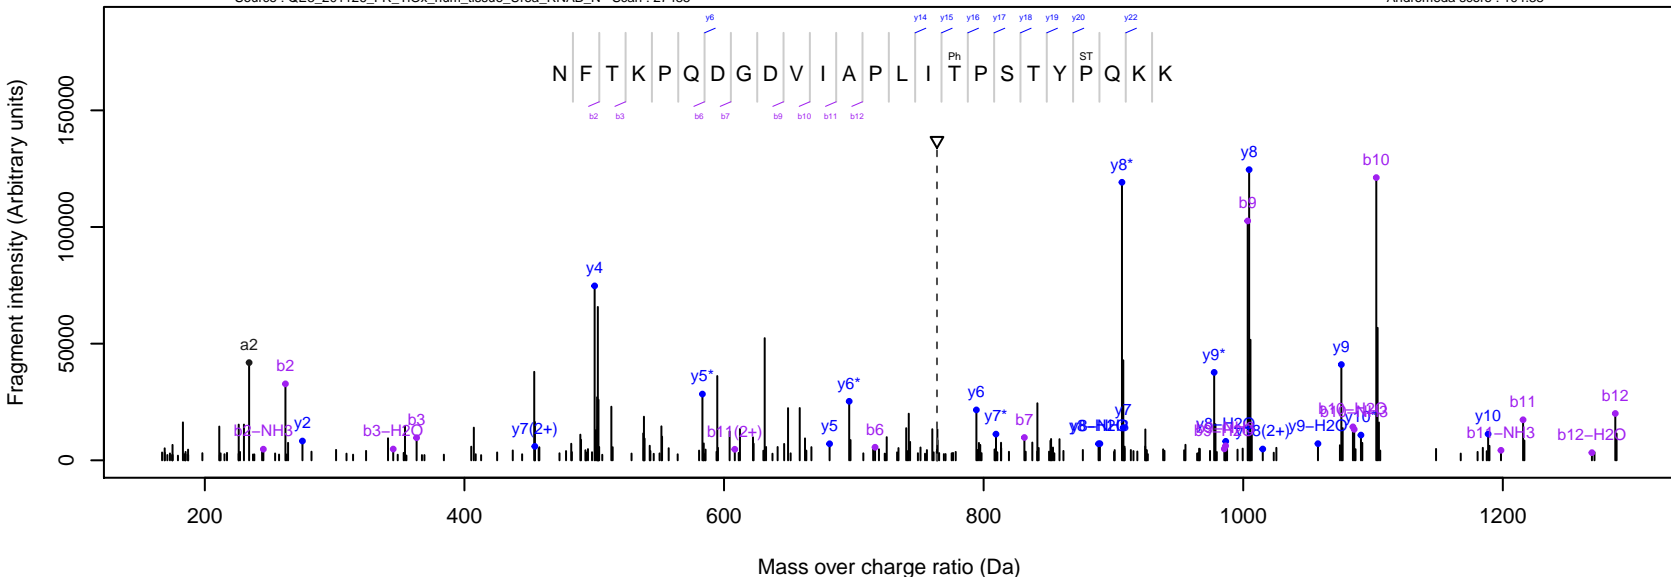

SKEGHSLEM(Oxidation (M))ENENLVENGADSD EDDNSFLKQQS(Phospho (STY))PQEPK-4+

Source : QE3\_201126\_FR\_TiOx\_hum\_tissue\_Urea\_RNAB\_H Scan : 25627

Andromeda score : 104.31

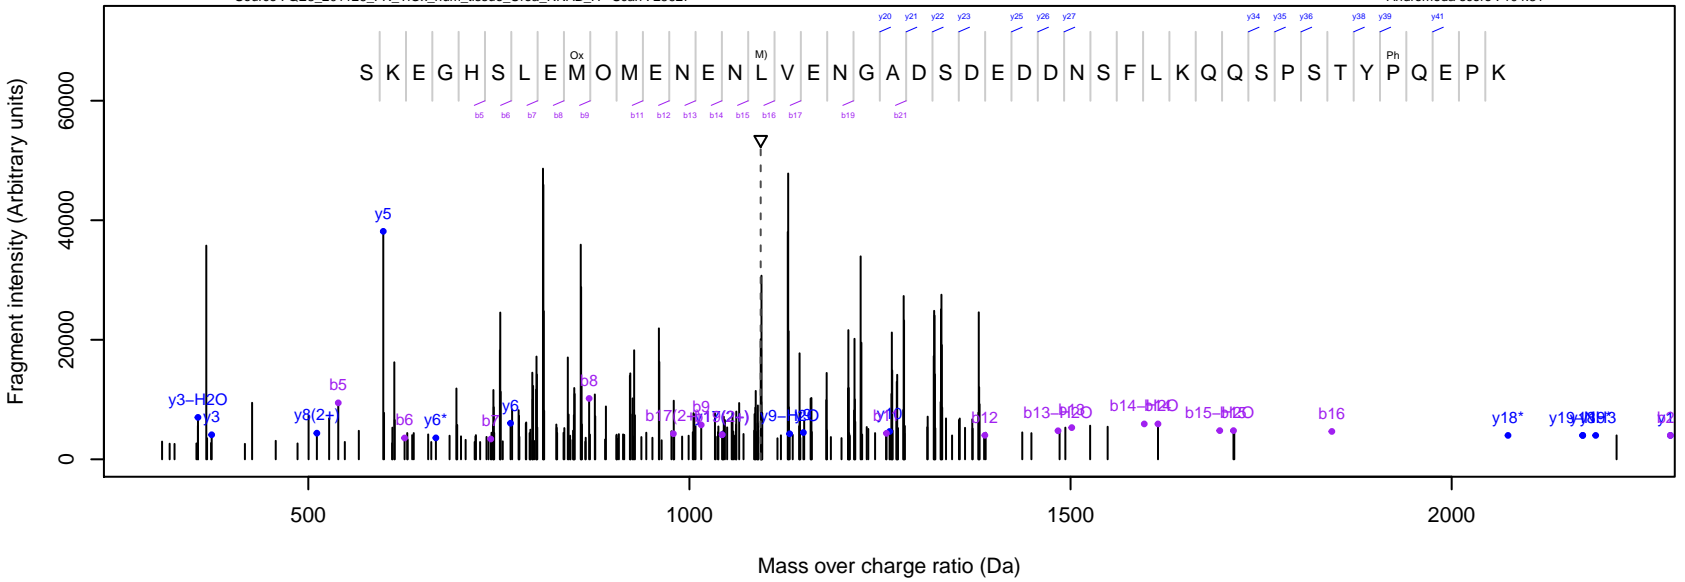

KVTSPSSSSSSSS(Phospho (STY))DS(Phospho (STY))ES(Phospho (STY))DDEADVSEVTPR-3+

Source : QE3\_201126\_FR\_TiOx\_hum\_tissue\_Urea\_RNAB\_H Scan : 27333

Andromeda score : 104.29

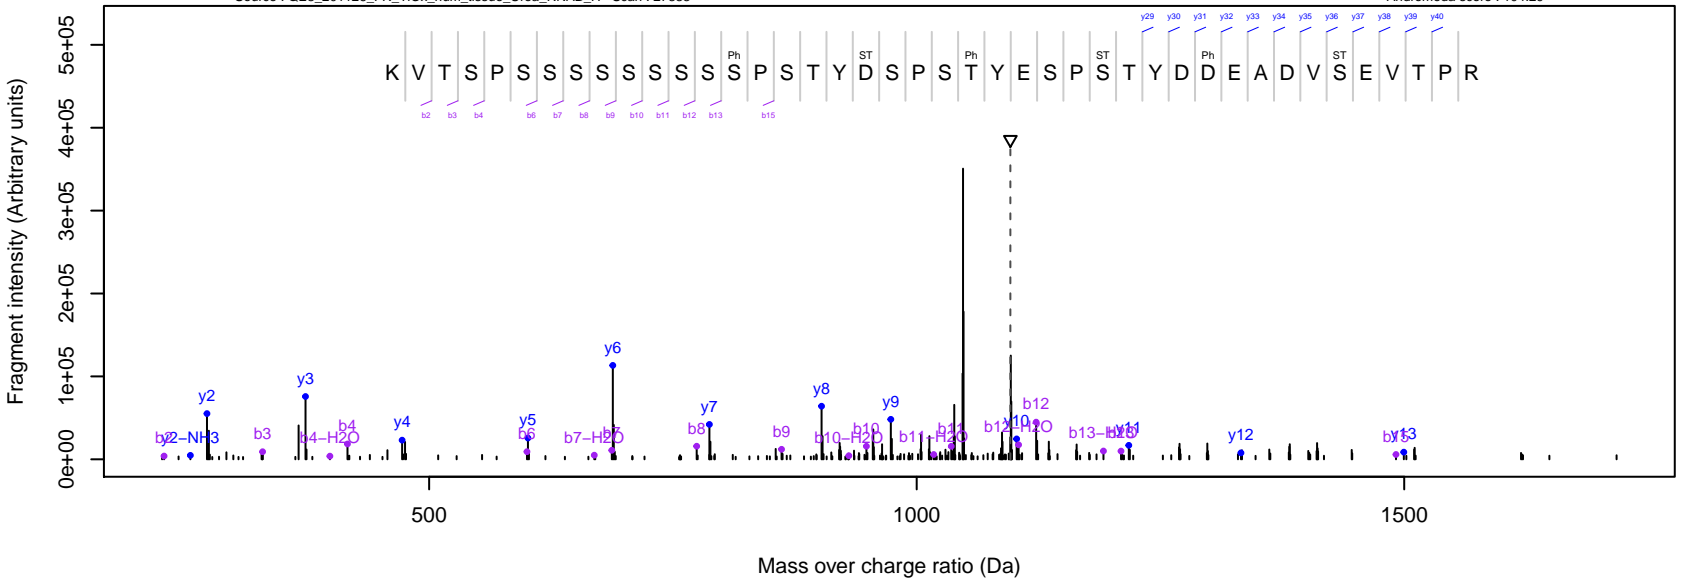

VRPPQEEQEREQLQPHENGEGNS(Phospho (STY))ET-3+

Source : QE3\_201126\_FR\_TiOx\_hum\_tissue\_Urea\_RNAB\_H Scan : 12503

Andromeda score : 104.29

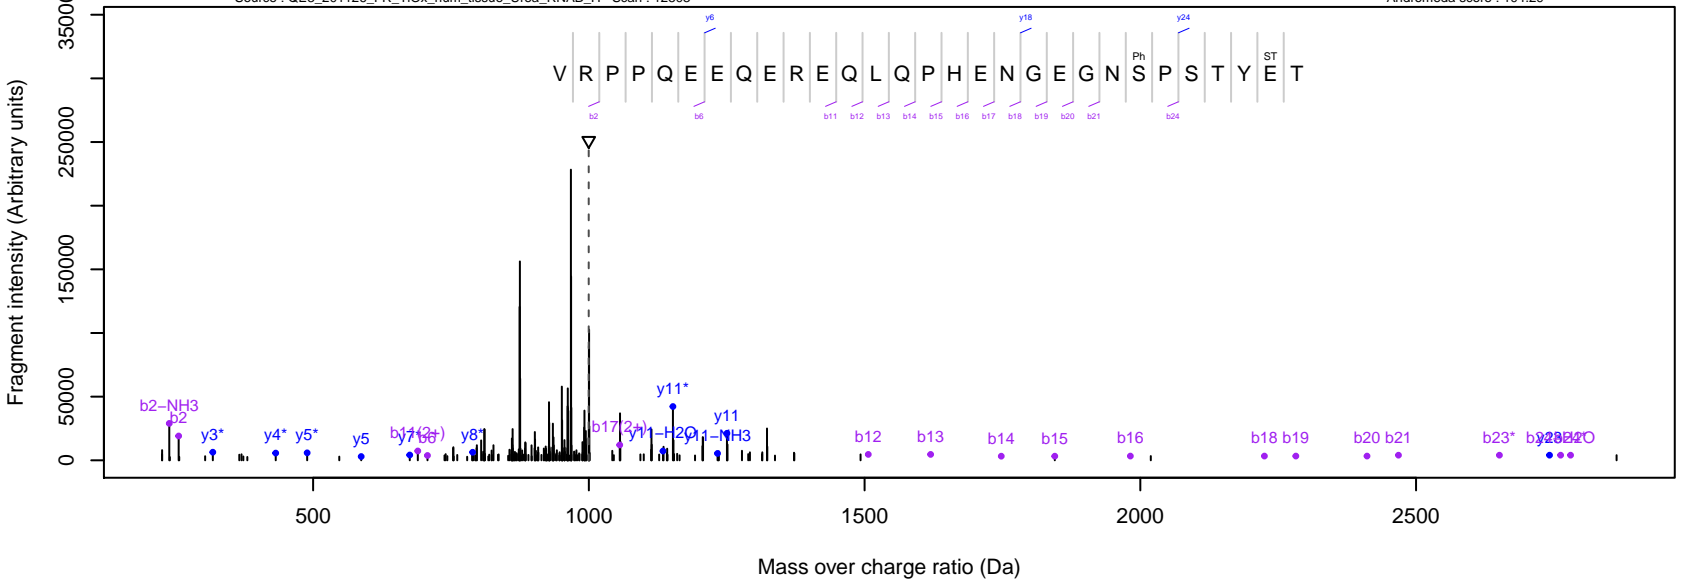

ENSFGS(Phospho (STY))PLEFR-2+

Source : QE3\_201126\_FR\_TiOx\_hum\_tissue\_Urea\_RNAB\_B Scan : 39949

Andromeda score : 104.24

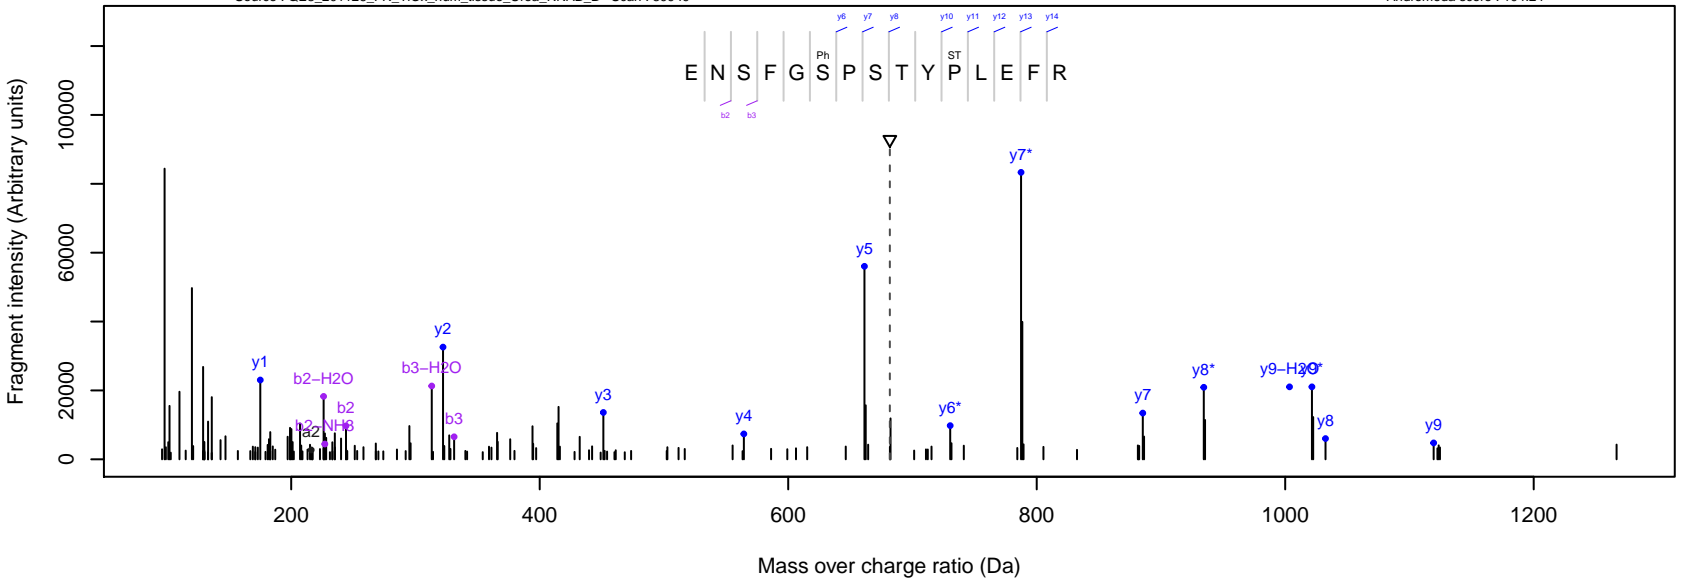

RRFS(Phospho (STY))DFGLYEK-3+

Source : QE3\_201126\_FR\_TiOx\_hum\_tissue\_Urea\_RNAB\_H Scan : 38261

Andromeda score : 104.2

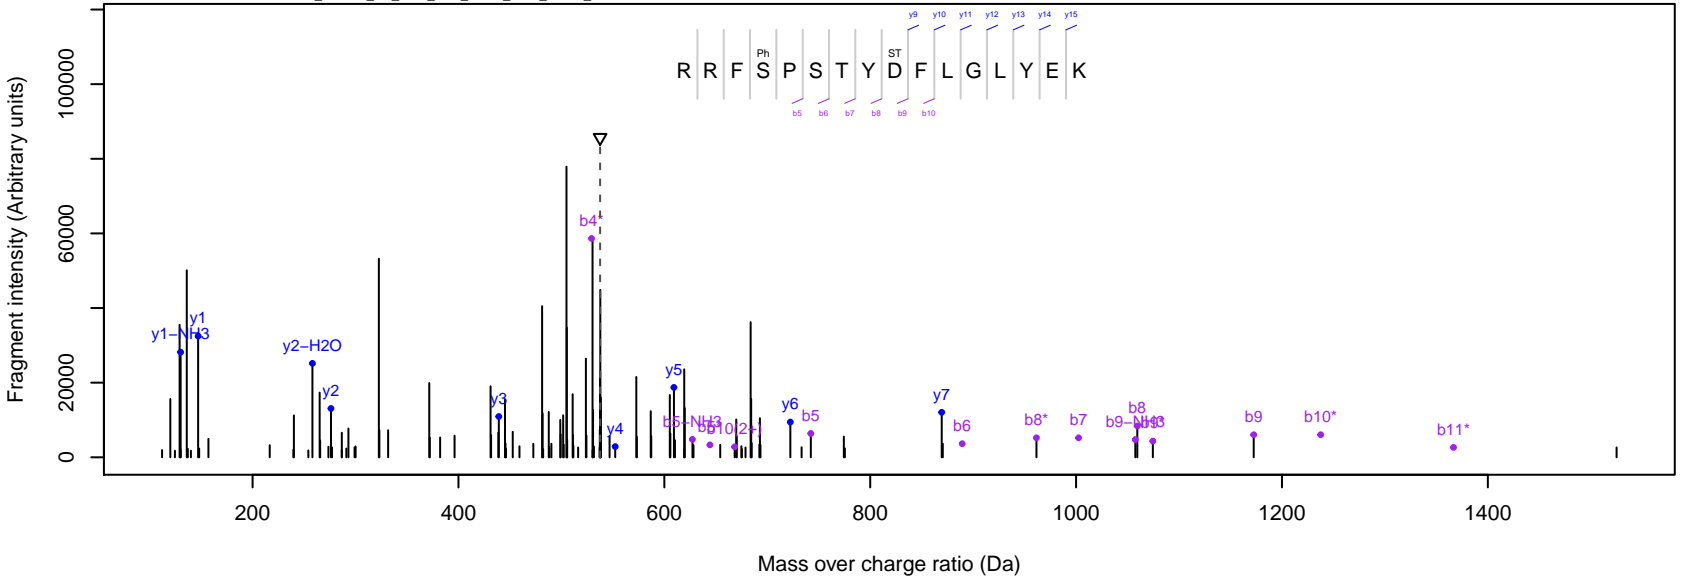

GPRIS(Phospho (STY))APNVDFNLEGPK-3+

Source : QE3\_201126\_FR\_TiOx\_hum\_tissue\_Urea\_RNAB\_H Scan : 36373

Andromeda score : 104.18

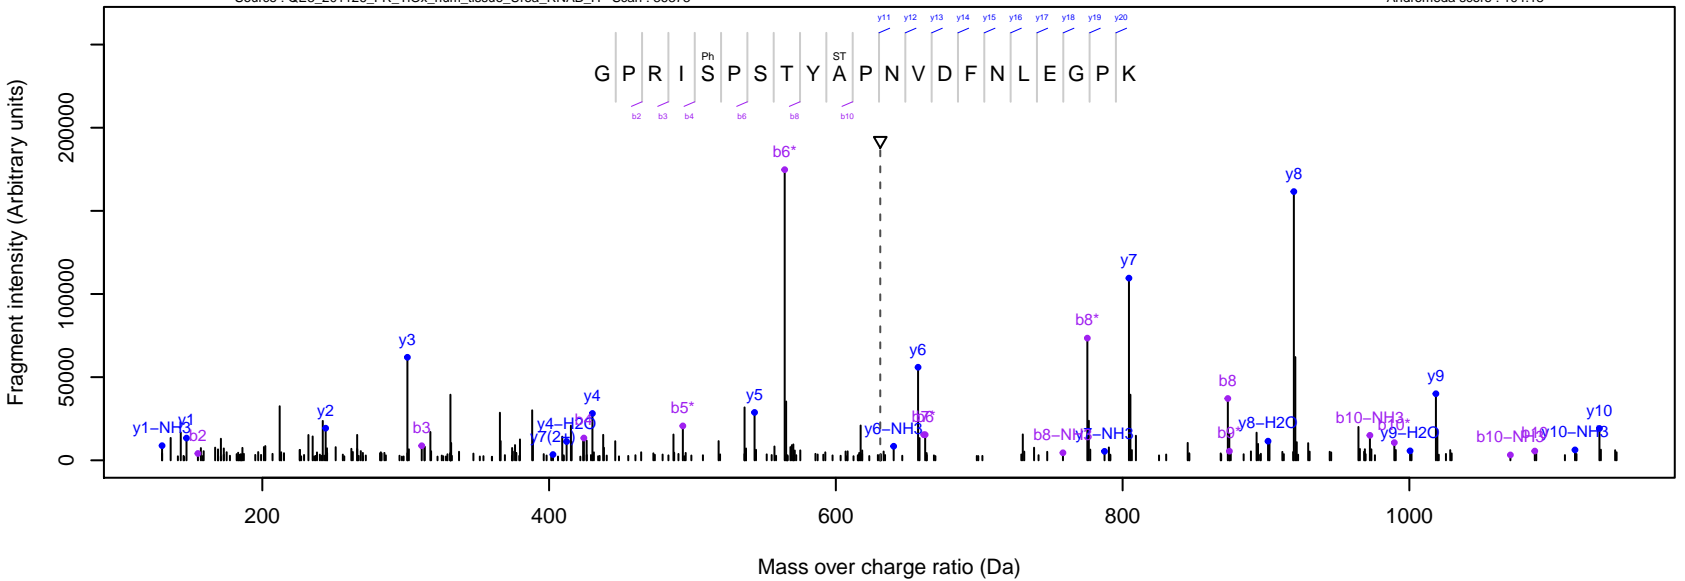

KVTAEADSSS(Phospho (STY))PTGLATSESK-3+

Source : QE3\_201126\_FR\_TIOx\_hum\_tissue\_Urea\_RNAB\_H Scan : 20757

Andromeda score : 104.18

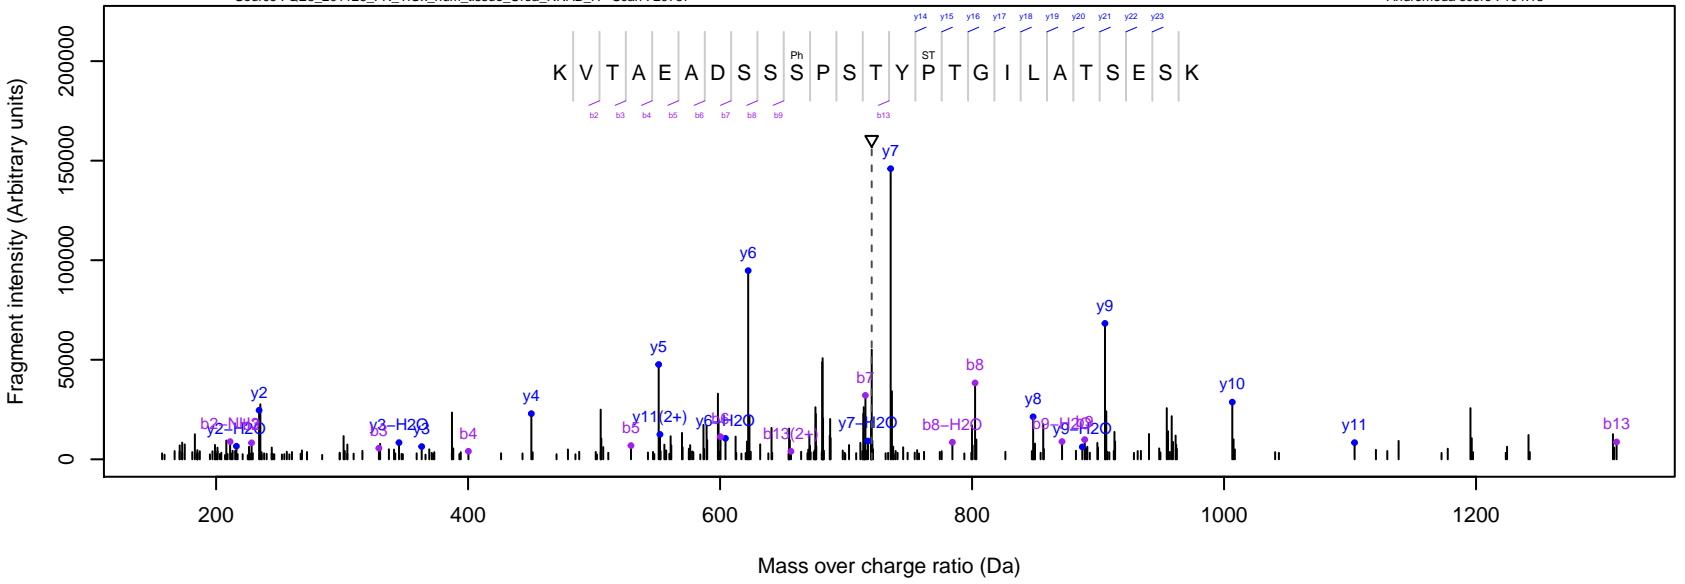

EEEEGISQESS(Phospho (STY))EEEQ-2+

Source : QE3\_201126\_FR\_TIOx\_hum\_tissue\_Urea\_RNAB\_H Scan : 17196

Andromeda score : 104.17

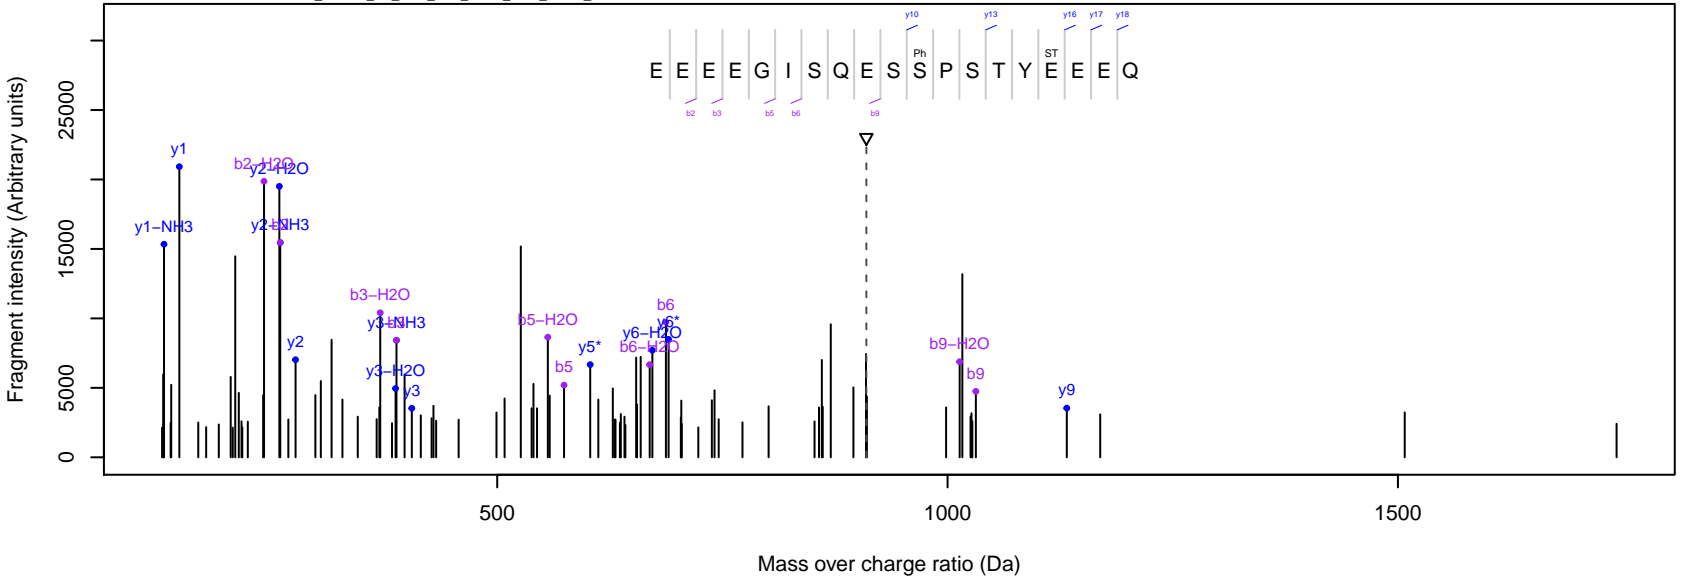

APQQPPPPQPPPPQPPPPPS(Phospho (STY))YSPARNPPGASTYNK-4+

Source : QE3\_201126\_FR\_TIOx\_hum\_tissue\_Urea\_RNAB\_N Scan : 26318

Andromeda score : 104.12

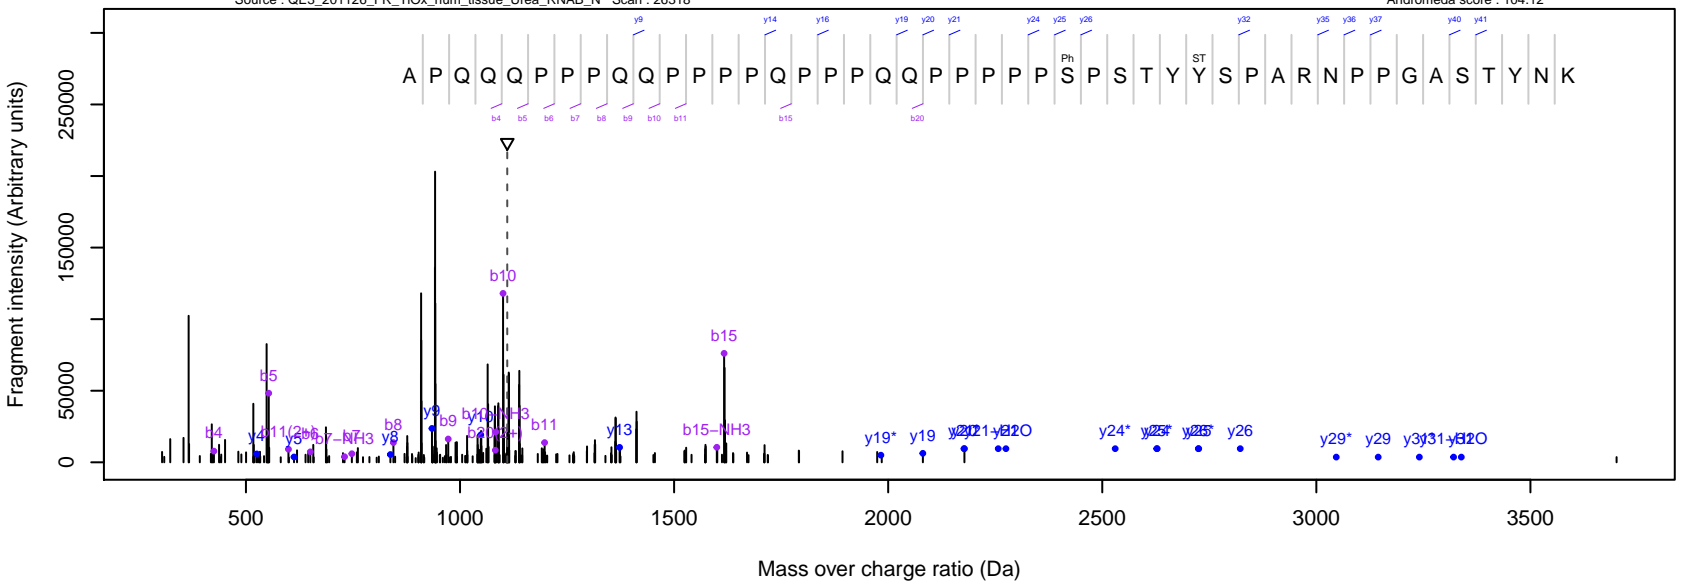

RQES(Phospho (STY))SS(Phospho (STY))SLEMPGVALEEGAHVLR-3+

Source : QE3\_201126\_FR\_TiOx\_hum\_tissue\_Urea\_RNAB\_B Scan : 40874

Andromeda score : 104.12

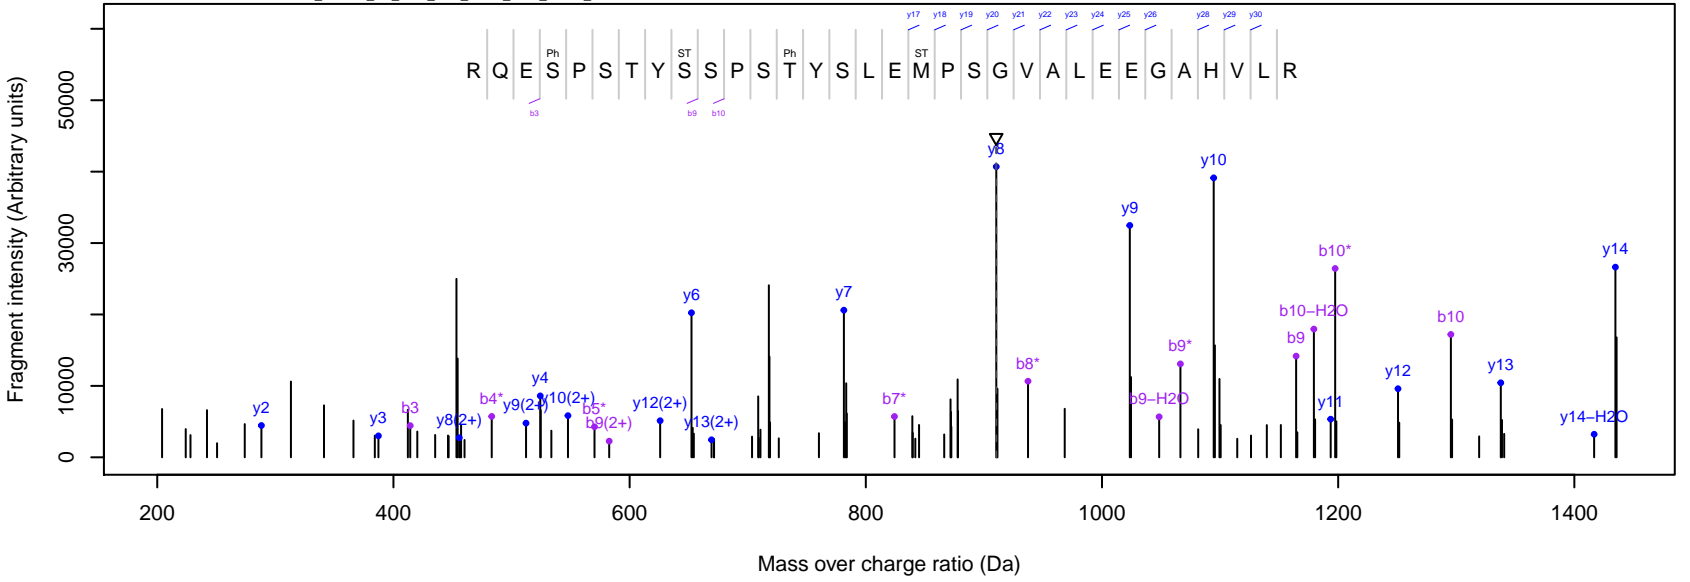

SKDHFGLEGDEESTM(Oxidation (M))LEDS(Phospho (STY))VSPK-3+

Source : QE3\_201126\_FR\_TiOx\_hum\_tissue\_Urea\_RNAB\_H Scan : 26440

Andromeda score : 104.12

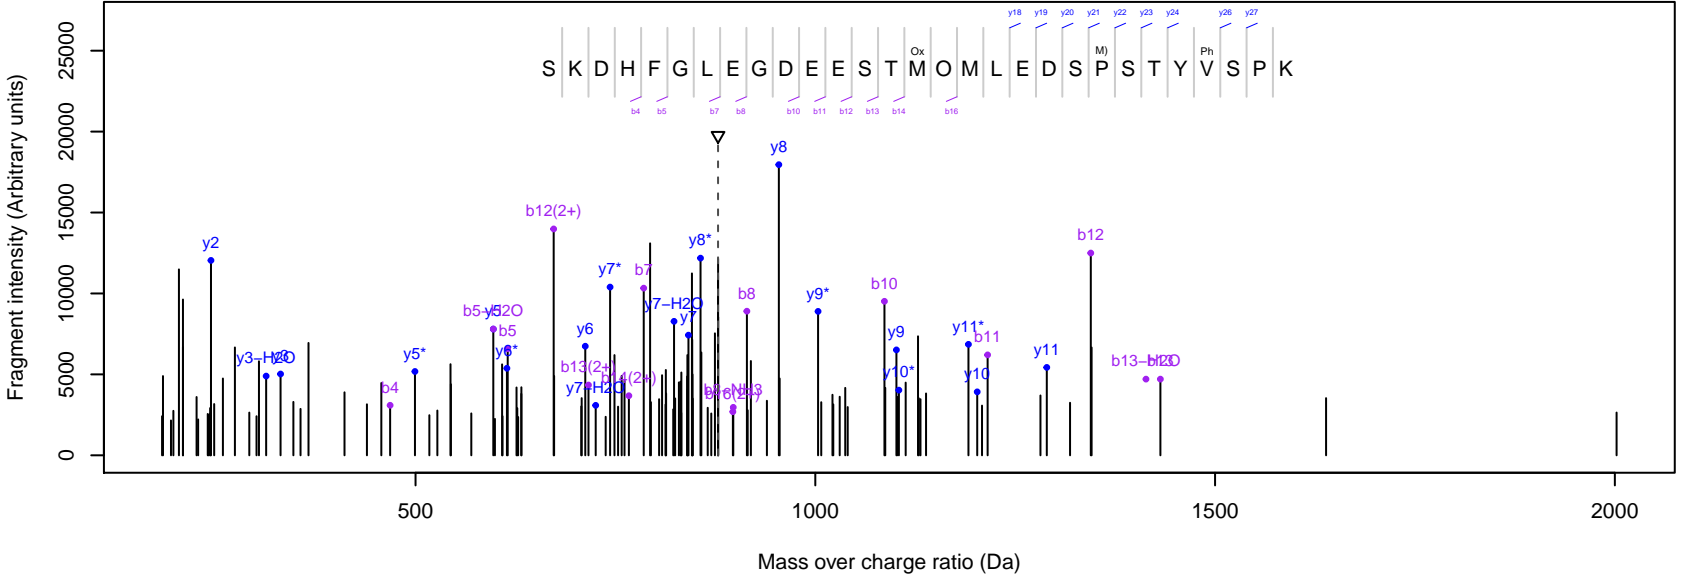

HHYDS(Phospho (STY))DEKS(Phospho (STY))ETRENGVTDDLDPK-4+

Source : QE3\_201126\_FR\_TiOx\_hum\_tissue\_Urea\_RNAB\_H Scan : 13106

Andromeda score : 104.09

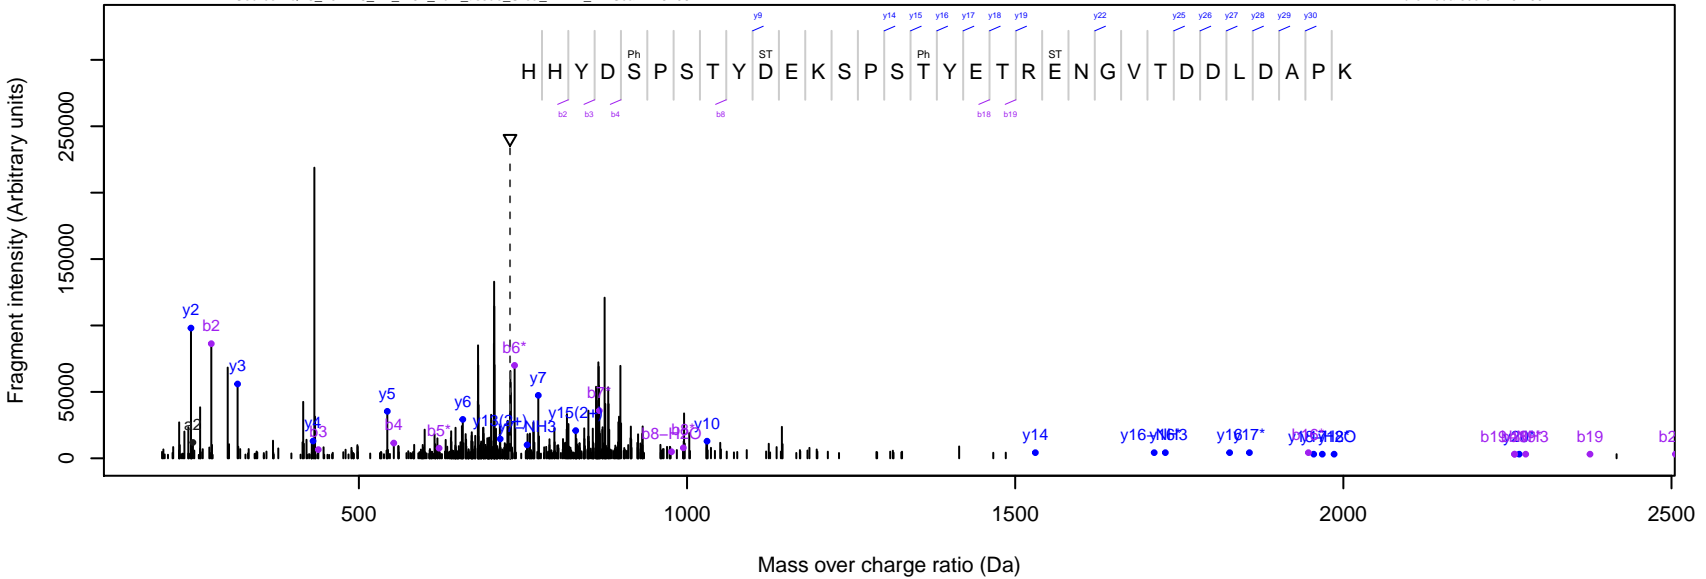



RRGS(Phospho (STY))DIDNPTLVMDISPPSR-3+

Source : QE3\_201126\_FR\_TiOx\_hum\_tissue\_Urea\_RNAB\_N Scan : 34038

Andromeda score : 104.06

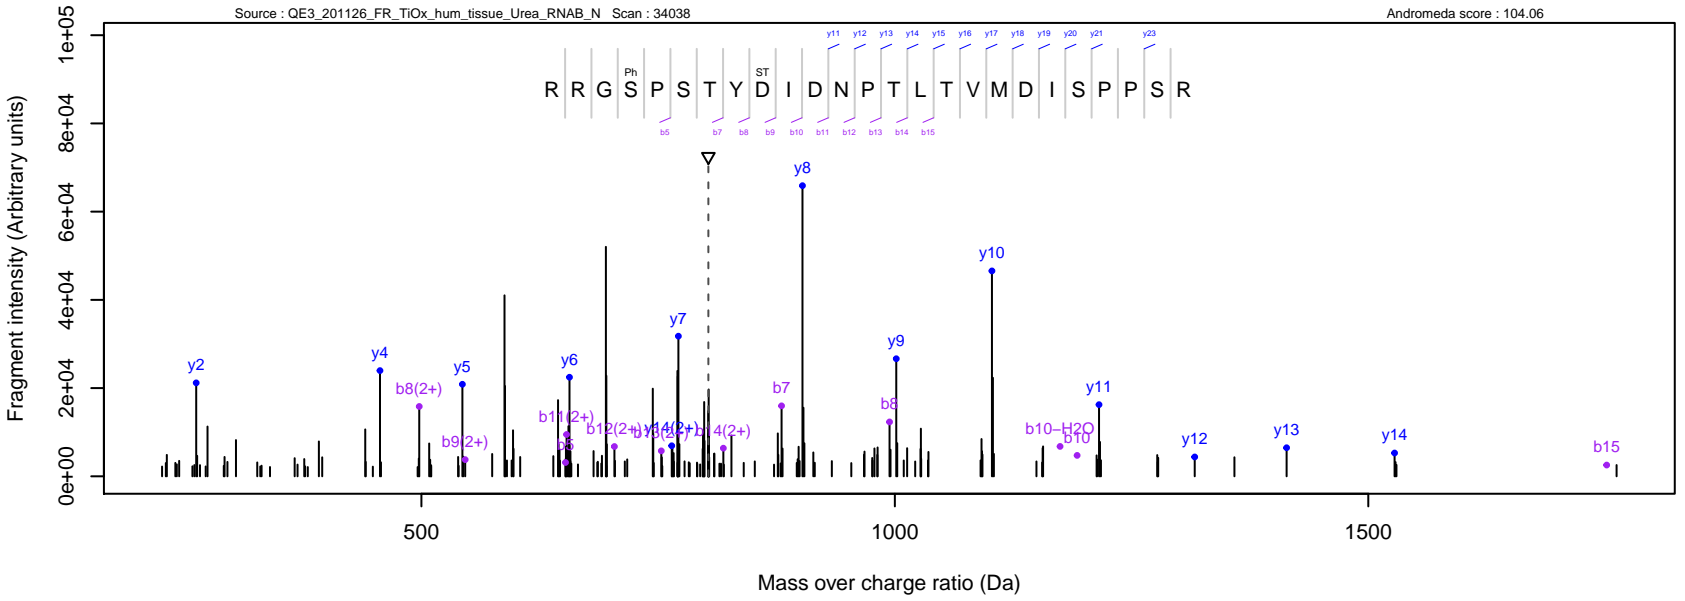

HPS(Phospho (STY))YRSEPSLEPESFR-3+

Source : QE3\_201126\_FR\_TiOx\_hum\_tissue\_Urea\_RNAB\_H Scan : 20382

Andromeda score : 104.03

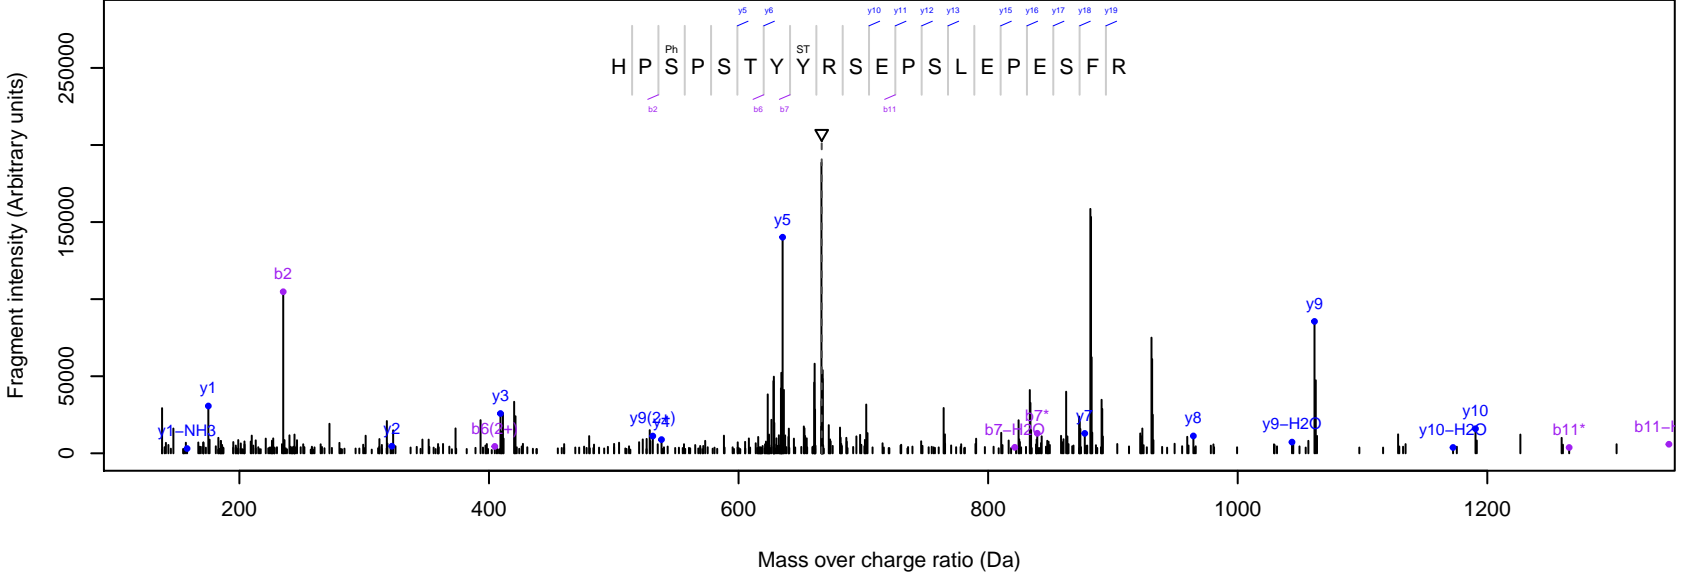

TPS(Phospho (STY))PESHRSPEAGSER-3+

Source : QE3\_201126\_FR\_TiOx\_hum\_tissue\_Urea\_RNAB\_H Scan : 4450

Andromeda score : 104.03

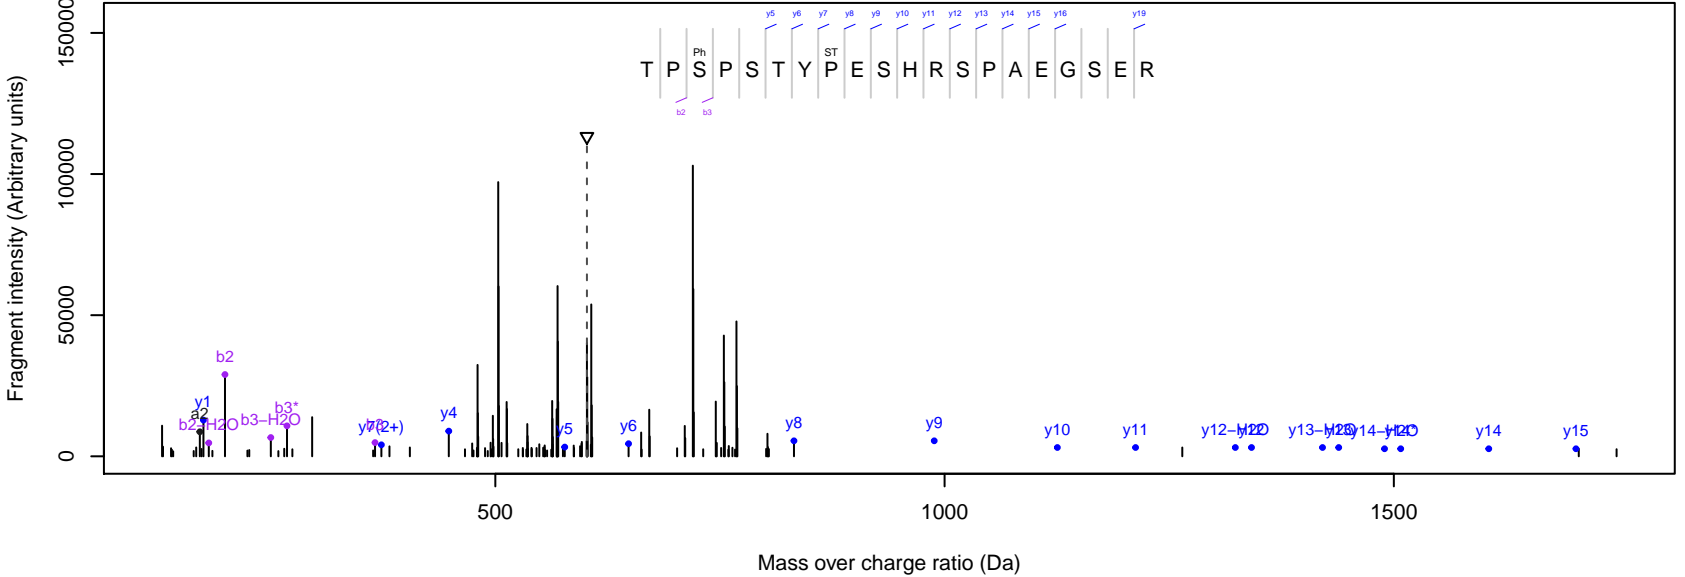

S(Phospho (STY))MGNLLEKENYLTAGLVGQVRPLVLPVTQNR-4+

Source : QE3\_201126\_FR\_TiOx\_hum\_tissue\_Urea\_RNAB\_N Scan : 56291

Andromeda score : 104

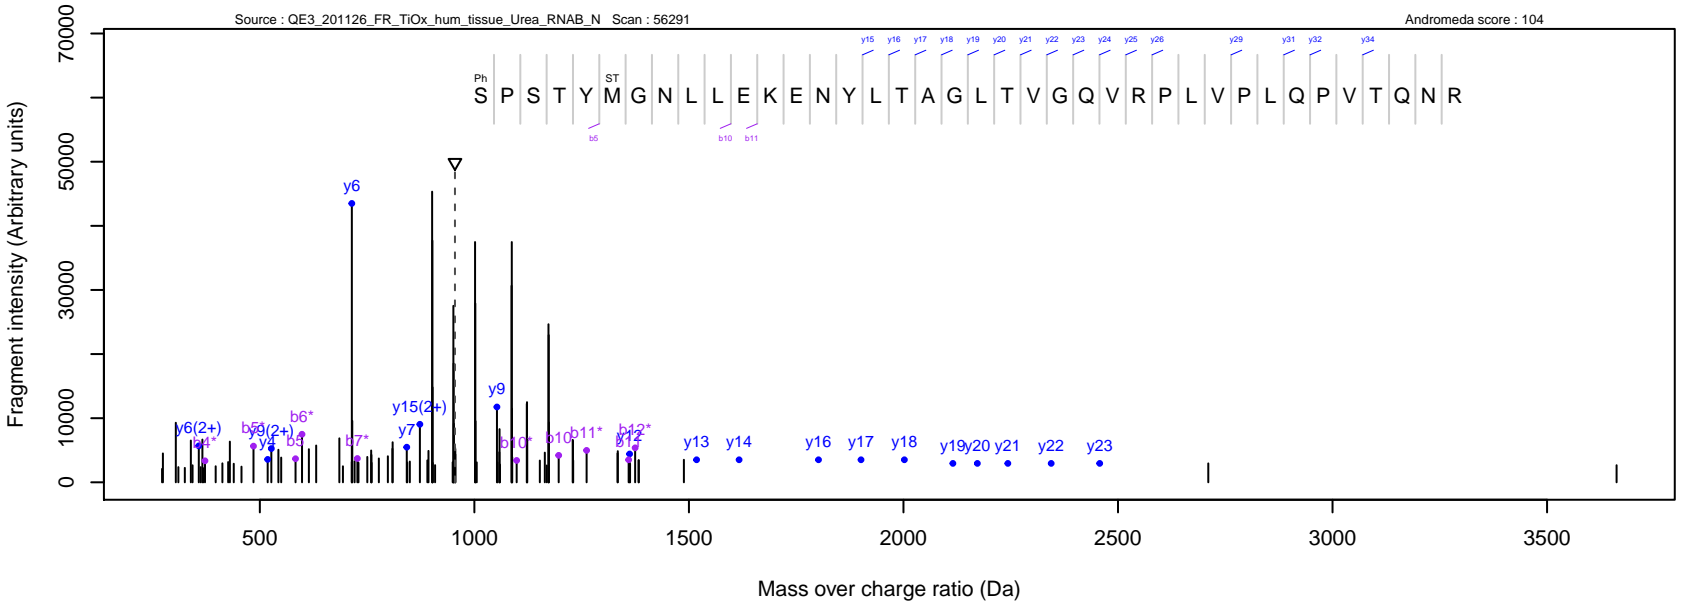

NQLNPIGS(Phospho (STY))LQELAIHHGWR-3+

Source : QE3\_201126\_FR\_TiOx\_hum\_tissue\_Urea\_RNAB\_N Scan : 47011

Andromeda score : 103.95

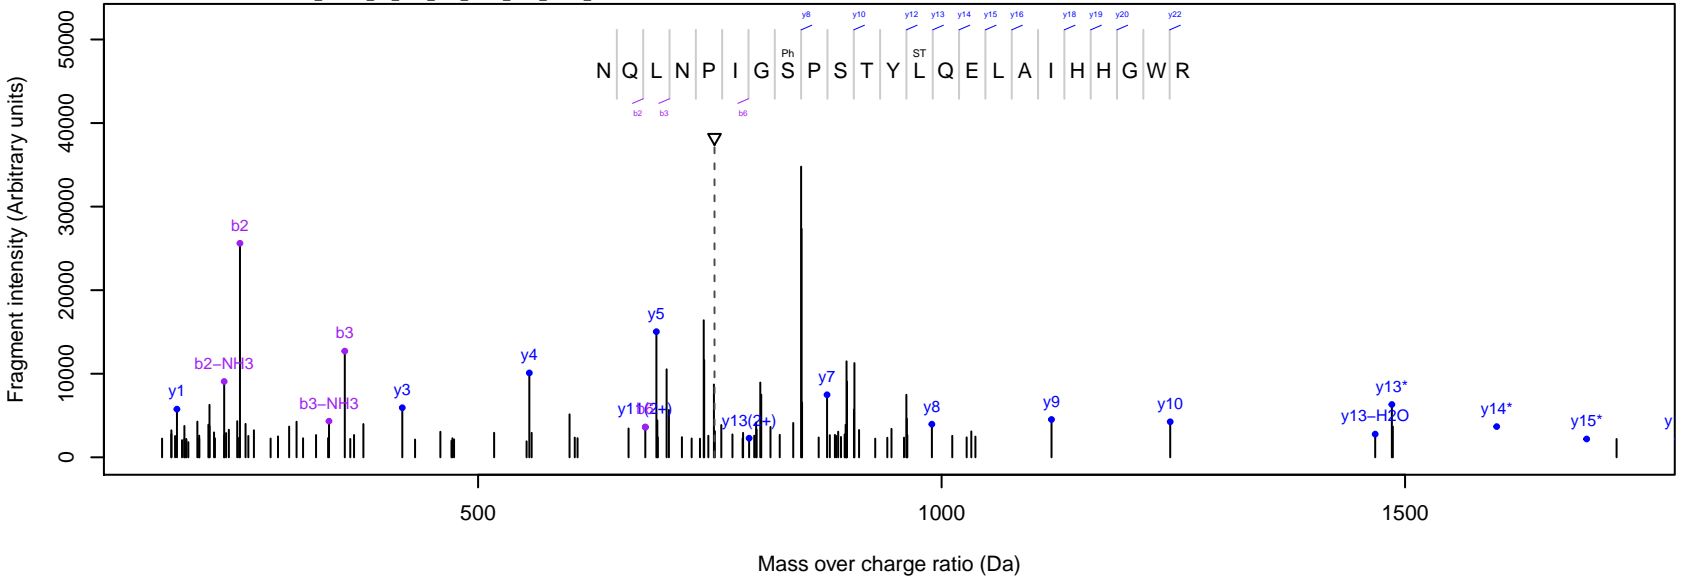

QKIDDRS(Phospho (STY))DEEGASDR-3+

Source : QE3\_201126\_FR\_TiOx\_hum\_tissue\_Urea\_RNAB\_H Scan : 4623

Andromeda score : 103.95

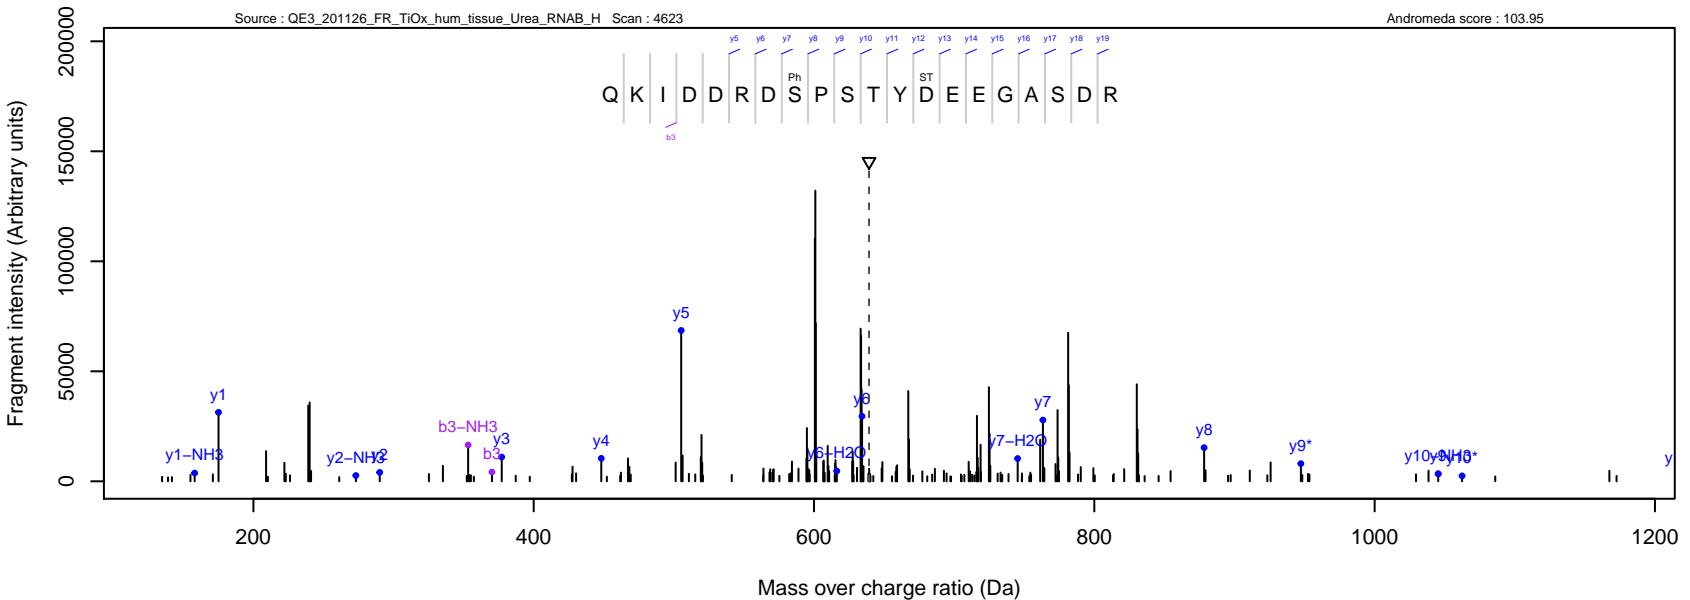

TEELIES(Phospho (STY))PKLESSEGEIITVDR-3+

Source : QE3\_201126\_FR\_TiOx\_hum\_tissue\_Urea\_RNAB\_H Scan : 44546

Andromeda score : 103.95

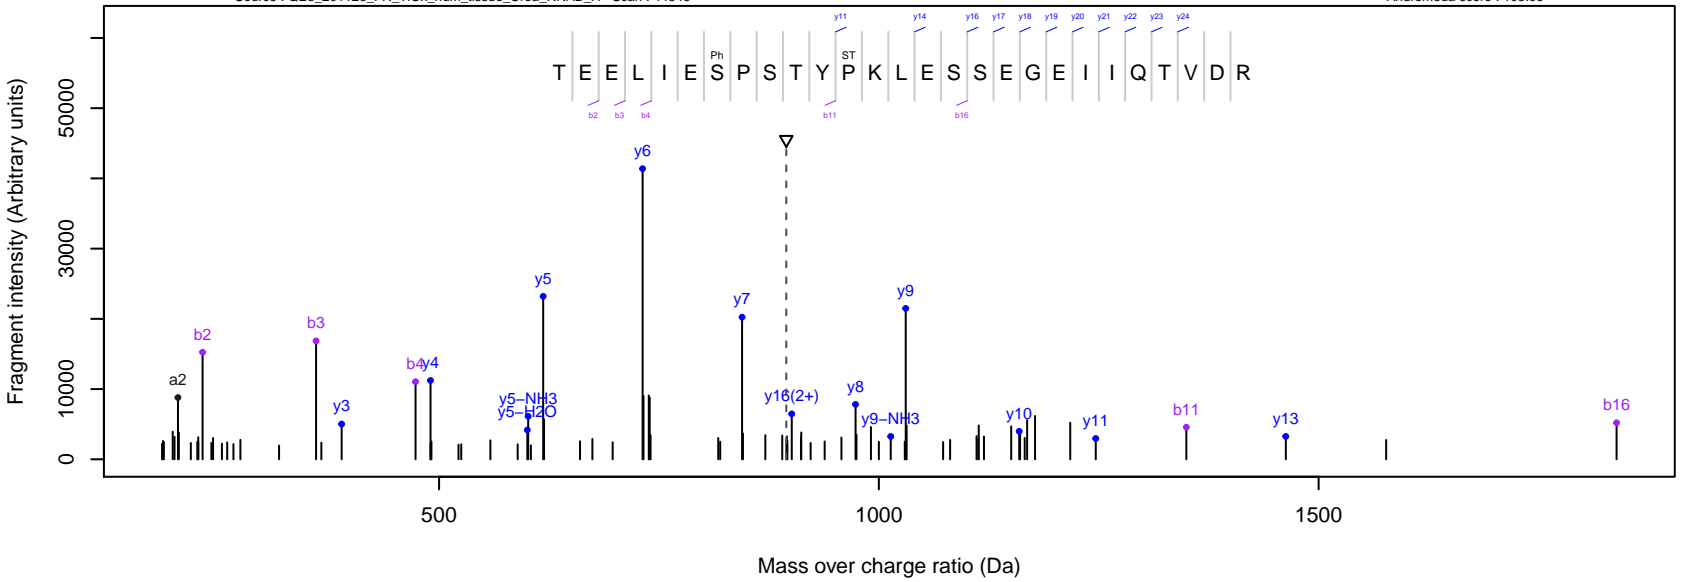

KKGDDS(Phospho (STY))DEEDLCISNK-3+

Source : QE3\_201126\_FR\_TiOx\_hum\_tissue\_Urea\_RNAB\_H Scan : 9999

Andromeda score : 103.92

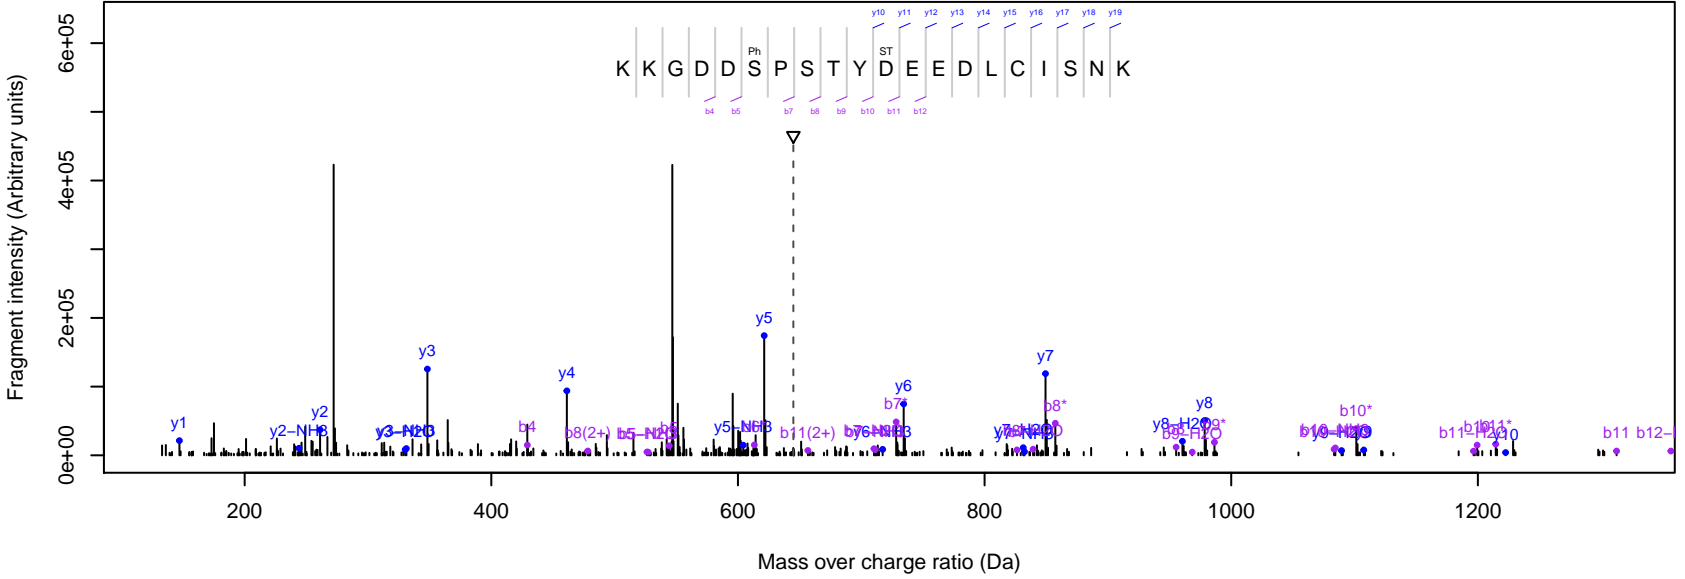

KLS(Phospho (STY))FTESLTSGASLLTLNK-3+

Source : QE3\_201126\_FR\_TiOx\_hum\_tissue\_Urea\_RNAB\_H Scan : 52328

Andromeda score : 103.92

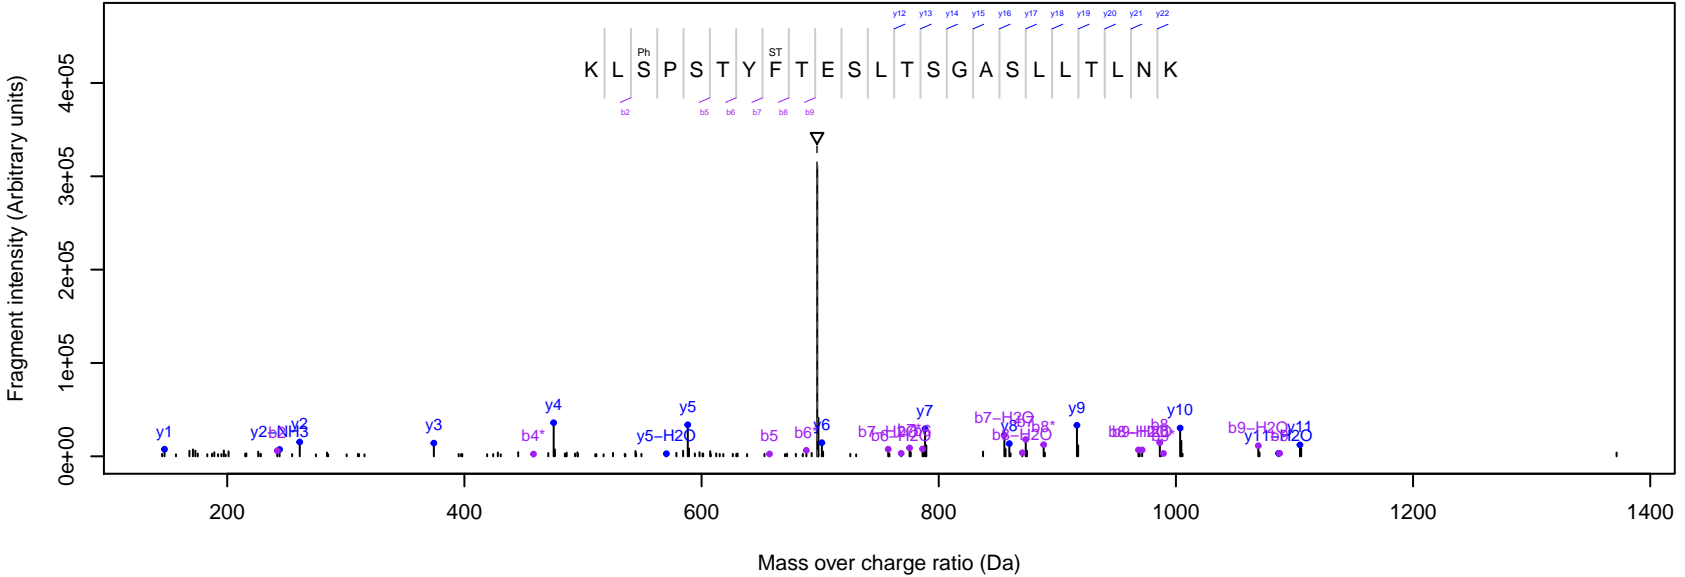

S(Phospho (STY))PERPTGDLR-2+

Source : QE3\_201126\_FR\_TIOx\_hum\_tissue\_Urea\_RNAB\_H Scan : 7764

Andromeda score : 103.91

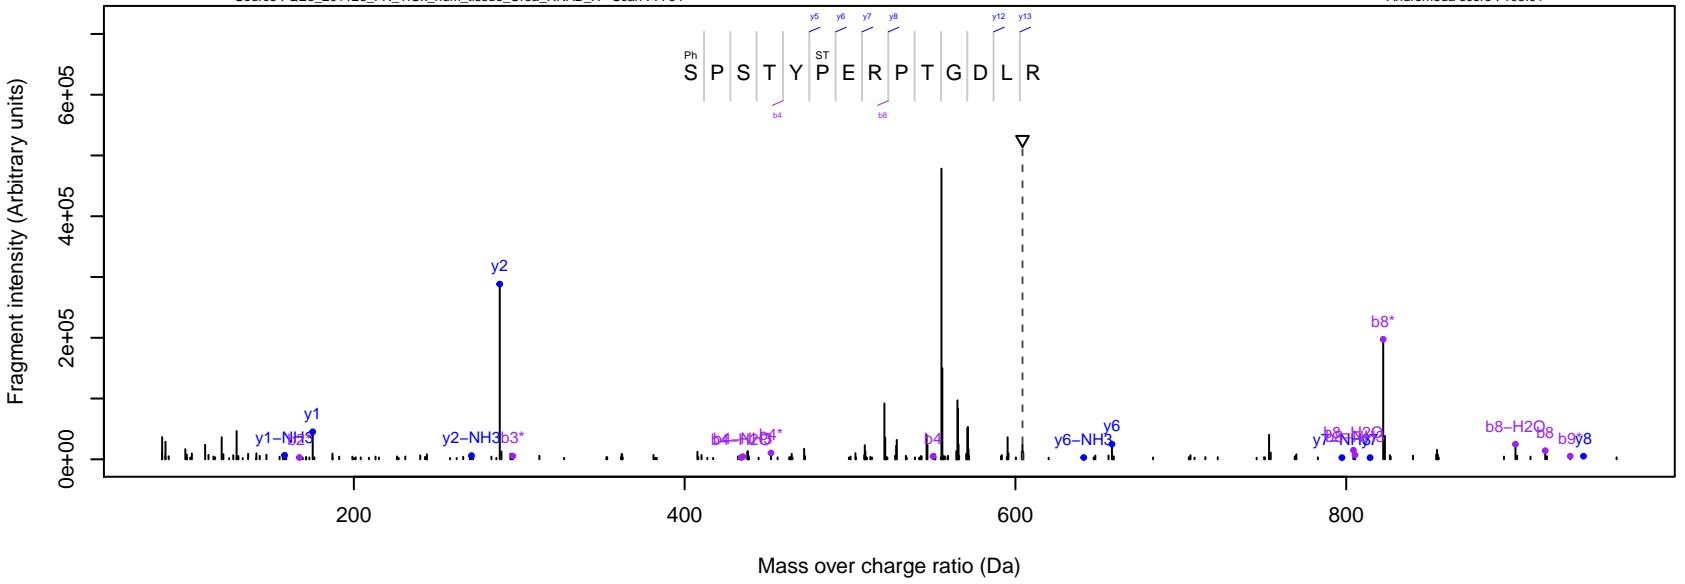

NYS(Phospho (STY))VGSRLKPLSPLR-3+

Source : QE3\_201126\_FR\_TIOx\_hum\_tissue\_Urea\_RNAB\_N Scan : 24633

Andromeda score : 103.9

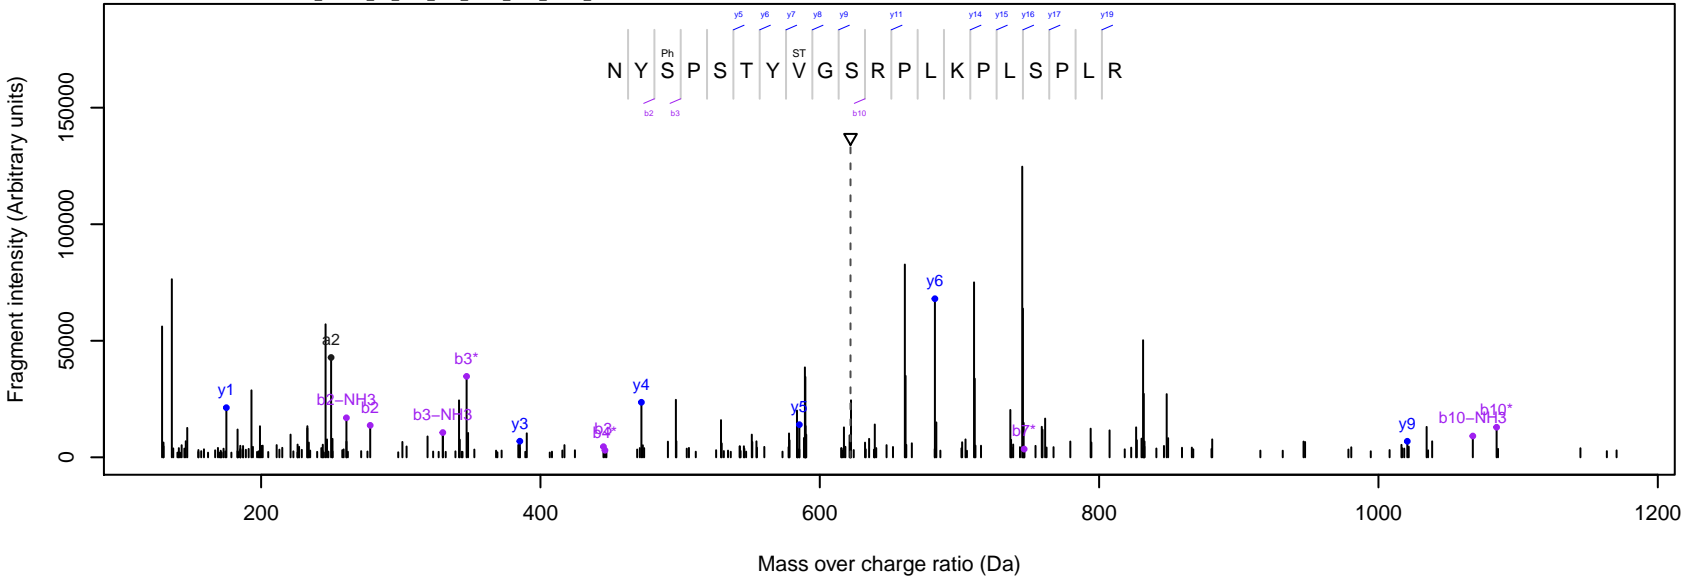

SRSHSDNDRPNCS(Phospho (STY))WNTQYSSAYYSR-4+

Source : QE3\_201126\_FR\_TIOx\_hum\_tissue\_Urea\_RNAB\_B Scan : 18398

Andromeda score : 103.9

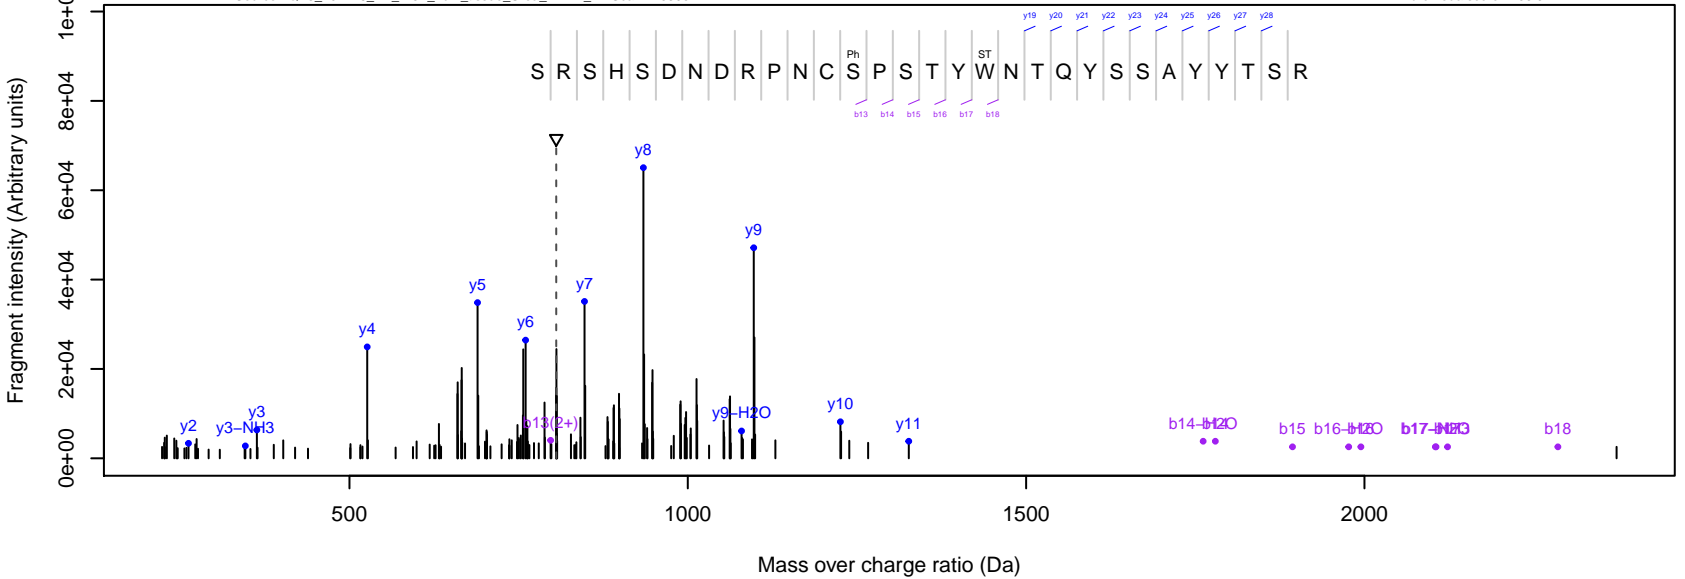

S(Phospho (STY))PEAPQPVIAM(Oxidation (M))EEPVAPLPLK-3+

Source : QE3\_201126\_FR\_TIOx\_hum\_tissue\_Urea\_RNAB\_N Scan : 43063

Andromeda score : 103.86

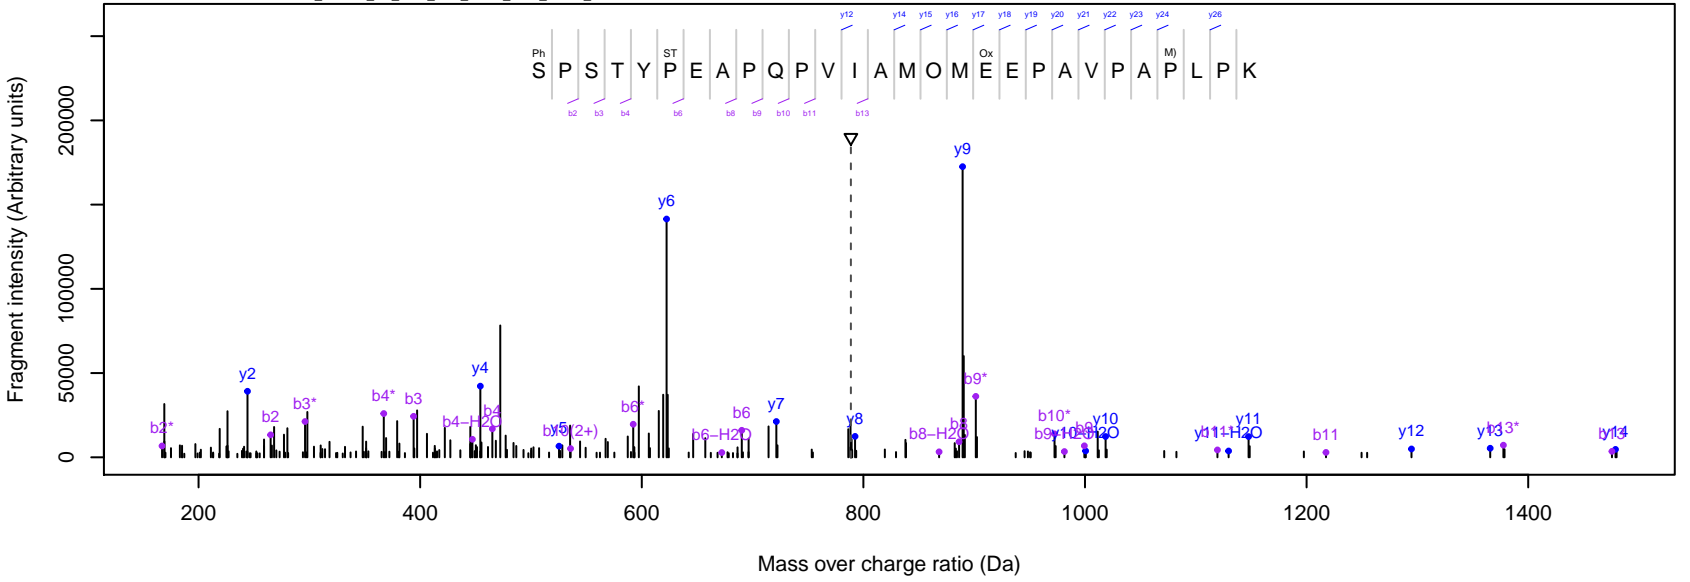

APS(Phospho (STY))WFDTGLSEM(Oxidation (M))R-2+

Source : QE3\_201126\_FR\_TIOx\_hum\_tissue\_Urea\_RNAB\_H Scan : 45154

Andromeda score : 103.85

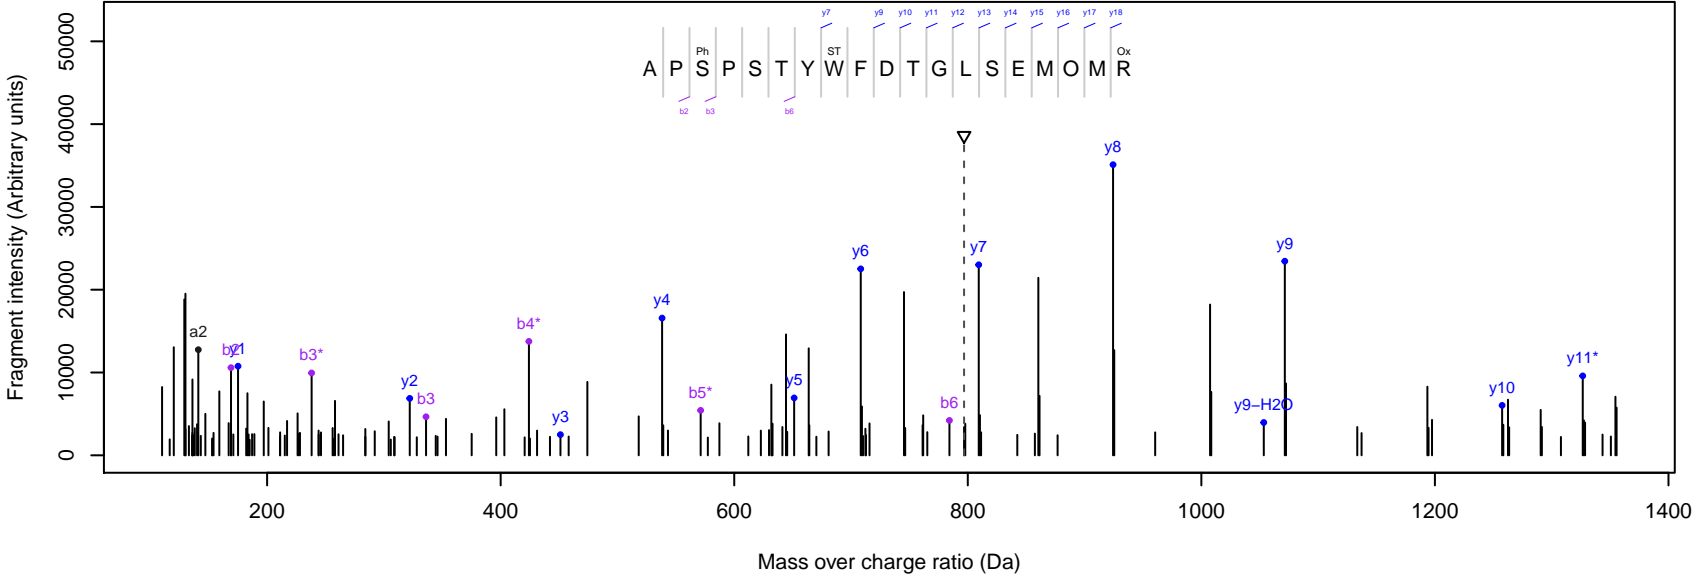

ASAGHAVS(Phospho (STY))IAQDDAGADDWETDPDFVNDVSEK-3+

Source : QE3\_201126\_FR\_TIOx\_hum\_tissue\_Urea\_RNAB\_H Scan : 44096

Andromeda score : 103.85

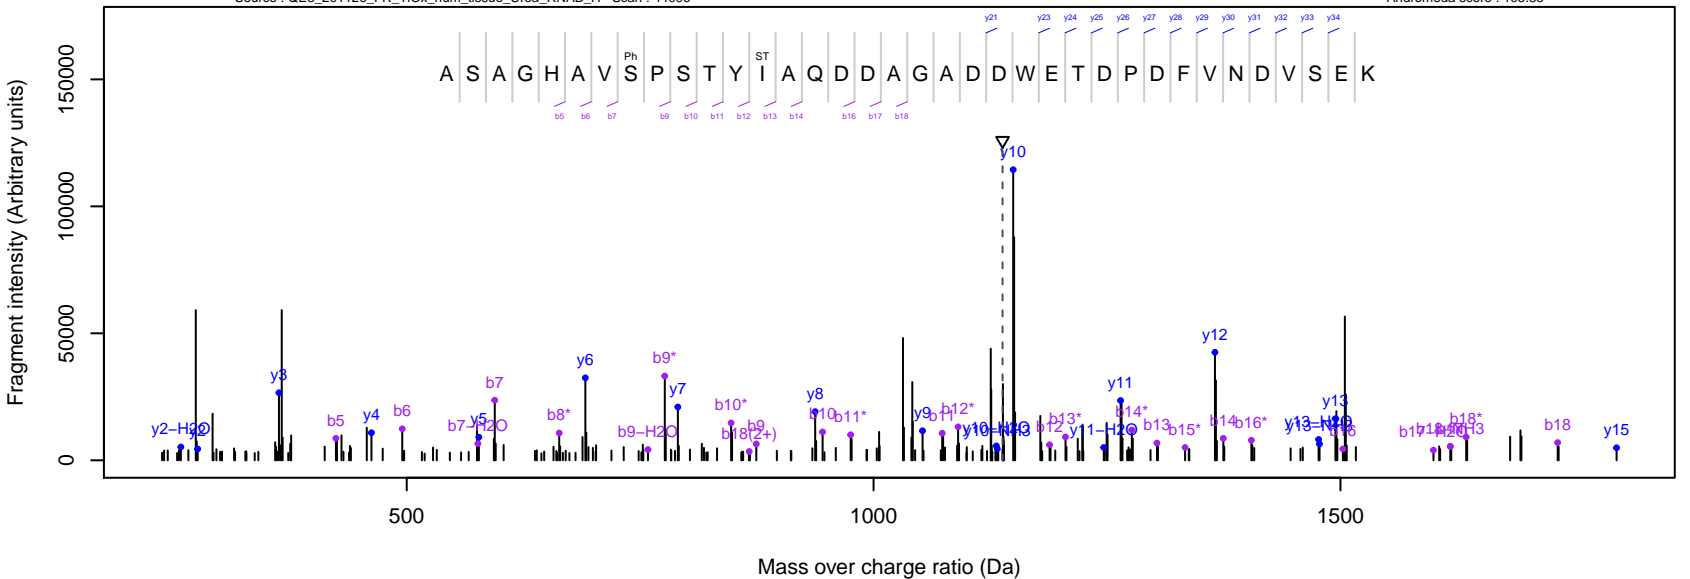

TNT(Phospho (STY))FPDLFSDLK-2+

Source : QE3\_201126\_FR\_TiOx\_hum\_tissue\_Urea\_RNAB\_H Scan : 58566

Andromeda score : 103.85

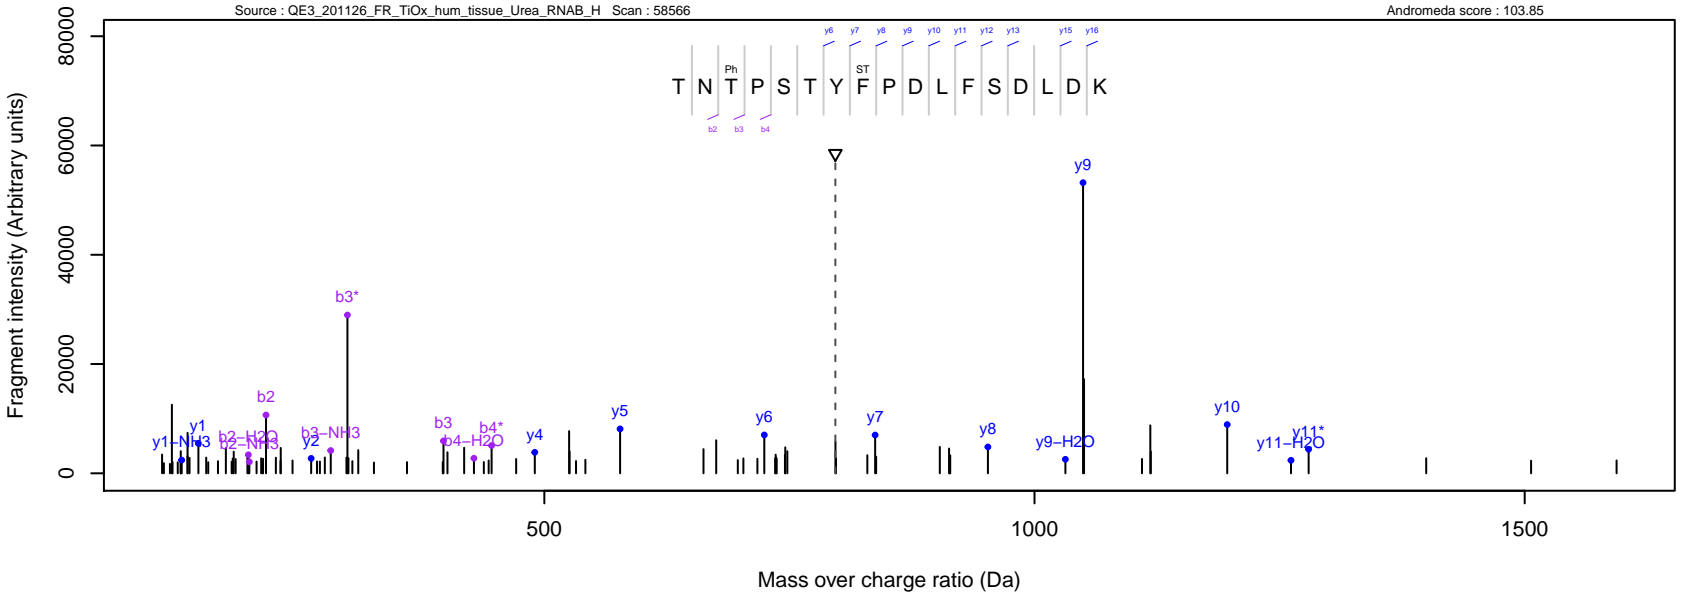

RTHS(Phospho (STY))DAS(Phospho (STY))DDEAFTTSK-3+

Source : QE3\_201126\_FR\_TiOx\_hum\_tissue\_Urea\_RNAB\_H Scan : 8659

Andromeda score : 103.84

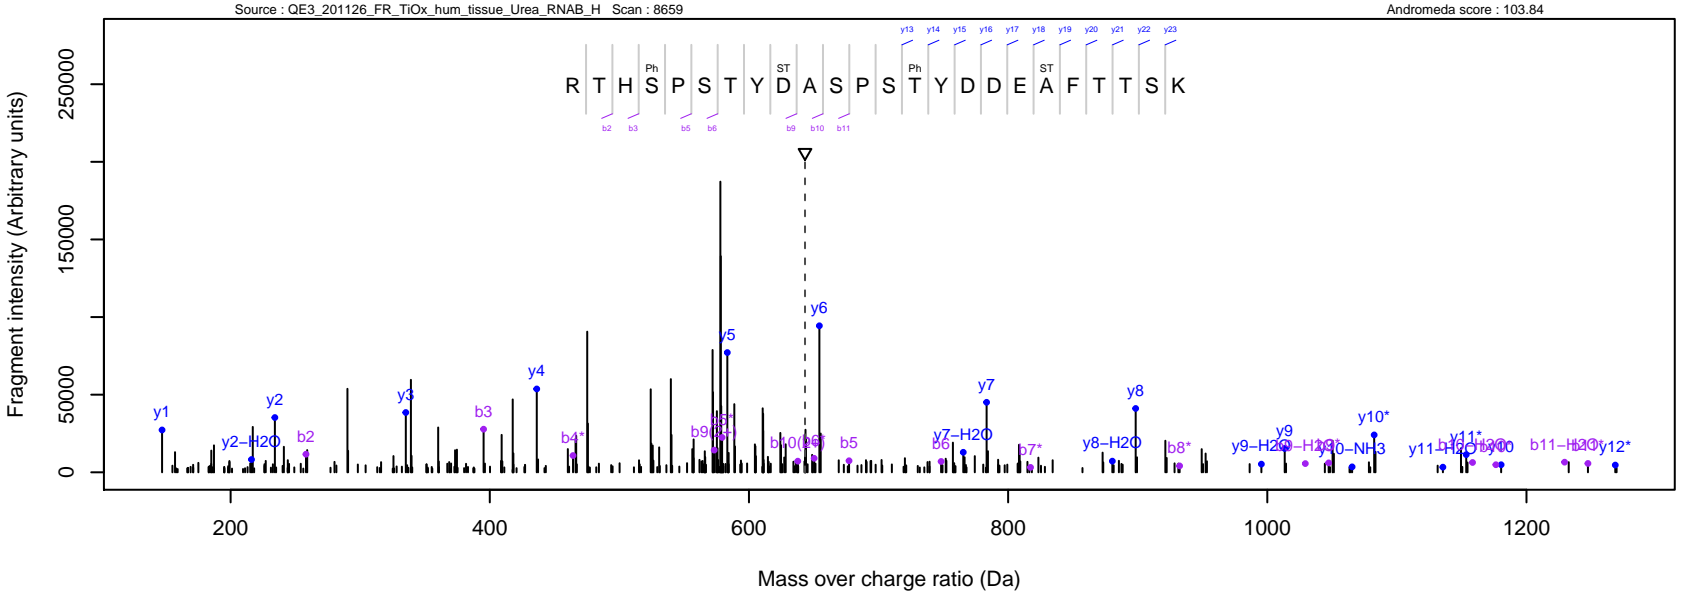

LESESTS(Phospho (STY))PSLEM(Oxidation (M))K-2+

Source : QE3\_201126\_FR\_TiOx\_hum\_tissue\_Urea\_RNAB\_H Scan : 13859

Andromeda score : 103.76

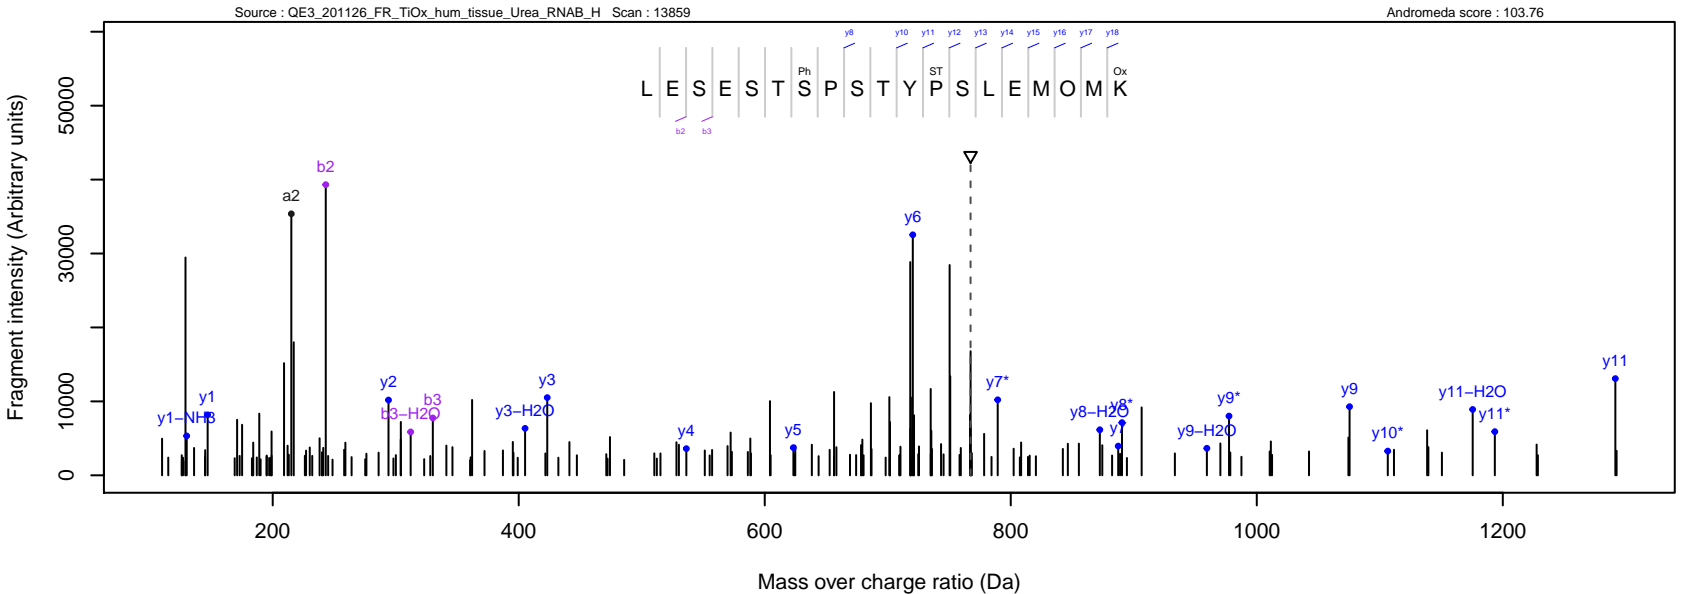

ALAEAESEELPS(Phospho (STY))DVLNDPYFAEEVK-3+

Source : QE3\_201126\_FR\_TIOx\_hum\_tissue\_Urea\_RNAB\_N Scan : 54470

Andromeda score : 103.75

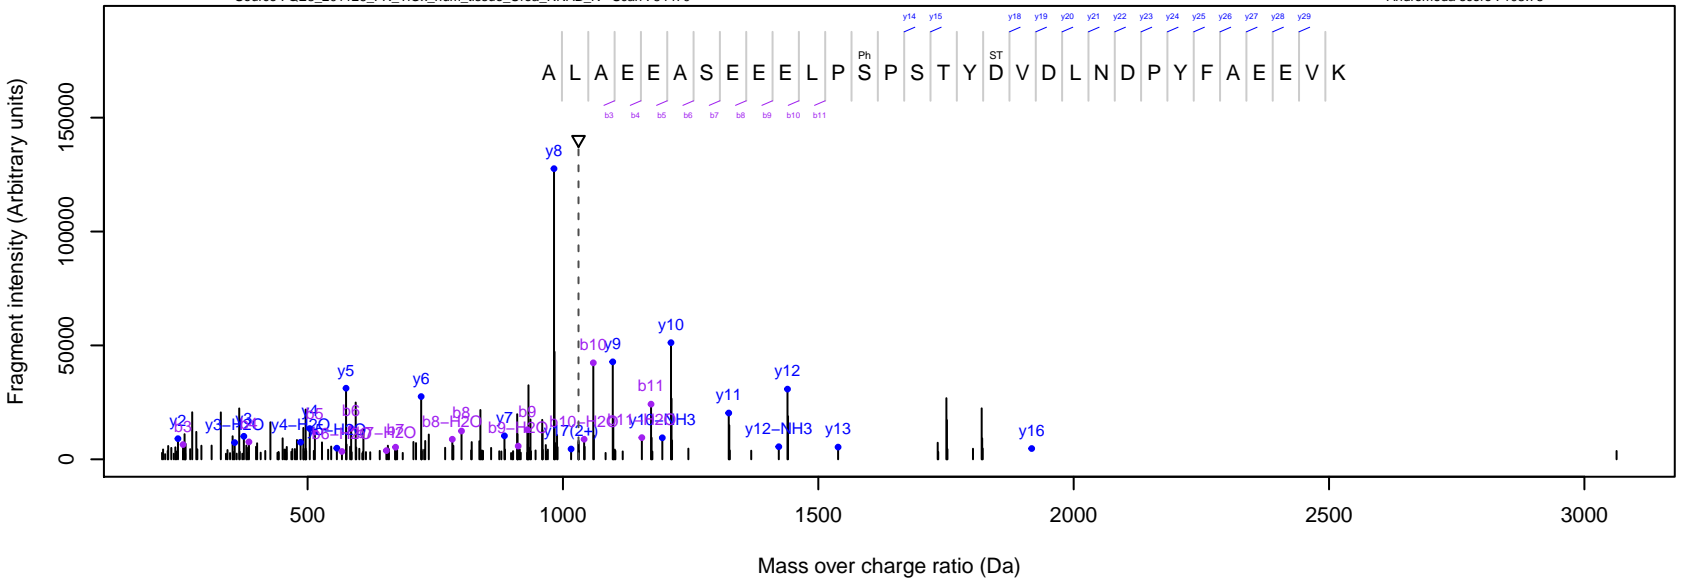

RGS(Phospho (STY))SPGSLEIPKDLPLNK-3+

Source : QE3\_201126\_FR\_TIOx\_hum\_tissue\_Urea\_RNAB\_H Scan : 42454

Andromeda score : 103.75

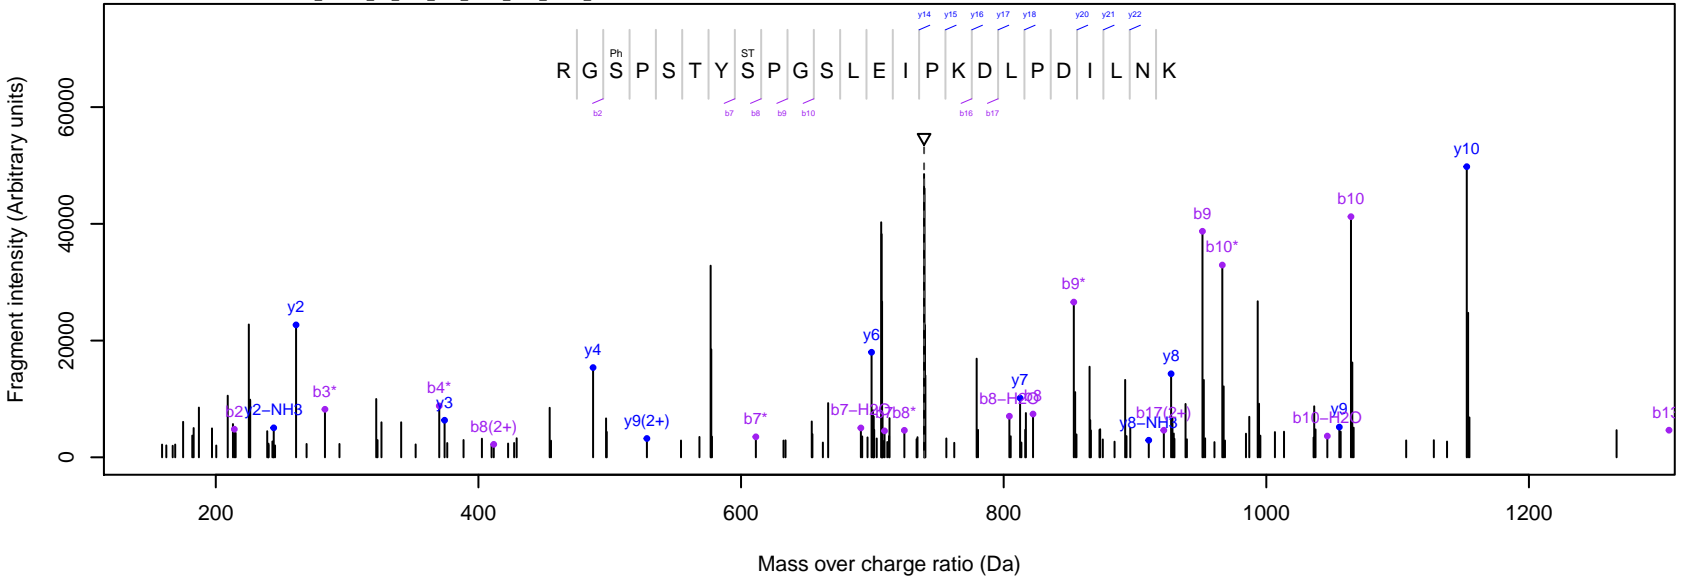

RKT(Phospho (STY))SSDDES(Phospho (STY))EEDEDDLLQR-3+

Source : QE3\_201126\_FR\_TIOx\_hum\_tissue\_Urea\_RNAB\_N Scan : 18421

Andromeda score : 103.75

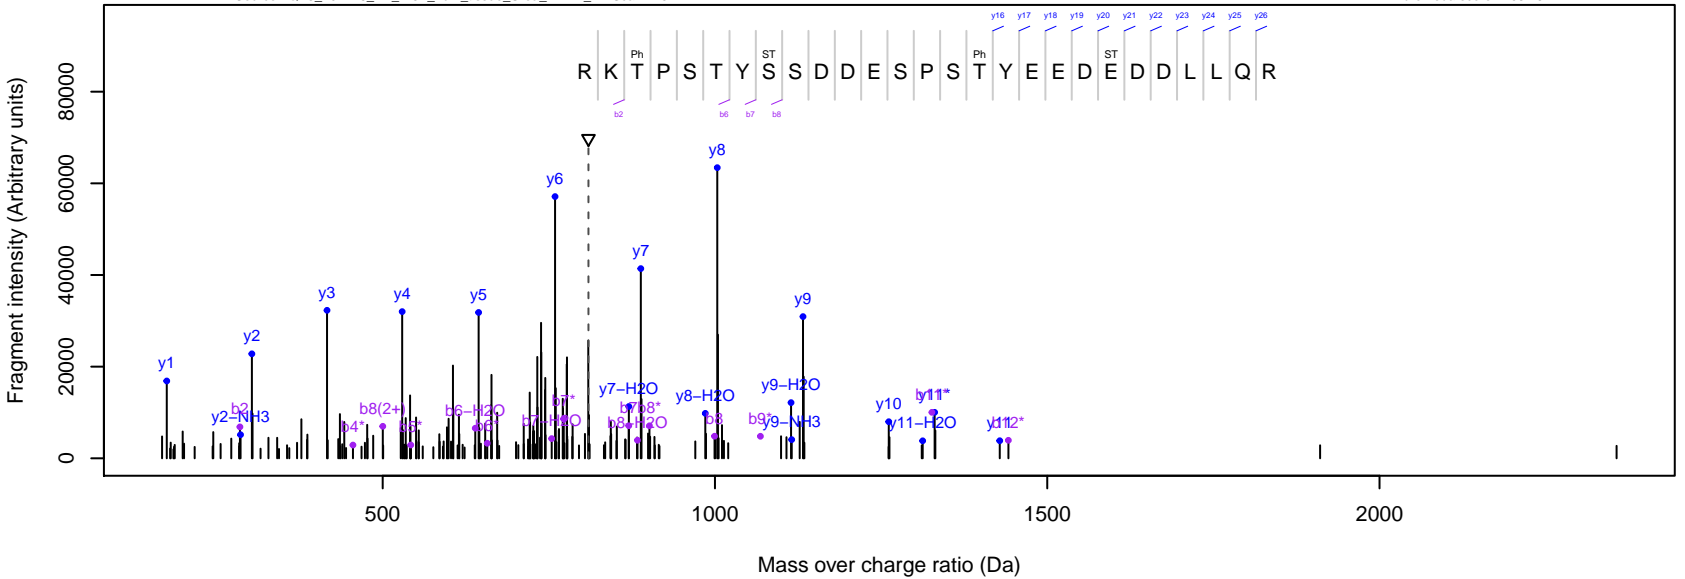

S(Phospho (STY))SVSHSVLSEMQVIEQETPVS AK-3+

Source : QE3\_201126\_FR\_TiOx\_hum\_tissue\_Urea\_RNAB\_N Scan : 50005

Andromeda score : 103.75

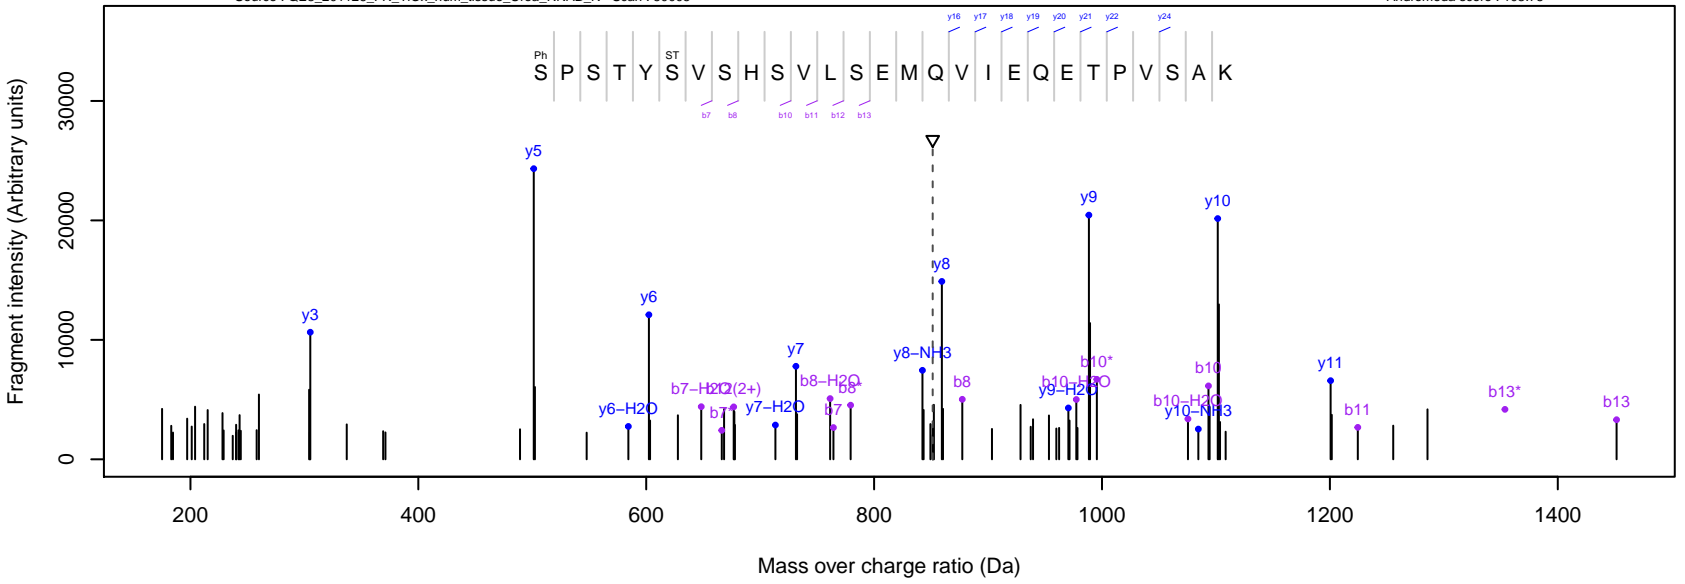

ARHDS(Phospho (STY))PDLAPNVTYSLPR-3+

Source : QE3\_201126\_FR\_TiOx\_hum\_tissue\_Urea\_RNAB\_N Scan : 26461

Andromeda score : 103.67

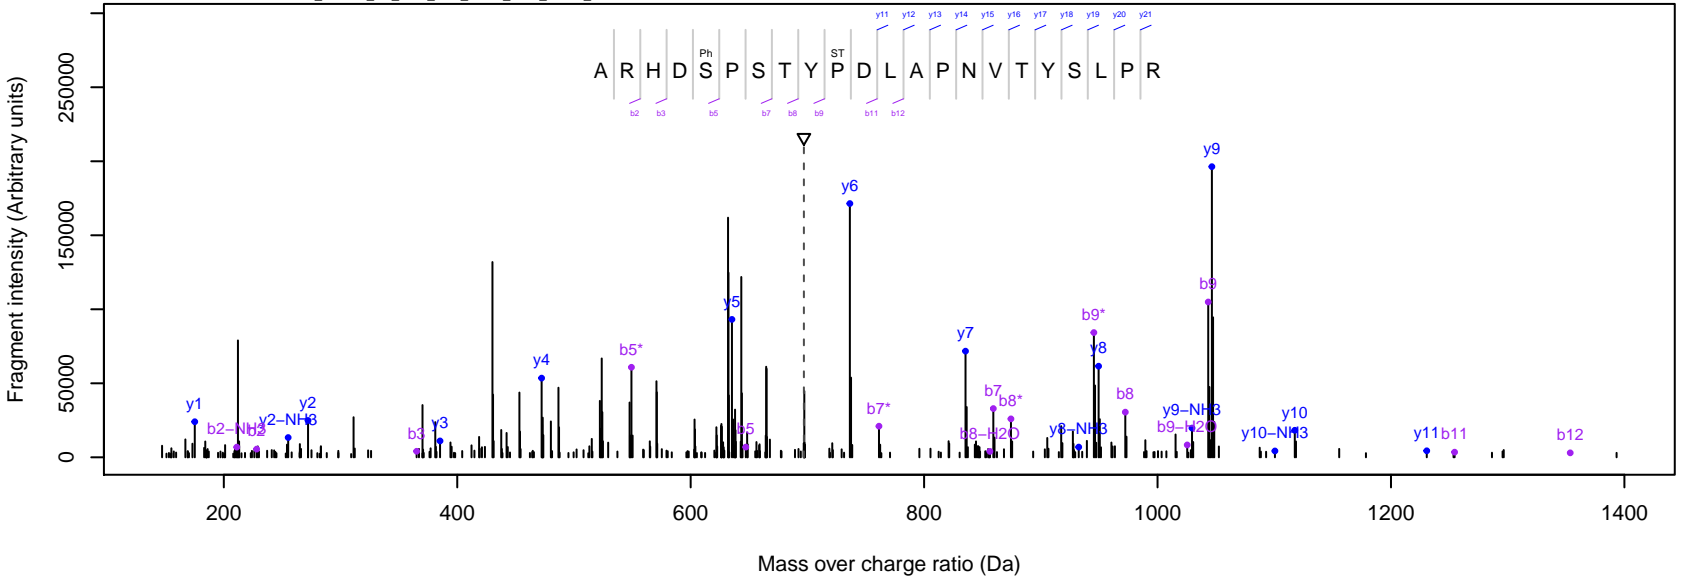

S(Phospho (STY))LTRS(Phospho (STY))PPAIR-2+

Source : QE3\_201126\_FR\_TiOx\_hum\_tissue\_Urea\_RNAB\_B Scan : 18118

Andromeda score : 103.67

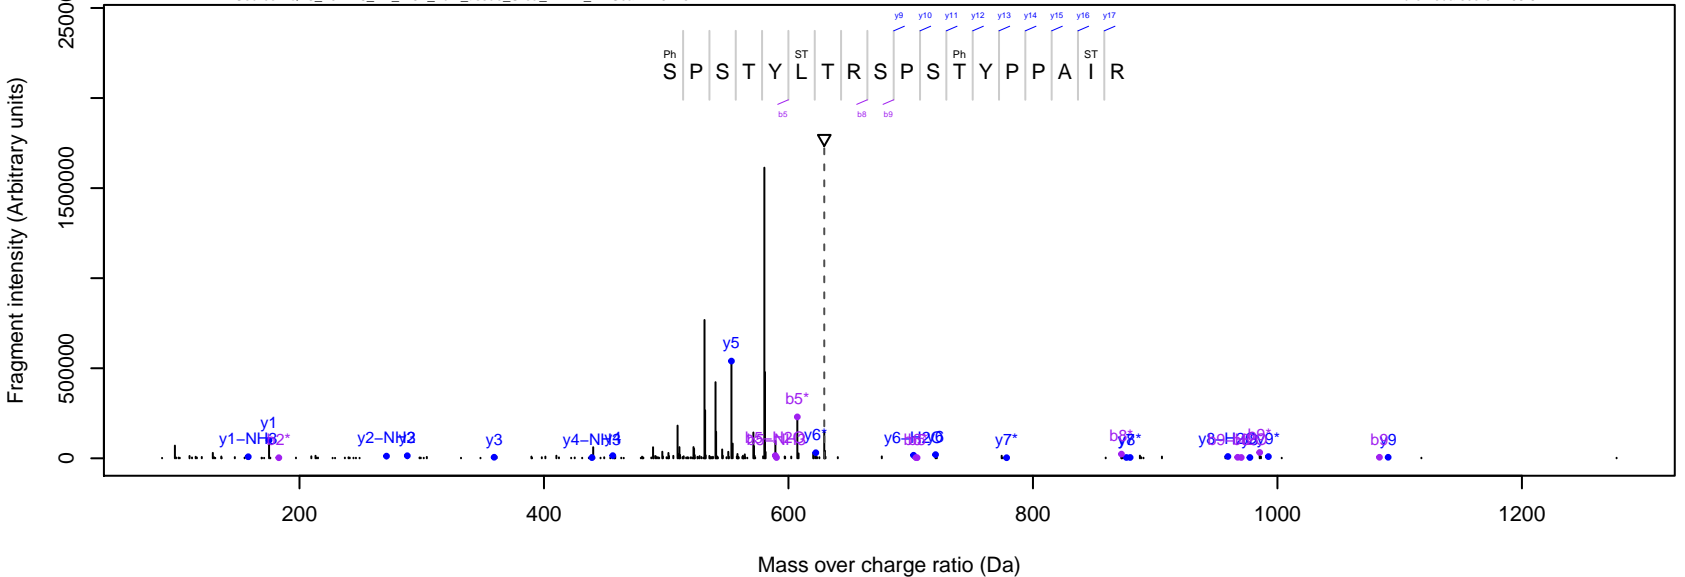



### SQHQTKEEQSQITSQVTPSTY GQIGWR-3+

Source : QE3\_201126\_FR\_TiOx\_hum\_tissue\_Urea\_RNAB\_B Scan : 22710

Andromeda score : 103.64

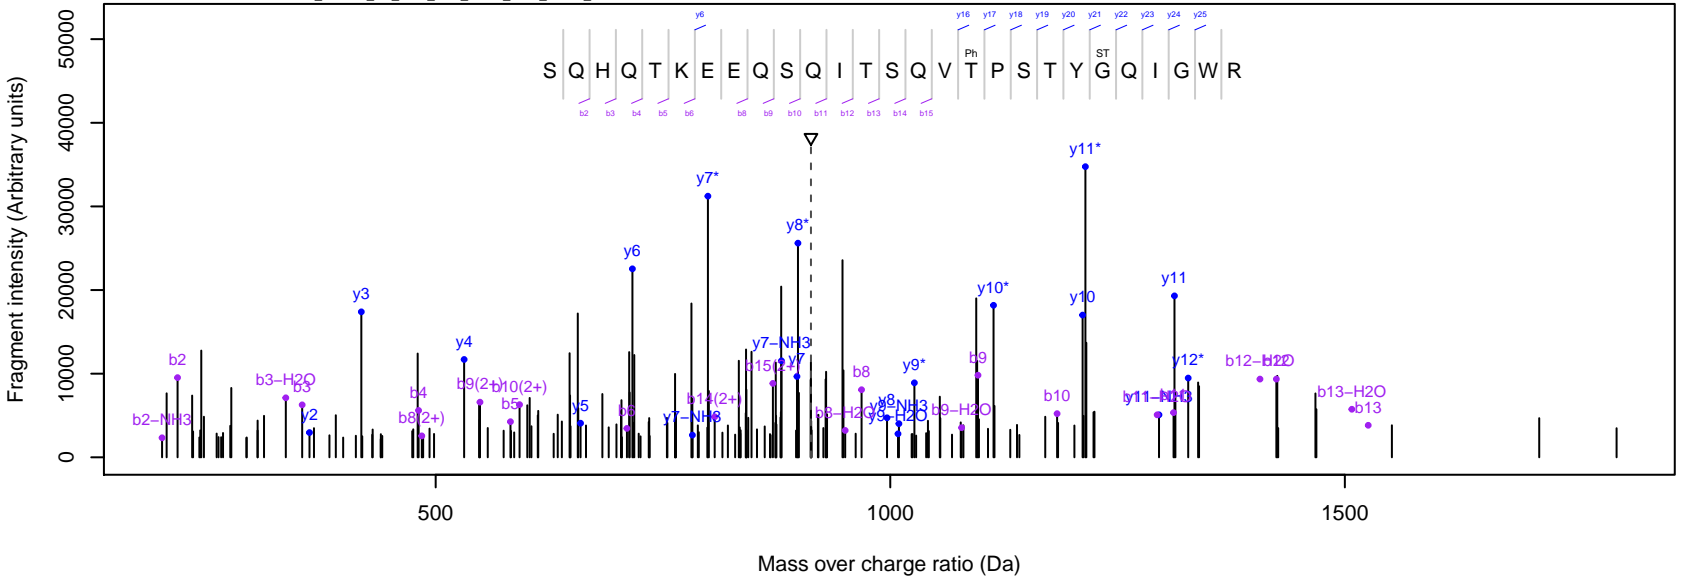

### S(Phospho (STY))QDKLDKDDLEK-3+

Source : QE3\_201126\_FR\_TiOx\_hum\_tissue\_Urea\_RNAB\_H Scan : 8198

Andromeda score : 103.61

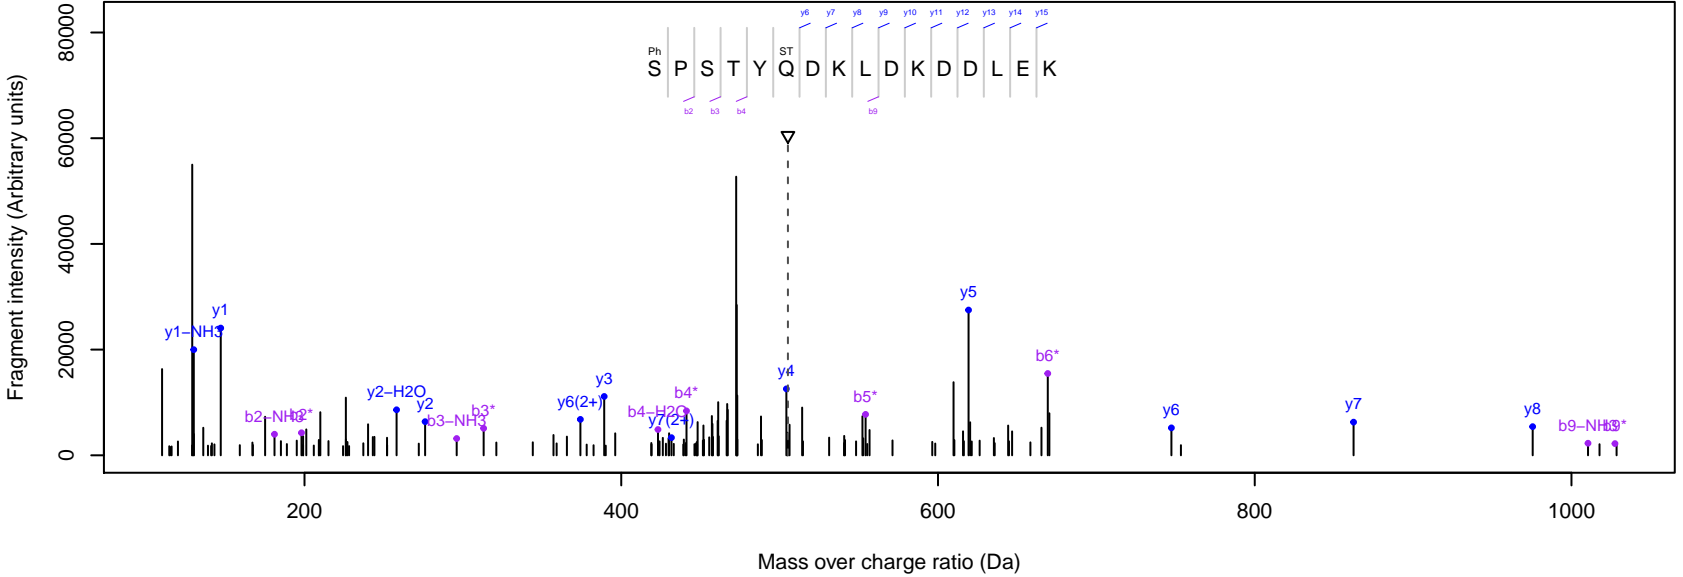

### HY(Phospho (STY))GGLTGLNK-2+

Source : QE3\_201126\_FR\_TiOx\_hum\_tissue\_Urea\_RNAB\_B Scan : 10821

Andromeda score : 103.56

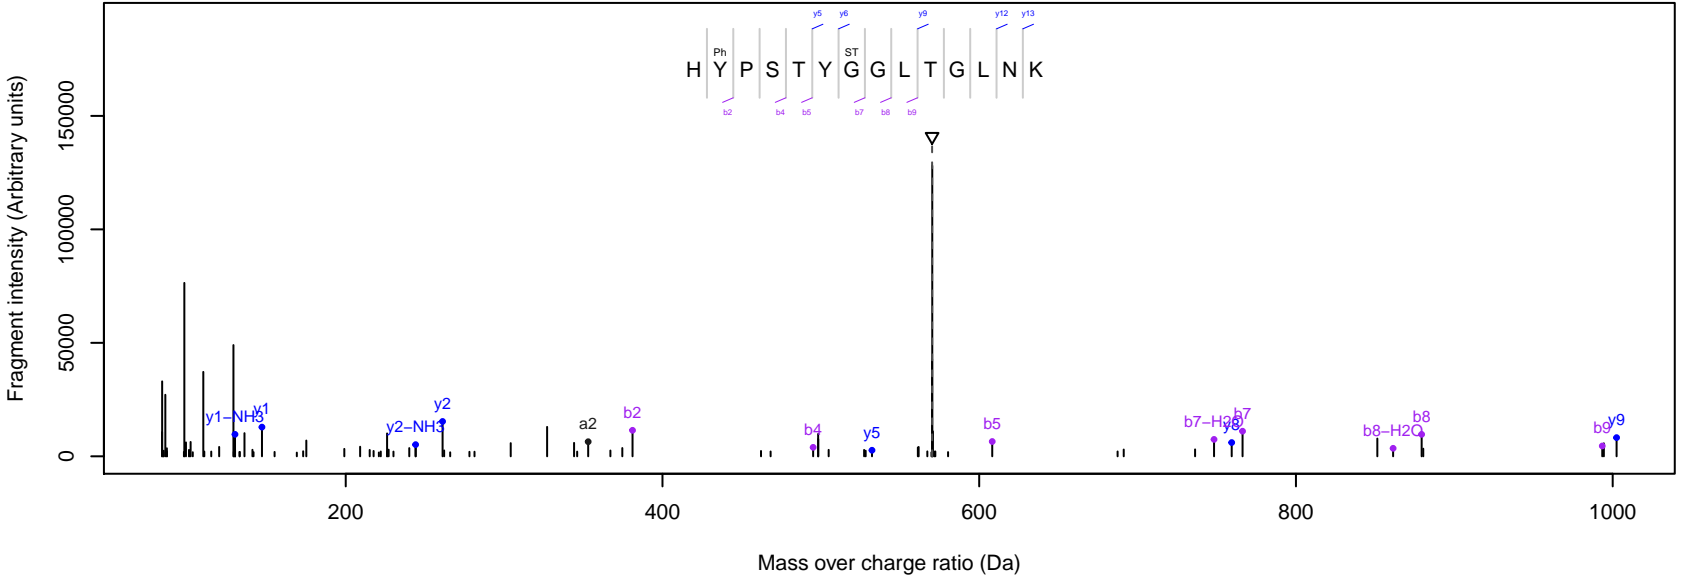

DVTNFTVGGFAPMOMSPSTYPR-2+

Source : QE3\_201126\_FR\_TiOx\_hum\_tissue\_Urea\_RNAB\_H Scan : 46559

Andromeda score : 103.5

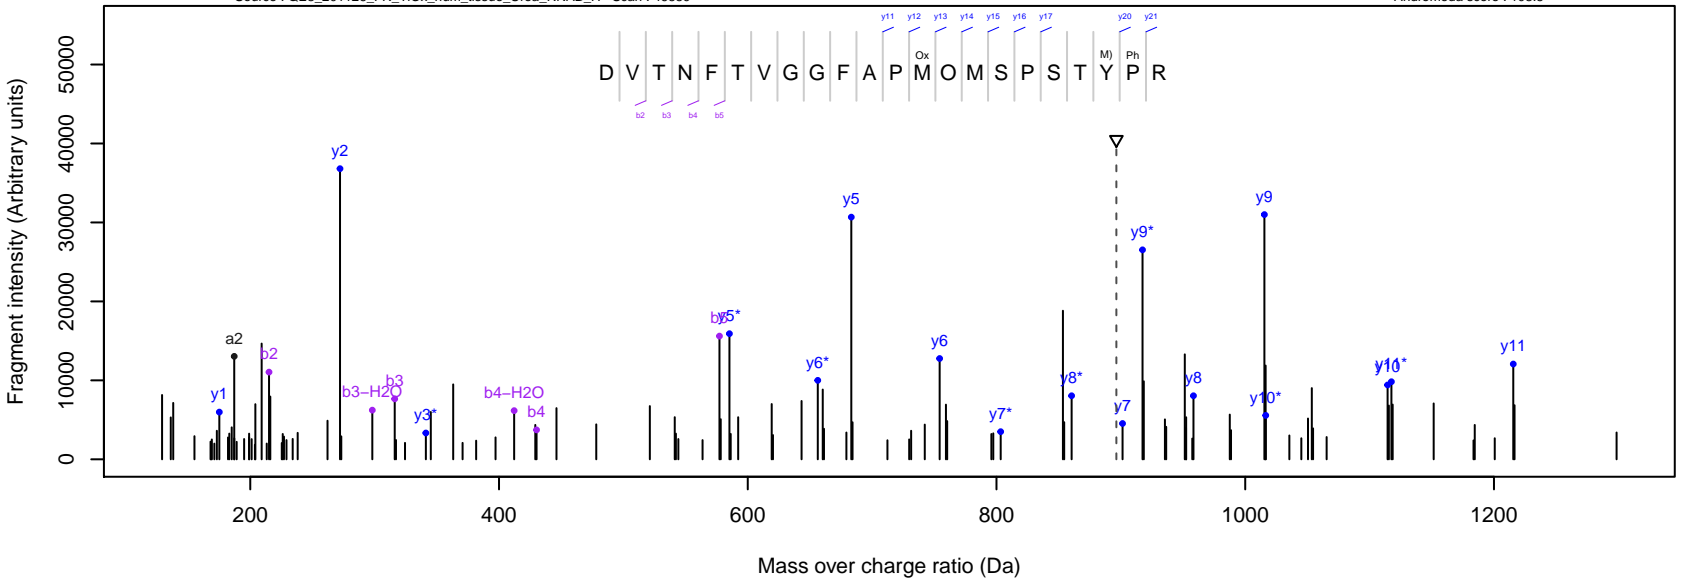

RIDFIPVSPSTYPAAPSSTYPTR-2+

Source : QE3\_201126\_FR\_TiOx\_hum\_tissue\_Urea\_RNAB\_H Scan : 44167

Andromeda score : 103.5

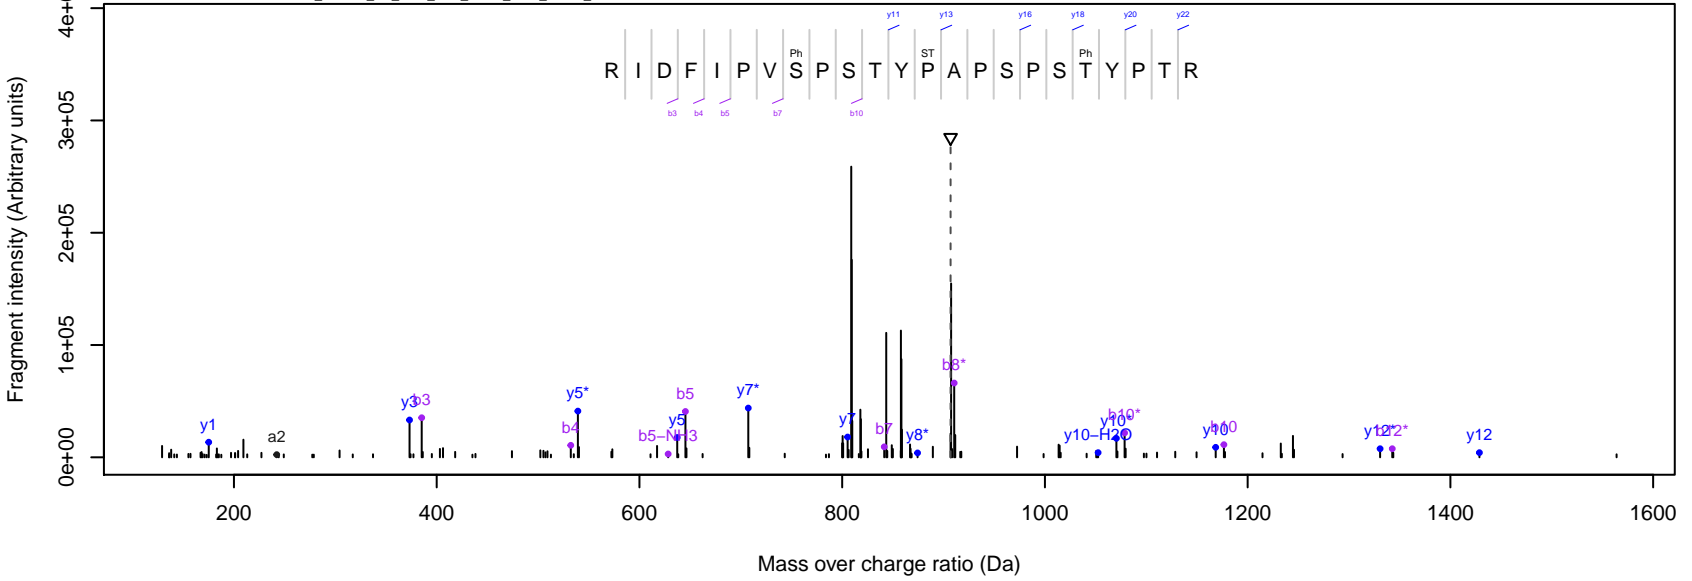

VGSLTPTSPSTYPPSPSTYSPKTKQR-3+

Source : QE3\_201126\_FR\_TiOx\_hum\_tissue\_Urea\_RNAB\_N Scan : 15153

Andromeda score : 103.5

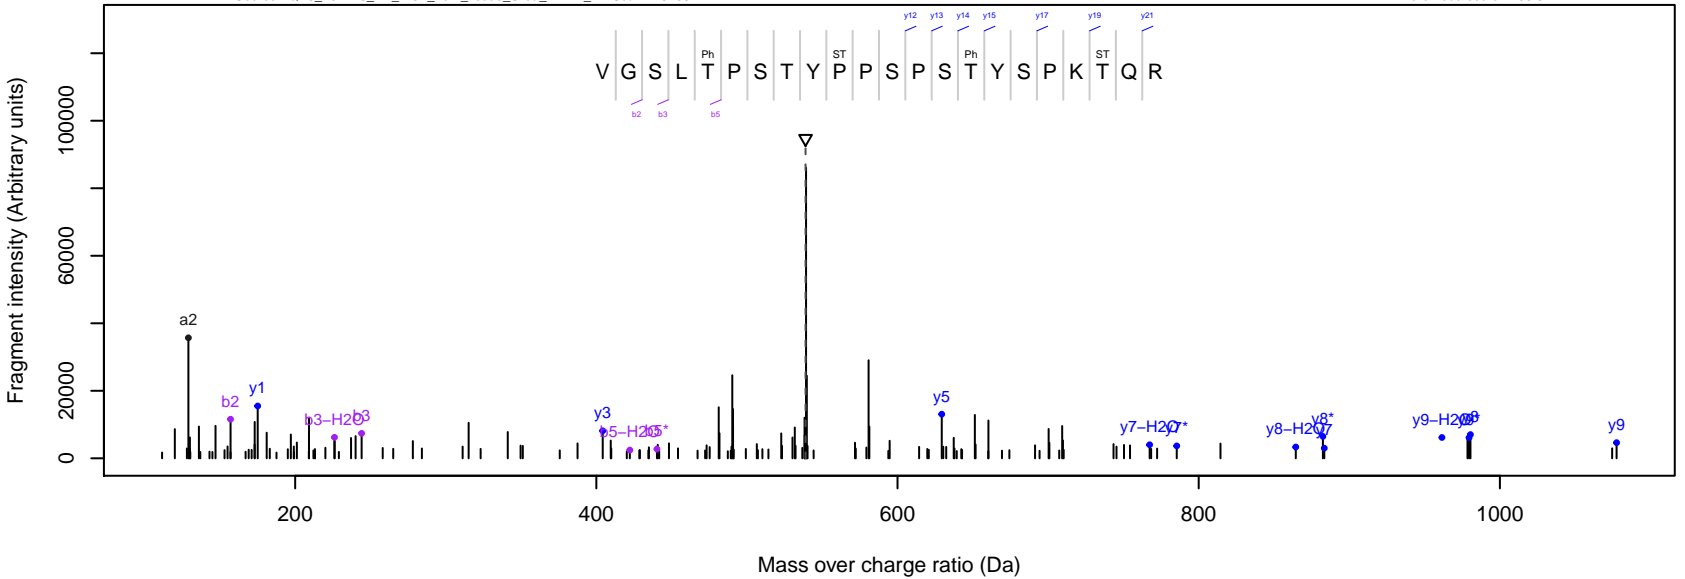

AFS(Phospho (STY))DPFVEAEK-2+

Source : QE3\_201126\_FR\_TiOx\_hum\_tissue\_Urea\_RNAB\_B Scan : 40649

Andromeda score : 103.46

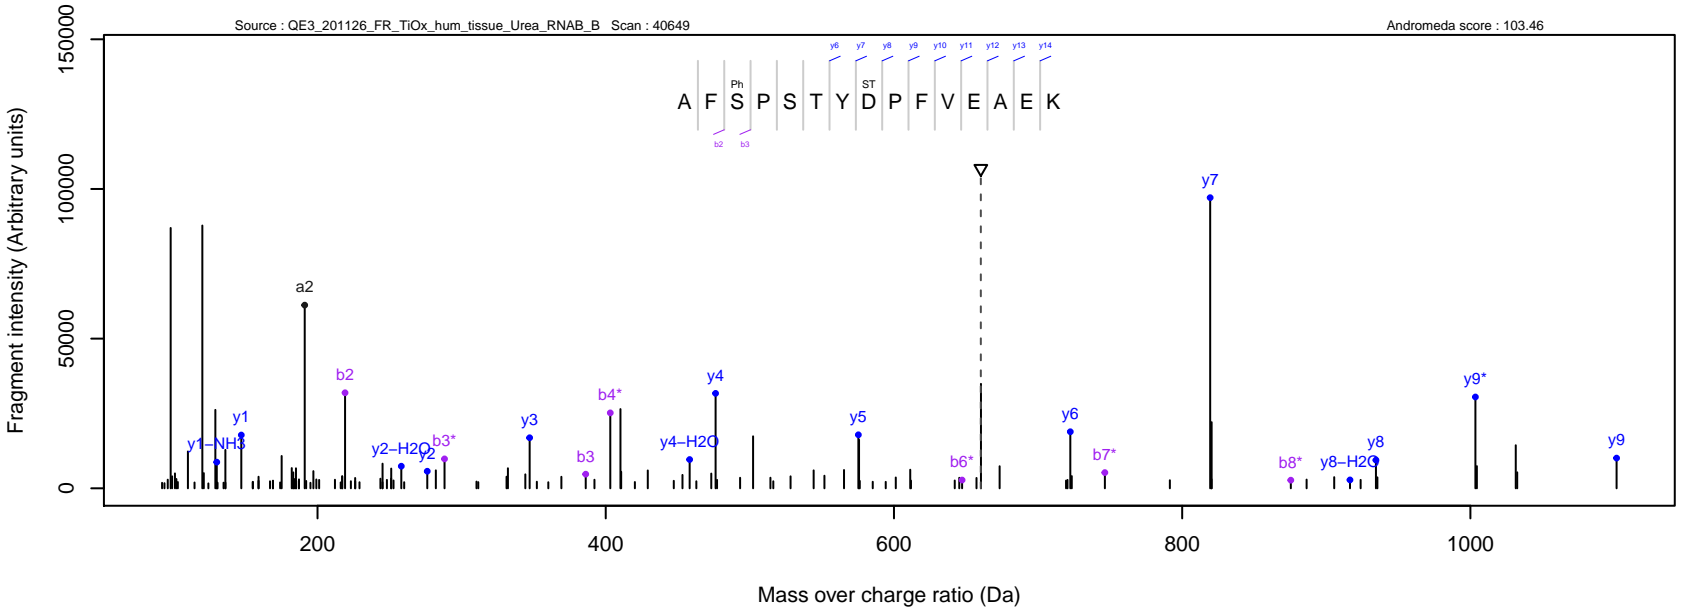

VRS(Phospho (STY))LETENR-3+

Source : QE3\_201126\_FR\_TiOx\_hum\_tissue\_Urea\_RNAB\_H Scan : 5888

Andromeda score : 103.43

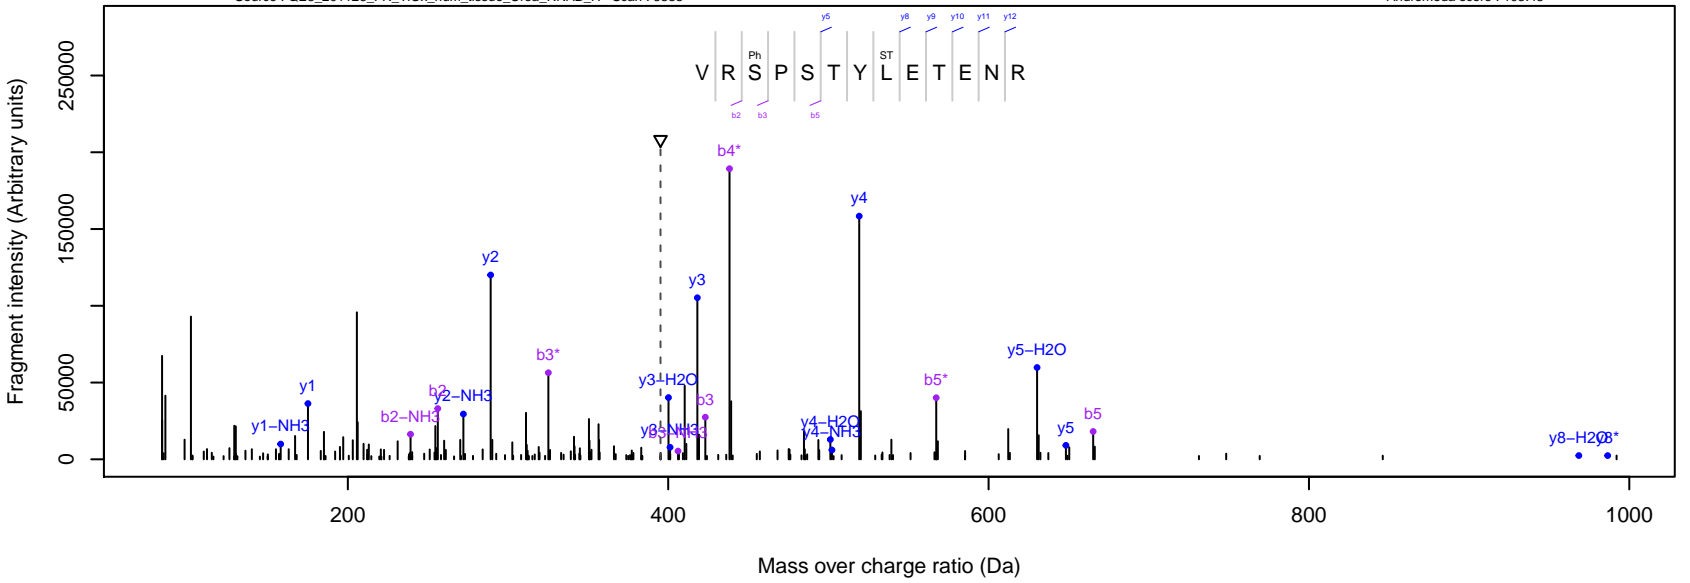

YFDS(Phospho (STY))GDYNM(Oxidation (M))AK-2+

Source : QE3\_201126\_FR\_TiOx\_hum\_tissue\_Urea\_RNAB\_H Scan : 20258

Andromeda score : 103.43

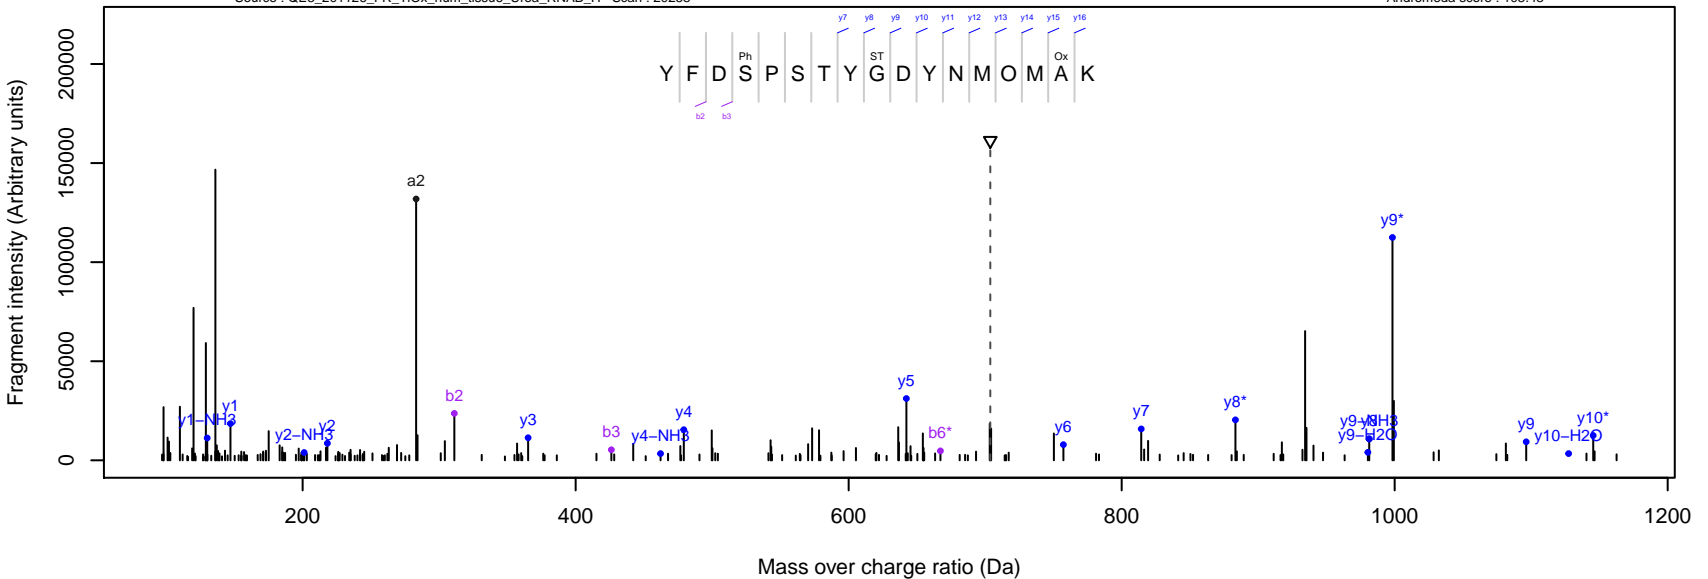

### LQANLTFDPAALLPGASPKS(Phospho (STY))PGLK-3+

Source : QE3\_201126\_FR\_TiOx\_hum\_tissue\_Urea\_RNAB\_H Scan : 54571

Andromeda score : 103.42

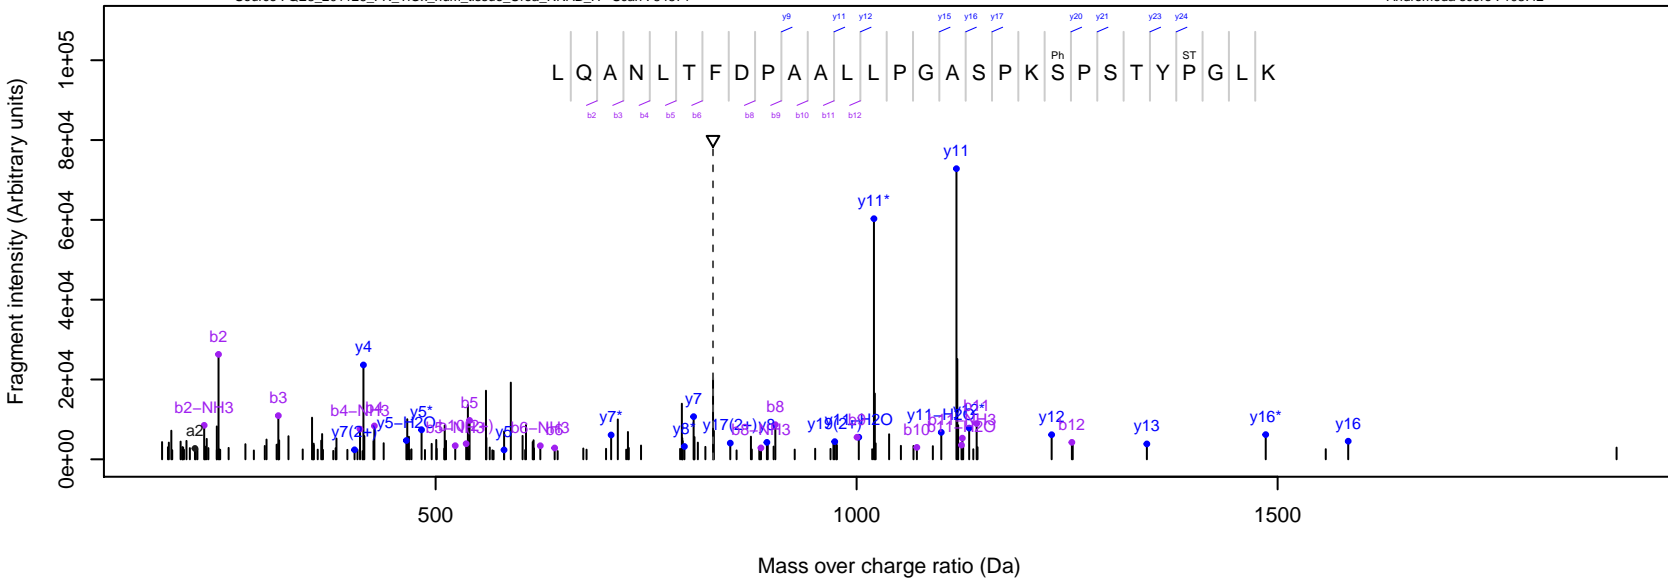

### QLS(Phospho (STY))SGVS(Phospho (STY))EIRHTADR-3+

Source : QE3\_201126\_FR\_TiOx\_hum\_tissue\_Urea\_RNAB\_N Scan : 21575

Andromeda score : 103.41

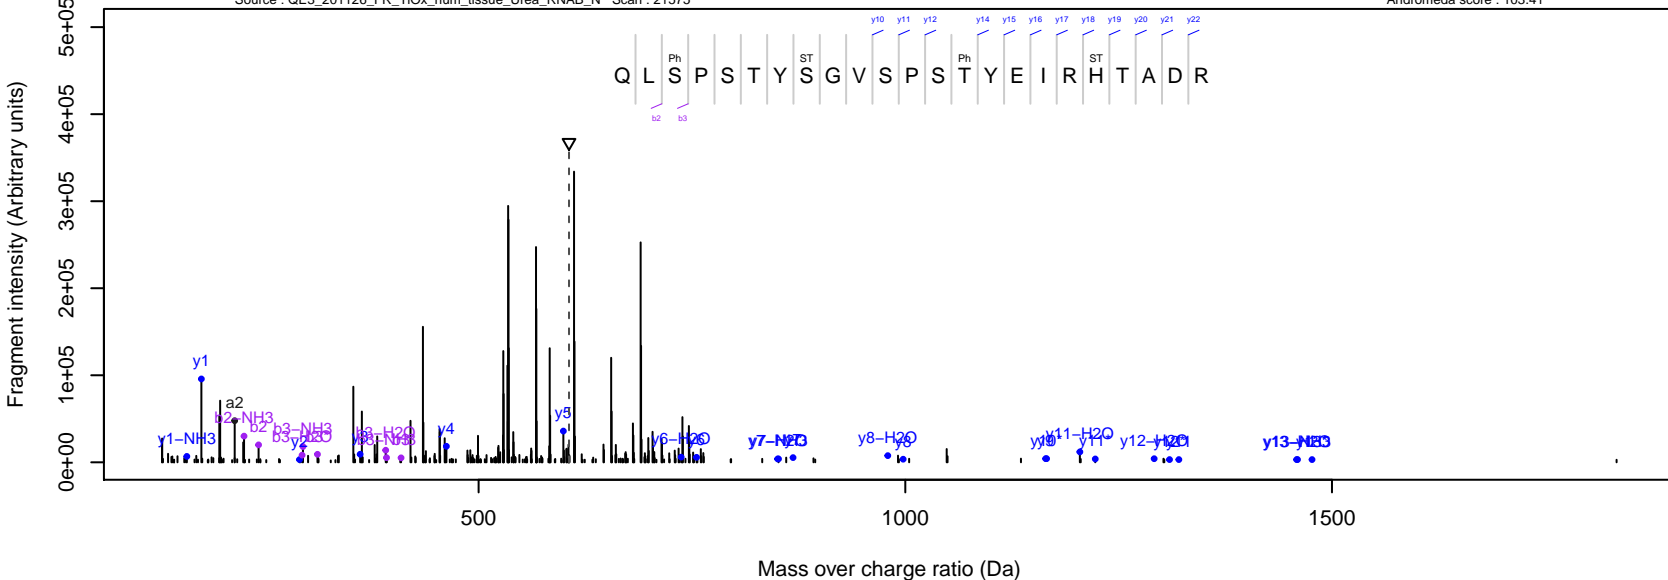

### IHRAS(Phospho (STY))DPGLPAEEPKEK-4+

Source : QE3\_201126\_FR\_TiOx\_hum\_tissue\_Urea\_RNAB\_N Scan : 8338

Andromeda score : 103.4

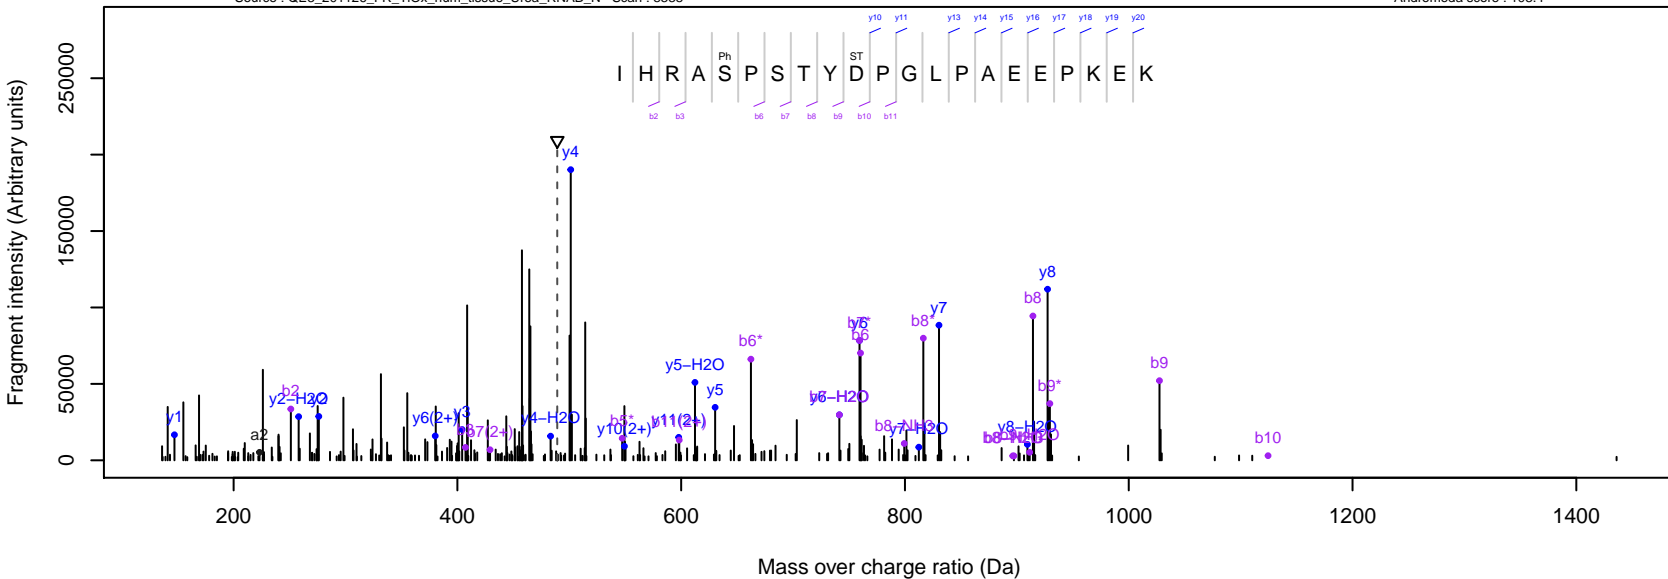

DHS(Phospho (STY))PT(Phospho (STY))PSVFNSEER-2+

Source : QE3\_201126\_FR\_TiOx\_hum\_tissue\_Urea\_RNAB\_H Scan : 23649

Andromeda score : 103.39

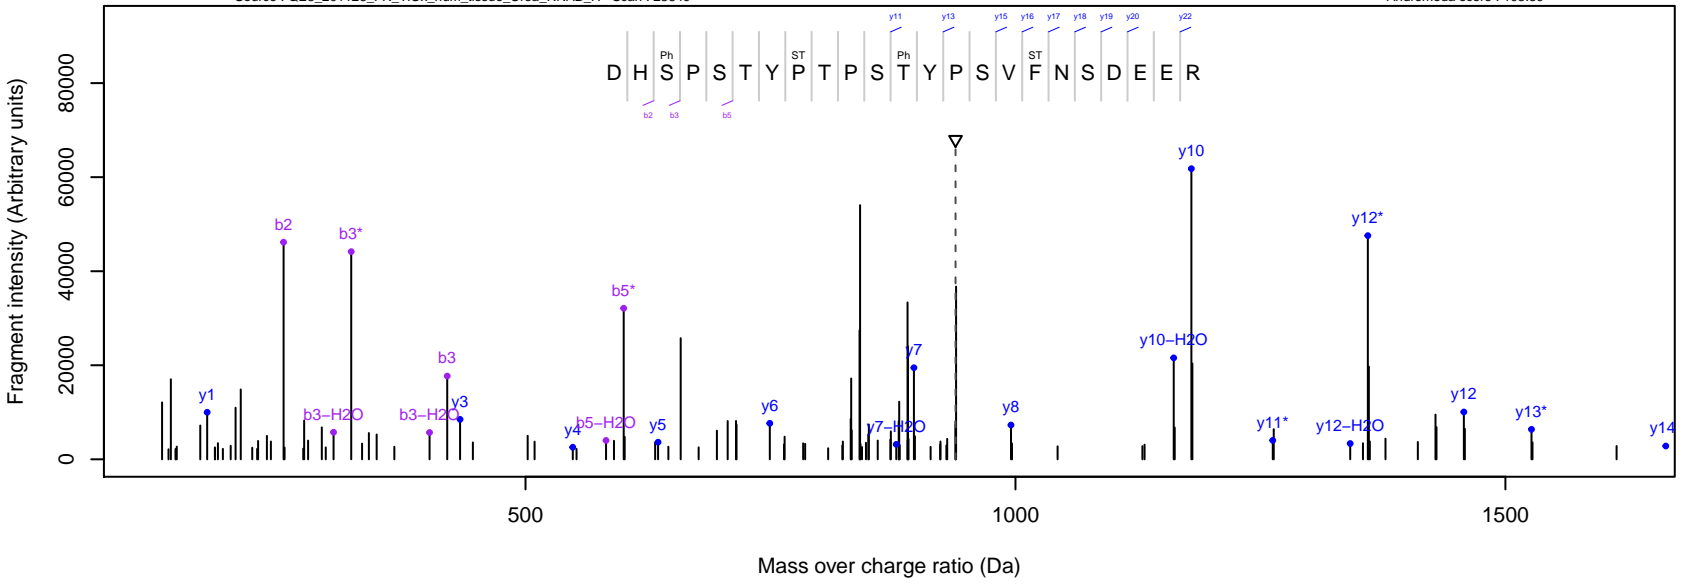

EGES(Phospho (STY))LEDLMK-2+

Source : QE3\_201126\_FR\_TiOx\_hum\_tissue\_Urea\_RNAB\_N Scan : 37826

Andromeda score : 103.34

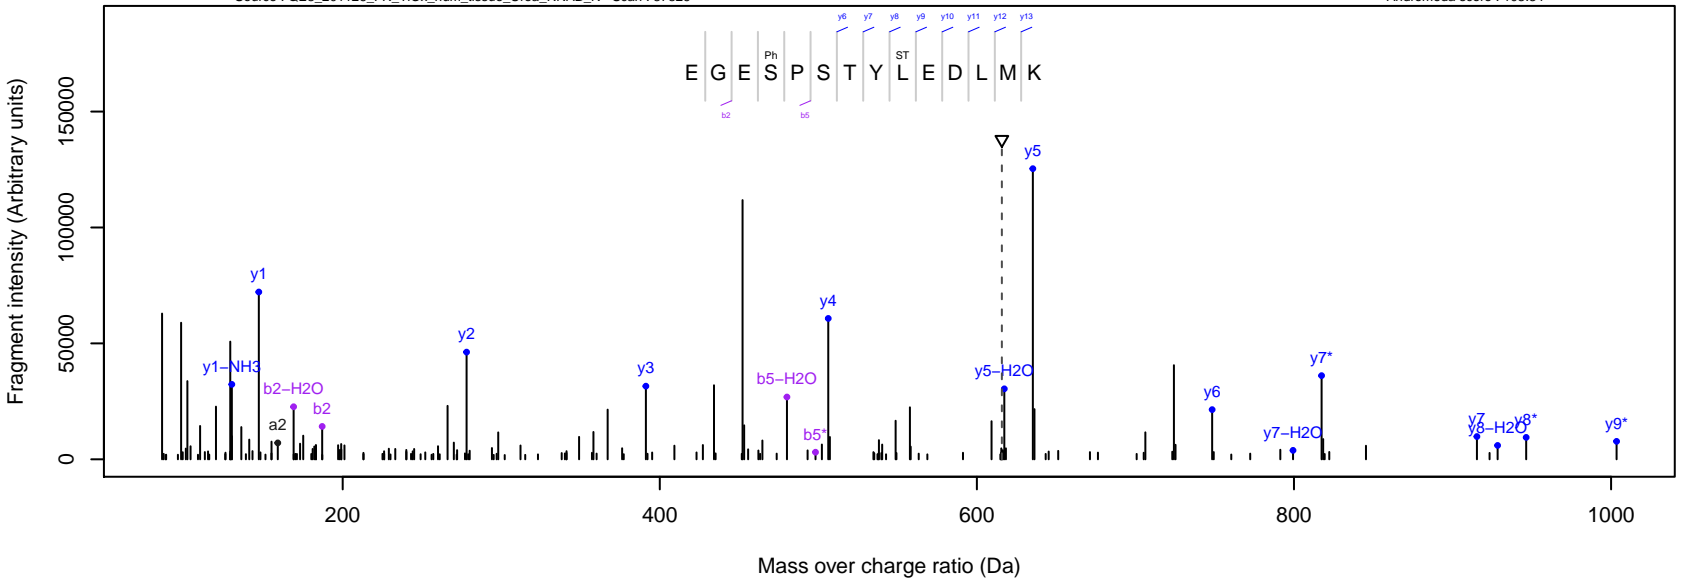

QNPTVGSHCAGLFSTSVLGGSS(Phospho (STY))APNLQDYAR-3+

Source : QE3\_201126\_FR\_TiOx\_hum\_tissue\_Urea\_RNAB\_B Scan : 46688

Andromeda score : 103.34

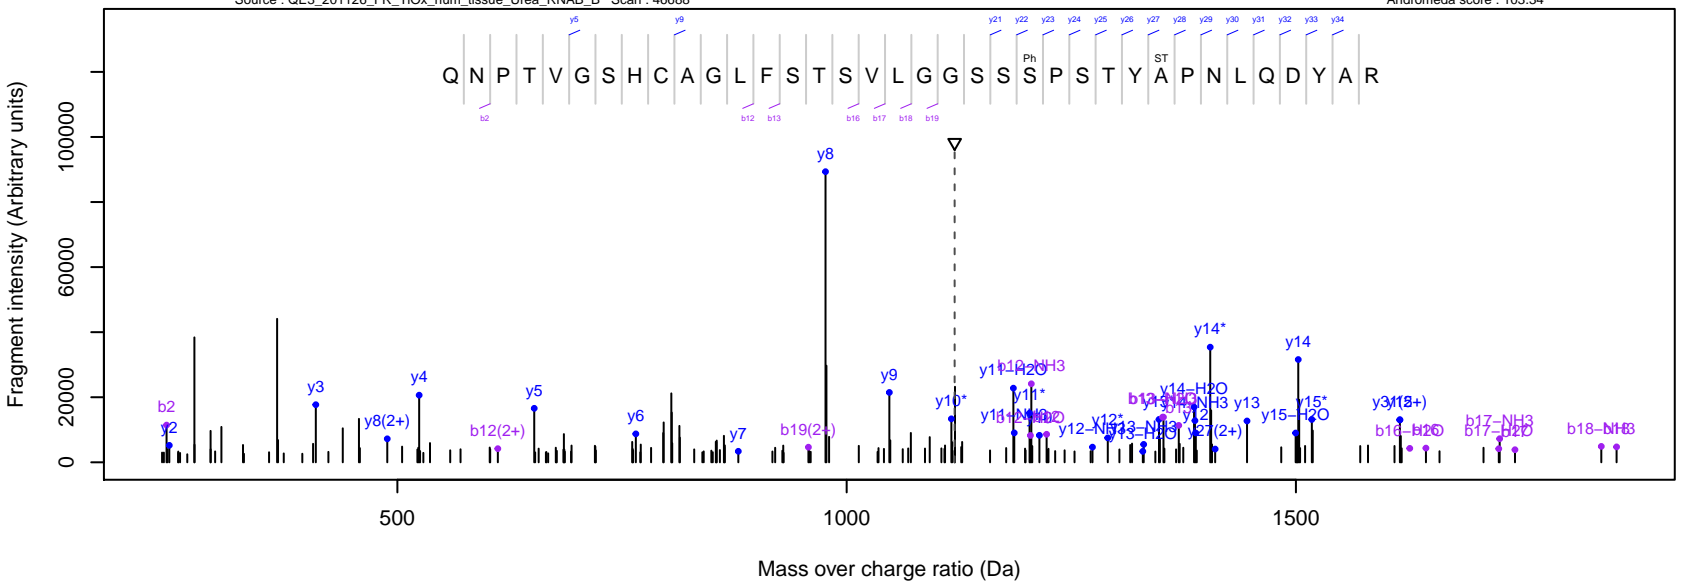

**RDYDDMS(Phospho (STY))PR-2+**

Source : QE3\_201126\_FR\_TiOx\_hum\_tissue\_Urea\_RNAB\_H Scan : 9344

Andromeda score : 103.34

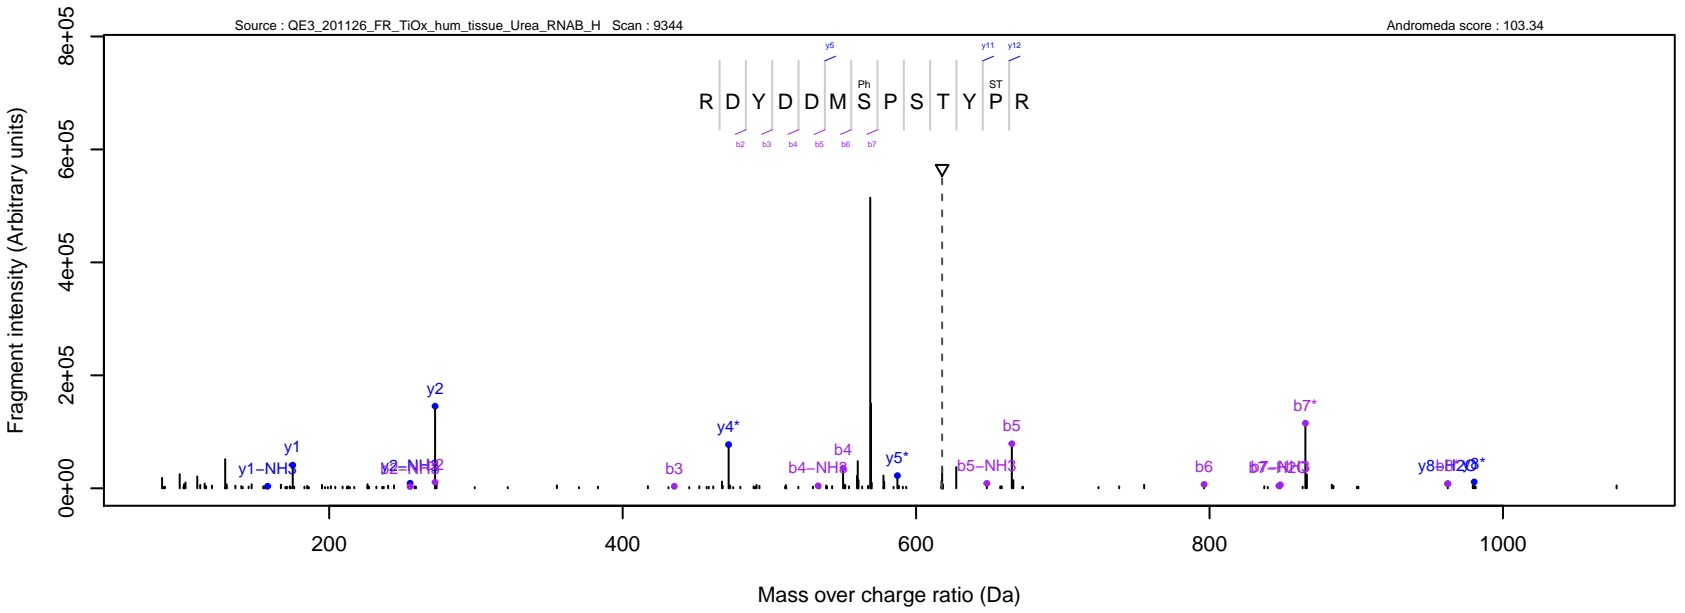

**SLEQIES(Phospho (STY))FFR-2+**

Source : QE3\_201126\_FR\_TiOx\_hum\_tissue\_Urea\_RNAB\_B Scan : 57474

Andromeda score : 103.34

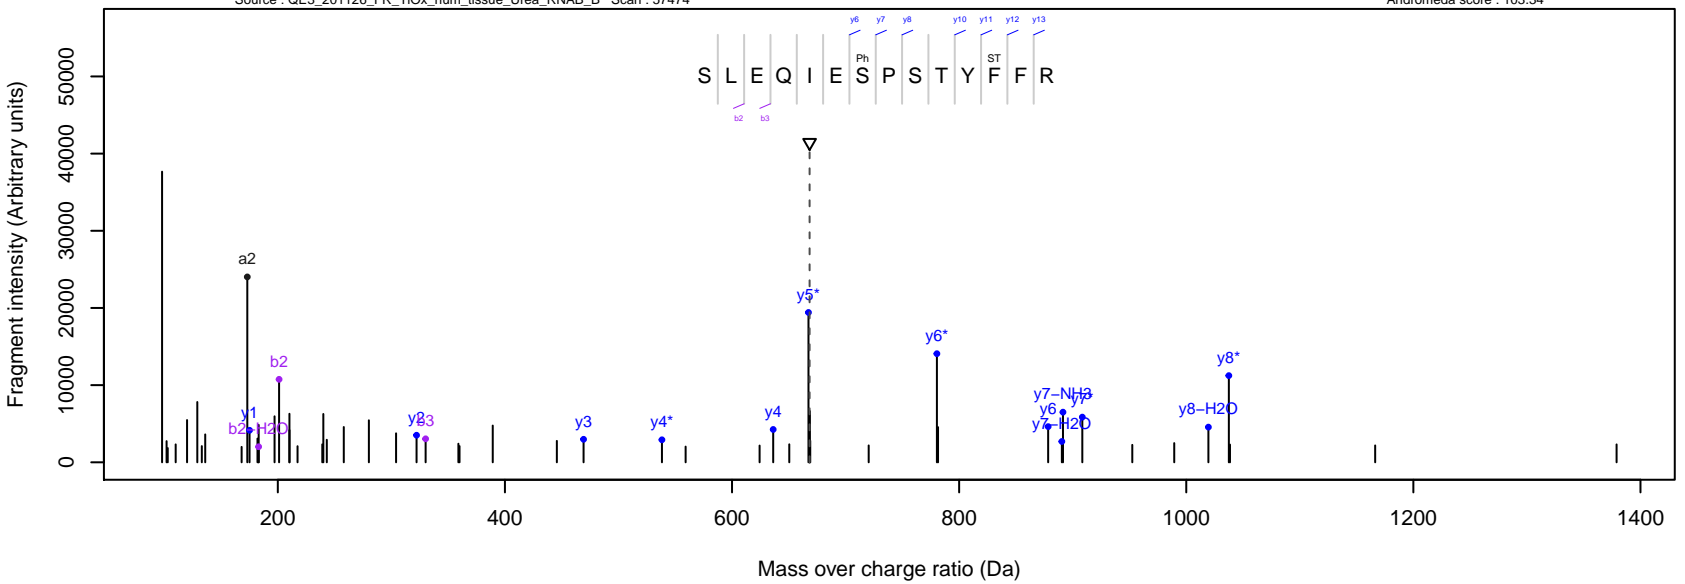

**GNPTVEVDLFTS(Phospho (STY))KGLFR-3+**

Source : QE3\_201126\_FR\_TiOx\_hum\_tissue\_Urea\_RNAB\_N Scan : 51748

Andromeda score : 103.31

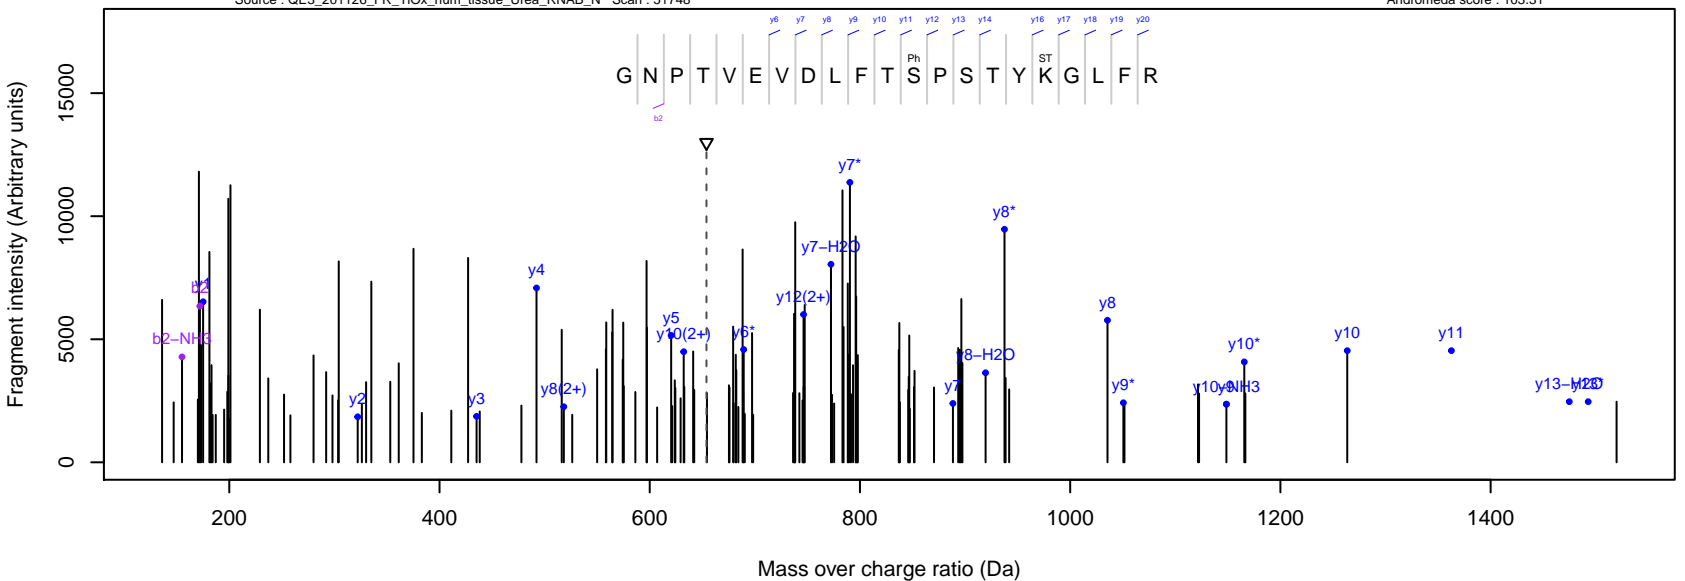

RPES(Phospho (STY))PSEIS(Phospho (STY))PIKGSVR-3+

Source : QE3\_201126\_FR\_TiOx\_hum\_tissue\_Urea\_RNAB\_B Scan : 16544

Andromeda score : 103.31

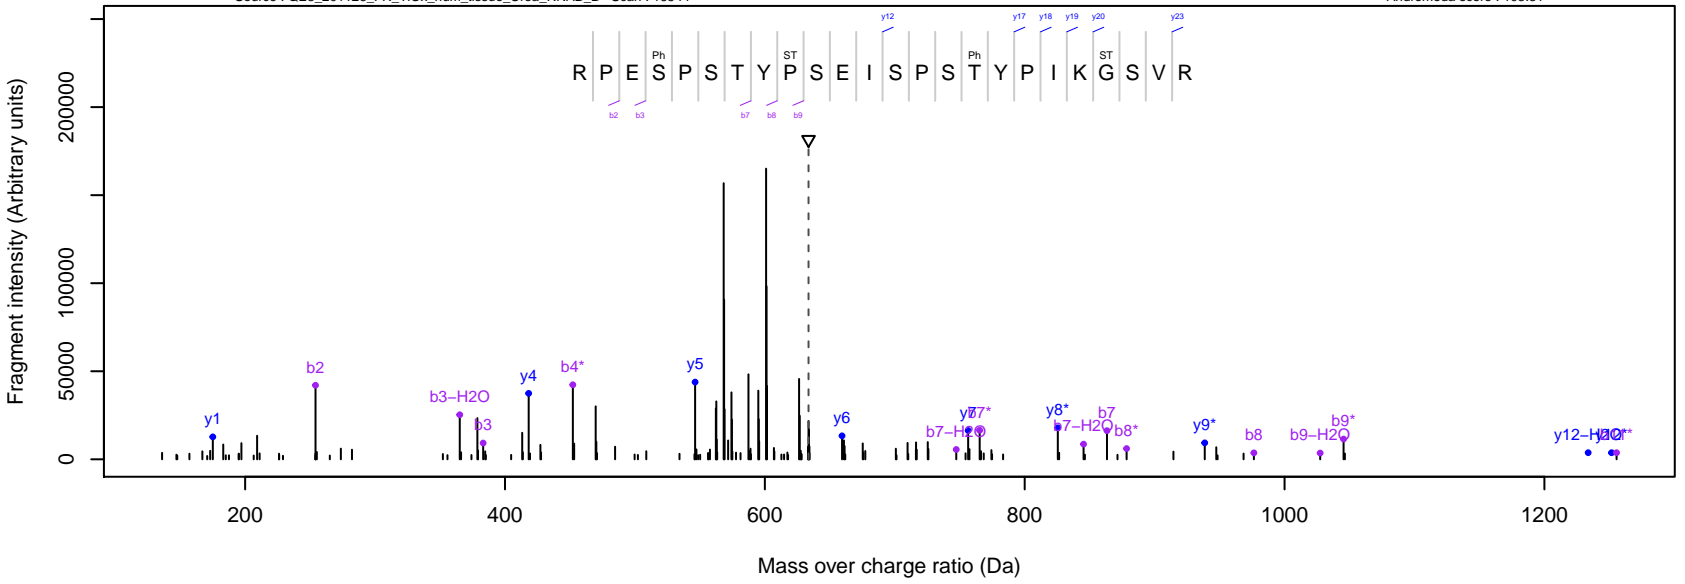

VNFPENGLS(Phospho (STY))PDKLSLLEK-3+

Source : QE3\_201126\_FR\_TiOx\_hum\_tissue\_Urea\_RNAB\_B Scan : 54871

Andromeda score : 103.27

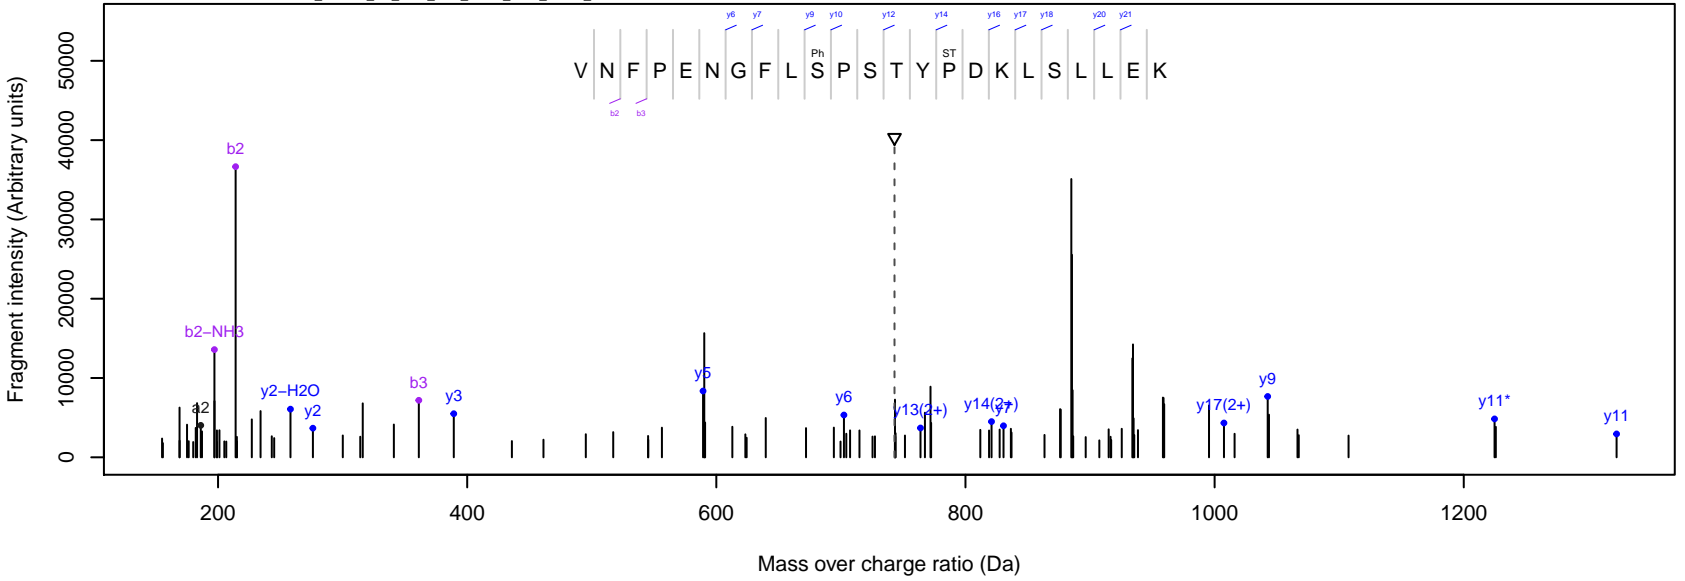

DYDDMS(Phospho (STY))PR-2+

Source : QE3\_201126\_FR\_TiOx\_hum\_tissue\_Urea\_RNAB\_N Scan : 15439

Andromeda score : 103.26

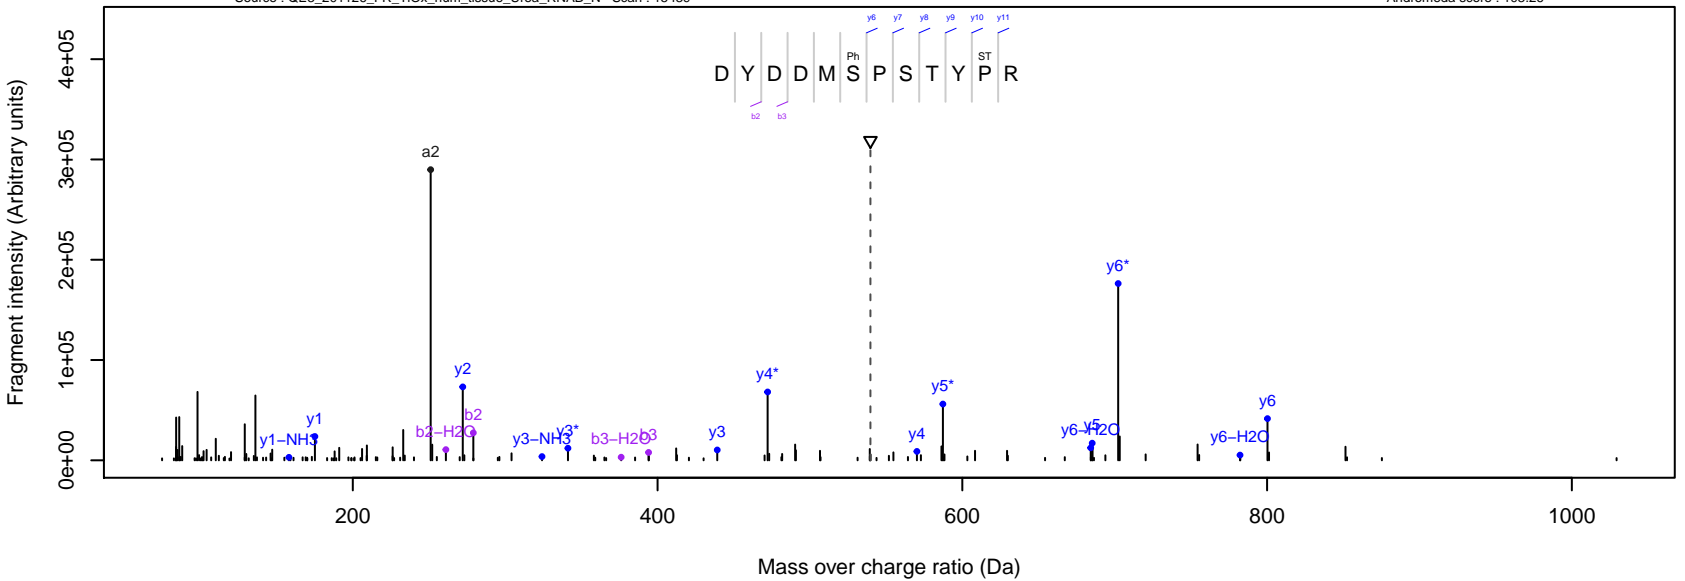

QRS(Phospho (STY))PAPGS(Phospho (STY))PDEEGAEAPAAGIR-3+

Source : QE3\_201126\_FR\_TiOx\_hum\_tissue\_Urea\_RNAB\_H Scan : 19172

Andromeda score : 103.26

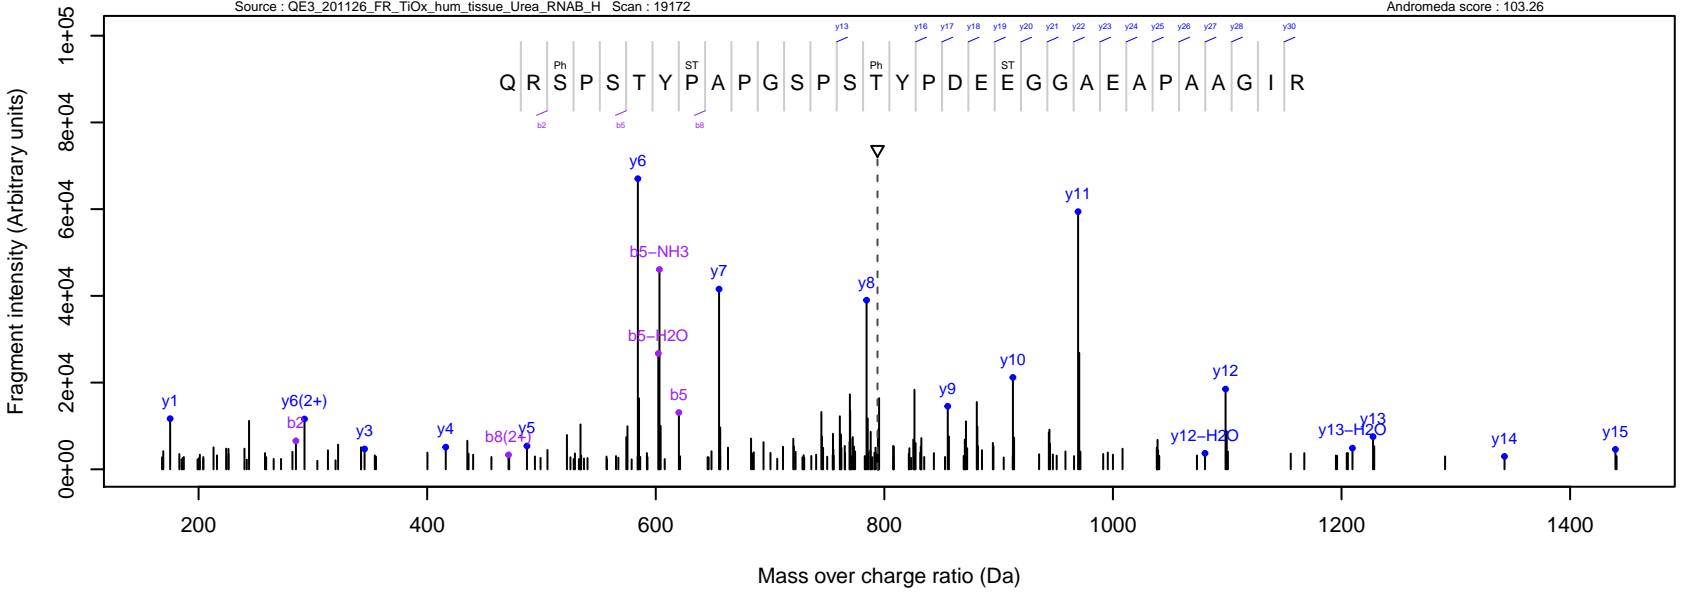

SPGGHSDGASPRS(Phospho (STY))PVPTTLPLGR-3+

Source : QE3\_201126\_FR\_TiOx\_hum\_tissue\_Urea\_RNAB\_B Scan : 21614

Andromeda score : 103.21

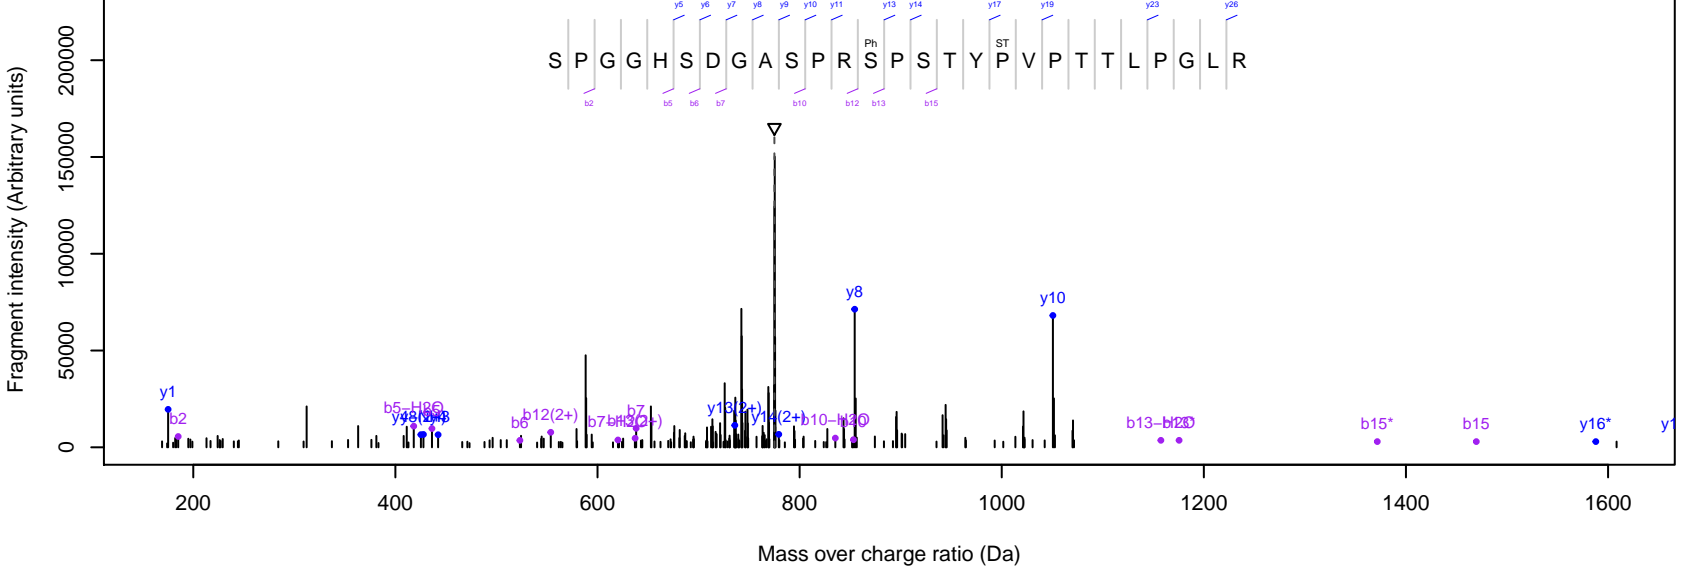

S(Phospho (STY))RT(Phospho (STY))PLLPR-2+

Source : QE3\_201126\_FR\_TiOx\_hum\_tissue\_Urea\_RNAB\_B Scan : 19603

Andromeda score : 103.21

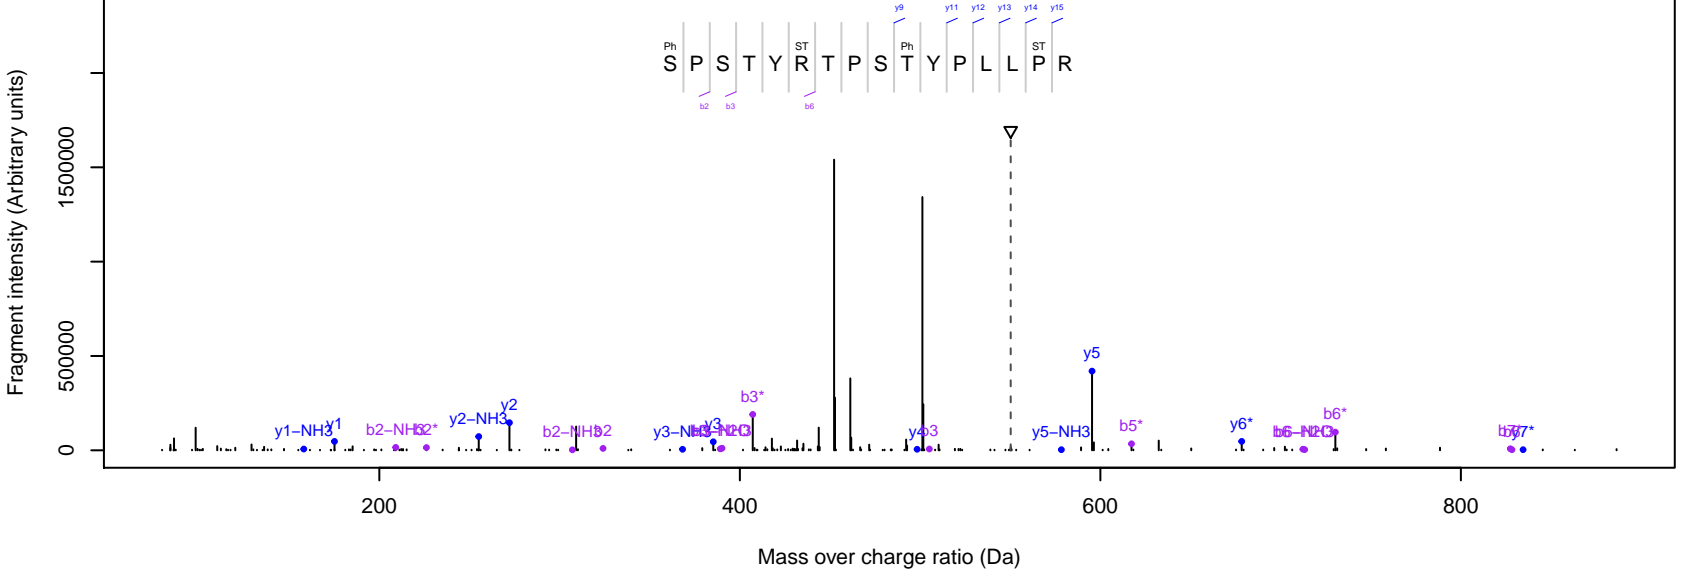



M(Oxidation (M))DTCSSLNNS(Phospho (STY))IYKK-3+

Source : QE3\_201126\_FR\_TIOx\_hum\_tissue\_Urea\_RNAB\_H Scan : 11865

Andromeda score : 103.17

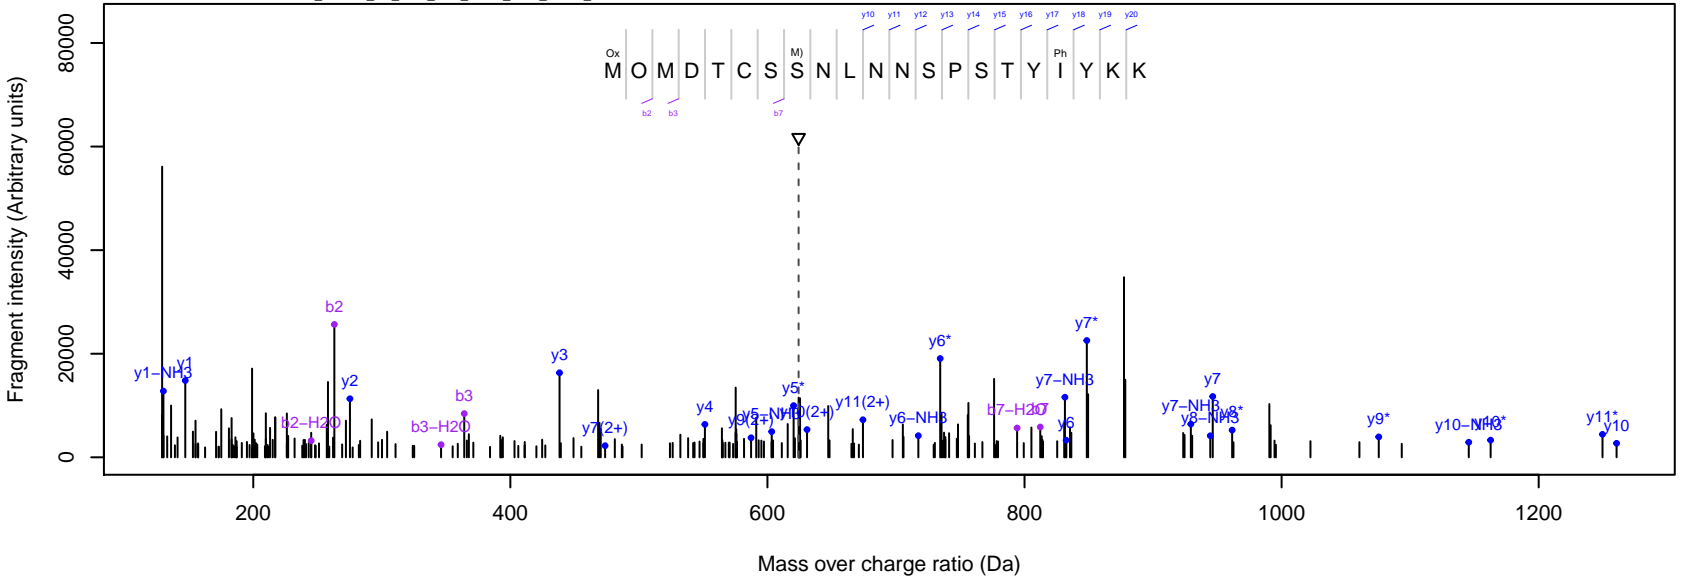

RQFS(Phospho (STY))ALVPAFDPRPGR-3+

Source : QE3\_201126\_FR\_TIOx\_hum\_tissue\_Urea\_RNAB\_H Scan : 35604

Andromeda score : 103.17

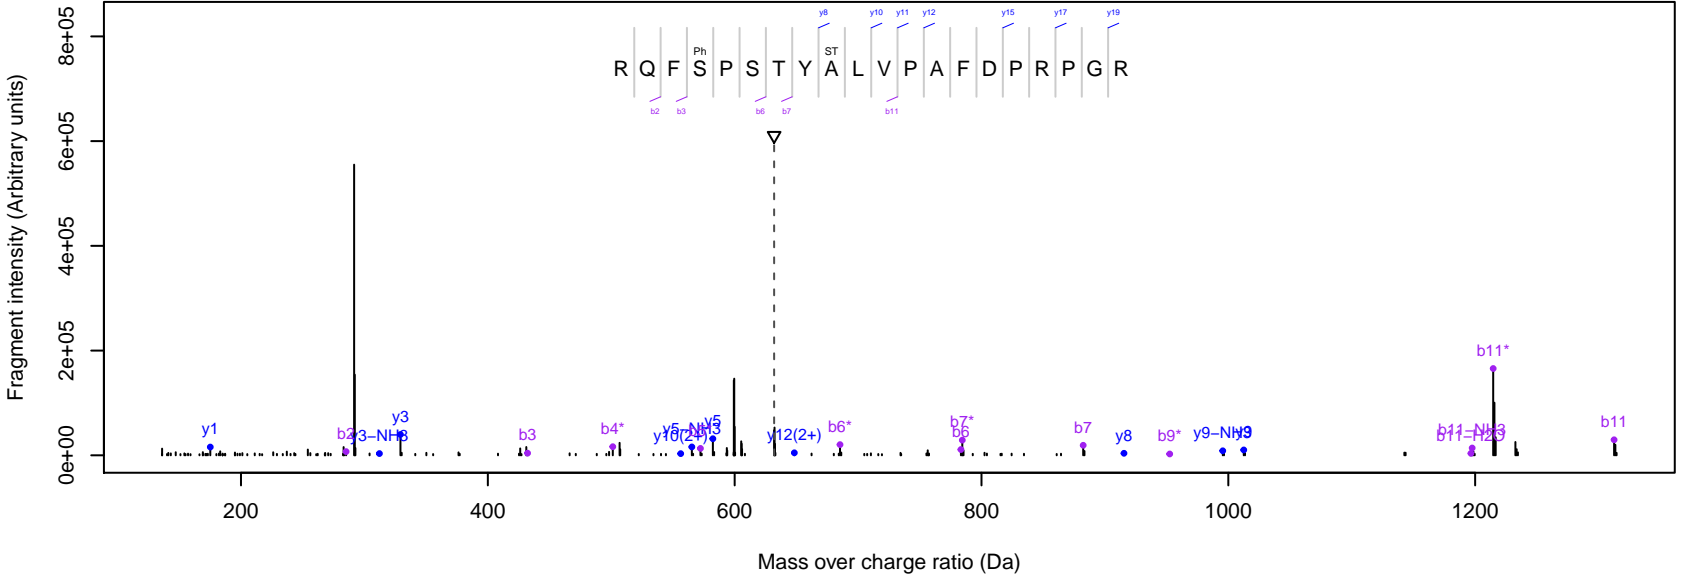

SGSS(Phospho (STY))QELDVKPS(Phospho (STY))ASPQER-2+

Source : QE3\_201126\_FR\_TIOx\_hum\_tissue\_Urea\_RNAB\_N Scan : 17072

Andromeda score : 103.17

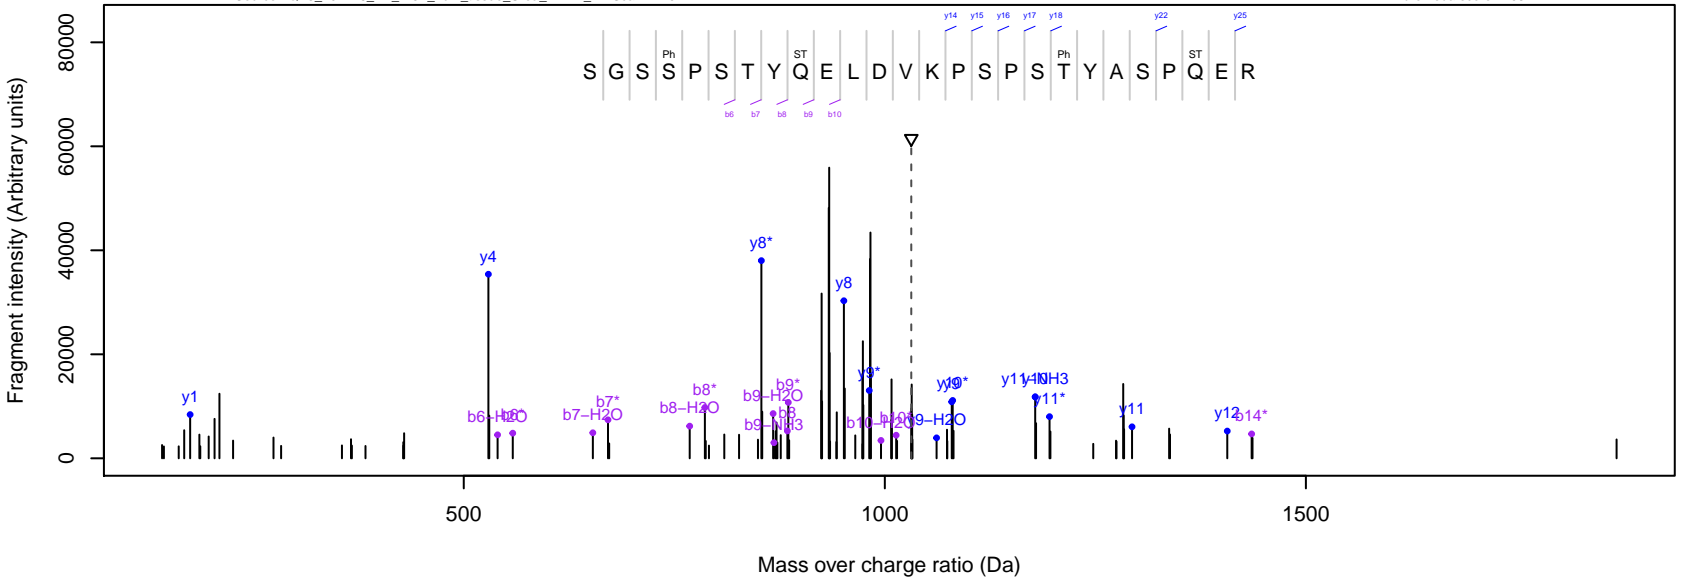

KNTFTAWS(Phospho (STY))DEESDYEDDRVNVK-4+

Source : QE3\_201126\_FR\_TIOx\_hum\_tissue\_Urea\_RNAB\_N Scan : 31385

Andromeda score : 103.16

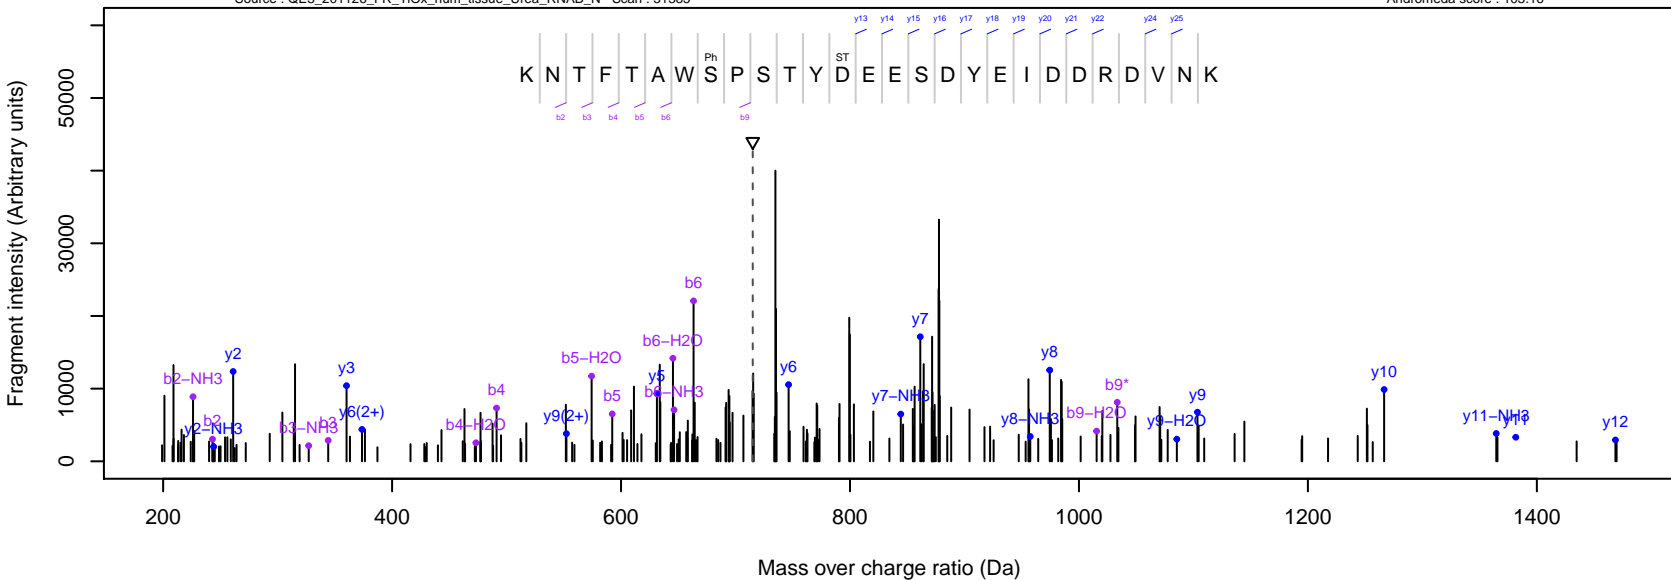

ALAEEAS(Phospho (STY))EEELPS(Phospho (STY))DVLNDPYFAEEVK-3+

Source : QE3\_201126\_FR\_TIOx\_hum\_tissue\_Urea\_RNAB\_N Scan : 59644

Andromeda score : 103.15

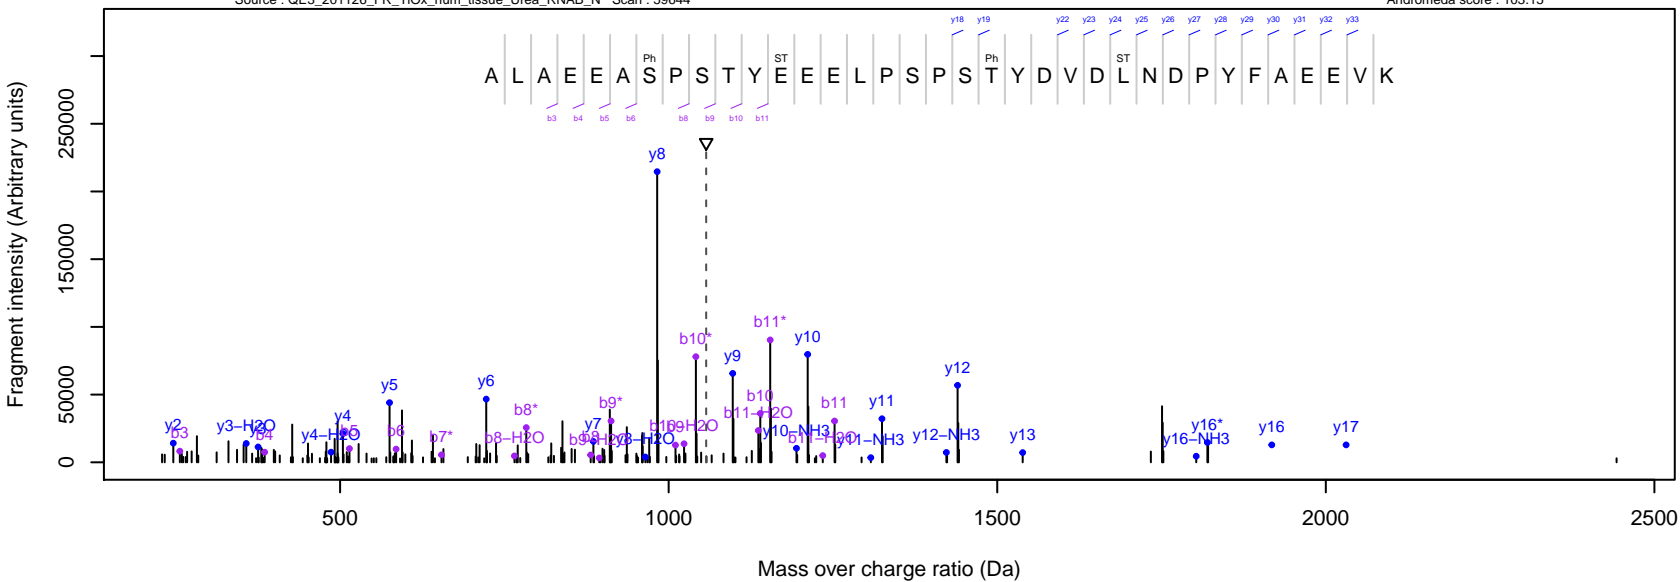

YSPIYSPDPYASEYWTYHGS(Phospho (STY))PK-3+

Source : QE3\_201126\_FR\_TIOx\_hum\_tissue\_Urea\_RNAB\_H Scan : 47856

Andromeda score : 103.15

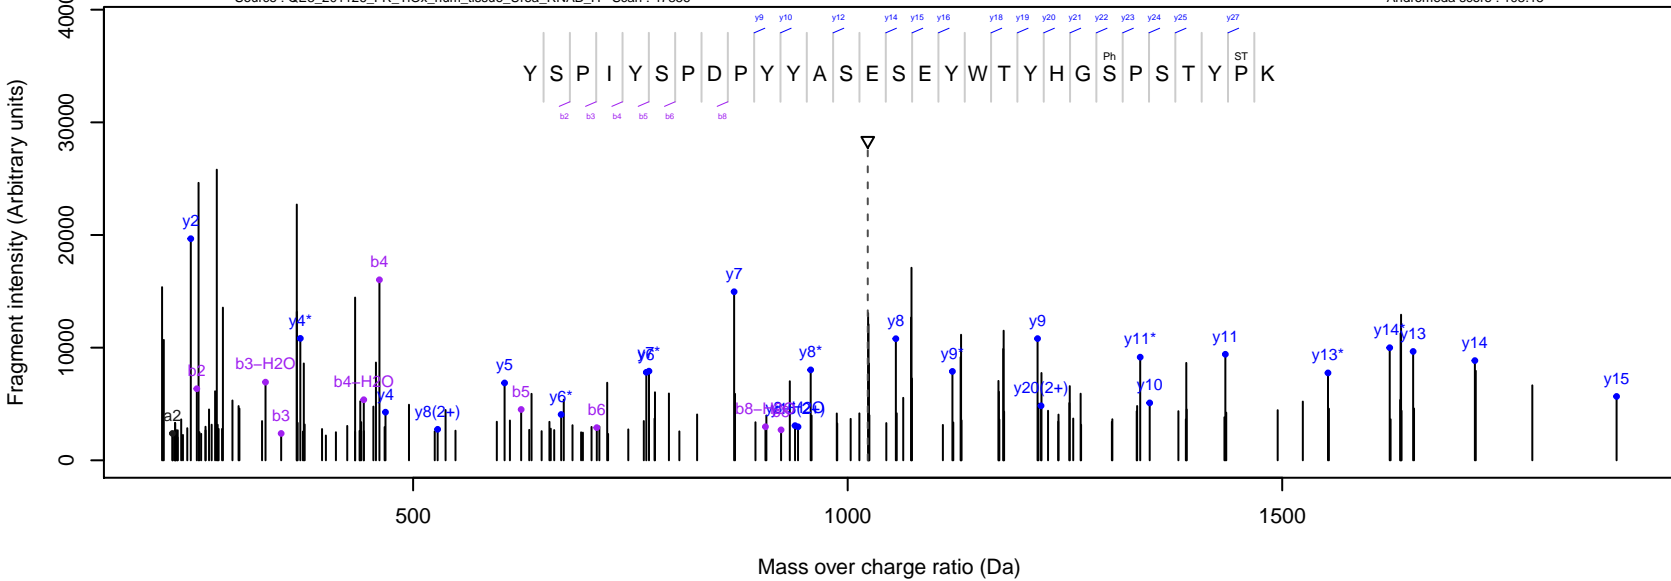

NSGS(Phospho (STY))DGSPSLLAR-2+

Source : QE3\_201126\_FR\_TIOx\_hum\_tissue\_Urea\_RNAB\_B Scan : 22904

Andromeda score : 103.14

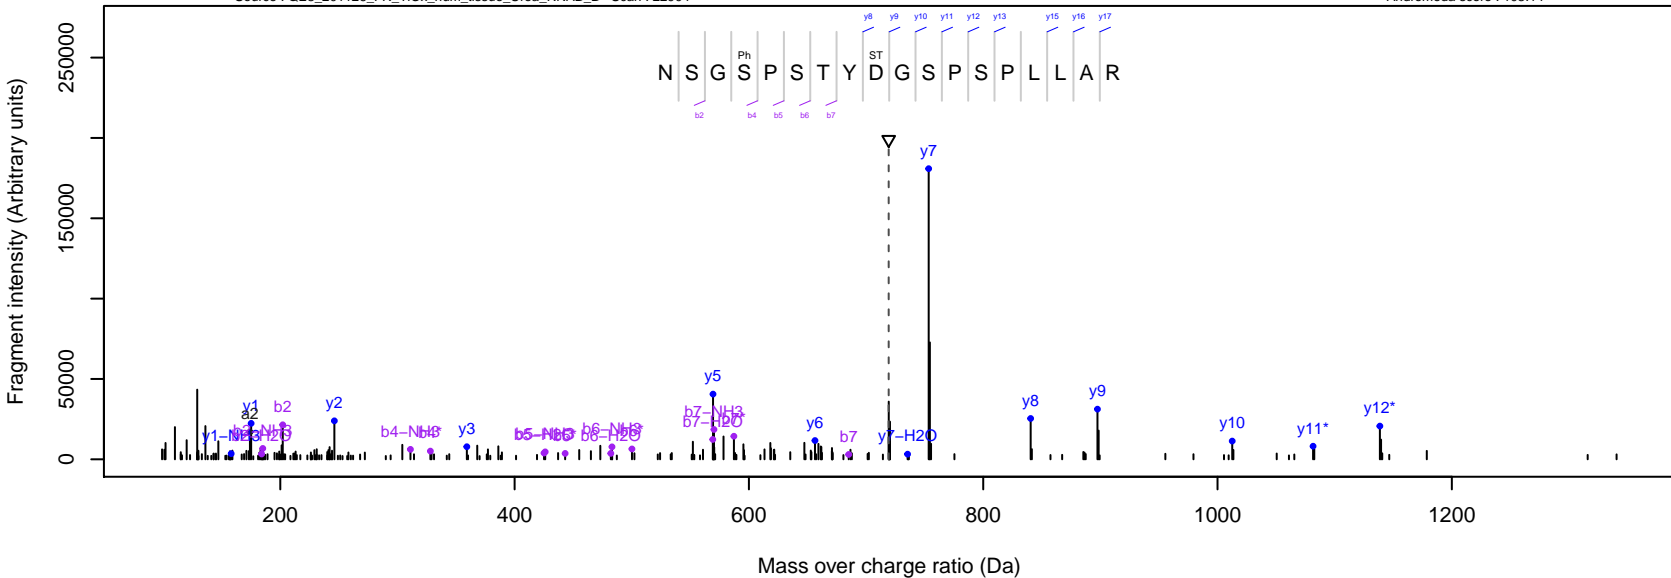

DAPSGIGLSASELDGSEEMGQGVSSS(Phospho (STY))PR-3+

Source : QE3\_201126\_FR\_TIOx\_hum\_tissue\_Urea\_RNAB\_H Scan : 62126

Andromeda score : 103.13

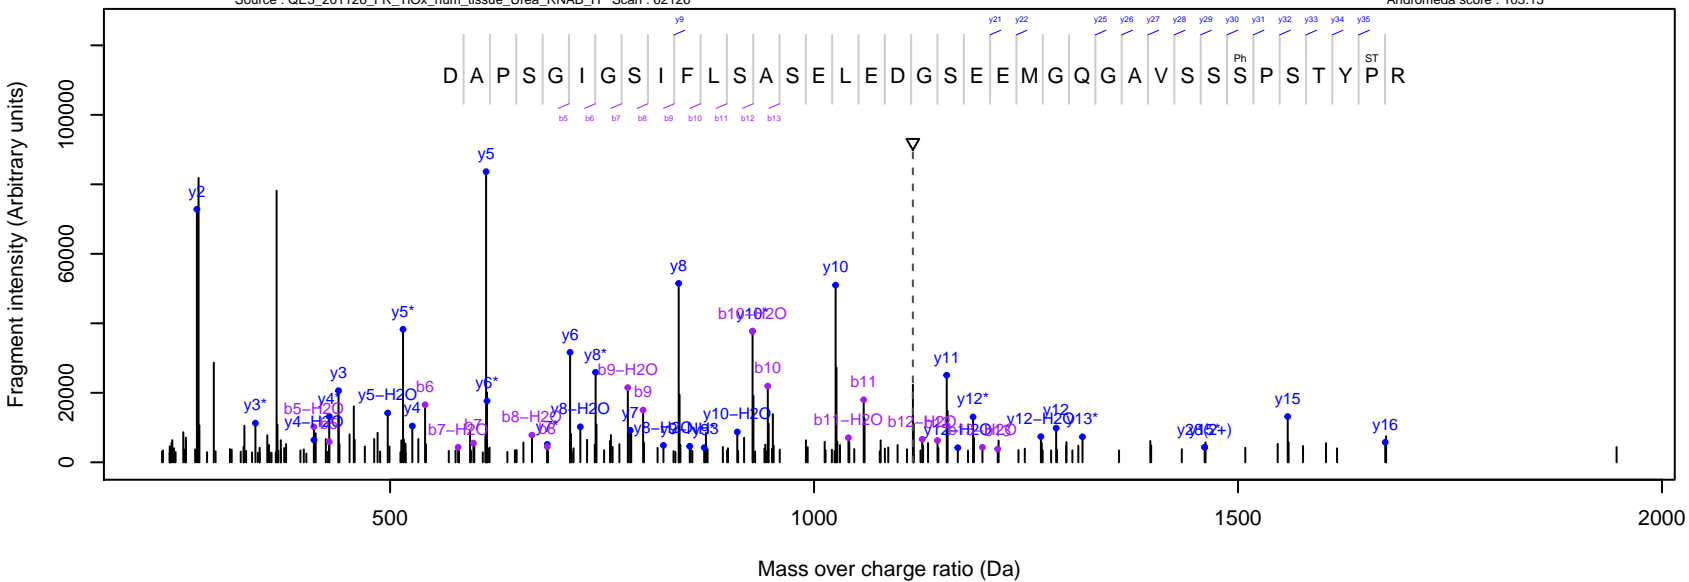

RHT(Phospho (STY))DPVQLQAAGR-3+

Source : QE3\_201126\_FR\_TIOx\_hum\_tissue\_Urea\_RNAB\_H Scan : 8993

Andromeda score : 103.13

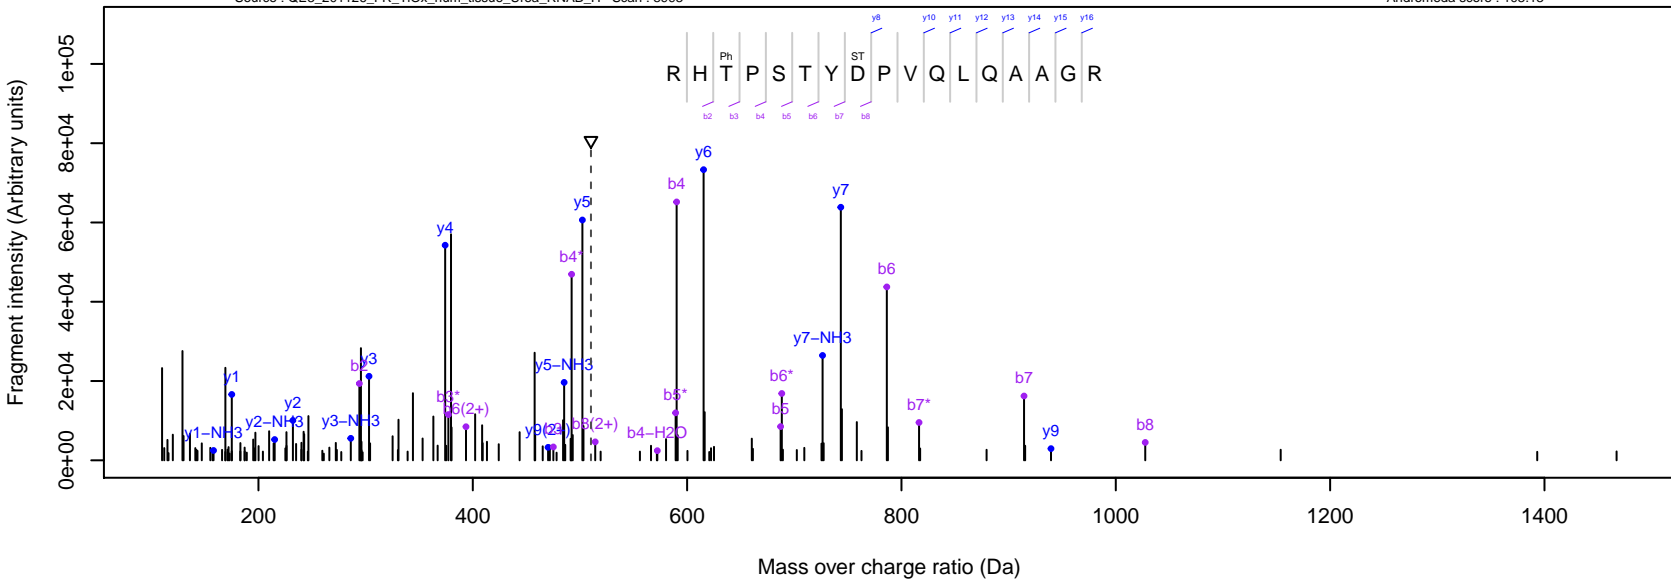

### S(Phospho (STY))PVPAQIITVPK-2+

Source : QE3\_201126\_FR\_TIOx\_hum\_tissue\_Urea\_RNAB\_B Scan : 37896

Andromeda score : 103.13

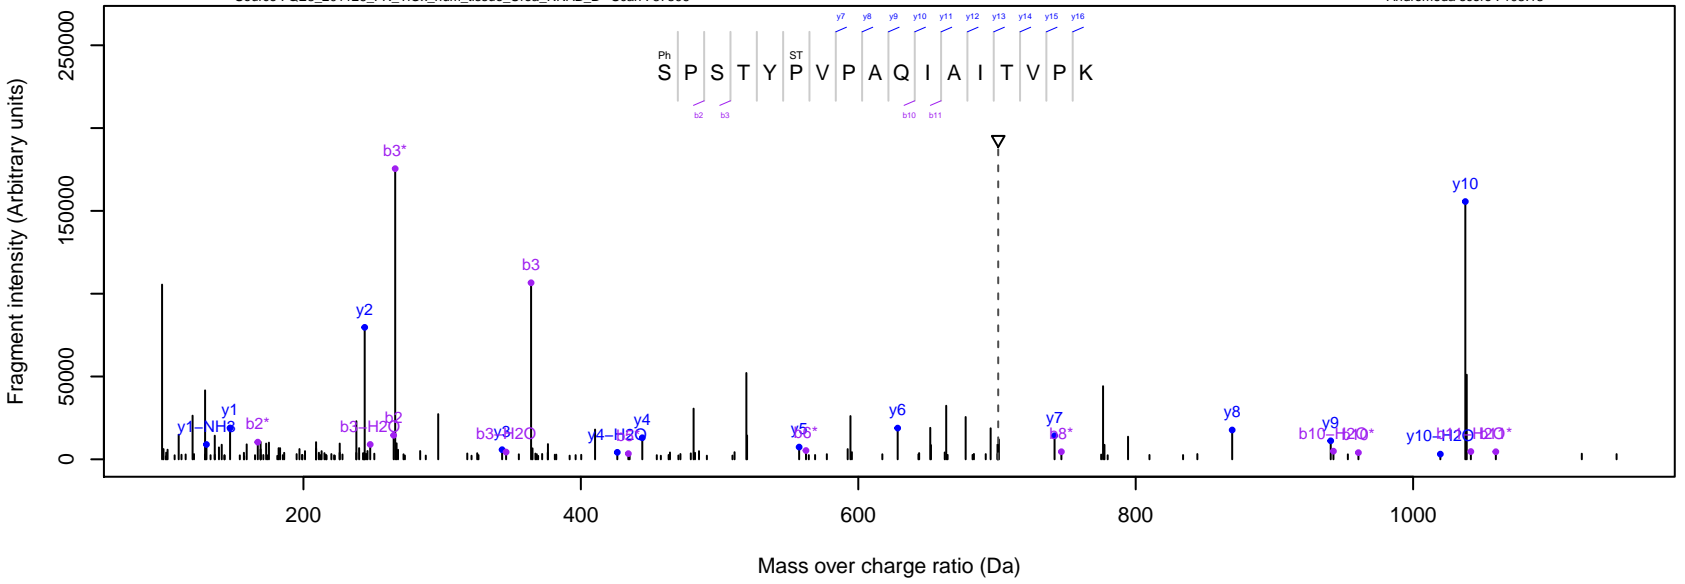

### AALPAKES(Phospho (STY))PR-2+

Source : QE3\_201126\_FR\_TIOx\_hum\_tissue\_Urea\_RNAB\_H Scan : 6400

Andromeda score : 103.11

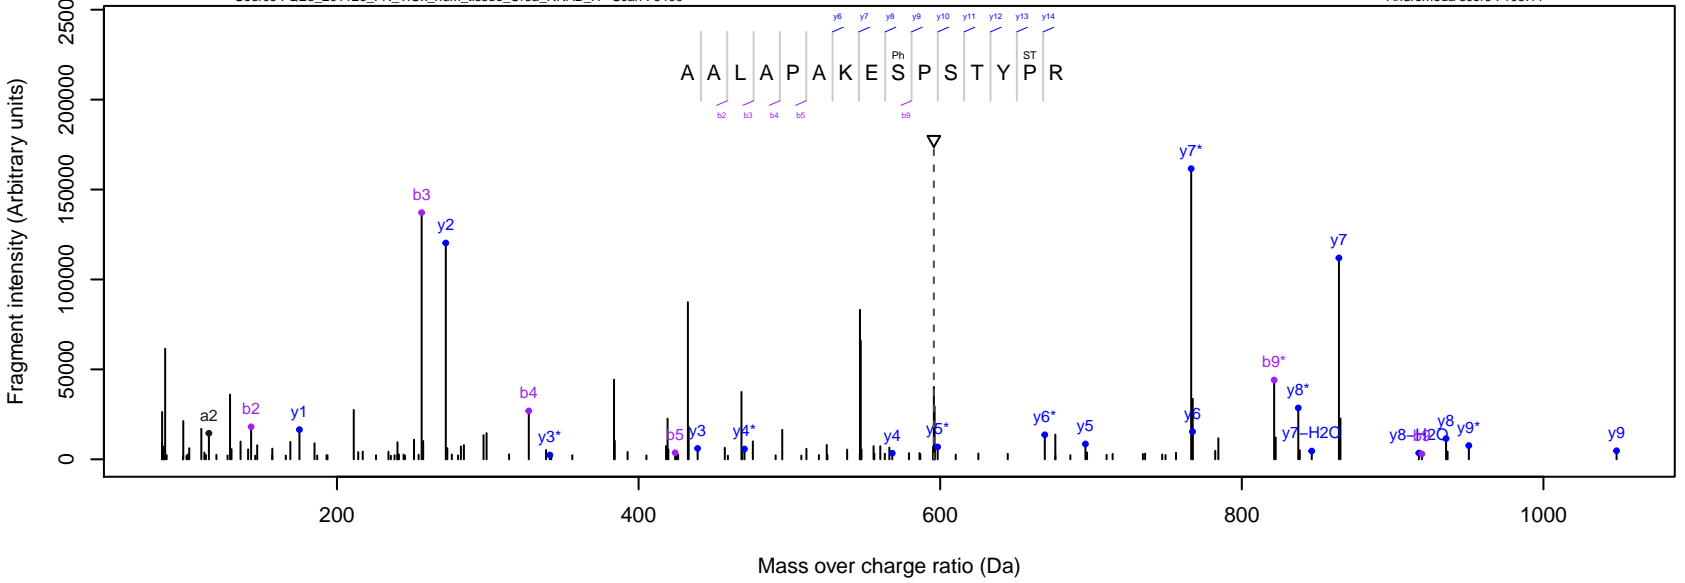

### RRPS(Phospho (STY))LLSEFPQGNR-3+

Source : QE3\_201126\_FR\_TIOx\_hum\_tissue\_Urea\_RNAB\_H Scan : 25220

Andromeda score : 103.1

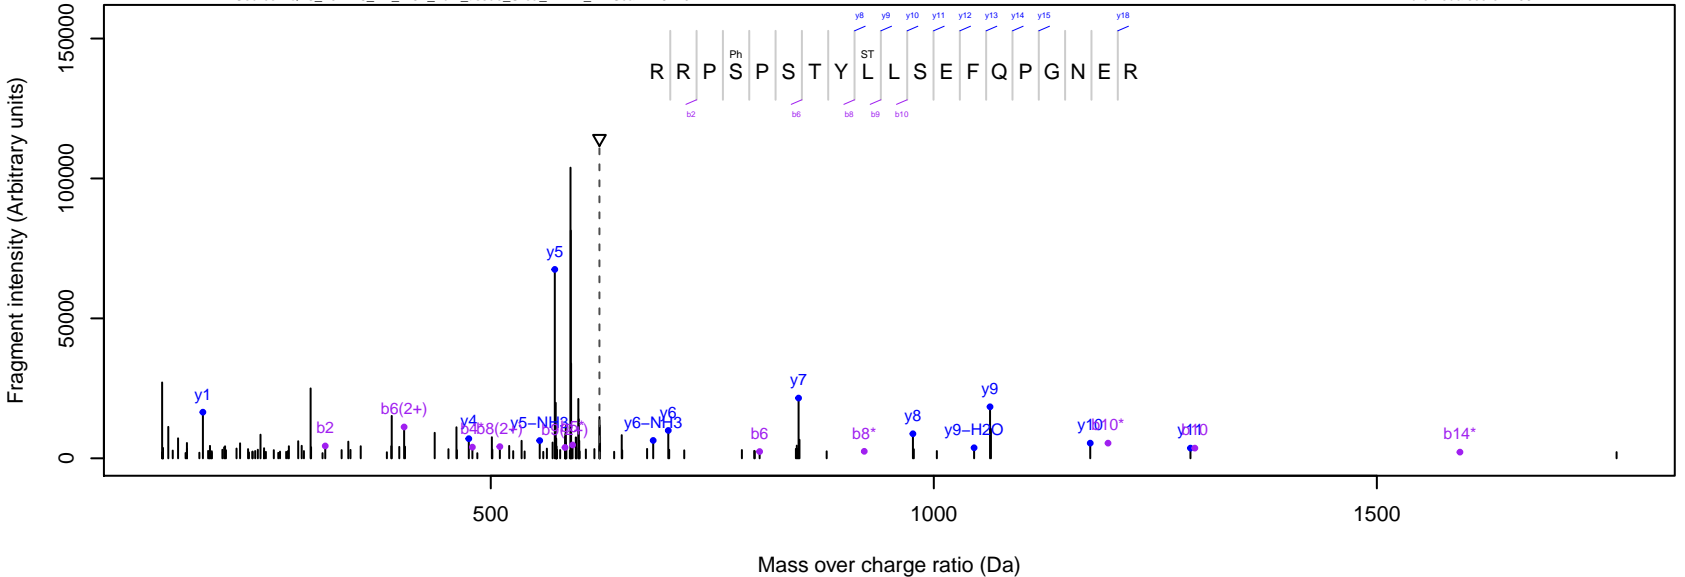

SGKLS(Phospho (STY))RELDVSHHVR-4+

Source : QE3\_201126\_FR\_TiOx\_hum\_tissue\_Urea\_RNAB\_H Scan : 25136

Andromeda score : 103.1

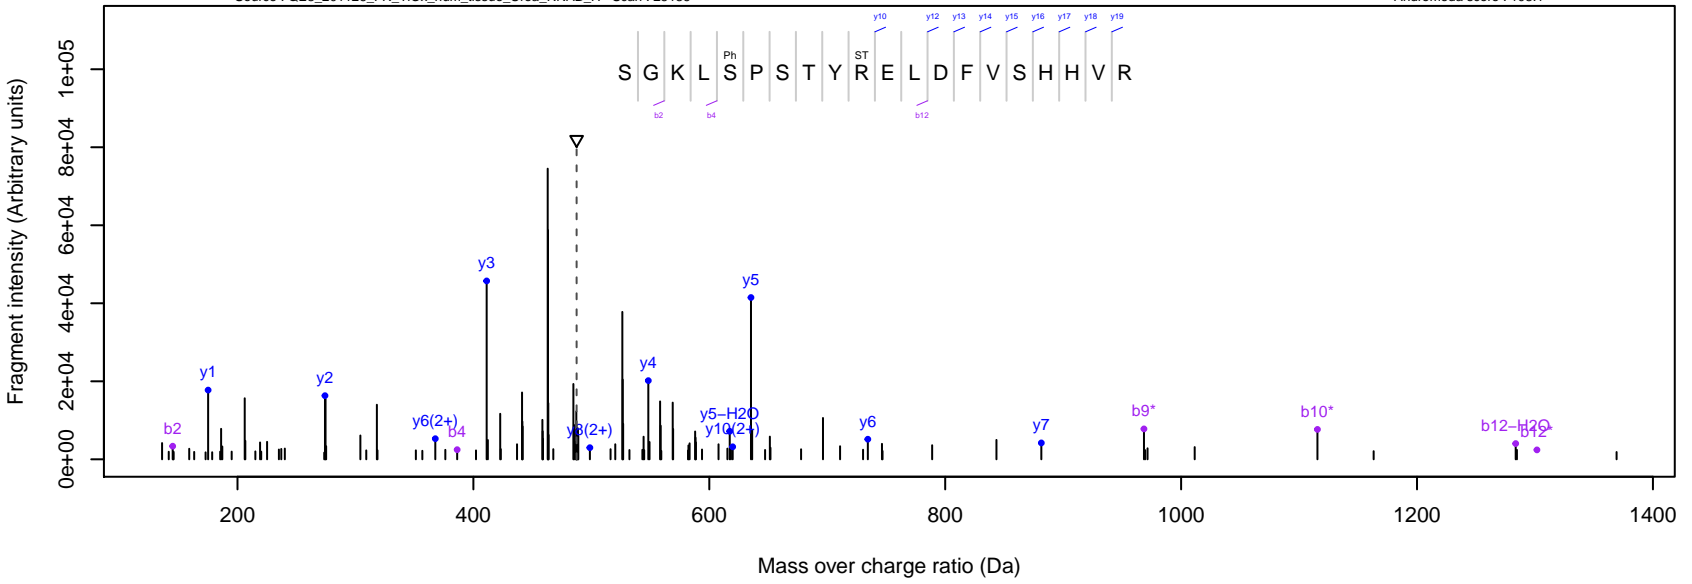

HNQGDS(Phospho (STY))DDDVEETHPMDGNDSDYDPKK-4+

Source : QE3\_201126\_FR\_TiOx\_hum\_tissue\_Urea\_RNAB\_N Scan : 12183

Andromeda score : 103.09

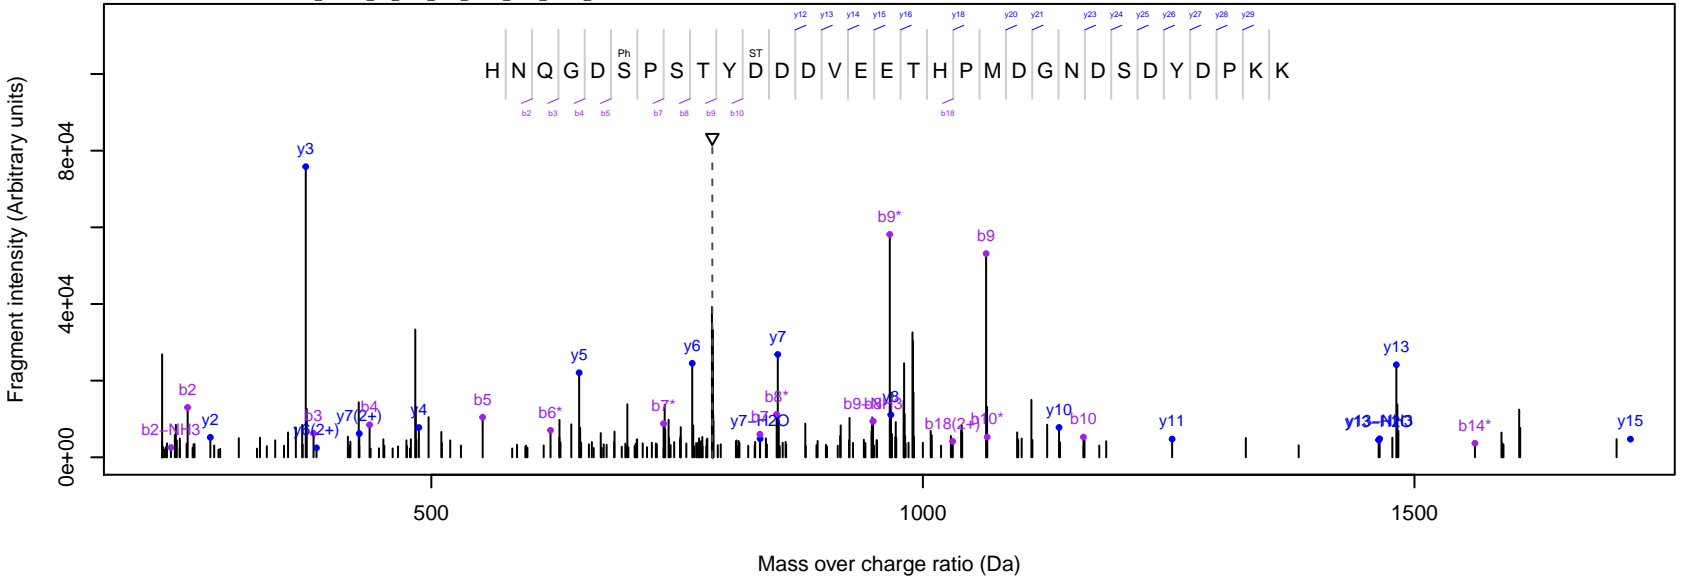

(Acetyl (Protein N-term))GS(Phospho (STY))PLRFDR-2+

Source : QE3\_201126\_FR\_TiOx\_hum\_tissue\_Urea\_RNAB\_B Scan : 27303

Andromeda score : 103.08

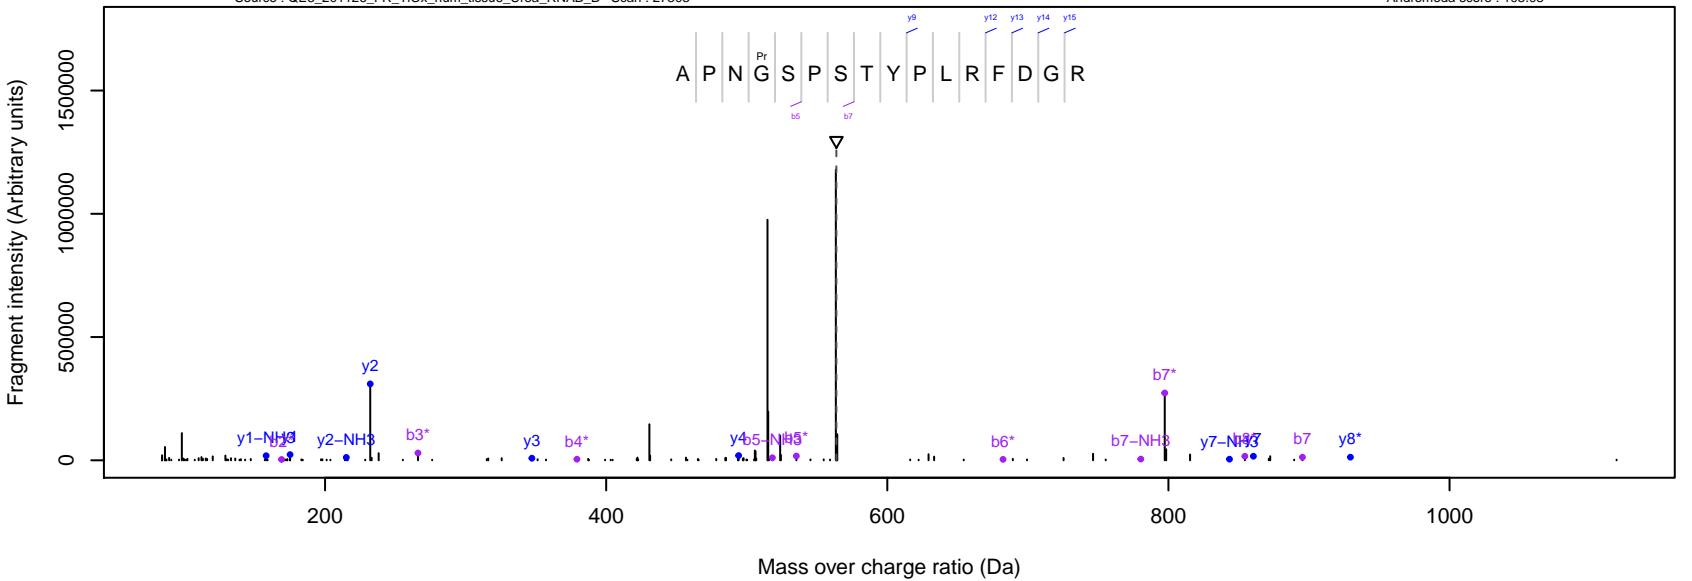

LNQPGT(Phospho (STY))PTR-2+

Source : QE3\_201126\_FR\_TiOx\_hum\_tissue\_Urea\_RNAB\_H Scan : 7054

Andromeda score : 103.08

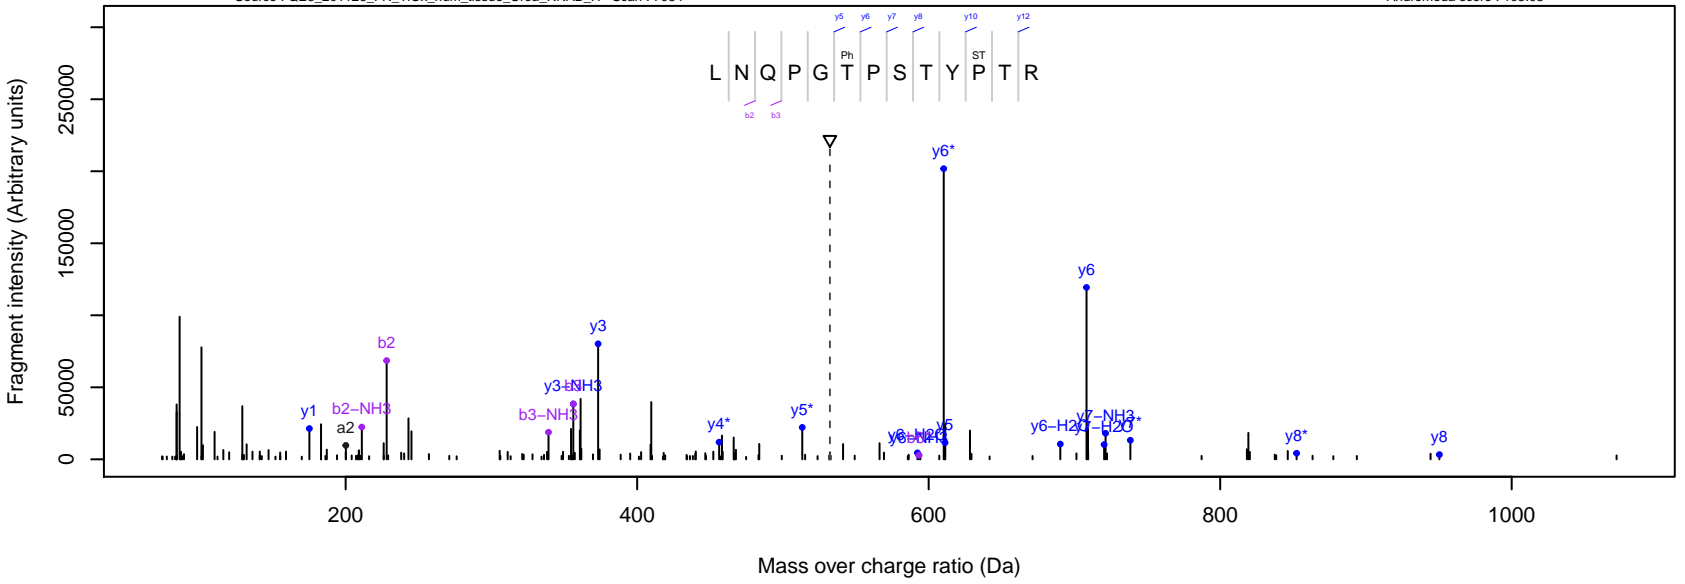

IRELESQIS(Phospho (STY))ELQEDLESER-3+

Source : QE3\_201126\_FR\_TiOx\_hum\_tissue\_Urea\_RNAB\_H Scan : 50699

Andromeda score : 103.03

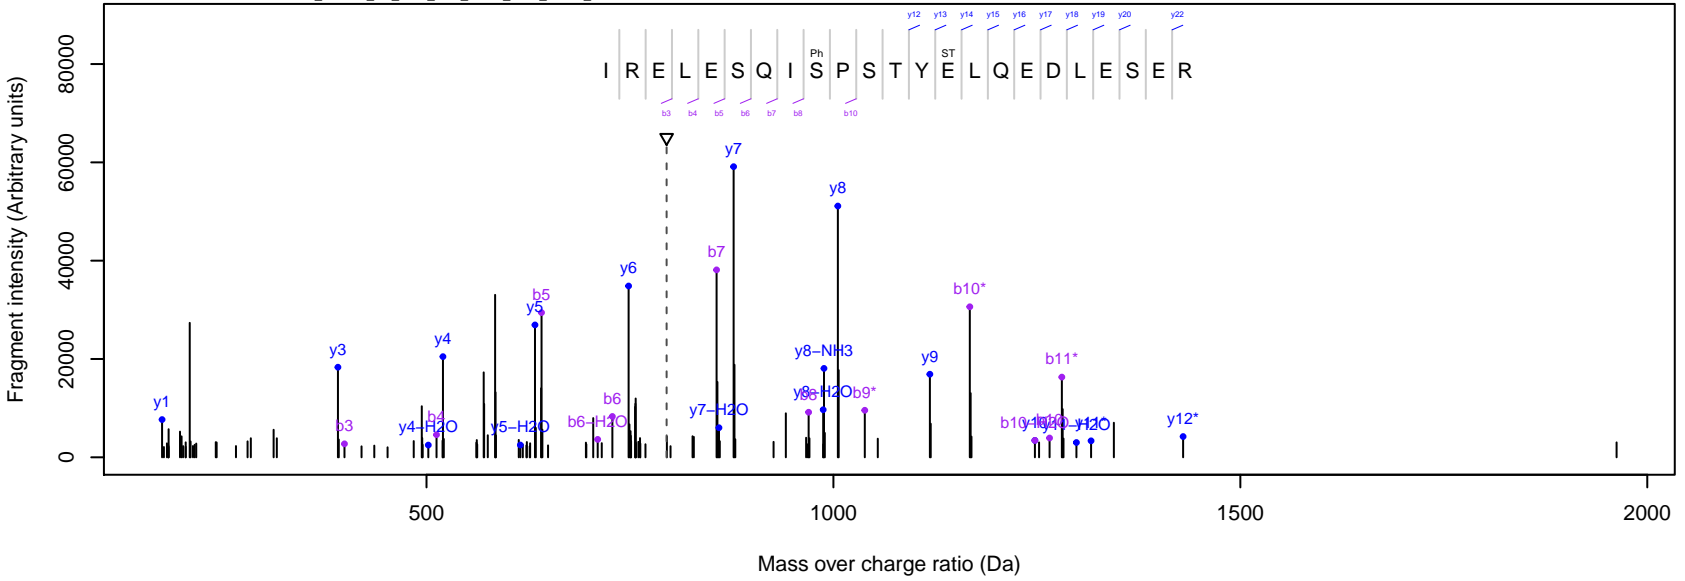

KHEFMS(Phospho (STY))DTNLSEHAAIPLK-3+

Source : QE3\_201126\_FR\_TiOx\_hum\_tissue\_Urea\_RNAB\_H Scan : 26925

Andromeda score : 103.03

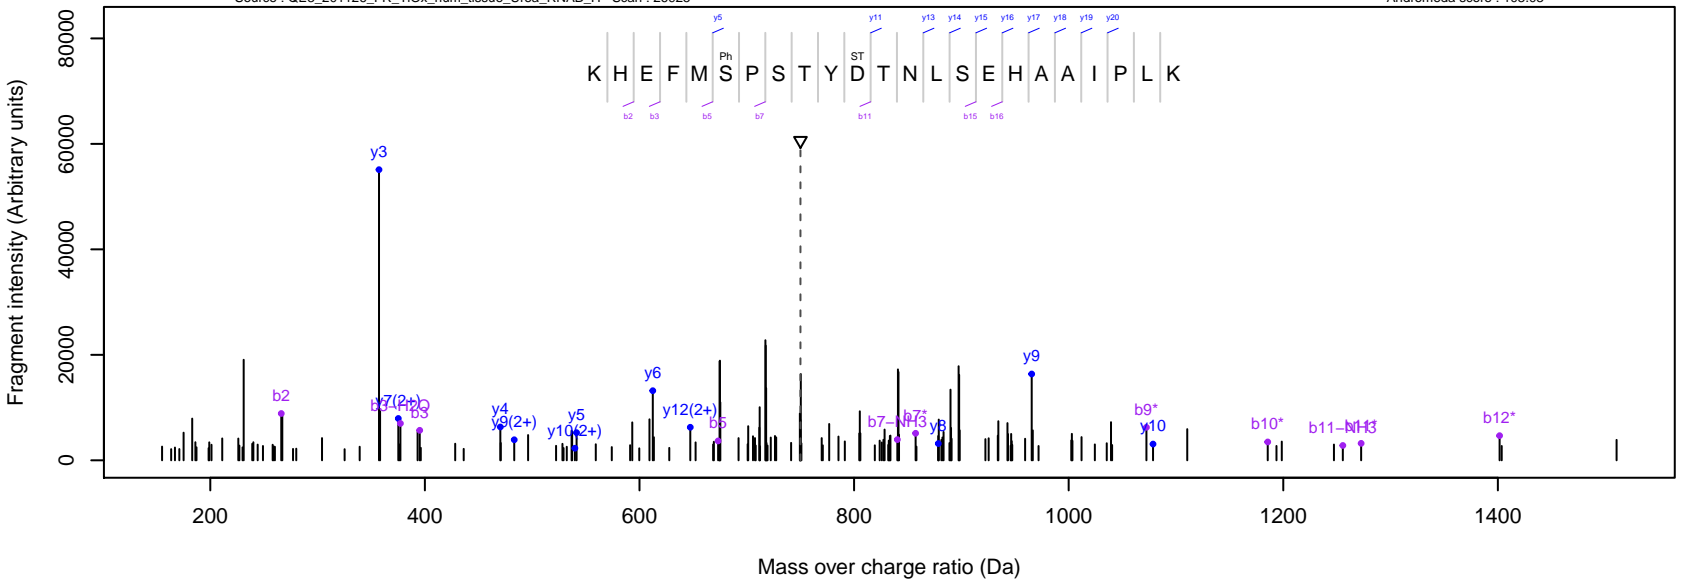

RTSET(Phospho (STY))SIS(Phospho (STY))PPGSSIGSPNR-3+

Source : QE3\_201126\_FR\_TiOx\_hum\_tissue\_Urea\_RNAB\_N Scan : 21178

Andromeda score : 103.03

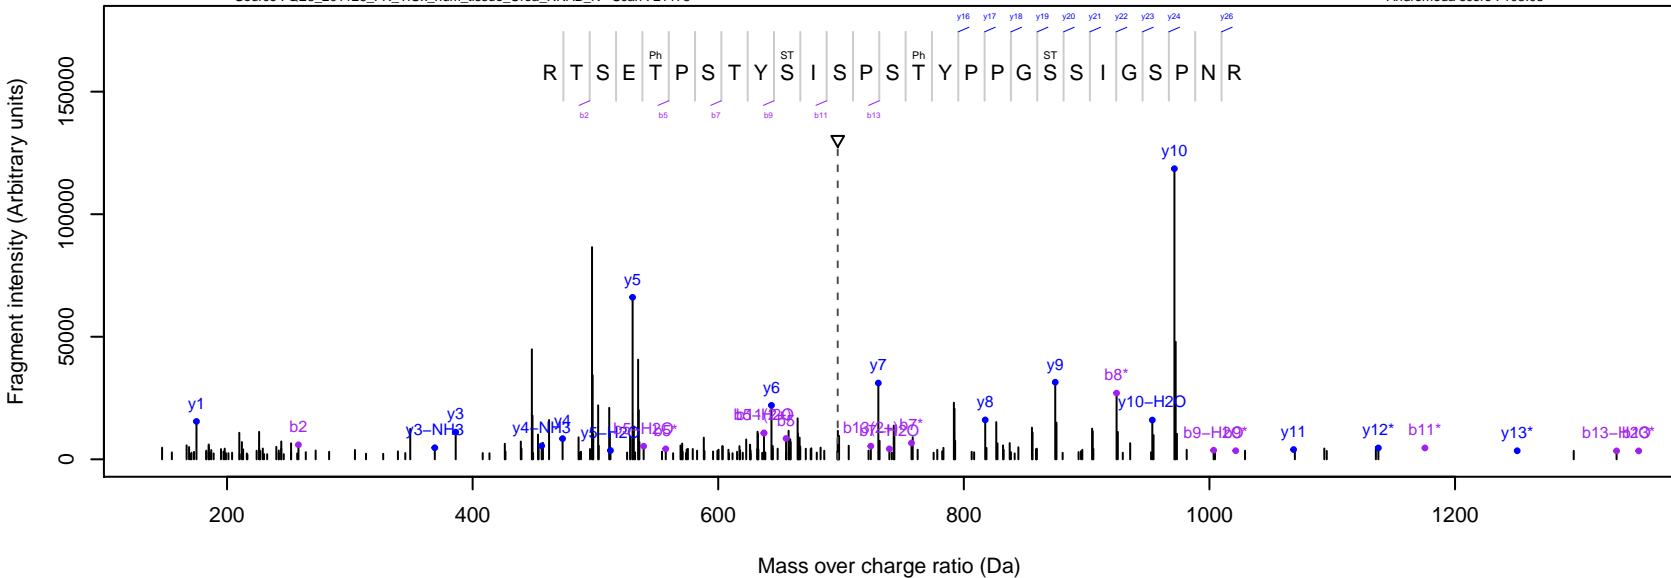

KSPS(Phospho (STY))LESLSRPPSLGFGDTR-3+

Source : QE3\_201126\_FR\_TiOx\_hum\_tissue\_Urea\_RNAB\_N Scan : 33793

Andromeda score : 103.02

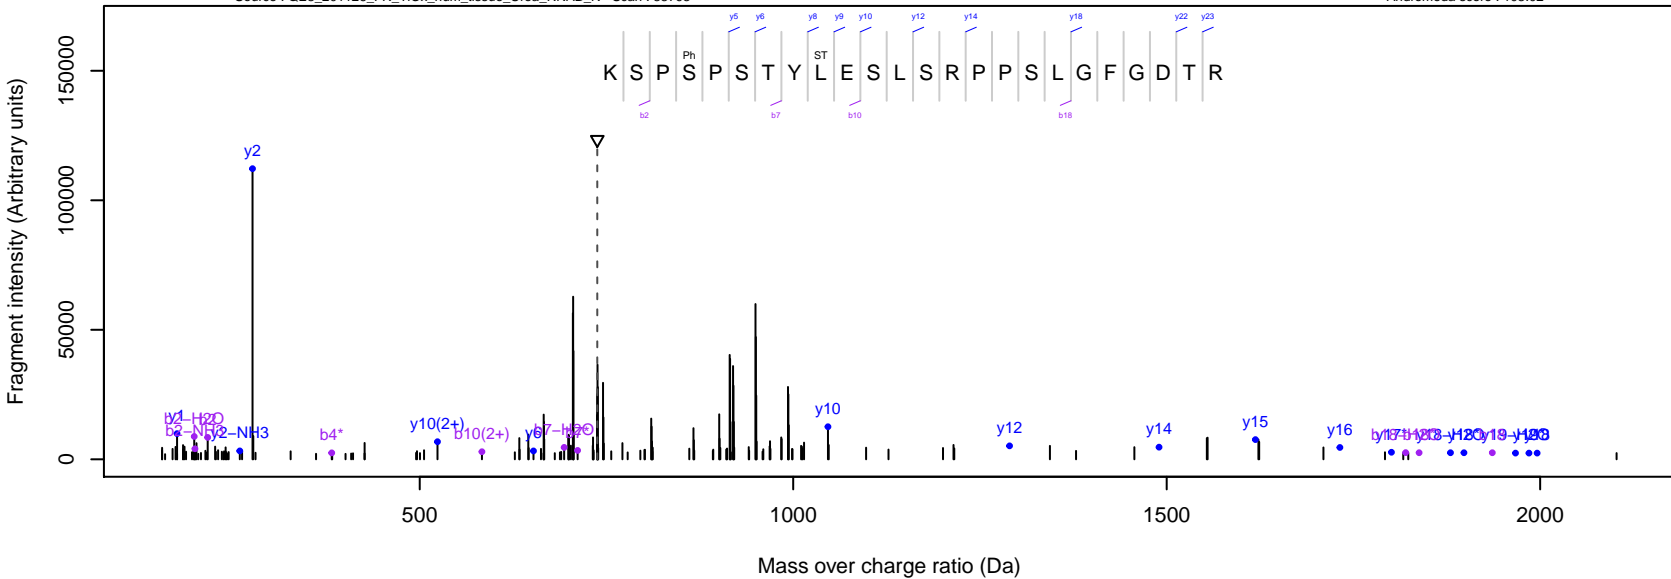

(Acetyl (Protein N-term))MDLFGDLPEPERS(Phospho (STY))PRPAAGK-3+

Source : QE3\_201126\_FR\_TiOx\_hum\_tissue\_Urea\_RNAB\_H Scan : 50218

Andromeda score : 103.02

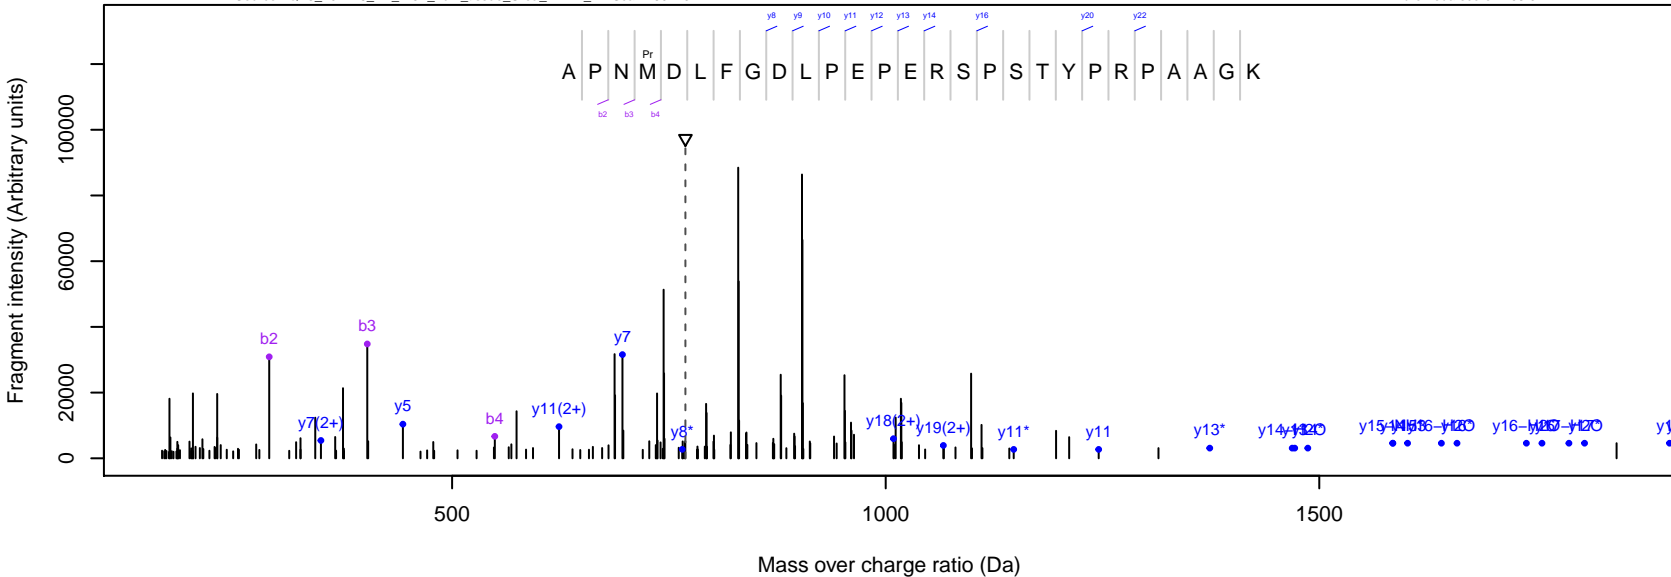

NAS(Phospho (STY))RENLNLEPQPATGQPR-3+

Source : QE3\_201126\_FR\_TiOx\_hum\_tissue\_Urea\_RNAB\_B Scan : 21690

Andromeda score : 103.02

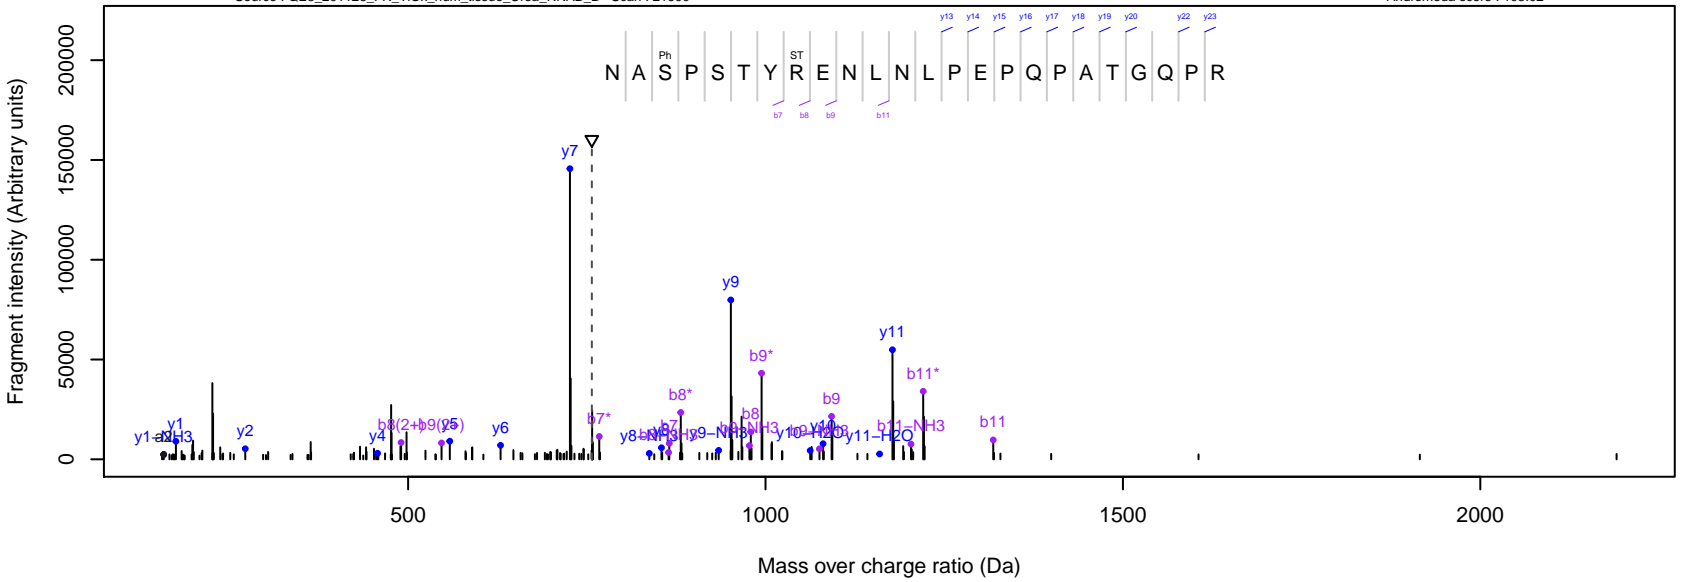

RT(Phospho (STY))SSEDNLYLAVLR-3+

Source : QE3\_201126\_FR\_TiOx\_hum\_tissue\_Urea\_RNAB\_H Scan : 39849

Andromeda score : 103.01

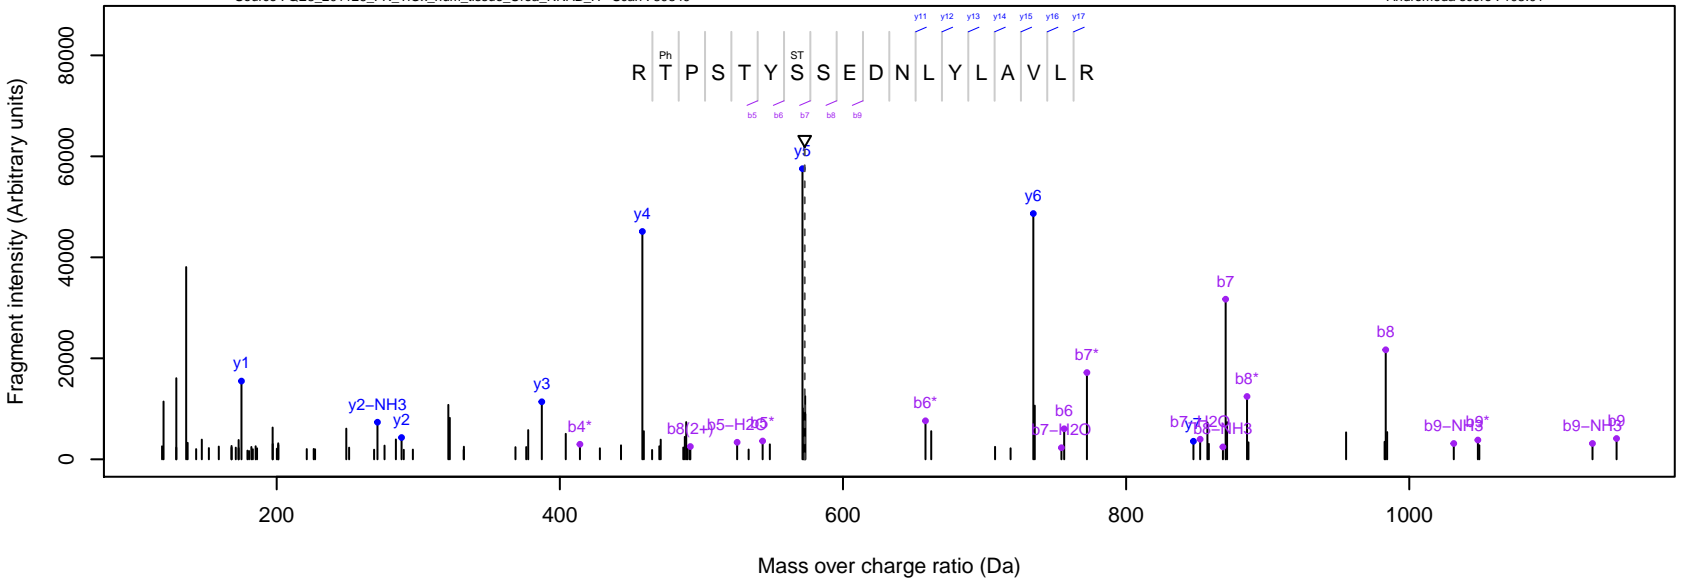

SLEETLHTVDSL(Phospho (STY))S(Phospho (STY))DDDLPHDEEALEDSAEKVEESR-4+

Source : QE3\_201126\_FR\_TiOx\_hum\_tissue\_Urea\_RNAB\_H Scan : 50631

Andromeda score : 103.01

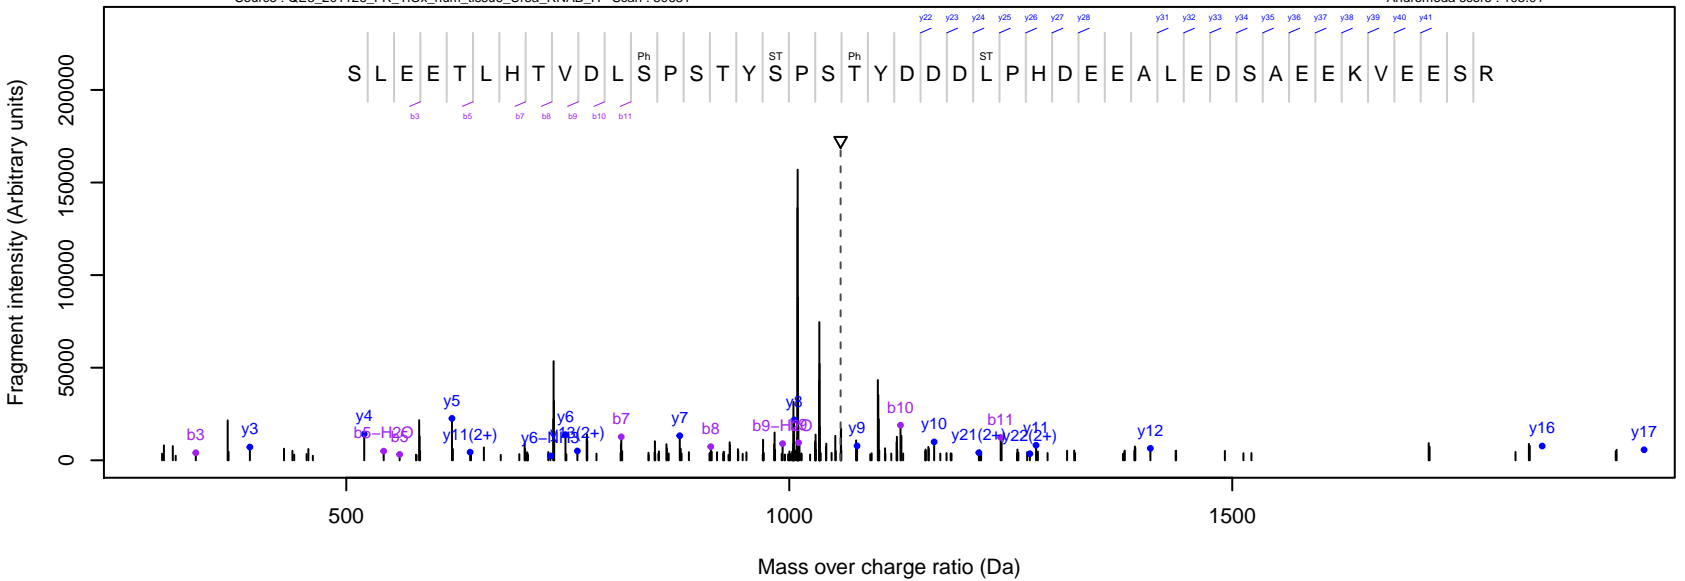



AESIS(Phospho (STY))S(Phospho (STY))DEEVHESVSDSNQQNK-3+

Source : QE3\_201126\_FR\_TiOx\_hum\_tissue\_Urea\_RNAB\_H Scan : 17954

Andromeda score : 102.95

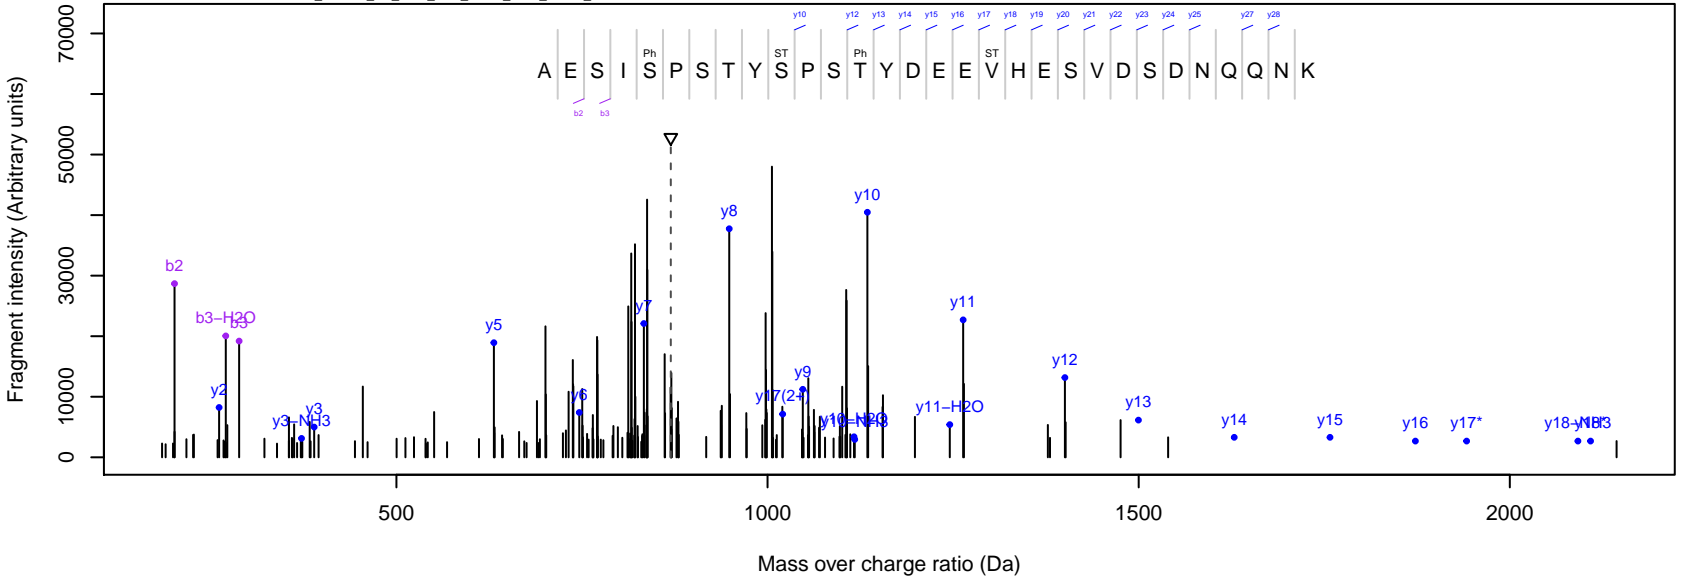

AAS(Phospho (STY))PPLKGSVSSEASELDKK-3+

Source : QE3\_201126\_FR\_TiOx\_hum\_tissue\_Urea\_RNAB\_H Scan : 18264

Andromeda score : 102.94

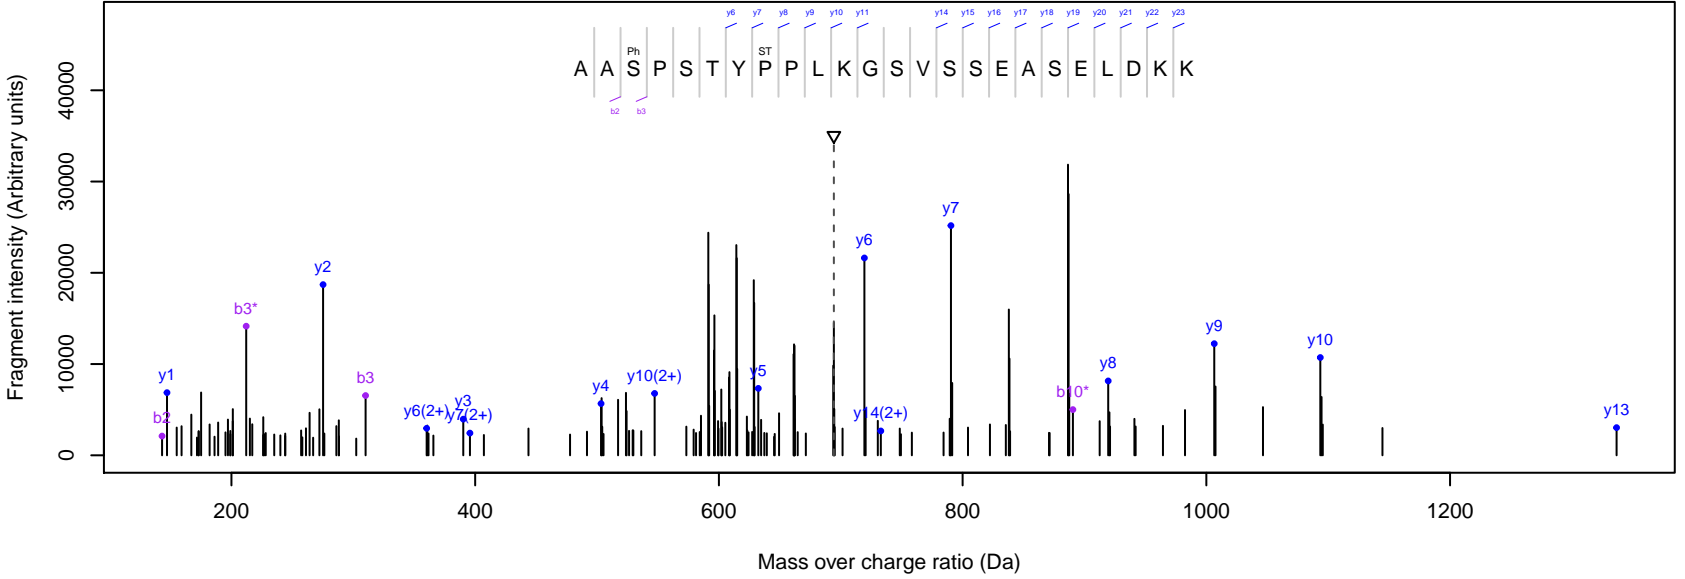

DAHDVS(Phospho (STY))PTSTDTEAQLTVER-3+

Source : QE3\_201126\_FR\_TiOx\_hum\_tissue\_Urea\_RNAB\_H Scan : 22865

Andromeda score : 102.94

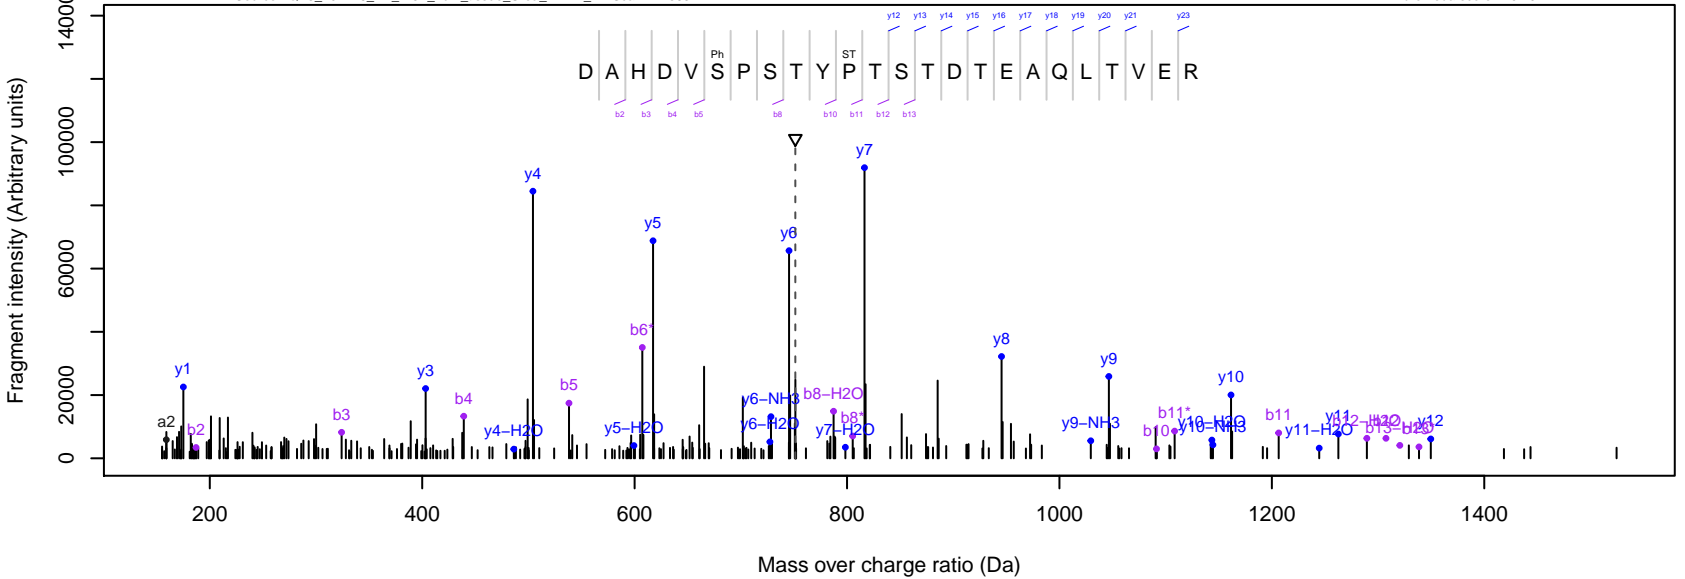

EREGS(Phospho (STY))FHSNDLFLDAQLLQR-3+

Source : QE3\_201126\_FR\_TiOx\_hum\_tissue\_Urea\_RNAB\_N Scan : 45184

Andromeda score : 102.94

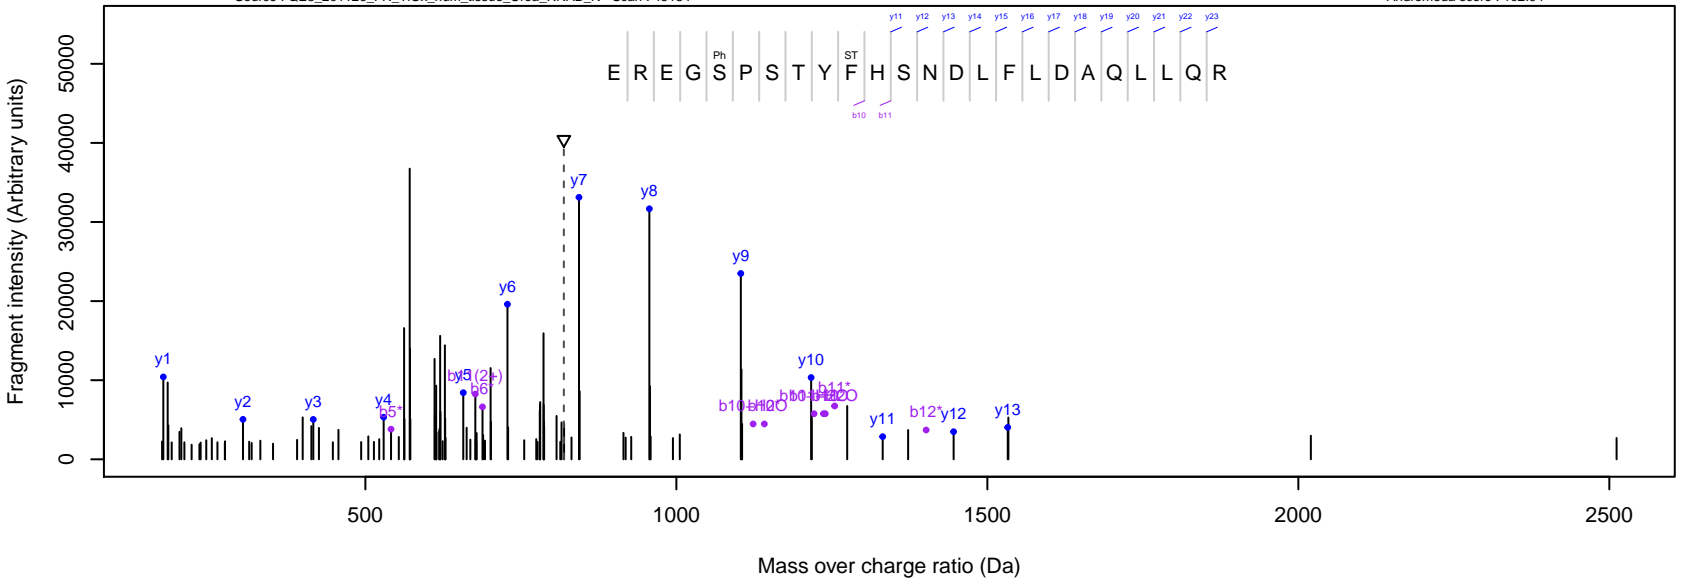

RVTQGAAS(Phospho (STY))PGHGIEK-3+

Source : QE3\_201126\_FR\_TiOx\_hum\_tissue\_Urea\_RNAB\_B Scan : 5132

Andromeda score : 102.9

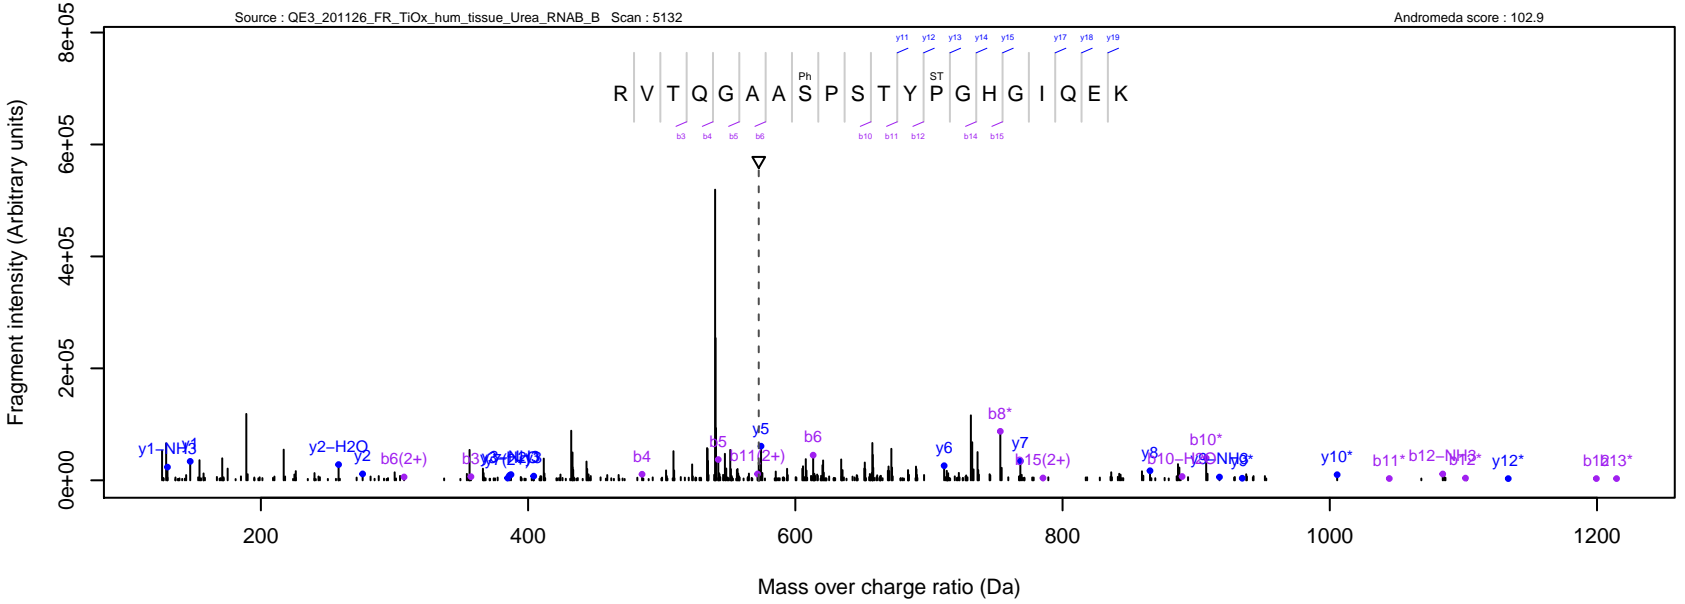

RAS(Phospho (STY))SPSLIER-2+

Source : QE3\_201126\_FR\_TiOx\_hum\_tissue\_Urea\_RNAB\_N Scan : 11317

Andromeda score : 102.87

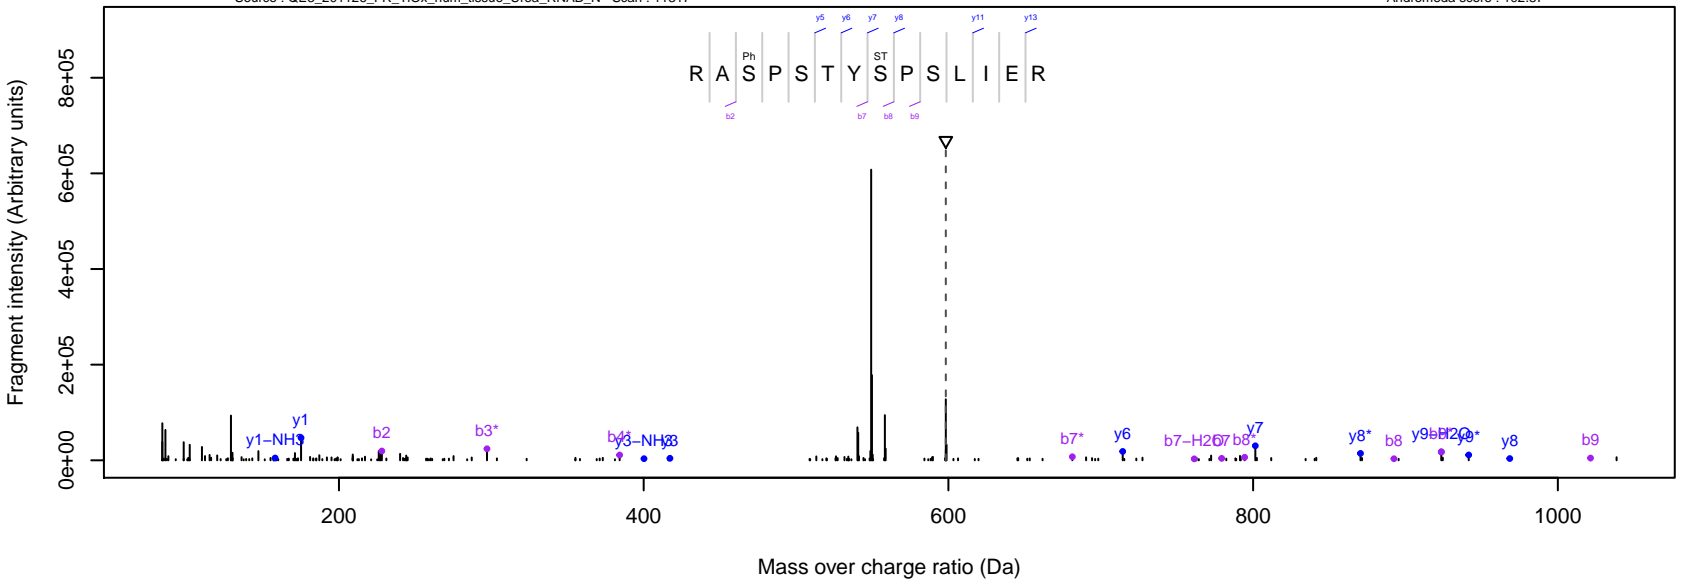

TTNSS(Phospho (STY))LEEIMDK-2+

Source : QE3\_201126\_FR\_TiOx\_hum\_tissue\_Urea\_RNAB\_H Scan : 29890

Andromeda score : 102.87

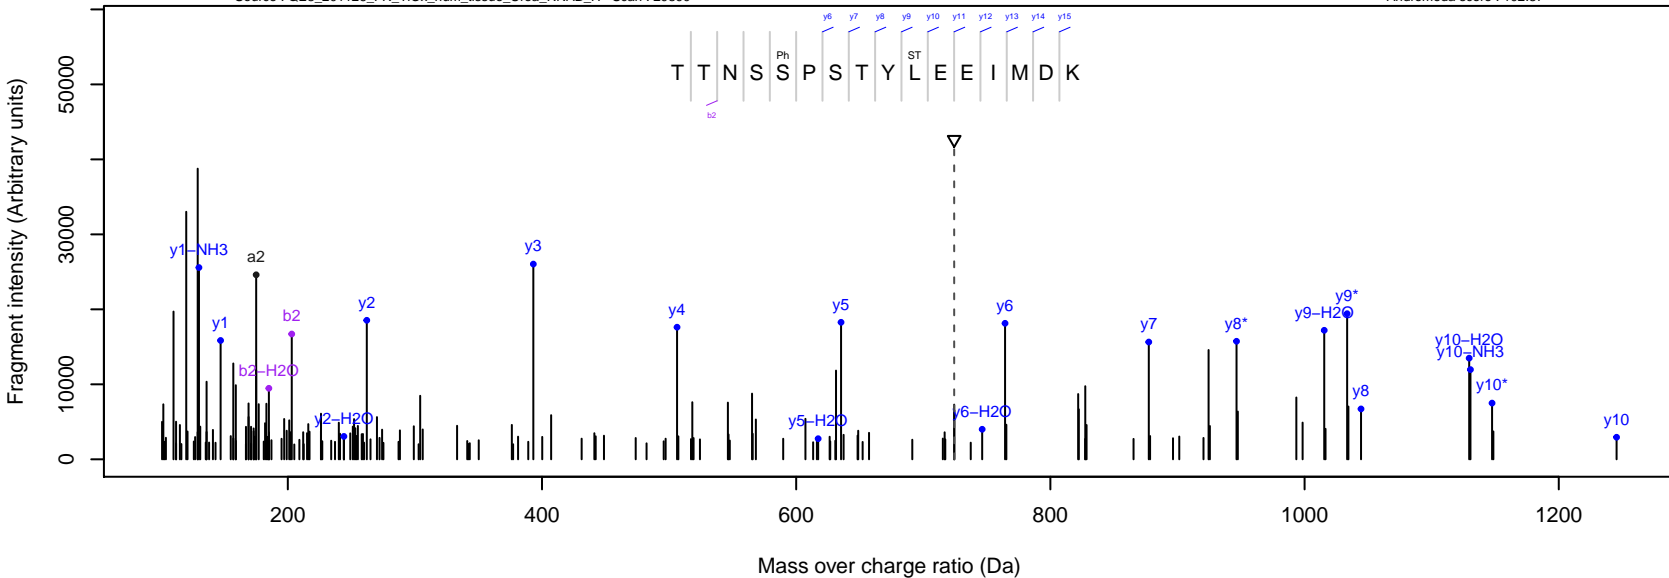

ETSGS(Phospho (STY))SENITMTSLSK-2+

Source : QE3\_201126\_FR\_TiOx\_hum\_tissue\_Urea\_RNAB\_H Scan : 37484

Andromeda score : 102.78

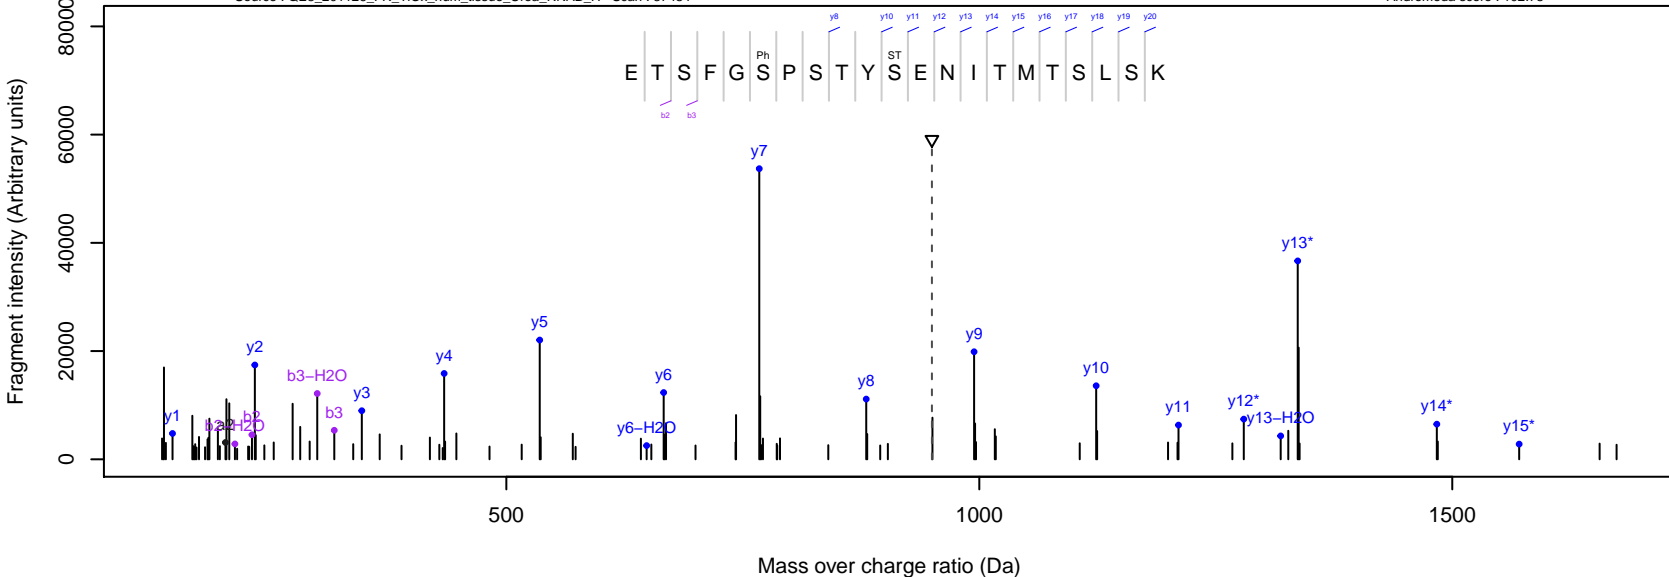

S(Phospho (STY))TSATDTHHVEMAR-3+

Source : QE3\_201126\_FR\_TiOx\_hum\_tissue\_Urea\_RNAB\_N Scan : 6177

Andromeda score : 102.78

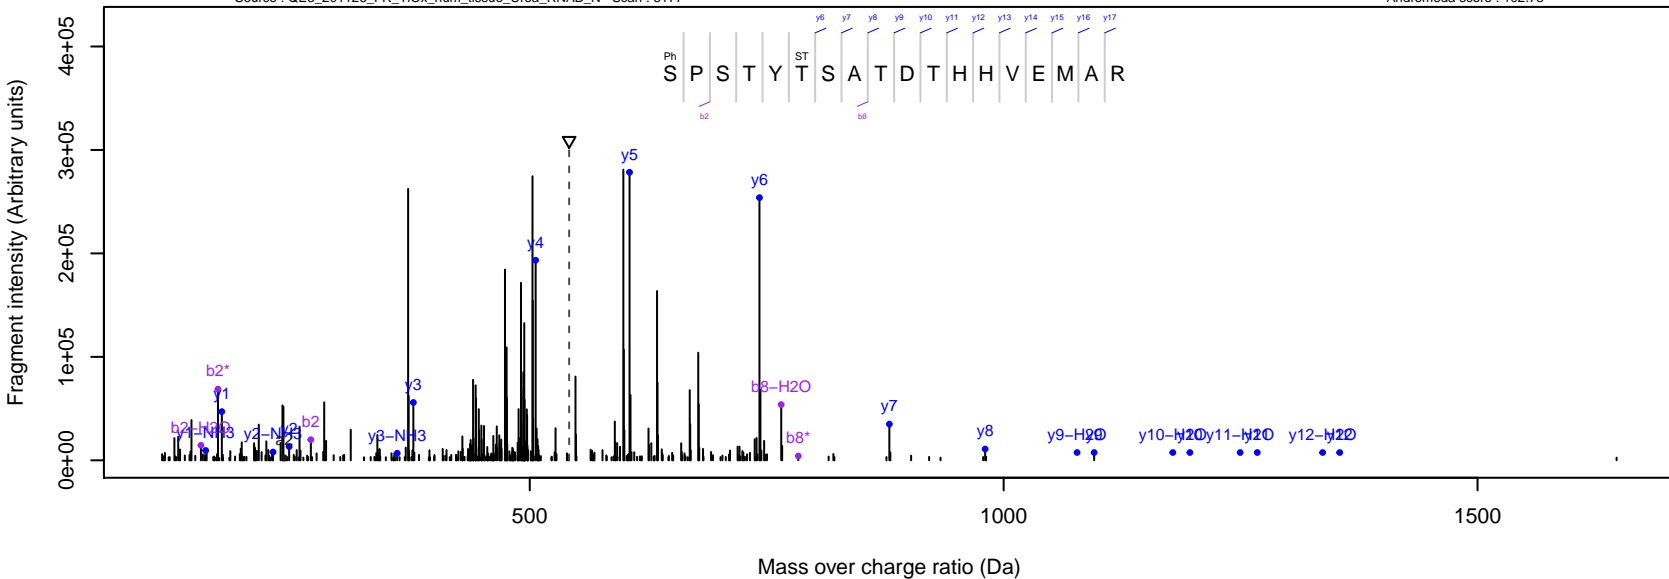

(Acetyl (Protein N-term))AS(Phospho (STY))PPESDGFSDVRK-2+

Source : QE3\_201126\_FR\_TiOx\_hum\_tissue\_Urea\_RNAB\_H Scan : 23294

Andromeda score : 102.73

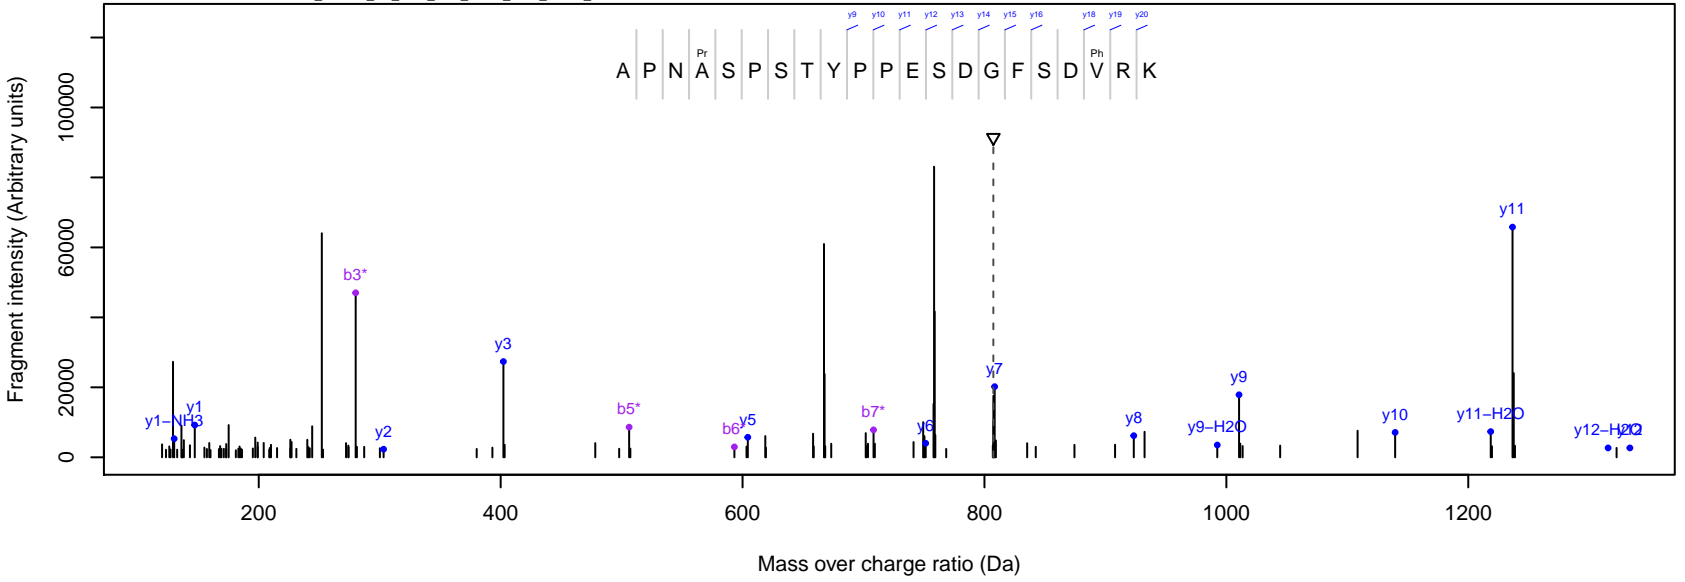

QDGP(M)(Oxidation (M))PKPHSVS(Phospho (STY))LNDTETR-3+

Source : QE3\_201126\_FR\_TiOx\_hum\_tissue\_Urea\_RNAB\_N Scan : 11154

Andromeda score : 102.73

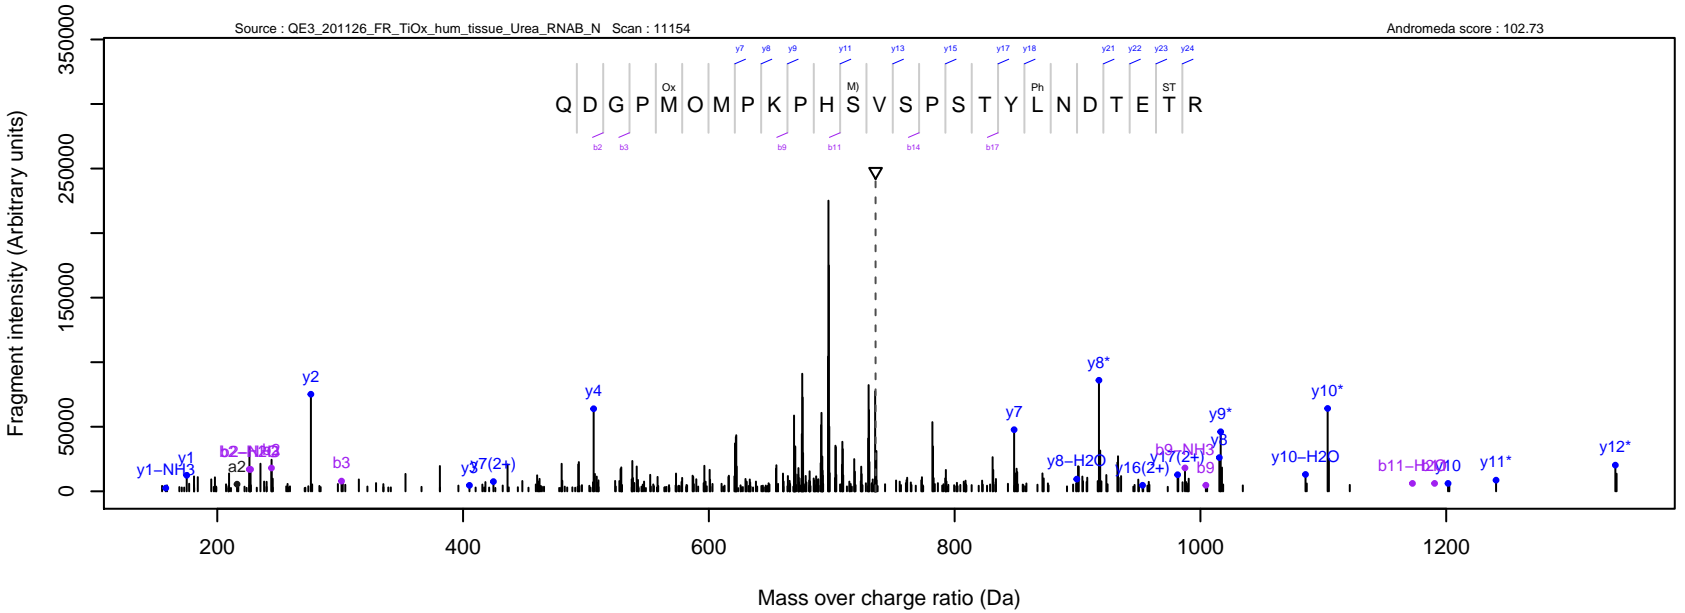

IQQFDDGGS(Phospho (STY))DEEDIWEEKHIAFTPEESQR-4+

Source : QE3\_201126\_FR\_TiOx\_hum\_tissue\_Urea\_RNAB\_H Scan : 39873

Andromeda score : 102.69

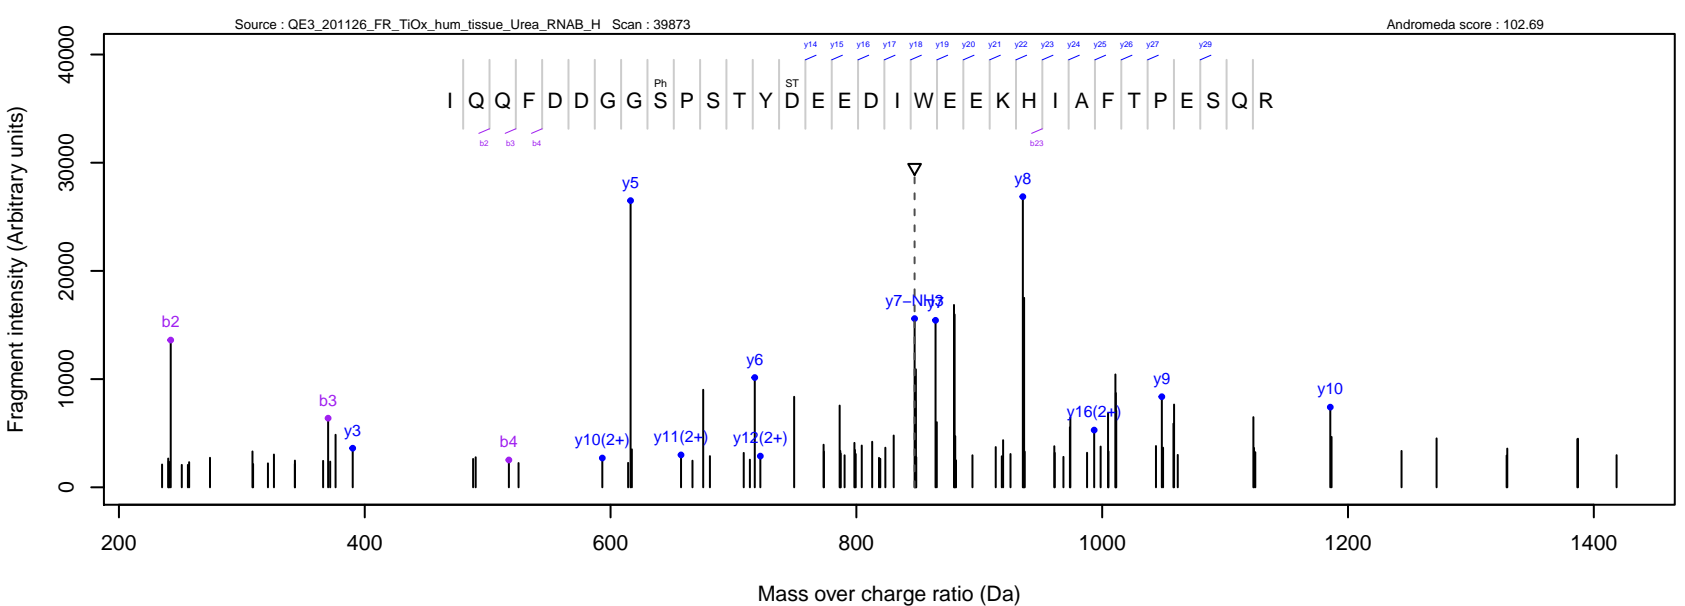

RAS(Phospho (STY))AYEALEKYPMAYVDYK-3+

Source : QE3\_201126\_FR\_TiOx\_hum\_tissue\_Urea\_RNAB\_H Scan : 39500

Andromeda score : 102.69

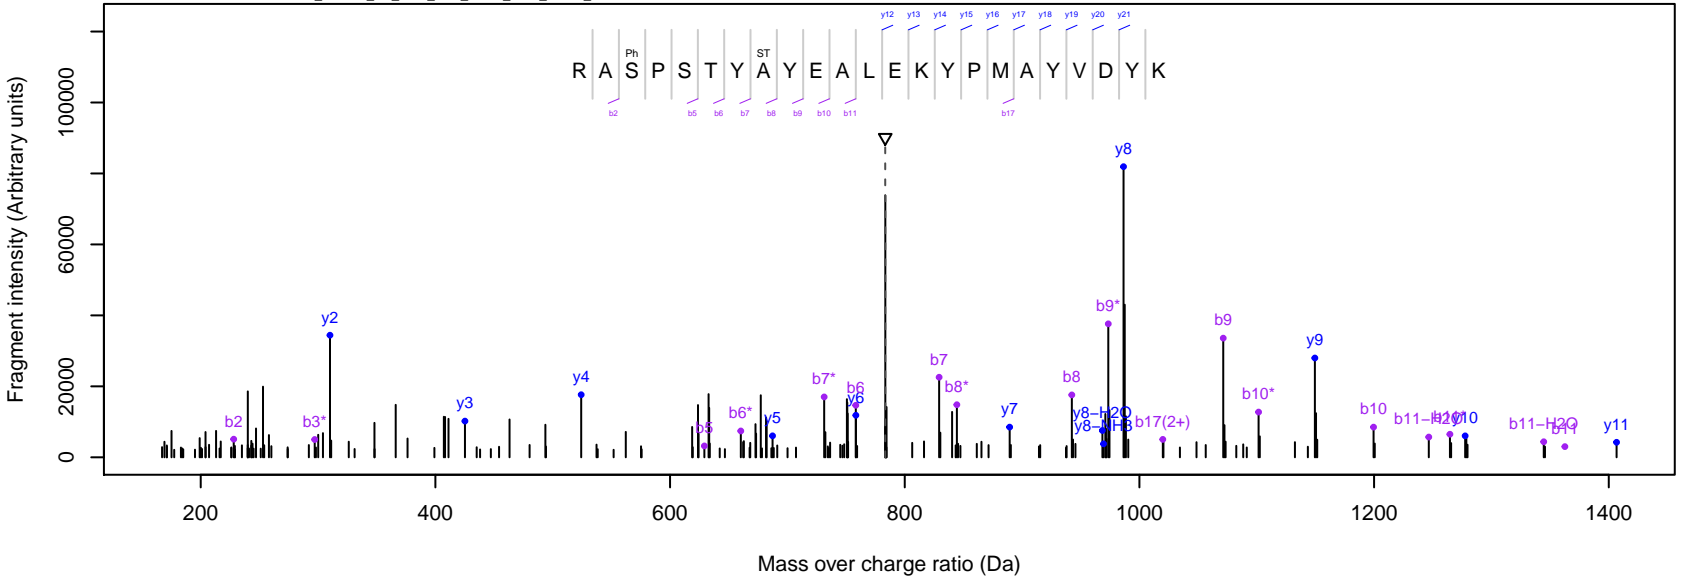

SLSDNGQPGT(Phospho (STY))PDPADSGGTSAK-2+

Source : QE3\_201126\_FR\_TiOx\_hum\_tissue\_Urea\_RNAB\_B Scan : 14714

Andromeda score : 102.67

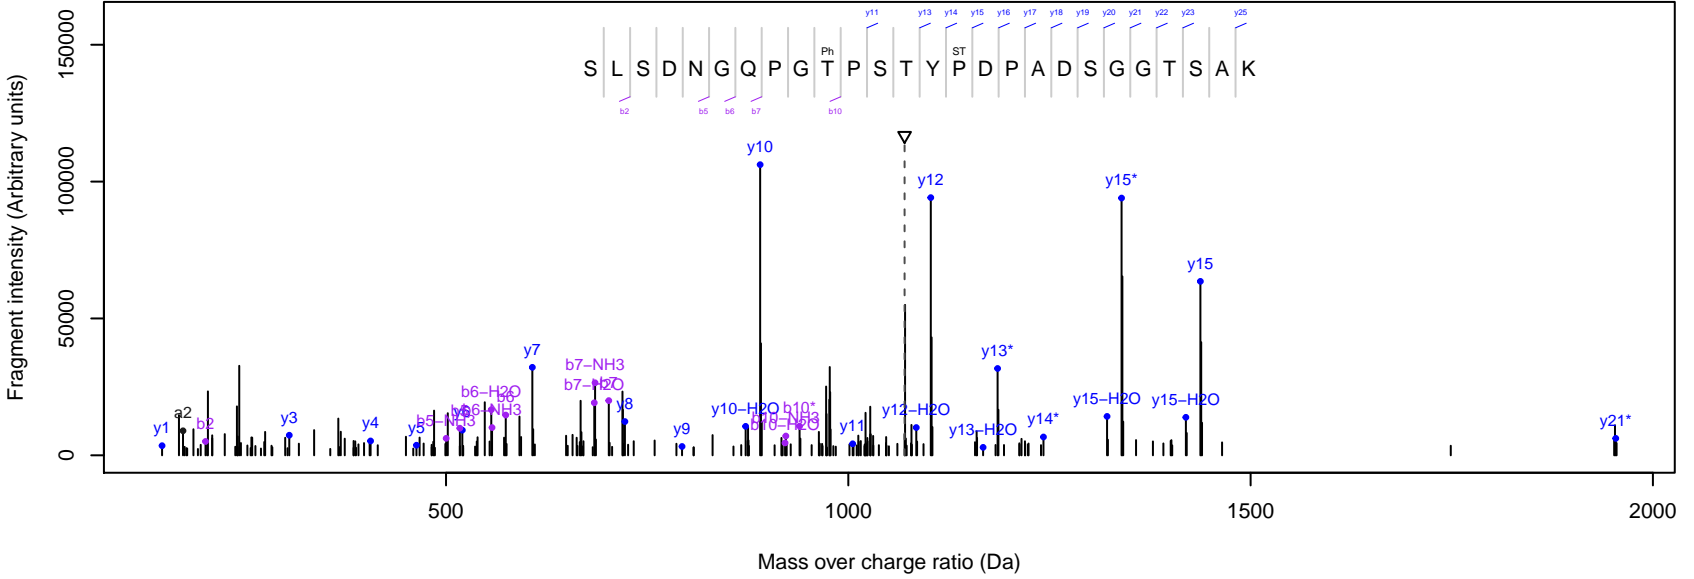

MSPNETLFLES(Phospho (STY))TNK-2+

Source : QE3\_201126\_FR\_TiOx\_hum\_tissue\_Urea\_RNAB\_B Scan : 37681

Andromeda score : 102.65

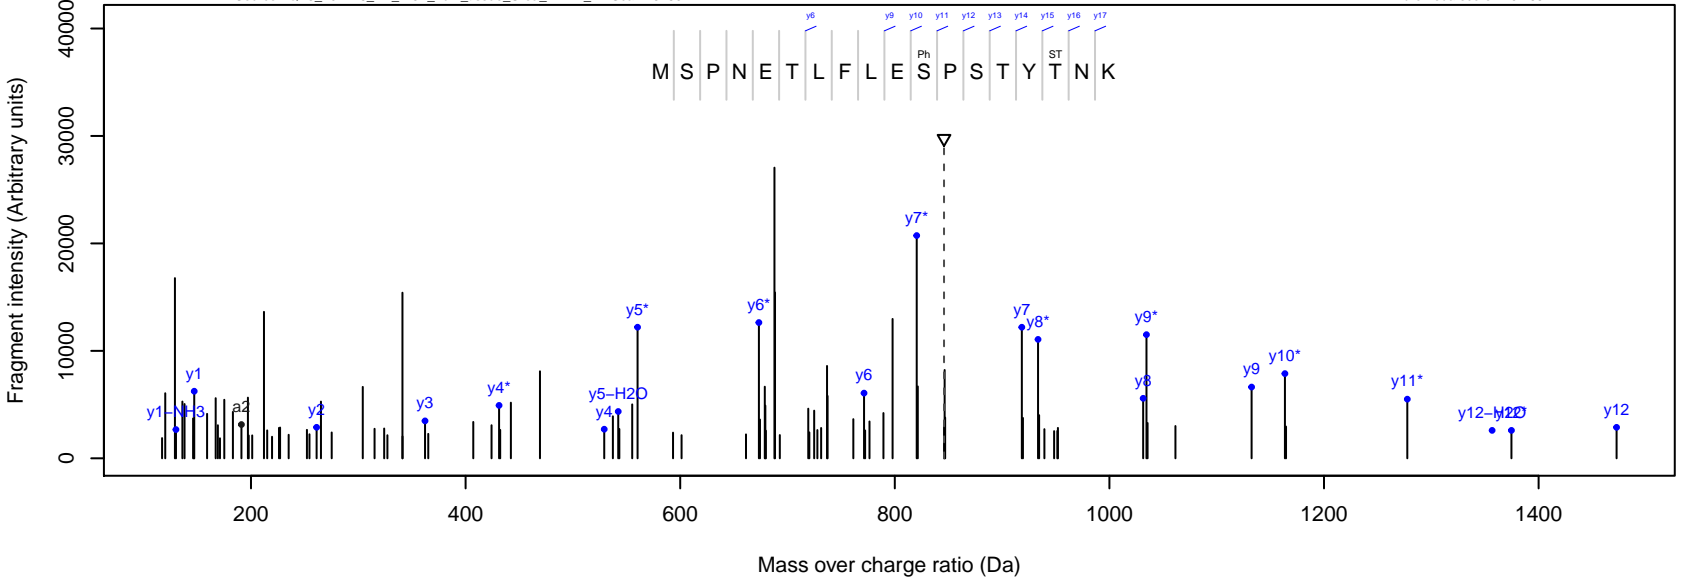

RVHS(Phospho (STY))ENNACINFK-3+

Source : QE3\_201126\_FR\_TiOx\_hum\_tissue\_Urea\_RNAB\_H Scan : 9492

Andromeda score : 102.64

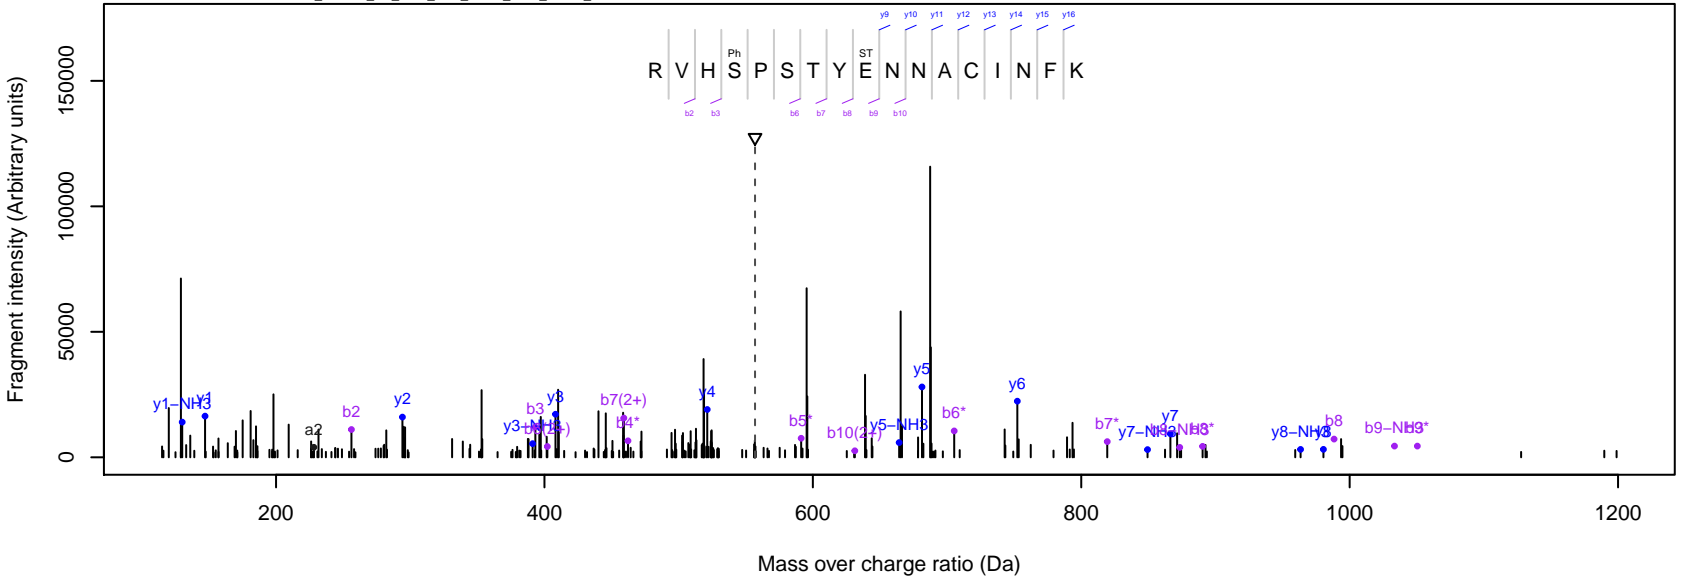

YLS(Phospho (STY))NAYAR-2+

Source : QE3\_201126\_FR\_TiOx\_hum\_tissue\_Urea\_RNAB\_H Scan : 20208

Andromeda score : 102.62

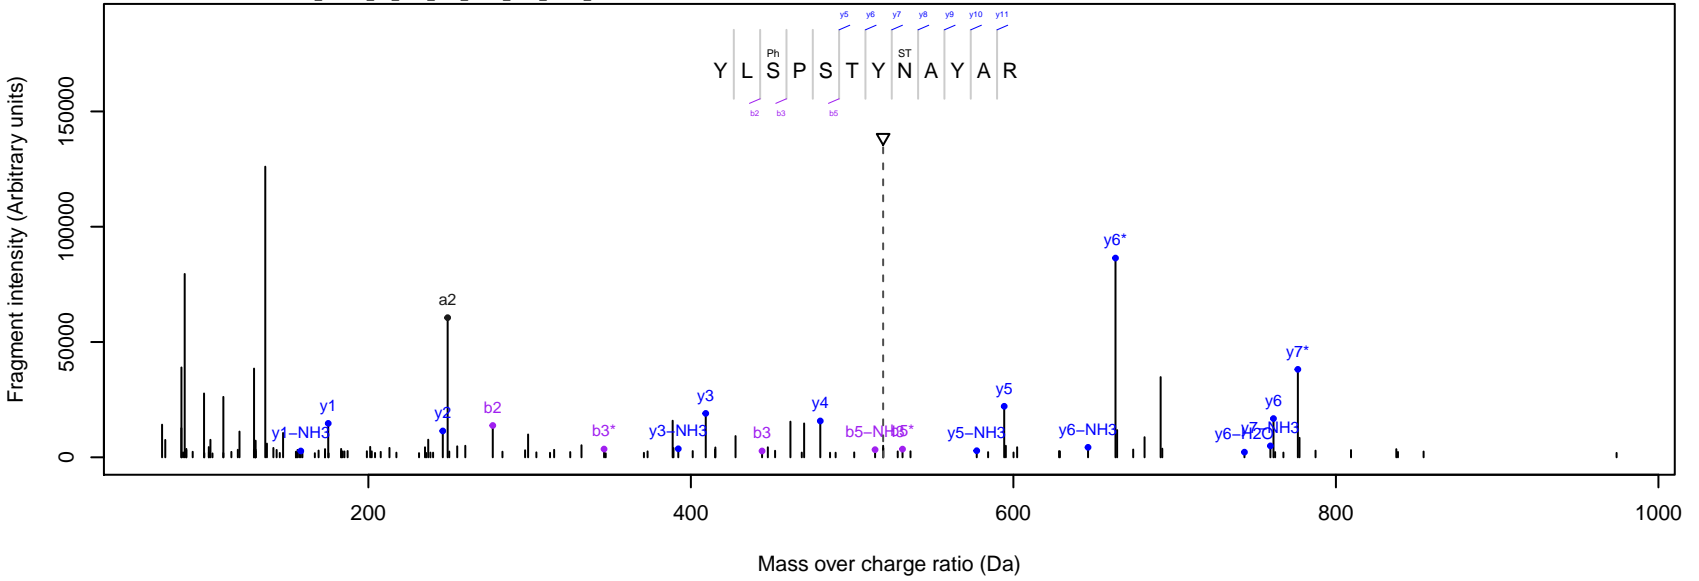

KVQVAALQAS(Phospho (STY))PPLDQDDR-3+

Source : QE3\_201126\_FR\_TiOx\_hum\_tissue\_Urea\_RNAB\_H Scan : 25513

Andromeda score : 102.6

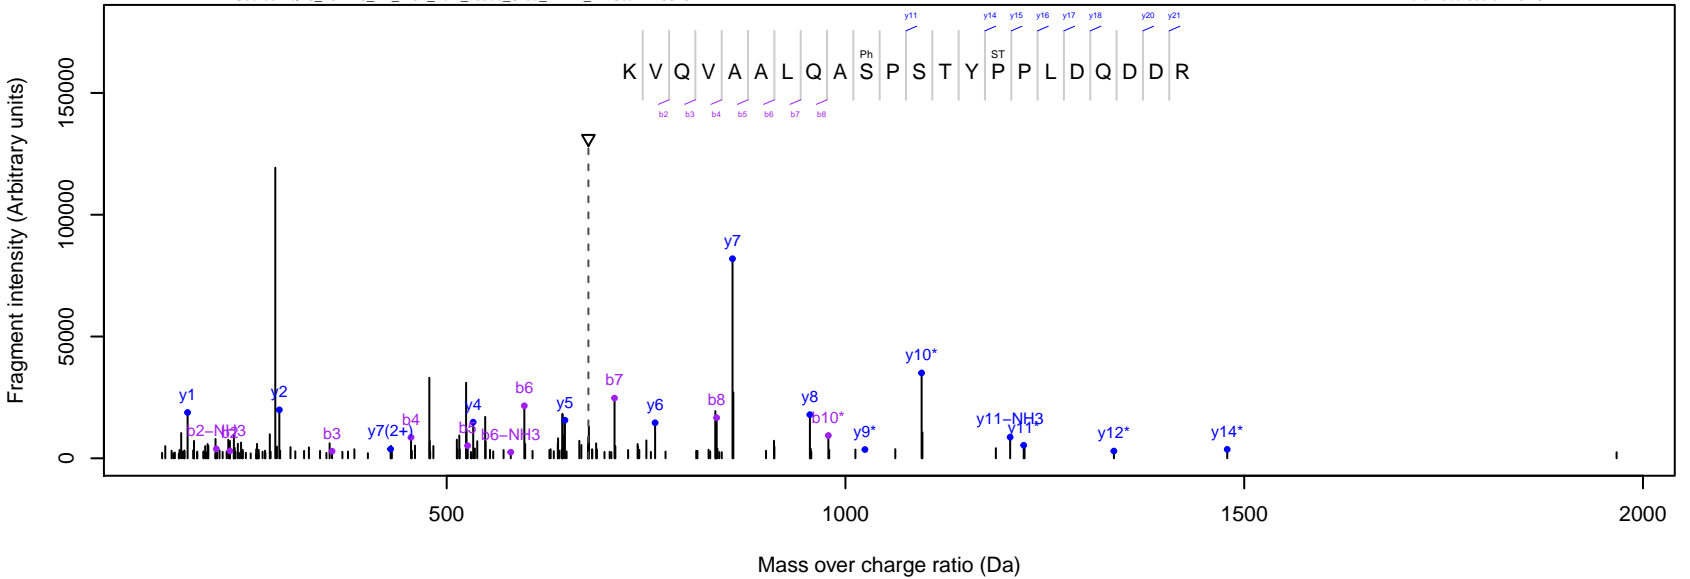

RNS(Phospho (STY))SS(Phospho (STY))PVS(Phospho (STY))PASVPGQR-2+

Source : QE3\_201126\_FR\_TiOx\_hum\_tissue\_Urea\_RNAB\_N Scan : 18302

Andromeda score : 102.58

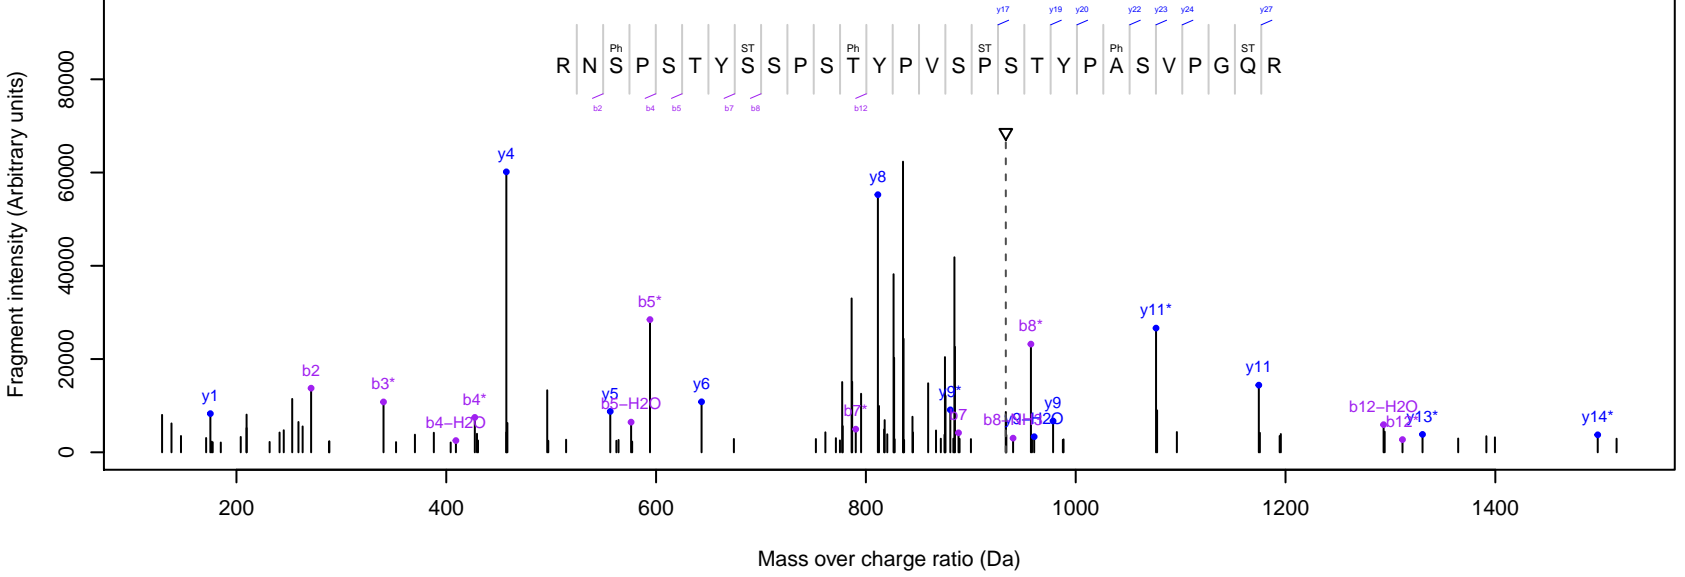

TIGGGDS(Phospho (STY))FNTFFSETGAGK-2+

Source : QE3\_201126\_FR\_TiOx\_hum\_tissue\_Urea\_RNAB\_H Scan : 50820

Andromeda score : 102.58

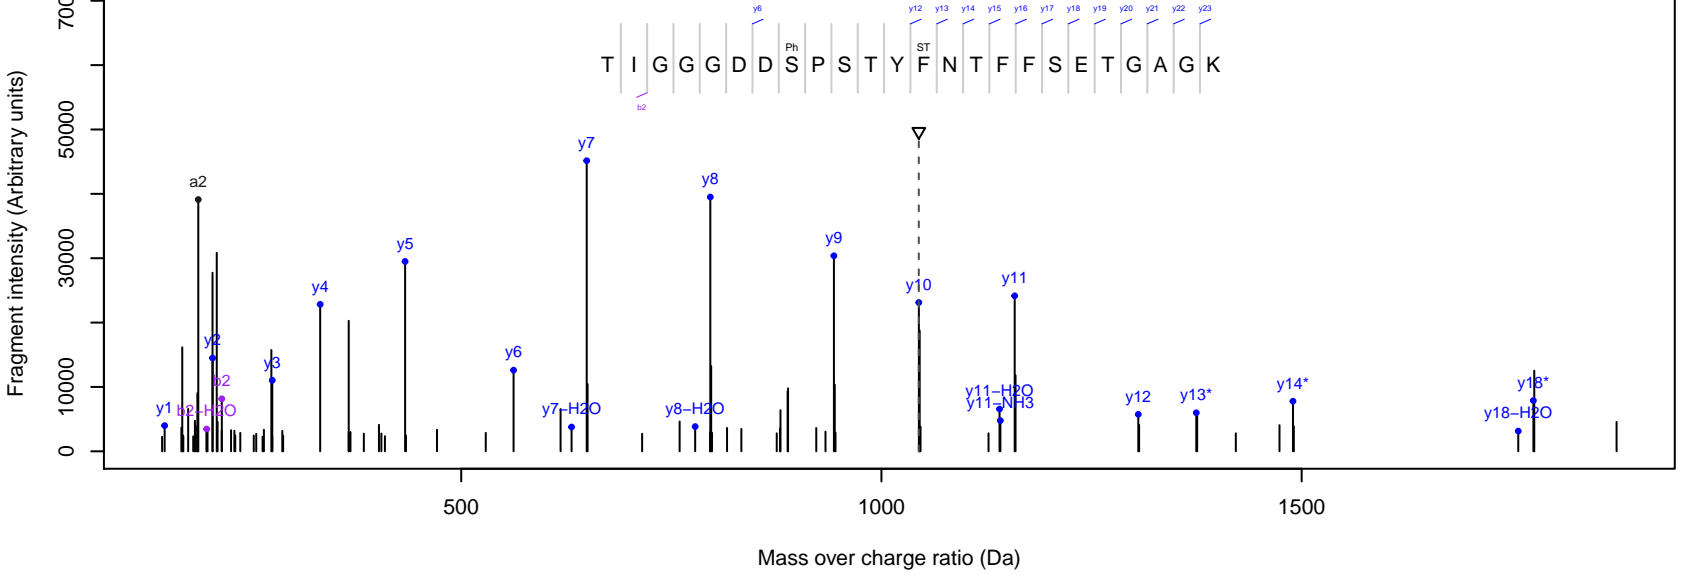

SPS(Phospho (STY))PISNQPSR-2+

Source : QE3\_201126\_FR\_TiOx\_hum\_tissue\_Urea\_RNAB\_H Scan : 11436

Andromeda score : 102.57

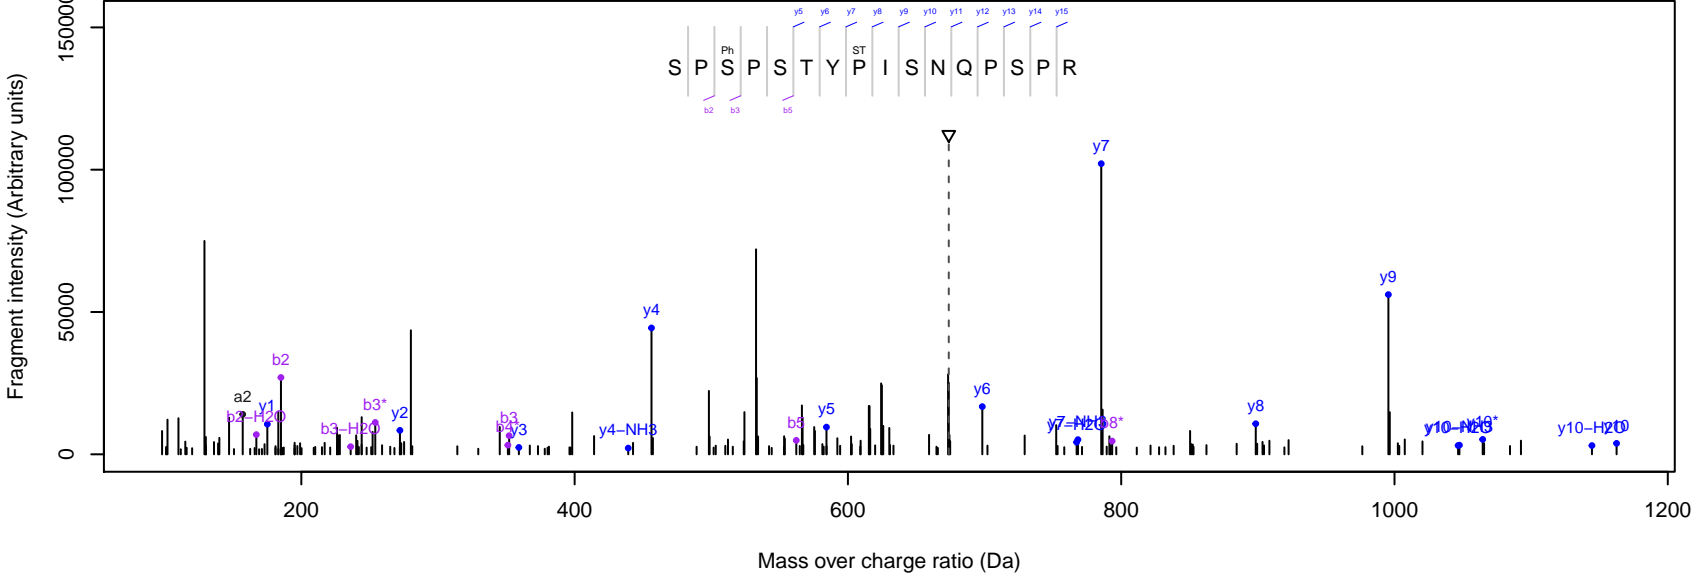

RVS(Phospho (STY))VELTNSLFK-2+

Source : QE3\_201126\_FR\_TiOx\_hum\_tissue\_Urea\_RNAB\_H Scan : 36009

Andromeda score : 102.52

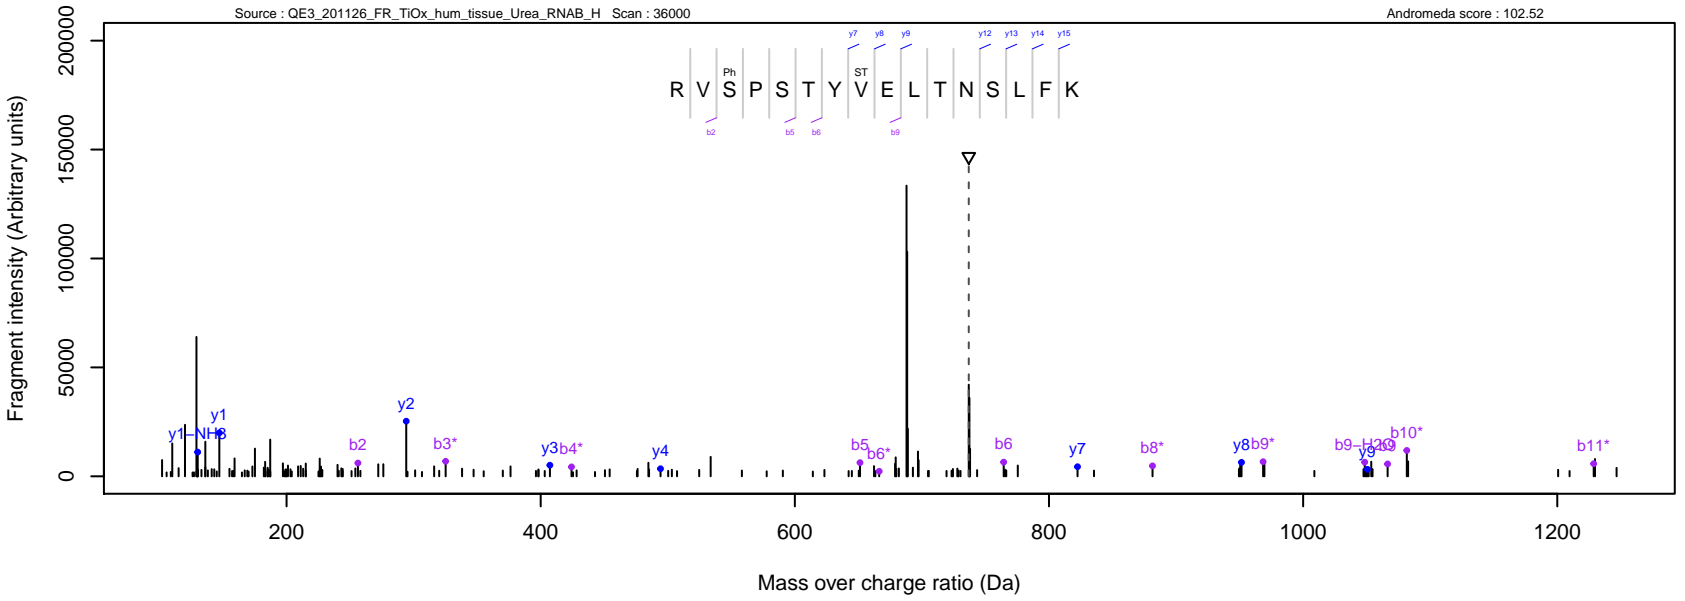

SRPTS(Phospho (STY))FADELAAR-2+

Source : QE3\_201126\_FR\_TiOx\_hum\_tissue\_Urea\_RNAB\_H Scan : 26049

Andromeda score : 102.52

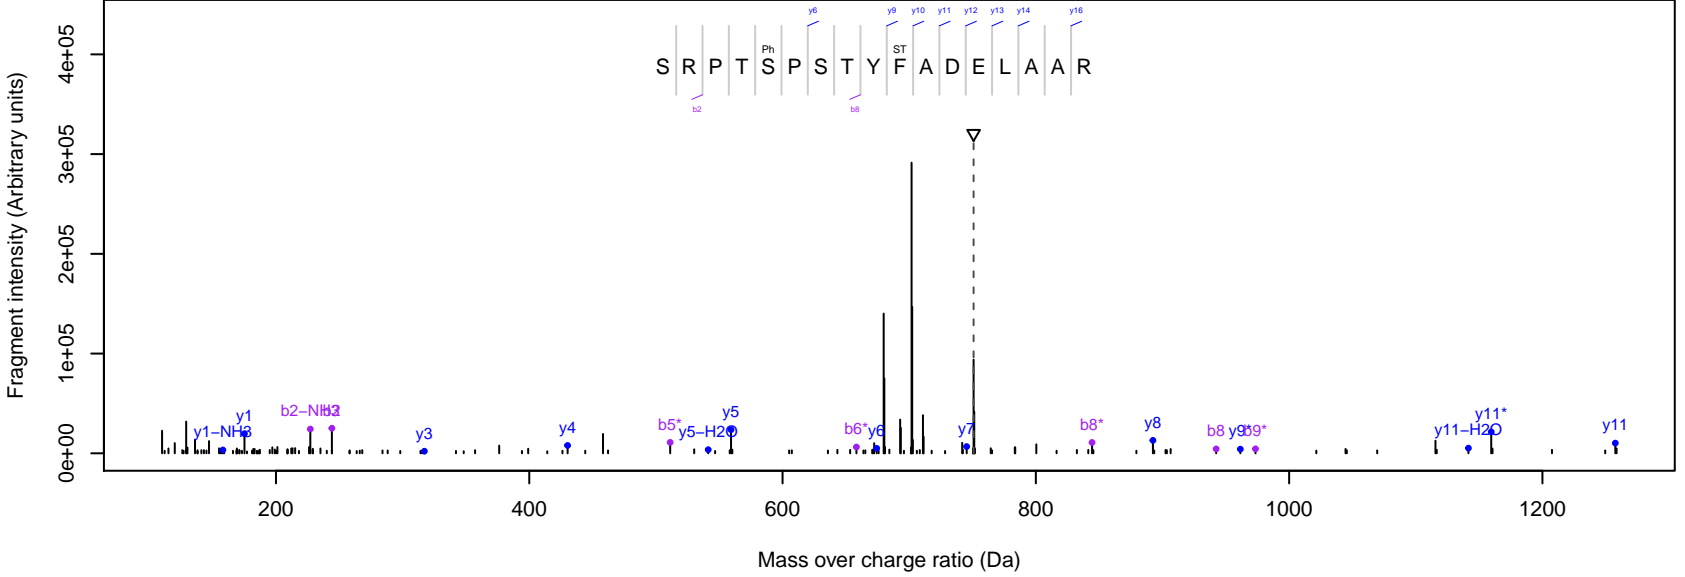

LDHVNIVHYNGCWDFDYDPETSDSPSTYLESSDYDPENSK-4+

Source : QE3\_201126\_FR\_TiOx\_hum\_tissue\_Urea\_RNAB\_H Scan : 49148

Andromeda score : 102.49

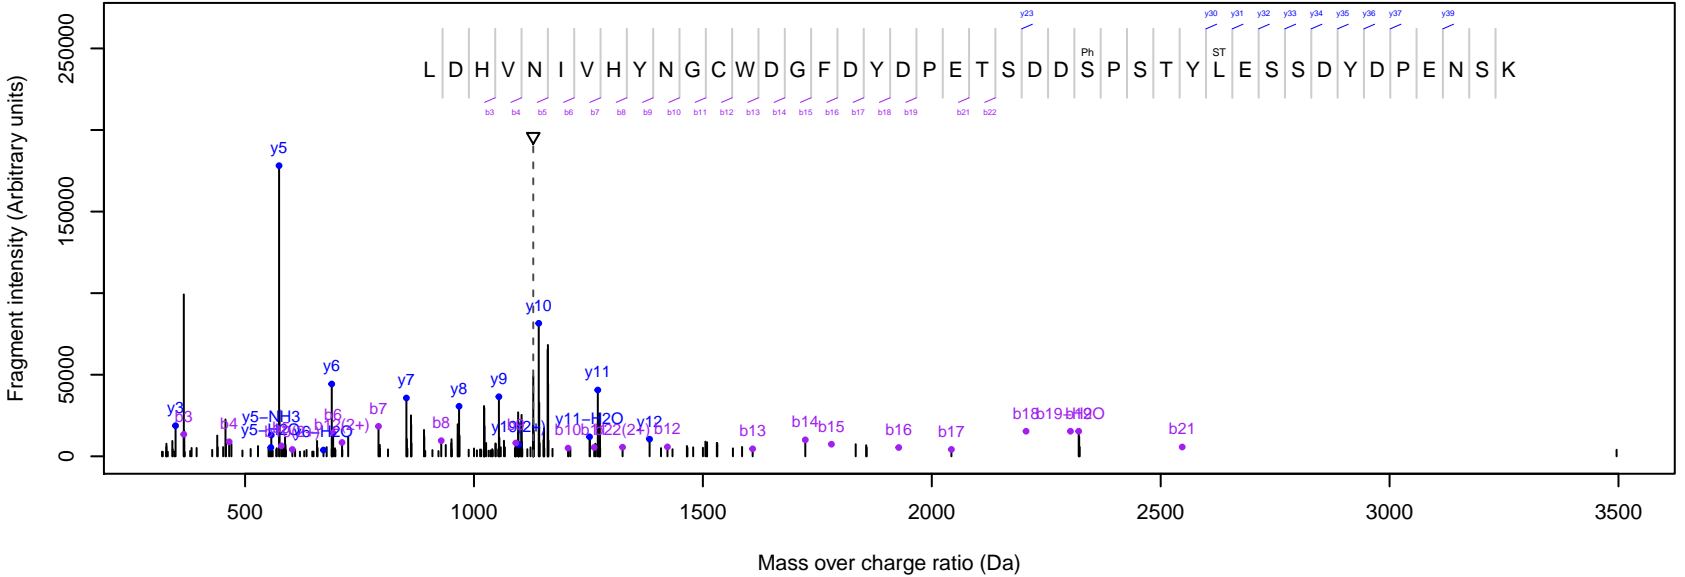



RGTGAGGDS(Phospho (STY))GPEEDYLSLGLAEACNFMQSSSAK-3+

Source : QE3\_201126\_FR\_TiOx\_hum\_tissue\_Urea\_RNAB\_B Scan : 52189

Andromeda score : 102.48

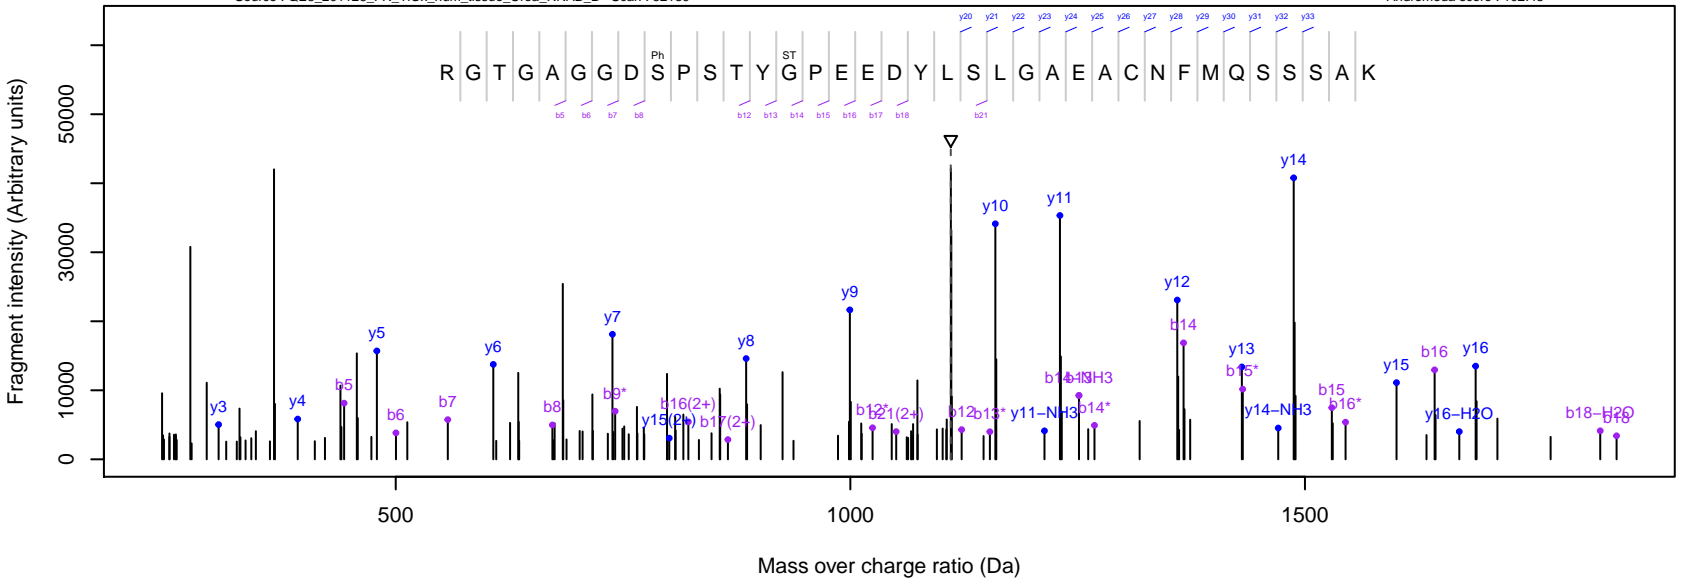

ALEAASLSQHPPSLCIS(Phospho (STY))DSEEEEEER-3+

Source : QE3\_201126\_FR\_TiOx\_hum\_tissue\_Urea\_RNAB\_H Scan : 34821

Andromeda score : 102.46

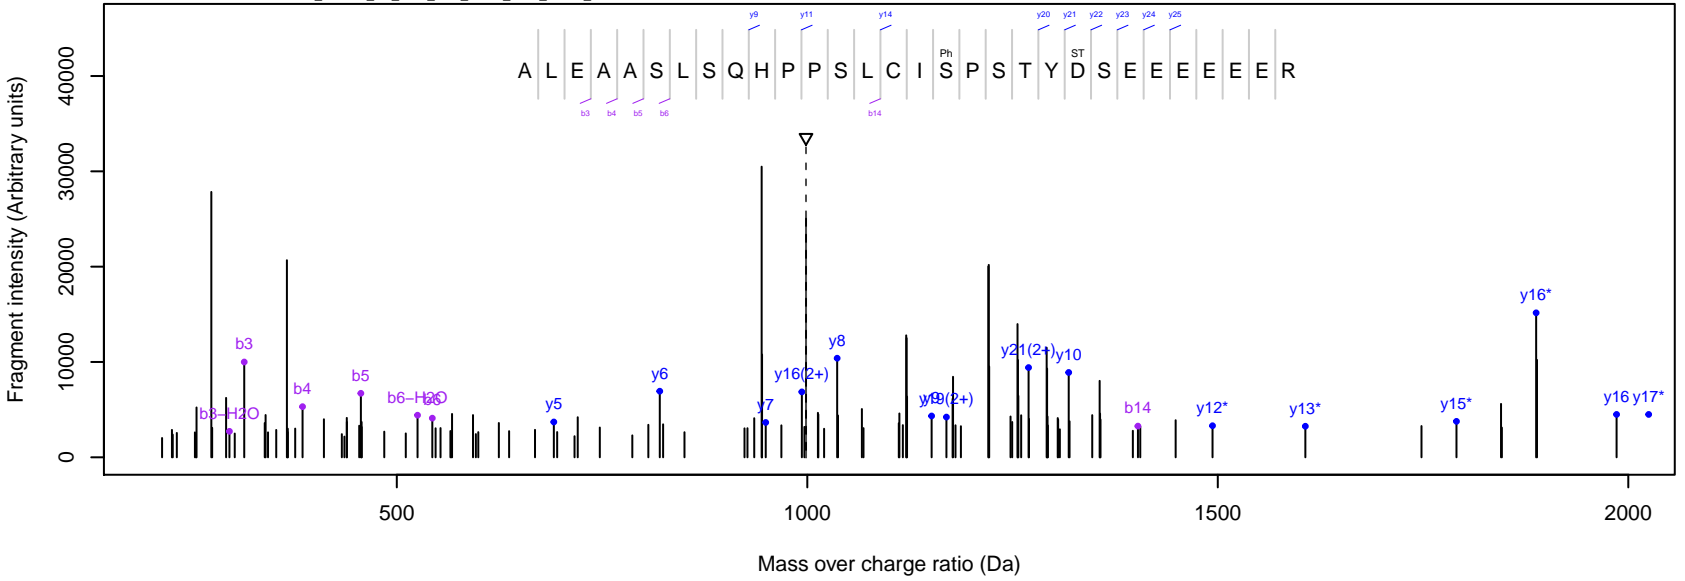

AGS(Phospho (STY))PFS(Phospho (STY))PPSSSLTGAAISR-2+

Source : QE3\_201126\_FR\_TiOx\_hum\_tissue\_Urea\_RNAB\_B Scan : 46772

Andromeda score : 102.45

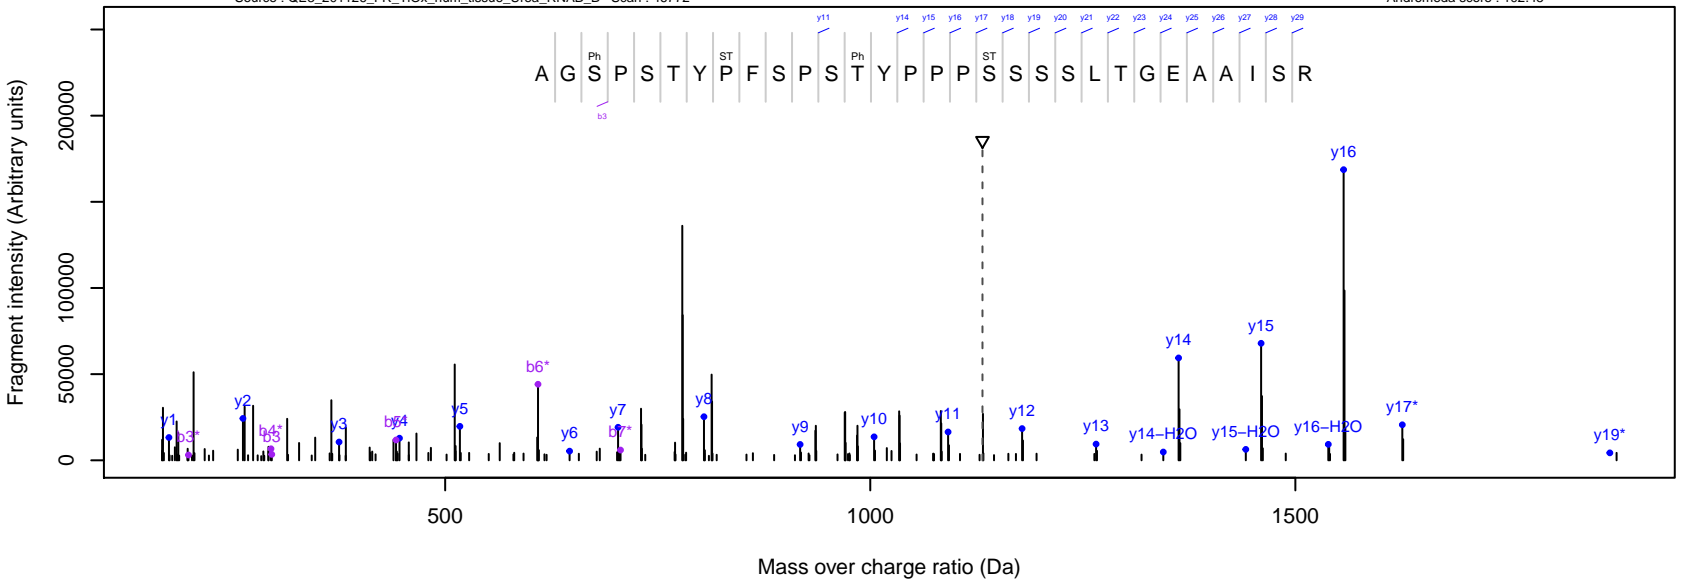

AVSREDS(Phospho (STY))VKPGAHLTVK-3+

Source : QE3\_201126\_FR\_TiOx\_hum\_tissue\_Urea\_RNAB\_H Scan : 8488

Andromeda score : 102.45

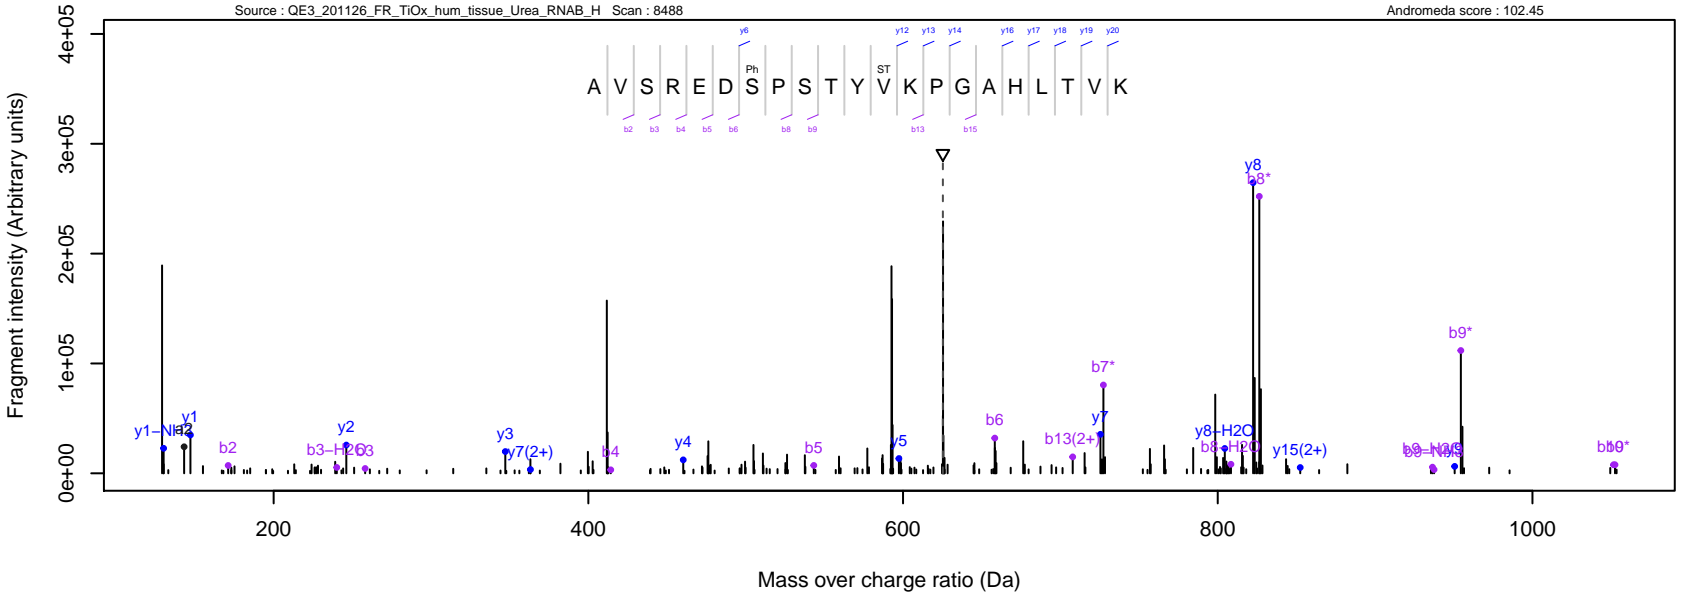

S(Phospho (STY))LQLAEER-2+

Source : QE3\_201126\_FR\_TiOx\_hum\_tissue\_Urea\_RNAB\_B Scan : 21369

Andromeda score : 102.4

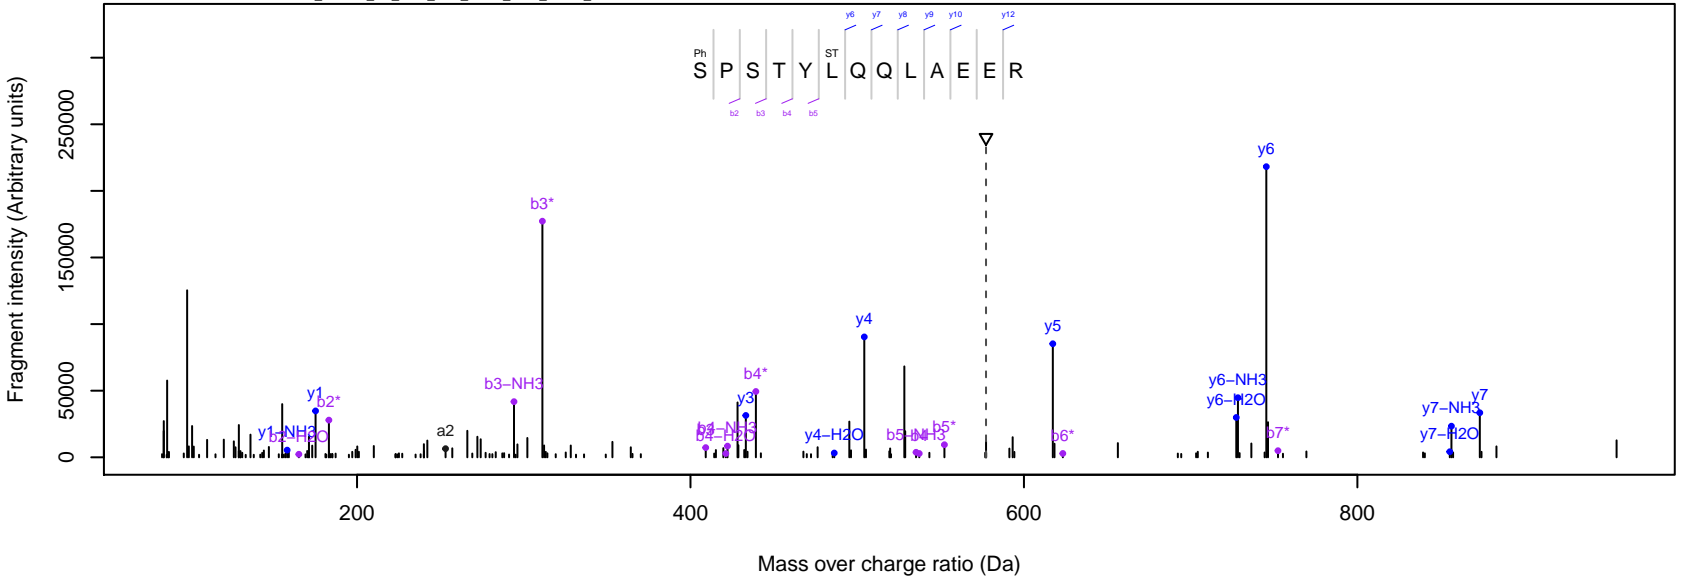

KS(Phospho (STY))STGSISNVLFTQDPVEDAVFGEATNLKK-4+

Source : QE3\_201126\_FR\_TiOx\_hum\_tissue\_Urea\_RNAB\_H Scan : 53256

Andromeda score : 102.39

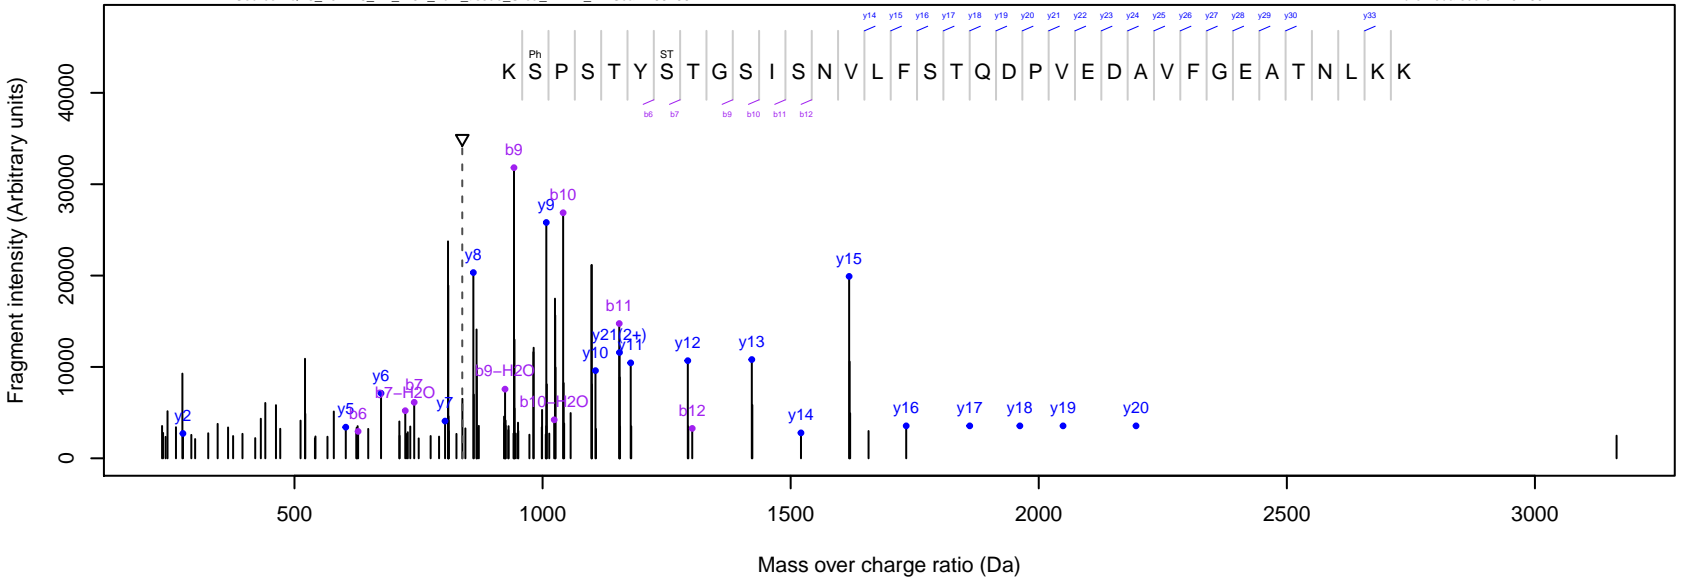

SKS(Phospho (STY))PKSP EEGAVS(Phospho (STY))S-2+

Source : QE3\_201126\_FR\_TIOx\_hum\_tissue\_Urea\_RNAB\_B Scan : 9485

Andromeda score : 102.39

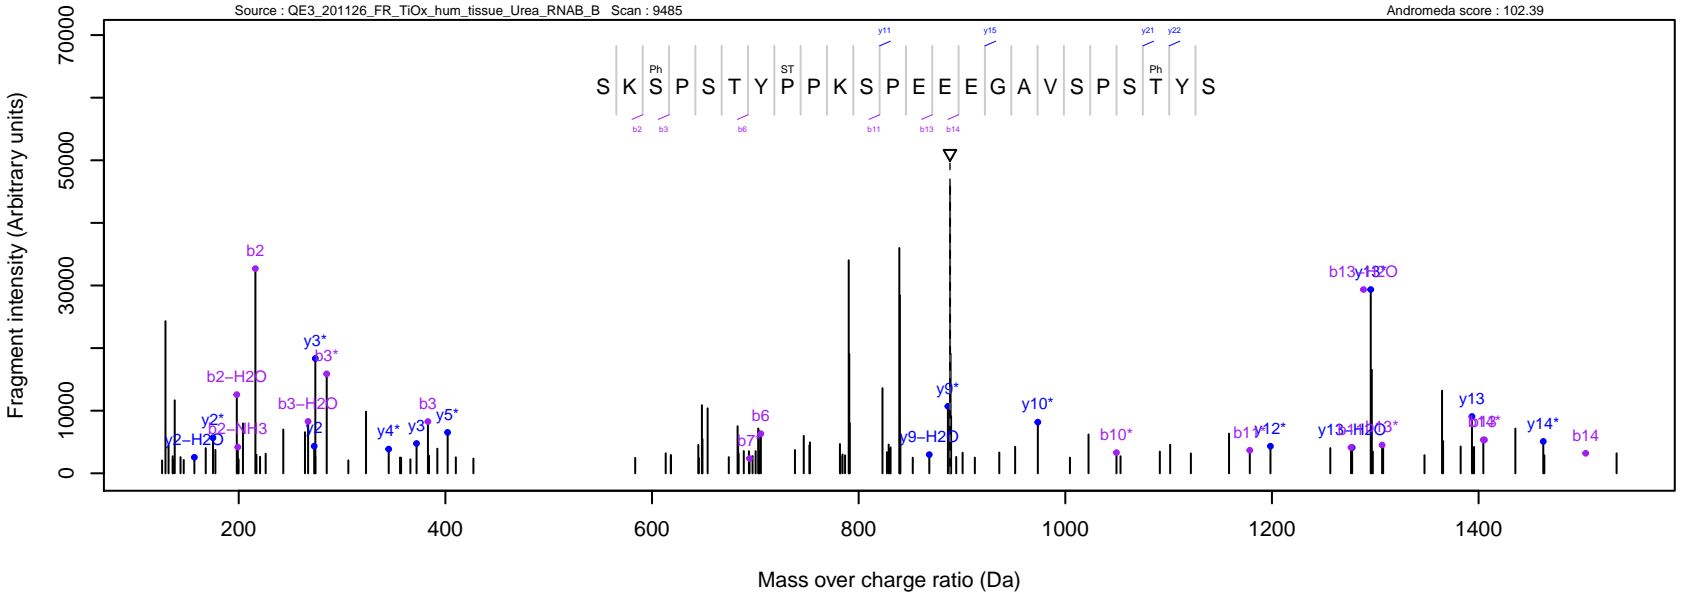

VDHGAEITQS(Phospho (STY))PGRS(Phospho (STY))SVAS(Phospho (STY))PR-3+

Source : QE3\_201126\_FR\_TIOx\_hum\_tissue\_Urea\_RNAB\_H Scan : 21560

Andromeda score : 102.39

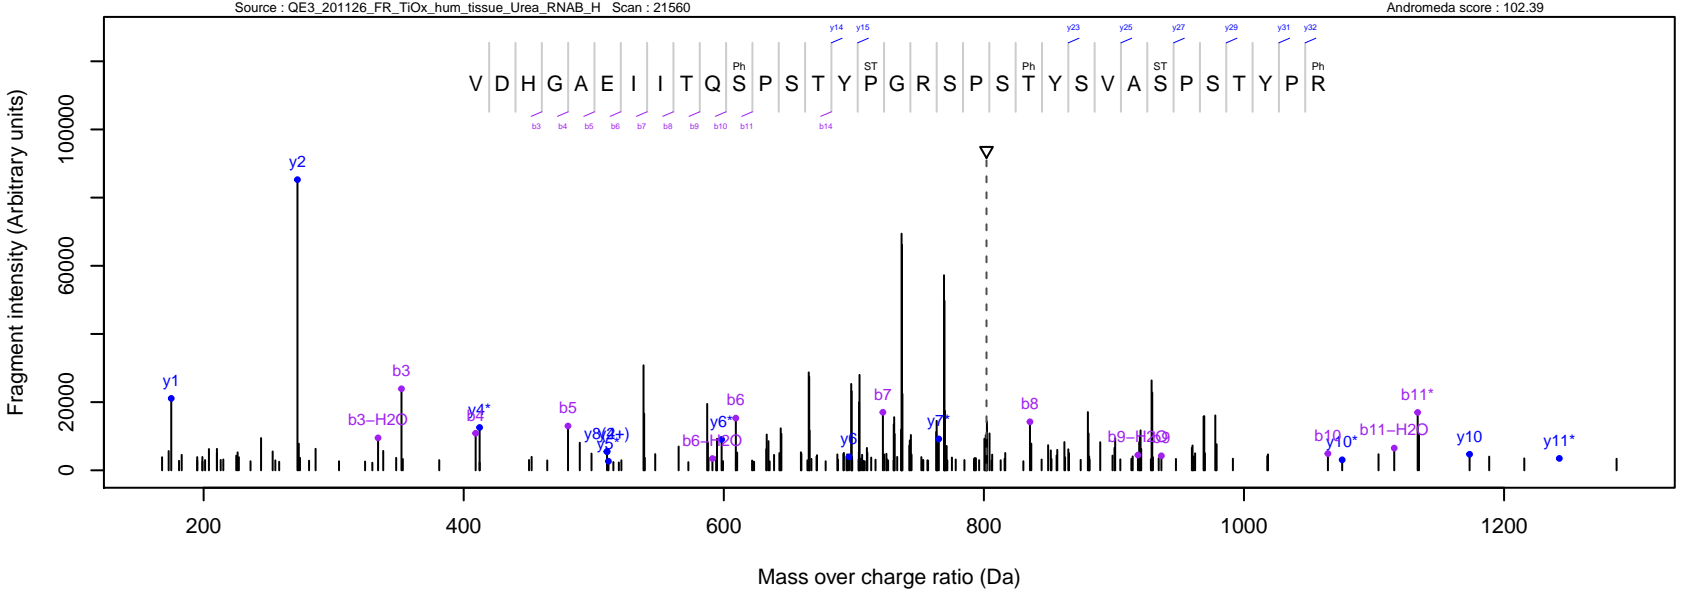

ISS(Phospho (STY))KSPGHM VILDQTK-2+

Source : QE3\_201126\_FR\_TIOx\_hum\_tissue\_Urea\_RNAB\_H Scan : 16860

Andromeda score : 102.38

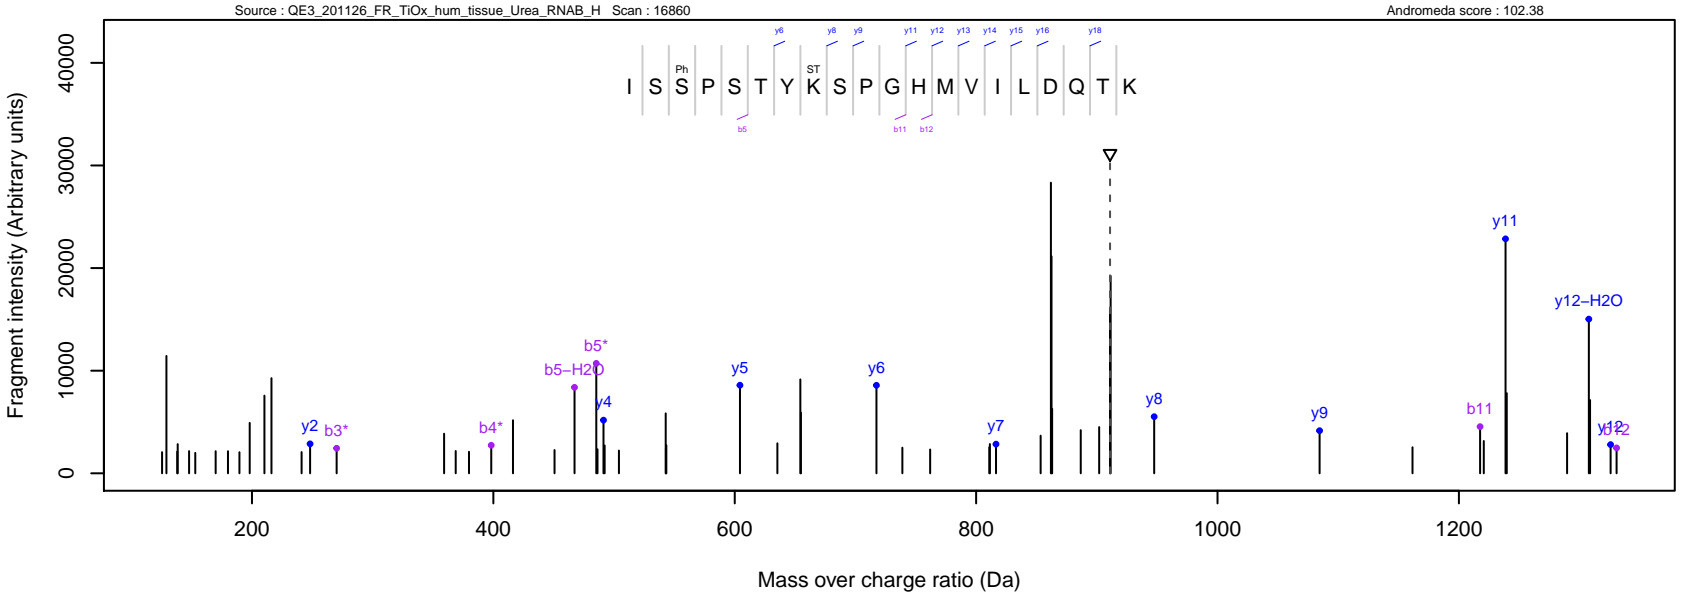

SLS(Phospho (STY))FPKLDSDSNQK-2+

Source : QE3\_201126\_FR\_TIOx\_hum\_tissue\_Urea\_RNAB\_B Scan : 29586

Andromeda score : 102.38

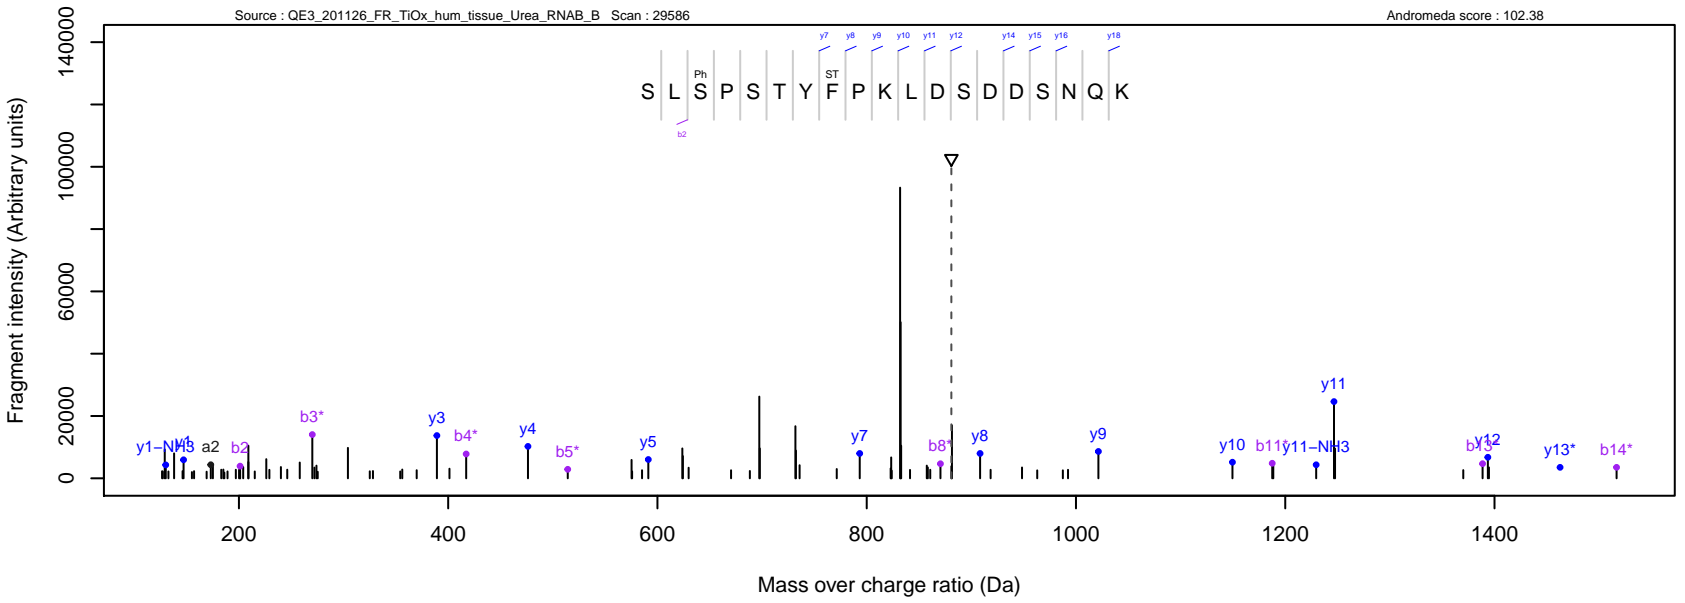

(Acetyl (Protein N-term))M(Oxidation (M))LPS(Phospho (STY))TSVNSLVQGNGLNSR-3+

Source : QE3\_201126\_FR\_TIOx\_hum\_tissue\_Urea\_RNAB\_N Scan : 57436

Andromeda score : 102.37

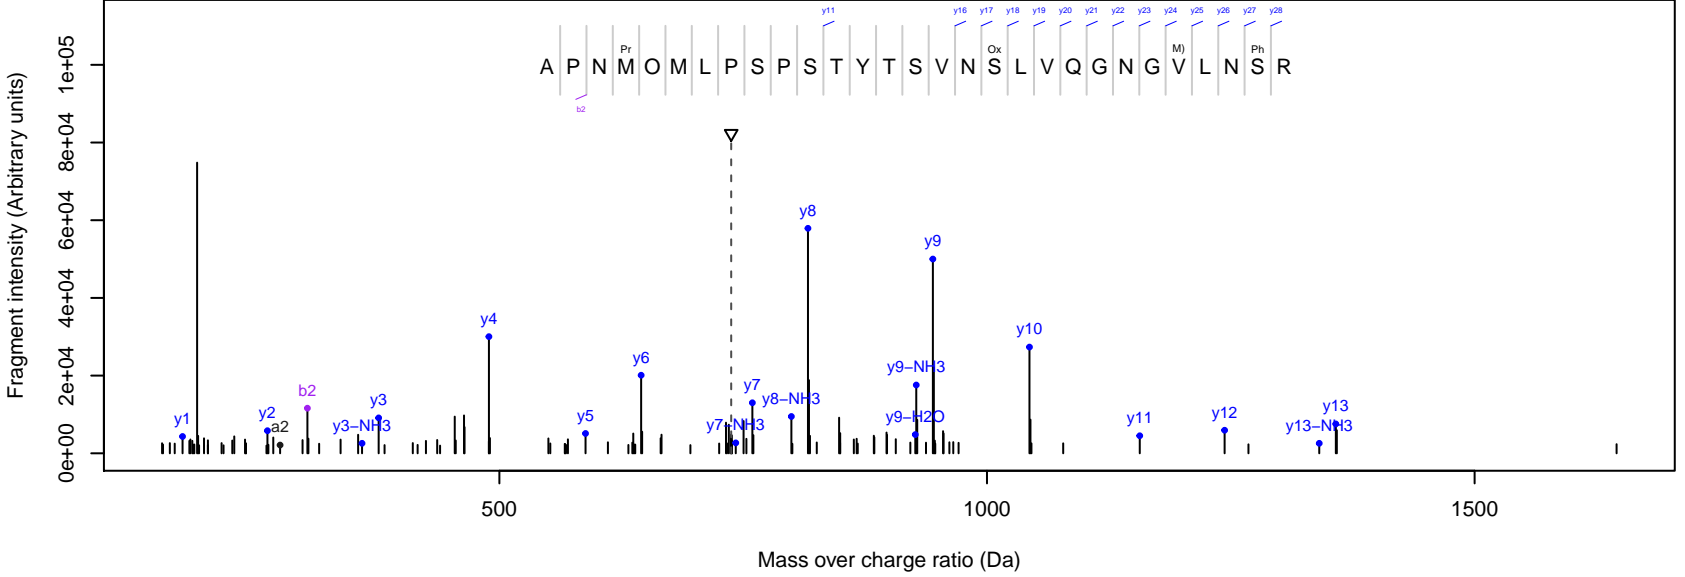

SDS(Phospho (STY))PVPTAPTSGGPKPSTASAVPELATDPELEK-3+

Source : QE3\_201126\_FR\_TIOx\_hum\_tissue\_Urea\_RNAB\_N Scan : 29951

Andromeda score : 102.36

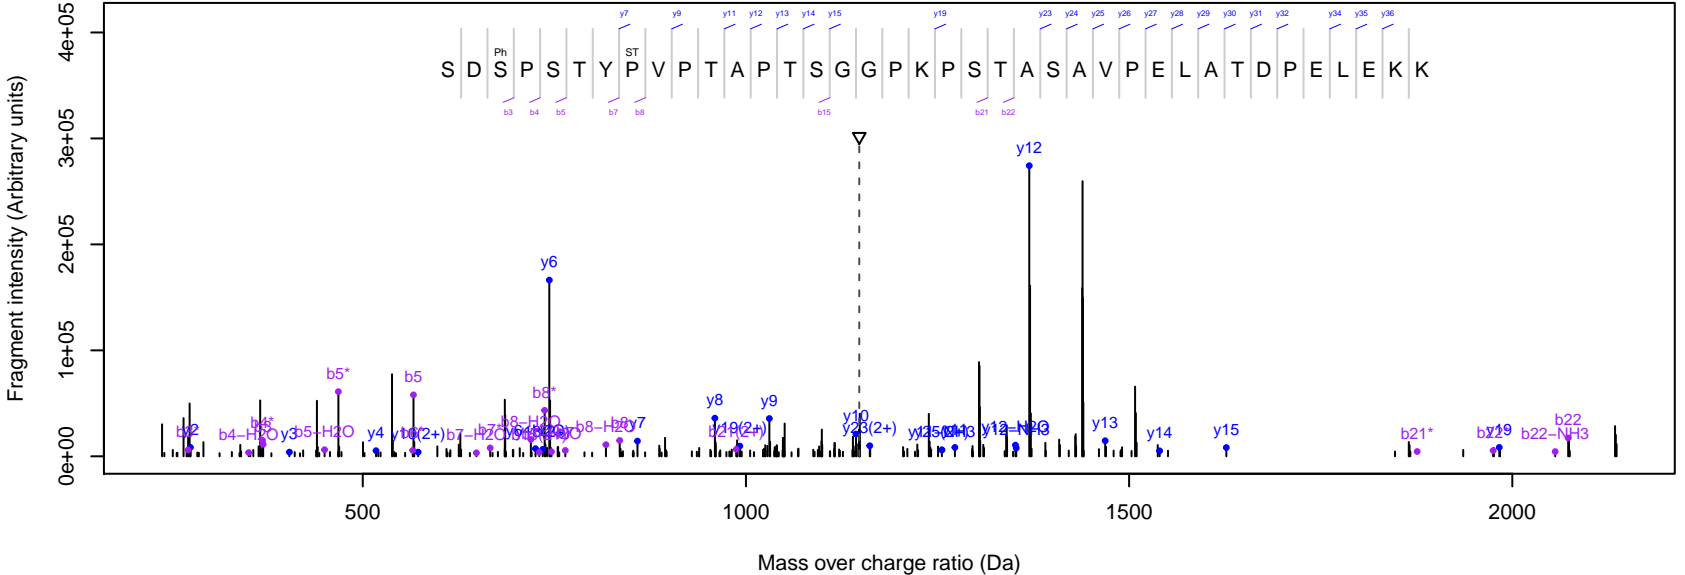

DAGGPRPES(PSTY)PVPAGR-3+

Source : QE3\_201126\_FR\_TiOx\_hum\_tissue\_Urea\_RNAB\_H Scan : 10062

Andromeda score : 102.33

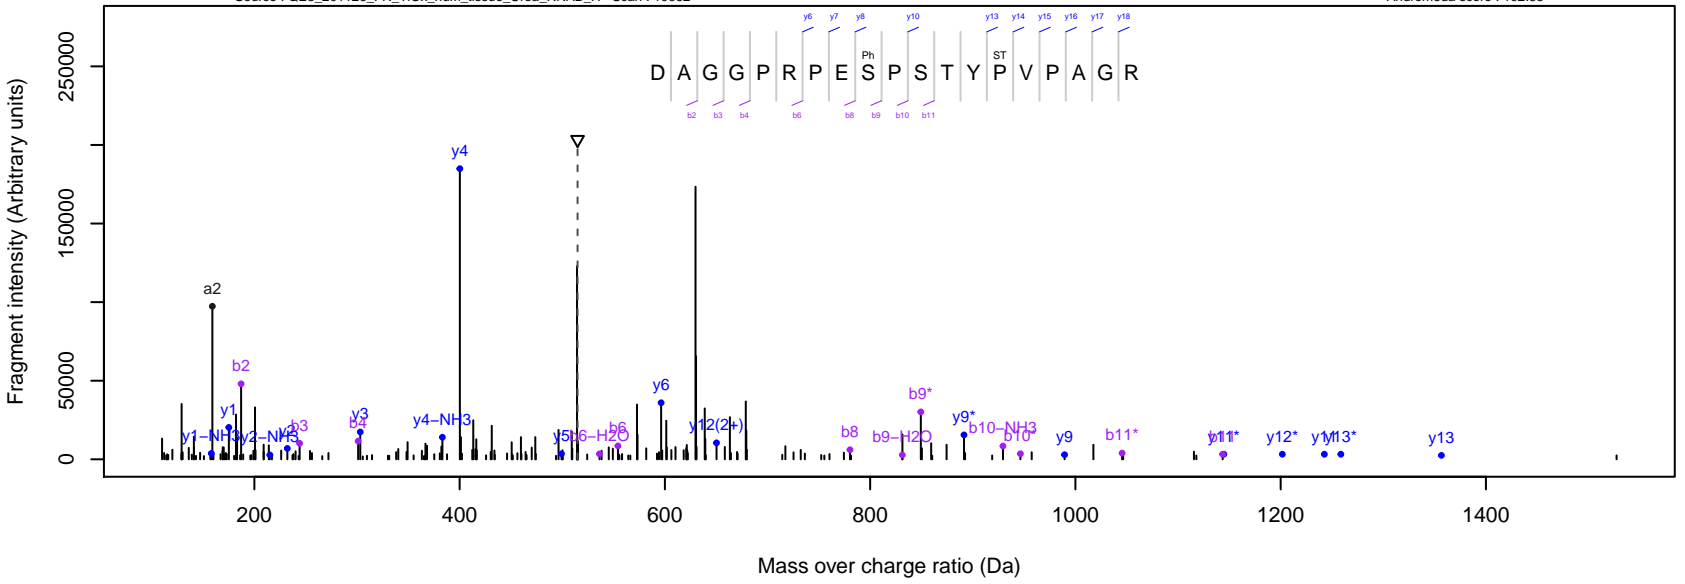

RS(Phospho (STY))SMSLYTAAASVIDTAAASK-3+

Source : QE3\_201126\_FR\_TiOx\_hum\_tissue\_Urea\_RNAB\_H Scan : 40032

Andromeda score : 102.29

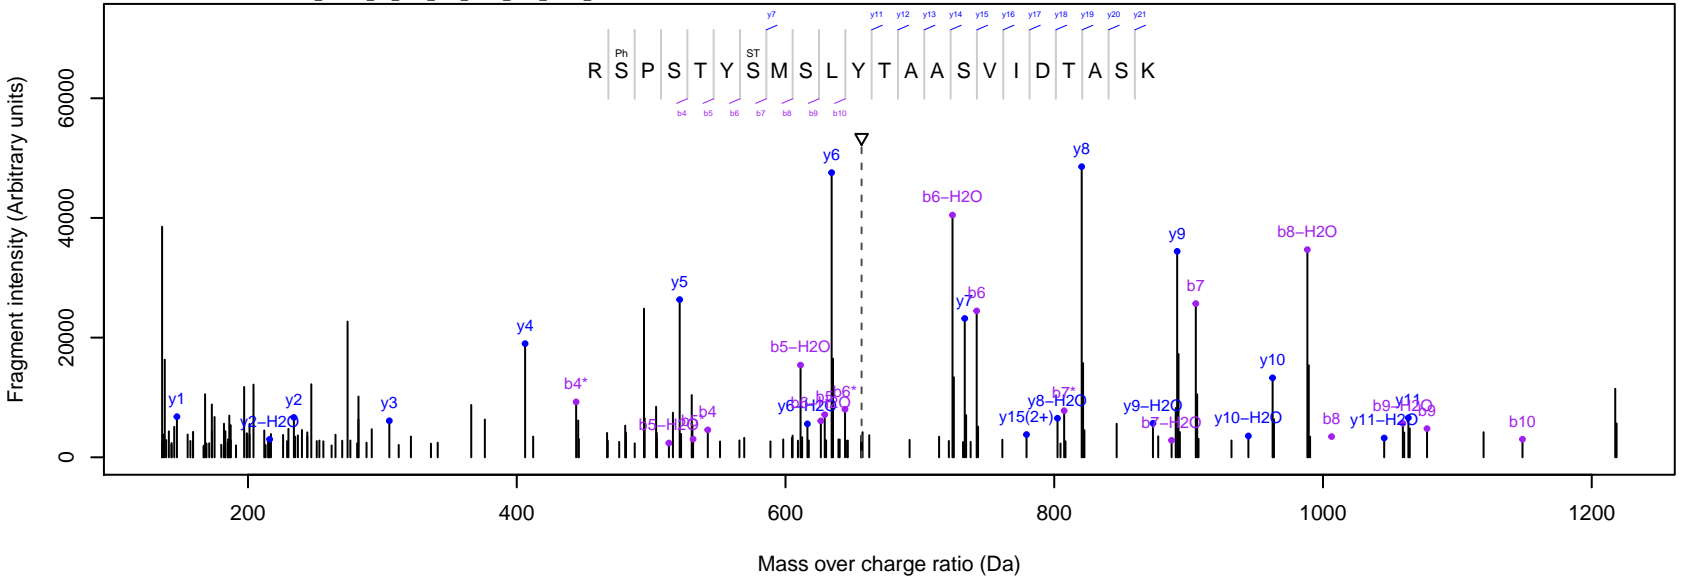

RTS(Phospho (STY))LPCIPR-2+

Source : QE3\_201126\_FR\_TiOx\_hum\_tissue\_Urea\_RNAB\_B Scan : 18887

Andromeda score : 102.28

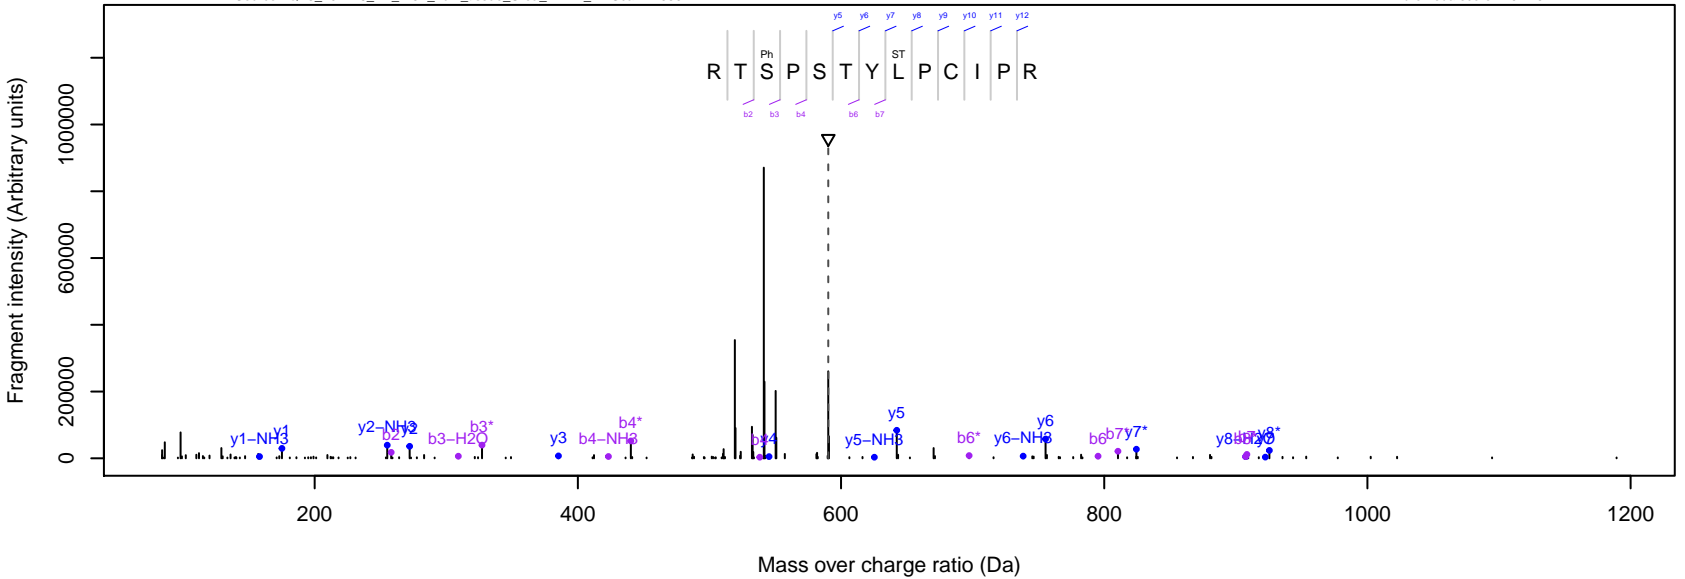

SDEEEDS(Phospho (STY))DFGEEQR-2+

Source : QE3\_201126\_FR\_TiOx\_hum\_tissue\_Urea\_RNAB\_B Scan : 16556

Andromeda score : 102.28

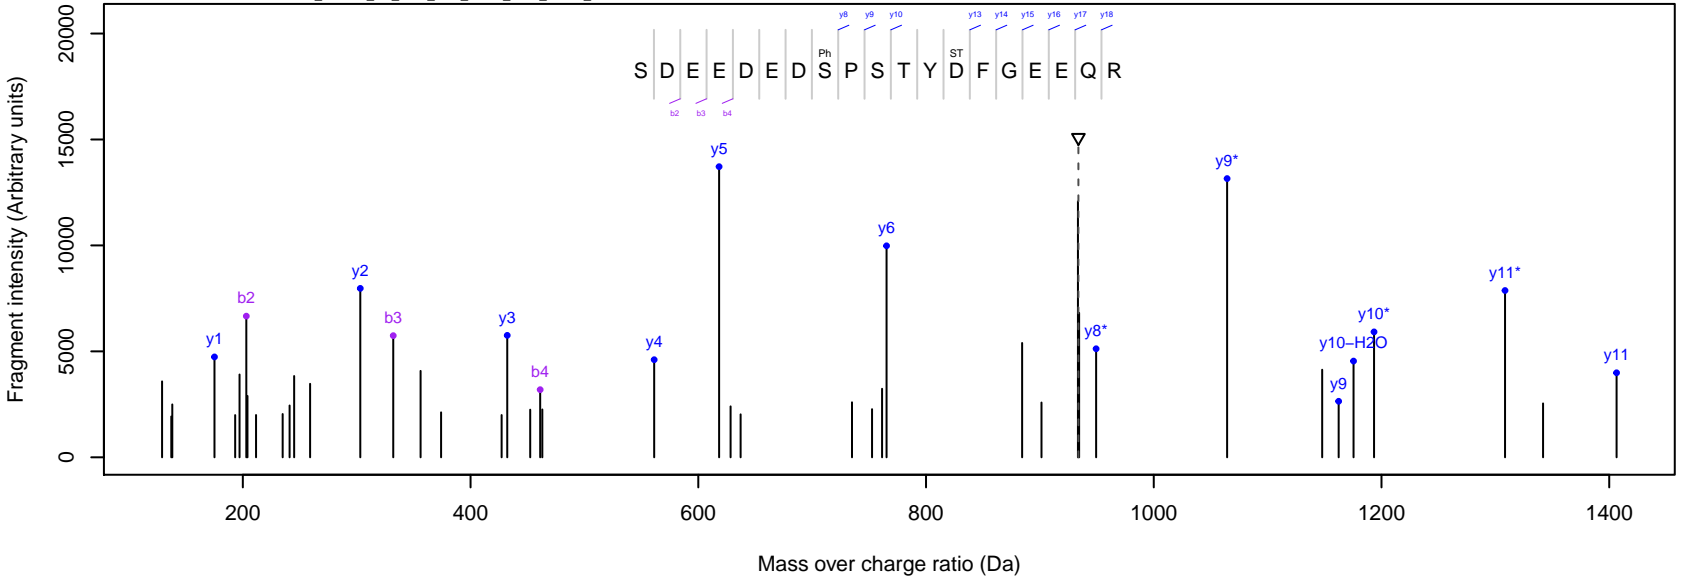

QNS(Phospho (STY))QLPAQVQNGPSQEELEIQR-3+

Source : QE3\_201126\_FR\_TiOx\_hum\_tissue\_Urea\_RNAB\_H Scan : 26838

Andromeda score : 102.27

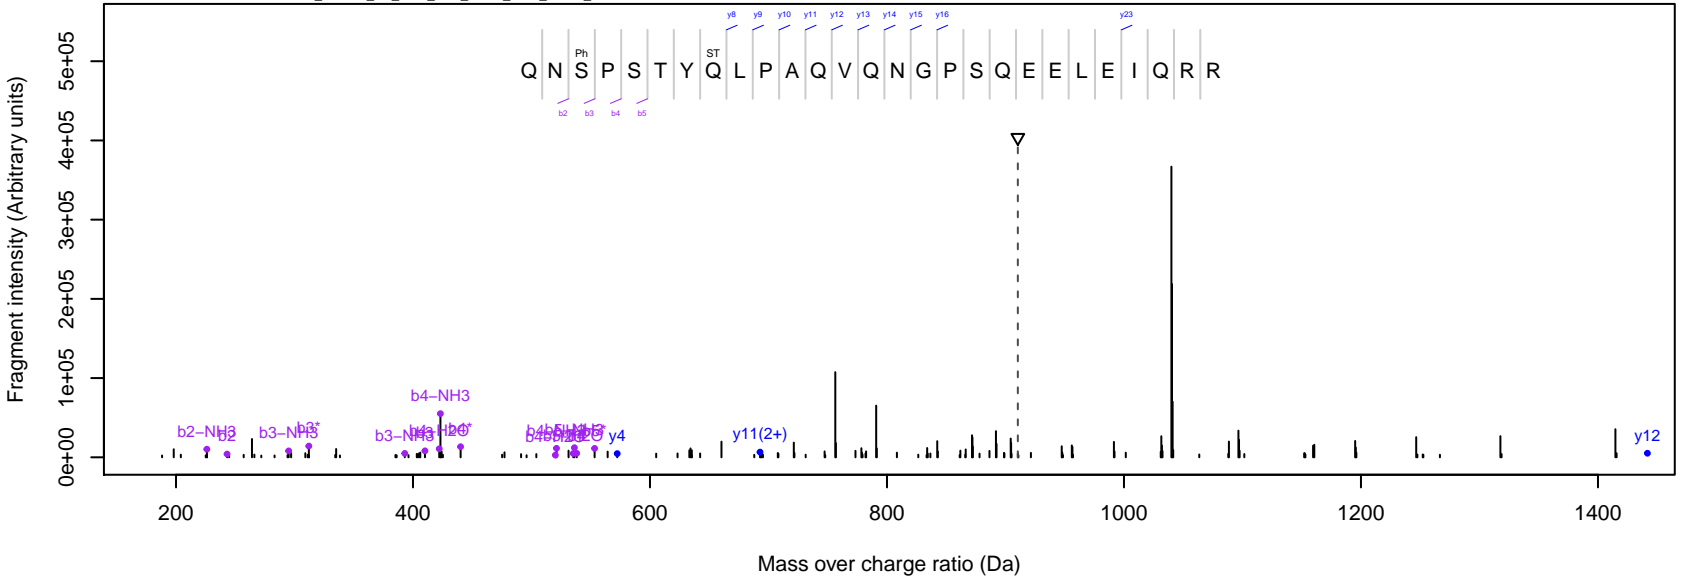

GVDFES(Phospho (STY))S(Phospho (STY))EDDDDDPFMNTSSLRR-3+

Source : QE3\_201126\_FR\_TiOx\_hum\_tissue\_Urea\_RNAB\_N Scan : 48993

Andromeda score : 102.23

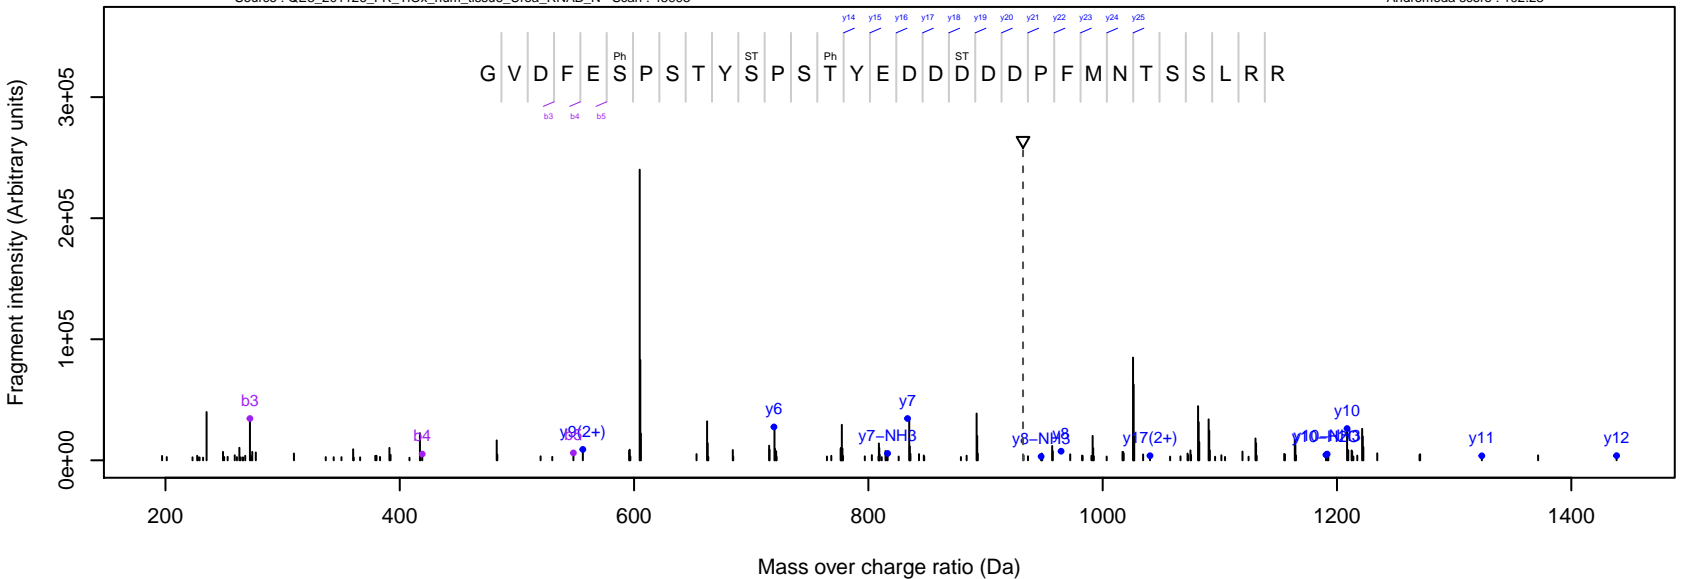

GAS(Phospho (STY))PPISAIEEFSIPEAPMR-3+

Source : QE3\_201126\_FR\_TiOx\_hum\_tissue\_Urea\_RNAB\_H Scan : 61681

Andromeda score : 102.21

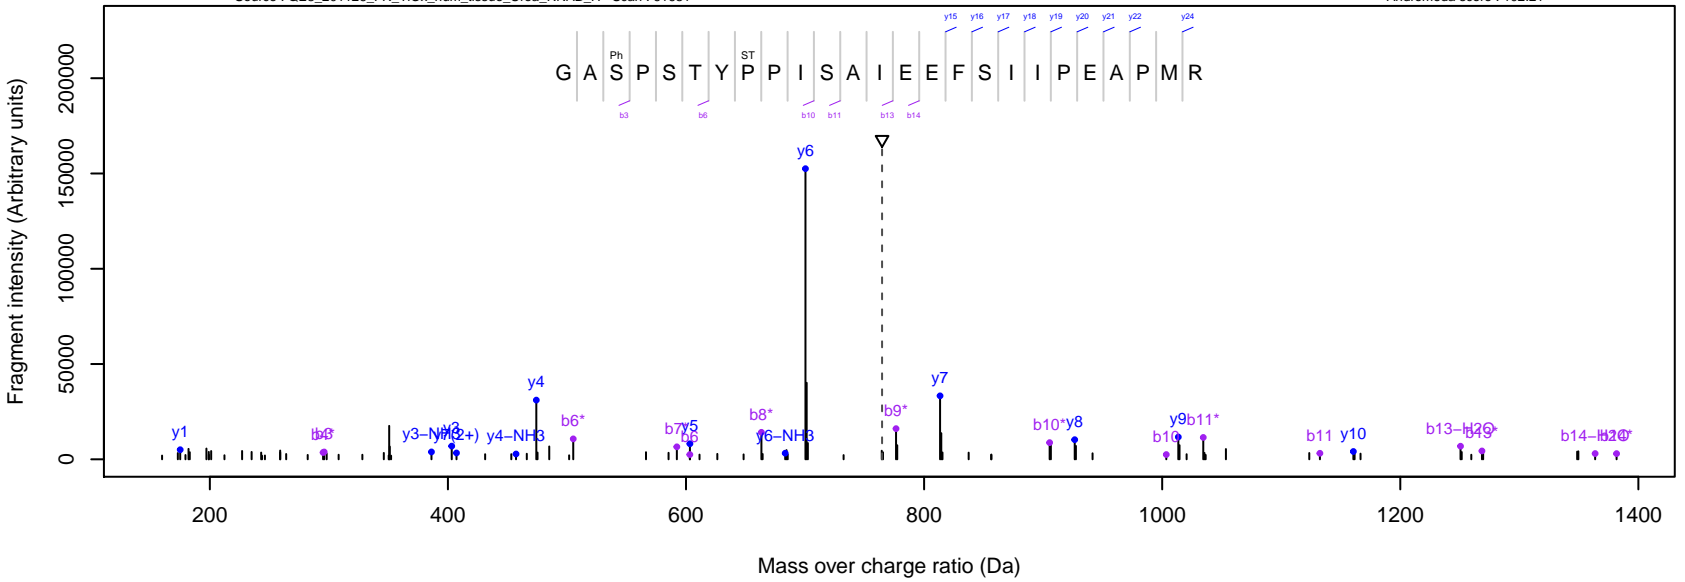

KFS(Phospho (STY))KEEPVSS(Phospho (STY))GPEEAVGK-3+

Source : QE3\_201126\_FR\_TiOx\_hum\_tissue\_Urea\_RNAB\_H Scan : 15876

Andromeda score : 102.21

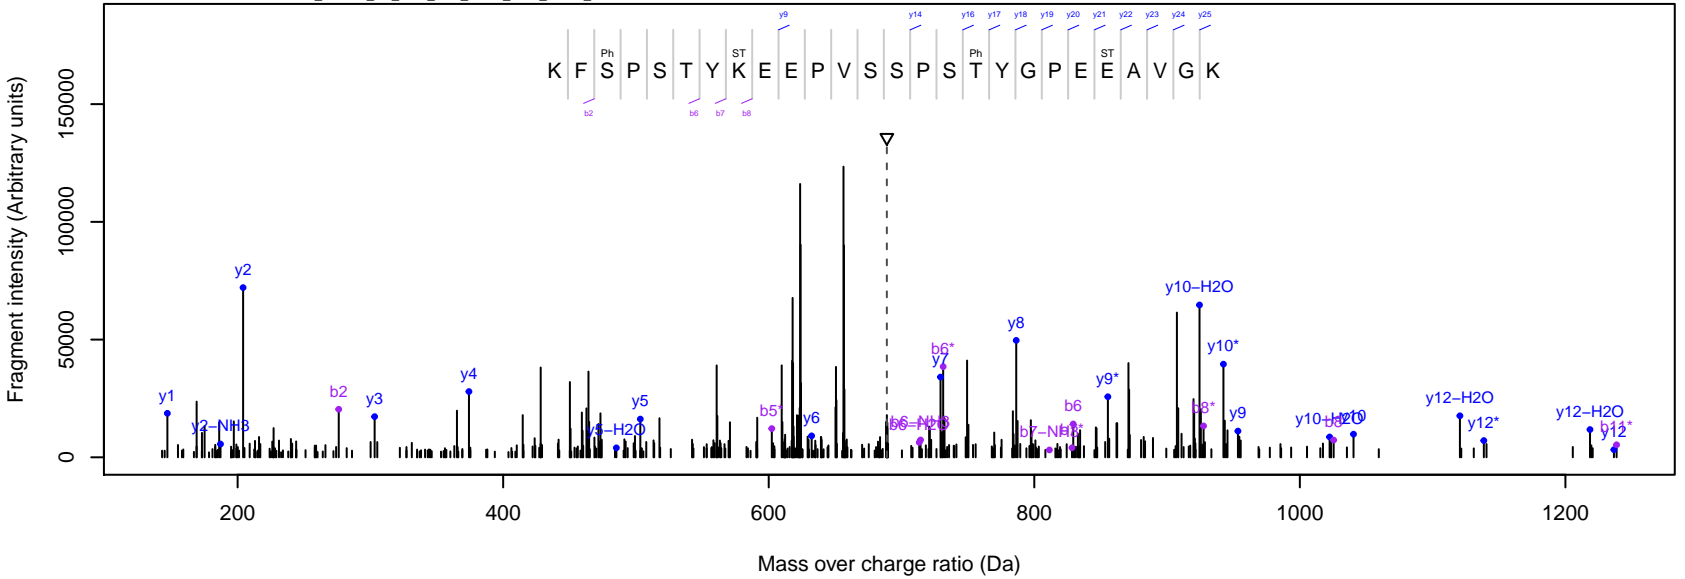

GKAS(Phospho (STY))PFEEEDQNR-3+

Source : QE3\_201126\_FR\_TiOx\_hum\_tissue\_Urea\_RNAB\_B Scan : 7991

Andromeda score : 102.15

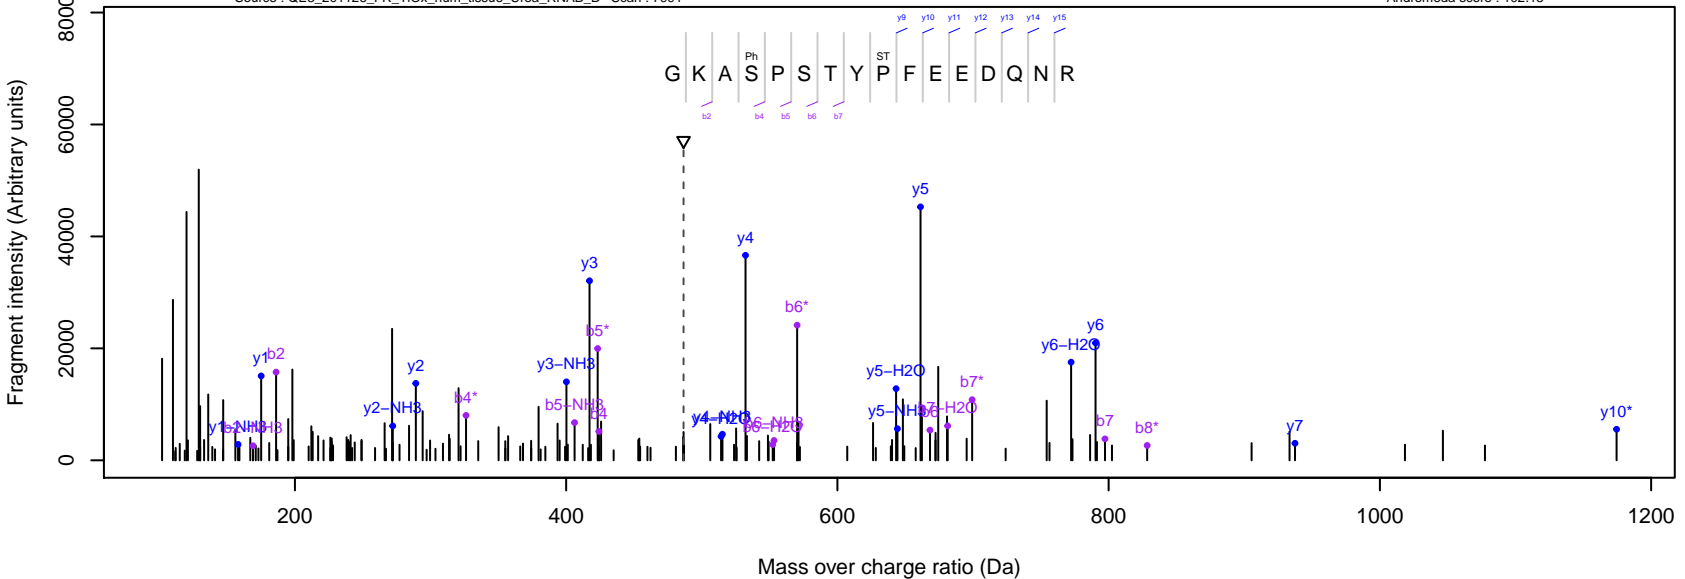

AGS(Phospho (STY))EECVFYTDETASPLAPDLAK-2+

Source : QE3\_201126\_FR\_TiOx\_hum\_tissue\_Urea\_RNAB\_N Scan : 51702

Andromeda score : 102.07

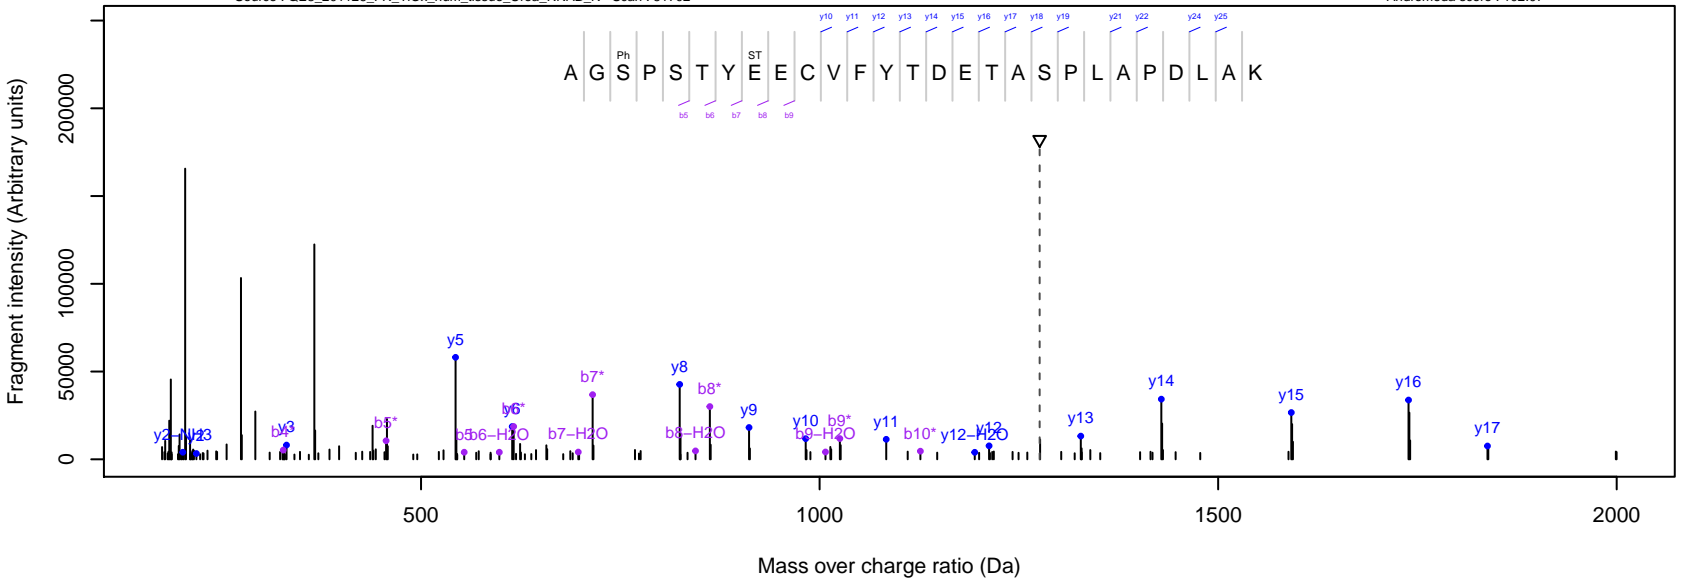

TAS(Phospho (STY))LPGYGR-2+

Source : QE3\_201126\_FR\_TiOx\_hum\_tissue\_Urea\_RNAB\_H Scan : 17981

Andromeda score : 102.06

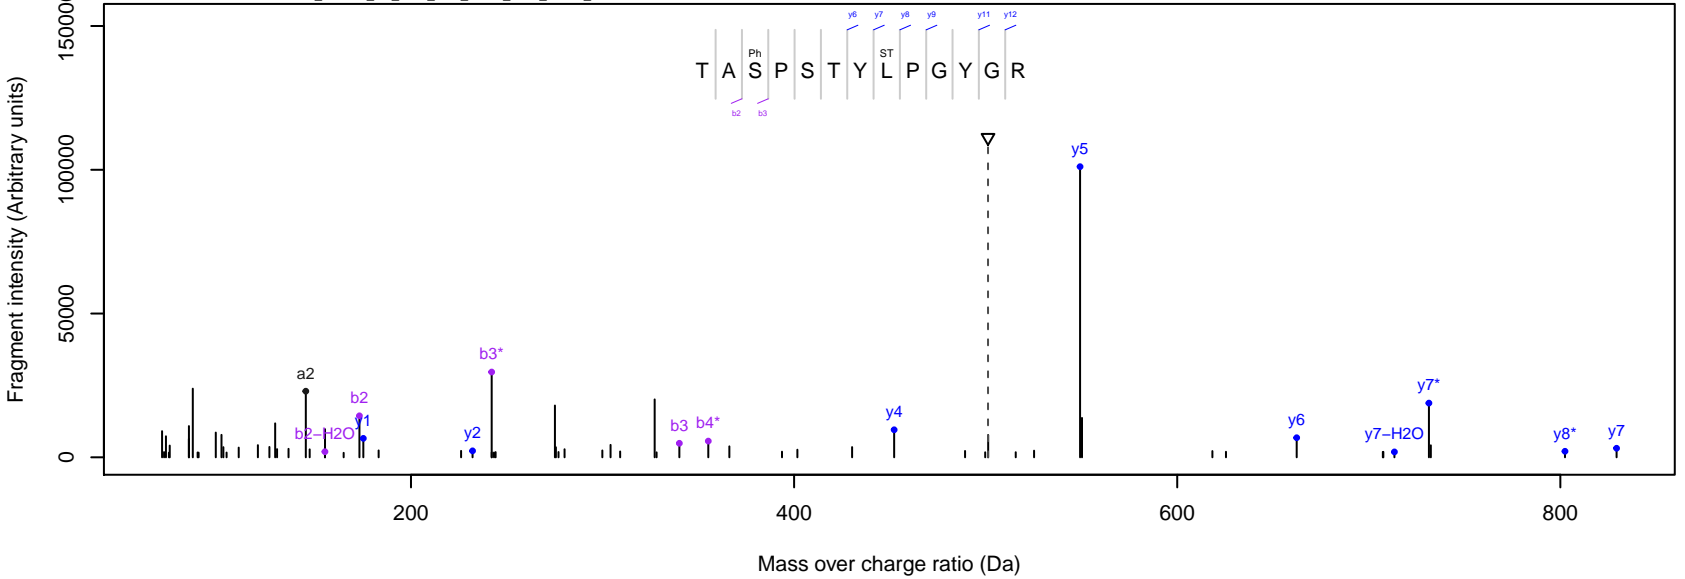

EVTSEDGS(Phospho (STY))DCPEAM(Oxidation (M))DLGTLGIGTLDGFR-3+

Source : QE3\_201126\_FR\_TiOx\_hum\_tissue\_Urea\_RNAB\_N Scan : 58842

Andromeda score : 102.05

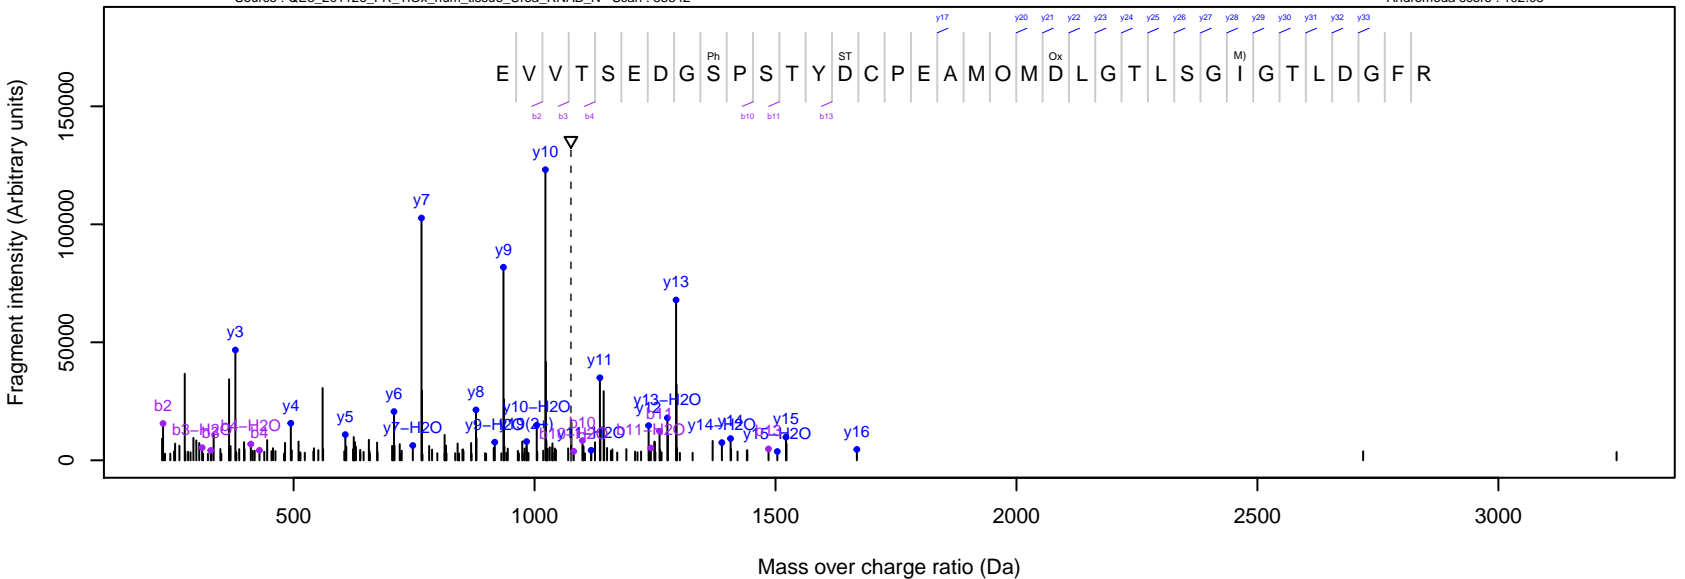



VVGKPAQLGTR(Phospho (STY))QEADVQDWEFR-4+

Source : QE3\_201126\_FR\_TiOx\_hum\_tissue\_Urea\_RNAB\_H Scan : 29612

Andromeda score : 102.05

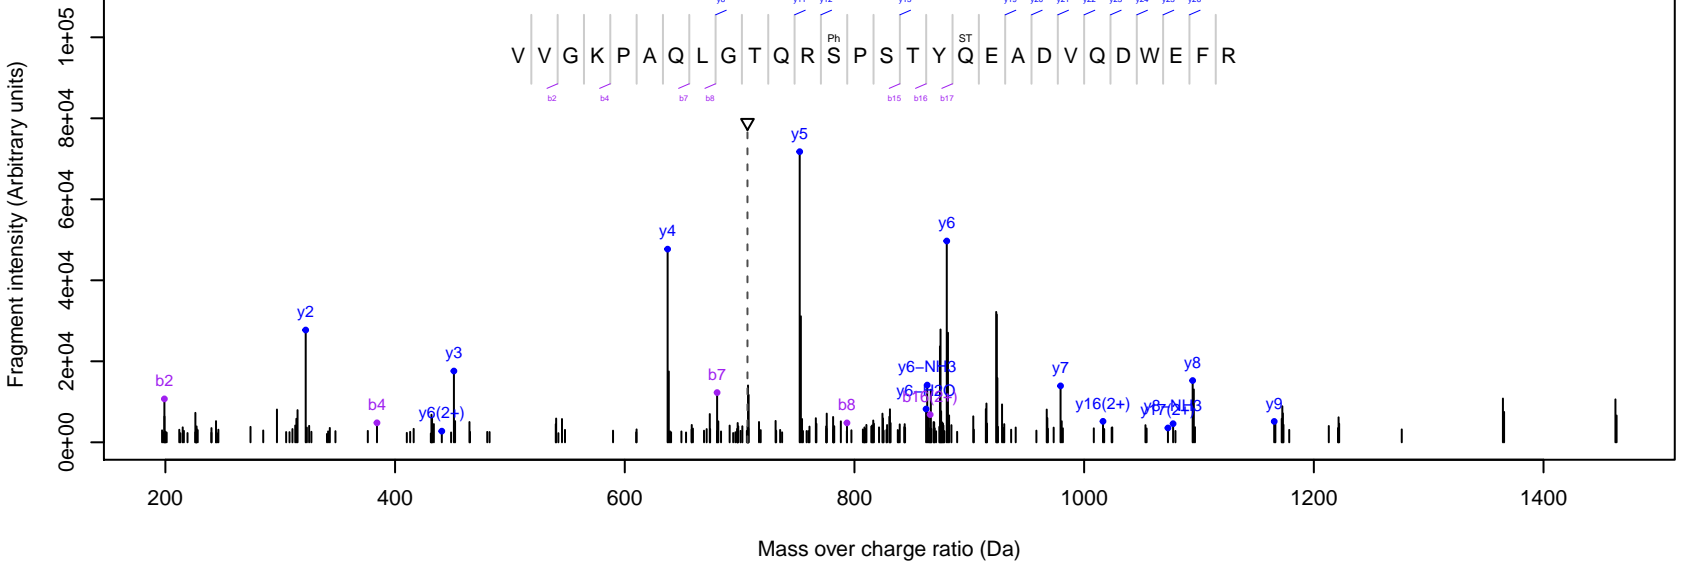

YLLSQSS(Phospho (STY))PAPLTAEEELR-2+

Source : QE3\_201126\_FR\_TiOx\_hum\_tissue\_Urea\_RNAB\_B Scan : 52982

Andromeda score : 101.96

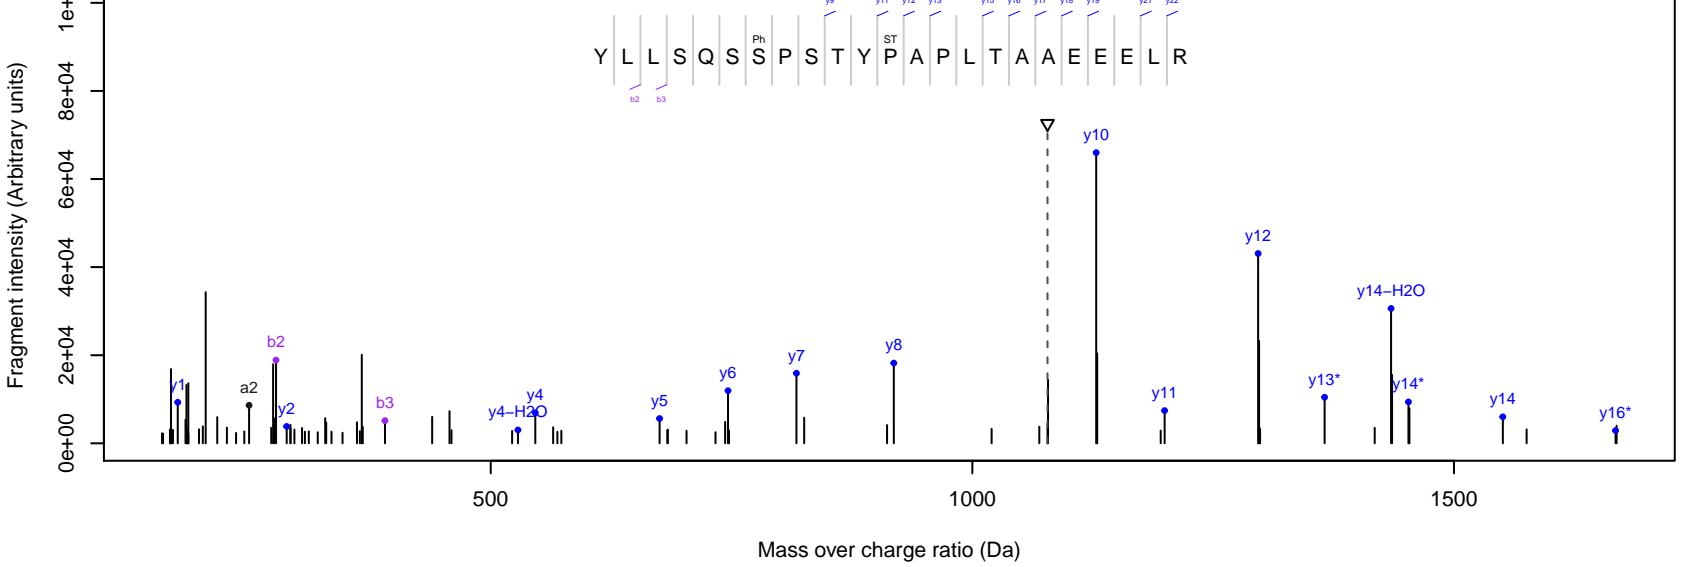

RSS(Phospho (STY))M(Oxidation (M))SSCGSSGYFSSSPVLCNPK-3+

Source : QE3\_201126\_FR\_TiOx\_hum\_tissue\_Urea\_RNAB\_B Scan : 34175

Andromeda score : 101.95

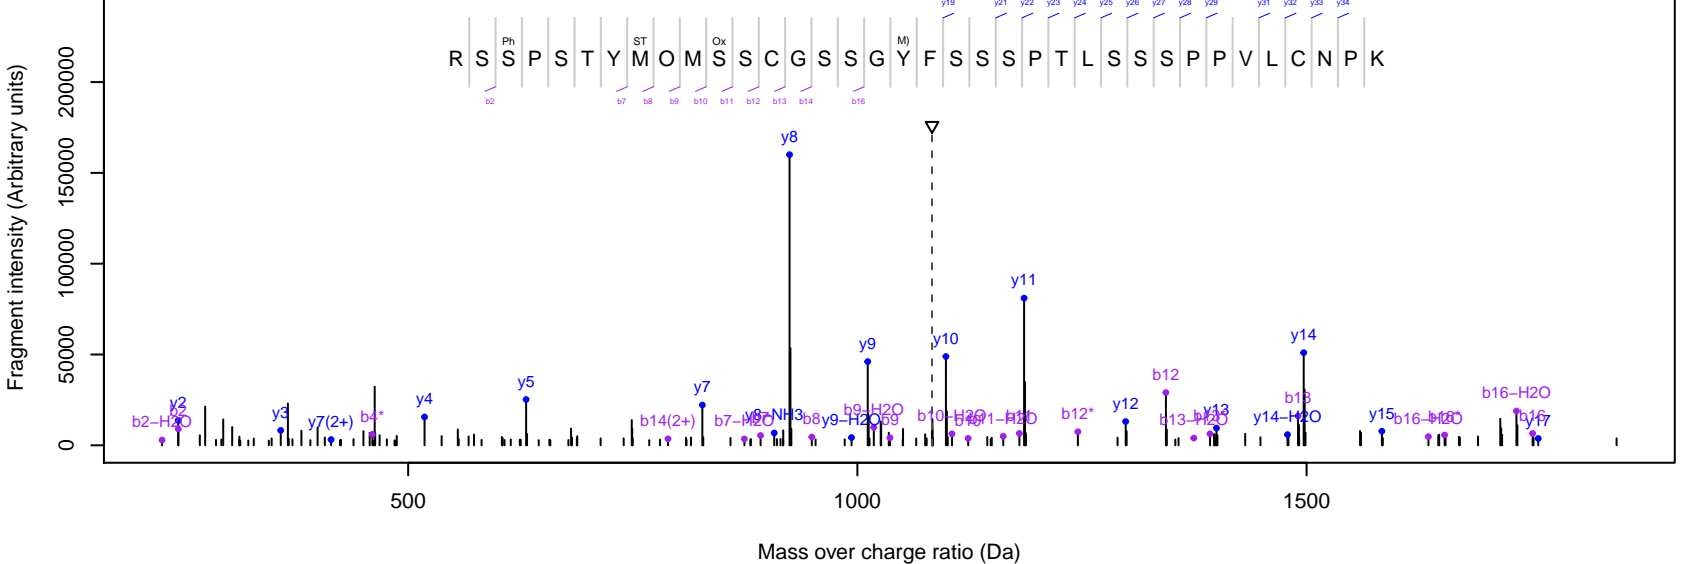

SVKHD SIPAADTFEDLS Ph PSTY DVEGGGSEPTQR

Source : QE3\_201126\_FR\_TiOx\_hum\_tissue\_Urea\_RNAB\_H Scan : 32439

Andromeda score : 101.95

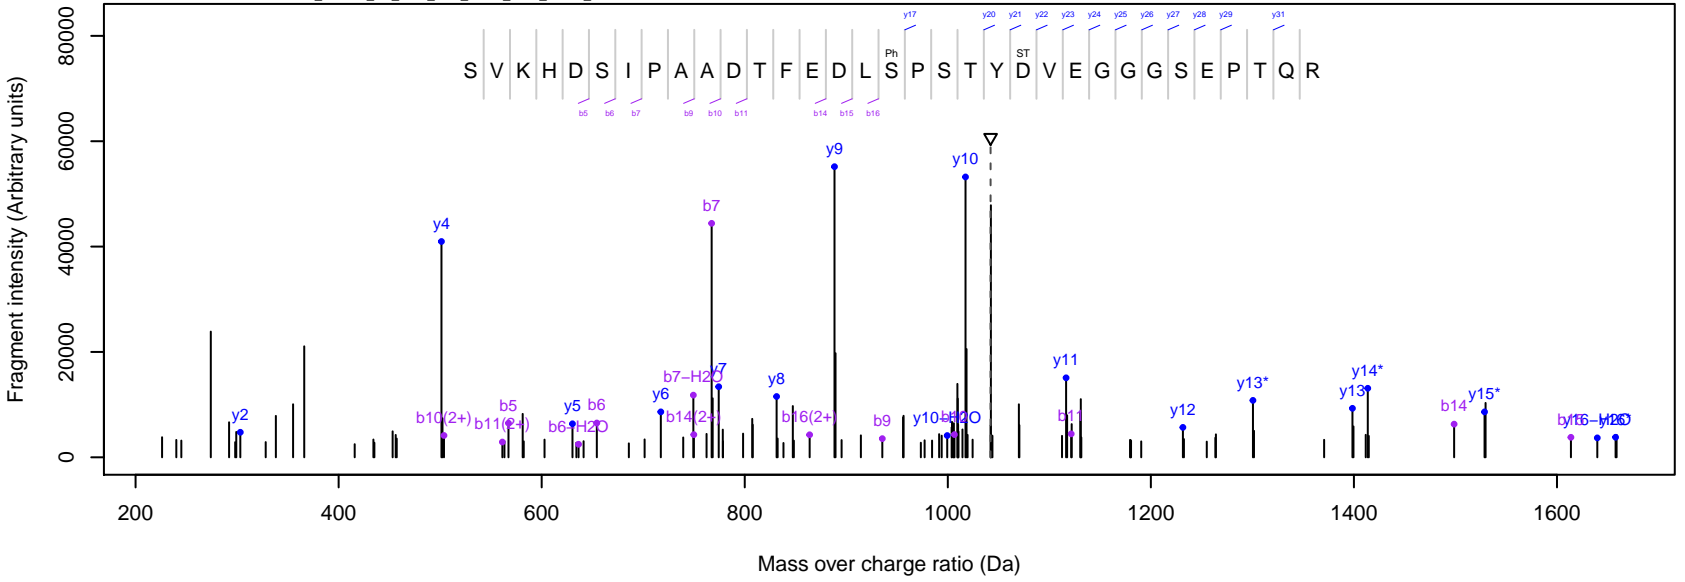

SIS(Phospho (STY))SSNPDLAVAPGSVDDEVSR

Source : QE3\_201126\_FR\_TiOx\_hum\_tissue\_Urea\_RNAB\_N Scan : 34447

Andromeda score : 101.94

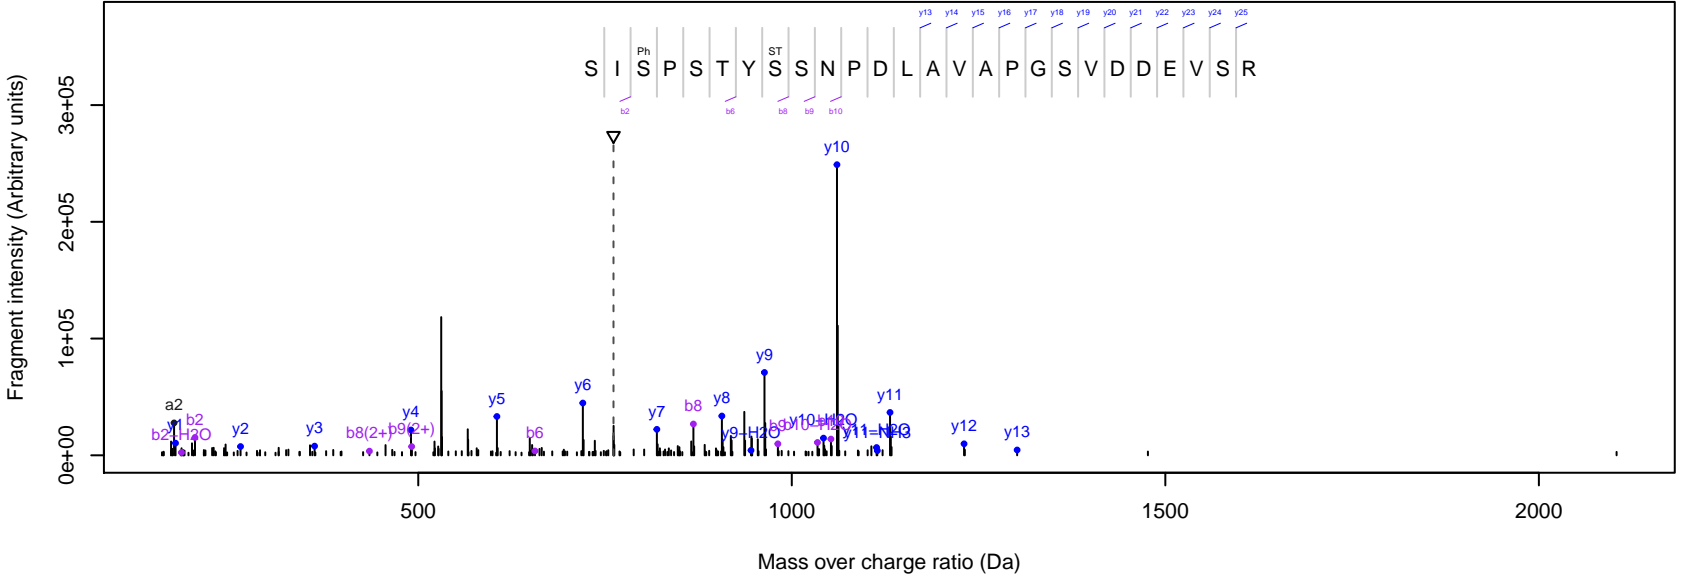

KEEENADS Ph PSTY DDEGELQLLSQDWR

Source : QE3\_201126\_FR\_TiOx\_hum\_tissue\_Urea\_RNAB\_B Scan : 53167

Andromeda score : 101.93

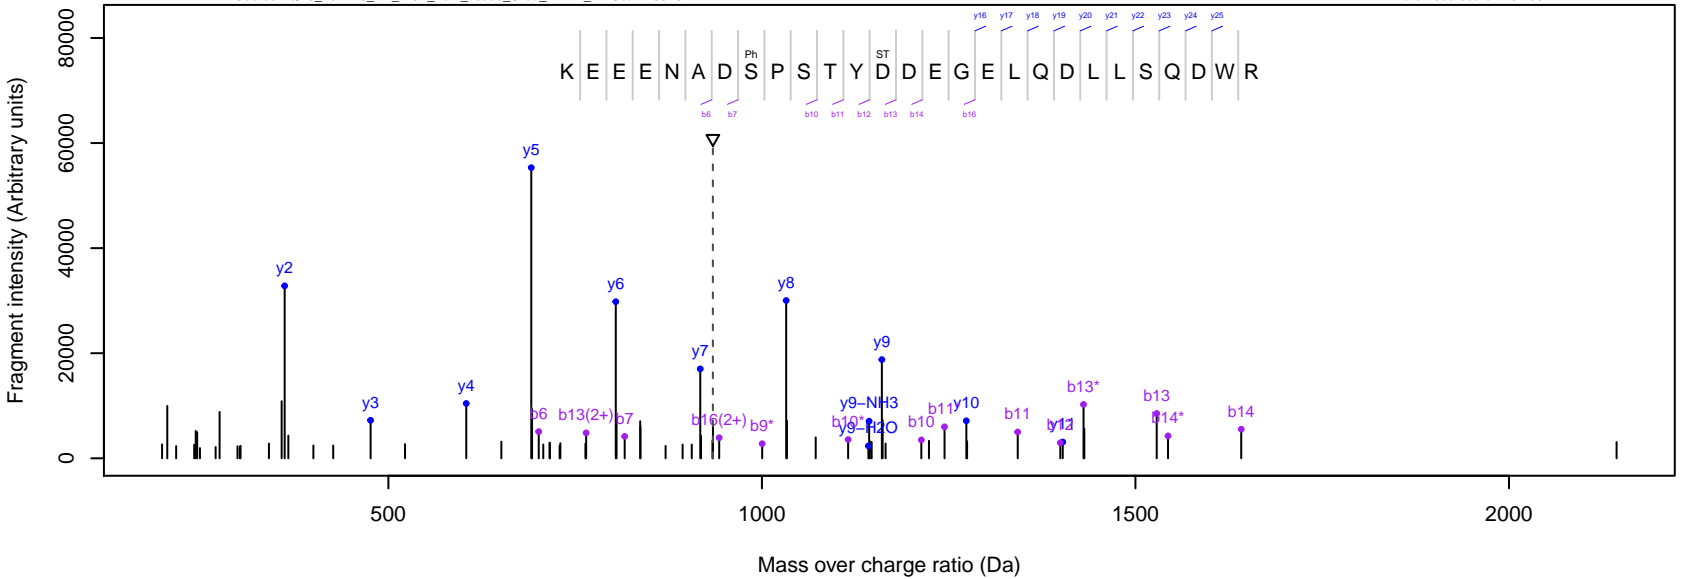

KIDTHPS(Phospho (STY))PSHSSTVKDSLIELK-4+

Source : QE3\_201126\_FR\_TiOx\_hum\_tissue\_Urea\_RNAB\_N Scan : 17899

Andromeda score : 101.93

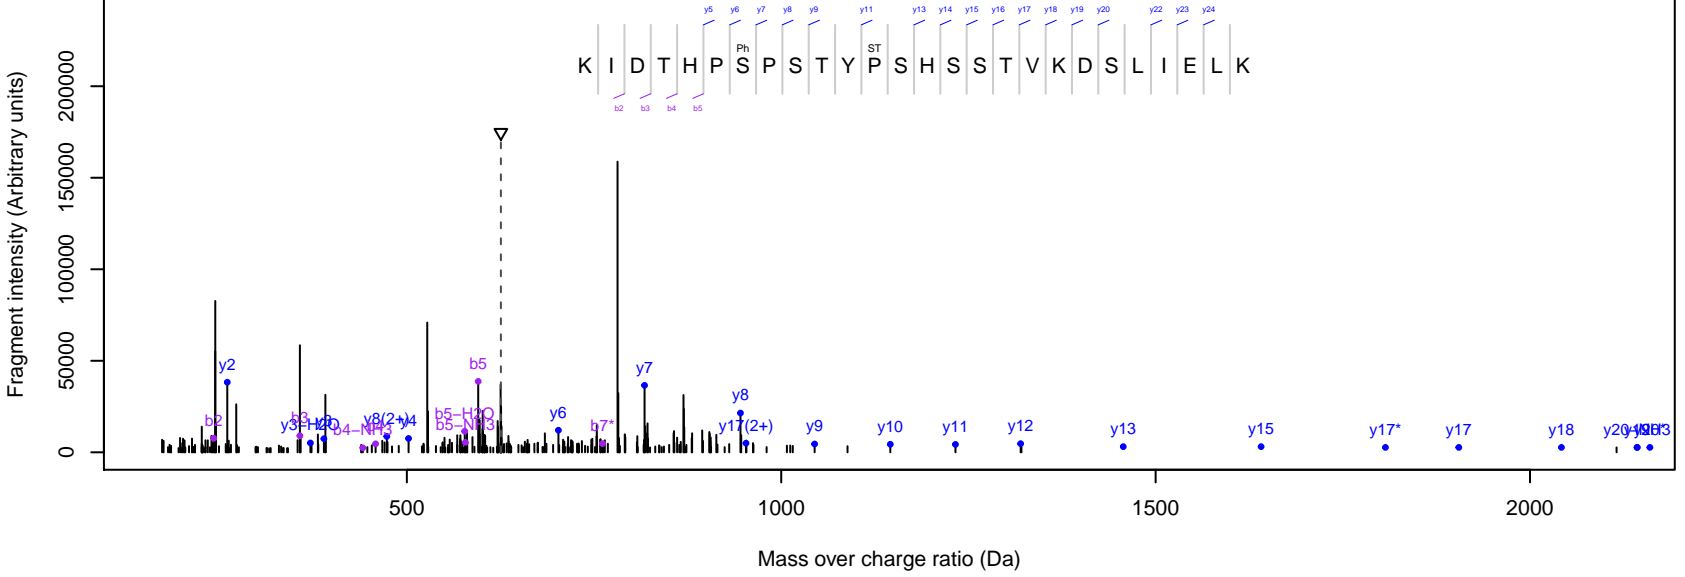

SFS(Phospho (STY))LDPLM(Oxidation (M))ER-2+

Source : QE3\_201126\_FR\_TiOx\_hum\_tissue\_Urea\_RNAB\_H Scan : 42310

Andromeda score : 101.93

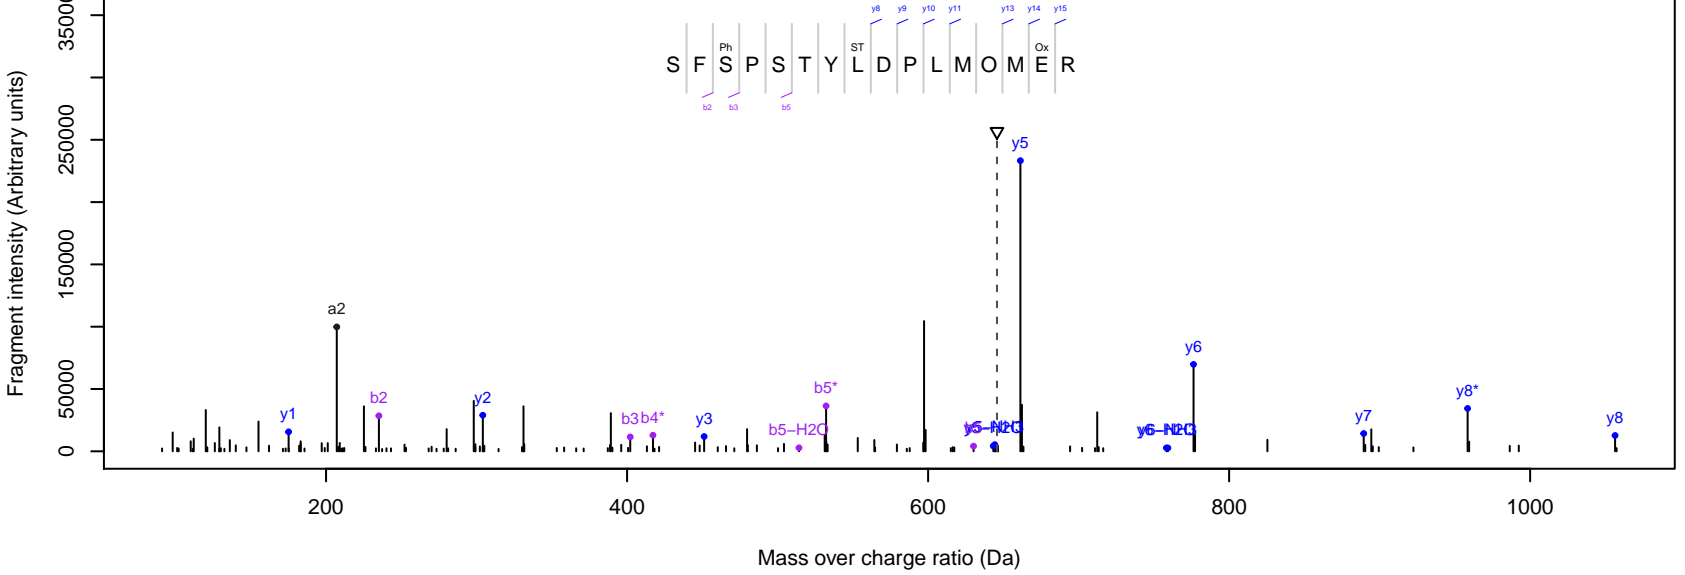

KS(Phospho (STY))SVCSSLNSVNSSDSR-3+

Source : QE3\_201126\_FR\_TiOx\_hum\_tissue\_Urea\_RNAB\_H Scan : 10969

Andromeda score : 101.89

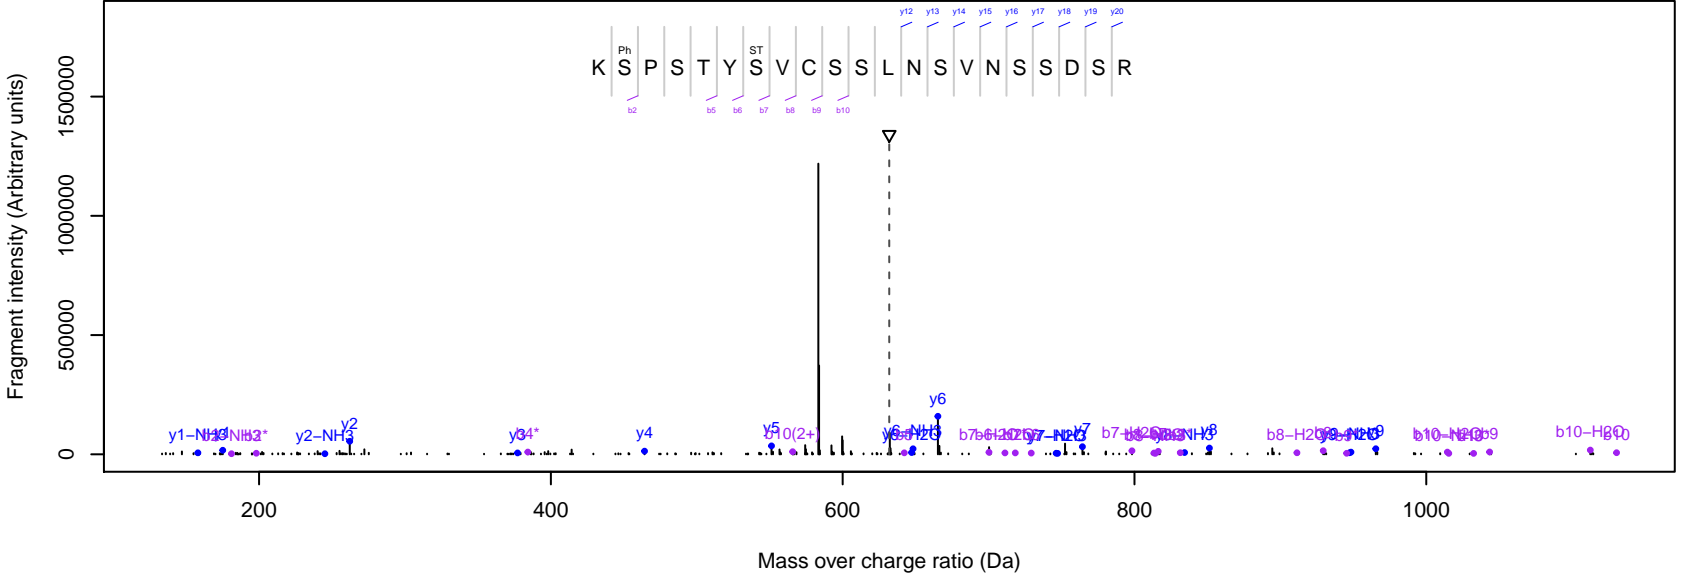

KVDEGAGDSAAVASGGAQTLALAGSPSTYPA PS GHPK-4+

Source : QE3\_201126\_FR\_TiOx\_hum\_tissue\_Urea\_RNAB\_H Scan : 22477

Andromeda score : 101.86

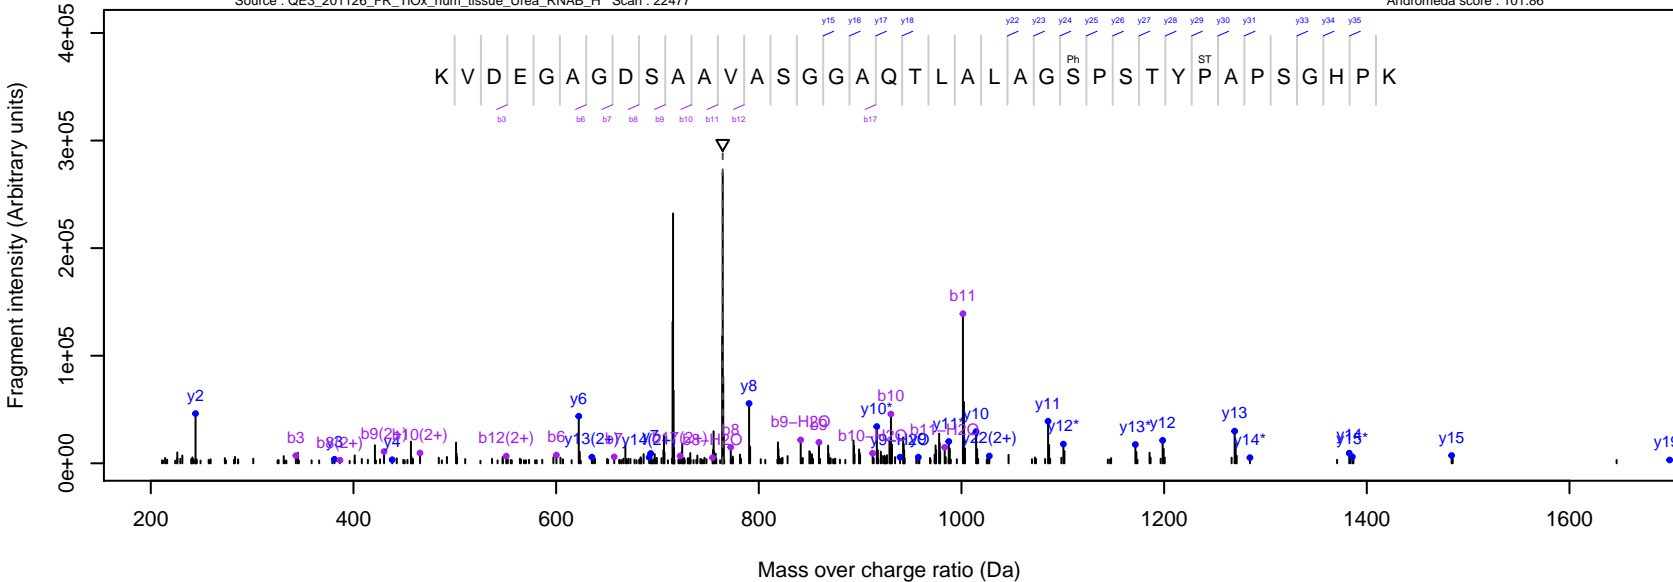

VEVKEEEEESSNGTASQSTS(Phospho (STY))PSQPR-3+

Source : QE3\_201126\_FR\_TiOx\_hum\_tissue\_Urea\_RNAB\_N Scan : 9321

Andromeda score : 101.86

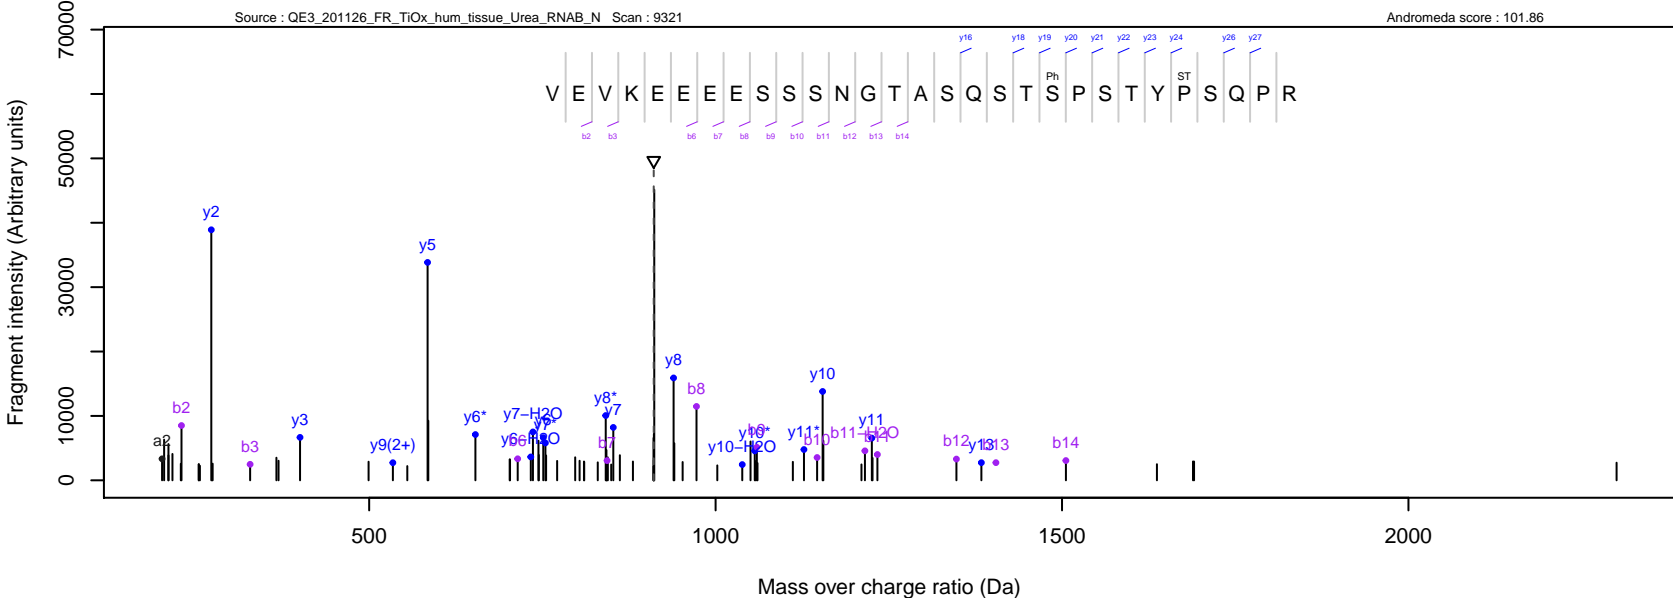

SKDEEEDEES(Phospho (STY))DDADDTPILKPVSLLR-3+

Source : QE3\_201126\_FR\_TiOx\_hum\_tissue\_Urea\_RNAB\_N Scan : 41780

Andromeda score : 101.85

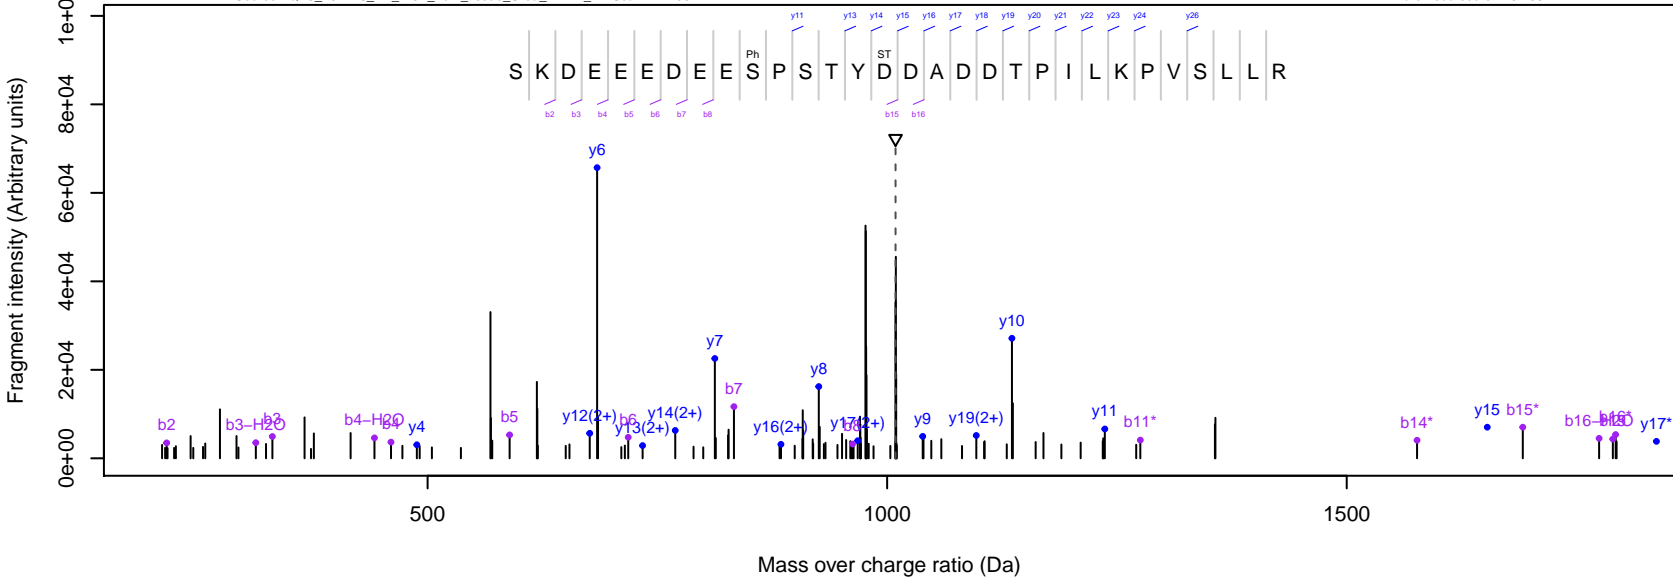

S(Phospho (STY))AS(Phospho (STY))PYPSHLSLSS(Phospho (STY))PQR-2+

Source : QE3\_201126\_FR\_TIOx\_hum\_tissue\_Urea\_RNAB\_N Scan : 21584

Andromeda score : 101.78

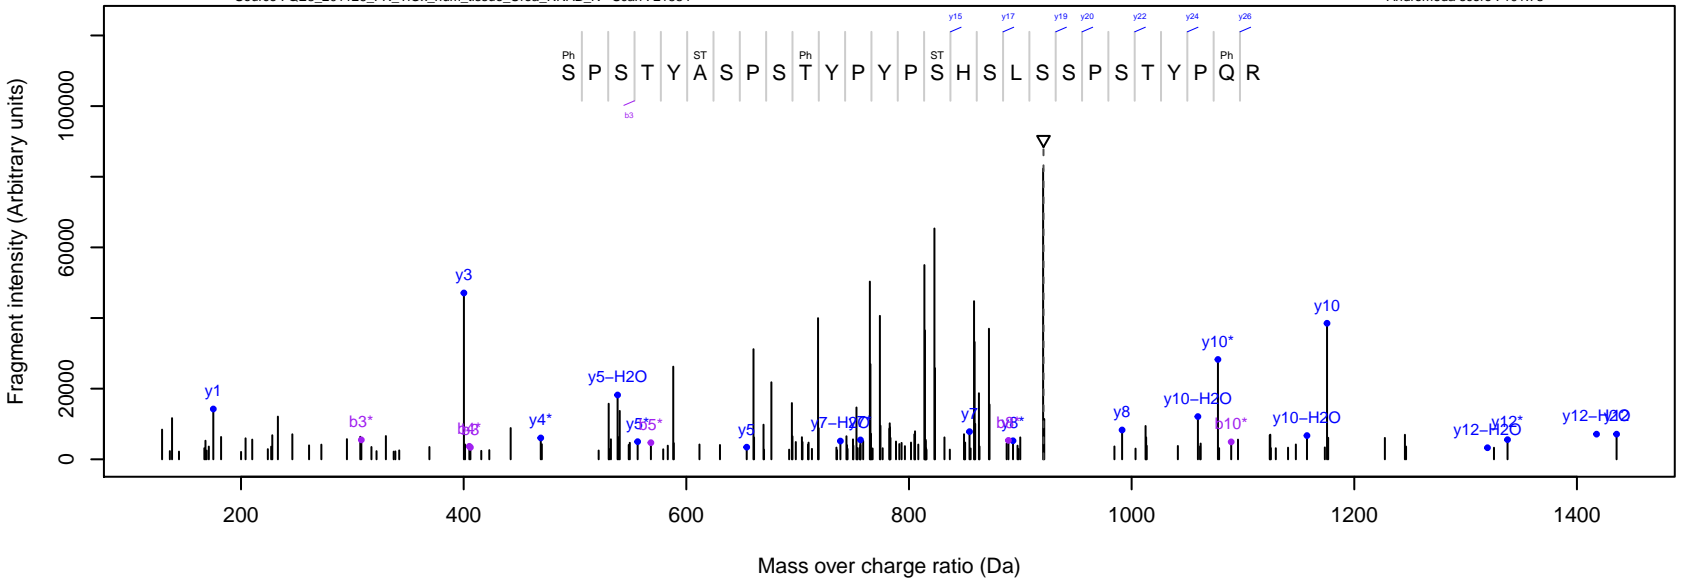

ATSSS(Phospho (STY))NPSS(Phospho (STY))PAPDWYKDFVTDADAEVLEHSGK-3+

Source : QE3\_201126\_FR\_TIOx\_hum\_tissue\_Urea\_RNAB\_N Scan : 57928

Andromeda score : 101.75

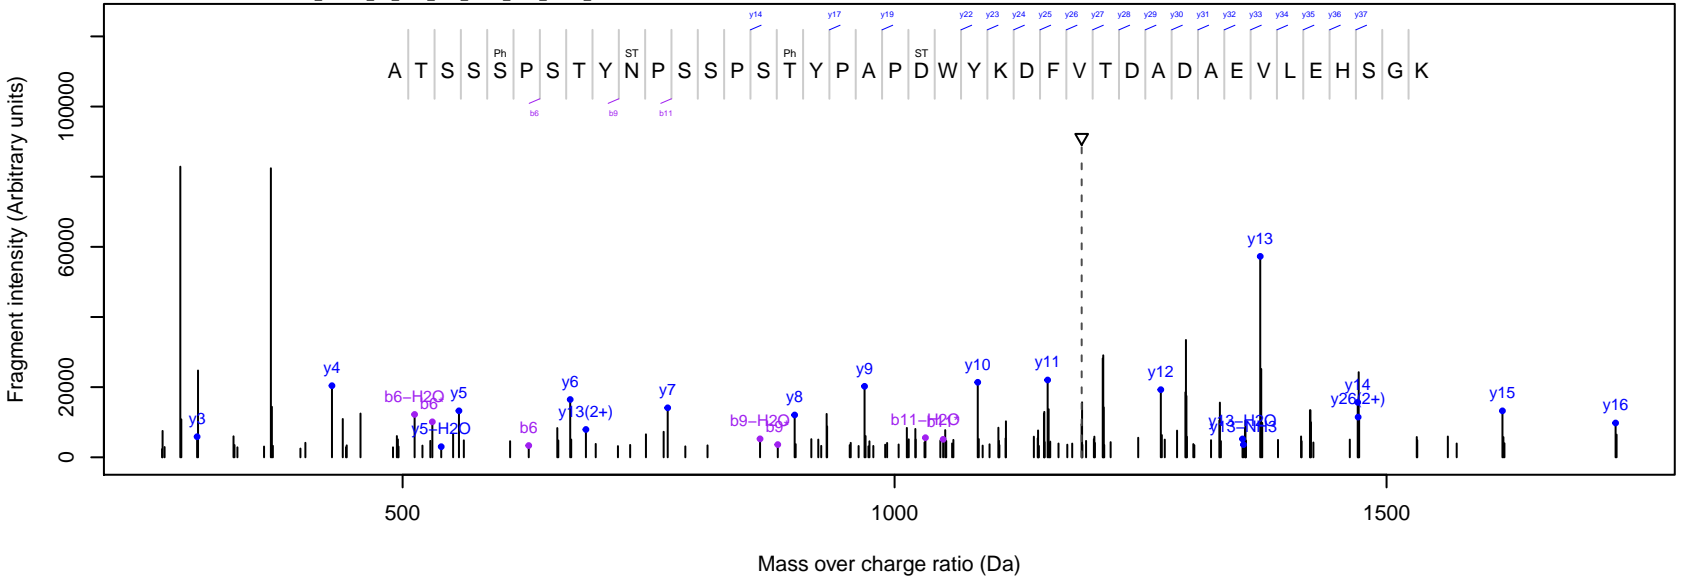

SLGSVQAPSYGARPVSSAASVYAGAGGS(Phospho (STY))GS(Phospho (STY))RIS(Phospho (STY))VSR-3+

Source : QE3\_201126\_FR\_TIOx\_hum\_tissue\_Urea\_RNAB\_N Scan : 37896

Andromeda score : 101.75

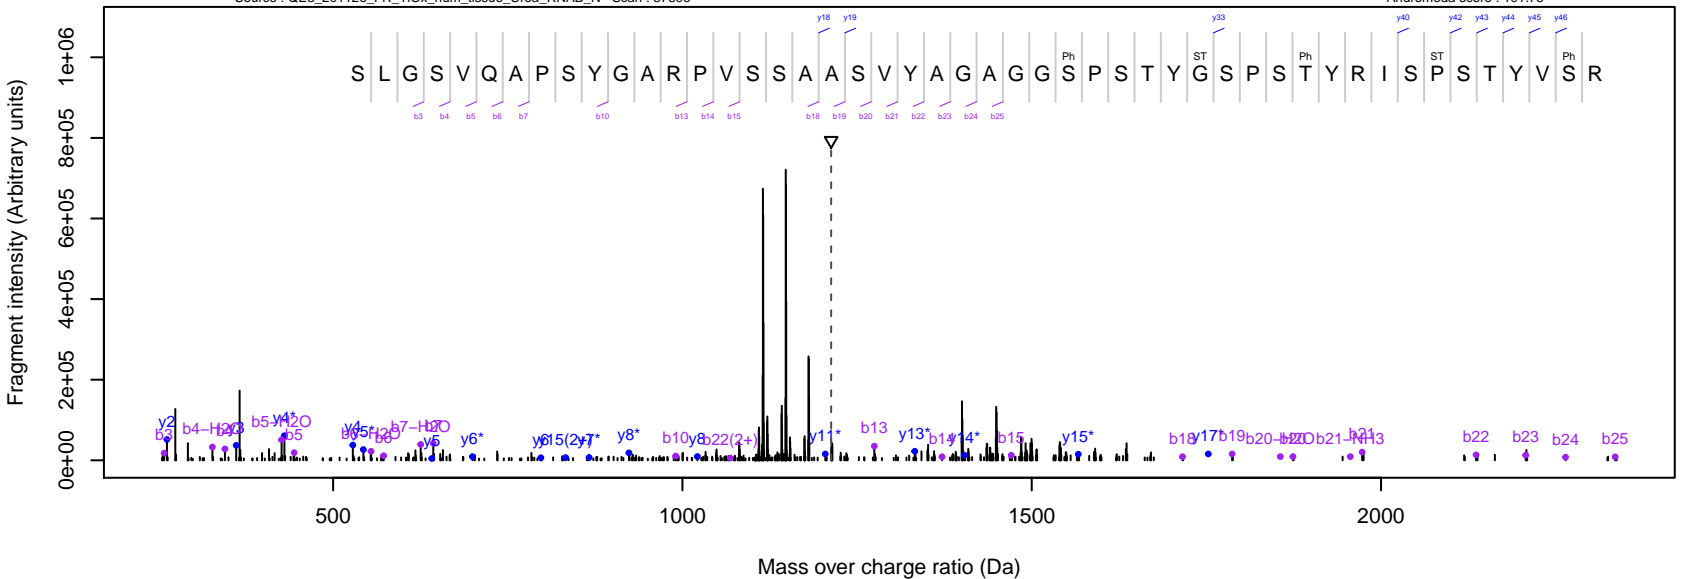

NHLS(Phospho (STY))PQQGGATPQVPS(Phospho (STY))PCCR-3+

Source : QE3\_201126\_FR\_TiOx\_hum\_tissue\_Urea\_RNAB\_N Scan : 20357

Andromeda score : 101.74

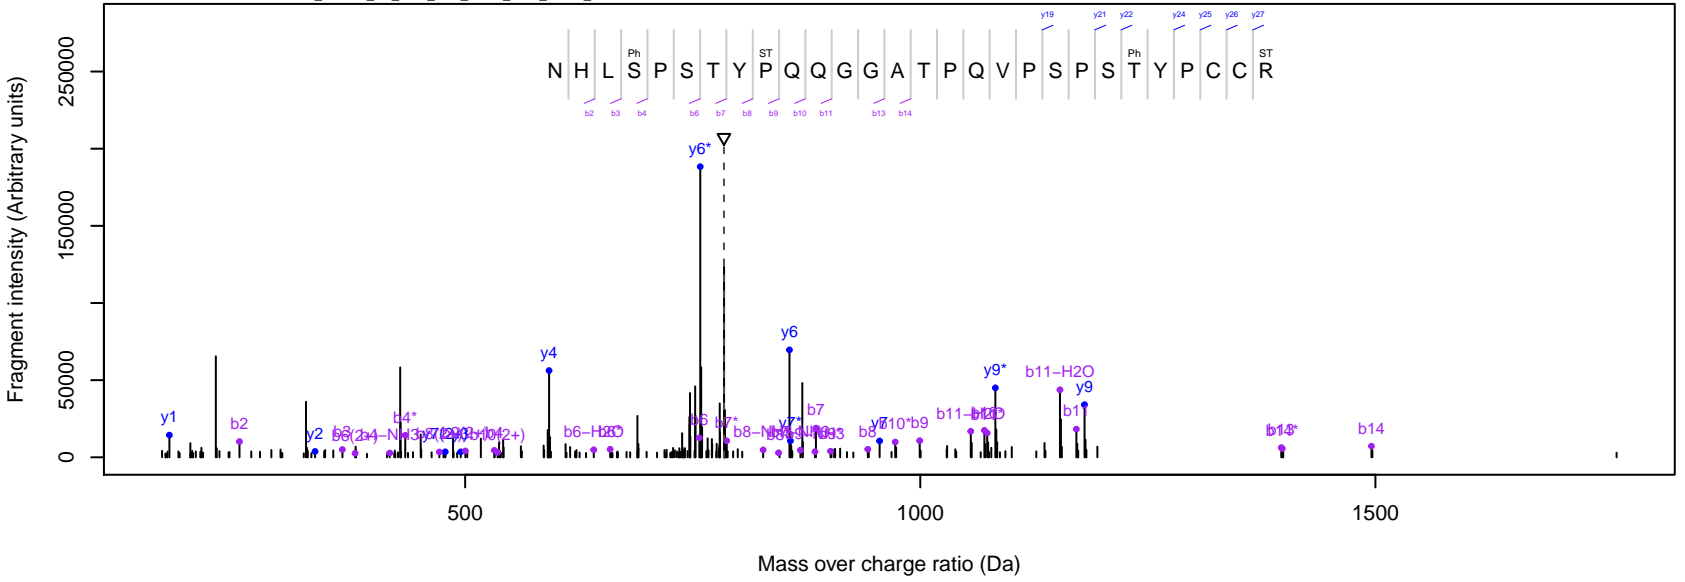

SNT(Phospho (STY))PILVDGKDVMPENK-3+

Source : QE3\_201126\_FR\_TiOx\_hum\_tissue\_Urea\_RNAB\_H Scan : 33098

Andromeda score : 101.74

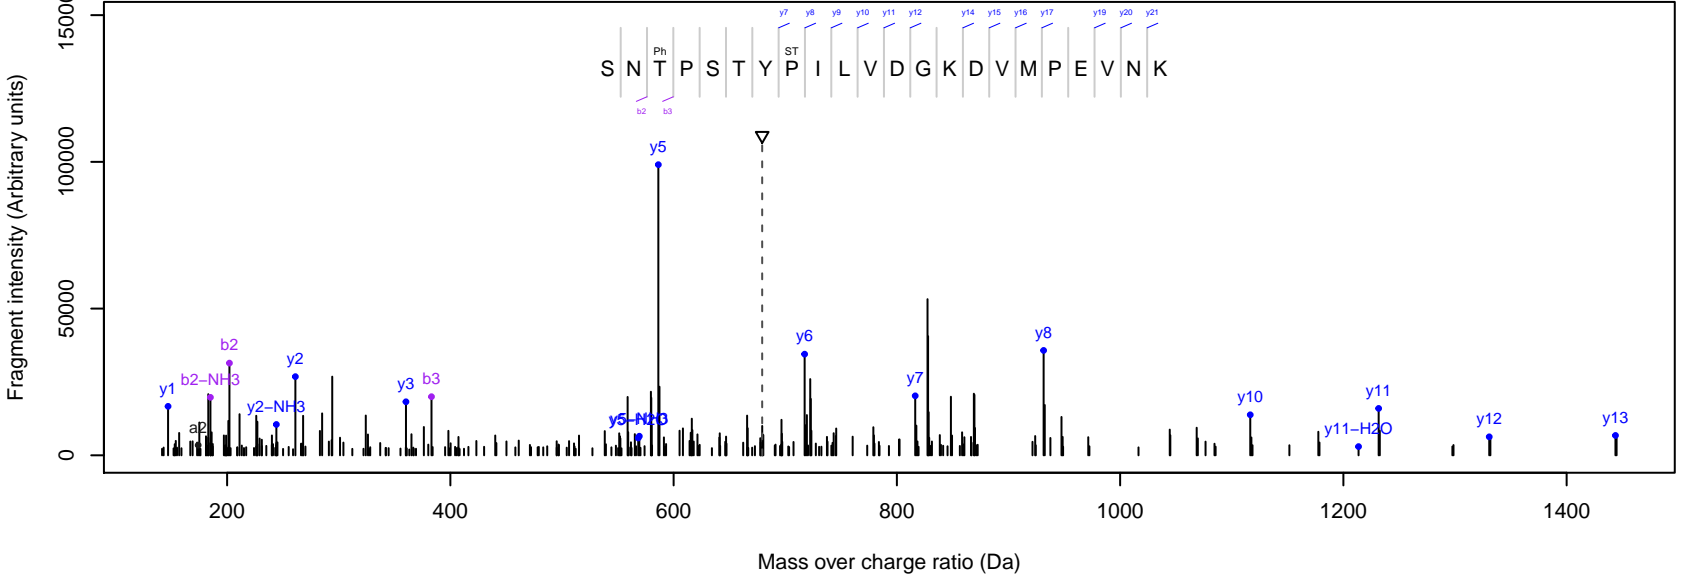

LCYVALDFEQEMATAASSPSTYSSEK-3+

Source : QE3\_201126\_FR\_TiOx\_hum\_tissue\_Urea\_RNAB\_B Scan : 58338

Andromeda score : 101.73

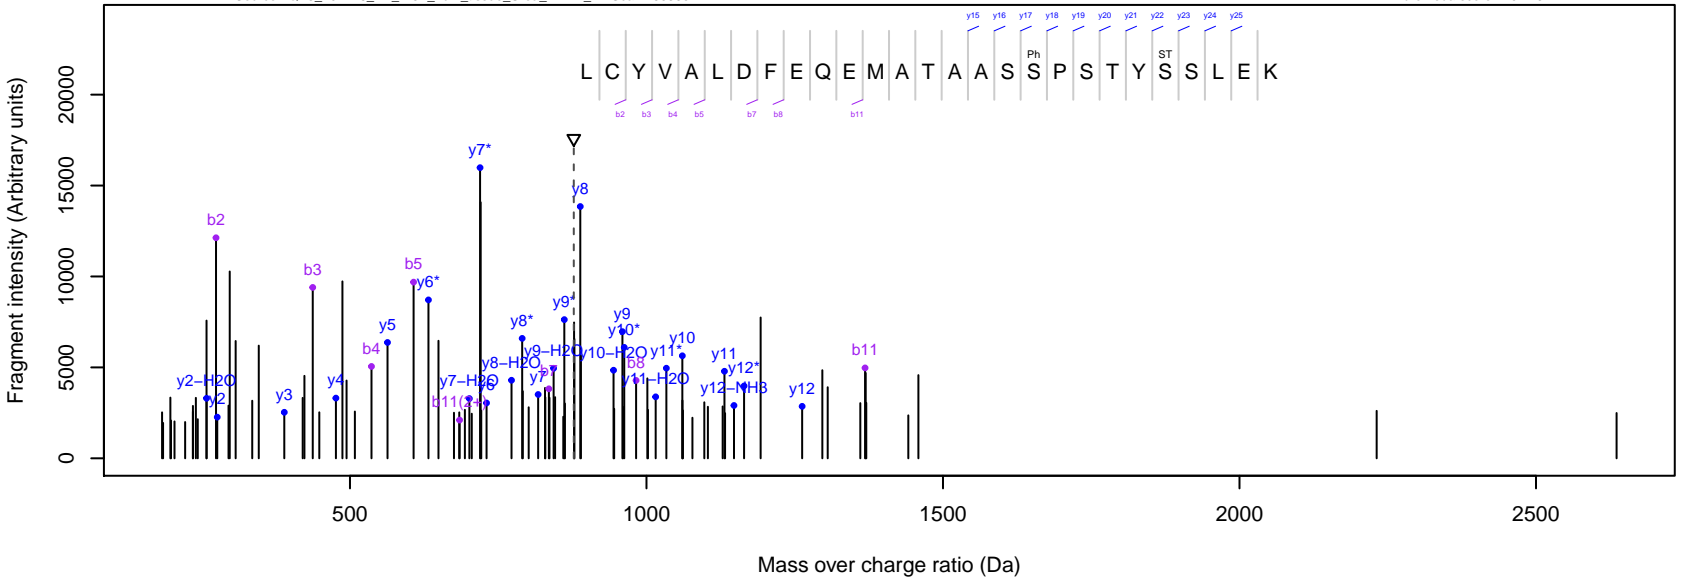

TGKEYIPGPPLSQSSDS(Phospho (STY))SPTR-3+

Source : QE3\_201126\_FR\_TiOx\_hum\_tissue\_Urea\_RNAB\_H Scan : 21652

Andromeda score : 101.73

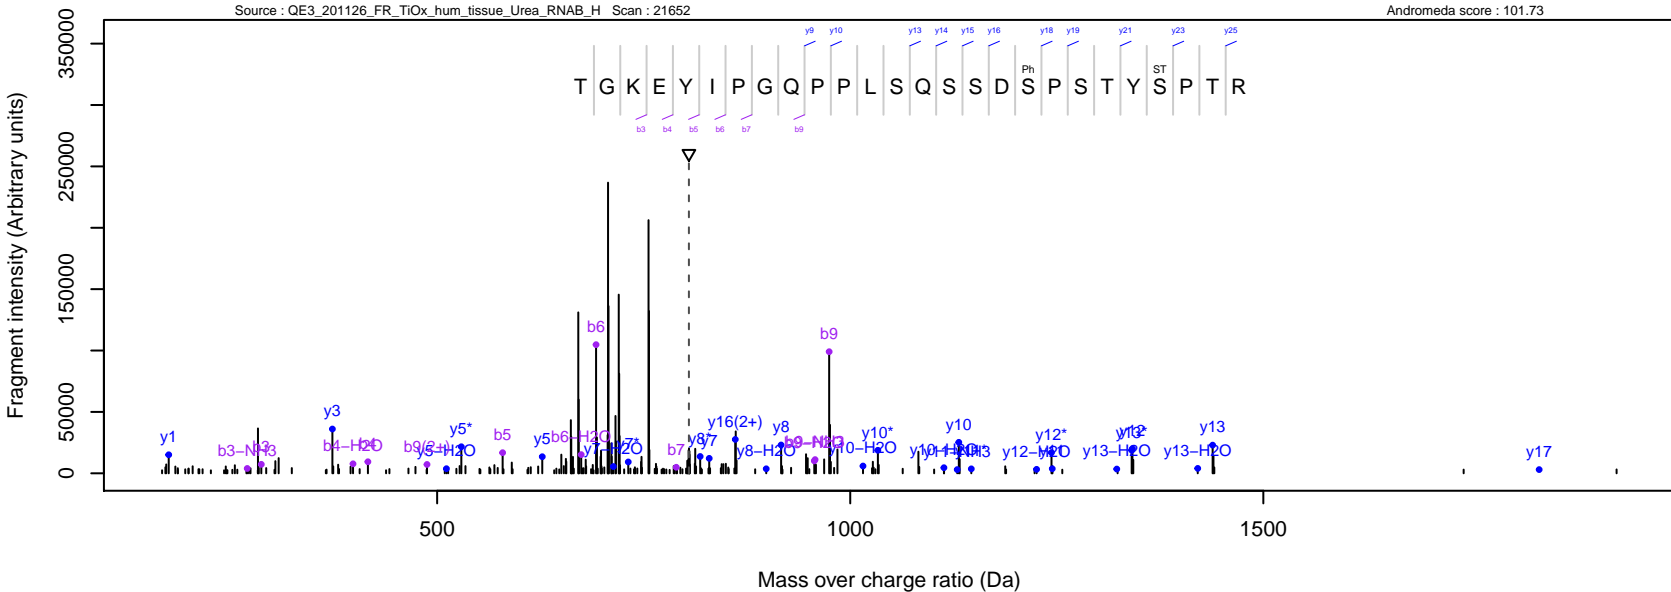

AYS(Phospho (STY))PEYR-2+

Source : QE3\_201126\_FR\_TiOx\_hum\_tissue\_Urea\_RNAB\_H Scan : 12231

Andromeda score : 101.72

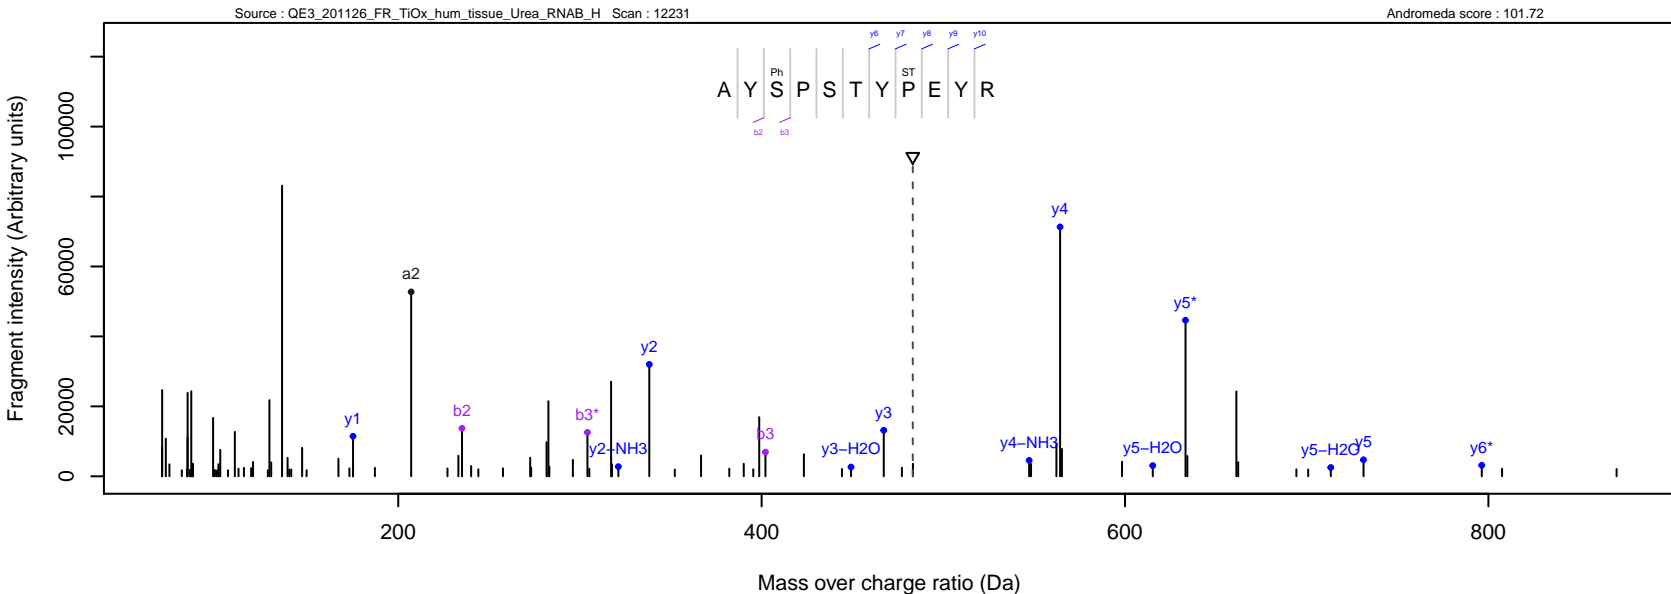

SLS(Phospho (STY))LPGR-2+

Source : QE3\_201126\_FR\_TiOx\_hum\_tissue\_Urea\_RNAB\_H Scan : 20877

Andromeda score : 101.72

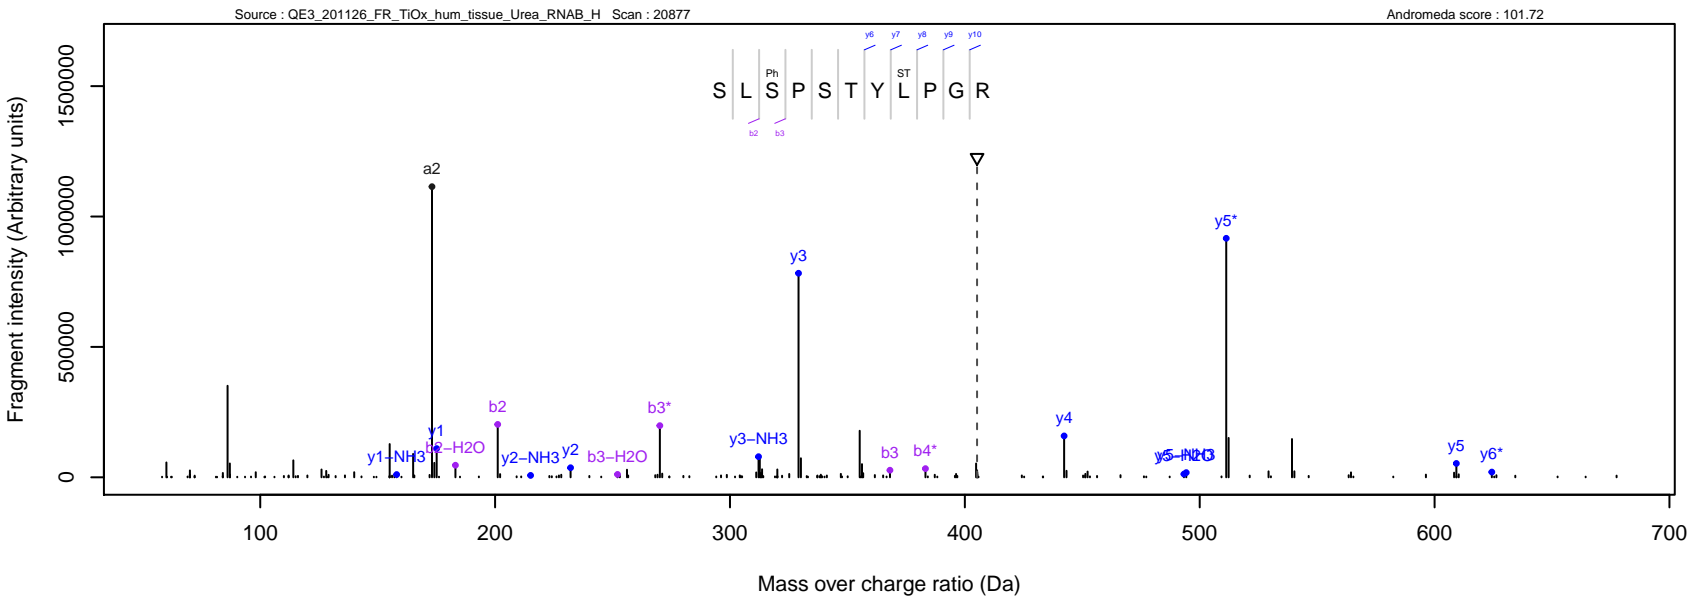

FGFGAKS(Phospho (STY))PK-2+

Source : QE3\_201126\_FR\_TiOx\_hum\_tissue\_Urea\_RNAB\_H Scan : 12433

Andromeda score : 101.71

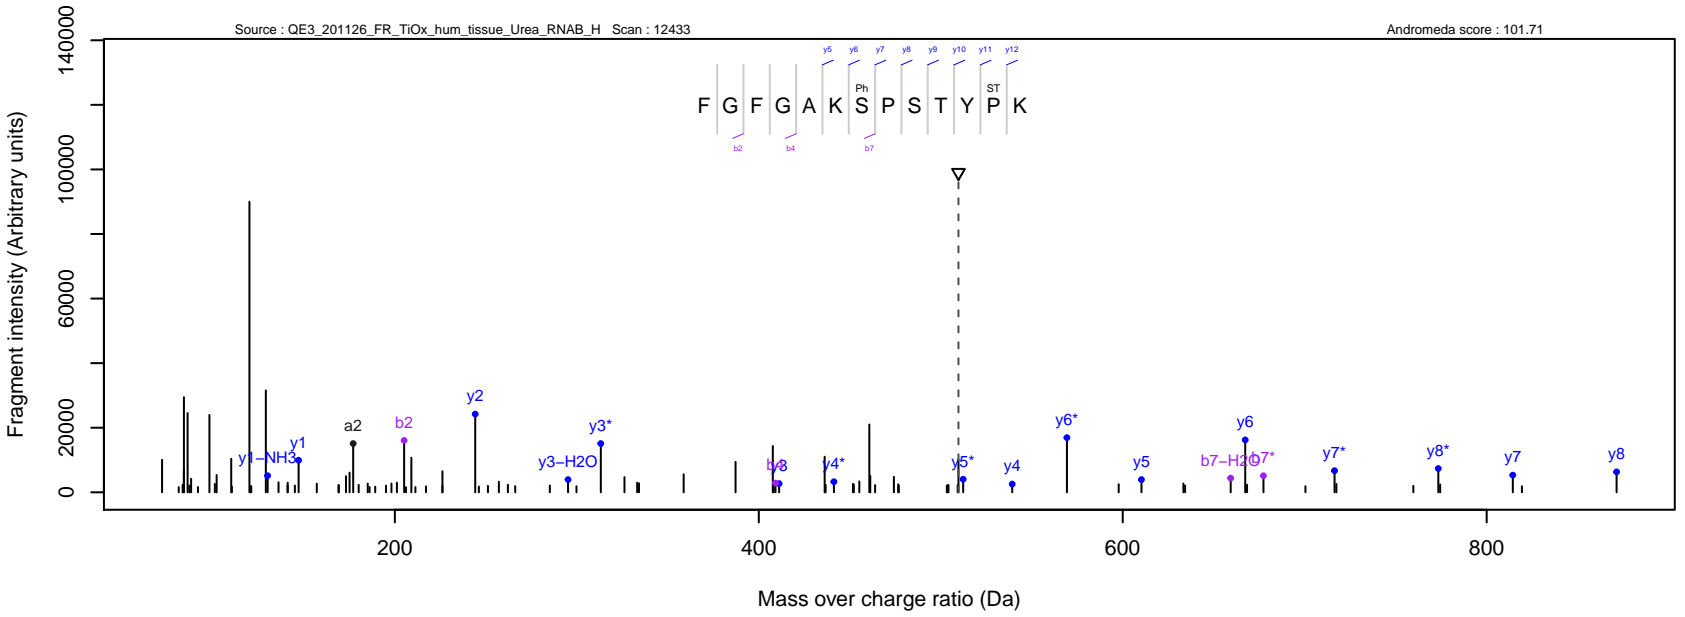

GLECSDWKPEAGLS(Phospho (STY))PPR-3+

Source : QE3\_201126\_FR\_TiOx\_hum\_tissue\_Urea\_RNAB\_B Scan : 31248

Andromeda score : 101.71

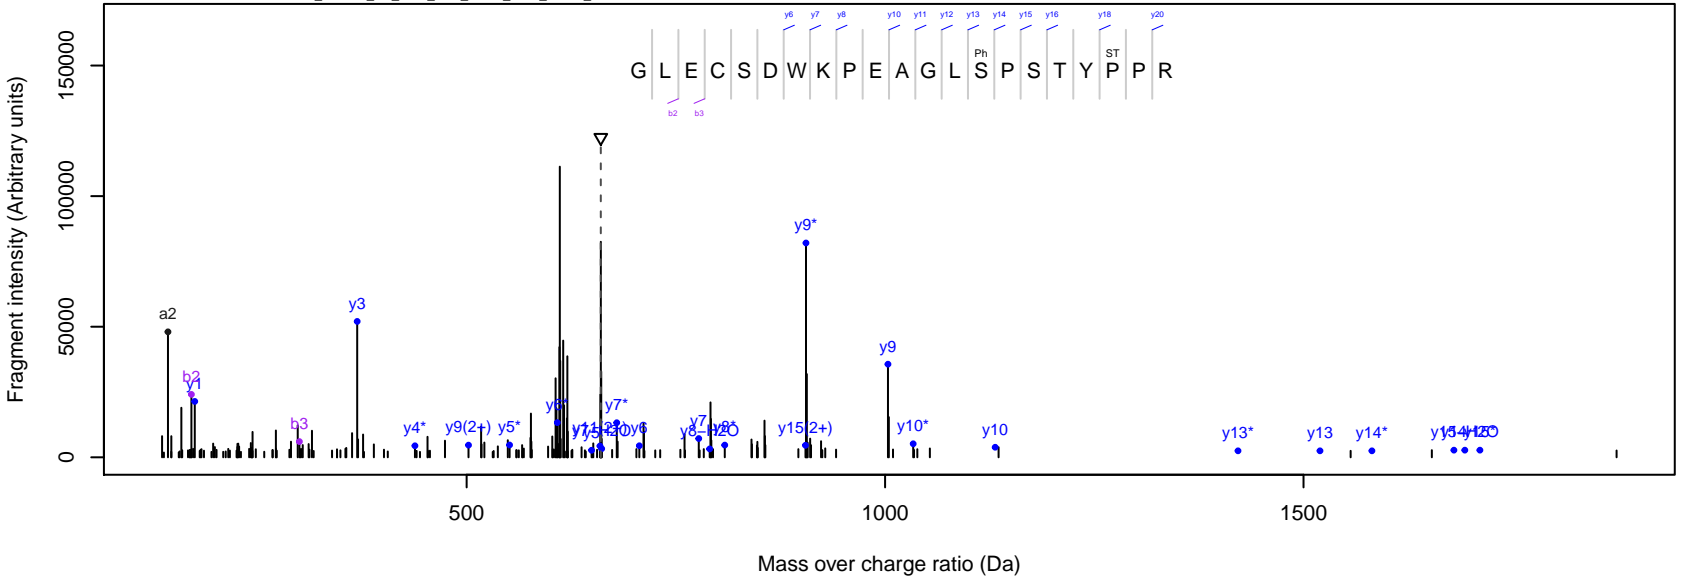

RLS(Phospho (STY))LAPDDSLVLAGTSYAWER-3+

Source : QE3\_201126\_FR\_TiOx\_hum\_tissue\_Urea\_RNAB\_B Scan : 59462

Andromeda score : 101.71

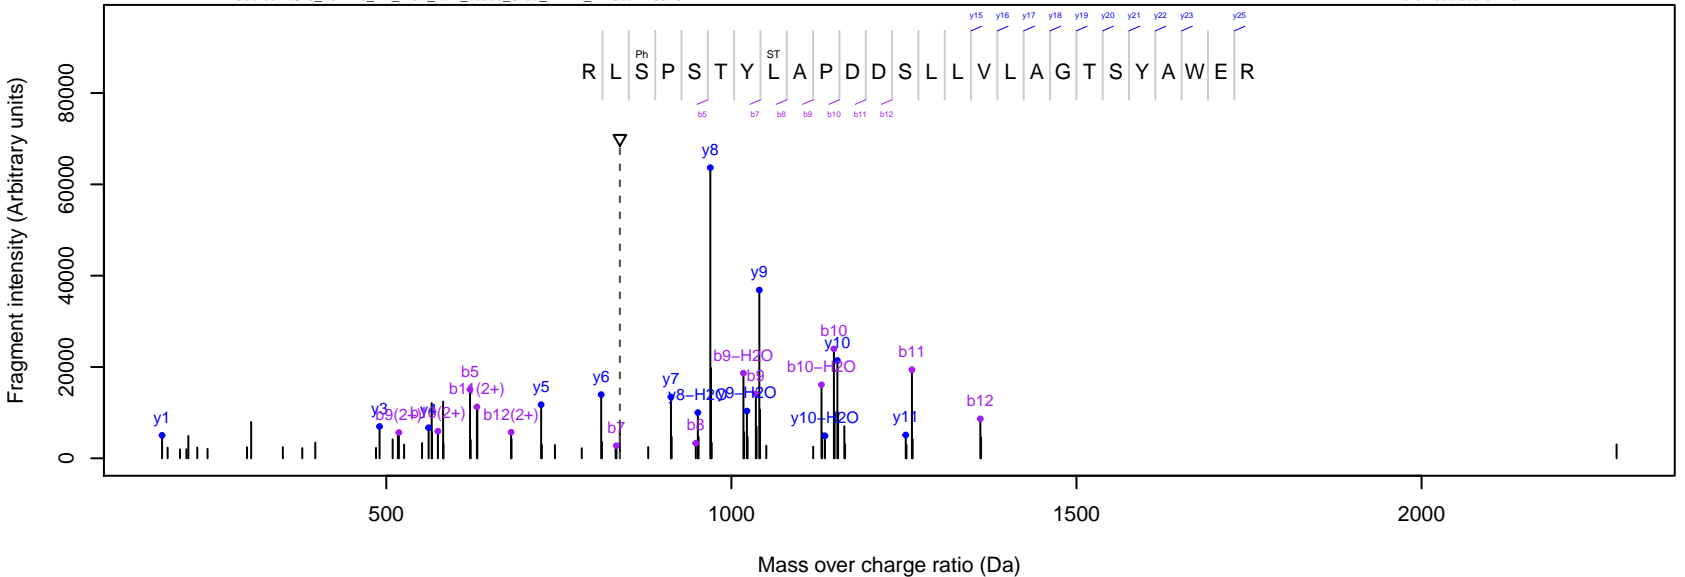



S(Phospho (STY))RSLPAFPTSSLTQSQK-3+

Source : QE3\_201126\_FR\_TiOx\_hum\_tissue\_Urea\_RNAB\_B Scan : 38310

Andromeda score : 101.71

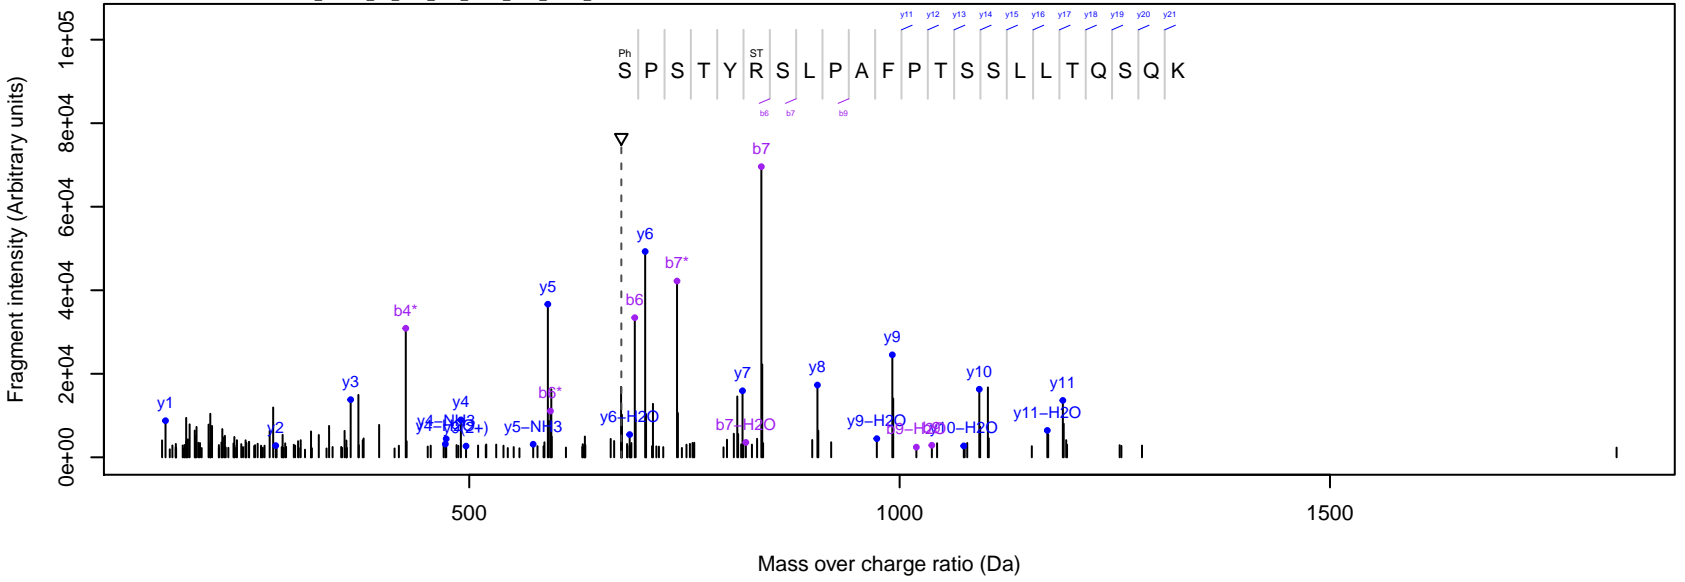

WAHDKFS(Phospho (STY))GEEGEI EDD E S G T E N R-3+

Source : QE3\_201126\_FR\_TiOx\_hum\_tissue\_Urea\_RNAB\_N Scan : 21426

Andromeda score : 101.66

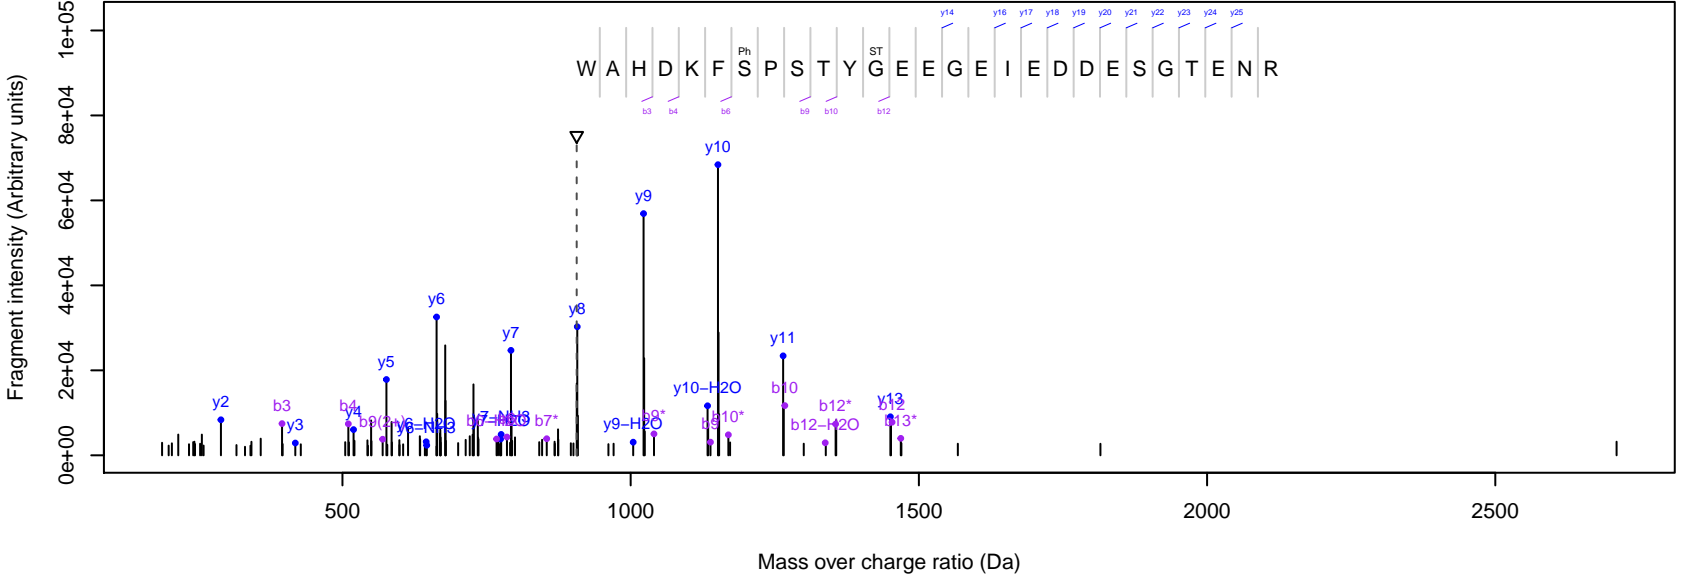

GRWES(Phospho (STY))QQDVSQT T V S R-3+

Source : QE3\_201126\_FR\_TiOx\_hum\_tissue\_Urea\_RNAB\_H Scan : 14678

Andromeda score : 101.64

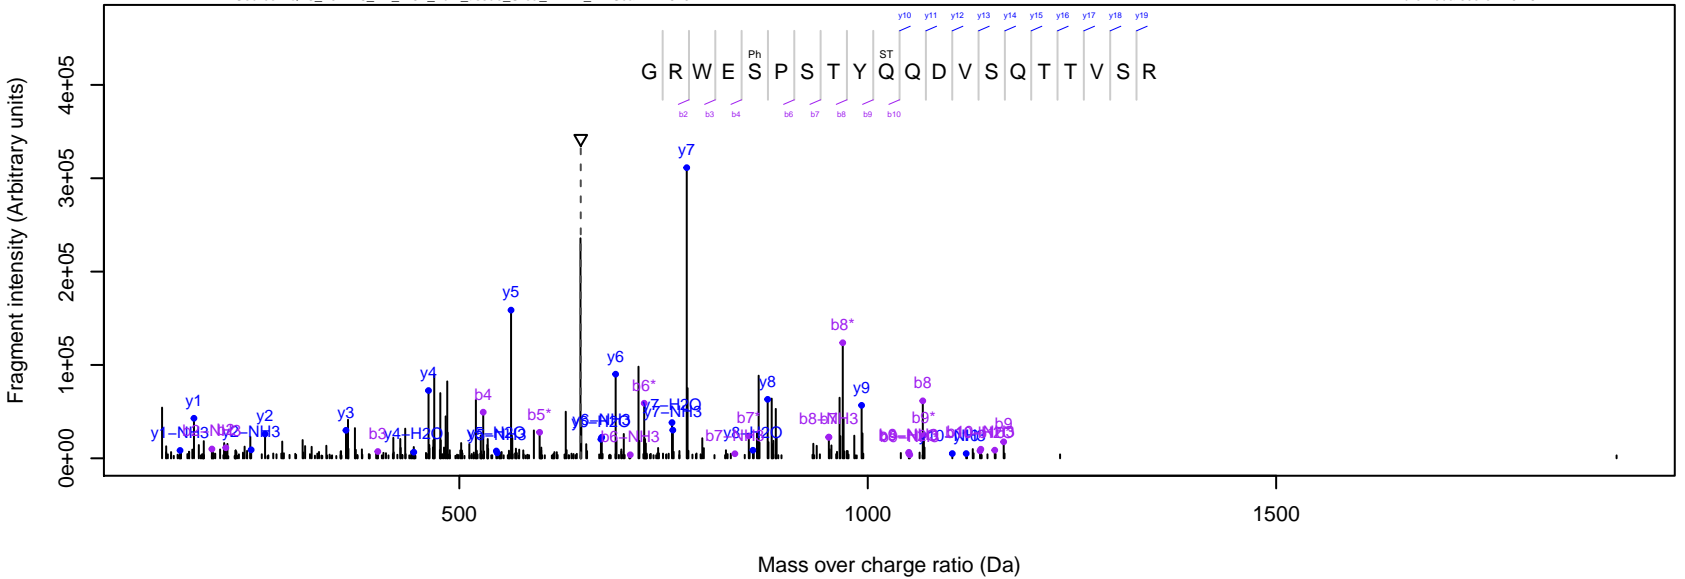

FHPEPYGLEDDQRS(Phospho (STY))MGYDDLGYMMSDYGTAR-3+

Source : QE3\_201126\_FR\_TIOx\_hum\_tissue\_Urea\_RNAB\_H Scan : 48240

Andromeda score : 101.6

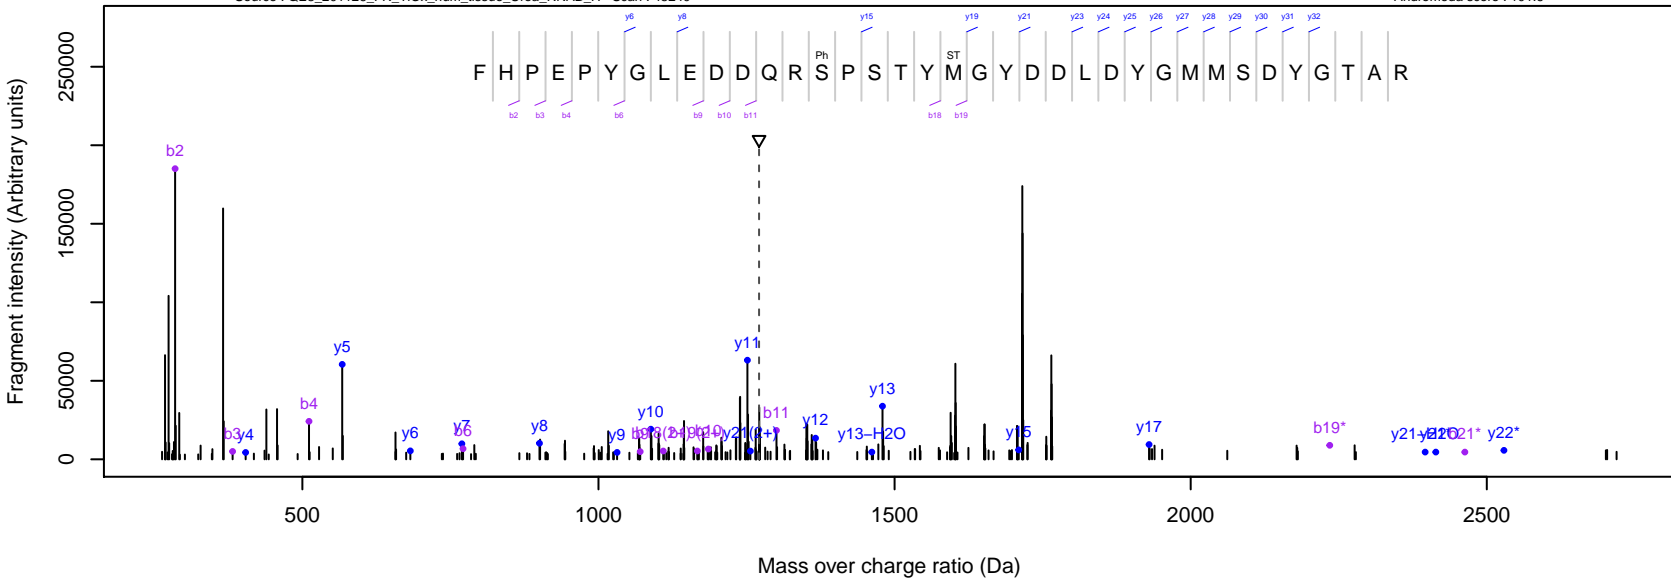

(Acetyl (Protein N-term))S(Phospho (STY))TNGDDHQVKSLEQLR-3+

Source : QE3\_201126\_FR\_TIOx\_hum\_tissue\_Urea\_RNAB\_B Scan : 24508

Andromeda score : 101.6

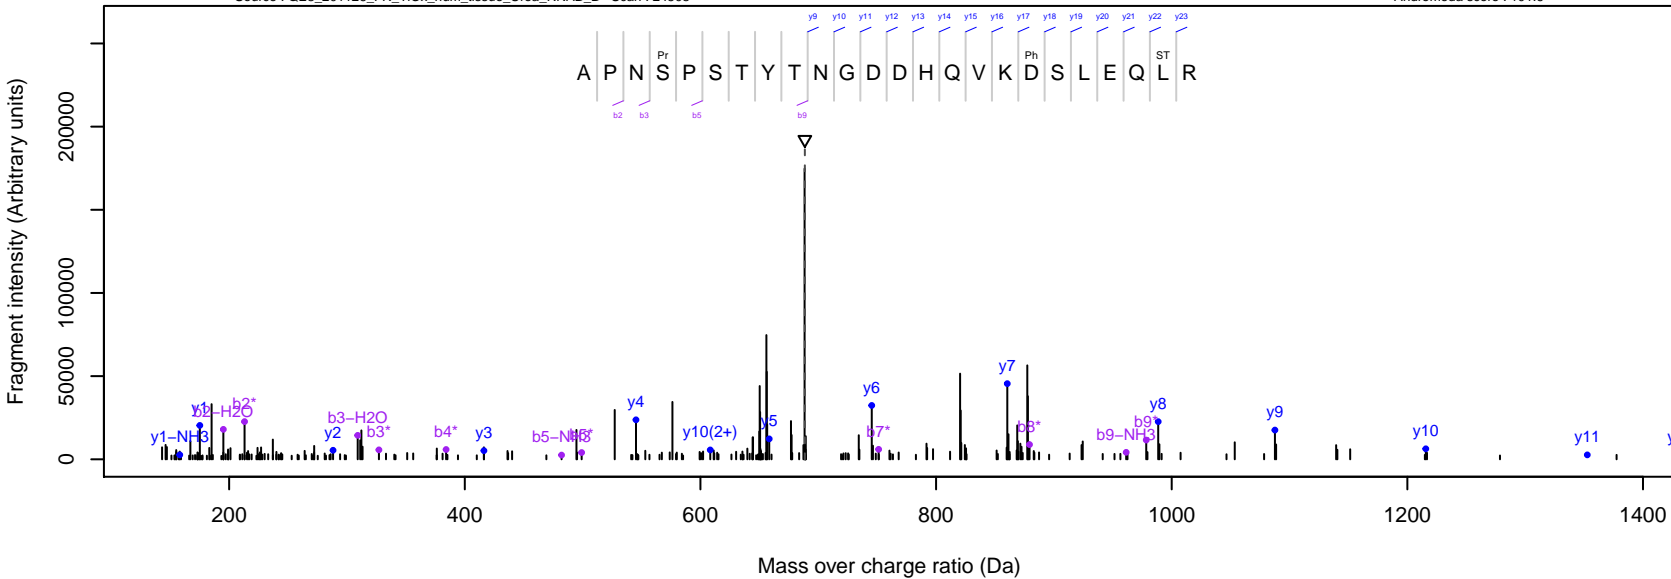

ESSTSEGADQKMS(Phospho (STY))SPEDDSDTKR-3+

Source : QE3\_201126\_FR\_TIOx\_hum\_tissue\_Urea\_RNAB\_H Scan : 6594

Andromeda score : 101.59

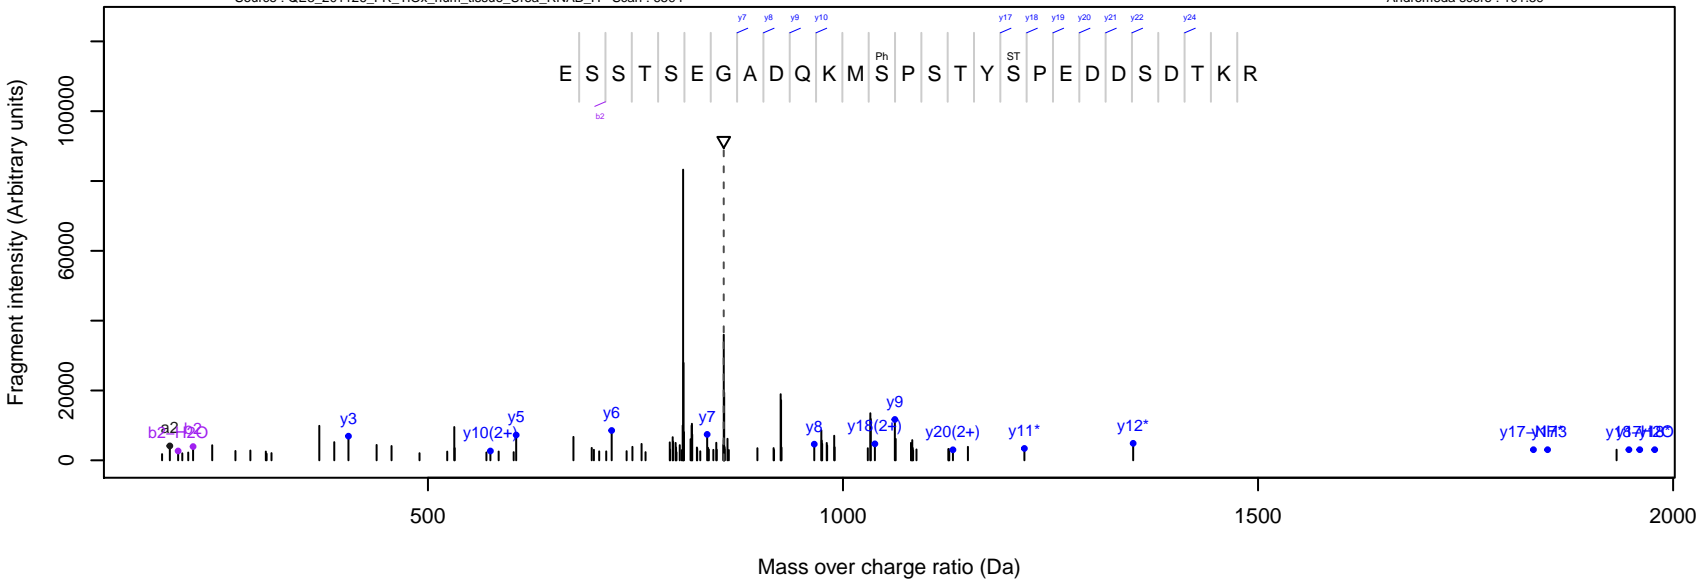

LLGPSAAADILQLSSS(Phospho (STY))LPLQSR-3+

Source : QE3\_201126\_FR\_TiOx\_hum\_tissue\_Urea\_RNAB\_H Scan : 60570

Andromeda score : 101.59

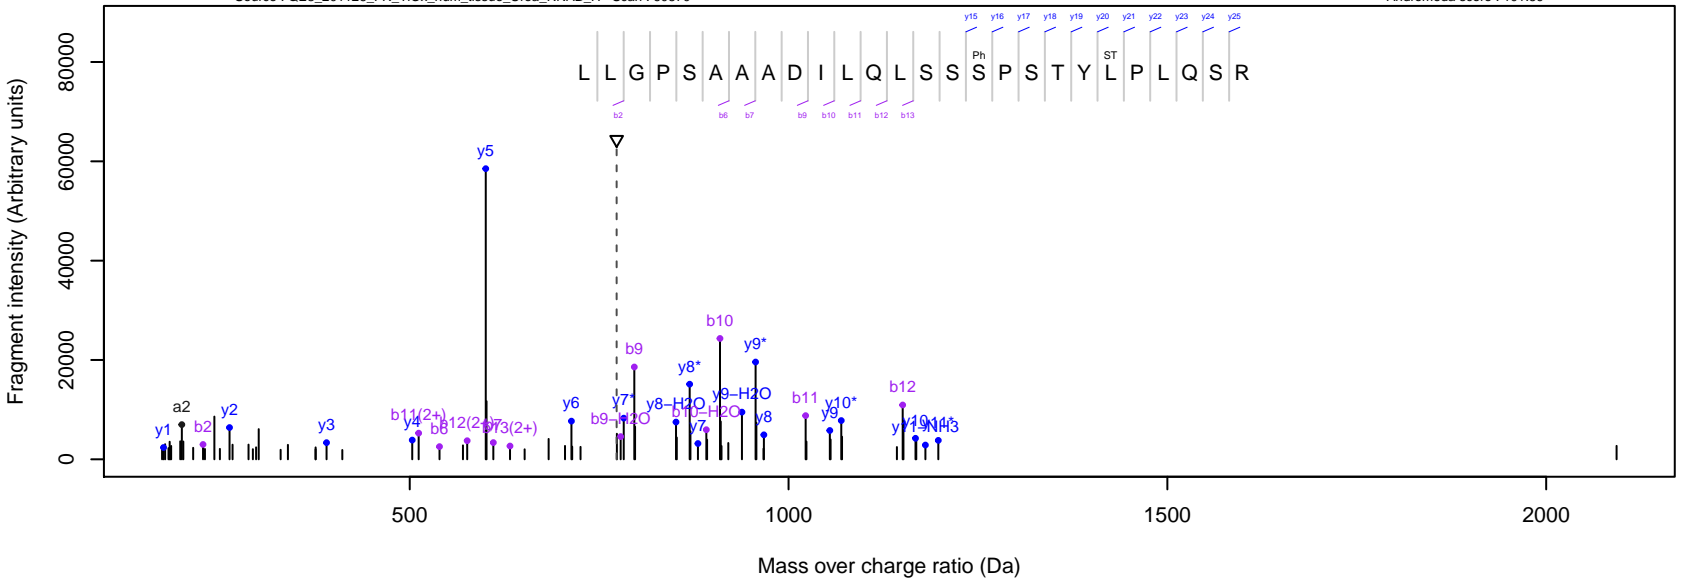

RVIHVSGETMEEYS(Phospho (STY))T(Phospho (STY))DEVEDGLEKK-4+

Source : QE3\_201126\_FR\_TiOx\_hum\_tissue\_Urea\_RNAB\_N Scan : 34195

Andromeda score : 101.59

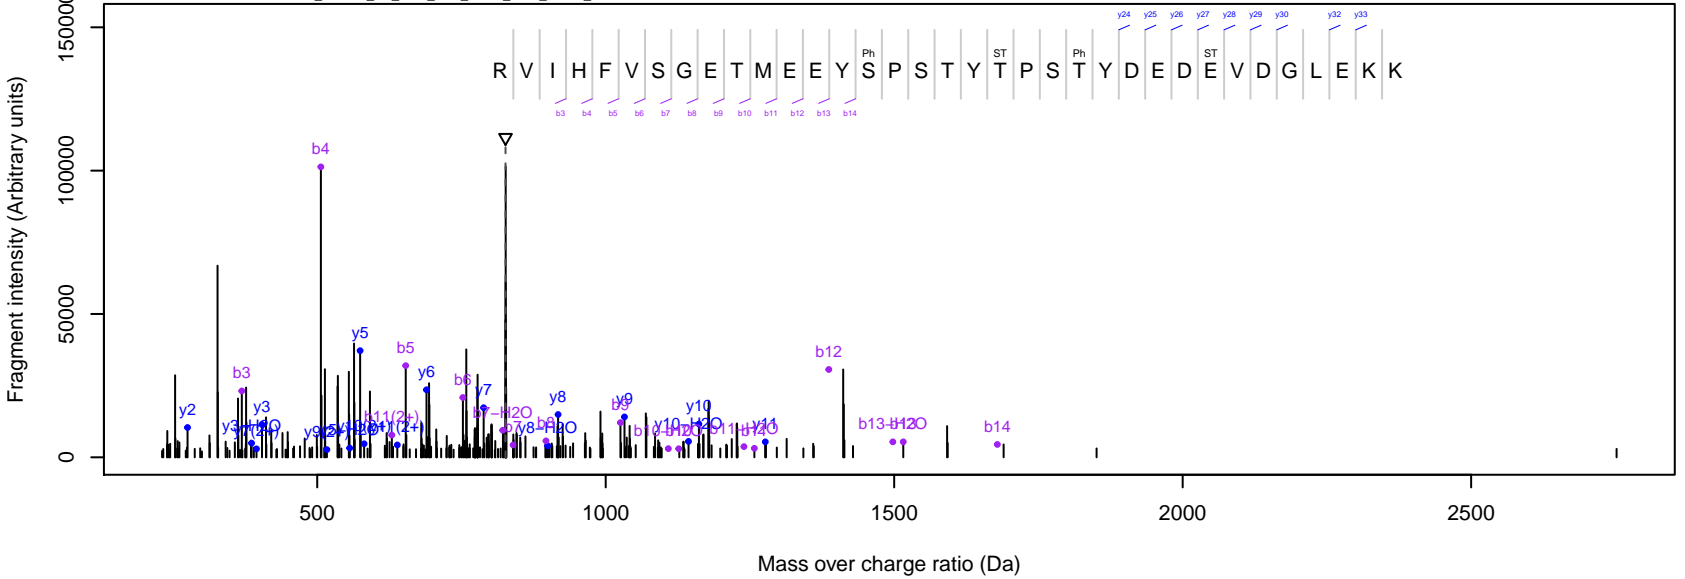

TASESISNLS(Phospho (STY))EAGS(Phospho (STY))IKKGER-3+

Source : QE3\_201126\_FR\_TiOx\_hum\_tissue\_Urea\_RNAB\_N Scan : 16770

Andromeda score : 101.59

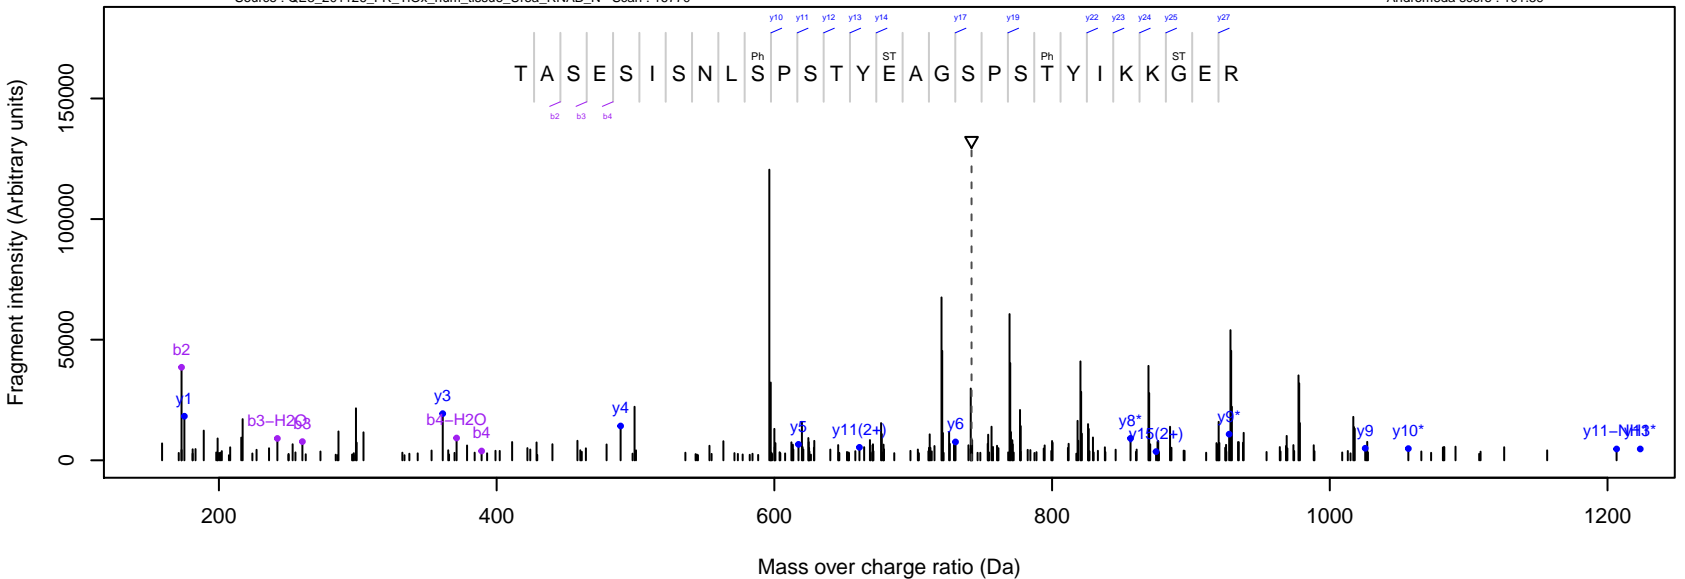

WAESGSGTSPESGDEEVSPSTYGAAGSSPVSGGVNLFANDGSFLELFK

Source : QE3\_201126\_FR\_TIOx\_hum\_tissue\_Urea\_RNAB\_N Scan : 62848

Andromeda score : 101.59

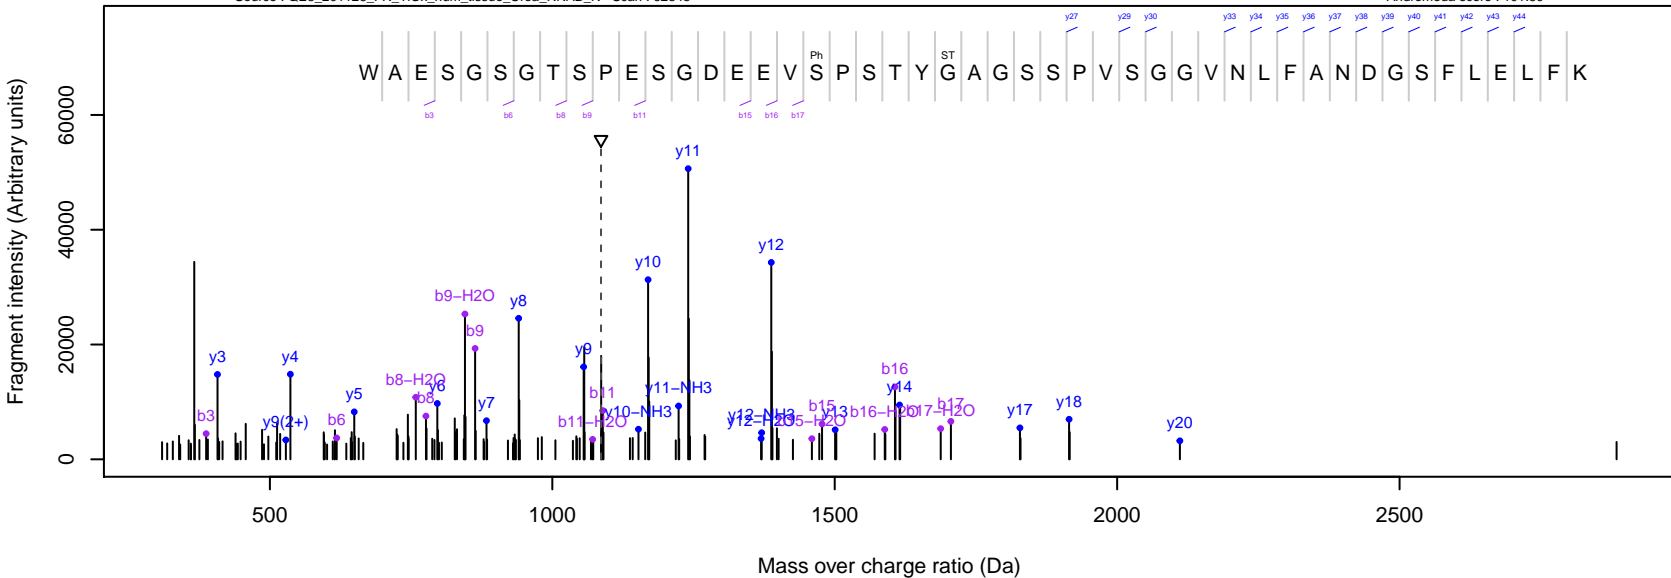

NIIGSS(Phospho (STY))PVADFSAIKELDTLNNIVDLQR

Source : QE3\_201126\_FR\_TIOx\_hum\_tissue\_Urea\_RNAB\_H Scan : 61894

Andromeda score : 101.58

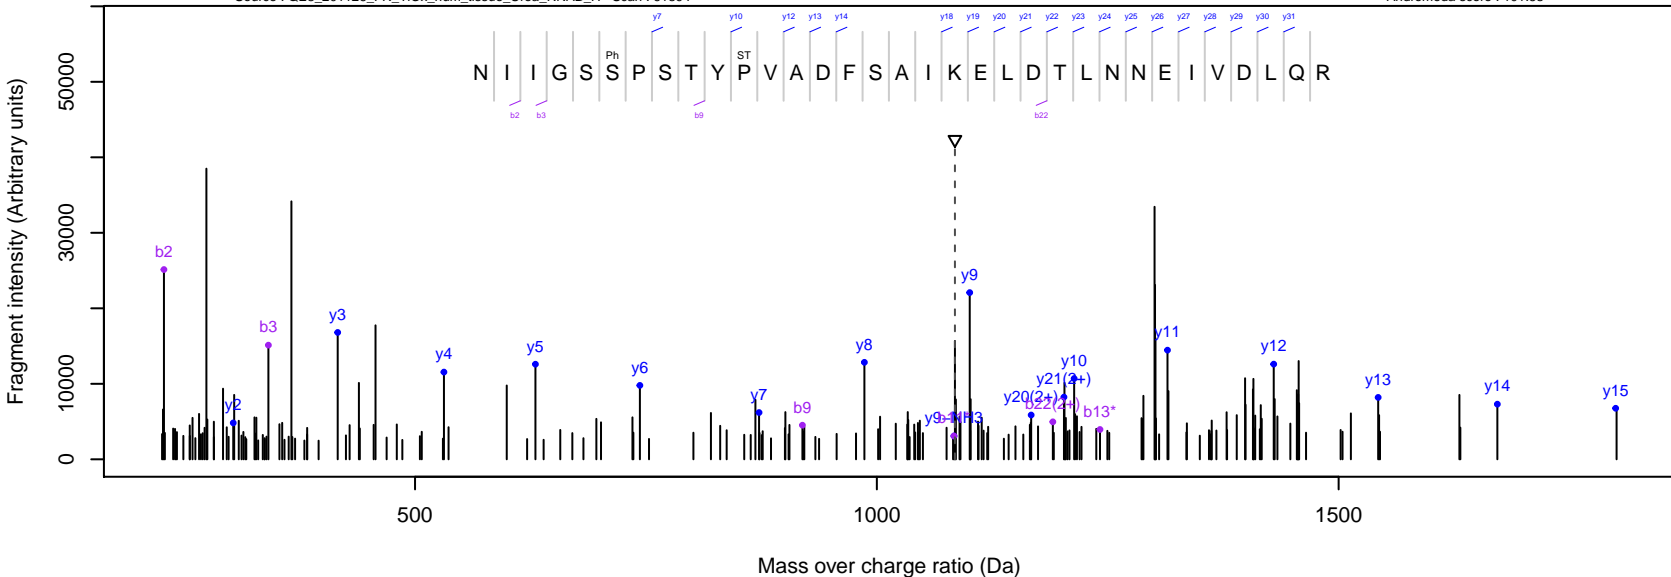

CSS(Phospho (STY))PTVGGPPPLPQK

Source : QE3\_201126\_FR\_TIOx\_hum\_tissue\_Urea\_RNAB\_B Scan : 23782

Andromeda score : 101.53

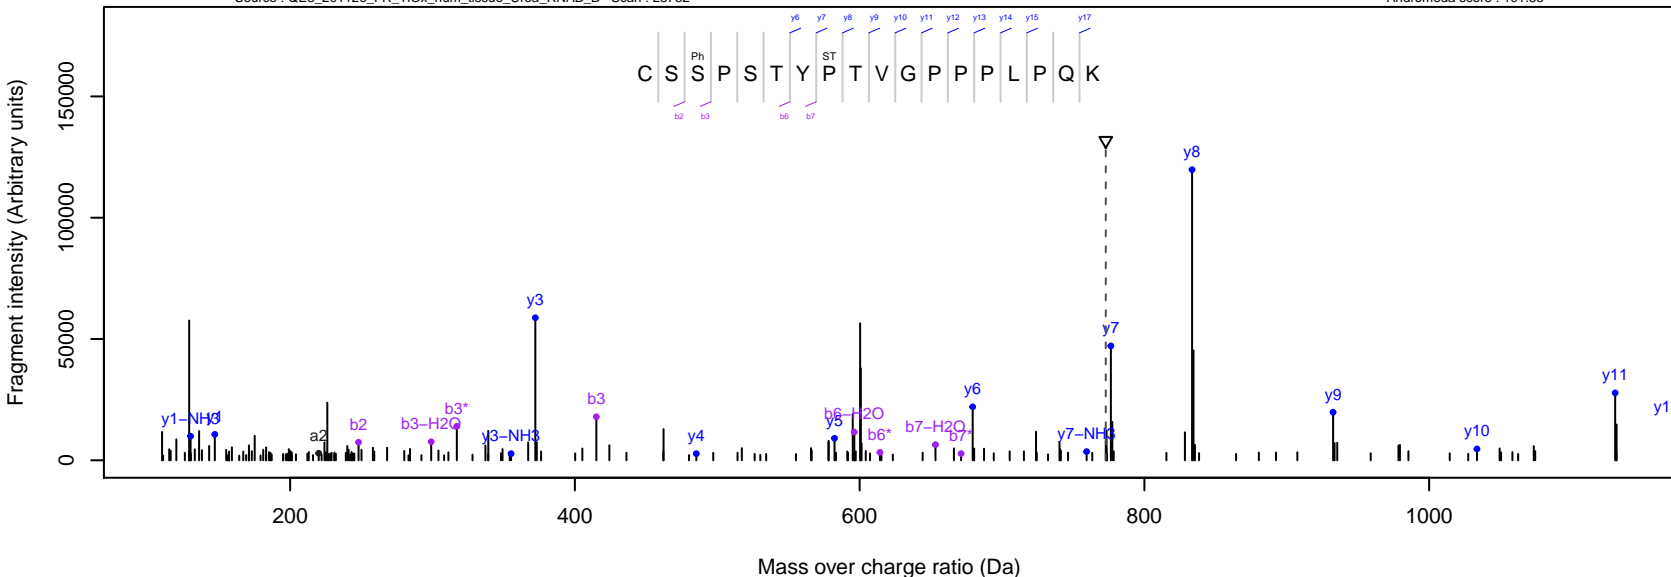

SVVS(Phospho (STY))FDKVKKEPR-2+

Source : QE3\_201126\_FR\_TiOx\_hum\_tissue\_Urea\_RNAB\_B Scan : 17284

Andromeda score : 101.53

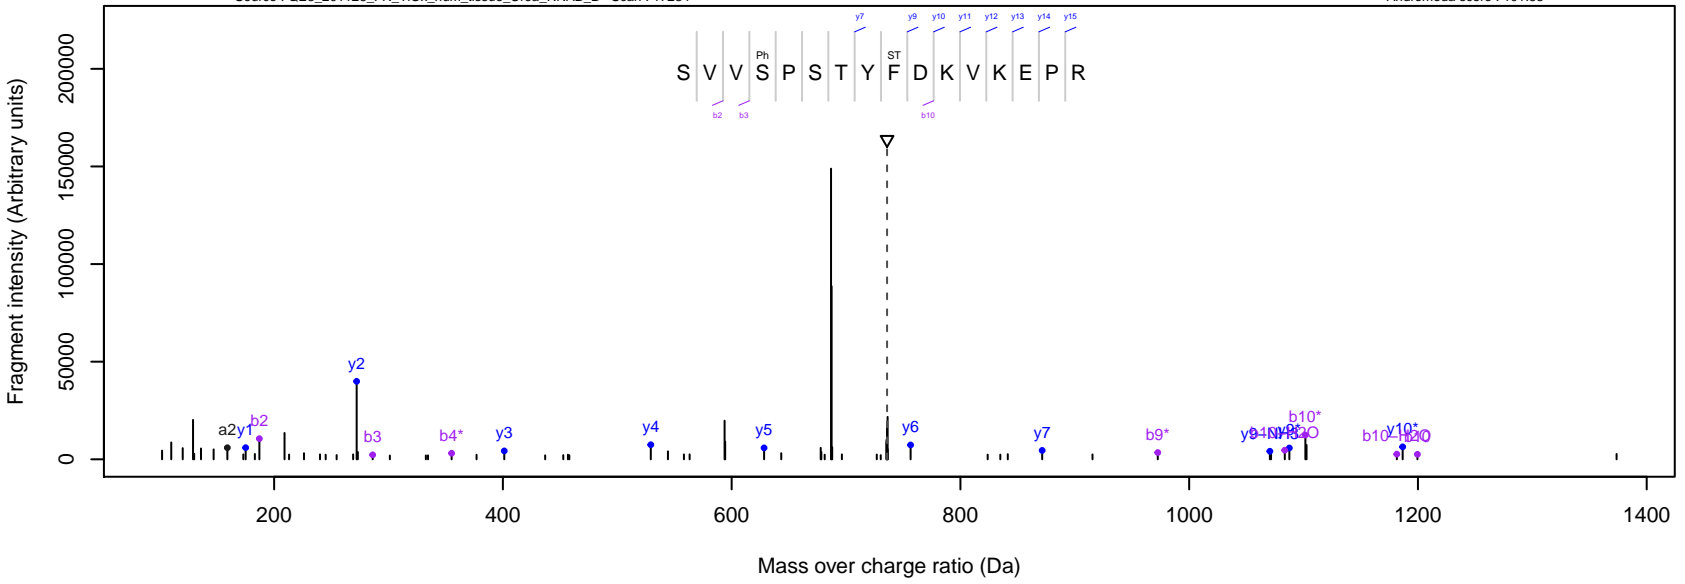

TSASEGNPYVSS(TL)SVPAS(Phospho (STY))PR-2+

Source : QE3\_201126\_FR\_TiOx\_hum\_tissue\_Urea\_RNAB\_B Scan : 32789

Andromeda score : 101.53

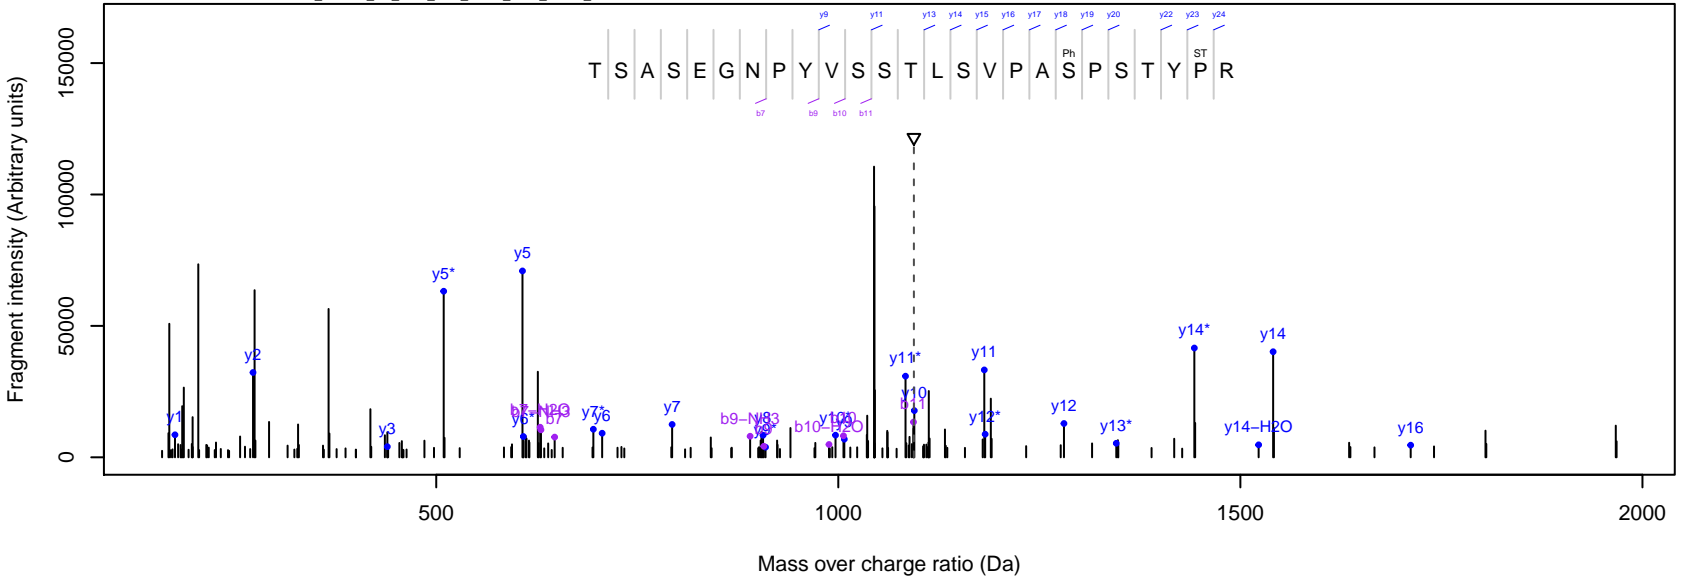

M(Oxidation (M))SCFSRPS(Phospho (STY))MS(Phospho (STY))PTPLDR-3+

Source : QE3\_201126\_FR\_TiOx\_hum\_tissue\_Urea\_RNAB\_H Scan : 28976

Andromeda score : 101.48

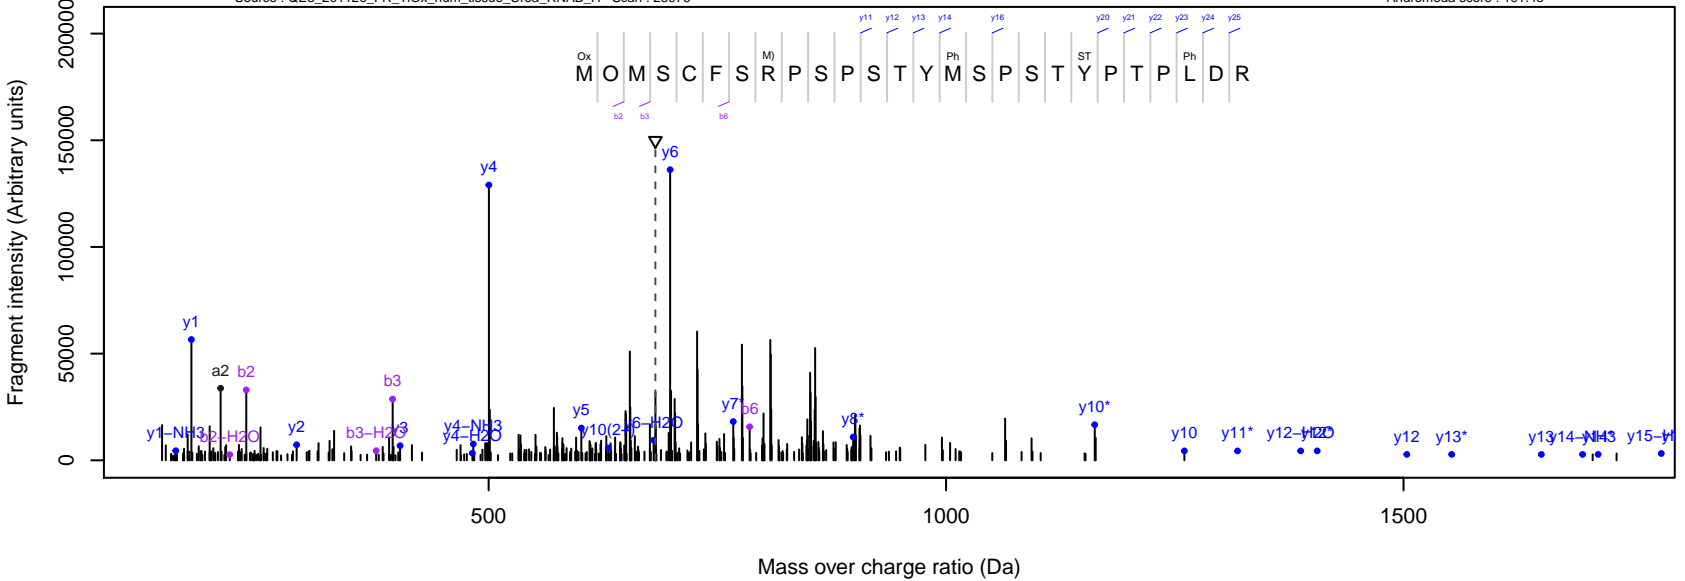

SYLEGS(Phospho (STY))SDNQLKDESTPDDR-3+

Source : QE3\_201126\_FR\_TIOx\_hum\_tissue\_Urea\_RNAB\_N Scan : 22513

Andromeda score : 101.47

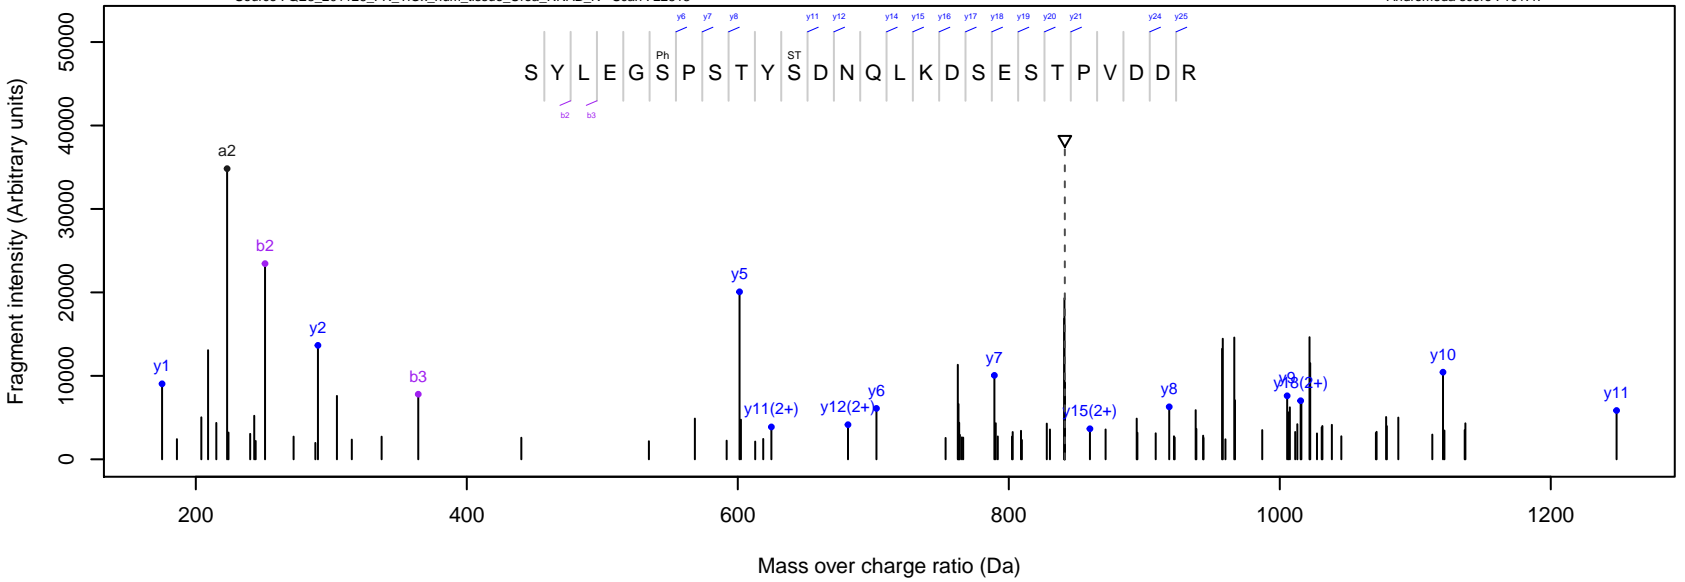

ST(Phospho (STY))S(Phospho (STY))FRGGM(Oxidation (M))GSGGLATGIAGGLAGM(Oxidation (M))GGIQNEKETMQLNDR-4+

Source : QE3\_201126\_FR\_TIOx\_hum\_tissue\_Urea\_RNAB\_H Scan : 42926

Andromeda score : 101.46

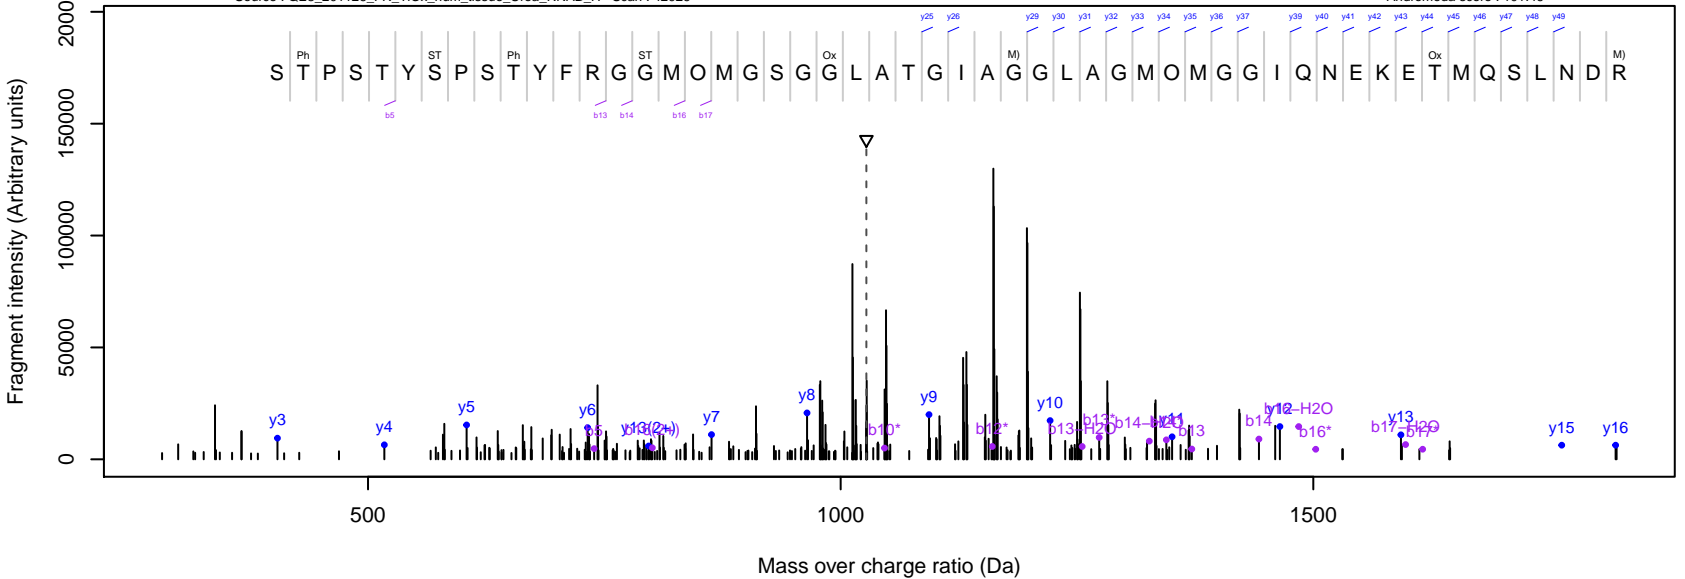

KQQHVISTEEGDM(Oxidation (M))M(Oxidation (M))ETNS(Phospho (STY))T(Phospho (STY))DDEKSTAK-3+

Source : QE3\_201126\_FR\_TIOx\_hum\_tissue\_Urea\_RNAB\_N Scan : 7549

Andromeda score : 101.44

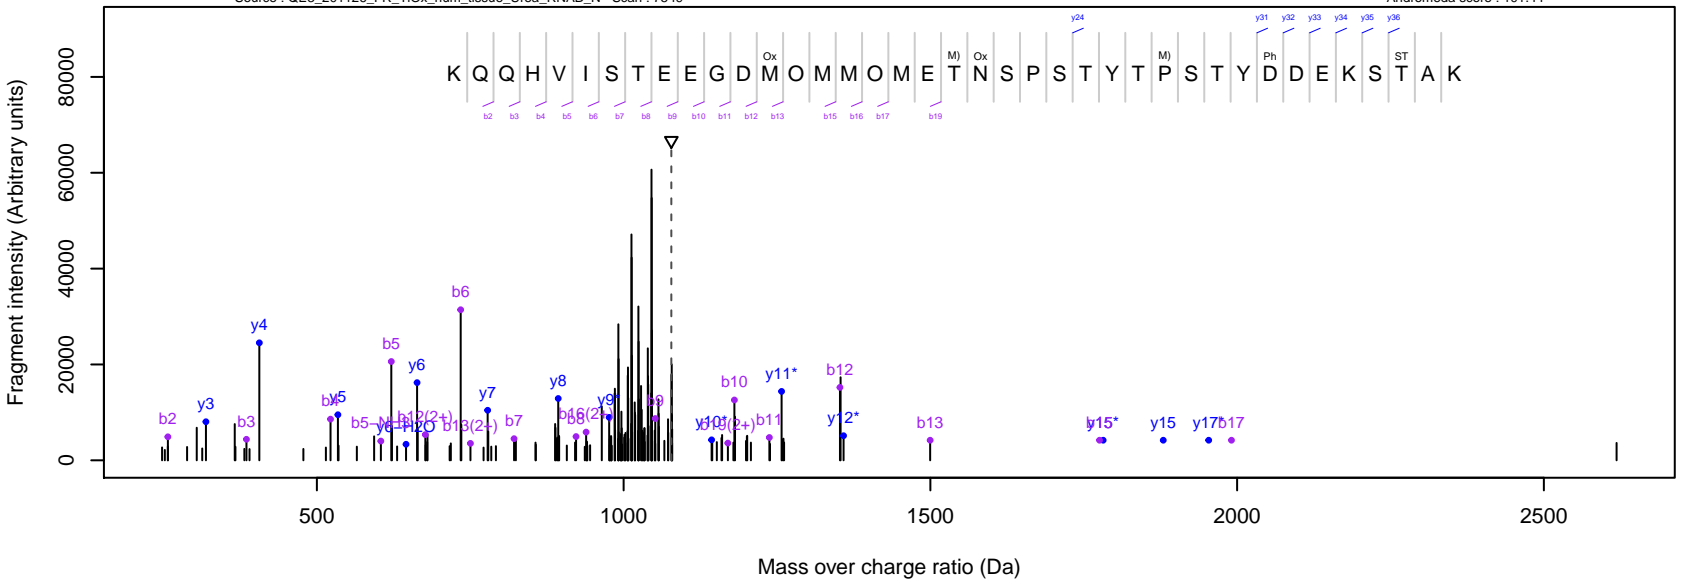

NSS(Phospho (STY))EKLPTLSK-2+

Source : QE3\_201126\_FR\_TiOx\_hum\_tissue\_Urea\_RNAB\_N Scan : 14855

Andromeda score : 101.43

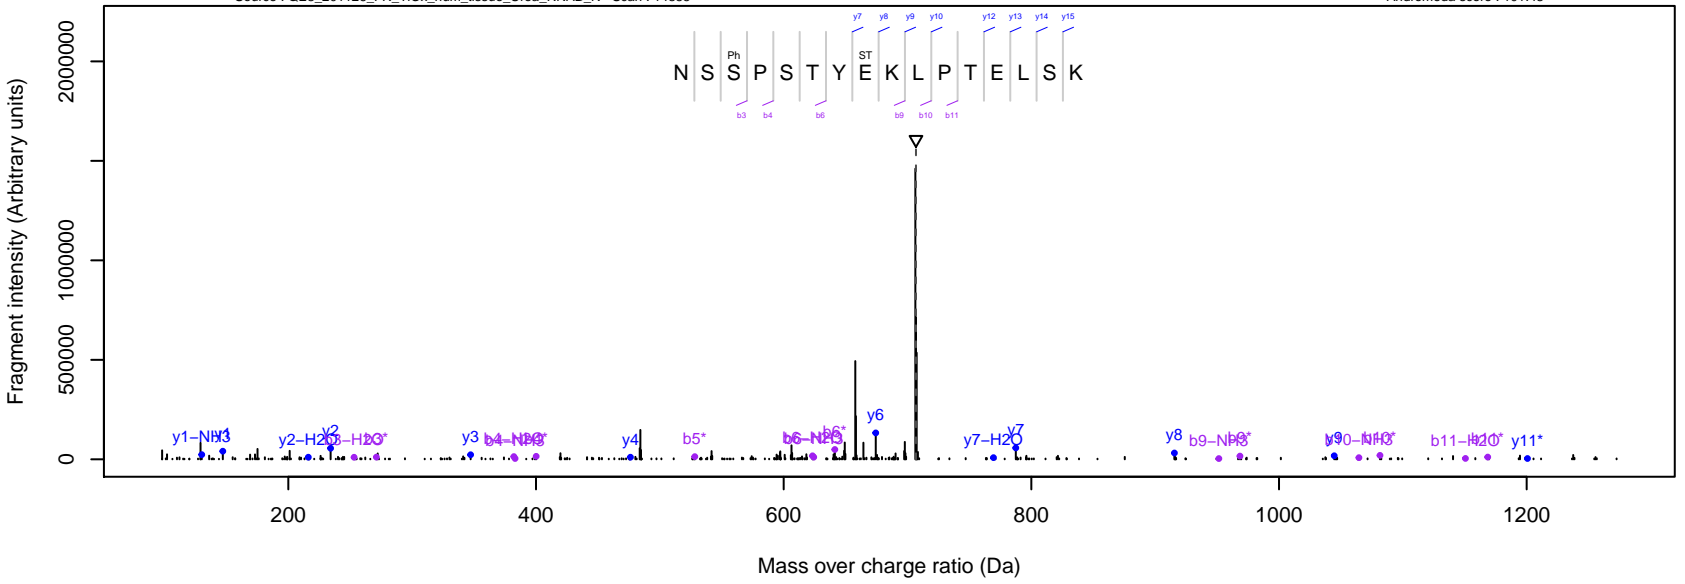

DINLASFIEQVAVS(Phospho (STY))M(Oxidation (M))T-2+

Source : QE3\_201126\_FR\_TiOx\_hum\_tissue\_Urea\_RNAB\_B Scan : 64086

Andromeda score : 101.39

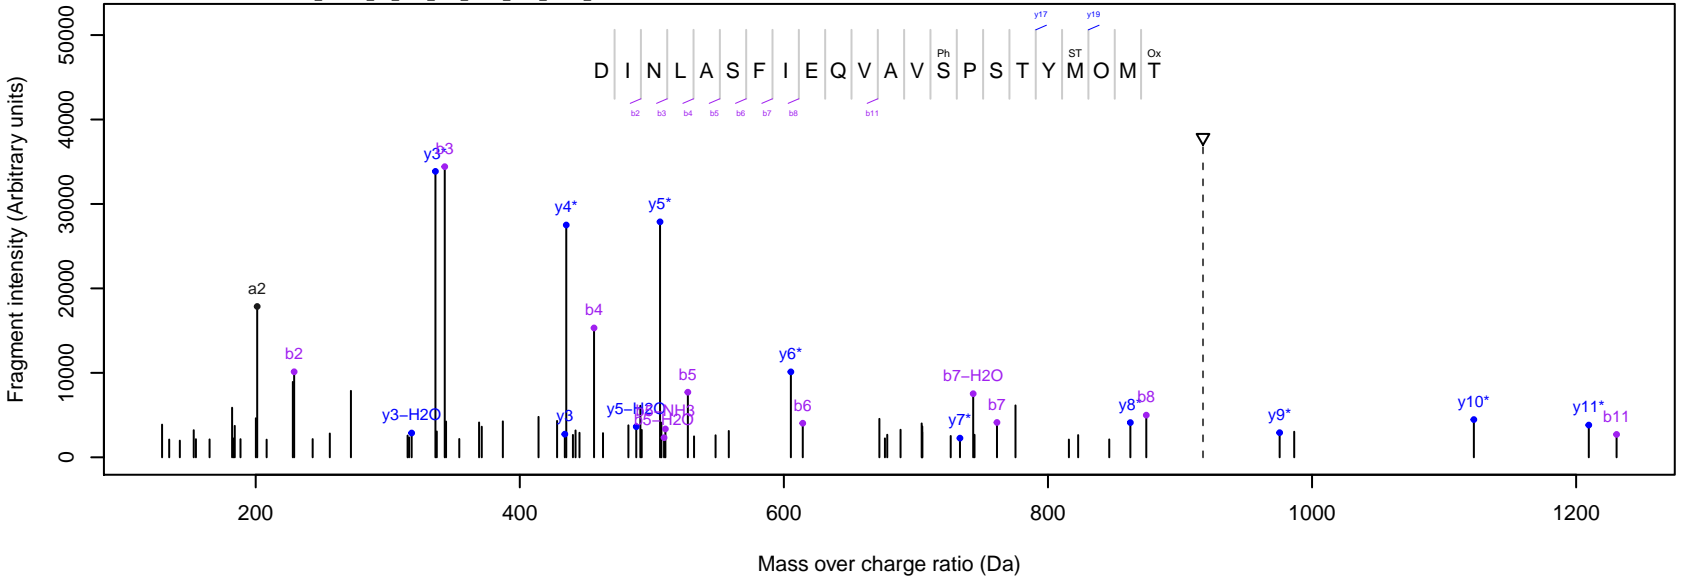

INNFS(Phospho (STY))ADIKDSK-2+

Source : QE3\_201126\_FR\_TiOx\_hum\_tissue\_Urea\_RNAB\_B Scan : 16978

Andromeda score : 101.39

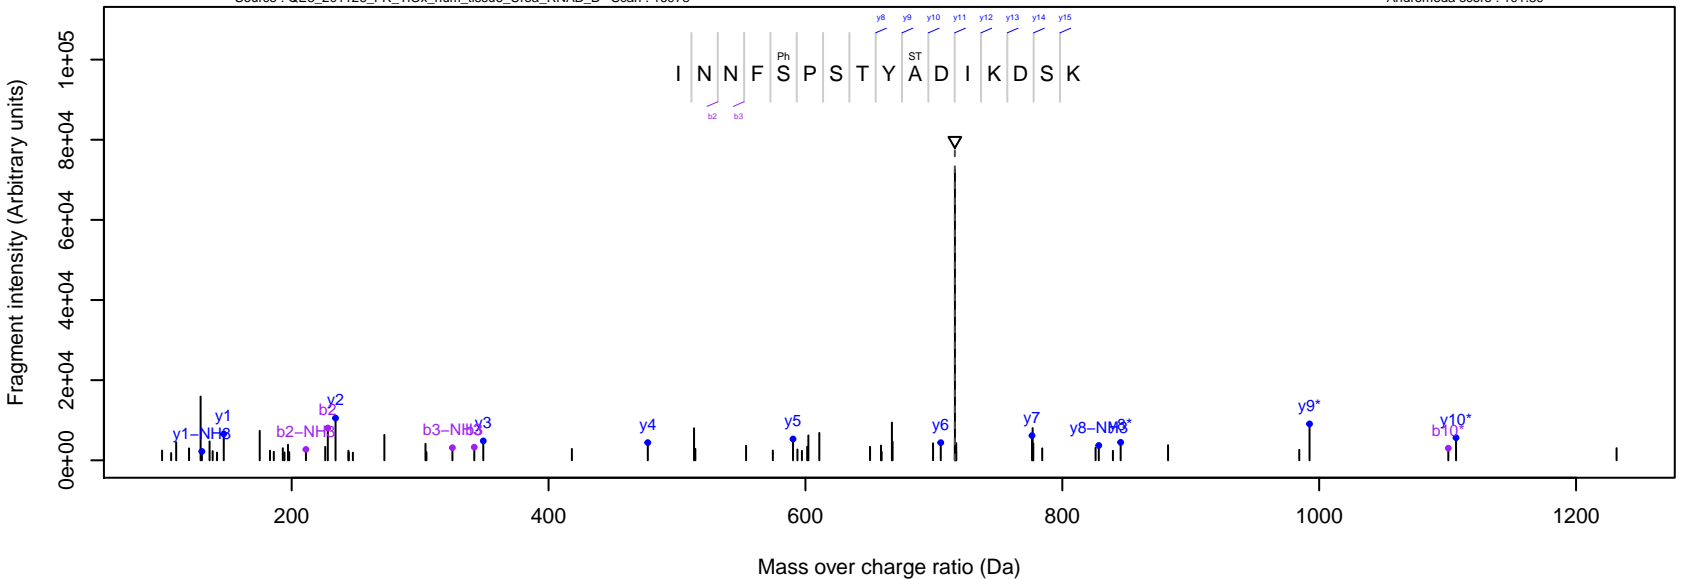

MLGEDS(Phospho (STY))DEEEEMDTSER-2+

Source : QE3\_201126\_FR\_TiOx\_hum\_tissue\_Urea\_RNAB\_N Scan : 26979

Andromeda score : 101.39

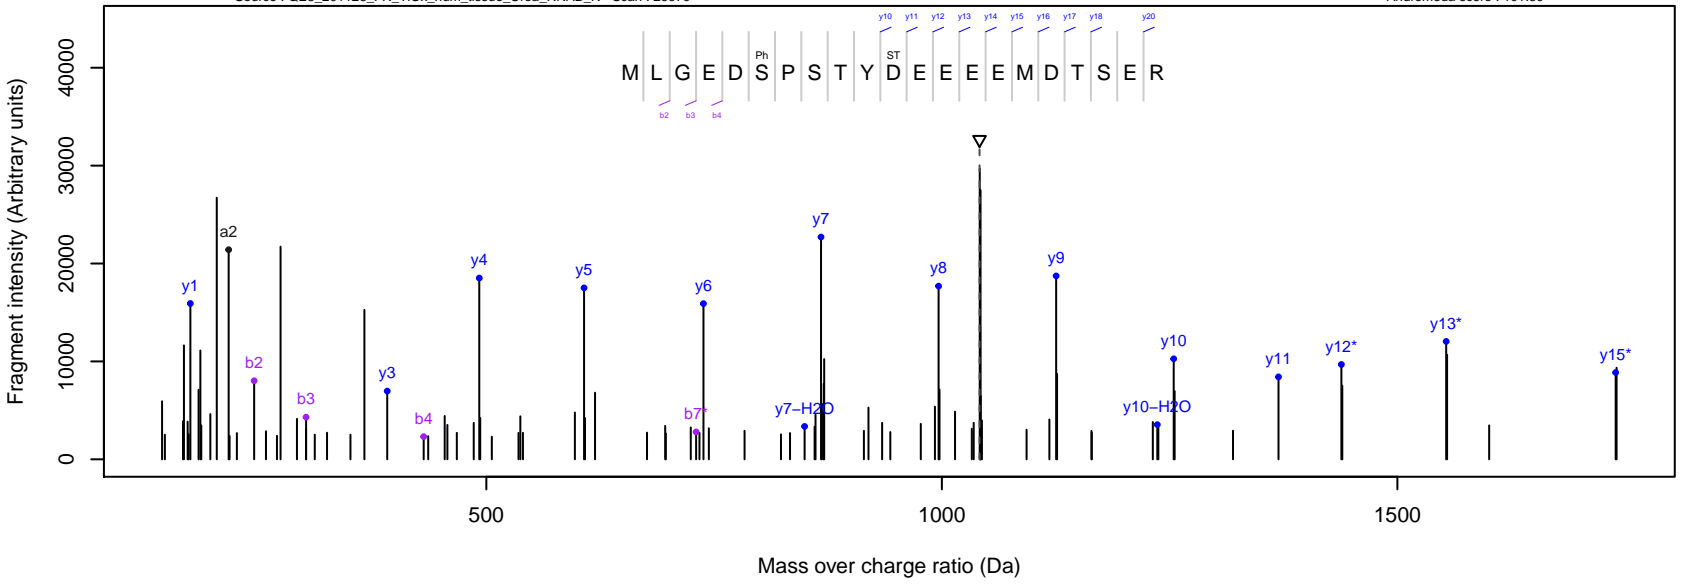

TLS(Phospho (STY))PEFNER-2+

Source : QE3\_201126\_FR\_TiOx\_hum\_tissue\_Urea\_RNAB\_H Scan : 21359

Andromeda score : 101.38

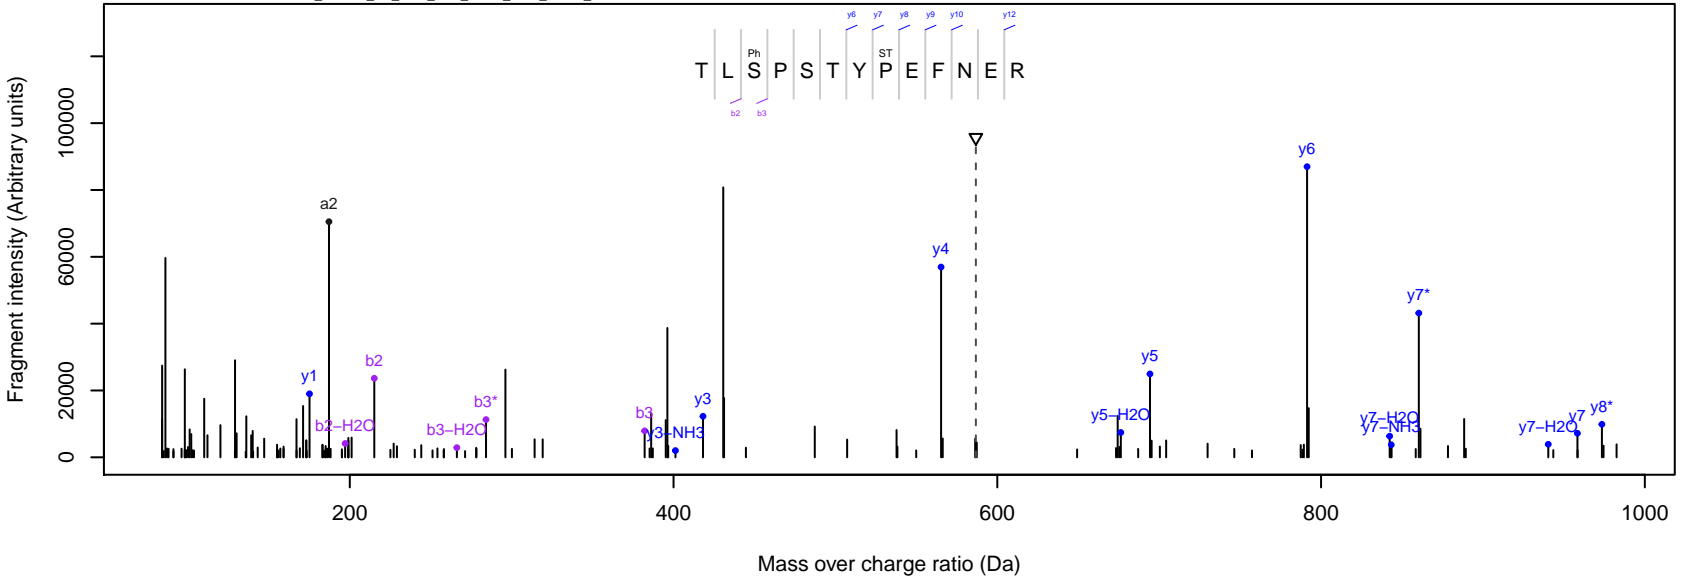

S(Phospho (STY))SSTSDILEPFTVER-2+

Source : QE3\_201126\_FR\_TiOx\_hum\_tissue\_Urea\_RNAB\_N Scan : 49553

Andromeda score : 101.36

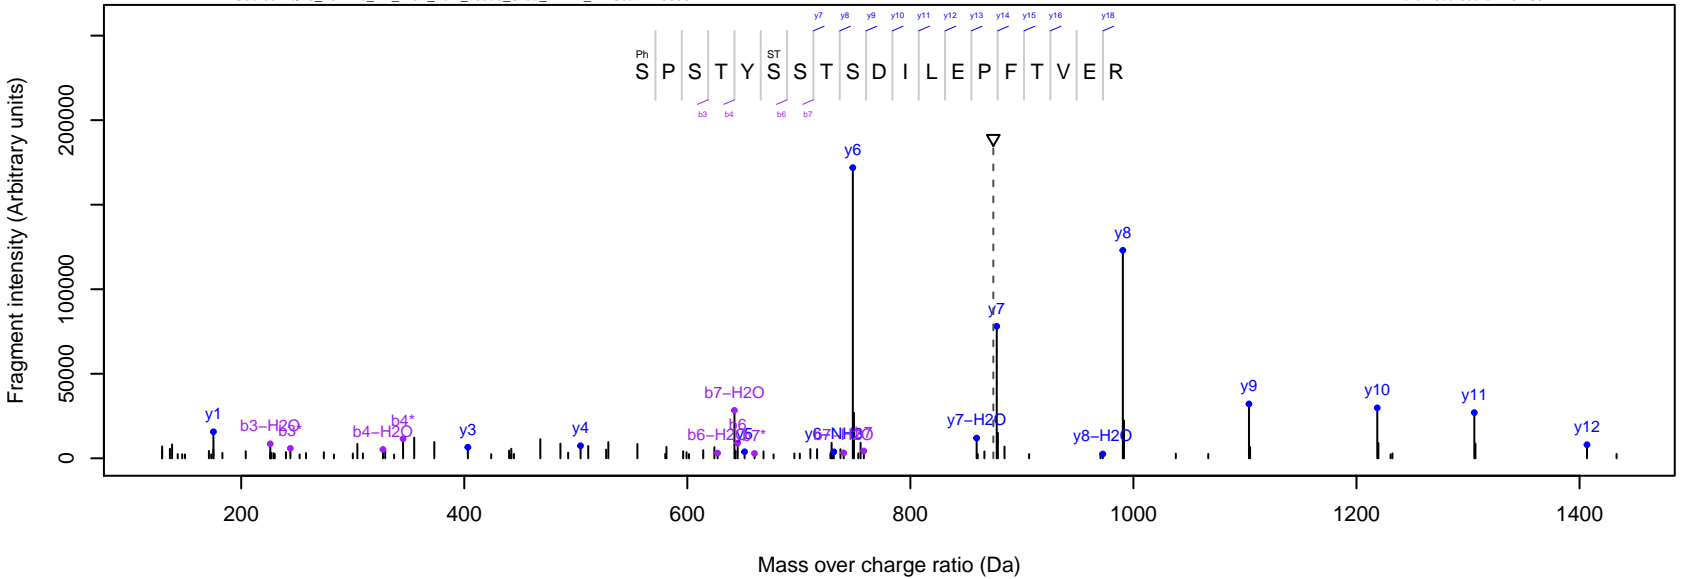



NVLTEES(Phospho (STY))VVR-2+

Source : QE3\_201126\_FR\_TiOx\_hum\_tissue\_Urea\_RNAB\_N Scan : 23944

Andromeda score : 101.35

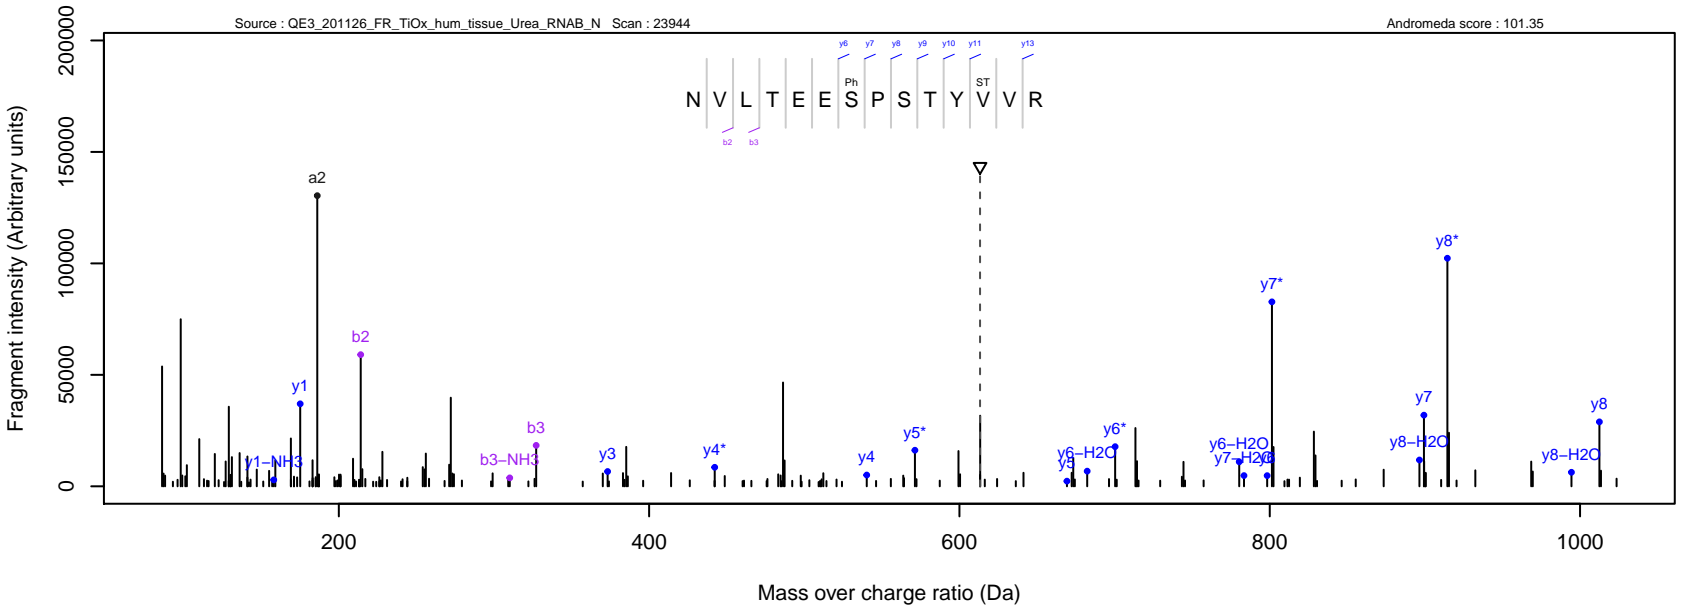

KMS(Phospho (STY))LGQLQSAR-2+

Source : QE3\_201126\_FR\_TiOx\_hum\_tissue\_Urea\_RNAB\_N Scan : 19801

Andromeda score : 101.32

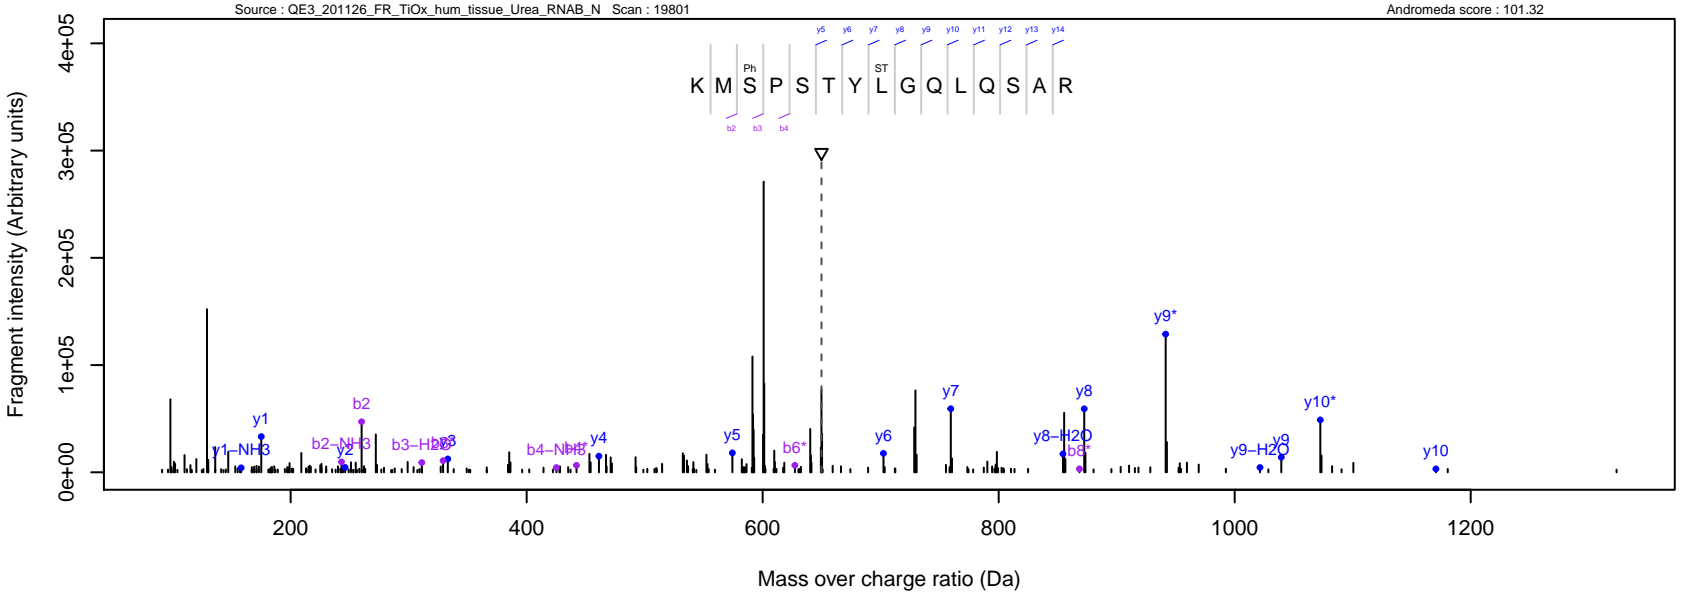

RFS(Phospho (STY))DLGFVVK-2+

Source : QE3\_201126\_FR\_TiOx\_hum\_tissue\_Urea\_RNAB\_B Scan : 33108

Andromeda score : 101.32

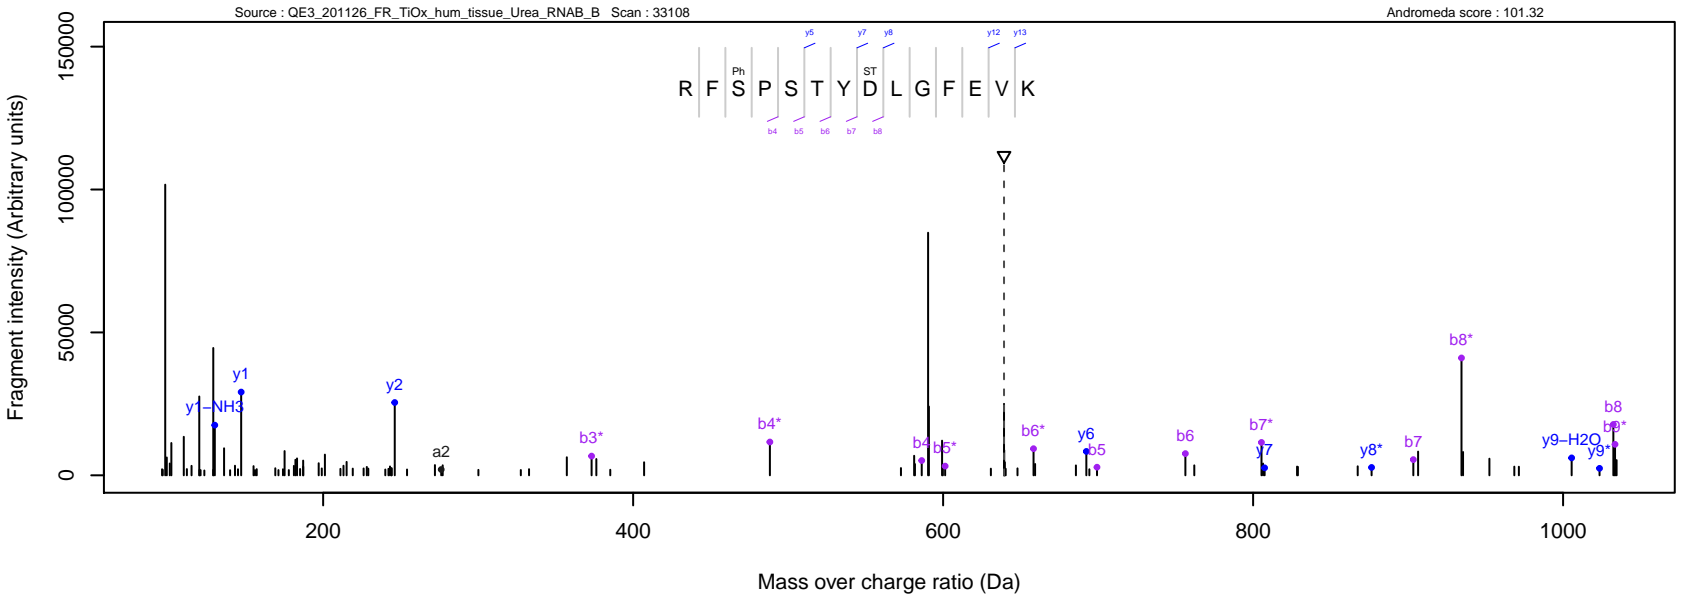

TS(Phospho (STY))PLKDNPS(Phospho (STY))PEPQLDDIKR-3+

Source : QE3\_201126\_FR\_TiOx\_hum\_tissue\_Urea\_RNAB\_H Scan : 22475

Andromeda score : 101.32

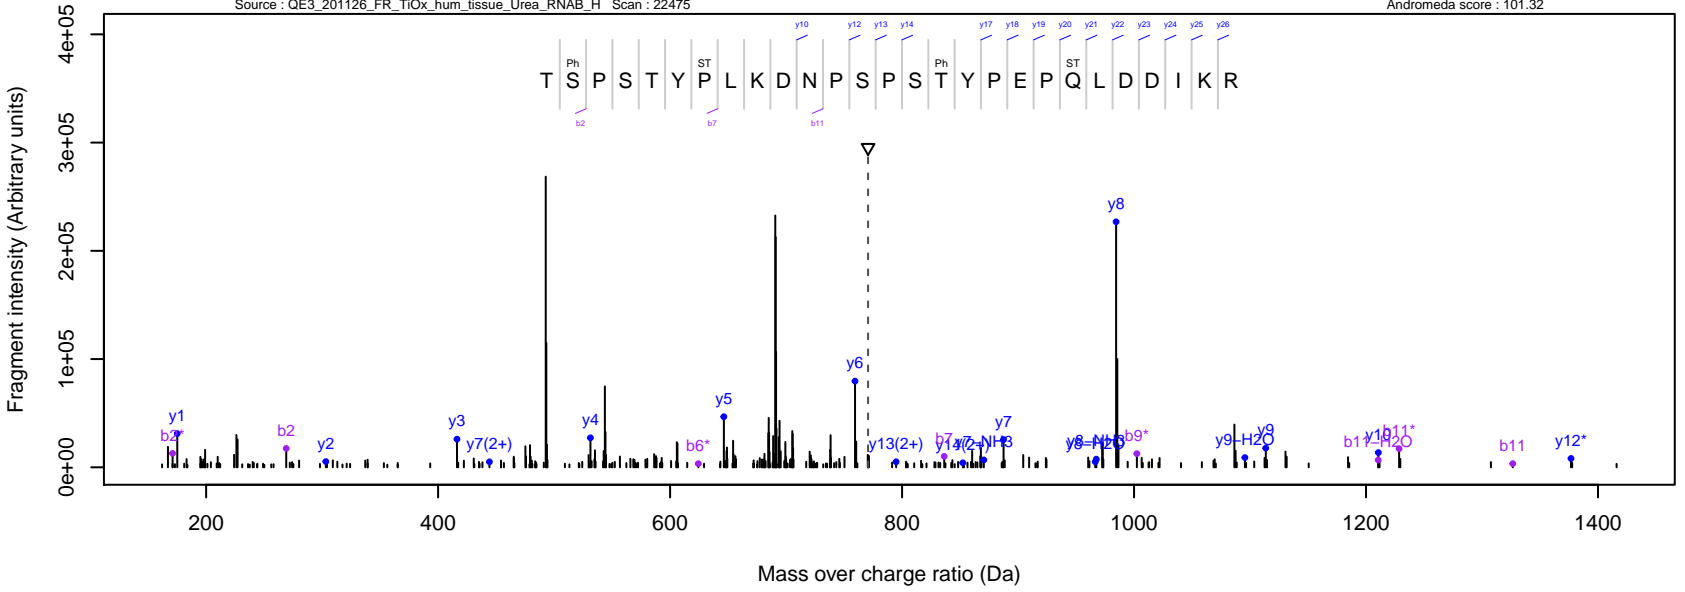

DSGNNS(Phospho (STY))GDQATEEEEGYSCGTAESHDSK-3+

Source : QE3\_201126\_FR\_TiOx\_hum\_tissue\_Urea\_RNAB\_N Scan : 12413

Andromeda score : 101.3

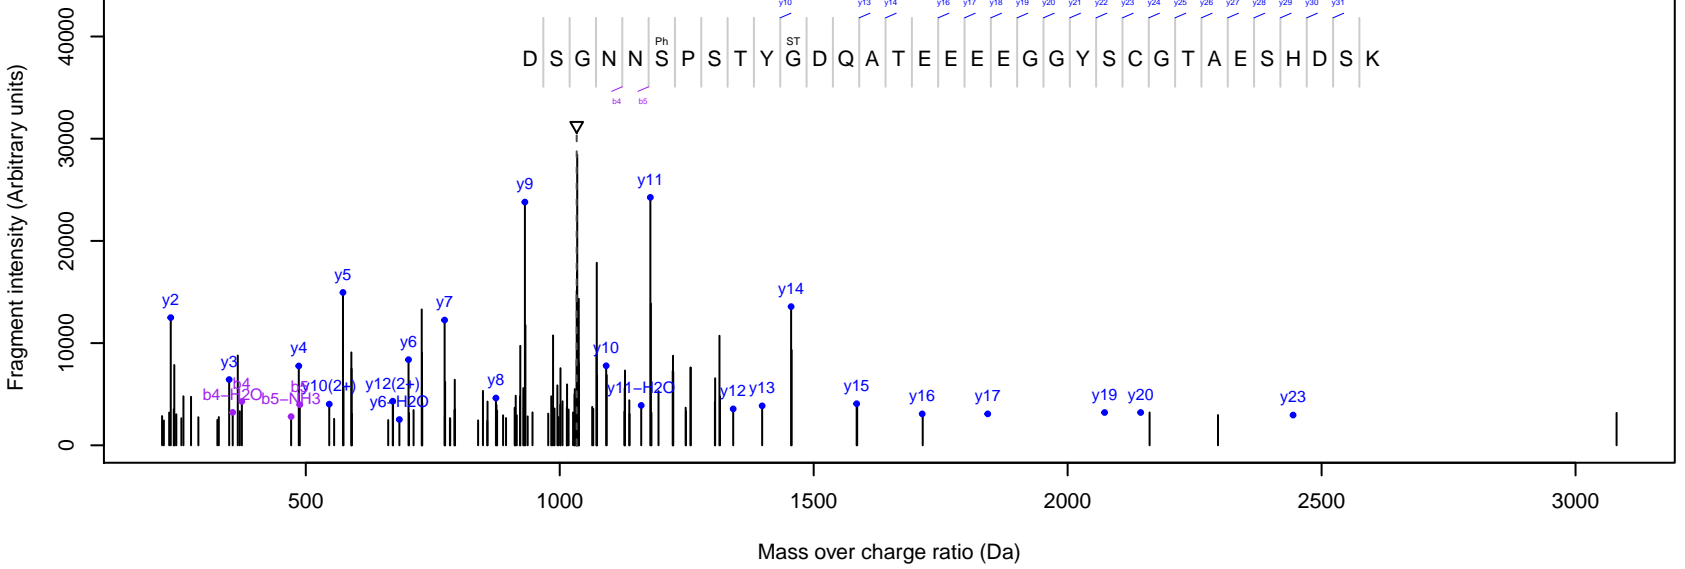

RAS(Phospho (STY))S(Phospho (STY))KGGGGYTCQSGSGWDEFTK-3+

Source : QE3\_201126\_FR\_TiOx\_hum\_tissue\_Urea\_RNAB\_H Scan : 25551

Andromeda score : 101.3

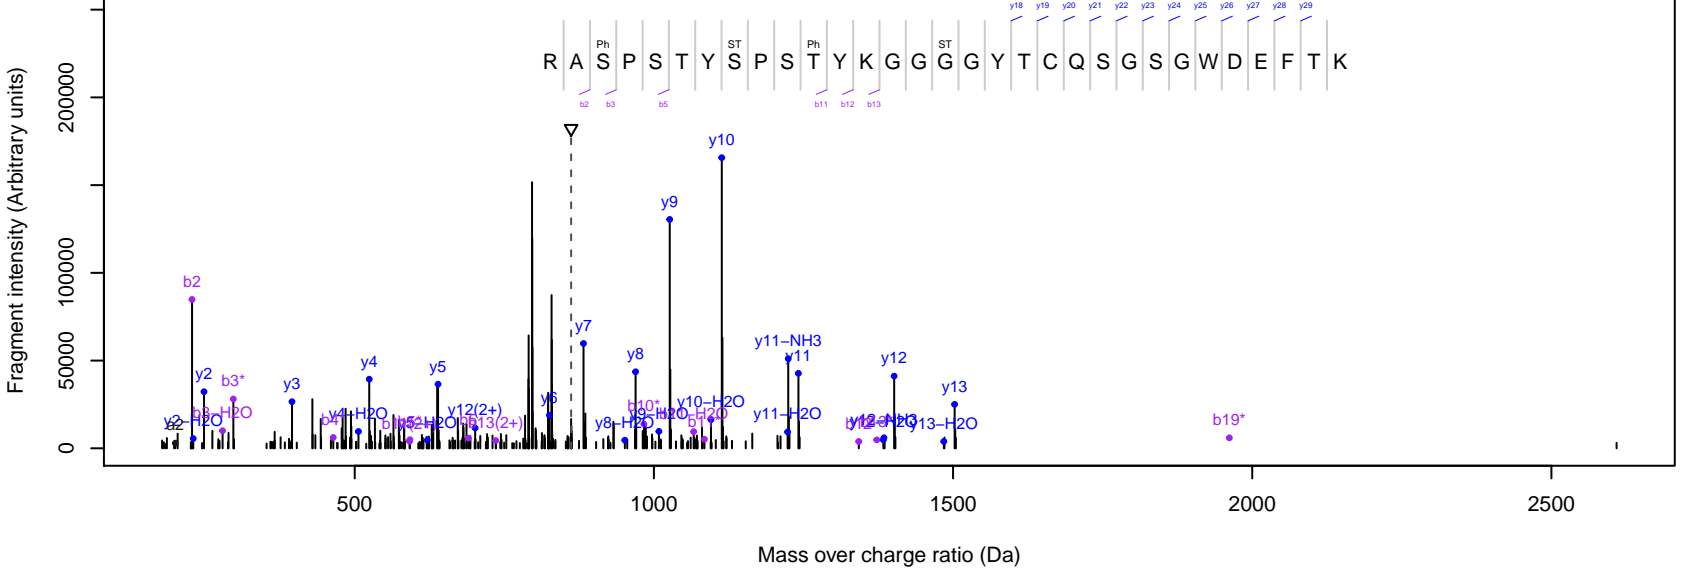

SVRDEVFHTDQDDPS(Phospho (STY))S(Phospho (STY))S(Phospho (STY))DDEGMPYTRPVK-3+

Source : QE3\_201126\_FR\_TiOx\_hum\_tissue\_Urea\_RNAB\_N Scan : 36066

Andromeda score : 101.3

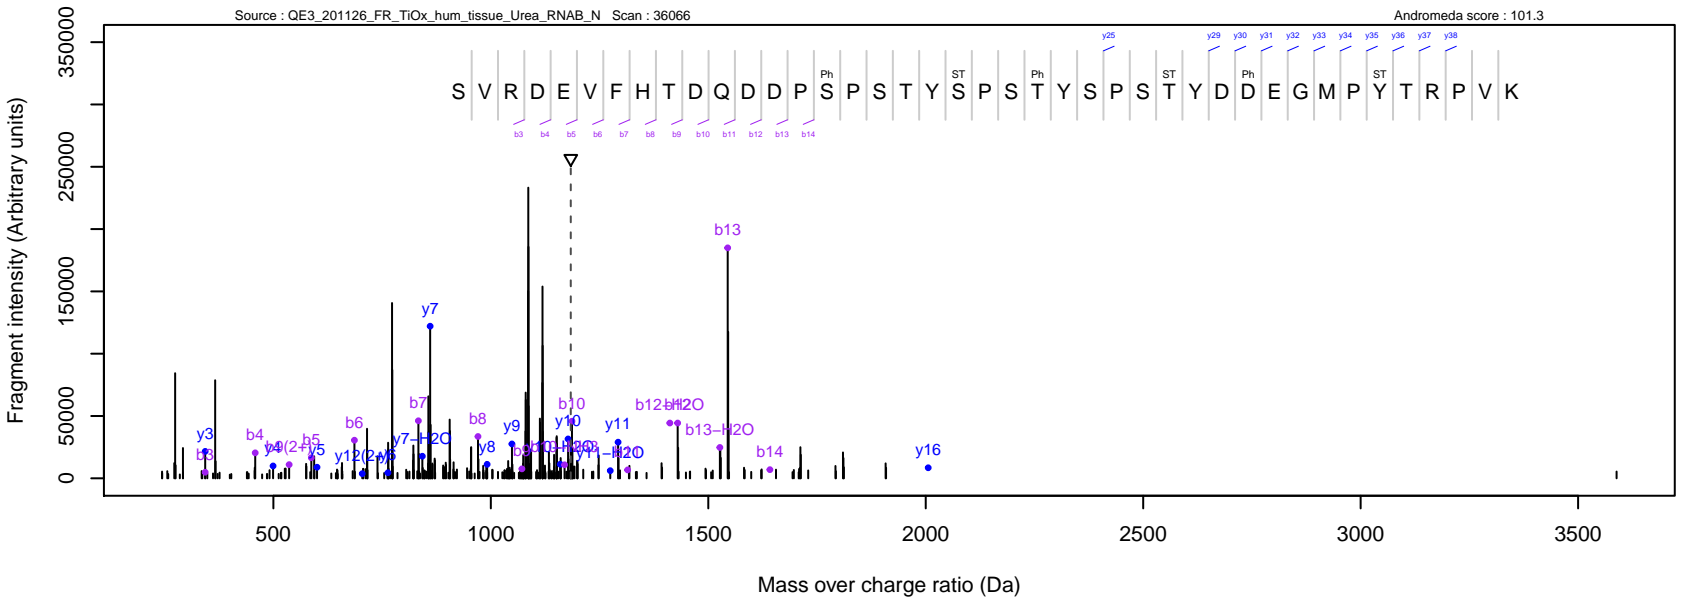

NIKS(Phospho (STY))VTELNGDIITNTMTLGDIVFKR-3+

Source : QE3\_201126\_FR\_TiOx\_hum\_tissue\_Urea\_RNAB\_B Scan : 59001

Andromeda score : 101.27

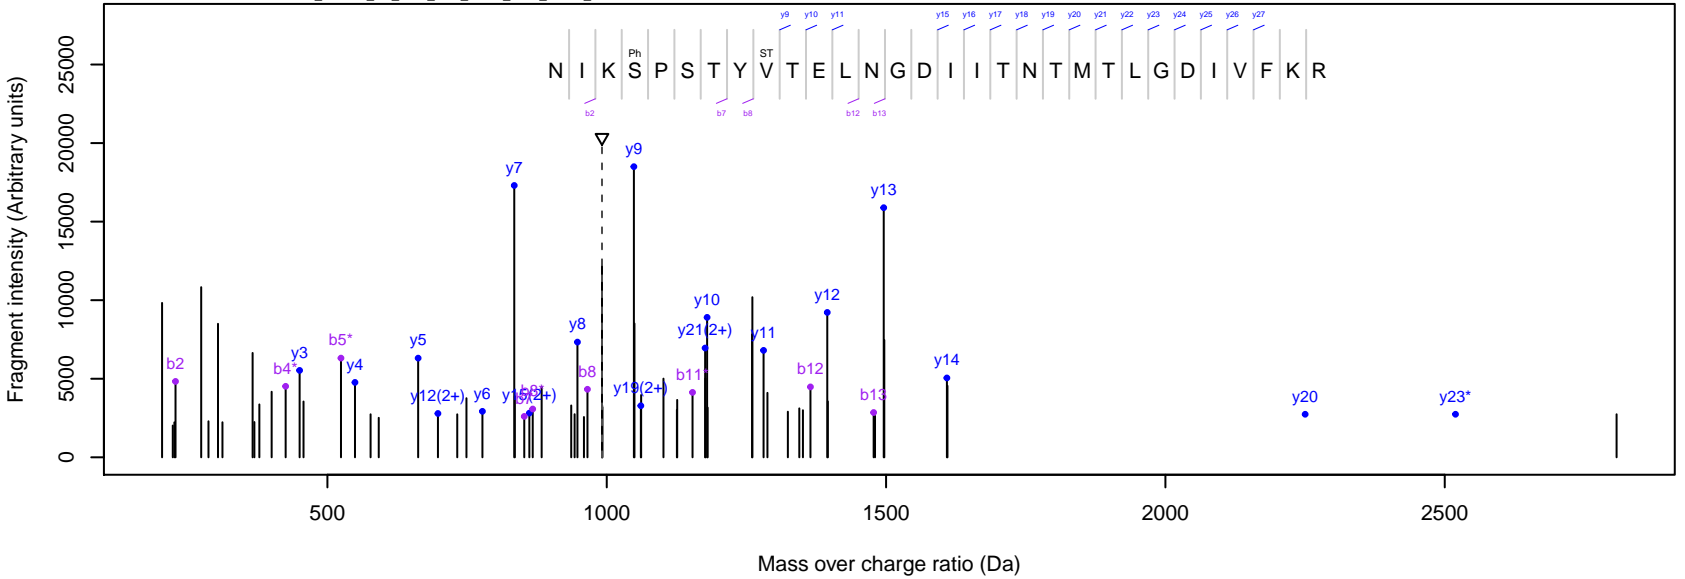

EMLAS(Phospho (STY))DDEEDVSSK-2+

Source : QE3\_201126\_FR\_TiOx\_hum\_tissue\_Urea\_RNAB\_H Scan : 19299

Andromeda score : 101.2

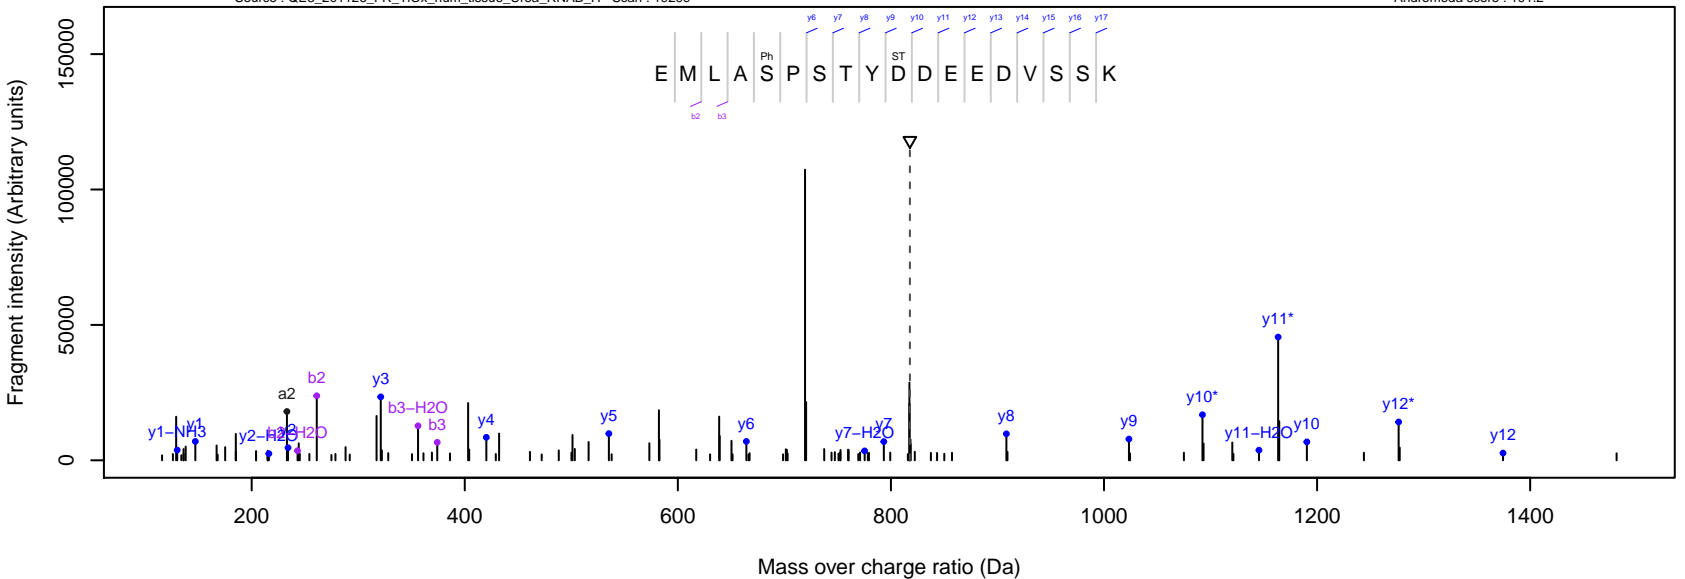

M(Oxidation (M))APPPKEVEEDS(Phospho (STY))EDEEM(Oxidation (M))SEDEEDS(Phospho (STY))S(Phospho (STY))GEEVVPQKK-4+

Source : QE3\_201126\_FR\_TiOx\_hum\_tissue\_Urea\_RNAB\_H Scan : 25520

Andromeda score : 101.12

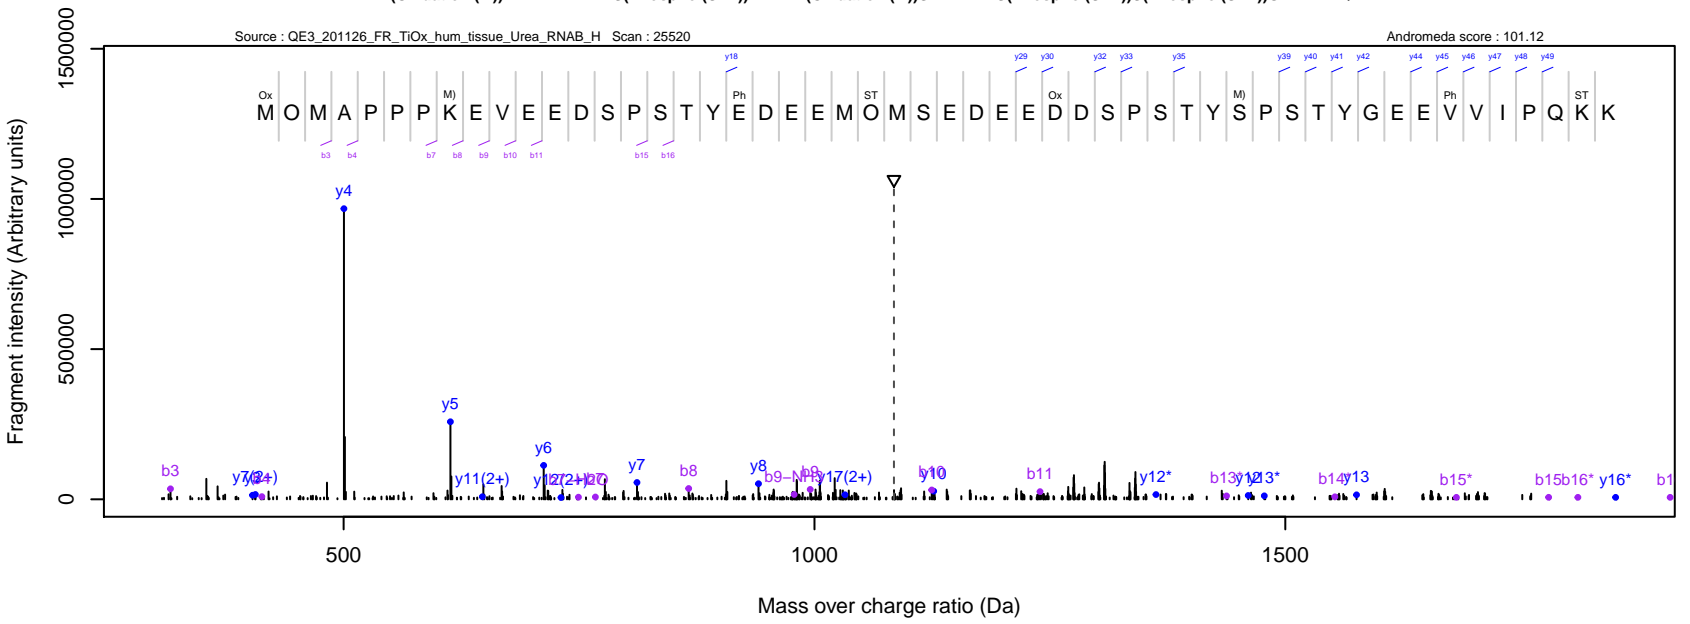

GVHKEGS(Phospho (STY))LGDPELLGYSEPEQEGASAGAPSPPTLELASR-3+

Source : QE3\_201126\_FR\_TiOx\_hum\_tissue\_Urea\_RNAB\_N Scan : 47649

Andromeda score : 101.09

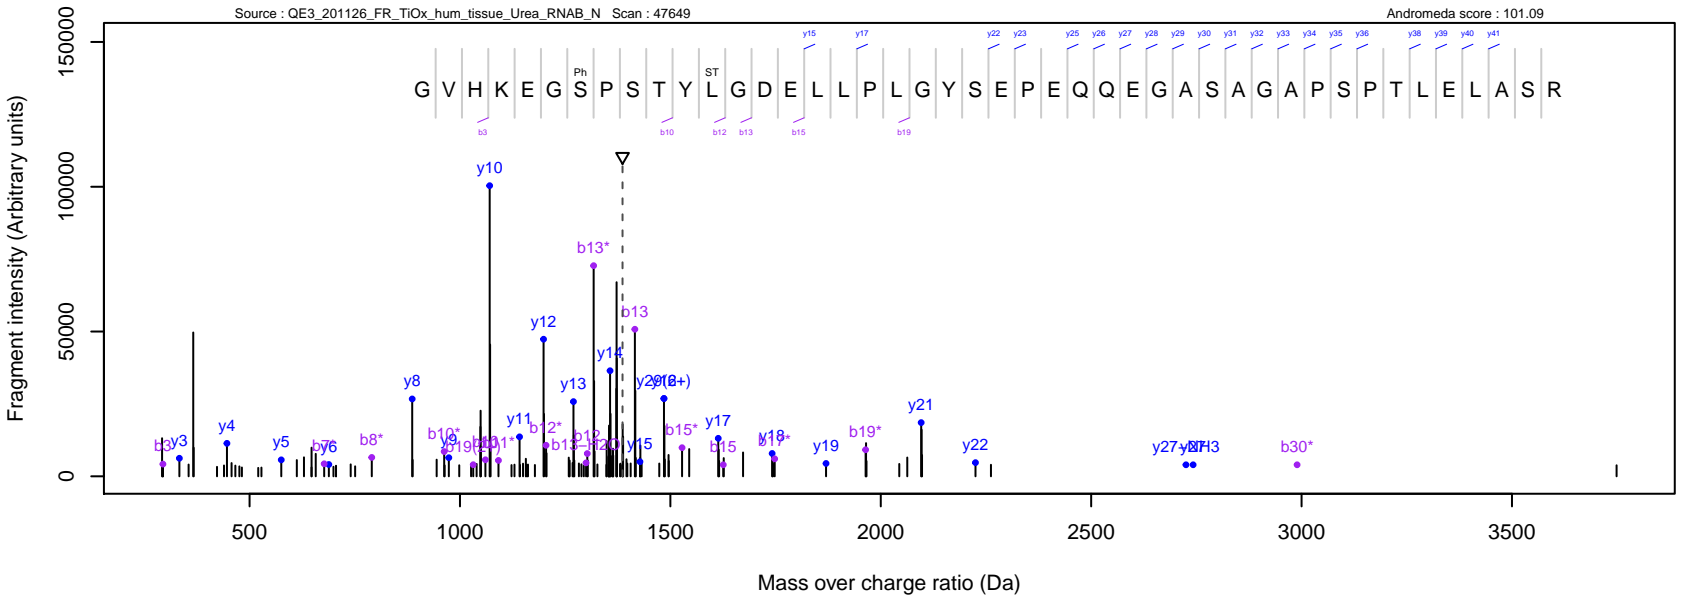

DKAIT(Phospho (STY))PPLPESTVPFNSGVLK-3+

Source : QE3\_201126\_FR\_TiOx\_hum\_tissue\_Urea\_RNAB\_B Scan : 47443

Andromeda score : 101.08

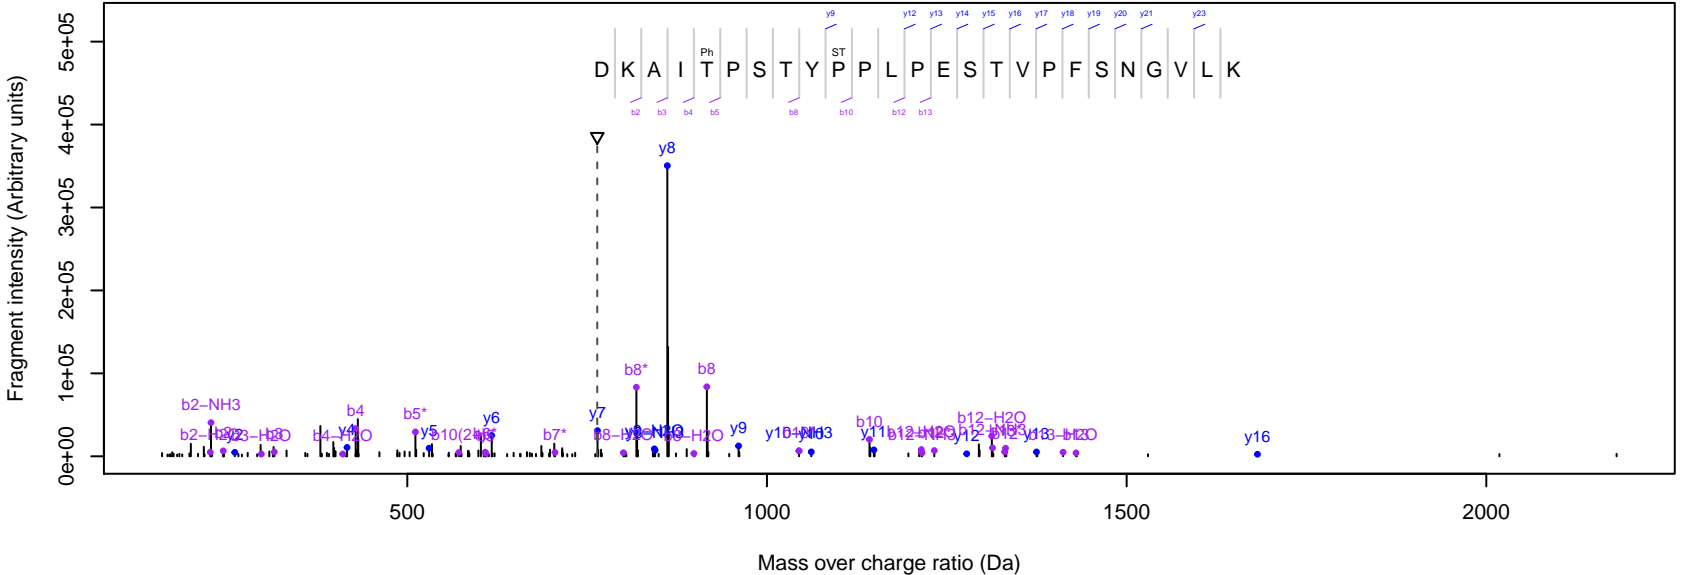

HGS(Phospho (STY))WGSLDM(Oxidation (M))HTKPWIR-4+

Source : QE3\_201126\_FR\_TiOx\_hum\_tissue\_Urea\_RNAB\_N Scan : 23927

Andromeda score : 100.97

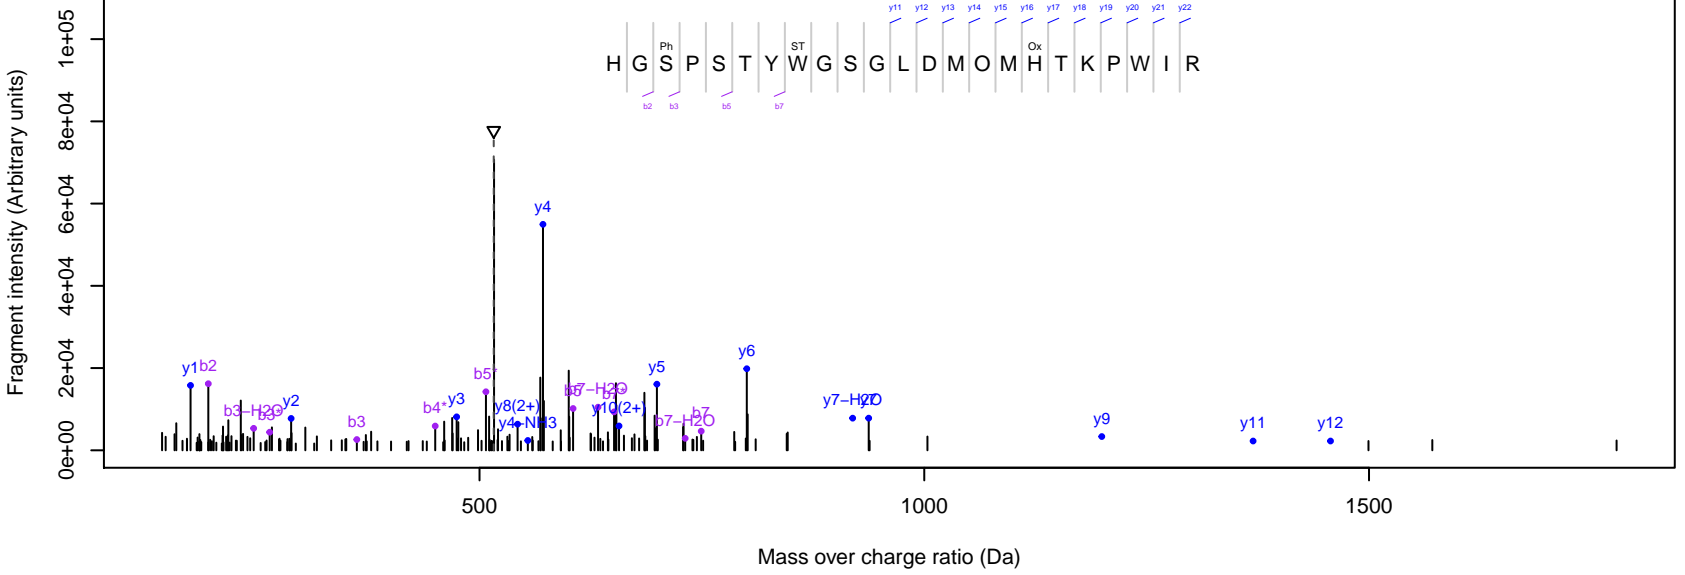

T(Phospho (STY))SDPSAAVNHVSSTTSLGENYEDDDLVSDEVMK-3+

Source : QE3\_201126\_FR\_TiOx\_hum\_tissue\_Urea\_RNAB\_H Scan : 39807

Andromeda score : 100.97

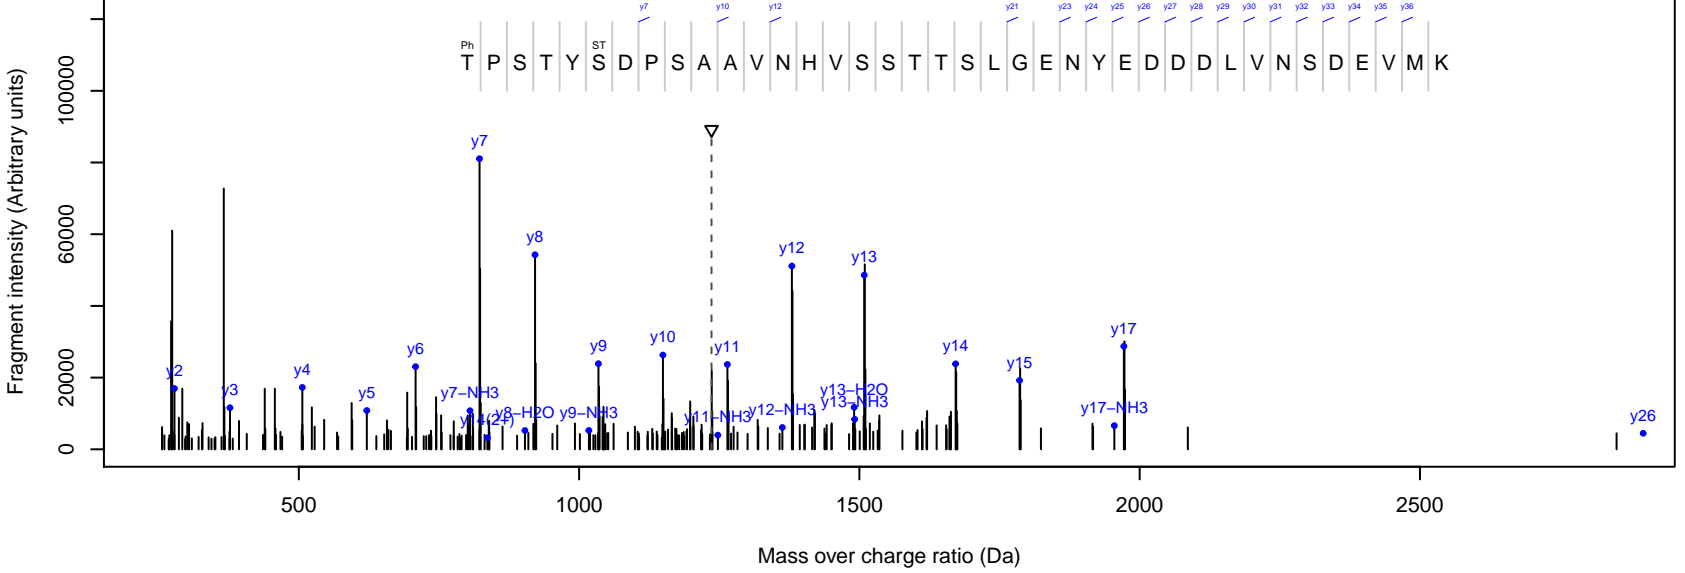

KT(Phospho (STY))PESFLGPNAALVDLDSLRPGPTPPGAK-4+

Source : QE3\_201126\_FR\_TiOx\_hum\_tissue\_Urea\_RNAB\_N Scan : 54852

Andromeda score : 100.95

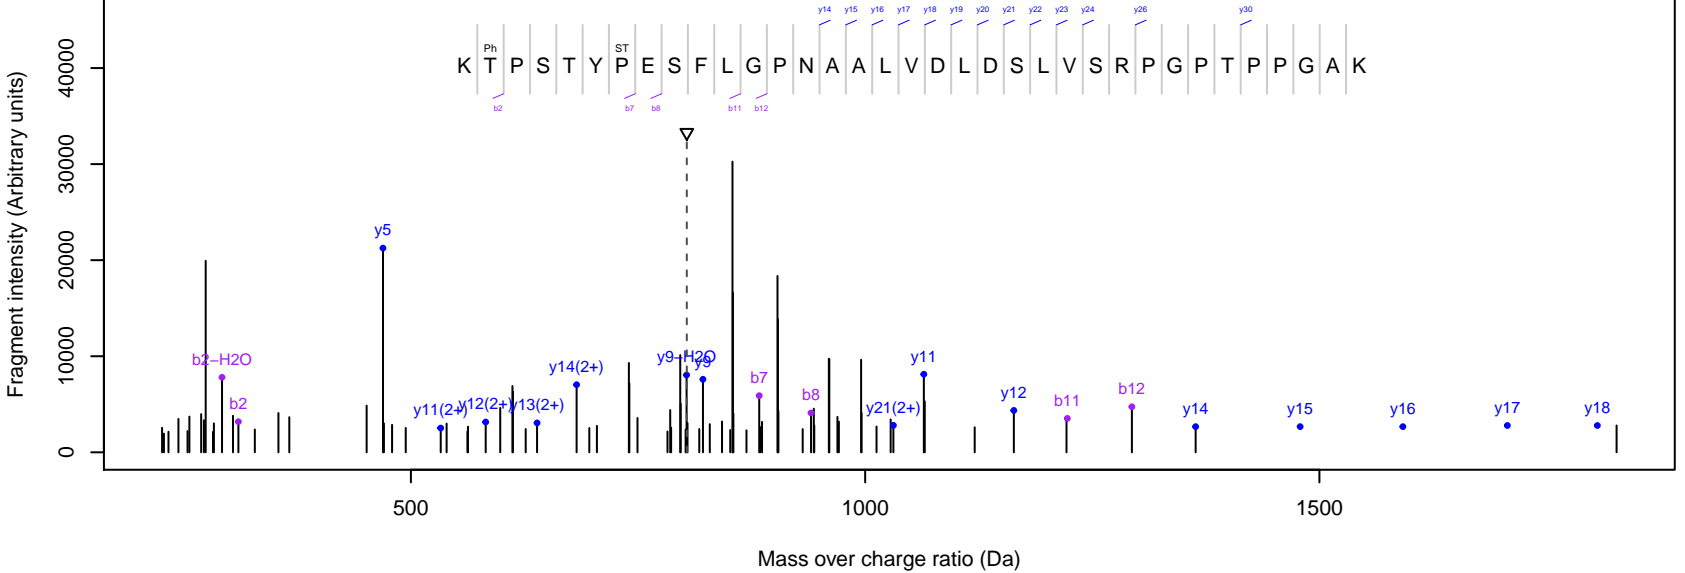

GKPIFPVYPLVGS(SPhospho (STY))SPTR-3+

Source : QE3\_201126\_FR\_TIOx\_hum\_tissue\_Urea\_RNAB\_N Scan : 44163

Andromeda score : 100.94

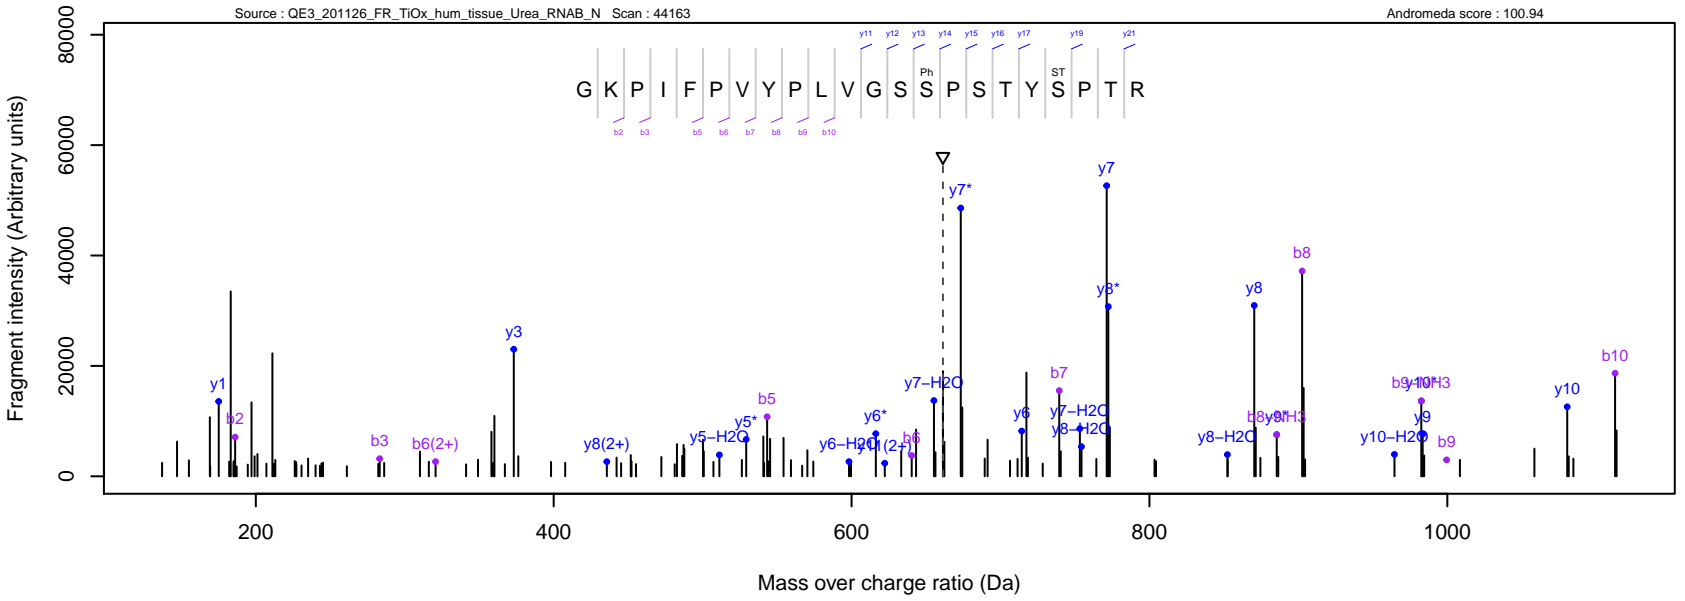

S(Phospho (STY))IRLPETIDLGALYLSMOM(K)K-3+

Source : QE3\_201126\_FR\_TIOx\_hum\_tissue\_Urea\_RNAB\_H Scan : 56501

Andromeda score : 100.94

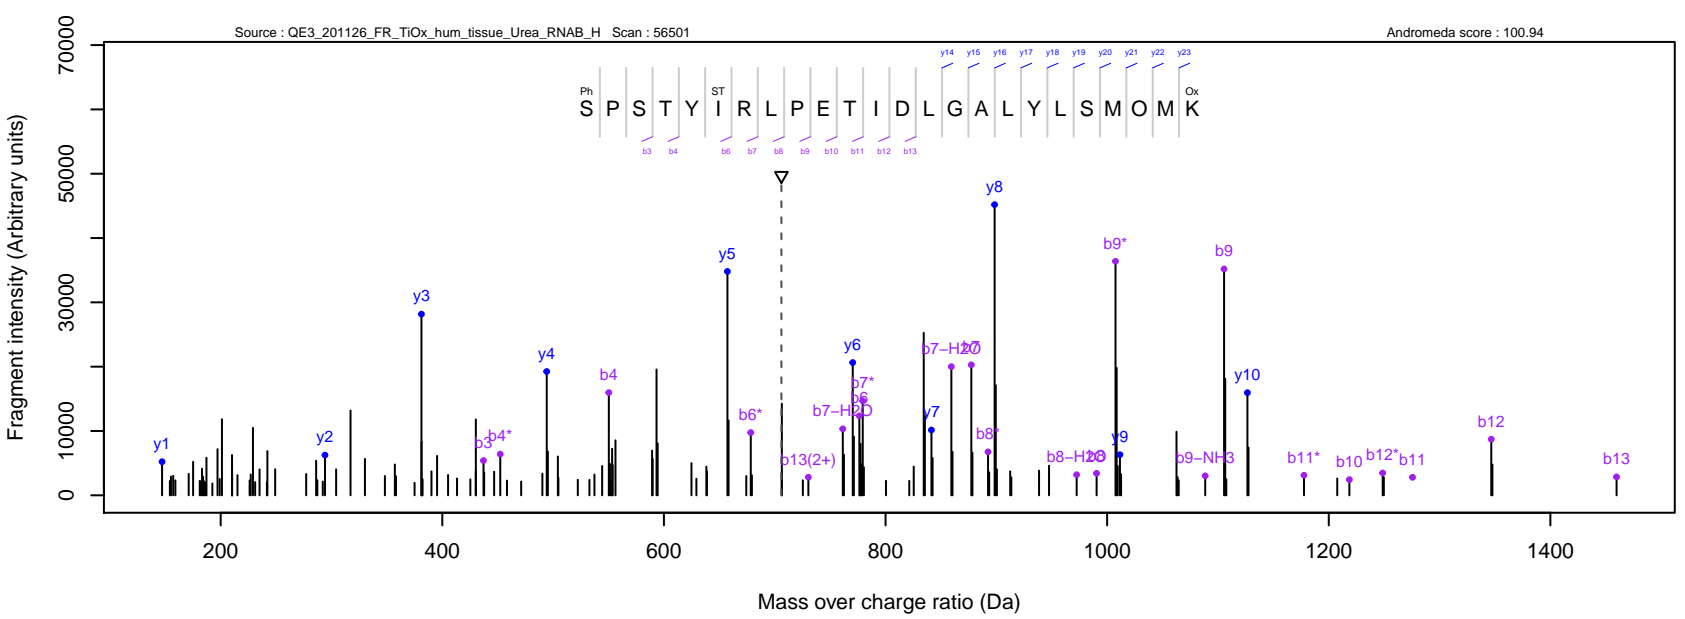

RTEARS(SPhospho (STY))S(Phospho (STY))DEENGPPSSPLDR-3+

Source : QE3\_201126\_FR\_TIOx\_hum\_tissue\_Urea\_RNAB\_H Scan : 12766

Andromeda score : 100.93

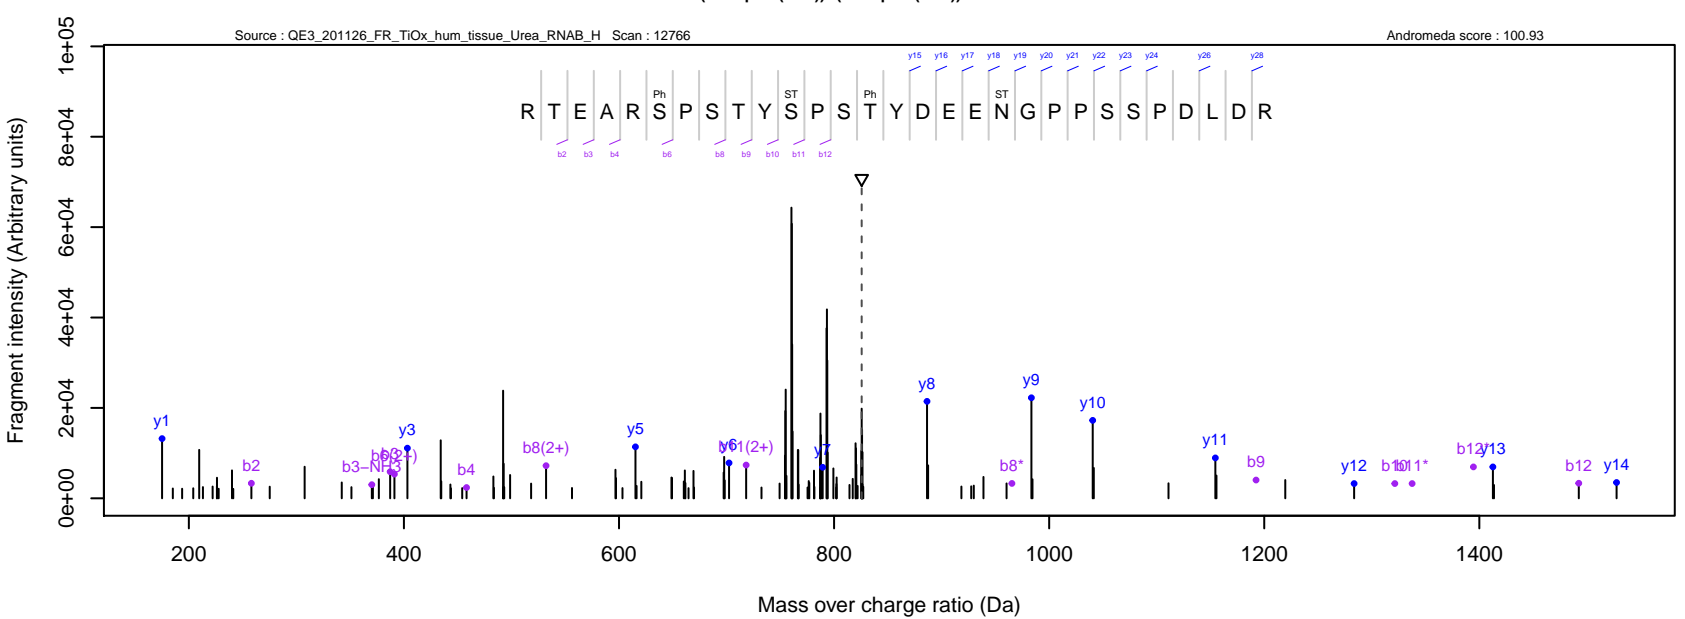

**SRINSSGEGDES(Phospho (STY))DFLQSR-3+**

Source : QE3\_201126\_FR\_TiOx\_hum\_tissue\_Urea\_RNAB\_B Scan : 18834

Andromeda score : 100.93

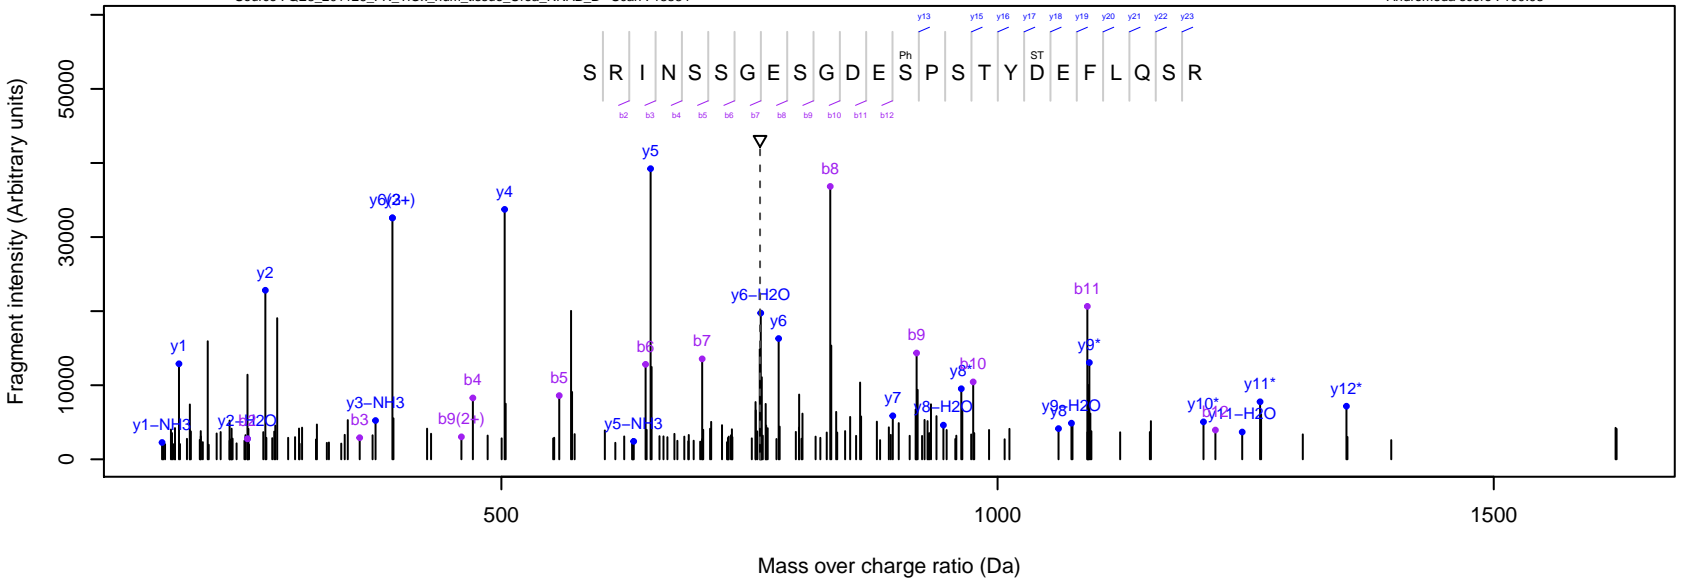

**SPAPGS(Phospho (STY))PDEEGEAEPAAIGR-2+**

Source : QE3\_201126\_FR\_TiOx\_hum\_tissue\_Urea\_RNAB\_N Scan : 20878

Andromeda score : 100.92

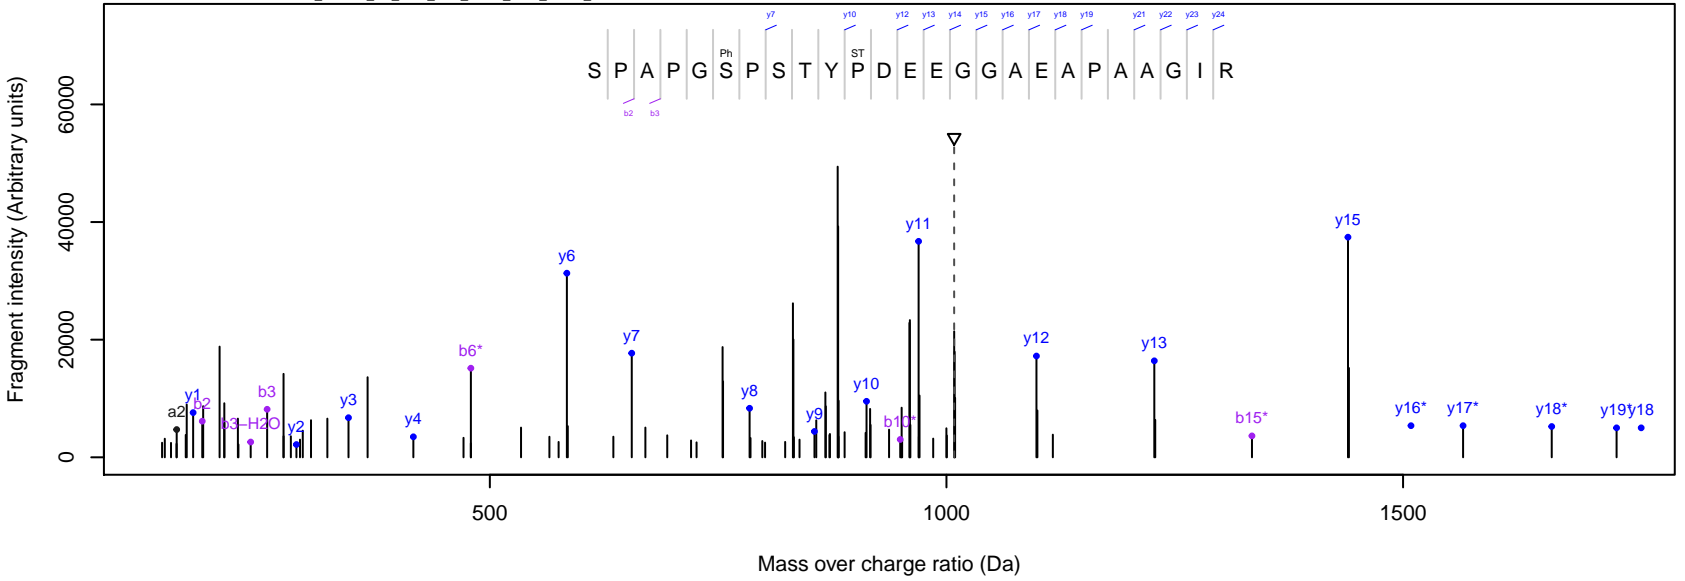

**GVDFESS(Phospho (STY))EDDDDDPFMNTSSLRR-3+**

Source : QE3\_201126\_FR\_TiOx\_hum\_tissue\_Urea\_RNAB\_H Scan : 41698

Andromeda score : 100.88

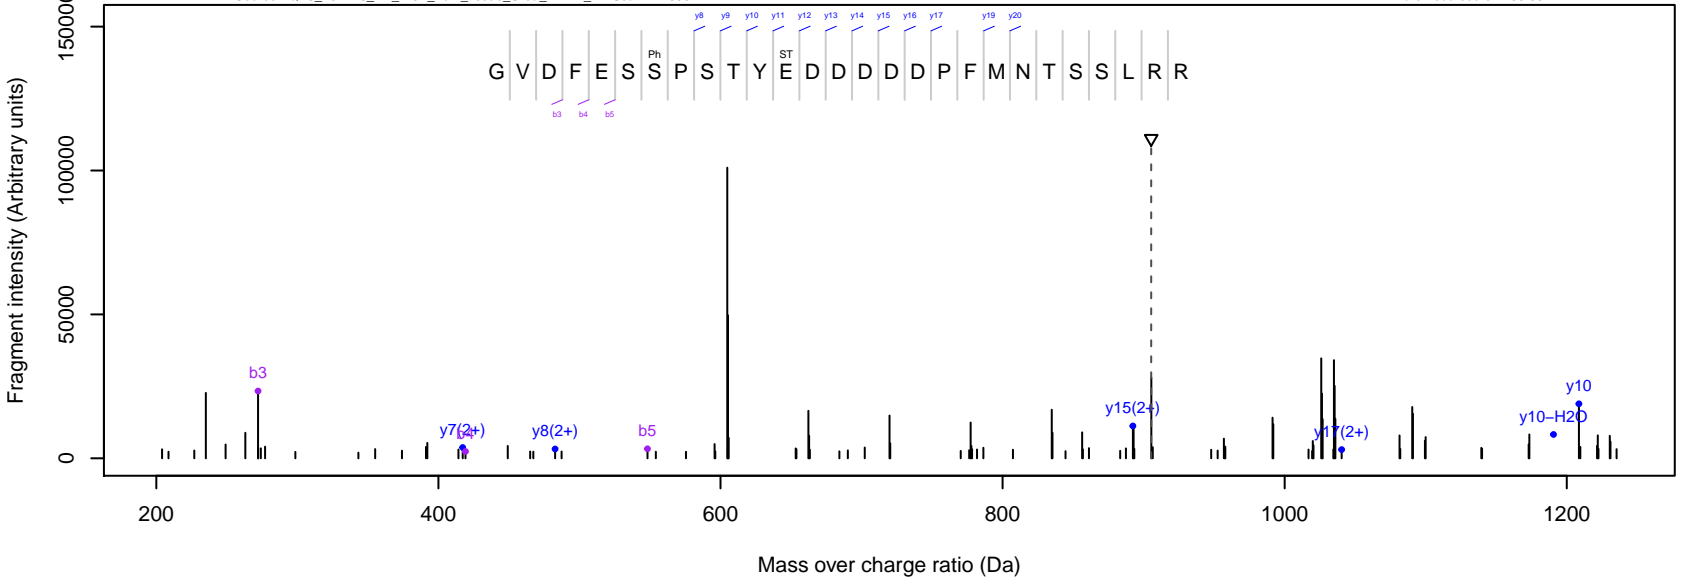

KNS(Phospho (STY))ITEIS(Phospho (STY))DNEDDLEYHRR-4+

Source : QE3\_201126\_FR\_TiOx\_hum\_tissue\_Urea\_RNAB\_B Scan : 27436

Andromeda score : 100.88

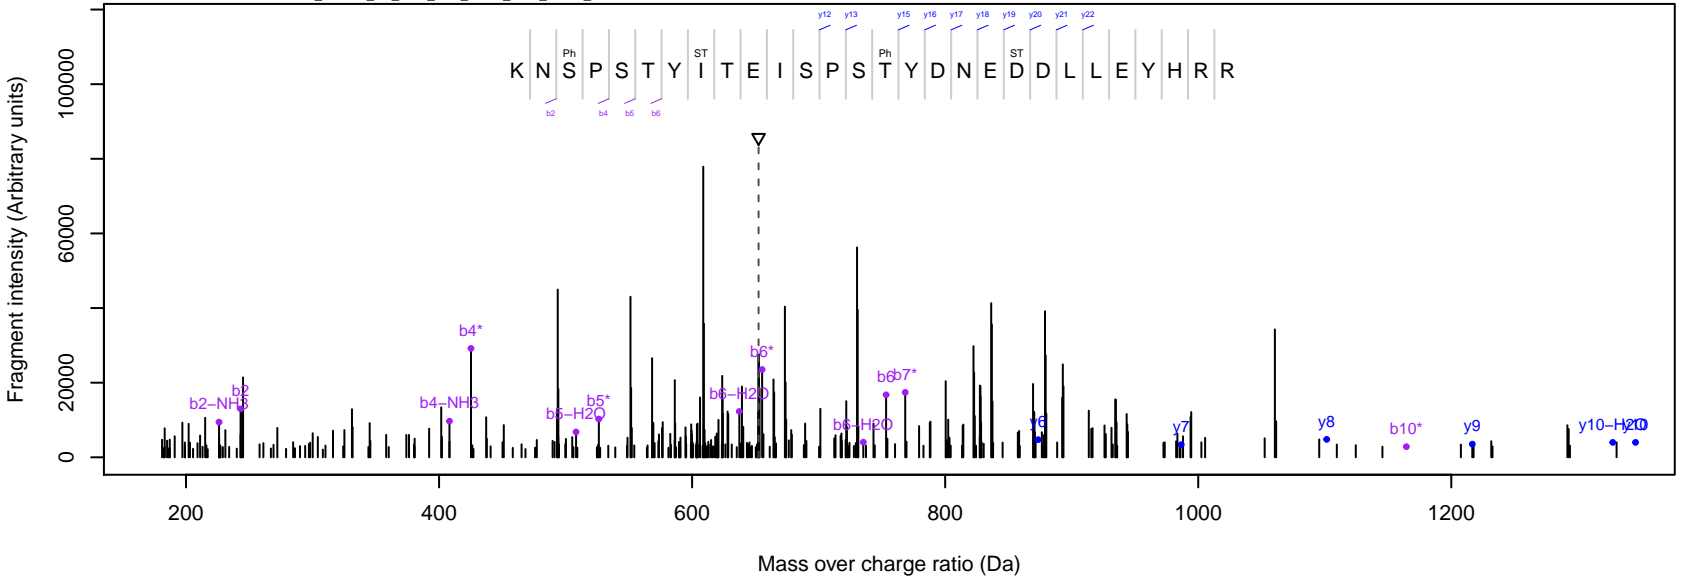

LQTTDNLPMSPSTYPEEFDEVSR-3+

Source : QE3\_201126\_FR\_TiOx\_hum\_tissue\_Urea\_RNAB\_H Scan : 55262

Andromeda score : 100.88

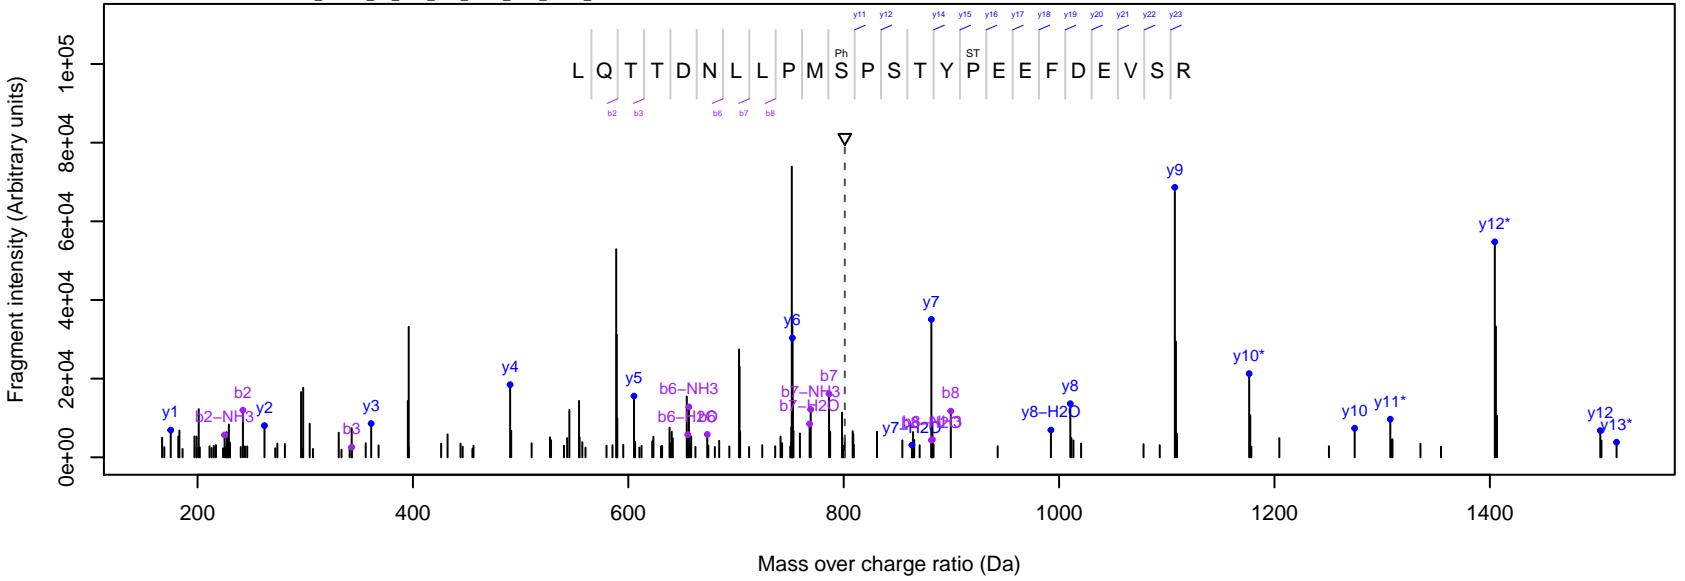

RAS(Phospho (STY))QGLLSIENSESDSSEAKEEGSR-3+

Source : QE3\_201126\_FR\_TiOx\_hum\_tissue\_Urea\_RNAB\_N Scan : 25554

Andromeda score : 100.88

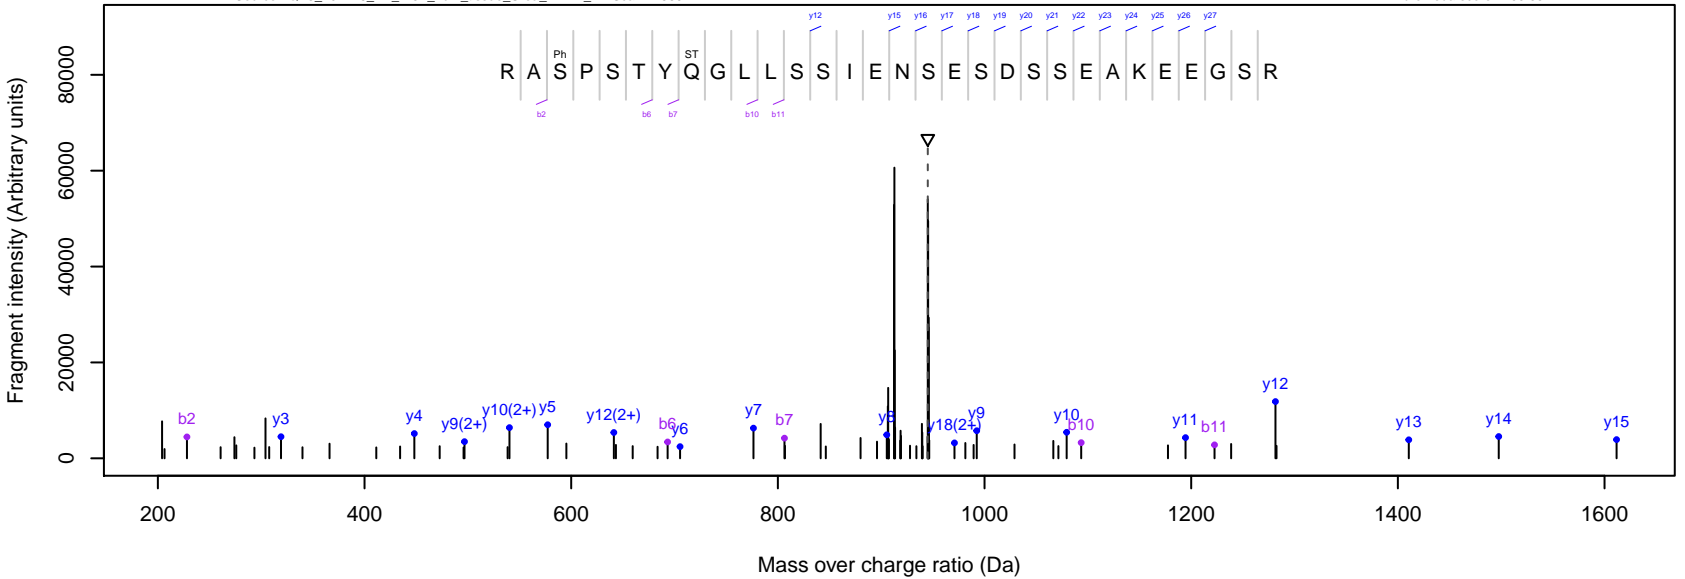



M(Oxidation (M))APTPIPT(Phospho (STY))RSPSDSSTASTPVAEQIER-3+

Source : QE3\_201126\_FR\_TIOx\_hum\_tissue\_Urea\_RNAB\_H Scan : 26339

Andromeda score : 100.86

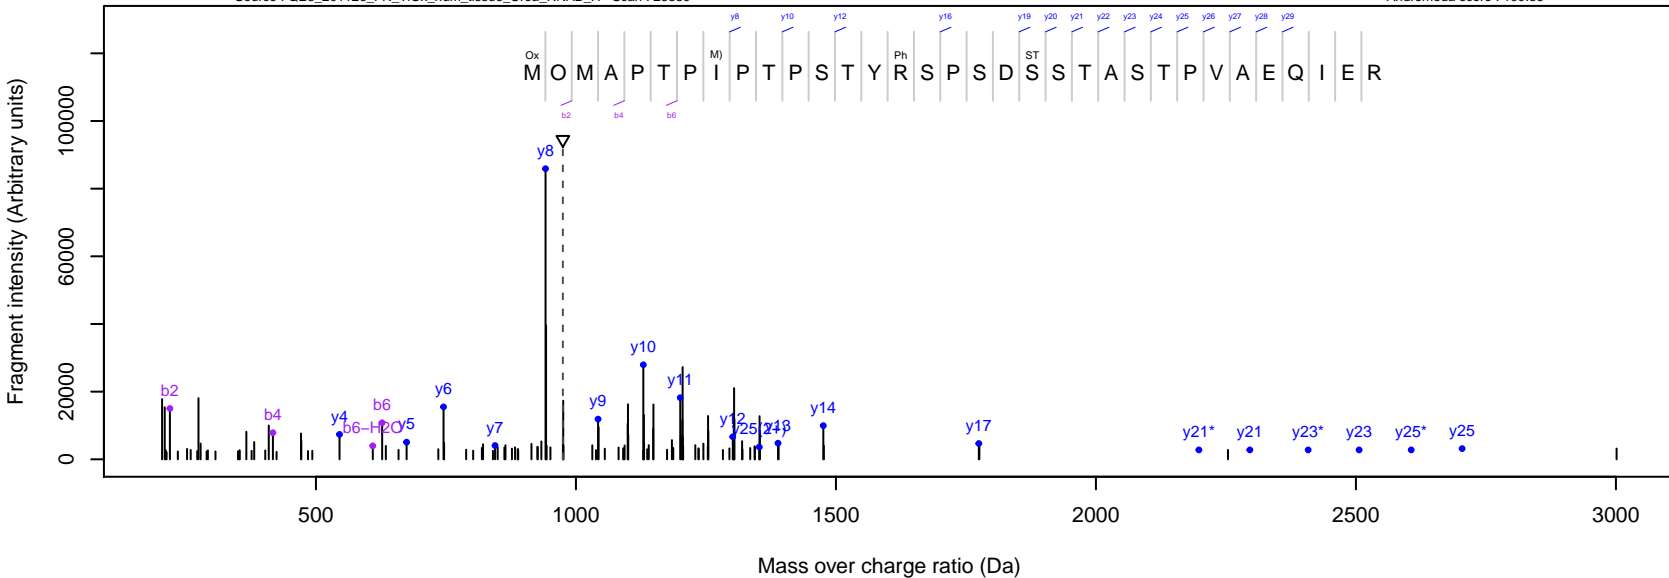

GSRPPLILQSQSLPCS(Phospho (STY))SPR-3+

Source : QE3\_201126\_FR\_TIOx\_hum\_tissue\_Urea\_RNAB\_N Scan : 30027

Andromeda score : 100.79

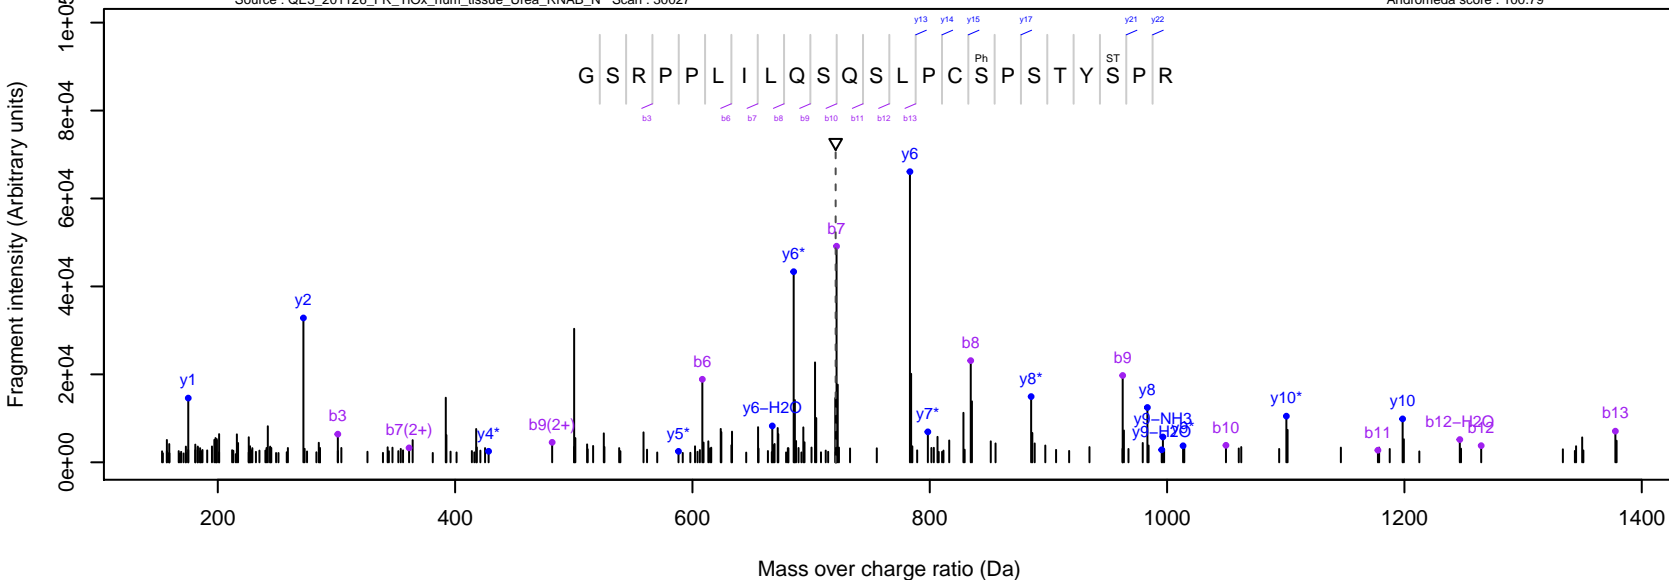

LLSPQM(Oxidation (M))S(Phospho (STY))GEEEDSLAAK-2+

Source : QE3\_201126\_FR\_TIOx\_hum\_tissue\_Urea\_RNAB\_B Scan : 24568

Andromeda score : 100.77

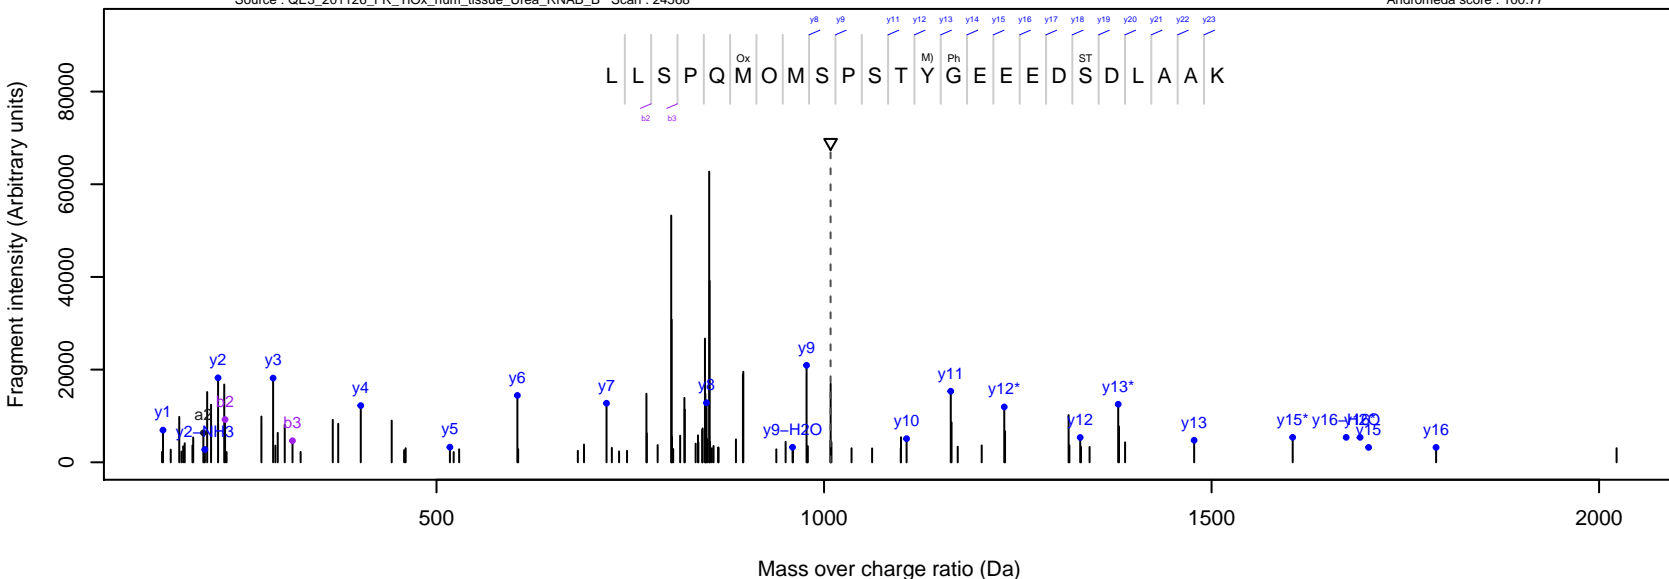

LSPEPWT(Phospho (STY))PETGLVTDAFK-2+

Source : QE3\_201126\_FR\_TiOx\_hum\_tissue\_Urea\_RNAB\_N Scan : 57238

Andromeda score : 100.77

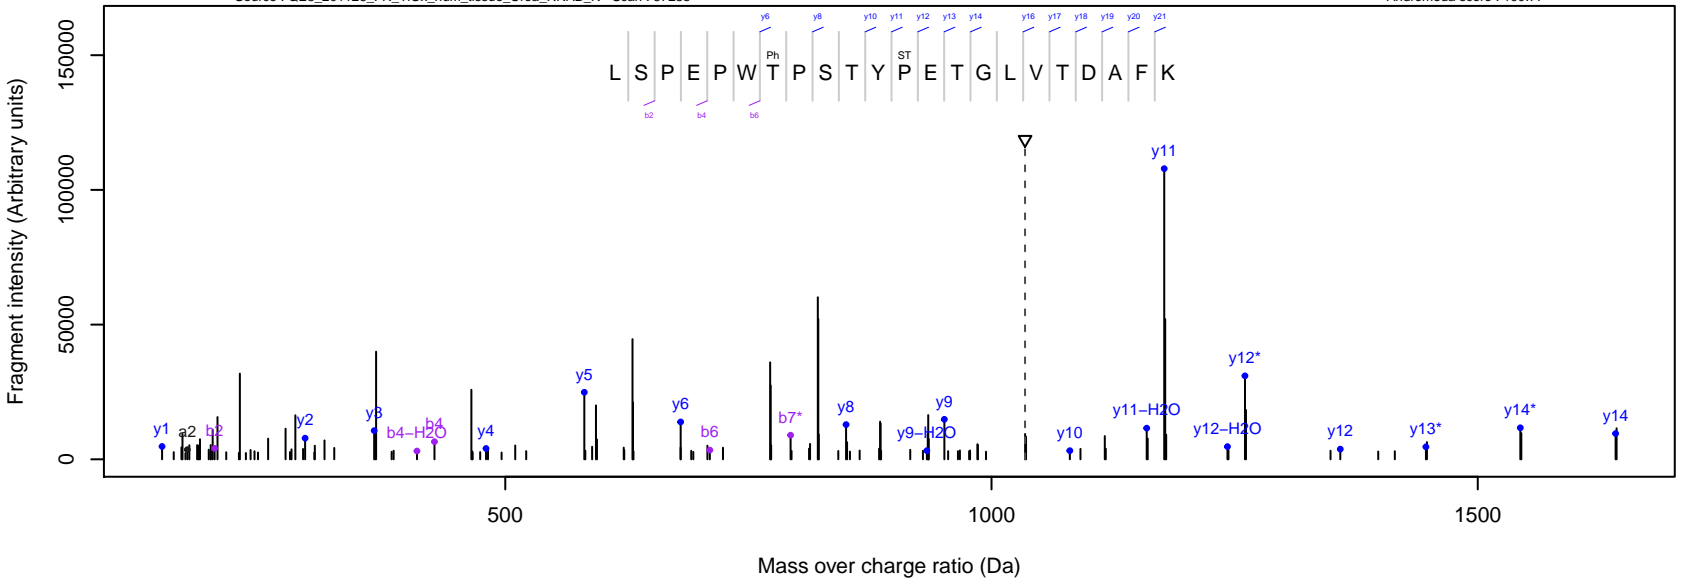

RNS(Phospho (STY))FTPLSSNTIR-3+

Source : QE3\_201126\_FR\_TiOx\_hum\_tissue\_Urea\_RNAB\_N Scan : 21038

Andromeda score : 100.77

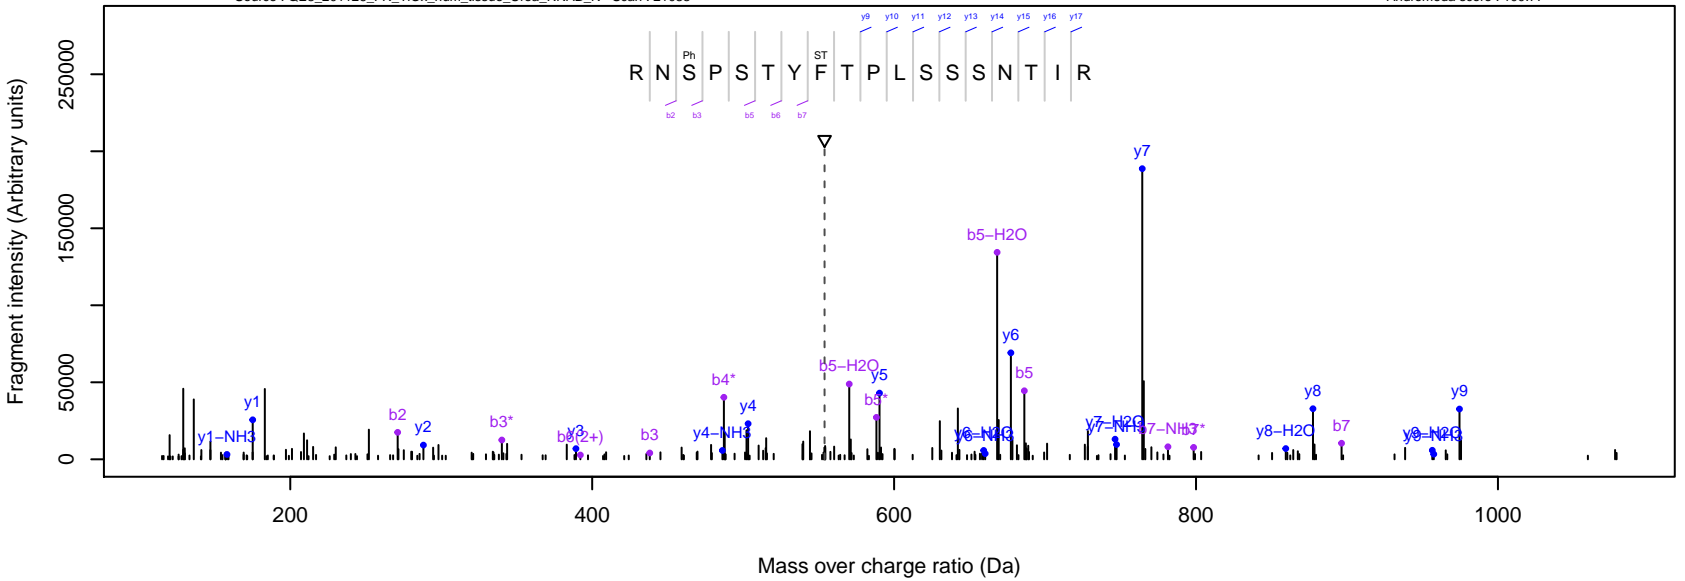

TTRT(Phospho (STY))PEEGYSYDISEK-3+

Source : QE3\_201126\_FR\_TiOx\_hum\_tissue\_Urea\_RNAB\_H Scan : 17902

Andromeda score : 100.76

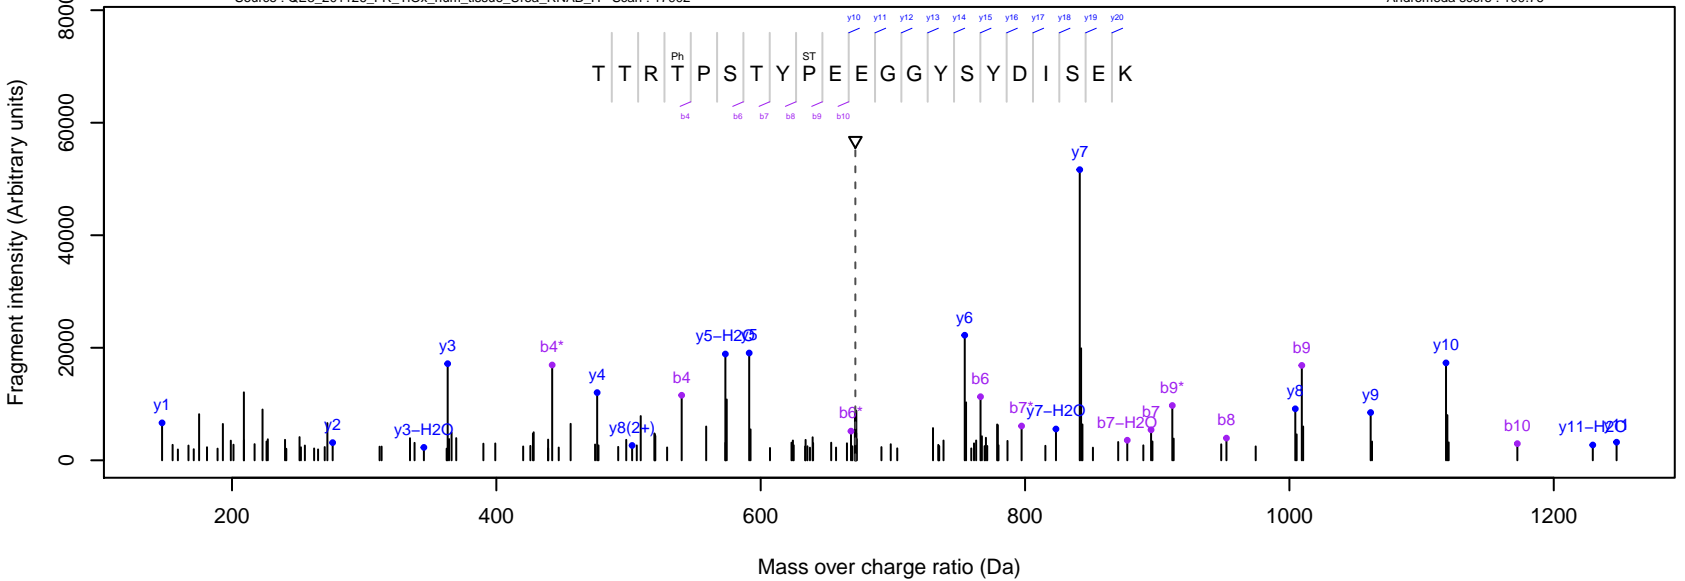

SIS(Phospho (STY))SPSVSSETM(Oxidation (M))DKPVDLSTR-3+

Source : QE3\_201126\_FR\_TIOx\_hum\_tissue\_Urea\_RNAB\_N Scan : 22857

Andromeda score : 100.7

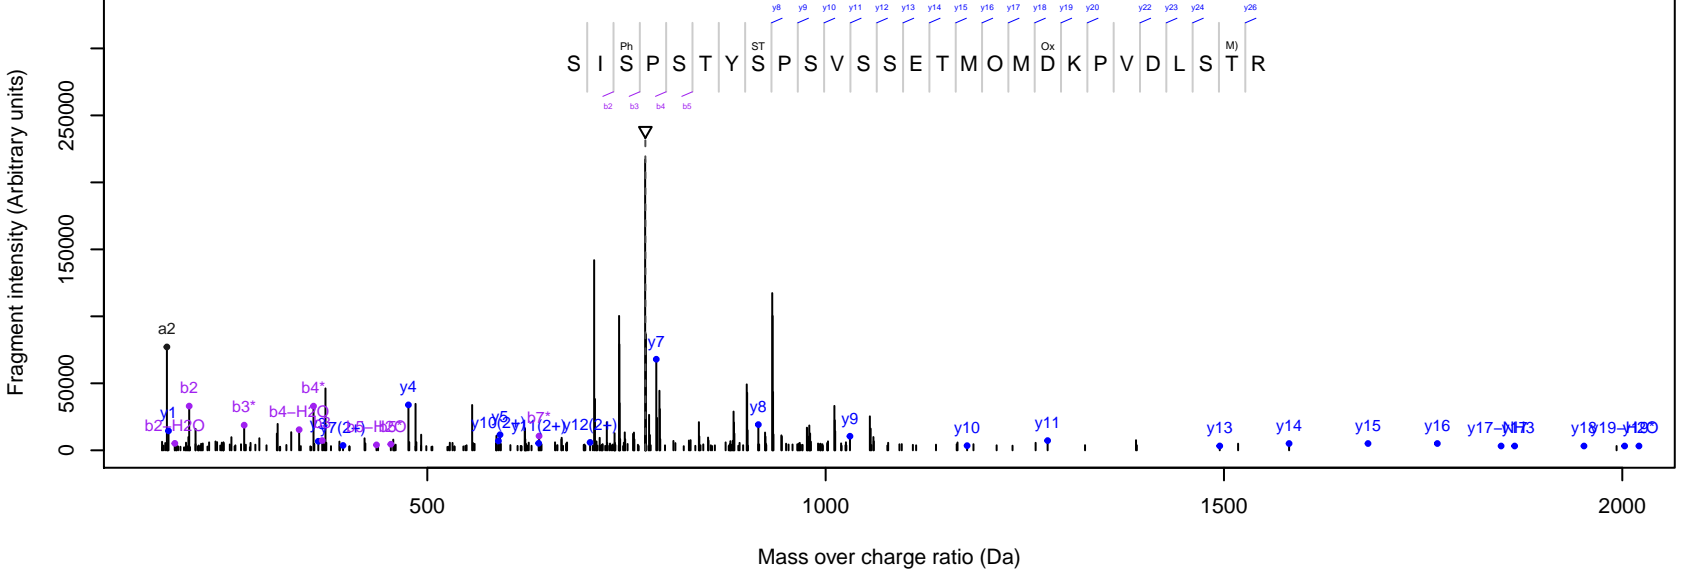

RAS(Phospho (STY))S(Phospho (STY))PSLIER-2+

Source : QE3\_201126\_FR\_TIOx\_hum\_tissue\_Urea\_RNAB\_H Scan : 15367

Andromeda score : 100.69

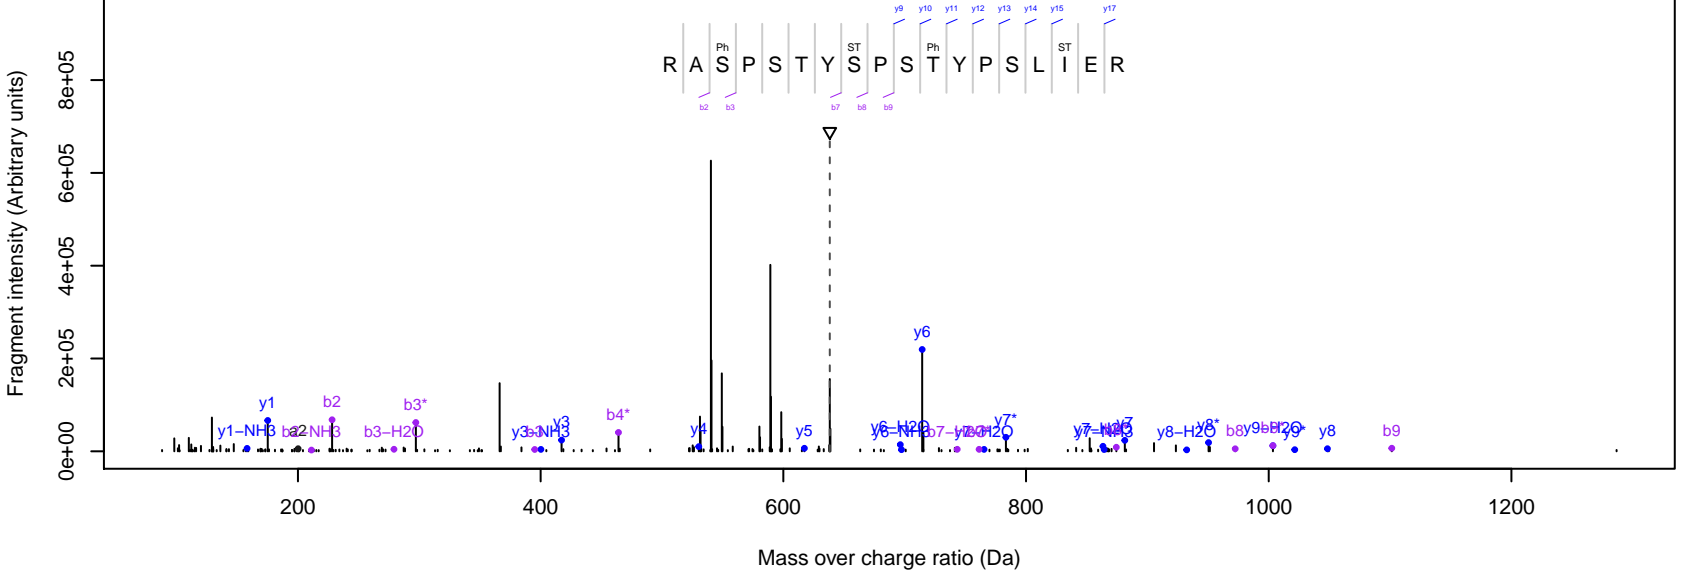

QGEDNS(Phospho (STY))TAQDTEELEKEIR-3+

Source : QE3\_201126\_FR\_TIOx\_hum\_tissue\_Urea\_RNAB\_N Scan : 28826

Andromeda score : 100.64

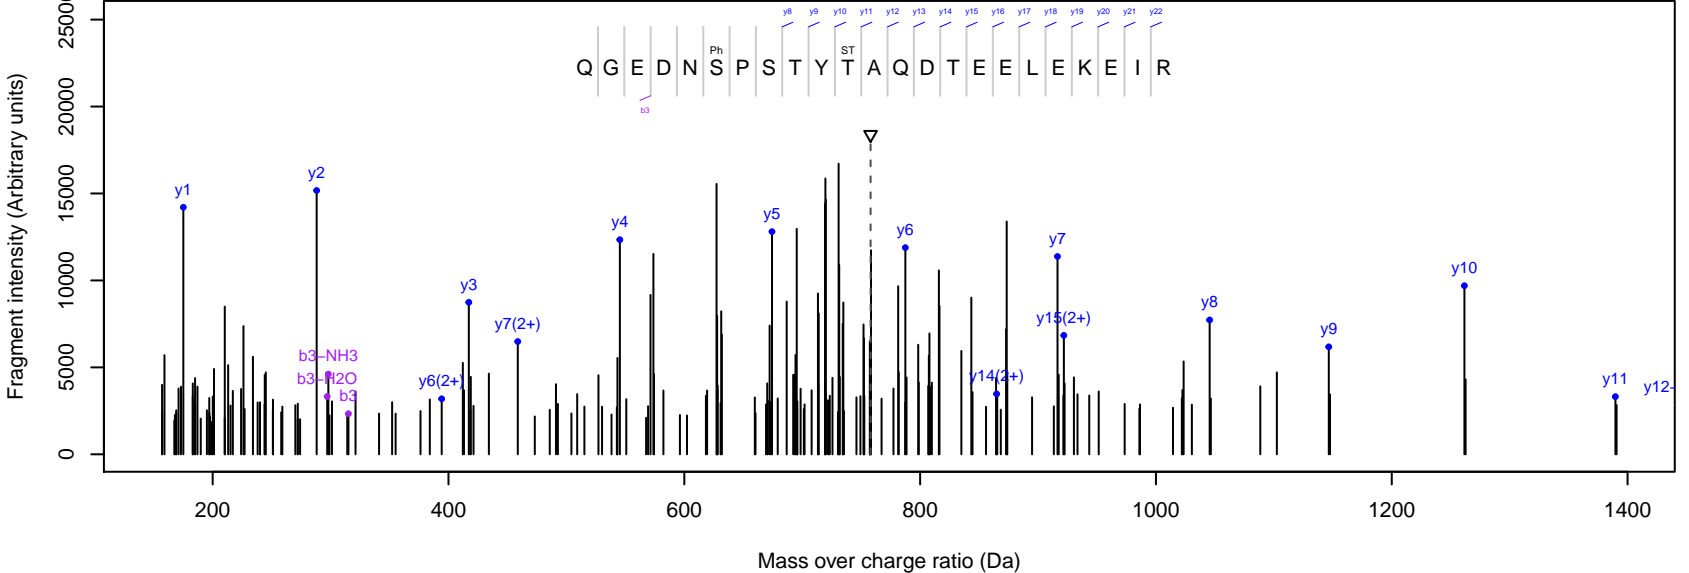

TLS(Phospho (STY))MIEEIR-2+

Source : QE3\_201126\_FR\_TIOx\_hum\_tissue\_Urea\_RNAB\_B Scan : 47551

Andromeda score : 100.55

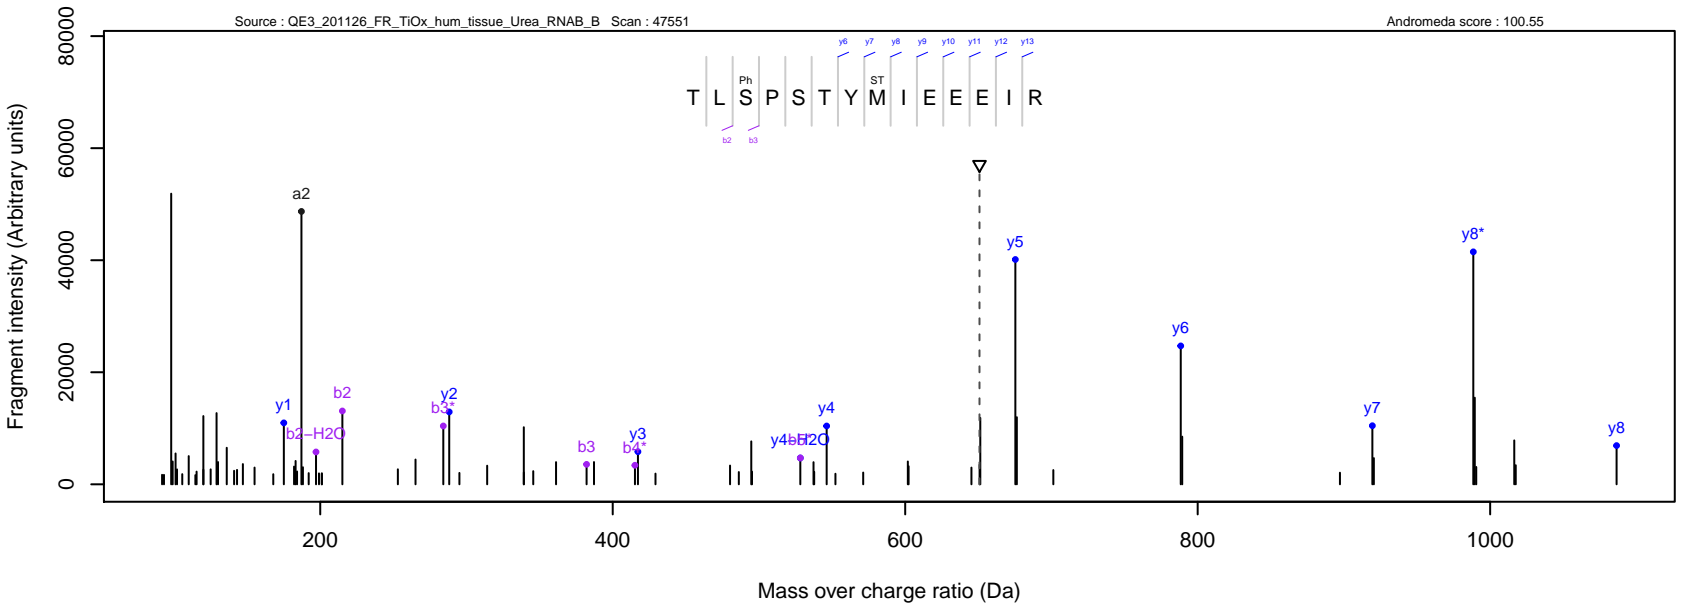

T(Phospho (STY))SPSGGTWSSVVGVP-2+

Source : QE3\_201126\_FR\_TIOx\_hum\_tissue\_Urea\_RNAB\_H Scan : 39627

Andromeda score : 100.55

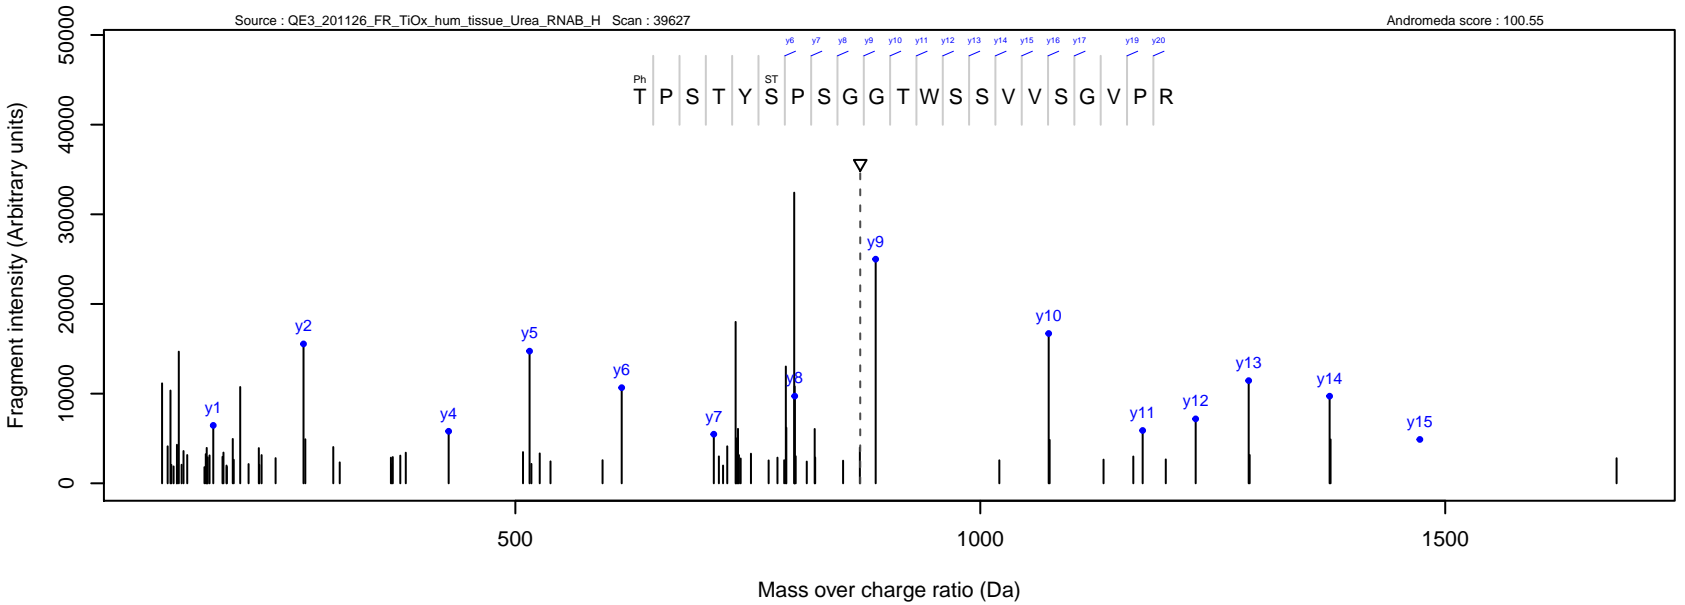

AFWM(Oxidation (M))AIGGRDEIEGLS(Phospho (STY))S(Phospho (STY))DEEH-3+

Source : QE3\_201126\_FR\_TIOx\_hum\_tissue\_Urea\_RNAB\_N Scan : 53326

Andromeda score : 100.44

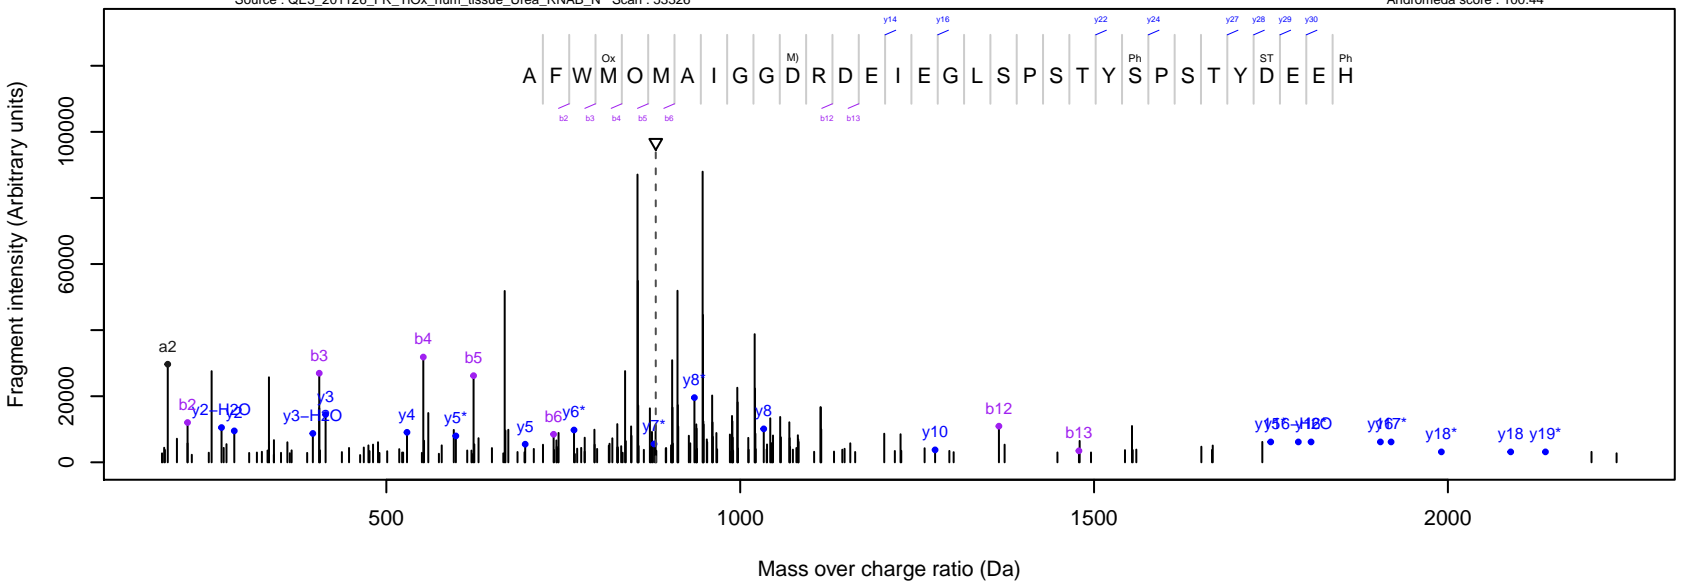

SAS(Phospho (STY))QSS(Phospho (STY))LDKLDQELK-2+

Source : QE3\_201126\_FR\_TiOx\_hum\_tissue\_Urea\_RNAB\_H Scan : 32175

Andromeda score : 100.43

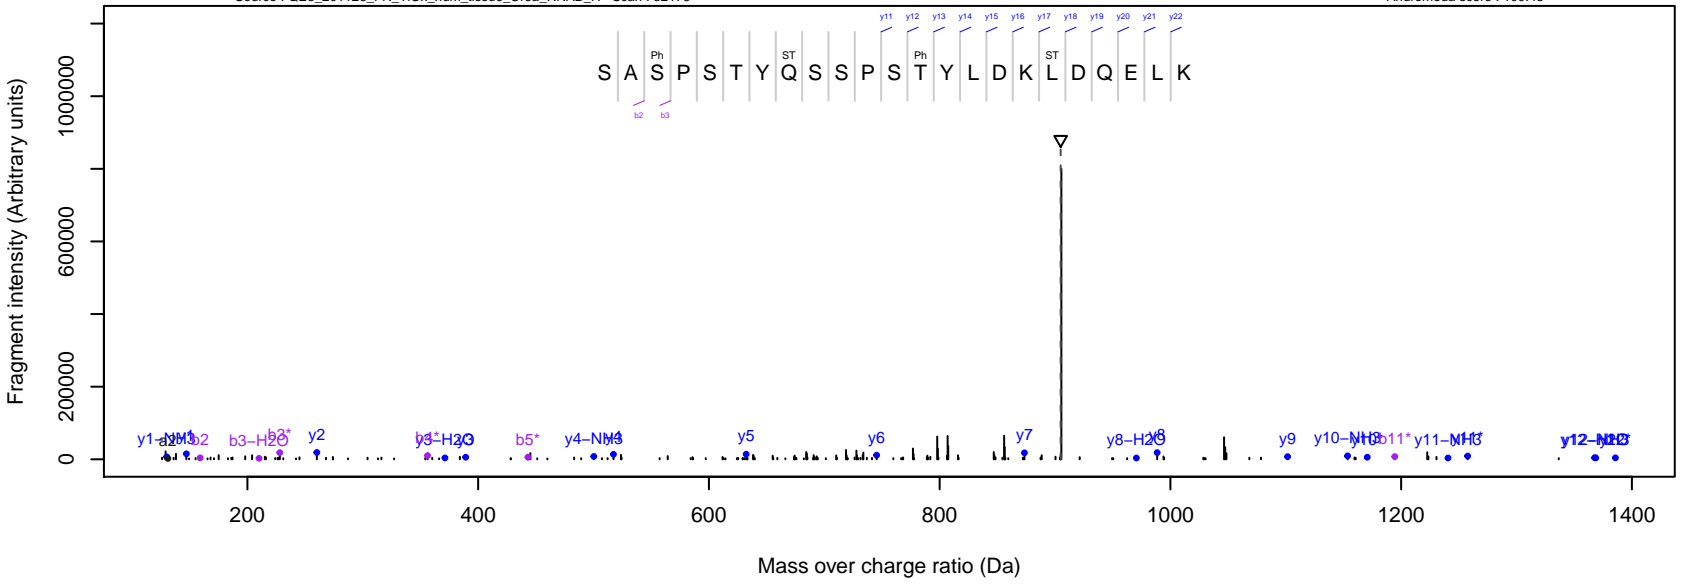

LLHEDLDES(Phospho (STY))DDDMEKLQSPNRR-4+

Source : QE3\_201126\_FR\_TiOx\_hum\_tissue\_Urea\_RNAB\_H Scan : 21524

Andromeda score : 100.42

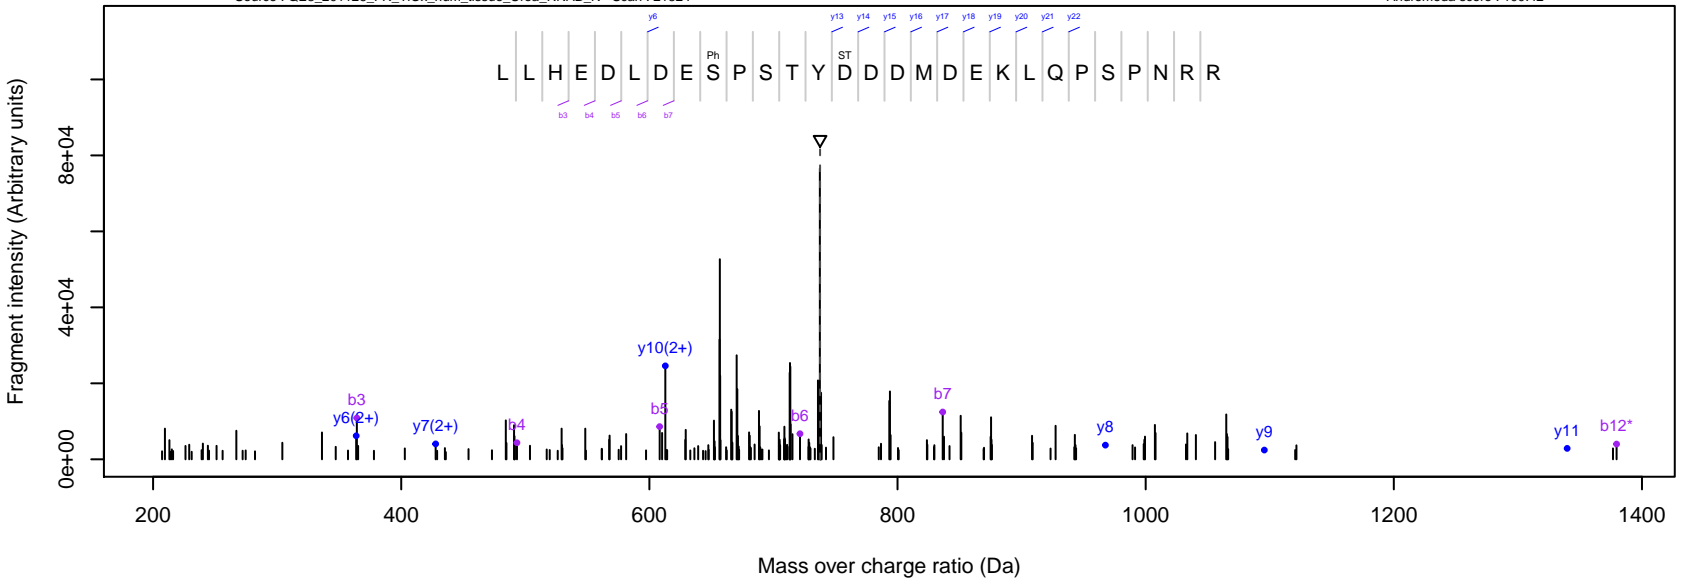

GGDHVPVS(Phospho (STY))HEQPR-3+

Source : QE3\_201126\_FR\_TiOx\_hum\_tissue\_Urea\_RNAB\_H Scan : 5679

Andromeda score : 100.41

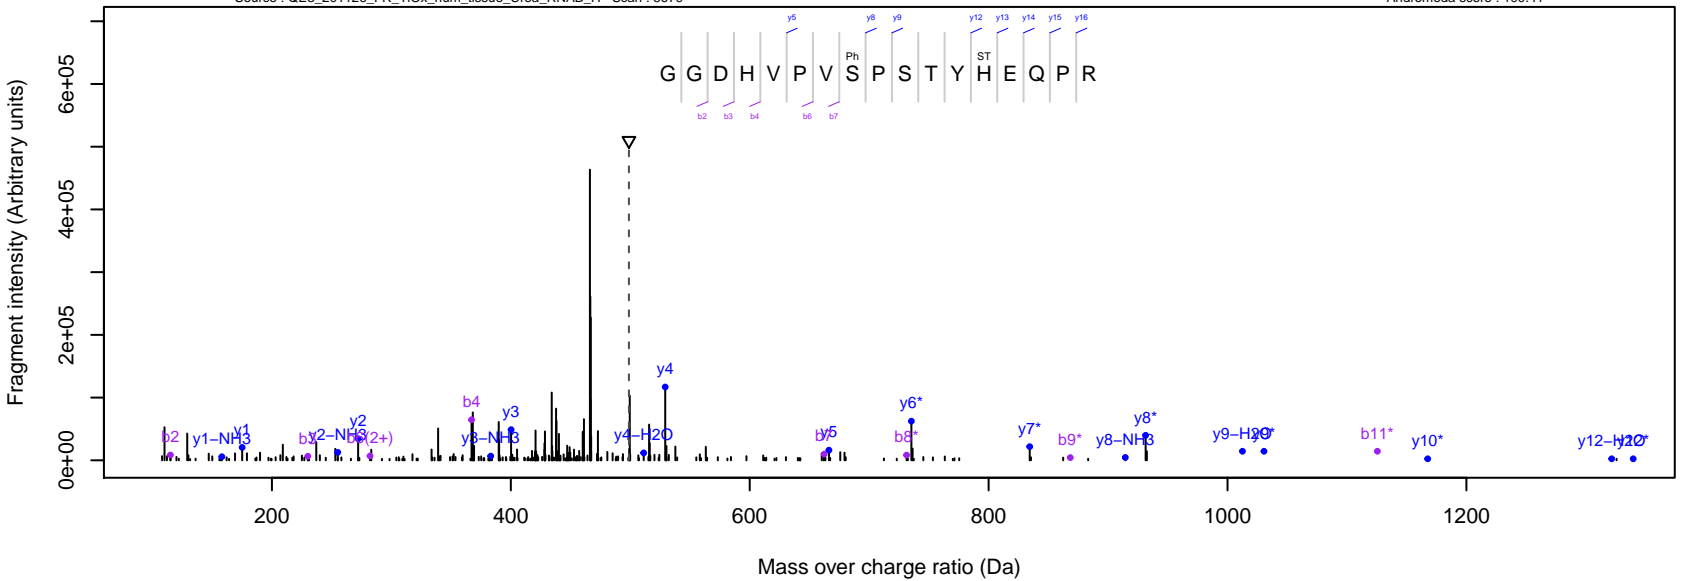

NLEEEENLGKGEYQES(Phospho (STY))LRSLLEEEGQELPQSADVQR-4+

Source : QE3\_201126\_FR\_TIOx\_hum\_tissue\_Urea\_RNAB\_H Scan : 43655

Andromeda score : 100.41

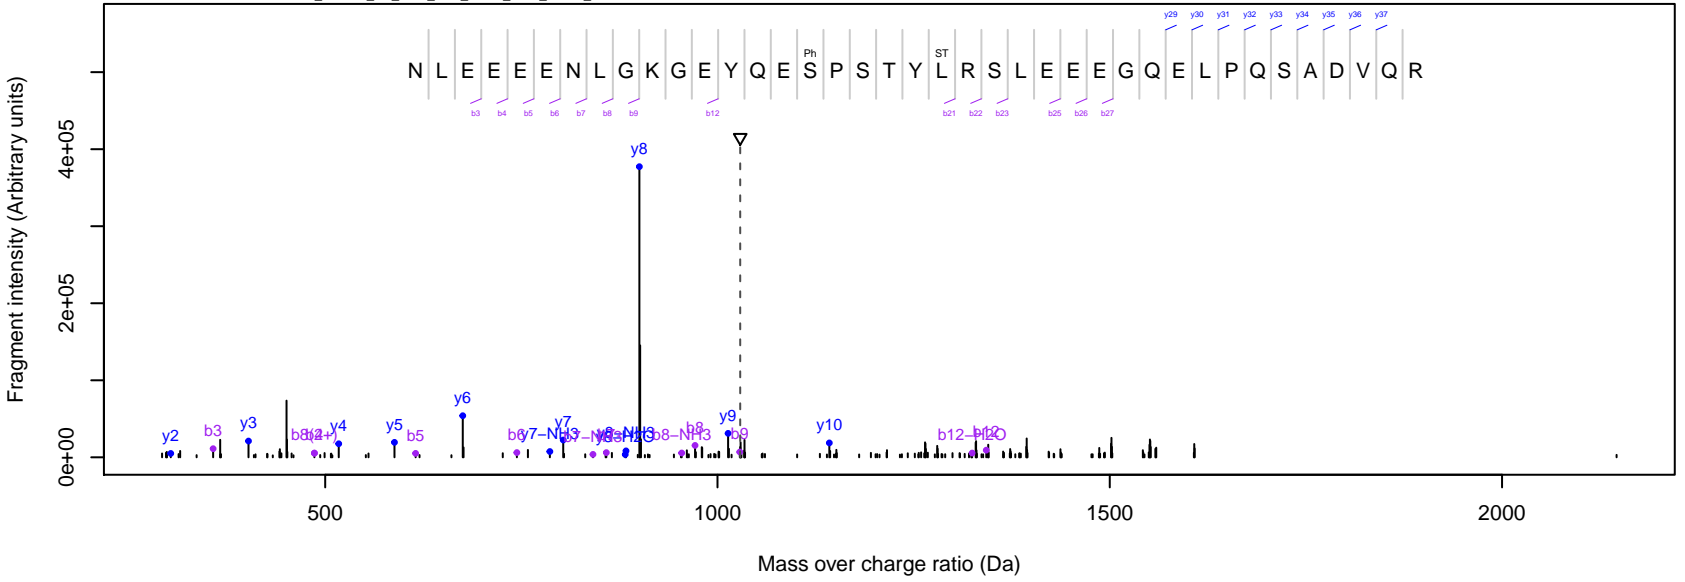

QHEAPSNRPLNELLTPQG(Phospho (STY))PR-3+

Source : QE3\_201126\_FR\_TIOx\_hum\_tissue\_Urea\_RNAB\_H Scan : 25799

Andromeda score : 100.24

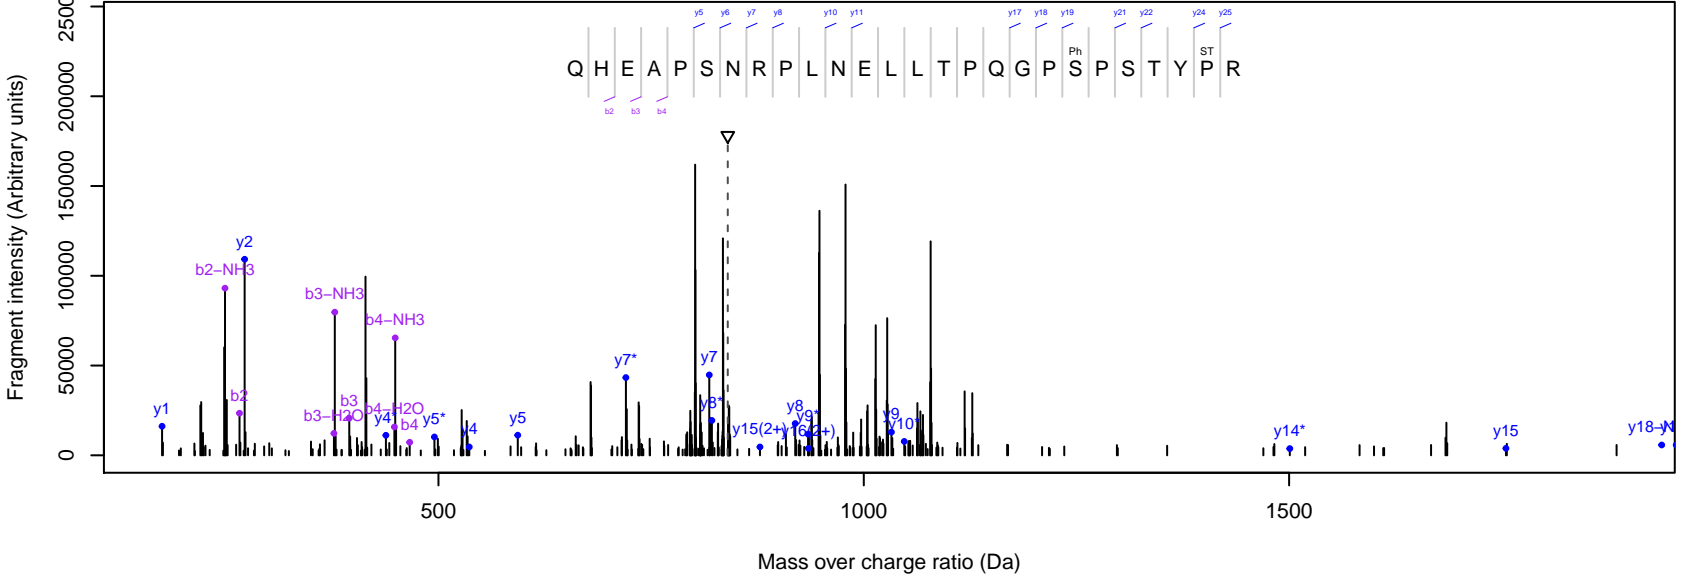

IRS(Phospho (STY))EALLEGQAR-2+

Source : QE3\_201126\_FR\_TIOx\_hum\_tissue\_Urea\_RNAB\_H Scan : 40166

Andromeda score : 100.23

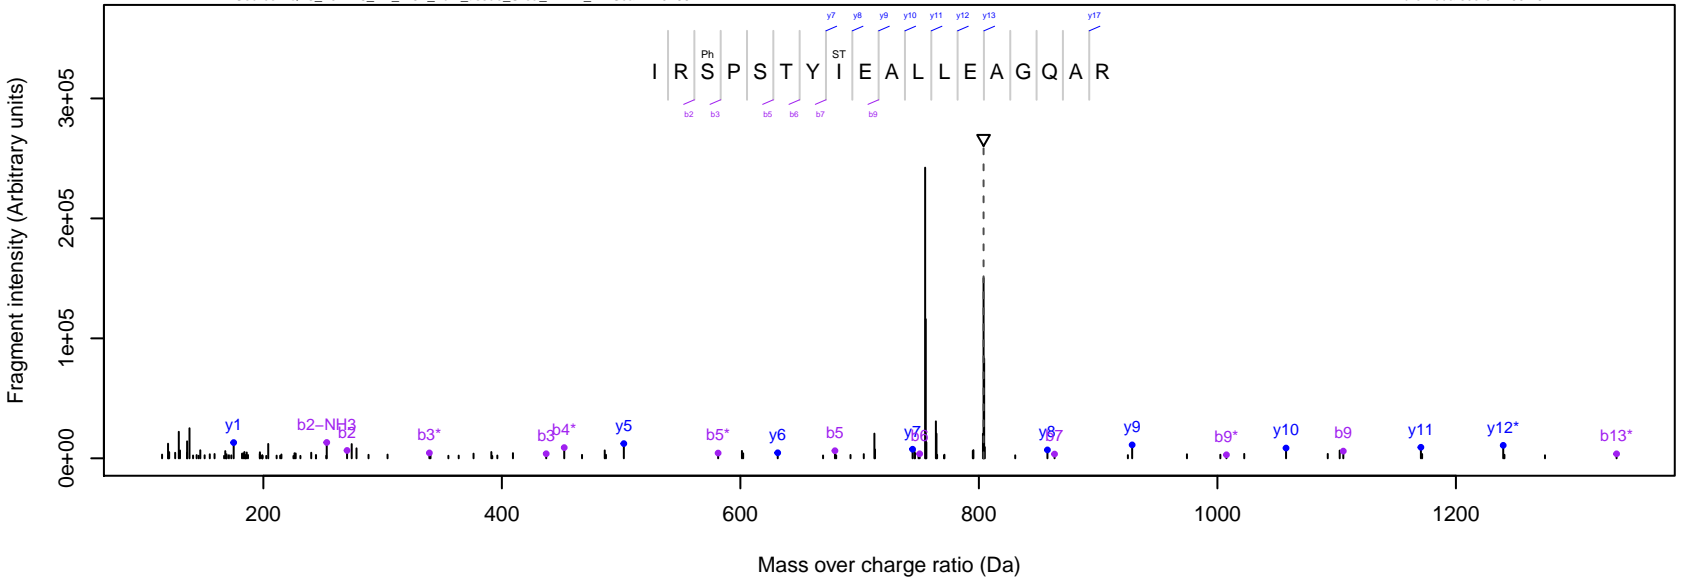

DTLRT(Phospho (STY))PPRER-3+

Source : QE3\_201126\_FR\_TIOx\_hum\_tissue\_Urea\_RNAB\_H Scan : 6463

Andromeda score : 100.19

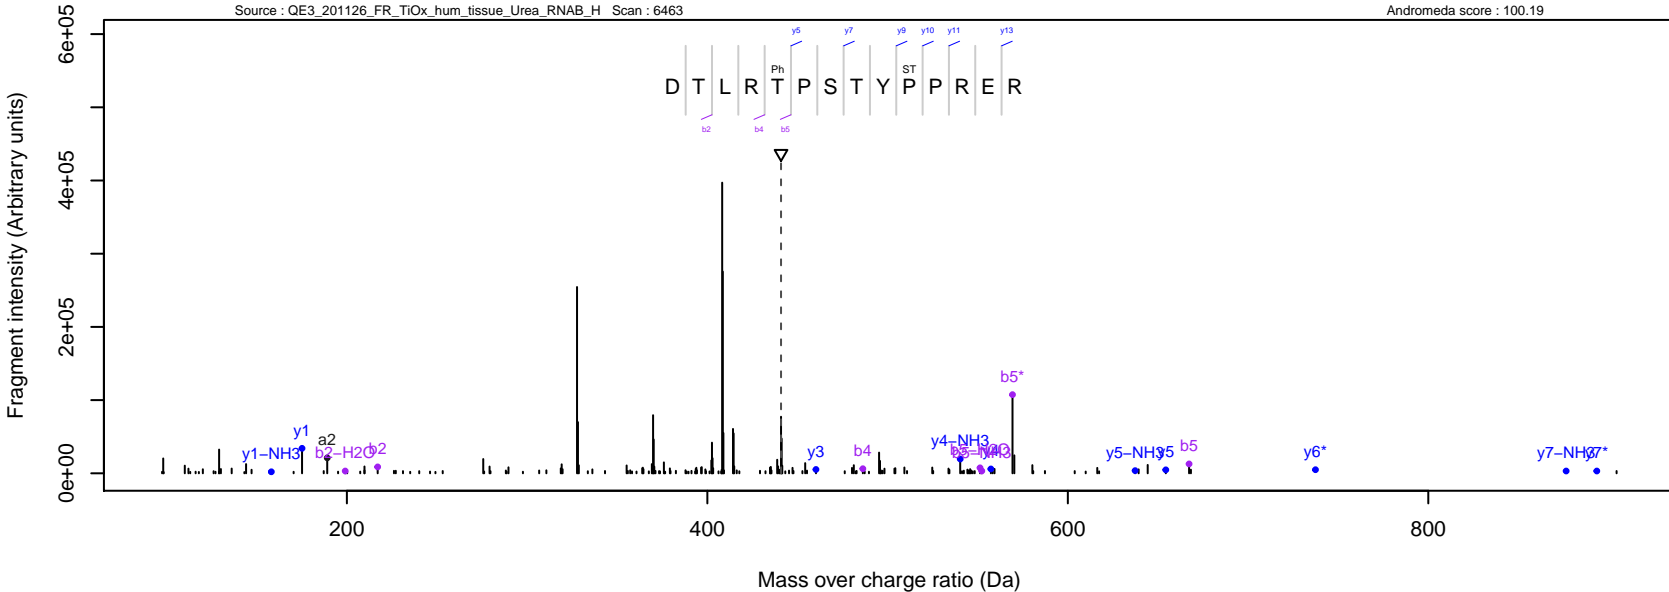

FKRPQFS(Phospho (STY))PTGDCQAEAAAAANGTGGEEDDGPAELLEK-4+

Source : QE3\_201126\_FR\_TIOx\_hum\_tissue\_Urea\_RNAB\_H Scan : 37696

Andromeda score : 100.17

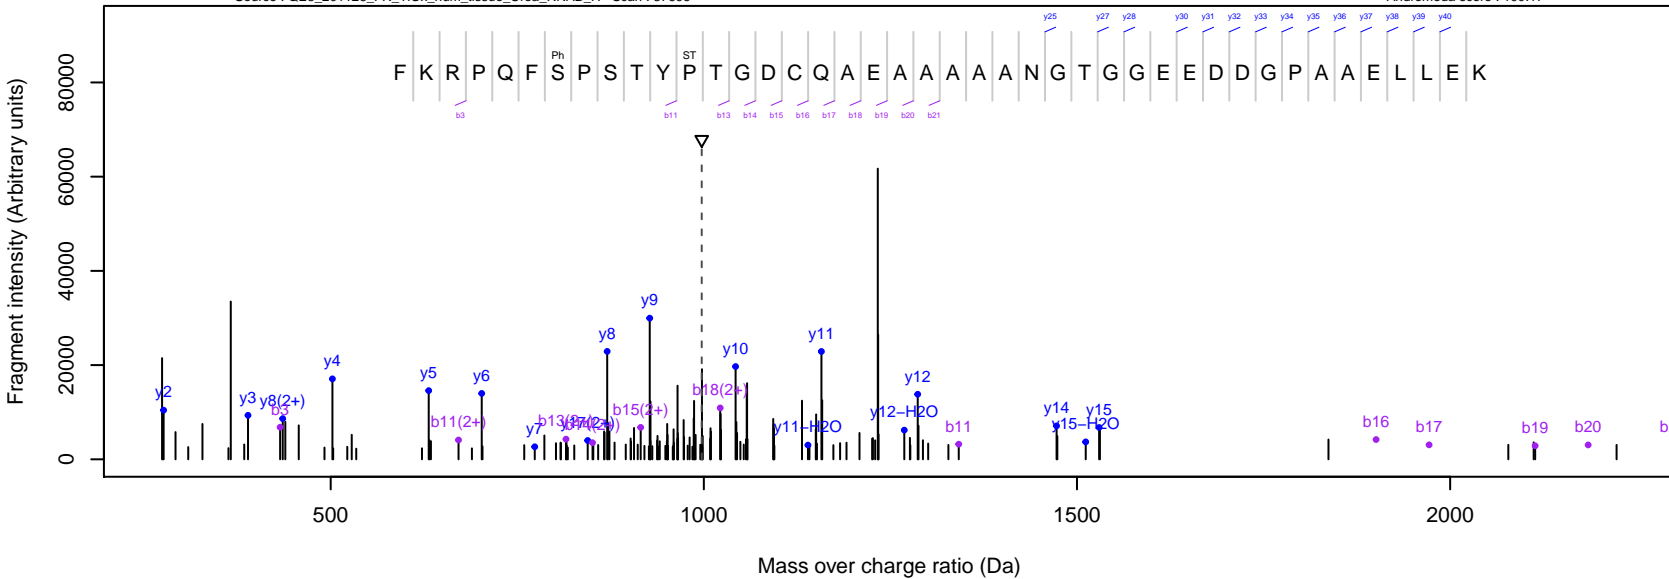

(Acetyl (Protein N-term))ASAVS(Phospho (STY))PANLPAVLLQPR-2+

Source : QE3\_201126\_FR\_TIOx\_hum\_tissue\_Urea\_RNAB\_N Scan : 62916

Andromeda score : 100.11

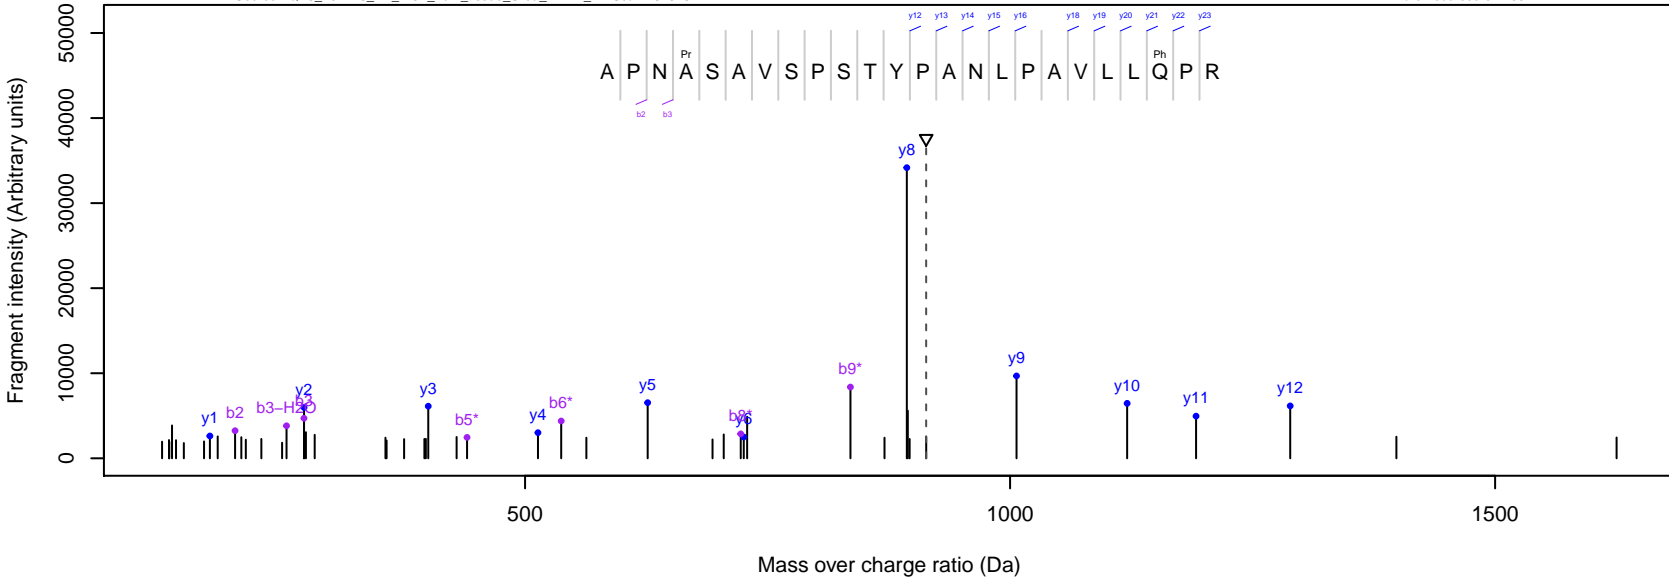

NGFPHPEPCNPEASEES(Phospho (STY))NS(Phospho (STY))EIEQEIPVEQK-3+

Source : QE3\_201126\_FR\_TIOx\_hum\_tissue\_Urea\_RNAB\_B Scan : 40862

Andromeda score : 100.1

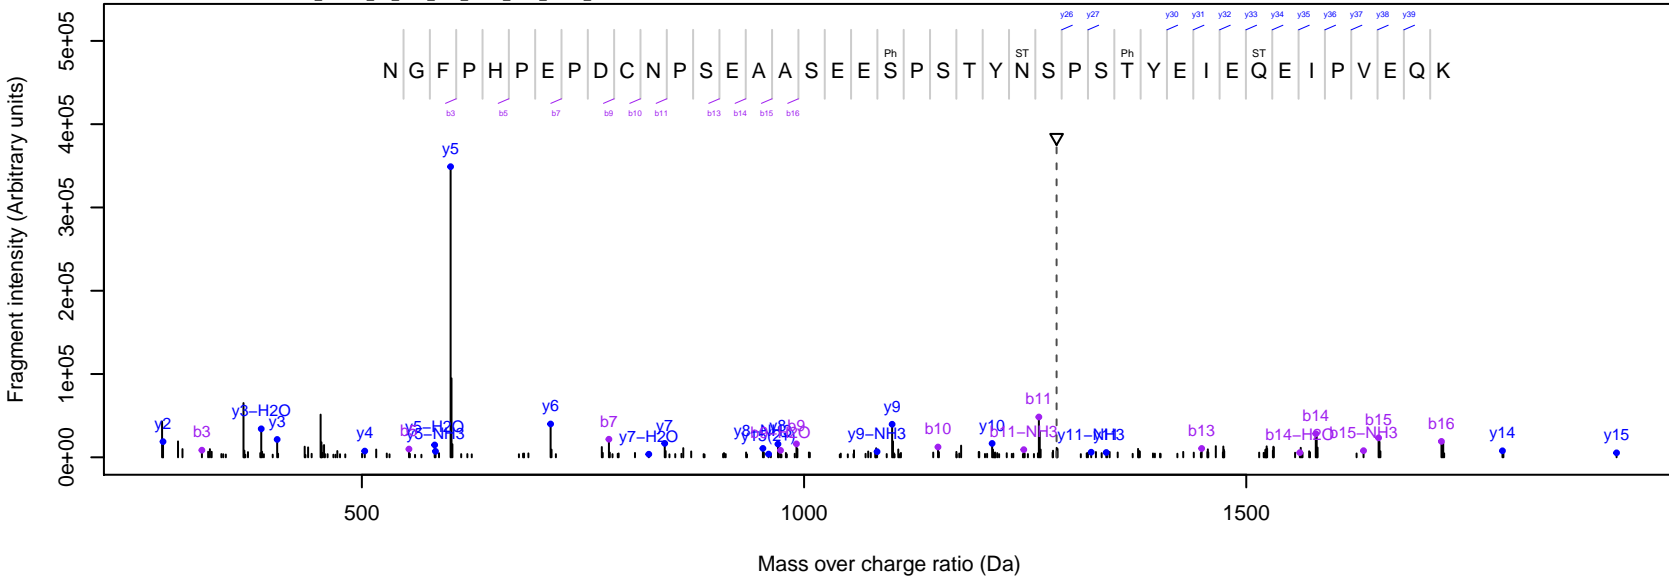

SYLLGNS(Phospho (STY))SPR-2+

Source : QE3\_201126\_FR\_TIOx\_hum\_tissue\_Urea\_RNAB\_N Scan : 23592

Andromeda score : 100.09

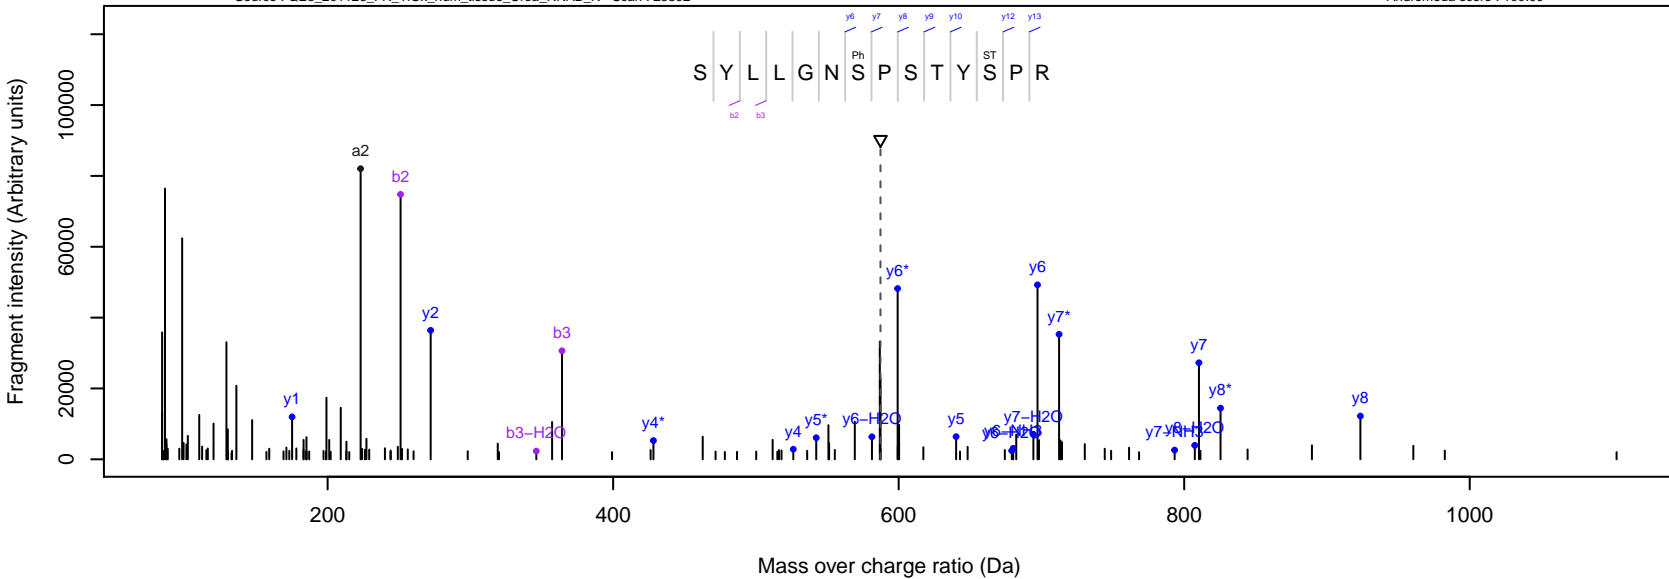

GRRS(Phospho (STY))PILLPK-3+

Source : QE3\_201126\_FR\_TIOx\_hum\_tissue\_Urea\_RNAB\_N Scan : 11922

Andromeda score : 100.07

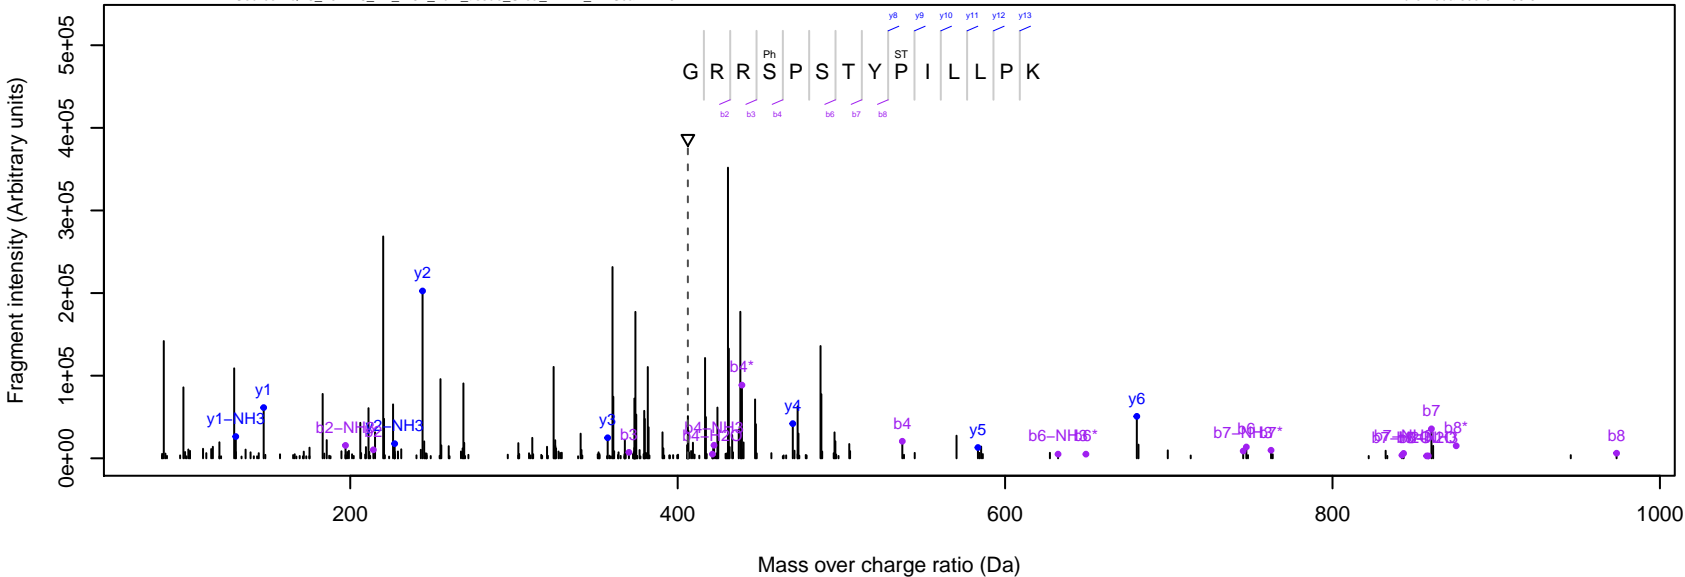



RGS(Phospho (STY))GSALGGPLDPQFVGVGSPDSTSLGAAPGHR-3+

Source : QE3\_201126\_FR\_TiOx\_hum\_tissue\_Urea\_RNAB\_B Scan : 35968

Andromeda score : 100.06

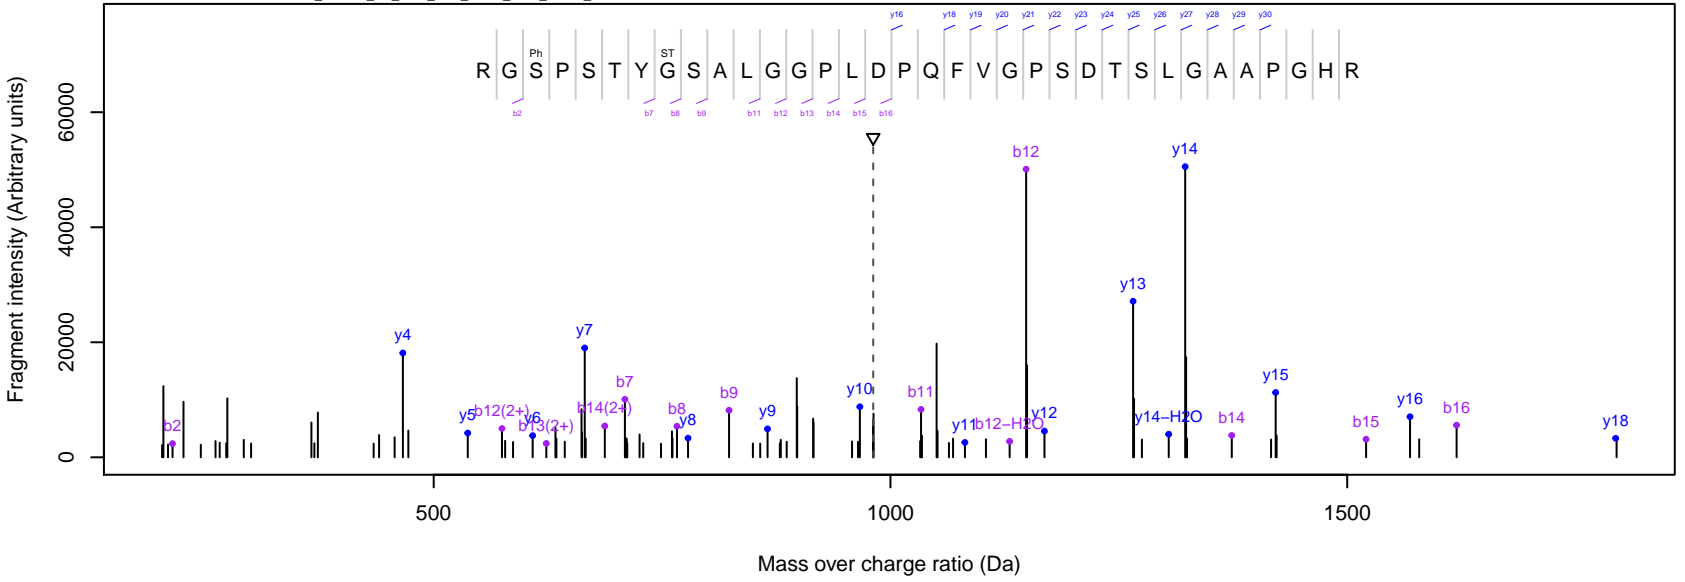

TCEERPAEDGS(Phospho (STY))DEEDPDSMEAPTR-3+

Source : QE3\_201126\_FR\_TiOx\_hum\_tissue\_Urea\_RNAB\_N Scan : 16242

Andromeda score : 100.06

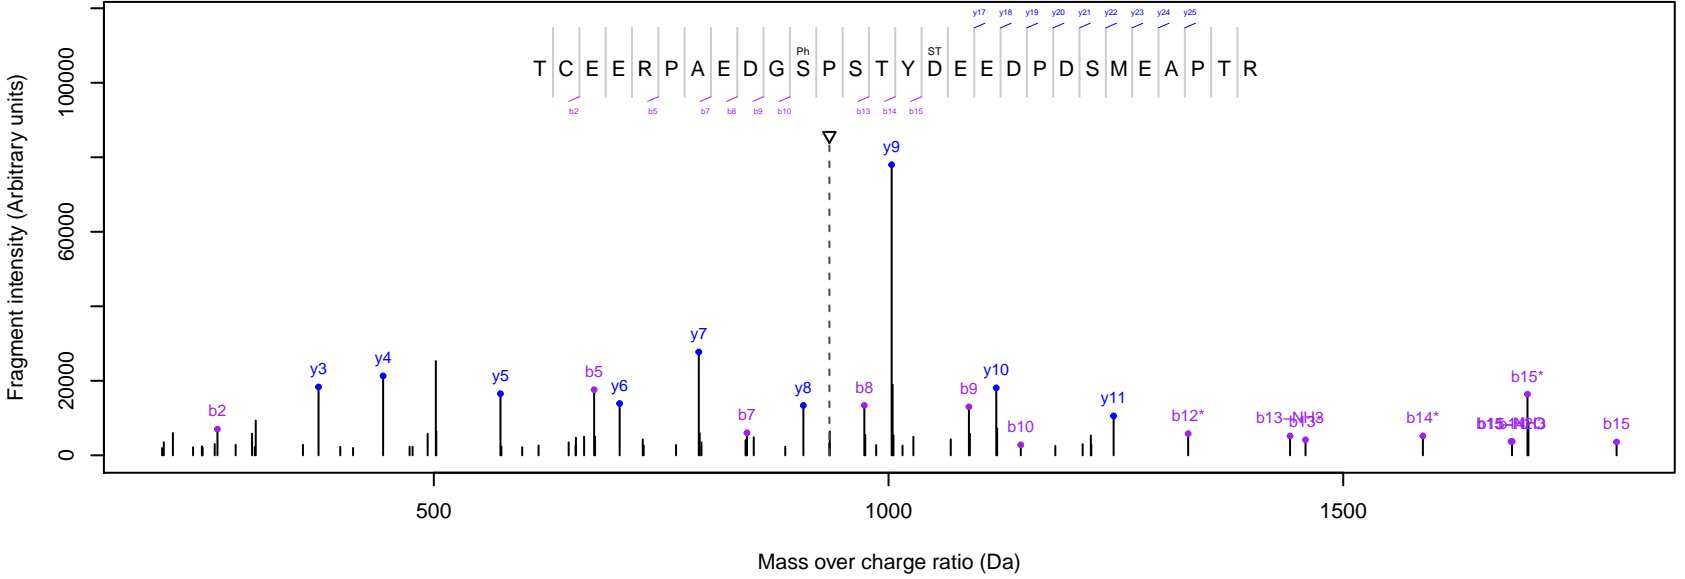

SAS(Phospho (STY))PSVPGPTKPKPK-3+

Source : QE3\_201126\_FR\_TiOx\_hum\_tissue\_Urea\_RNAB\_H Scan : 6275

Andromeda score : 100.04

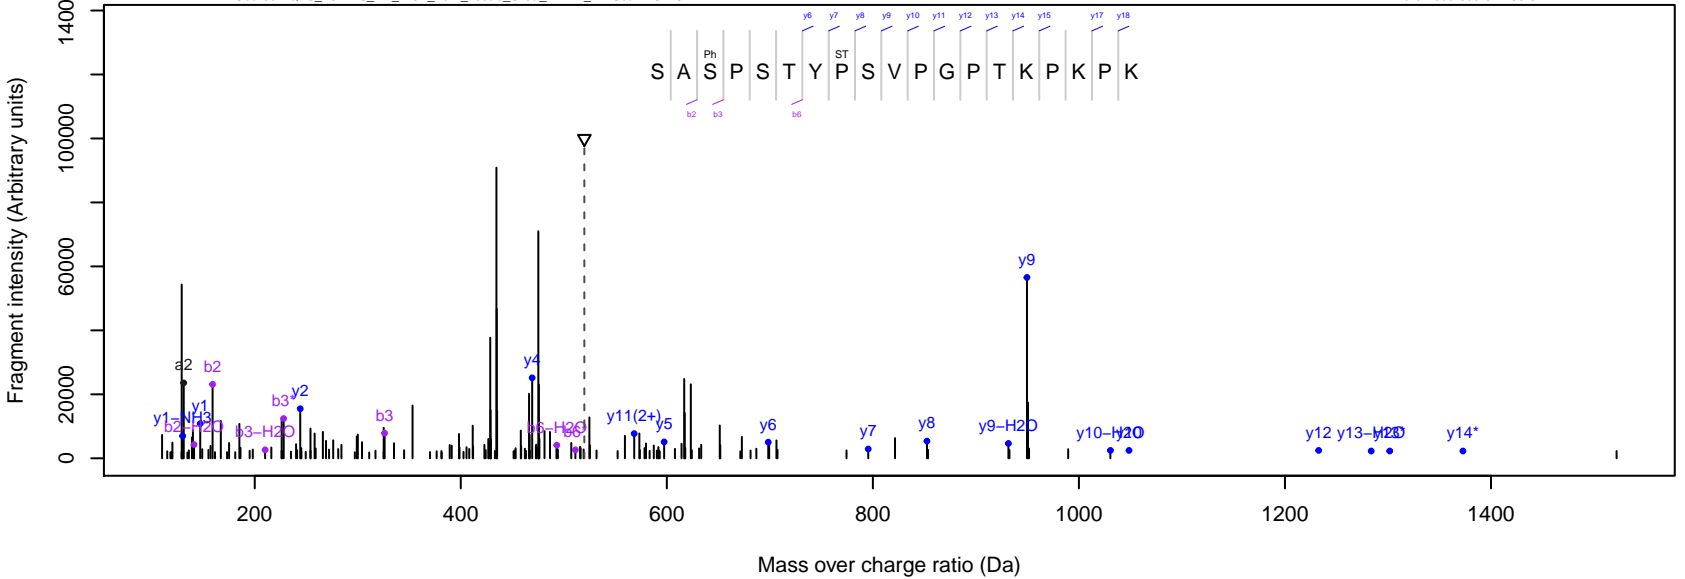

HDS(Phospho (STY))PDLAPNVTVSLPR-3+

Source : QE3\_201126\_FR\_TiOx\_hum\_tissue\_Urea\_RNAB\_H Scan : 33063

Andromeda score : 100.02

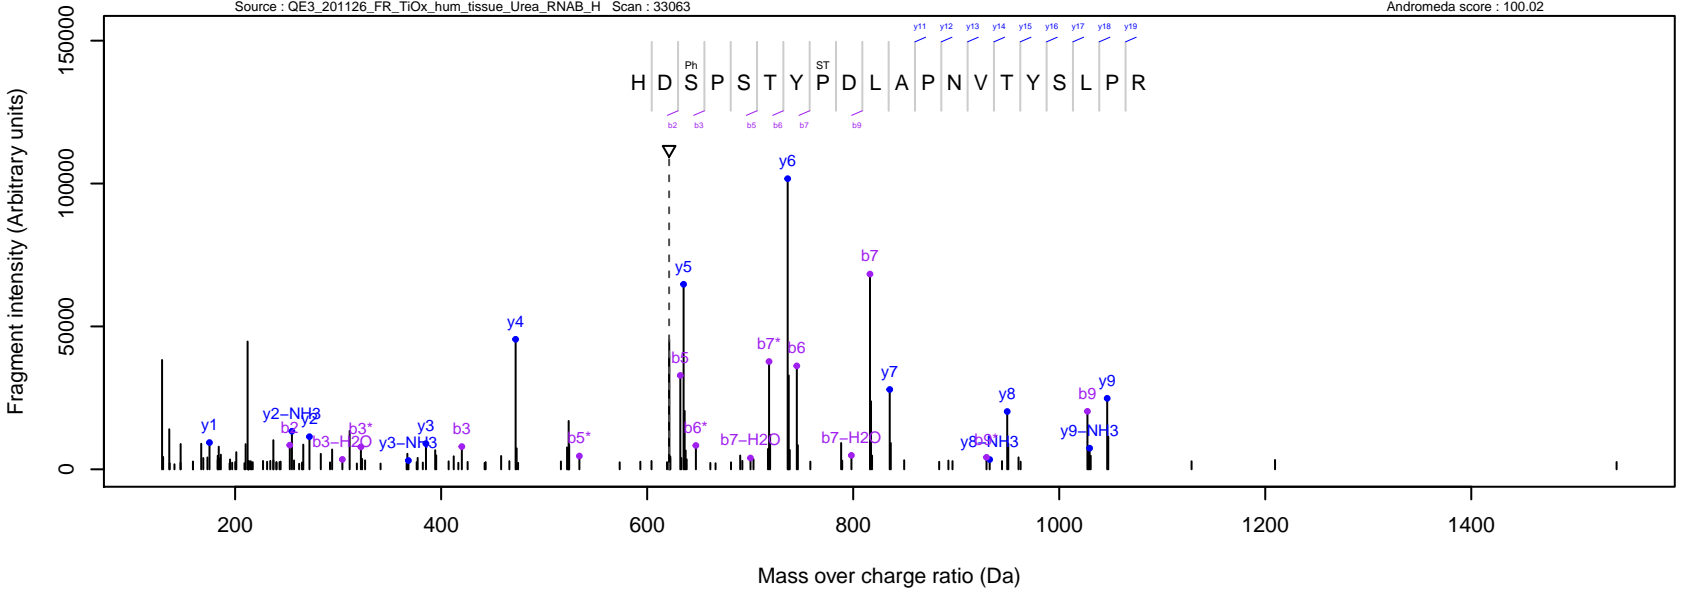

DIRS(Phospho (STY))DVEES(Phospho (STY))DS(Phospho (STY))SEEAAAQEPLQLK-3+

Source : QE3\_201126\_FR\_TiOx\_hum\_tissue\_Urea\_RNAB\_H Scan : 49944

Andromeda score : 99.997

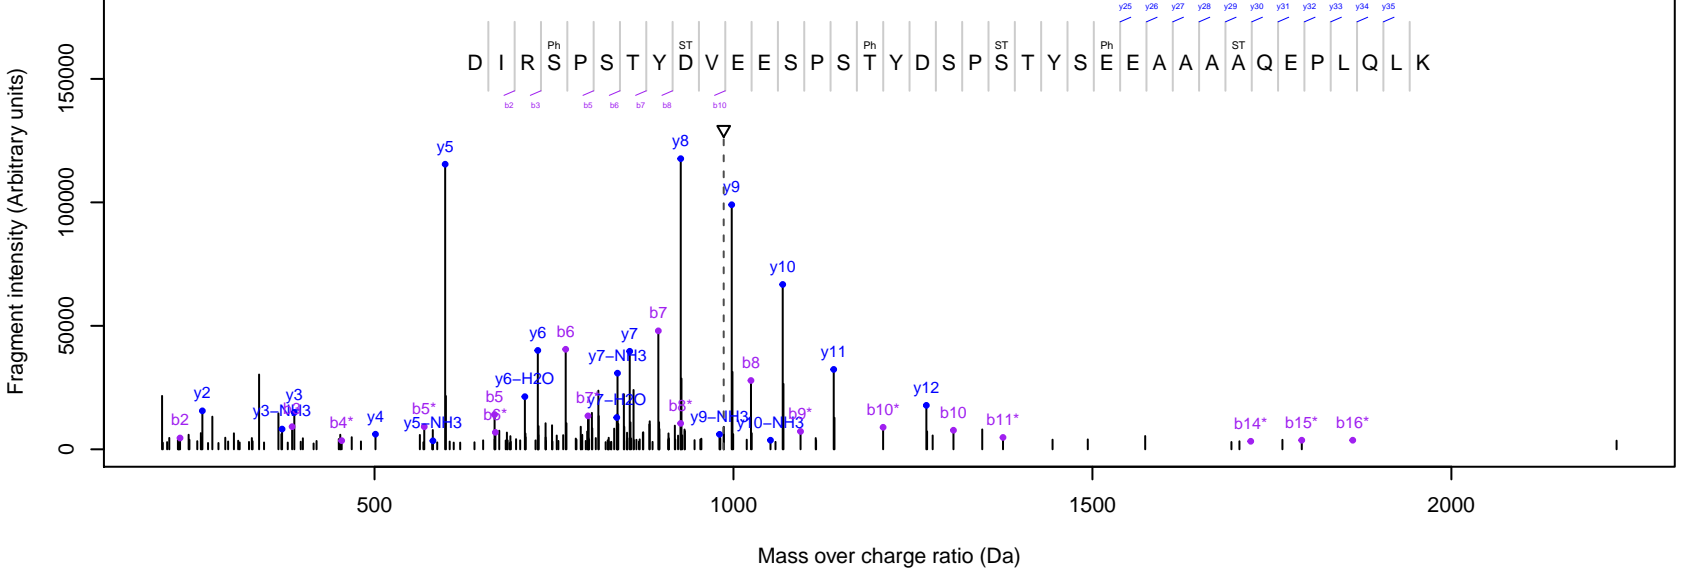

DLPDGHAAS(Phospho (STY))PR-2+

Source : QE3\_201126\_FR\_TiOx\_hum\_tissue\_Urea\_RNAB\_N Scan : 8886

Andromeda score : 99.991

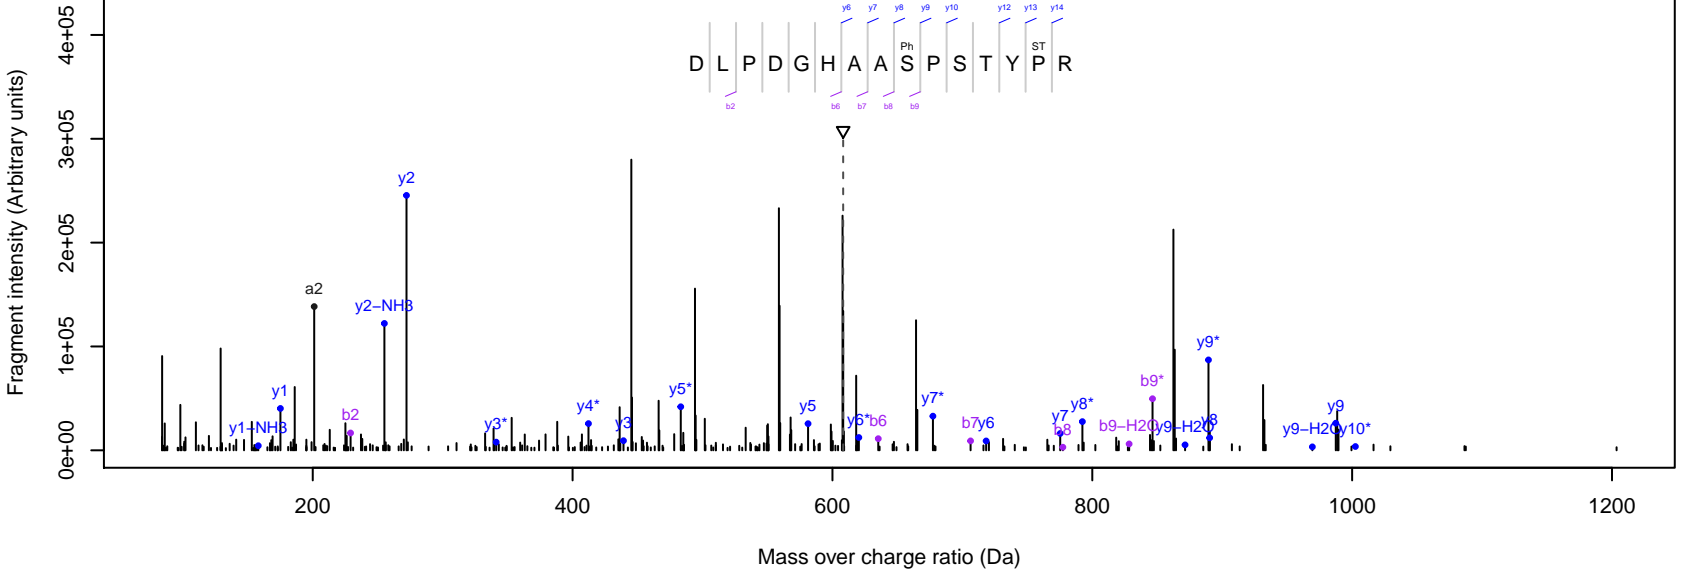

LPS(Phospho (STY))SNLLK-2+

Source : QE3\_201126\_FR\_TiOx\_hum\_tissue\_Urea\_RNAB\_H Scan : 24906

Andromeda score : 99.973

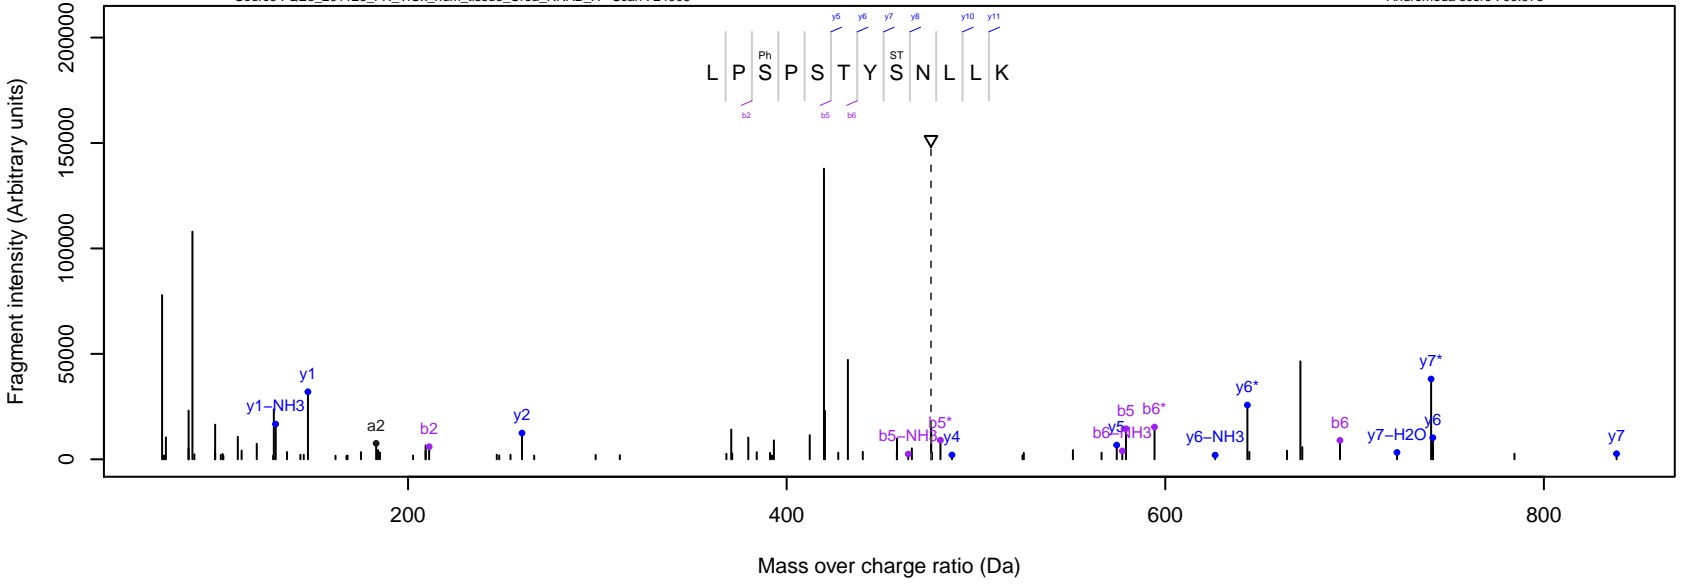

THELRQGDDS(Phospho (STY))S(Phospho (STY))DEEDKER-3+

Source : QE3\_201126\_FR\_TiOx\_hum\_tissue\_Urea\_RNAB\_N Scan : 4250

Andromeda score : 99.93

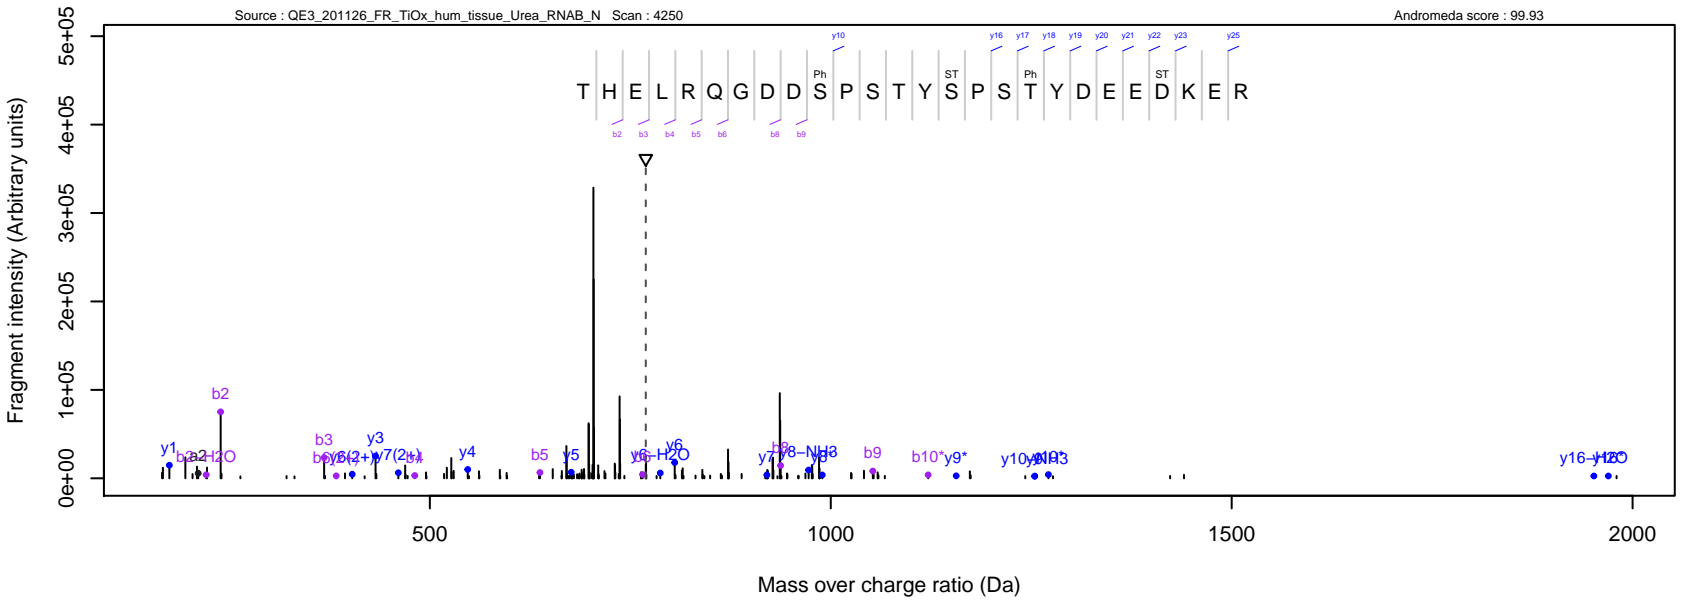

KSPS(Phospho (STY))DTEGLVK-2+

Source : QE3\_201126\_FR\_TiOx\_hum\_tissue\_Urea\_RNAB\_B Scan : 9016

Andromeda score : 99.927

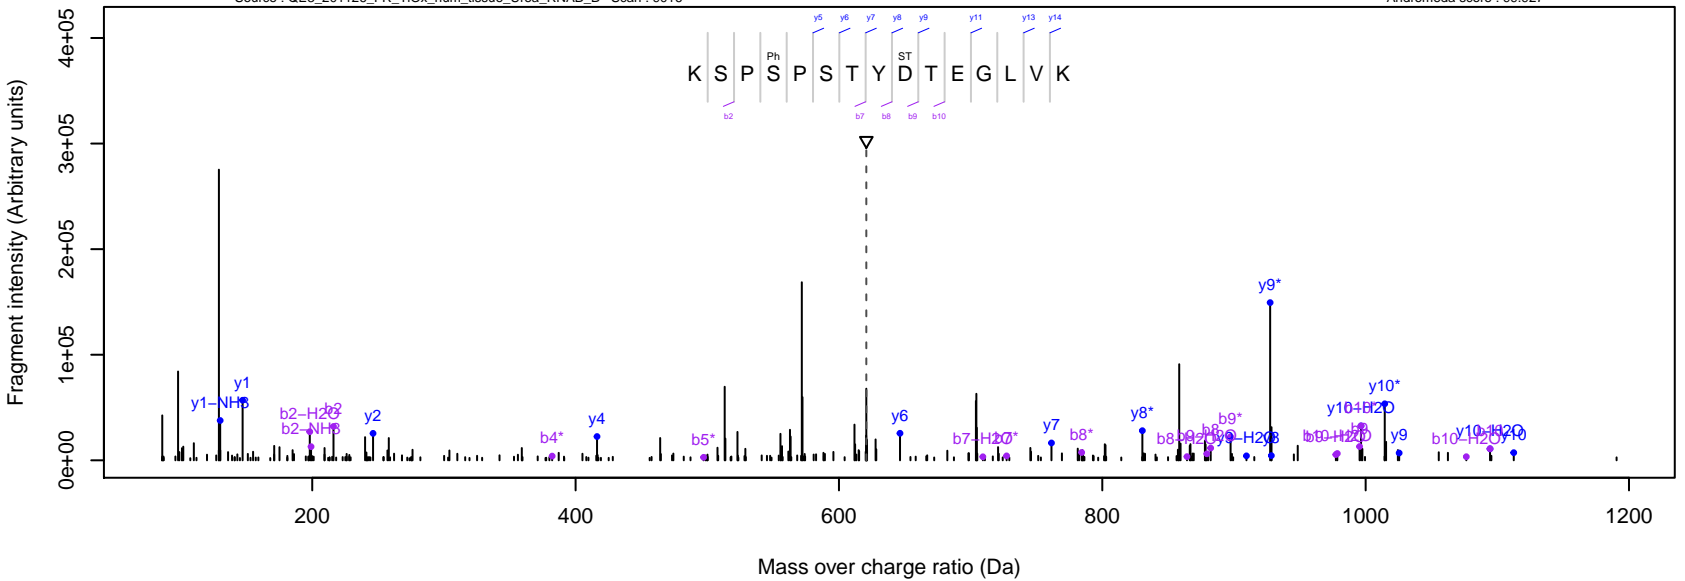

QQLSPS(Phospho (STY))PGQEAGILPETEK-3+

Source : QE3\_201126\_FR\_TiOx\_hum\_tissue\_Urea\_RNAB\_N Scan : 33670

Andromeda score : 99.923

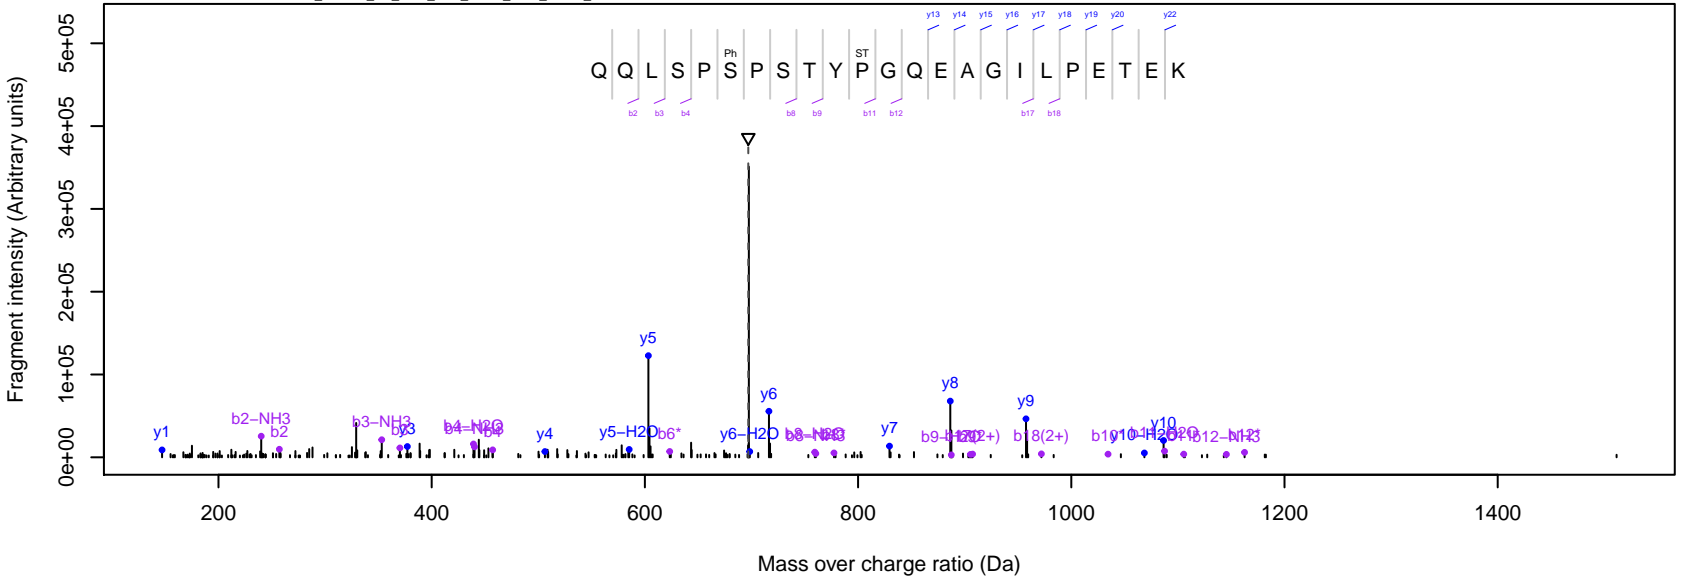

YSPTS(Phospho (STY))PTYSPTS(Phospho (STY))PK-2+

Source : QE3\_201126\_FR\_TiOx\_hum\_tissue\_Urea\_RNAB\_N Scan : 25215

Andromeda score : 99.915

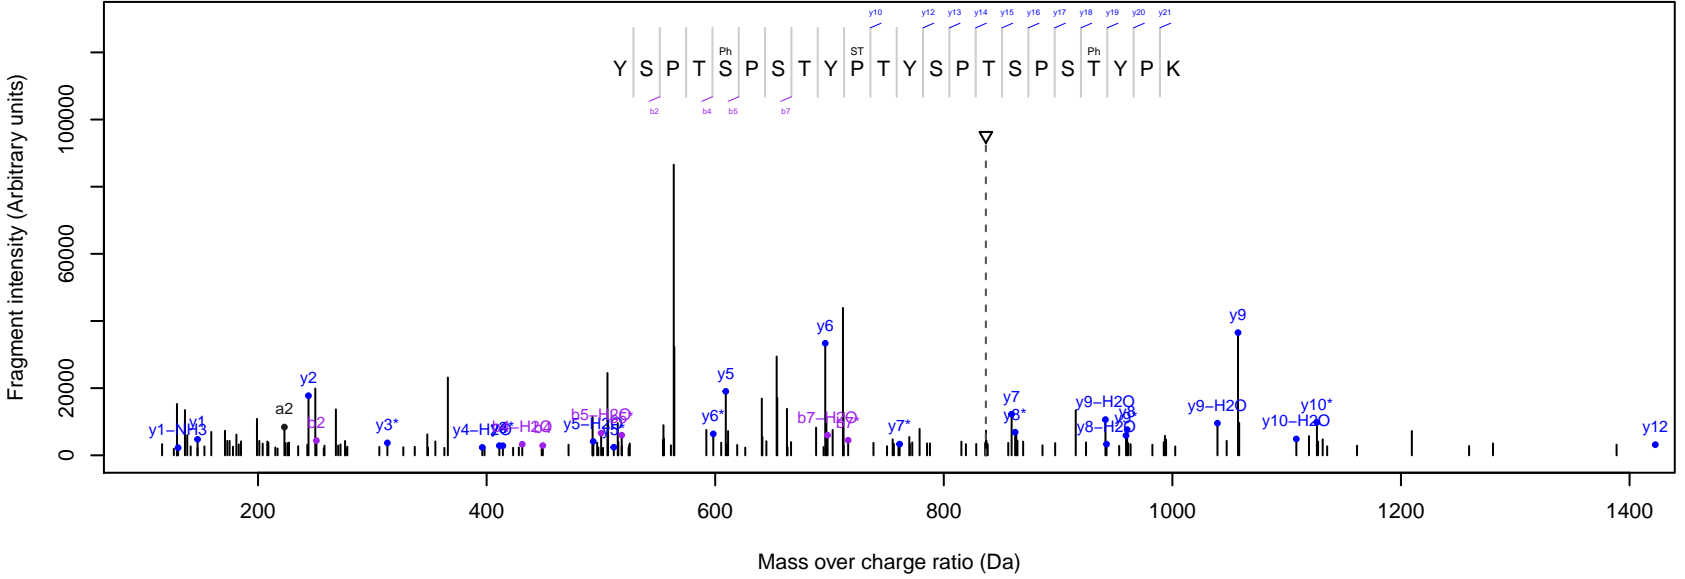

KCS(Phospho (STY))LPAEEDSVLEK-3+

Source : QE3\_201126\_FR\_TiOx\_hum\_tissue\_Urea\_RNAB\_B Scan : 20505

Andromeda score : 99.891

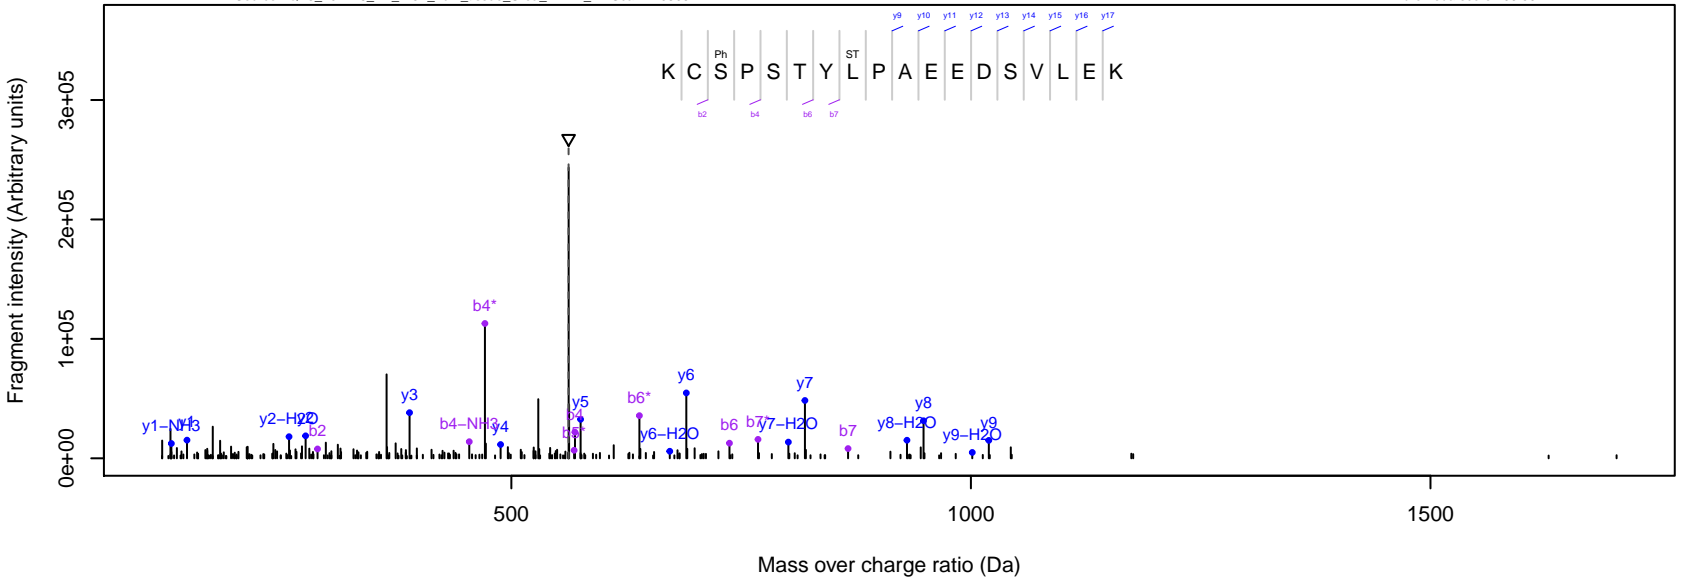

DKVSSKNS(Phospho (STY))LESYAFNMK-3+

Source : QE3\_201126\_FR\_TIOx\_hum\_tissue\_Urea\_RNAB\_N Scan : 26554

Andromeda score : 99.86

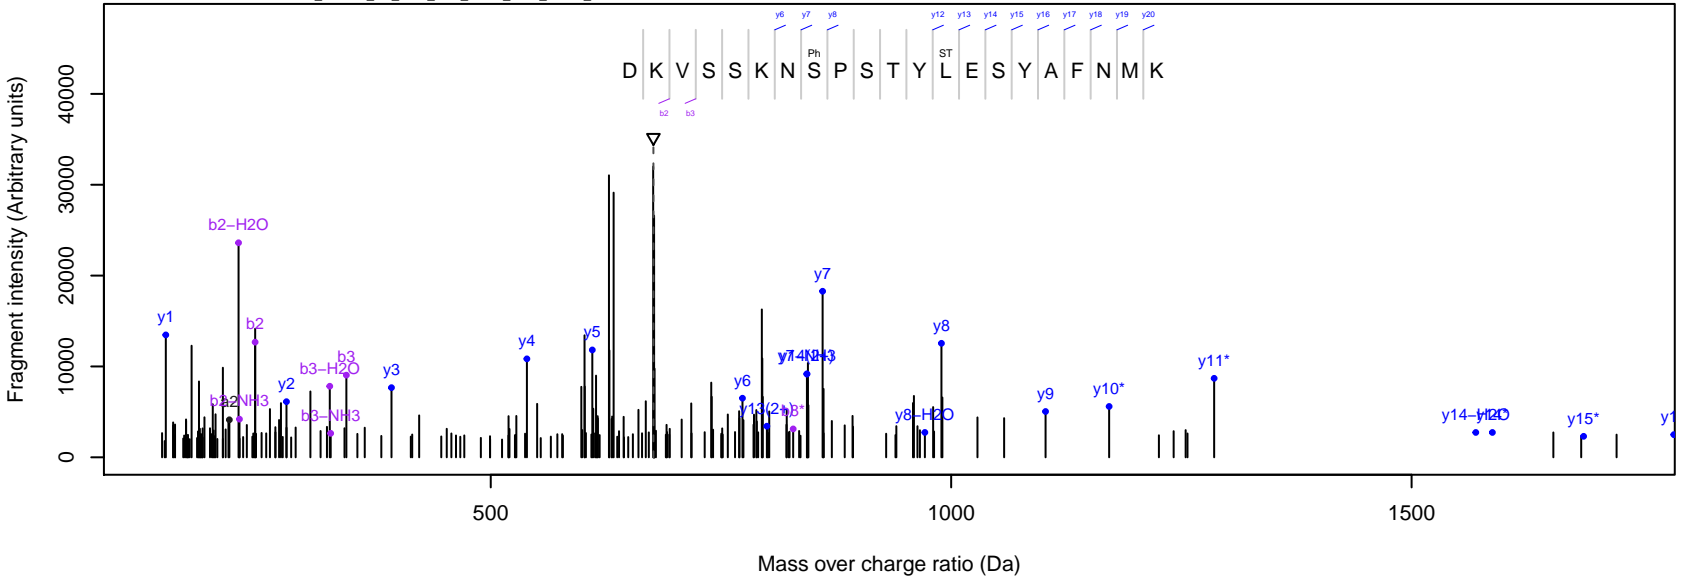

TLVSTVGS(Phospho (STY))MVFNEGEAQR-3+

Source : QE3\_201126\_FR\_TIOx\_hum\_tissue\_Urea\_RNAB\_H Scan : 52989

Andromeda score : 99.86

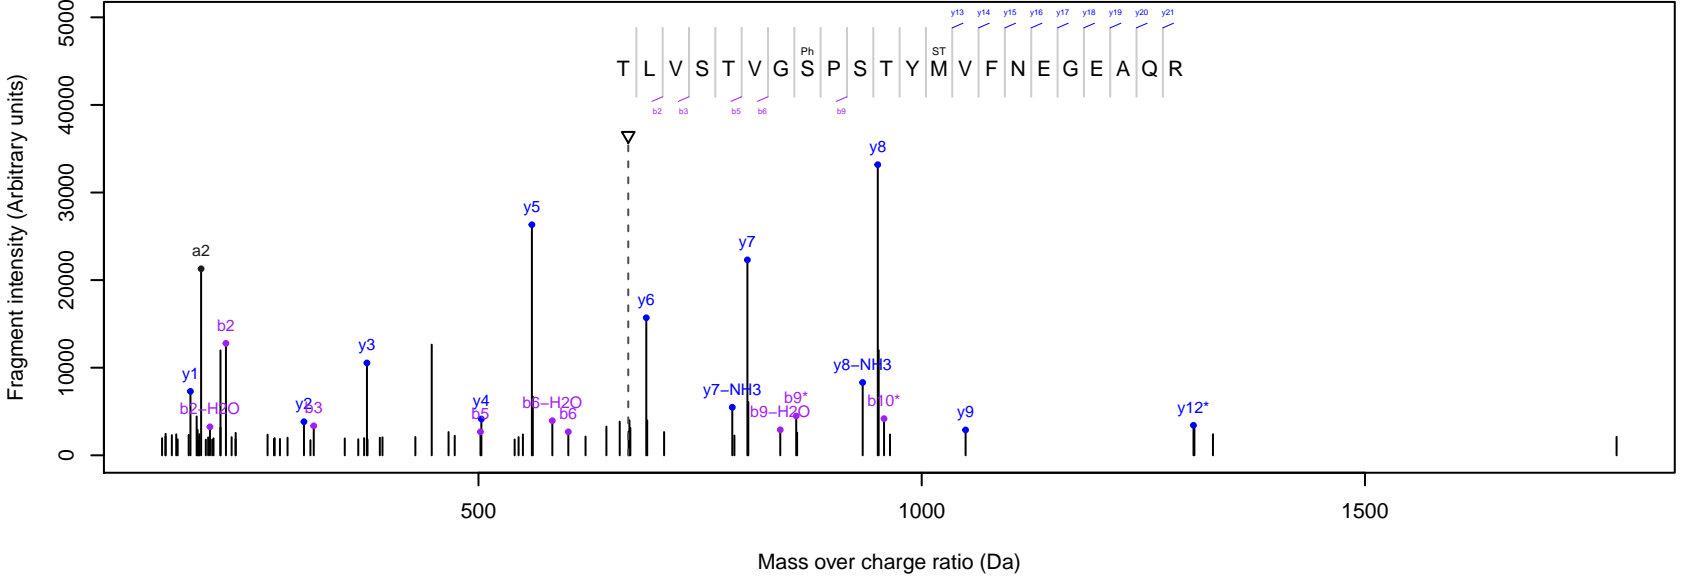

NAS(Phospho (STY))VPNLR-2+

Source : QE3\_201126\_FR\_TIOx\_hum\_tissue\_Urea\_RNAB\_H Scan : 15830

Andromeda score : 99.855

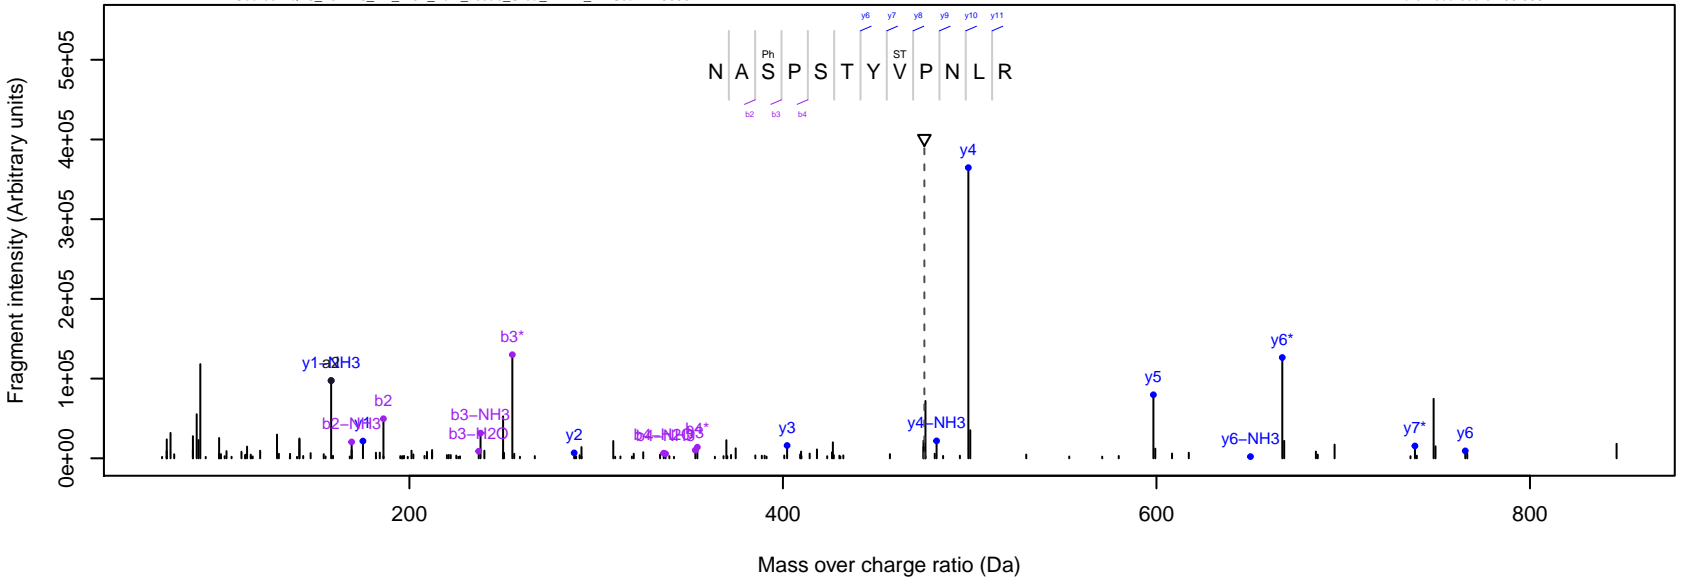

QQLEEEENFSRPQIDENPLDDNSPSTYEEMOMEDAPK

Source : QE3\_201126\_FR\_TIOx\_hum\_tissue\_Urea\_RNAB\_N Scan : 38110

Andromeda score : 99.846

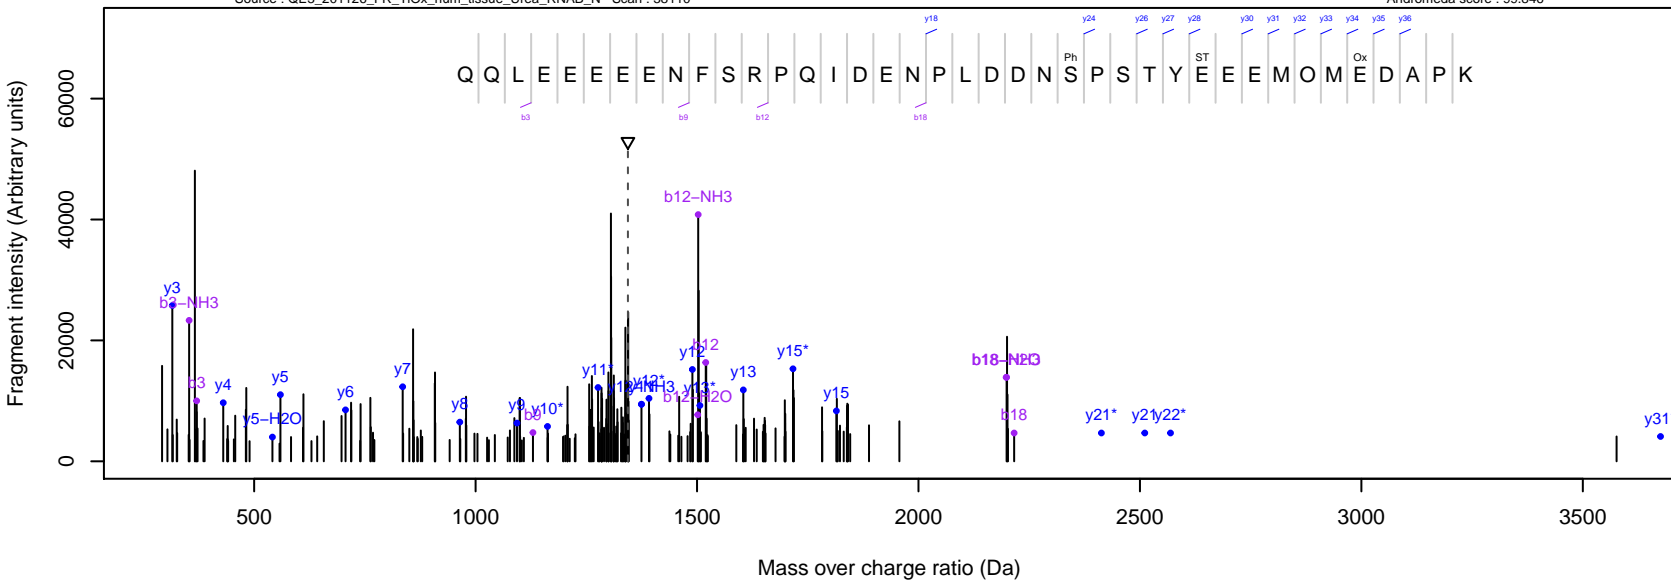

EKGS(Phospho (STY))TLDLSLEAEKLV(M)FQR

Source : QE3\_201126\_FR\_TIOx\_hum\_tissue\_Urea\_RNAB\_H Scan : 45111

Andromeda score : 99.838

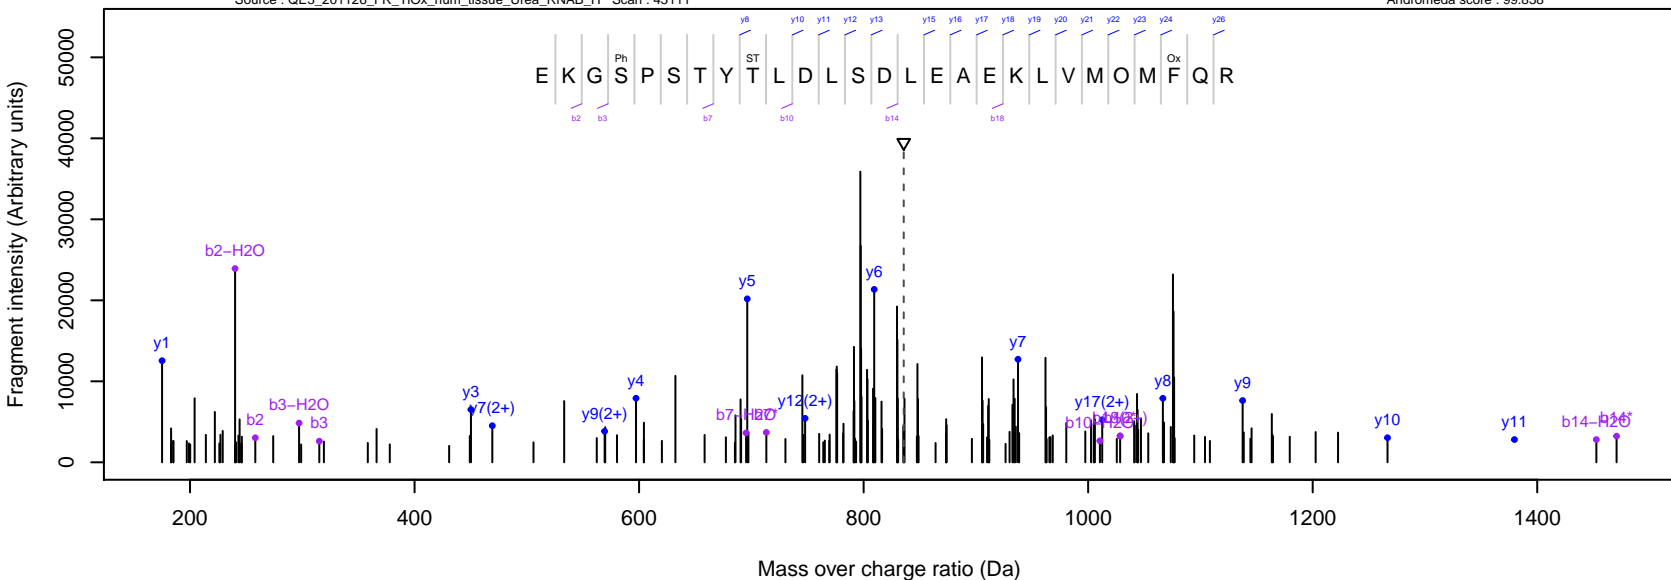

S(Phospho (STY))IRLPETIDLGALYLSMK

Source : QE3\_201126\_FR\_TIOx\_hum\_tissue\_Urea\_RNAB\_N Scan : 60085

Andromeda score : 99.838

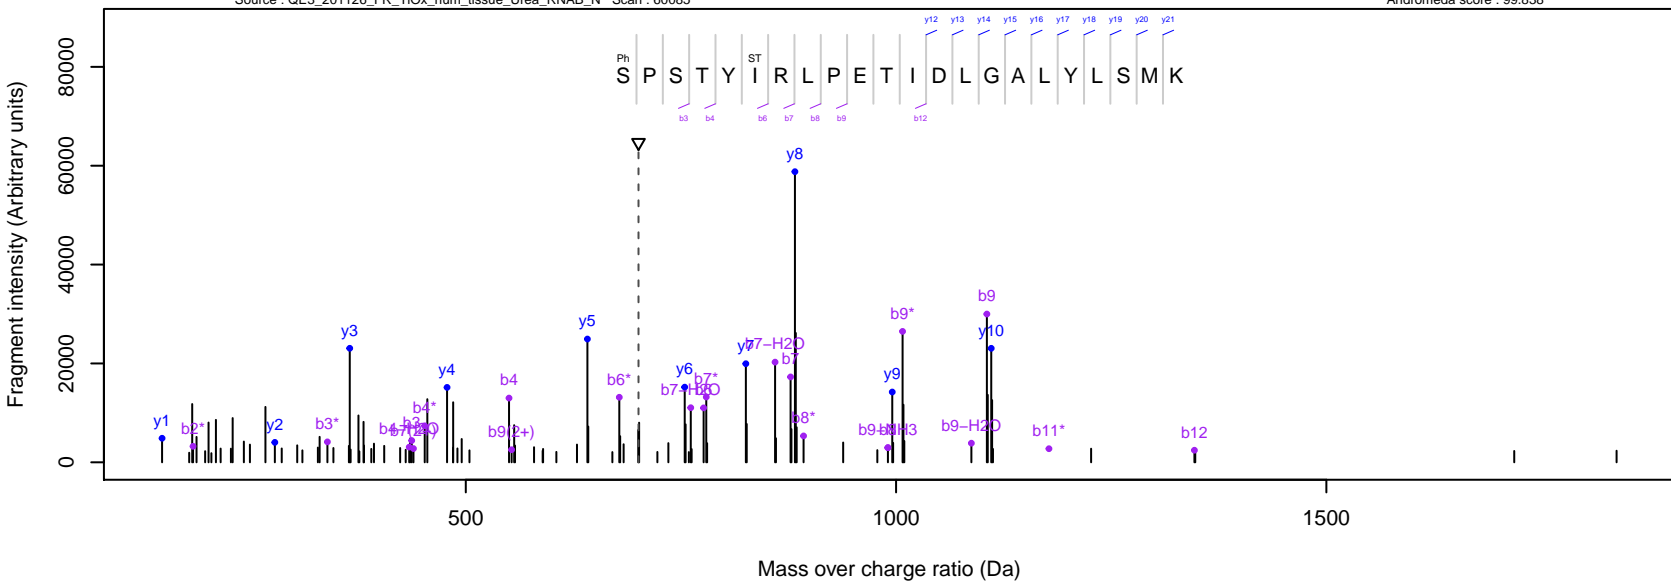

SVTHFDS(Phospho (STY))LAVIDIPGADTLDK-3+

Source : QE3\_201126\_FR\_TiOx\_hum\_tissue\_Urea\_RNAB\_N Scan : 53912

Andromeda score : 99.838

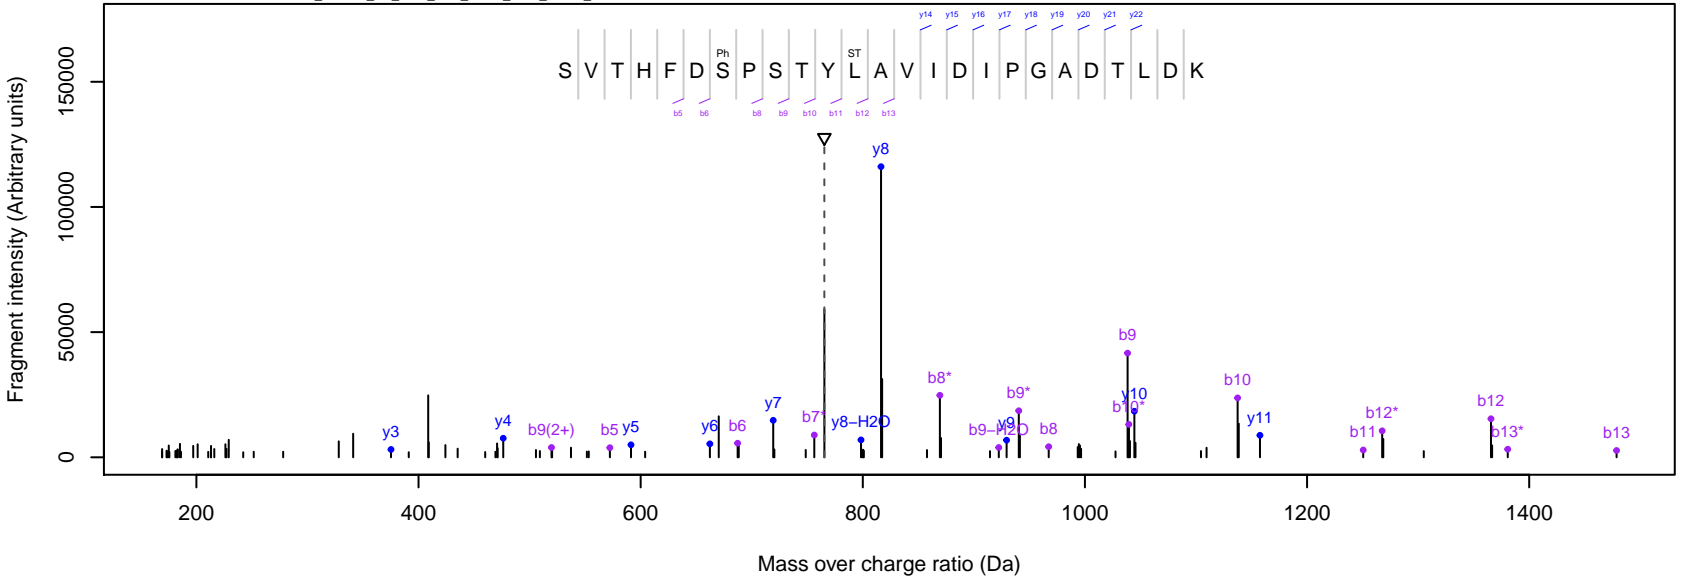

DSS(Phospho (STY))FTEVPRS(Phospho (STY))PK-2+

Source : QE3\_201126\_FR\_TiOx\_hum\_tissue\_Urea\_RNAB\_N Scan : 19171

Andromeda score : 99.796

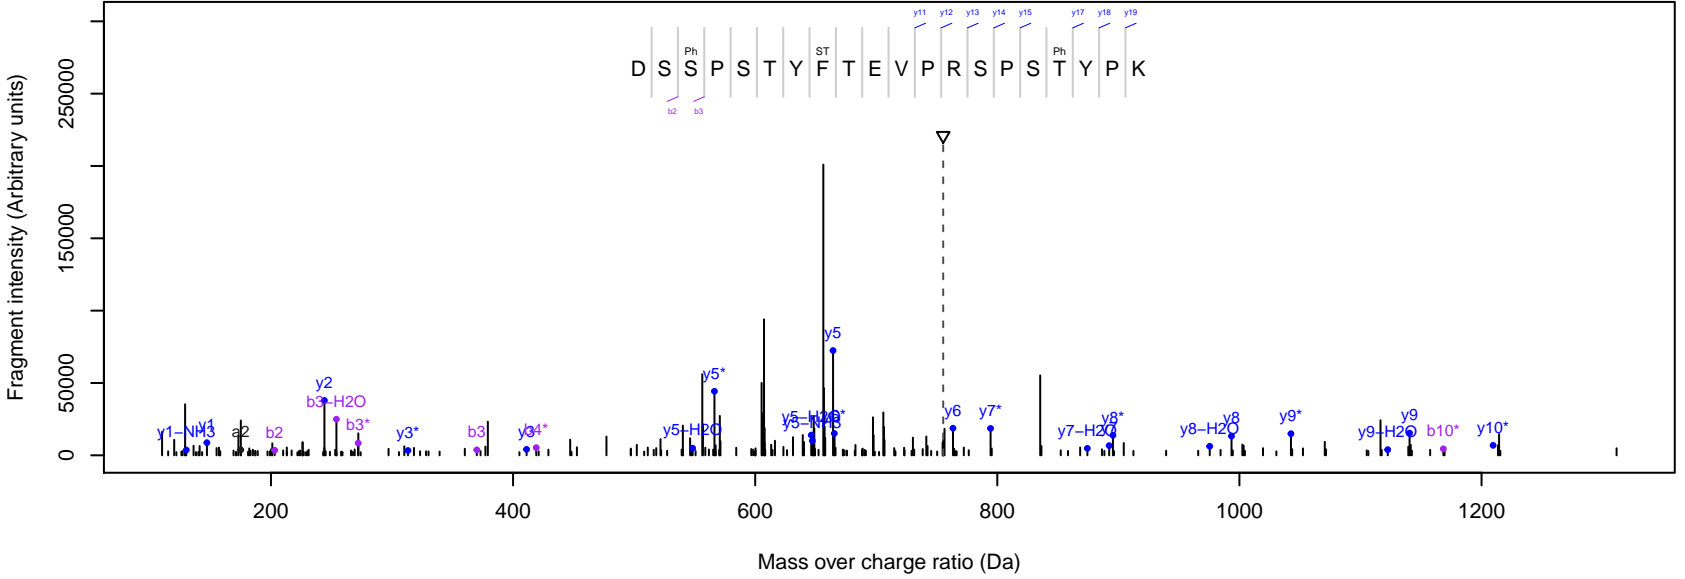

HADNS(Phospho (STY))SDTEMEDMIAEETLEEMSELLK-3+

Source : QE3\_201126\_FR\_TiOx\_hum\_tissue\_Urea\_RNAB\_B Scan : 61853

Andromeda score : 99.774

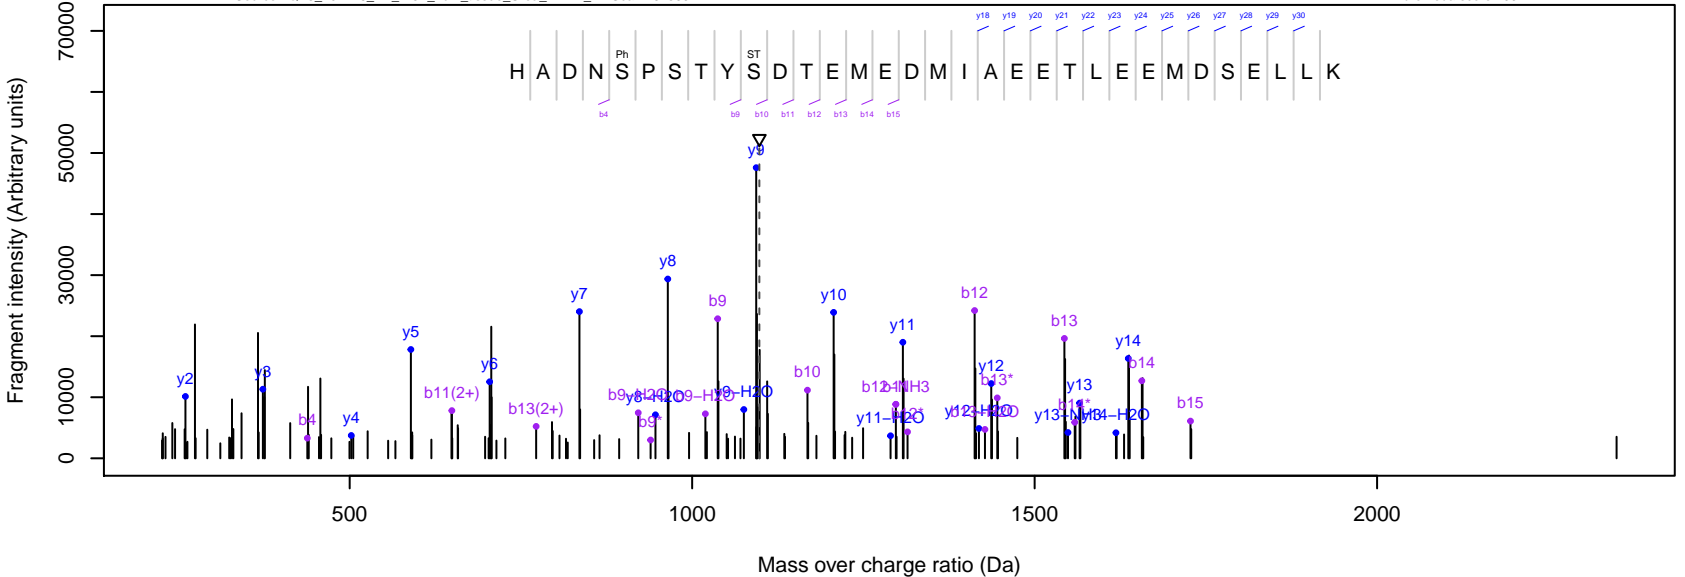

S(Phospho (STY))RS(Phospho (STY))RS(Phospho (STY))PT(Phospho (STY))PPSSAGLGSNSAPPIDSR-3+

Source : QE3\_201126\_FR\_TiOx\_hum\_tissue\_Urea\_RNAB\_H Scan : 33962

Andromeda score : 99.774

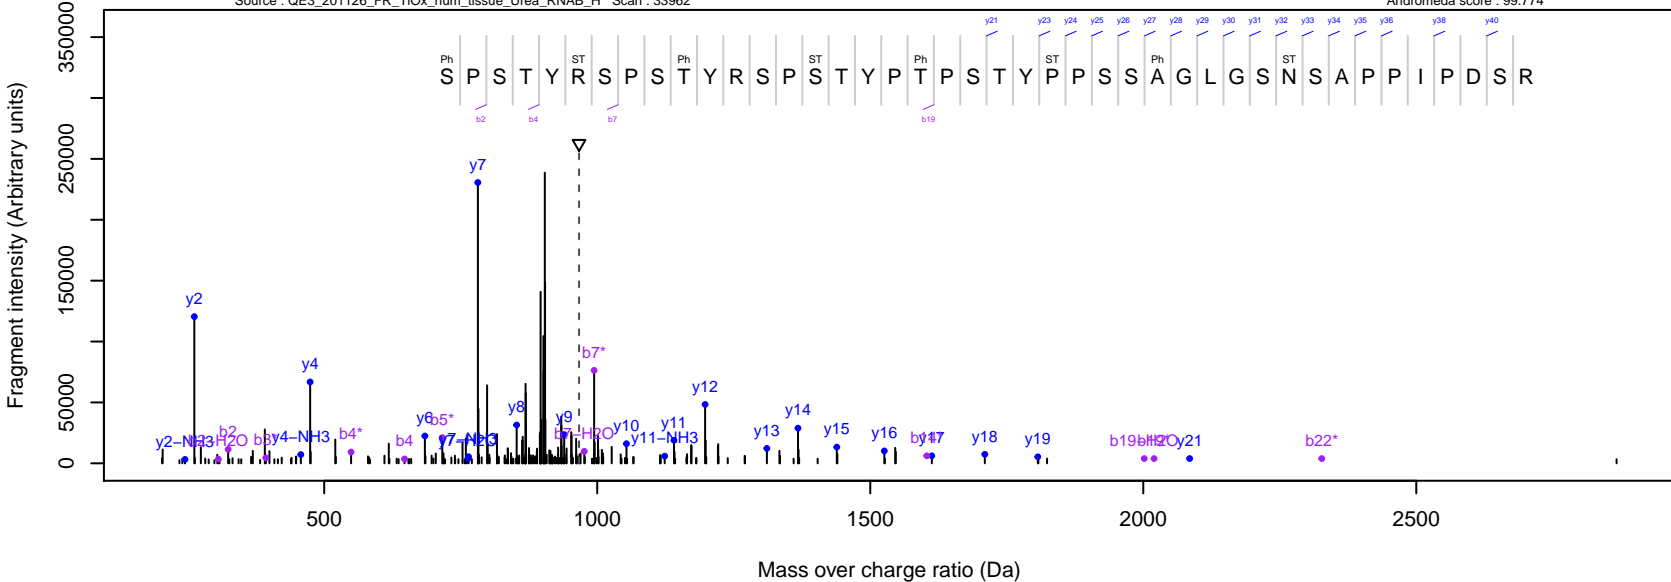

LSTT(Phospho (STY))PS(Phospho (STY))PTSS(Phospho (STY))LHEDGVDFRR-3+

Source : QE3\_201126\_FR\_TiOx\_hum\_tissue\_Urea\_RNAB\_N Scan : 30328

Andromeda score : 99.711

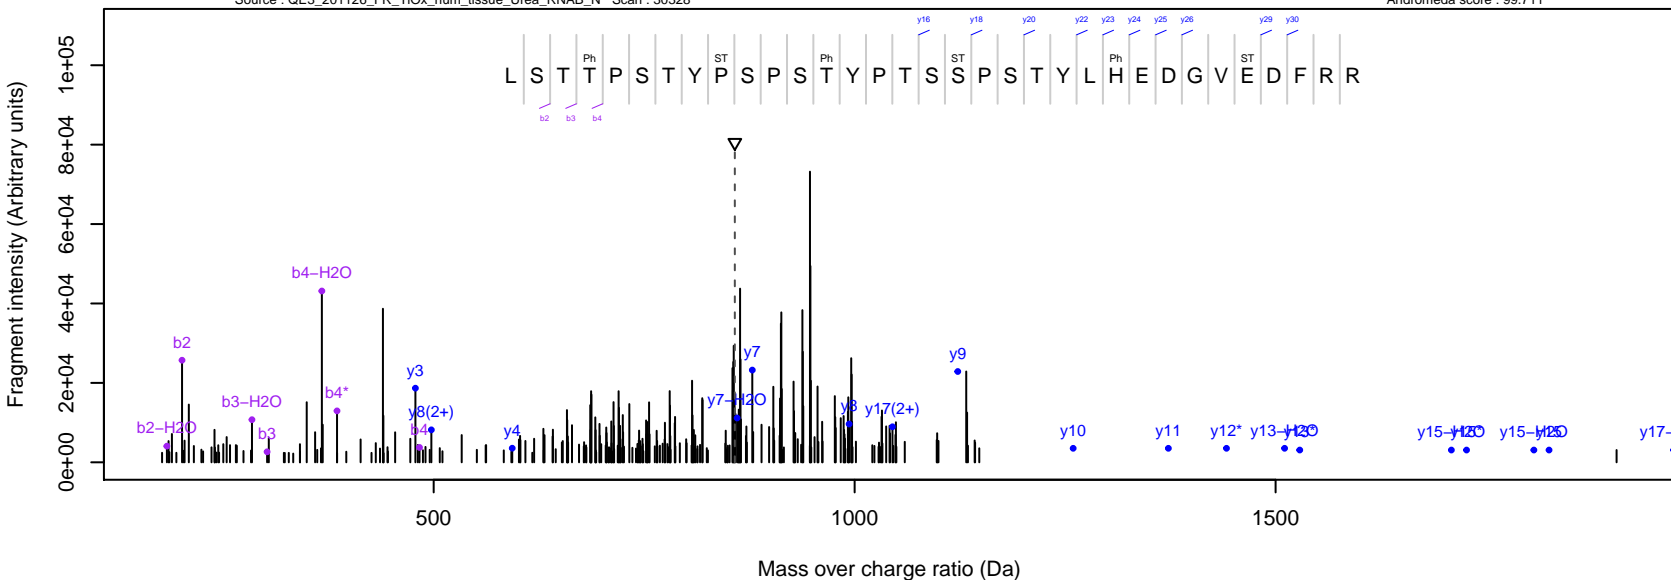

RT(Phospho (STY))SDPSAANVHVSSTTSLGENYEDDDLVSNDVEMK-3+

Source : QE3\_201126\_FR\_TiOx\_hum\_tissue\_Urea\_RNAB\_H Scan : 34245

Andromeda score : 99.709

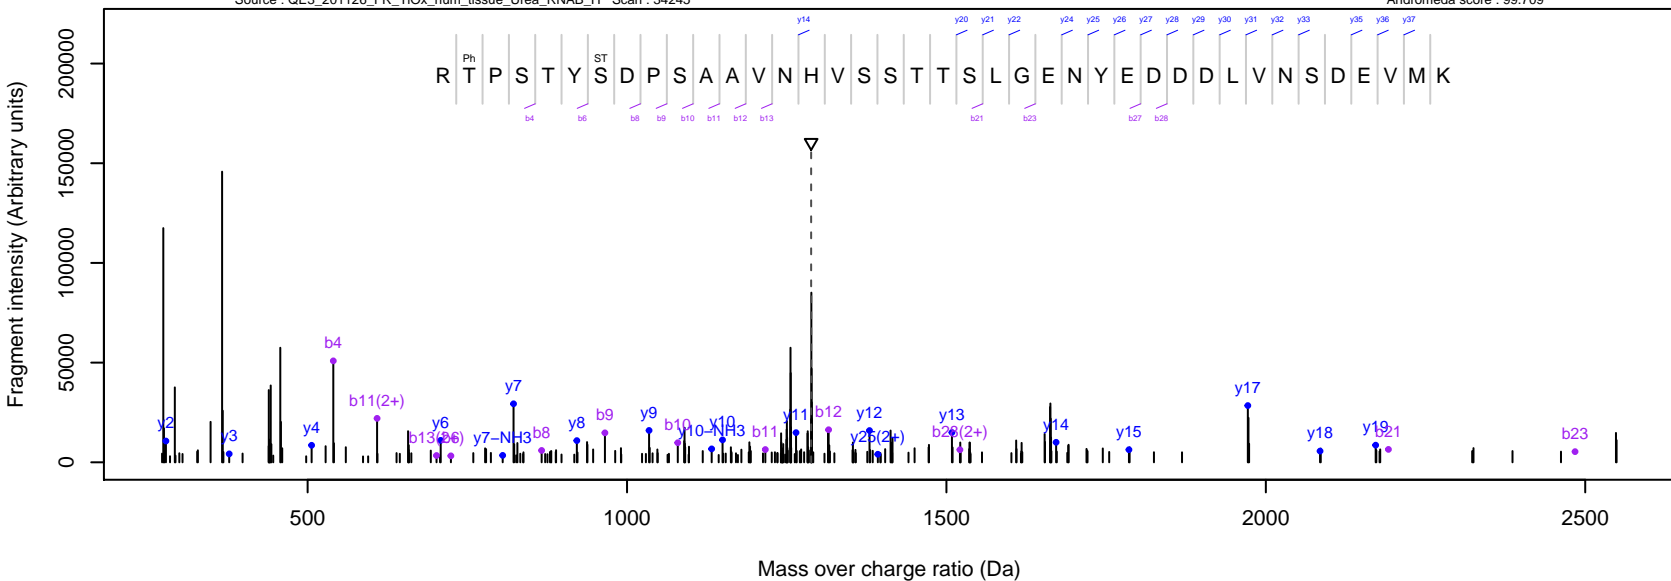



S(Phospho (STY))LPGESEEM(Oxidation (M))M(Oxidation (M))EEVDQVTLYSYK-2+

Source : QE3\_201126\_FR\_TiOx\_hum\_tissue\_Urea\_RNAB\_N Scan : 47378

Andromeda score : 99.705

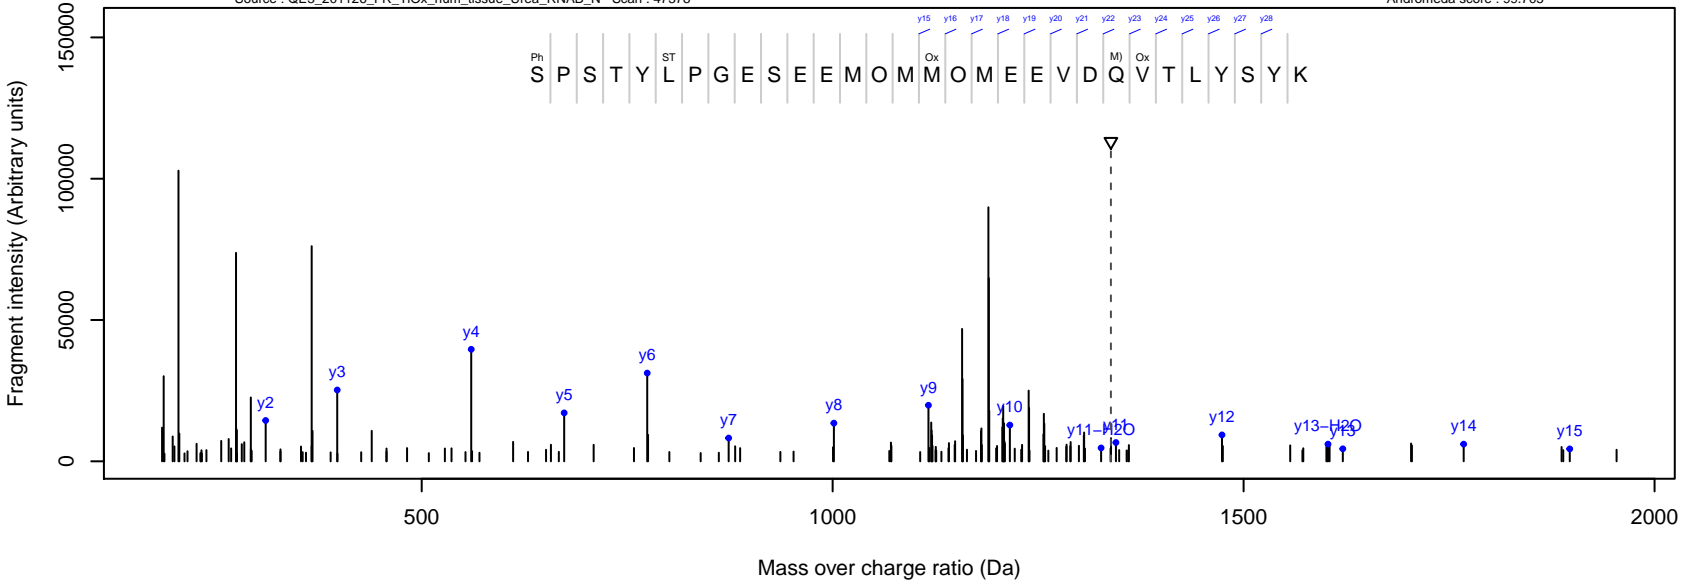

YRIQEQES(Phospho (STY))S(Phospho (STY))GEEDSDLSP EER-3+

Source : QE3\_201126\_FR\_TiOx\_hum\_tissue\_Urea\_RNAB\_N Scan : 23933

Andromeda score : 99.614

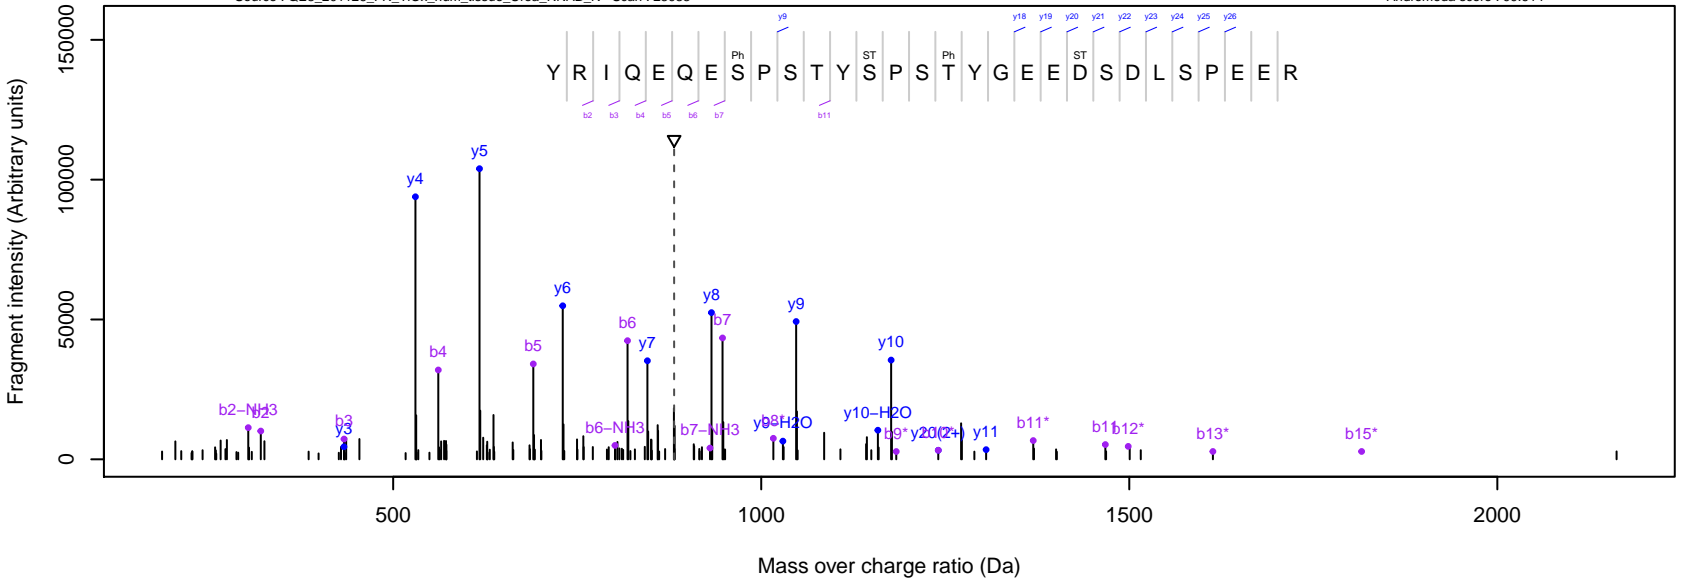

LLLERPS(Phospho (STY))PIRDR-3+

Source : QE3\_201126\_FR\_TiOx\_hum\_tissue\_Urea\_RNAB\_N Scan : 19388

Andromeda score : 99.566

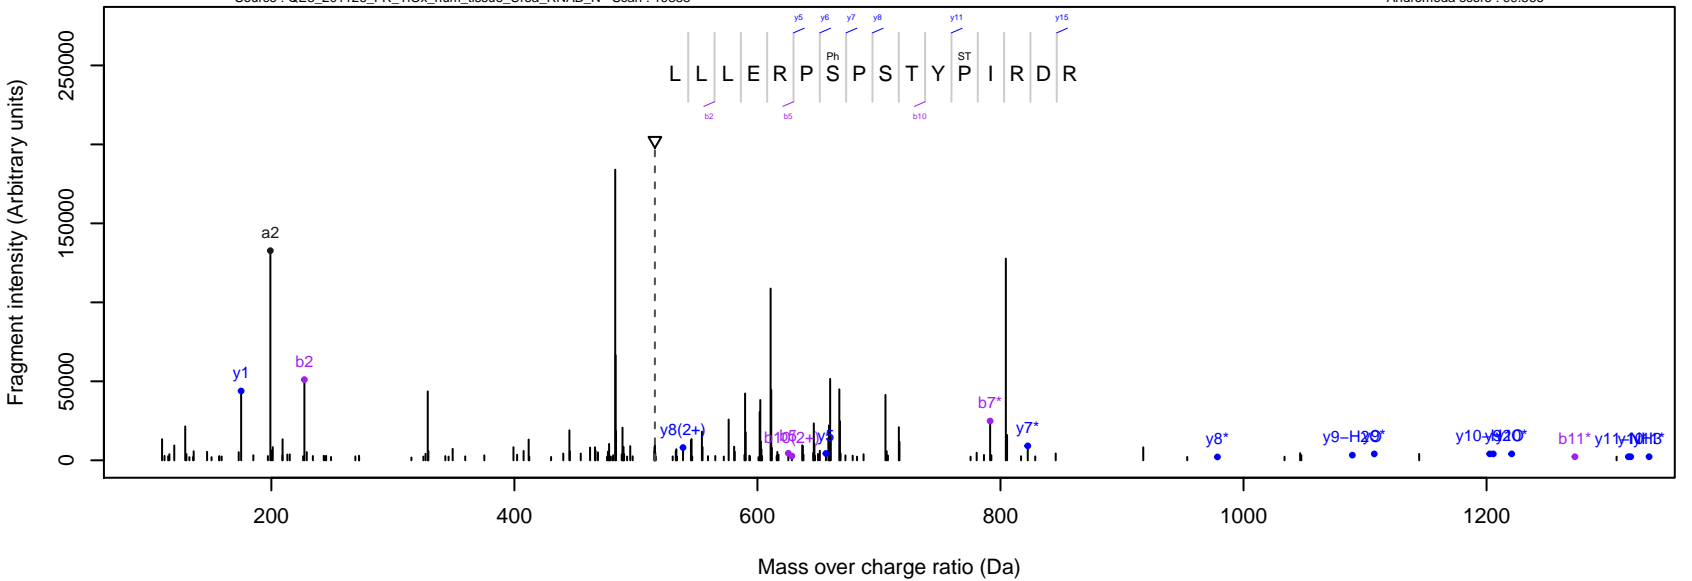

RPDYAPMES(Phospho (STY))S(Phospho (STY))DEEDEFQFIK-3+

Source : QE3\_201126\_FR\_TiOx\_hum\_tissue\_Urea\_RNAB\_N Scan : 52201

Andromeda score : 99.508

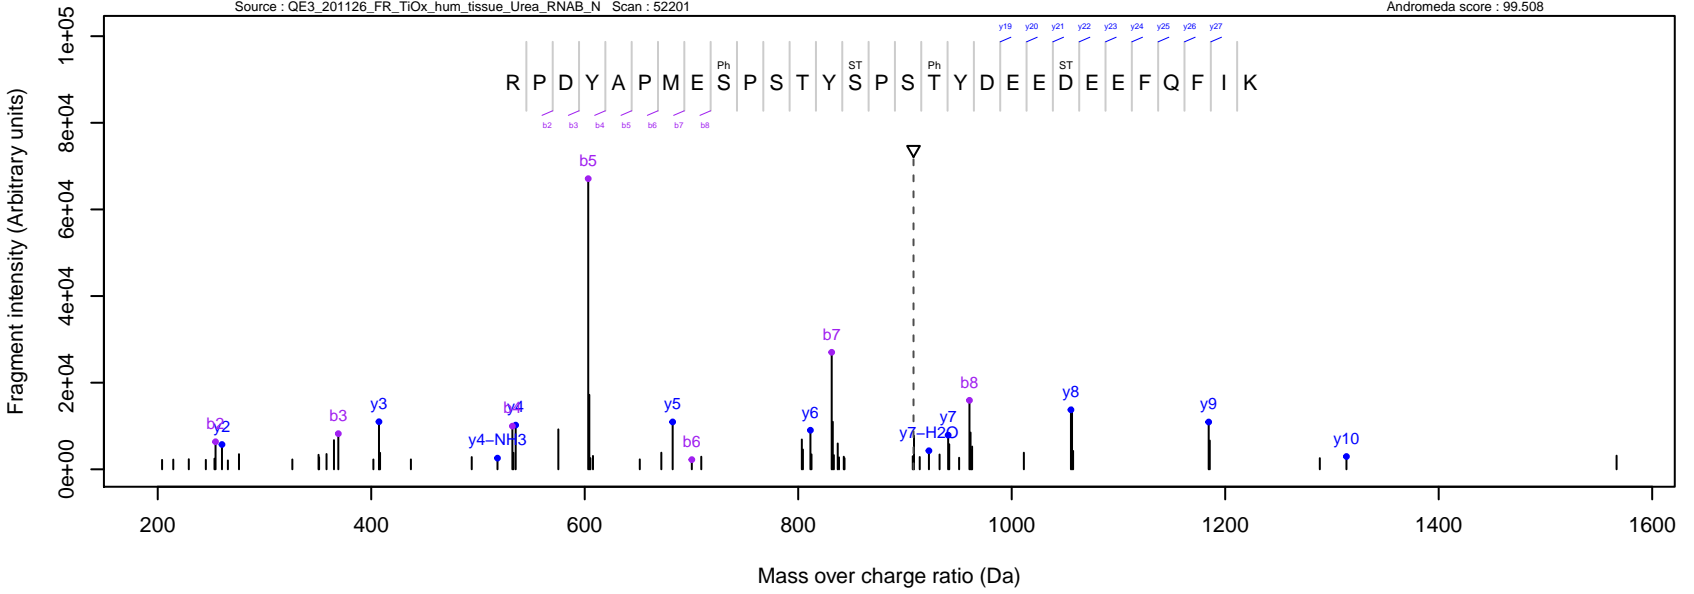

AISAPTS(Phospho (STY))PTR-2+

Source : QE3\_201126\_FR\_TiOx\_hum\_tissue\_Urea\_RNAB\_N Scan : 10963

Andromeda score : 99.5

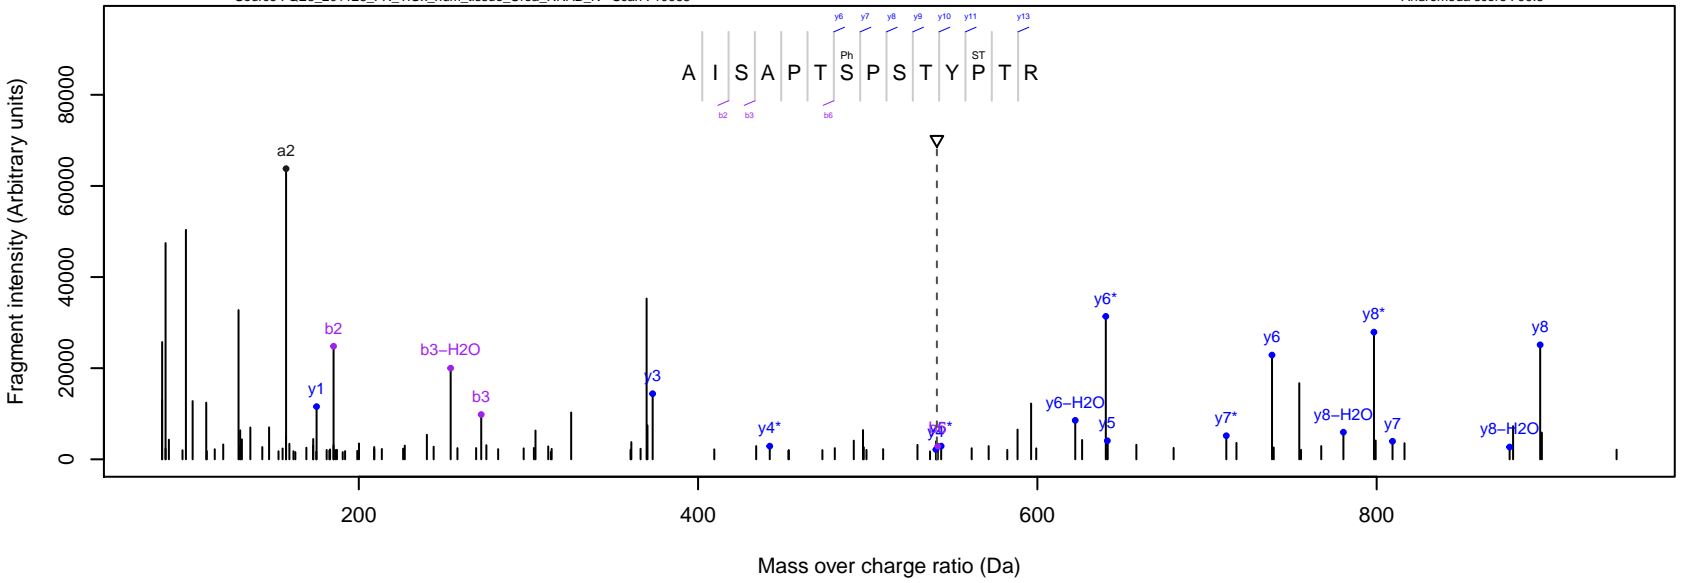

RDFT(Phospho (STY))PAELR-2+

Source : QE3\_201126\_FR\_TiOx\_hum\_tissue\_Urea\_RNAB\_H Scan : 18123

Andromeda score : 99.5

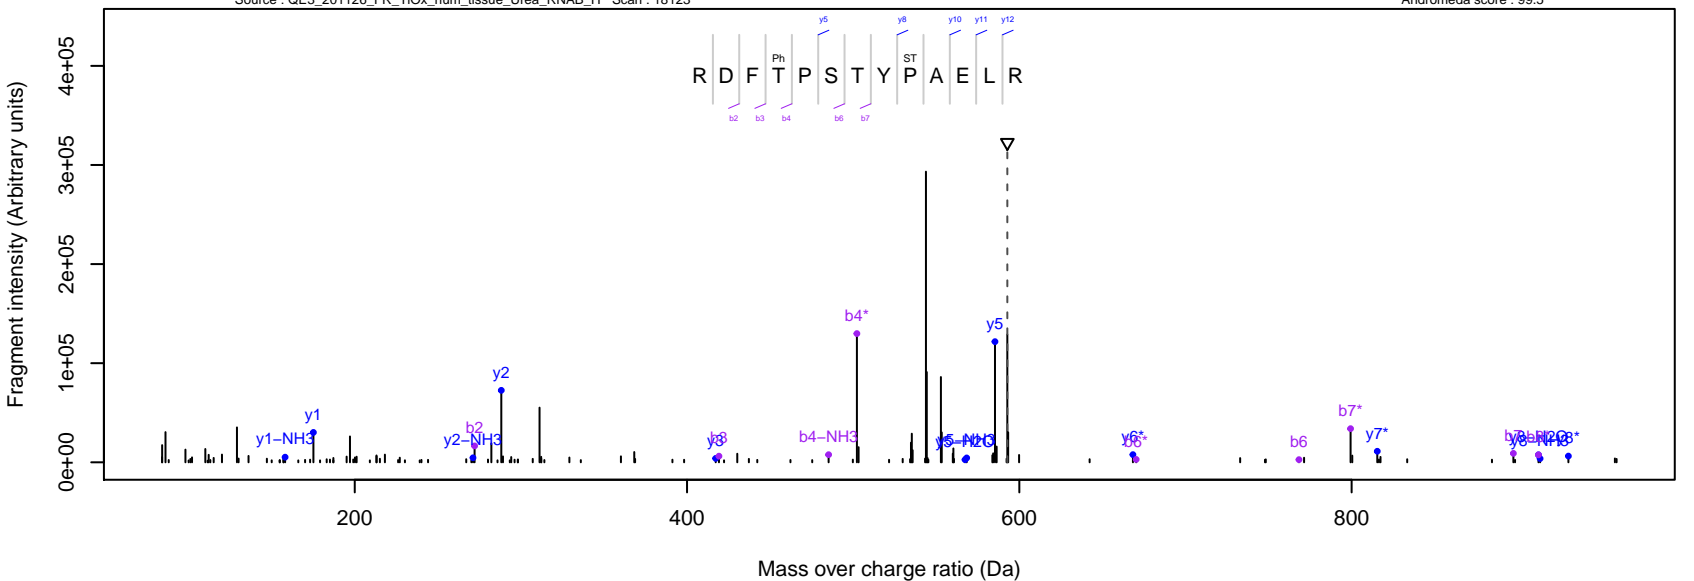

GNRTDGS(Phospho (STY))IS(Phospho (STY))GDRQPVTVDYISR-3+

Source : QE3\_201126\_FR\_TiOx\_hum\_tissue\_Urea\_RNAB\_B Scan : 30453

Andromeda score : 99.446

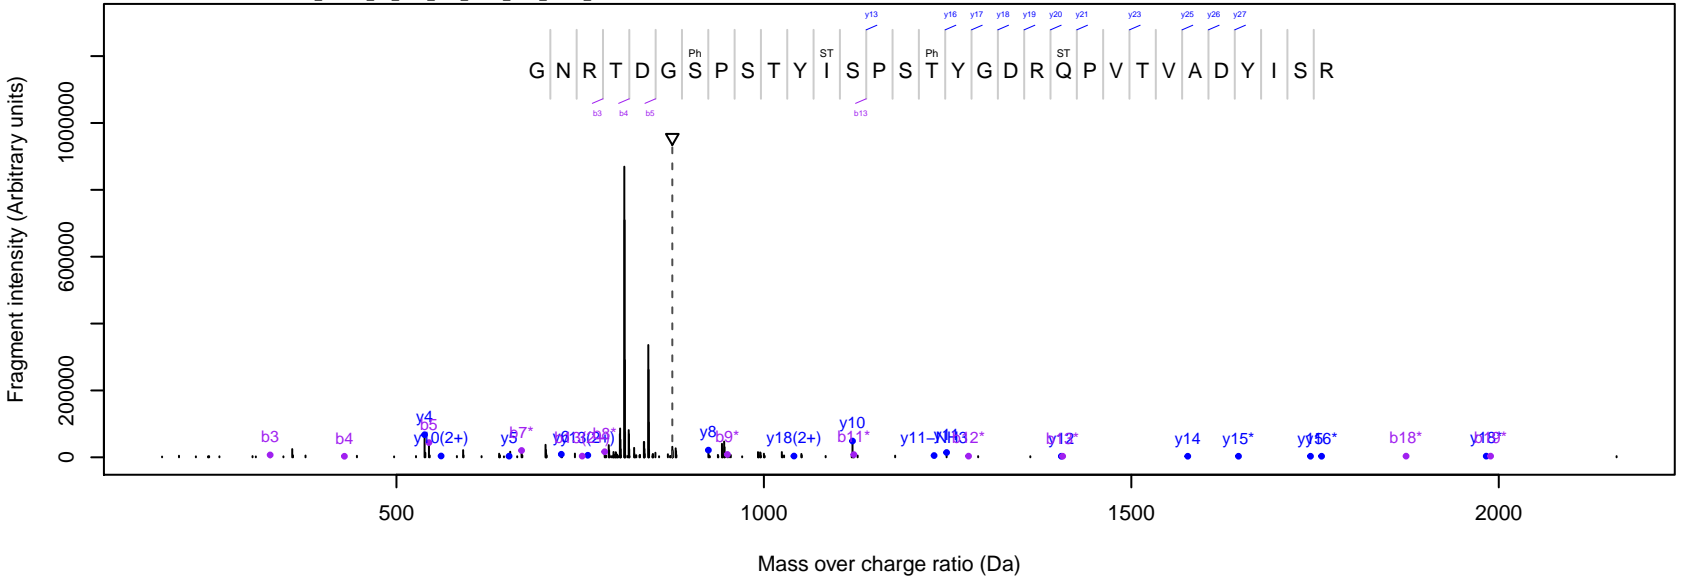

DFYLAT(Phospho (STY))SPPDSFLDDHHLTRPHER-4+

Source : QE3\_201126\_FR\_TiOx\_hum\_tissue\_Urea\_RNAB\_H Scan : 37932

Andromeda score : 99.441

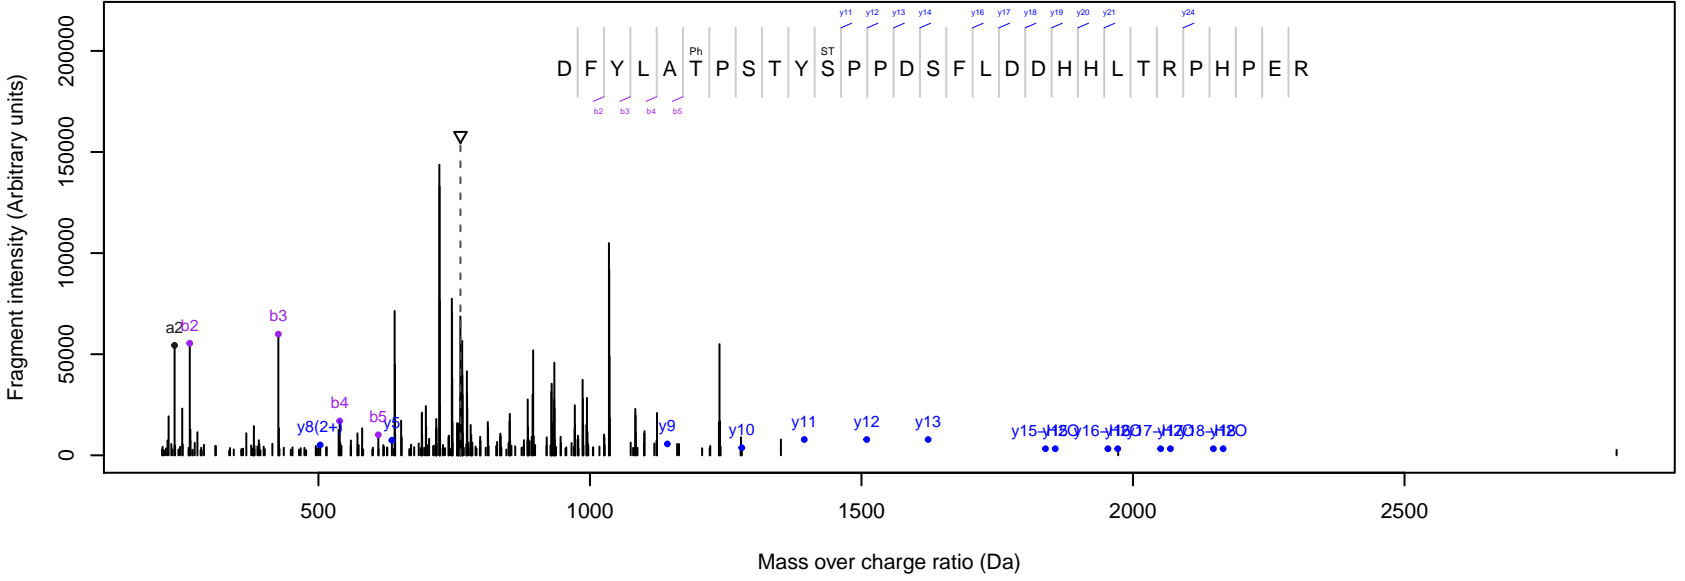

SLDDS(Phospho (STY))EEDDEDGHSR-3+

Source : QE3\_201126\_FR\_TiOx\_hum\_tissue\_Urea\_RNAB\_H Scan : 6884

Andromeda score : 99.441

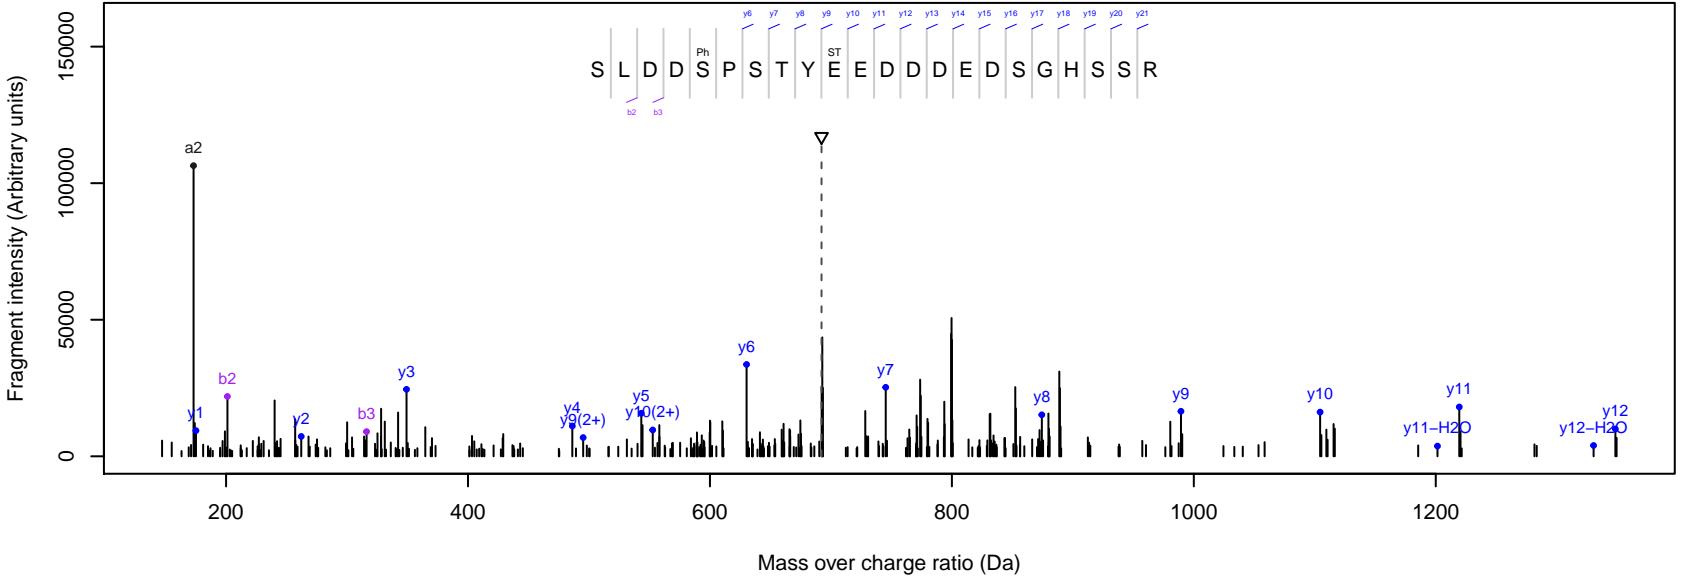

M(Oxidation (M))EREDS(Phospho (STY))SEEEEEIDDEIER-3+

Source : QE3\_201126\_FR\_TIOx\_hum\_tissue\_Urea\_RNAB\_H Scan : 21858

Andromeda score : 99.423

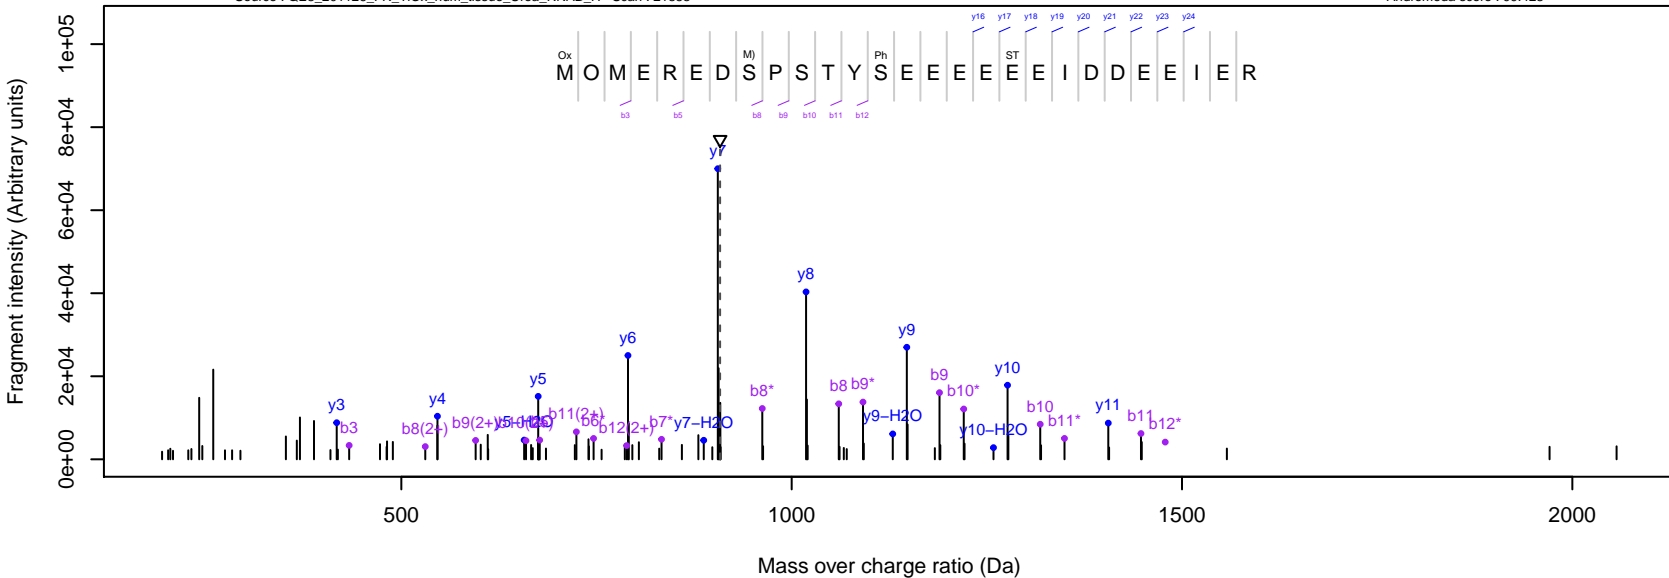

QVLTPGSAGQPRS(Phospho (STY))EEDSLEEAGSPAPGPCPR-3+

Source : QE3\_201126\_FR\_TIOx\_hum\_tissue\_Urea\_RNAB\_N Scan : 27990

Andromeda score : 99.415

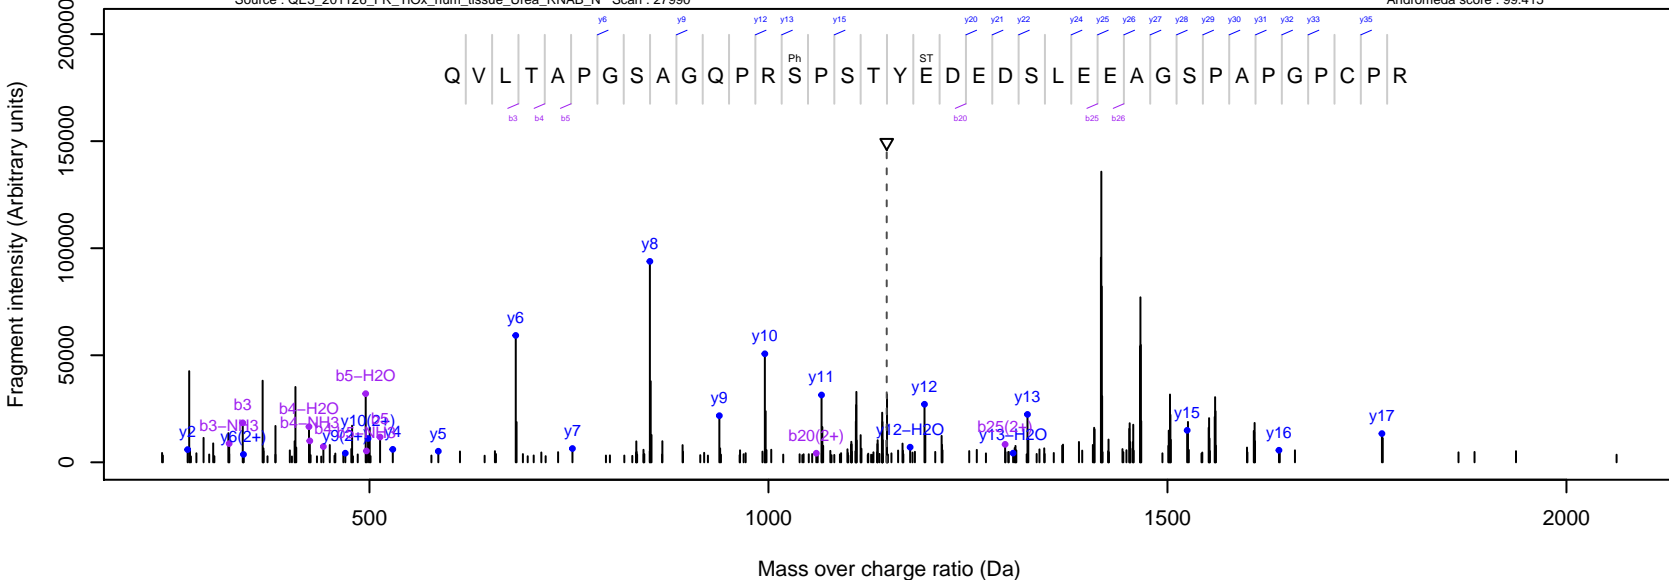

LIGTAVPQRT(Phospho (STY))SPTGPK-3+

Source : QE3\_201126\_FR\_TIOx\_hum\_tissue\_Urea\_RNAB\_H Scan : 14880

Andromeda score : 99.413

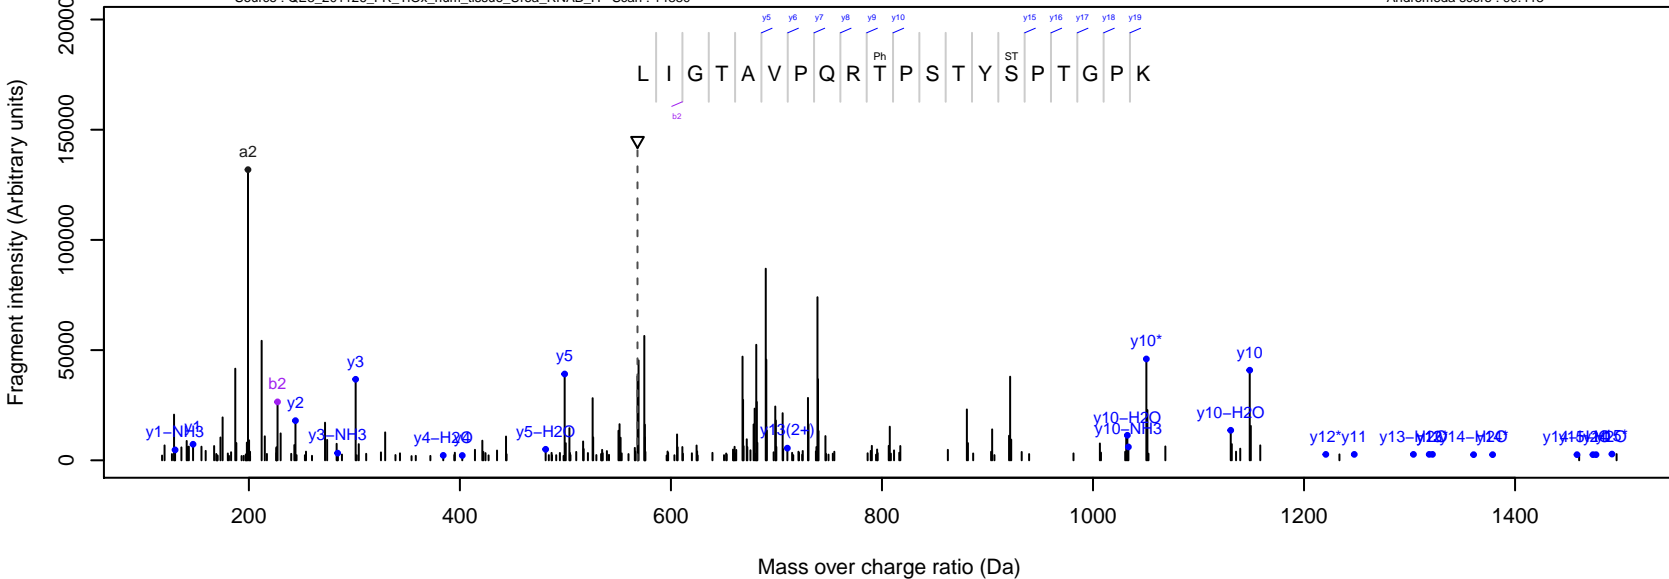

TSS(Phospho (STY))KESS(Phospho (STY))PIPS(Phospho (STY))PTSDR-2+

Source : QE3\_201126\_FR\_TiOx\_hum\_tissue\_Urea\_RNAB\_N Scan : 17248

Andromeda score : 99.413

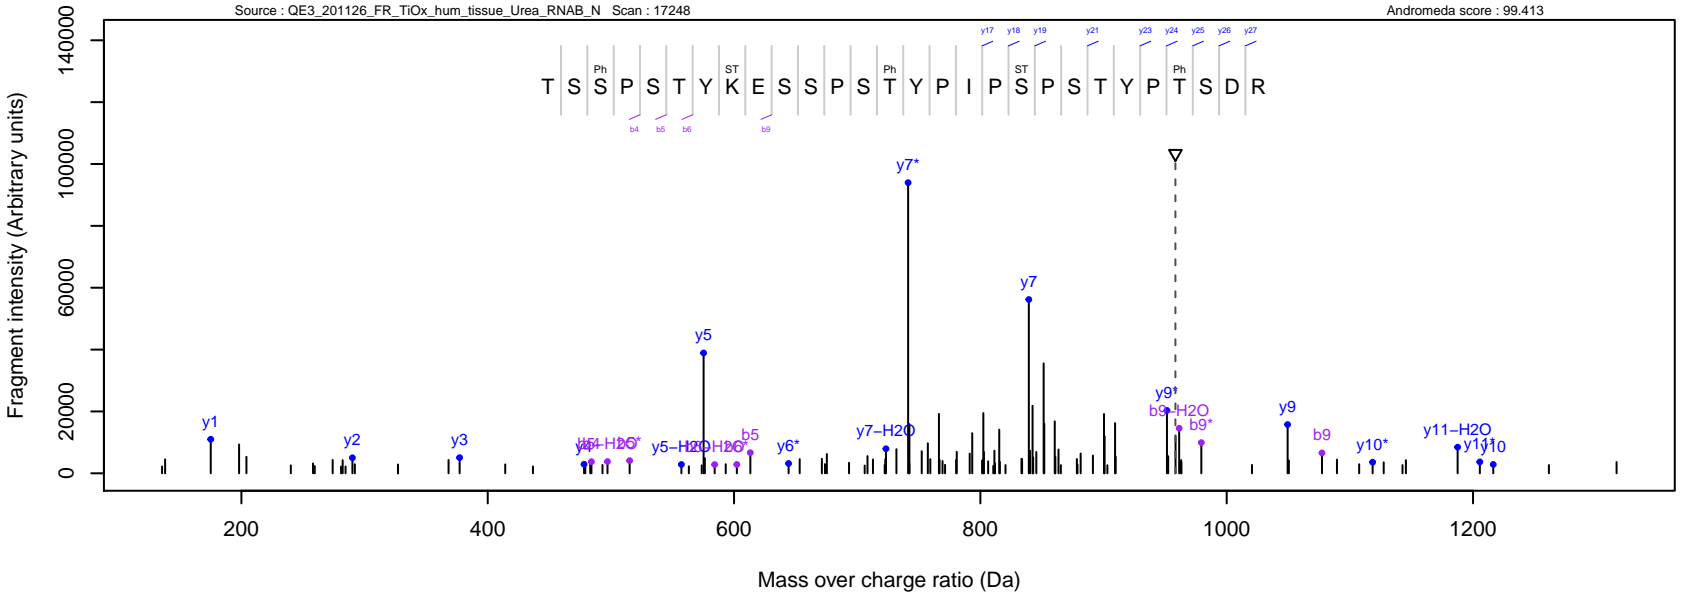

INS(Phospho (STY))SGESGDES(Phospho (STY))DEFLQSR-2+

Source : QE3\_201126\_FR\_TiOx\_hum\_tissue\_Urea\_RNAB\_N Scan : 34026

Andromeda score : 99.407

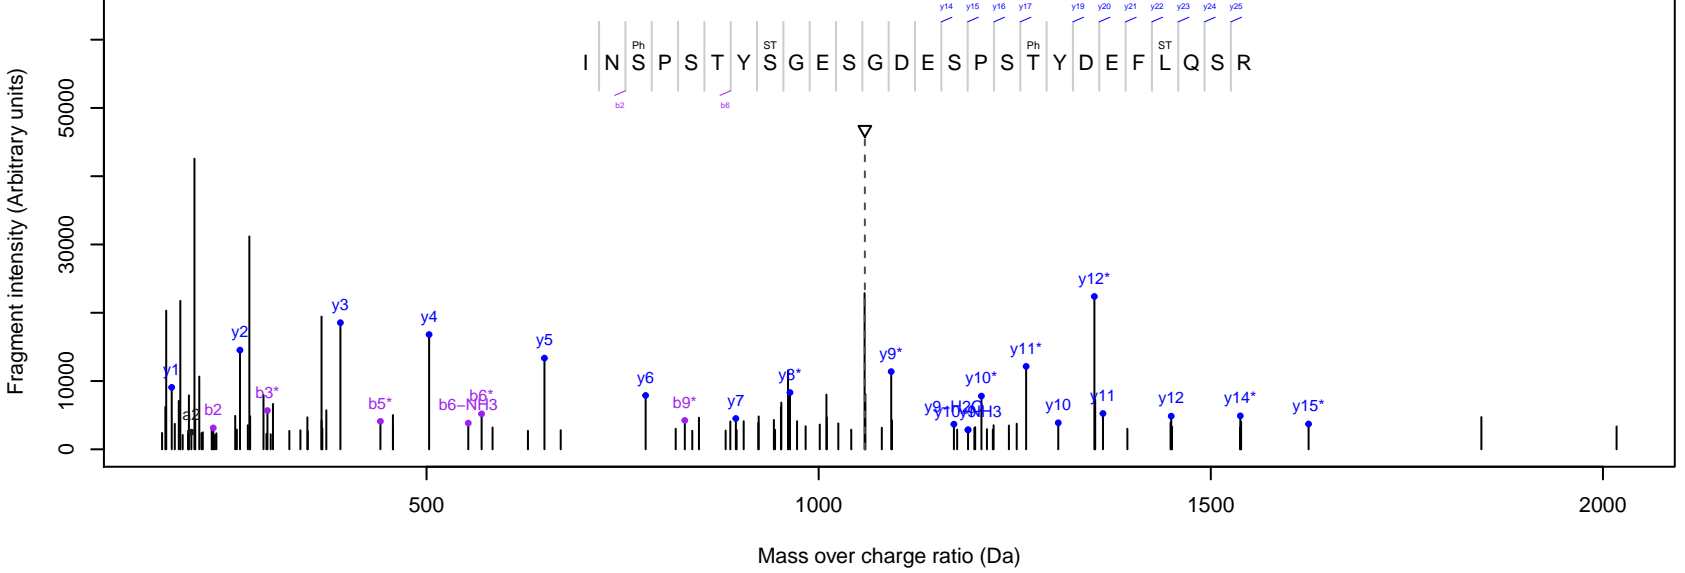

EIPEDVDM(Oxidation (M))EEEKES(Phospho (STY))EDS(Phospho (STY))DEENDFTEK-3+

Source : QE3\_201126\_FR\_TiOx\_hum\_tissue\_Urea\_RNAB\_H Scan : 30348

Andromeda score : 99.402

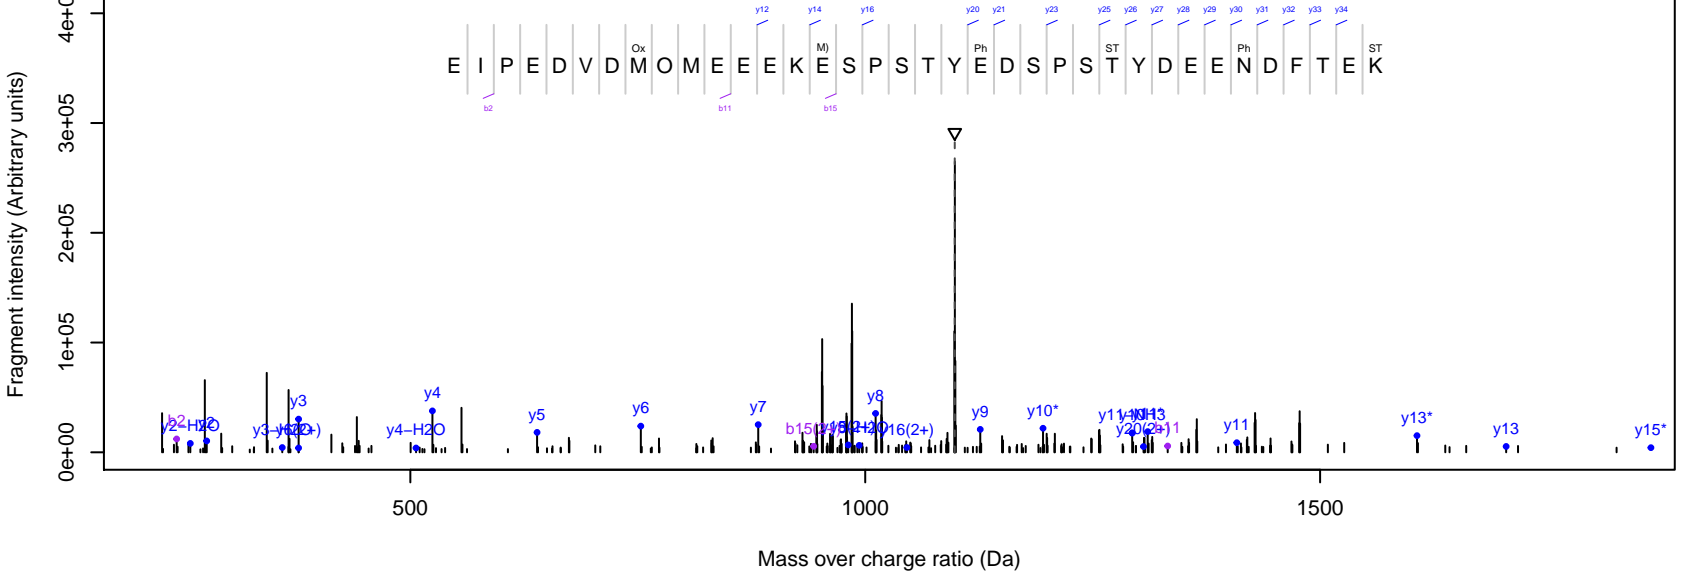

RAS(Phospho (STY))S(Phospho (STY))PGYIDSPYSR-2+

Source : QE3\_201126\_FR\_TiOx\_hum\_tissue\_Urea\_RNAB\_H Scan : 21004

Andromeda score : 99.392

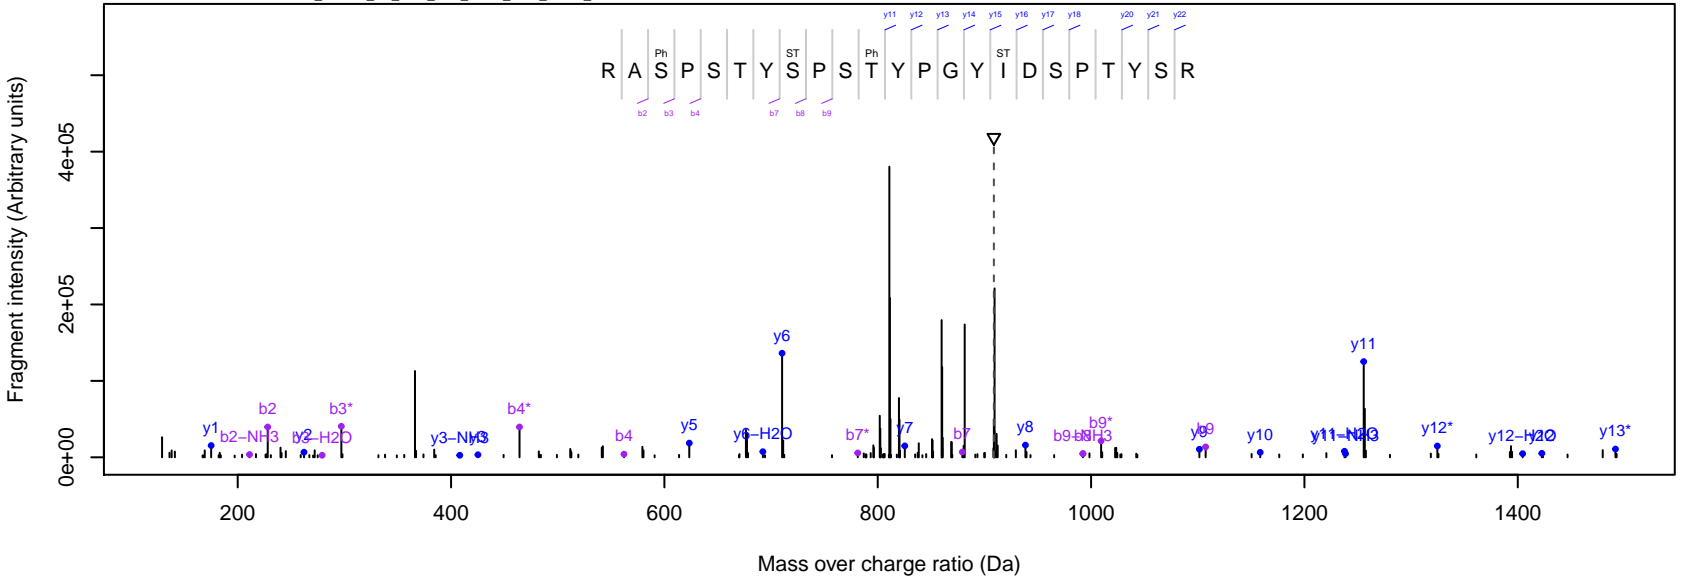

NPNSAILLS(Phospho (STY))PVETPYANVDAEVHANR-3+

Source : QE3\_201126\_FR\_TiOx\_hum\_tissue\_Urea\_RNAB\_N Scan : 44547

Andromeda score : 99.387

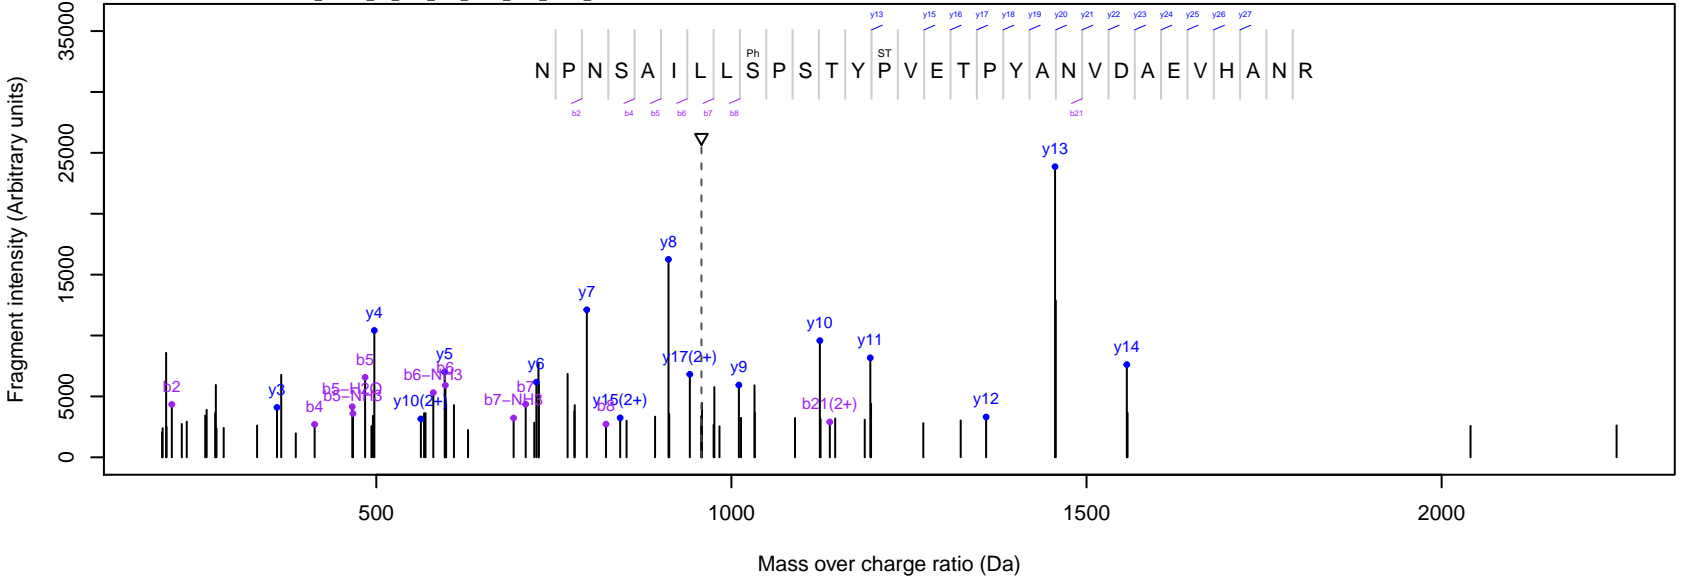

RVS(Phospho (STY))VCAETYNPDEEEEDTDPRIHPK-4+

Source : QE3\_201126\_FR\_TiOx\_hum\_tissue\_Urea\_RNAB\_B Scan : 20557

Andromeda score : 99.372

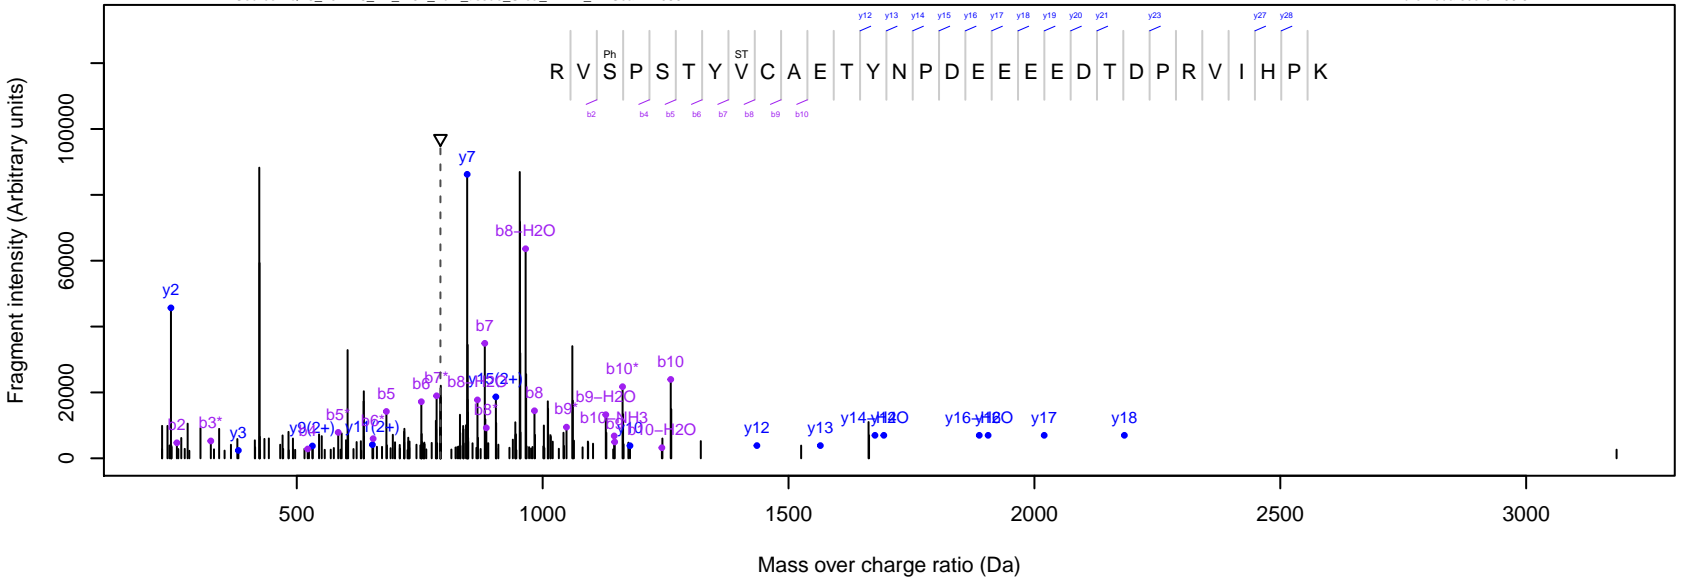

S(Phospho (STY))GEQIFTQDVRPEQLLEGK-3+

Source : QE3\_201126\_FR\_TiOx\_hum\_tissue\_Urea\_RNAB\_H Scan : 44964

Andromeda score : 99.366

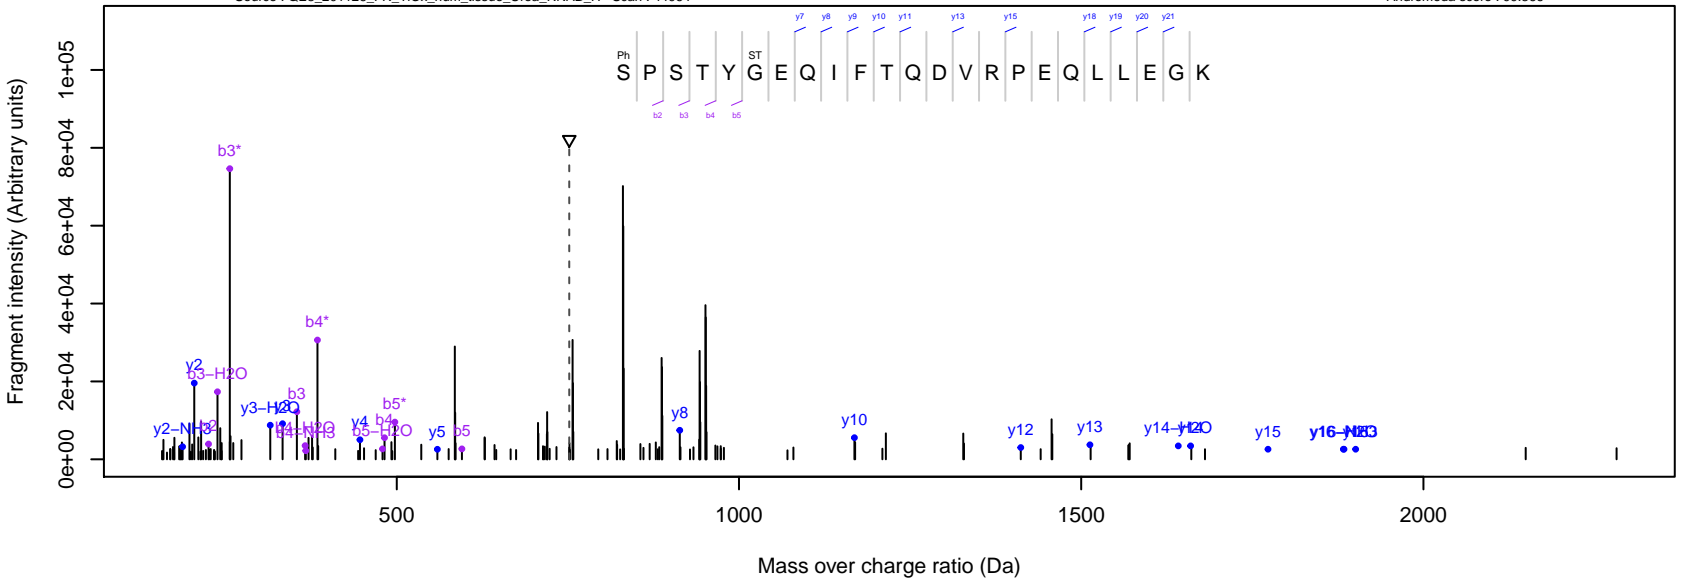

SVS(Phospho (STY))TTNIAGHFNDESPGLRR-3+

Source : QE3\_201126\_FR\_TiOx\_hum\_tissue\_Urea\_RNAB\_N Scan : 31352

Andromeda score : 99.366

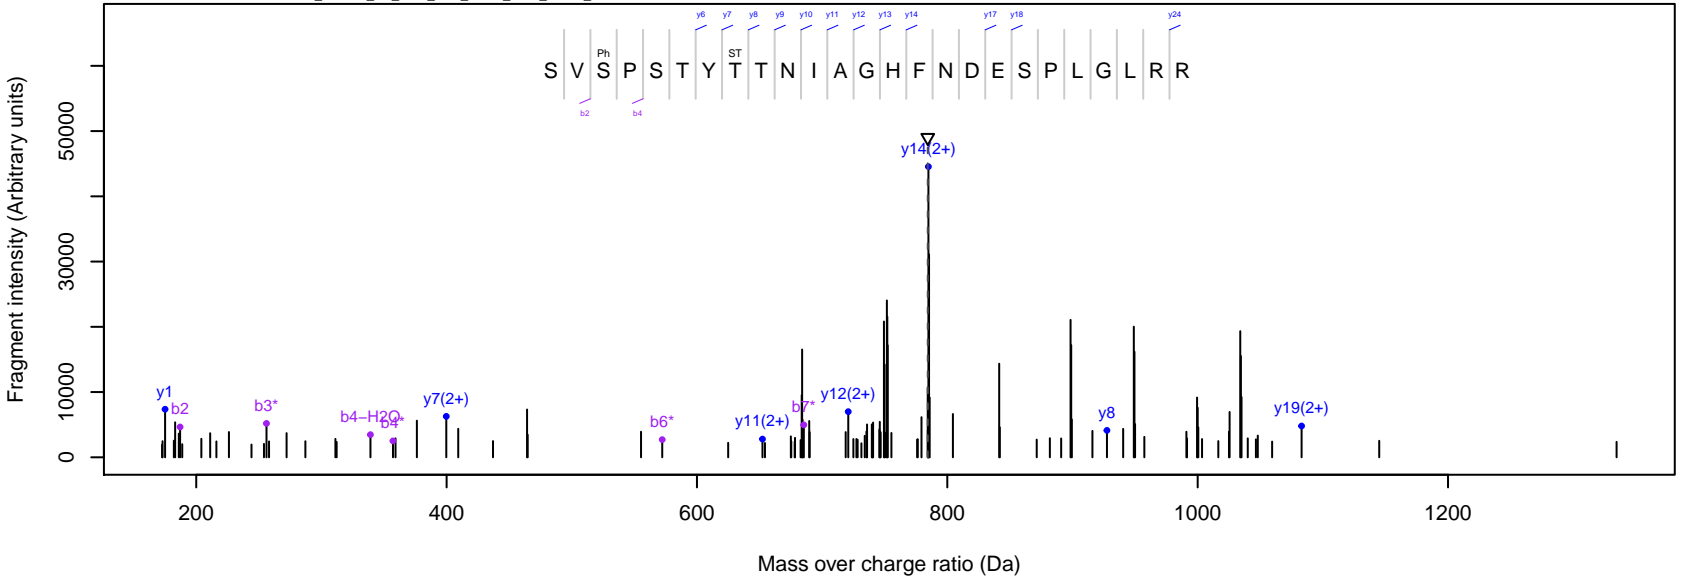

VLSSTINNQAVETDEGIEEIPDSPSTYPGIEK-3+

Source : QE3\_201126\_FR\_TiOx\_hum\_tissue\_Urea\_RNAB\_H Scan : 45259

Andromeda score : 99.357

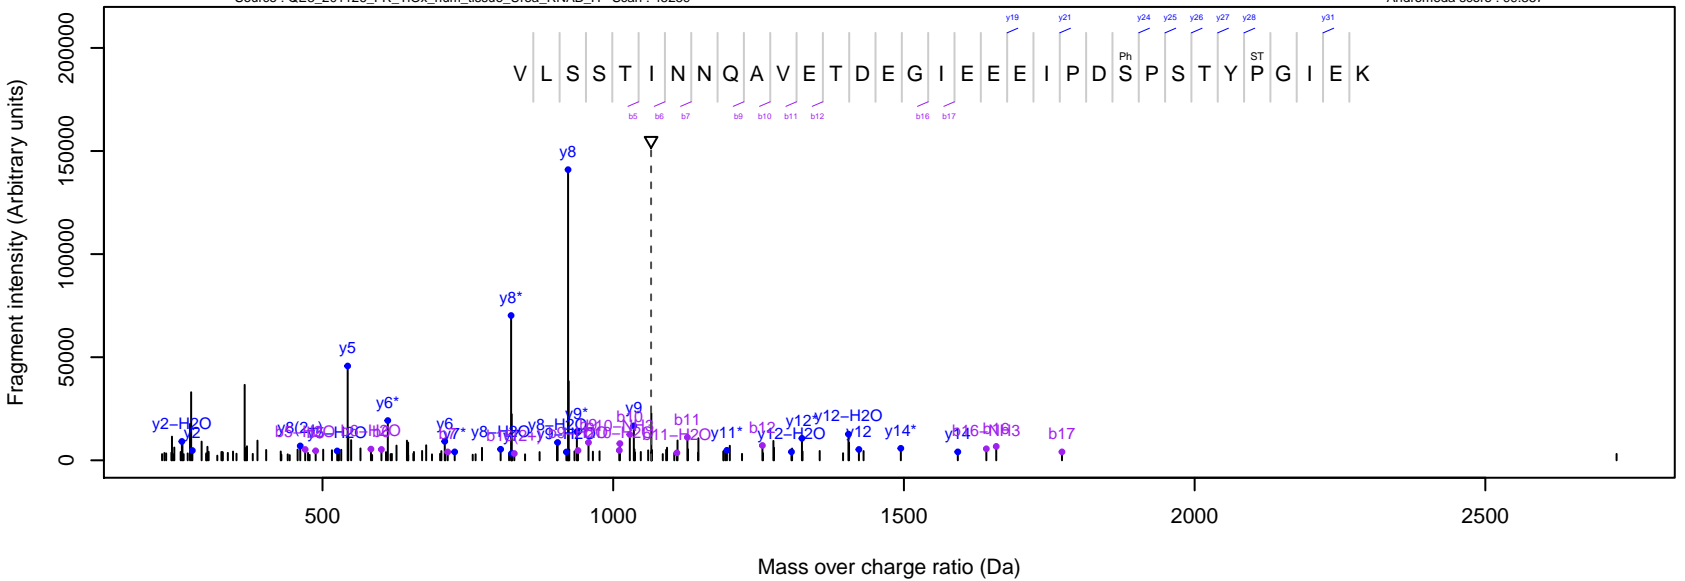

SSSS(Phospho (STY))GSDDYAYTQALLHQR-3+

Source : QE3\_201126\_FR\_TiOx\_hum\_tissue\_Urea\_RNAB\_H Scan : 37880

Andromeda score : 99.34

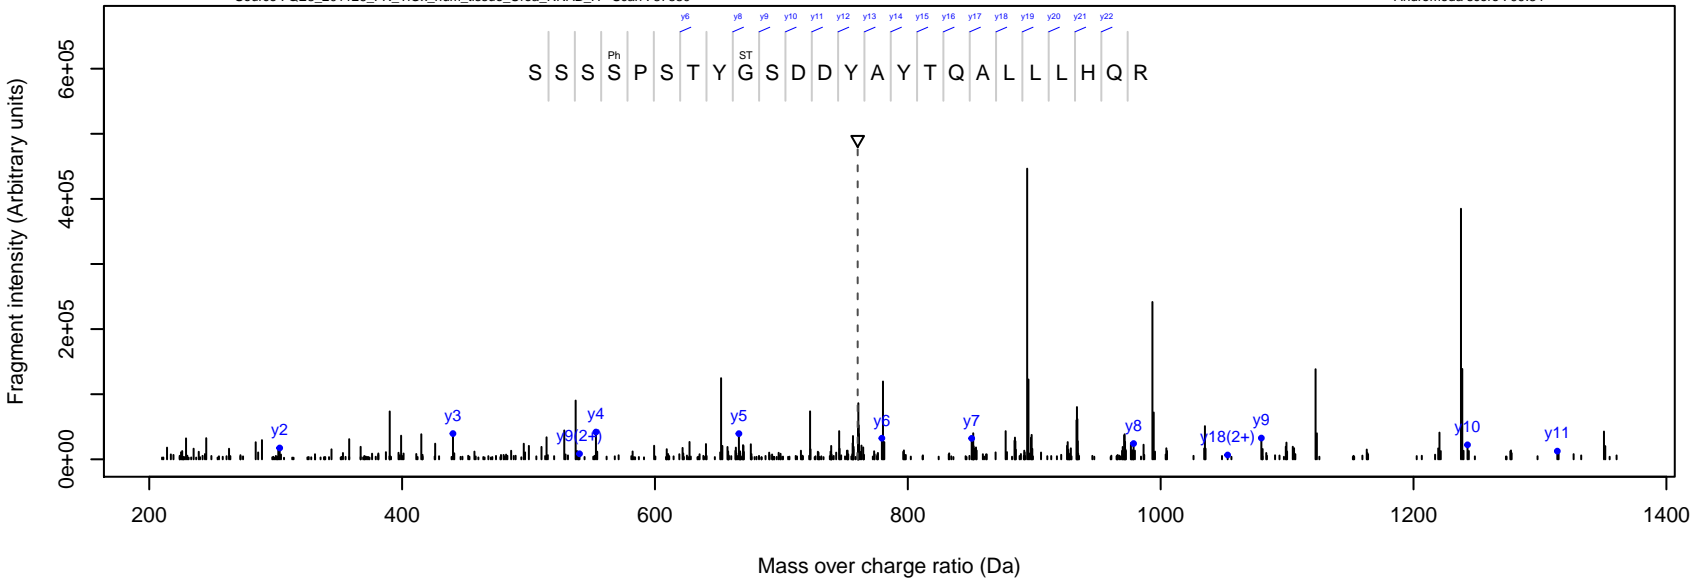

T(Phospho (STY))LDQSPELR-2+

Source : QE3\_201126\_FR\_TiOx\_hum\_tissue\_Urea\_RNAB\_N Scan : 39566

Andromeda score : 99.34

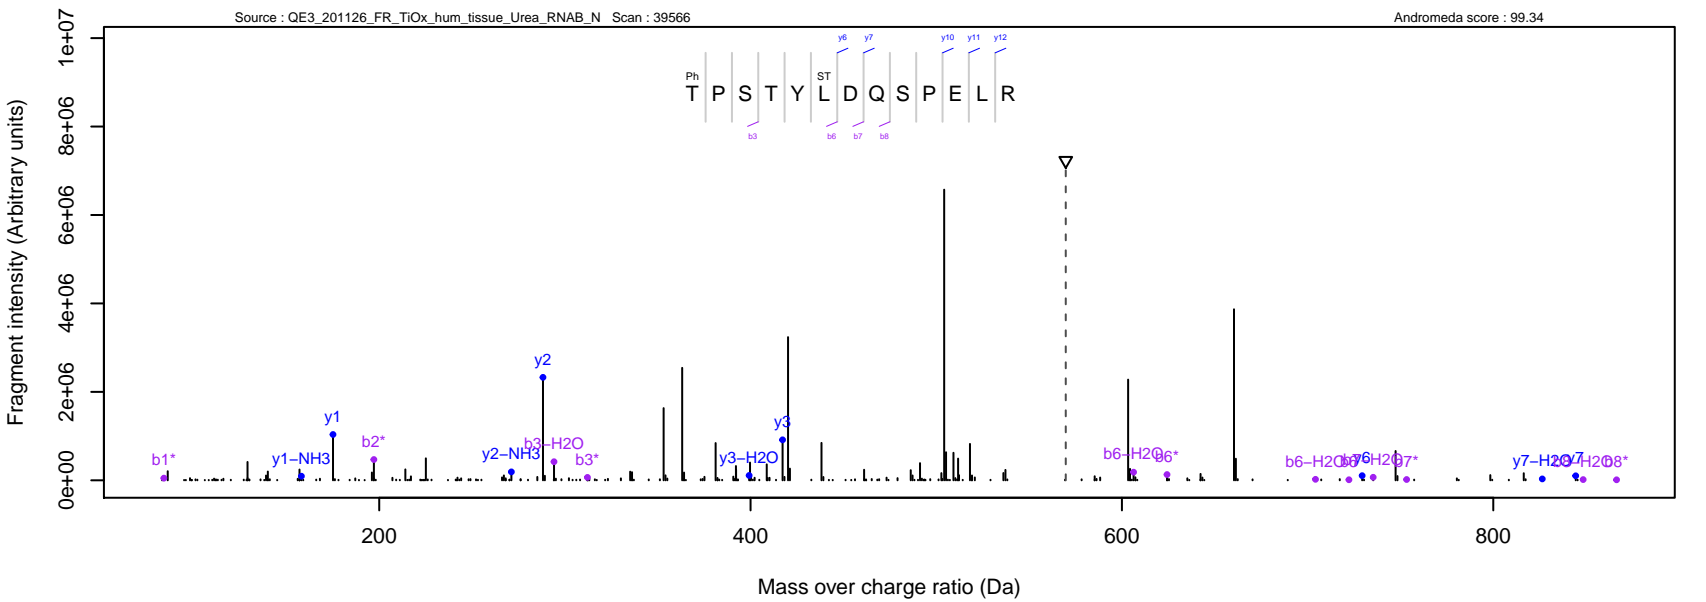

NM(Oxidation (M))T(Phospho (STY))SPIADFPAPPYSAVTPPPDAFSR-3+

Source : QE3\_201126\_FR\_TiOx\_hum\_tissue\_Urea\_RNAB\_H Scan : 55743

Andromeda score : 99.325

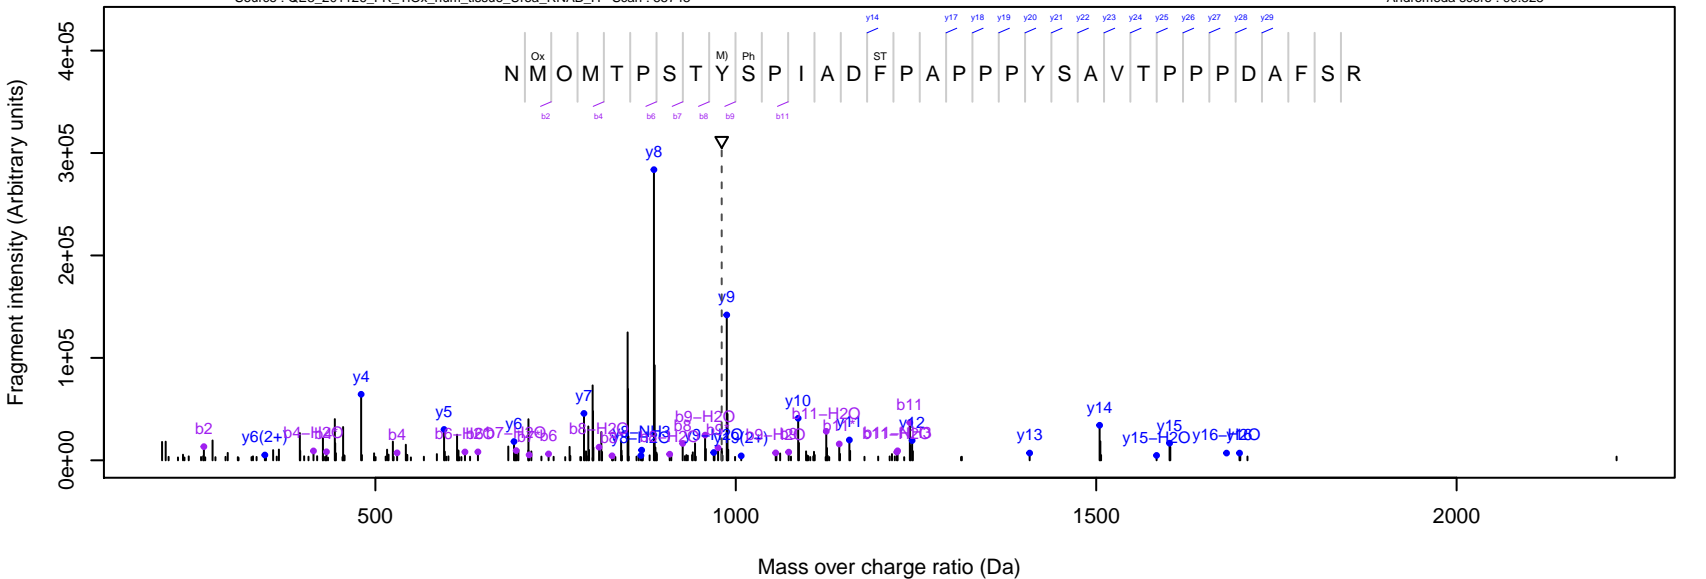



LGLSLTPEIVST(Phospho (STY))PS(Phospho (STY))SPEEDKSLNNAVLIDDSVPTTK-3+

Source : QE3\_201126\_FR\_TiOx\_hum\_tissue\_Urea\_RNAB\_B Scan : 62854

Andromeda score : 99.323

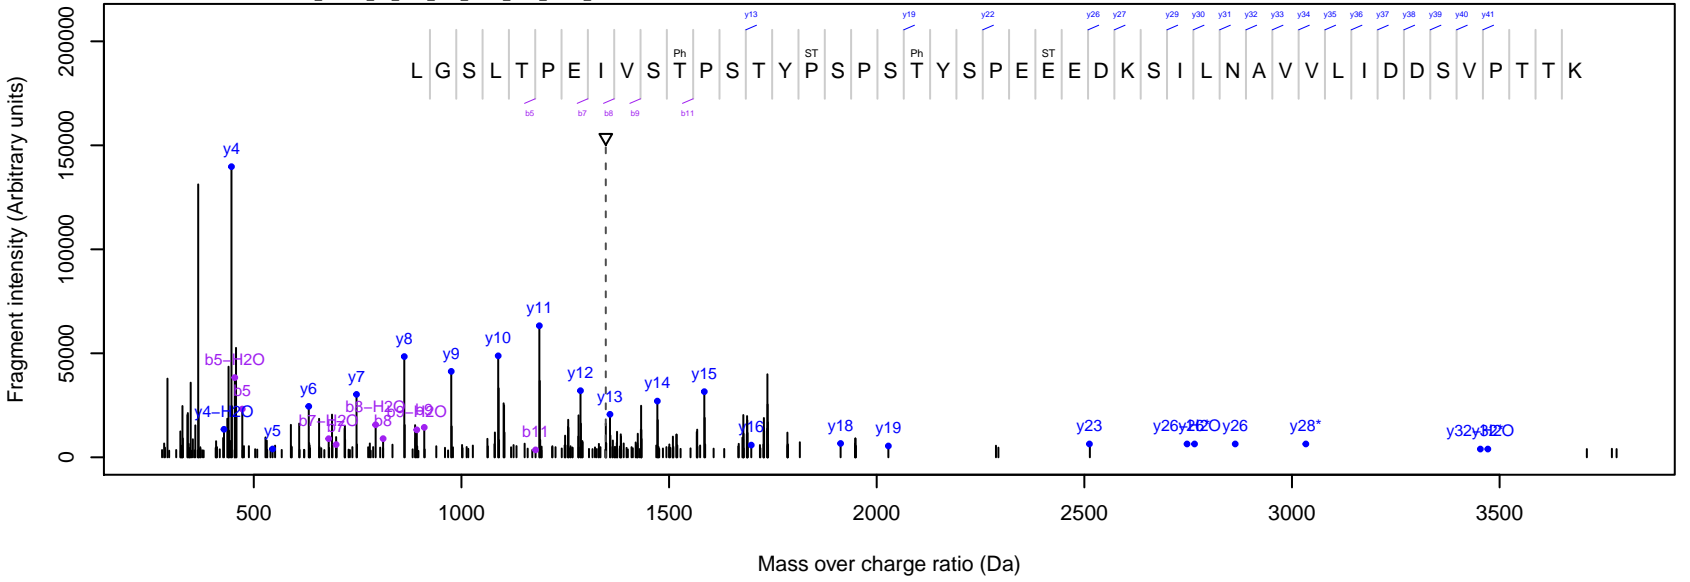

T(Phospho (STY))TSPLEEEEREIK-2+

Source : QE3\_201126\_FR\_TiOx\_hum\_tissue\_Urea\_RNAB\_B Scan : 19654

Andromeda score : 99.283

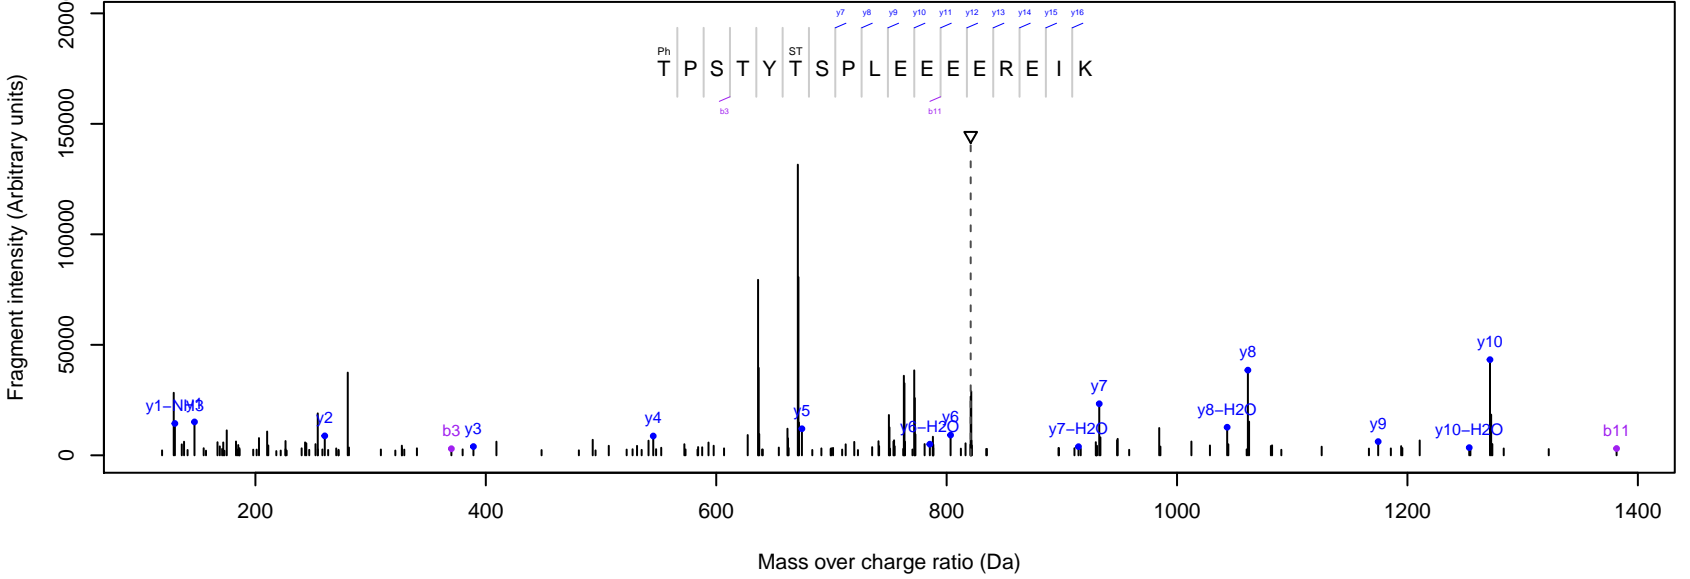

GPTS(Phospho (STY))SPCEEEDRT(Phospho (STY))SDLRDEASSVTR-3+

Source : QE3\_201126\_FR\_TiOx\_hum\_tissue\_Urea\_RNAB\_N Scan : 24669

Andromeda score : 99.228

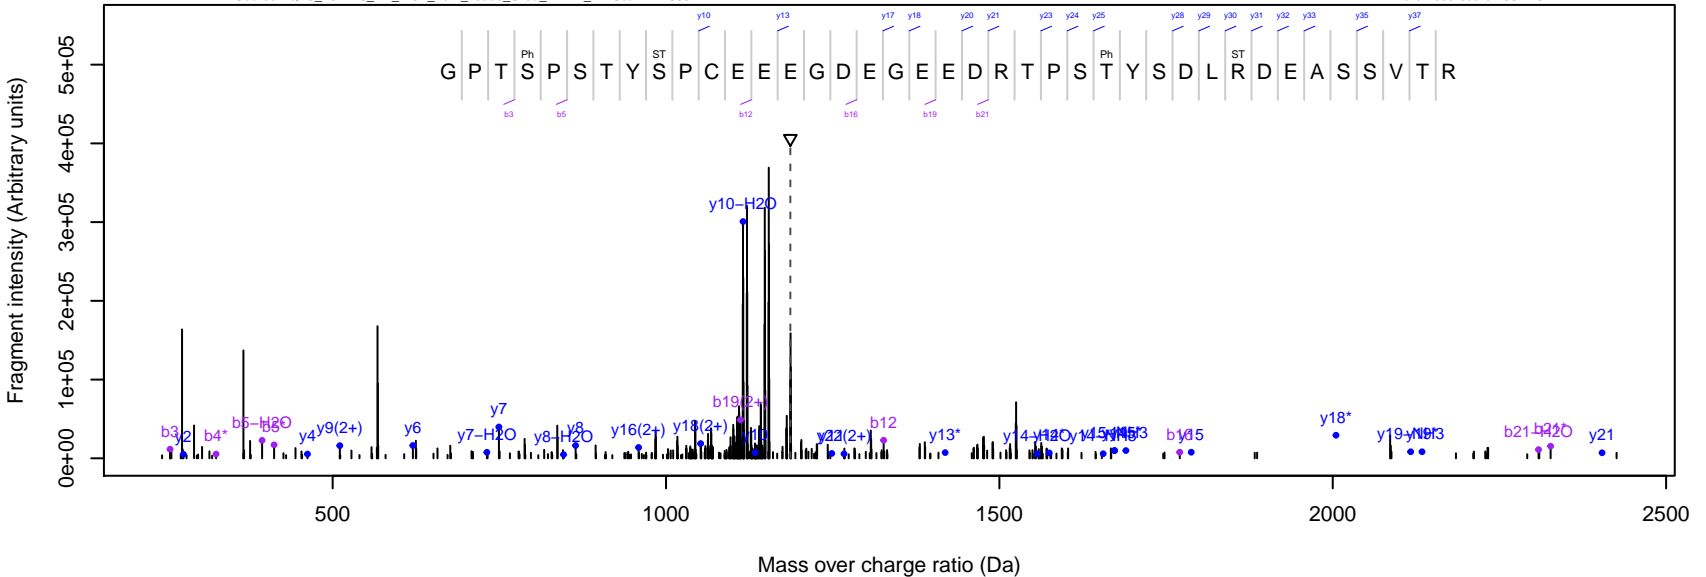

KAPGFGGGSSAVSGGS(Phospho (STY))TAAMITETIETDKPK-4+

Source : QE3\_201126\_FR\_TIOx\_hum\_tissue\_Urea\_RNAB\_N Scan : 53776

Andromeda score : 99.228

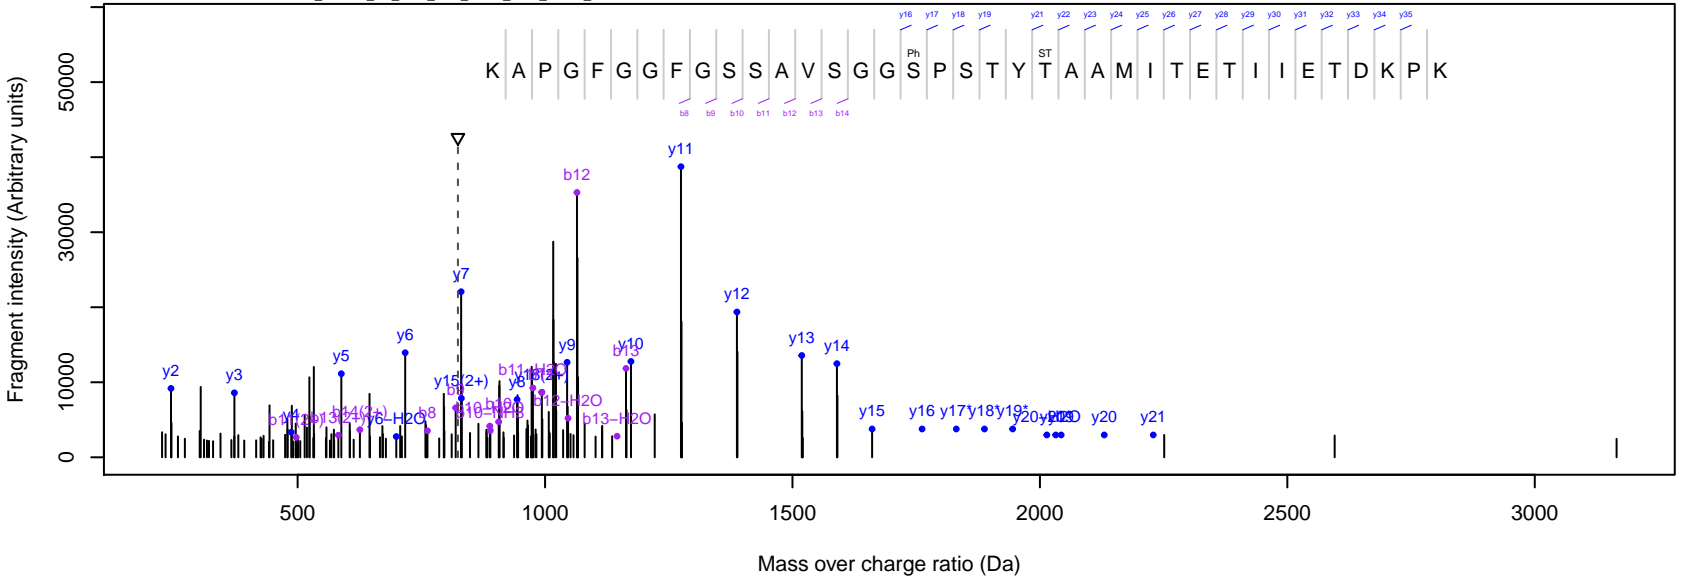

VS(Phospho (STY))SRDKLTEM(Oxidation (M))AASSQGNFEGNFESLDLAEFAK-3+

Source : QE3\_201126\_FR\_TIOx\_hum\_tissue\_Urea\_RNAB\_N Scan : 48942

Andromeda score : 99.228

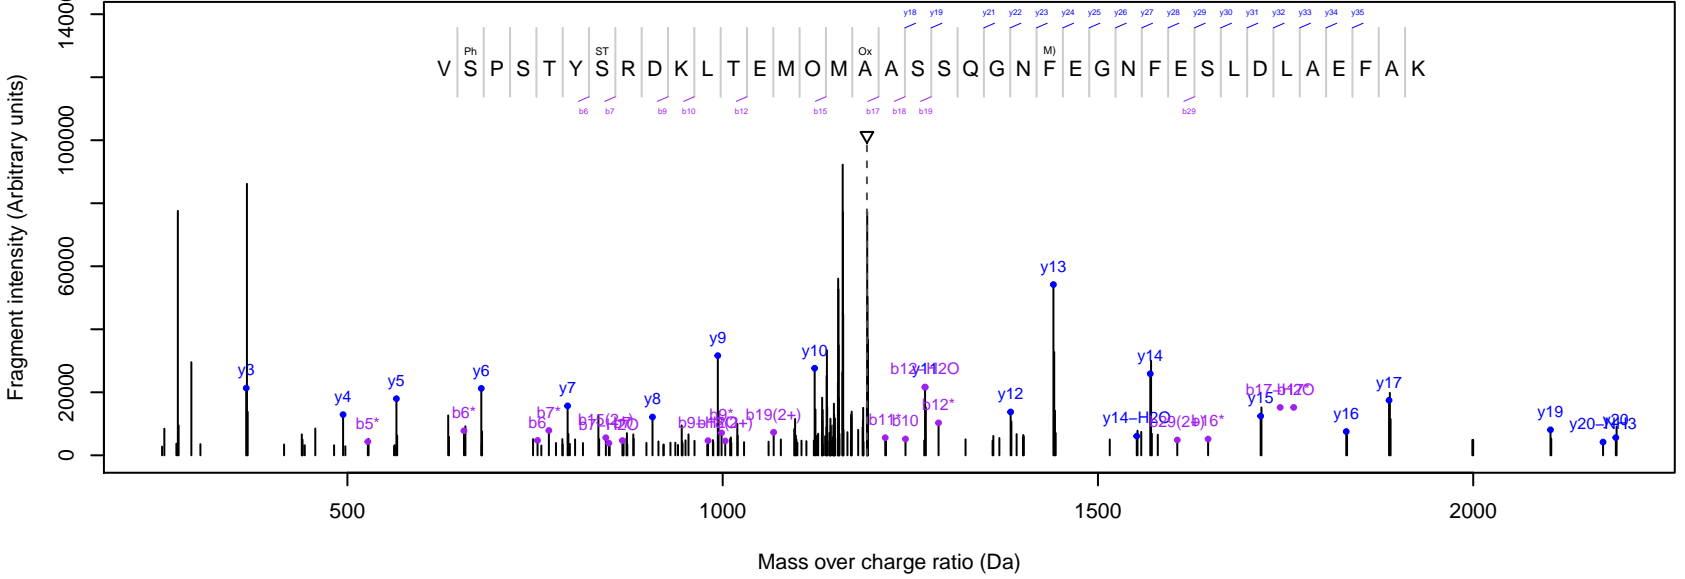

STVLTPM(Oxidation (M))FVET(Phospho (STY))QAS(Phospho (STY))QGTLQTR-3+

Source : QE3\_201126\_FR\_TIOx\_hum\_tissue\_Urea\_RNAB\_B Scan : 49214

Andromeda score : 99.135

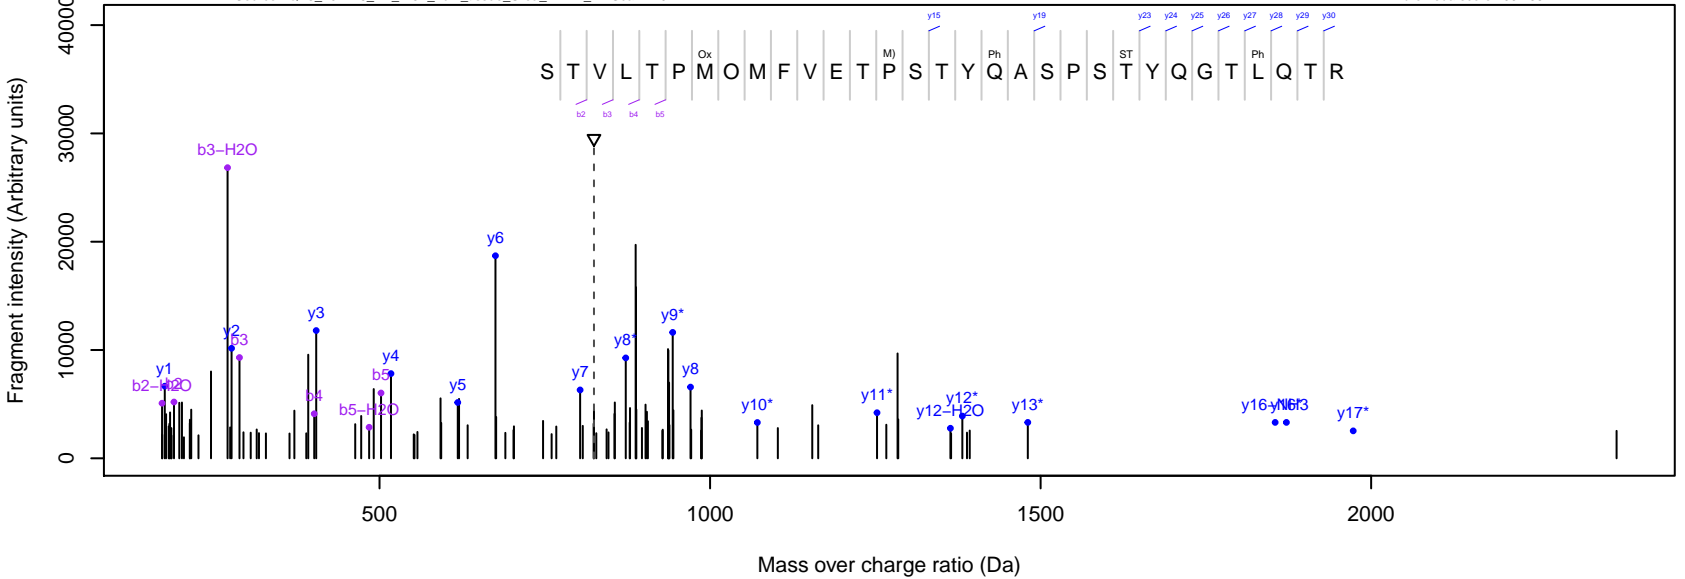

WLKEAEES(Phospho (STY))SGGEEEDENIEVVYSK-3+

Source : QE3\_201126\_FR\_TiOx\_hum\_tissue\_Urea\_RNAB\_H Scan : 34995

Andromeda score : 99.135

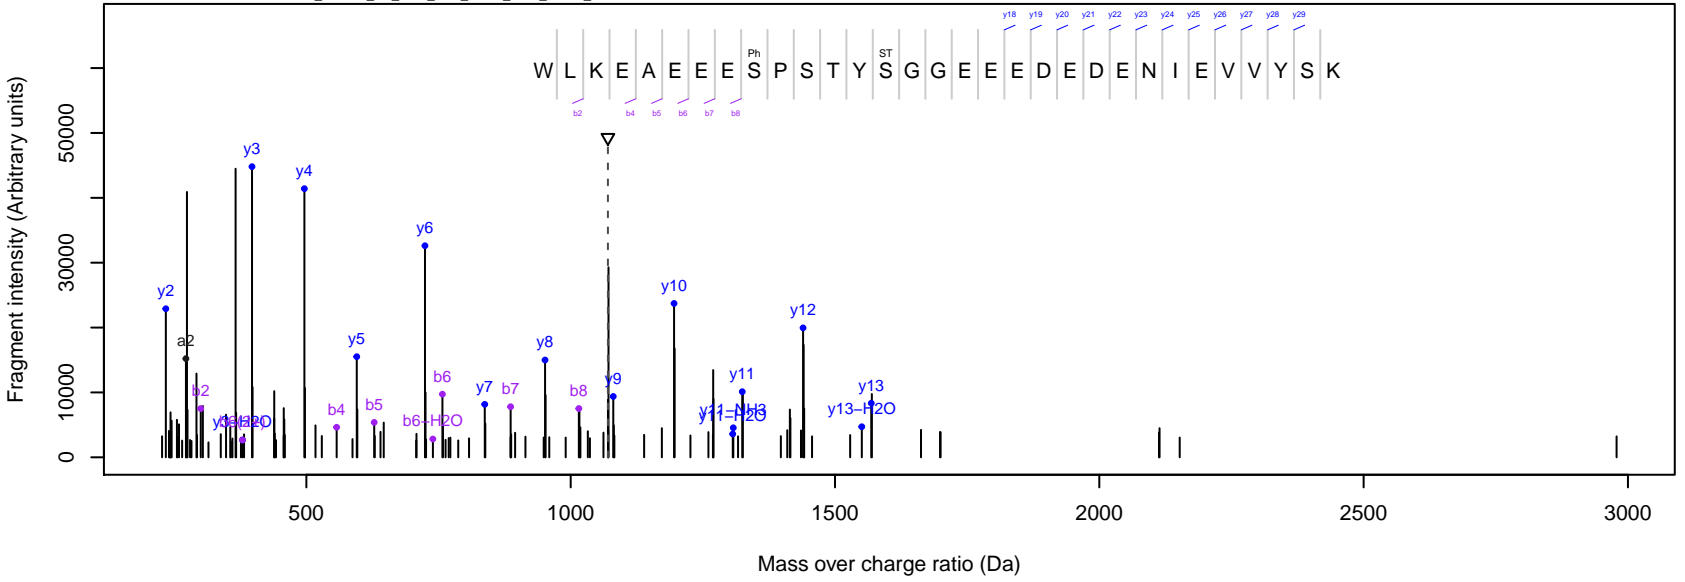

STS(Phospho (STY))TPNVHM(Oxidation (M))VSTTLPVDSR-3+

Source : QE3\_201126\_FR\_TiOx\_hum\_tissue\_Urea\_RNAB\_N Scan : 22408

Andromeda score : 99.11

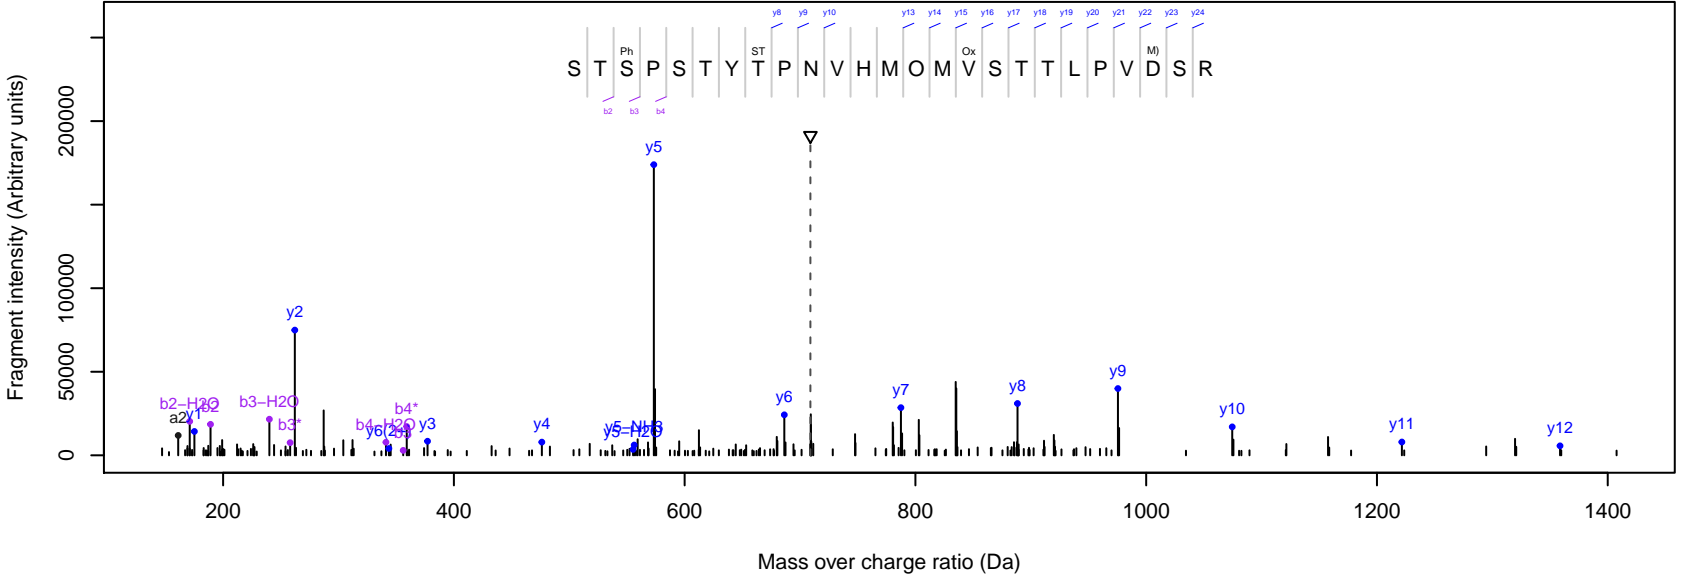

KEDESQM(Oxidation (M))EDPSTS(Phospho (STY))PSPGTR-3+

Source : QE3\_201126\_FR\_TiOx\_hum\_tissue\_Urea\_RNAB\_N Scan : 6454

Andromeda score : 99.064

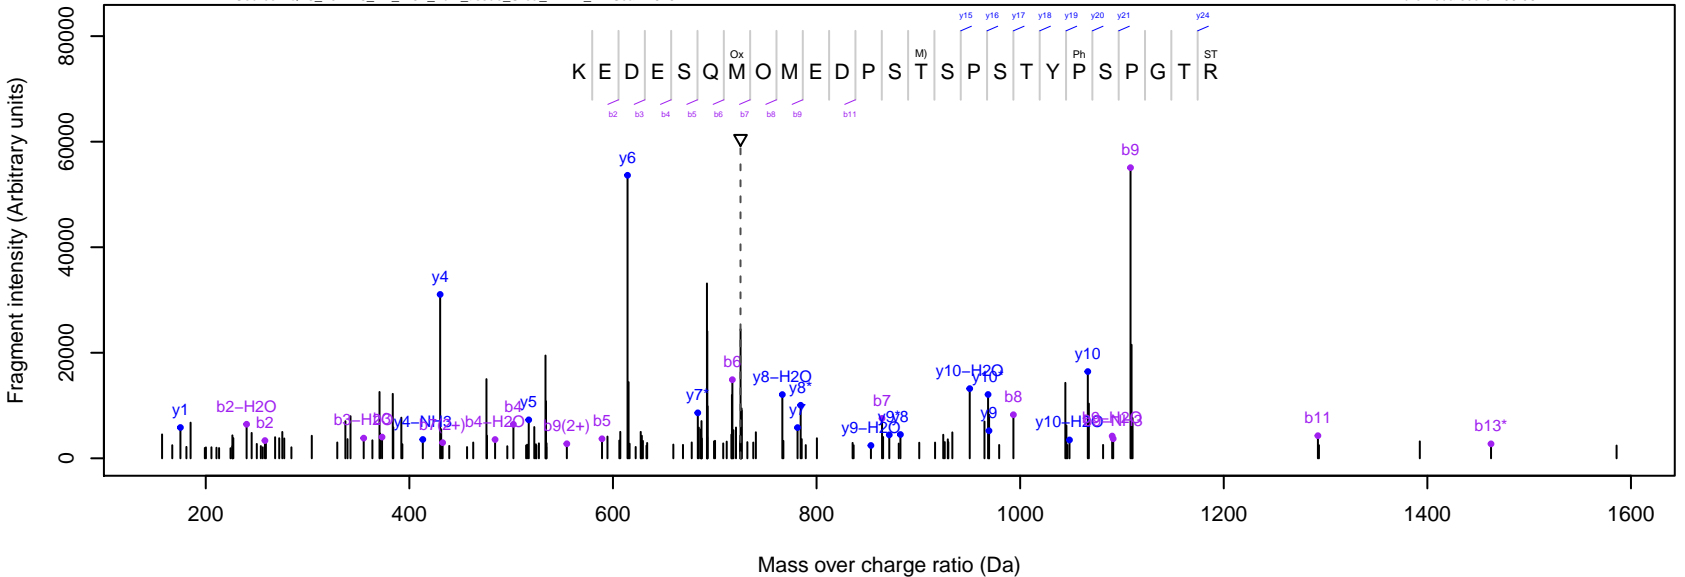

HTRDS(Phospho (STY))EAQLPDSFK-3+

Source : QE3\_201126\_FR\_TIOx\_hum\_tissue\_Urea\_RNAB\_N Scan : 11832

Andromeda score : 99.059

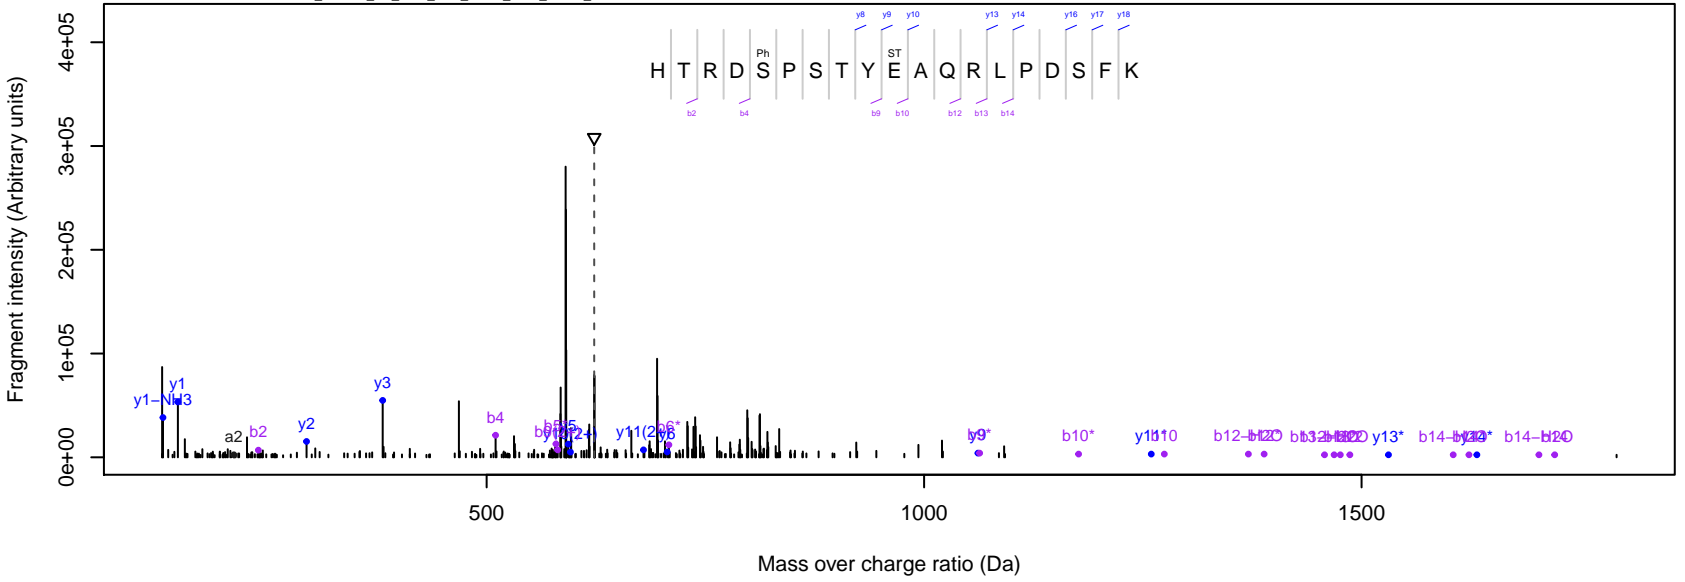

QKT(Phospho (STY))PPPVAPKPAVK-3+

Source : QE3\_201126\_FR\_TIOx\_hum\_tissue\_Urea\_RNAB\_H Scan : 7116

Andromeda score : 99.055

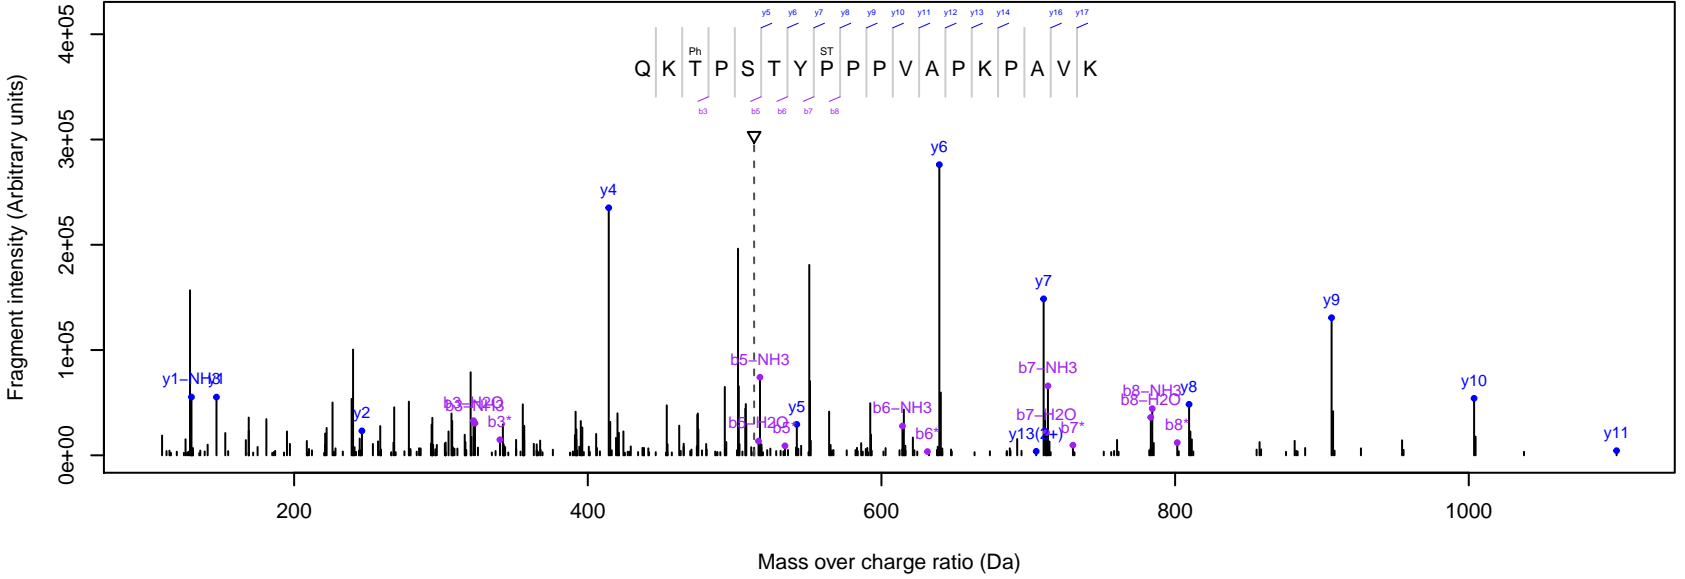

ADSAYSSFAAS(Phospho (STY))GGPEPR-2+

Source : QE3\_201126\_FR\_TIOx\_hum\_tissue\_Urea\_RNAB\_B Scan : 25035

Andromeda score : 99.044

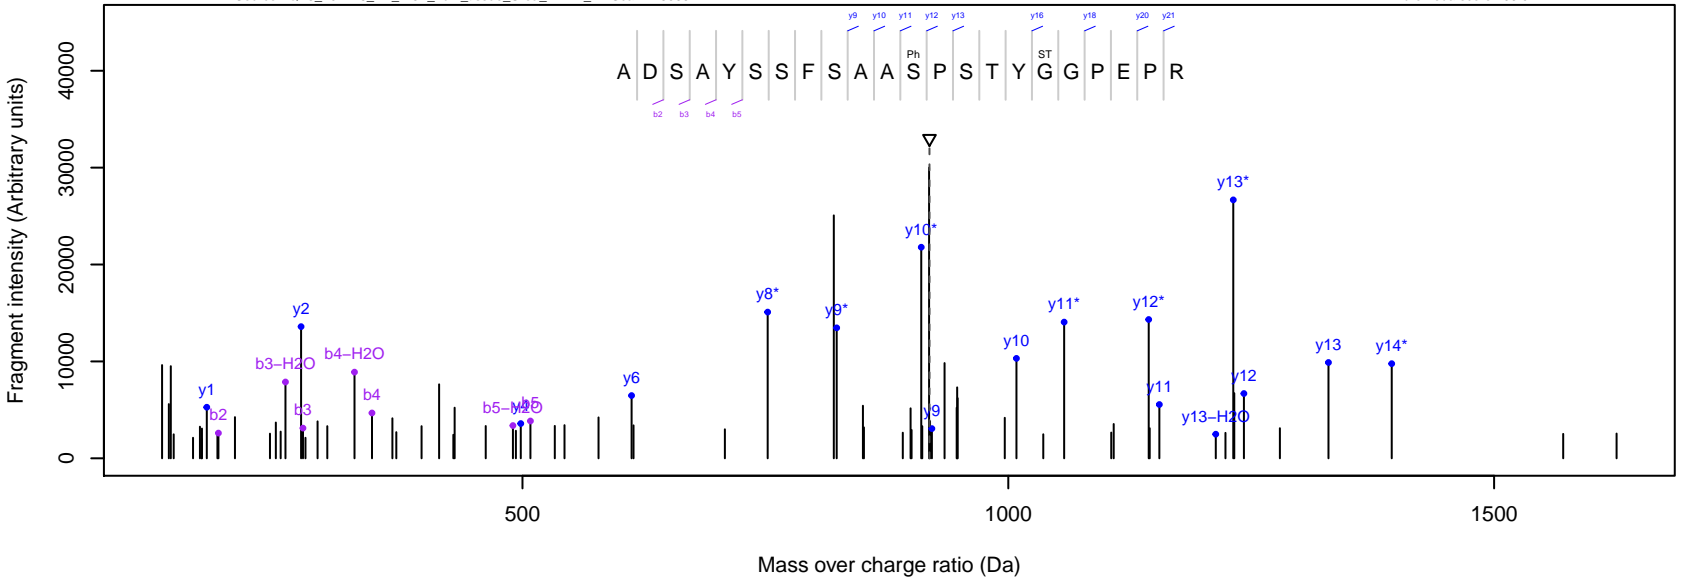

GRPPAEKLS(Phospho (STY))PNPPK-3+

Source : QE3\_201126\_FR\_TiOx\_hum\_tissue\_Urea\_RNAB\_N Scan : 8021

Andromeda score : 99.044

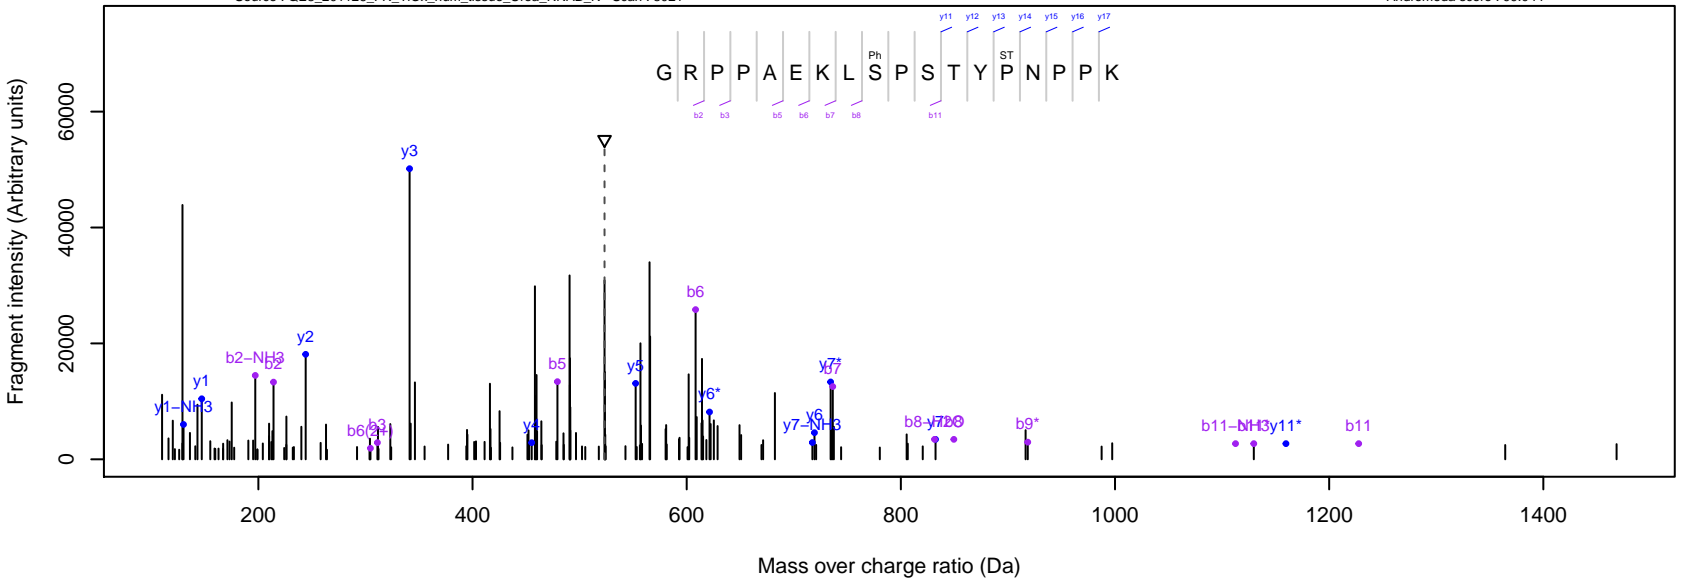

(Acetyl (Protein N-term))ASESDT(Phospho (STY))EEFYDAPEDVHLGGGYPVGS PGK-3+

Source : QE3\_201126\_FR\_TiOx\_hum\_tissue\_Urea\_RNAB\_H Scan : 52566

Andromeda score : 99.018

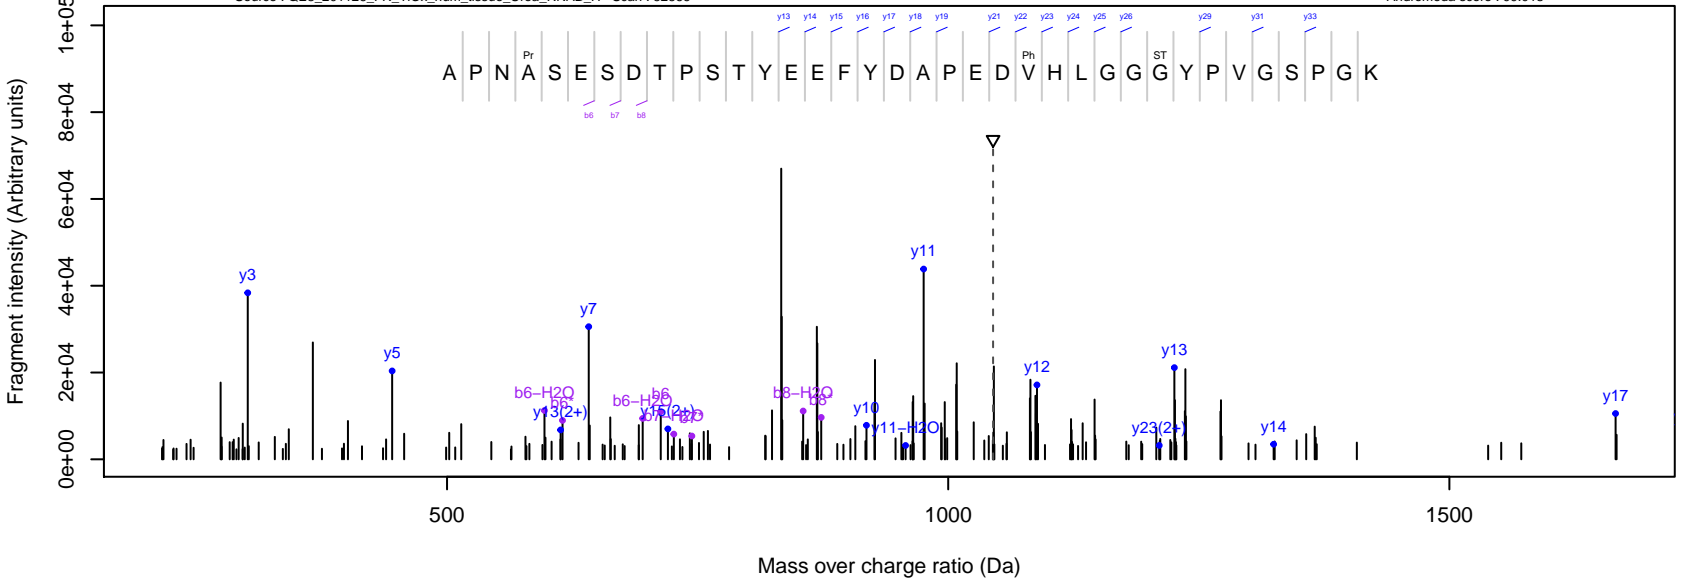

SGS(Phospho (STY))LPSLHDIK-2+

Source : QE3\_201126\_FR\_TiOx\_hum\_tissue\_Urea\_RNAB\_N Scan : 37151

Andromeda score : 99.011

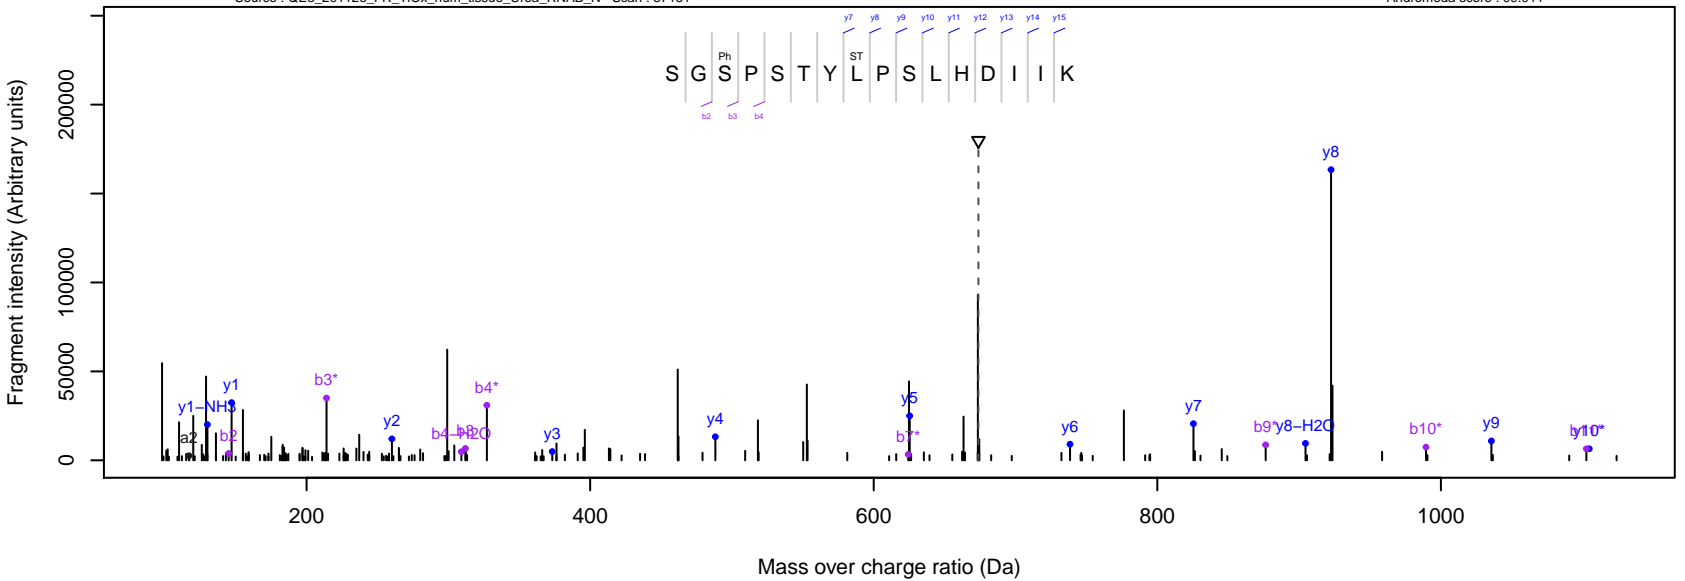

SLS(Phospho (STY))DPIPQR-2+

Source : QE3\_201126\_FR\_TiOx\_hum\_tissue\_Urea\_RNAB\_H Scan : 22399

Andromeda score : 98.943

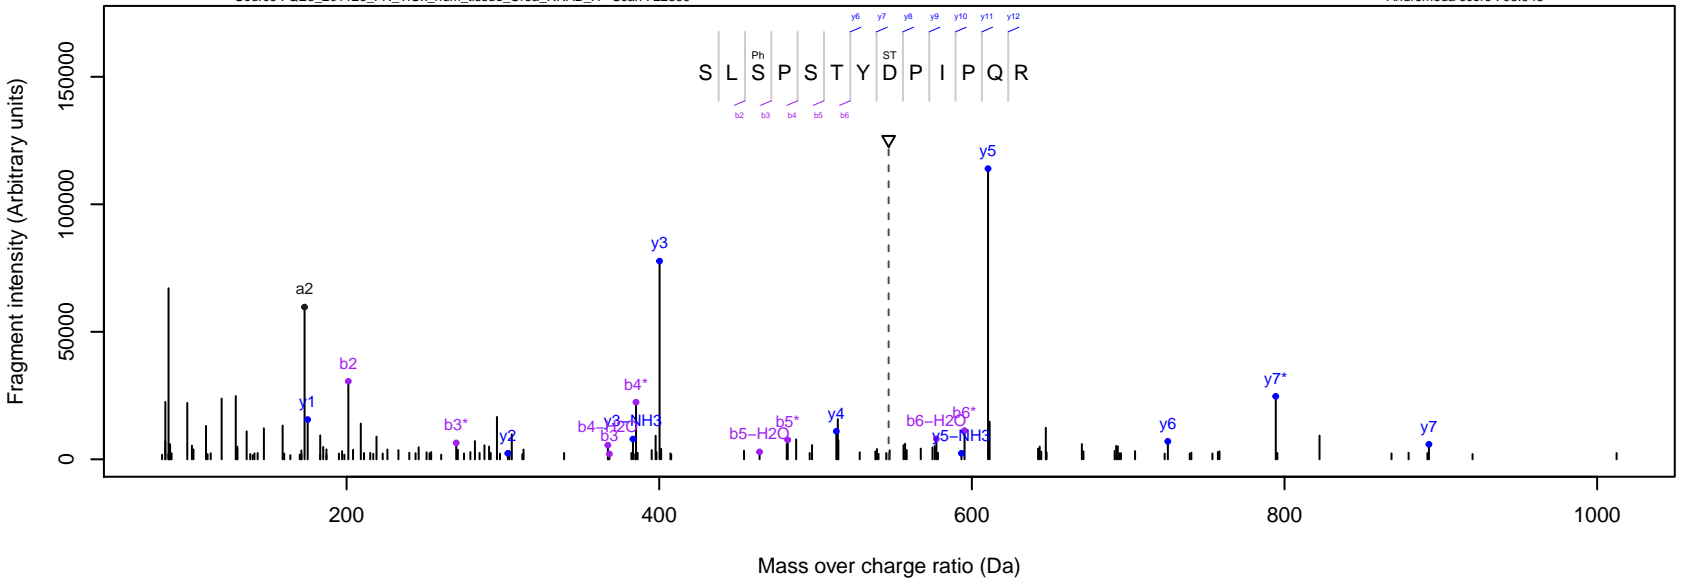

RLPIFSRLS(Phospho (STY))ISDD-2+

Source : QE3\_201126\_FR\_TiOx\_hum\_tissue\_Urea\_RNAB\_H Scan : 44247

Andromeda score : 98.942

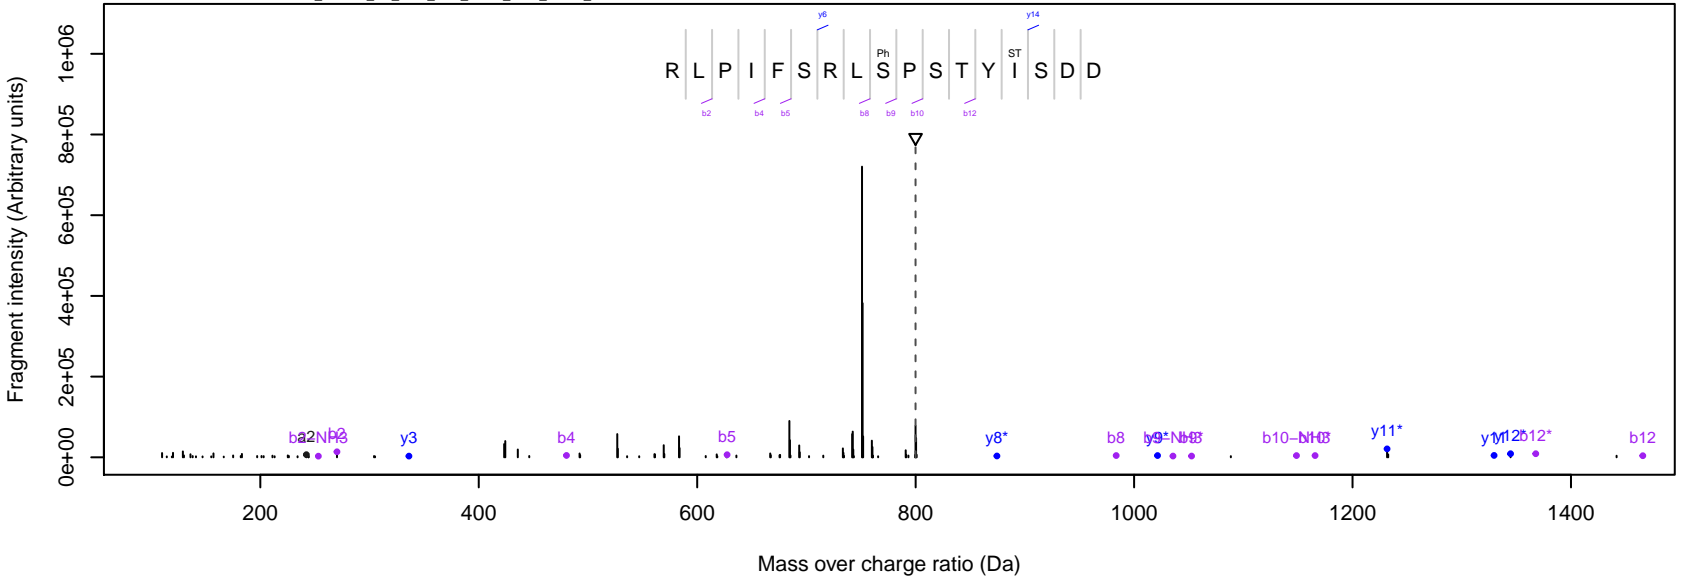

RRT(Phospho (STY))PTPLALR-3+

Source : QE3\_201126\_FR\_TiOx\_hum\_tissue\_Urea\_RNAB\_B Scan : 11054

Andromeda score : 98.942

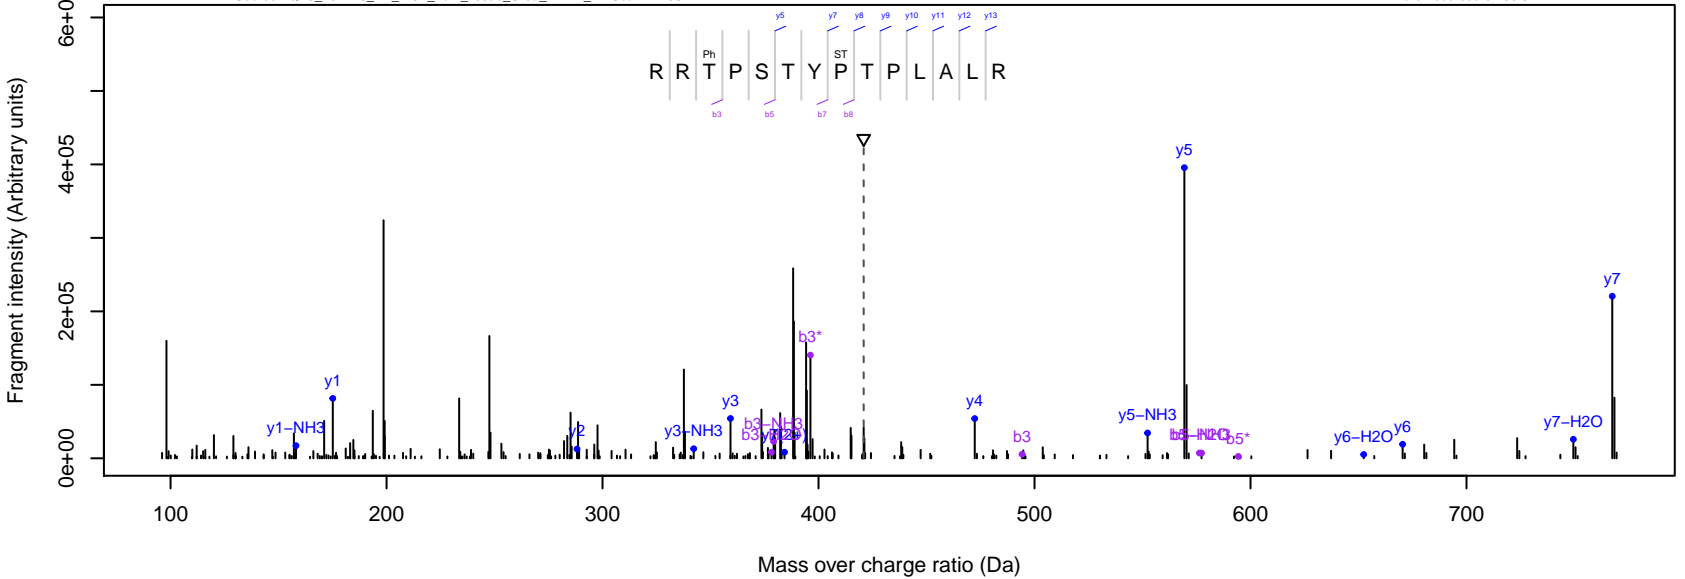

RGPLSQNGSFGPS(Phospho (STY))PVSGGECSPSTY(Phospho (STY))PPLTVEPPVRLSATLNR-4+

Source : QE3\_201126\_FR\_TIOx\_hum\_tissue\_Urea\_RNAB\_H Scan : 48501

Andromeda score : 98.841

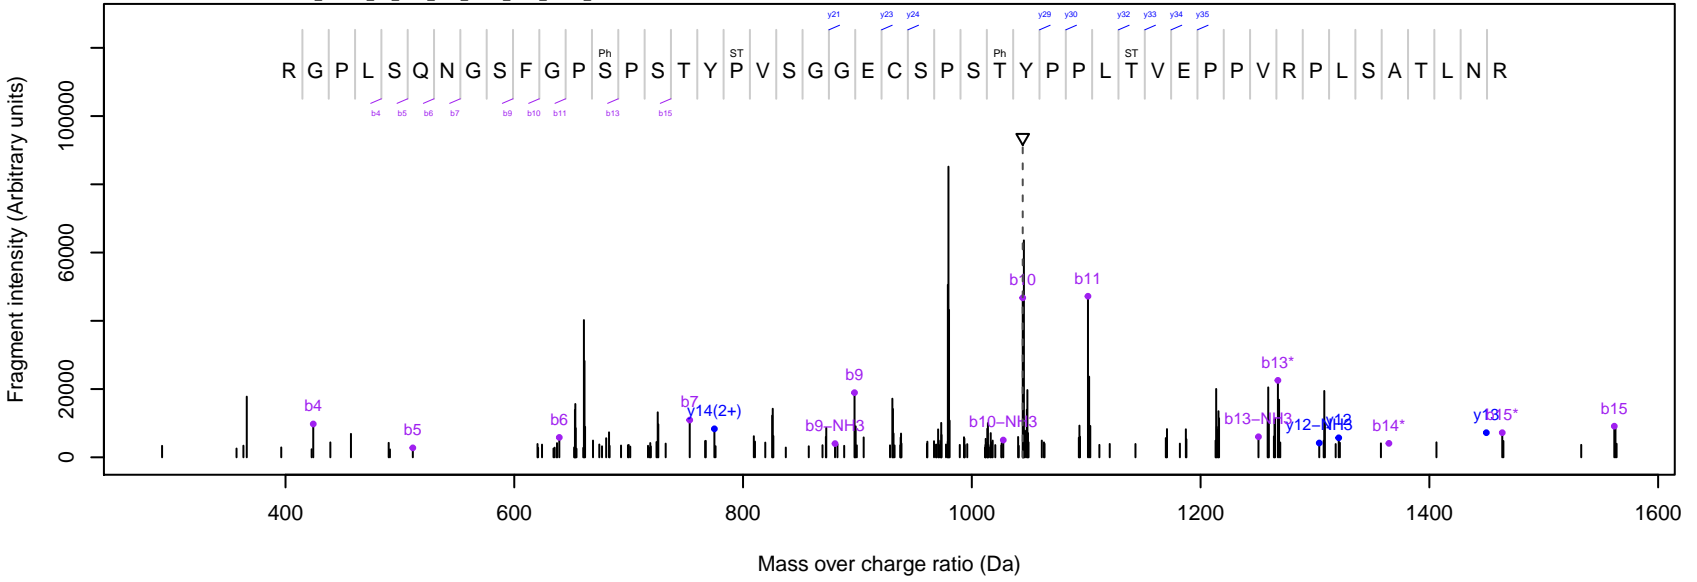

KS(Phospho (STY))SFNVSDVARPEAAGSPPEEGCTEGTPAK-3+

Source : QE3\_201126\_FR\_TIOx\_hum\_tissue\_Urea\_RNAB\_B Scan : 21738

Andromeda score : 98.812

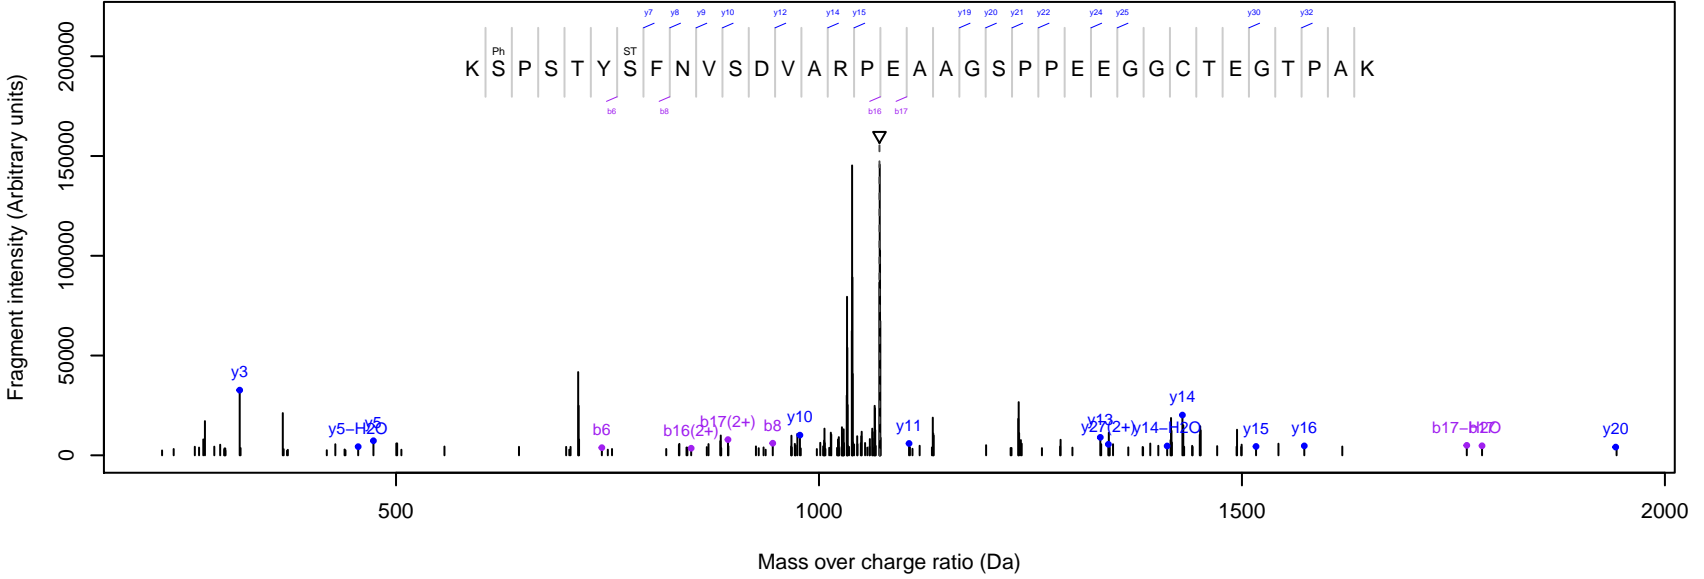

STPES(Phospho (STY))GDS(Phospho (STY))DKESVGSSTSNEGGR-3+

Source : QE3\_201126\_FR\_TIOx\_hum\_tissue\_Urea\_RNAB\_N Scan : 8507

Andromeda score : 98.812

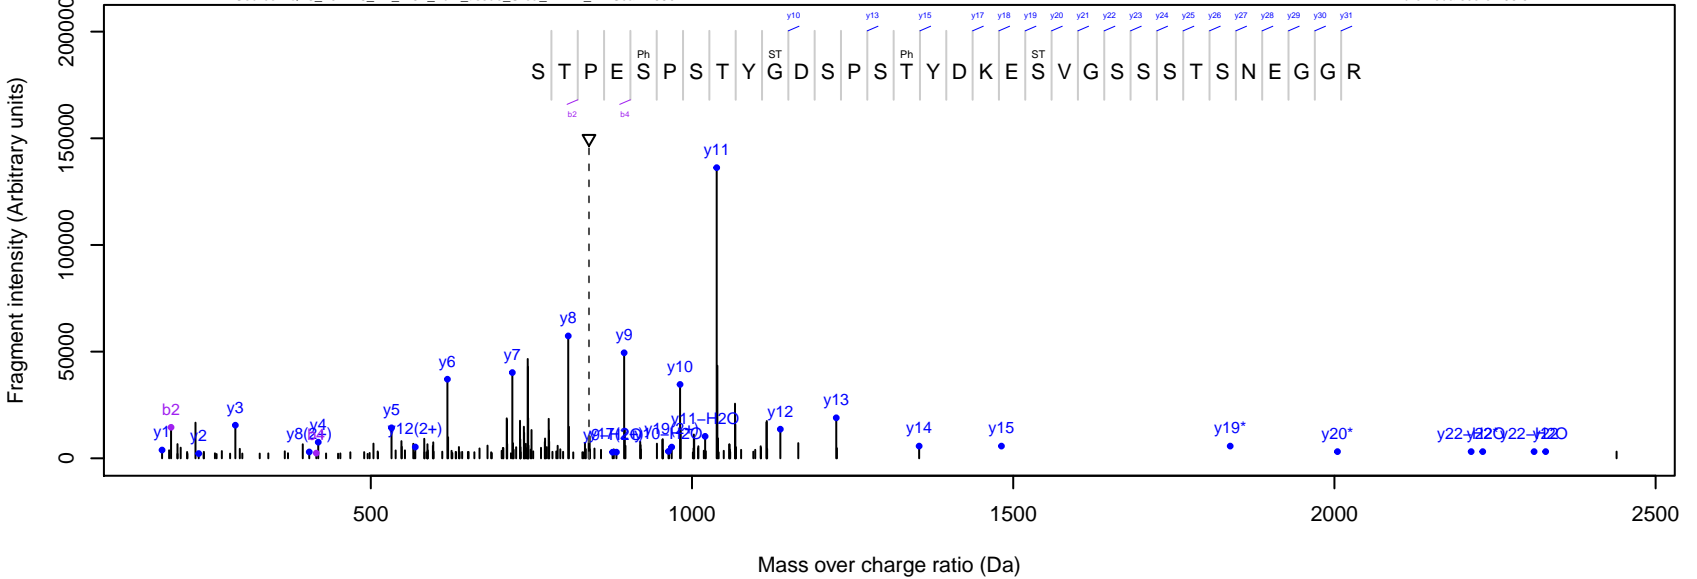

DRT(Phospho (STY))PPLLYSRDR-4+

Source : QE3\_201126\_FR\_TiOx\_hum\_tissue\_Urea\_RNAB\_H Scan : 13395

Andromeda score : 98.796

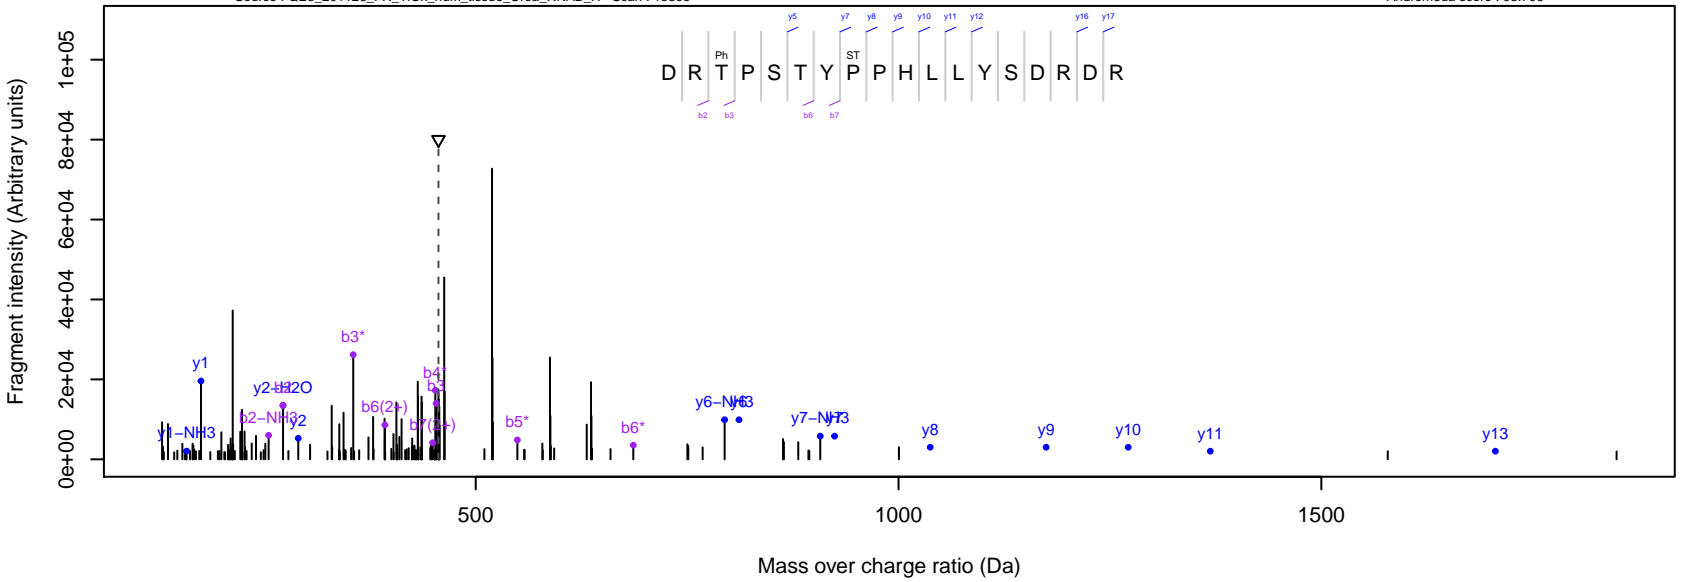

YFDNKDDDS(Phospho (STY))DTETSNDLPK-3+

Source : QE3\_201126\_FR\_TiOx\_hum\_tissue\_Urea\_RNAB\_B Scan : 20111

Andromeda score : 98.74

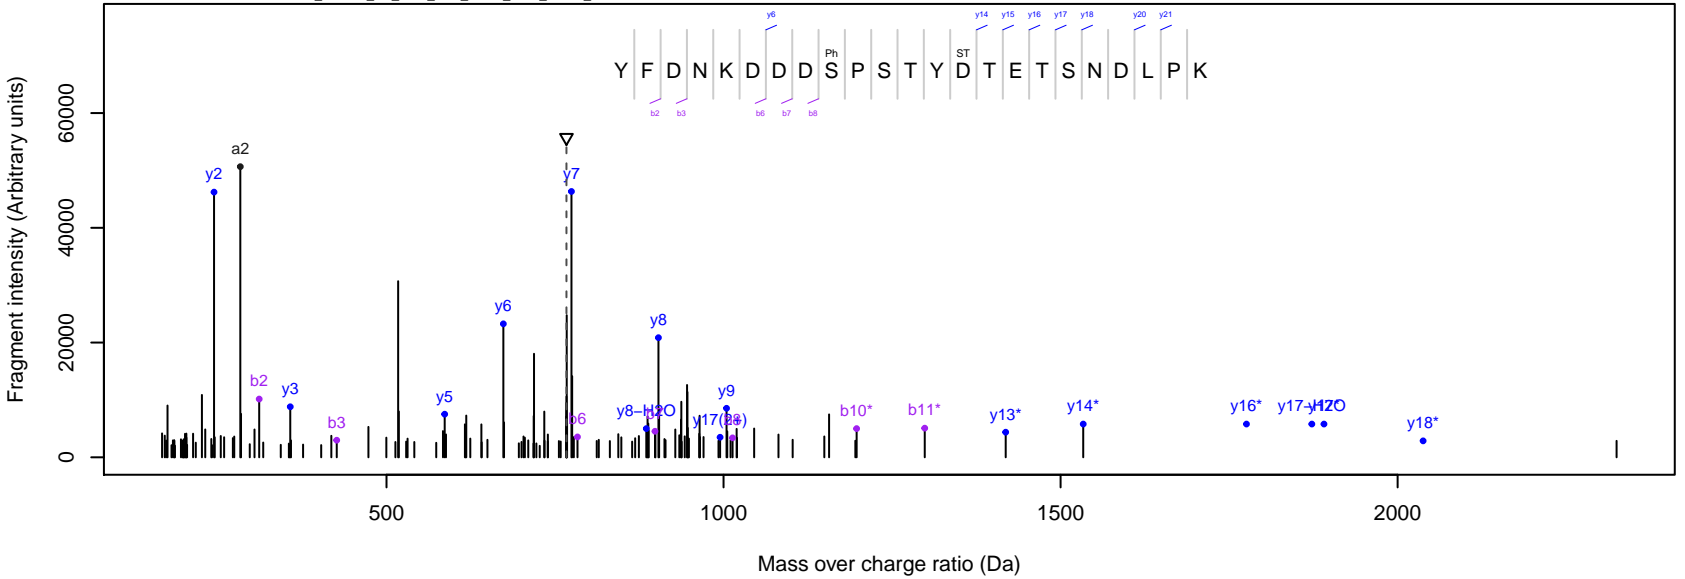

TAFYNEDDS(Phospho (STY))EEEQR-2+

Source : QE3\_201126\_FR\_TiOx\_hum\_tissue\_Urea\_RNAB\_N Scan : 19617

Andromeda score : 98.694

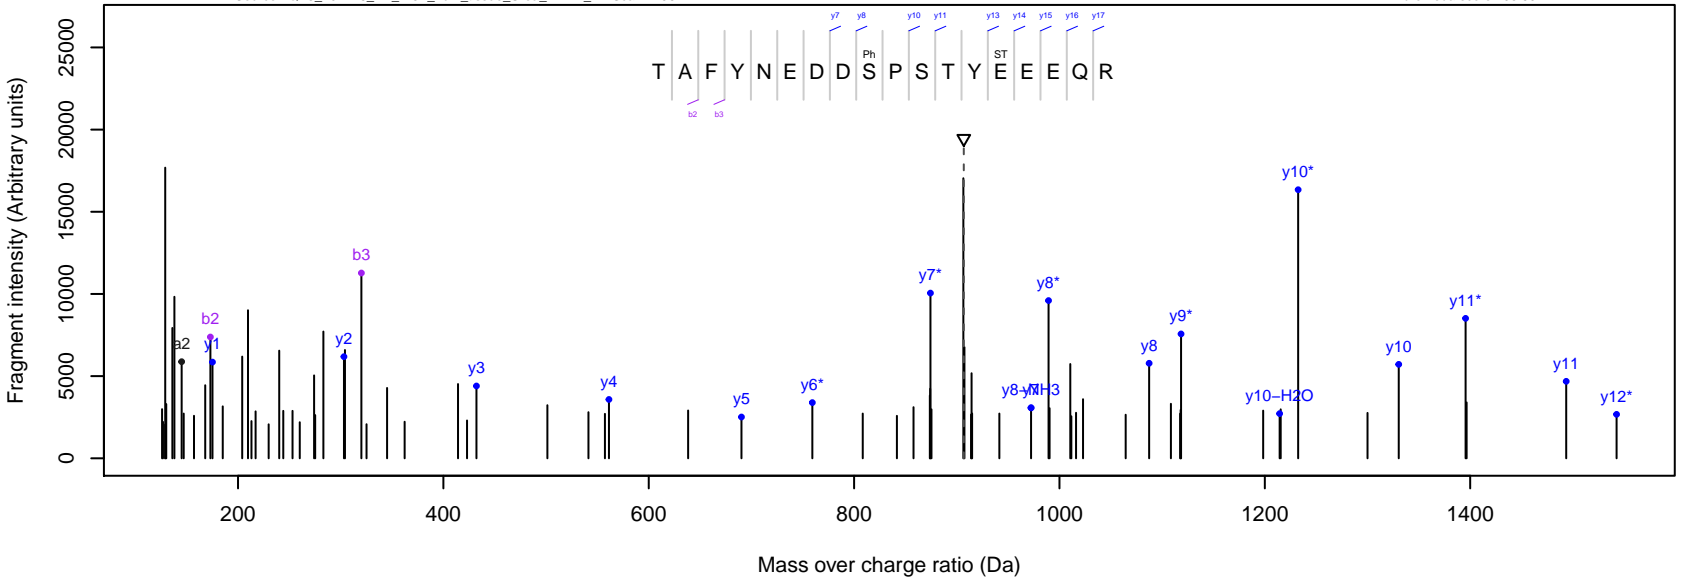



AEDS(Phospho (STY))DS(Phospho (STY))EPEPEDNVR-2+

Source : QE3\_201126\_FR\_TiOx\_hum\_tissue\_Urea\_RNAB\_B Scan : 17890

Andromeda score : 98.676

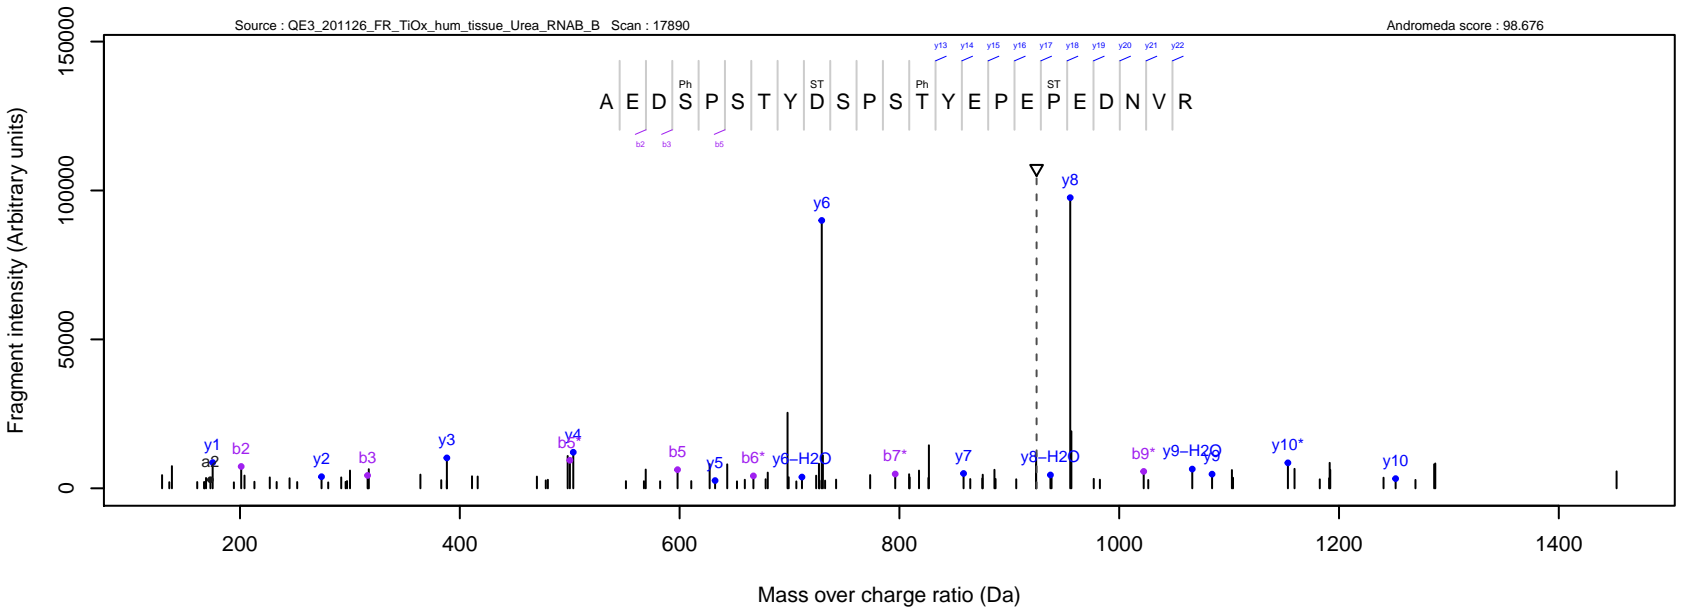

LERSPSTYPVDES GDEVQYGDVPVENGMAPPFFEMK-3+

Source : QE3\_201126\_FR\_TiOx\_hum\_tissue\_Urea\_RNAB\_N Scan : 55309

Andromeda score : 98.636

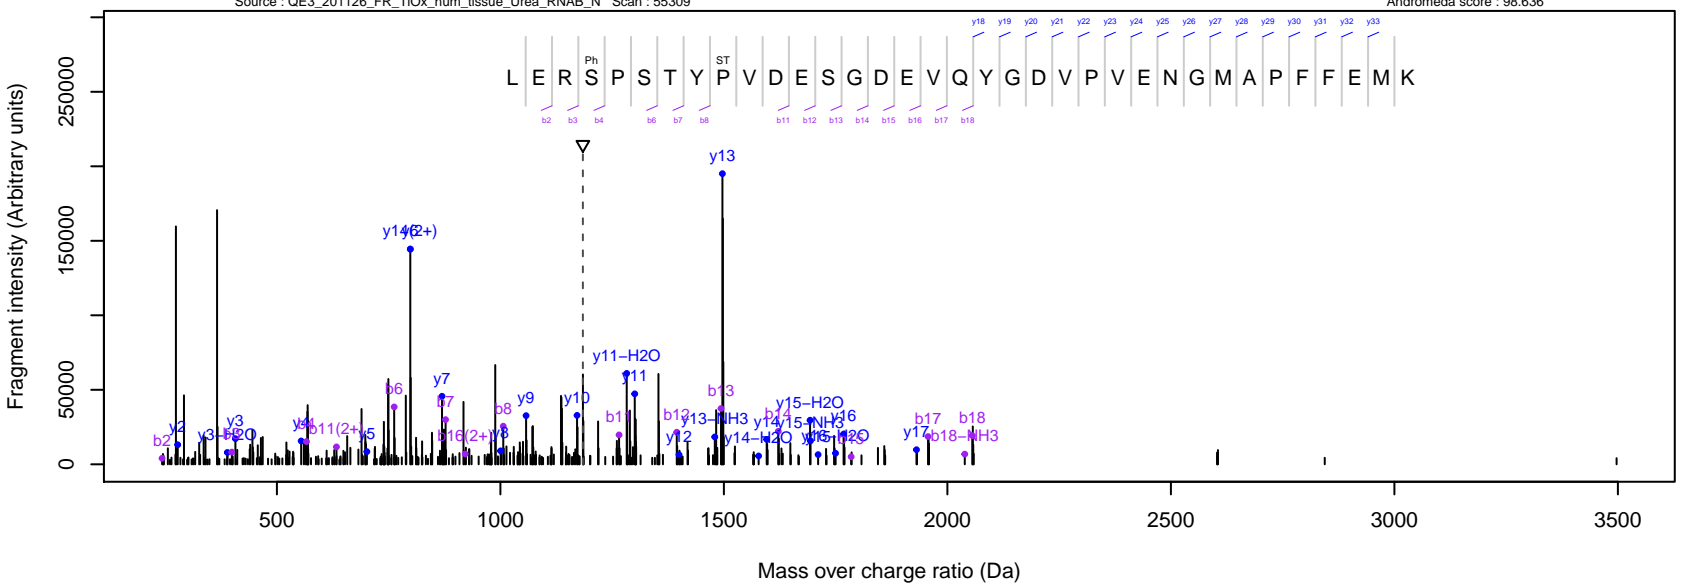

MKNFETLSFS(Phospho (STY))PEENFGDDSGLAAYVAK-3+

Source : QE3\_201126\_FR\_TiOx\_hum\_tissue\_Urea\_RNAB\_B Scan : 54298

Andromeda score : 98.632

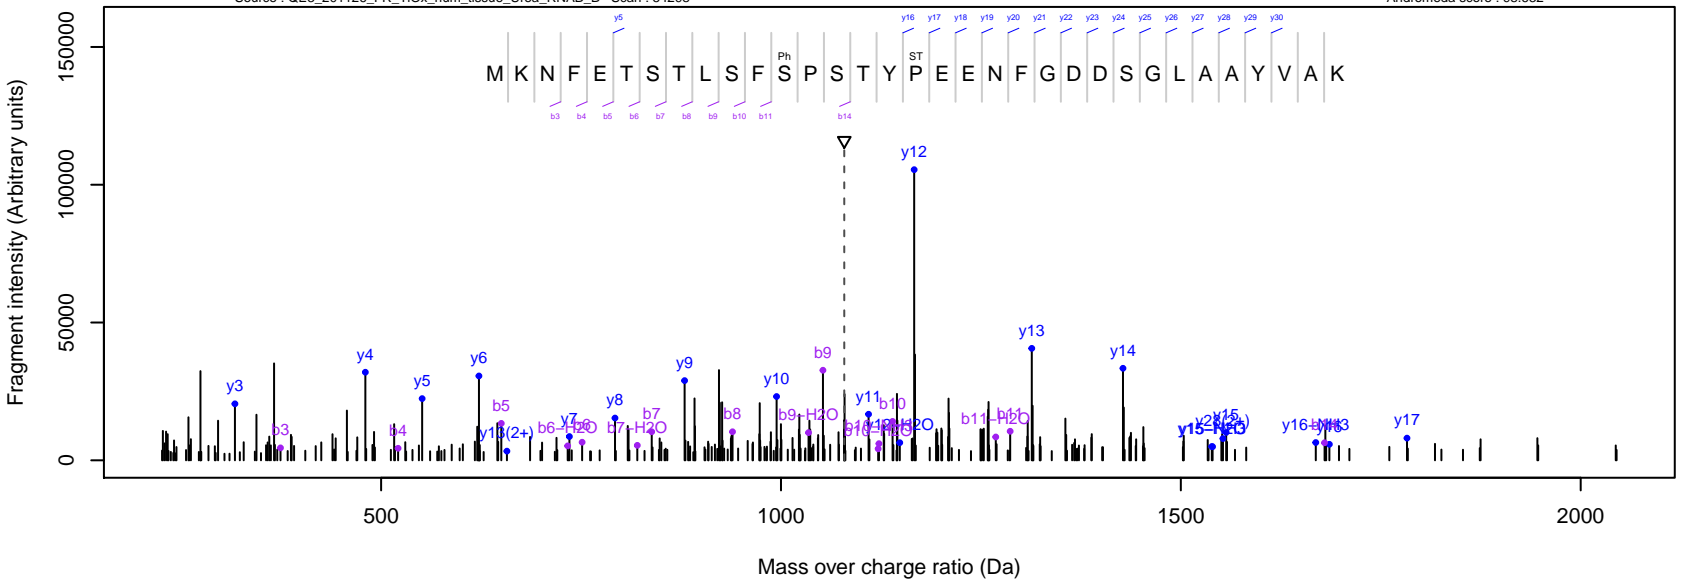

ALAAVPS(Phospho (STY))AGSVQR-2+

Source : QE3\_201126\_FR\_TIOx\_hum\_tissue\_Urea\_RNAB\_N Scan : 22344

Andromeda score : 98.592

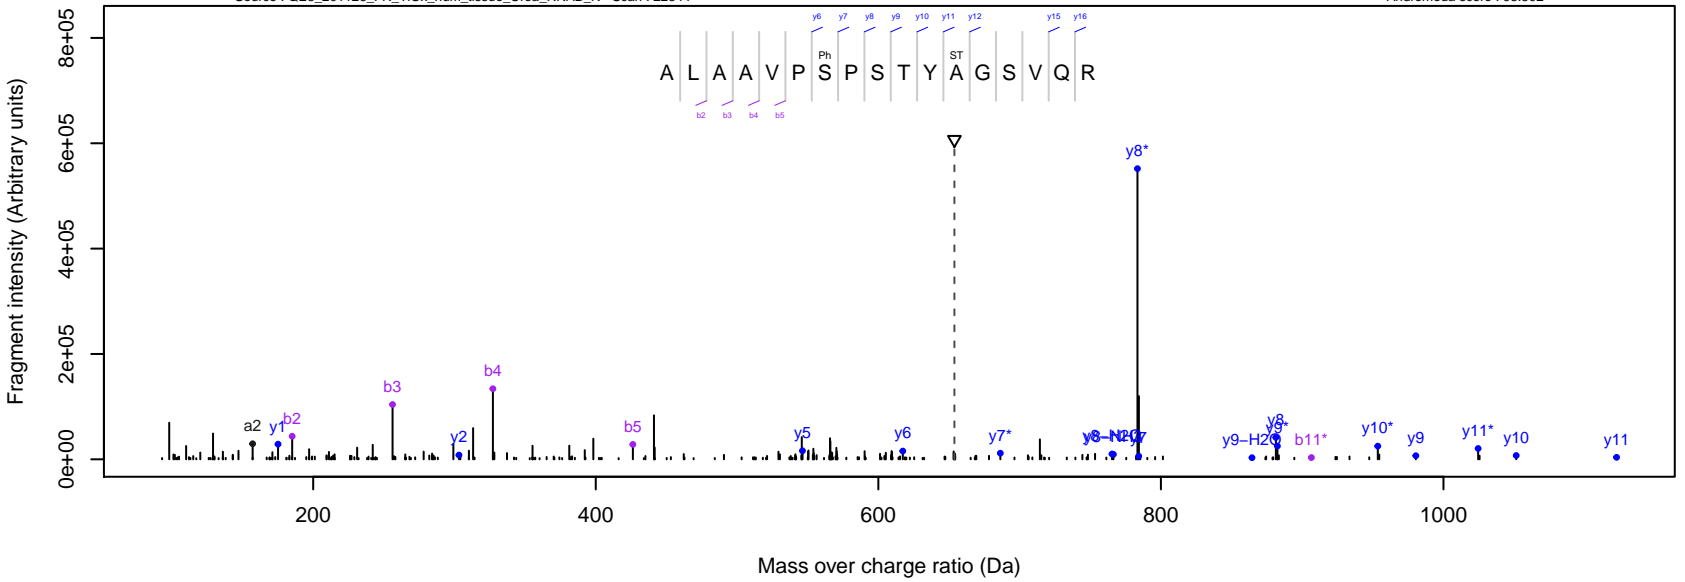

QIS(Phospho (STY))FKAENVSSGK-2+

Source : QE3\_201126\_FR\_TIOx\_hum\_tissue\_Urea\_RNAB\_N Scan : 17581

Andromeda score : 98.592

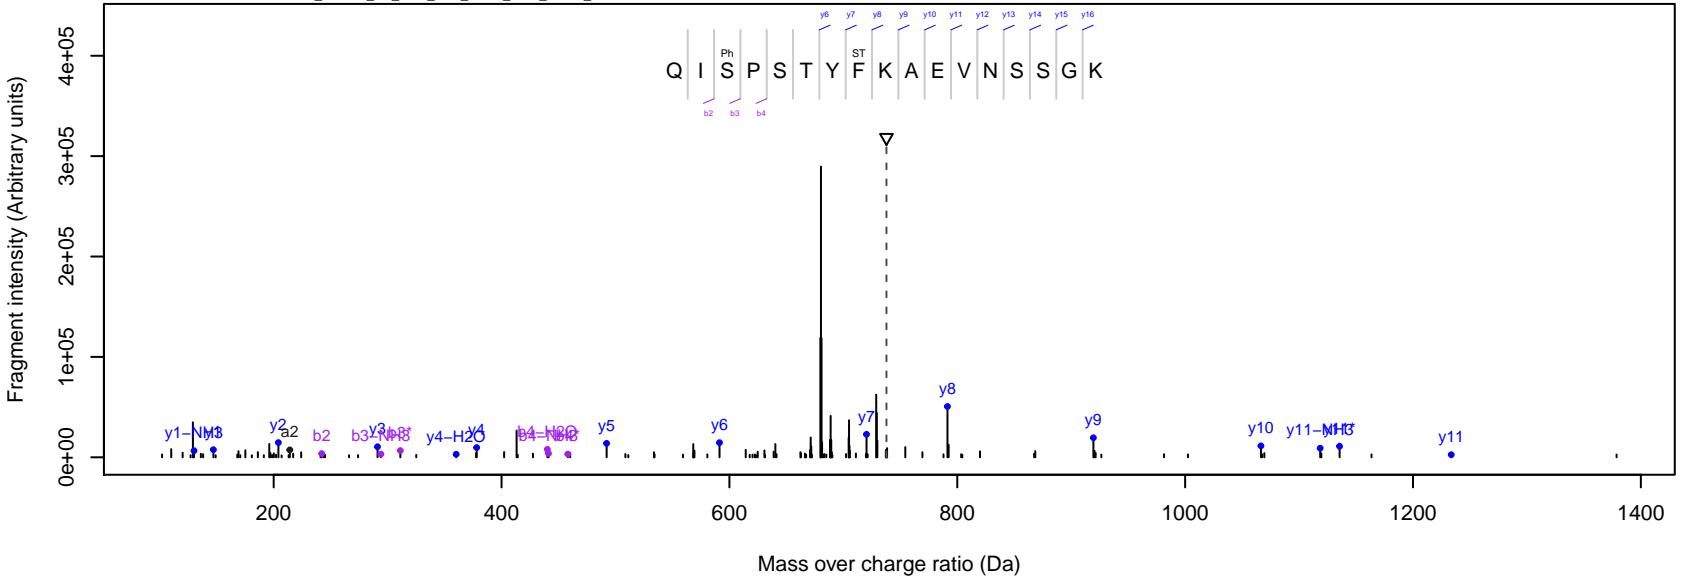

TVFPGAVPVLPA(Phospho (STY))PPPKDSLRL-3+

Source : QE3\_201126\_FR\_TIOx\_hum\_tissue\_Urea\_RNAB\_N Scan : 43038

Andromeda score : 98.565

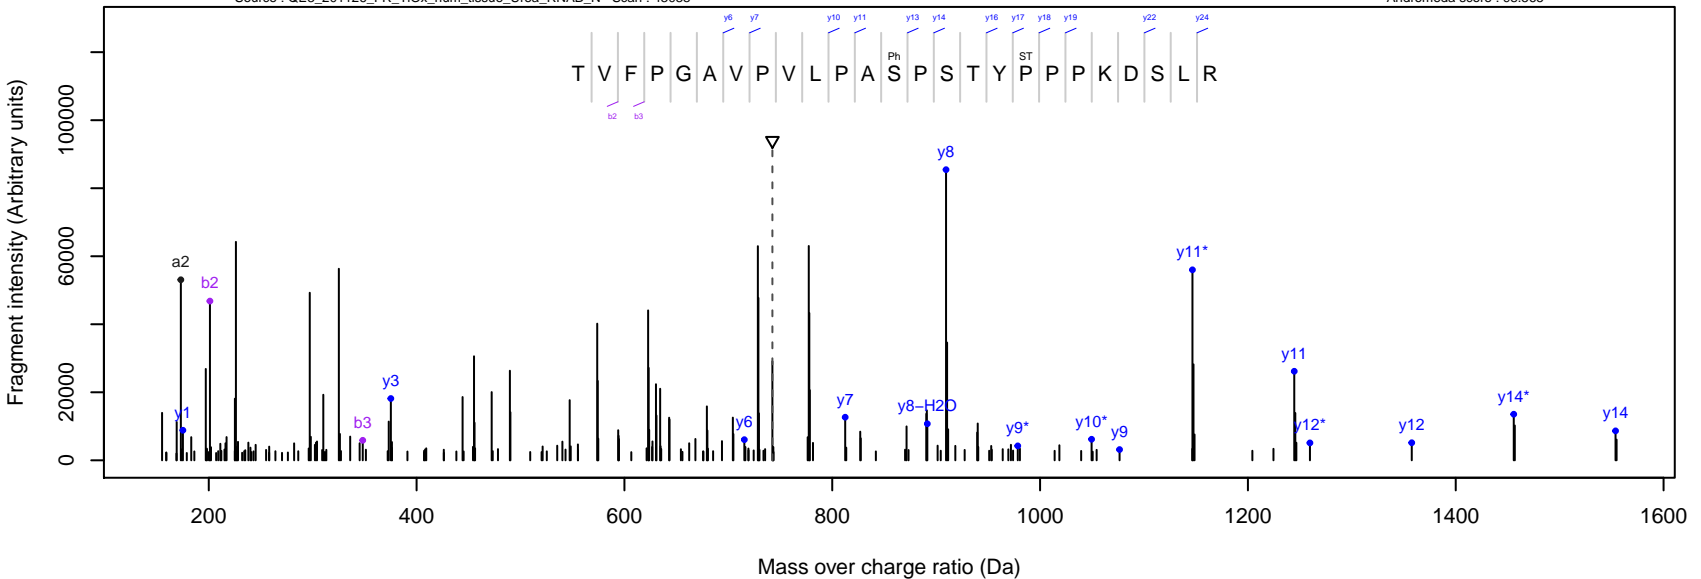

CDDS(Phospho (STY))PRTPSNTPSAEADWS(Phospho (STY))PGLELHPDYK-3+

Source : QE3\_201126\_FR\_TIOx\_hum\_tissue\_Urea\_RNAB\_H Scan : 39143

Andromeda score : 98.561

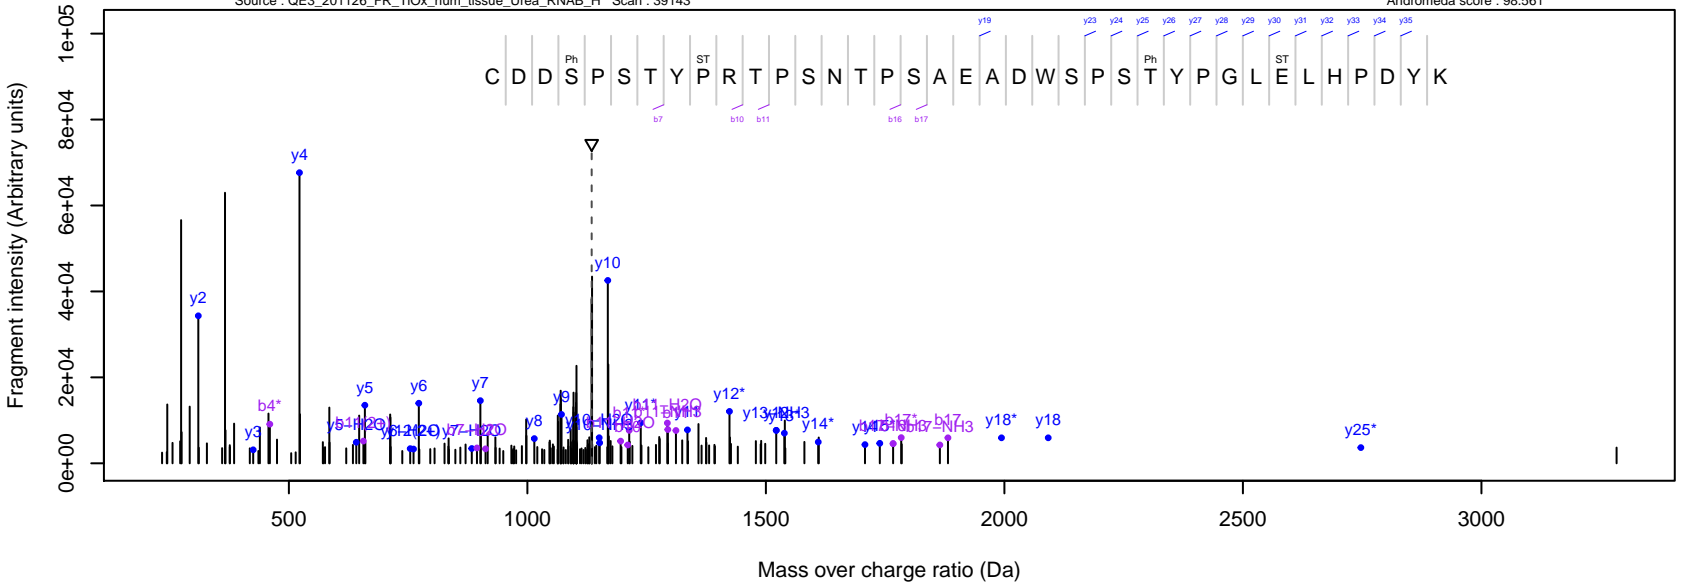

AQS(Phospho (STY))PGAVEILDRENKR-3+

Source : QE3\_201126\_FR\_TIOx\_hum\_tissue\_Urea\_RNAB\_H Scan : 25458

Andromeda score : 98.543

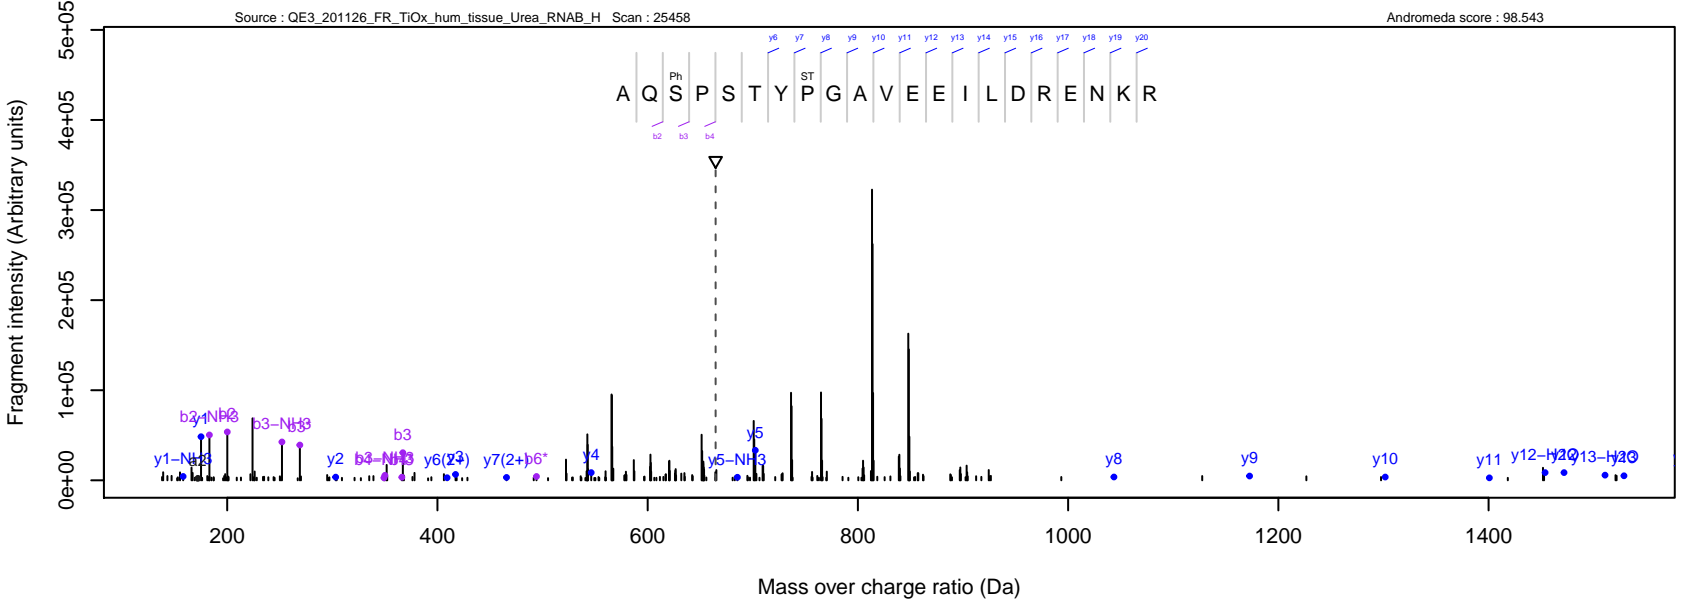

ETMQS(Phospho (STY))LNDRLAS(Phospho (STY))YLDR-3+

Source : QE3\_201126\_FR\_TIOx\_hum\_tissue\_Urea\_RNAB\_N Scan : 54969

Andromeda score : 98.543

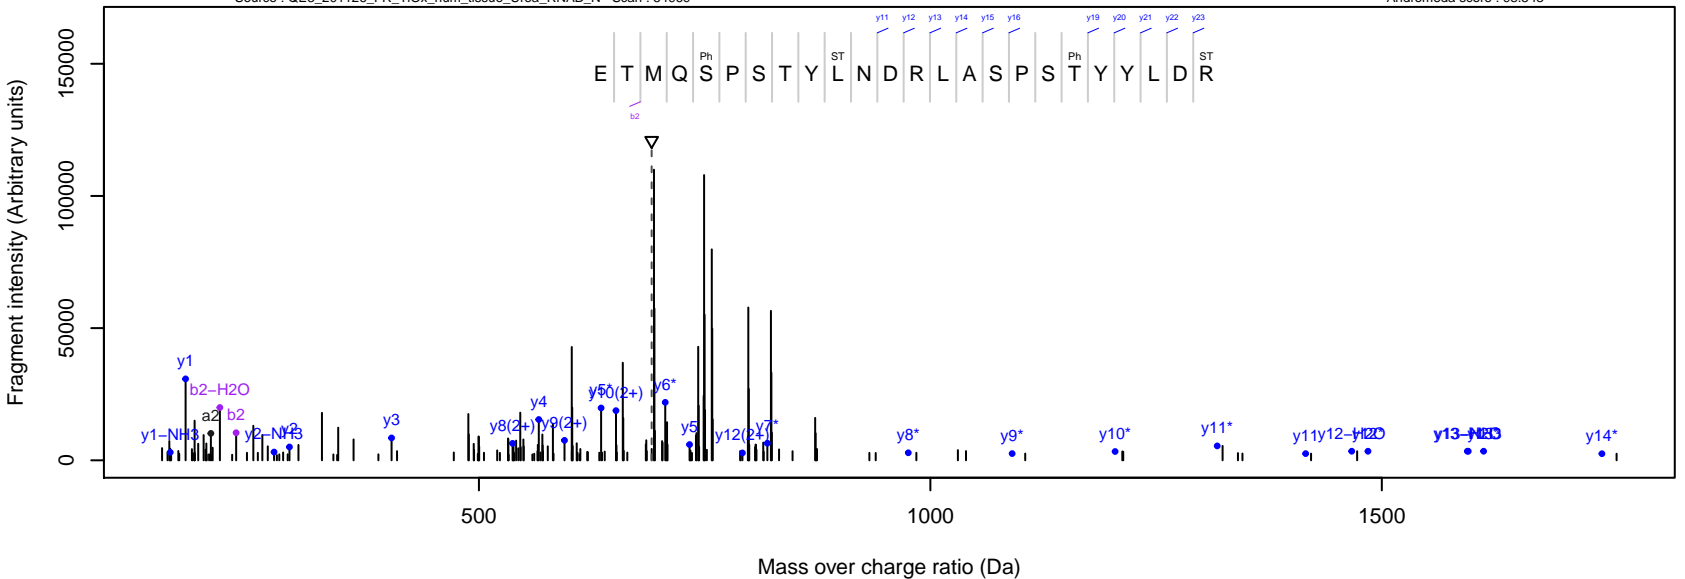

HGS(Phospho (STY))GAFYSPELLEALTLR-3+

Source : QE3\_201126\_FR\_TiOx\_hum\_tissue\_Urea\_RNAB\_N Scan : 57647

Andromeda score : 98.543

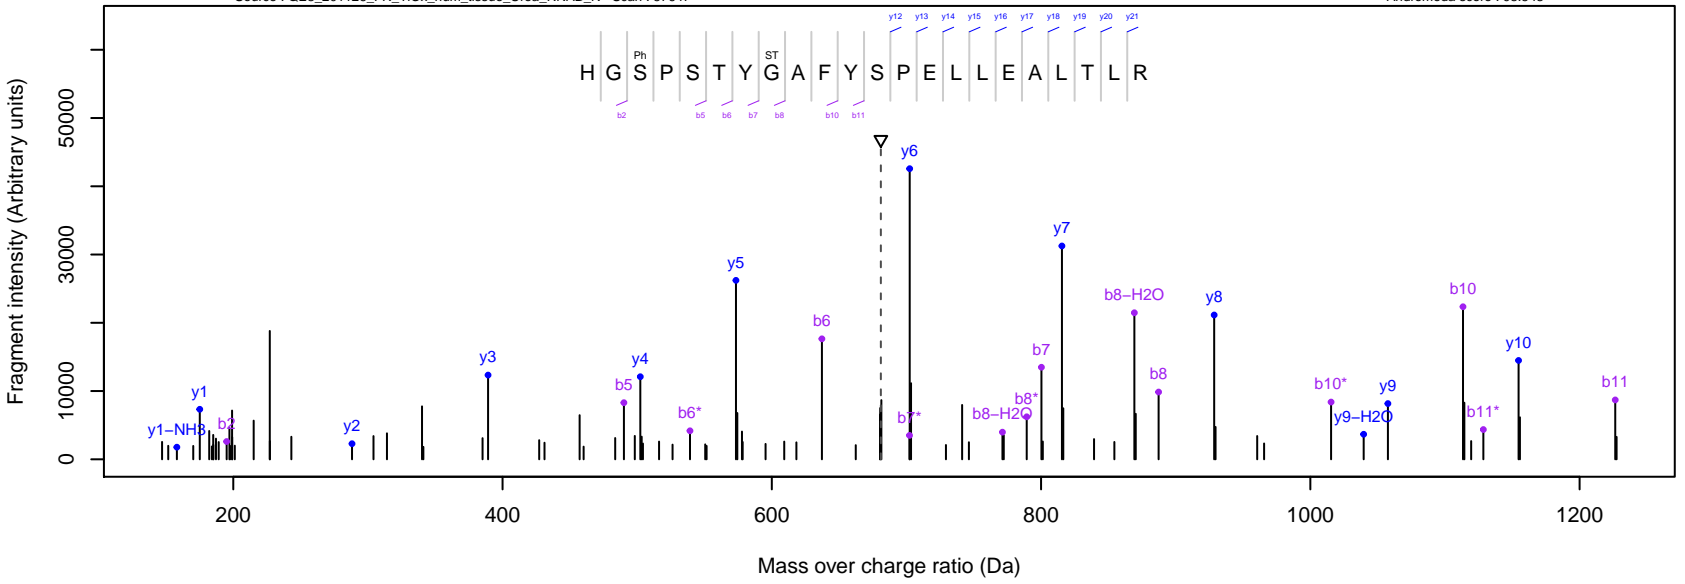

S(Phospho (STY))GKYDLDFKSPDDPSR-3+

Source : QE3\_201126\_FR\_TiOx\_hum\_tissue\_Urea\_RNAB\_N Scan : 21151

Andromeda score : 98.543

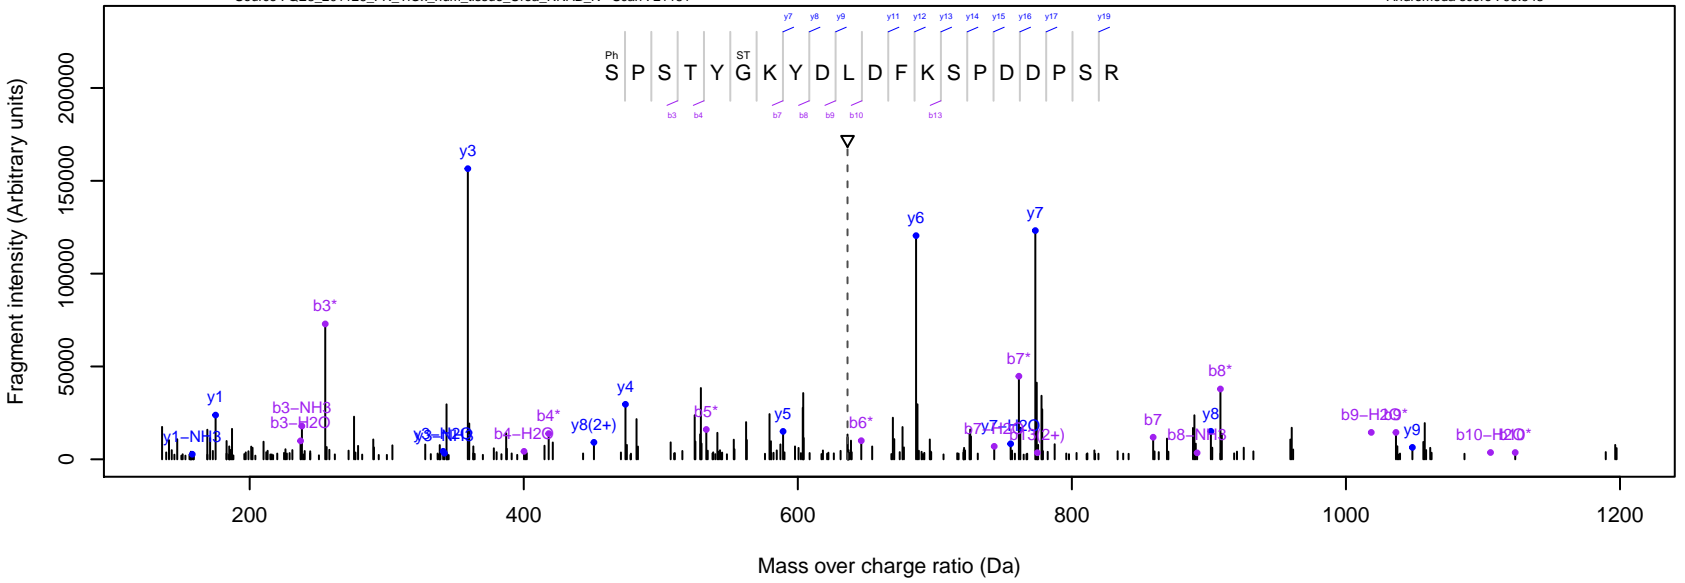

AAVPSGASTGIY(Pospho (STY))EALRL-2+

Source : QE3\_201126\_FR\_TiOx\_hum\_tissue\_Urea\_RNAB\_B Scan : 48512

Andromeda score : 98.531

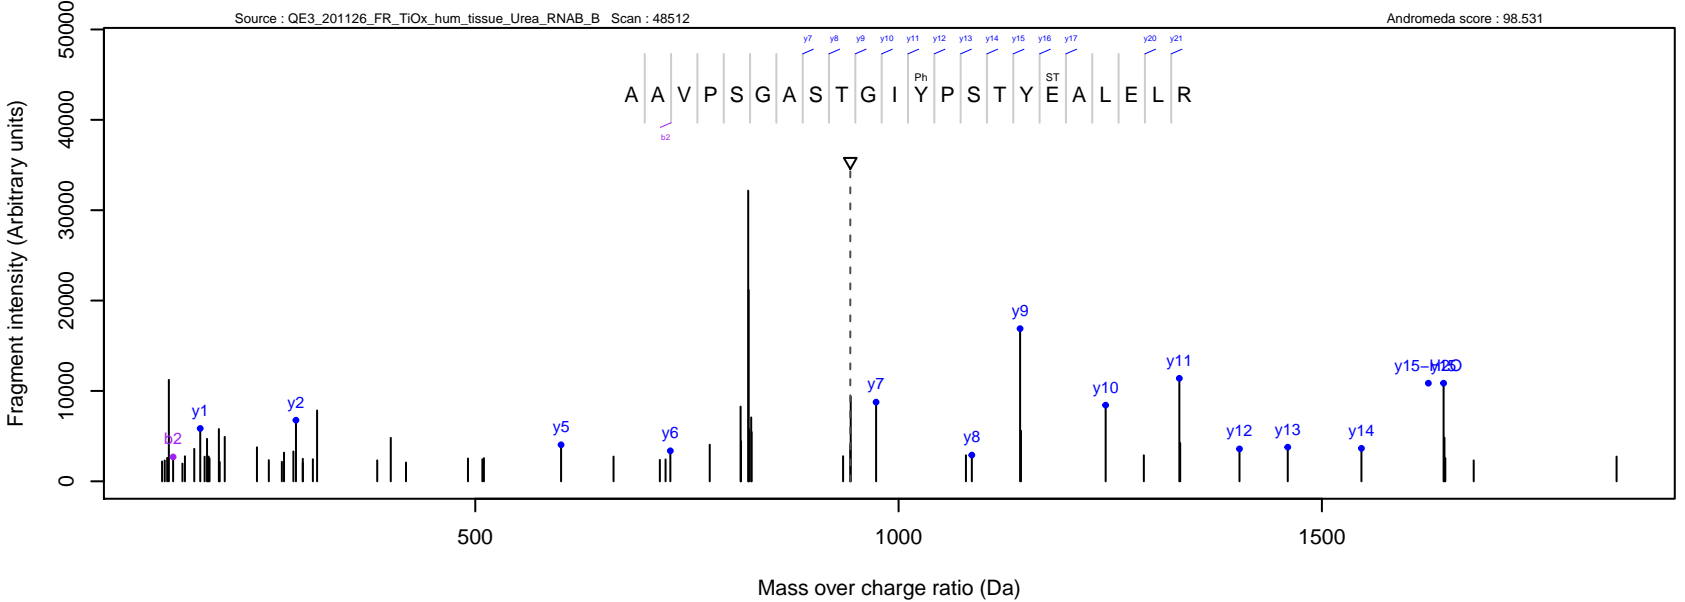

FQDVGPAQVGS(Phospho (STY))VYQK-2+

Source : QE3\_201126\_FR\_TiOx\_hum\_tissue\_Urea\_RNAB\_N Scan : 29189

Andromeda score : 98.507

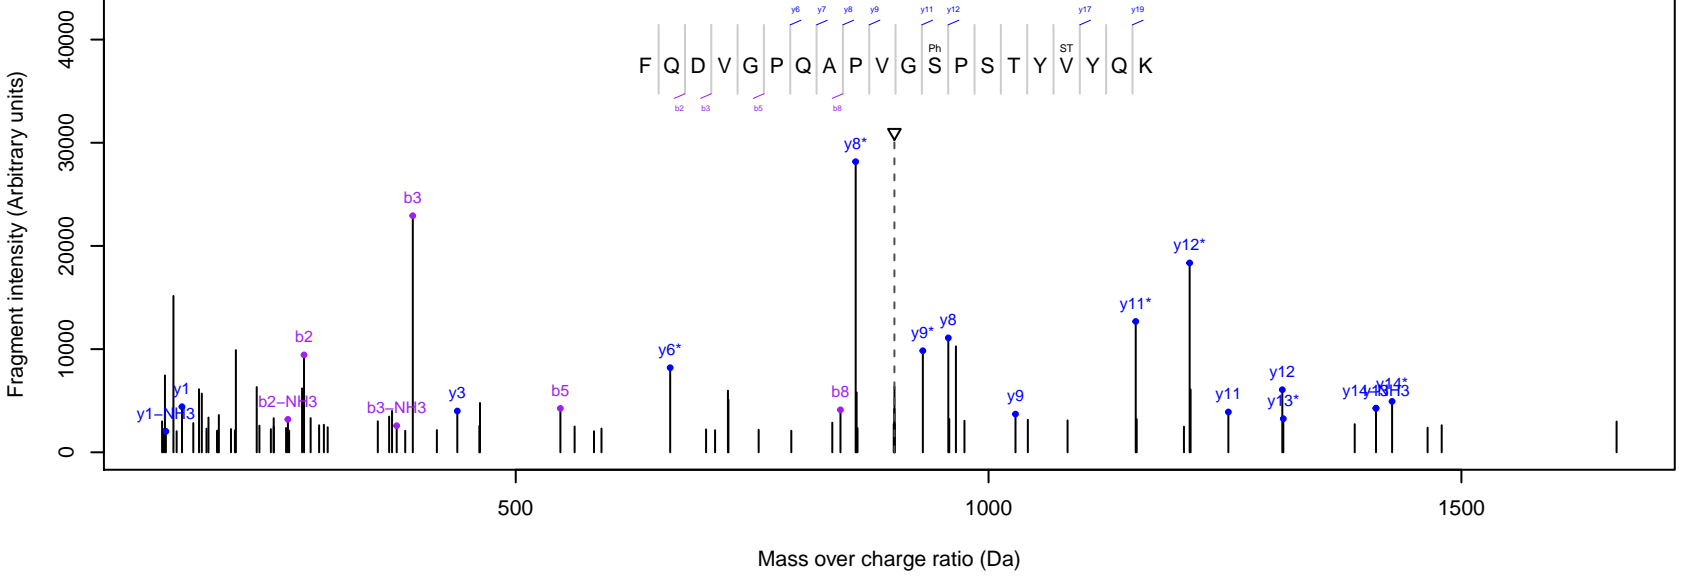

KWSS(Phospho (STY))KGNIDIAAAK-3+

Source : QE3\_201126\_FR\_TiOx\_hum\_tissue\_Urea\_RNAB\_N Scan : 15713

Andromeda score : 98.507

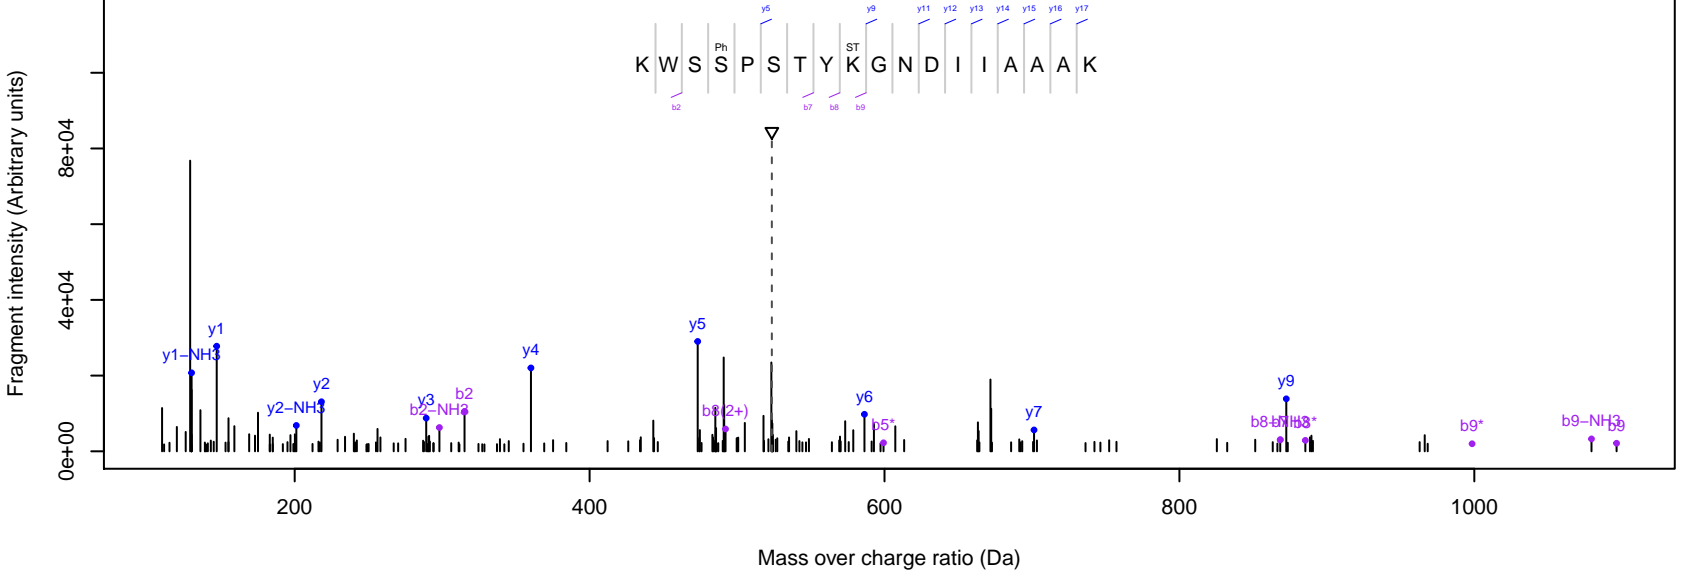

VHEPPREDAAPTQKPAAPPAPPPQNLQPESDAPQQPGS(Phospho (STY))SPR-4+

Source : QE3\_201126\_FR\_TiOx\_hum\_tissue\_Urea\_RNAB\_H Scan : 19539

Andromeda score : 98.463

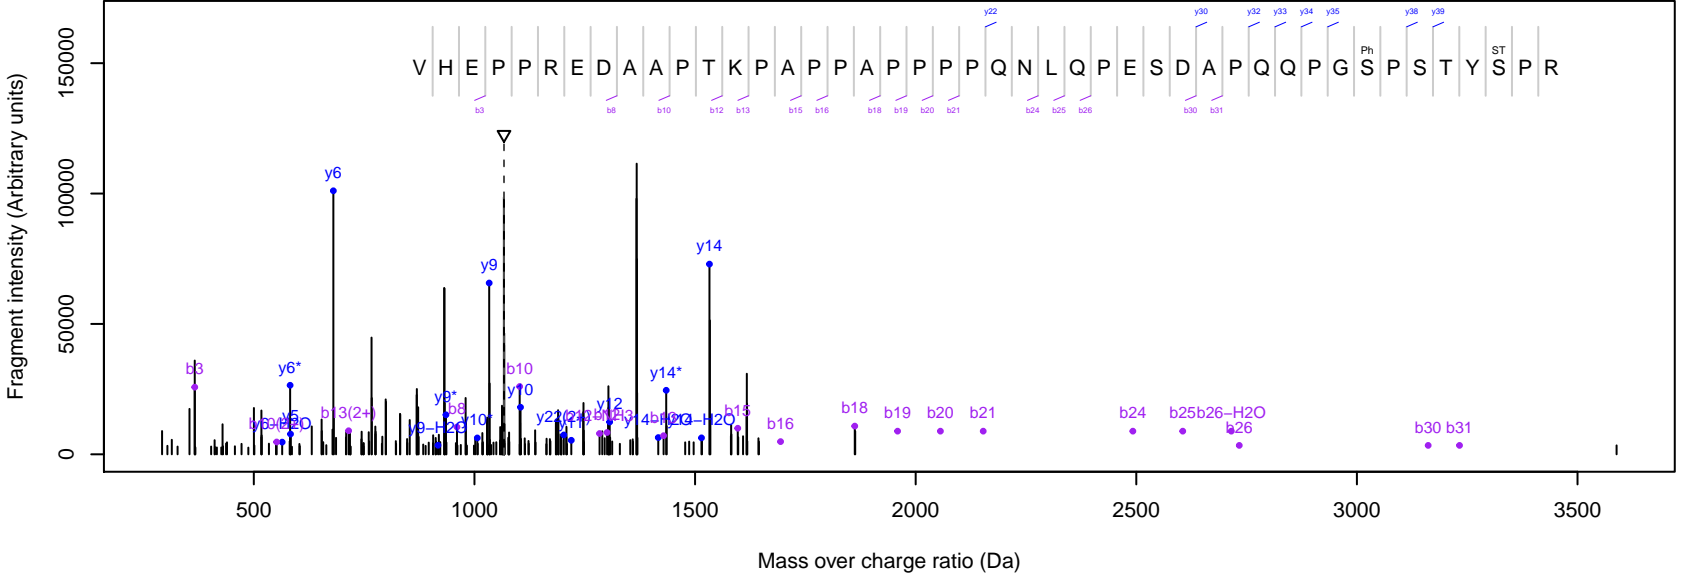

KGS(Phospho (STY))LAALYDLAVLK-2+

Source : QE3\_201126\_FR\_TiOx\_hum\_tissue\_Urea\_RNAB\_H Scan : 52269

Andromeda score : 98.439

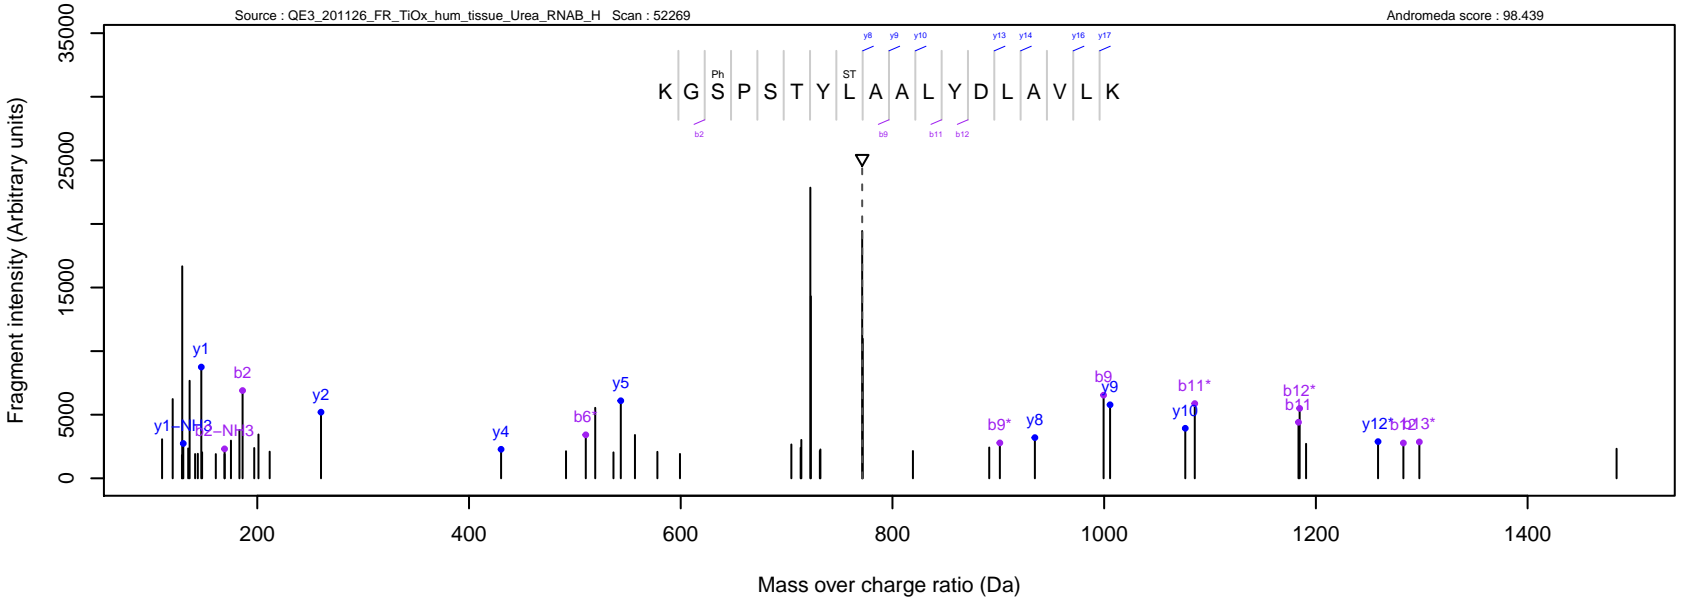

RAEQIEDINNTGTES(Phospho (STY))ASEEGDSSLITVVPVK-3+

Source : QE3\_201126\_FR\_TiOx\_hum\_tissue\_Urea\_RNAB\_N Scan : 50266

Andromeda score : 98.398

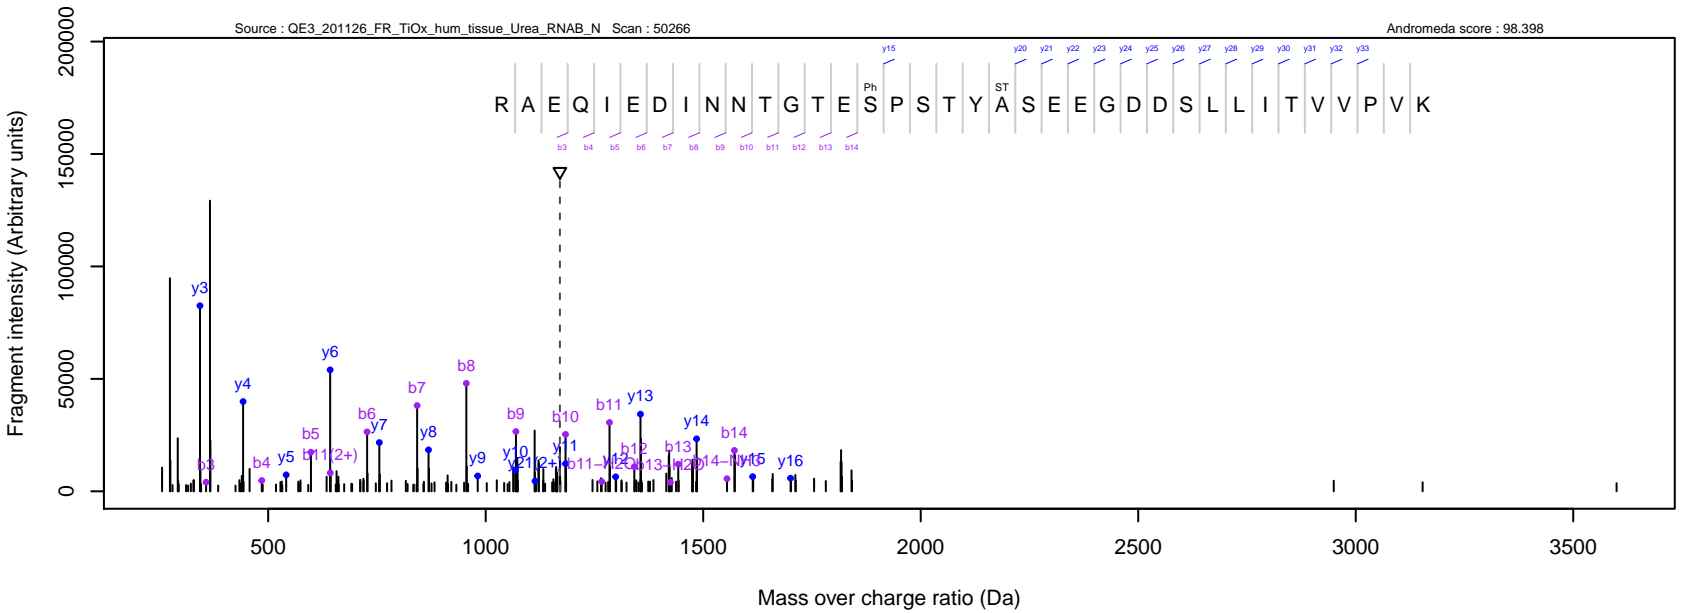

ADVQLFDDDSY(Phospho (STY))SHHS(Phospho (STY))GLEADPEKFADSDQDRDPHR-4+

Source : QE3\_201126\_FR\_TiOx\_hum\_tissue\_Urea\_RNAB\_N Scan : 38697

Andromeda score : 98.393

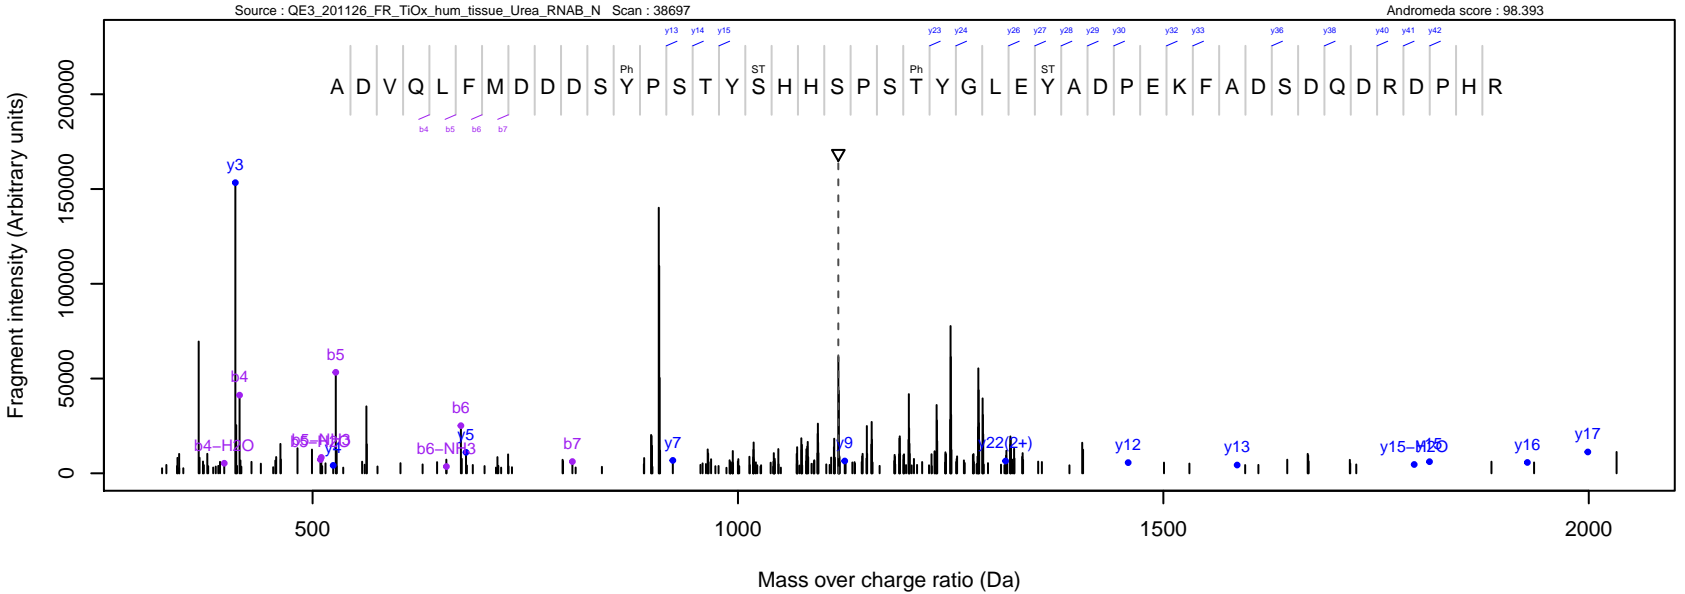

VLSPLRS(Phospho (STY))PPLIGSESAYESFLSADDK-3+

Source : QE3\_201126\_FR\_TiOx\_hum\_tissue\_Urea\_RNAB\_B Scan : 55187

Andromeda score : 98.37

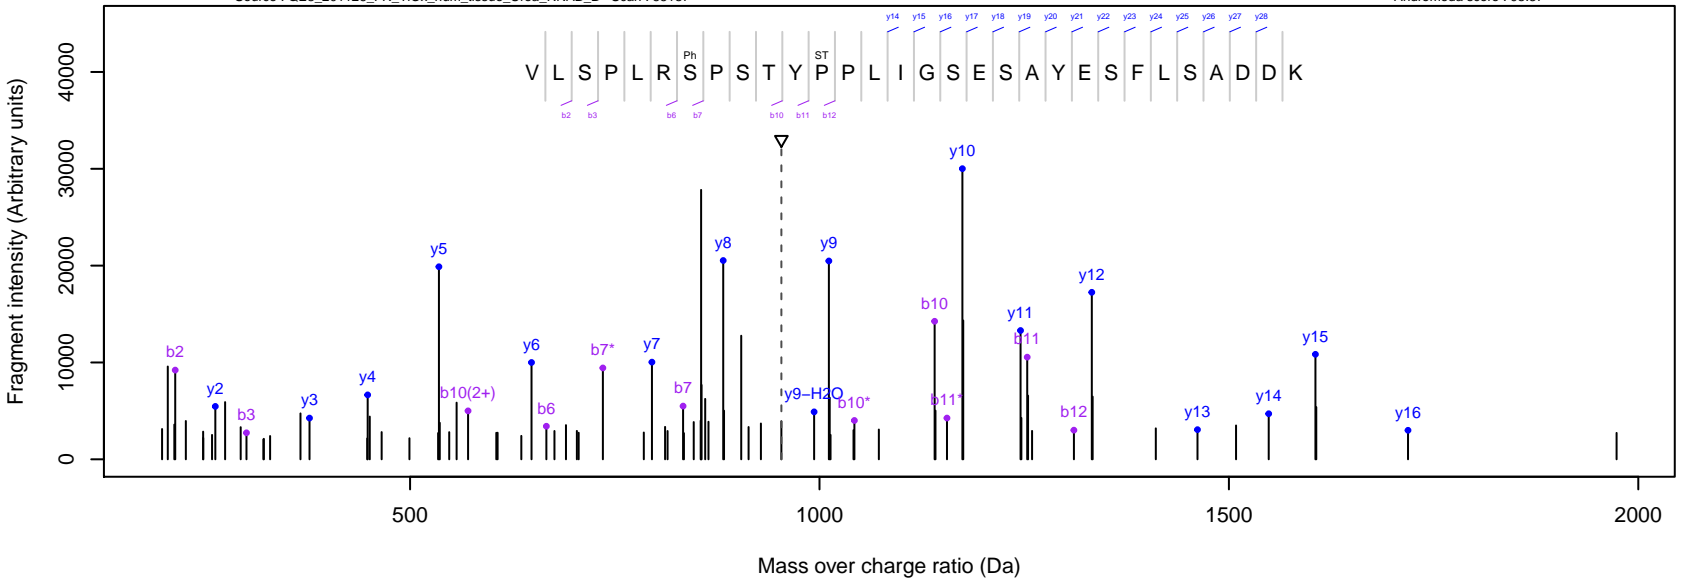

(Acetyl (Protein N-term))AAASVT(Phospho (STY))PPGSLELLQPGFSK-3+

Source : QE3\_201126\_FR\_TiOx\_hum\_tissue\_Urea\_RNAB\_N Scan : 61930

Andromeda score : 98.3

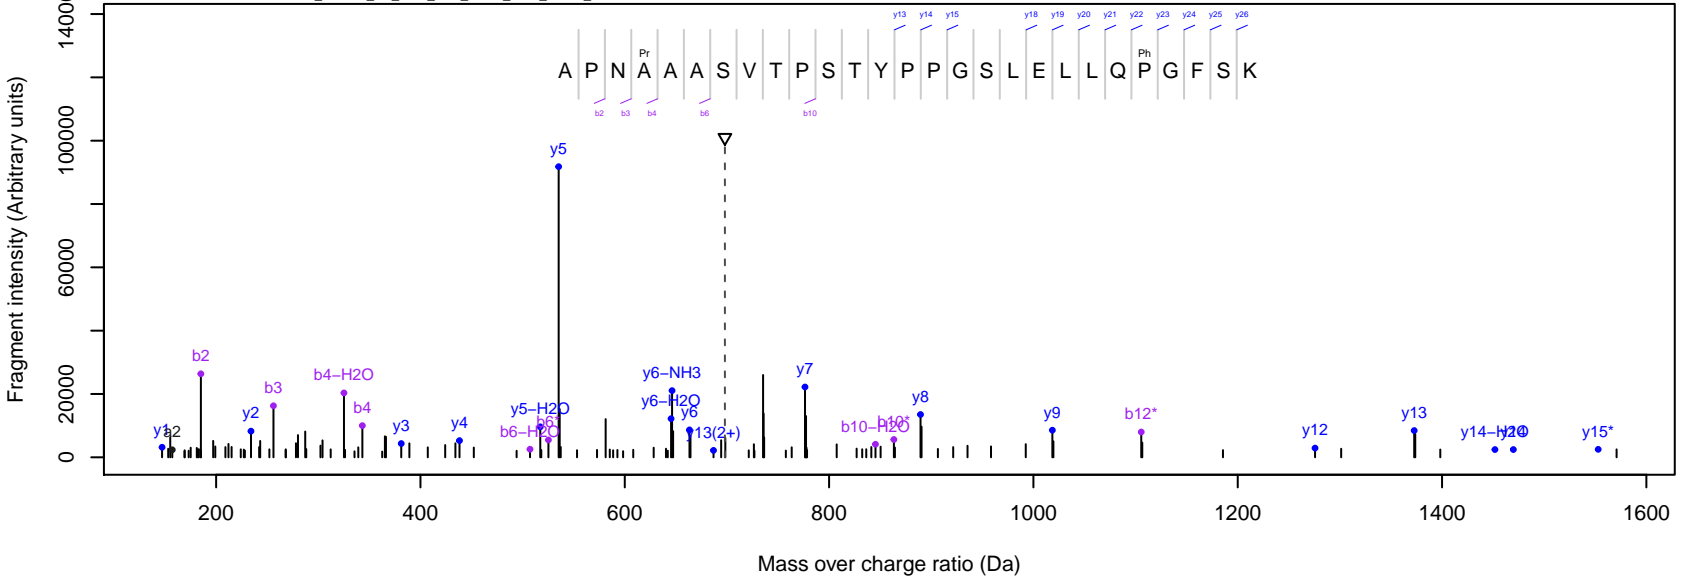

EDM(Oxidation (M))AALEKDYEEVGADSPSTYADGEDEGEEY-3+

Source : QE3\_201126\_FR\_TiOx\_hum\_tissue\_Urea\_RNAB\_H Scan : 38699

Andromeda score : 98.3

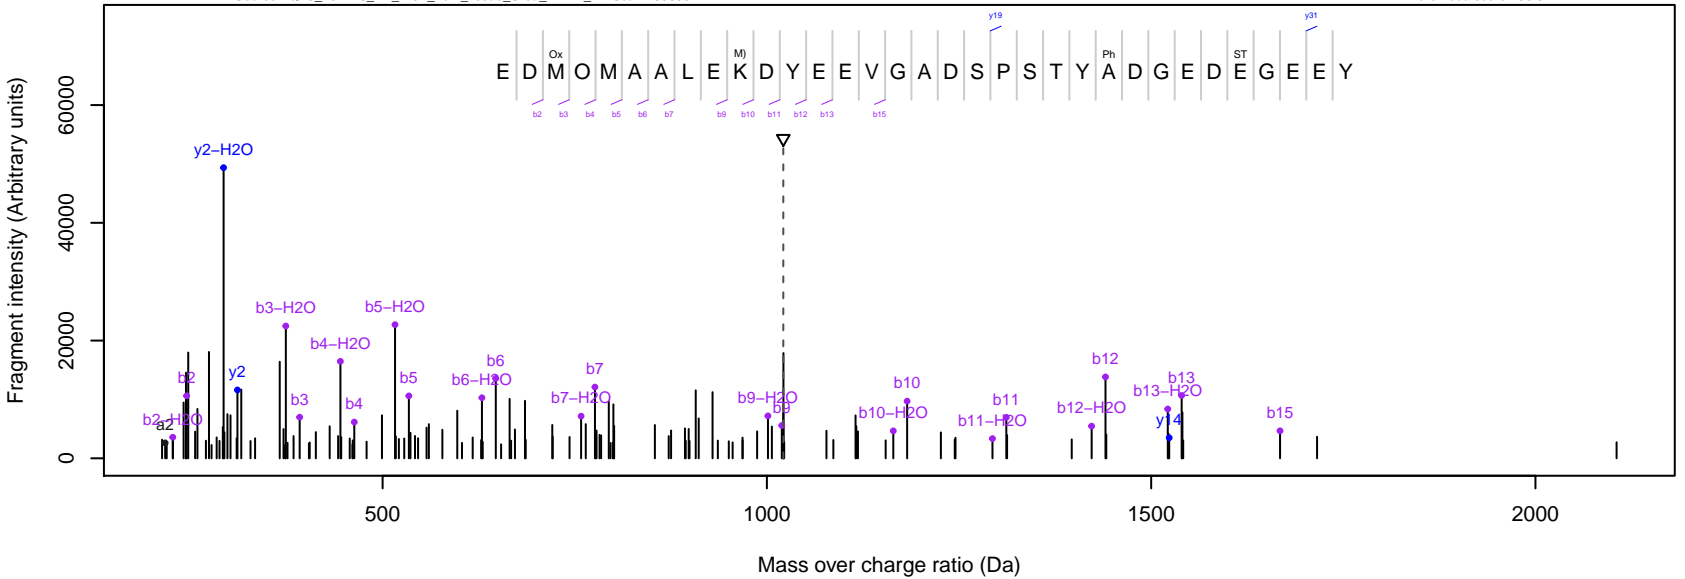

FIIGSVS(Phospho (STY))EDNS(Phospho (STY))EDEISNLVK-2+

Source : QE3\_201126\_FR\_TiOx\_hum\_tissue\_Urea\_RNAB\_B Scan : 61705

Andromeda score : 98.292

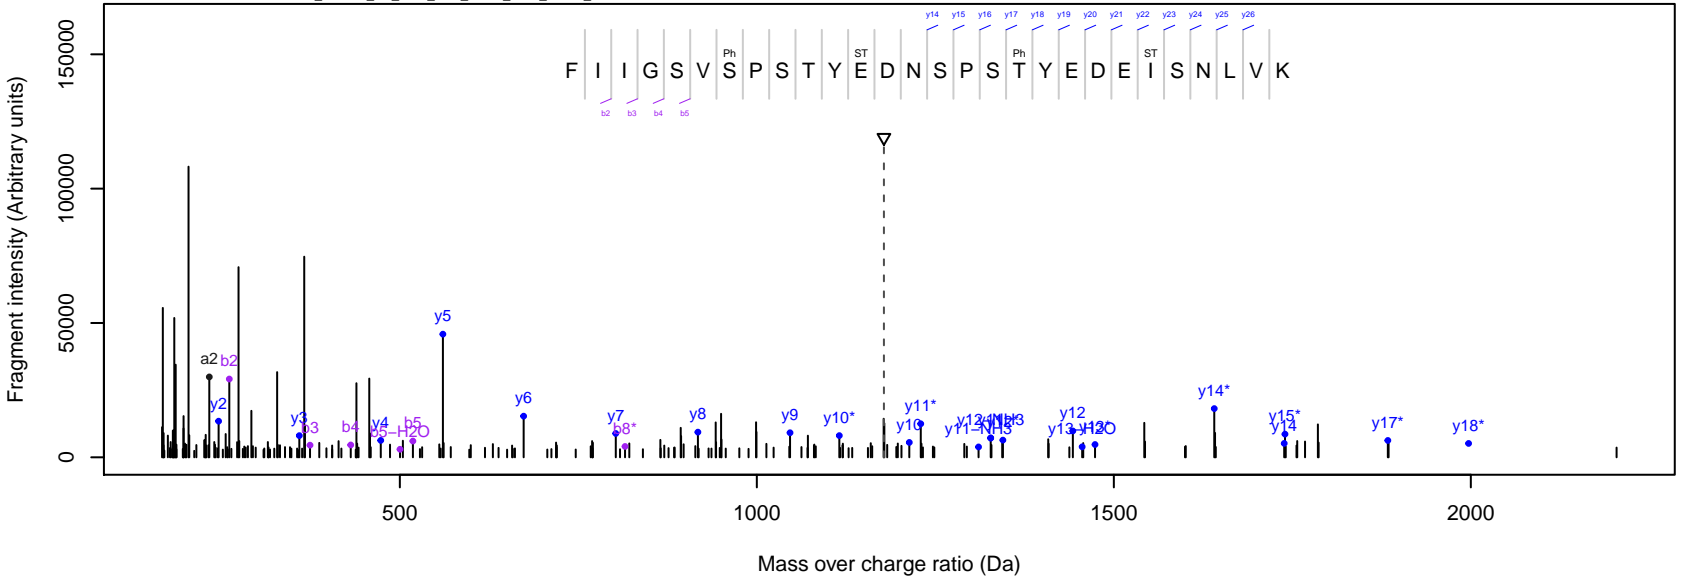

RCS(Phospho (STY))VTSMESTVSSGTQTTVQDDPEQFEVIK-3+

Source : QE3\_201126\_FR\_TiOx\_hum\_tissue\_Urea\_RNAB\_N Scan : 39746

Andromeda score : 98.236

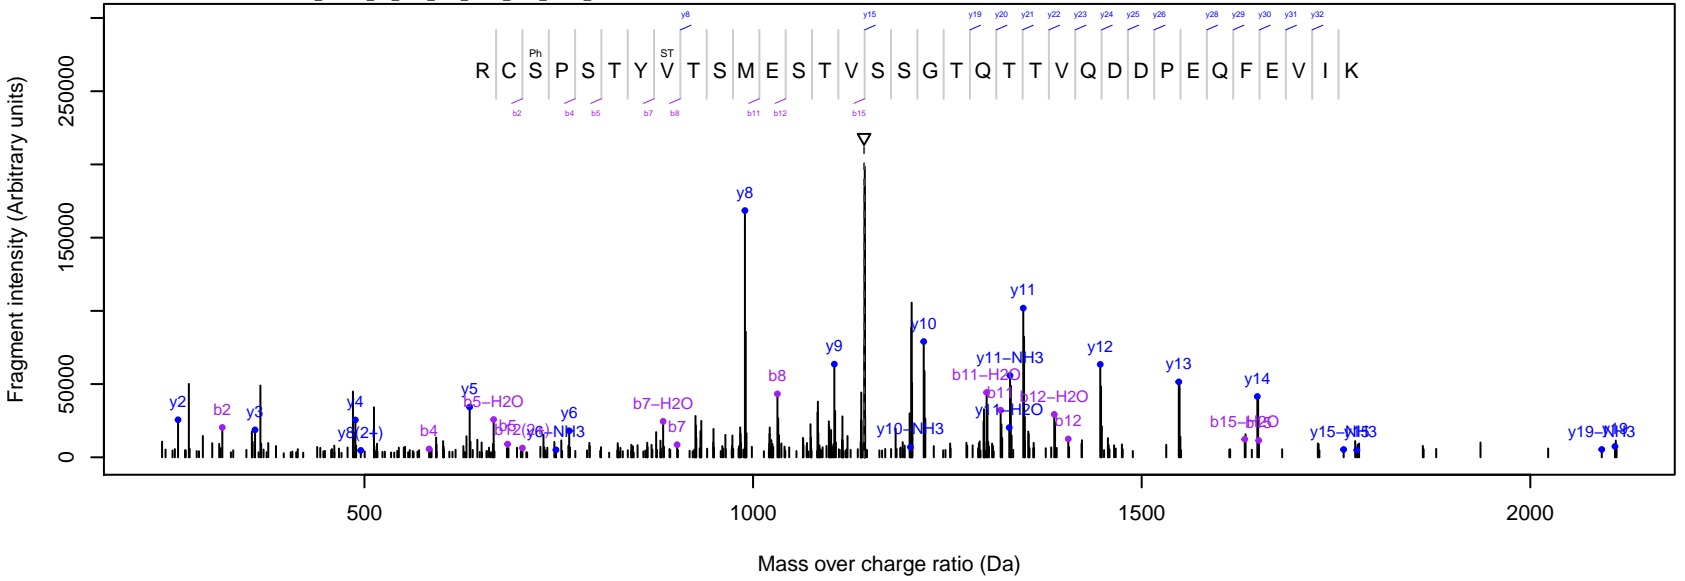

RLGGLRPES(Phospho (STY))PELTSVSR-3+

Source : QE3\_201126\_FR\_TiOx\_hum\_tissue\_Urea\_RNAB\_N Scan : 22772

Andromeda score : 98.21

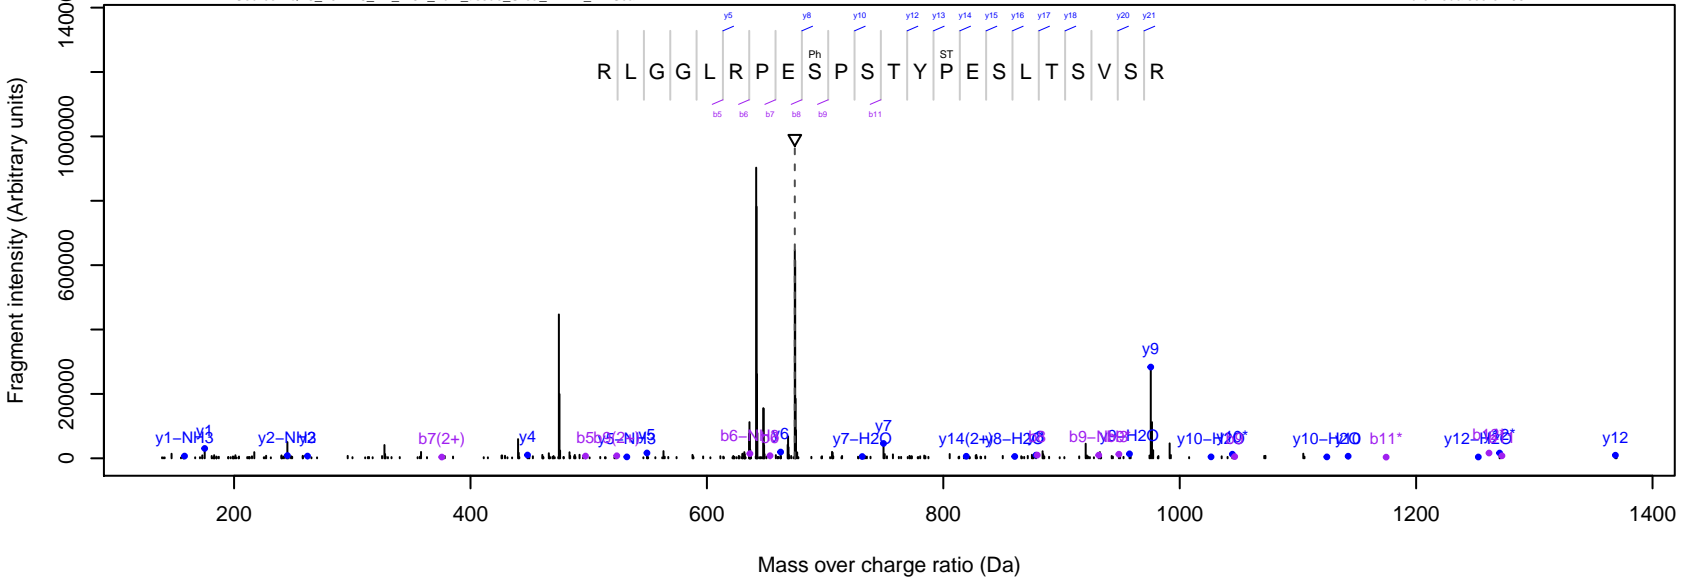



T(Phospho (STY))TSGDDACNLTSFRPATLTVTNFFK-3+

Source : QE3\_201126\_FR\_TIOx\_hum\_tissue\_Urea\_RNAB\_B Scan : 56221

Andromeda score : 98.199

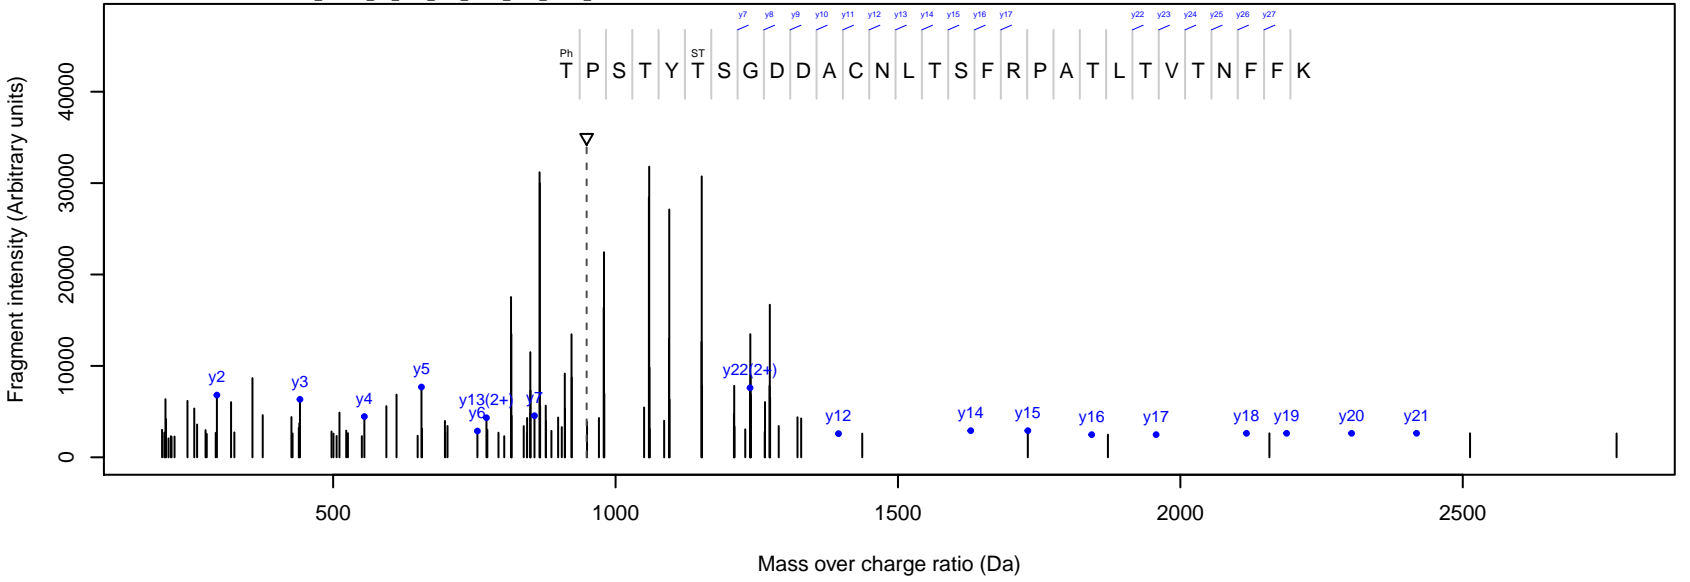

AHKS(Phospho (STY))VQANLDQSQR-3+

Source : QE3\_201126\_FR\_TIOx\_hum\_tissue\_Urea\_RNAB\_H Scan : 5683

Andromeda score : 98.165

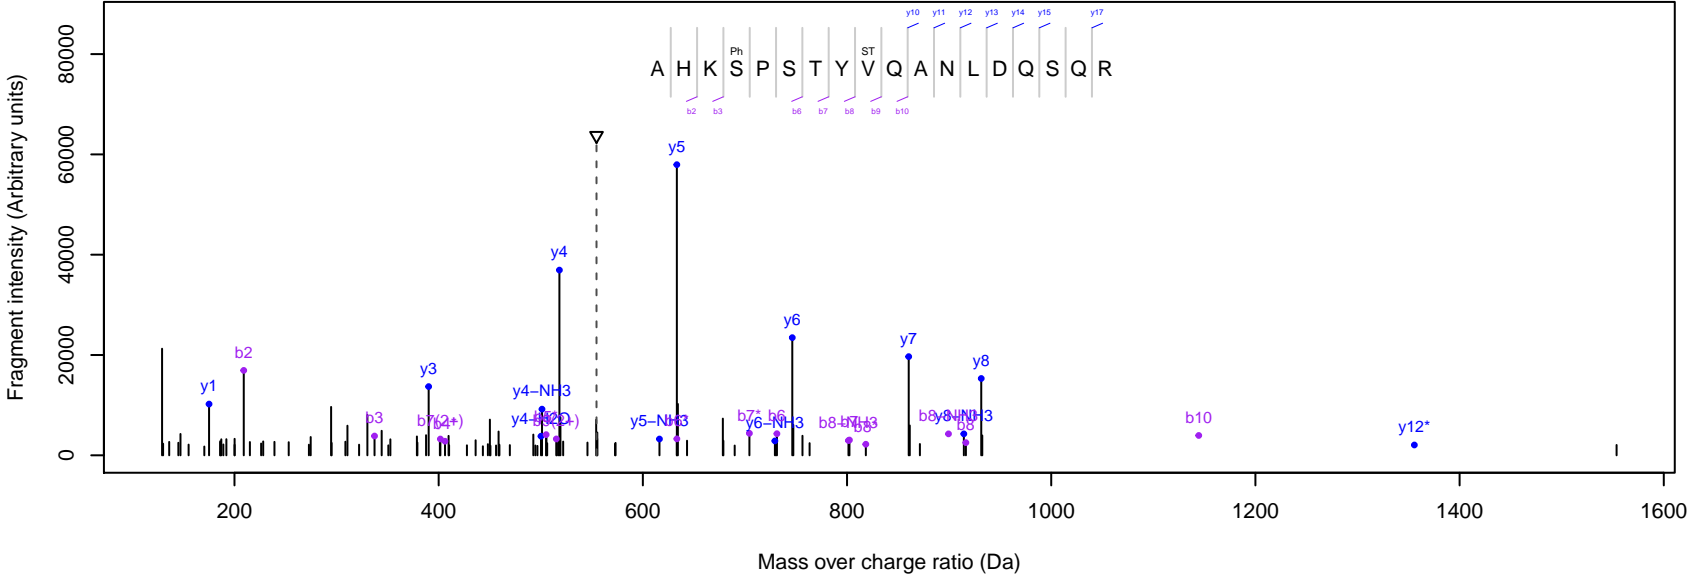

VSM(Oxidation (M))PDVELNLKS(Phospho (STY))PK-3+

Source : QE3\_201126\_FR\_TIOx\_hum\_tissue\_Urea\_RNAB\_B Scan : 22543

Andromeda score : 98.165

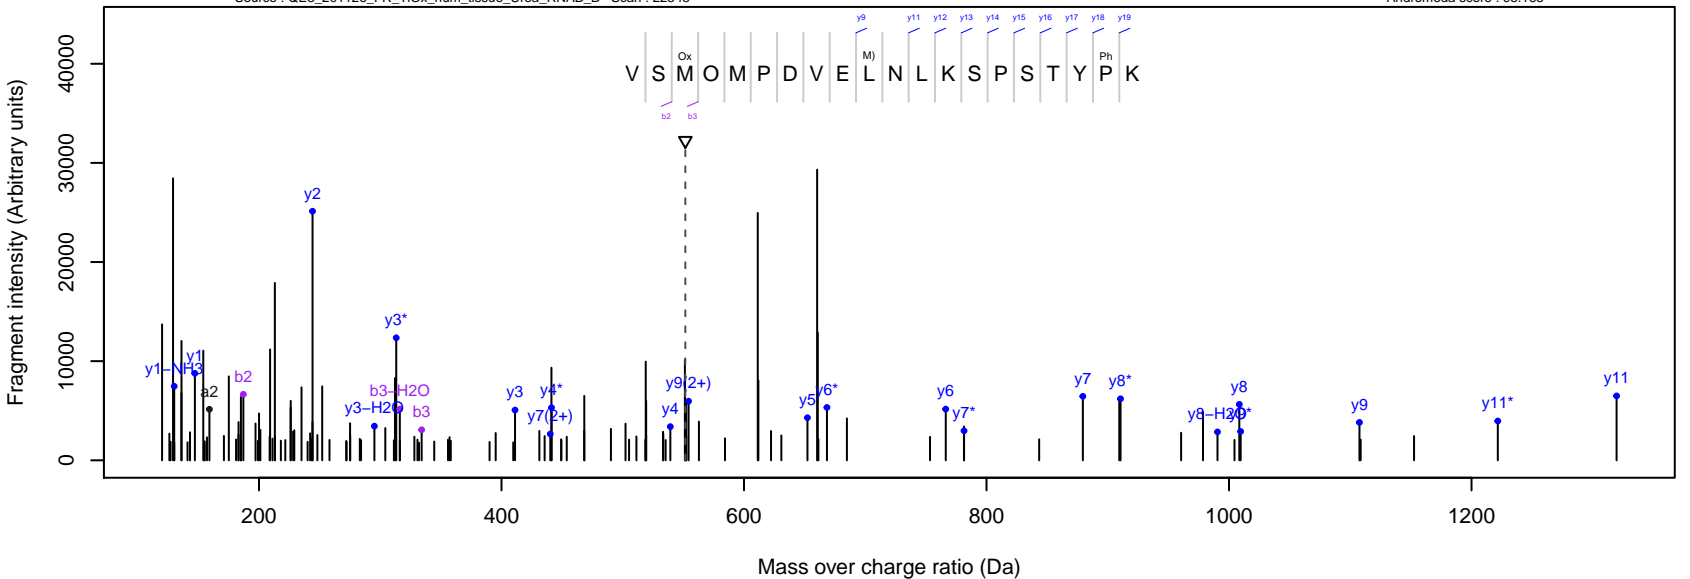

ISS(Phospho (STY))VPNSLSK-2+

Source : QE3\_201126\_FR\_TiOx\_hum\_tissue\_Urea\_RNAB\_H Scan : 16256

Andromeda score : 98.156

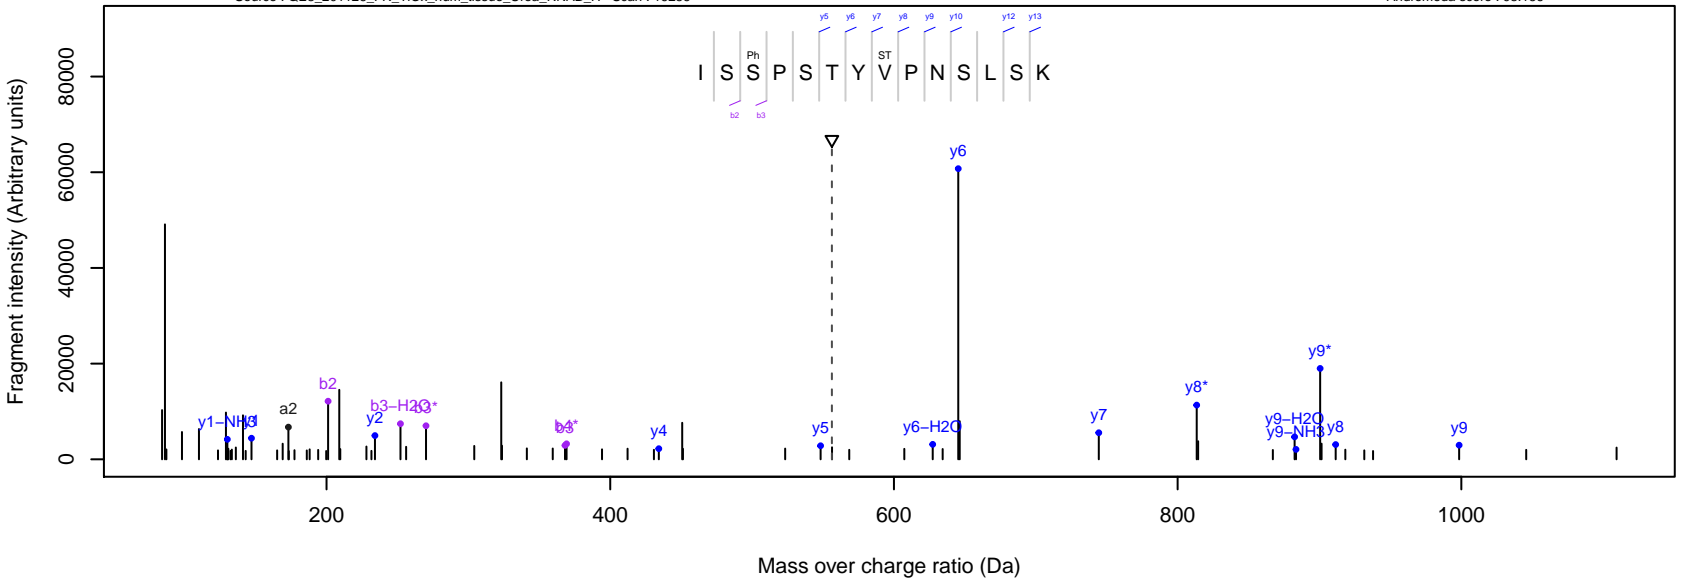

VPHNTPVDVT(Phospho (STY))PCMS(Phospho (STY))PLPHDSPLIEKPGGLQIEENEGAGFK-4+

Source : QE3\_201126\_FR\_TiOx\_hum\_tissue\_Urea\_RNAB\_H Scan : 46094

Andromeda score : 98.153

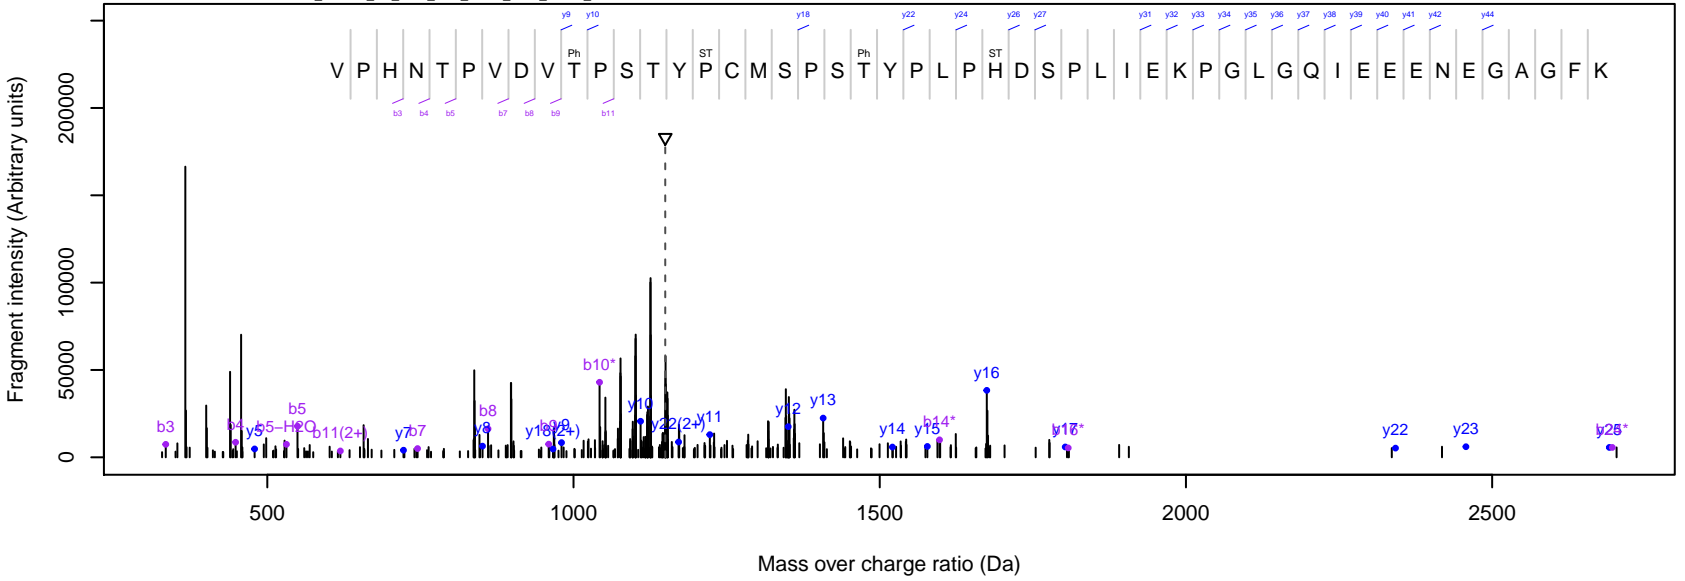

ATLDEEDLVDSL(Phospho (STY))EGDAYPNGLQVNFHSPR-3+

Source : QE3\_201126\_FR\_TiOx\_hum\_tissue\_Urea\_RNAB\_B Scan : 51993

Andromeda score : 98.144

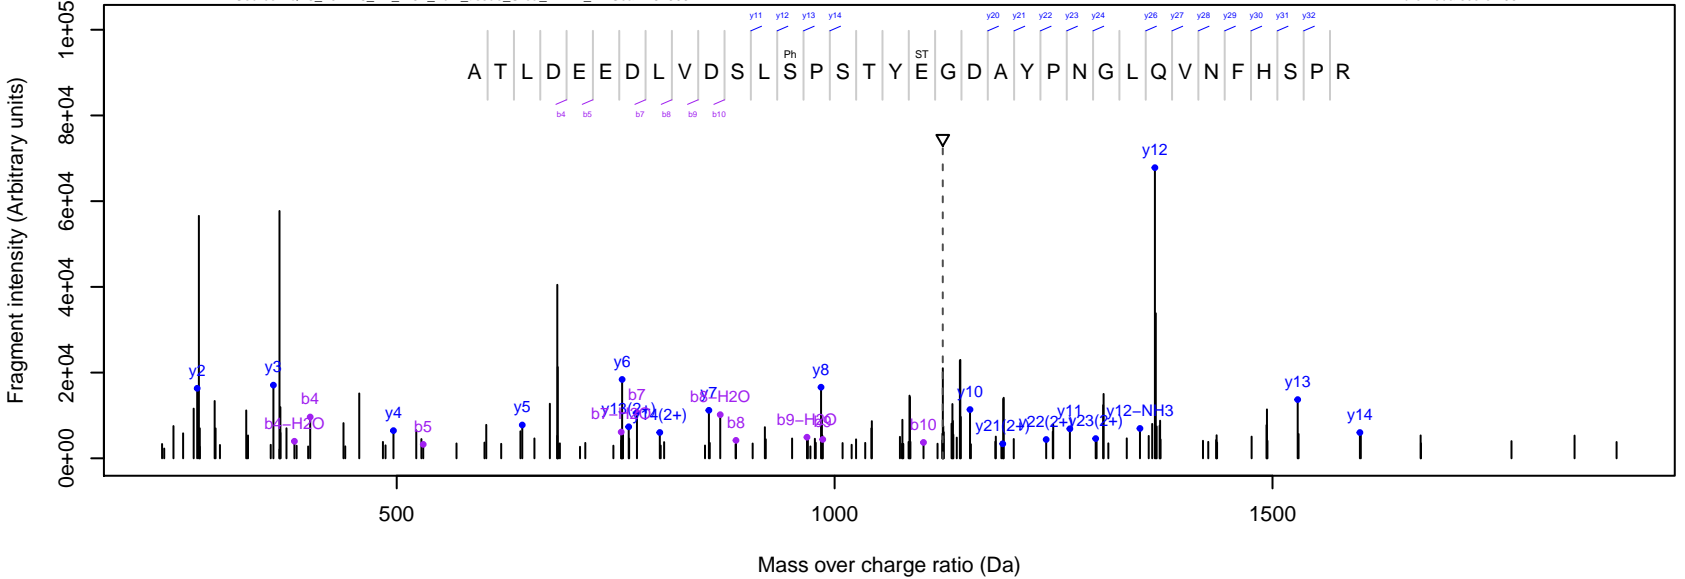

LAS(Phospho (STY))PS(Phospho (STY))GSTS(Phospho (STY))SGLEVVAPEGTSAPGGGPGTLDDSATICR-3+

Source : QE3\_201126\_FR\_TIOx\_hum\_tissue\_Urea\_RNAB\_H Scan : 59633

Andromeda score : 98.144

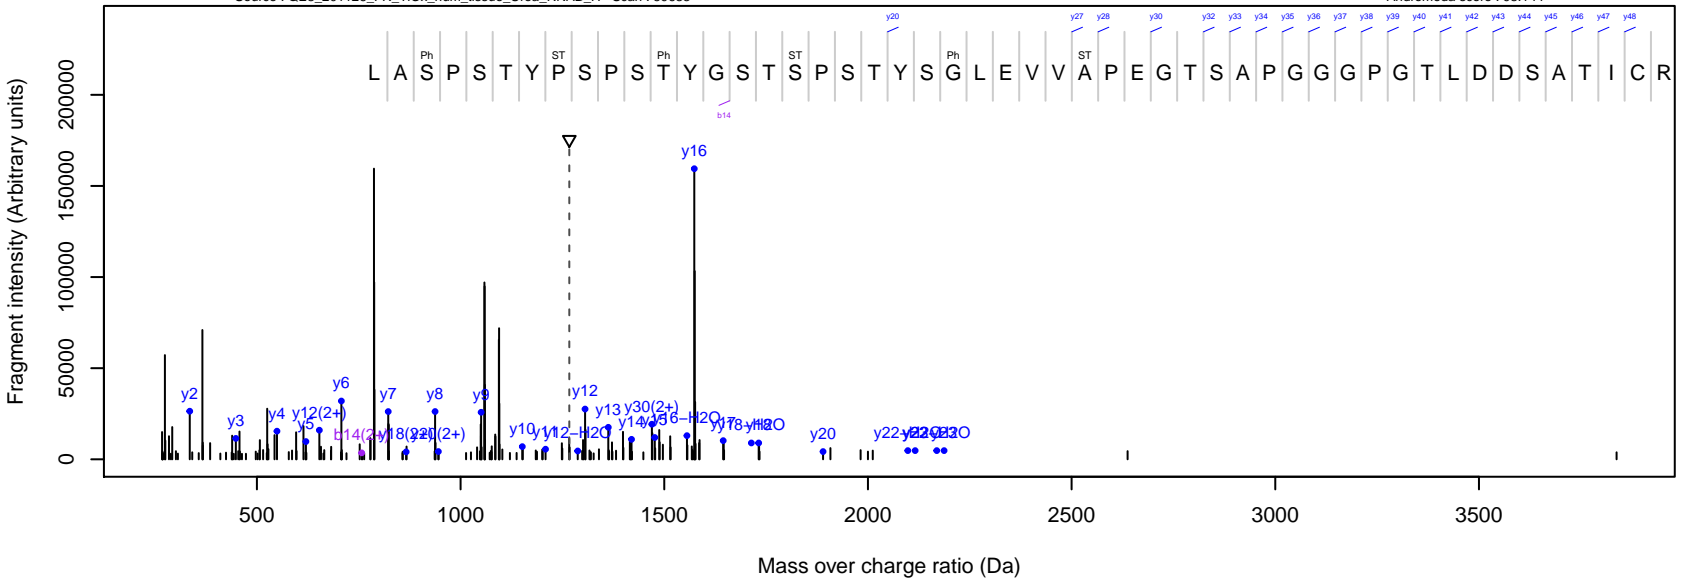

SGYIPSNILEPLQPGTPT(Phospho (STY))QGQSPSRVPMMLR-3+

Source : QE3\_201126\_FR\_TIOx\_hum\_tissue\_Urea\_RNAB\_H Scan : 52911

Andromeda score : 98.144

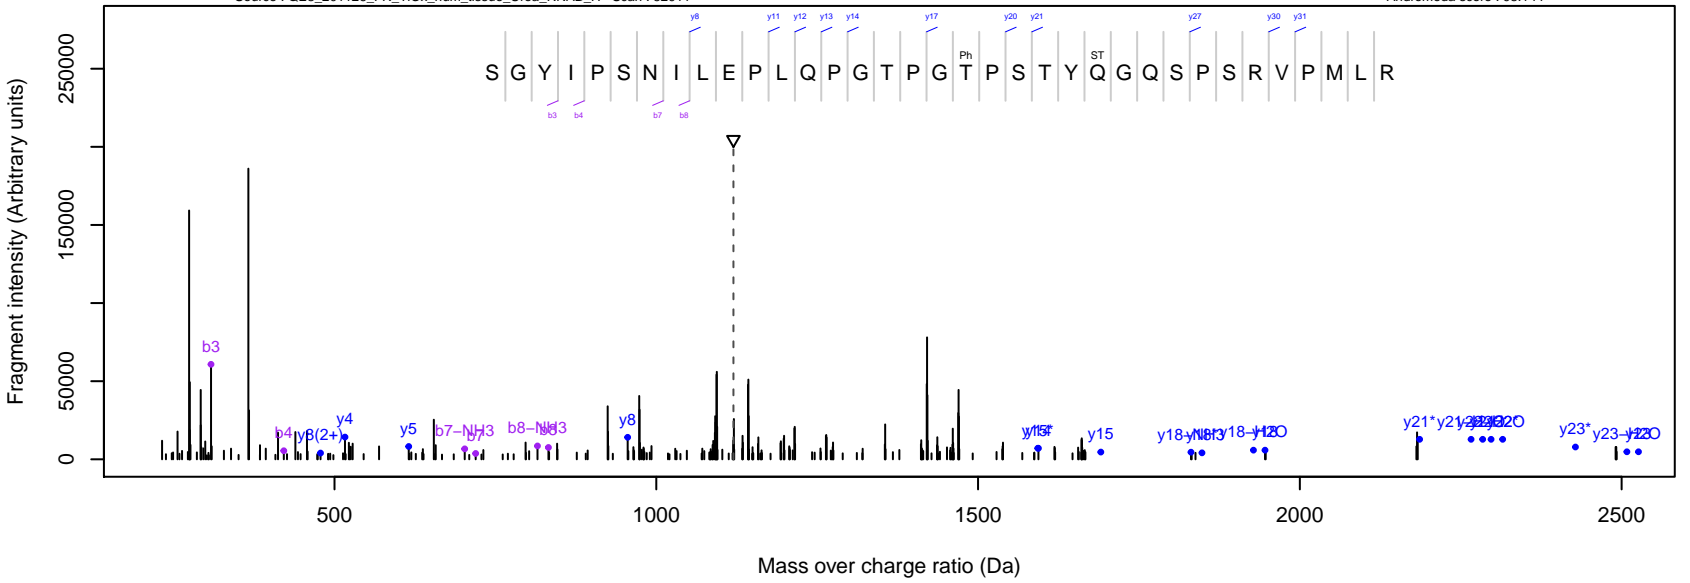

SYLEGS(Phospho (STY))S(Phospho (STY))DNQLKDESTPVDDR-3+

Source : QE3\_201126\_FR\_TIOx\_hum\_tissue\_Urea\_RNAB\_H Scan : 28713

Andromeda score : 98.132

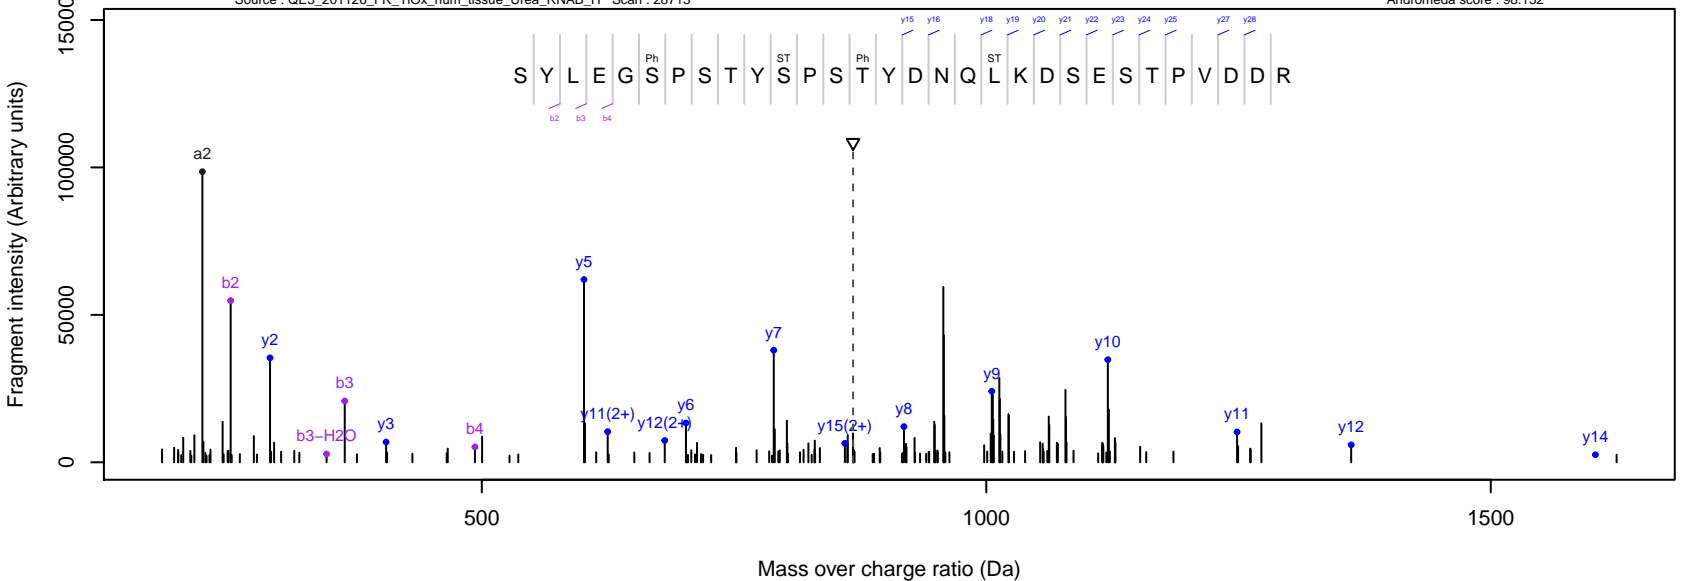



KSFSKEELMSS(Phospho (STY))DLEETAGSTSIPK-3+

Source : QE3\_201126\_FR\_TiOx\_hum\_tissue\_Urea\_RNAB\_N Scan : 30778

Andromeda score : 98.019

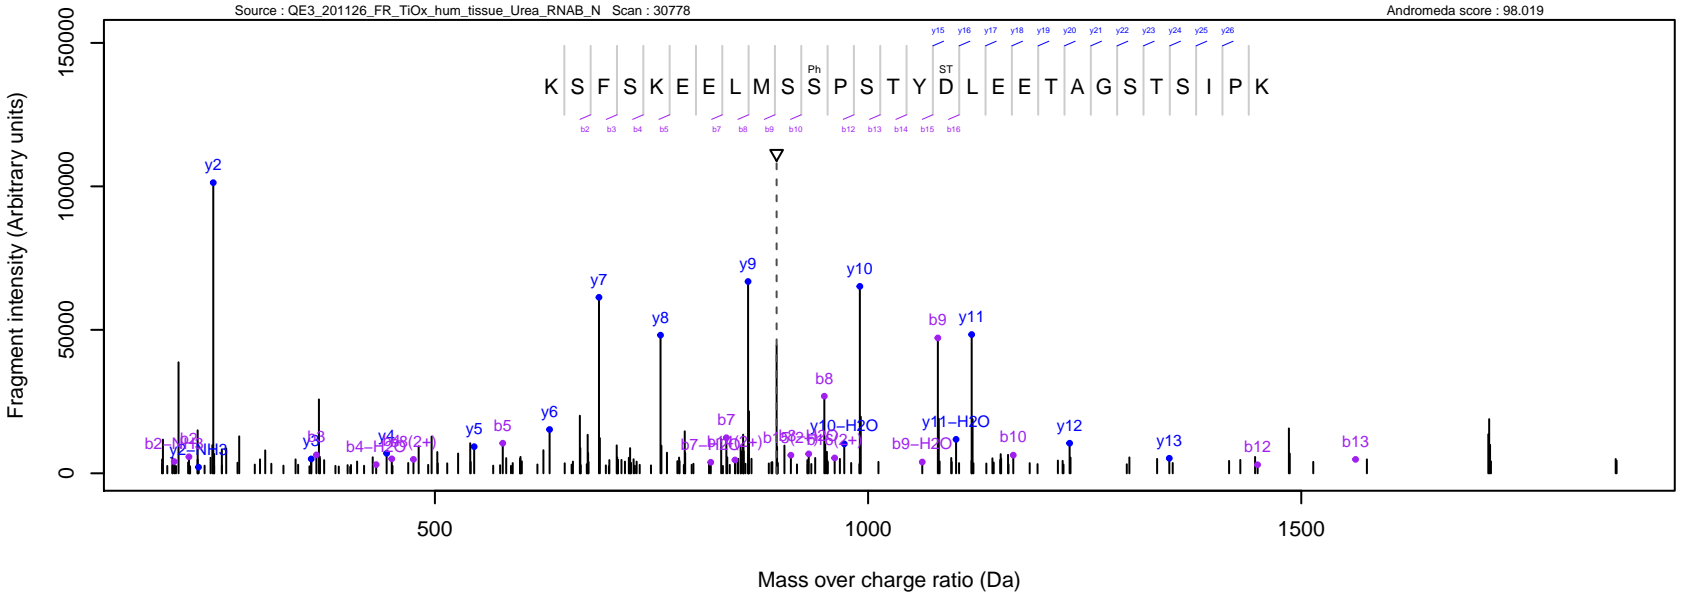

LTIFGNSAVSQPASSNHS(Phospho (STY))SR-3+

Source : QE3\_201126\_FR\_TiOx\_hum\_tissue\_Urea\_RNAB\_H Scan : 25974

Andromeda score : 98.015

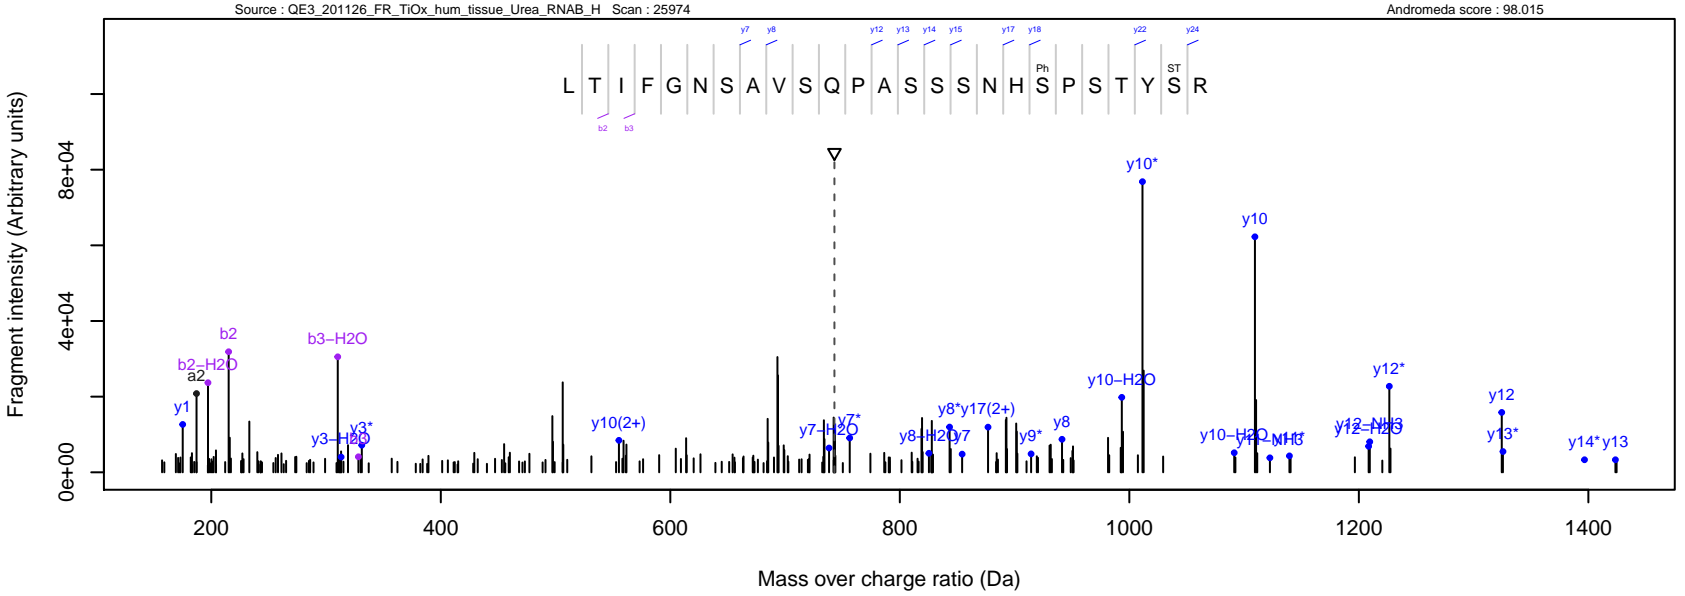

AIHS(Phospho (STY))S(Phospho (STY))DEDEDEDEEDFEDDDEWED-3+

Source : QE3\_201126\_FR\_TiOx\_hum\_tissue\_Urea\_RNAB\_N Scan : 51024

Andromeda score : 97.999

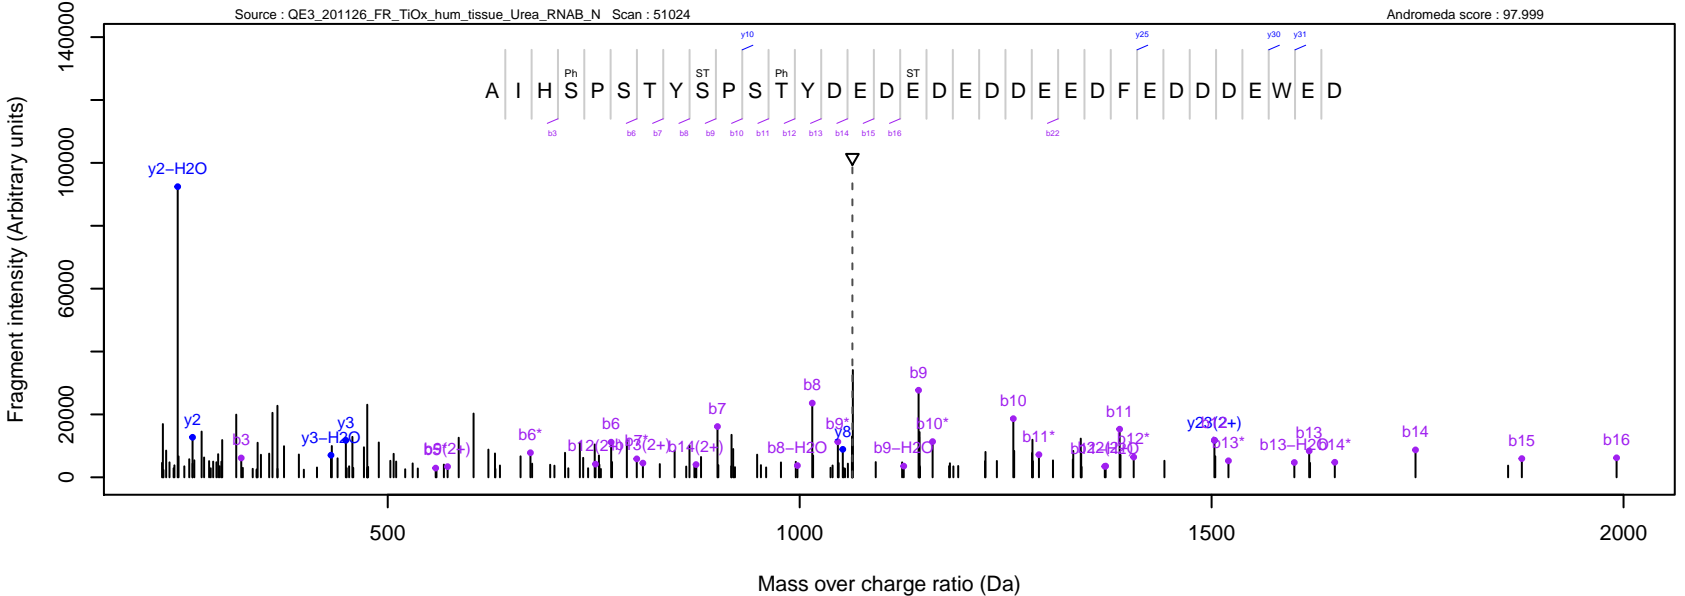

GSLAS(Phospho (STY))LDS(Phospho (STY))LRKGGPPPPNWR-3+

Source : QE3\_201126\_FR\_TiOx\_hum\_tissue\_Urea\_RNAB\_N Scan : 36952

Andromeda score : 97.974

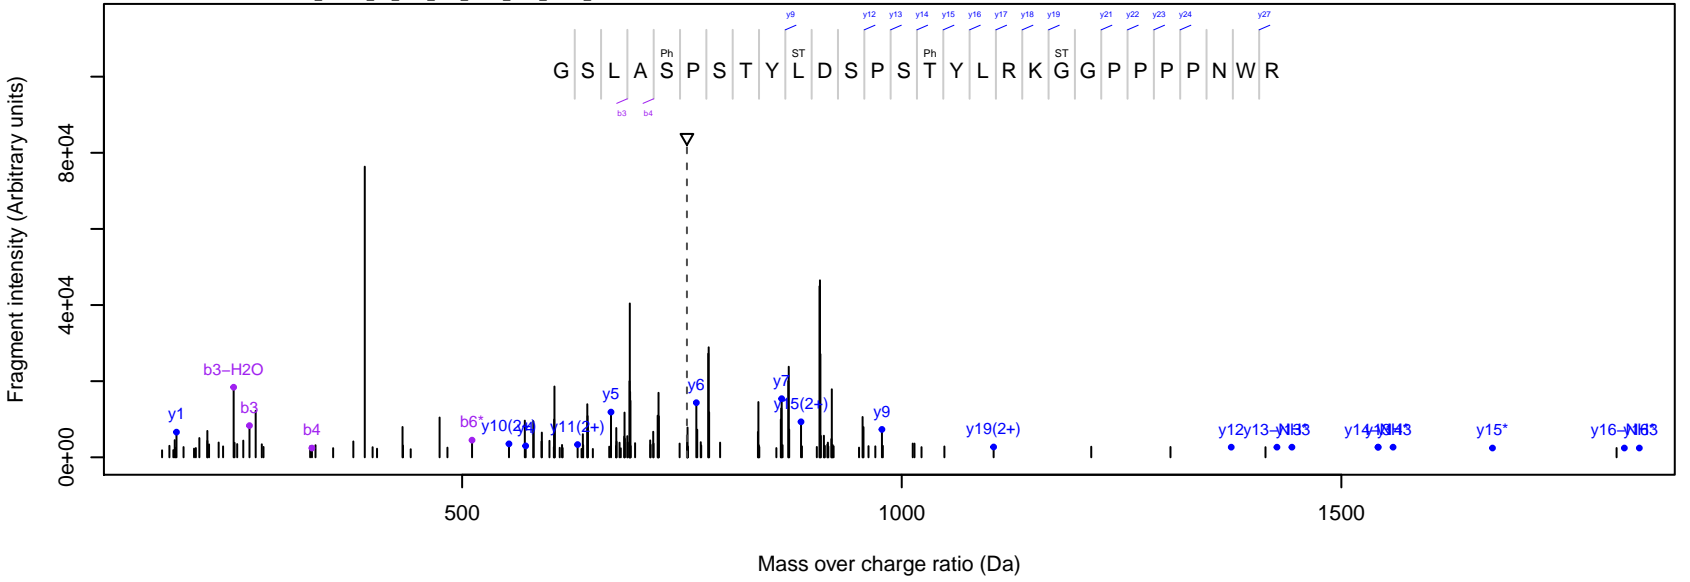

RFS(Phospho (STY))LFGK-2+

Source : QE3\_201126\_FR\_TiOx\_hum\_tissue\_Urea\_RNAB\_H Scan : 27505

Andromeda score : 97.965

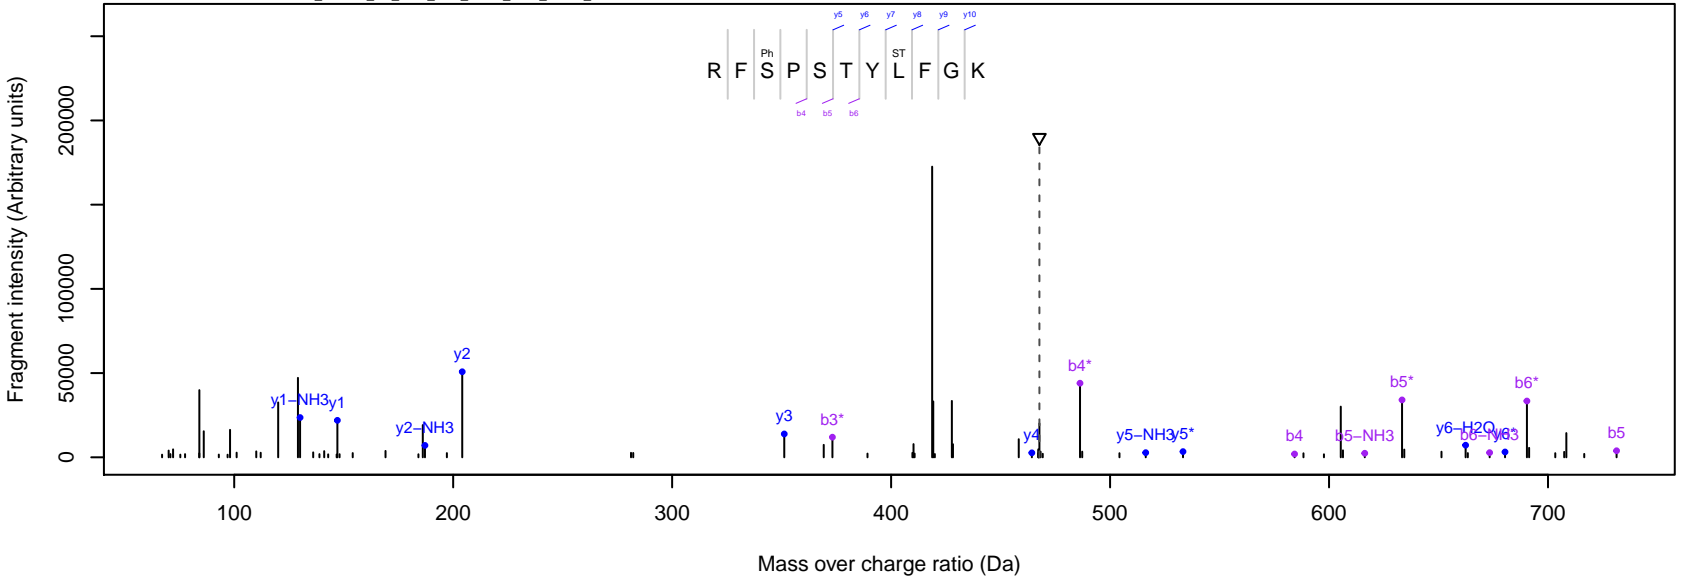

KVM(Oxidation (M))DS(Phospho (STY))DEDDDY-2+

Source : QE3\_201126\_FR\_TiOx\_hum\_tissue\_Urea\_RNAB\_B Scan : 10804

Andromeda score : 97.957

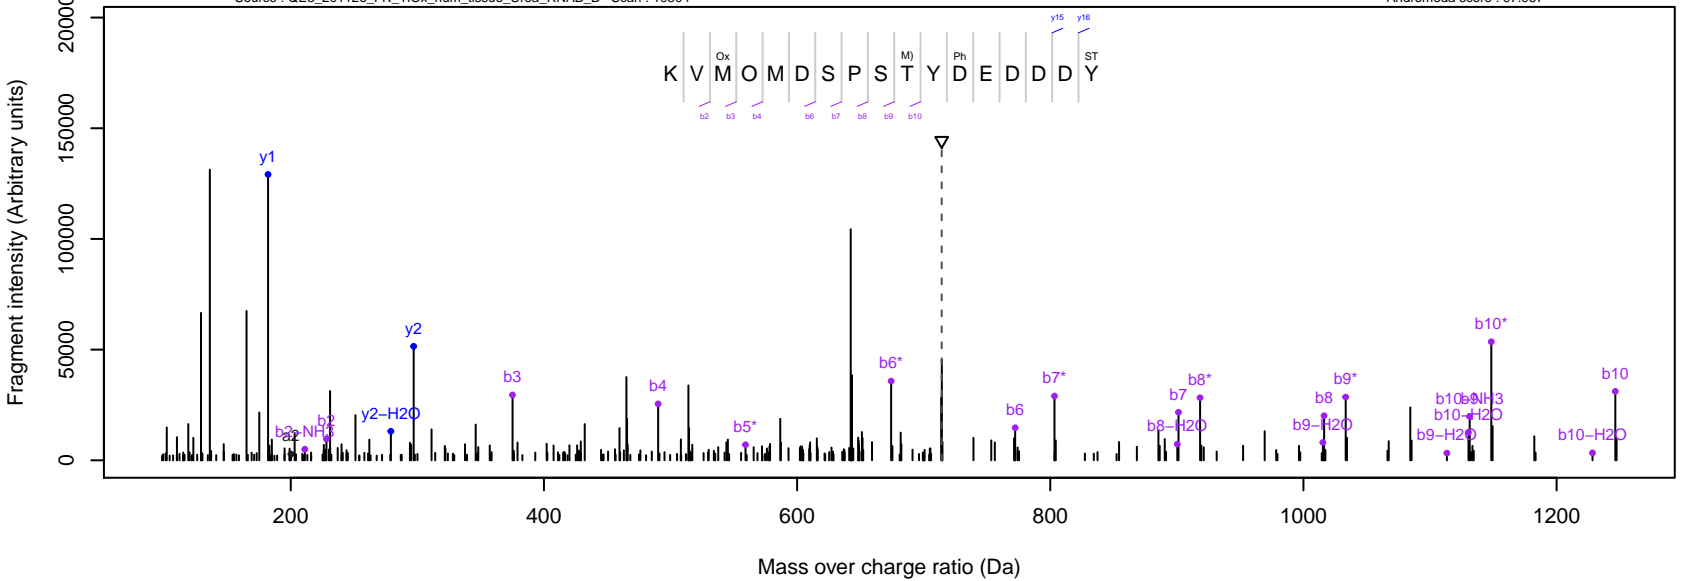

SSANDLLASDIFAPPV(Phospho (STY))EPSGQASPTGQPALQPNPLDLFK-4+

Source : QE3\_201126\_FR\_TiOx\_hum\_tissue\_Urea\_RNAB\_N Scan : 62870

Andromeda score : 97.82

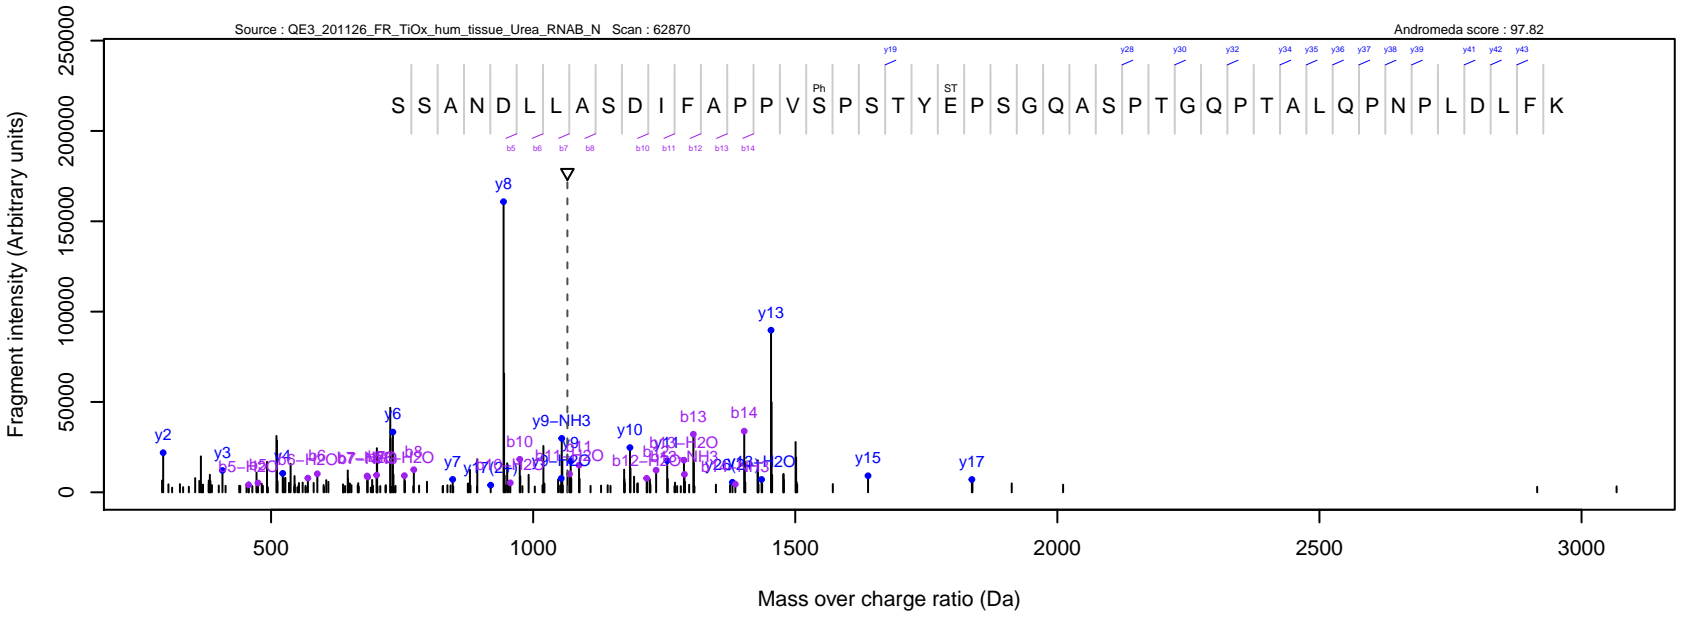

LSGSGPAELS(Phospho (STY))AGEDEEESELVSKPLLR-3+

Source : QE3\_201126\_FR\_TiOx\_hum\_tissue\_Urea\_RNAB\_B Scan : 42512

Andromeda score : 97.804

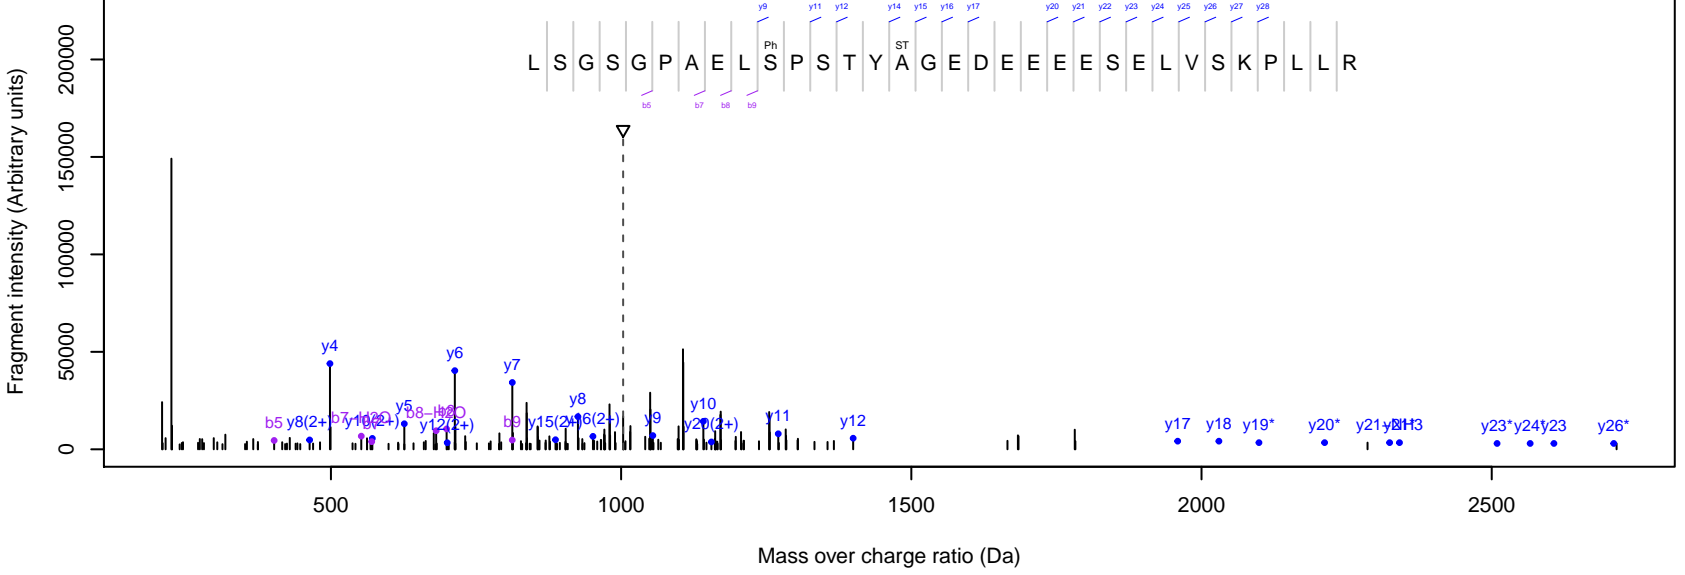

RHEEQQRELEEEENS(Phospho (STY))DEDELDSHTMVK-4+

Source : QE3\_201126\_FR\_TiOx\_hum\_tissue\_Urea\_RNAB\_H Scan : 18259

Andromeda score : 97.804

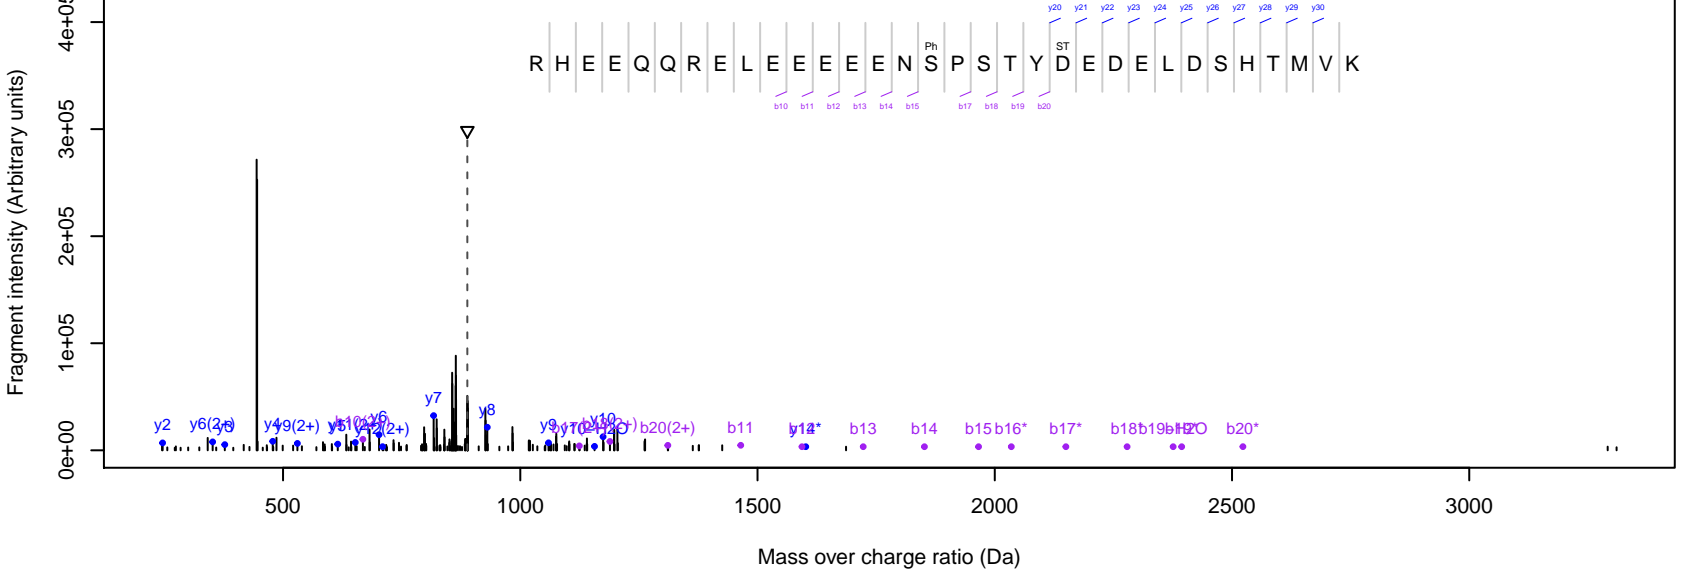

S(Phospho (STY))NLS(Phospho (STY))LASLTFQR-2+

Source : QE3\_201126\_FR\_TiOx\_hum\_tissue\_Urea\_RNAB\_B Scan : 57458

Andromeda score : 97.797

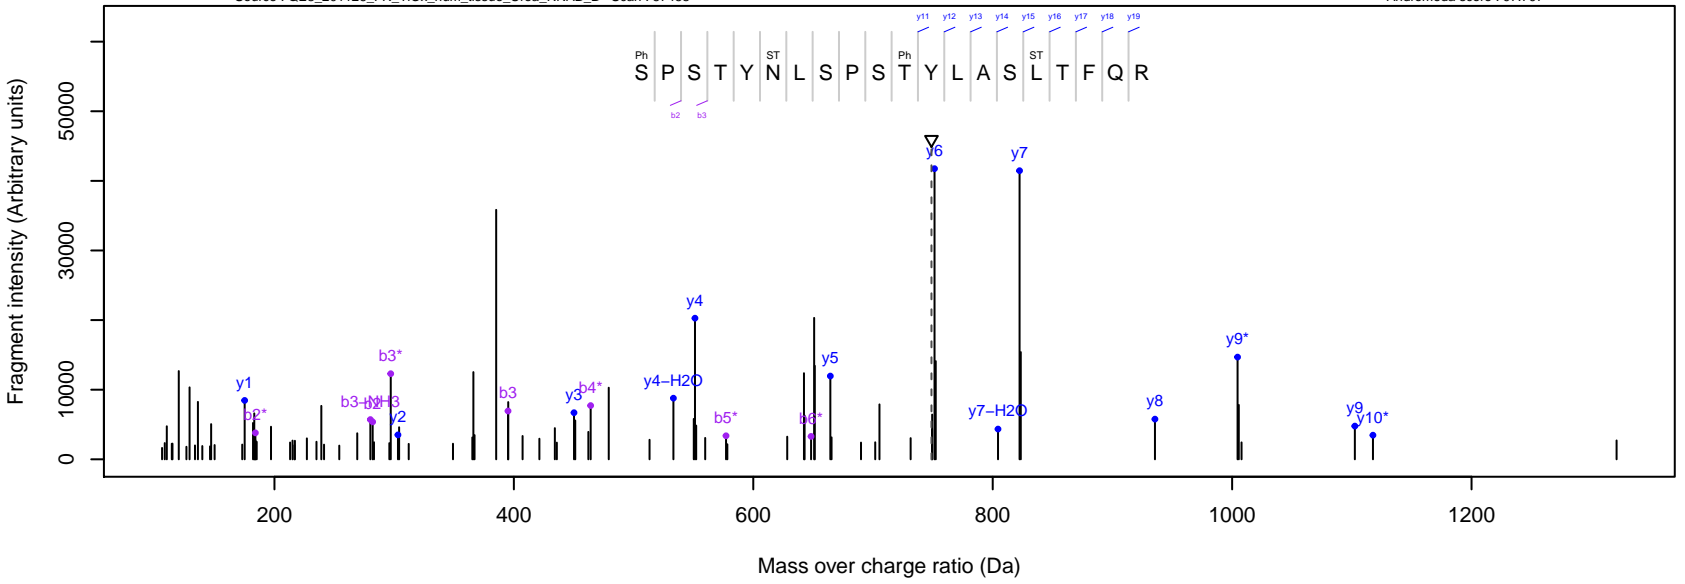

(Acetyl (Protein N-term))S(Phospho (STY))S(Phospho (STY))SEEVSWISWFCGLR-2+

Source : QE3\_201126\_FR\_TiOx\_hum\_tissue\_Urea\_RNAB\_N Scan : 64017

Andromeda score : 97.797

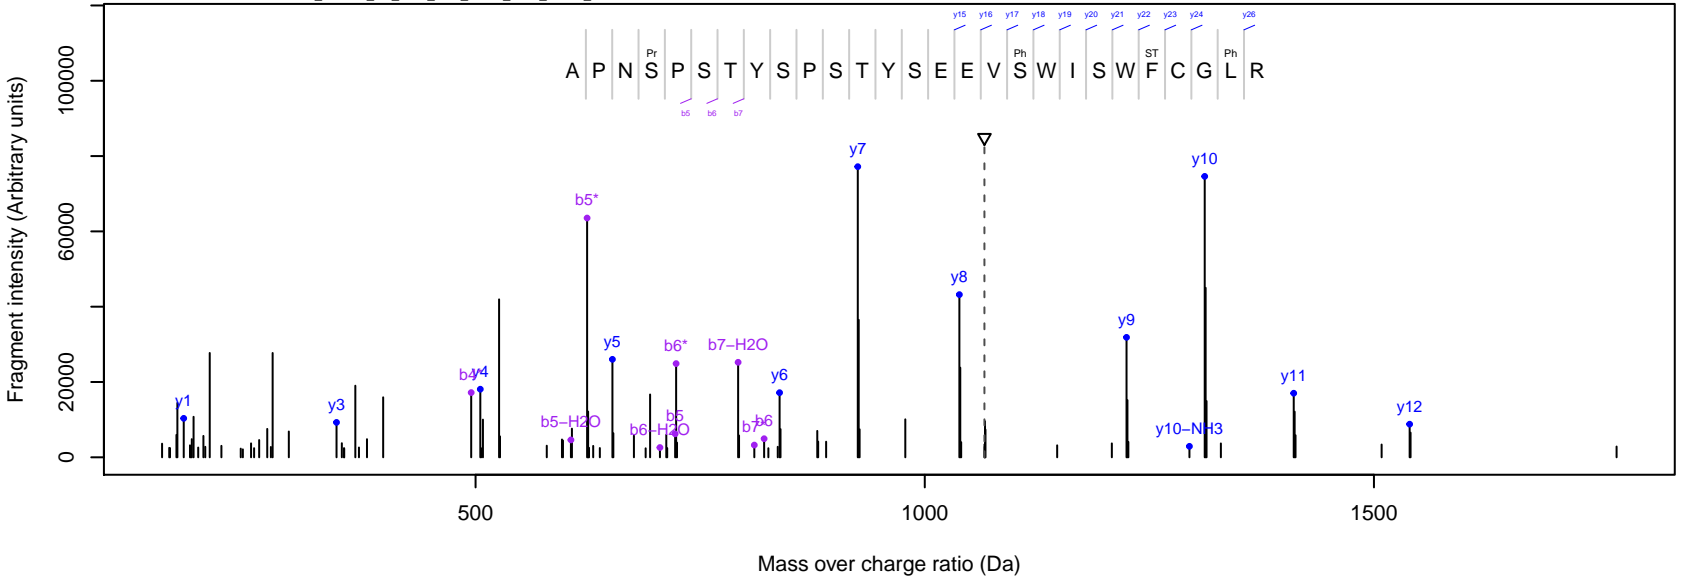

T(Phospho (STY))STAPAASPVR-2+

Source : QE3\_201126\_FR\_TiOx\_hum\_tissue\_Urea\_RNAB\_H Scan : 9233

Andromeda score : 97.779

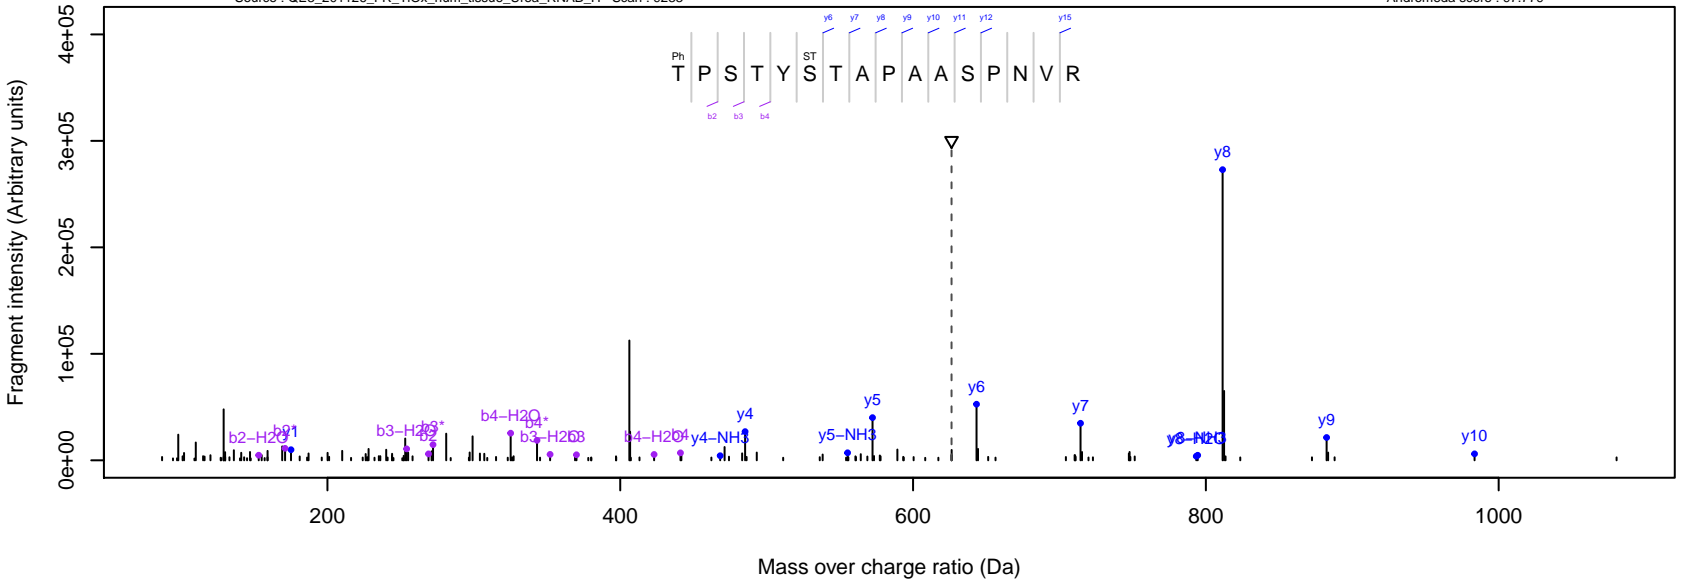



MESEGGADDS(Phospho (STY))AEEGLLDDDDNDRGDDQLLELIK-3+

Source : QE3\_201126\_FR\_TiOx\_hum\_tissue\_Urea\_RNAB\_N Scan : 45675

Andromeda score : 97.758

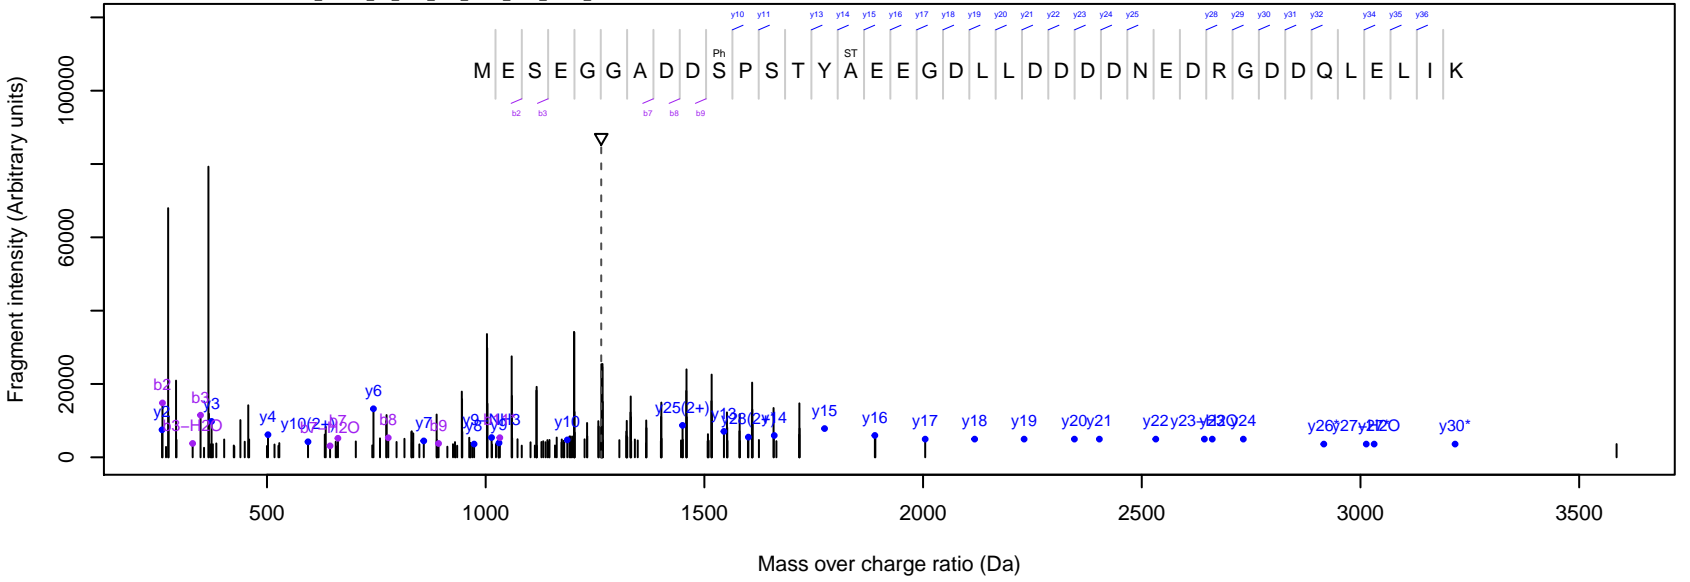

NGYGFVEFEDS(Phospho (STY))RDADDAVYELNGK-3+

Source : QE3\_201126\_FR\_TiOx\_hum\_tissue\_Urea\_RNAB\_H Scan : 49309

Andromeda score : 97.691

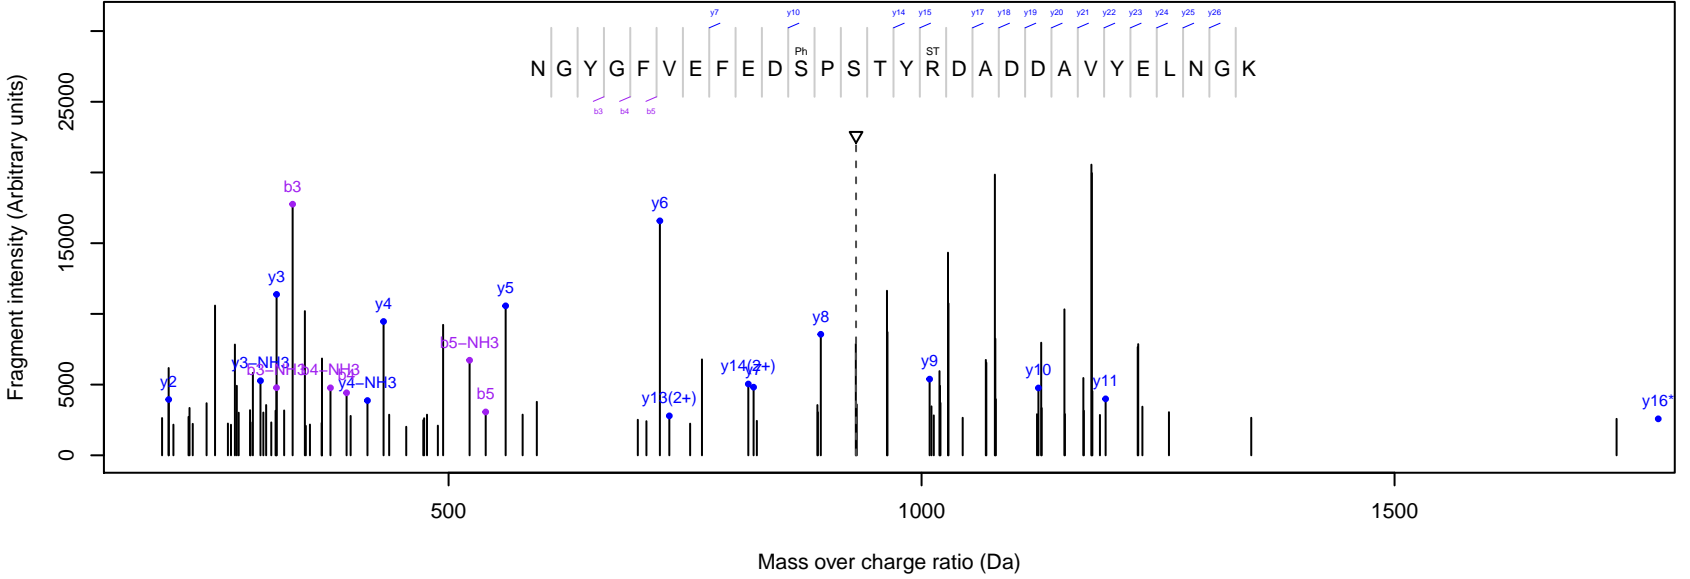

LDYVPS(Phospho (STY))SASREVR-2+

Source : QE3\_201126\_FR\_TiOx\_hum\_tissue\_Urea\_RNAB\_N Scan : 18354

Andromeda score : 97.69

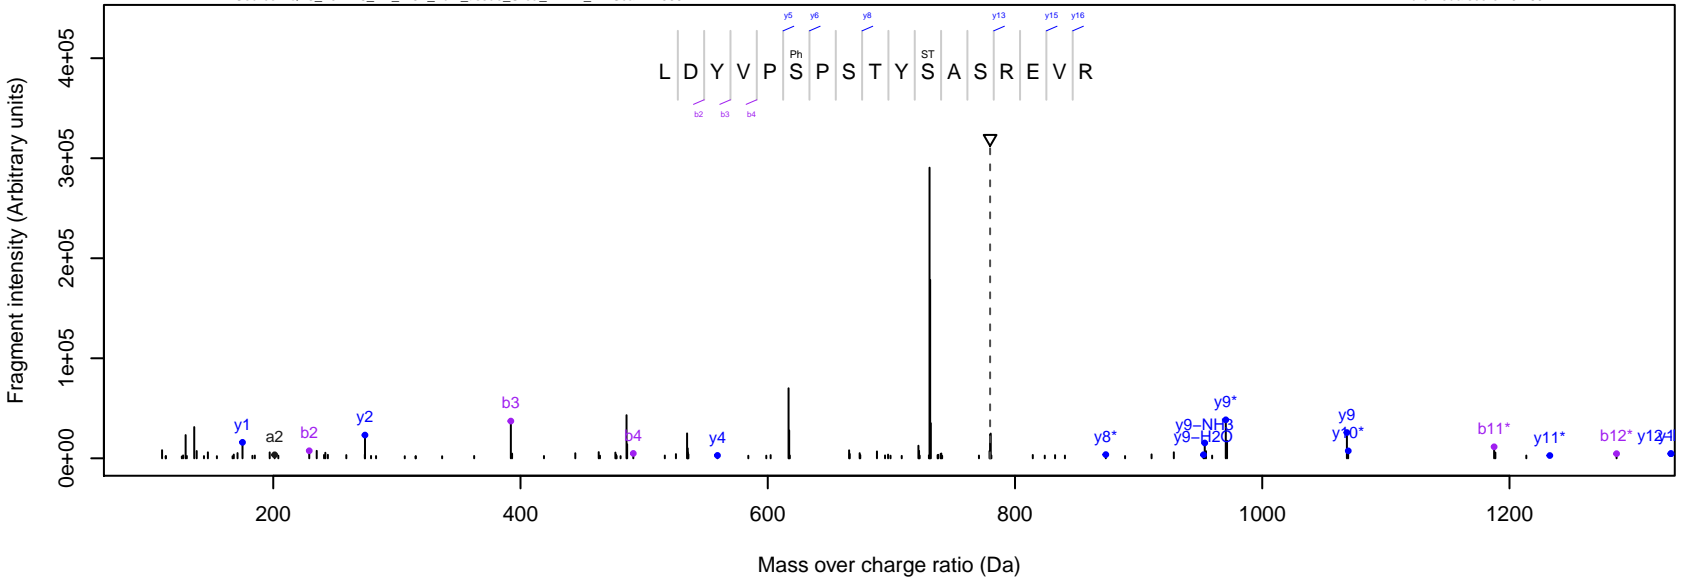

SHTSSNYDSYKKS(Phospho (STY))PGSTSR-3+

Source : QE3\_201126\_FR\_TiOx\_hum\_tissue\_Urea\_RNAB\_H Scan : 4898

Andromeda score : 97.69

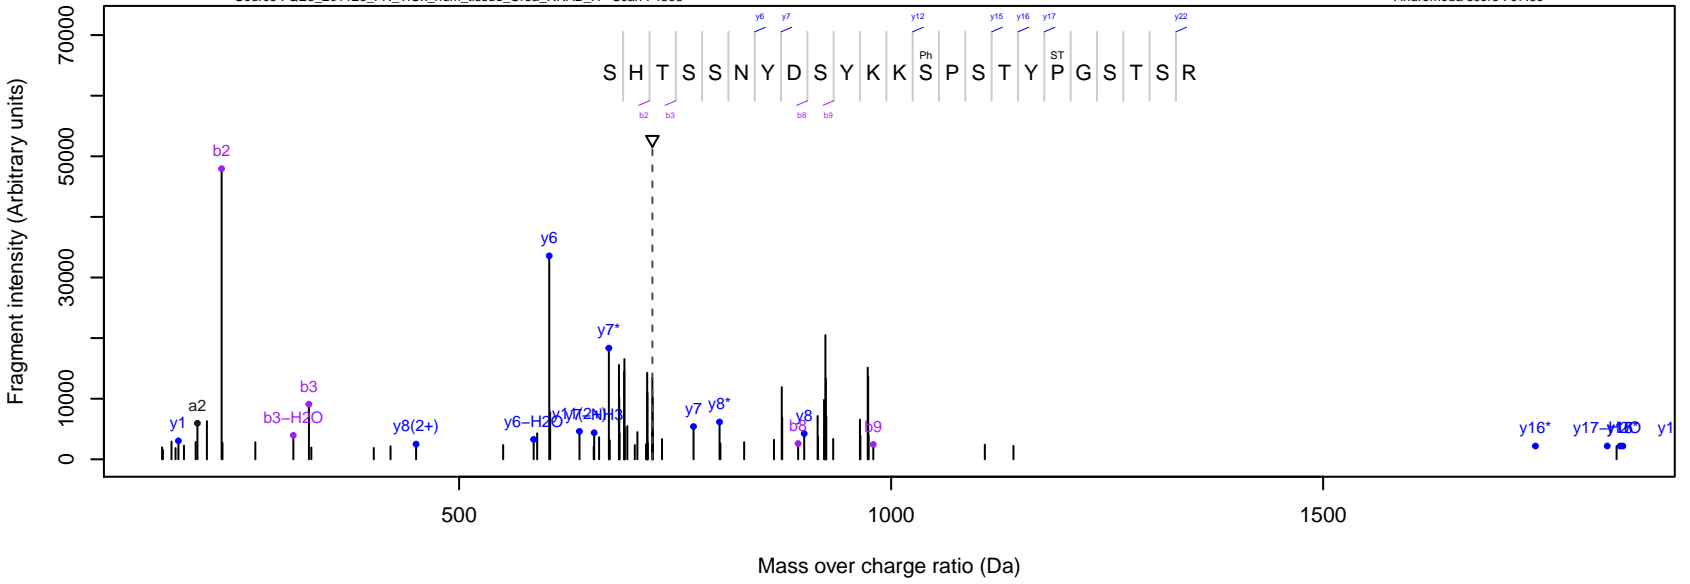

GLSAS(Phospho (STY))TM(Oxidation (M))DLSSS-2+

Source : QE3\_201126\_FR\_TiOx\_hum\_tissue\_Urea\_RNAB\_B Scan : 23190

Andromeda score : 97.633

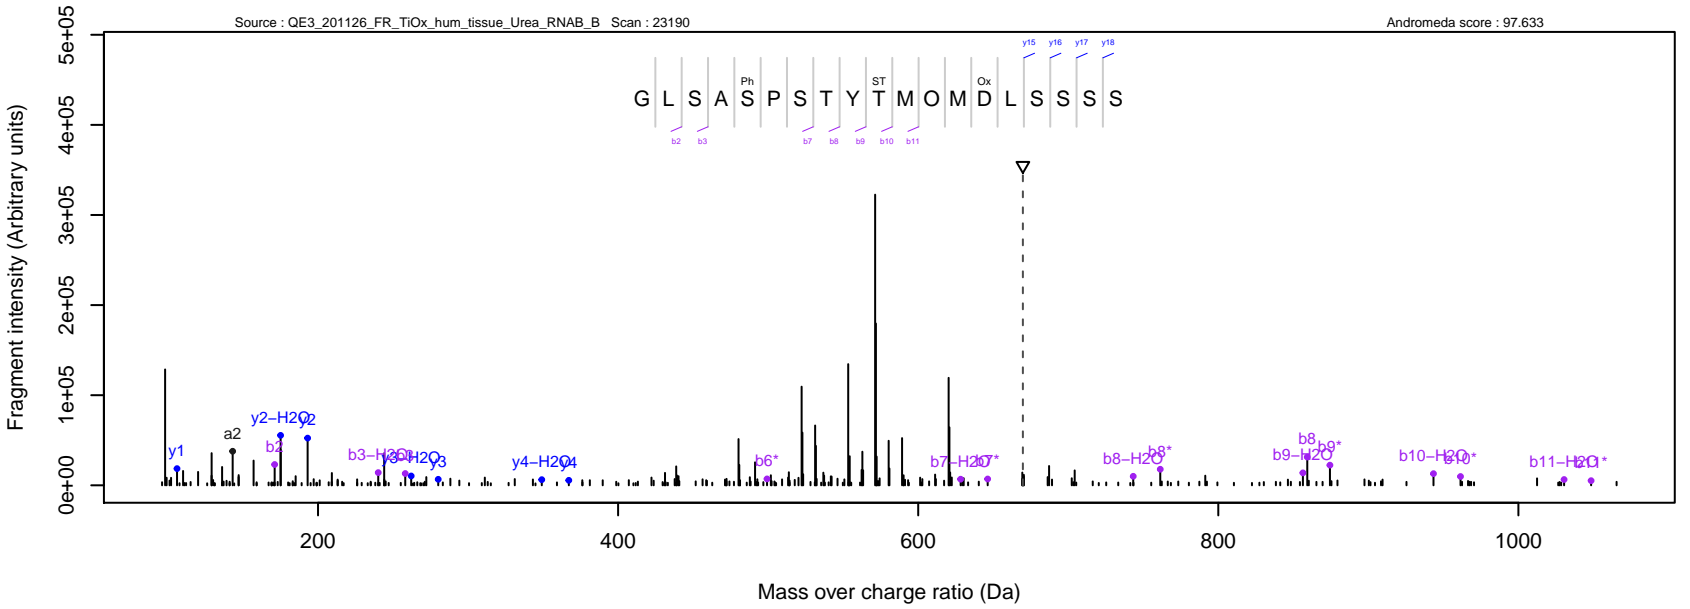

S(Phospho (STY))RS(Phospho (STY))RT(Phospho (STY))PLLPR-2+

Source : QE3\_201126\_FR\_TiOx\_hum\_tissue\_Urea\_RNAB\_B Scan : 17596

Andromeda score : 97.631

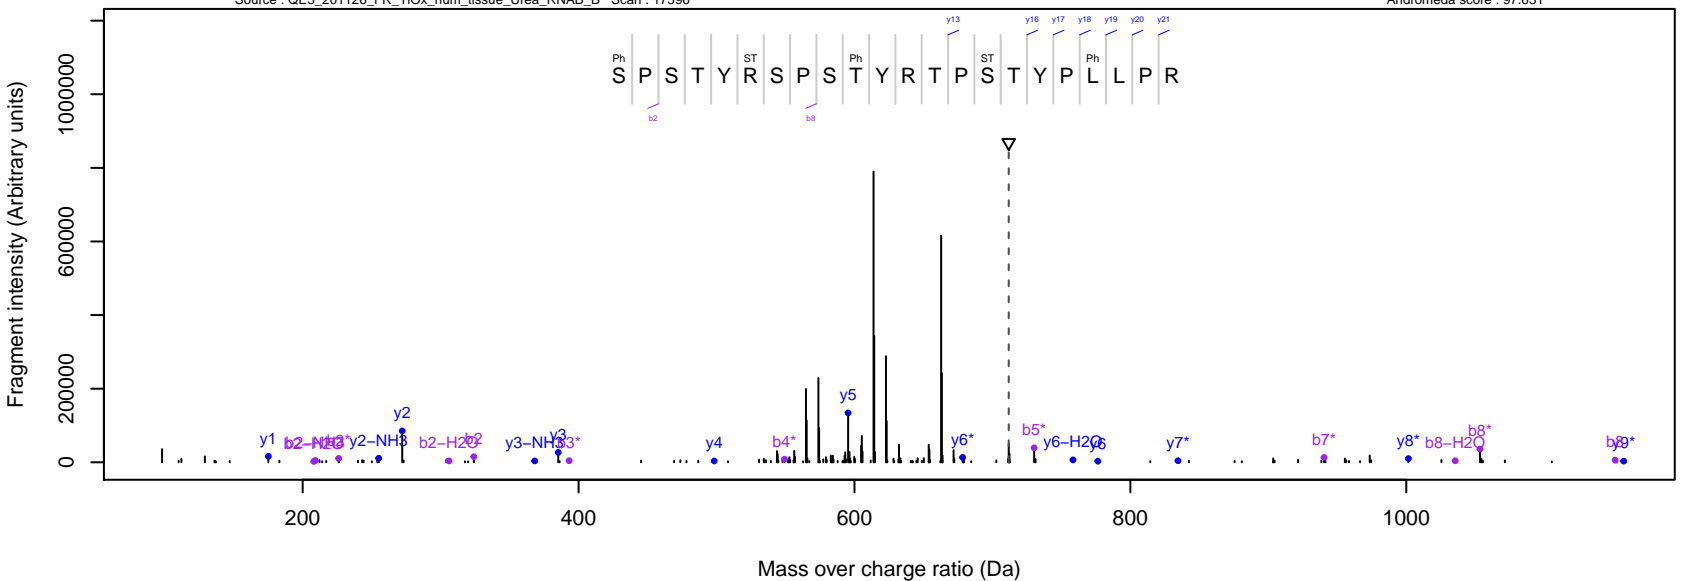

S(Phospho (STY))NSGLGGEVSGVMSKPNVDPPWFQDGPK-3+

Source : QE3\_201126\_FR\_TiOx\_hum\_tissue\_Urea\_RNAB\_N Scan : 47908

Andromeda score : 97.609

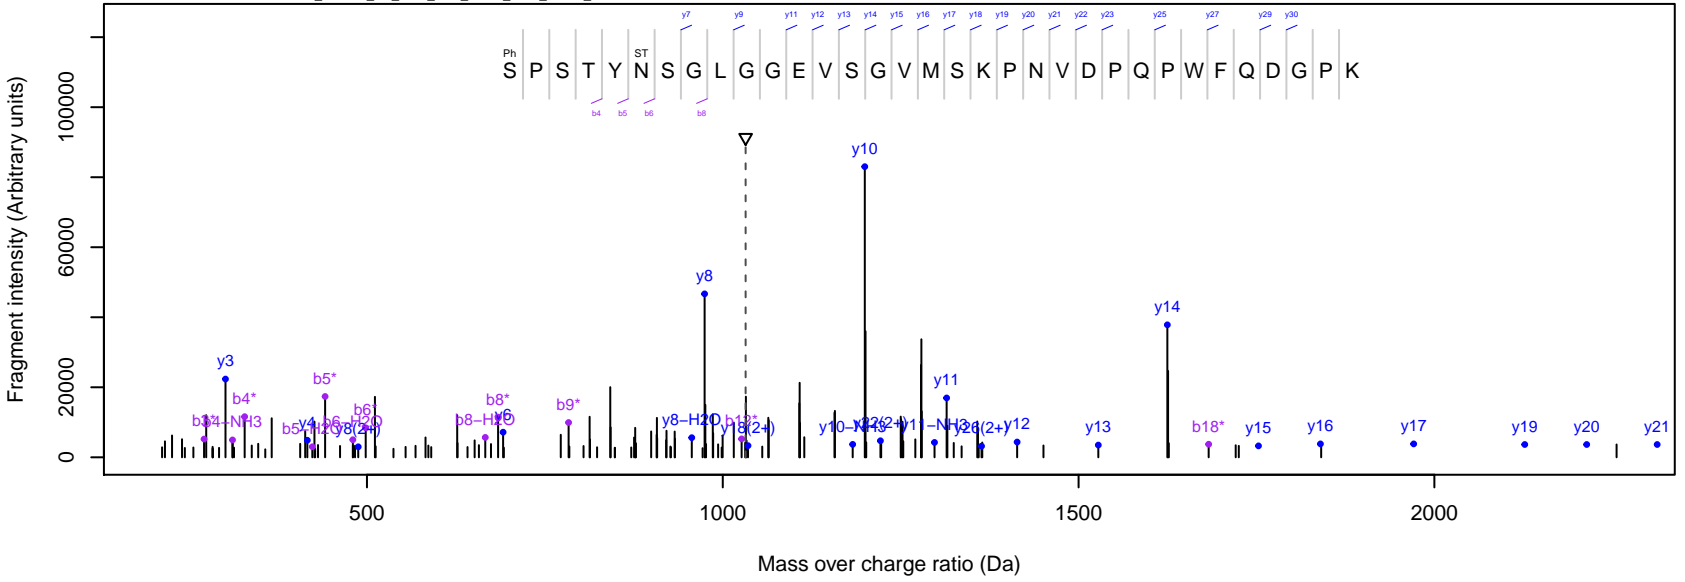

RYASGSSAS(Phospho (STY))LGGPESAVA-2+

Source : QE3\_201126\_FR\_TiOx\_hum\_tissue\_Urea\_RNAB\_N Scan : 21959

Andromeda score : 97.579

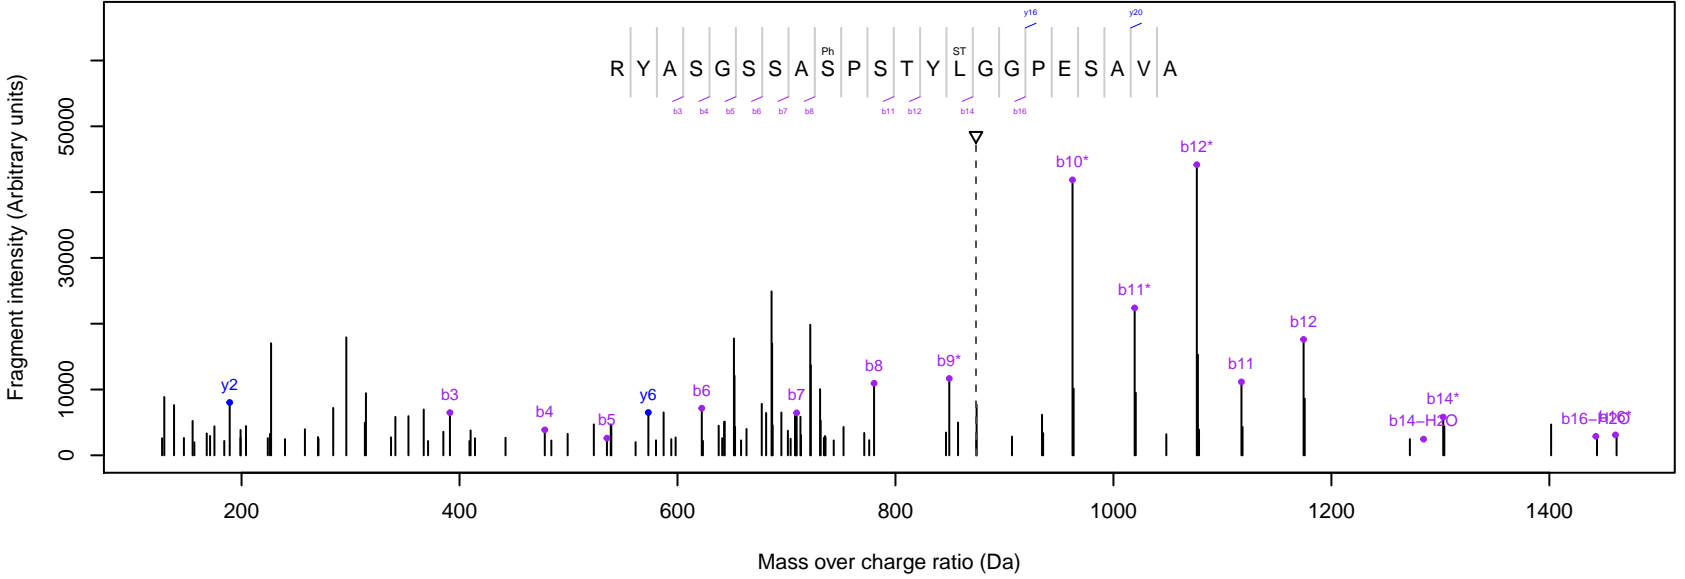

KA AVL S(Phospho (STY))D S P S T Y E D E E K A S A K-3+

Source : QE3\_201126\_FR\_TiOx\_hum\_tissue\_Urea\_RNAB\_H Scan : 9431

Andromeda score : 97.57

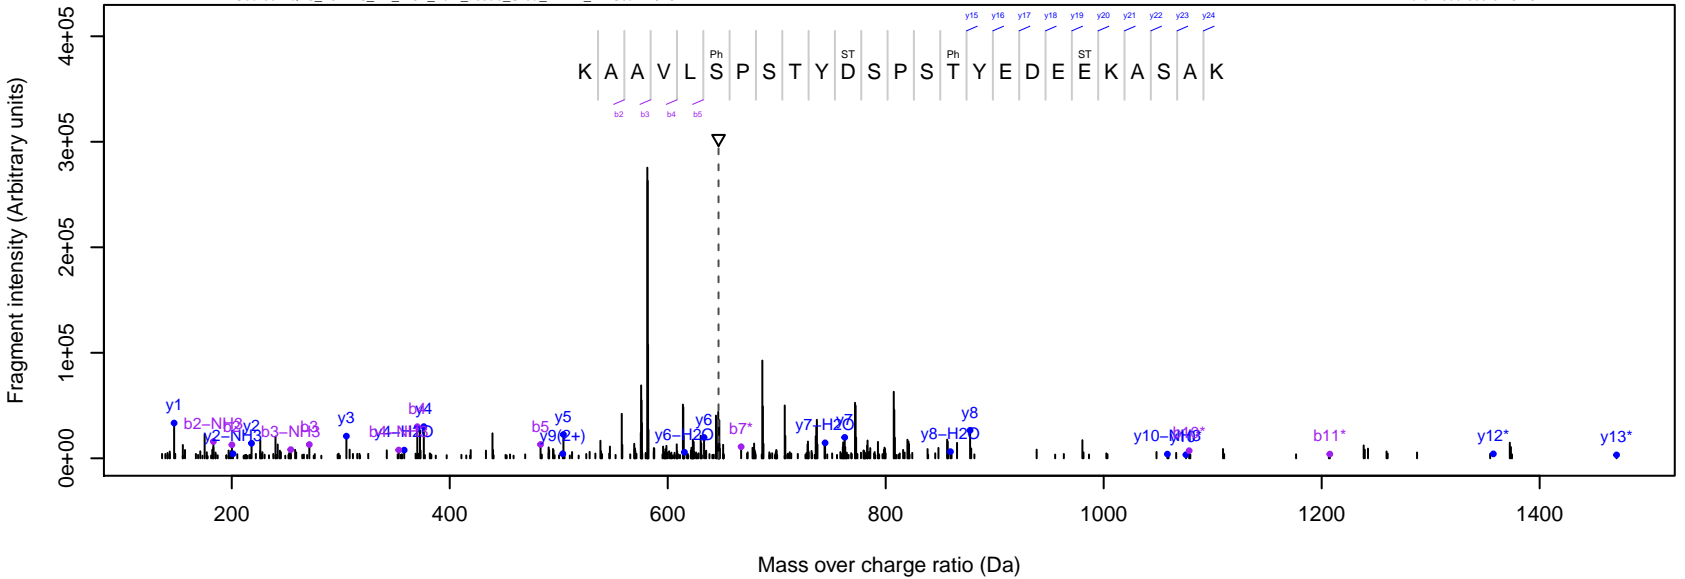

KHS(Phospho (STY))SDDYYGDISSLESSQK-3+

Source : QE3\_201126\_FR\_TiOx\_hum\_tissue\_Urea\_RNAB\_B Scan : 27075

Andromeda score : 97.542

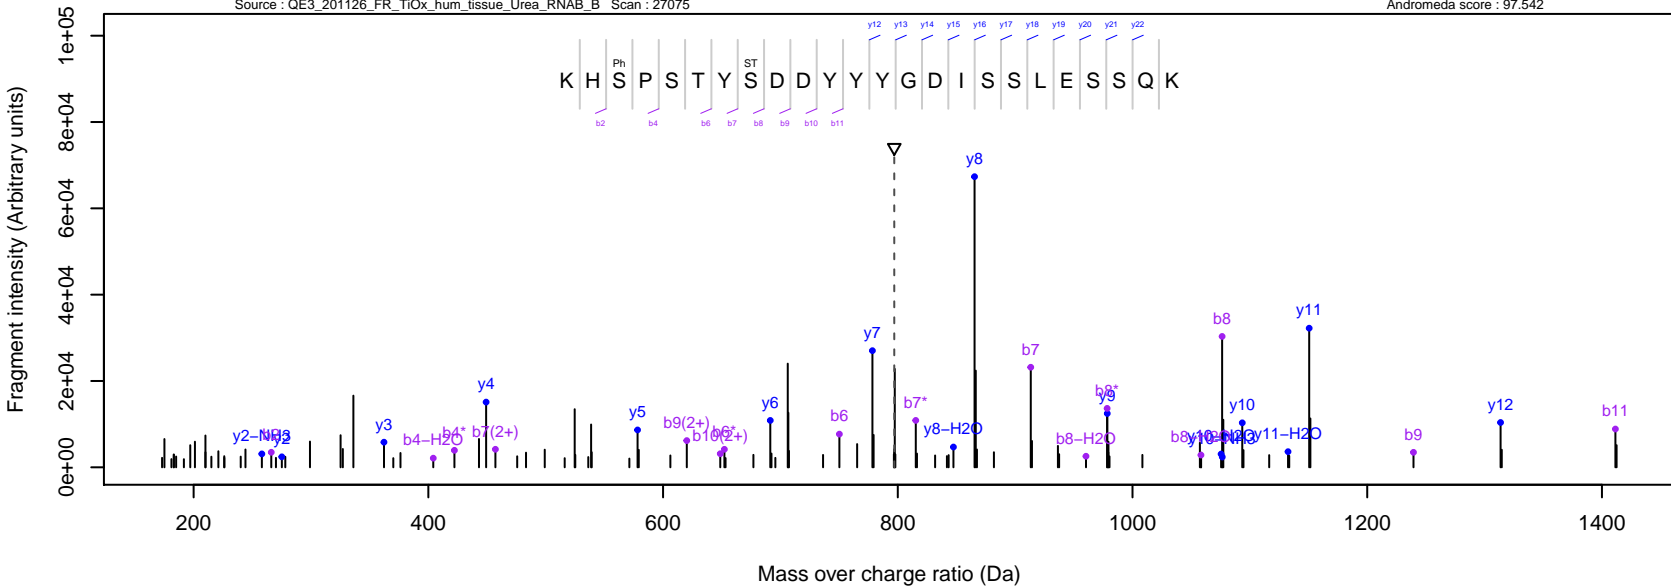

CLS(Phospho (STY))DPGPHEPGEPEFFPK-3+

Source : QE3\_201126\_FR\_TiOx\_hum\_tissue\_Urea\_RNAB\_H Scan : 35978

Andromeda score : 97.509

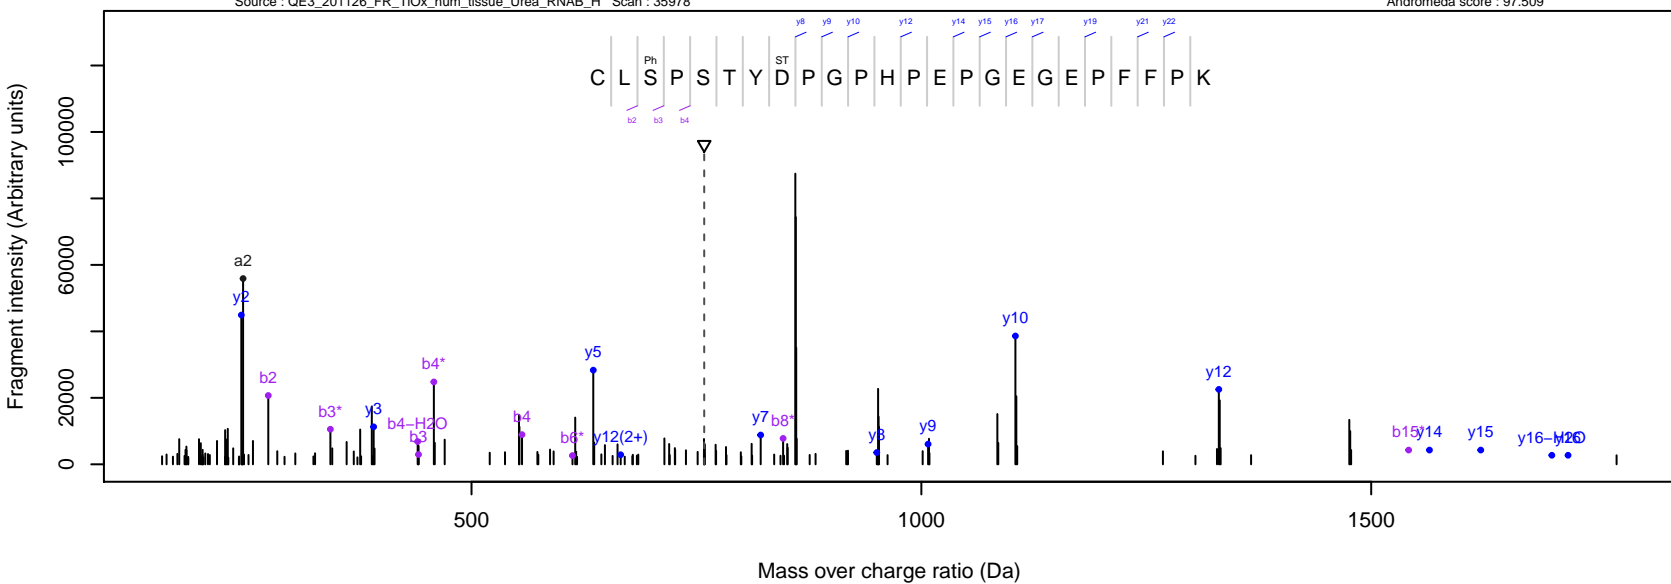

VEQALSEVASS(Phospho (STY))LQSSAPK-3+

Source : QE3\_201126\_FR\_TiOx\_hum\_tissue\_Urea\_RNAB\_N Scan : 32338

Andromeda score : 97.5

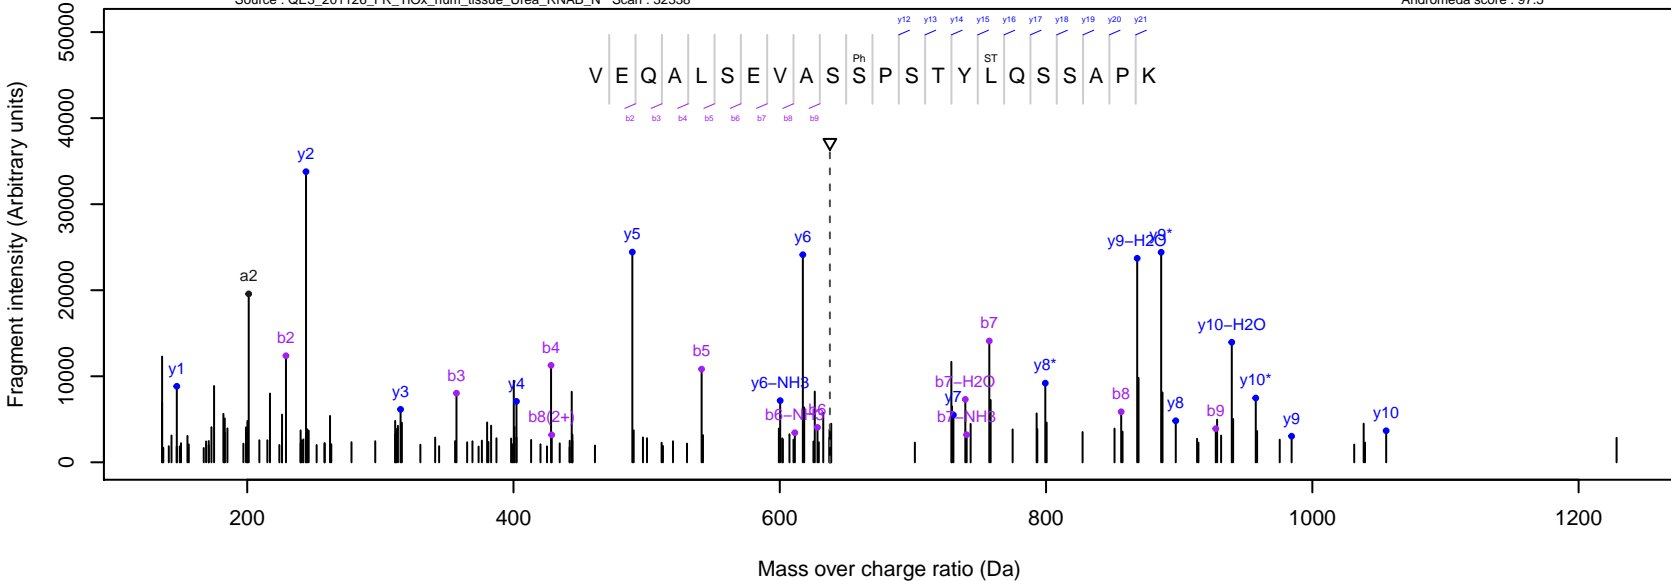

RRS(Phospho (STY))GEQITSSPVSPK-3+

Source : QE3\_201126\_FR\_TiOx\_hum\_tissue\_Urea\_RNAB\_N Scan : 7962

Andromeda score : 97.488

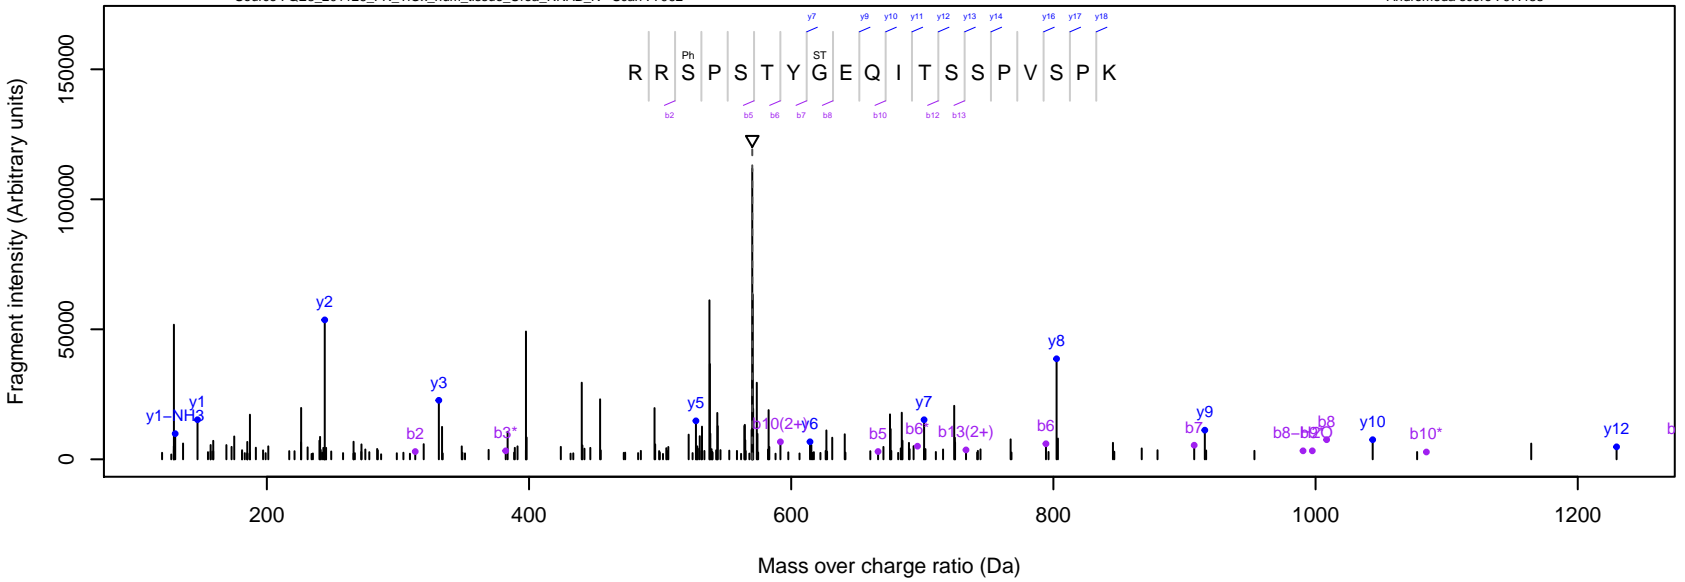

GLGPPS(Phospho (STY))PPAPPR-2+

Source : QE3\_201126\_FR\_TiOx\_hum\_tissue\_Urea\_RNAB\_N Scan : 24630

Andromeda score : 97.463

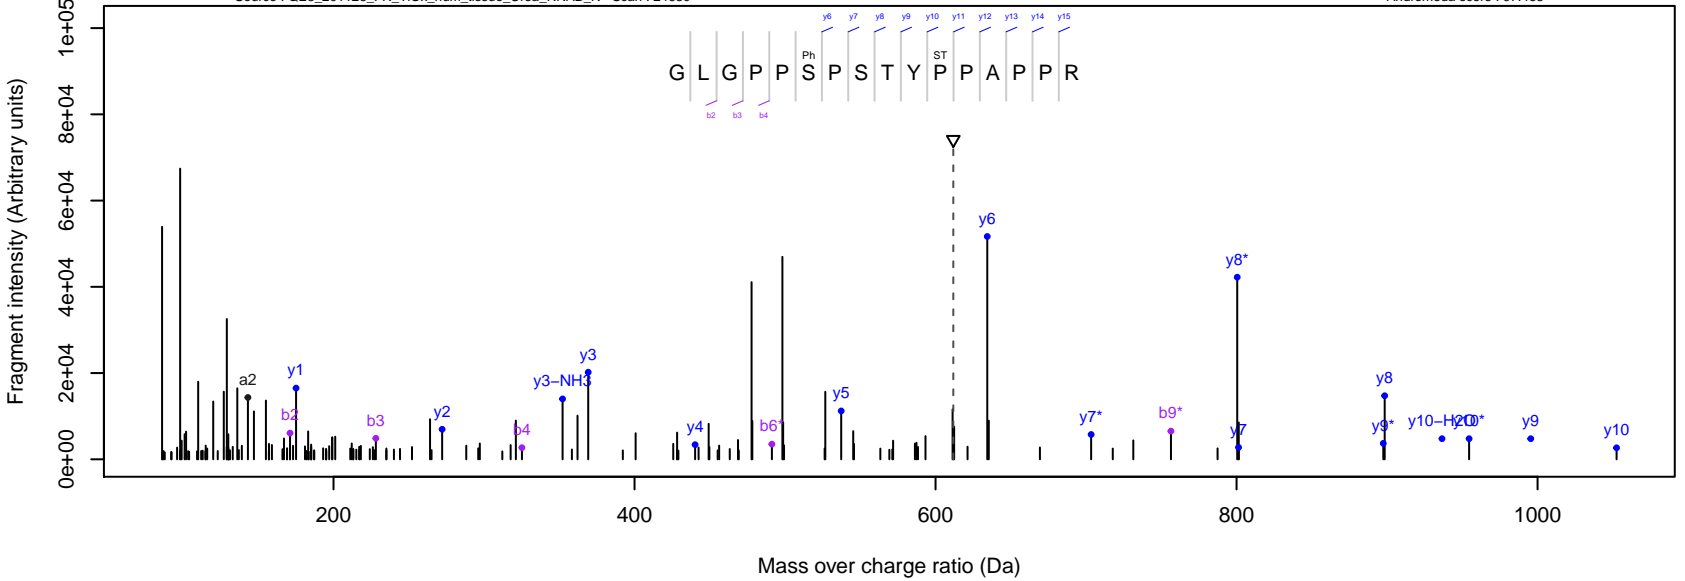

(Acetyl (Protein N-term))AHS(Phospho (STY))PVQSGLPGMQLK-2+

Source : QE3\_201126\_FR\_TiOx\_hum\_tissue\_Urea\_RNAB\_H Scan : 34911

Andromeda score : 97.45

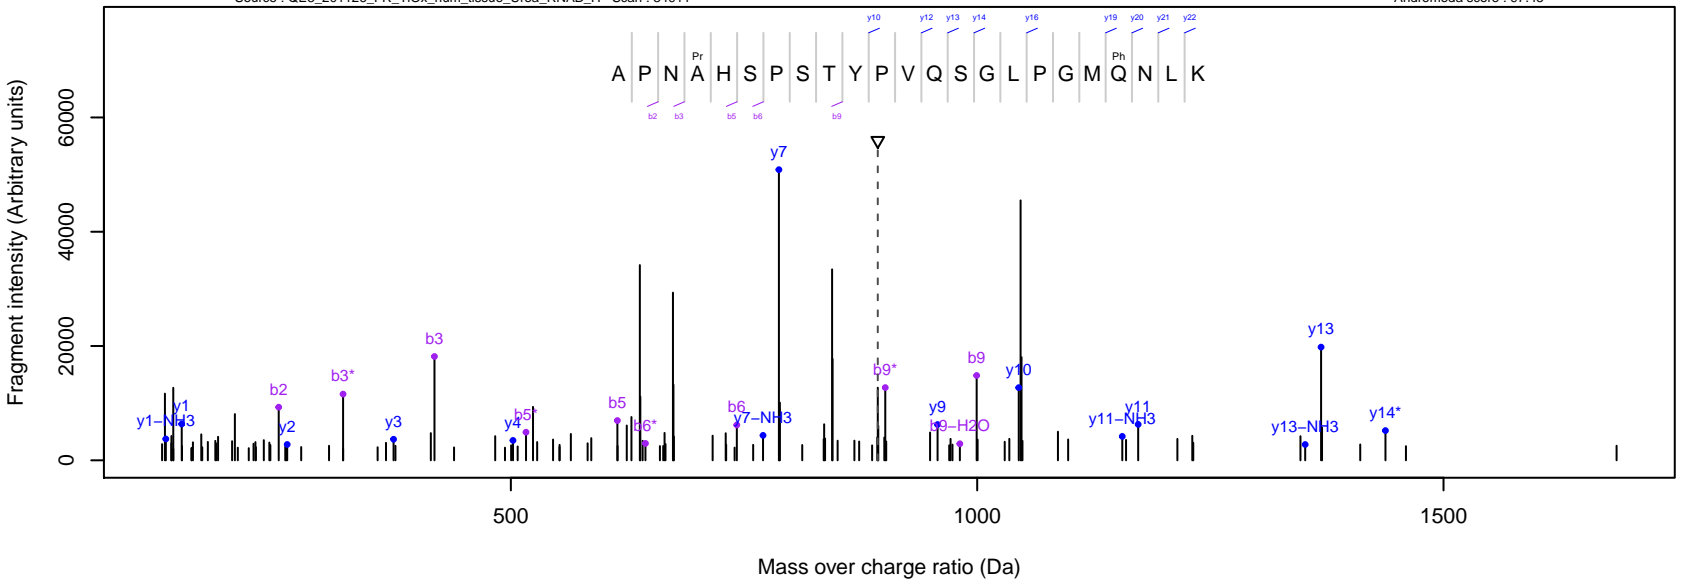

SASS(Phospho (STY))GAEGDVSSEREP-2+

Source : QE3\_201126\_FR\_TiOx\_hum\_tissue\_Urea\_RNAB\_N Scan : 12074

Andromeda score : 97.45

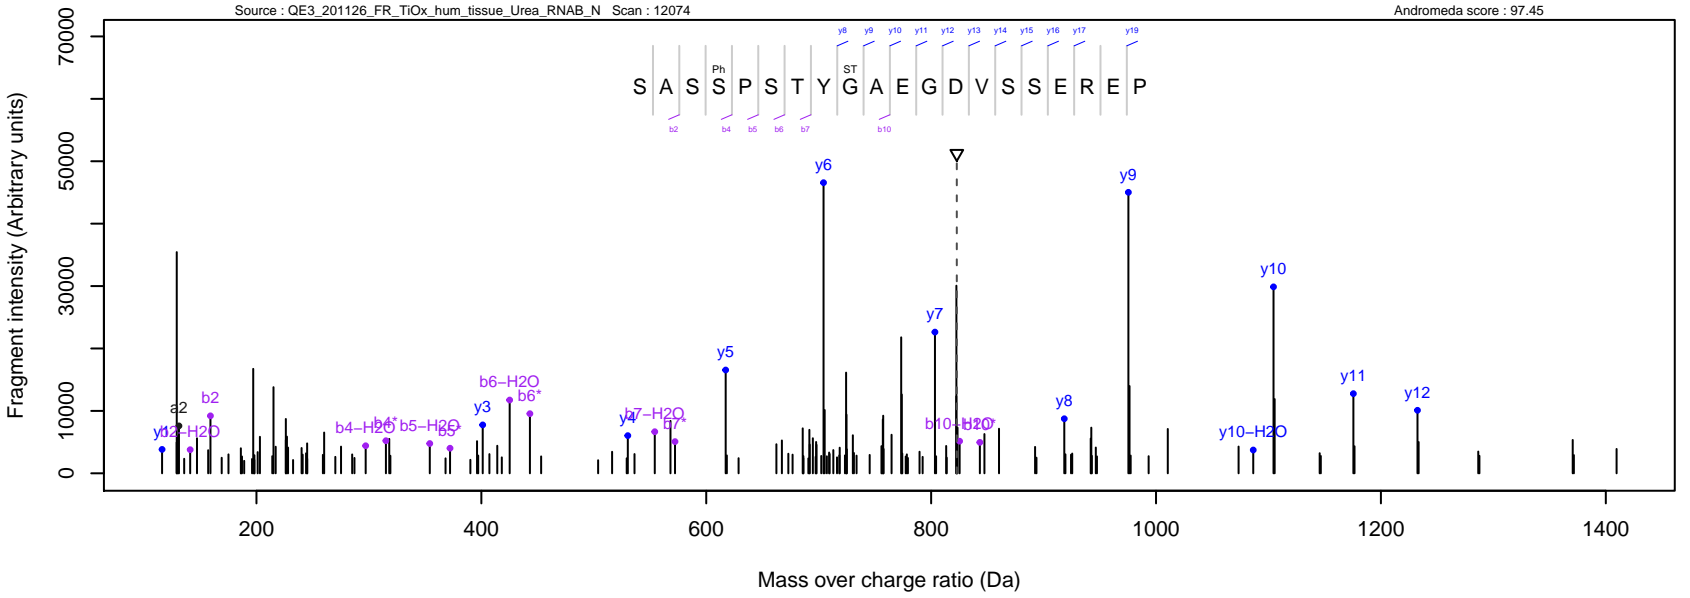

EGS(Phospho (STY))PAPLEPEGAQPK-2+

Source : QE3\_201126\_FR\_TiOx\_hum\_tissue\_Urea\_RNAB\_H Scan : 20658

Andromeda score : 97.417

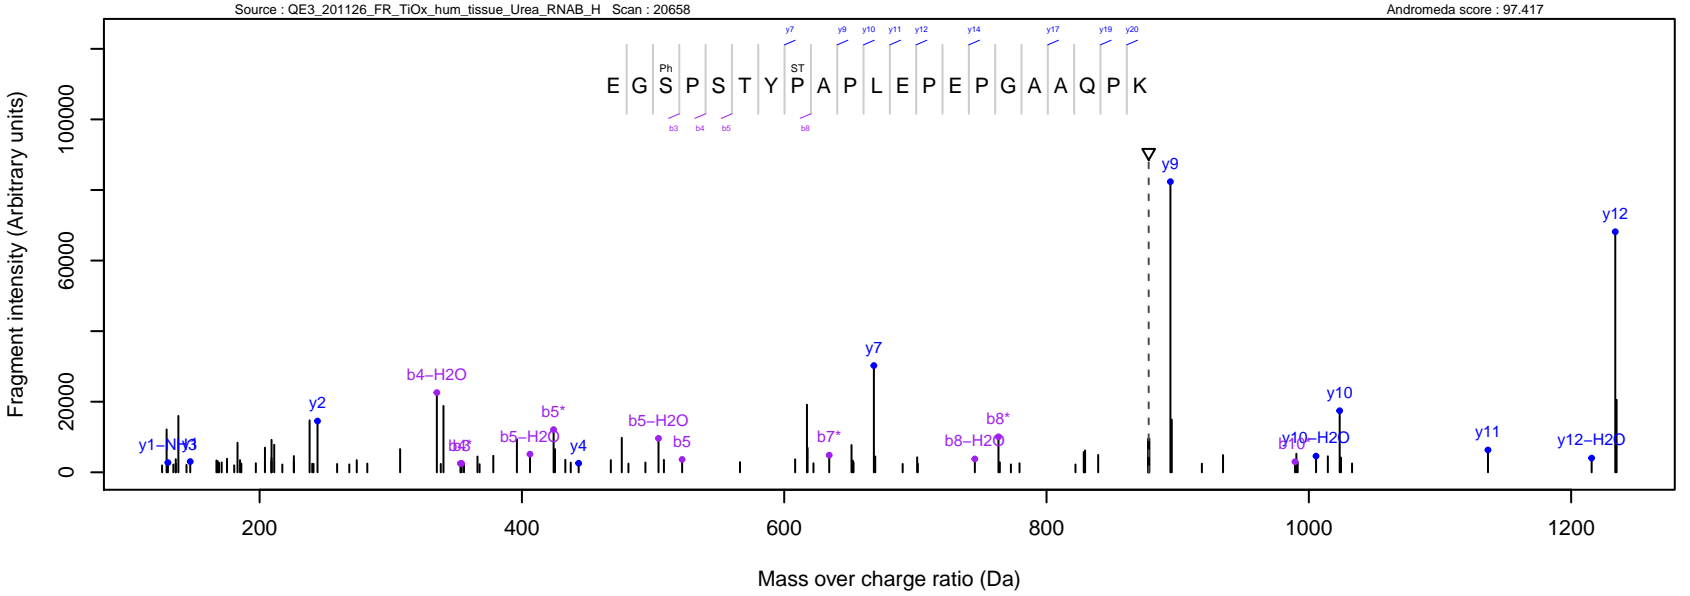

TGGIGDSRPPSFHPHAGGGS(Phospho (STY))QENLDNDTETDSLVSQQR-4+

Source : QE3\_201126\_FR\_TiOx\_hum\_tissue\_Urea\_RNAB\_H Scan : 24851

Andromeda score : 97.407

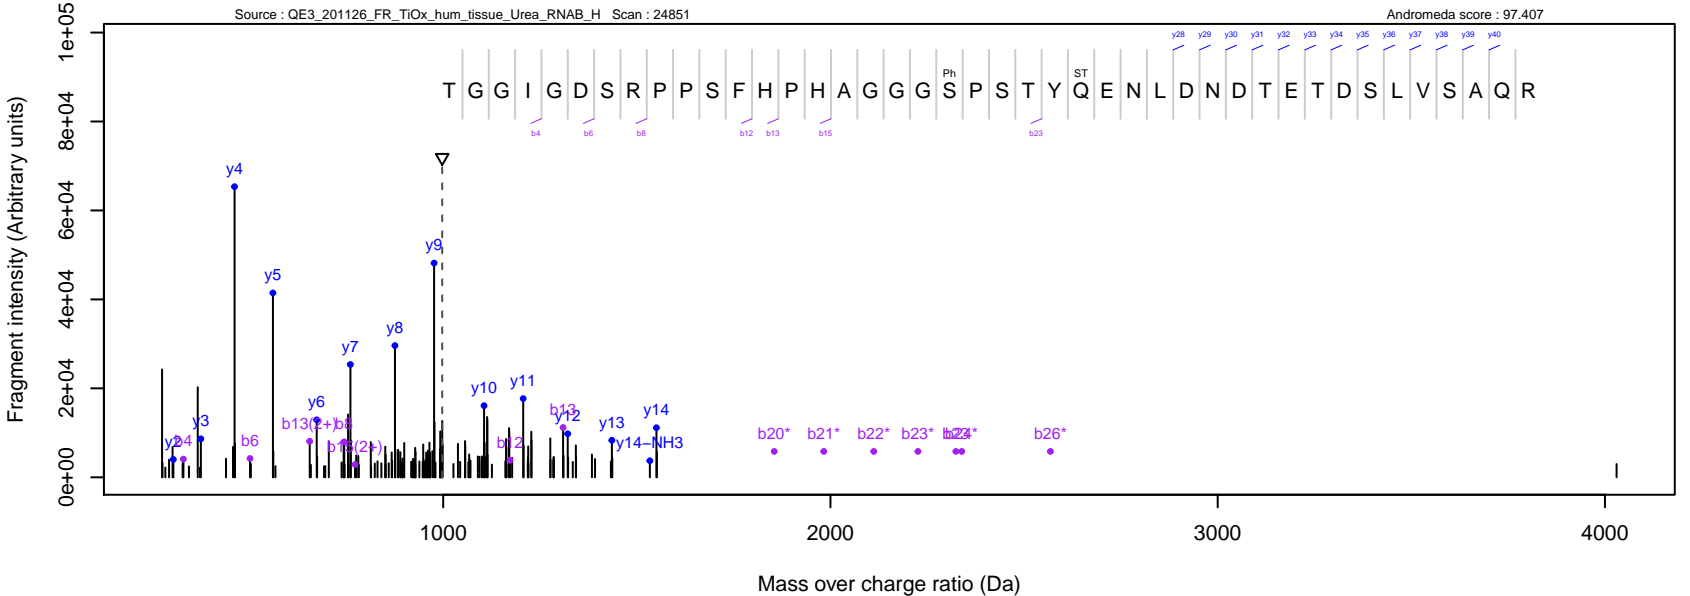

DS(Phospho (STY))LGAYASQDANEQGQDLGKR-3+

Source : QE3\_201126\_FR\_TiOx\_hum\_tissue\_Urea\_RNAB\_H Scan : 22197

Andromeda score : 97.346

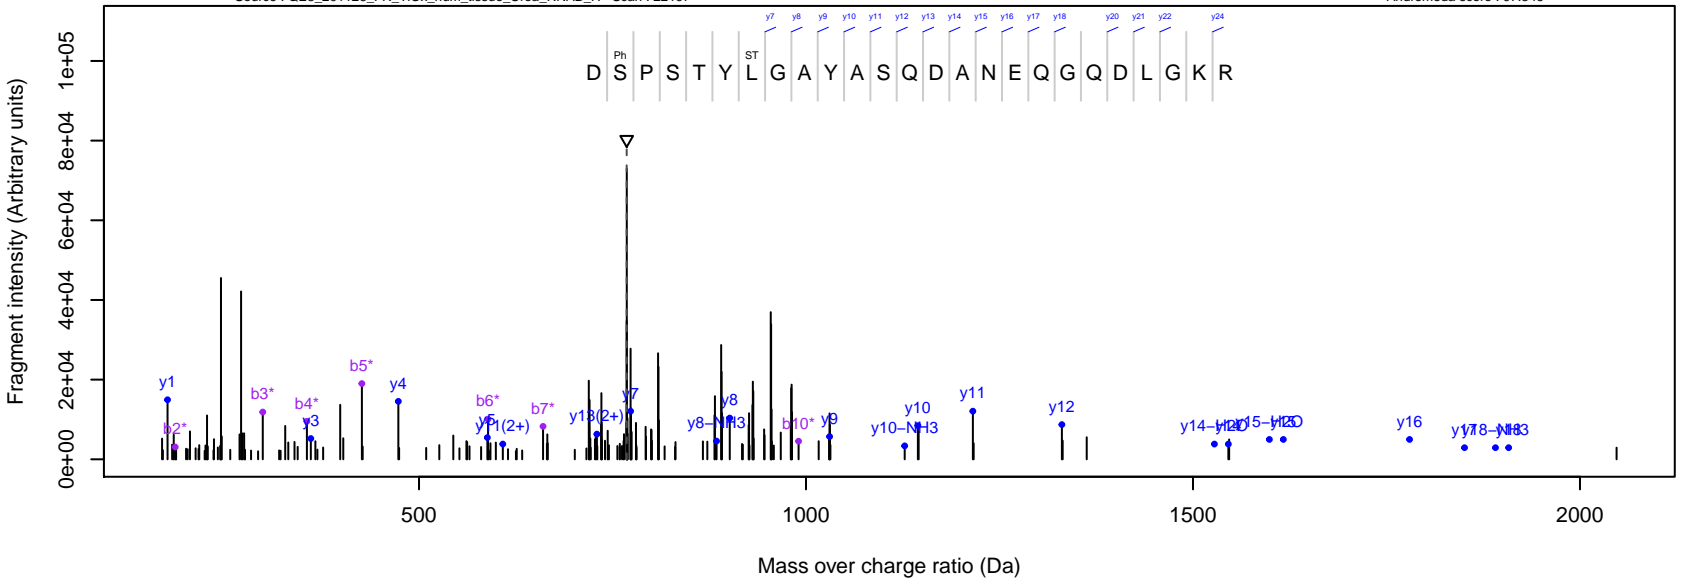

QRS(Phospho (STY))PLLNPVPELSHASLIANQSPFR-4+

Source : QE3\_201126\_FR\_TiOx\_hum\_tissue\_Urea\_RNAB\_B Scan : 42192

Andromeda score : 97.346

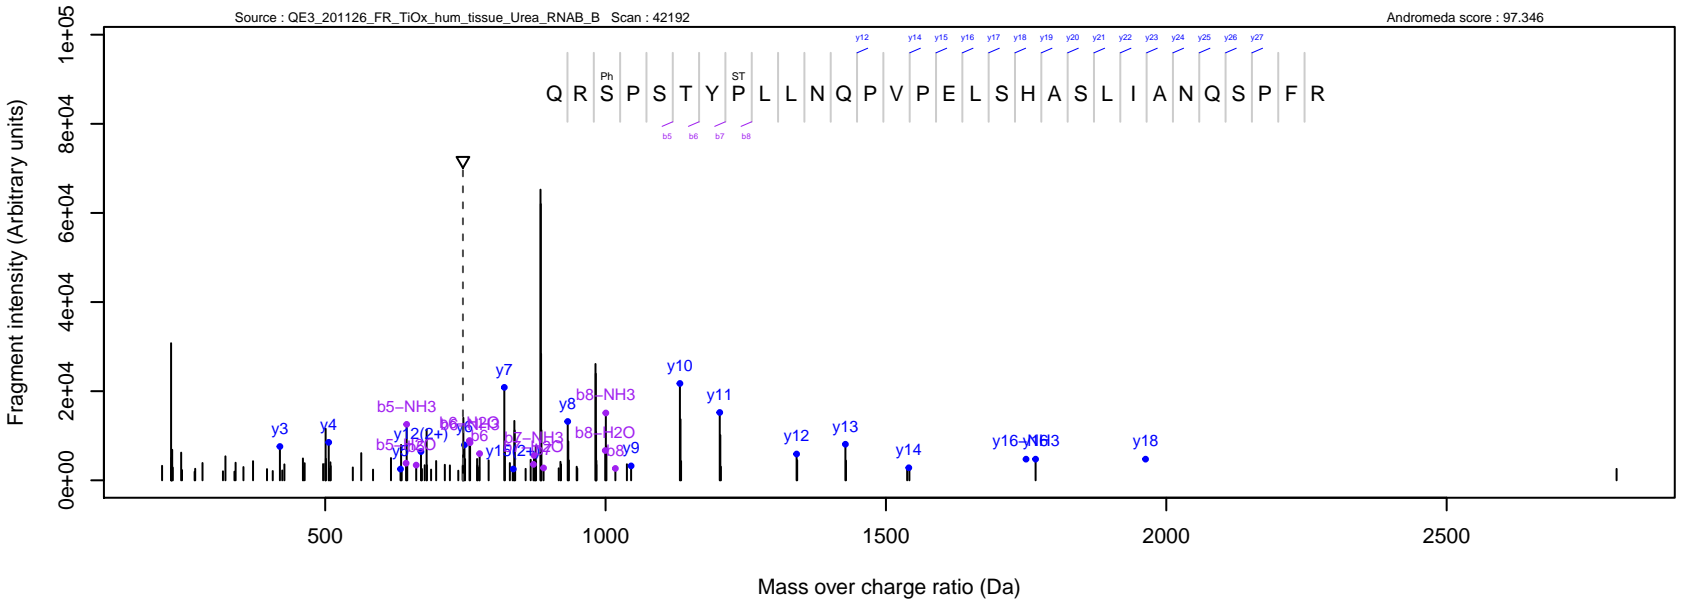

TALPTSGS(Phospho (STY))S(Phospho (STY))AGELELLAGEVPAR-3+

Source : QE3\_201126\_FR\_TiOx\_hum\_tissue\_Urea\_RNAB\_B Scan : 60363

Andromeda score : 97.346

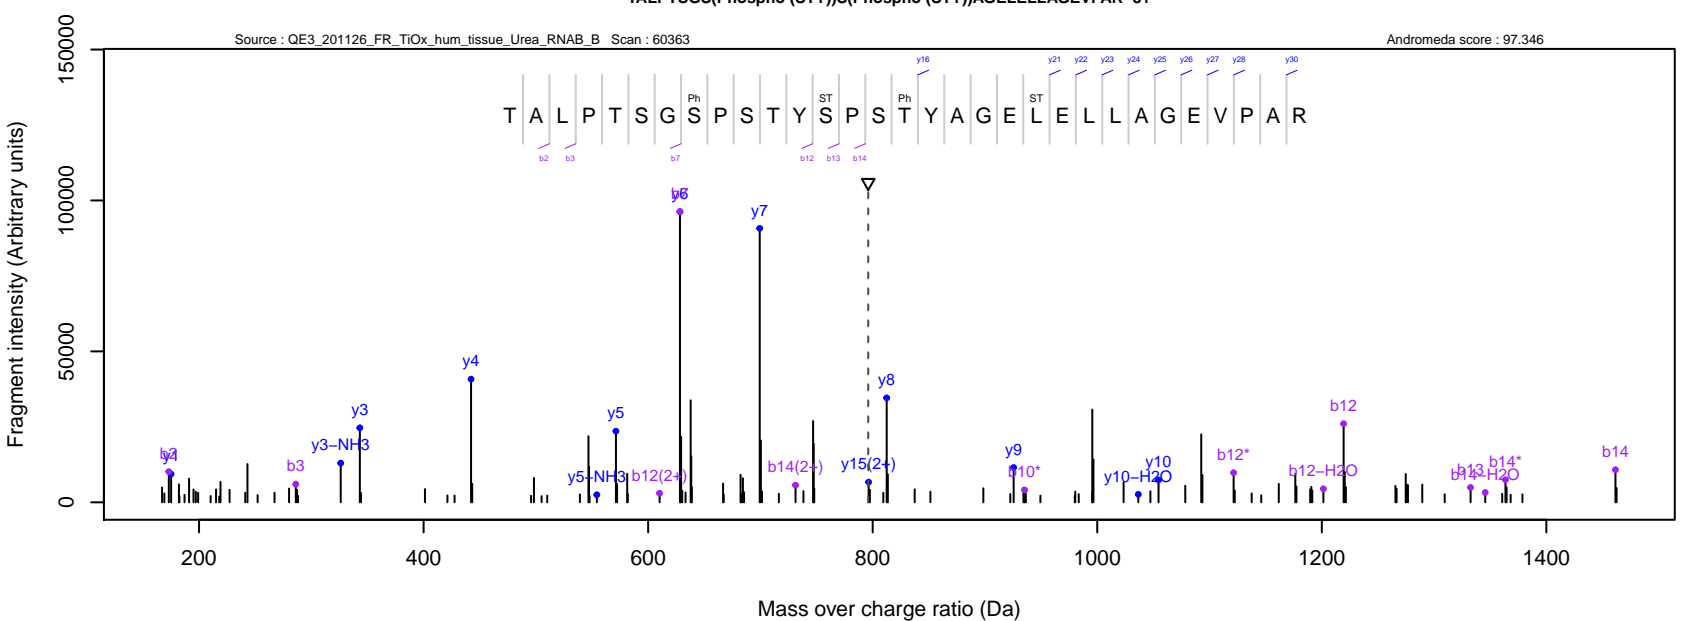

VTPTEEHVEGLPLSPSTYPTVNTNGTSPAQLNGGSAACSSR-3+

Source : QE3\_201126\_FR\_TiOx\_hum\_tissue\_Urea\_RNAB\_N Scan : 31549

Andromeda score : 97.301

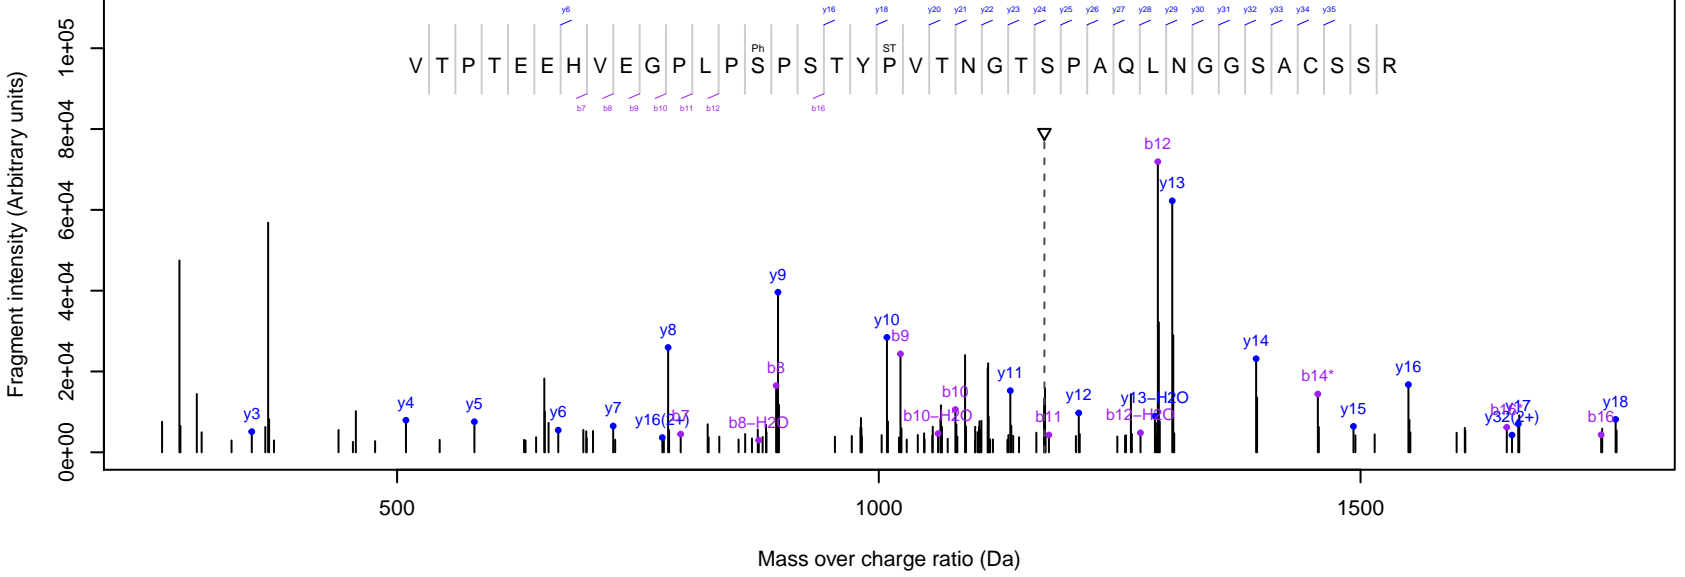

KVVGSMP TAGSAGSPSTYVPE N L N L F P E P G S K-3+

Source : QE3\_201126\_FR\_TiOx\_hum\_tissue\_Urea\_RNAB\_H Scan : 44073

Andromeda score : 97.289

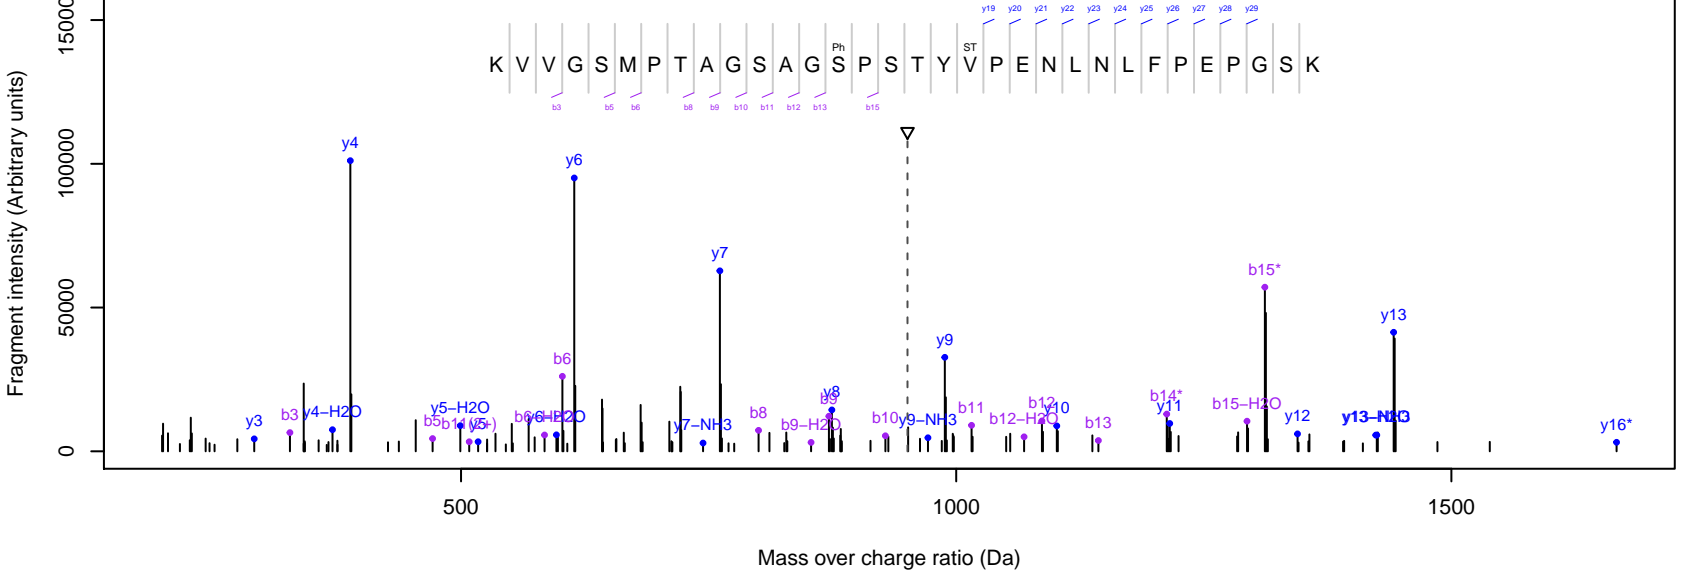

DLAALGDKVNSPSTYLGETAER-2+

Source : QE3\_201126\_FR\_TiOx\_hum\_tissue\_Urea\_RNAB\_H Scan : 35198

Andromeda score : 97.284

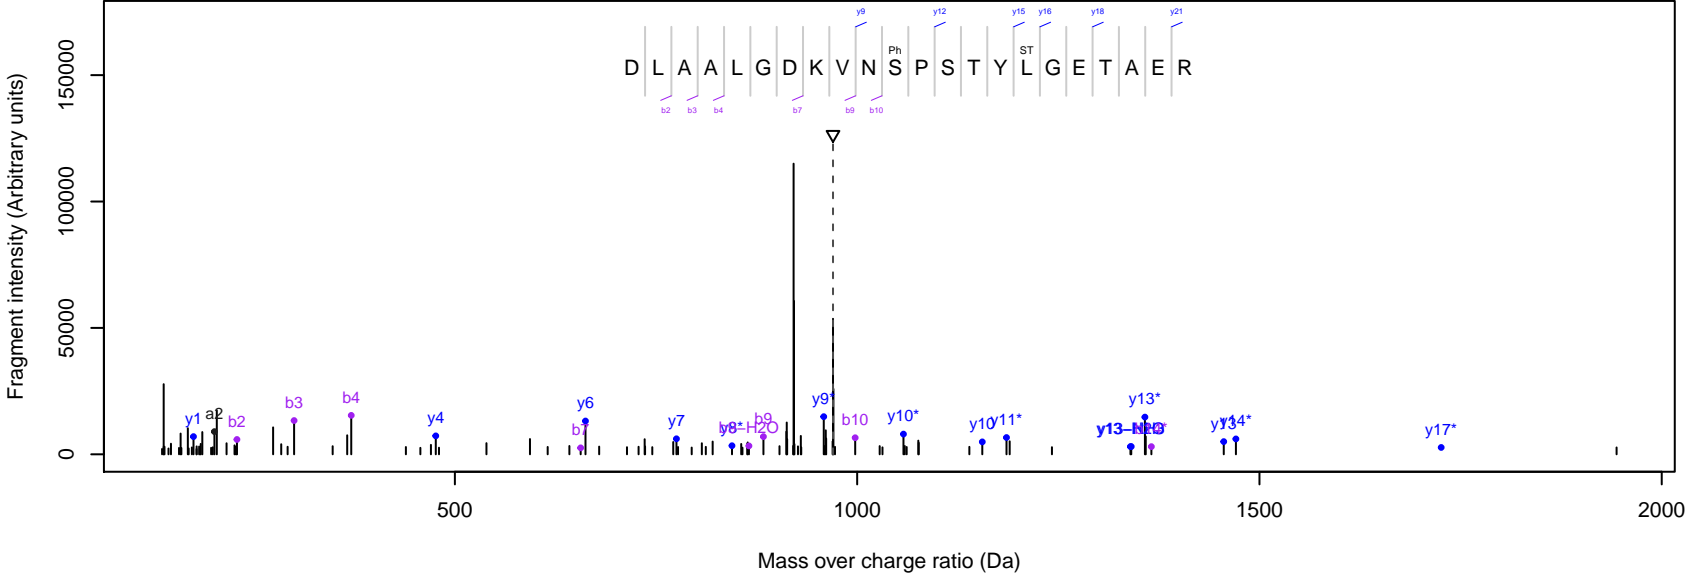



YM(Oxidation (M))NSDTT(Phospho (STY))SPELR-2+

Source : QE3\_201126\_FR\_TiOx\_hum\_tissue\_Urea\_RNAB\_H Scan : 13344

Andromeda score : 97.273

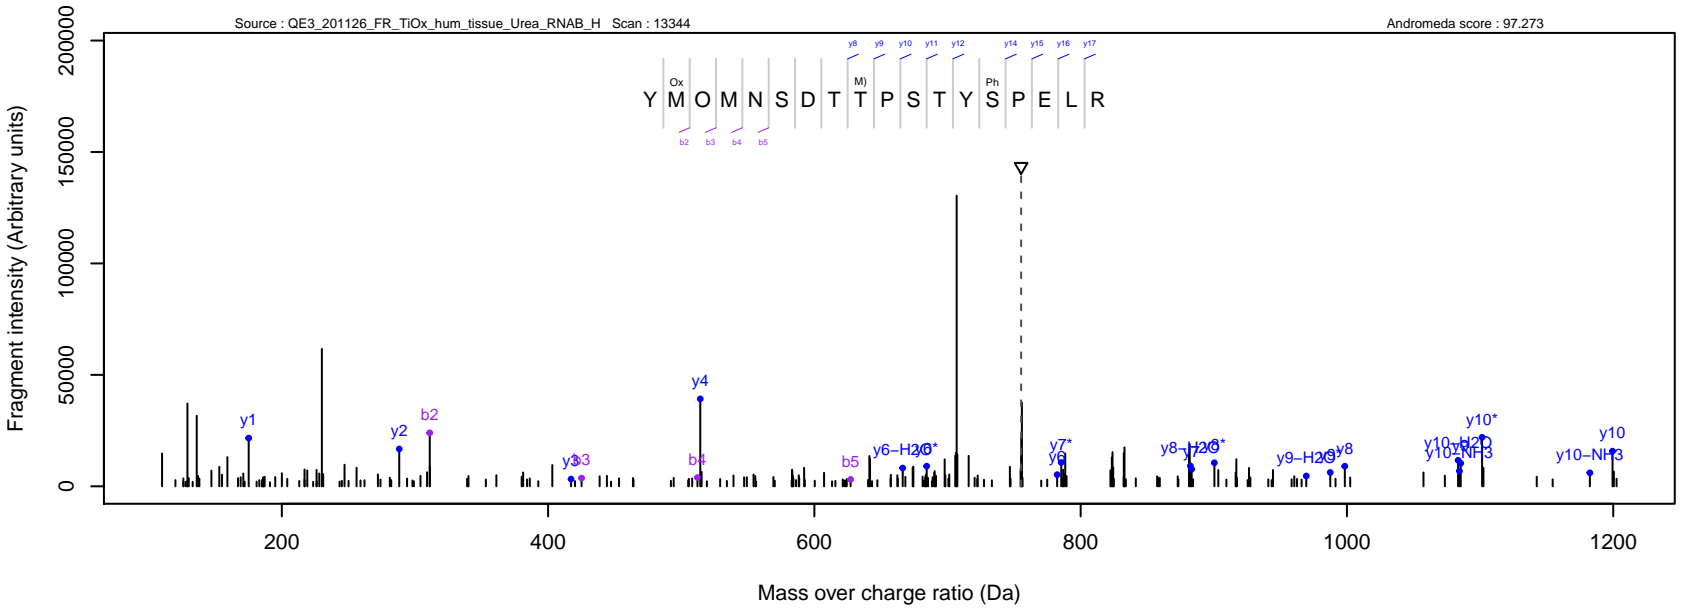

AEERPTFDYLSVLDLDFYTATEGQYPSTYQQQP-3+

Source : QE3\_201126\_FR\_TiOx\_hum\_tissue\_Urea\_RNAB\_H Scan : 62920

Andromeda score : 97.257

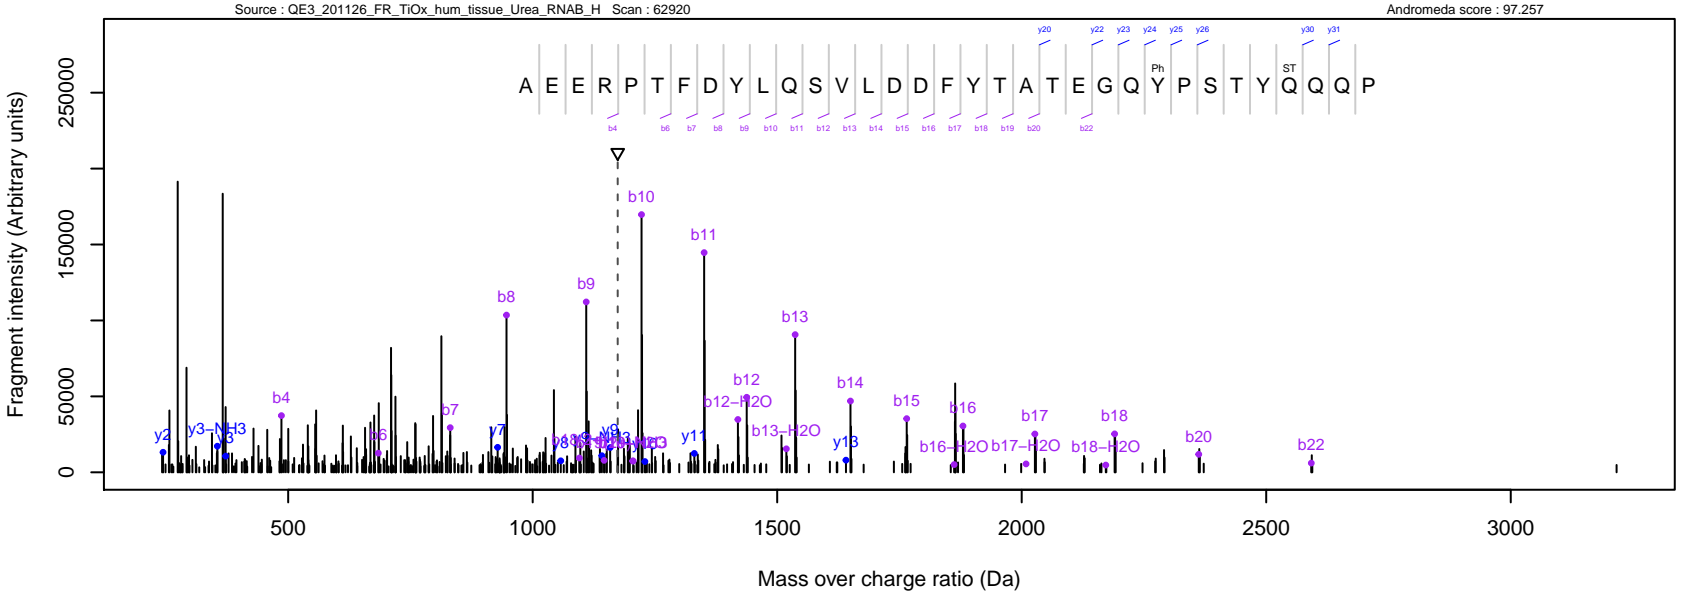

QEAIPLDLEDS(Phospho (STY))PPVSPSTYDSEEQESAR-3+

Source : QE3\_201126\_FR\_TiOx\_hum\_tissue\_Urea\_RNAB\_H Scan : 41037

Andromeda score : 97.257

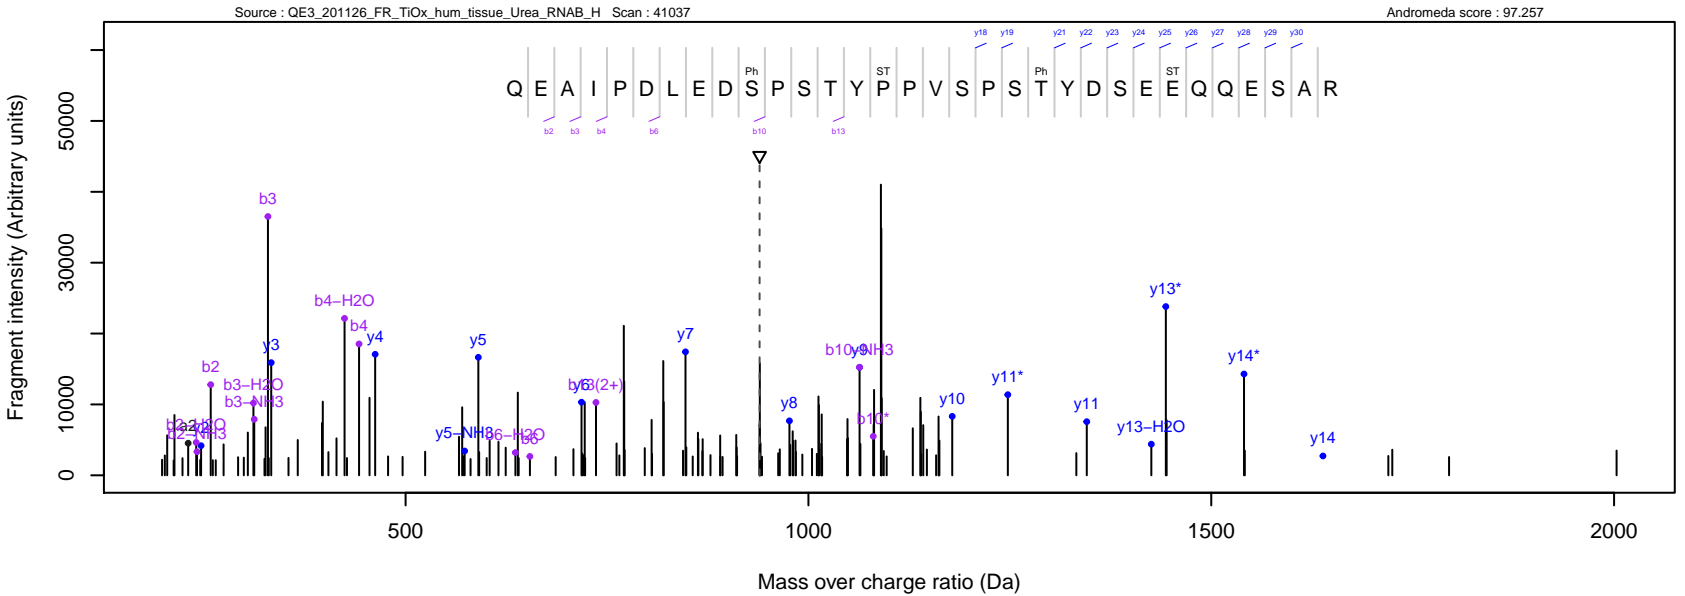

AAPEASS(Phospho (STY))PPASPLQHLLPGK-3+

Source : QE3\_201126\_FR\_TiOx\_hum\_tissue\_Urea\_RNAB\_N Scan : 38450

Andromeda score : 97.253

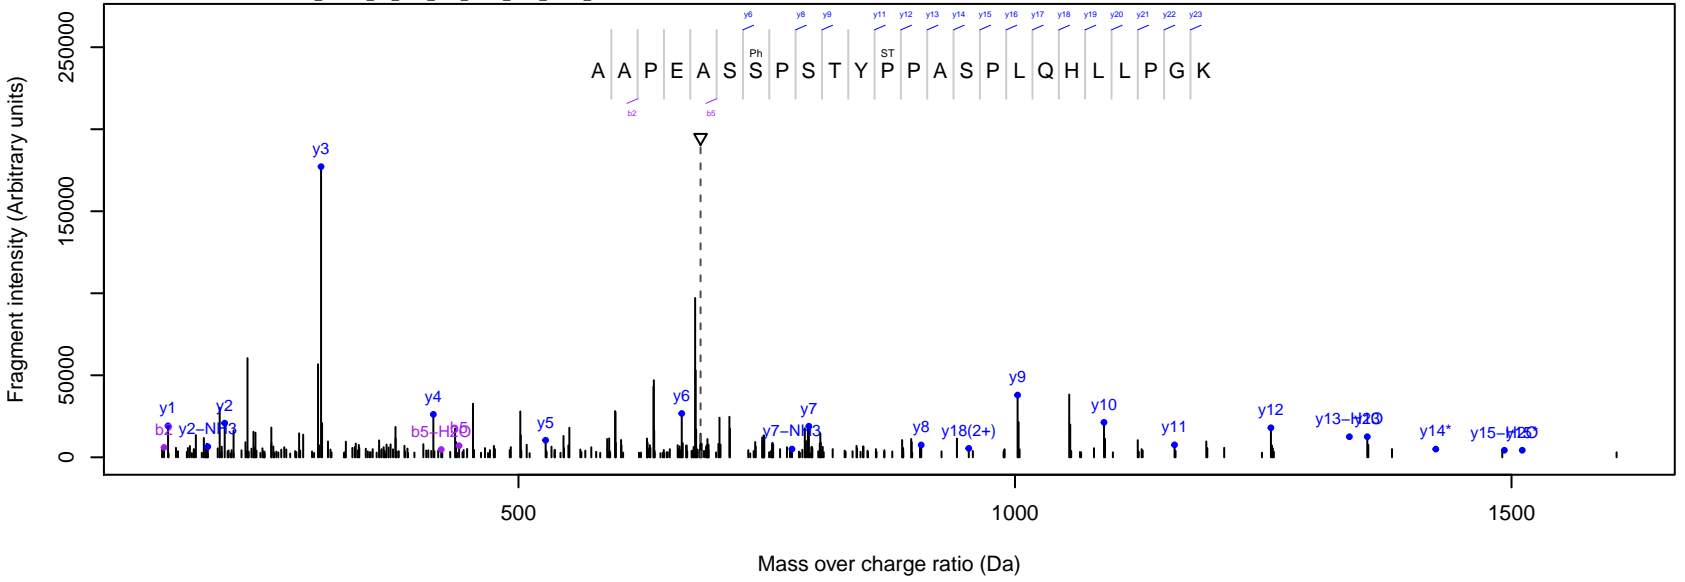

AQDTIS(Phospho (STY))RGSDDSVVISFK-3+

Source : QE3\_201126\_FR\_TiOx\_hum\_tissue\_Urea\_RNAB\_B Scan : 33797

Andromeda score : 97.253

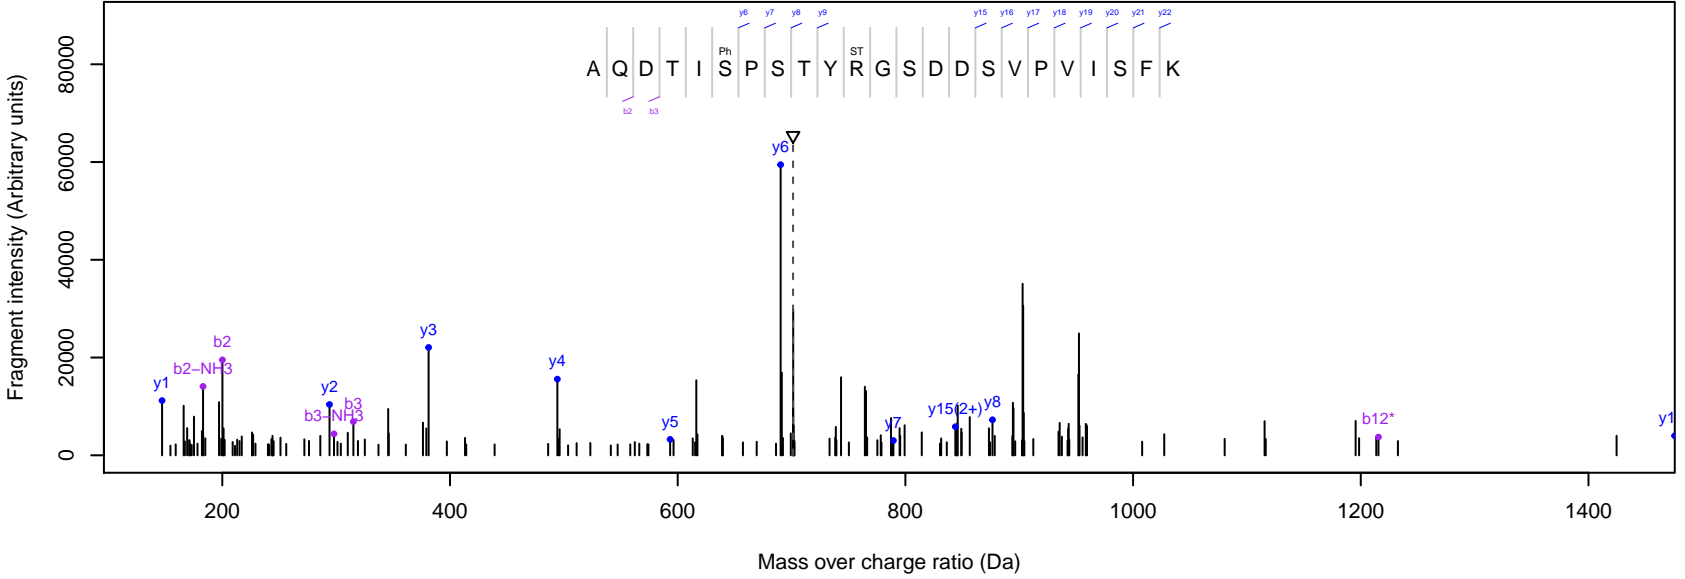

S(Phospho (STY))YPLNAASLNGAPK-2+

Source : QE3\_201126\_FR\_TiOx\_hum\_tissue\_Urea\_RNAB\_N Scan : 30263

Andromeda score : 97.203

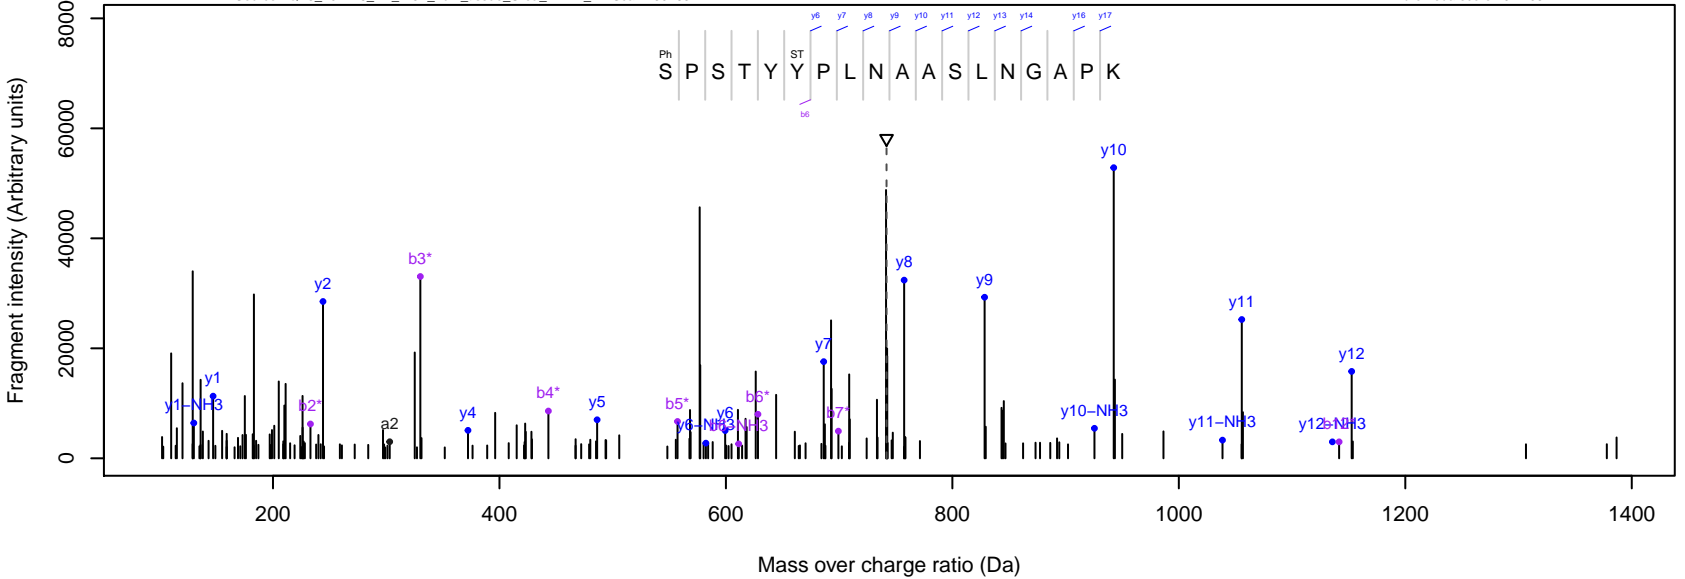

DGGLICTS(Phospho (STY))CR-2+

Source : QE3\_201126\_FR\_TiOx\_hum\_tissue\_Urea\_RNAB\_N Scan : 20334

Andromeda score : 97.163

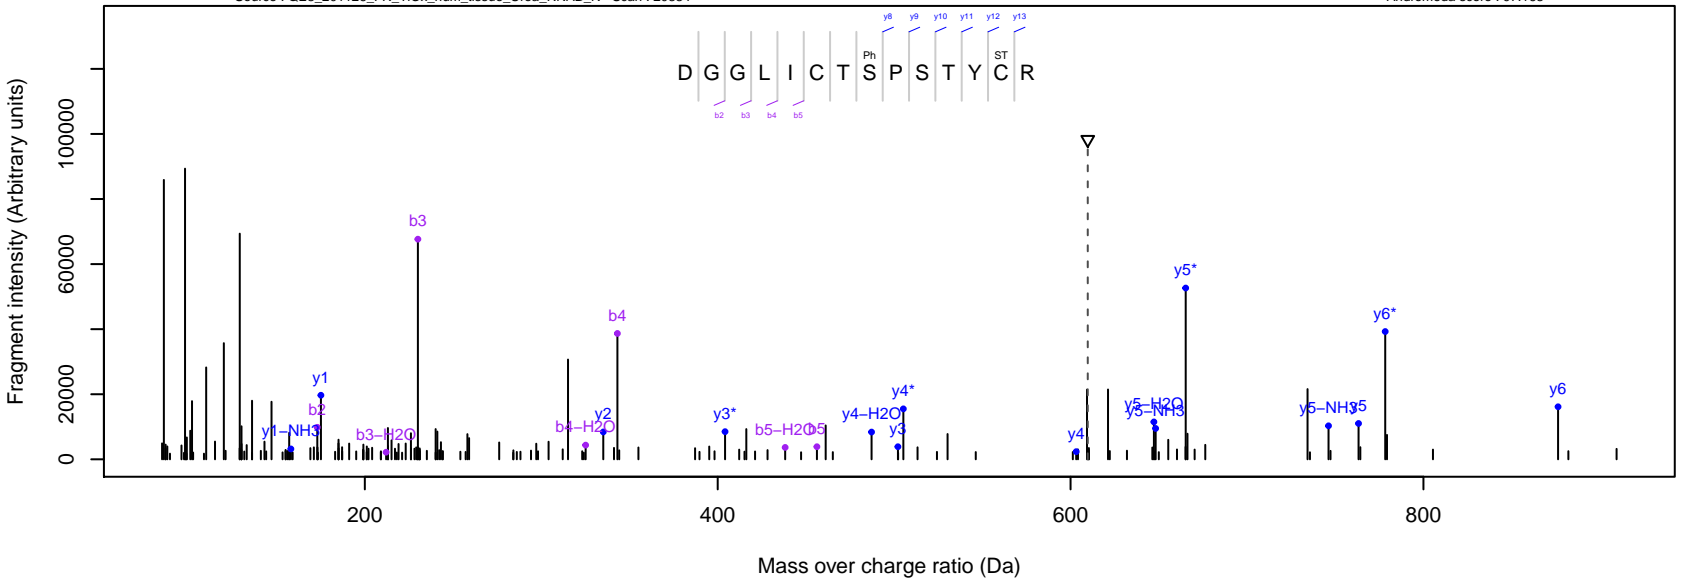

QLHLEGASLELS(Phospho (STY))DDDT(Phospho (STY))ES(Phospho (STY))KTSDVNETQPPQSE-3+

Source : QE3\_201126\_FR\_TiOx\_hum\_tissue\_Urea\_RNAB\_N Scan : 52411

Andromeda score : 97.128

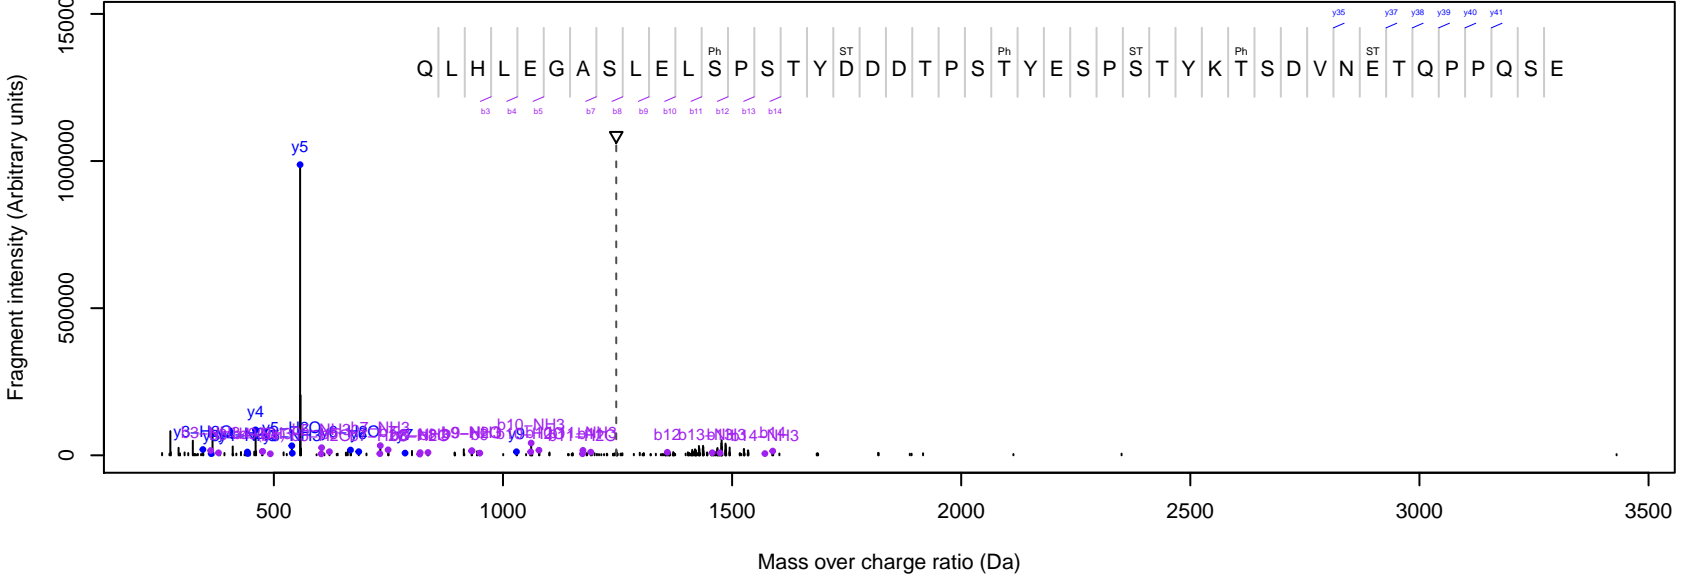

NGGLEHVPS(Phospho (STY))SSSIHNGDM(Oxidation (M))EK-3+

Source : QE3\_201126\_FR\_TiOx\_hum\_tissue\_Urea\_RNAB\_N Scan : 11701

Andromeda score : 97.124

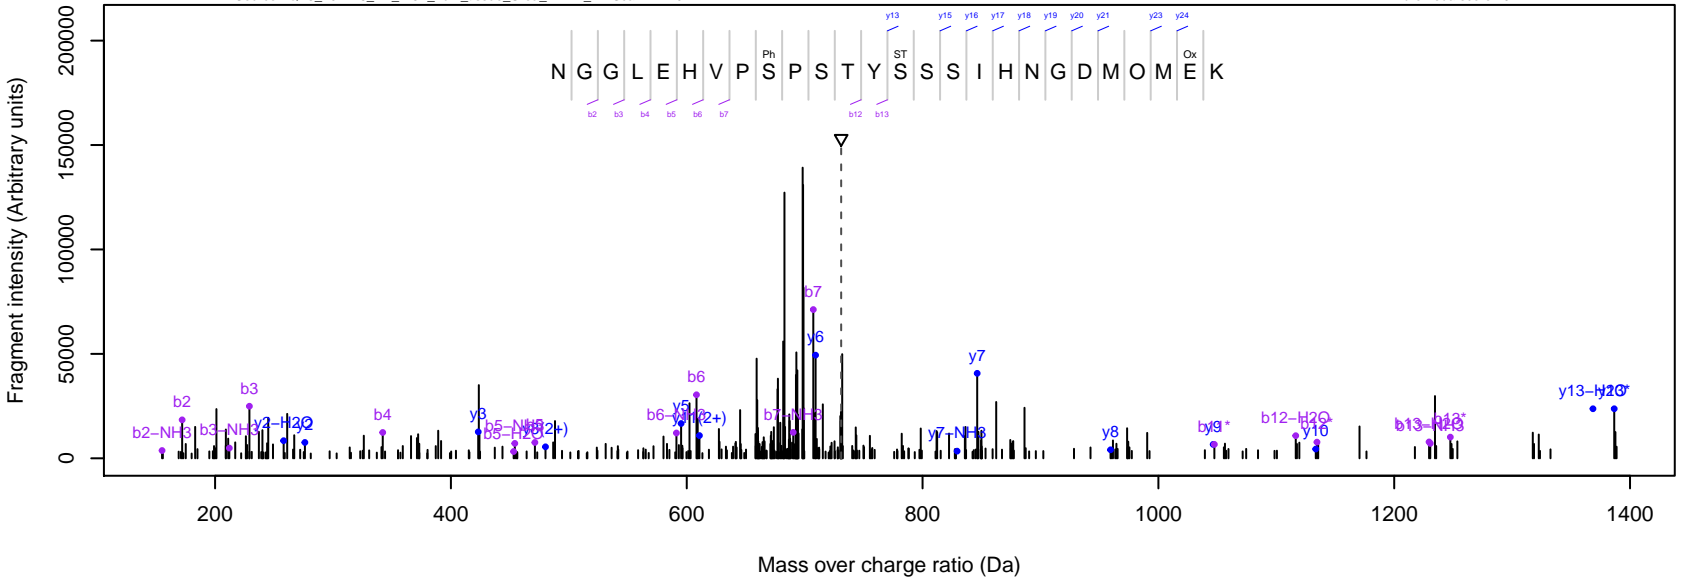

HADNS(Phospho (STY))S(Phospho (STY))DTEMEDIAEETLEEMDSLELK-3+

Source : QE3\_201126\_FR\_TiOx\_hum\_tissue\_Urea\_RNAB\_N Scan : 62735

Andromeda score : 97.1

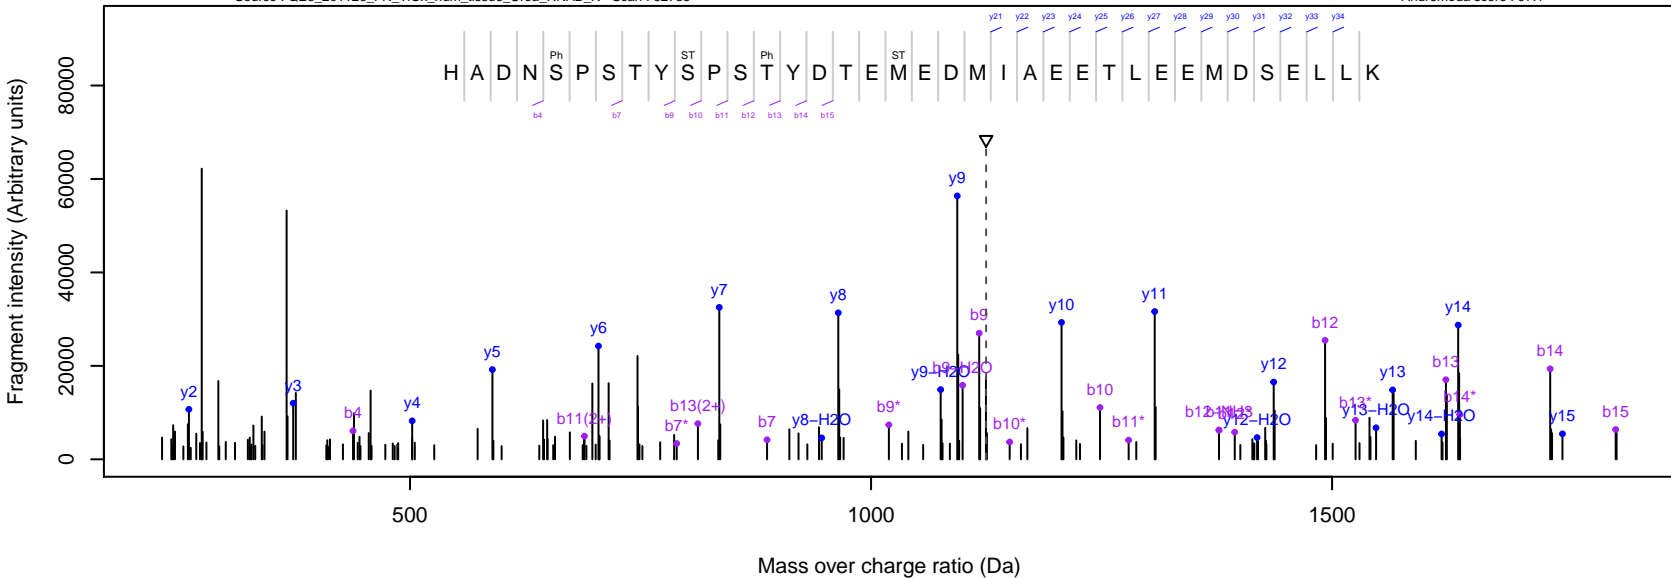

SSS(Phospho (STY))QPSS(Phospho (STY))CCS(Phospho (STY))DPSKPGNVEGATQSLAEQM(Oxidation (M))R-3+

Source : QE3\_201126\_FR\_TiOx\_hum\_tissue\_Urea\_RNAB\_B Scan : 30594

Andromeda score : 97.099

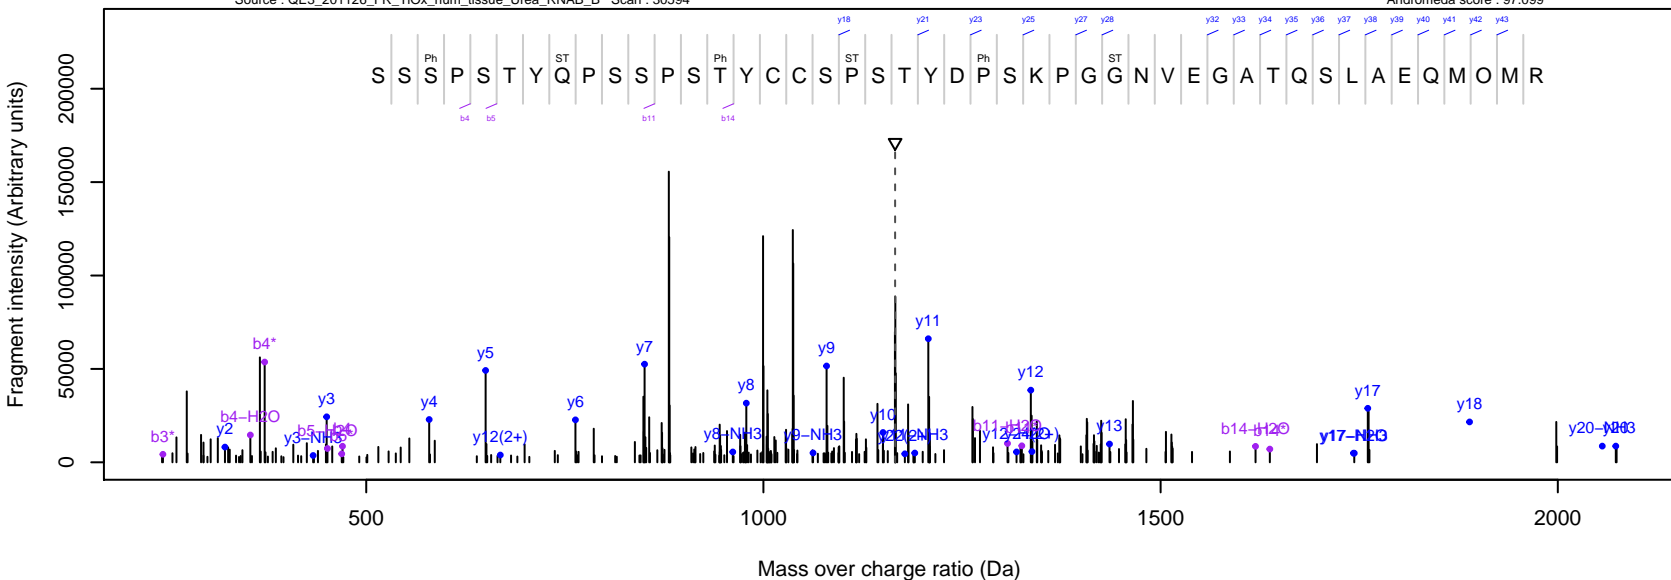

YEMACAIADAFNLPSSHLRPITDS(Phospho (STY))PVLGAQRPR-4+

Source : QE3\_201126\_FR\_TiOx\_hum\_tissue\_Urea\_RNAB\_N Scan : 52026

Andromeda score : 97.099

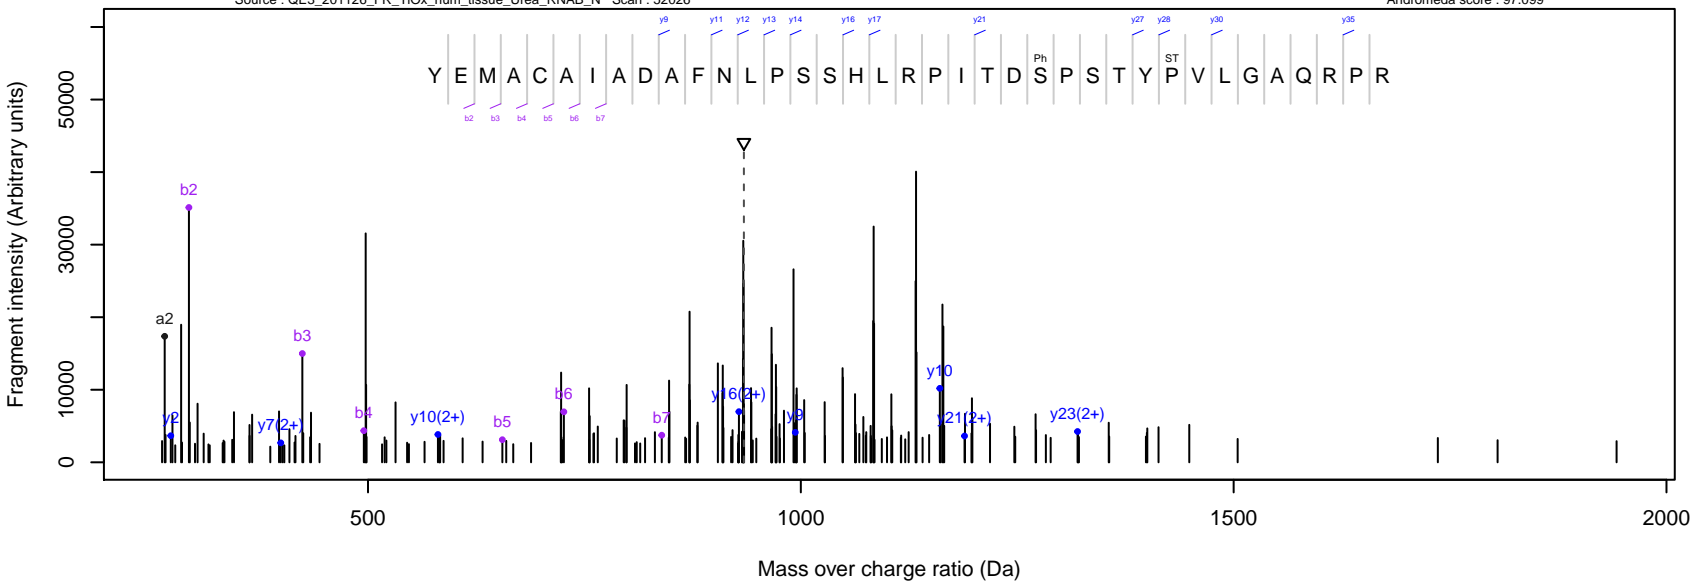

QSS(Phospho (STY))FEIPDDVPLPAGWEM(Oxidation (M))AK-2+

Source : QE3\_201126\_FR\_TIOx\_hum\_tissue\_Urea\_RNAB\_H Scan : 56948

Andromeda score : 97.095

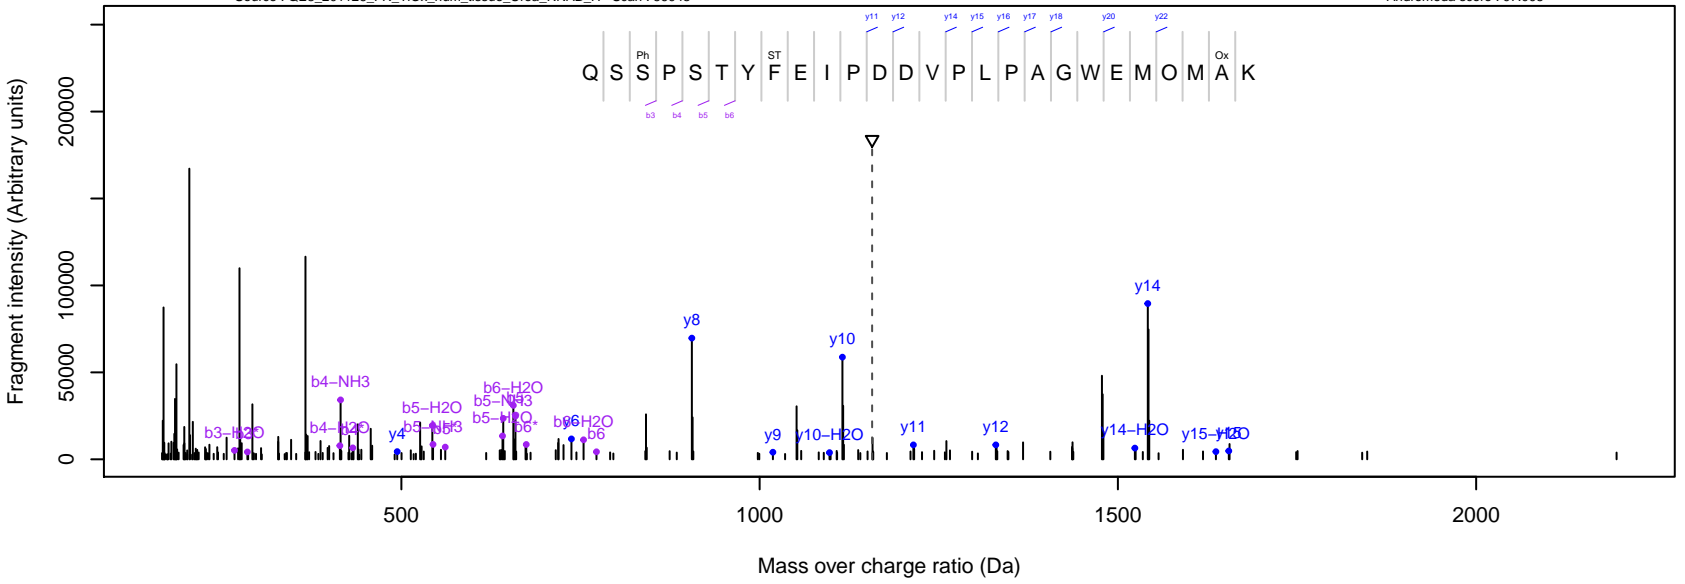

KKPSTDEQTS(Phospho (STY))S(Phospho (STY))AEEDVPTCGYLNVLNSNR-3+

Source : QE3\_201126\_FR\_TIOx\_hum\_tissue\_Urea\_RNAB\_B Scan : 38169

Andromeda score : 97.077

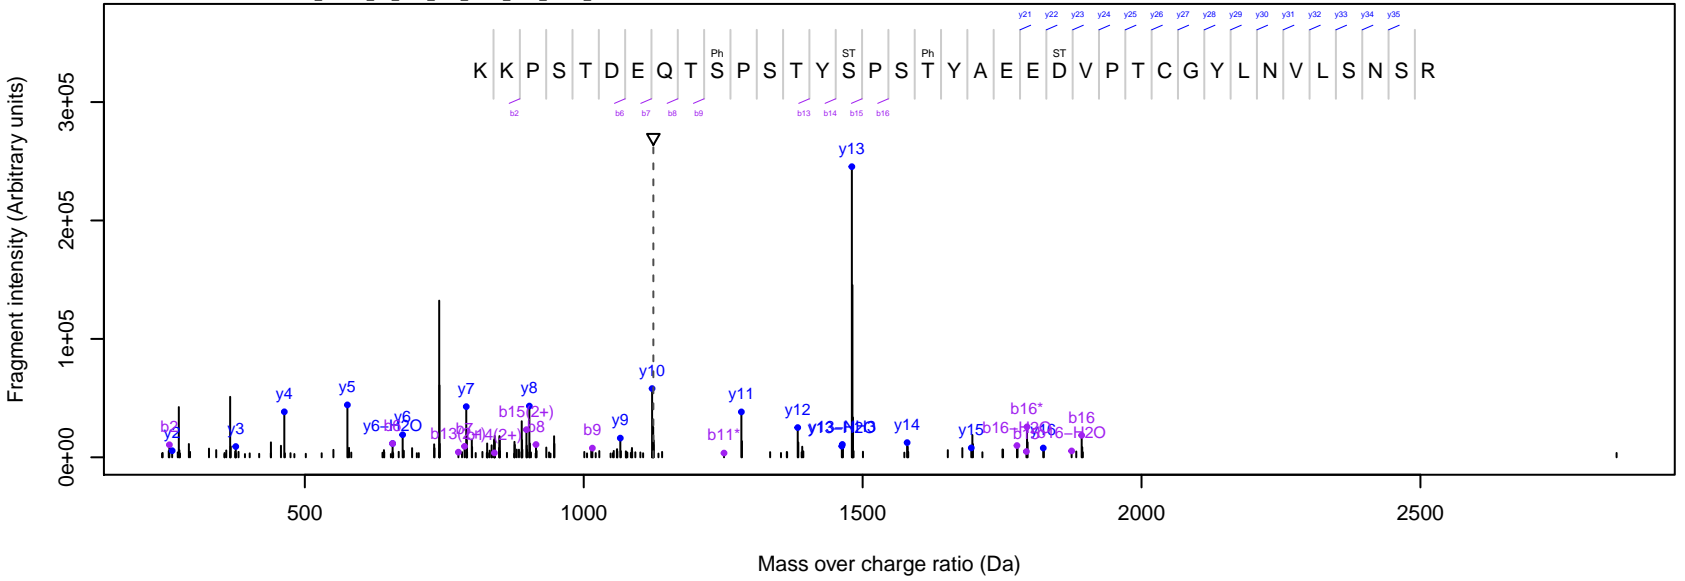

NSPVT(Phospho (STY))KTPPRDLPTIPGVTSPPSSDEPPM(Oxidation (M))EASQSHLR-4+

Source : QE3\_201126\_FR\_TIOx\_hum\_tissue\_Urea\_RNAB\_H Scan : 29211

Andromeda score : 97.077

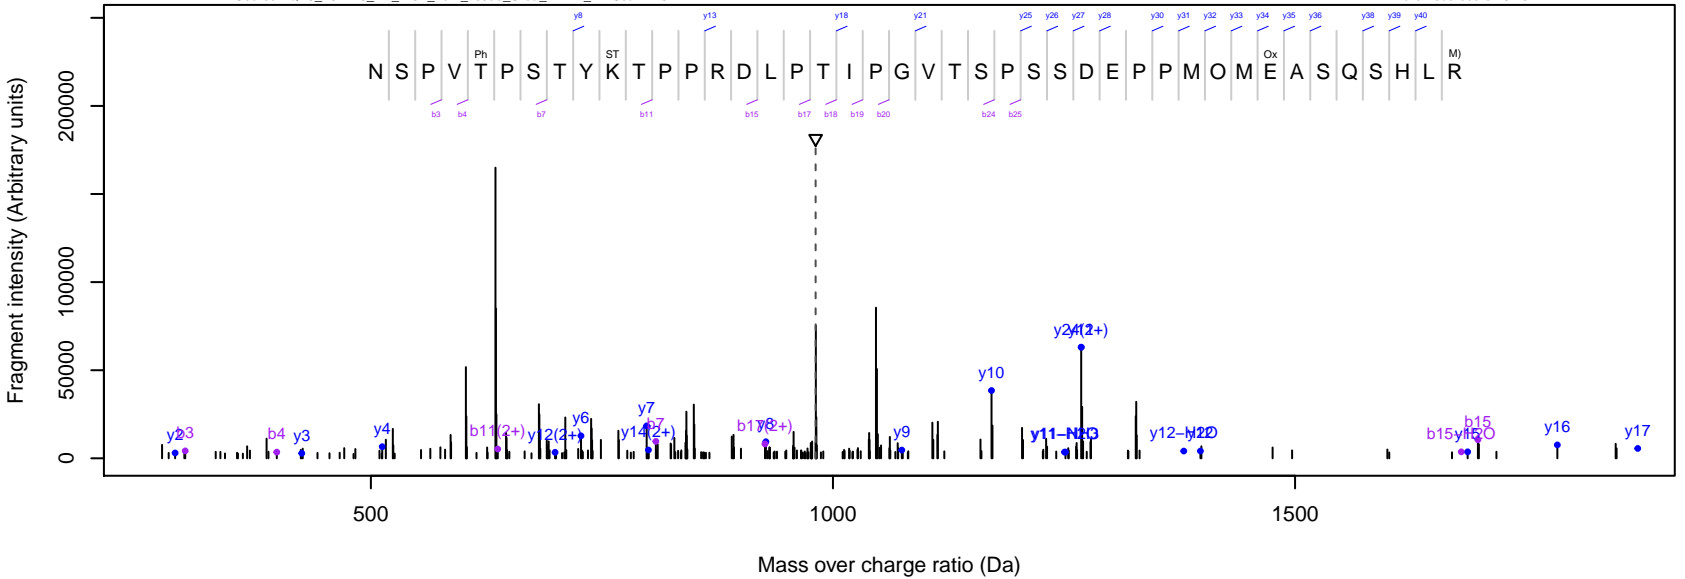

GRT(Phospho (STY))WTLCGTPEYLAPEIILSK-3+

Source : QE3\_201126\_FR\_TiOx\_hum\_tissue\_Urea\_RNAB\_B Scan : 55233

Andromeda score : 97.063

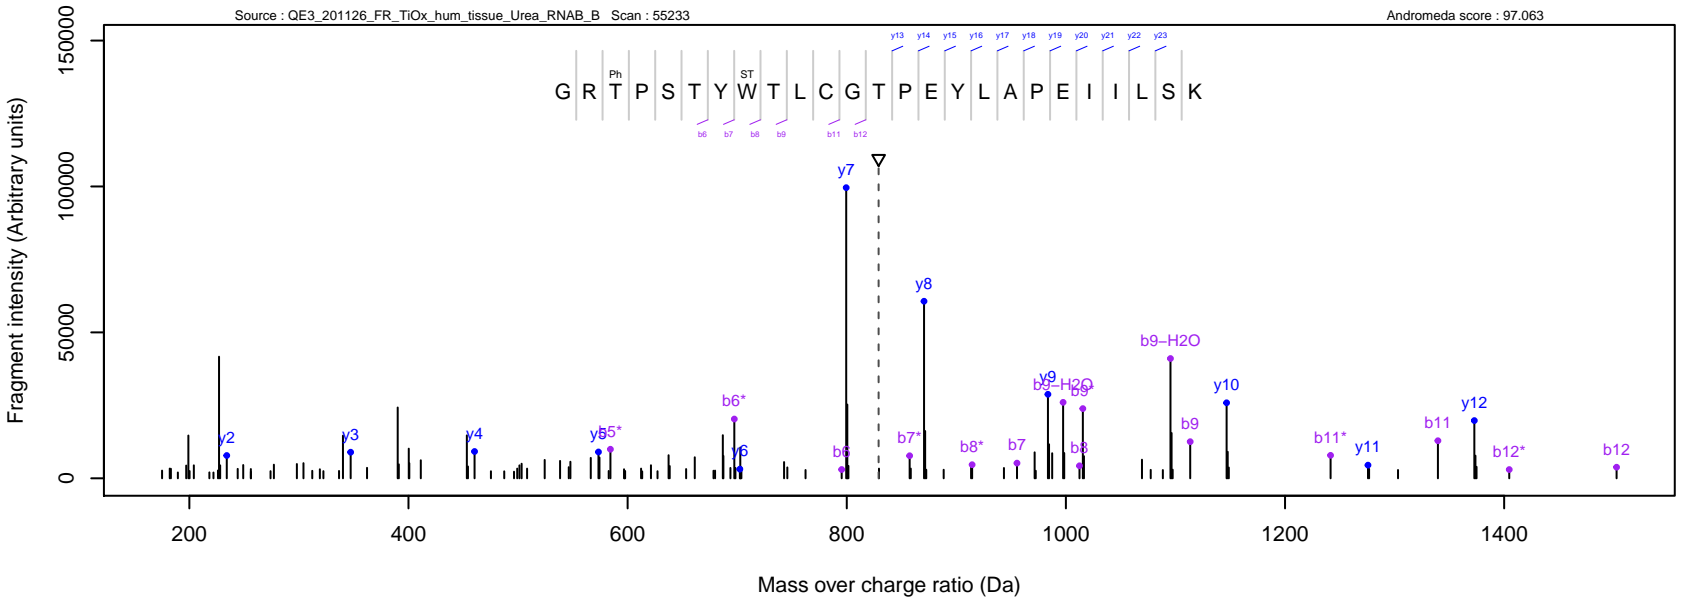

KREEGS(Phospho (STY))DIEEDM(Oxidation (M))EELLNDTR-3+

Source : QE3\_201126\_FR\_TiOx\_hum\_tissue\_Urea\_RNAB\_B Scan : 23503

Andromeda score : 97.063

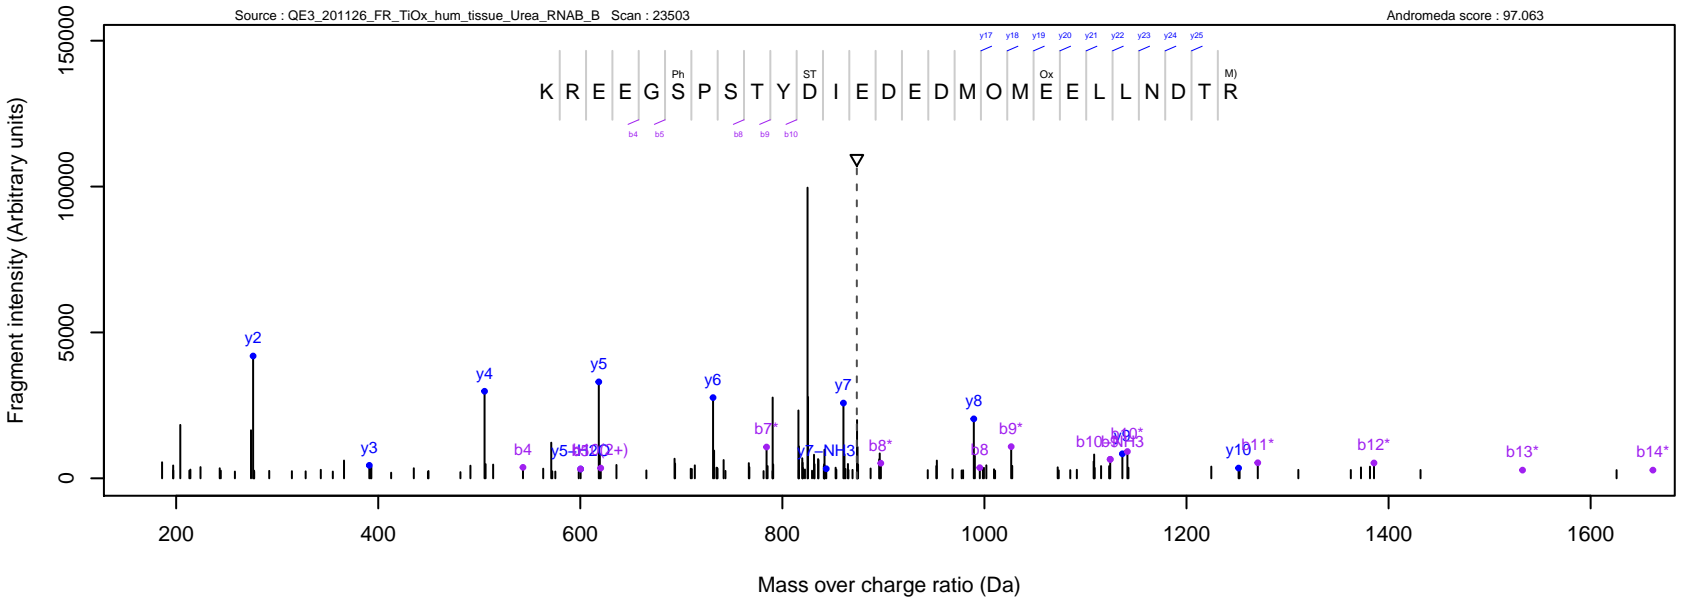

LSSESHHGS(Phospho (STY))PIHWVLPAGMOMSAK-4+

Source : QE3\_201126\_FR\_TiOx\_hum\_tissue\_Urea\_RNAB\_B Scan : 21655

Andromeda score : 97.063

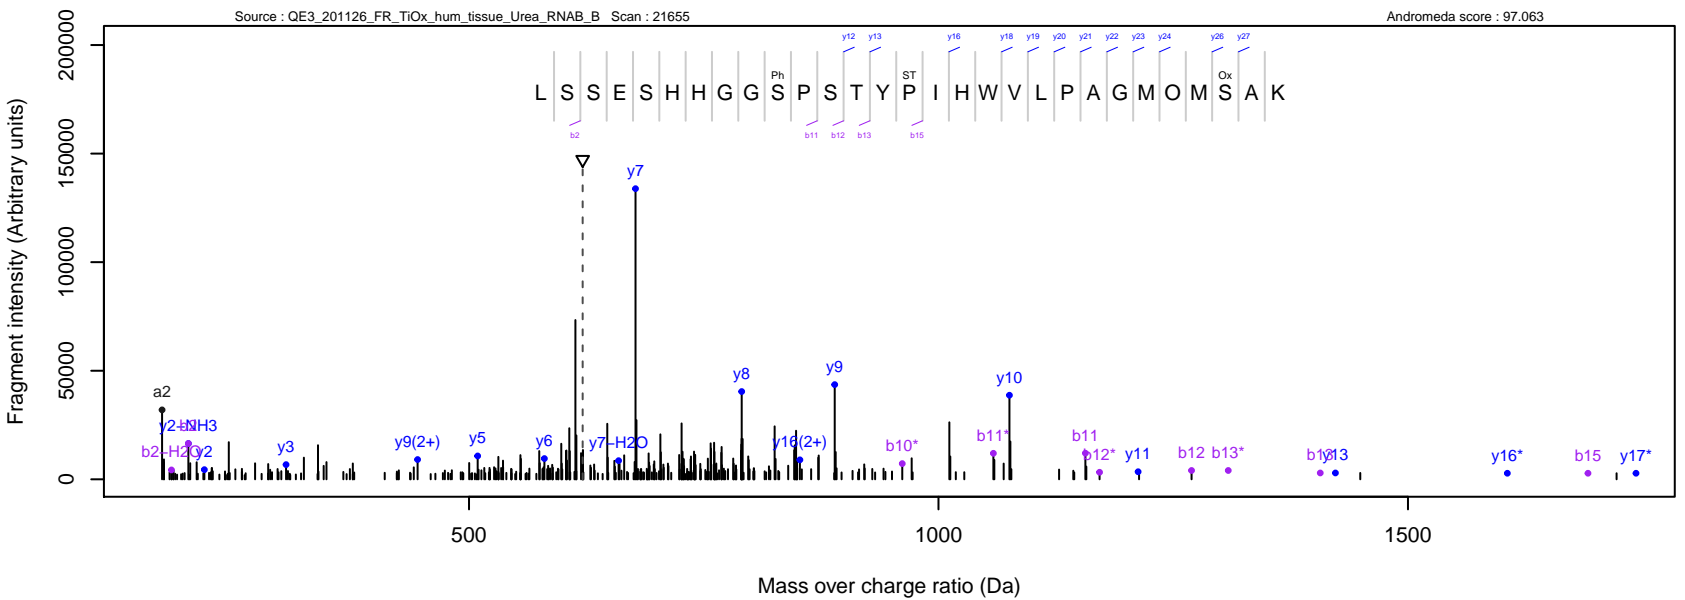

KYS(Phospho (STY))DVEVPASVTGYSFASDGDSDGTCSPLR-3+

Source : QE3\_201126\_FR\_TiOx\_hum\_tissue\_Urea\_RNAB\_H Scan : 43801

Andromeda score : 97.047

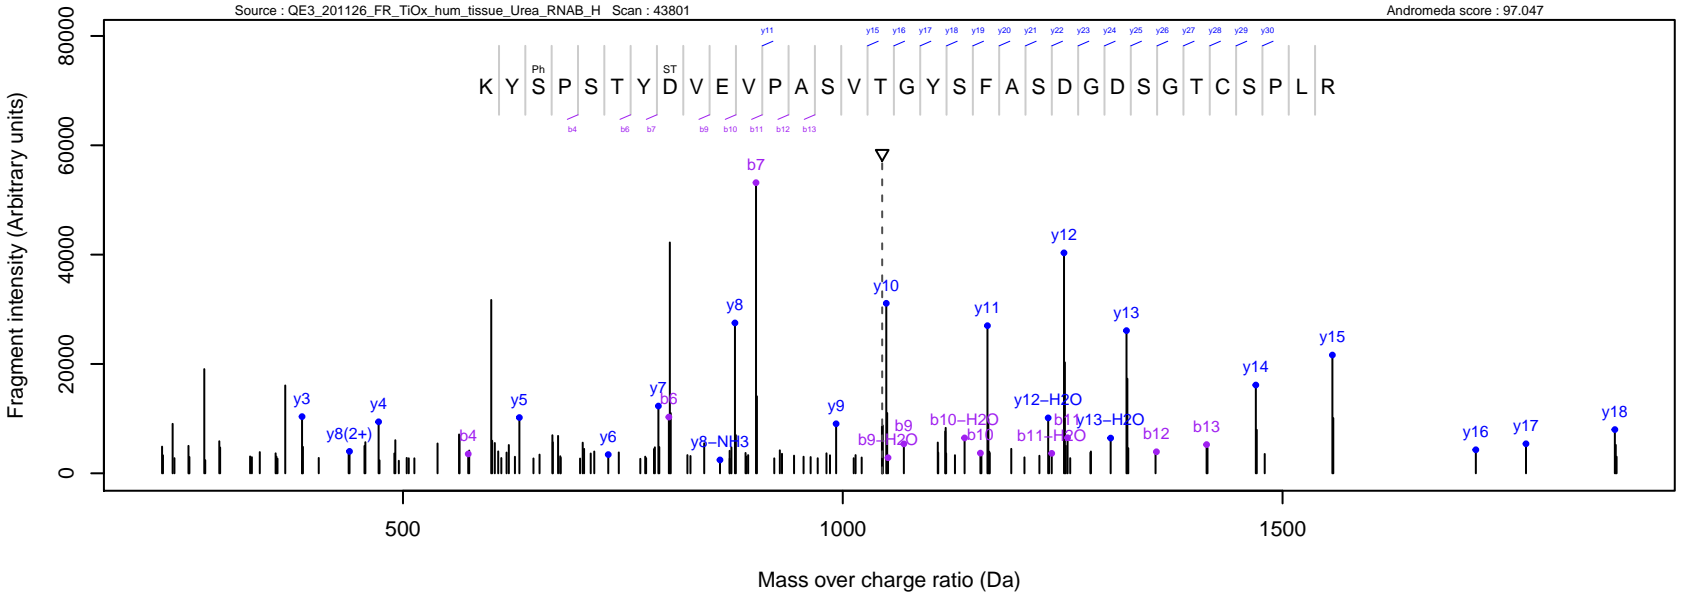

KLS(Phospho (STY))DASDERGEPDLASGSDVNGSTESFEMOMVIEEATIDSATK-4+

Source : QE3\_201126\_FR\_TiOx\_hum\_tissue\_Urea\_RNAB\_H Scan : 54560

Andromeda score : 96.97

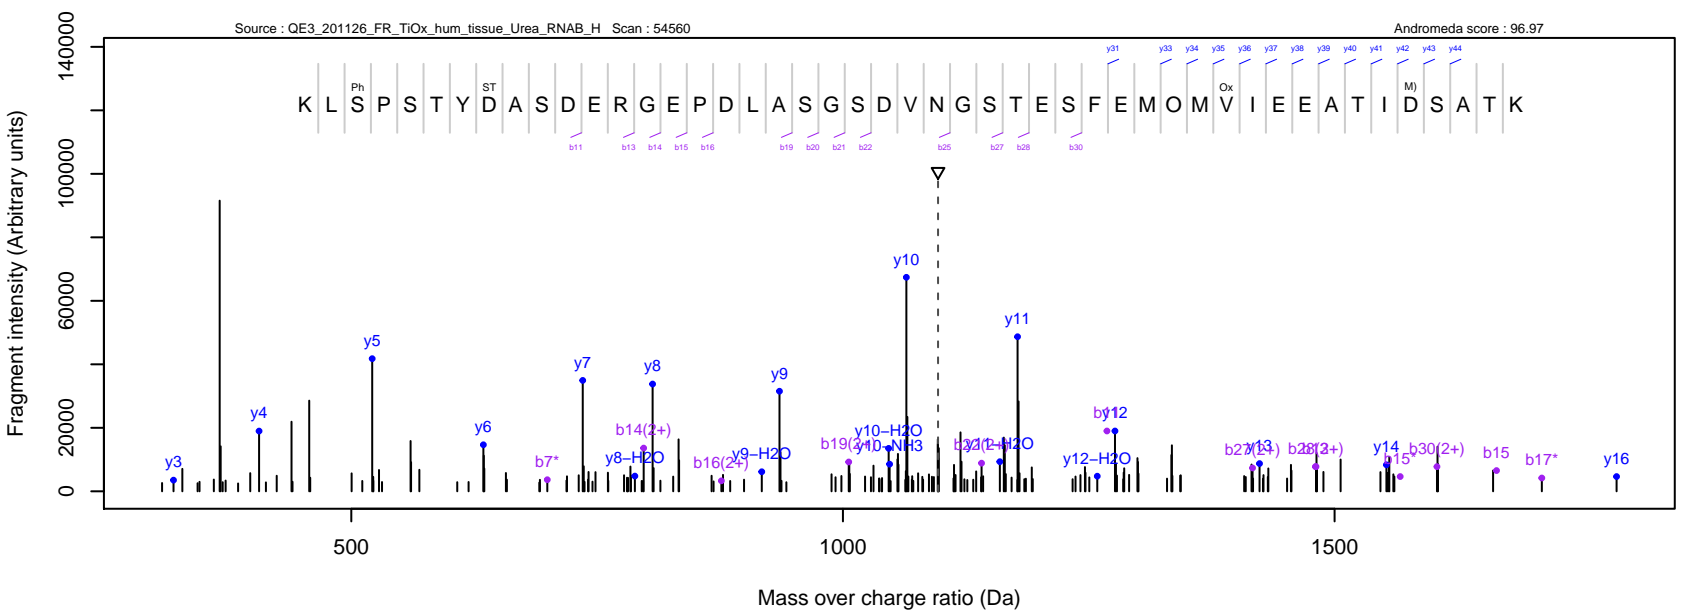

QATPLLYALAAEAAQAAPPS(Phospho (STY))PPASR-3+

Source : QE3\_201126\_FR\_TiOx\_hum\_tissue\_Urea\_RNAB\_H Scan : 62581

Andromeda score : 96.957

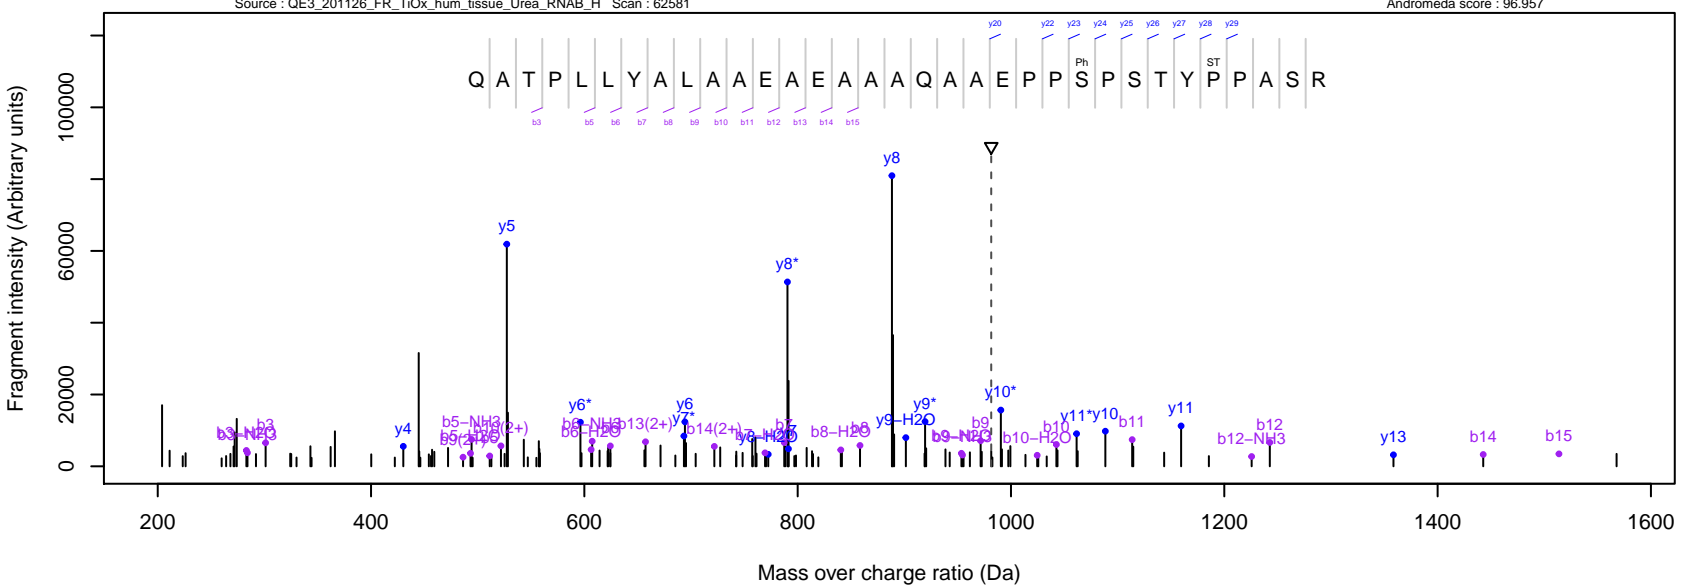

GSGGS(Phospho (STY))S(Phospho (STY))GDELREDEPVKK-3+

Source : QE3\_201126\_FR\_TIOx\_hum\_tissue\_Urea\_RNAB\_B Scan : 10882

Andromeda score : 96.903

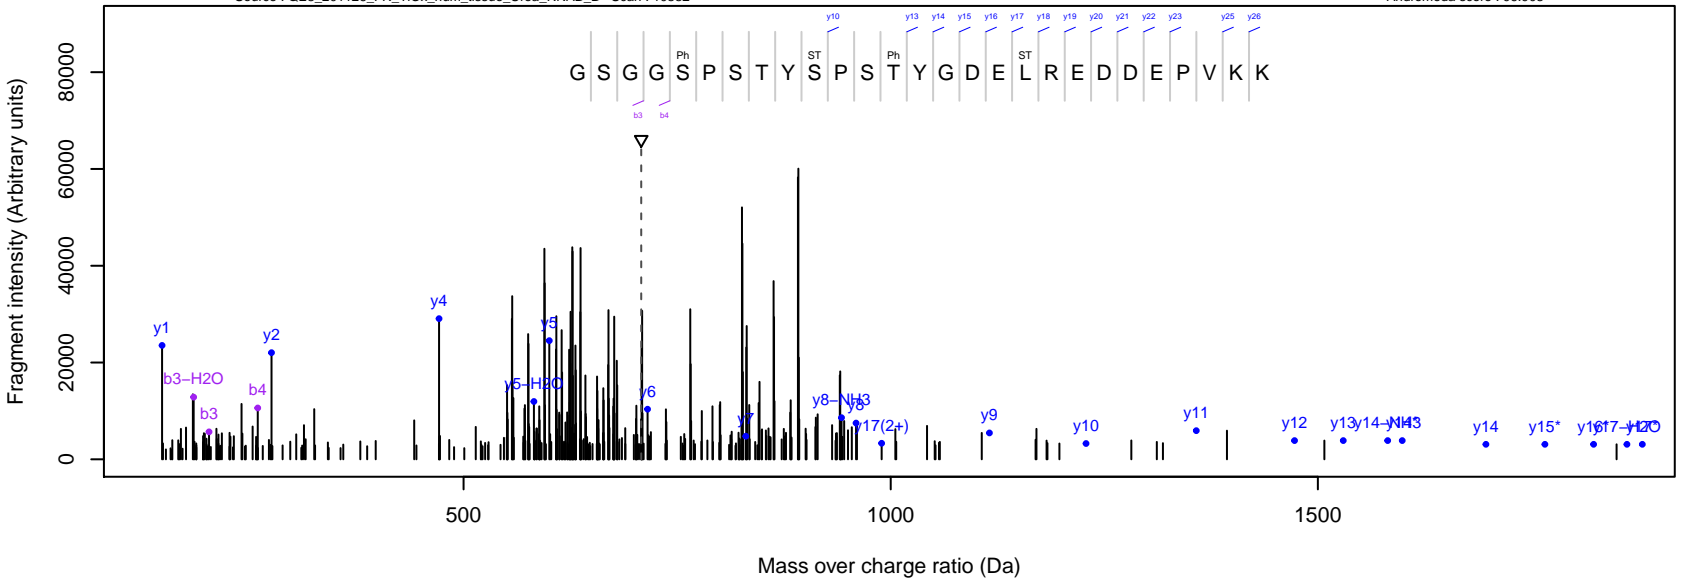

M(Oxidation (M))SVQPTVS(Phospho (STY))LGGFEITPPVLR-3+

Source : QE3\_201126\_FR\_TIOx\_hum\_tissue\_Urea\_RNAB\_H Scan : 60418

Andromeda score : 96.887

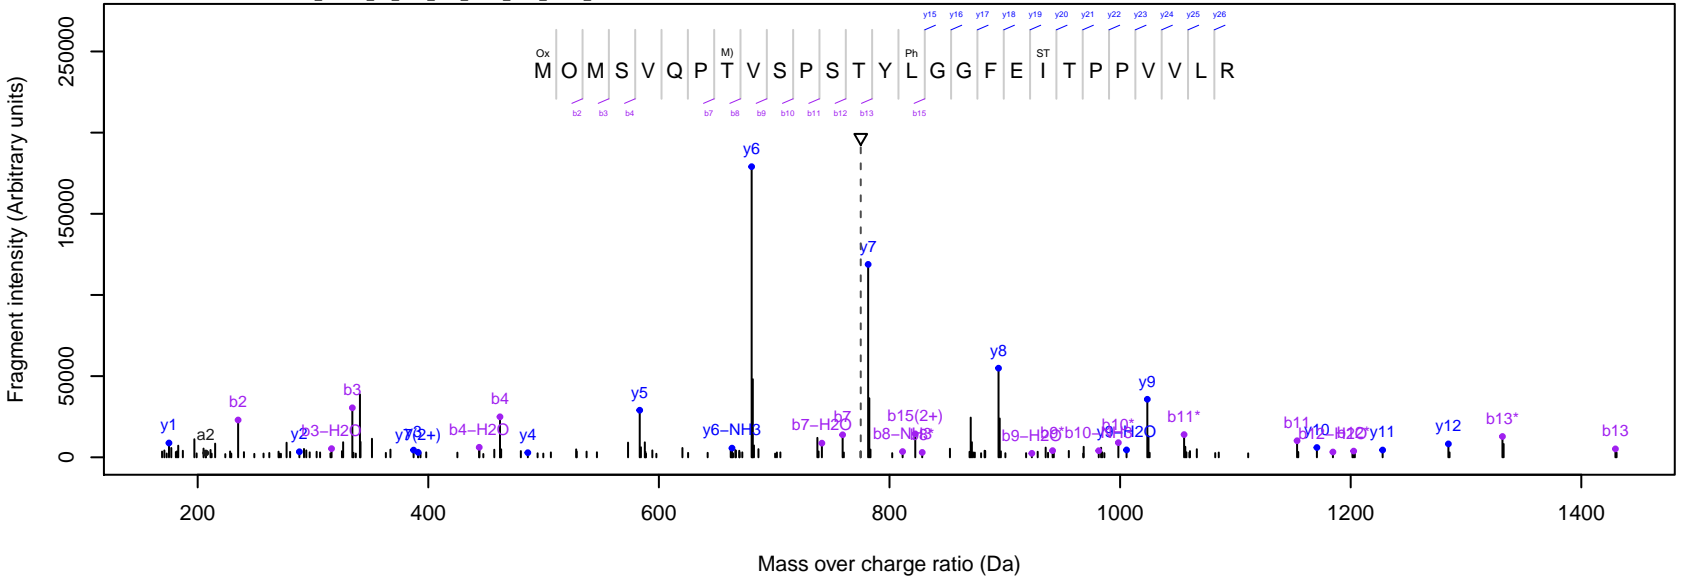

AAS(Phospho (STY))QQEIEQS(Phospho (STY))IETLNM(Oxidation (M))LMLDLEPASAAAPLHK-3+

Source : QE3\_201126\_FR\_TIOx\_hum\_tissue\_Urea\_RNAB\_B Scan : 62702

Andromeda score : 96.886

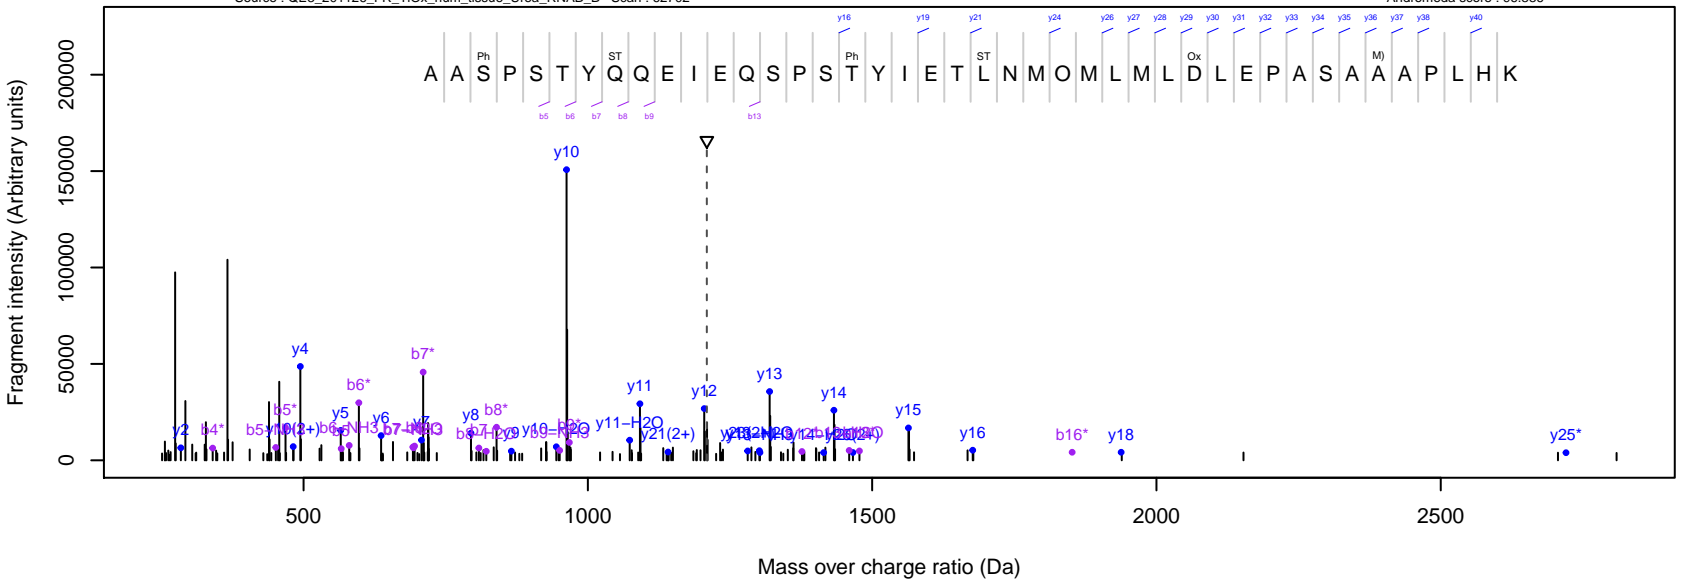



KYSDVEVPASVTGYSAFASDGDSDGTCSPLRHS(Phospho (STY))FQK-4+

Source : QE3\_201126\_FR\_TiOx\_hum\_tissue\_Urea\_RNAB\_N Scan : 34403

Andromeda score : 96.886

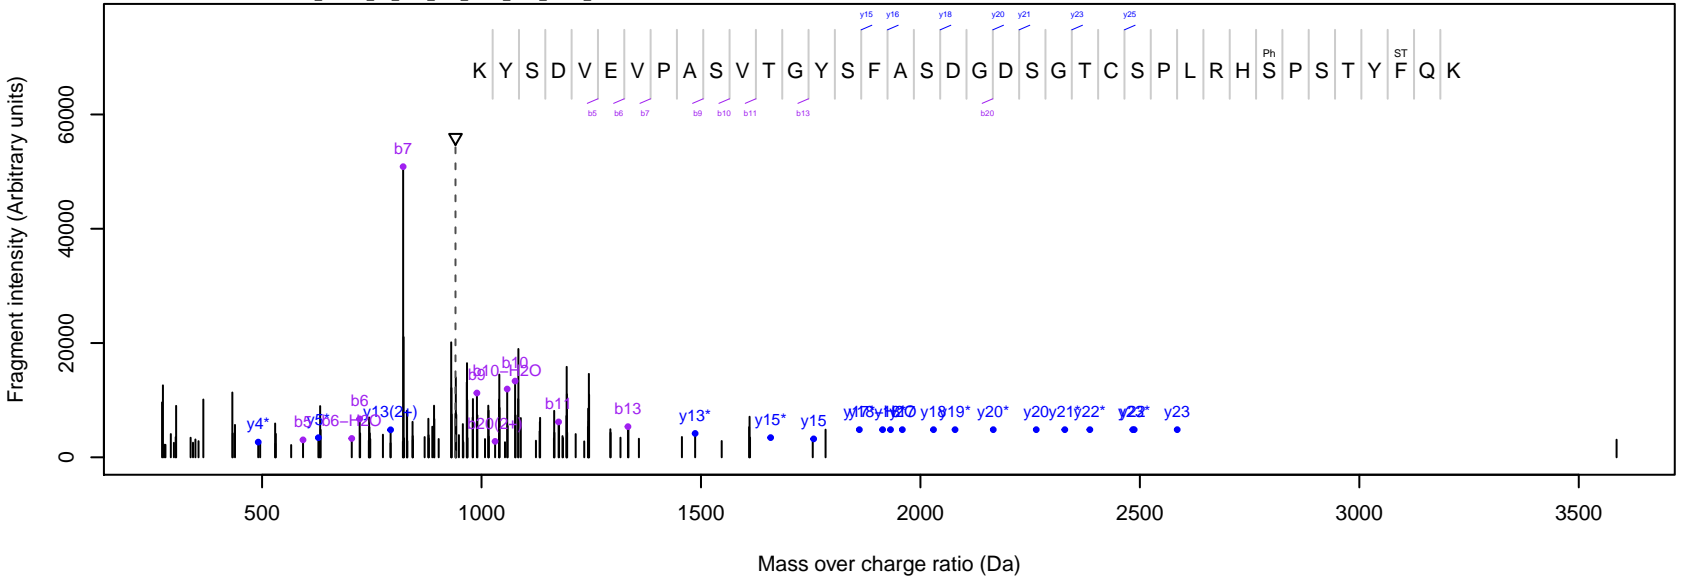

RPDYAPM(Oxidation (M))ESS(Phospho (STY))DEEDEFQFIKK-3+

Source : QE3\_201126\_FR\_TiOx\_hum\_tissue\_Urea\_RNAB\_H Scan : 30457

Andromeda score : 96.848

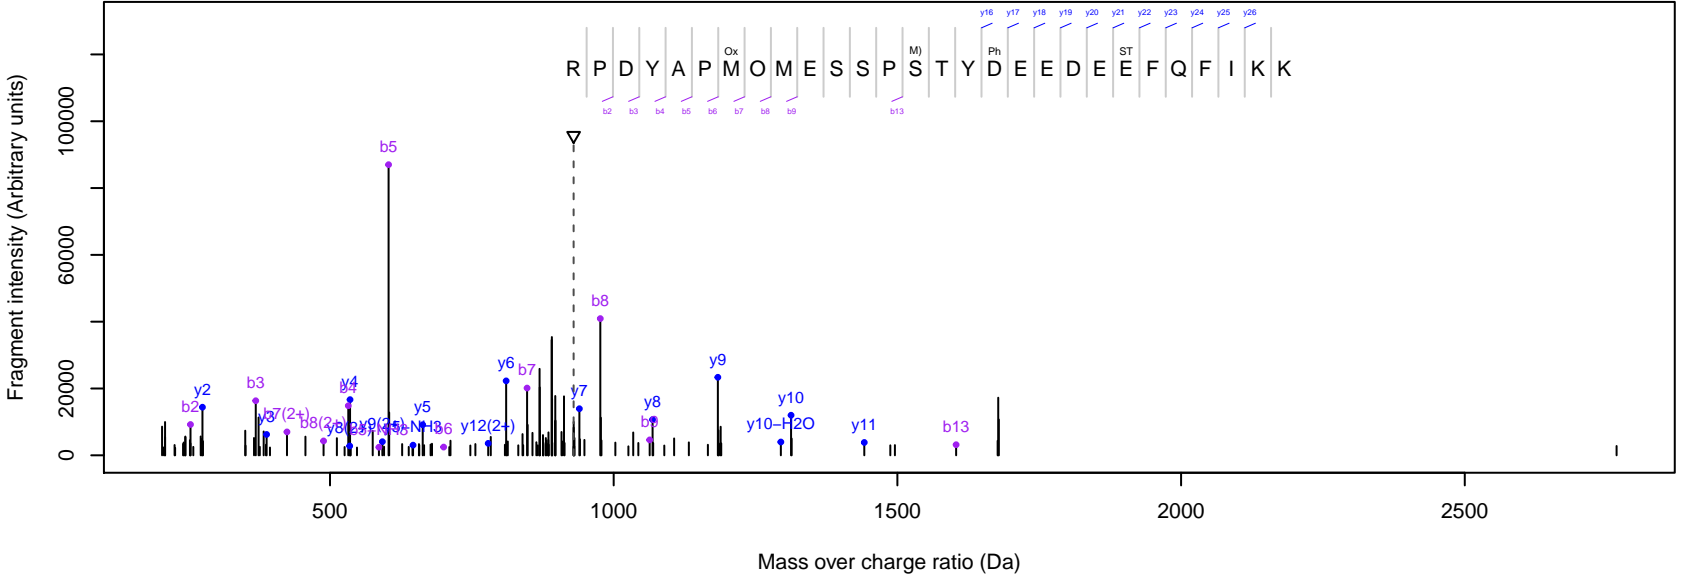

HWVAPGGPYSAETPGVPSPSTYPIAALK-3+

Source : QE3\_201126\_FR\_TiOx\_hum\_tissue\_Urea\_RNAB\_H Scan : 46906

Andromeda score : 96.793

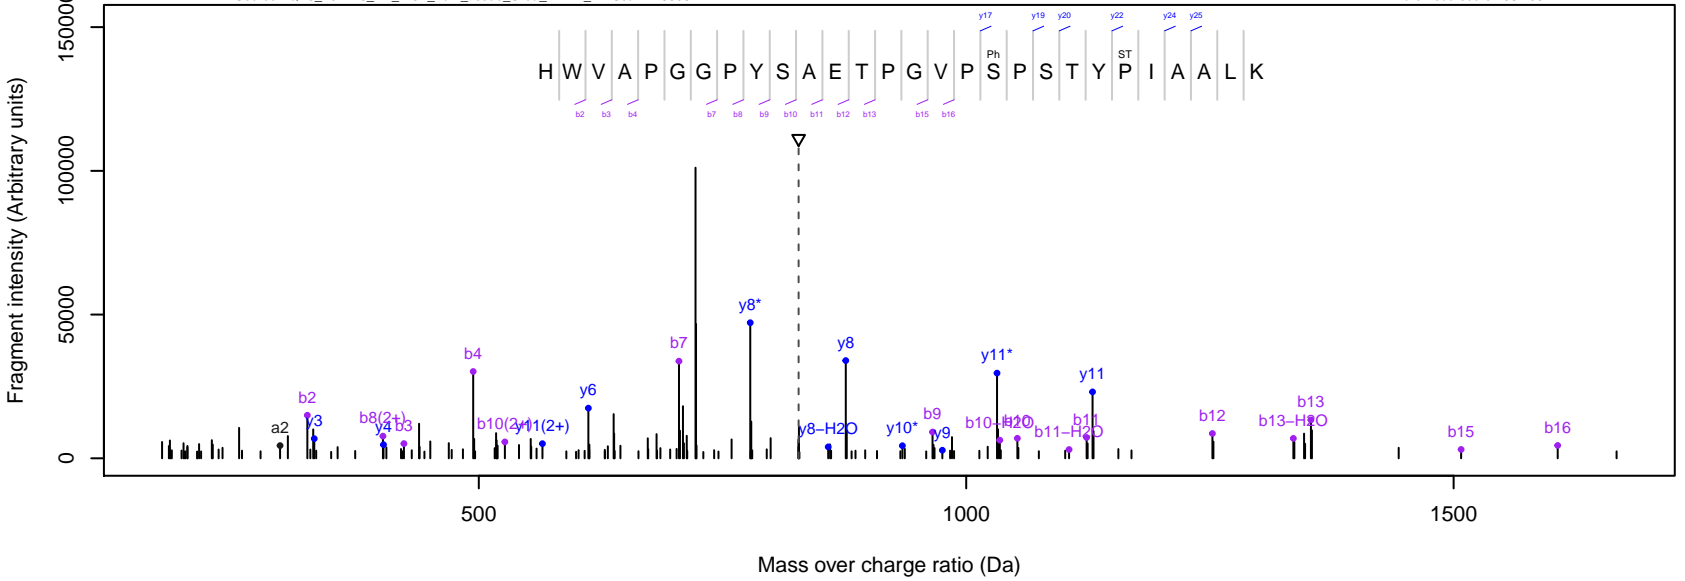

S(Phospho (STY))LEHSEGPVGRDPAGPPDGGPDTEPR-3+

Source : QE3\_201126\_FR\_TiOx\_hum\_tissue\_Urea\_RNAB\_H Scan : 16322

Andromeda score : 96.748

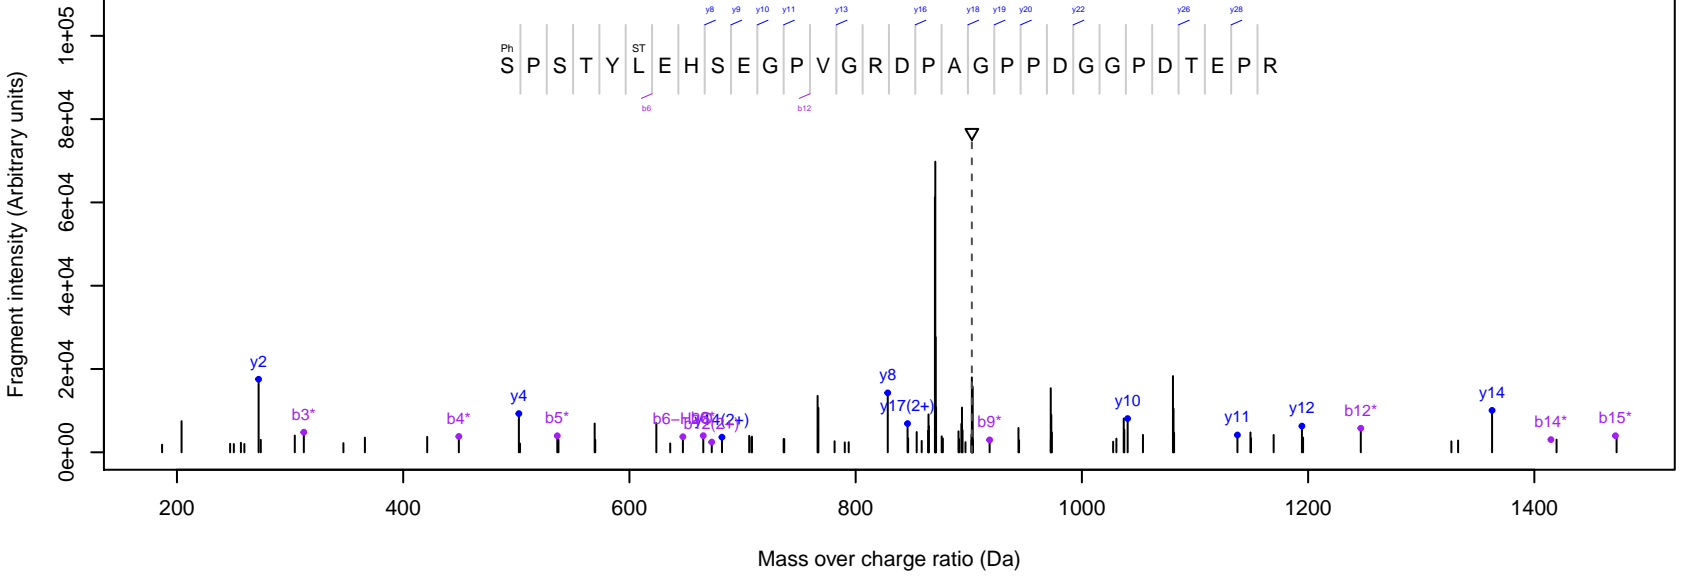

AFLS(Phospho (STY))PPTLLEGLR-2+

Source : QE3\_201126\_FR\_TiOx\_hum\_tissue\_Urea\_RNAB\_H Scan : 60312

Andromeda score : 96.734

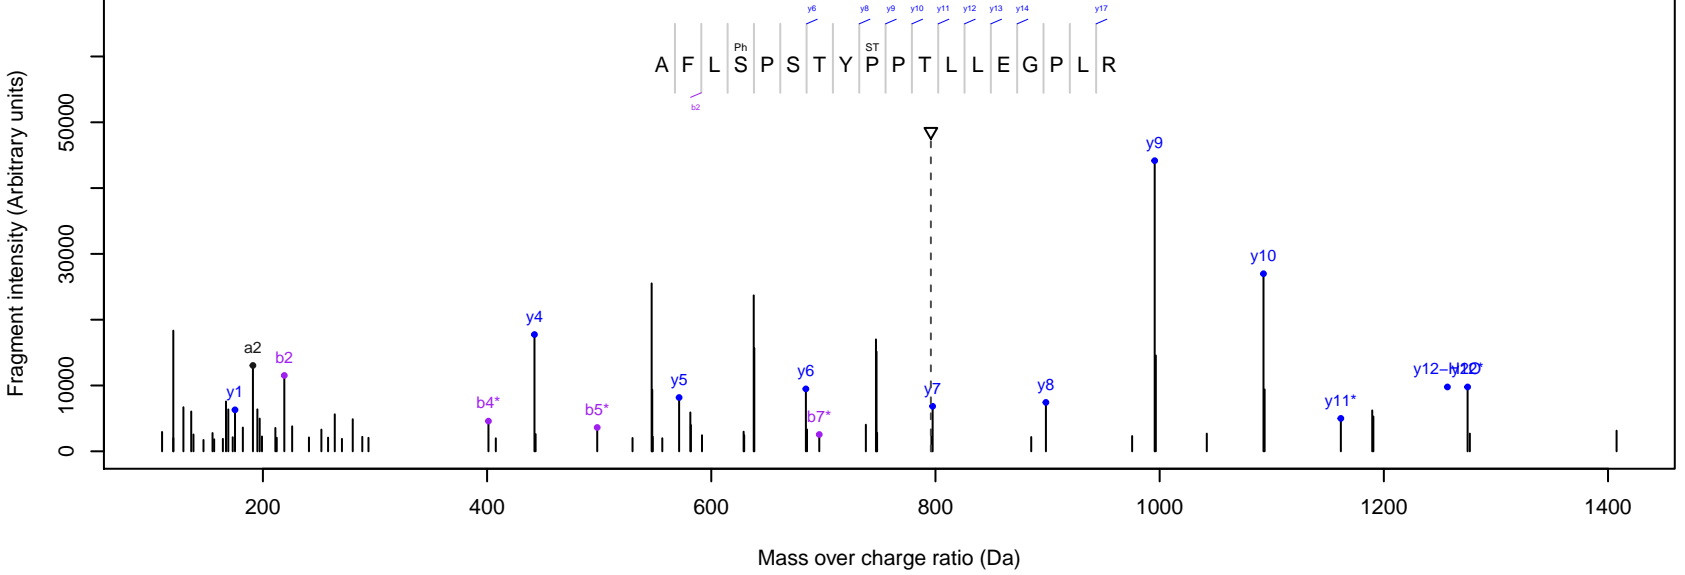

SGLTVPTS(Phospho (STY))PKGR-2+

Source : QE3\_201126\_FR\_TiOx\_hum\_tissue\_Urea\_RNAB\_N Scan : 12439

Andromeda score : 96.734

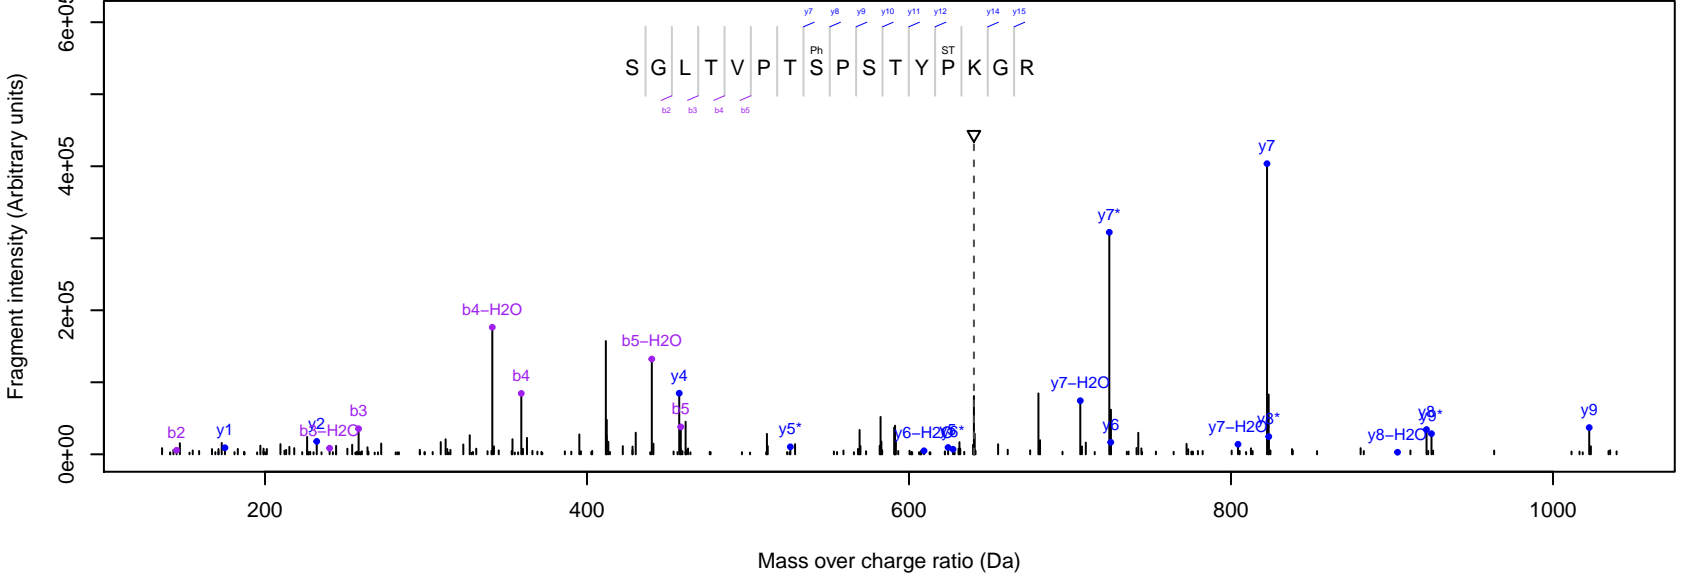

SWAQQSS(Phospho (STY))EQELHYASLQR-3+

Source : QE3\_201126\_FR\_TiOx\_hum\_tissue\_Urea\_RNAB\_B Scan : 27778

Andromeda score : 96.718

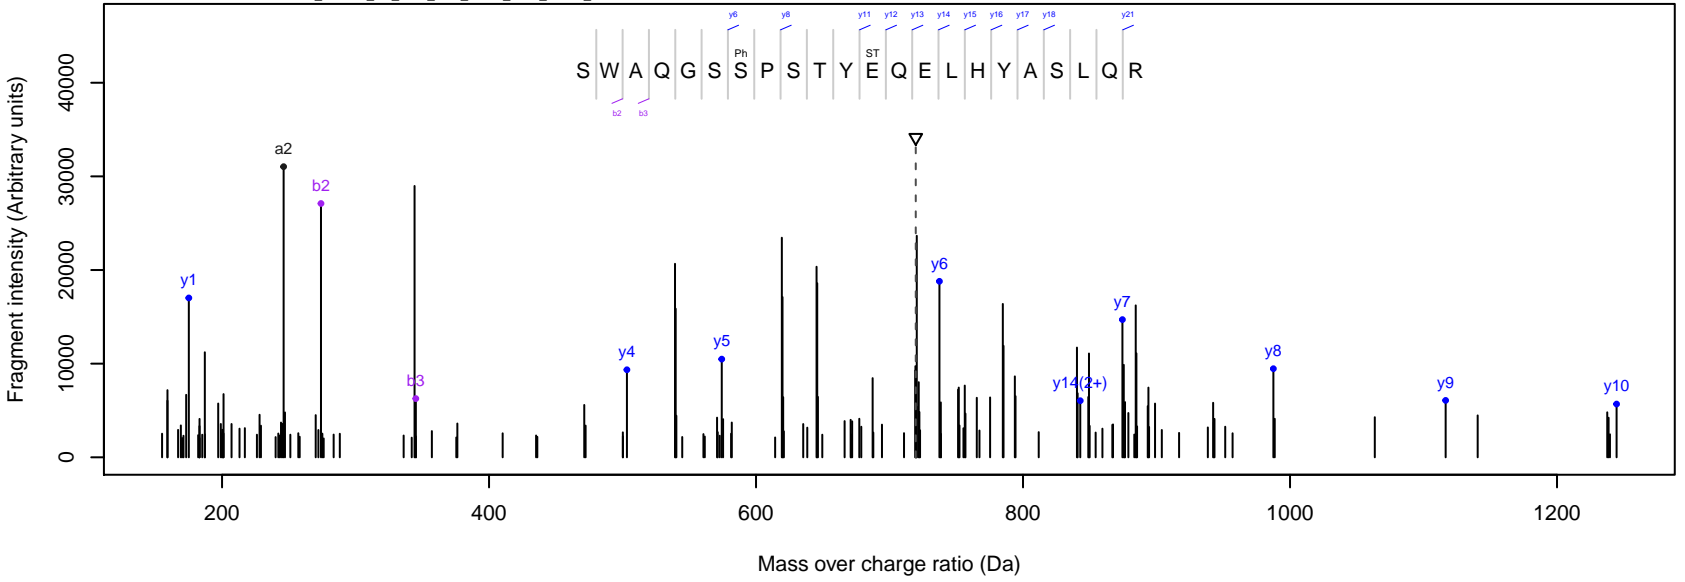

QAQQRDELADEIANS(Phospho (STY))SGKGLALEEK-3+

Source : QE3\_201126\_FR\_TiOx\_hum\_tissue\_Urea\_RNAB\_B Scan : 29783

Andromeda score : 96.679

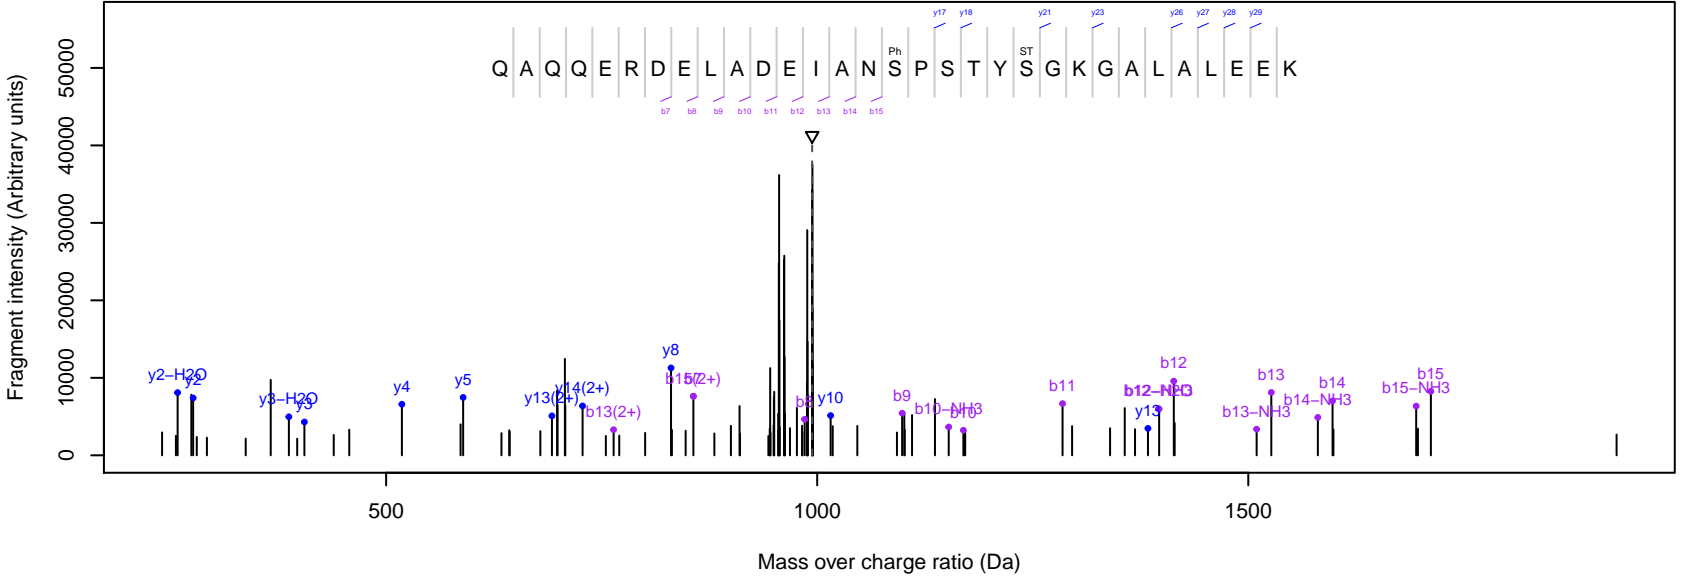

DVYLS(Phospho (STY))PR-2+

Source : QE3\_201126\_FR\_TiOx\_hum\_tissue\_Urea\_RNAB\_H Scan : 19307

Andromeda score : 96.668

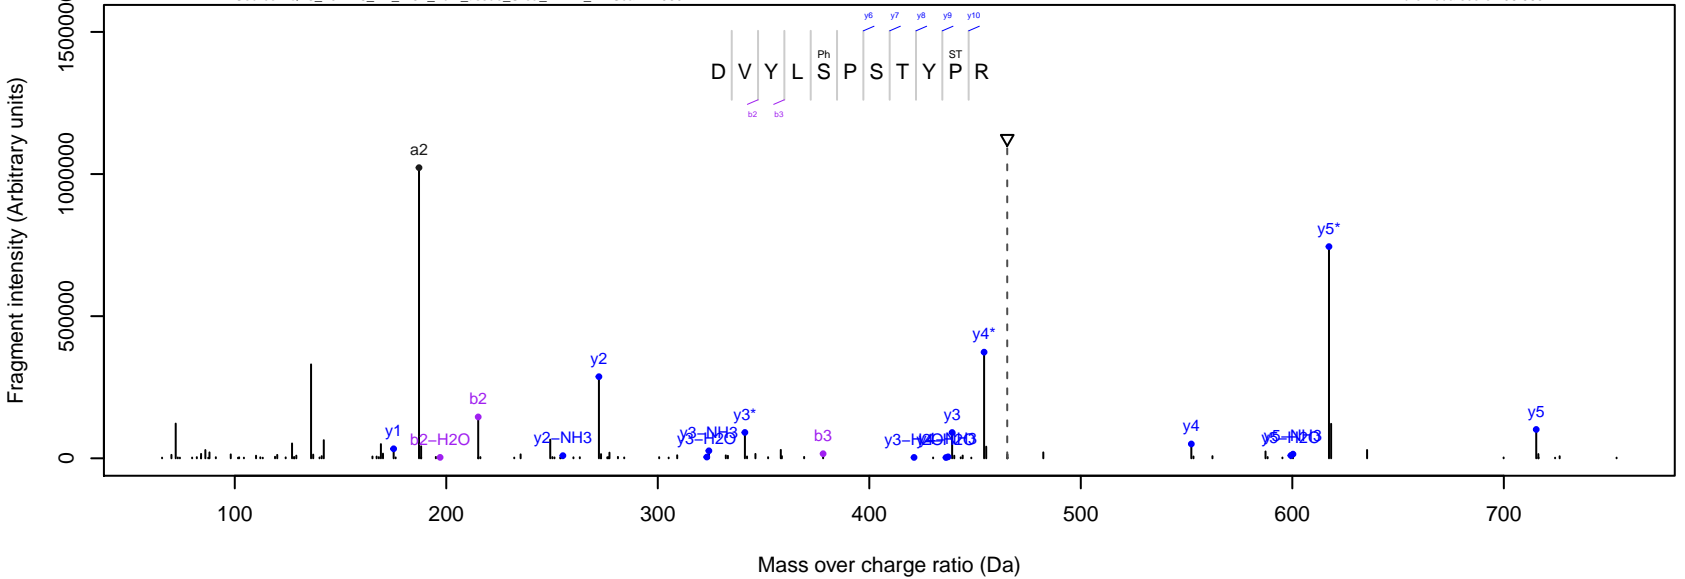

KPVTVSPTT(Phospho (STY))PT(Phospho (STY))SPTEGEAS-2+

Source : QE3\_201126\_FR\_TiOx\_hum\_tissue\_Urea\_RNAB\_H Scan : 21807

Andromeda score : 96.666

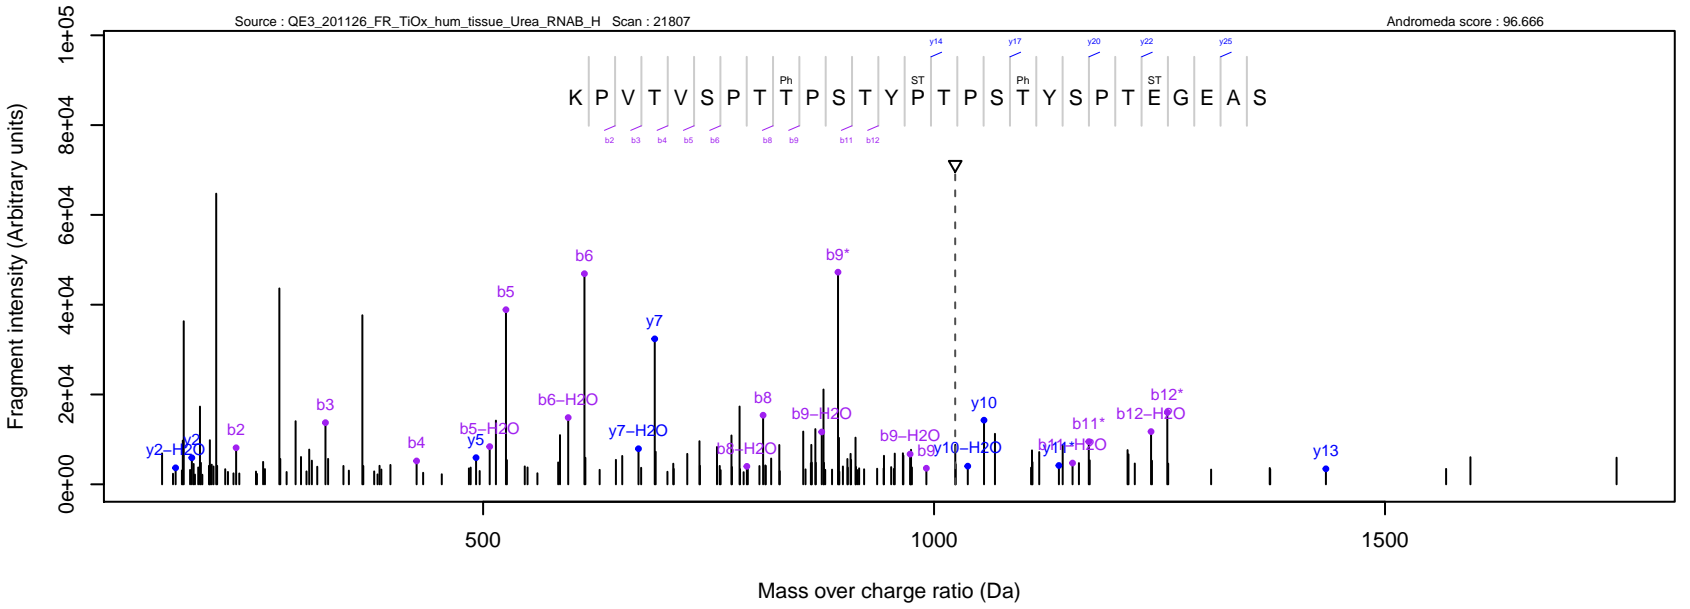

M(Oxidation (M))APPPKEVEEDS(Phospho (STY))EDEEMSEDEEDS(Phospho (STY))S(Phospho (STY))GEEVIPQKK-4+

Source : QE3\_201126\_FR\_TiOx\_hum\_tissue\_Urea\_RNAB\_N Scan : 29490

Andromeda score : 96.604

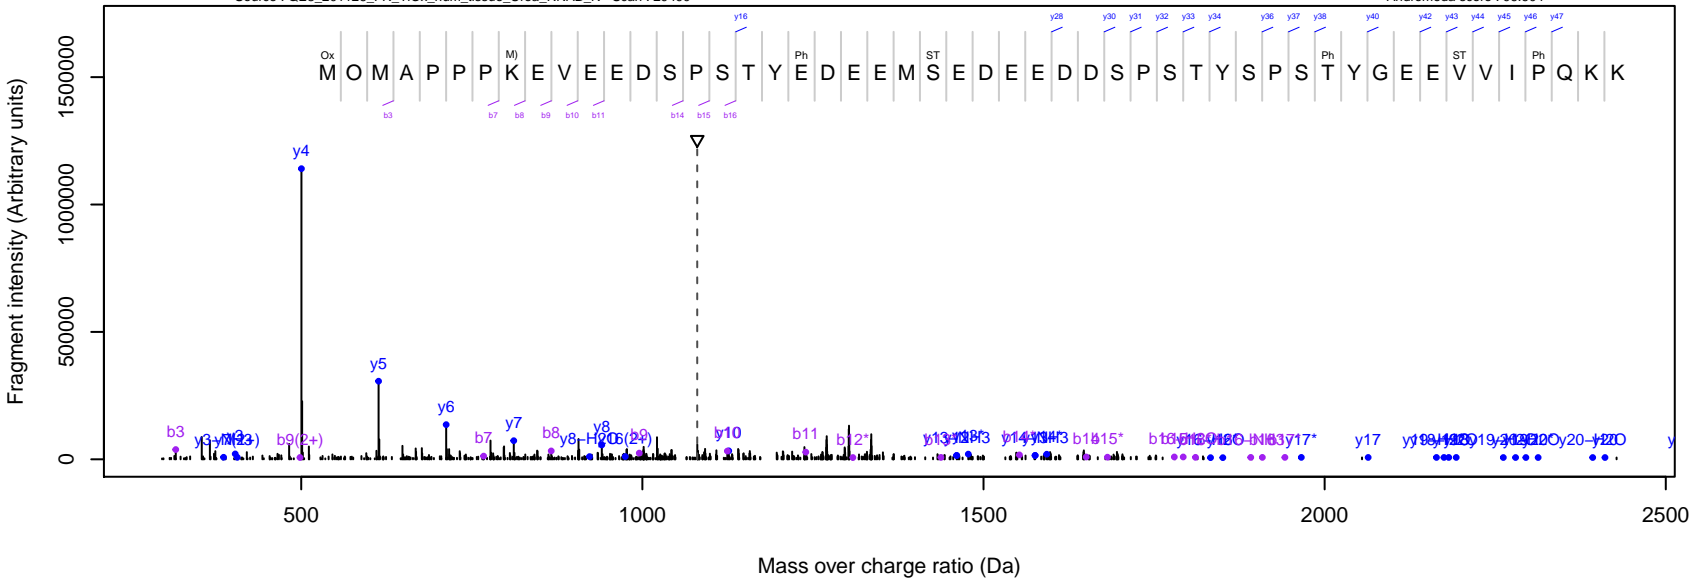

TATLPPDDM(Oxidation (M))ITQREDAEGVAEEEEQEGDS(Phospho (STY))GEQETGATDARPR-4+

Source : QE3\_201126\_FR\_TiOx\_hum\_tissue\_Urea\_RNAB\_H Scan : 26043

Andromeda score : 96.602

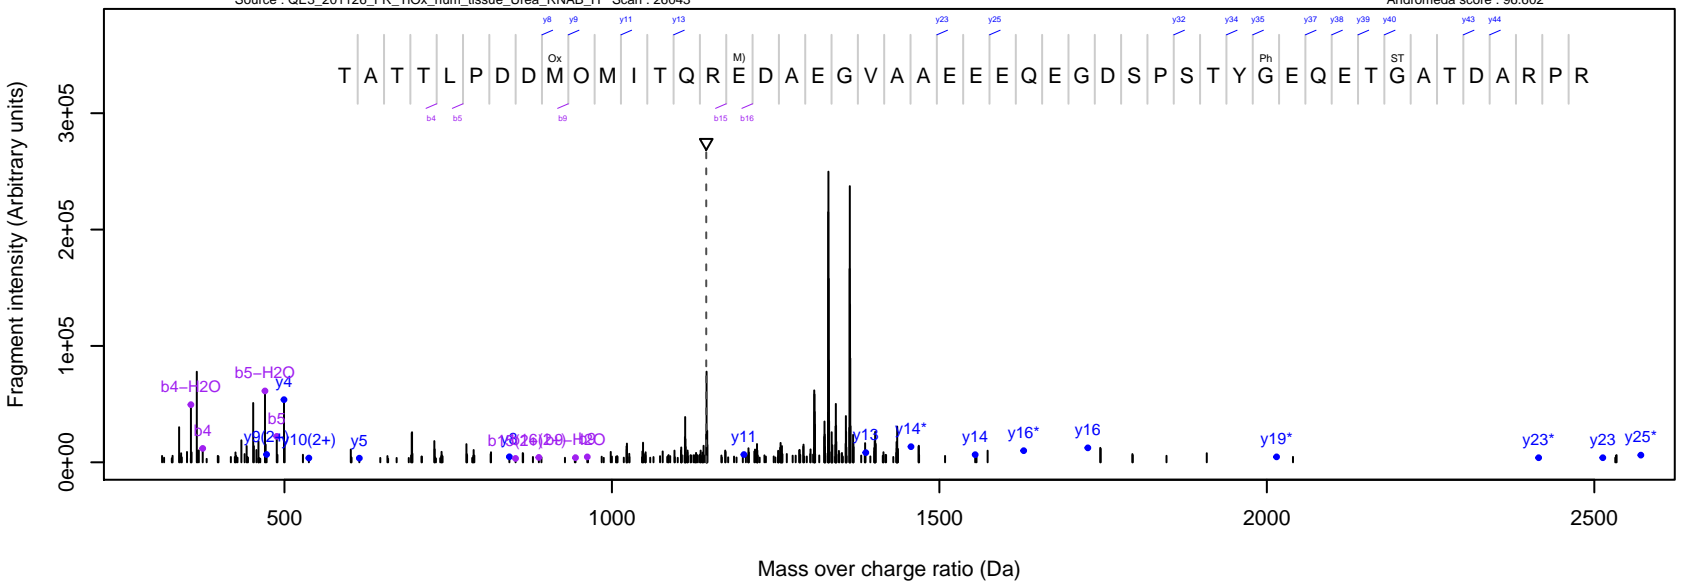

S(Phospho (STY))LHTEEPALDAAR-2+

Source : QE3\_201126\_FR\_TiOx\_hum\_tissue\_Urea\_RNAB\_N Scan : 18494

Andromeda score : 96.591

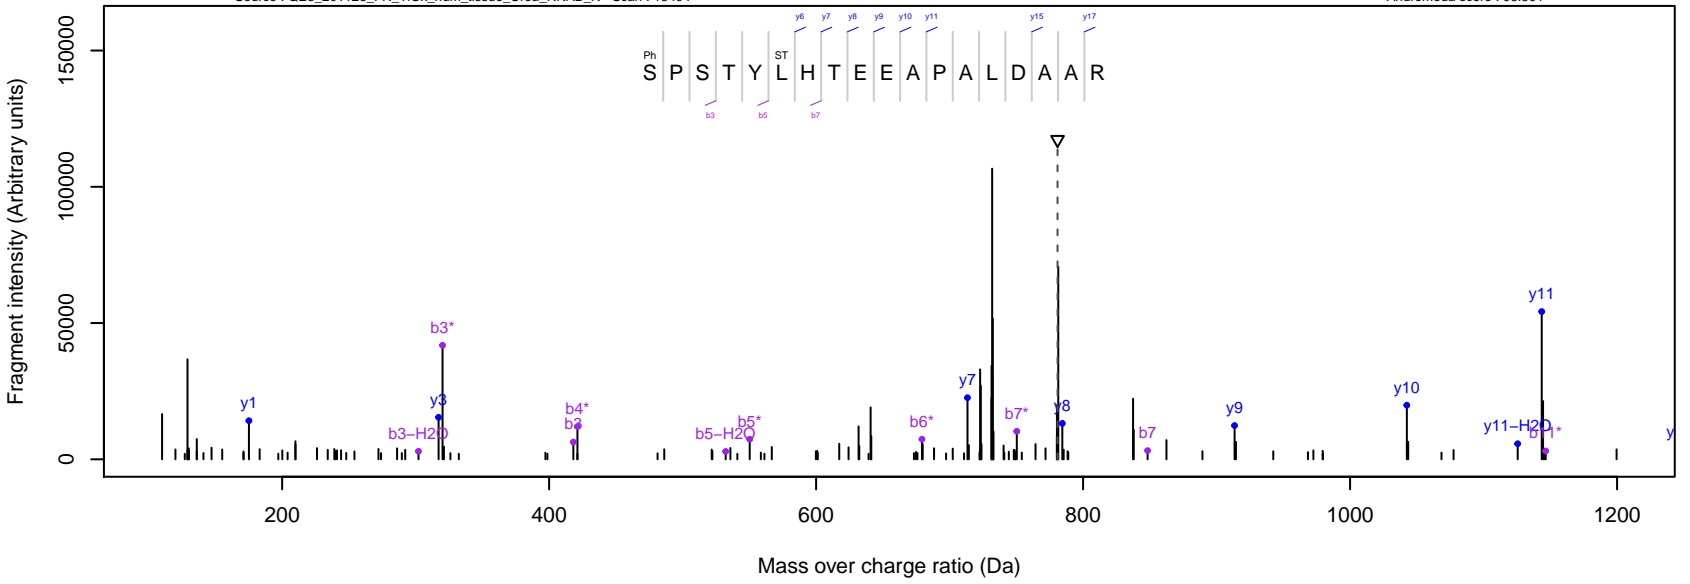

LKIS(Phospho (STY))PEQHWDFTAEDLKDLGEIGR-4+

Source : QE3\_201126\_FR\_TiOx\_hum\_tissue\_Urea\_RNAB\_B Scan : 48464

Andromeda score : 96.568

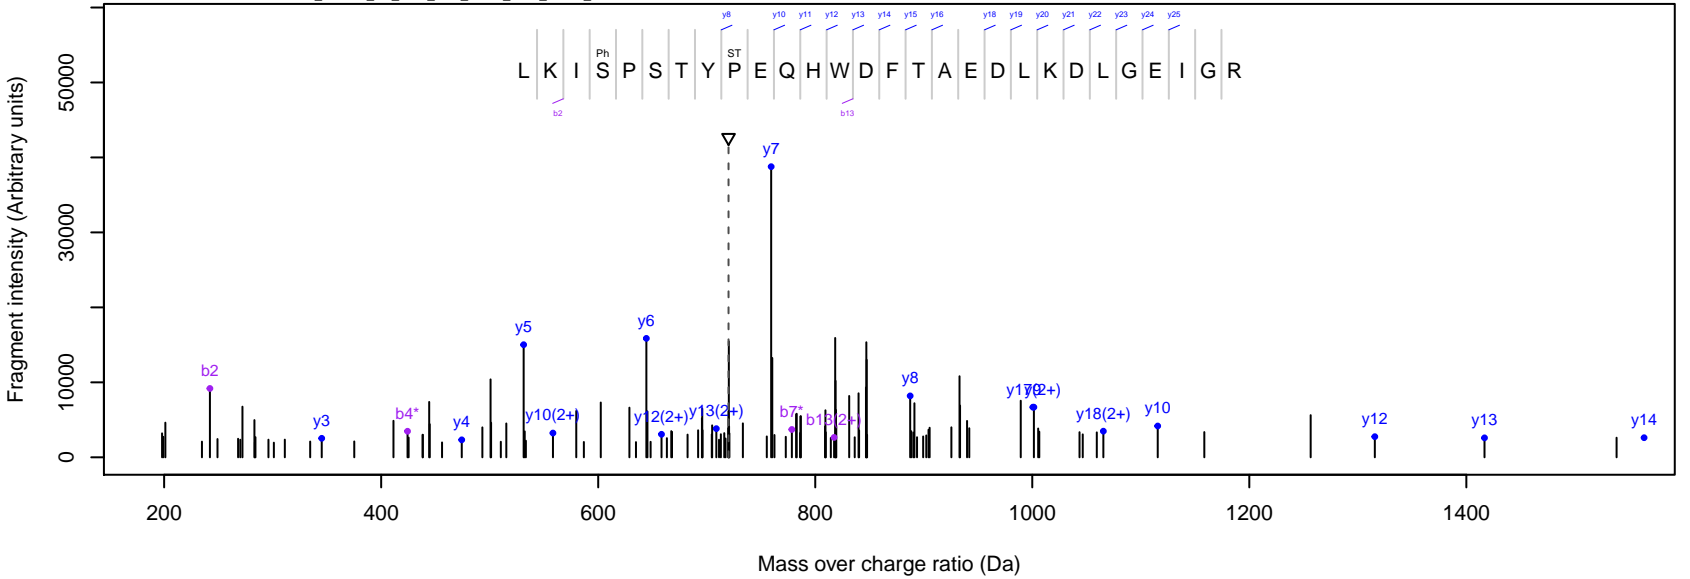

QNPEQS(Phospho (STY))AEDAEKNEEDS(Phospho (STY))EGS(Phospho (STY))SDEDEDEDGVSAAATFLKK-4+

Source : QE3\_201126\_FR\_TiOx\_hum\_tissue\_Urea\_RNAB\_N Scan : 38856

Andromeda score : 96.55

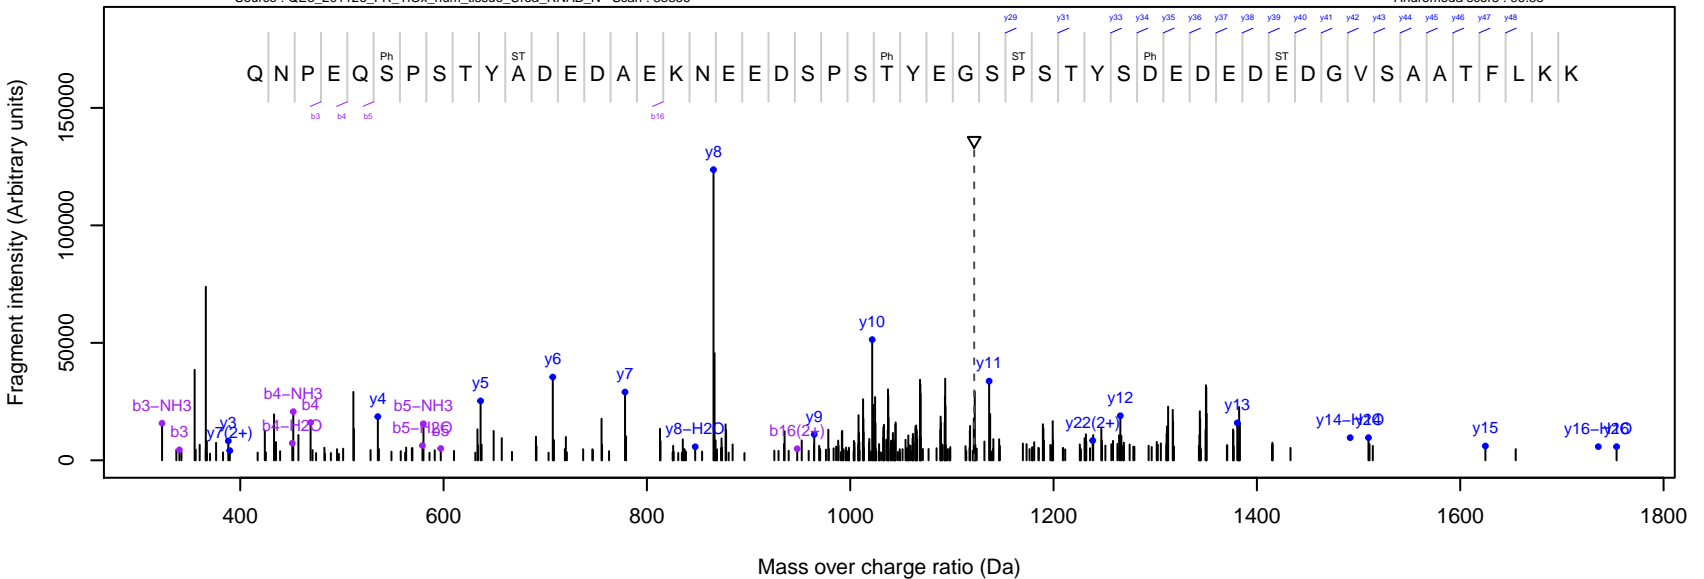

T(Phospho (STY))RSYDNLTTACDNTVPLASR-3+

Source : QE3\_201126\_FR\_TiOx\_hum\_tissue\_Urea\_RNAB\_N Scan : 26598

Andromeda score : 96.55

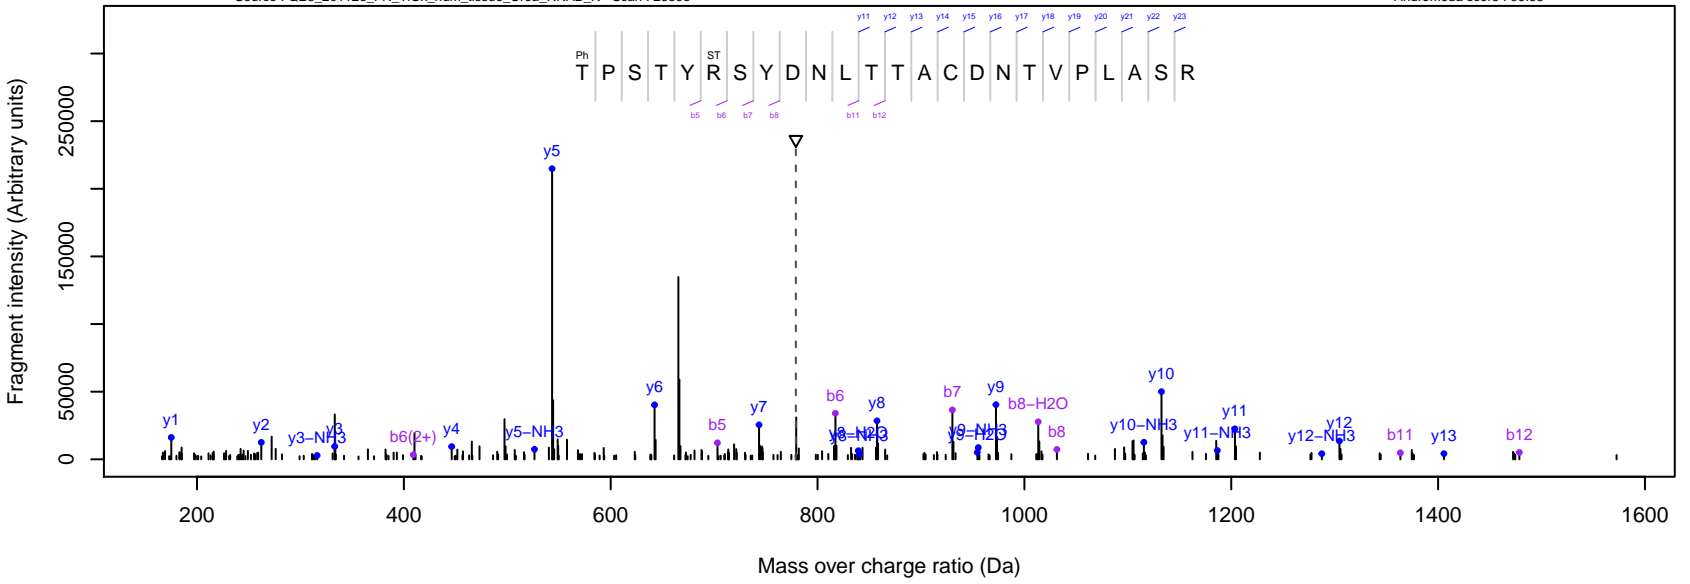

VRGGAPDPSGATATPGAPAQPS(Phospho (STY))SPDAR-3+

Source : QE3\_201126\_FR\_TiOx\_hum\_tissue\_Urea\_RNAB\_H Scan : 15493

Andromeda score : 96.55

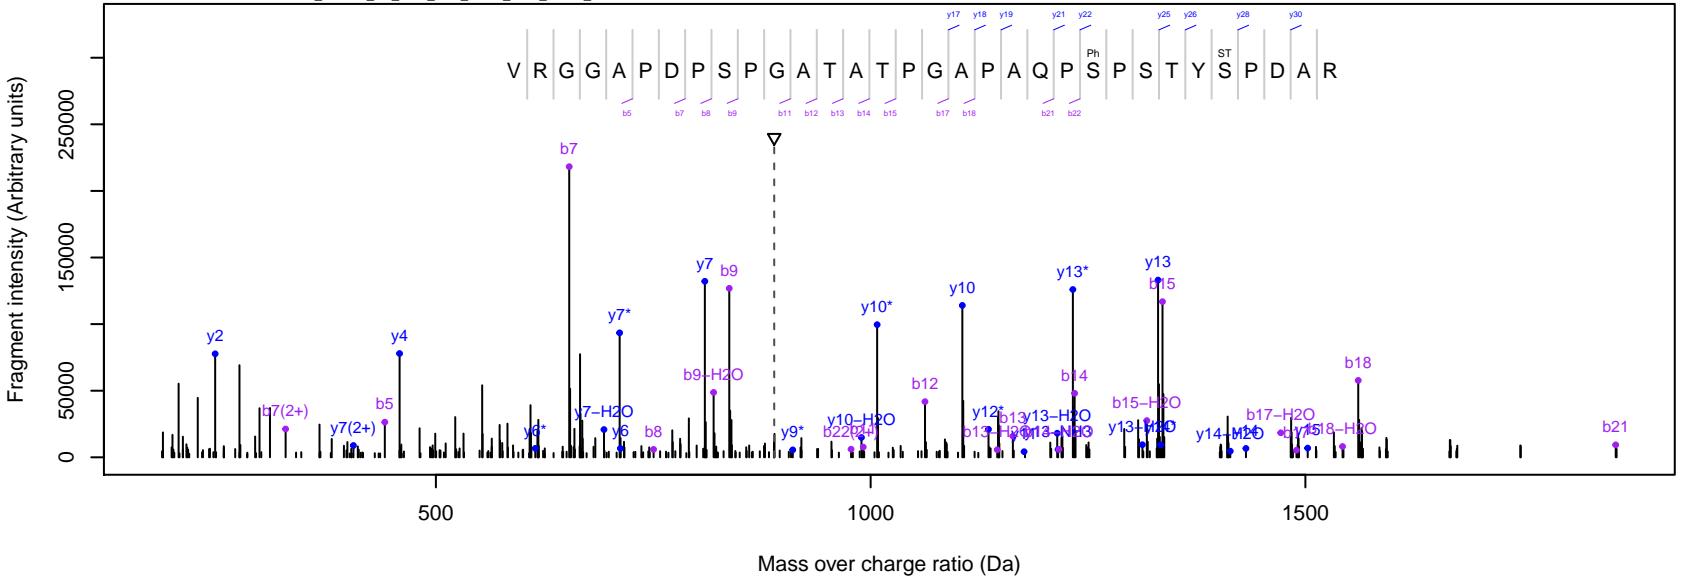

KSPSGPVKS(Phospho (STY))PPLS(Phospho (STY))PVGTTVPVK-3+

Source : QE3\_201126\_FR\_TiOx\_hum\_tissue\_Urea\_RNAB\_N Scan : 20188

Andromeda score : 96.515

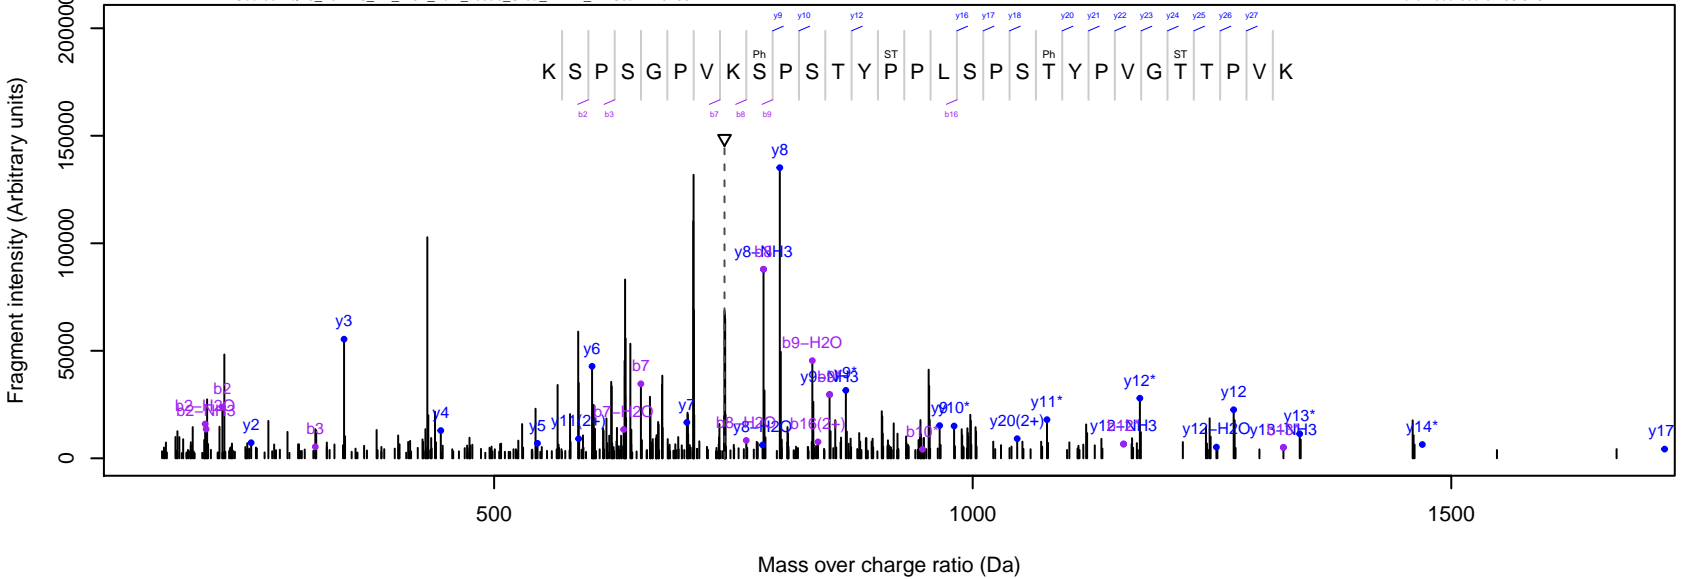

VTETEDDS(Phospho (STY))DSDS(Phospho (STY))DDEDDVHVHTIGDIK-3+

Source : QE3\_201126\_FR\_TiOx\_hum\_tissue\_Urea\_RNAB\_N Scan : 38483

Andromeda score : 96.492

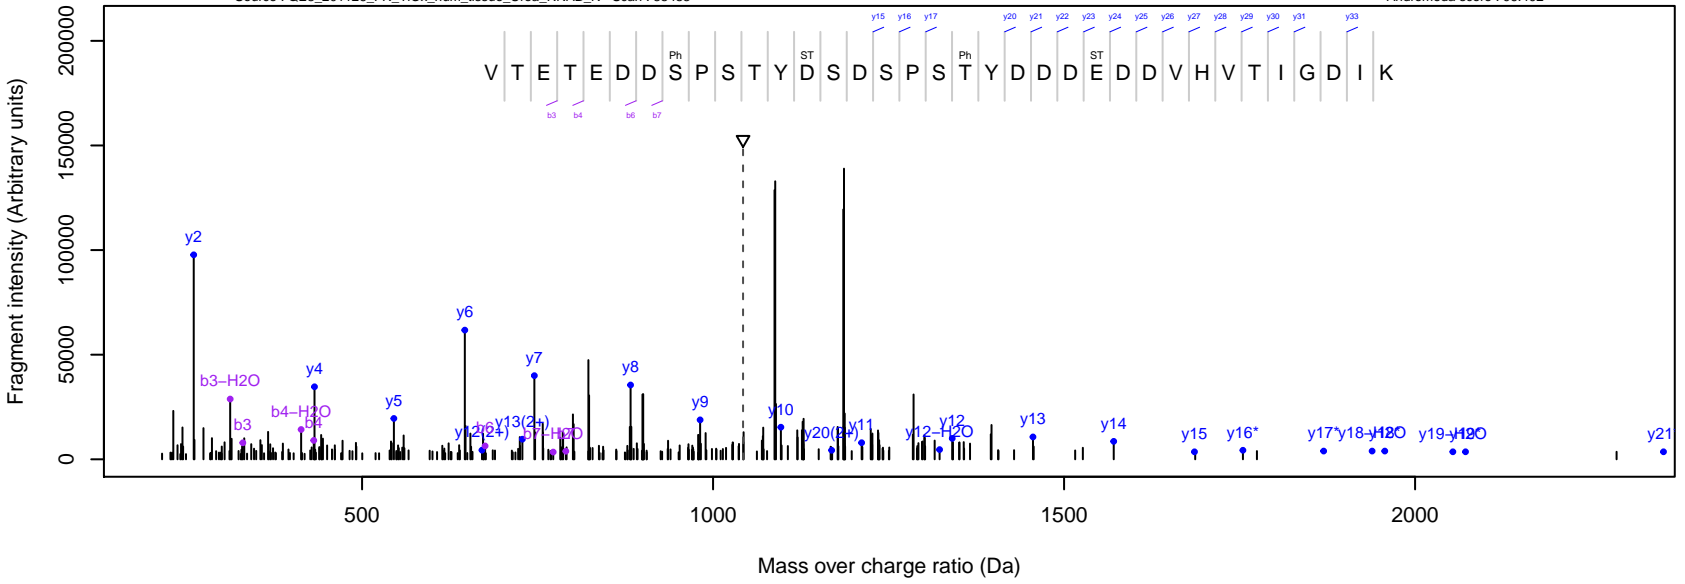

EEAS(Phospho (STY))DDMEGDEAVR-2+

Source : QE3\_201126\_FR\_TiOx\_hum\_tissue\_Urea\_RNAB\_B Scan : 21964

Andromeda score : 96.489

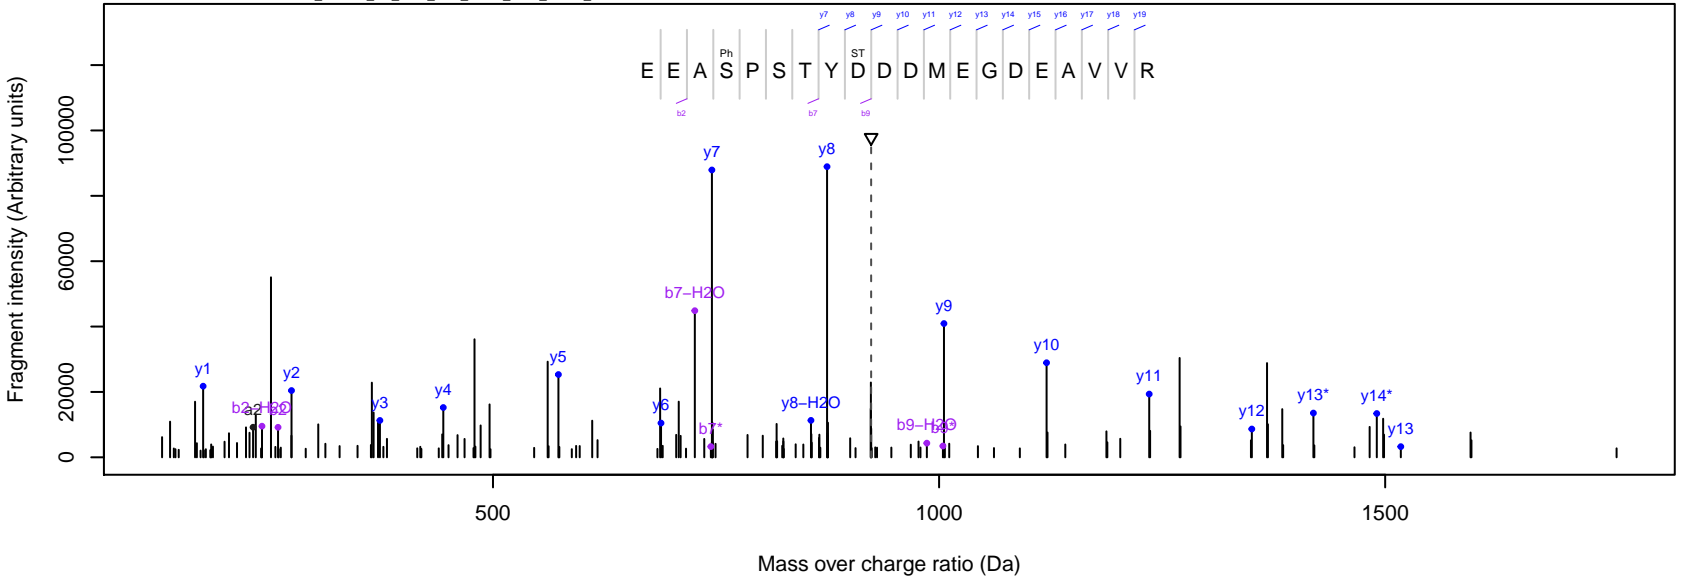

ESS(Phospho (STY))PLYS(Phospho (STY))PTFSDSTSAVK-2+

Source : QE3\_201126\_FR\_TiOx\_hum\_tissue\_Urea\_RNAB\_H Scan : 40026

Andromeda score : 96.487

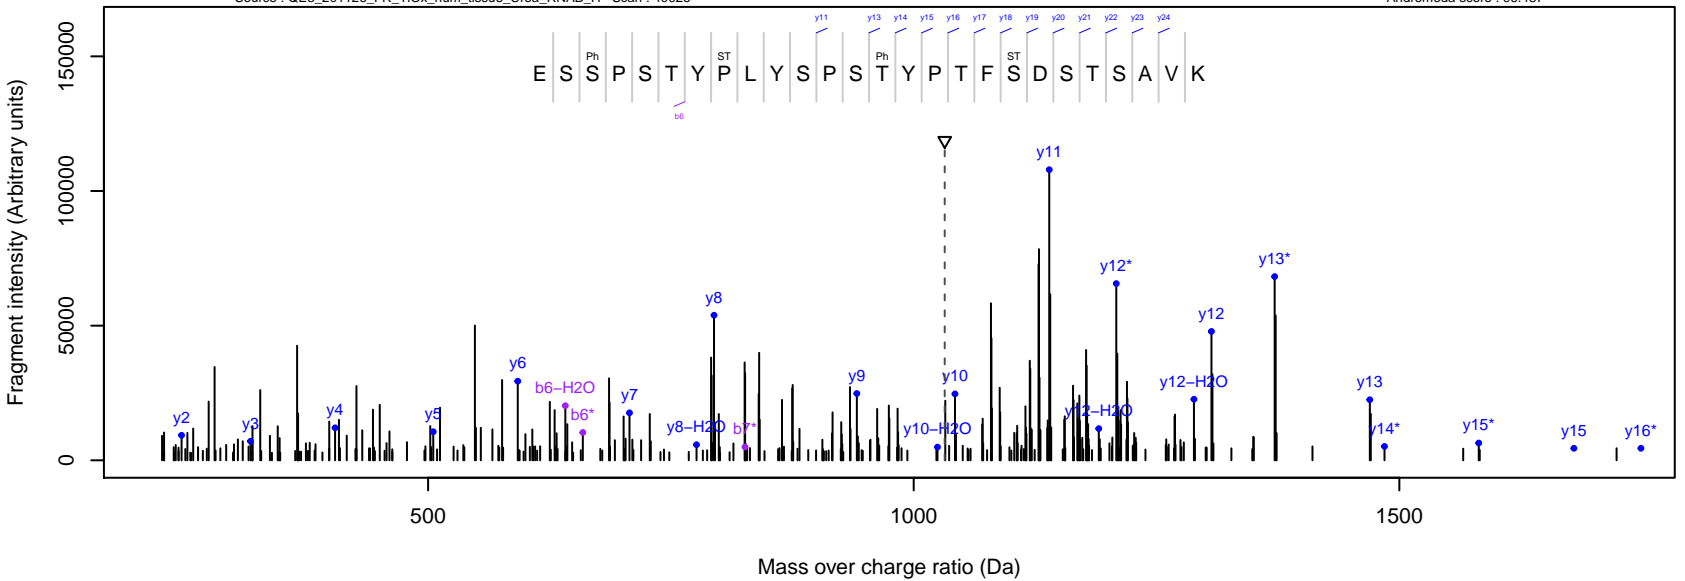

QGIDILYSGS(Phospho (STY))QK-2+

Source : QE3\_201126\_FR\_TiOx\_hum\_tissue\_Urea\_RNAB\_B Scan : 35063

Andromeda score : 96.464

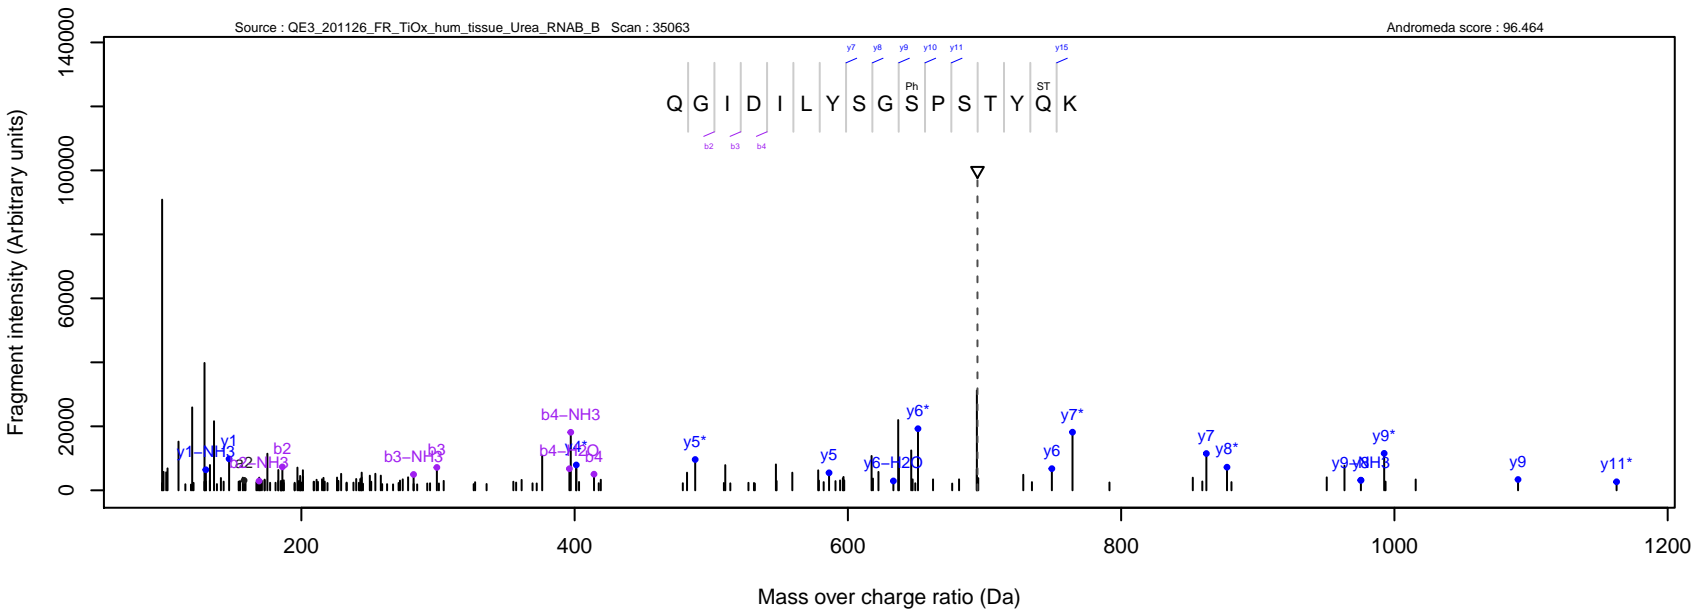

(Acetyl (Protein N-term))S(Phospho (STY))GDEMIFDPTMSKK-2+

Source : QE3\_201126\_FR\_TiOx\_hum\_tissue\_Urea\_RNAB\_N Scan : 44450

Andromeda score : 96.464

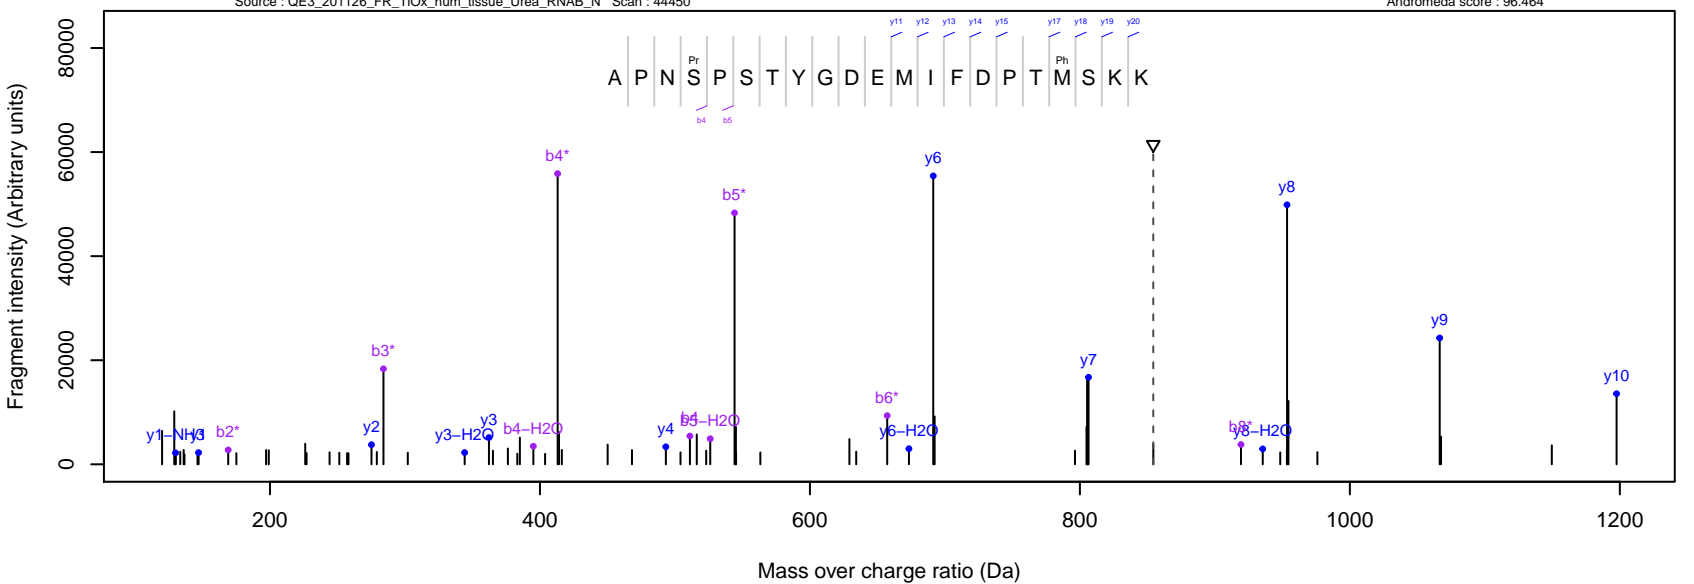

KRS(Phospho (STY))S(Phospho (STY))SEDAESLAPR-3+

Source : QE3\_201126\_FR\_TiOx\_hum\_tissue\_Urea\_RNAB\_H Scan : 9788

Andromeda score : 96.447

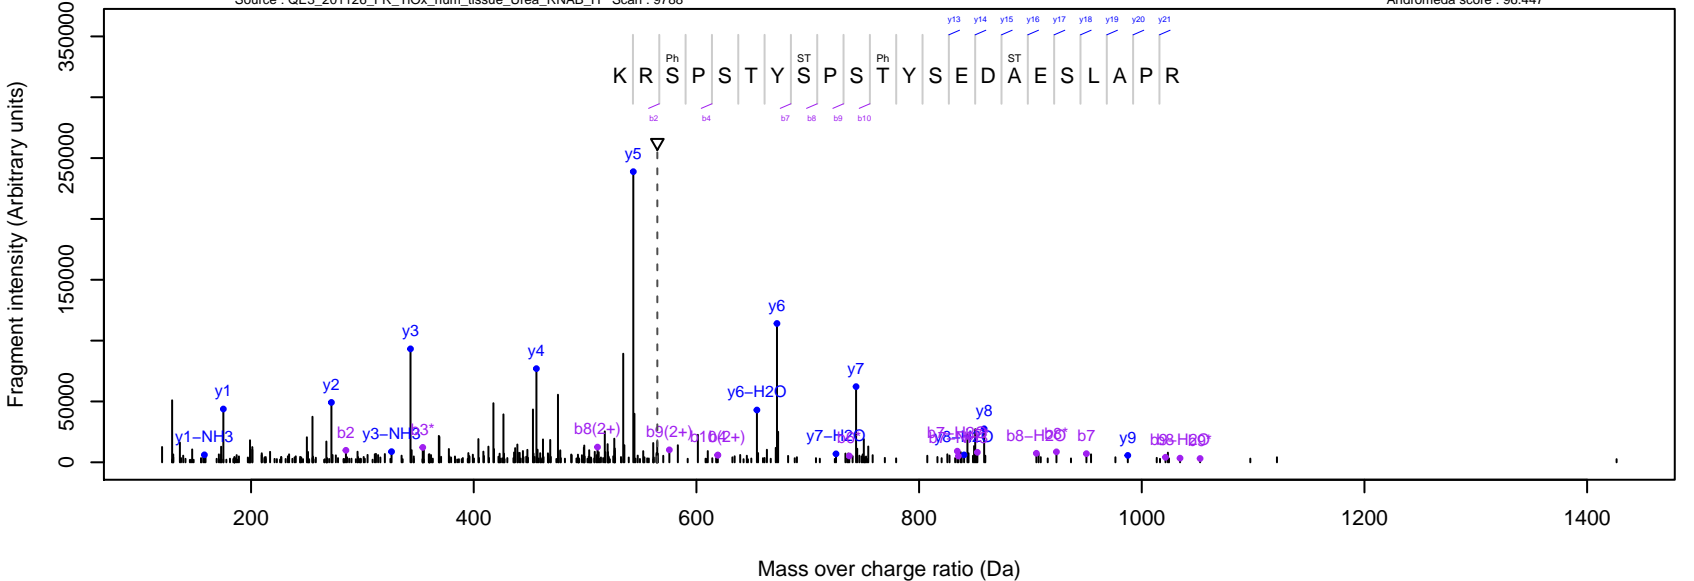



DHDHLDNHRENSGDSGYPS(Phospho (STY))EK-4+

Source : QE3\_201126\_FR\_TiOx\_hum\_tissue\_Urea\_RNAB\_N Scan : 6107

Andromeda score : 96.44

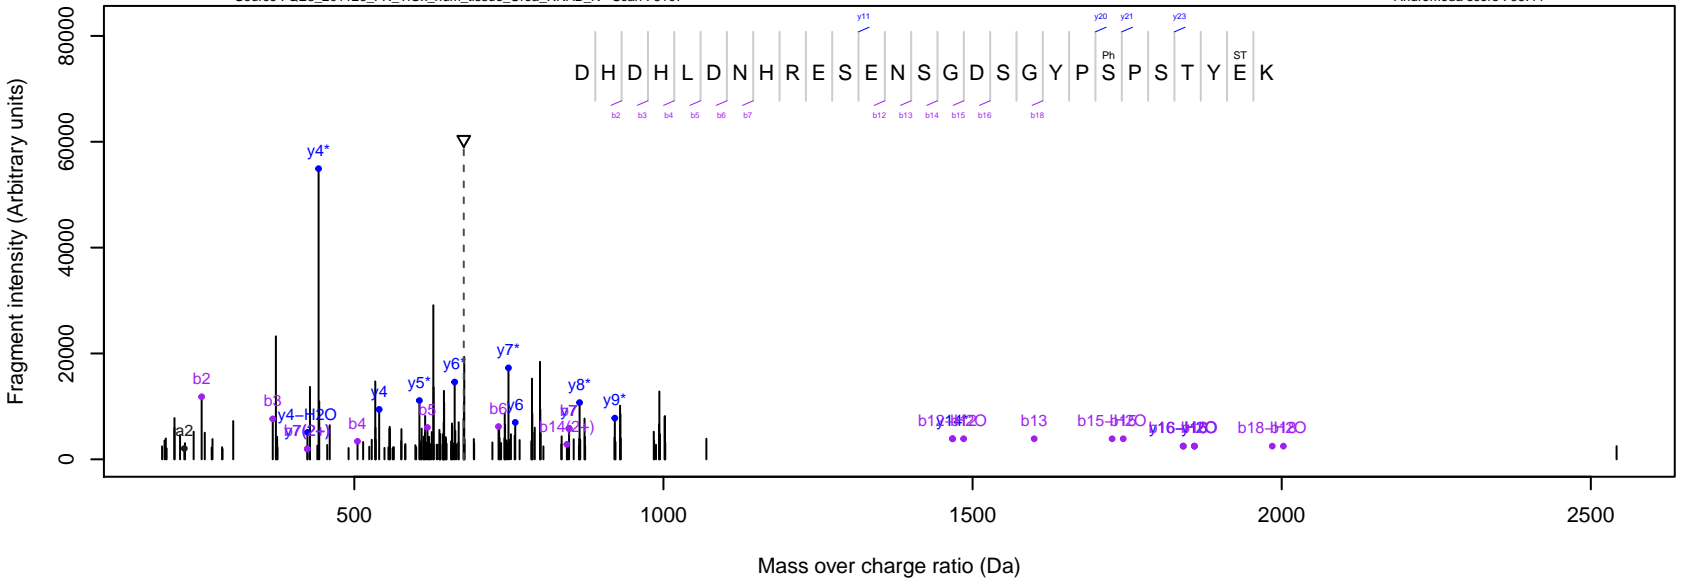

APS(Phospho (STY))VANVGSCHCDLSLK-3+

Source : QE3\_201126\_FR\_TiOx\_hum\_tissue\_Urea\_RNAB\_N Scan : 22426

Andromeda score : 96.379

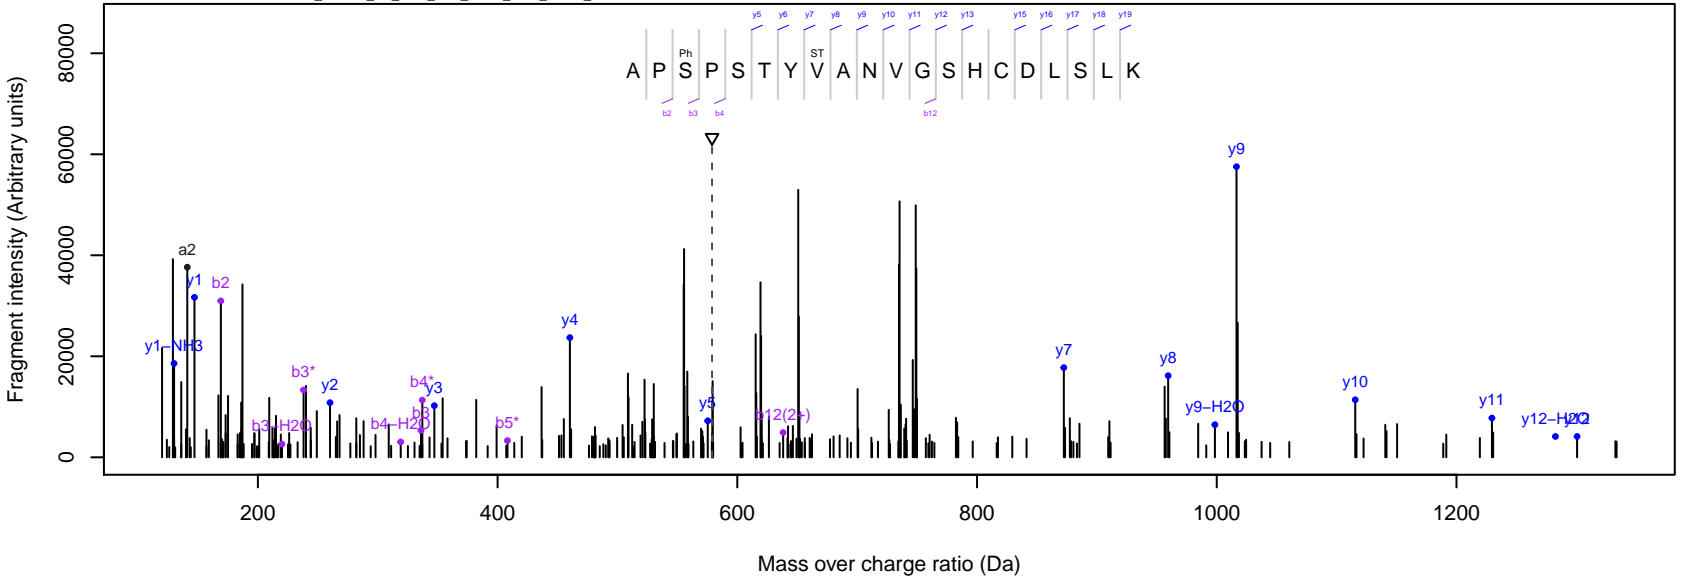

ENVS(Phospho (STY))AVCLDMQSLER-3+

Source : QE3\_201126\_FR\_TiOx\_hum\_tissue\_Urea\_RNAB\_N Scan : 44869

Andromeda score : 96.379

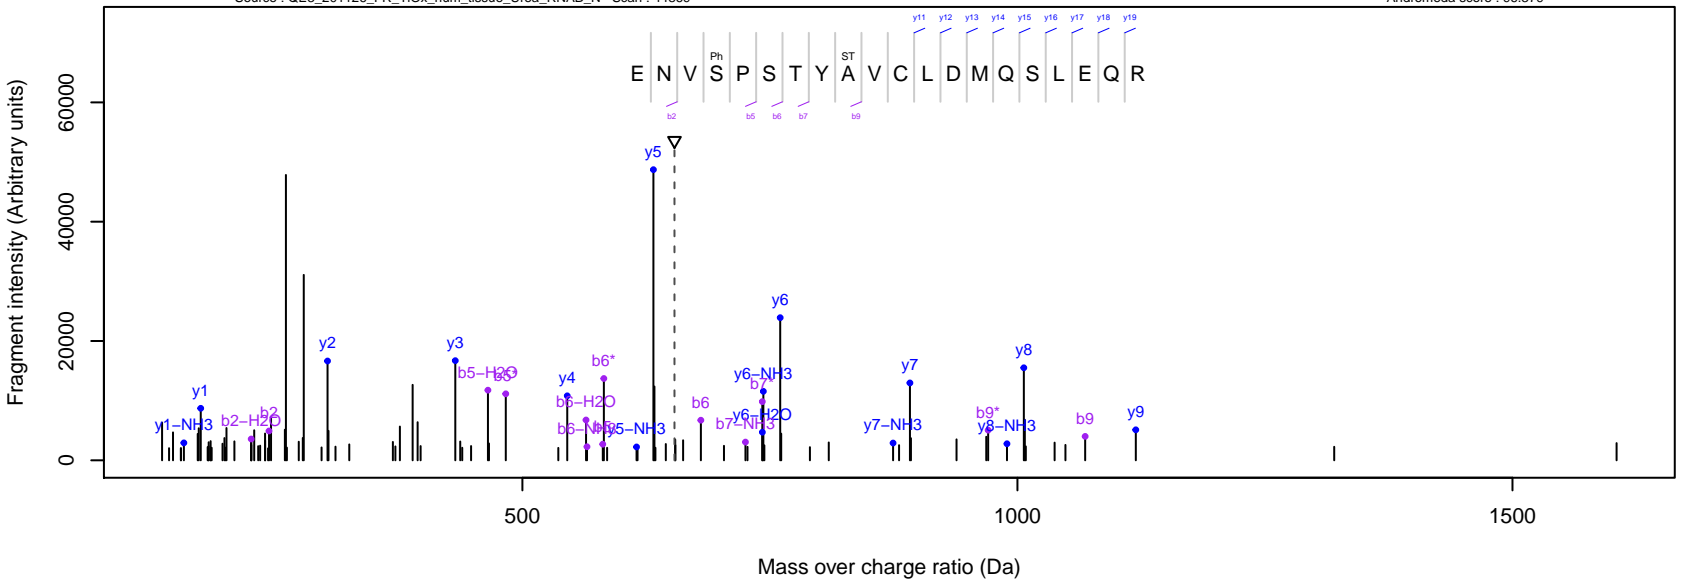

LVLIRHGES(Phospho (STY))AWNLENR-3+

Source : QE3\_201126\_FR\_TiOx\_hum\_tissue\_Urea\_RNAB\_N Scan : 30783

Andromeda score : 96.379

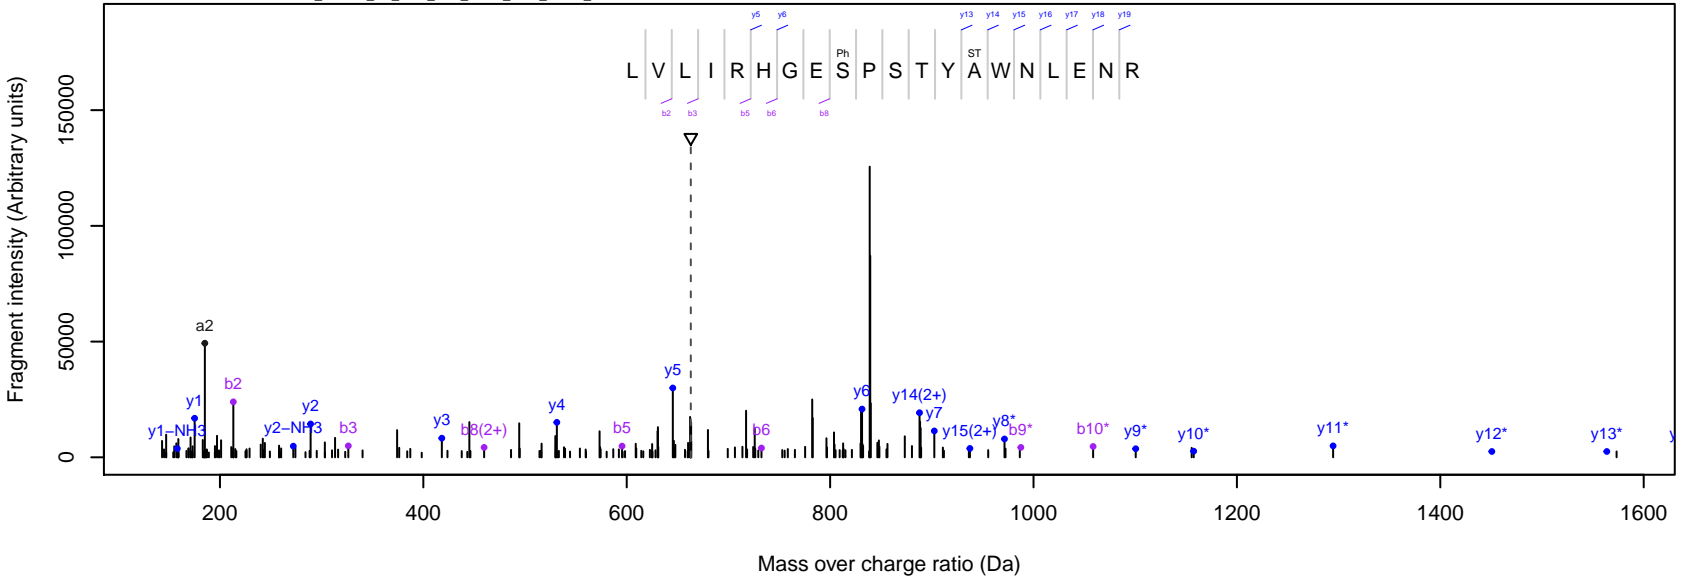

QAS(Phospho (STY))LDGLQLR-2+

Source : QE3\_201126\_FR\_TiOx\_hum\_tissue\_Urea\_RNAB\_N Scan : 31482

Andromeda score : 96.334

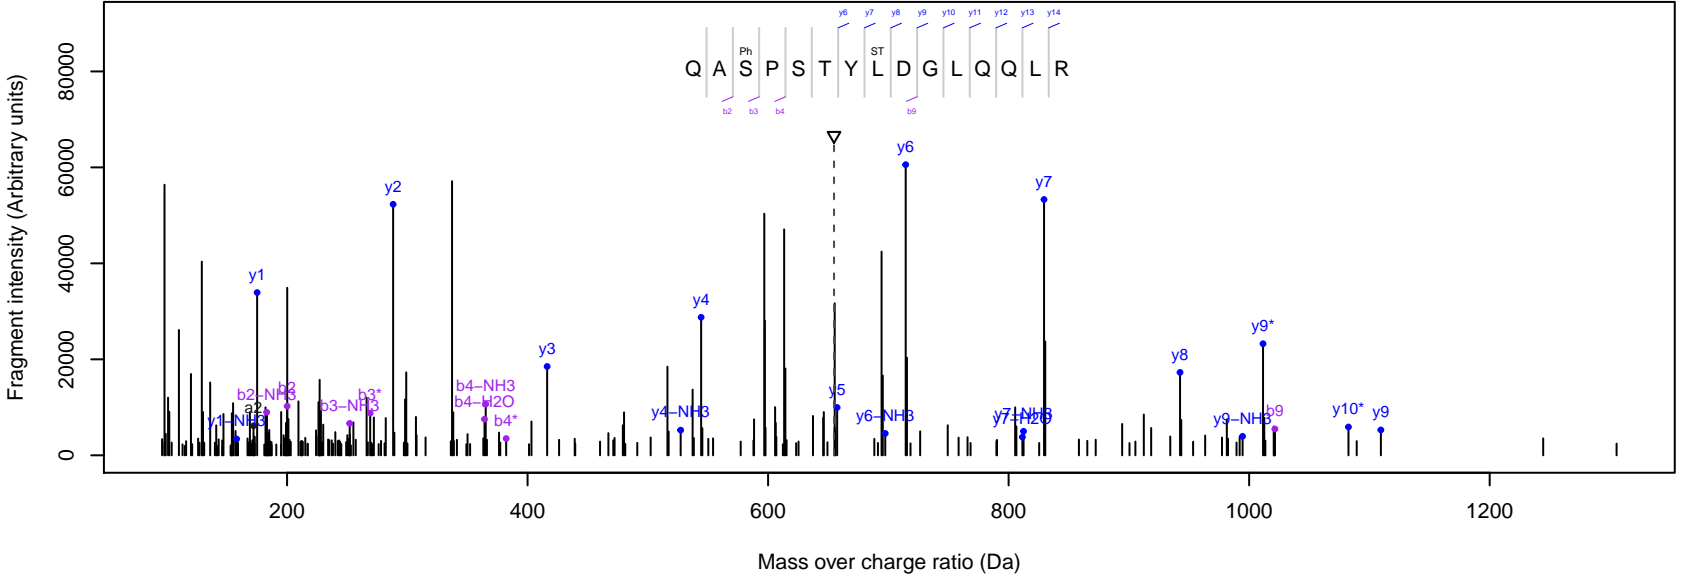

EVPPPPAES(Phospho (STY))EEEDDDGLPKK-3+

Source : QE3\_201126\_FR\_TiOx\_hum\_tissue\_Urea\_RNAB\_N Scan : 14133

Andromeda score : 96.303

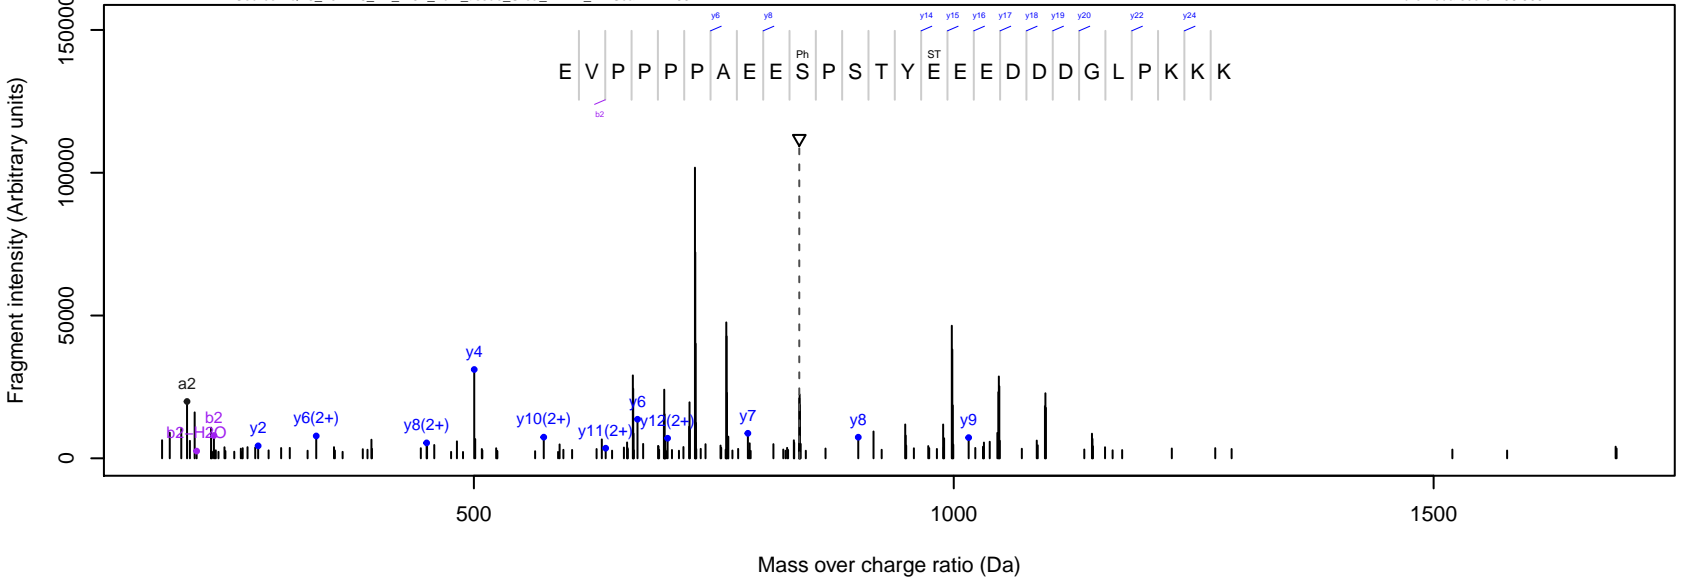

**KVS(Phospho (STY))IVSKPVL<sup>-</sup>YR-3+**

Source : QE3\_201126\_FR\_TiOx\_hum\_tissue\_Urea\_RNAB\_H Scan : 18204

Andromeda score : 96.247

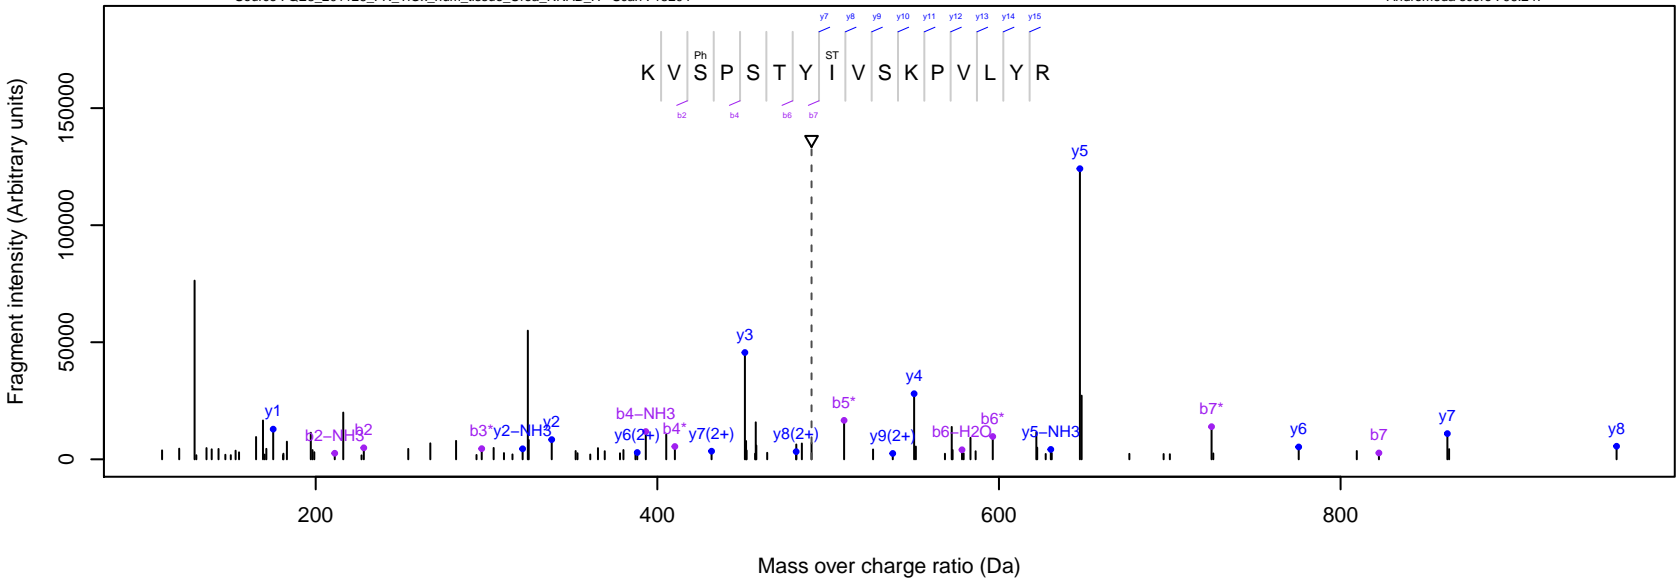

**HLLTDLPLPELPGGDL<sup>-</sup>S(Phospho (STY))PPDSPEK-3+**

Source : QE3\_201126\_FR\_TiOx\_hum\_tissue\_Urea\_RNAB\_N Scan : 56580

Andromeda score : 96.242

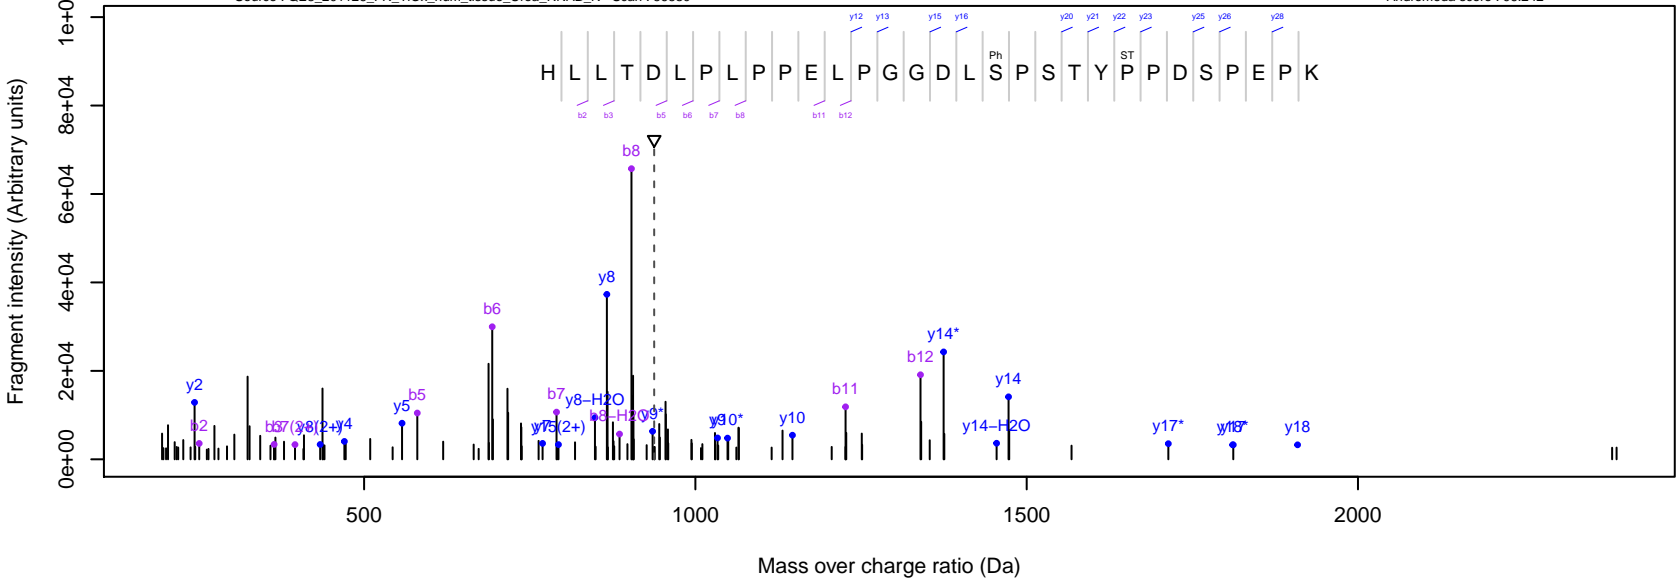

**NAKKEDS(Phospho (STY))DEEEDDD<sup>-</sup>S(Phospho (STY))EEDEEDED<sup>-</sup>EIEPAAMK-4+**

Source : QE3\_201126\_FR\_TiOx\_hum\_tissue\_Urea\_RNAB\_B Scan : 26035

Andromeda score : 96.221

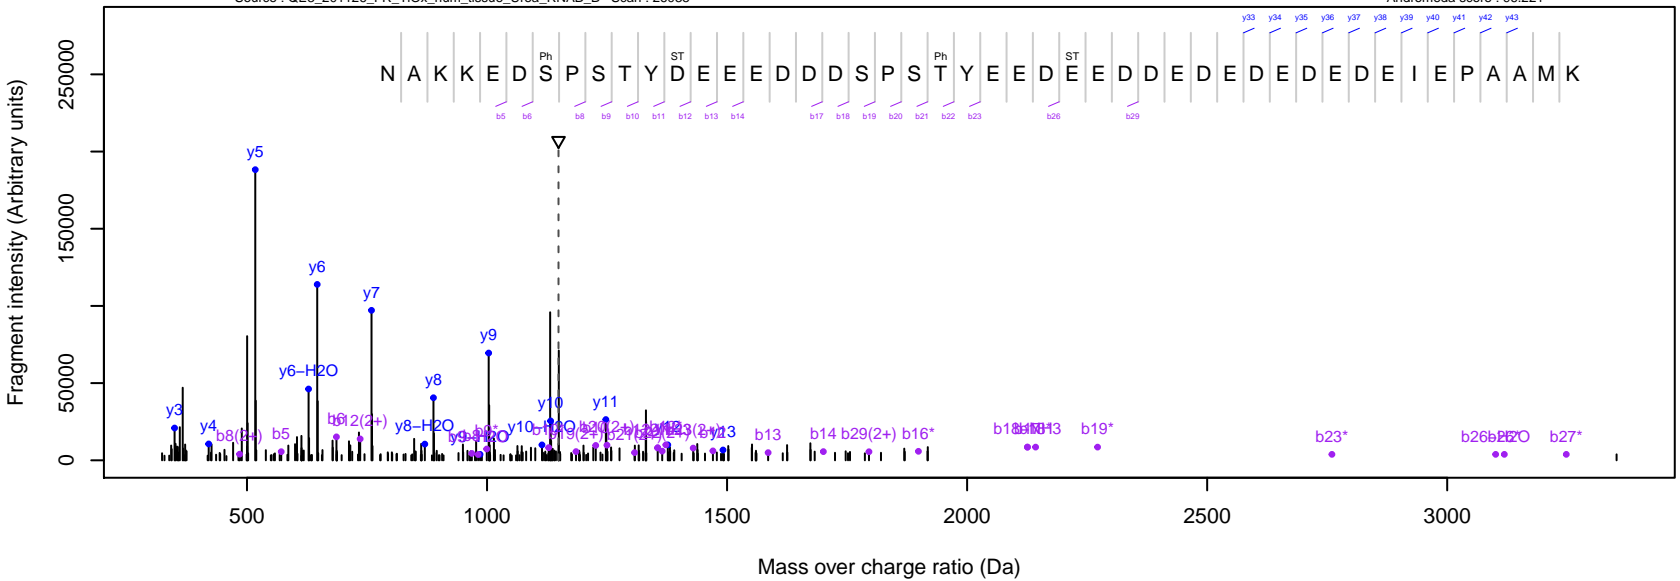

QRS(Phospho (STY))PSPAPAPAAAAAGPPTR-3+

Source : QE3\_201126\_FR\_TiOx\_hum\_tissue\_Urea\_RNAB\_N Scan : 13420

Andromeda score : 96.181

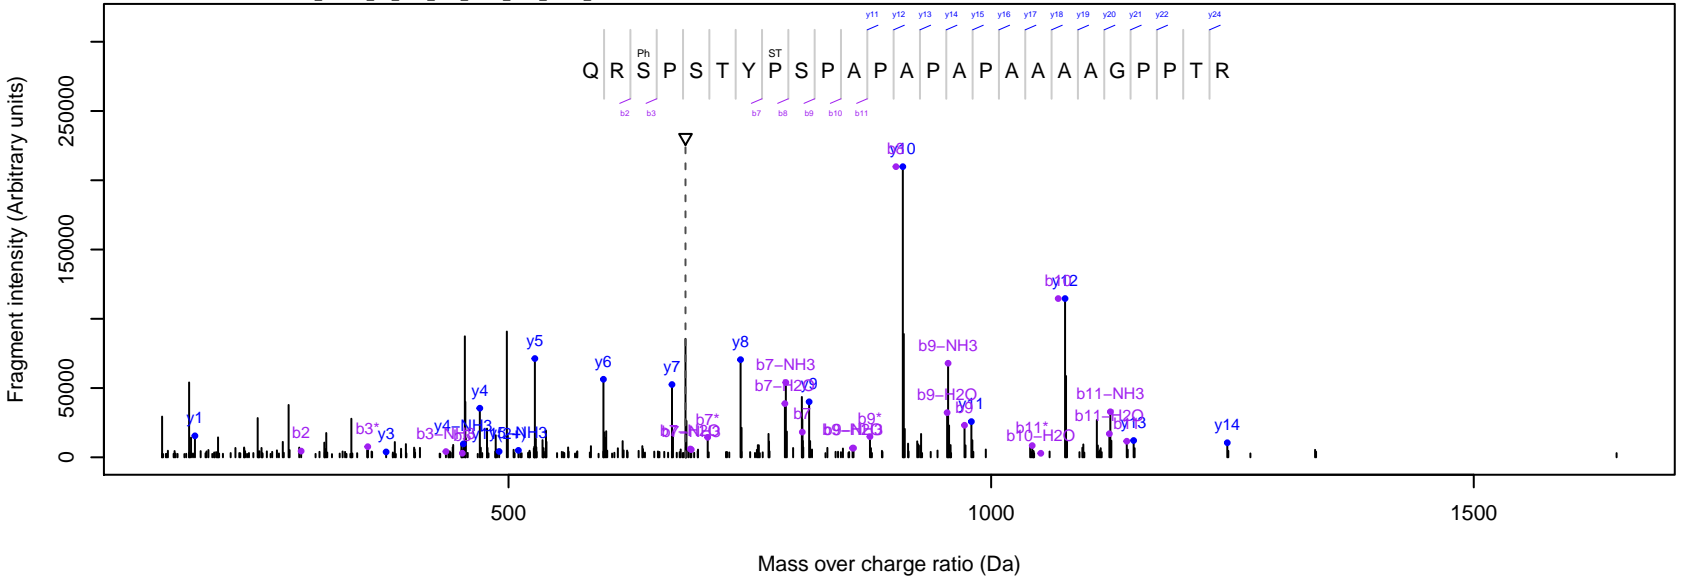

DMS(Phospho (STY))PLSETEMALGKDVT(Phospho (STY))PPPETEVLLIK-3+

Source : QE3\_201126\_FR\_TiOx\_hum\_tissue\_Urea\_RNAB\_N Scan : 60912

Andromeda score : 96.164

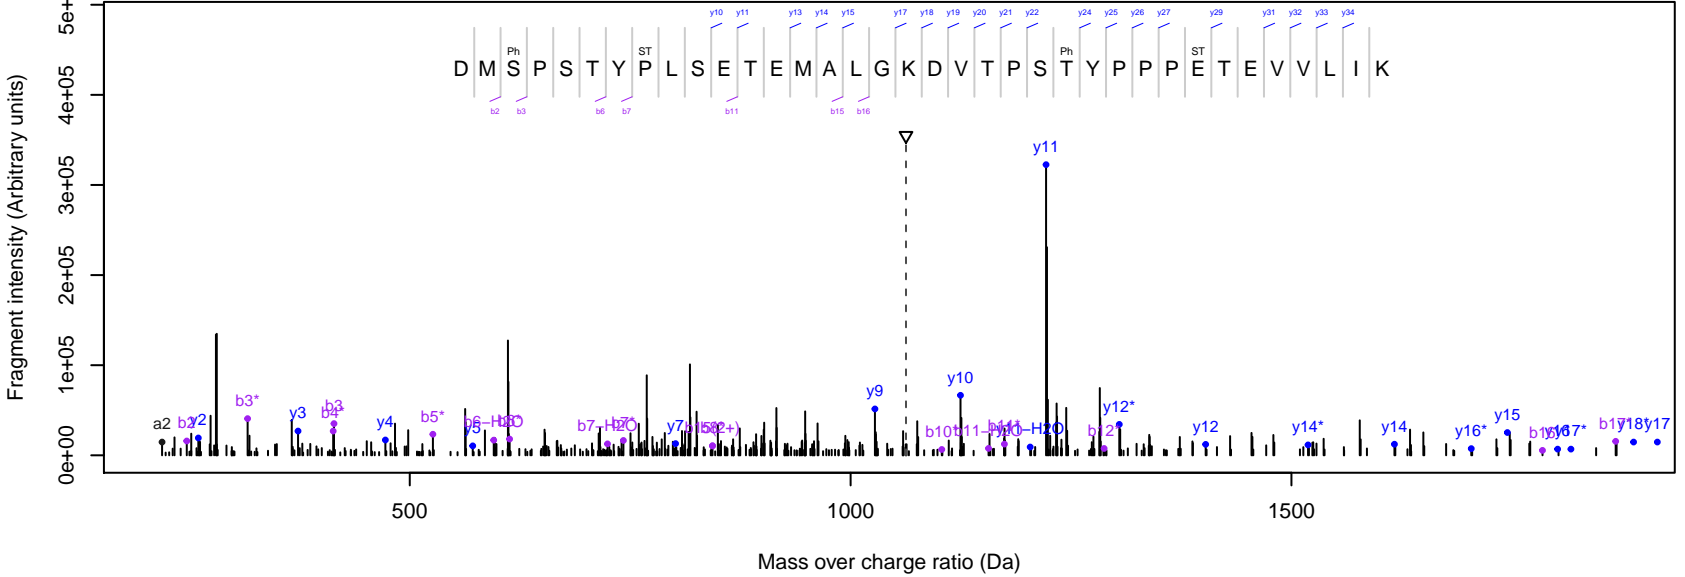

S(Phospho (STY))SPPVLQGPAPAGFSQHPGLLVPHTHAR-4+

Source : QE3\_201126\_FR\_TiOx\_hum\_tissue\_Urea\_RNAB\_H Scan : 31128

Andromeda score : 96.134

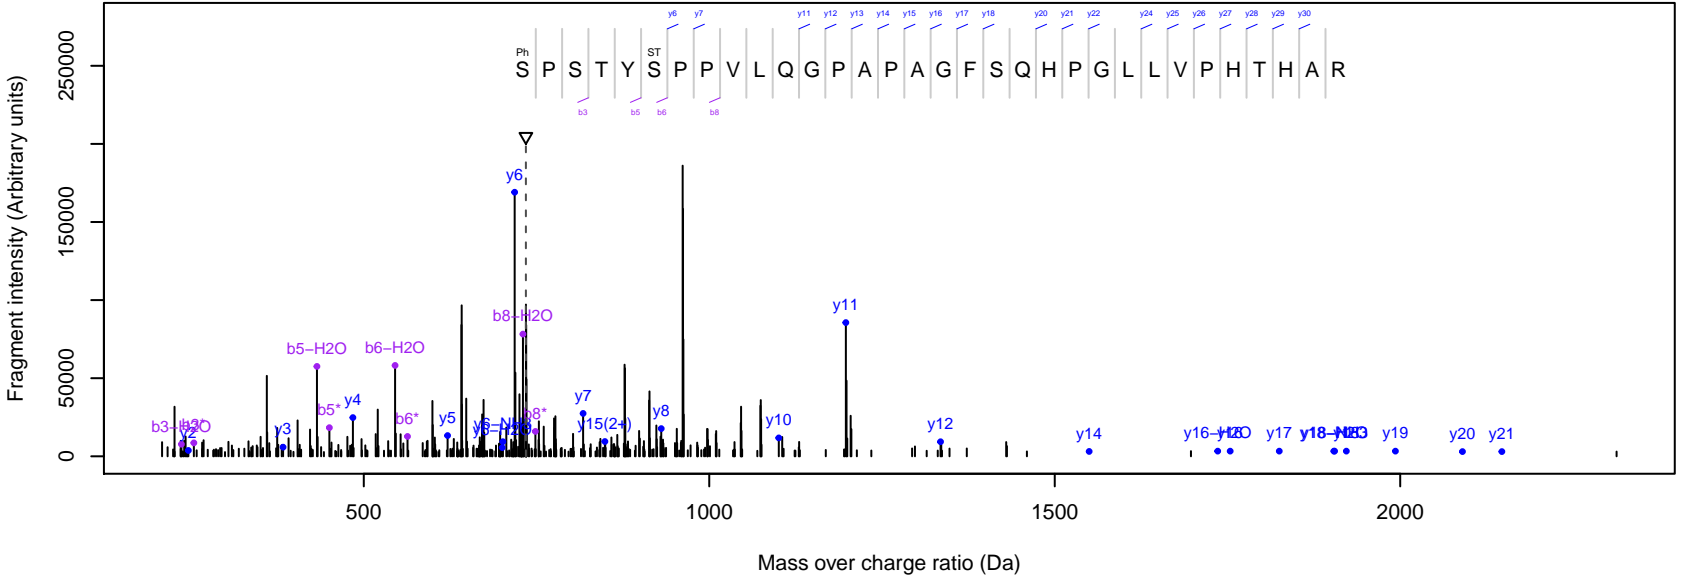

YLVDGTPNAGSEIS(Phospho (STY))S(Phospho (STY))EDELVEEK-3+

Source : QE3\_201126\_FR\_TIOx\_hum\_tissue\_Urea\_RNAB\_N Scan : 29345

Andromeda score : 96.134

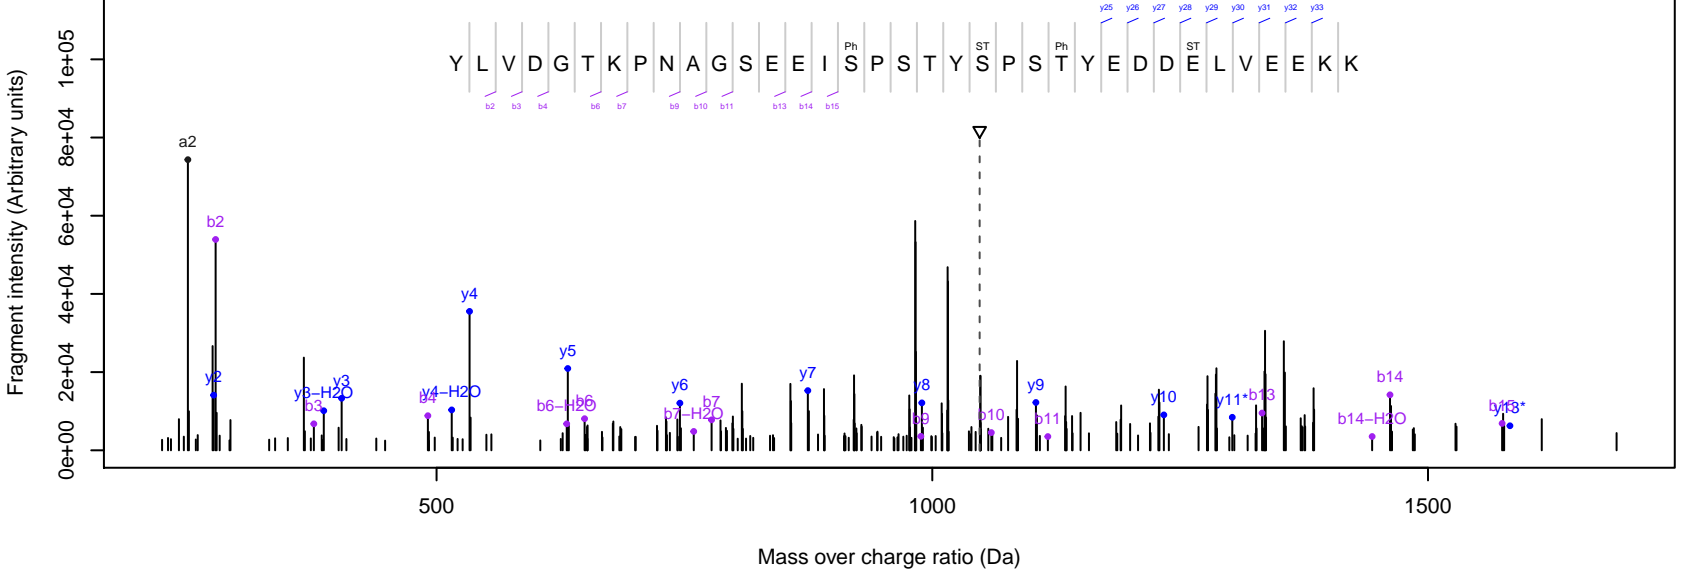

KGVS(Phospho (STY))GDWK-2+

Source : QE3\_201126\_FR\_TIOx\_hum\_tissue\_Urea\_RNAB\_H Scan : 8381

Andromeda score : 96.113

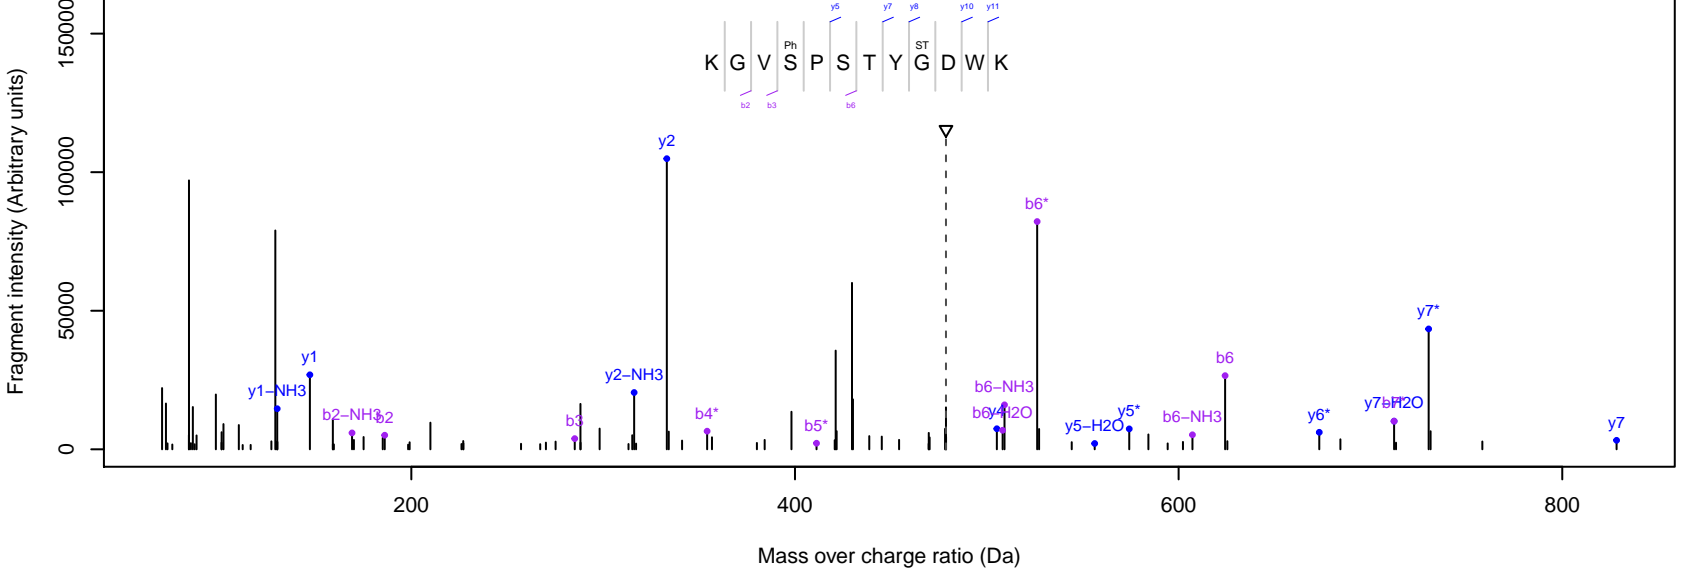

DWEDDS(Phospho (STY))DEDMNSFDR-3+

Source : QE3\_201126\_FR\_TIOx\_hum\_tissue\_Urea\_RNAB\_B Scan : 40224

Andromeda score : 96.096

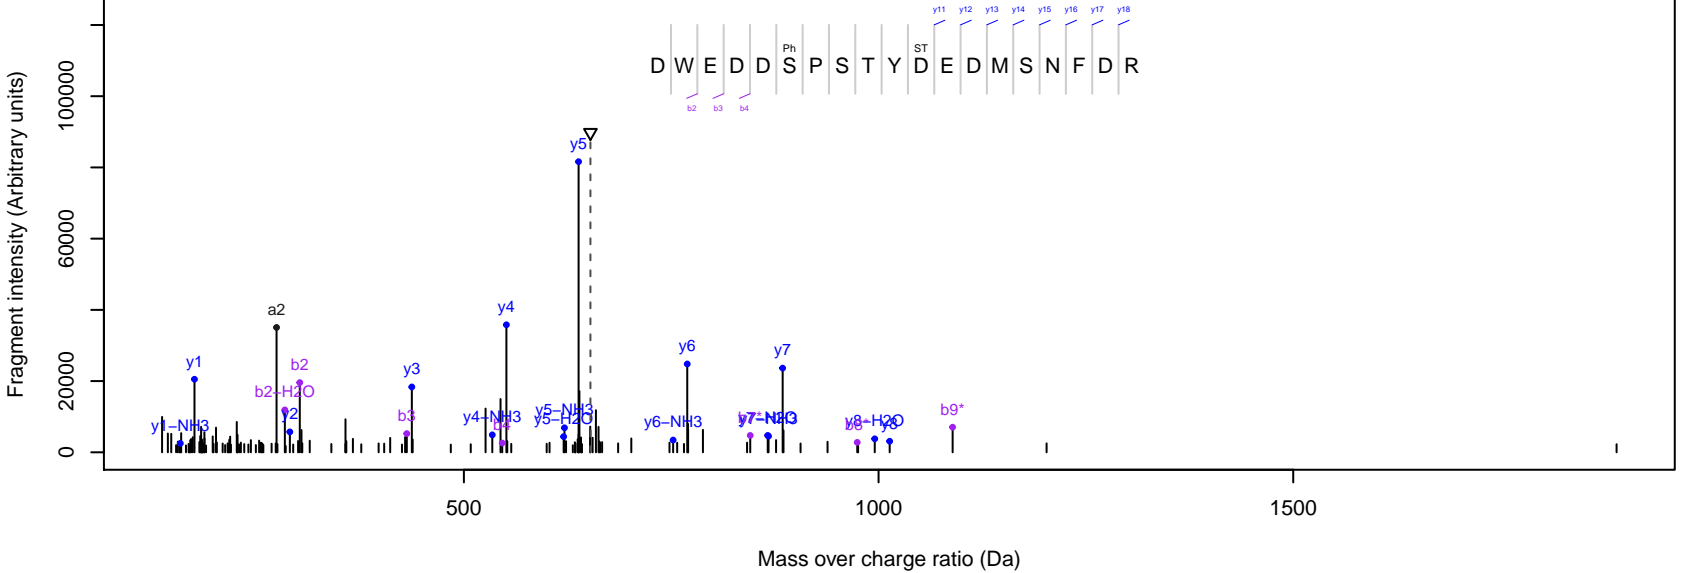

DVAGATWNGS(Phospho (STY))GEEEEEDGPAVLVEQQTDSAM(Oxidation (M))EPTGPTQER-4+

Source : QE3\_201126\_FR\_TIOx\_hum\_tissue\_Urea\_RNAB\_N Scan : 51678

Andromeda score : 96.064

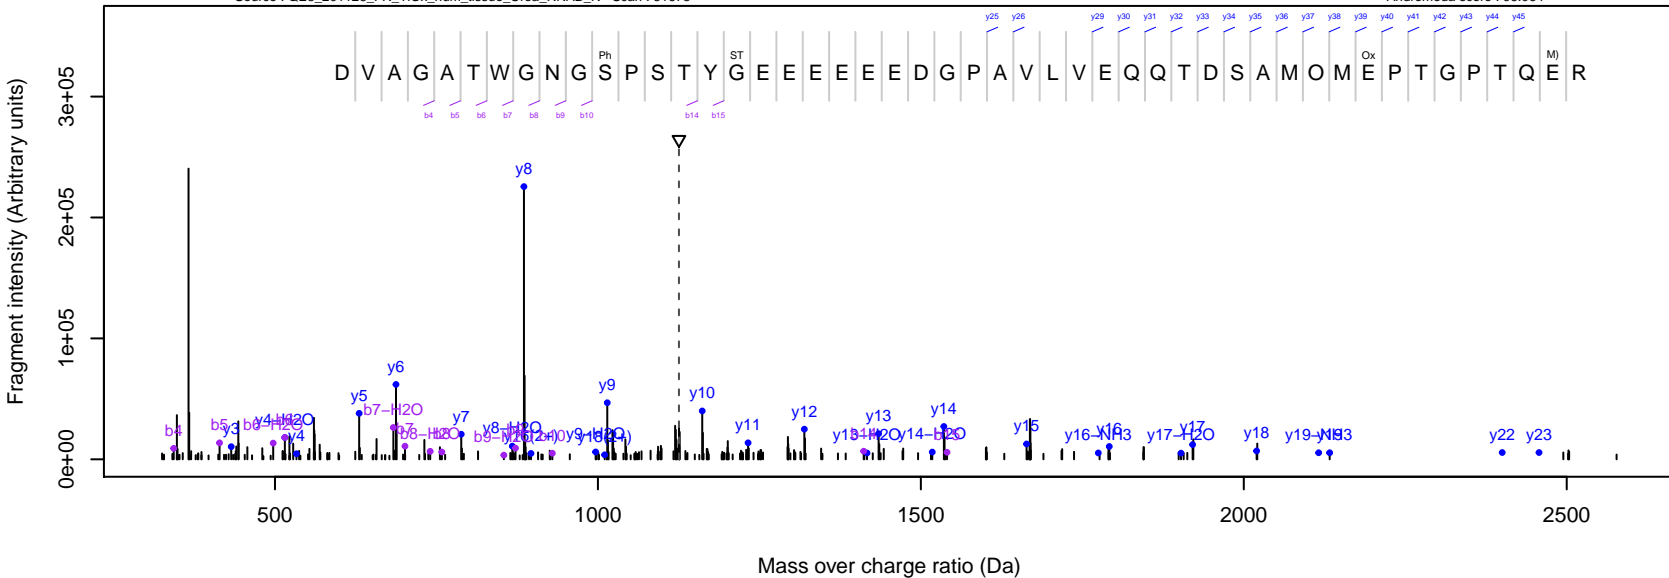

EM(Oxidation (M))EKS(Phospho (STY))FDEQNVPK-2+

Source : QE3\_201126\_FR\_TIOx\_hum\_tissue\_Urea\_RNAB\_H Scan : 11789

Andromeda score : 96.059

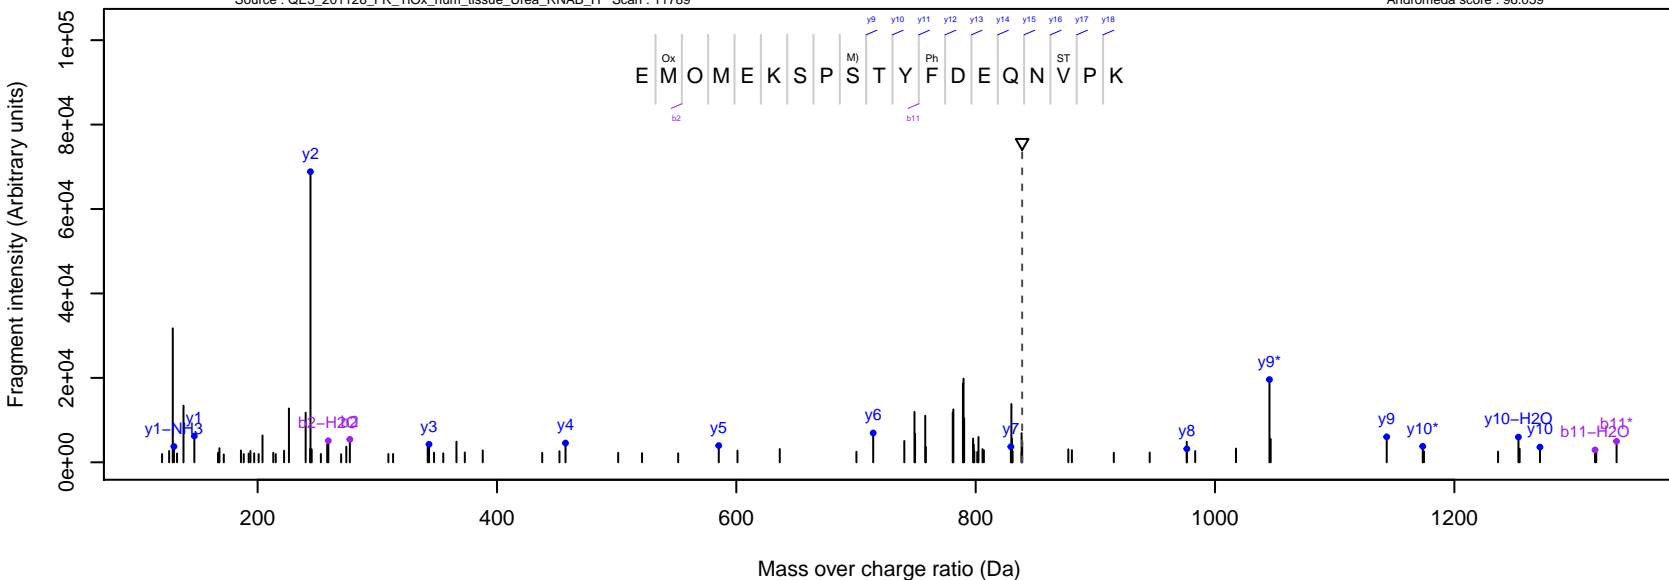

HHS(Phospho (STY))VEIKIEK-3+

Source : QE3\_201126\_FR\_TIOx\_hum\_tissue\_Urea\_RNAB\_N Scan : 7942

Andromeda score : 96.059

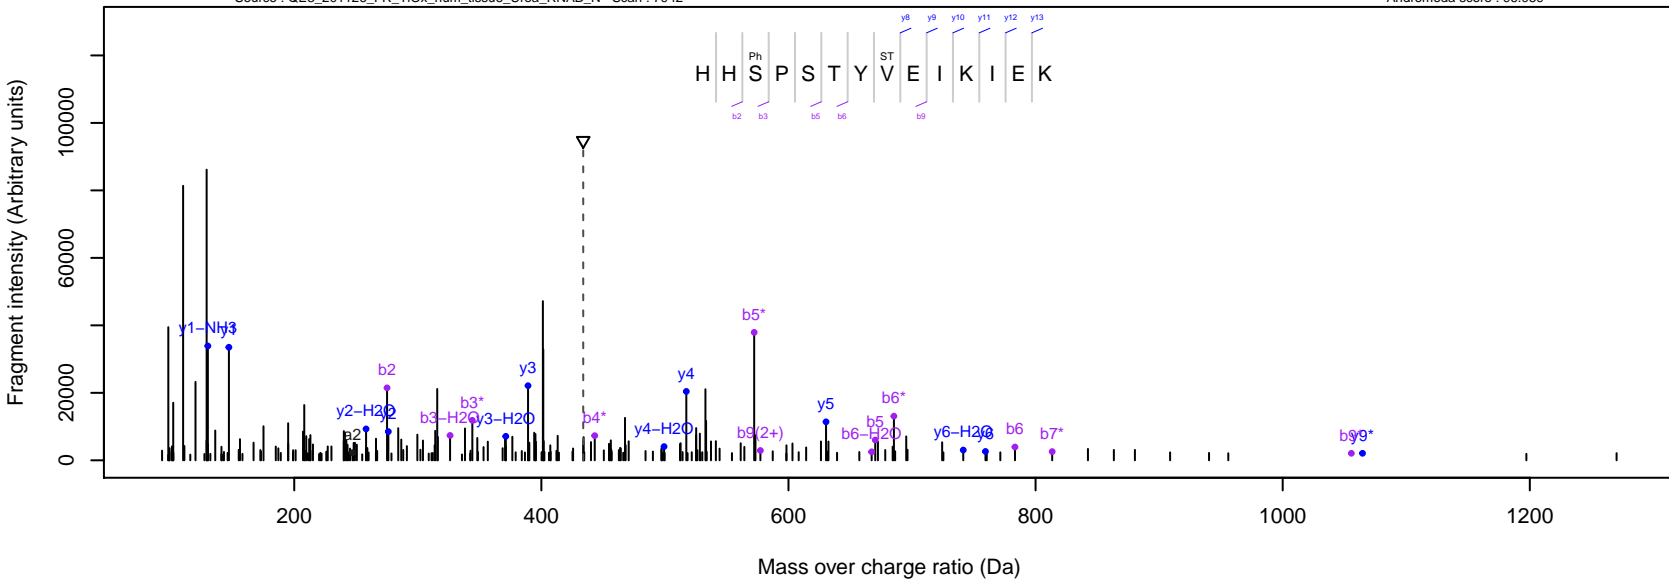

**S(Phospho (STY))LQSLGPK-2+**

Source : QE3\_201126\_FR\_TiOx\_hum\_tissue\_Urea\_RNAB\_N Scan : 33615

Andromeda score : 96.059

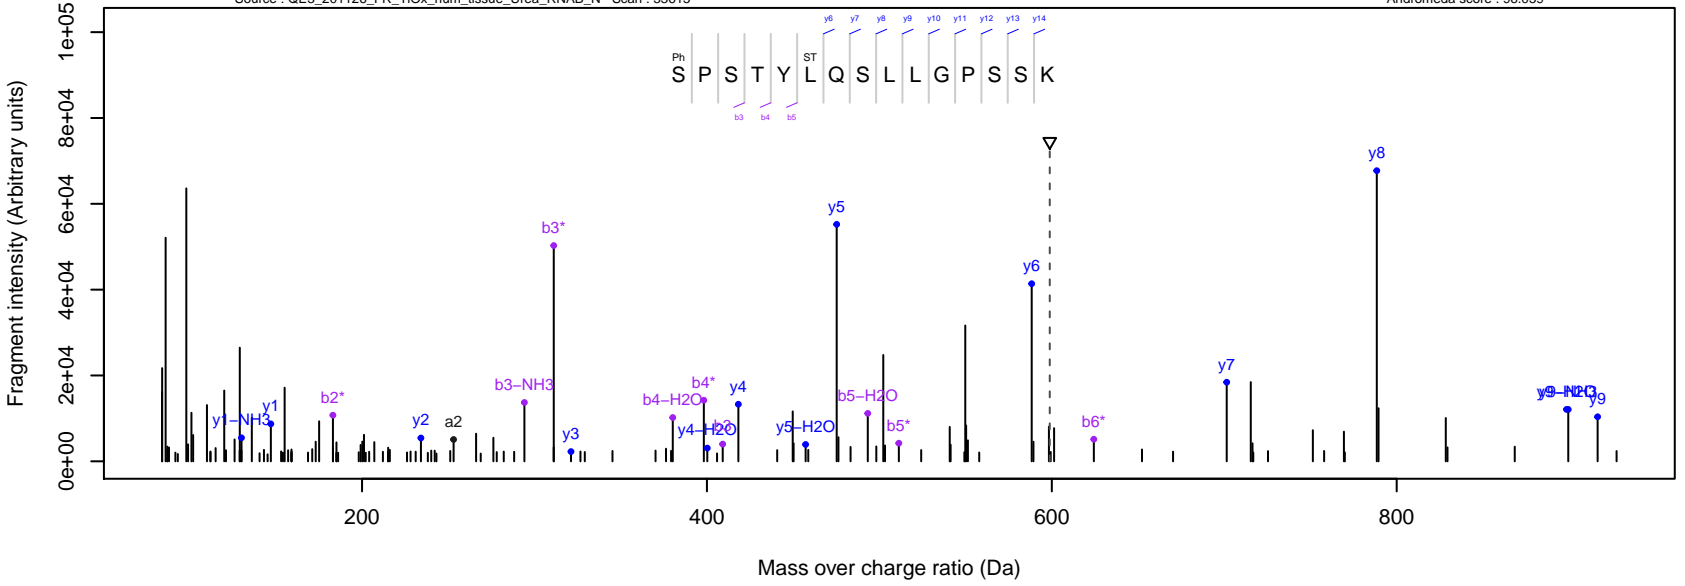

**KLS(Phospho (STY))DFGQETSYIEDNCNQNGAISLIFSLKEEVGALAK-4+**

Source : QE3\_201126\_FR\_TiOx\_hum\_tissue\_Urea\_RNAB\_N Scan : 61837

Andromeda score : 96.055

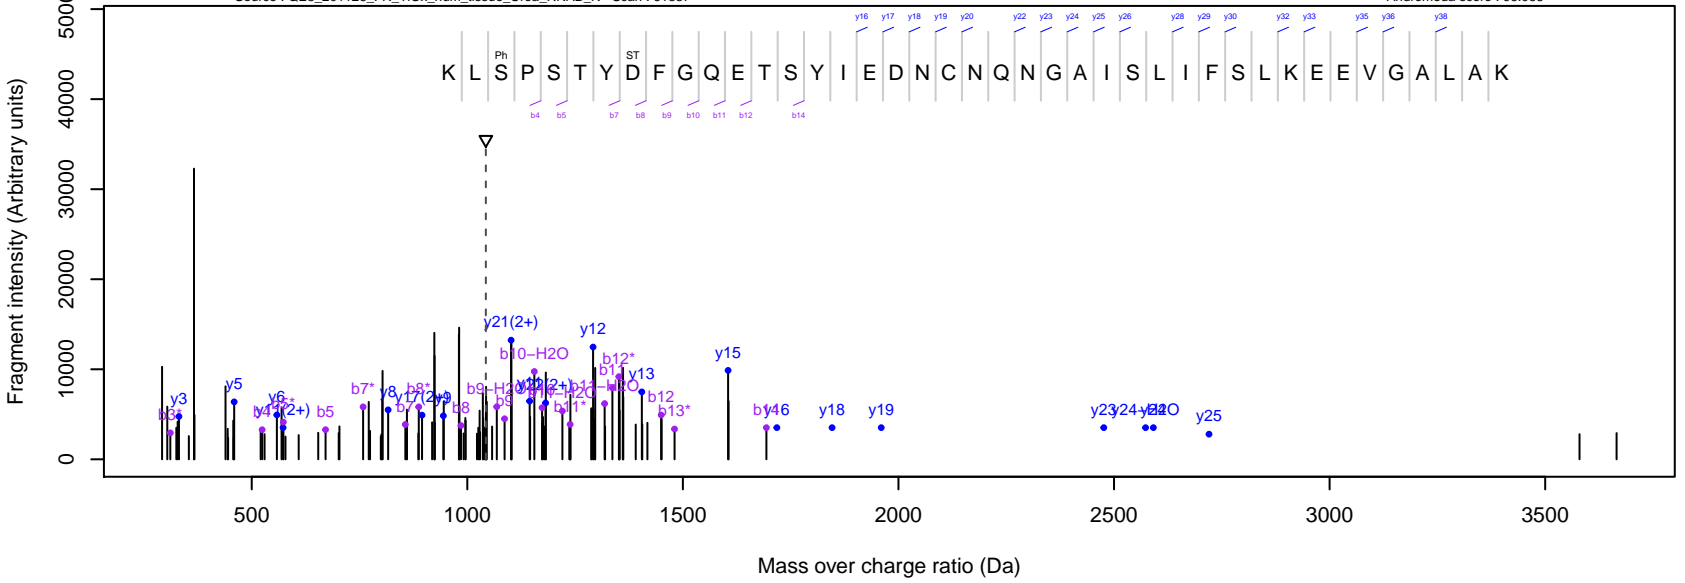

**AFWMAIGGDRDEIEGLS(Phospho (STY))S(Phospho (STY))DEEH-3+**

Source : QE3\_201126\_FR\_TiOx\_hum\_tissue\_Urea\_RNAB\_H Scan : 57385

Andromeda score : 96.052

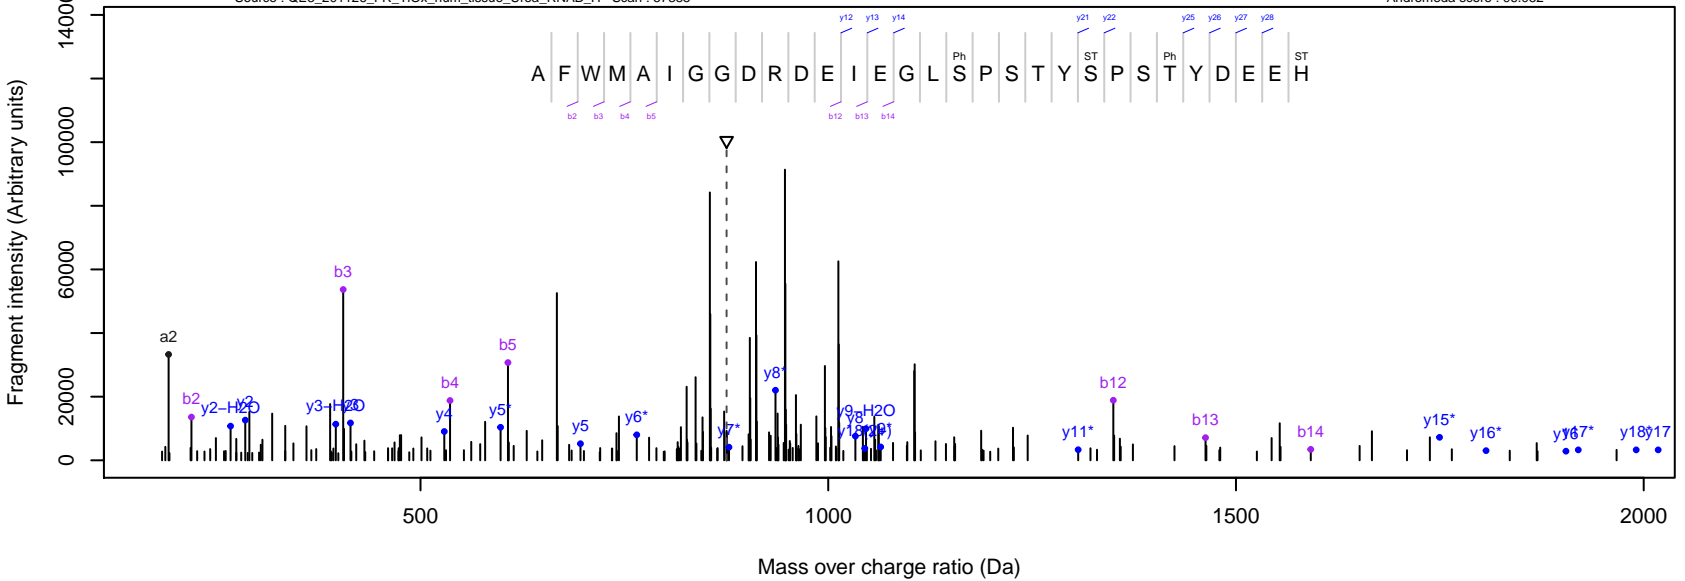

DQCCS(Phospho (STY))GKGDMSDEDDENEFFDAPEIITMPENLGHKR-4+

Source : QE3\_201126\_FR\_TiOx\_hum\_tissue\_Urea\_RNAB\_H Scan : 49391

Andromeda score : 96.042

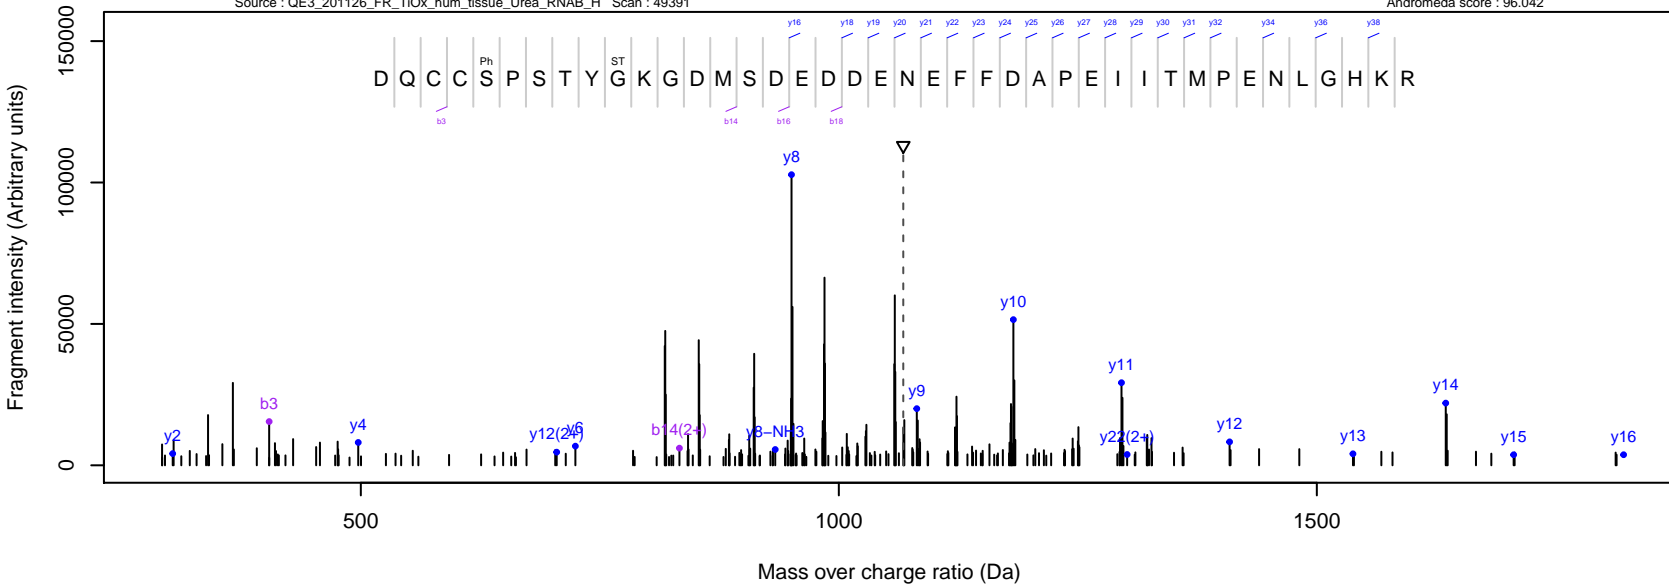

TQS(Phospho (STY))GSSLASLAATTEPESVHSGGTPSQR-3+

Source : QE3\_201126\_FR\_TiOx\_hum\_tissue\_Urea\_RNAB\_H Scan : 24671

Andromeda score : 96.024

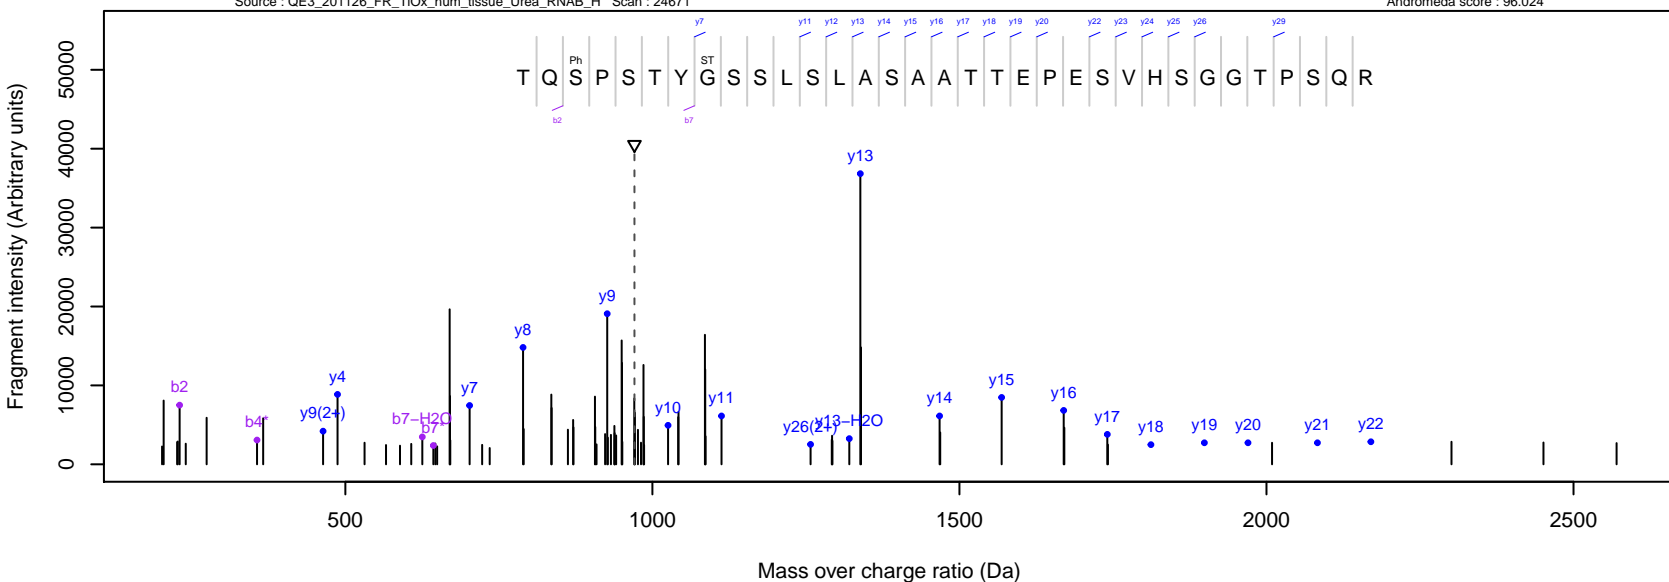

YGLLANTEPTM(Oxidation (M))AS(Phospho (STY))LDS(Phospho (STY))DEETVFESR-3+

Source : QE3\_201126\_FR\_TiOx\_hum\_tissue\_Urea\_RNAB\_B Scan : 60475

Andromeda score : 96.024

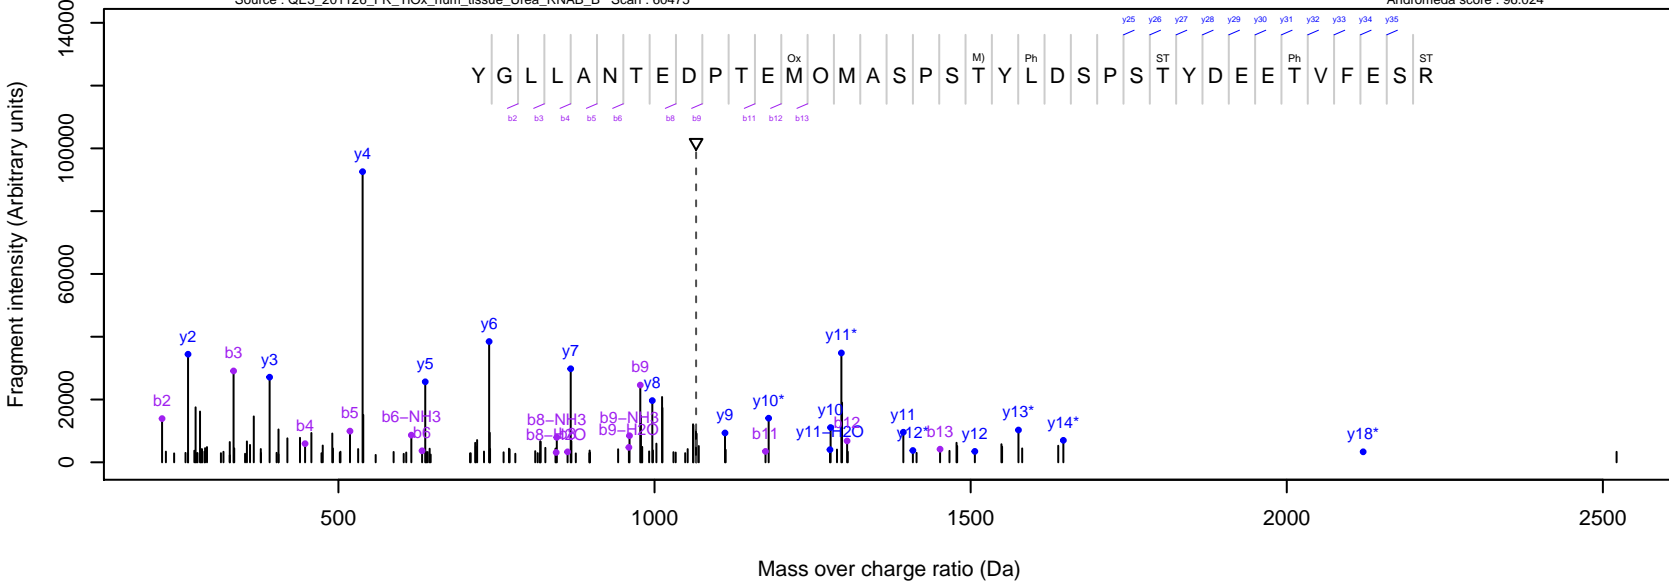



KQS(Phospho (STY))PVPALPIVVQLMEMGFSR-3+

Source : QE3\_201126\_FR\_TiOx\_hum\_tissue\_Urea\_RNAB\_H Scan : 62474

Andromeda score : 96.016

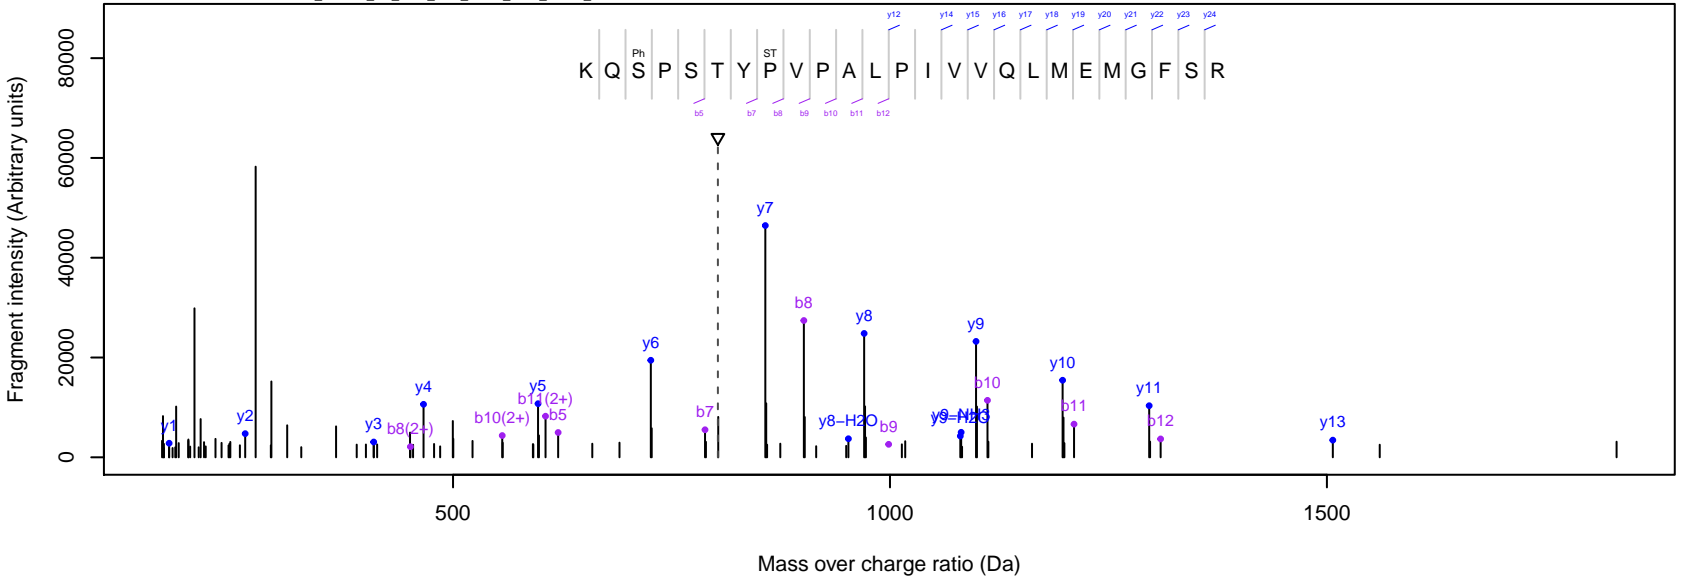

S(Phospho (STY))SPKSNDSDLQEYELVLR-3+

Source : QE3\_201126\_FR\_TiOx\_hum\_tissue\_Urea\_RNAB\_B Scan : 21472

Andromeda score : 96.016

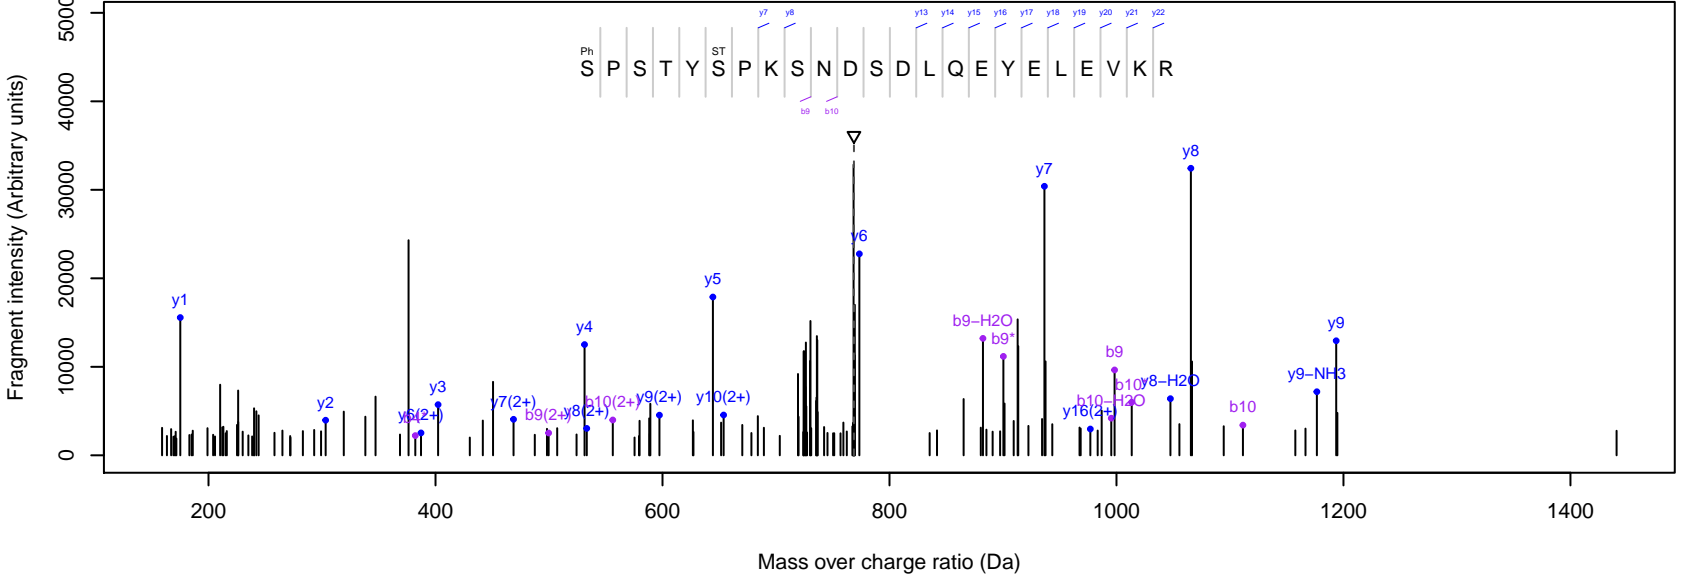

RFS(Phospho (STY))VSTLR-2+

Source : QE3\_201126\_FR\_TiOx\_hum\_tissue\_Urea\_RNAB\_H Scan : 18587

Andromeda score : 96.015

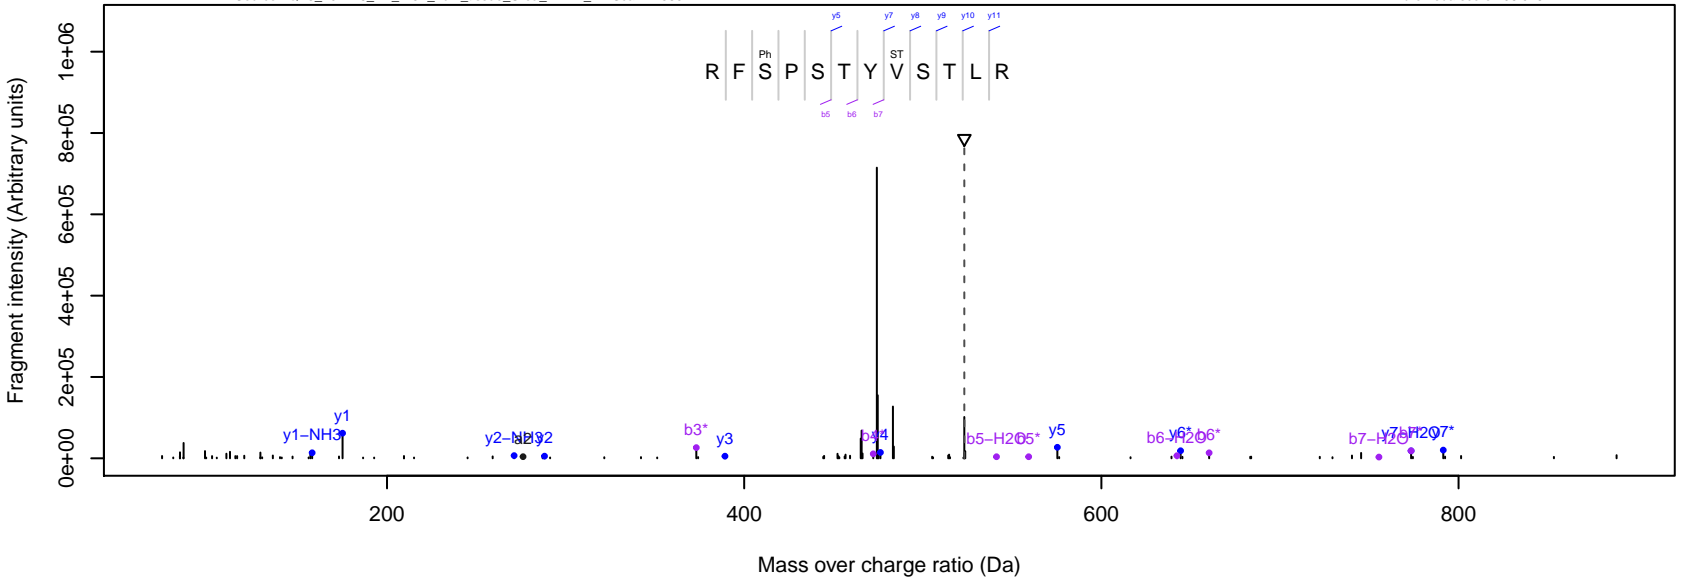

SES(Phospho (STY))MPVQLNK-2+

Source : QE3\_201126\_FR\_TiOx\_hum\_tissue\_Urea\_RNAB\_B Scan : 21544

Andromeda score : 96.009

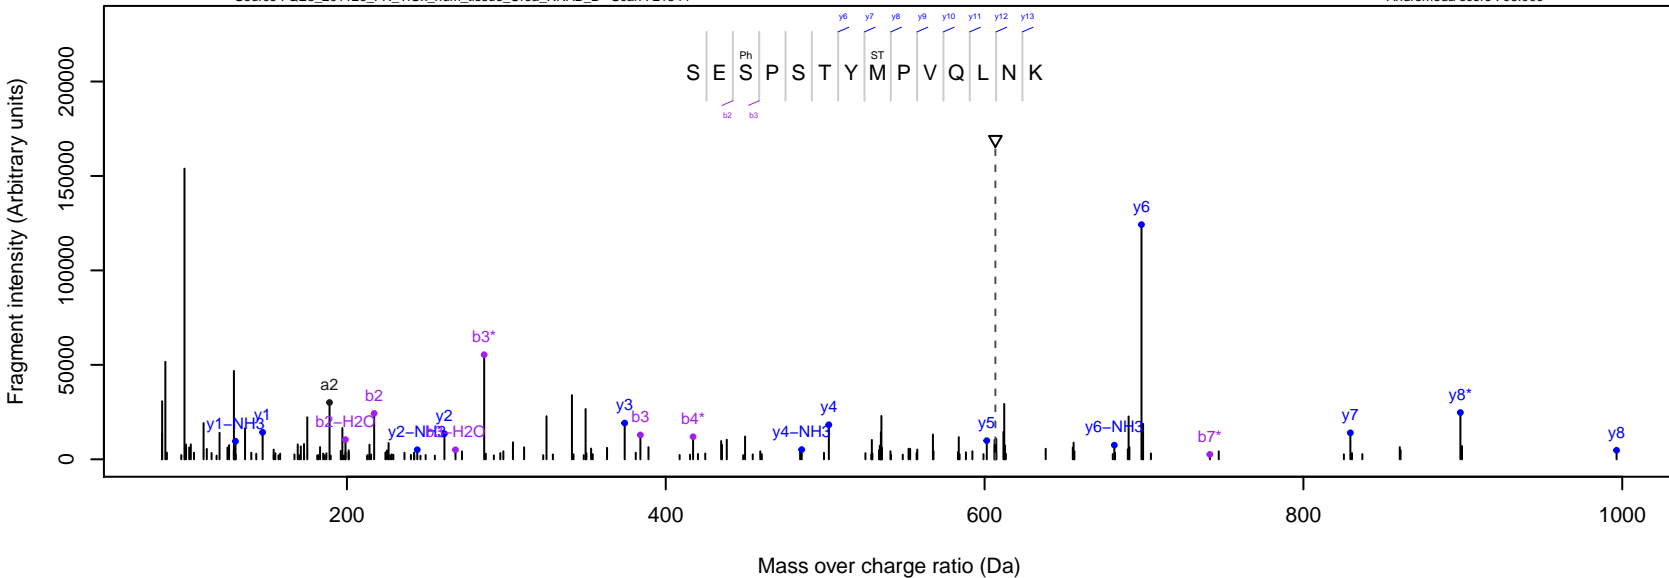

ELVSSKVS(Phospho (STY))GAQEM(Oxidation (M))VSSAK-3+

Source : QE3\_201126\_FR\_TiOx\_hum\_tissue\_Urea\_RNAB\_N Scan : 15095

Andromeda score : 95.996

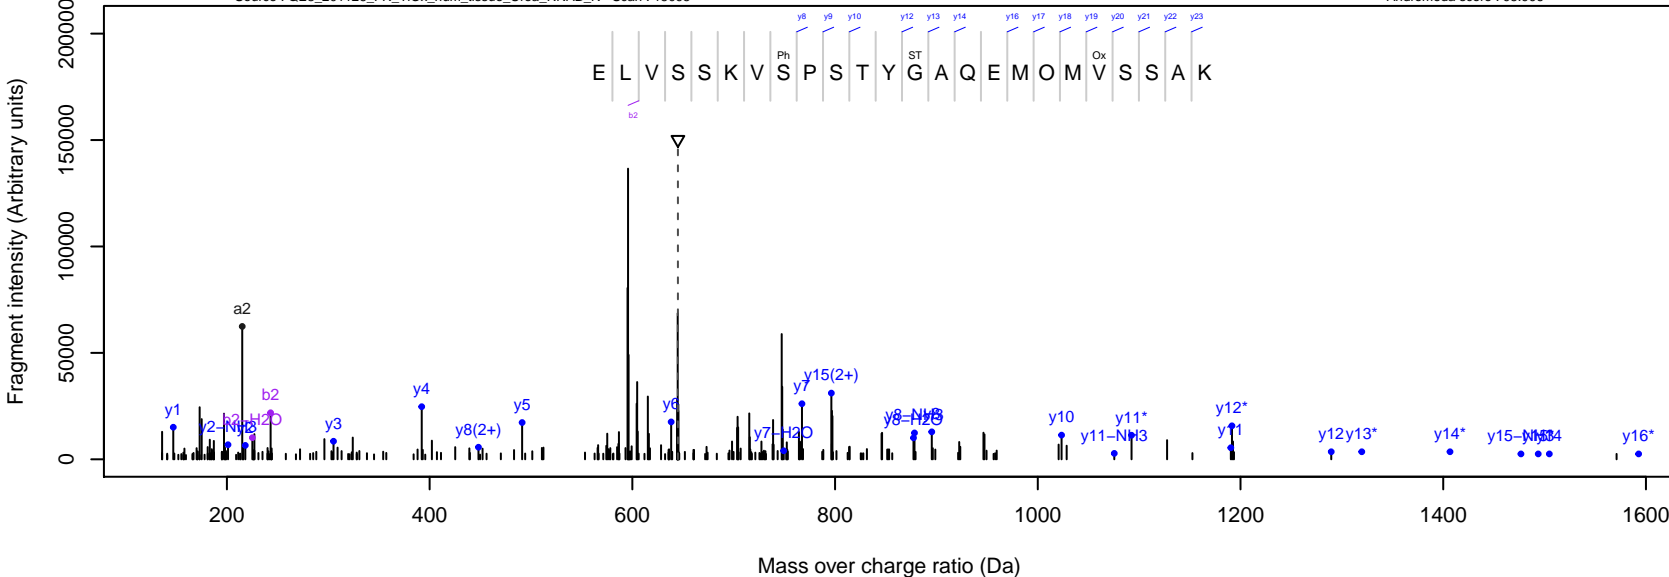

ATLPS(Phospho (STY))PDKLPGFK-2+

Source : QE3\_201126\_FR\_TiOx\_hum\_tissue\_Urea\_RNAB\_B Scan : 33134

Andromeda score : 95.981

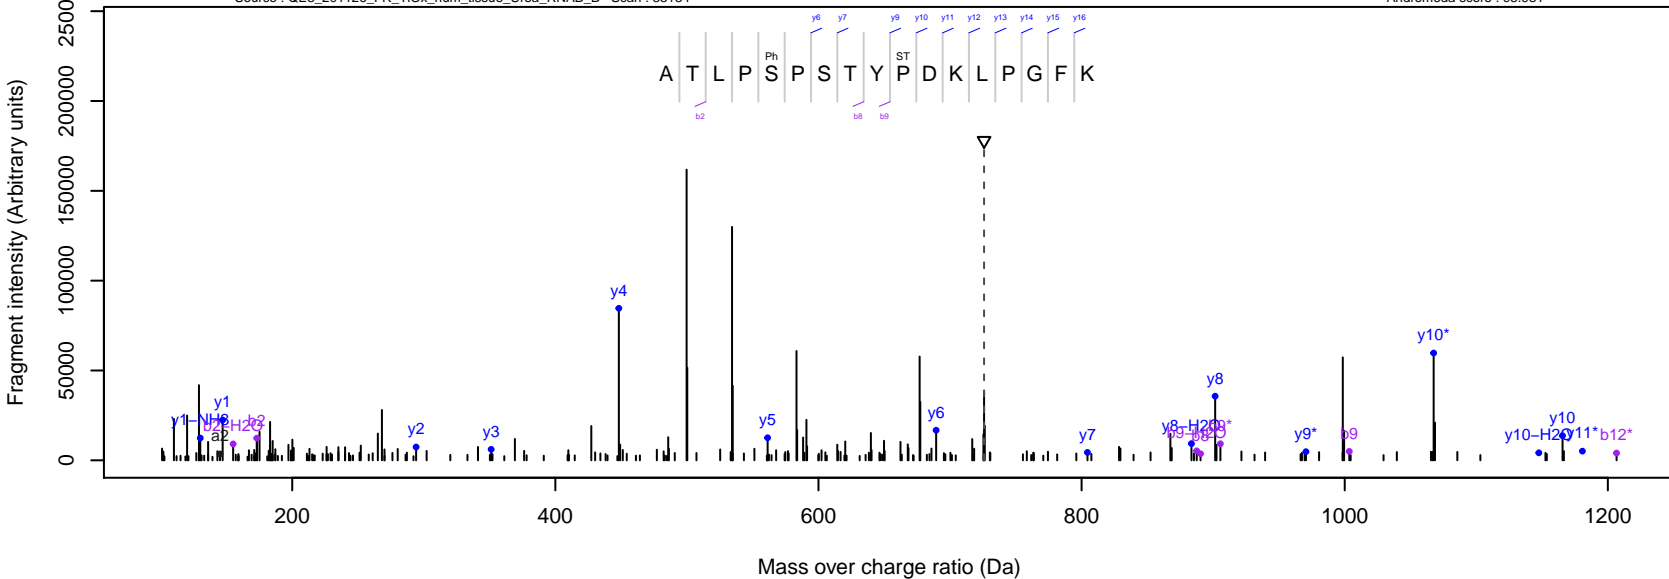

S(Phospho (STY))IQFVDCPTGFK-2+

Source : QE3\_201126\_FR\_TiOx\_hum\_tissue\_Urea\_RNAB\_N Scan : 56179

Andromeda score : 95.981

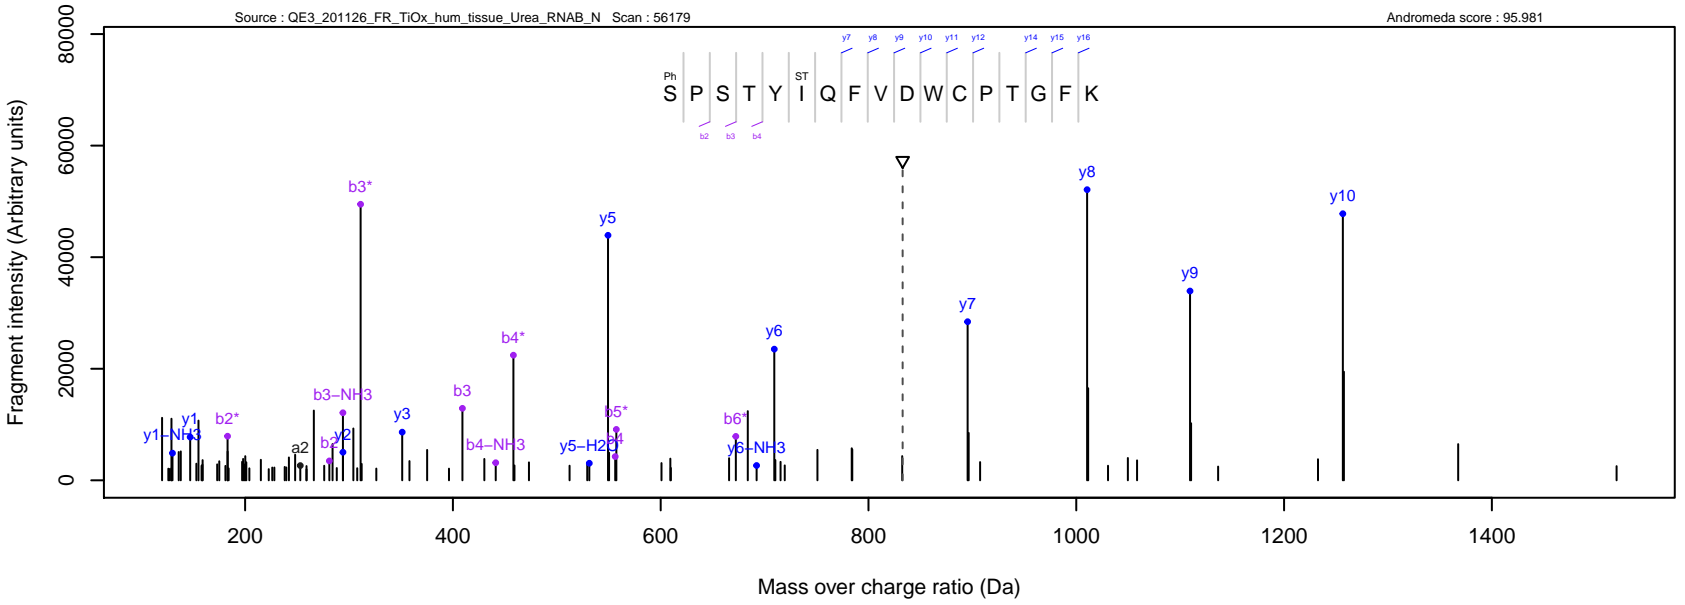

QGSPDQVS(Phospho (STY))PVSEMTSTSLYQDKQEGK-3+

Source : QE3\_201126\_FR\_TiOx\_hum\_tissue\_Urea\_RNAB\_H Scan : 31321

Andromeda score : 95.963

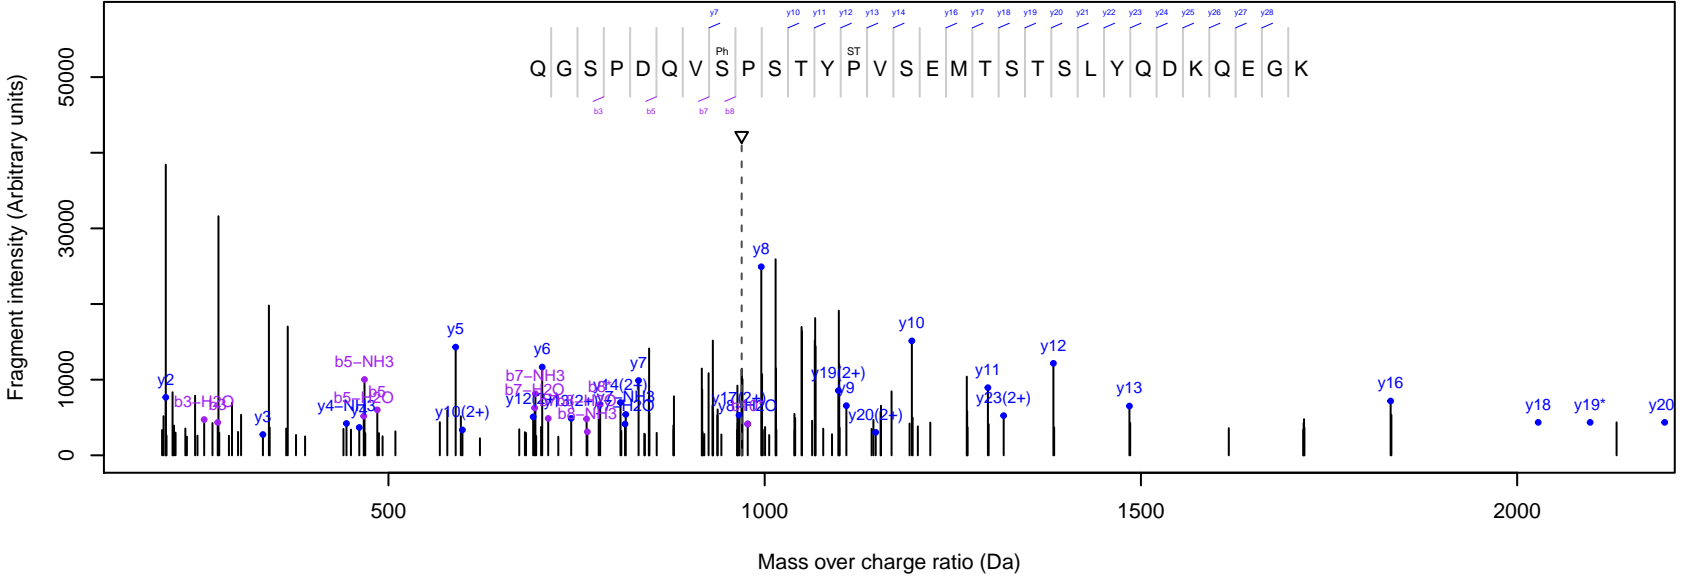

KGS(Phospho (STY))DDDGGDS(Phospho (STY))PVQDIDTPEVDLYQLQVNTLR-3+

Source : QE3\_201126\_FR\_TiOx\_hum\_tissue\_Urea\_RNAB\_N Scan : 58951

Andromeda score : 95.926

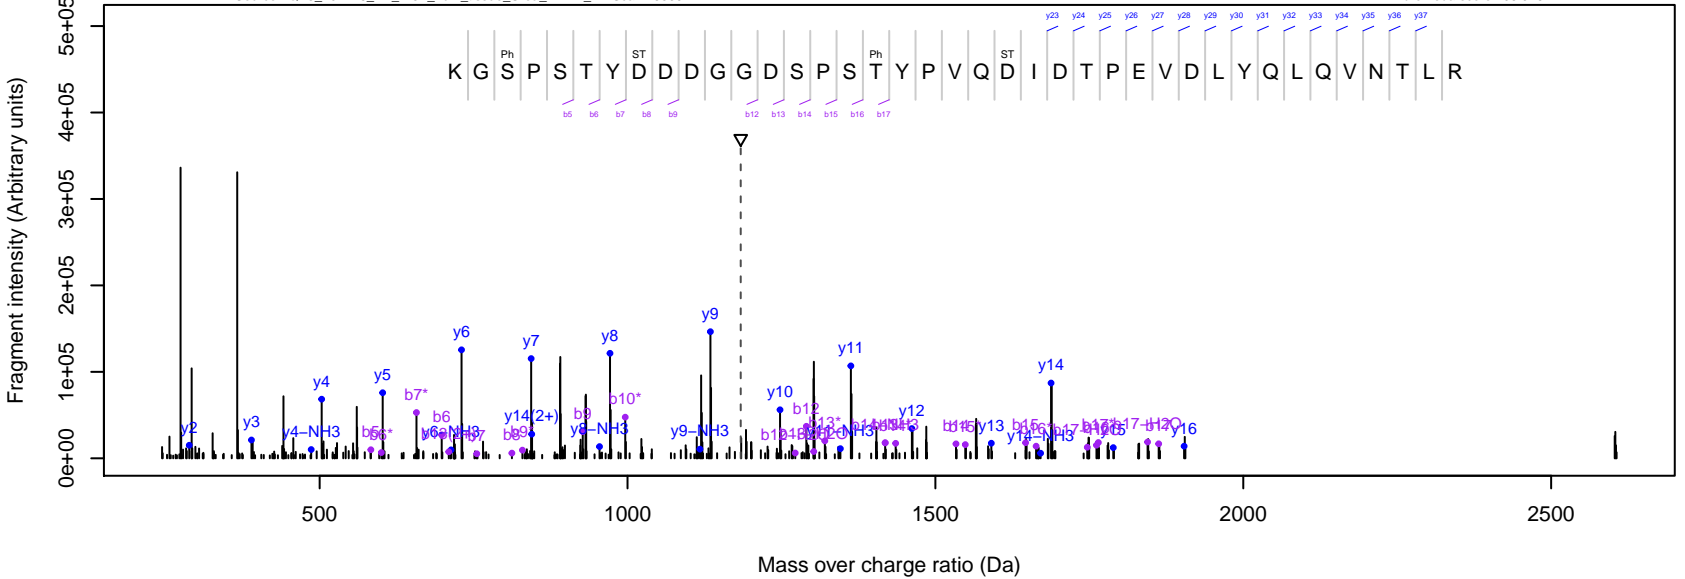

GKGGVTGS(Phospho (STY))PEASISGS(Phospho (STY))KGDLK-3+

Source : QE3\_201126\_FR\_TiOx\_hum\_tissue\_Urea\_RNAB\_H Scan : 14031

Andromeda score : 95.878

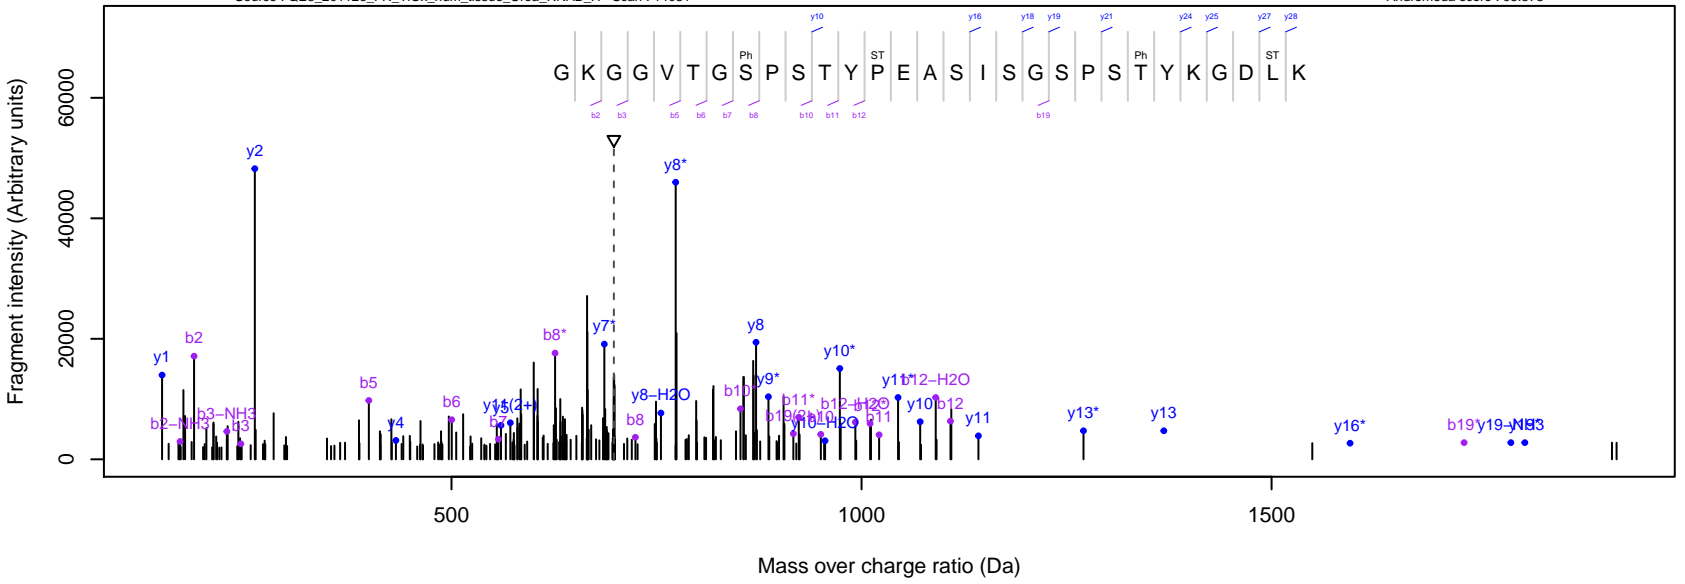

S(Phospho (STY))PGSGSQSSGWHEVEPGMPSPPTTLK-3+

Source : QE3\_201126\_FR\_TiOx\_hum\_tissue\_Urea\_RNAB\_N Scan : 32353

Andromeda score : 95.878

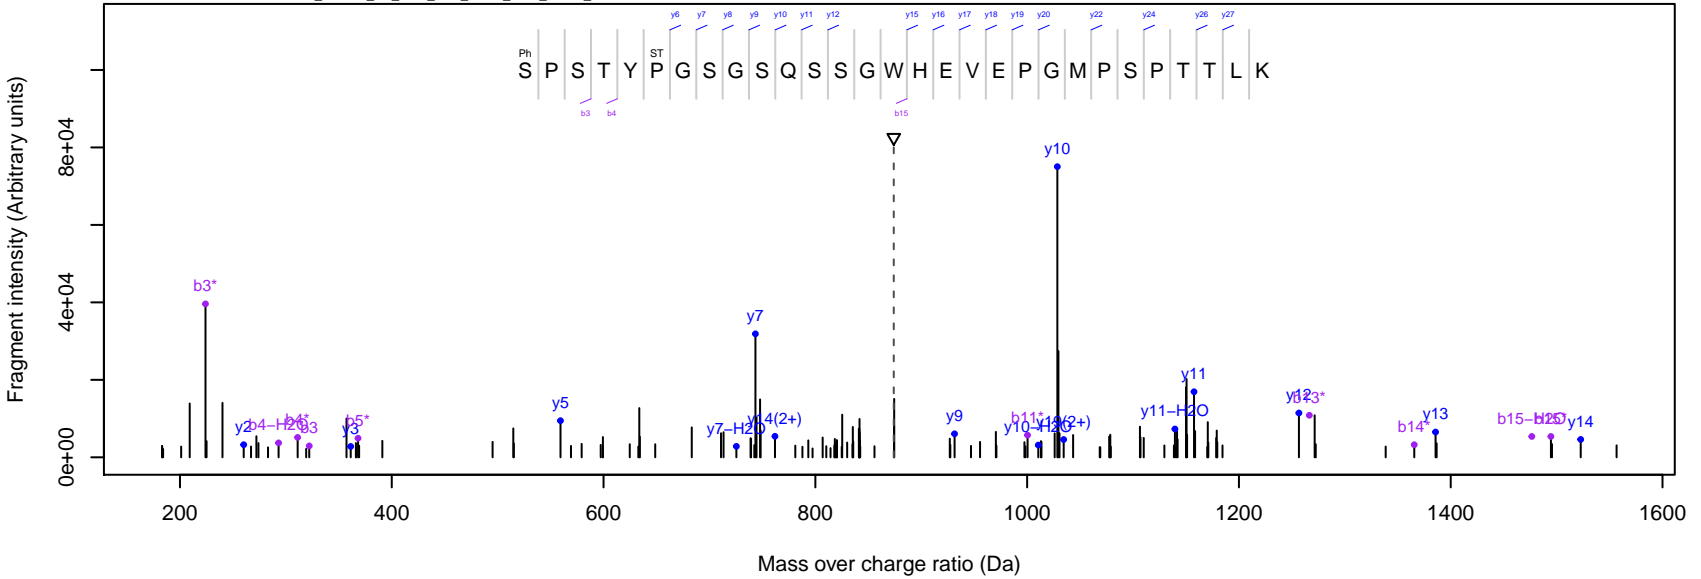

S(Phospho (STY))RS(Phospho (STY))PT(Phospho (STY))PPSSAGLGSNSAPPIDSR-3+

Source : QE3\_201126\_FR\_TiOx\_hum\_tissue\_Urea\_RNAB\_H Scan : 35024

Andromeda score : 95.878

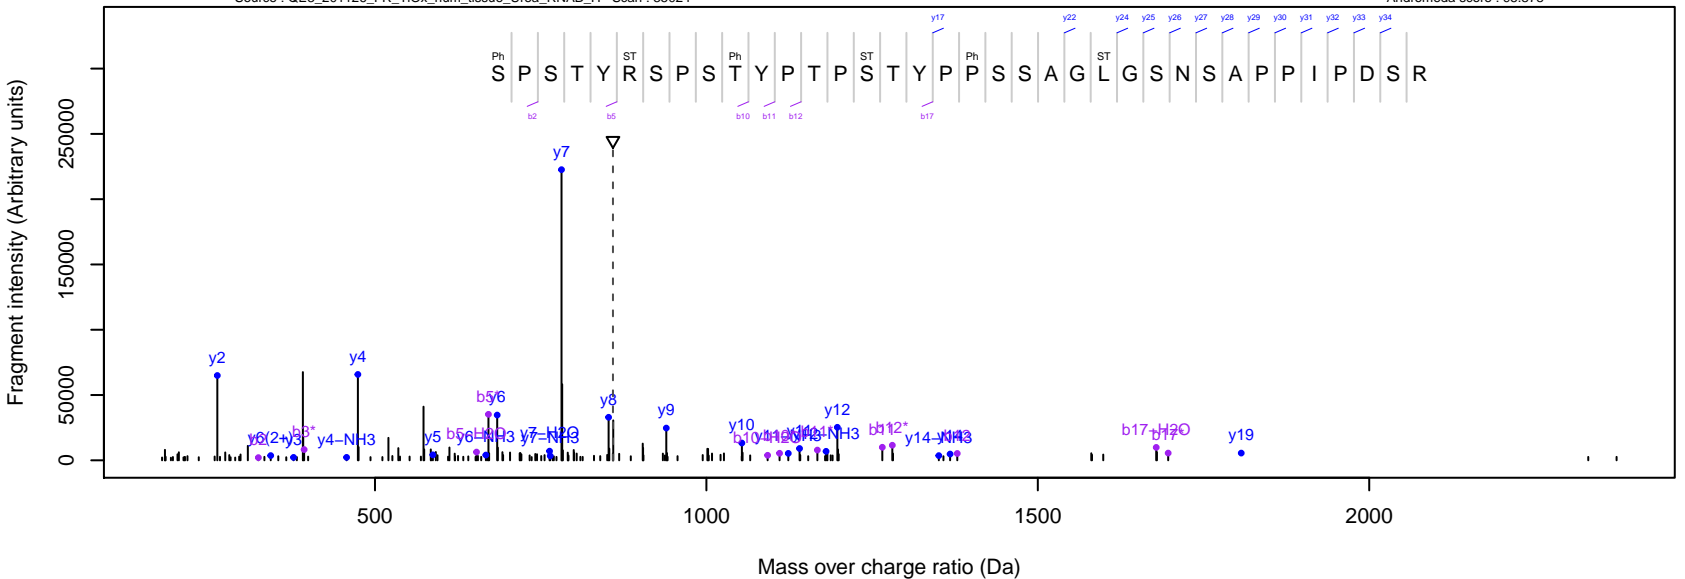

KRNS(Phospho (STY))LIELPDDYSCLLNQASHFR-4+

Source : QE3\_201126\_FR\_TiOx\_hum\_tissue\_Urea\_RNAB\_N Scan : 49653

Andromeda score : 95.823

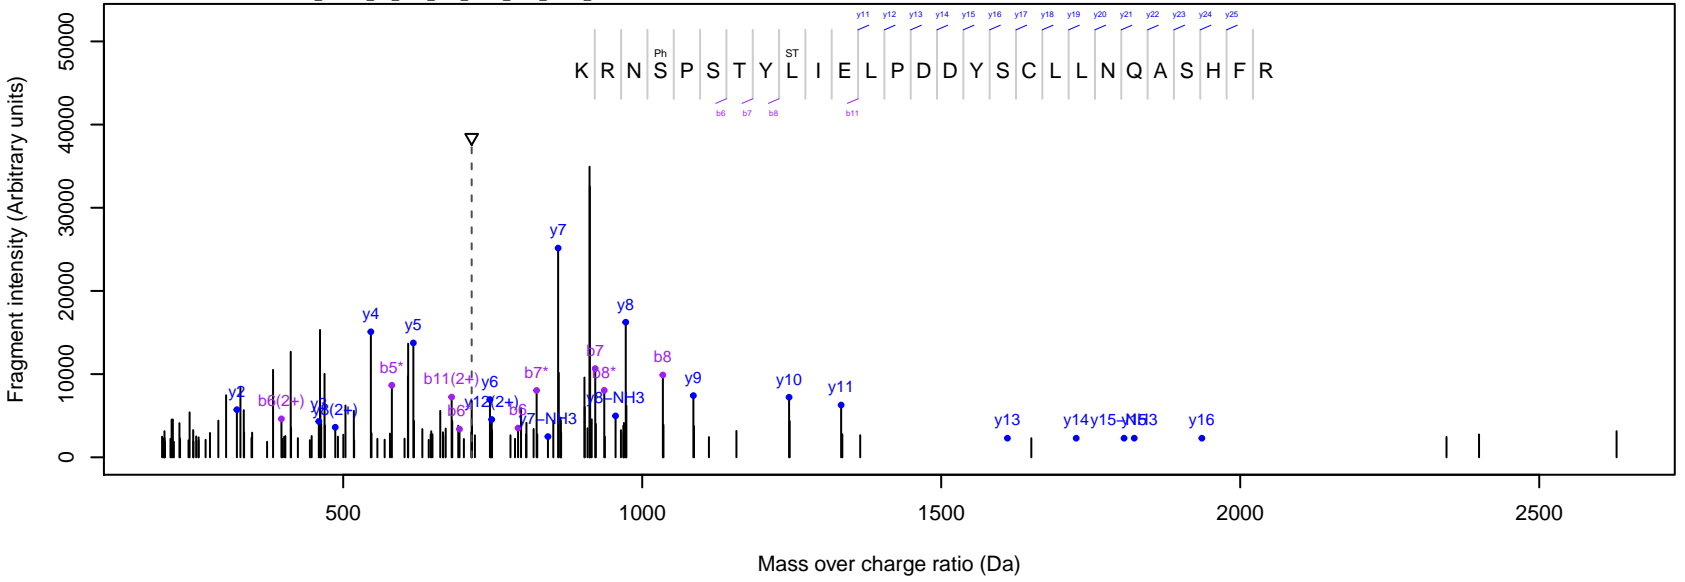

S(Phospho (STY))RS(Phospho (STY))PLGFVHLK-2+

Source : QE3\_201126\_FR\_TiOx\_hum\_tissue\_Urea\_RNAB\_B Scan : 36043

Andromeda score : 95.822

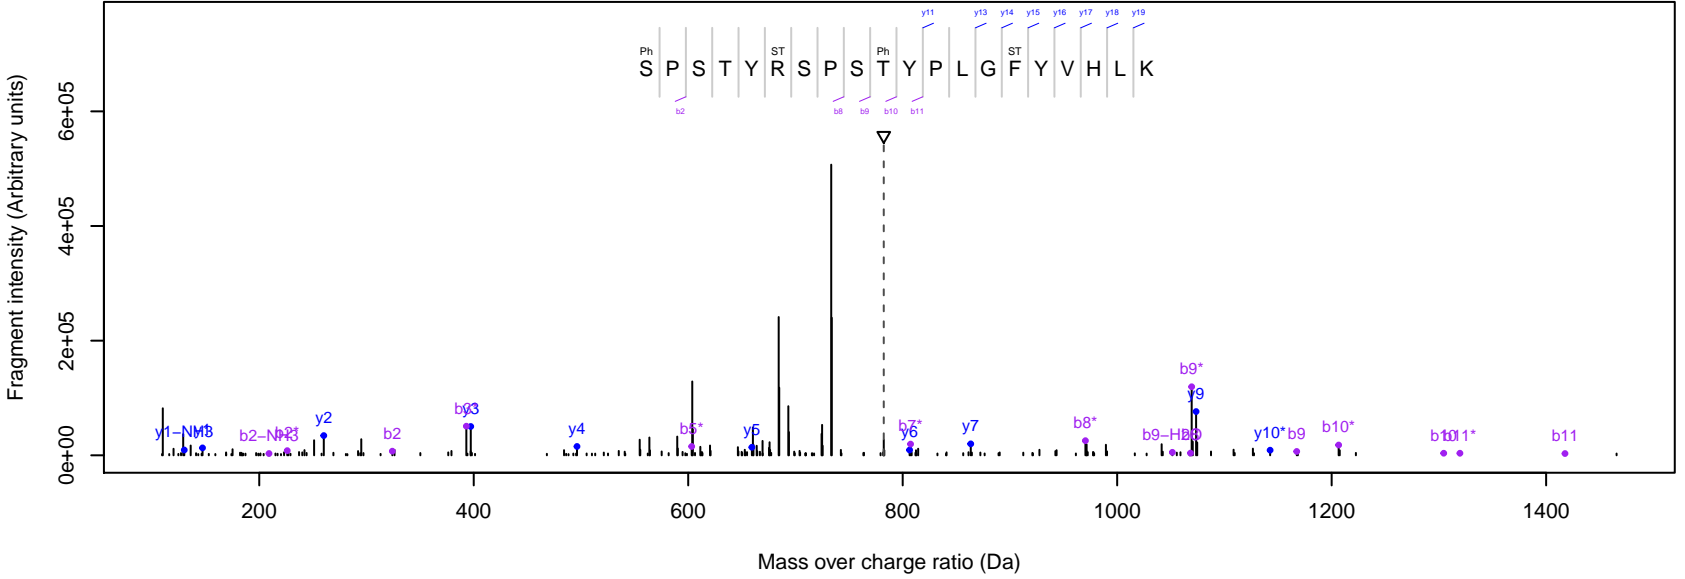

LTRPAAS(Phospho (STY))PAVGEK-3+

Source : QE3\_201126\_FR\_TiOx\_hum\_tissue\_Urea\_RNAB\_B Scan : 8906

Andromeda score : 95.814

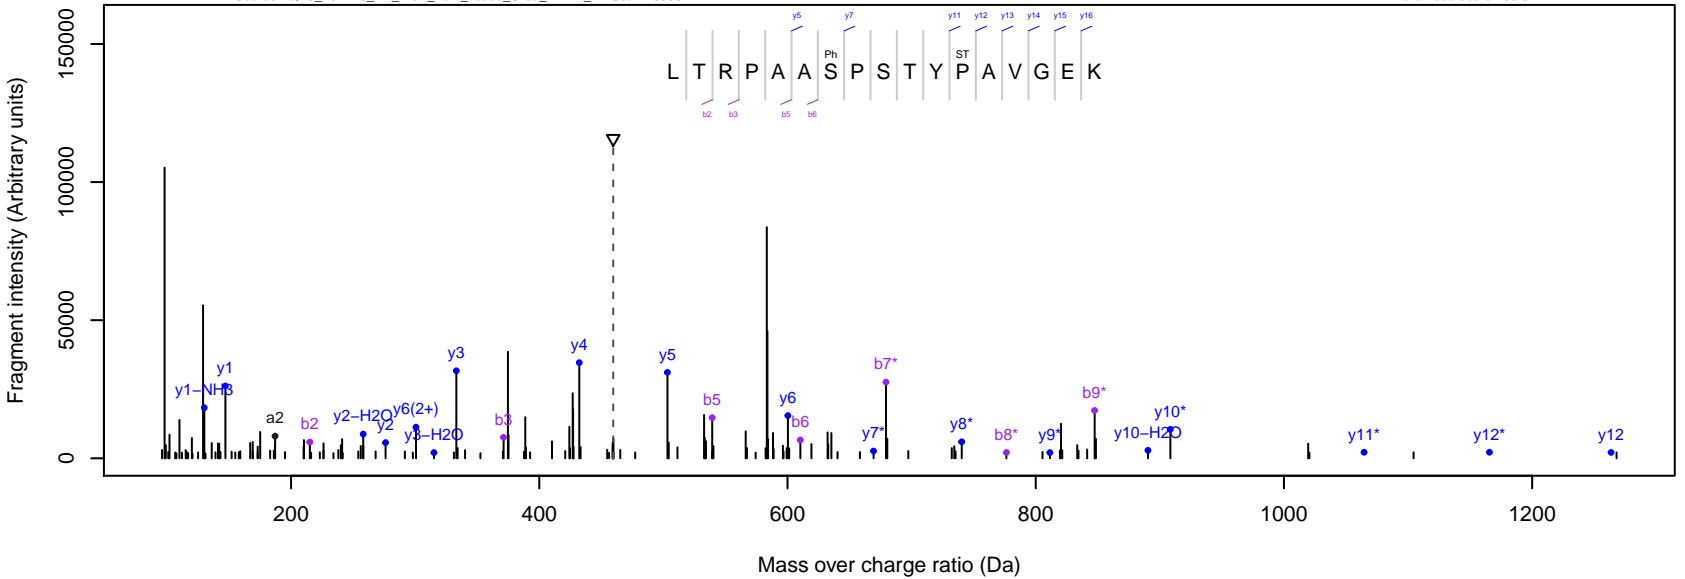

S(Phospho (STY))SPKSNDSLQEYELV K-2+

Source : QE3\_201126\_FR\_TiOx\_hum\_tissue\_Urea\_RNAB\_N Scan : 27464

Andromeda score : 95.814

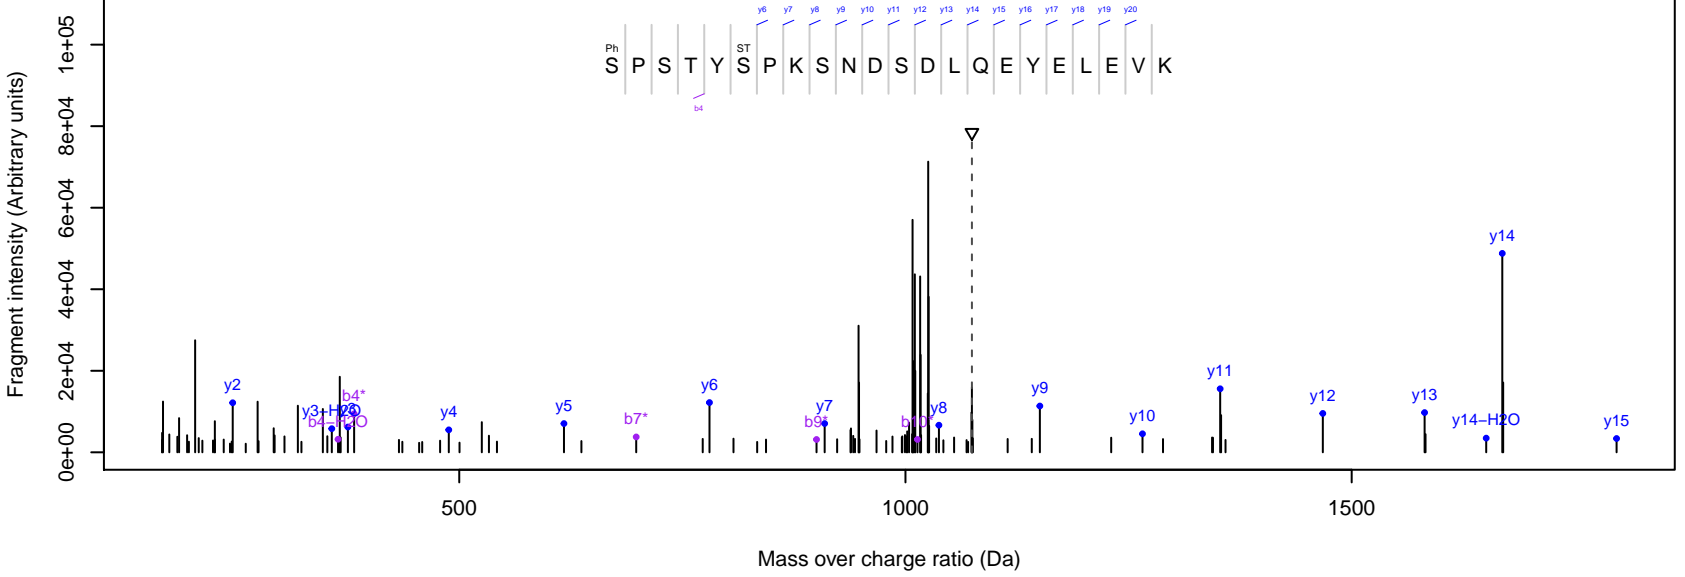

EEAENTLQSFQRQDV DNAS(Phospho (STY))LAR-3+

Source : QE3\_201126\_FR\_TiOx\_hum\_tissue\_Urea\_RNAB\_N Scan : 36301

Andromeda score : 95.794

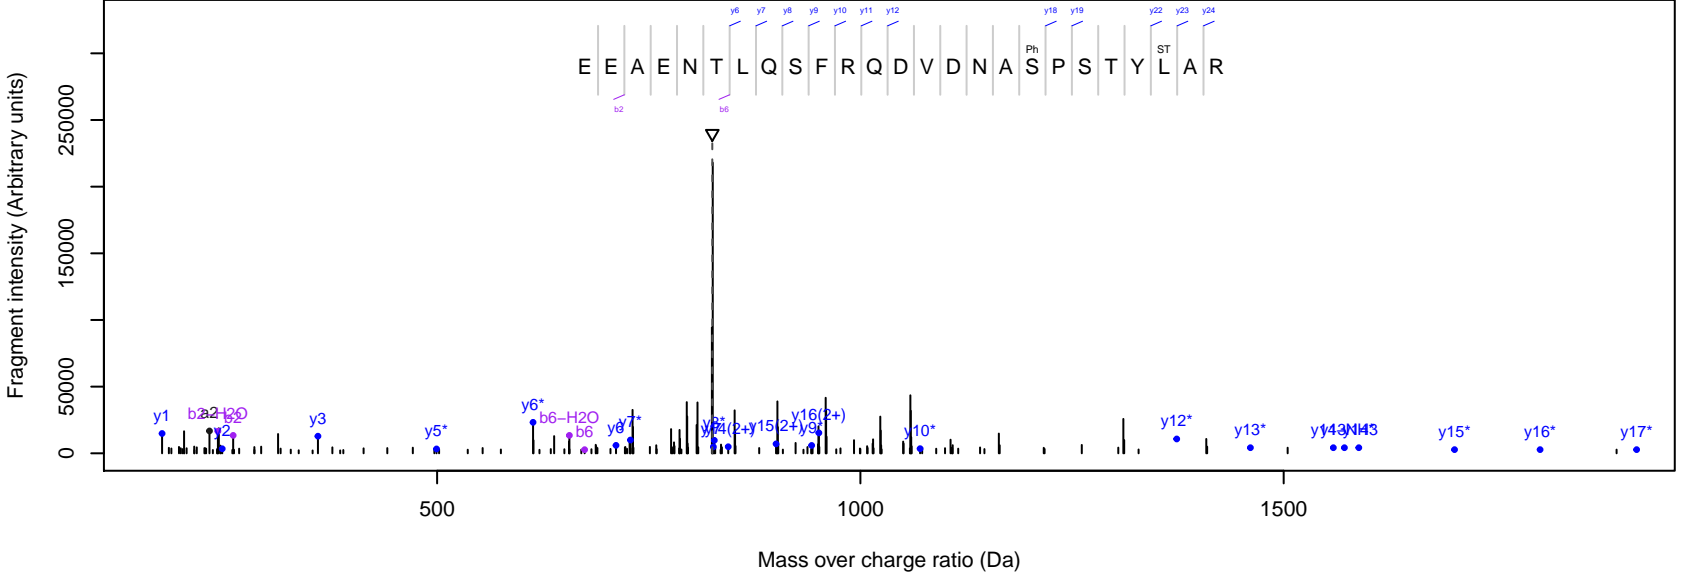

RPAERS(Phospho (STY))SPGQTPEEGAQALAEFAALHGPALR-4+

Source : QE3\_201126\_FR\_TiOx\_hum\_tissue\_Urea\_RNAB\_H Scan : 44359

Andromeda score : 95.794

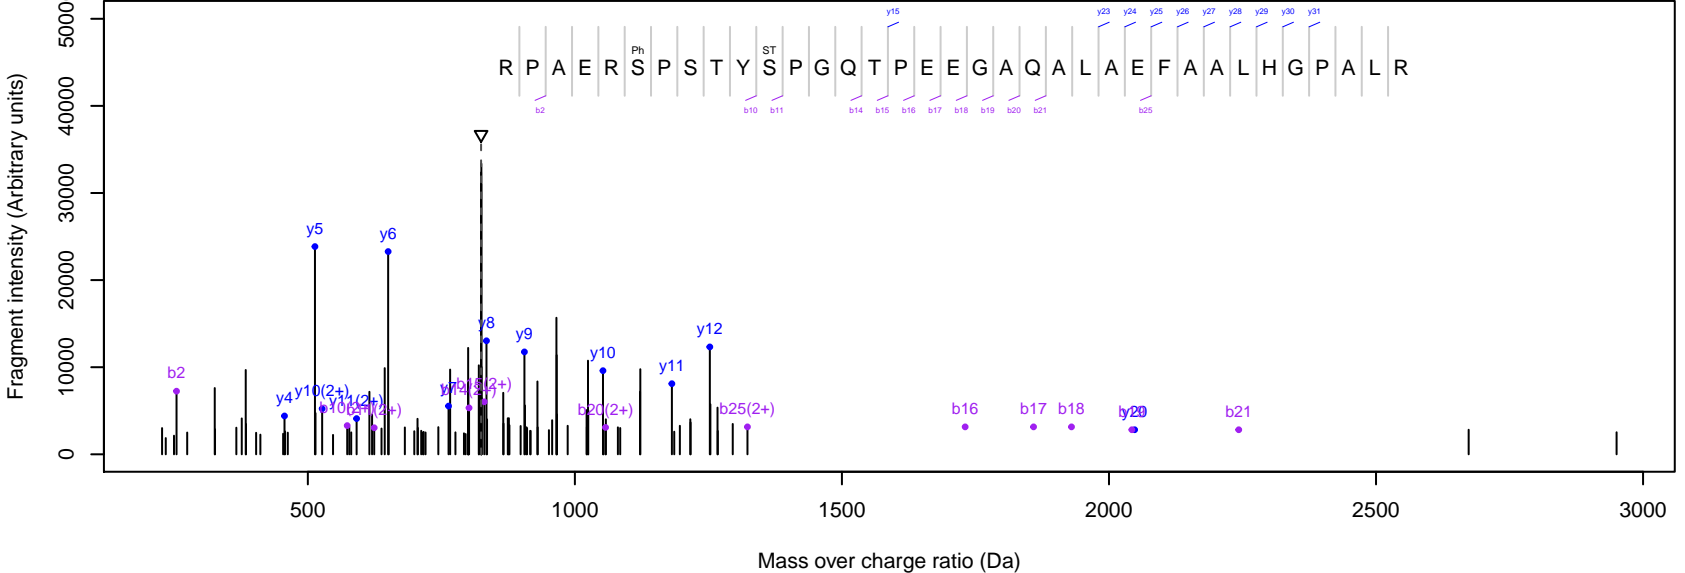

GSNS(Phospho (STY))GM(Oxidation (M))DSNIDLTIVEDEEEESVALEQAQK-3+

Source : QE3\_201126\_FR\_TIOx\_hum\_tissue\_Urea\_RNAB\_B Scan : 56604

Andromeda score : 95.784

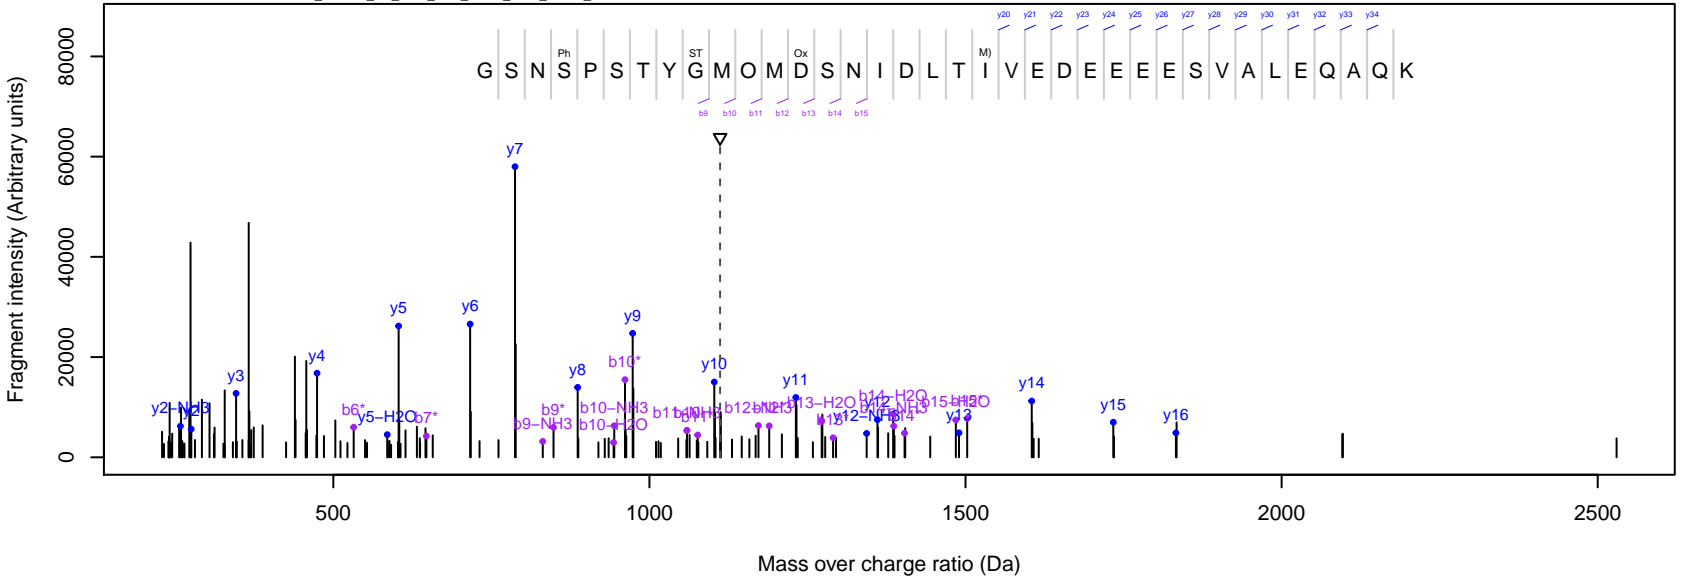

S(Phospho (STY))KTFDWAEFRPIQQALAEER-3+

Source : QE3\_201126\_FR\_TIOx\_hum\_tissue\_Urea\_RNAB\_B Scan : 50446

Andromeda score : 95.71

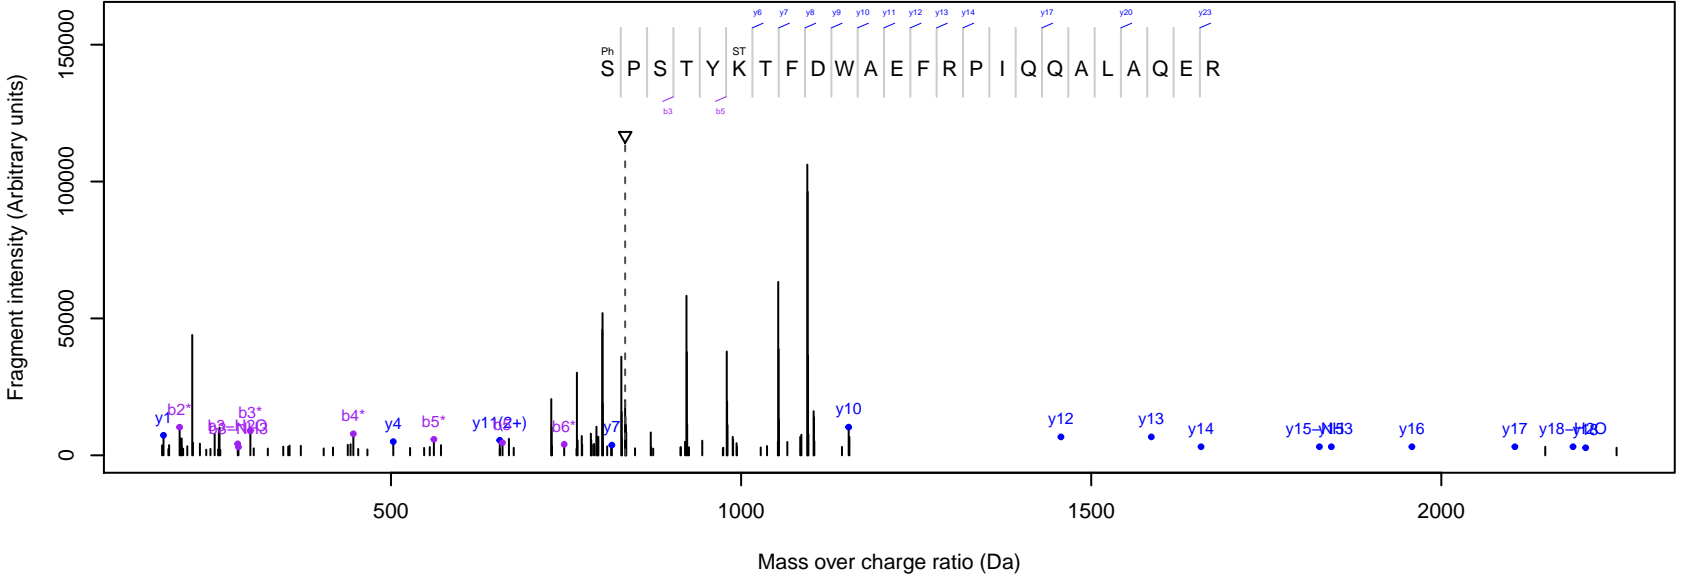

TASIKPEVALLDTQDMENMS(Phospho (STY))DDGWEFVNLGDQQSFGIK-4+

Source : QE3\_201126\_FR\_TIOx\_hum\_tissue\_Urea\_RNAB\_N Scan : 60675

Andromeda score : 95.691

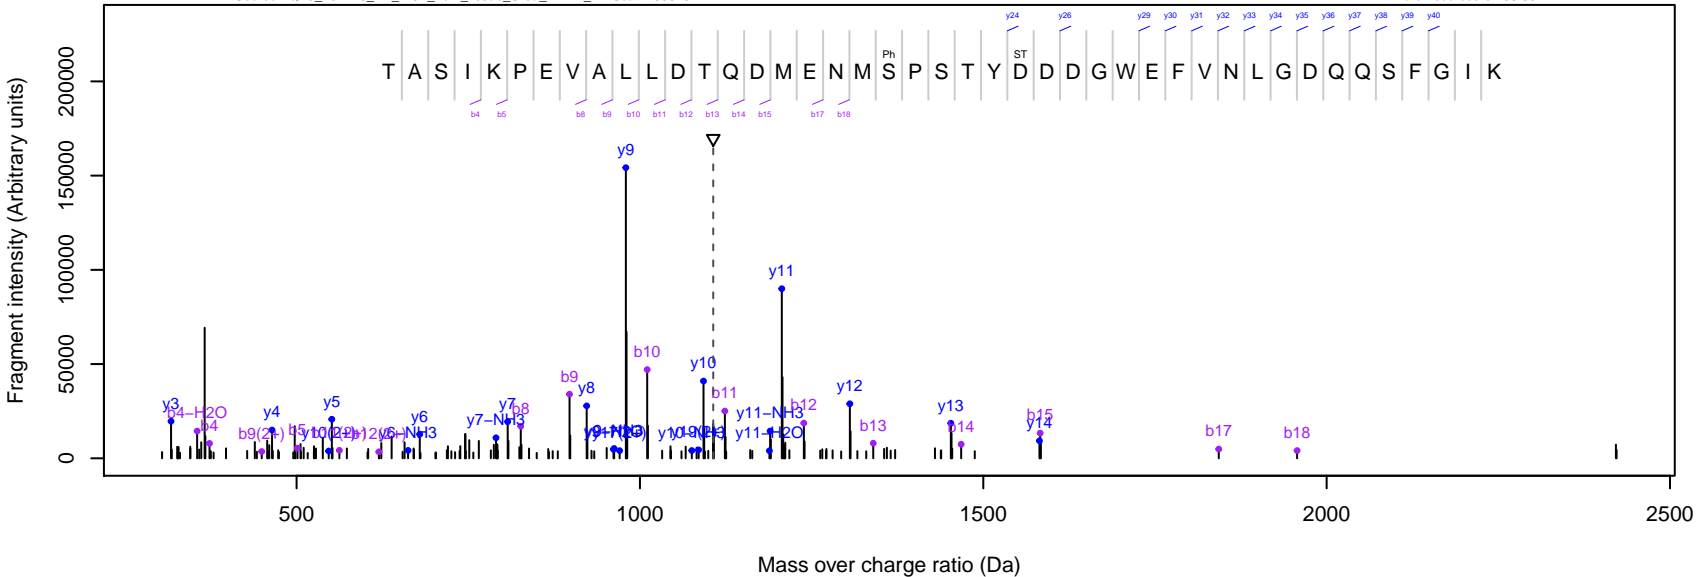

KGS(Phospho (STY))LSNLM(Oxidation (M))DFVK-2+

Source : QE3\_201126\_FR\_TiOx\_hum\_tissue\_Urea\_RNAB\_B Scan : 30088

Andromeda score : 95.677

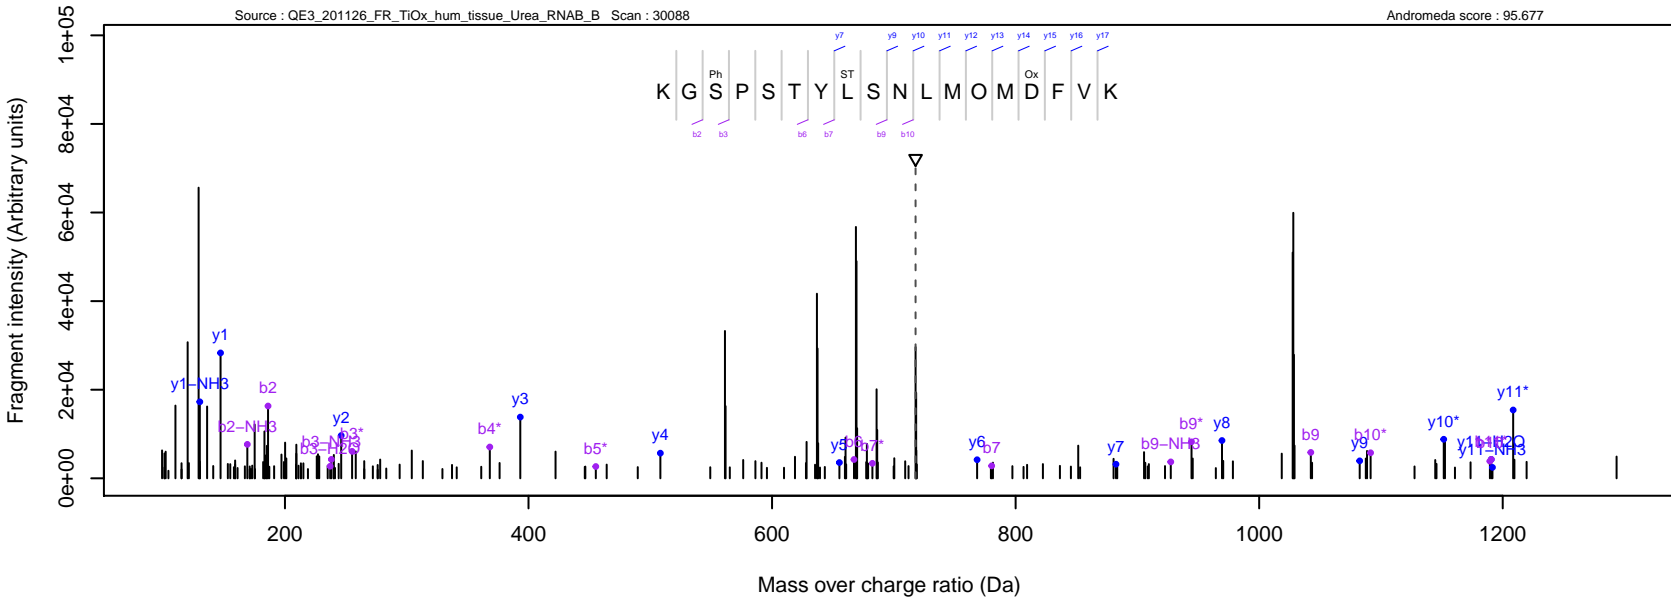

GVEPSPS(Phospho (STY))PIKPGDIKR-3+

Source : QE3\_201126\_FR\_TiOx\_hum\_tissue\_Urea\_RNAB\_N Scan : 15208

Andromeda score : 95.666

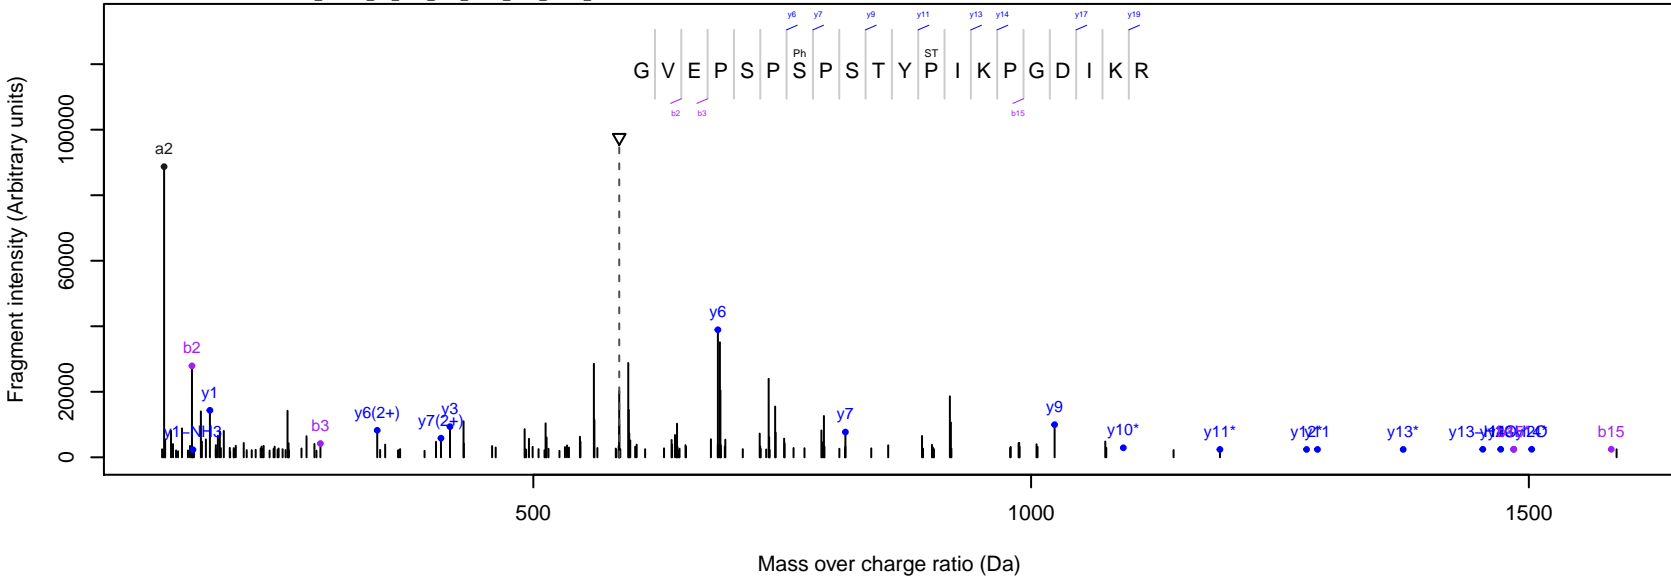

IPSFPSPEEPPS(Phospho (STY))PSAPSIK-2+

Source : QE3\_201126\_FR\_TiOx\_hum\_tissue\_Urea\_RNAB\_N Scan : 53078

Andromeda score : 95.666

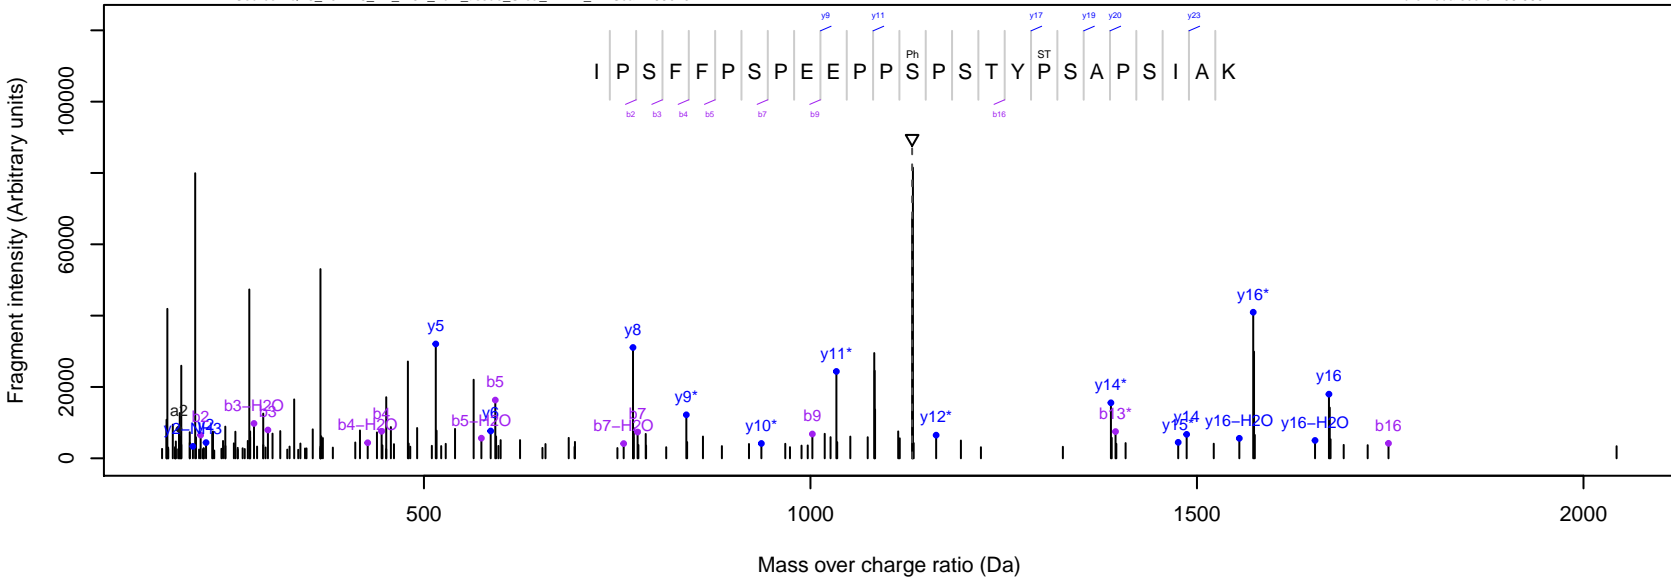



NGDECAHHPIIS(Phospho (STY))PCK-3+

Source : QE3\_201126\_FR\_TiOx\_hum\_tissue\_Urea\_RNAB\_N Scan : 8198

Andromeda score : 95.666

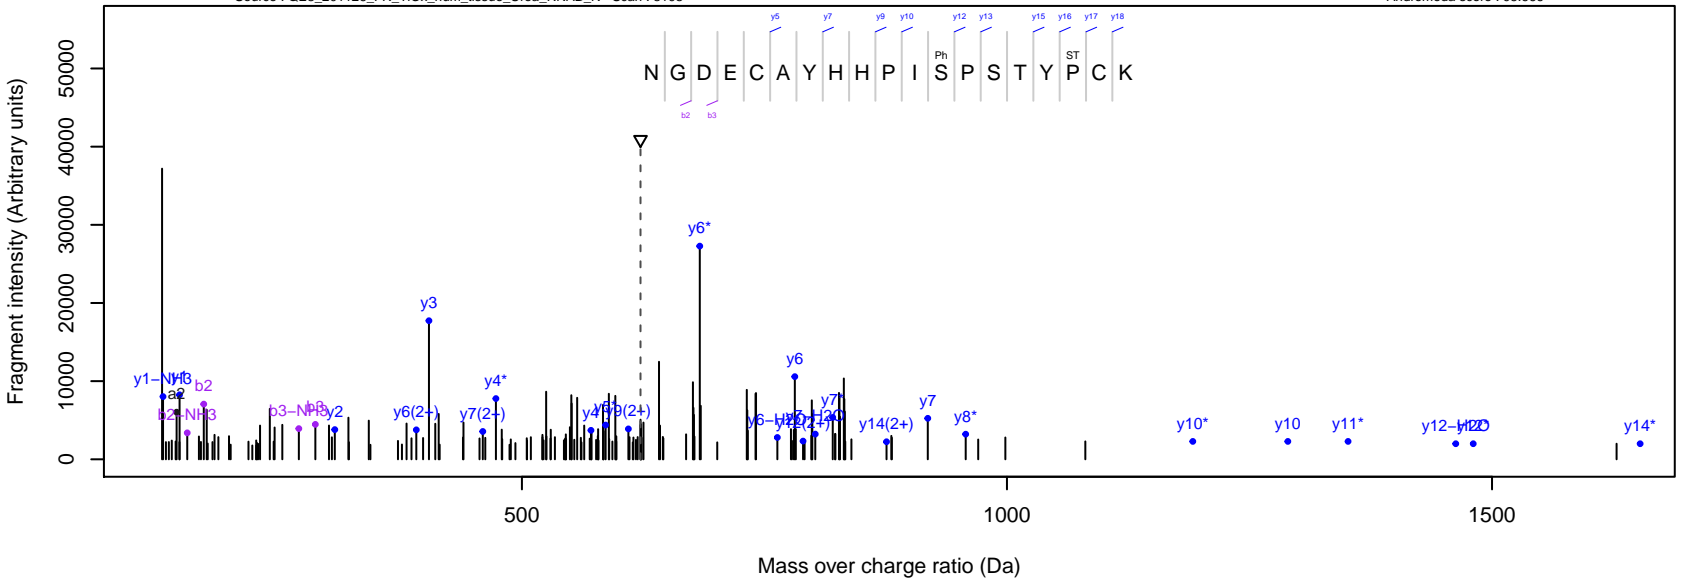

ESSTSEGADQKM(Oxidation (M))S(Phospho (STY))S(Phospho (STY))PEDDSDTKR-3+

Source : QE3\_201126\_FR\_TiOx\_hum\_tissue\_Urea\_RNAB\_H Scan : 4303

Andromeda score : 95.652

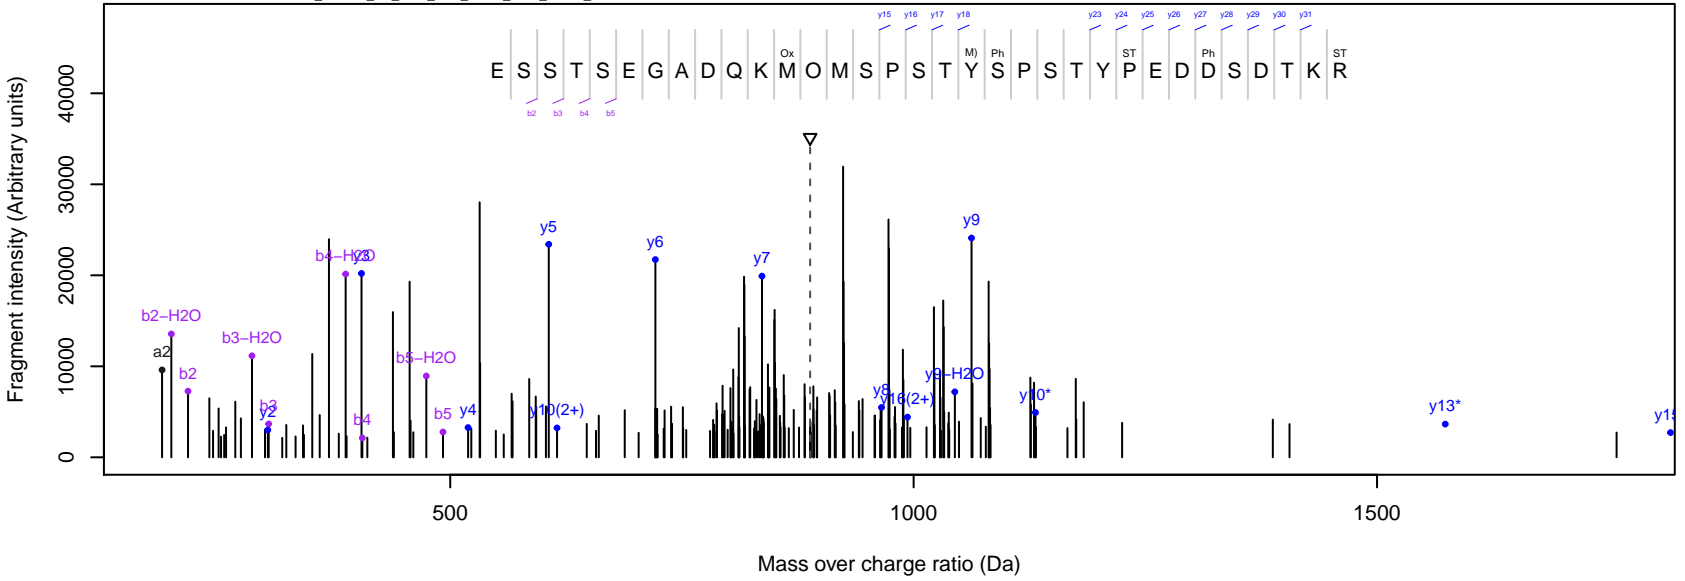

DAPT(Phospho (STY))SPASVASSSTPSSK-2+

Source : QE3\_201126\_FR\_TiOx\_hum\_tissue\_Urea\_RNAB\_H Scan : 16210

Andromeda score : 95.651

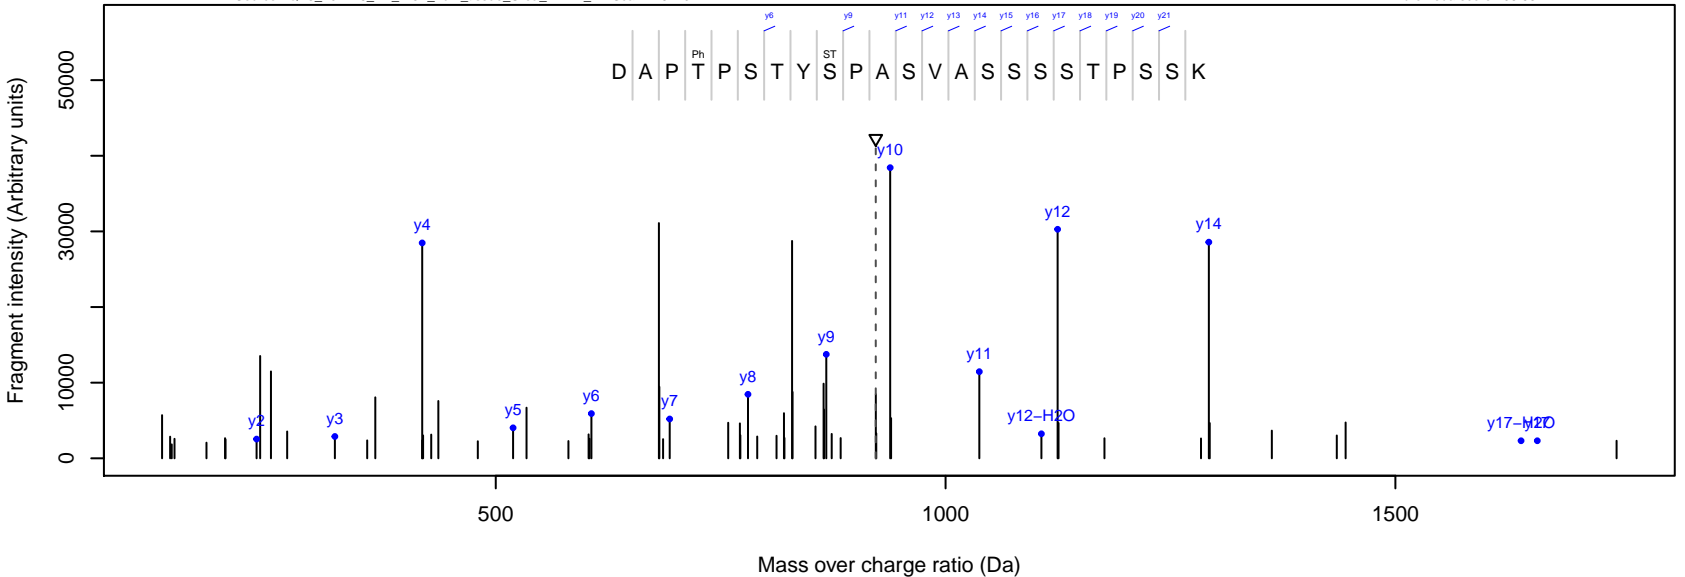

KQS(Phospho (STY))VFSAPLSAGASAAEPLDR-3+

Source : QE3\_201126\_FR\_TiOx\_hum\_tissue\_Urea\_RNAB\_B Scan : 34059

Andromeda score : 95.646

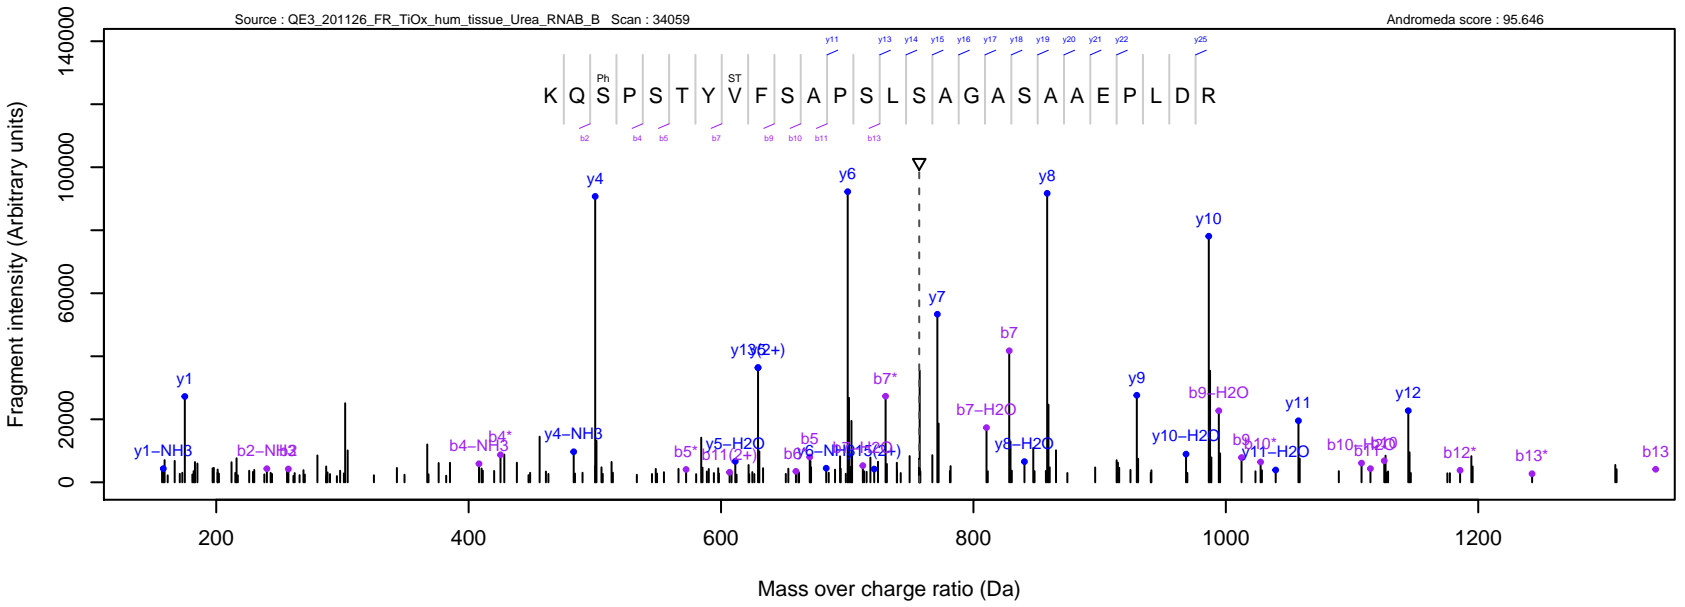

SSSVLSLEGS(Phospho (STY))EK-2+

Source : QE3\_201126\_FR\_TiOx\_hum\_tissue\_Urea\_RNAB\_N Scan : 24283

Andromeda score : 95.631

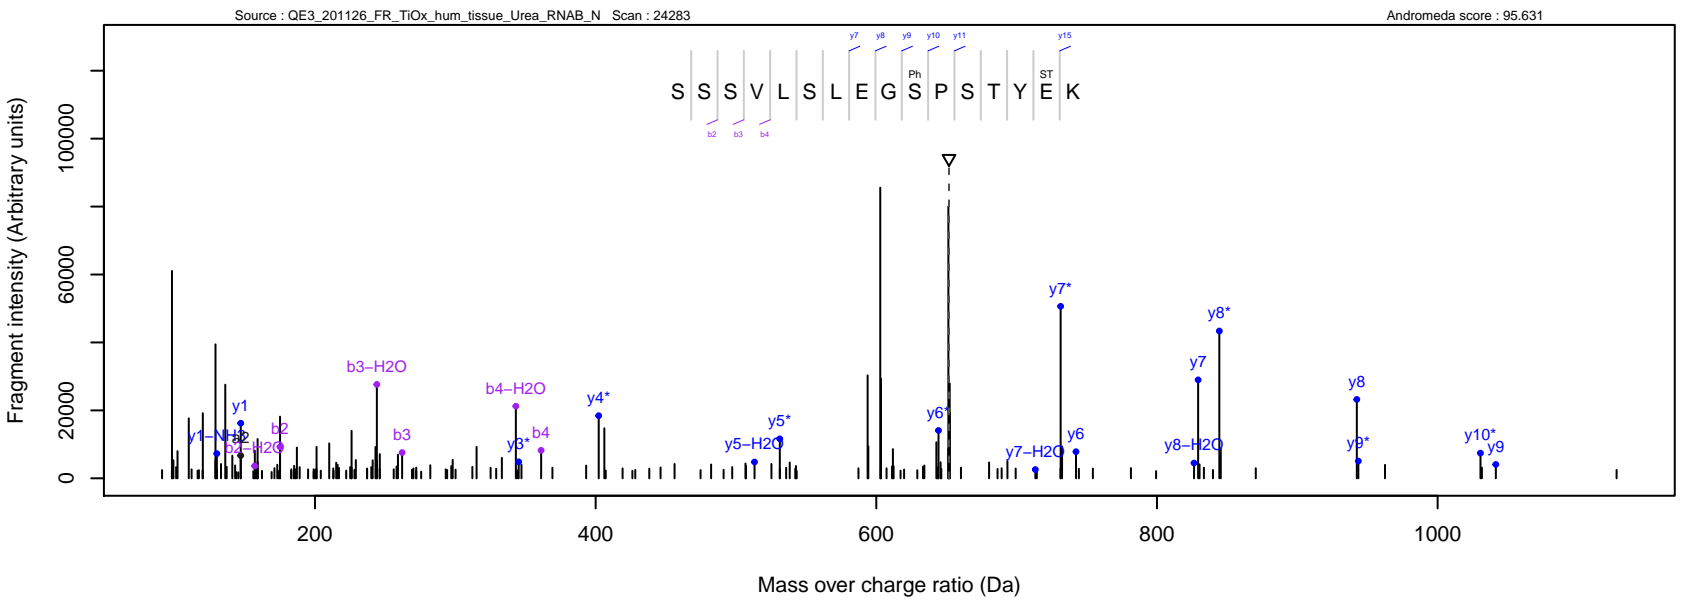

GGPISFS(Phospho (STY))SSR-2+

Source : QE3\_201126\_FR\_TiOx\_hum\_tissue\_Urea\_RNAB\_H Scan : 21604

Andromeda score : 95.618

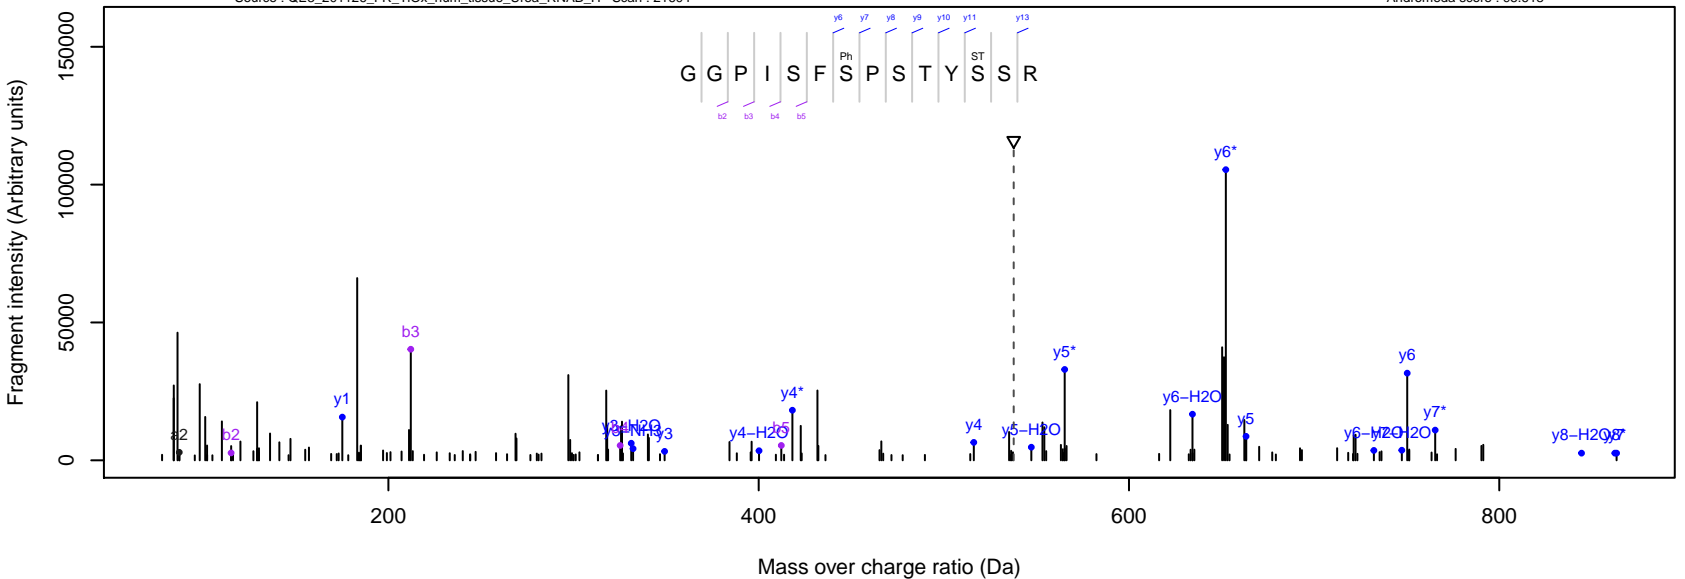



SQS(Phospho (STY))FAGFSLQER-2+

Source : QE3\_201126\_FR\_TiOx\_hum\_tissue\_Urea\_RNAB\_B Scan : 36567

Andromeda score : 95.57

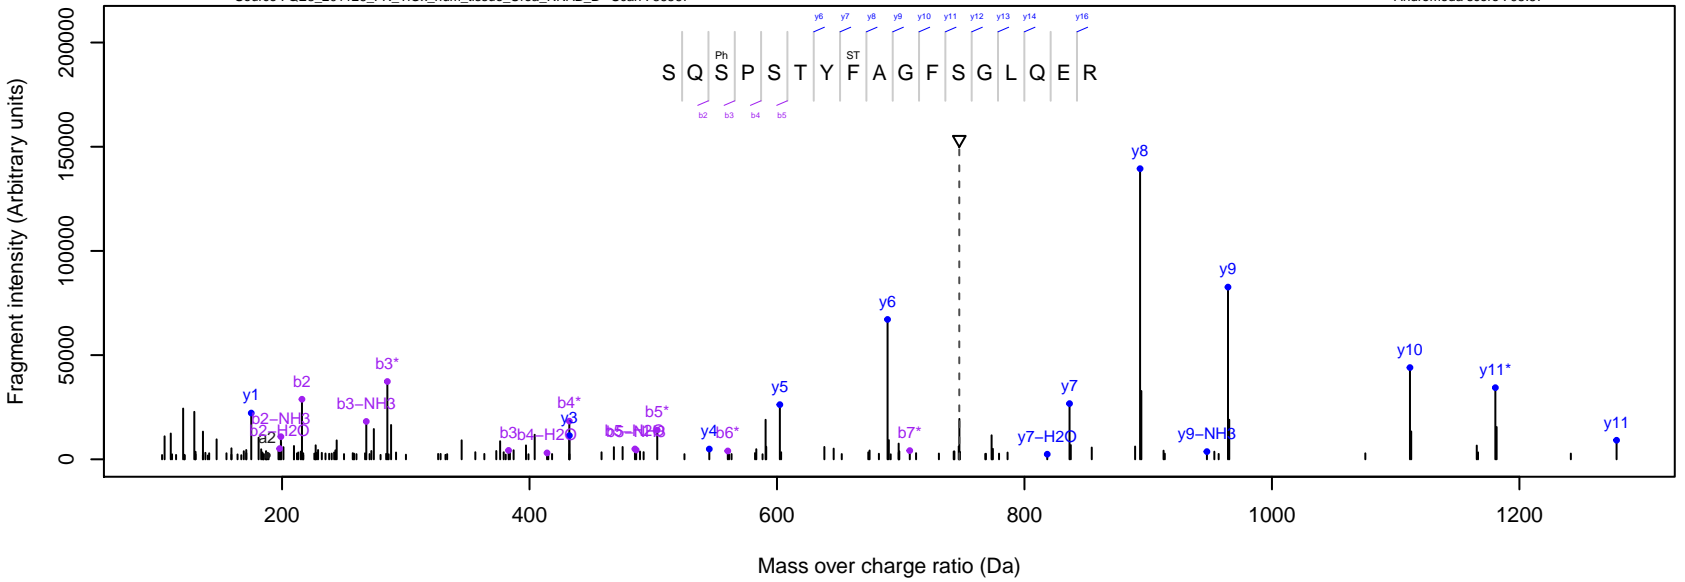

AT(Phospho (STY))SRGSNSGM(Oxidation (M))DSNIDLTI VEDEEEESVALEQAQK-3+

Source : QE3\_201126\_FR\_TiOx\_hum\_tissue\_Urea\_RNAB\_H Scan : 50275

Andromeda score : 95.56

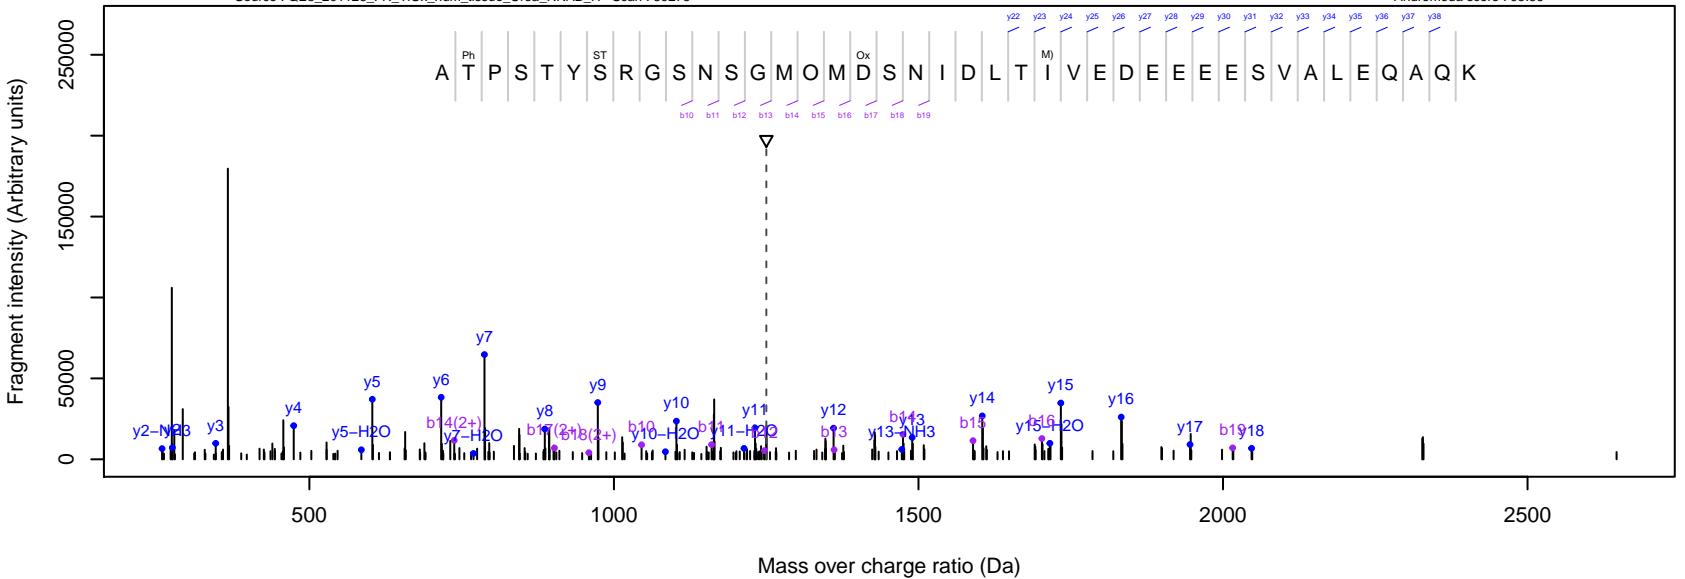

KQEGPATQVDSAVGTLPAT(Phospho (STY))SPQSTSVQAK-3+

Source : QE3\_201126\_FR\_TiOx\_hum\_tissue\_Urea\_RNAB\_B Scan : 25230

Andromeda score : 95.551

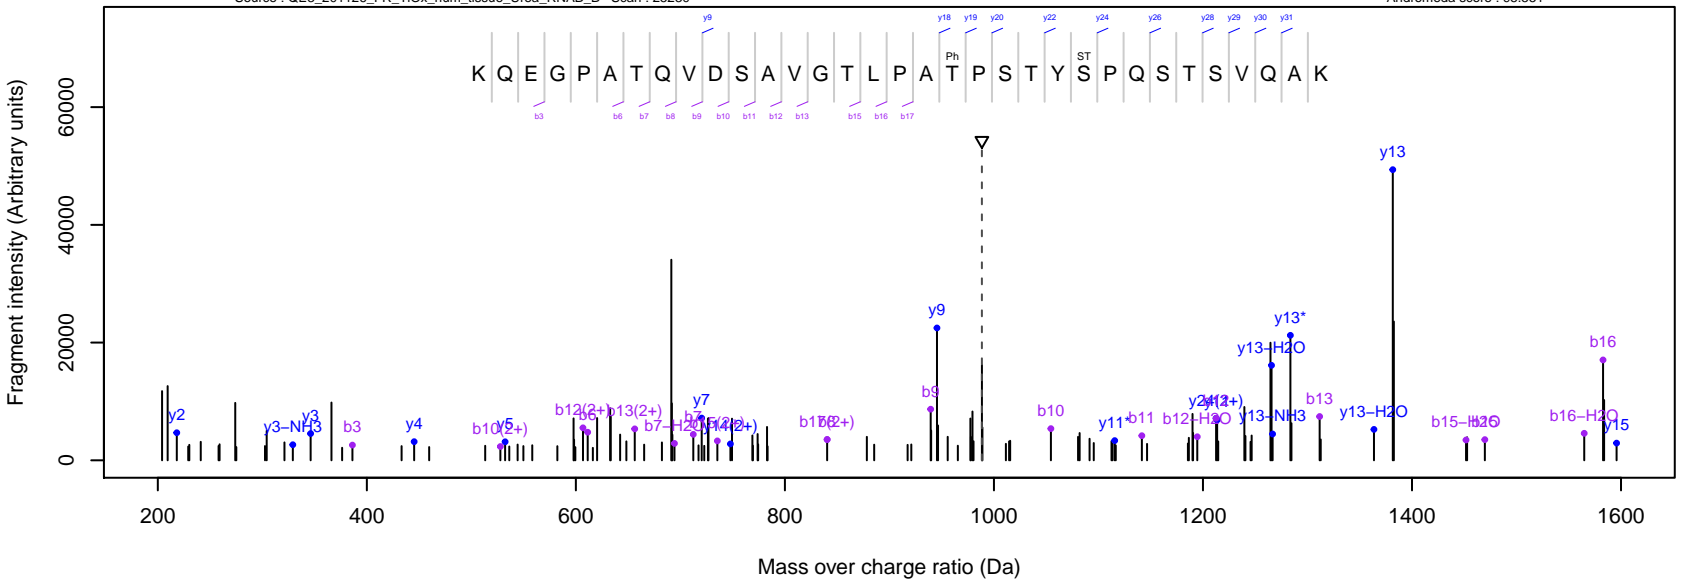

SISGST(Phospho (STY))YTPSEAGNELDMELGEEVEEESR-3+

Source : QE3\_201126\_FR\_TIOx\_hum\_tissue\_Urea\_RNAB\_B Scan : 53499

Andromeda score : 95.551

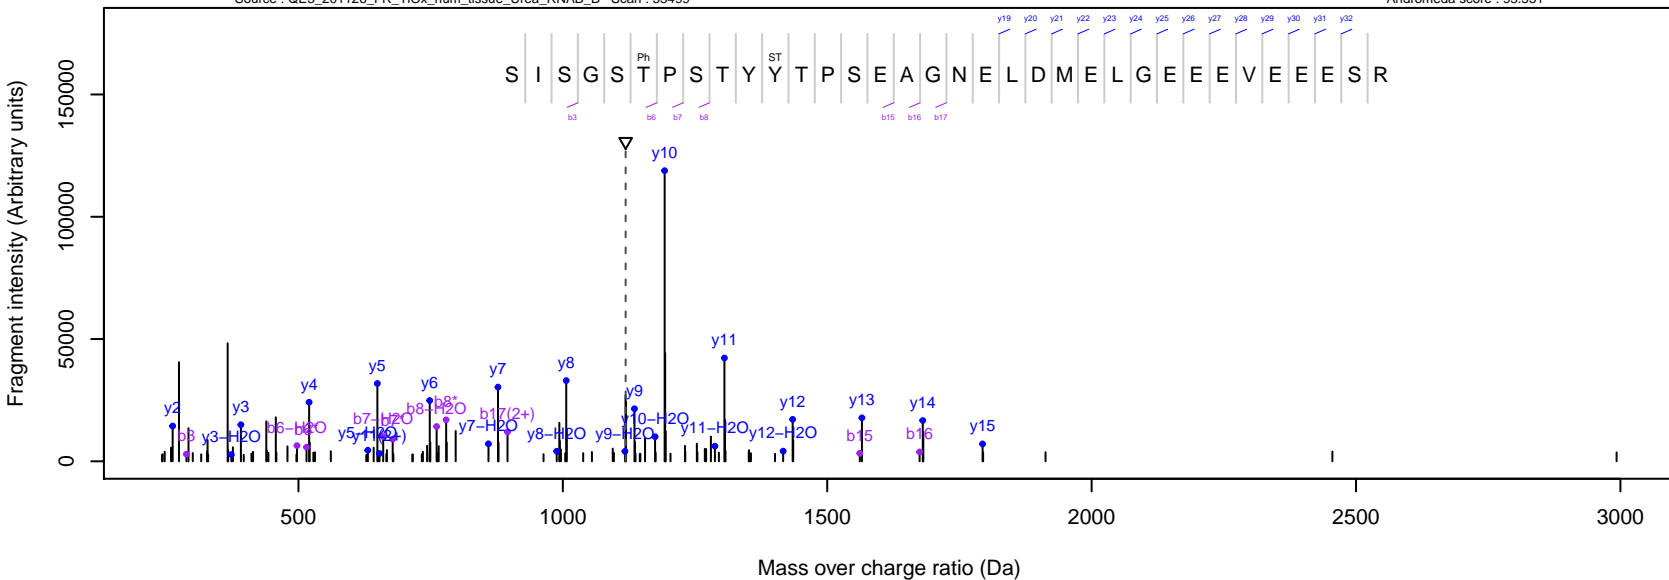

AGTLSITEFADMLS(Phospho (STY))GNAGGFRS(Phospho (STY))RSSS(Phospho (STY))VGSSTYPISSPAVSR-4+

Source : QE3\_201126\_FR\_TIOx\_hum\_tissue\_Urea\_RNAB\_H Scan : 62100

Andromeda score : 95.522

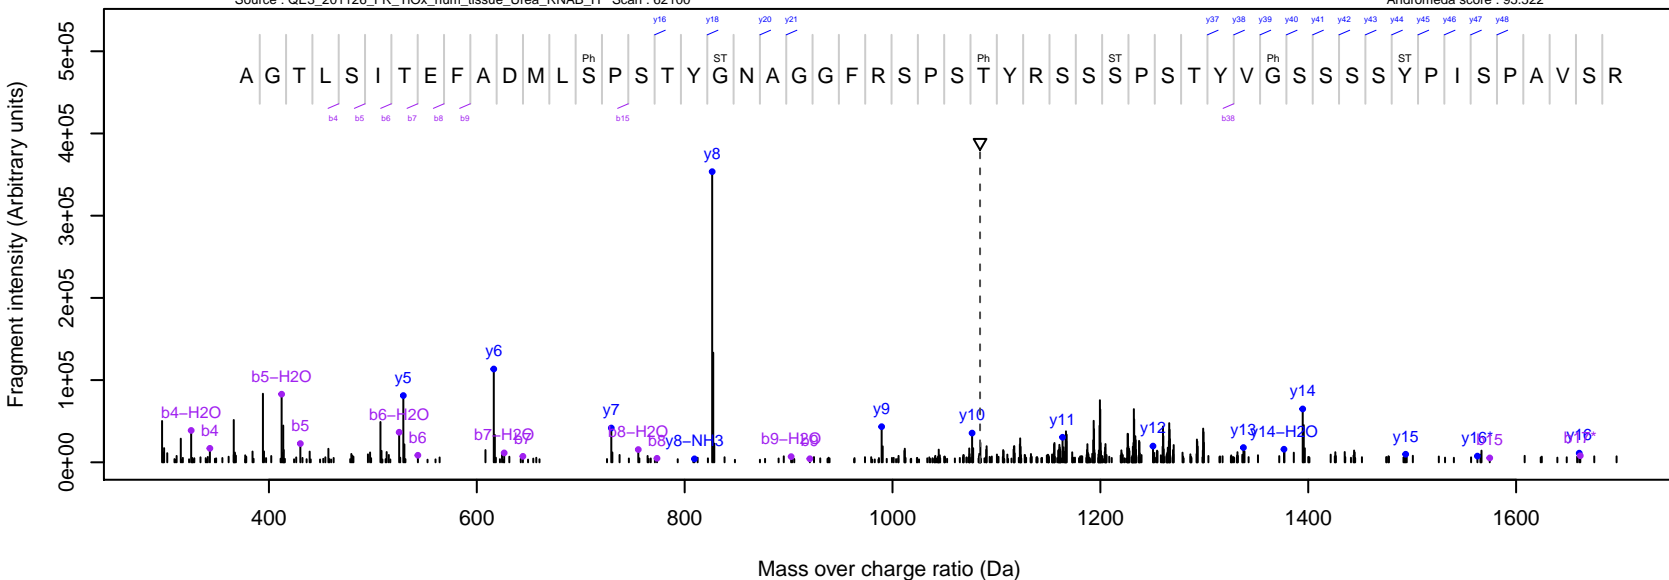

GLVAAYSGES(Phospho (STY))DS(Phospho (STY))EEEQERGGPER-3+

Source : QE3\_201126\_FR\_TIOx\_hum\_tissue\_Urea\_RNAB\_N Scan : 24562

Andromeda score : 95.519

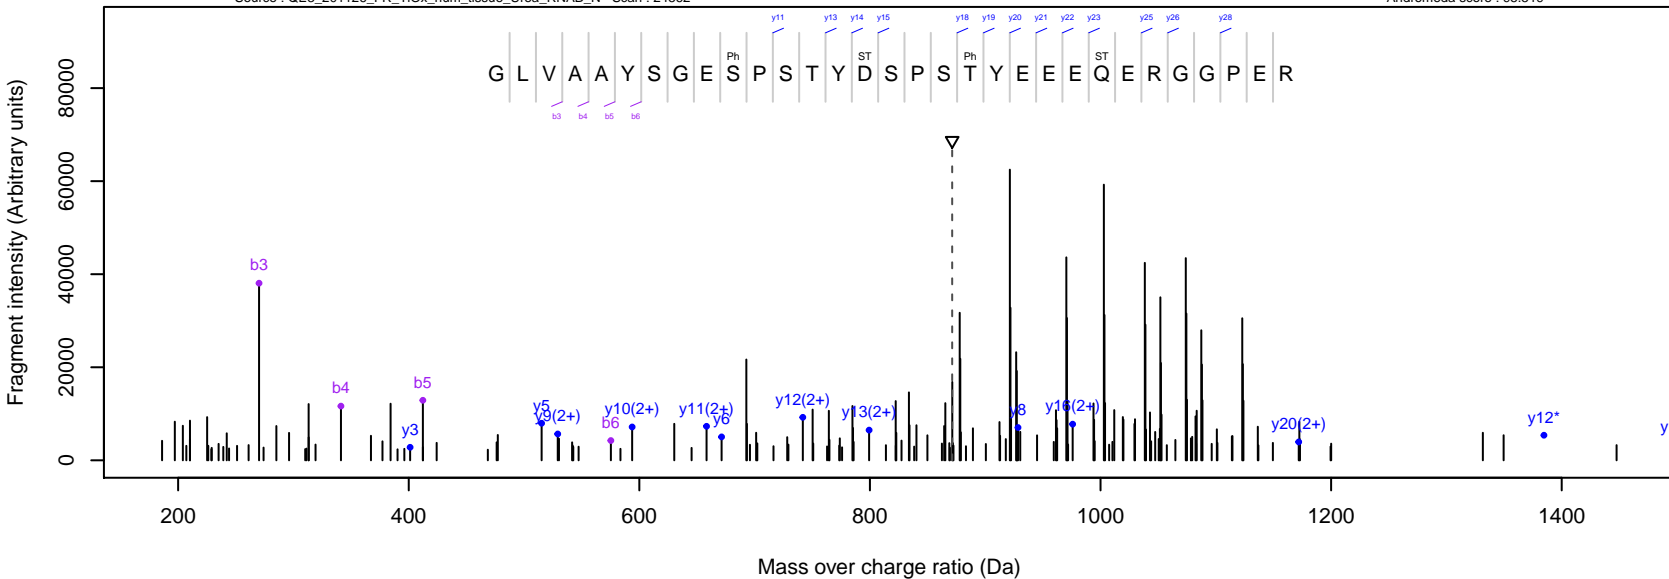

HPTGNSITKS(Phospho (STY))PPLMAK-3+

Source : QE3\_201126\_FR\_TiOx\_hum\_tissue\_Urea\_RNAB\_H Scan : 12568

Andromeda score : 95.5

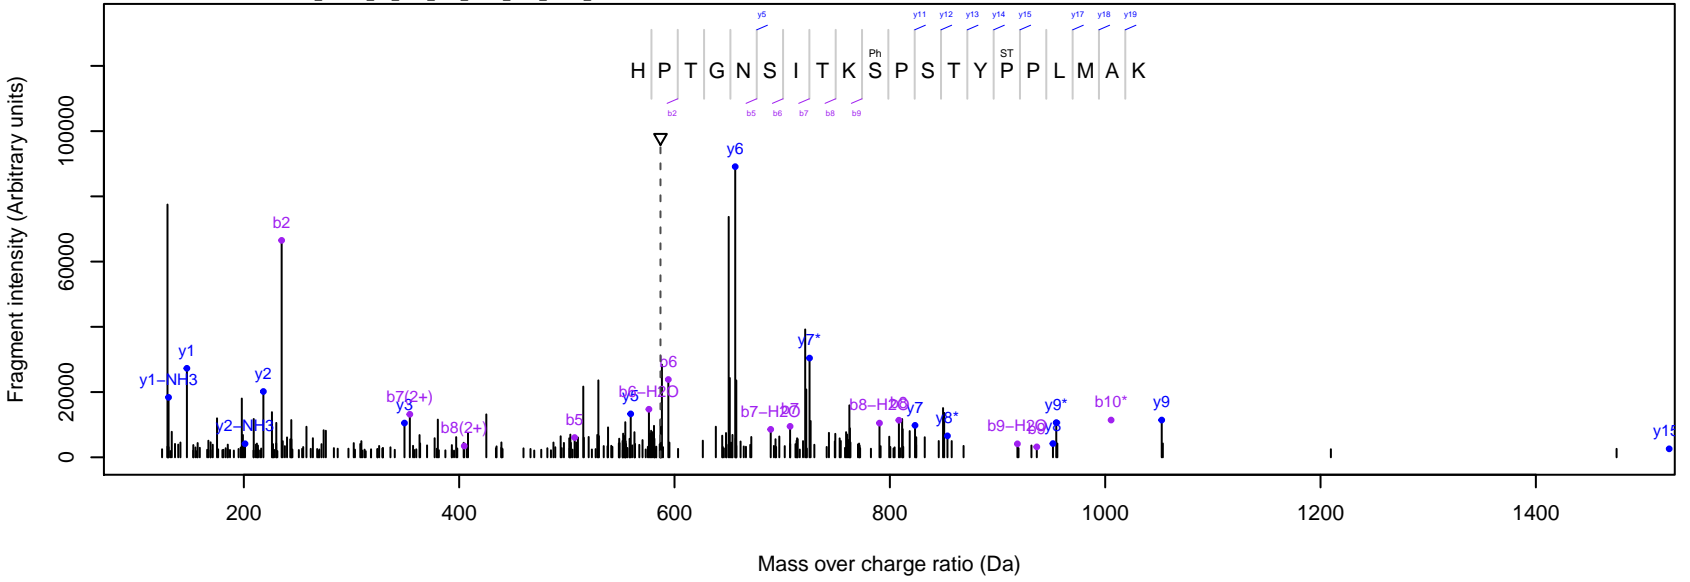

HSLSPSTYLDDIR-2+

Source : QE3\_201126\_FR\_TiOx\_hum\_tissue\_Urea\_RNAB\_N Scan : 21637

Andromeda score : 95.483

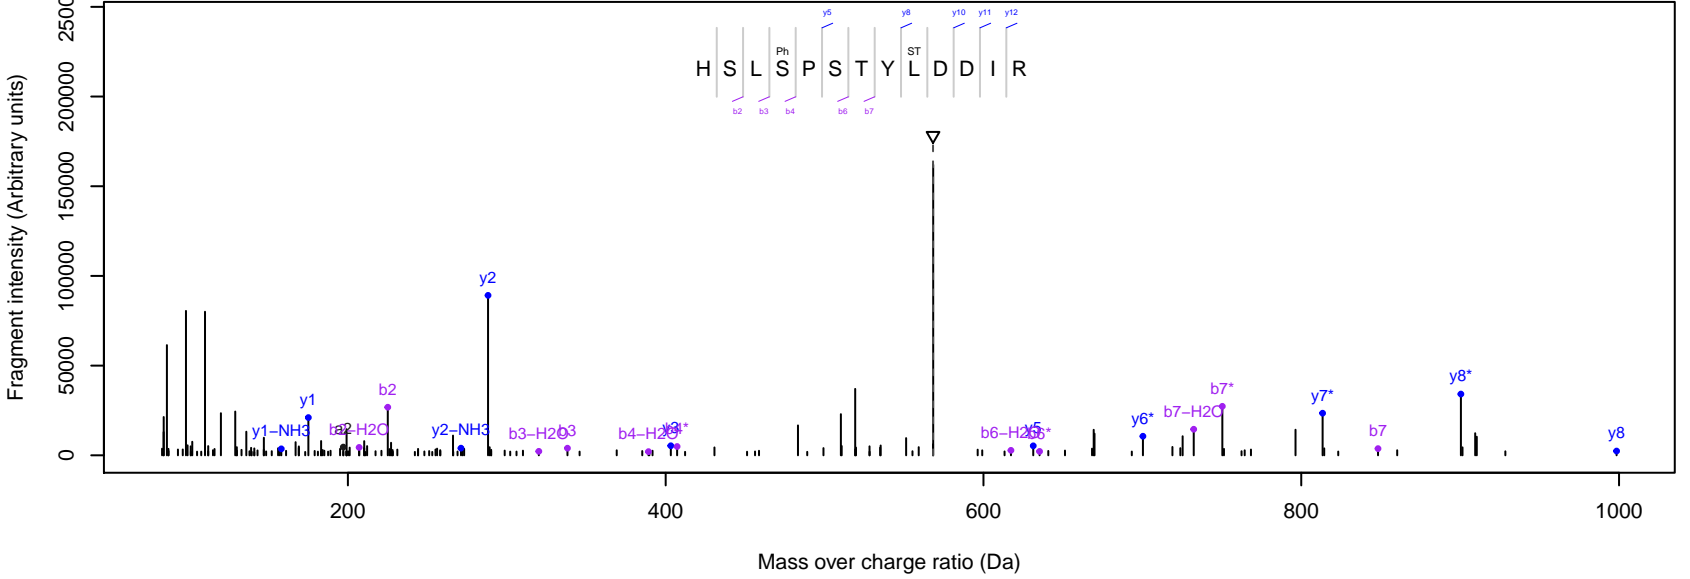

AVDSPSTYSSSEIEVEVPVDDR-3+

Source : QE3\_201126\_FR\_TiOx\_hum\_tissue\_Urea\_RNAB\_H Scan : 33492

Andromeda score : 95.48

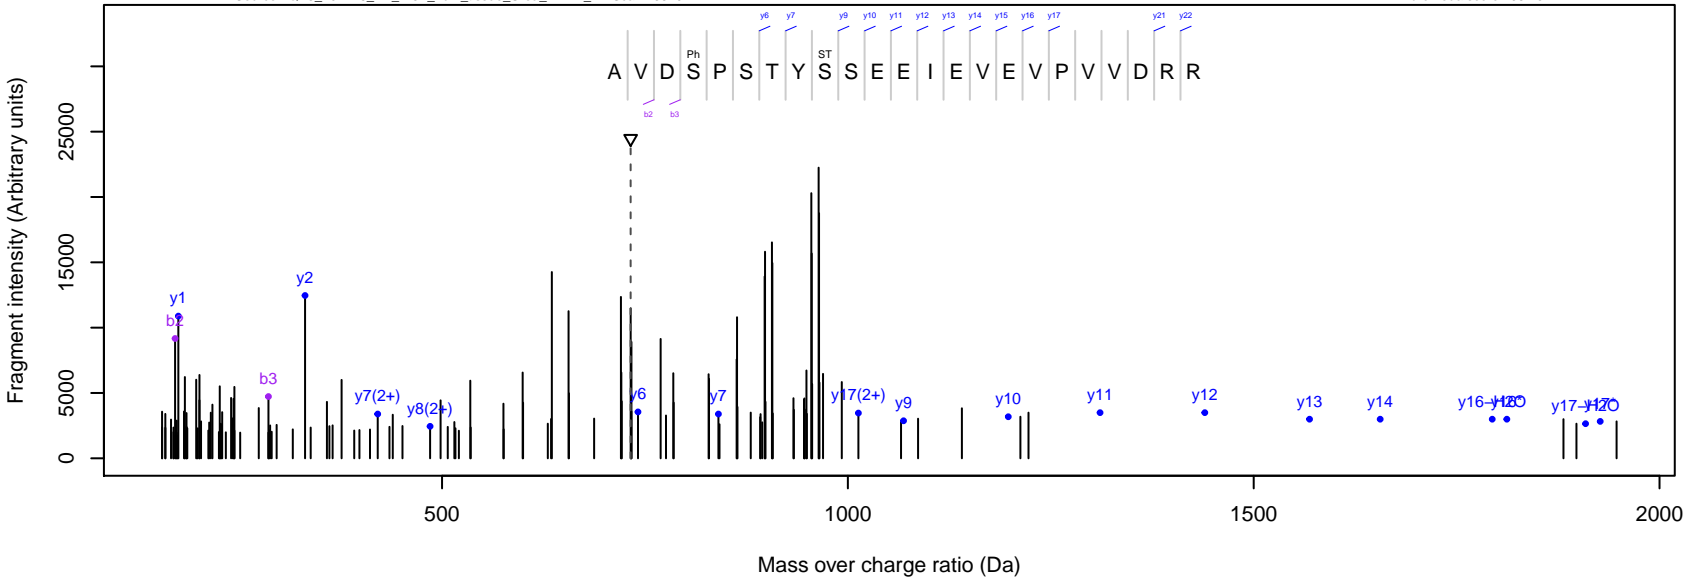

EADIDS(Phospho (STY))S(Phospho (STY))DESIEEDIDQPSAHK-3+

Source : QE3\_201126\_FR\_TiOx\_hum\_tissue\_Urea\_RNAB\_N Scan : 37516

Andromeda score : 95.48

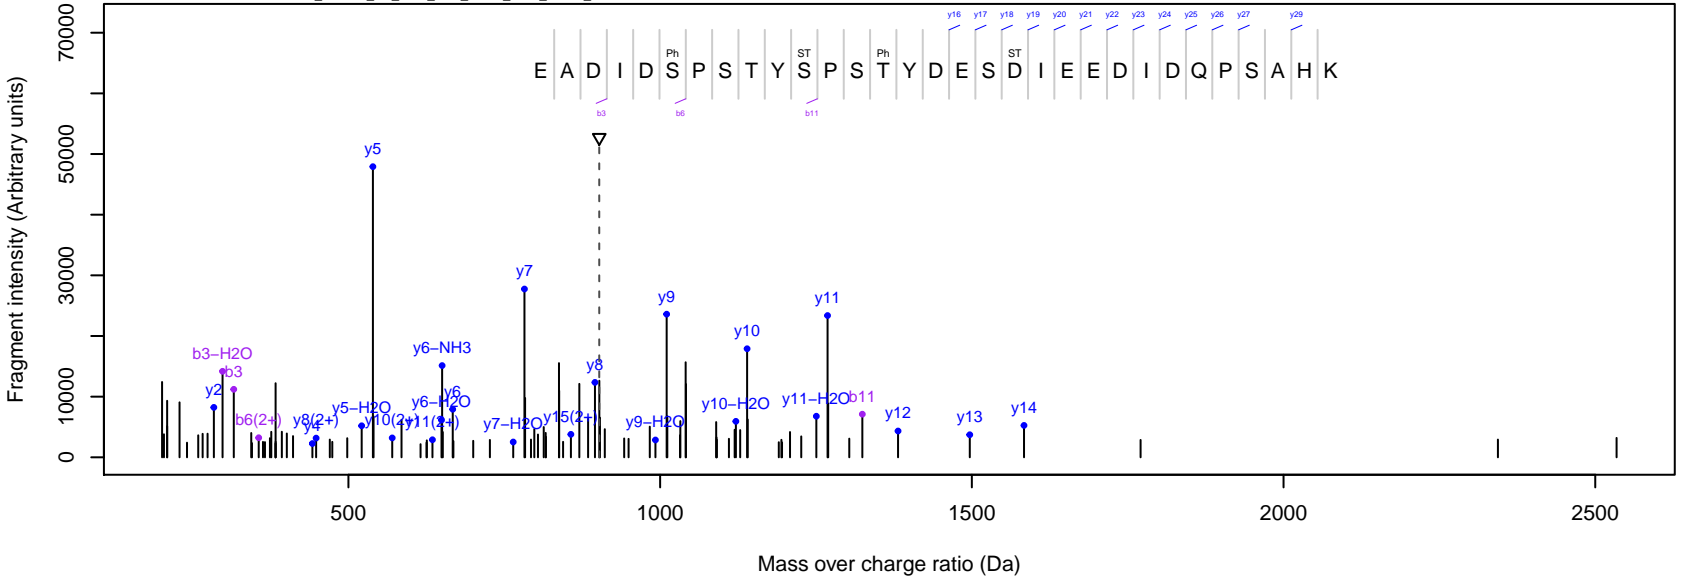

YS(Phospho (STY))EVSFMELDKFLEDVR-3+

Source : QE3\_201126\_FR\_TiOx\_hum\_tissue\_Urea\_RNAB\_N Scan : 61418

Andromeda score : 95.48

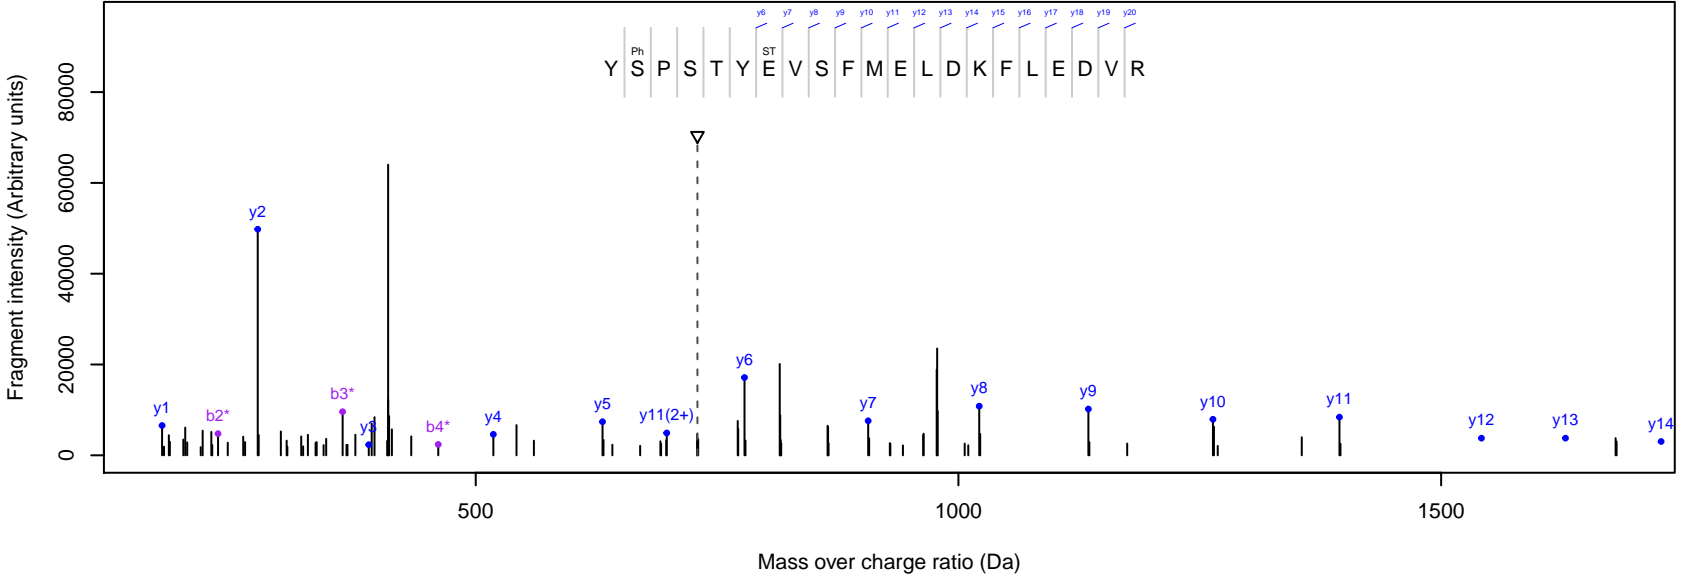

KVLS(Phospho (STY))DS(Phospho (STY))EDEEKDADVPGTSTR-3+

Source : QE3\_201126\_FR\_TiOx\_hum\_tissue\_Urea\_RNAB\_N Scan : 17115

Andromeda score : 95.459

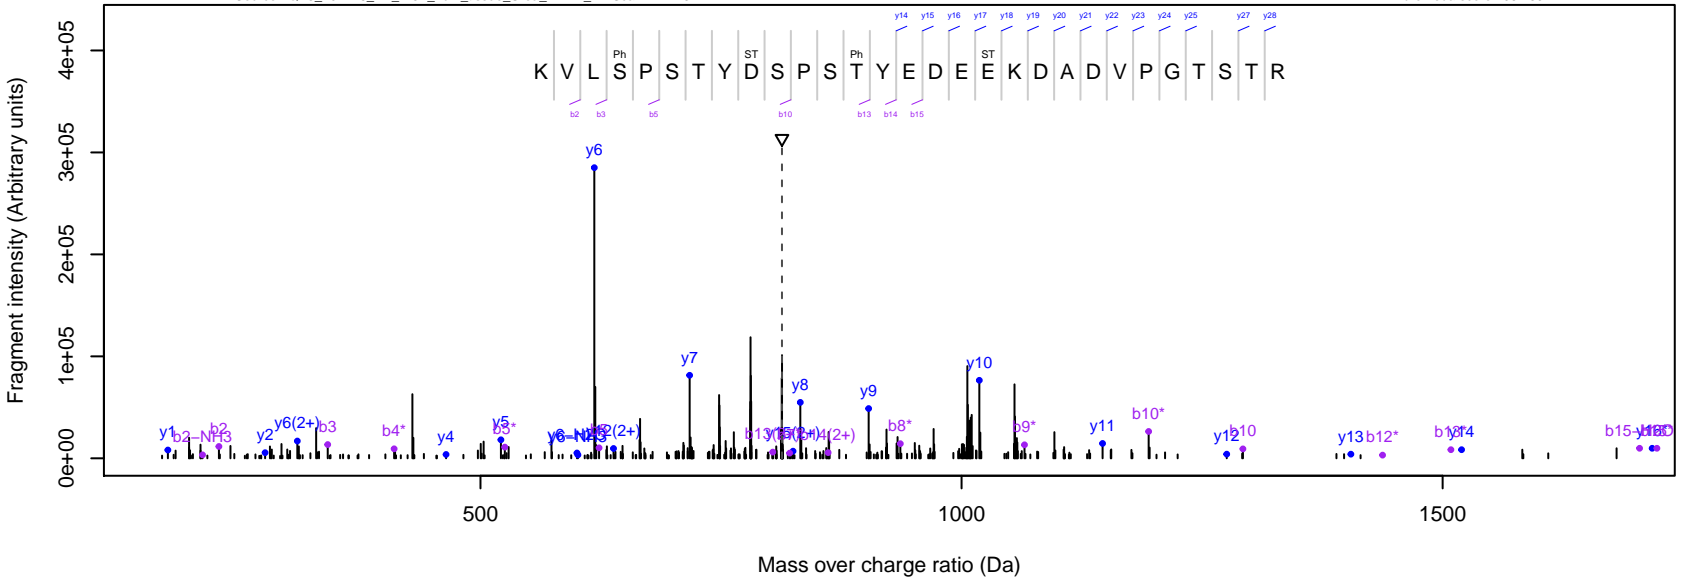

AHFNLDESGVLSLDRVSVFETLVEDS(Phospho (STY))AEEESTLTK-4+

Source : QE3\_201126\_FR\_TiOx\_hum\_tissue\_Urea\_RNAB\_B Scan : 62267

Andromeda score : 95.458

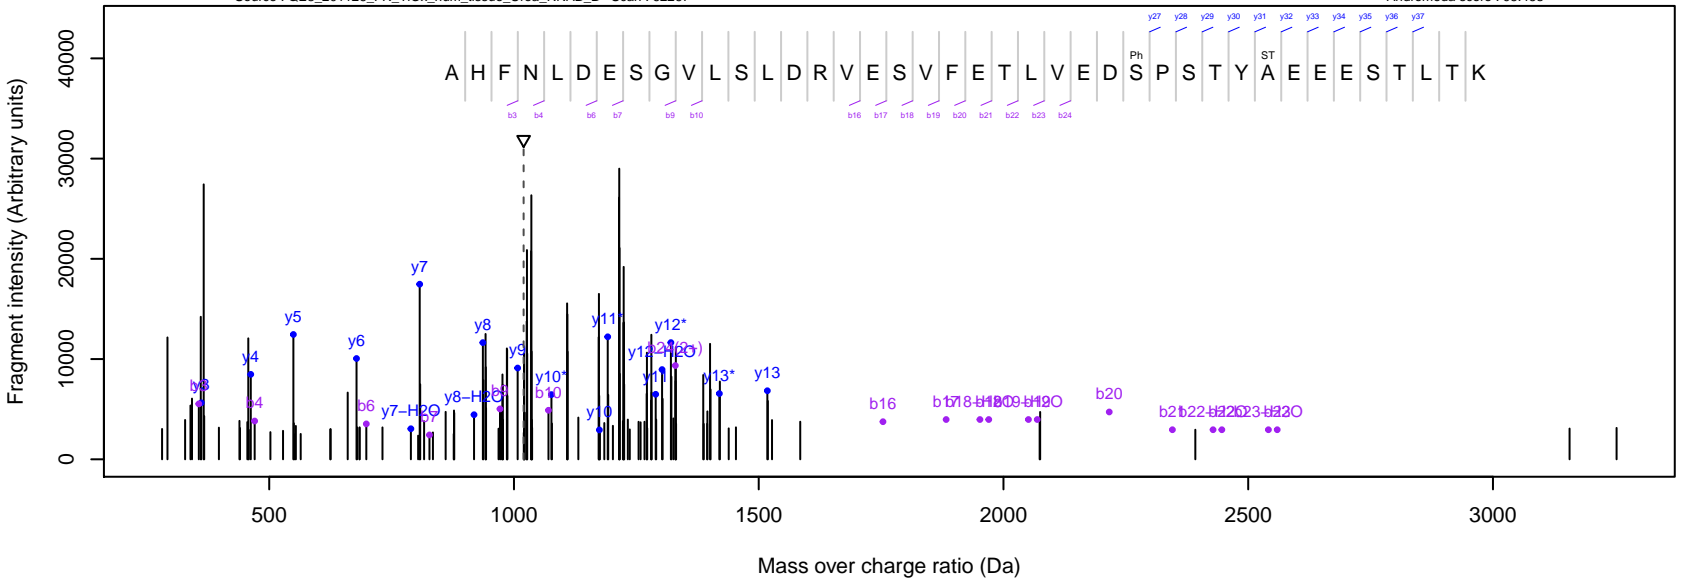

GVPEKS(Phospho (STY))PVLEK-2+

Source : QE3\_201126\_FR\_TiOx\_hum\_tissue\_Urea\_RNAB\_H Scan : 9181

Andromeda score : 95.417

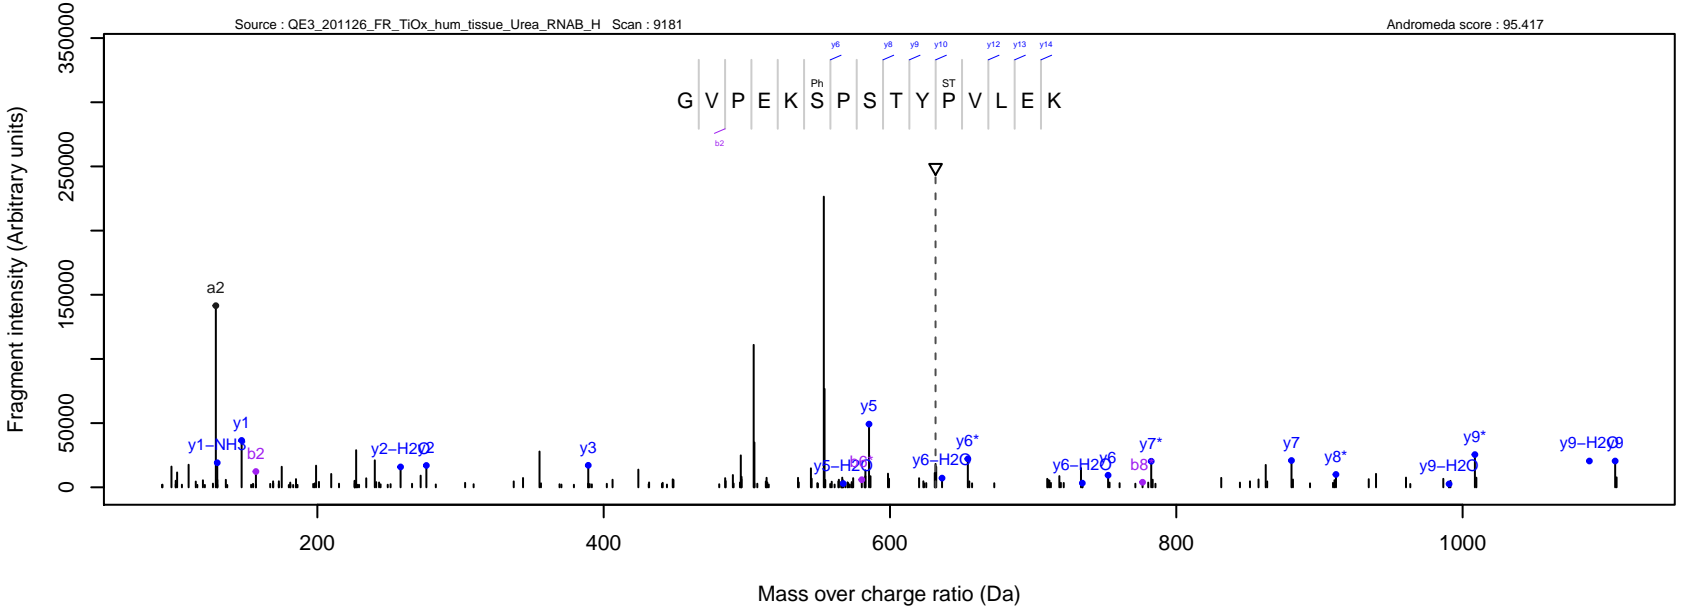



FRIS(Phospho (STY))HELDSASSPSTYEVN-2+

Source : QE3\_201126\_FR\_TiOx\_hum\_tissue\_Urea\_RNAB\_H Scan : 30775

Andromeda score : 95.409

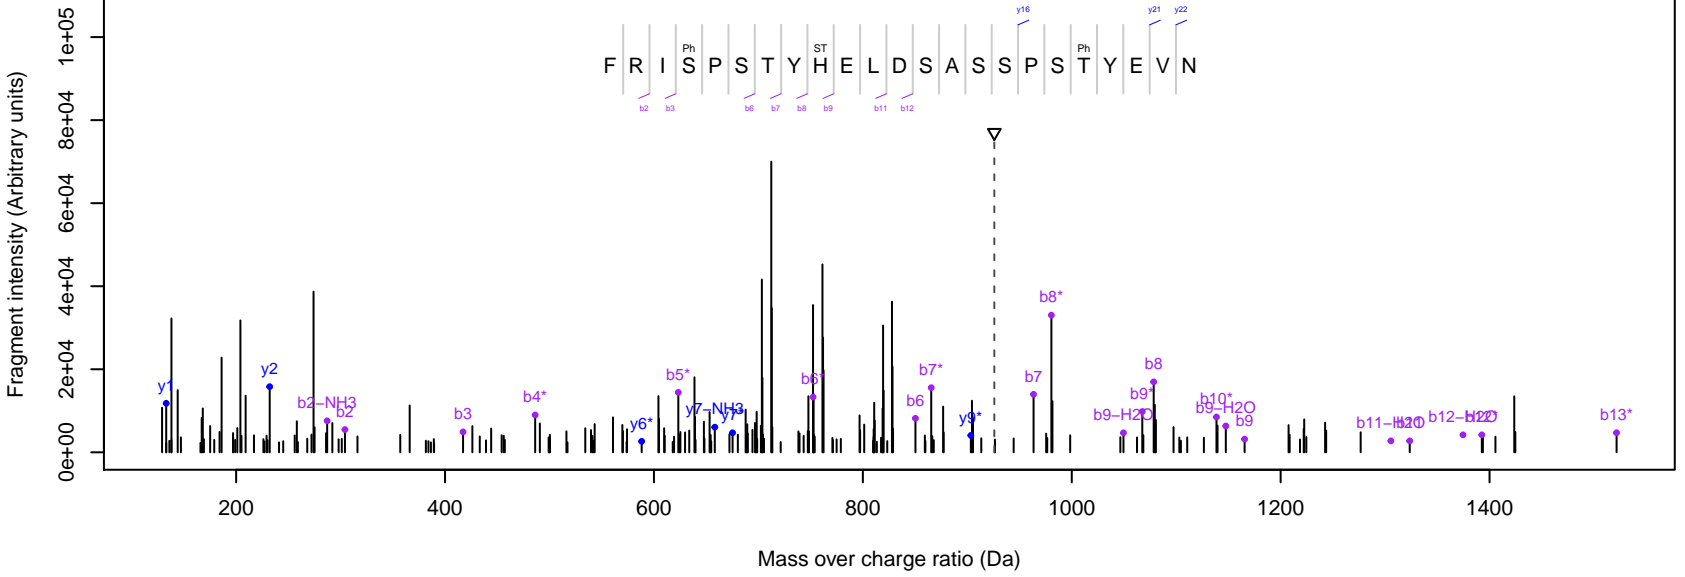

SAVQKPPS(Phospho (STY))TGSAPAIESVD-2+

Source : QE3\_201126\_FR\_TiOx\_hum\_tissue\_Urea\_RNAB\_N Scan : 24926

Andromeda score : 95.409

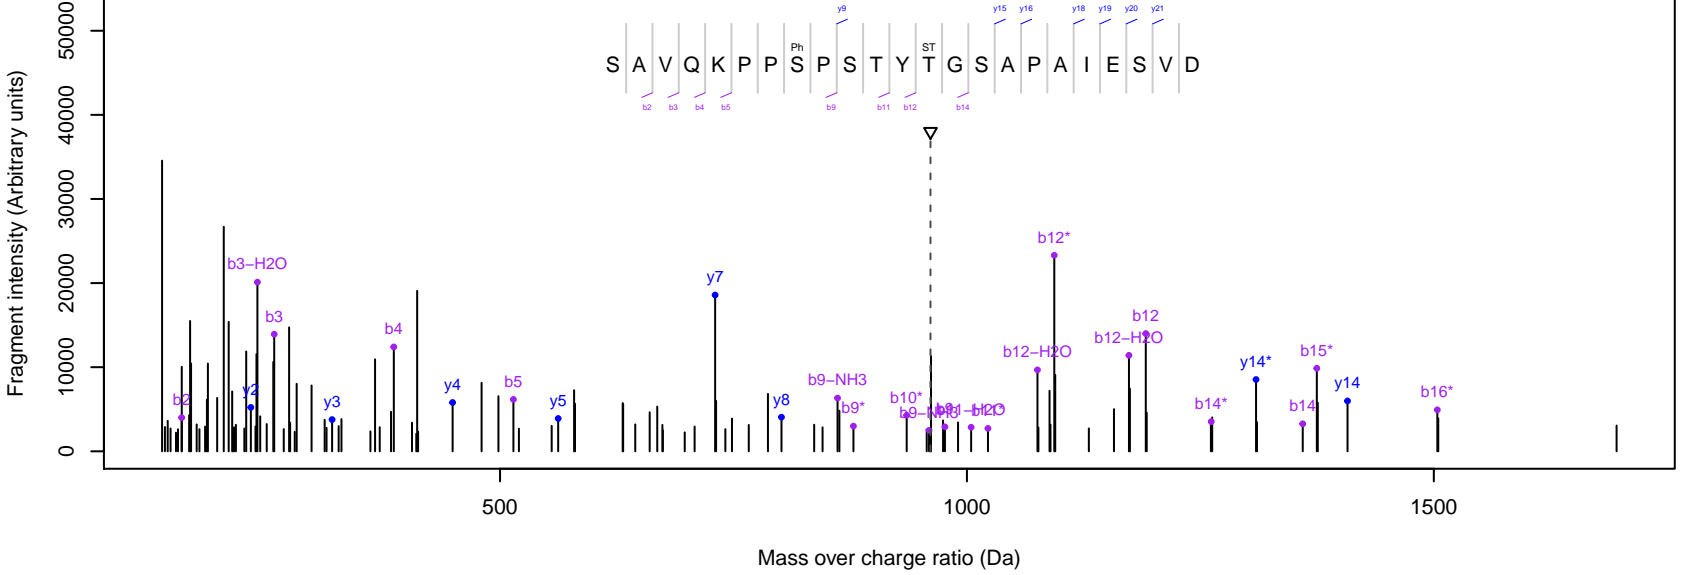

SMS(Phospho (STY))APVIFDR-2+

Source : QE3\_201126\_FR\_TiOx\_hum\_tissue\_Urea\_RNAB\_N Scan : 38657

Andromeda score : 95.401

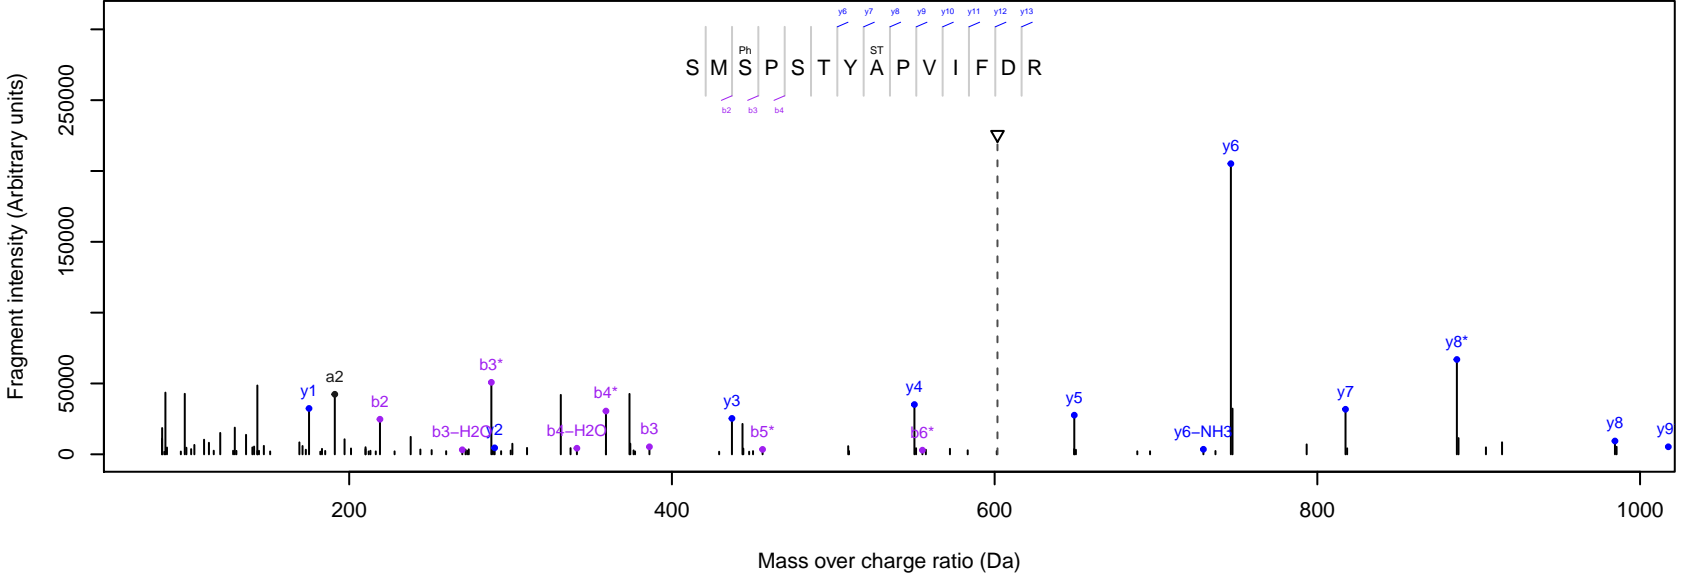

S(Phospho (STY))NLDITVGSR-2+

Source : QE3\_2011126\_FR\_TiOx\_hum\_tissue\_Urea\_RNAB\_H Scan : 22625

Andromeda score : 95.401

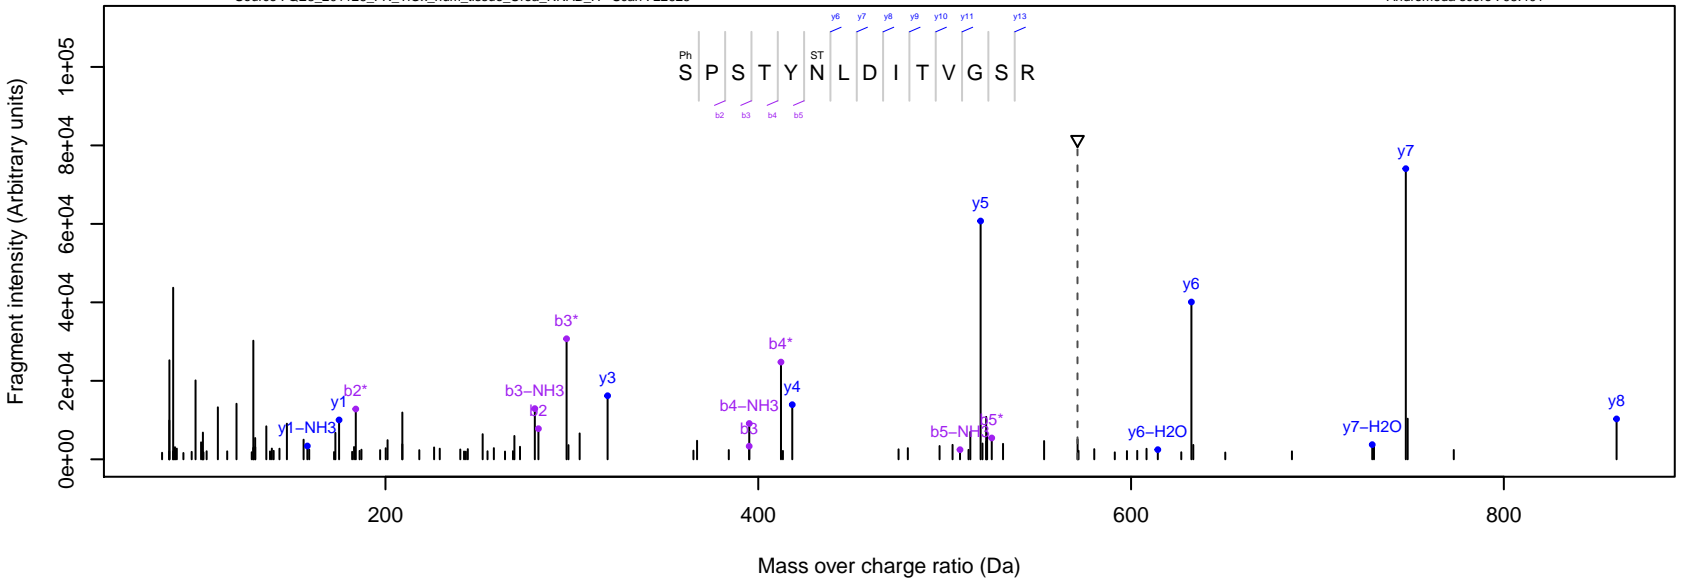

ASLVALPEQTAS(Phospho (STY))EETPPPLTK-3+

Source : QE3\_2011126\_FR\_TiOx\_hum\_tissue\_Urea\_RNAB\_N Scan : 51601

Andromeda score : 95.366

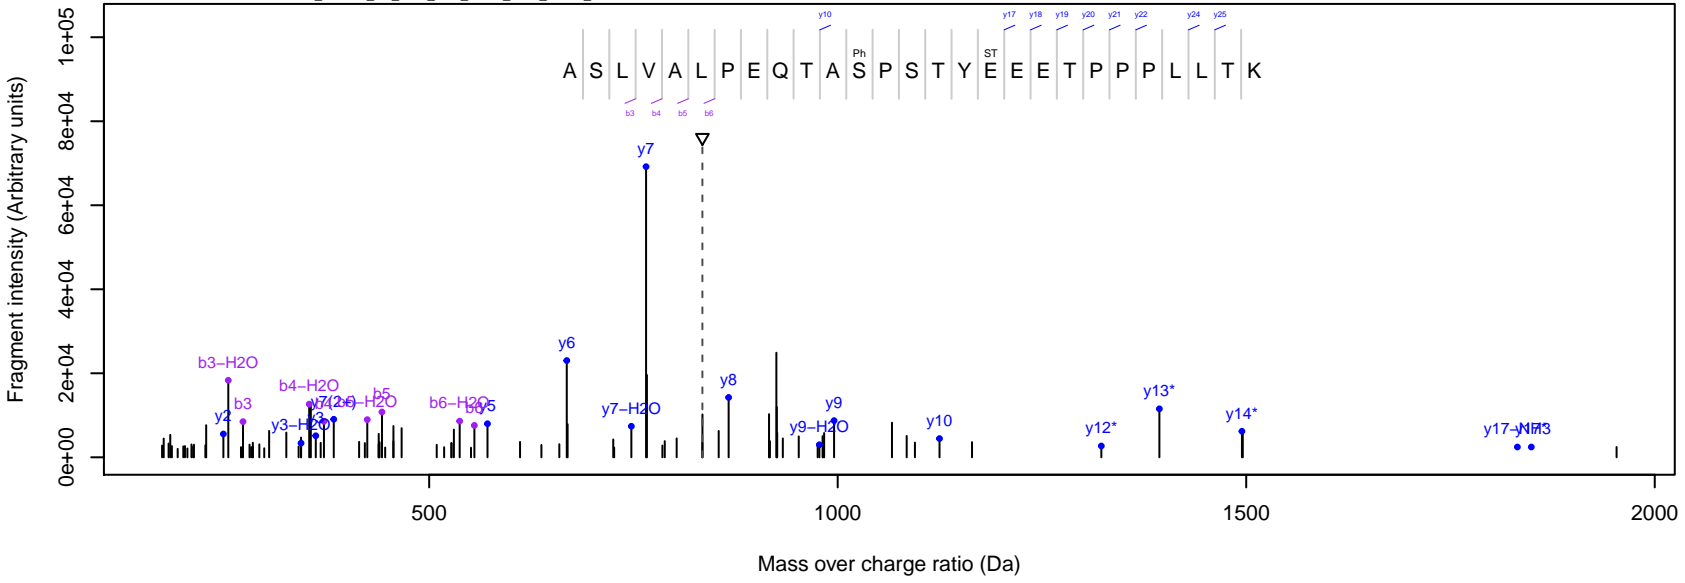

RPGQSFHVNSEVLS(Phospho (STY))PR-3+

Source : QE3\_2011126\_FR\_TiOx\_hum\_tissue\_Urea\_RNAB\_N Scan : 24594

Andromeda score : 95.366

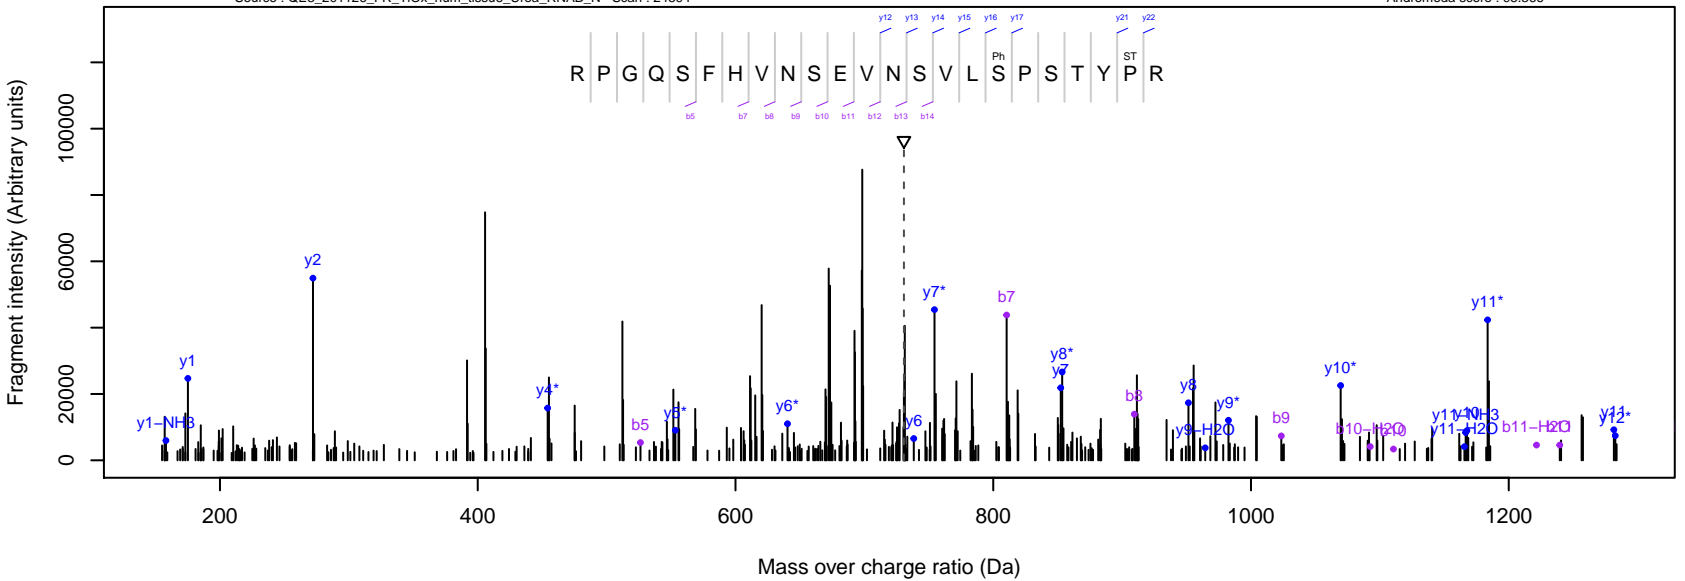

SIS(Phospho (STY))SPSVSSETMDKPKVDLSTRK-3+

Source : QE3\_201126\_FR\_TiOx\_hum\_tissue\_Urea\_RNAB\_B Scan : 21626

Andromeda score : 95.366

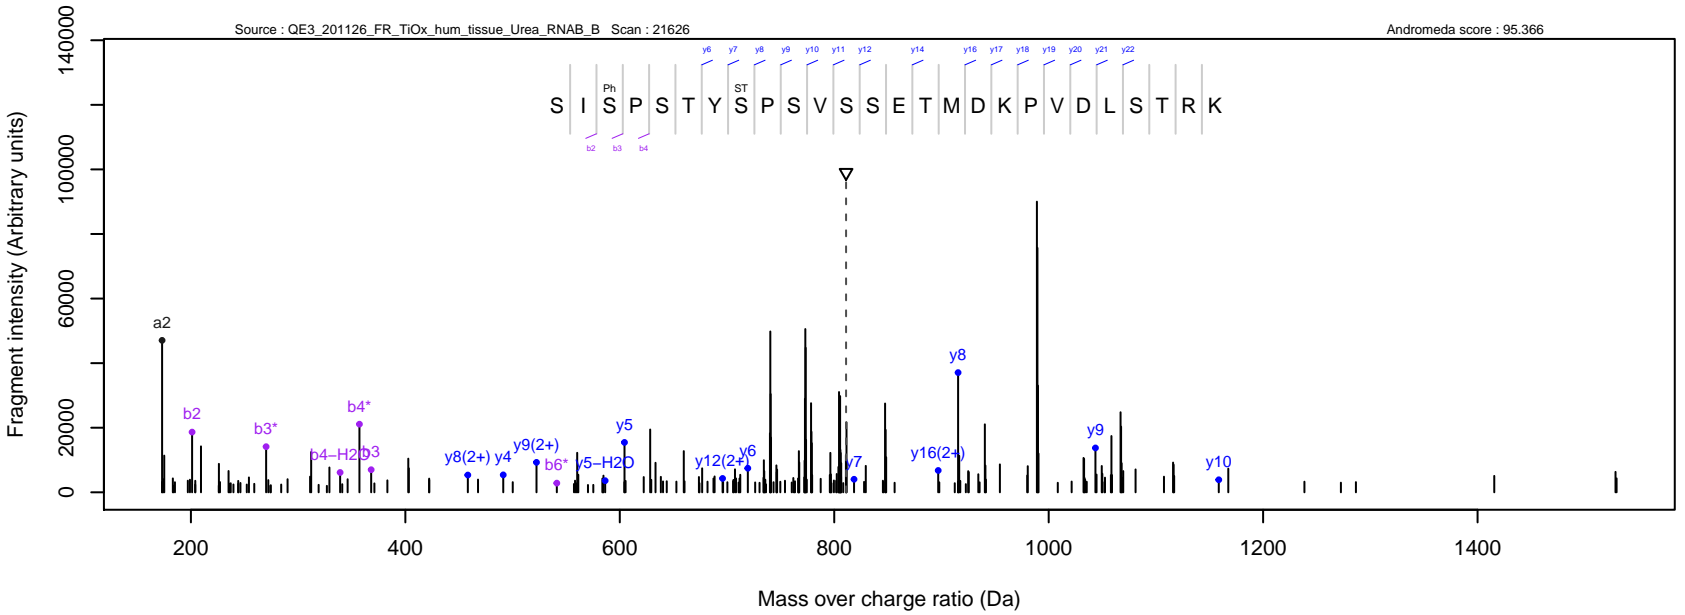

TPADTGFAFPDWAYKPESSPSTYPGSR-3+

Source : QE3\_201126\_FR\_TiOx\_hum\_tissue\_Urea\_RNAB\_H Scan : 49105

Andromeda score : 95.366

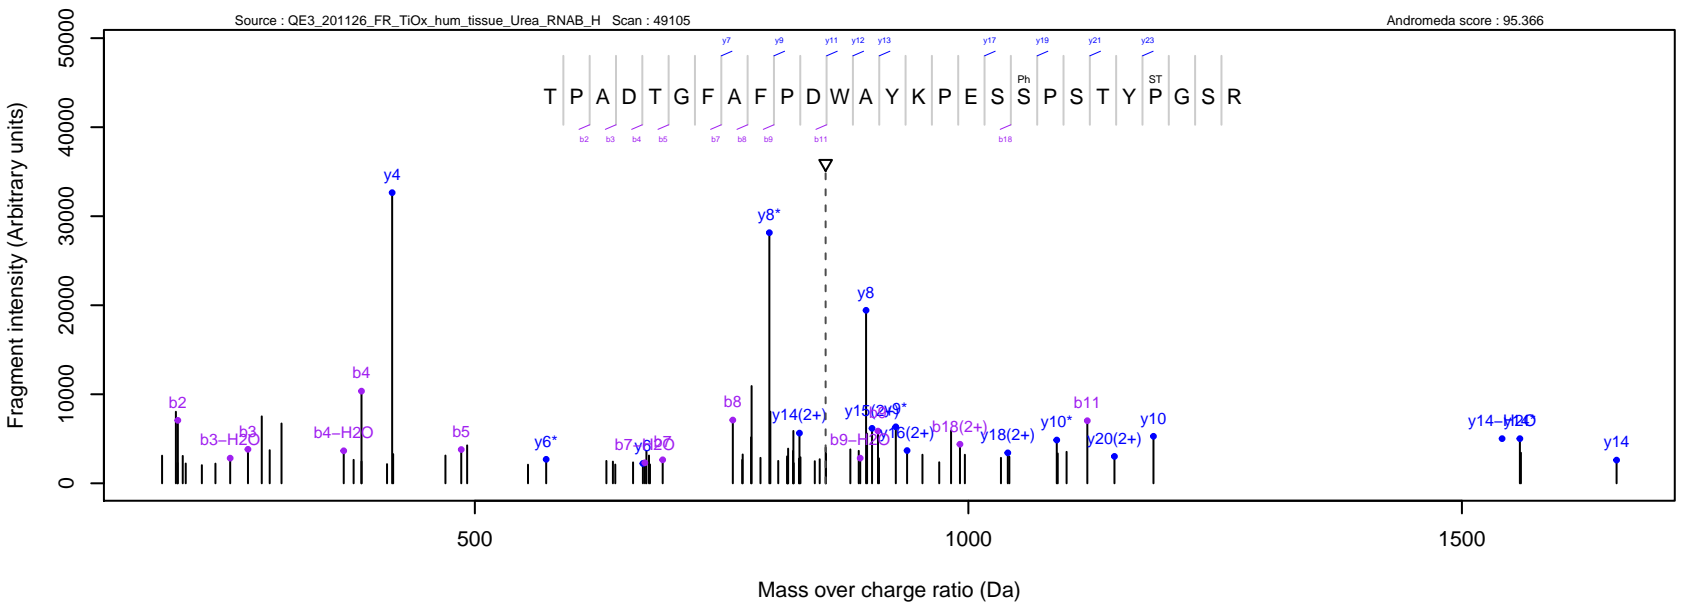

S(Phospho (STY))RTS(Phospho (STY))PAPWKR-2+

Source : QE3\_201126\_FR\_TiOx\_hum\_tissue\_Urea\_RNAB\_N Scan : 9970

Andromeda score : 95.345

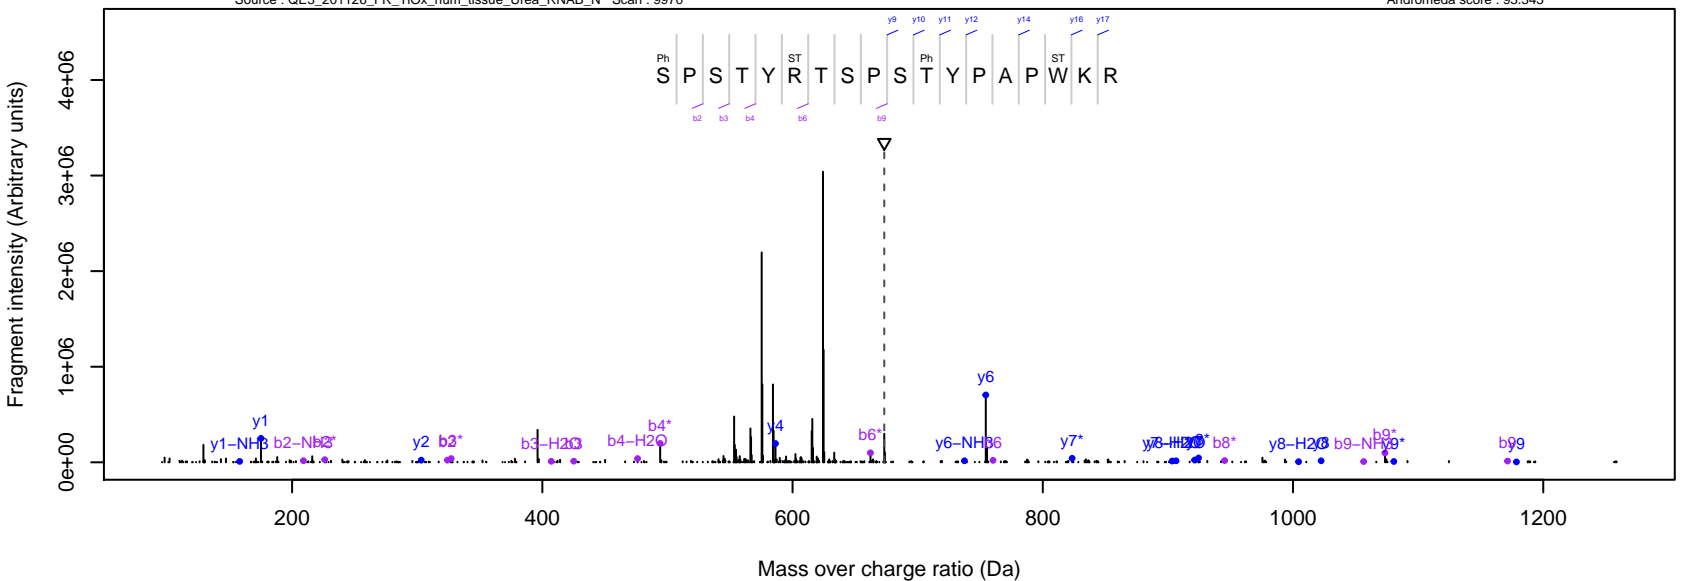

WS(Phospho (STY))PPQNYK-2+

Source : QE3\_201126\_FR\_TiOx\_hum\_tissue\_Urea\_RNAB\_N Scan : 21578

Andromeda score : 95.311

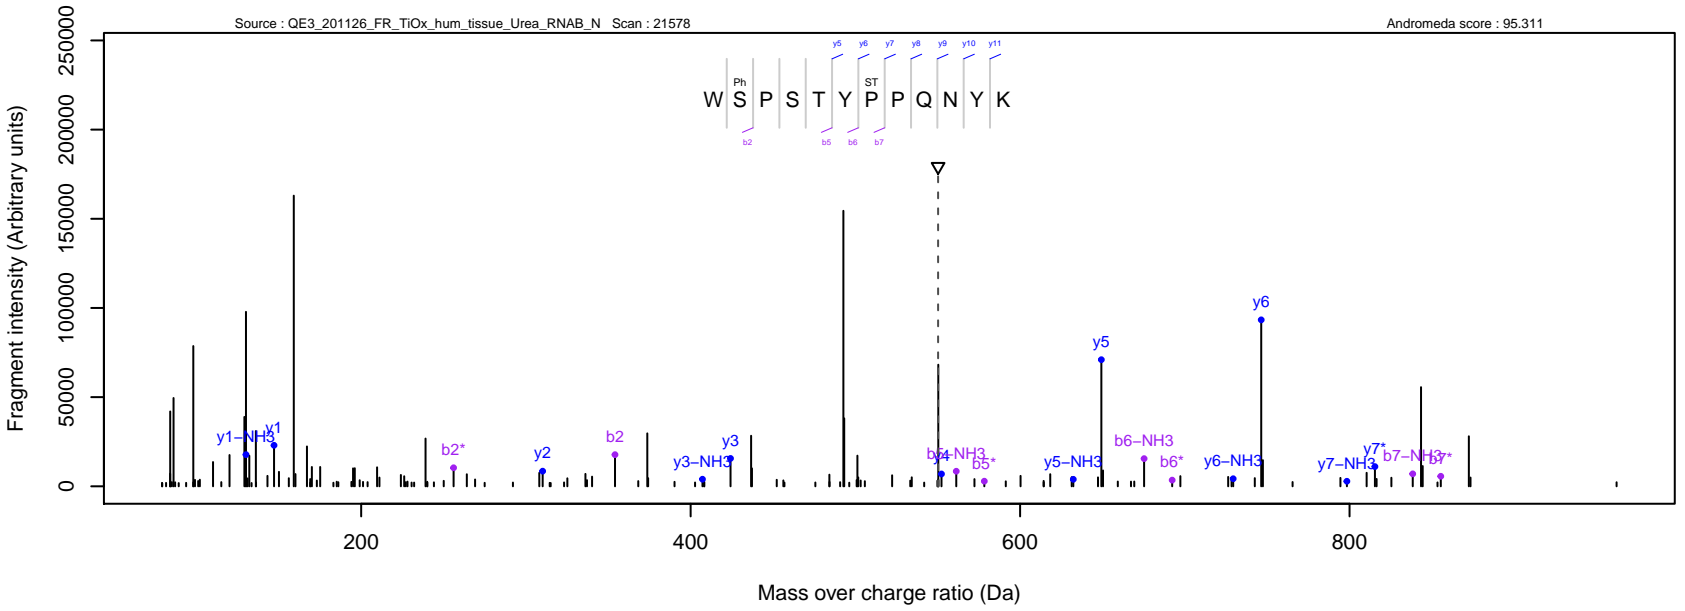

APS(Phospho (STY))VALPVAQVPTDPGHFVLLDVK-3+

Source : QE3\_201126\_FR\_TiOx\_hum\_tissue\_Urea\_RNAB\_B Scan : 57269

Andromeda score : 95.302

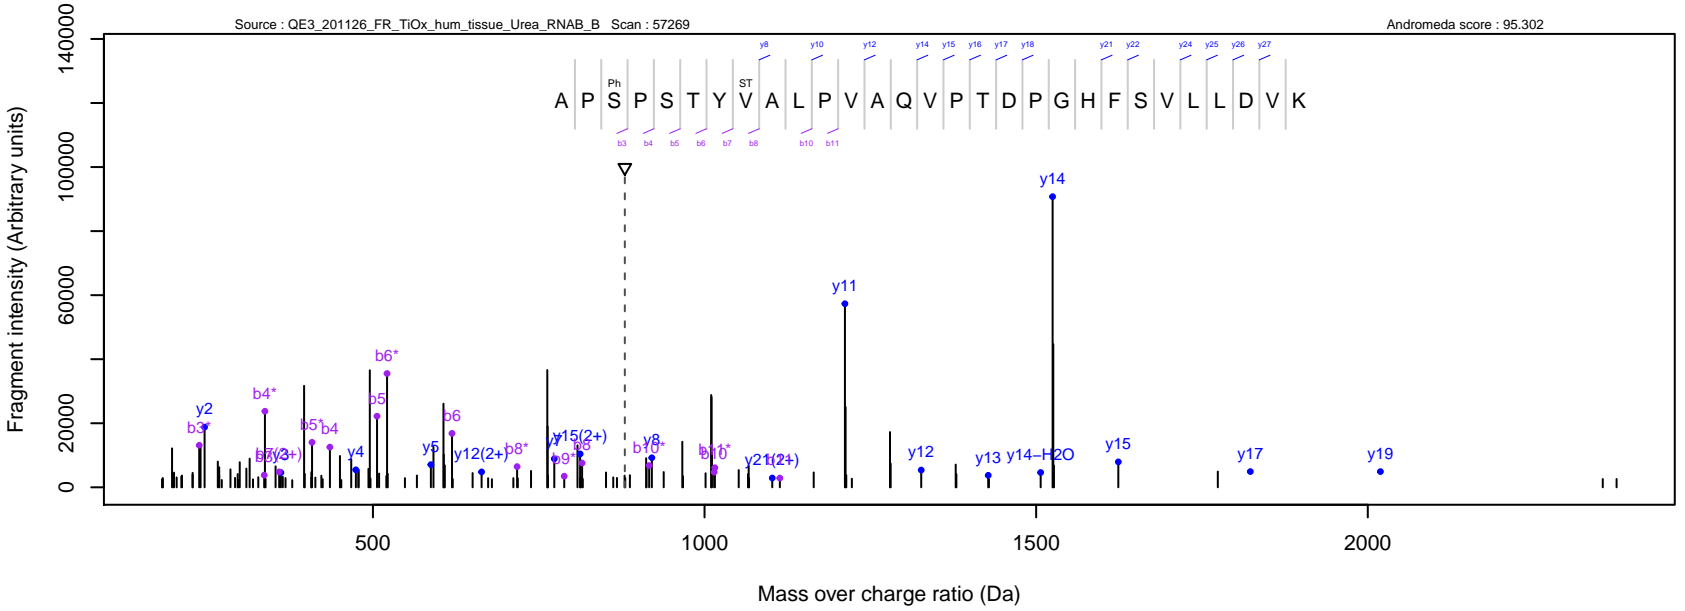

TQQLHPVLQKPSVFGNDS(Phospho (STY))DDDDETSVESLQR-4+

Source : QE3\_201126\_FR\_TiOx\_hum\_tissue\_Urea\_RNAB\_N Scan : 34867

Andromeda score : 95.302

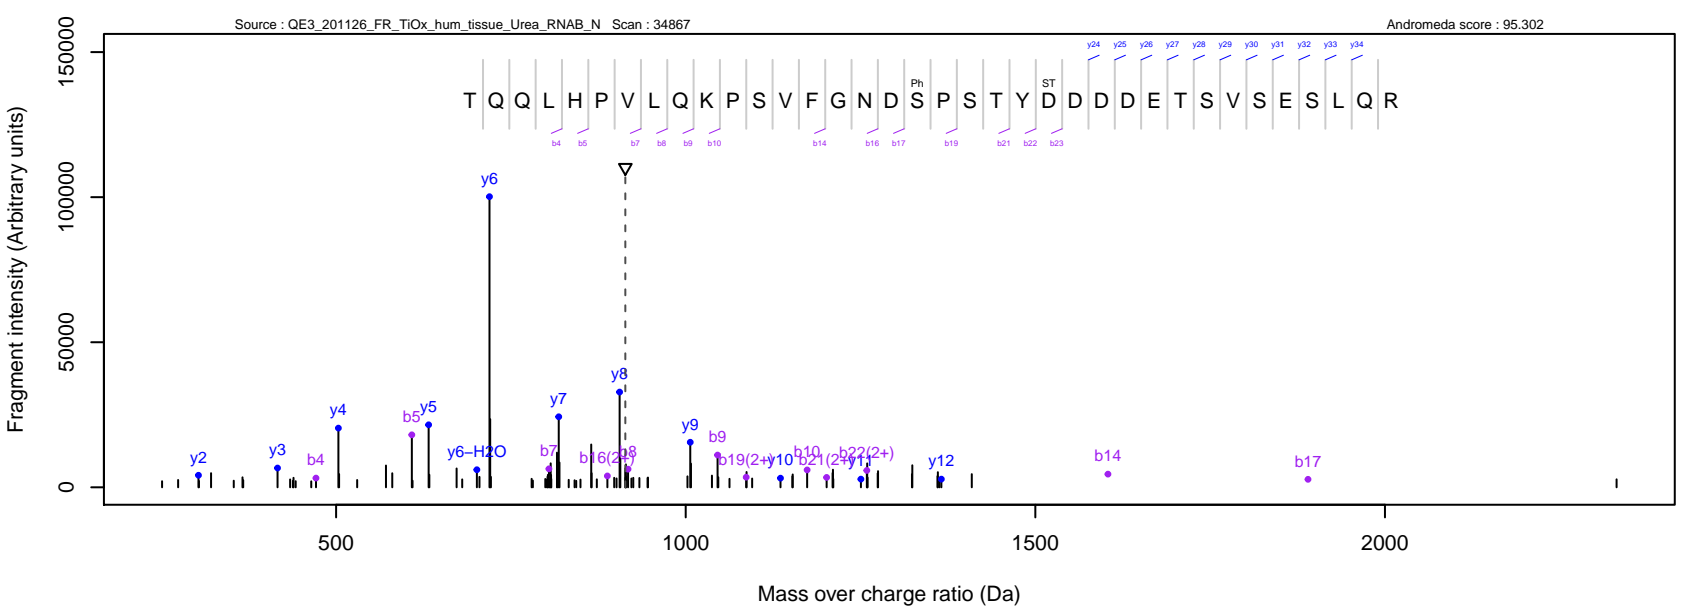

DMS(Phospho (STY))PLSETEMALGK-2+

Source : QE3\_201126\_FR\_TiOx\_hum\_tissue\_Urea\_RNAB\_H Scan : 50511

Andromeda score : 95.264

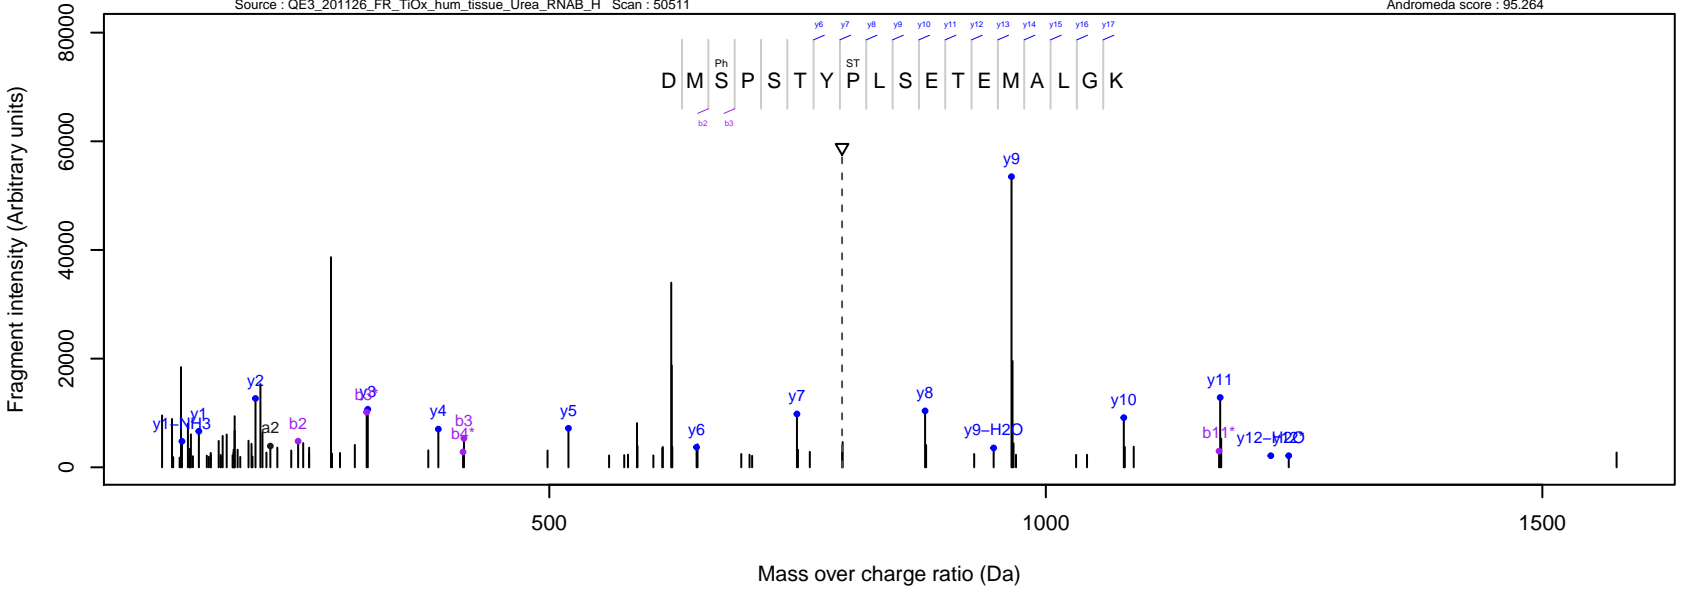

MDRT(Phospho (STY))PPPTLS(Phospho (STY))PAAITVGR-3+

Source : QE3\_201126\_FR\_TiOx\_hum\_tissue\_Urea\_RNAB\_N Scan : 37908

Andromeda score : 95.255

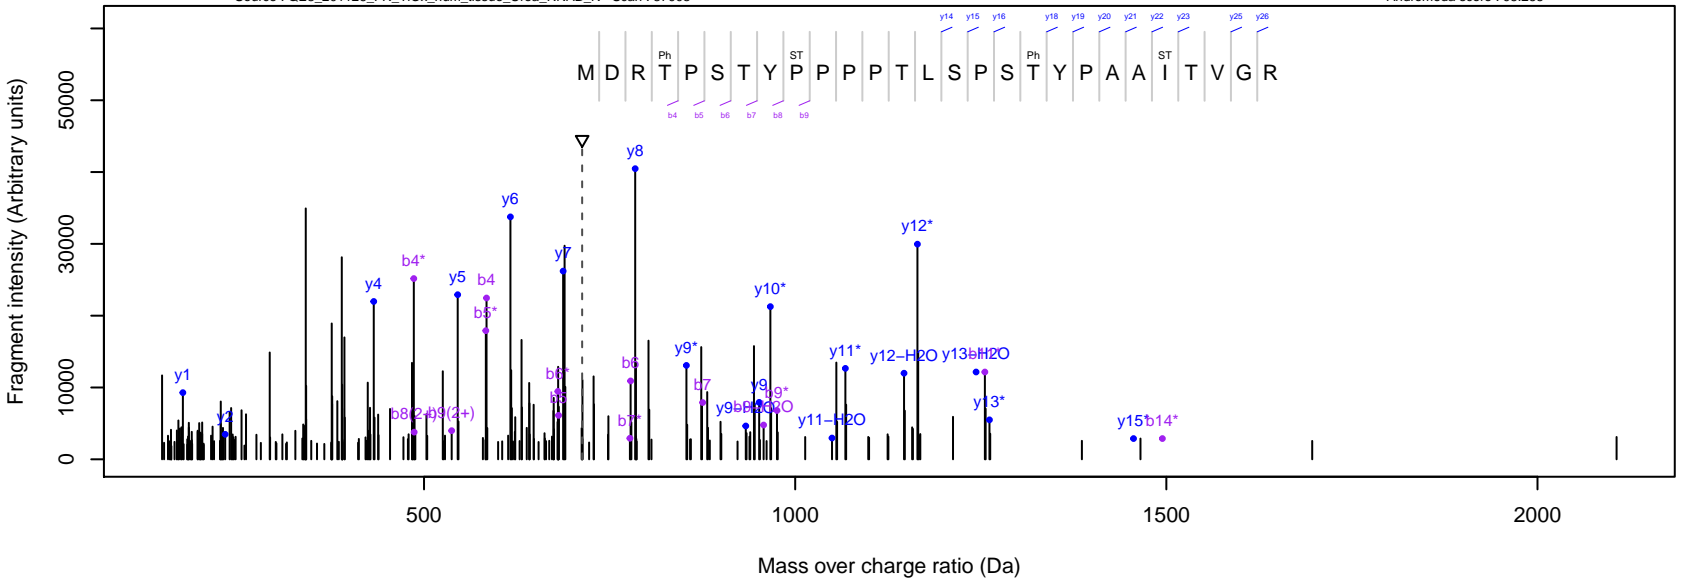

TSS(Phospho (STY))FTEQLDEGTPNRENASTHASK-3+

Source : QE3\_201126\_FR\_TiOx\_hum\_tissue\_Urea\_RNAB\_B Scan : 15334

Andromeda score : 95.255

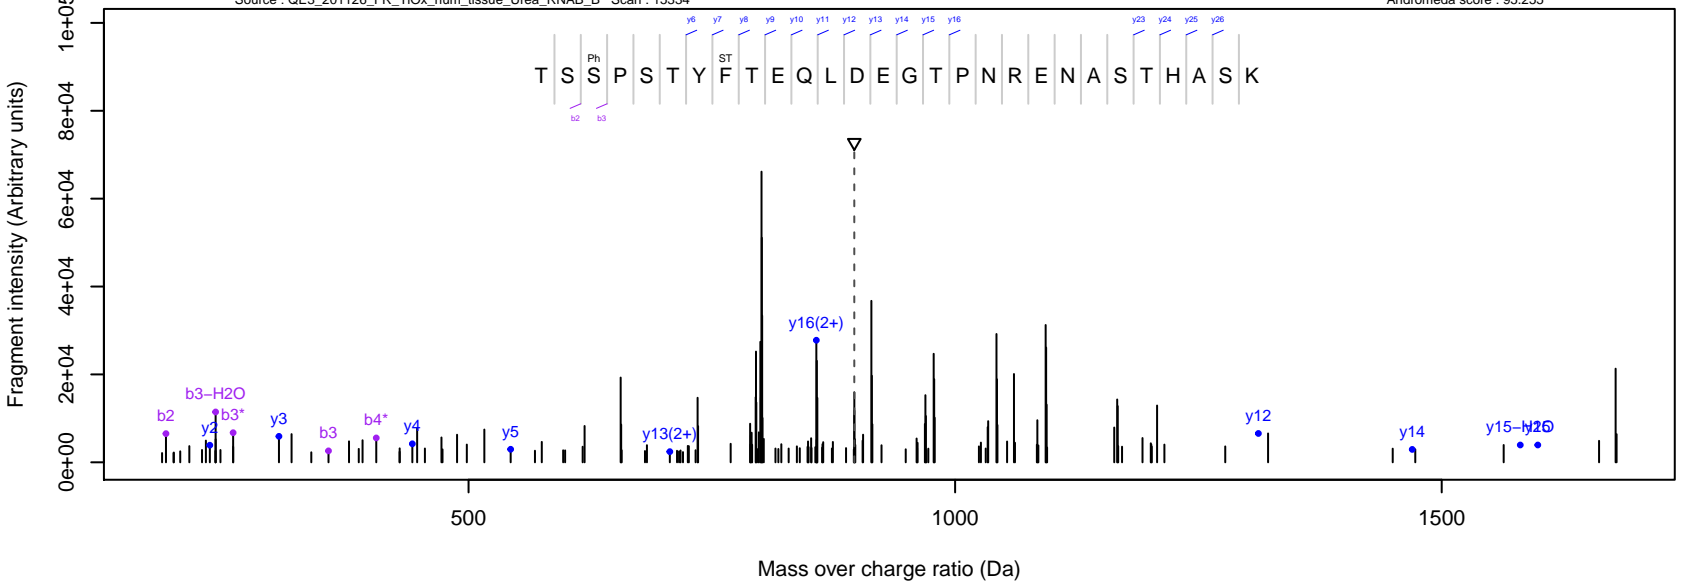

WT(Phospho (STY))PKSPLDPDSGLLSCTLPNGFGGQSGPEGER-3+

Source : QE3\_201126\_FR\_TiOx\_hum\_tissue\_Urea\_RNAB\_H Scan : 53873

Andromeda score : 95.244

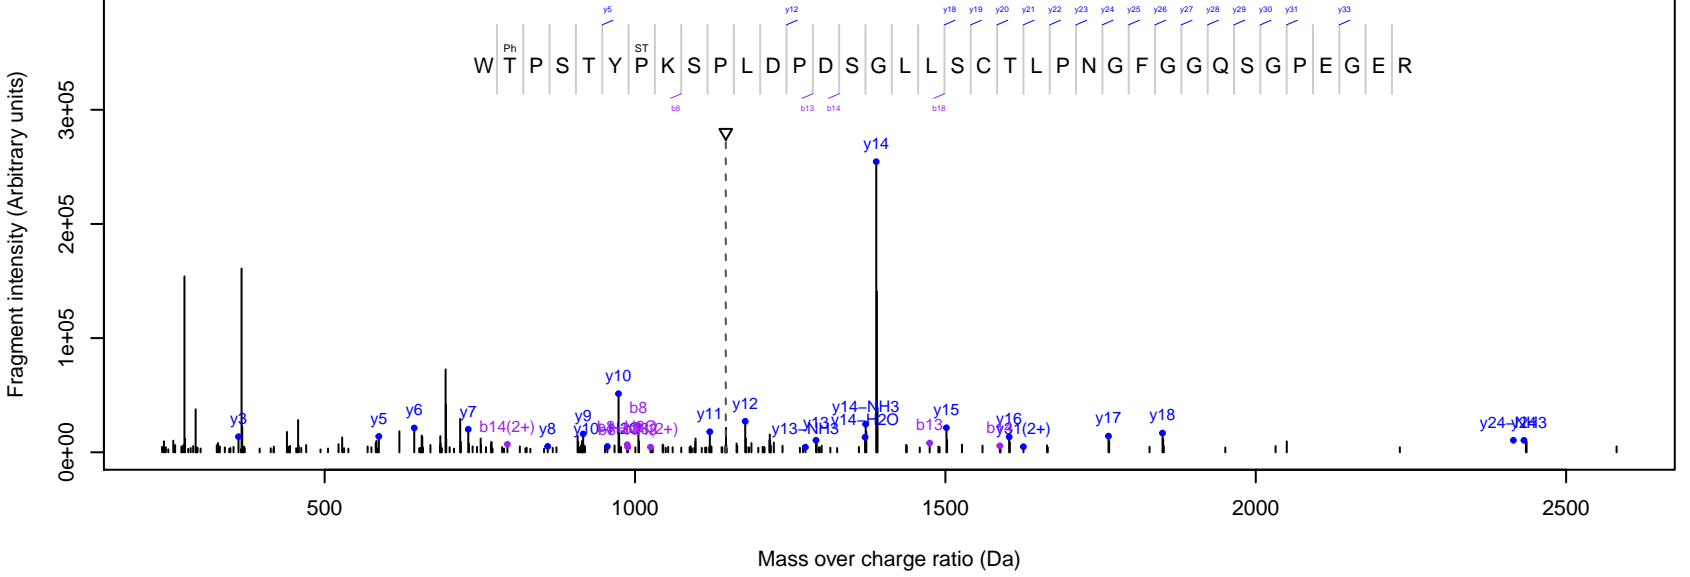

DGDSYDPY(Phospho (STY))DFSDEEEMPVHT(Phospho (STY))PK-3+

Source : QE3\_201126\_FR\_TiOx\_hum\_tissue\_Urea\_RNAB\_B Scan : 49106

Andromeda score : 95.212

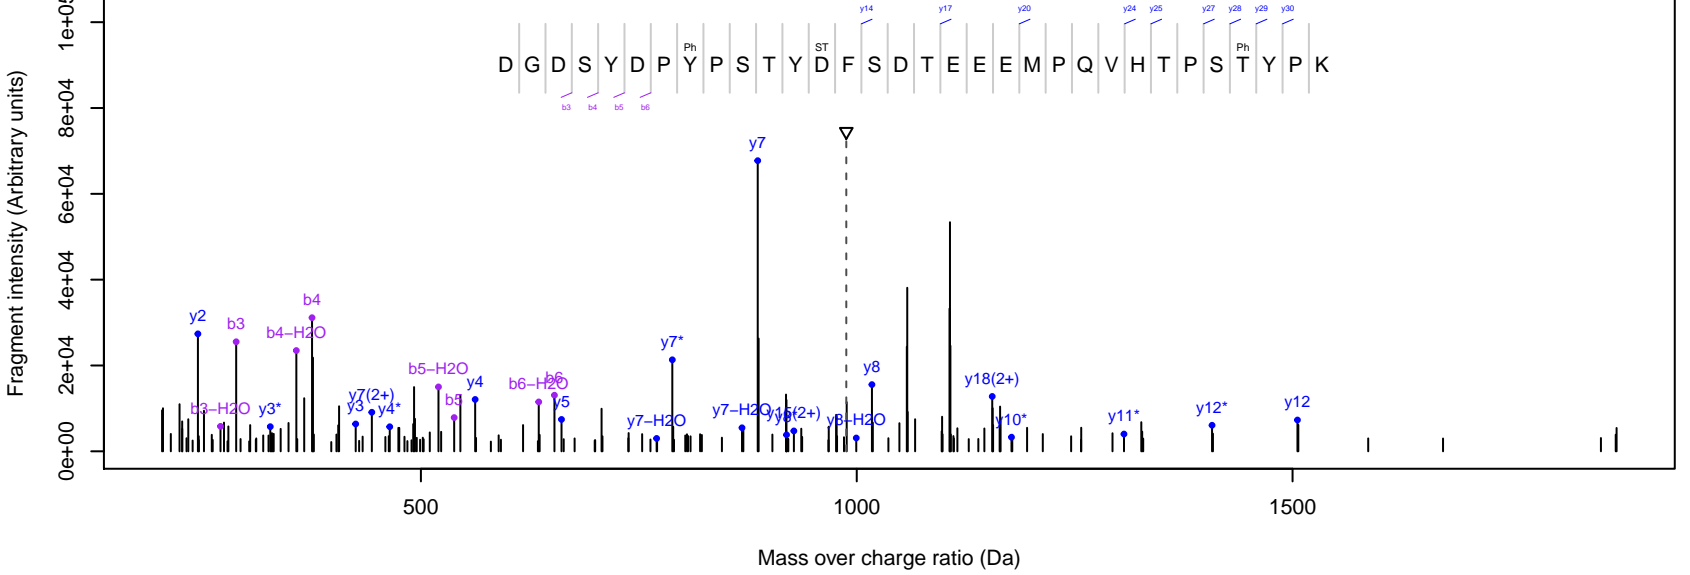

AT(Phospho (STY))TPPNQGRPDSVPYANLQELK-3+

Source : QE3\_201126\_FR\_TiOx\_hum\_tissue\_Urea\_RNAB\_H Scan : 31463

Andromeda score : 95.206

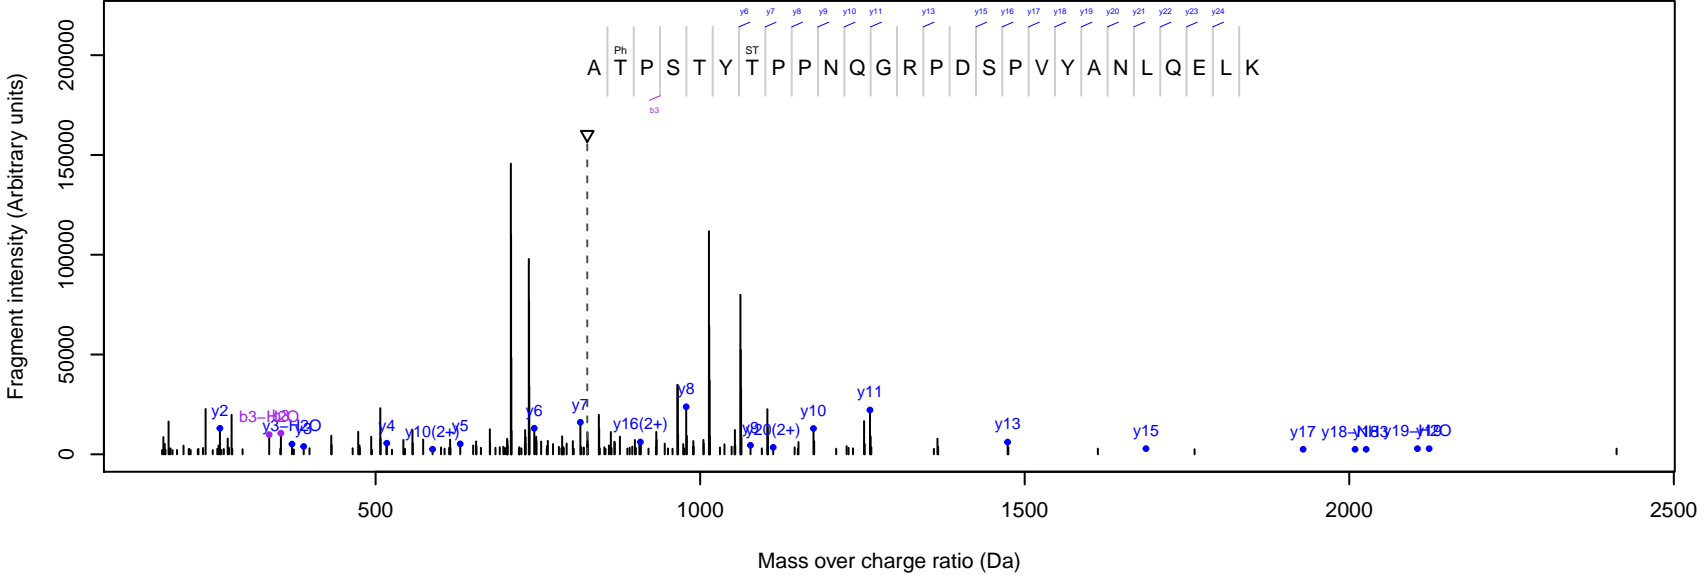

ILLVDS(Phospho (STY))PGM(Oxidation (M))GNADDEQQEEGTSSK-3+

Source : QE3\_201126\_FR\_TiOx\_hum\_tissue\_Urea\_RNAB\_H Scan : 30318

Andromeda score : 95.206

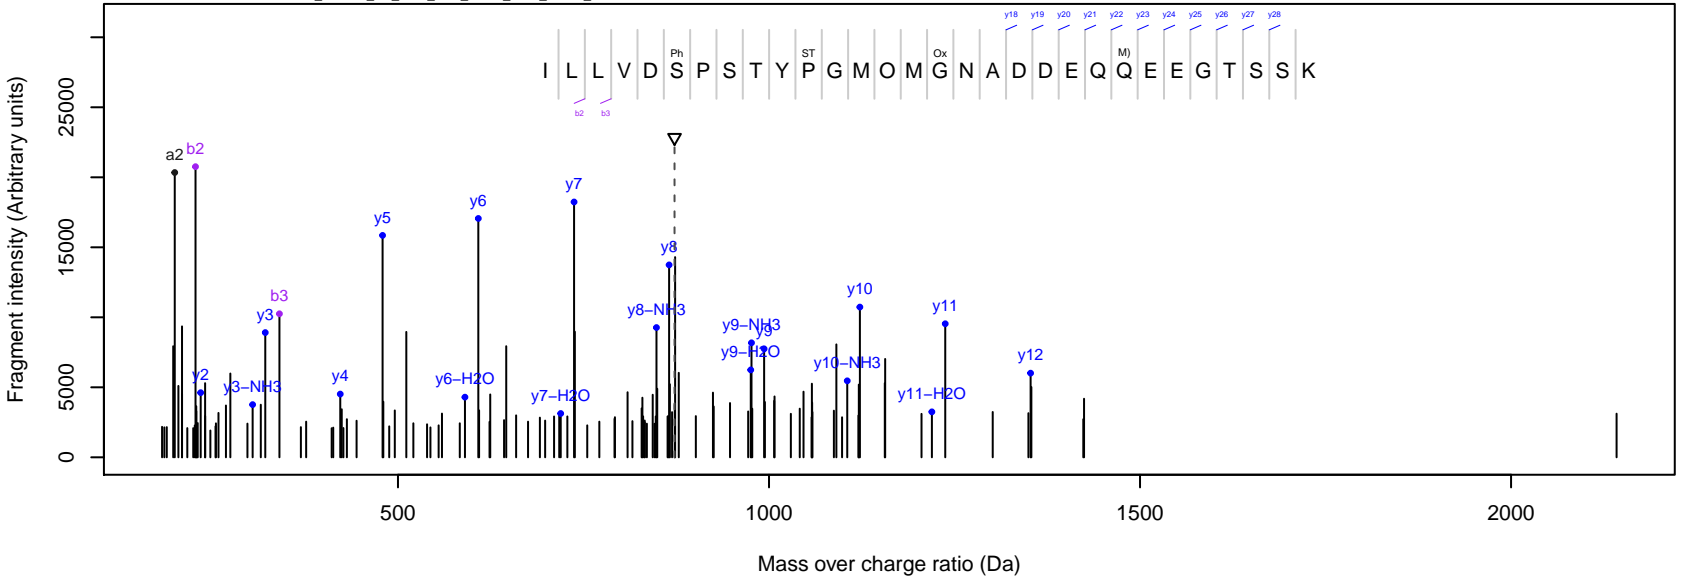

NHS(Phospho (STY))PLPPPQTNHEEPSR-4+

Source : QE3\_201126\_FR\_TiOx\_hum\_tissue\_Urea\_RNAB\_N Scan : 7450

Andromeda score : 95.206

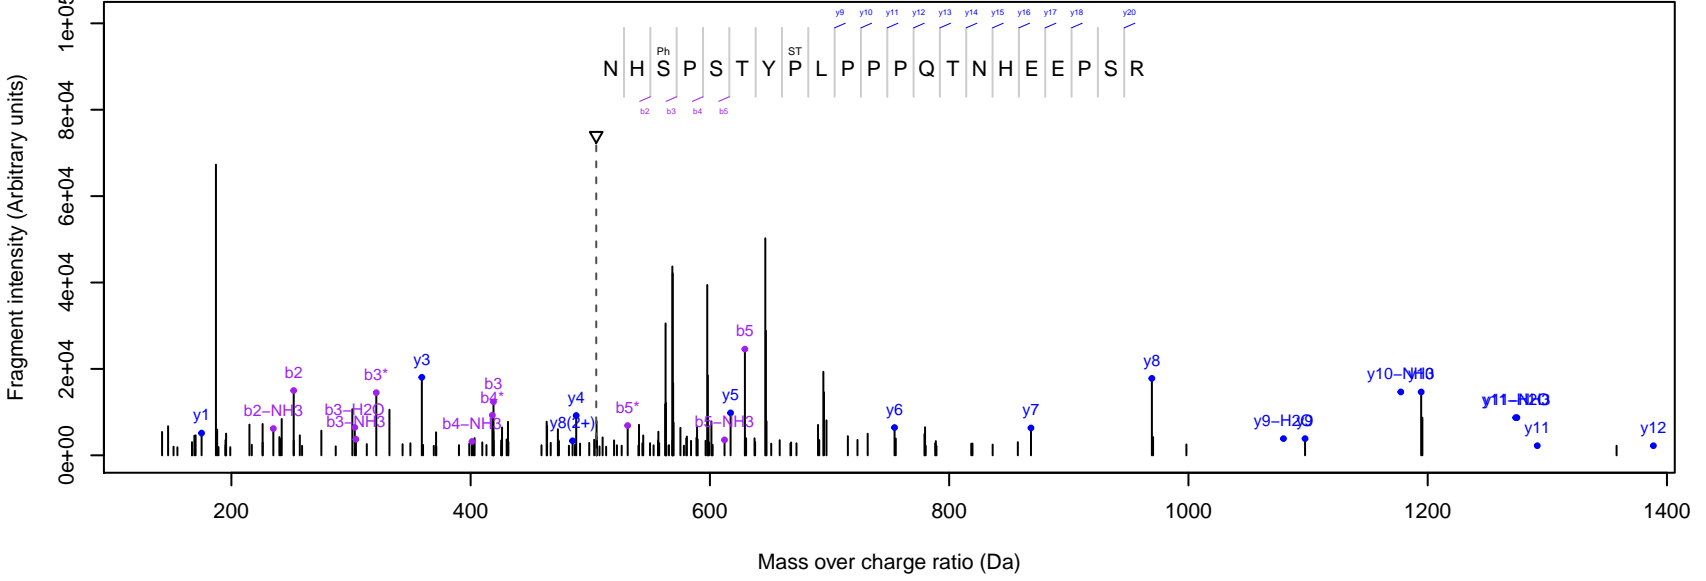

STPLASPSPPGRS(Phospho (STY))PQR-3+

Source : QE3\_201126\_FR\_TiOx\_hum\_tissue\_Urea\_RNAB\_H Scan : 11058

Andromeda score : 95.206

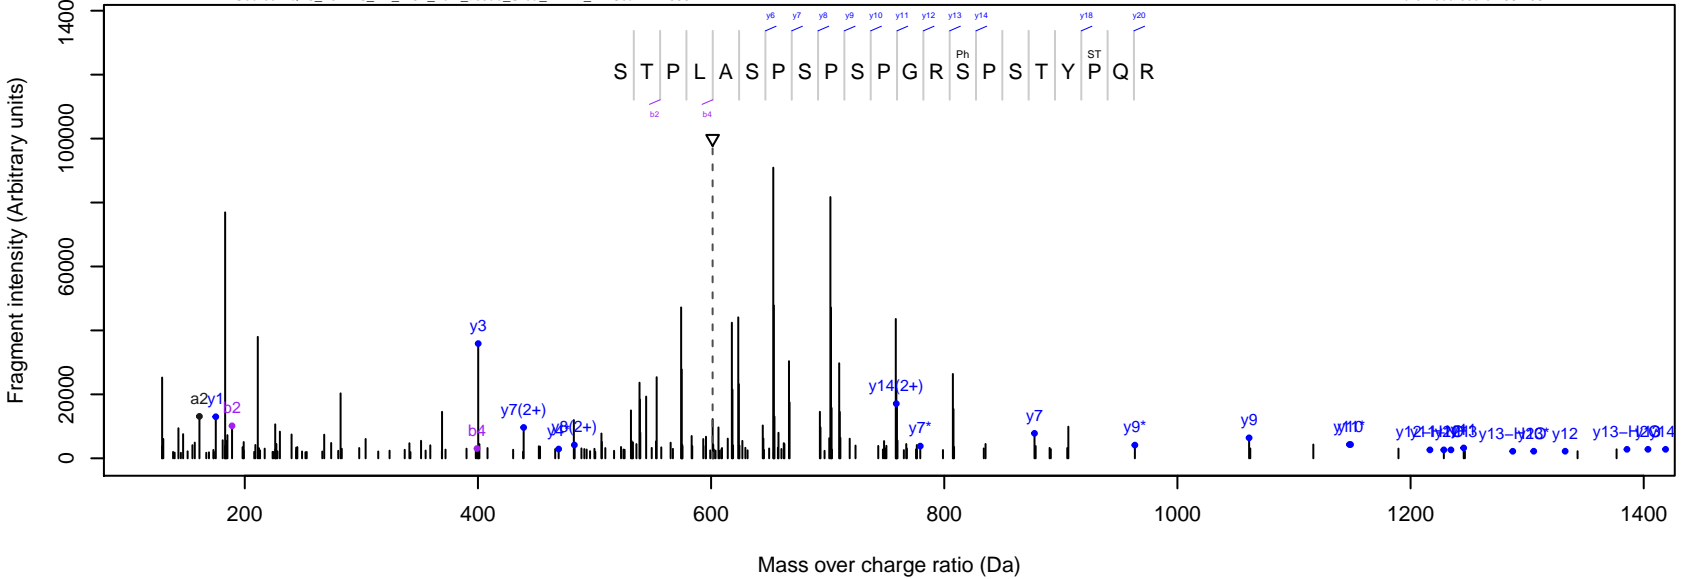

ILLDAQHES(Phospho (STY))GRSSSK-3+

Source : QE3\_201126\_FR\_TIOx\_hum\_tissue\_Urea\_RNAB\_N Scan : 8935

Andromeda score : 95.205

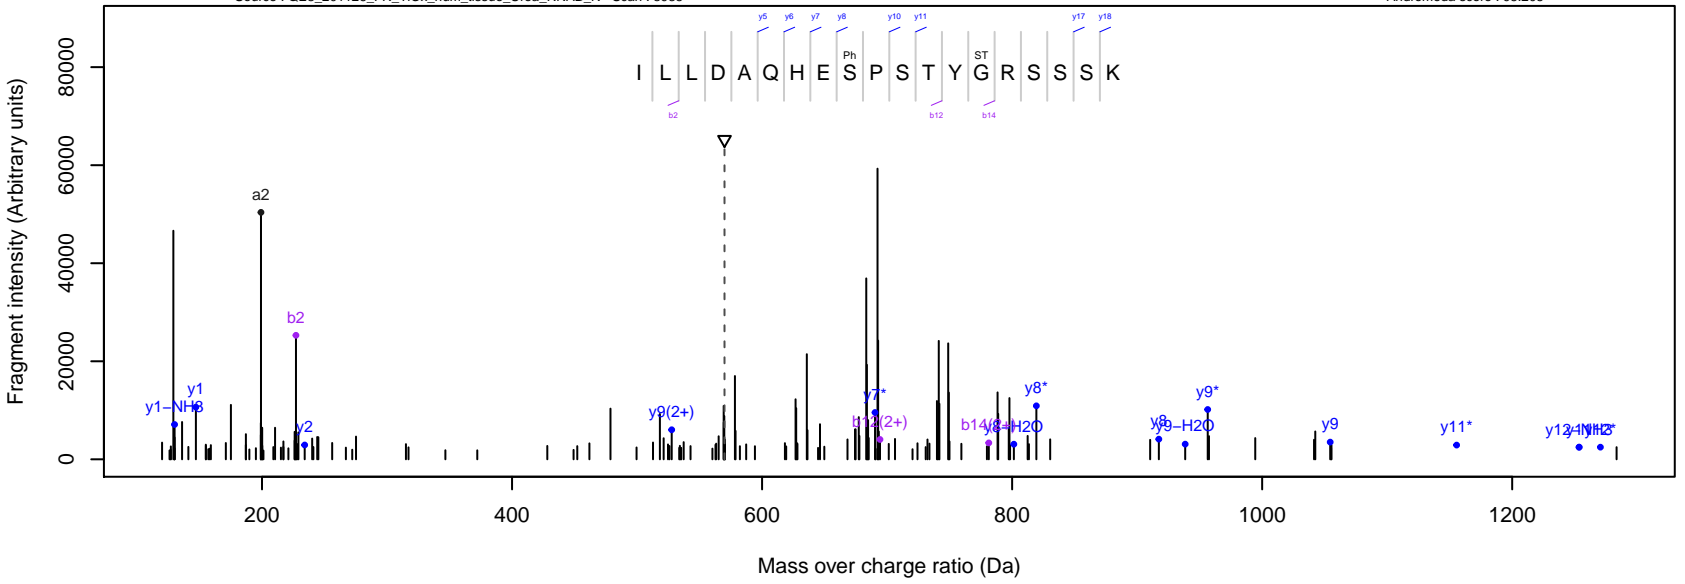

VLGSEEEEEALS(Phospho (STY))PAK-2+

Source : QE3\_201126\_FR\_TIOx\_hum\_tissue\_Urea\_RNAB\_B Scan : 22488

Andromeda score : 95.197

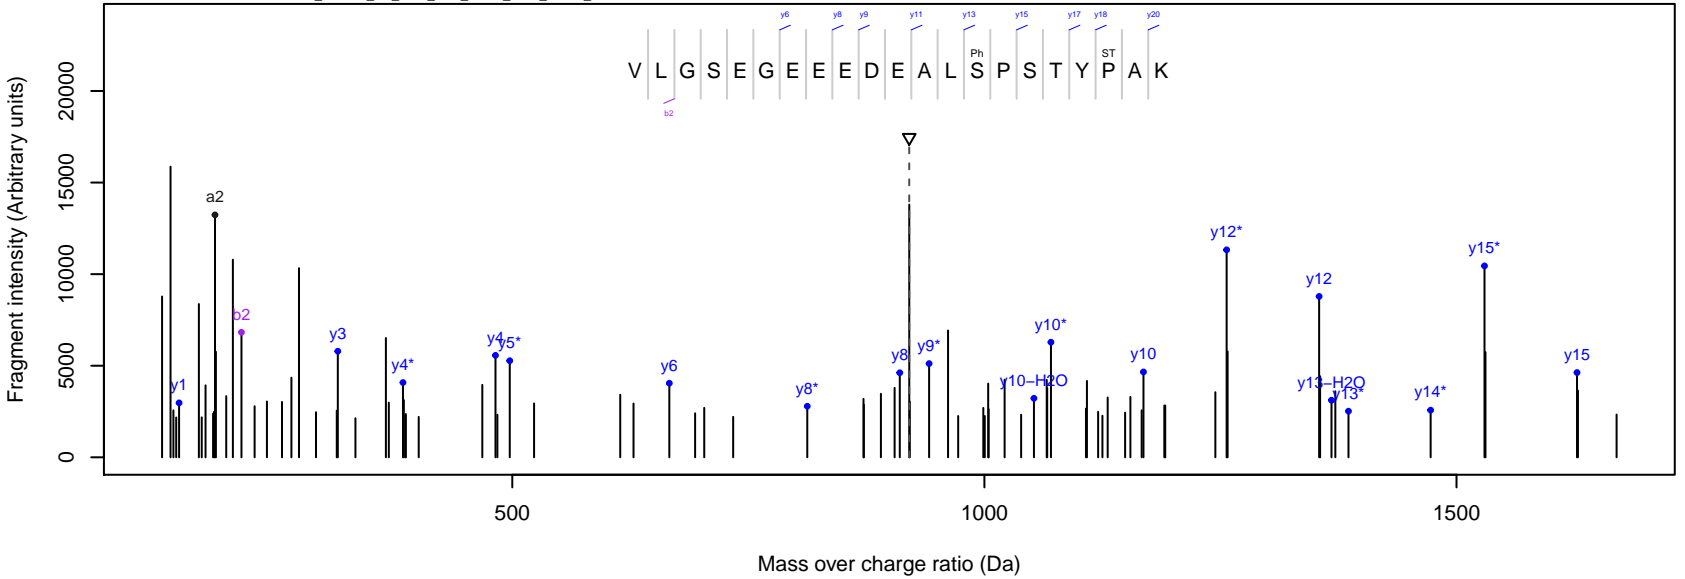

SANPTRPS(Phospho (STY))SPVTSISK-3+

Source : QE3\_201126\_FR\_TIOx\_hum\_tissue\_Urea\_RNAB\_N Scan : 8356

Andromeda score : 95.195

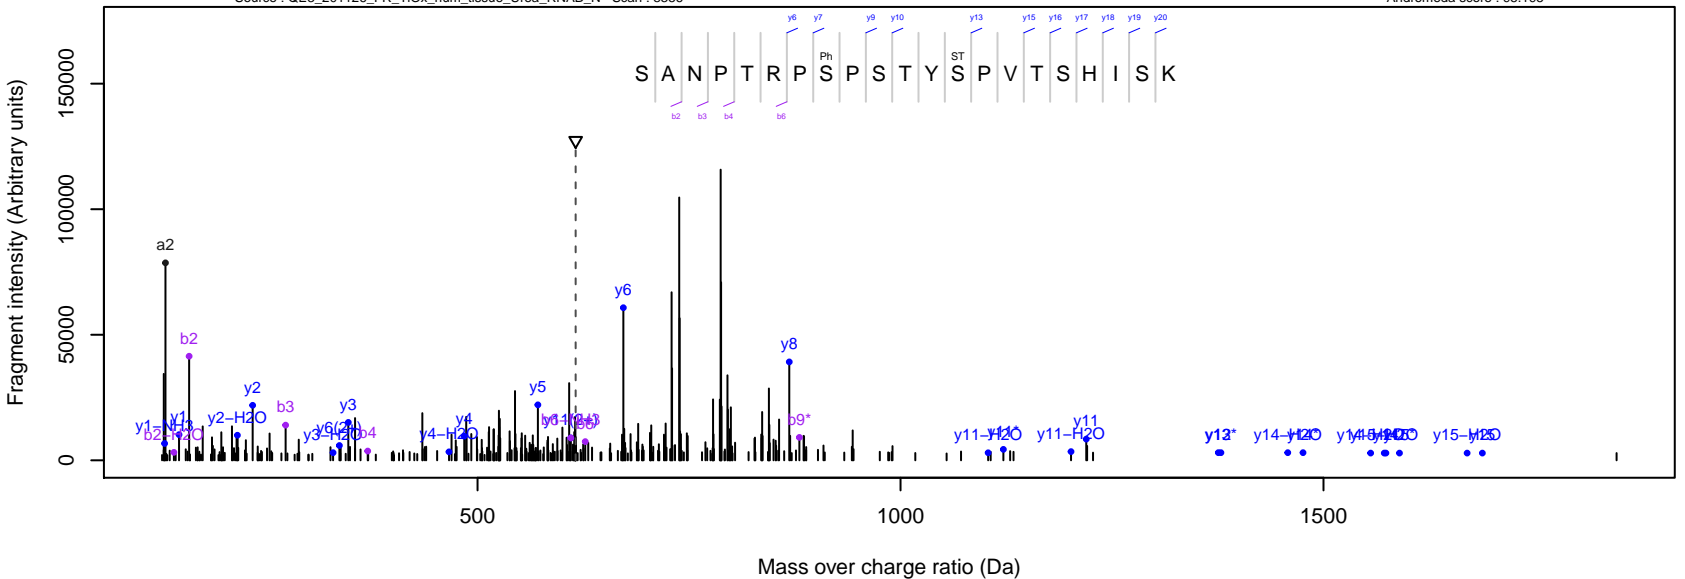



QQSDELPASPDSPSTYDNSPSTYVSESESLDEFDYSVAEISR-3+

Source : QE3\_201126\_FR\_TiOx\_hum\_tissue\_Urea\_RNAB\_B Scan : 63152

Andromeda score : 95.19

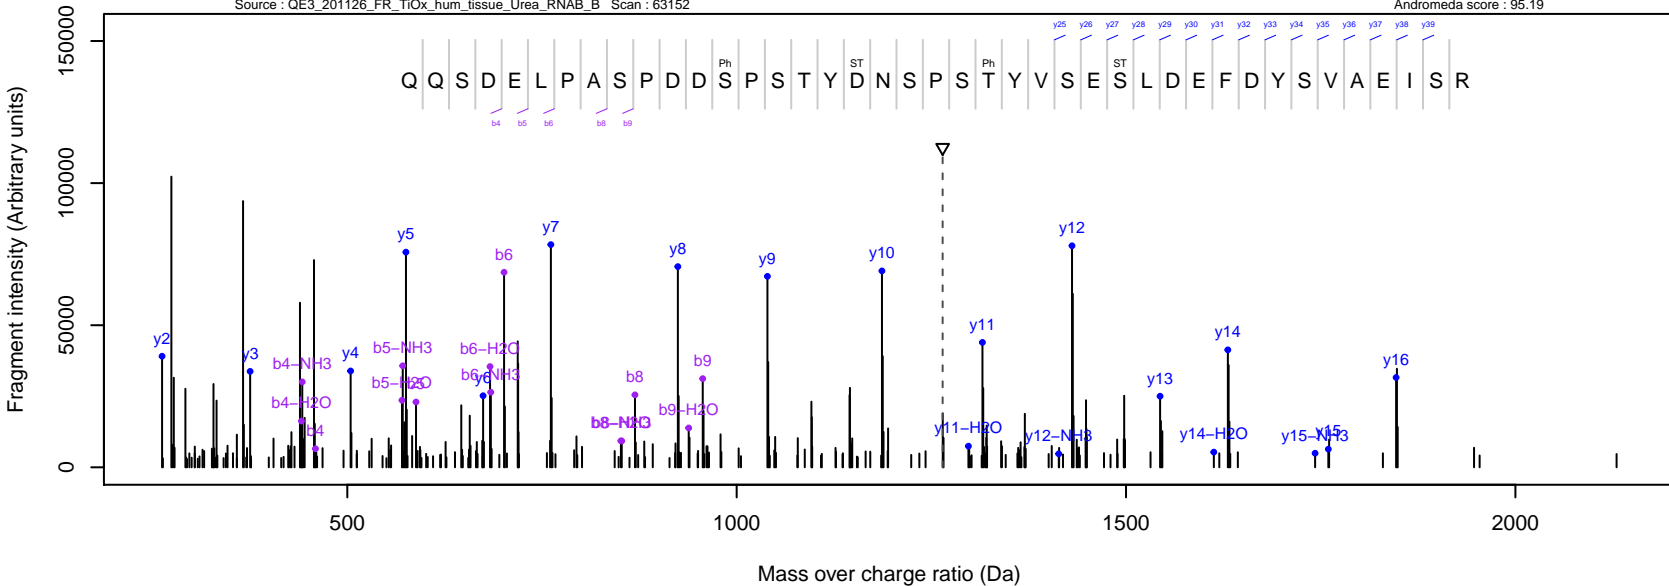

RRVS(Phospho (STY))VAVVPK-3+

Source : QE3\_201126\_FR\_TiOx\_hum\_tissue\_Urea\_RNAB\_B Scan : 9175

Andromeda score : 95.183

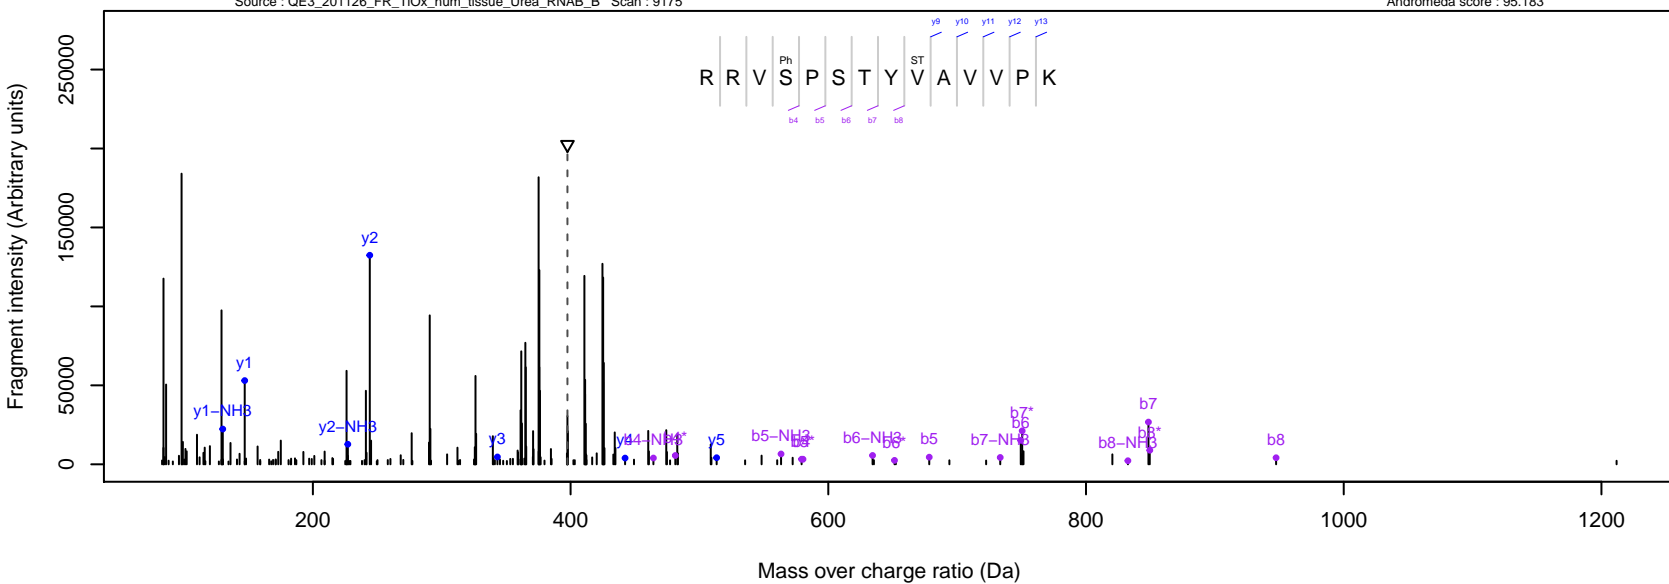

(Acetyl (Protein N-term))S(Phospho (STY))DKPDMAEIEK-2+

Source : QE3\_201126\_FR\_TiOx\_hum\_tissue\_Urea\_RNAB\_H Scan : 21474

Andromeda score : 95.183

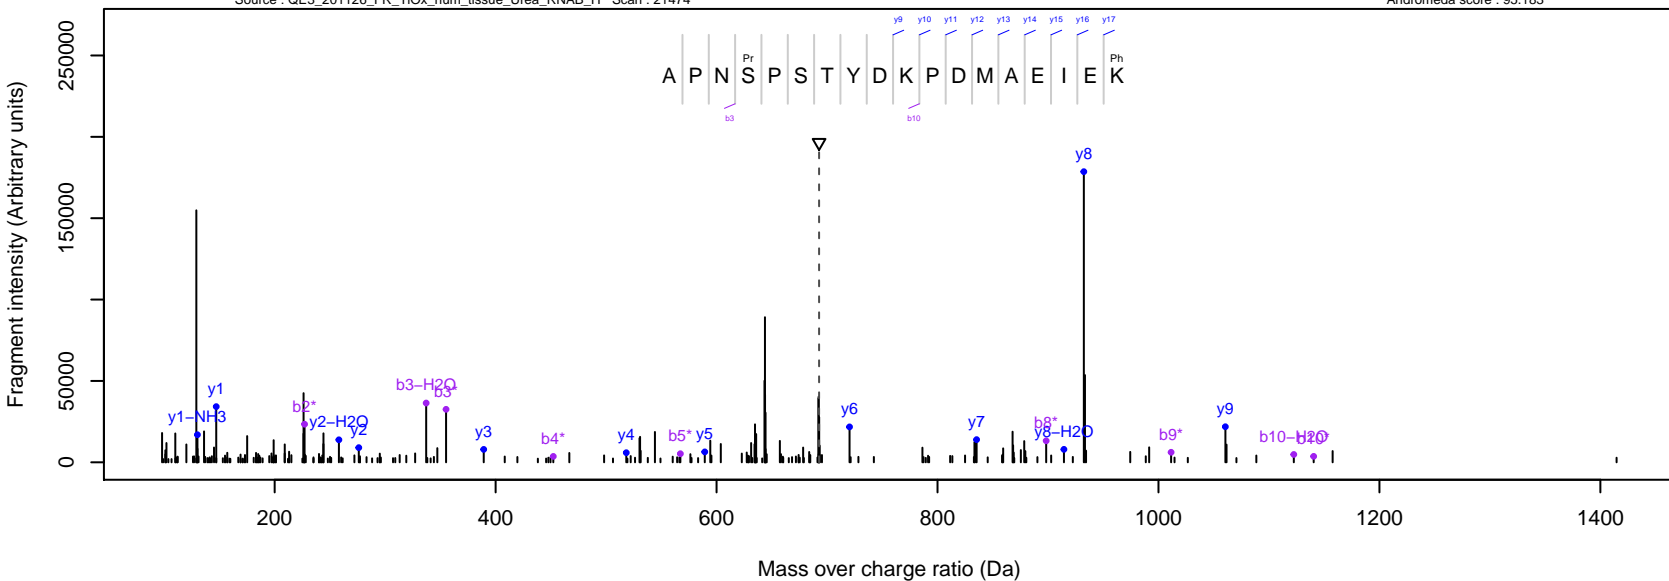

S(Phospho (STY))FTPDHVVYAR-2+

Source : QE3\_201126\_FR\_TiOx\_hum\_tissue\_Urea\_RNAB\_B Scan : 21714

Andromeda score : 95.162

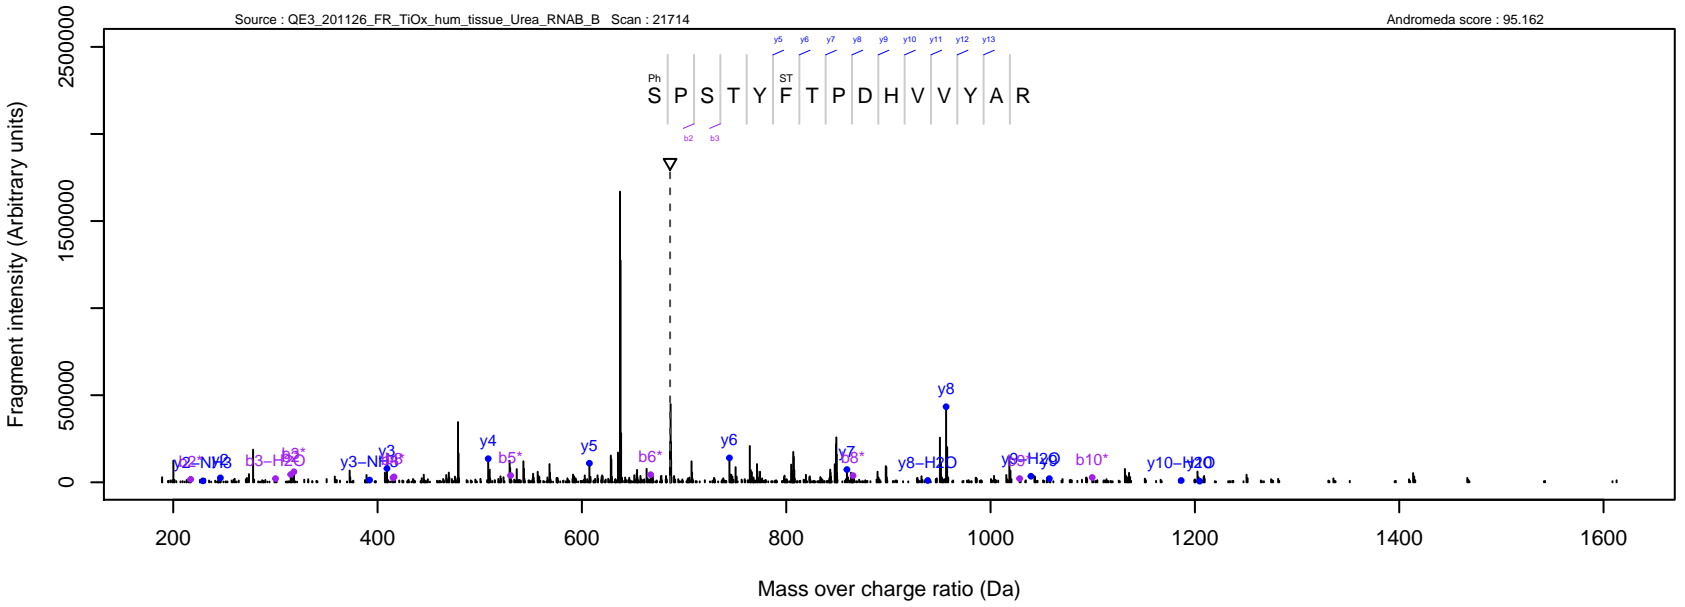

KKIPDPDS(Phospho (STY))DDVSEVDAR-3+

Source : QE3\_201126\_FR\_TiOx\_hum\_tissue\_Urea\_RNAB\_N Scan : 14192

Andromeda score : 95.138

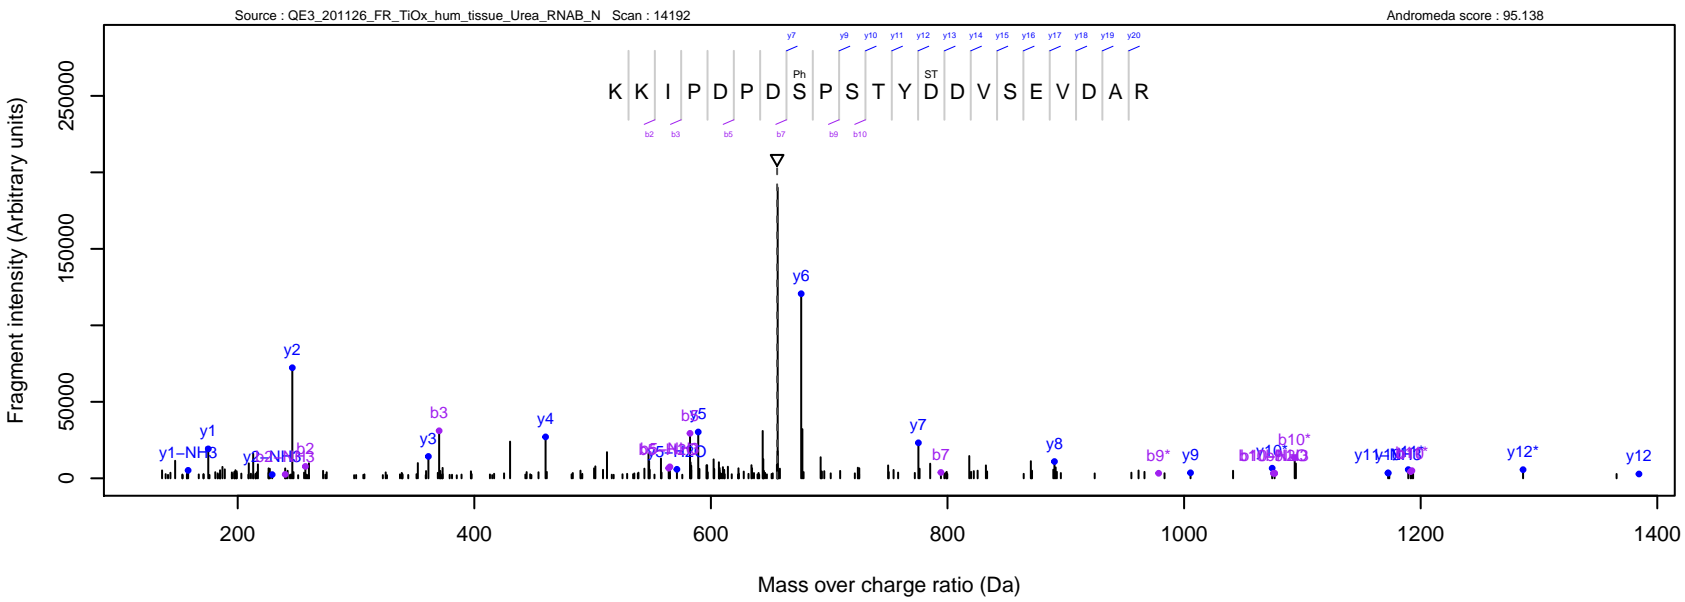

LREQTLS(Phospho (STY))PTITSGLHNIAR-3+

Source : QE3\_201126\_FR\_TiOx\_hum\_tissue\_Urea\_RNAB\_H Scan : 28701

Andromeda score : 95.138

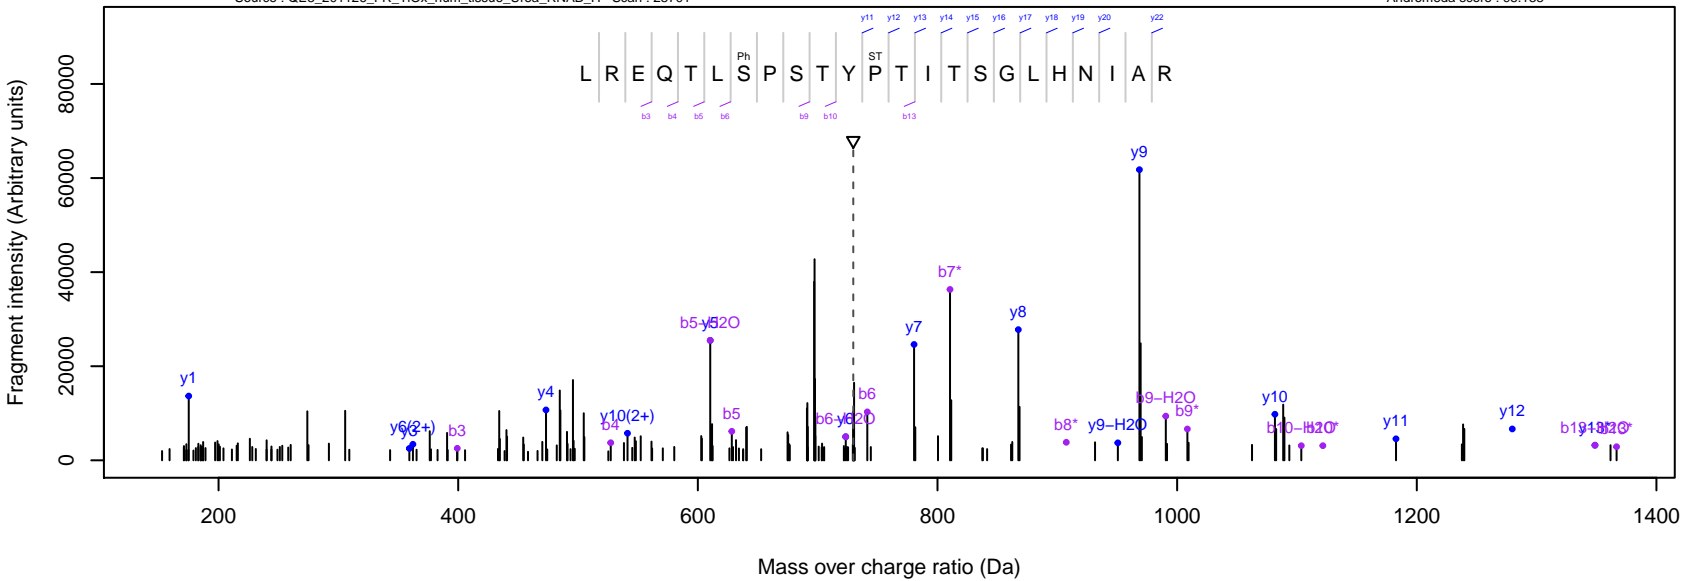

EREPEPEPEANS(Phospho (STY))EESDSVFSSENTEDLQEQFTTQK-3+

Source : QE3\_201126\_FR\_TiOx\_hum\_tissue\_Urea\_RNAB\_B Scan : 44804

Andromeda score : 95.099

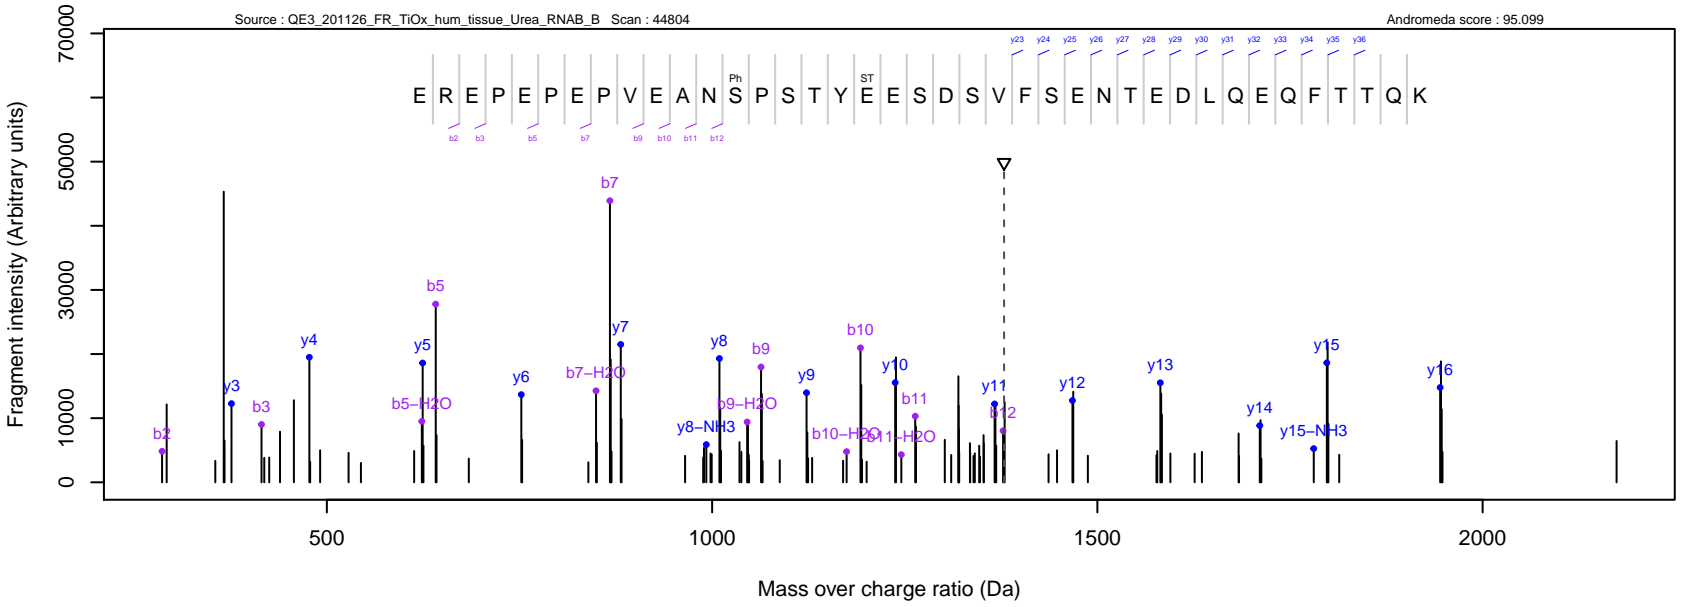

HTVVEHLVSHS(Phospho (STY))PQR-4+

Source : QE3\_201126\_FR\_TiOx\_hum\_tissue\_Urea\_RNAB\_H Scan : 8664

Andromeda score : 94.882

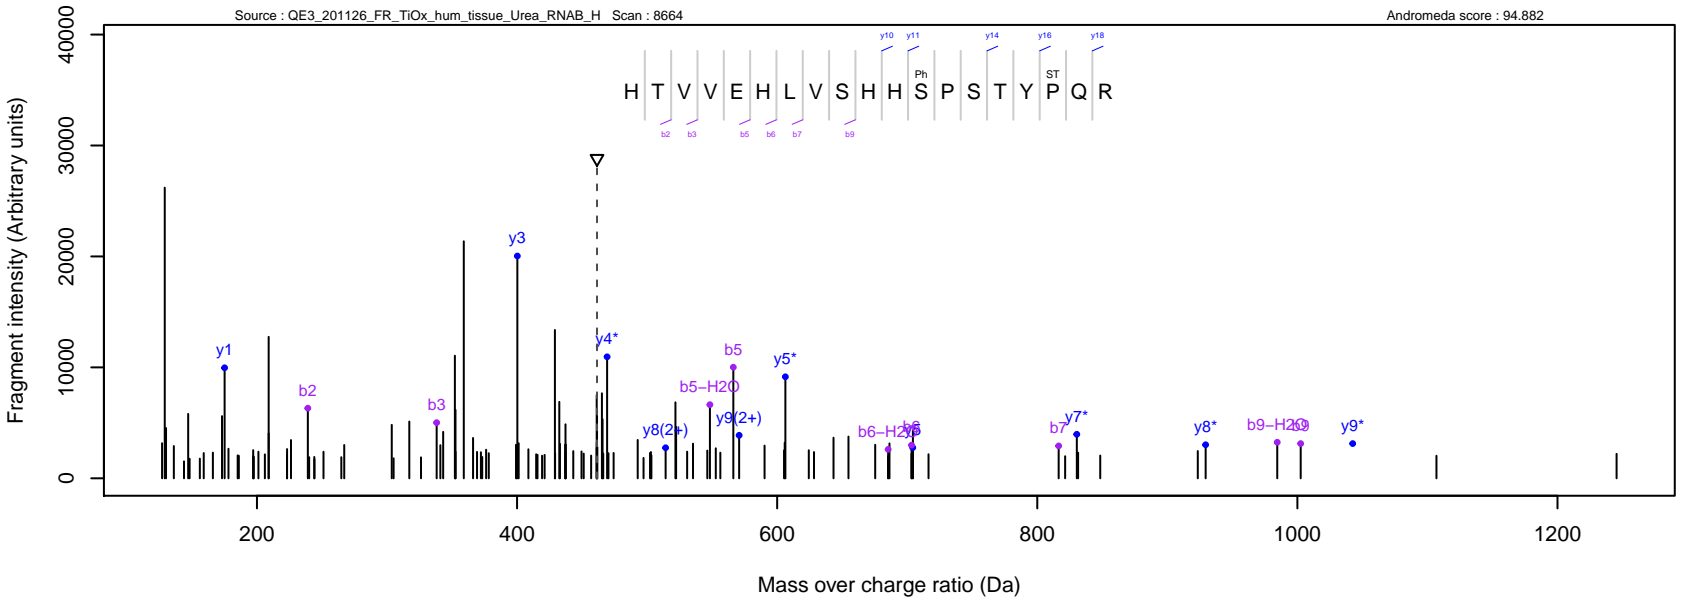

S(Phospho (STY))HEVDISNLEAALR-3+

Source : QE3\_201126\_FR\_TiOx\_hum\_tissue\_Urea\_RNAB\_N Scan : 48667

Andromeda score : 94.882

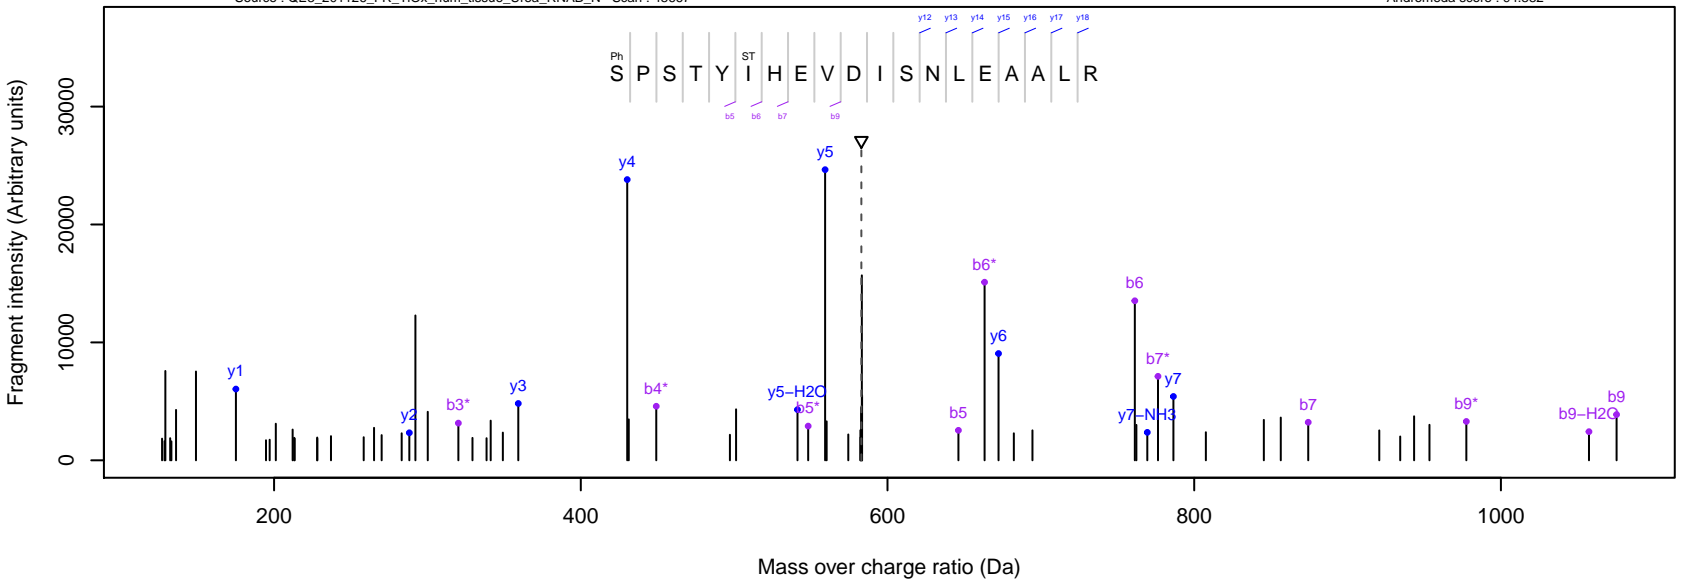

RKS(Phospho (STY))QMEEVQDELIHR-4+

Source : QE3\_201126\_FR\_TiOx\_hum\_tissue\_Urea\_RNAB\_H Scan : 18588

Andromeda score : 94.856

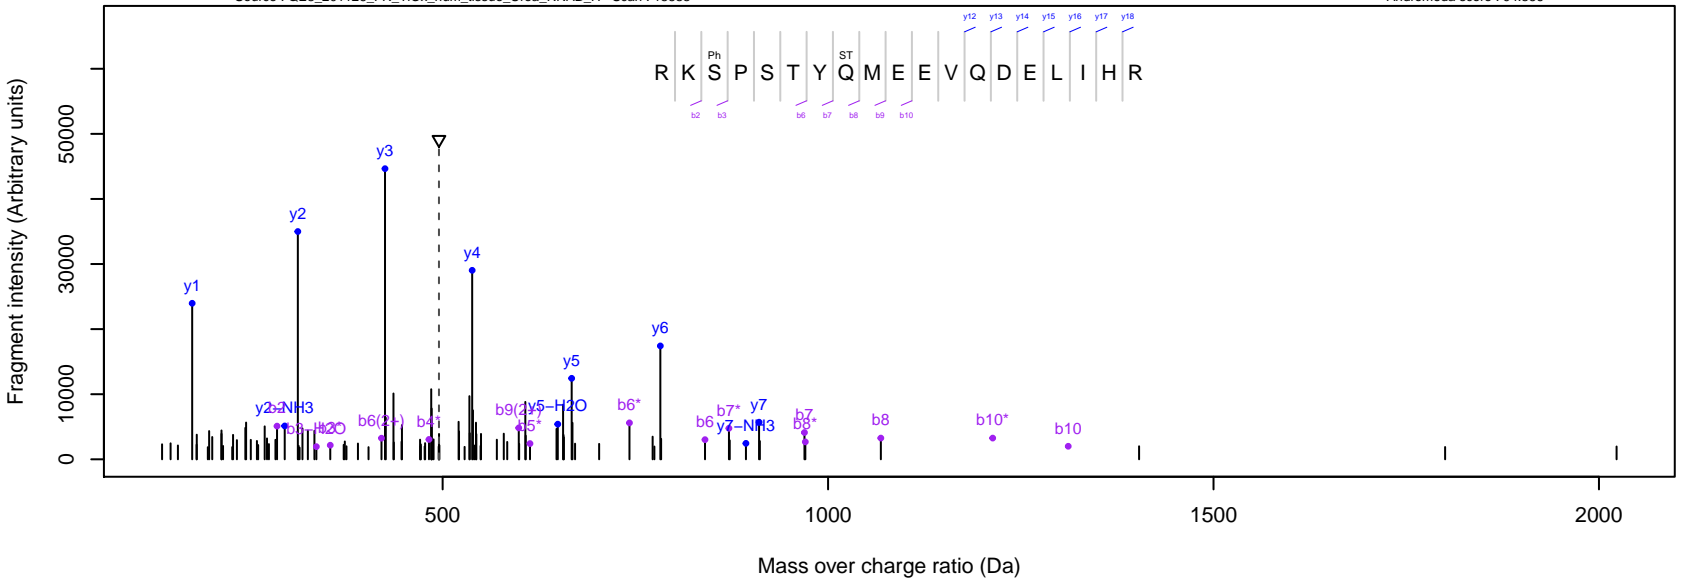

GHTDTEGRPPS(Phospho (STY))PPPT(Phospho (STY))STPEK-3+

Source : QE3\_201126\_FR\_TiOx\_hum\_tissue\_Urea\_RNAB\_N Scan : 9292

Andromeda score : 94.838

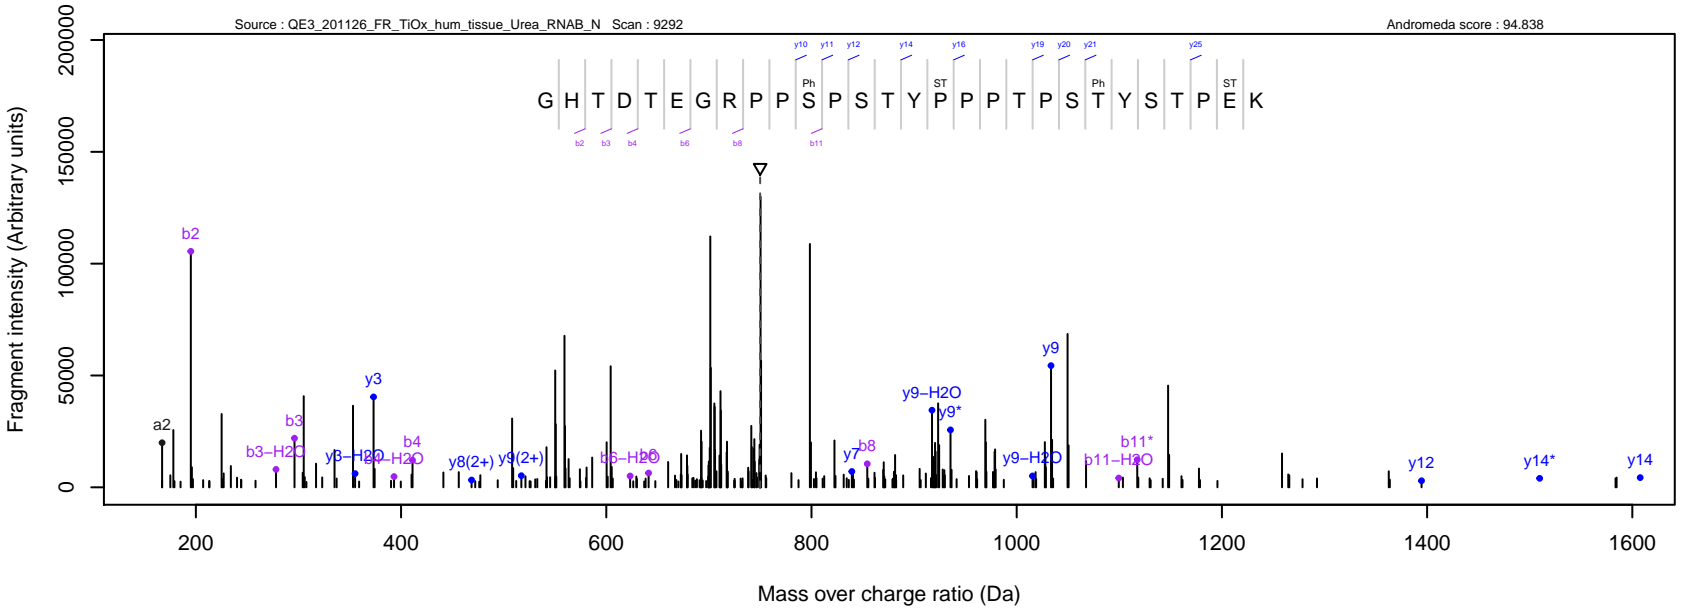

RKS(Phospho (STY))QVNGEAGSYEM(Oxidation (M))TNQHVK-4+

Source : QE3\_201126\_FR\_TiOx\_hum\_tissue\_Urea\_RNAB\_B Scan : 5046

Andromeda score : 94.838

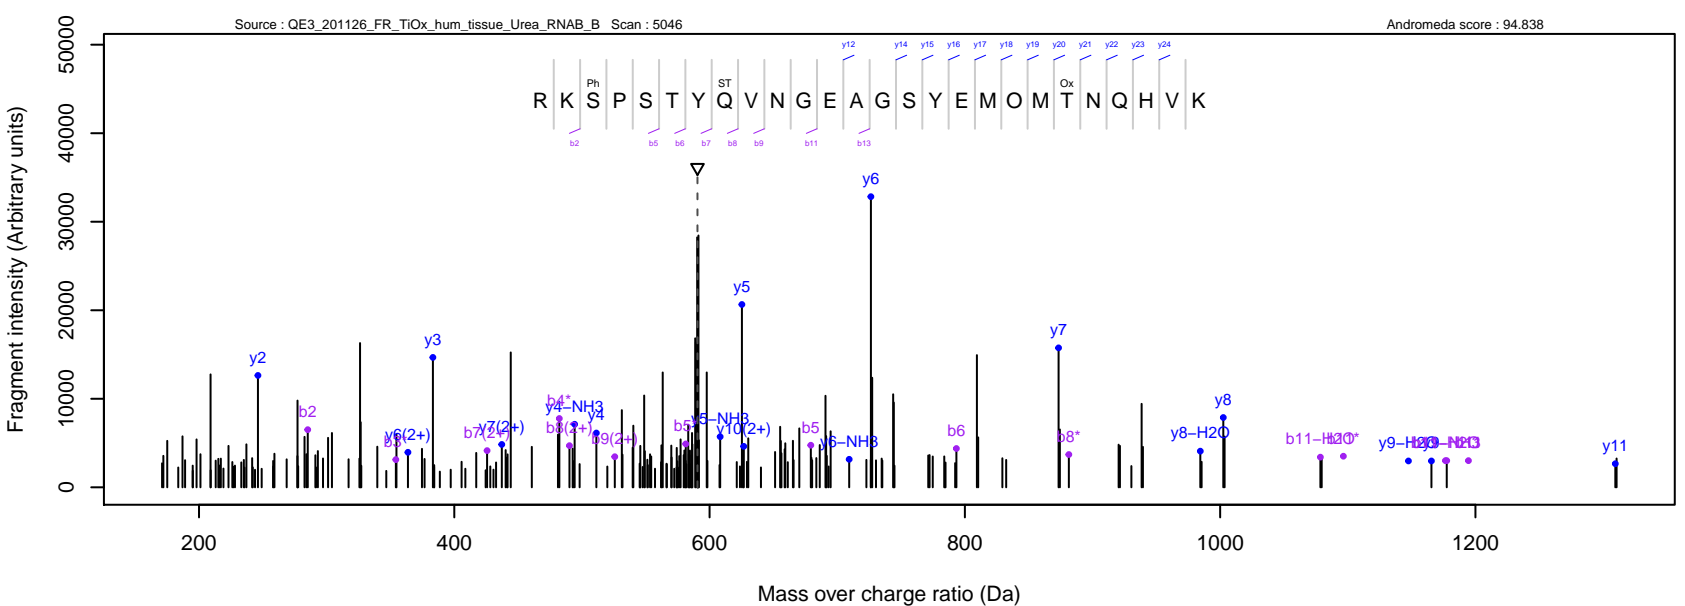

LGGs(Phospho (STY))TSDPPSSQSFSFHR-3+

Source : QE3\_201126\_FR\_TiOx\_hum\_tissue\_Urea\_RNAB\_N Scan : 23996

Andromeda score : 94.837

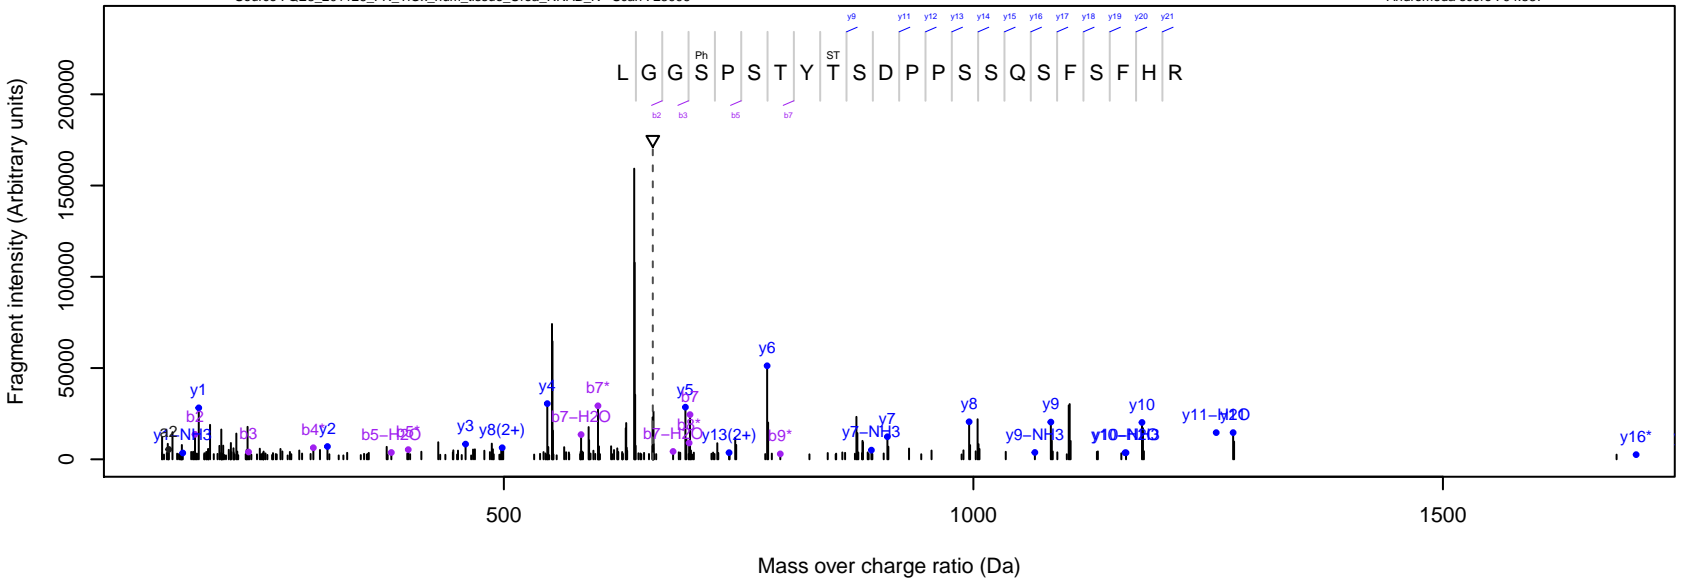

KGS(Phospho (STY))KVGDFGDAINWPTPGEIAHK-4+

Source : QE3\_201126\_FR\_TiOx\_hum\_tissue\_Urea\_RNAB\_H Scan : 35075

Andromeda score : 94.834

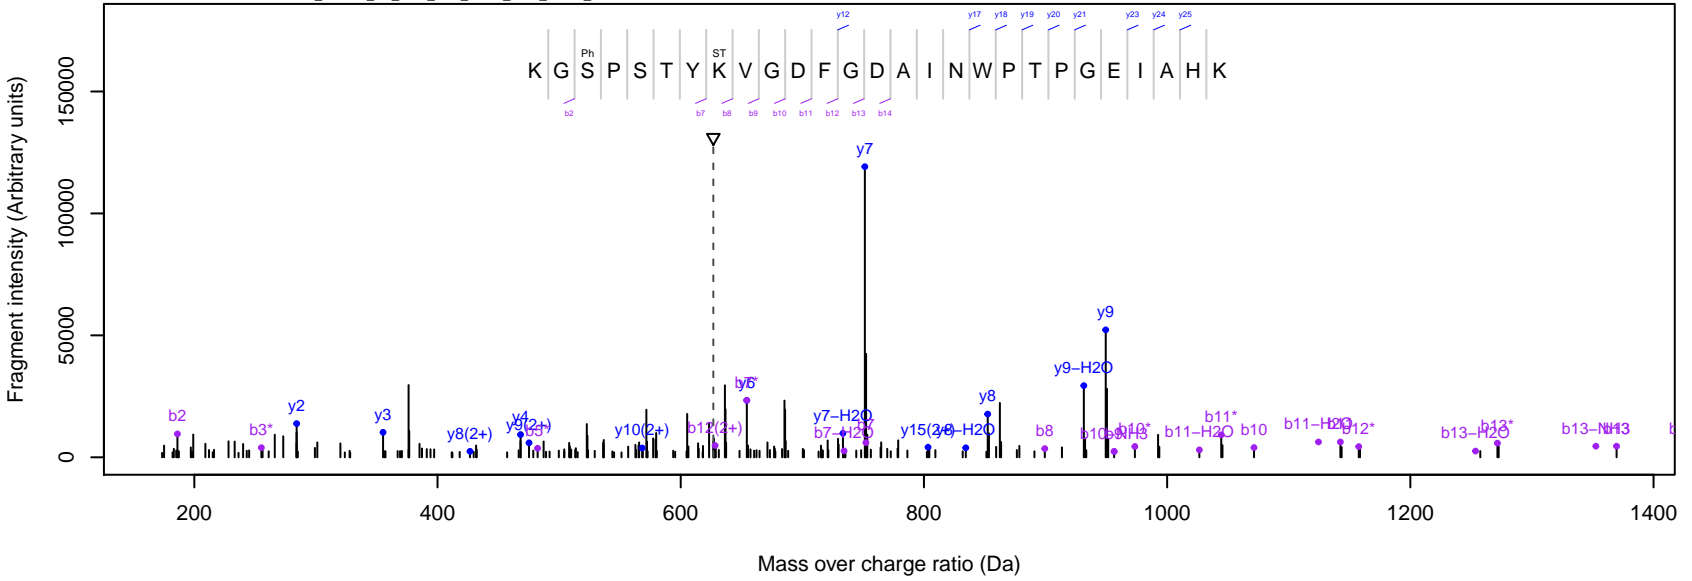

RRS(Phospho (STY))FNDFR-3+

Source : QE3\_201126\_FR\_TiOx\_hum\_tissue\_Urea\_RNAB\_N Scan : 9491

Andromeda score : 94.82

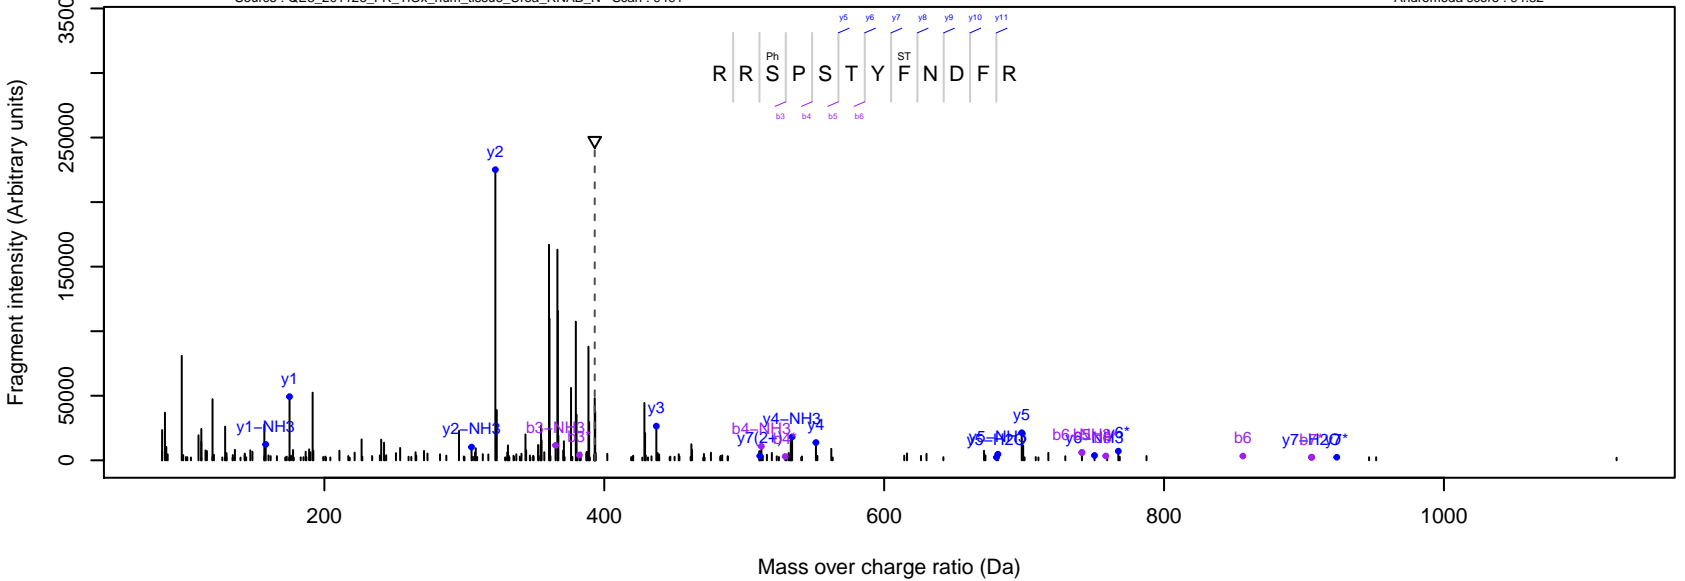

EGTAPS(Phospho (STY))ENGETKAEAAQKTESVDNEGE-3+

Source : QE3\_201126\_FR\_TiOx\_hum\_tissue\_Urea\_RNAB\_H Scan : 13365

Andromeda score : 94.807

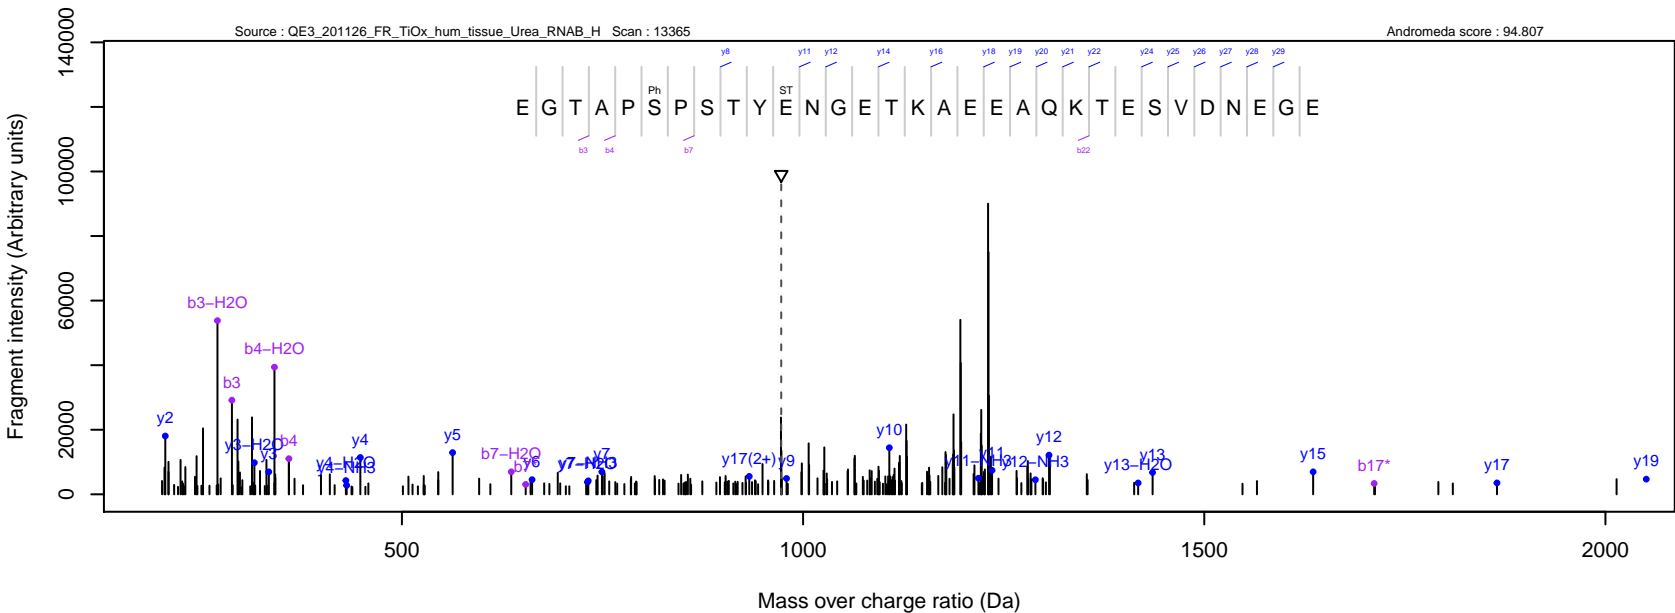

RPPS(Phospho (STY))PDVIVL(Phospho (STY))DNEQPSS(Phospho (STY))PR-3+

Source : QE3\_201126\_FR\_TiOx\_hum\_tissue\_Urea\_RNAB\_N Scan : 39307

Andromeda score : 94.802

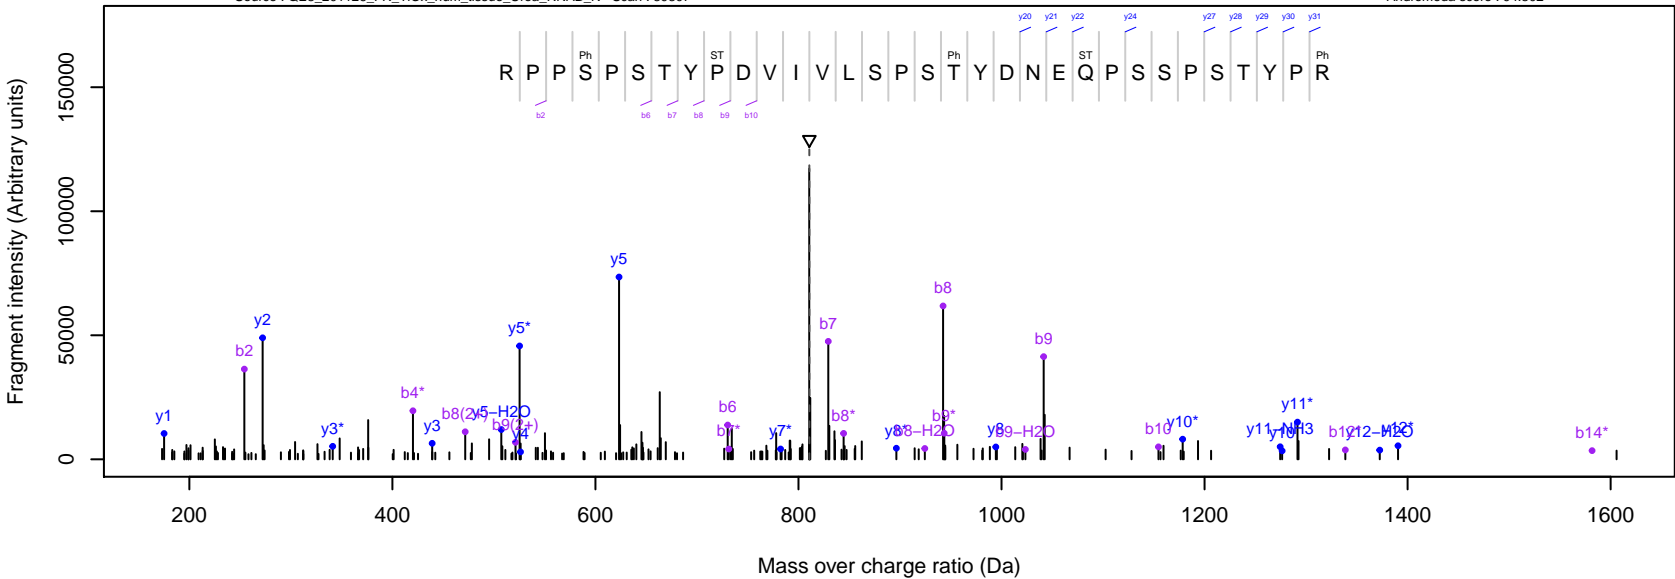

DAM(Oxidation (M))PS(Phospho (STY))DANLNSINK-2+

Source : QE3\_201126\_FR\_TiOx\_hum\_tissue\_Urea\_RNAB\_N Scan : 19055

Andromeda score : 94.728

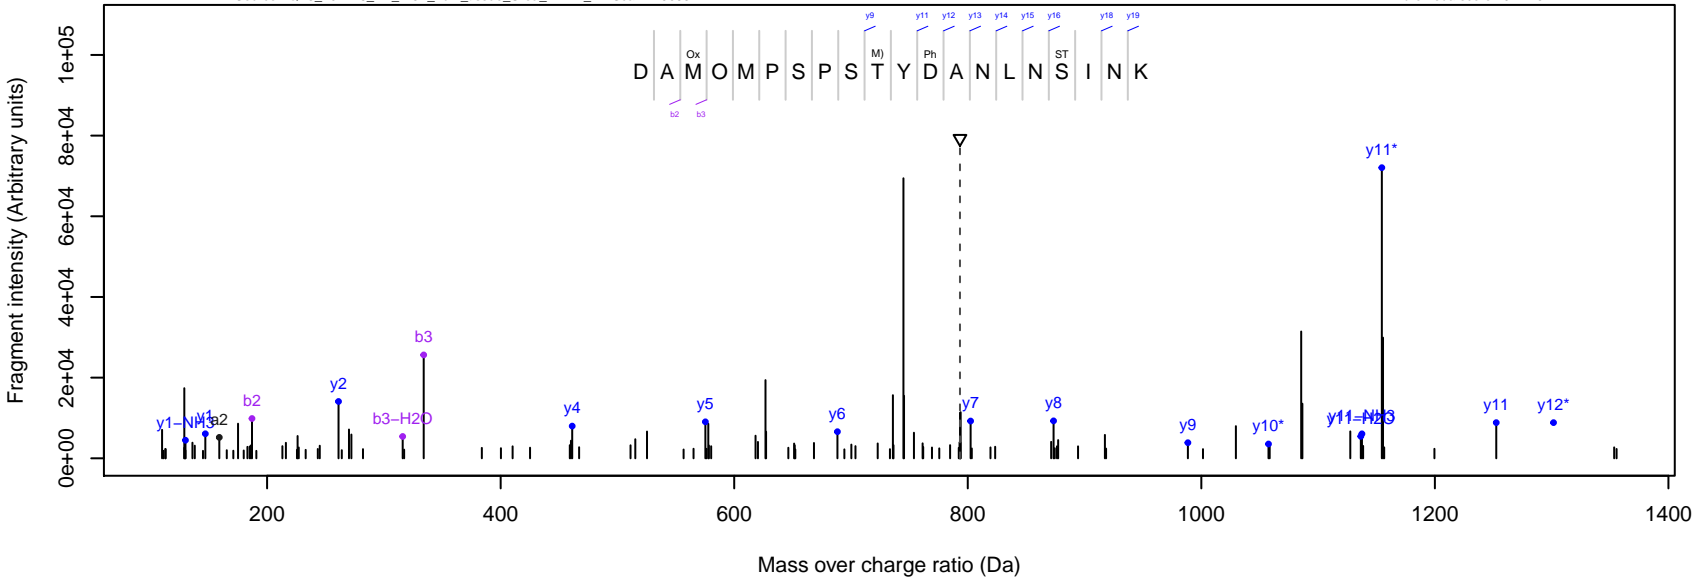

NKPYISWPSS(Phospho (STY))GGSEPSVTPLR-3+

Source : QE3\_201126\_FR\_TiOx\_hum\_tissue\_Urea\_RNAB\_N Scan : 44160

Andromeda score : 94.72

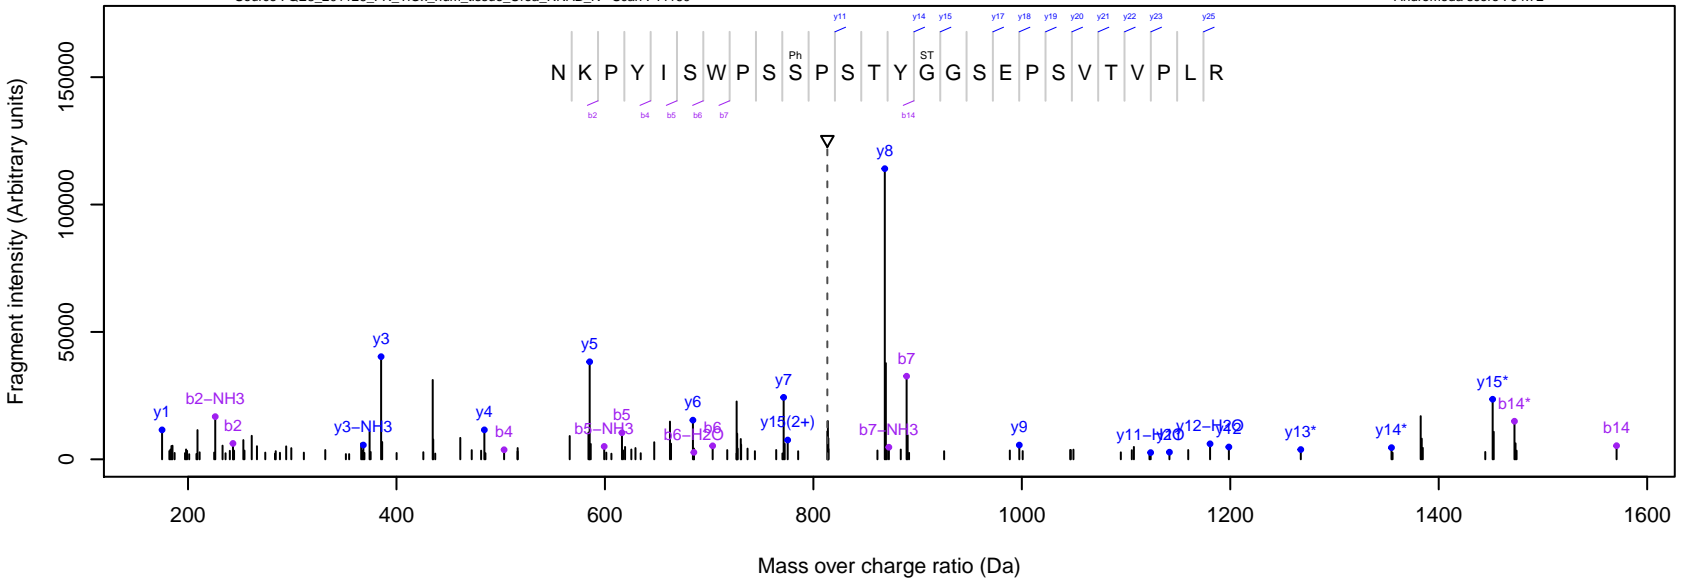

NLNNLNLS(Phospho (STY))PVNR-2+

Source : QE3\_201126\_FR\_TiOx\_hum\_tissue\_Urea\_RNAB\_B Scan : 34190

Andromeda score : 94.717

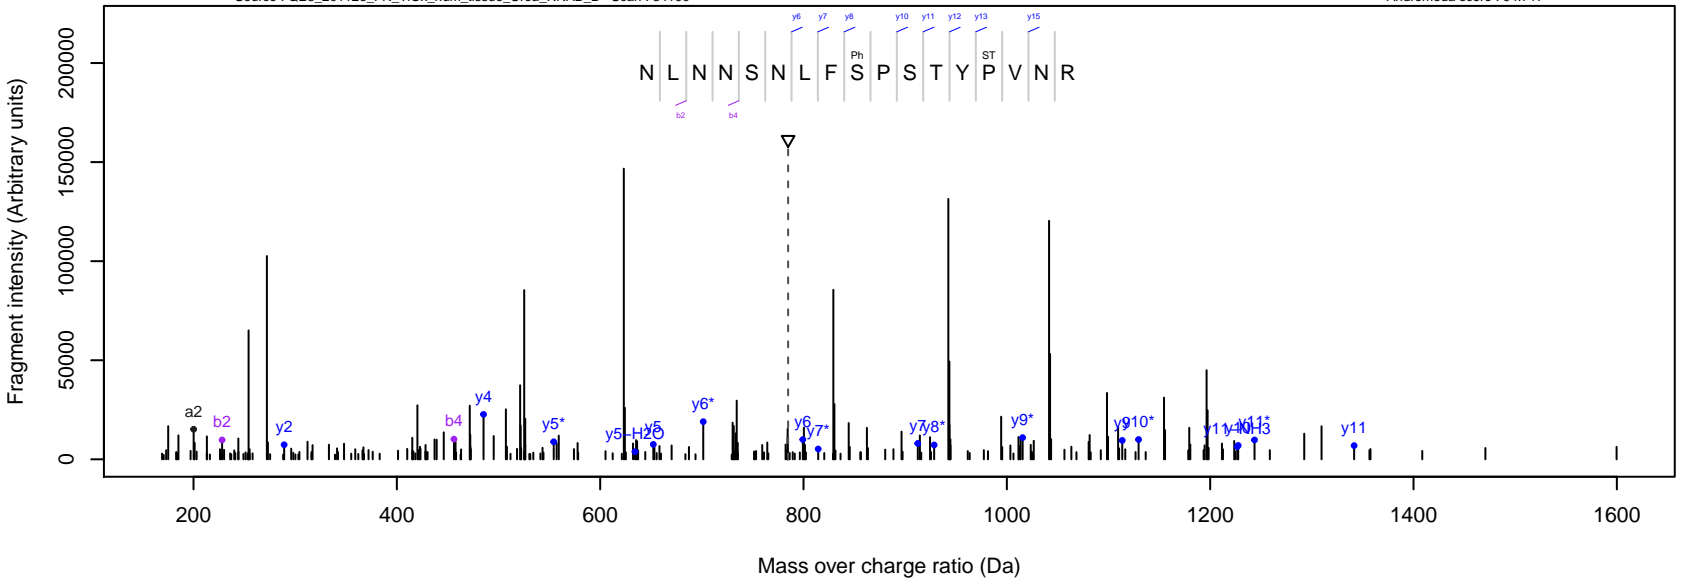

S(Phospho (STY))GDETPGSEVPGDK-2+

Source : QE3\_201126\_FR\_TiOx\_hum\_tissue\_Urea\_RNAB\_B Scan : 12925

Andromeda score : 94.673

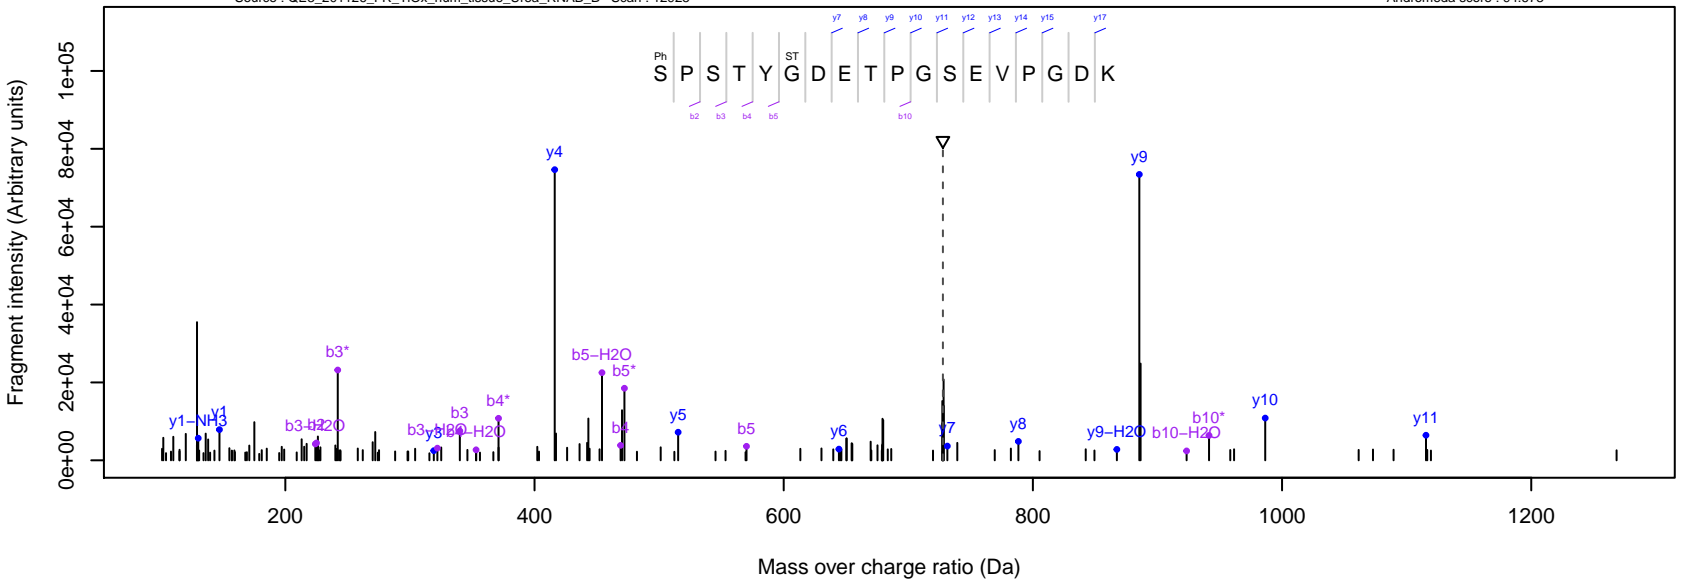

TASIKPEVALLDTQDM(Oxidation (M))ENM(Oxidation (M))S(Phospho (STY))DDDGWEFVNLGDDQQSFGIK-4+

Source : QE3\_201126\_FR\_TiOx\_hum\_tissue\_Urea\_RNAB\_B Scan : 58726

Andromeda score : 94.629

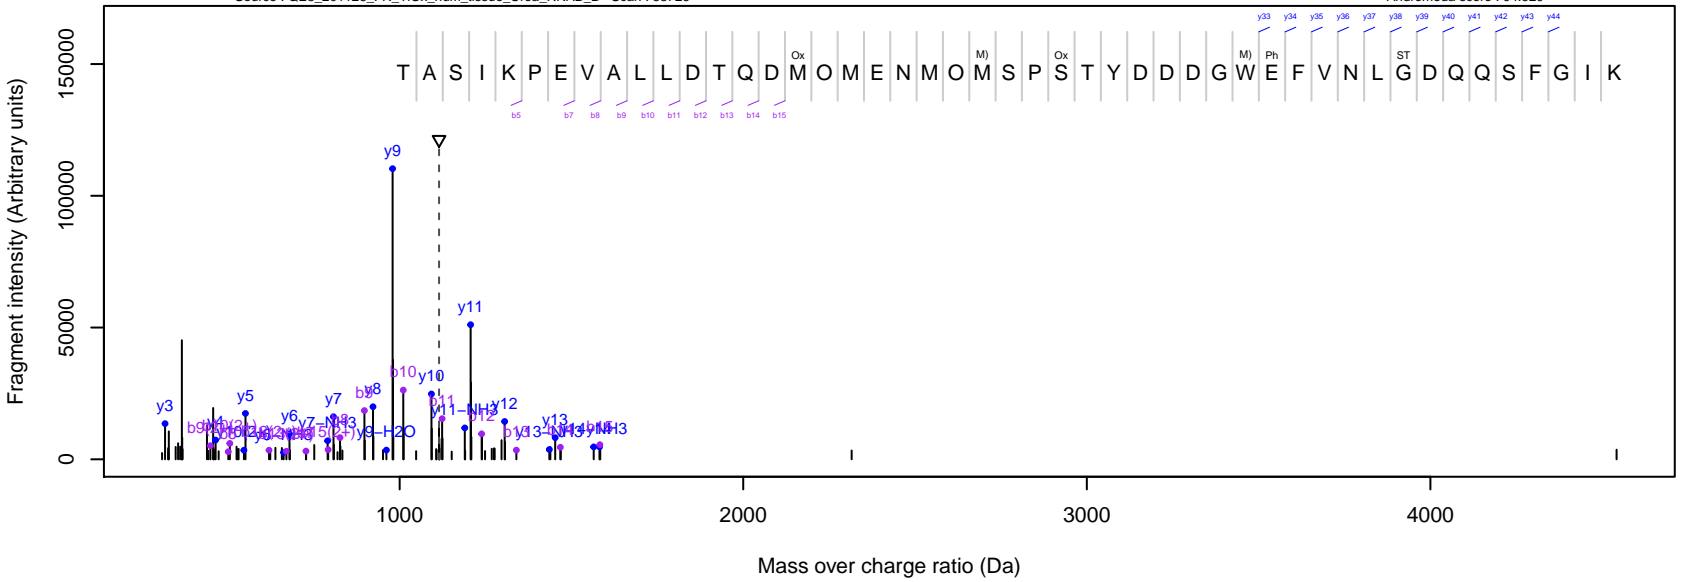

TIVMGAS(Phospho (STY))FR-2+

Source : QE3\_201126\_FR\_TiOx\_hum\_tissue\_Urea\_RNAB\_N Scan : 31063

Andromeda score : 94.616

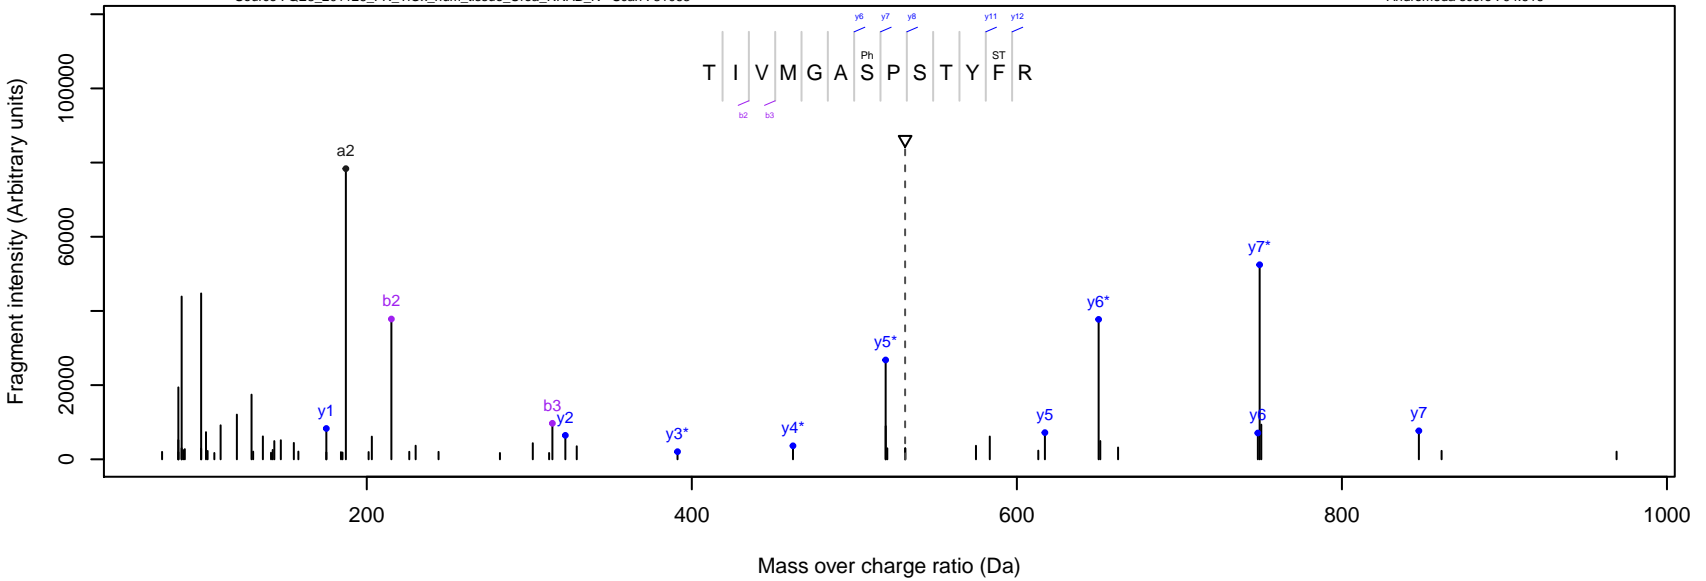

QEAIPLDLEDS(Phospho (STY))PPVSDSEEQESAR-3+

Source : QE3\_201126\_FR\_TiOx\_hum\_tissue\_Urea\_RNAB\_B Scan : 34825

Andromeda score : 94.606

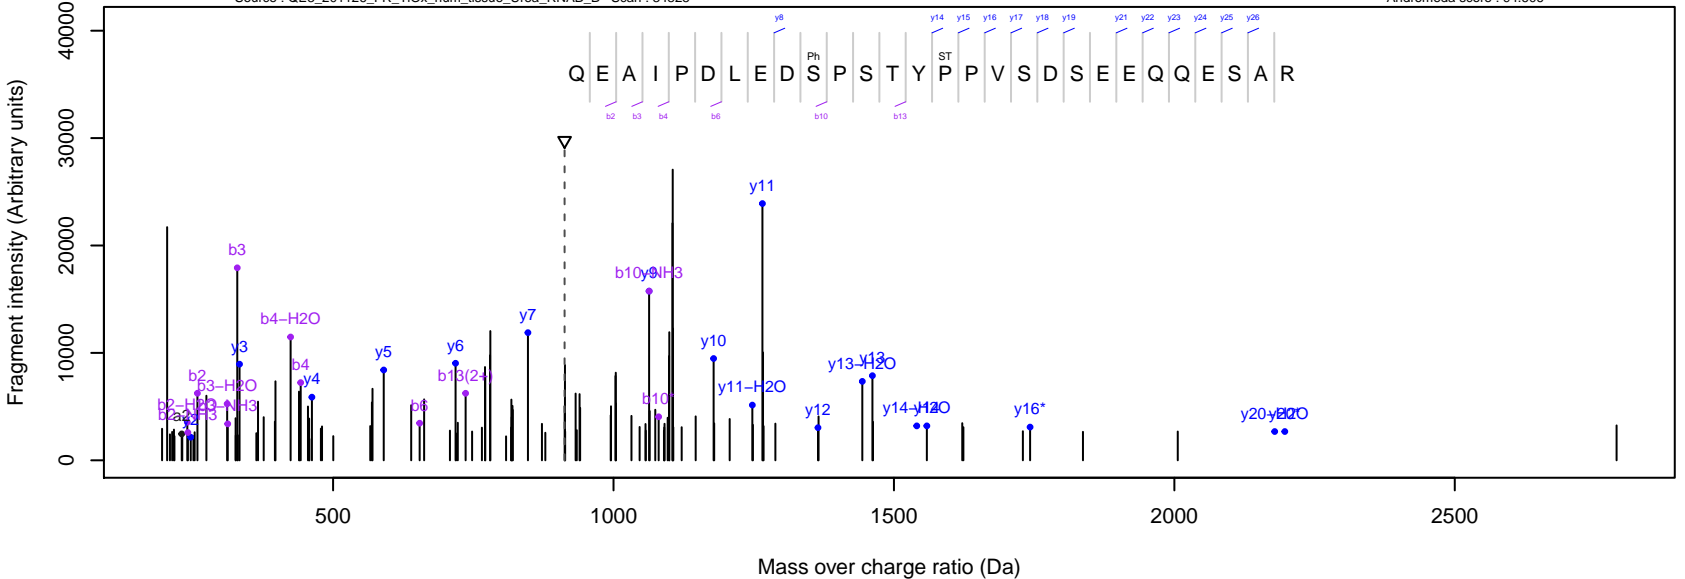



(Acetyl (Protein N-term))AGAGSAAVSGAGT(Pospho (STY))PVAGPTGR-2+

Source : QE3\_201126\_FR\_TiOx\_hum\_tissue\_Urea\_RNAB\_N Scan : 26441

Andromeda score : 94.551

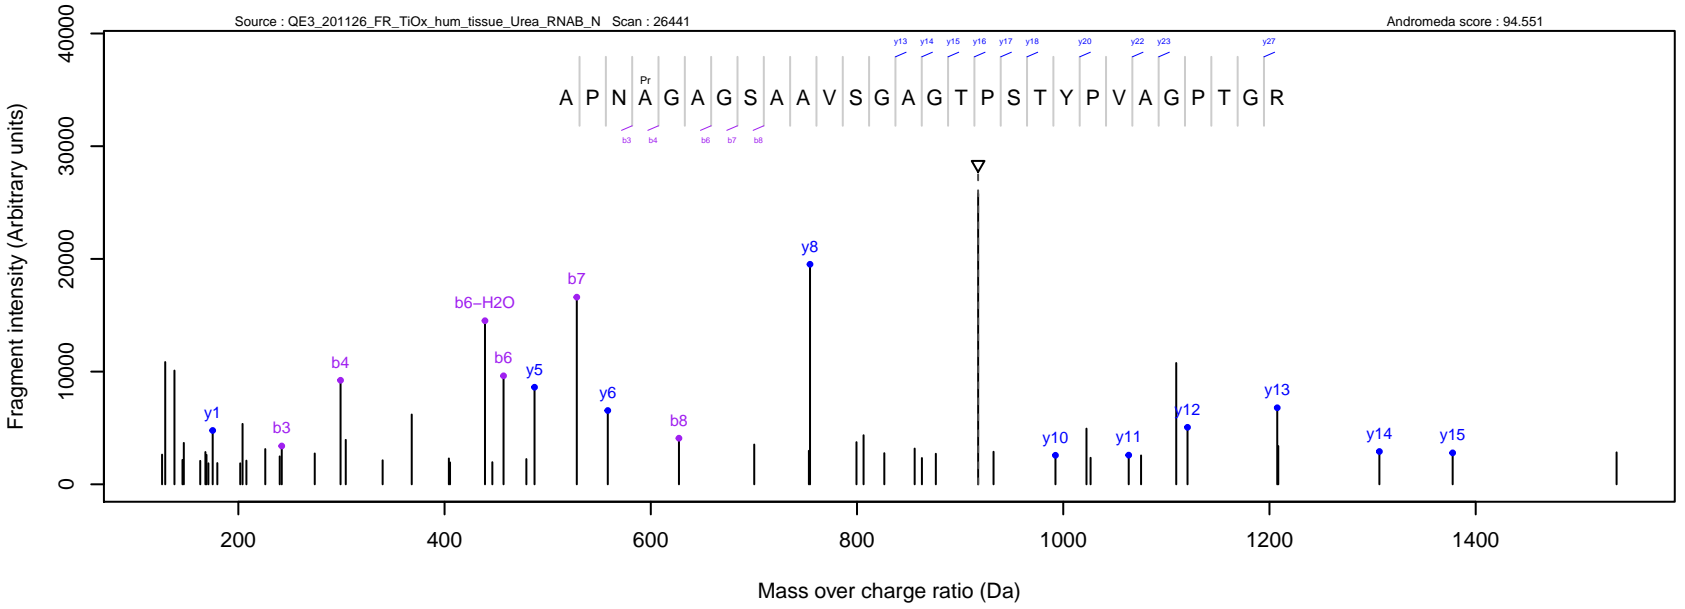

LPSFISLQSS(Pospho (STY))PSPGAQPR-2+

Source : QE3\_201126\_FR\_TiOx\_hum\_tissue\_Urea\_RNAB\_N Scan : 46963

Andromeda score : 94.544

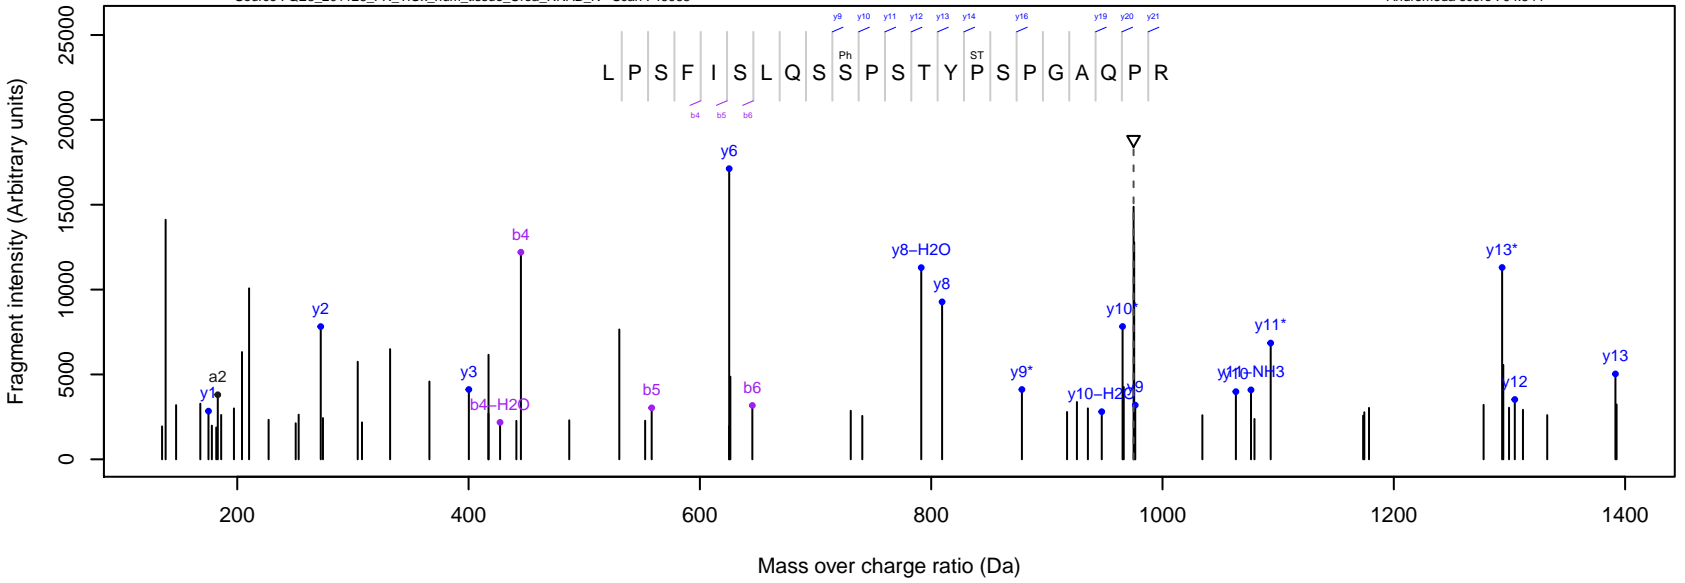

RAS(Pospho (STY))HTLLPSHR-3+

Source : QE3\_201126\_FR\_TiOx\_hum\_tissue\_Urea\_RNAB\_H Scan : 6464

Andromeda score : 94.532

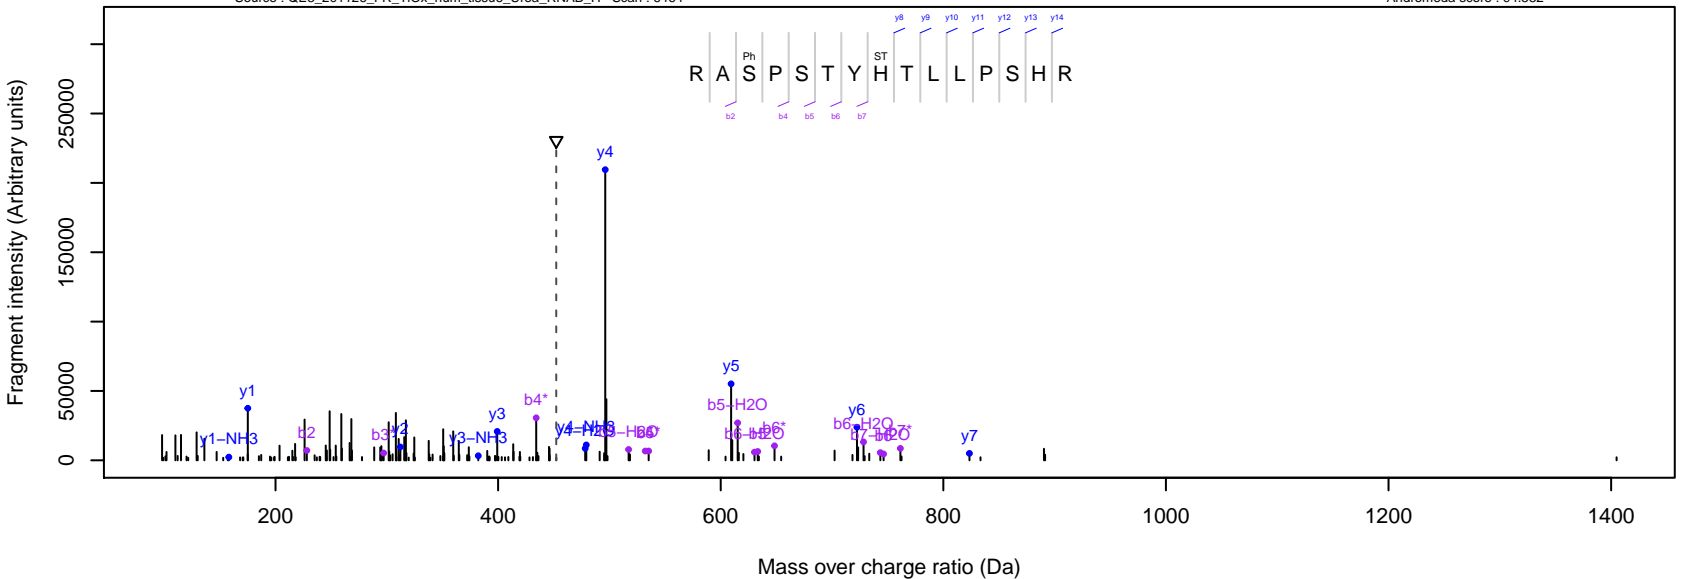

AKKPEEESSEEGSES(Phospho (STY))EEEEAPAGTR-3+

Source : QE3\_201126\_FR\_TiOx\_hum\_tissue\_Urea\_RNAB\_N Scan : 6813

Andromeda score : 94.503

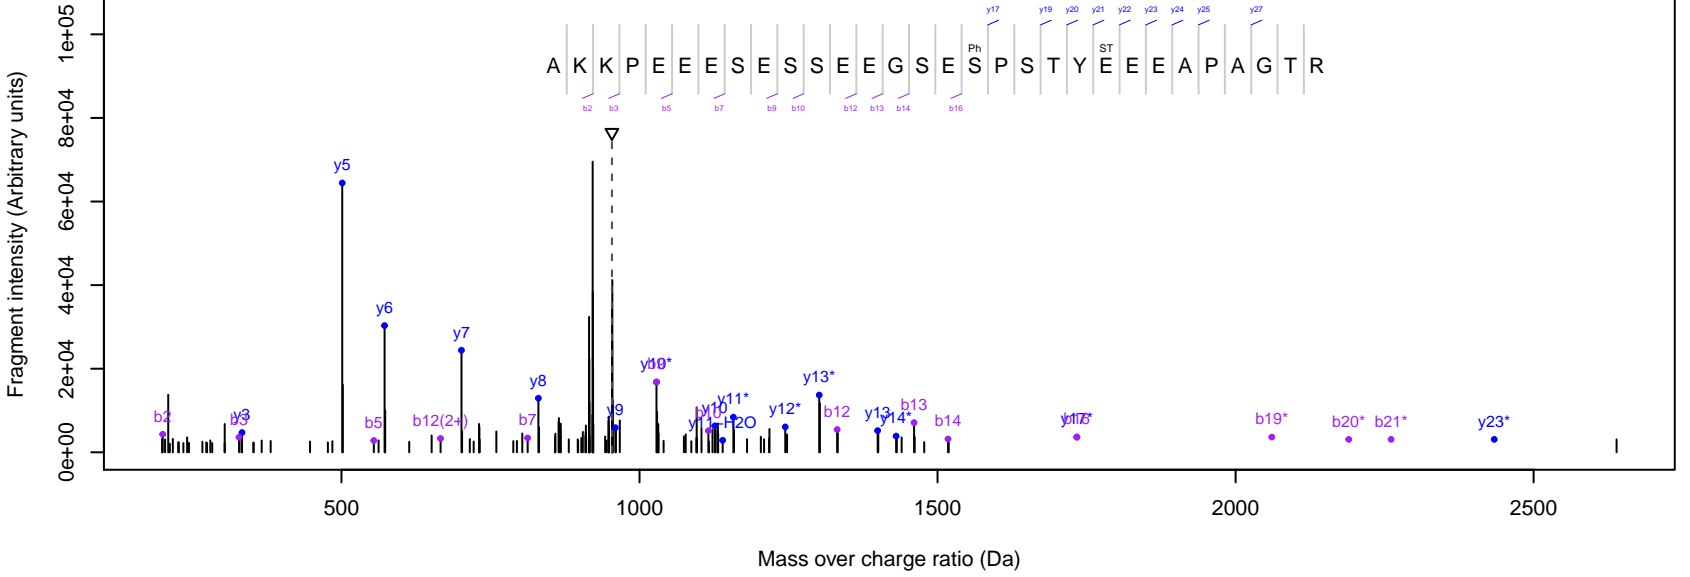

SLS(Phospho (STY))RPSSLIEQEK-2+

Source : QE3\_201126\_FR\_TiOx\_hum\_tissue\_Urea\_RNAB\_N Scan : 20955

Andromeda score : 94.487

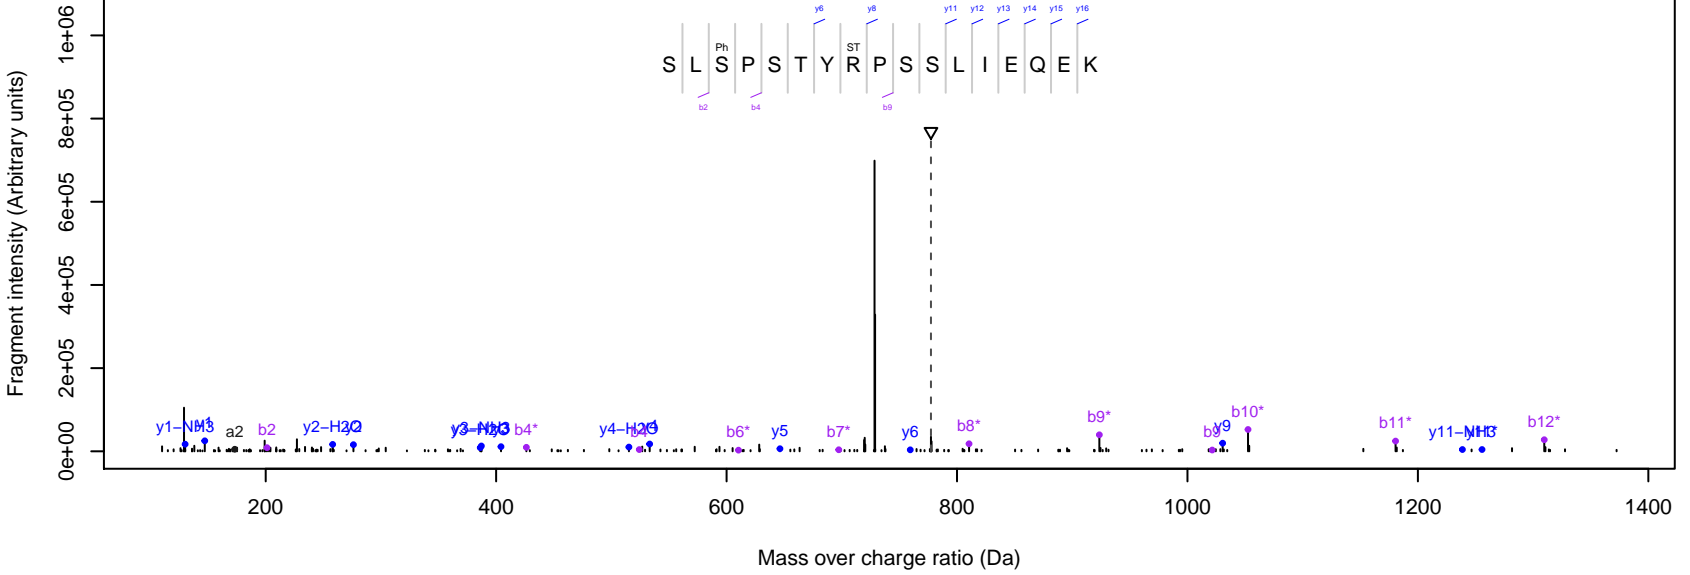

VPSAPGQES(Phospho (STY))PIPDPK-2+

Source : QE3\_201126\_FR\_TiOx\_hum\_tissue\_Urea\_RNAB\_N Scan : 20812

Andromeda score : 94.487

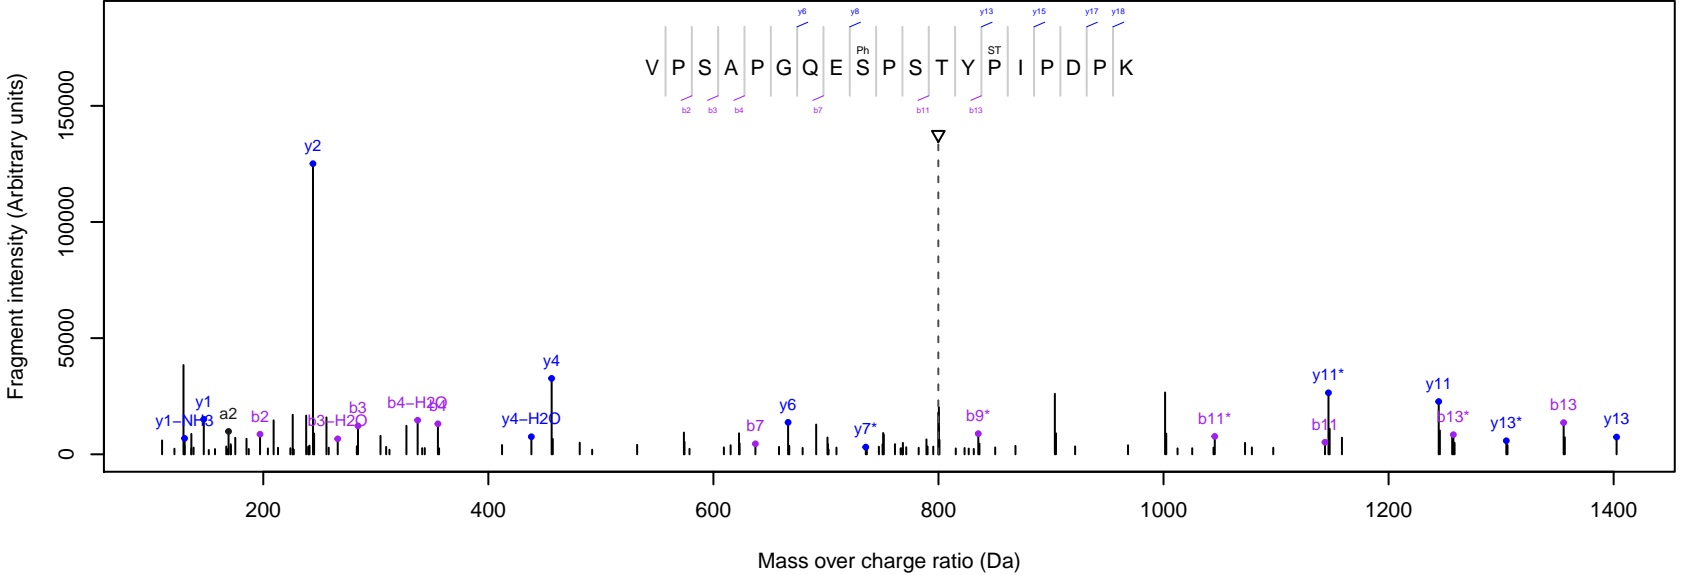

S(Phospho (STY))NENLDKIDMSLDDIIK-3+

Source : QE3\_201126\_FR\_TiOx\_hum\_tissue\_Urea\_RNAB\_H Scan : 51907

Andromeda score : 94.463

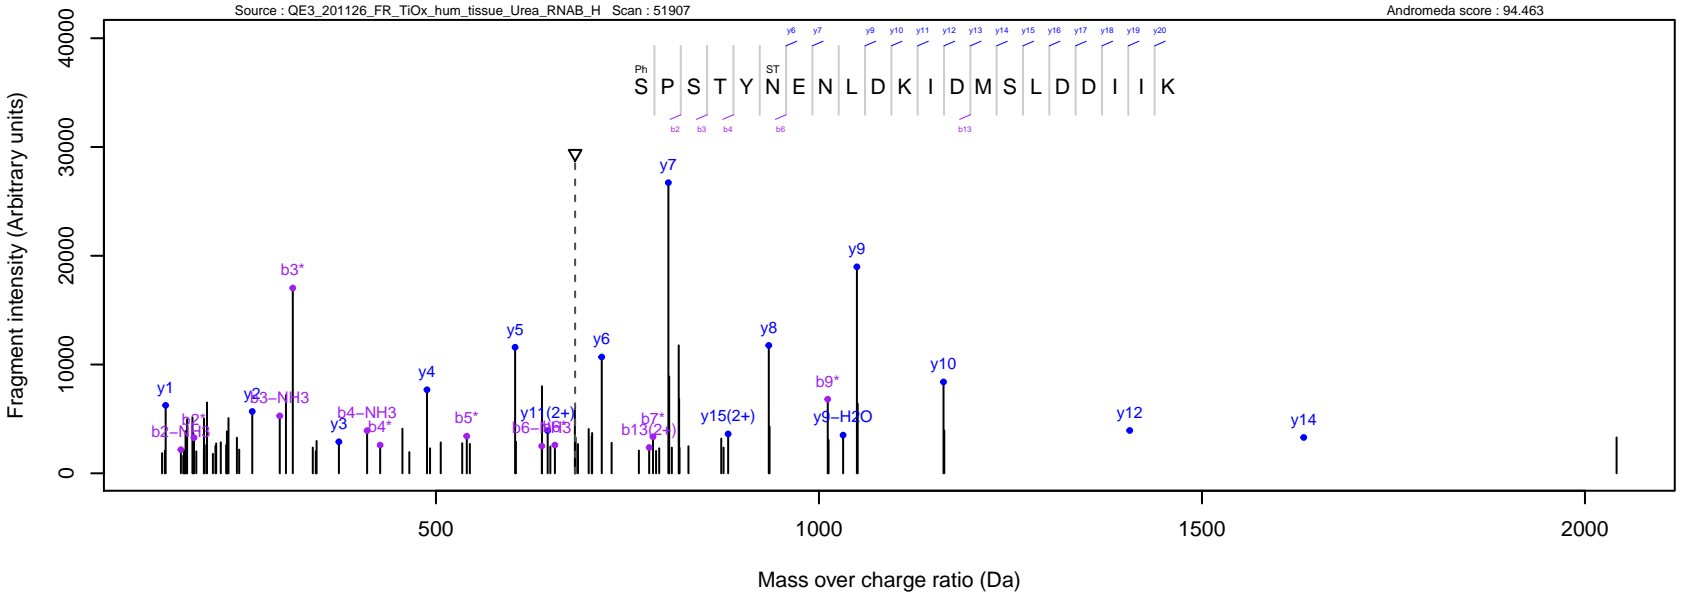

SQS(Phospho (STY))IVSSVFSEAWK-2+

Source : QE3\_201126\_FR\_TiOx\_hum\_tissue\_Urea\_RNAB\_B Scan : 55935

Andromeda score : 94.461

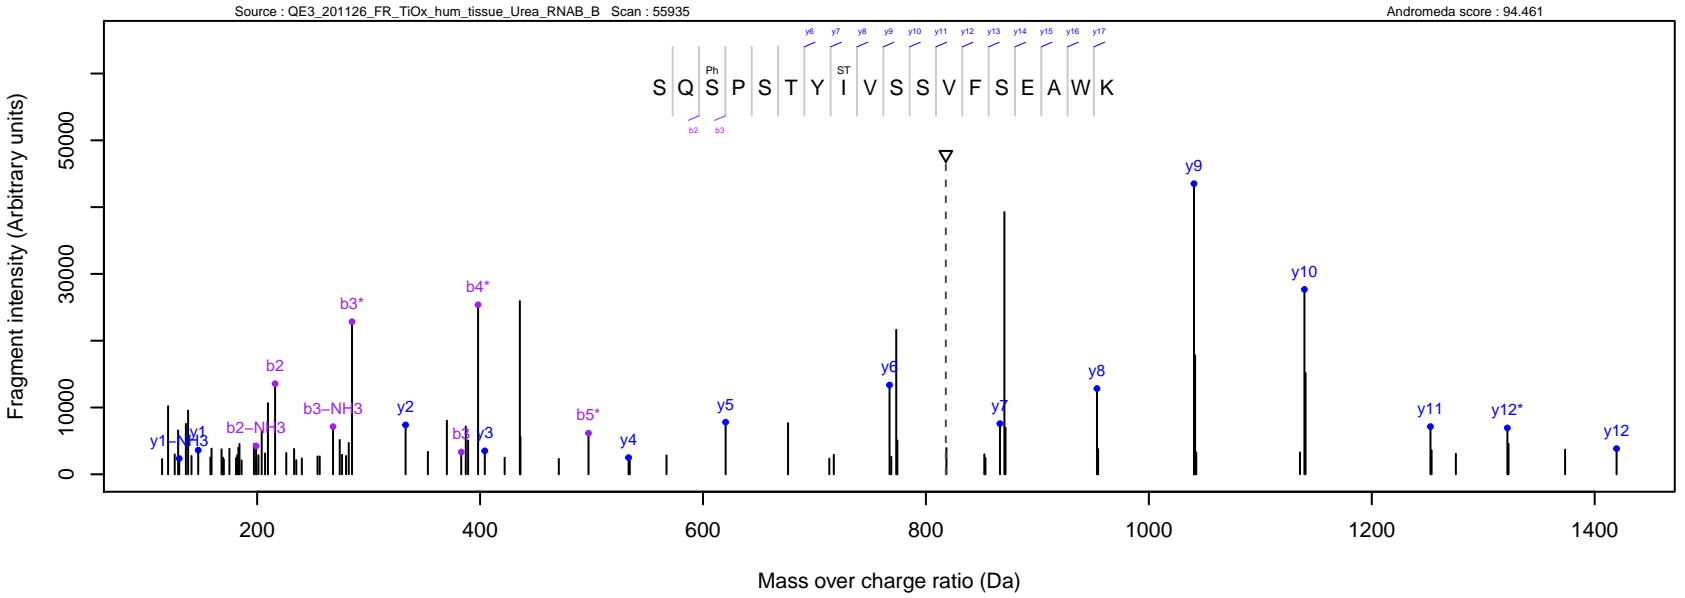

RVNDAEPGS(Phospho (STY))PEAPQGGK-3+

Source : QE3\_201126\_FR\_TiOx\_hum\_tissue\_Urea\_RNAB\_N Scan : 7091

Andromeda score : 94.45

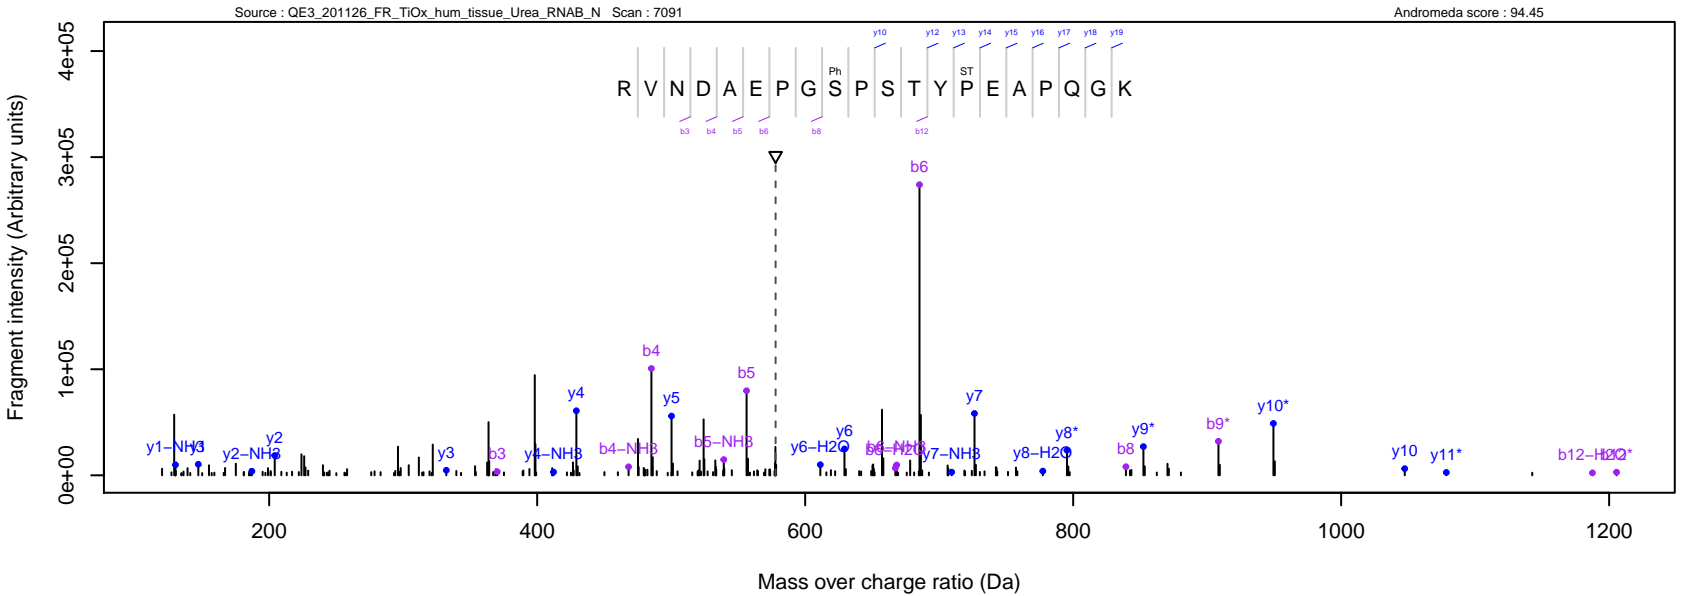

### KL<sup>SM</sup>(Oxidation (M))GS(Phospho (STY))DDAAYTQALLVH<sup>QK</sup>-3+

Source : QE3\_201126\_FR\_TIOx\_hum\_tissue\_Urea\_RNAB\_H Scan : 25210

Andromeda score : 94.449

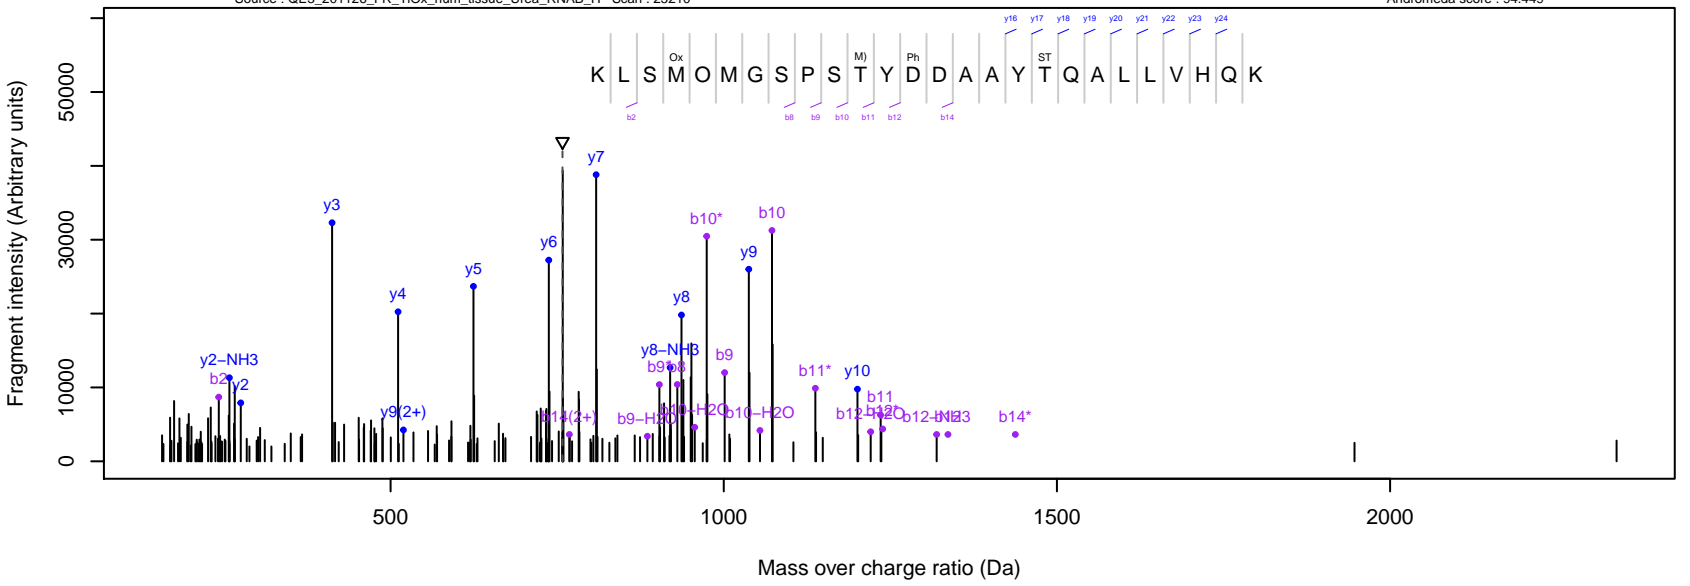

### (Acetyl (Protein N-term))S(Phospho (STY))AVGAATPYLHHPGDSHS<sup>GR</sup>-3+

Source : QE3\_201126\_FR\_TIOx\_hum\_tissue\_Urea\_RNAB\_H Scan : 19672

Andromeda score : 94.449

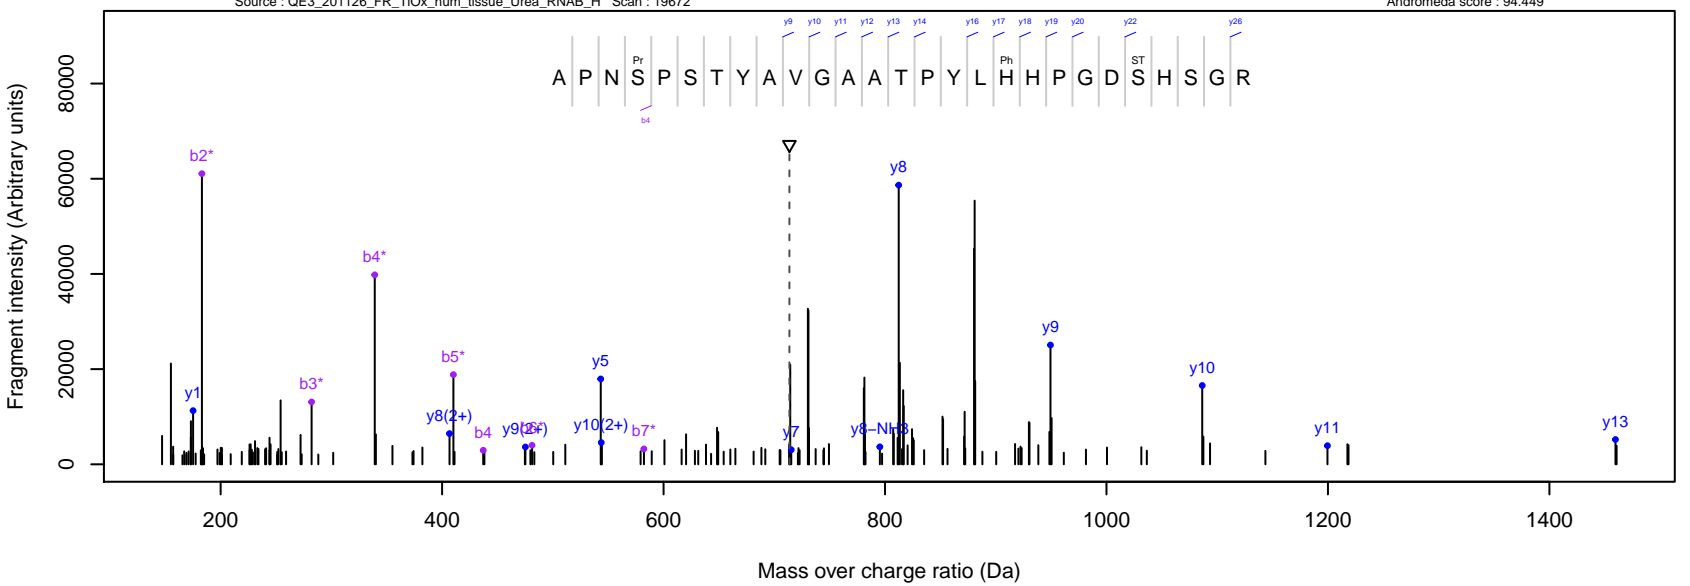

### VESVFETLVEDS(Phospho (STY))AEEESTLTK-3+

Source : QE3\_201126\_FR\_TIOx\_hum\_tissue\_Urea\_RNAB\_N Scan : 54339

Andromeda score : 94.449

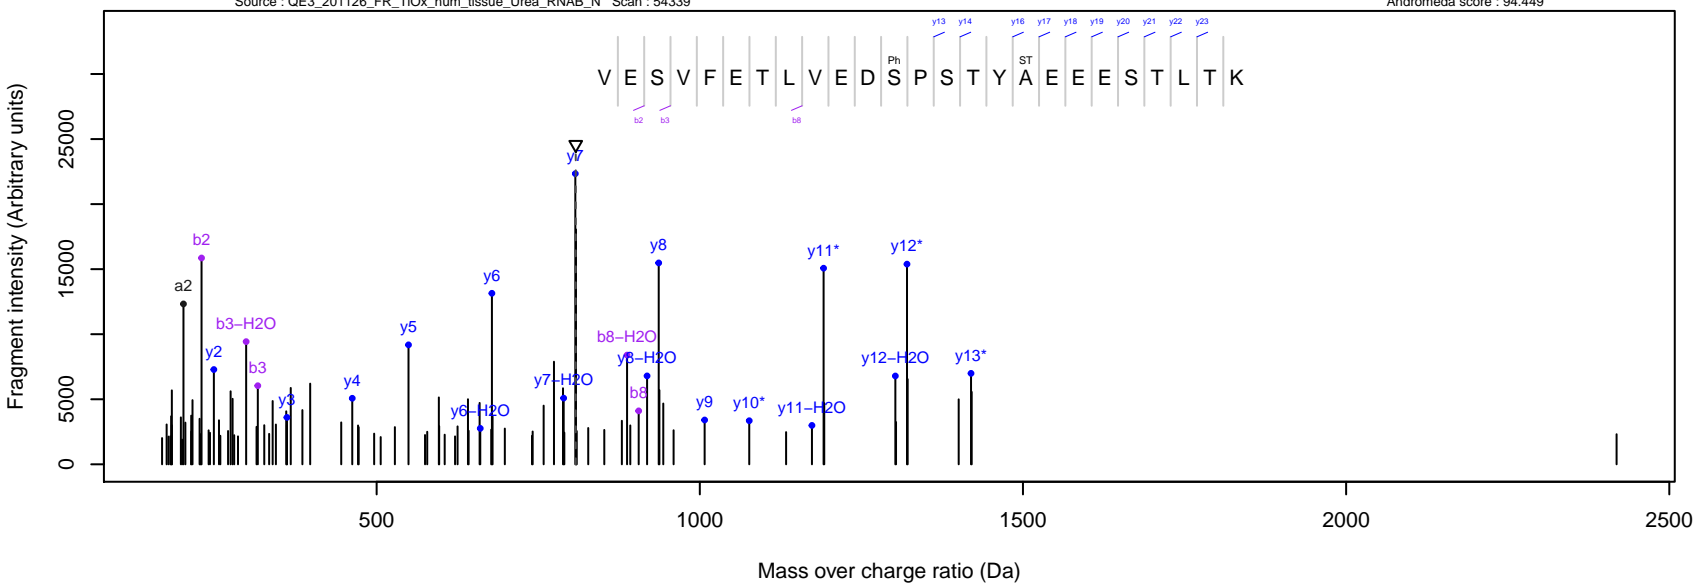

TATTLPDDMITQREDAEGVAEEEQEGDS(Phospho (STY))GEQETGATDARPR-4+

Source : QE3\_201126\_FR\_TIOx\_hum\_tissue\_Urea\_RNAB\_B Scan : 31635

Andromeda score : 94.434

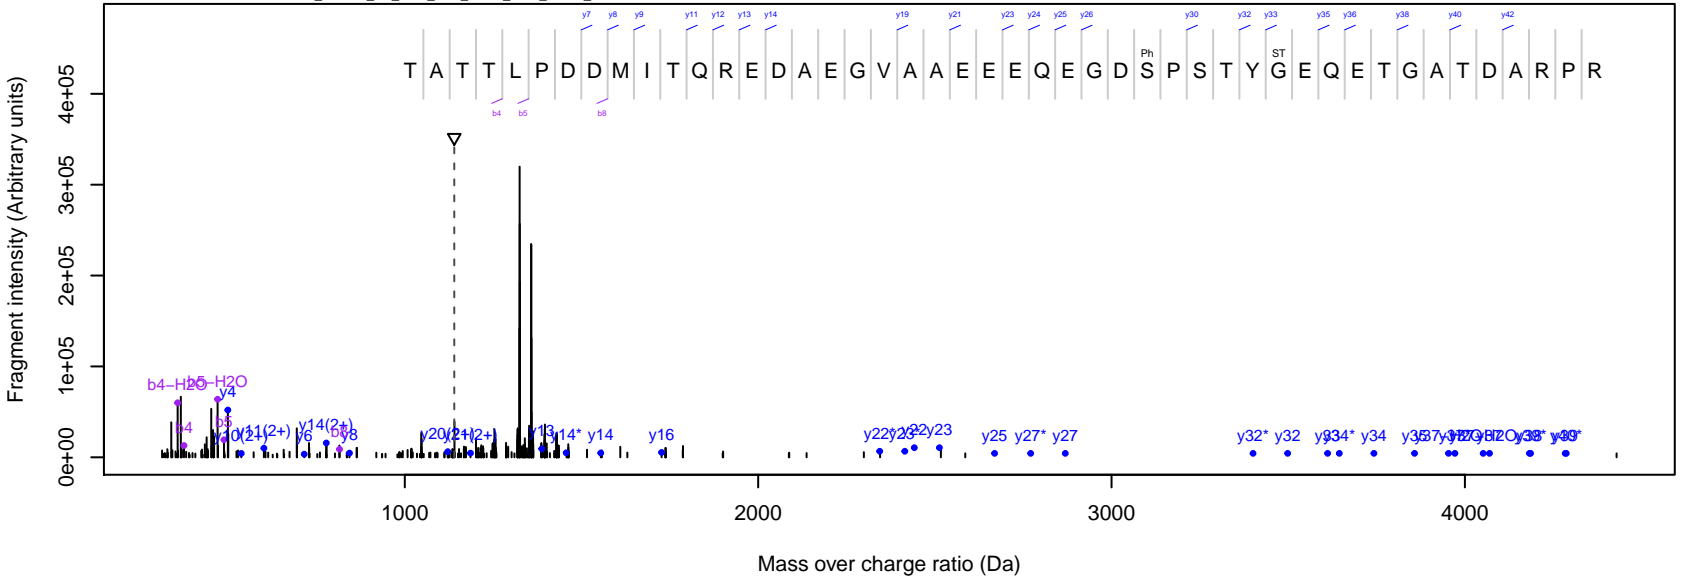

KQS(Phospho (STY))EADLAETRPDLK-3+

Source : QE3\_201126\_FR\_TIOx\_hum\_tissue\_Urea\_RNAB\_N Scan : 13248

Andromeda score : 94.42

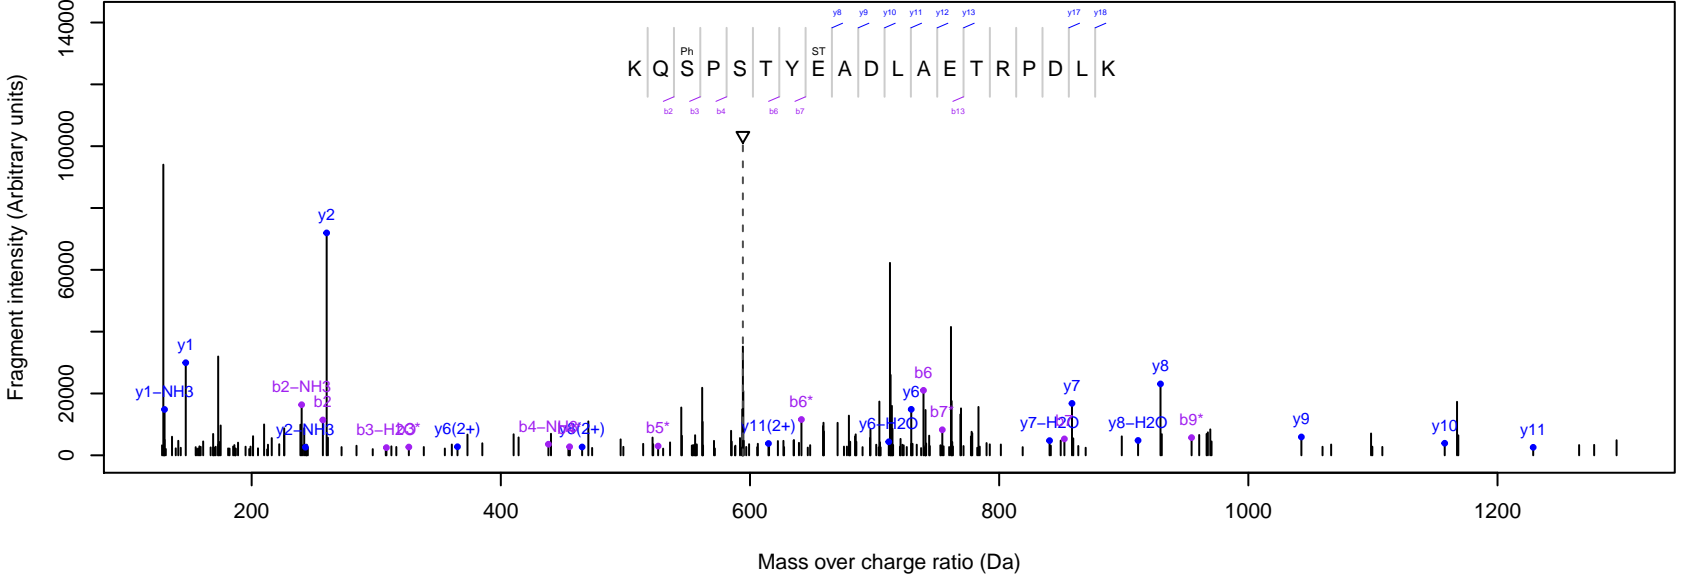

IIQIS(Phospho (STY))SGR-2+

Source : QE3\_201126\_FR\_TIOx\_hum\_tissue\_Urea\_RNAB\_N Scan : 15592

Andromeda score : 94.409

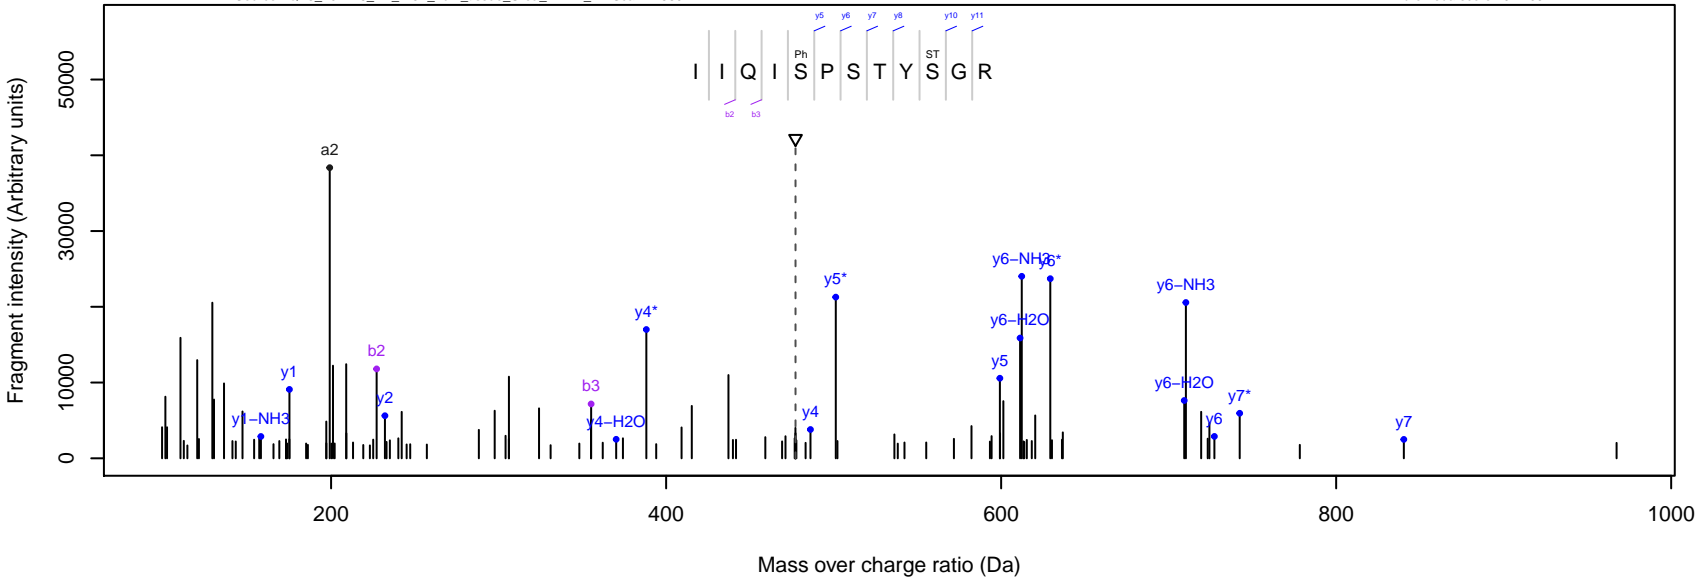

### DKGS(Phospho (STY))QVCNYANGGLFSK-3+

Source : QE3\_201126\_FR\_TiOx\_hum\_tissue\_Urea\_RNAB\_N Scan : 27779

Andromeda score : 94.384

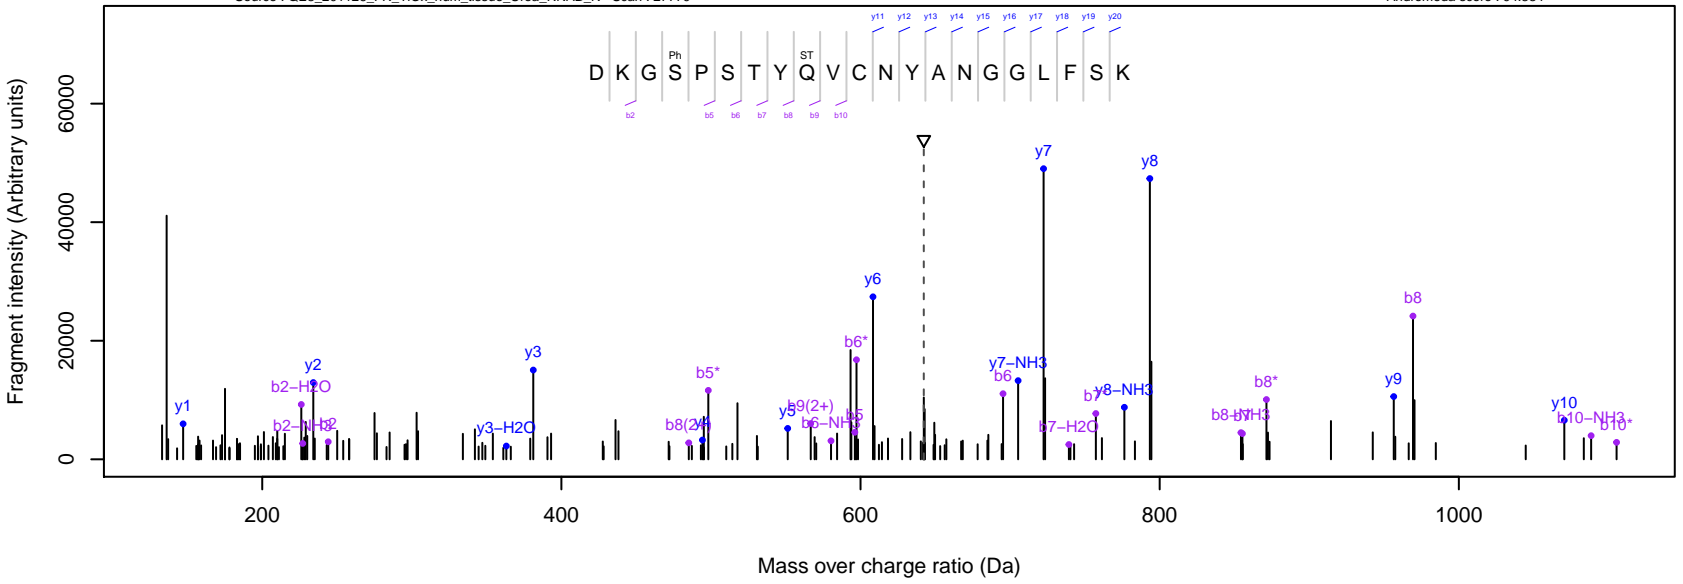

### HAPHCLS(Phospho (STY))EEEGQDRPR-4+

Source : QE3\_201126\_FR\_TiOx\_hum\_tissue\_Urea\_RNAB\_B Scan : 7491

Andromeda score : 94.384

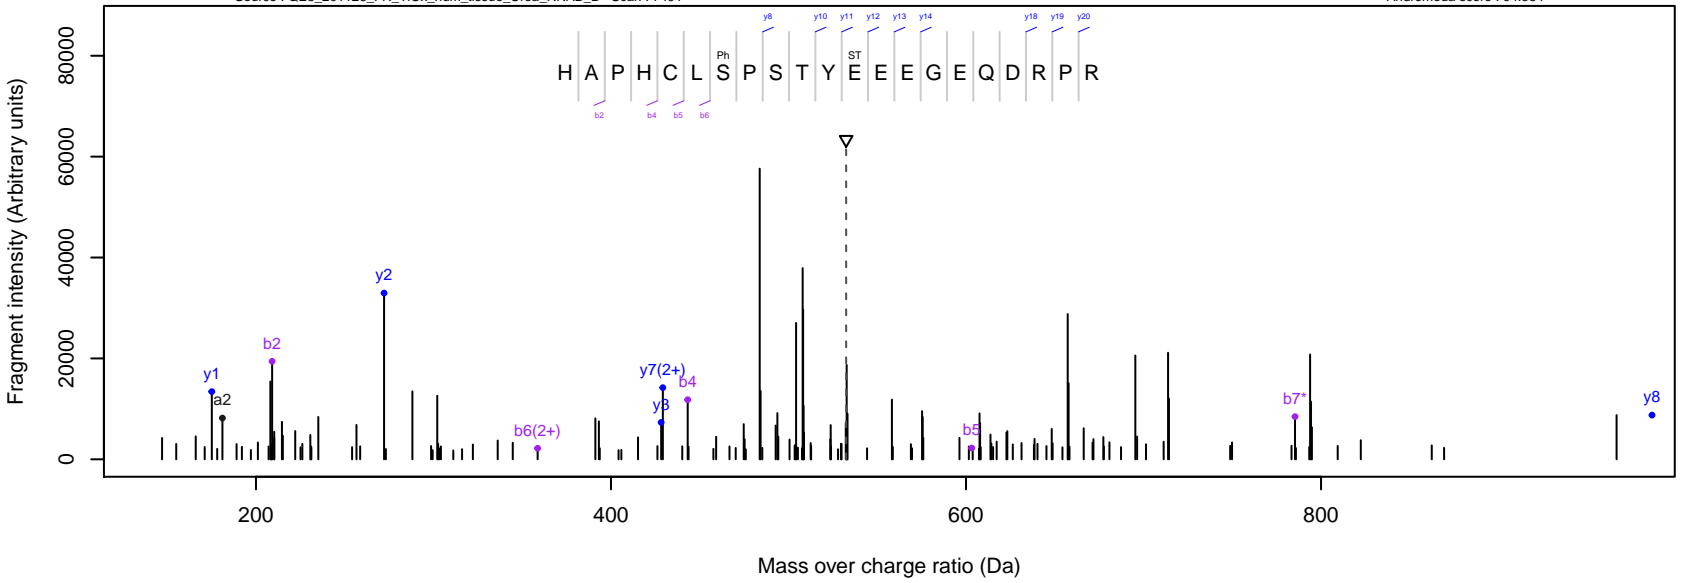

### HGS(Phospho (STY))WGSGLDMHTKPWIR-4+

Source : QE3\_201126\_FR\_TiOx\_hum\_tissue\_Urea\_RNAB\_H Scan : 28947

Andromeda score : 94.384

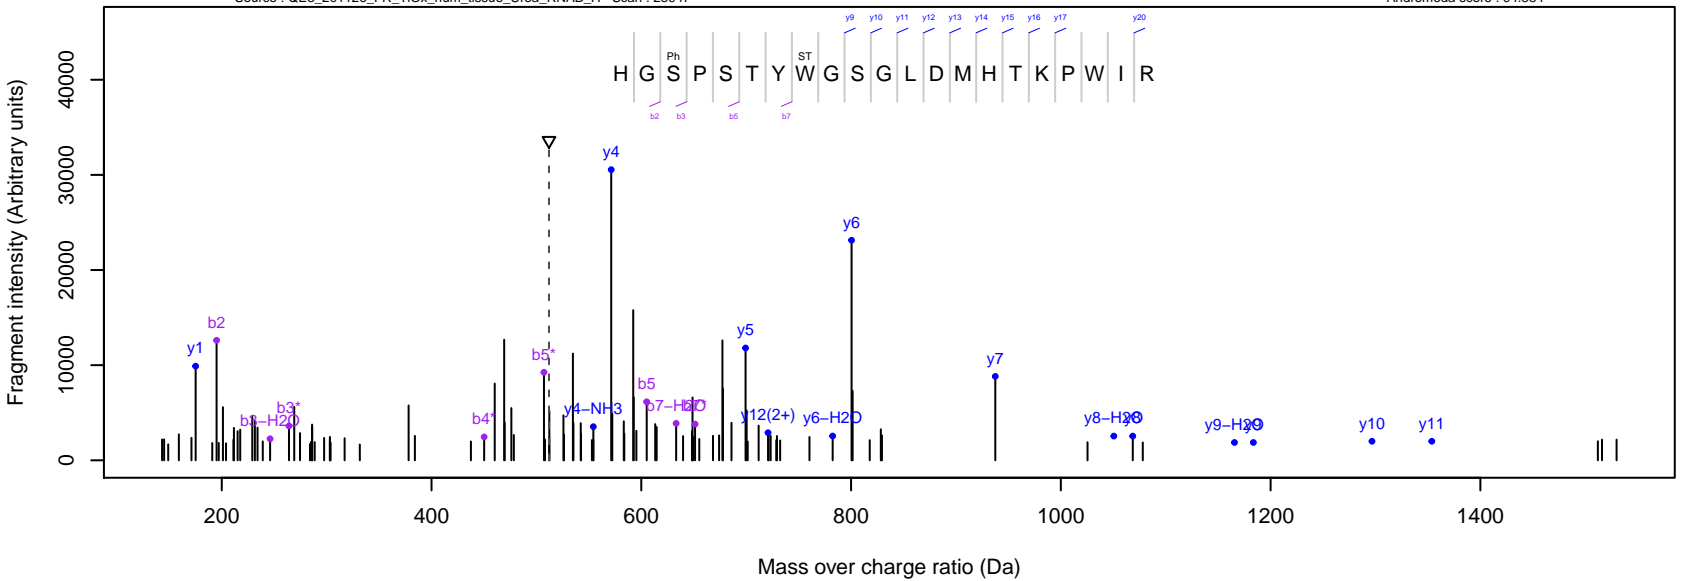

WNQAHKSS(Phospho (STY))GTNFQGLPSK-3+

Source : QE3\_201126\_FR\_TiOx\_hum\_tissue\_Urea\_RNAB\_H Scan : 13904

Andromeda score : 94.384

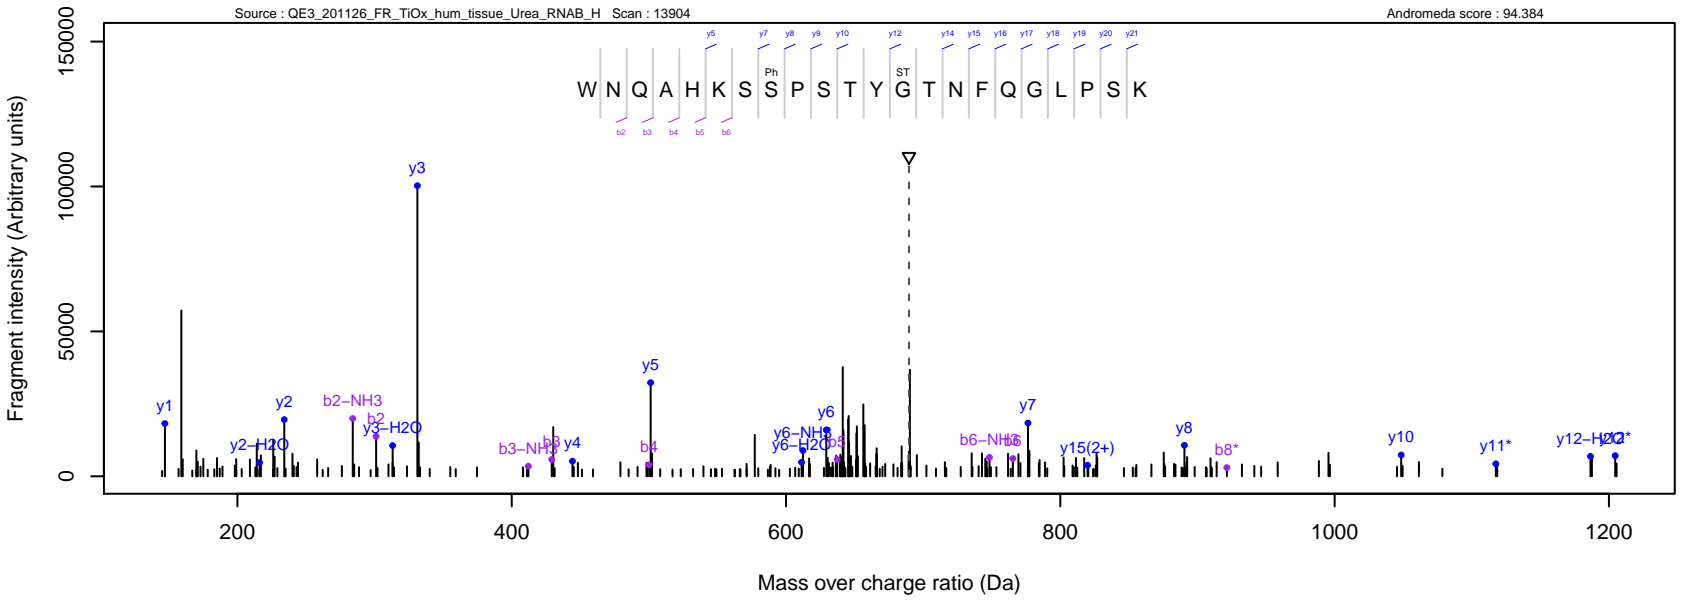

YSS(Phospho (STY))QDADEQDWEFQKR-3+

Source : QE3\_201126\_FR\_TiOx\_hum\_tissue\_Urea\_RNAB\_B Scan : 23468

Andromeda score : 94.384

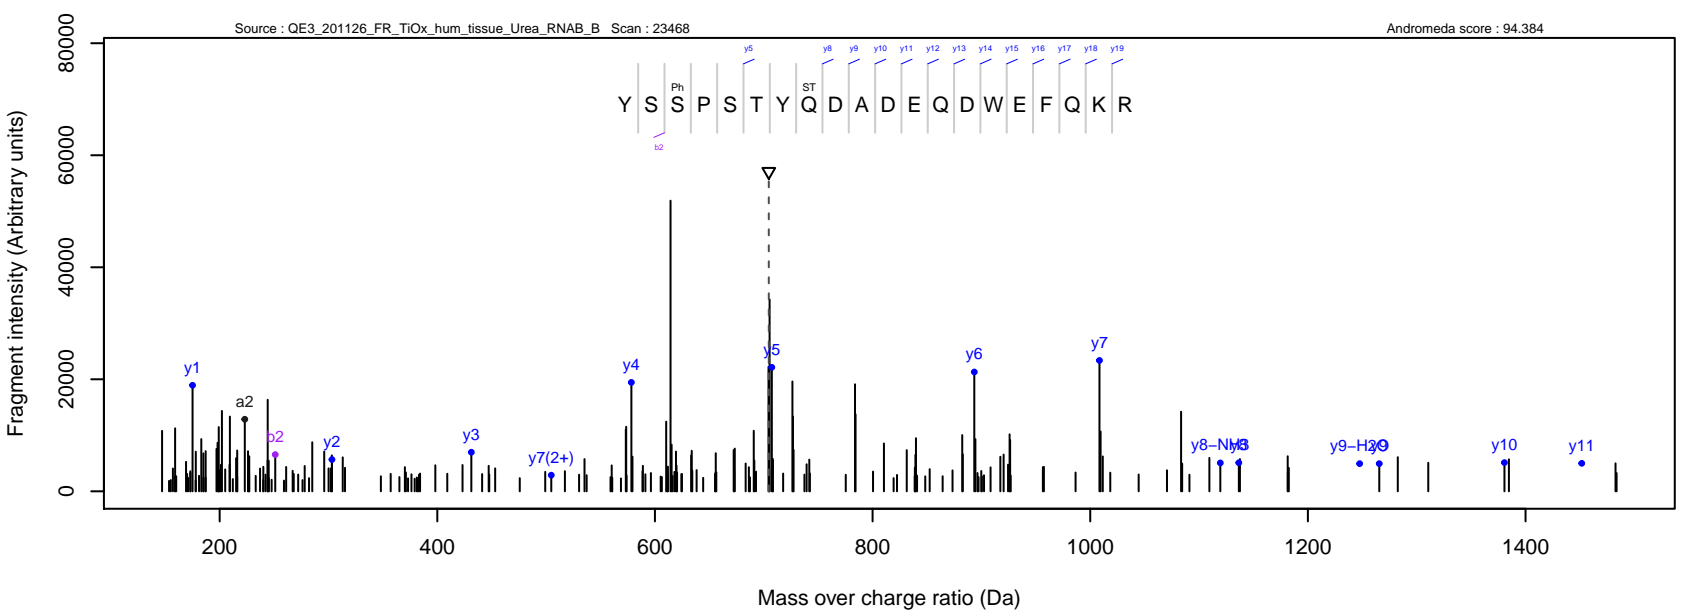

S(Phospho (STY))SLGSHQLPR-2+

Source : QE3\_201126\_FR\_TiOx\_hum\_tissue\_Urea\_RNAB\_N Scan : 10603

Andromeda score : 94.363

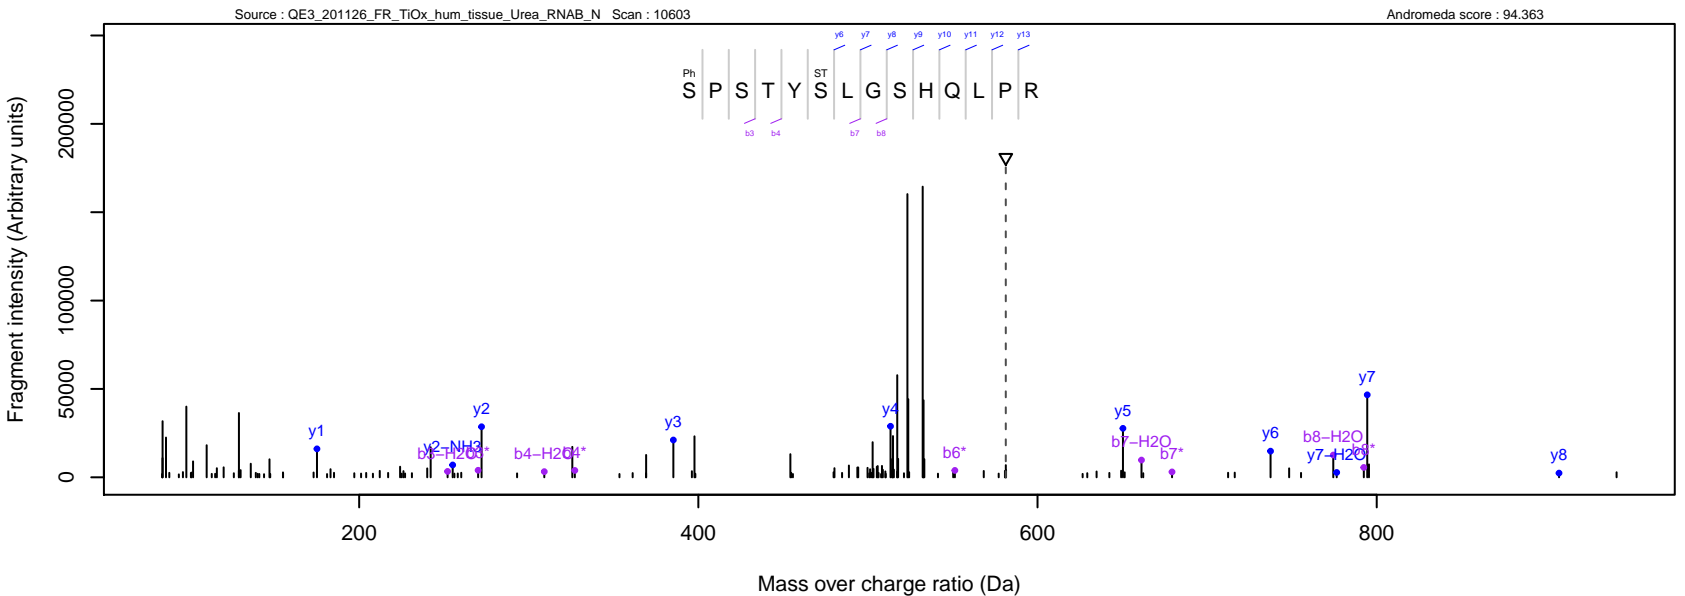

ALEAASLSQHPPSLCIS(Phospho (STY))DS(Phospho (STY))EEEEERKK-3+

Source : QE3\_201126\_FR\_TIOx\_hum\_tissue\_Urea\_RNAB\_N Scan : 27813

Andromeda score : 94.352

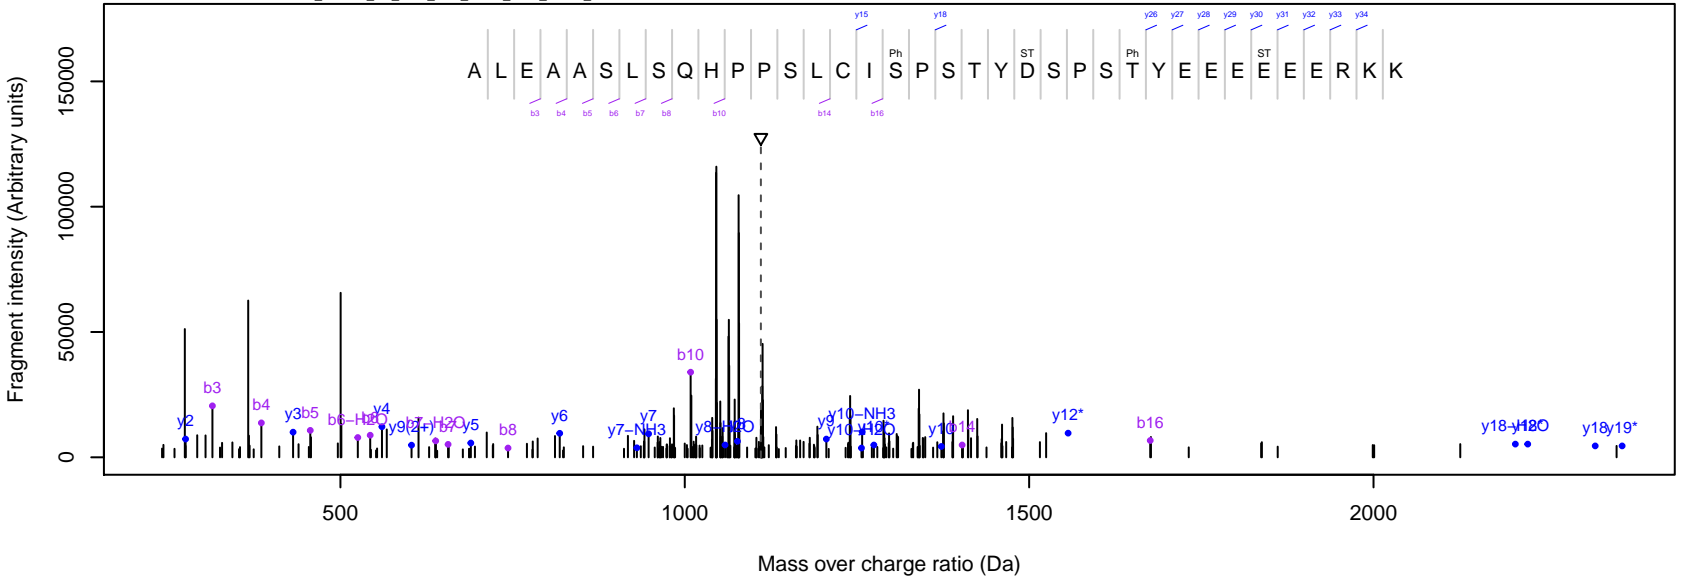

DSGNWDTSPSTYGS(Phospho (STY))PSTYELSPSTYEGELEKR-3+

Source : QE3\_201126\_FR\_TIOx\_hum\_tissue\_Urea\_RNAB\_N Scan : 40019

Andromeda score : 94.301

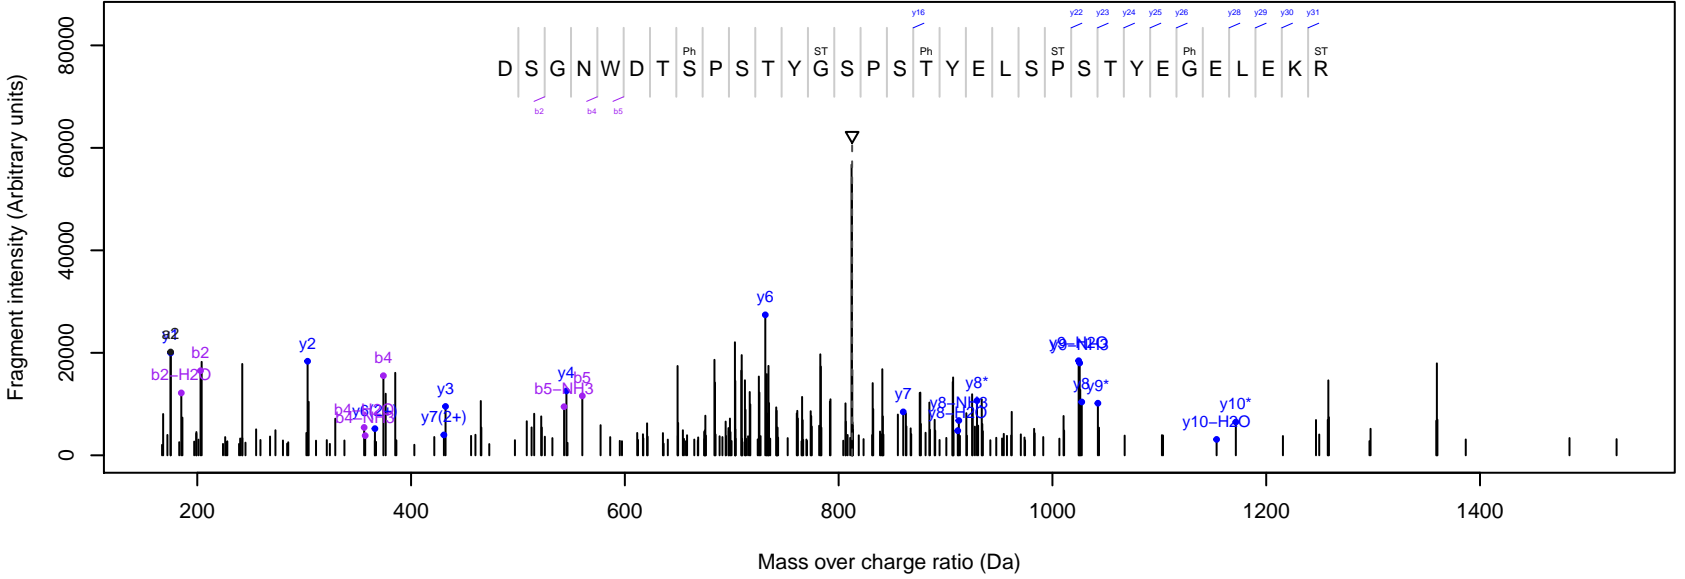

AELS(Phospho (STY))YRGPVSGTEPEPVYSM(Oxidation (M))EAADYR-3+

Source : QE3\_201126\_FR\_TIOx\_hum\_tissue\_Urea\_RNAB\_B Scan : 33970

Andromeda score : 94.261

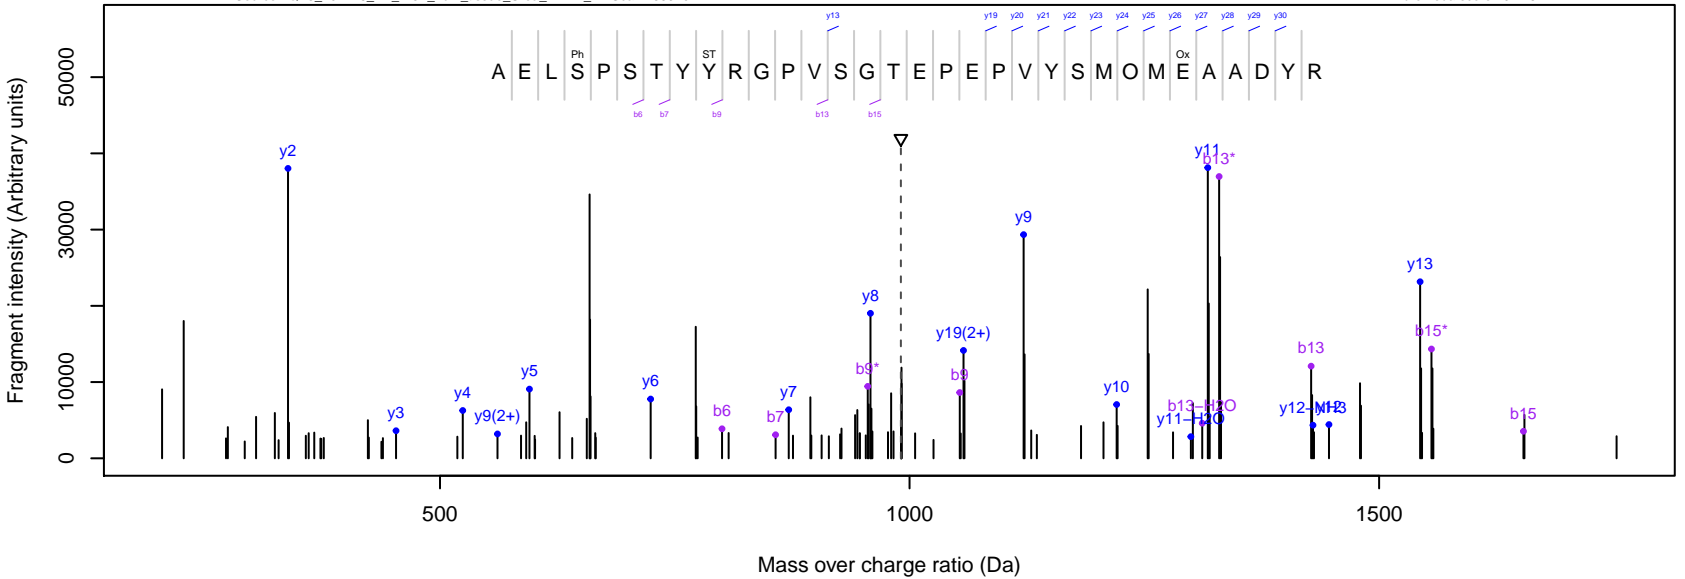



DFQDYMEPEGCGS(Phospho (STY))PQRR-3+

Source : QE3\_201126\_FR\_TiOx\_hum\_tissue\_Urea\_RNAB\_H Scan : 28627

Andromeda score : 94.259

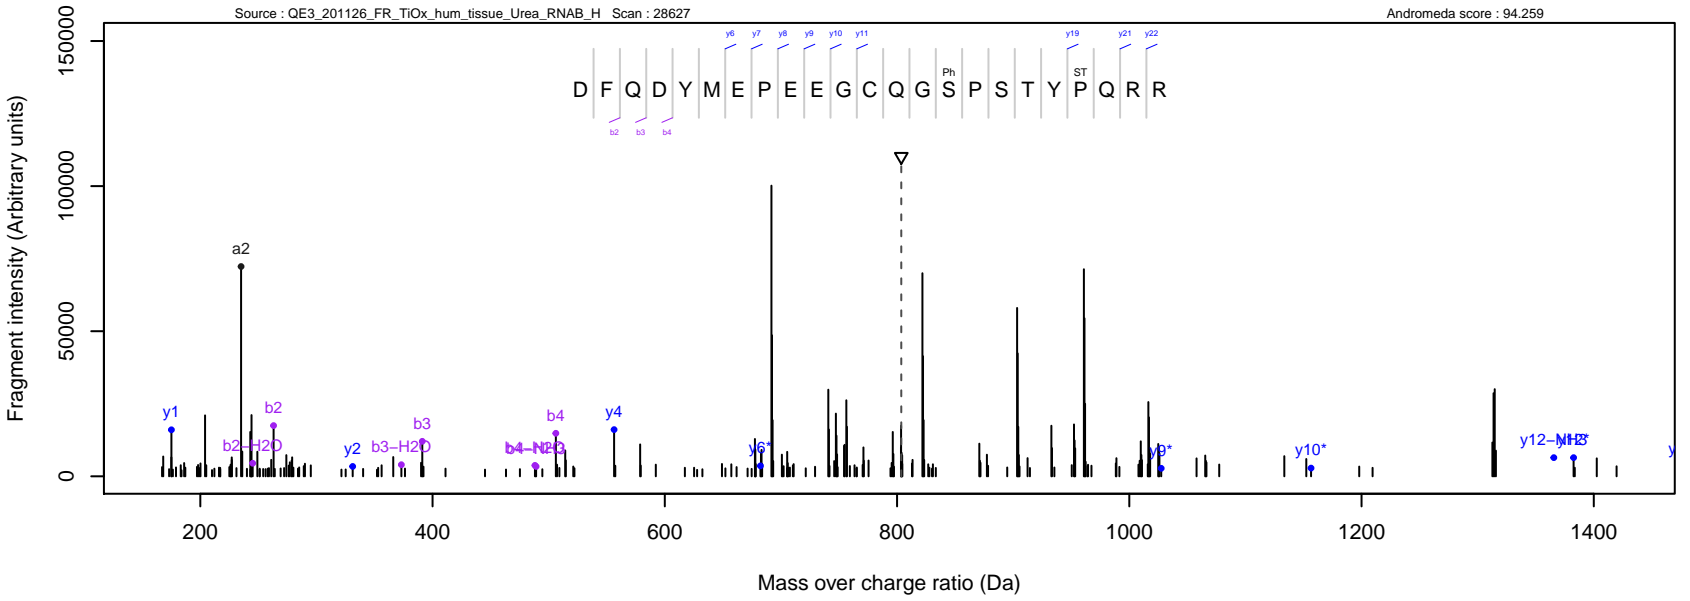

DSS(Phospho (STY))ESQLASTESDKPTTGR-3+

Source : QE3\_201126\_FR\_TiOx\_hum\_tissue\_Urea\_RNAB\_H Scan : 11405

Andromeda score : 94.259

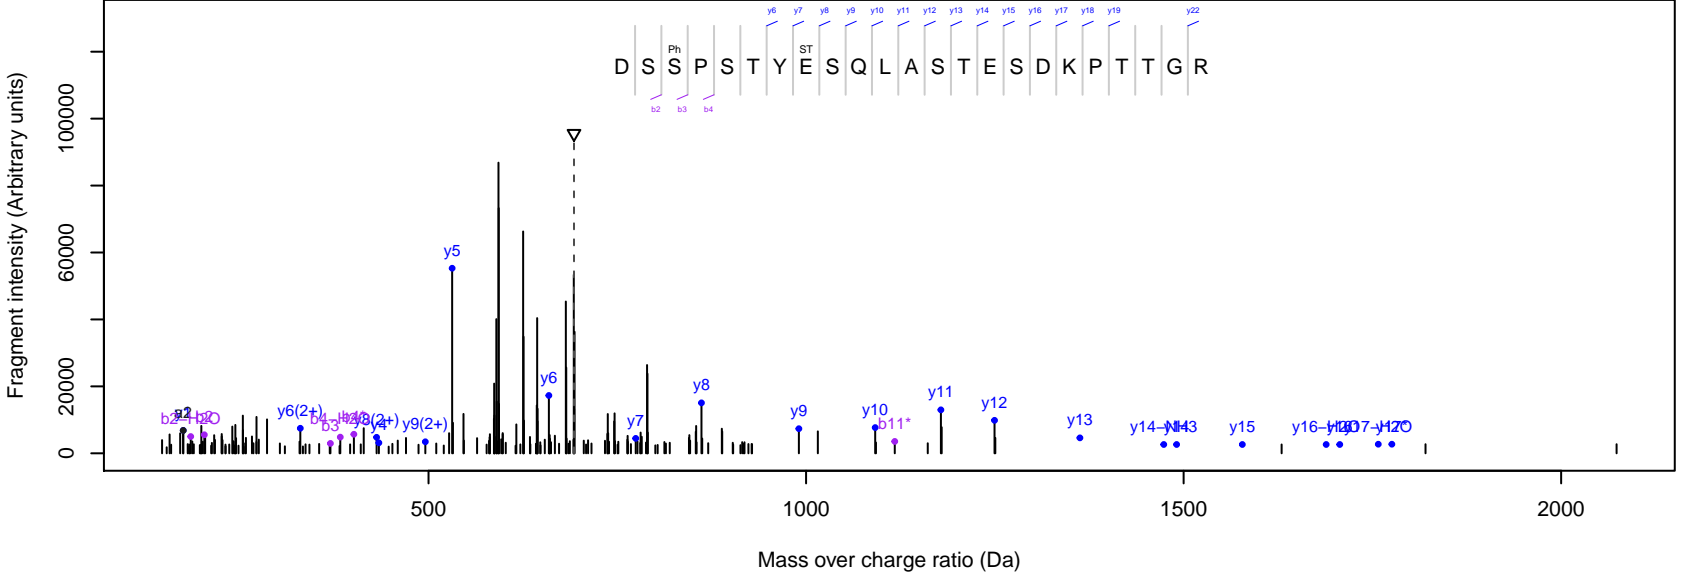

DYGDLPFADIPNDS(Phospho (STY))PFQIVK-3+

Source : QE3\_201126\_FR\_TiOx\_hum\_tissue\_Urea\_RNAB\_B Scan : 62628

Andromeda score : 94.259

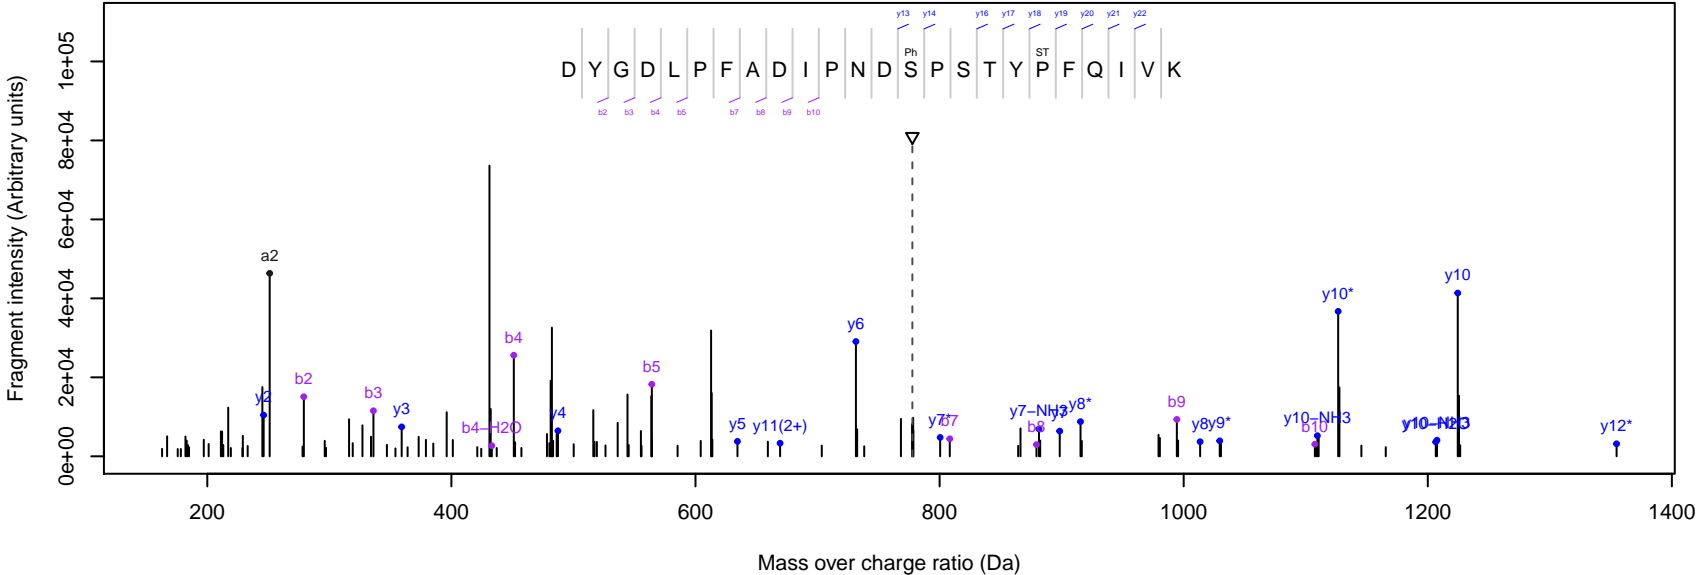

HGSPT(Phospho (STY))APICLGSPEFTDQGR-3+

Source : QE3\_201126\_FR\_TiOx\_hum\_tissue\_Urea\_RNAB\_H Scan : 32974

Andromeda score : 94.259

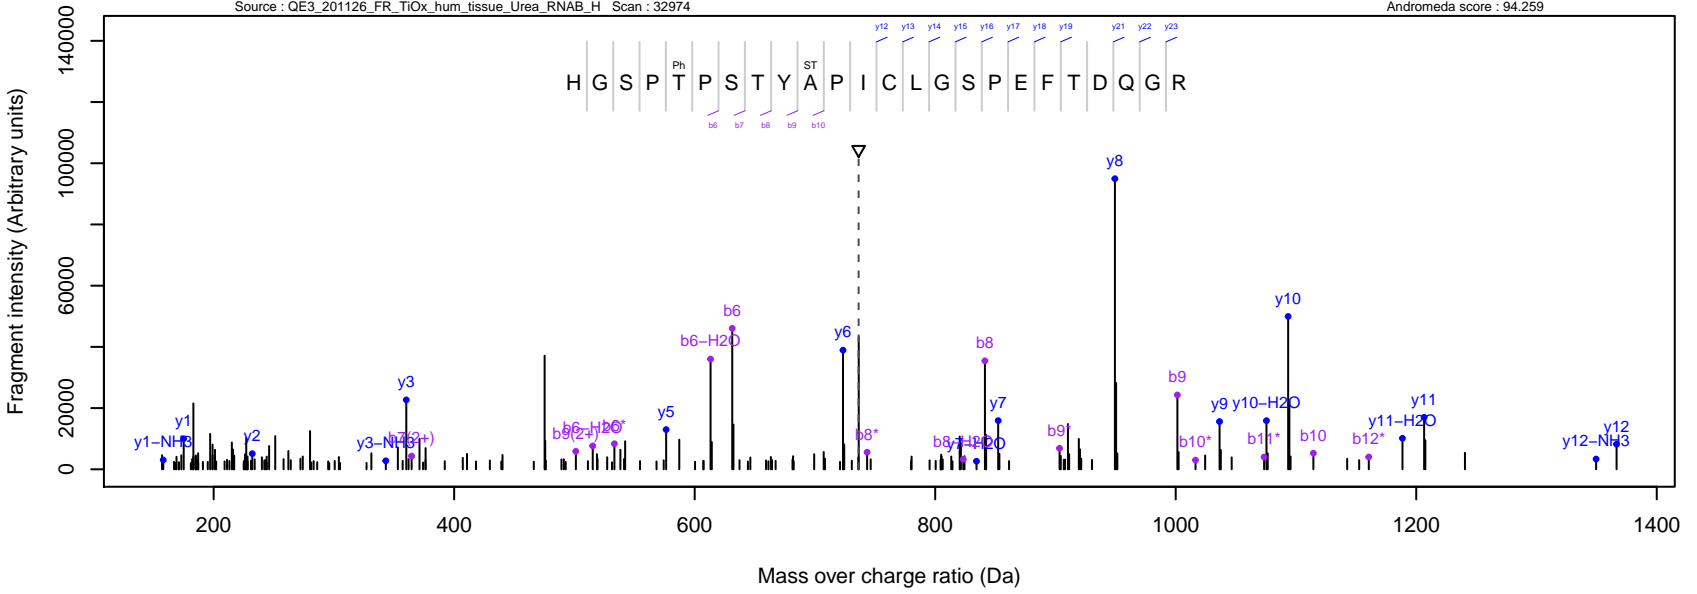

ALPS(Phospho (STY))EDEEGQDDKDFYLR-3+

Source : QE3\_201126\_FR\_TiOx\_hum\_tissue\_Urea\_RNAB\_H Scan : 30035

Andromeda score : 94.201

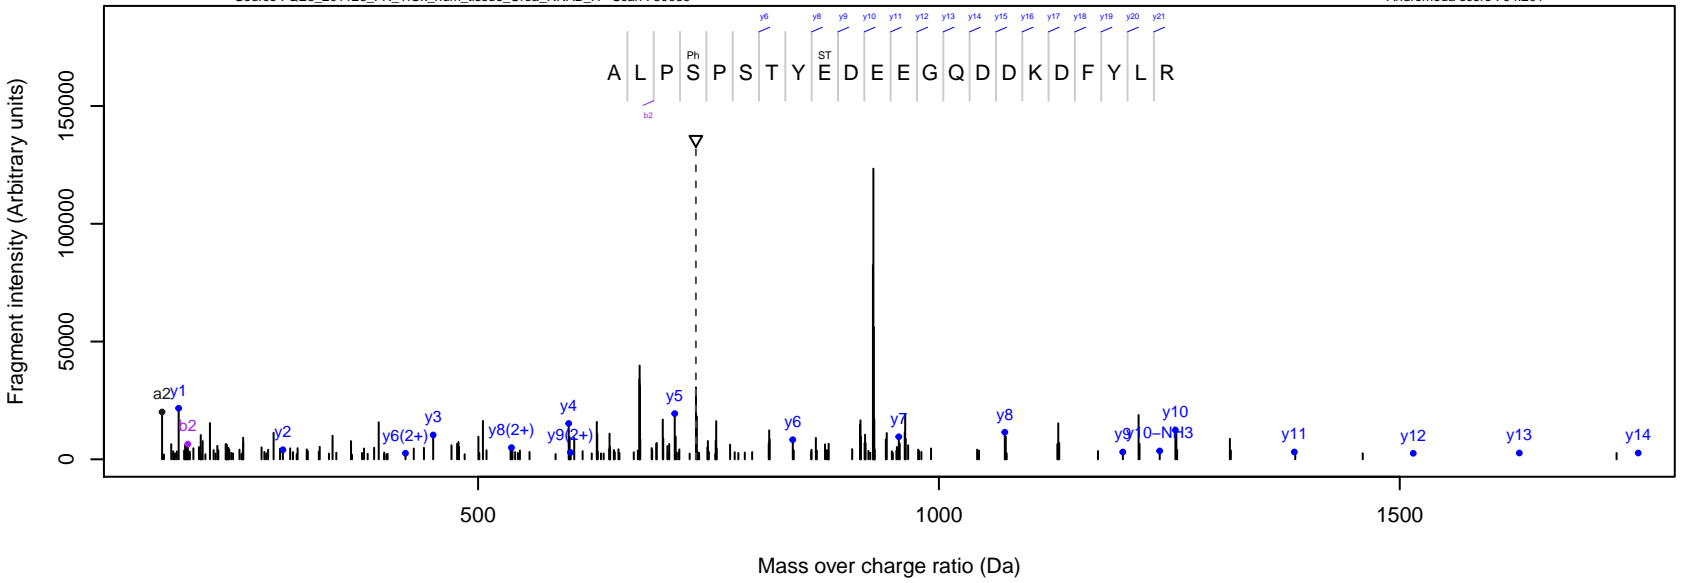

RNS(Phospho (STY))EGSELSCTEGSLTSSLSLDSR-3+

Source : QE3\_201126\_FR\_TiOx\_hum\_tissue\_Urea\_RNAB\_H Scan : 29344

Andromeda score : 94.192

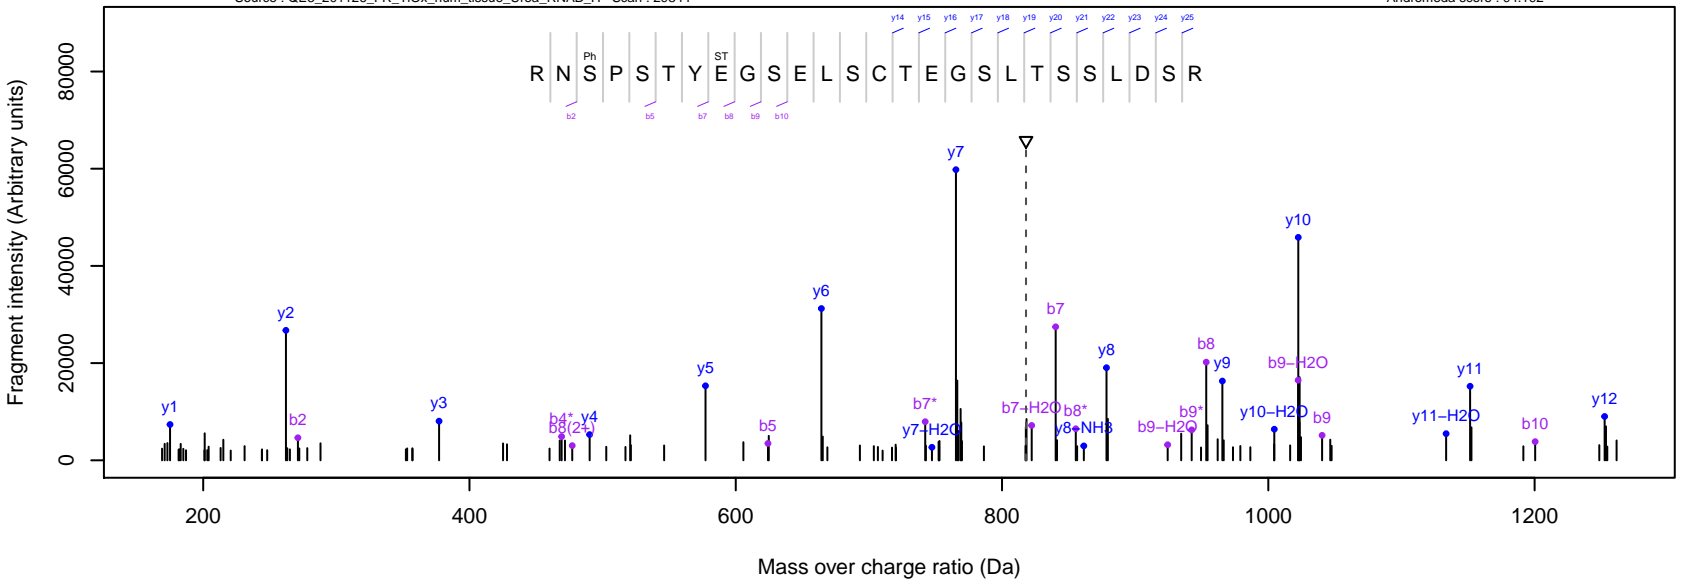



NQIHVKS(Phospho (STY))PPREGSQGELTPANSQSR-4+

Source : QE3\_201126\_FR\_TiOx\_hum\_tissue\_Urea\_RNAB\_H Scan : 10477

Andromeda score : 94.15

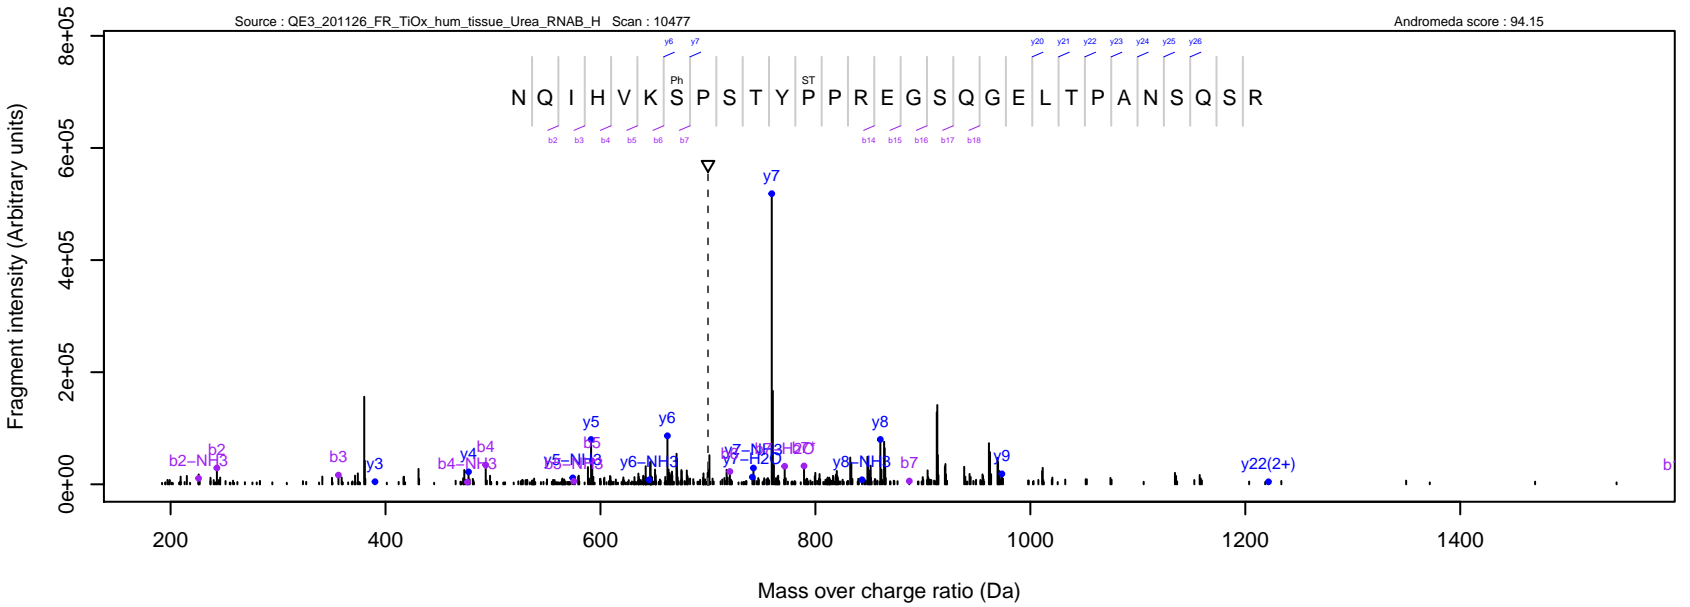

GGT(Phospho (STY))PAGS(Phospho (STY))ARGS(Phospho (STY))PTRPNPPVR-3+

Source : QE3\_201126\_FR\_TiOx\_hum\_tissue\_Urea\_RNAB\_B Scan : 12757

Andromeda score : 94.08

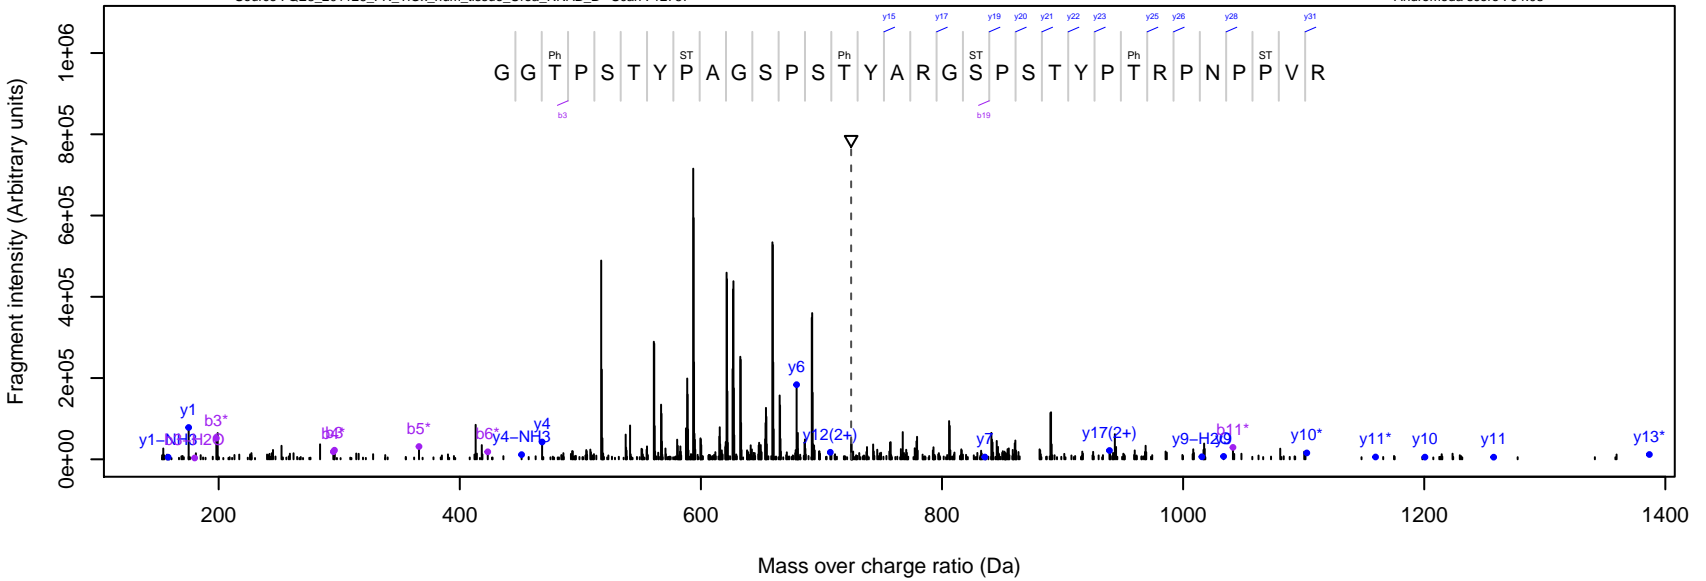

TEAPGT(Phospho (STY))PEGPEPERPSPGDGNPR-3+

Source : QE3\_201126\_FR\_TiOx\_hum\_tissue\_Urea\_RNAB\_N Scan : 13542

Andromeda score : 94.08

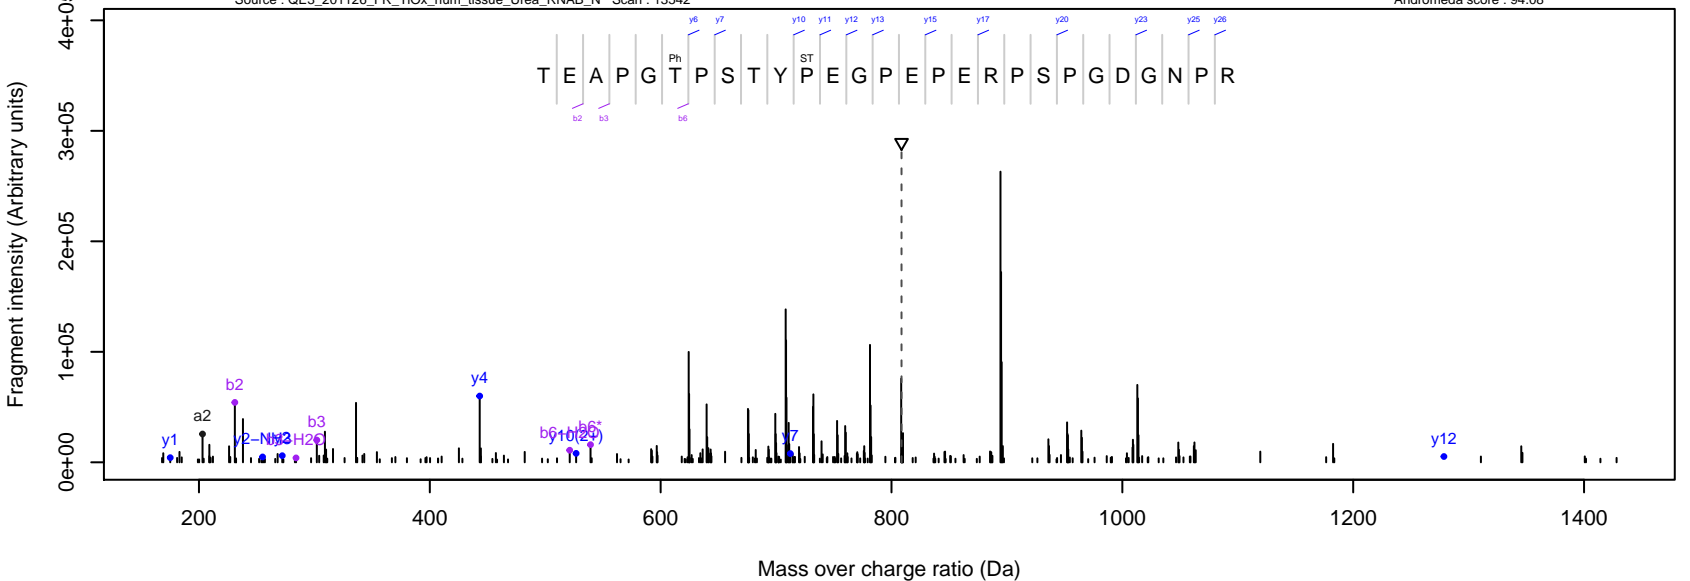

MEHIPES(Phospho (STY))RPLSPTAFSLQLFLHK-4+

Source : QE3\_201126\_FR\_TiOx\_hum\_tissue\_Urea\_RNAB\_H Scan : 42814

Andromeda score : 94.057

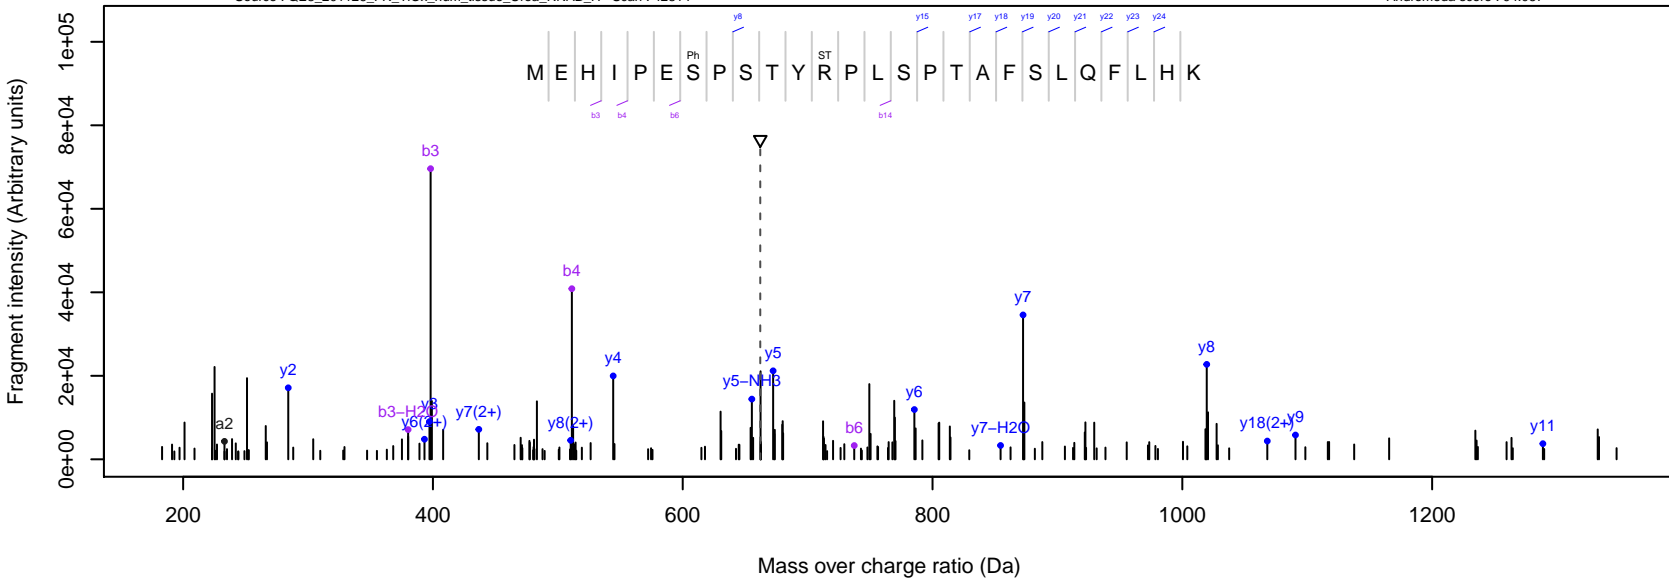

NSLVGGEDDRM(Oxidation (M))S(Phospho (STY))VNSGSSSSK-3+

Source : QE3\_201126\_FR\_TiOx\_hum\_tissue\_Urea\_RNAB\_N Scan : 10100

Andromeda score : 94.019

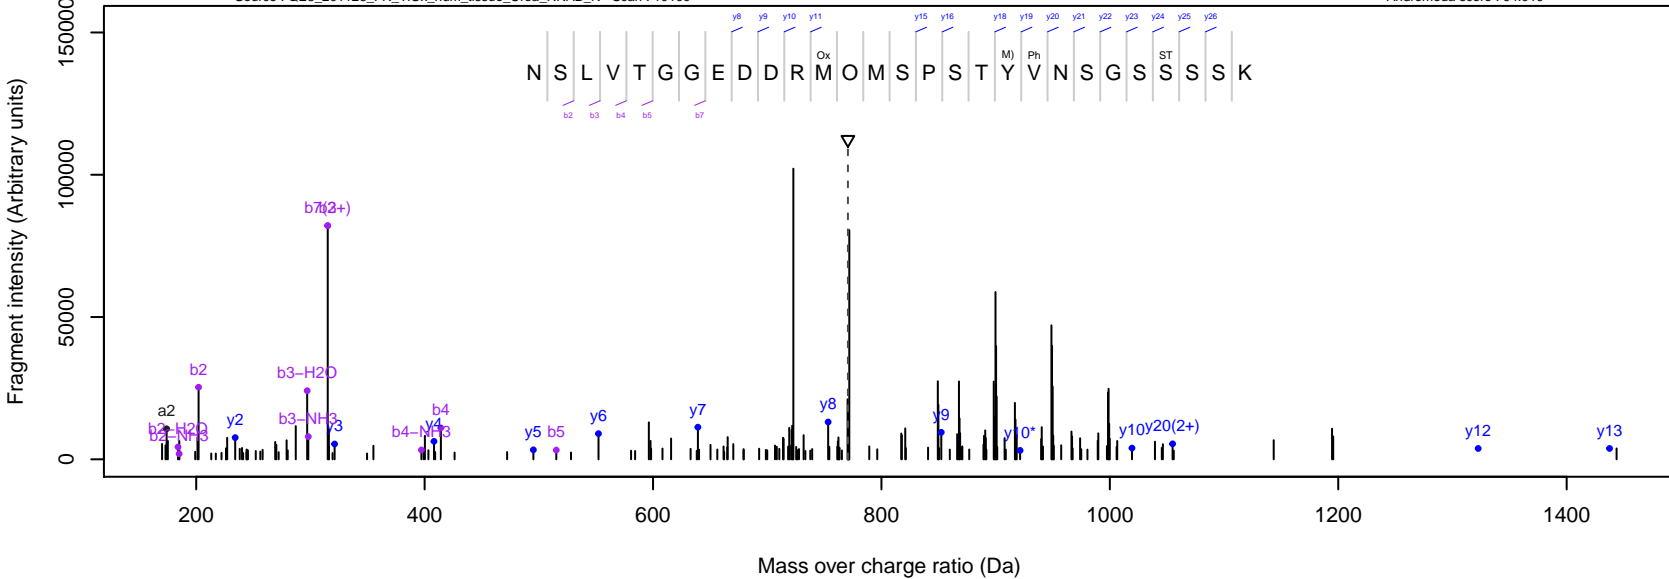

S(Phospho (STY))RSESDLSQPESDEEGYALSGR-3+

Source : QE3\_201126\_FR\_TiOx\_hum\_tissue\_Urea\_RNAB\_H Scan : 22750

Andromeda score : 94.019

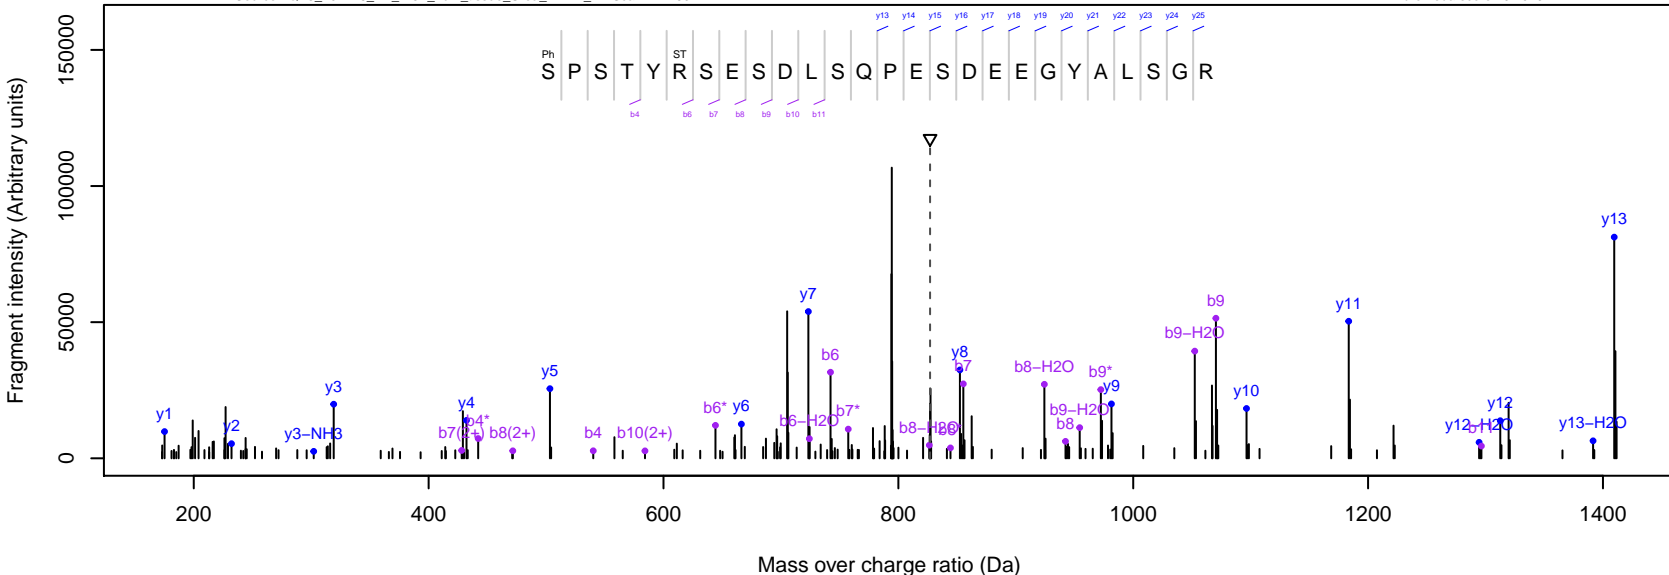

STS(Phospho (STY))QGS(Phospho (STY))INSPVYSR-2+

Source : QE3\_201126\_FR\_TiOx\_hum\_tissue\_Urea\_RNAB\_H Scan : 23398

Andromeda score : 94.007

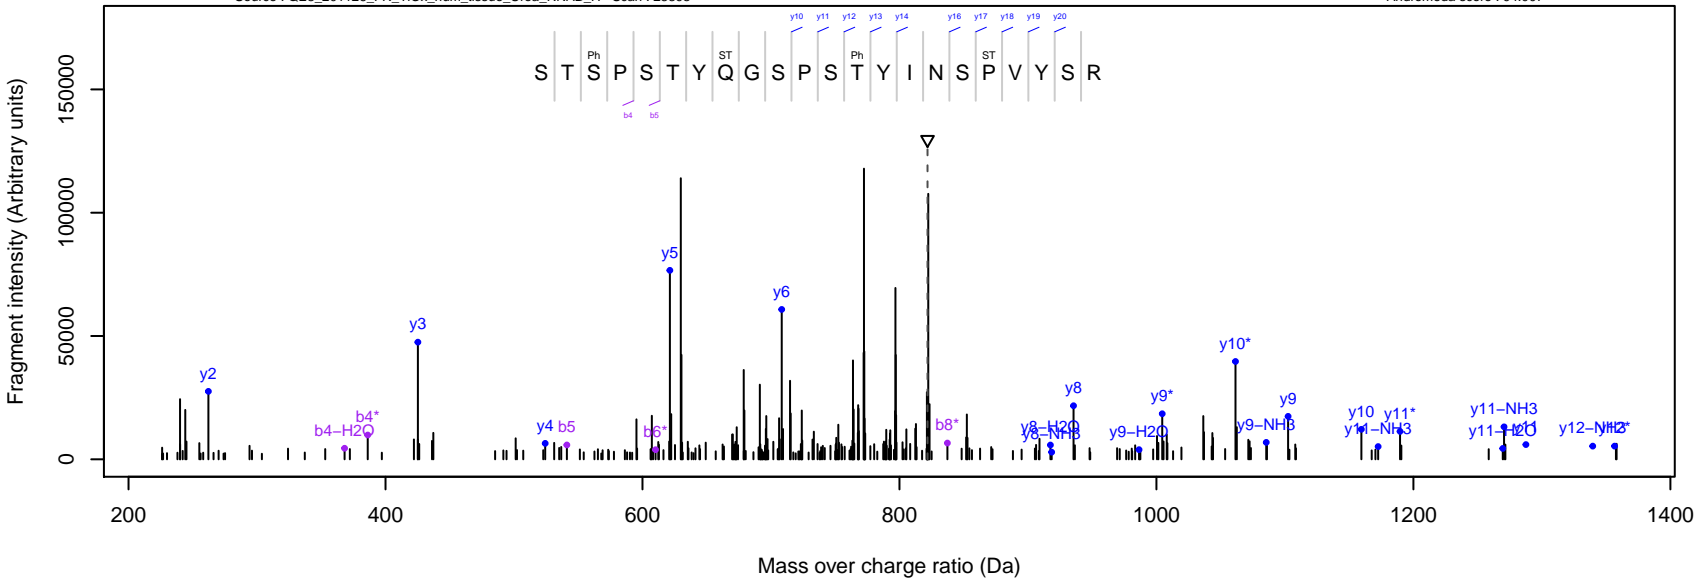

QIPS(Phospho (STY))AEDLETGGGGQVDDGLEHR-3+

Source : QE3\_201126\_FR\_TiOx\_hum\_tissue\_Urea\_RNAB\_N Scan : 38644

Andromeda score : 93.997

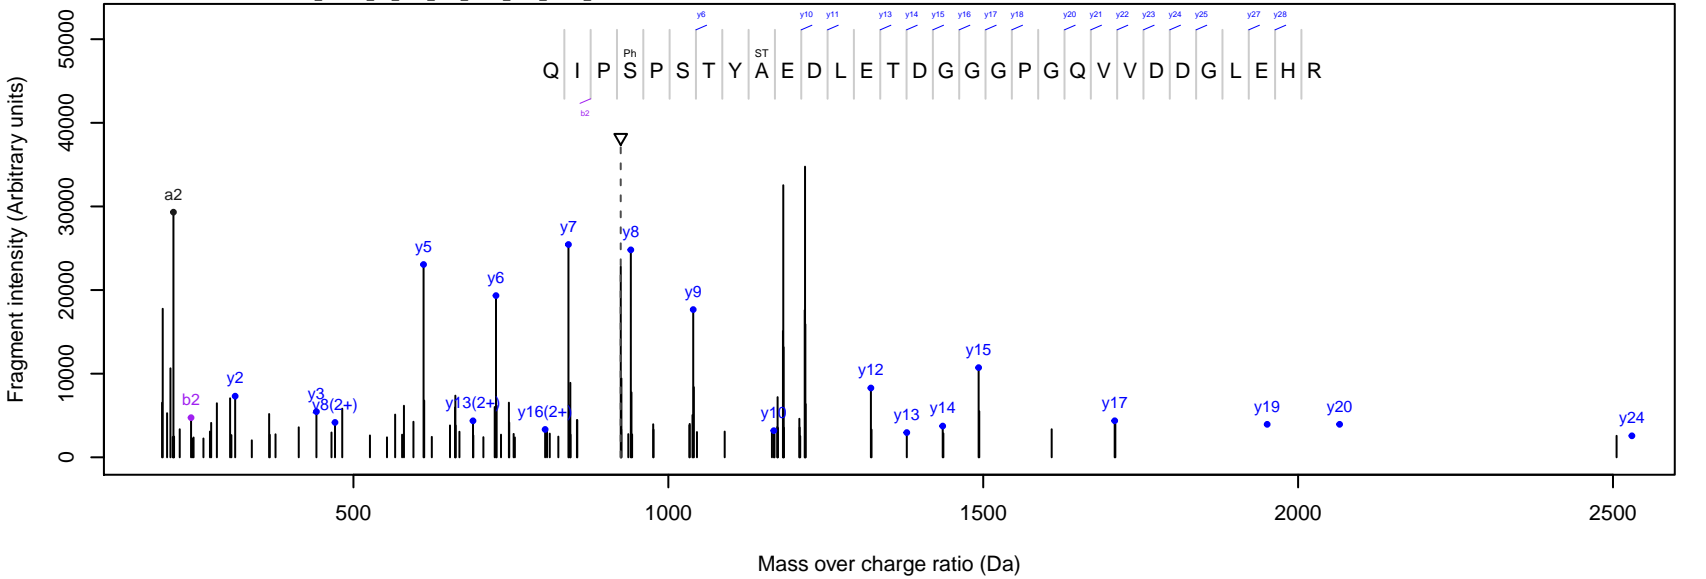

GTEPSPGTPQSRPVS(Phospho (STY))PAGPPEGVPEEAQPPR-3+

Source : QE3\_201126\_FR\_TiOx\_hum\_tissue\_Urea\_RNAB\_B Scan : 24412

Andromeda score : 93.983

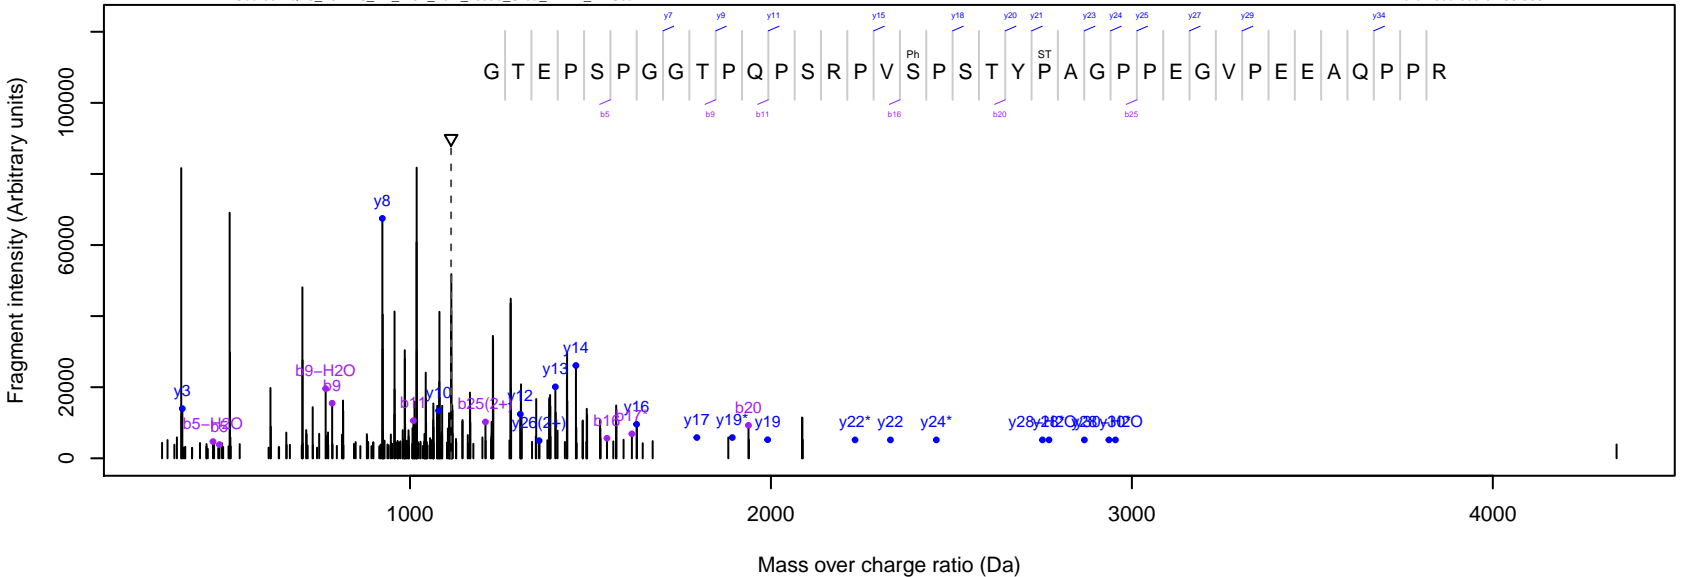

S(Phospho (STY))HSLDDLQVEPGAEQDVPTEVTEPPPQIVPEVPQK-3+

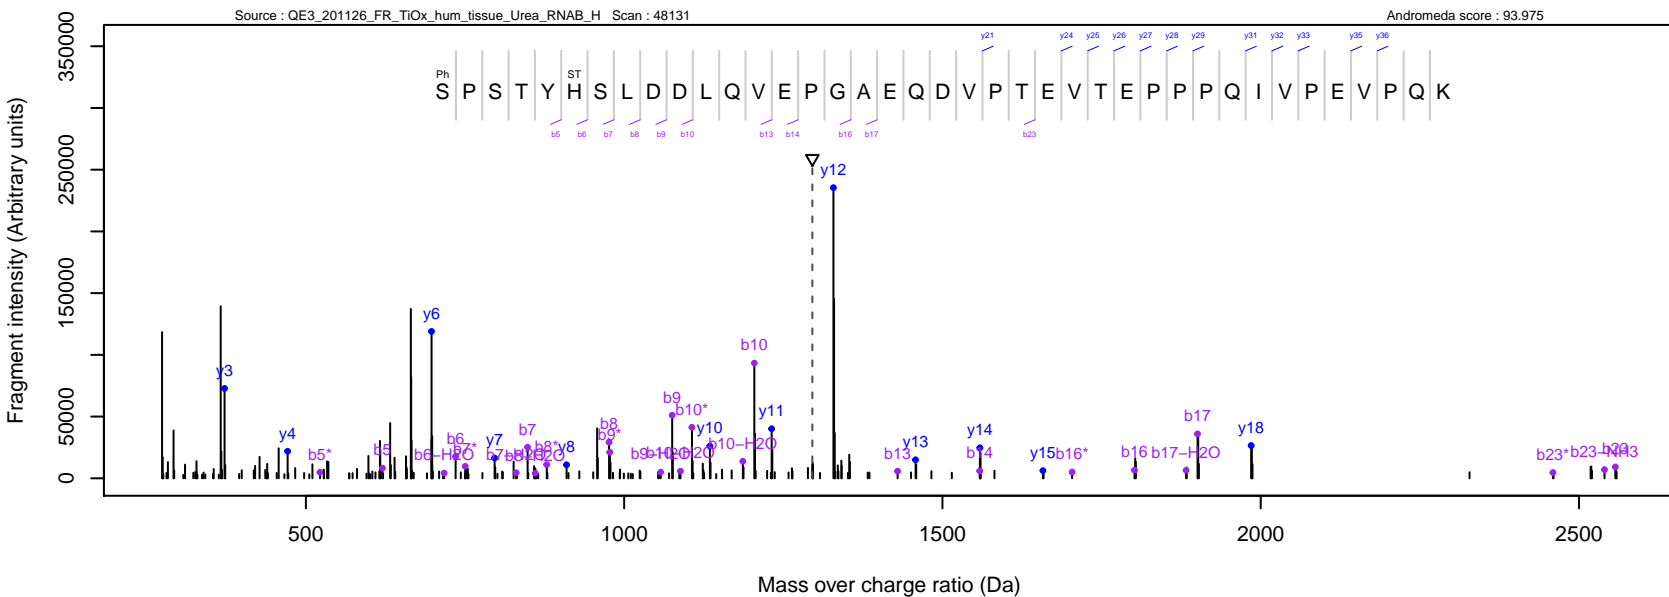

KAENIASVEEAEDLS(Phospho (STY))GTQFVCETVIR-3+

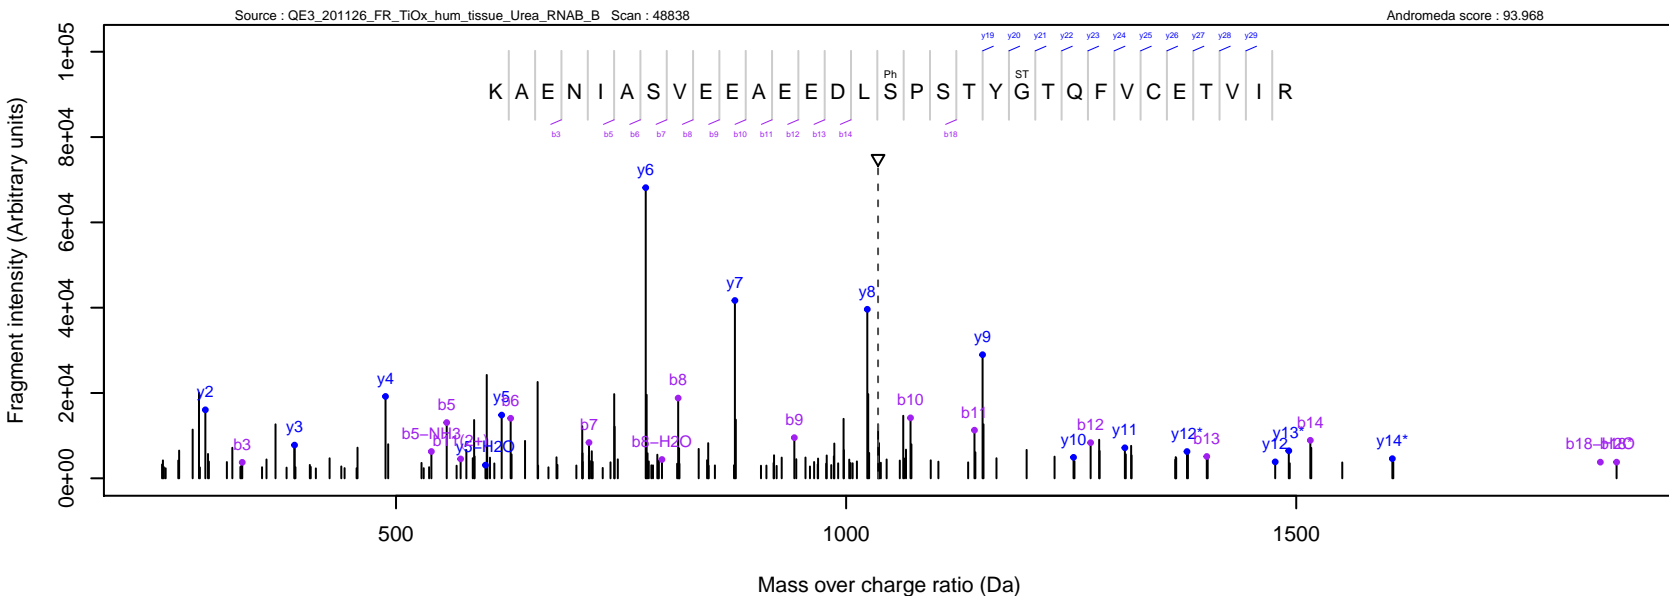

KYS(Phospho (STY))SCSTIFLDDSTV SQPNLR-3+

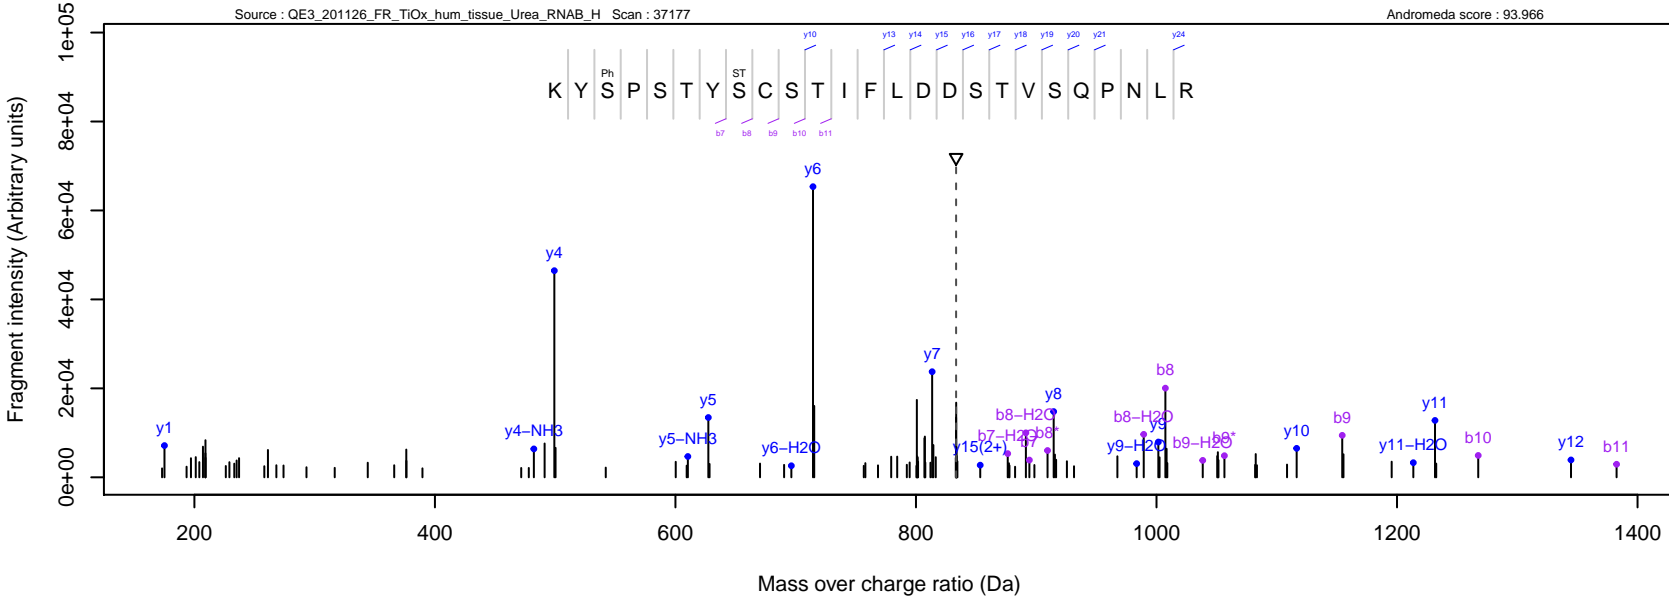

MADHLEGLS(Phospho (STY))S(Phospho (STY))DDEETSTDTNFNLEKDR-3+

Source : QE3\_201126\_FR\_TIOx\_hum\_tissue\_Urea\_RNAB\_B Scan : 43558

Andromeda score : 93.949

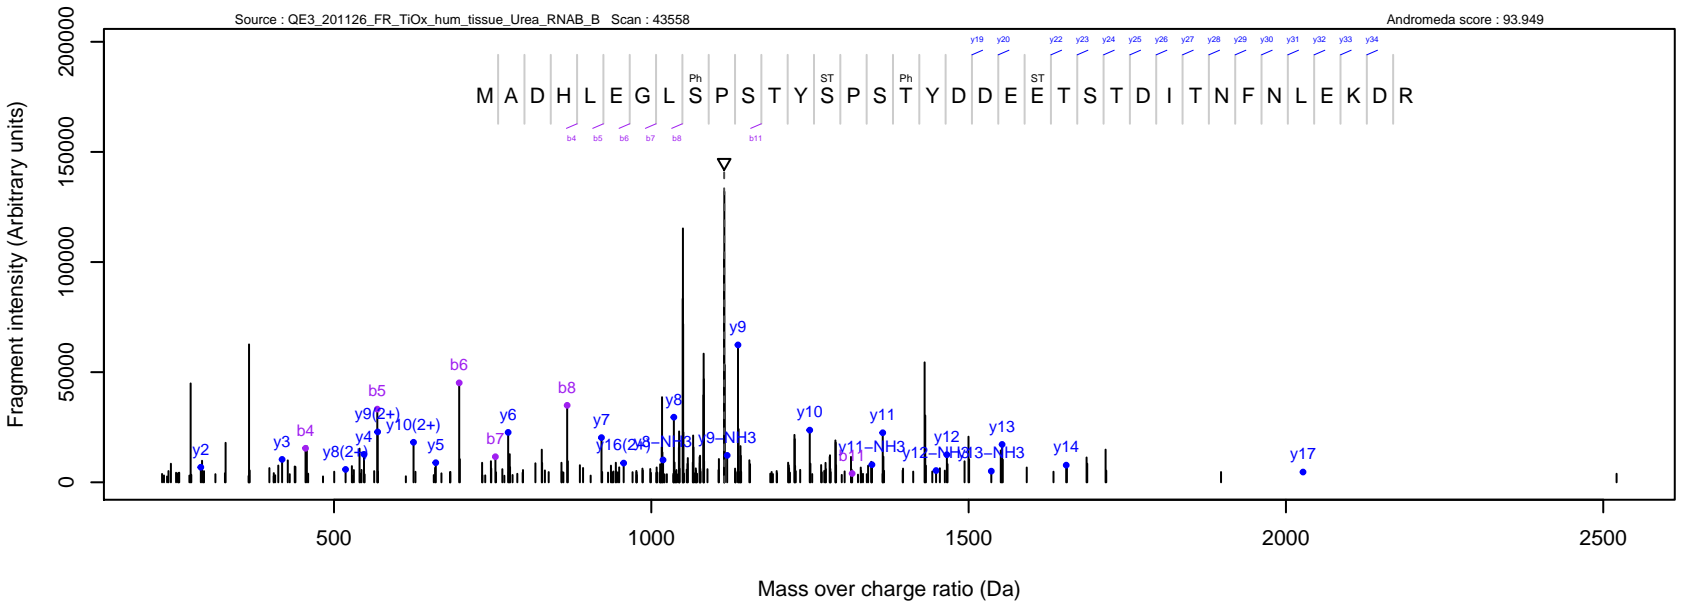

STTSQVTPAEKDGHS(Phospho (STY))PM(Oxidation (M))SK-3+

Source : QE3\_201126\_FR\_TIOx\_hum\_tissue\_Urea\_RNAB\_B Scan : 4537

Andromeda score : 93.949

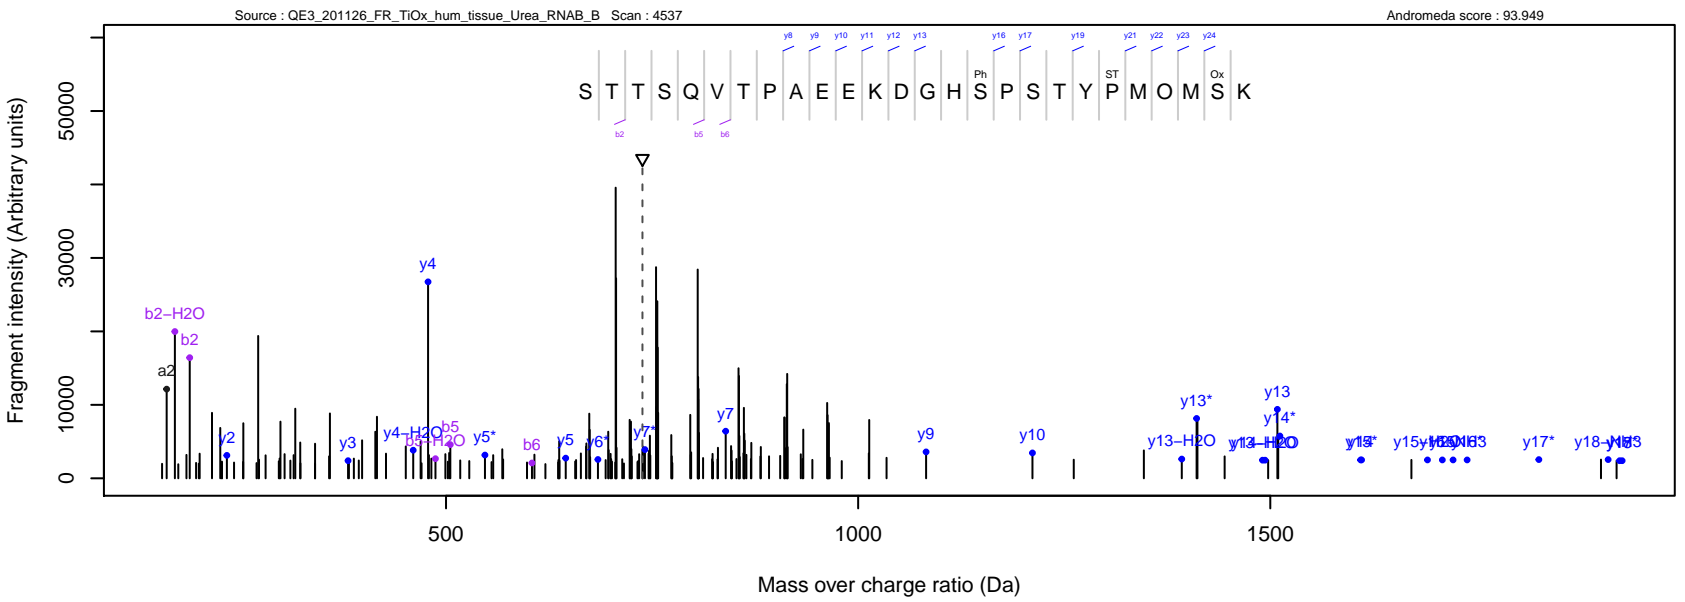

GERQS(Phospho (STY))PVDIDHTAK-3+

Source : QE3\_201126\_FR\_TIOx\_hum\_tissue\_Urea\_RNAB\_N Scan : 7501

Andromeda score : 93.92

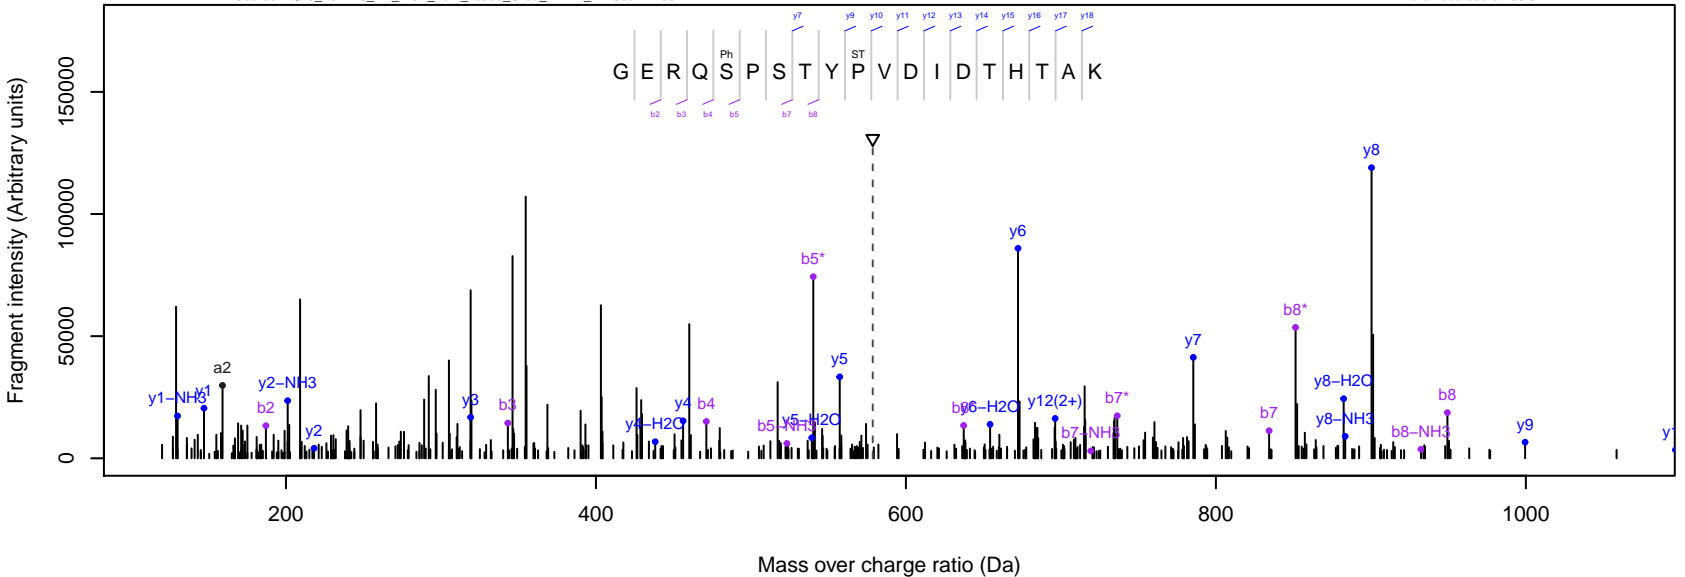



RMEDEGGFPVPQENGQPES(Phospho (STY))PR-3+

Source : QE3\_201126\_FR\_TiOx\_hum\_tissue\_Urea\_RNAB\_N Scan : 25359

Andromeda score : 93.876

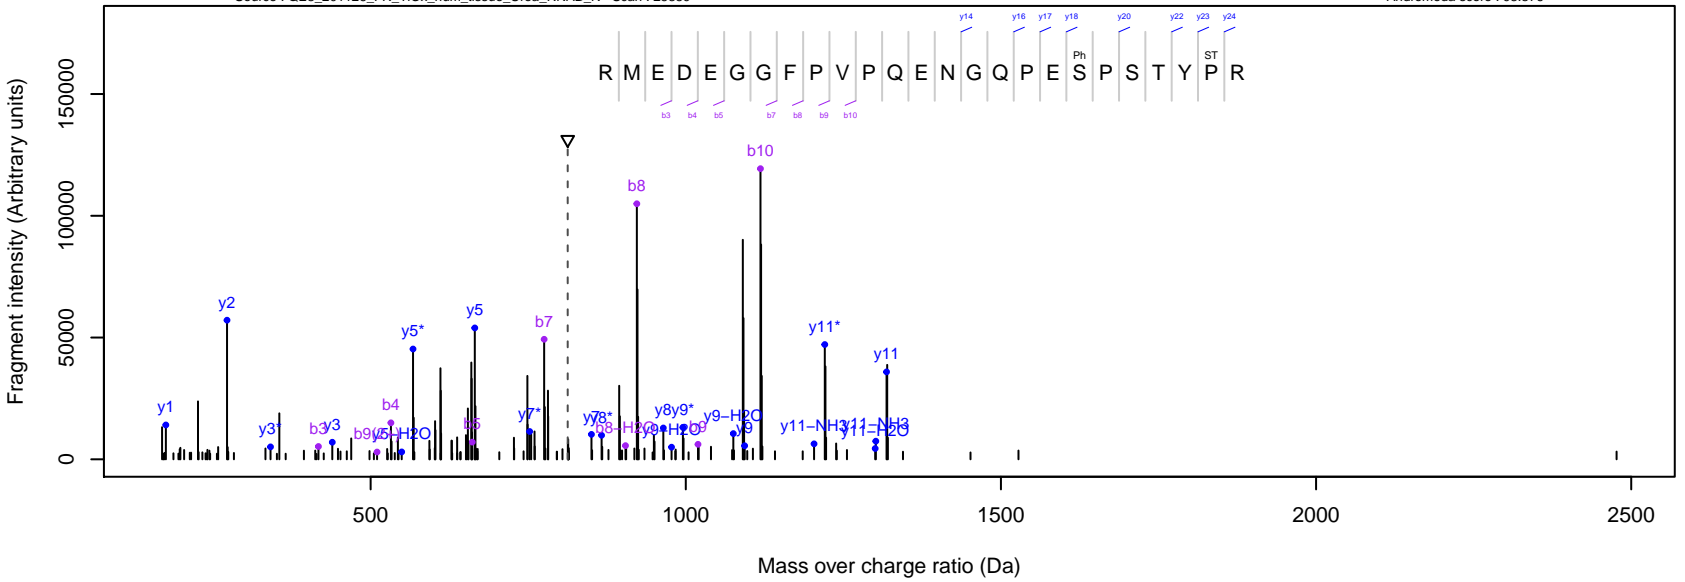

MSCFSRPS(Phospho (STY))MS(Phospho (STY))PTPLDR-3+

Source : QE3\_201126\_FR\_TiOx\_hum\_tissue\_Urea\_RNAB\_N Scan : 32697

Andromeda score : 93.851

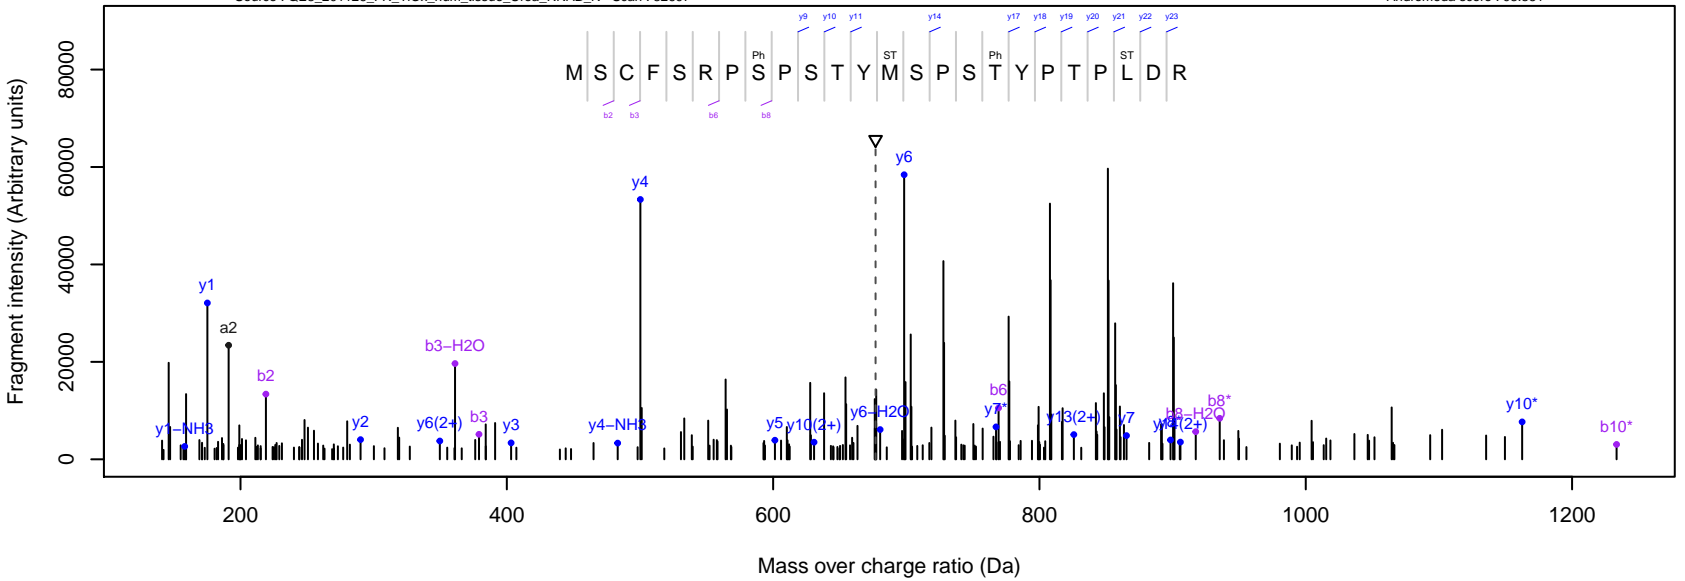

SSGDVLETFNFLENADDS(Phospho (STY))DEDEENDMIEGIPEGK-3+

Source : QE3\_201126\_FR\_TiOx\_hum\_tissue\_Urea\_RNAB\_B Scan : 62667

Andromeda score : 93.807

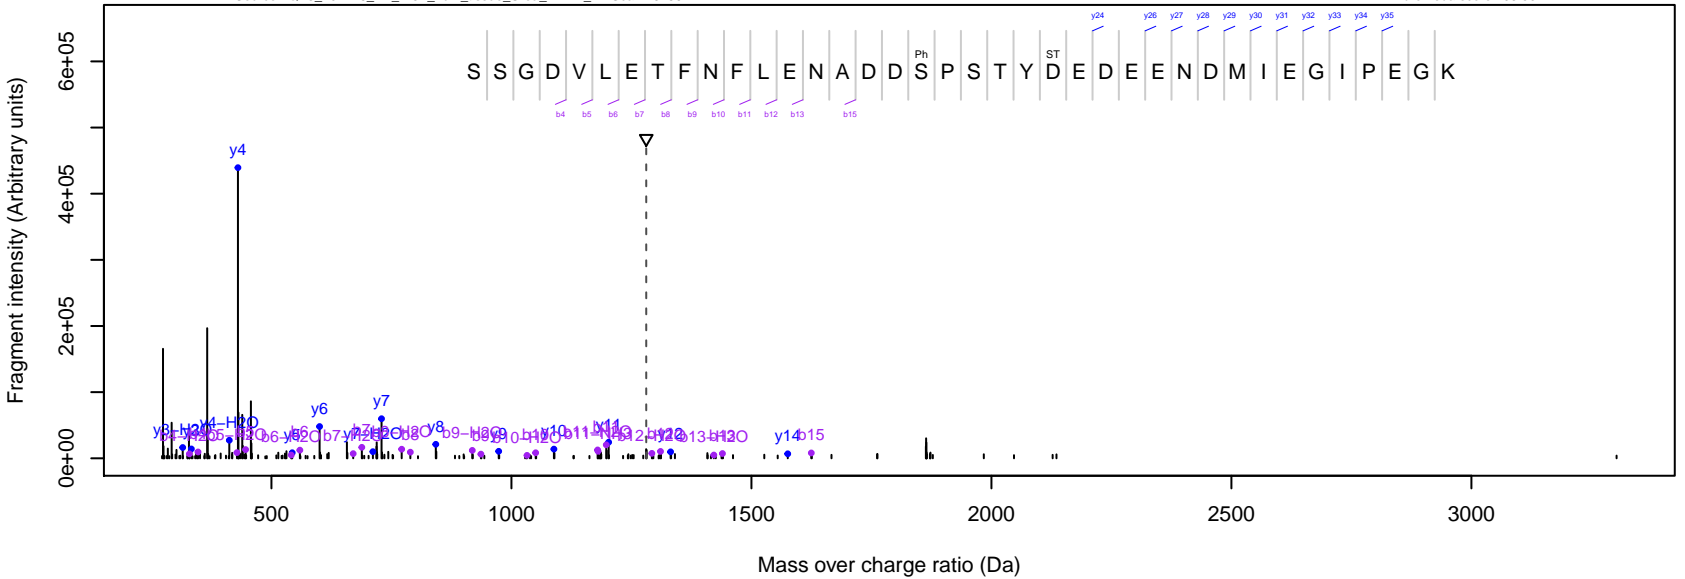

RPAEATSS(Phospho (STY))PTS(Phospho (STY))PERPR-3+

Source : QE3\_201126\_FR\_TIOx\_hum\_tissue\_Urea\_RNAB\_N Scan : 5845

Andromeda score : 93.776

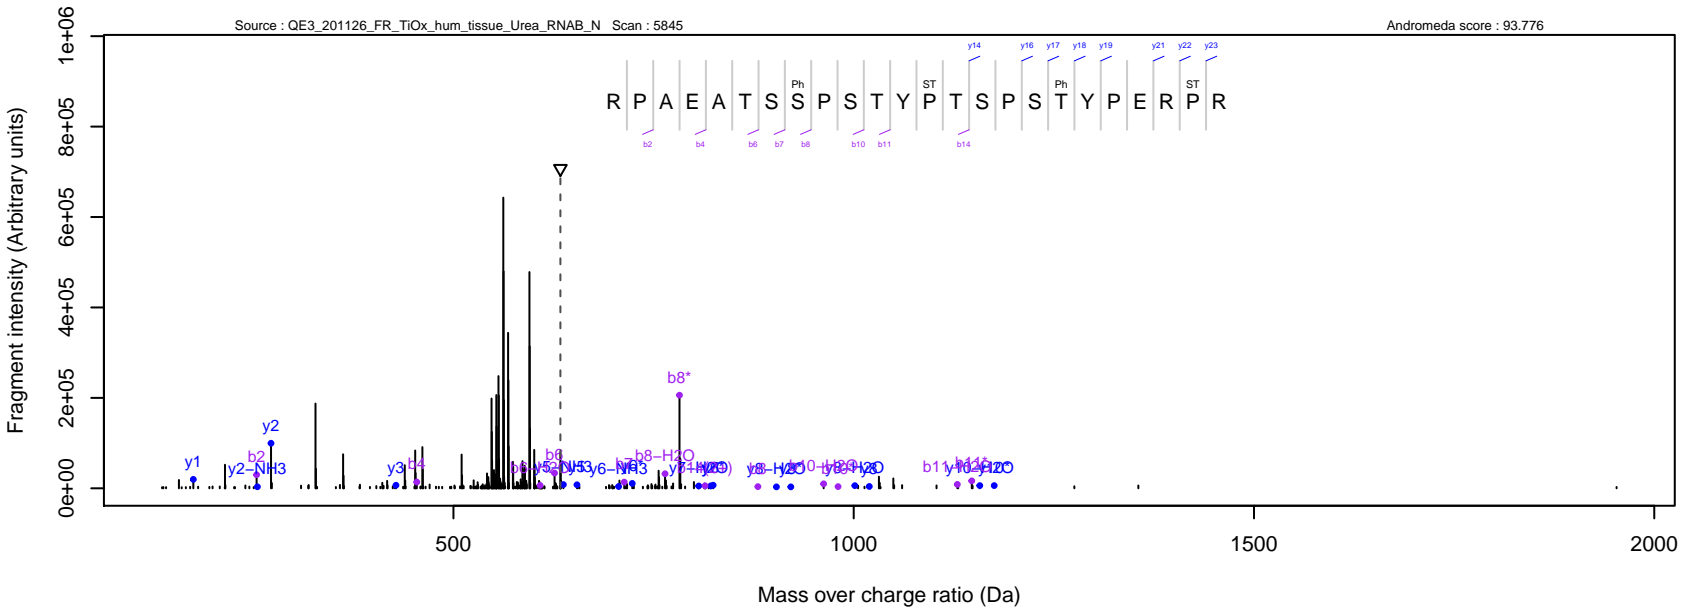

SVQGDHEM(Oxidation (M))IHSAS(Phospho (STY))TK-3+

Source : QE3\_201126\_FR\_TIOx\_hum\_tissue\_Urea\_RNAB\_H Scan : 4187

Andromeda score : 93.776

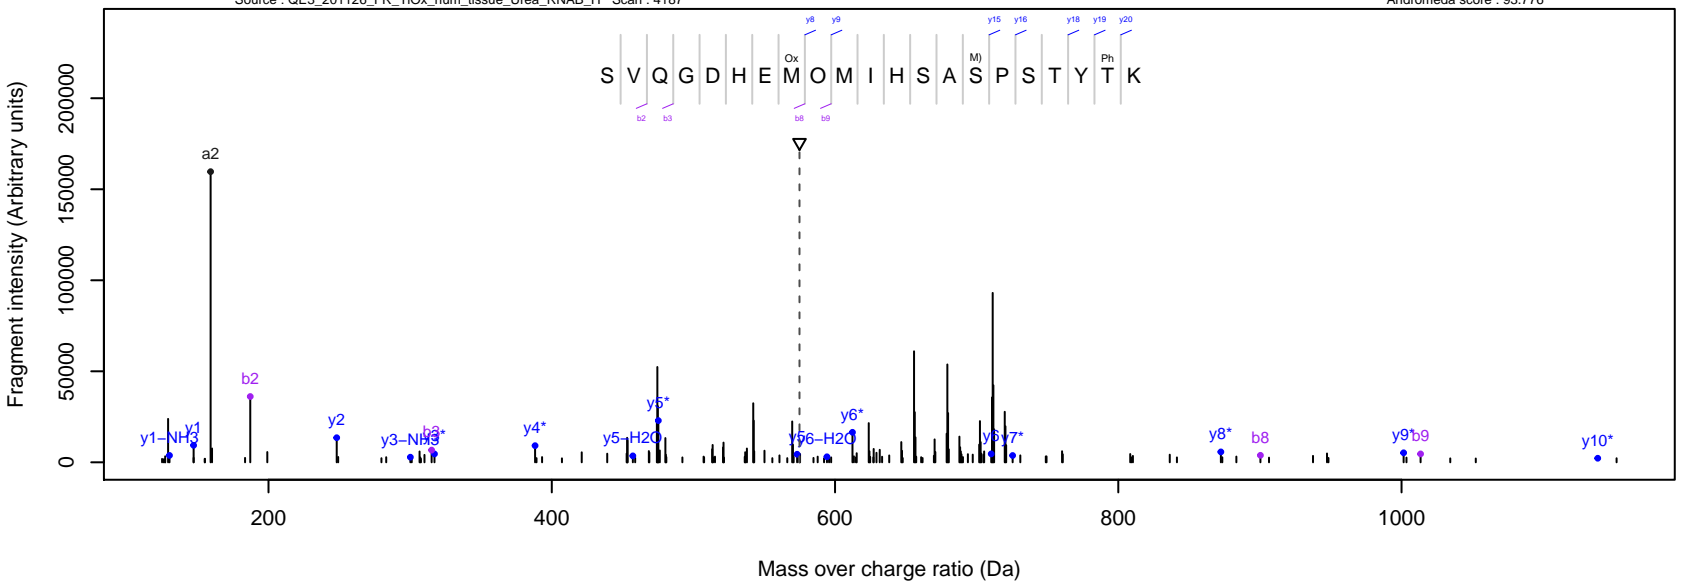

GGIDNPAITS(Phospho (STY))DQELDDK-3+

Source : QE3\_201126\_FR\_TIOx\_hum\_tissue\_Urea\_RNAB\_H Scan : 19682

Andromeda score : 93.729

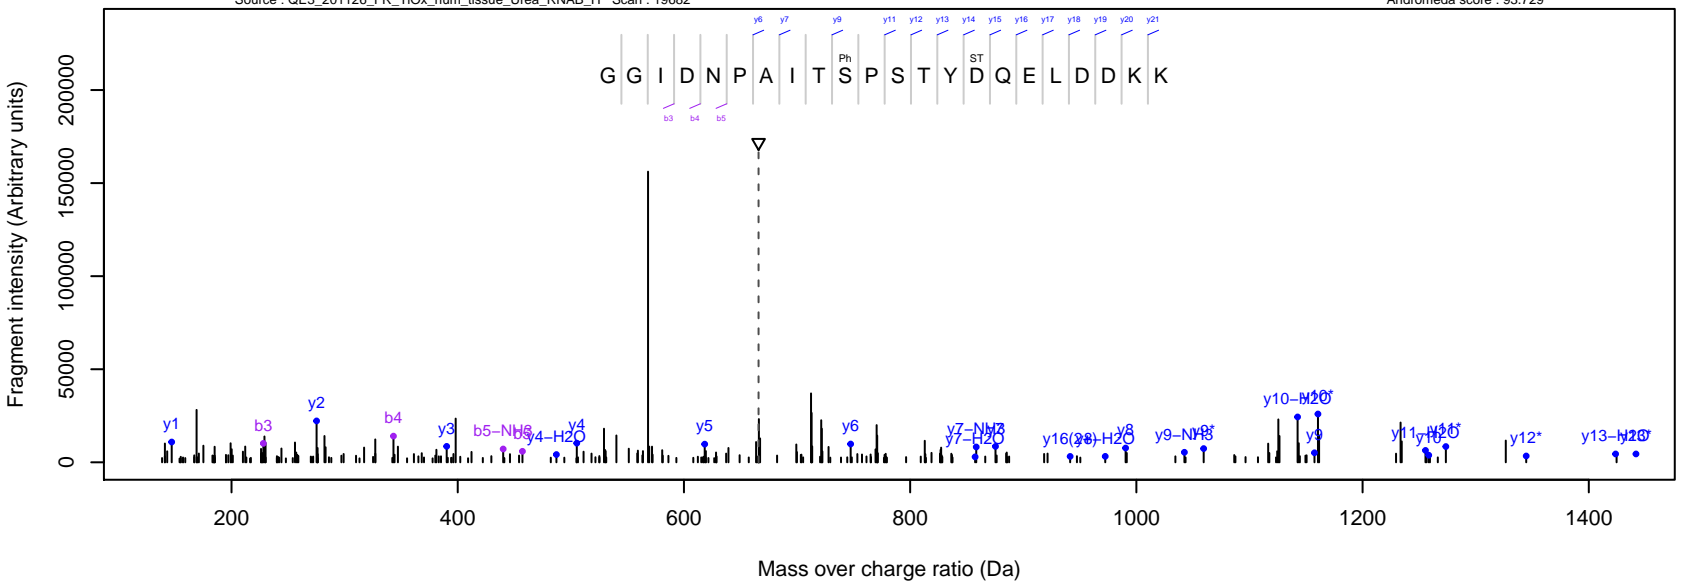

AVSREDS(Phospho (STY))QRPGAHLTVK-4+

Source : QE3\_201126\_FR\_TiOx\_hum\_tissue\_Urea\_RNAB\_B Scan : 7296

Andromeda score : 93.684

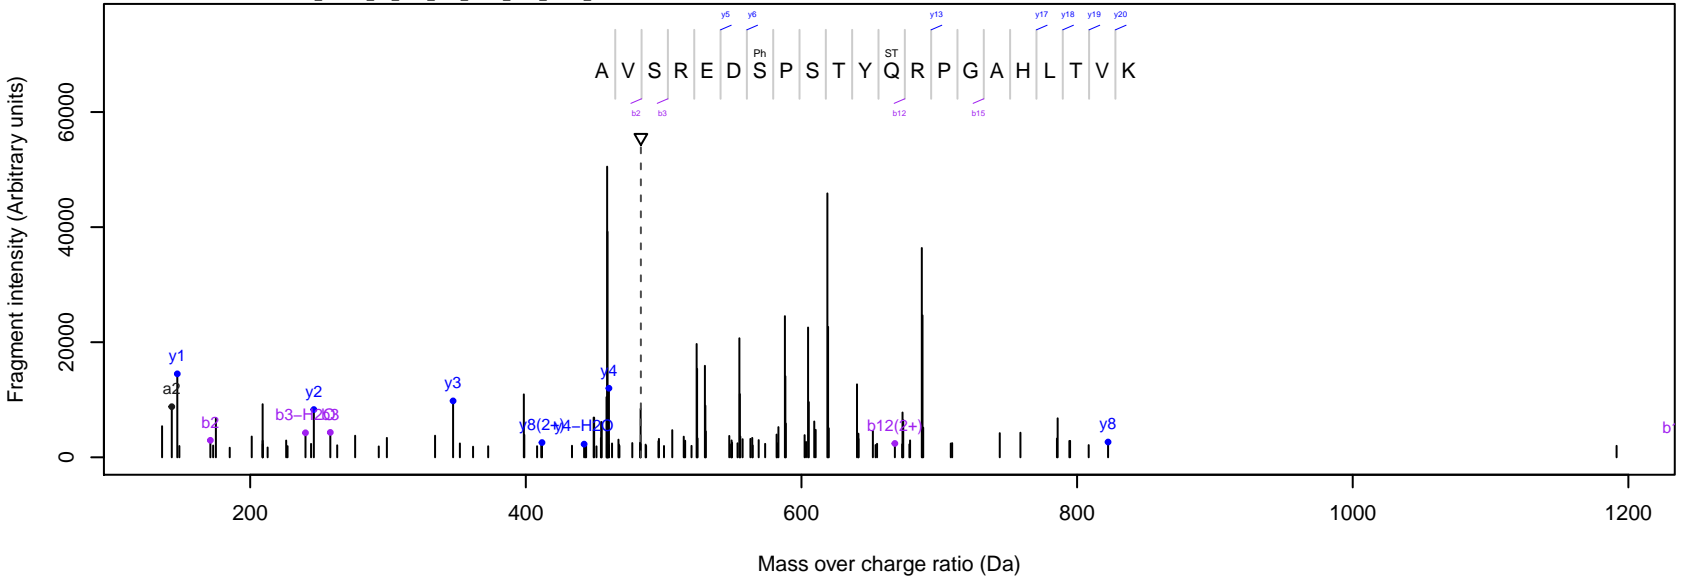

TRS(Phospho (STY))WDSSSPVDRPEPEAASPTTR-3+

Source : QE3\_201126\_FR\_TiOx\_hum\_tissue\_Urea\_RNAB\_B Scan : 17245

Andromeda score : 93.687

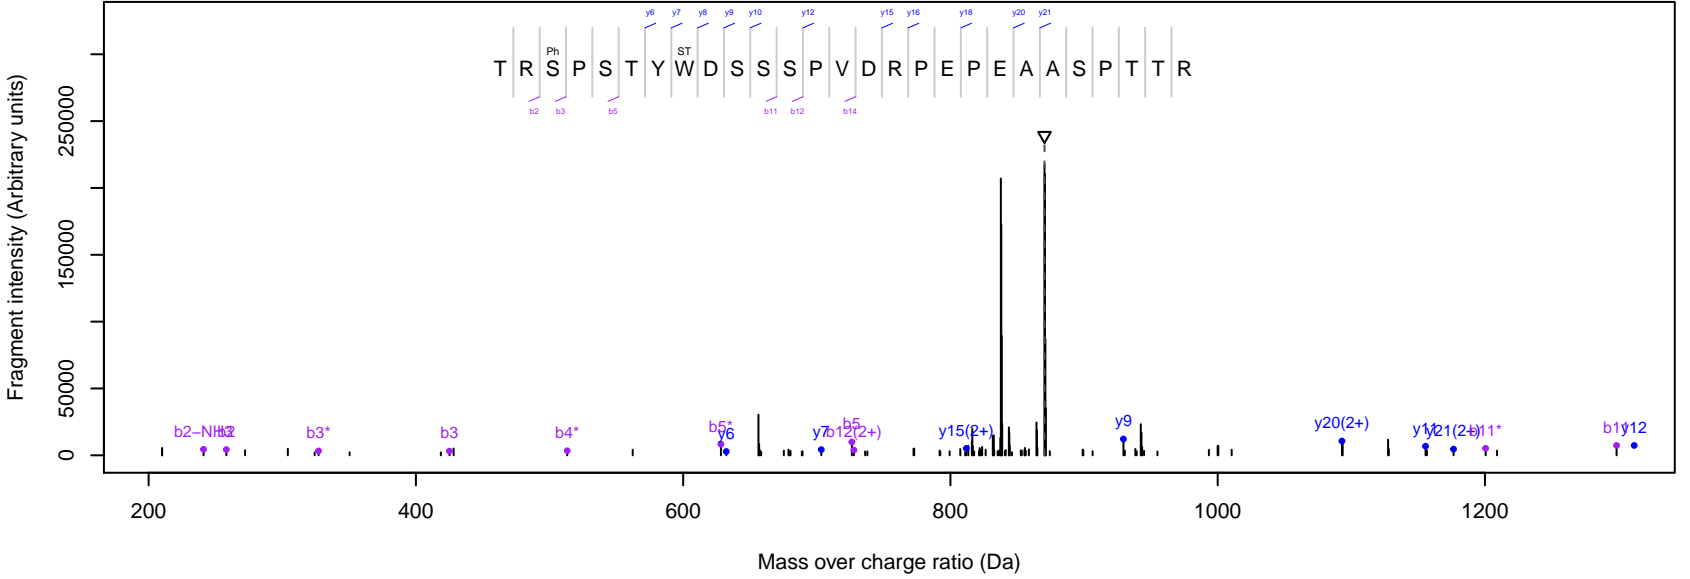

RHS(Phospho (STY))VTLPSSK-3+

Source : QE3\_201126\_FR\_TiOx\_hum\_tissue\_Urea\_RNAB\_H Scan : 6364

Andromeda score : 93.649

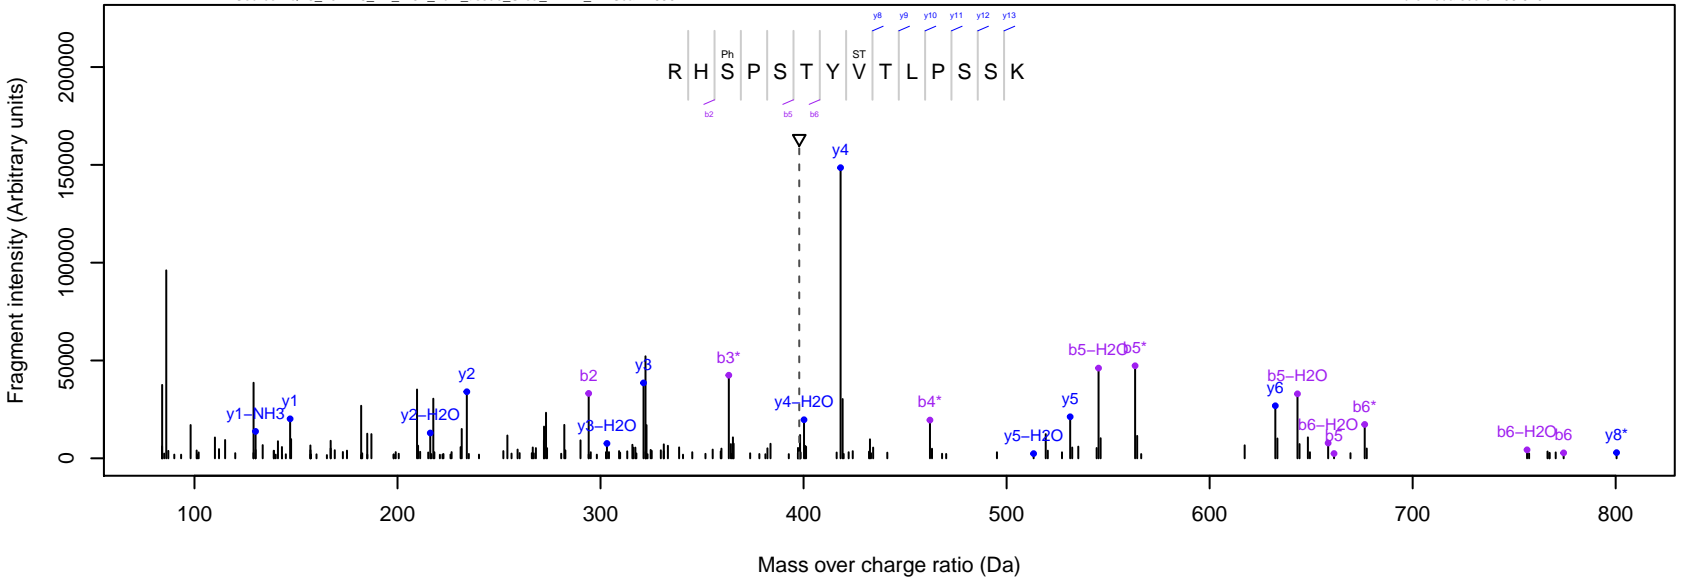

LHLET(Phospho (STY))PQPS(Phospho (STY))PQEGGSVDIWR-3+

Source : QE3\_201126\_FR\_TIOx\_hum\_tissue\_Urea\_RNAB\_H Scan : 44513

Andromeda score : 93.633

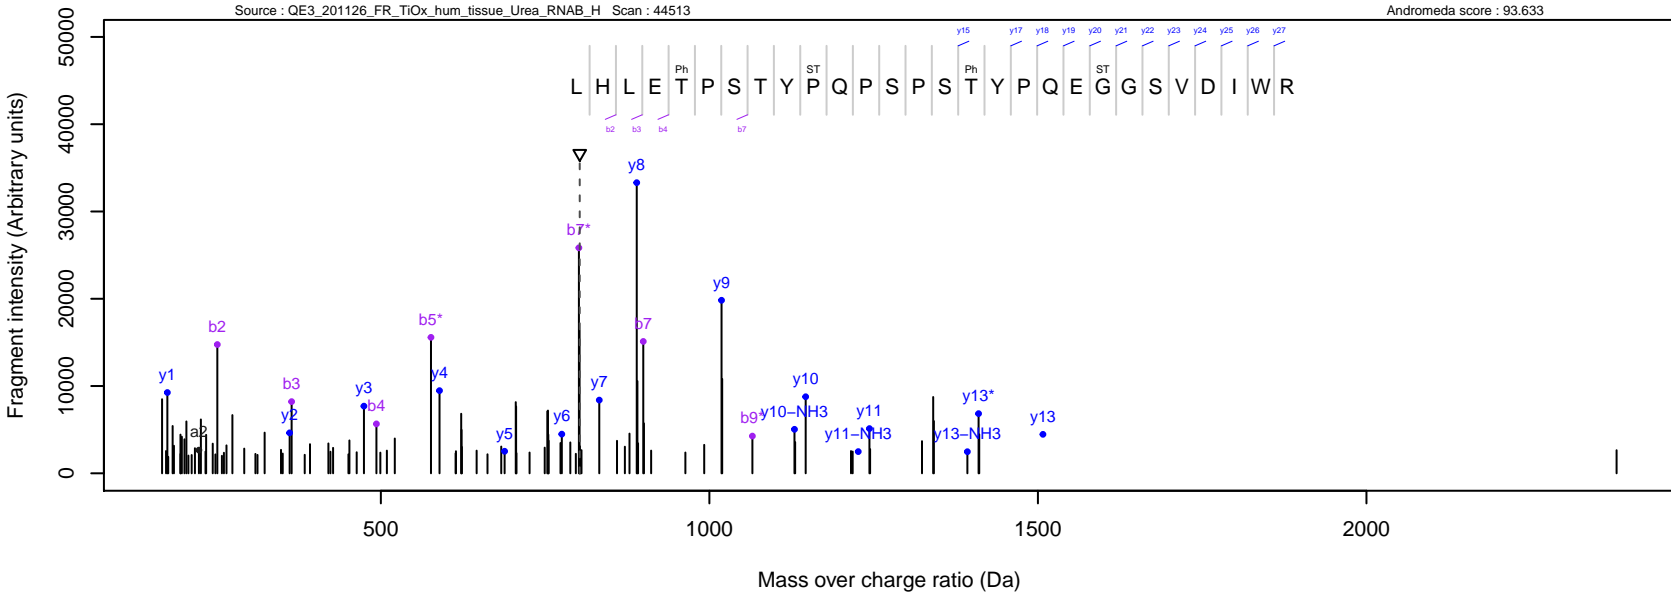

VRHFS(Phospho (STY))QSEETGNEVFGALNEEQPLPR-3+

Source : QE3\_201126\_FR\_TIOx\_hum\_tissue\_Urea\_RNAB\_H Scan : 36496

Andromeda score : 93.6

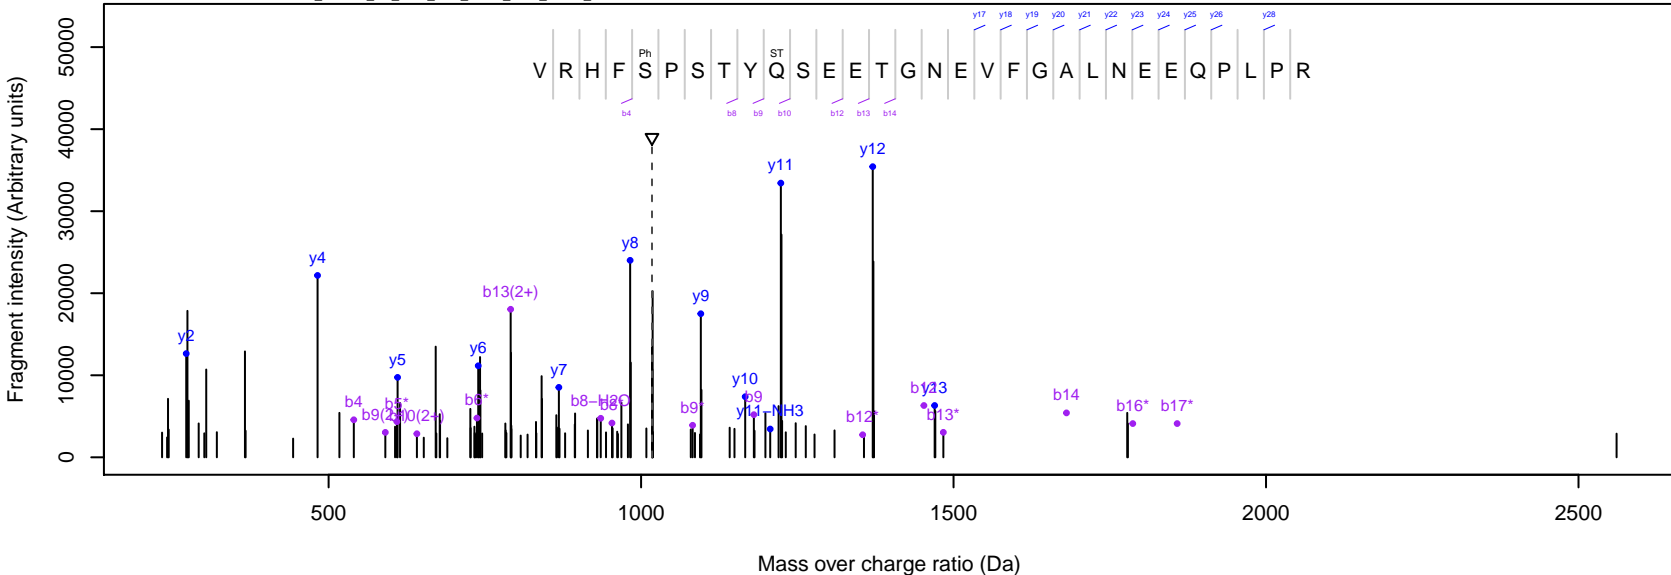

S(Phospho (STY))IRLPETIDLGALYLSMKDTEK-3+

Source : QE3\_201126\_FR\_TIOx\_hum\_tissue\_Urea\_RNAB\_H Scan : 56069

Andromeda score : 93.596

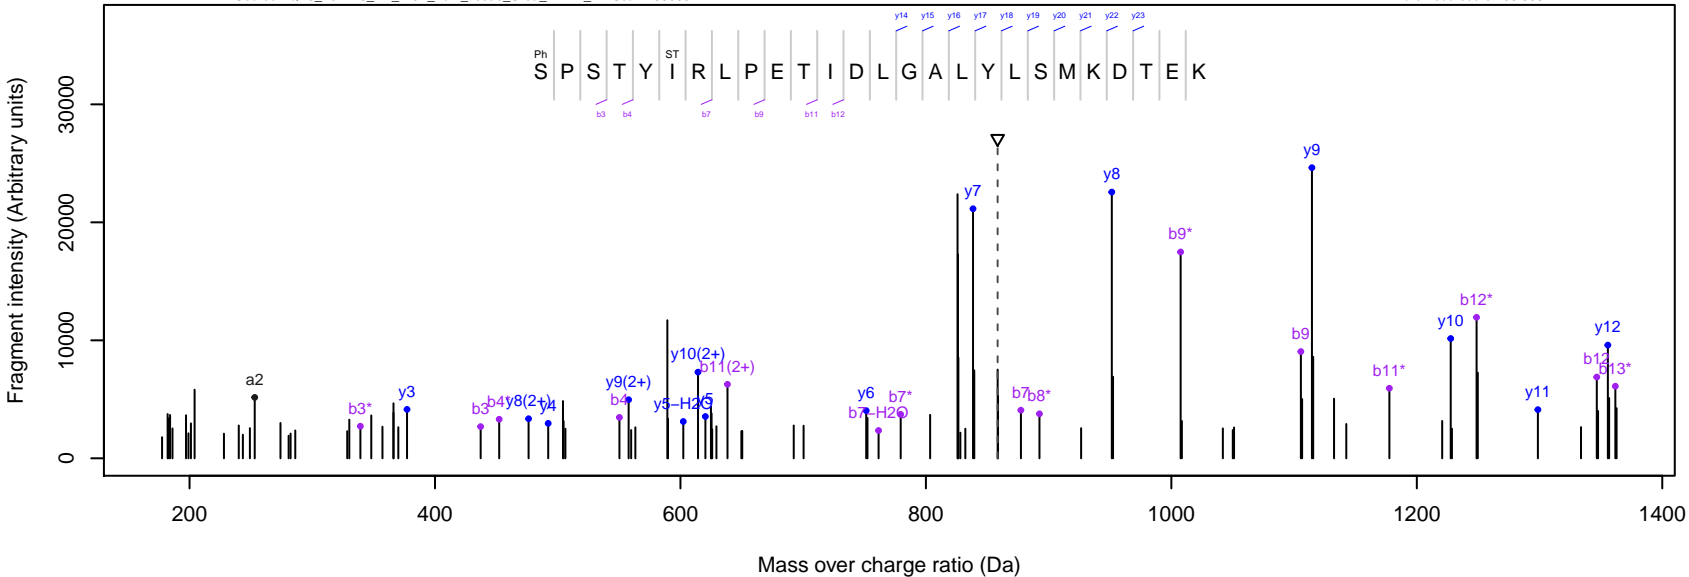

SGLS(Phospho (STY))LEELR-2+

Source : QE3\_201126\_FR\_TiOx\_hum\_tissue\_Urea\_RNAB\_N Scan : 34750

Andromeda score : 93.561

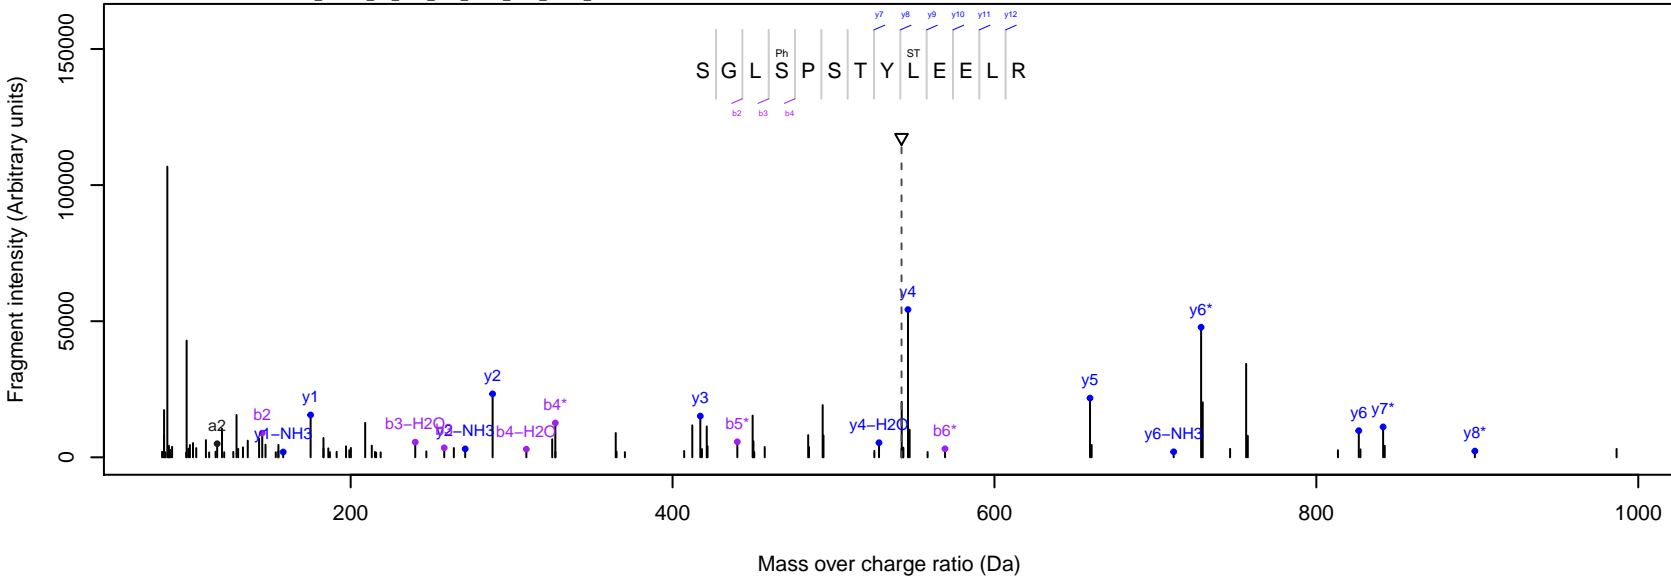

S(Phospho (STY))LDDKPYK-2+

Source : QE3\_201126\_FR\_TiOx\_hum\_tissue\_Urea\_RNAB\_H Scan : 7960

Andromeda score : 93.556

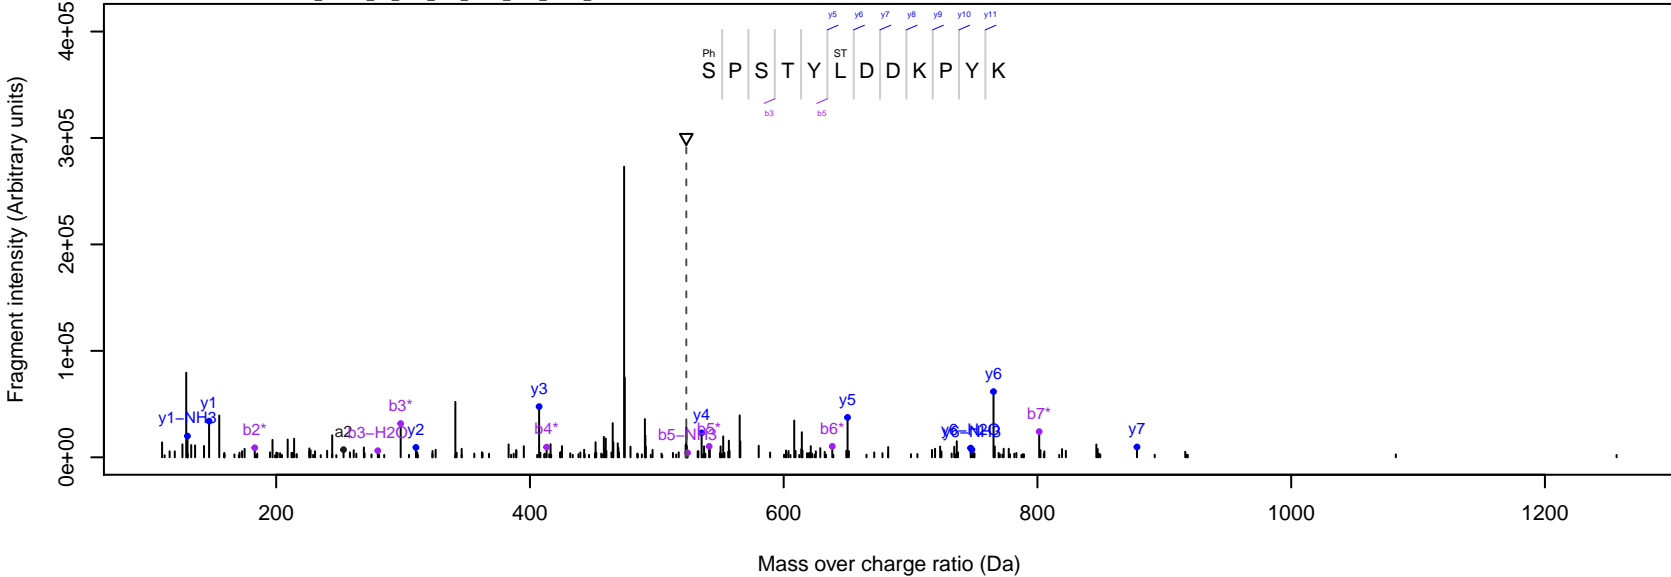

M(Oxidation (M))APALSGANLT(Phospho (STY))SPR-2+

Source : QE3\_201126\_FR\_TiOx\_hum\_tissue\_Urea\_RNAB\_N Scan : 23289

Andromeda score : 93.51

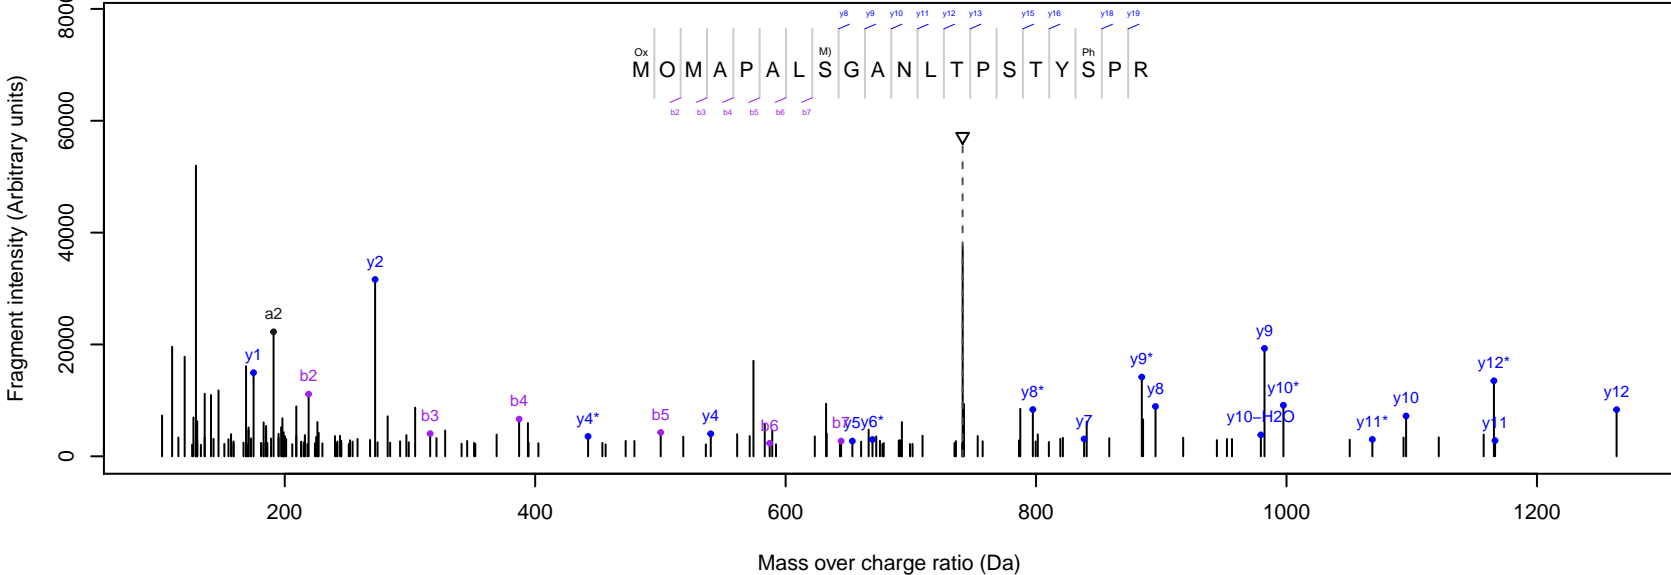

S(Phospho (STY))LVGTPYWMAPELISR-2+

Source : QE3\_201126\_FR\_TIOx\_hum\_tissue\_Urea\_RNAB\_H Scan : 60185

Andromeda score : 93.51

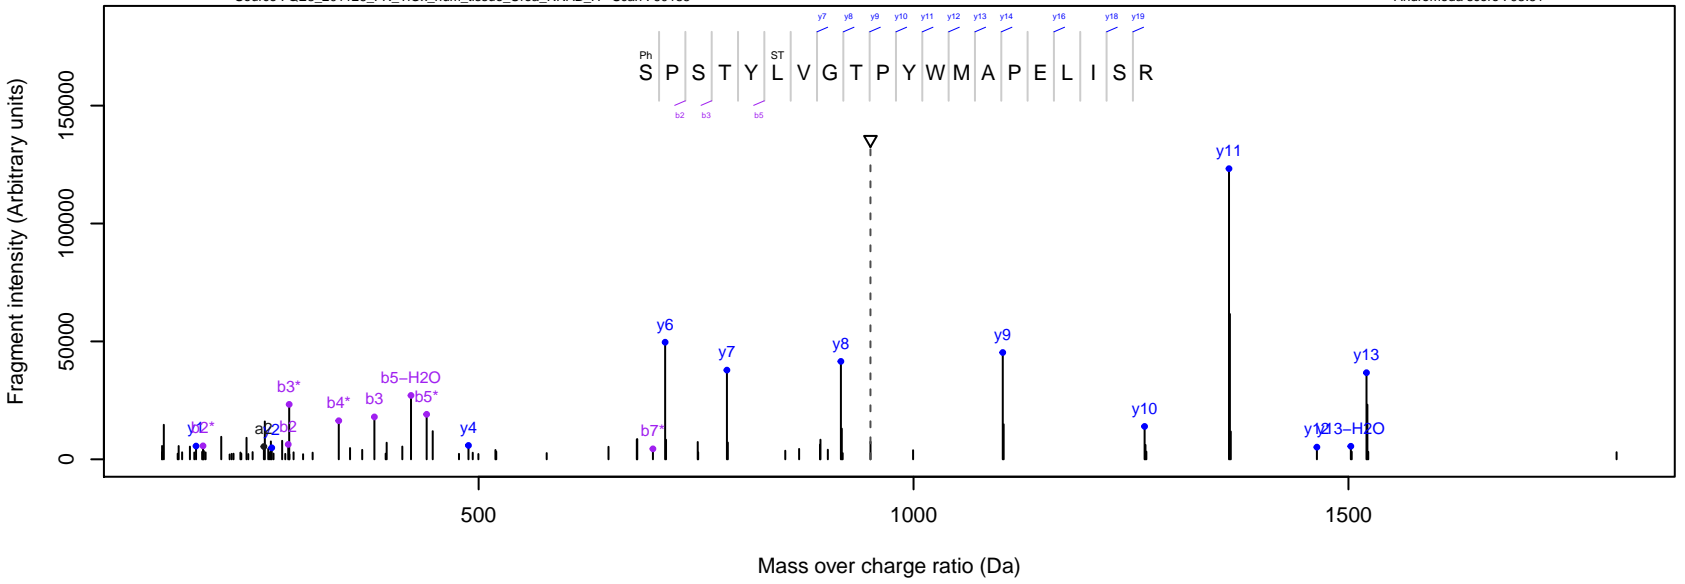

SLDS(Phospho (STY))PTSS(Phospho (STY))PGAGTR-2+

Source : QE3\_201126\_FR\_TIOx\_hum\_tissue\_Urea\_RNAB\_H Scan : 16756

Andromeda score : 93.478

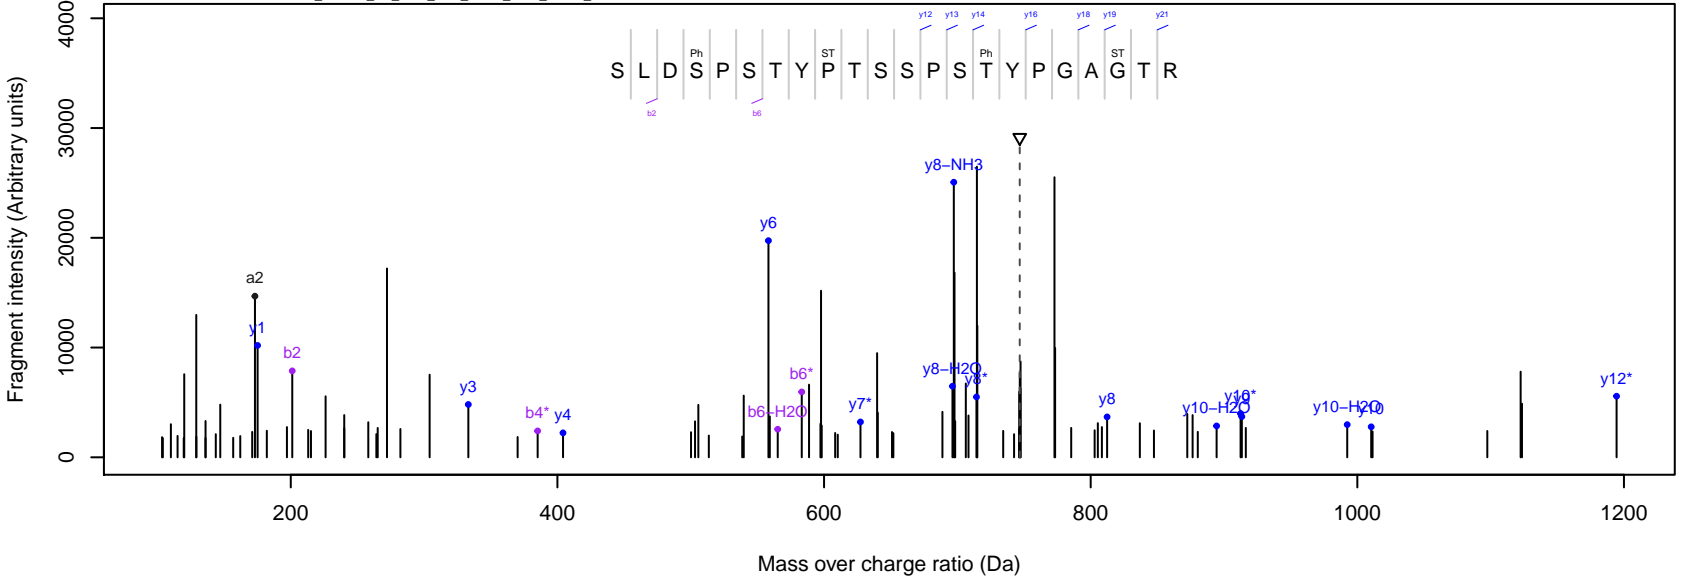

SYQNS(Phospho (STY))PSS(Phospho (STY))DDGIRLPEYSTEK-3+

Source : QE3\_201126\_FR\_TIOx\_hum\_tissue\_Urea\_RNAB\_H Scan : 31980

Andromeda score : 93.446

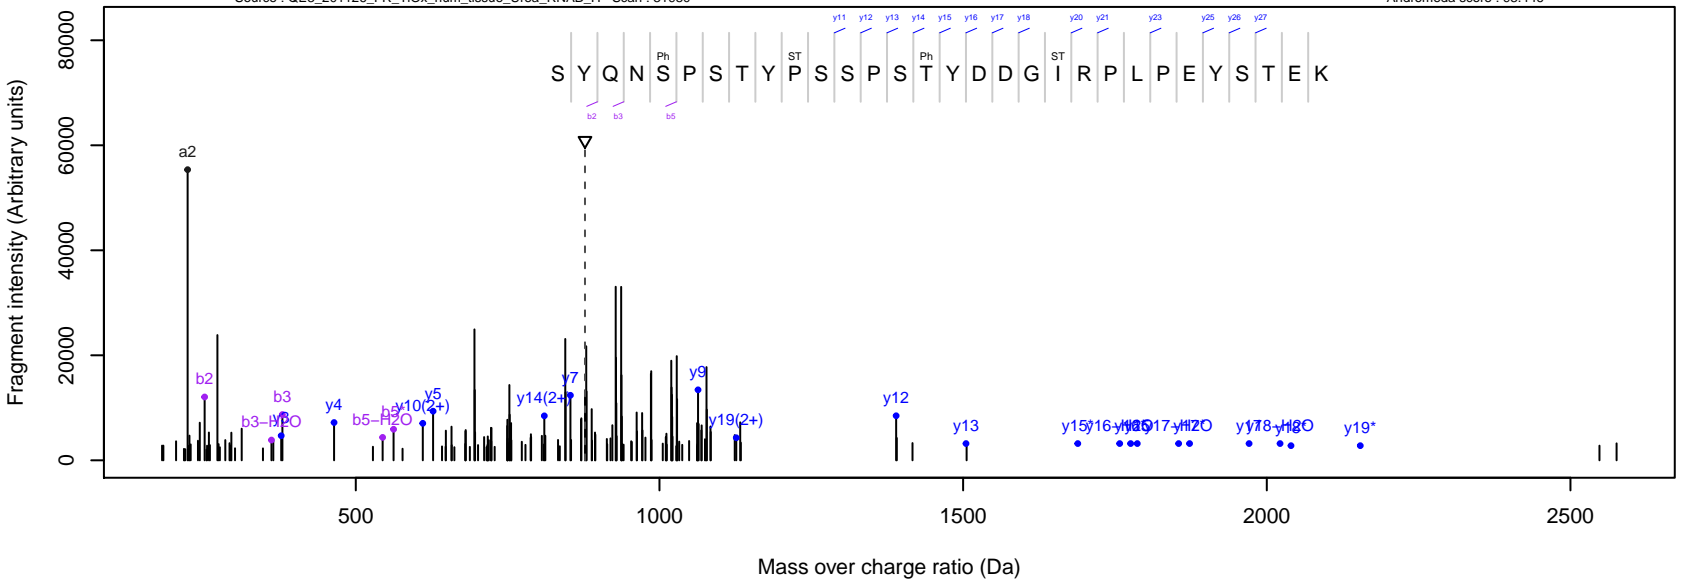

RQQDPS(Phospho (STY))PGSNLGGDDLK-3+

Source : QE3\_201126\_FR\_TiOx\_hum\_tissue\_Urea\_RNAB\_H Scan : 13545

Andromeda score : 93.407

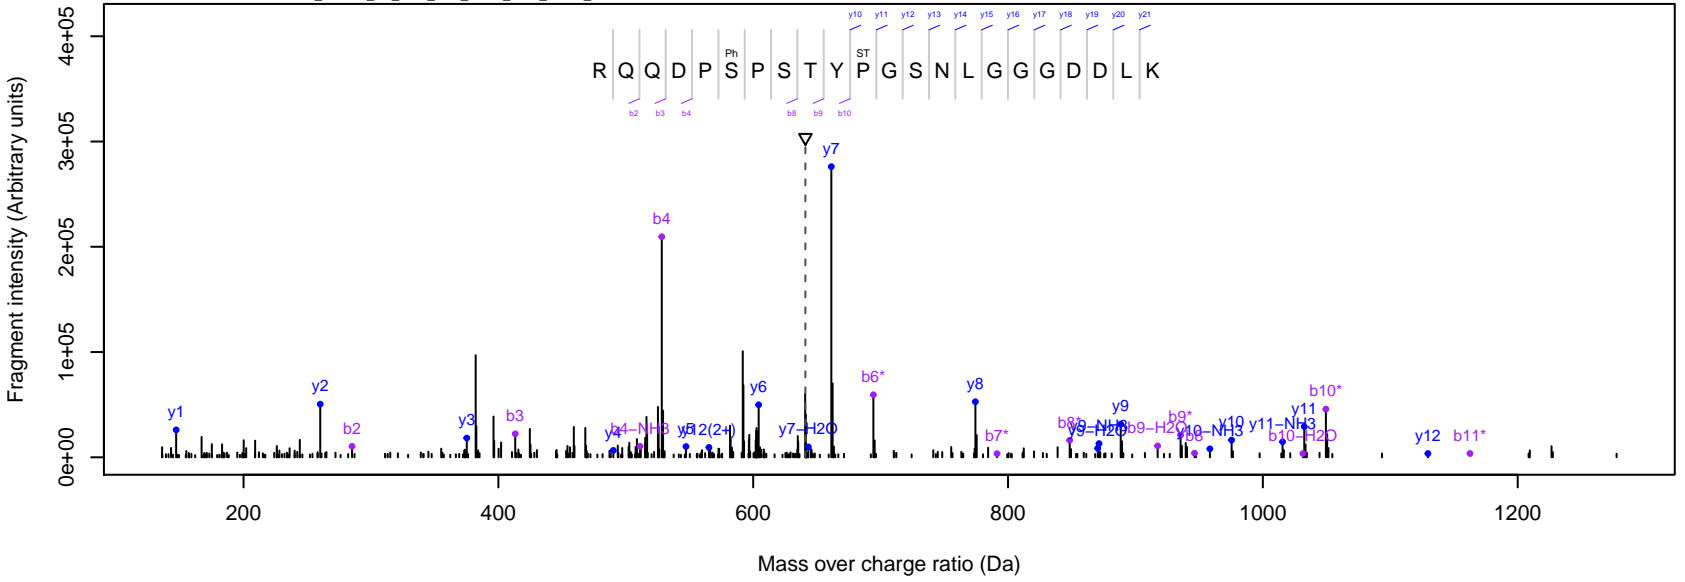

DQSS(Phospho (STY))WQNSDASQEVGGHQR-3+

Source : QE3\_201126\_FR\_TiOx\_hum\_tissue\_Urea\_RNAB\_N Scan : 15400

Andromeda score : 93.397

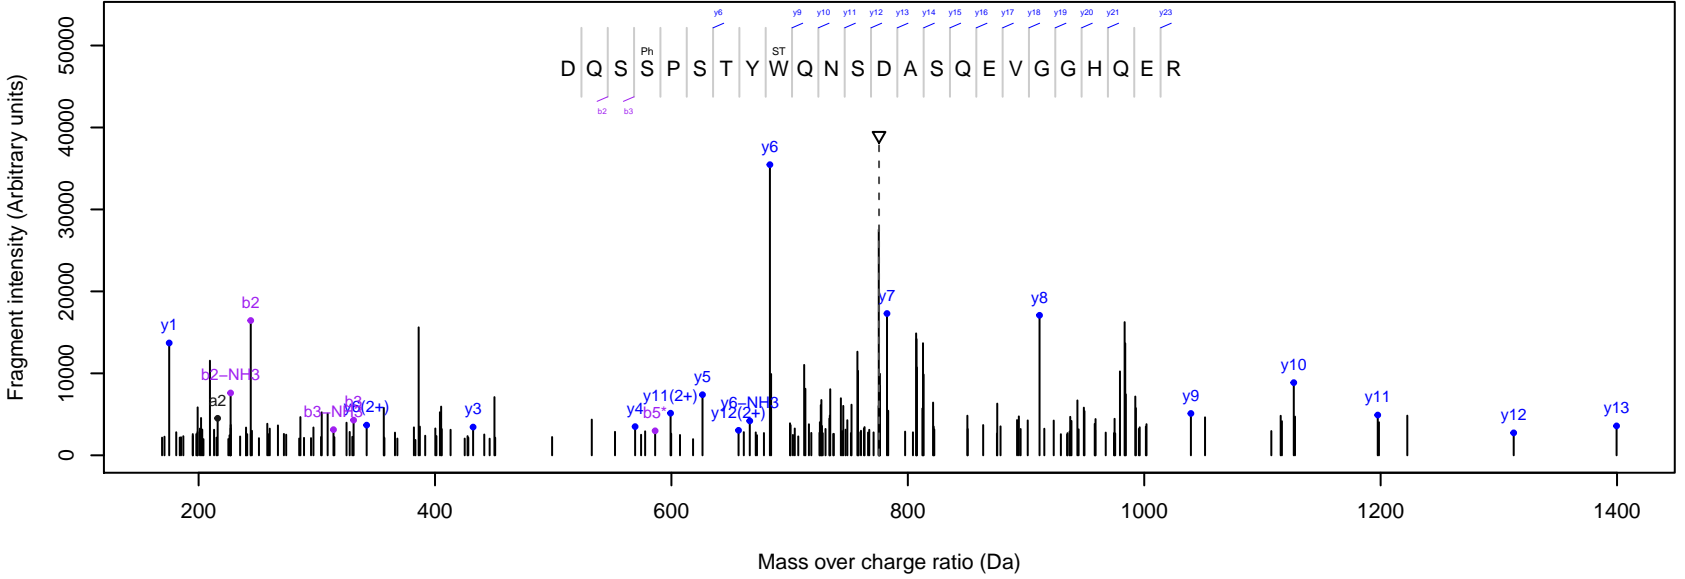

GS(Phospho (STY))GGLFSPSTAHVPDGLGQR-3+

Source : QE3\_201126\_FR\_TiOx\_hum\_tissue\_Urea\_RNAB\_N Scan : 34852

Andromeda score : 93.397

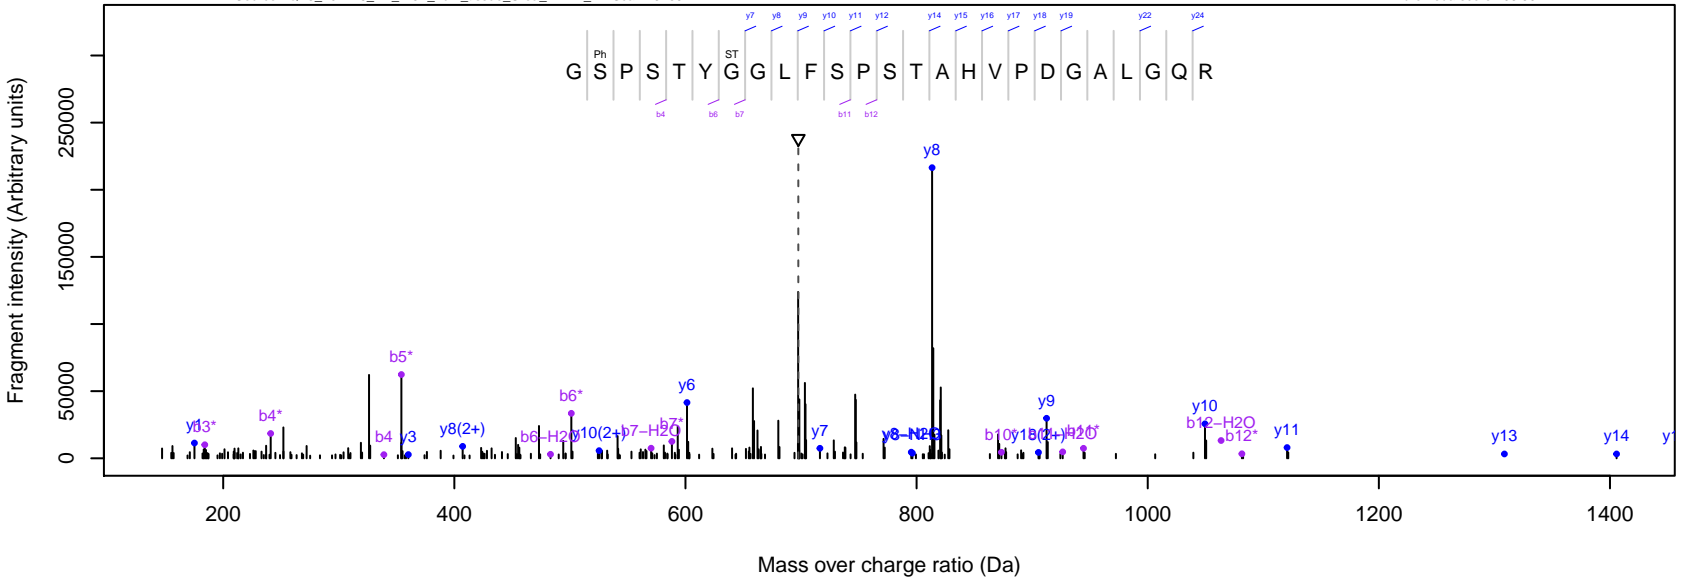

VVDFGSATYDDEHHSTLVST(Phospho (STY))R-3+

Source : QE3\_201126\_FR\_TiOx\_hum\_tissue\_Urea\_RNAB\_H Scan : 24696

Andromeda score : 93.397

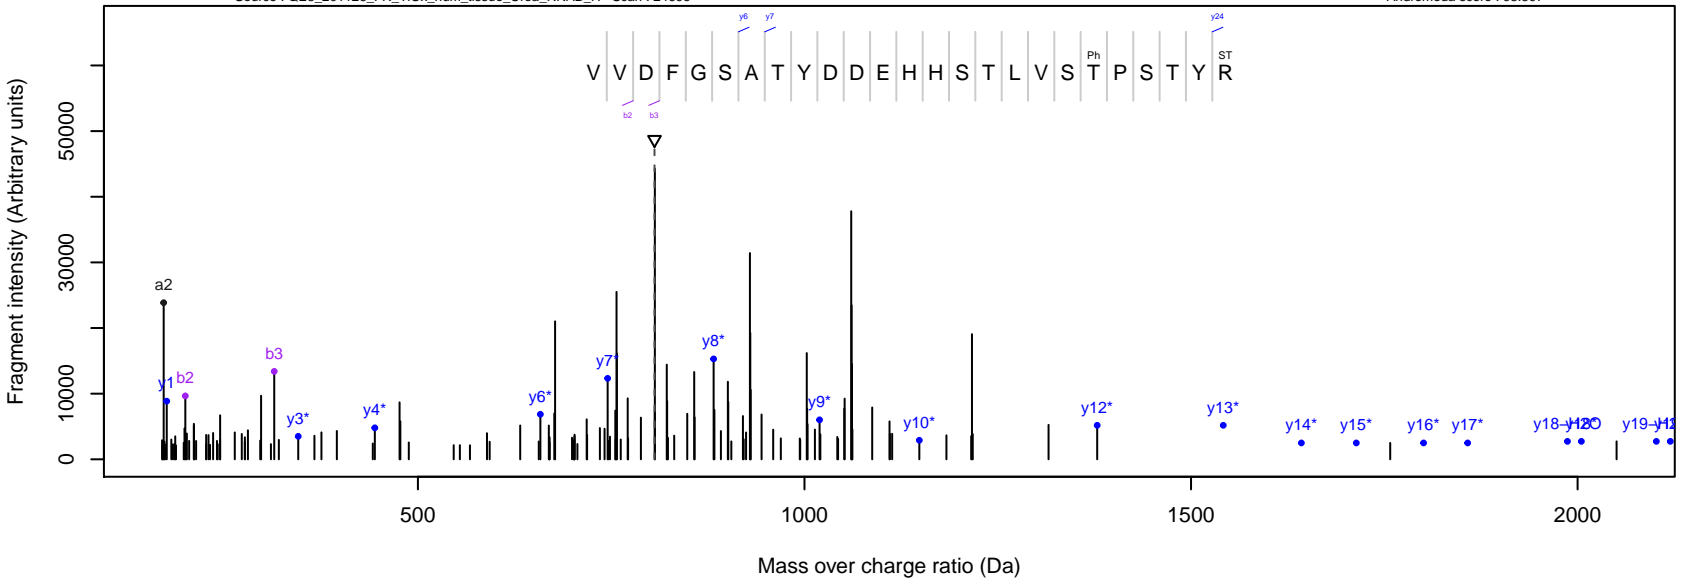

KKS(Phospho (STY))PIINESR-2+

Source : QE3\_201126\_FR\_TiOx\_hum\_tissue\_Urea\_RNAB\_H Scan : 4295

Andromeda score : 93.345

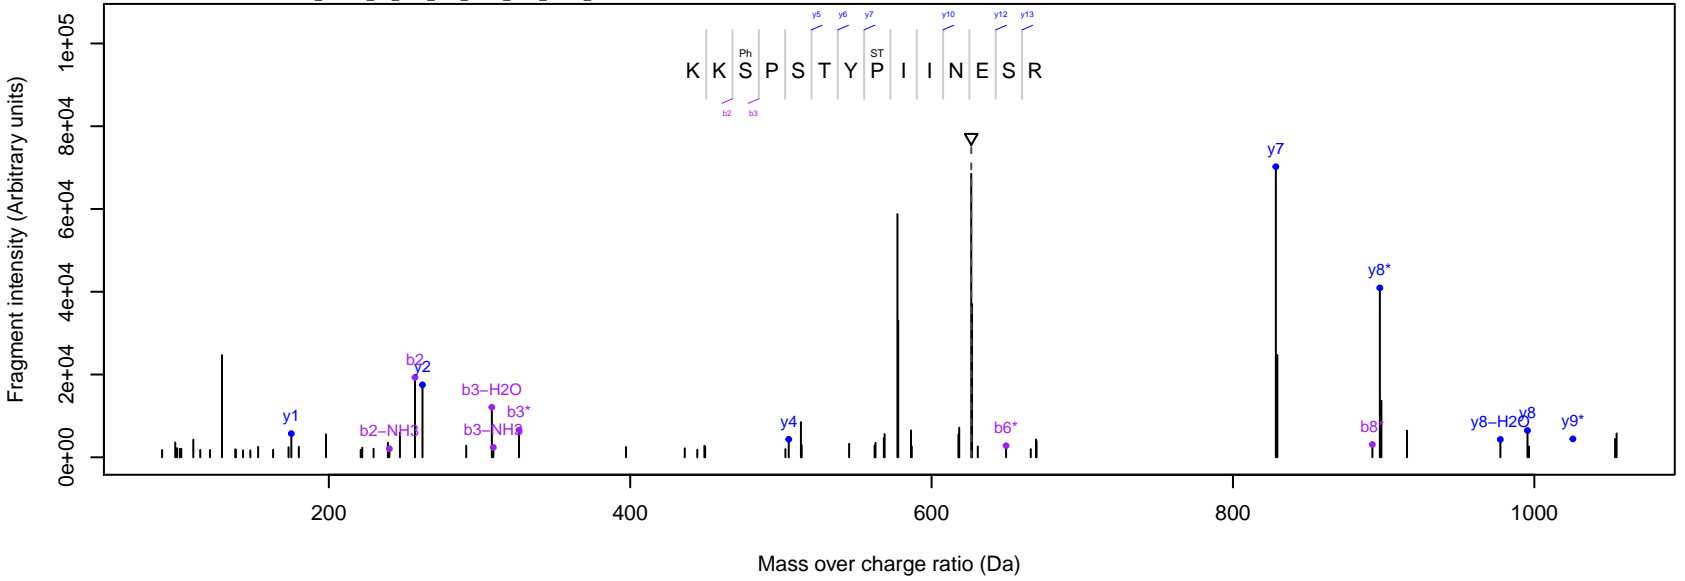

RFS(Phospho (STY))DIQIR-2+

Source : QE3\_201126\_FR\_TiOx\_hum\_tissue\_Urea\_RNAB\_N Scan : 21035

Andromeda score : 93.345

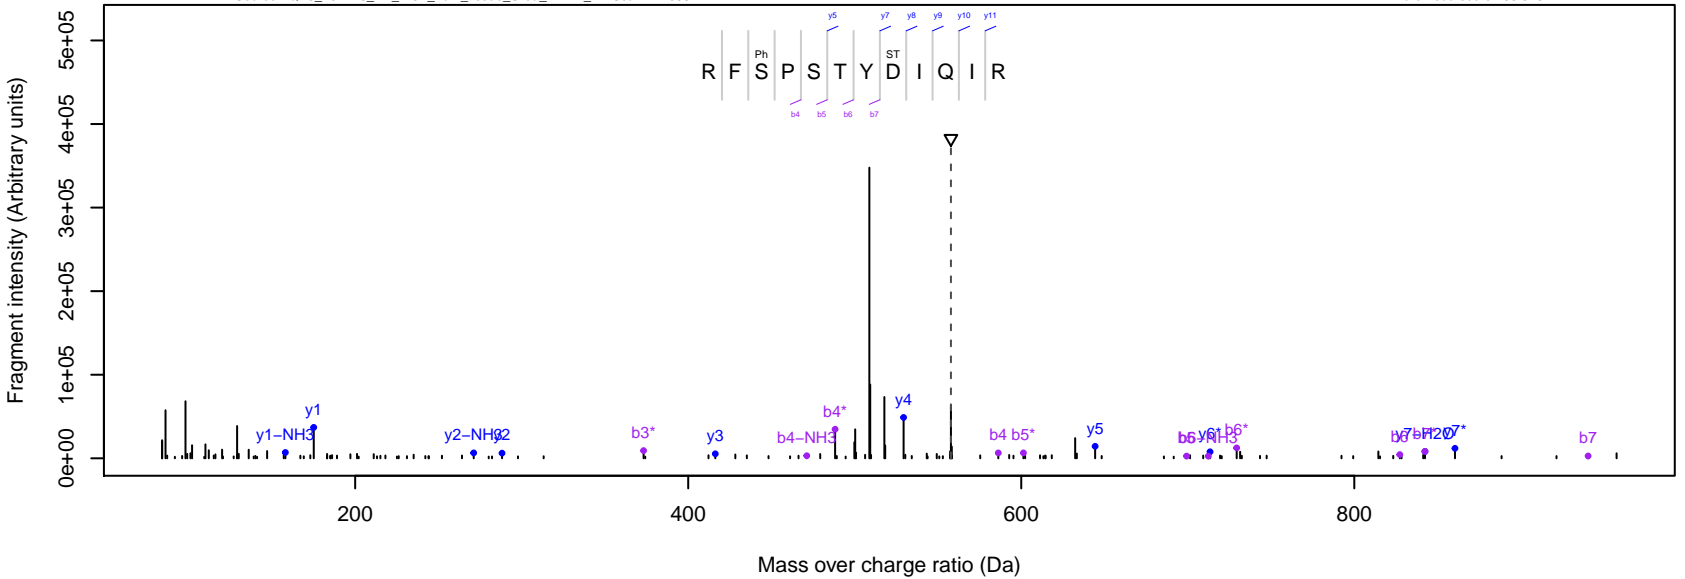



SNS(Phospho (STY))FNNPLGNR-2+

Source : QE3\_201126\_FR\_TiOx\_hum\_tissue\_Urea\_RNAB\_B Scan : 23725

Andromeda score : 93.336

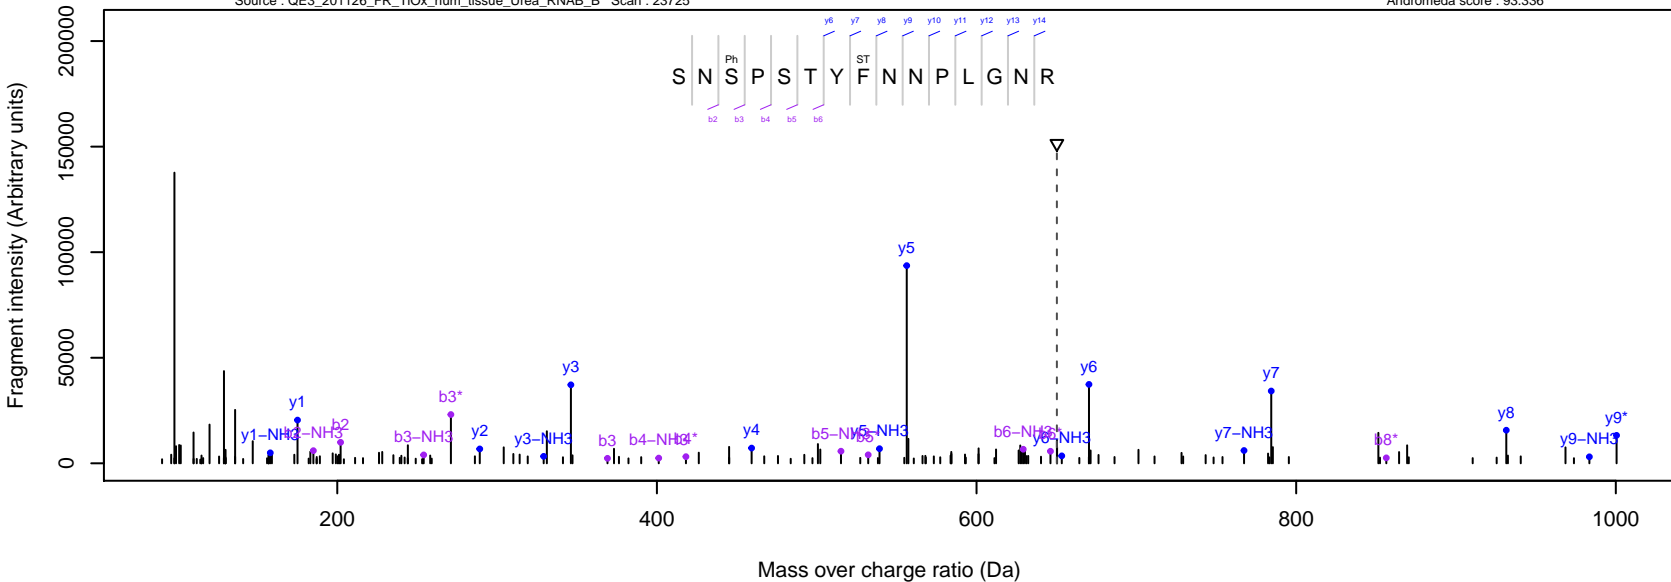

NSSS(Phospho (STY))PVSPASVPGQR-2+

Source : QE3\_201126\_FR\_TiOx\_hum\_tissue\_Urea\_RNAB\_N Scan : 15637

Andromeda score : 93.301

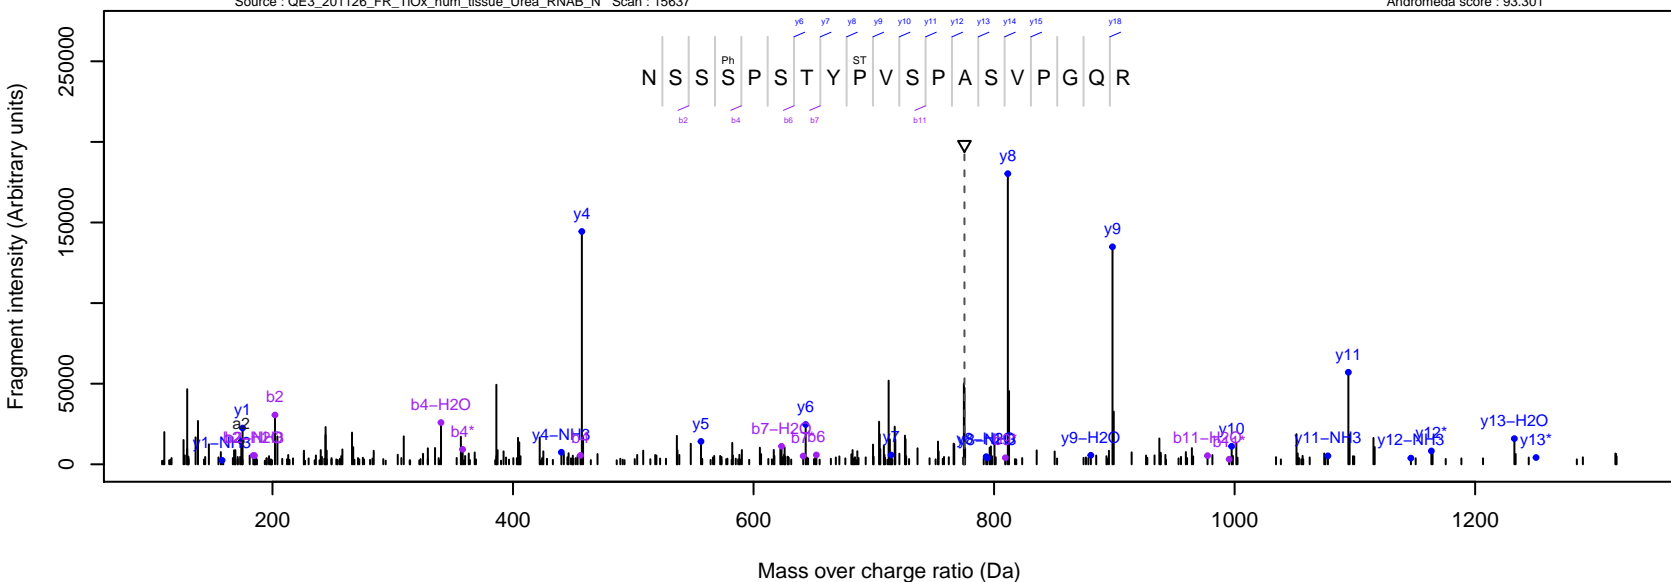

NKFGS(Phospho (STY))ADNIPNLKDSLEEGQVDDAGK-3+

Source : QE3\_201126\_FR\_TiOx\_hum\_tissue\_Urea\_RNAB\_N Scan : 32826

Andromeda score : 93.295

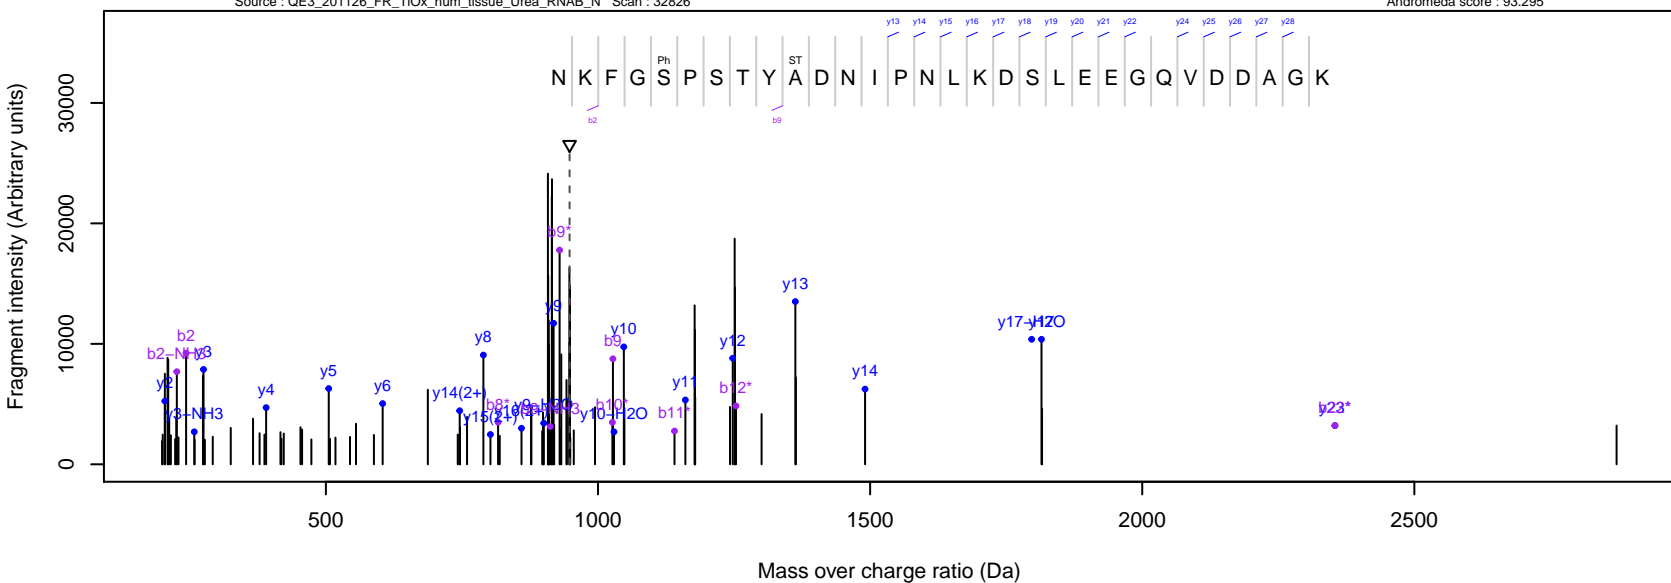

TVS(Phospho (STY))SPPTSPRPGSAATVSASTSNIIPR-3+

Source : QE3\_201126\_FR\_TiOx\_hum\_tissue\_Urea\_RNAB\_H Scan : 27387

Andromeda score : 93.295

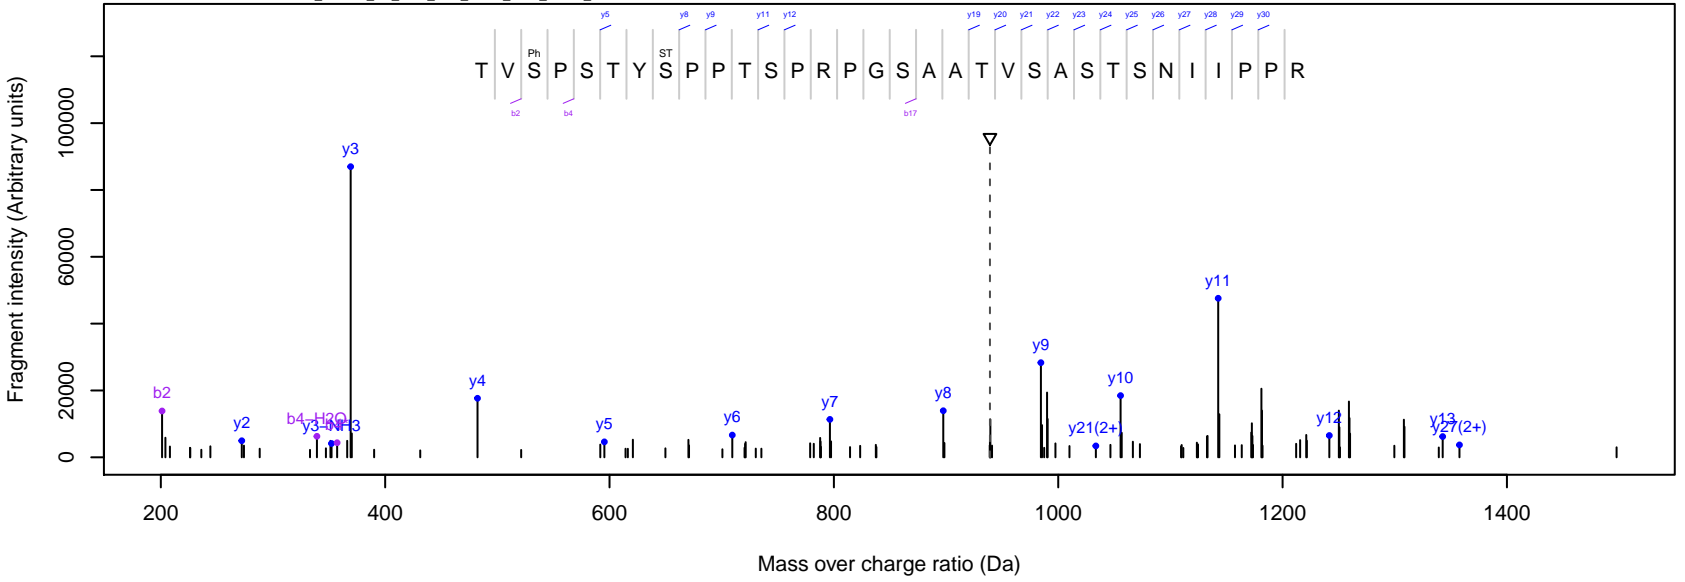

TTQSM(Oxidation (M))QDFPVVDS(Phospho (STY))EEEEEEEFQKELSQWR-3+

Source : QE3\_201126\_FR\_TiOx\_hum\_tissue\_Urea\_RNAB\_H Scan : 57286

Andromeda score : 93.29

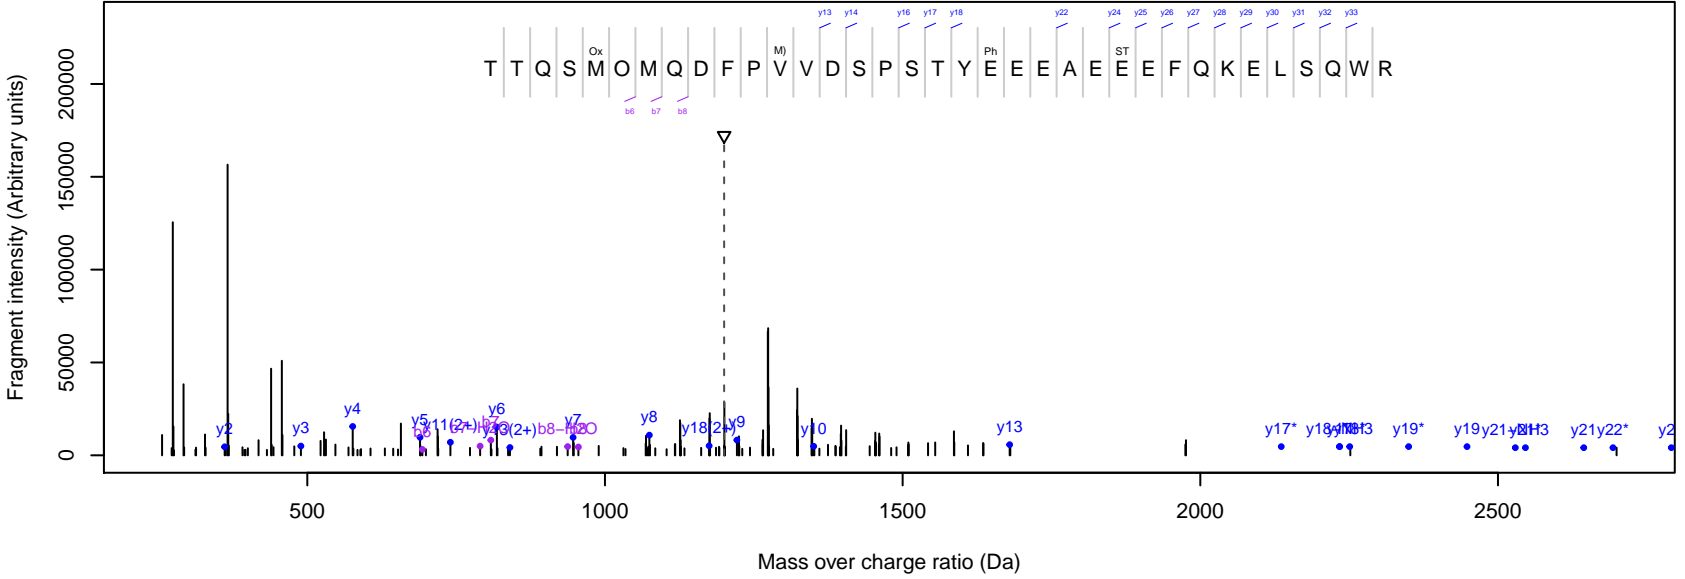

HFS(Phospho (STY))SAGTIESVNLDAIPLAIAR-3+

Source : QE3\_201126\_FR\_TiOx\_hum\_tissue\_Urea\_RNAB\_N Scan : 55329

Andromeda score : 93.269

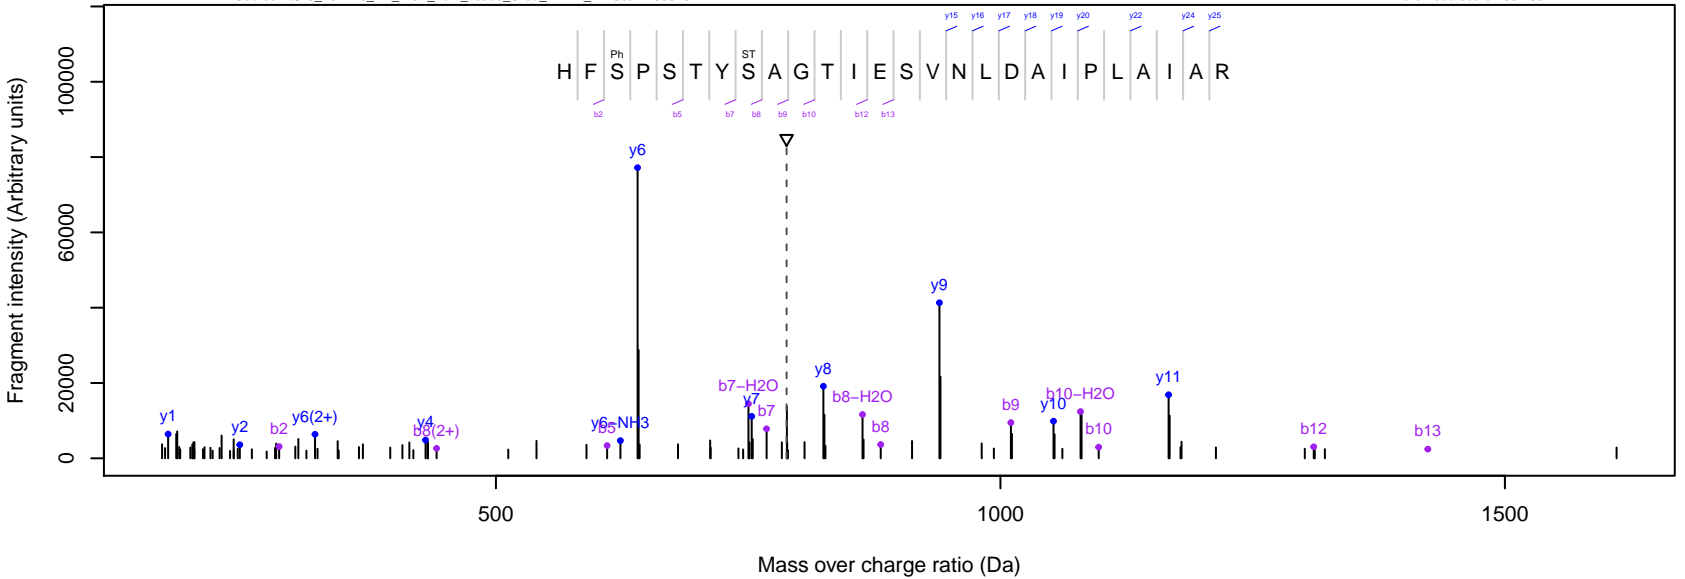

SQIDDLY(Phospho (STY))STIKV-2+

Source : QE3\_201126\_FR\_TiOx\_hum\_tissue\_Urea\_RNAB\_H Scan : 42104

Andromeda score : 93.258

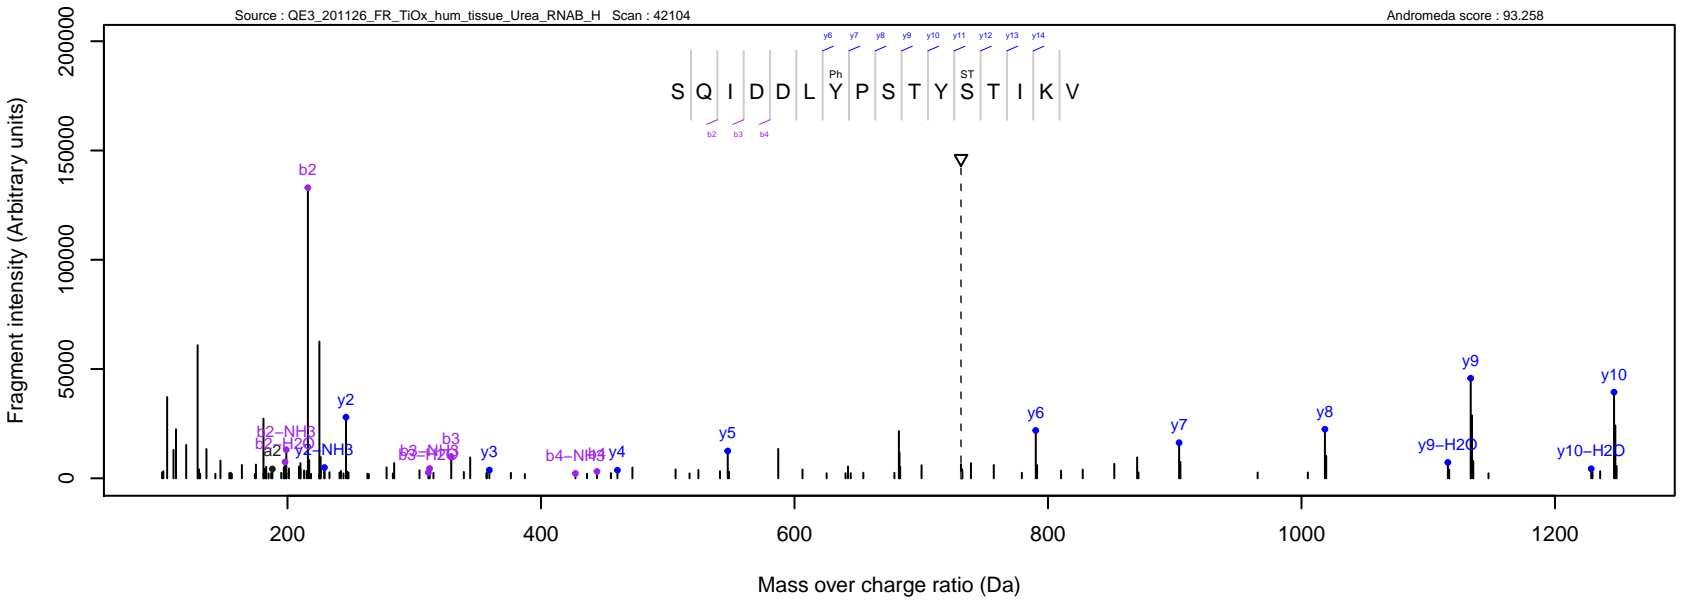

SQS(Phospho (STY))SDLLER-2+

Source : QE3\_201126\_FR\_TiOx\_hum\_tissue\_Urea\_RNAB\_H Scan : 17034

Andromeda score : 93.258

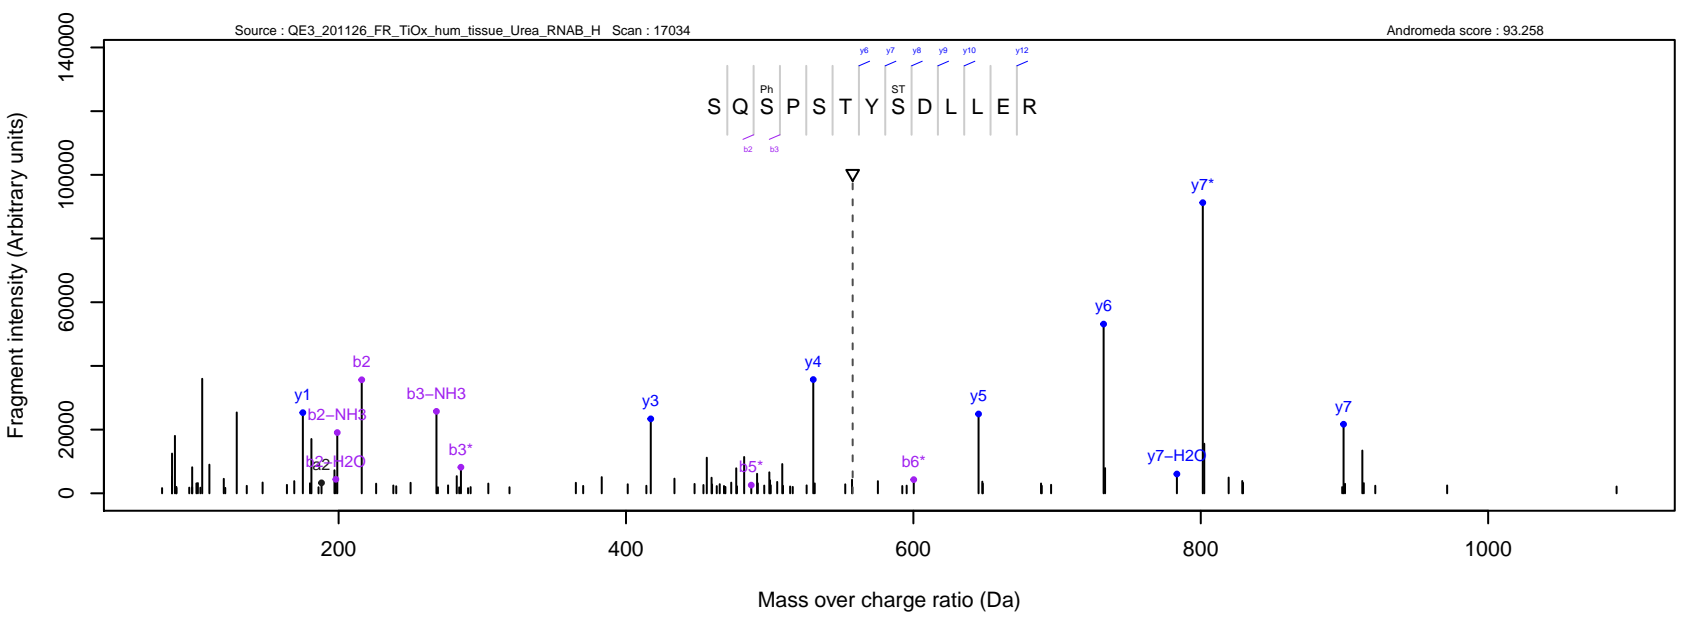

ADREVQAEQPS(Phospho (STY))SPR-3+

Source : QE3\_201126\_FR\_TiOx\_hum\_tissue\_Urea\_RNAB\_N Scan : 6021

Andromeda score : 93.255

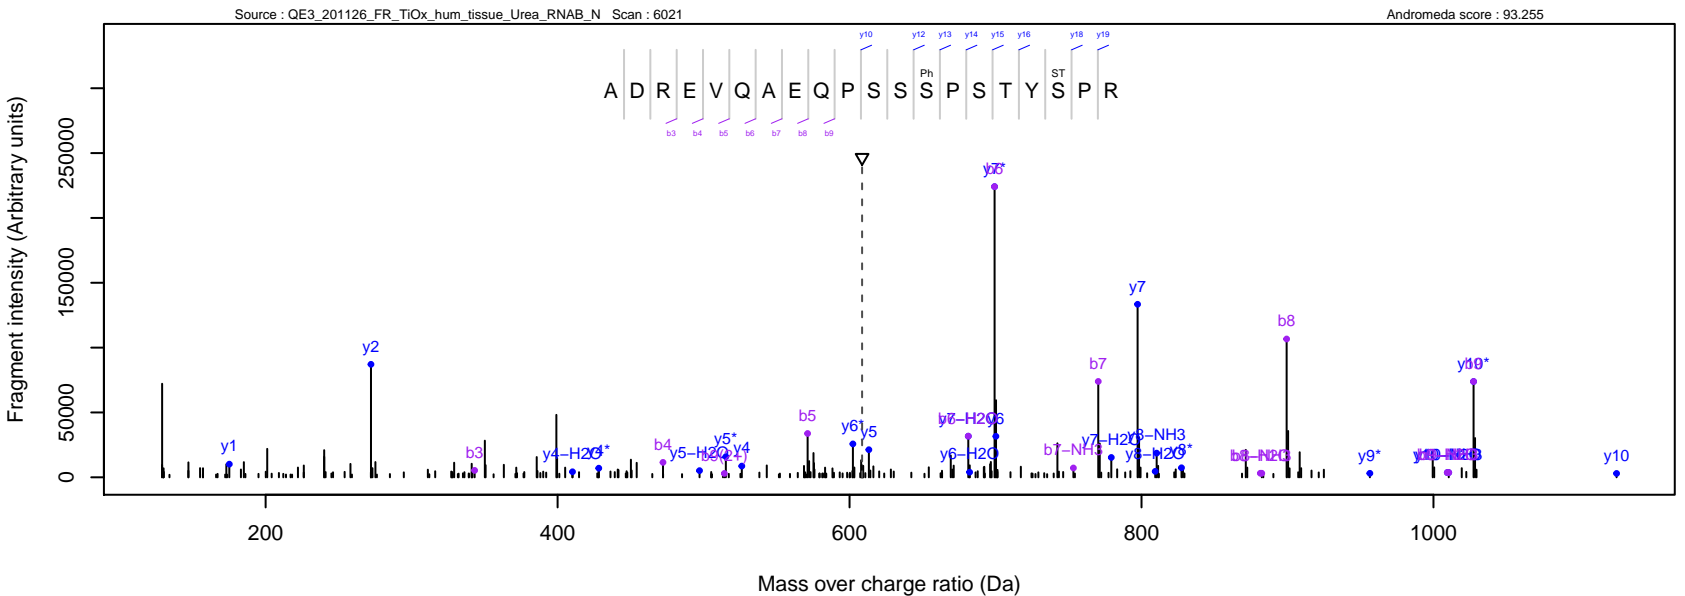



S(Phospho (STY))PSWTAPPVIALQNGLSEDEALQR-3+

Source : QE3\_201126\_FR\_TIOx\_hum\_tissue\_Urea\_RNAB\_N Scan : 58972

Andromeda score : 93.176

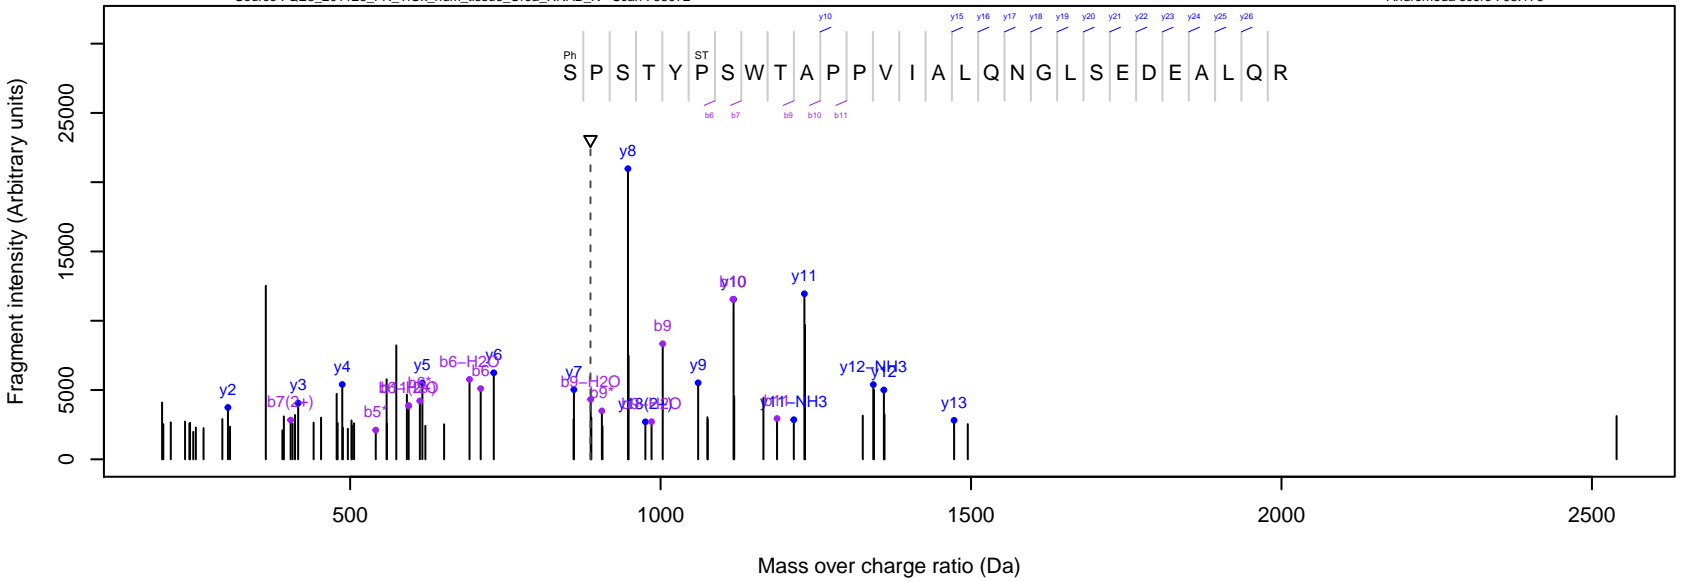

GTDDLNPVTSTPAKPS(Phospho (STY))PPPEFSFNTPGK-3+

Source : QE3\_201126\_FR\_TIOx\_hum\_tissue\_Urea\_RNAB\_N Scan : 39737

Andromeda score : 93.172

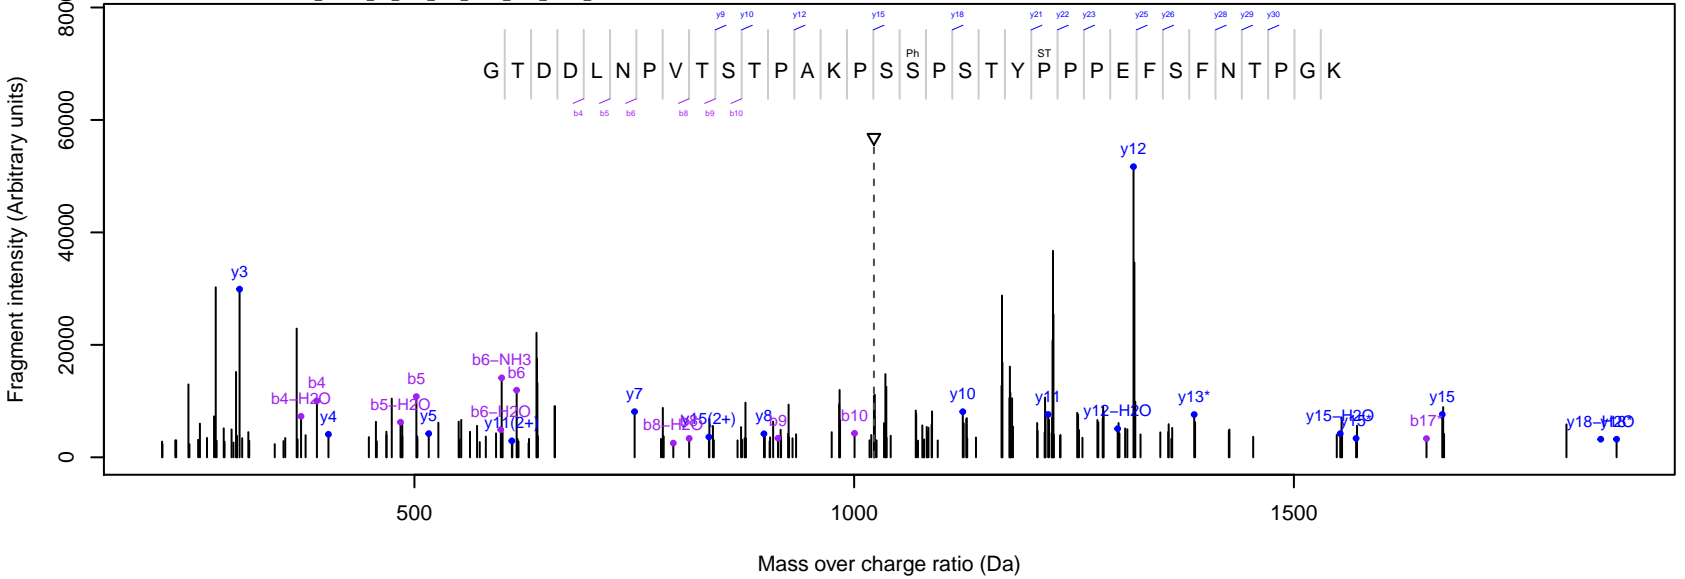

EM(Oxidation (M))LM(Oxidation (M))EDVGS(Phospho (STY))EEEQEEDEAPFQEK-3+

Source : QE3\_201126\_FR\_TIOx\_hum\_tissue\_Urea\_RNAB\_H Scan : 34463

Andromeda score : 93.166

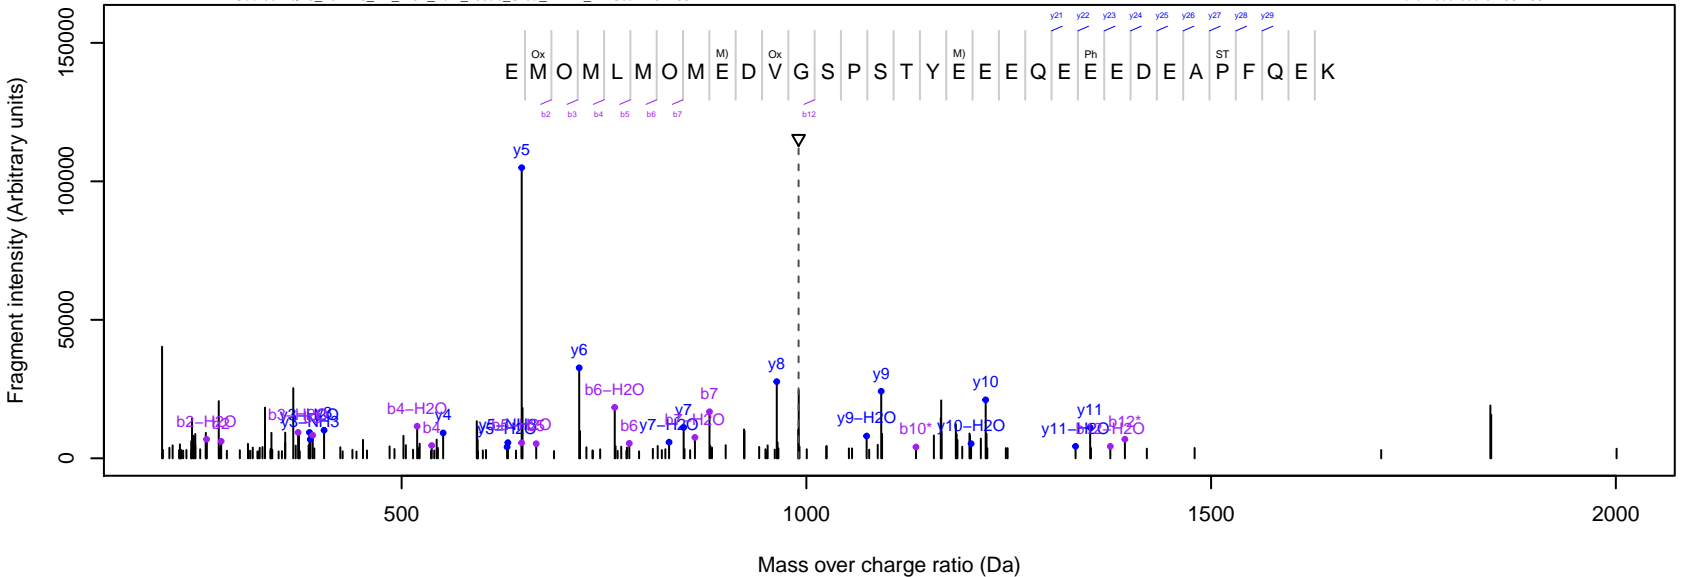

KGDVEGSQS(Phospho (STY))QDEGEGSGESER-3+

Source : QE3\_201126\_FR\_TiOx\_hum\_tissue\_Urea\_RNAB\_H Scan : 5143

Andromeda score : 93.166

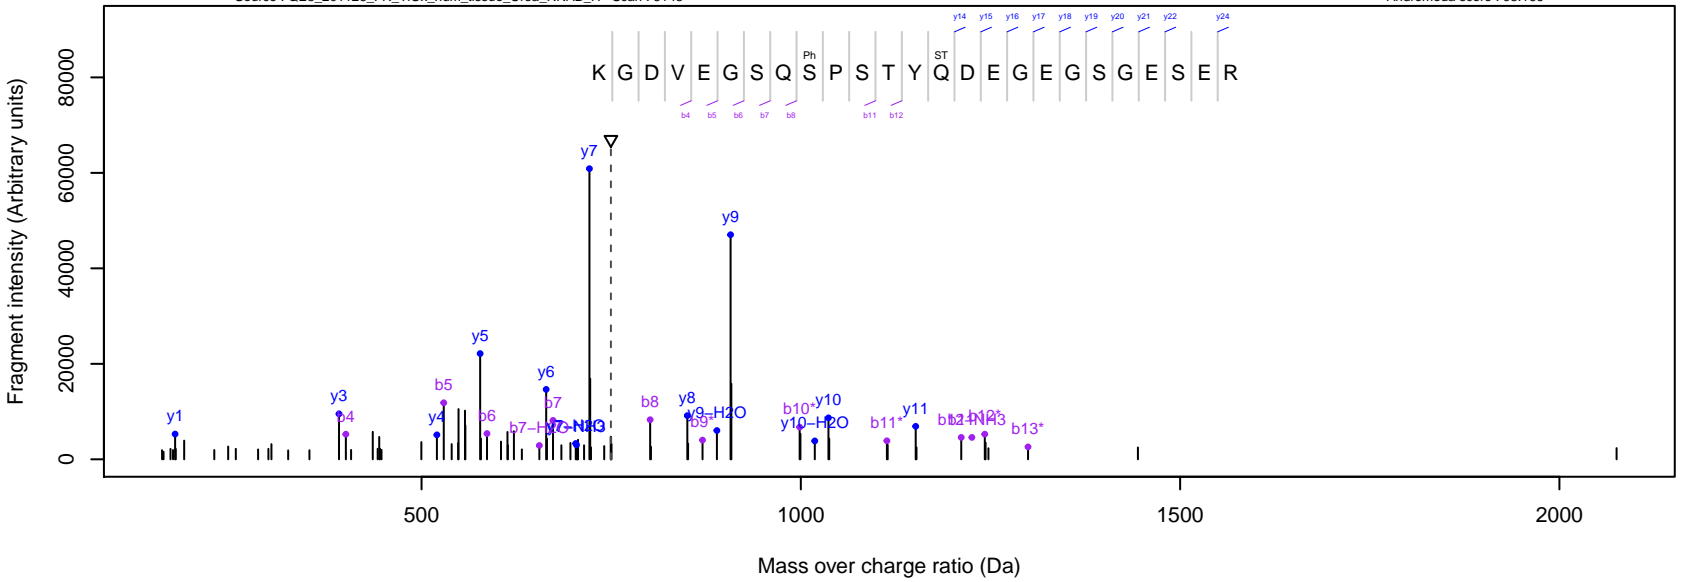

VLSPLRS(Phospho (STY))PPLIGSESAYESFLSADDKASGR-4+

Source : QE3\_201126\_FR\_TiOx\_hum\_tissue\_Urea\_RNAB\_H Scan : 51048

Andromeda score : 93.147

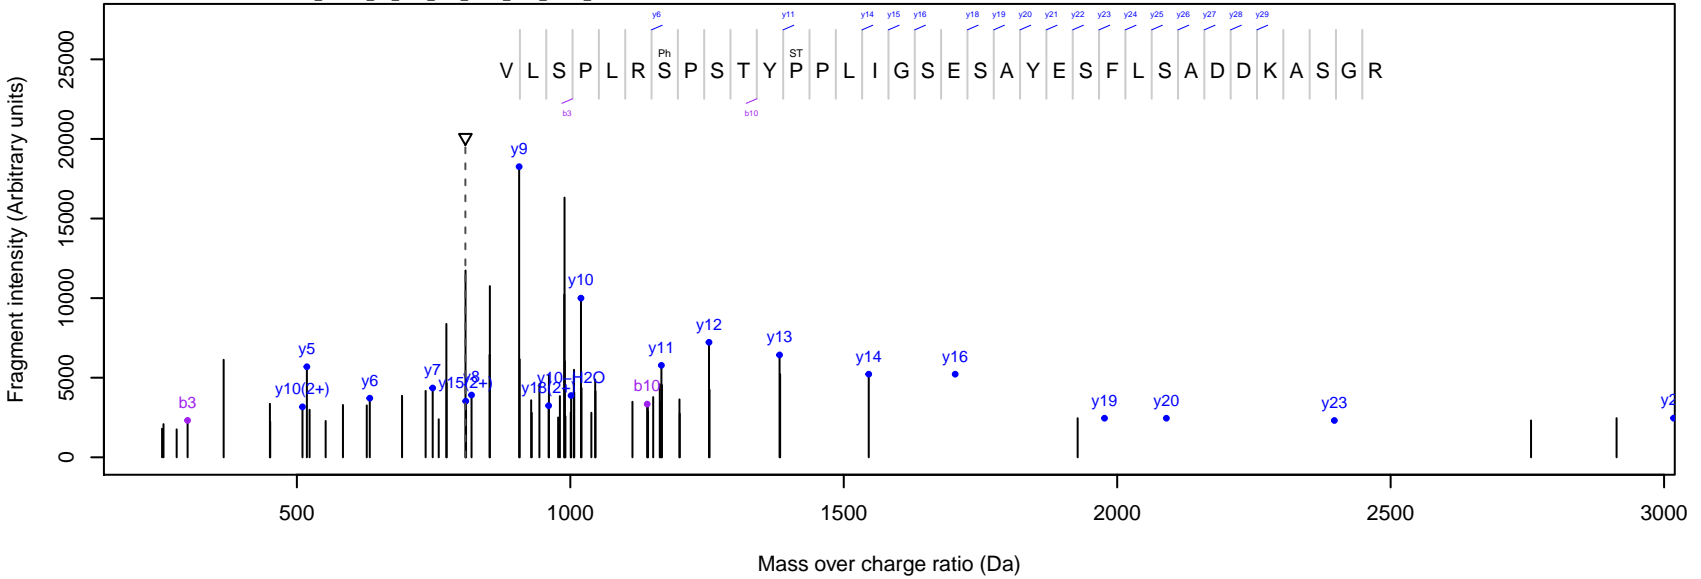

QGAIYHGLATLLNQPS(Phospho (STY))PM(Oxidation (M))M(Oxidation (M))QR-3+

Source : QE3\_201126\_FR\_TiOx\_hum\_tissue\_Urea\_RNAB\_H Scan : 41930

Andromeda score : 93.115

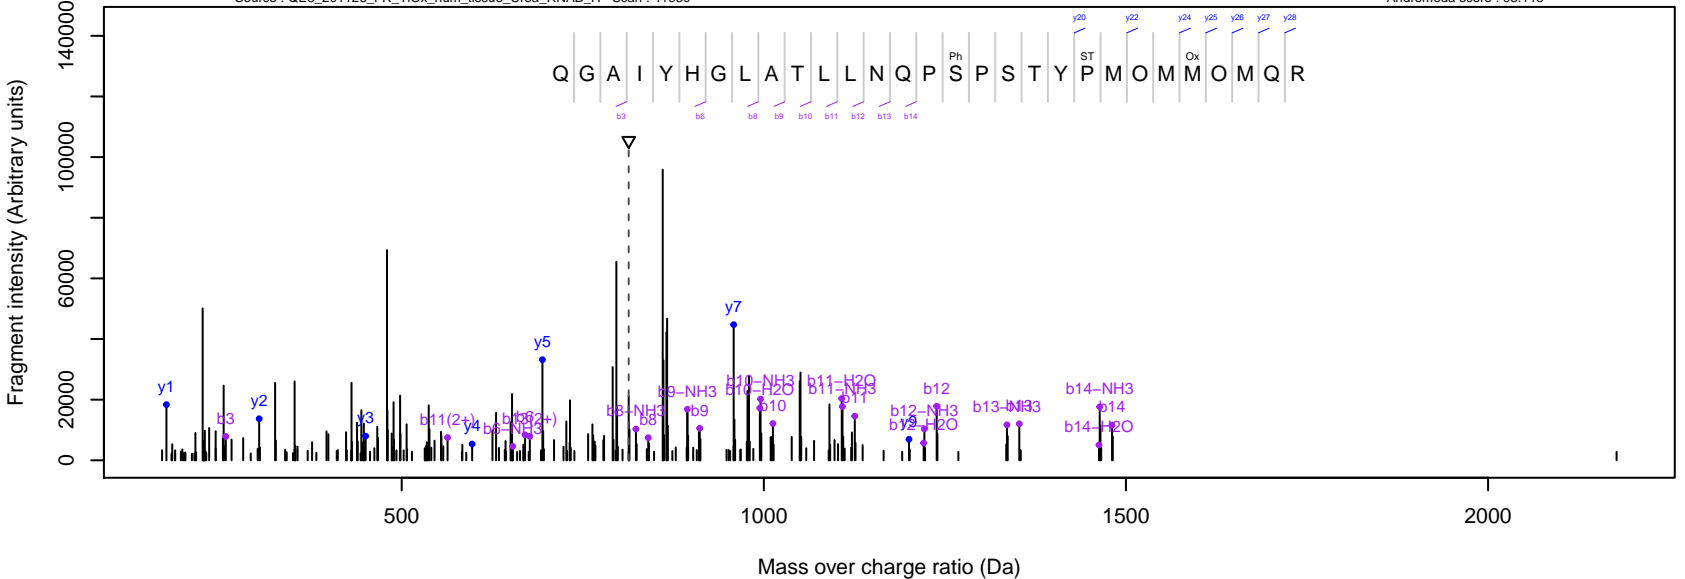

ALS(Phospho (STY))PAELR-2+

Source : QE3\_201126\_FR\_TiOx\_hum\_tissue\_Urea\_RNAB\_H Scan : 20745

Andromeda score : 93.111

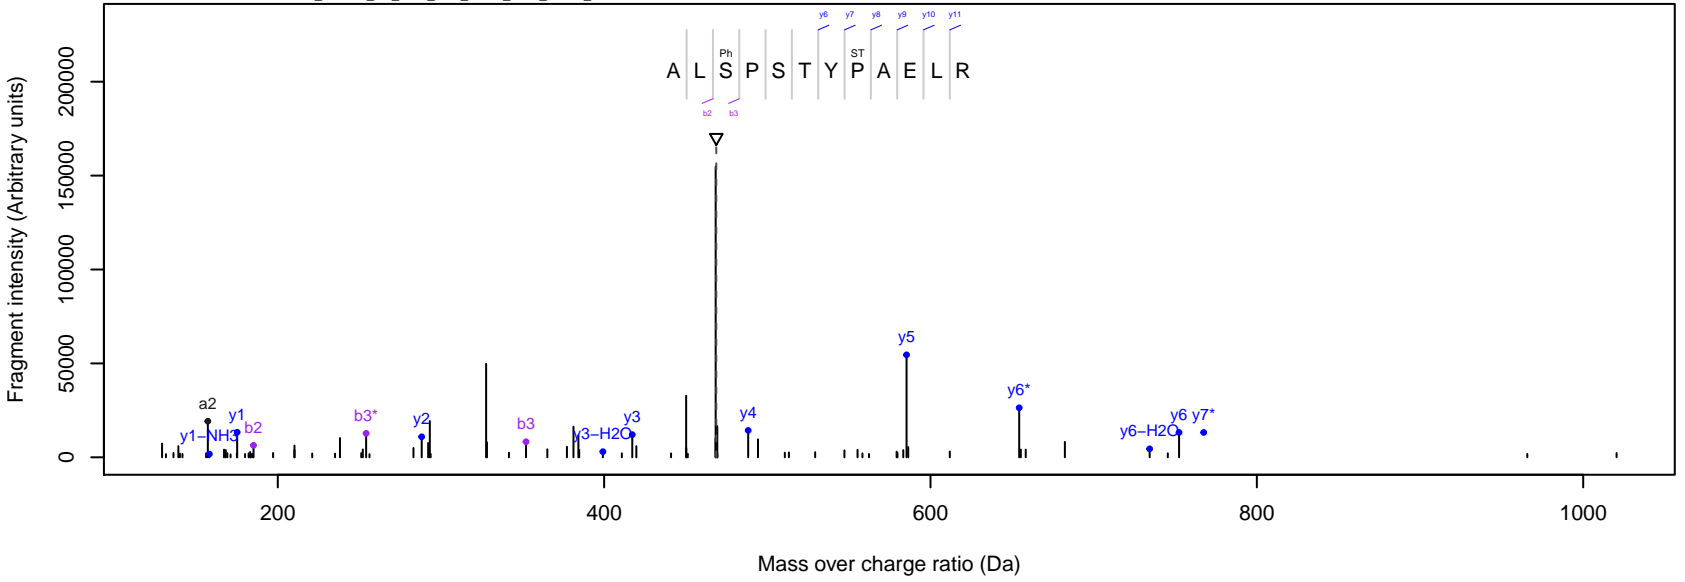

S(Phospho (STY))SPQLDPLR-2+

Source : QE3\_201126\_FR\_TiOx\_hum\_tissue\_Urea\_RNAB\_N Scan : 25385

Andromeda score : 93.096

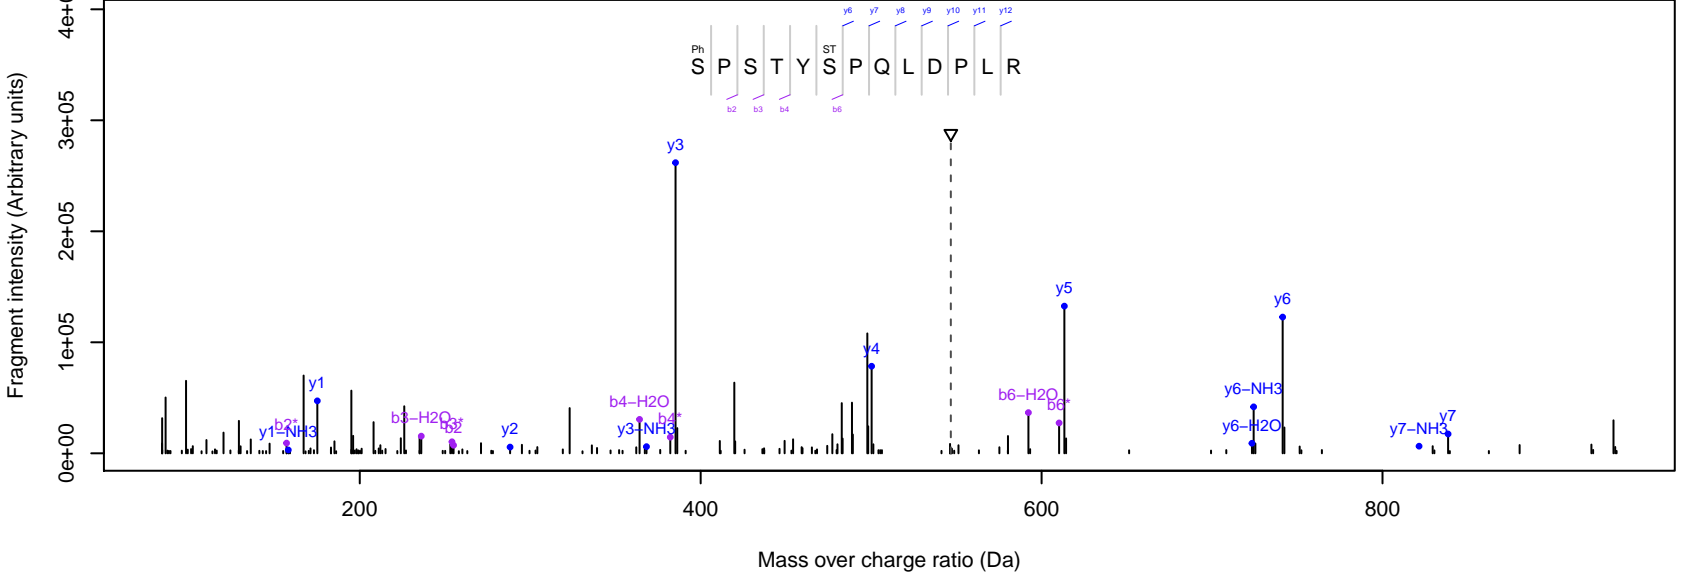

ERDHS(Phospho (STY))PTPSVFNS(Phospho (STY))DEERYR-3+

Source : QE3\_201126\_FR\_TiOx\_hum\_tissue\_Urea\_RNAB\_H Scan : 18563

Andromeda score : 93.093

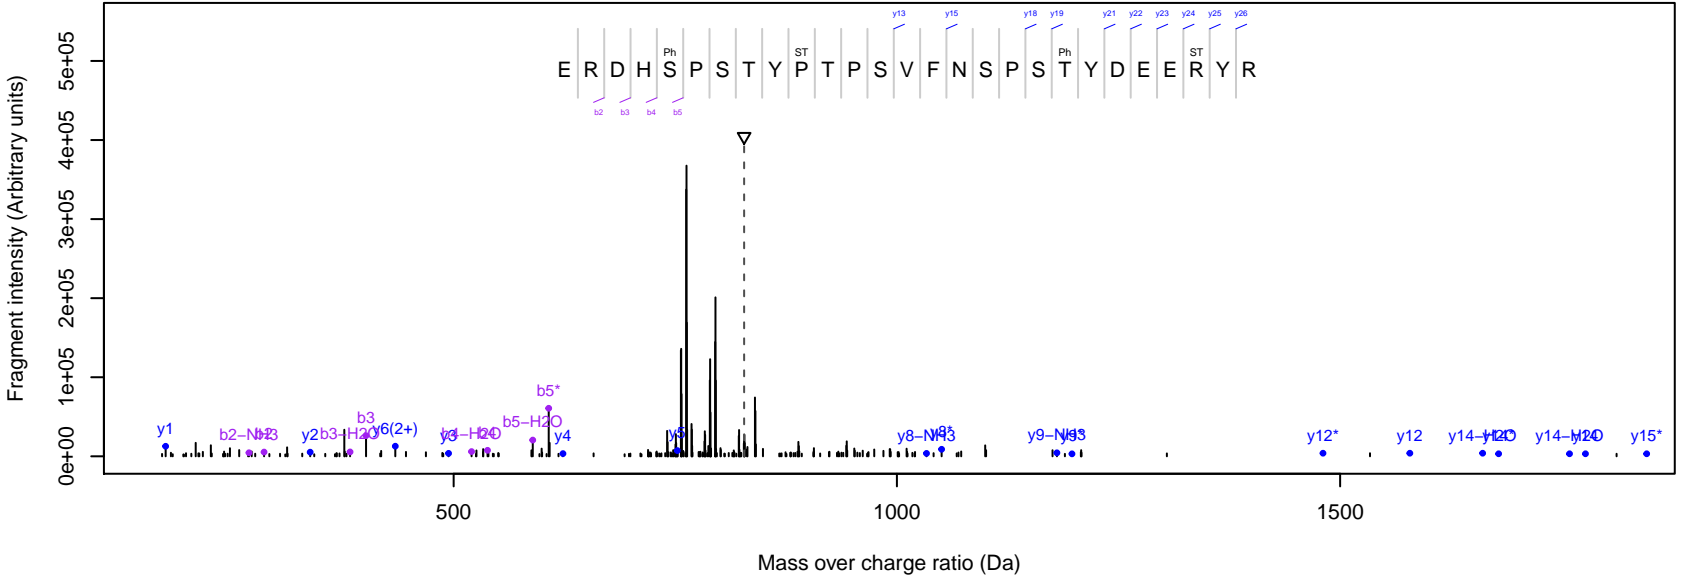

TSPLKDNPS(Phospho (STY))PEPQLDDIKR-3+

Source : QE3\_201126\_FR\_TiOx\_hum\_tissue\_Urea\_RNAB\_H Scan : 19215

Andromeda score : 93.093

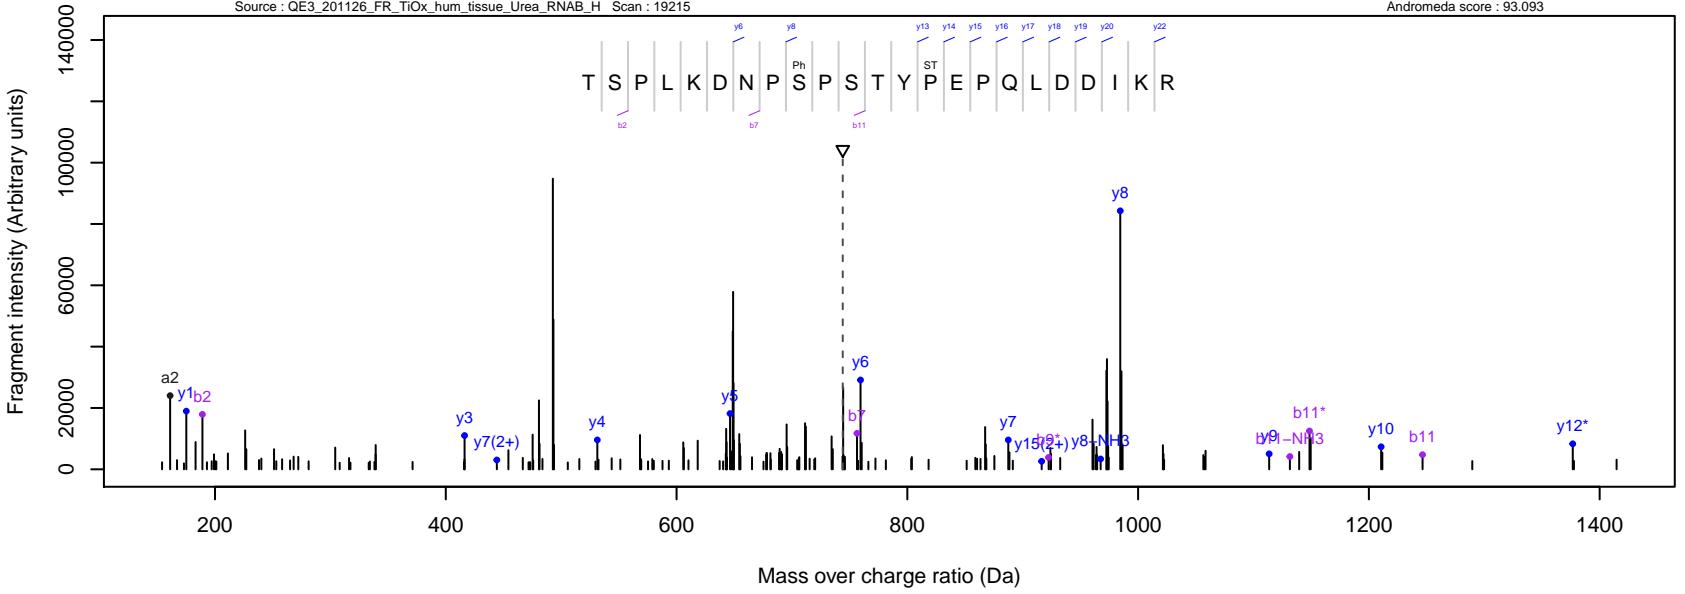

VPS(Phospho (STY))EGAYDILPR-2+

Source : QE3\_201126\_FR\_TiOx\_hum\_tissue\_Urea\_RNAB\_B Scan : 47742

Andromeda score : 93.058

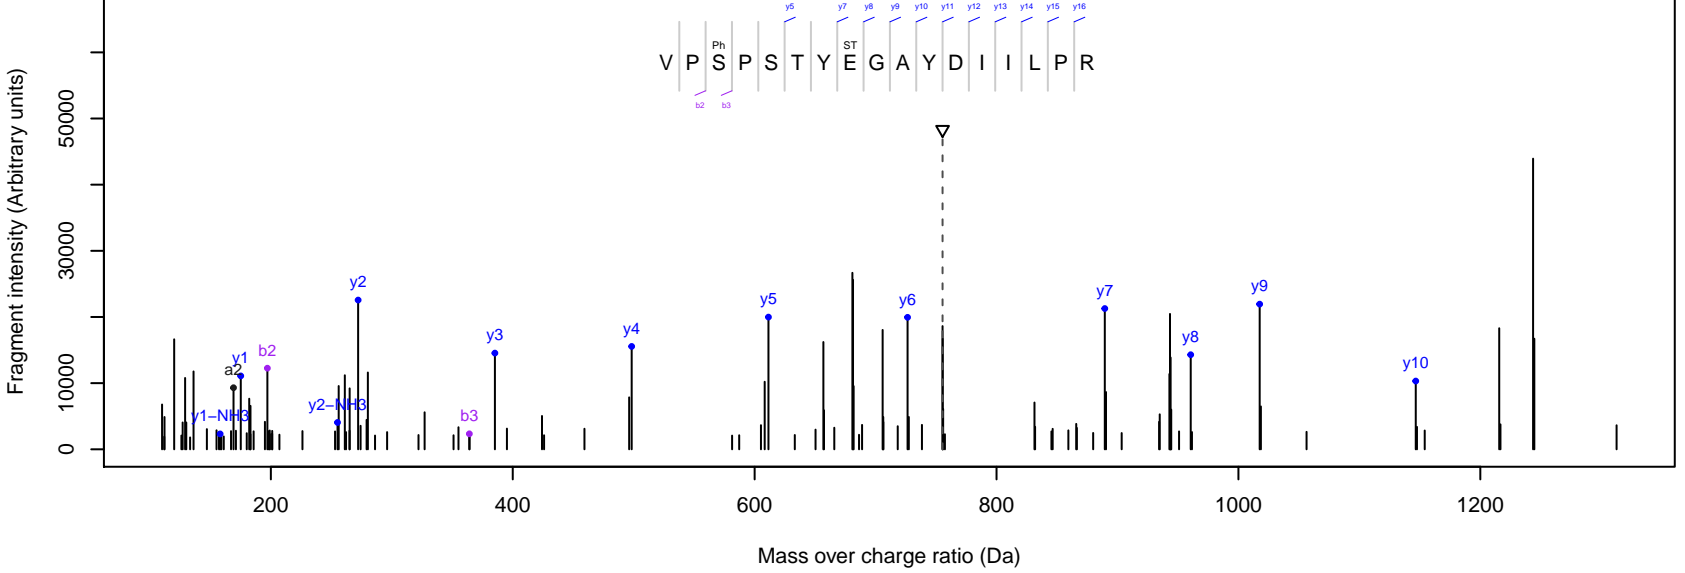

DAPSGIGSIFLSASELEDGSEEM(Oxidation (M))GQGVSSS(Phospho (STY))PR-3+

Source : QE3\_201126\_FR\_TiOx\_hum\_tissue\_Urea\_RNAB\_B Scan : 61483

Andromeda score : 93.055

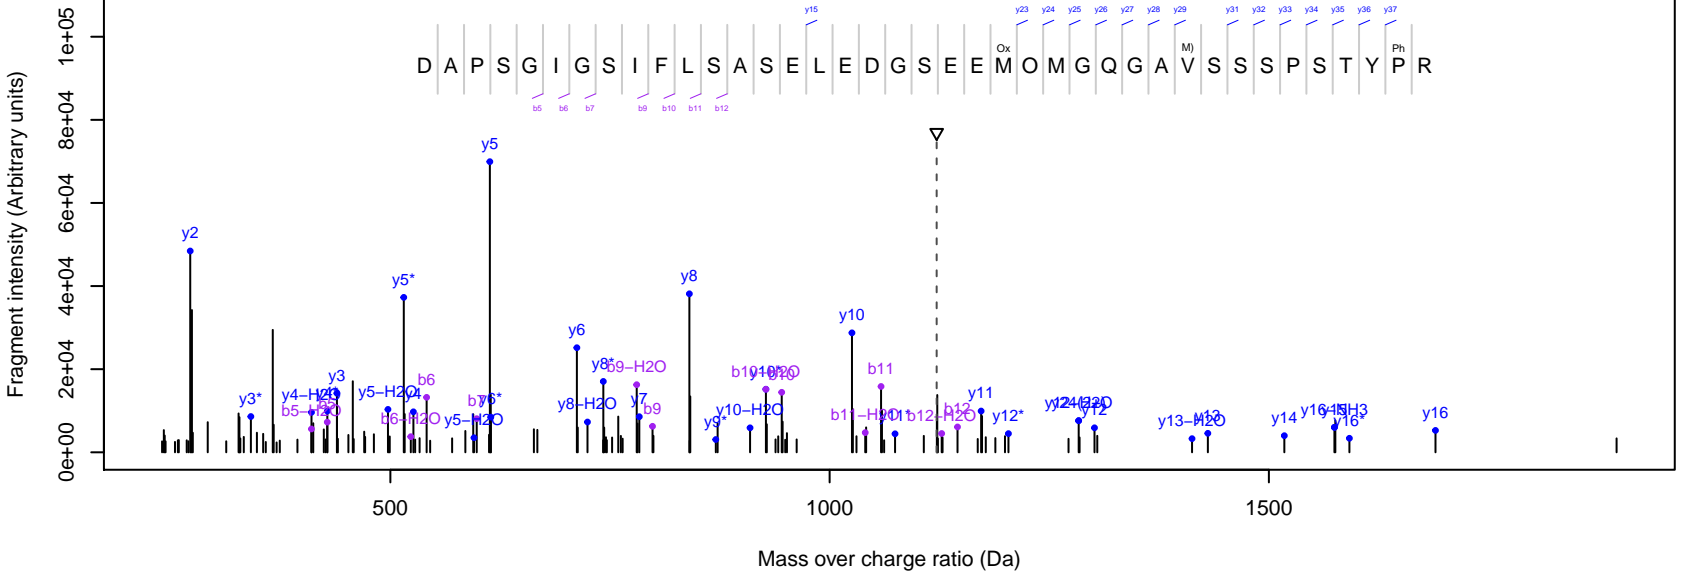



QLSGS(Phospho (STY))TPSLNK-2+

Source : QE3\_201126\_FR\_TiOx\_hum\_tissue\_Urea\_RNAB\_H Scan : 13983

Andromeda score : 93.011

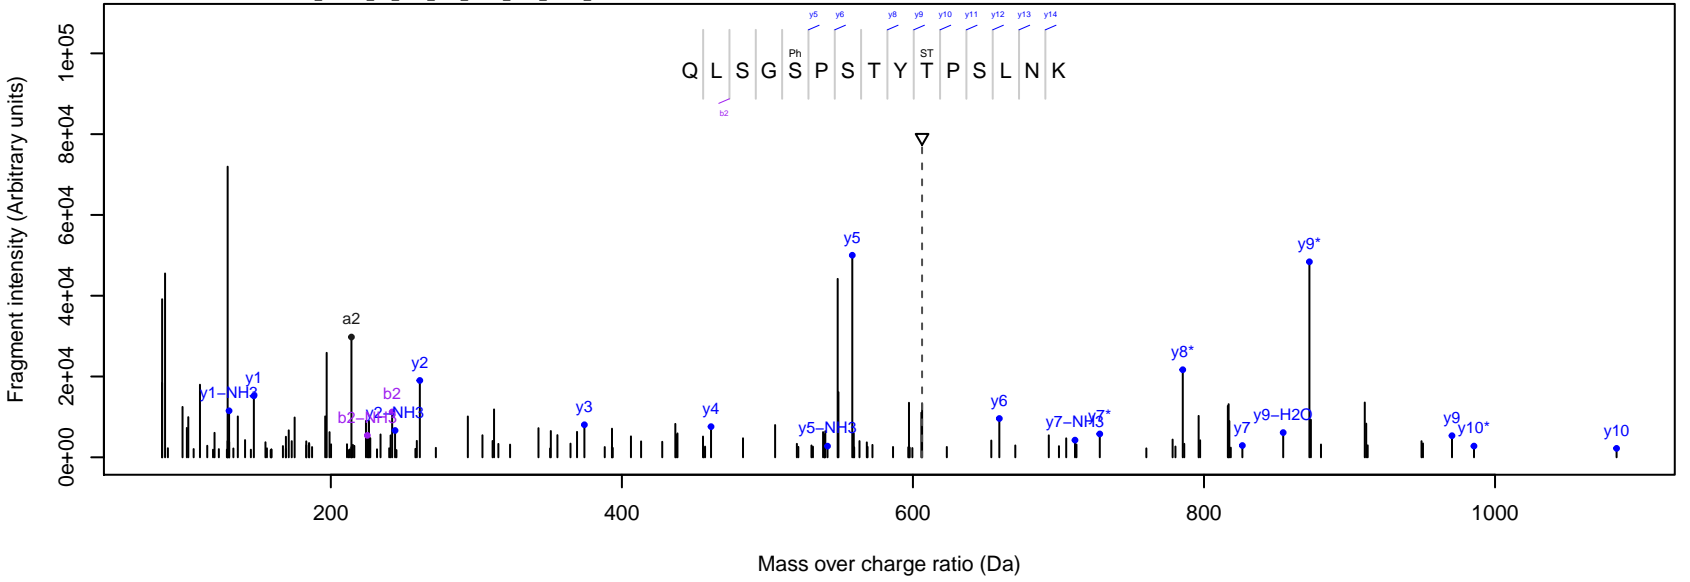

S(Phospho (STY))PGMLEPLGSSR-2+

Source : QE3\_201126\_FR\_TiOx\_hum\_tissue\_Urea\_RNAB\_H Scan : 31163

Andromeda score : 93.011

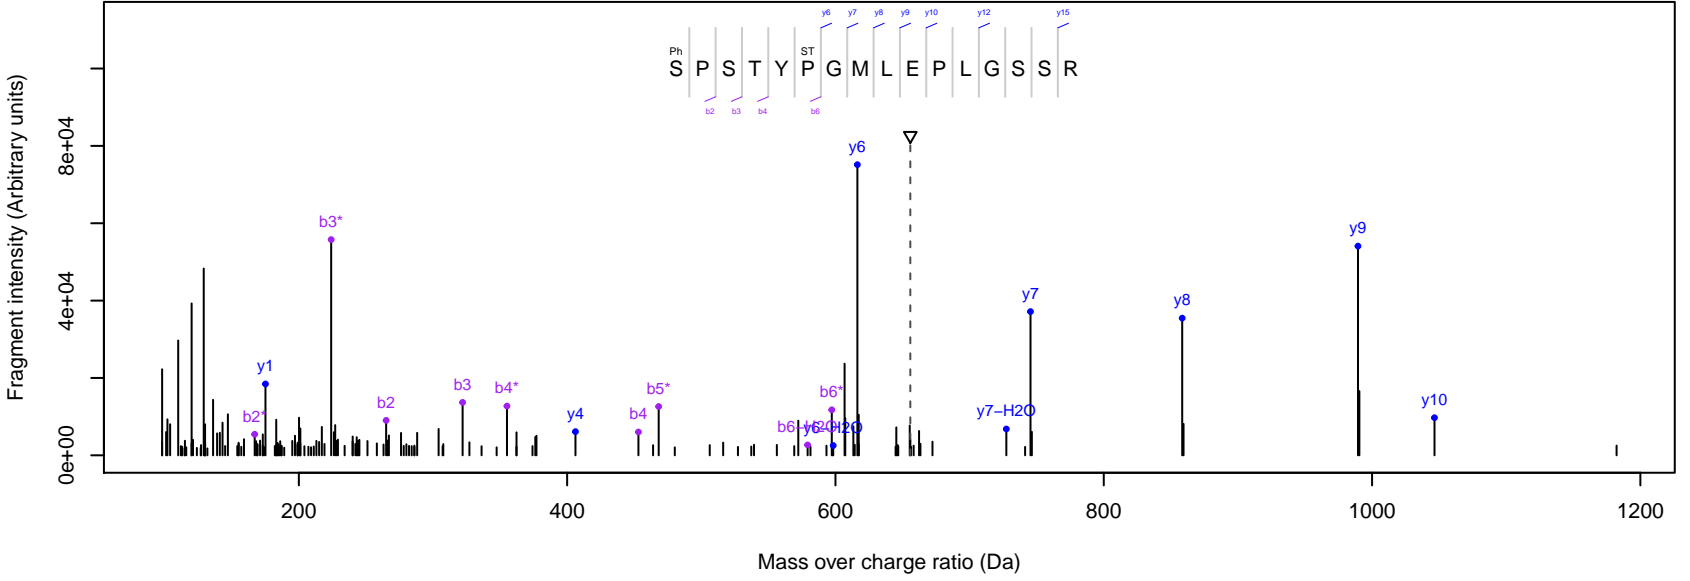

REEQT(Phospho (STY))DT(Phospho (STY))SDGESVTHHIR-3+

Source : QE3\_201126\_FR\_TiOx\_hum\_tissue\_Urea\_RNAB\_B Scan : 8592

Andromeda score : 93.006

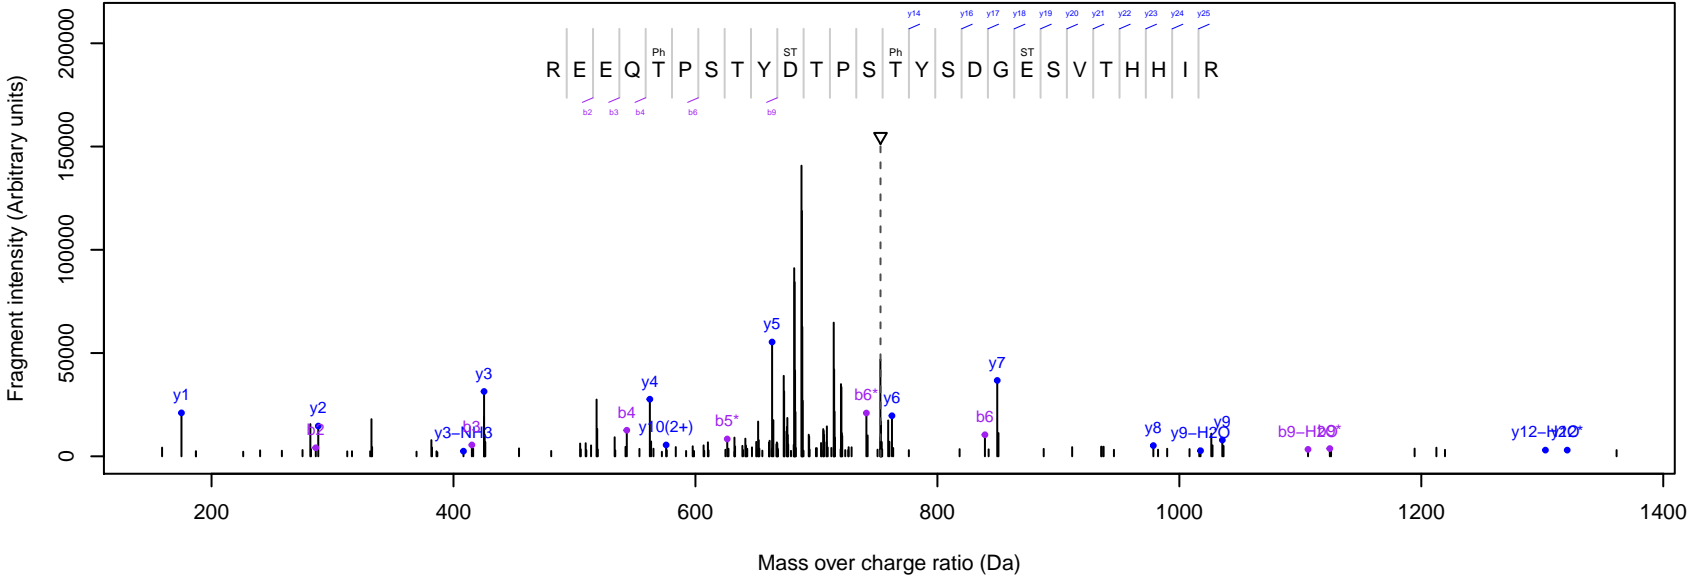

ETDLQLFLRPFSGIS(Phospho (STY))R-3+

Source : QE3\_201126\_FR\_TiOx\_hum\_tissue\_Urea\_RNAB\_H Scan : 55968

Andromeda score : 92.993

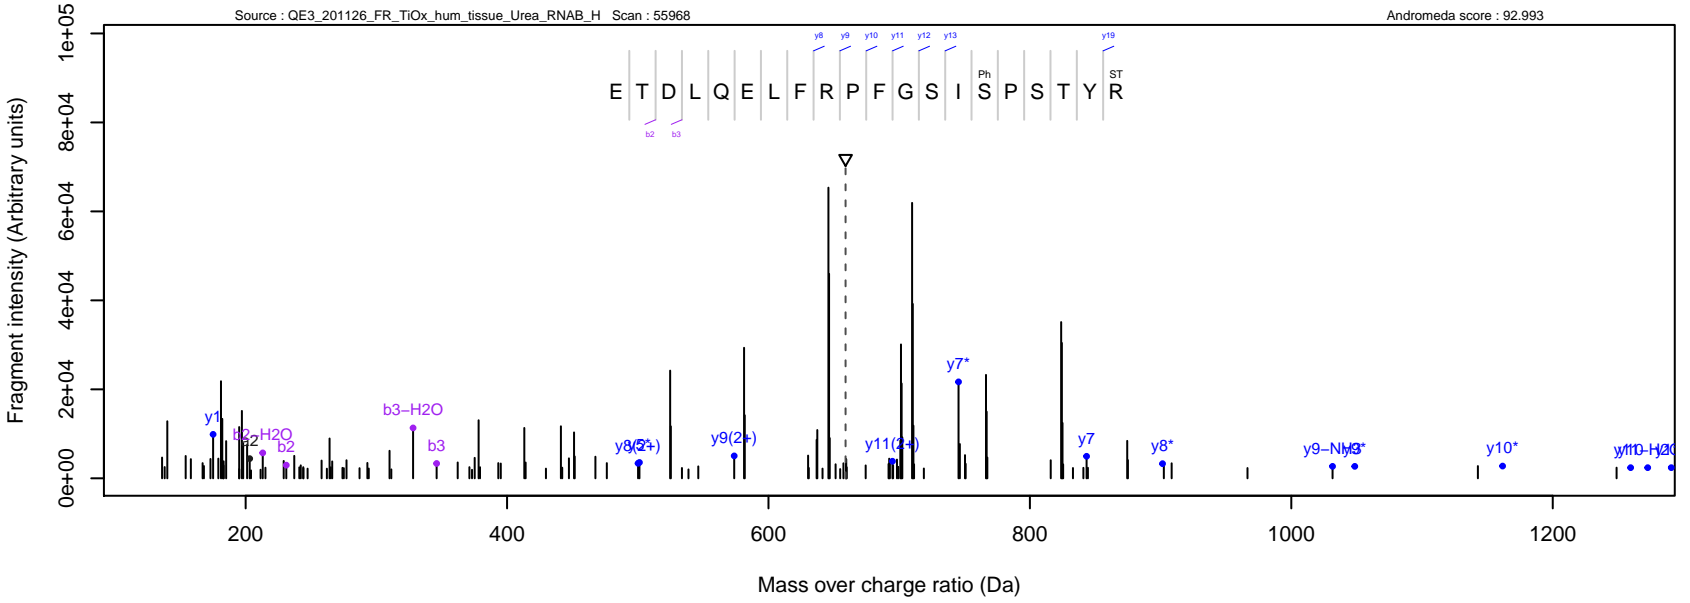

GRS(Phospho (STY))DSVDYGTTHYHQR-4+

Source : QE3\_201126\_FR\_TiOx\_hum\_tissue\_Urea\_RNAB\_B Scan : 8979

Andromeda score : 92.993

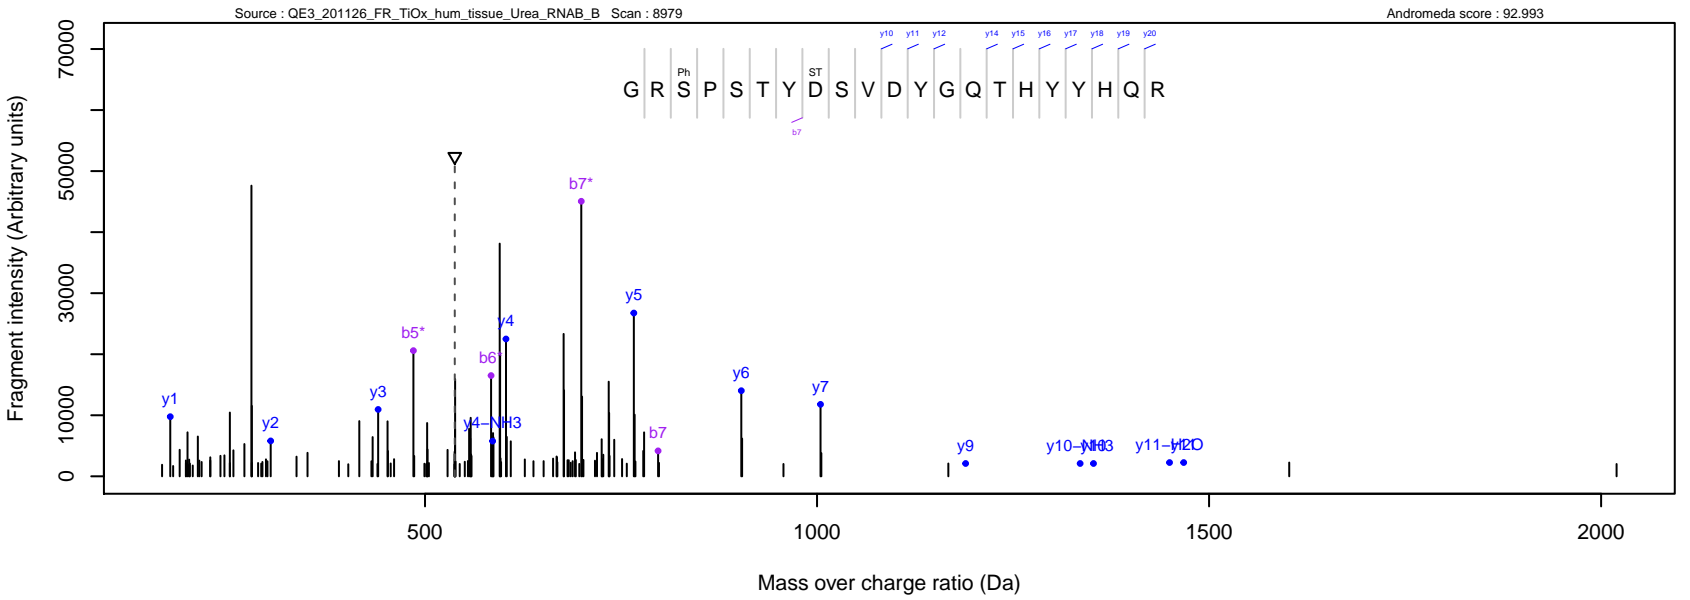

RPPEEDFRHS(Phospho (STY))PEEDFR-4+

Source : QE3\_201126\_FR\_TiOx\_hum\_tissue\_Urea\_RNAB\_H Scan : 15005

Andromeda score : 92.993

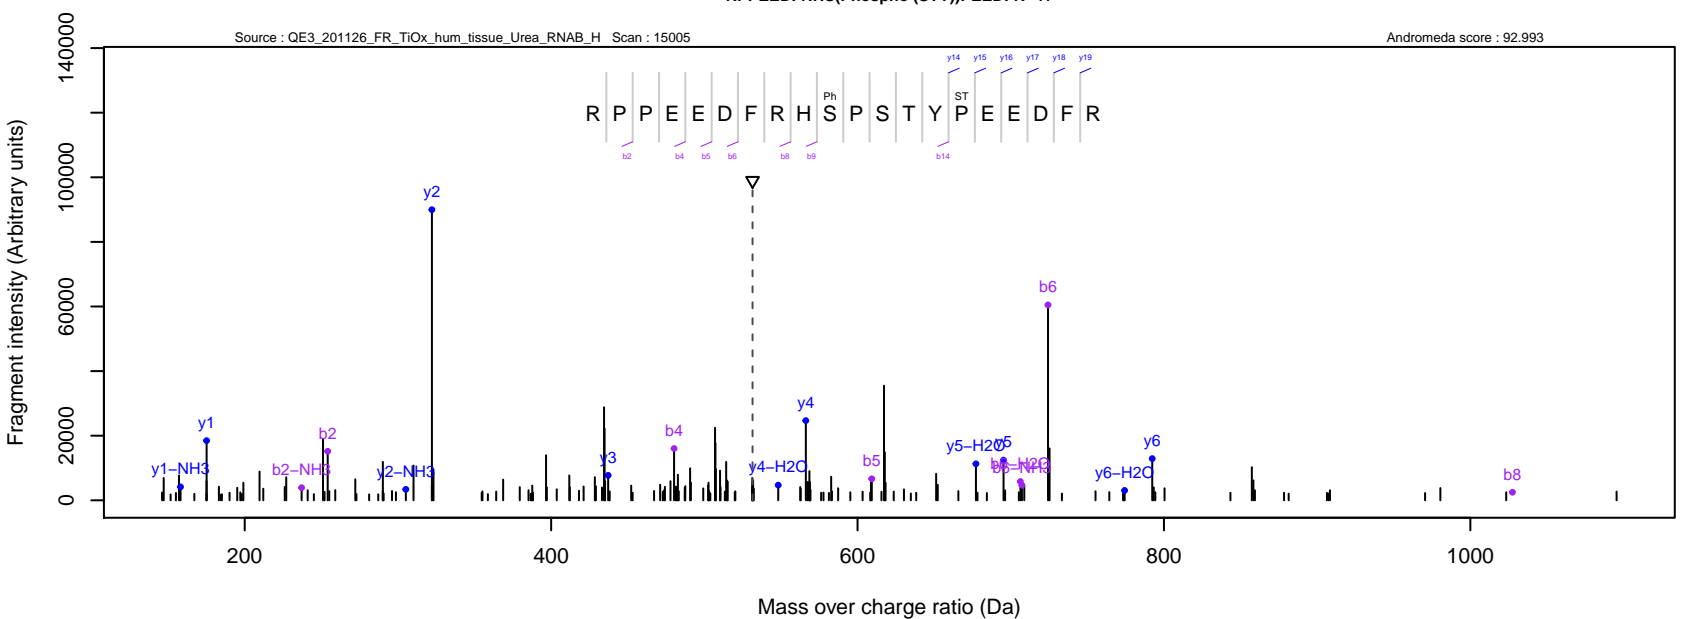

YNDWS(Phospho (STY))DDDD(Phospho (STY))NESK-2+

Source : QE3\_201126\_FR\_TiOx\_hum\_tissue\_Urea\_RNAB\_H Scan : 22392

Andromeda score : 92.993

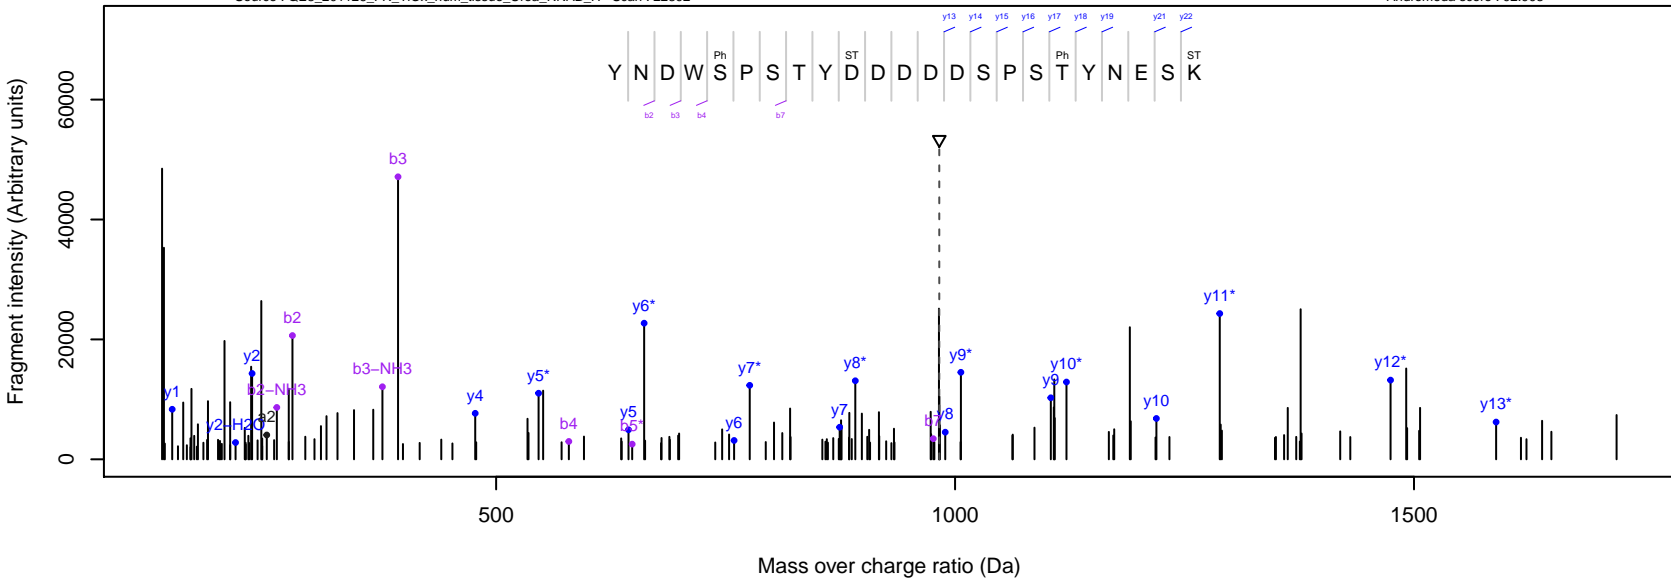

KGELM(Oxidation (M))ENDQDAM(Oxidation (M))EYS(Phospho (STY))S(Phospho (STY))EEEEVDLQALTGYQTK-3+

Source : QE3\_201126\_FR\_TiOx\_hum\_tissue\_Urea\_RNAB\_H Scan : 50187

Andromeda score : 92.956

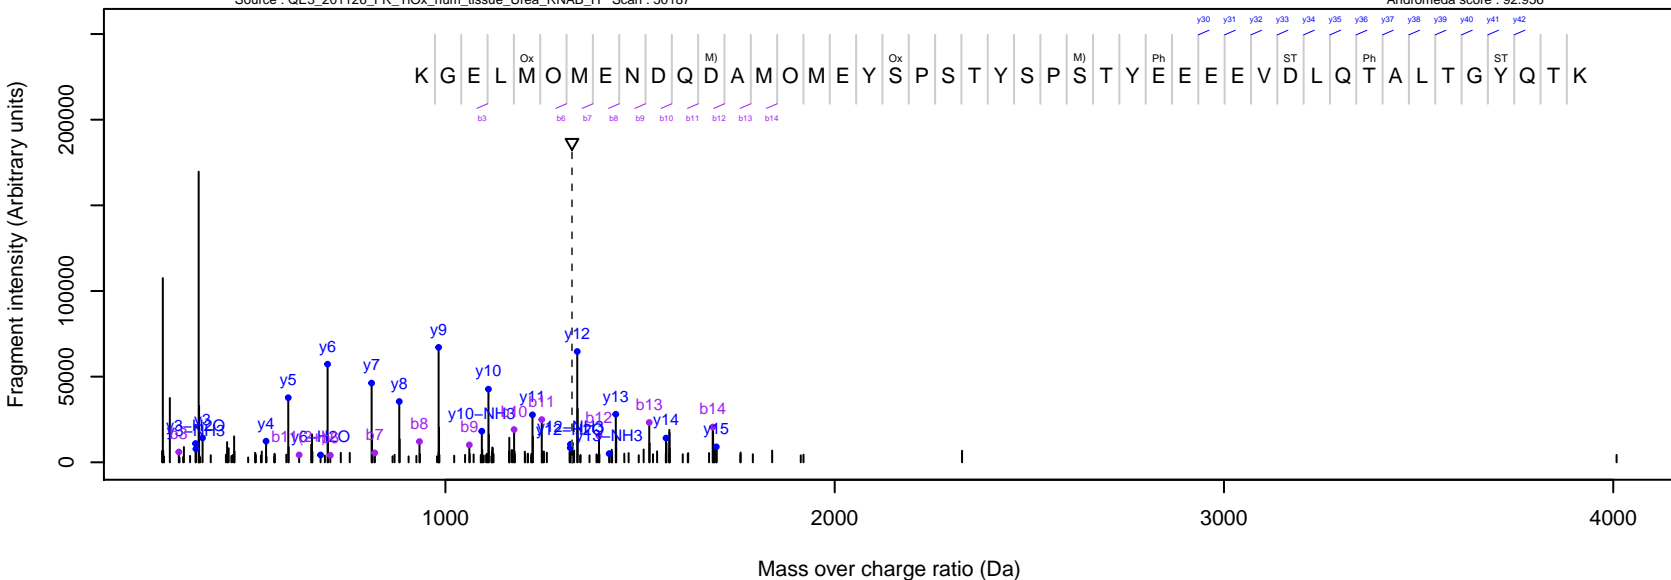

S(Phospho (STY))LEDVTAEYIHKAEHEK-3+

Source : QE3\_201126\_FR\_TiOx\_hum\_tissue\_Urea\_RNAB\_N Scan : 29095

Andromeda score : 92.95

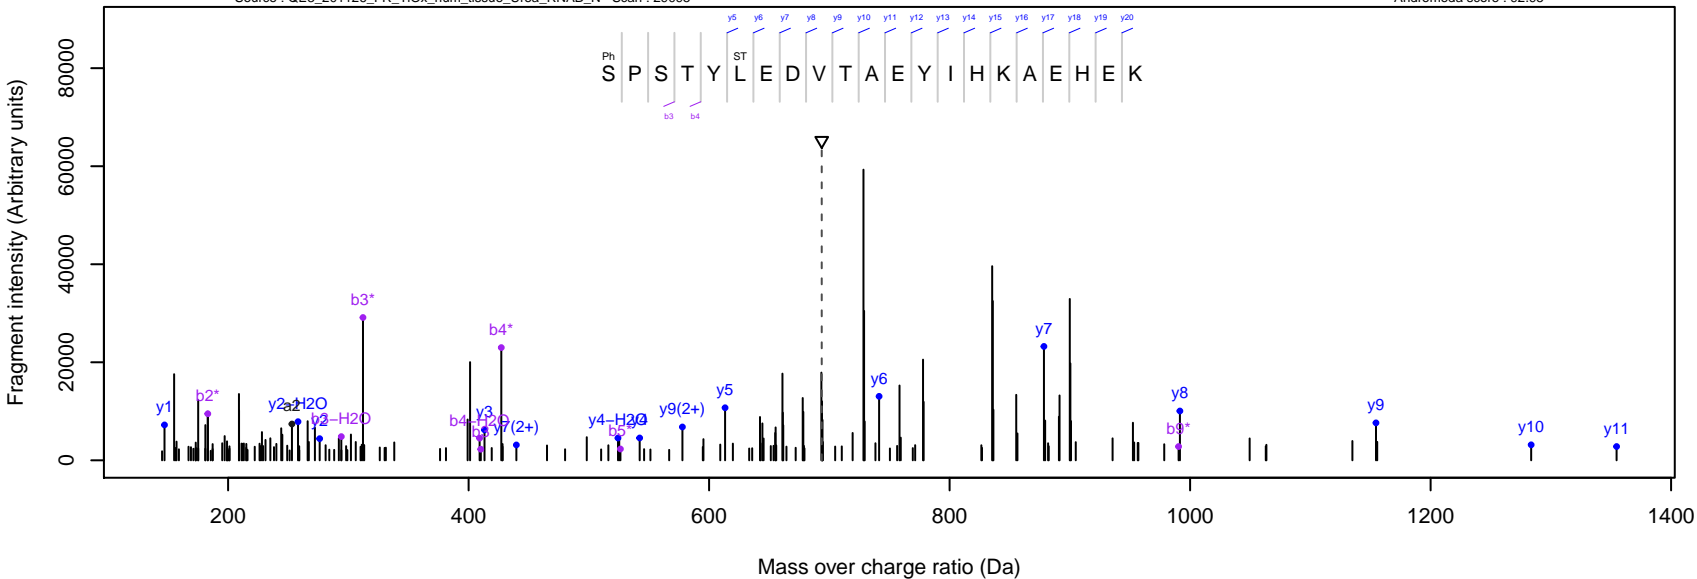

DLGQS(Phospho (STY))NSDLMPFAK-2+

Source : QE3\_201126\_FR\_TiOx\_hum\_tissue\_Urea\_RNAB\_N Scan : 46405

Andromeda score : 92.939

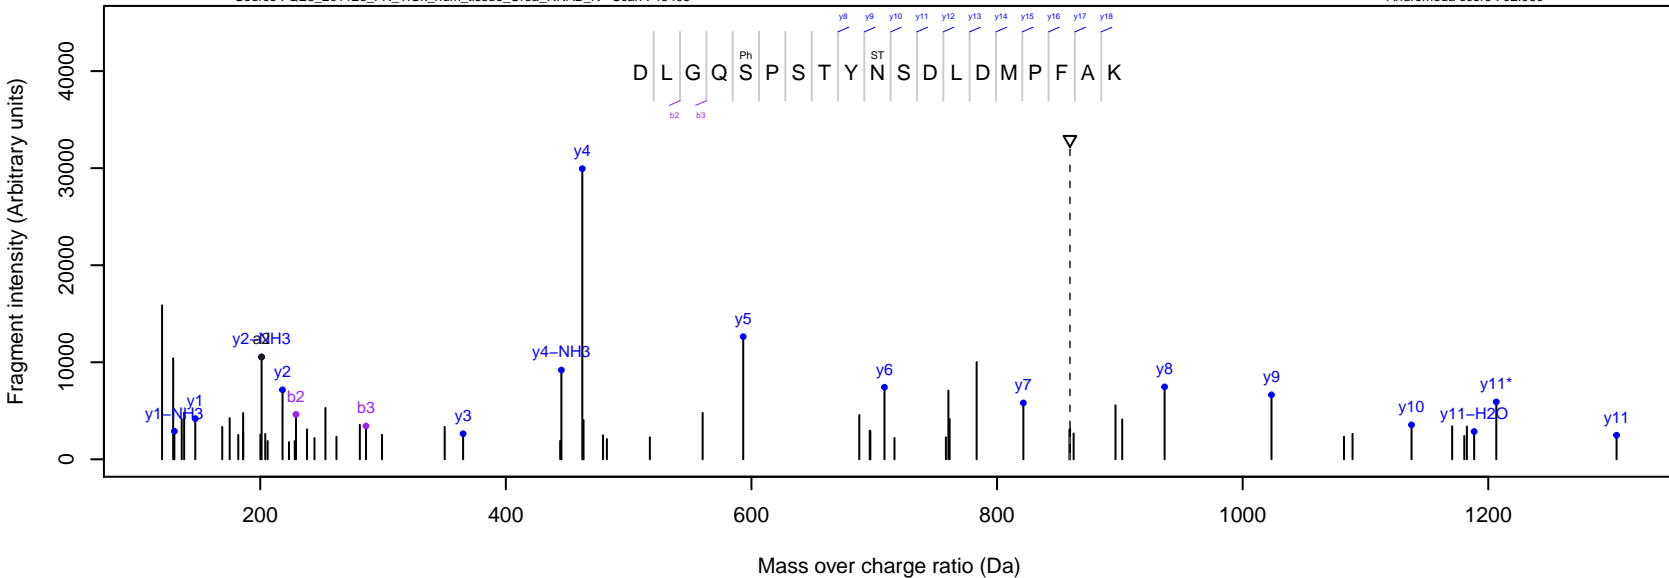

RAPS(Phospho (STY))SAQYLEEK-2+

Source : QE3\_201126\_FR\_TiOx\_hum\_tissue\_Urea\_RNAB\_N Scan : 12468

Andromeda score : 92.939

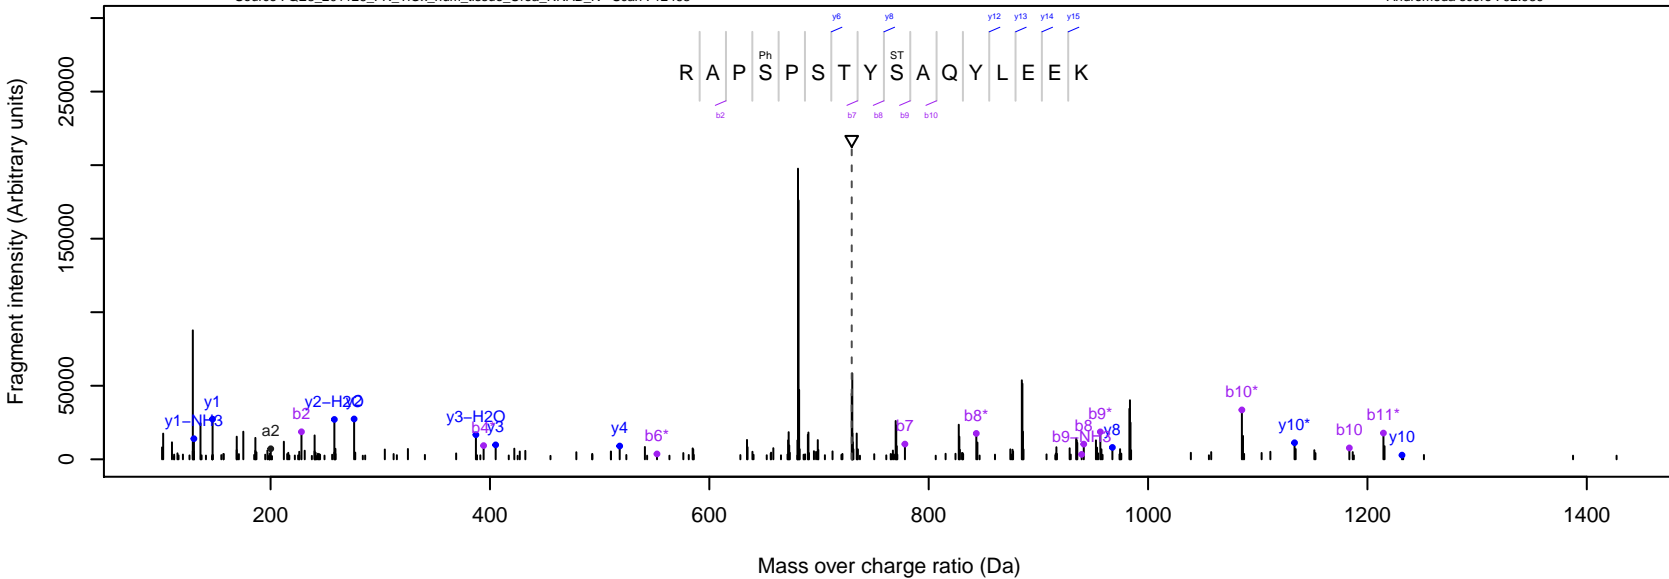

FAGDKGY(Phospho (STY))LTKEDLR-3+

Source : QE3\_201126\_FR\_TiOx\_hum\_tissue\_Urea\_RNAB\_H Scan : 15314

Andromeda score : 92.935

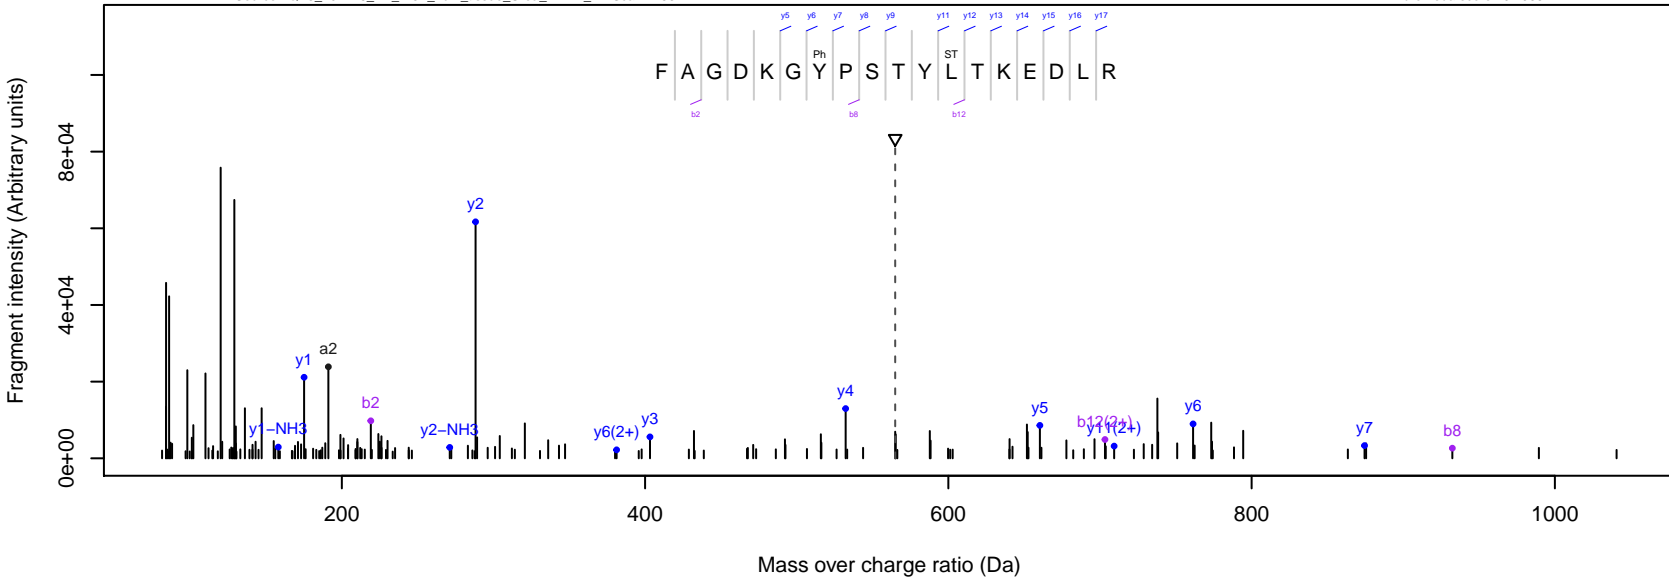

RKS(Phospho (STY))QM(Oxidation (M))EEVQDELIHR-3+

Source : QE3\_201126\_FR\_TIOx\_hum\_tissue\_Urea\_RNAB\_N Scan : 12446

Andromeda score : 92.935

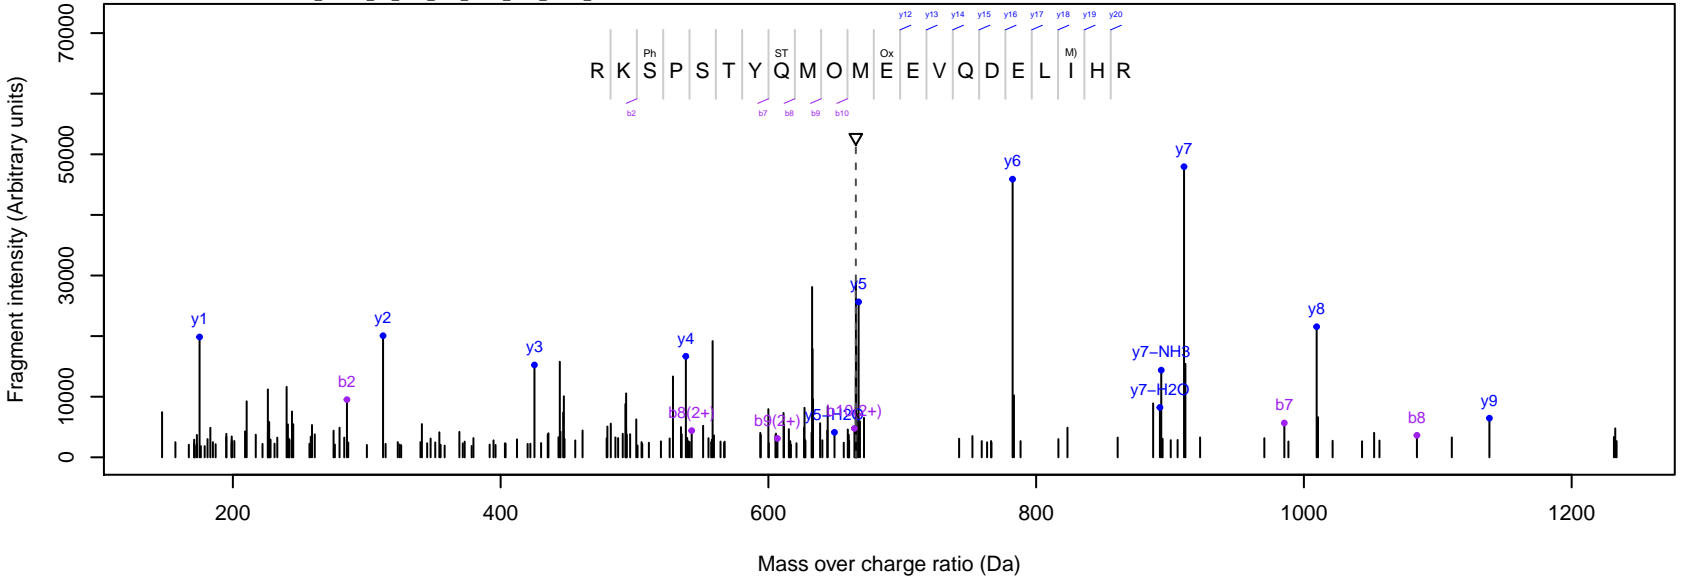

(Acetyl (Protein N-term))S(Phospho (STY))ELEQLRQEAELR-2+

Source : QE3\_201126\_FR\_TIOx\_hum\_tissue\_Urea\_RNAB\_N Scan : 54256

Andromeda score : 92.935

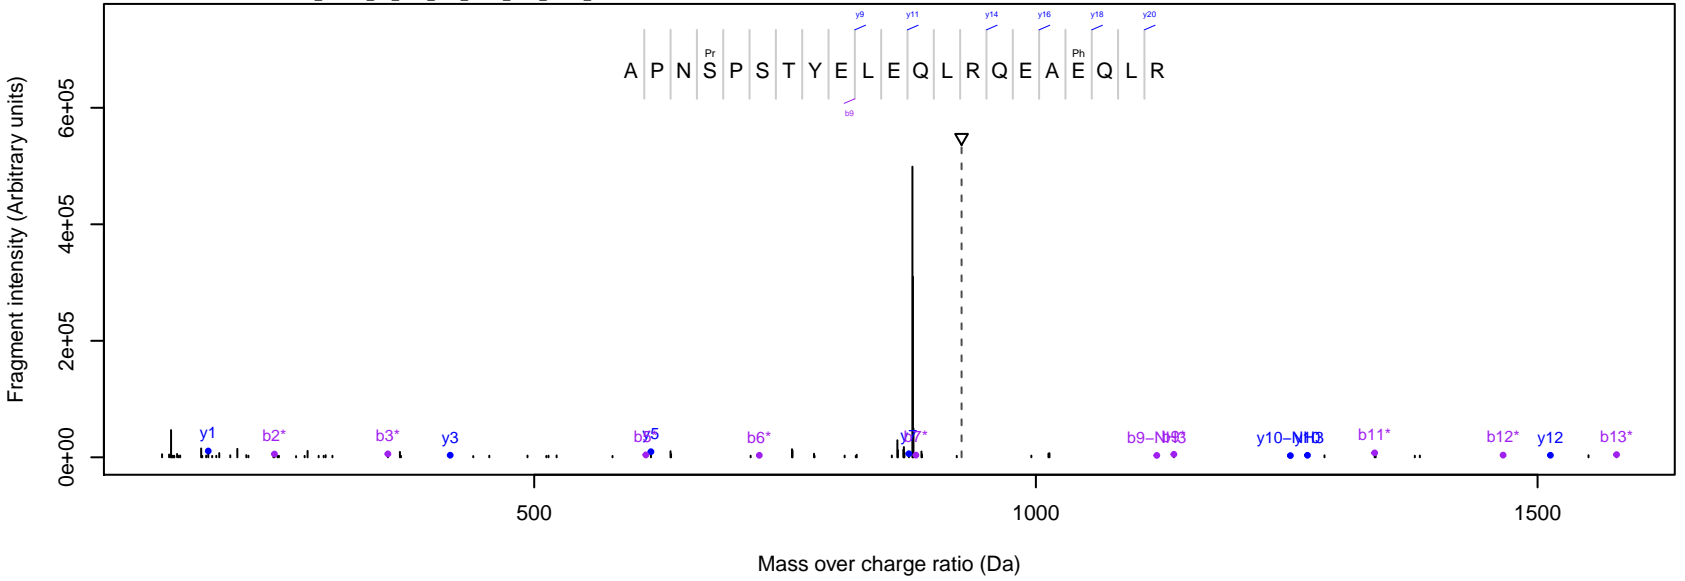

VLSSTS(Phospho (STY))EEDEPGVVK-2+

Source : QE3\_201126\_FR\_TIOx\_hum\_tissue\_Urea\_RNAB\_N Scan : 19615

Andromeda score : 92.935

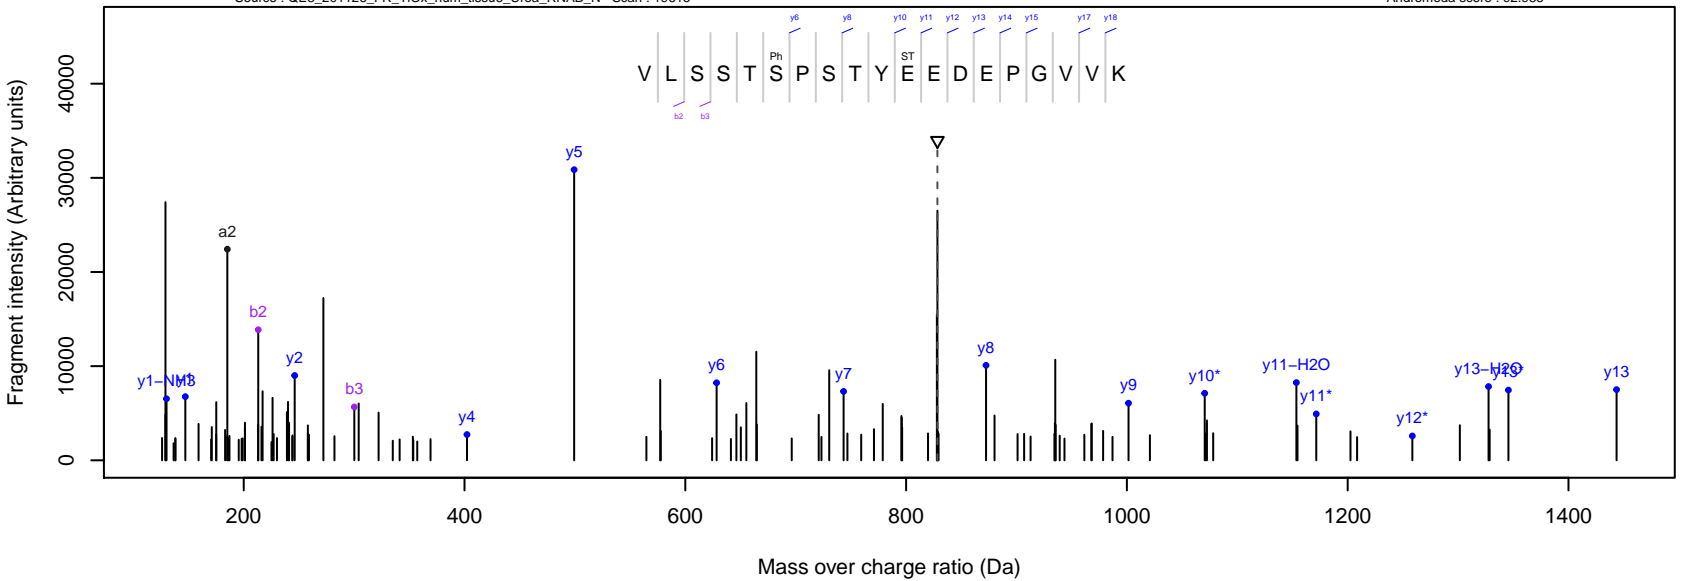

(Acetyl (Protein N-term))M(Oxidation (M))DNYADLS(Phospho (STY))DTELTLLR-3+

Source : QE3\_201126\_FR\_TiOx\_hum\_tissue\_Urea\_RNAB\_H Scan : 62902

Andromeda score : 92.932

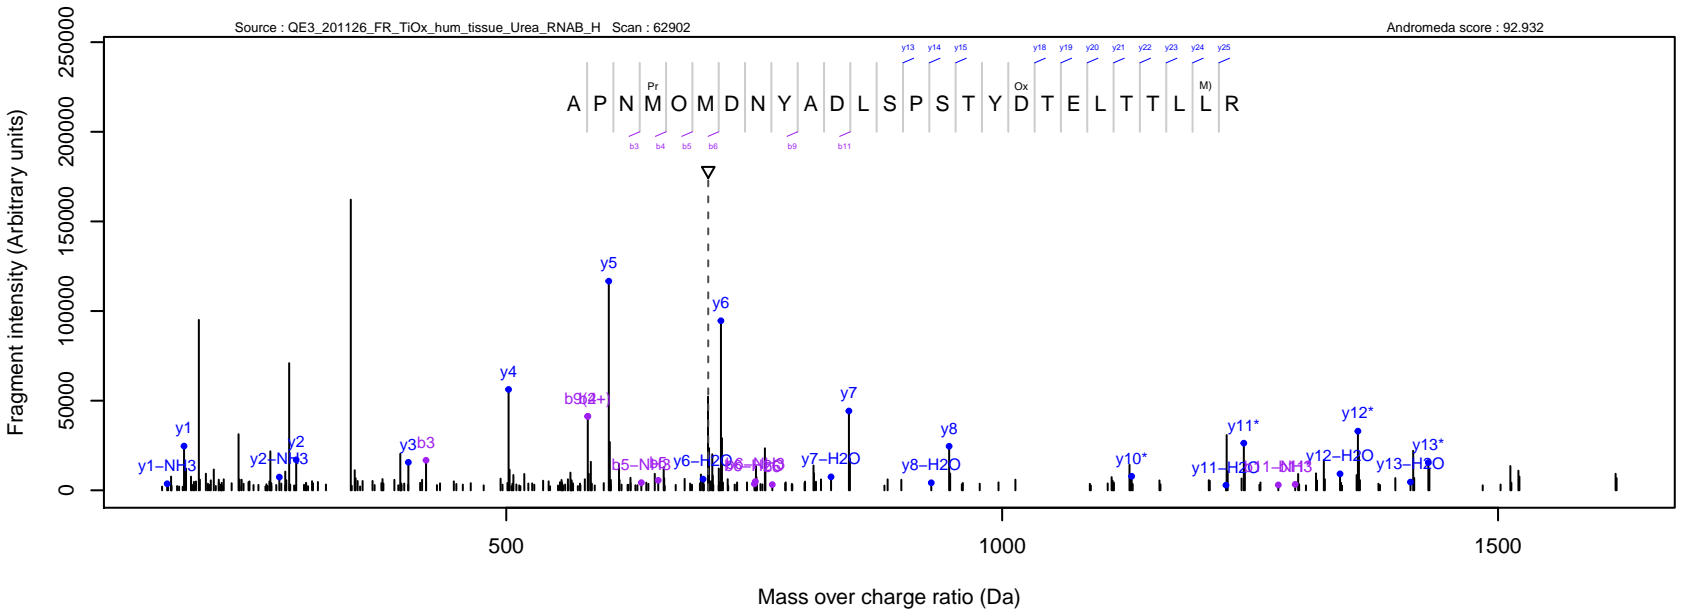

TNS(Phospho (STY))MQLEQWIK-2+

Source : QE3\_201126\_FR\_TiOx\_hum\_tissue\_Urea\_RNAB\_H Scan : 50899

Andromeda score : 92.925

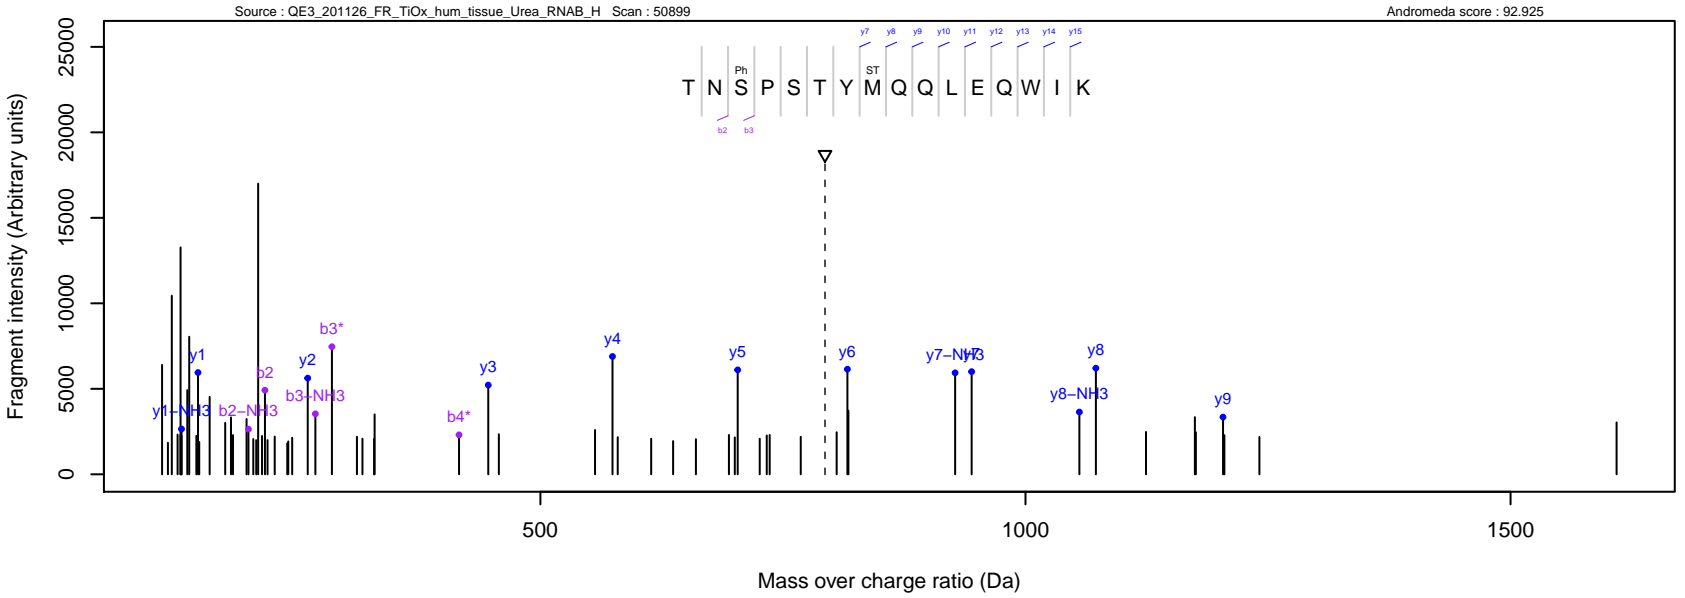

GKPIFPVYPLVGSSS(Phospho (STY))PTRK-3+

Source : QE3\_201126\_FR\_TiOx\_hum\_tissue\_Urea\_RNAB\_N Scan : 34480

Andromeda score : 92.886

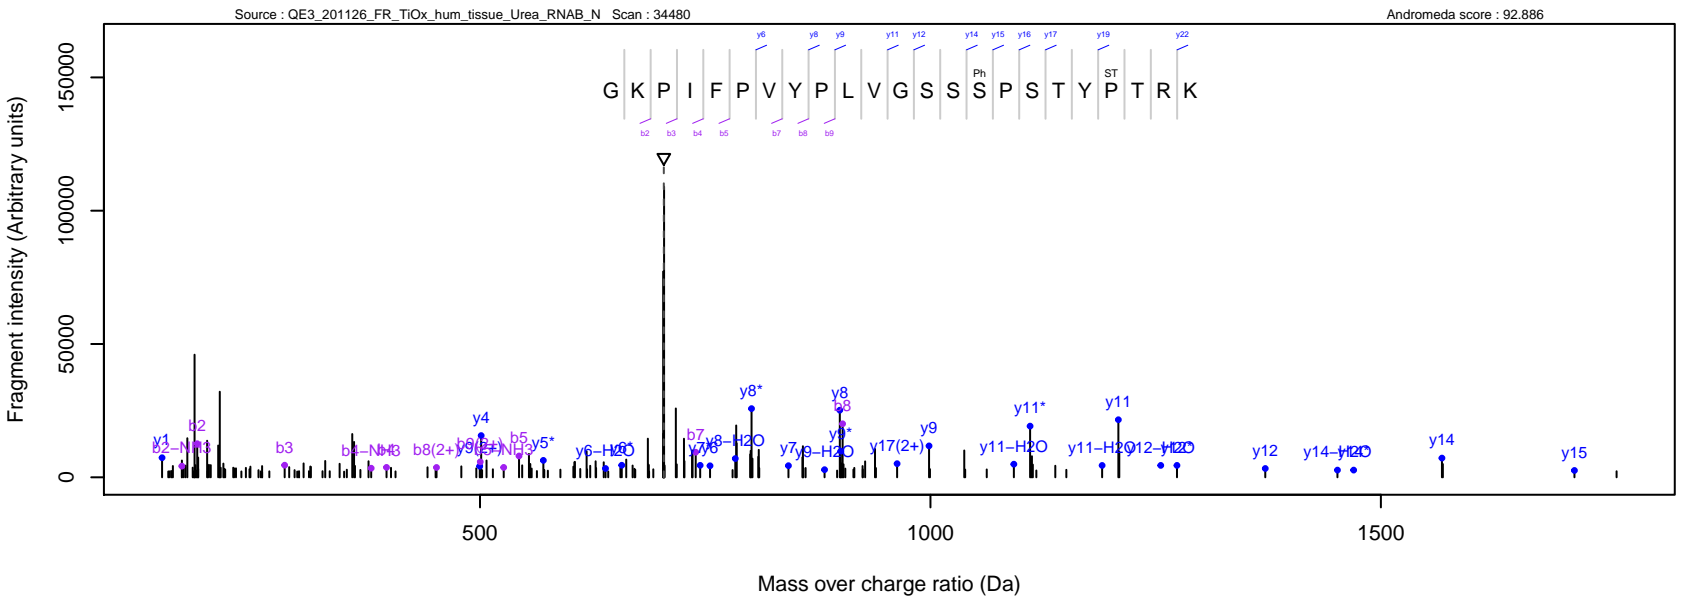

GQSQT(Phospho (STY))SPDHRS(Phospho (STY))DTSS(Phospho (STY))PEVR-3+

Source : QE3\_201126\_FR\_TiOx\_hum\_tissue\_Urea\_RNAB\_H Scan : 7366

Andromeda score : 92.886

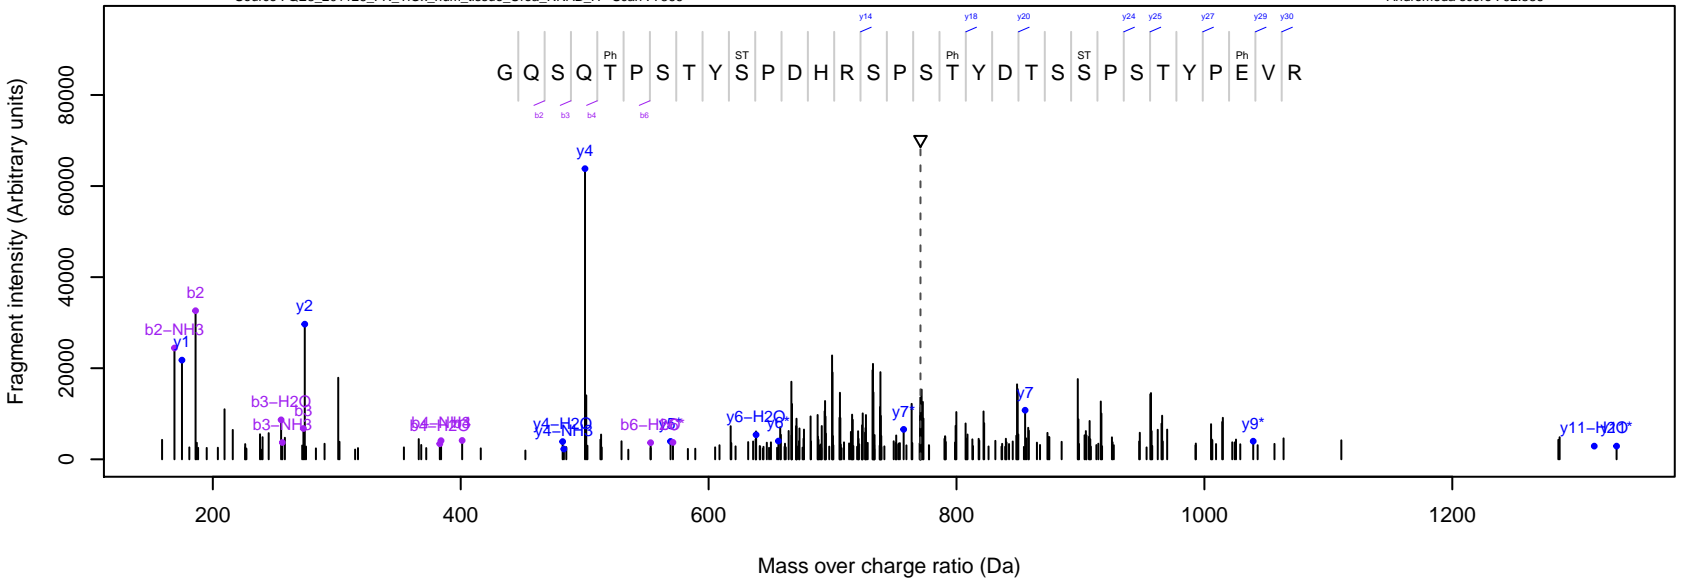

S(Phospho (STY))LDGAAVDSADRSPRPTSAIPAITQGQVAEGGVLDASAK-4+

Source : QE3\_201126\_FR\_TiOx\_hum\_tissue\_Urea\_RNAB\_N Scan : 31774

Andromeda score : 92.883

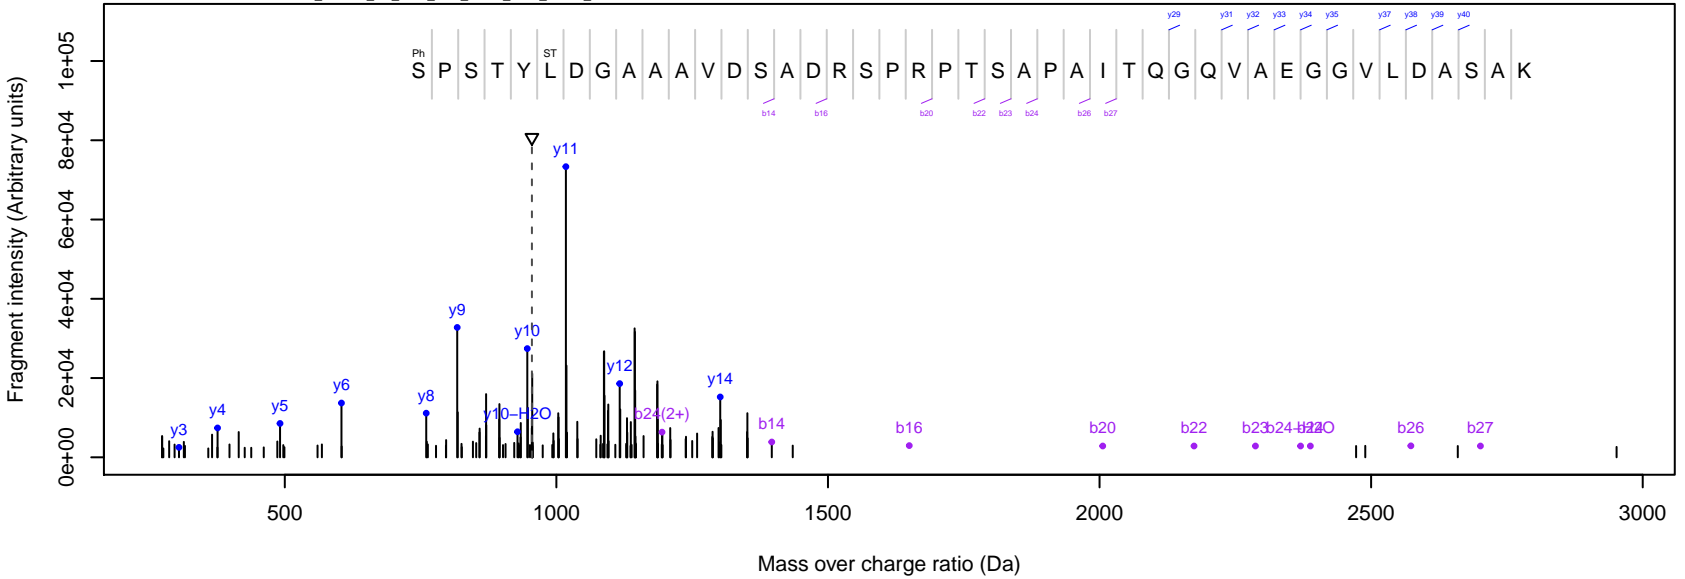

FIQWLKEAEEES(Phospho (STY))S(Phospho (STY))EDD-2+

Source : QE3\_201126\_FR\_TiOx\_hum\_tissue\_Urea\_RNAB\_H Scan : 57866

Andromeda score : 92.866

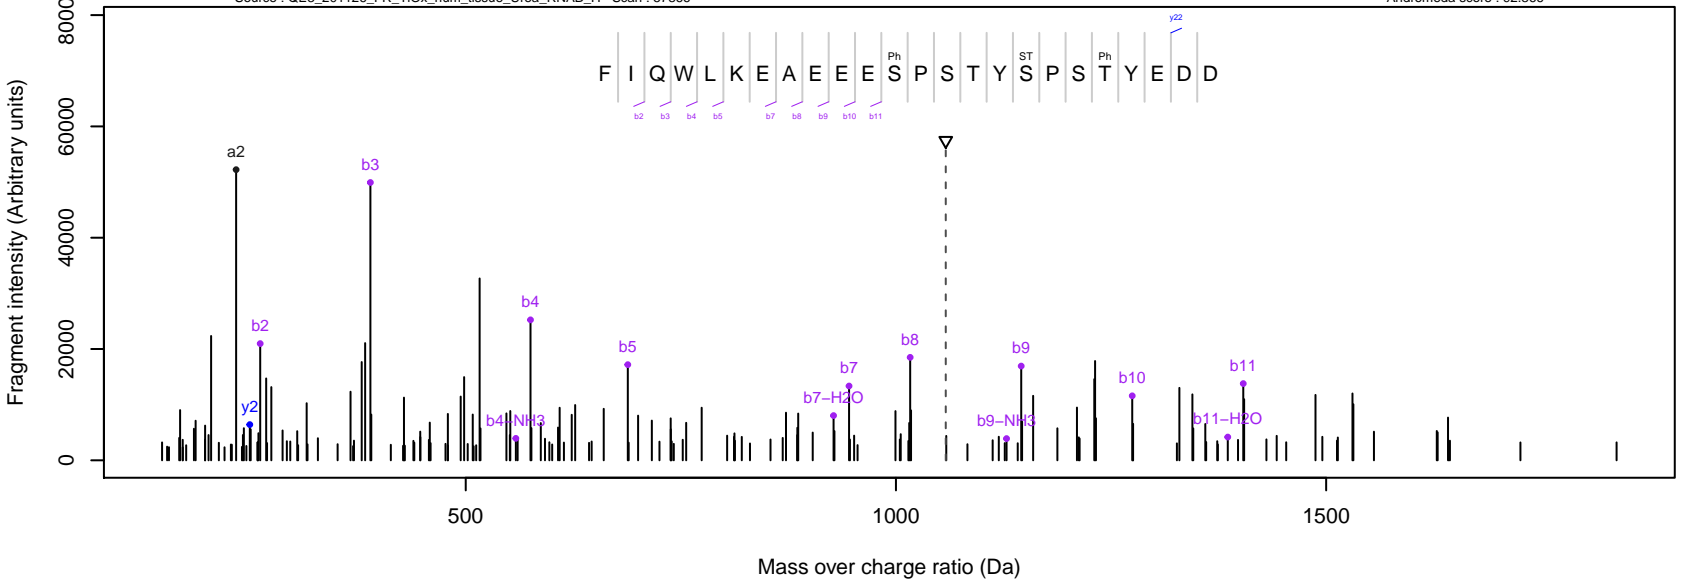

QGM(Oxidation (M))S(Phospho (STY))PTFSR-2+

Source : QE3\_201126\_FR\_TiOx\_hum\_tissue\_Urea\_RNAB\_H Scan : 10486

Andromeda score : 92.866

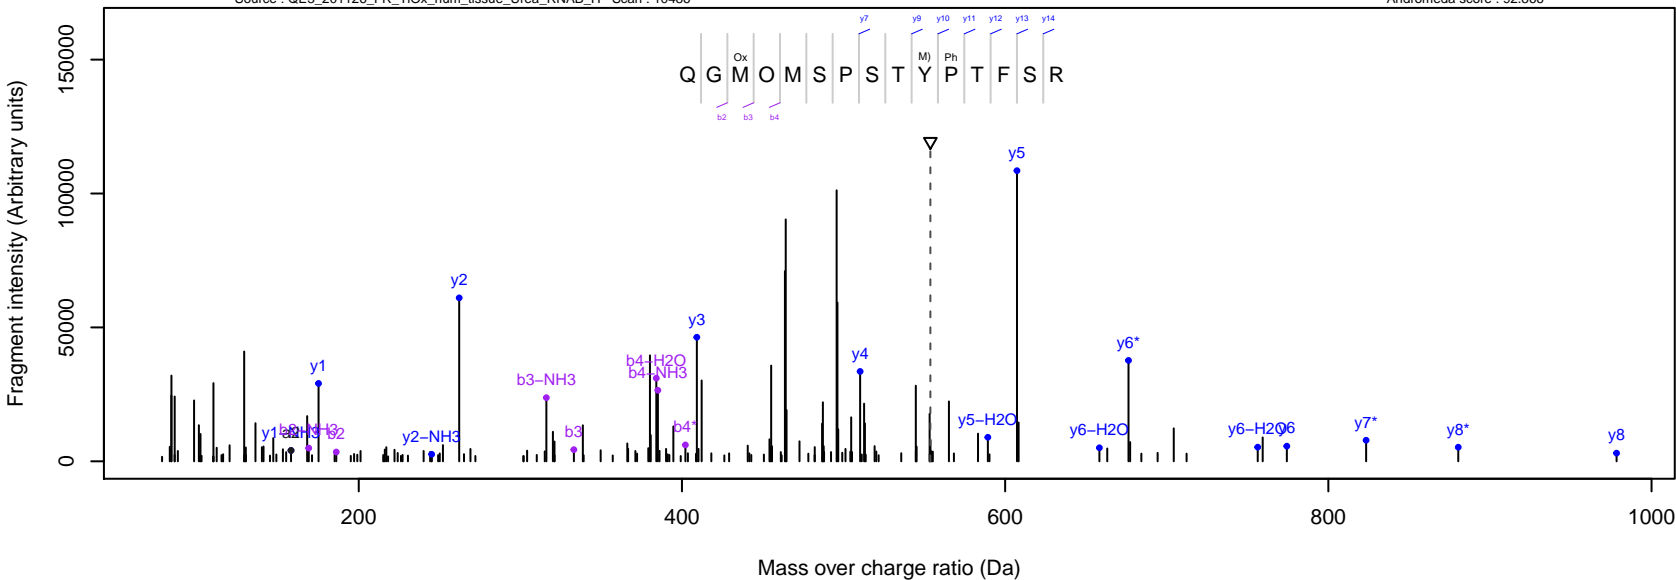

KANDESNEHSDVIDSQELSKV(Phospho (STY))R-4+

Source : QE3\_201126\_FR\_TiOx\_hum\_tissue\_Urea\_RNAB\_N Scan : 13875

Andromeda score : 92.865

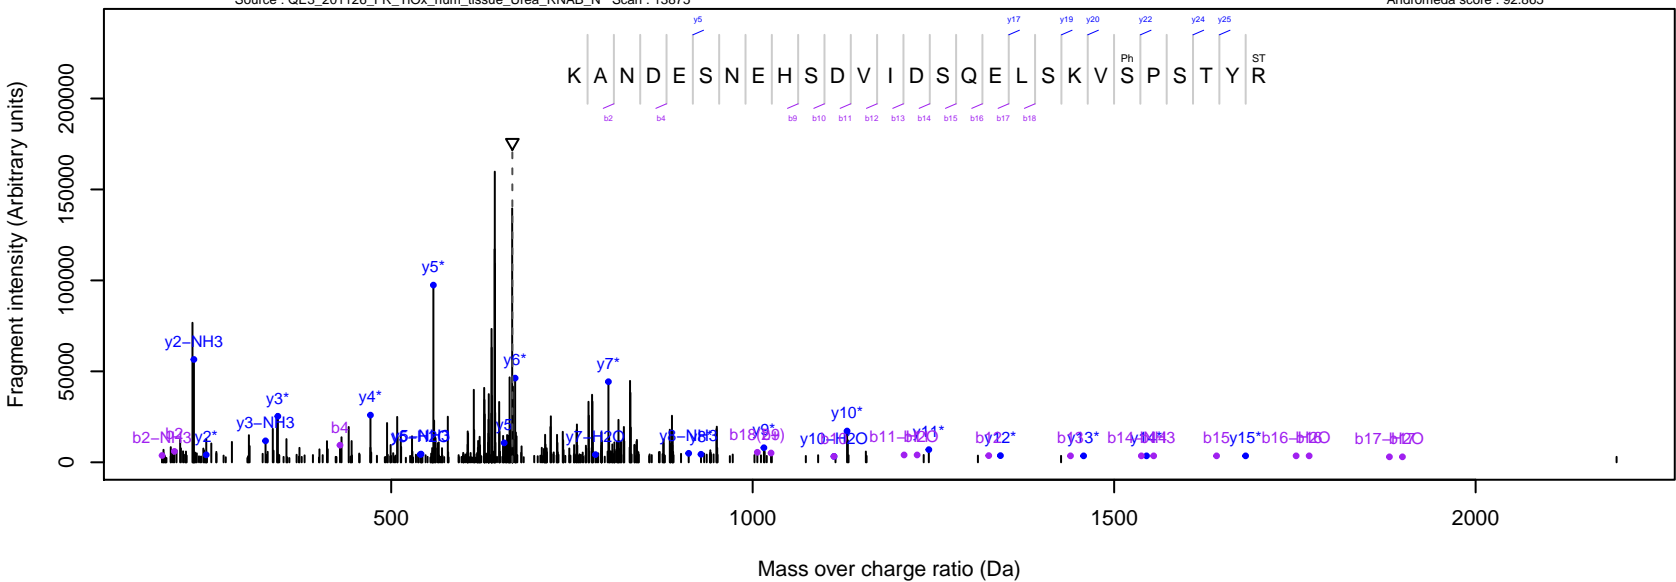

QHPVPPPAQNQNQVRS(Phospho (STY))PGAPGLTLK-4+

Source : QE3\_201126\_FR\_TiOx\_hum\_tissue\_Urea\_RNAB\_H Scan : 19927

Andromeda score : 92.865

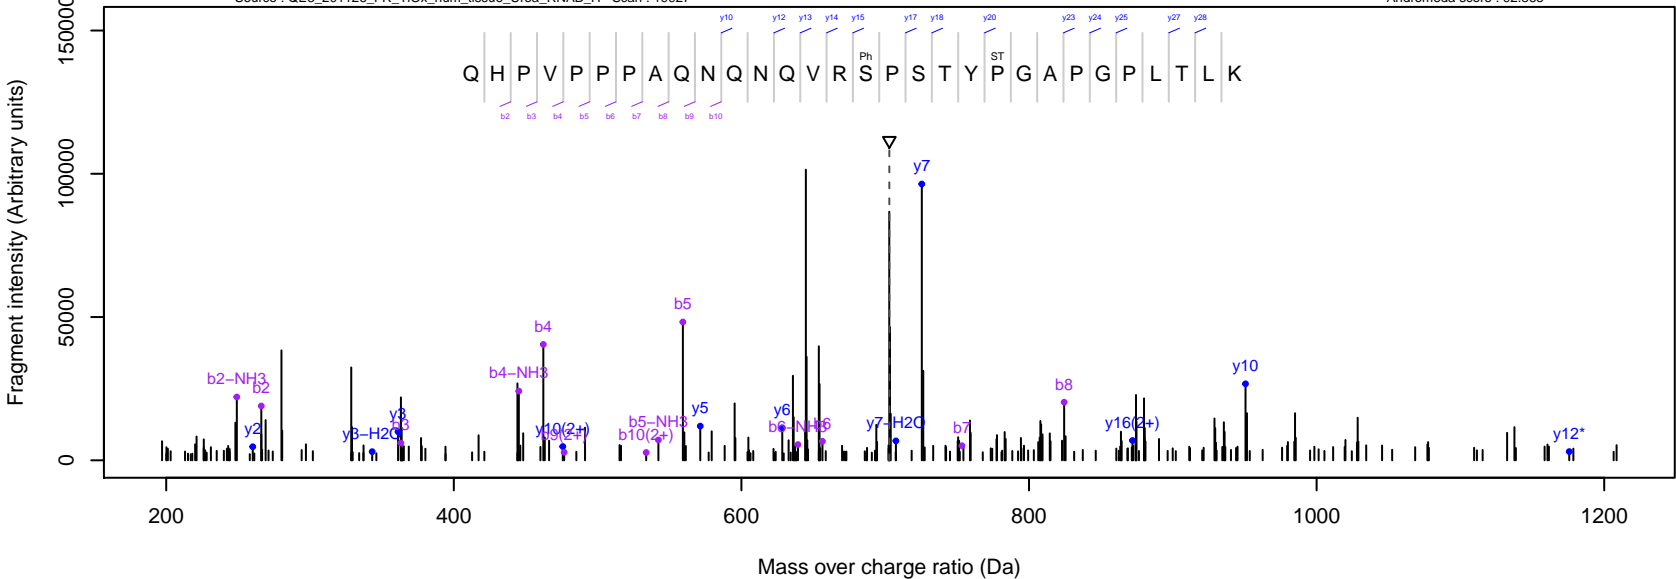



NFYES(Phospho (STY))DDDQKEK-2+

Source : QE3\_201126\_FR\_TiOx\_hum\_tissue\_Urea\_RNAB\_B Scan : 9916

Andromeda score : 92.856

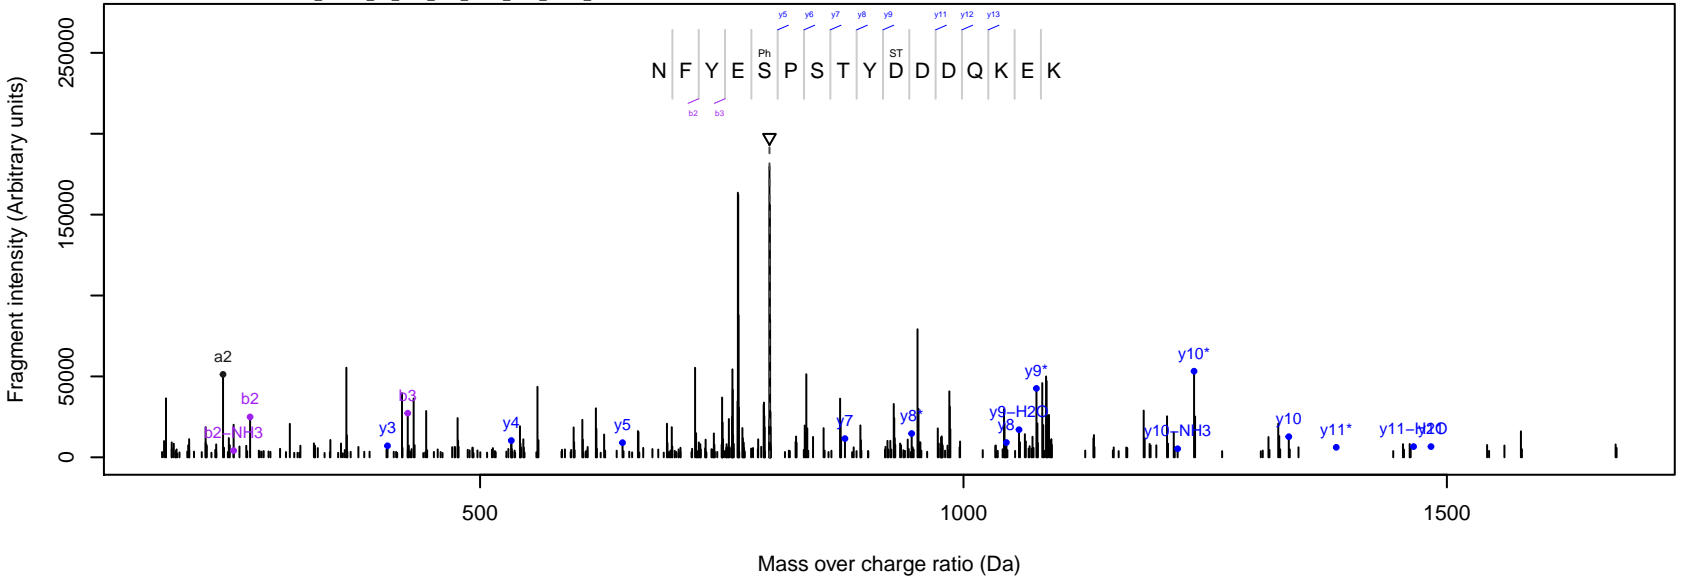

T(Phospho (STY))ASTPT(Phospho (STY))PPQTGGGLEPQANGETPQVAVIVRPDDR-3+

Source : QE3\_201126\_FR\_TiOx\_hum\_tissue\_Urea\_RNAB\_N Scan : 43274

Andromeda score : 92.817

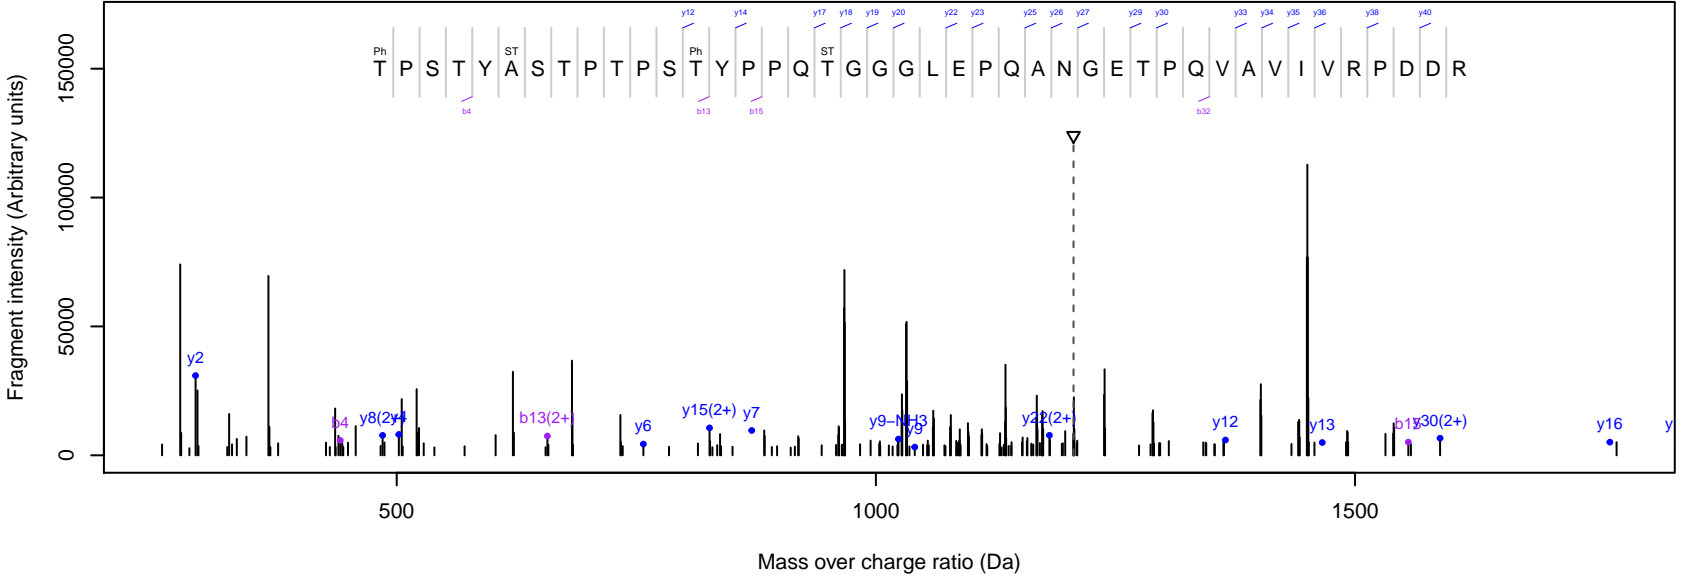

KGS(Phospho (STY))LSNLMDFVK-2+

Source : QE3\_201126\_FR\_TiOx\_hum\_tissue\_Urea\_RNAB\_B Scan : 43006

Andromeda score : 92.8

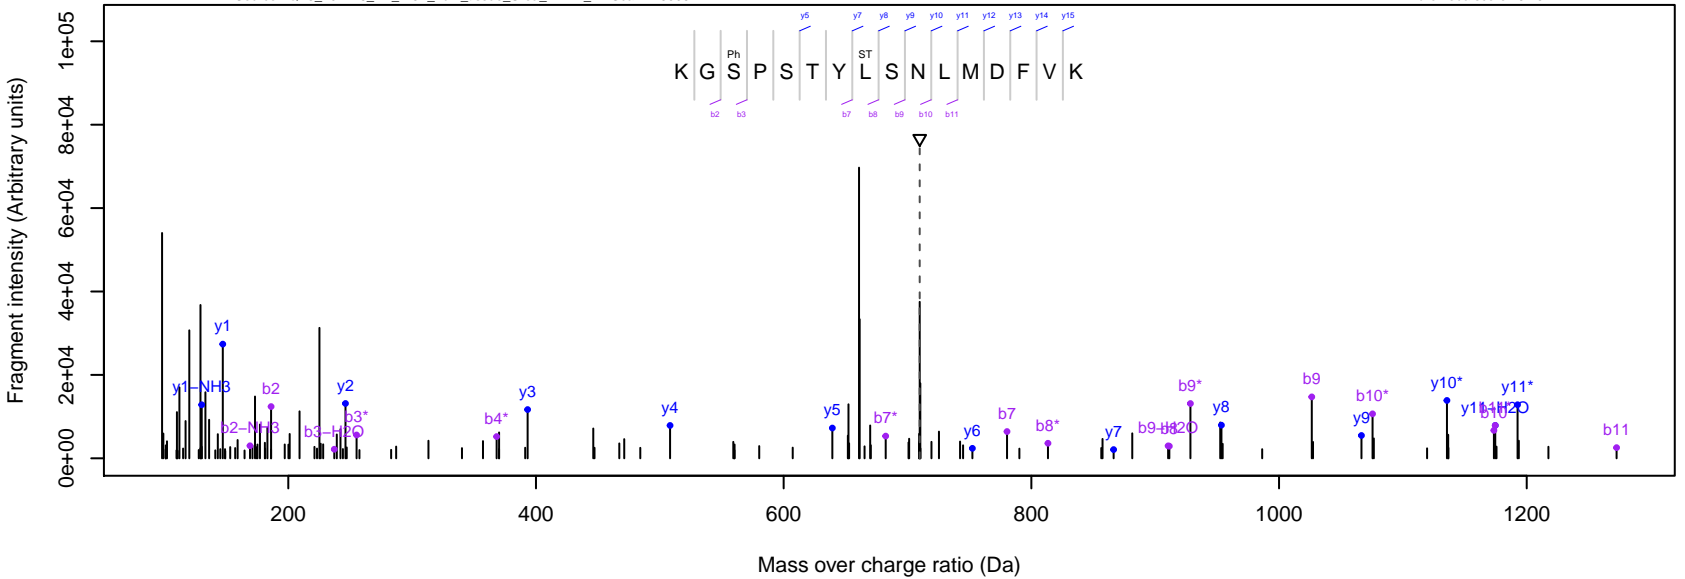

RYS(Phospho (STY))PS(Phospho (STY))PPPK-2+

Source : QE3\_201126\_FR\_TiOx\_hum\_tissue\_Urea\_RNAB\_H Scan : 8078

Andromeda score : 92.792

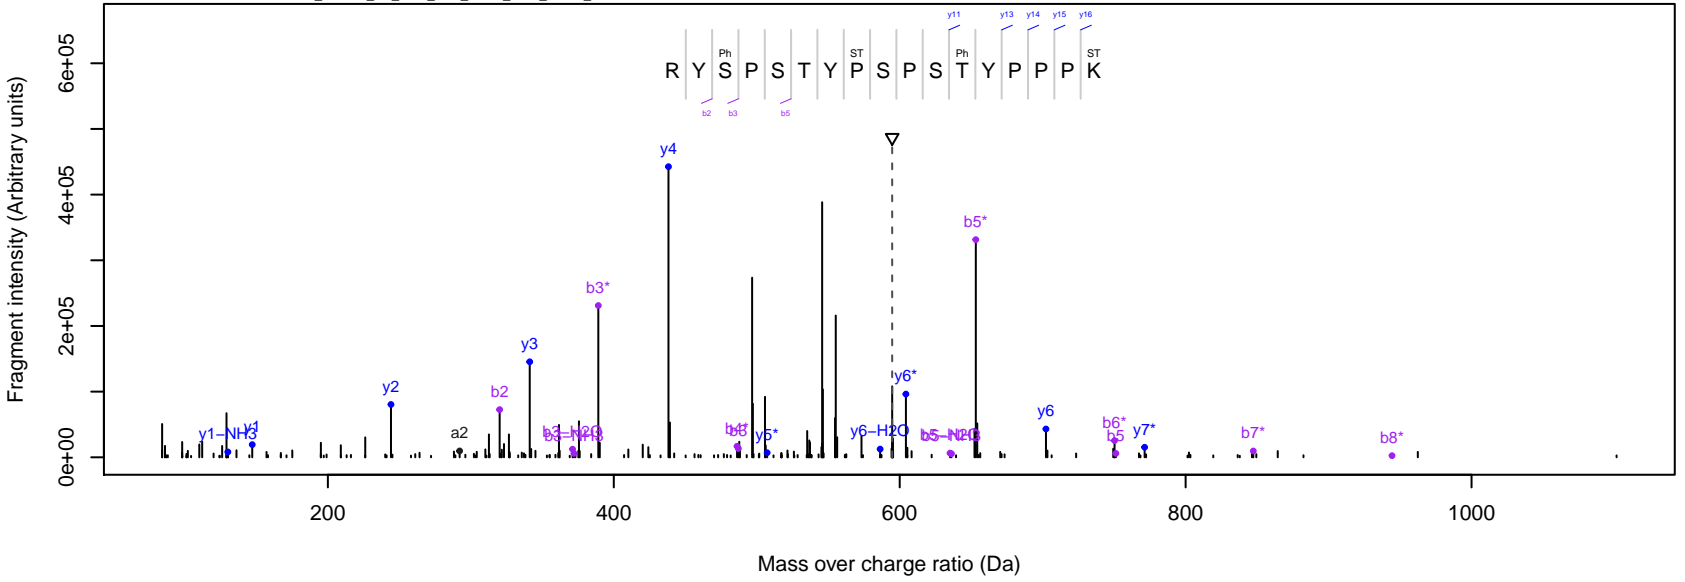

EES(Phospho (STY))EESEAEPVQR-2+

Source : QE3\_201126\_FR\_TiOx\_hum\_tissue\_Urea\_RNAB\_N Scan : 10572

Andromeda score : 92.781

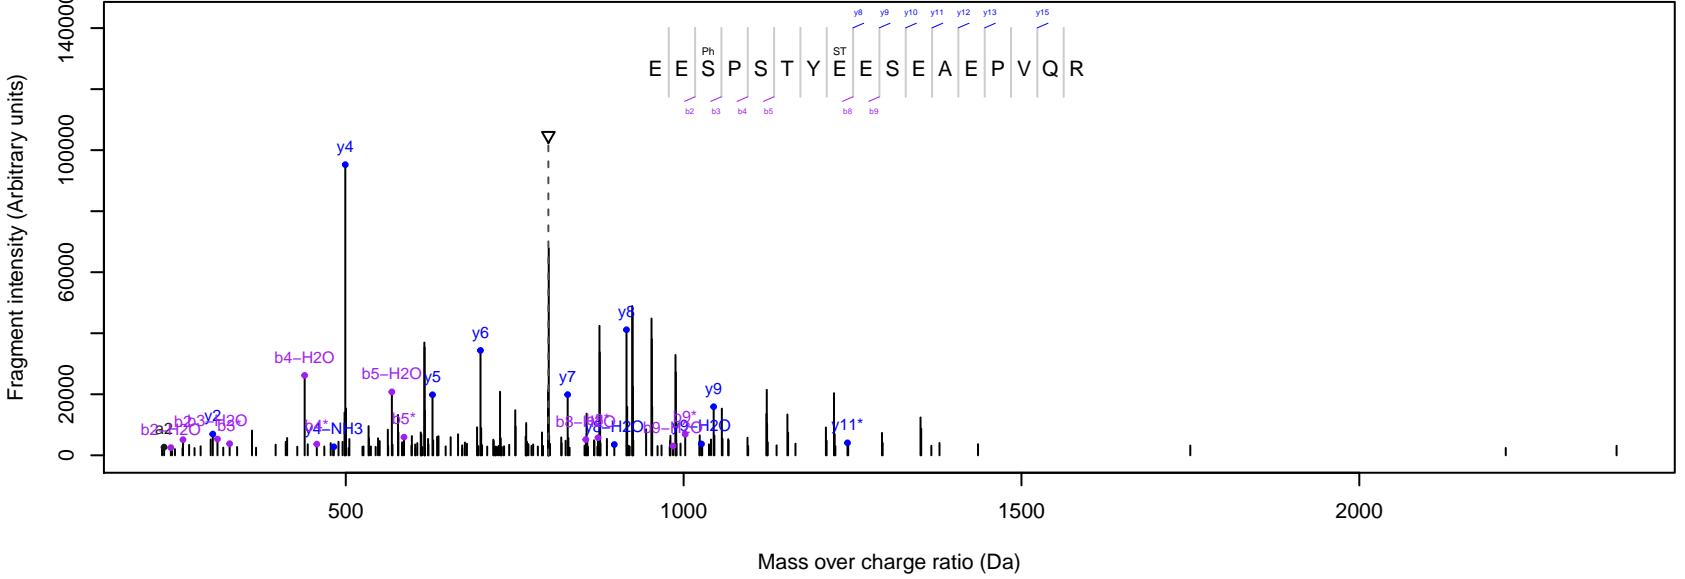

HGHY(Phospho (STY))FVALFDYQAR-3+

Source : QE3\_201126\_FR\_TiOx\_hum\_tissue\_Urea\_RNAB\_B Scan : 38200

Andromeda score : 92.781

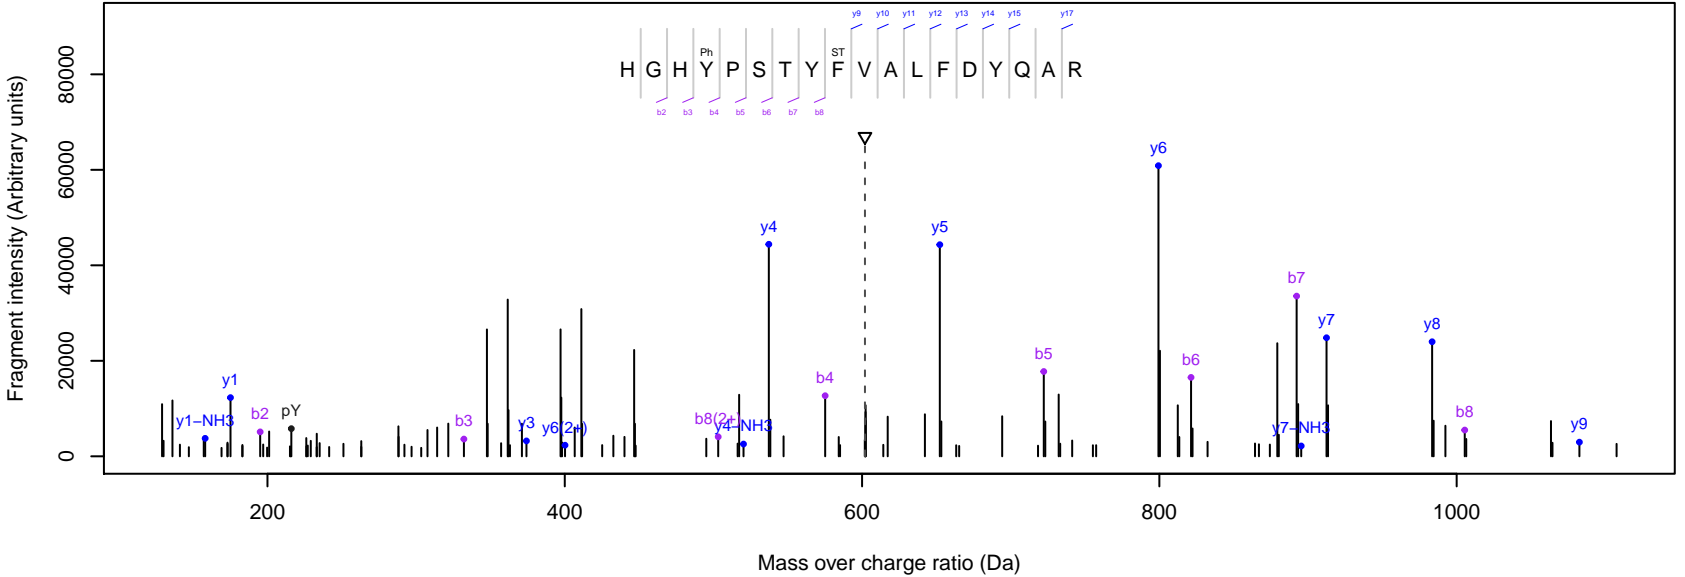

ISDYFEYQGGNGS(Phospho (STY))SPVR-2+

Source : QE3\_201126\_FR\_TiOx\_hum\_tissue\_Urea\_RNAB\_B Scan : 33408

Andromeda score : 92.773

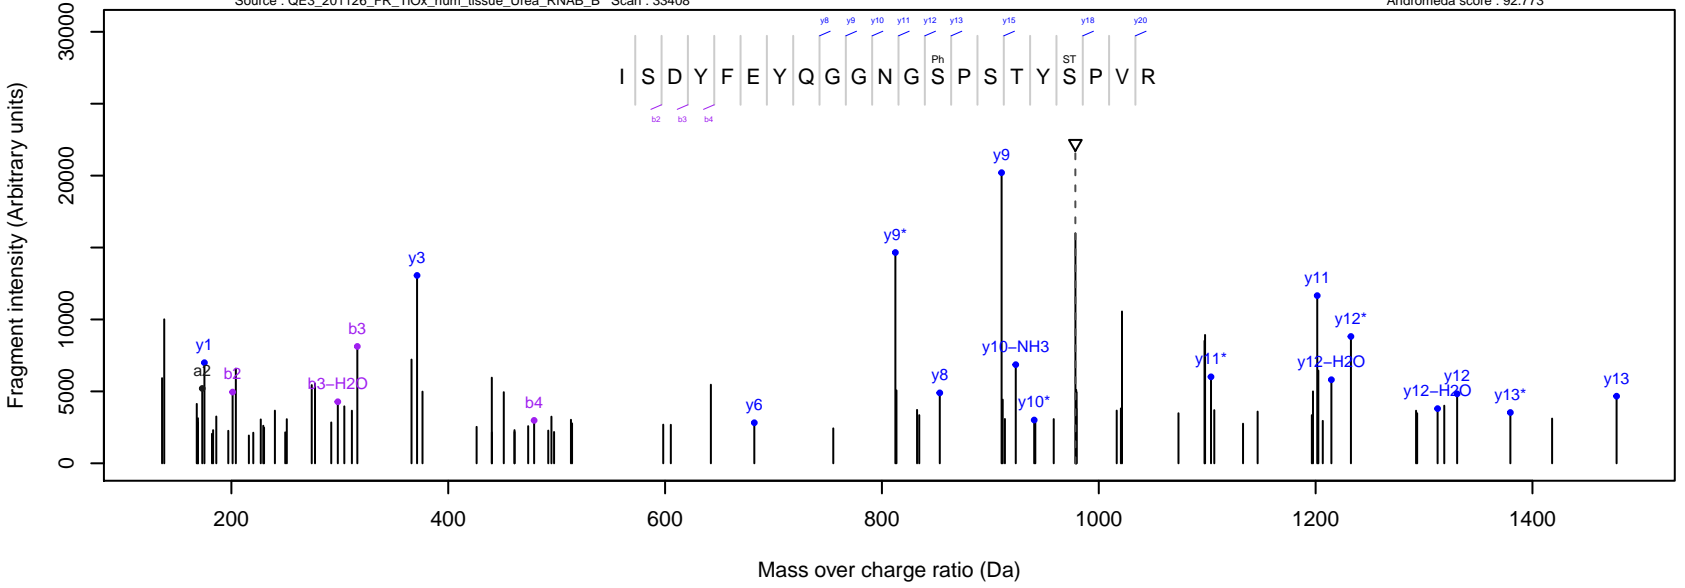

TLM(Oxidation (M))LPLTEGS(Phospho (STY))LR-2+

Source : QE3\_201126\_FR\_TiOx\_hum\_tissue\_Urea\_RNAB\_B Scan : 44418

Andromeda score : 92.65

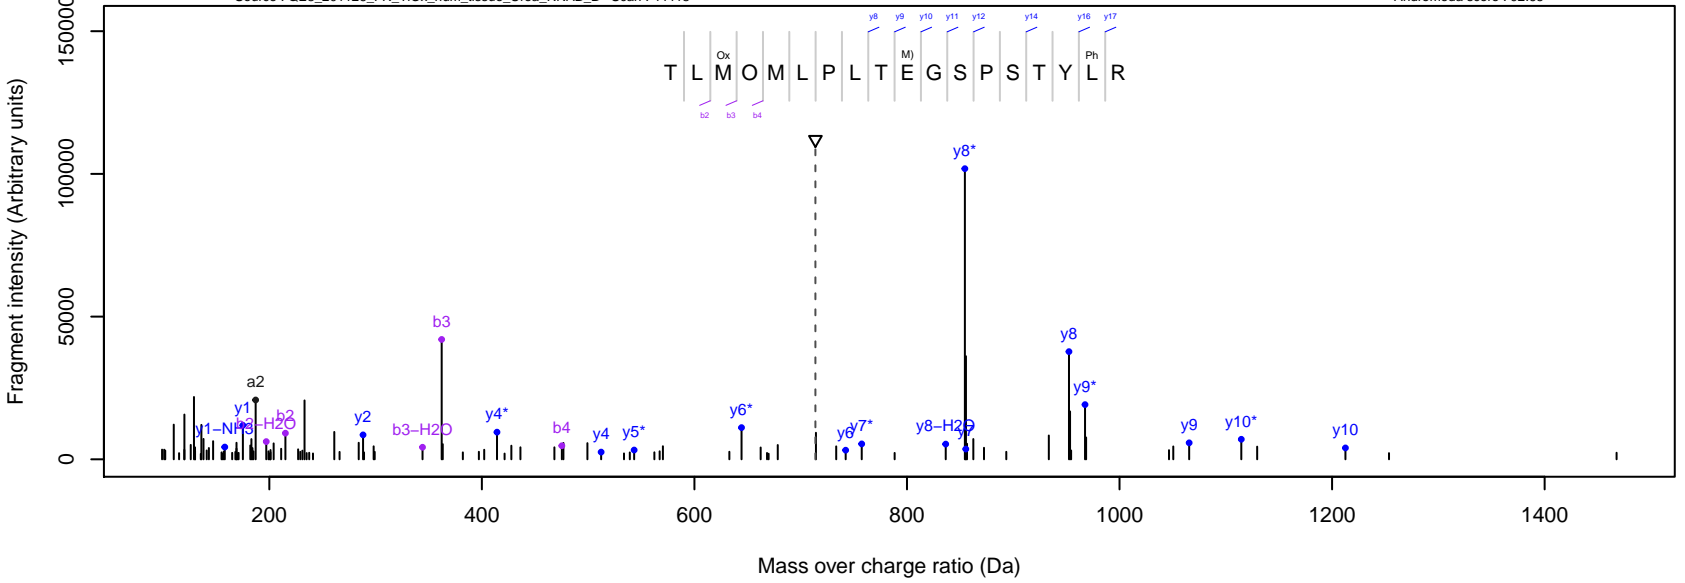

IKYGFDDL(Phospho (STY))ES(Phospho (STY))EDDEDDDCQVER-3+

Source : QE3\_201126\_FR\_TiOx\_hum\_tissue\_Urea\_RNAB\_H Scan : 53697

Andromeda score : 92.632

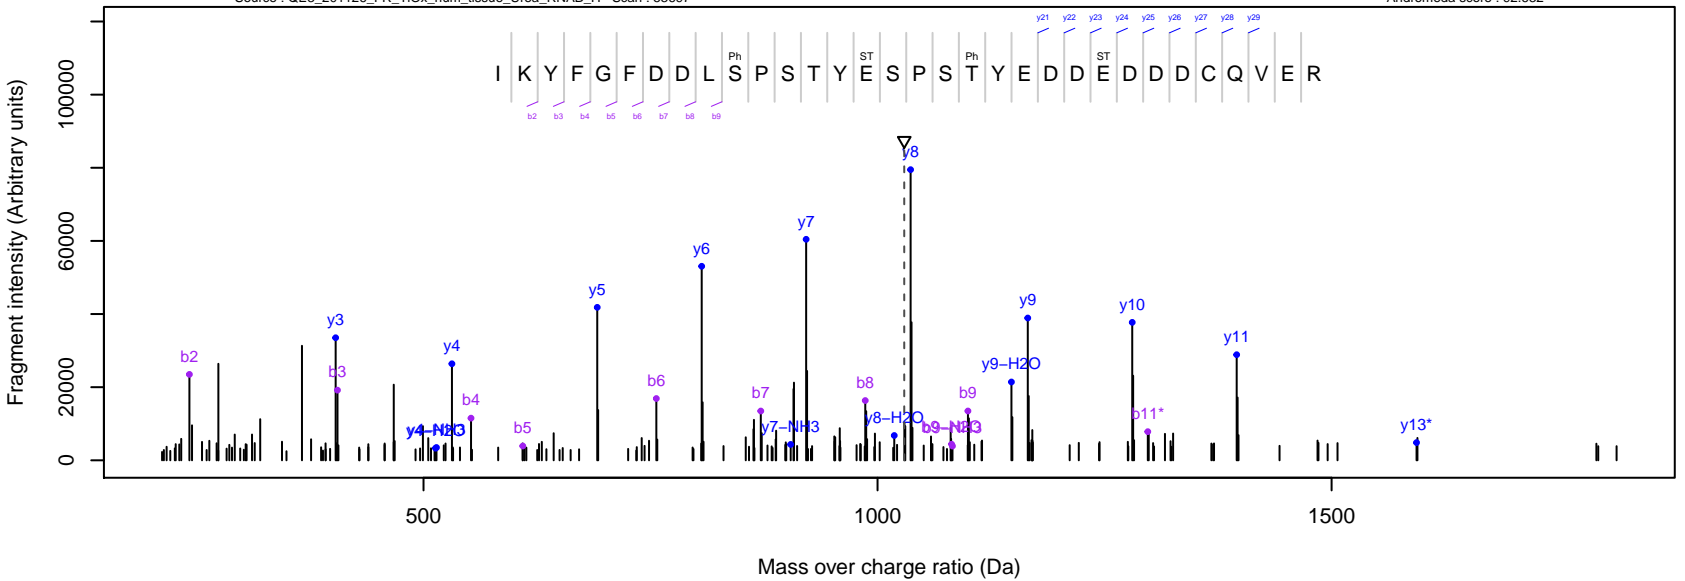

S(Phospho (STY))SPVPPVPER-2+

Source : QE3\_201126\_FR\_TiOx\_hum\_tissue\_Urea\_RNAB\_N Scan : 16392

Andromeda score : 92.611

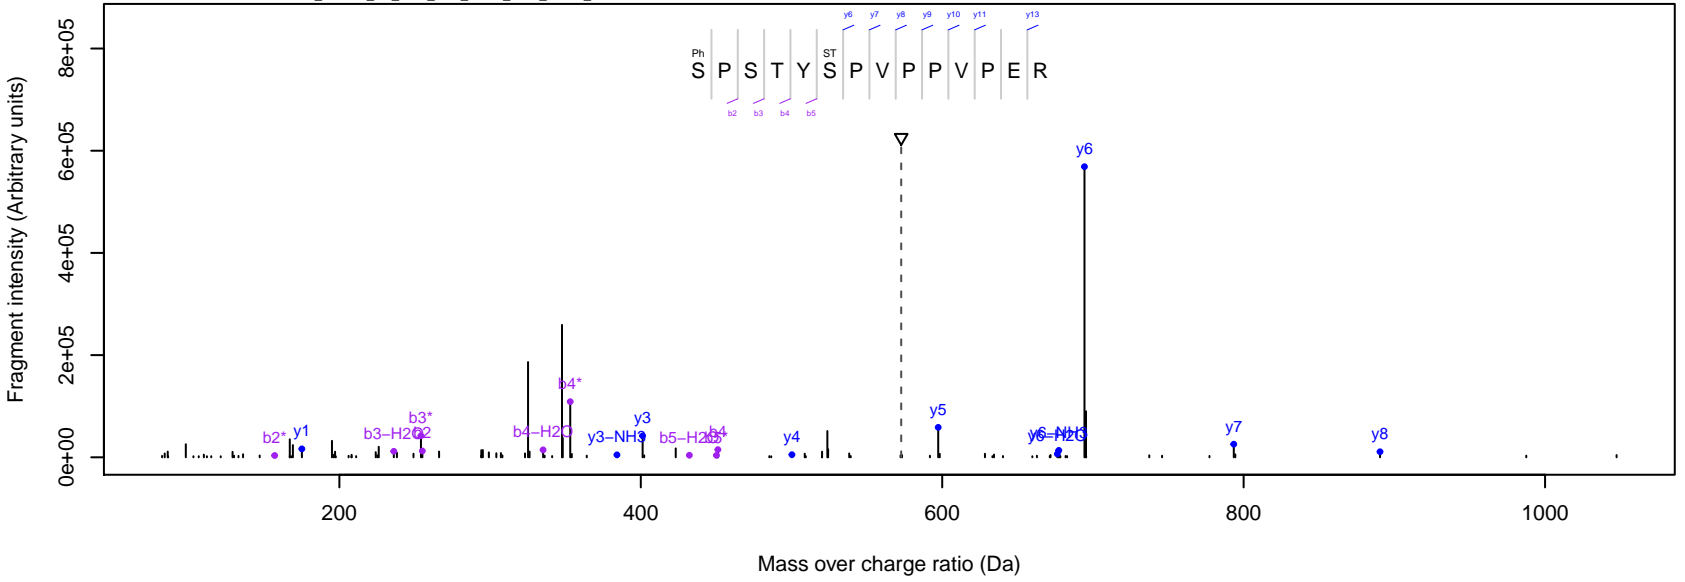

PVAPQVPS(Phospho (STY))PGGAPGQGYPYLSLEPAPLTLDTS GK-3+

Source : QE3\_201126\_FR\_TiOx\_hum\_tissue\_Urea\_RNAB\_H Scan : 54815

Andromeda score : 92.606

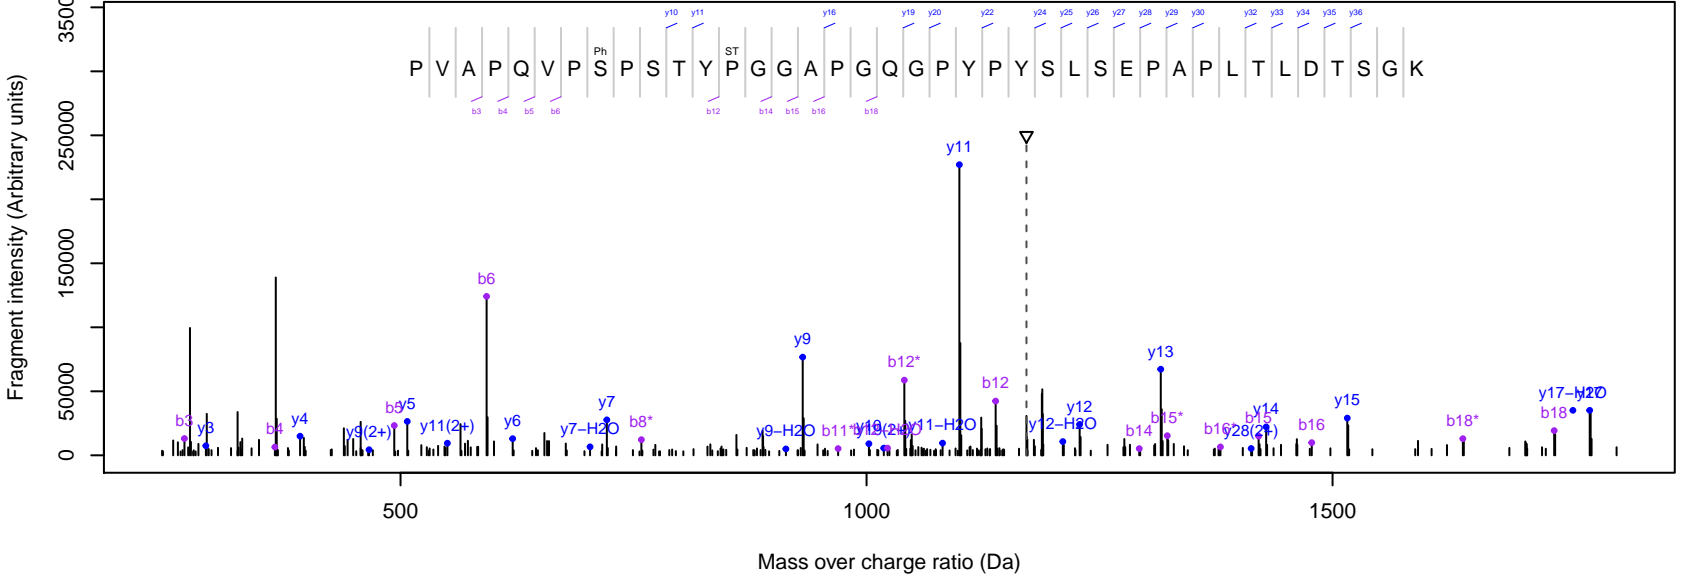

FSKEEPVS(Phospho (STY))SGPEEAVGK-2+

Source : QE3\_201126\_FR\_TiOx\_hum\_tissue\_Urea\_RNAB\_H Scan : 15290

Andromeda score : 92.575

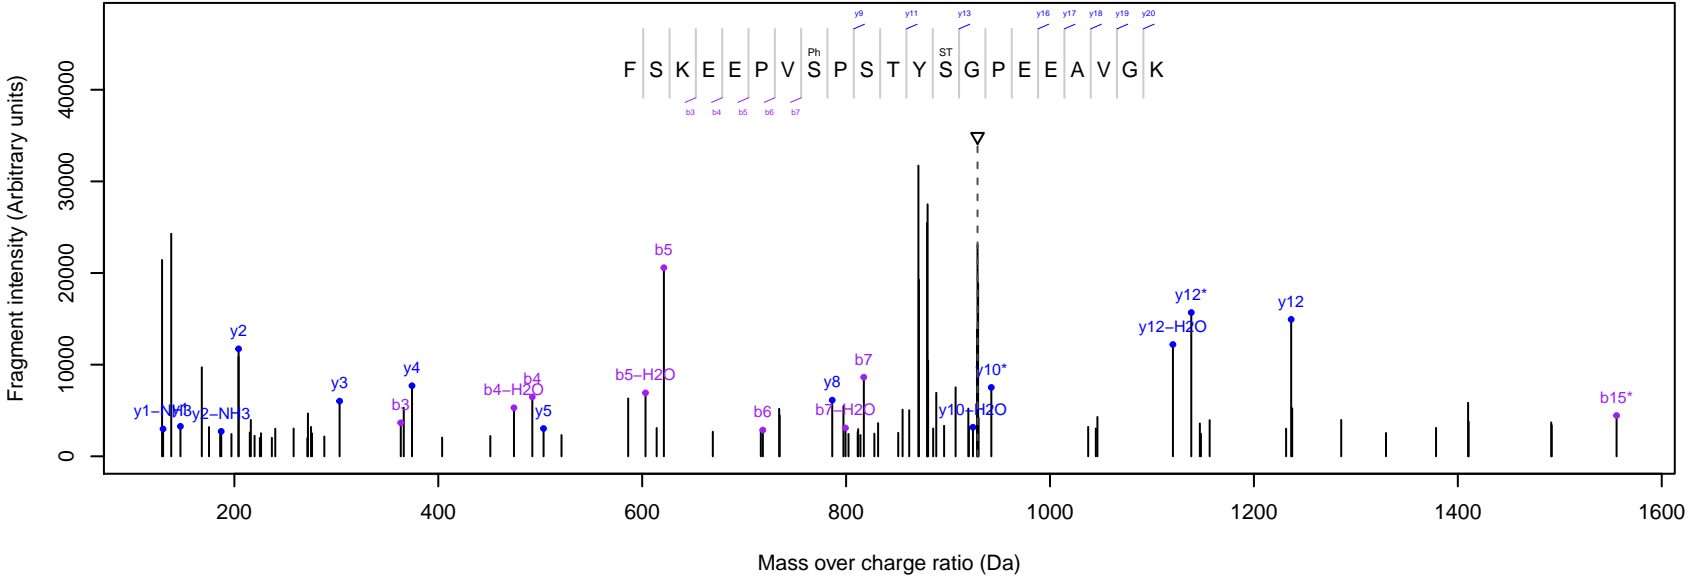

LNSSGSS(Phospho (STY))EDSPSTYFVEIR-2+

Source : QE3\_201126\_FR\_TiOx\_hum\_tissue\_Urea\_RNAB\_B Scan : 40118

Andromeda score : 92.575

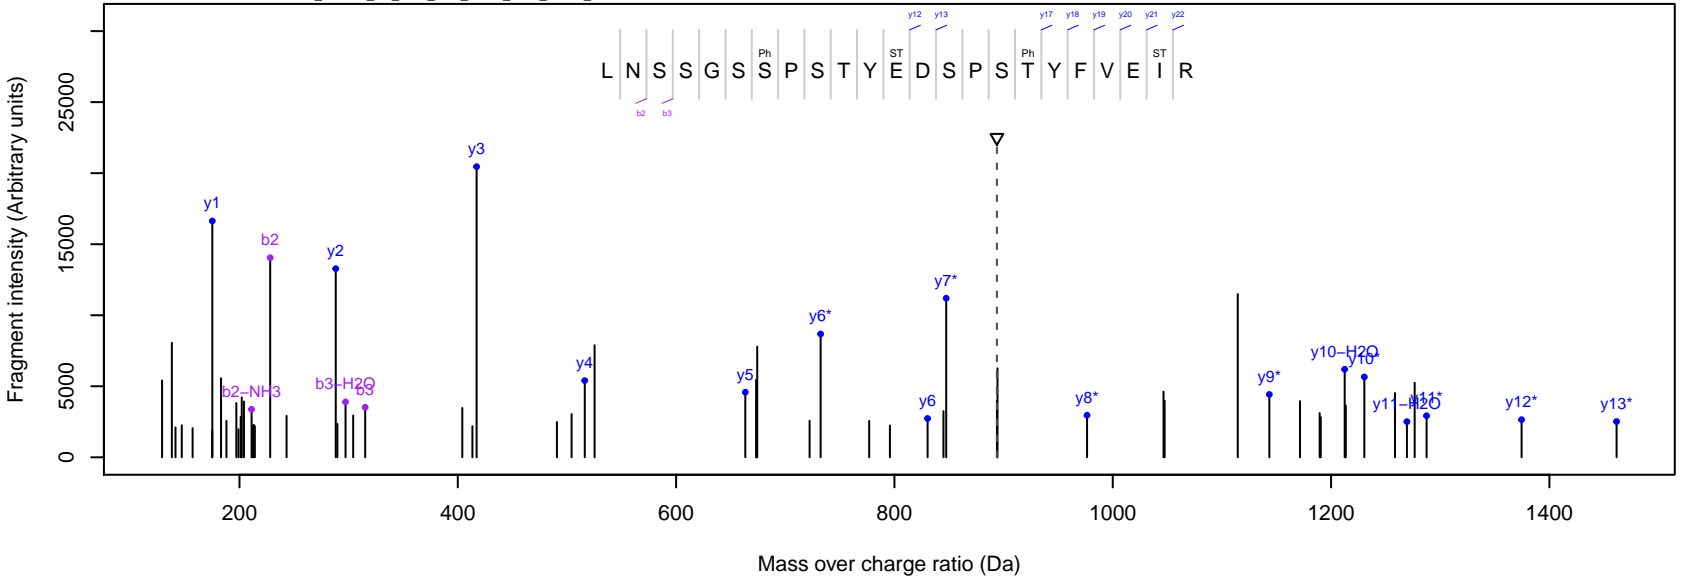

SAPAMQSSGSPSTYFNYPARK-2+

Source : QE3\_201126\_FR\_TiOx\_hum\_tissue\_Urea\_RNAB\_H Scan : 18119

Andromeda score : 92.575

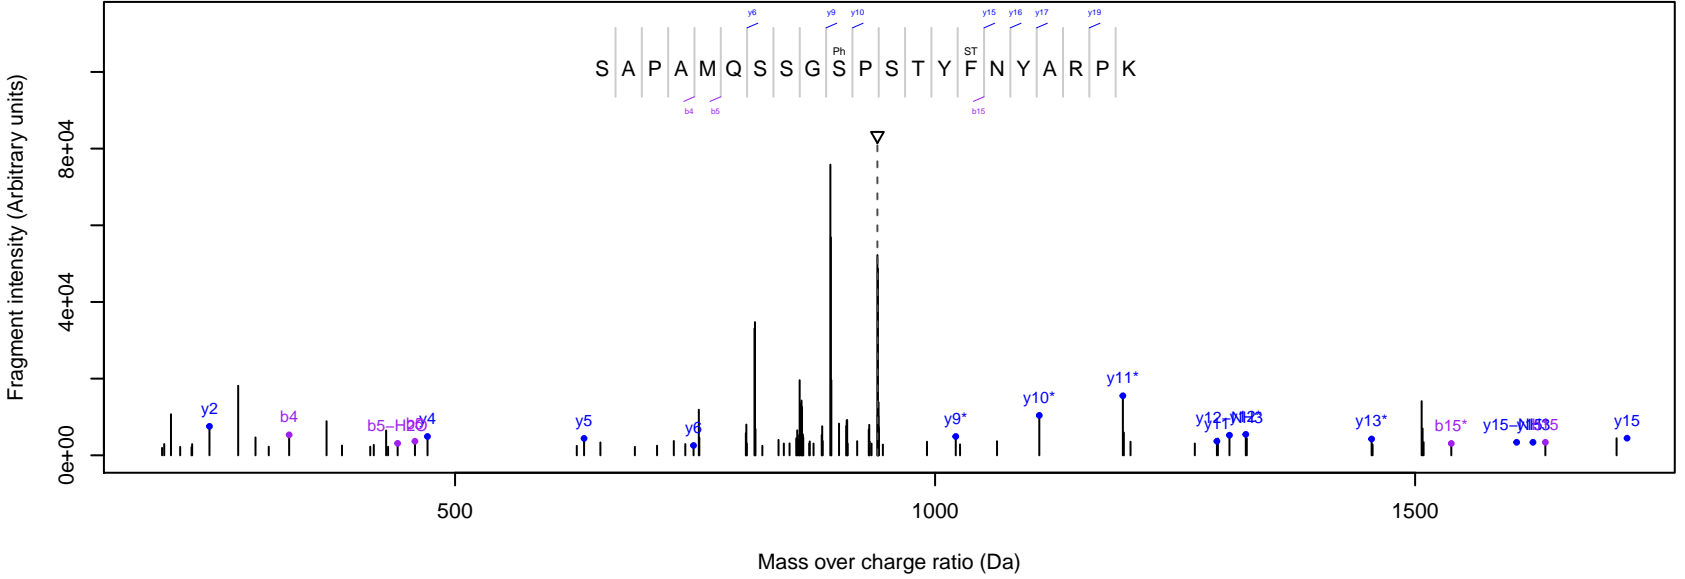

EQGGSLGSGSS(Phospho (STY))GGGGSTGLSGYIGR-2+

Source : QE3\_201126\_FR\_TiOx\_hum\_tissue\_Urea\_RNAB\_N Scan : 28970

Andromeda score : 92.565

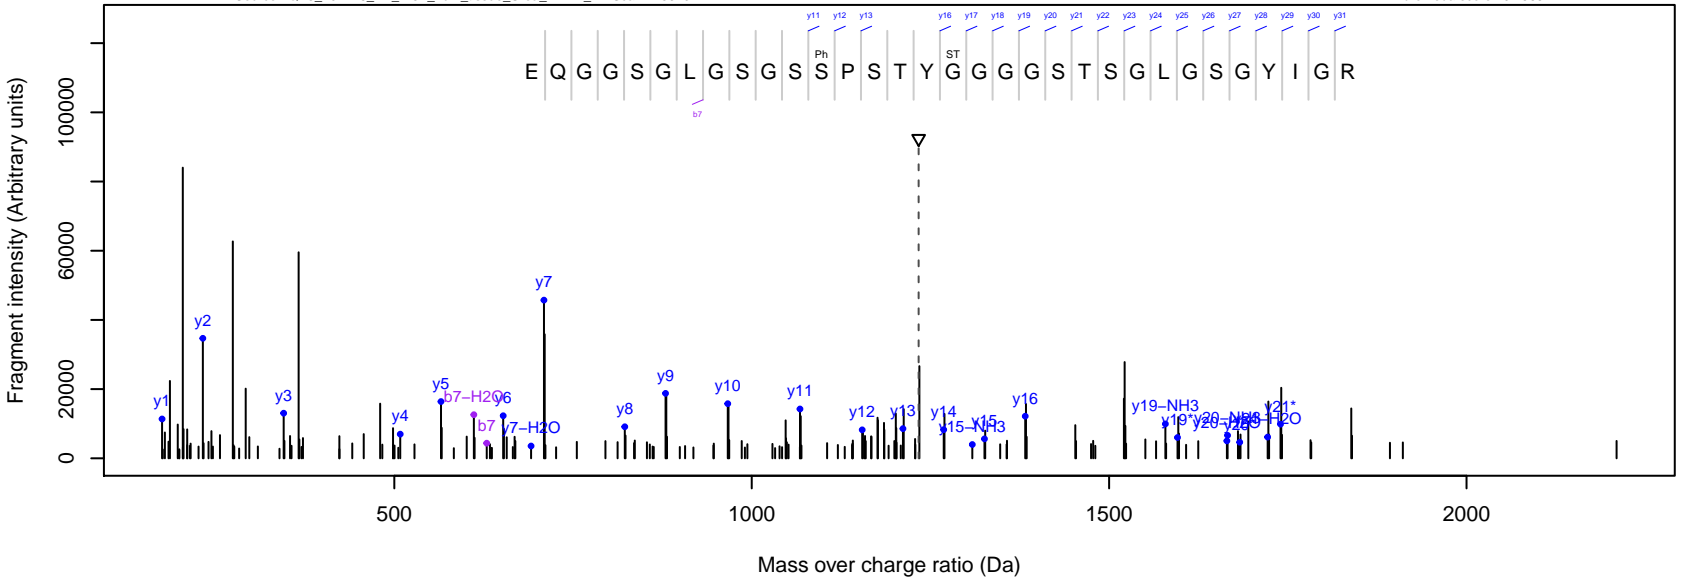

LAALQLMQNASQLETPSSLENGGPS(Phospho (STY))SLESK-3+

Source : QE3\_201126\_FR\_TIOx\_hum\_tissue\_Urea\_RNAB\_N Scan : 54482

Andromeda score : 92.552

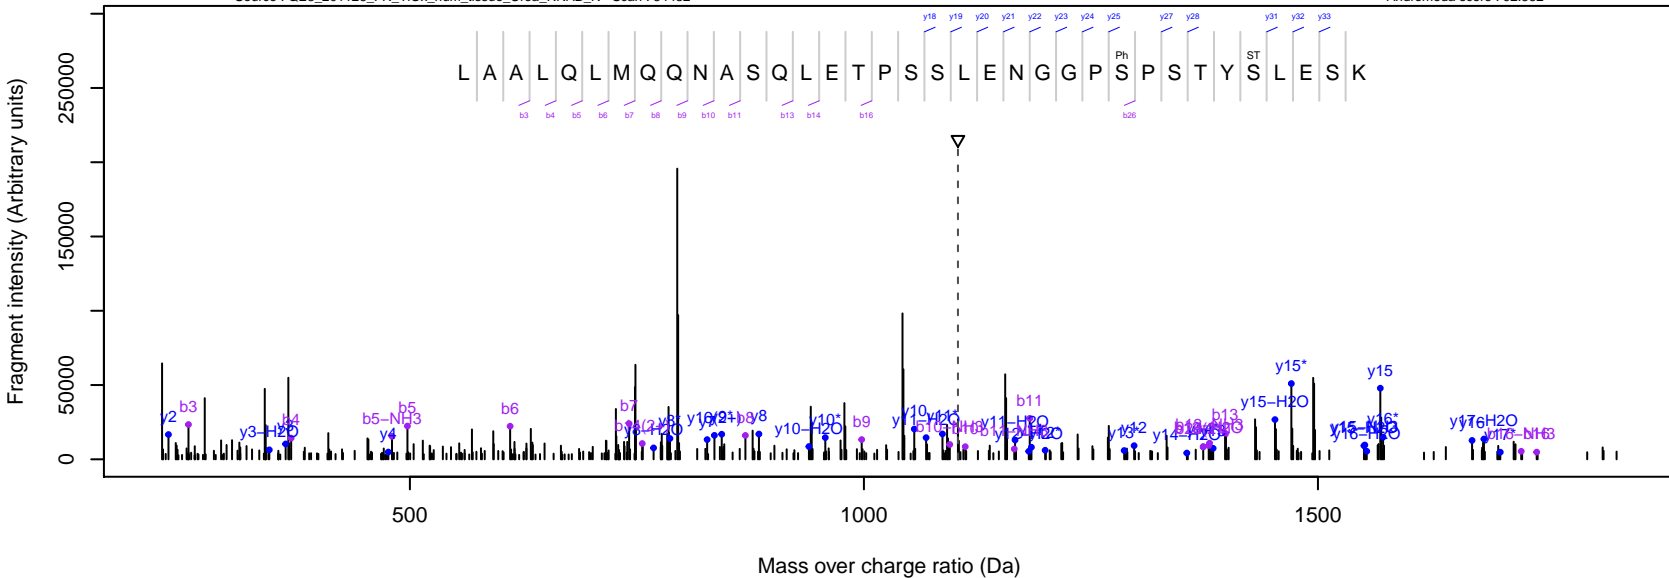

LSRGDS(Phospho (STY))LKEPTSI AESSR-3+

Source : QE3\_201126\_FR\_TIOx\_hum\_tissue\_Urea\_RNAB\_B Scan : 14509

Andromeda score : 92.518

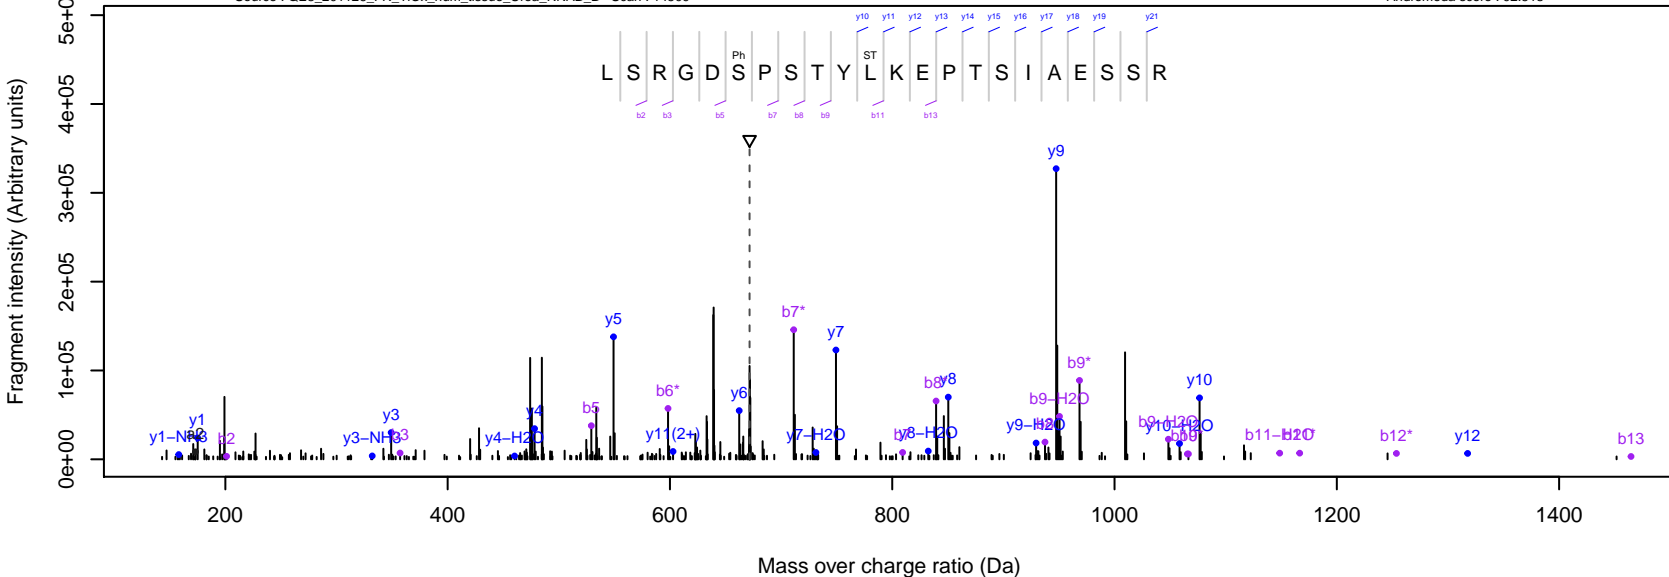

RKAS(Phospho (STY))PEPPDSAEGALK-3+

Source : QE3\_201126\_FR\_TIOx\_hum\_tissue\_Urea\_RNAB\_N Scan : 9013

Andromeda score : 92.492

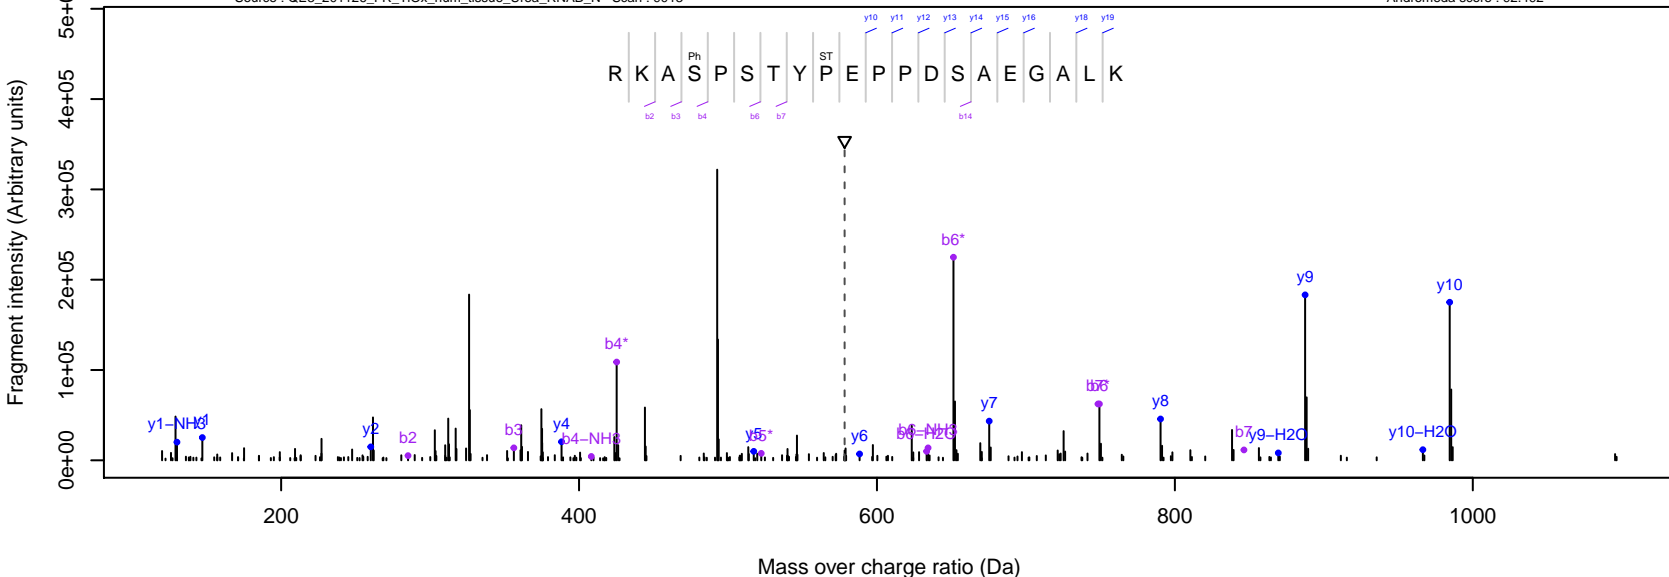

RQYHESEES(Phospho (STY))EEEEAA-3+

Source : QE3\_201126\_FR\_TiOx\_hum\_tissue\_Urea\_RNAB\_H Scan : 8164

Andromeda score : 92.492

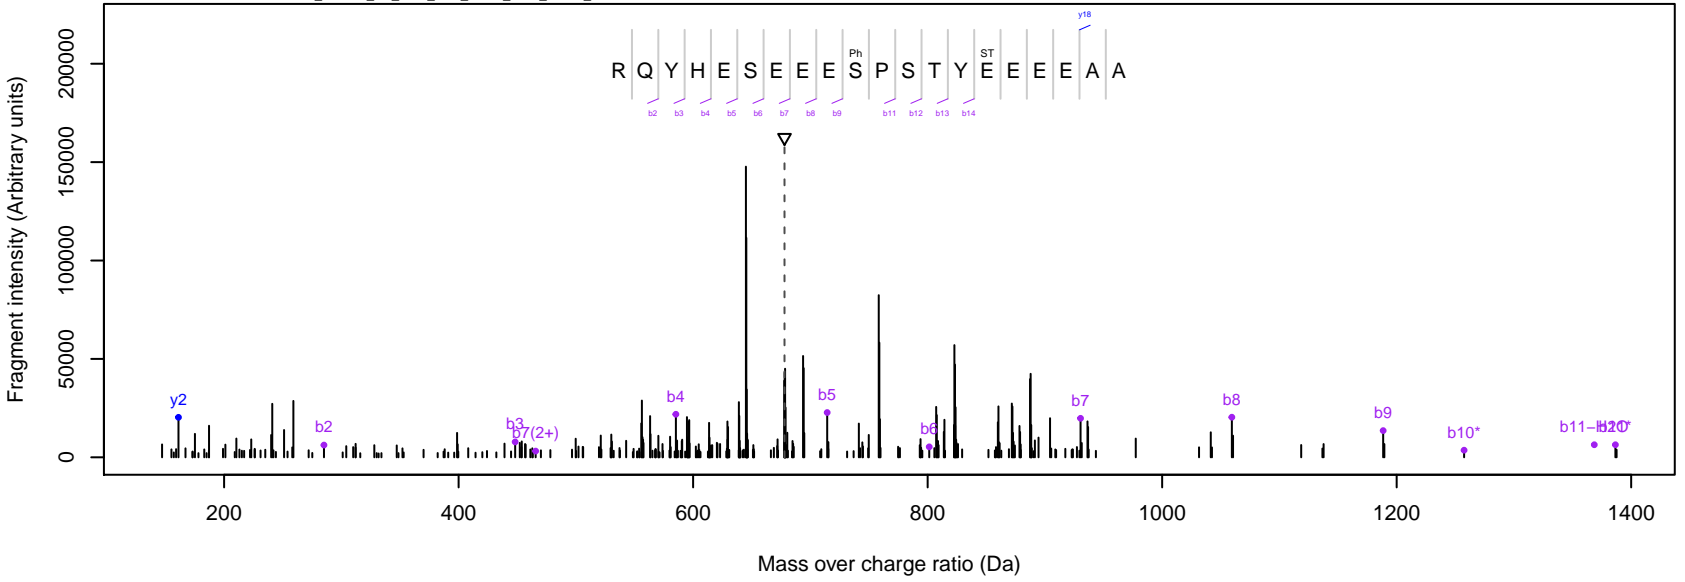

TSQVGAASAPAKES(Phospho (STY))PRK-3+

Source : QE3\_201126\_FR\_TiOx\_hum\_tissue\_Urea\_RNAB\_H Scan : 4435

Andromeda score : 92.492

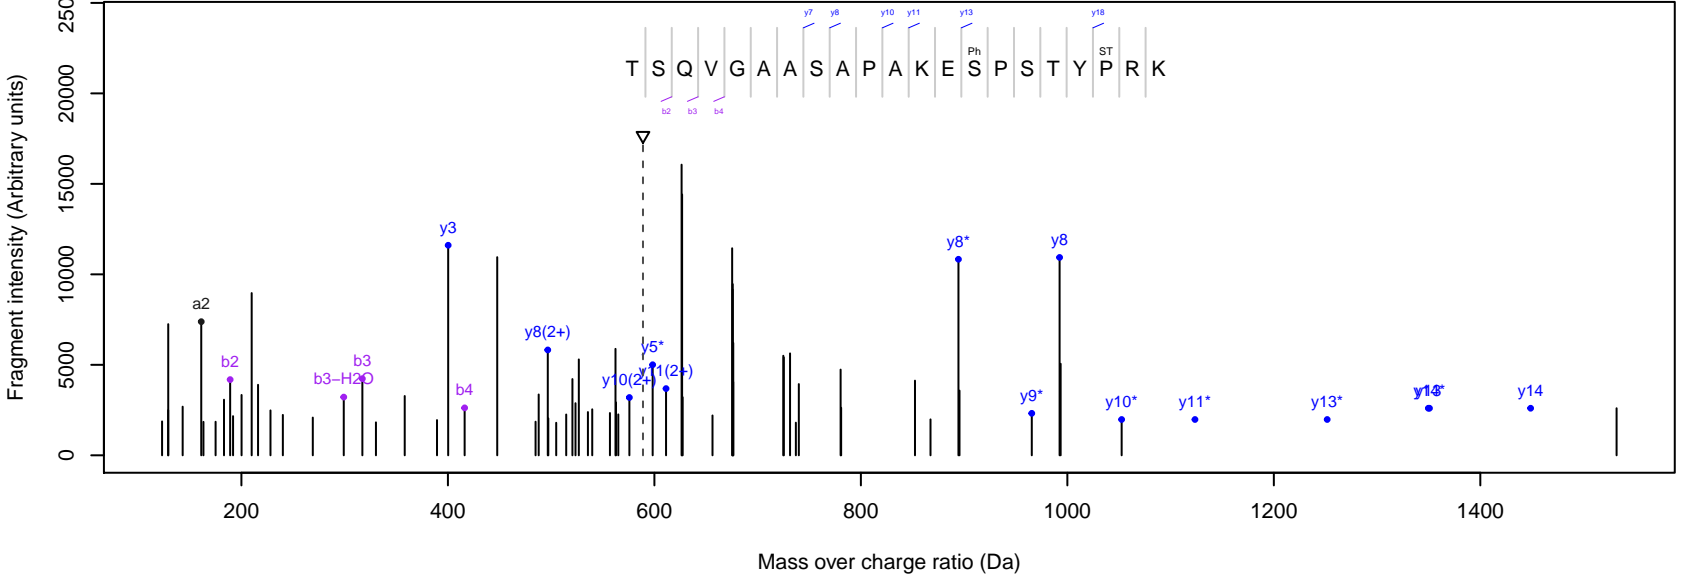

SQSDLDDQHDYDS(Phospho (STY))VAS(Phospho (STY))DEDTQEPLR-3+

Source : QE3\_201126\_FR\_TiOx\_hum\_tissue\_Urea\_RNAB\_B Scan : 30133

Andromeda score : 92.49

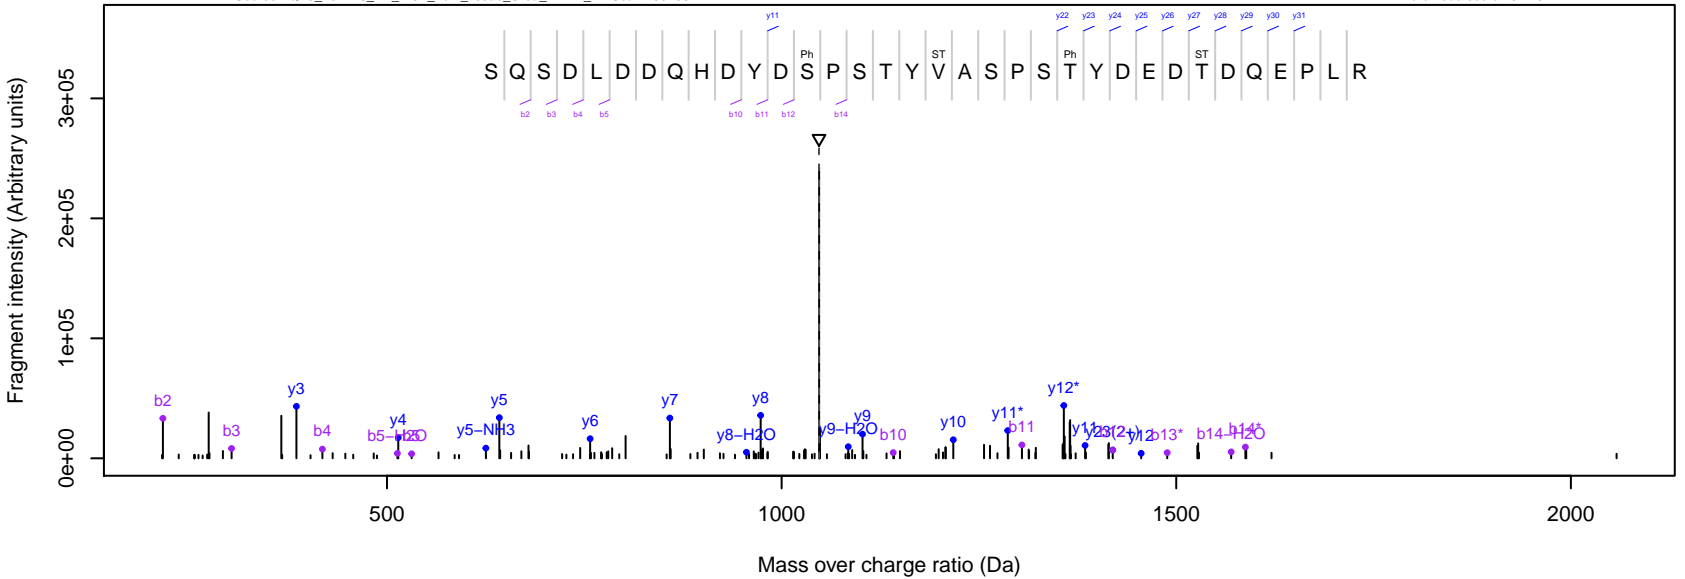

NAPLSLQNGPNTPNKPS(Phospho (STY))PPPPQQFVVQHSFLGSPVAK-4+

Source : QE3\_201126\_FR\_TiOx\_hum\_tissue\_Urea\_RNAB\_H Scan : 44548

Andromeda score : 92.485

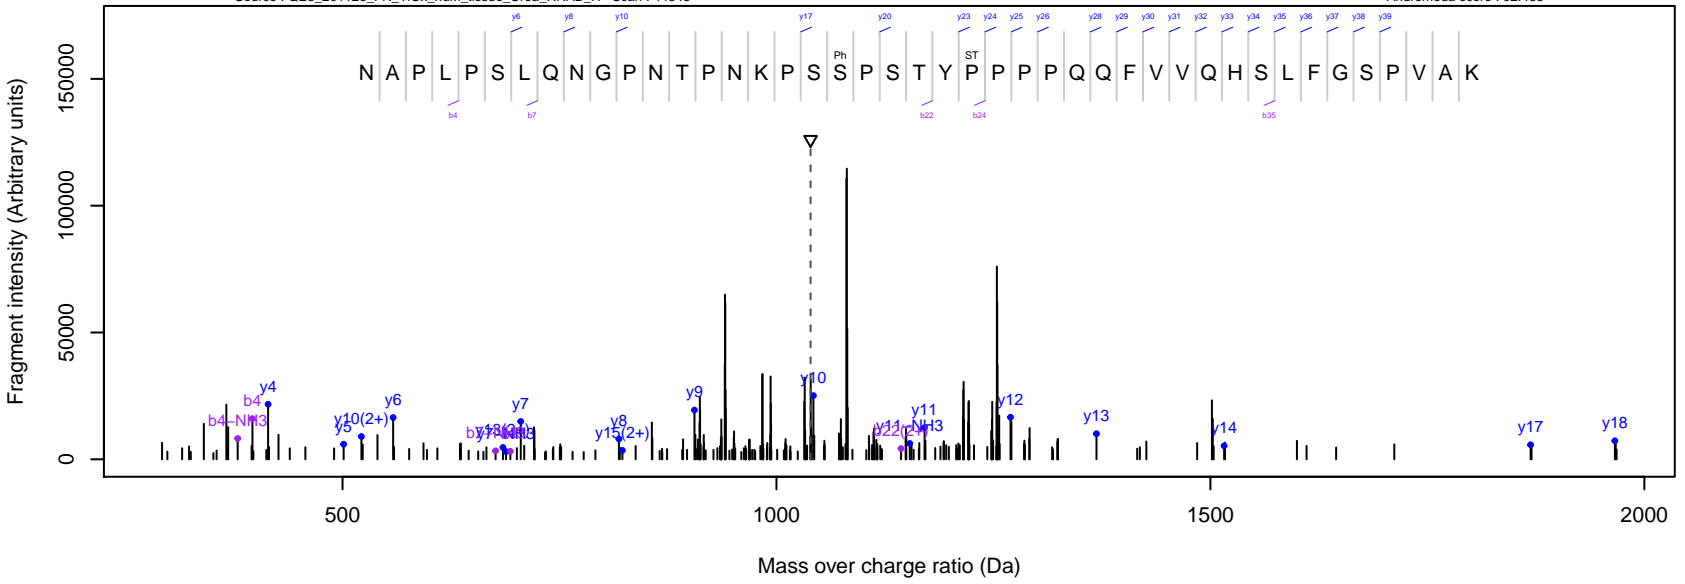

GPGAPAS(Phospho (STY))PSASHPQGLDTPKPH-3+

Source : QE3\_201126\_FR\_TiOx\_hum\_tissue\_Urea\_RNAB\_B Scan : 12166

Andromeda score : 92.463

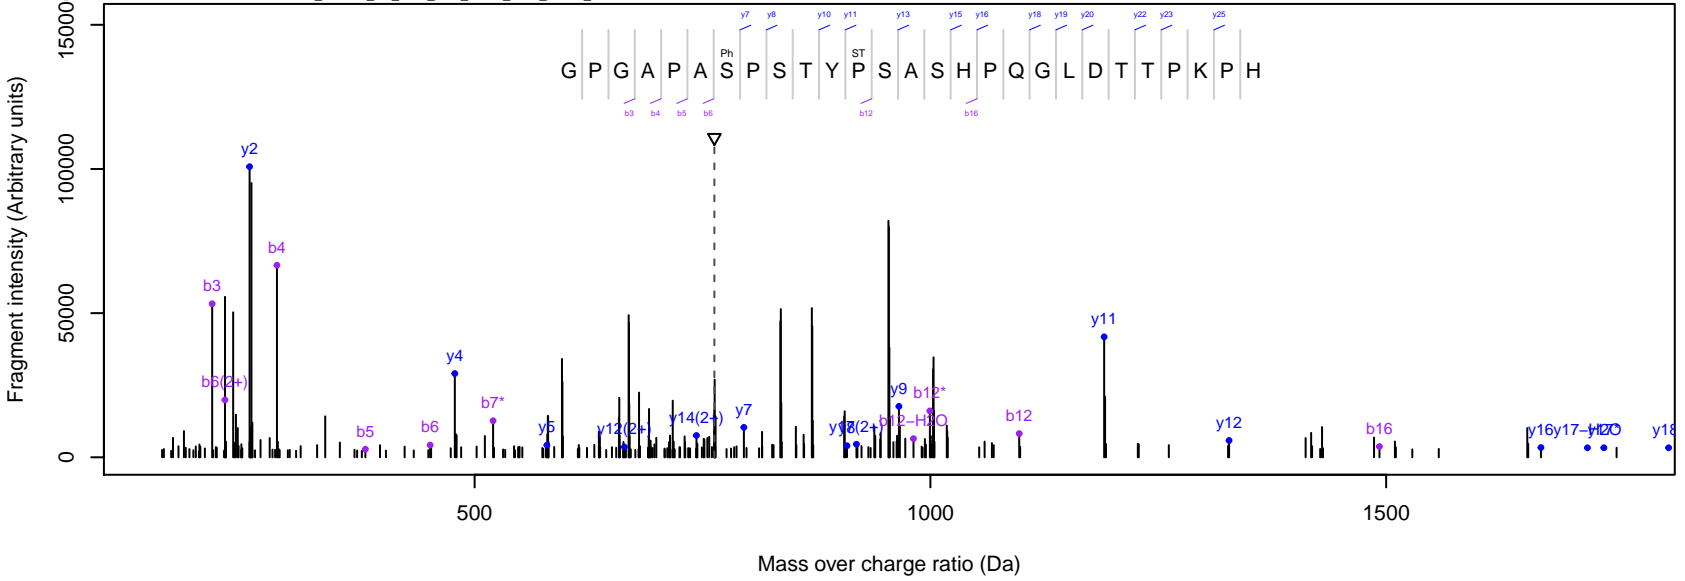

NKPLEQS(Phospho (STY))VEDLSK-2+

Source : QE3\_201126\_FR\_TiOx\_hum\_tissue\_Urea\_RNAB\_N Scan : 17500

Andromeda score : 92.457

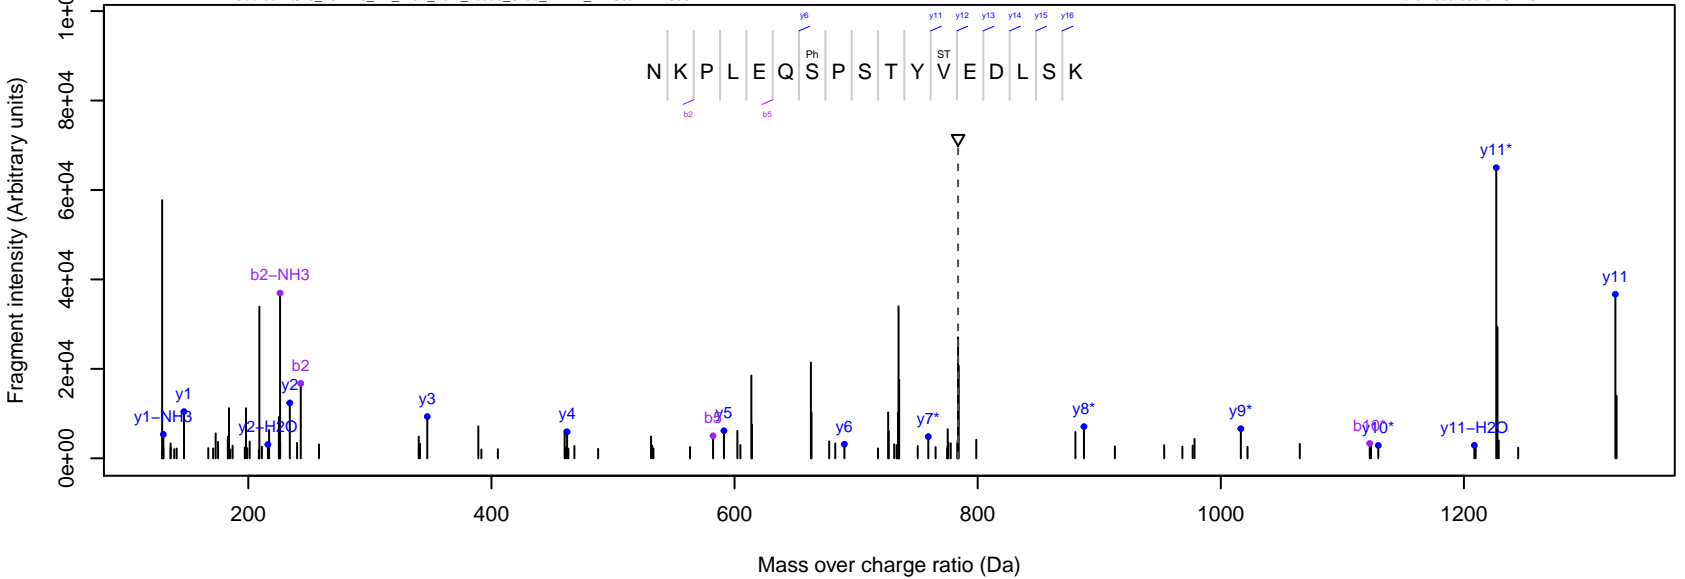



IKQHLENDPGS(Phospho (STY))NEDTDIPK-3+

Source : QE3\_201126\_FR\_TiOx\_hum\_tissue\_Urea\_RNAB\_H Scan : 12667

Andromeda score : 92.426

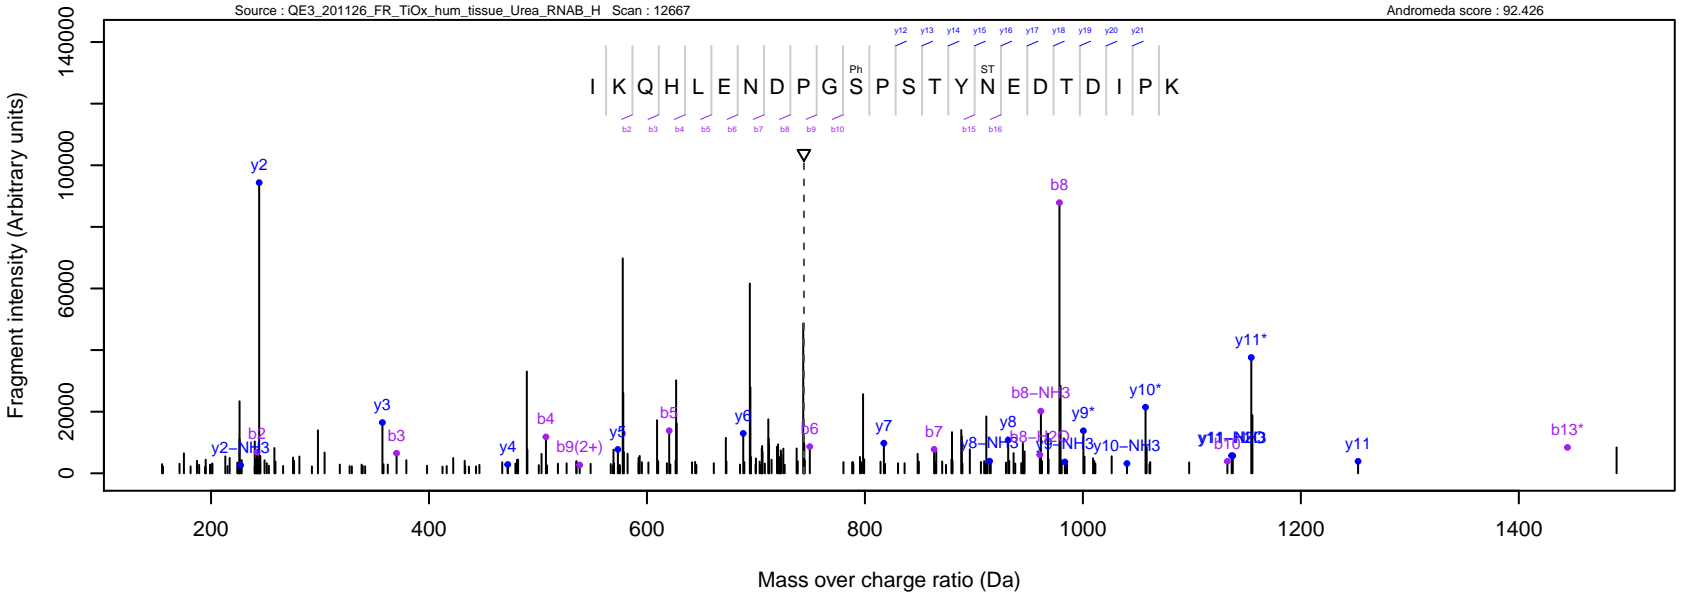

IGPPS(Phospho (STY))PGDDEEEAAAAGAPAAAGATGLASALGGAPNR-3+

Source : QE3\_201126\_FR\_TiOx\_hum\_tissue\_Urea\_RNAB\_N Scan : 47404

Andromeda score : 92.372

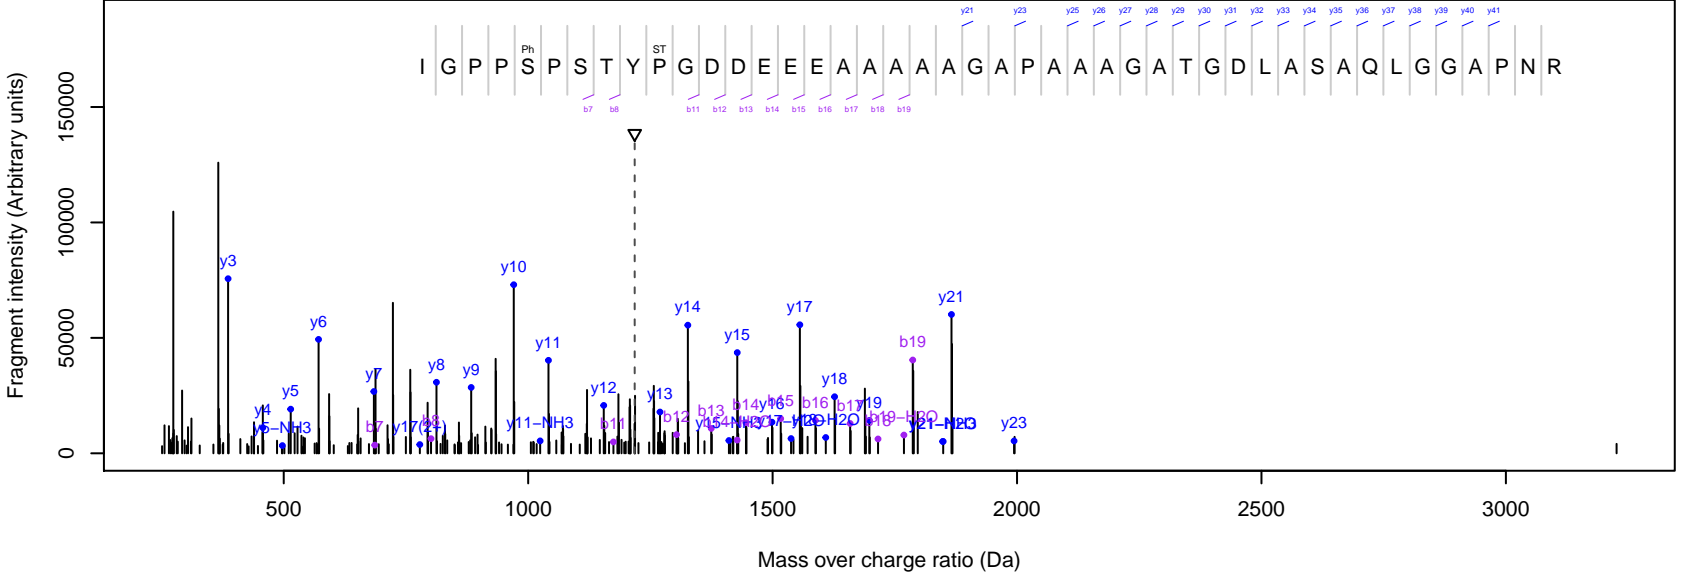

KS(Phospho (STY))S(Phospho (STY))TGSISNVLFSTQDPVEDAVFGEATNLK-3+

Source : QE3\_201126\_FR\_TiOx\_hum\_tissue\_Urea\_RNAB\_B Scan : 61472

Andromeda score : 92.372

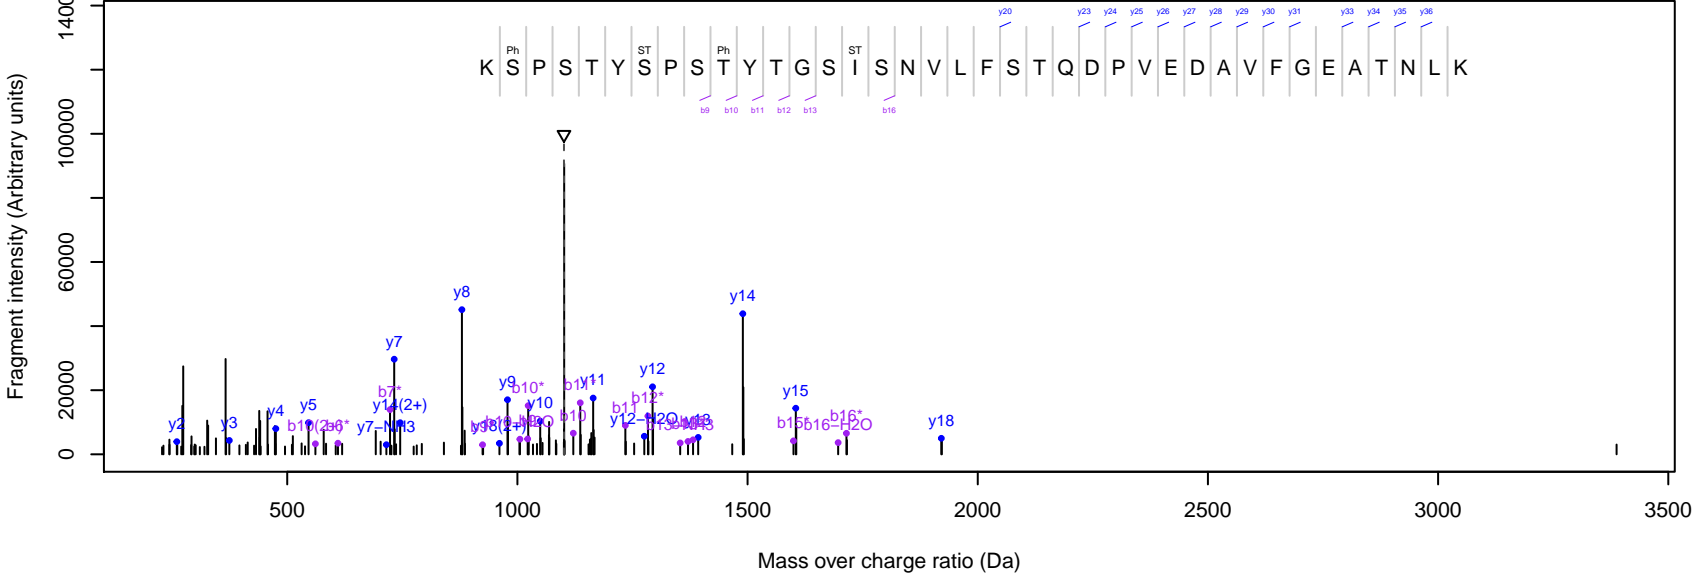

ASASGGAQVGGPISSGSSPSTYASSVTVTR-3+

Source : QE3\_201126\_FR\_TiOx\_hum\_tissue\_Urea\_RNAB\_B Scan : 22732

Andromeda score : 92.349

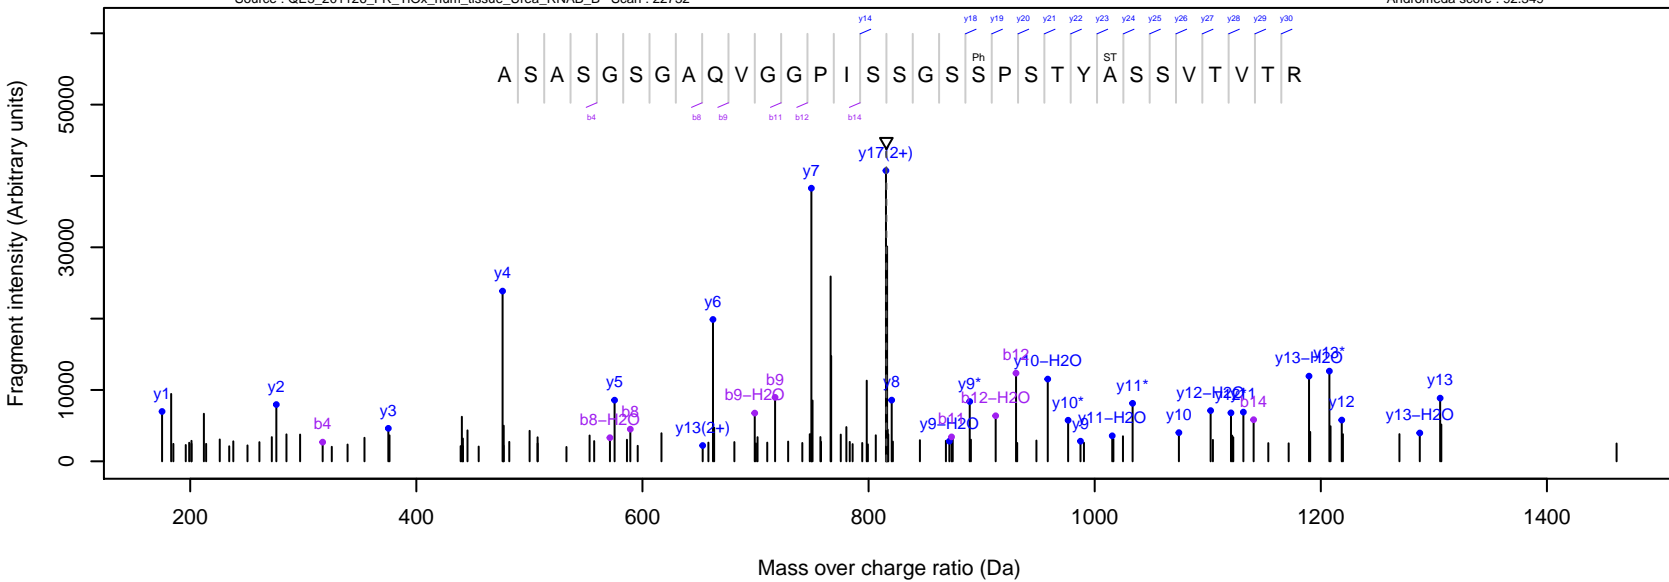

(Acetyl (Protein N-term))AQVLRGT(Phospho (STY))VTDFPGFDER-3+

Source : QE3\_201126\_FR\_TiOx\_hum\_tissue\_Urea\_RNAB\_H Scan : 53960

Andromeda score : 92.336

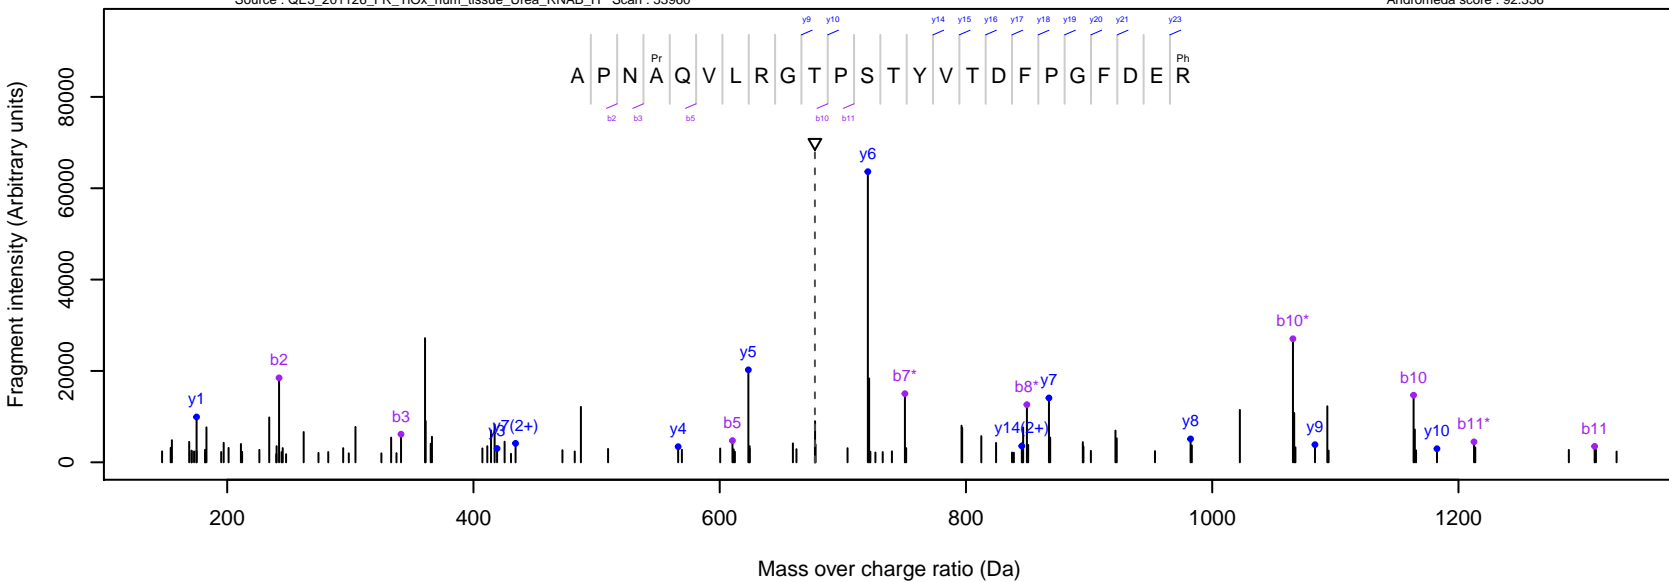

CSS(Phospho (STY))PVDTECSHAEGSR-3+

Source : QE3\_201126\_FR\_TiOx\_hum\_tissue\_Urea\_RNAB\_N Scan : 6014

Andromeda score : 92.31

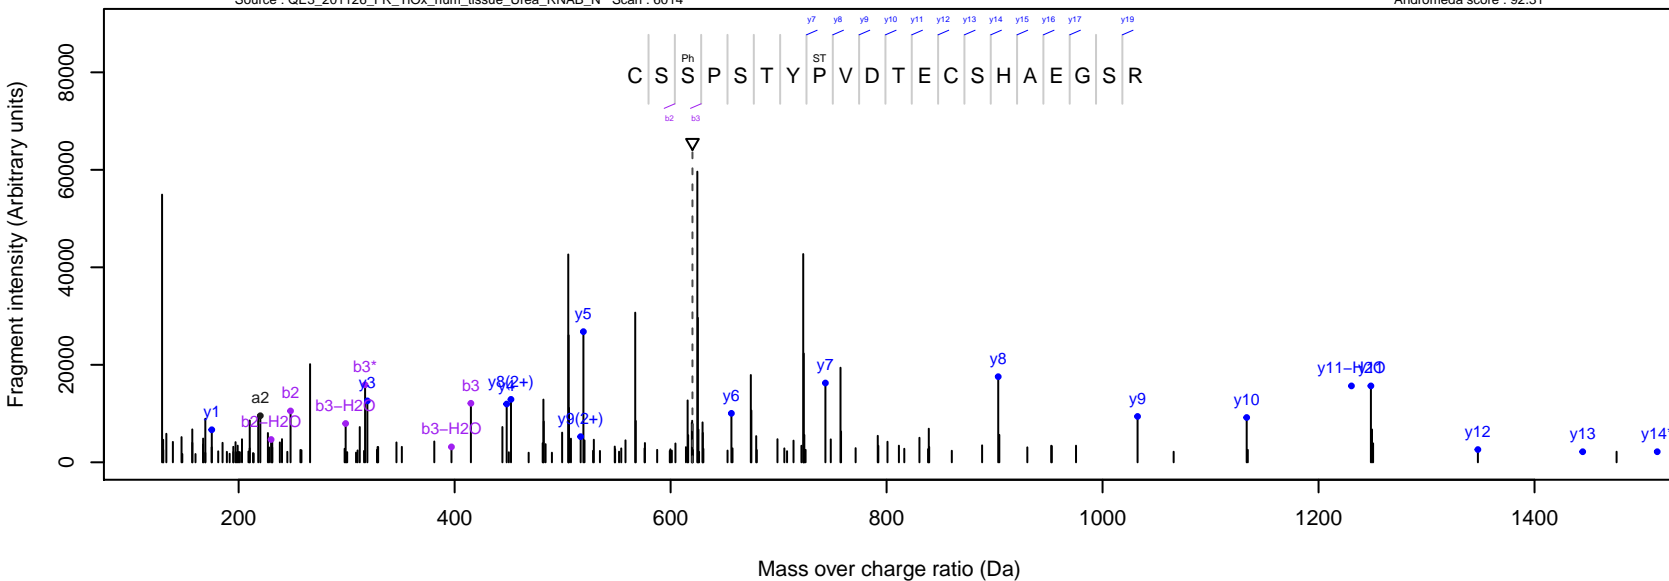

LGHSL(Phospho (STY))VSKDSISR-3+

Source : QE3\_201126\_FR\_TIOx\_hum\_tissue\_Urea\_RNAB\_N Scan : 12855

Andromeda score : 92.307

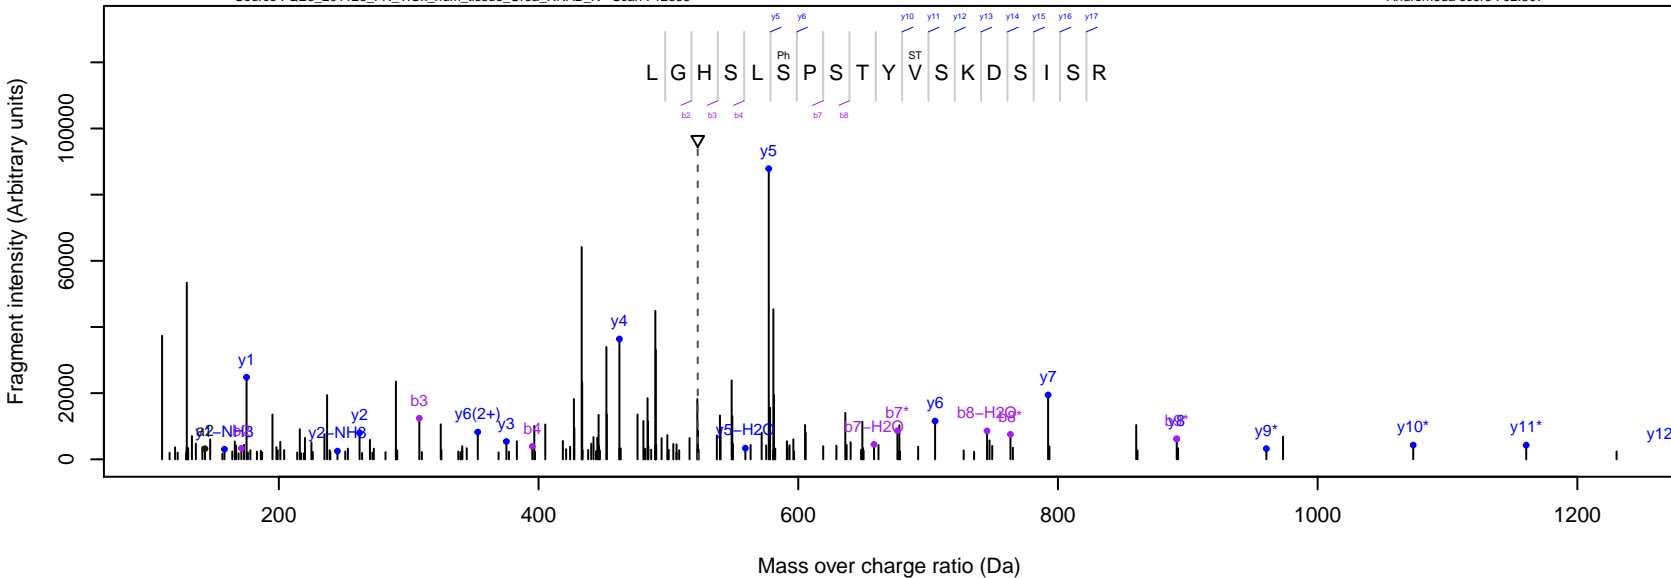

FGGS(Phospho (STY))GSQVDSAR-2+

Source : QE3\_201126\_FR\_TIOx\_hum\_tissue\_Urea\_RNAB\_B Scan : 10885

Andromeda score : 92.295

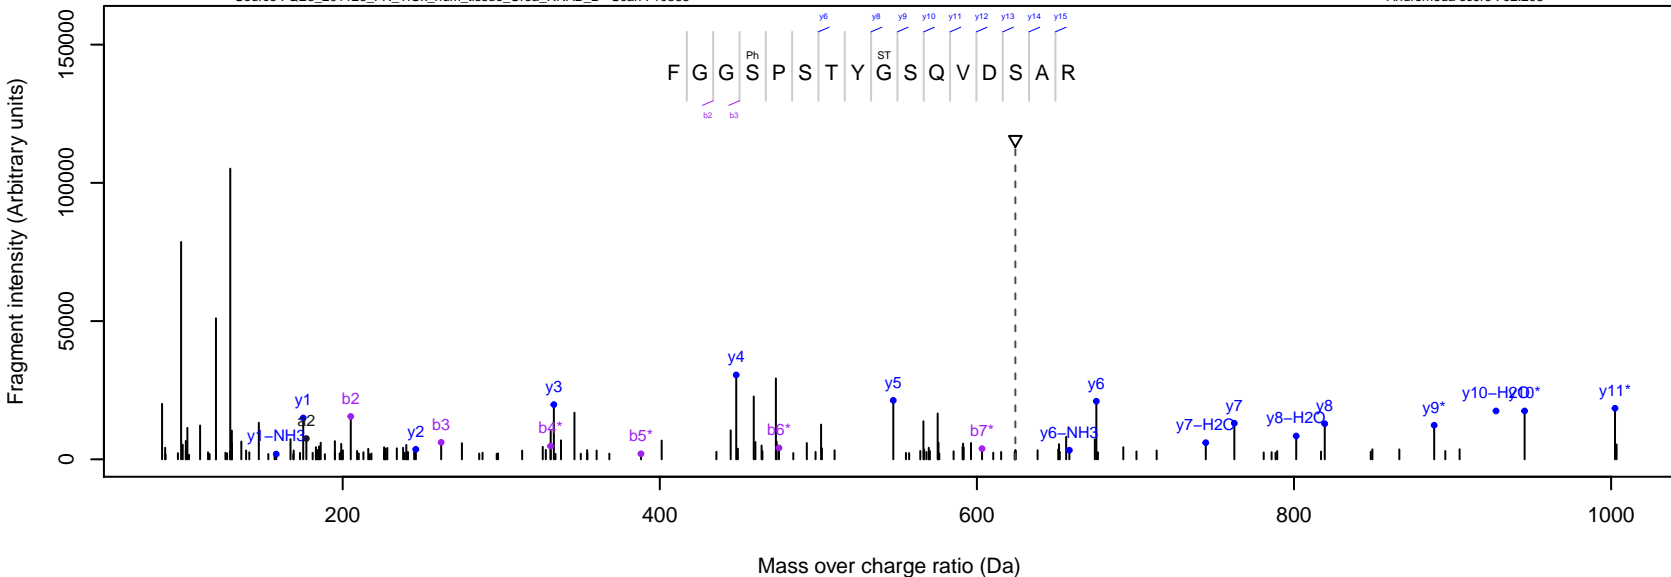

SPS(Phospho (STY))PLRGNVVPSPLPTR-3+

Source : QE3\_201126\_FR\_TIOx\_hum\_tissue\_Urea\_RNAB\_H Scan : 29772

Andromeda score : 92.29

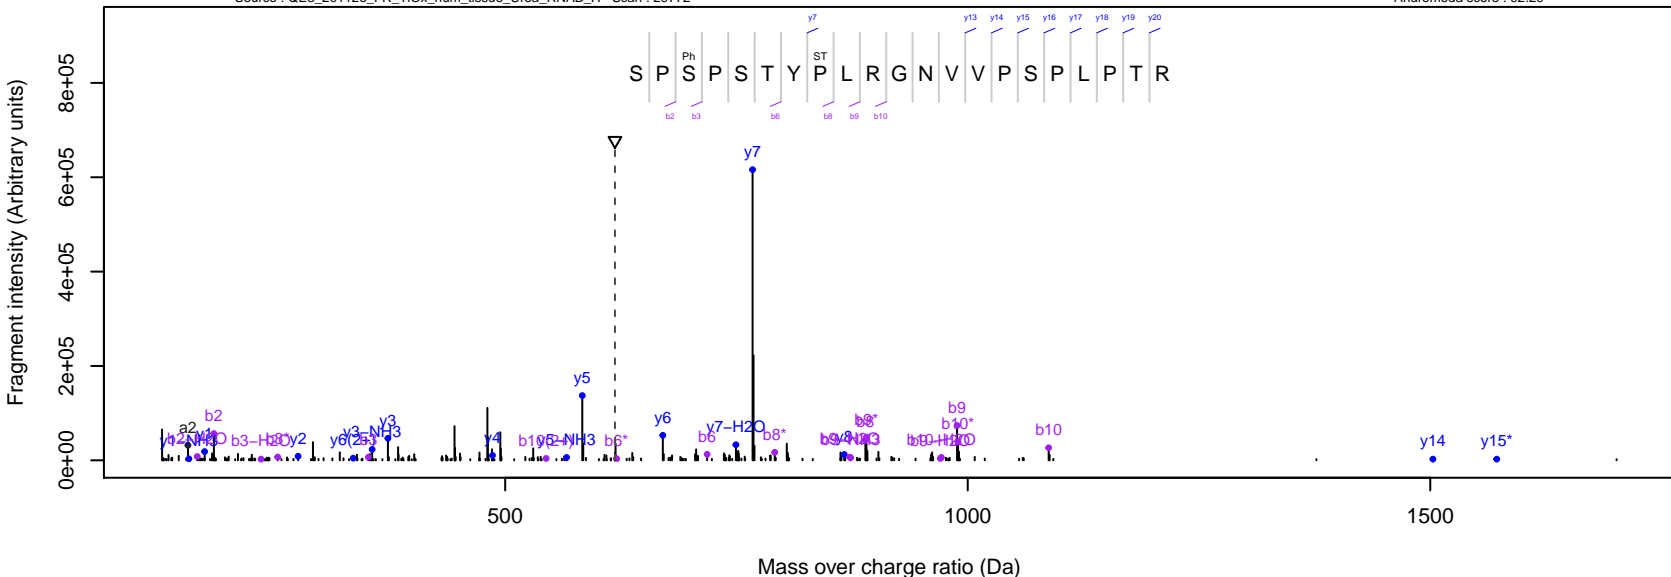

VSPNPELLS(Phospho (STY))LLQNSEGKR-3+

Source : QE3\_201126\_FR\_TiOx\_hum\_tissue\_Urea\_RNAB\_B Scan : 46753

Andromeda score : 92.29

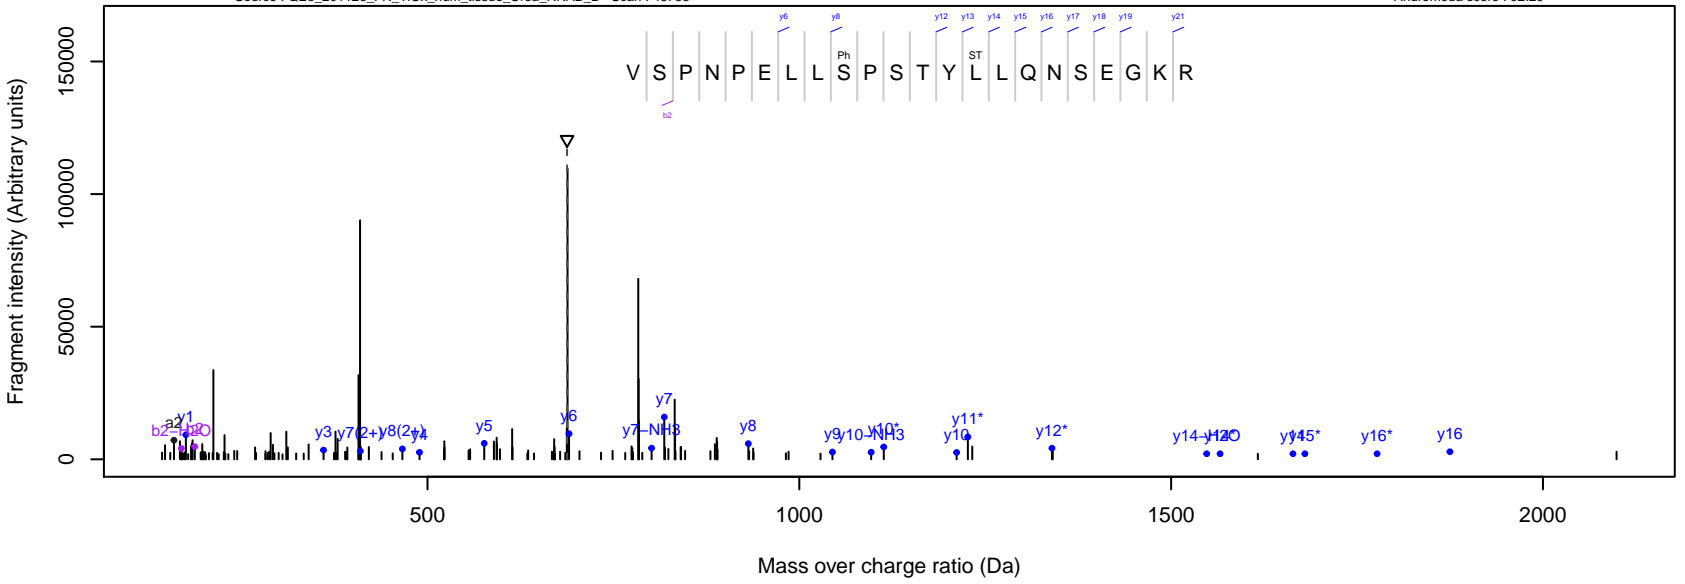

YAGLDDT(Phospho (STY))DS(Phospho (STY))EDELPPGWEER-3+

Source : QE3\_201126\_FR\_TiOx\_hum\_tissue\_Urea\_RNAB\_N Scan : 55351

Andromeda score : 92.29

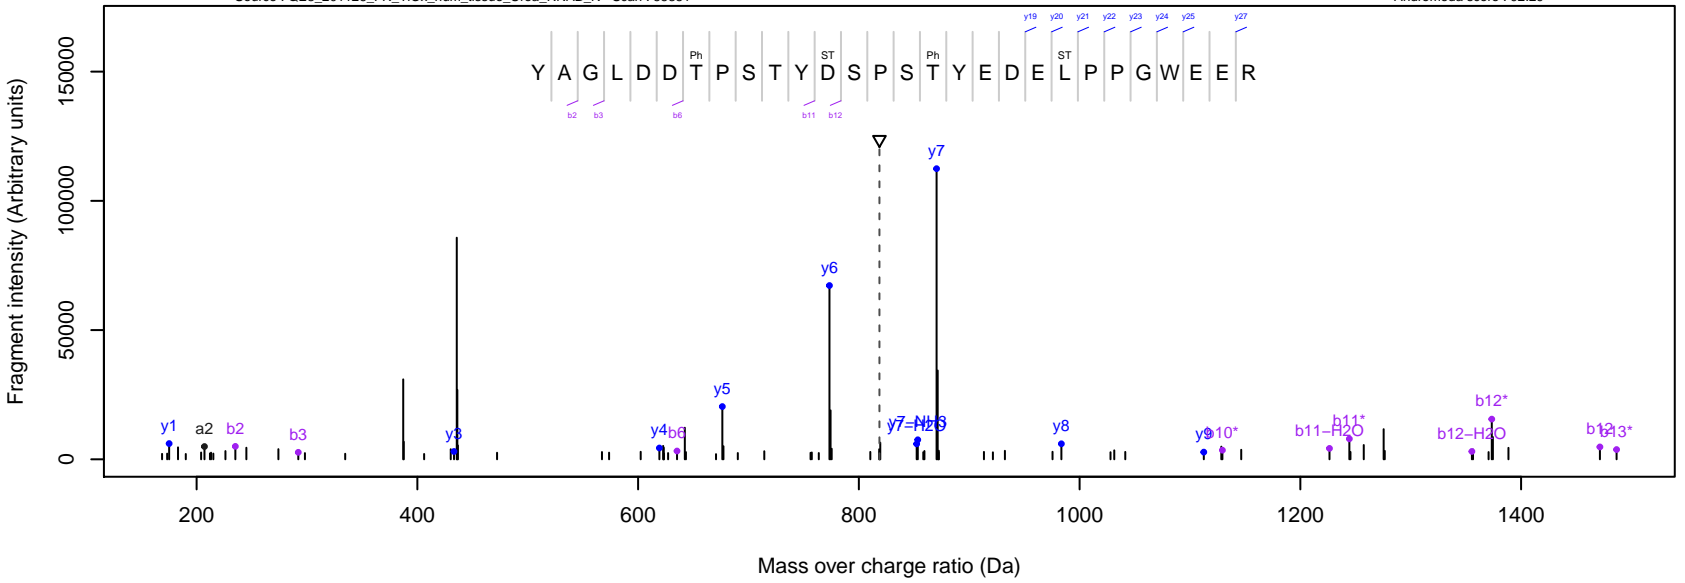

DVAAEAVARS(Phospho (STY))PK-2+

Source : QE3\_201126\_FR\_TiOx\_hum\_tissue\_Urea\_RNAB\_N Scan : 10247

Andromeda score : 92.265

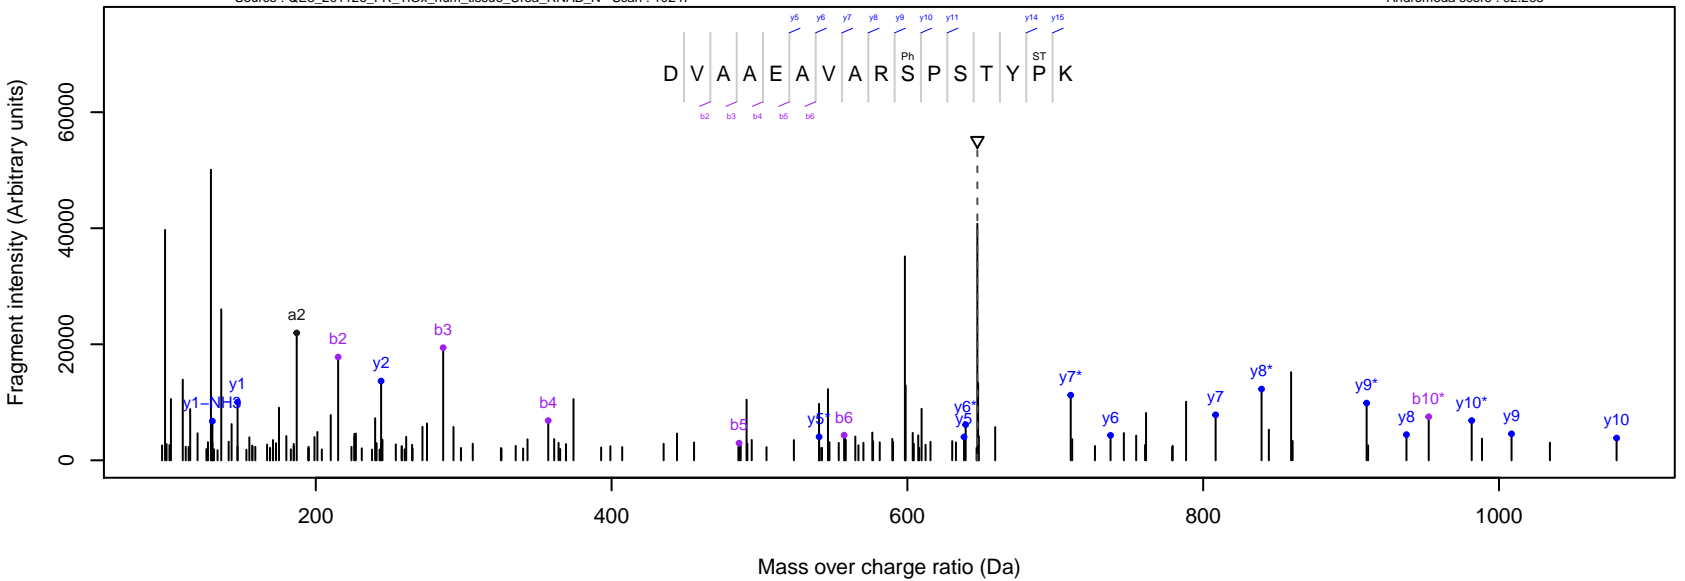

RYS(Phospho (STY))FRVPEEEER-3+

Source : QE3\_201126\_FR\_TIOx\_hum\_tissue\_Urea\_RNAB\_N Scan : 18747

Andromeda score : 92.265

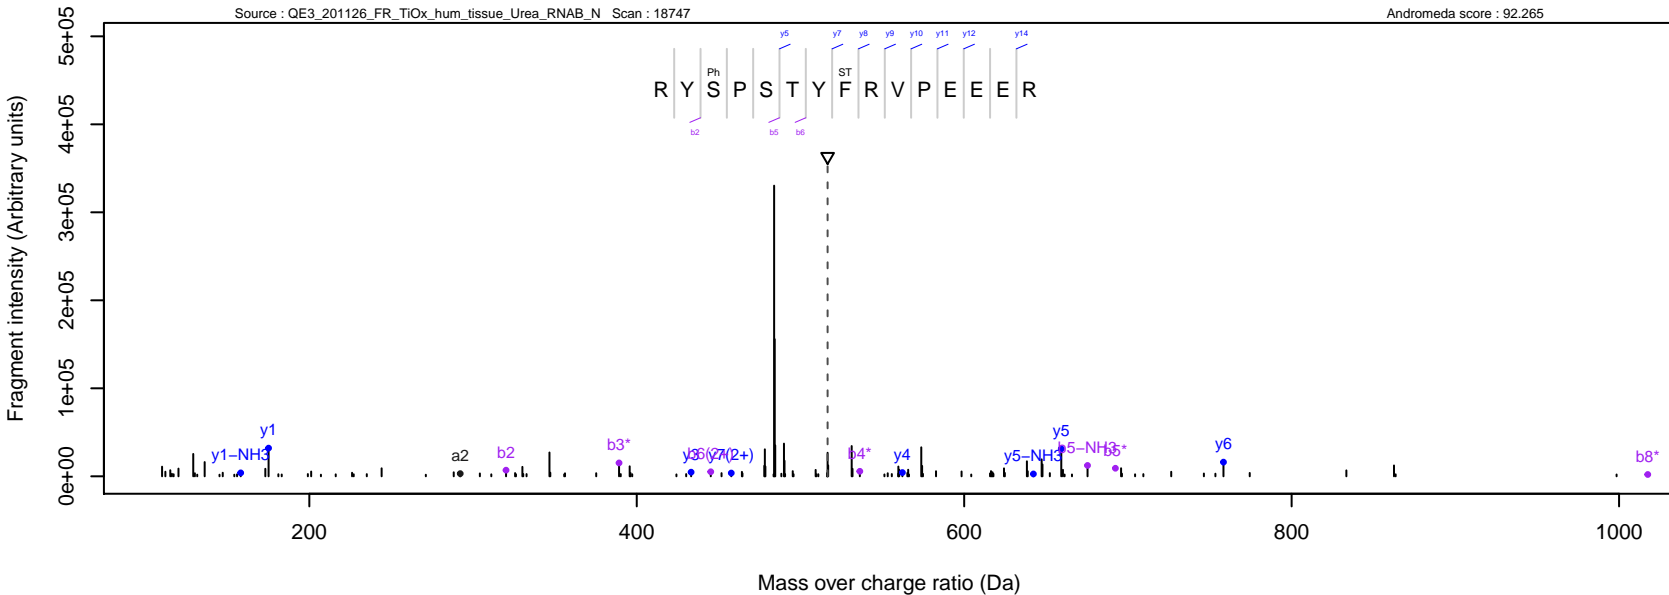

(Acetyl (Protein N-term))S(Phospho (STY))QAEFEKAAEEVR-2+

Source : QE3\_201126\_FR\_TIOx\_hum\_tissue\_Urea\_RNAB\_N Scan : 36559

Andromeda score : 92.265

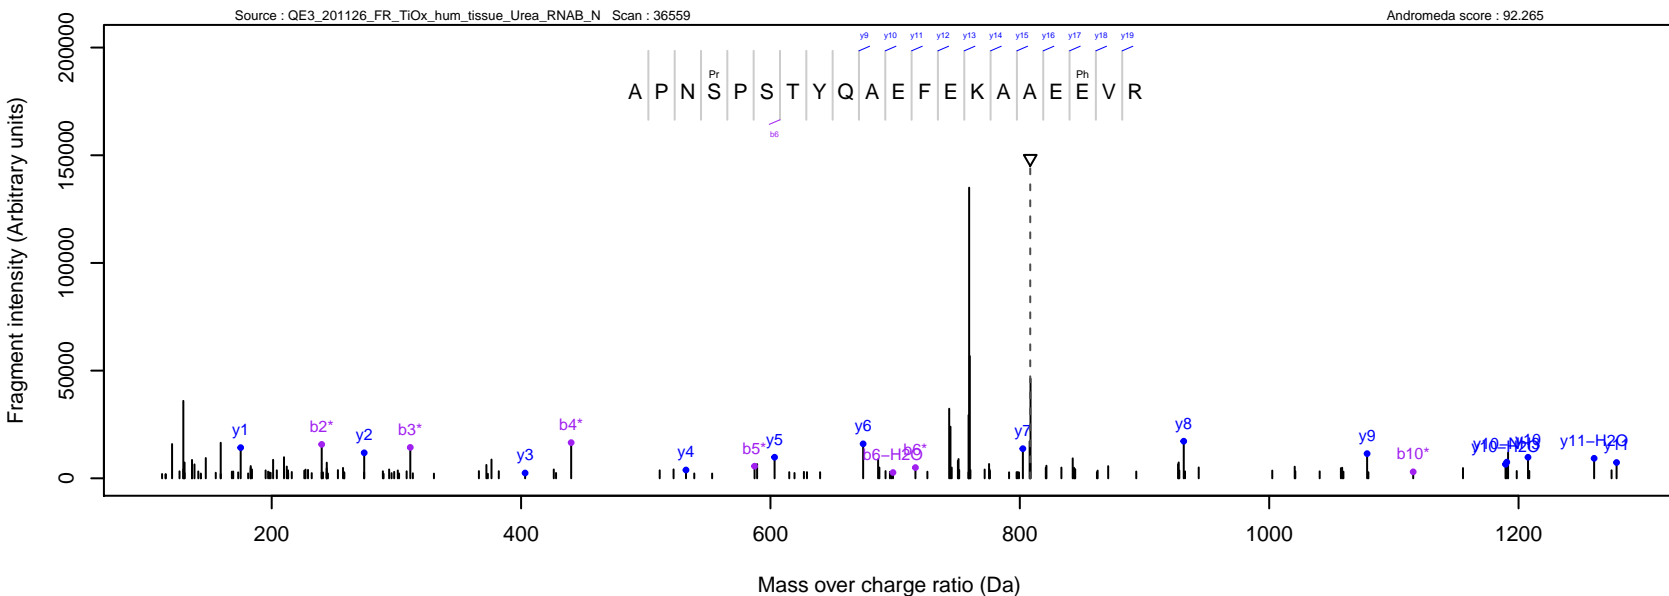

GHNEGNQLISAEPVV(S(Phospho (STY))S(Phospho (STY))DEEGPVEHK-3+

Source : QE3\_201126\_FR\_TIOx\_hum\_tissue\_Urea\_RNAB\_B Scan : 33430

Andromeda score : 92.238

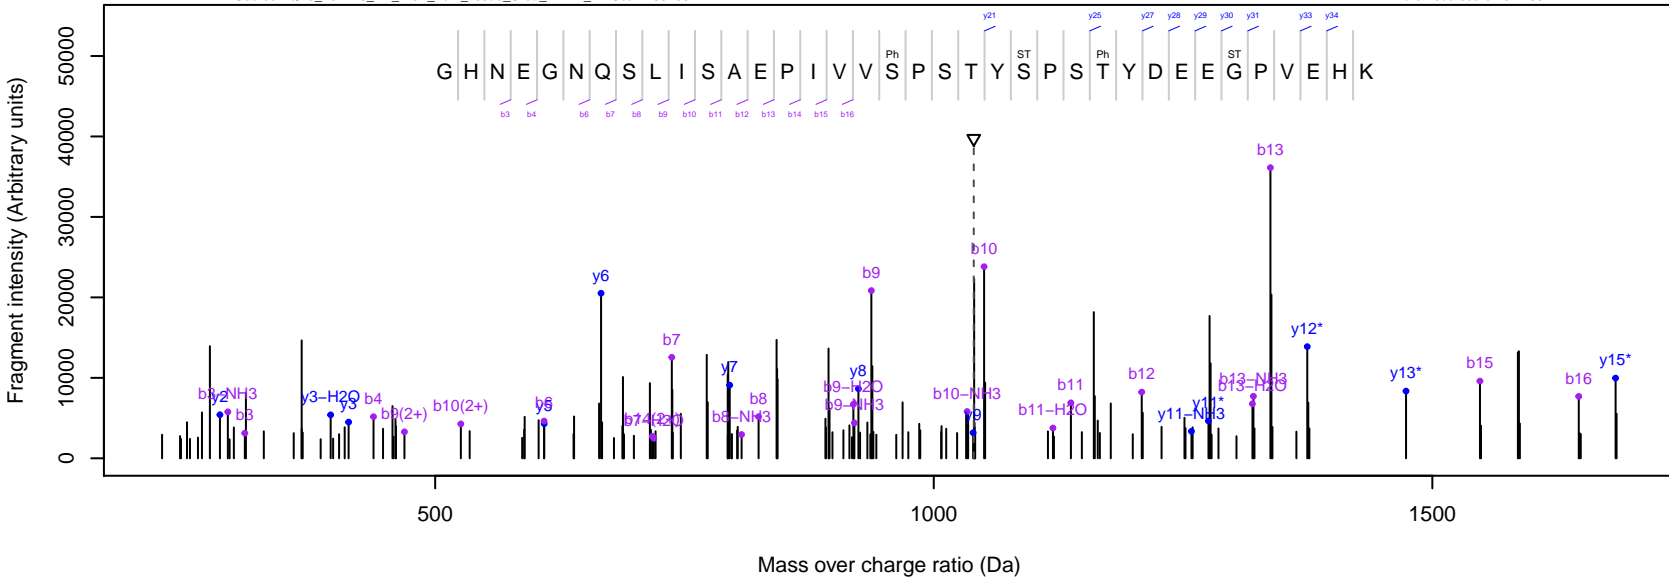

KLPPPPQAPPEENES(Phospho (STY))EPEPSGVEGAAFQSR-3+

Source : QE3\_201126\_FR\_TIOx\_hum\_tissue\_Urea\_RNAB\_B Scan : 31002

Andromeda score : 92.23

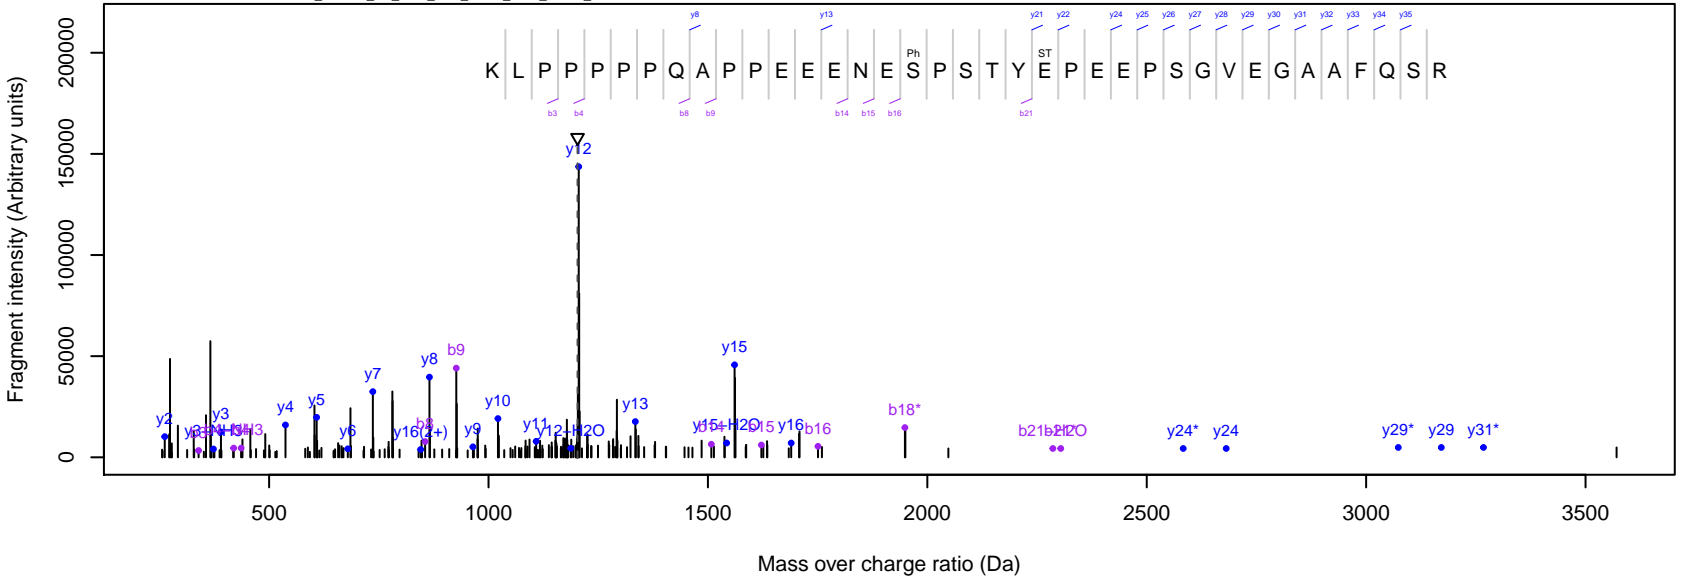

DNQESS(Phospho (STY))DAELSSSEYIK-2+

Source : QE3\_201126\_FR\_TIOx\_hum\_tissue\_Urea\_RNAB\_N Scan : 27696

Andromeda score : 92.211

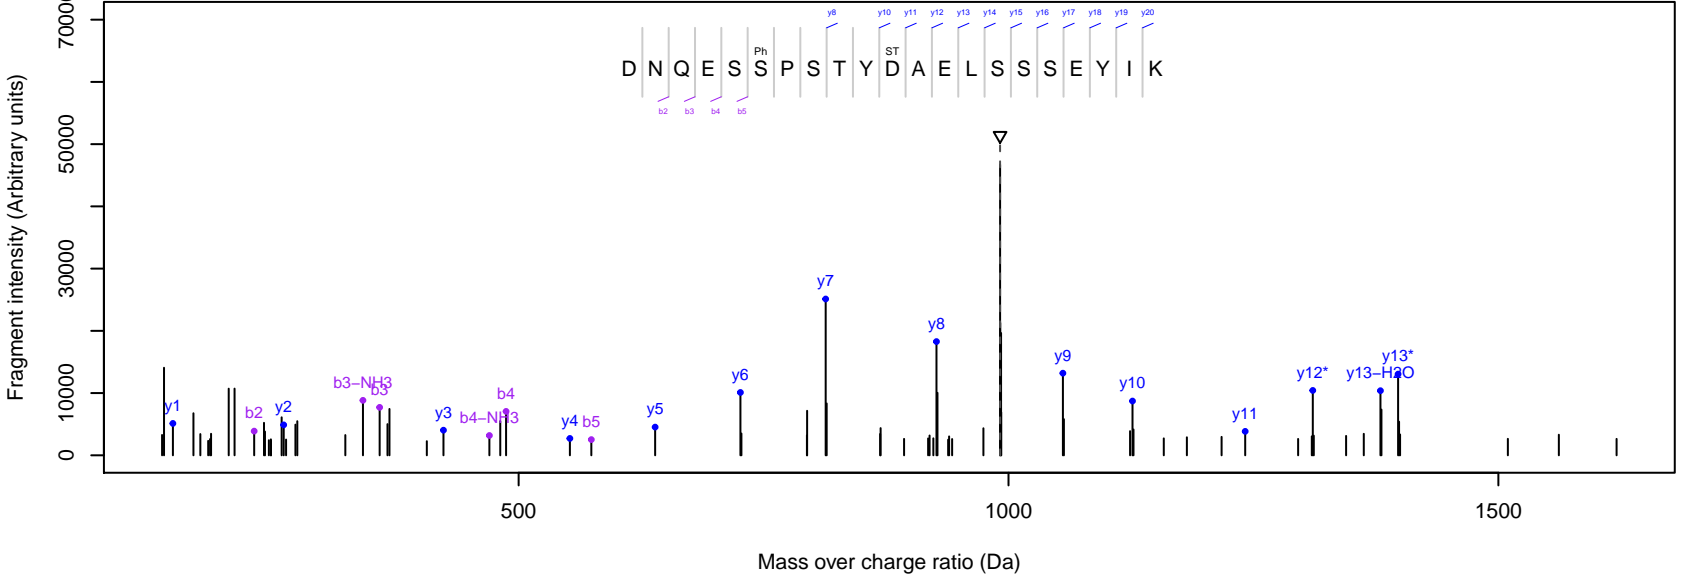

SRLS(Phospho (STY))PAGEM(Oxidation (M))KPM(Oxidation (M))PLSEGK-3+

Source : QE3\_201126\_FR\_TIOx\_hum\_tissue\_Urea\_RNAB\_N Scan : 10866

Andromeda score : 92.198

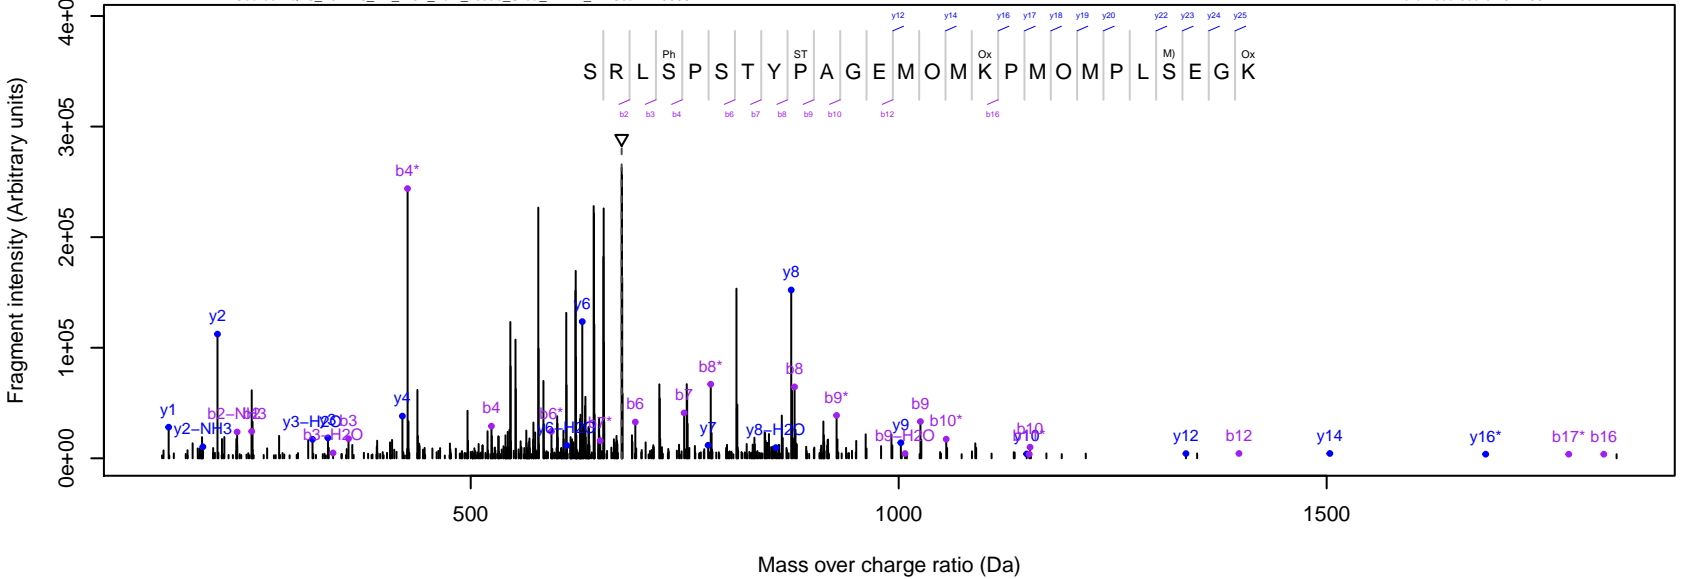

GSKPS(Phospho (STY))PLSVK-2+

Source : QE3\_201126\_FR\_TiOx\_hum\_tissue\_Urea\_RNAB\_N Scan : 8170

Andromeda score : 92.19

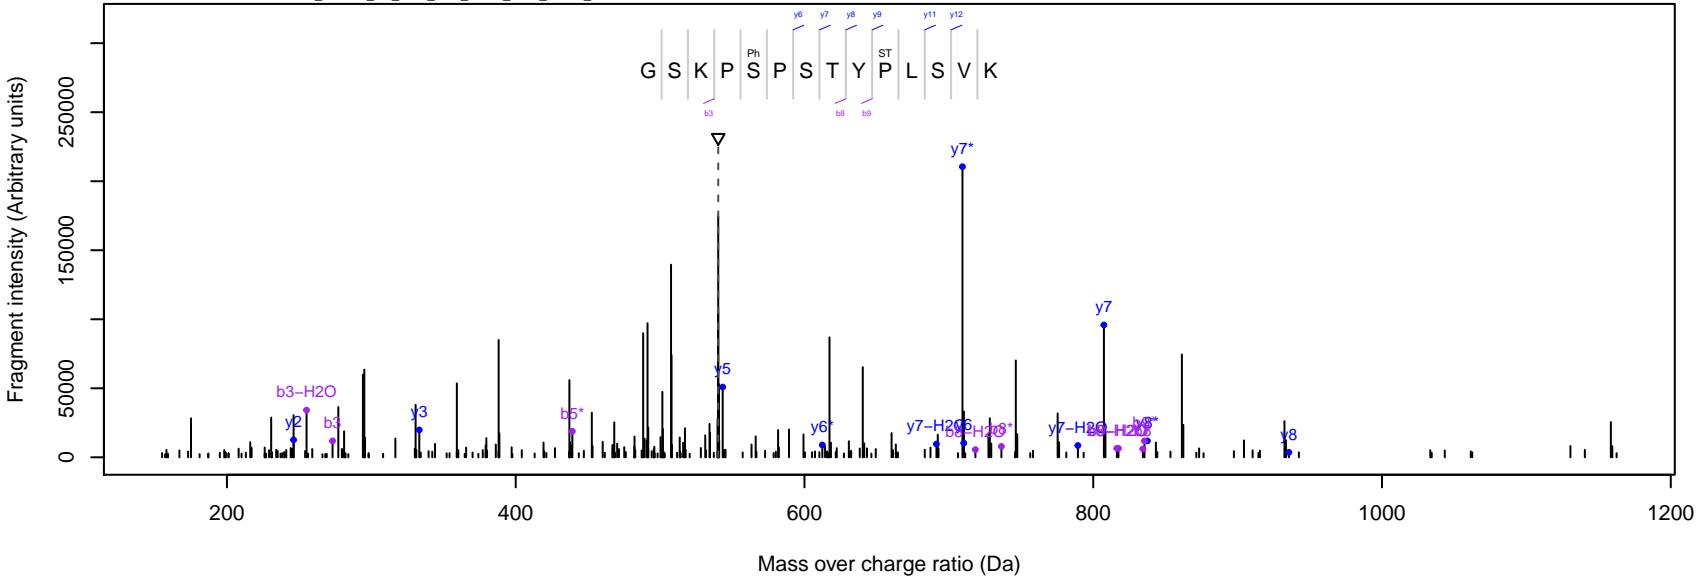

TIS(Phospho (STY))DGTISASK-2+

Source : QE3\_201126\_FR\_TiOx\_hum\_tissue\_Urea\_RNAB\_H Scan : 14920

Andromeda score : 92.19

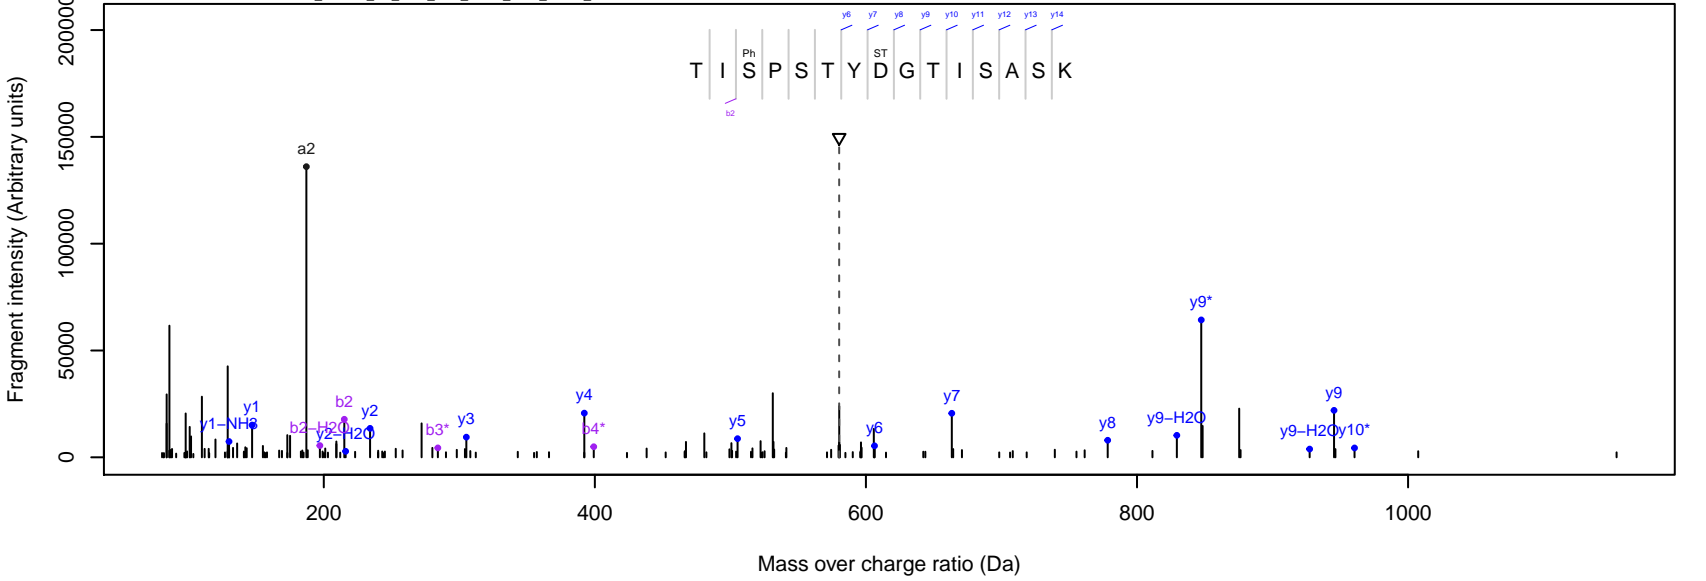

FHDTS(Phospho (STY))SPLMVTPPSAEAHWAVR-3+

Source : QE3\_201126\_FR\_TiOx\_hum\_tissue\_Urea\_RNAB\_B Scan : 34227

Andromeda score : 92.147

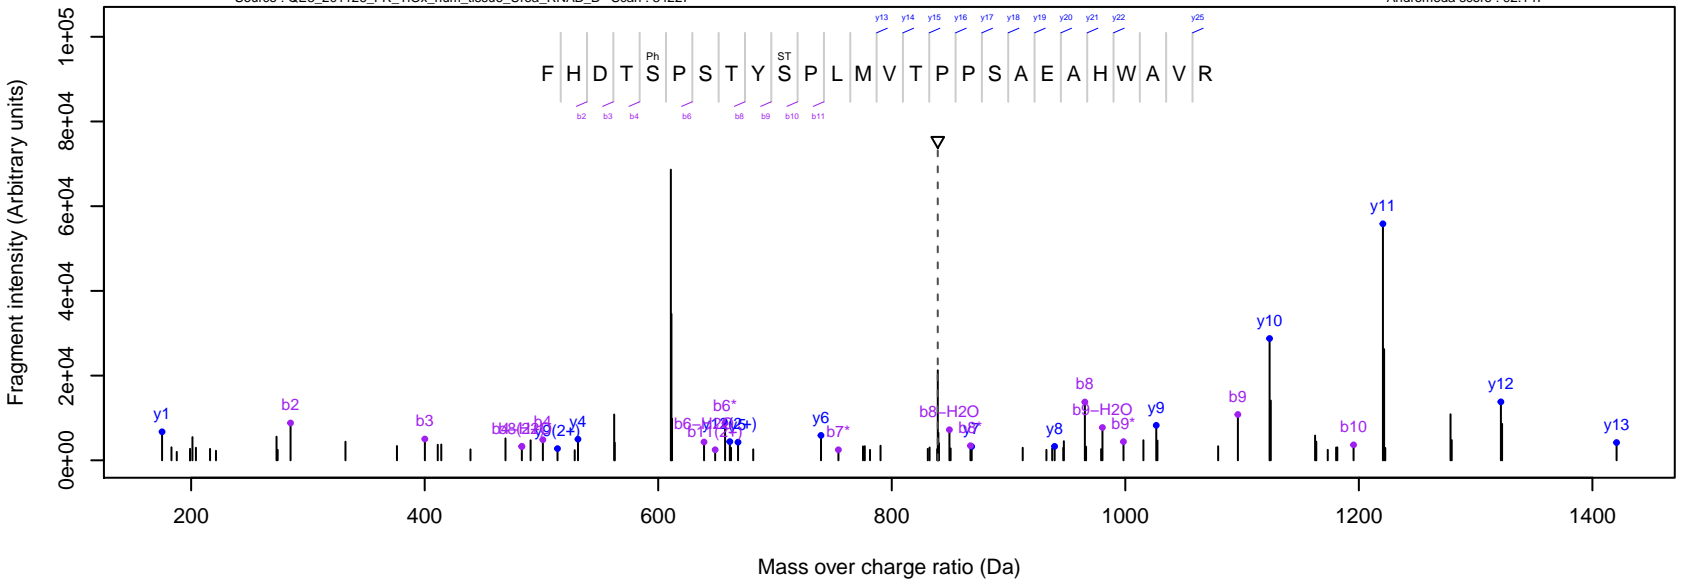

SSGDVLETFNLFLENADDS(Phospho (STY))DEEDNDM(Oxidation (M))EGIPEGK-3+

Source : QE3\_201126\_FR\_TiOx\_hum\_tissue\_Urea\_RNAB\_H Scan : 61615

Andromeda score : 92.142

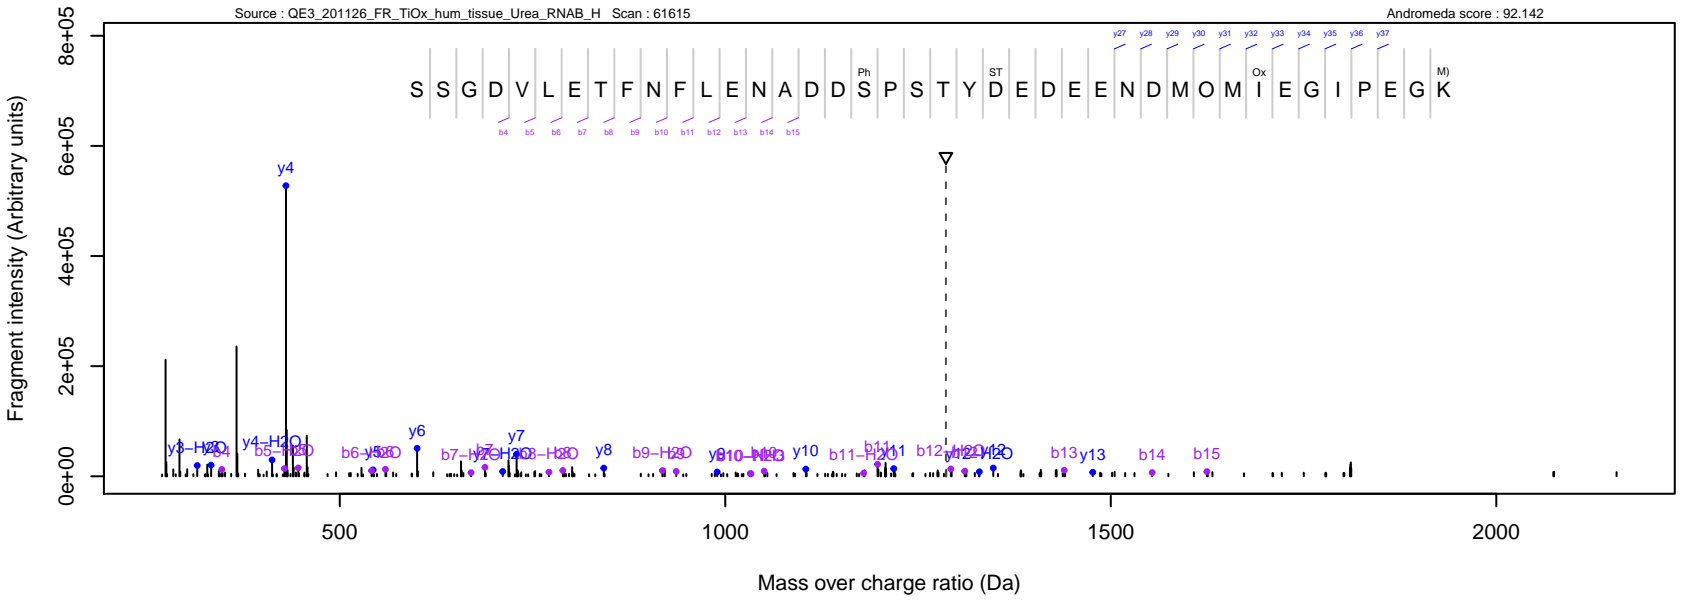

TFAPLPEFEQEEDDGEVTP(Phospho (STY))EDSPSTYDEDFIQPR-3+

Source : QE3\_201126\_FR\_TiOx\_hum\_tissue\_Urea\_RNAB\_B Scan : 62697

Andromeda score : 92.135

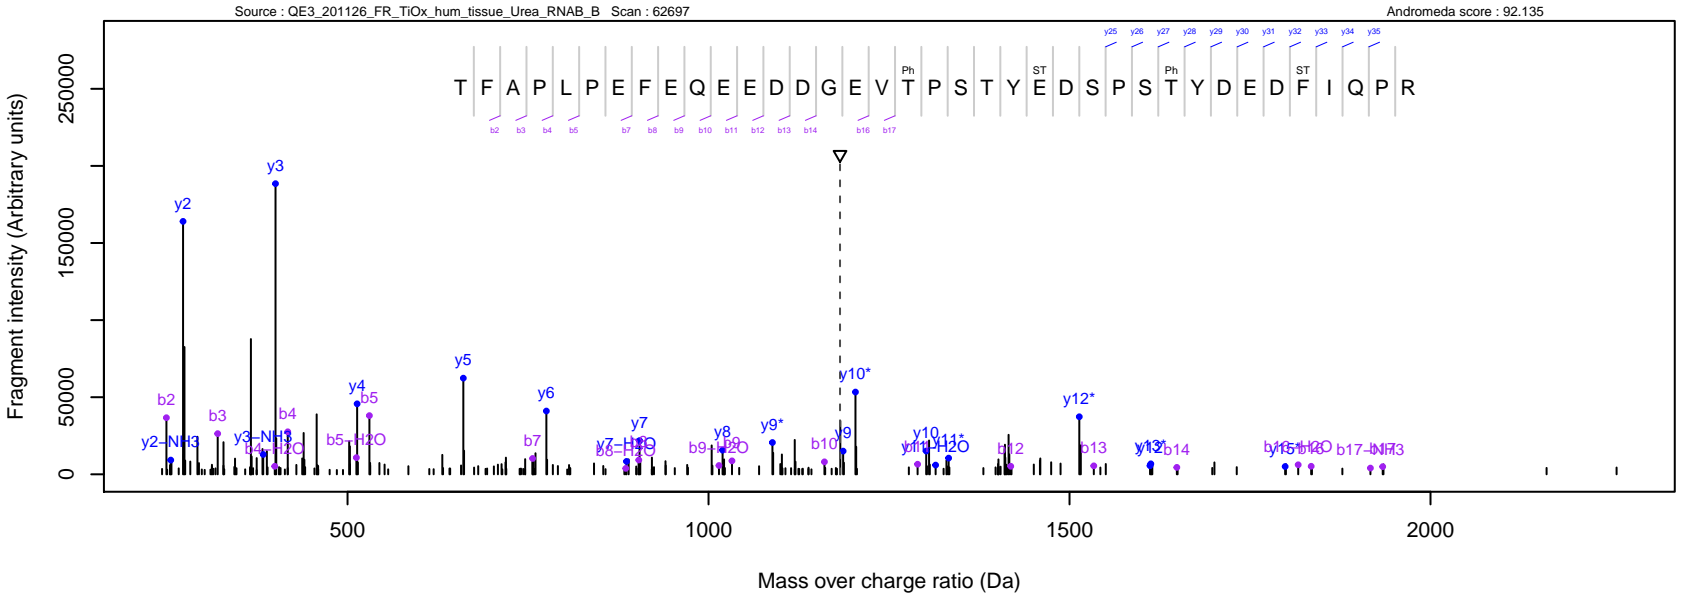

AM(Oxidation (M))VSPFHS(Phospho (STY))PPSTPSSPGVR-3+

Source : QE3\_201126\_FR\_TiOx\_hum\_tissue\_Urea\_RNAB\_H Scan : 21704

Andromeda score : 92.01

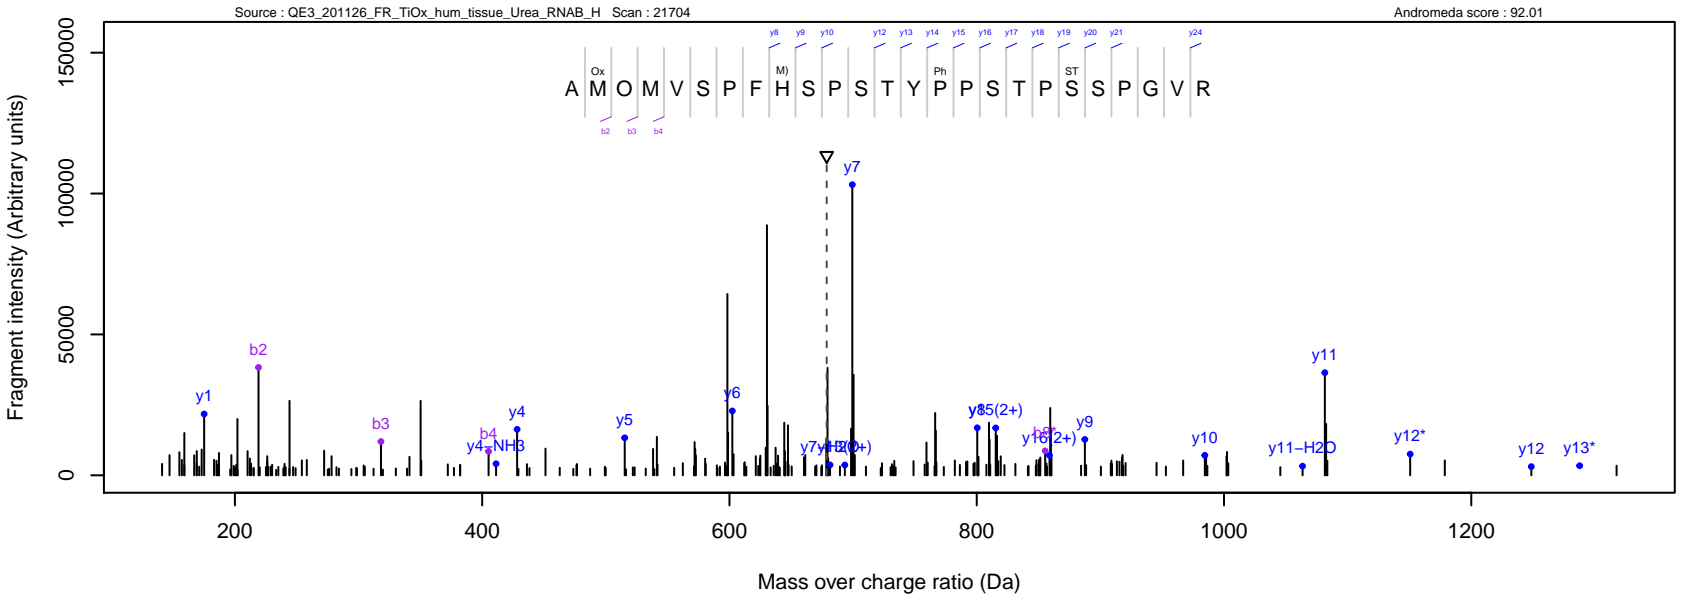



RNYS(Phospho (STY))REQHGVAASCLEDLR-4+

Source : QE3\_201126\_FR\_TIOx\_hum\_tissue\_Urea\_RNAB\_H Scan : 17138

Andromeda score : 92.01

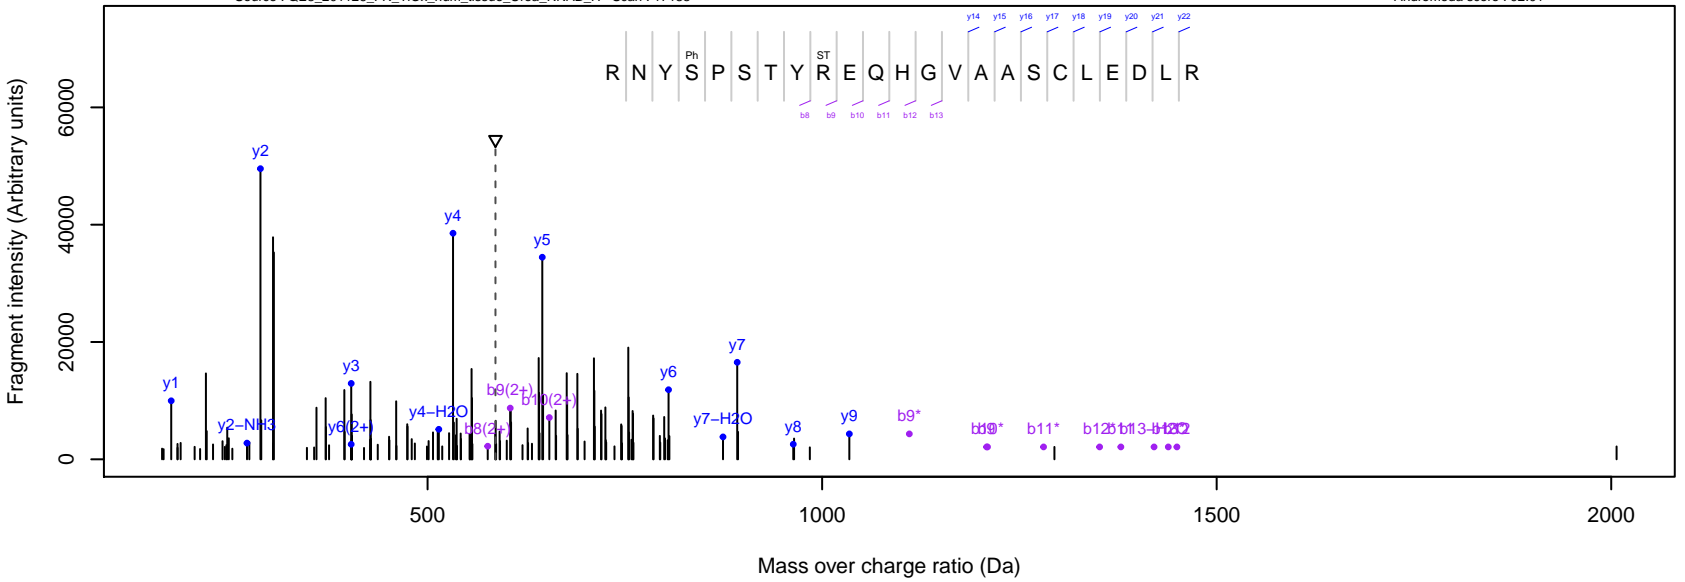

LRGTQEVAPPTPLTPT(Phospho (STY))SHTANTSPRPVSGM(Oxidation (M))ER-4+

Source : QE3\_201126\_FR\_TIOx\_hum\_tissue\_Urea\_RNAB\_H Scan : 18065

Andromeda score : 91.967

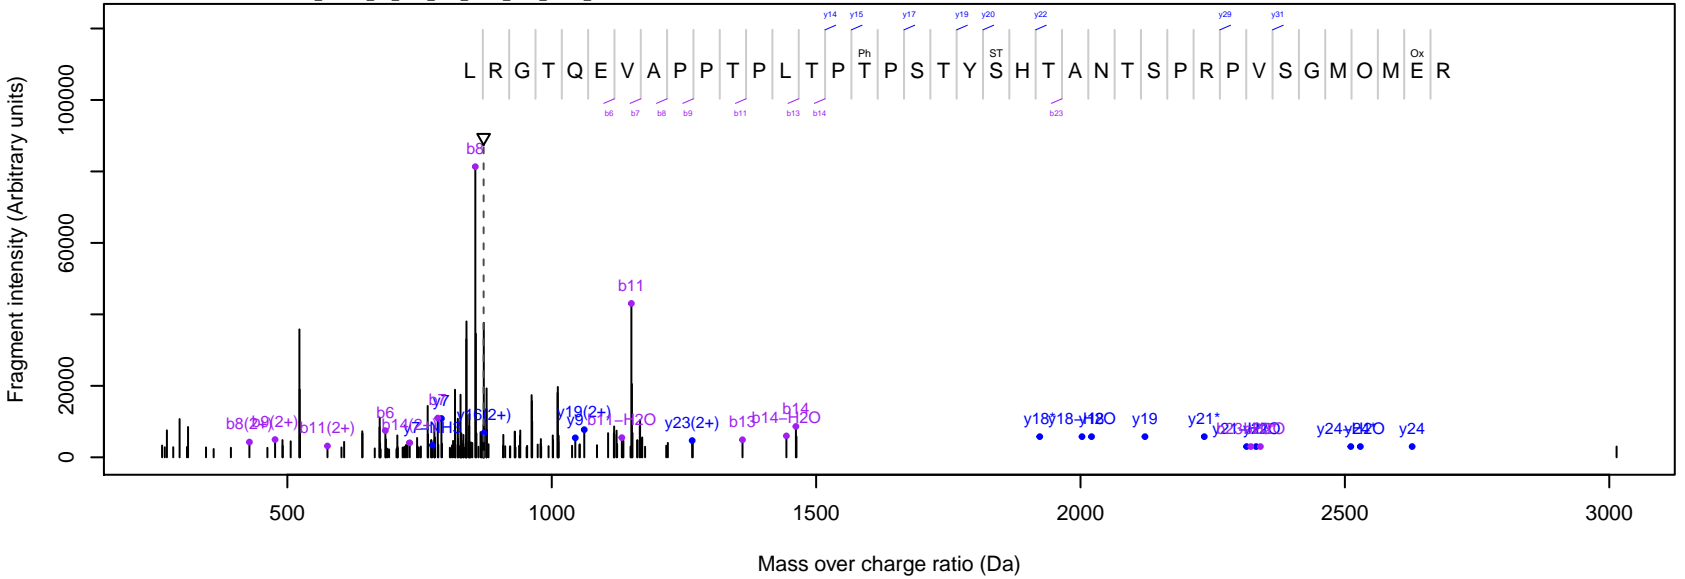

AVLFCLS(Phospho (STY))EDKK-2+

Source : QE3\_201126\_FR\_TIOx\_hum\_tissue\_Urea\_RNAB\_N Scan : 27763

Andromeda score : 91.961

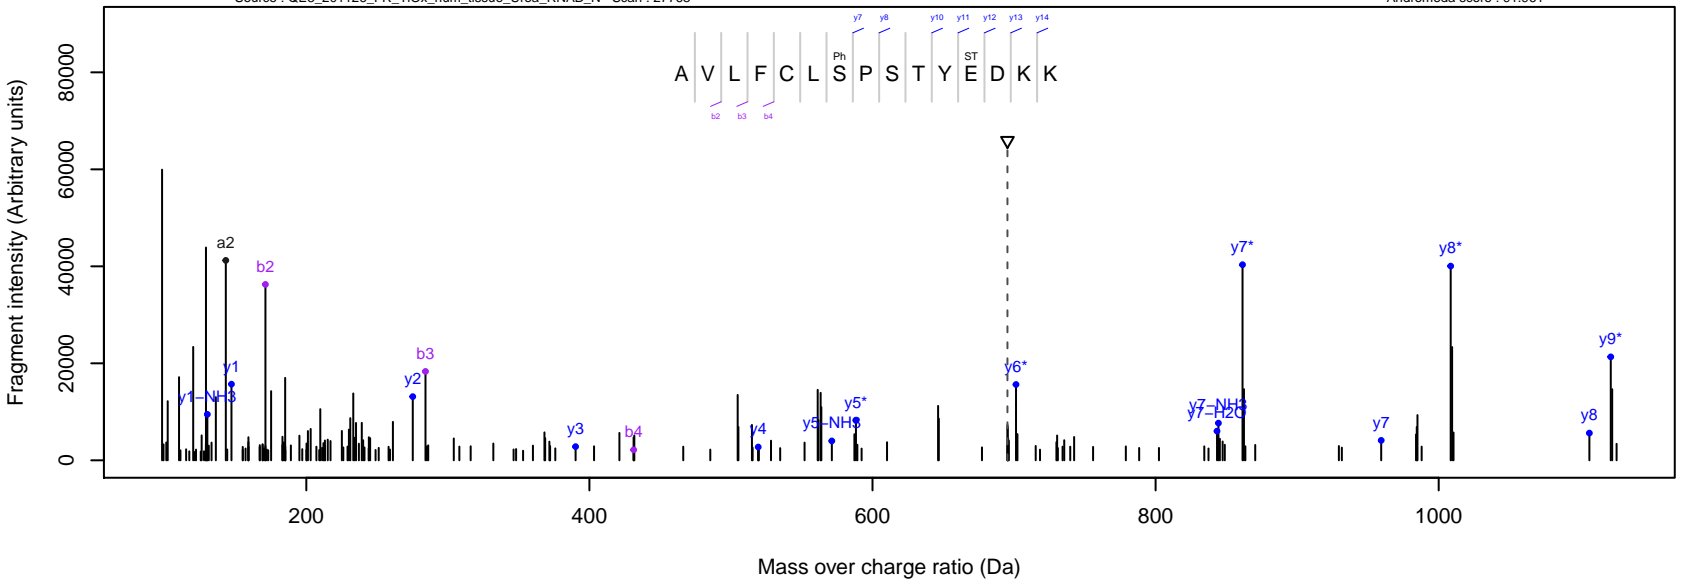

M(Oxidation (M))KS(Phospho (STY))LEQDALR-2+

Source : QE3\_201126\_FR\_TiOx\_hum\_tissue\_Urea\_RNAB\_H Scan : 10949

Andromeda score : 91.939

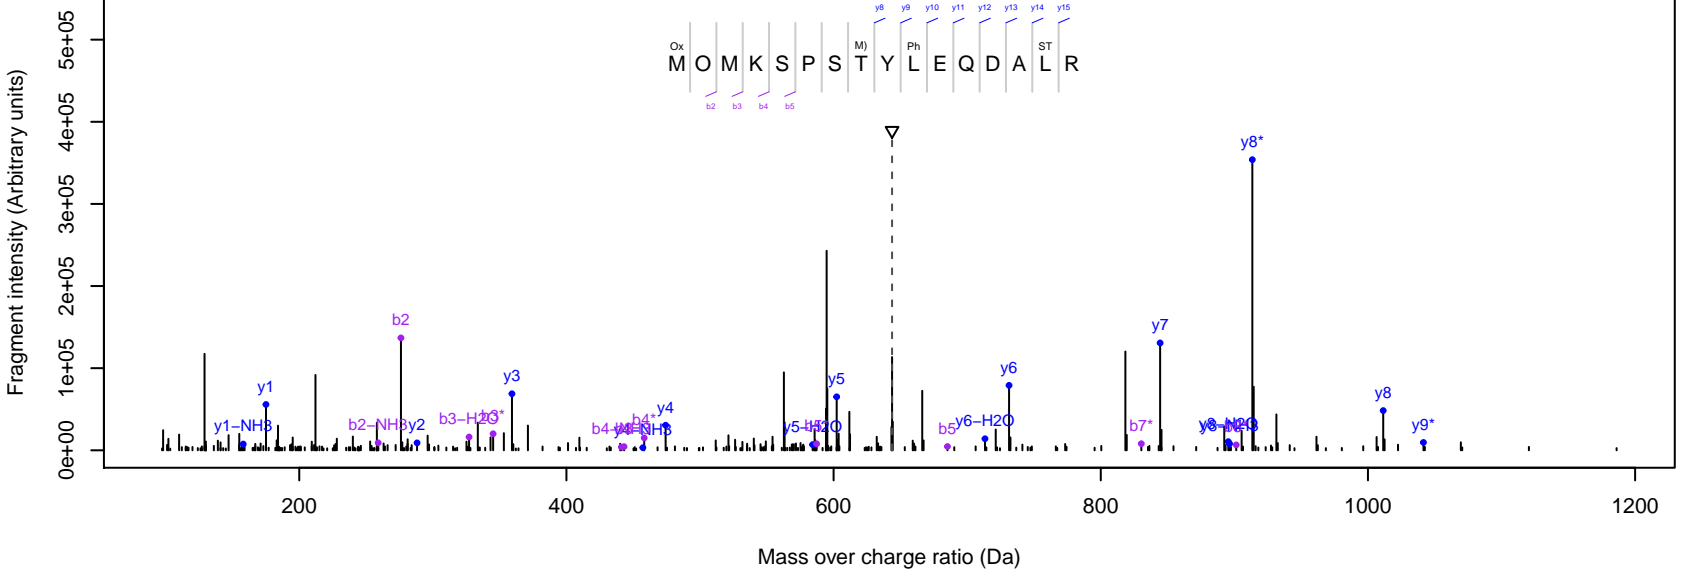

SLGS(Phospho (STY))ADELFK-2+

Source : QE3\_201126\_FR\_TiOx\_hum\_tissue\_Urea\_RNAB\_H Scan : 38483

Andromeda score : 91.937

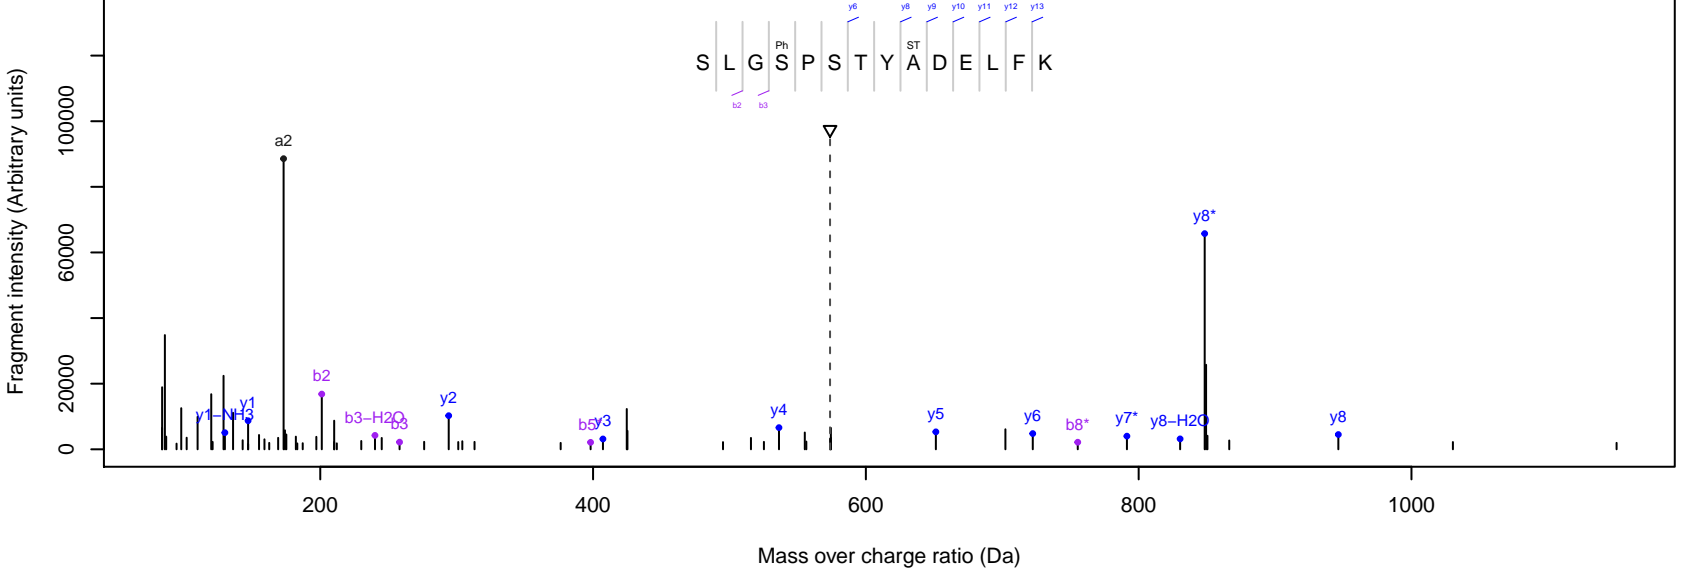

AGETRFT(Phospho (STY))DTR-3+

Source : QE3\_201126\_FR\_TiOx\_hum\_tissue\_Urea\_RNAB\_H Scan : 7152

Andromeda score : 91.914

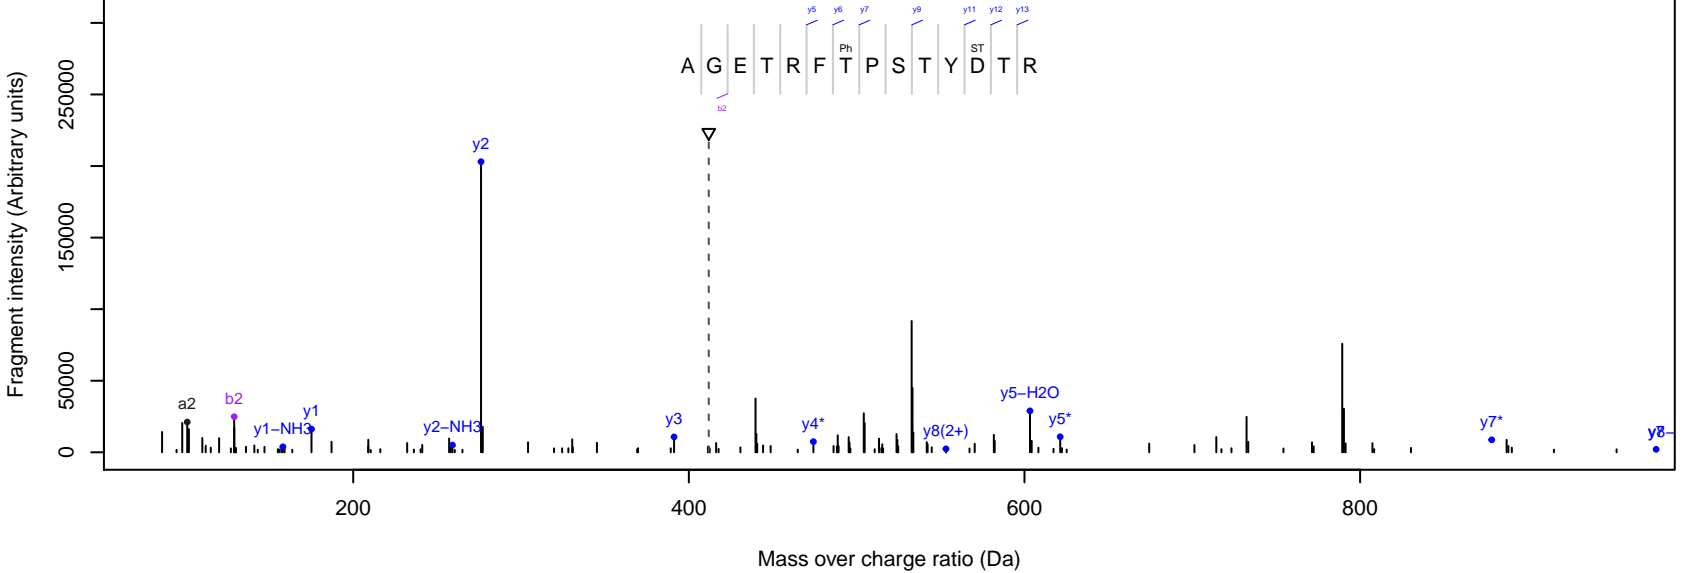

TVSAS(Phospho (STY))STGDLPK-2+

Source : QE3\_201126\_FR\_TiOx\_hum\_tissue\_Urea\_RNAB\_B Scan : 14060

Andromeda score : 91.914

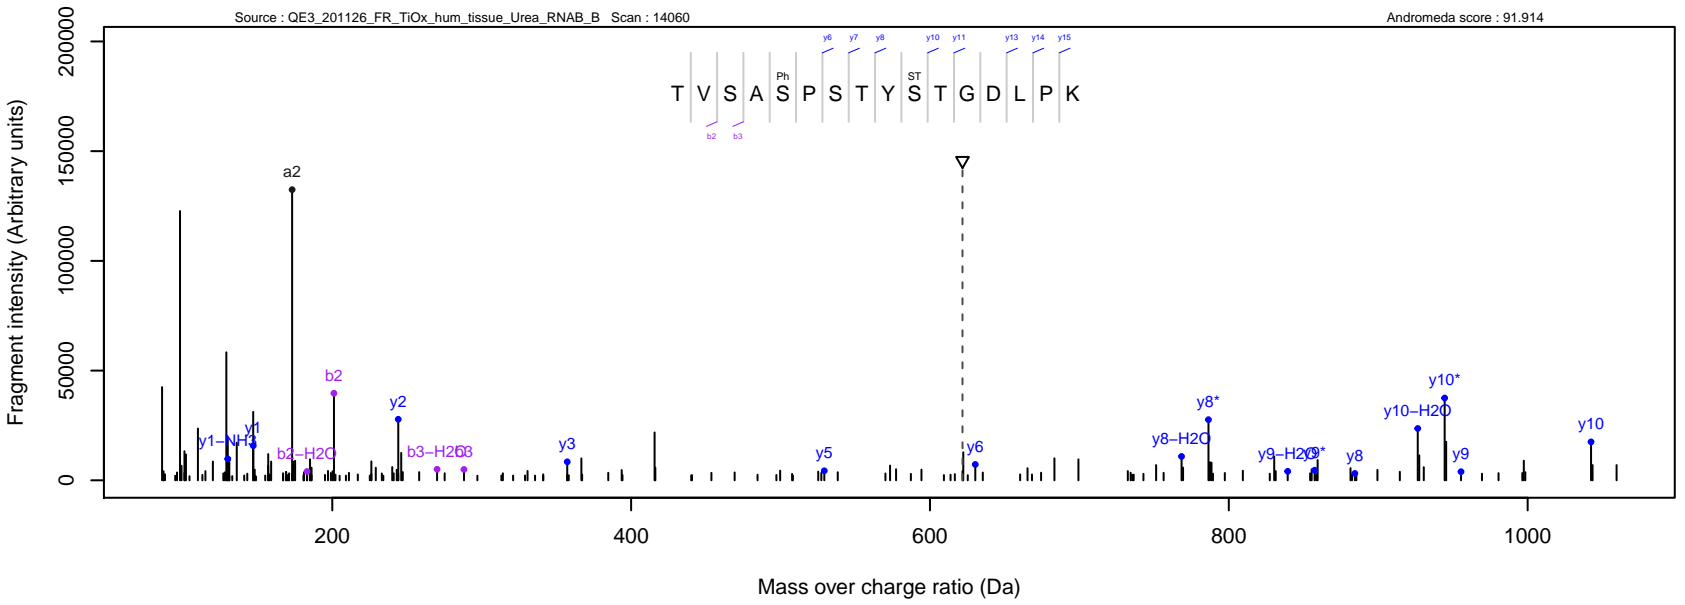

GRLDSEMDHS(Phospho (STY))ENEDYTMSSPLPGKK-4+

Source : QE3\_201126\_FR\_TiOx\_hum\_tissue\_Urea\_RNAB\_H Scan : 19880

Andromeda score : 91.873

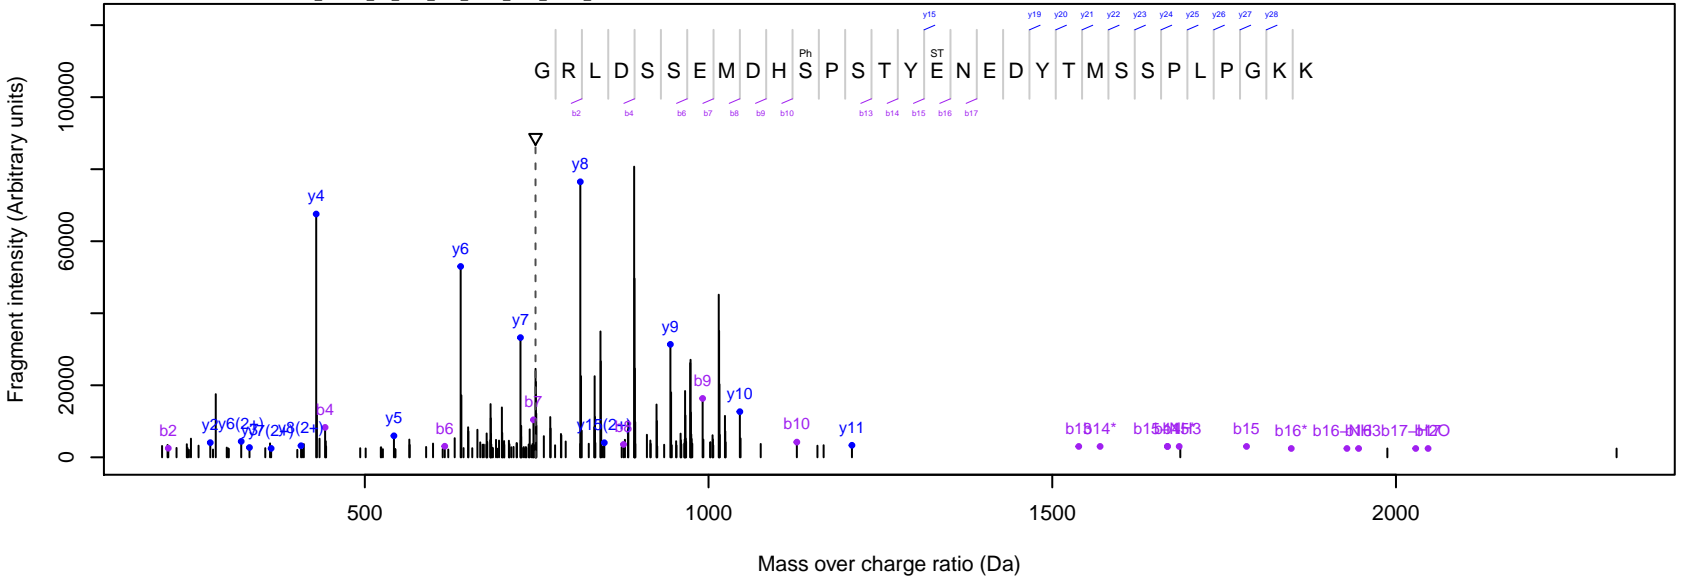

NS(Phospho (STY))CPGPLDSSAFLLPEDPKPR-3+

Source : QE3\_201126\_FR\_TiOx\_hum\_tissue\_Urea\_RNAB\_B Scan : 57521

Andromeda score : 91.873

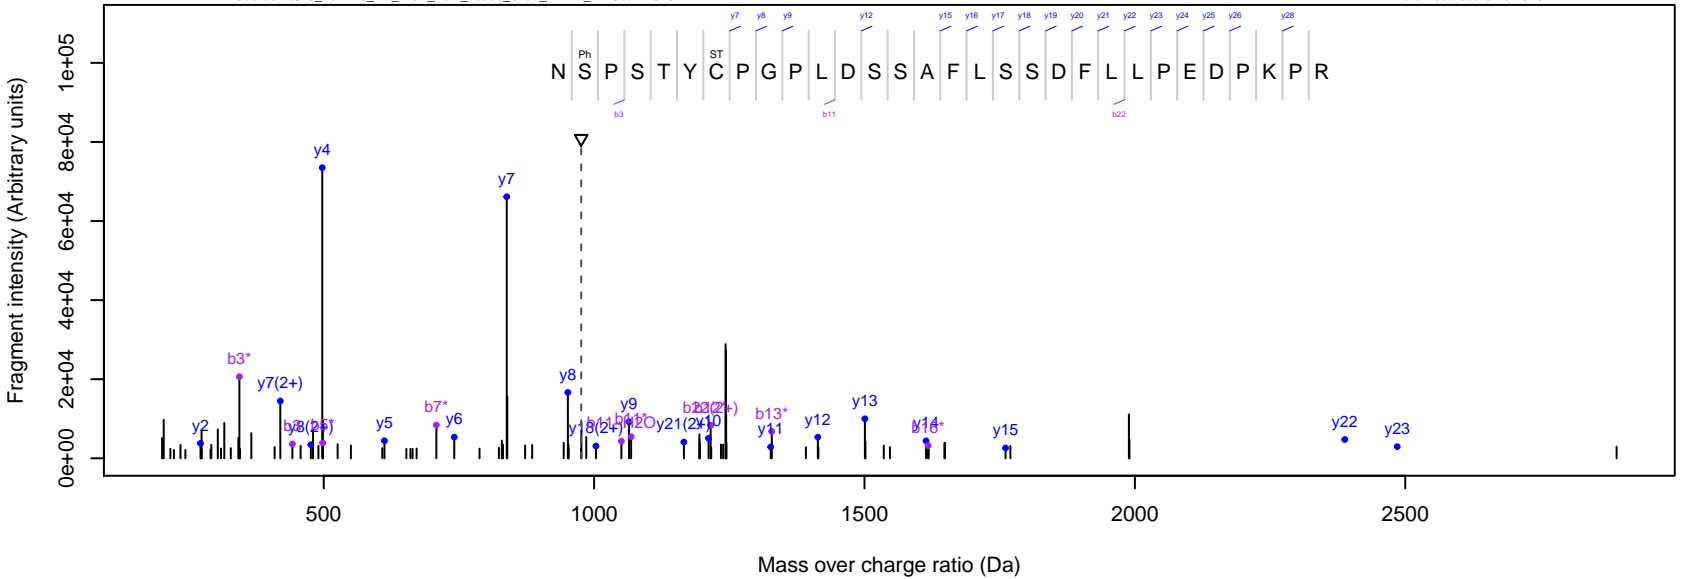

SDVQEE(Phospho (STY))EGS(Phospho (STY))DTDDNKDSAAFEDNEVQDEFLEK-3+

Source : QE3\_201126\_FR\_TiOx\_hum\_tissue\_Urea\_RNAB\_N Scan : 45927

Andromeda score : 91.873

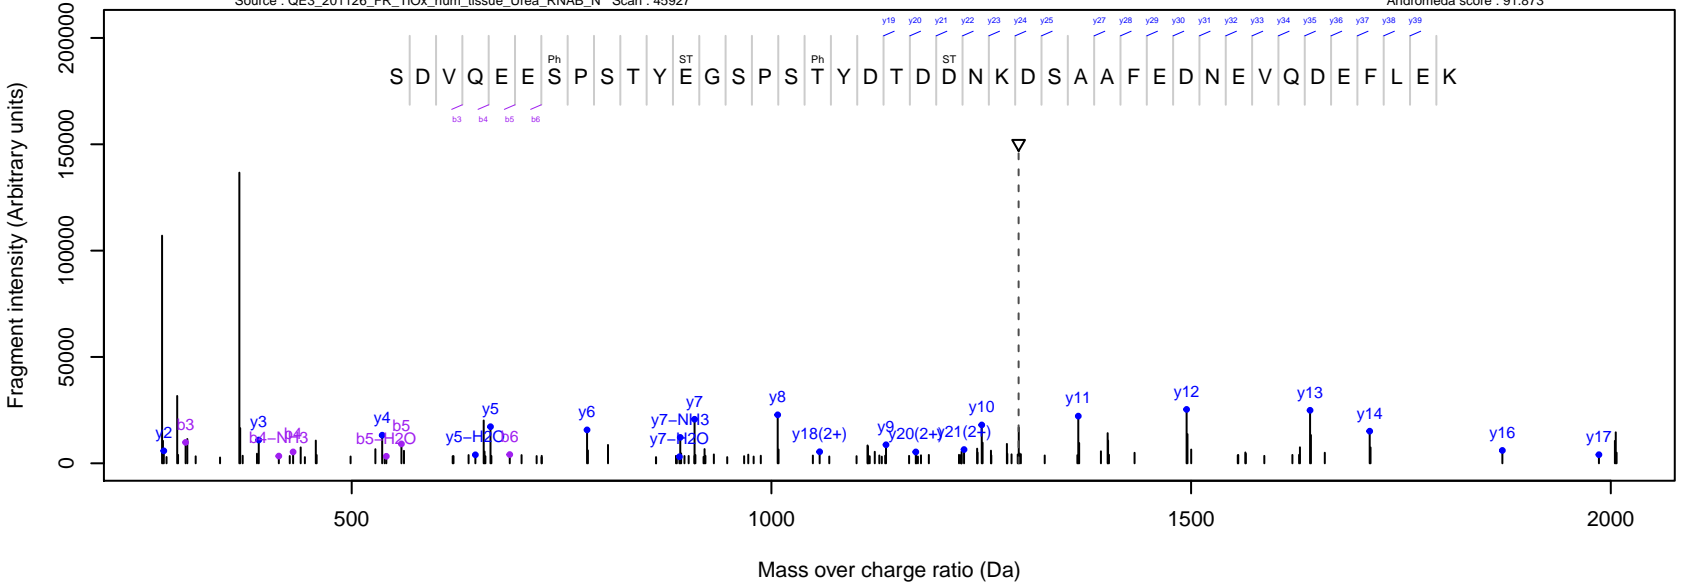

KTS(Phospho (STY))SVSSISQVSPER-2+

Source : QE3\_201126\_FR\_TiOx\_hum\_tissue\_Urea\_RNAB\_N Scan : 13664

Andromeda score : 91.858

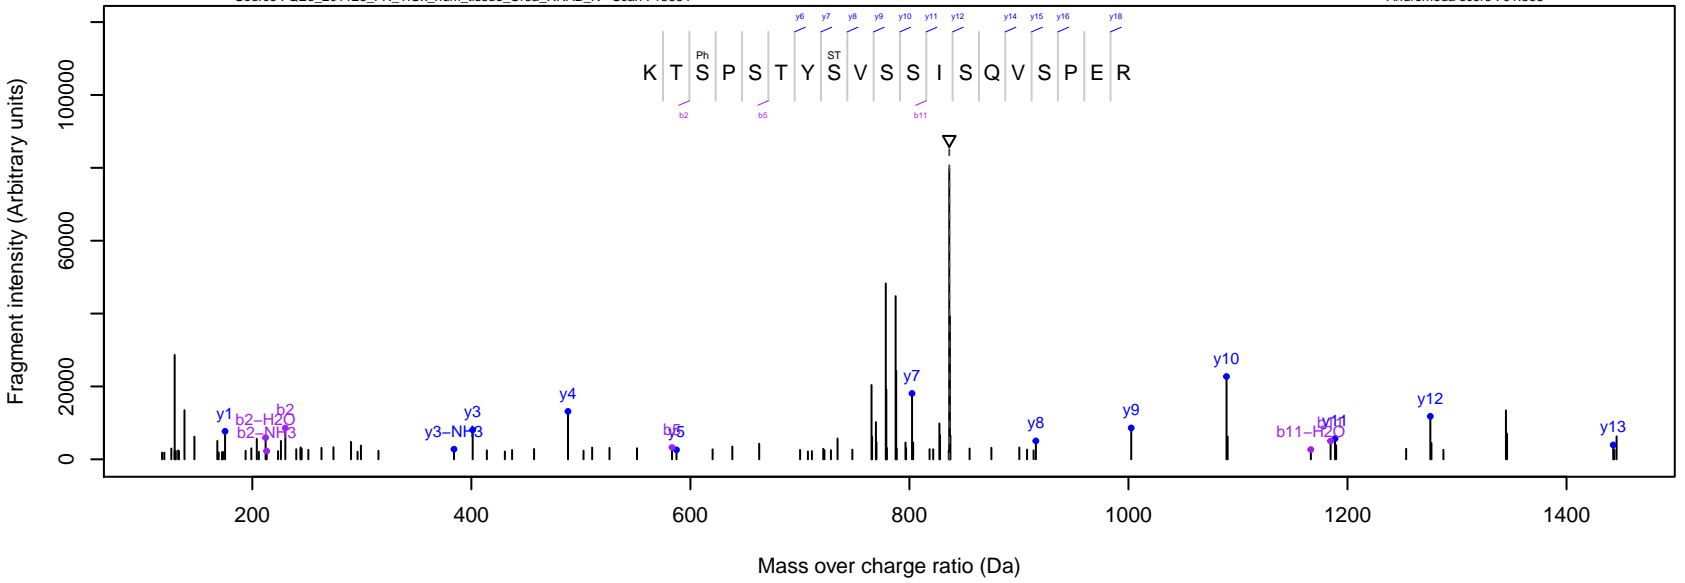

PGS(Phospho (STY))LPLNAEACWPK-2+

Source : QE3\_201126\_FR\_TiOx\_hum\_tissue\_Urea\_RNAB\_B Scan : 42263

Andromeda score : 91.812

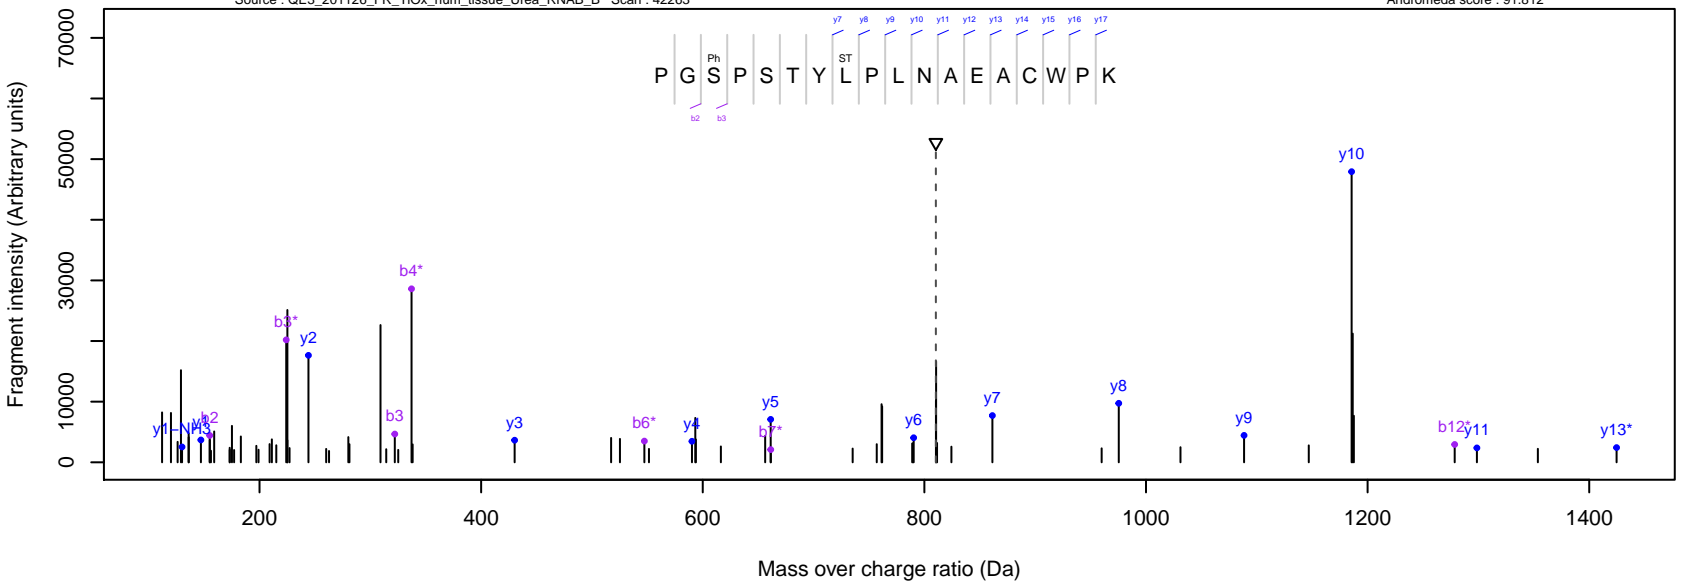

LKNGFPHPPEDCNPSEAAASPSTYEEESPSTYNS E I E Q E I P V E Q K

Source : QE3\_201126\_FR\_TiOx\_hum\_tissue\_Urea\_RNAB\_N Scan : 36085

Andromeda score : 91.751

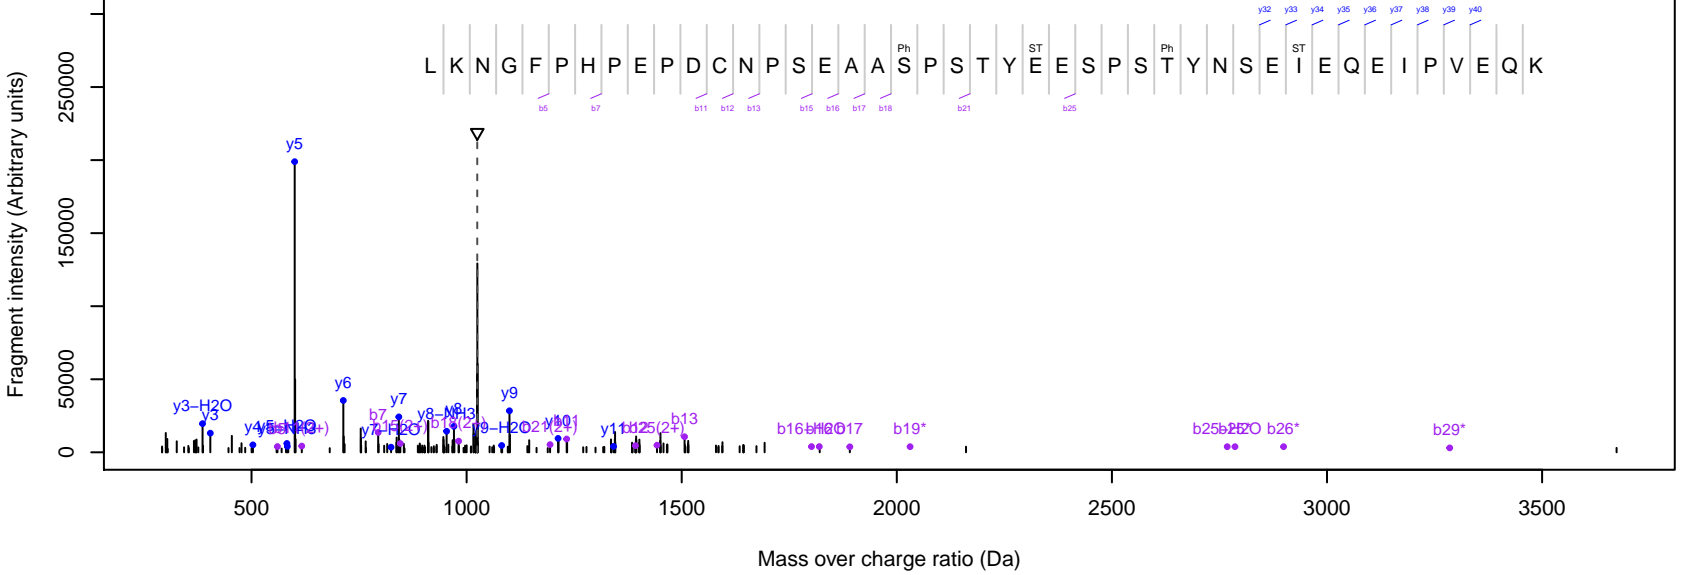

AHS(Phospho (STY))SPASLQLGAVSPGT(Phospho (STY))LTPTGVVSGPAATPTAQHLR-4+

Source : QE3\_201126\_FR\_TiOx\_hum\_tissue\_Urea\_RNAB\_B Scan : 43363

Andromeda score : 91.748

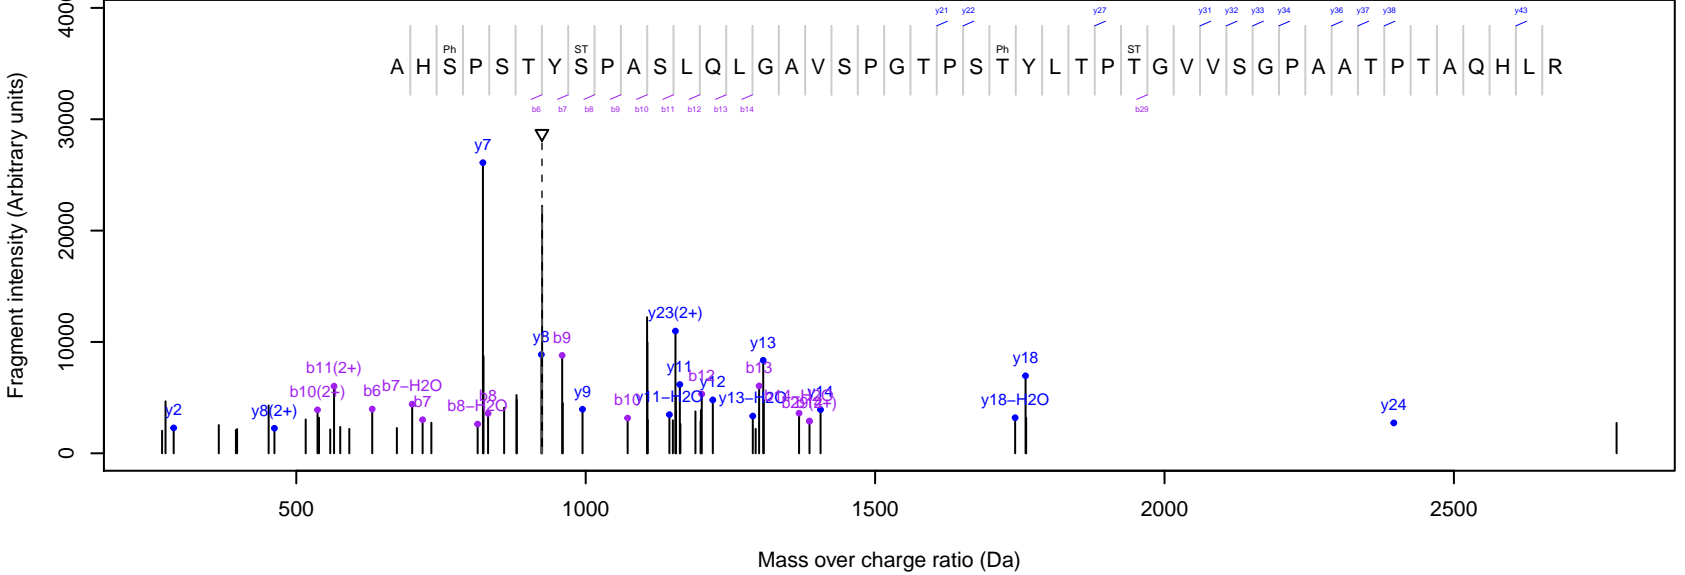

DFQDYM(Oxidation (M))EPEEGCQGS(Phospho (STY))PQRR-3+

Source : QE3\_201126\_FR\_TiOx\_hum\_tissue\_Urea\_RNAB\_N Scan : 19188

Andromeda score : 91.729

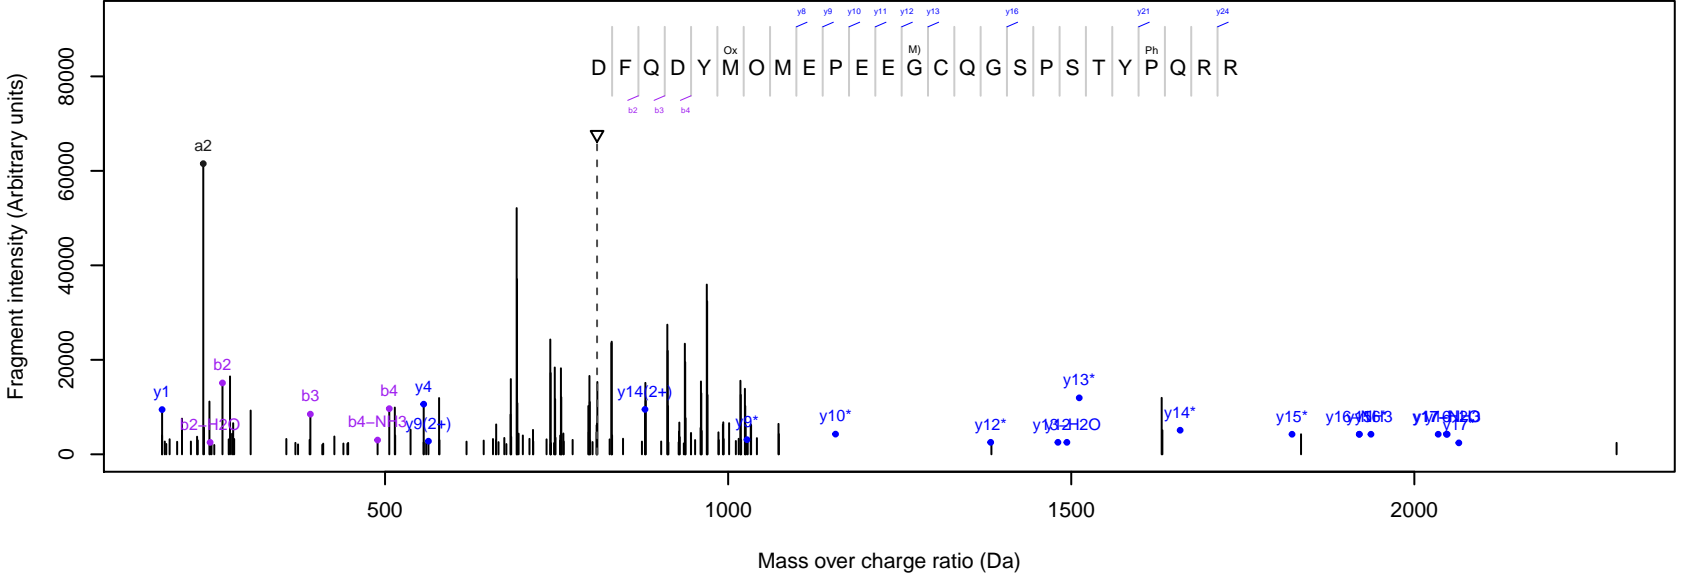

DRAS(Phospho (STY))PES(Phospho (STY))LDLTRDITSLR-3+

Source : QE3\_201126\_FR\_TiOx\_hum\_tissue\_Urea\_RNAB\_H Scan : 29955

Andromeda score : 91.729

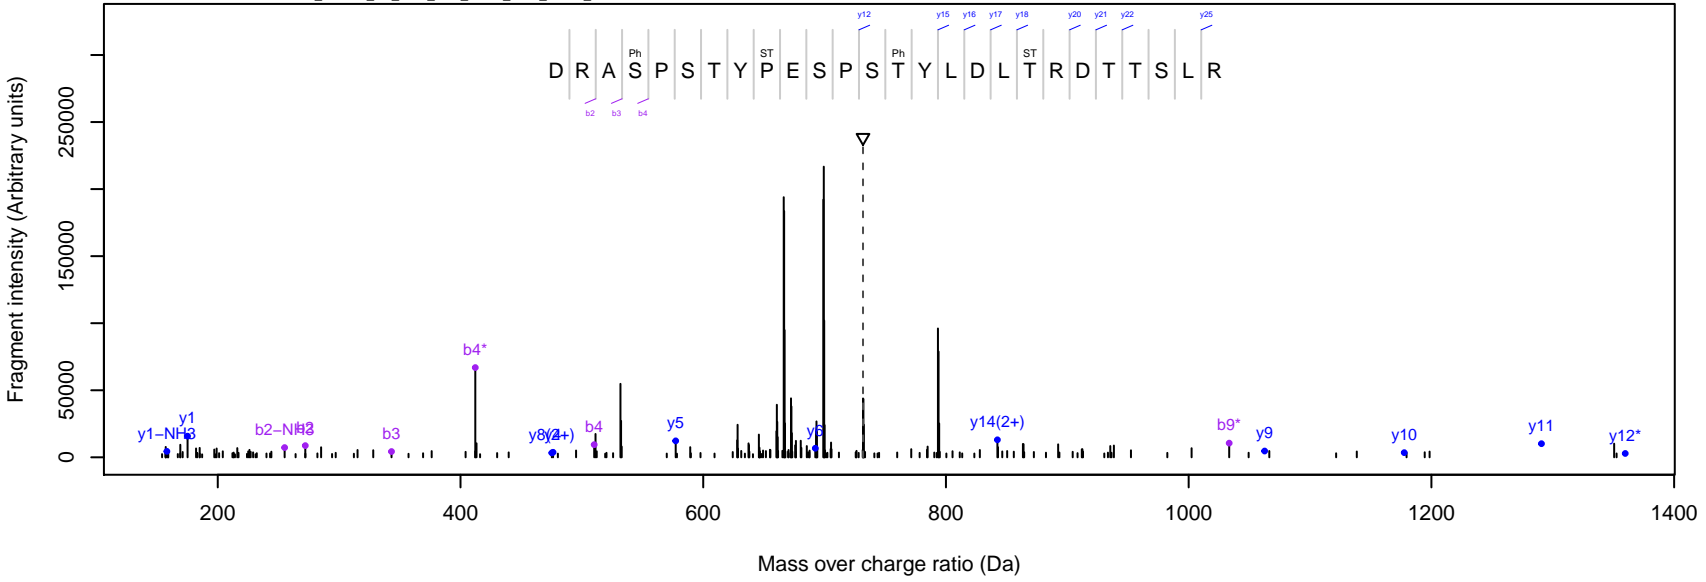

GQGTAS(Phospho (STY))SGNVSDLAQTVK-2+

Source : QE3\_201126\_FR\_TiOx\_hum\_tissue\_Urea\_RNAB\_H Scan : 24107

Andromeda score : 91.725

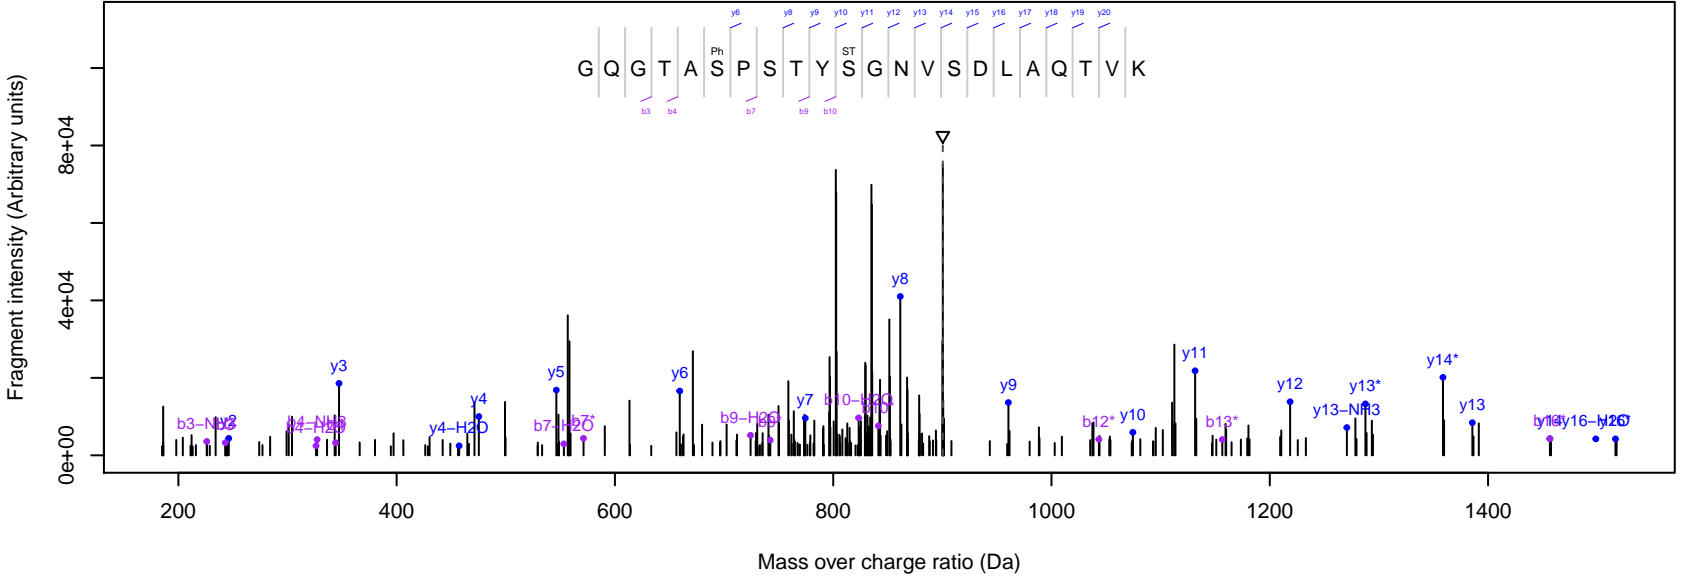

KDS(Phospho (STY))KAHEQALAEITK-3+

Source : QE3\_201126\_FR\_TiOx\_hum\_tissue\_Urea\_RNAB\_H Scan : 10641

Andromeda score : 91.725

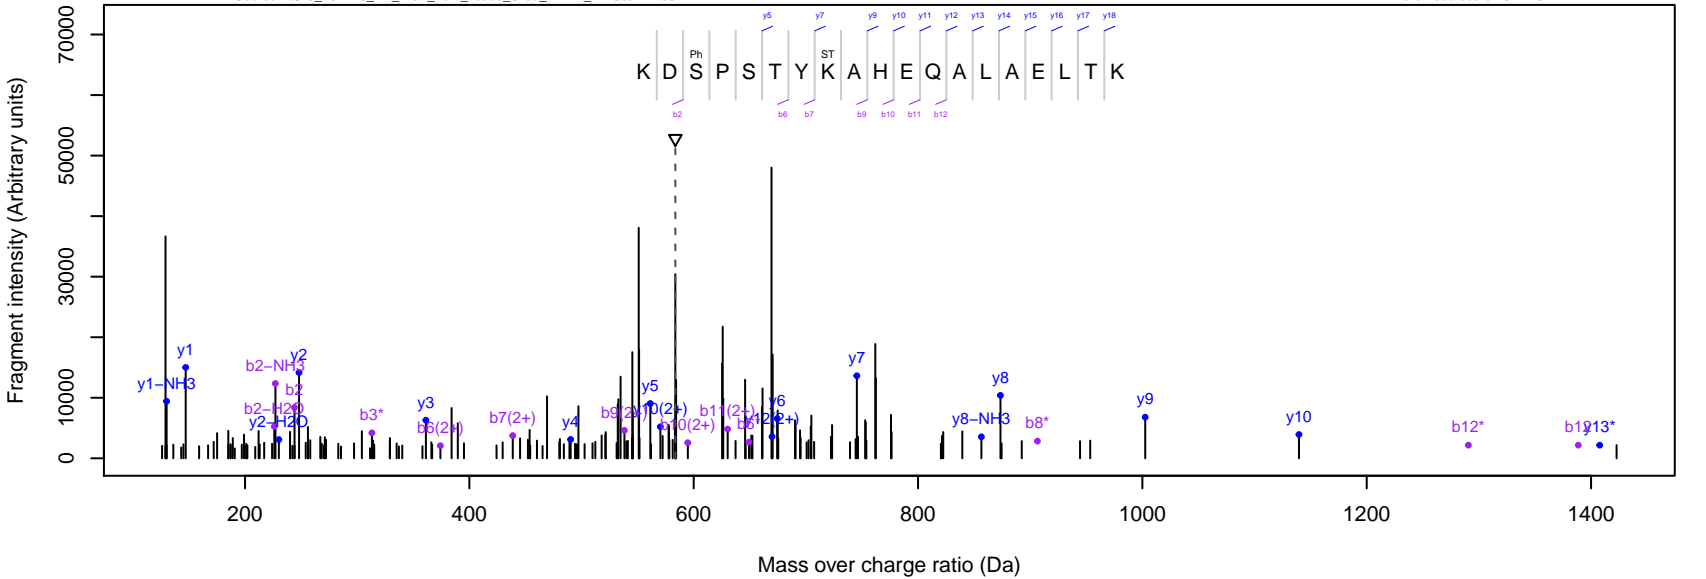



LSEEAECNPST(Phospho (STY))PSK-2+

Source : QE3\_201126\_FR\_TiOx\_hum\_tissue\_Urea\_RNAB\_B Scan : 12070

Andromeda score : 91.712

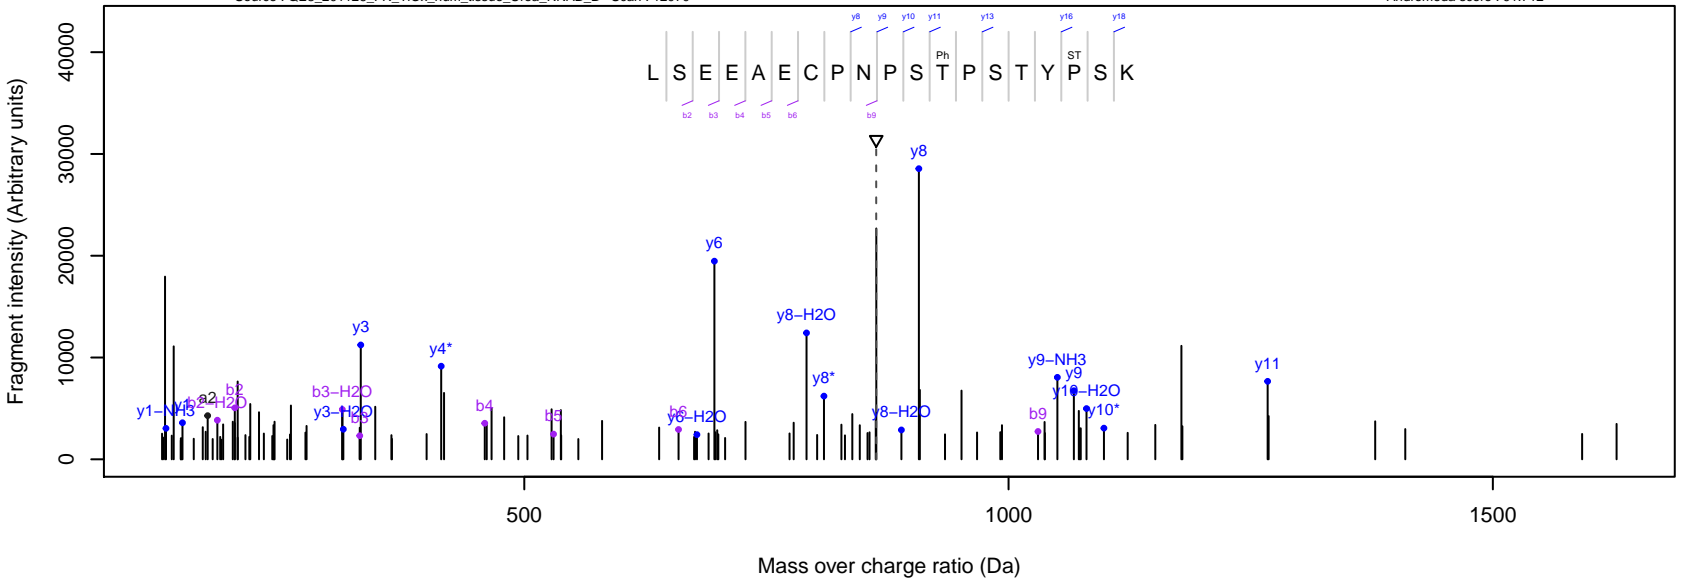

TAPPALPTGYDS(Phospho (STY))EEEEERPMYSYDEK-3+

Source : QE3\_201126\_FR\_TiOx\_hum\_tissue\_Urea\_RNAB\_N Scan : 30918

Andromeda score : 91.66

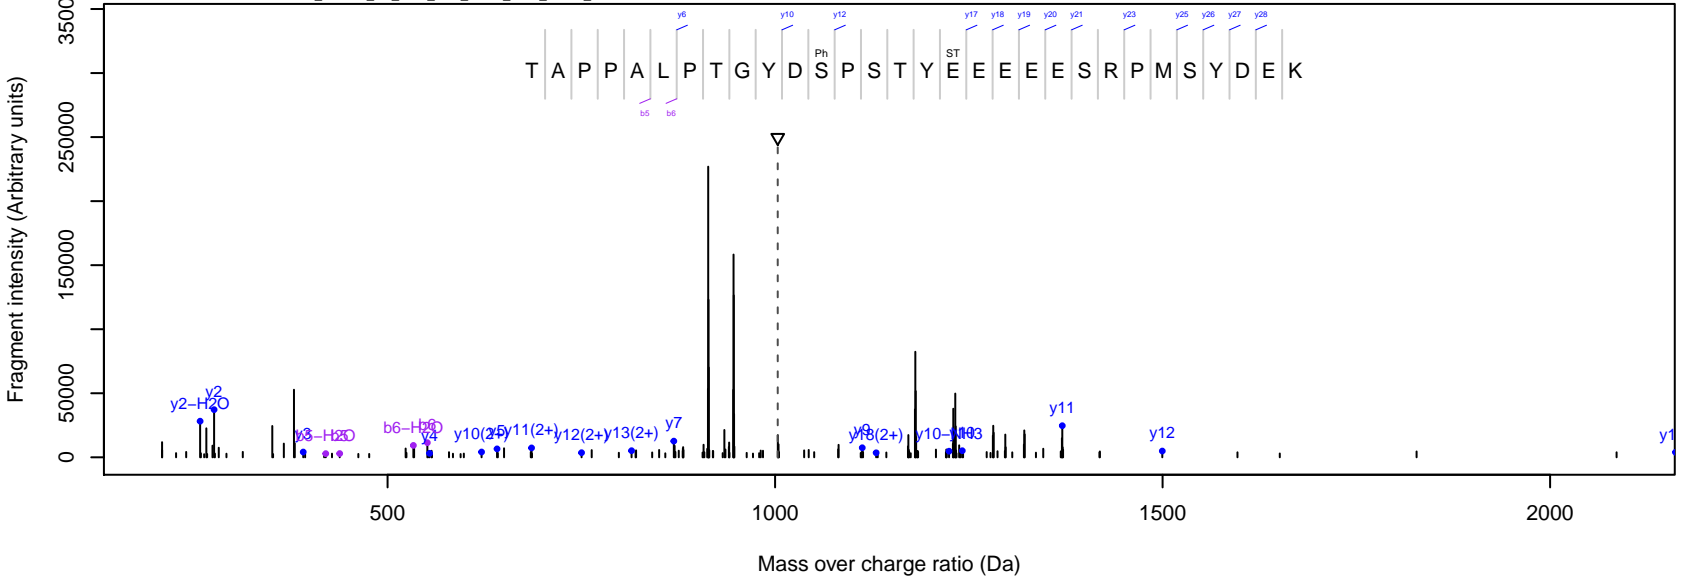

VTEPIS(Phospho (STY))AES(Phospho (STY))GEQVER-2+

Source : QE3\_201126\_FR\_TiOx\_hum\_tissue\_Urea\_RNAB\_H Scan : 22432

Andromeda score : 91.657

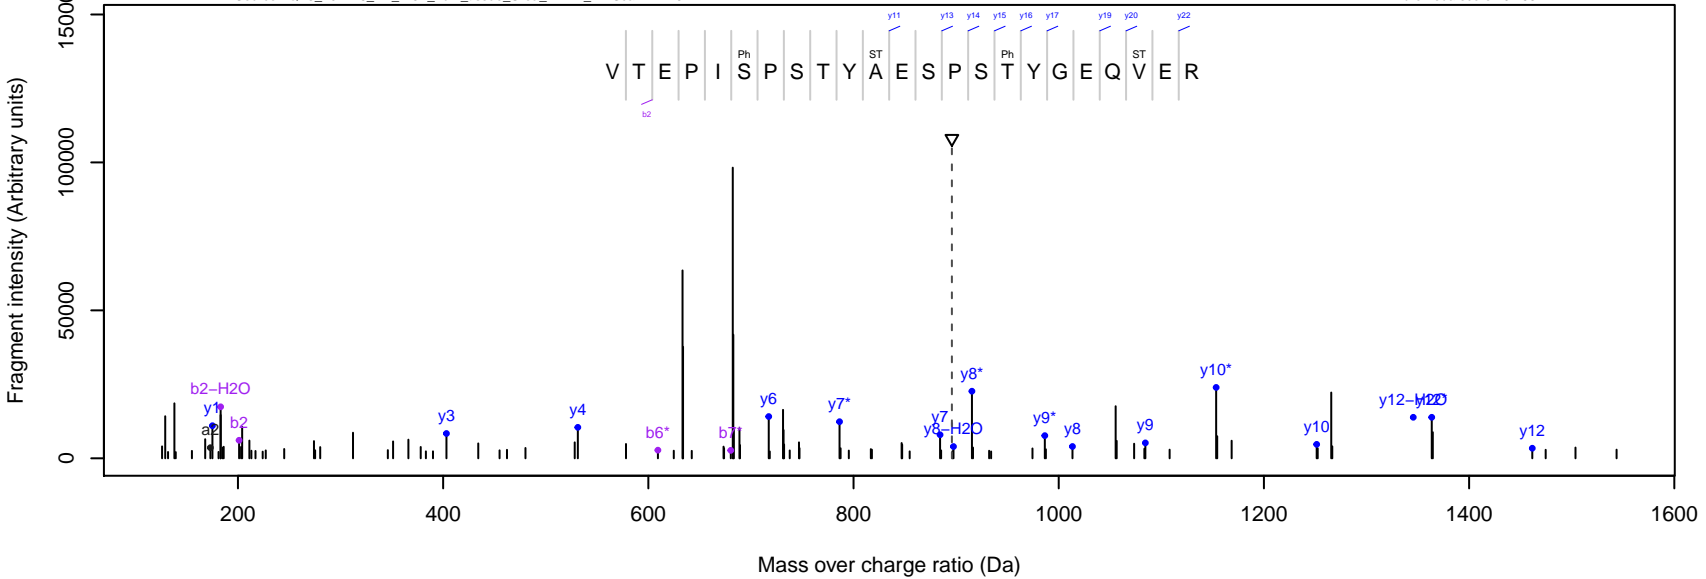



HEAPS(Phospho (STY))SPISGQPCGDDQNASPSK-3+

Source : QE3\_201126\_FR\_TiOx\_hum\_tissue\_Urea\_RNAB\_H Scan : 10329

Andromeda score : 91.655

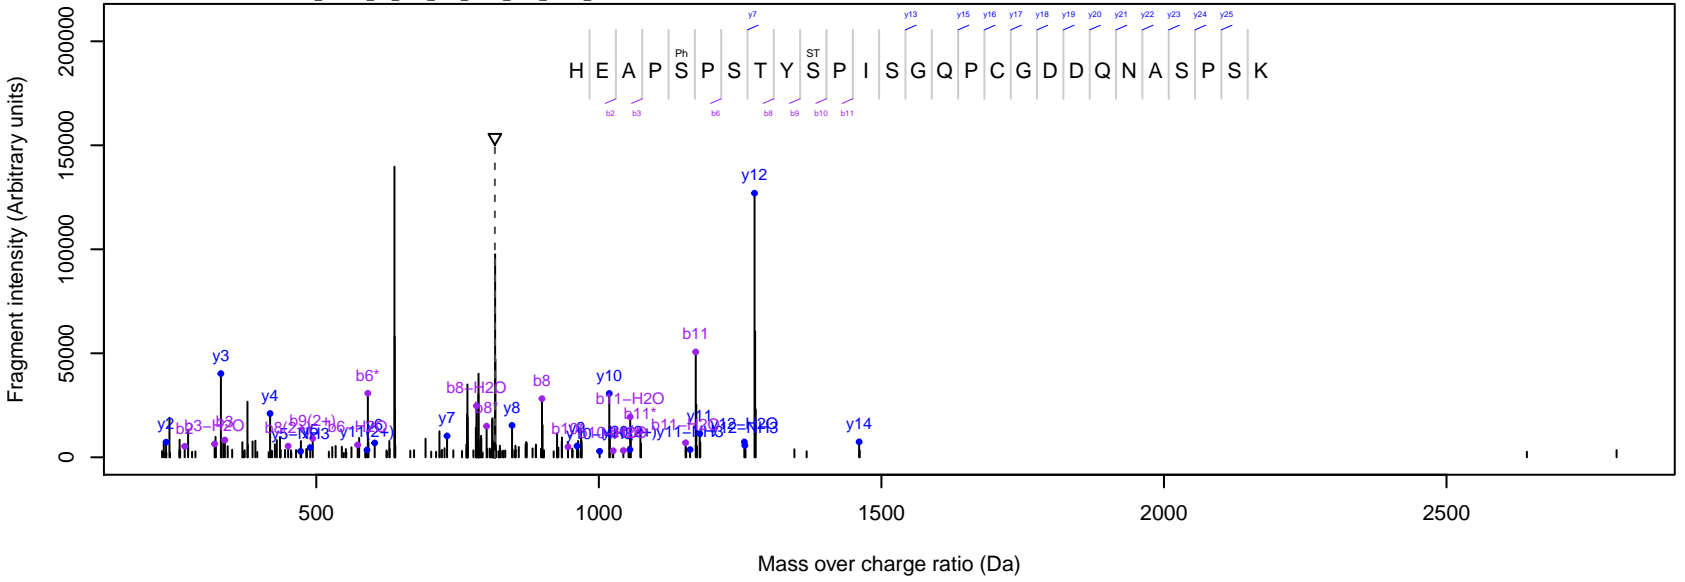

NKGDS(Phospho (STY))HLNVQVSNFK-3+

Source : QE3\_201126\_FR\_TiOx\_hum\_tissue\_Urea\_RNAB\_N Scan : 15711

Andromeda score : 91.64

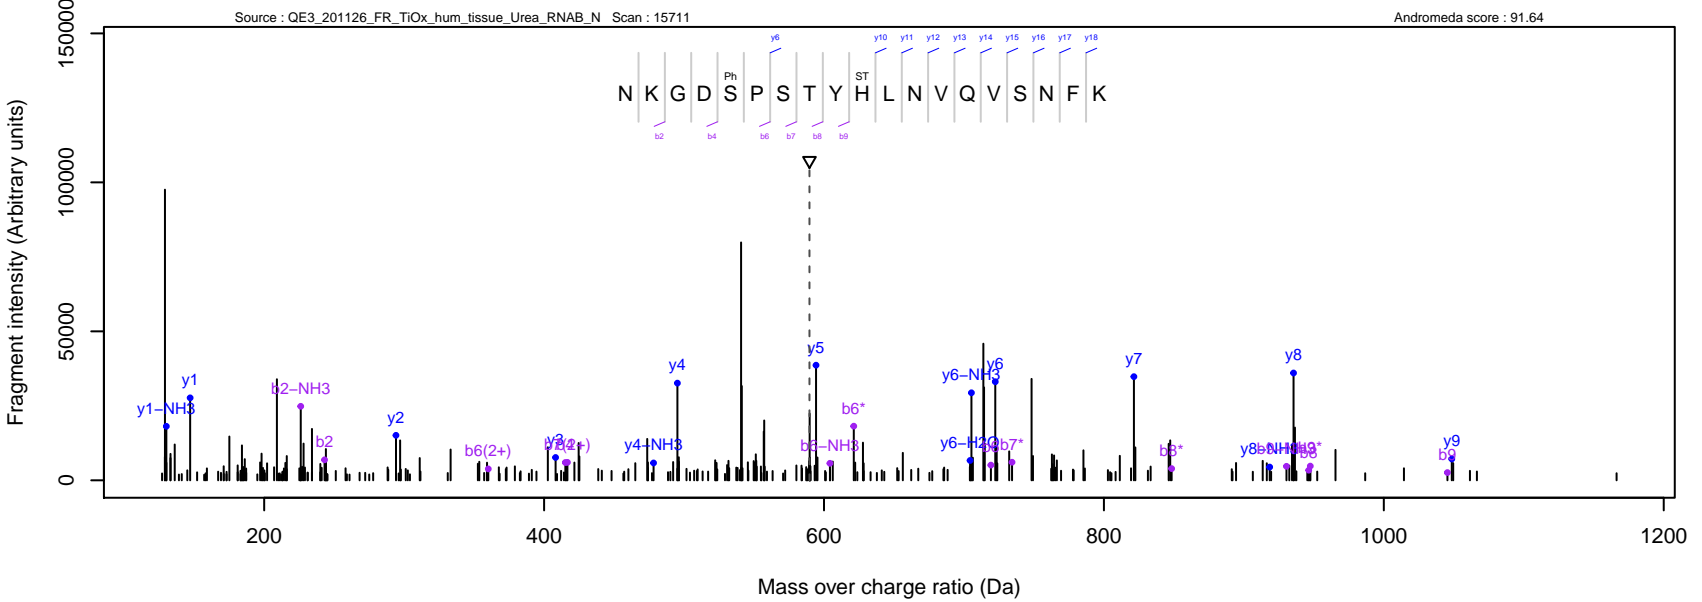

LSTTPS(Phospho (STY))PTSS(Phospho (STY))LHEDGVDFRR-3+

Source : QE3\_201126\_FR\_TiOx\_hum\_tissue\_Urea\_RNAB\_B Scan : 26102

Andromeda score : 91.618

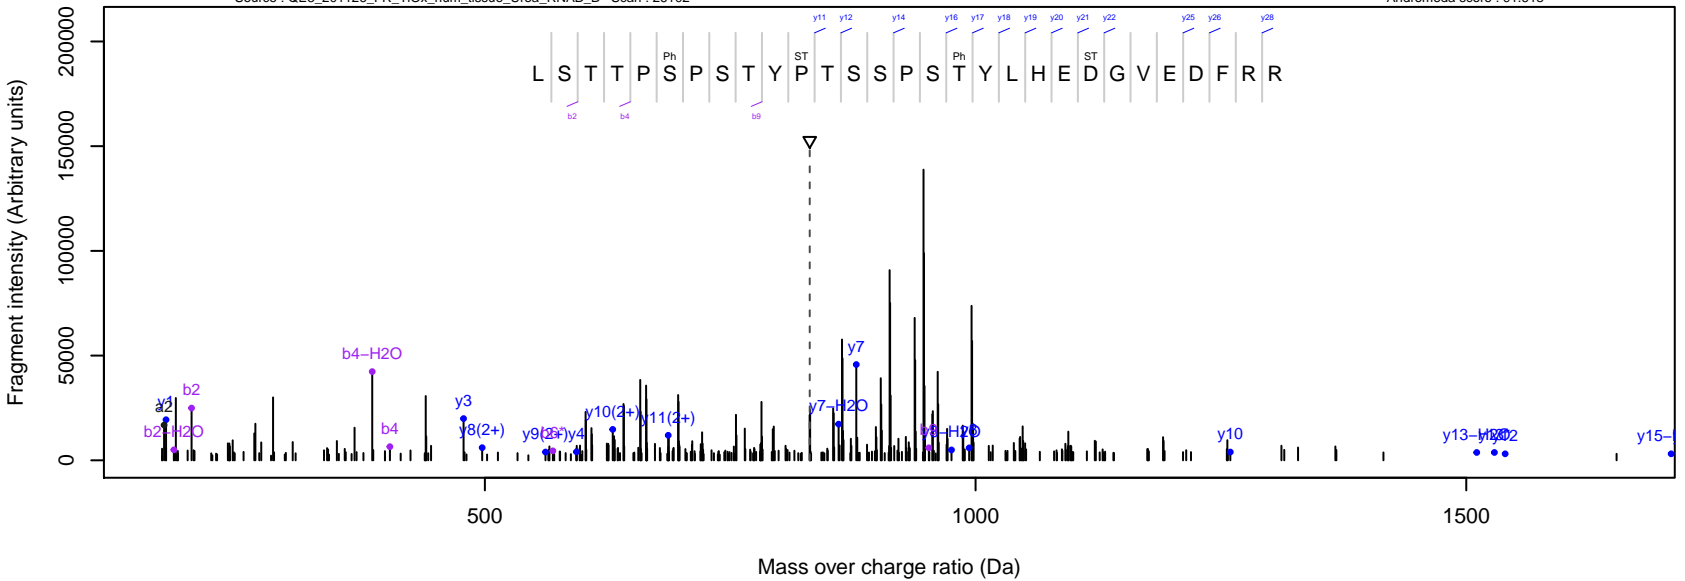

SVRDEVFHTDQDDPS(Phospho (STY))S(Phospho (STY))S(Phospho (STY))DDEGM(Oxidation (M))PYTRPVK-3+

Source : QE3\_201126\_FR\_TiOx\_hum\_tissue\_Urea\_RNAB\_H Scan : 29623

Andromeda score : 91.615

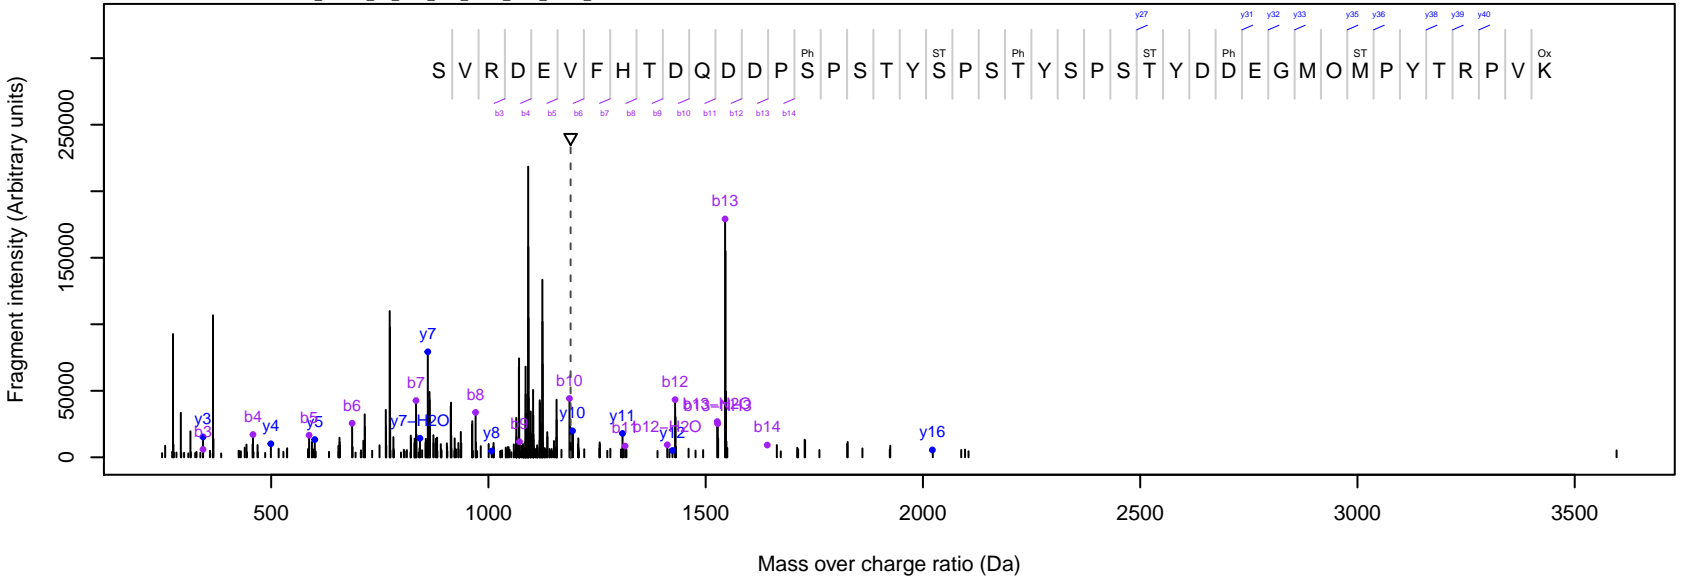

ANTLS(Phospho (STY))PVR-2+

Source : QE3\_201126\_FR\_TiOx\_hum\_tissue\_Urea\_RNAB\_H Scan : 11435

Andromeda score : 91.584

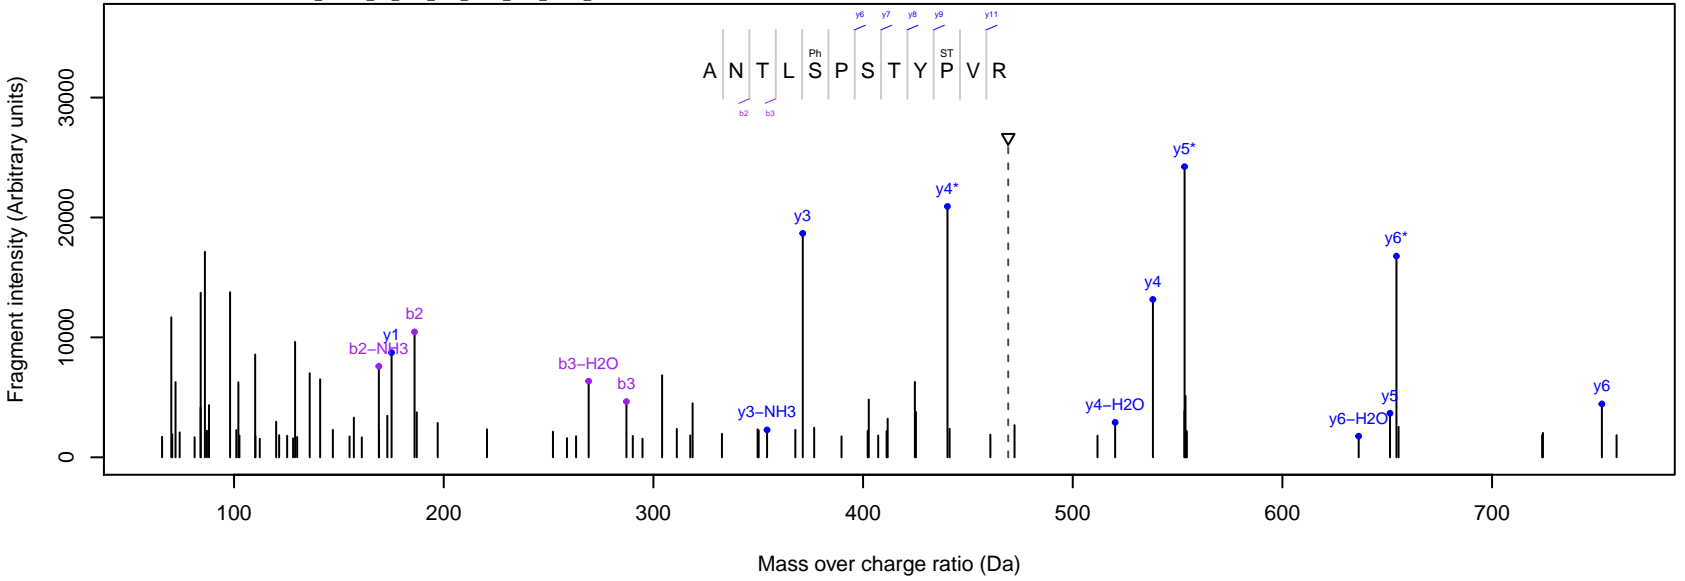

LQAGEY(Phospho (STY))VSLGK-2+

Source : QE3\_201126\_FR\_TiOx\_hum\_tissue\_Urea\_RNAB\_N Scan : 22038

Andromeda score : 91.584

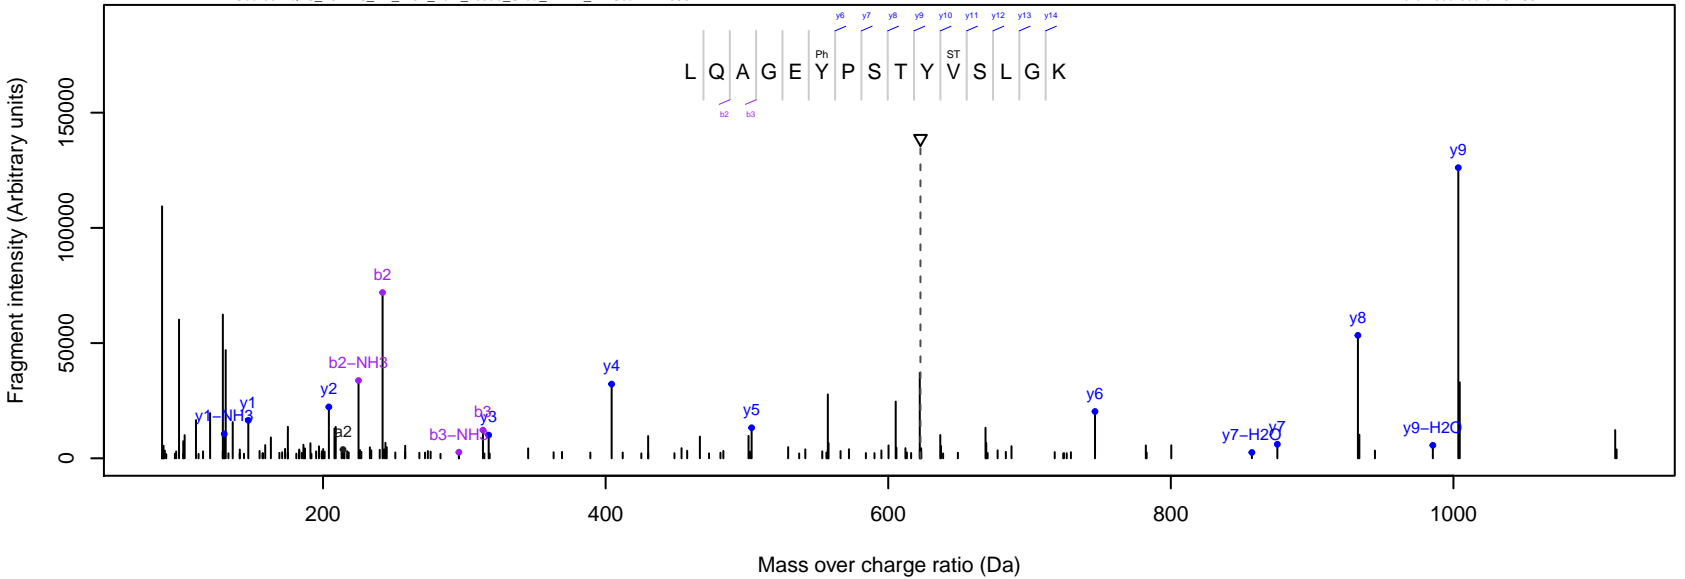

TWS(Phospho (STY))EKDLR-2+

Source : QE3\_201126\_FR\_TiOx\_hum\_tissue\_Urea\_RNAB\_H Scan : 14520

Andromeda score : 91.549

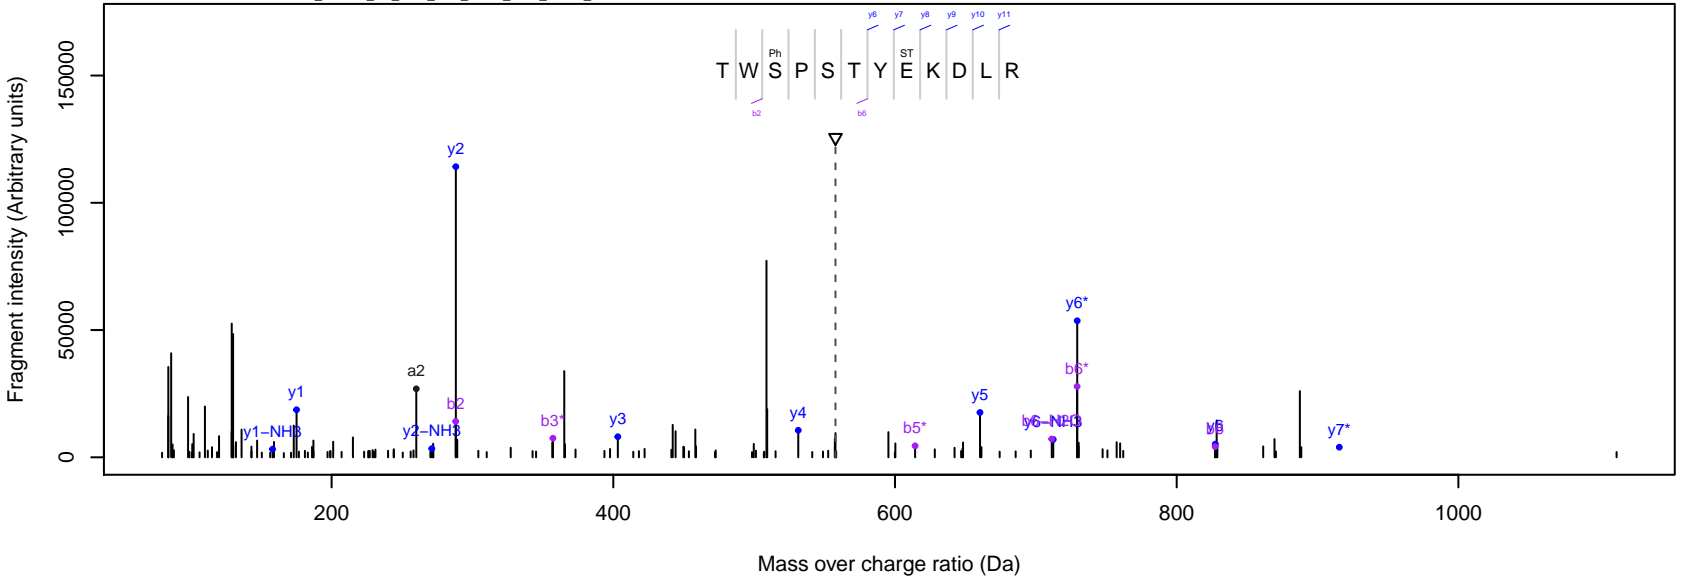

FVEWLKNAEEES(Phospho (STY))ES(Phospho (STY))EAEEGD-2+

Source : QE3\_201126\_FR\_TiOx\_hum\_tissue\_Urea\_RNAB\_N Scan : 53698

Andromeda score : 91.518

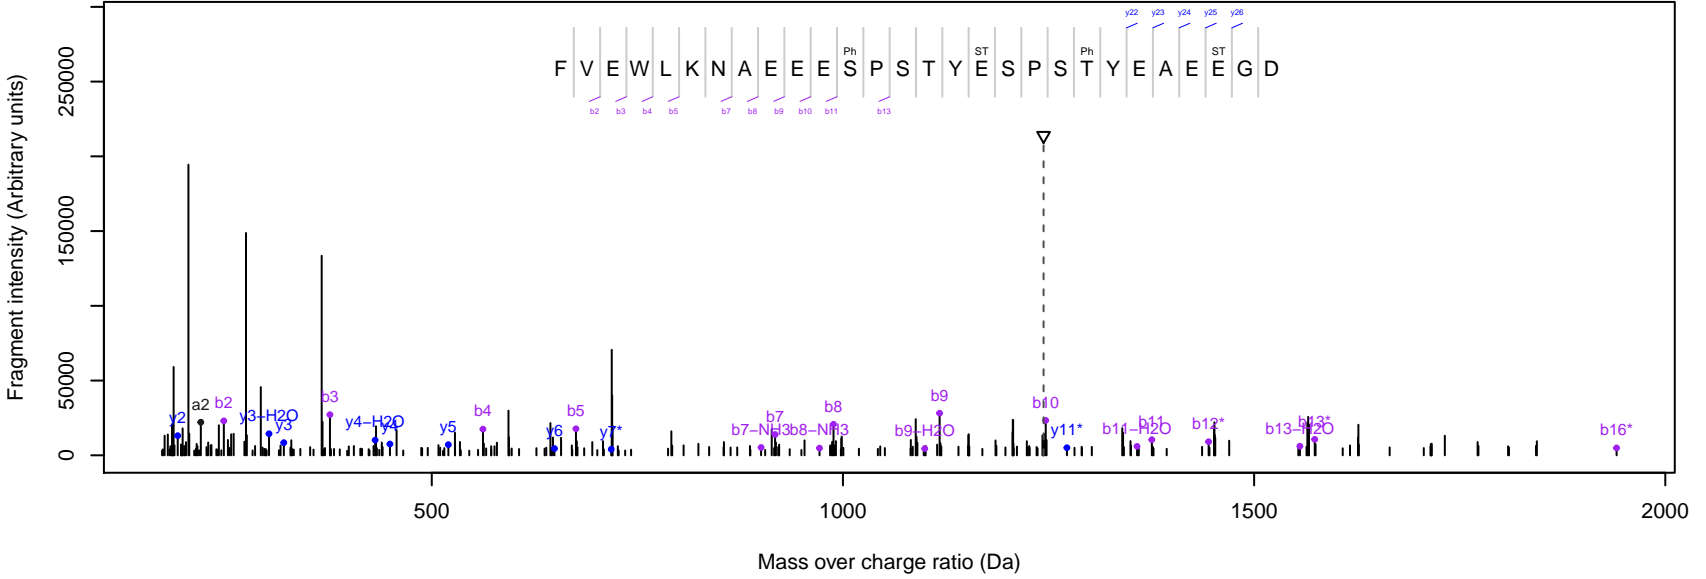

S(Phospho (STY))RSPLELEPEAKK-3+

Source : QE3\_201126\_FR\_TiOx\_hum\_tissue\_Urea\_RNAB\_B Scan : 10748

Andromeda score : 91.518

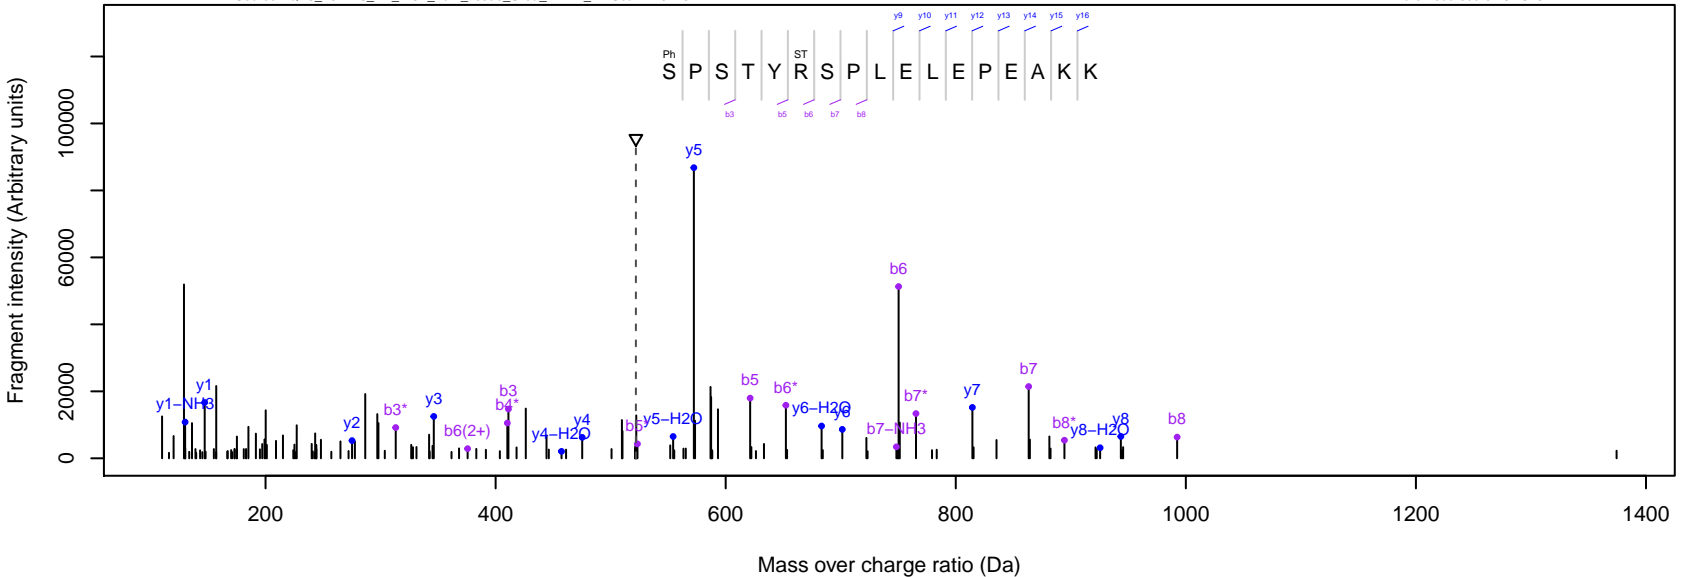

**VI(Phospho (STY))EEITEVKDNKK-3+**

Source : QE3\_201126\_FR\_TIOx\_hum\_tissue\_Urea\_RNAB\_H Scan : 13440

Andromeda score : 91.518

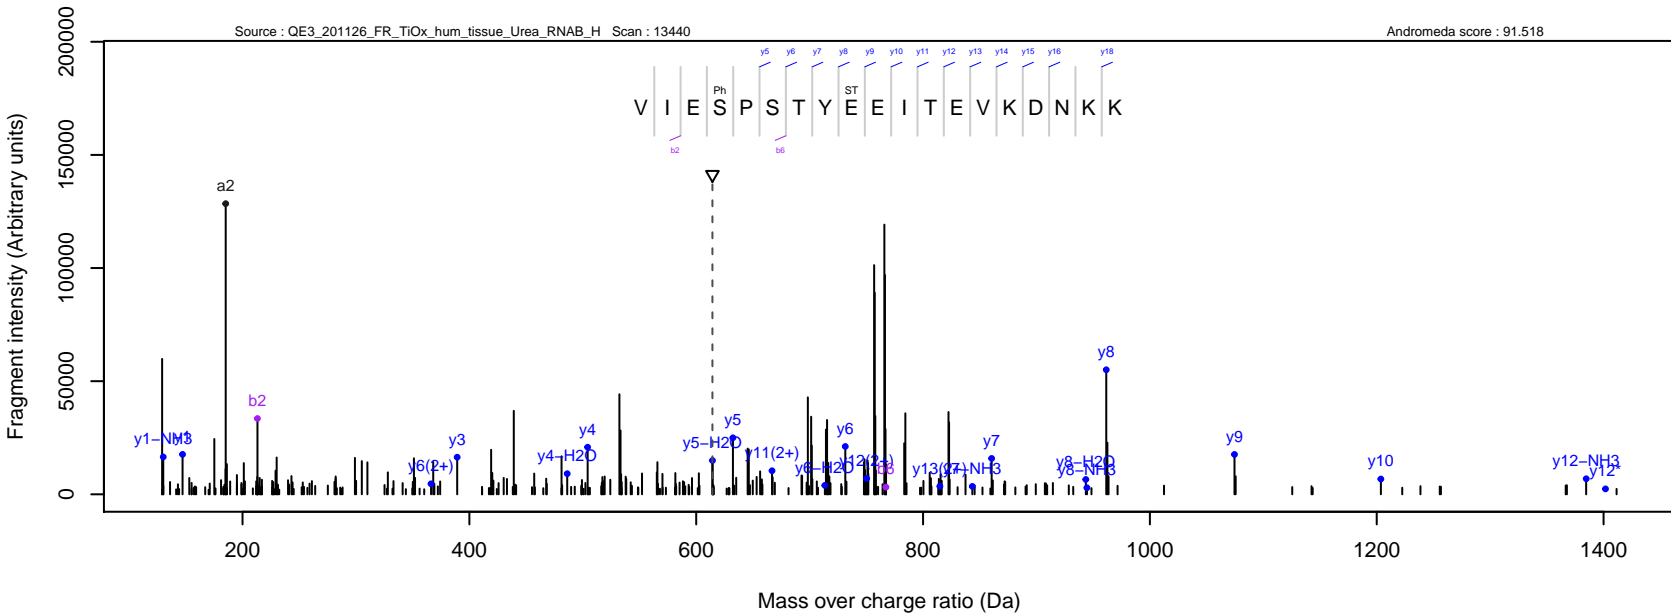

**AQS(Phospho (STY))TDS(Phospho (STY))LGTSGSLQSK-2+**

Source : QE3\_201126\_FR\_TIOx\_hum\_tissue\_Urea\_RNAB\_N Scan : 20213

Andromeda score : 91.475

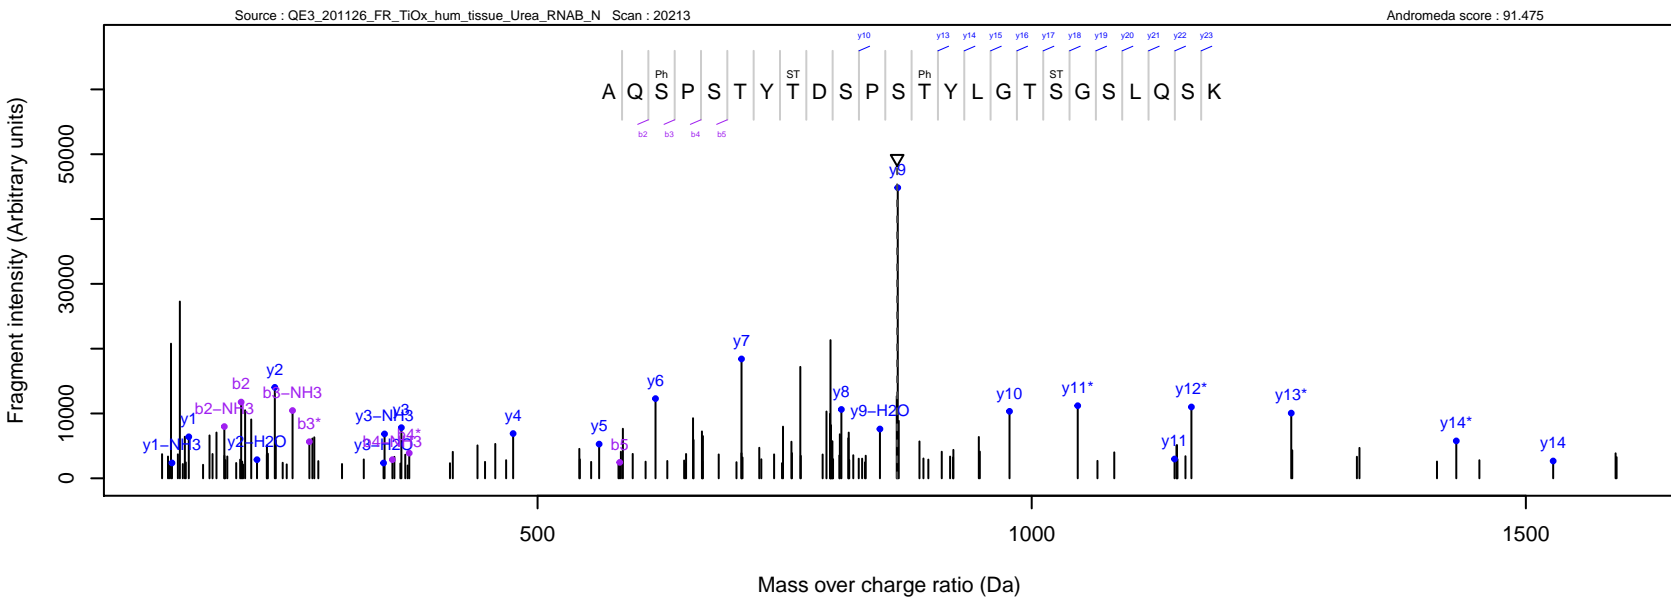

**T(Phospho (STY))DKSSASAPD VDDPEAFPALA-2+**

Source : QE3\_201126\_FR\_TIOx\_hum\_tissue\_Urea\_RNAB\_H Scan : 46935

Andromeda score : 91.475

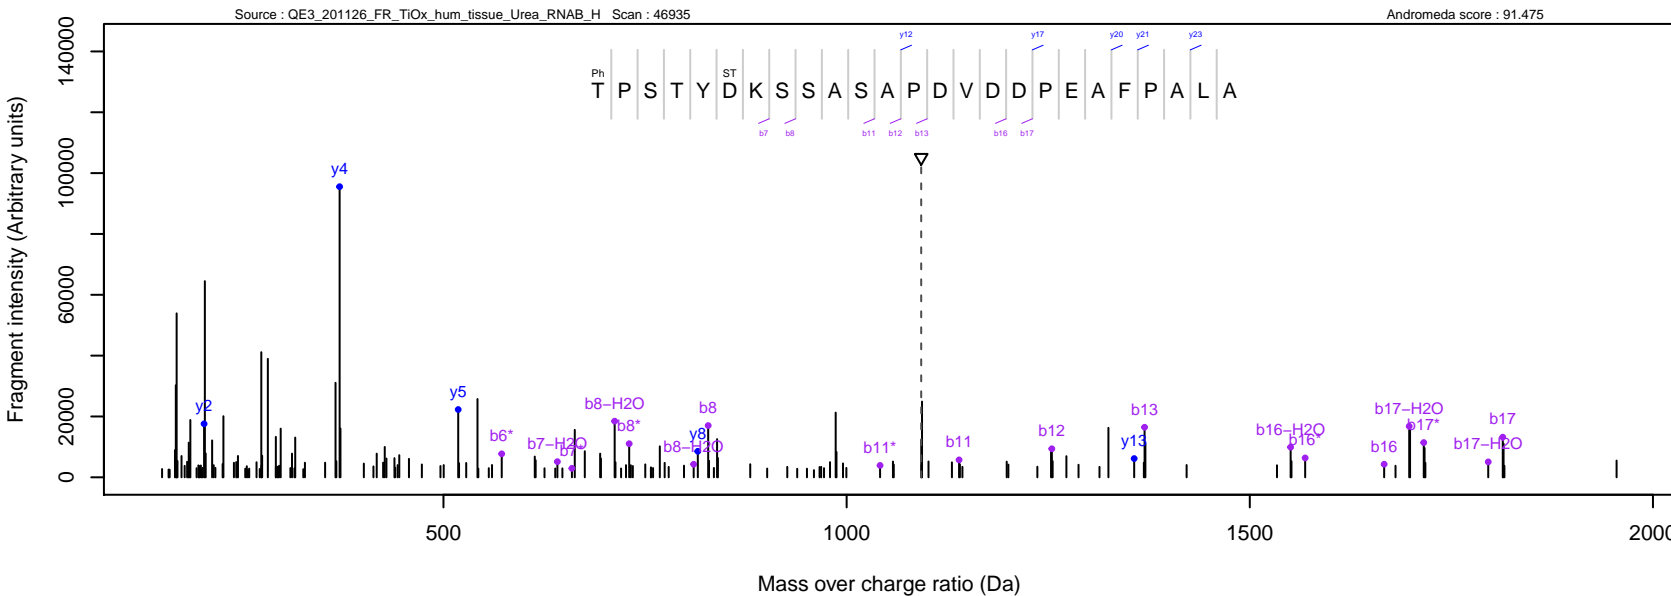

YVDS(Phospho (STY))EGHLYTVPIR-3+

Source : QE3\_201126\_FR\_TiOx\_hum\_tissue\_Urea\_RNAB\_H Scan : 29513

Andromeda score : 91.457

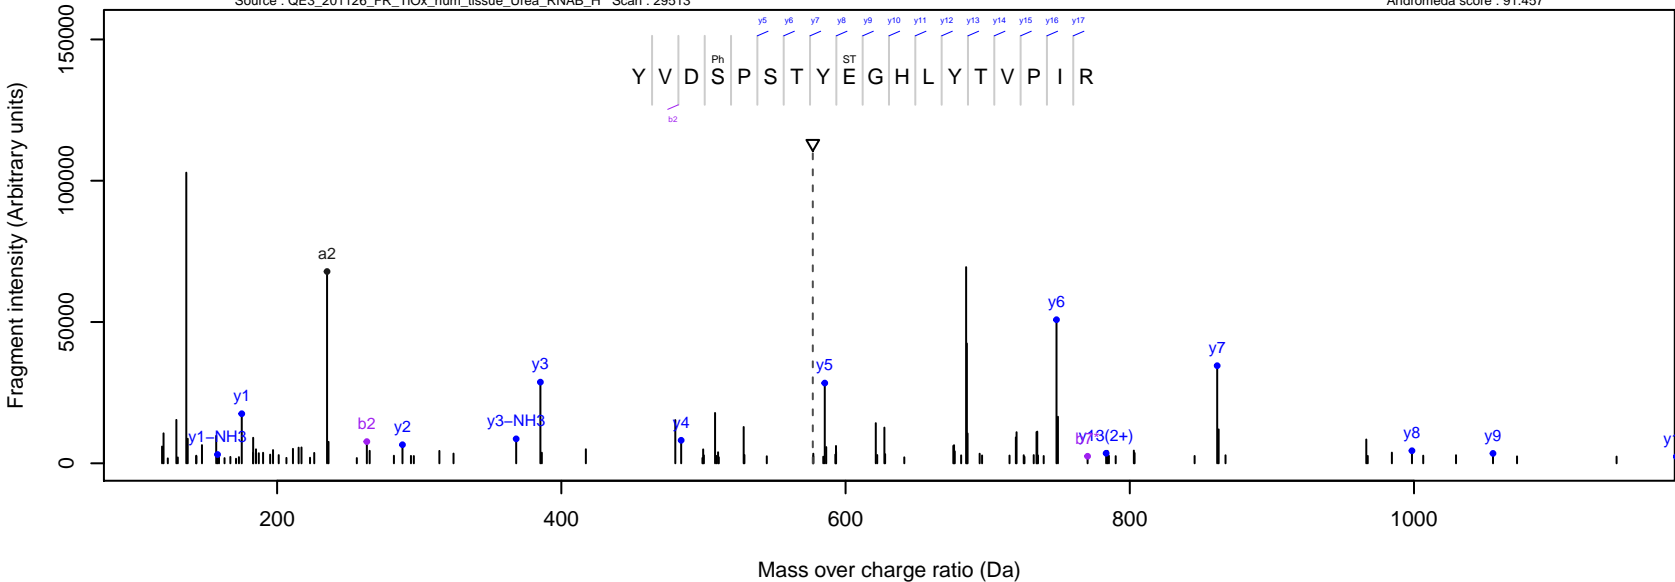

QVPVM(Oxidation (M))QGTGM(Oxidation (M))QGASIQGGSQPGGFS(Phospho (STY))PGQNQVTPQDHEK-4+

Source : QE3\_201126\_FR\_TiOx\_hum\_tissue\_Urea\_RNAB\_B Scan : 23261

Andromeda score : 91.424

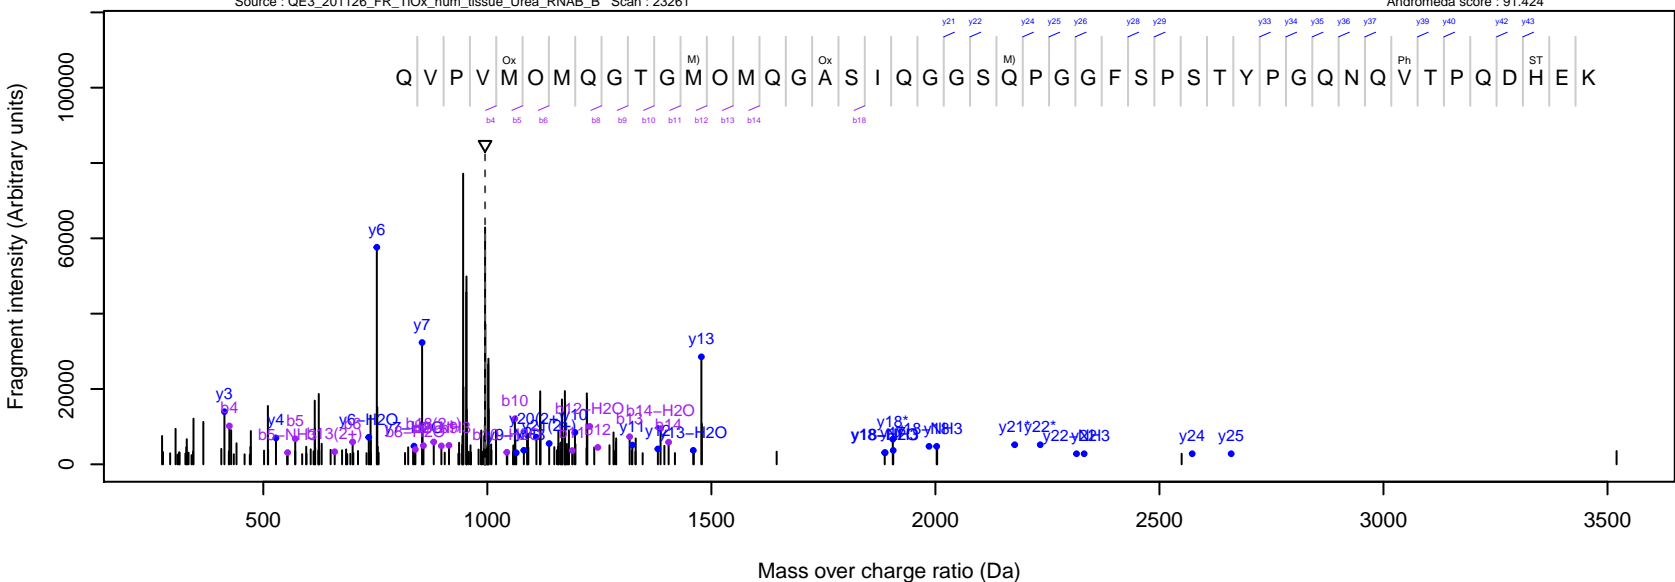

TES(Phospho (STY))PATAAETASEELDNR-2+

Source : QE3\_201126\_FR\_TiOx\_hum\_tissue\_Urea\_RNAB\_B Scan : 35632

Andromeda score : 91.401

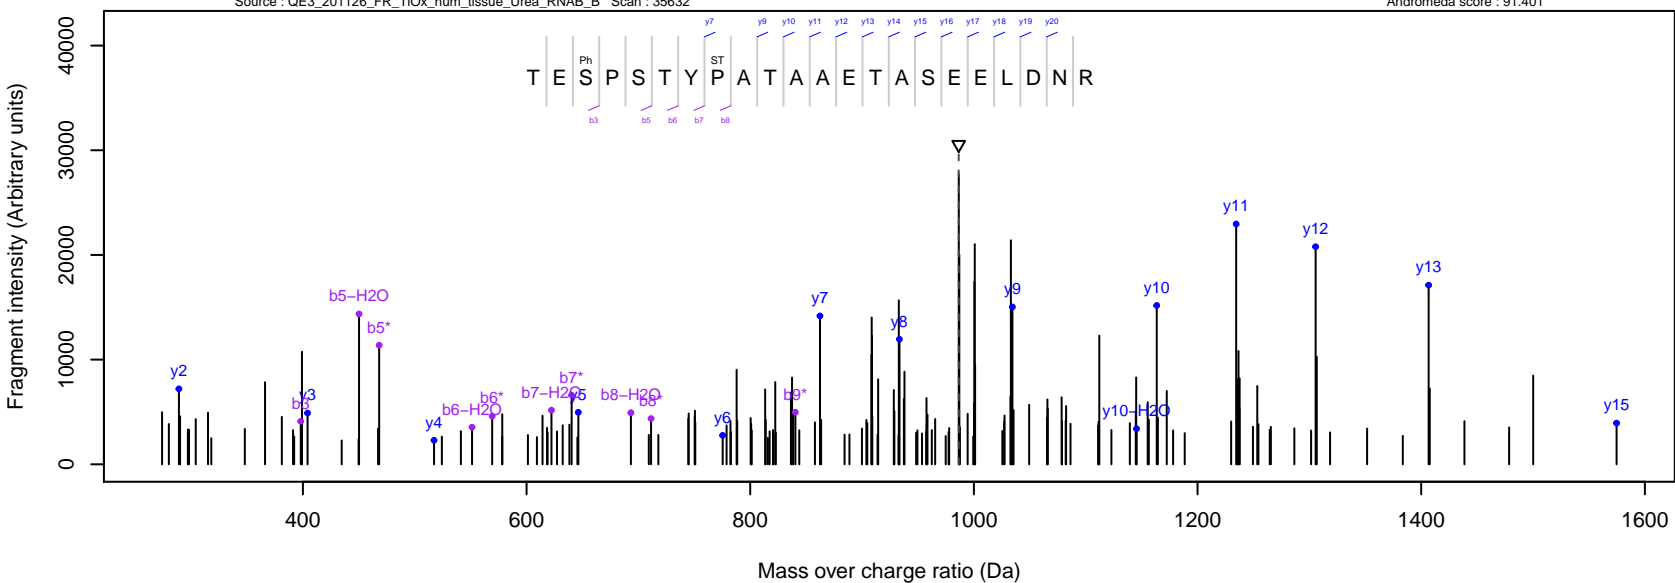

EAALPPVS(Phospho (STY))PLKAALSEEELEKK-3+

Source : QE3\_201126\_FR\_TiOx\_hum\_tissue\_Urea\_RNAB\_B Scan : 40073

Andromeda score : 91.389

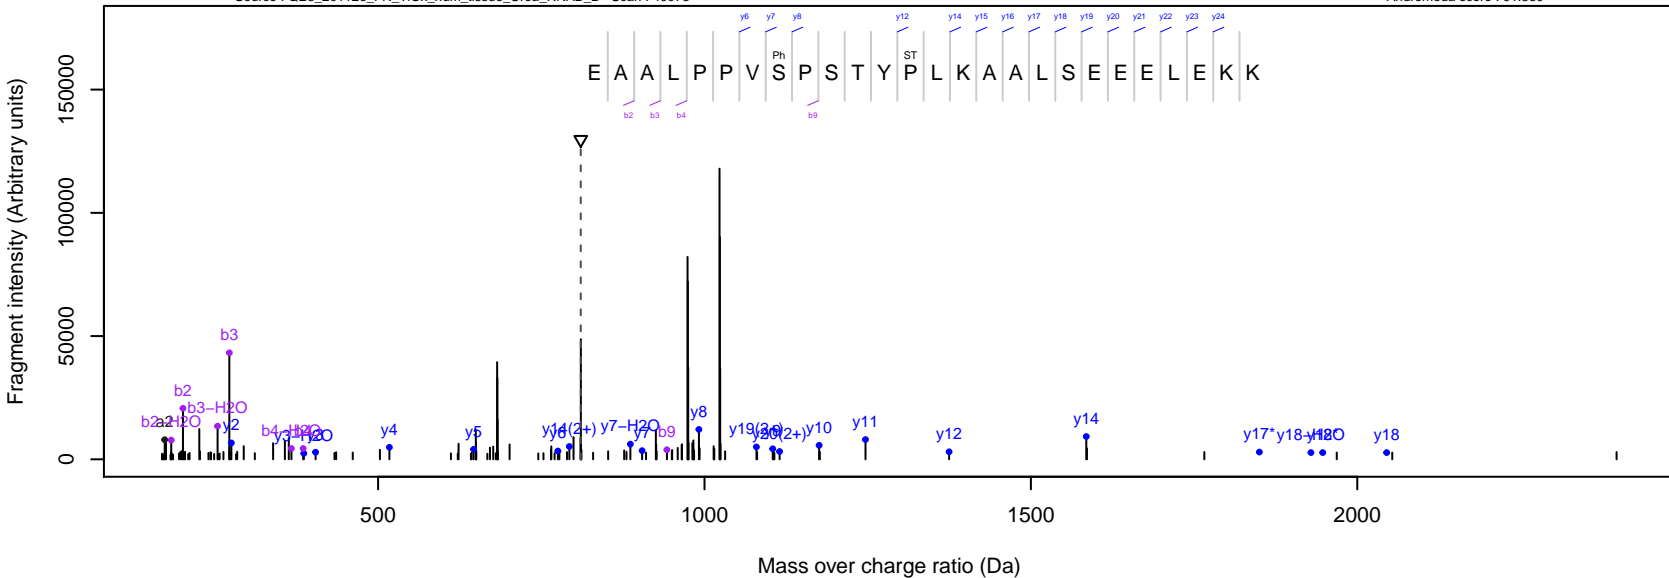

SPQGPSPVLAEDS(Phospho (STY))EGEG-2+

Source : QE3\_201126\_FR\_TiOx\_hum\_tissue\_Urea\_RNAB\_B Scan : 30786

Andromeda score : 91.355

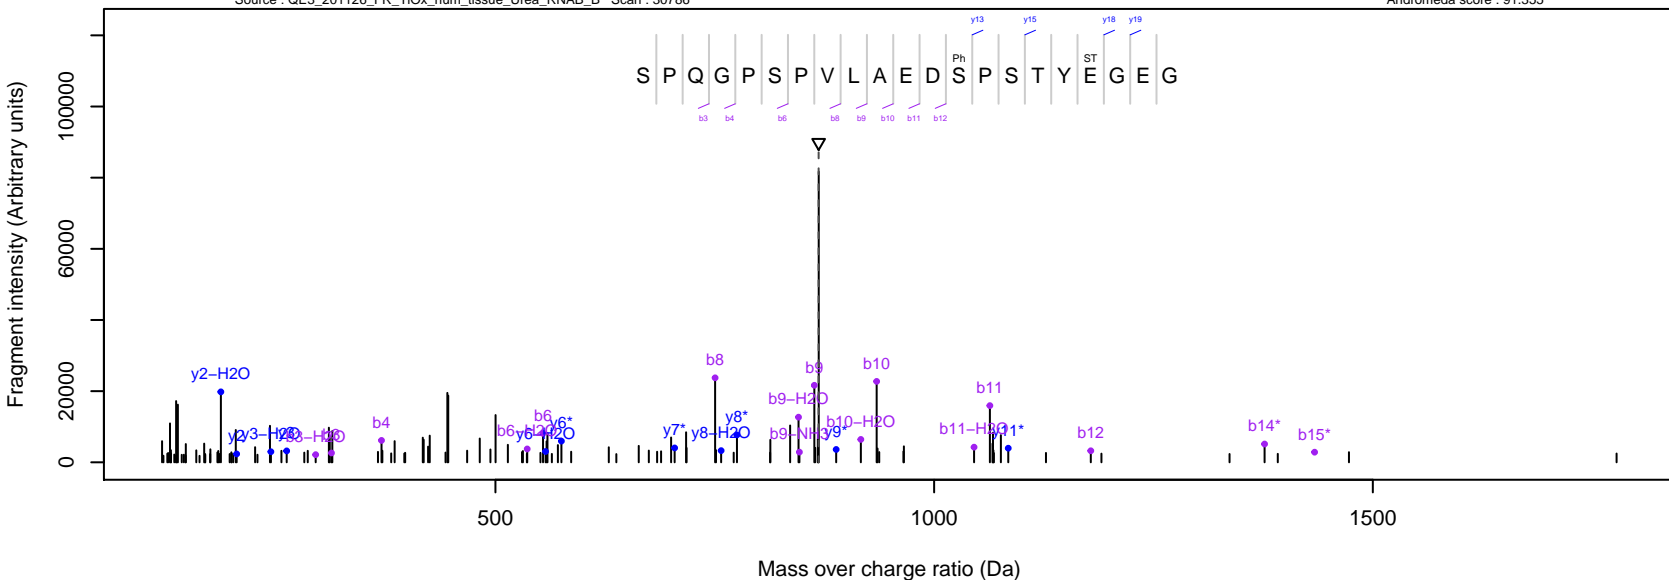

FLQPGS(Phospho (STY))PRKPPMDEK-3+

Source : QE3\_201126\_FR\_TiOx\_hum\_tissue\_Urea\_RNAB\_N Scan : 14126

Andromeda score : 91.317

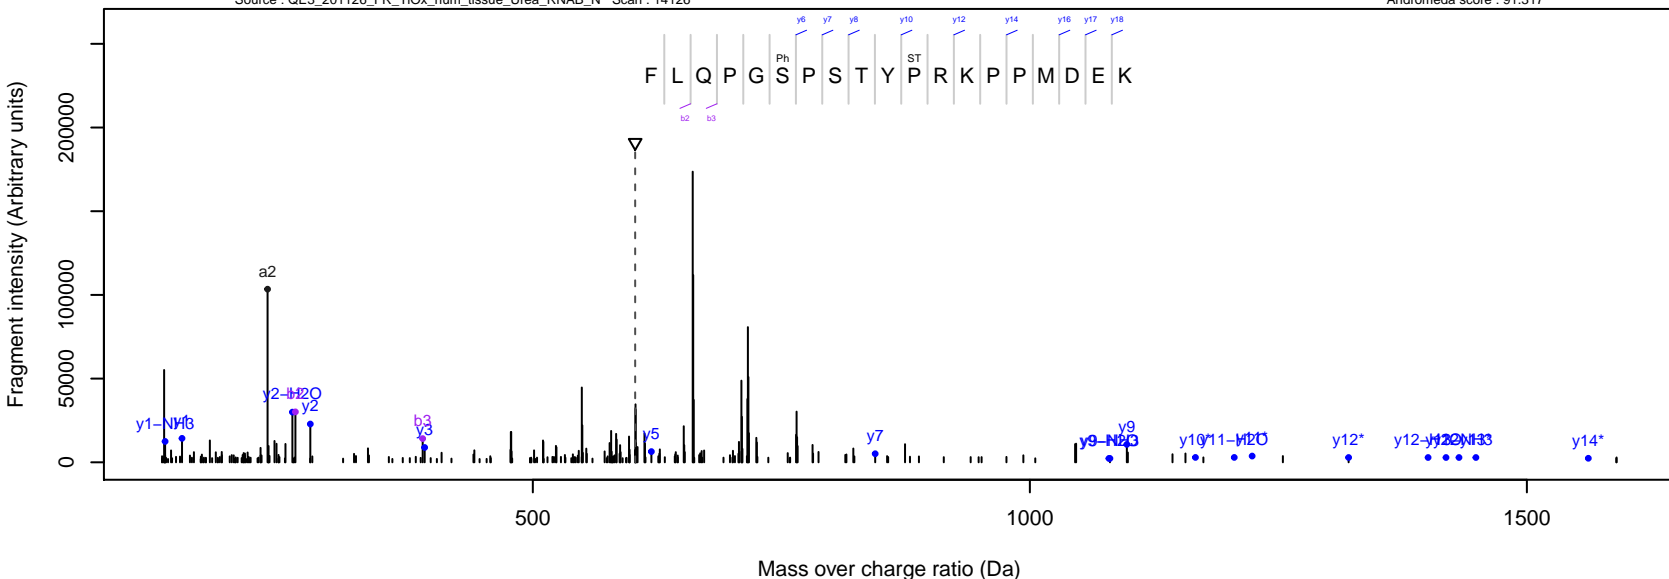

ESS(Phospho (STY))PIPSPTSDRK-2+

Source : QE3\_201126\_FR\_TIOx\_hum\_tissue\_Urea\_RNAB\_N Scan : 9585

Andromeda score : 91.307

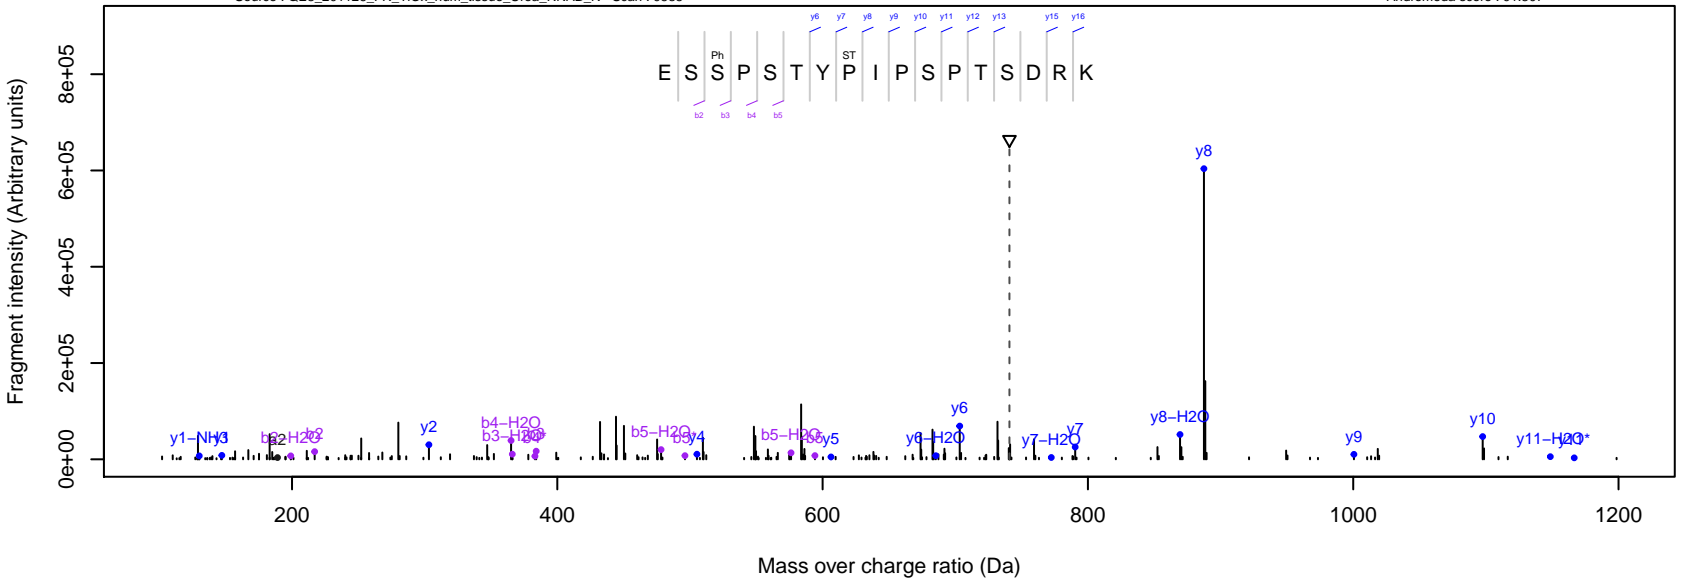

LEIS(Phospho (STY))PDSS(Phospho (STY))PER-2+

Source : QE3\_201126\_FR\_TIOx\_hum\_tissue\_Urea\_RNAB\_N Scan : 23895

Andromeda score : 91.307

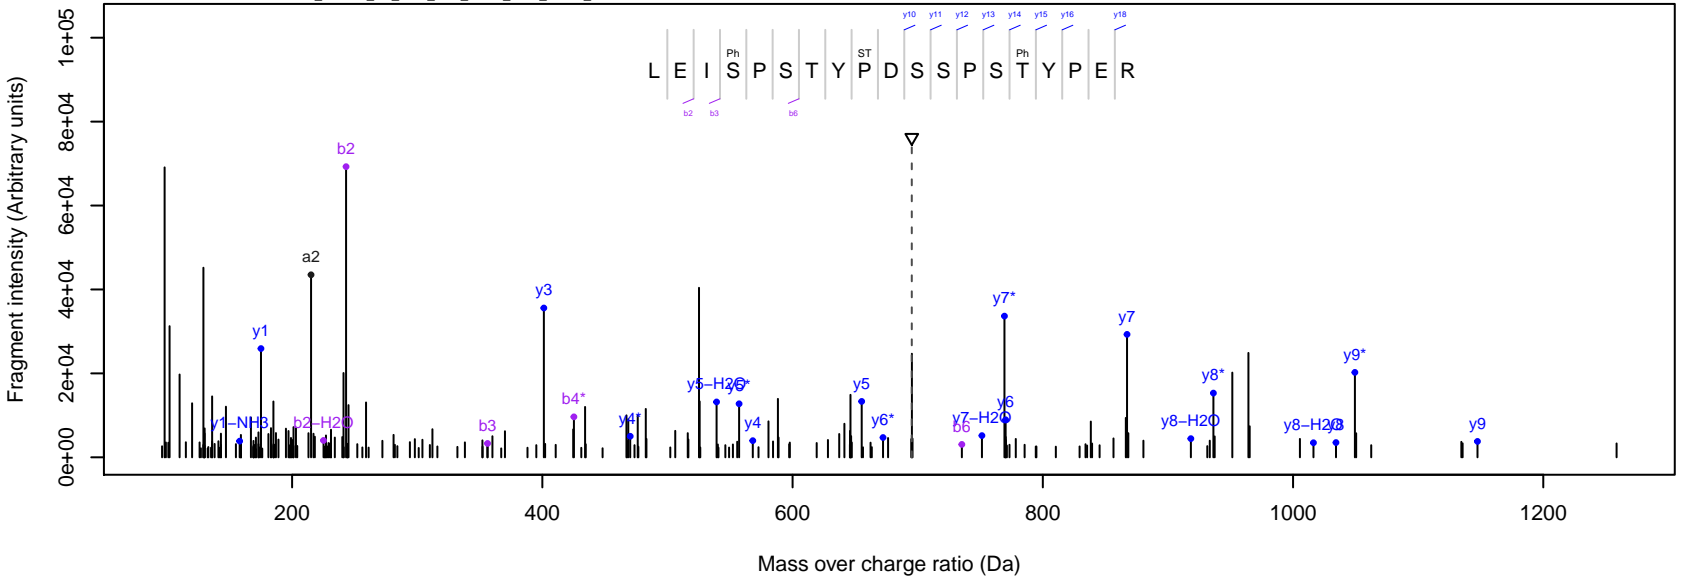

NS(Phospho (STY))LEISSIDR-2+

Source : QE3\_201126\_FR\_TIOx\_hum\_tissue\_Urea\_RNAB\_H Scan : 26915

Andromeda score : 91.307

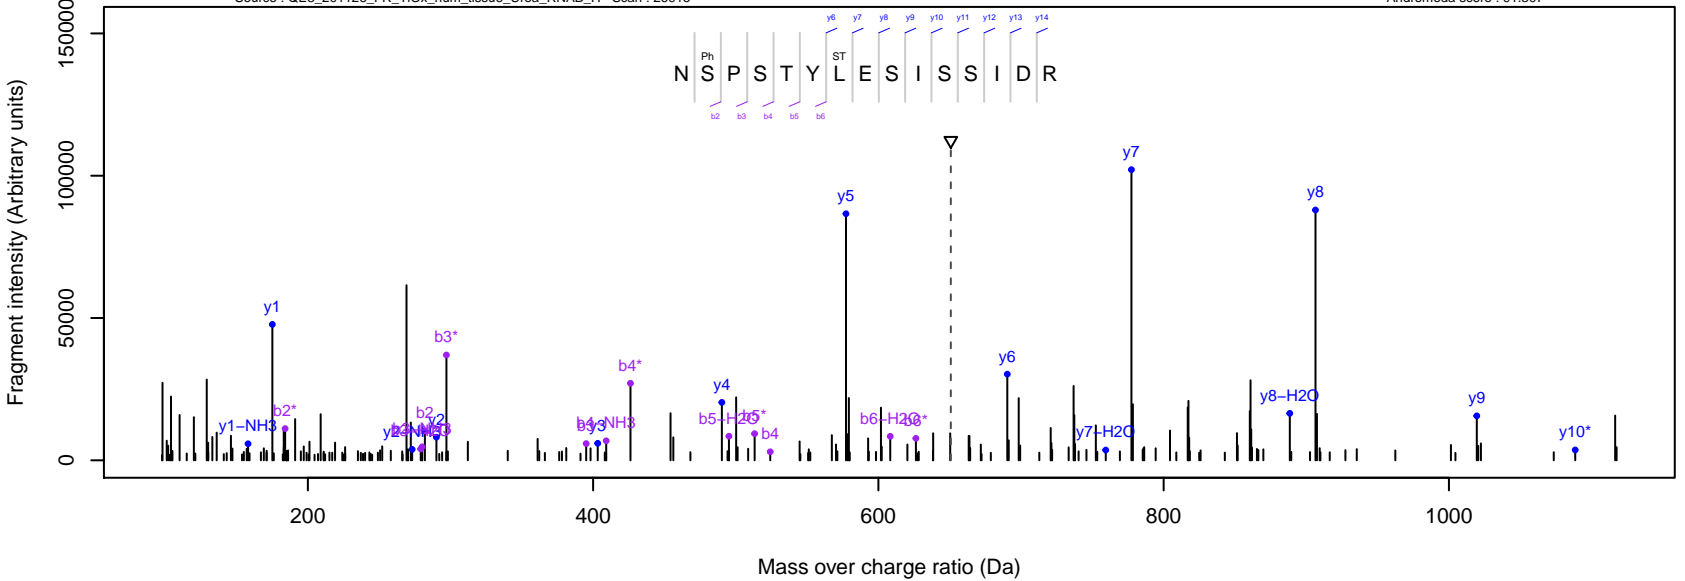

LAGEDKDSEPAADGPAASEDP SATESDLPNPHVGEVSVLS(Phospho (STY))SGSPR-4+

Source : QE3\_201126\_FR\_TiOx\_hum\_tissue\_Urea\_RNAB\_B Scan : 35795

Andromeda score : 91.305

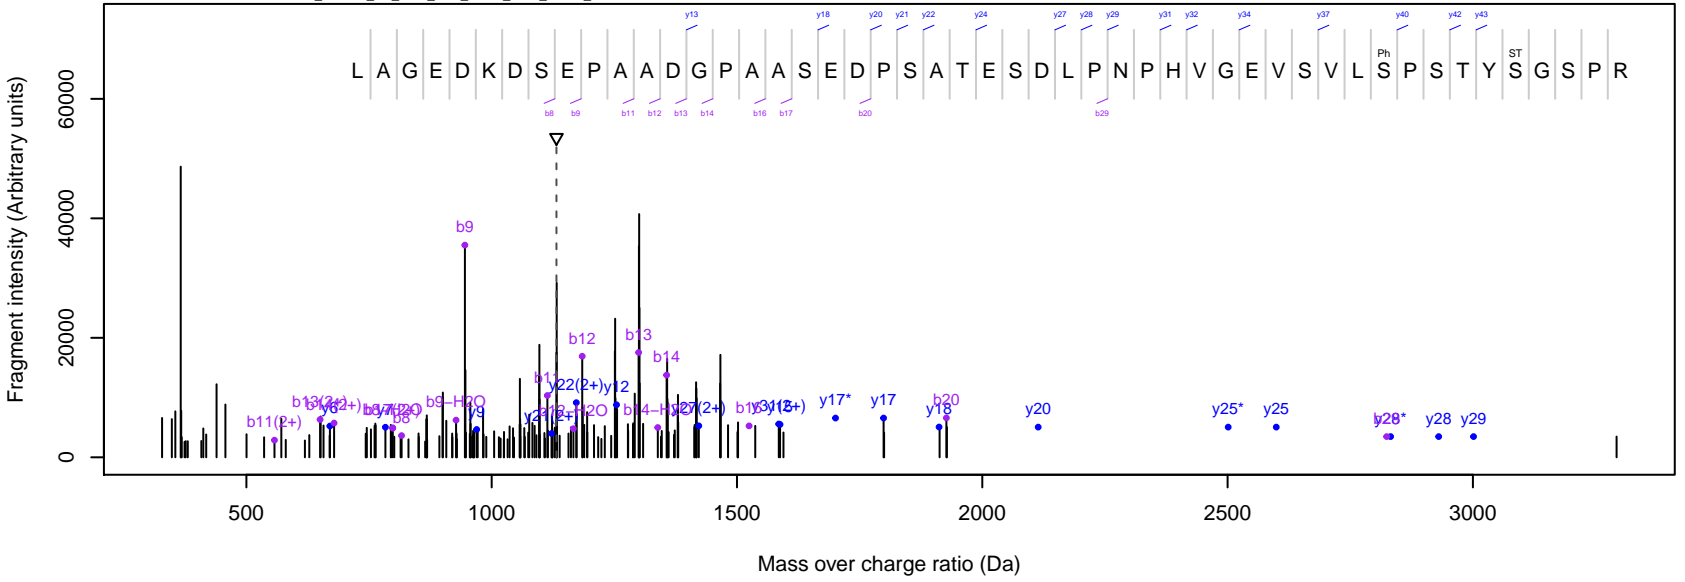

ANS(Phospho (STY))PEKPPEAGAAHKPR-3+

Source : QE3\_201126\_FR\_TiOx\_hum\_tissue\_Urea\_RNAB\_H Scan : 4444

Andromeda score : 91.276

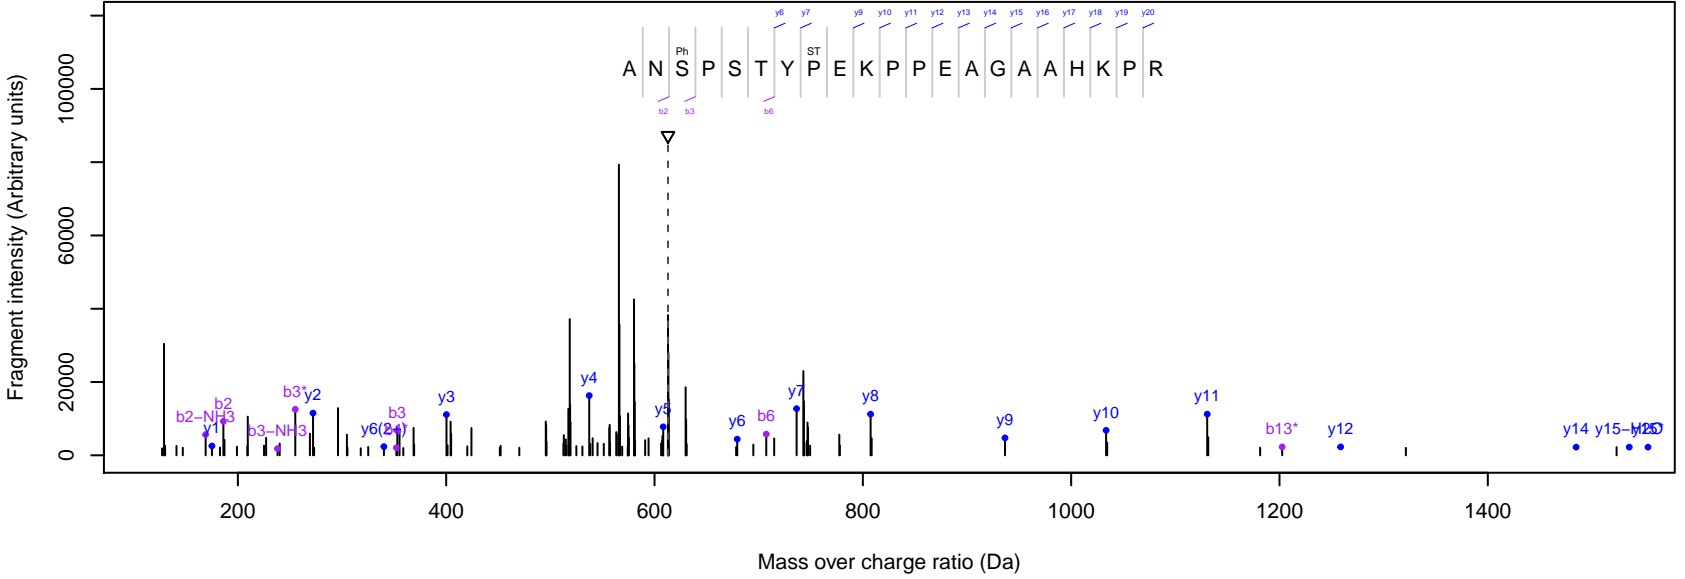

RFS(Phospho (STY))YSEAEER-2+

Source : QE3\_201126\_FR\_TiOx\_hum\_tissue\_Urea\_RNAB\_N Scan : 11849

Andromeda score : 91.245

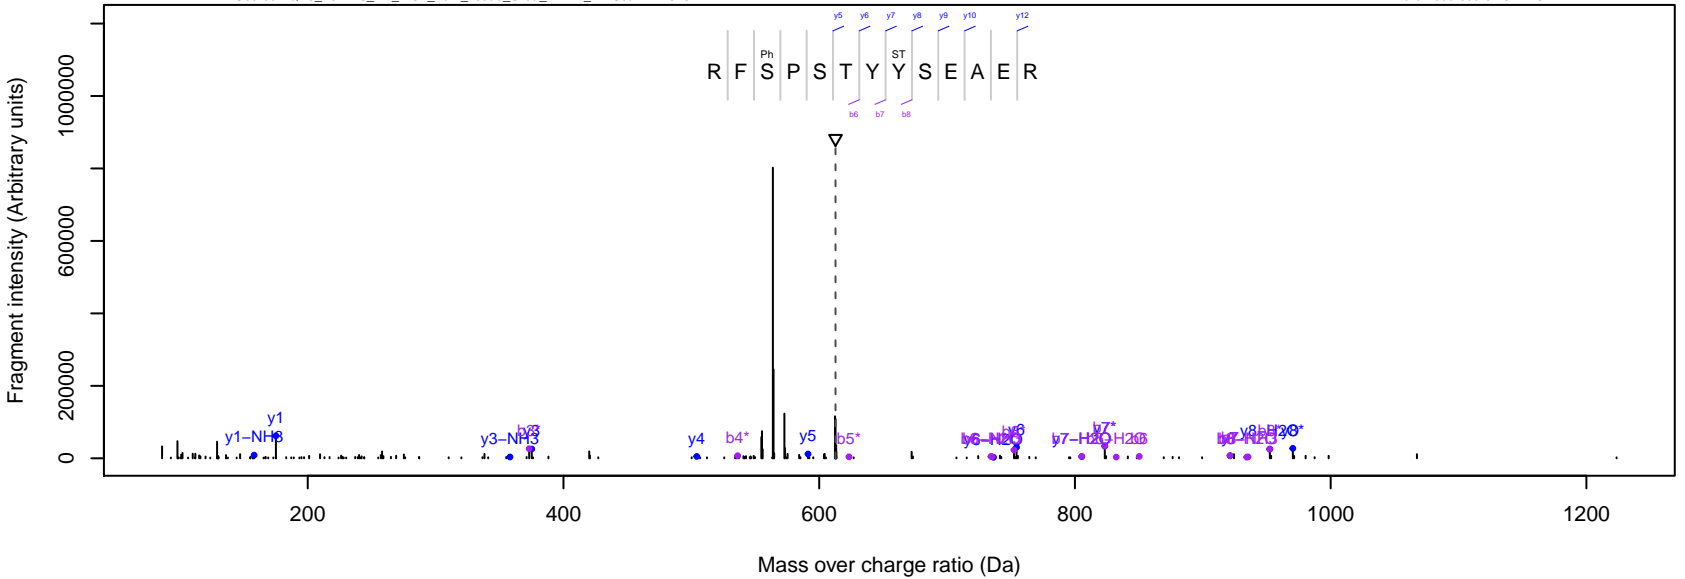



VIHFVSGETMEEYS(Phospho(STY))T(Phospho(STY))DEVEDGLEKK-3+

Source : QE3\_201126\_FR\_TIOx\_hum\_tissue\_Urea\_RNAB\_N Scan : 39748

Andromeda score : 91.238

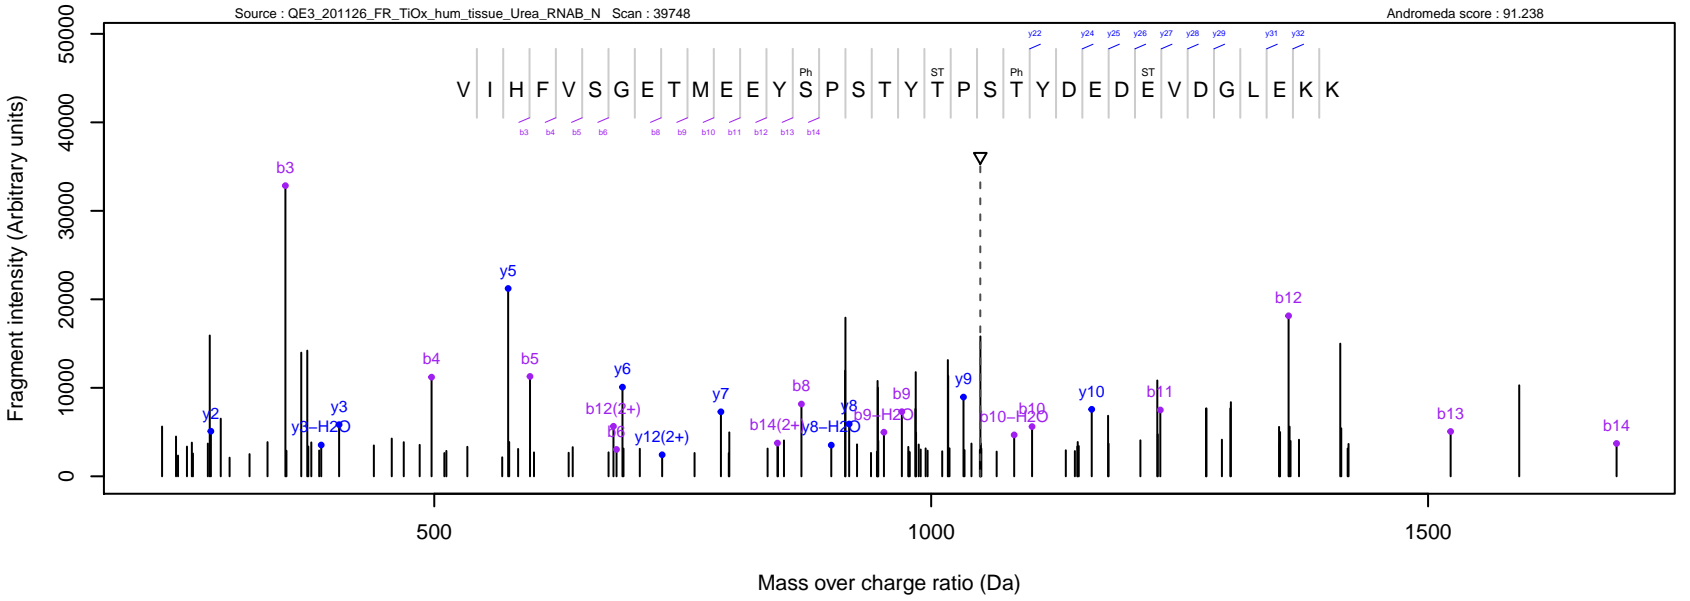

RSS(Phospho(STY))EEVDGQHPAQEEVPE(Phospho(STY))PQTSGPAAENR-3+

Source : QE3\_201126\_FR\_TIOx\_hum\_tissue\_Urea\_RNAB\_N Scan : 16307

Andromeda score : 91.223

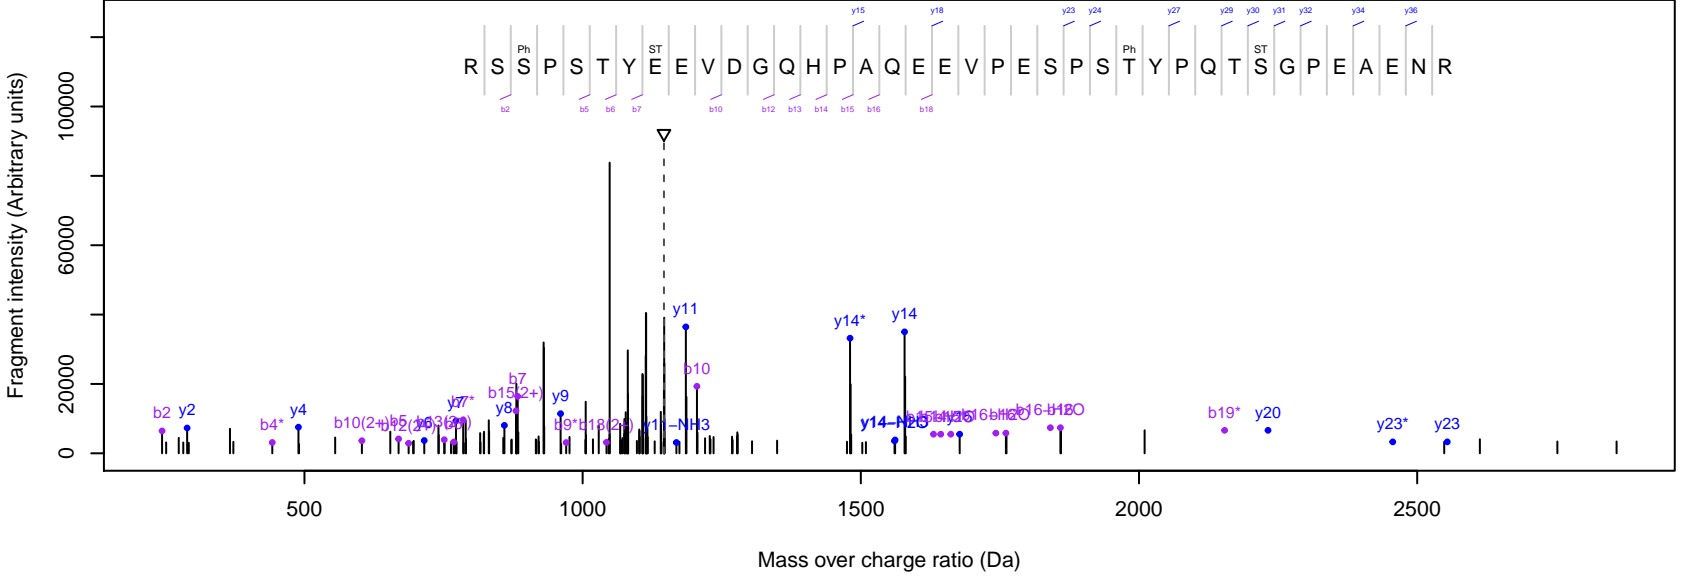

SNS(Phospho(STY))M(Oxidation(M))LELAPK-2+

Source : QE3\_201126\_FR\_TIOx\_hum\_tissue\_Urea\_RNAB\_H Scan : 20015

Andromeda score : 91.202

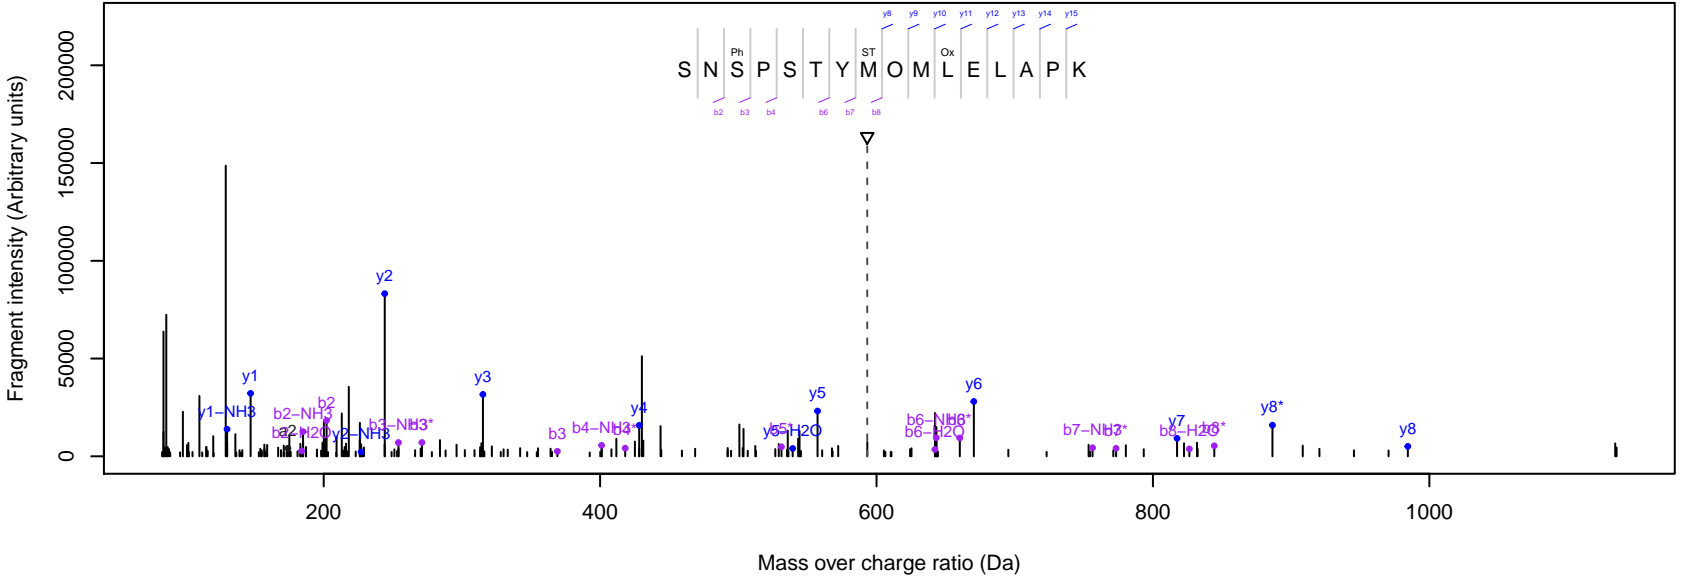

SHVSSEPYEPIS(Phospho (STY))PPQVPVHKEK-3+

Source : QE3\_201126\_FR\_TiOx\_hum\_tissue\_Urea\_RNAB\_N Scan : 29337

Andromeda score : 91.175

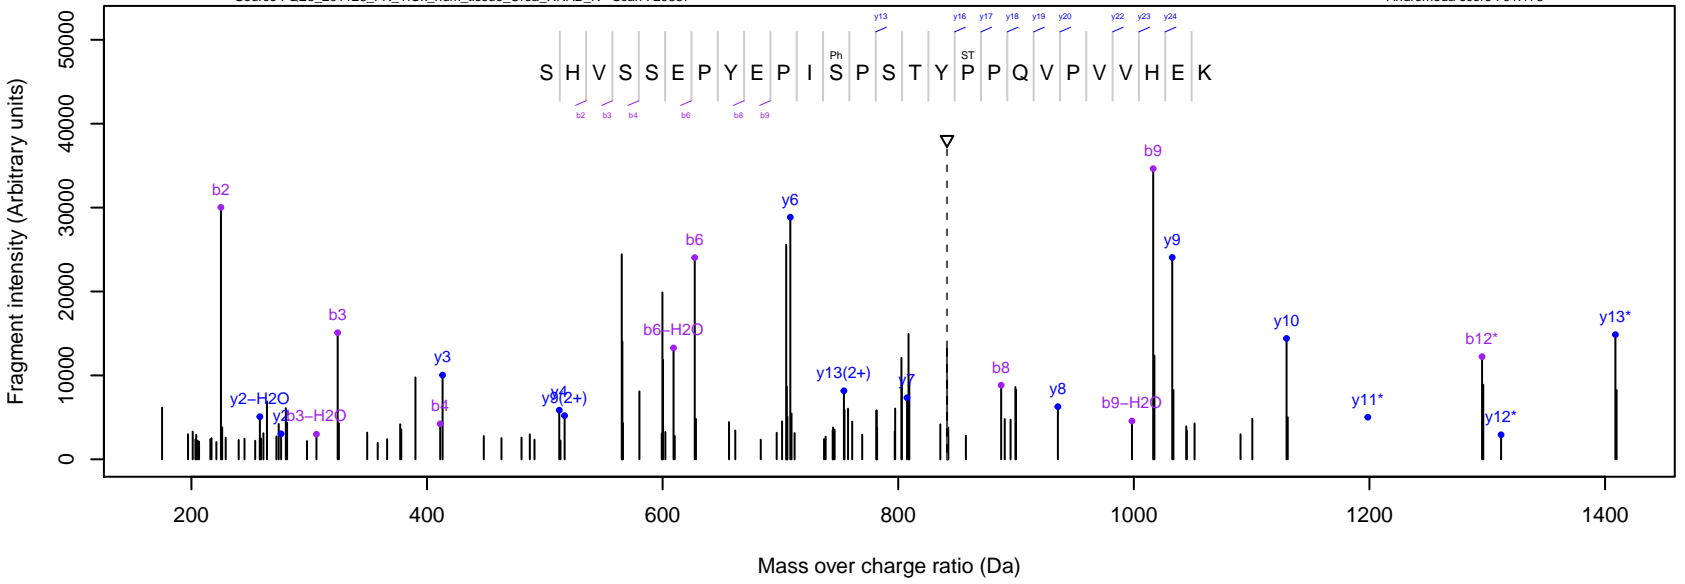

LRS(Phospho (STY))SLIFSTSQEAGAAGAAATEK-3+

Source : QE3\_201126\_FR\_TiOx\_hum\_tissue\_Urea\_RNAB\_H Scan : 34928

Andromeda score : 91.086

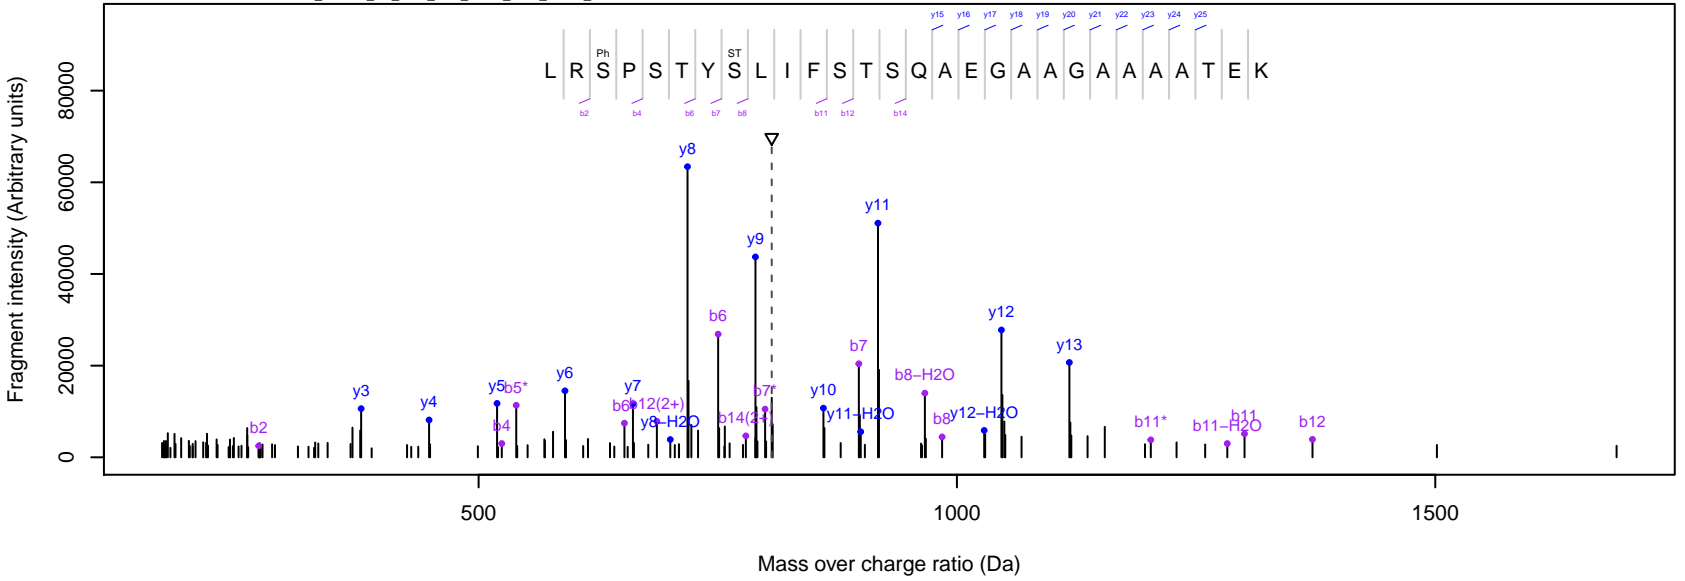

DYDEEEQGYDS(Phospho (STY))EKEK-2+

Source : QE3\_201126\_FR\_TiOx\_hum\_tissue\_Urea\_RNAB\_B Scan : 11065

Andromeda score : 91.076

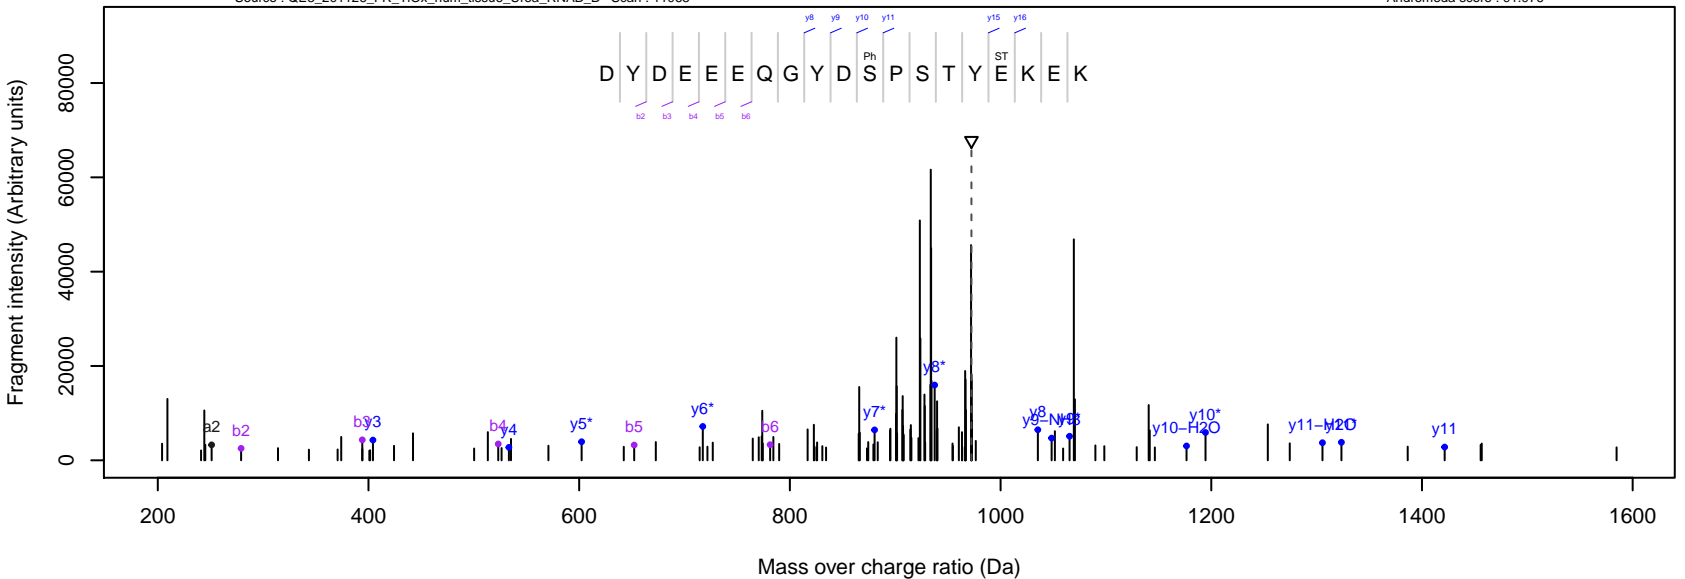

KLS(Phospho (STY))DFDQ-2+

Source : QE3\_201126\_FR\_TiOx\_hum\_tissue\_Urea\_RNAB\_H Scan : 39234

Andromeda score : 91.069

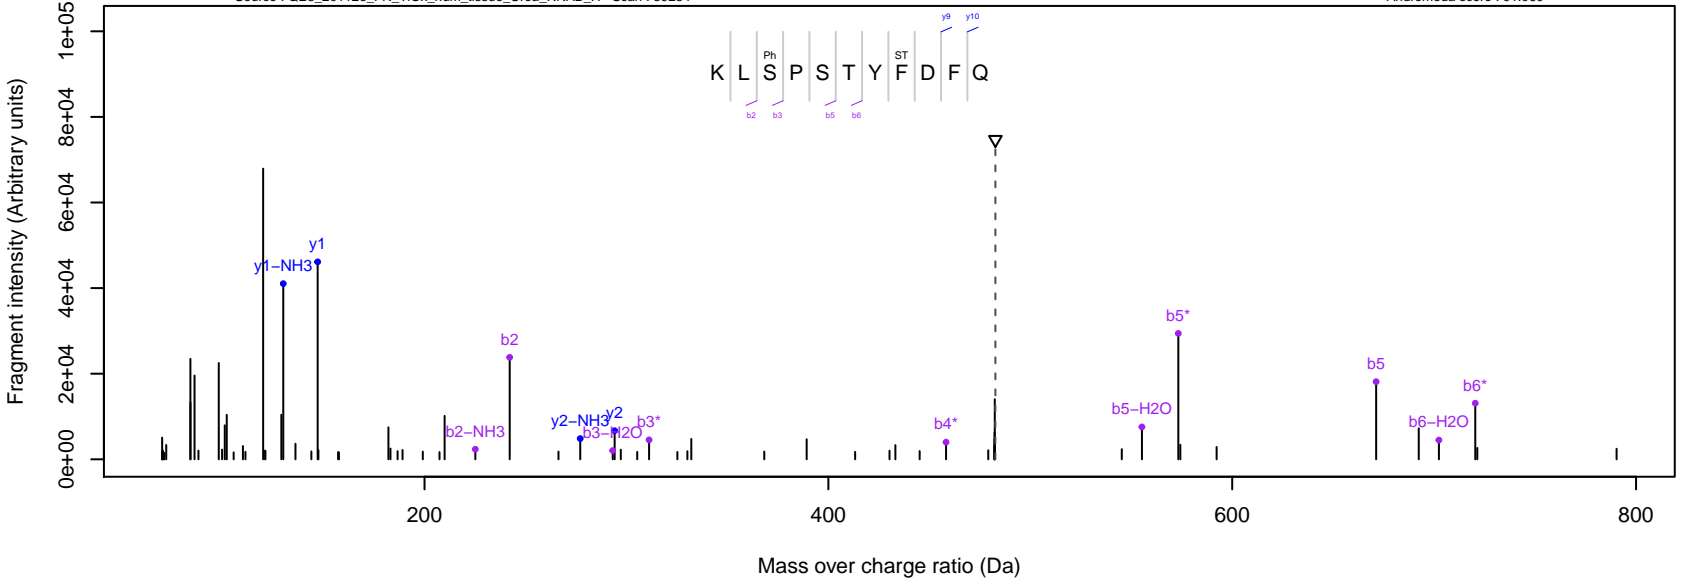

LPPPPFGLPESEGAAGGS(Phospho (STY))EPEAGDS(Phospho (STY))DT(Phospho (STY))EGEDIFTGAAVSK-4+

Source : QE3\_201126\_FR\_TiOx\_hum\_tissue\_Urea\_RNAB\_N Scan : 64639

Andromeda score : 91.041

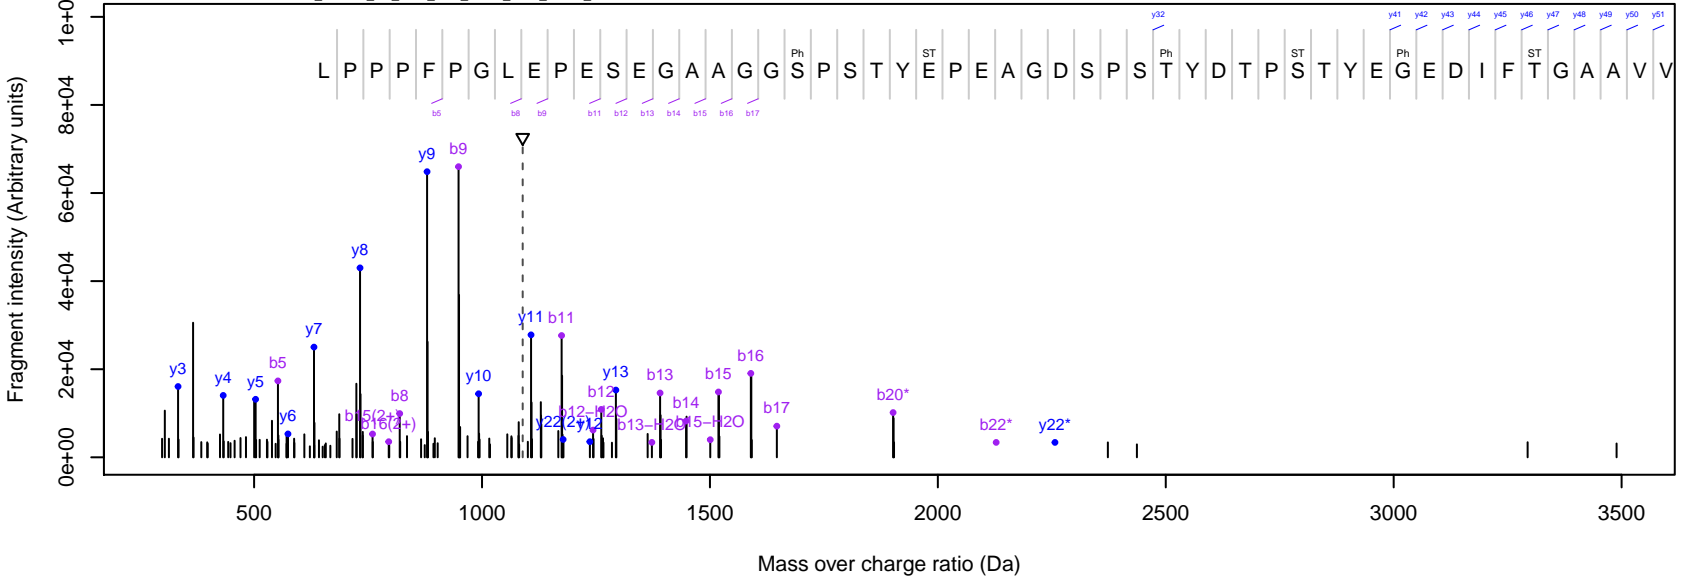

(Acetyl (Protein N-term))AALM(Oxidation (M))TPGTGAPPAGDFSGEGS(Phospho (STY))QGLPDPSPPEPK-3+

Source : QE3\_201126\_FR\_TiOx\_hum\_tissue\_Urea\_RNAB\_H Scan : 54712

Andromeda score : 90.999

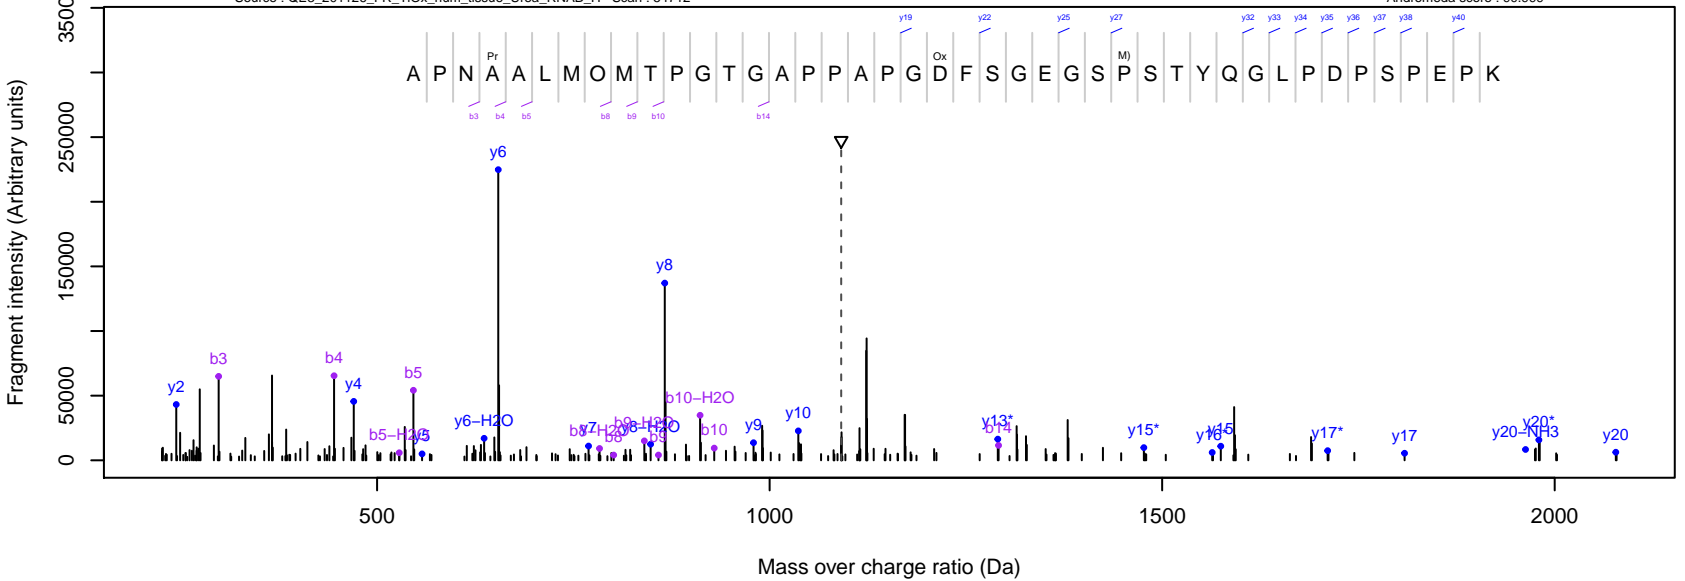

GSNPLDGRDS(Phospho (STY))PSAGGPVGLQLEPIPIAPASPGTRPTLK-4+

Source : QE3\_201126\_FR\_TIOx\_hum\_tissue\_Urea\_RNAB\_H Scan : 44152

Andromeda score : 90.999

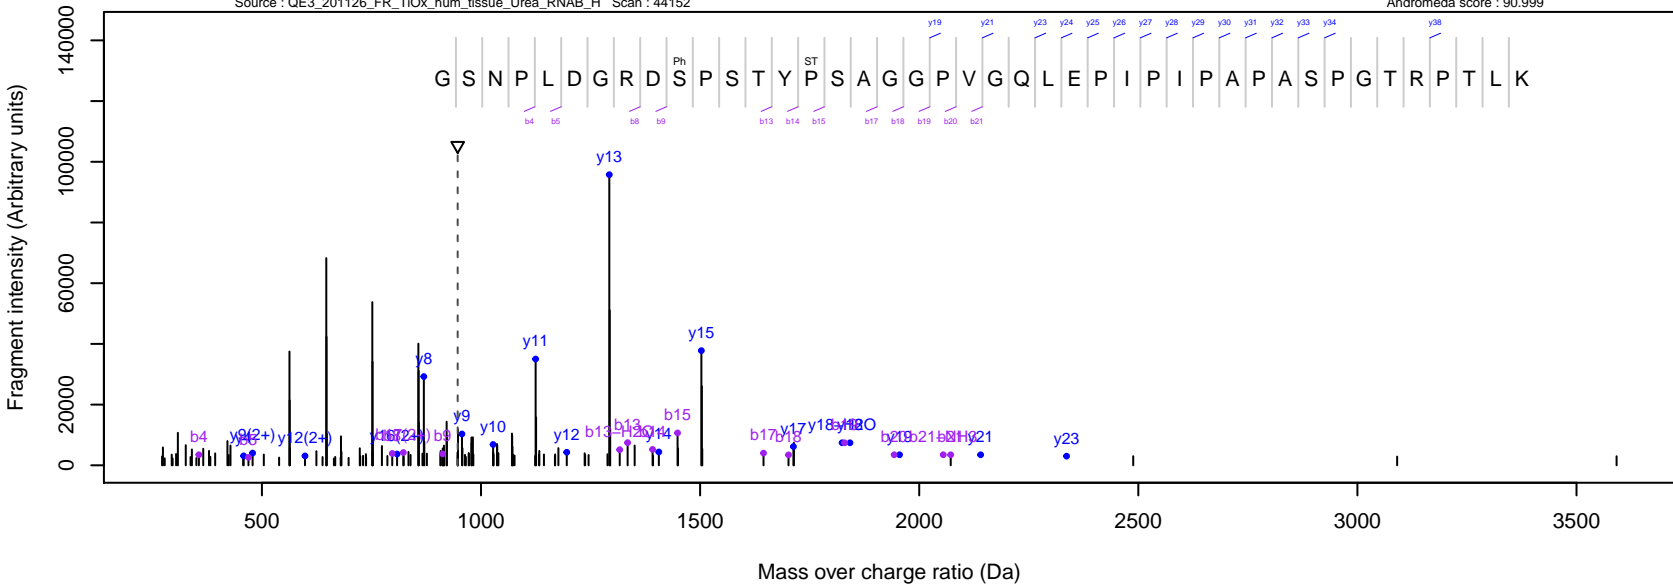

AAS(Phospho (STY))SPDGFFWTQGSPPKPGTASP-3+

Source : QE3\_201126\_FR\_TIOx\_hum\_tissue\_Urea\_RNAB\_H Scan : 35491

Andromeda score : 90.974

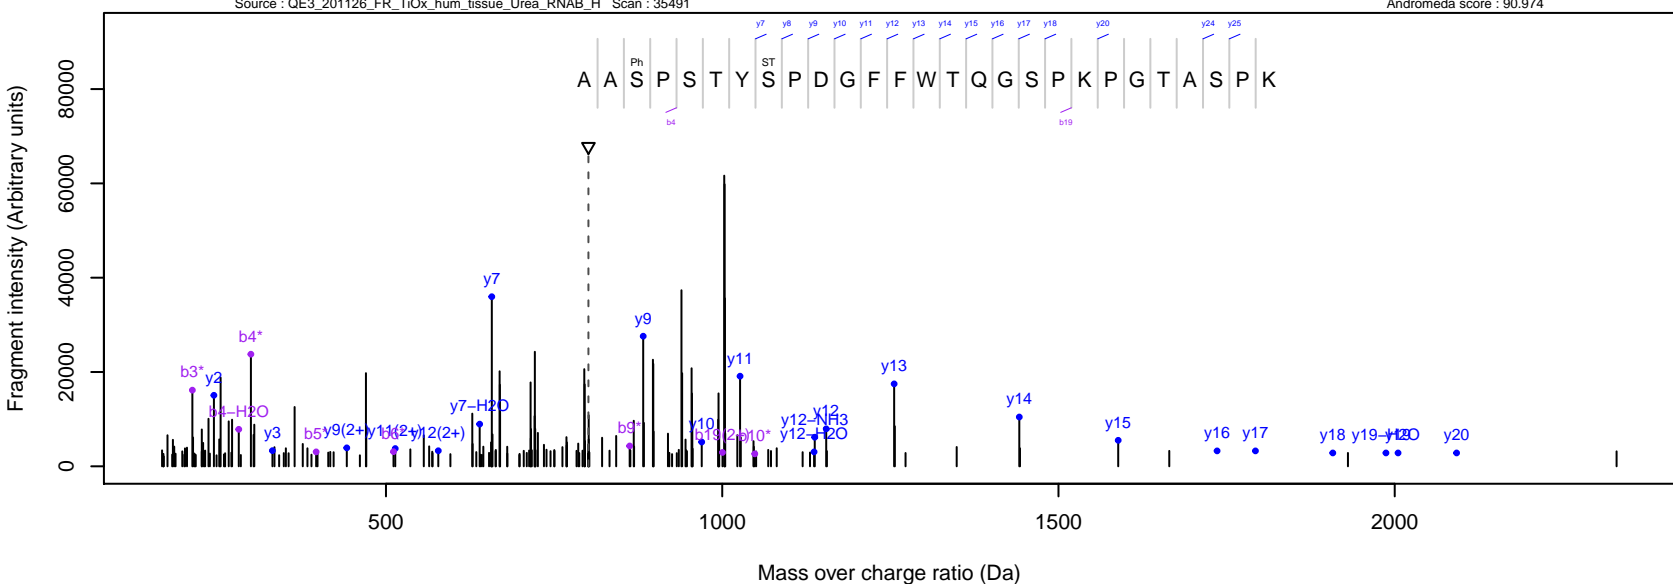

APVPSTCSSTFPEELS(Phospho (STY))PPSHQAK-3+

Source : QE3\_201126\_FR\_TIOx\_hum\_tissue\_Urea\_RNAB\_H Scan : 26983

Andromeda score : 90.974

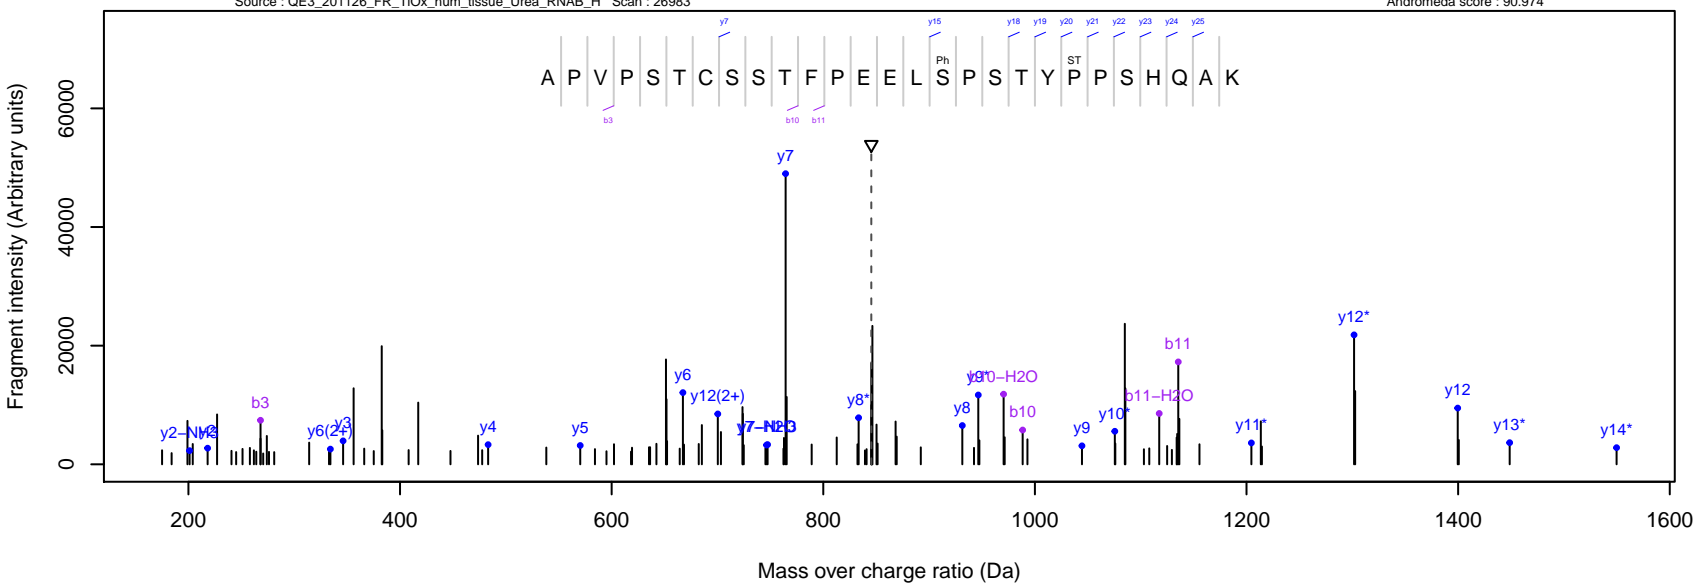

EDQALSKEEMET(Phospho (STY))ES(Phospho (STY))DAVECDLSNMEITEELR-3+

Source : QE3\_201126\_FR\_TiOx\_hum\_tissue\_Urea\_RNAB\_H Scan : 55559

Andromeda score : 90.944

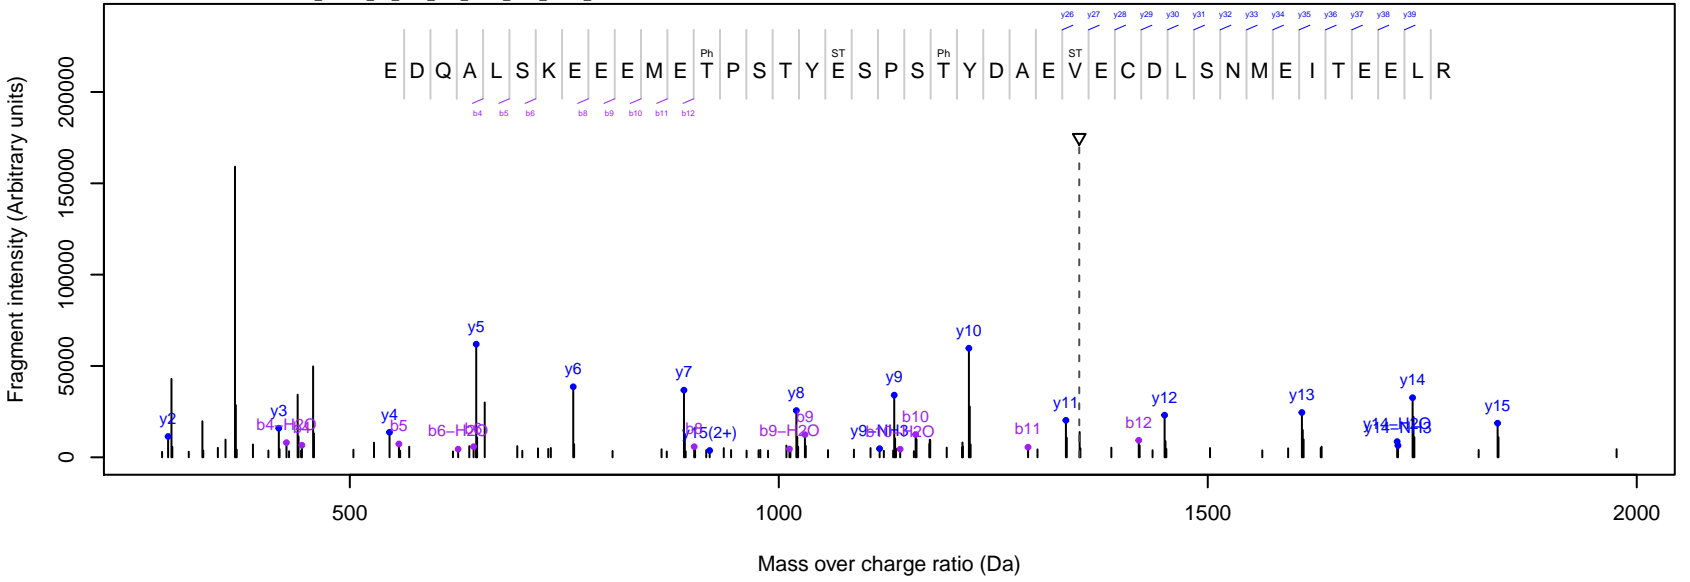

TDEVPAAGGS(Phospho (STY))RS(Phospho (STY))EAEDDEDDYVPYVPLR-3+

Source : QE3\_201126\_FR\_TiOx\_hum\_tissue\_Urea\_RNAB\_H Scan : 49726

Andromeda score : 90.944

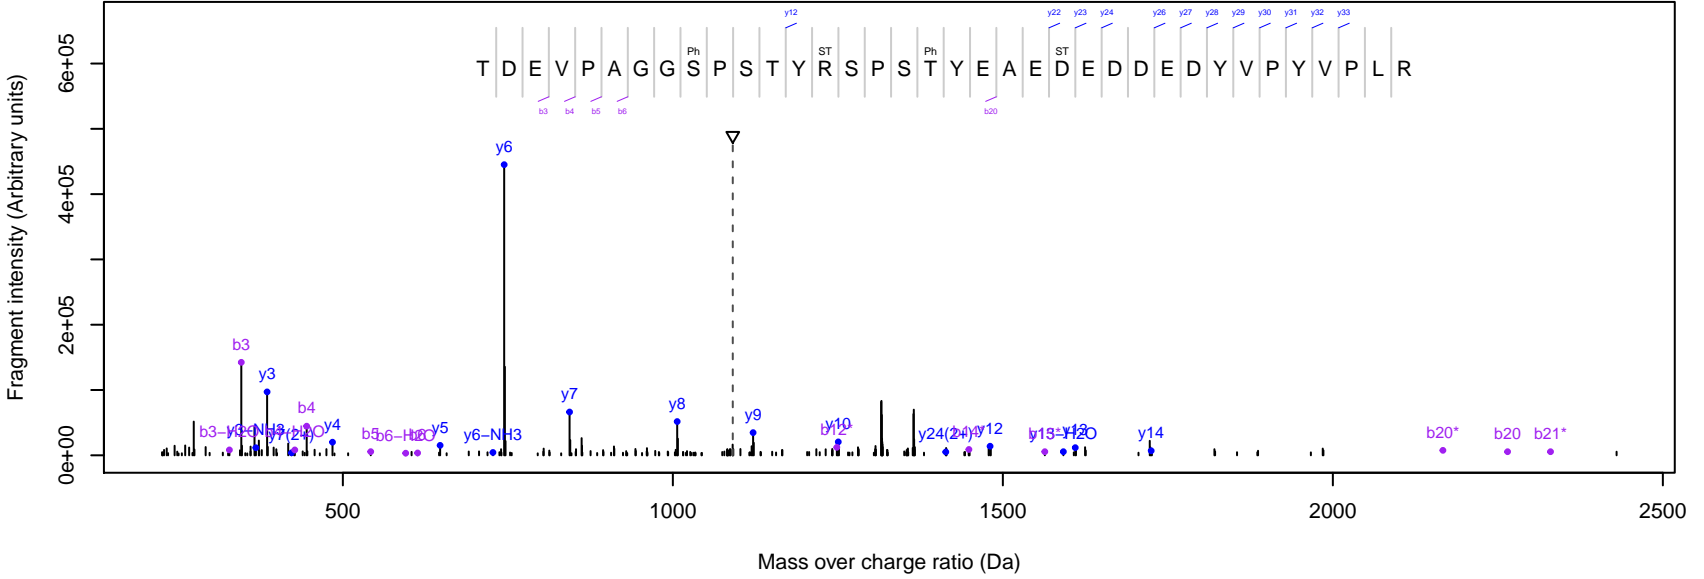

EGSLGDELLPLGYSEPEQEGAS(Phospho (STY))AGAPS(Phospho (STY))PTLELASR-3+

Source : QE3\_201126\_FR\_TiOx\_hum\_tissue\_Urea\_RNAB\_H Scan : 62558

Andromeda score : 90.935

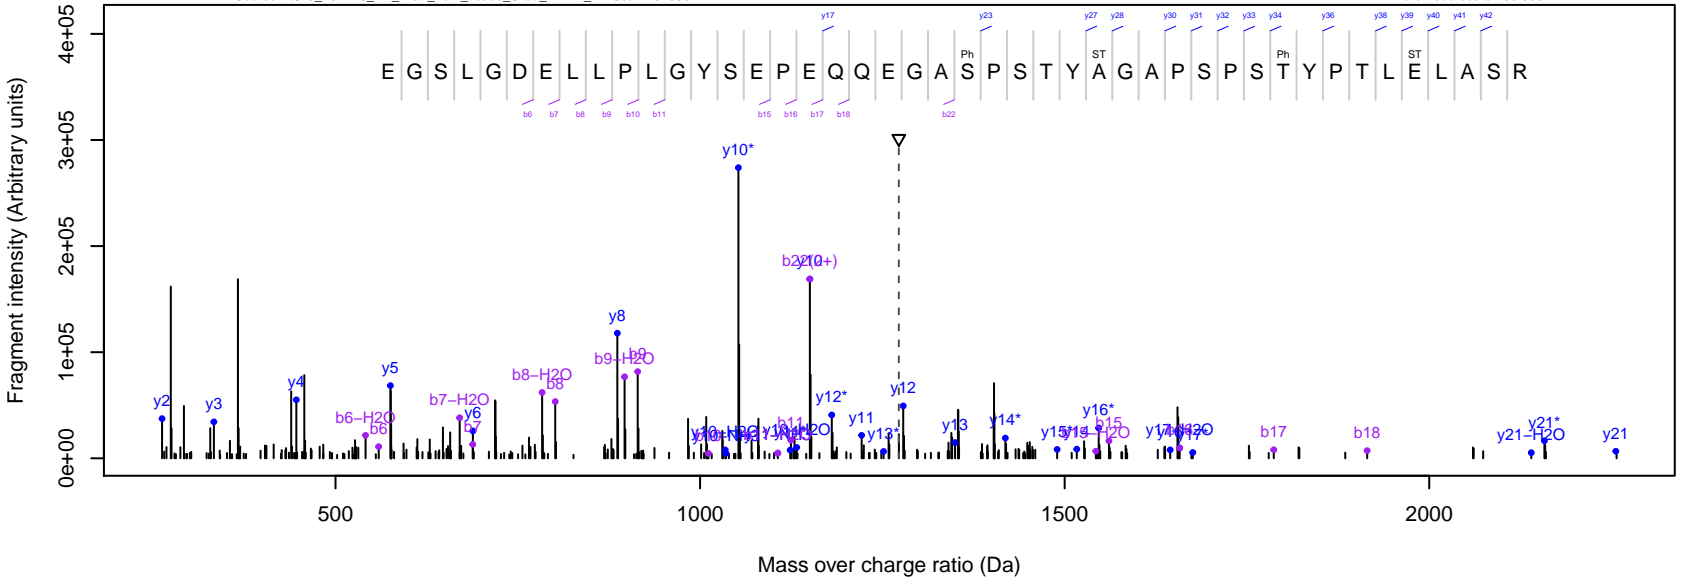

EQVNVGDVGAVSEPPCLPKPEAPPSPSTYPESSHSPR-4+

Source : QE3\_201126\_FR\_TIOx\_hum\_tissue\_Urea\_RNAB\_N Scan : 28873

Andromeda score : 90.93

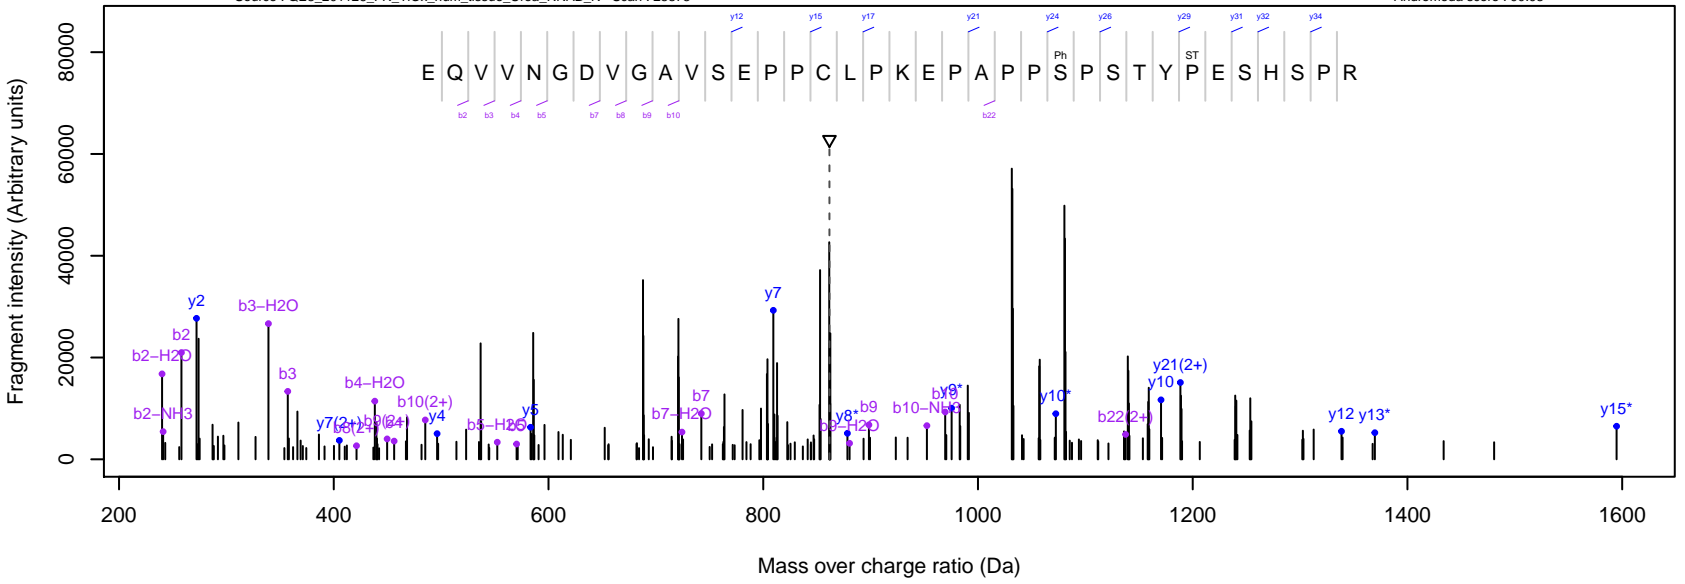

GLSAS(Phospho (STY))TMDLSSSS-2+

Source : QE3\_201126\_FR\_TIOx\_hum\_tissue\_Urea\_RNAB\_H Scan : 37592

Andromeda score : 90.913

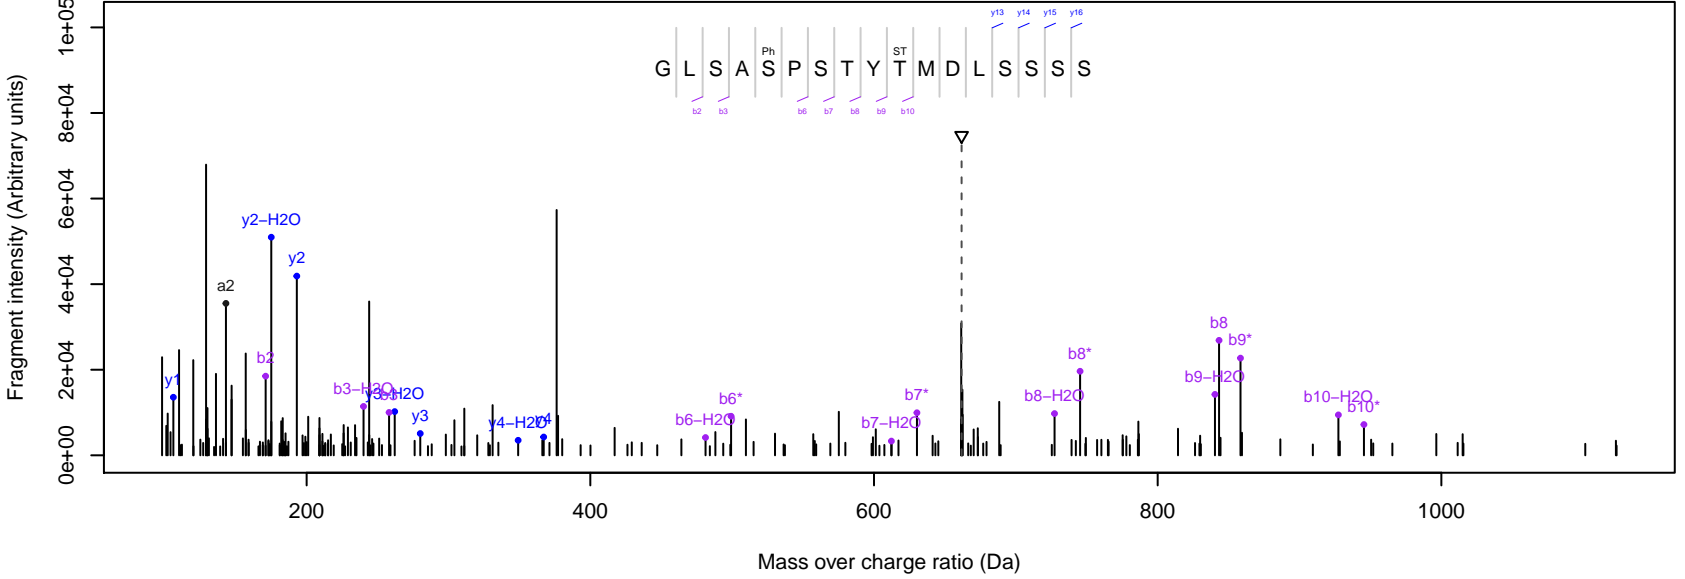

S(Phospho (STY))RS(Phospho (STY))PVDLR-2+

Source : QE3\_201126\_FR\_TIOx\_hum\_tissue\_Urea\_RNAB\_H Scan : 11778

Andromeda score : 90.913

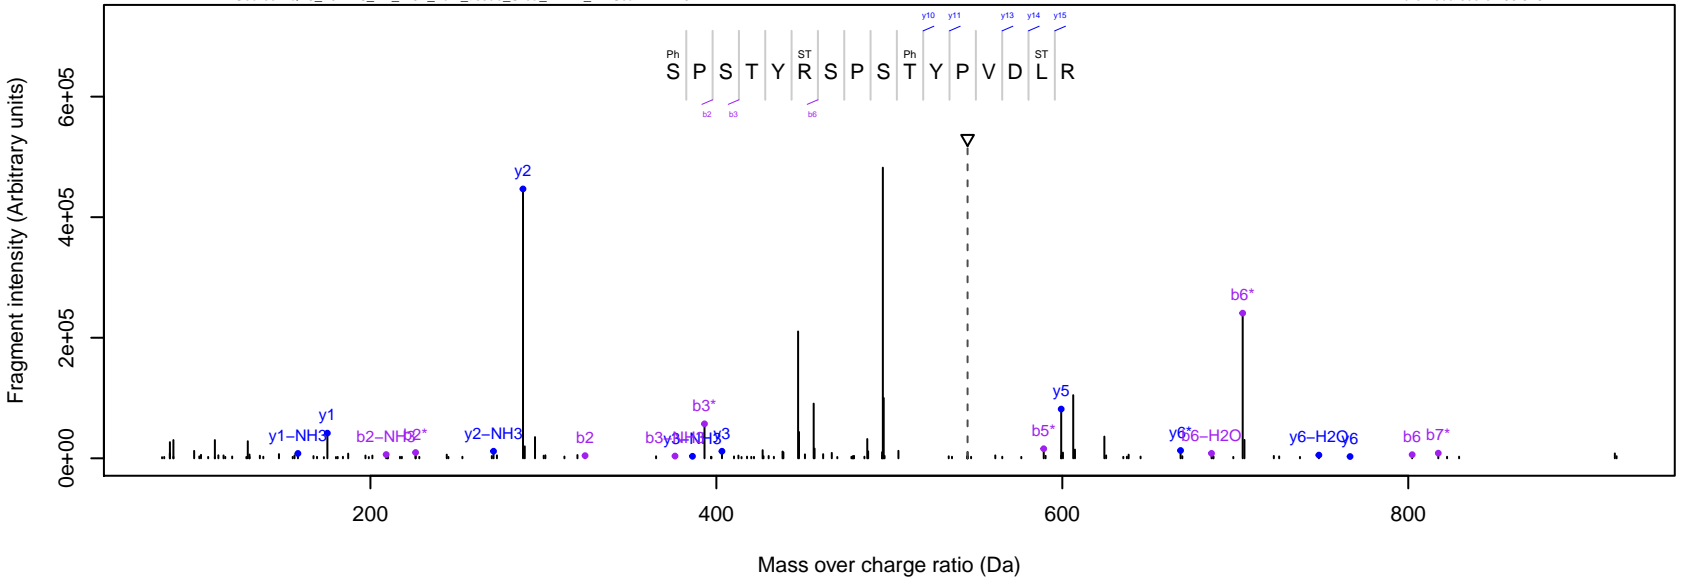

NEALIALREGES(Phospho (STY))LEDLM(Oxidation (M))K-3+

Source : QE3\_201126\_FR\_TiOx\_hum\_tissue\_Urea\_RNAB\_H Scan : 56808

Andromeda score : 90.884

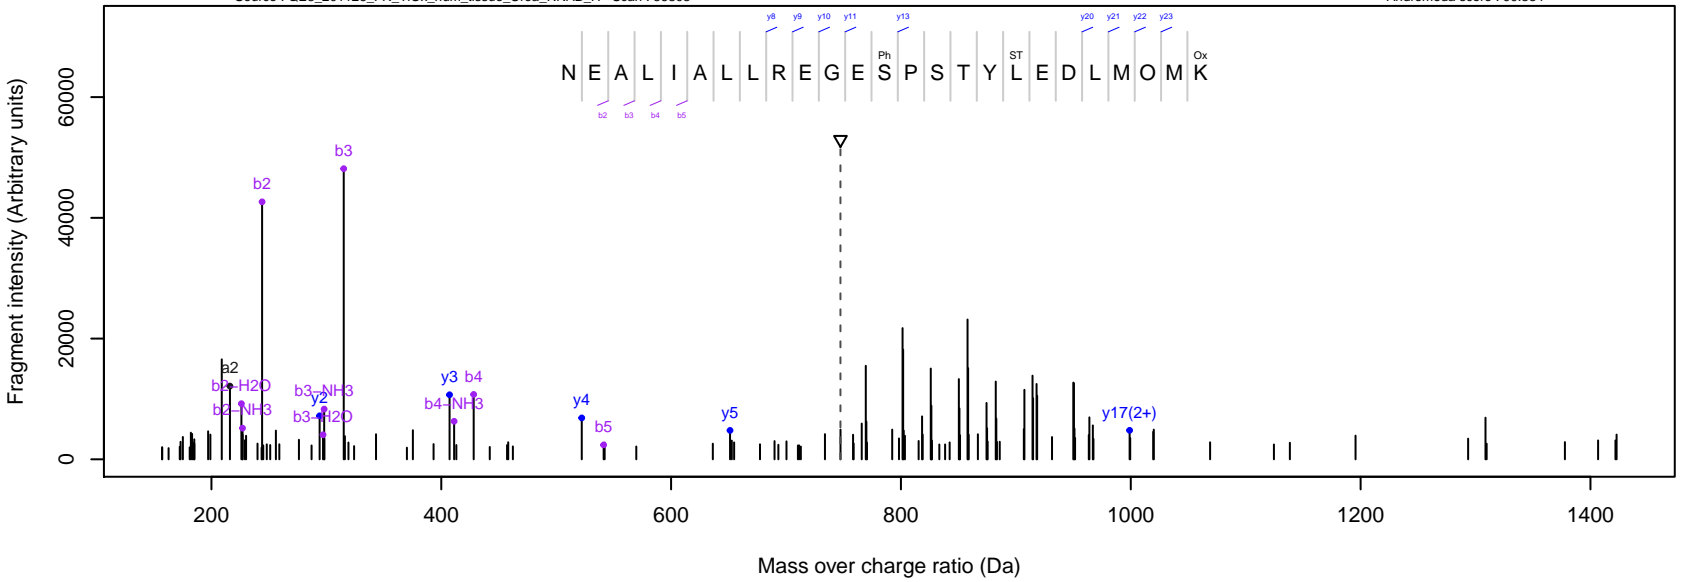

TGS(Phospho (STY))SGALGPPE-2+

Source : QE3\_201126\_FR\_TiOx\_hum\_tissue\_Urea\_RNAB\_H Scan : 13093

Andromeda score : 90.861

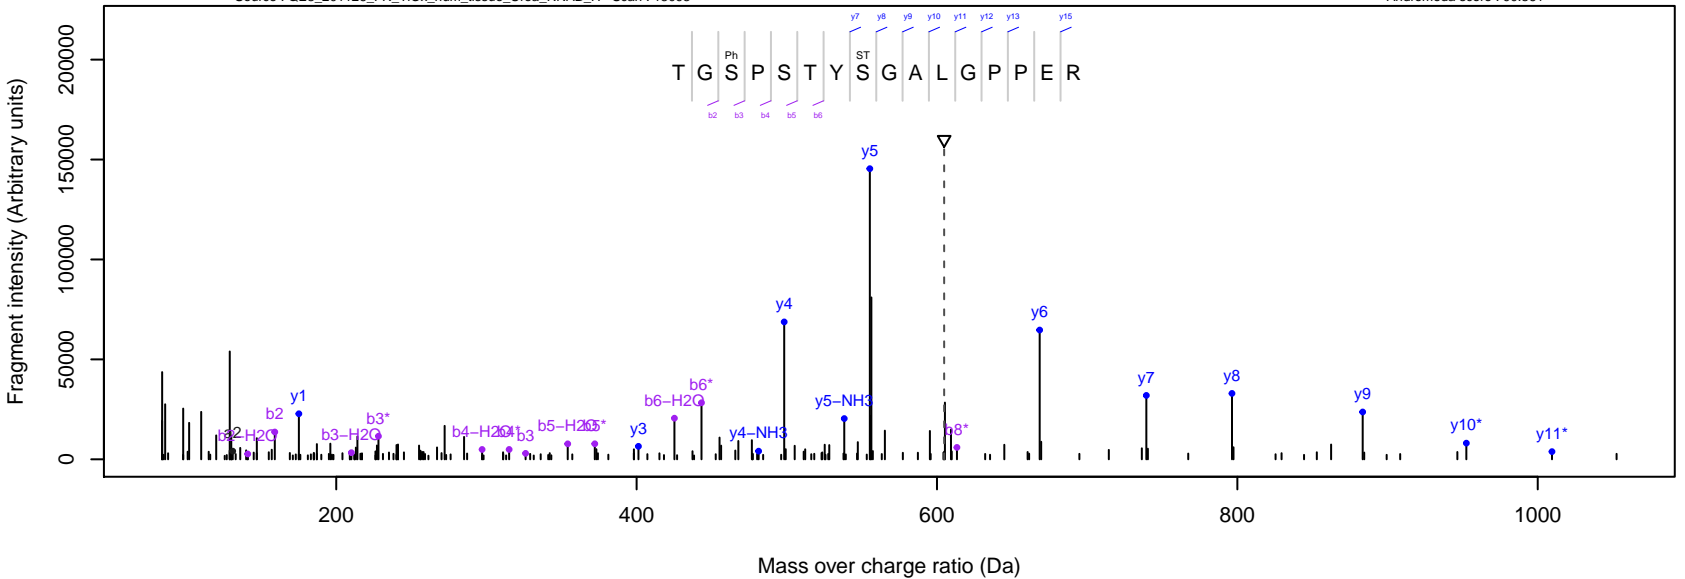

(Acetyl (Protein N-term))S(Phospho (STY))DKPDM(Oxidation (M))AEIEK-2+

Source : QE3\_201126\_FR\_TiOx\_hum\_tissue\_Urea\_RNAB\_B Scan : 12313

Andromeda score : 90.759

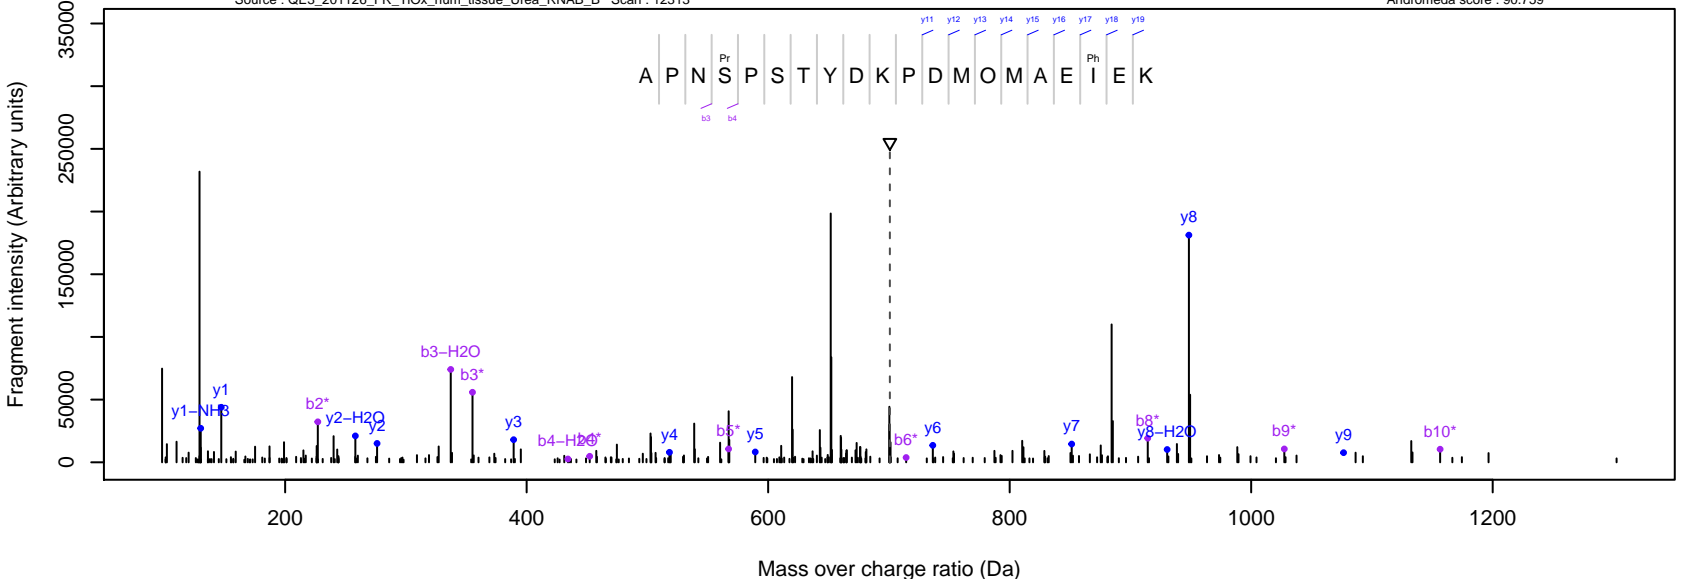

S(Phospho (STY))PGM(Oxidation (M))LEPLGSSR-2+

Source : QE3\_201126\_FR\_TiOx\_hum\_tissue\_Urea\_RNAB\_H Scan : 22385

Andromeda score : 90.759

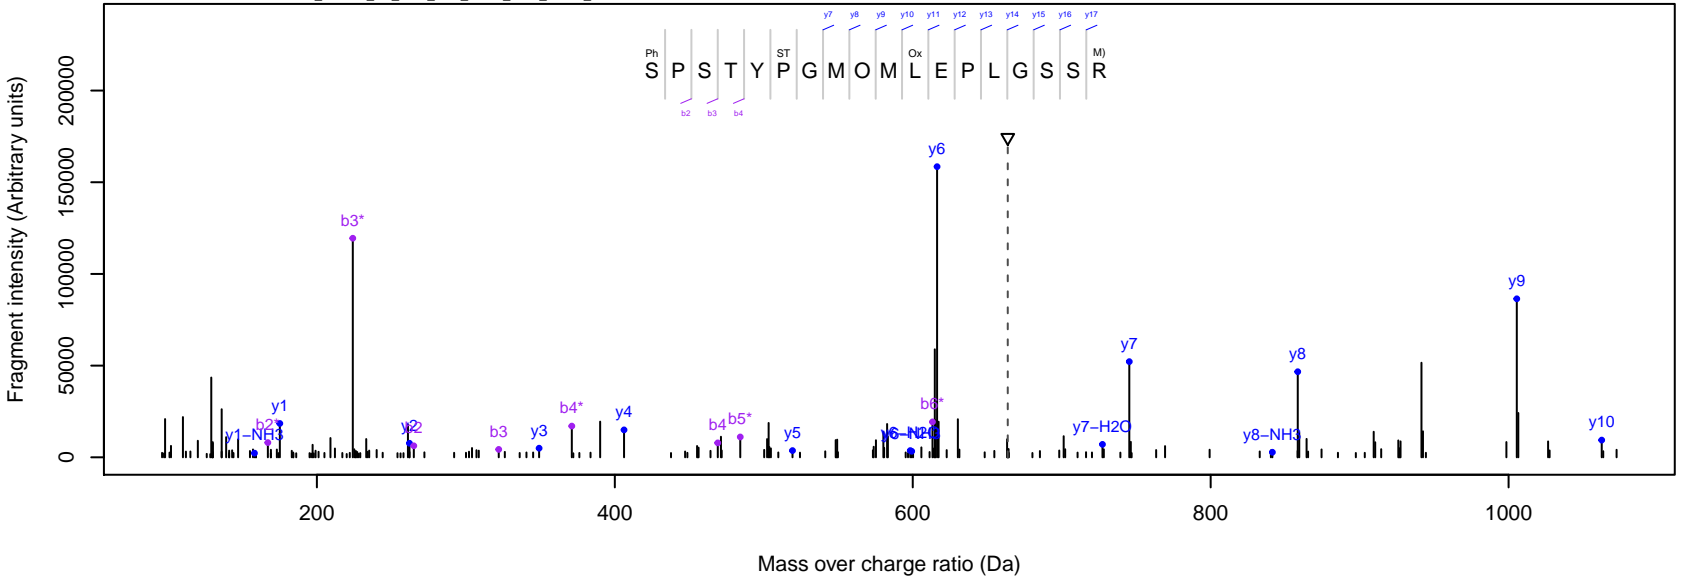

VVQGS(Phospho (STY))LDLSPQAVR-2+

Source : QE3\_201126\_FR\_TiOx\_hum\_tissue\_Urea\_RNAB\_H Scan : 31842

Andromeda score : 90.759

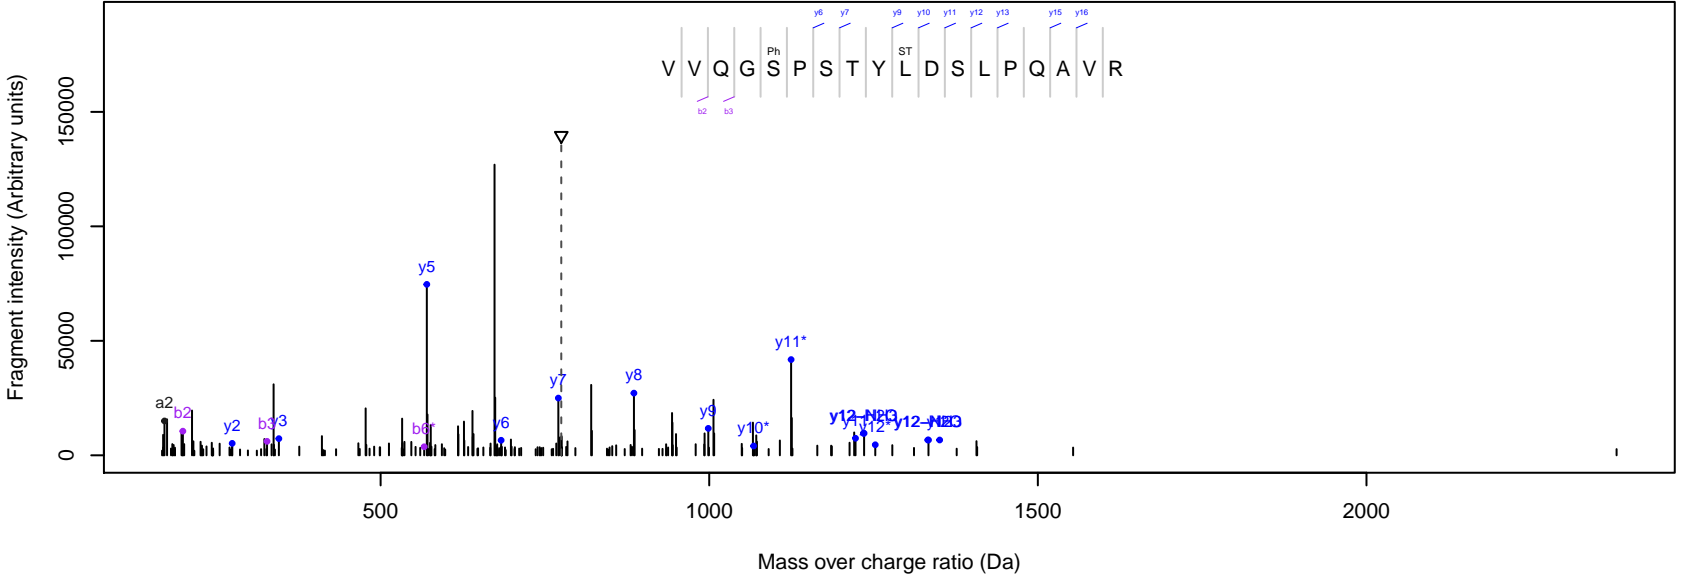

RGS(Phospho (STY))GDTSIDTEASIR-3+

Source : QE3\_201126\_FR\_TiOx\_hum\_tissue\_Urea\_RNAB\_H Scan : 23291

Andromeda score : 90.758

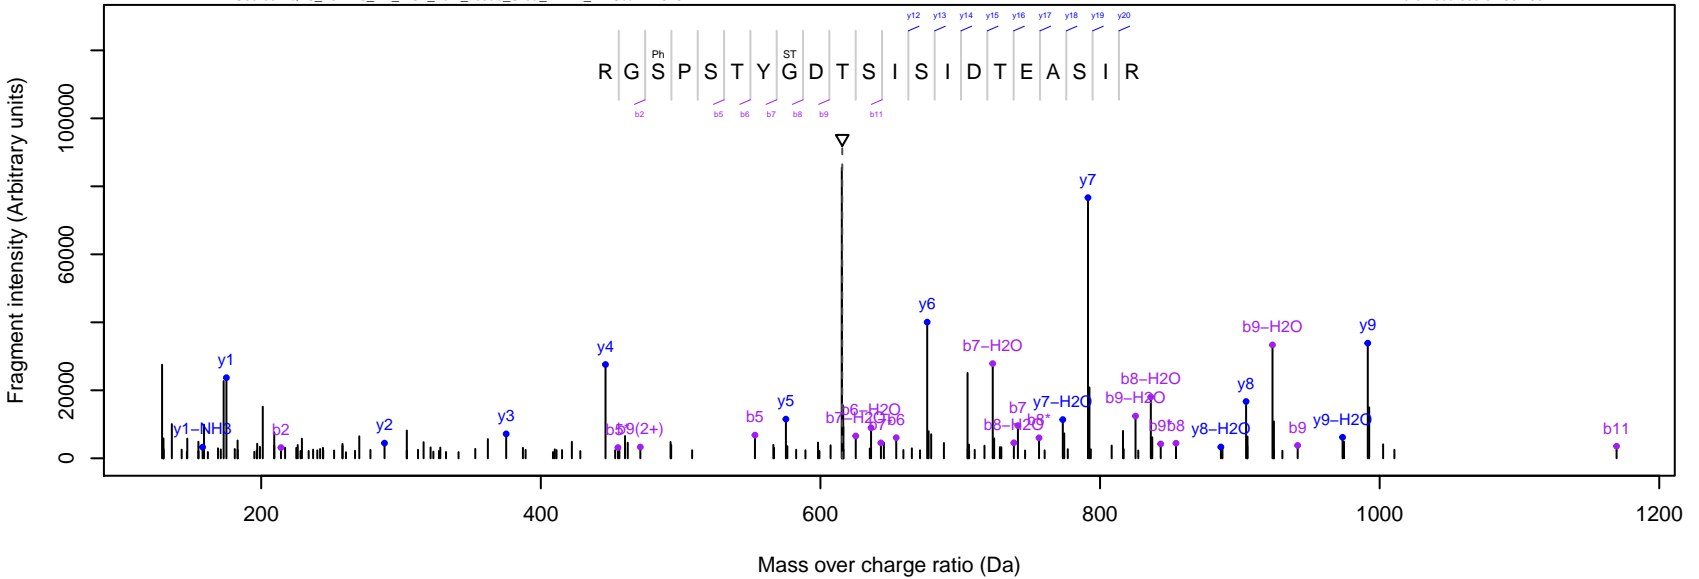



KRLS(Phospho (STY))VELTSSLFR-3+

Source : QE3\_201126\_FR\_TiOx\_hum\_tissue\_Urea\_RNAB\_N Scan : 34398

Andromeda score : 90.754

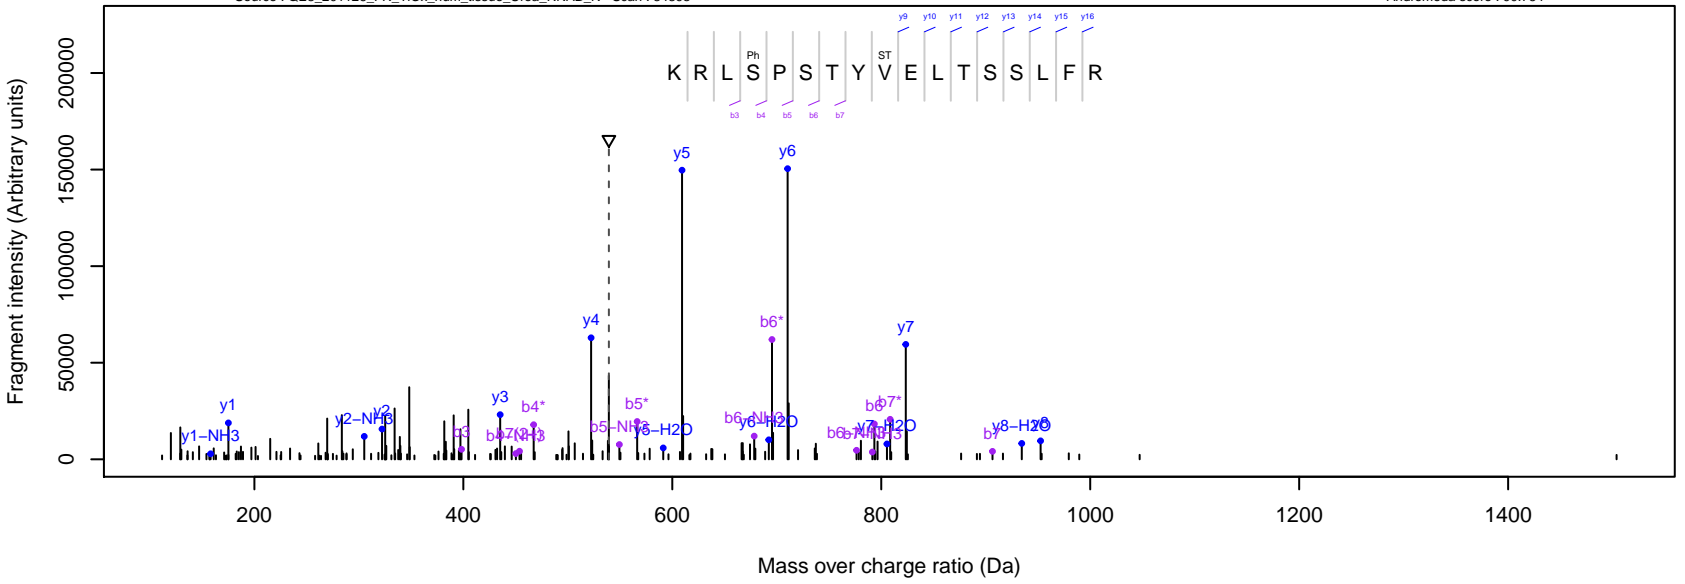

S(Phospho (STY))RS(Phospho (STY))PESQVIGENTK-2+

Source : QE3\_201126\_FR\_TiOx\_hum\_tissue\_Urea\_RNAB\_N Scan : 15568

Andromeda score : 90.754

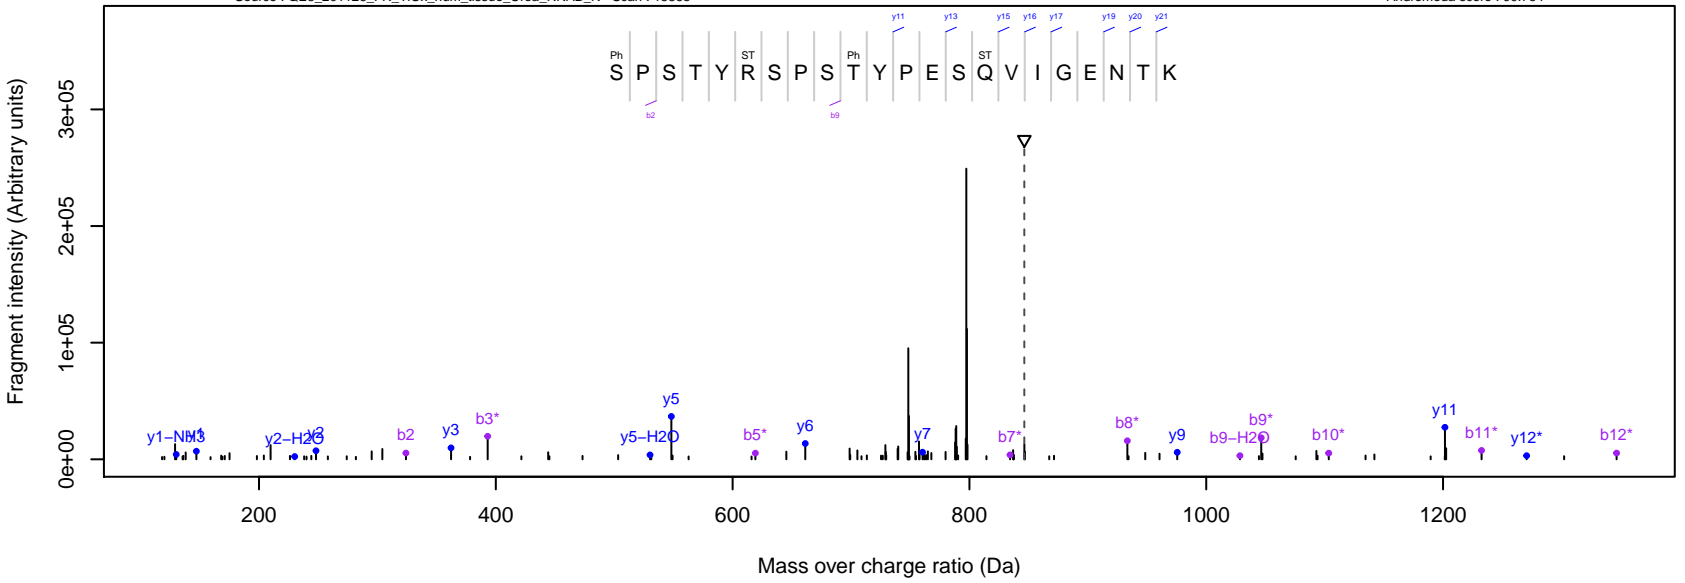

TKS(Phospho (STY))TGGAPTFTVTK-2+

Source : QE3\_201126\_FR\_TiOx\_hum\_tissue\_Urea\_RNAB\_B Scan : 20056

Andromeda score : 90.754

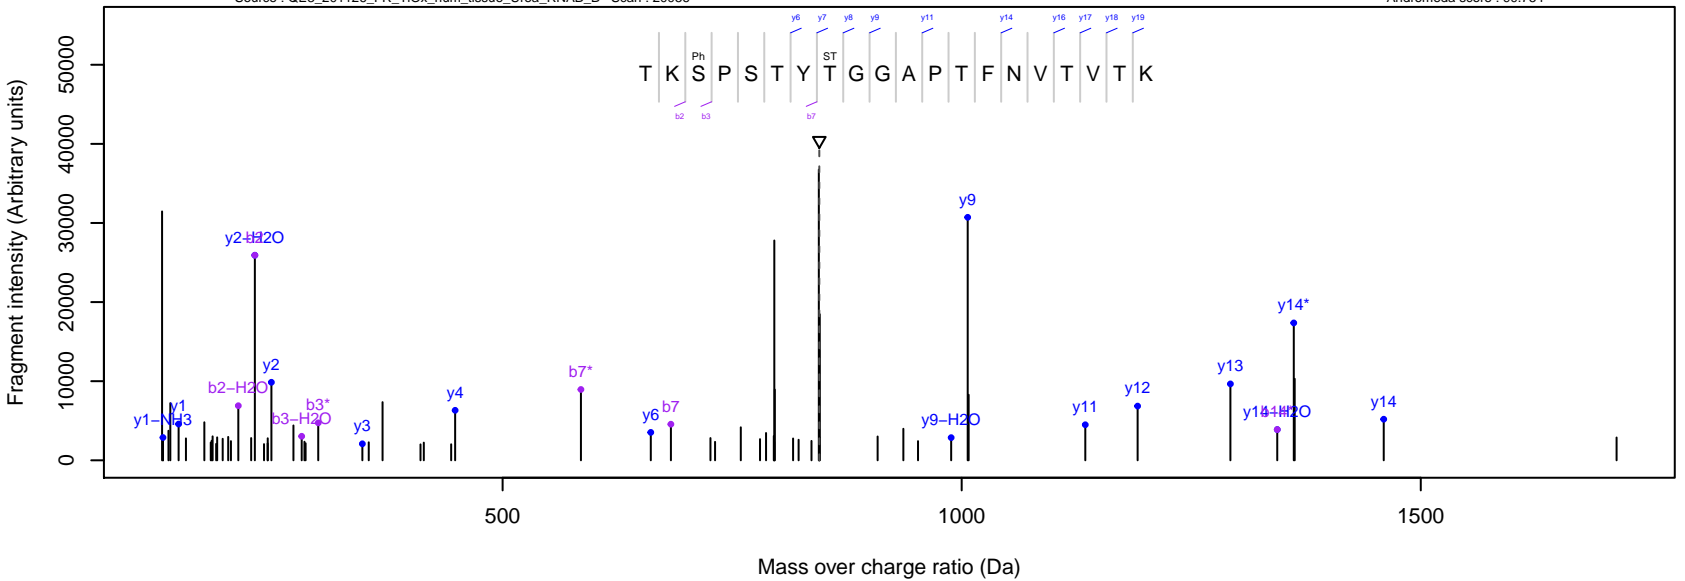

MVIQGPSS(Phospho (STY))PQGEAMVTDVLEDQKEGR-3+

Source : QE3\_201126\_FR\_TiOx\_hum\_tissue\_Urea\_RNAB\_H Scan : 46222

Andromeda score : 90.741

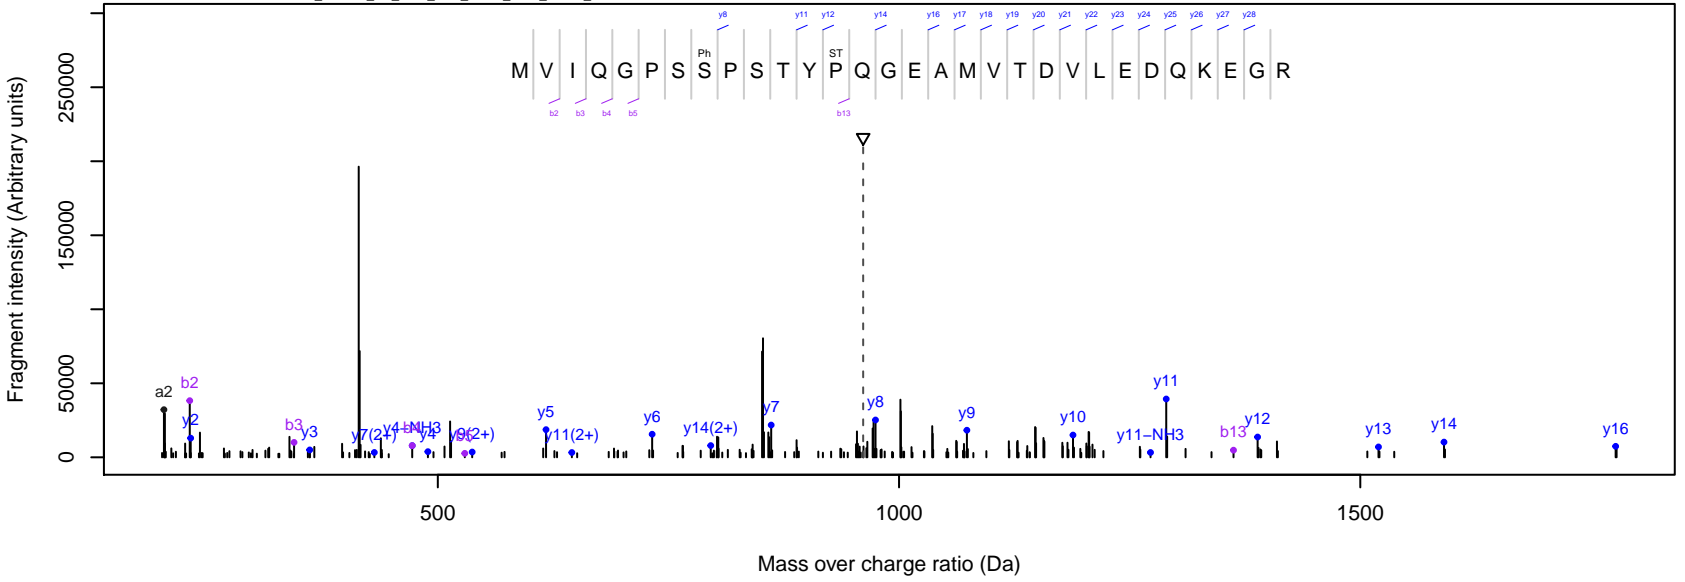

DQS(Phospho (STY))TPIIEVEGPLLSDTHVTFK-3+

Source : QE3\_201126\_FR\_TiOx\_hum\_tissue\_Urea\_RNAB\_H Scan : 54235

Andromeda score : 90.729

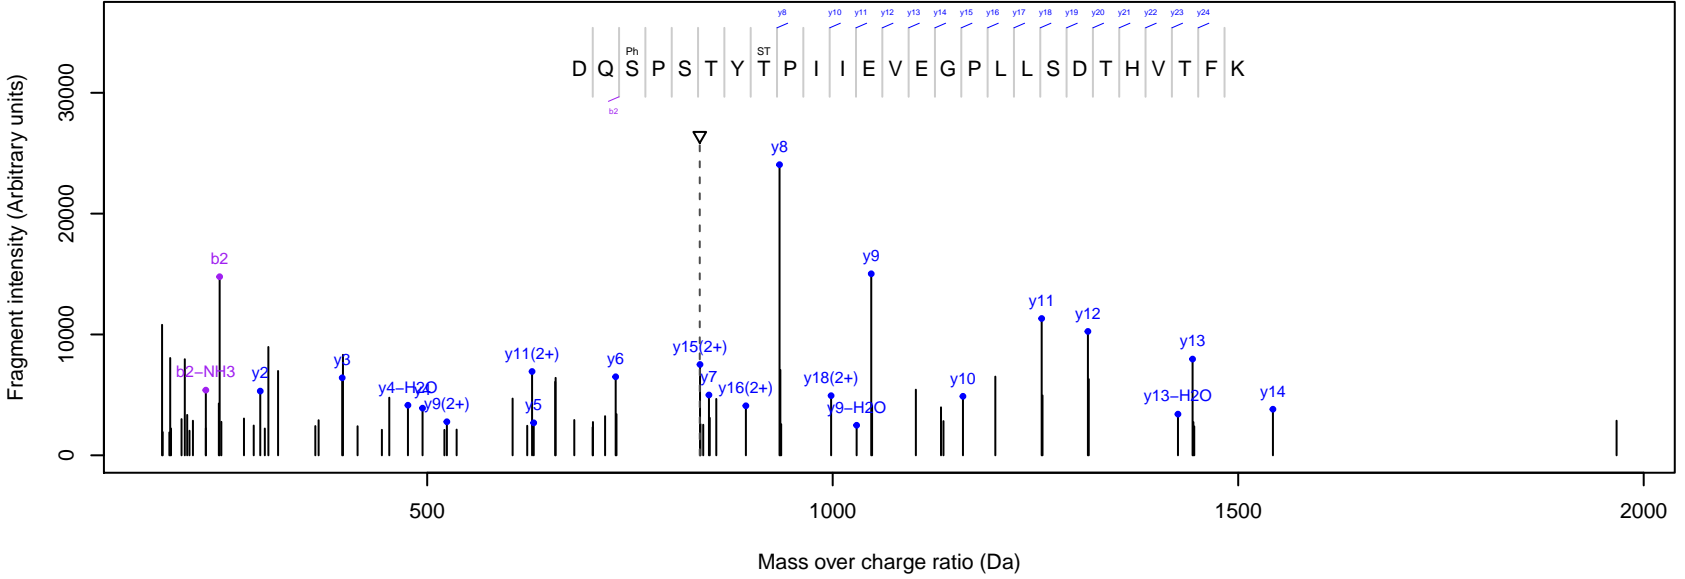

AGSS(Phospho (STY))TPGDAPPAVAEQGR-2+

Source : QE3\_201126\_FR\_TiOx\_hum\_tissue\_Urea\_RNAB\_H Scan : 23117

Andromeda score : 90.714

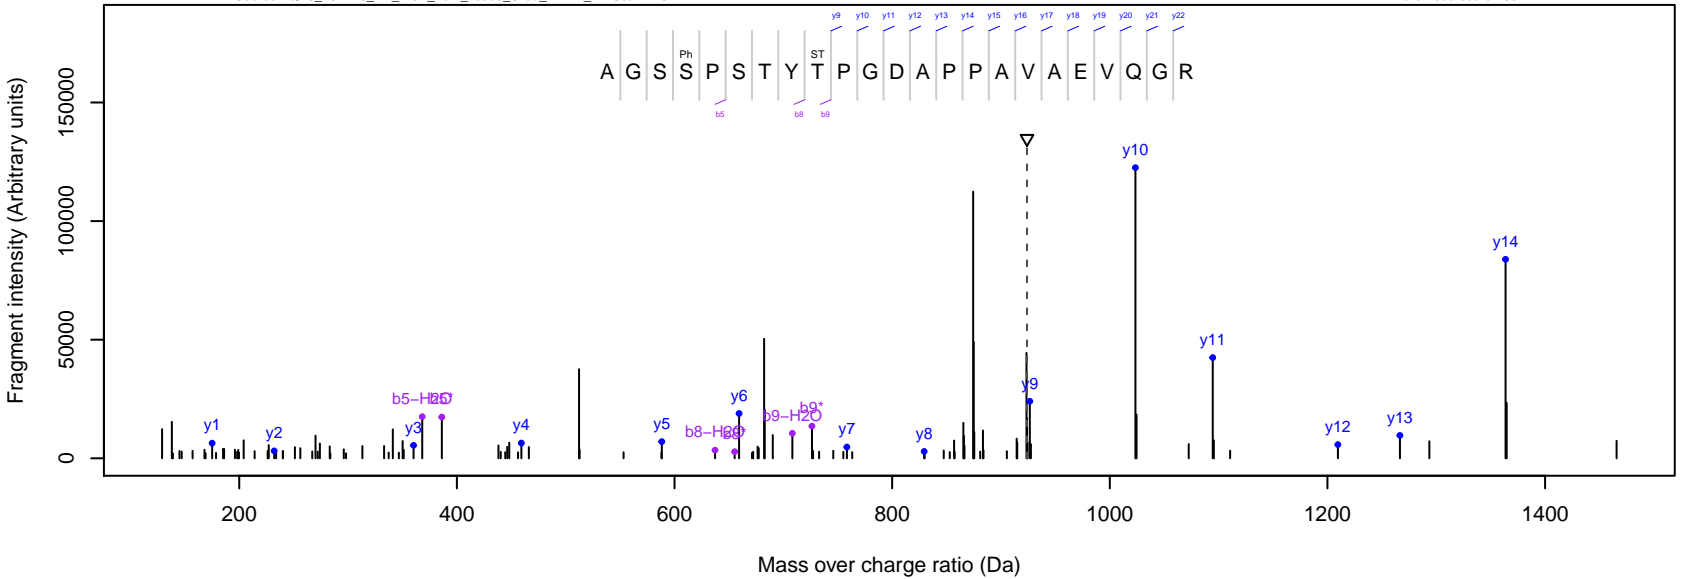

DRAS(Phospho (STY))PES(Phospho (STY))LDLTR-2+

Source : QE3\_201126\_FR\_TiOx\_hum\_tissue\_Urea\_RNAB\_N Scan : 24136

Andromeda score : 90.706

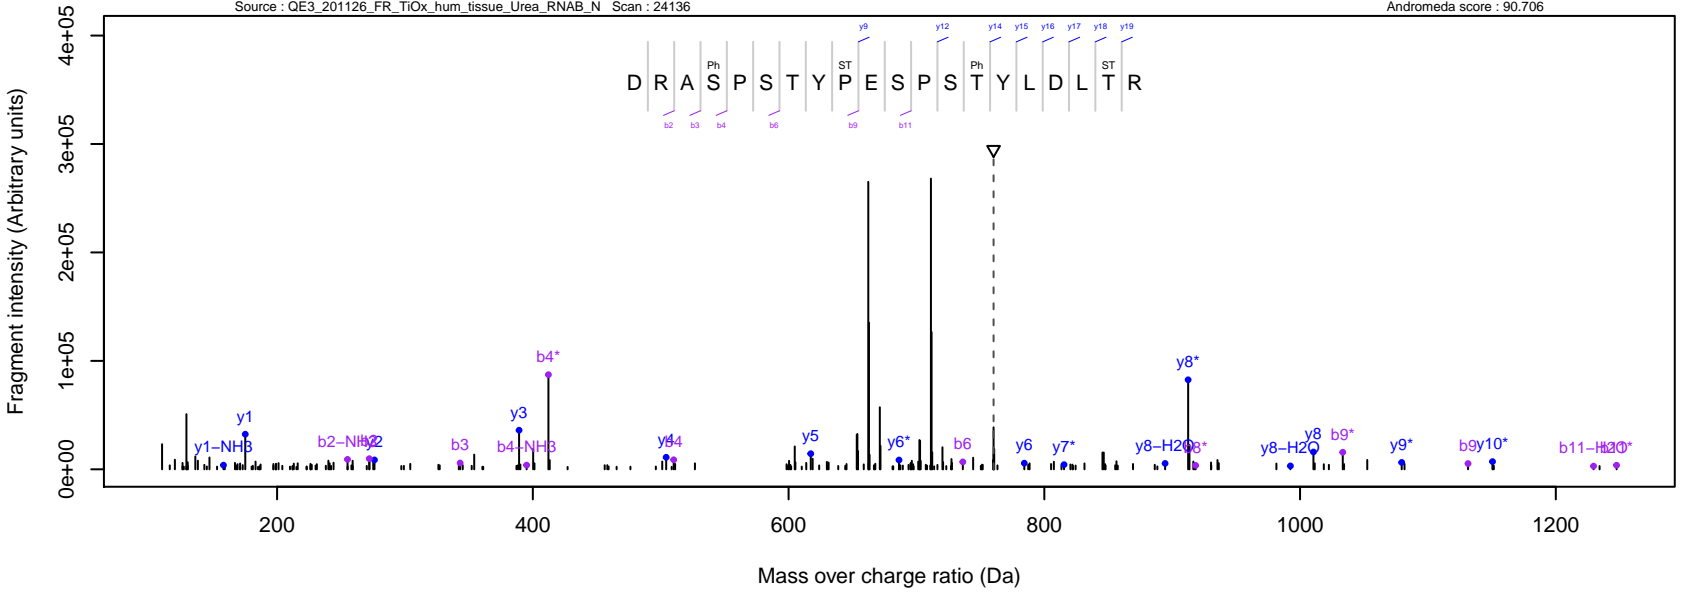

TDS(Phospho (STY))TSDGRPAWM(Oxidation (M))R-2+

Source : QE3\_201126\_FR\_TiOx\_hum\_tissue\_Urea\_RNAB\_H Scan : 11892

Andromeda score : 90.689

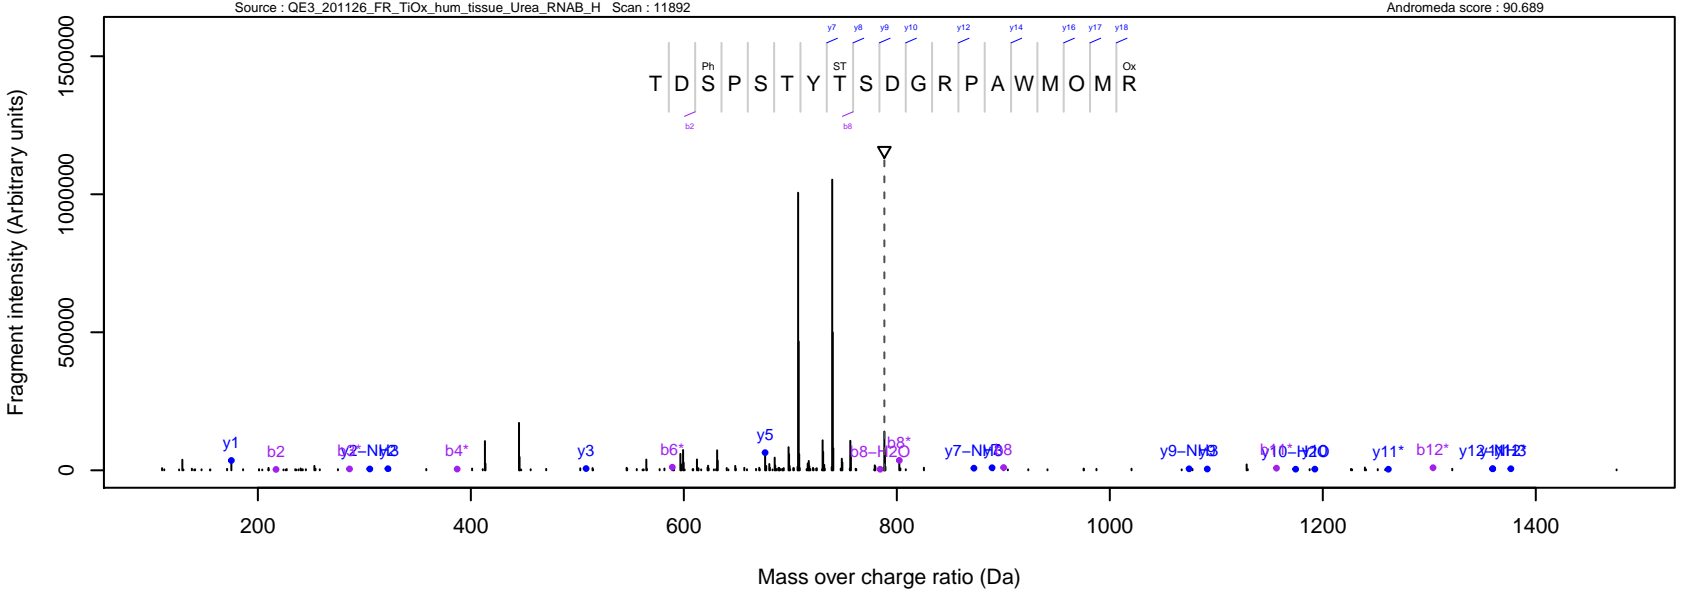

KGEEEVAVDGY(Phospho (STY))ETDHDYCEVCQQGGEIILCDTCPR-4+

Source : QE3\_201126\_FR\_TiOx\_hum\_tissue\_Urea\_RNAB\_H Scan : 39708

Andromeda score : 90.672

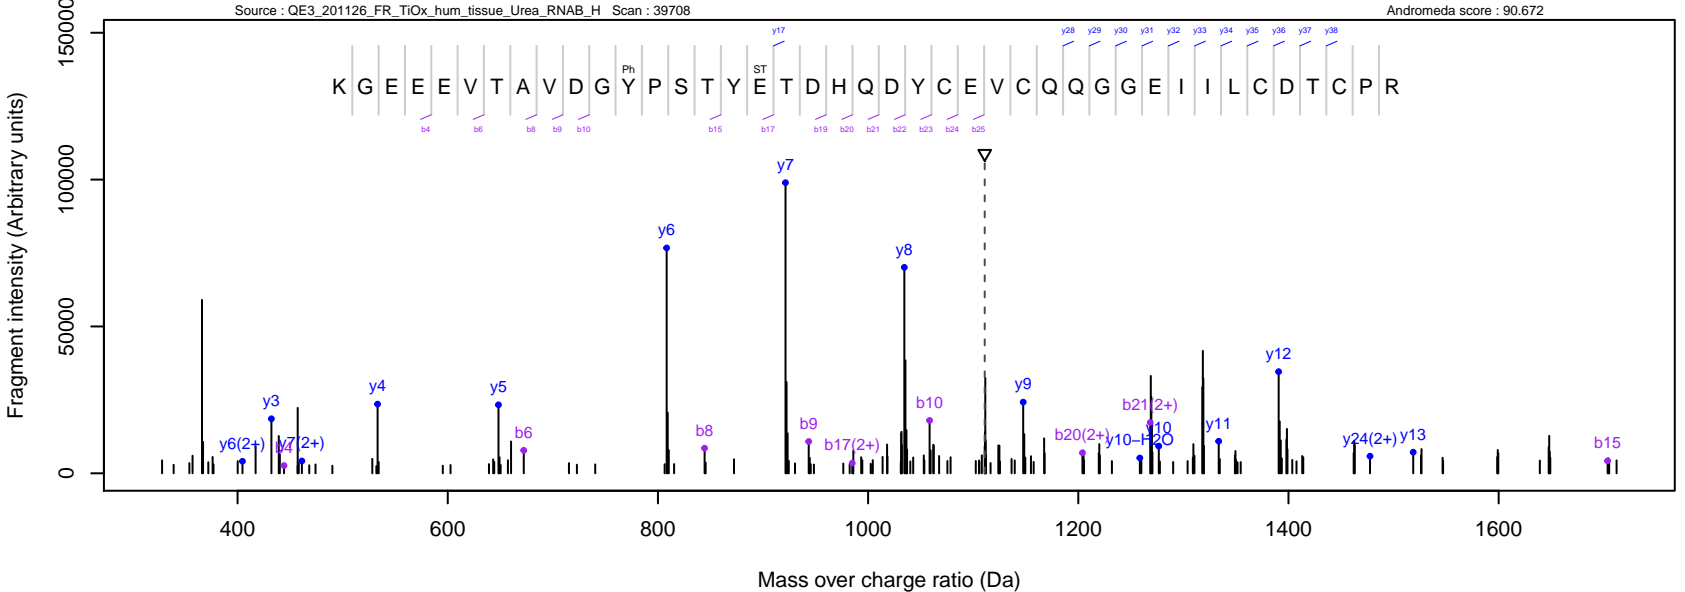

GPPS(Phospho (STY))PPAPVMHSPSR-3+

Source : QE3\_201126\_FR\_TiOx\_hum\_tissue\_Urea\_RNAB\_H Scan : 17192

Andromeda score : 90.654

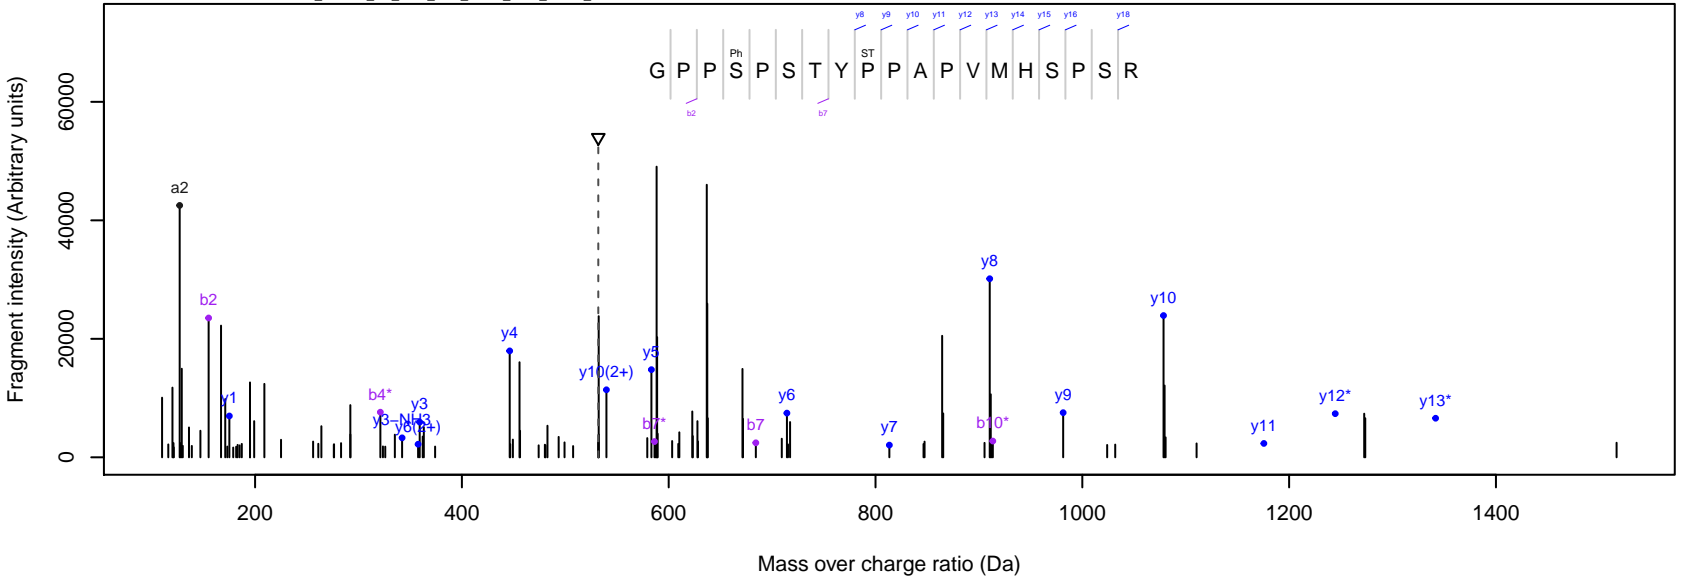

SES(Phospho (STY))PSKDFGPTLGLK-3+

Source : QE3\_201126\_FR\_TiOx\_hum\_tissue\_Urea\_RNAB\_H Scan : 28404

Andromeda score : 90.654

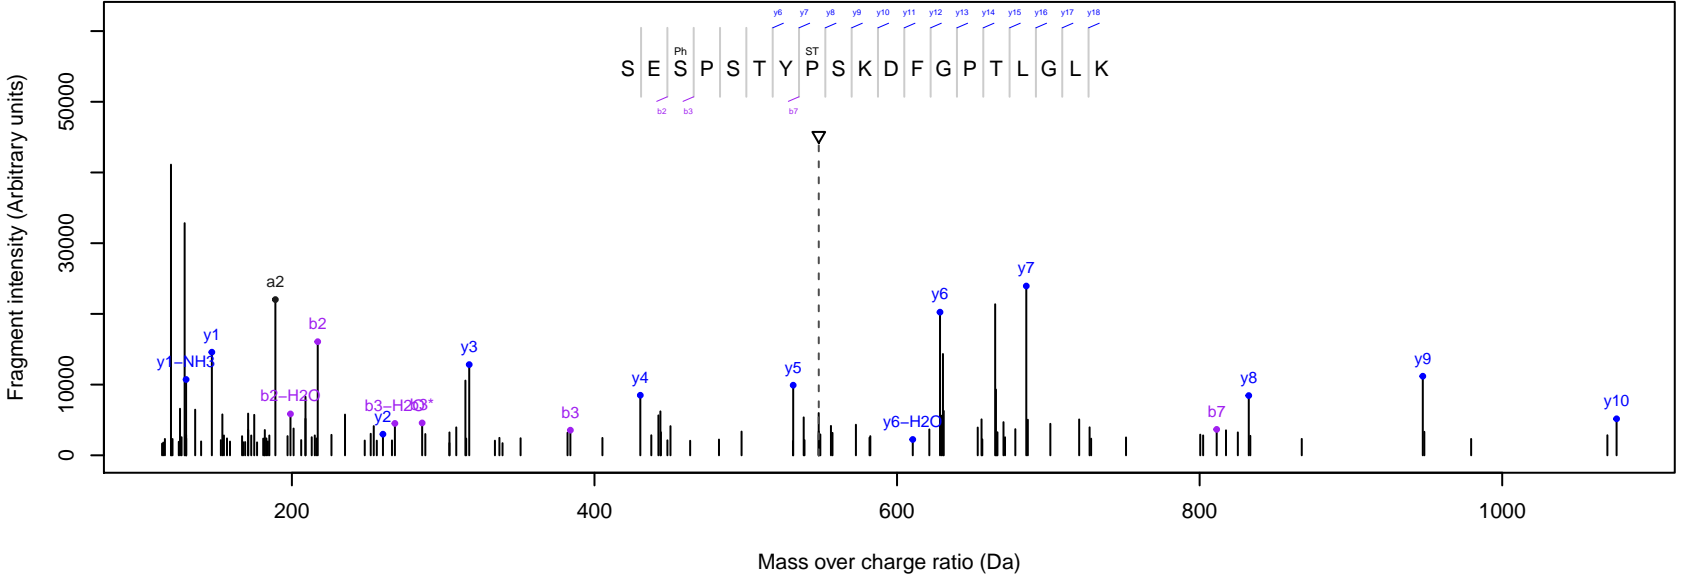

TPS(Phospho (STY))PEPVDKDFYSEFGNK-3+

Source : QE3\_201126\_FR\_TiOx\_hum\_tissue\_Urea\_RNAB\_H Scan : 35294

Andromeda score : 90.654

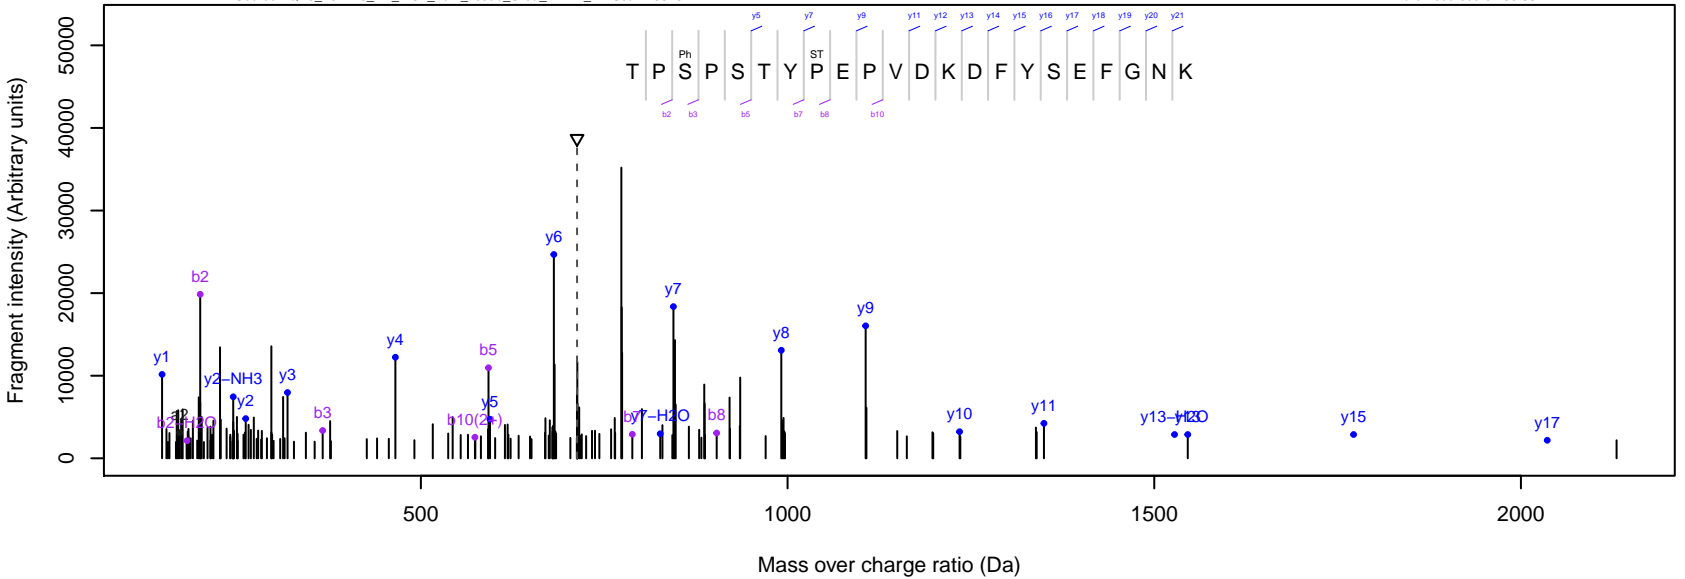

KVQS(Phospho (STY))TADIFGDEEGDLFKEK-3+

Source : QE3\_201126\_FR\_TiOx\_hum\_tissue\_Urea\_RNAB\_H Scan : 37706

Andromeda score : 90.633

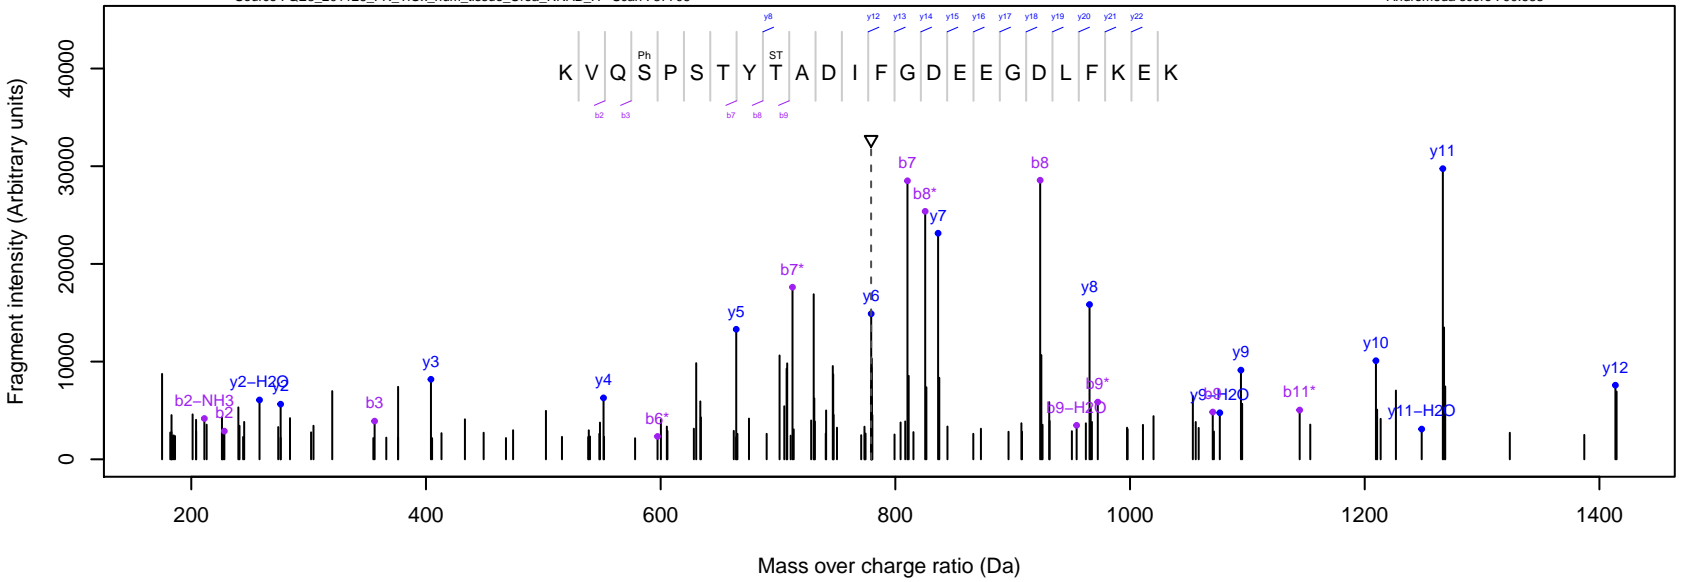

GQAGLPGLVS(Phospho (STY))PGSGDR-2+

Source : QE3\_201126\_FR\_TiOx\_hum\_tissue\_Urea\_RNAB\_N Scan : 29136

Andromeda score : 90.561

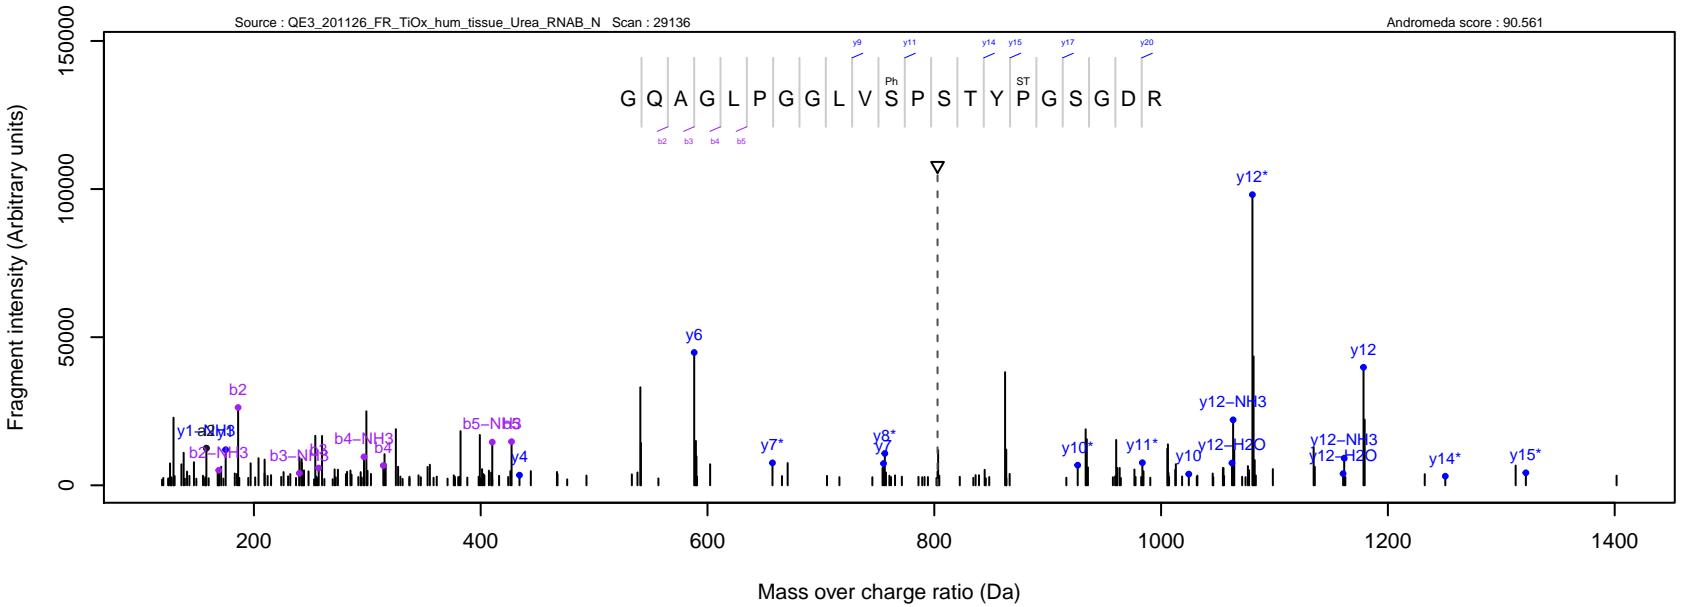

AAAAPAS(Phospho (STY))EDEDDEDDEDDEDDDDDEEDDSEEEAM(Oxidation (M))ETTPAK-4+

Source : QE3\_201126\_FR\_TiOx\_hum\_tissue\_Urea\_RNAB\_H Scan : 21779

Andromeda score : 90.552

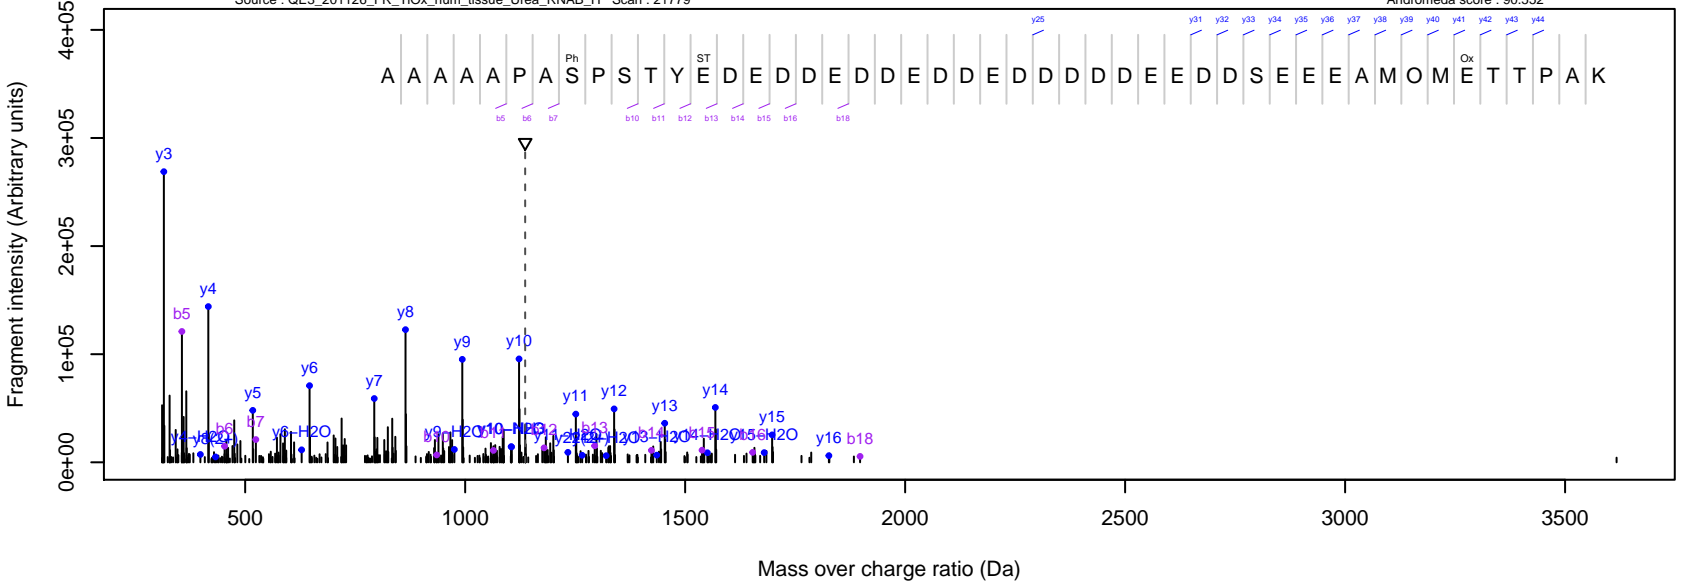

YLQAHTQSVYNYHLS(Phospho (STY))PR-3+

Source : QE3\_201126\_FR\_TiOx\_hum\_tissue\_Urea\_RNAB\_B Scan : 21391

Andromeda score : 90.534

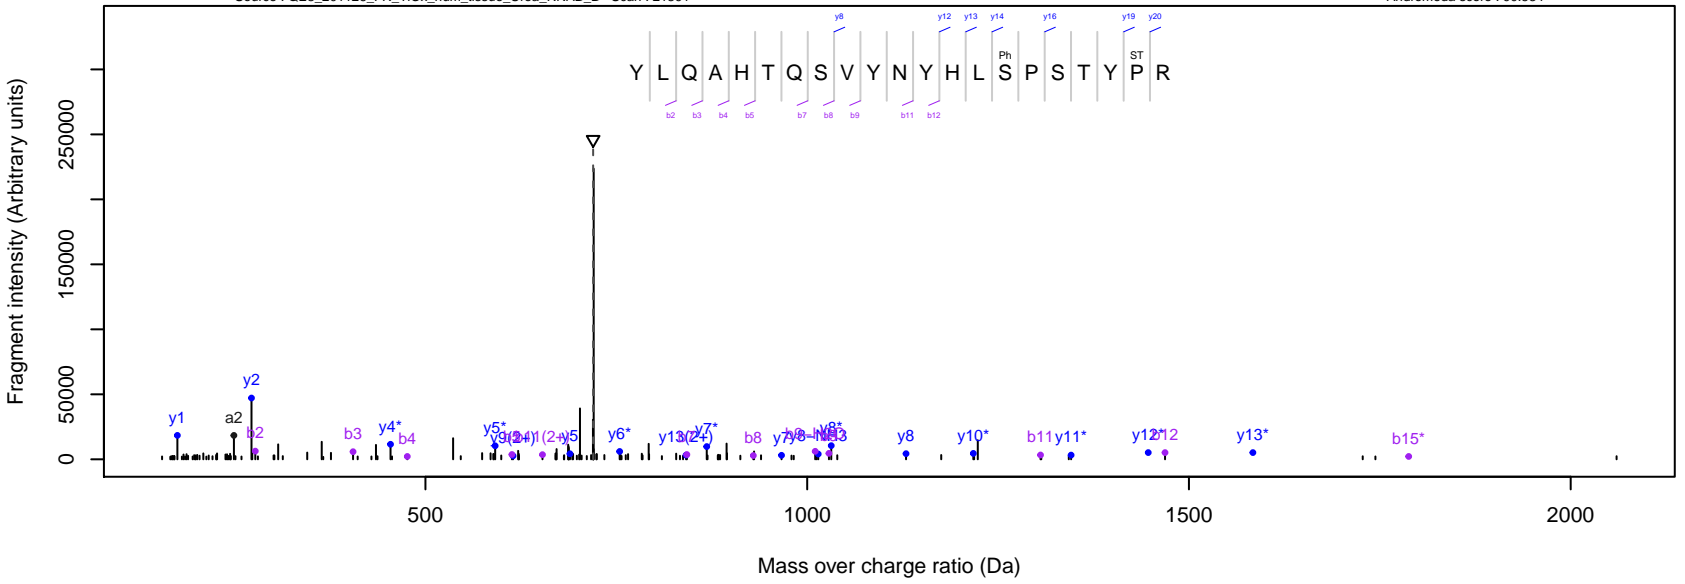

VDAGHTDQVPVPSGSGVGGPARPAS(Phospho (STY))GPR-4+

Source : QE3\_201126\_FR\_TiOx\_hum\_tissue\_Urea\_RNAB\_H Scan : 13400

Andromeda score : 90.518

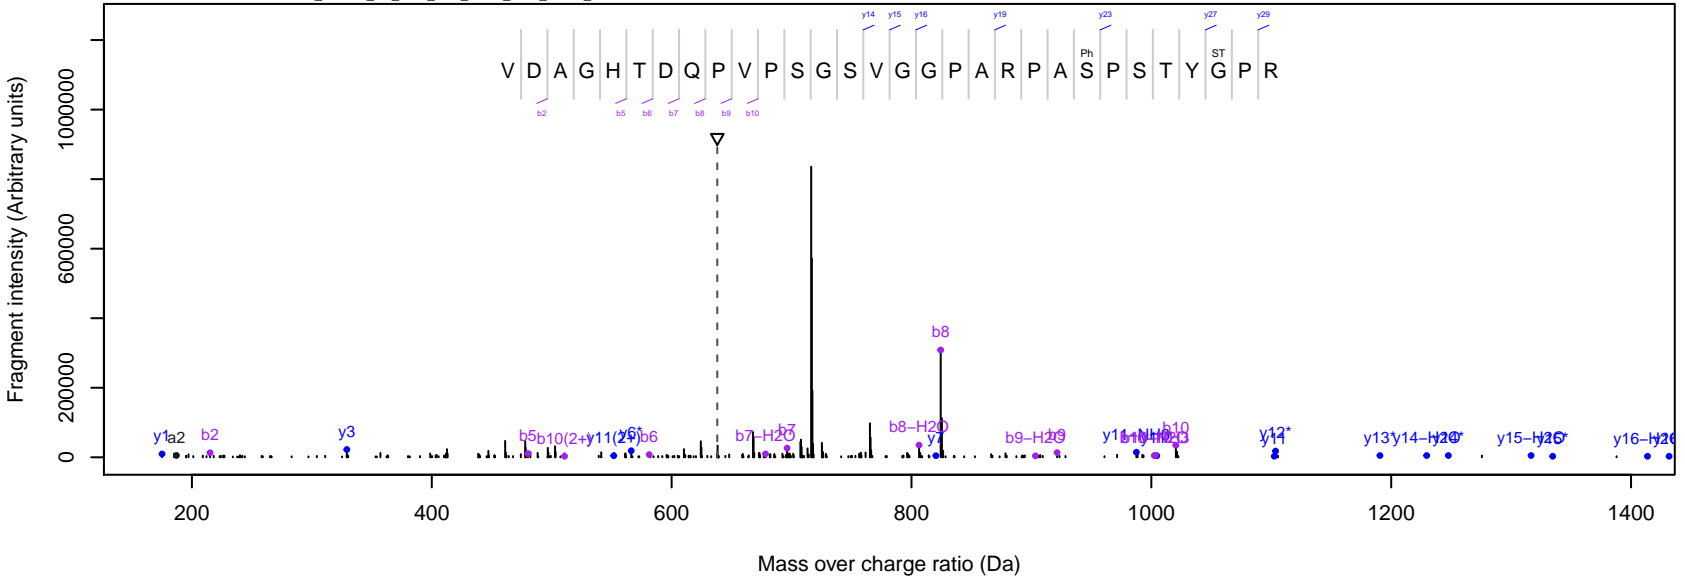

YAFMOMPLIDDS(Phospho (M))PLIDDS(Phospho (STY))DDEIEEFMVTSENLETEGIK-3+

Source : QE3\_201126\_FR\_TiOx\_hum\_tissue\_Urea\_RNAB\_N Scan : 63038

Andromeda score : 90.485

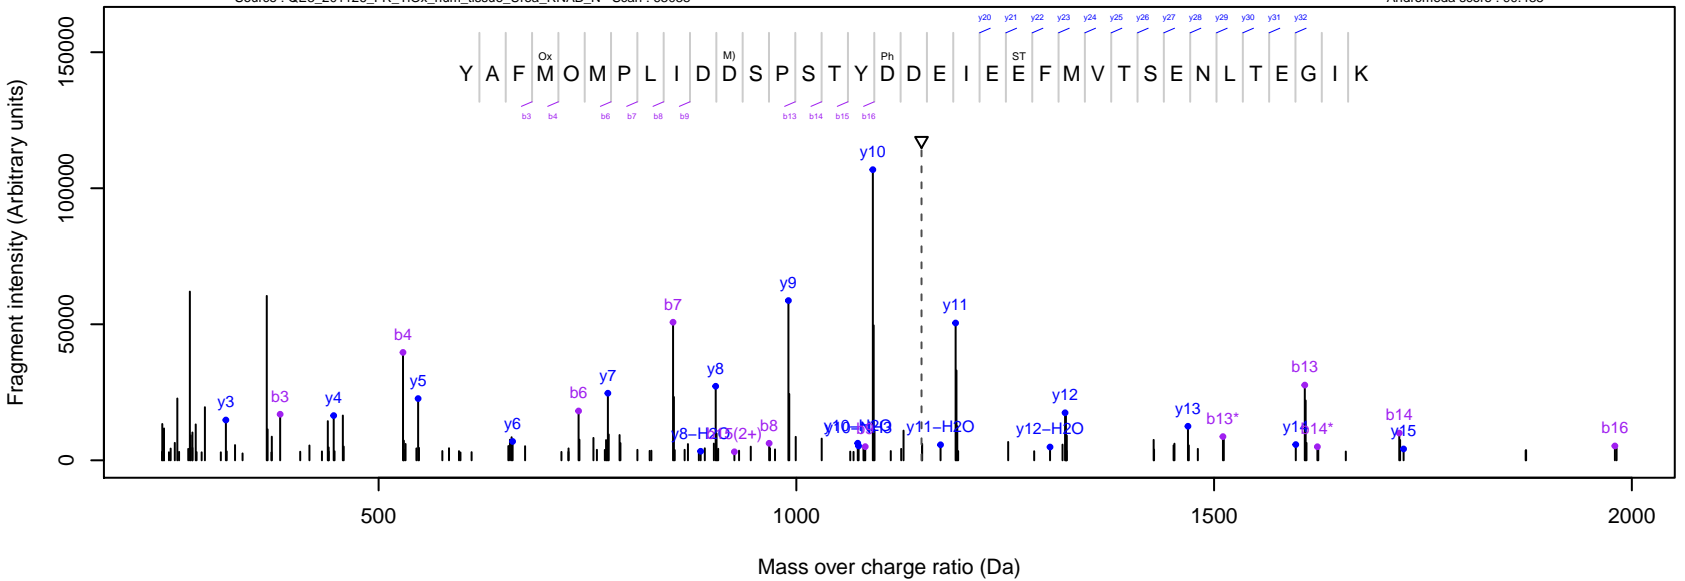



(Acetyl (Protein N-term))S(Phospho (STY))FTTRS(Phospho (STY))TFSTNYR-2+

Source : QE3\_201126\_FR\_TIOx\_hum\_tissue\_Urea\_RNAB\_H Scan : 39976

Andromeda score : 90.444

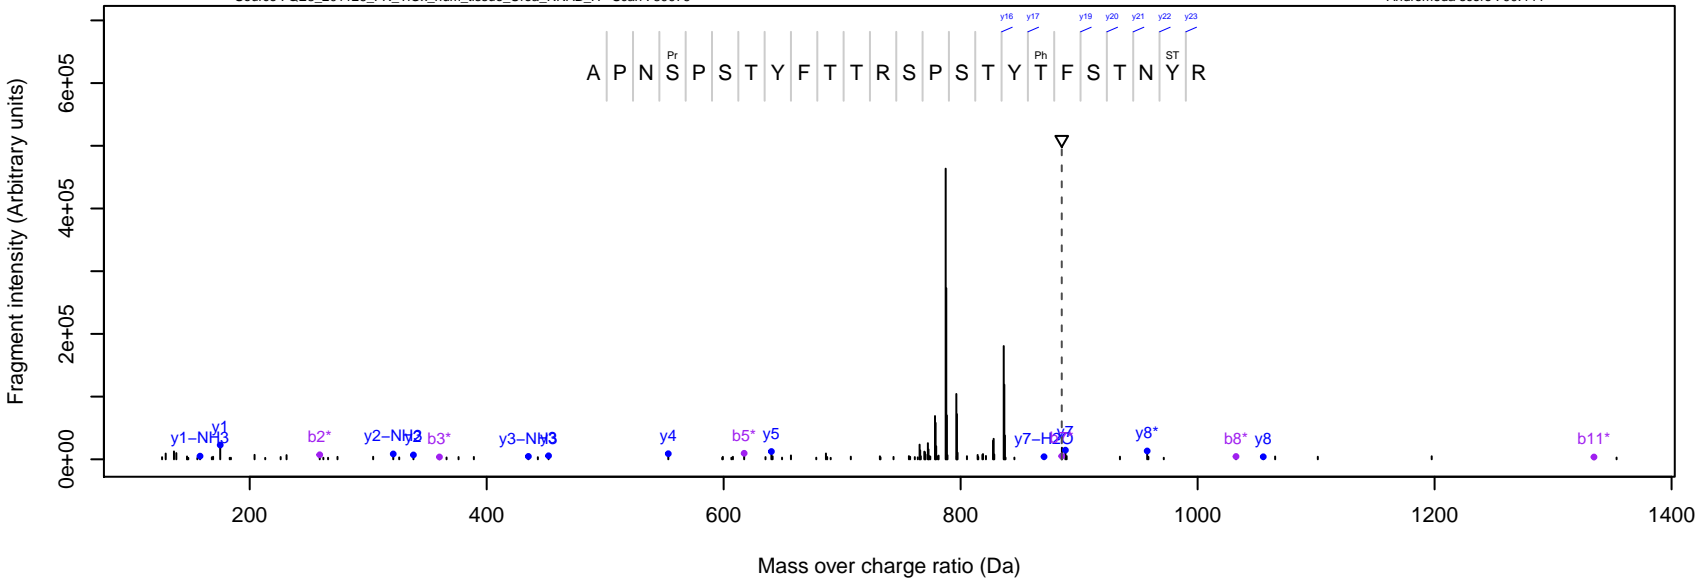

QPEYSPES(Phospho (STY))PR-2+

Source : QE3\_201126\_FR\_TIOx\_hum\_tissue\_Urea\_RNAB\_B Scan : 11588

Andromeda score : 90.434

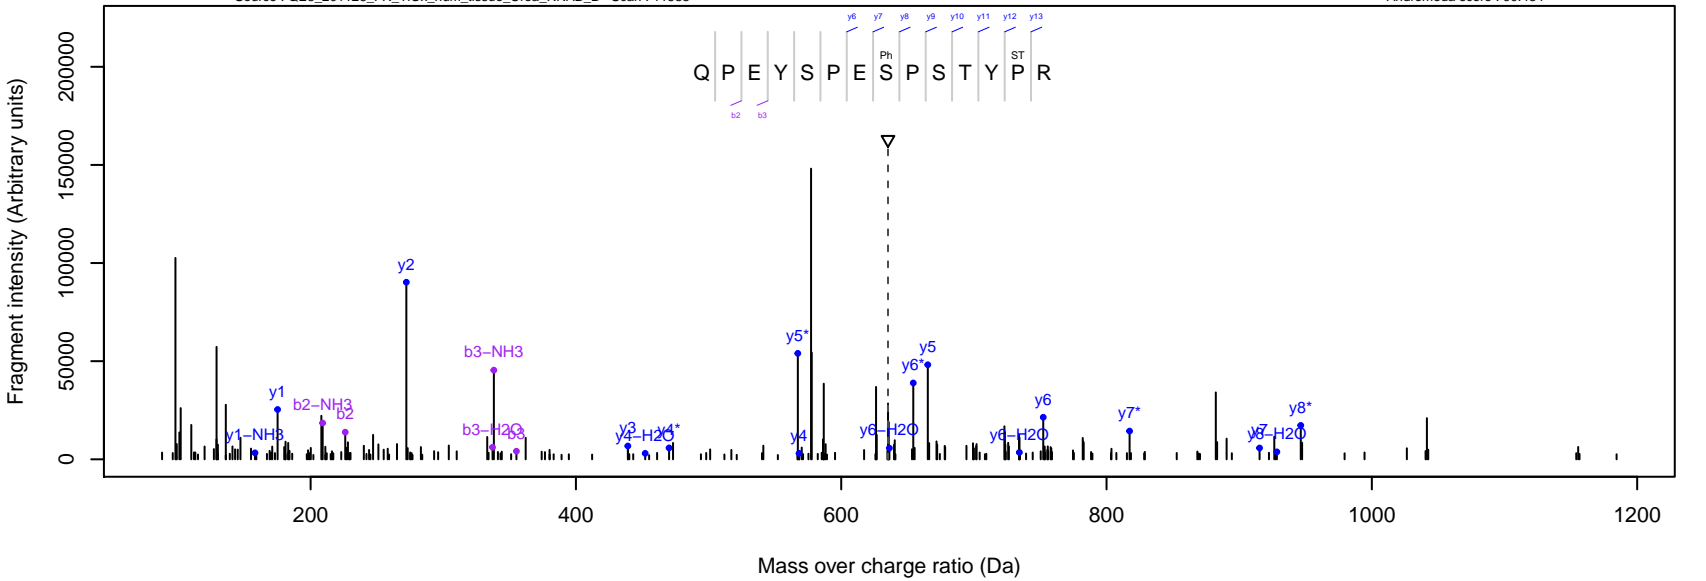

QSS(Phospho (STY))DPM(Oxidation (M))LSEFK-2+

Source : QE3\_201126\_FR\_TIOx\_hum\_tissue\_Urea\_RNAB\_N Scan : 23217

Andromeda score : 90.434

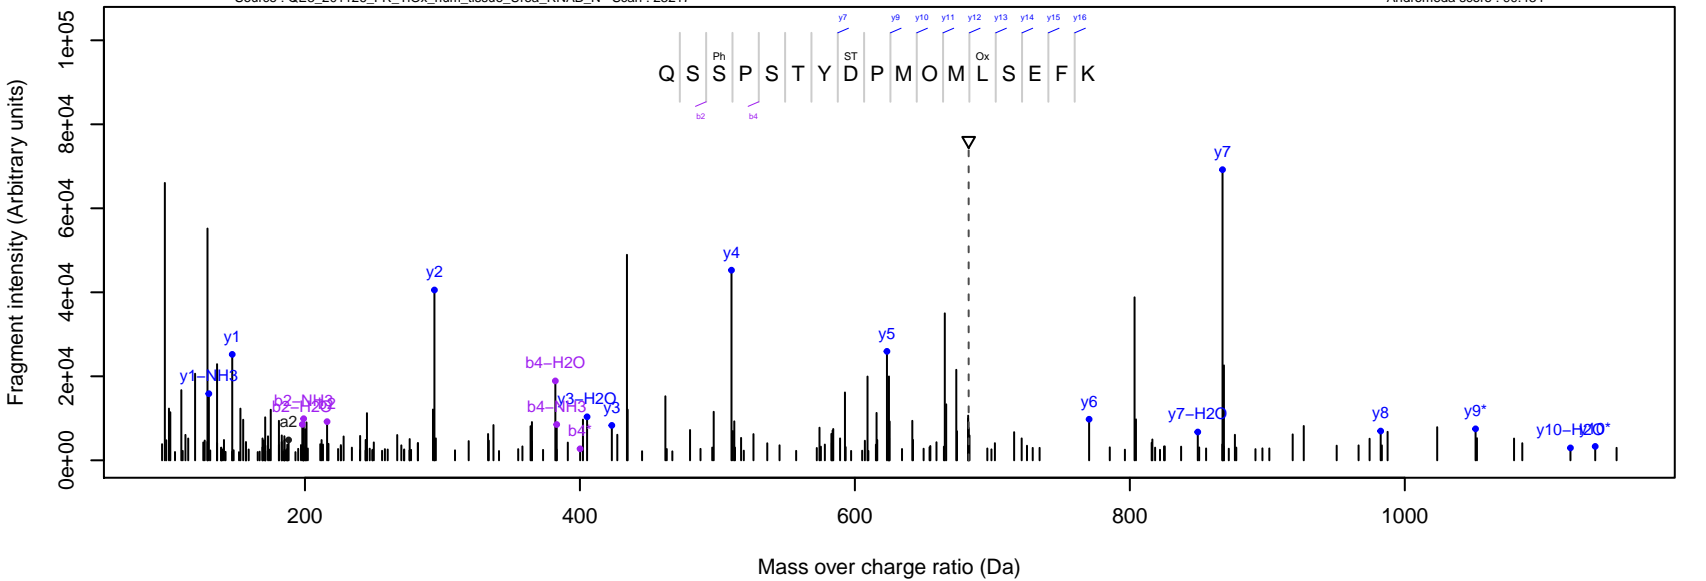



GVHKEGS(Phospho (STY))LGDPELLGYSEPEQEGASAGAPS(Phospho (STY))PTLELASR-4+

Source : QE3\_201126\_FR\_TiOx\_hum\_tissue\_Urea\_RNAB\_N Scan : 51516

Andromeda score : 90.428

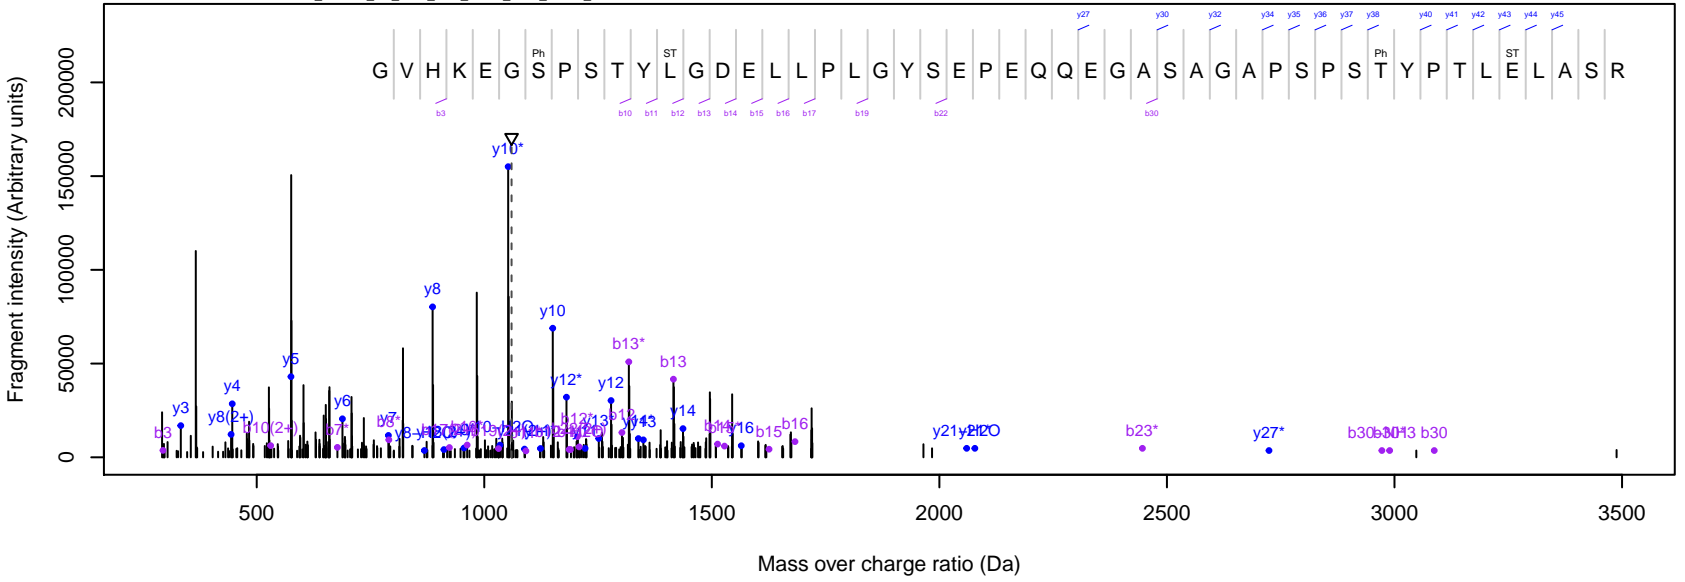

LTDPHRAP(Phospho (STY))DTGS(Phospho (STY))LSPPWQDRR-4+

Source : QE3\_201126\_FR\_TiOx\_hum\_tissue\_Urea\_RNAB\_H Scan : 24613

Andromeda score : 90.397

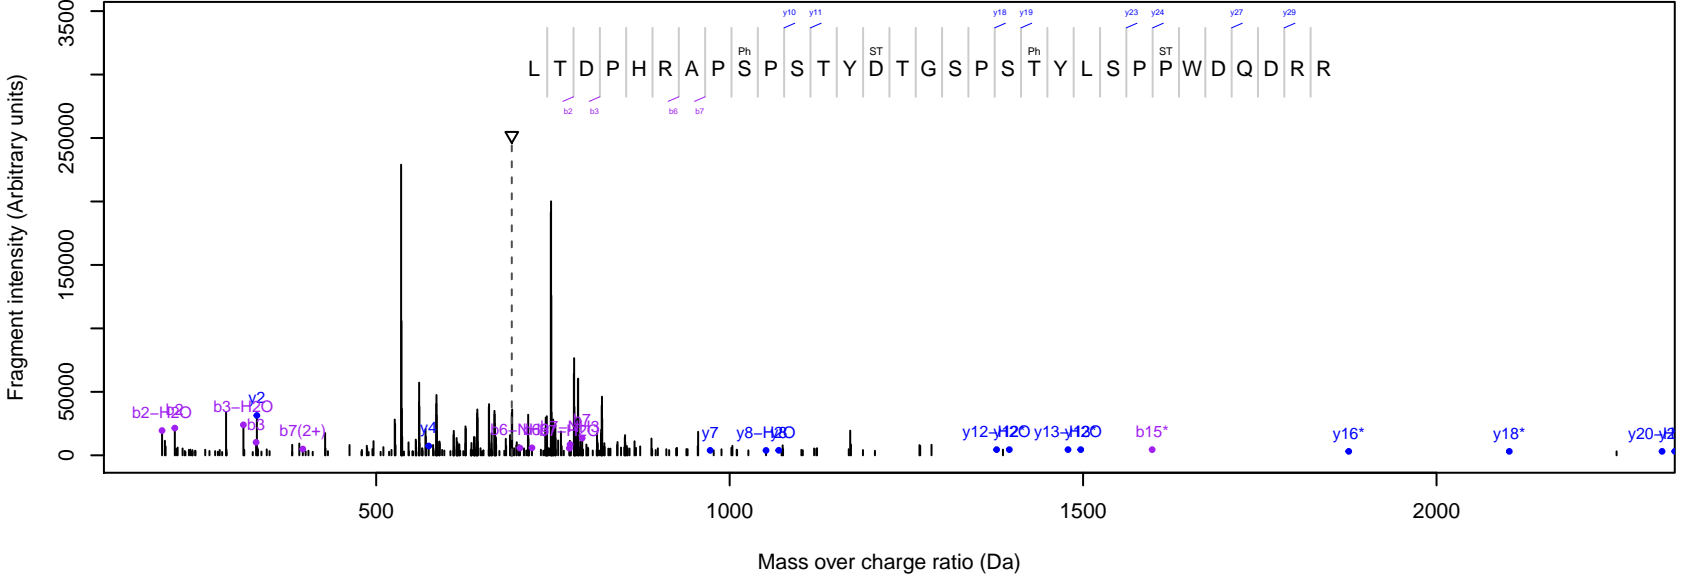

ADSGTQPPLSL(Phospho (STY))PAPETK-2+

Source : QE3\_201126\_FR\_TiOx\_hum\_tissue\_Urea\_RNAB\_B Scan : 31446

Andromeda score : 90.385

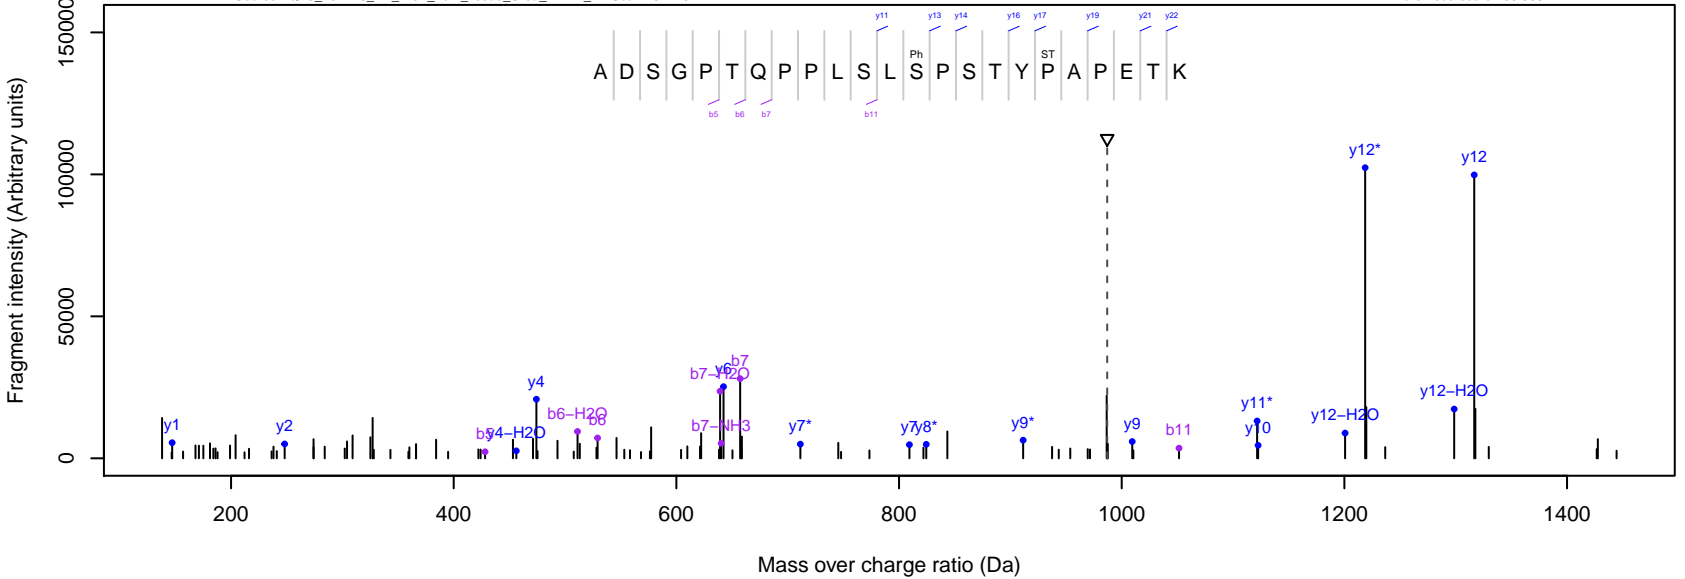

M(Oxidation (M))APPPKEVEEDSEDEEMSEDEEDS(Phospho (STY))S(Phospho (STY))GEEVVPQKK-4+

Source : QE3\_201126\_FR\_TIOx\_hum\_tissue\_Urea\_RNAB\_H Scan : 26420

Andromeda score : 90.38

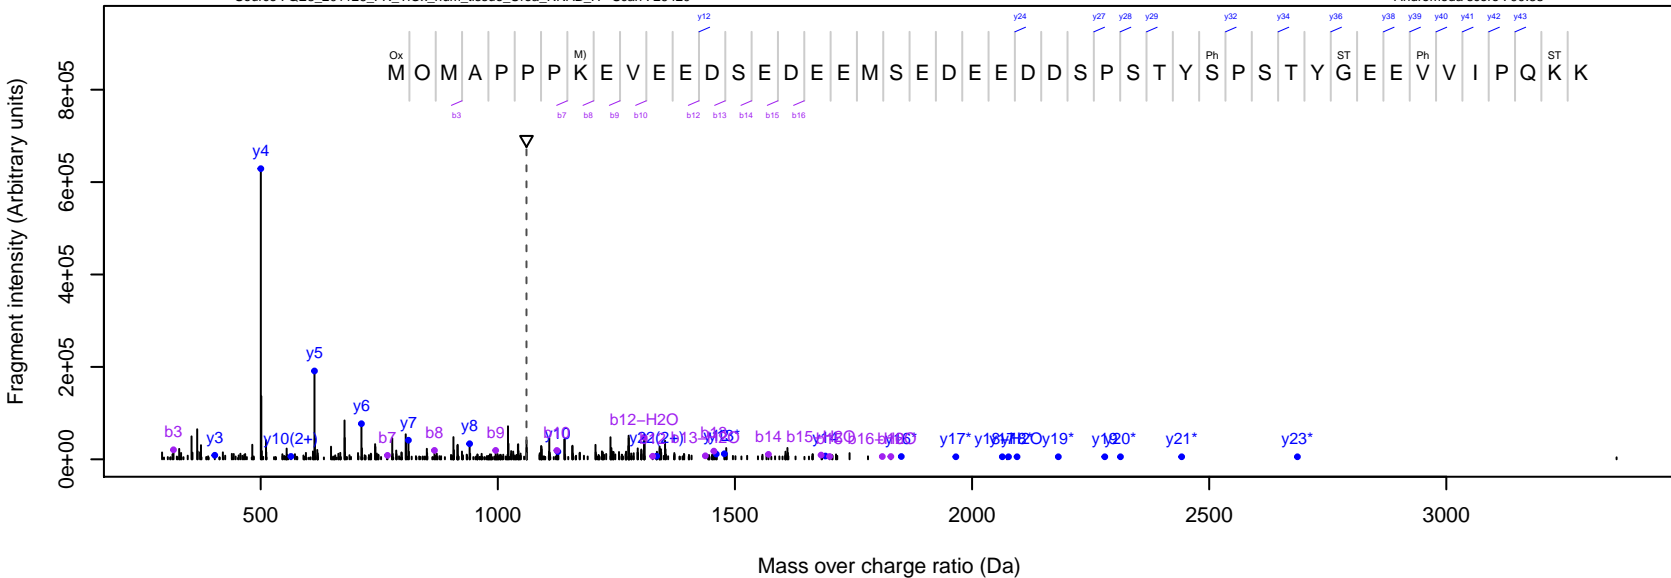

DGDSYDPYDFS(Phospho (STY))DTEEM(Oxidation (M))PQVHTPK-3+

Source : QE3\_201126\_FR\_TIOx\_hum\_tissue\_Urea\_RNAB\_H Scan : 35226

Andromeda score : 90.37

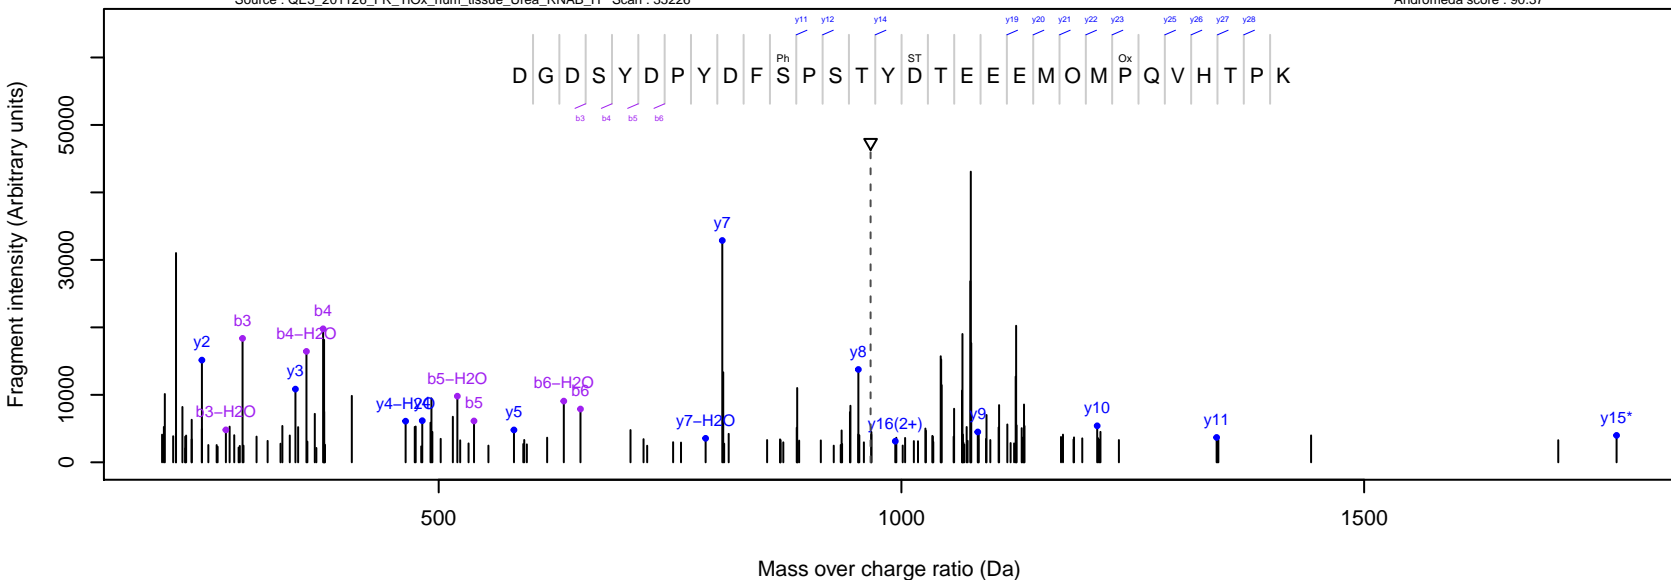

RLIDSSGSASVLTHSS(Phospho (STY))SGNSLK-3+

Source : QE3\_201126\_FR\_TIOx\_hum\_tissue\_Urea\_RNAB\_N Scan : 20162

Andromeda score : 90.37

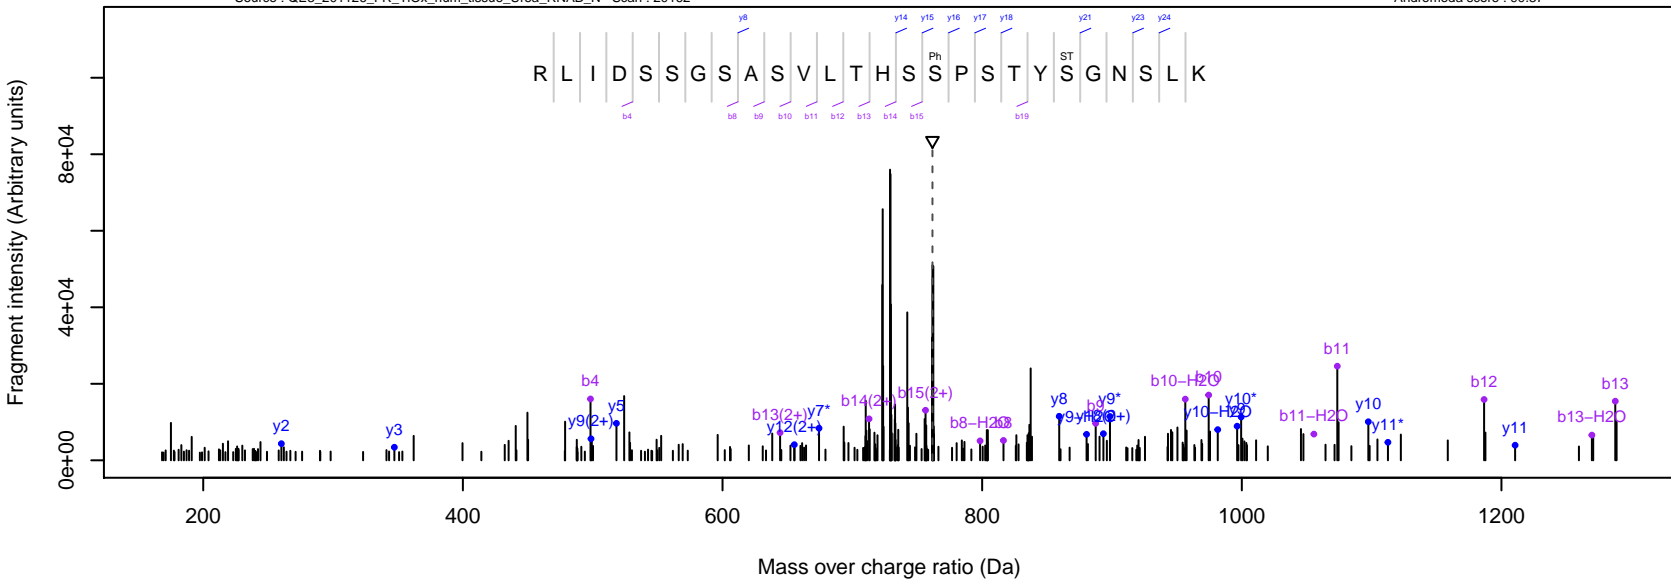

(Acetyl (Protein N-term))SDFVES(Phospho (STY))EAESEEEYND EGEVPR-3+

Source : QE3\_201126\_FR\_TiOx\_hum\_tissue\_Urea\_RNAB\_H Scan : 52494

Andromeda score : 90.35

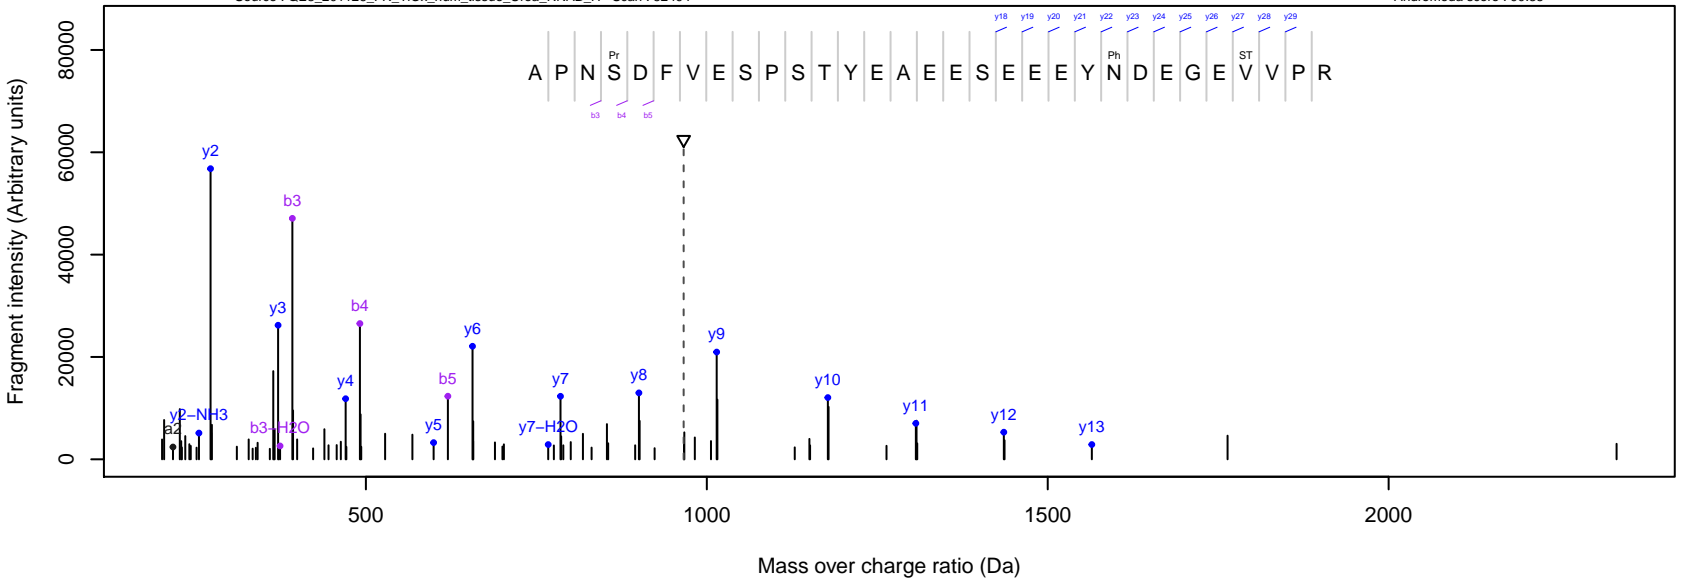

YS(Phospho (STY))RSLEELLDANQLR-3+

Source : QE3\_201126\_FR\_TiOx\_hum\_tissue\_Urea\_RNAB\_N Scan : 53060

Andromeda score : 90.316

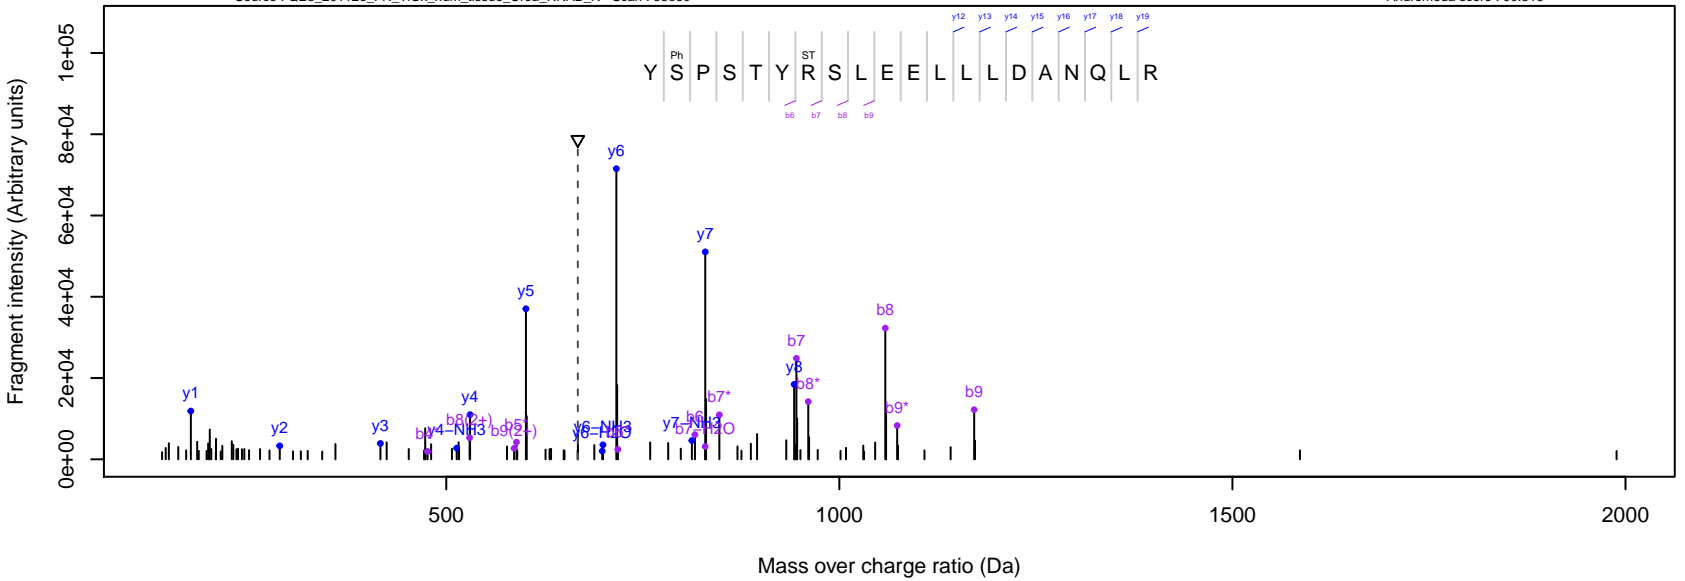

DGTAPPQSPGSPGTGQDEEWS(Phospho (STY))DEESPRK-3+

Source : QE3\_201126\_FR\_TiOx\_hum\_tissue\_Urea\_RNAB\_N Scan : 20433

Andromeda score : 90.303

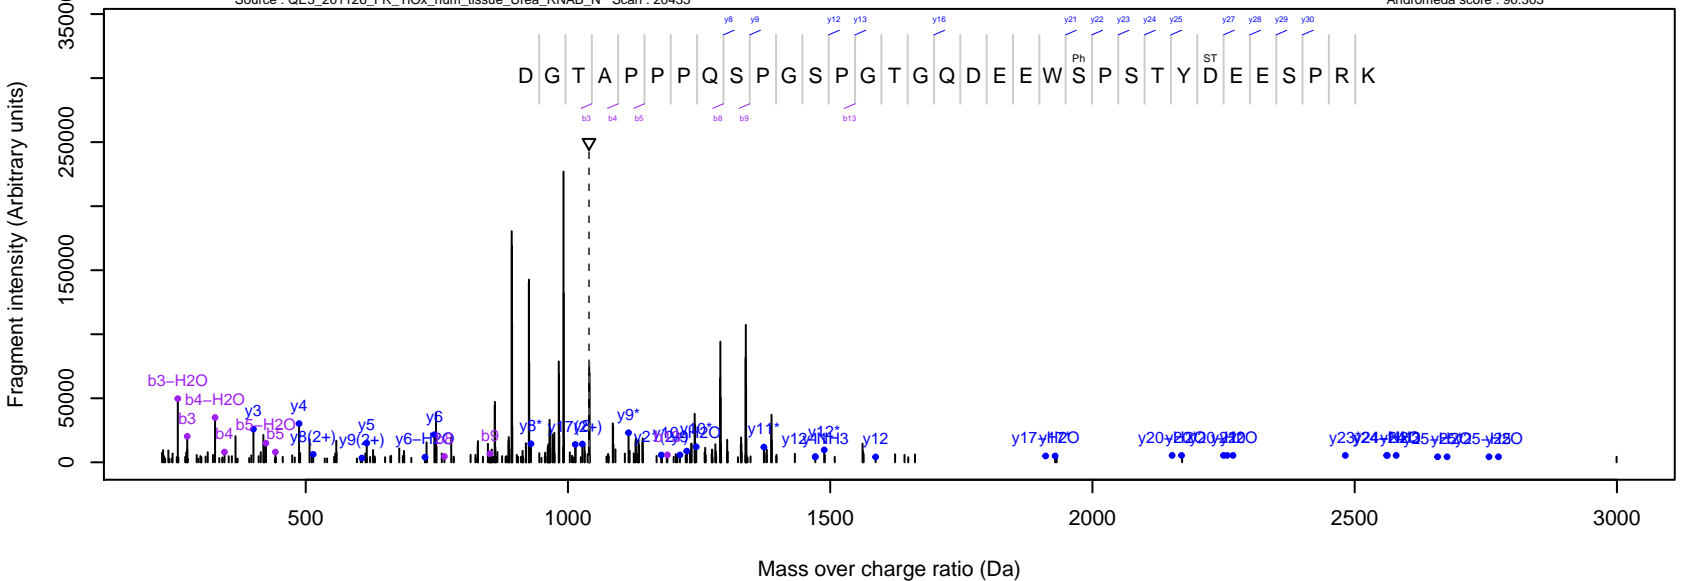

EEDEPEERS(Phospho (STY))GDET(Phospho (STY))PGSEVPGDKAAEEQGDDQDSEK-4+

Source : QE3\_201126\_FR\_TiOx\_hum\_tissue\_Urea\_RNAB\_B Scan : 17353

Andromeda score : 90.3

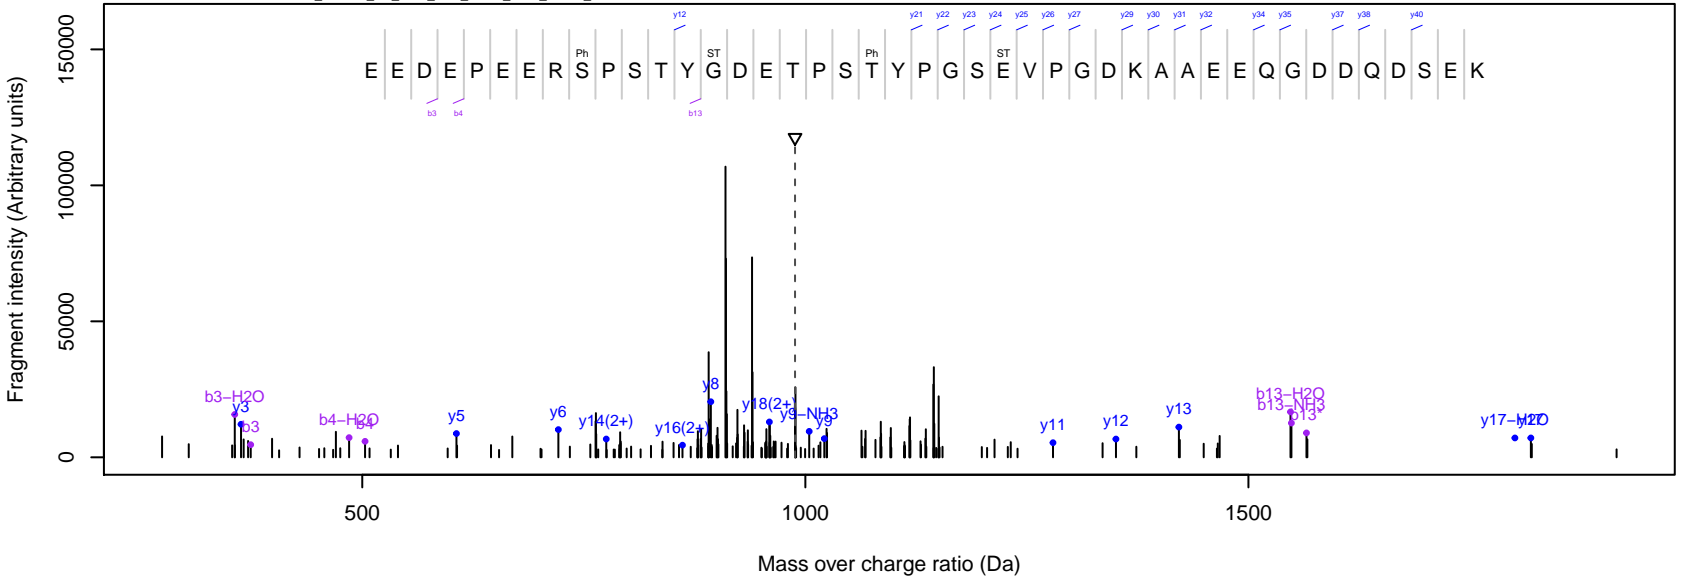

KPSLVSDLPWEGAAPQS(Phospho (STY))PSFSGSEDSGSPK-3+

Source : QE3\_201126\_FR\_TiOx\_hum\_tissue\_Urea\_RNAB\_H Scan : 45012

Andromeda score : 90.287

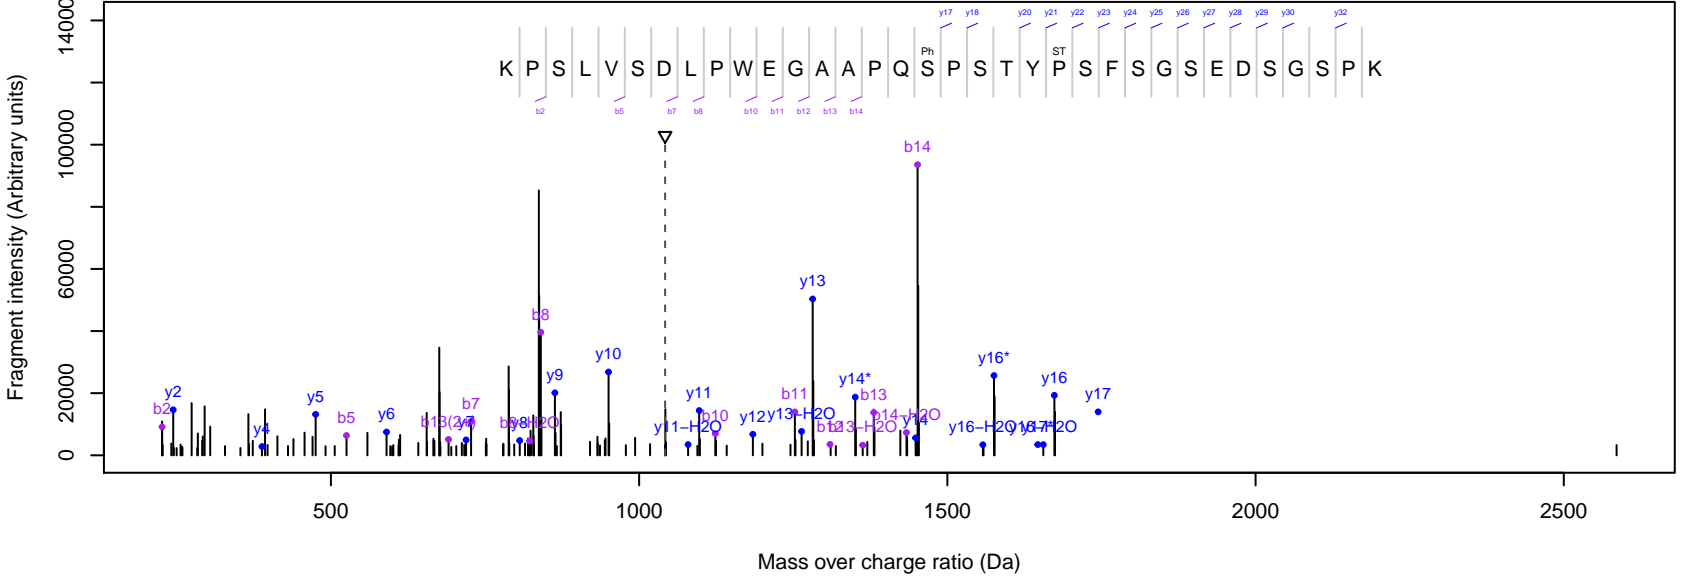

GKDGEEYELLNSSS(Phospho (STY))ISS(Phospho (STY))LLDAQGFSDLEK-3+

Source : QE3\_201126\_FR\_TiOx\_hum\_tissue\_Urea\_RNAB\_N Scan : 61834

Andromeda score : 90.246

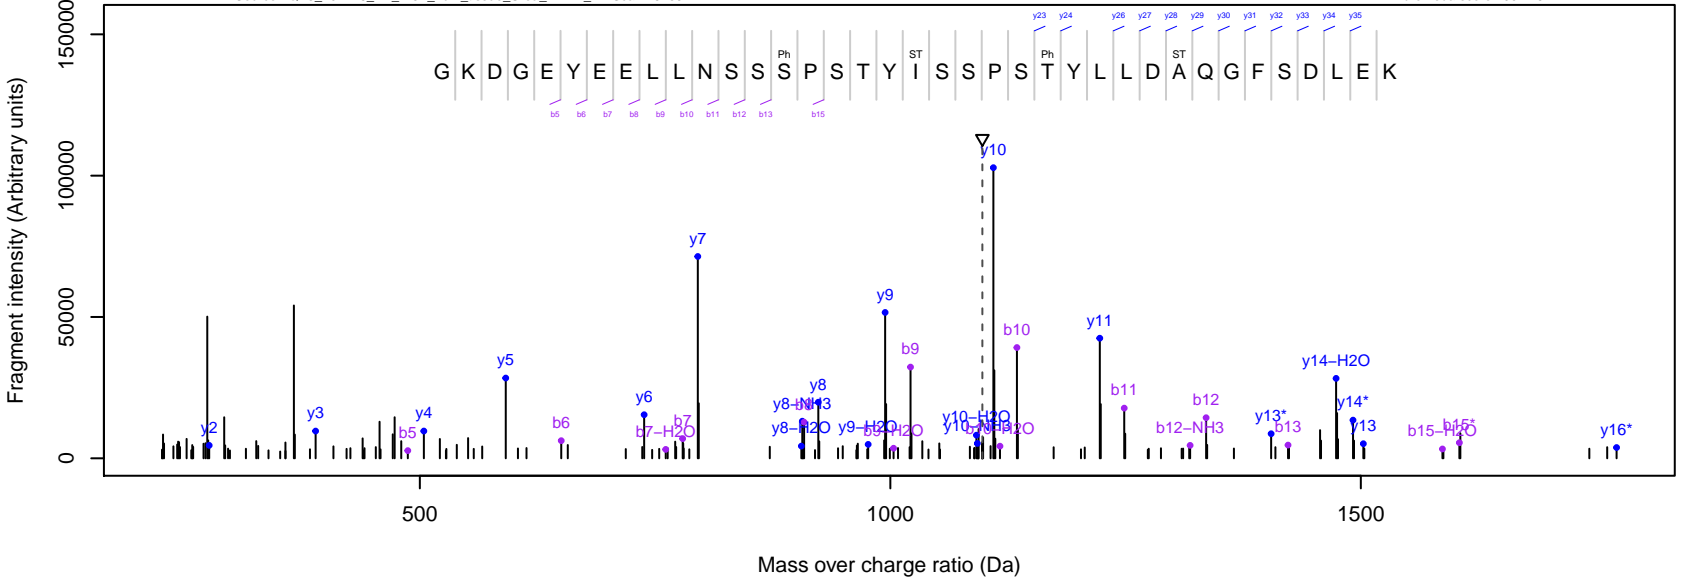

SATLSGS(Phospho (STY))ATNLASLTAALAK-2+

Source : QE3\_201126\_FR\_TiOx\_hum\_tissue\_Urea\_RNAB\_B Scan : 54931

Andromeda score : 90.223

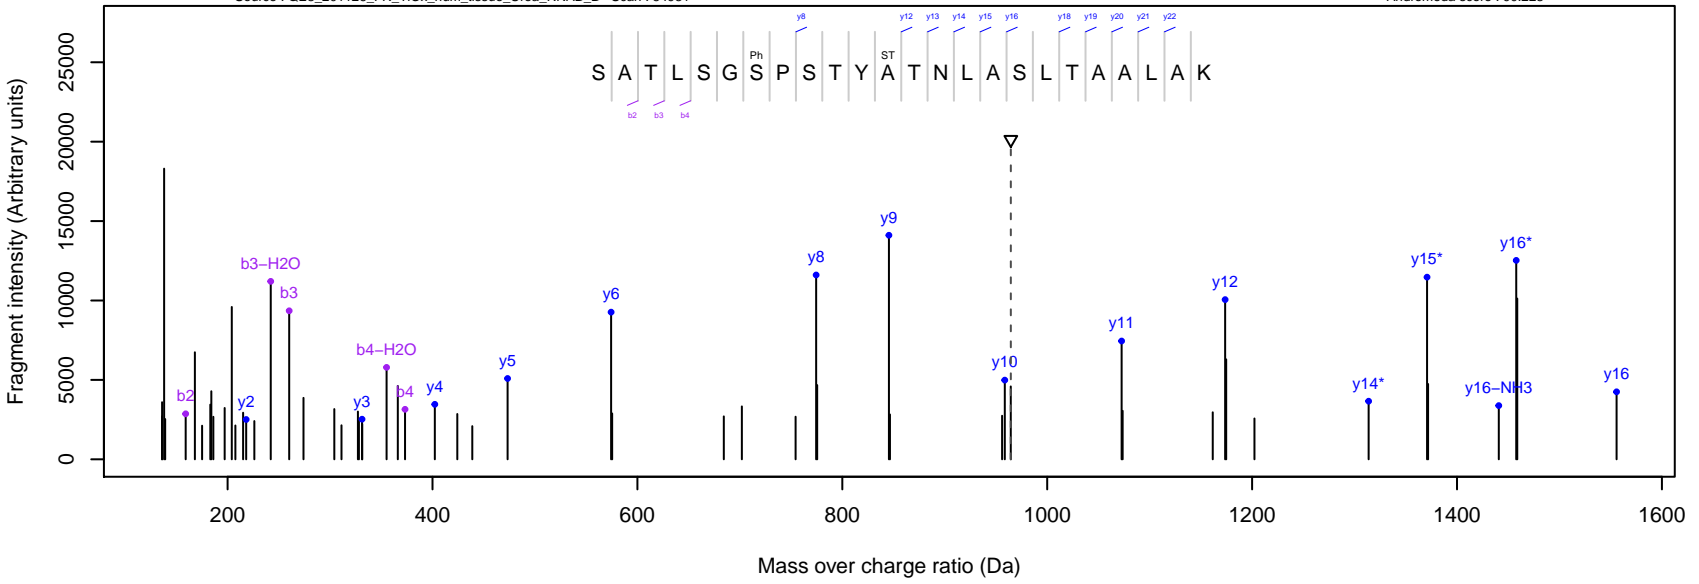

SFSKEELM(Oxidation (M))S(Phospho (STY))SDLEETAGSTSIPKR-3+

Source : QE3\_201126\_FR\_TiOx\_hum\_tissue\_Urea\_RNAB\_H Scan : 24592

Andromeda score : 90.193

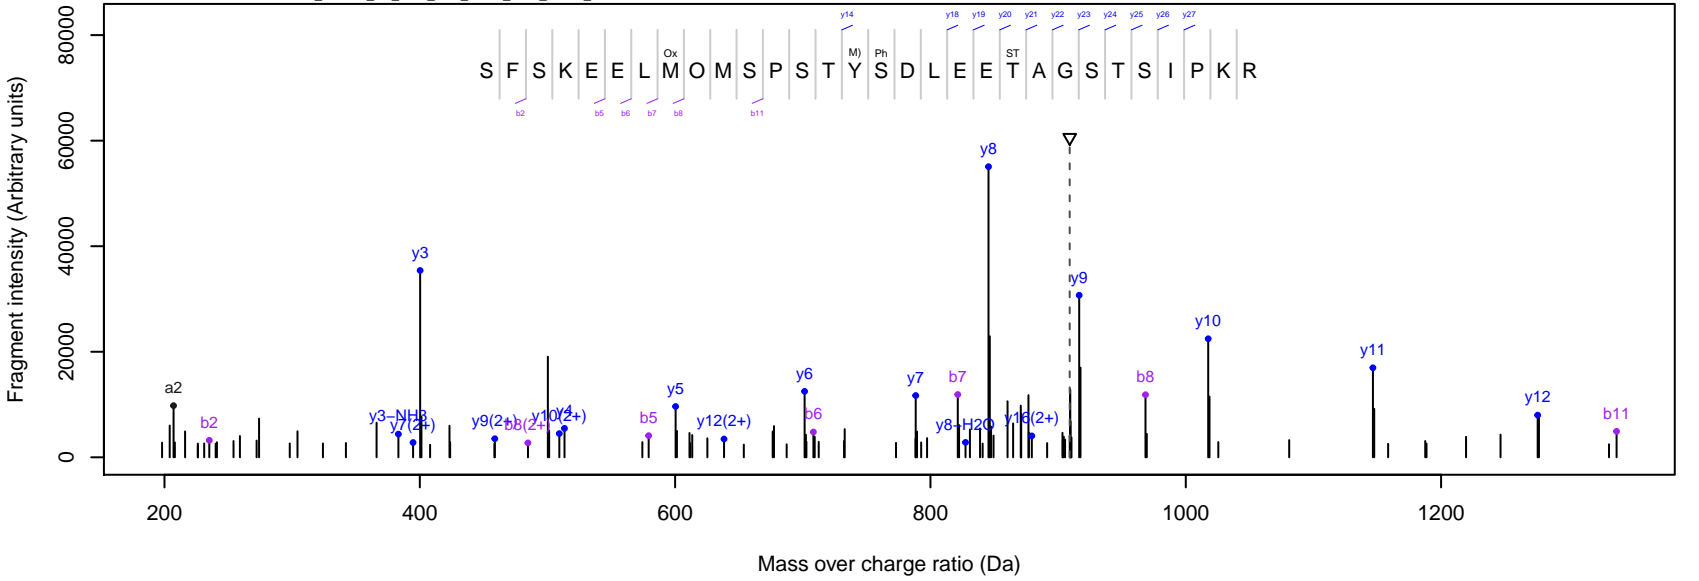

YGS(Phospho (STY))LNSLESTSSSGIGSYSTQM(Oxidation (M))SGTDNPEQFEVLK-3+

Source : QE3\_201126\_FR\_TiOx\_hum\_tissue\_Urea\_RNAB\_H Scan : 52471

Andromeda score : 90.177

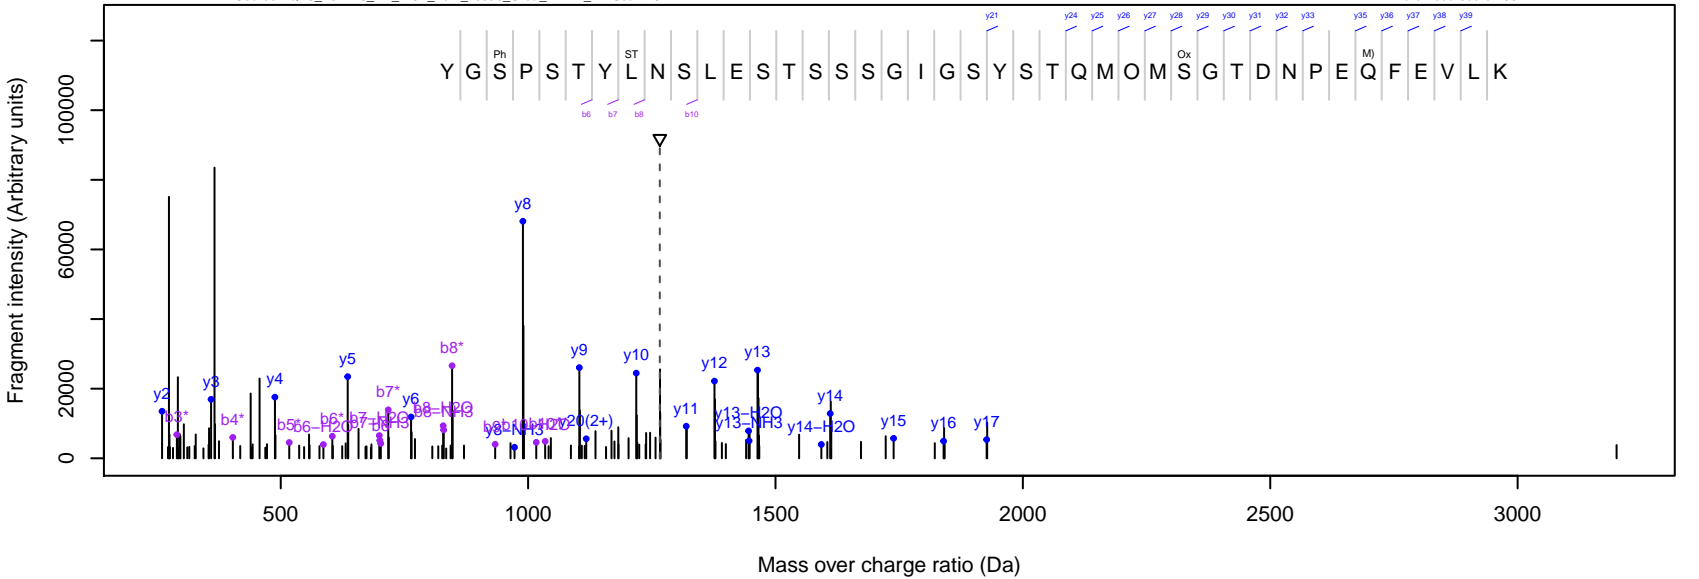

GPSS(Phospho (STY))VEDIK-2+

Source : QE3\_201126\_FR\_TiOx\_hum\_tissue\_Urea\_RNAB\_B Scan : 12447

Andromeda score : 90.149

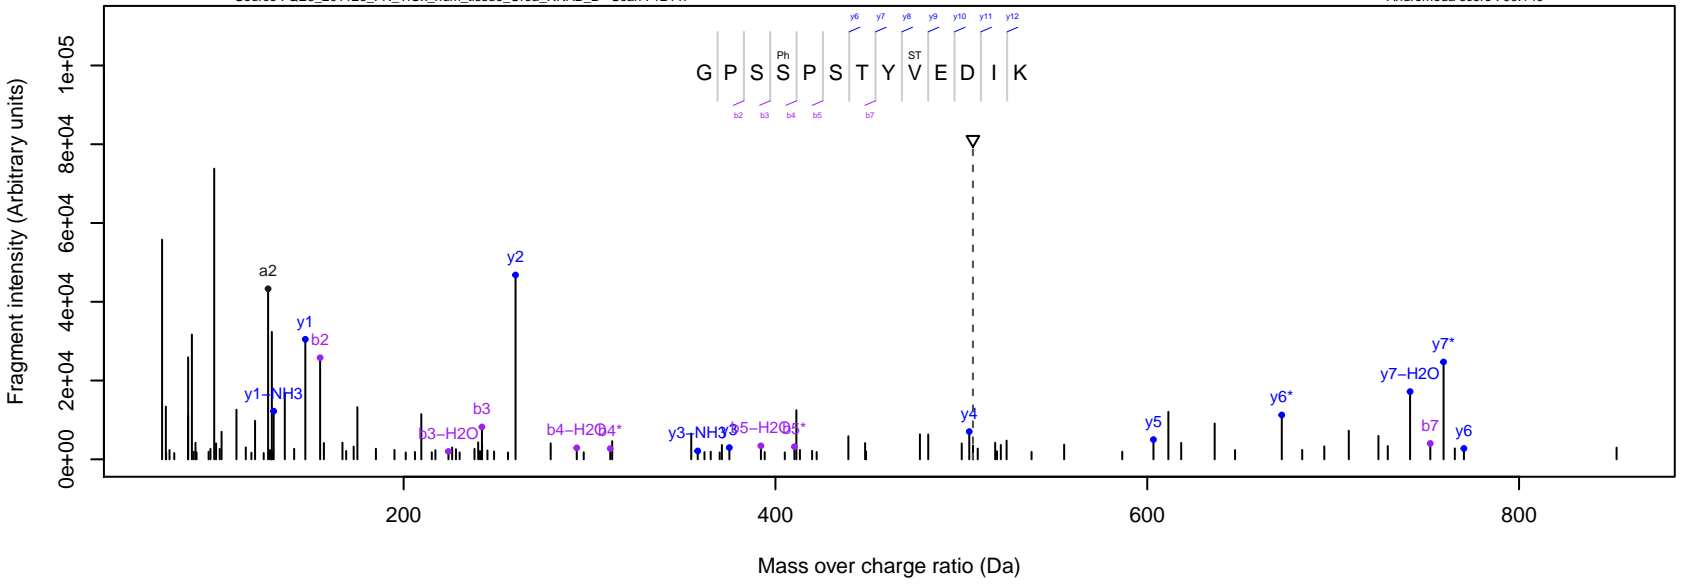

RTPAPPEPGS(Phospho (STY))PAPGEGPSGR-3+

Source : QE3\_201126\_FR\_TiOx\_hum\_tissue\_Urea\_RNAB\_B Scan : 12903

Andromeda score : 90.097

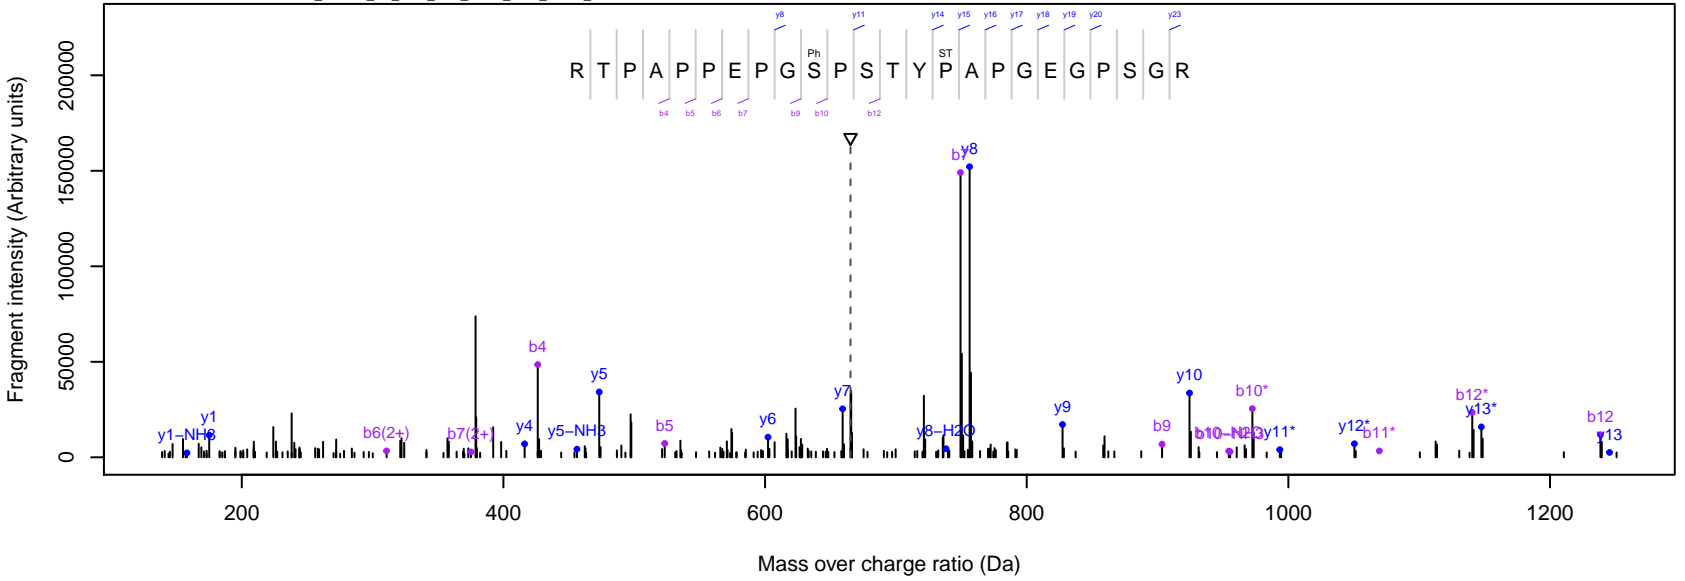

RYS(Phospho (STY))DHAGPAIPSVVAYPK-3+

Source : QE3\_201126\_FR\_TiOx\_hum\_tissue\_Urea\_RNAB\_H Scan : 26337

Andromeda score : 90.062

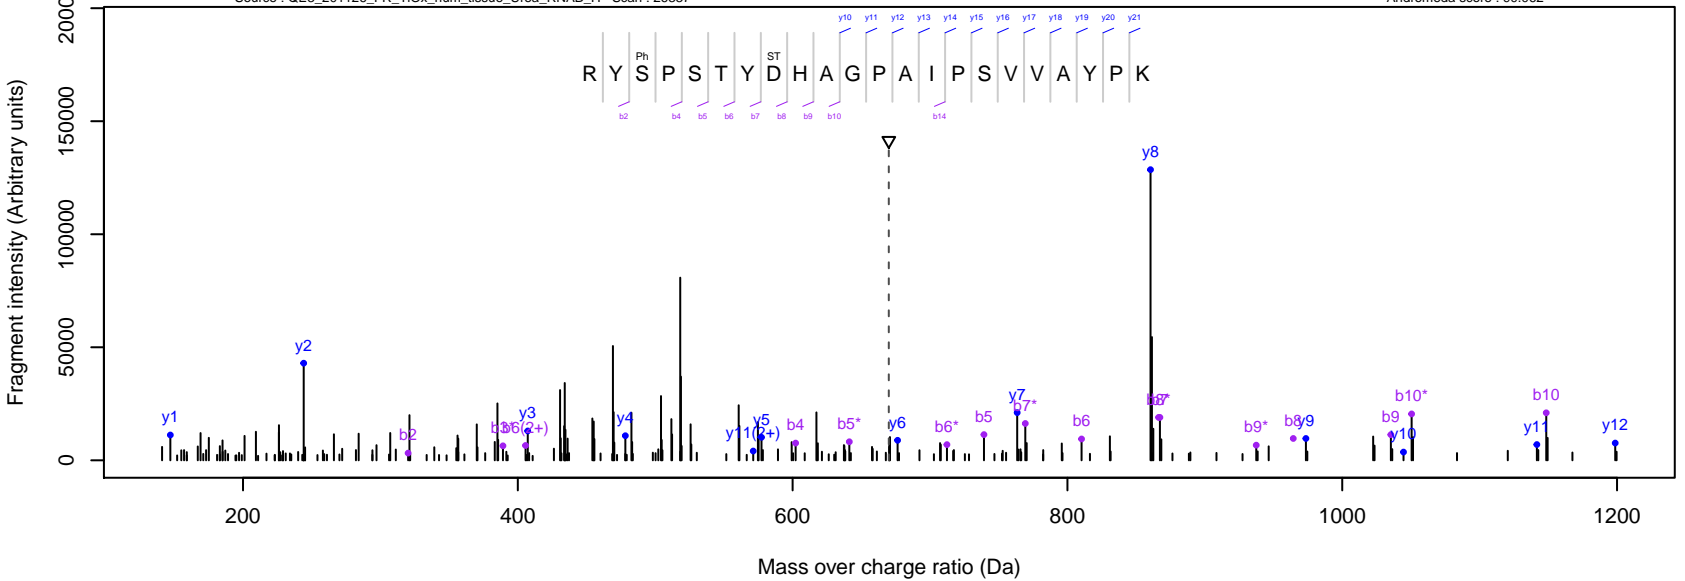

S(Phospho (STY))T(Phospho (STY))S(Phospho (STY))FRGGM(Oxidation (M))GSGGLATGIAGGLAGMGGIQQNEKETMQLNDR-4+

Source : QE3\_201126\_FR\_TIOx\_hum\_tissue\_Urea\_RNAB\_B Scan : 55185

Andromeda score : 90.036

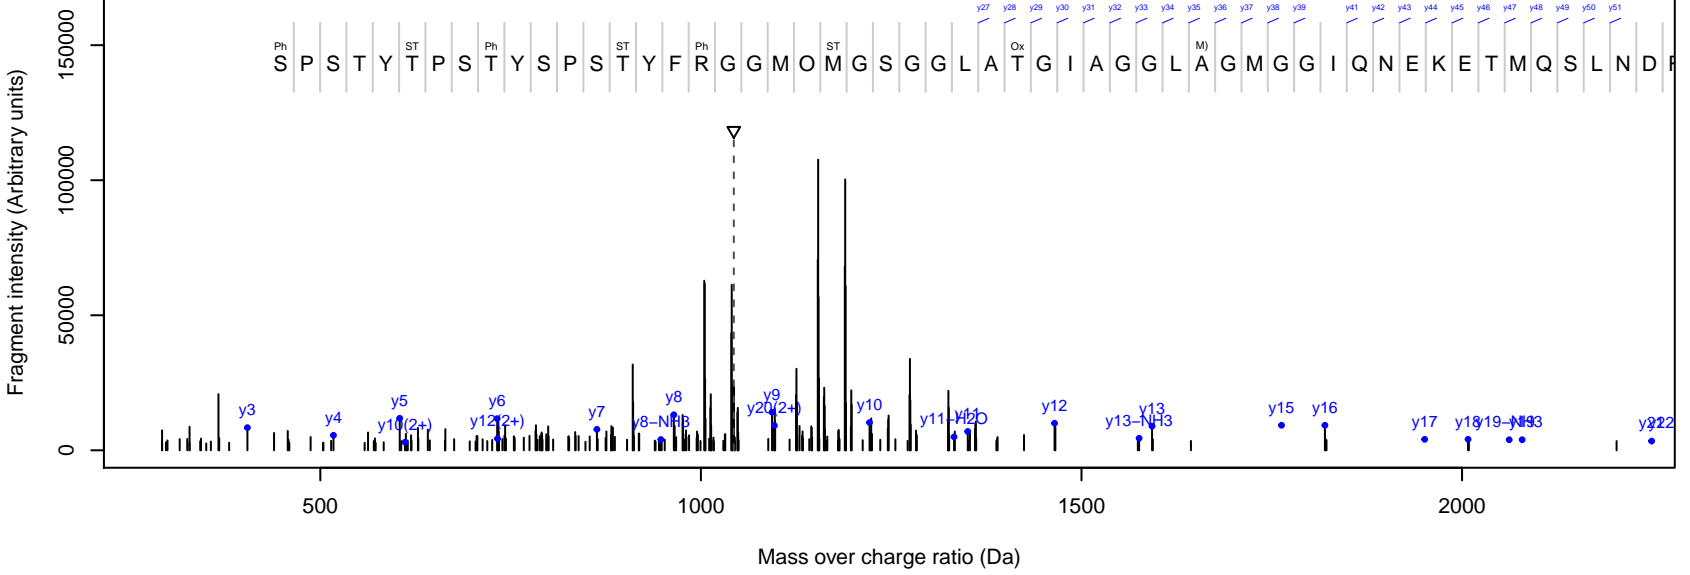

LLSPQMS(Phospho (STY))GEEEDSLAAK-2+

Source : QE3\_201126\_FR\_TIOx\_hum\_tissue\_Urea\_RNAB\_H Scan : 31249

Andromeda score : 89.982

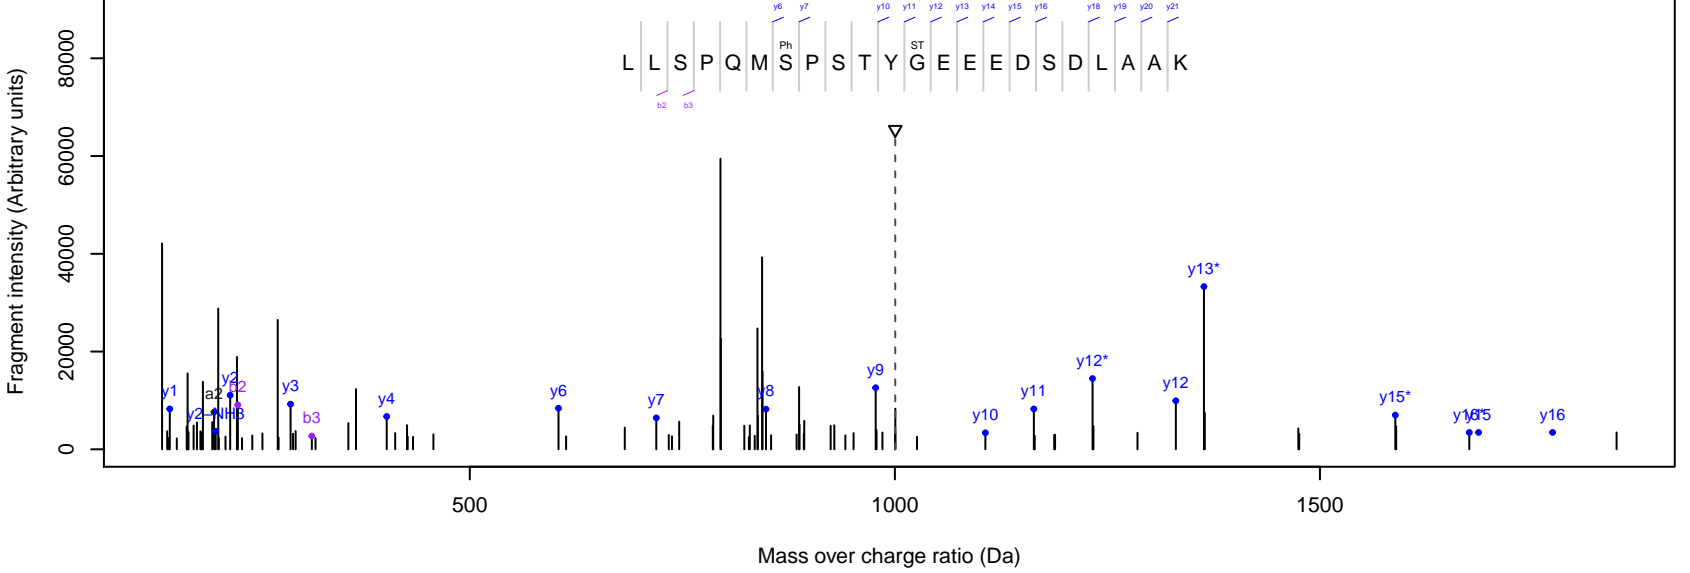

RSEACPCQPS(Phospho (STY))PLPAEEEK-3+

Source : QE3\_201126\_FR\_TIOx\_hum\_tissue\_Urea\_RNAB\_N Scan : 14033

Andromeda score : 89.968

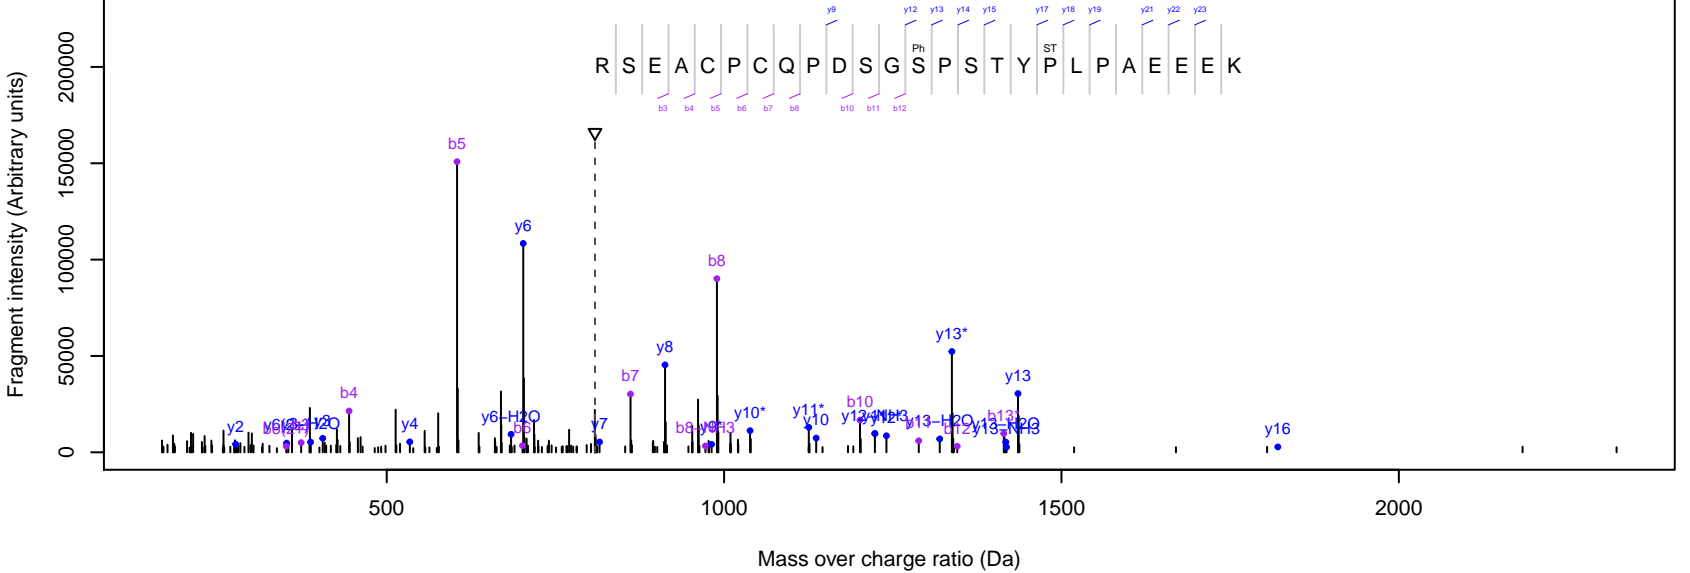

(Acetyl (Protein N-term))AAAAAAGDS(Phospho (STY))DS(Phospho (STY))WDADAFSVEDPVRK-3+

Source : QE3\_201126\_FR\_TiOx\_hum\_tissue\_Urea\_RNAB\_H Scan : 58038

Andromeda score : 89.946

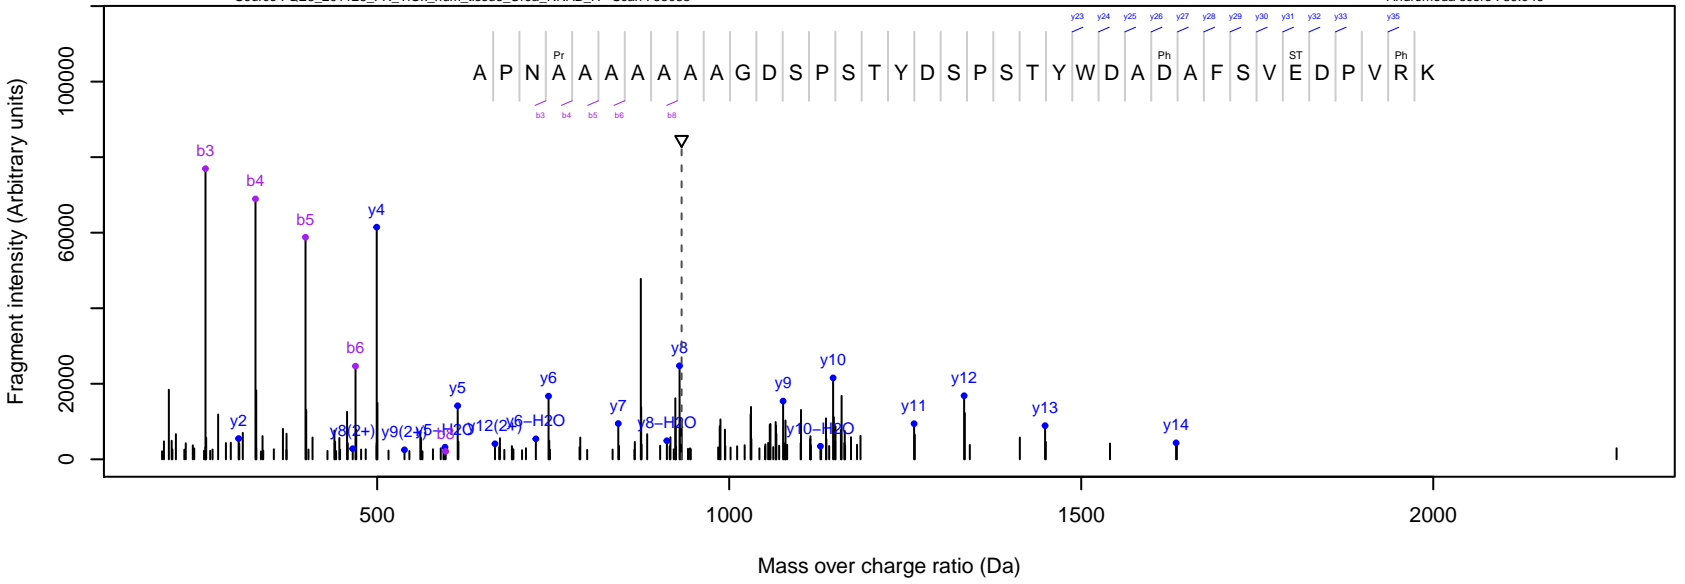

CSSS(Phospho (STY))S(Phospho (STY))GGSSGDEGLDGLDAPGGGKR-3+

Source : QE3\_201126\_FR\_TiOx\_hum\_tissue\_Urea\_RNAB\_H Scan : 23887

Andromeda score : 89.946

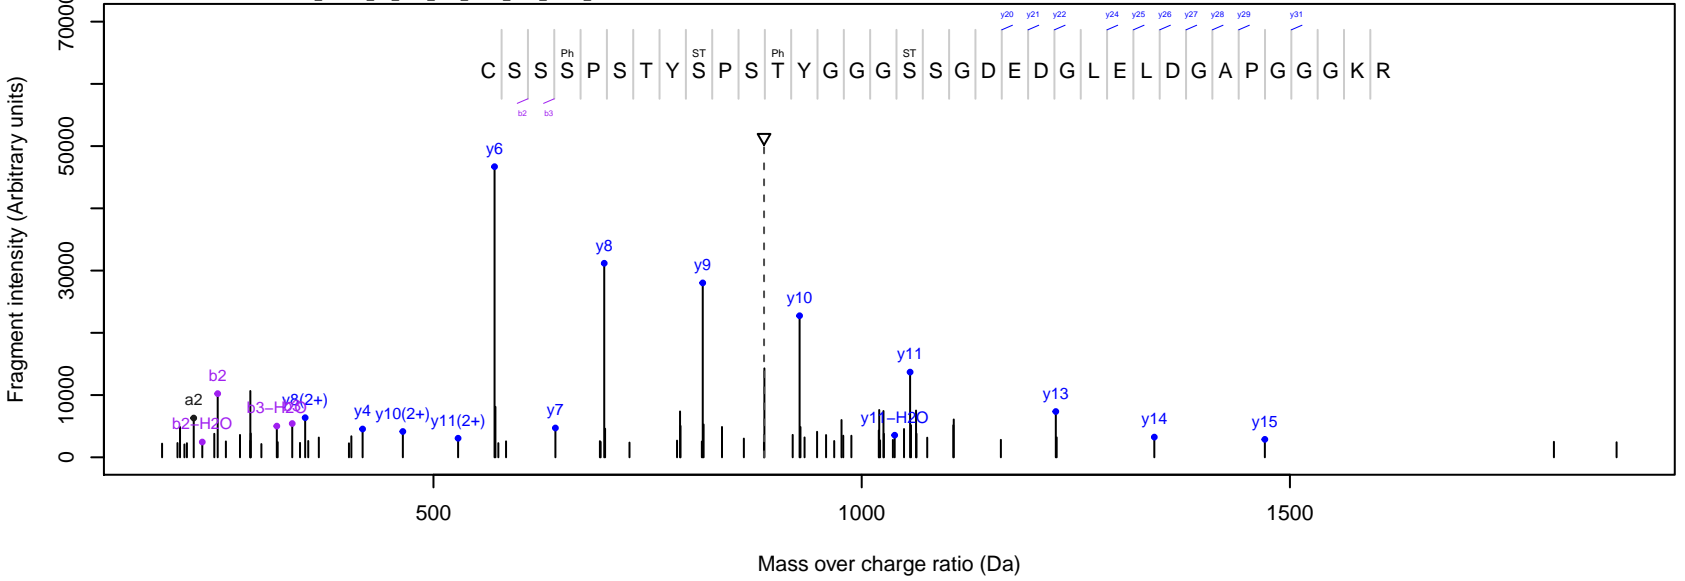

AAKPGPAEAPS(Phospho (STY))PTASPSGDAS(Phospho (STY))PPATAPYDPR-3+

Source : QE3\_201126\_FR\_TiOx\_hum\_tissue\_Urea\_RNAB\_N Scan : 26276

Andromeda score : 89.904

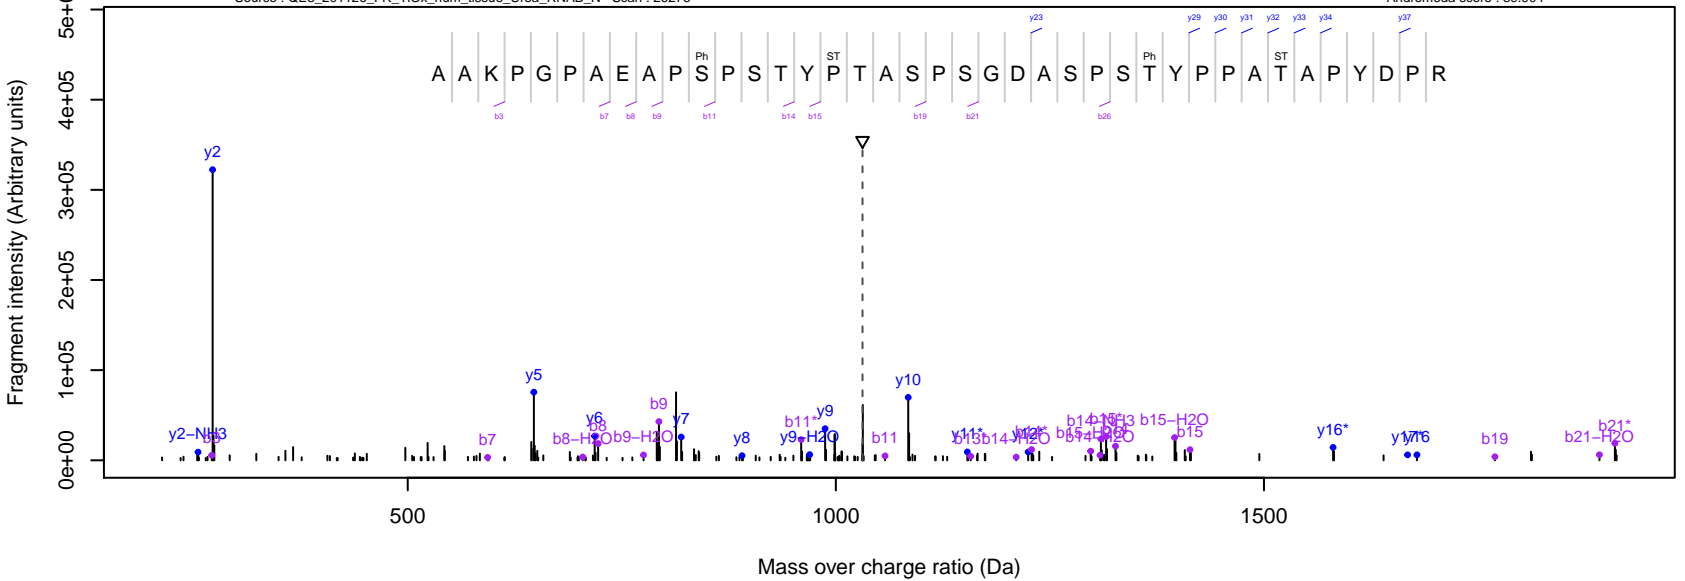



NRPGLSYHYAHSHLAE E E G E D K E D S P S T Y Q P P T P S T Y P V S Q R

Source : QE3\_201126\_FR\_TiOx\_hum\_tissue\_Urea\_RNAB\_N Scan : 18723

Andromeda score : 89.904

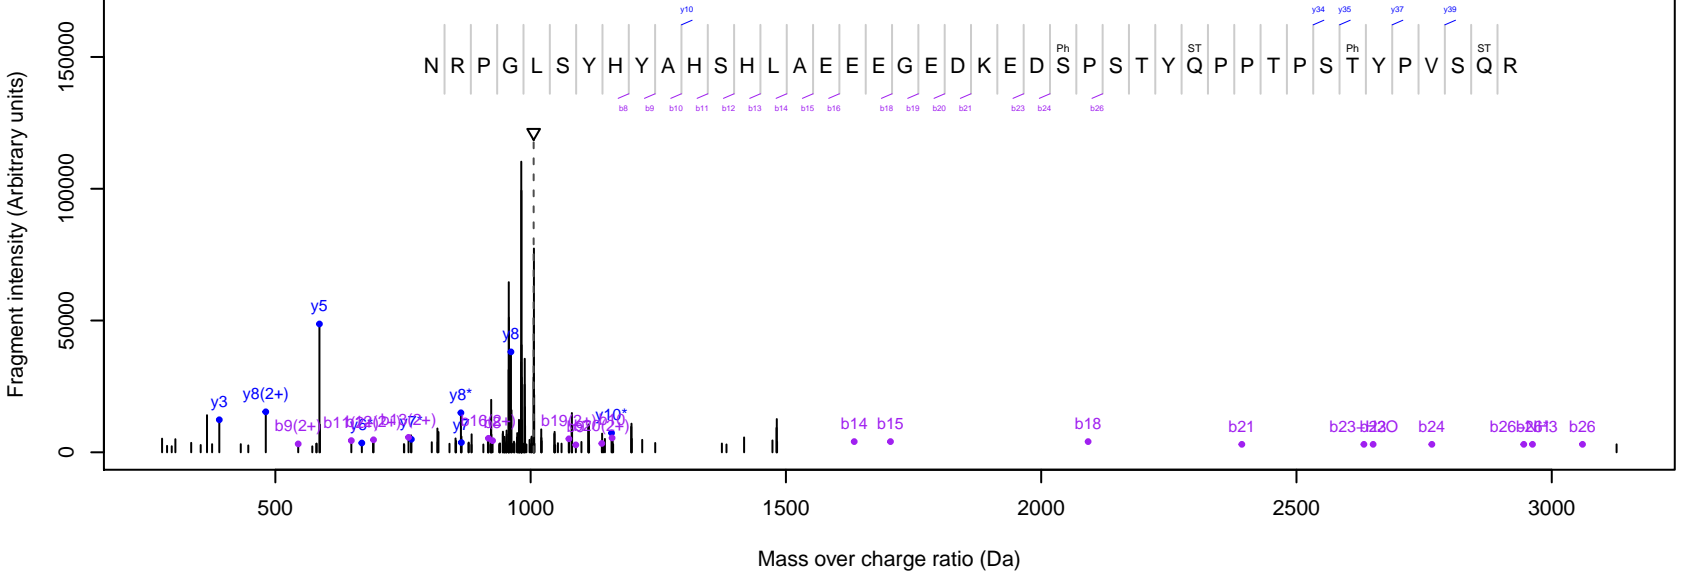

RWS(Phospho (STY))VELKR-3+

Source : QE3\_201126\_FR\_TiOx\_hum\_tissue\_Urea\_RNAB\_H Scan : 14787

Andromeda score : 89.9

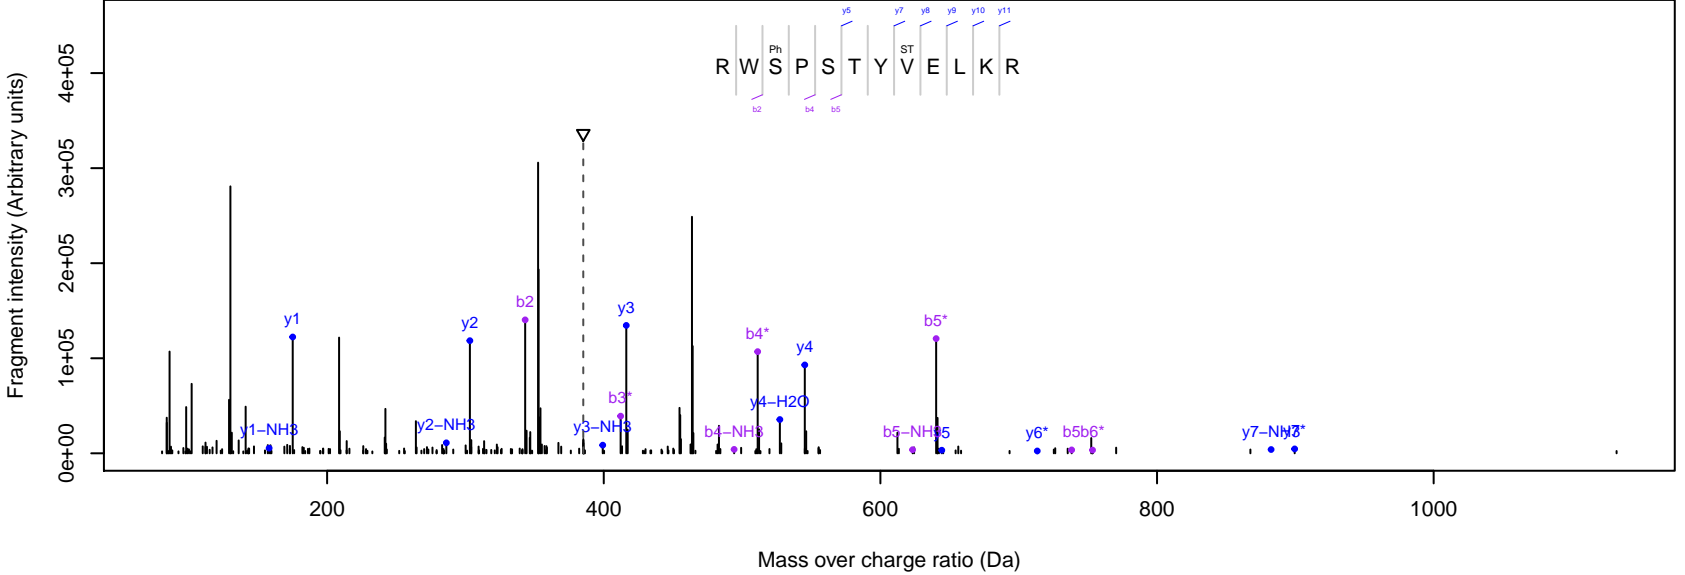

RES(Phospho (STY))VVNLENFRK-3+

Source : QE3\_201126\_FR\_TiOx\_hum\_tissue\_Urea\_RNAB\_H Scan : 18700

Andromeda score : 89.866

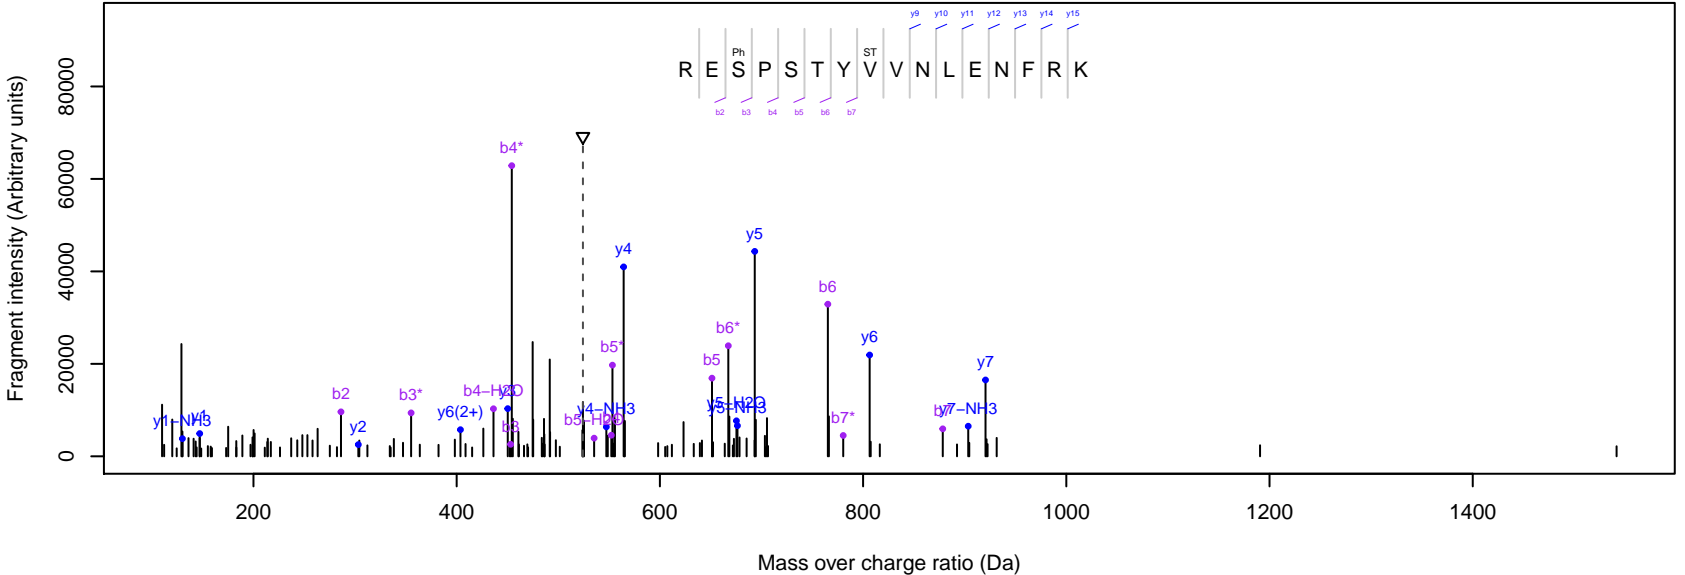



AHS(Phospho (STY))LLFENSDFSSEDSSTLGR-3+

Source : QE3\_201126\_FR\_TiOx\_hum\_tissue\_Urea\_RNAB\_H Scan : 39487

Andromeda score : 89.829

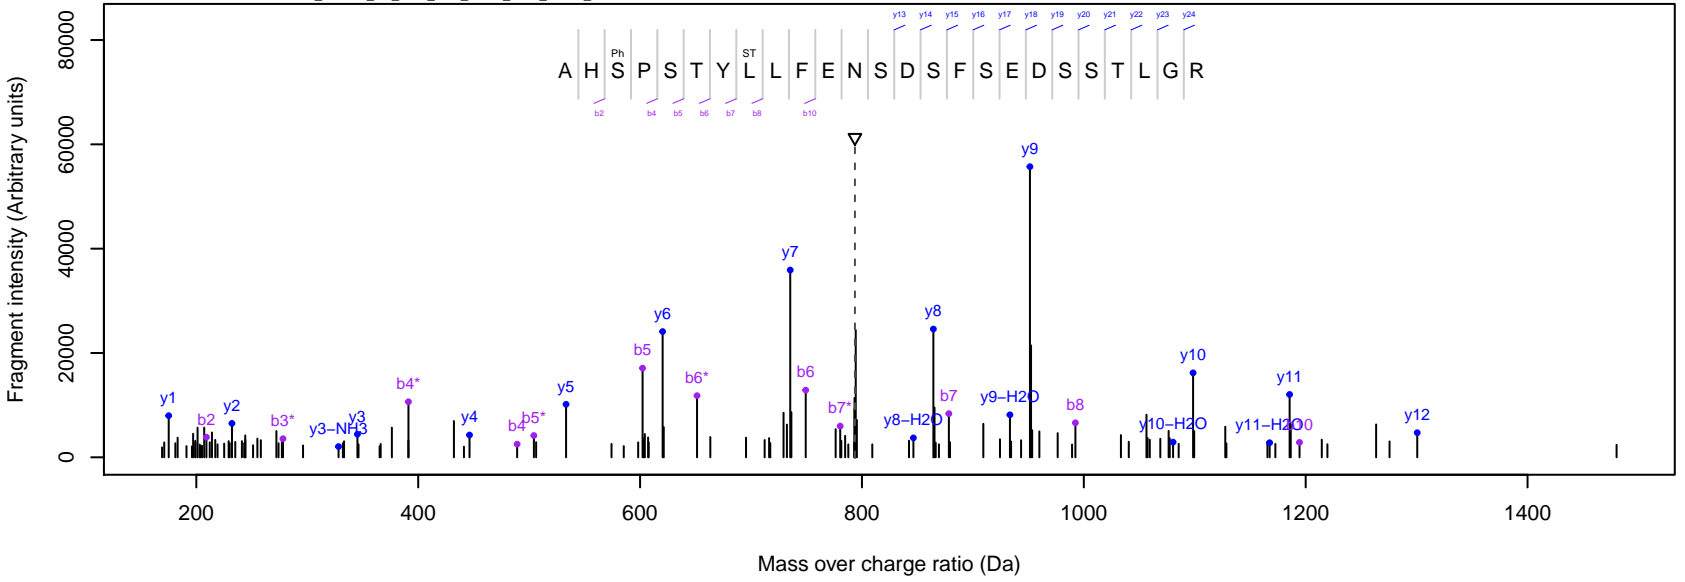

FIQELSGS(Phospho (STY))SPK-2+

Source : QE3\_201126\_FR\_TiOx\_hum\_tissue\_Urea\_RNAB\_H Scan : 21707

Andromeda score : 89.805

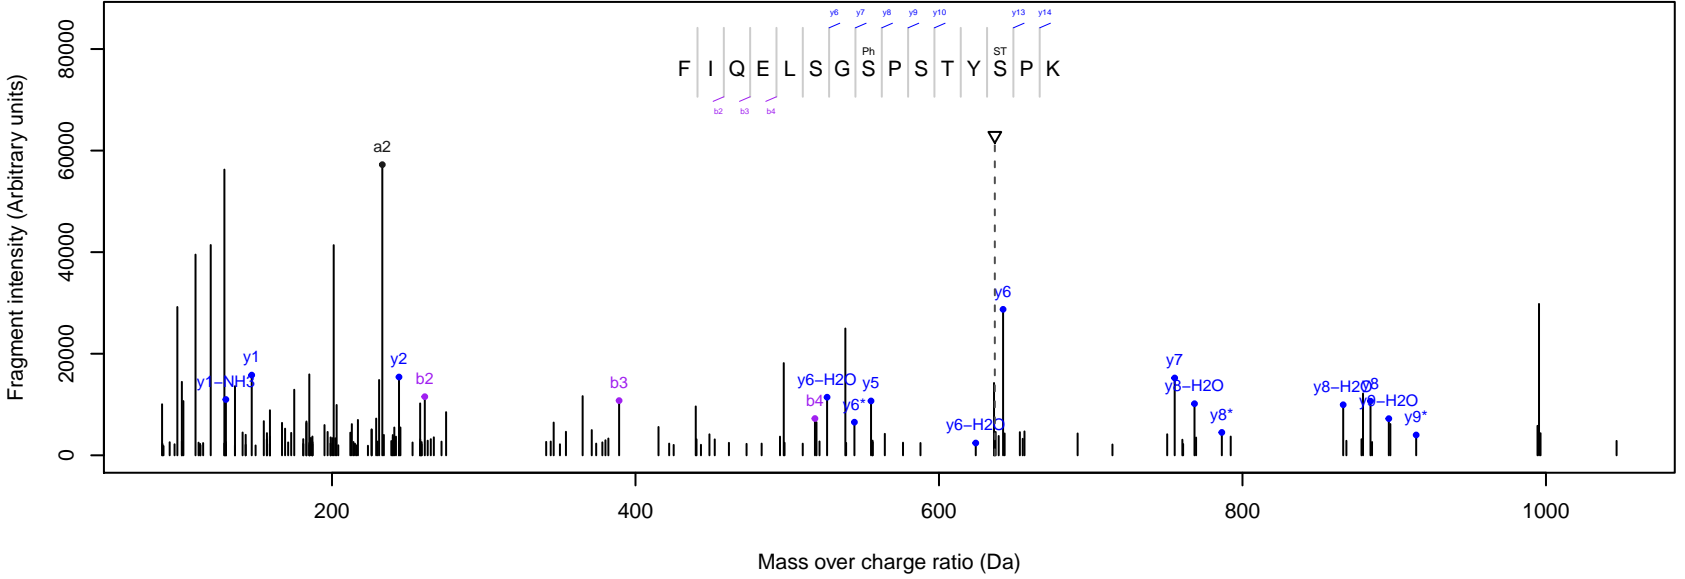

AT(Phospho (STY))SRGNSNGMDSNIDLTI VEDEEEESVALEQAQK-3+

Source : QE3\_201126\_FR\_TiOx\_hum\_tissue\_Urea\_RNAB\_H Scan : 52605

Andromeda score : 89.793

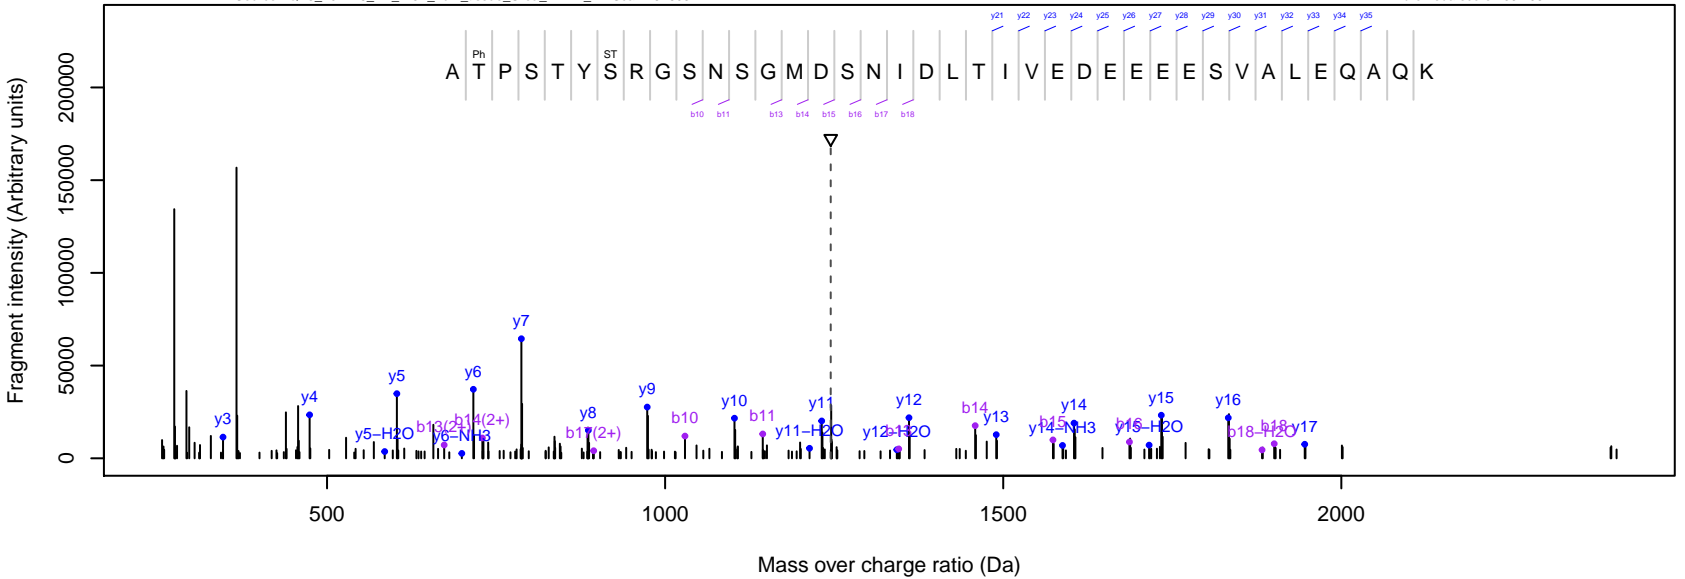

NS(Phospho (STY))LEISSIDRELSPEGPGEK-3+

Source : QE3\_201126\_FR\_TIOx\_hum\_tissue\_Urea\_RNAB\_N Scan : 31159

Andromeda score : 89.773

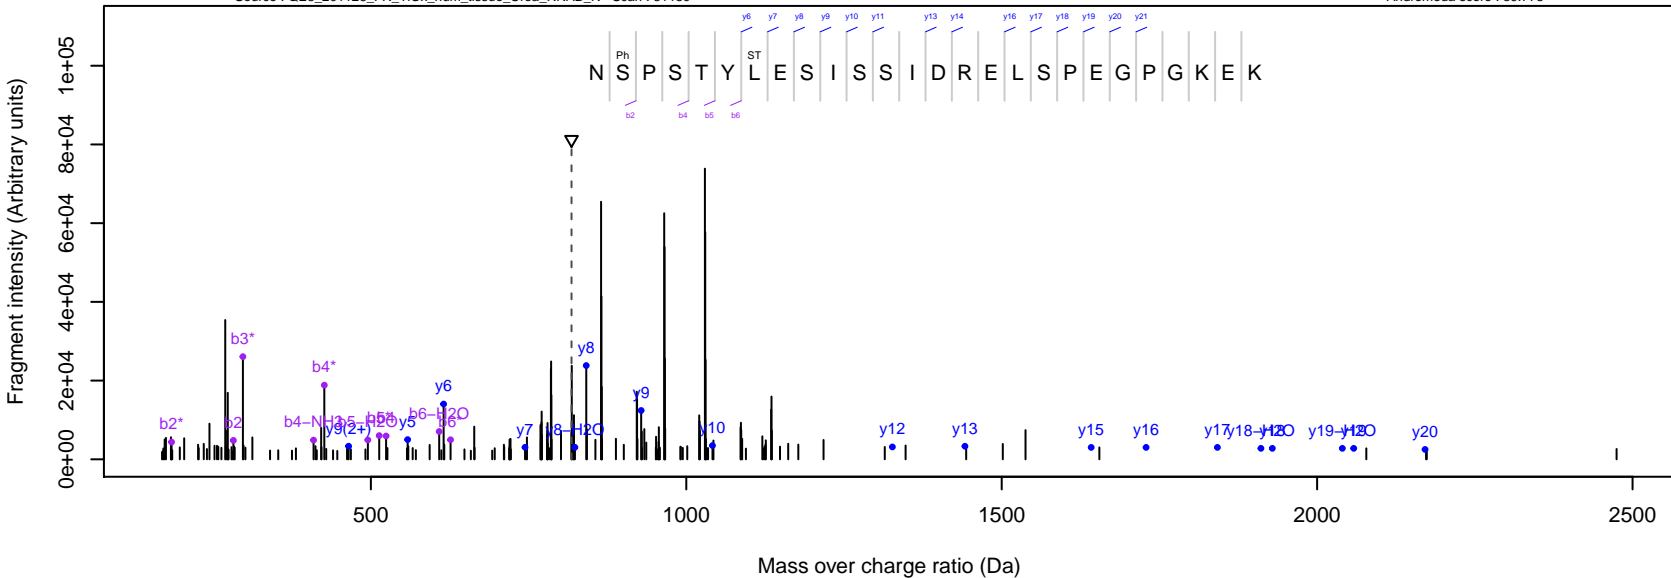

KINS(Phospho (STY))SPNVNTTASGVEDLNIIQVTIPDDDNER-3+

Source : QE3\_201126\_FR\_TIOx\_hum\_tissue\_Urea\_RNAB\_B Scan : 50511

Andromeda score : 89.751

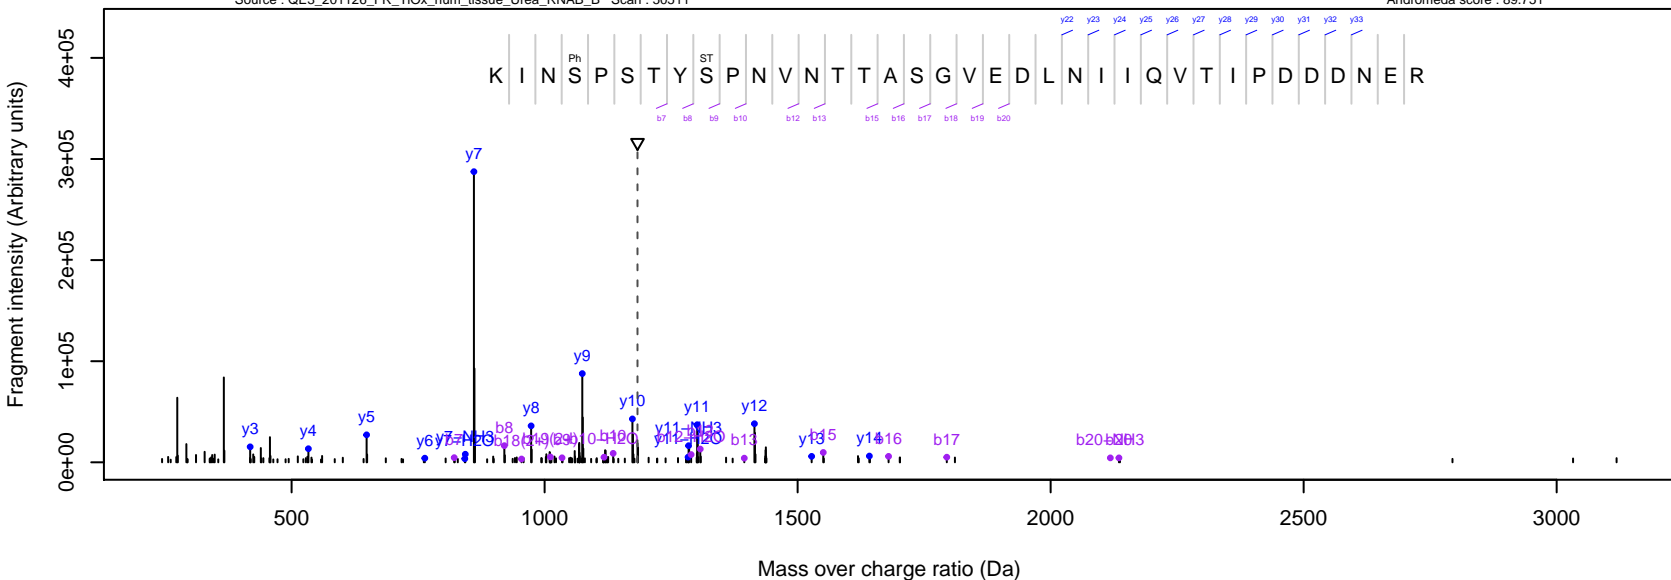

RYGLLANTEDPTEM(Oxidation (M))ASLDS(Phospho (STY))DEETVFESR-3+

Source : QE3\_201126\_FR\_TIOx\_hum\_tissue\_Urea\_RNAB\_B Scan : 47229

Andromeda score : 89.742

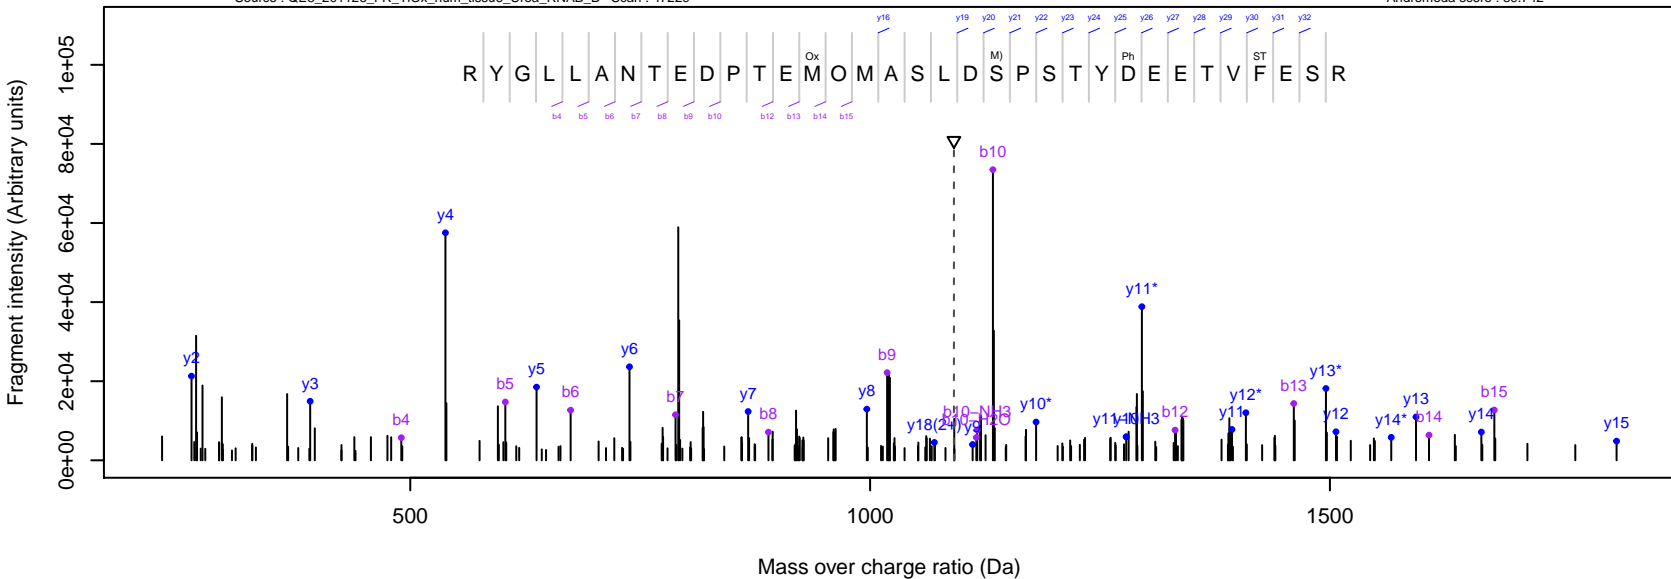

HTPNTSDNEGS(Phospho (STY))DTEVCGPNSPSKR-3+

Source : QE3\_201126\_FR\_TiOx\_hum\_tissue\_Urea\_RNAB\_N Scan : 6954

Andromeda score : 89.727

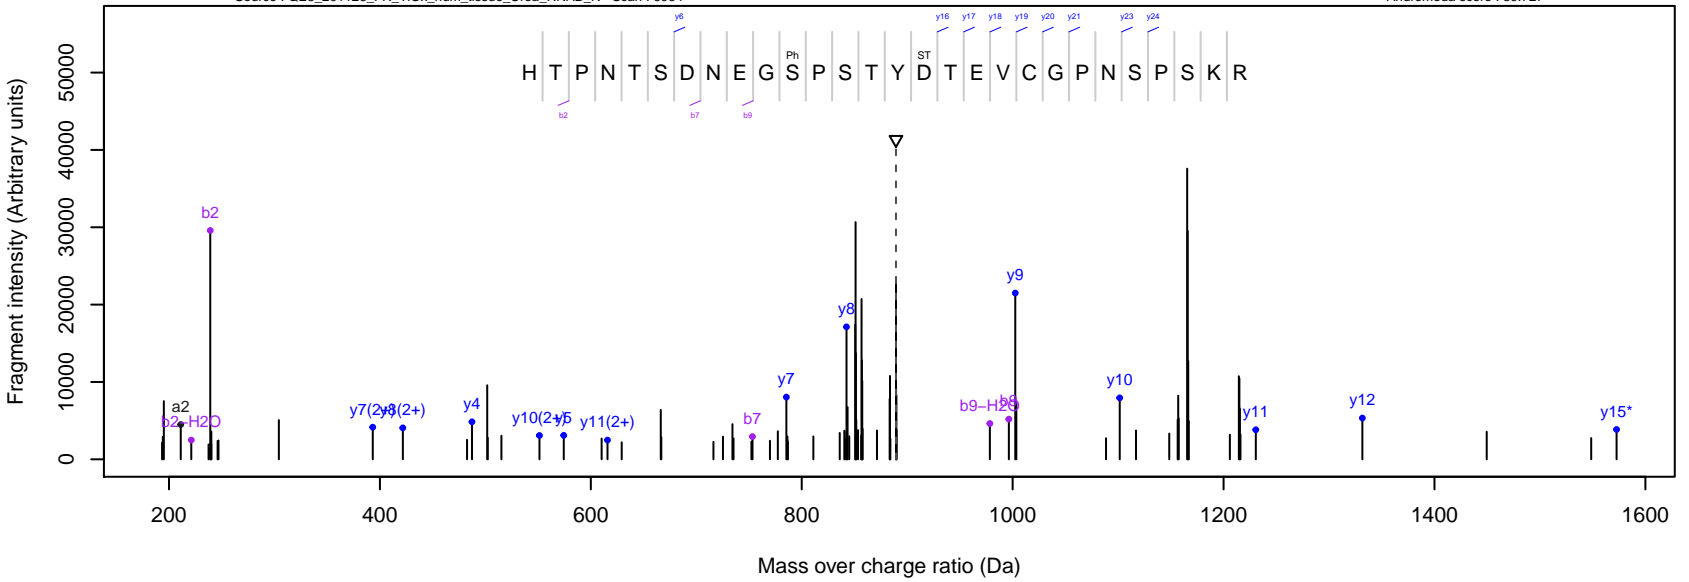

VGEQDSAPTQEKP(Phospho (STY))SPGKAIEK-3+

Source : QE3\_201126\_FR\_TiOx\_hum\_tissue\_Urea\_RNAB\_B Scan : 10340

Andromeda score : 89.723

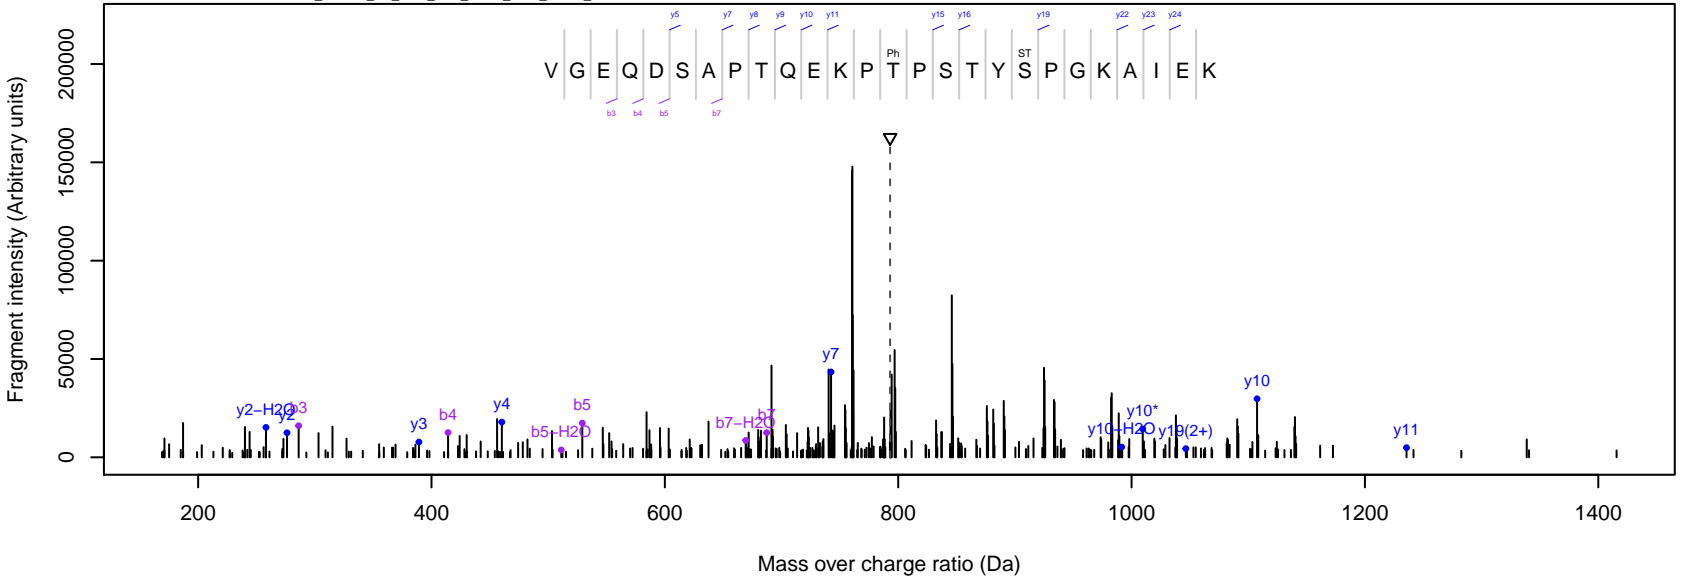

VVSDADD(Phospho (STY))DS(Phospho (STY))DAVSDKSGKR-3+

Source : QE3\_201126\_FR\_TiOx\_hum\_tissue\_Urea\_RNAB\_N Scan : 6456

Andromeda score : 89.721

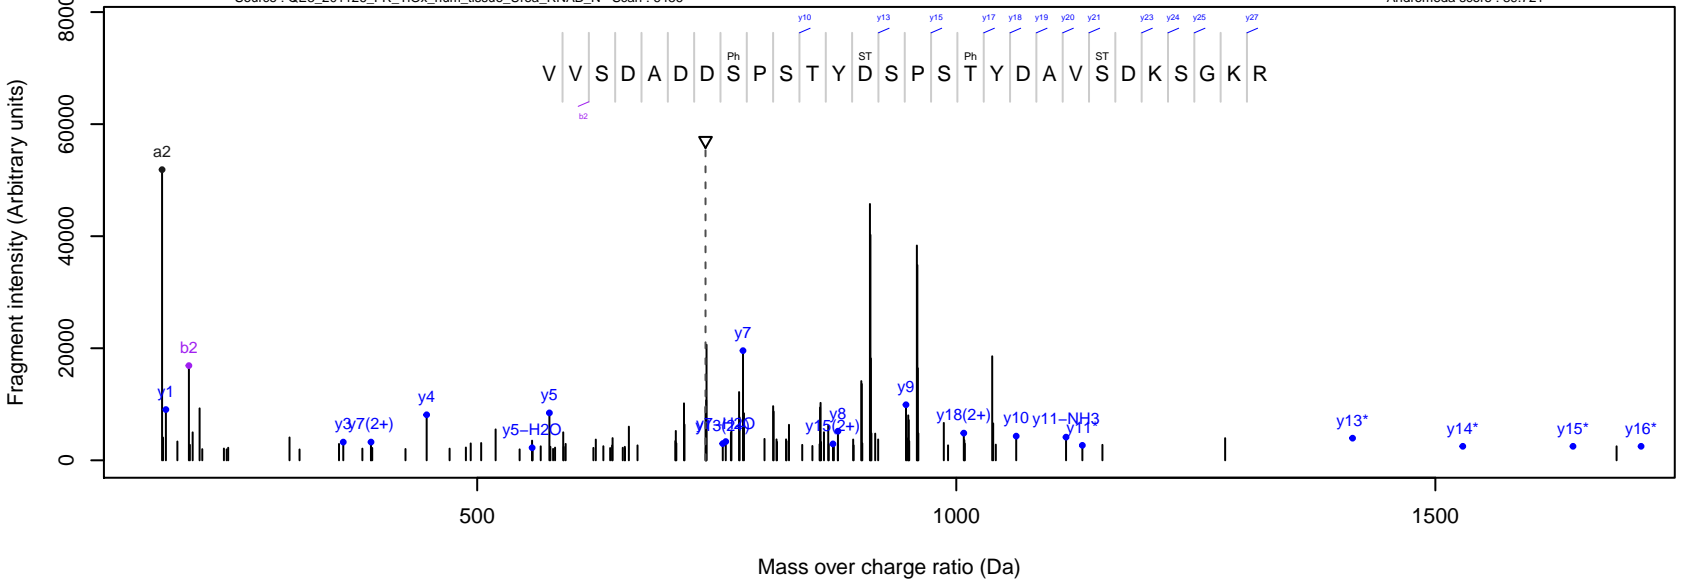

YS(Phospho (STY))PSQNS(Phospho (STY))PIHHIPSR-3+

Source : QE3\_201126\_FR\_TiOx\_hum\_tissue\_Urea\_RNAB\_N Scan : 15775

Andromeda score : 89.668

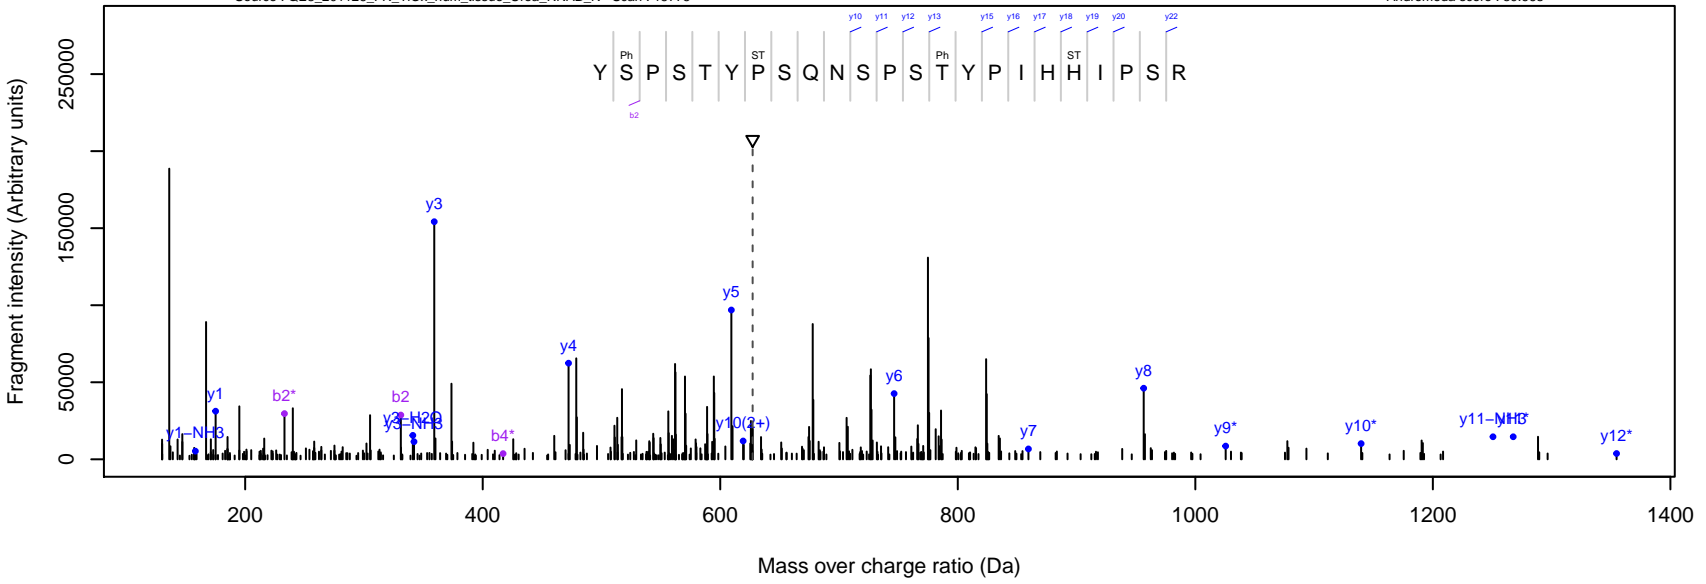

DDTSRYDERPGPS(Phospho (STY))PLPHR-4+

Source : QE3\_201126\_FR\_TiOx\_hum\_tissue\_Urea\_RNAB\_H Scan : 13128

Andromeda score : 89.663

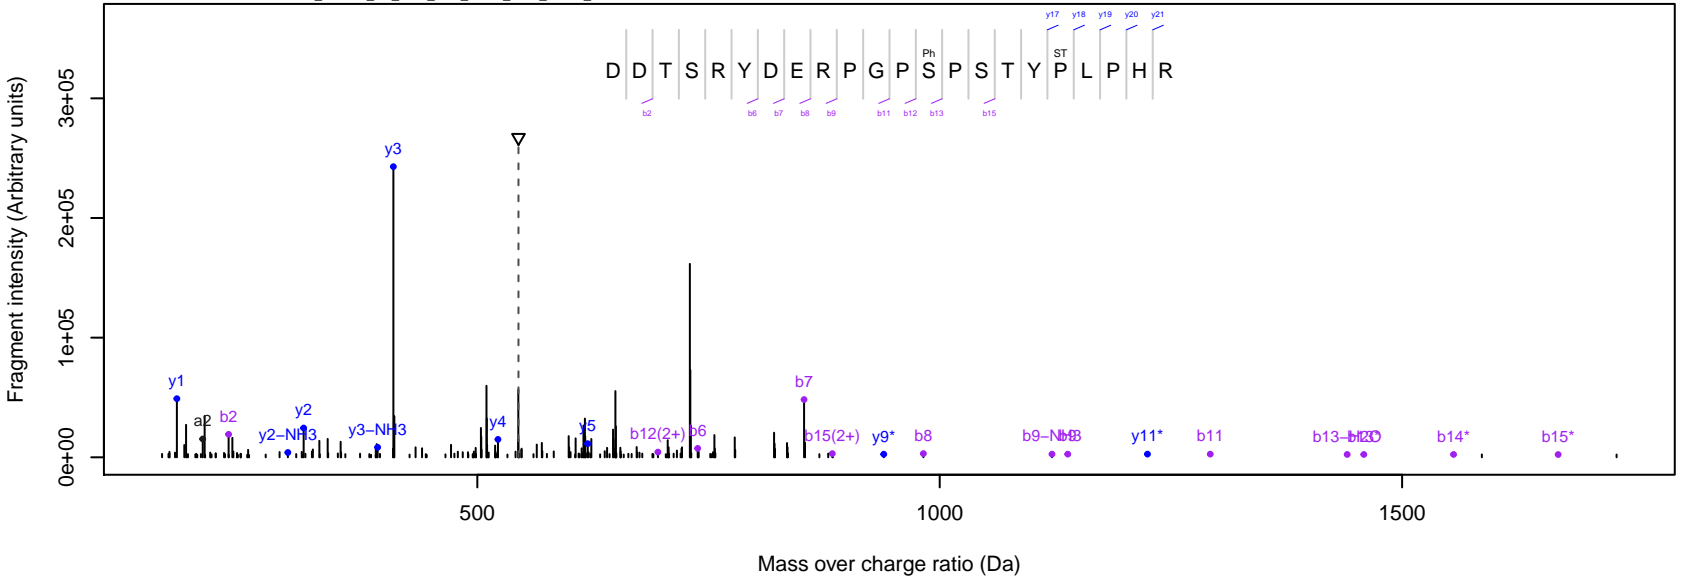

KPWTCFPKPSNS(Phospho (STY))QPTS(Phospho (STY))PSLEDPK-3+

Source : QE3\_201126\_FR\_TiOx\_hum\_tissue\_Urea\_RNAB\_H Scan : 31165

Andromeda score : 89.659

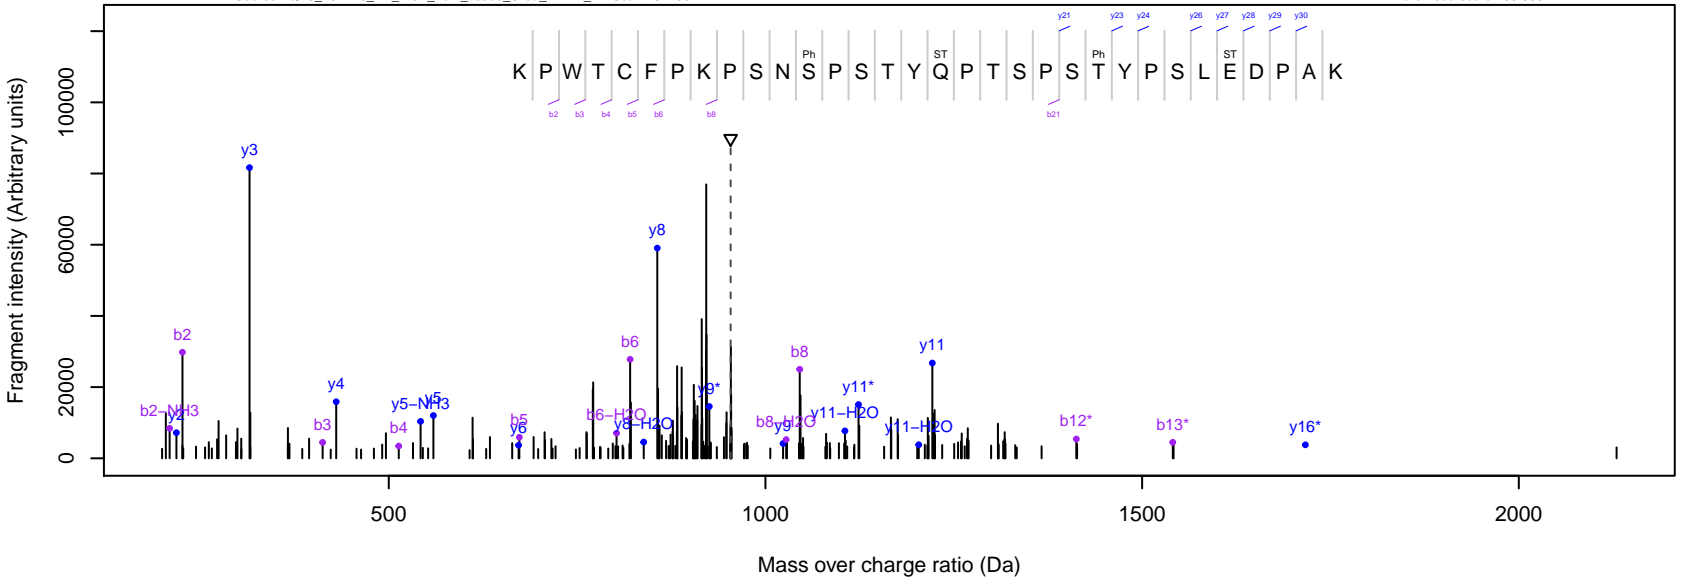

YRS(Phospho (STY))PEPDPYLSYR-3+

Source : QE3\_201126\_FR\_TiOx\_hum\_tissue\_Urea\_RNAB\_H Scan : 23941

Andromeda score : 89.636

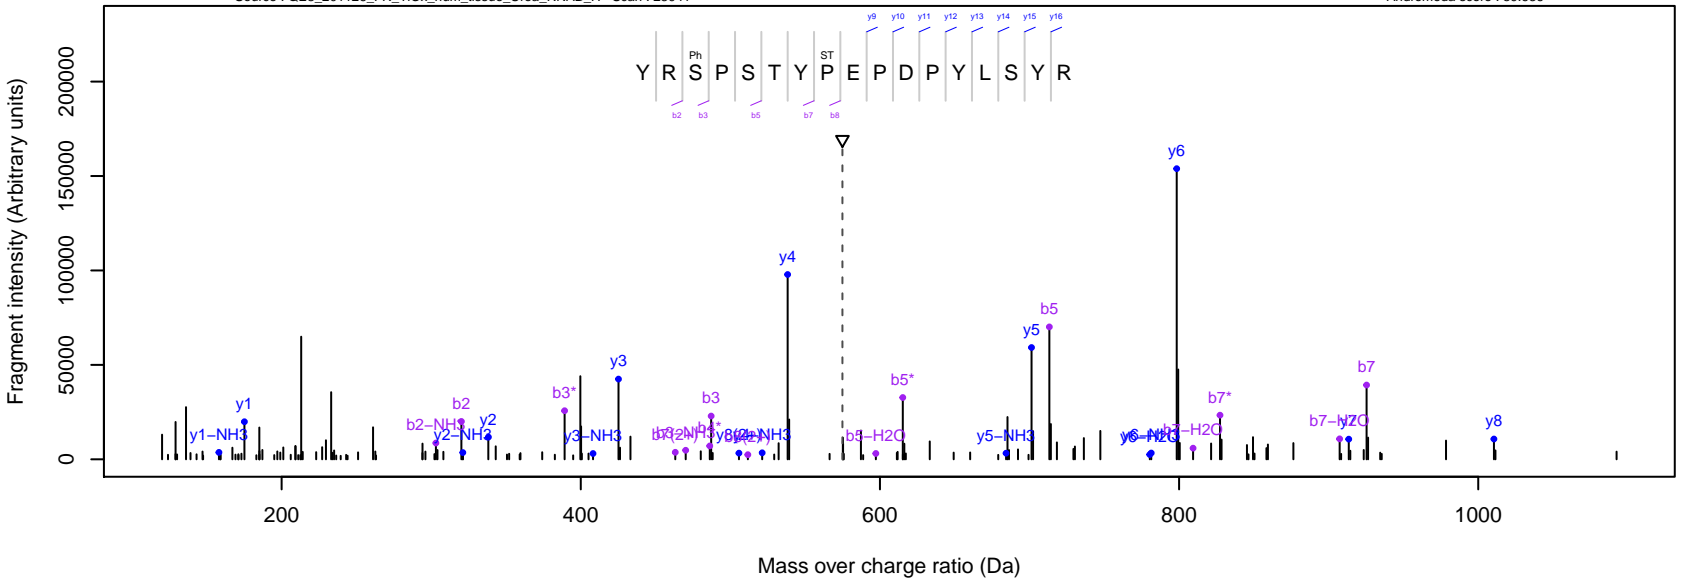

TVTCVTVEPEAPS(Phospho (STY))PDVLQAATHR-3+

Source : QE3\_201126\_FR\_TiOx\_hum\_tissue\_Urea\_RNAB\_H Scan : 40417

Andromeda score : 89.634

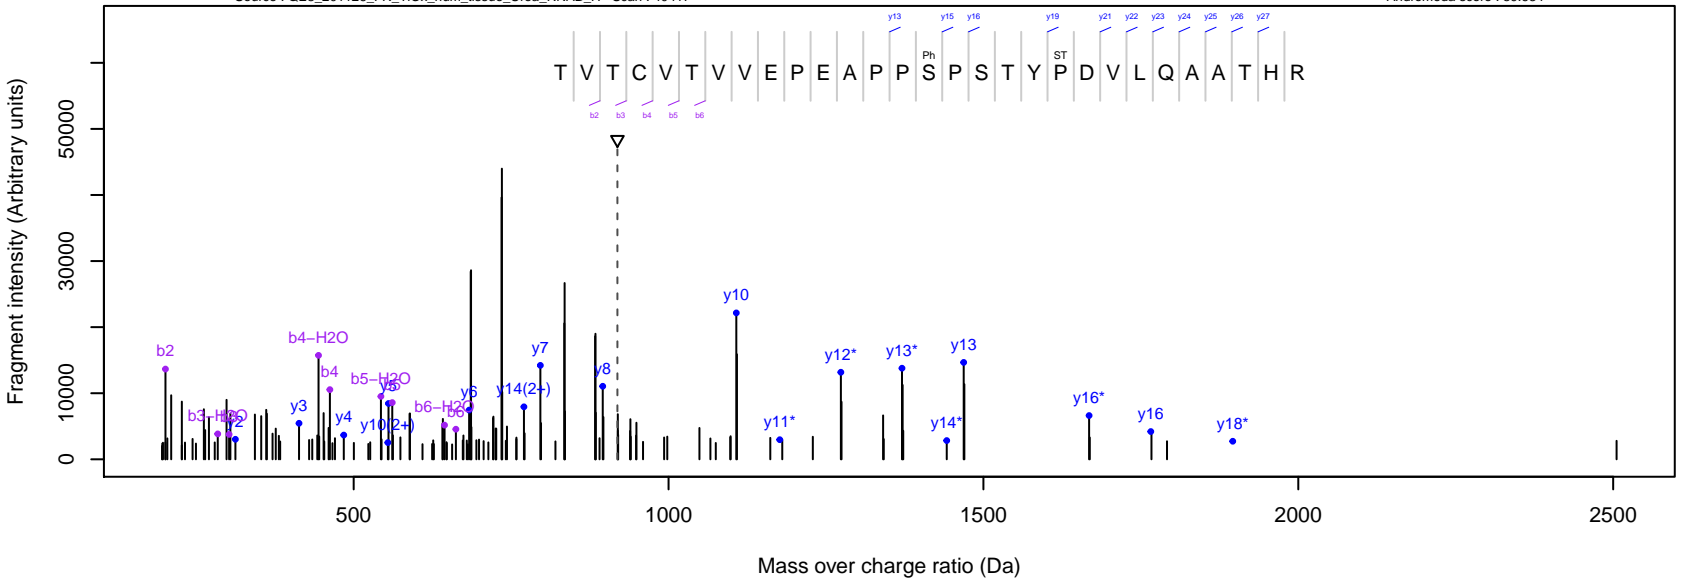

ATS(Phospho (STY))VDYSSFADR-2+

Source : QE3\_201126\_FR\_TiOx\_hum\_tissue\_Urea\_RNAB\_H Scan : 27109

Andromeda score : 89.629

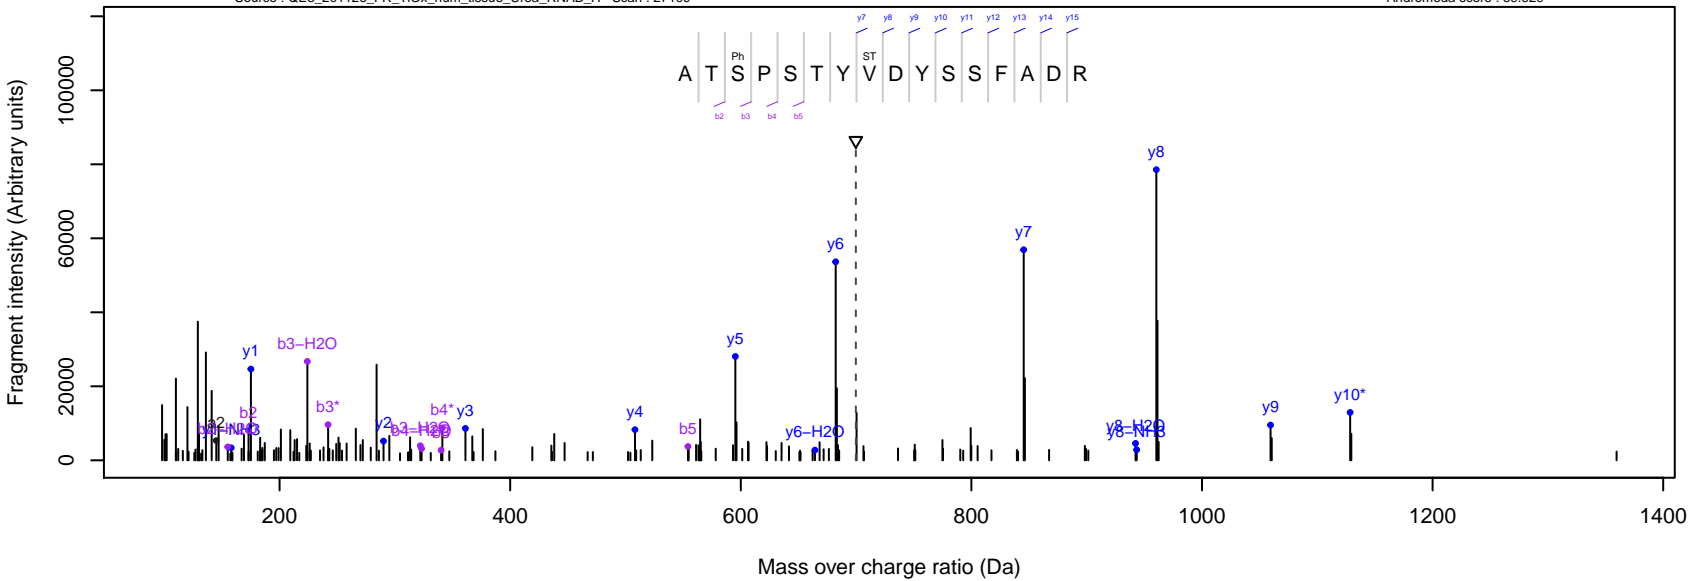

(Acetyl (Protein N-term))M(Oxidation (M))NTAPS(Phospho (STY))RSPSTR-3+

Source : QE3\_201126\_FR\_TIOx\_hum\_tissue\_Urea\_RNAB\_B Scan : 6967

Andromeda score : 89.624

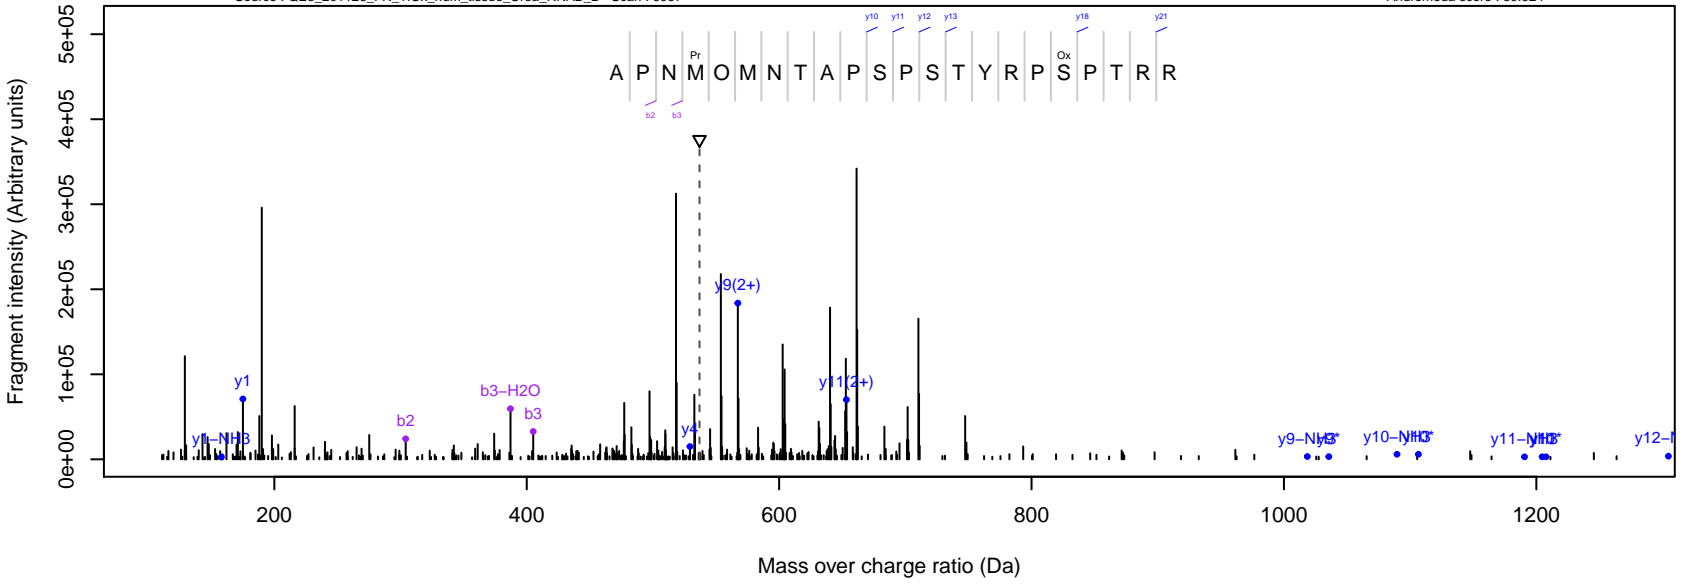

SQT(Phospho (STY))GVGELTTQNT-2+

Source : QE3\_201126\_FR\_TIOx\_hum\_tissue\_Urea\_RNAB\_B Scan : 16677

Andromeda score : 89.624

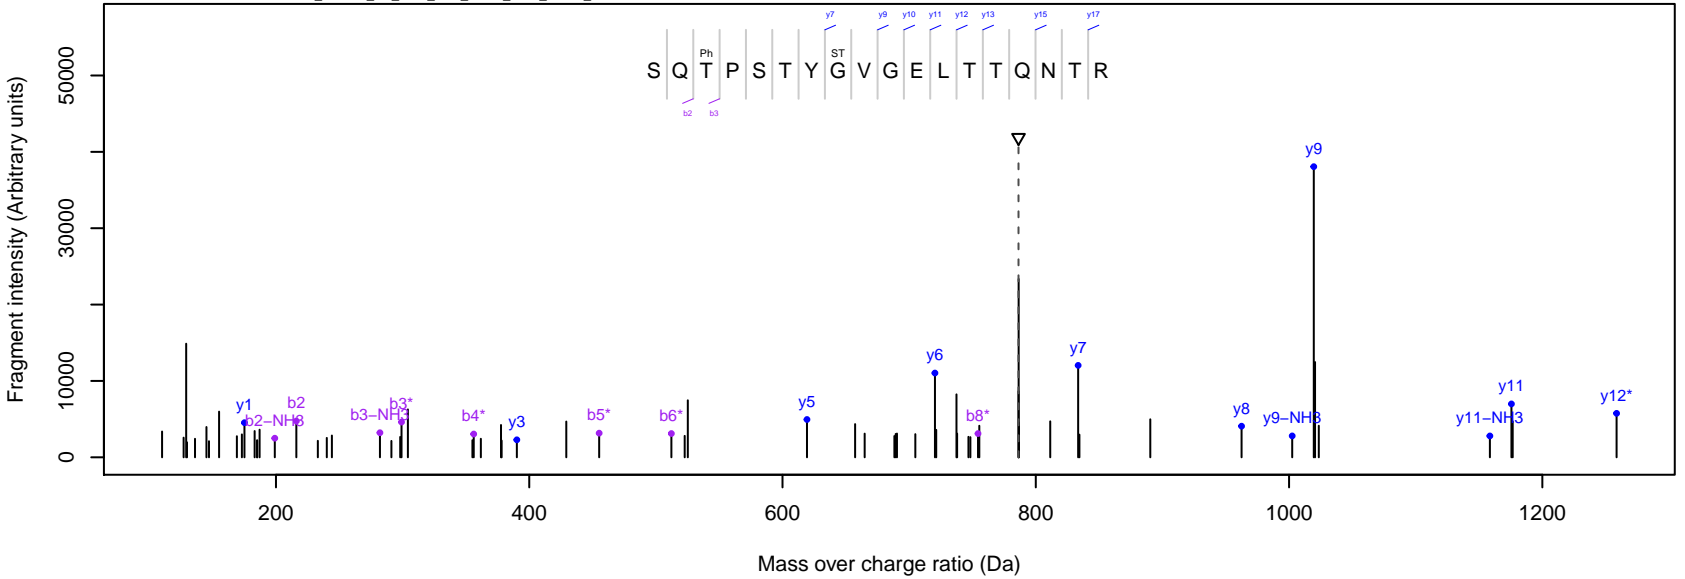

SFS(Phospho (STY))M(Oxidation (M))HDLTIQGDEPVGQRPYQLPEAK-3+

Source : QE3\_201126\_FR\_TIOx\_hum\_tissue\_Urea\_RNAB\_N Scan : 33271

Andromeda score : 89.577

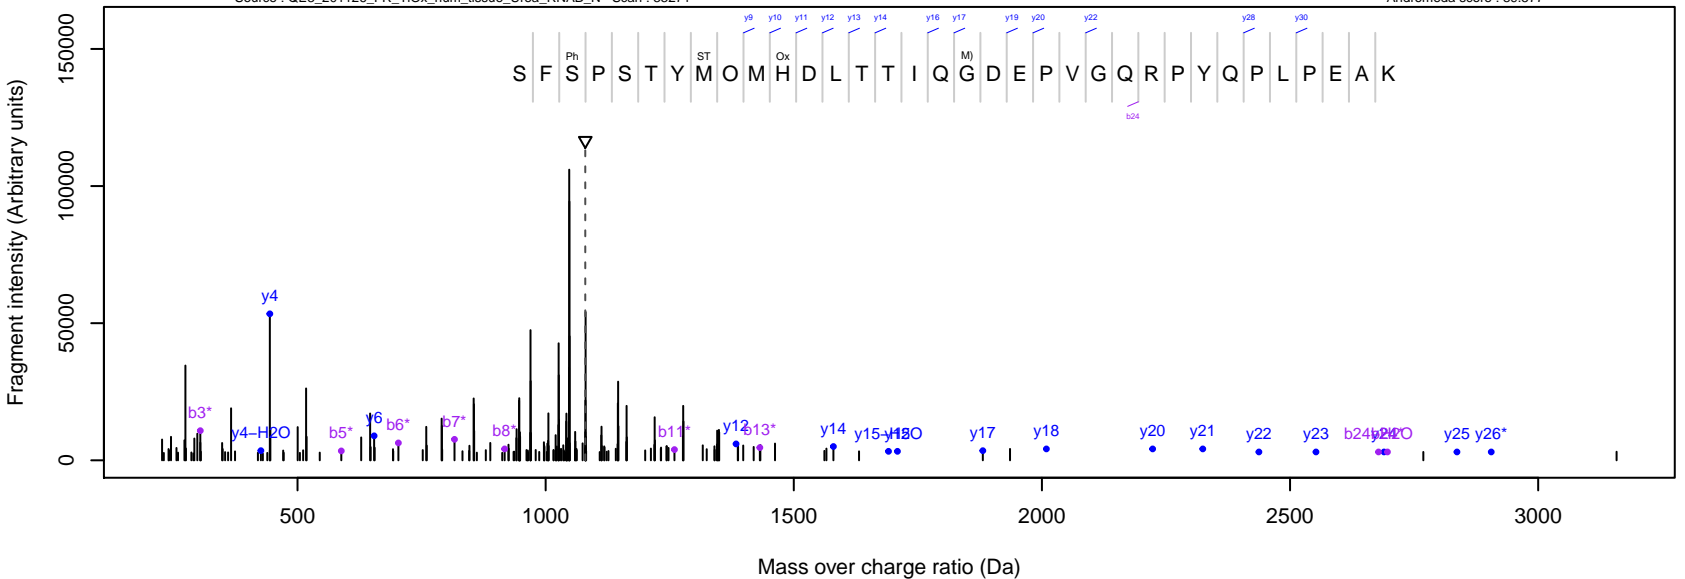



LIESLSQM(Oxidation (M))LS(Phospho (STY))M(Oxidation (M))GFS(Phospho (STY))DEGGWLTR-3+

Source : QE3\_201126\_FR\_TiOx\_hum\_tissue\_Urea\_RNAB\_B Scan : 62679

Andromeda score : 89.565

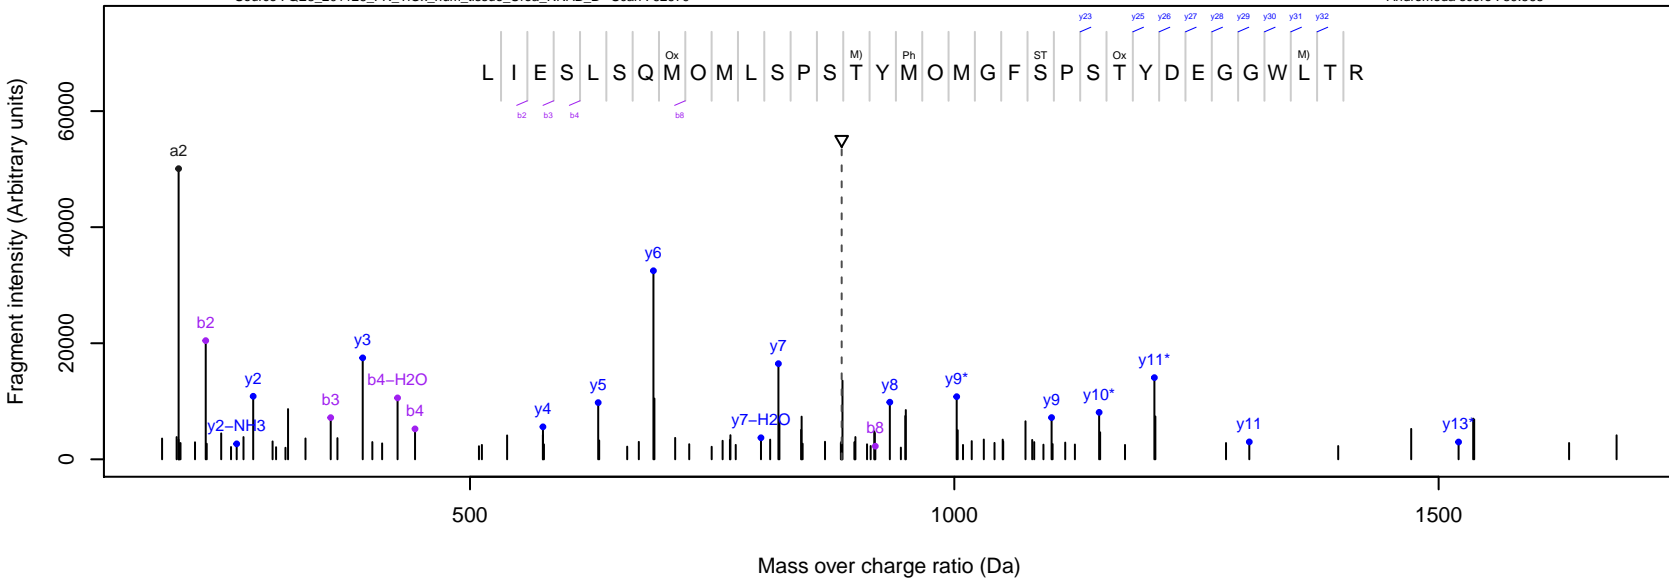

DKS(Phospho (STY))PSSLLEDAKETCFTR-3+

Source : QE3\_201126\_FR\_TiOx\_hum\_tissue\_Urea\_RNAB\_N Scan : 32425

Andromeda score : 89.511

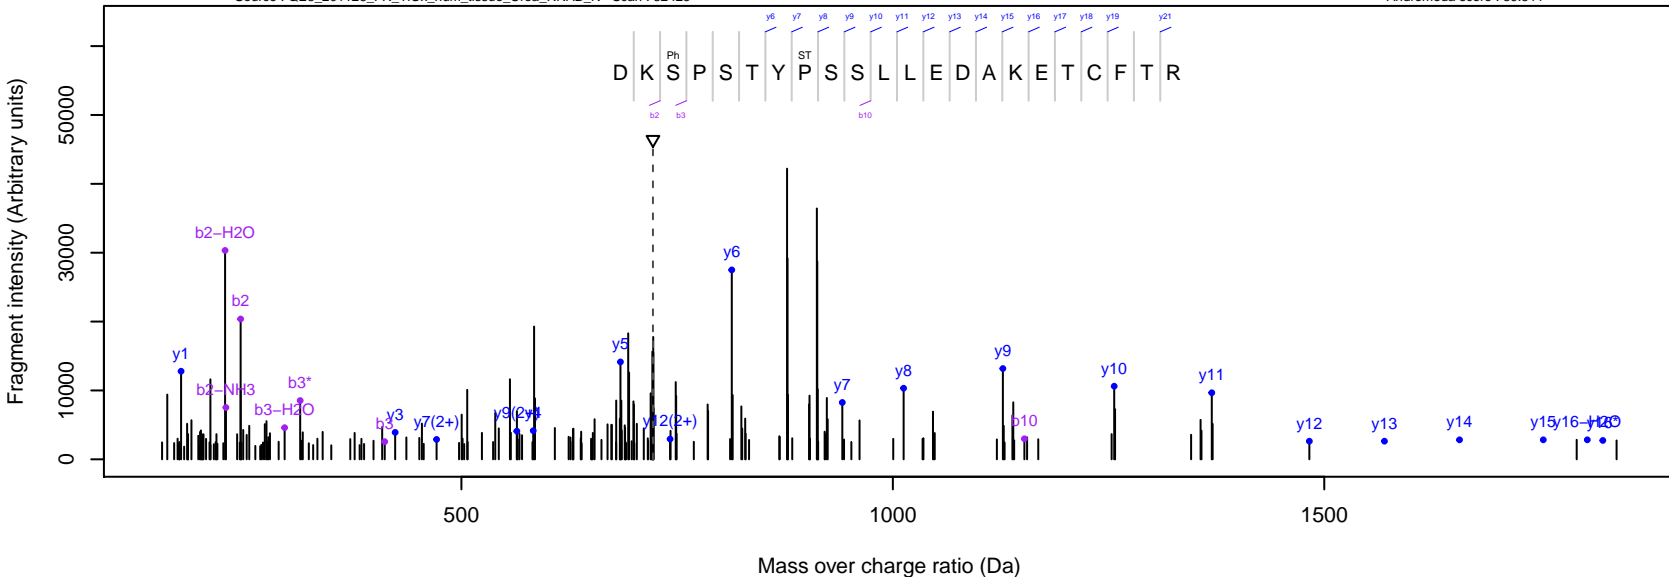

SSM(Oxidation (M))QPDNSS(Phospho (STY))DSDYDLHGAQR-3+

Source : QE3\_201126\_FR\_TiOx\_hum\_tissue\_Urea\_RNAB\_N Scan : 12265

Andromeda score : 89.511

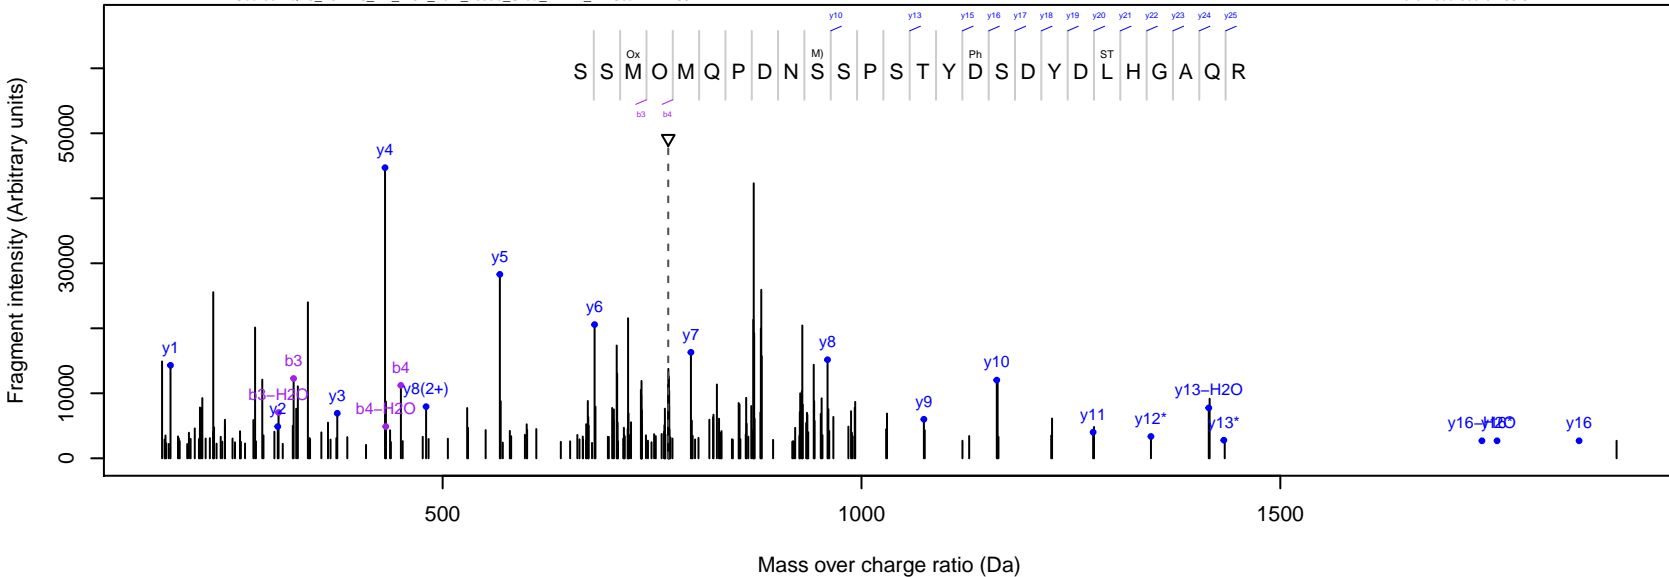

TEEDSKS(Phospho (STY))IKS(Phospho (STY))DVPVYLK-3+

Source : QE3\_201126\_FR\_TIOx\_hum\_tissue\_Urea\_RNAB\_N Scan : 27635

Andromeda score : 89.511

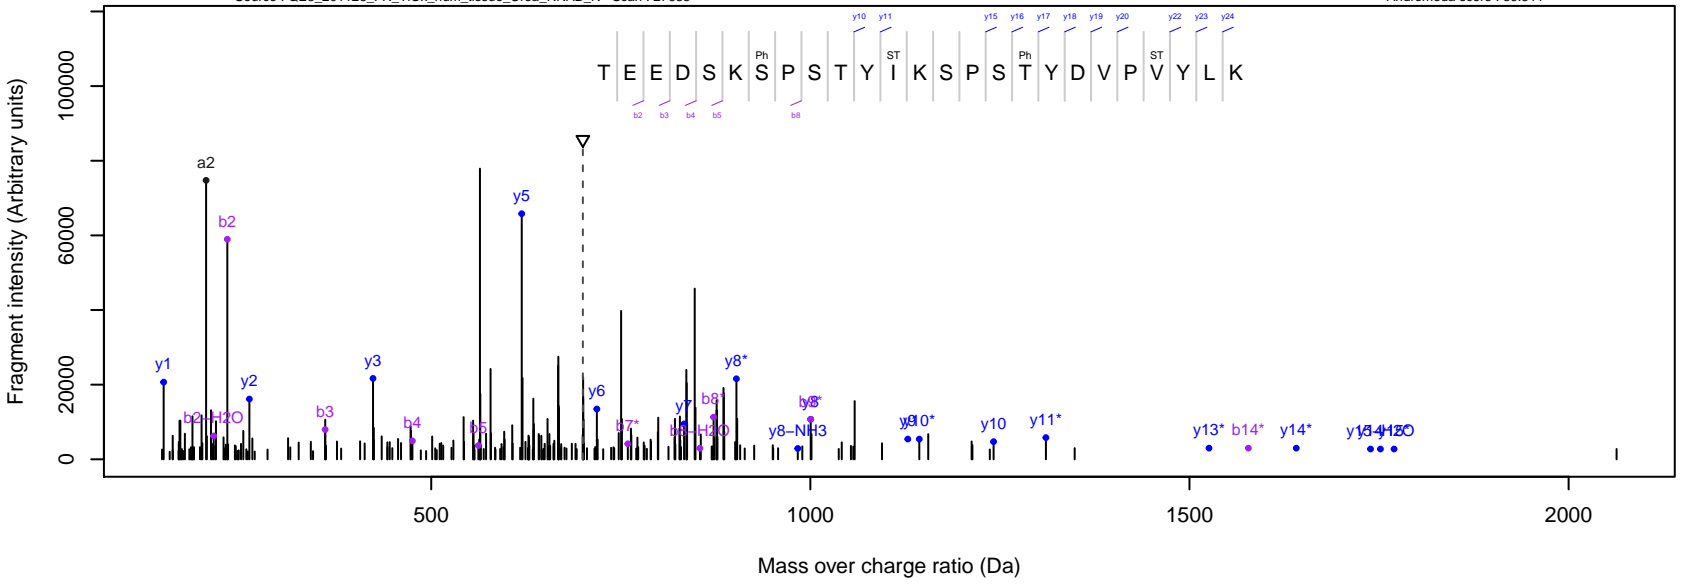

(Acetyl (Protein N-term))AEQS(Phospho (STY))DEAVKYITLLEEIQK-2+

Source : QE3\_201126\_FR\_TIOx\_hum\_tissue\_Urea\_RNAB\_B Scan : 45097

Andromeda score : 89.507

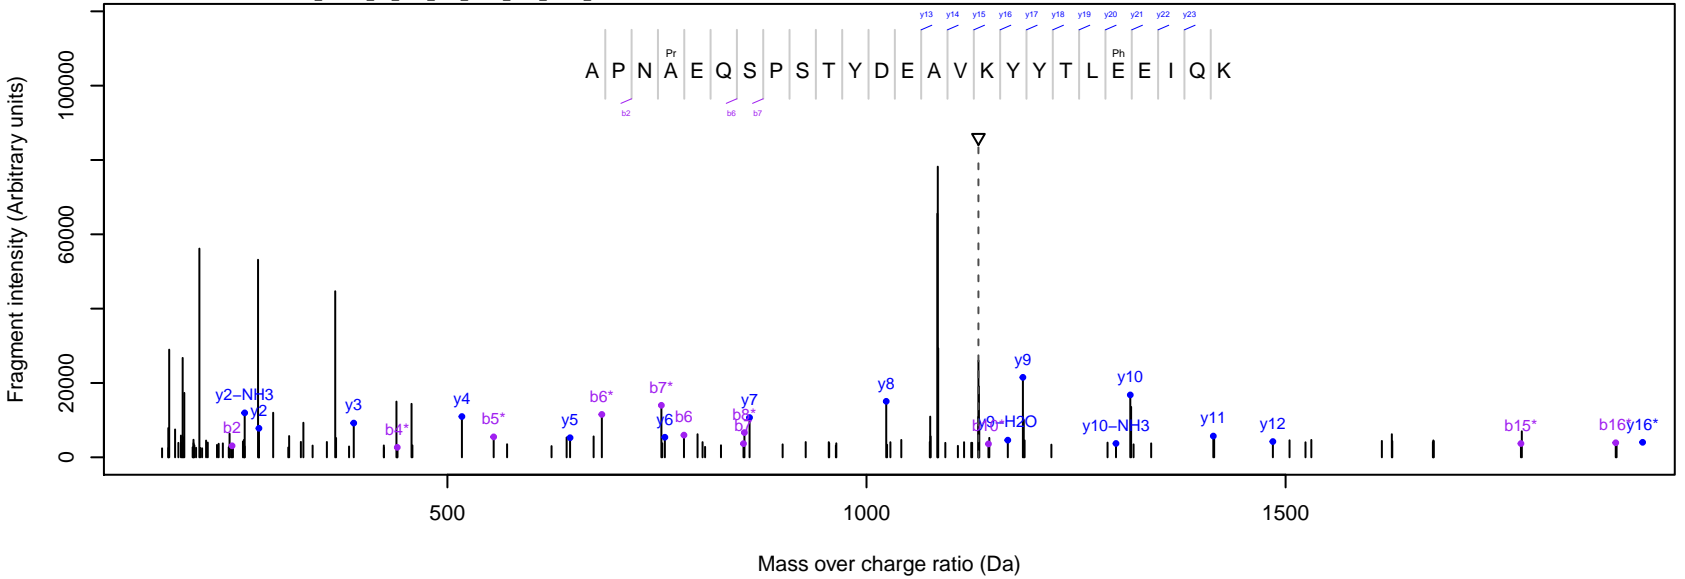

RLS(Phospho (STY))EVIYEPFQLLSK-3+

Source : QE3\_201126\_FR\_TiOx\_hum\_tissue\_Urea\_RNAB\_H Scan : 57184

Andromeda score : 89.483

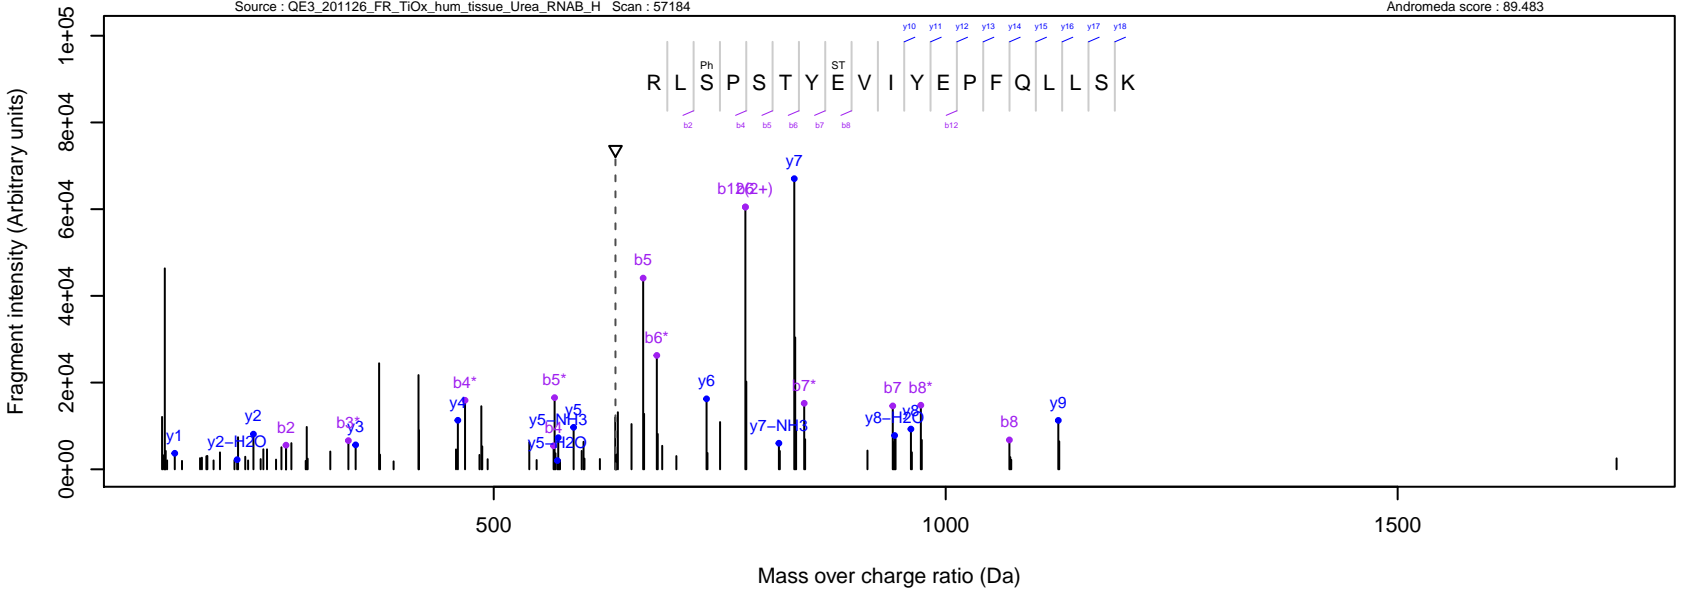

SSS(Phospho (STY))LVDIREETEGR-3+

Source : QE3\_201126\_FR\_TiOx\_hum\_tissue\_Urea\_RNAB\_N Scan : 20045

Andromeda score : 89.483

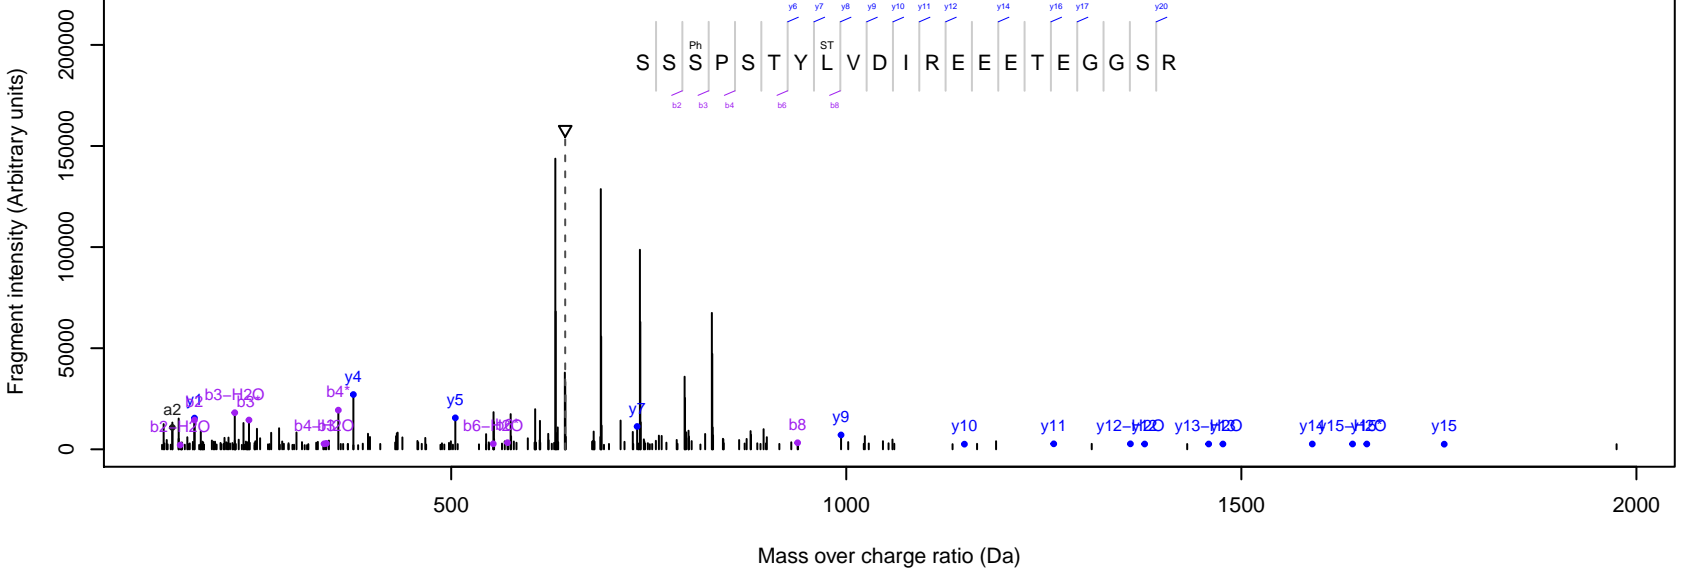

VETVKS(Phospho (STY))DNKDDDDIDAI-3+

Source : QE3\_201126\_FR\_TiOx\_hum\_tissue\_Urea\_RNAB\_N Scan : 31264

Andromeda score : 89.483

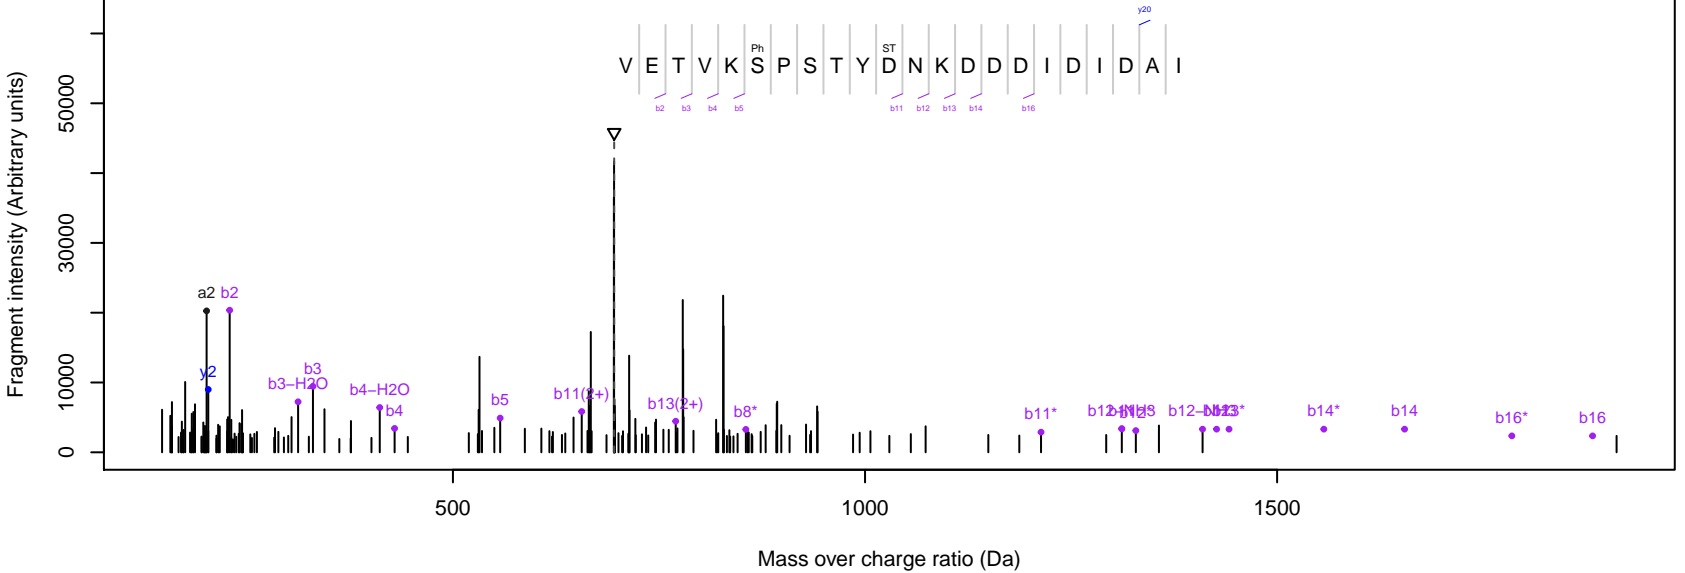

FLQPGS(Phospho (STY))PRKPPM(Oxidation (M))DEK-3+

Source : QE3\_201126\_FR\_TiOx\_hum\_tissue\_Urea\_RNAB\_H Scan : 10141

Andromeda score : 89.468

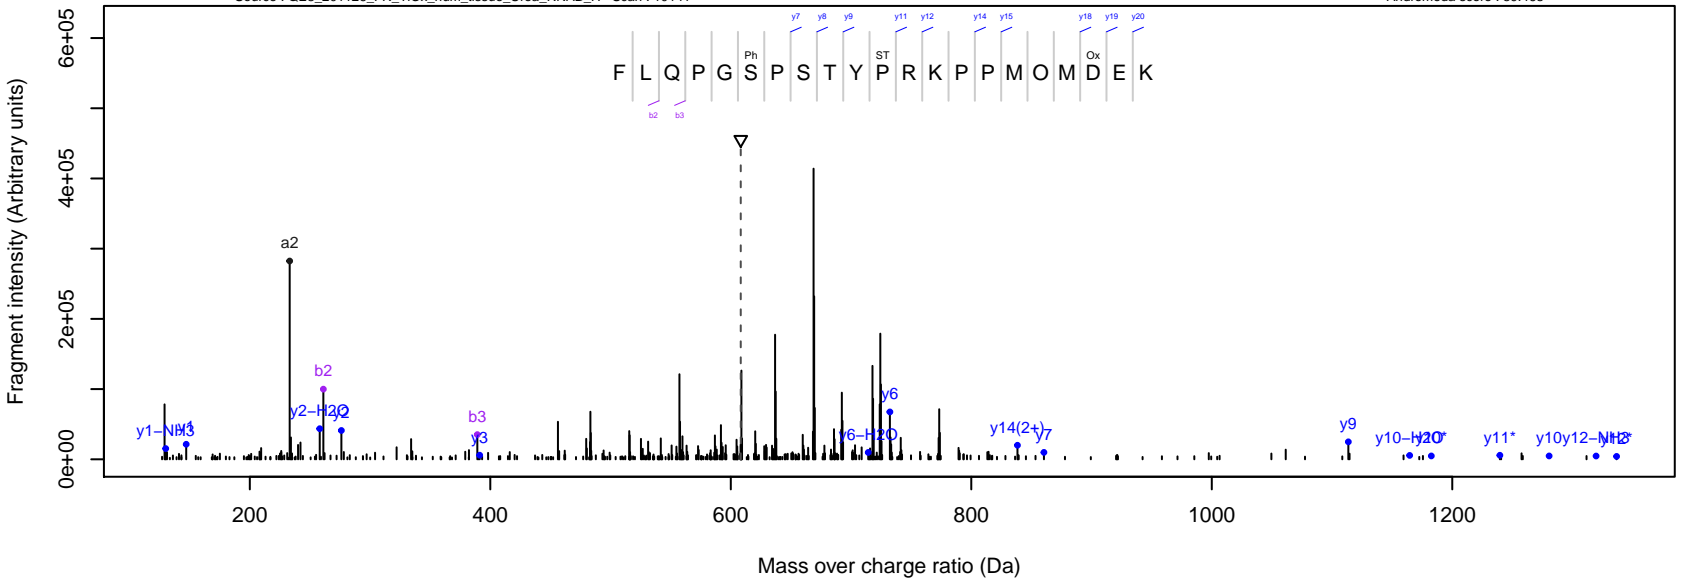

SSFASSASDASKPS(Phospho (STY))SPR-2+

Source : QE3\_201126\_FR\_TiOx\_hum\_tissue\_Urea\_RNAB\_N Scan : 8205

Andromeda score : 89.468

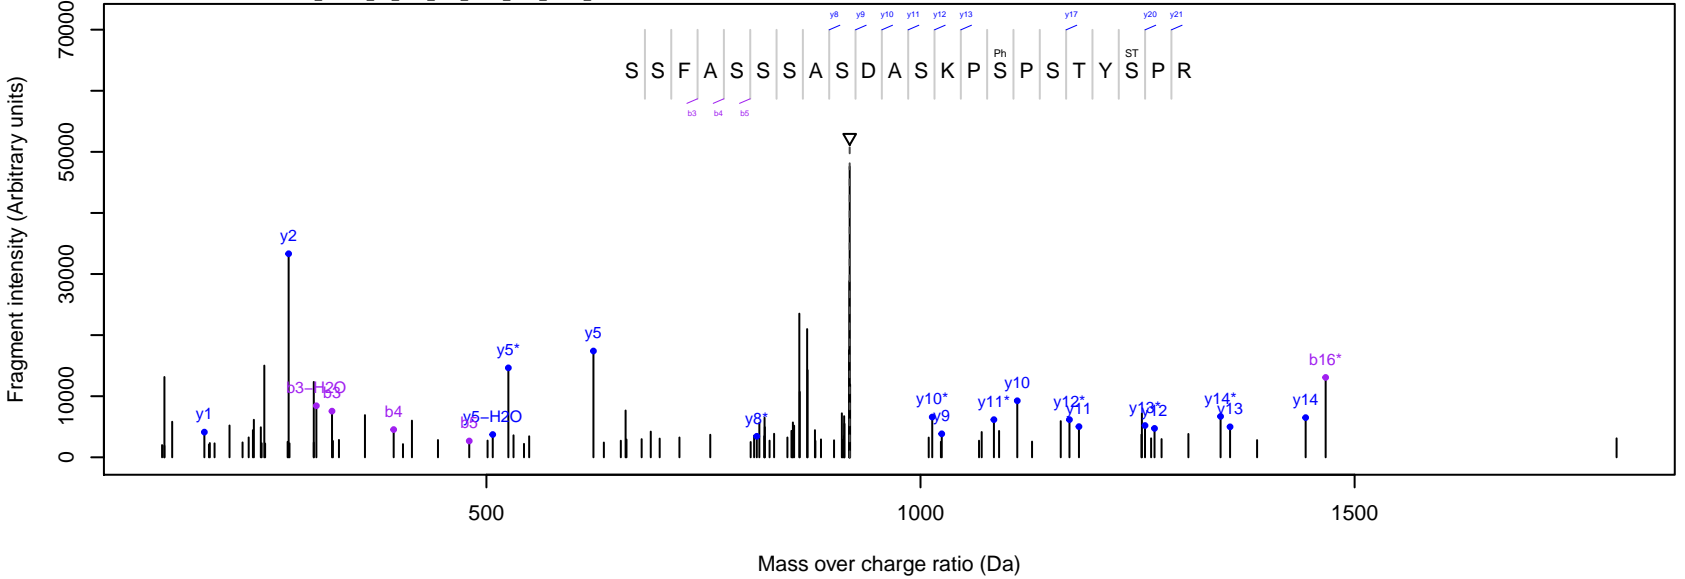

KDS(Phospho (STY))LLKPLGLR-3+

Source : QE3\_201126\_FR\_TiOx\_hum\_tissue\_Urea\_RNAB\_B Scan : 12437

Andromeda score : 89.44

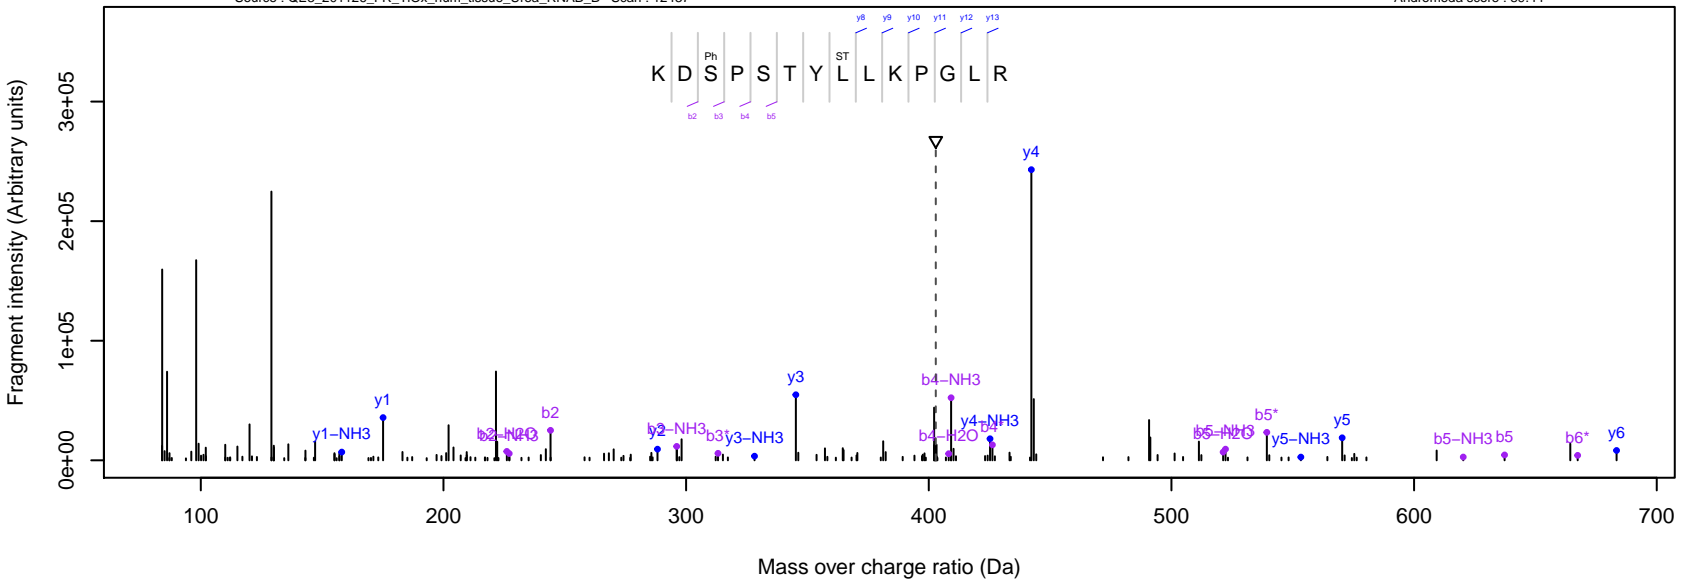

RES(Phospho (STY))LGLESK-2+

Source : QE3\_201126\_FR\_TiOx\_hum\_tissue\_Urea\_RNAB\_N Scan : 10346

Andromeda score : 89.44

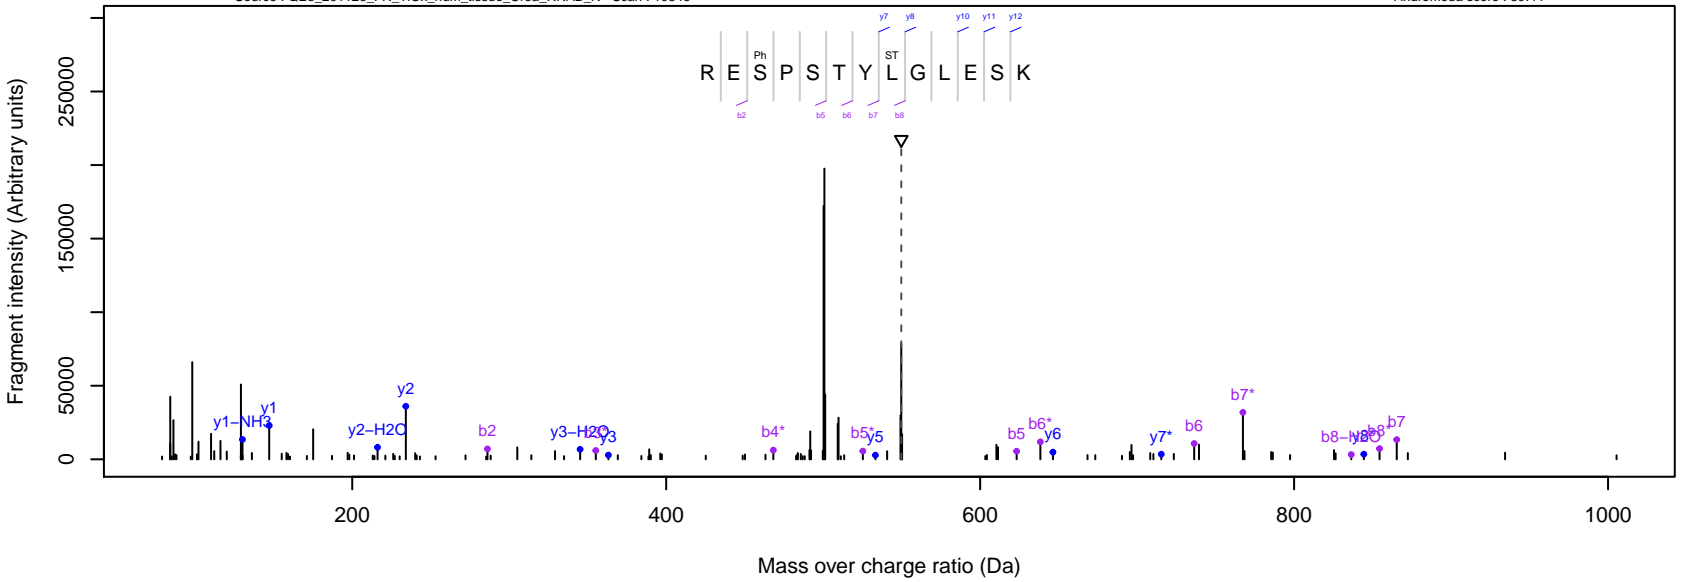

IQPEDMFVCDINEKDISGPS(Phospho (STY))PSKK-4+

Source : QE3\_201126\_FR\_TiOx\_hum\_tissue\_Urea\_RNAB\_N Scan : 36565

Andromeda score : 89.396

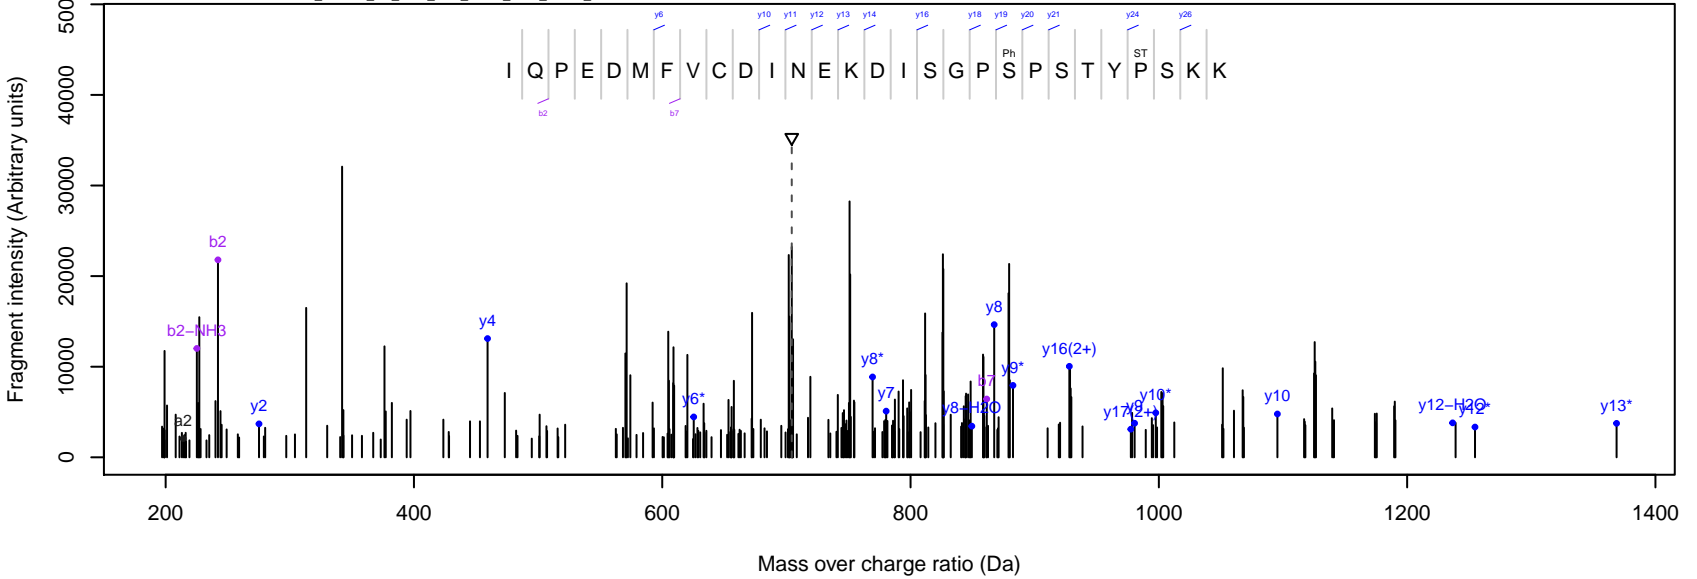

KSHS(Phospho (STY))ANDSEEFFREDDGGADLHNATNLR-4+

Source : QE3\_201126\_FR\_TiOx\_hum\_tissue\_Urea\_RNAB\_N Scan : 22921

Andromeda score : 89.391

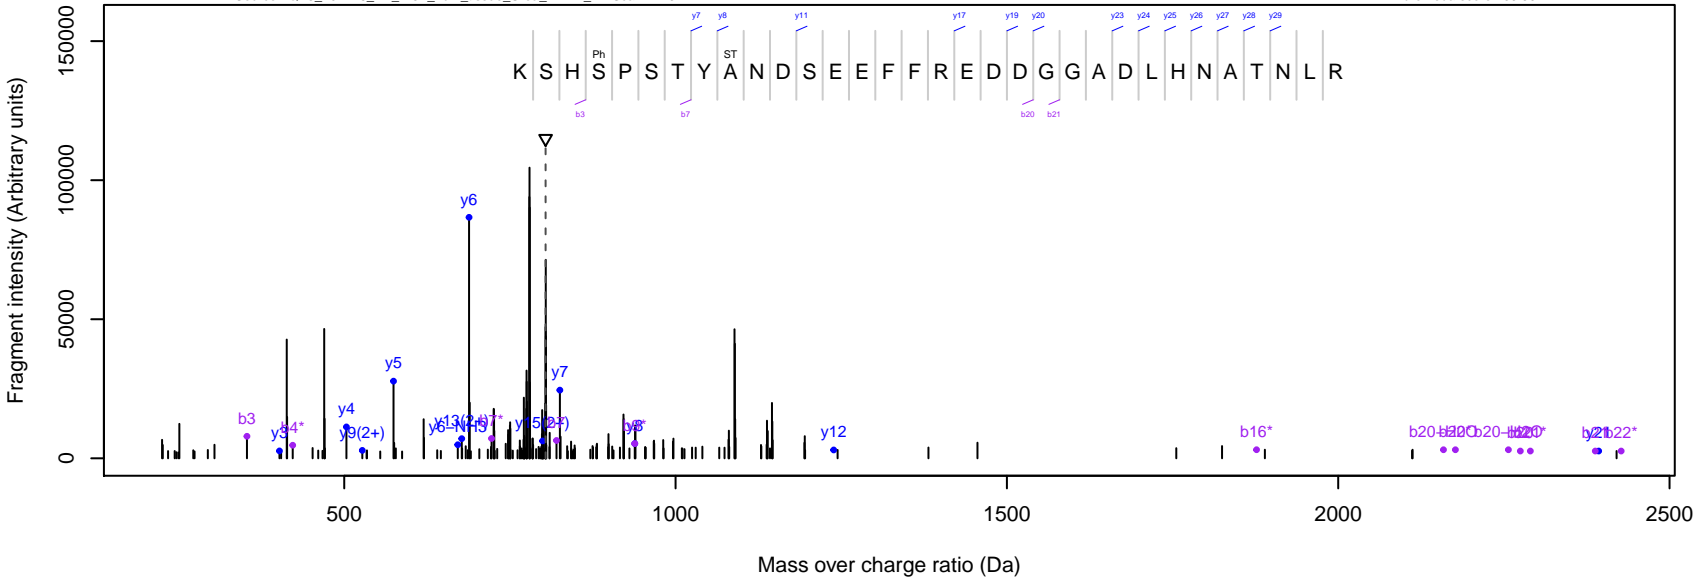

DLNES(Phospho (STY))PVKSFVSISEATDCLVDFKK-4+

Source : QE3\_201126\_FR\_TiOx\_hum\_tissue\_Urea\_RNAB\_H Scan : 55757

Andromeda score : 89.365

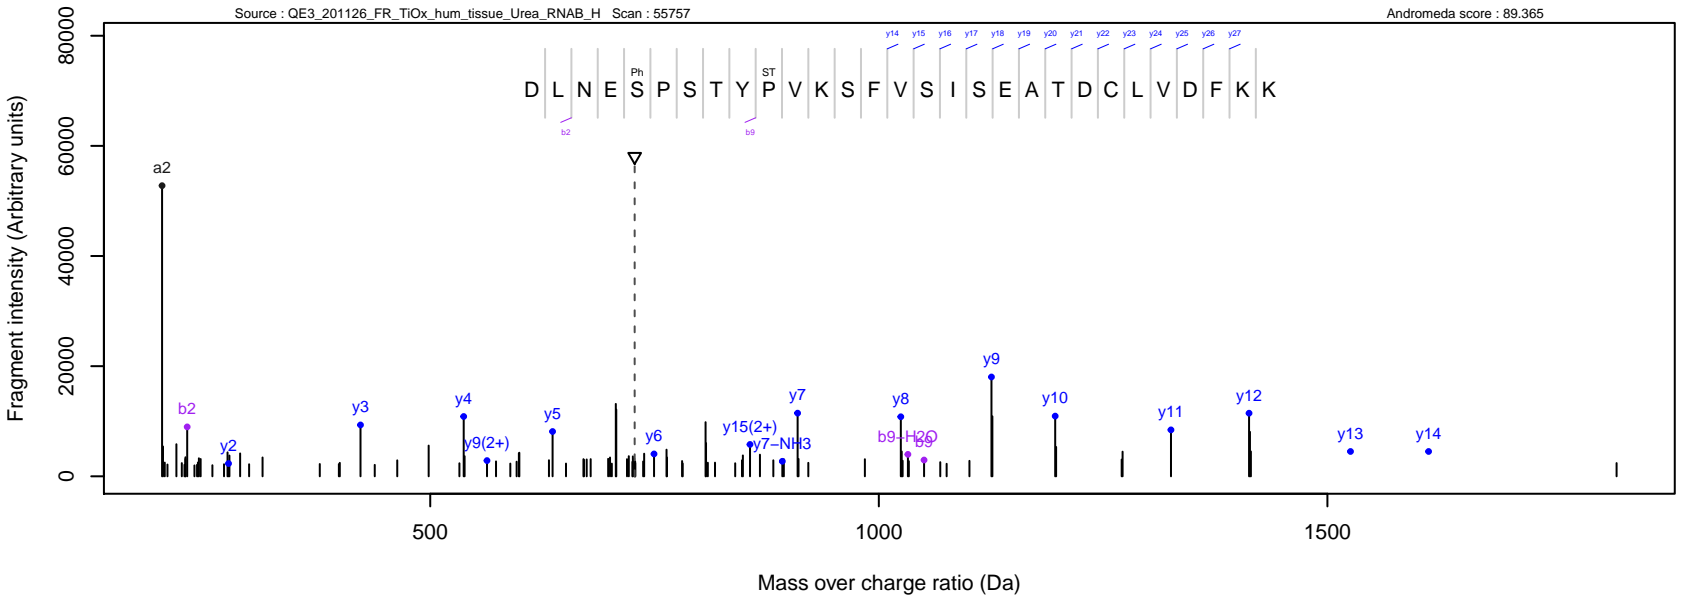

HKM(Oxidation (M))S(Phospho (STY))PPPSGFGER-3+

Source : QE3\_201126\_FR\_TiOx\_hum\_tissue\_Urea\_RNAB\_N Scan : 6660

Andromeda score : 89.358

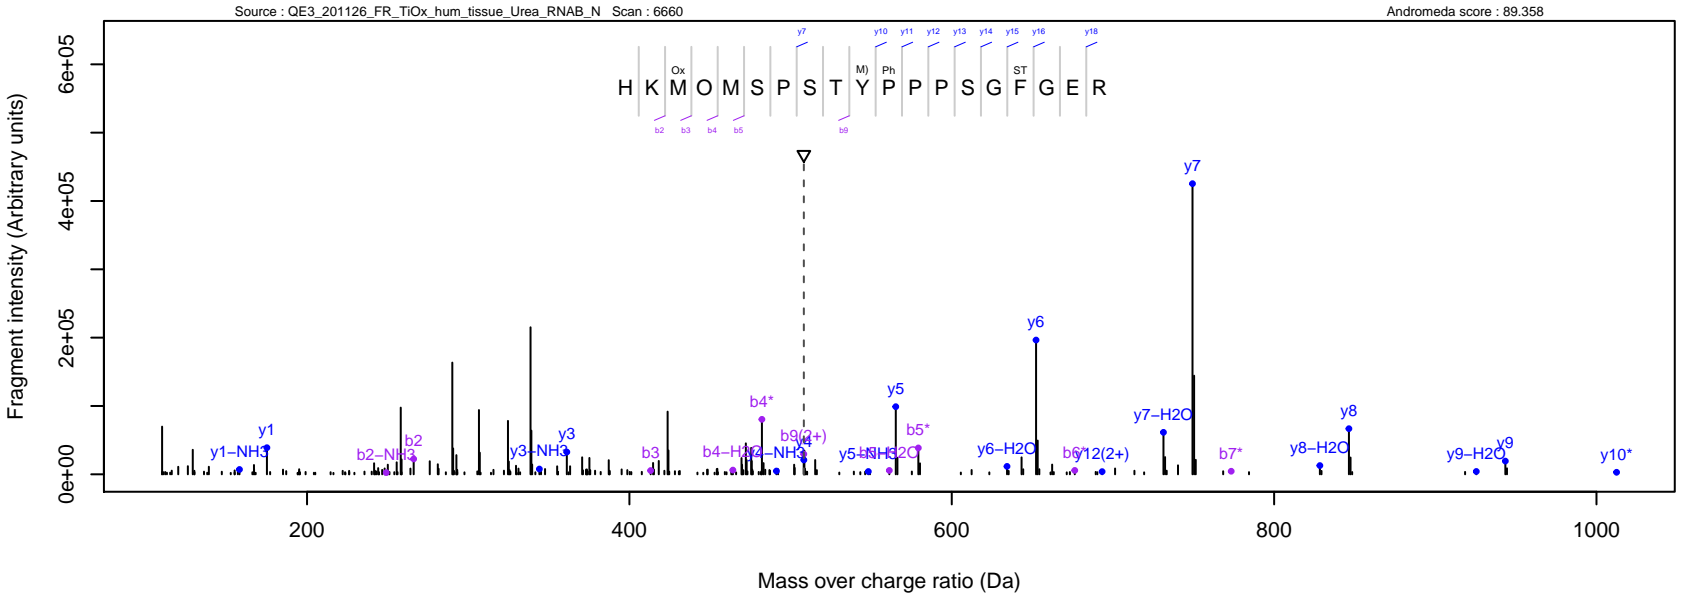

### HGS(Phospho (STY))FVNKPTR-3+

Source : QE3\_201126\_FR\_TIOx\_hum\_tissue\_Urea\_RNAB\_H Scan : 5160

Andromeda score : 89.301

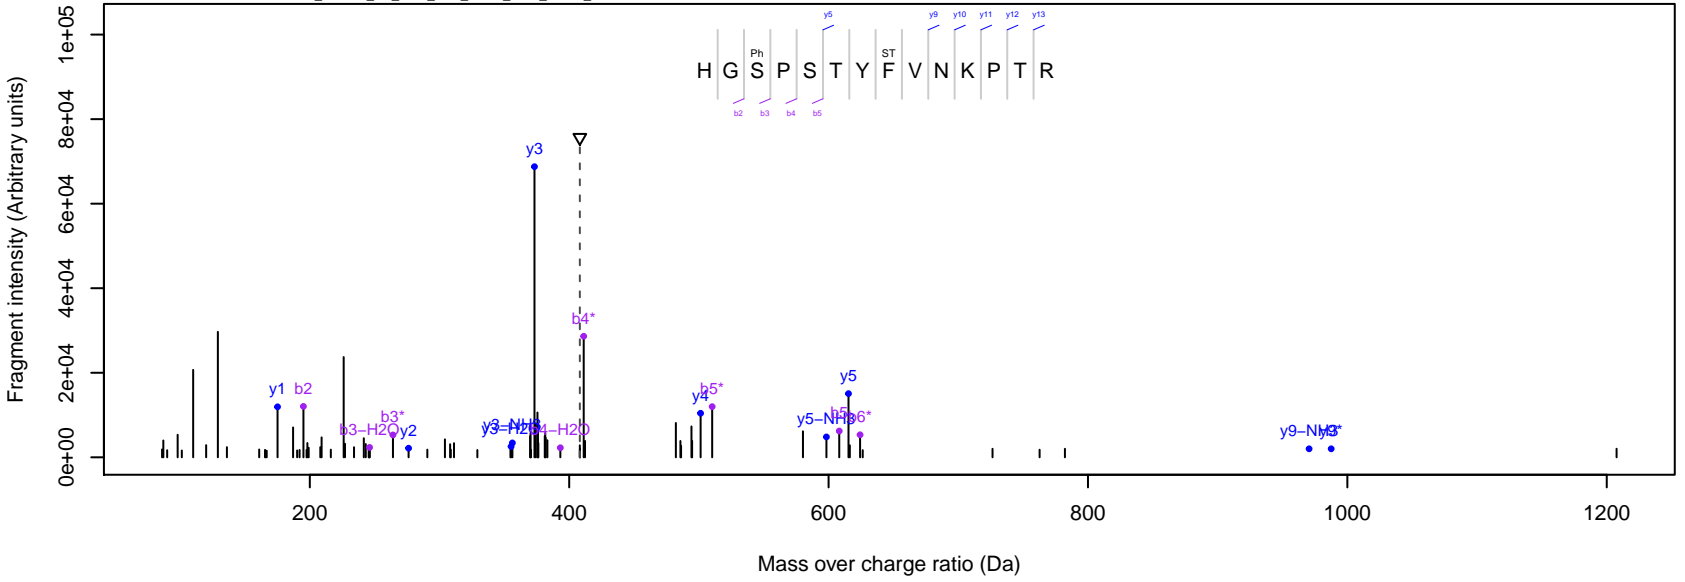

### NLNLVS(Phospho (STY))STASIK-2+

Source : QE3\_201126\_FR\_TIOx\_hum\_tissue\_Urea\_RNAB\_H Scan : 29347

Andromeda score : 89.301

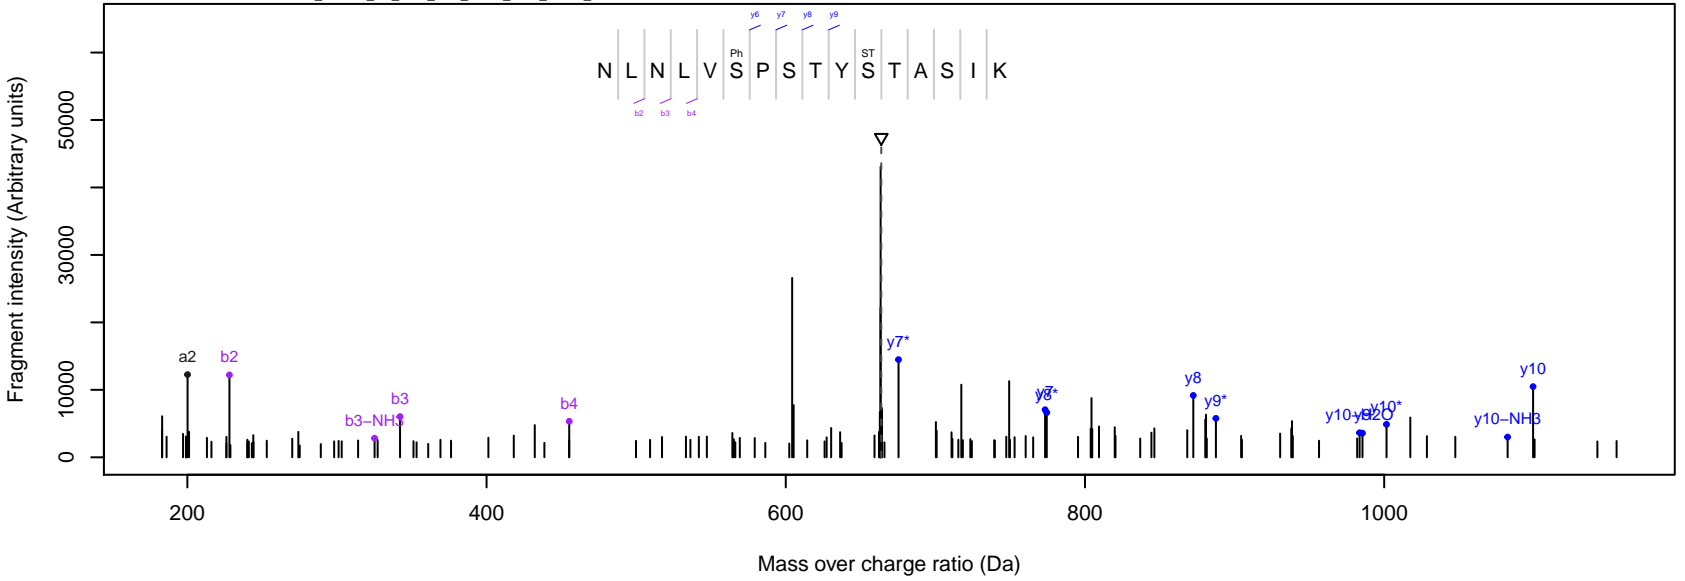

### (Acetyl (Protein N-term))S(Phospho (STY))ASS(Phospho (STY))LLEQRPK-2+

Source : QE3\_201126\_FR\_TIOx\_hum\_tissue\_Urea\_RNAB\_H Scan : 34736

Andromeda score : 89.301

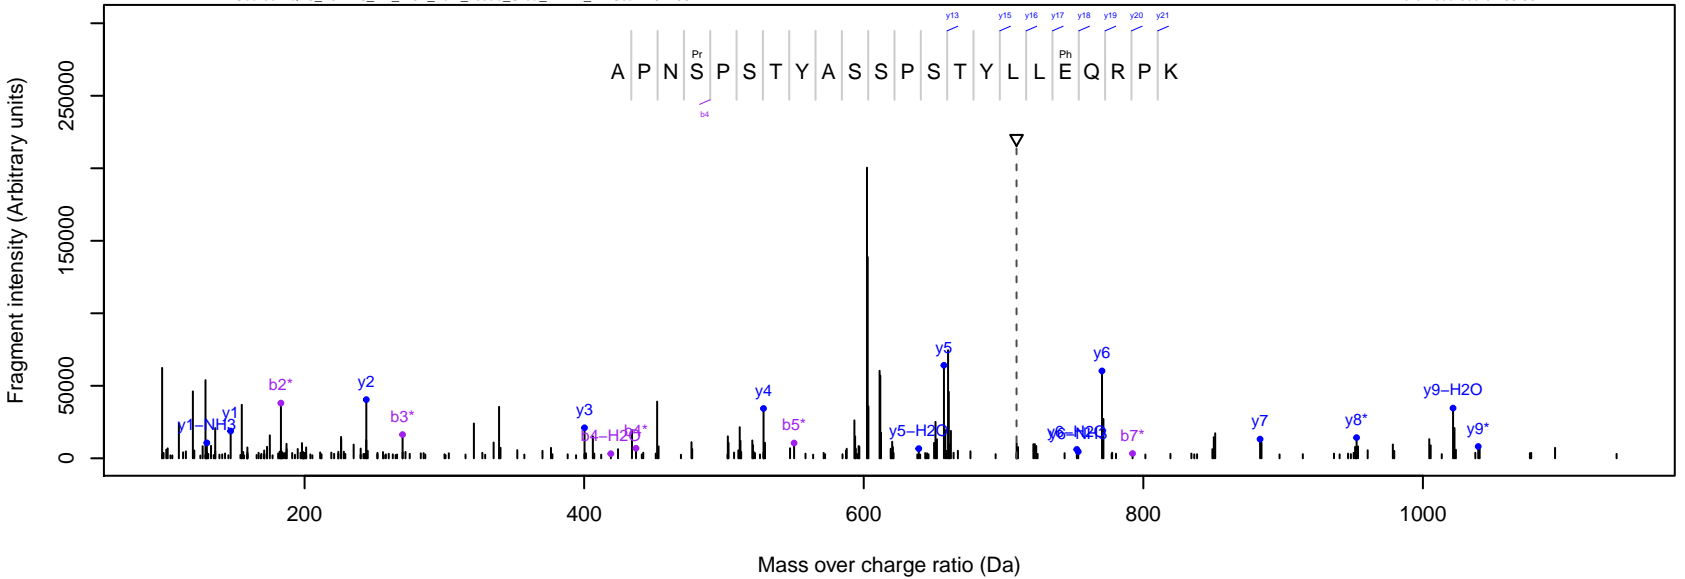

S(Phospho (STY))SPPLPPPAEER-2+

Source : QE3\_201126\_FR\_TiOx\_hum\_tissue\_Urea\_RNAB\_H Scan : 19150

Andromeda score : 89.301

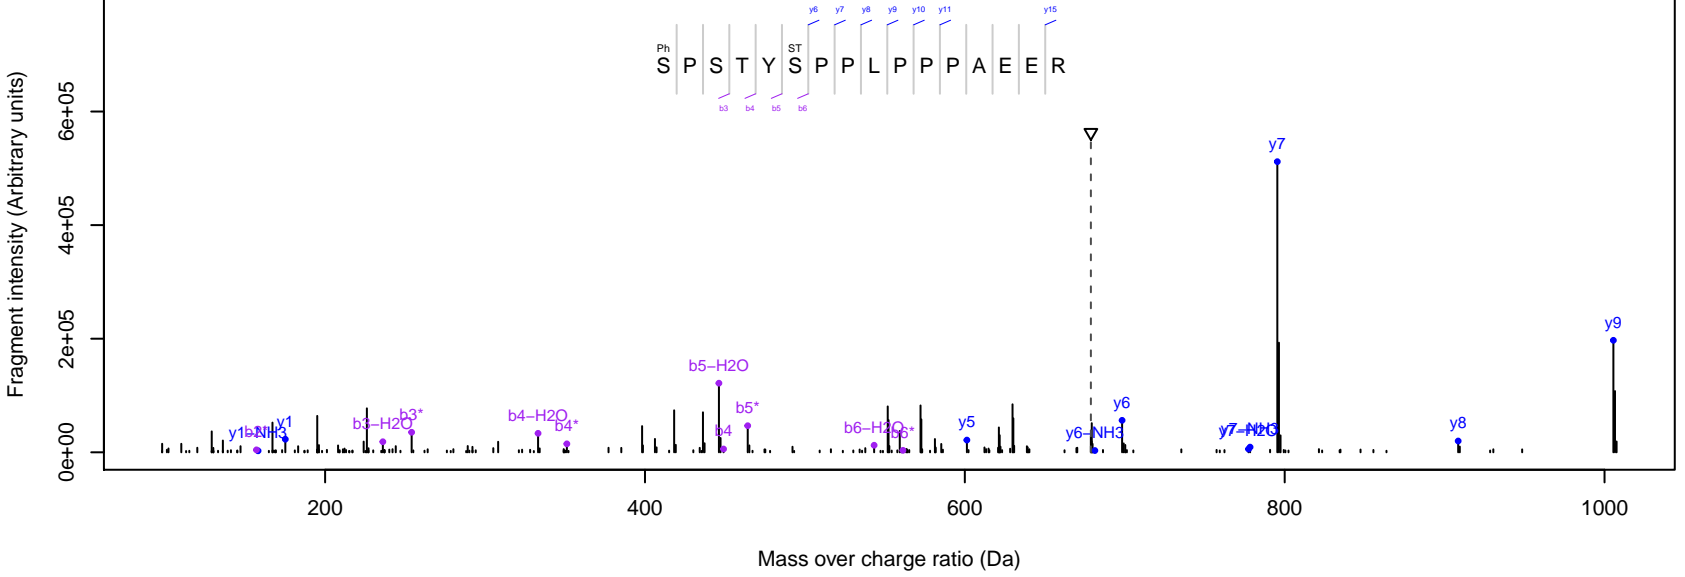

SRS(Phospho (STY))RS(Phospho (STY))PHEAGFCVYLK-3+

Source : QE3\_201126\_FR\_TiOx\_hum\_tissue\_Urea\_RNAB\_B Scan : 20373

Andromeda score : 89.282

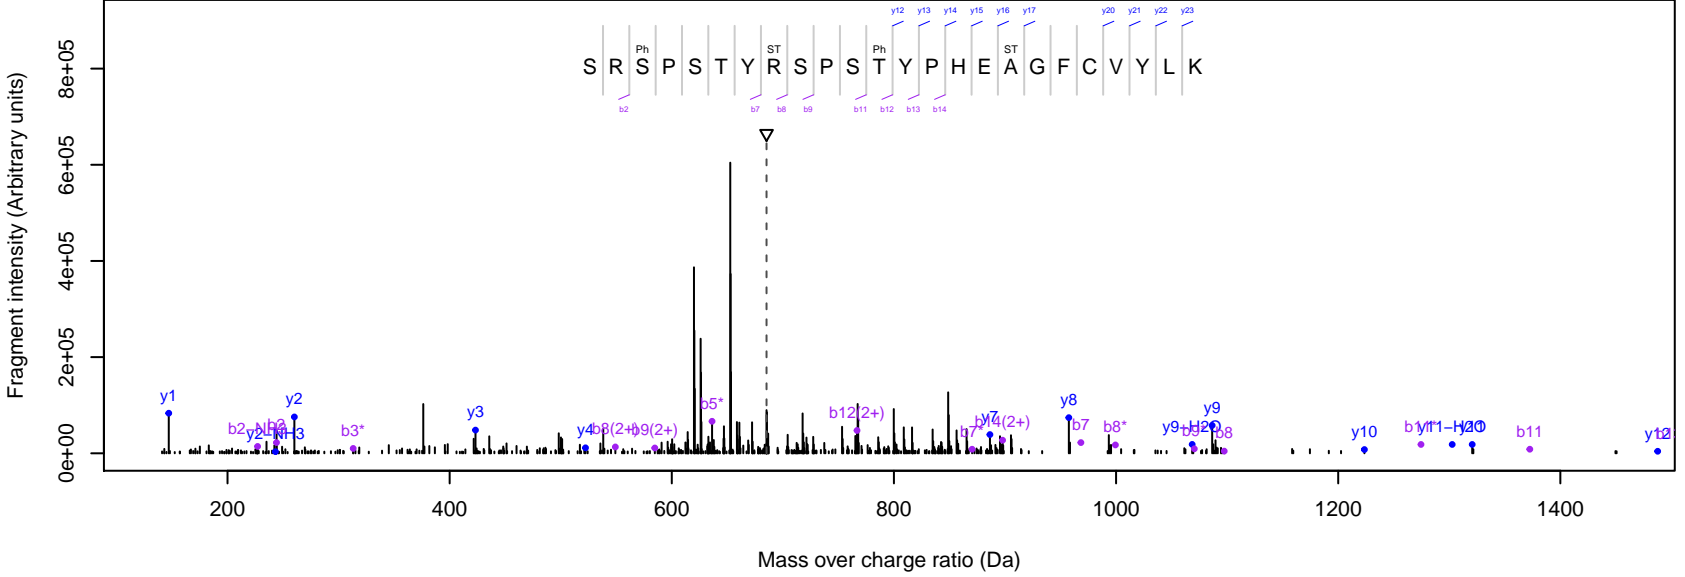

VANEPVLAFTQGS(Phospho (STY))PERDALQK-3+

Source : QE3\_201126\_FR\_TiOx\_hum\_tissue\_Urea\_RNAB\_N Scan : 36830

Andromeda score : 89.272

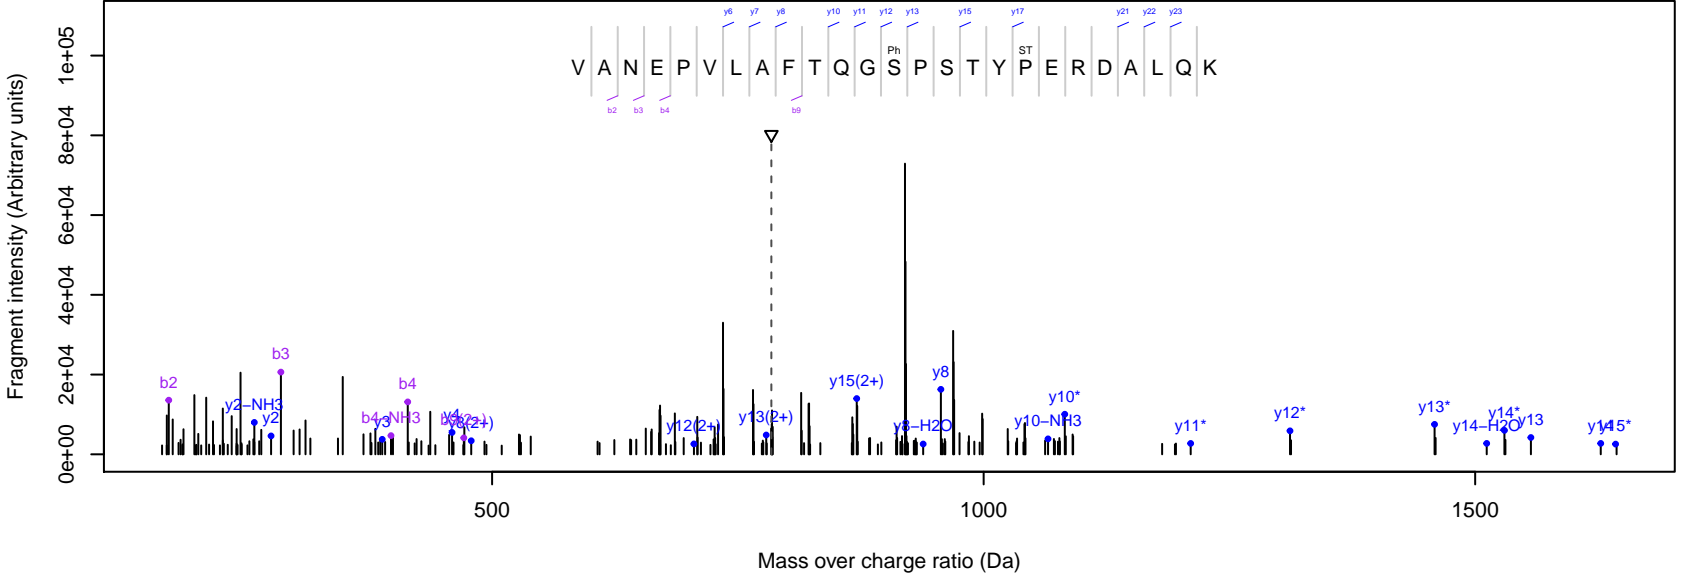



S(Phospho (STY))FDYNYRR-2+

Source : QE3\_201126\_FR\_TiOx\_hum\_tissue\_Urea\_RNAB\_H Scan : 15549

Andromeda score : 89.247

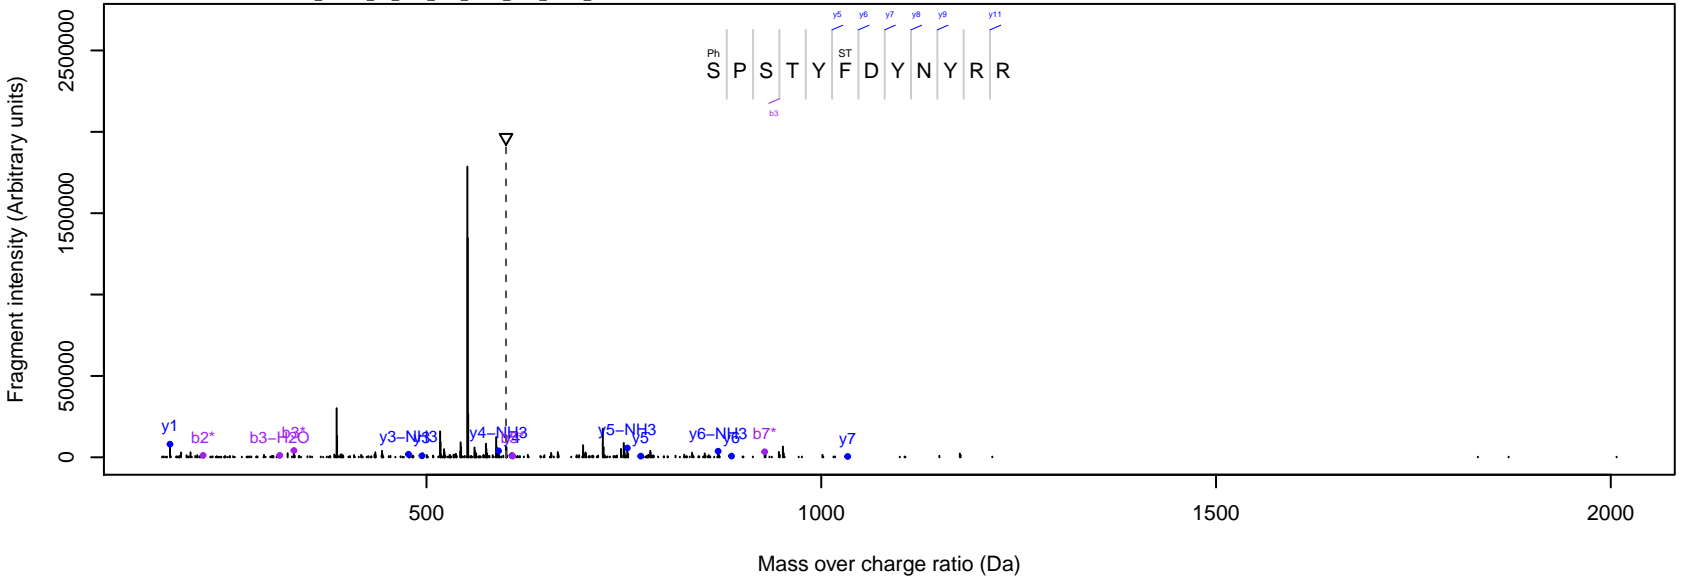

ETPSSSPAS(Phospho (STY))PQETR-2+

Source : QE3\_201126\_FR\_TiOx\_hum\_tissue\_Urea\_RNAB\_H Scan : 7608

Andromeda score : 89.232

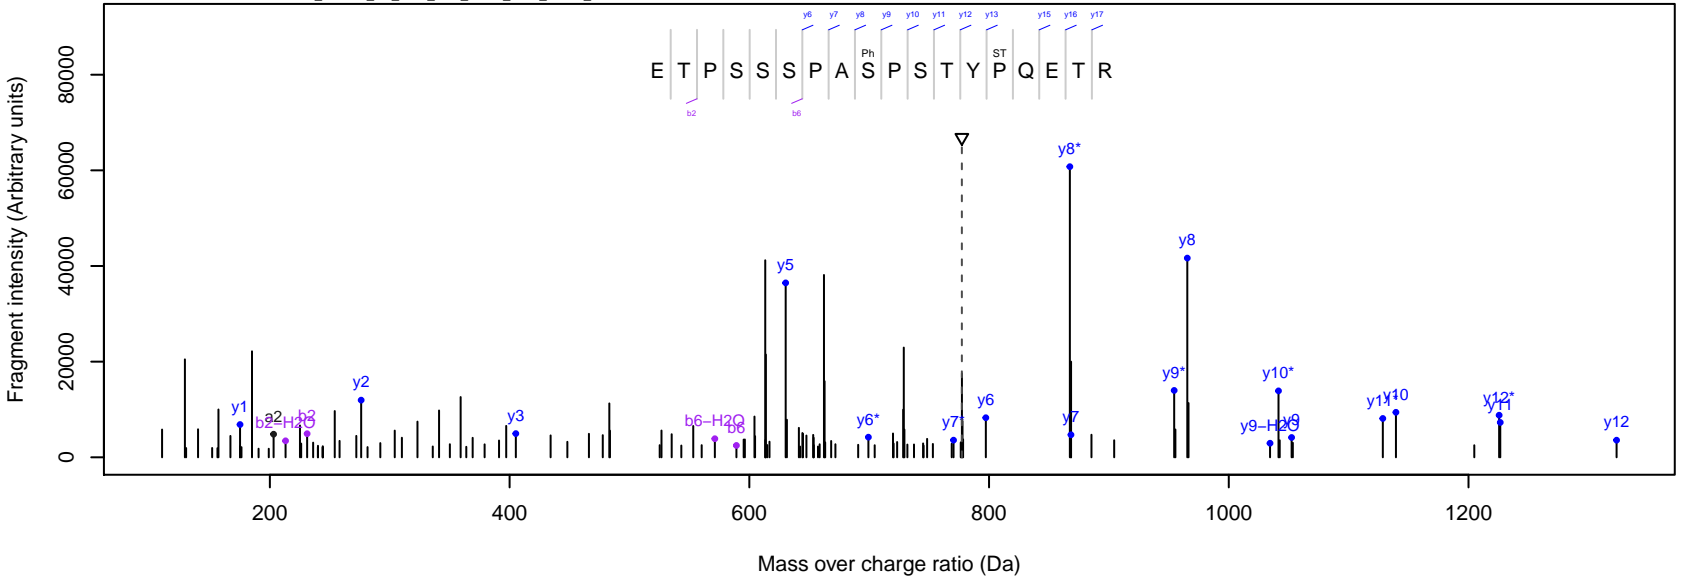

SSWHQSS(Phospho (STY))FHSTR-3+

Source : QE3\_201126\_FR\_TiOx\_hum\_tissue\_Urea\_RNAB\_H Scan : 7871

Andromeda score : 89.232

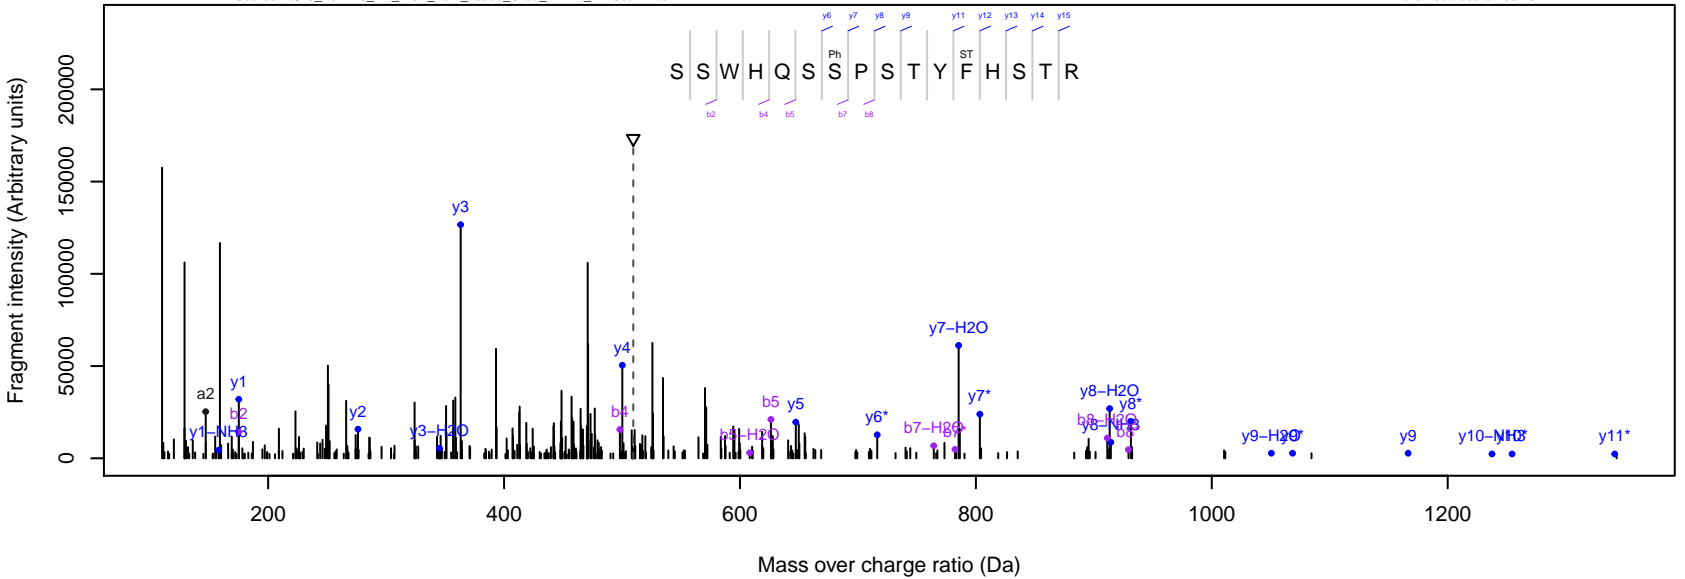

ELGS(Phospho (STY))TEDIYLASR-2+

Source : QE3\_201126\_FR\_TiOx\_hum\_tissue\_Urea\_RNAB\_H Scan : 36710

Andromeda score : 89.231

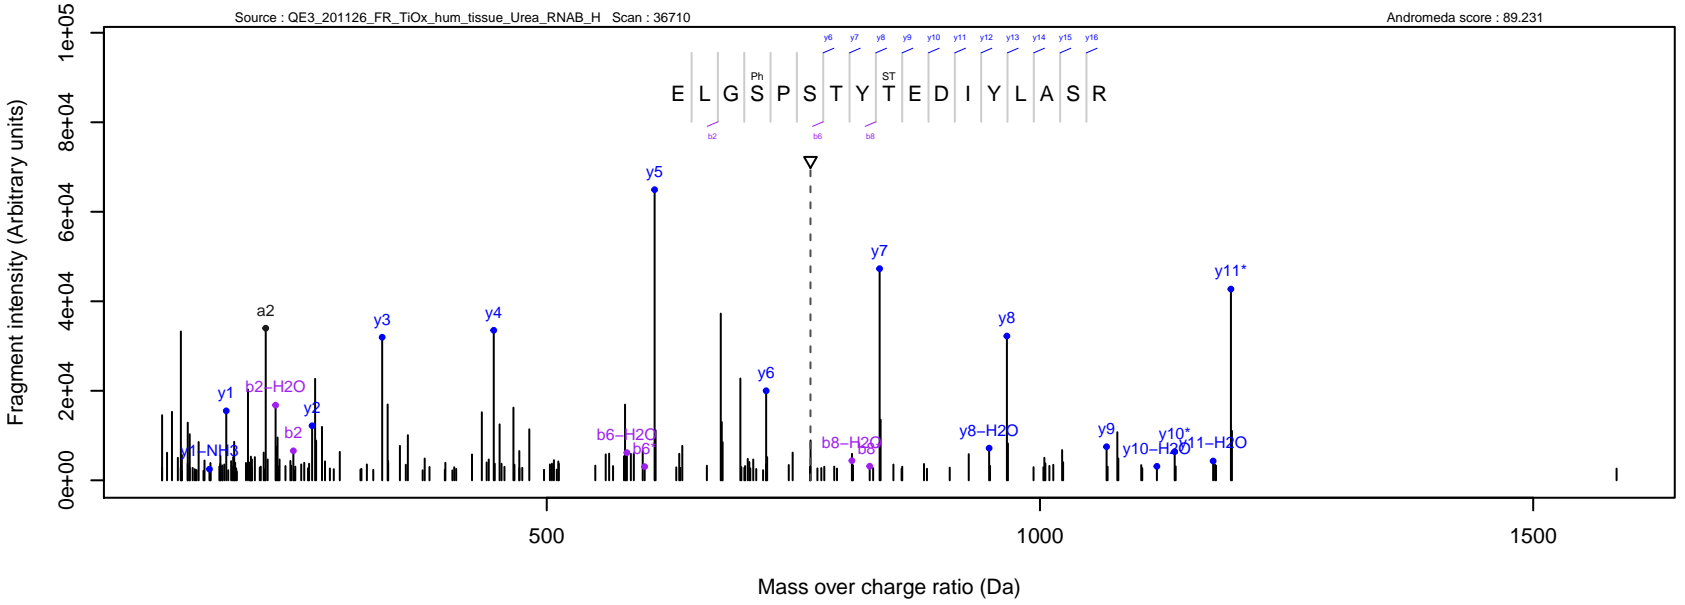

EMS(Phospho (STY))MDESKQVETK-2+

Source : QE3\_201126\_FR\_TiOx\_hum\_tissue\_Urea\_RNAB\_B Scan : 11474

Andromeda score : 89.231

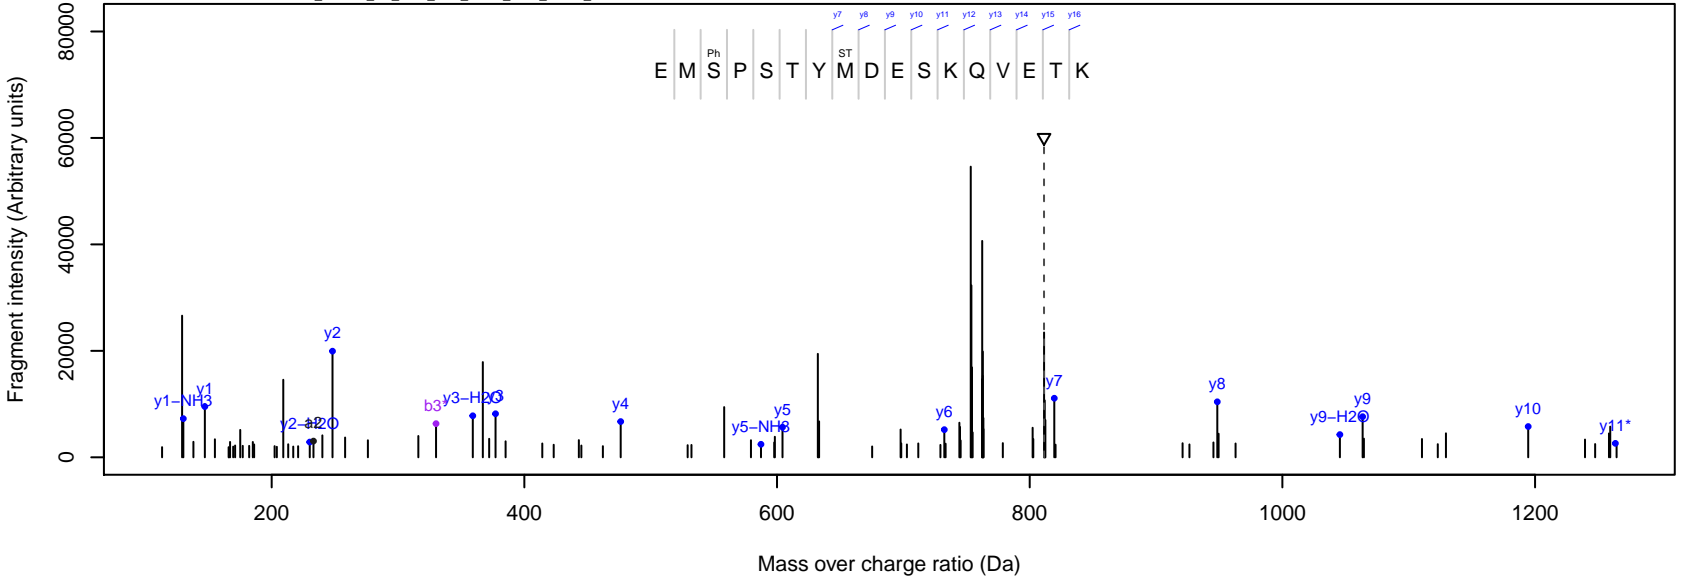

SSFFSDRGS(Phospho (STY))GSR-2+

Source : QE3\_201126\_FR\_TiOx\_hum\_tissue\_Urea\_RNAB\_N Scan : 13978

Andromeda score : 89.231

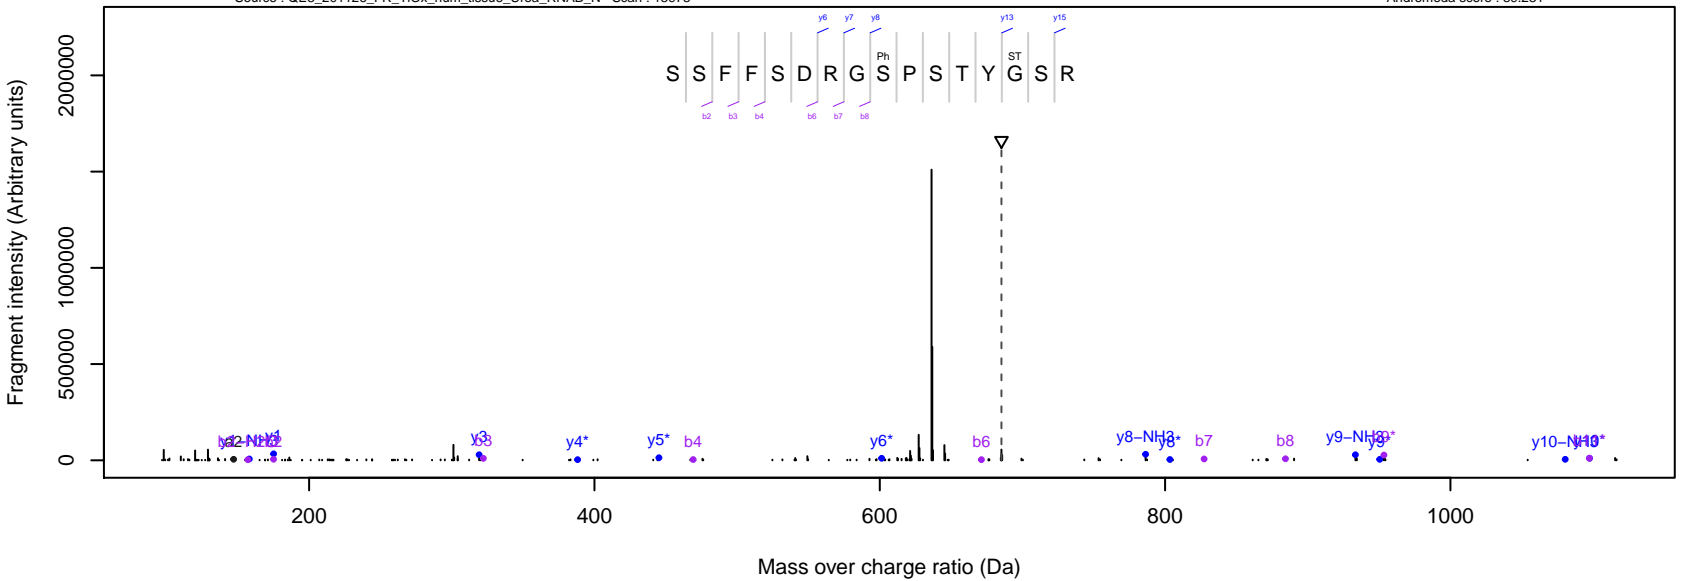

WPTVDAS(Phospho (STY))YGGGR-2+

Source : QE3\_201126\_FR\_TiOx\_hum\_tissue\_Urea\_RNAB\_H Scan : 38727

Andromeda score : 89.231

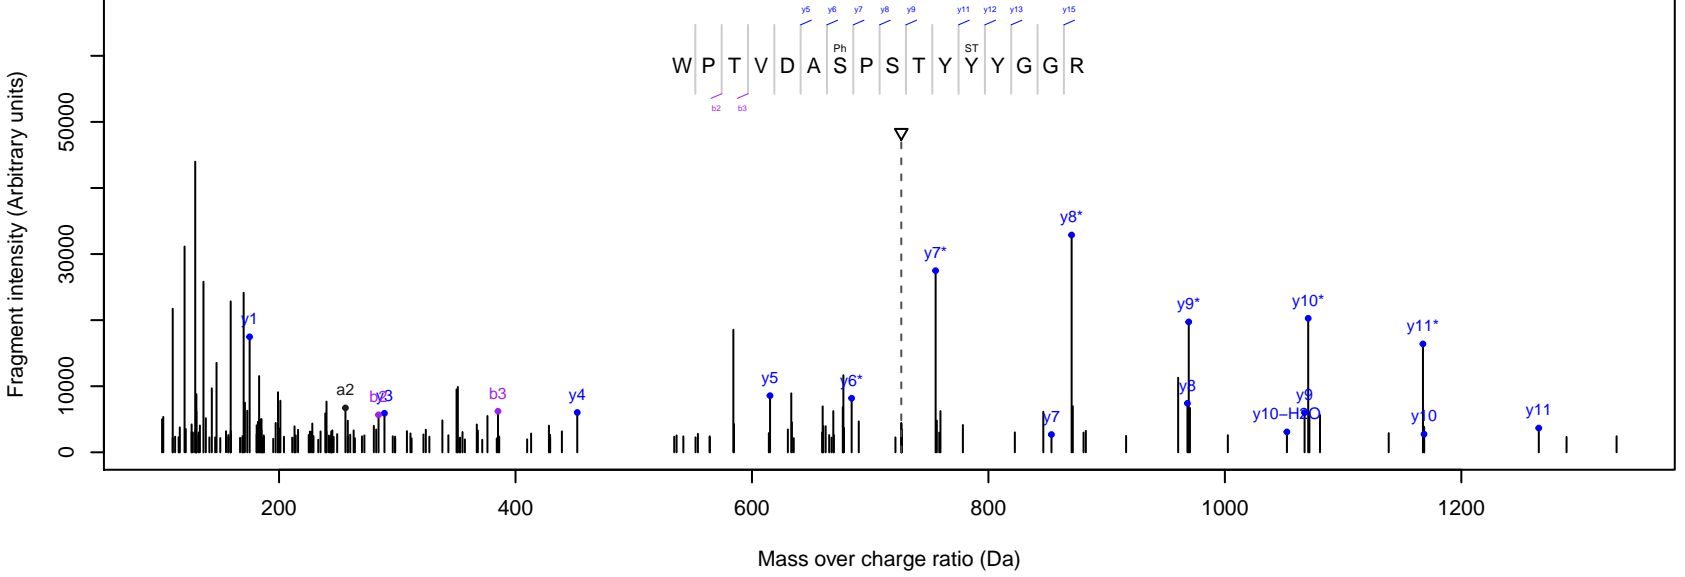

RGS(Phospho (STY))PSAAFTFPDITDFGK-3+

Source : QE3\_201126\_FR\_TiOx\_hum\_tissue\_Urea\_RNAB\_B Scan : 40413

Andromeda score : 89.201

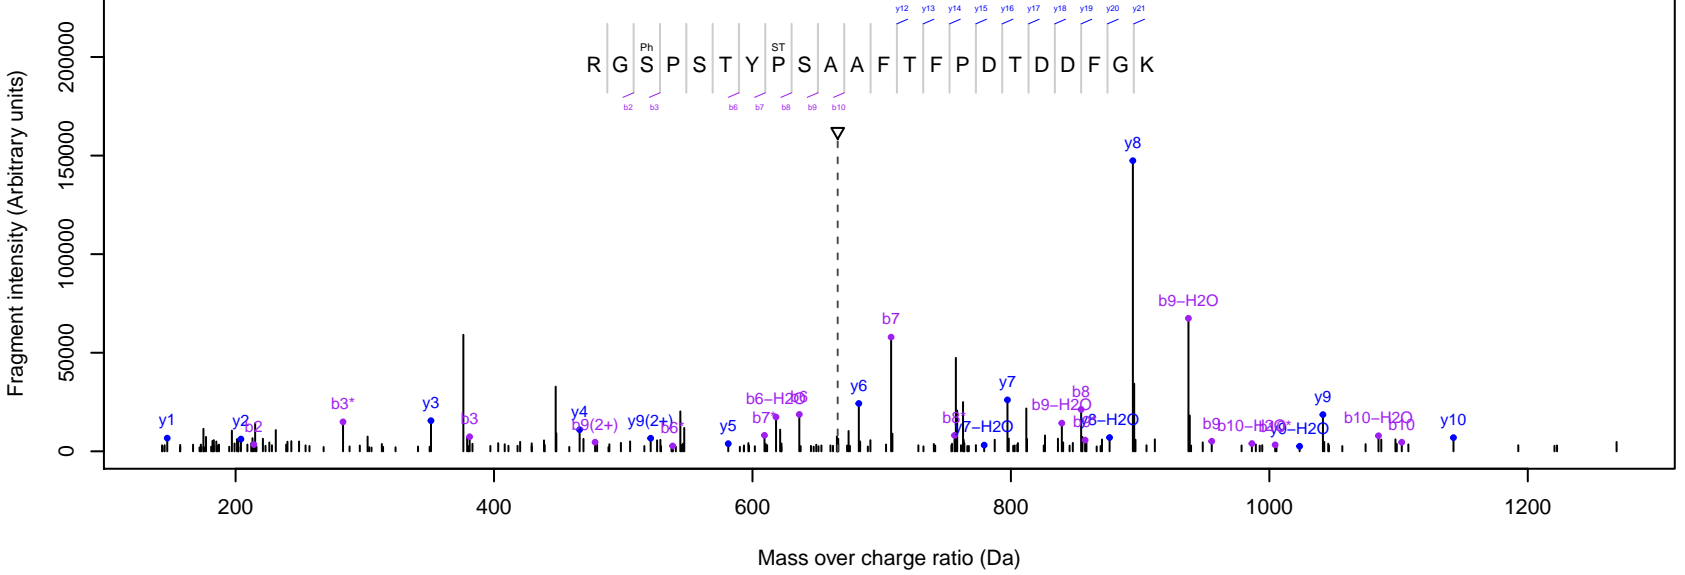

DHS(Phospho (STY))SQS(Phospho (STY))EEEEVEGEKEVEALKK-4+

Source : QE3\_201126\_FR\_TiOx\_hum\_tissue\_Urea\_RNAB\_H Scan : 28731

Andromeda score : 89.181

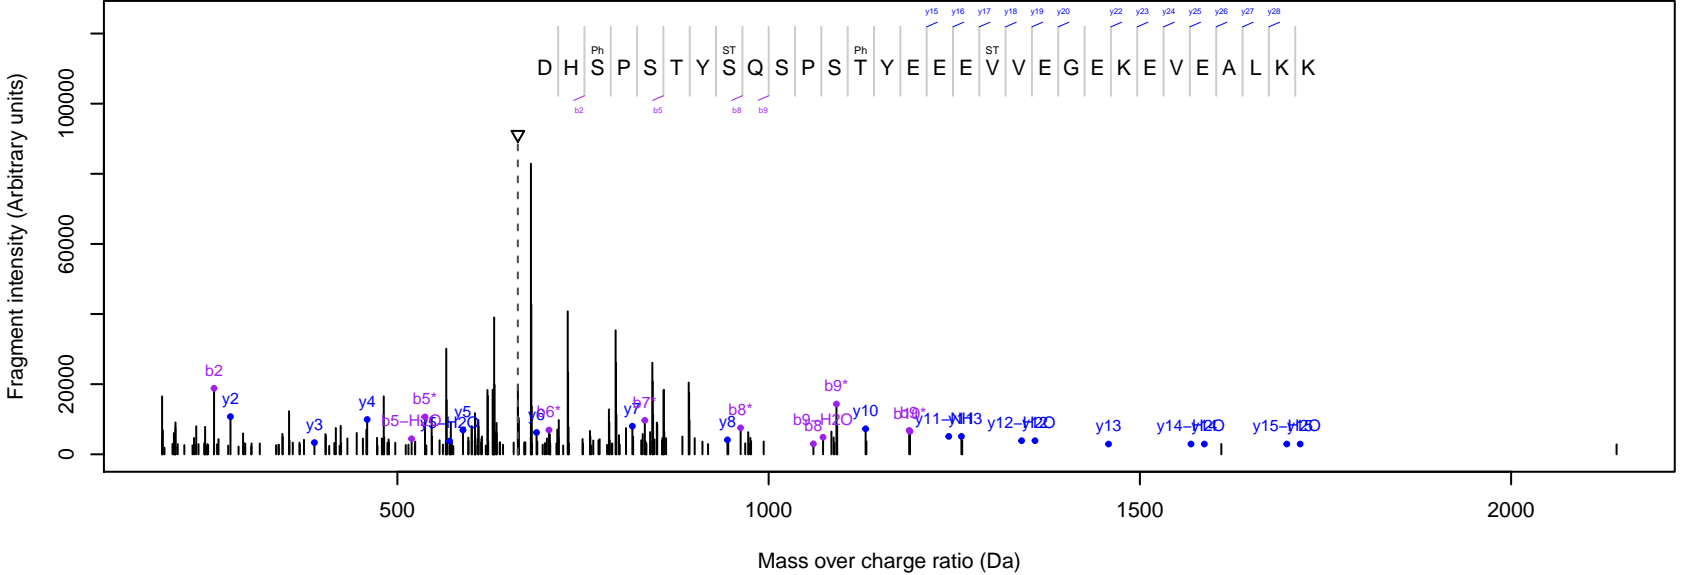

KQS(Phospho (STY))SEGIPVAQPSVMDDIEVWLR-3+

Source : QE3\_201126\_FR\_TiOx\_hum\_tissue\_Urea\_RNAB\_B Scan : 60866

Andromeda score : 89.181

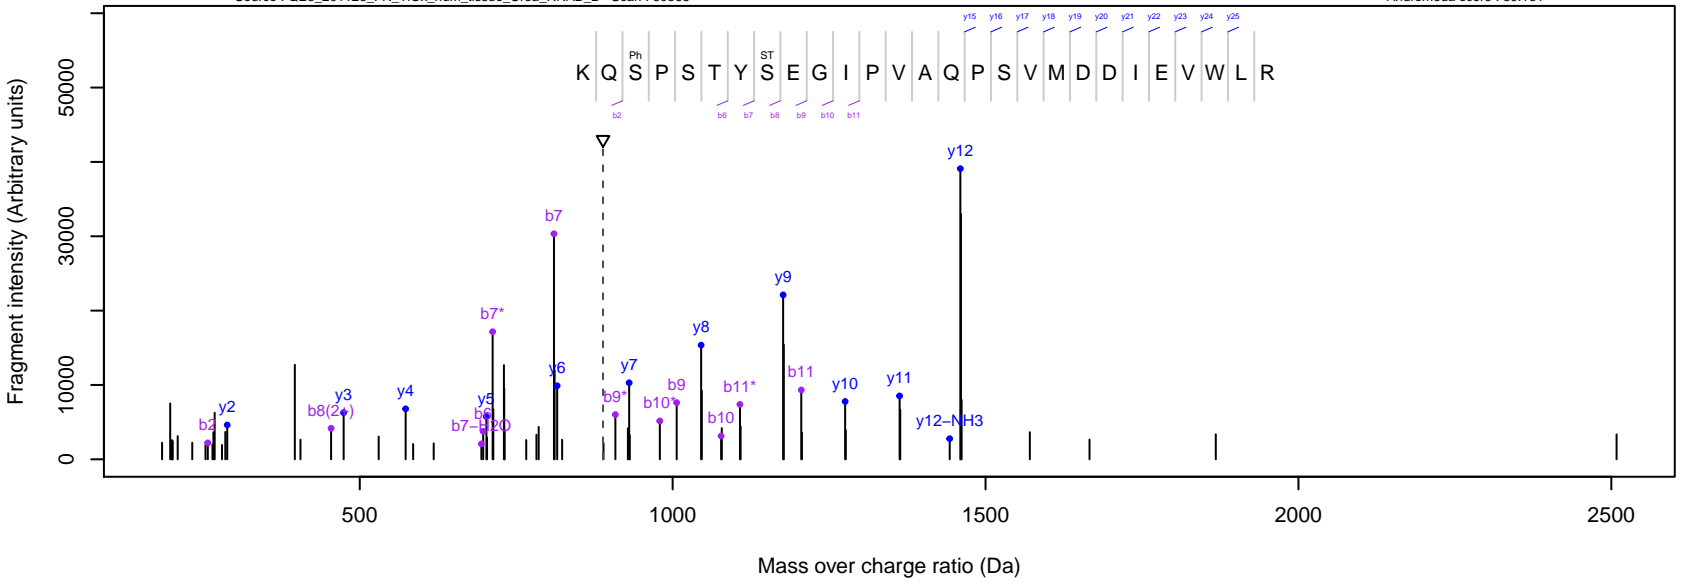

ADRPSSLPLDFNDEFS(Phospho (STY))DLDGVVQQR-3+

Source : QE3\_201126\_FR\_TiOx\_hum\_tissue\_Urea\_RNAB\_H Scan : 55612

Andromeda score : 89.149

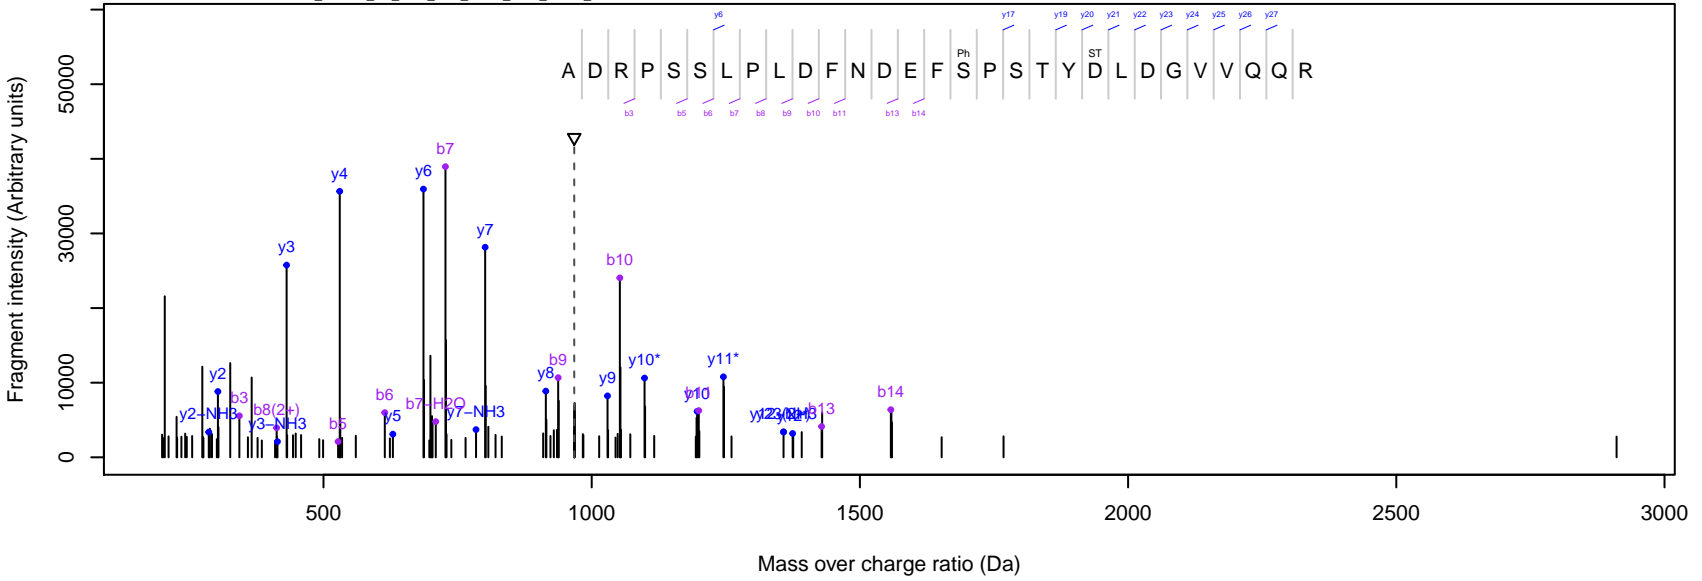

S(Phospho (STY))LSPEDAESLVSPSPDTANQEPTPK-3+

Source : QE3\_201126\_FR\_TiOx\_hum\_tissue\_Urea\_RNAB\_H Scan : 51209

Andromeda score : 89.145

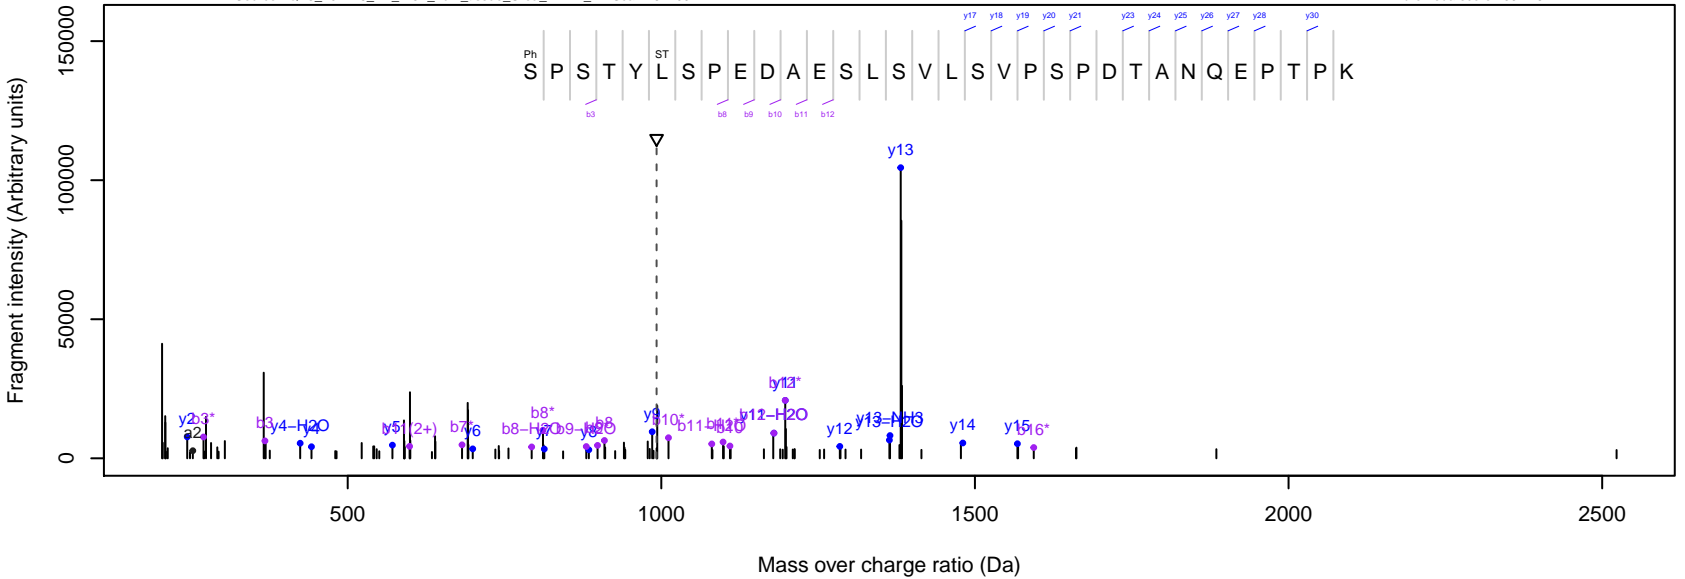

VVAPT(Phospho (STY))ISSPVCQEQLVEAGR-3+

Source : QE3\_201126\_FR\_TiOx\_hum\_tissue\_Urea\_RNAB\_N Scan : 38286

Andromeda score : 89.107

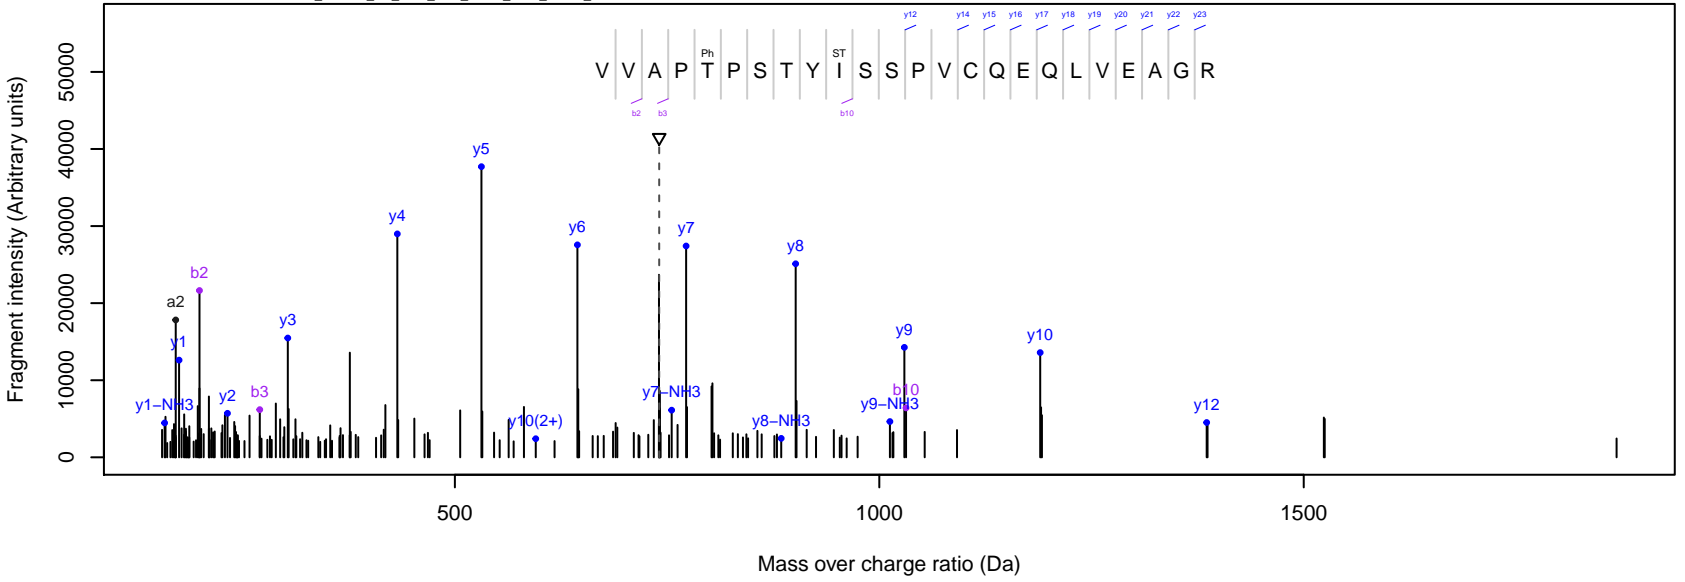

NRS(Phospho (STY))FSLK-2+

Source : QE3\_201126\_FR\_TiOx\_hum\_tissue\_Urea\_RNAB\_N Scan : 10548

Andromeda score : 89.08

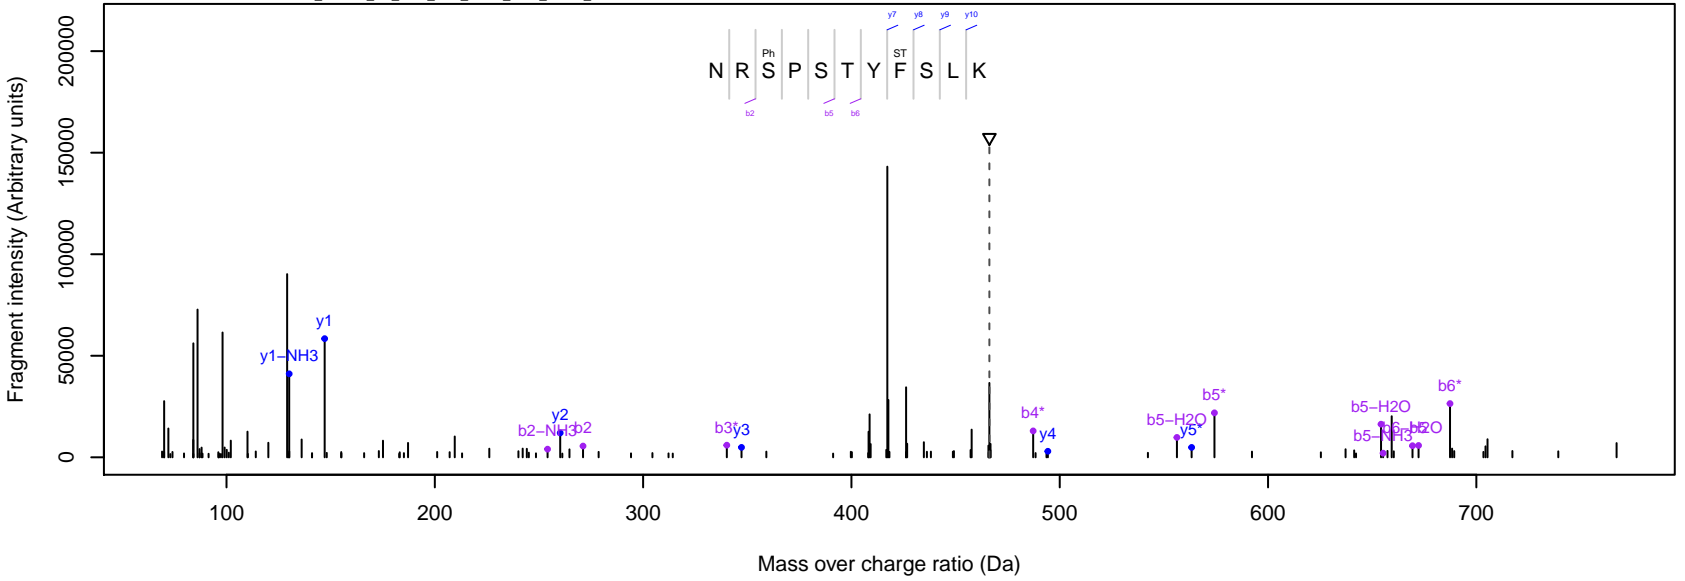

TQS(Phospho (STY))PGTDLPLPYLDWDYVR-2+

Source : QE3\_201126\_FR\_TiOx\_hum\_tissue\_Urea\_RNAB\_H Scan : 62025

Andromeda score : 89.049

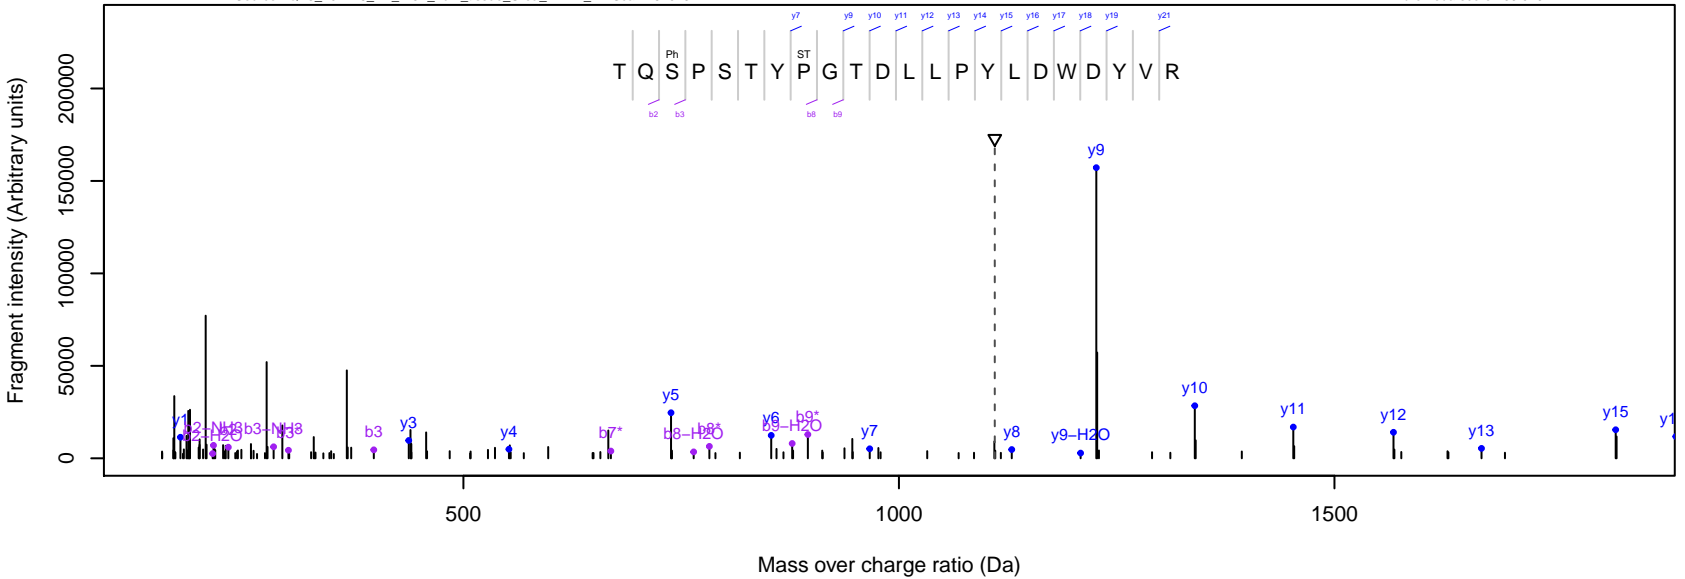

**GG(SPhospho(STY))PQM(Oxidation(M))DDIKVFQNEVLGTLQR-3+**

Source : QE3\_201126\_FR\_TiOx\_hum\_tissue\_Urea\_RNAB\_N Scan : 53789

Andromeda score : 89.039

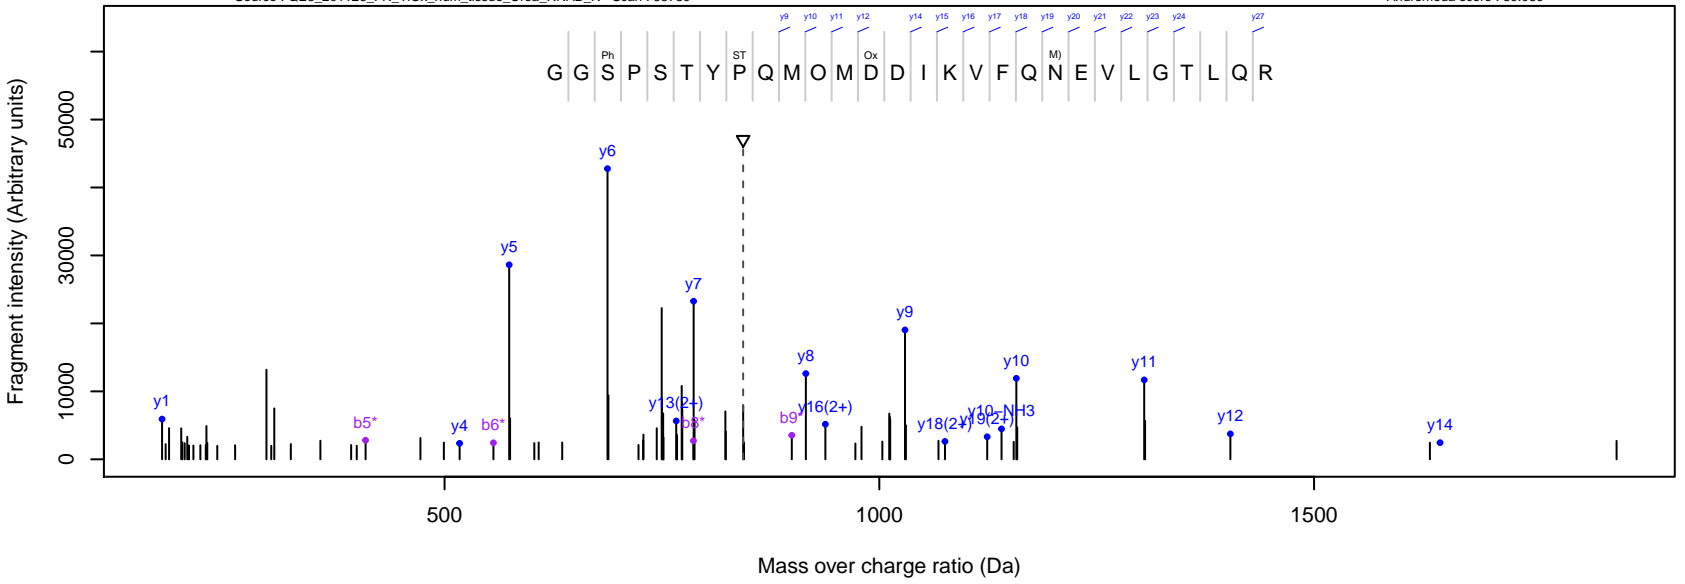

**SRGPKS(Phospho(STY))DDDGFIEIPIEDPAK-3+**

Source : QE3\_201126\_FR\_TiOx\_hum\_tissue\_Urea\_RNAB\_B Scan : 31136

Andromeda score : 89.039

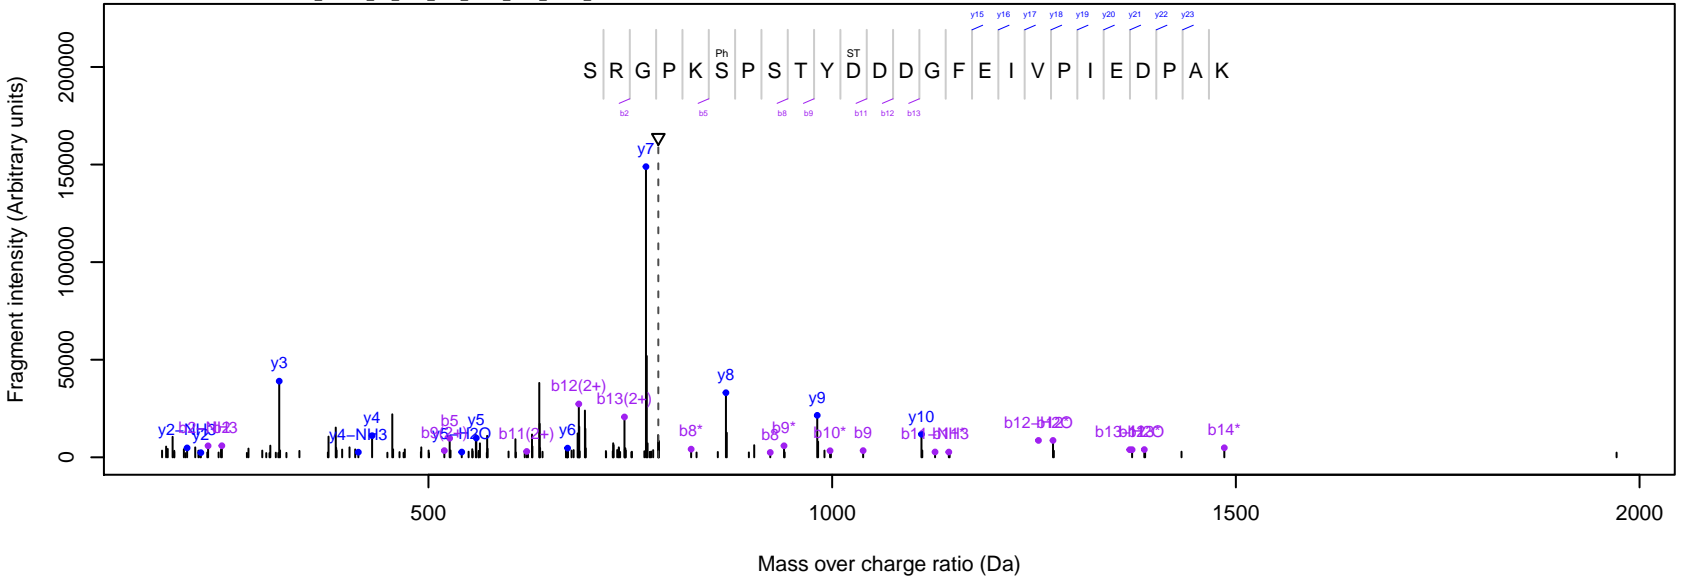

**TM(Oxidation(M))IIS(Phospho(STY))PERLDPFADGGKTPDPK-3+**

Source : QE3\_201126\_FR\_TiOx\_hum\_tissue\_Urea\_RNAB\_H Scan : 38576

Andromeda score : 89.039

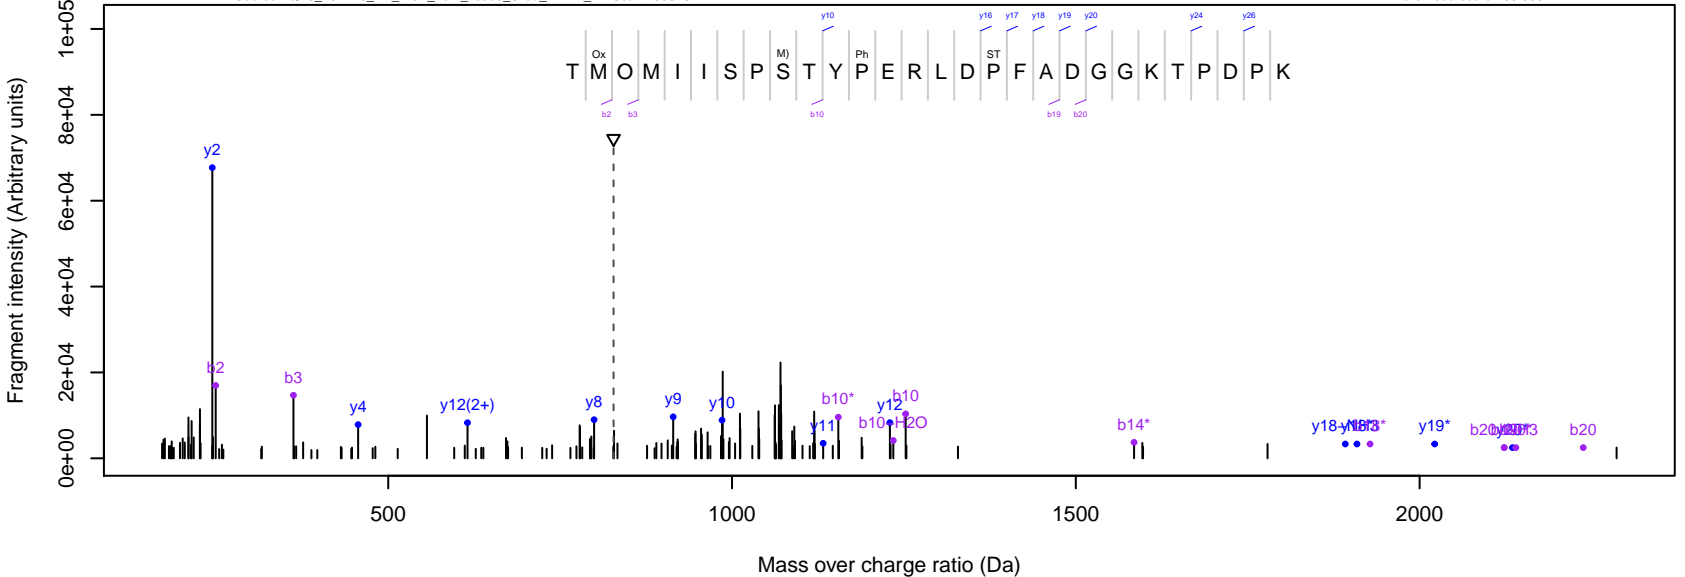

GSYGS(Phospho (STY))DAEEEEYR-2+

Source : QE3\_201126\_FR\_TiOx\_hum\_tissue\_Urea\_RNAB\_B Scan : 17120

Andromeda score : 89.013

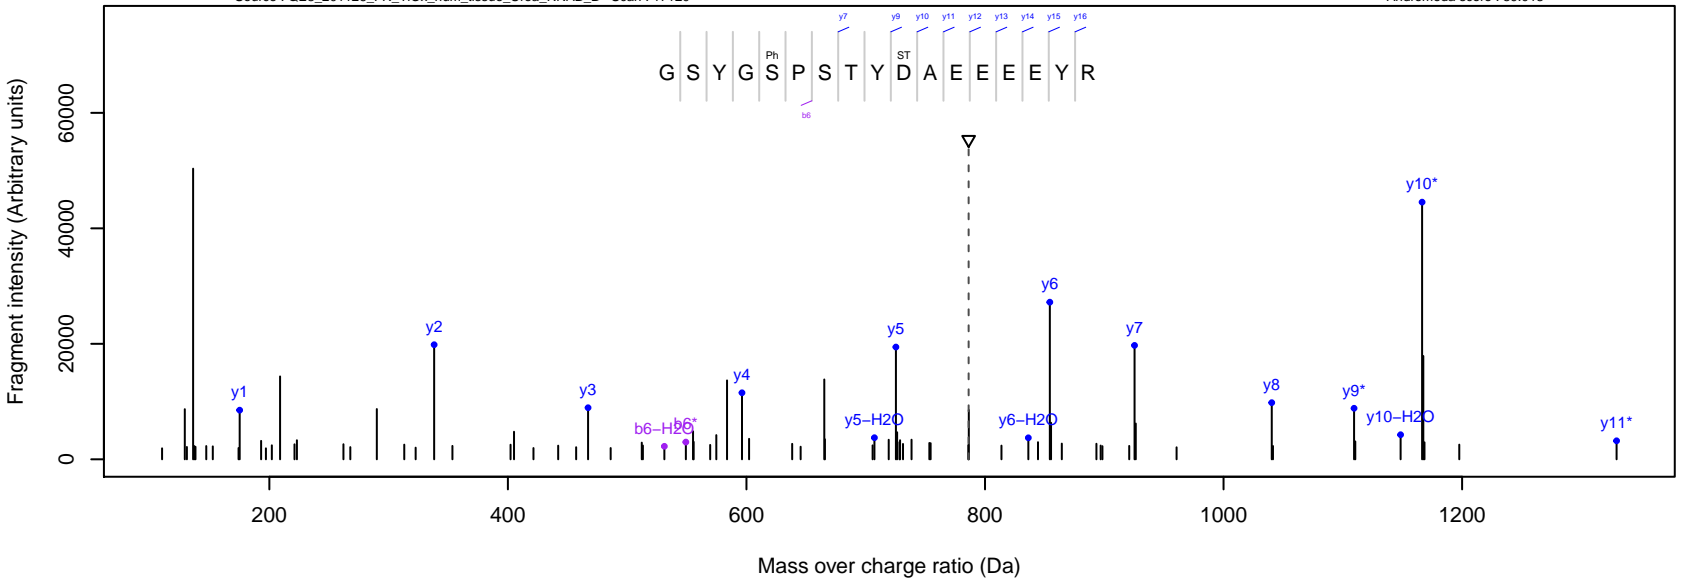

HGLQLGAQS(Phospho (STY))PGR-2+

Source : QE3\_201126\_FR\_TiOx\_hum\_tissue\_Urea\_RNAB\_B Scan : 11986

Andromeda score : 89.013

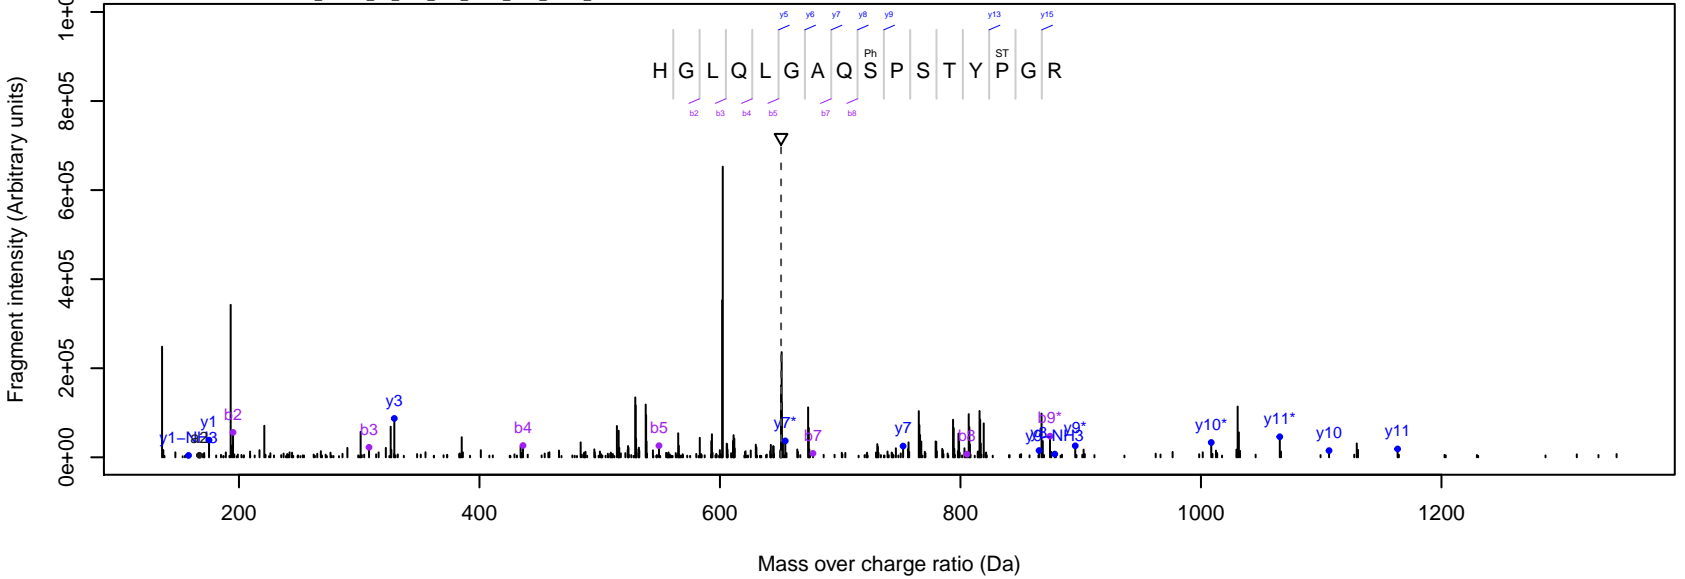

S(Phospho (STY))NSISQIPSL EEMQQLR-2+

Source : QE3\_201126\_FR\_TiOx\_hum\_tissue\_Urea\_RNAB\_N Scan : 51270

Andromeda score : 88.992

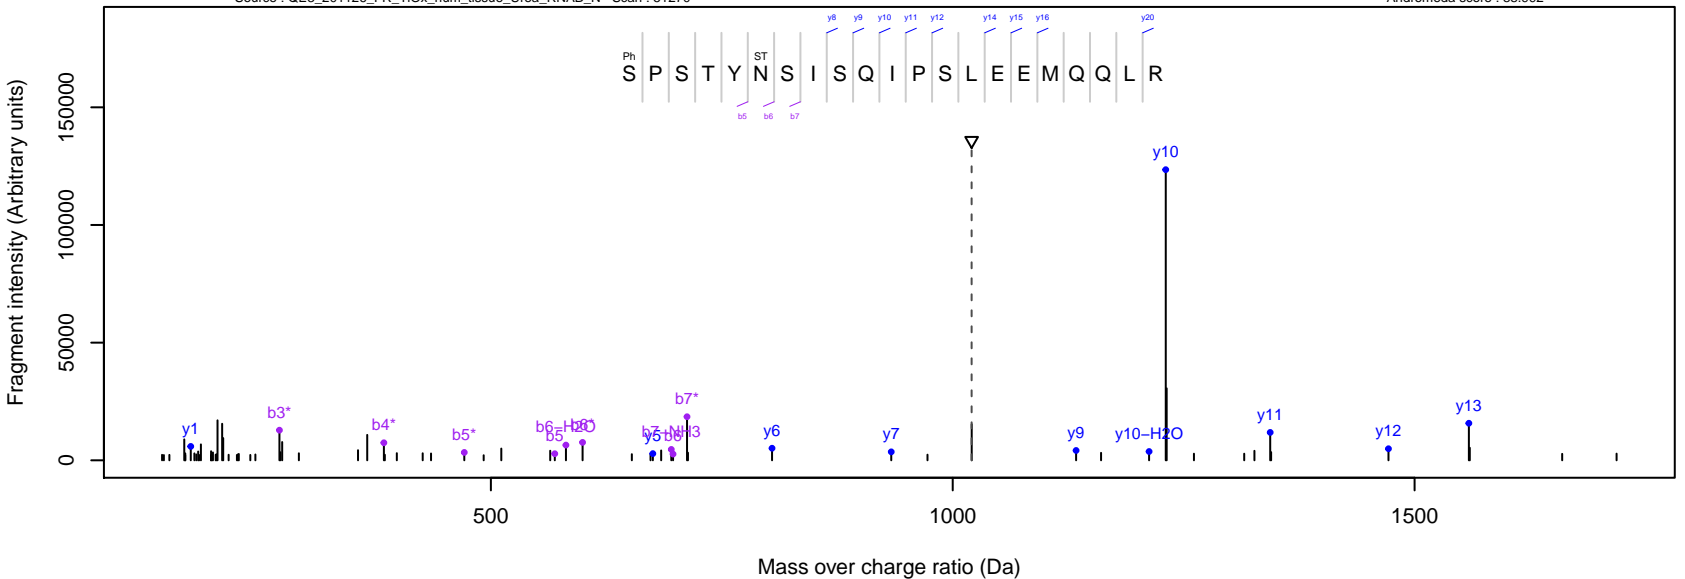

DTM(Oxidation (M))DLESS(Phospho (STY))SSEEEKEDDDALVPDSK-3+

Source : QE3\_201126\_FR\_TIOx\_hum\_tissue\_Urea\_RNAB\_H Scan : 25580

Andromeda score : 88.976

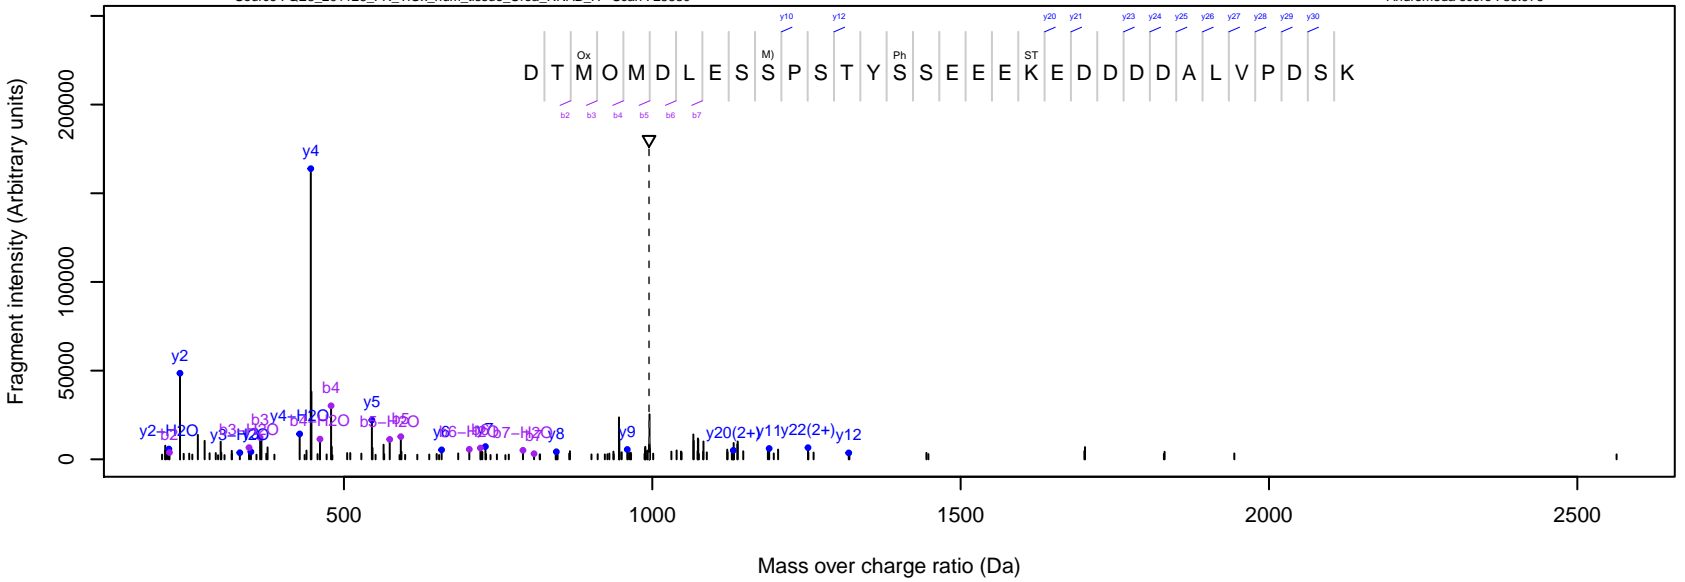

SGS(Phospho (STY))DAGEARPPPTASPR-3+

Source : QE3\_201126\_FR\_TIOx\_hum\_tissue\_Urea\_RNAB\_B Scan : 10433

Andromeda score : 88.945

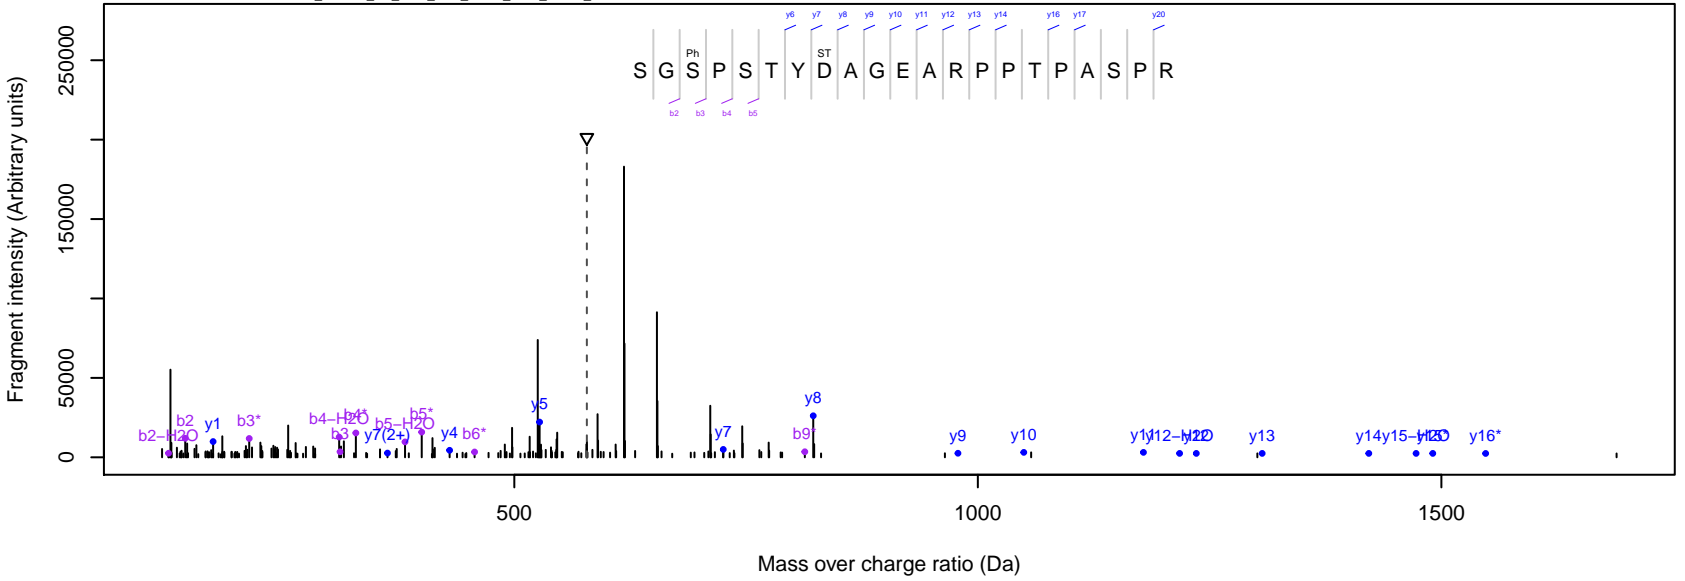

VEMYS(Phospho (STY))GS(Phospho (STY))DDDDFNKLPKK-3+

Source : QE3\_201126\_FR\_TIOx\_hum\_tissue\_Urea\_RNAB\_N Scan : 25408

Andromeda score : 88.872

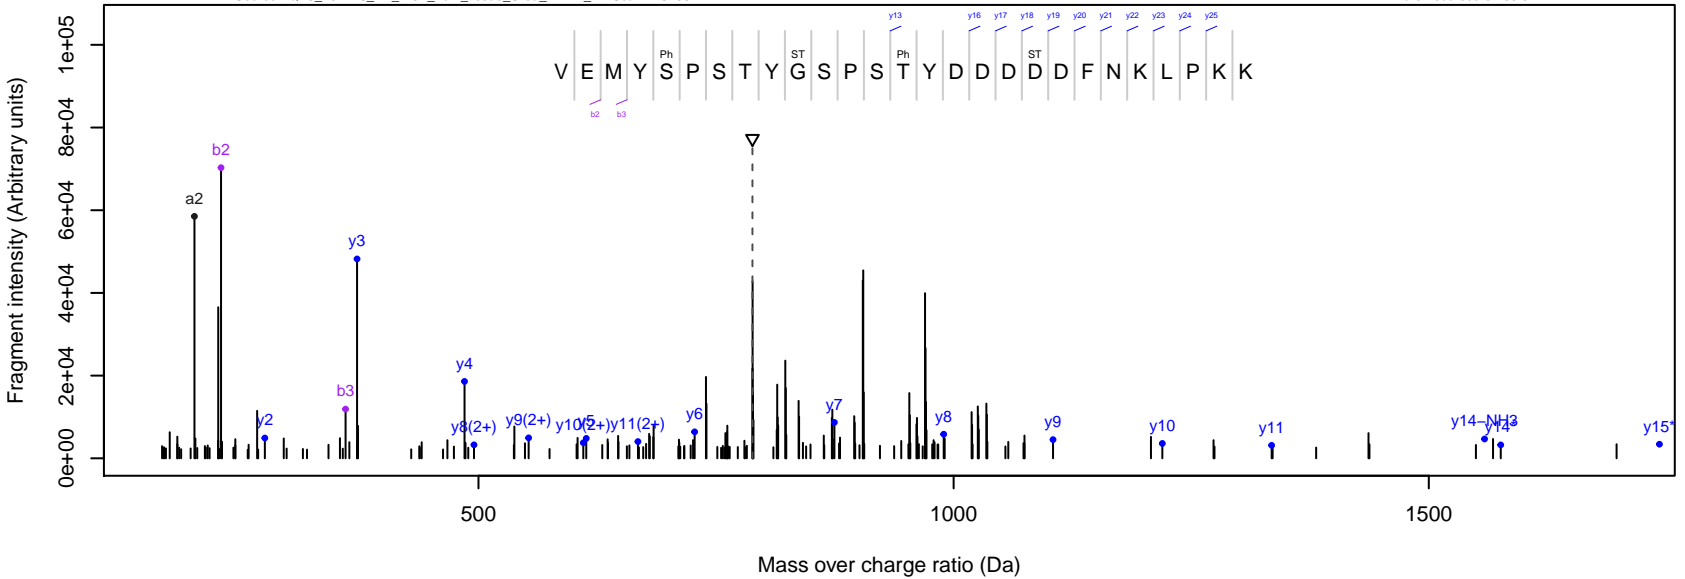



(Acetyl (Protein N-term))AGGEAGVTLGQPHLS P STY RQDLTLDVTK-3+

Source : QE3\_201126\_FR\_TiOx\_hum\_tissue\_Urea\_RNAB\_N Scan : 43030

Andromeda score : 88.842

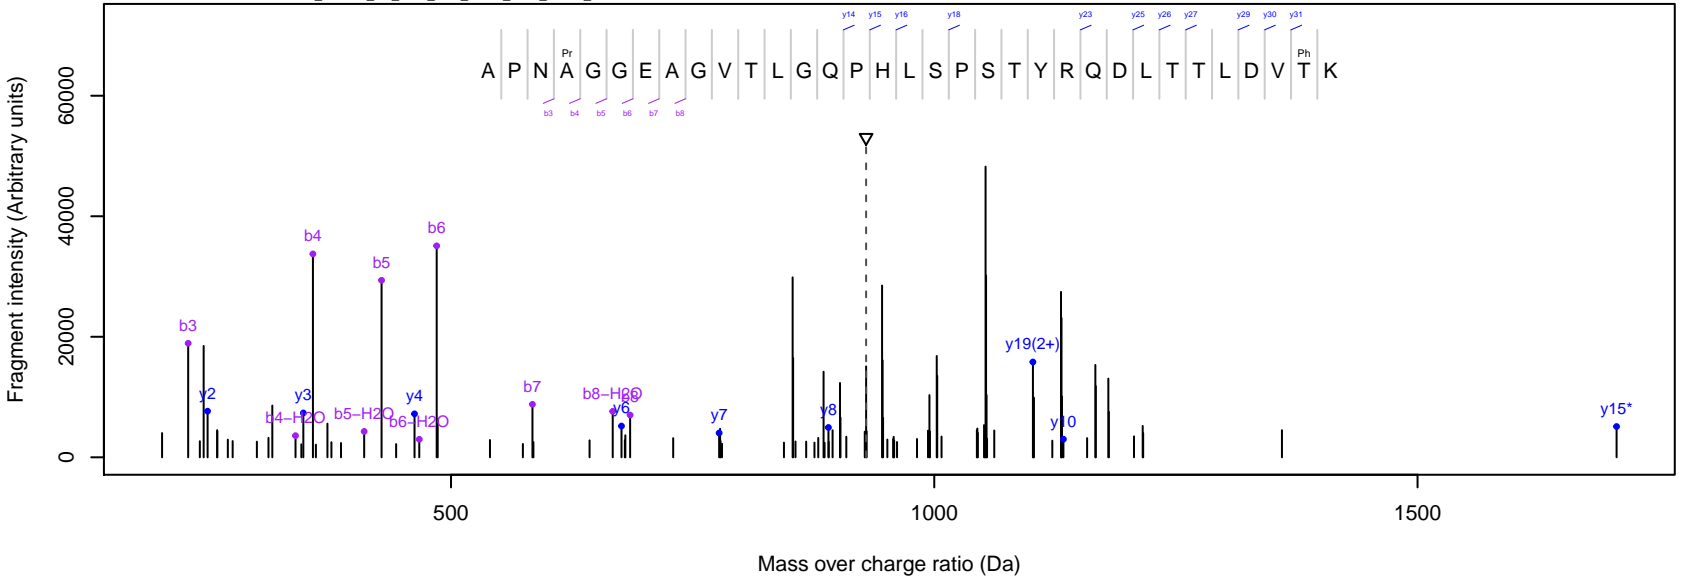

RAS(Phospho (STY))M(Oxidation (M))QPIQIAEGGITR-3+

Source : QE3\_201126\_FR\_TiOx\_hum\_tissue\_Urea\_RNAB\_B Scan : 24773

Andromeda score : 88.836

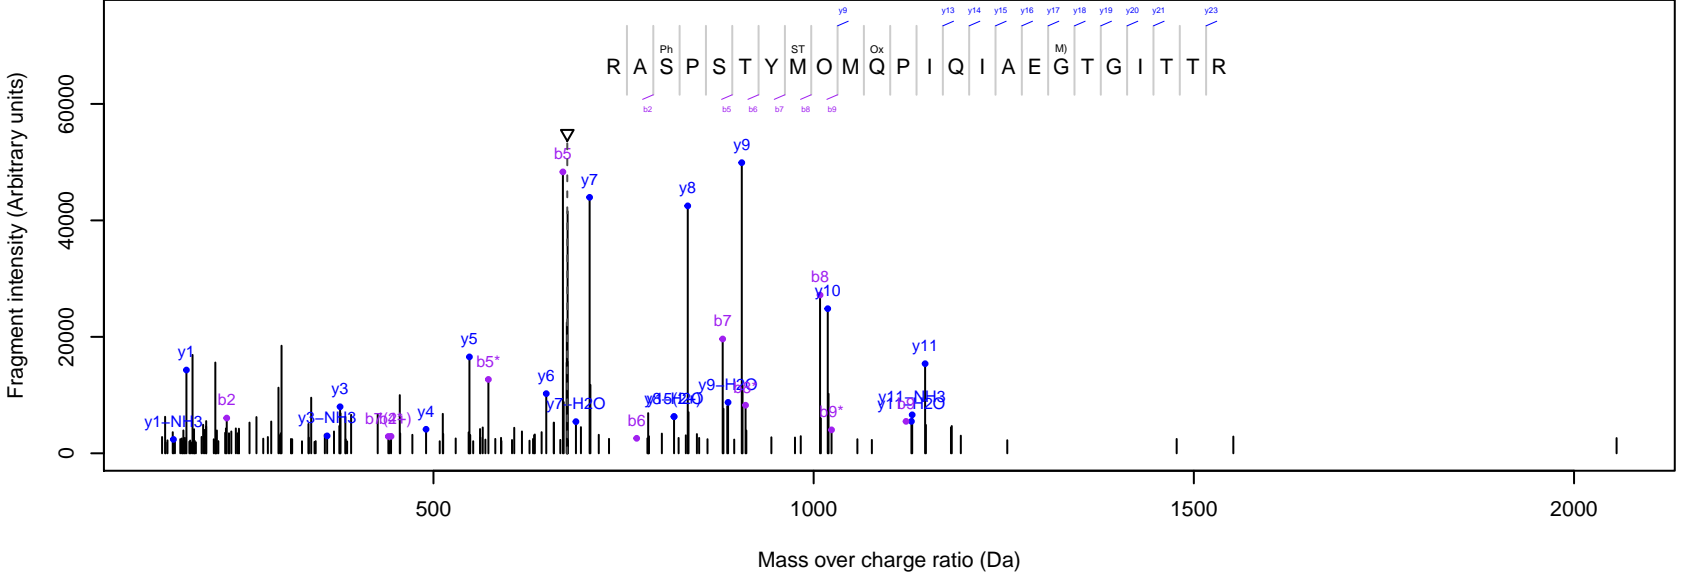

RGS(Phospho (STY))TTSIPSPQSDGGDPNQDDR-3+

Source : QE3\_201126\_FR\_TiOx\_hum\_tissue\_Urea\_RNAB\_B Scan : 14672

Andromeda score : 88.836

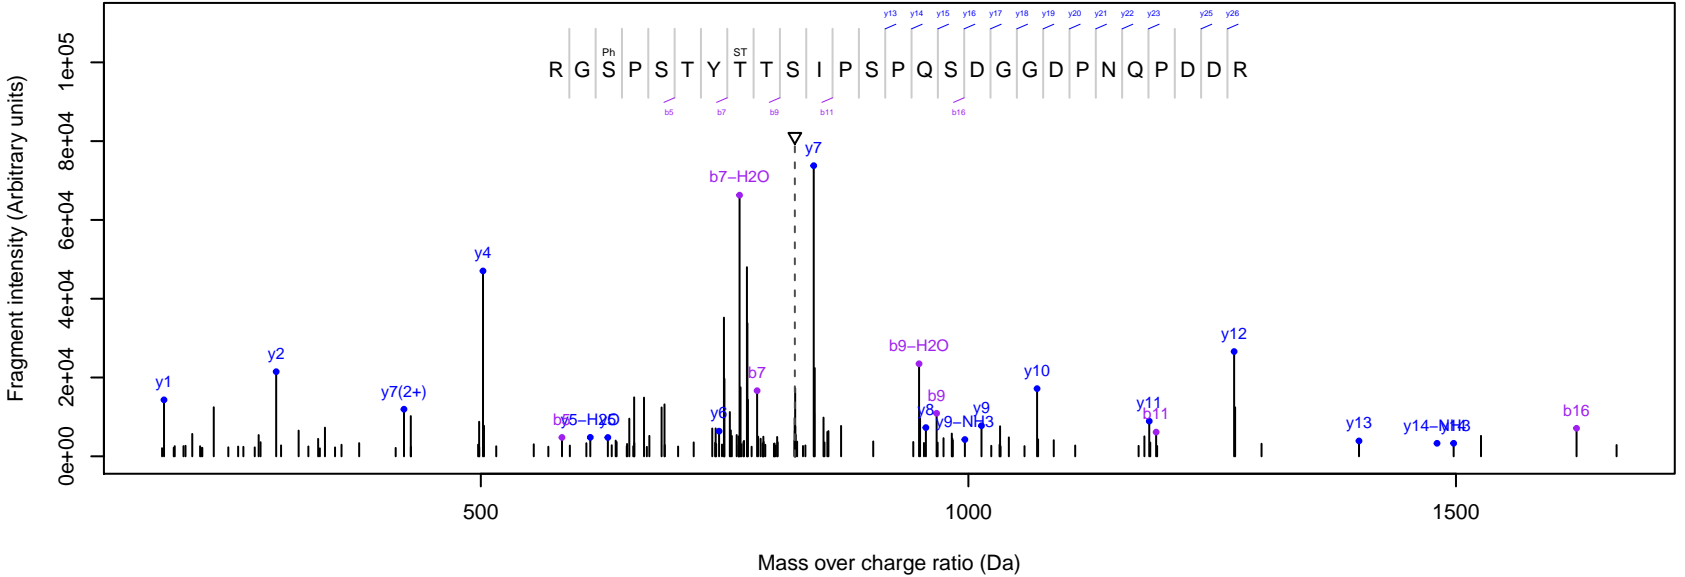

TDS(Phospho (STY))DSDLQLYK-2+

Source : QE3\_201126\_FR\_TiOx\_hum\_tissue\_Urea\_RNAB\_N Scan : 25815

Andromeda score : 88.83

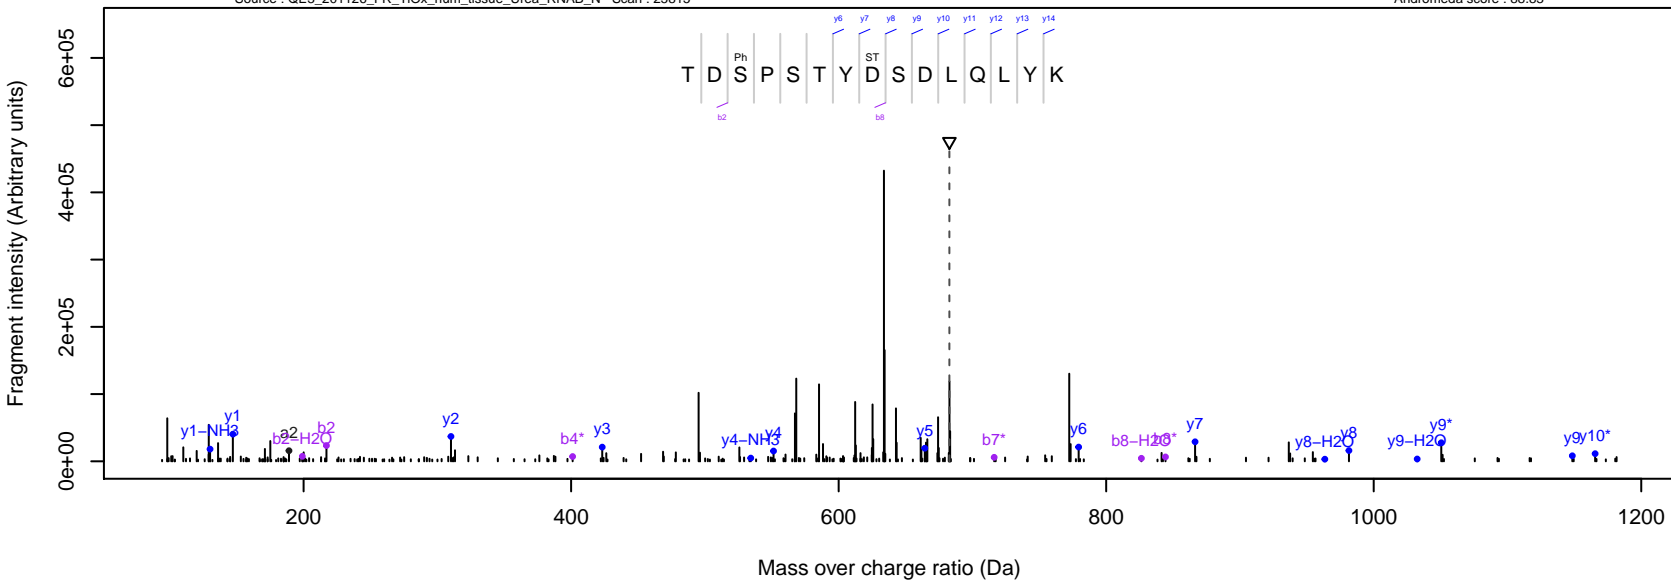

LNEAAAGLNQAATELVQAS(Phospho (STY))RGTPQDLAR-3+

Source : QE3\_201126\_FR\_TiOx\_hum\_tissue\_Urea\_RNAB\_H Scan : 47903

Andromeda score : 88.814

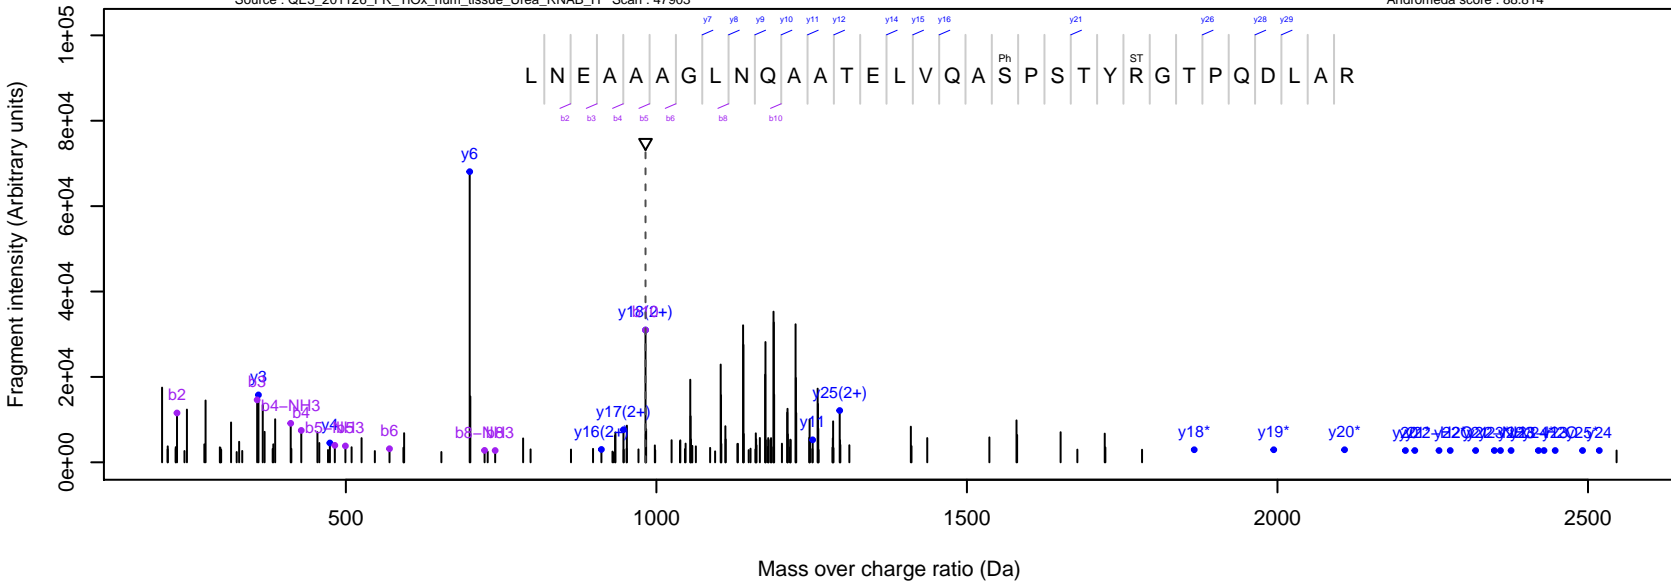

LTFDSSFS(Phospho (STY))PNTGK-2+

Source : QE3\_201126\_FR\_TiOx\_hum\_tissue\_Urea\_RNAB\_N Scan : 33823

Andromeda score : 88.73

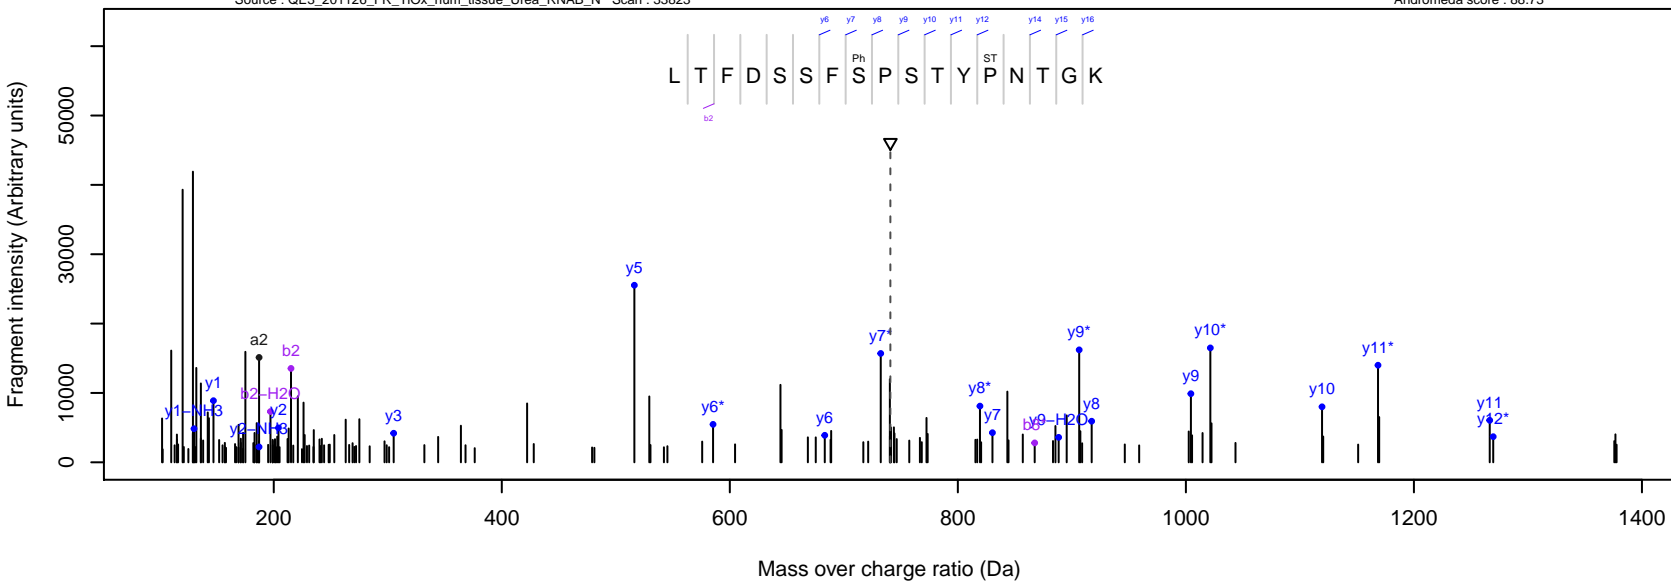

T(Phospho (STY))STFCGTPEFLAPEVLTDTSYTR-2+

Source : QE3\_201126\_FR\_TiOx\_hum\_tissue\_Urea\_RNAB\_B Scan : 58952

Andromeda score : 88.73

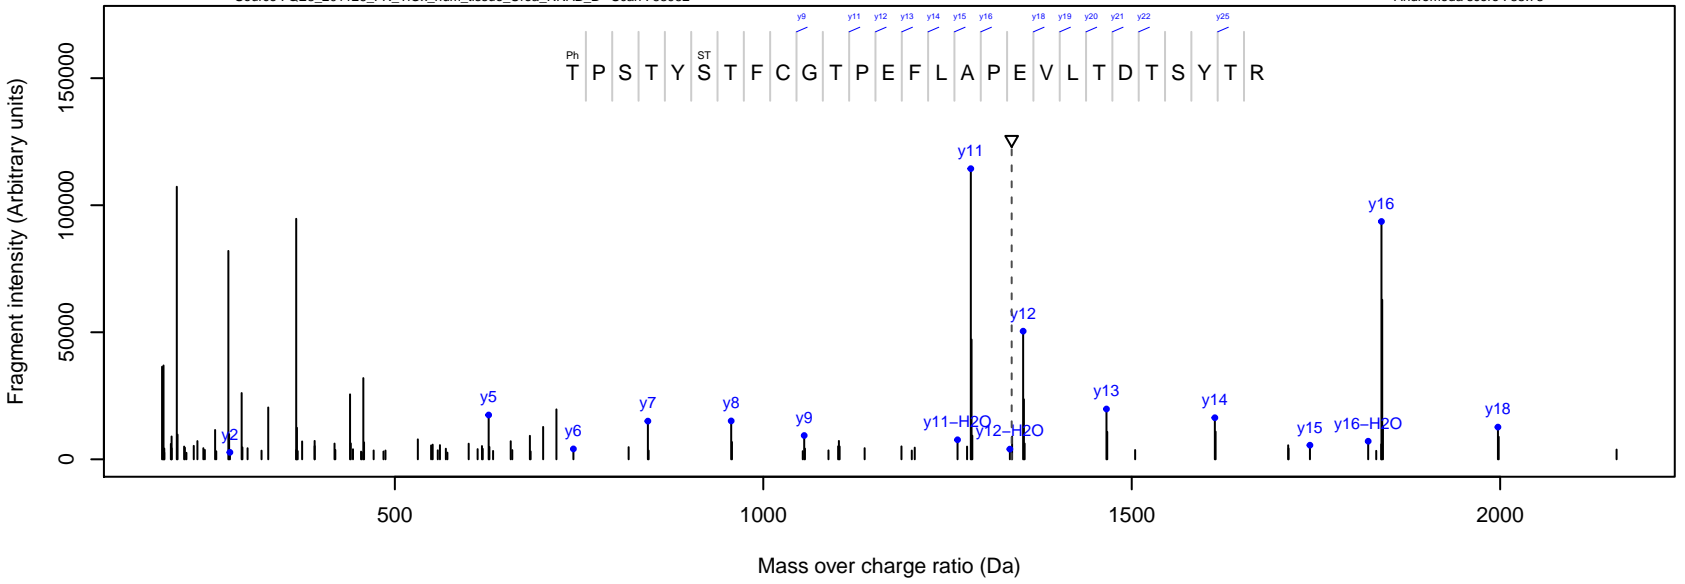

LNECIS(Phospho (STY))PVANEM(Oxidation (M))NHLPAHSHDLQR-4+

Source : QE3\_201126\_FR\_TiOx\_hum\_tissue\_Urea\_RNAB\_H Scan : 18496

Andromeda score : 88.708

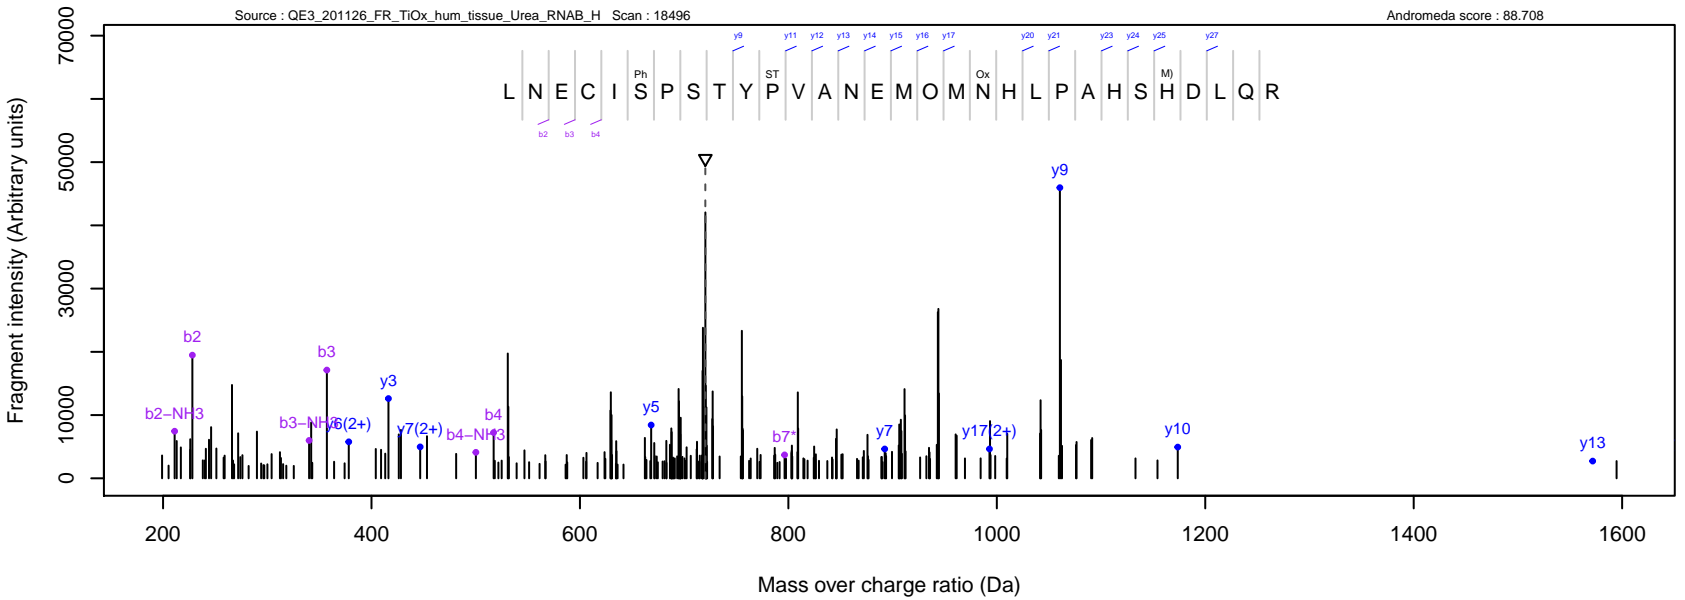

IKEEVLS(Phospho (STY))ESEAENQQAGAAALAPEIVIK-3+

Source : QE3\_201126\_FR\_TiOx\_hum\_tissue\_Urea\_RNAB\_H Scan : 44374

Andromeda score : 88.683

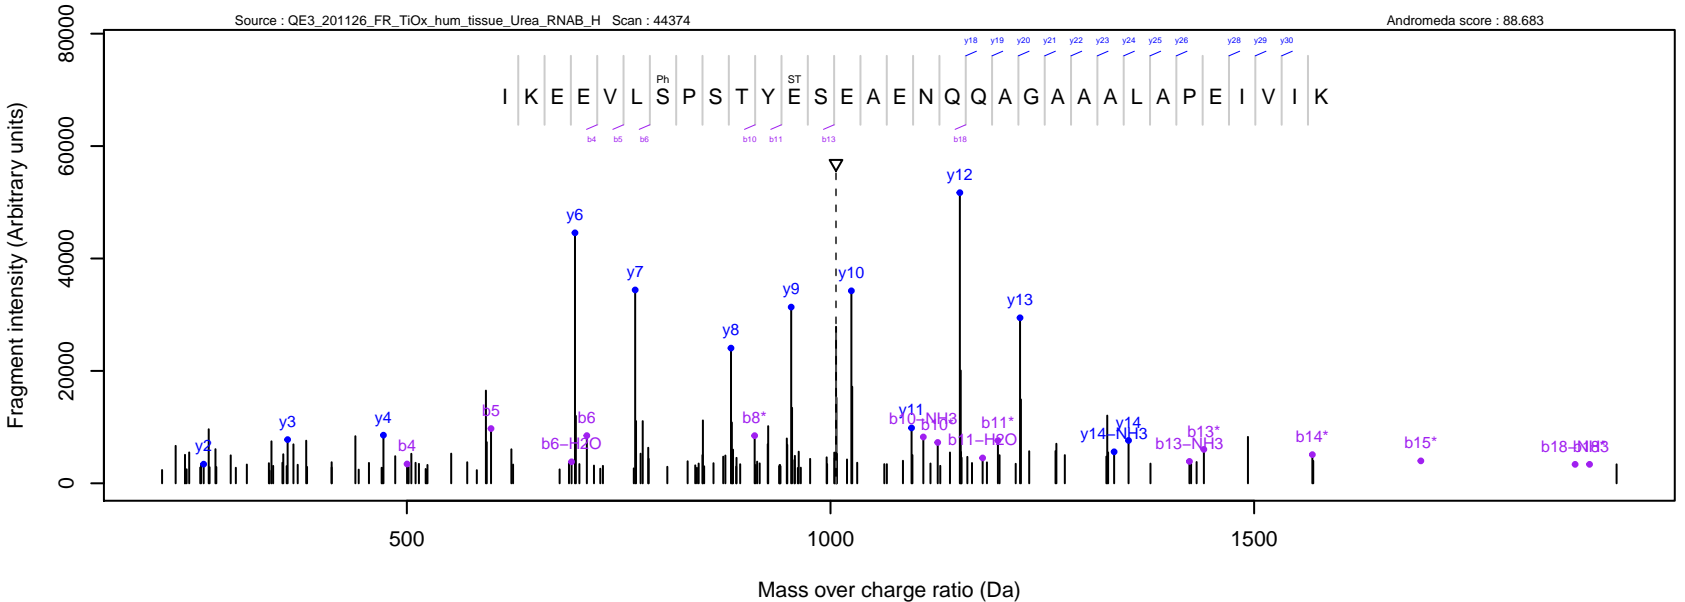

ITNDAREDEMEENLTQVGS(Phospho (STY))ILGNLK-3+

Source : QE3\_201126\_FR\_TiOx\_hum\_tissue\_Urea\_RNAB\_B Scan : 55082

Andromeda score : 88.668

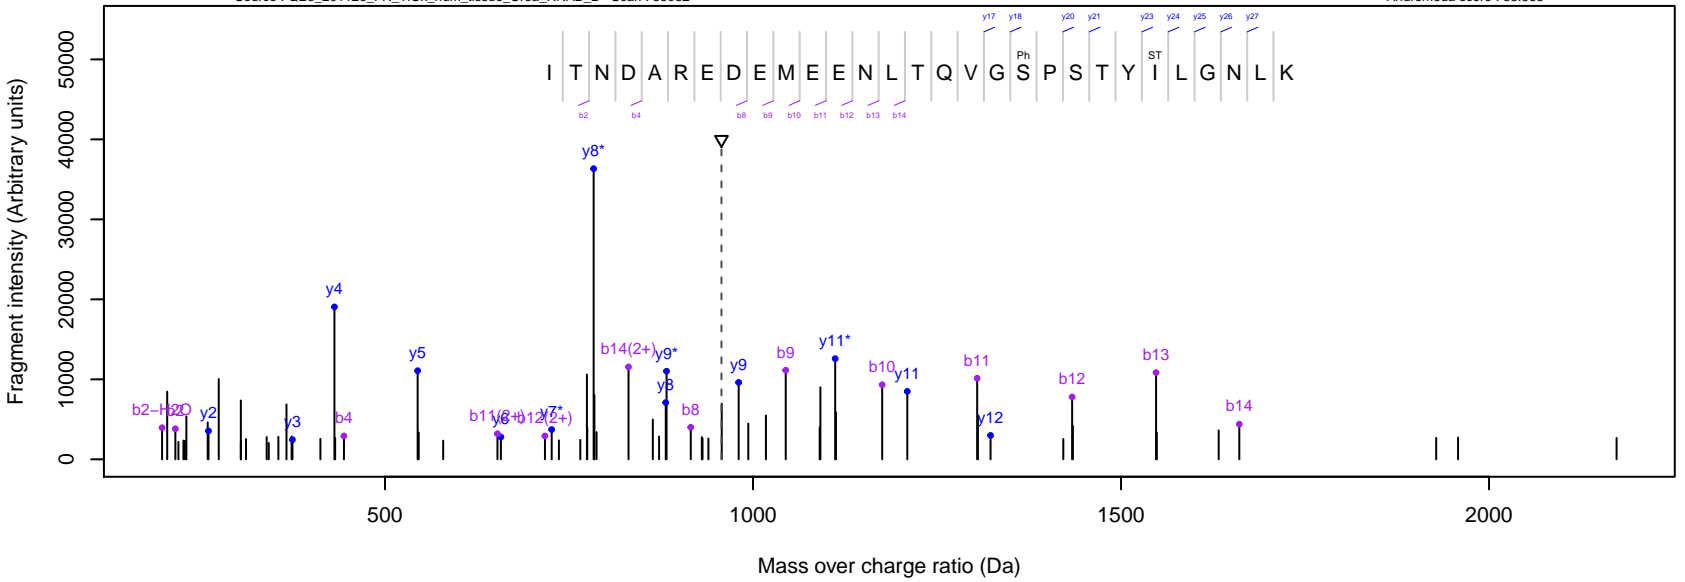

TPLSFNPLHS(Phospho (STY))DDS(Phospho (STY))DS(Phospho (STY))DERNSDGAVTQNK-3+

Source : QE3\_201126\_FR\_TiOx\_hum\_tissue\_Urea\_RNAB\_H Scan : 40183

Andromeda score : 88.634

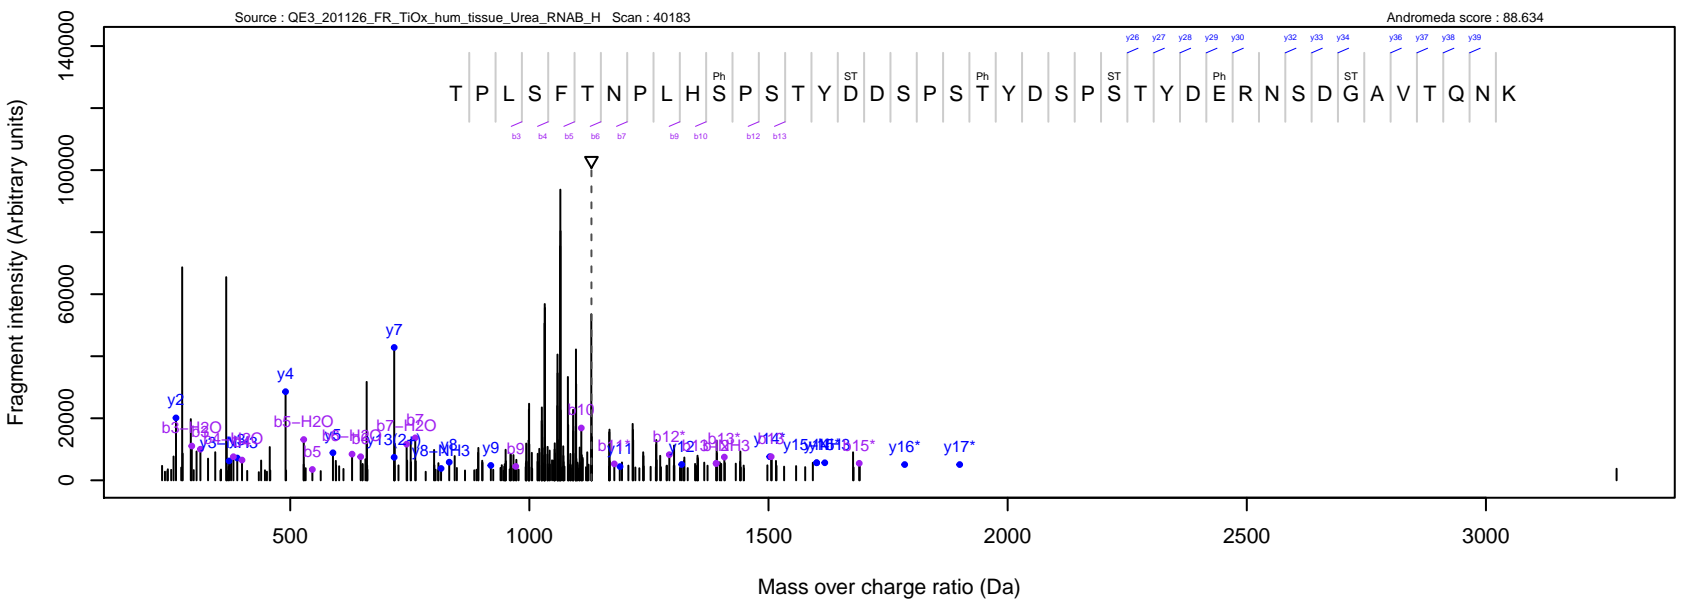

SAGRPGS(Phospho (STY))GPQLGTGR-3+

Source : QE3\_201126\_FR\_TiOx\_hum\_tissue\_Urea\_RNAB\_N Scan : 8364

Andromeda score : 88.574

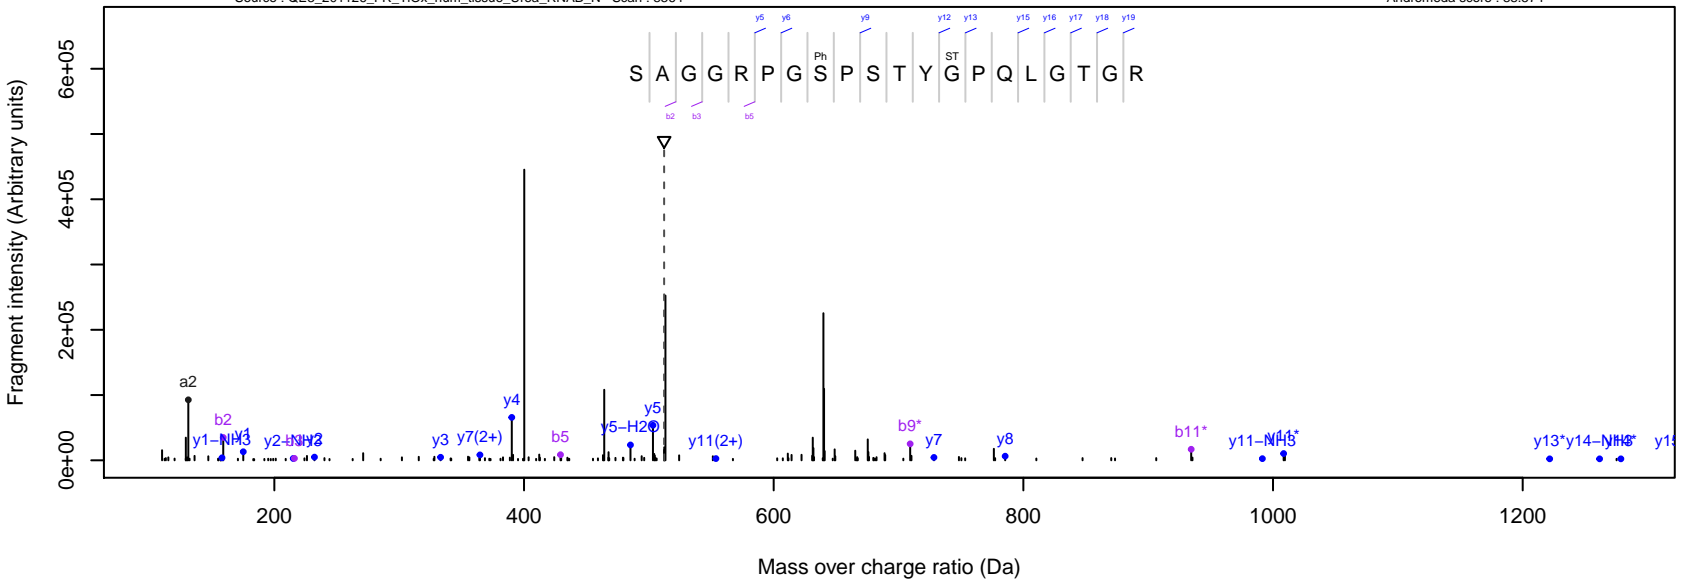

VAQSQ(Phospho (STY))PPS(Phospho (STY))PASAEALLPALPLR-3+

Source : QE3\_201126\_FR\_TiOx\_hum\_tissue\_Urea\_RNAB\_H Scan : 62415

Andromeda score : 88.573

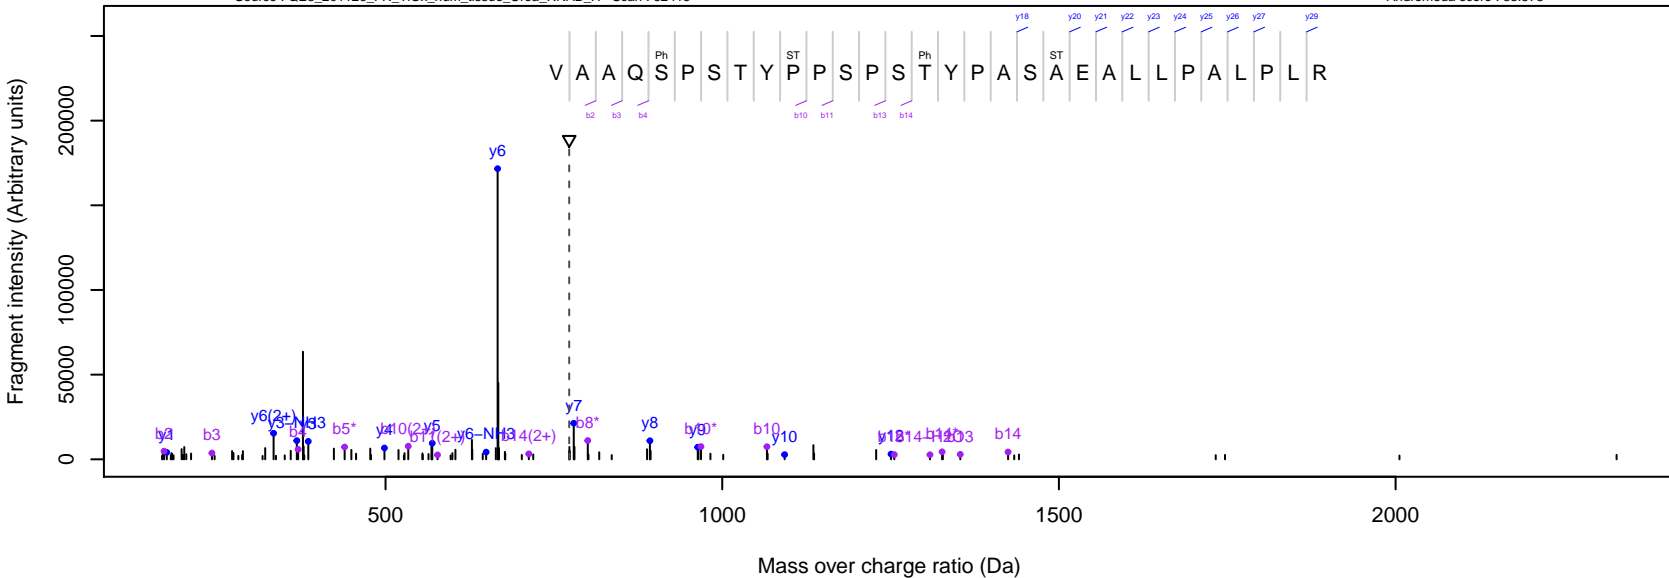

SSPNPFVGS(Phospho (STY))PPKGLSIQNGVK-3+

Source : QE3\_201126\_FR\_TiOx\_hum\_tissue\_Urea\_RNAB\_N Scan : 35660

Andromeda score : 88.571

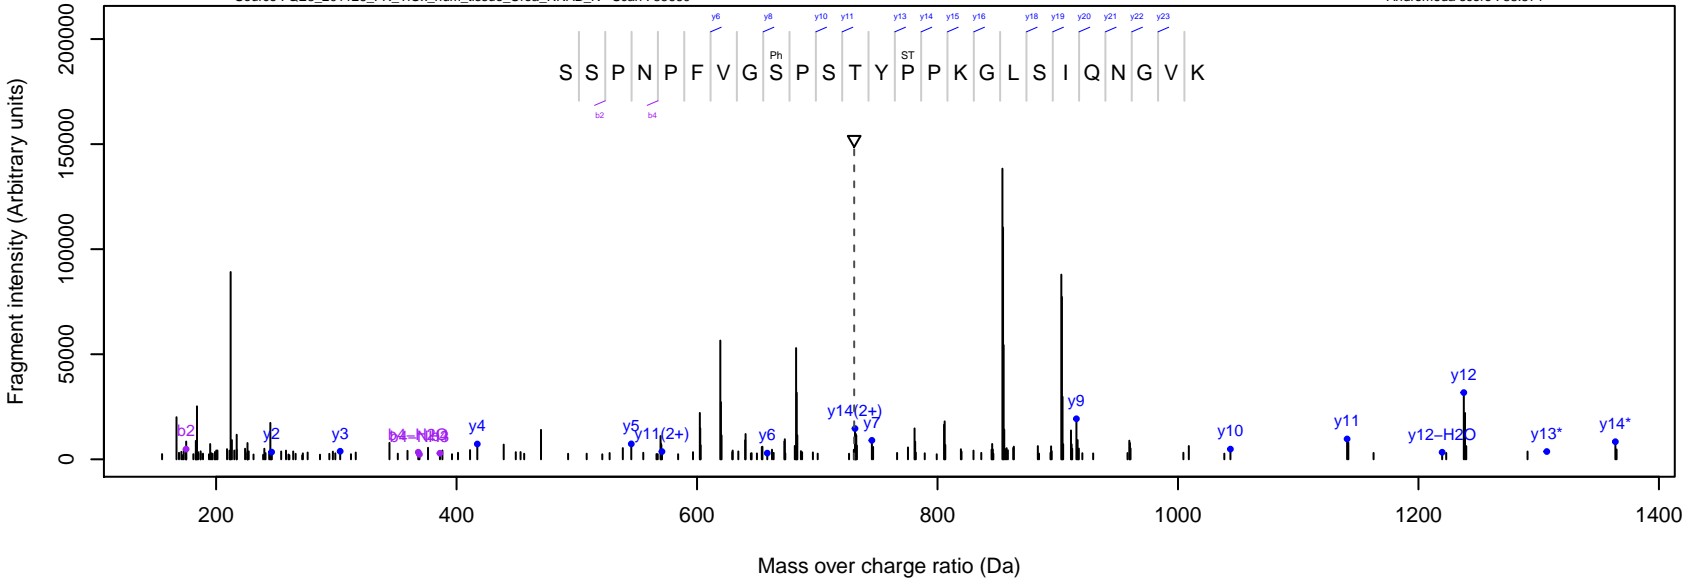

NLQDGGQIS(Phospho (STY))DTGDLGEDIASN-2+

Source : QE3\_201126\_FR\_TiOx\_hum\_tissue\_Urea\_RNAB\_N Scan : 51888

Andromeda score : 88.565

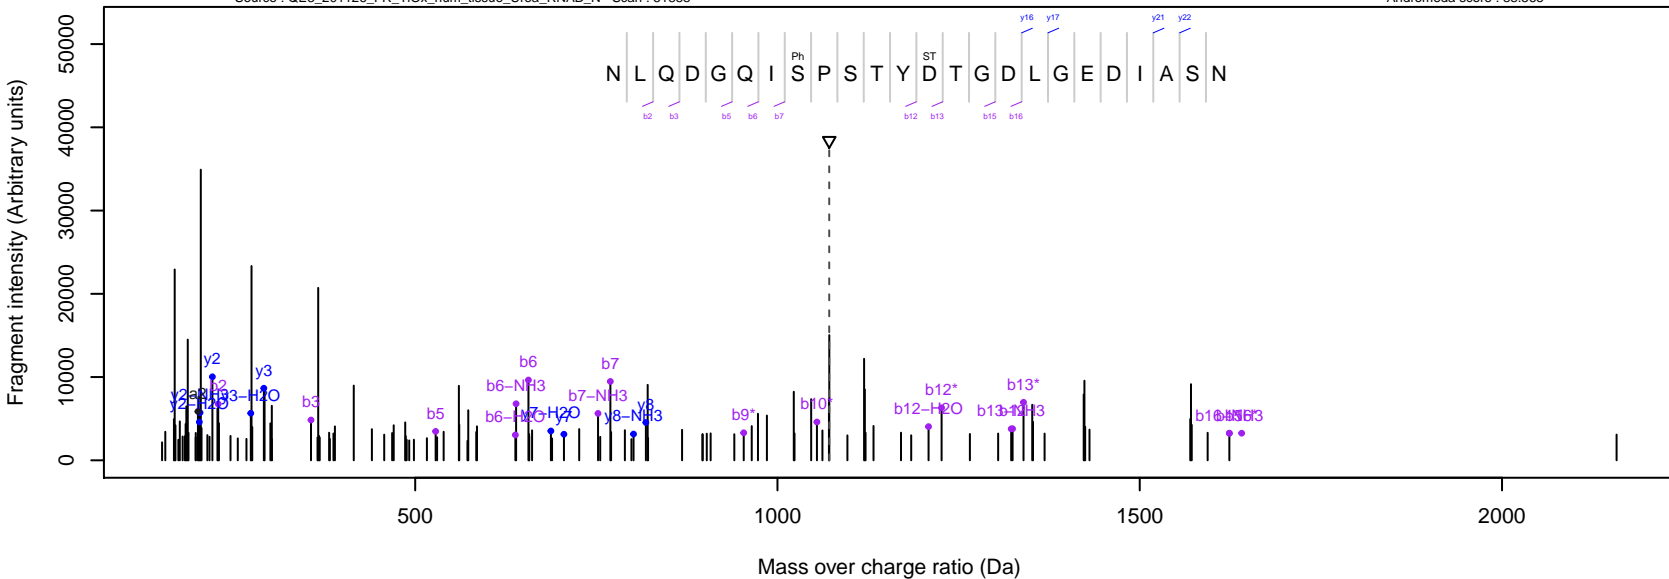

RRS(Phospho (STY))PS(Phospho (STY))PTPTPGSR-3+

Source : QE3\_201126\_FR\_TiOx\_hum\_tissue\_Urea\_RNAB\_B Scan : 5169

Andromeda score : 88.565

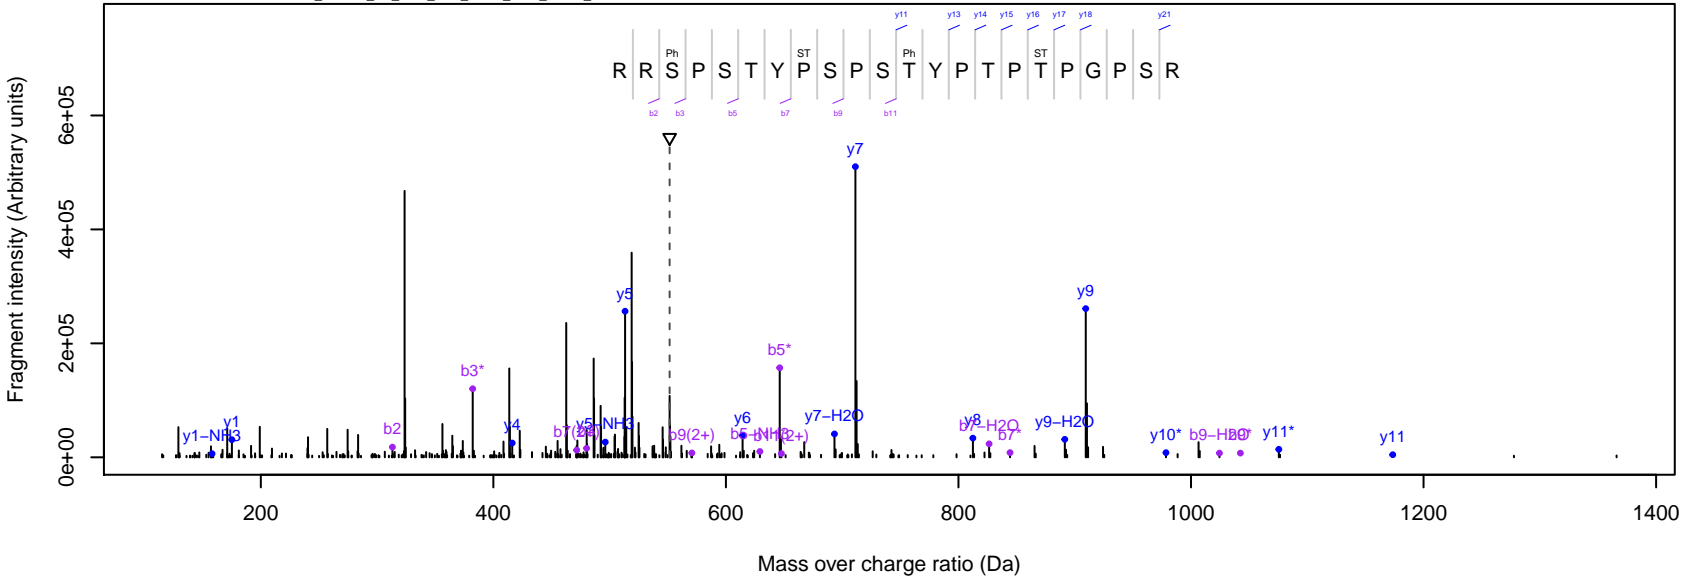

SQISSVNS(Phospho (STY))DVEALRR-3+

Source : QE3\_201126\_FR\_TiOx\_hum\_tissue\_Urea\_RNAB\_N Scan : 26394

Andromeda score : 88.565

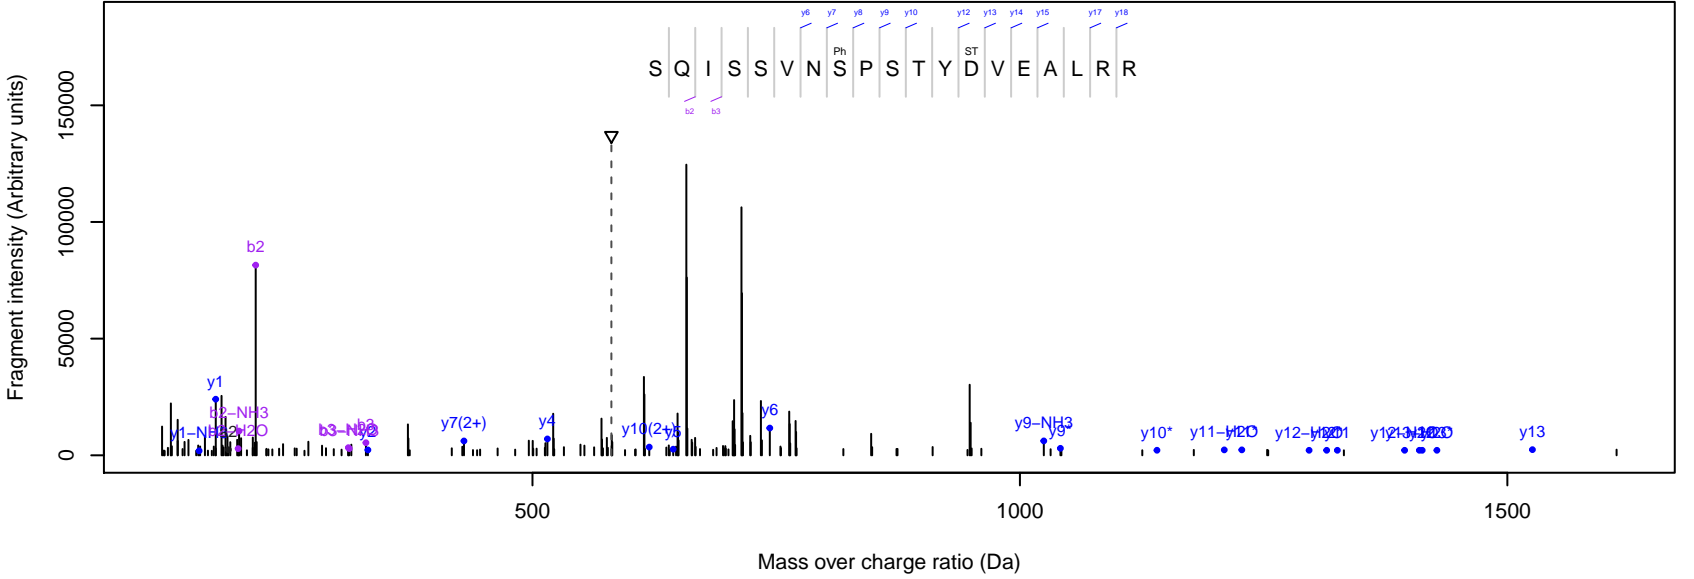

VTSSVPLPSGST(Phospho (STY))SSPGR-2+

Source : QE3\_201126\_FR\_TiOx\_hum\_tissue\_Urea\_RNAB\_H Scan : 21617

Andromeda score : 88.561

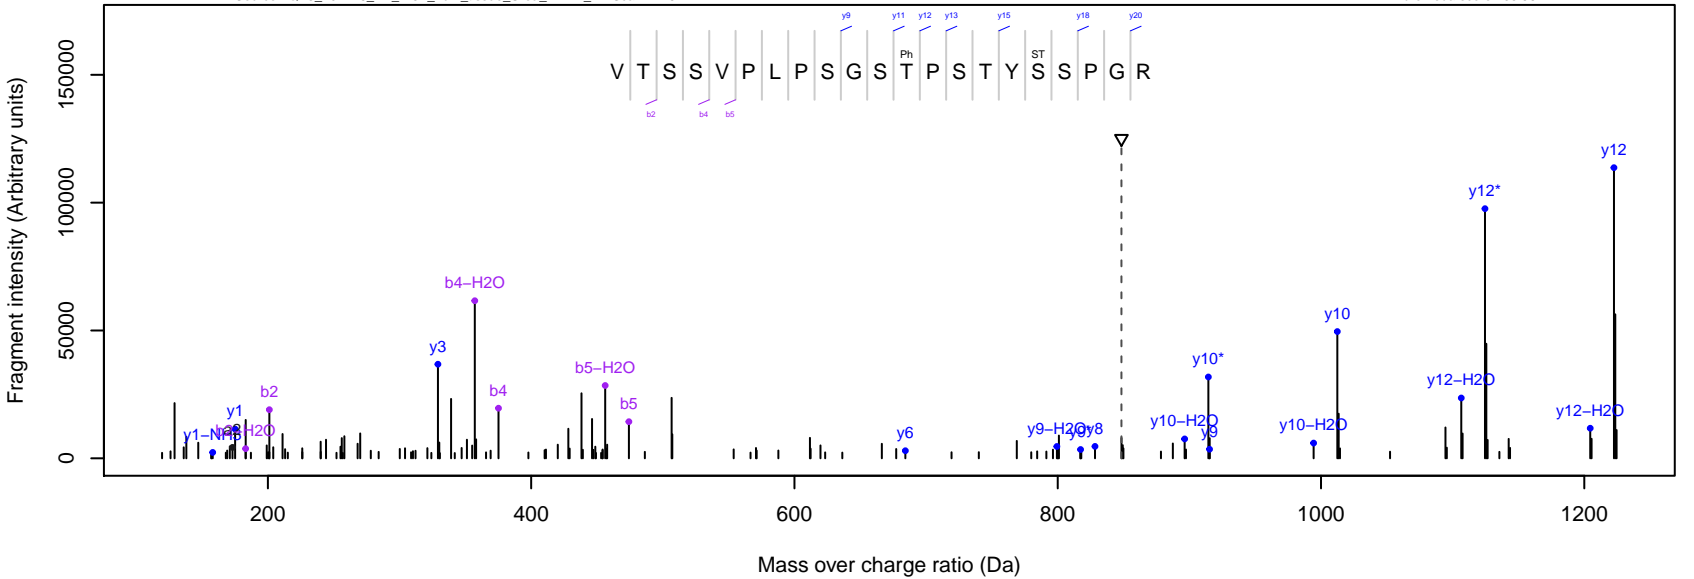

GSS(Phospho (STY))QPNLSTSHSEQEYQK-3+

Source : QE3\_201126\_FR\_TiOx\_hum\_tissue\_Urea\_RNAB\_B Scan : 10775

Andromeda score : 88.555

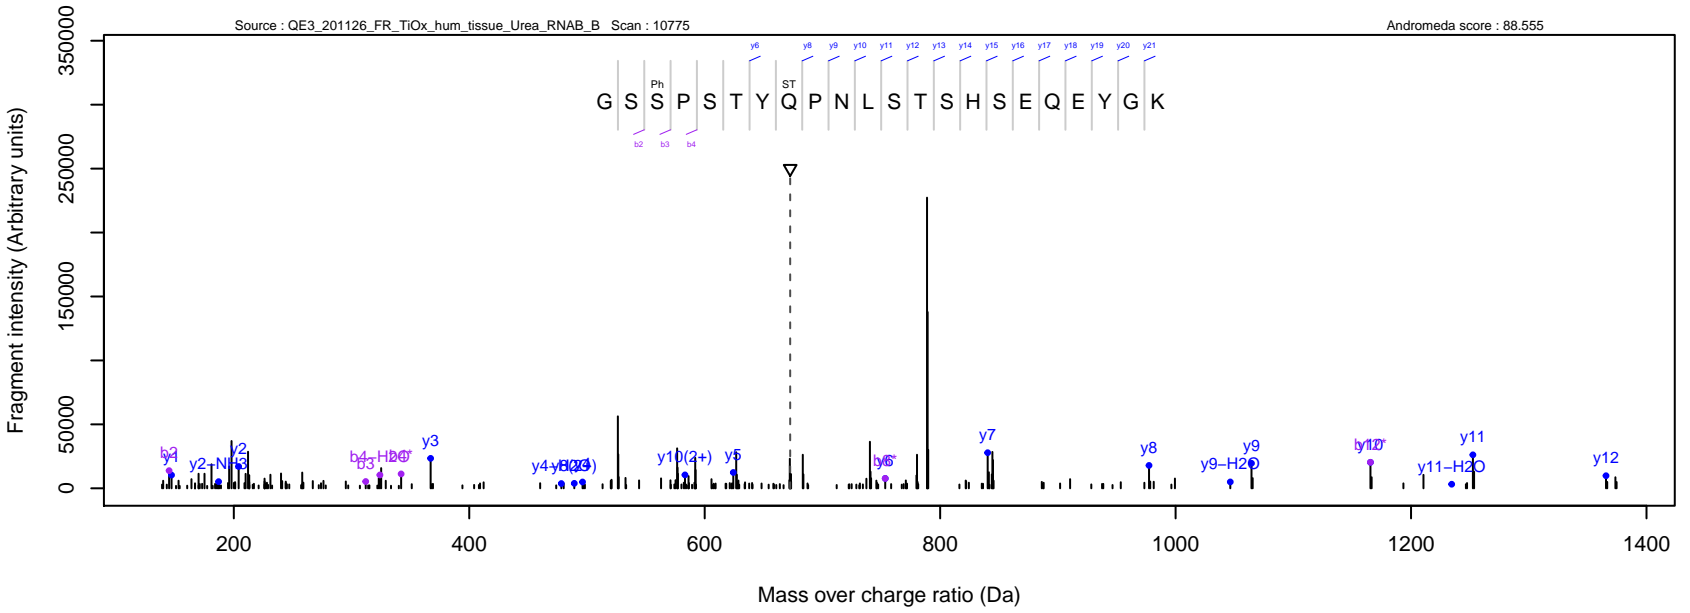

S(Phospho (STY))FEEEGEHLGSR-2+

Source : QE3\_201126\_FR\_TiOx\_hum\_tissue\_Urea\_RNAB\_B Scan : 15202

Andromeda score : 88.552

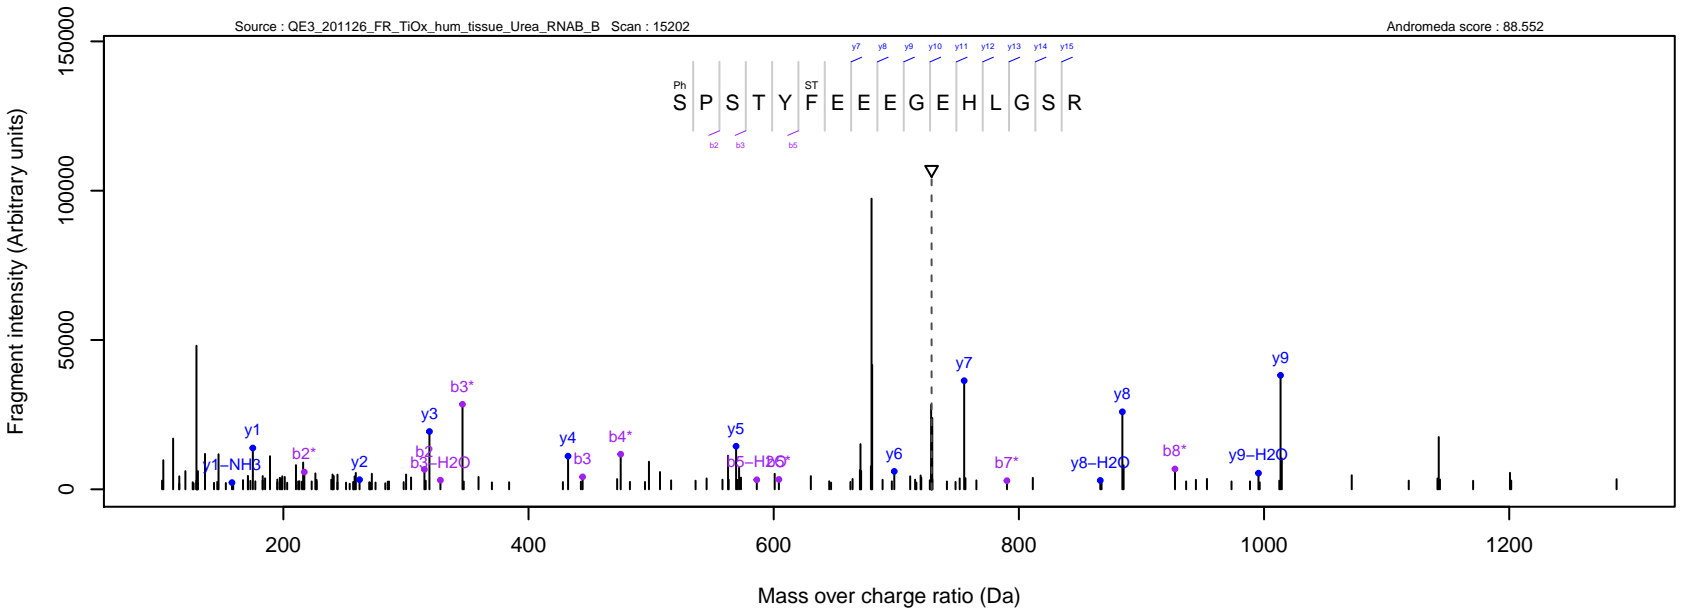

(Acetyl (Protein N-term))S(Phospho (STY))GDEM(Oxidation (M))IFDPTMSKK-2+

Source : QE3\_201126\_FR\_TiOx\_hum\_tissue\_Urea\_RNAB\_H Scan : 35543

Andromeda score : 88.552

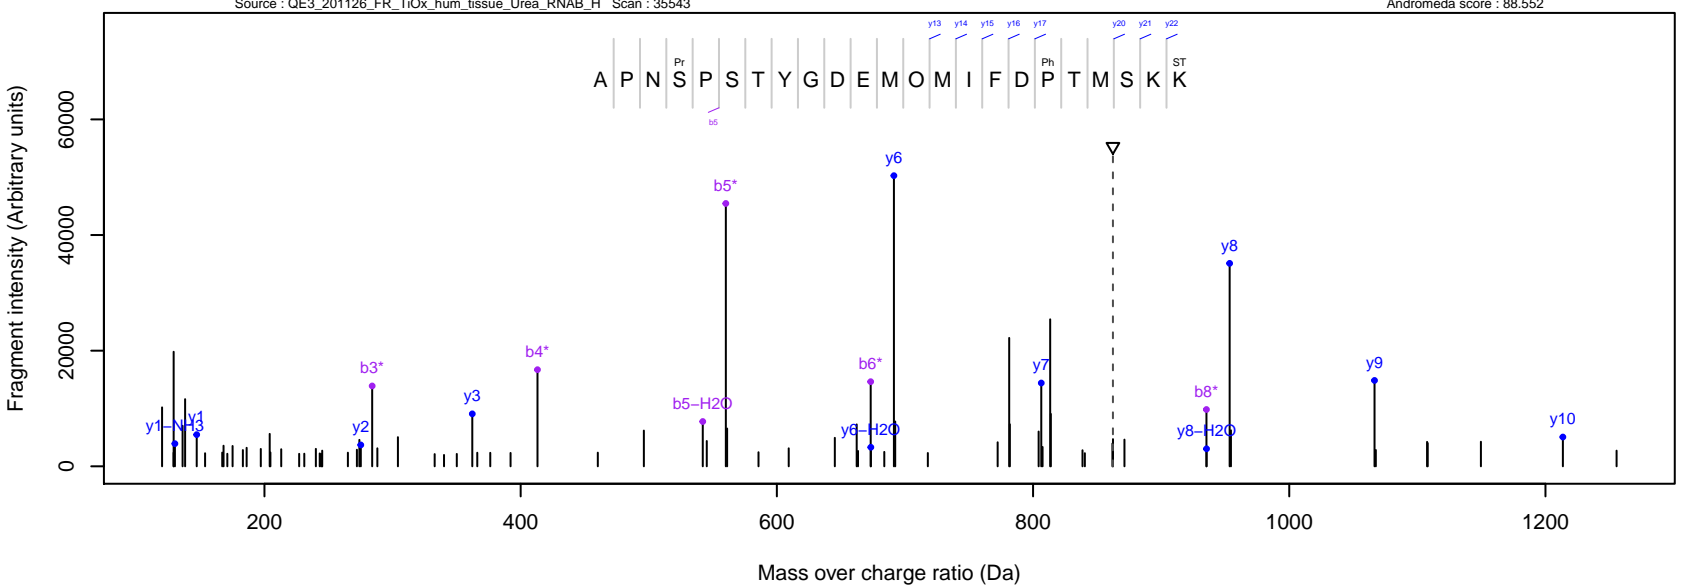

SEHQNS(Phospho (STY))SPTCQEDEEDV-3+

Source : QE3\_201126\_FR\_TIOx\_hum\_tissue\_Urea\_RNAB\_H Scan : 7337

Andromeda score : 88.551

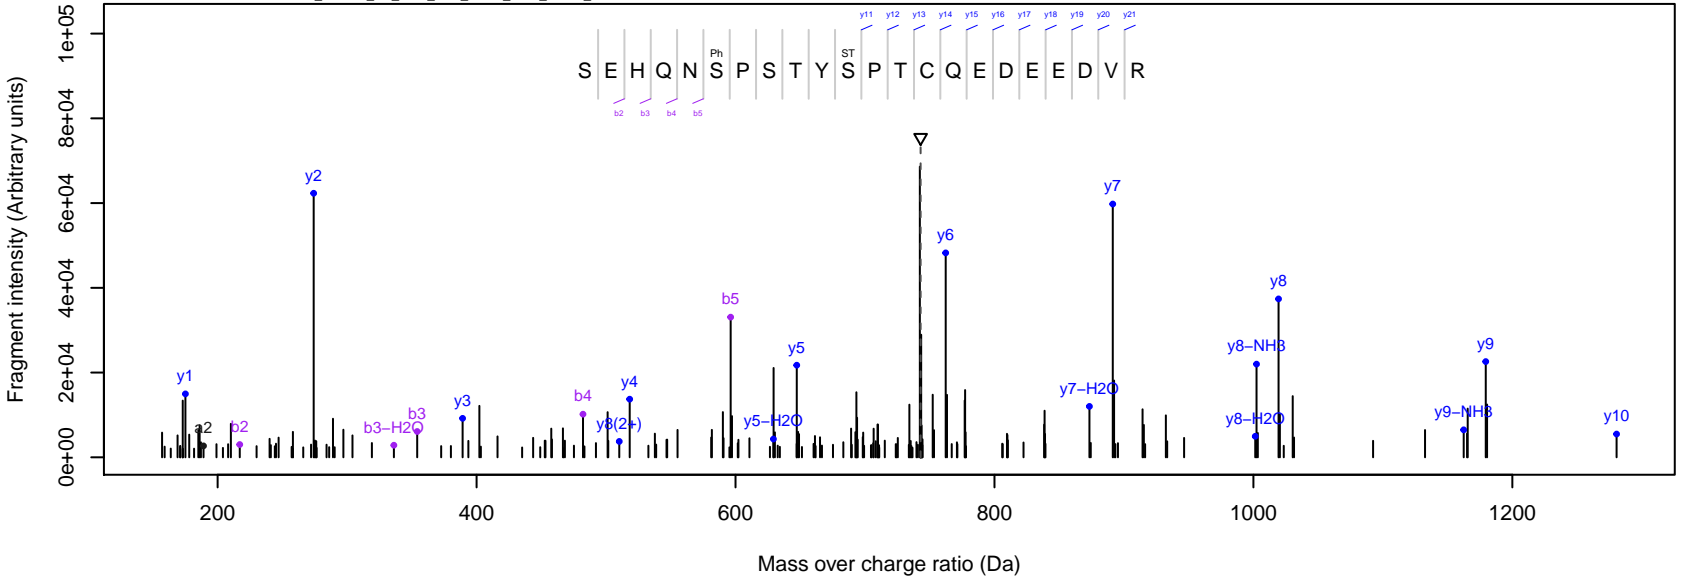

AELS(Phospho (STY))YRGPVSGTEPEPEPVYSMEAADYR-3+

Source : QE3\_201126\_FR\_TIOx\_hum\_tissue\_Urea\_RNAB\_B Scan : 40666

Andromeda score : 88.544

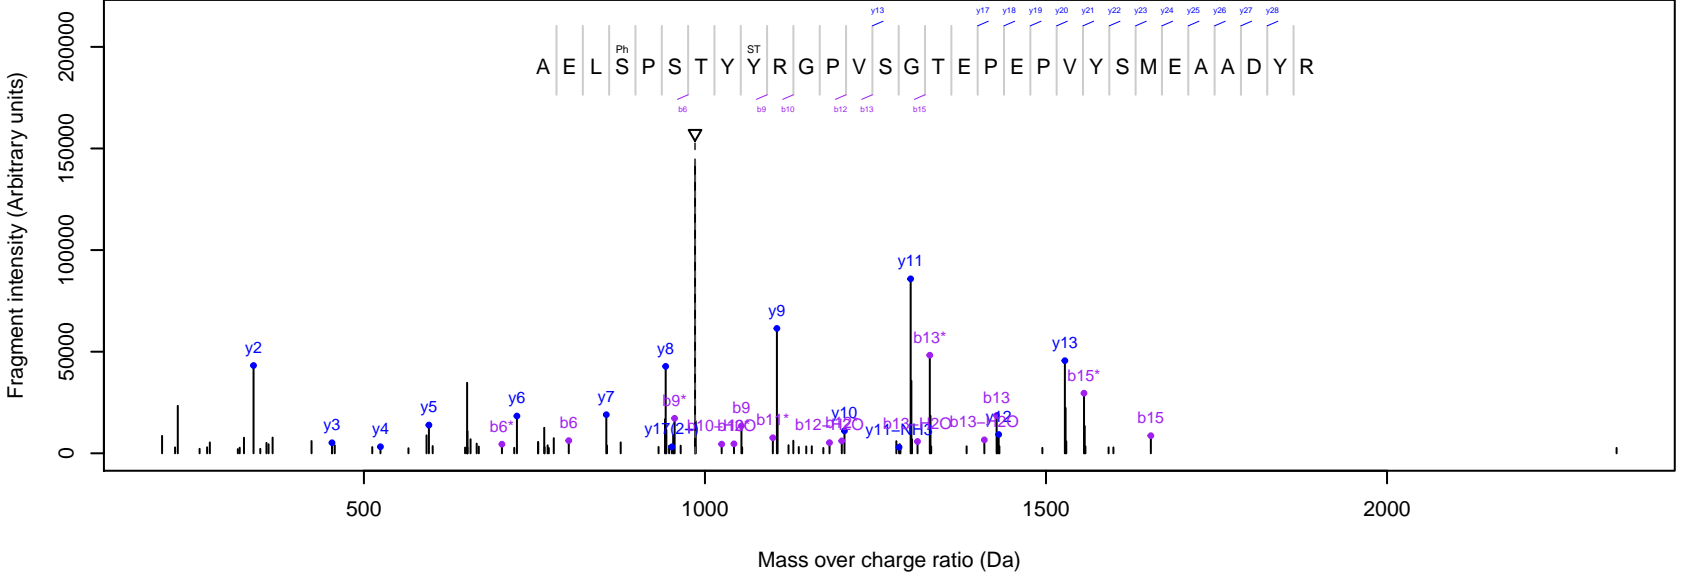

LGS(Phospho (STY))VTHVTSFSHAPPSSR-3+

Source : QE3\_201126\_FR\_TIOx\_hum\_tissue\_Urea\_RNAB\_H Scan : 17152

Andromeda score : 88.396

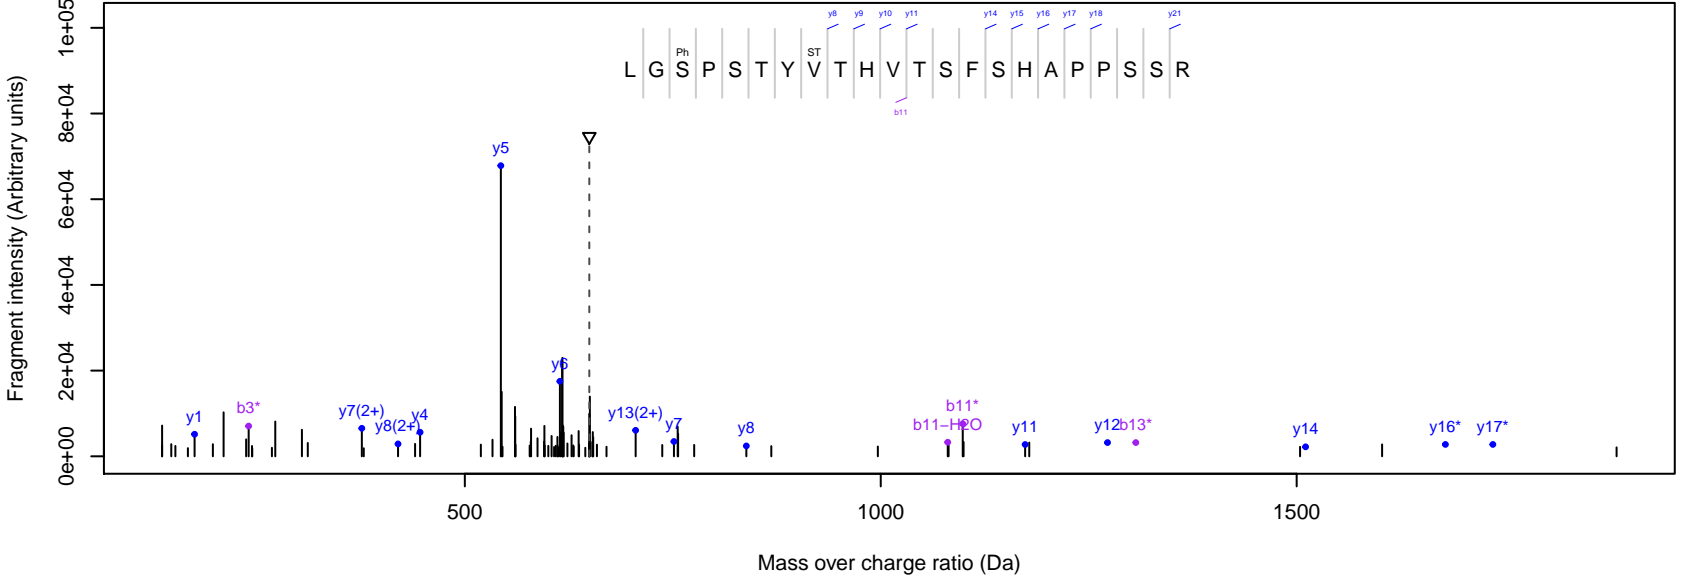



RVT(Phospho (STY))QEQGVSLLEDK-3+

Source : QE3\_201126\_FR\_TIOx\_hum\_tissue\_Urea\_RNAB\_H Scan : 5691

Andromeda score : 88.385

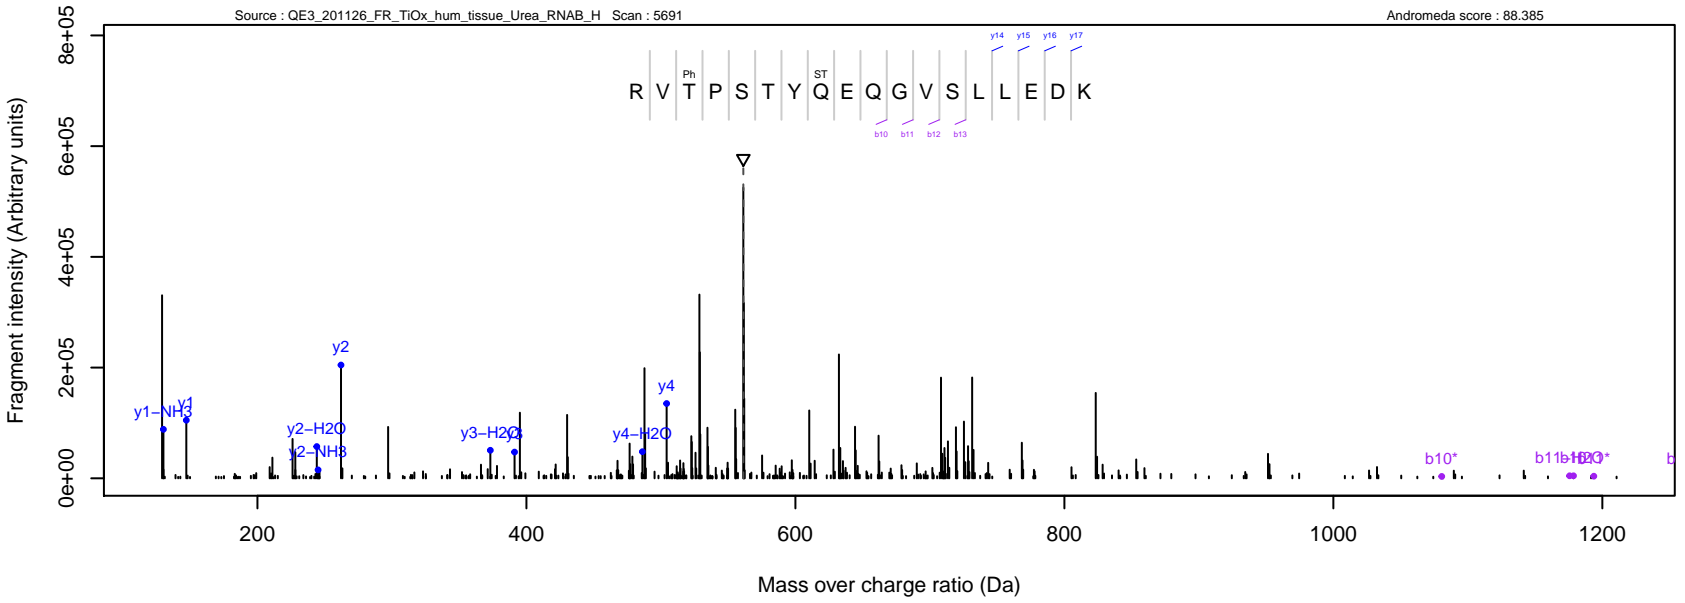

DKVLT(Phospho (STY))DSGLDSTIPGIENITVTTEQLTTASFPVGSK-3+

Source : QE3\_201126\_FR\_TIOx\_hum\_tissue\_Urea\_RNAB\_B Scan : 62520

Andromeda score : 88.367

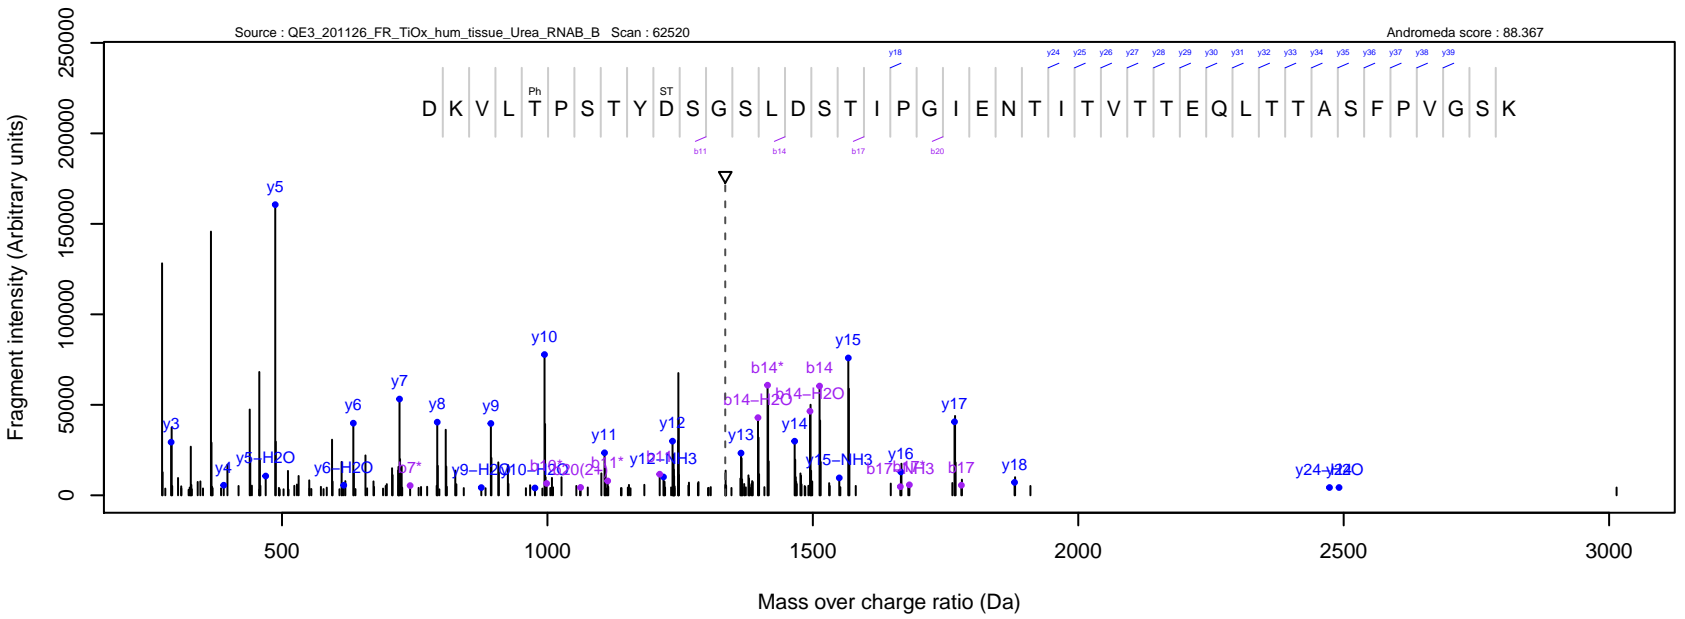

VWT(Phospho (STY))SGQVEEYDLDAADDINSR-2+

Source : QE3\_201126\_FR\_TIOx\_hum\_tissue\_Urea\_RNAB\_H Scan : 44504

Andromeda score : 88.311

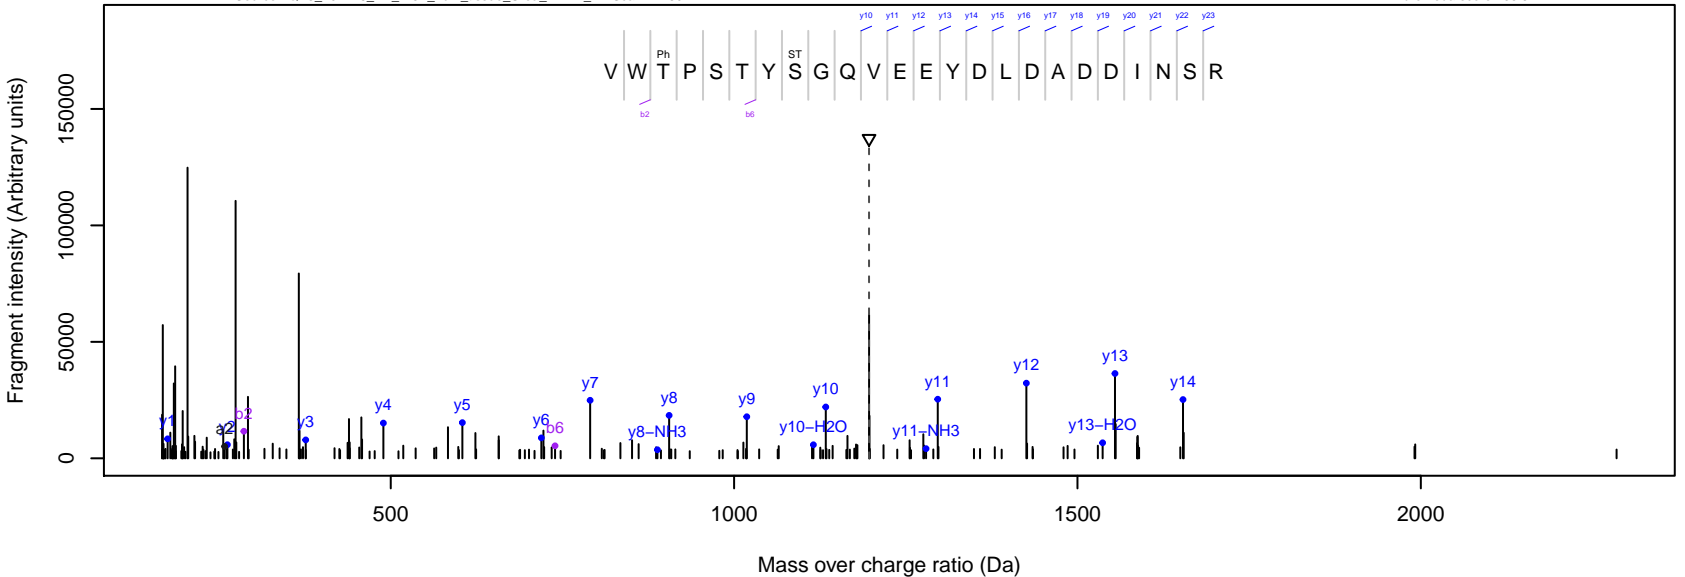

RLS(Phospho (STY))NSS(Phospho (STY))LCSIEEHR-3+

Source : QE3\_201126\_FR\_TIOx\_hum\_tissue\_Urea\_RNAB\_H Scan : 19020

Andromeda score : 88.282

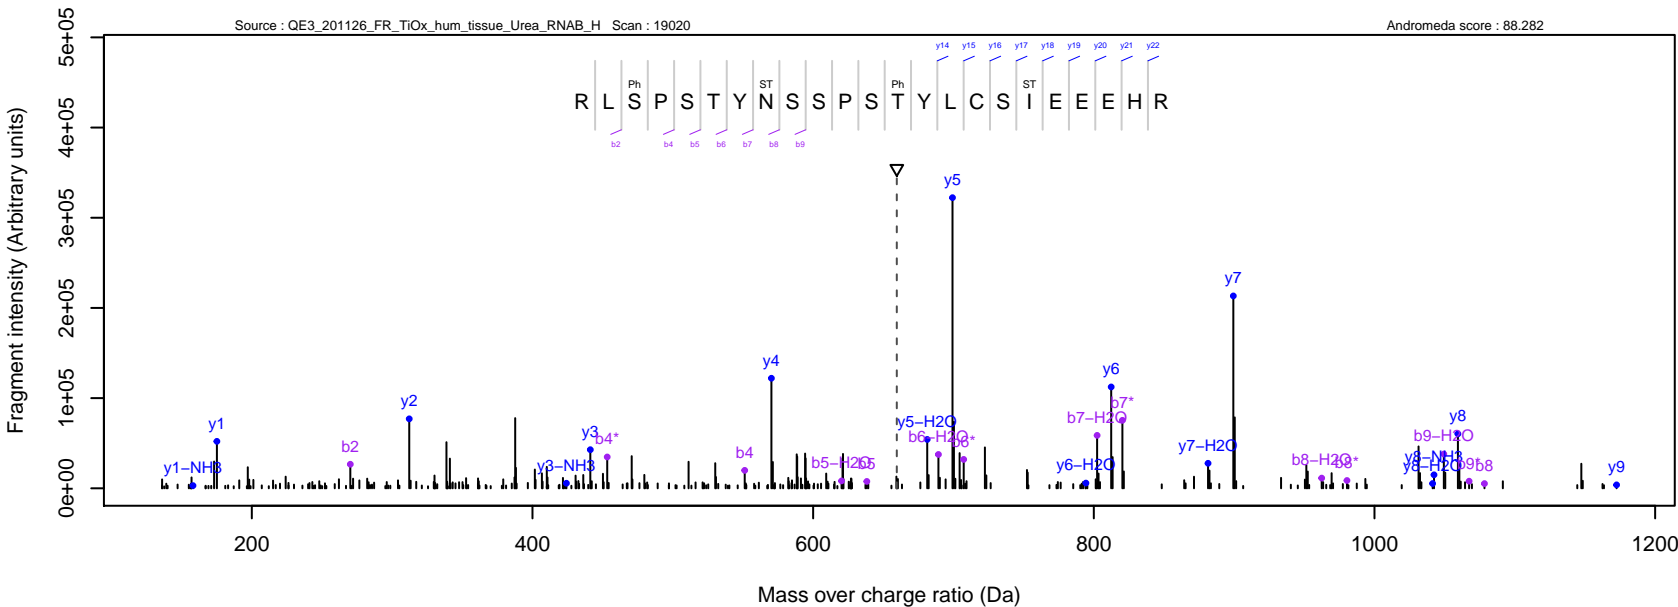

YASGS(Phospho (STY))SAS(Phospho (STY))LGGPESAVA-2+

Source : QE3\_201126\_FR\_TIOx\_hum\_tissue\_Urea\_RNAB\_B Scan : 44360

Andromeda score : 88.282

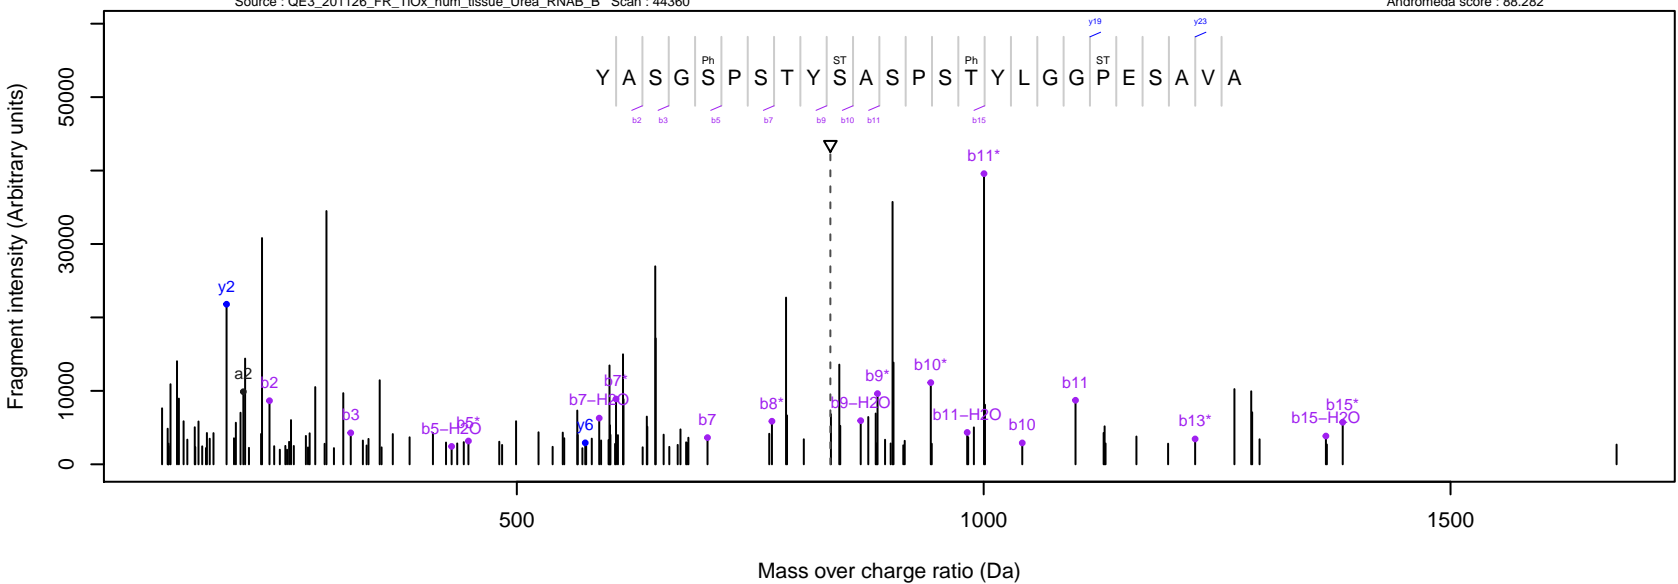

TKPPRPDS(Phospho (STY))PATTPNISVK-3+

Source : QE3\_201126\_FR\_TIOx\_hum\_tissue\_Urea\_RNAB\_N Scan : 13461

Andromeda score : 88.239

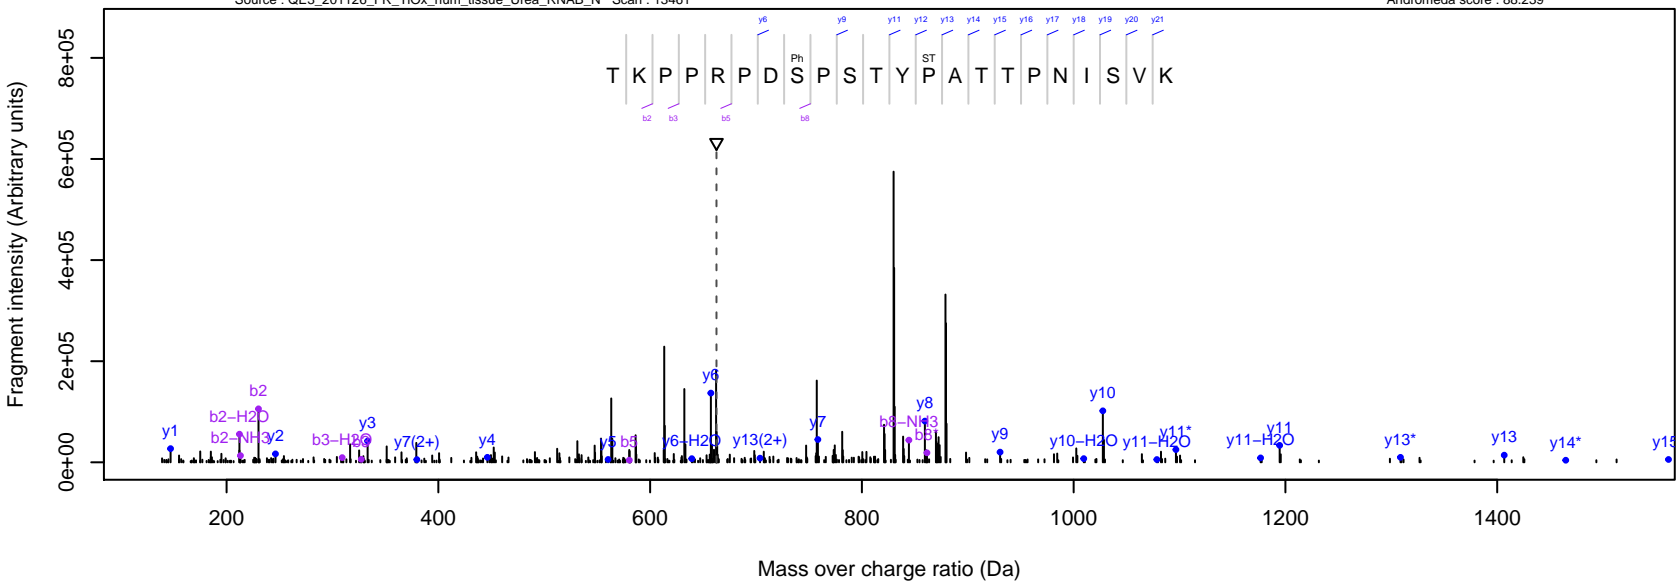

YCRPESQEHP EADPGSAAPY(Phospho (STY))LK-3+

Source : QE3\_201126\_FR\_TiOx\_hum\_tissue\_Urea\_RNAB\_B Scan : 15625

Andromeda score : 88.239

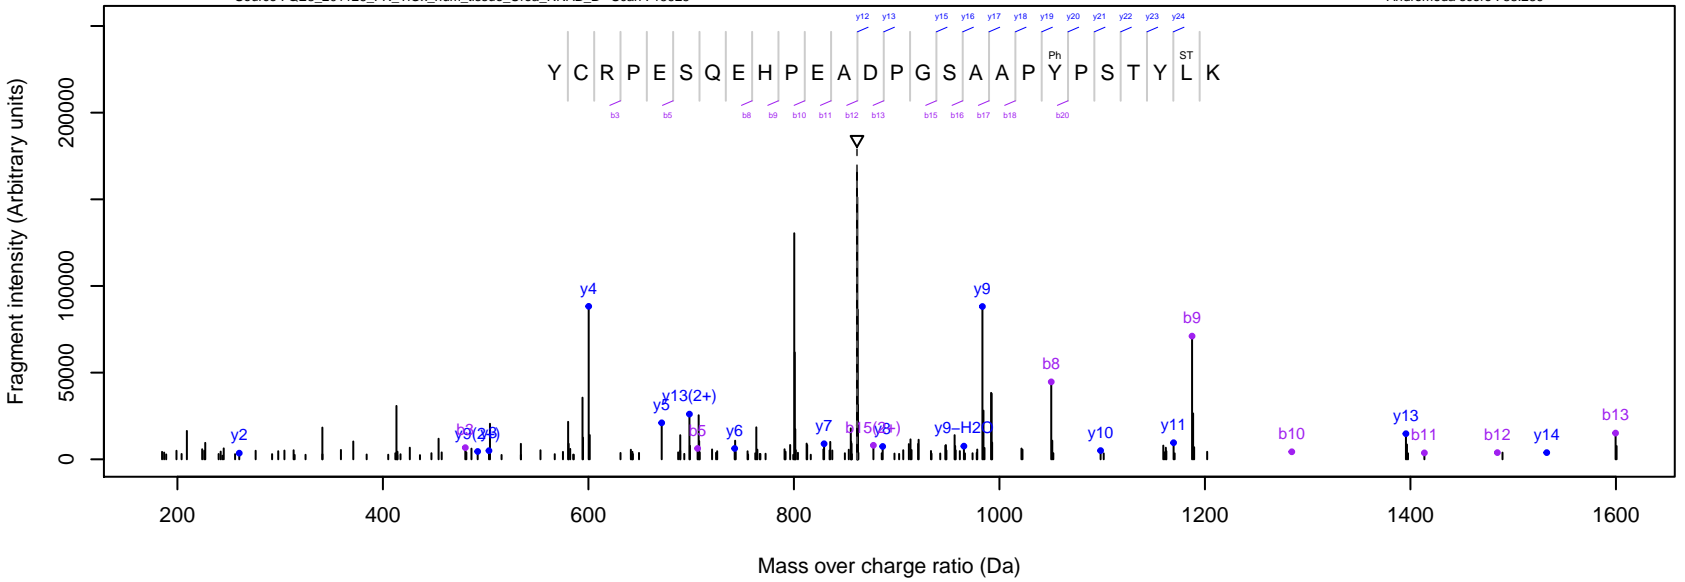

AGDNIPEEQPVASTPTTVS(Phospho (STY))DGENKKDK-4+

Source : QE3\_201126\_FR\_TiOx\_hum\_tissue\_Urea\_RNAB\_H Scan : 15934

Andromeda score : 88.226

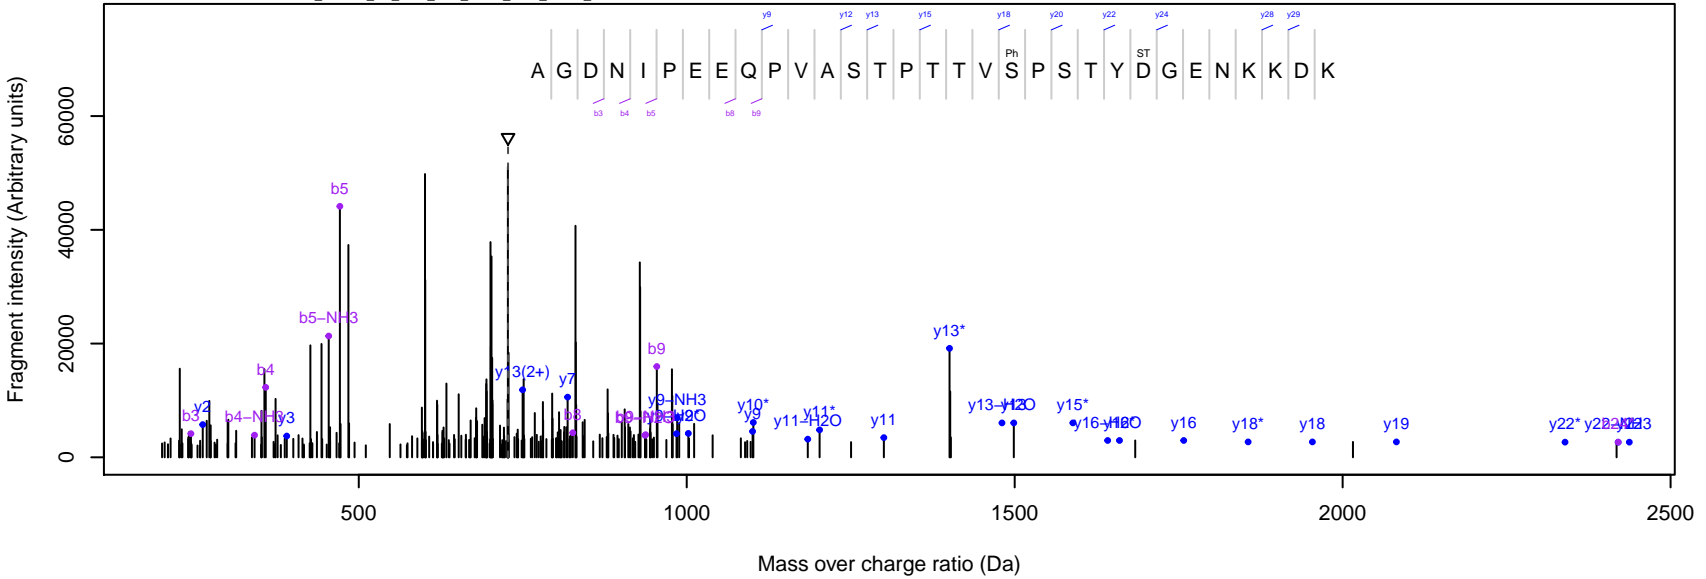

DVSGFSDPYCLLGIEQGVGVPGGSPSTY(Phospho (STY))PGSR-3+

Source : QE3\_201126\_FR\_TiOx\_hum\_tissue\_Urea\_RNAB\_H Scan : 61632

Andromeda score : 88.226

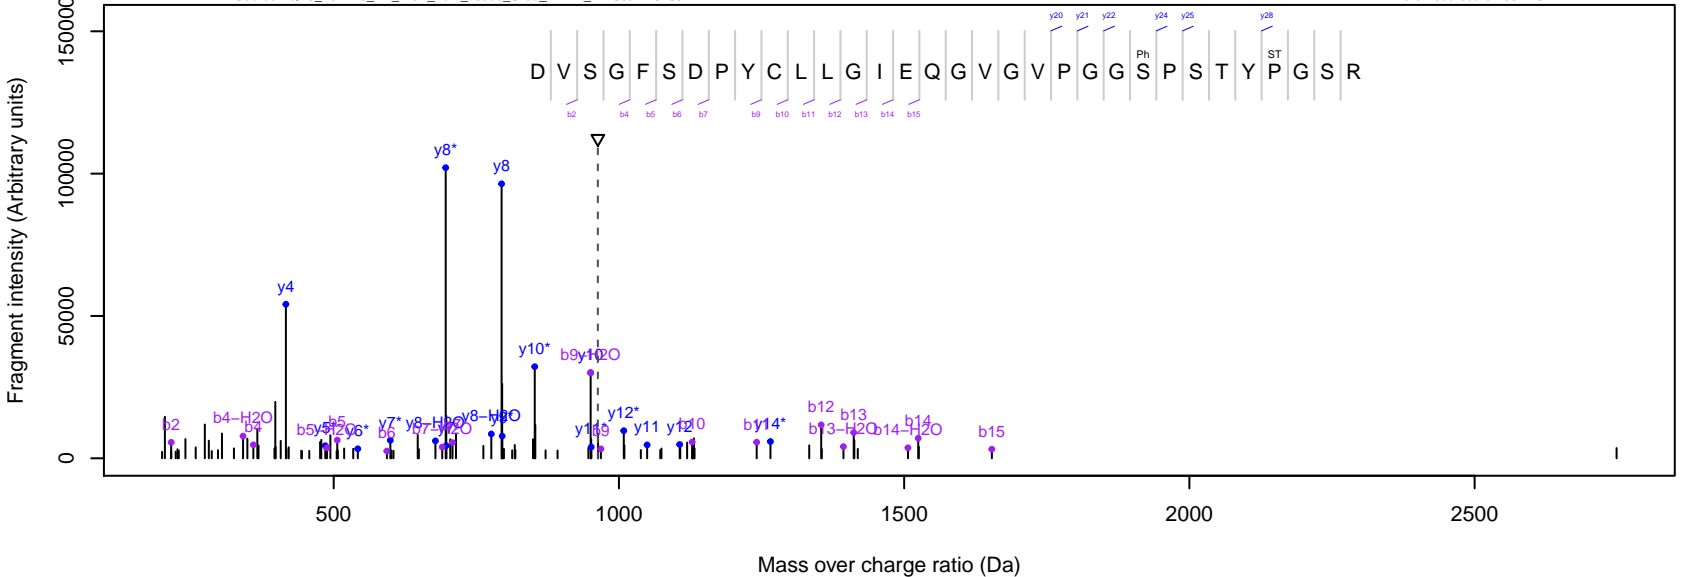

(Acetyl (Protein N-term))AAASVT(Phospho (STY))PPGS(Phospho (STY))LELLQPGFSK-3+

Source : QE3\_201126\_FR\_TiOx\_hum\_tissue\_Urea\_RNAB\_H Scan : 57420

Andromeda score : 88.222

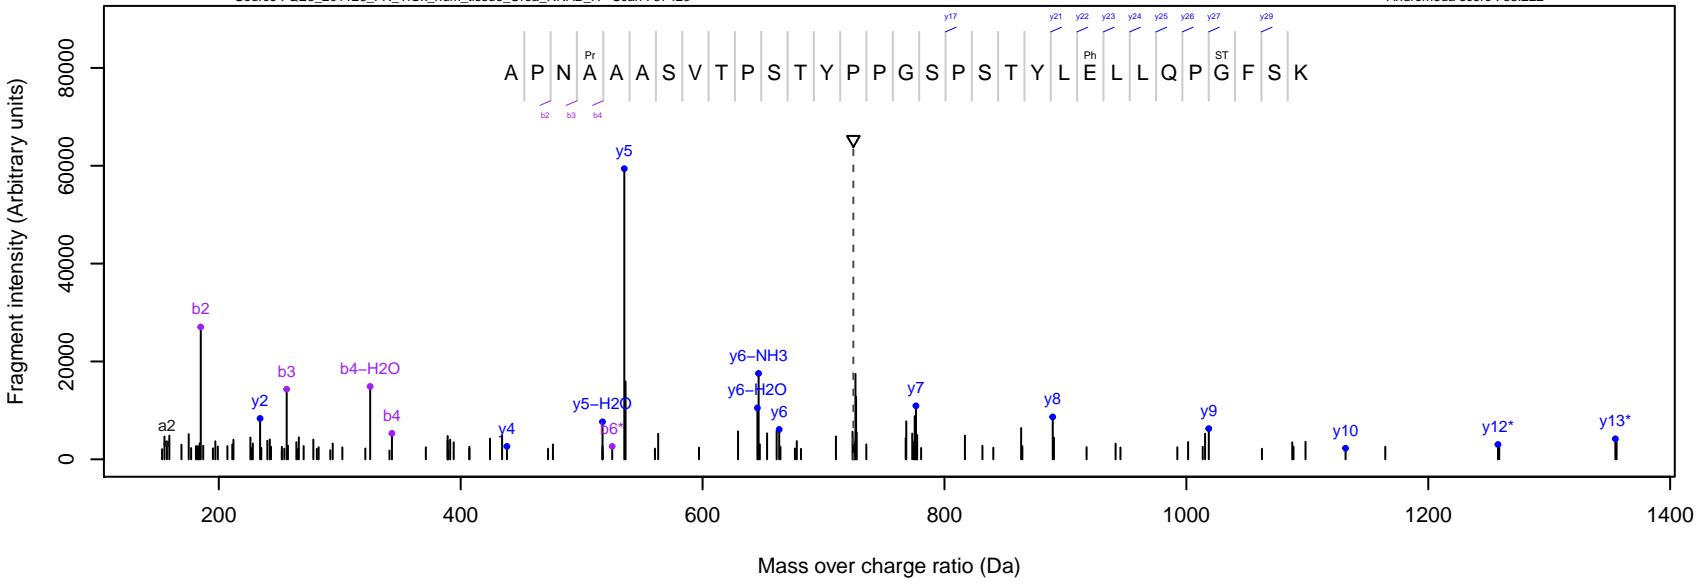

KAS(Phospho (STY))SRLENLGIPEEELLR-3+

Source : QE3\_201126\_FR\_TiOx\_hum\_tissue\_Urea\_RNAB\_H Scan : 36825

Andromeda score : 88.222

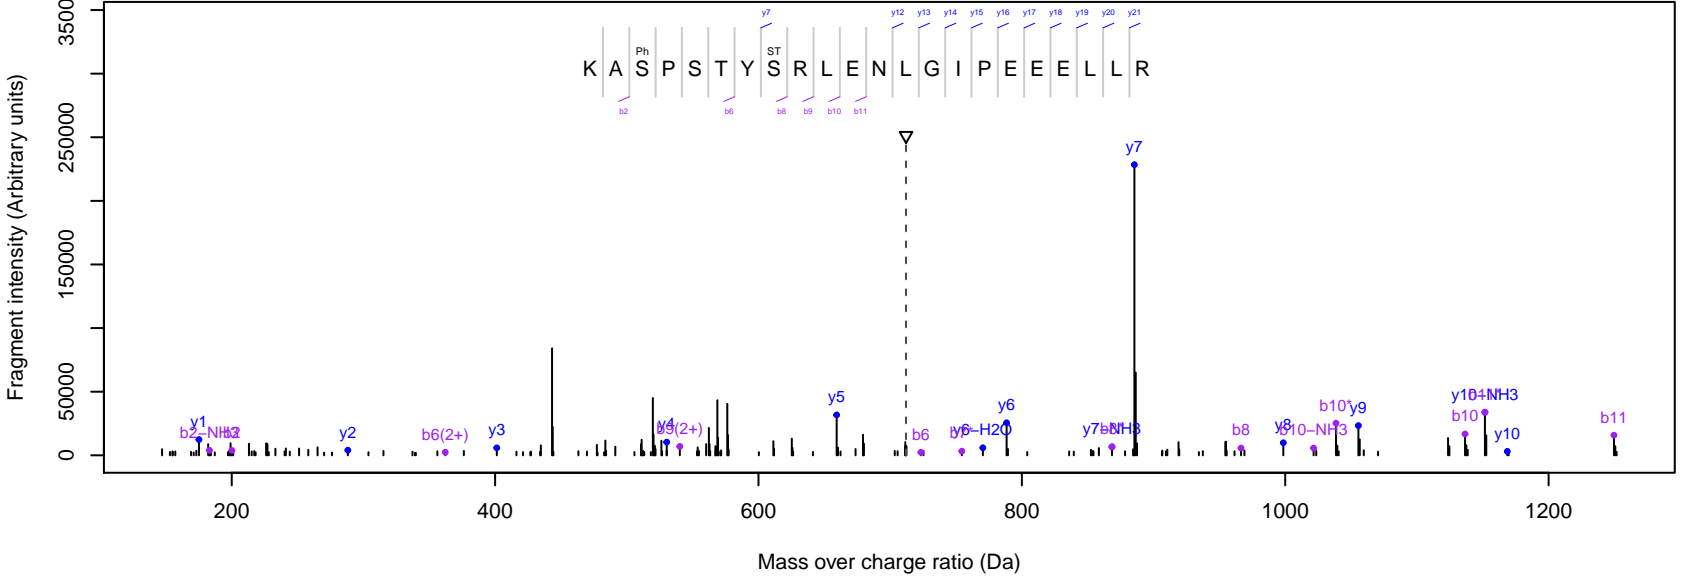

(Acetyl (Protein N-term))M(Oxidation (M))DLFGDLPEPERS(Phospho (STY))PRPAAGK-3+

Source : QE3\_201126\_FR\_TiOx\_hum\_tissue\_Urea\_RNAB\_H Scan : 40508

Andromeda score : 88.222

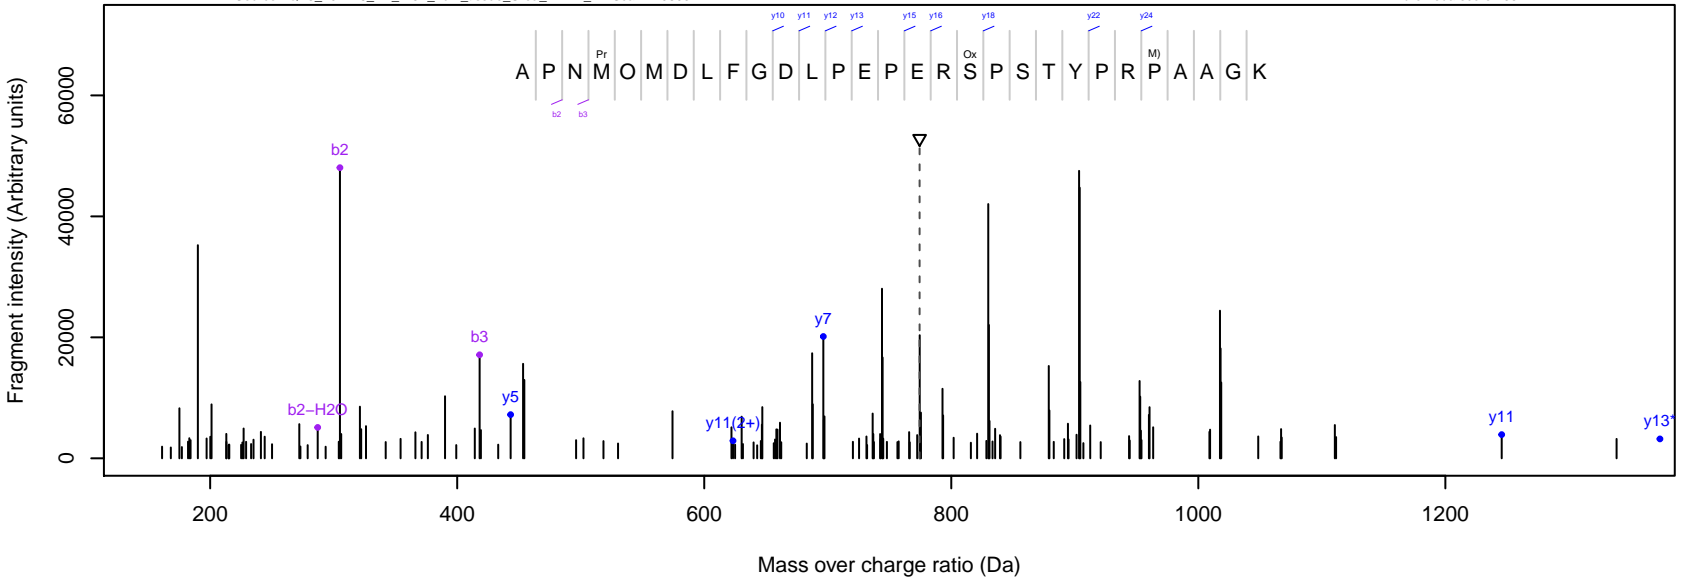

SLS(Phospho (STY))LGGHVGFDLDPQLVSK-3+

Source : QE3\_201126\_FR\_TiOx\_hum\_tissue\_Urea\_RNAB\_N Scan : 49809

Andromeda score : 88.222

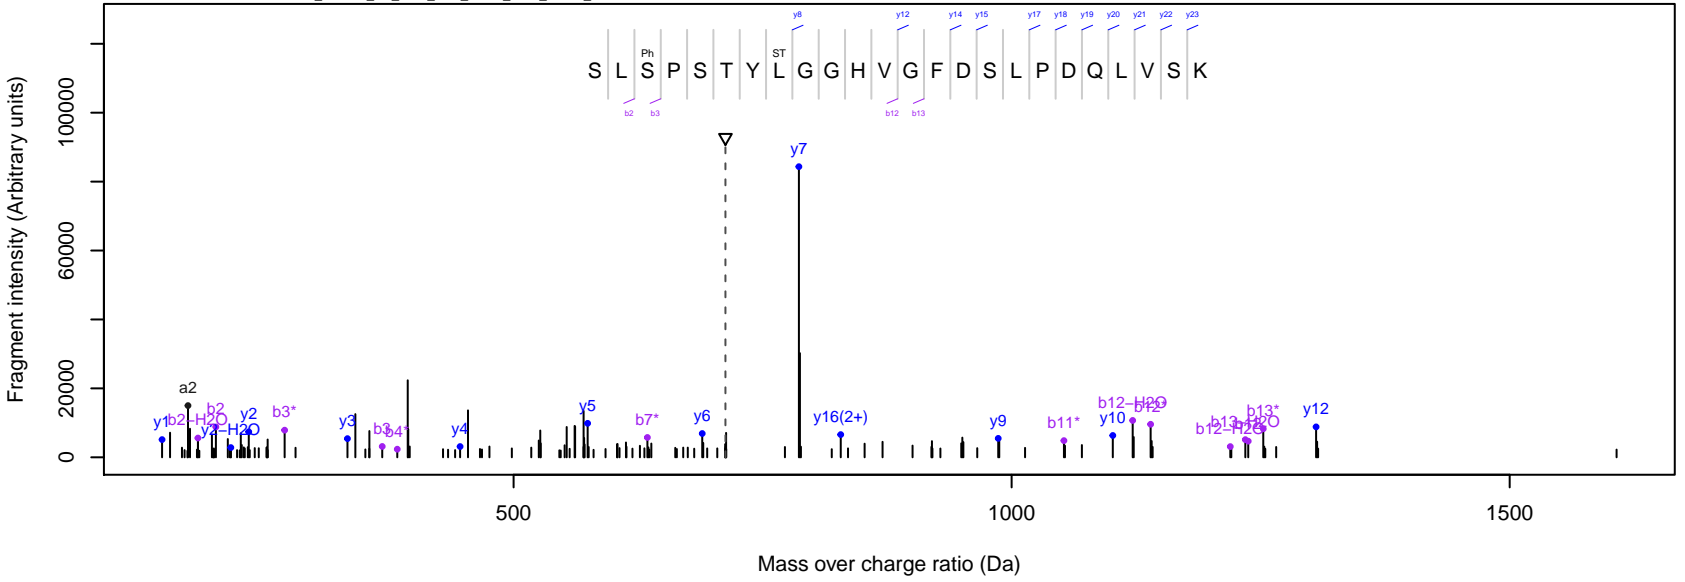

TNPPTQKPPS(Phospho (STY))PPM(Oxidation (M))SGR-2+

Source : QE3\_201126\_FR\_TiOx\_hum\_tissue\_Urea\_RNAB\_N Scan : 9524

Andromeda score : 88.19

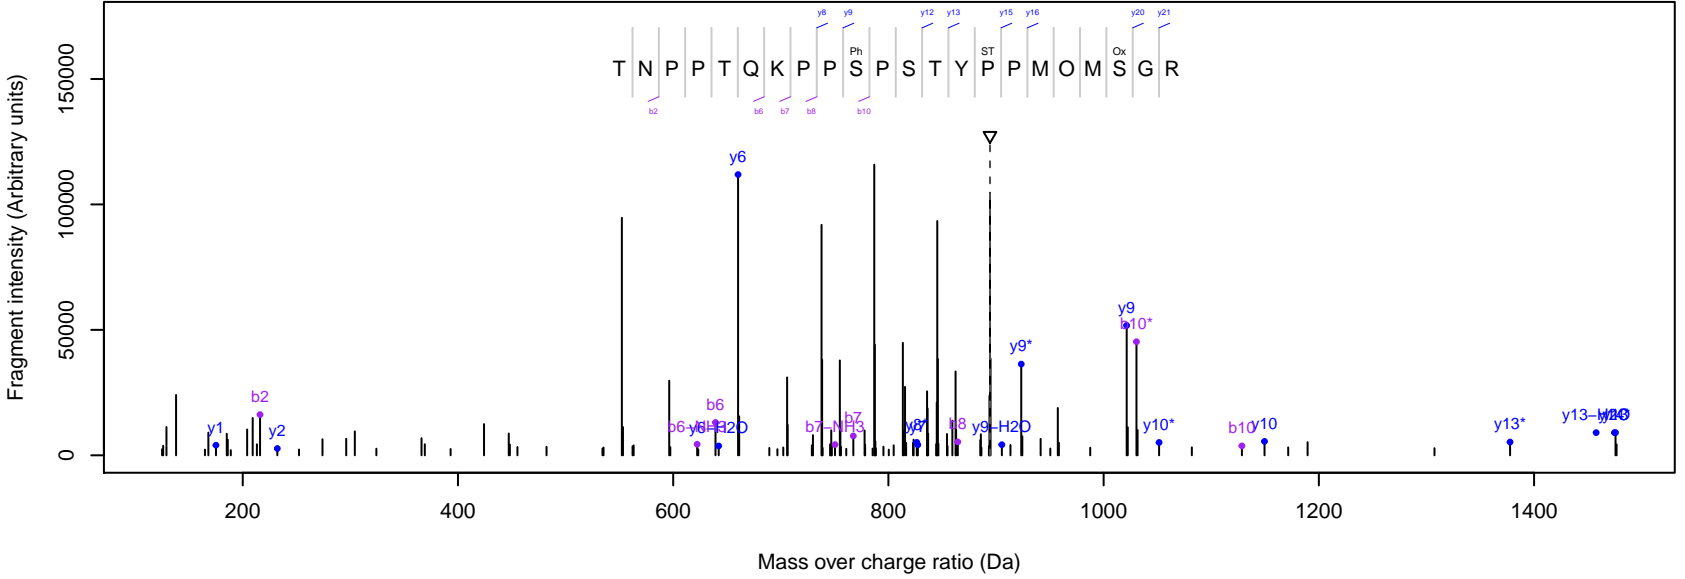

NNSY(Phospho (STY))TCYTAICGLPVHATFR-3+

Source : QE3\_201126\_FR\_TiOx\_hum\_tissue\_Urea\_RNAB\_B Scan : 46728

Andromeda score : 88.176

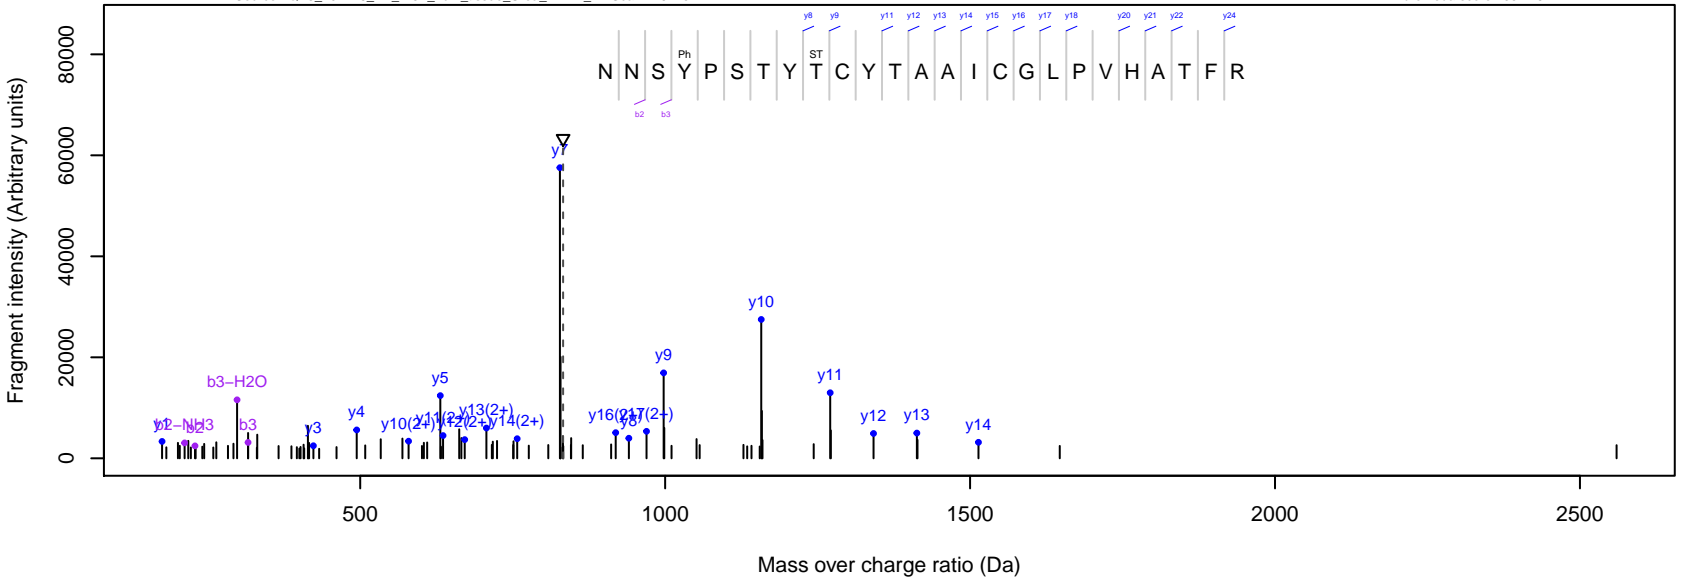

(Acetyl (Protein N-term))S(Phospho (STY))AAEAGGVFHR-2+

Source : QE3\_201126\_FR\_TiOx\_hum\_tissue\_Urea\_RNAB\_H Scan : 23847

Andromeda score : 88.155

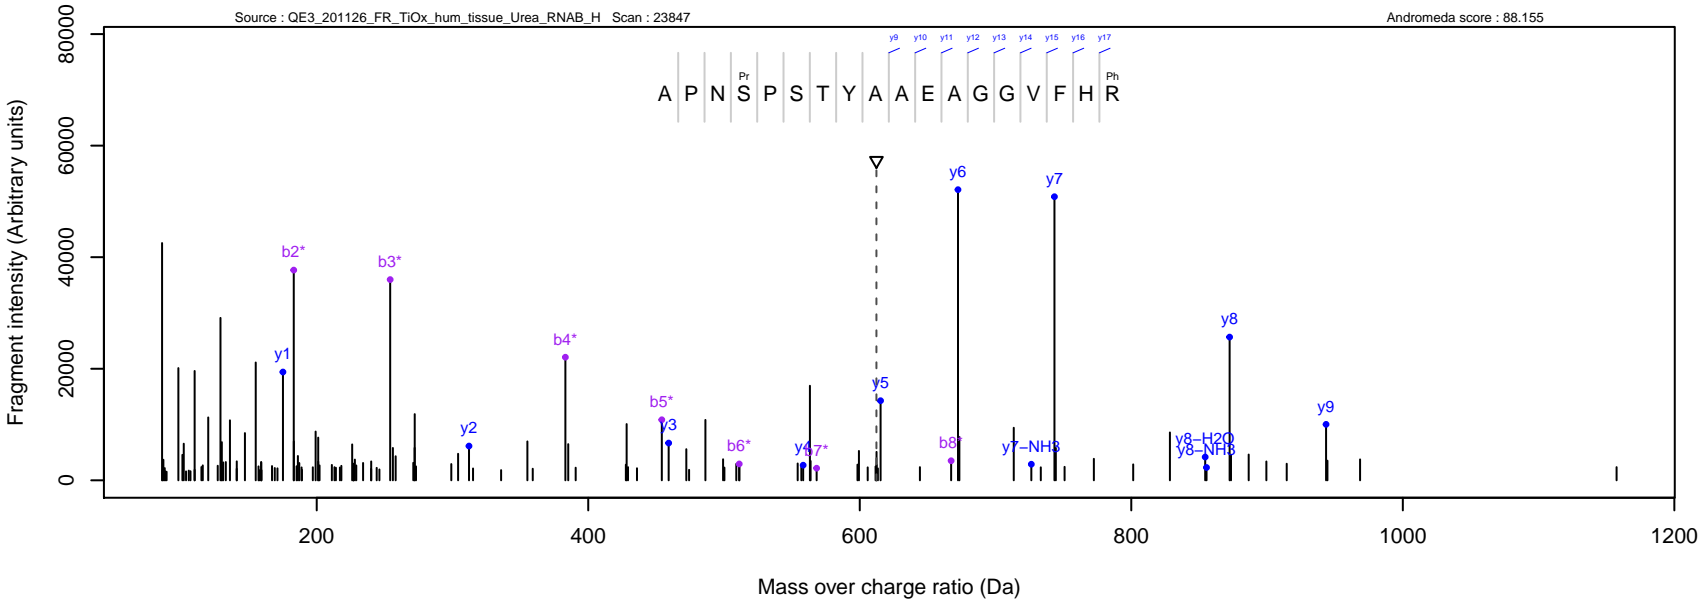

RKVS(Phospho (STY))LVLEK-3+

Source : QE3\_201126\_FR\_TiOx\_hum\_tissue\_Urea\_RNAB\_N Scan : 11275

Andromeda score : 88.101

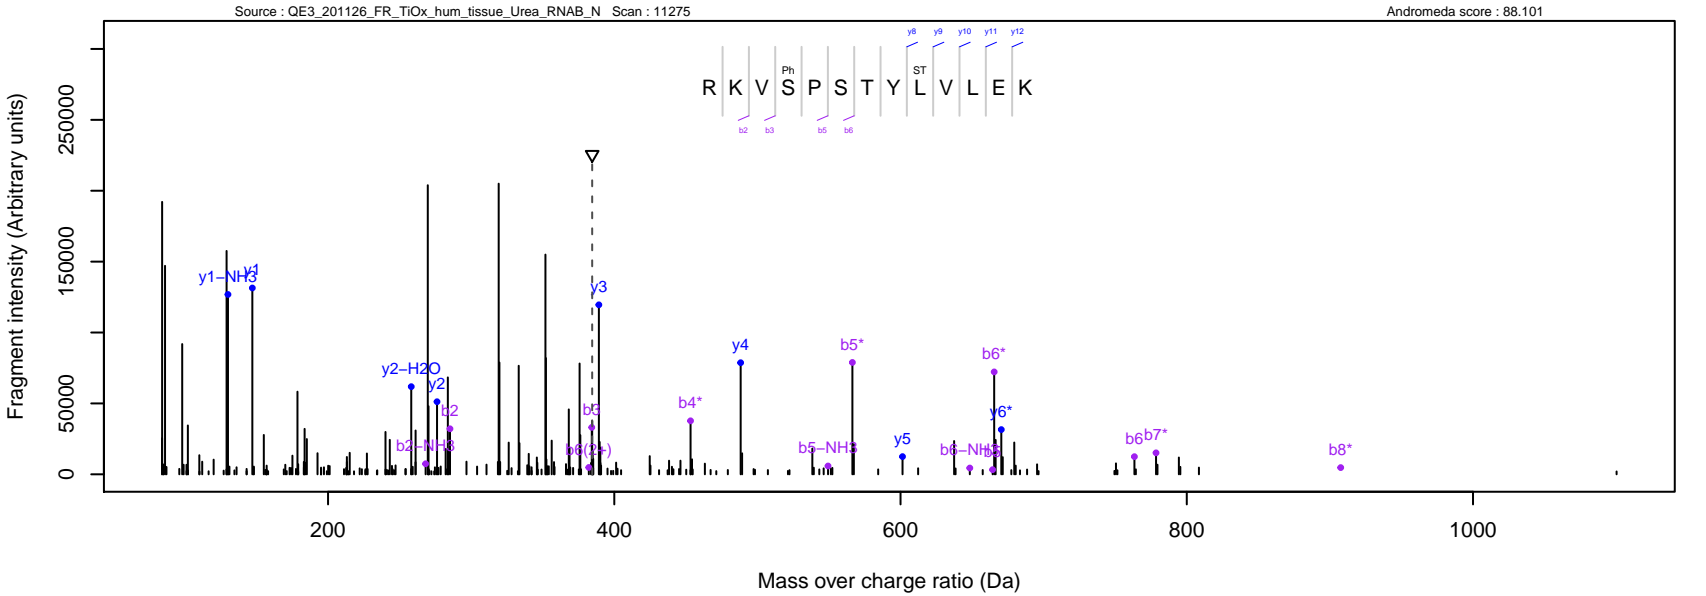

RAS(Phospho (STY))PVADIQEEILNAVK-3+

Source : QE3\_201126\_FR\_TiOx\_hum\_tissue\_Urea\_RNAB\_B Scan : 50451

Andromeda score : 88.09

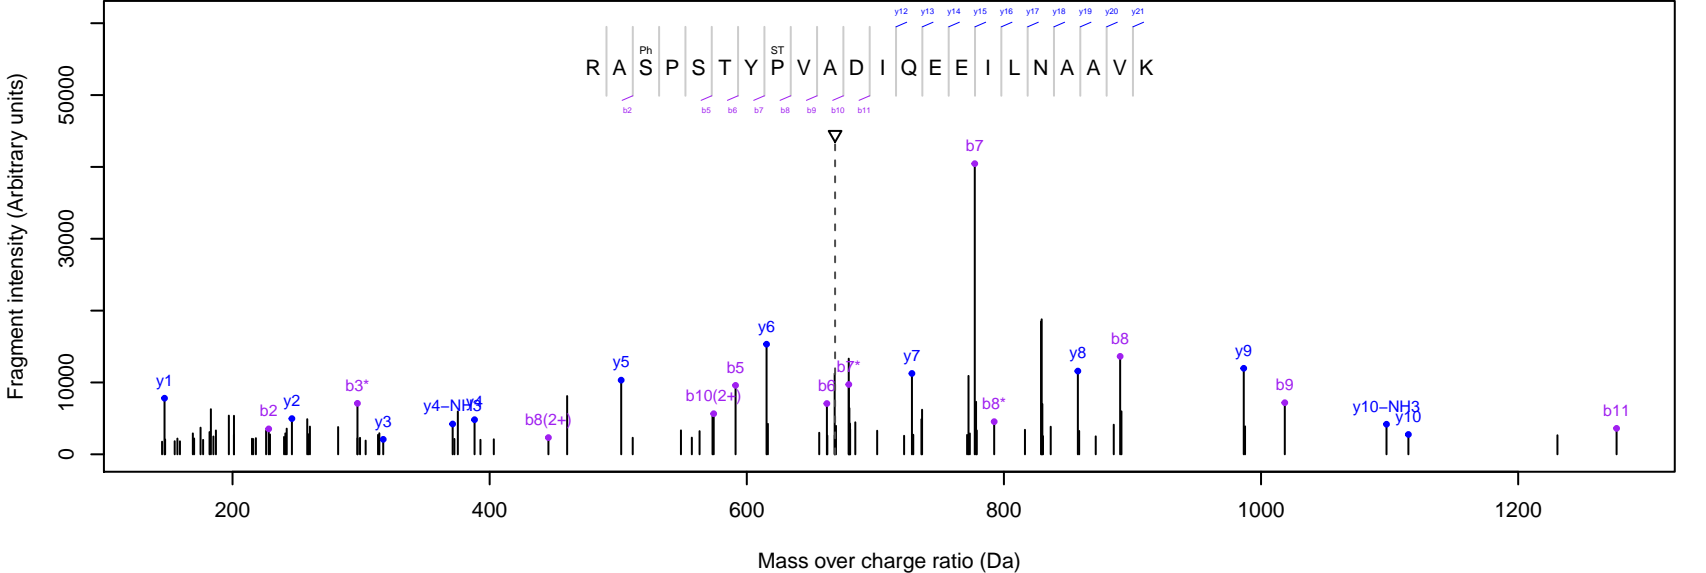

S(Phospho (STY))TPKEETVNDPEEAGHR-3+

Source : QE3\_201126\_FR\_TiOx\_hum\_tissue\_Urea\_RNAB\_N Scan : 7236

Andromeda score : 88.09

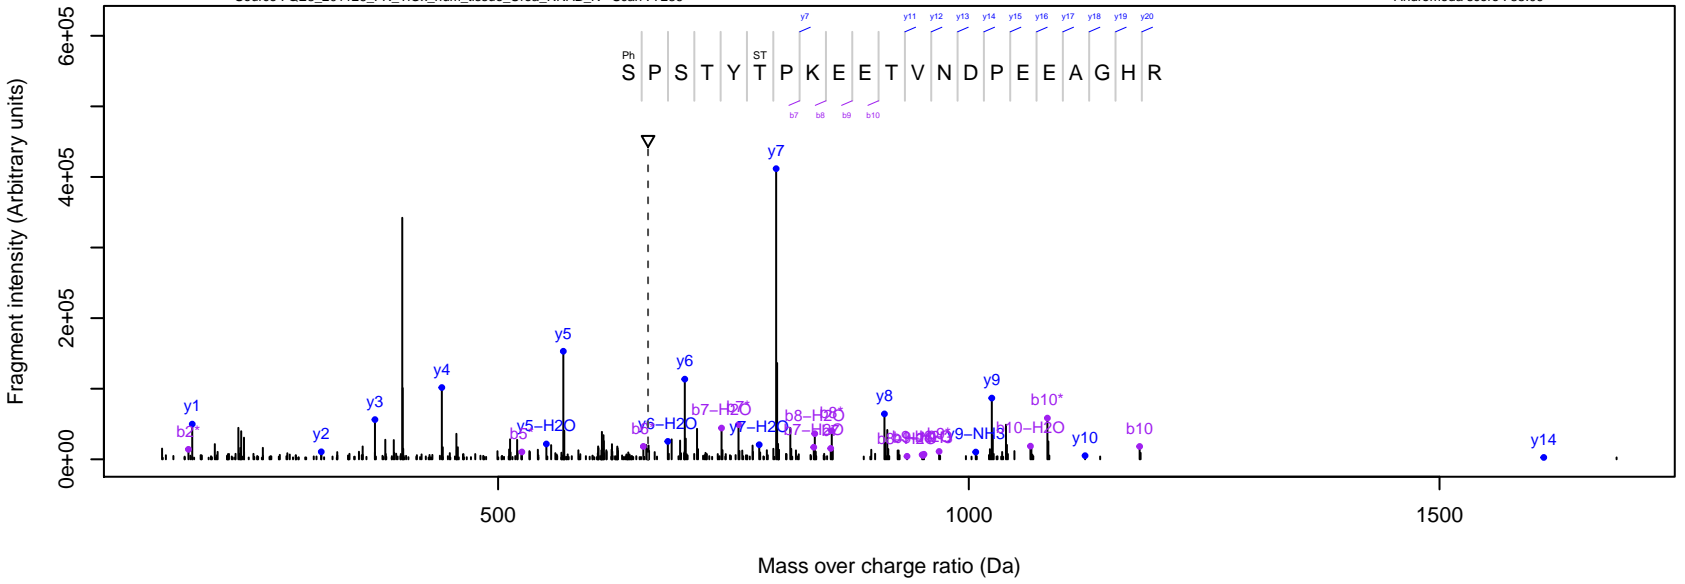

VES(Phospho (STY))DLKGPEVDIEGPEGK-3+

Source : QE3\_201126\_FR\_TiOx\_hum\_tissue\_Urea\_RNAB\_H Scan : 27126

Andromeda score : 88.09

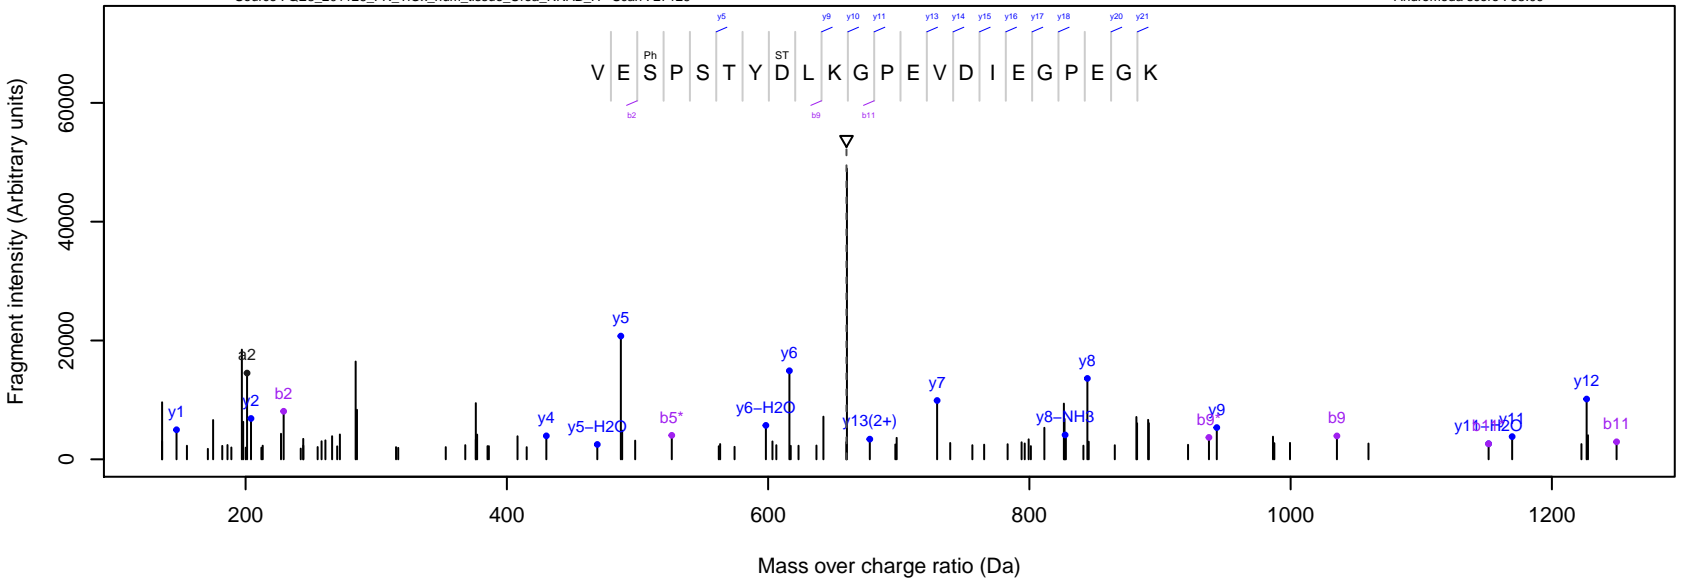

LQSLPFALT(Phospho (STY))HLNLK-2+

Source : QE3\_201126\_FR\_TiOx\_hum\_tissue\_Urea\_RNAB\_H Scan : 50874

Andromeda score : 88.075

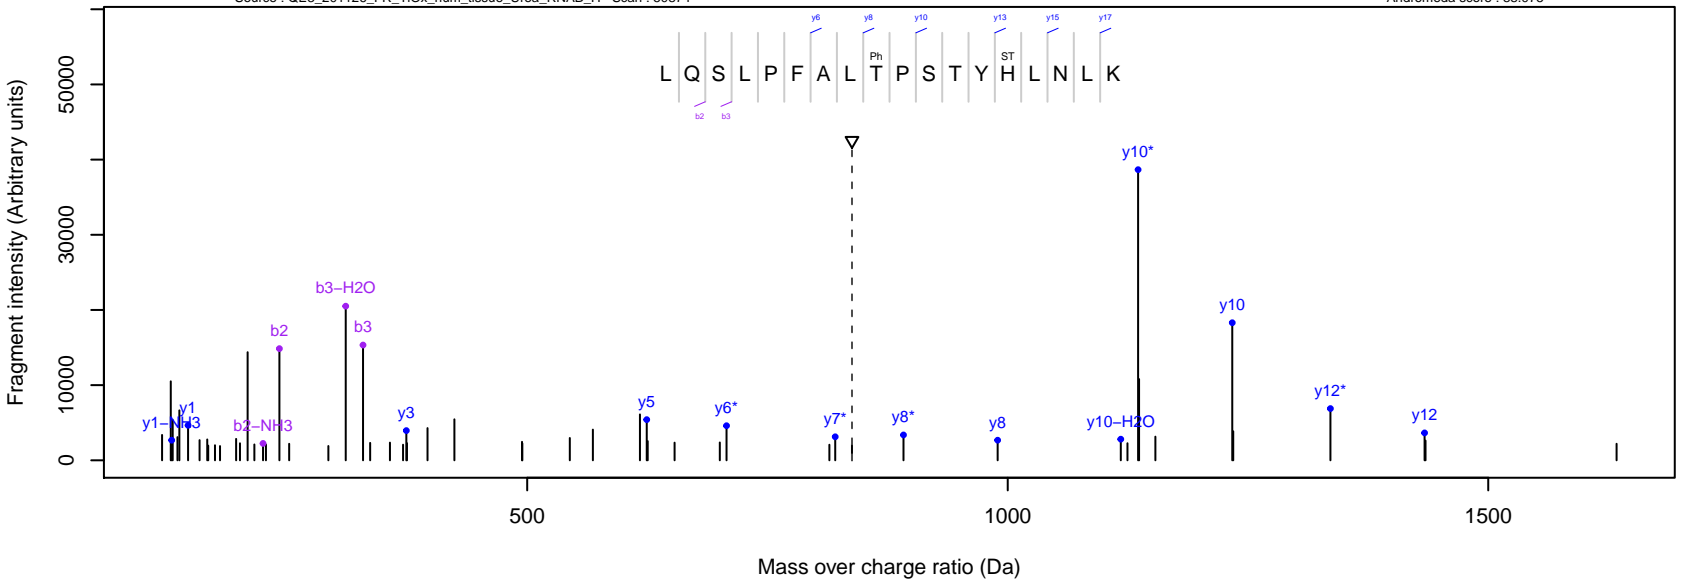

NADS(Phospho (STY))QEDAELKATTR-3+

Source : QE3\_201126\_FR\_TiOx\_hum\_tissue\_Urea\_RNAB\_H Scan : 12563

Andromeda score : 88.019

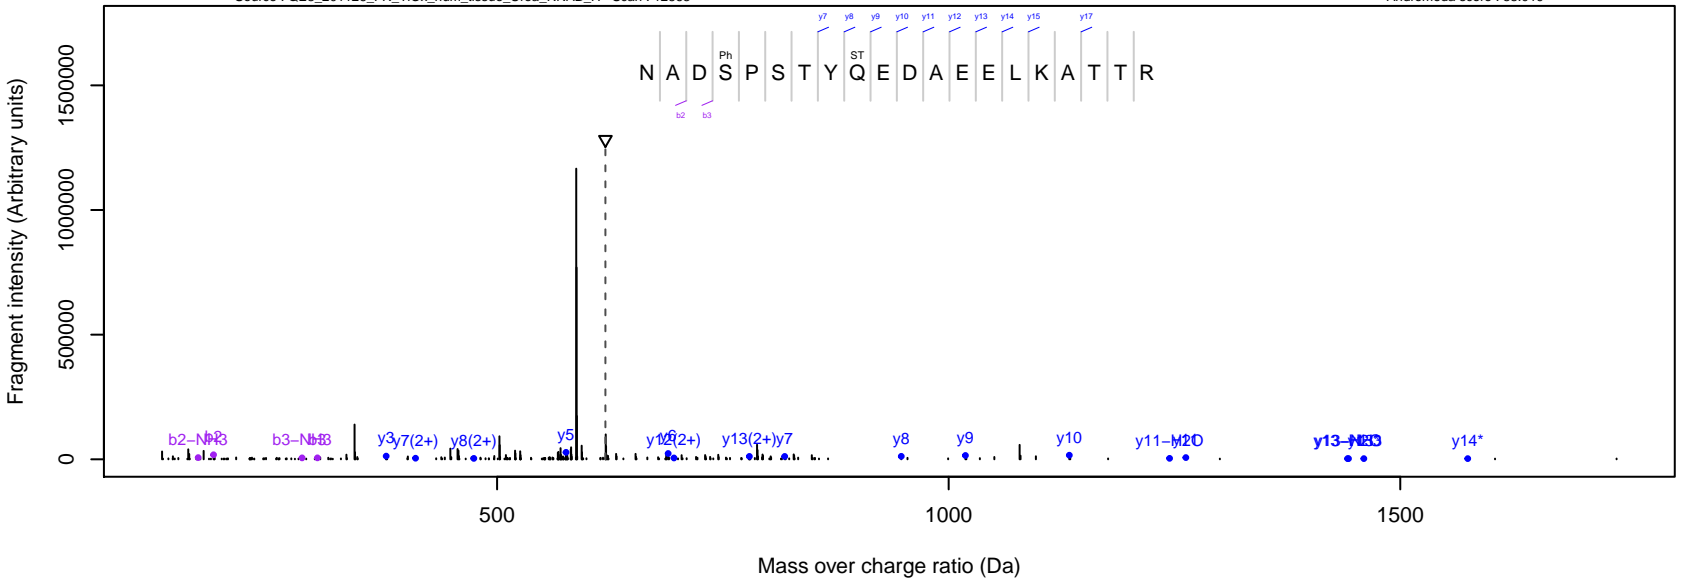

M(Oxidation (M))QNNSS(Phospho (STY))PSISPNTSFTSDGSPSLGGIKR-3+

Source : QE3\_201126\_FR\_TiOx\_hum\_tissue\_Urea\_RNAB\_N Scan : 32912

Andromeda score : 87.952

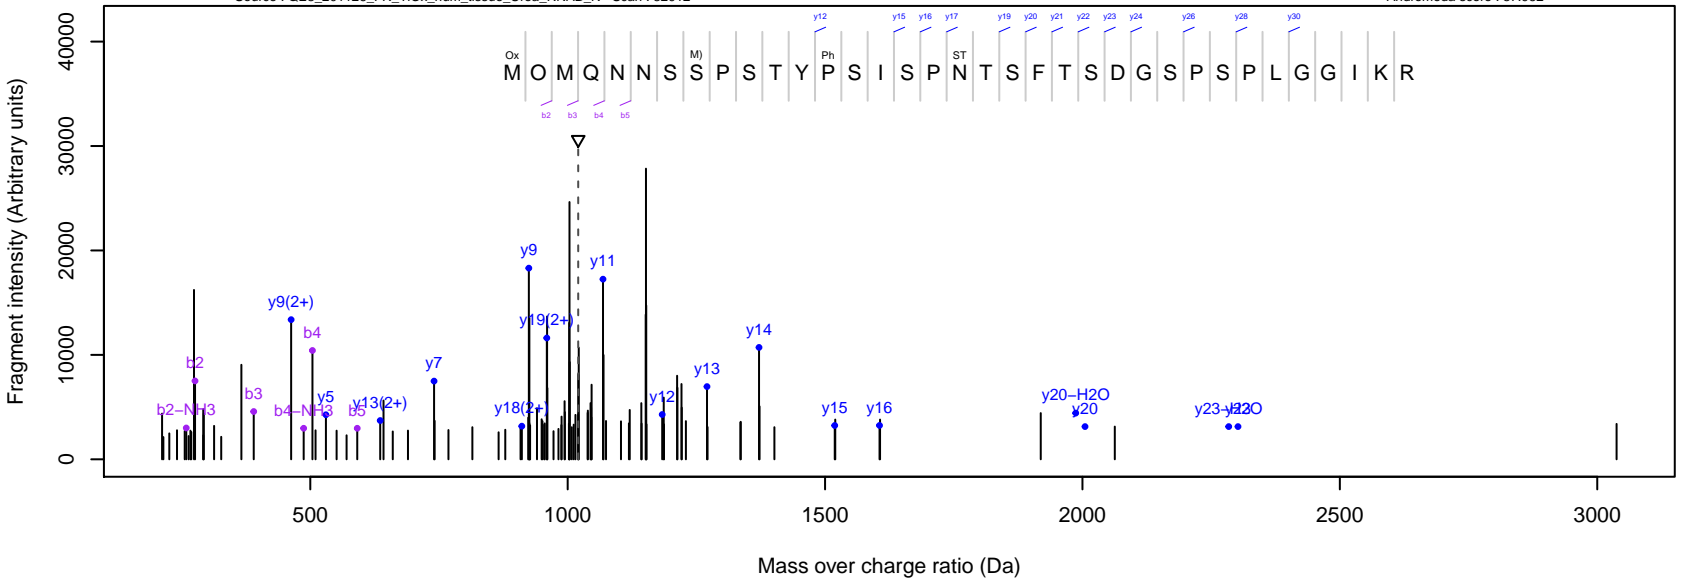

S(Phospho (STY))TQGVTLTDLQEAEK-2+

Source : QE3\_201126\_FR\_TiOx\_hum\_tissue\_Urea\_RNAB\_B Scan : 33830

Andromeda score : 87.932

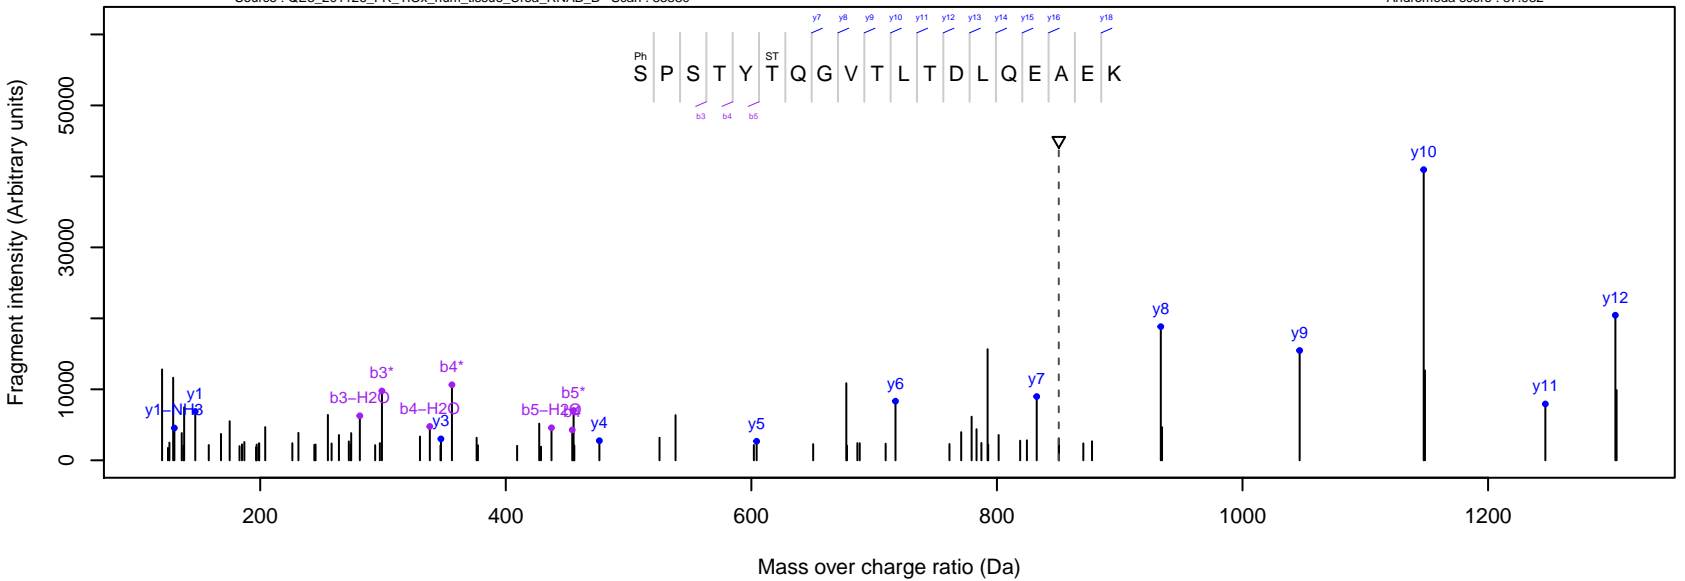



THS(Phospho (STY))VNGITEEADPTIYS GK-3+

Source : QE3\_201126\_FR\_TiOx\_hum\_tissue\_Urea\_RNAB\_N Scan : 24824

Andromeda score : 87.92

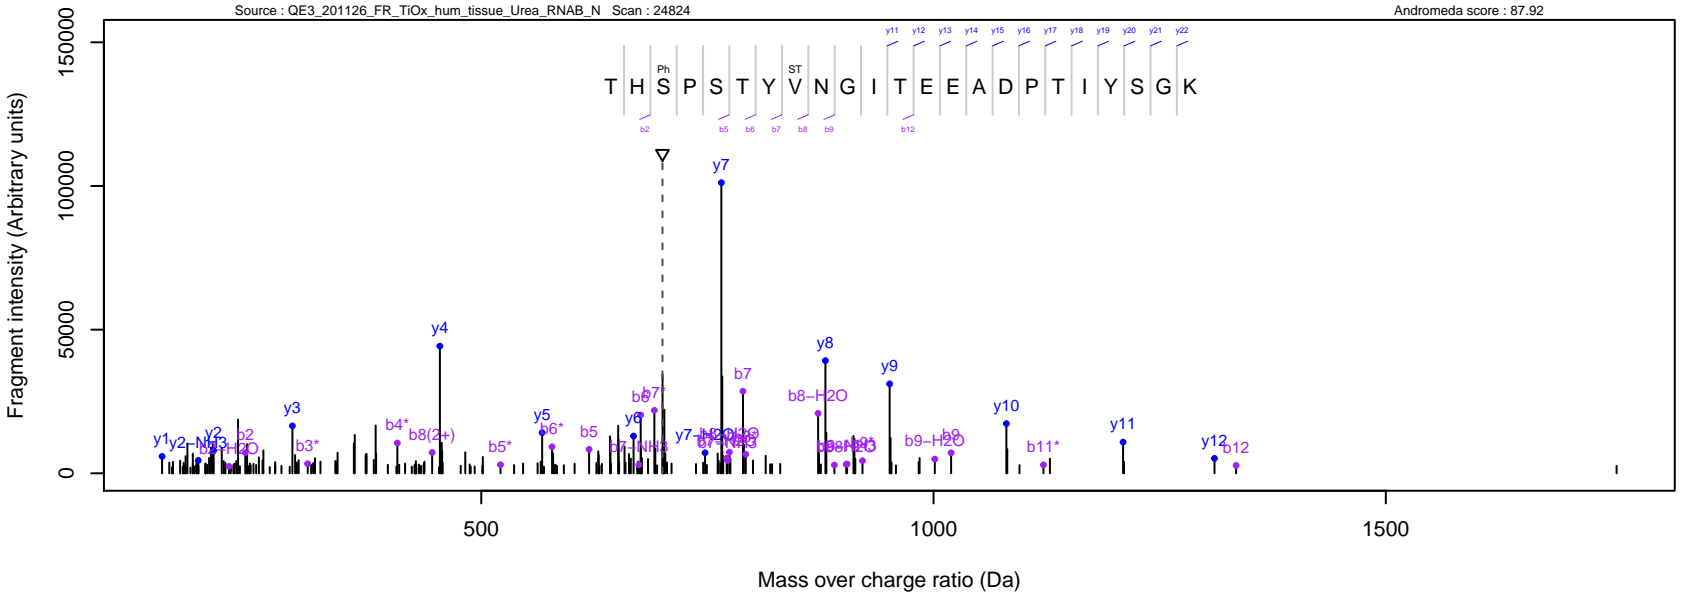

FGGEHVPNS(Phospho (STY))PFQVTALAGDQPSVQPPLR-3+

Source : QE3\_201126\_FR\_TiOx\_hum\_tissue\_Urea\_RNAB\_H Scan : 47782

Andromeda score : 87.881

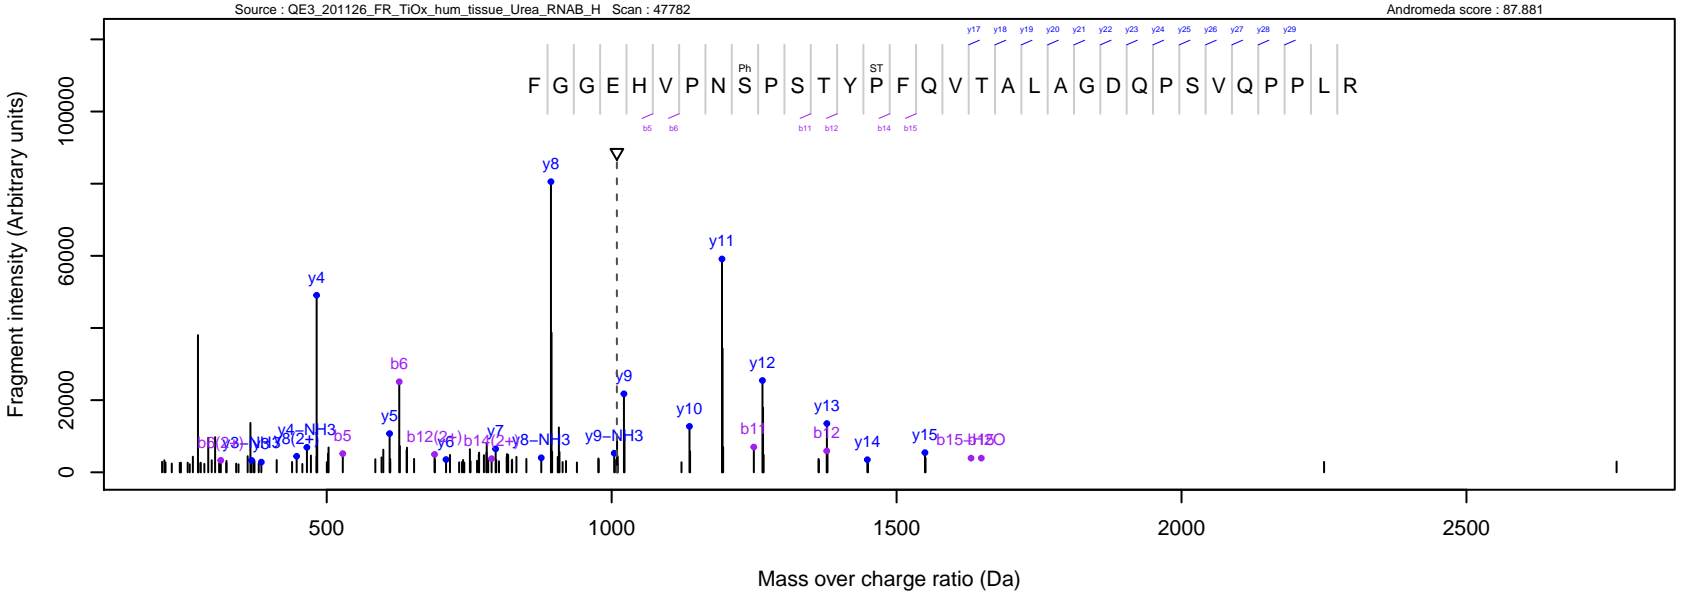

KLS(Phospho (STY))VPT(Phospho (STY))S(Phospho (STY))DEEDEVPAKPR-3+

Source : QE3\_201126\_FR\_TiOx\_hum\_tissue\_Urea\_RNAB\_H Scan : 26292

Andromeda score : 87.881

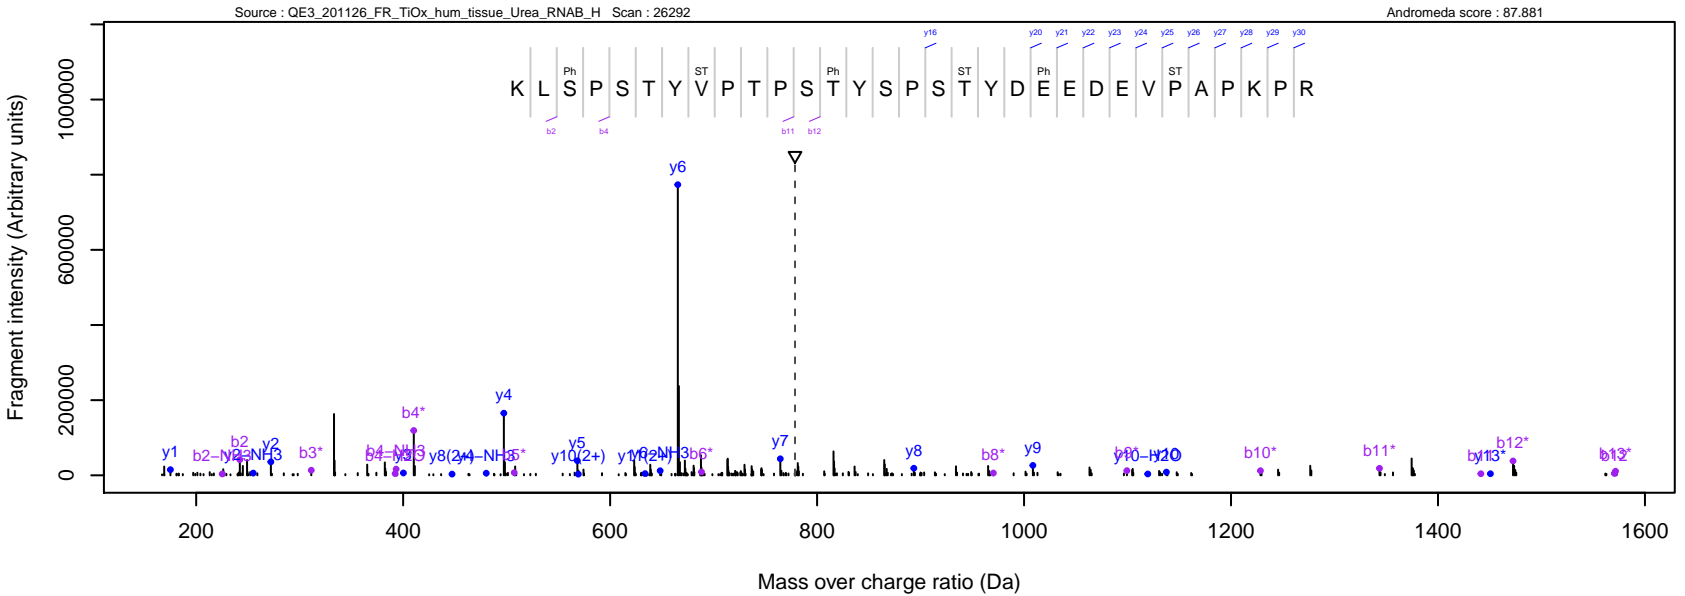

EDIHTS(Phospho (STY))EESKIFER-3+

Source : QE3\_201126\_FR\_TiOx\_hum\_tissue\_Urea\_RNAB\_B Scan : 18429

Andromeda score : 87.85

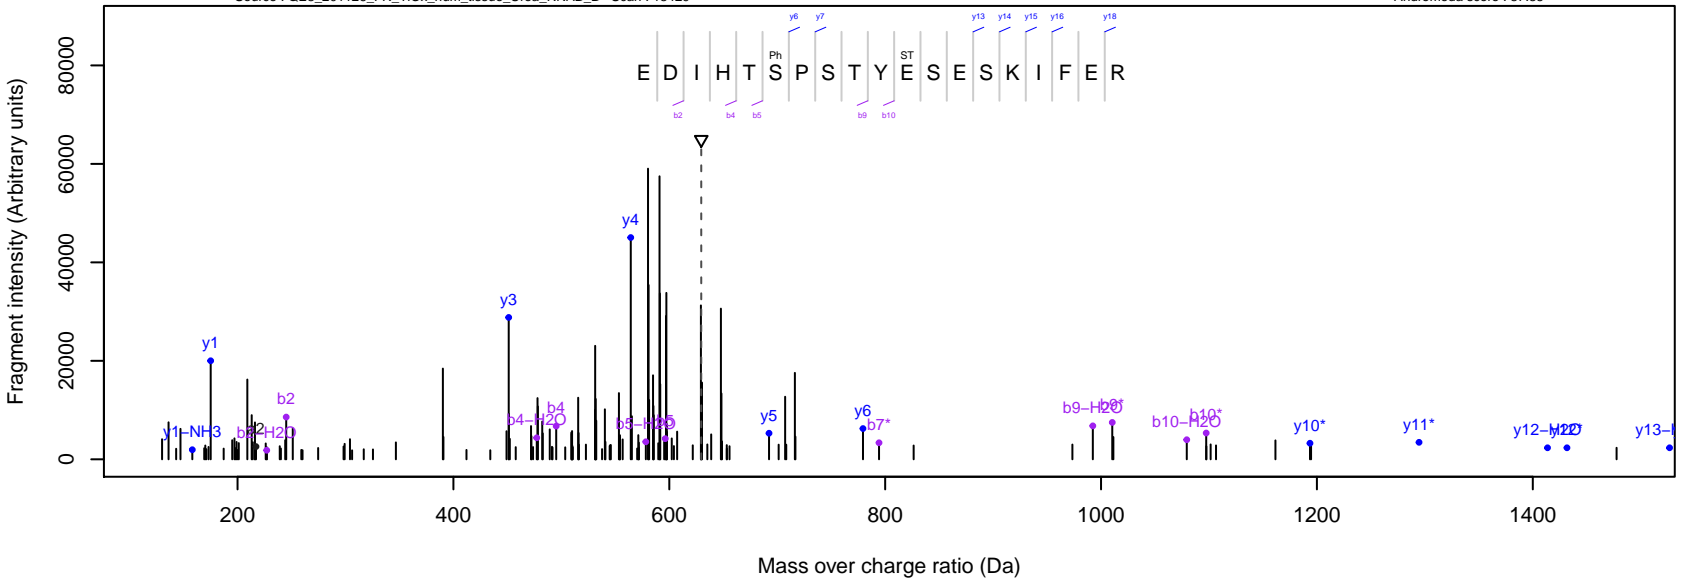

TKDQPDGSSLS(Phospho (STY))PAQS(Phospho (STY))PSQSPPAASSLR-3+

Source : QE3\_201126\_FR\_TiOx\_hum\_tissue\_Urea\_RNAB\_N Scan : 22380

Andromeda score : 87.842

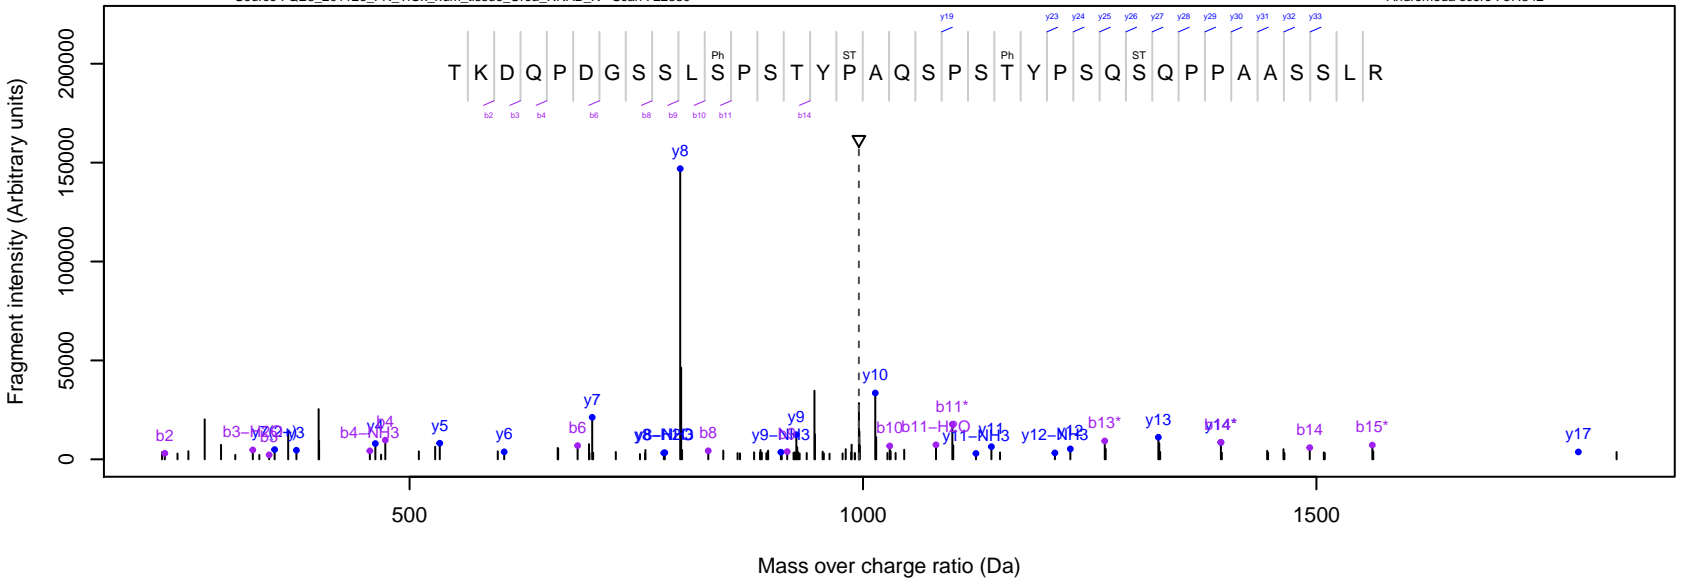

IRNPFGRGS(Phospho (STY))PK-3+

Source : QE3\_201126\_FR\_TiOx\_hum\_tissue\_Urea\_RNAB\_H Scan : 10550

Andromeda score : 87.831

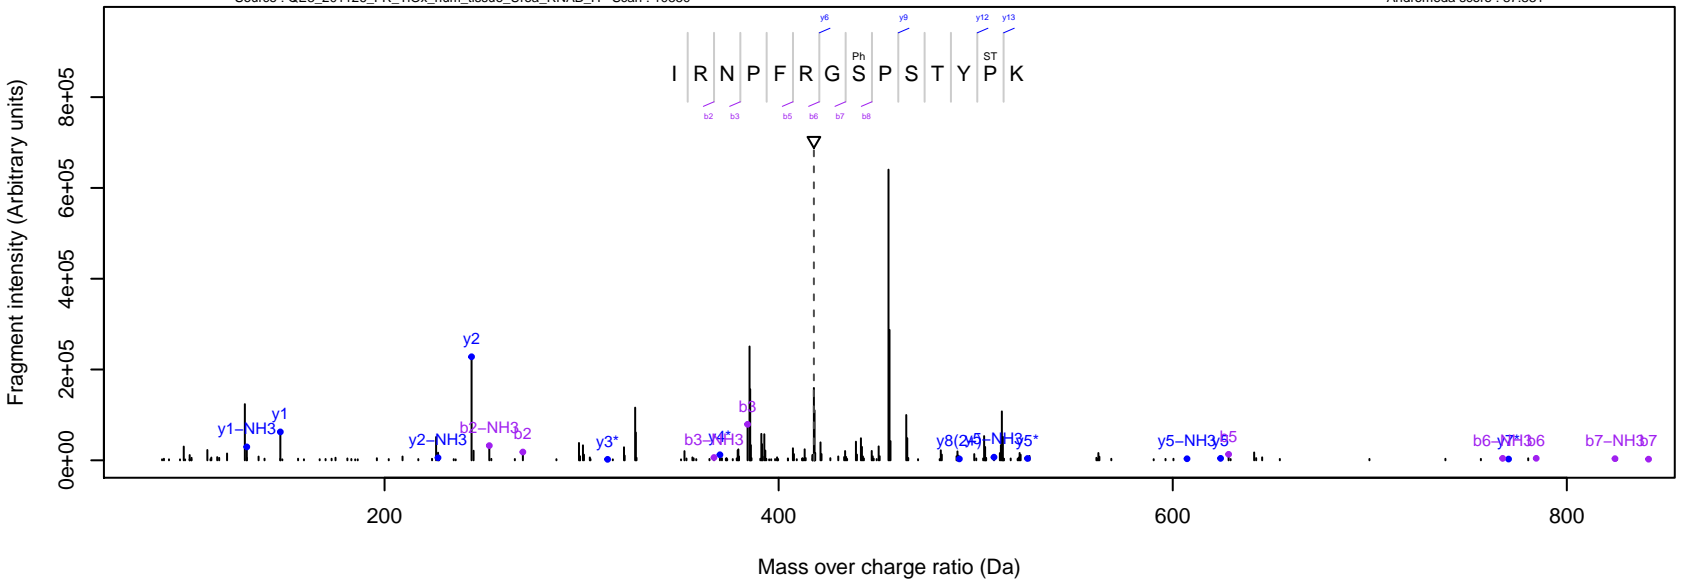

SHHAPMS(Phospho (STY))PGSSGGGGQPLAR-3+

Source : QE3\_201126\_FR\_TiOx\_hum\_tissue\_Urea\_RNAB\_H Scan : 9572

Andromeda score : 87.802

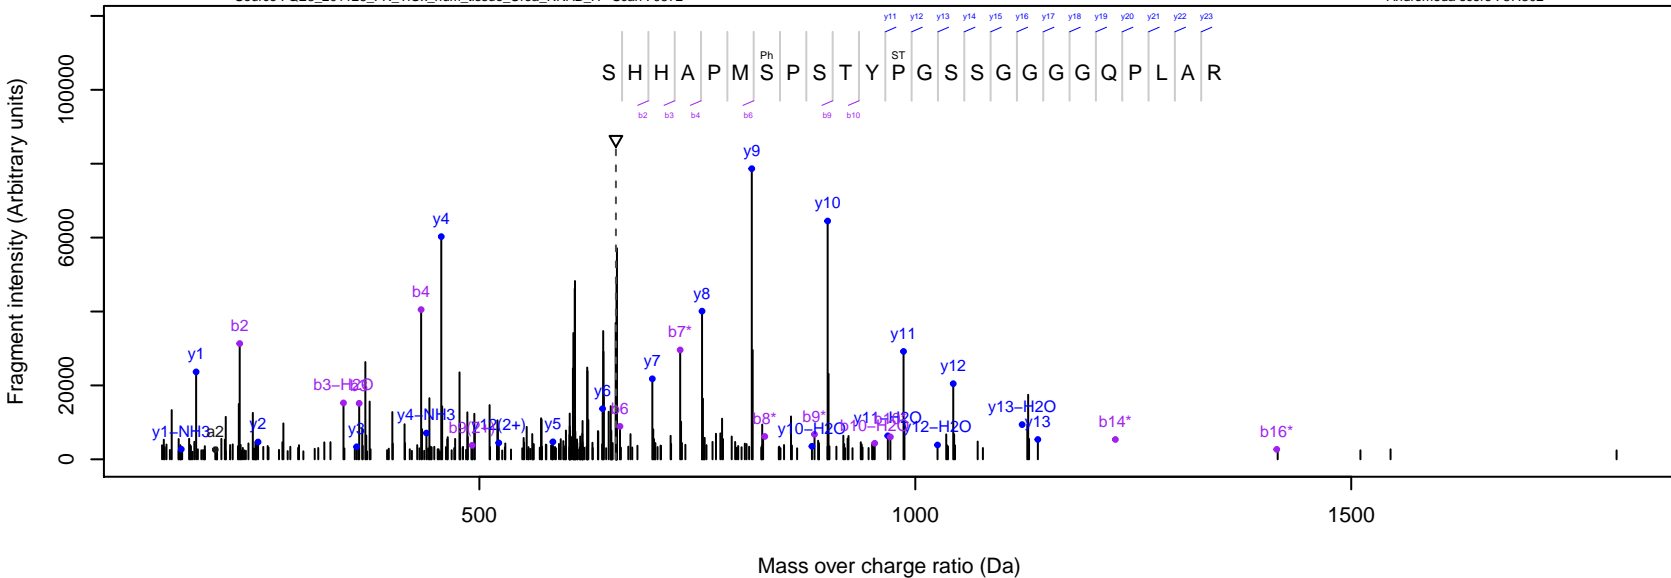

LHGGFSDCS(Phospho (STY))EDGEALNGEPELDLTSK-3+

Source : QE3\_201126\_FR\_TiOx\_hum\_tissue\_Urea\_RNAB\_B Scan : 39059

Andromeda score : 87.772

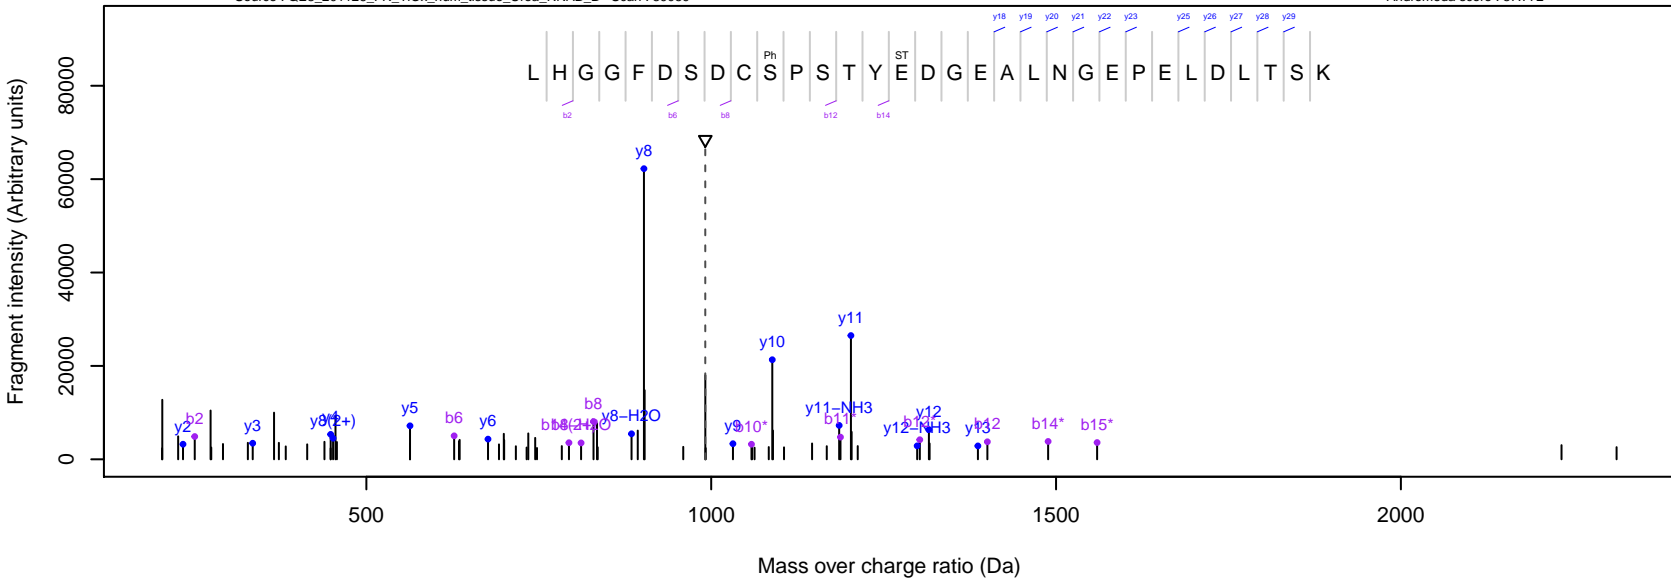

RLIS(Phospho (STY))VEPRPEQPEPDR-3+

Source : QE3\_201126\_FR\_TiOx\_hum\_tissue\_Urea\_RNAB\_H Scan : 27062

Andromeda score : 87.772

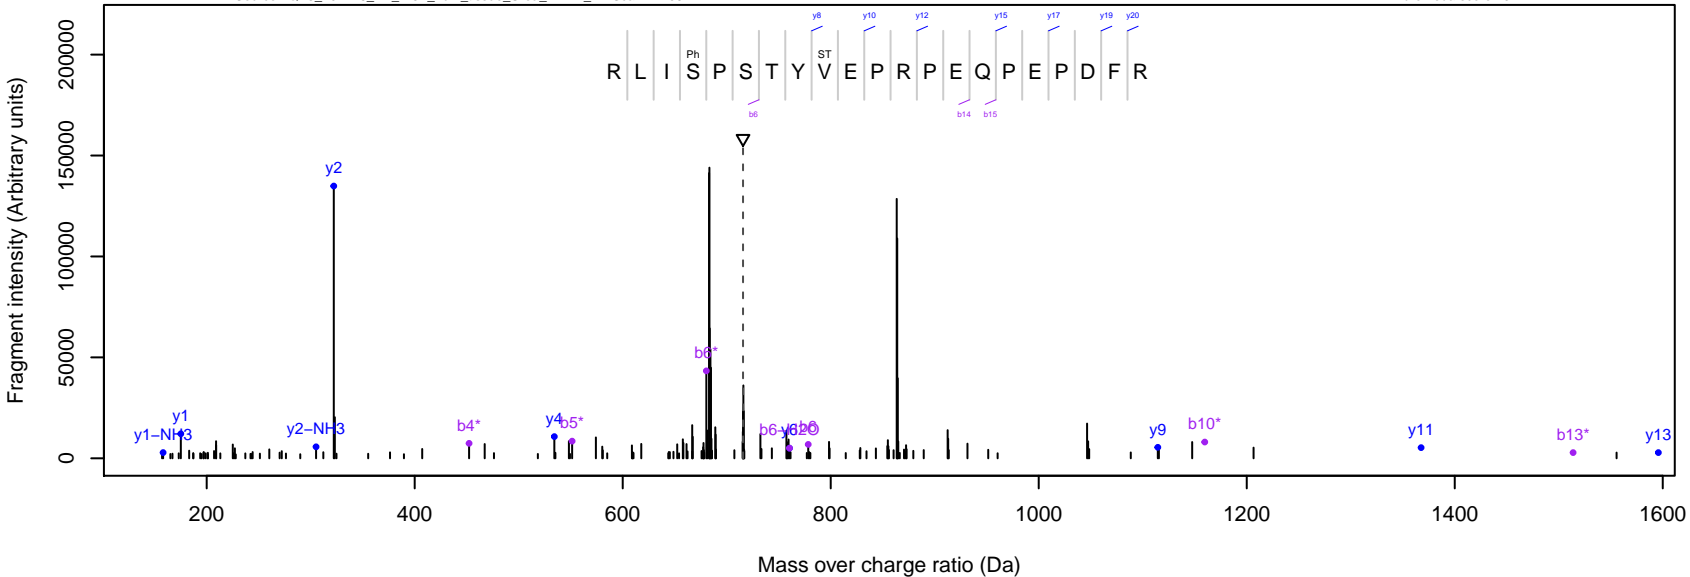

WDS(Phospho (STY))YDNFSGHRDDGMEEVVGHTQGPLDGSLYAK-4+

Source : QE3\_201126\_FR\_TiOx\_hum\_tissue\_Urea\_RNAB\_H Scan : 41693

Andromeda score : 87.753

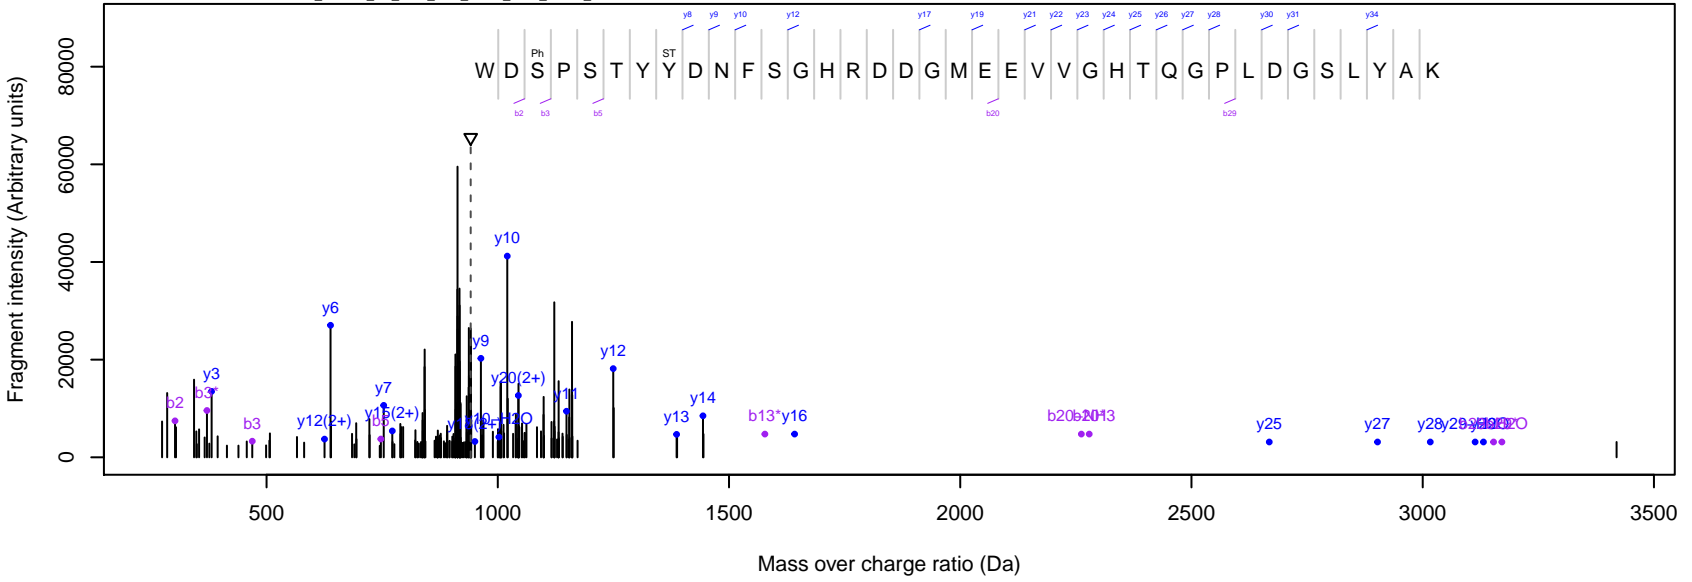

HTGPGILSM(Oxidation (M))ANAGPNTNGS(Phospho (STY))QFFICTAK-3+

Source : QE3\_201126\_FR\_TiOx\_hum\_tissue\_Urea\_RNAB\_B Scan : 39355

Andromeda score : 87.749

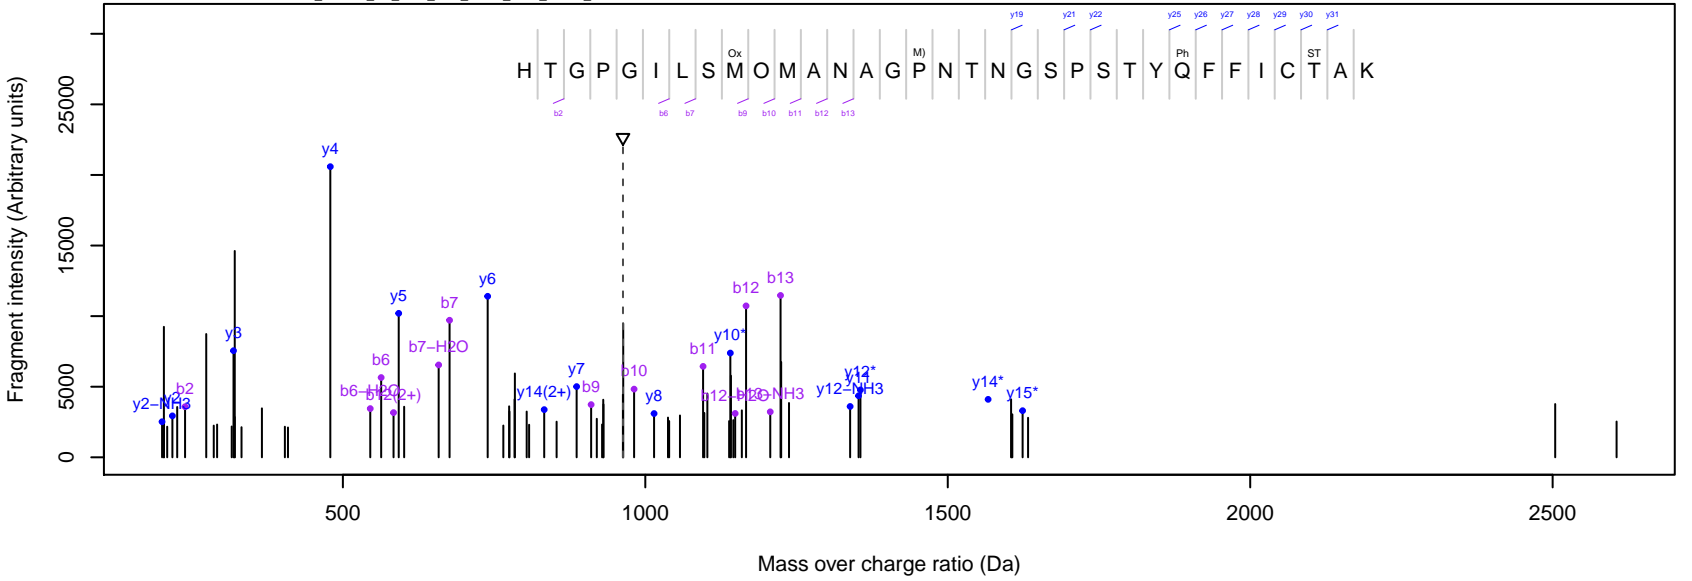

FHDTS(Phospho (STY))SPLM(Oxidation (M))VTPPSAEAHWAVR-3+

Source : QE3\_201126\_FR\_TiOx\_hum\_tissue\_Urea\_RNAB\_B Scan : 30774

Andromeda score : 87.72

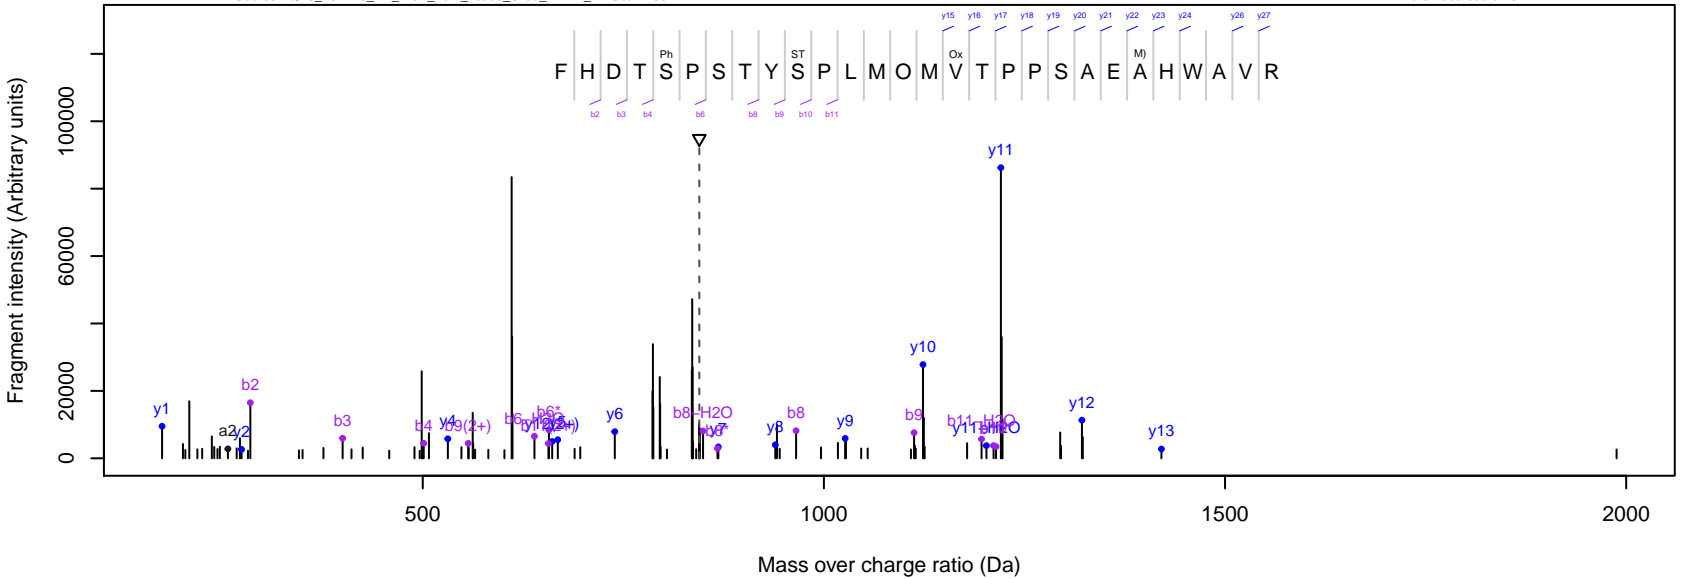

HLDGEEDGSS(Phospho (STY))DQSQASGTTGGR-3+

Source : QE3\_201126\_FR\_TiOx\_hum\_tissue\_Urea\_RNAB\_B Scan : 7138

Andromeda score : 87.72

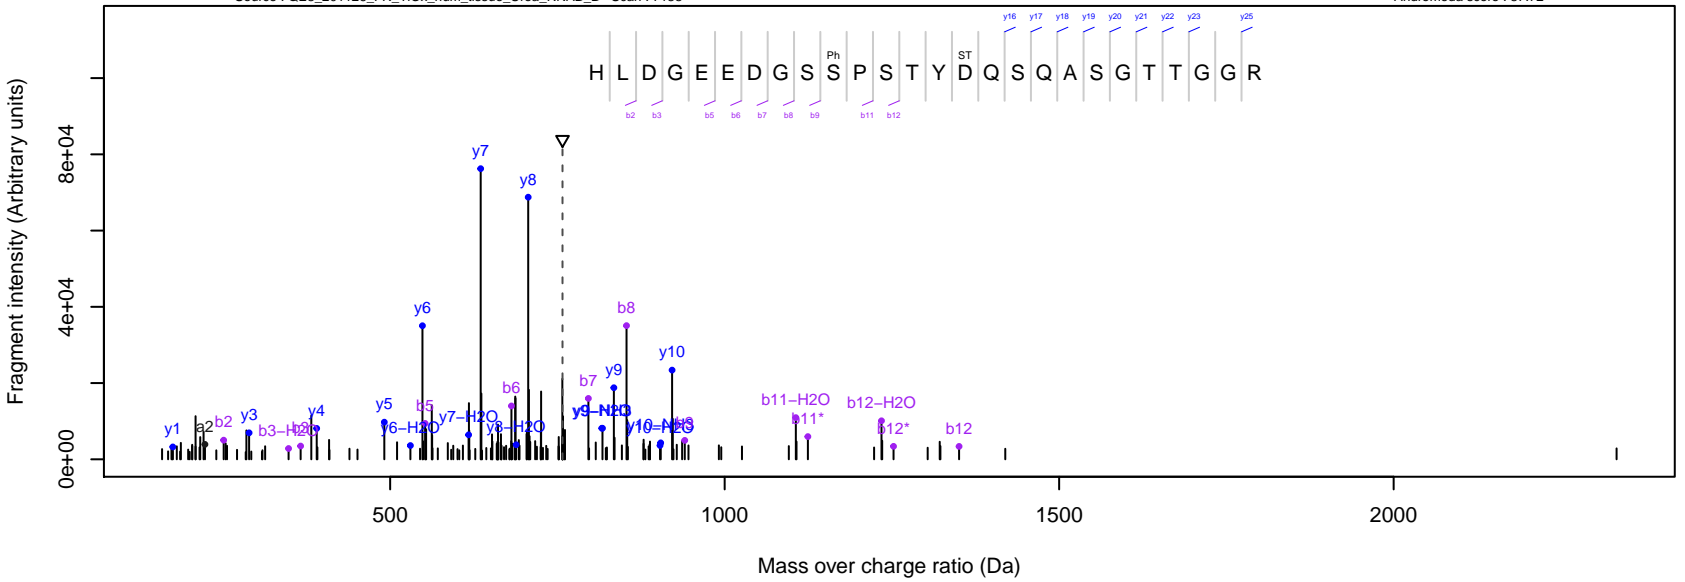

AGLGS(Phospho (STY))PERPPK-2+

Source : QE3\_201126\_FR\_TiOx\_hum\_tissue\_Urea\_RNAB\_H Scan : 8414

Andromeda score : 87.719

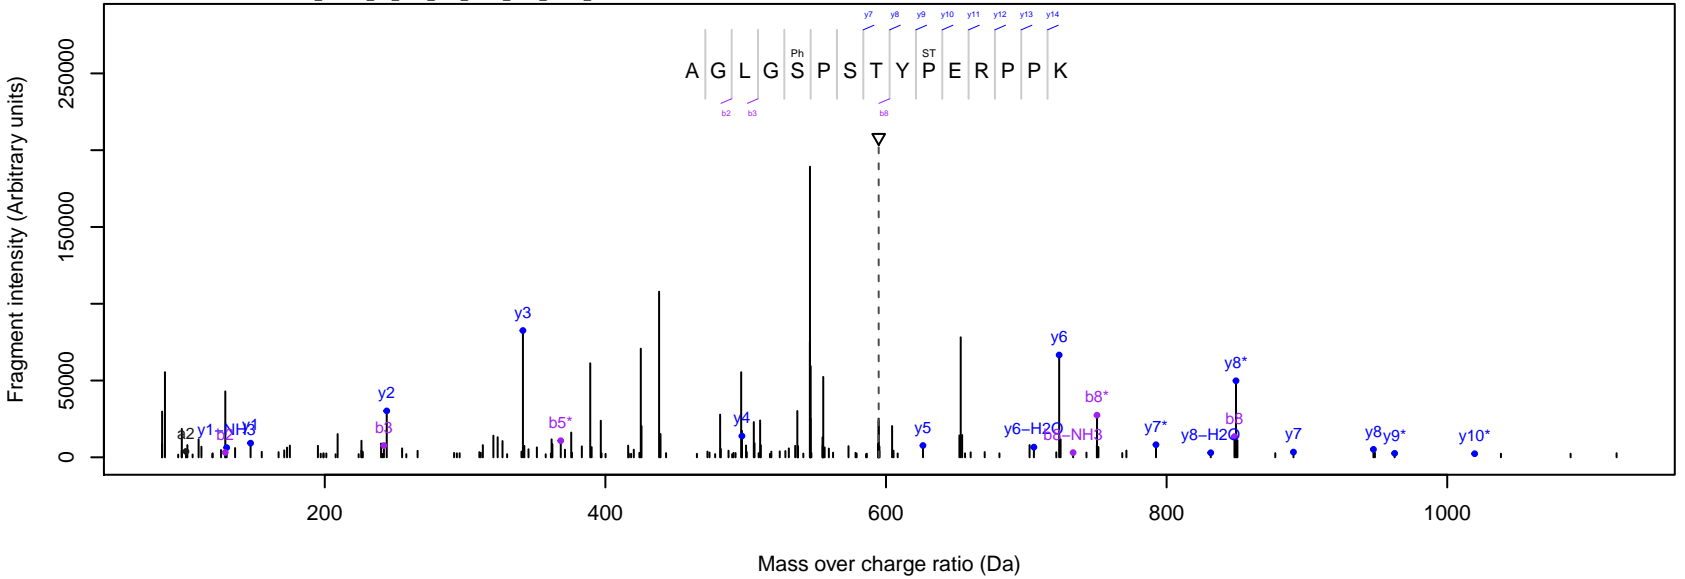

SPLPAGSSCTS(Phospho (STY))PRS(Phospho (STY))PLPAPRPFLYR-3+

Source : QE3\_201126\_FR\_TiOx\_hum\_tissue\_Urea\_RNAB\_N Scan : 42573

Andromeda score : 87.719

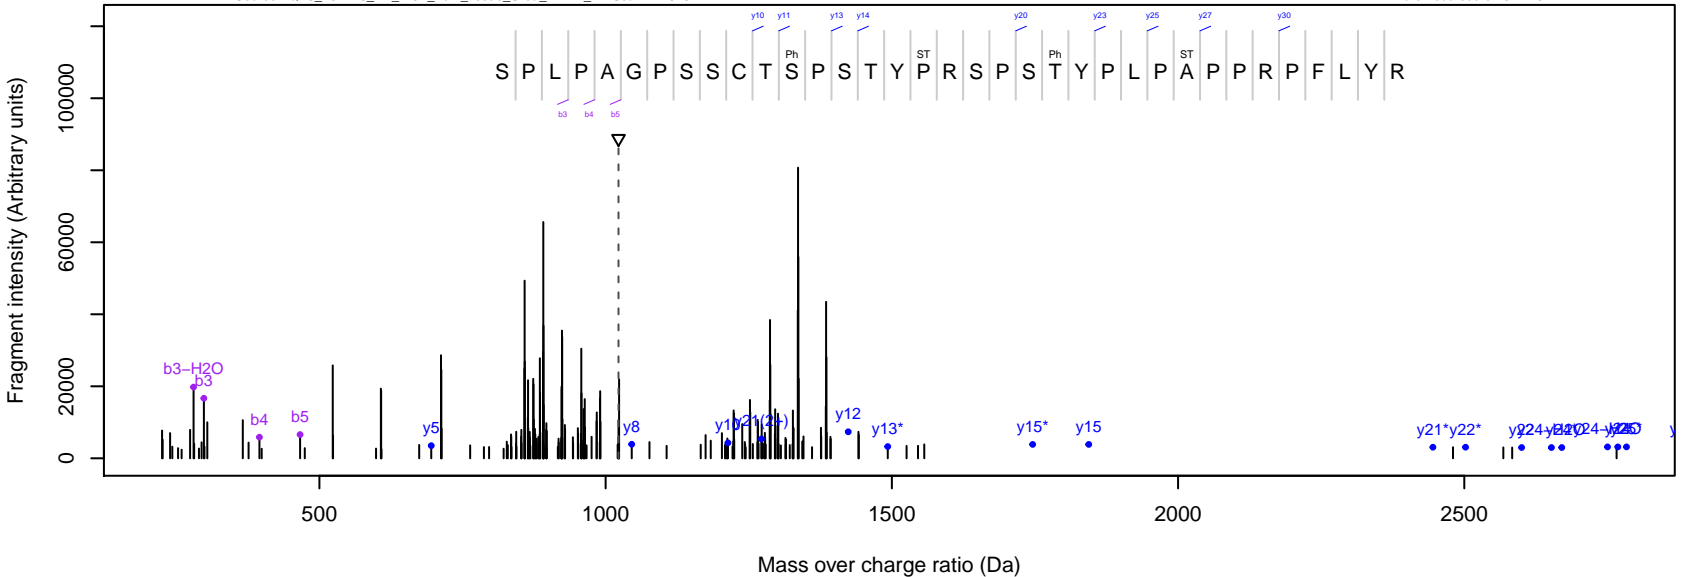

TQS(Phospho (STY))SAS(Phospho (STY))LAASYAAQQHPQAAASYR-3+

Source : QE3\_201126\_FR\_TiOx\_hum\_tissue\_Urea\_RNAB\_H Scan : 27506

Andromeda score : 87.719

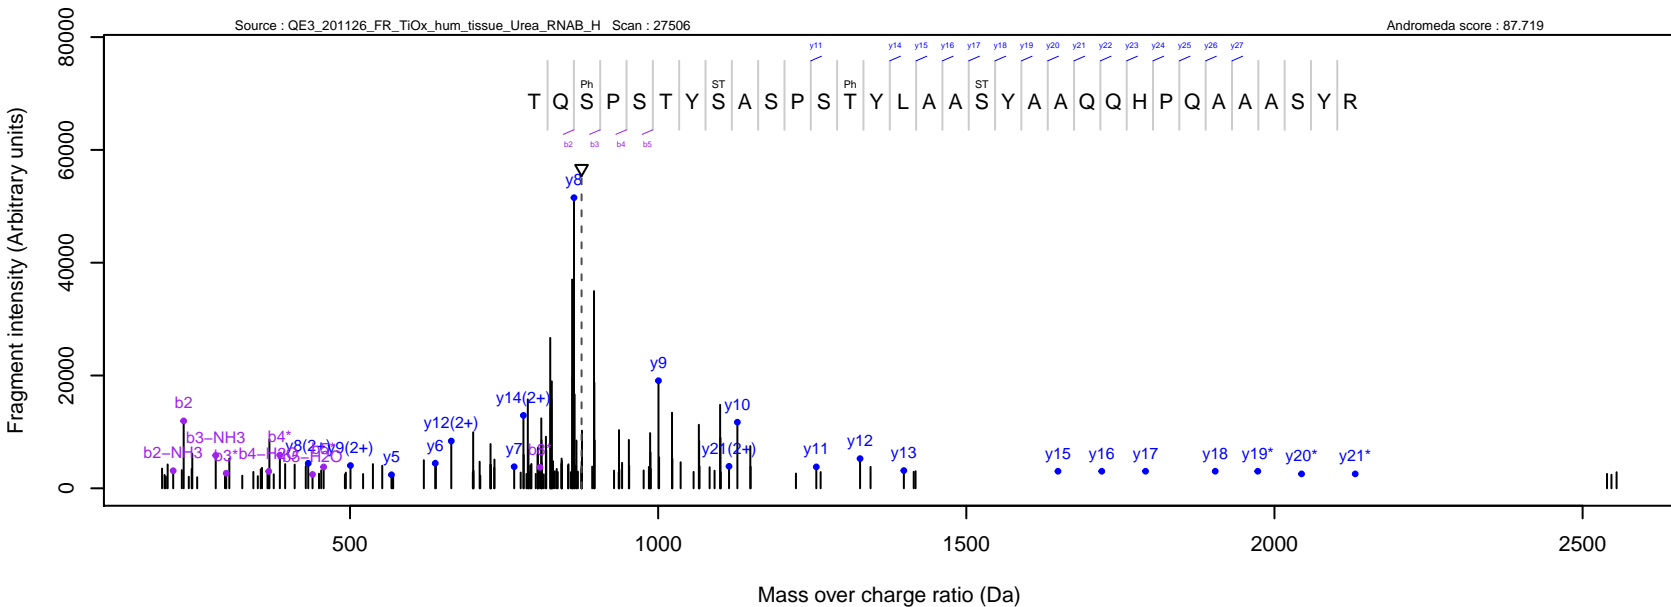

SDEENLKEECS(Phospho (STY))S(Phospho (STY))TES(Phospho (STY))TQQEHEDAPSTK-3+

Source : QE3\_201126\_FR\_TiOx\_hum\_tissue\_Urea\_RNAB\_H Scan : 13913

Andromeda score : 87.712

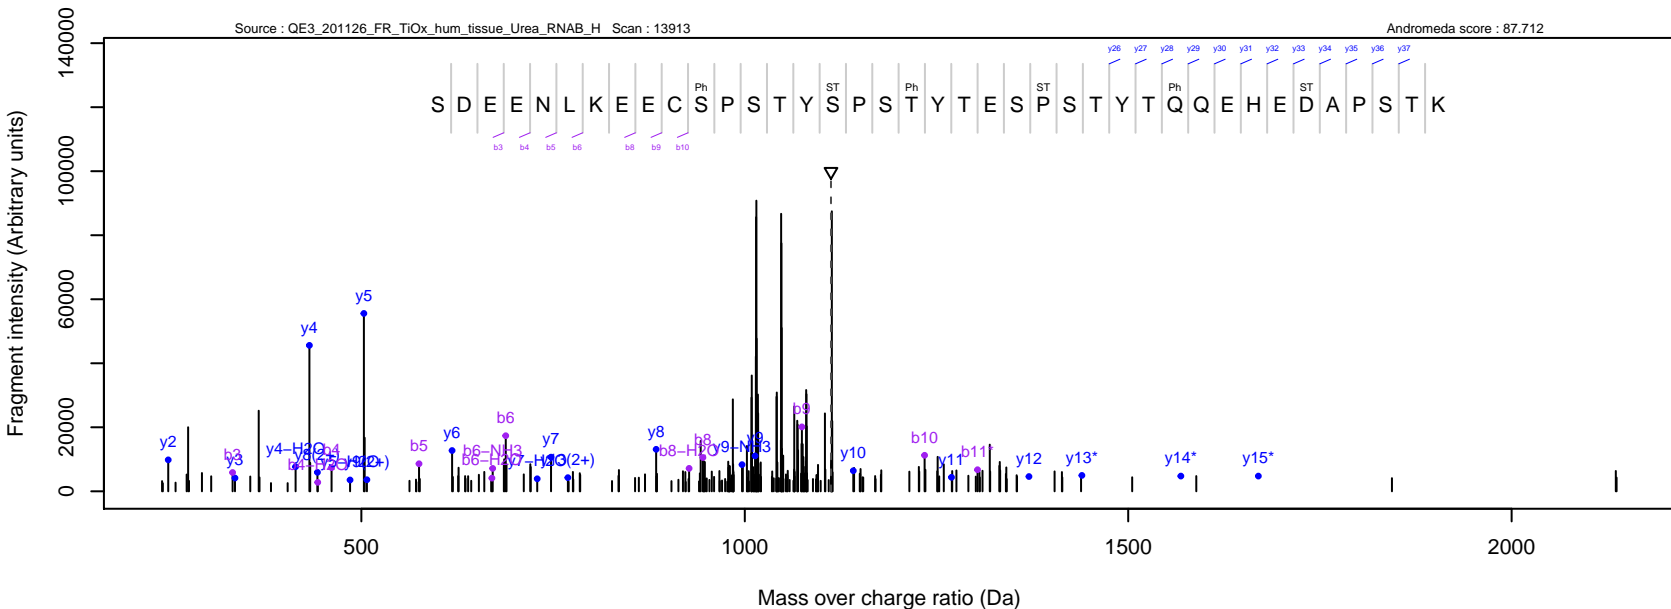

S(Phospho (STY))TENVNKLPELSSFGKPSVVQGTGLIR-4+

Source : QE3\_201126\_FR\_TiOx\_hum\_tissue\_Urea\_RNAB\_H Scan : 38012

Andromeda score : 87.712

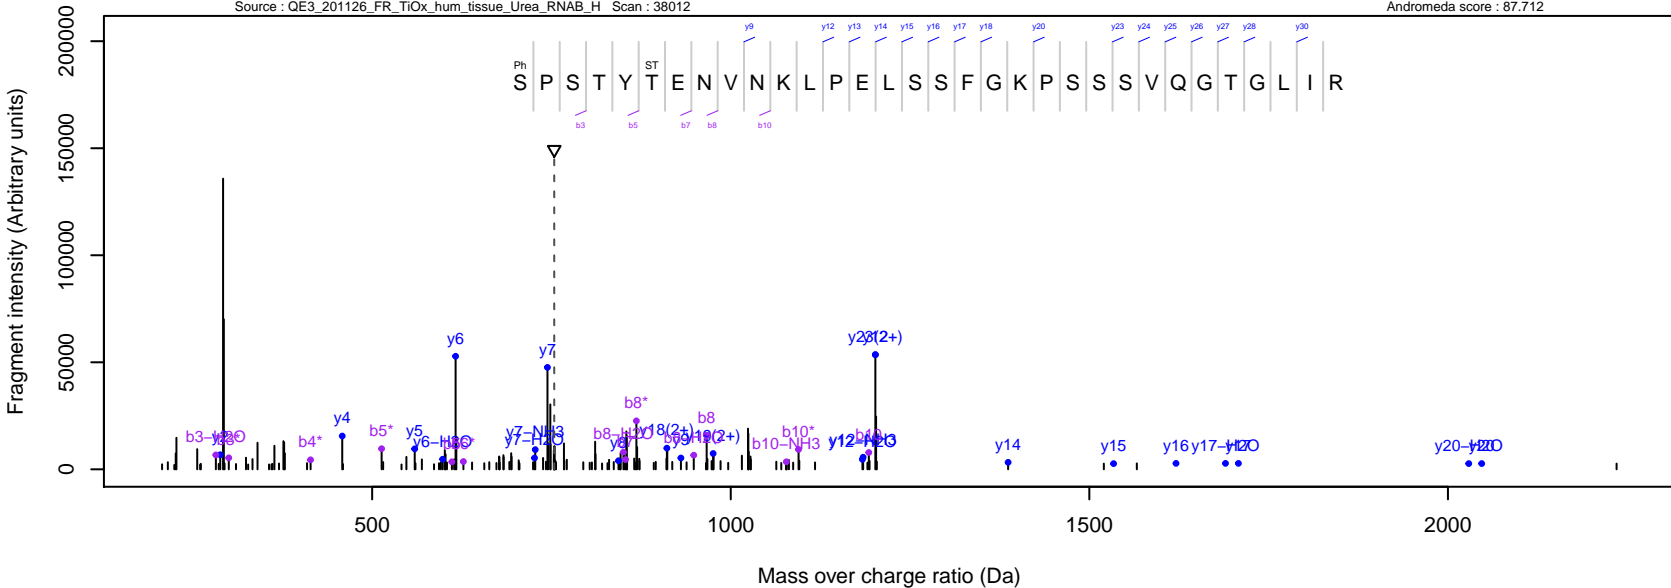

AVSPPHLDGPPS(Phospho (STY))PR-3+

Source : QE3\_201126\_FR\_TIOx\_hum\_tissue\_Urea\_RNAB\_H Scan : 18252

Andromeda score : 87.676

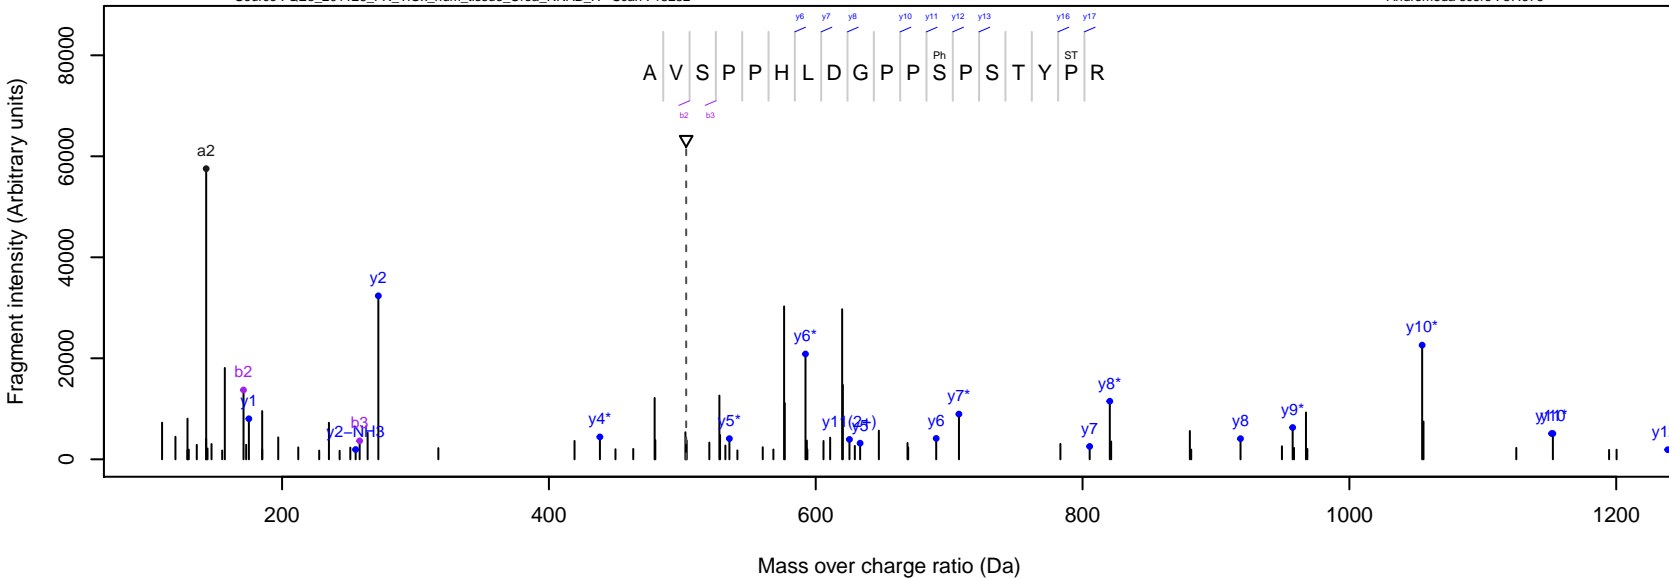

QGAIYHGLATLLNQPS(Phospho (STY))PMM(Oxidation (M))QR-3+

Source : QE3\_201126\_FR\_TIOx\_hum\_tissue\_Urea\_RNAB\_B Scan : 44080

Andromeda score : 87.659

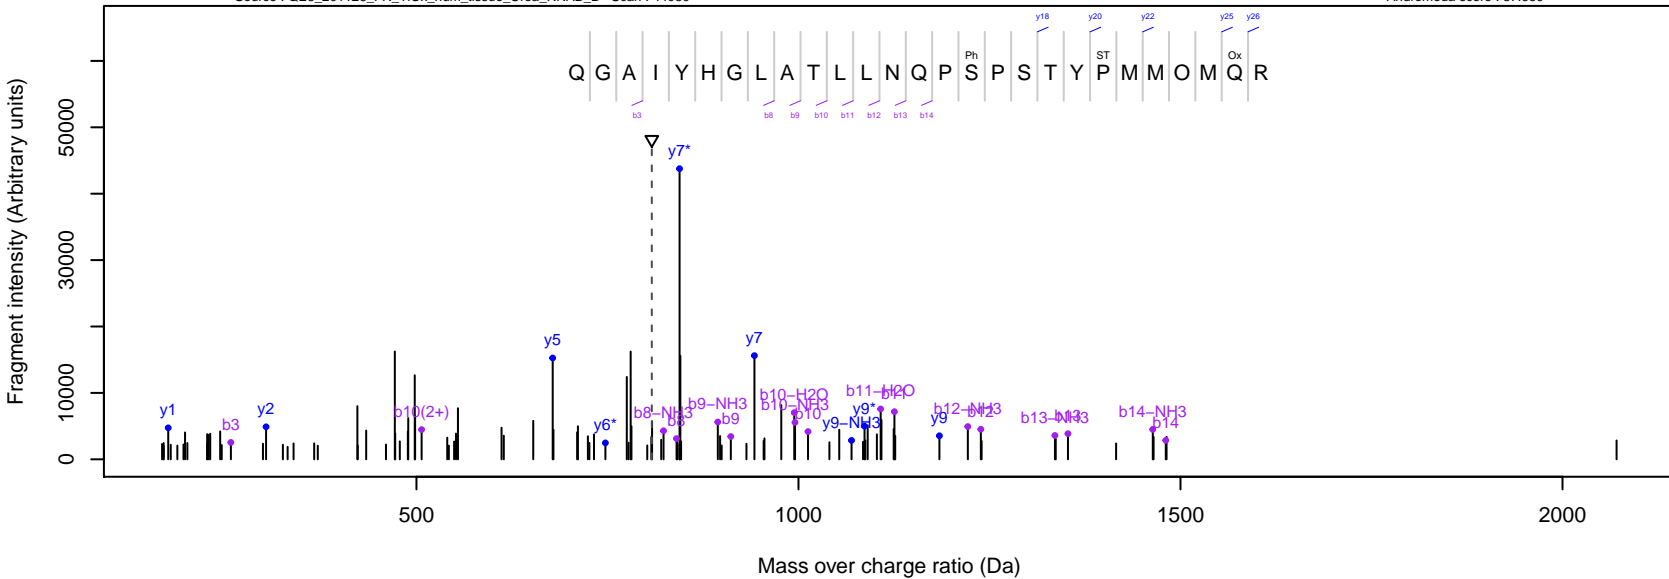

SNT(Phospho (STY))PILVDGKDVMOPEVNK-3+

Source : QE3\_201126\_FR\_TIOx\_hum\_tissue\_Urea\_RNAB\_H Scan : 24372

Andromeda score : 87.659

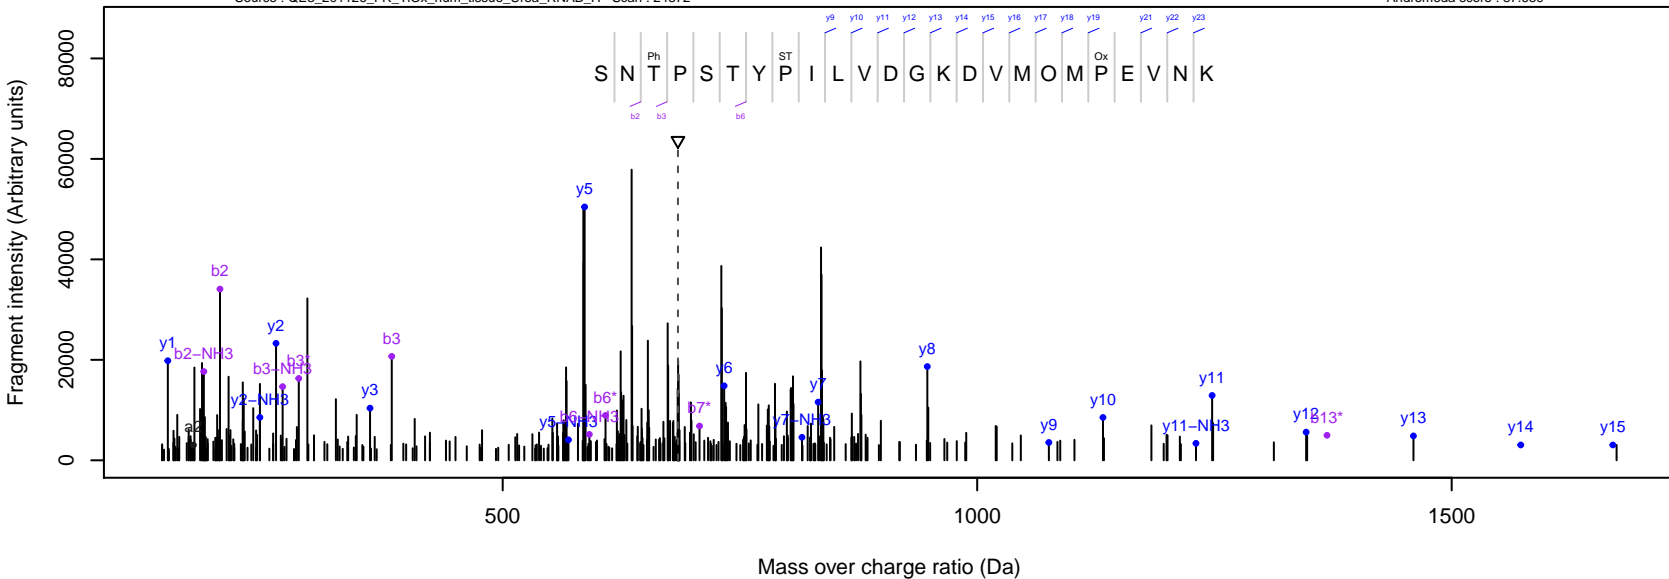

TAAGEYDS(Phospho (STY))VS(Phospho (STY))ESEDEEMLEIR-2+

Source : QE3\_201126\_FR\_TIOx\_hum\_tissue\_Urea\_RNAB\_H Scan : 51904

Andromeda score : 87.654

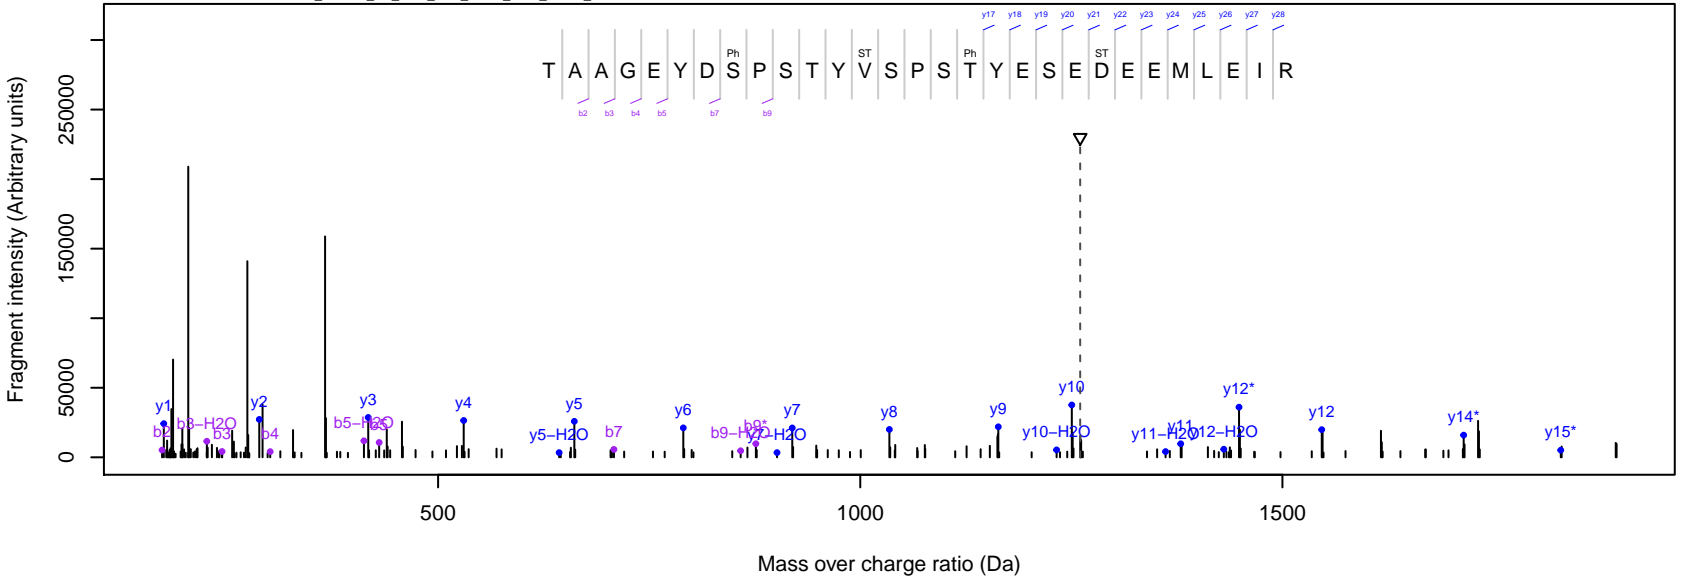

(Acetyl (Protein N-term))M(Oxidation (M))DDDS(Phospho (STY))LDELVAR-2+

Source : QE3\_201126\_FR\_TIOx\_hum\_tissue\_Urea\_RNAB\_H Scan : 49239

Andromeda score : 87.618

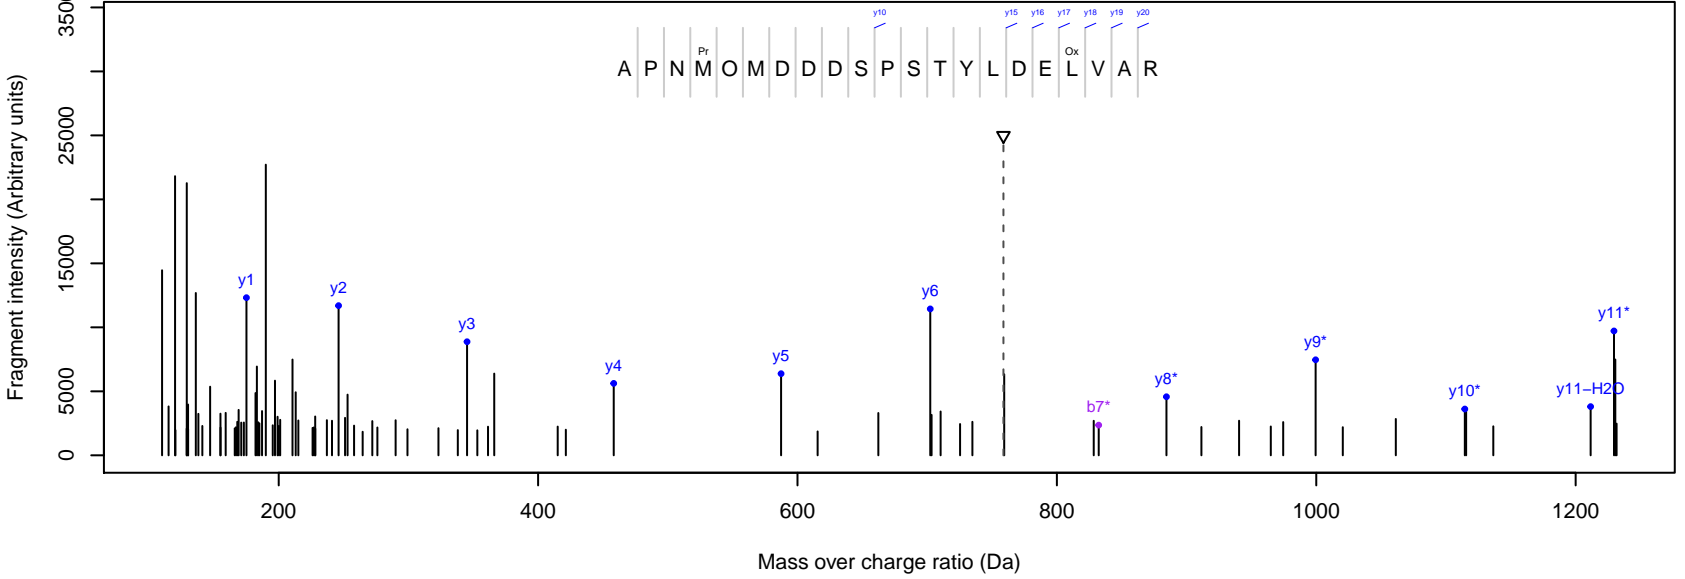

ATLLNVPDLSDS(Phospho (STY))IHS(Phospho (STY))ANASERDDISEIQLASDHSGR-4+

Source : QE3\_201126\_FR\_TIOx\_hum\_tissue\_Urea\_RNAB\_N Scan : 52086

Andromeda score : 87.578

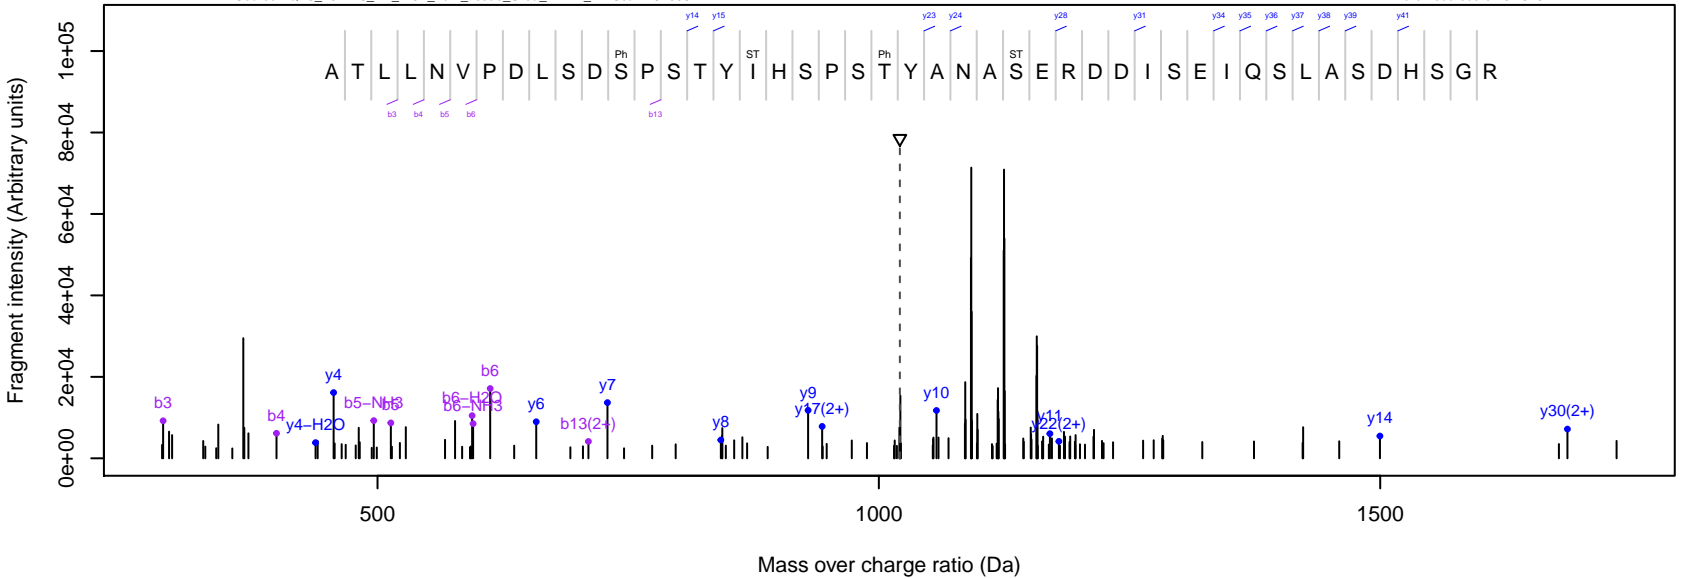



**GS(Phospho (STY))PTSAYPER-2+**

Source : QE3\_201126\_FR\_TIOx\_hum\_tissue\_Urea\_RNAB\_N Scan : 9958

Andromeda score : 87.568

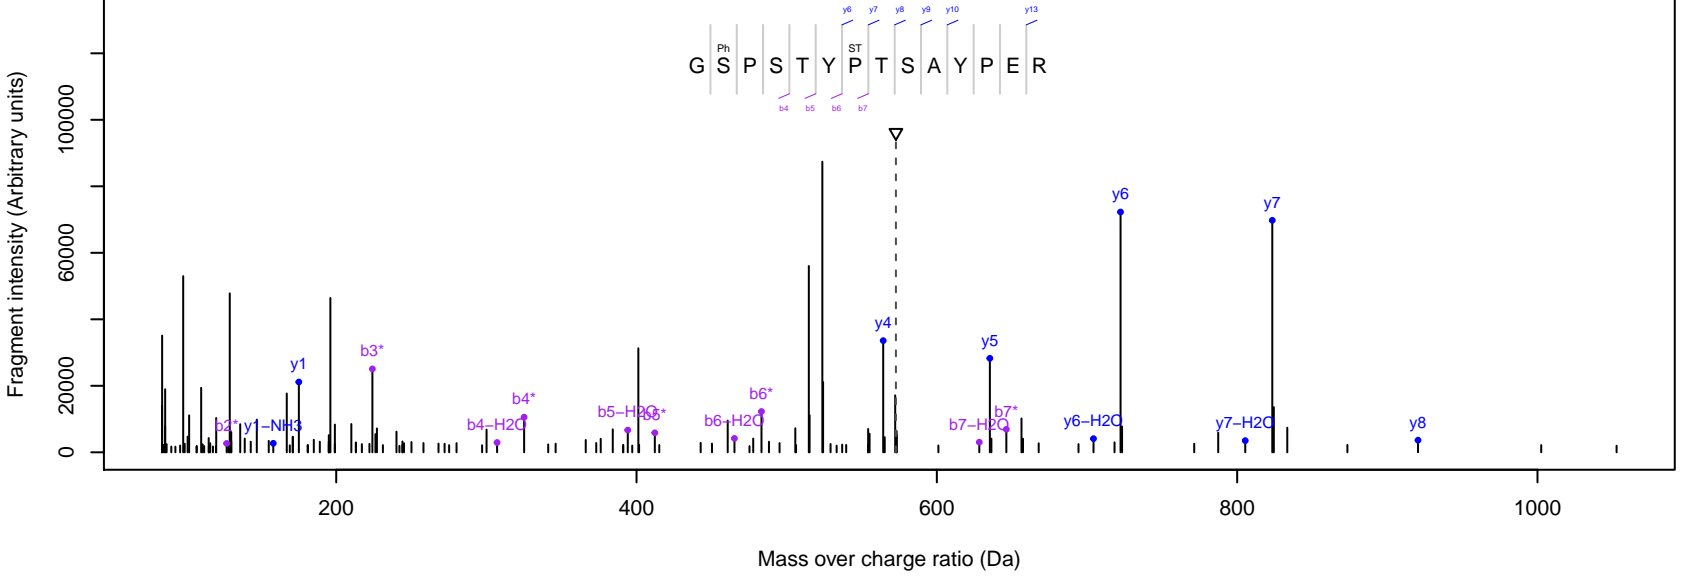

**SQGS(Phospho (STY))QAELHPLQLK-2+**

Source : QE3\_201126\_FR\_TIOx\_hum\_tissue\_Urea\_RNAB\_H Scan : 23919

Andromeda score : 87.519

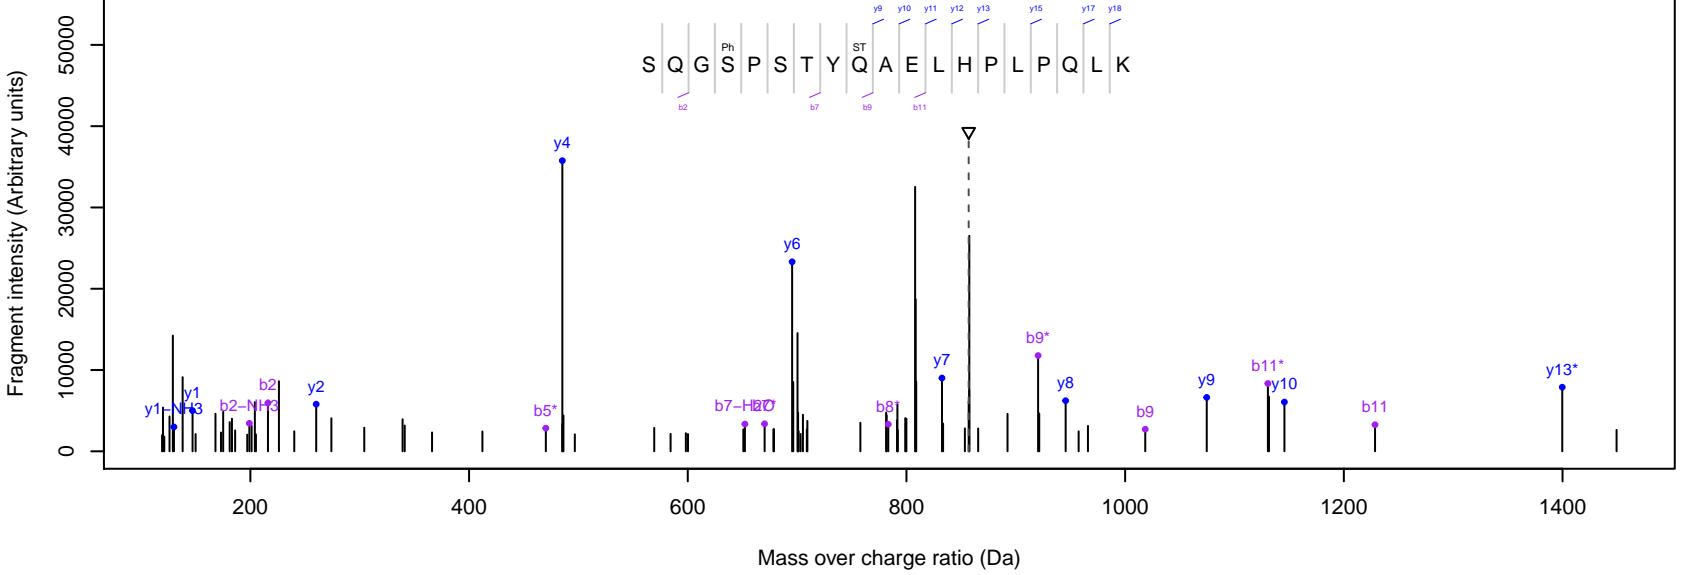

**SLM(Oxidation (M))S(Phospho (STY))SPEDLTKDFEELKAEEDVTK-3+**

Source : QE3\_201126\_FR\_TIOx\_hum\_tissue\_Urea\_RNAB\_B Scan : 51435

Andromeda score : 87.509

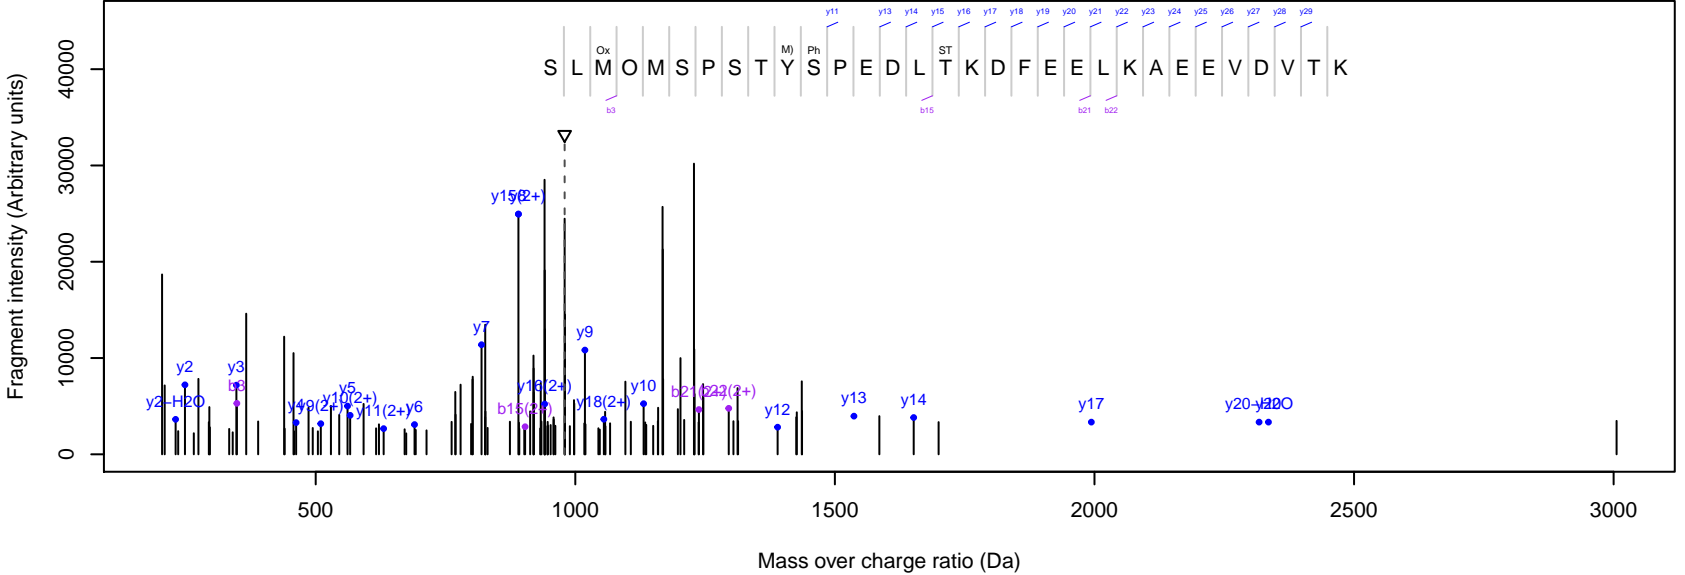

DVAVS(Phospho (STY))YYHFYHM(Oxidation (M))AK-2+

Source : QE3\_201126\_FR\_TiOx\_hum\_tissue\_Urea\_RNAB\_H Scan : 26436

Andromeda score : 87.498

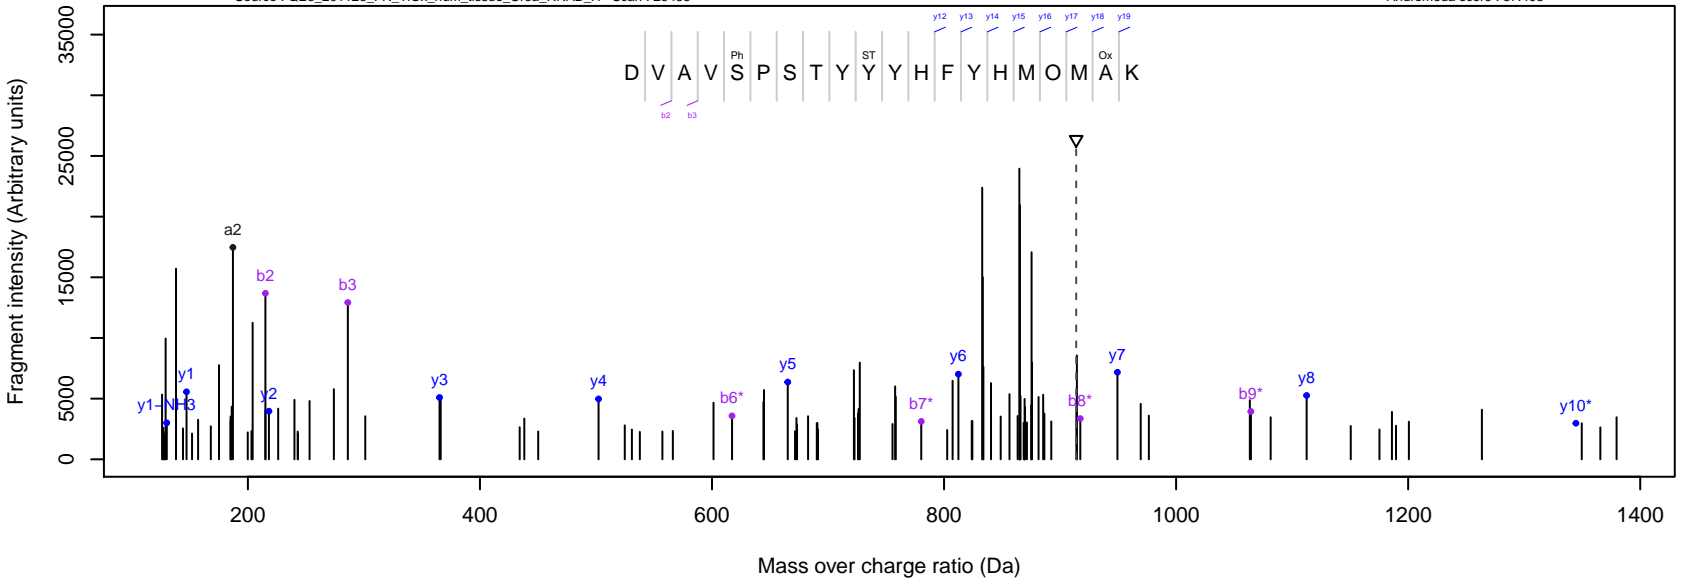

GS(Phospho (STY))LDESSLGFGYPK-2+

Source : QE3\_201126\_FR\_TiOx\_hum\_tissue\_Urea\_RNAB\_B Scan : 40629

Andromeda score : 87.498

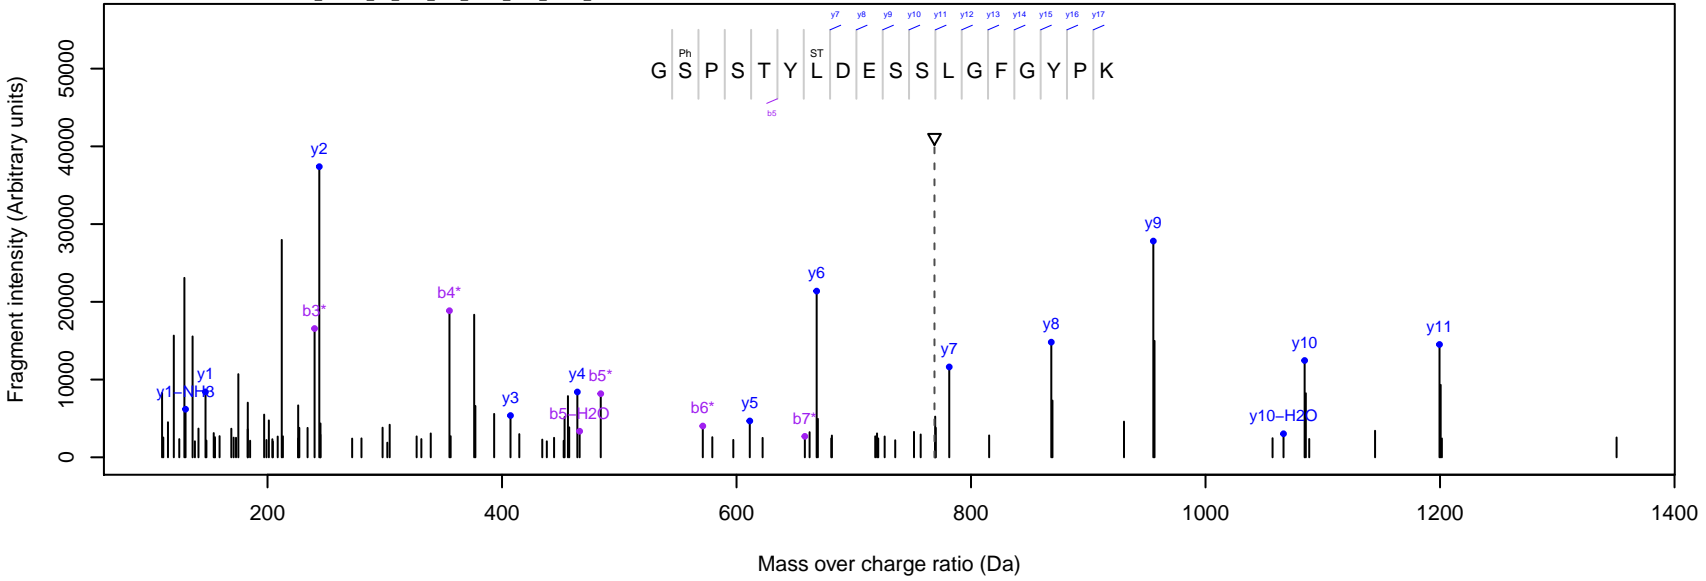

RRDEDMLYS(Phospho (STY))PELAQR-3+

Source : QE3\_201126\_FR\_TiOx\_hum\_tissue\_Urea\_RNAB\_H Scan : 22686

Andromeda score : 87.486

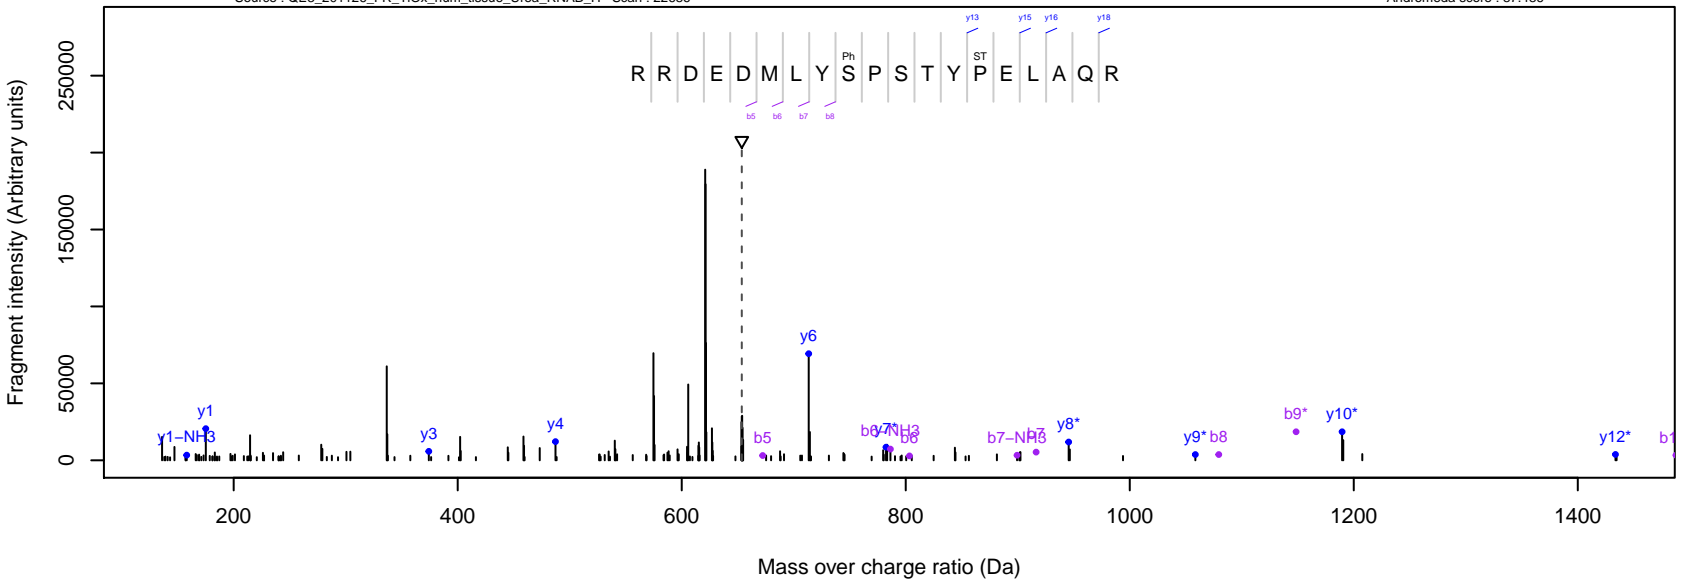

FRRS(Phospho (STY))ET(Phospho (STY))PPHWR-3+

Source : QE3\_201126\_FR\_TiOx\_hum\_tissue\_Urea\_RNAB\_N Scan : 12432

Andromeda score : 87.447

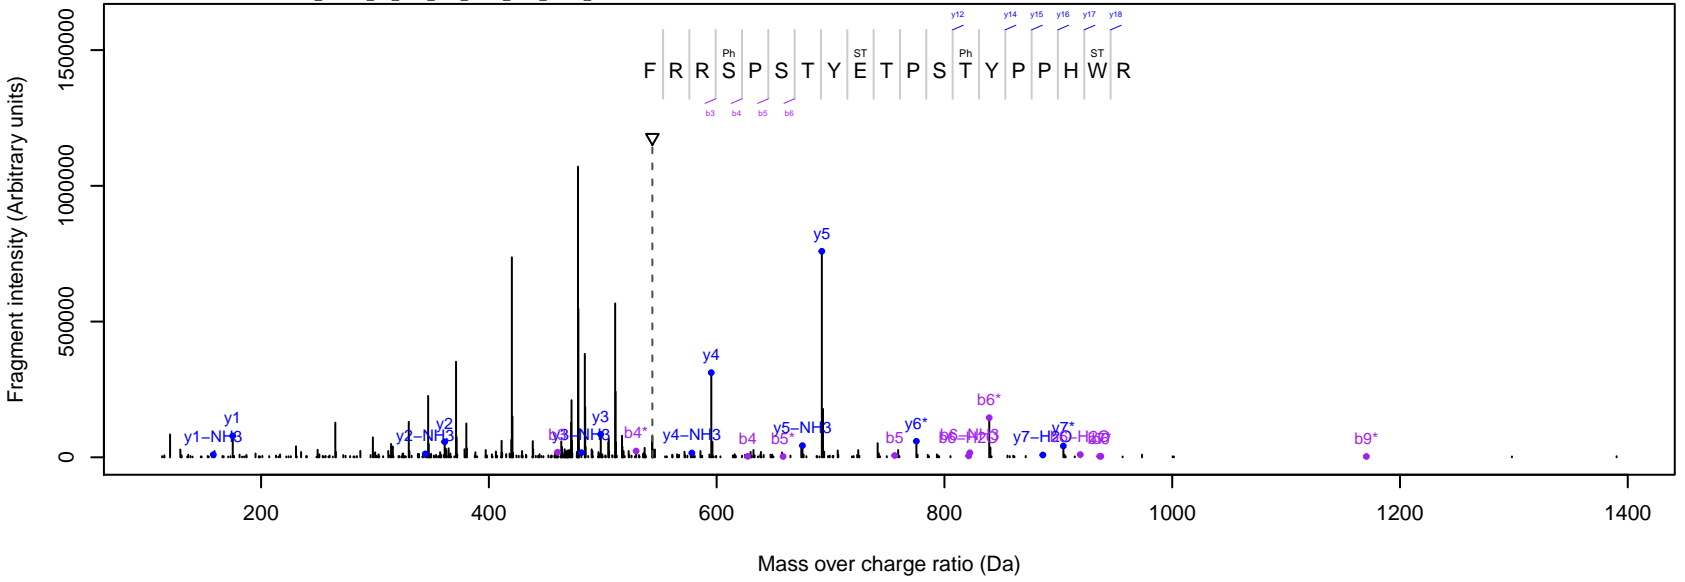

RQGS(Phospho (STY))FSEDVISHK-3+

Source : QE3\_201126\_FR\_TiOx\_hum\_tissue\_Urea\_RNAB\_B Scan : 12326

Andromeda score : 87.429

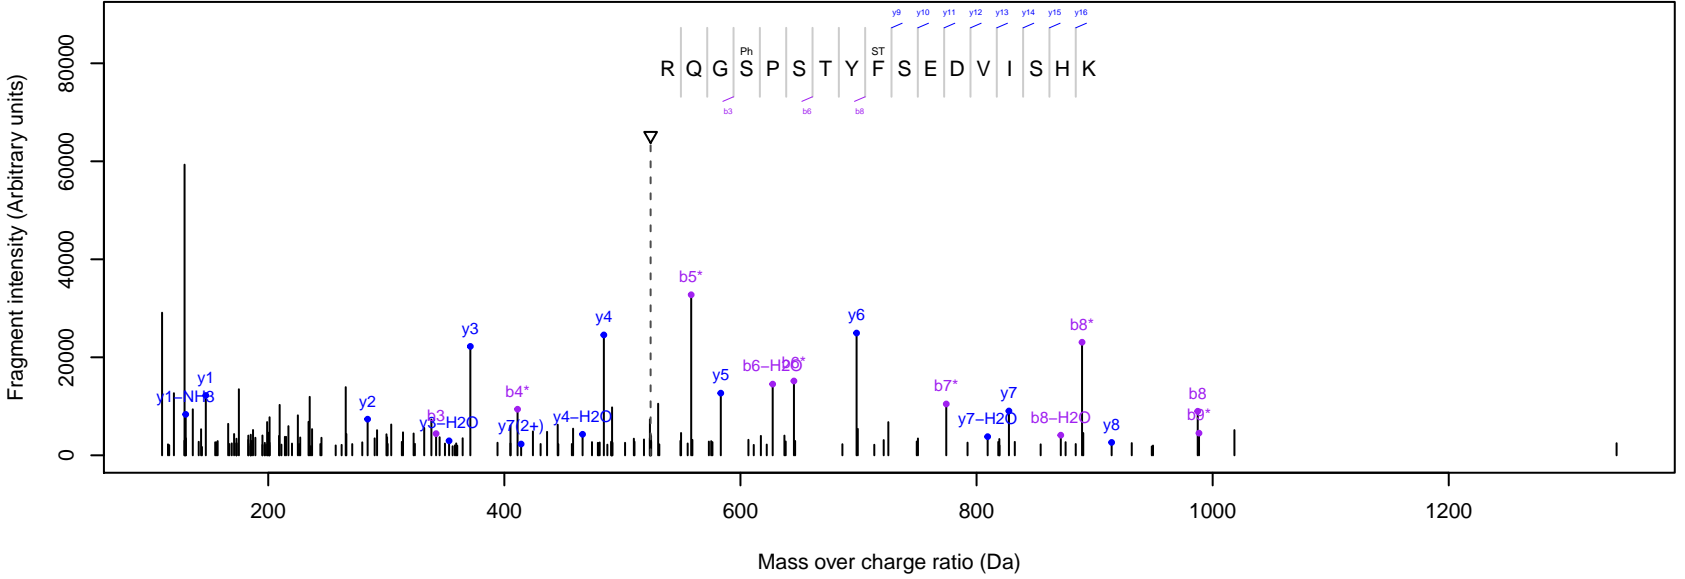

SS(Phospho (STY))SVPHPFQVTLR-3+

Source : QE3\_201126\_FR\_TiOx\_hum\_tissue\_Urea\_RNAB\_H Scan : 39094

Andromeda score : 87.388

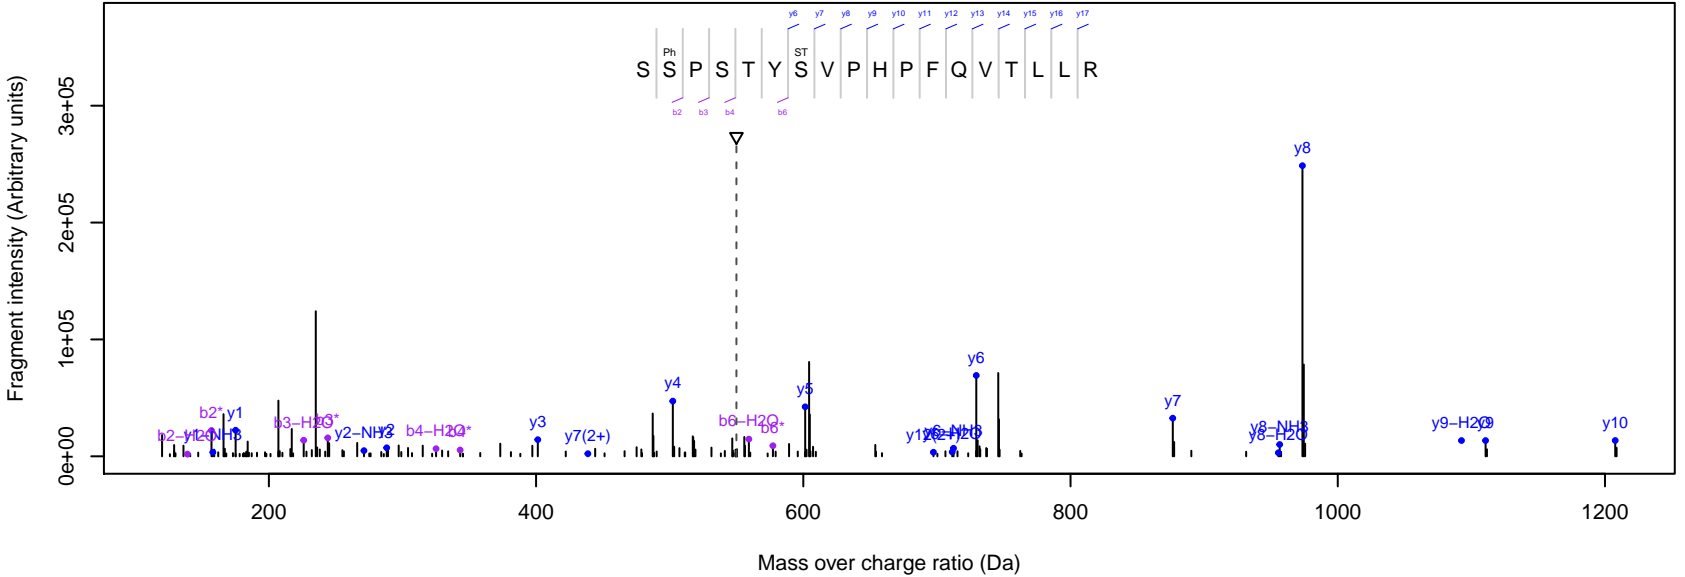

KRS(Phospho (STY))S(Phospho (STY))S(Phospho (STY))EDDDLVDVESDFDDASINSYSVSDGSTR-3+

Source : QE3\_201126\_FR\_TiOx\_hum\_tissue\_Urea\_RNAB\_N Scan : 48391

Andromeda score : 87.368

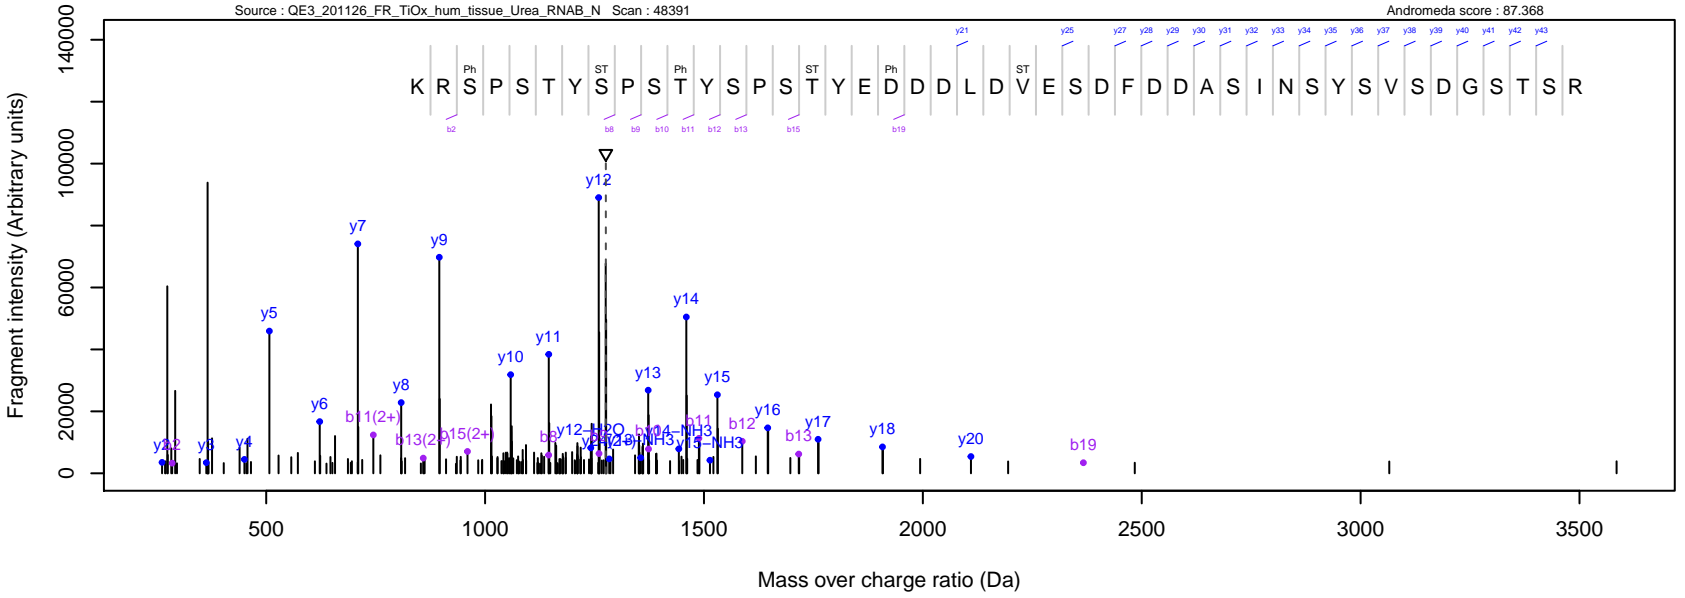

RT(Phospho (STY))SIIS(Phospho (STY))LTPWKPSK-3+

Source : QE3\_201126\_FR\_TiOx\_hum\_tissue\_Urea\_RNAB\_H Scan : 38392

Andromeda score : 87.352

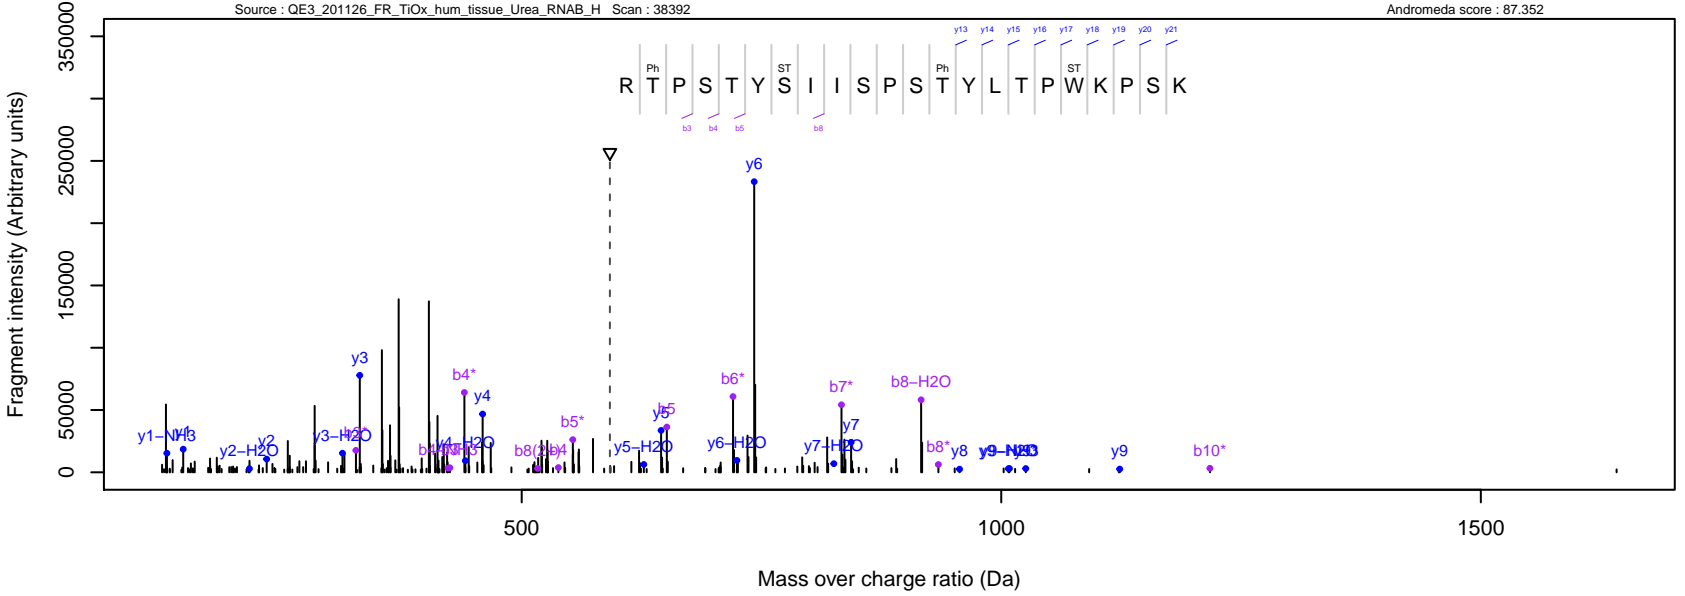

ARS(Phospho (STY))VDALDLPSTAES(Phospho (STY))GSRSPSTNGGR-3+

Source : QE3\_201126\_FR\_TiOx\_hum\_tissue\_Urea\_RNAB\_H Scan : 27483

Andromeda score : 87.347

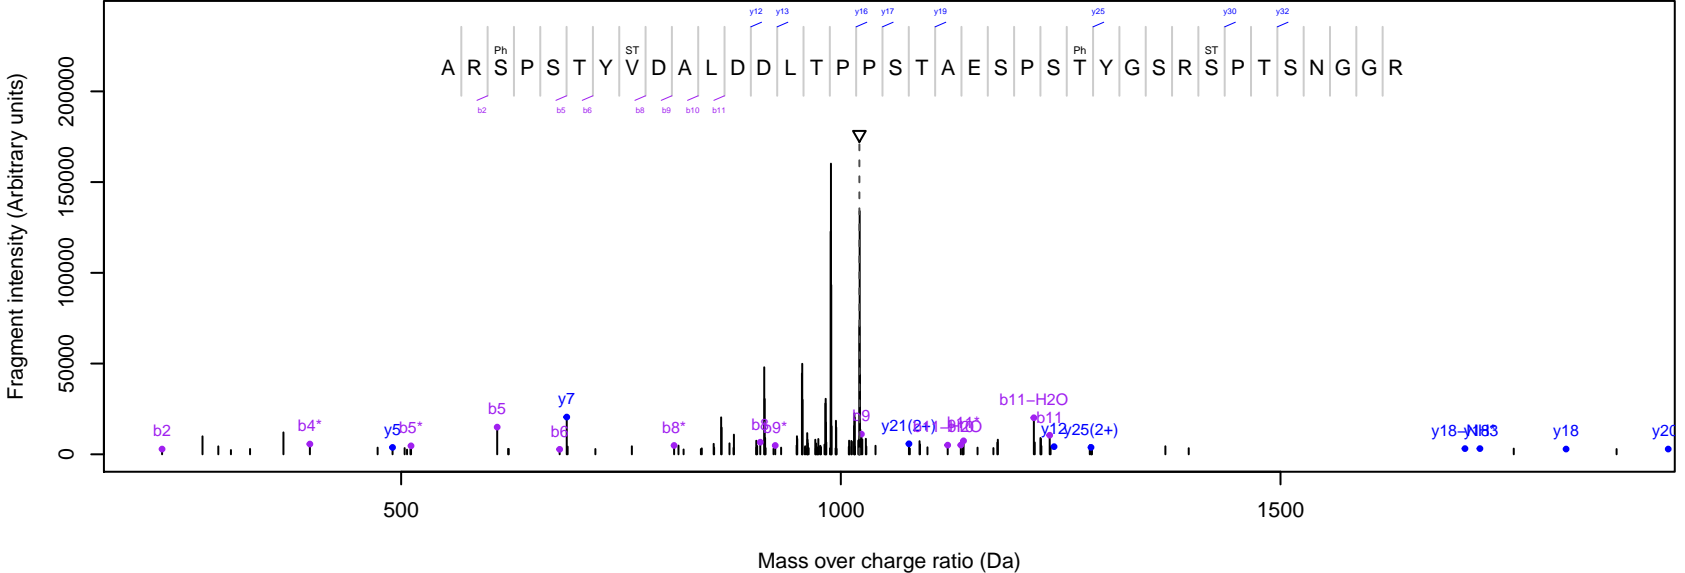

**M(Oxidation (M))LPHAPGVQM(Oxidation (M))QAIPEDAVHEDS(Phospho (STY))GDEDGEDPKR-4+**

Source : QE3\_201126\_FR\_TIOx\_hum\_tissue\_Urea\_RNAB\_B Scan : 21240

Andromeda score : 87.347

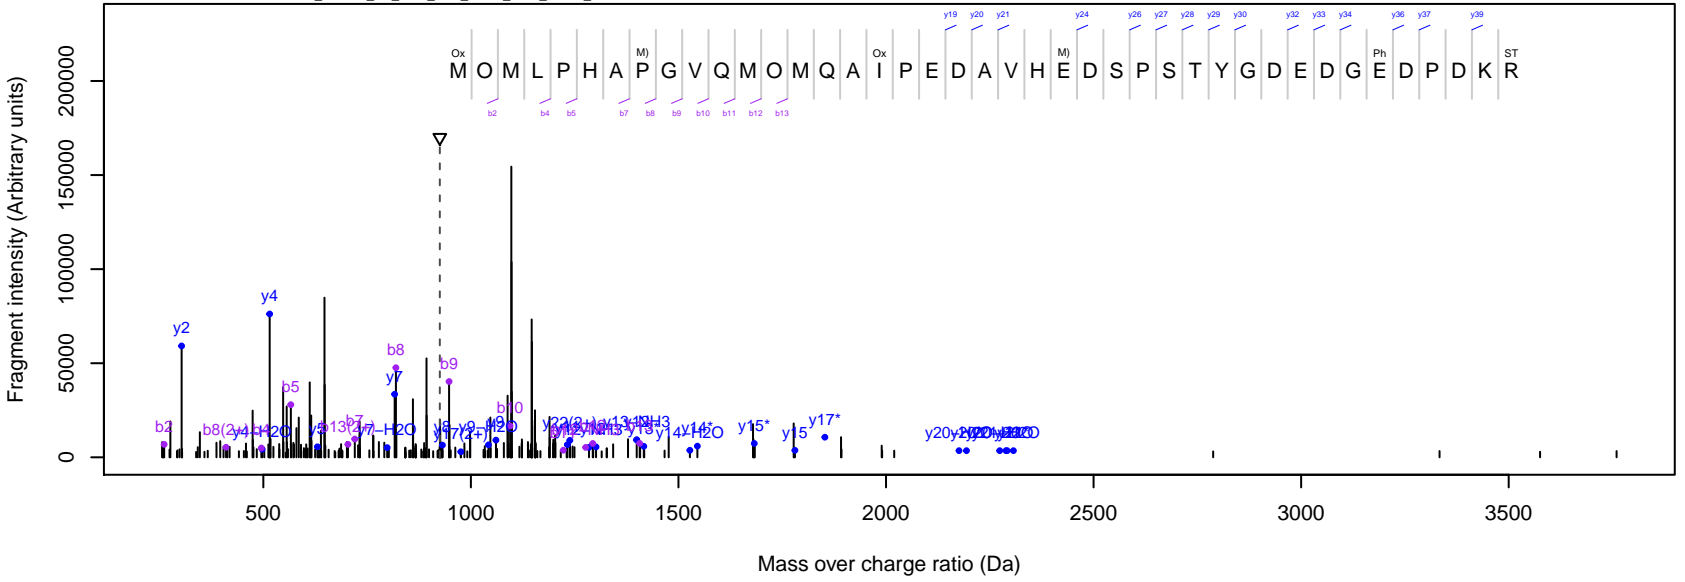

**AEEQLPPLSPPS(Phospho (STY))PSTPNHR-3+**

Source : QE3\_201126\_FR\_TIOx\_hum\_tissue\_Urea\_RNAB\_H Scan : 27176

Andromeda score : 87.339

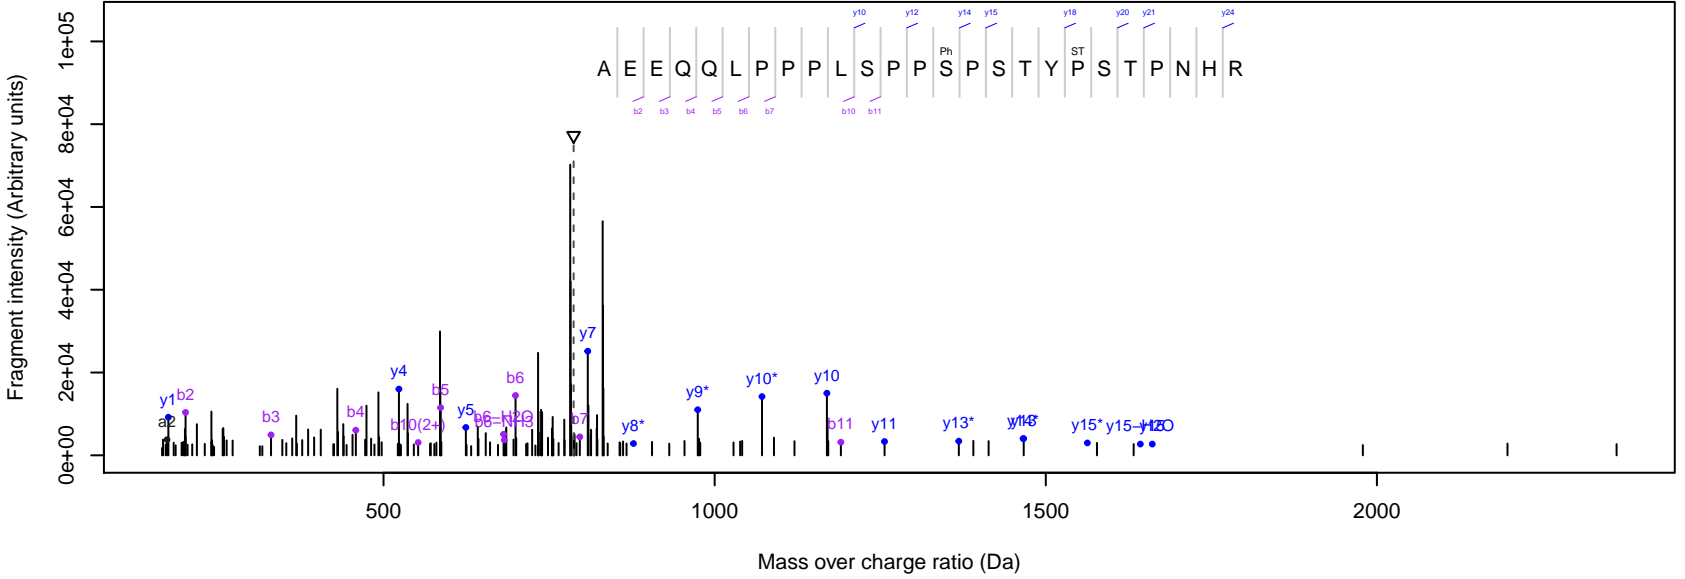

**KSPSGPVKS(Phospho (STY))PPLSPVGTTPVK-3+**

Source : QE3\_201126\_FR\_TIOx\_hum\_tissue\_Urea\_RNAB\_N Scan : 18052

Andromeda score : 87.339

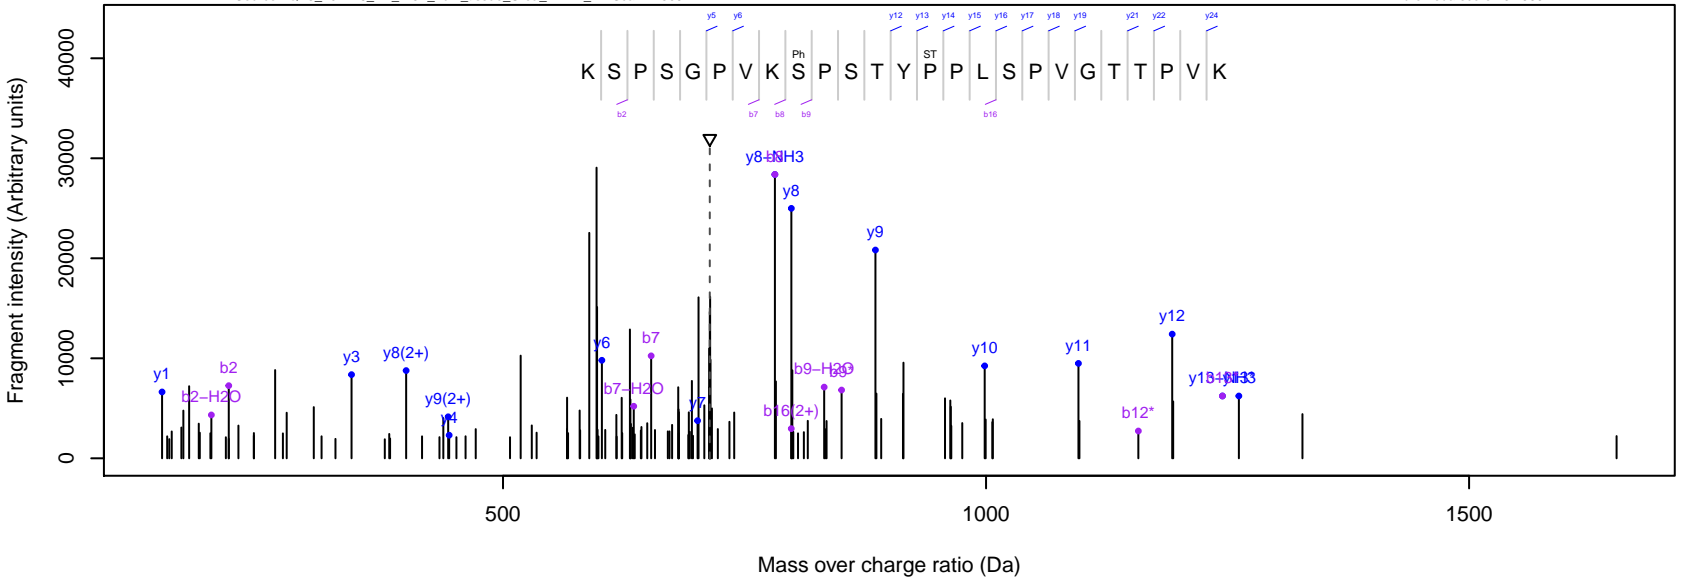

SGLEPAS(Phospho (STY))SPSKGSEPRPLVPPVSGHATIAIR-4+

Source : QE3\_201126\_FR\_TiOx\_hum\_tissue\_Urea\_RNAB\_H Scan : 21543

Andromeda score : 87.339

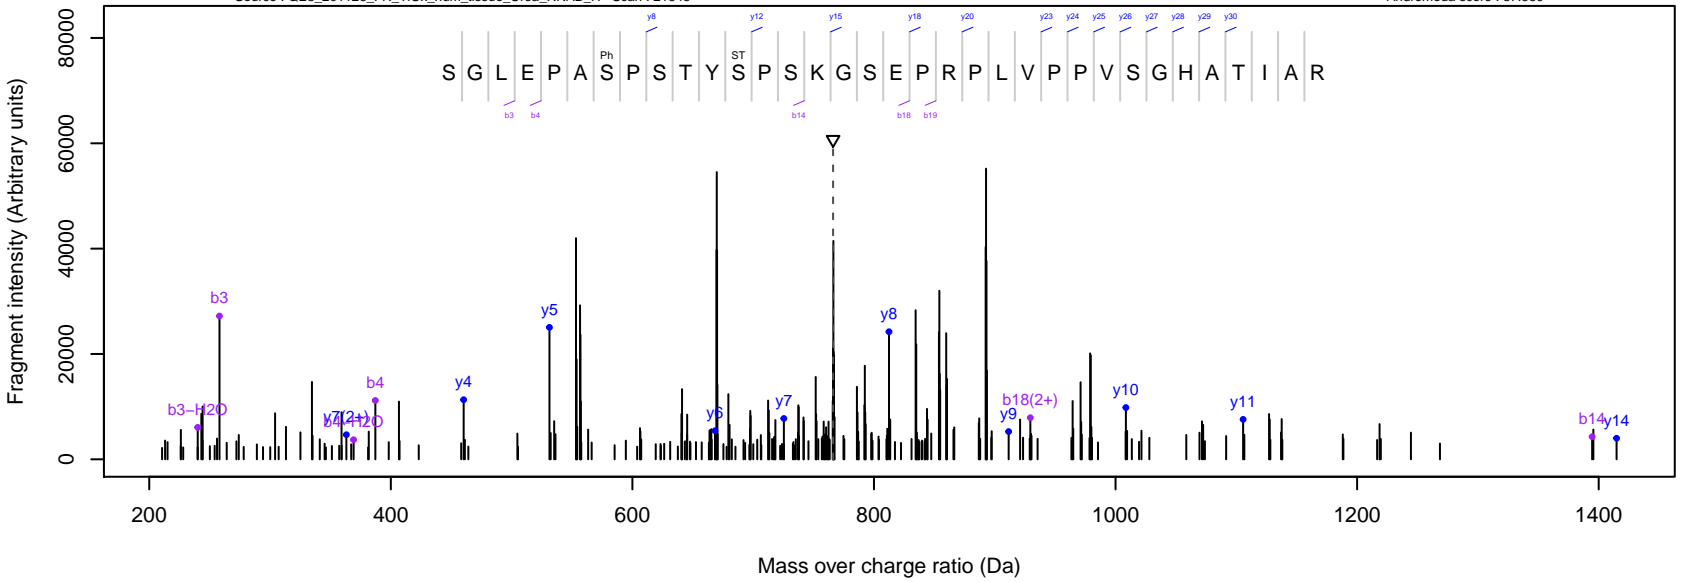

SSS(Phospho (STY))PCRT(Phospho (STY))PEPDNDAHLR-3+

Source : QE3\_201126\_FR\_TiOx\_hum\_tissue\_Urea\_RNAB\_N Scan : 9848

Andromeda score : 87.326

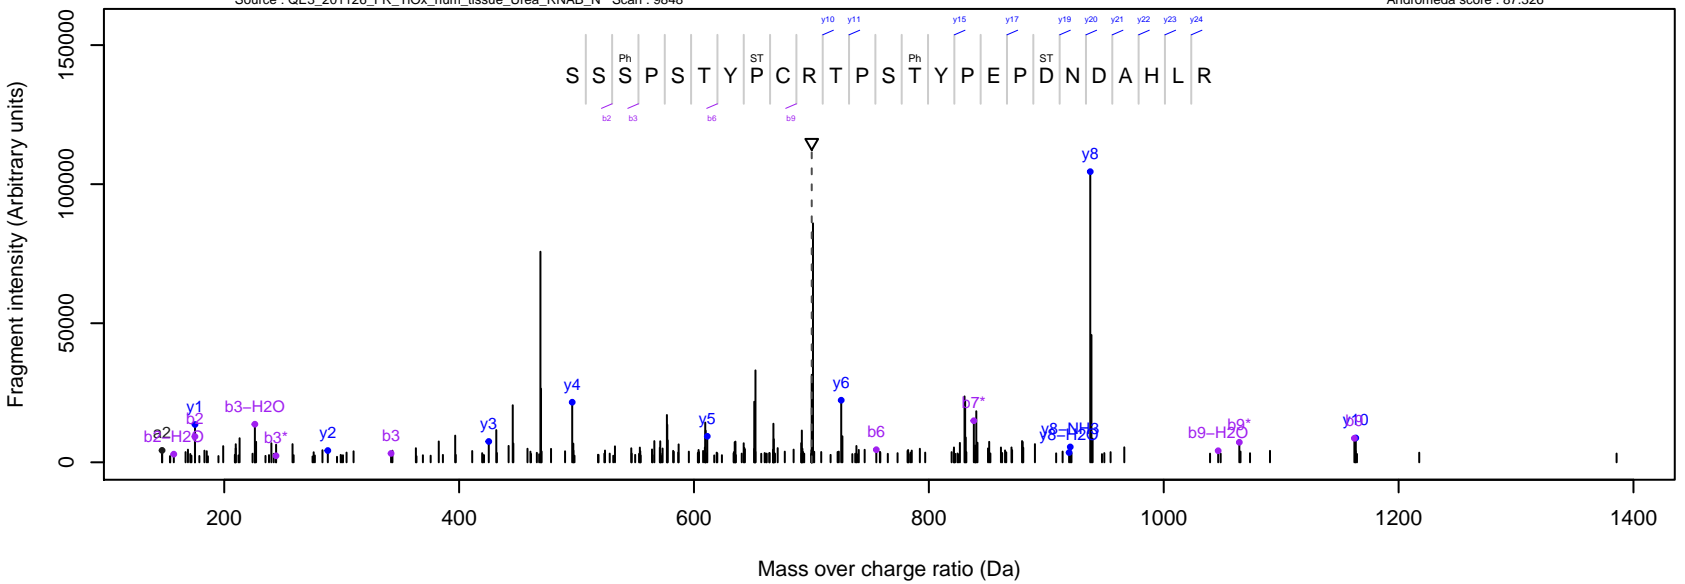

VVEAVNSDS(Phospho (STY))DSEFGIPKK-3+

Source : QE3\_201126\_FR\_TiOx\_hum\_tissue\_Urea\_RNAB\_N Scan : 24279

Andromeda score : 87.326

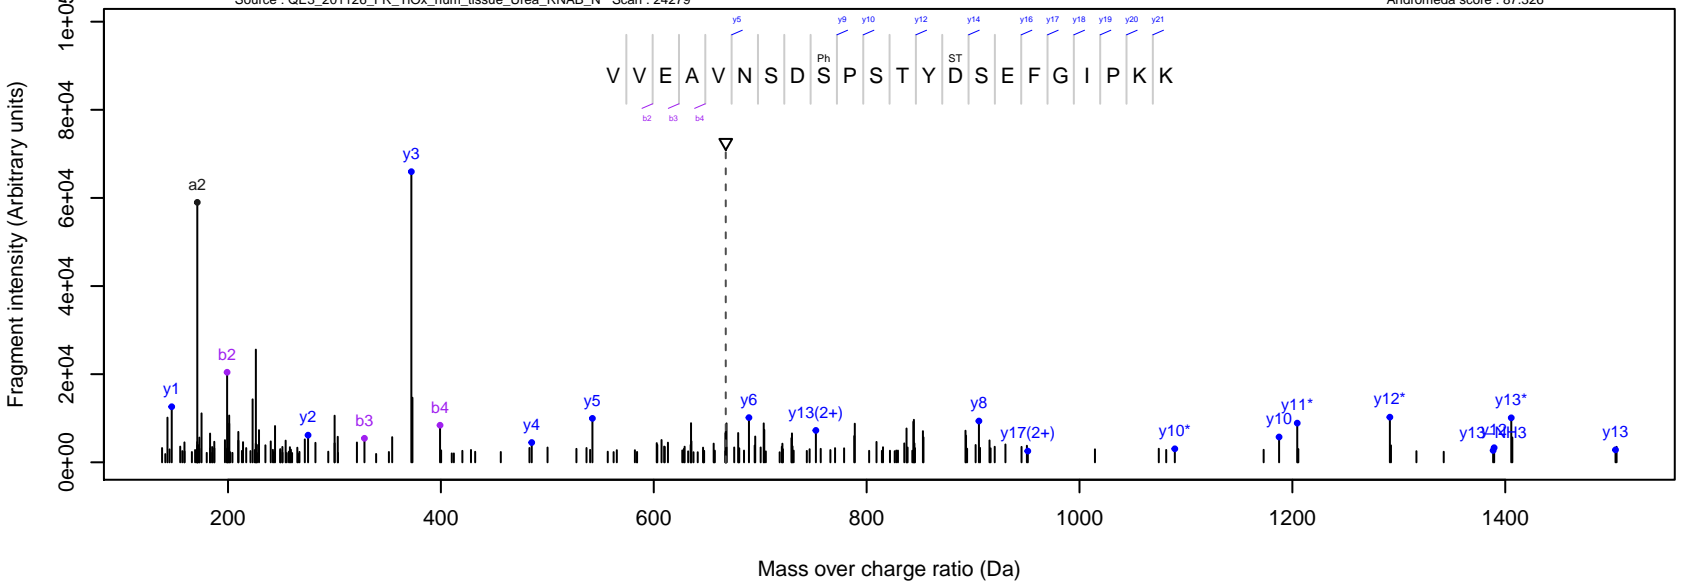

ALRAS(Phospho (STY))ESGI-2+

Source : QE3\_201126\_FR\_TiOx\_hum\_tissue\_Urea\_RNAB\_H Scan : 15927

Andromeda score : 87.298

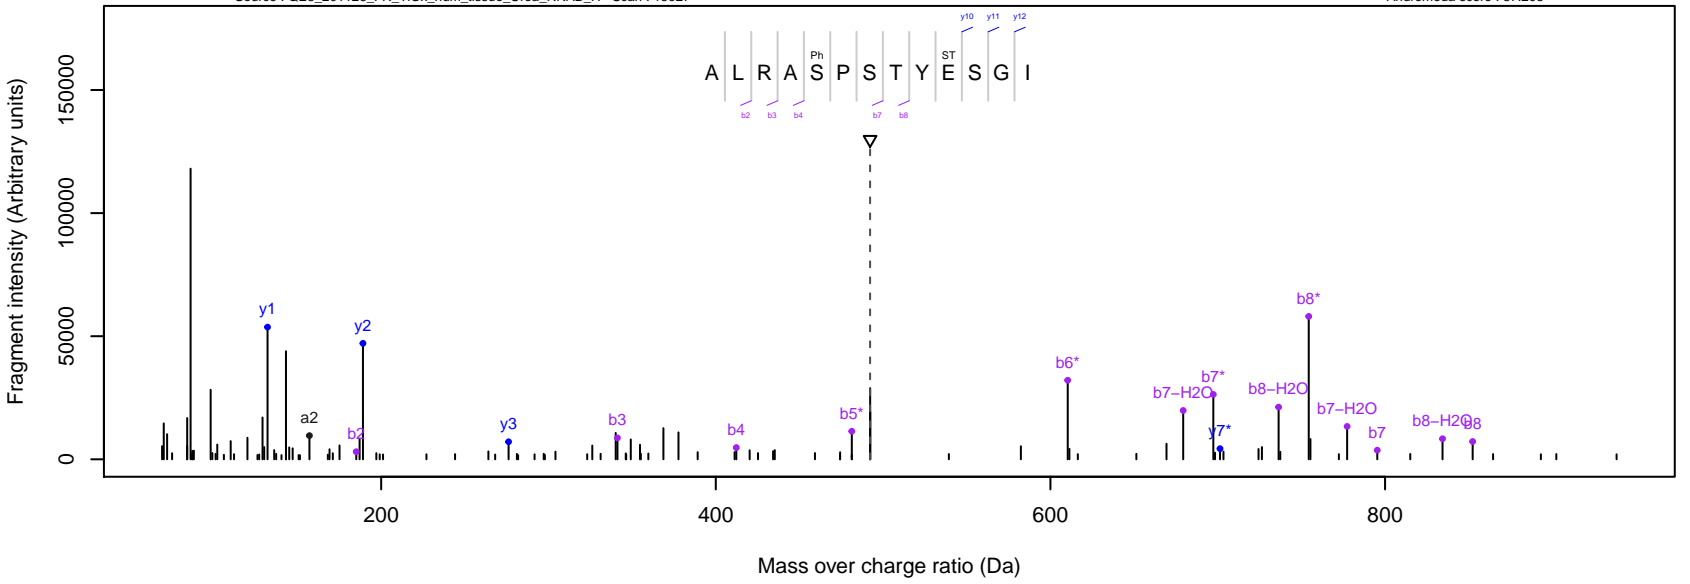

AVLPVTCRDS(Phospho (STY))FSR-3+

Source : QE3\_201126\_FR\_TiOx\_hum\_tissue\_Urea\_RNAB\_B Scan : 15227

Andromeda score : 87.287

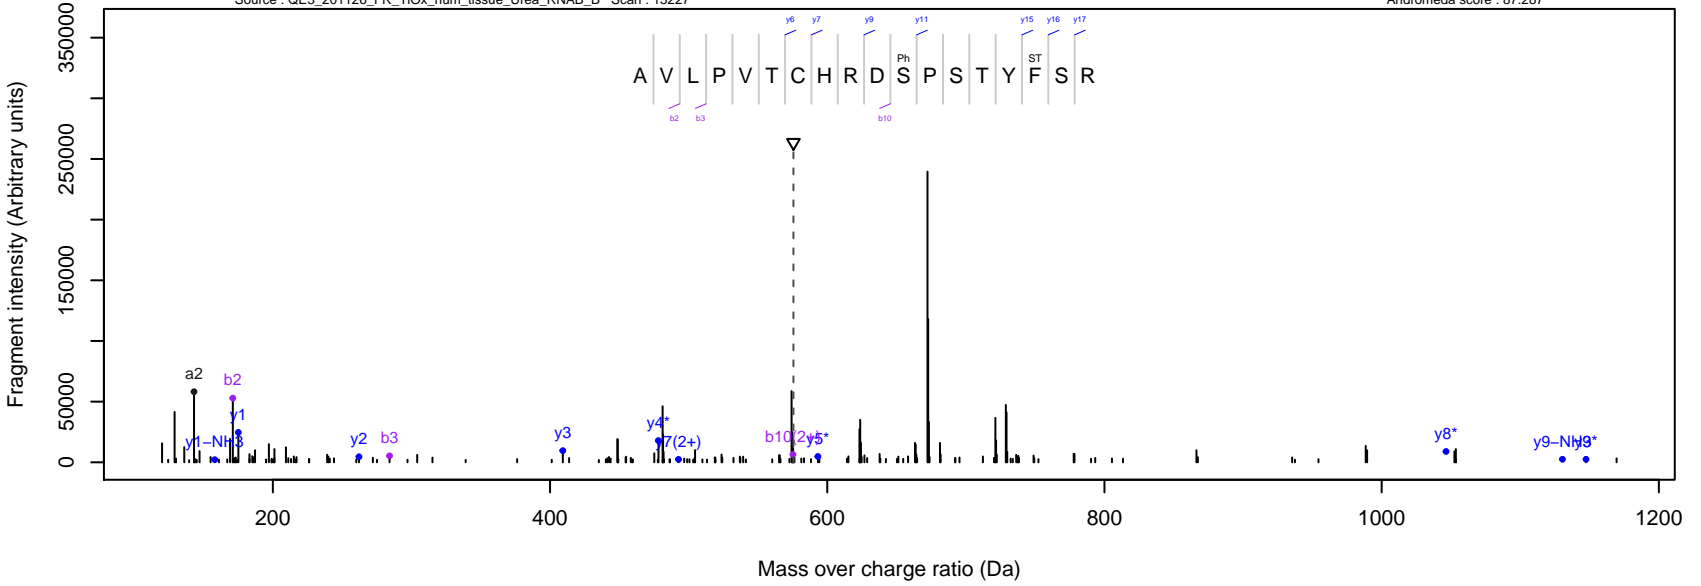

DSFSHS(Phospho (STY))PGAVSSLK-3+

Source : QE3\_201126\_FR\_TiOx\_hum\_tissue\_Urea\_RNAB\_H Scan : 18143

Andromeda score : 87.287

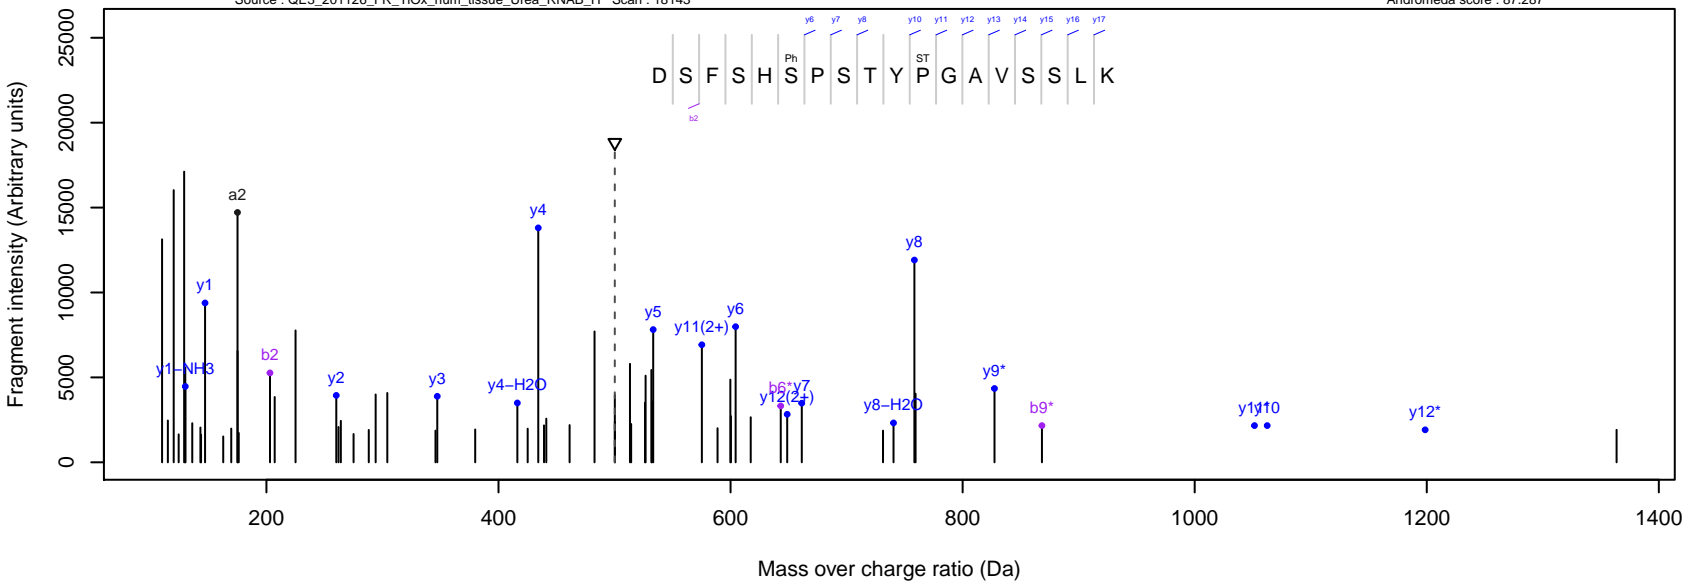

SIPRDPS(Phospho (STY))DLSHSR-3+

Source : QE3\_201126\_FR\_TIOx\_hum\_tissue\_Urea\_RNAB\_N Scan : 11924

Andromeda score : 87.287

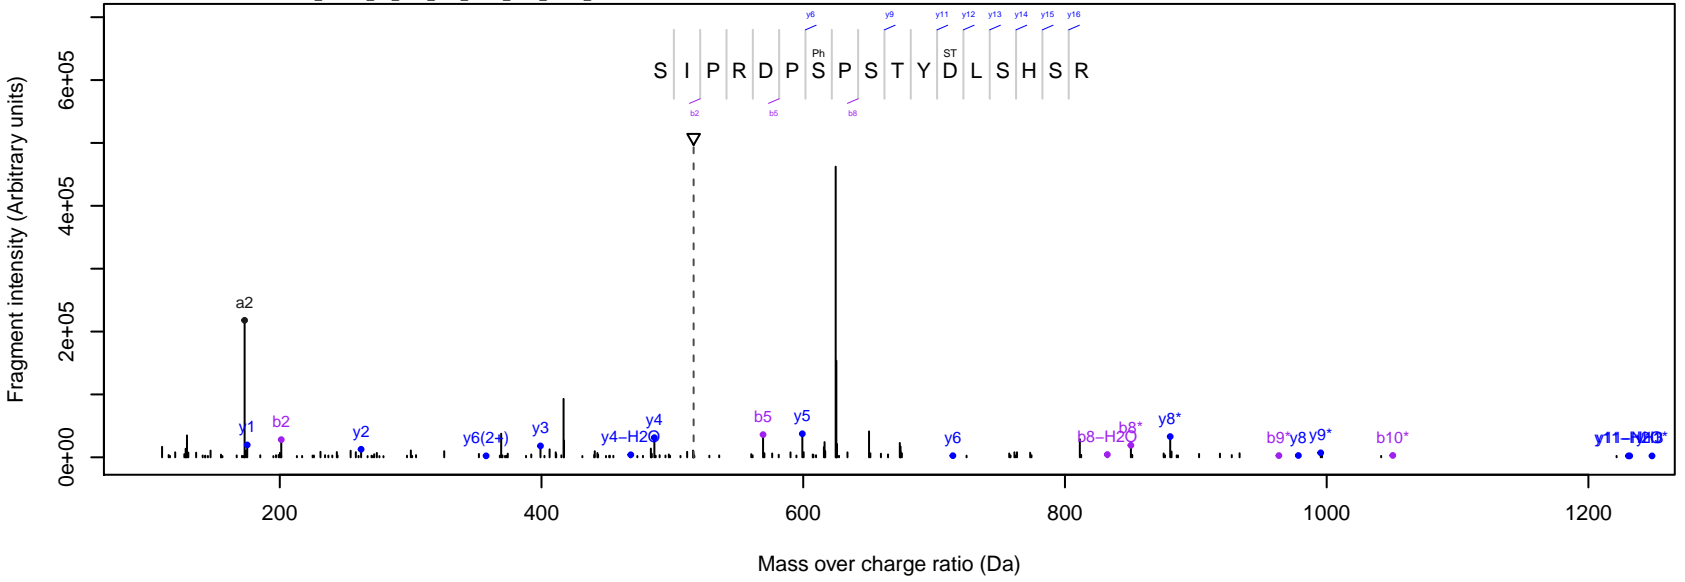

SLSTS(Phospho (STY))GES(Phospho (STY))LYHVLGLDK-2+

Source : QE3\_201126\_FR\_TIOx\_hum\_tissue\_Urea\_RNAB\_B Scan : 56091

Andromeda score : 87.287

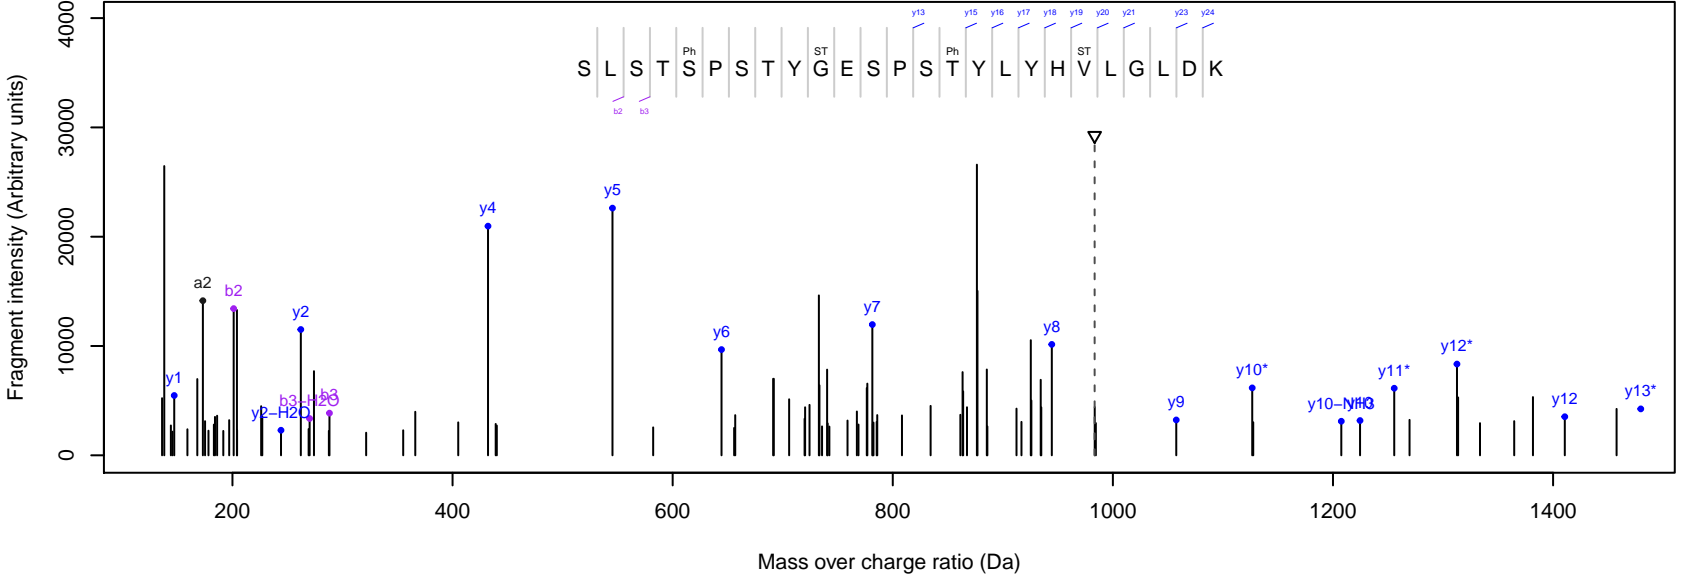

RS(Phospho (STY))ASPHDVLCLVSPCEFEHR-4+

Source : QE3\_201126\_FR\_TIOx\_hum\_tissue\_Urea\_RNAB\_H Scan : 30349

Andromeda score : 87.28

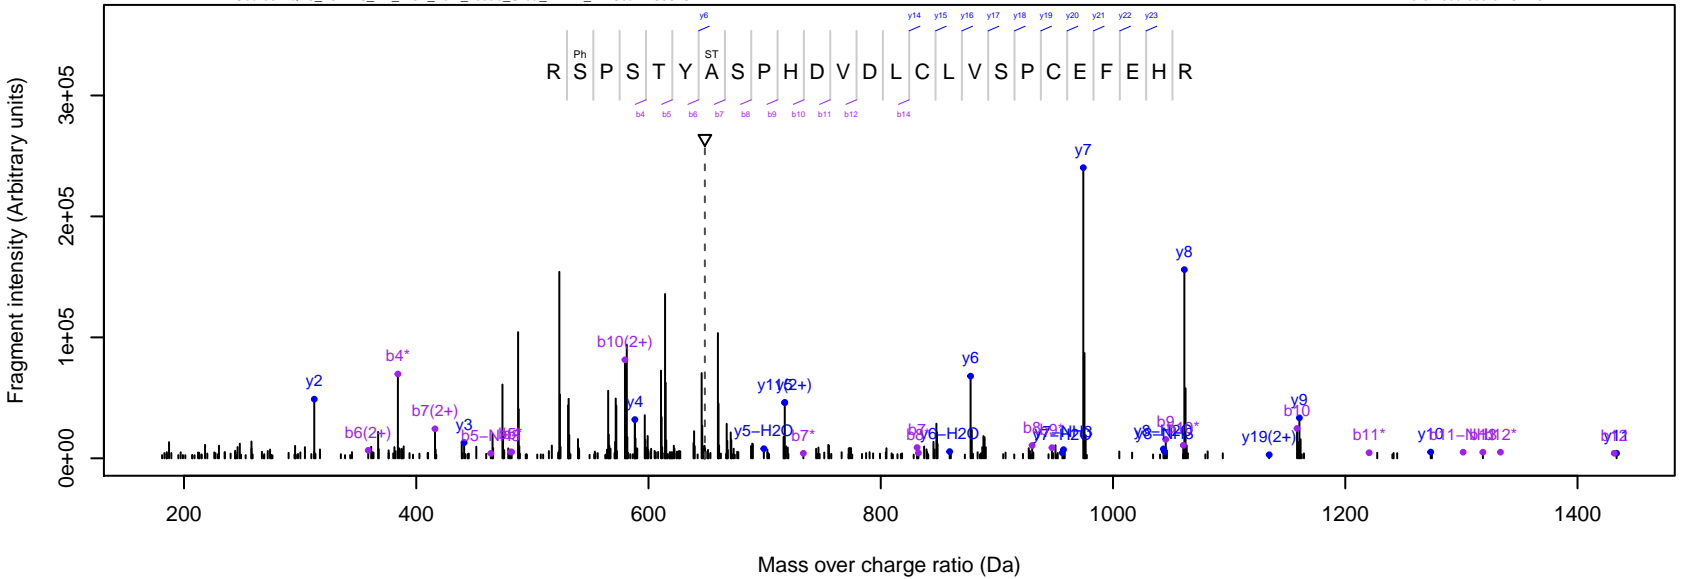



VGSAADIPINIS(Phospho (STY))ETDLSLLTATVPPSGR-3+

Source : QE3\_201126\_FR\_TiOx\_hum\_tissue\_Urea\_RNAB\_N Scan : 62408

Andromeda score : 87.28

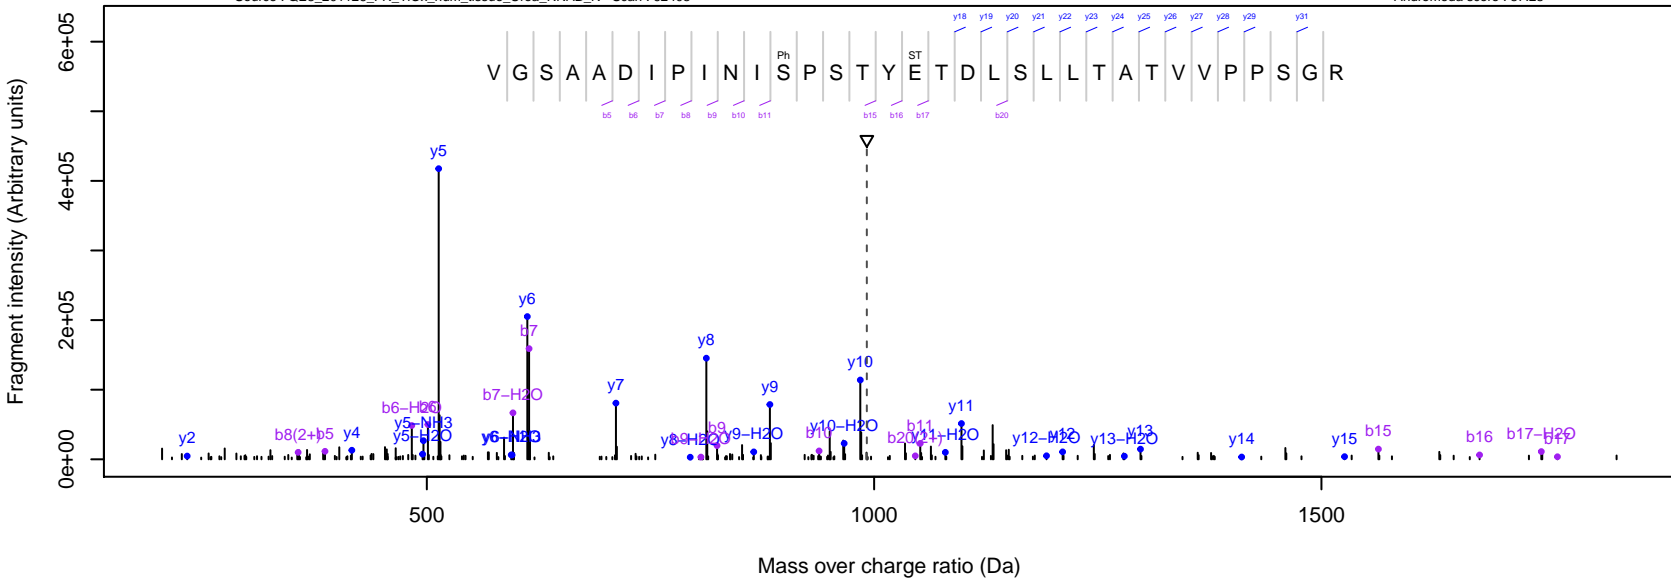

ILDNTGEPAPVLS(Phospho (STY))SPPPADVSTFLAFPSPEK-3+

Source : QE3\_201126\_FR\_TiOx\_hum\_tissue\_Urea\_RNAB\_N Scan : 61261

Andromeda score : 87.25

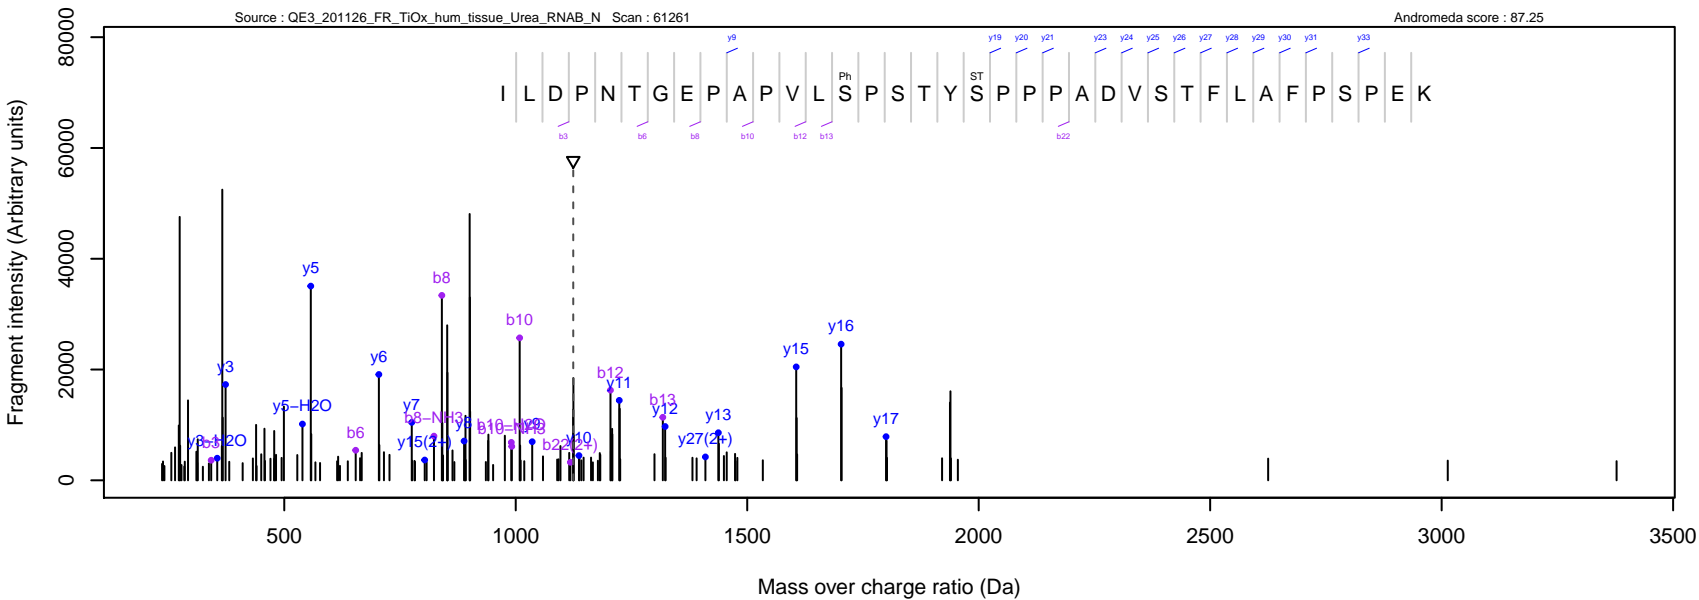

QQAAYYAQT(Phospho (STY))SPQGM(Oxidation (M))PQHPPAPQGQ-3+

Source : QE3\_201126\_FR\_TiOx\_hum\_tissue\_Urea\_RNAB\_H Scan : 20176

Andromeda score : 87.228

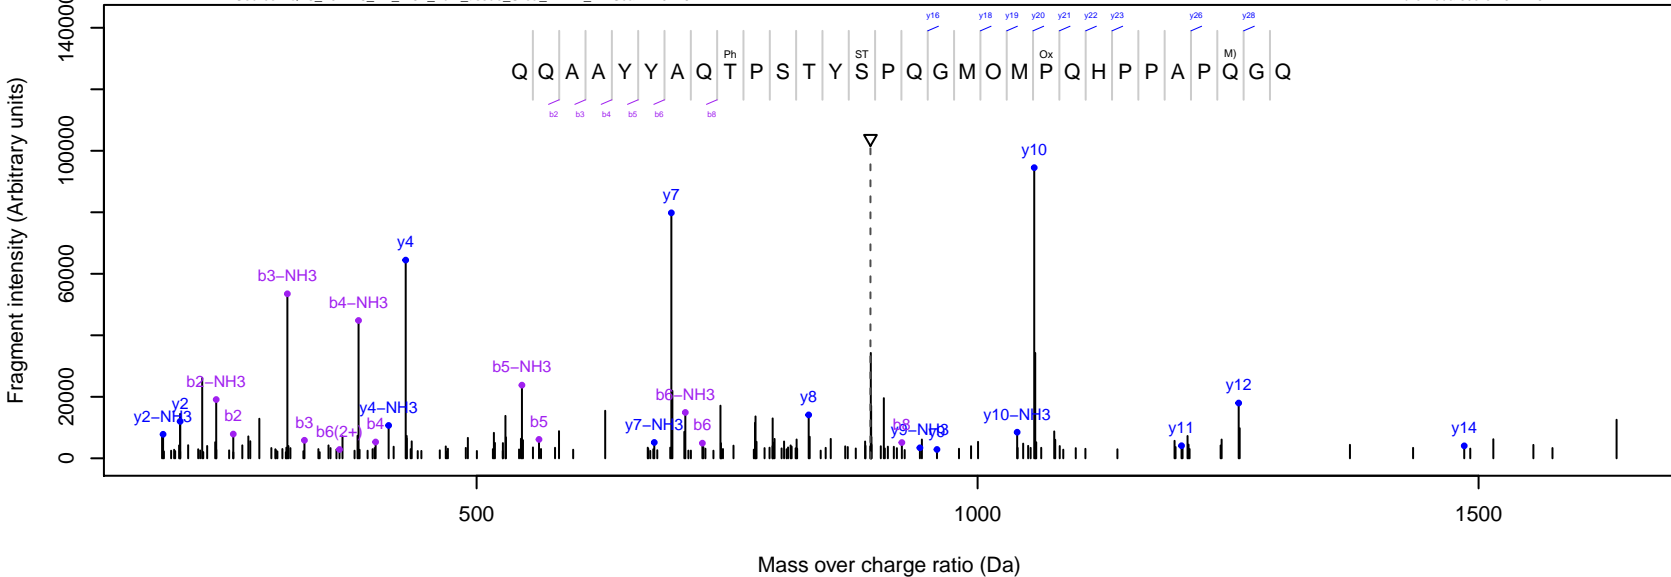

GLVGGQEEASQEAGLPAGAGPSPSTYPTFPALGIGMDS CVIPLR-3+

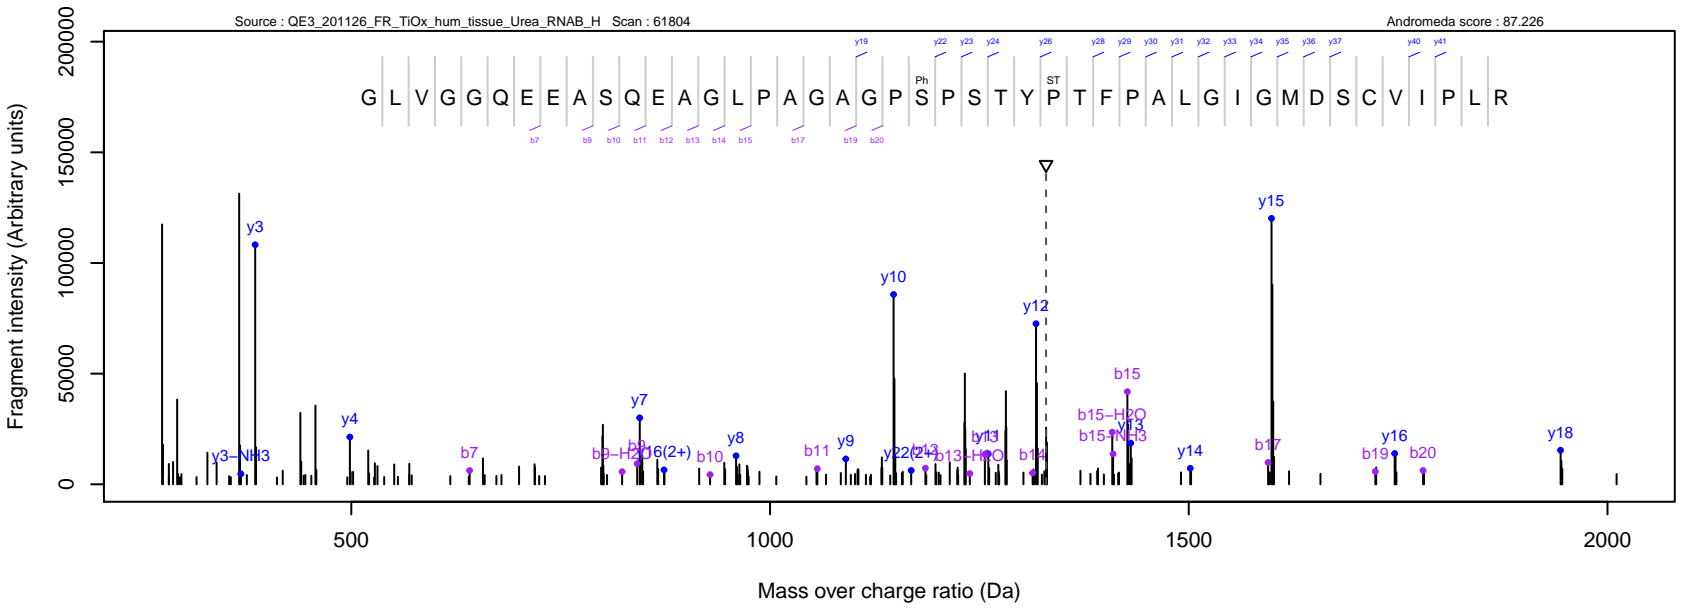

SNS(Phospho (STY))WQNLGGNK-2+

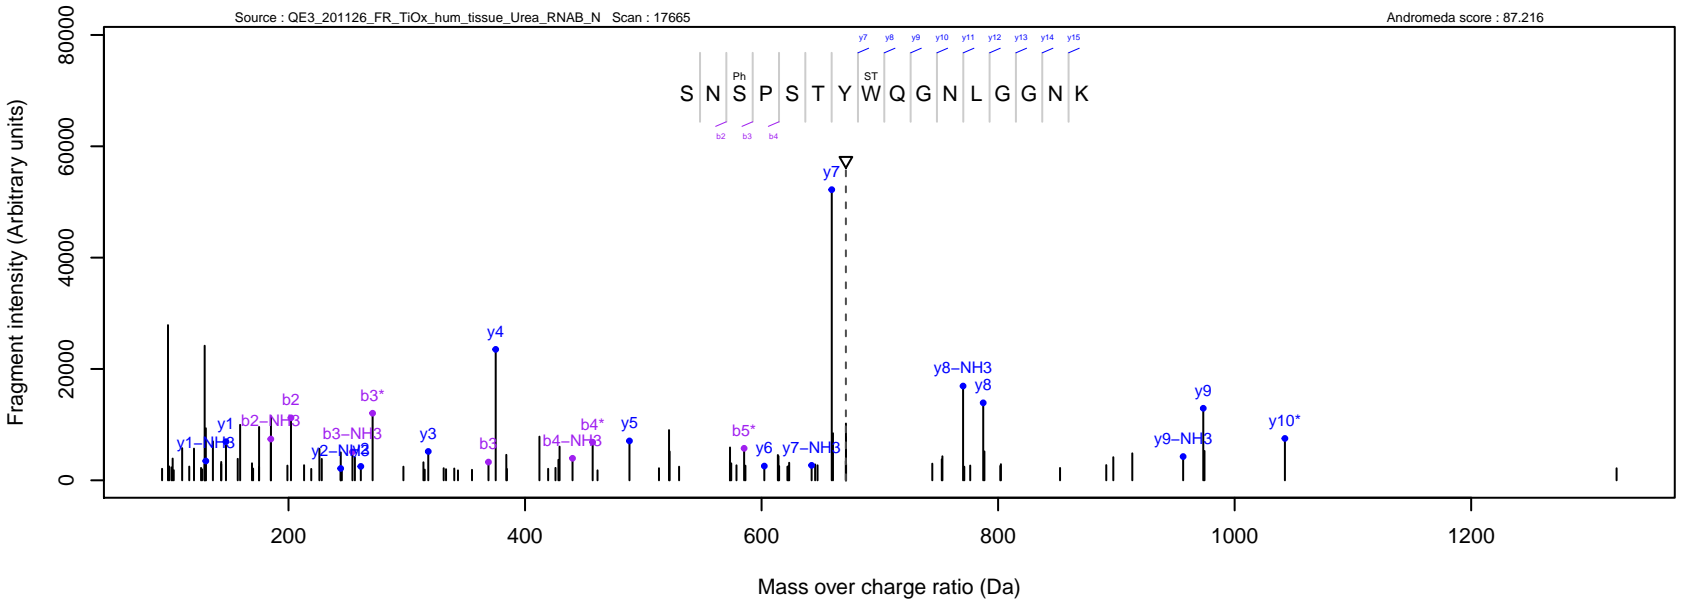

QPS(Phospho (STY))DASETTGLVQR-2+

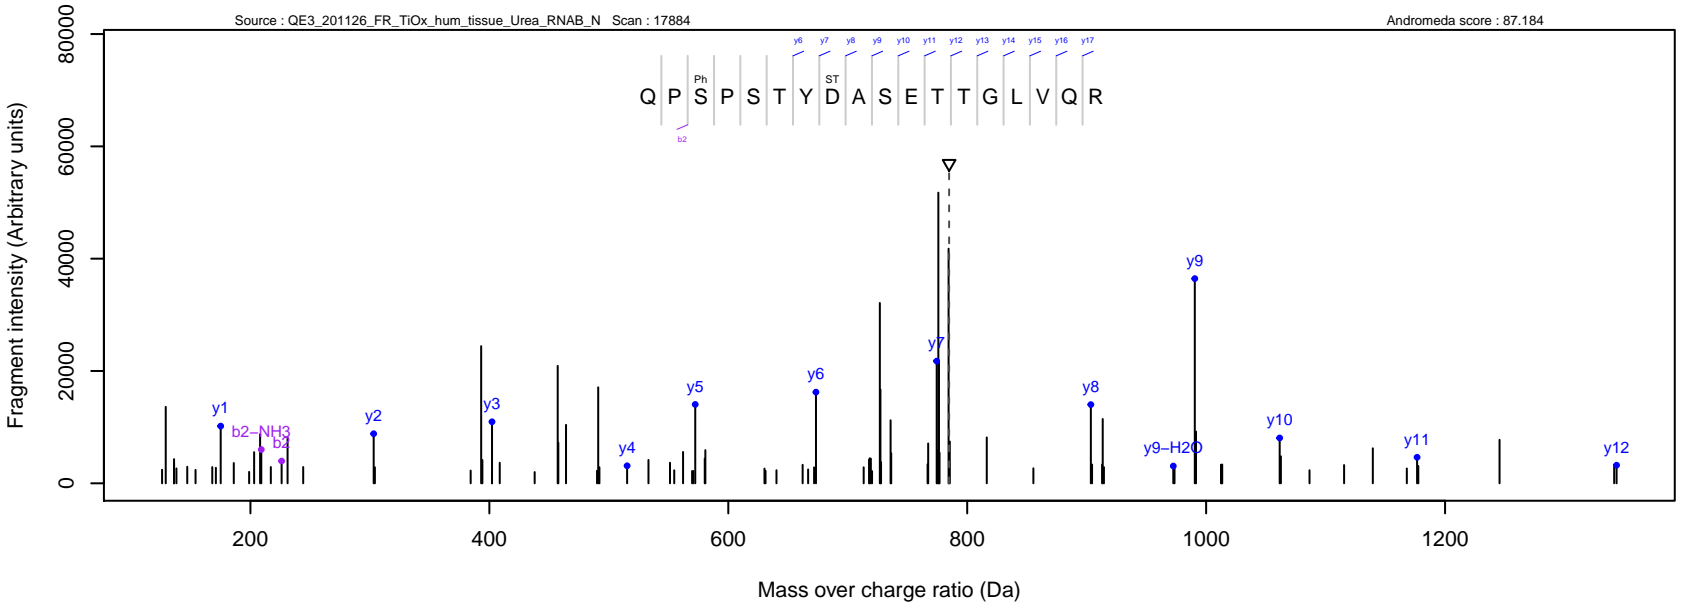

SLS(Phospho (STY))PFRR-2+

Source : QE3\_201126\_FR\_TiOx\_hum\_tissue\_Urea\_RNAB\_H Scan : 13056

Andromeda score : 87.181

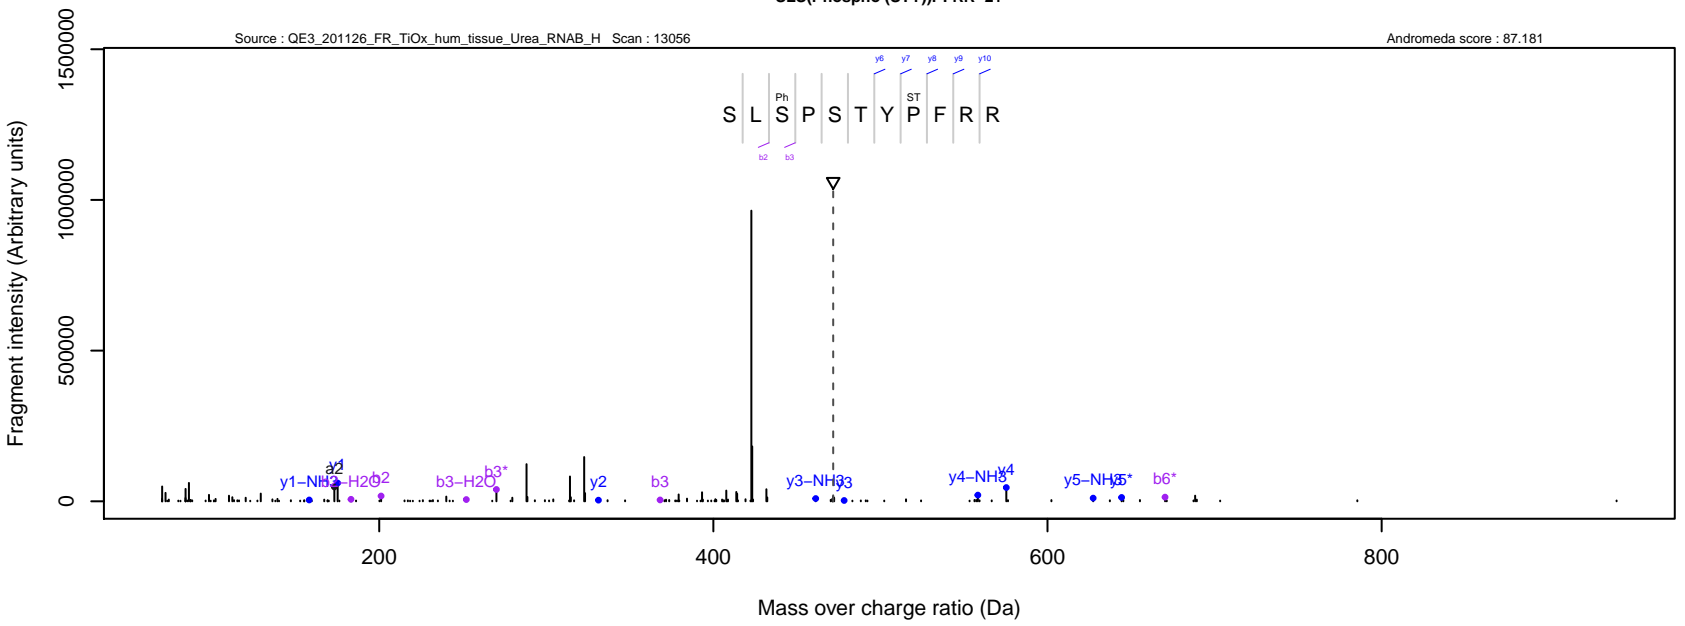

LSVHDMKPLDS(Phospho (STY))PGRR-4+

Source : QE3\_201126\_FR\_TiOx\_hum\_tissue\_Urea\_RNAB\_H Scan : 14339

Andromeda score : 87.16

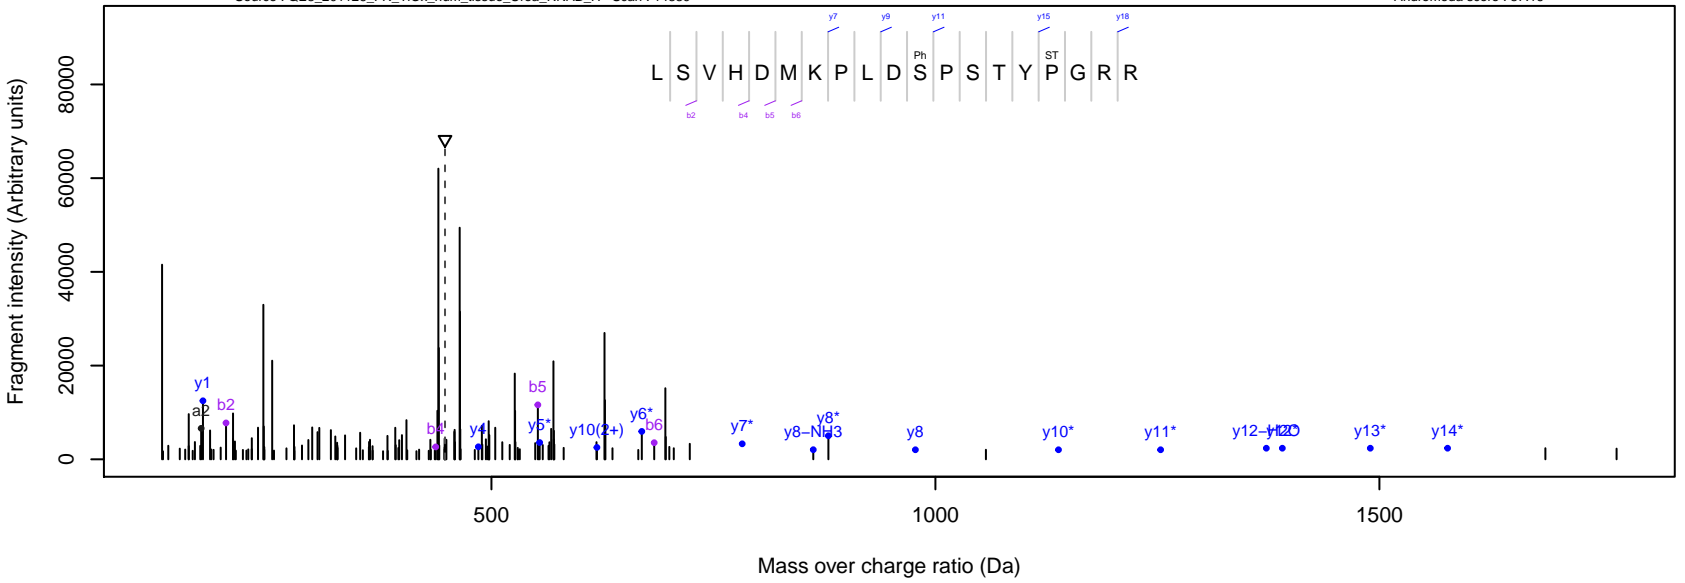

AQLS(Phospho (STY))PGIYDDTSAR-2+

Source : QE3\_201126\_FR\_TiOx\_hum\_tissue\_Urea\_RNAB\_N Scan : 26746

Andromeda score : 87.138

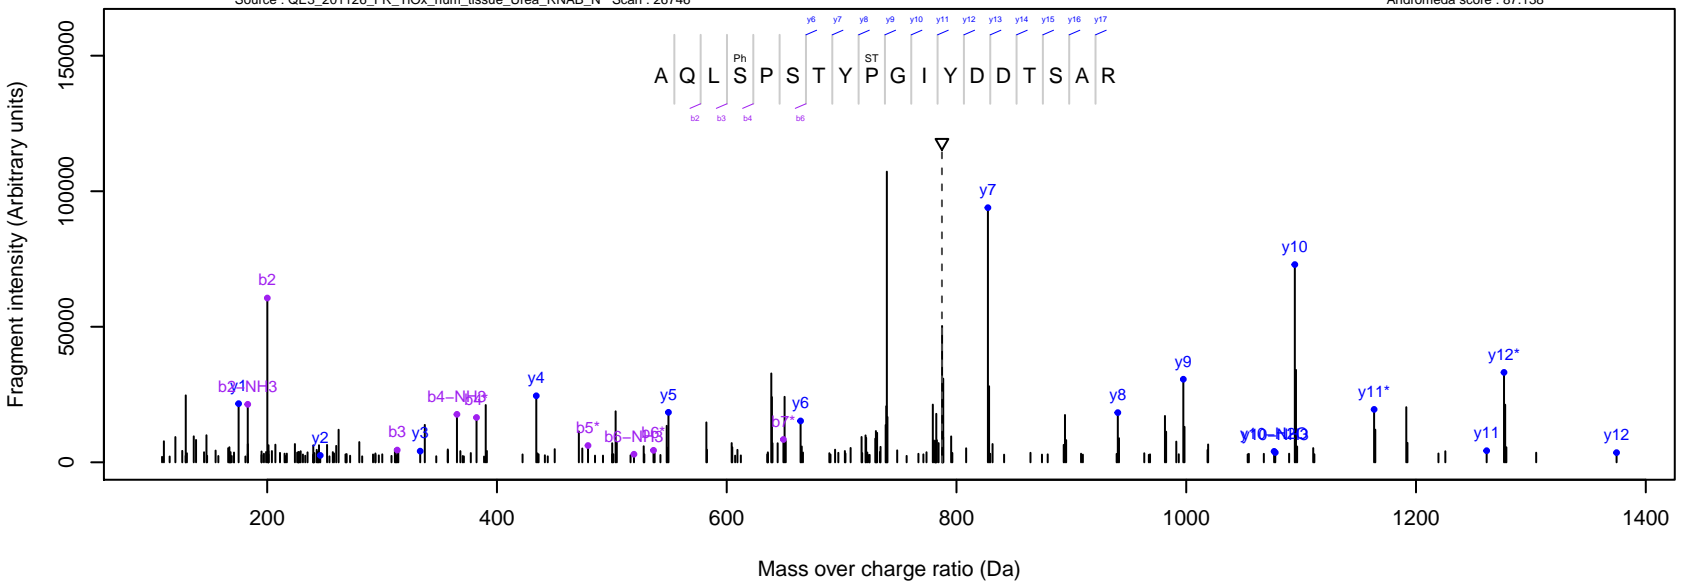

S(Phospho (STY))DKGSPGEDGFVPSALGTR-3+

Source : QE3\_201126\_FR\_TiOx\_hum\_tissue\_Urea\_RNAB\_H Scan : 28206

Andromeda score : 87.117

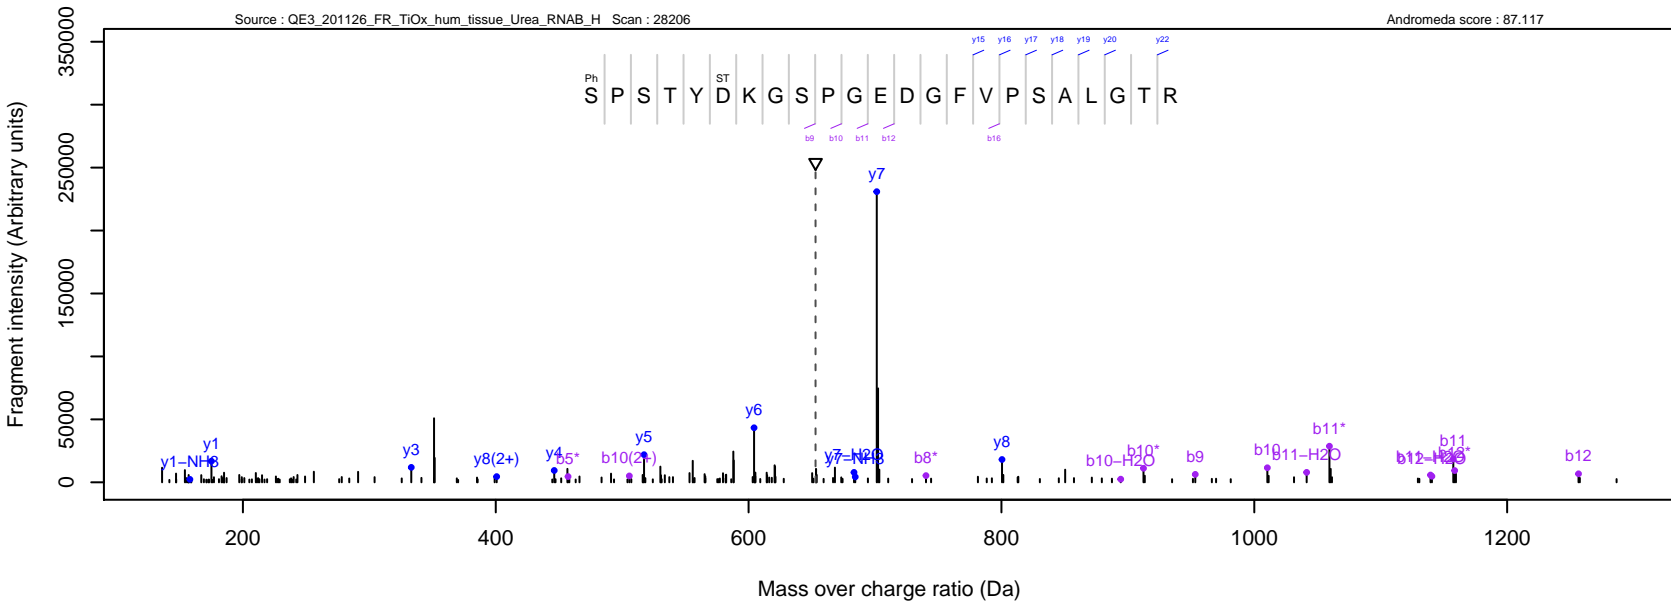

FSEM(Oxidation (M))MNNM(Oxidation (M))GGDEDVDLPEVDGADDDSQDS(Phospho (STY))DDEKMPDL-4+

Source : QE3\_201126\_FR\_TiOx\_hum\_tissue\_Urea\_RNAB\_H Scan : 51931

Andromeda score : 87.111

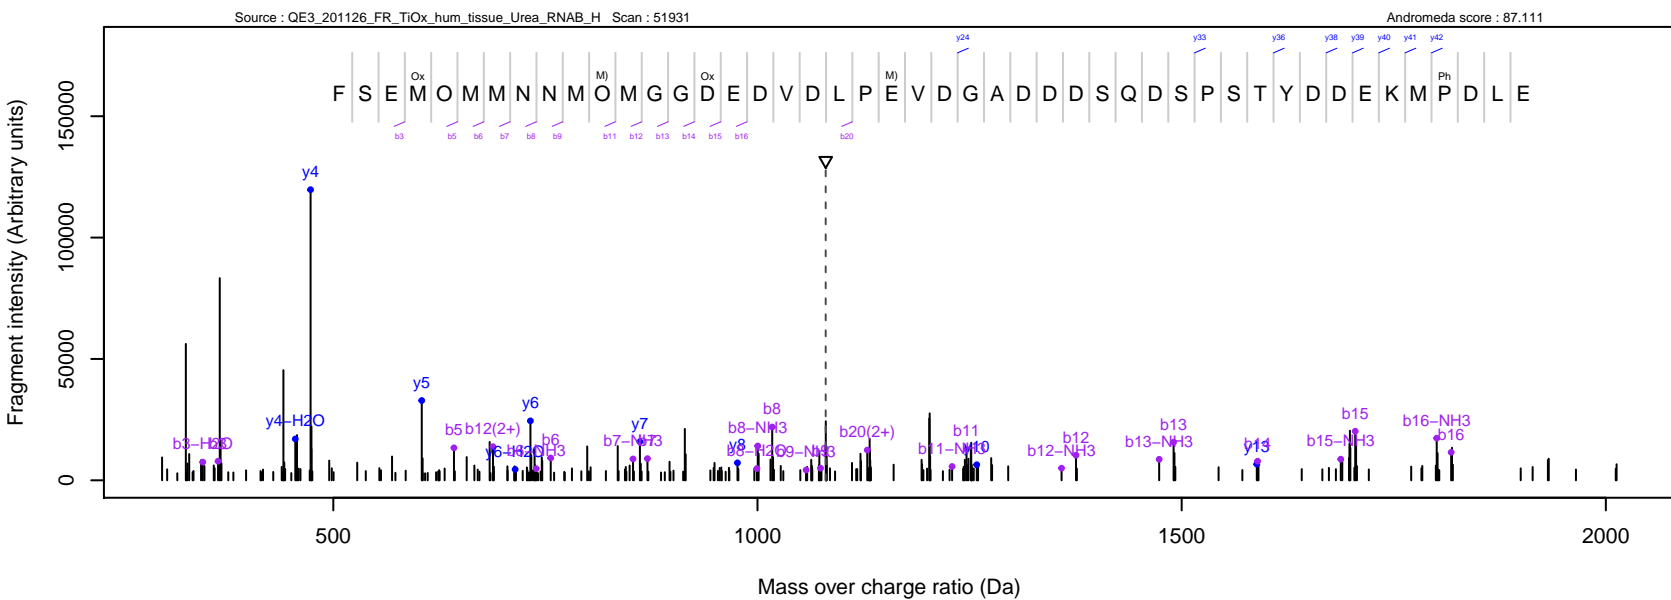

KM(Oxidation (M))S(Phospho (STY))LGQLQSAR-3+

Source : QE3\_201126\_FR\_TiOx\_hum\_tissue\_Urea\_RNAB\_B Scan : 11542

Andromeda score : 87.083

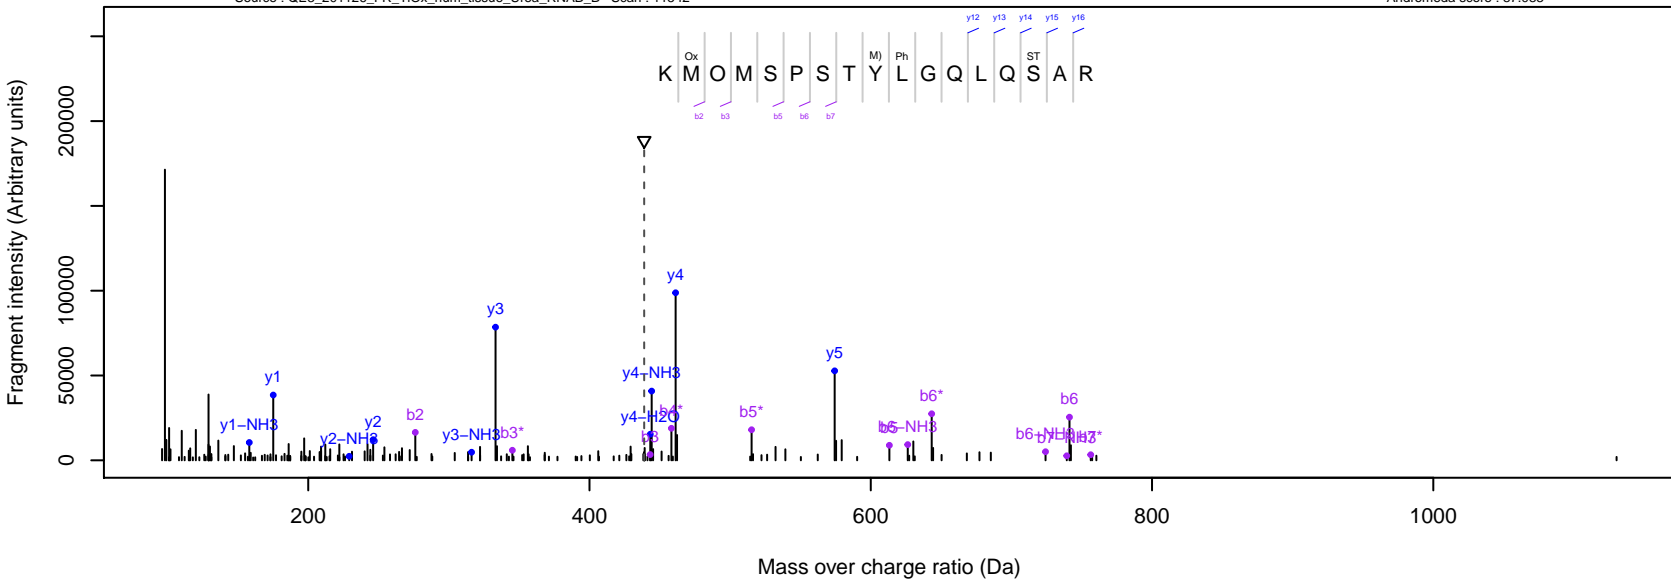

VSNLQVS(Phospho (STY))PK-2+

Source : QE3\_201126\_FR\_TiOx\_hum\_tissue\_Urea\_RNAB\_H Scan : 12341

Andromeda score : 87.026

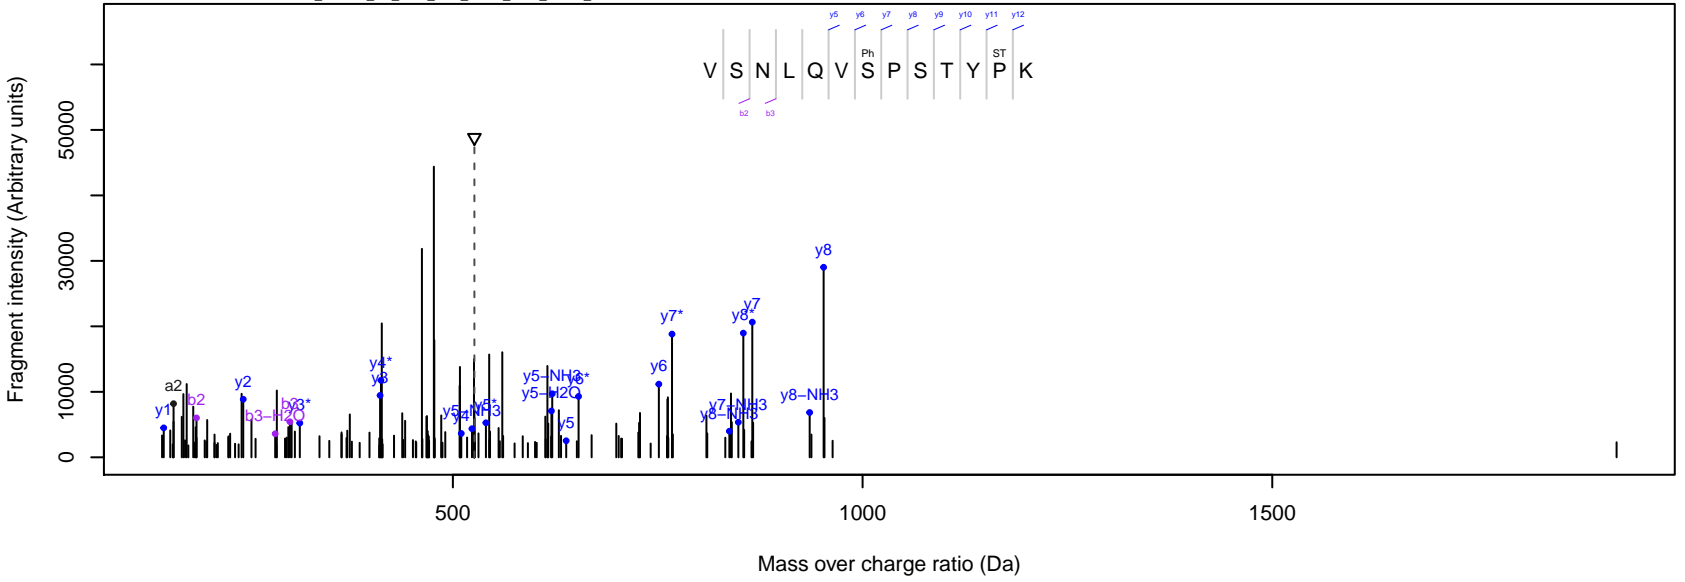

ASS(Phospho (STY))FADM(Oxidation (M))M(Oxidation (M))GILK-2+

Source : QE3\_201126\_FR\_TiOx\_hum\_tissue\_Urea\_RNAB\_H Scan : 27102

Andromeda score : 87.001

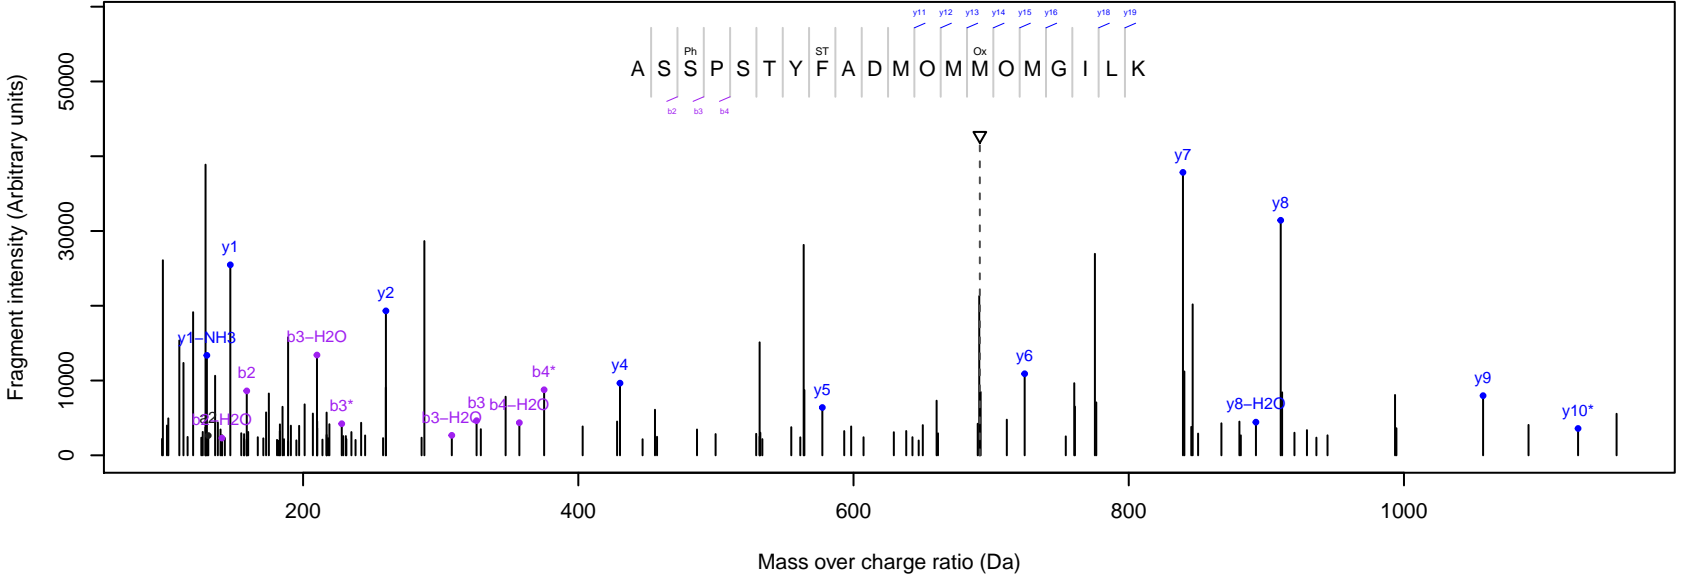

LPS(Phospho (STY))EPGMTLTIR-2+

Source : QE3\_201126\_FR\_TiOx\_hum\_tissue\_Urea\_RNAB\_N Scan : 53791

Andromeda score : 86.944

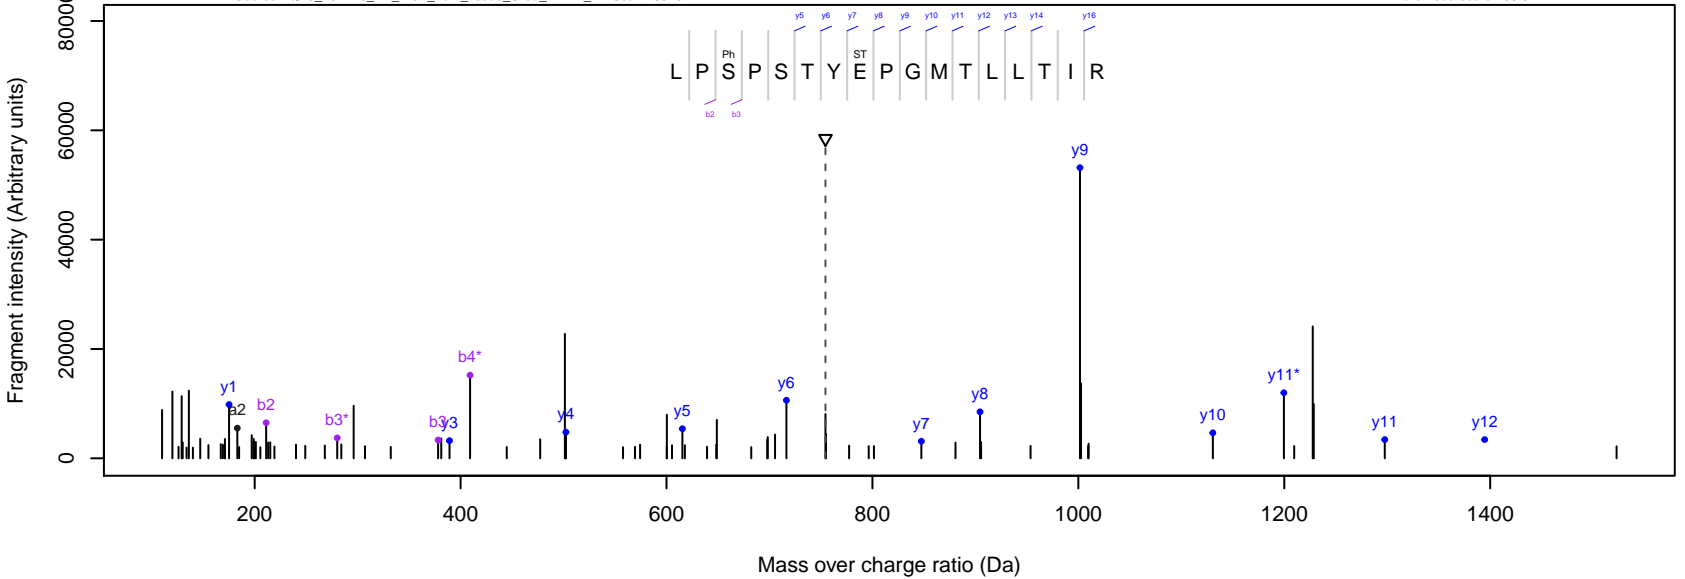

RVS(Phospho (STY))LSEIGFGK-2+

Source : QE3\_201126\_FR\_TiOx\_hum\_tissue\_Urea\_RNAB\_N Scan : 31286

Andromeda score : 86.944

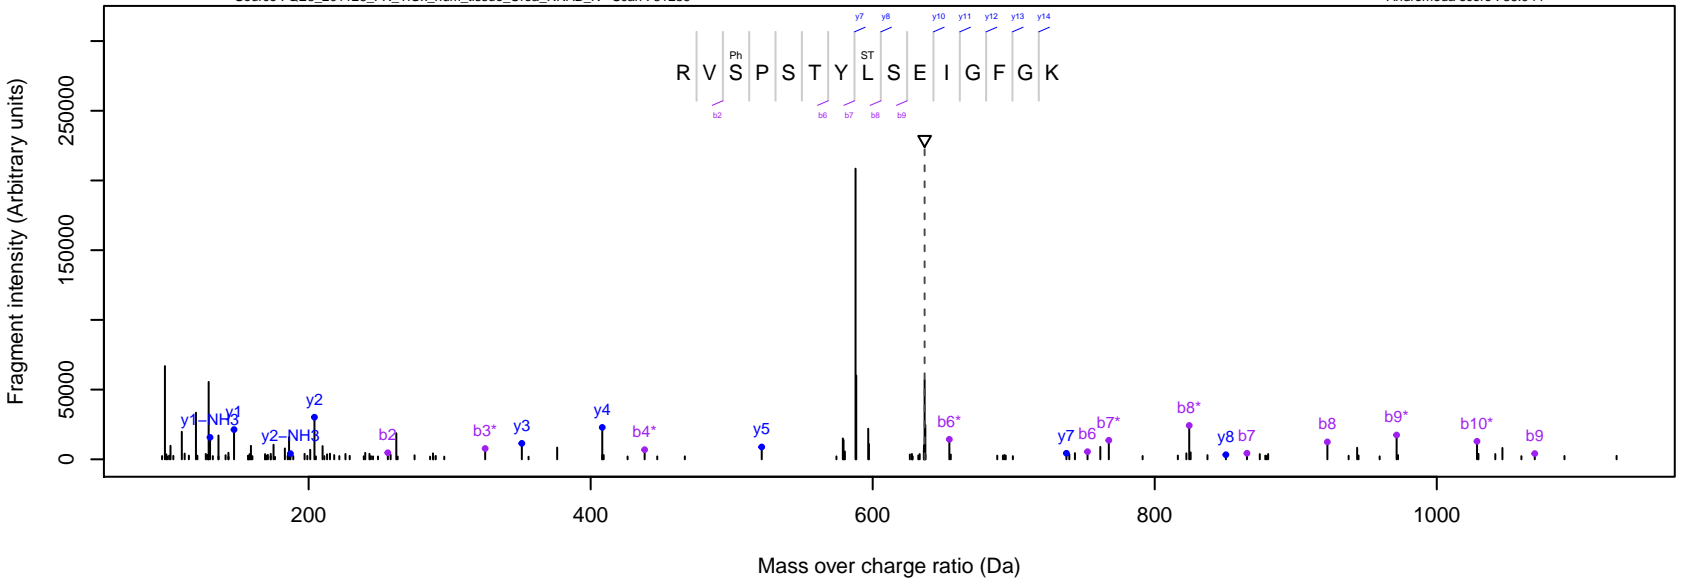

CVS(Phospho (STY))CLPGQR-2+

Source : QE3\_201126\_FR\_TiOx\_hum\_tissue\_Urea\_RNAB\_B Scan : 14618

Andromeda score : 86.898

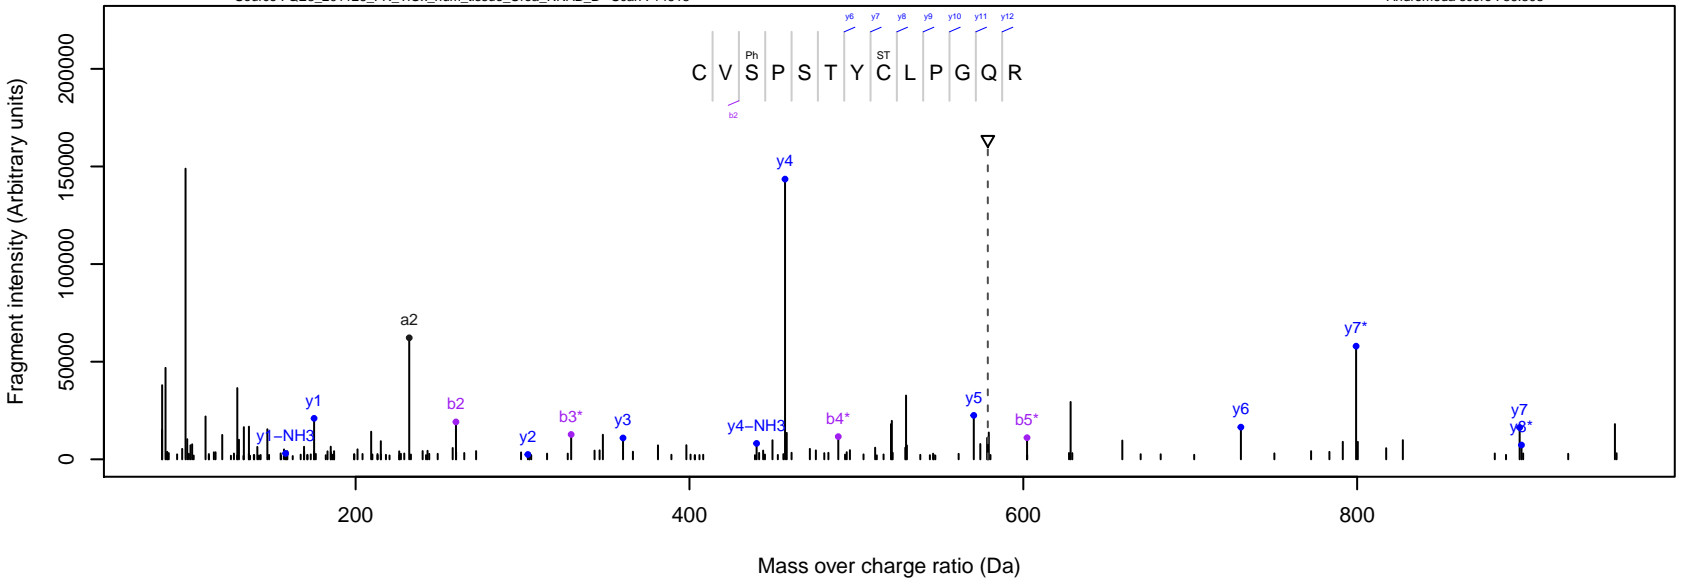

VYEHTSRFS(Phospho (STY))PK-3+

Source : QE3\_201126\_FR\_TiOx\_hum\_tissue\_Urea\_RNAB\_H Scan : 7412

Andromeda score : 86.803

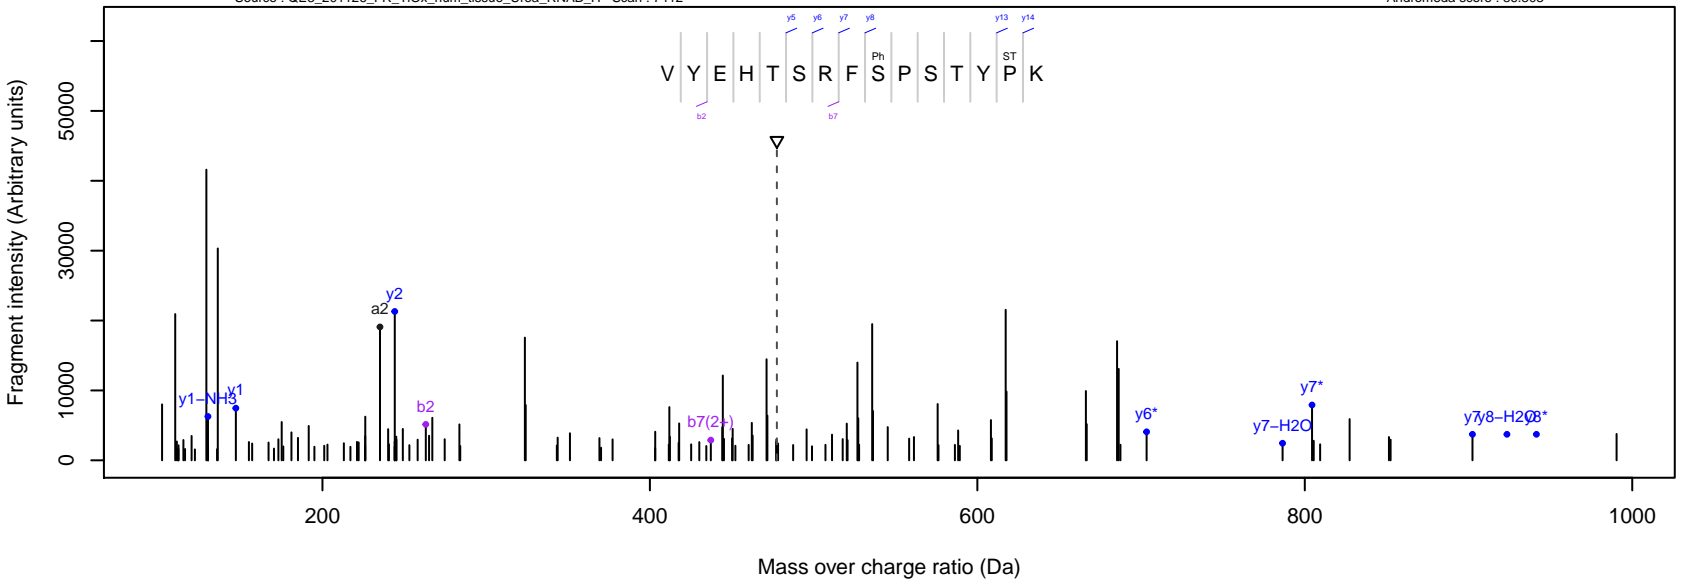

EAEALLQSMGLTPESPIVPPPOxMOMSPSTYPSK

Source : QE3\_201126\_FR\_TiOx\_hum\_tissue\_Urea\_RNAB\_N Scan : 57453

Andromeda score : 86.793

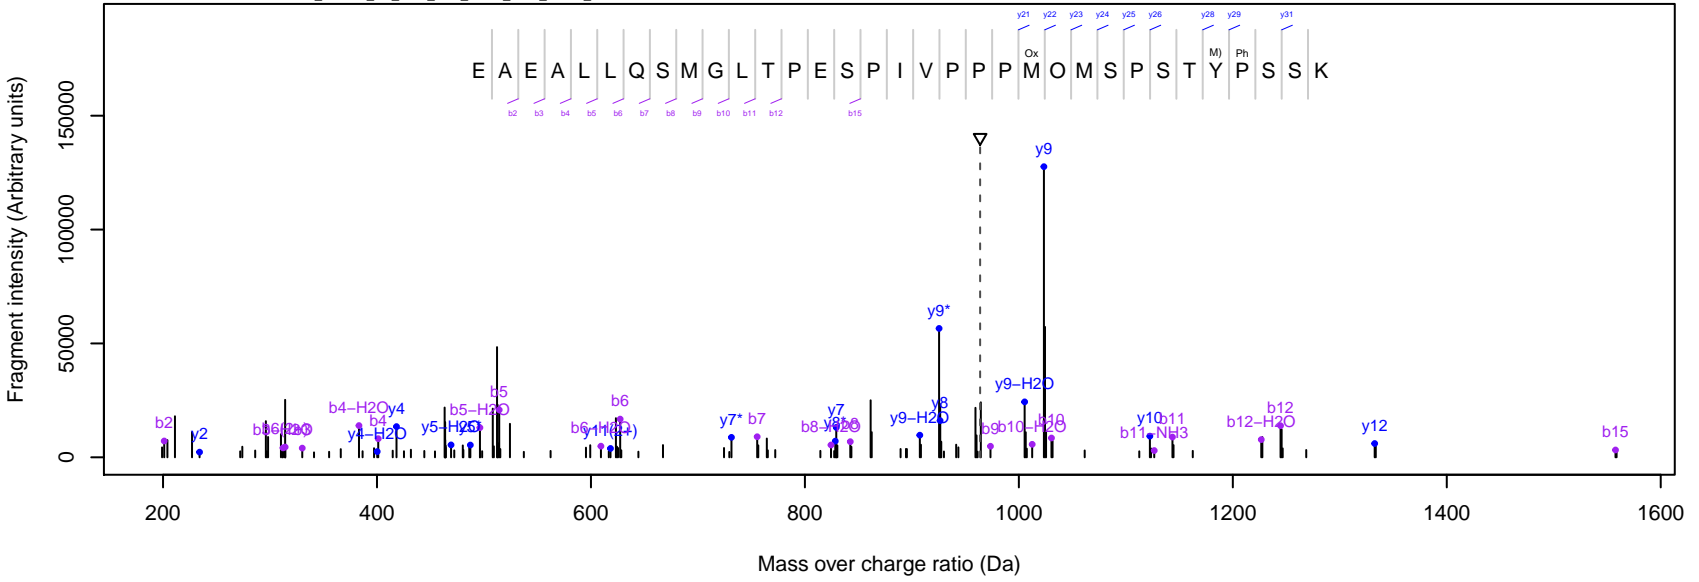

QRS(Phospho(STY))DDESPSTSSGSSDADQRDPAAPEPEEQEER-4+

Source : QE3\_201126\_FR\_TiOx\_hum\_tissue\_Urea\_RNAB\_N Scan : 11511

Andromeda score : 86.785

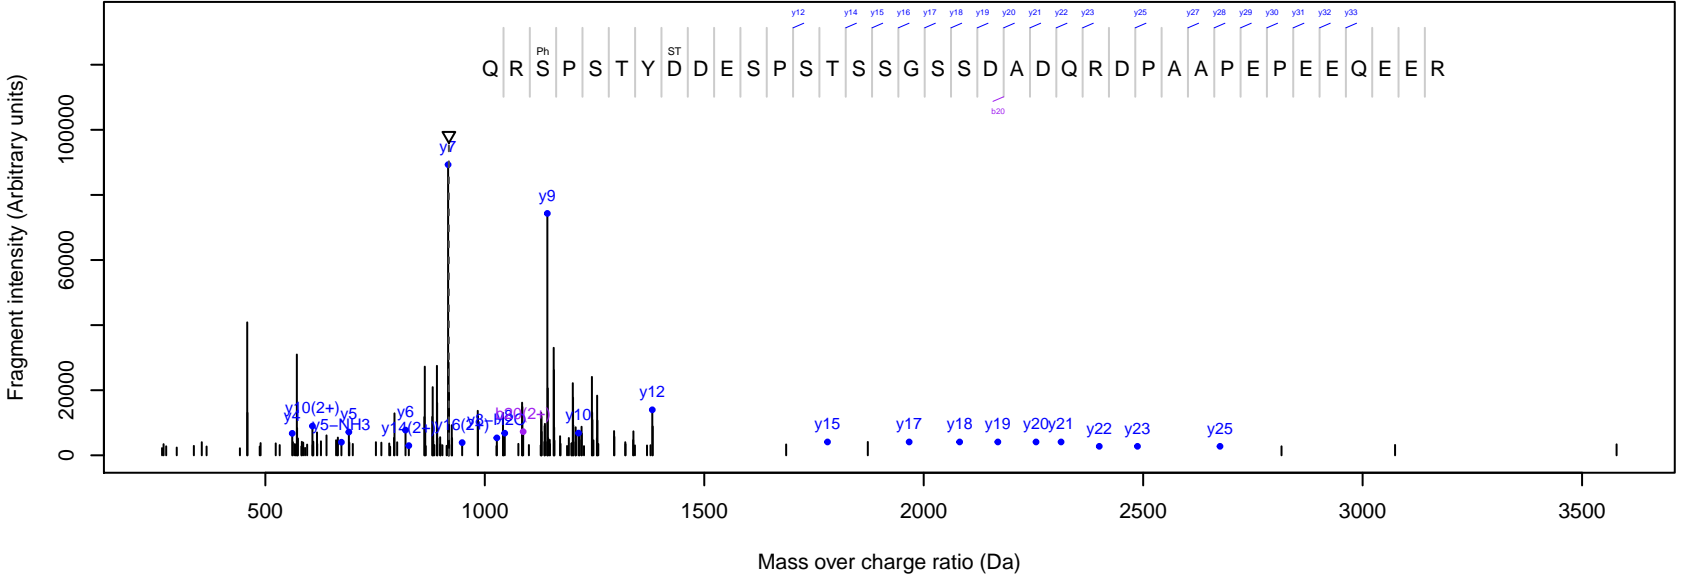

LEGVDGGQS(Phospho(STY))PR-2+

Source : QE3\_201126\_FR\_TiOx\_hum\_tissue\_Urea\_RNAB\_H Scan : 11187

Andromeda score : 86.772

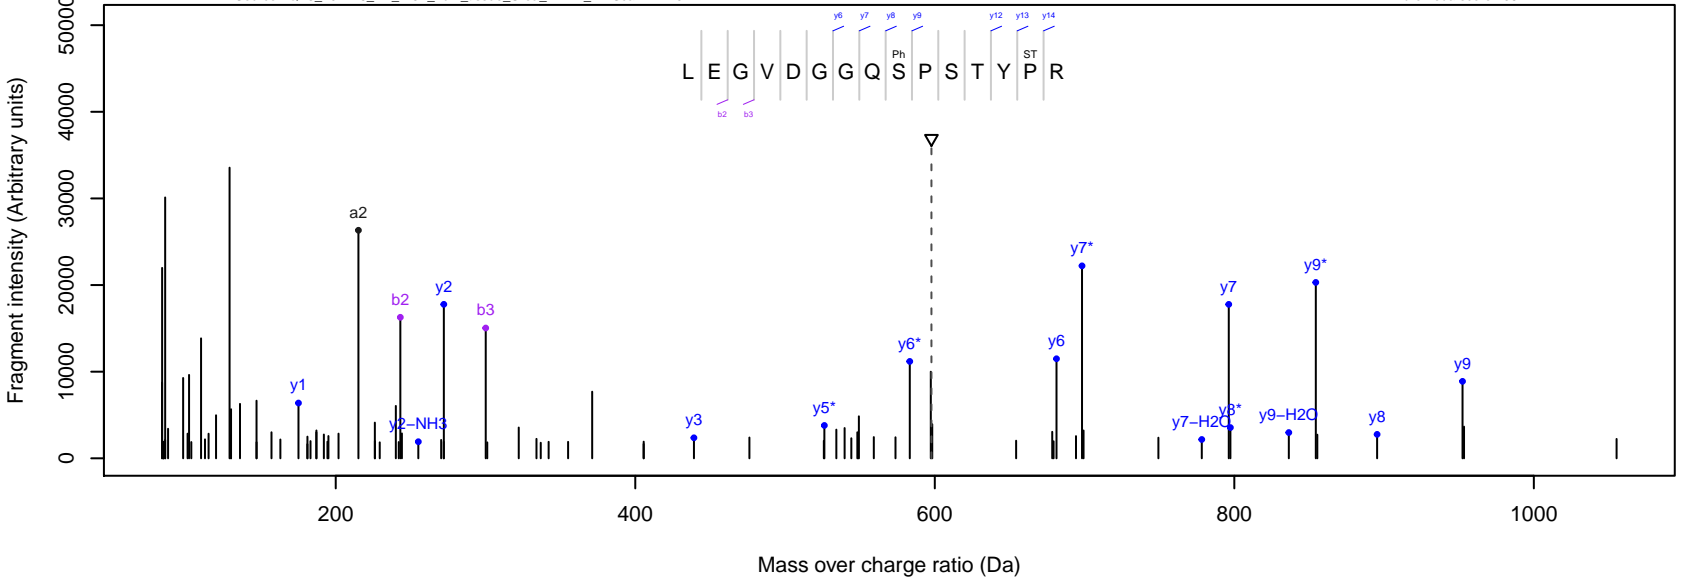





**KTES(Phospho (STY))PIKLSPATPSR-3+**

Source : QE3\_201126\_FR\_TiOx\_hum\_tissue\_Urea\_RNAB\_H Scan : 11978

Andromeda score : 86.748

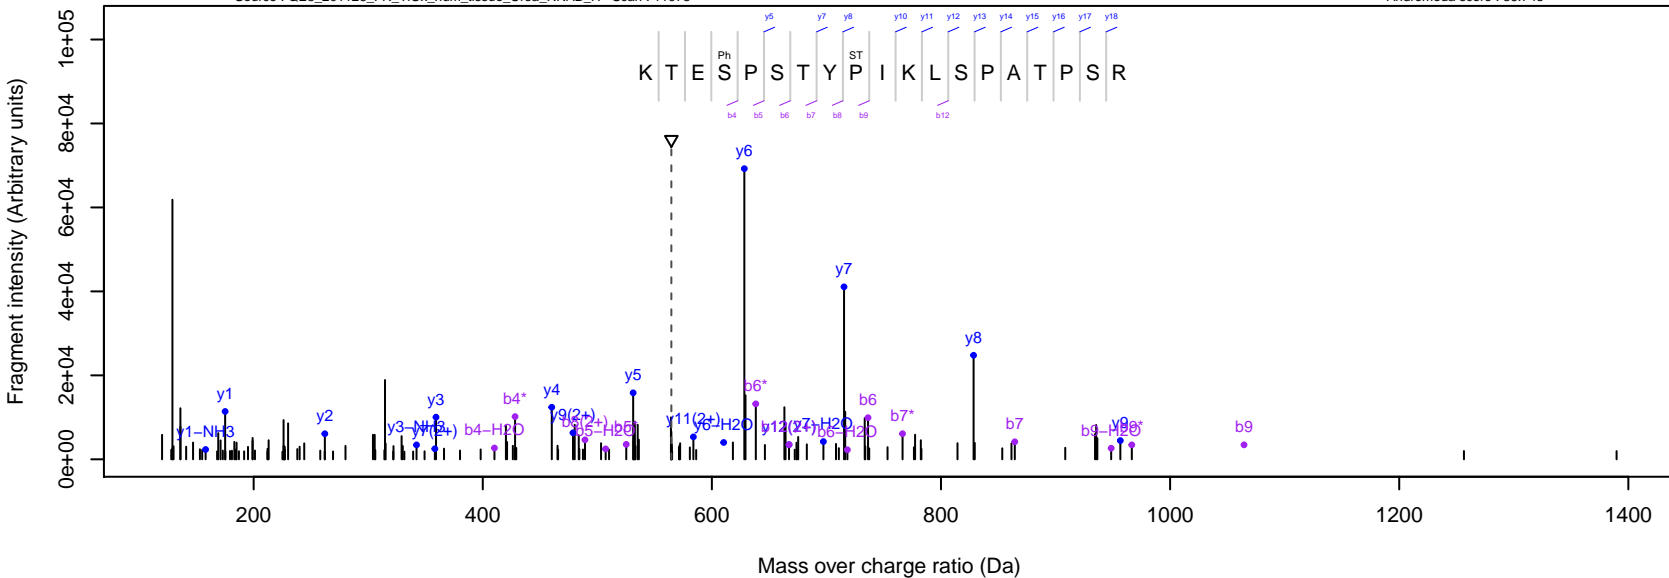

**LIQSHPE(Phospho (STY))AEDLQEK-3+**

Source : QE3\_201126\_FR\_TiOx\_hum\_tissue\_Urea\_RNAB\_H Scan : 13482

Andromeda score : 86.748

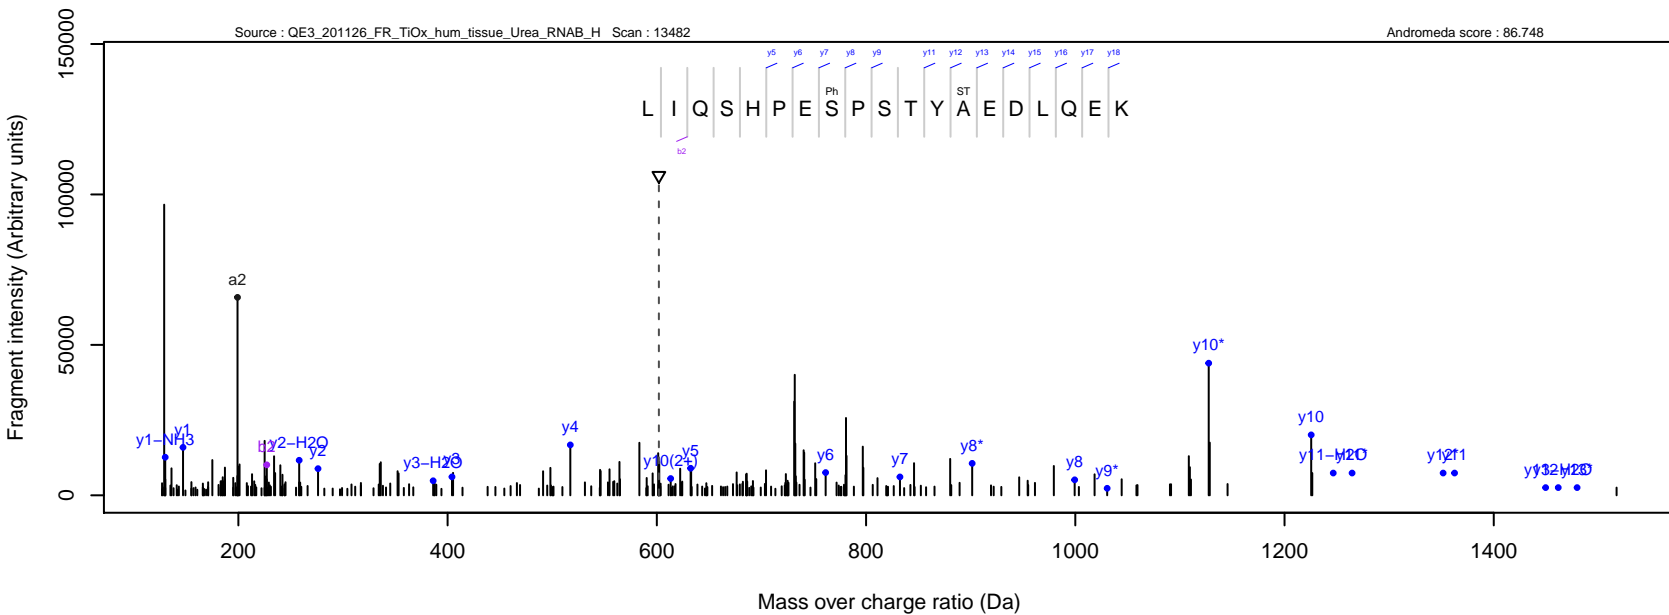

**GFGS(Phospho (STY))DKEALDIITSR-3+**

Source : QE3\_201126\_FR\_TiOx\_hum\_tissue\_Urea\_RNAB\_H Scan : 54634

Andromeda score : 86.727

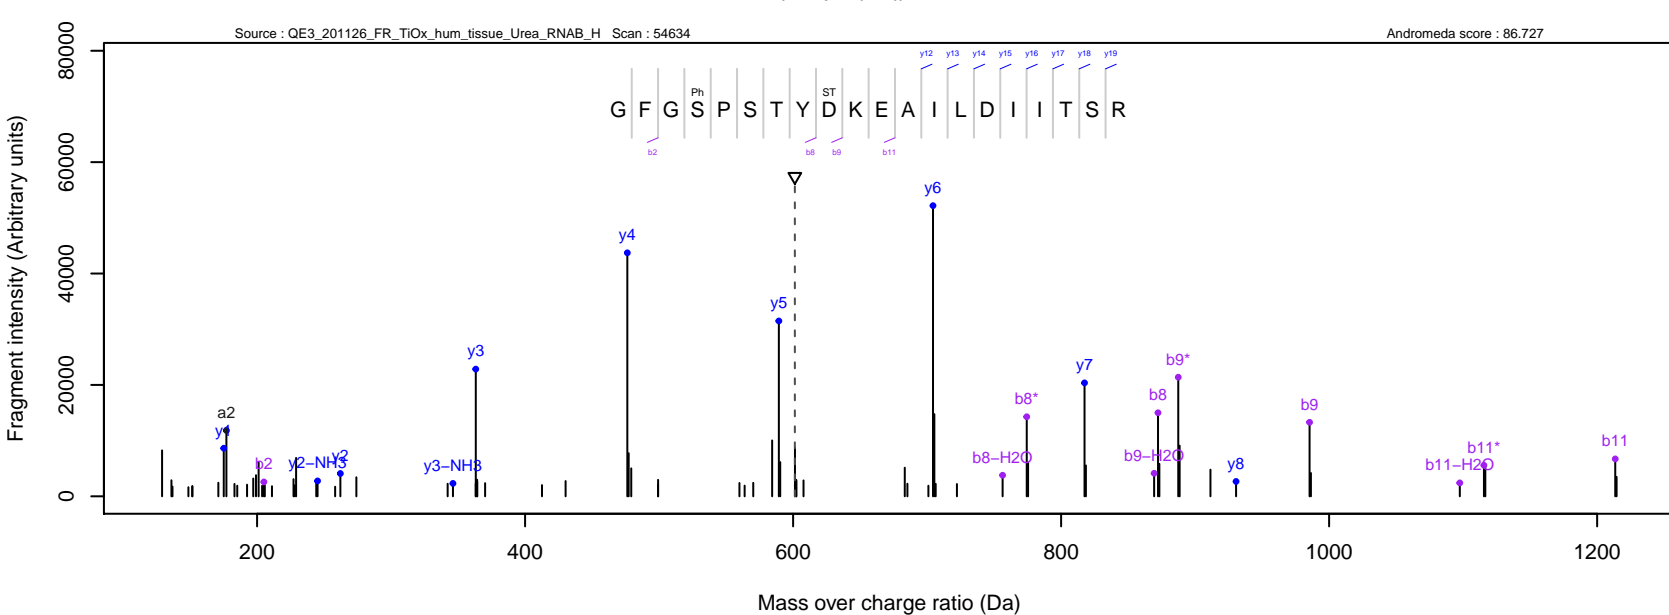

(Acetyl (Protein N-term))M(Oxidation (M))DDPDCDS(Phospho (STY))TWEDEEDAEDAEDCEDGEAAGAR-3+

Source : QE3\_201126\_FR\_TIOx\_hum\_tissue\_Urea\_RNAB\_N Scan : 48985

Andromeda score : 86.675

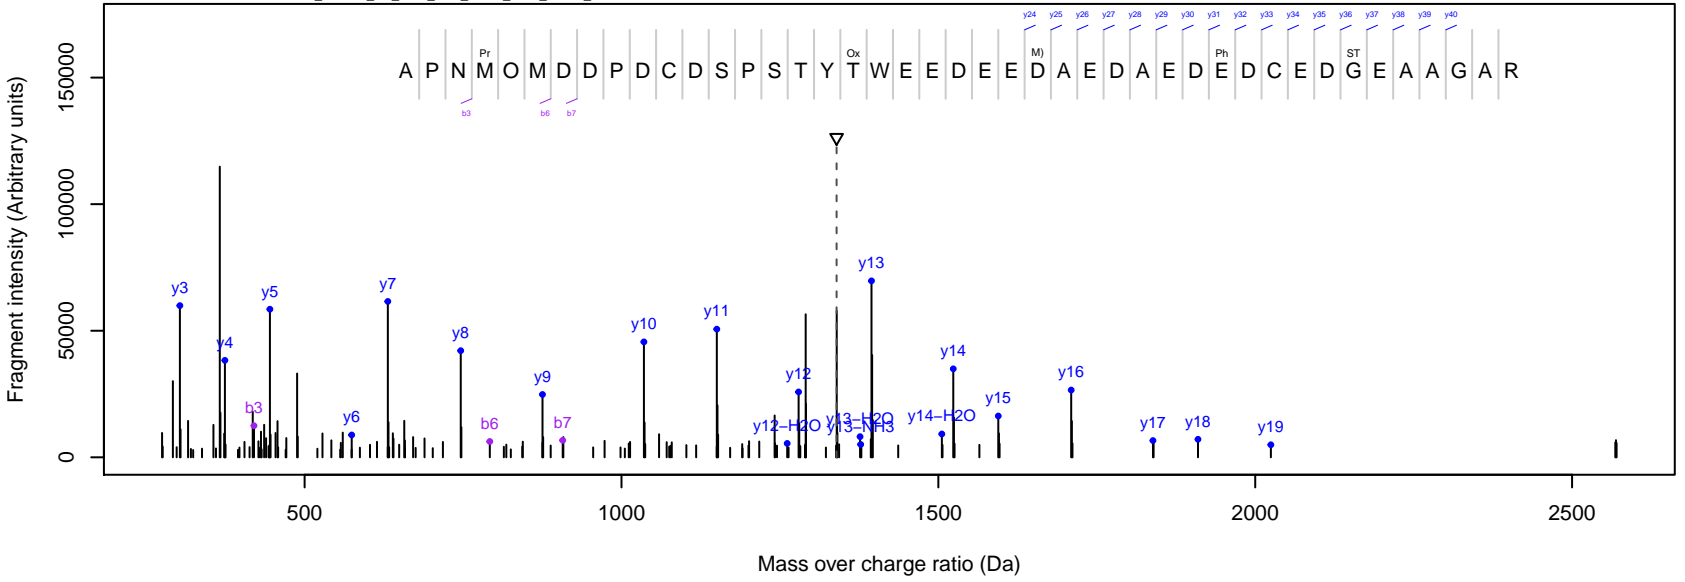

GRPPAEKLS(Phospho (STY))PNPPLTK-3+

Source : QE3\_201126\_FR\_TIOx\_hum\_tissue\_Urea\_RNAB\_H Scan : 14340

Andromeda score : 86.625

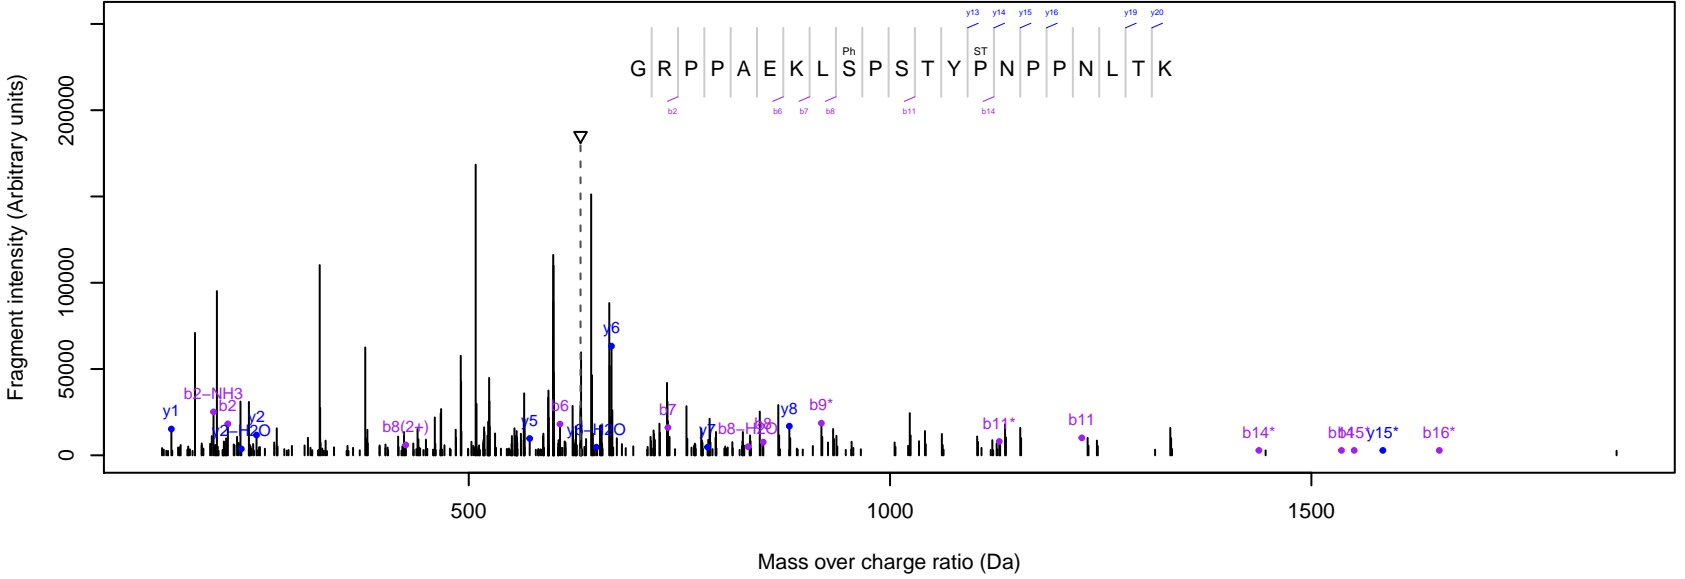

IHSGHVVEEPAS(Phospho (STY))PLAAYQK-3+

Source : QE3\_201126\_FR\_TIOx\_hum\_tissue\_Urea\_RNAB\_N Scan : 16346

Andromeda score : 86.625

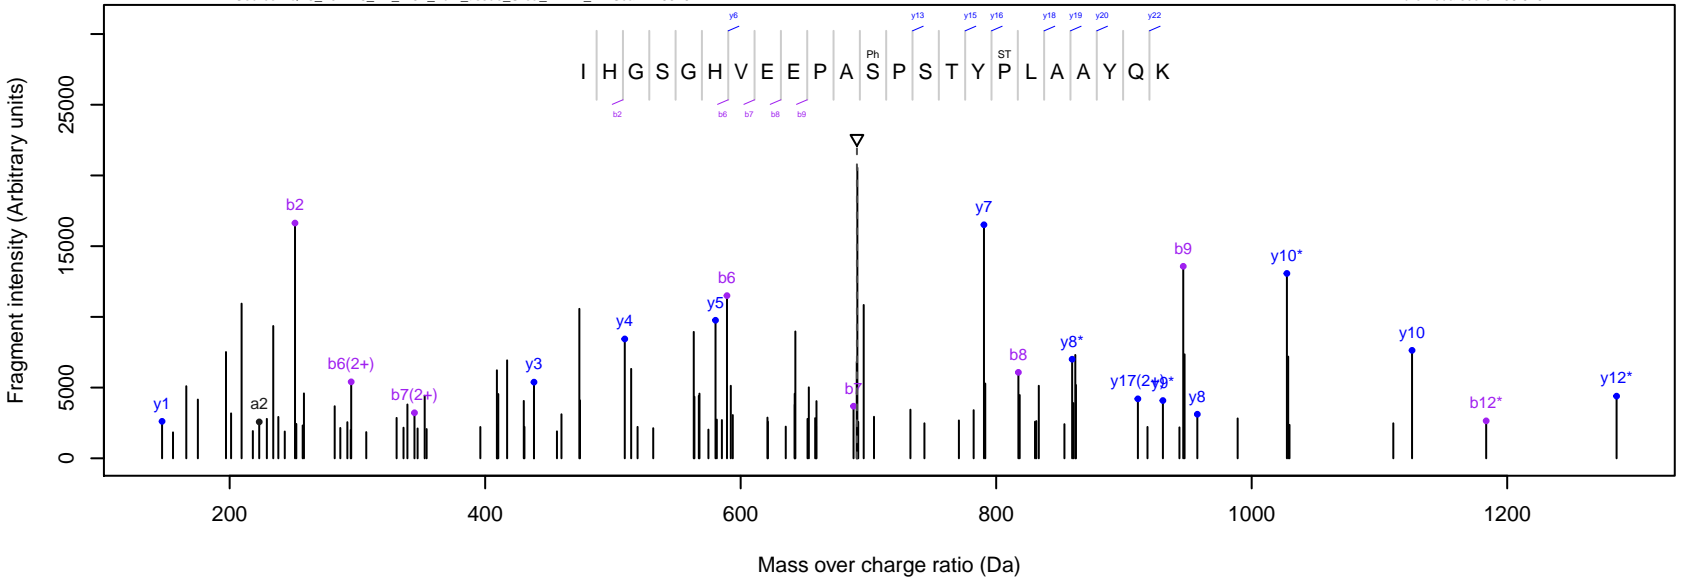

QGGVQPQAGDGAQT(Phospho (STY))PKEEK-3+

Source : QE3\_201126\_FR\_TiOx\_hum\_tissue\_Urea\_RNAB\_N Scan : 6167

Andromeda score : 86.557

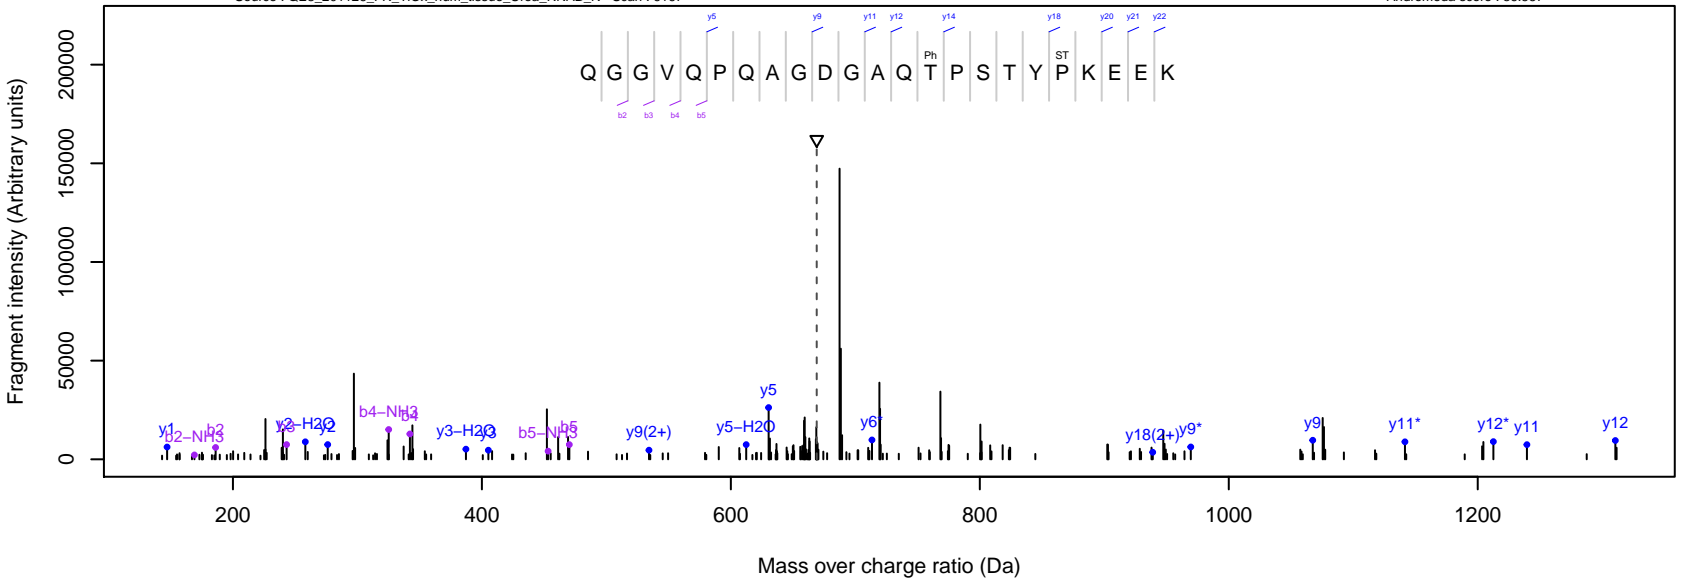

RS(Phospho (STY))PVSPQLQQHQAAAAFLQQR-3+

Source : QE3\_201126\_FR\_TiOx\_hum\_tissue\_Urea\_RNAB\_N Scan : 24784

Andromeda score : 86.557

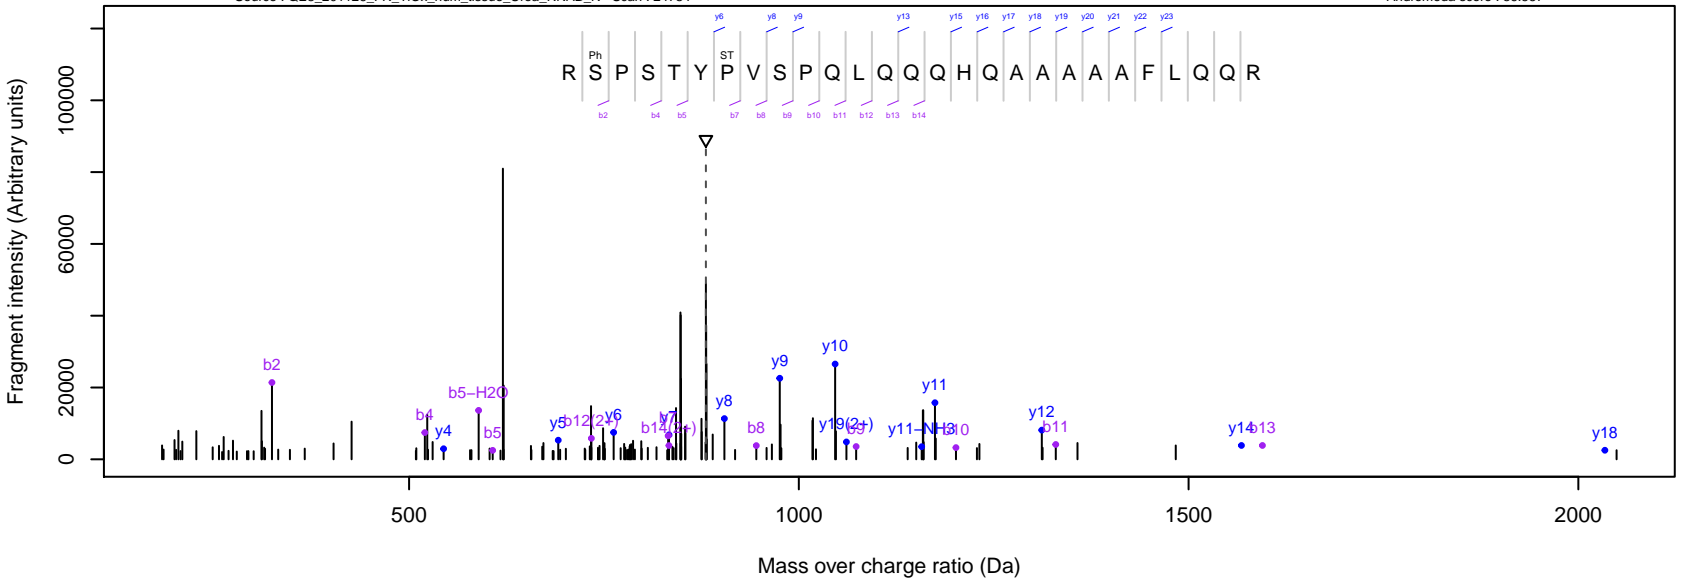

KVVGSM(Oxidation (M))PTAGSAGS(Phospho (STY))VPENLNLFPPEGSK-3+

Source : QE3\_201126\_FR\_TiOx\_hum\_tissue\_Urea\_RNAB\_H Scan : 38998

Andromeda score : 86.552

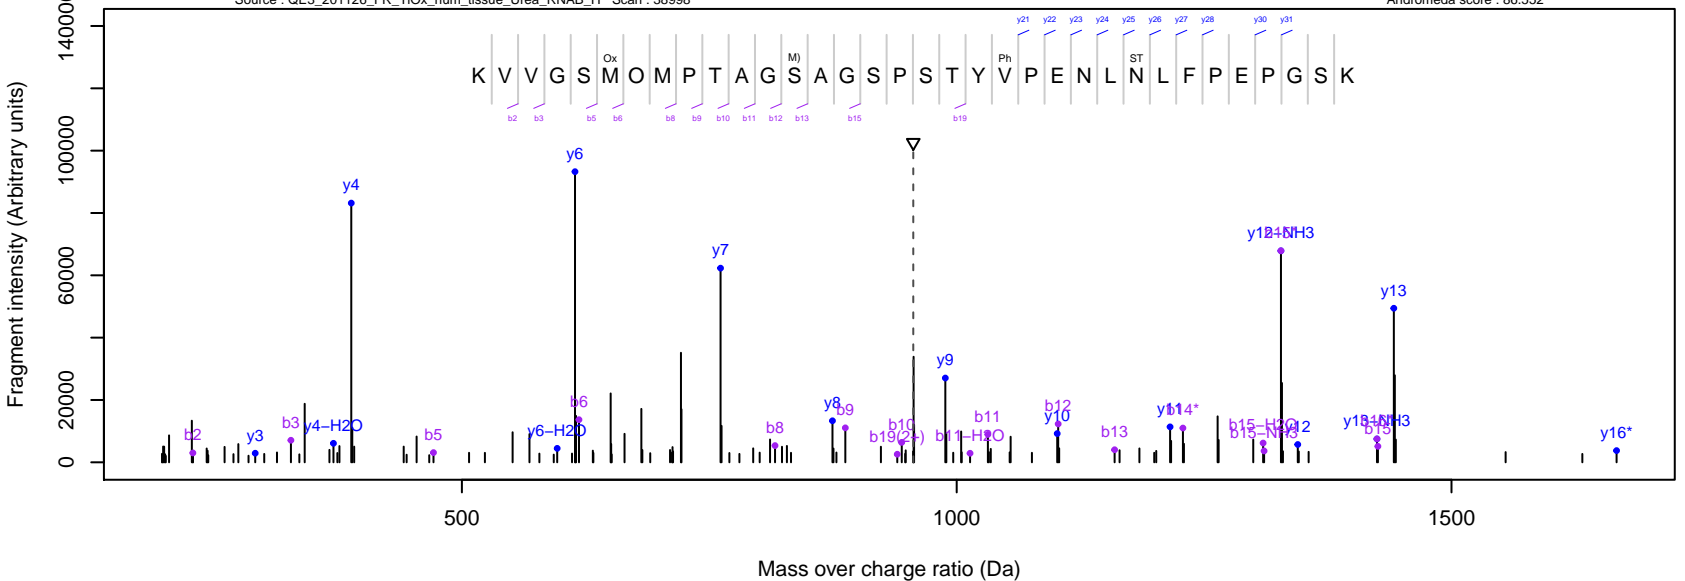

LNS(Phospho (STY))VQSSERPLFLVHP IEGSTTVFHSLASR-4+

Source : QE3\_201126\_FR\_TiOx\_hum\_tissue\_Urea\_RNAB\_H Scan : 46135

Andromeda score : 86.552

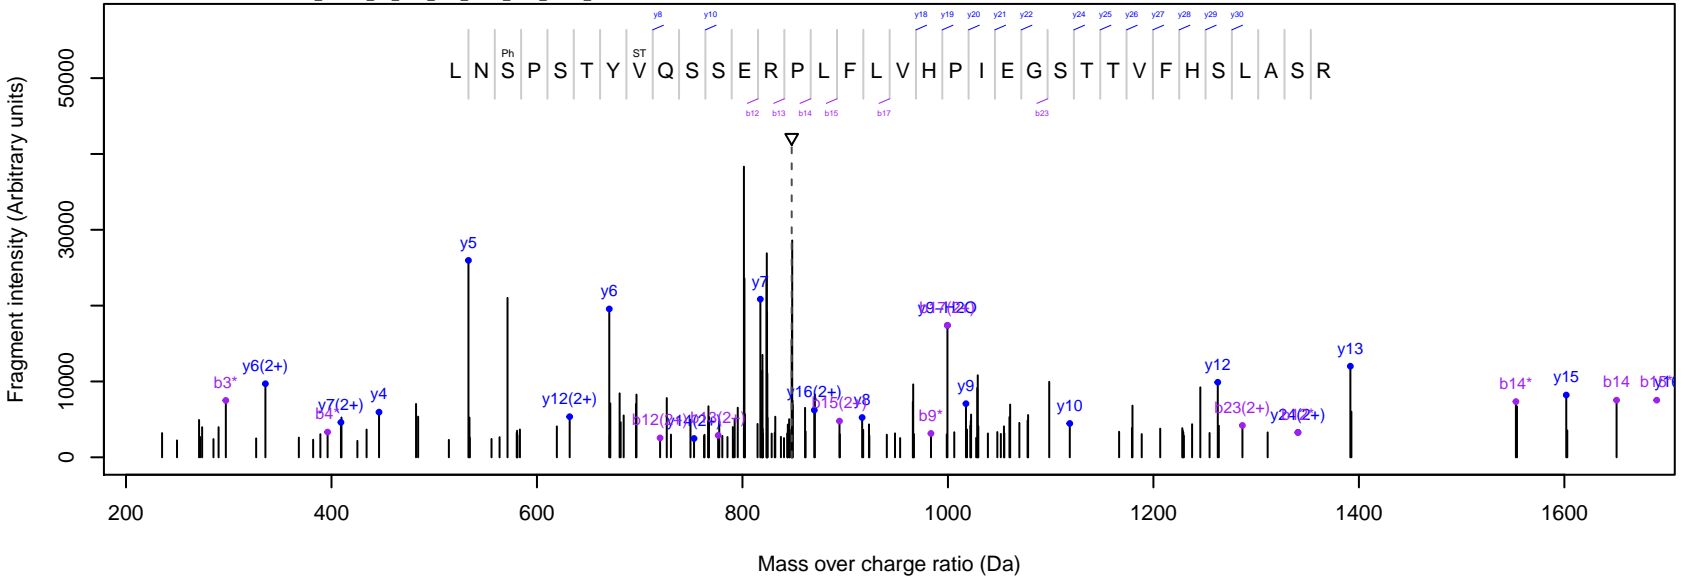

EM(Oxidation (M))SSDSEYDS(Phospho (STY))DDDRTKEE R-3+

Source : QE3\_201126\_FR\_TiOx\_hum\_tissue\_Urea\_RNAB\_N Scan : 5149

Andromeda score : 86.551

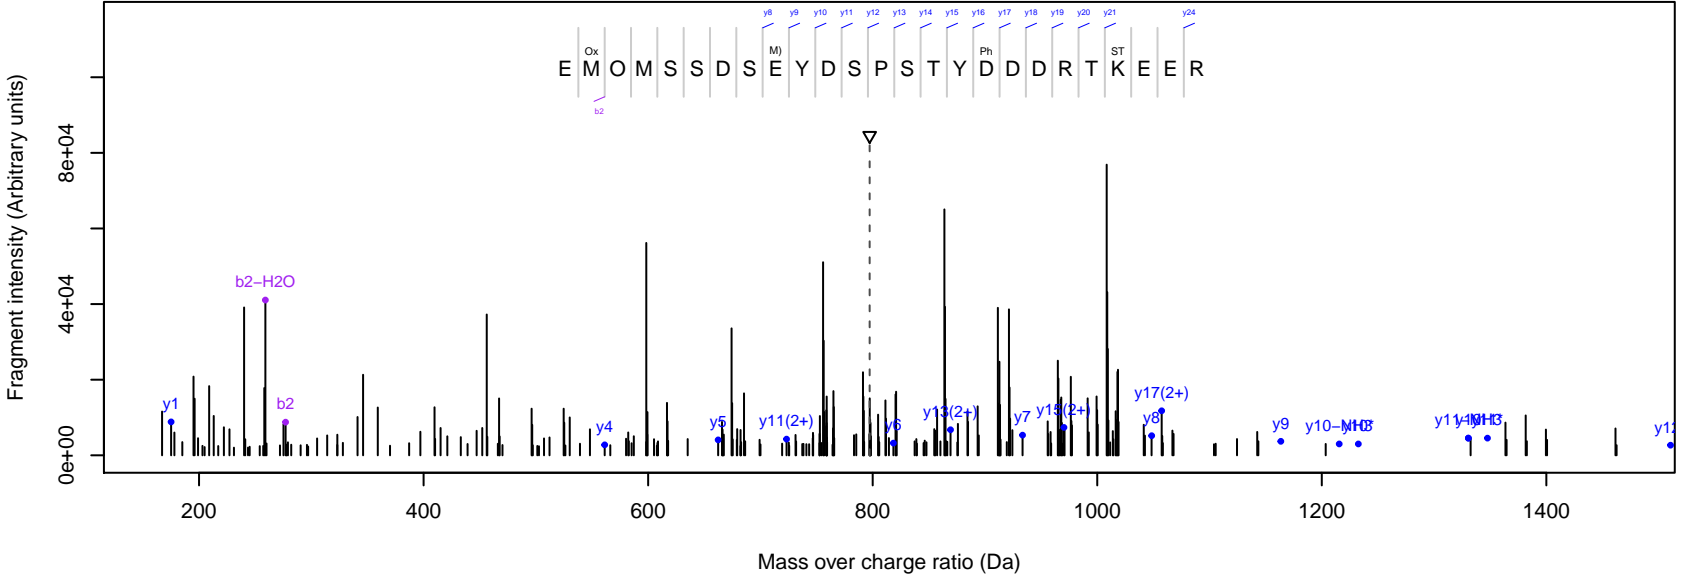

GDKEELT(Phospho (STY))PQKCS(Phospho (STY))EPQSSK-3+

Source : QE3\_201126\_FR\_TiOx\_hum\_tissue\_Urea\_RNAB\_B Scan : 7082

Andromeda score : 86.551

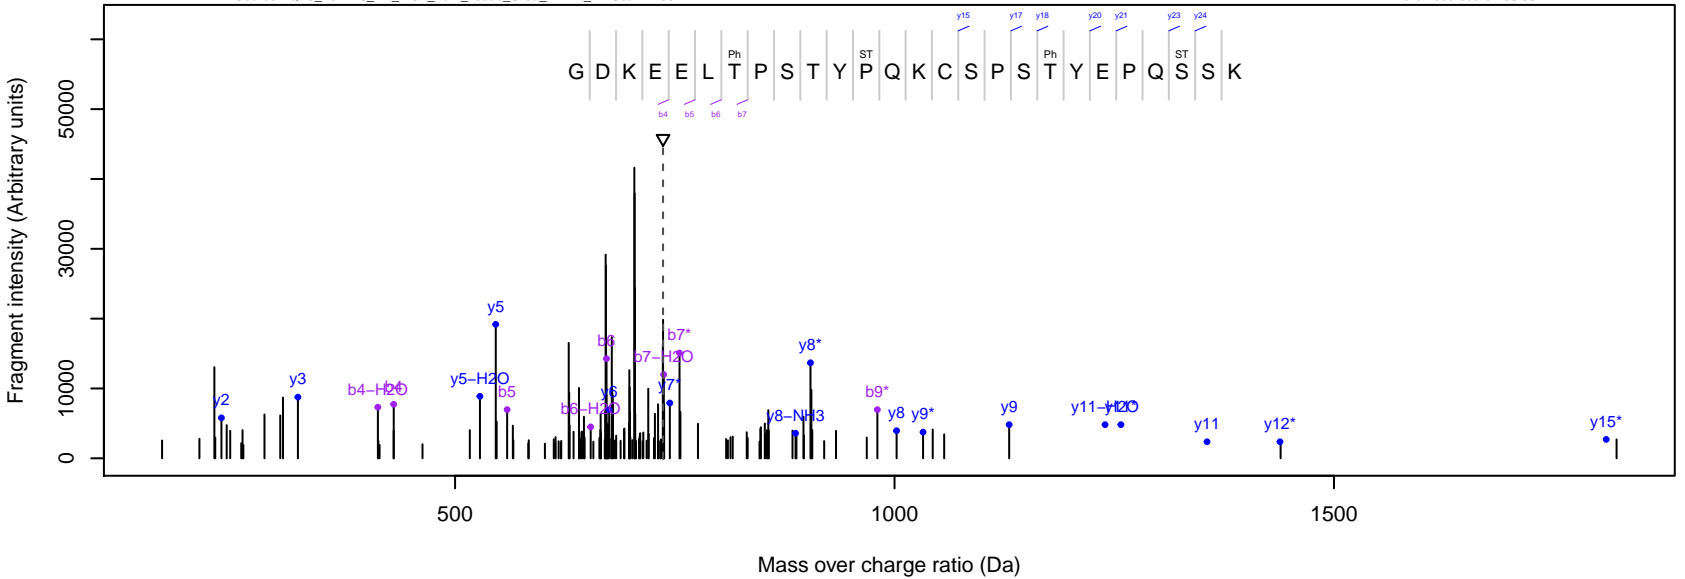

RFS(Phospho (STY))S(Phospho (STY))SDFS(DL)SNGEELQETCSSSLR-3+

Source : QE3\_201126\_FR\_TiOx\_hum\_tissue\_Urea\_RNAB\_N Scan : 45775

Andromeda score : 86.551

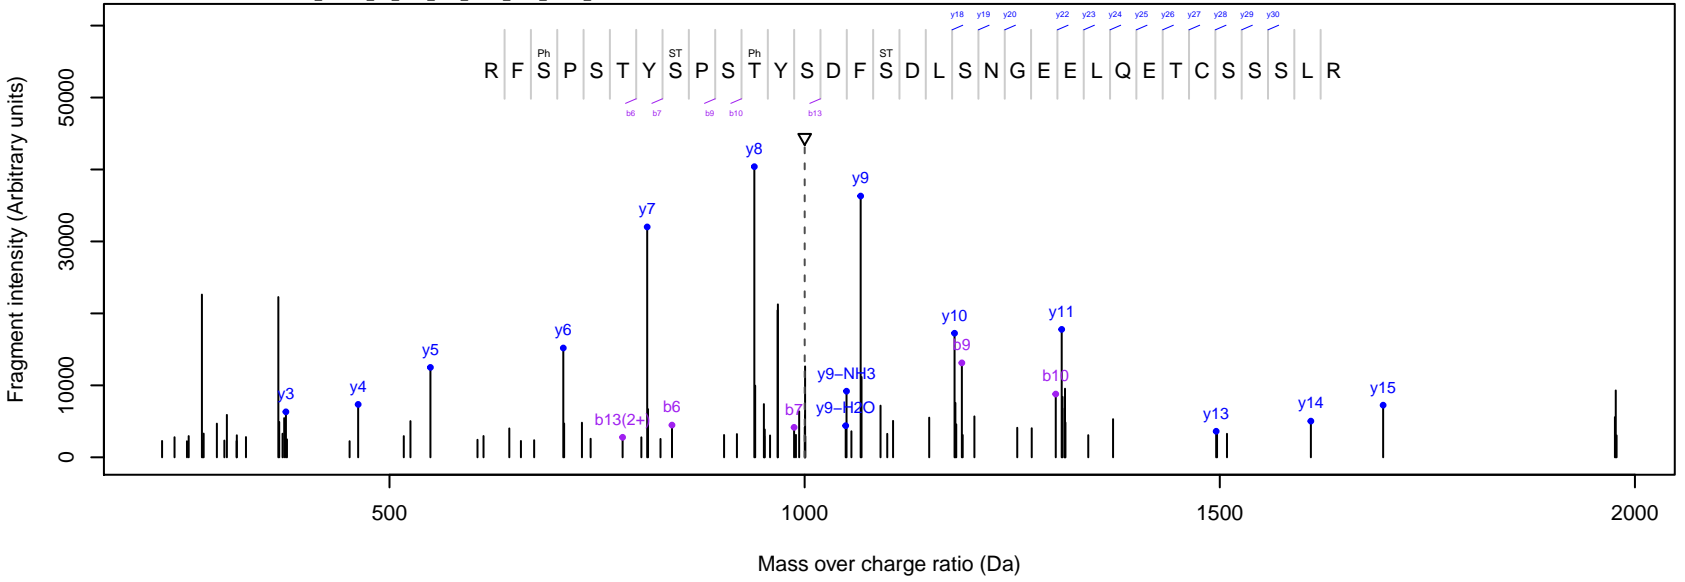

MS(Phospho (STY))LPDVL(DL)KGP(K)-2+

Source : QE3\_201126\_FR\_TiOx\_hum\_tissue\_Urea\_RNAB\_H Scan : 42622

Andromeda score : 86.498

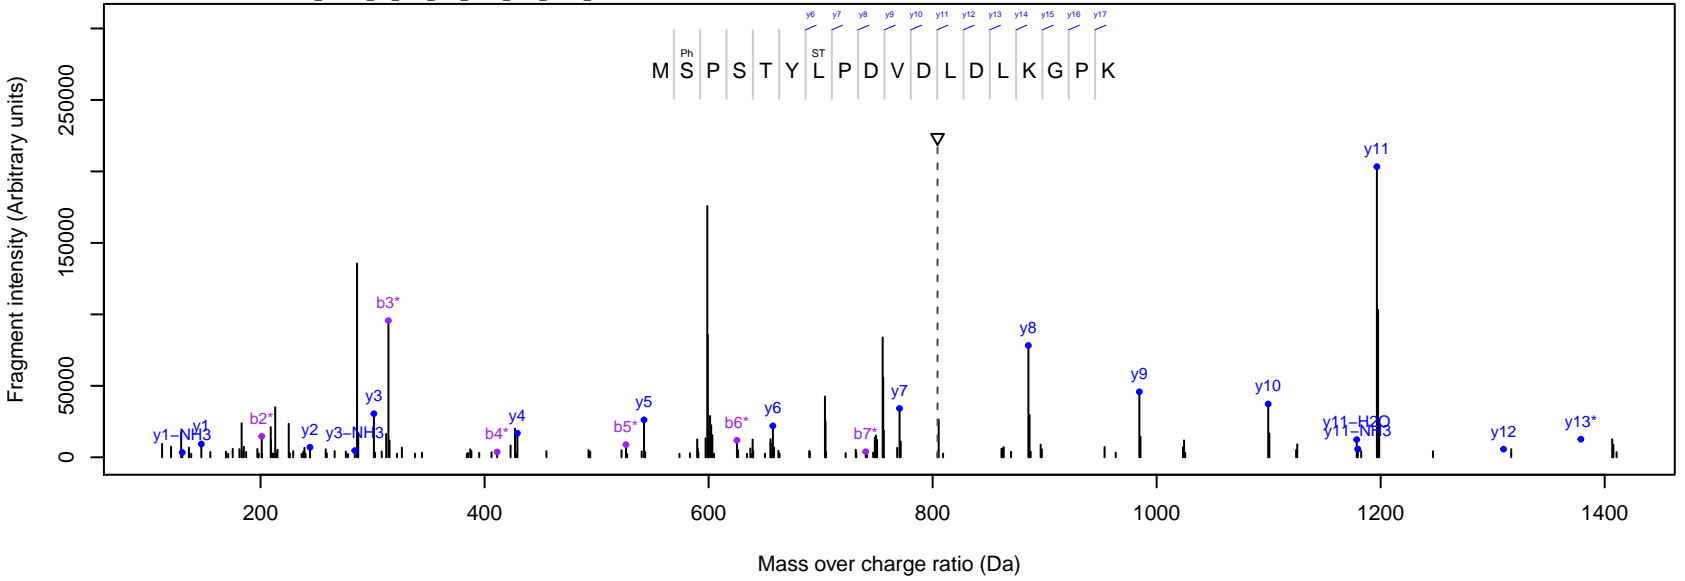

FRS(Phospho (STY))DVHTEAVQAALAK-3+

Source : QE3\_201126\_FR\_TiOx\_hum\_tissue\_Urea\_RNAB\_B Scan : 19199

Andromeda score : 86.497

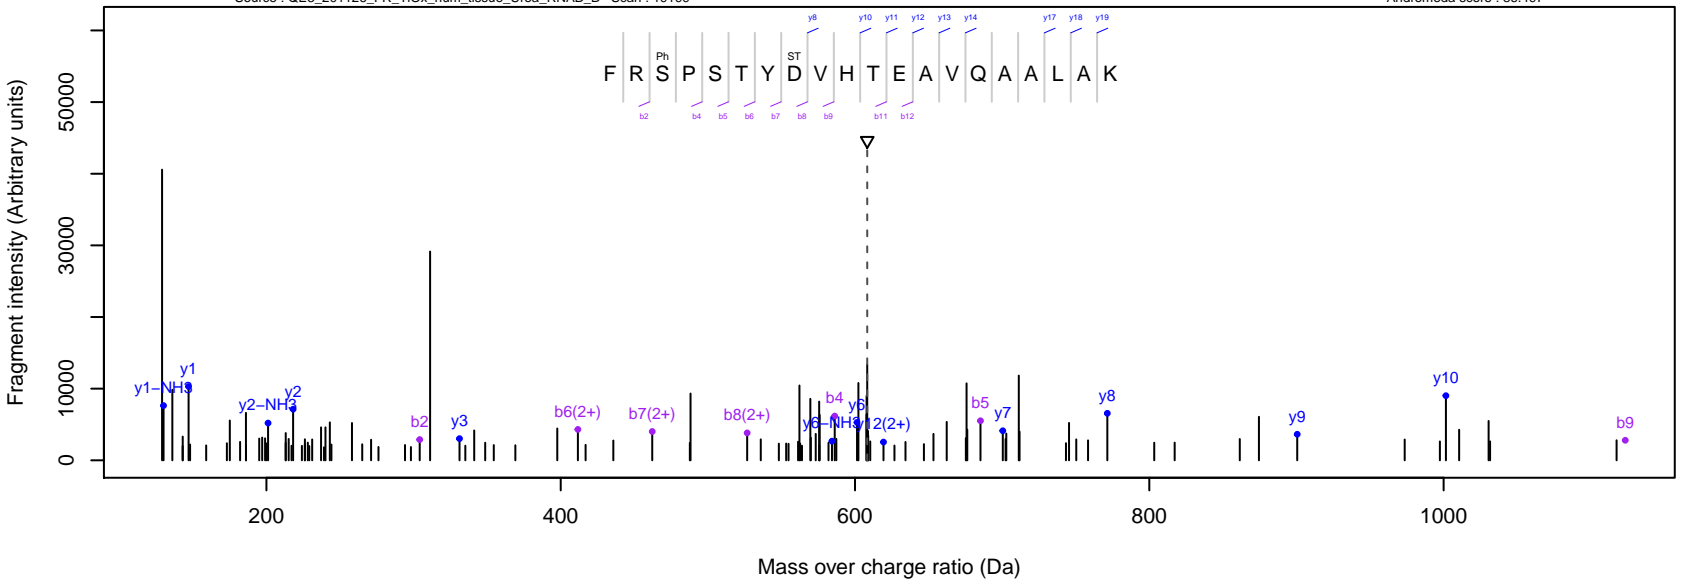

**NAAS(Phospho (STY))FKEVSDSLTSSK-2+**

Source : QE3\_201126\_FR\_TIOx\_hum\_tissue\_Urea\_RNAB\_H Scan : 33195

Andromeda score : 86.479

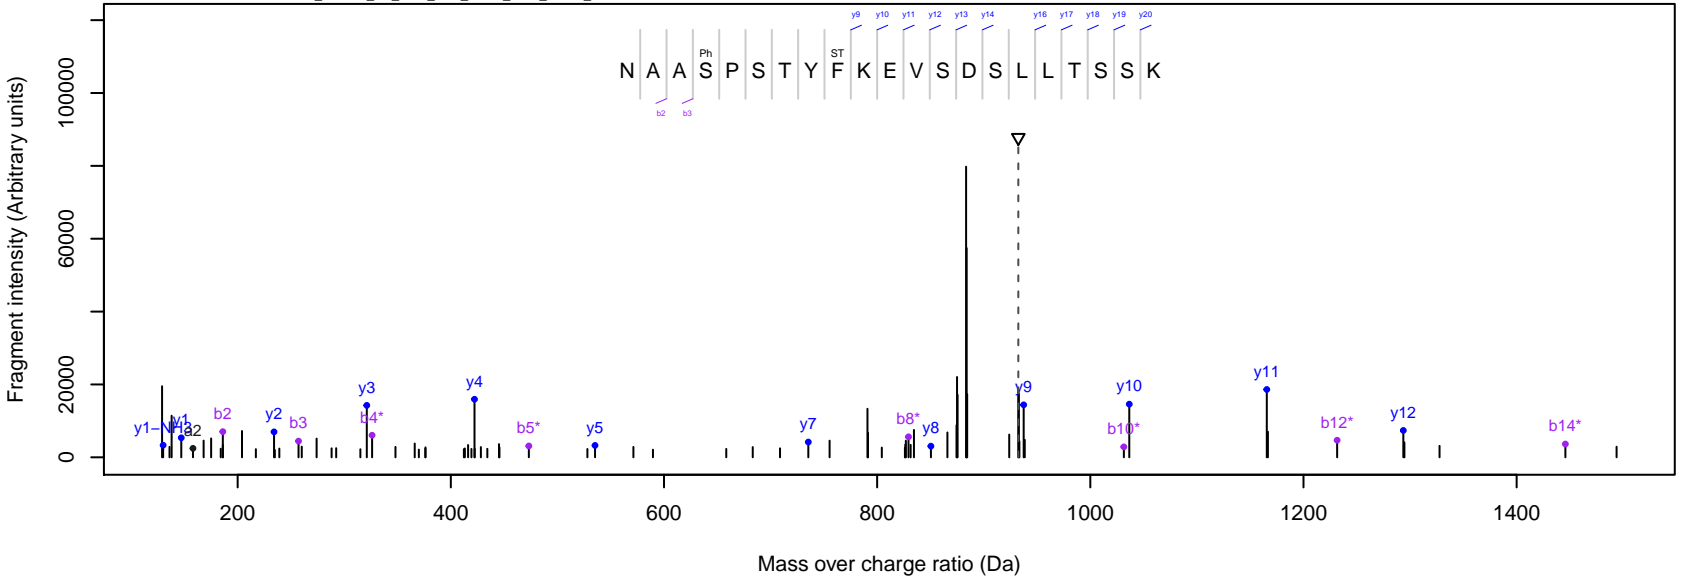**LVHDS(Phospho (STY))LEDLQM(Oxidation (M))TR-2+**

Source : QE3\_201126\_FR\_TIOx\_hum\_tissue\_Urea\_RNAB\_H Scan : 20211

Andromeda score : 86.467

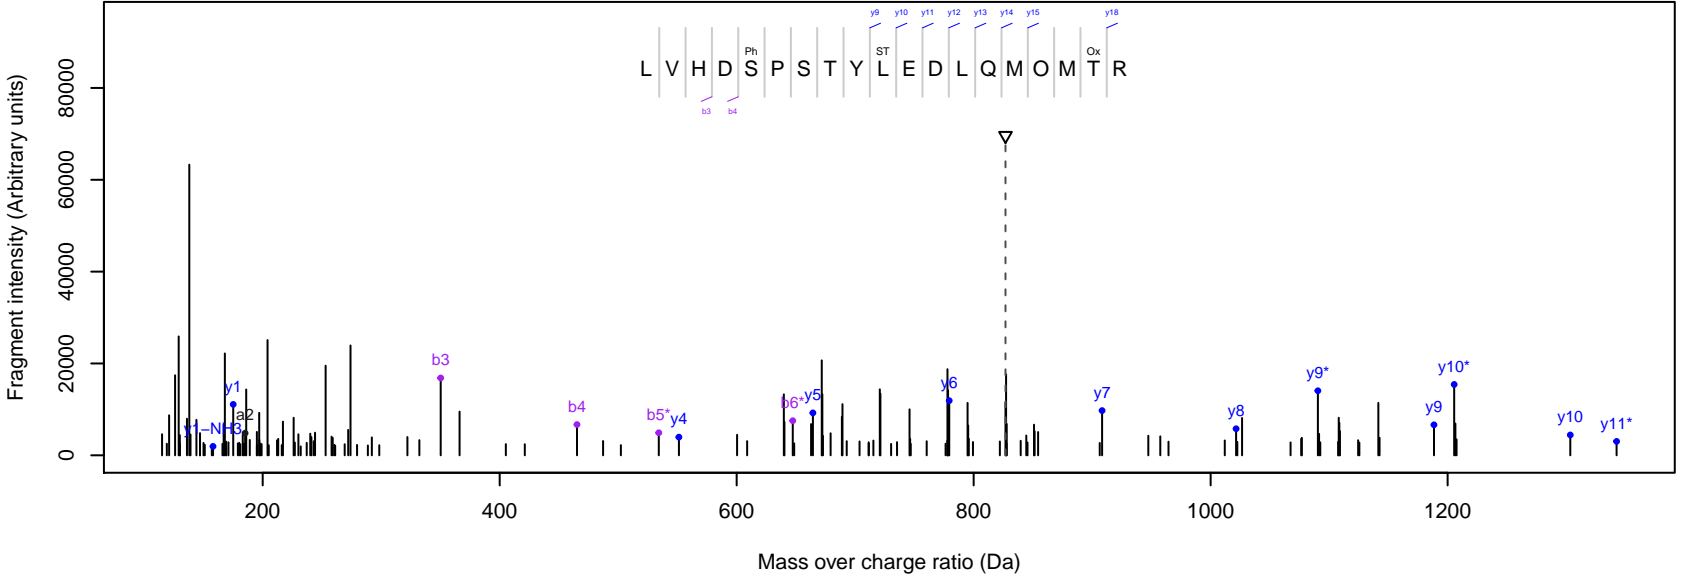**SSS(Phospho (STY))SVGGLSVSSR-2+**

Source : QE3\_201126\_FR\_TIOx\_hum\_tissue\_Urea\_RNAB\_B Scan : 17590

Andromeda score : 86.467

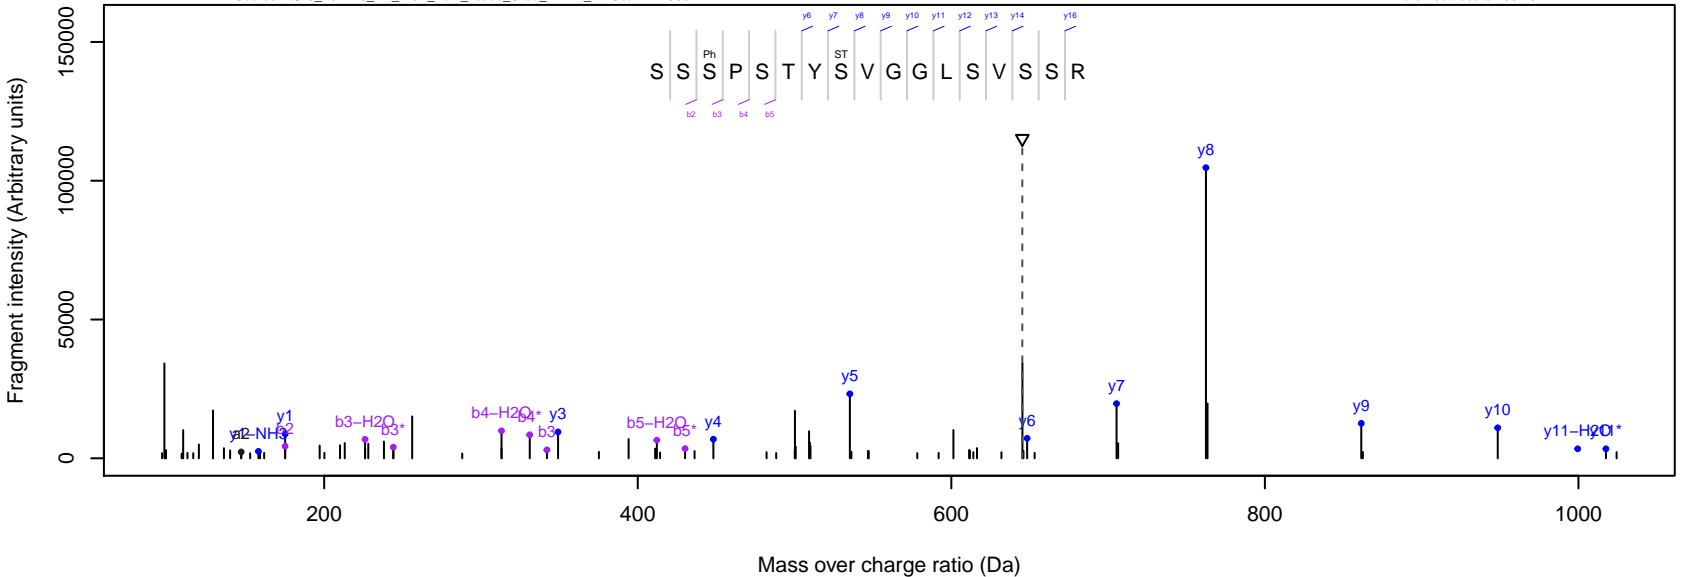

TLS(Phospho (STY))KDDVNYK-2+

Source : QE3\_201126\_FR\_TiOx\_hum\_tissue\_Urea\_RNAB\_N Scan : 10373

Andromeda score : 86.463

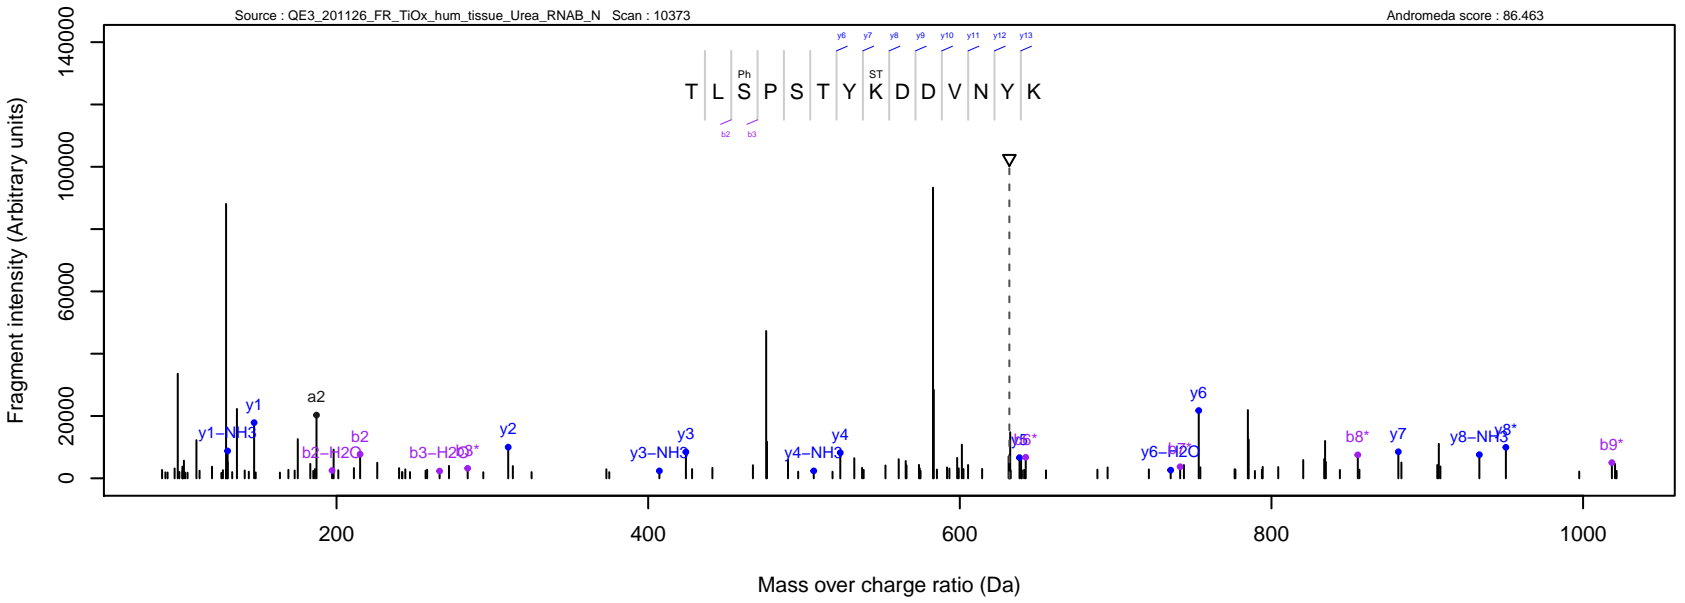

RKS(Phospho (STY))FDASDTLALPR-3+

Source : QE3\_201126\_FR\_TiOx\_hum\_tissue\_Urea\_RNAB\_N Scan : 22443

Andromeda score : 86.367

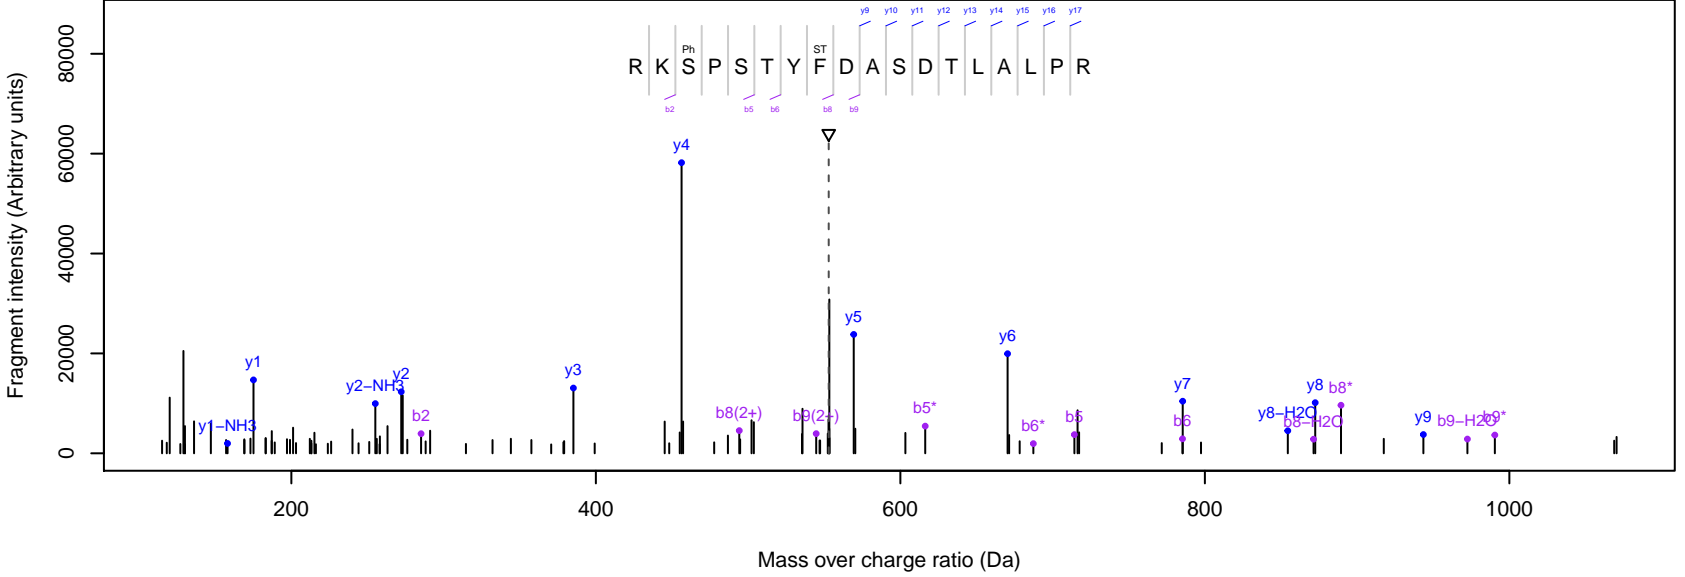

RQS(Phospho (STY))MAFSILNTPK-3+

Source : QE3\_201126\_FR\_TiOx\_hum\_tissue\_Urea\_RNAB\_N Scan : 33584

Andromeda score : 86.367

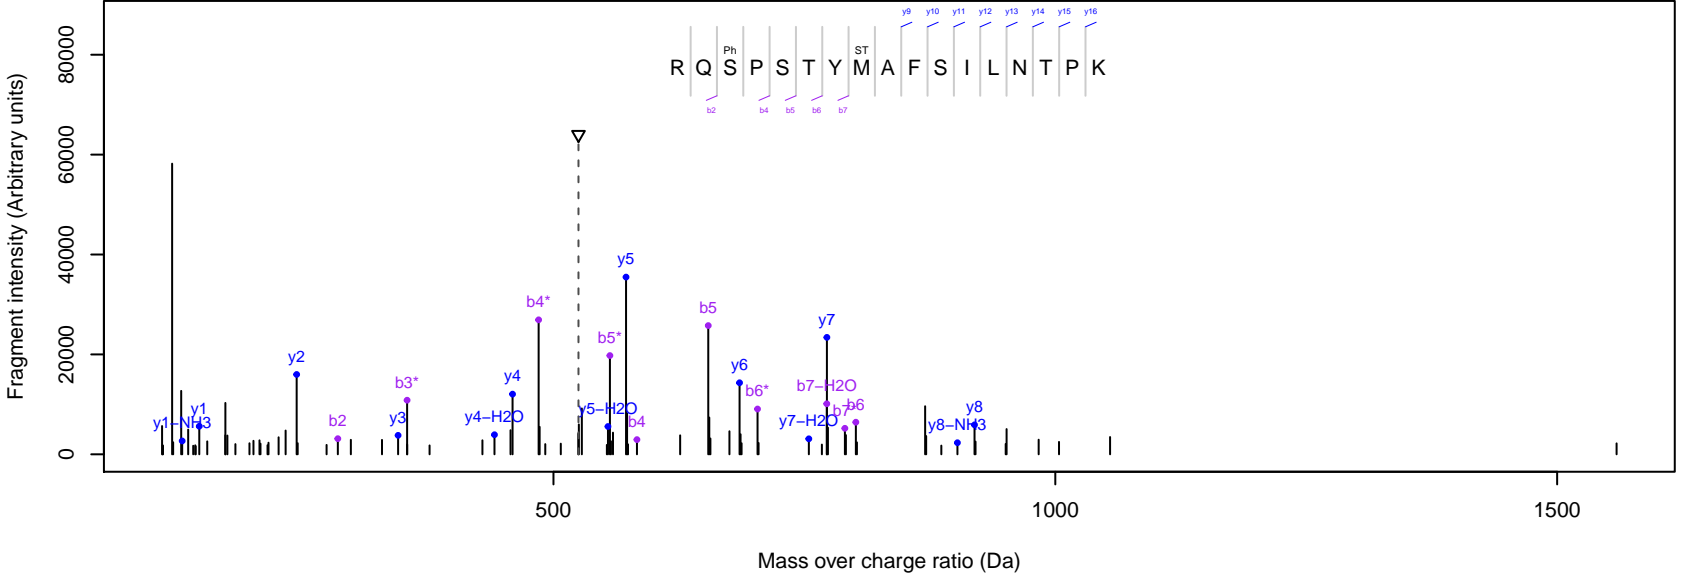

MAPPPKEEEDS(Phospho (STY))EEEMSEEDDS(Phospho (STY))S(Phospho (STY))GEEVIPQKK-4+

Source : QE3\_201126\_FR\_TIOx\_hum\_tissue\_Urea\_RNAB\_H Scan : 32411

Andromeda score : 86.366

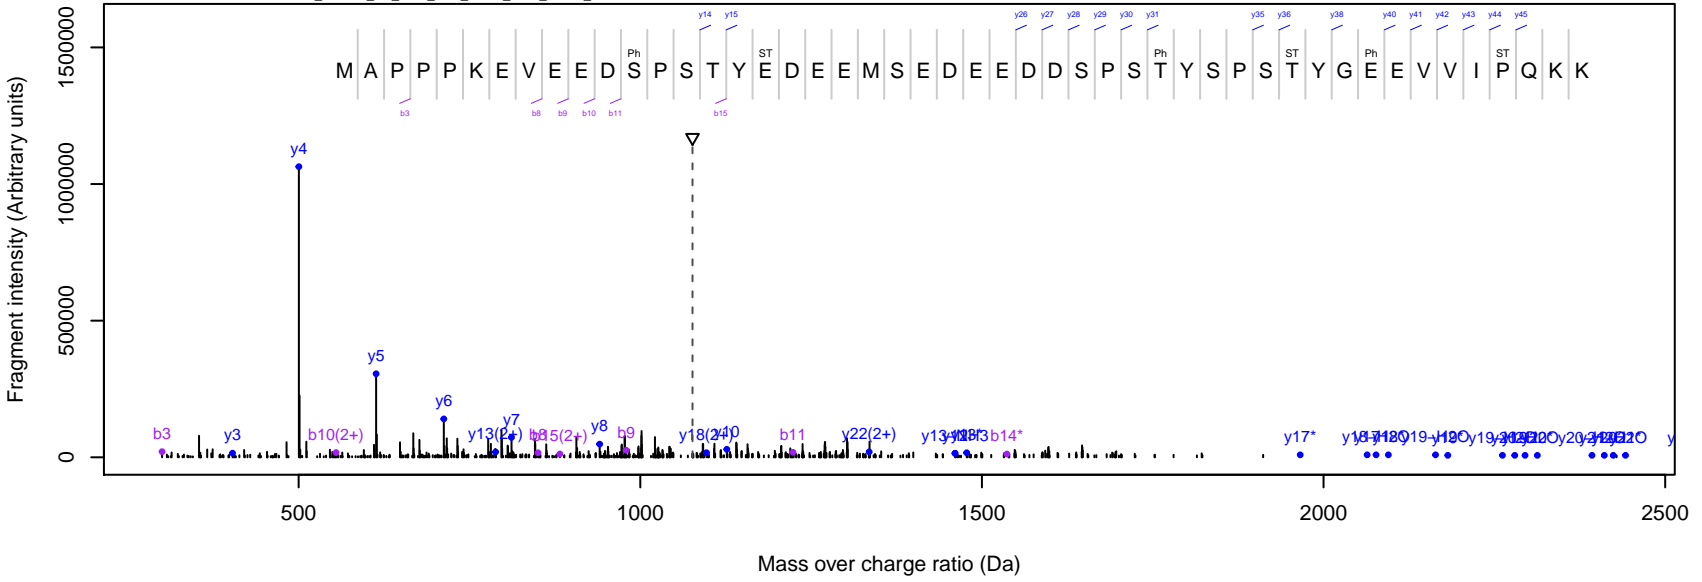

ATS(Phospho (STY))PSSS(Phospho (STY))VSGDFDDGHHVSTPGPSR-3+

Source : QE3\_201126\_FR\_TIOx\_hum\_tissue\_Urea\_RNAB\_H Scan : 18789

Andromeda score : 86.324

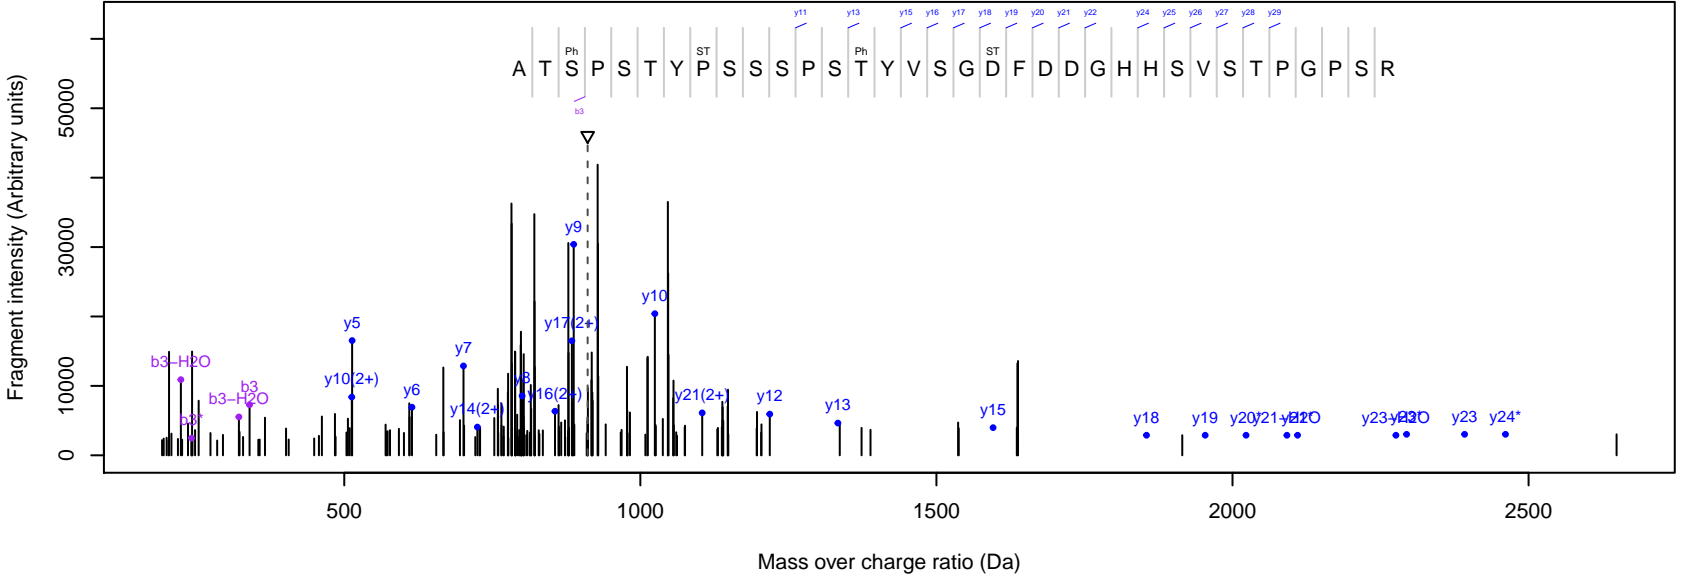

AGNS(Phospho (STY))DSEEDDANGRVELILEPK-3+

Source : QE3\_201126\_FR\_TIOx\_hum\_tissue\_Urea\_RNAB\_H Scan : 34383

Andromeda score : 86.32

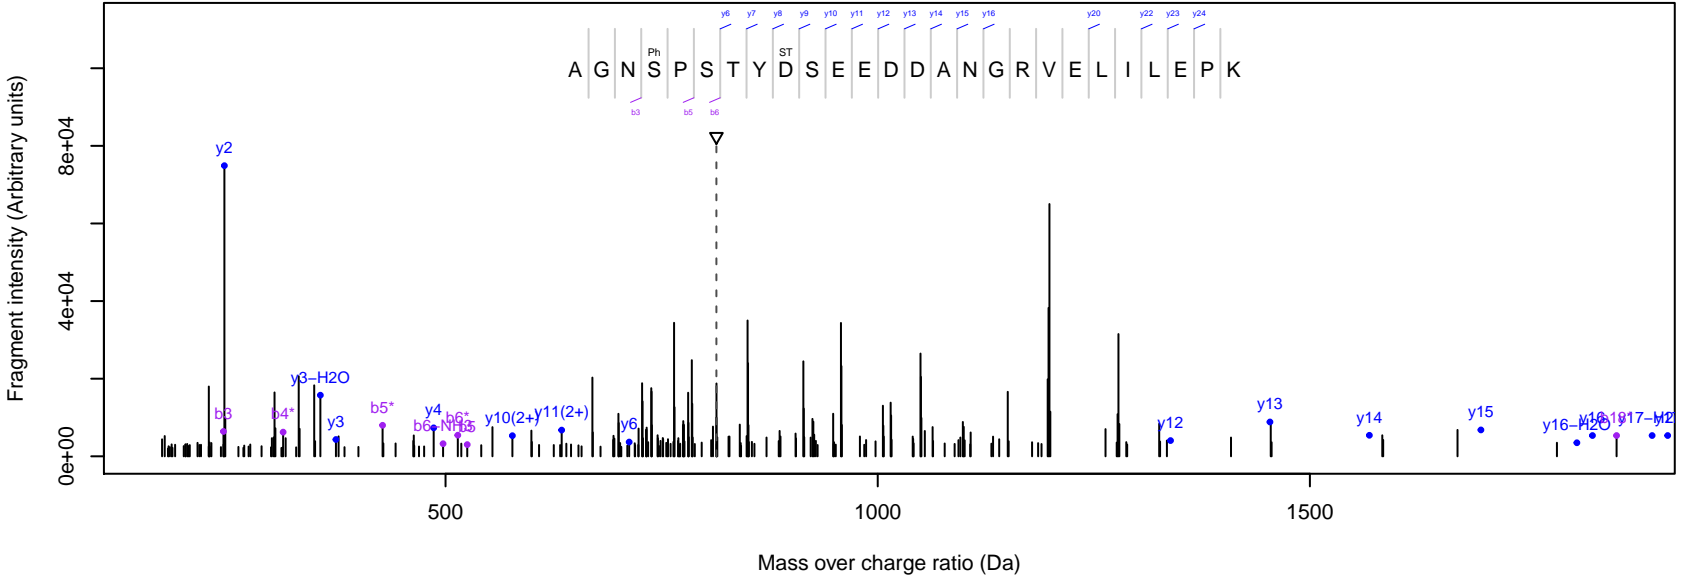



RVS(Phospho (STY))GPDPKPGS(Phospho (STY))NCSPAQSVLSEVPSVPTNGMAK-3+

Source : QE3\_201126\_FR\_TiOx\_hum\_tissue\_Urea\_RNAB\_N Scan : 38938

Andromeda score : 86.315

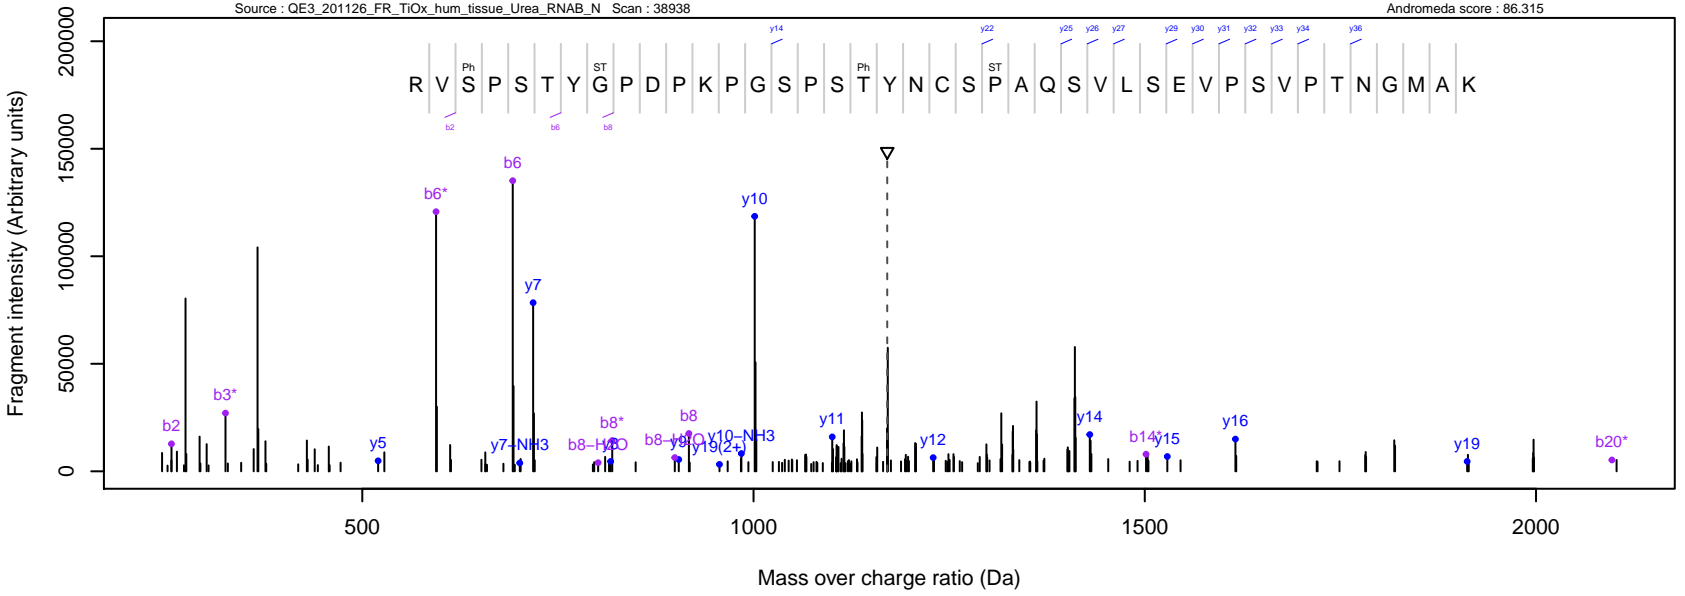

AEQS(Phospho (STY))LHDLQER-3+

Source : QE3\_201126\_FR\_TiOx\_hum\_tissue\_Urea\_RNAB\_B Scan : 11097

Andromeda score : 86.291

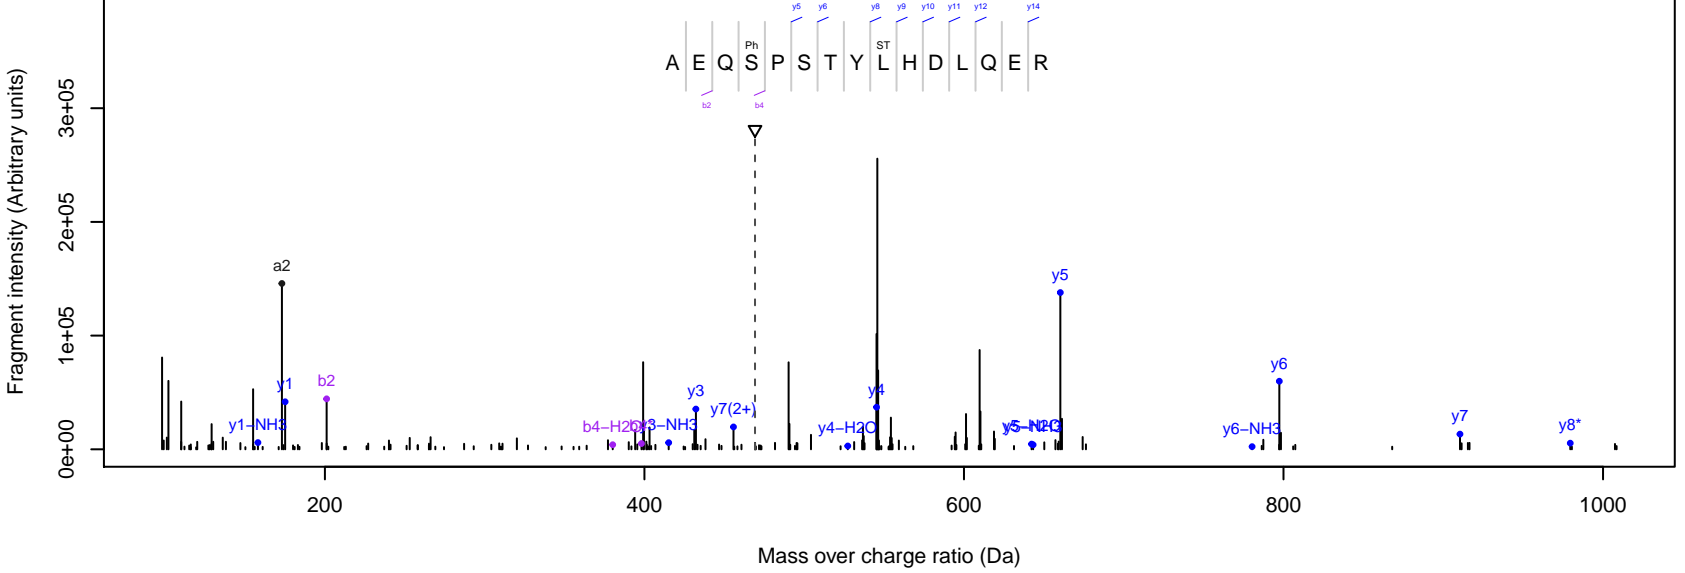

SPSGGAAGPLLT(Phospho (STY))PSQS(Phospho (STY))LDGSR-3+

Source : QE3\_201126\_FR\_TiOx\_hum\_tissue\_Urea\_RNAB\_B Scan : 37871

Andromeda score : 86.248

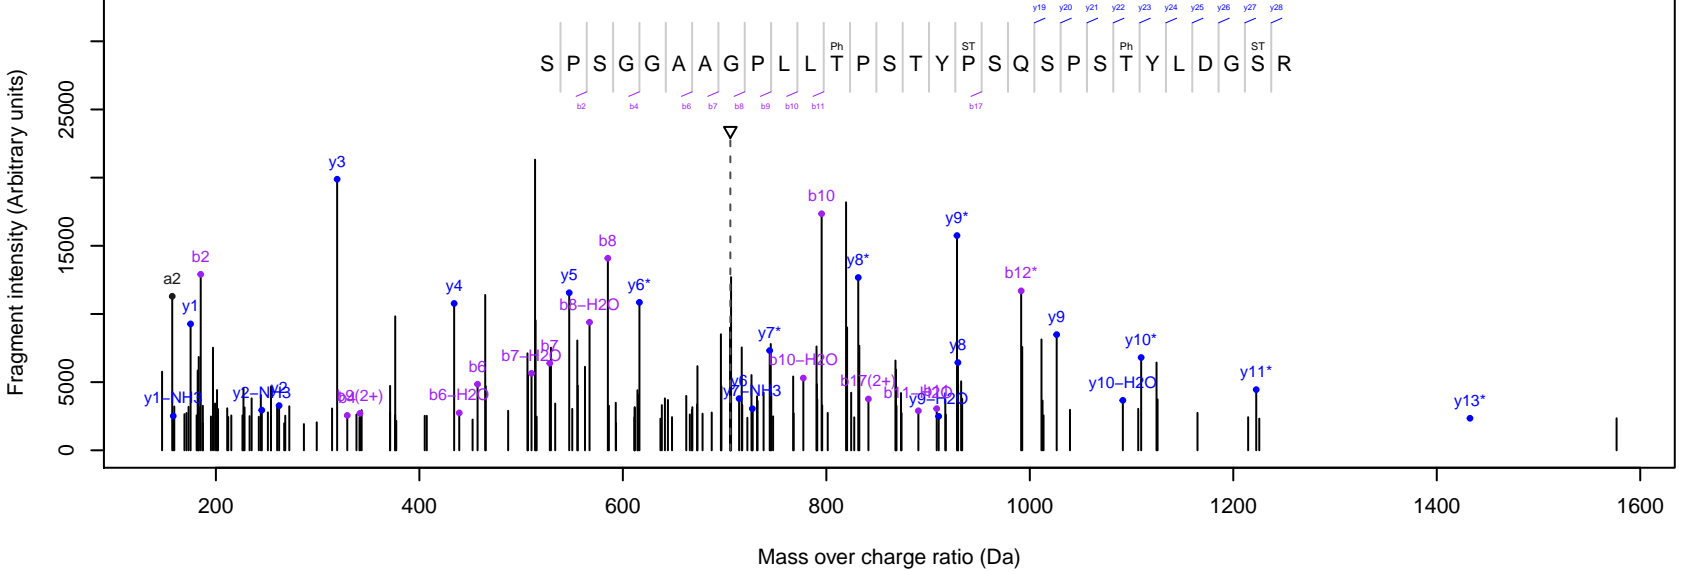

GEPAAAAPEAGASPVEKEAPEEGEAAEPGS(Phospho (STY))PTAAEGEAAASAASSTSSPK-4+

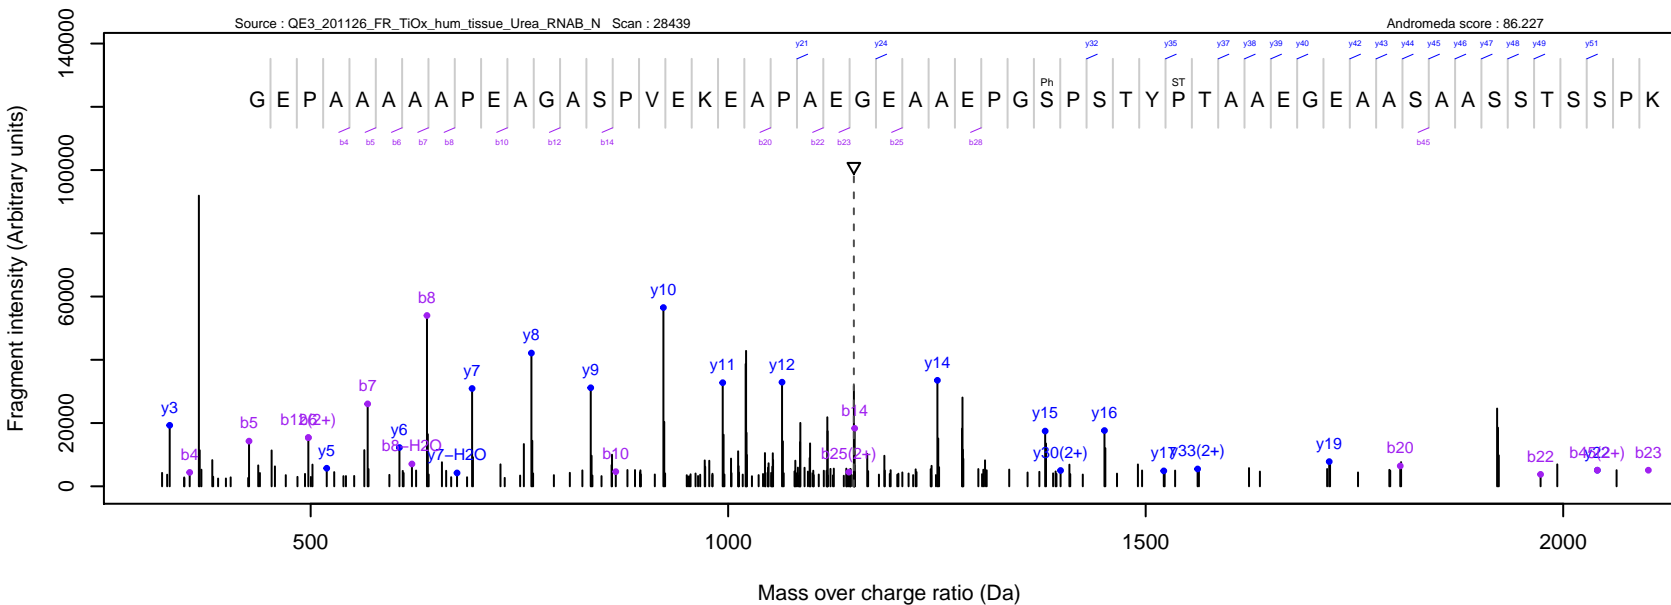

AGVQSVGEKES(Phospho (STY))LEAAKEK-3+

Source : QE3\_201126\_FR\_TIOx\_hum\_tissue\_Urea\_RNAB\_H Scan : 9395

Andromeda score : 86.182

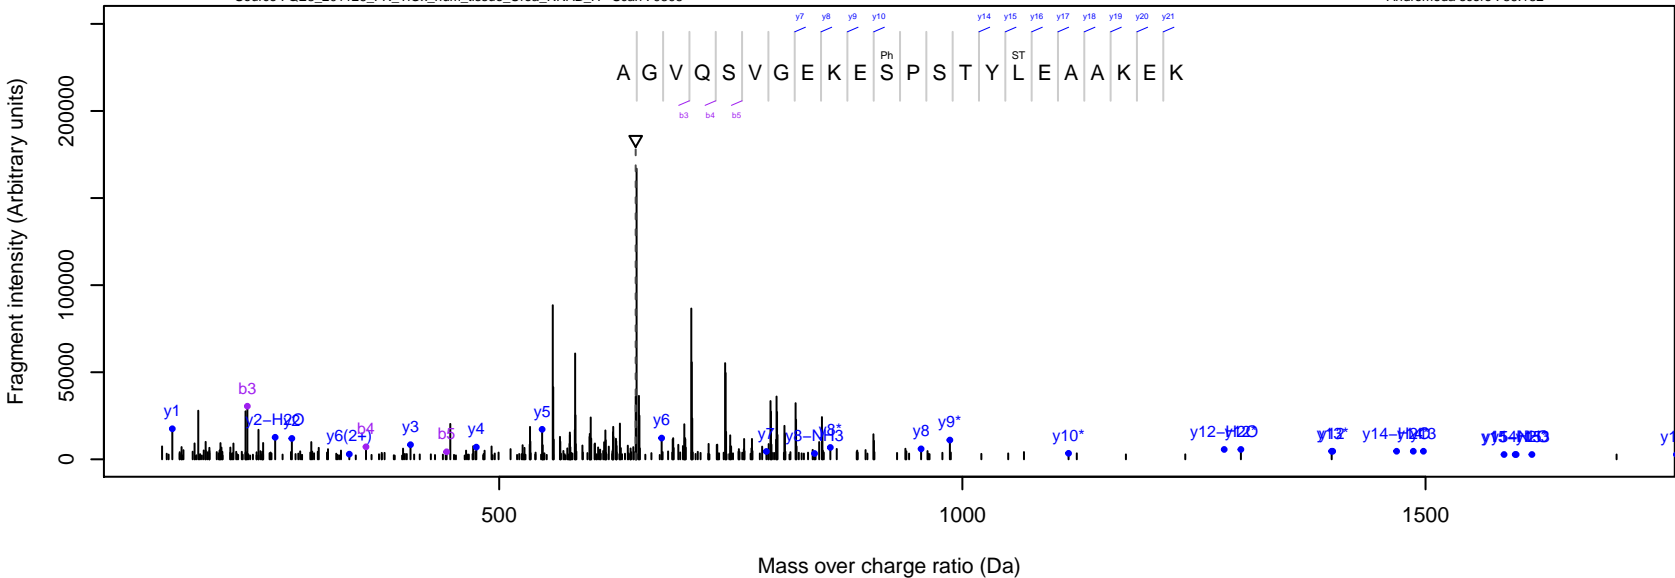

YGLSLNS(Phospho (STY))LESTSSSGIGSYSTQMSGTDNPEQFEVLK-3+

Source : QE3\_201126\_FR\_TIOx\_hum\_tissue\_Urea\_RNAB\_H Scan : 54939

Andromeda score : 86.138

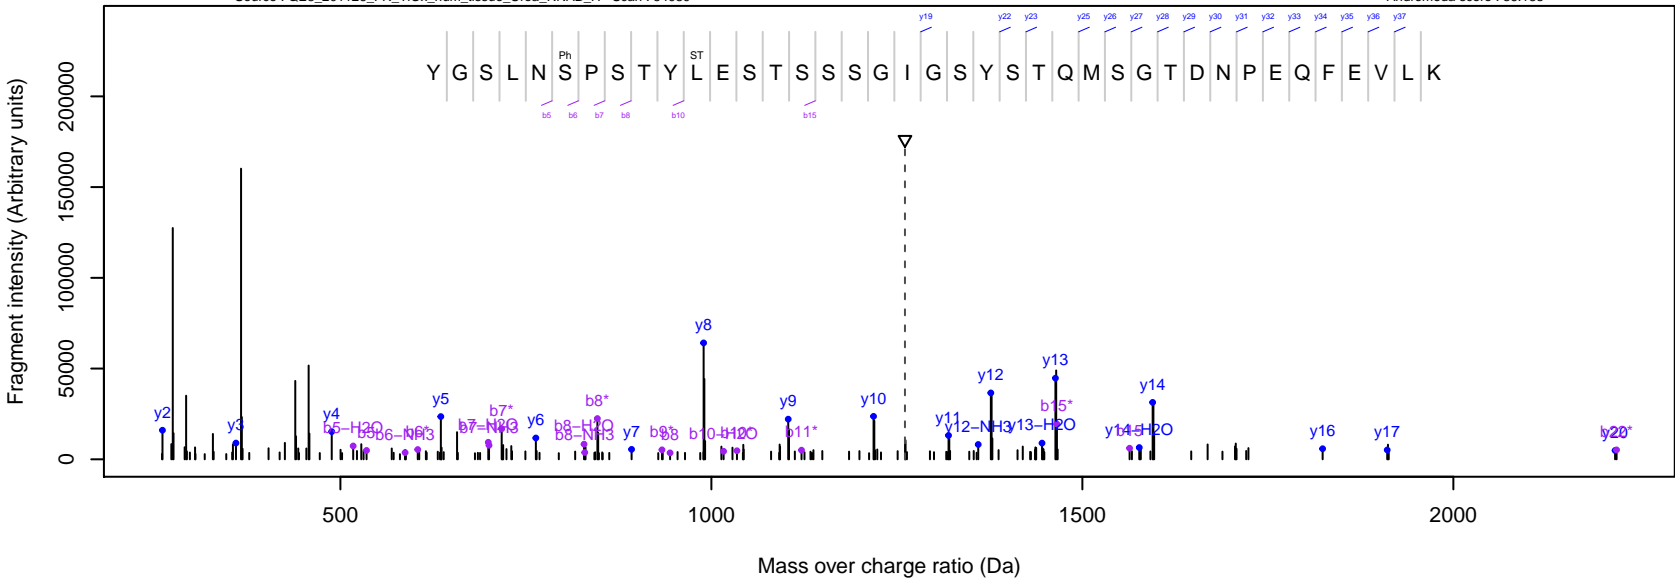

TGSRPS(Phospho (STY))SHGGGGPAAEEEV-3+

Source : QE3\_201126\_FR\_TIOx\_hum\_tissue\_Urea\_RNAB\_N Scan : 7790

Andromeda score : 86.131

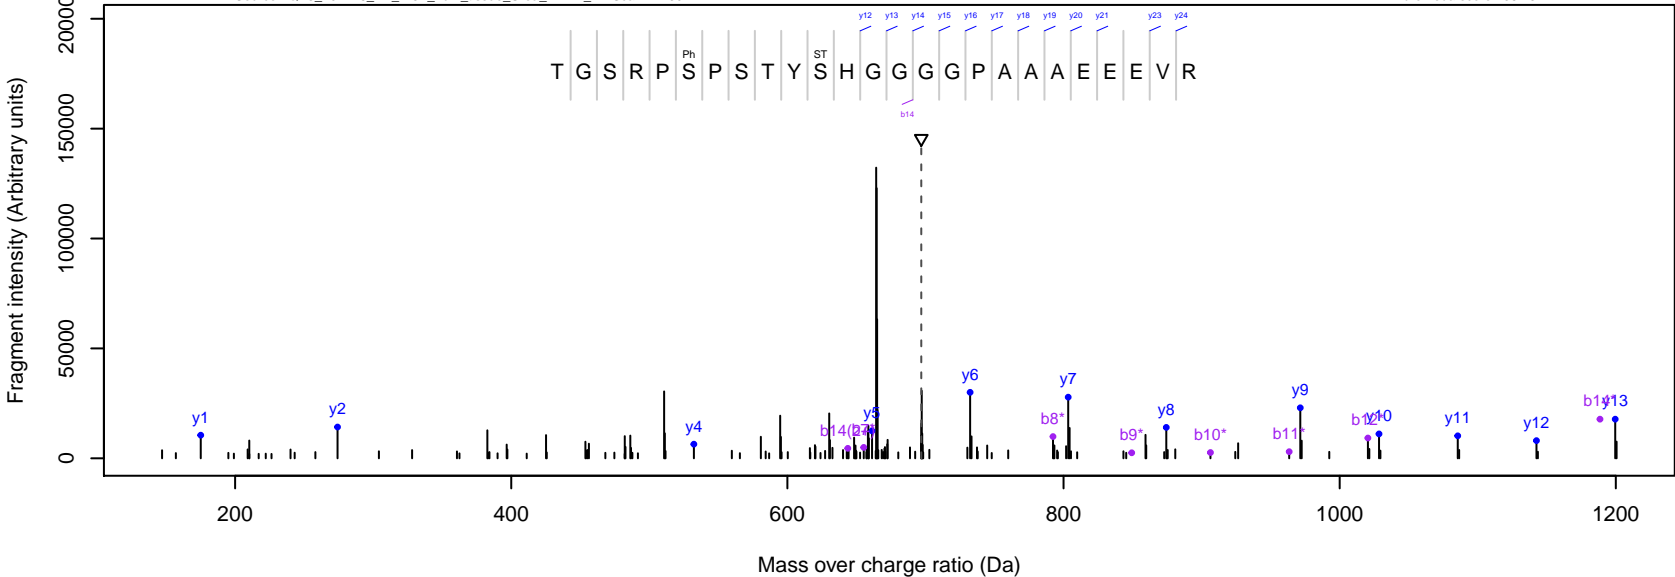

GPIHS(Phospho (STY))PVELK-2+

Source : QE3\_201126\_FR\_TiOx\_hum\_tissue\_Urea\_RNAB\_N Scan : 14704

Andromeda score : 86.114

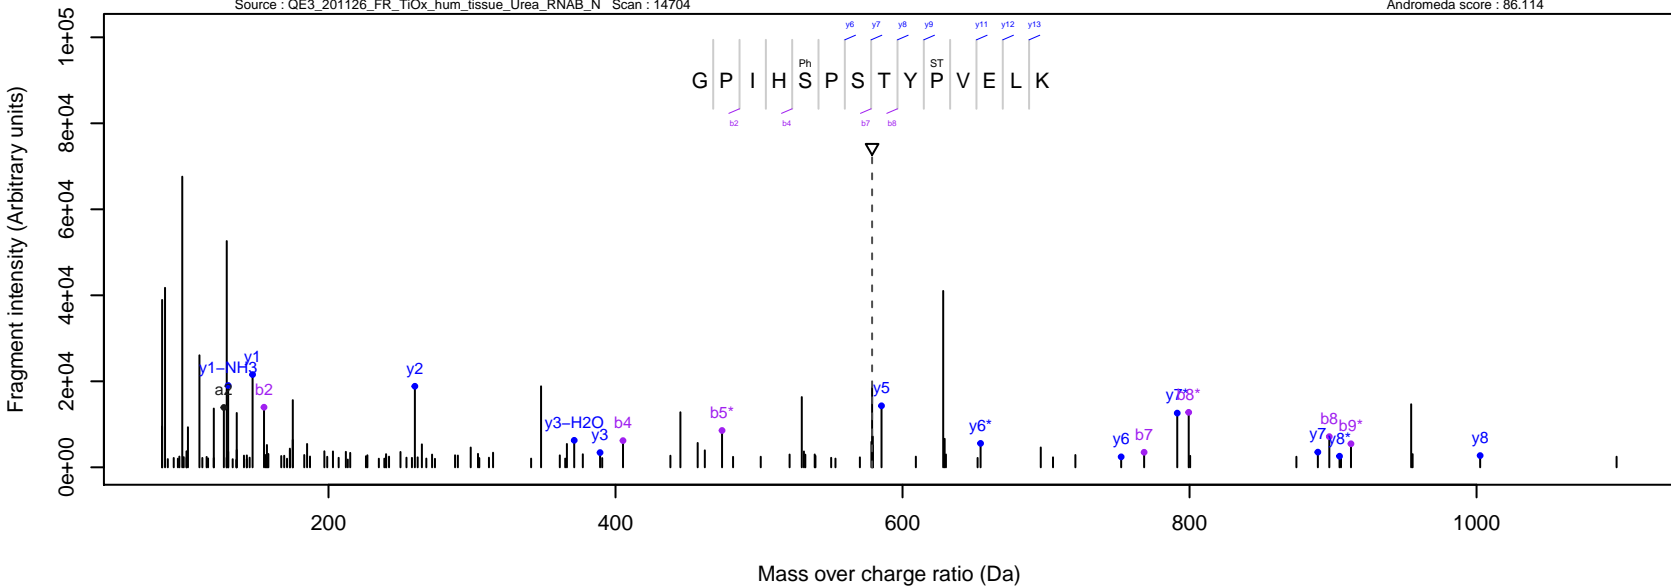

STELKTEIKEEDQPSTSATQSS(Phospho (STY))PAPGQSK-4+

Source : QE3\_201126\_FR\_TiOx\_hum\_tissue\_Urea\_RNAB\_H Scan : 15410

Andromeda score : 86.081

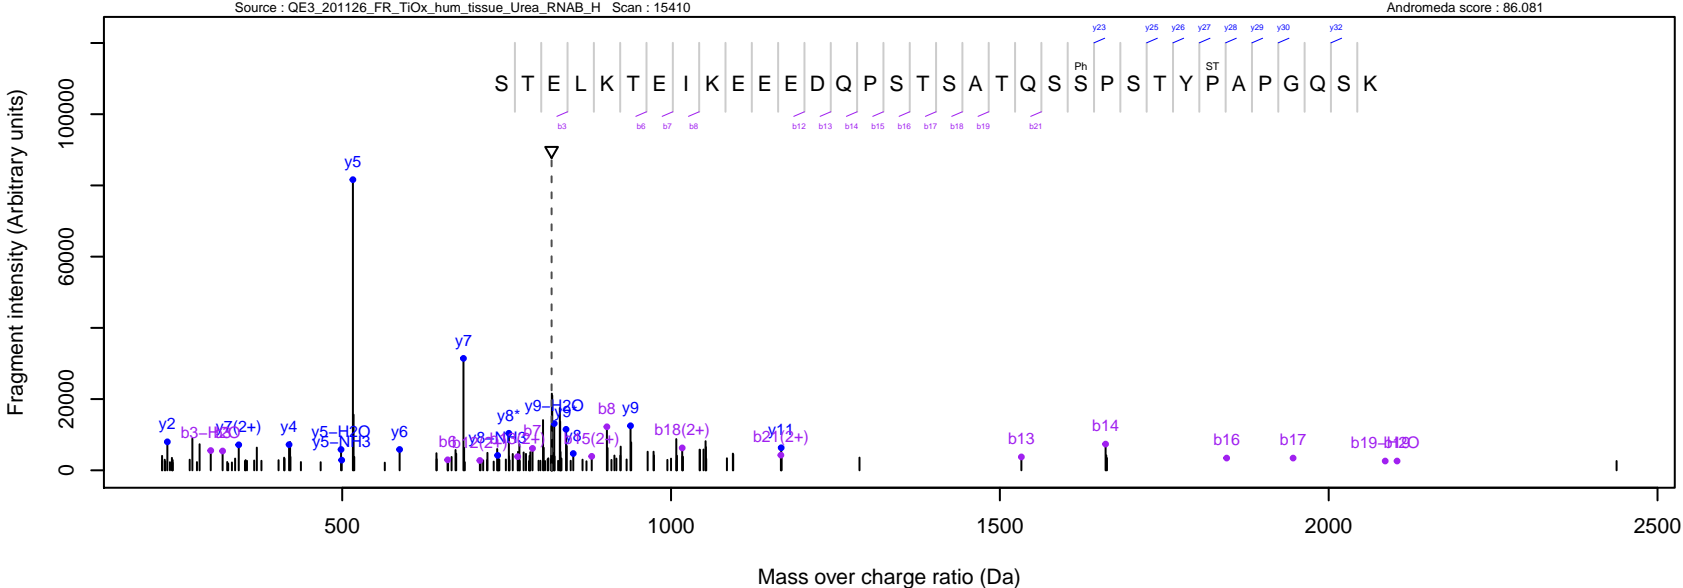

AAEDDSAS(Phospho (STY))PPGAAS(Phospho (STY))DAEPGDEERPGLQVDCVCGDK-3+

Source : QE3\_201126\_FR\_TiOx\_hum\_tissue\_Urea\_RNAB\_B Scan : 37032

Andromeda score : 86.075

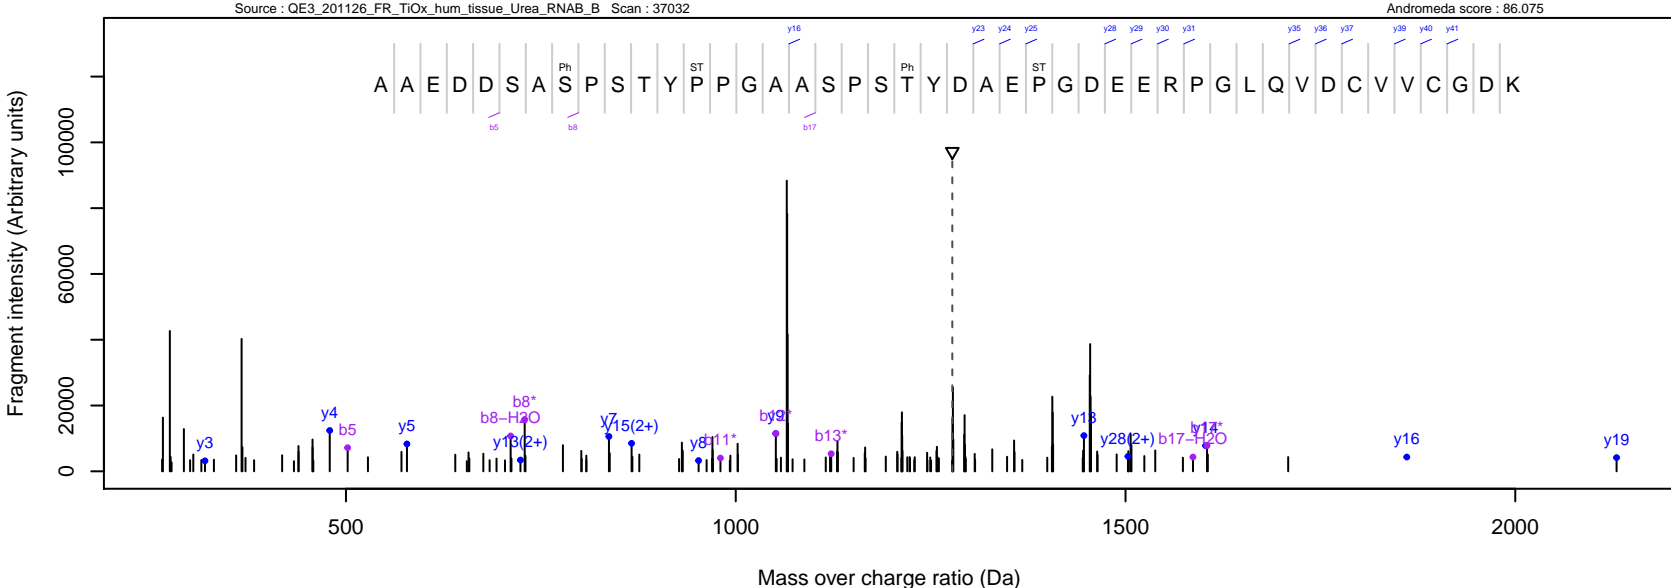

TRSPS(Phospho (STY))PTLGESLAPHK-3+

Source : QE3\_201126\_FR\_TiOx\_hum\_tissue\_Urea\_RNAB\_H Scan : 14774

Andromeda score : 86.036

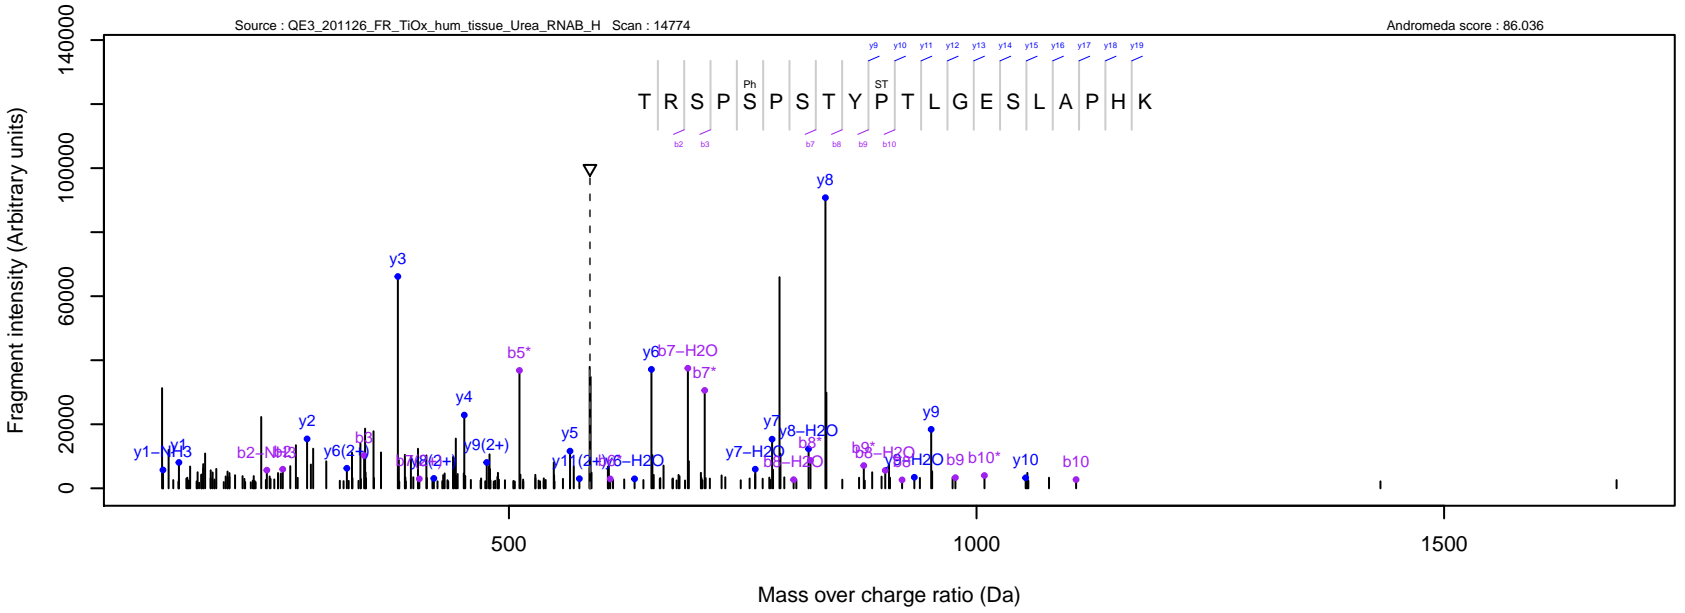

TTS(Phospho (STY))PSSDTLLDR-2+

Source : QE3\_201126\_FR\_TiOx\_hum\_tissue\_Urea\_RNAB\_B Scan : 24479

Andromeda score : 86.014

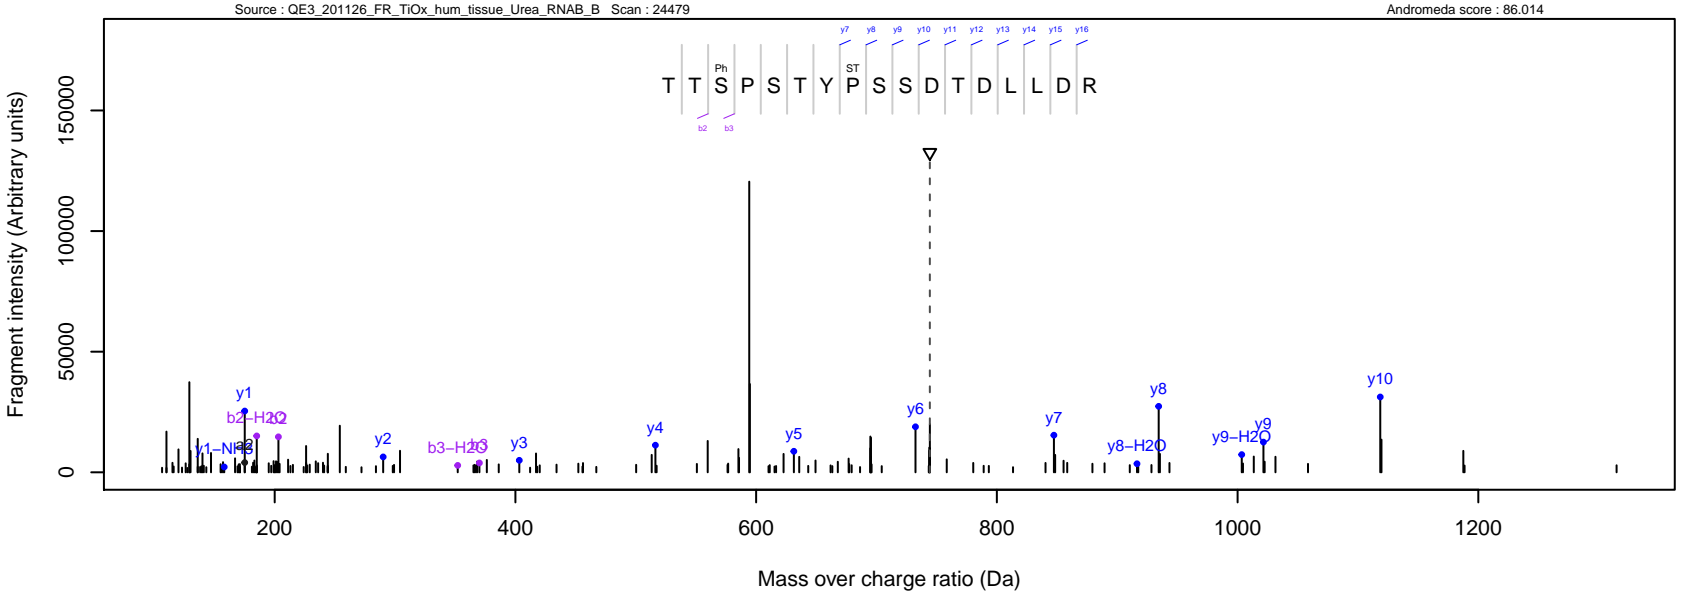

SST(Phospho (STY))PPLHVHV DENTPVHVHIK-4+

Source : QE3\_201126\_FR\_TiOx\_hum\_tissue\_Urea\_RNAB\_B Scan : 20376

Andromeda score : 86.006

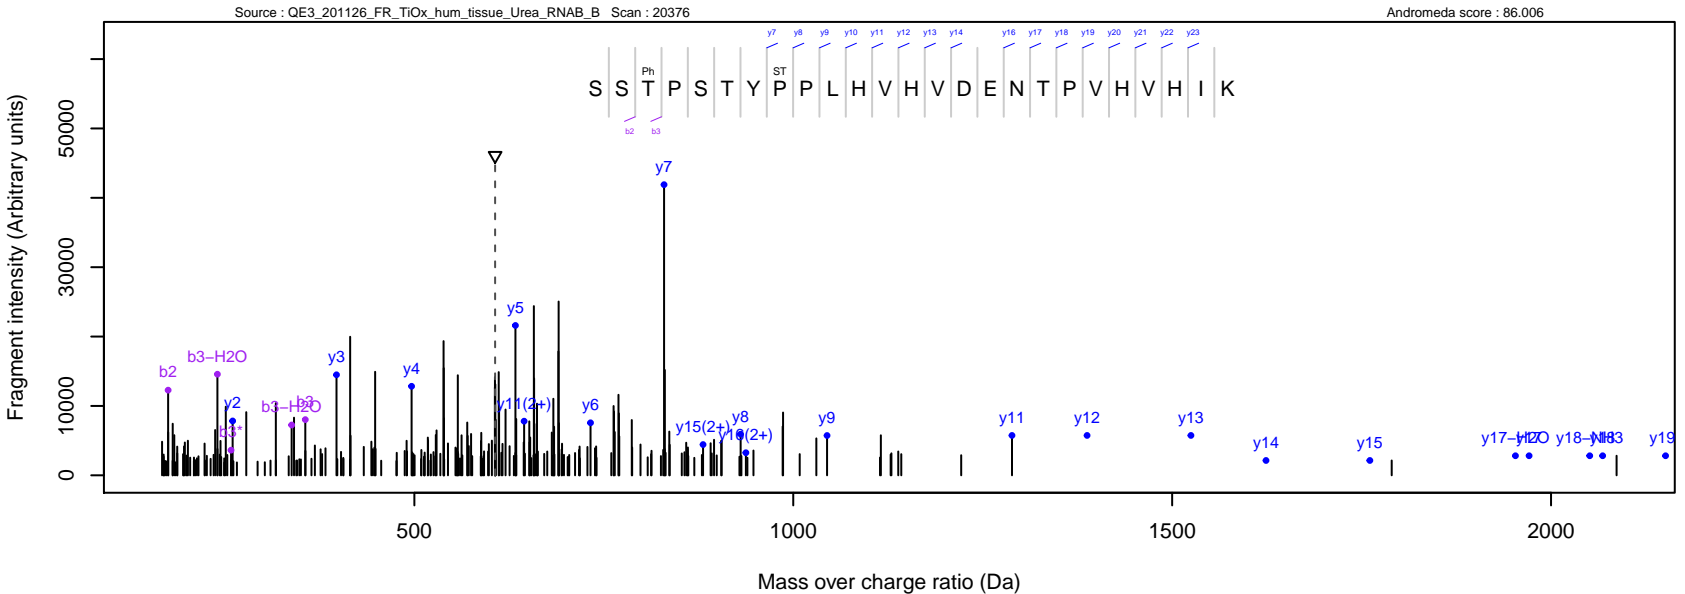

KHIKEPLS(Phospho (STY))EEEPCTSTAIASPEK-4+

Source : QE3\_201126\_FR\_TiOx\_hum\_tissue\_Urea\_RNAB\_H Scan : 17277

Andromeda score : 85.982

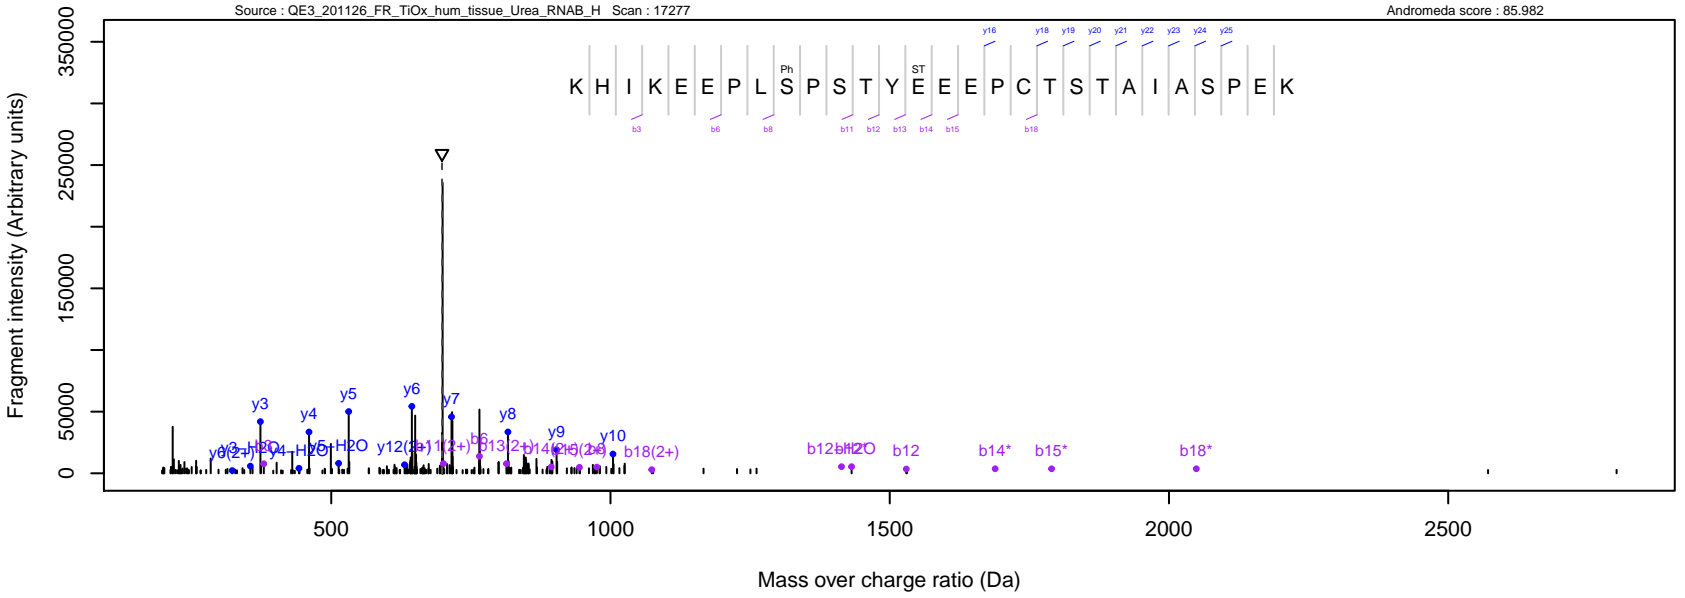

LEISPDSP(Phospho (STY))SPERAHYTHSDYQYSQR-4+

Source : QE3\_201126\_FR\_TiOx\_hum\_tissue\_Urea\_RNAB\_N Scan : 17954

Andromeda score : 85.982

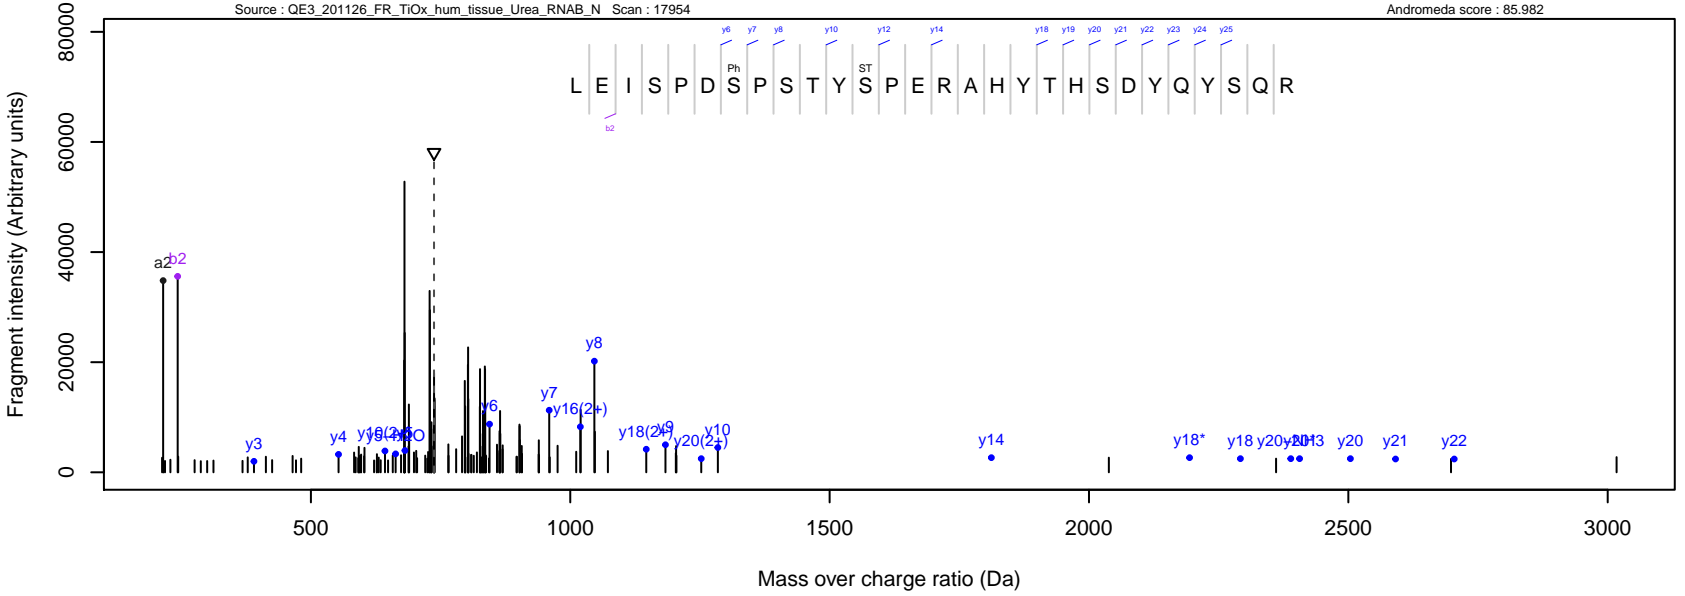

HDT(Phospho (STY))PDPSPLR-2+

Source : QE3\_201126\_FR\_TiOx\_hum\_tissue\_Urea\_RNAB\_H Scan : 10861

Andromeda score : 85.958

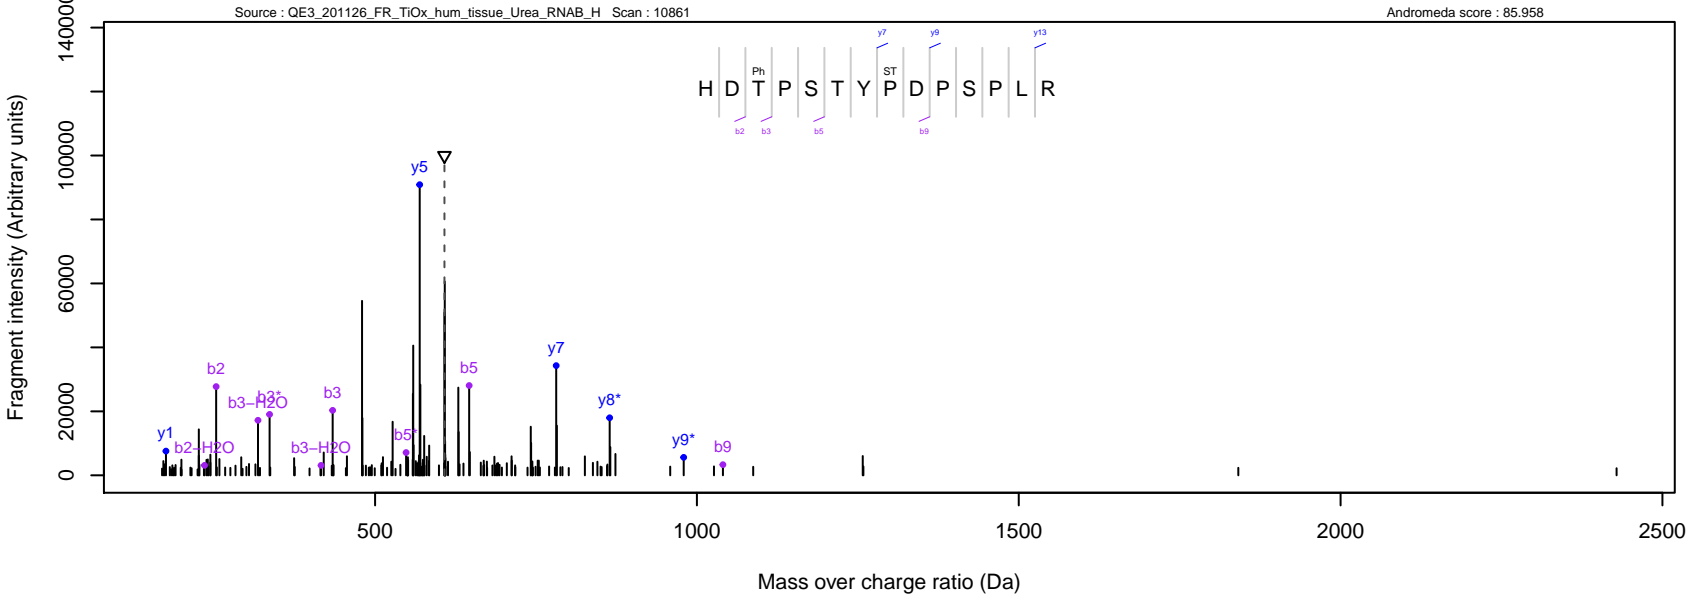

VPS(Phospho (STY))PTPAPK-2+

Source : QE3\_201126\_FR\_TiOx\_hum\_tissue\_Urea\_RNAB\_H Scan : 8744

Andromeda score : 85.958

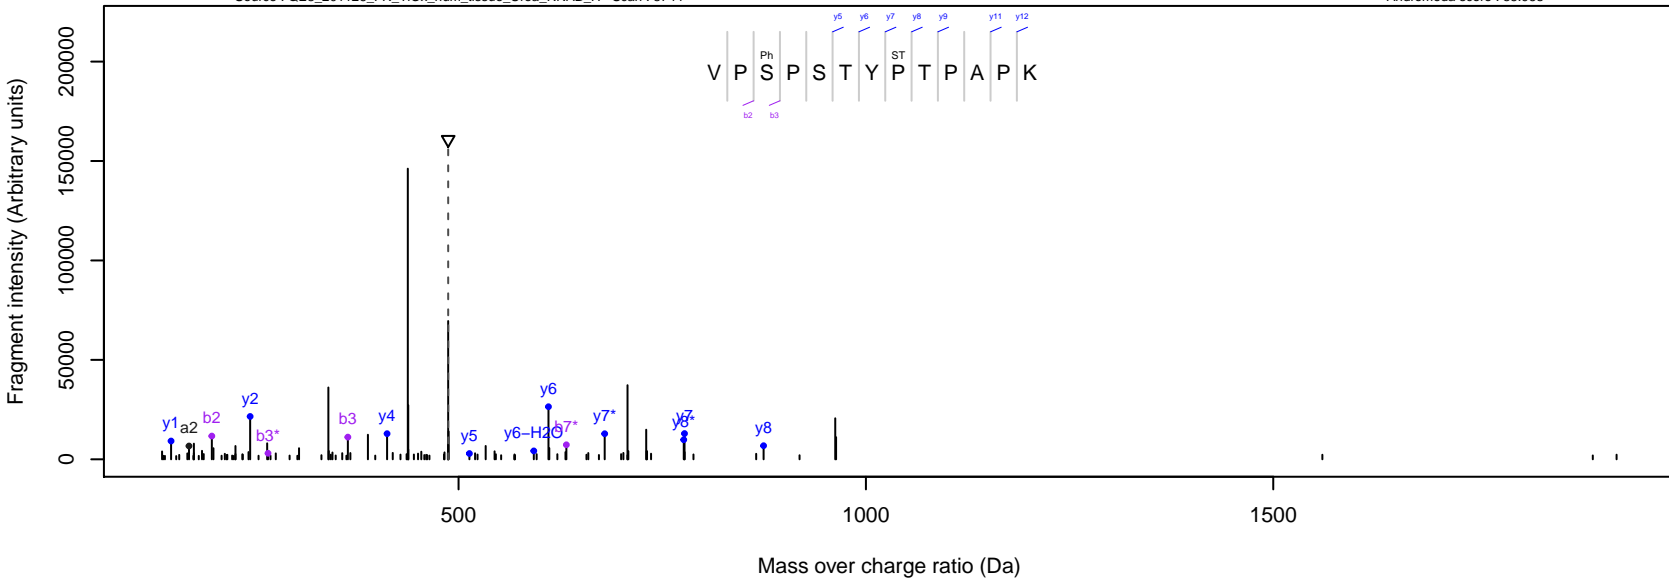

(Acetyl (Protein N-term))MEQLS(Phospho (STY))DEEIDHGAEEDS(Phospho (STY))DKEDQLDK-3+

Source : QE3\_201126\_FR\_TiOx\_hum\_tissue\_Urea\_RNAB\_N Scan : 36819

Andromeda score : 85.939

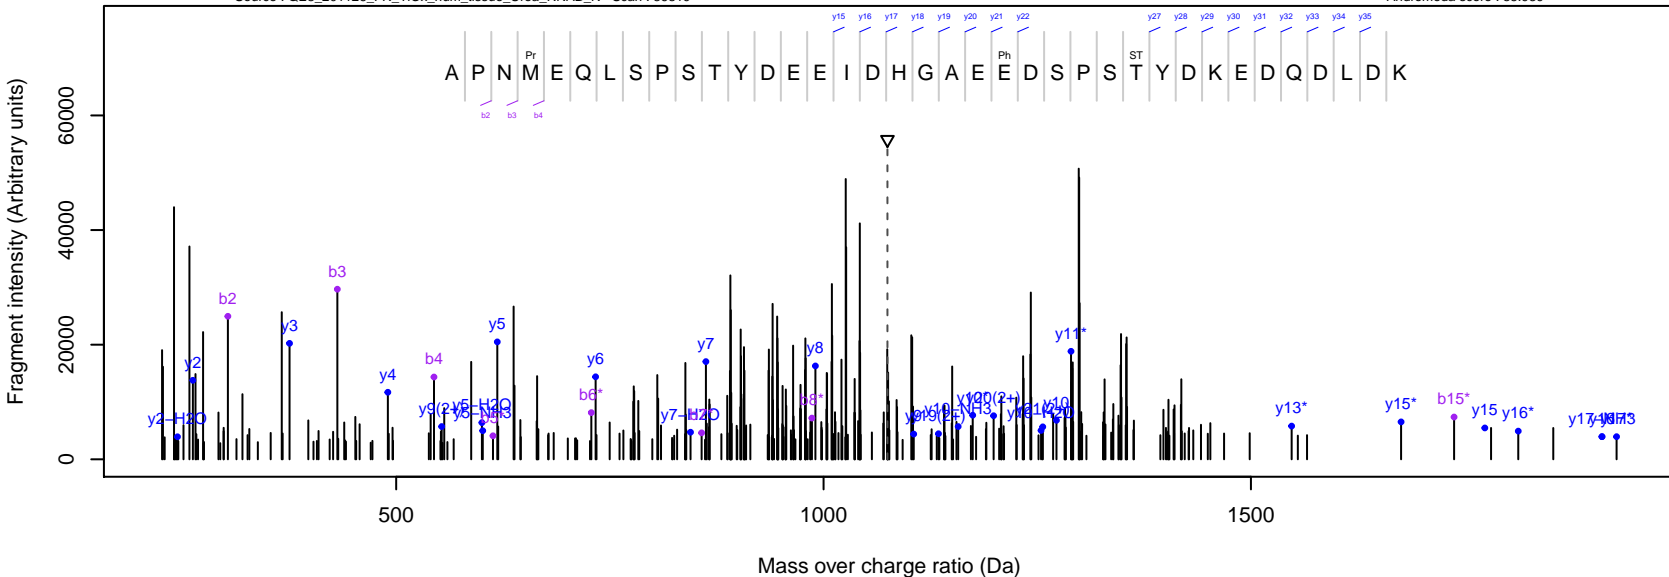

EVEEELAT(Phospho (STY))SGGQSPTGEQIPQFQQR-3+

Source : QE3\_201126\_FR\_TiOx\_hum\_tissue\_Urea\_RNAB\_N Scan : 37124

Andromeda score : 85.932

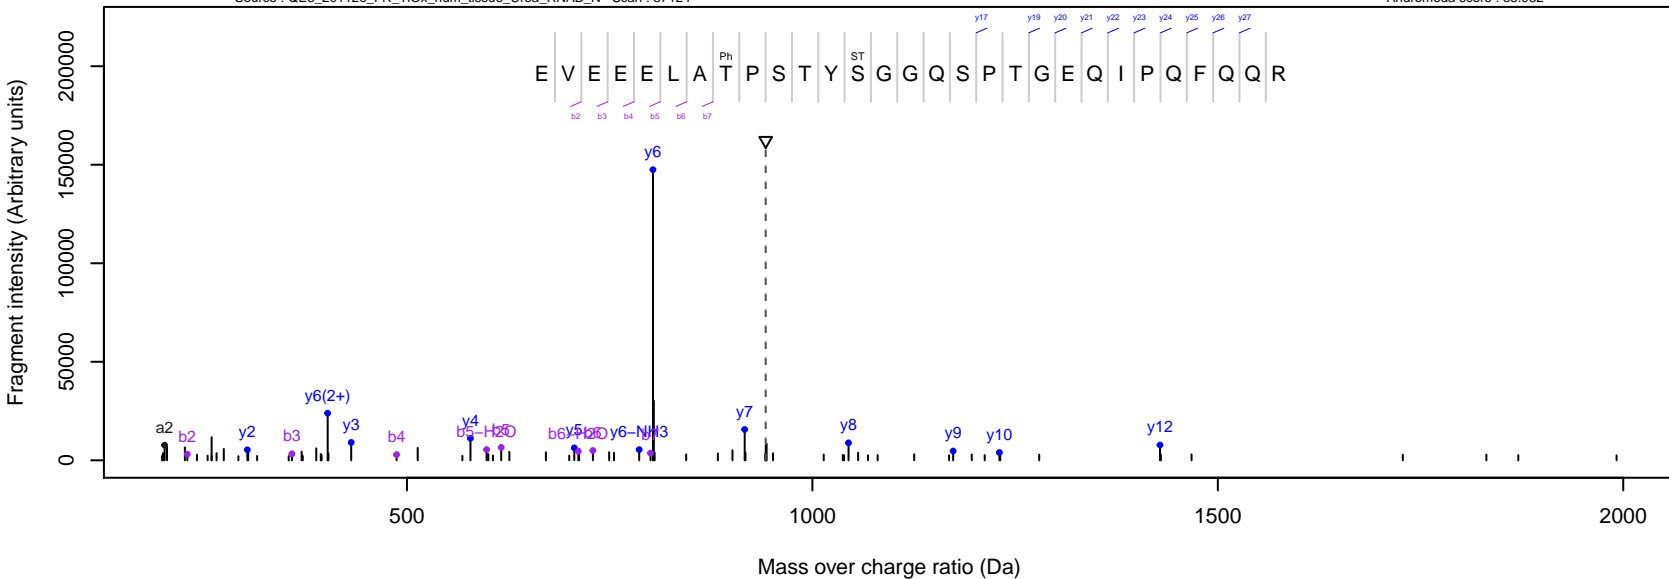

I<sup>1</sup>ALDGTKNSTFS(Phospho (STY))EIFKK-3+

Source : QE3\_201126\_FR\_TiOx\_hum\_tissue\_Urea\_RNAB\_N Scan : 40829

Andromeda score : 85.932

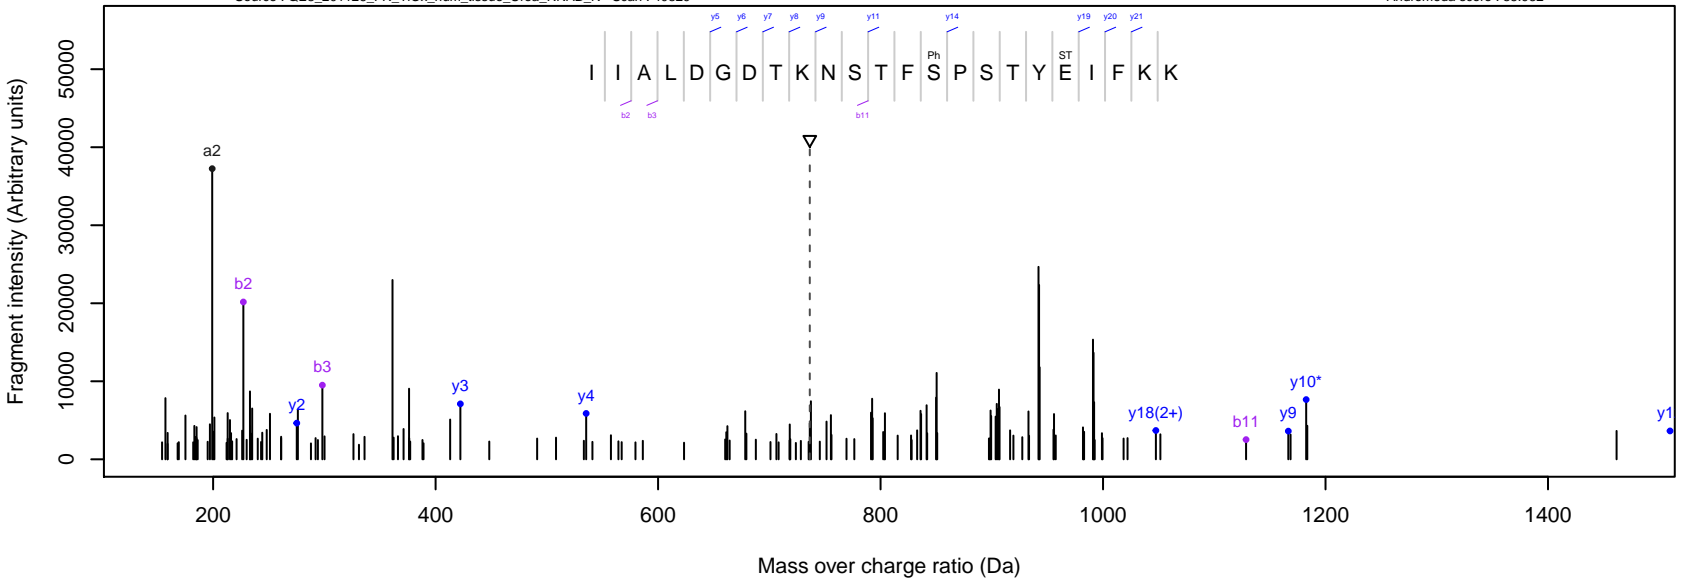

S<sup>1</sup>RADLT(Phospho (STY))AEMISAPLGDFR-3+

Source : QE3\_201126\_FR\_TiOx\_hum\_tissue\_Urea\_RNAB\_H Scan : 50648

Andromeda score : 85.932

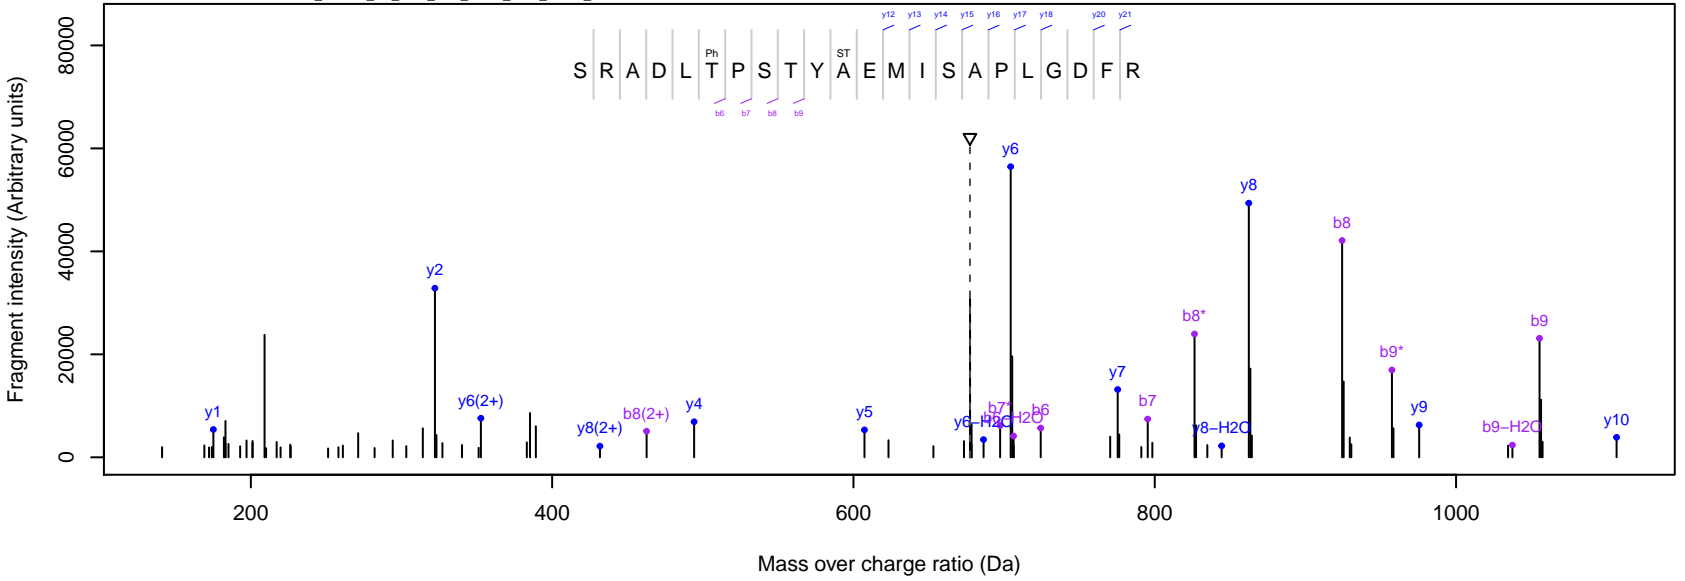

V<sup>1</sup>PETVADARQS(Phospho (STY))IDVGKTS-3+

Source : QE3\_201126\_FR\_TiOx\_hum\_tissue\_Urea\_RNAB\_H Scan : 19206

Andromeda score : 85.932

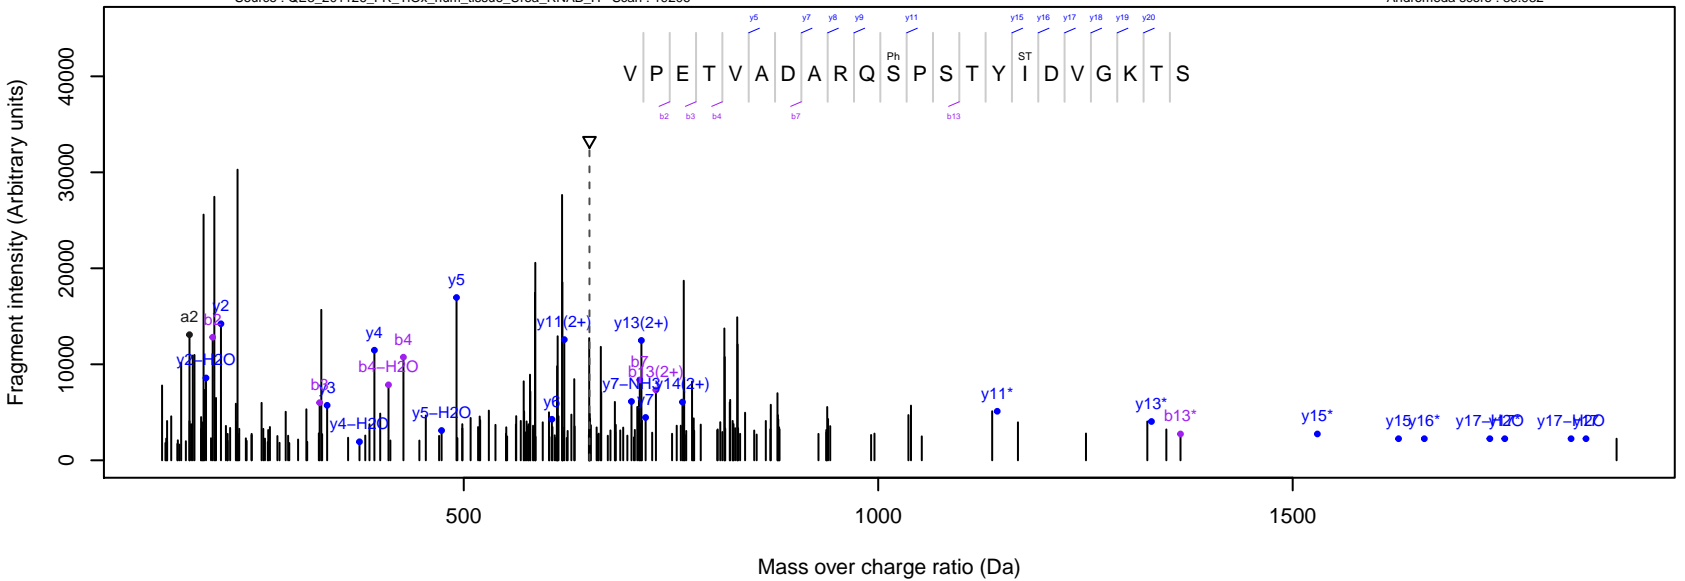



AHS(Phospho (STY))PASLSFASYR-3+

Source : QE3\_201126\_FR\_TiOx\_hum\_tissue\_Urea\_RNAB\_H Scan : 23996

Andromeda score : 85.909

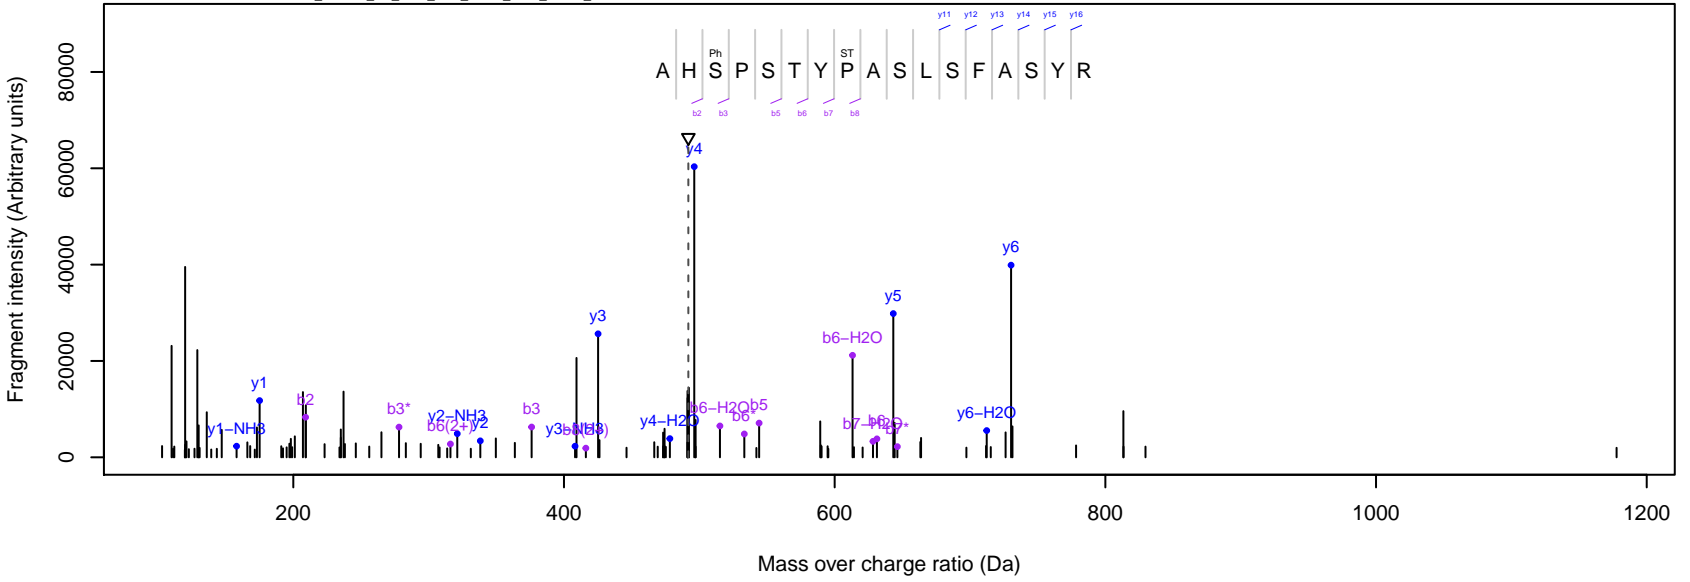

LVPASQCGS(Phospho (STY))LIGK-2+

Source : QE3\_201126\_FR\_TiOx\_hum\_tissue\_Urea\_RNAB\_N Scan : 30955

Andromeda score : 85.909

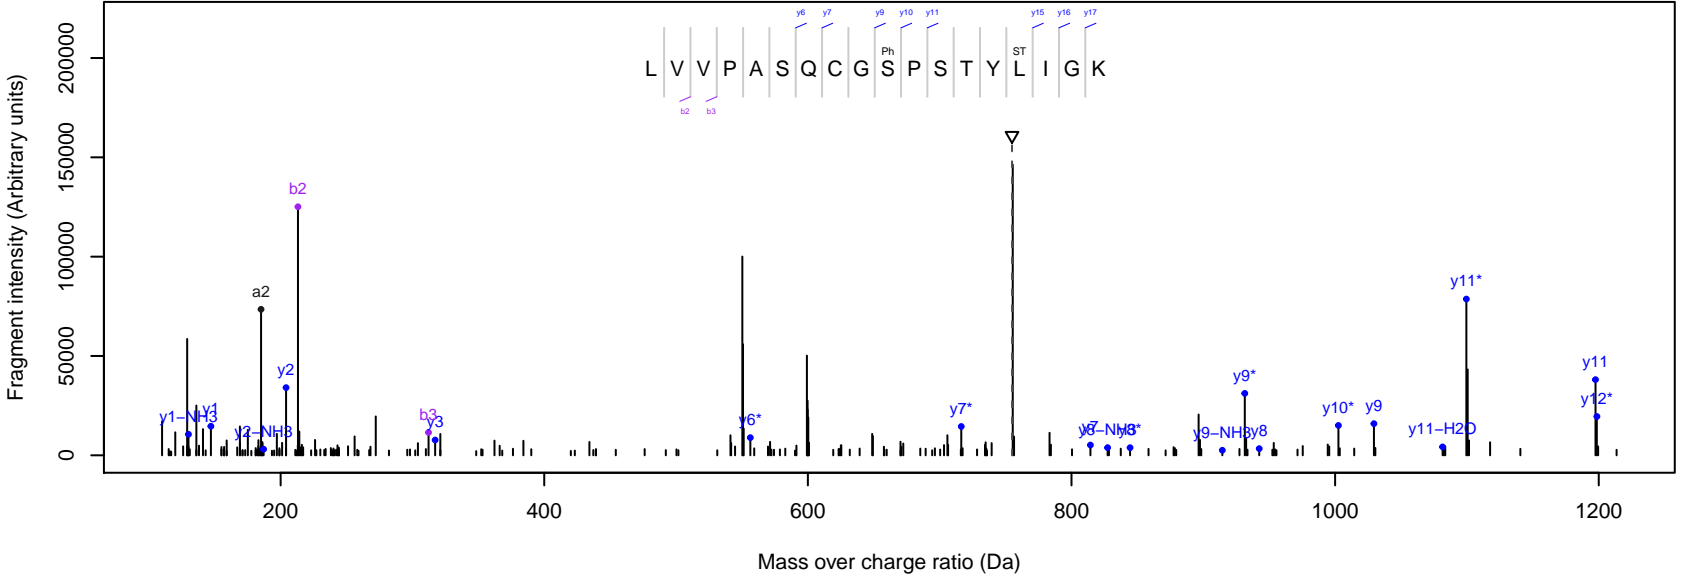

TQEDEEISTS(Phospho (STY))PGVSEFVSDAFDACLNLQEDLRK-3+

Source : QE3\_201126\_FR\_TiOx\_hum\_tissue\_Urea\_RNAB\_B Scan : 55224

Andromeda score : 85.864

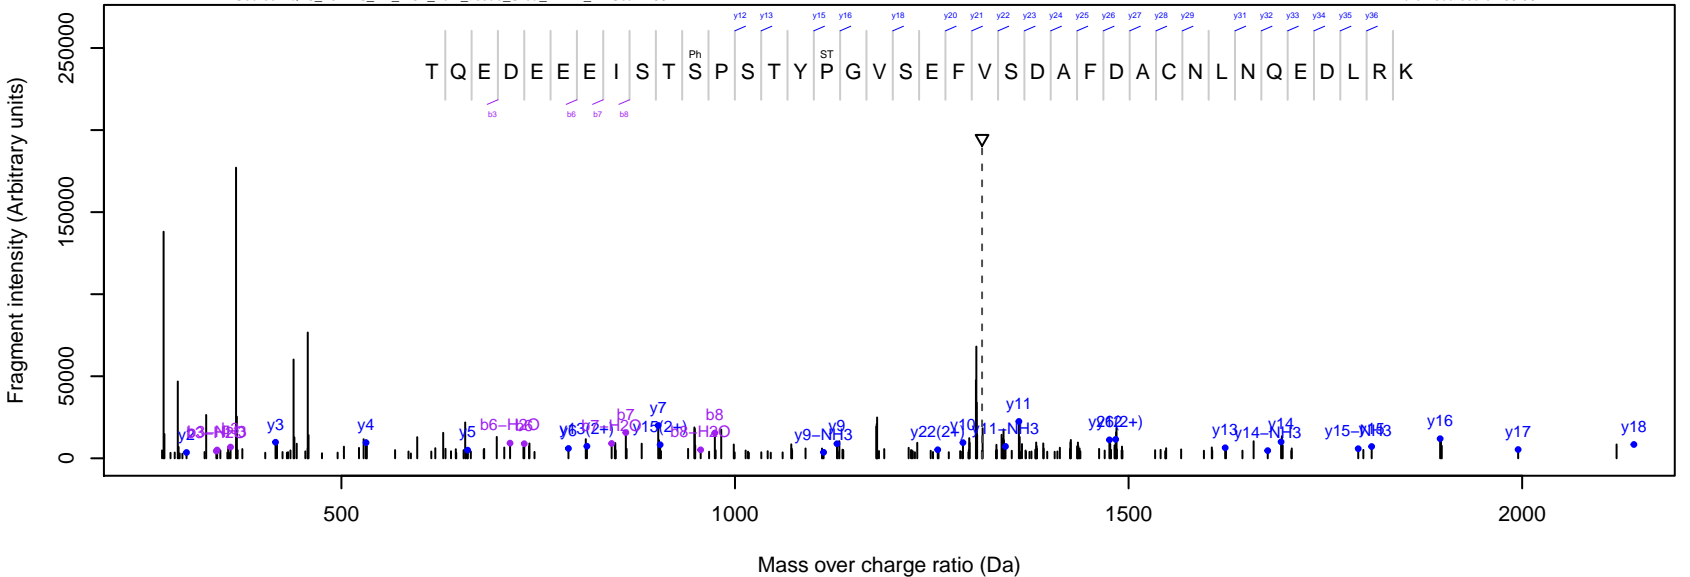

GVPIIFADELDDSKPPPS(Phospho (STY))SSMPLILQEEK-3+

Source : QE3\_201126\_FR\_TiOx\_hum\_tissue\_Urea\_RNAB\_N Scan : 57290

Andromeda score : 85.861

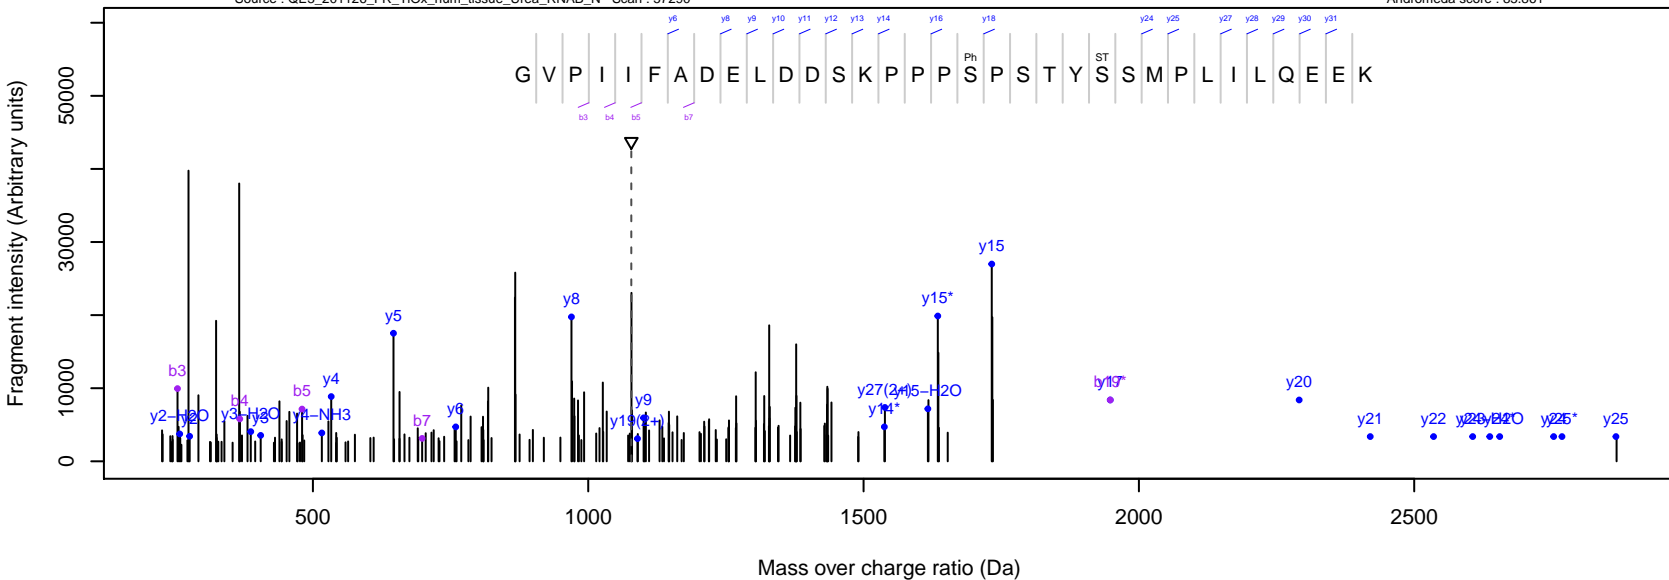

TATCHSSSS(Phospho (STY))PPIDAASAEPYGFGR-3+

Source : QE3\_201126\_FR\_TiOx\_hum\_tissue\_Urea\_RNAB\_N Scan : 28180

Andromeda score : 85.849

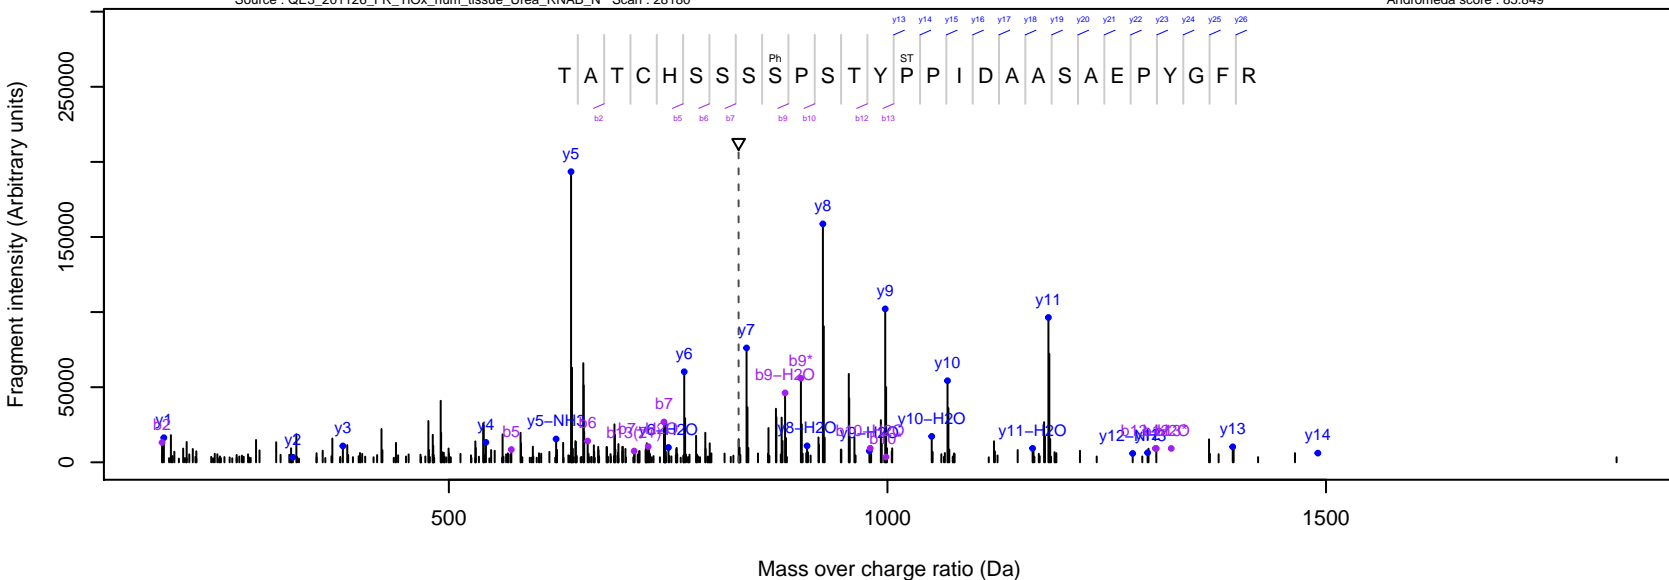

RIS(Phospho (STY))FSASHR-3+

Source : QE3\_201126\_FR\_TiOx\_hum\_tissue\_Urea\_RNAB\_N Scan : 8006

Andromeda score : 85.813

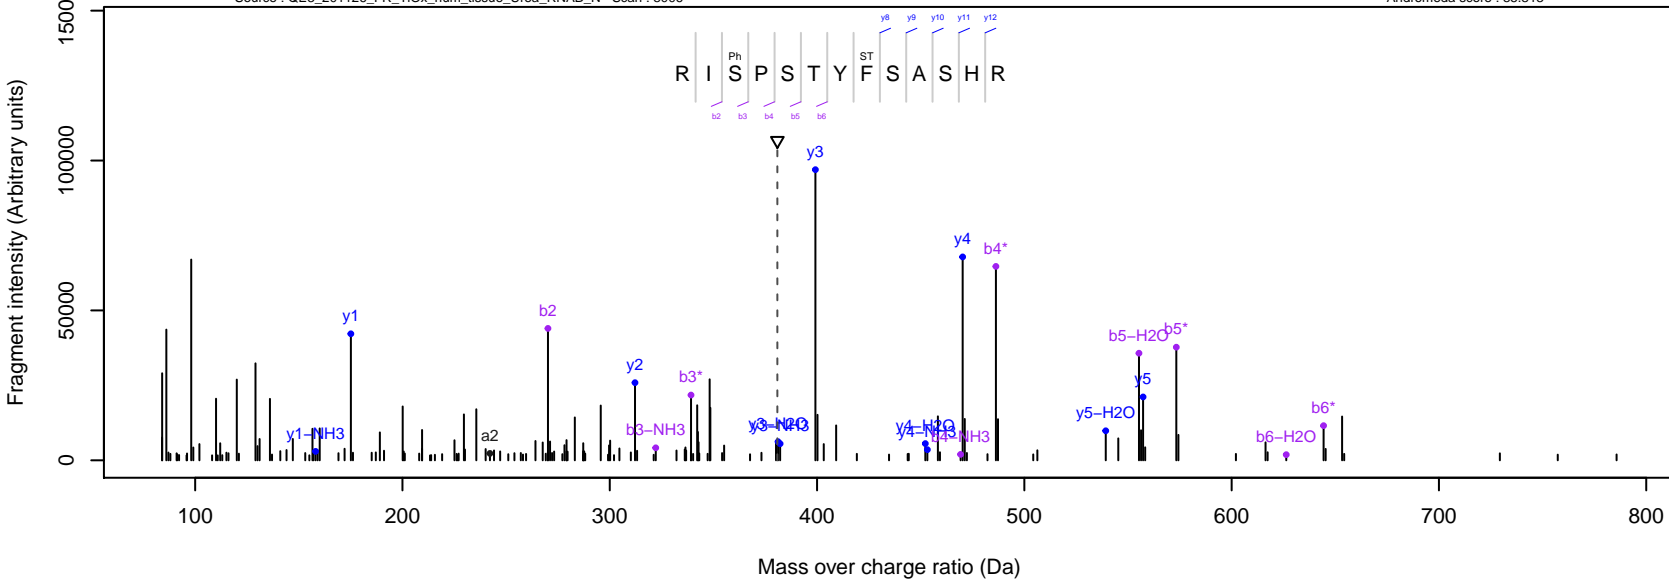

RIS(Phospho (STY))QSQPVR--2+

Source : QE3\_201126\_FR\_TiOx\_hum\_tissue\_Urea\_RNAB\_H Scan : 5325

Andromeda score : 85.813

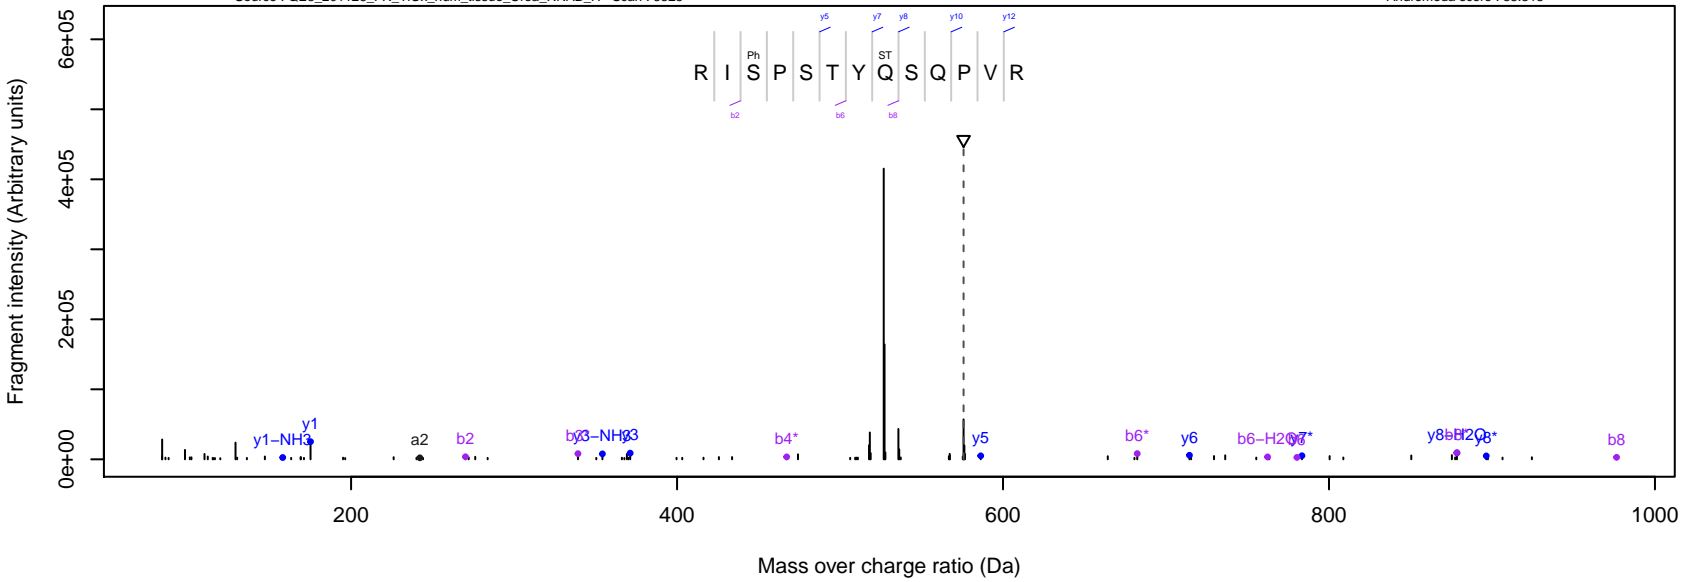

RLS(Phospho (STY))QRPTEELEQR--3+

Source : QE3\_201126\_FR\_TiOx\_hum\_tissue\_Urea\_RNAB\_N Scan : 11387

Andromeda score : 85.808

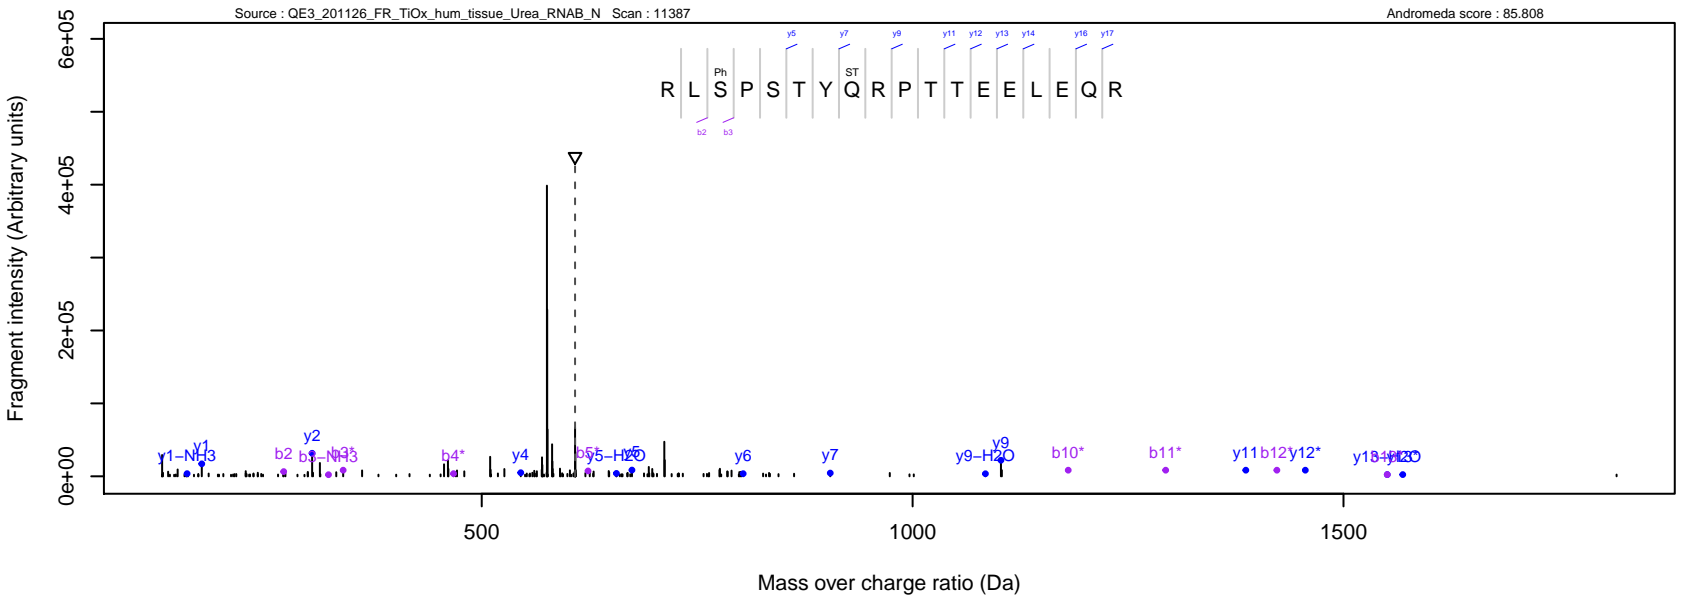

HNS(Phospho (STY))WDTVNTVLPEDPEVADLFSR--3+

Source : QE3\_201126\_FR\_TiOx\_hum\_tissue\_Urea\_RNAB\_N Scan : 57322

Andromeda score : 85.805

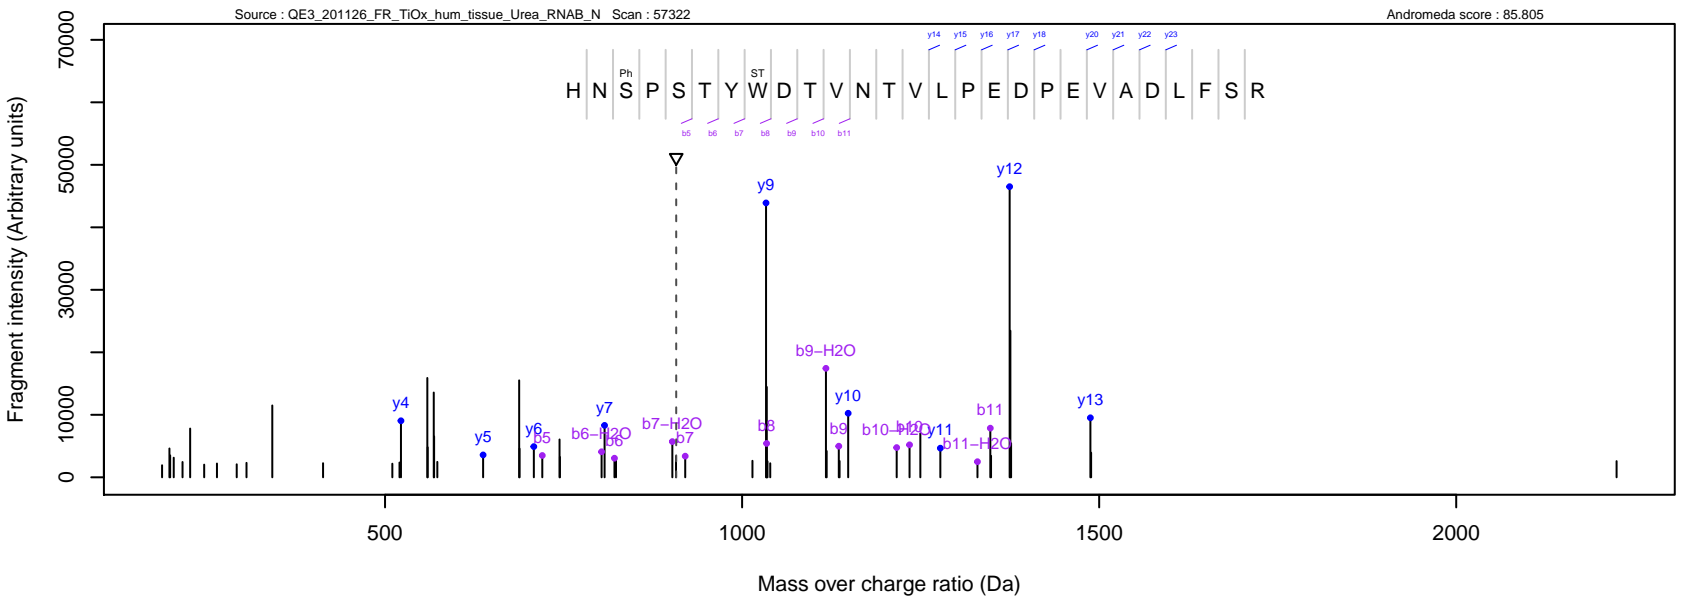

ESQLAHIKDEPPPLS(Phospho (STY))PAPLTPATPSSLDPFSSR-3+

Source : QE3\_201126\_FR\_TiOx\_hum\_tissue\_Urea\_RNAB\_H Scan : 52544

Andromeda score : 85.751

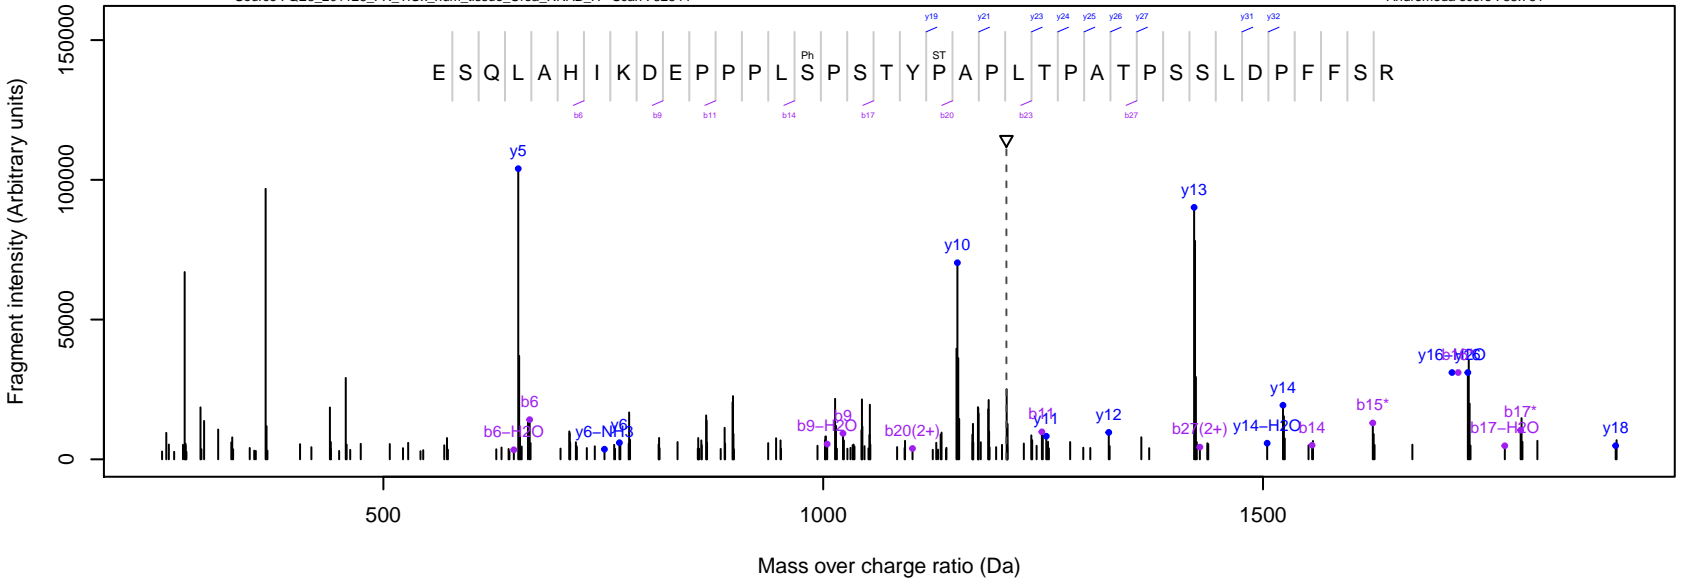

DSGRGDSVS(Phospho (STY))DSGDALR-3+

Source : QE3\_201126\_FR\_TiOx\_hum\_tissue\_Urea\_RNAB\_H Scan : 11164

Andromeda score : 85.737

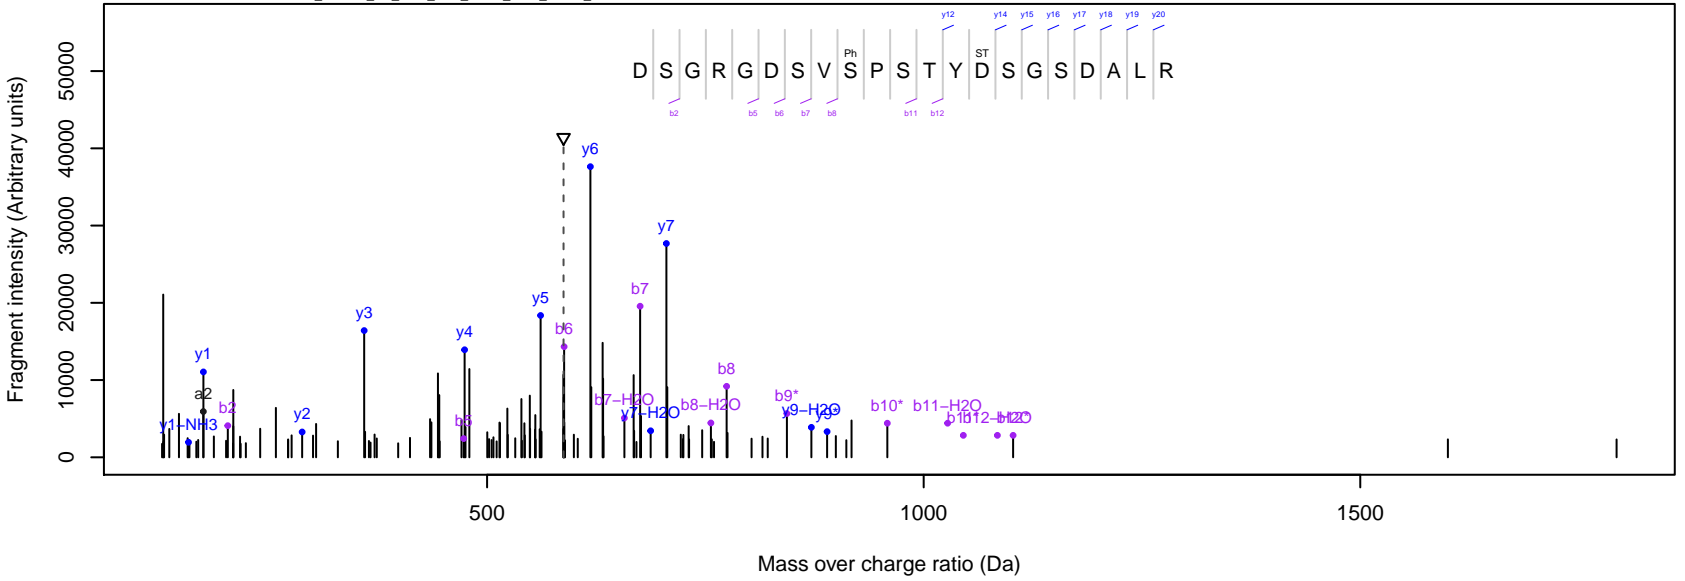

SPLAMSHASGVKT(Phospho (STY))SPDPR-3+

Source : QE3\_201126\_FR\_TiOx\_hum\_tissue\_Urea\_RNAB\_H Scan : 12105

Andromeda score : 85.737

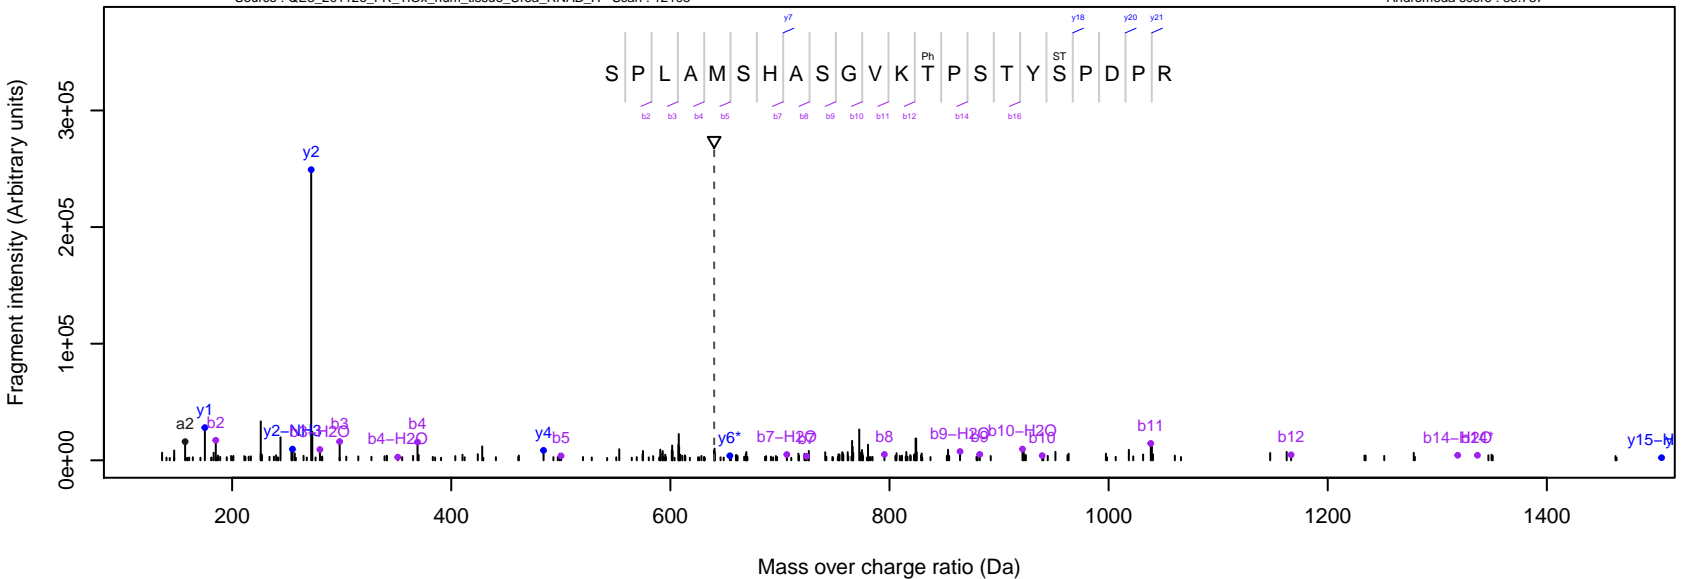

SPSSQETHDS(Phospho (STY))PFCLRK-3+

Source : QE3\_201126\_FR\_TiOx\_hum\_tissue\_Urea\_RNAB\_H Scan : 12117

Andromeda score : 85.737

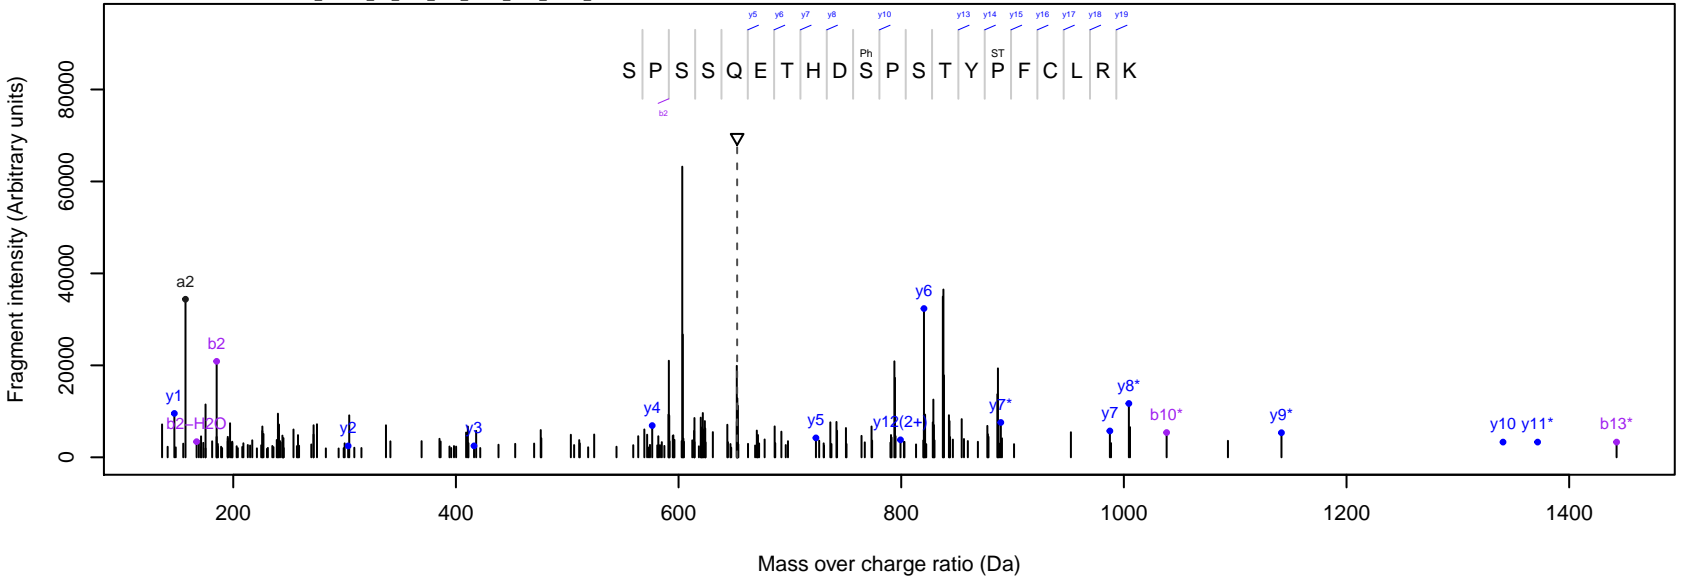

LAVDALAEGGSEAYS(Phospho (STY))R-2+

Source : QE3\_201126\_FR\_TiOx\_hum\_tissue\_Urea\_RNAB\_H Scan : 33211

Andromeda score : 85.734

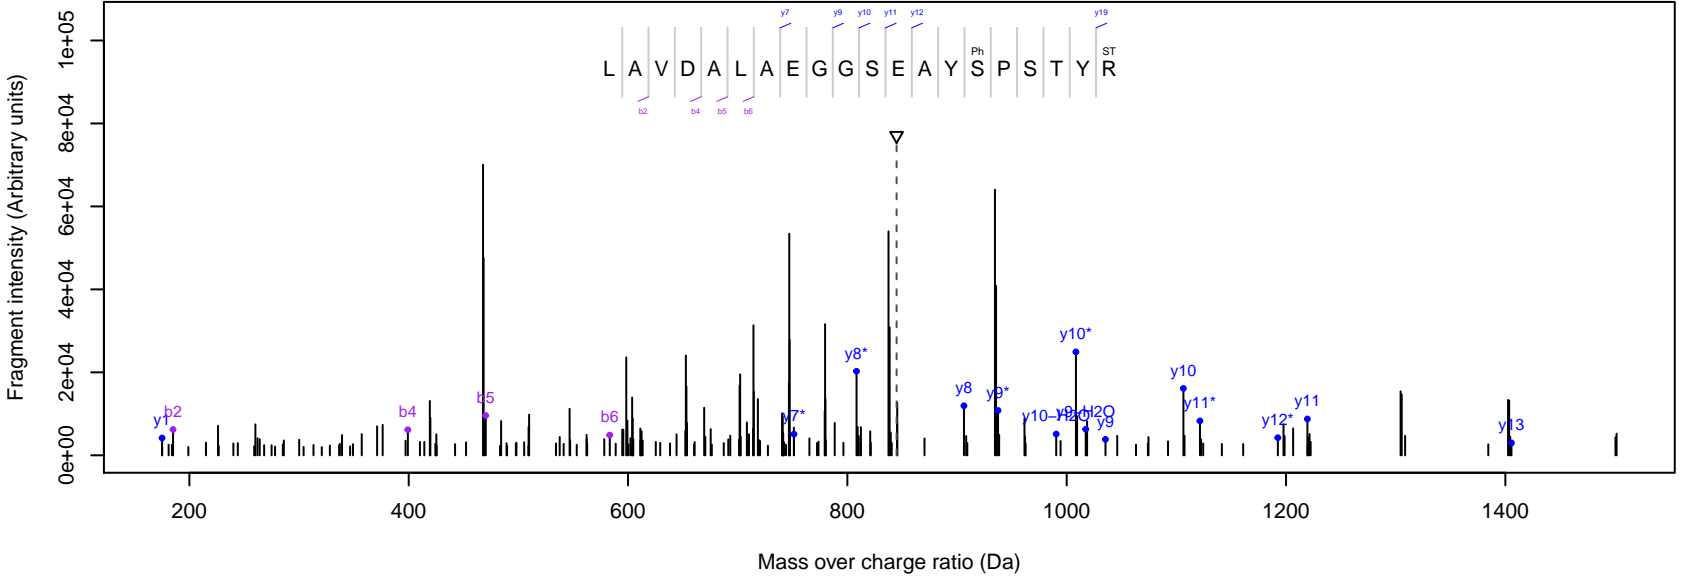

VLTKAS(Phospho (STY))TDL-2+

Source : QE3\_201126\_FR\_TiOx\_hum\_tissue\_Urea\_RNAB\_B Scan : 19490

Andromeda score : 85.729

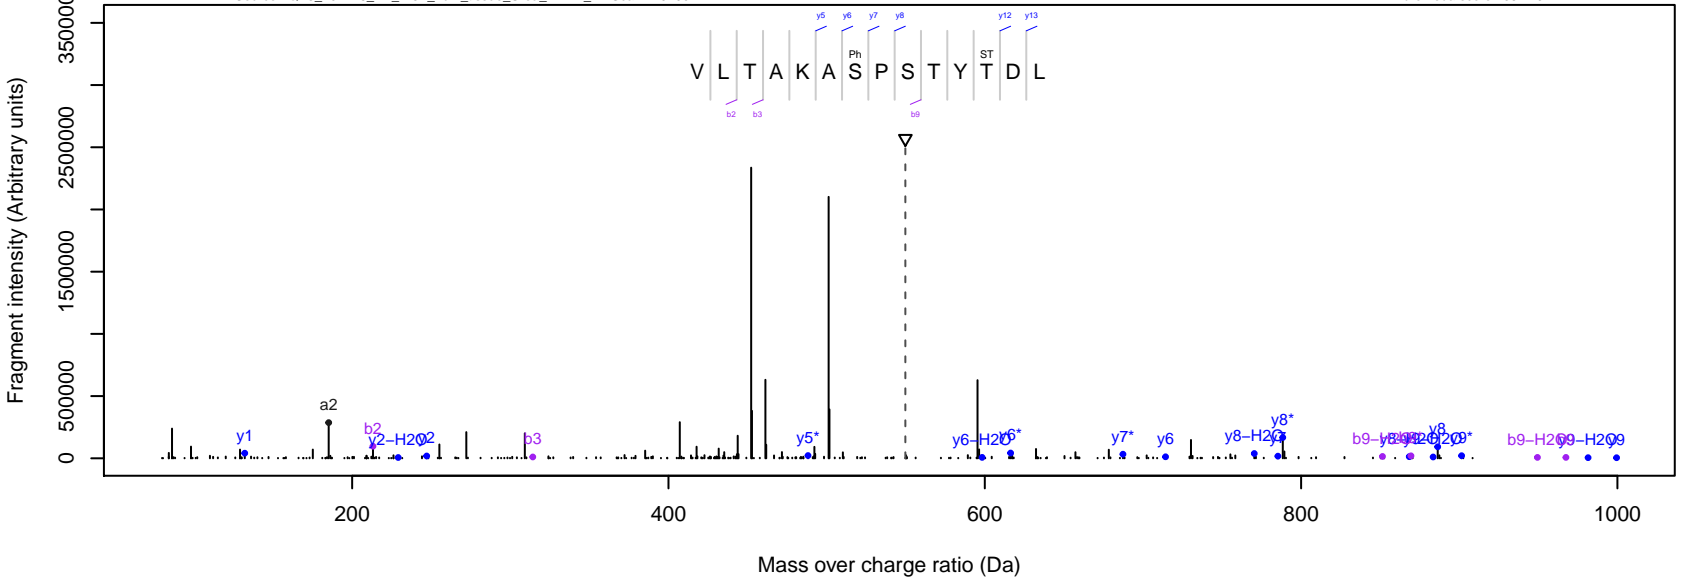

GSTNDPPKQSPGSTS(Phospho (STY))PKPHTLSR-4+

Source : QE3\_201126\_FR\_TiOx\_hum\_tissue\_Urea\_RNAB\_N Scan : 7890

Andromeda score : 85.715

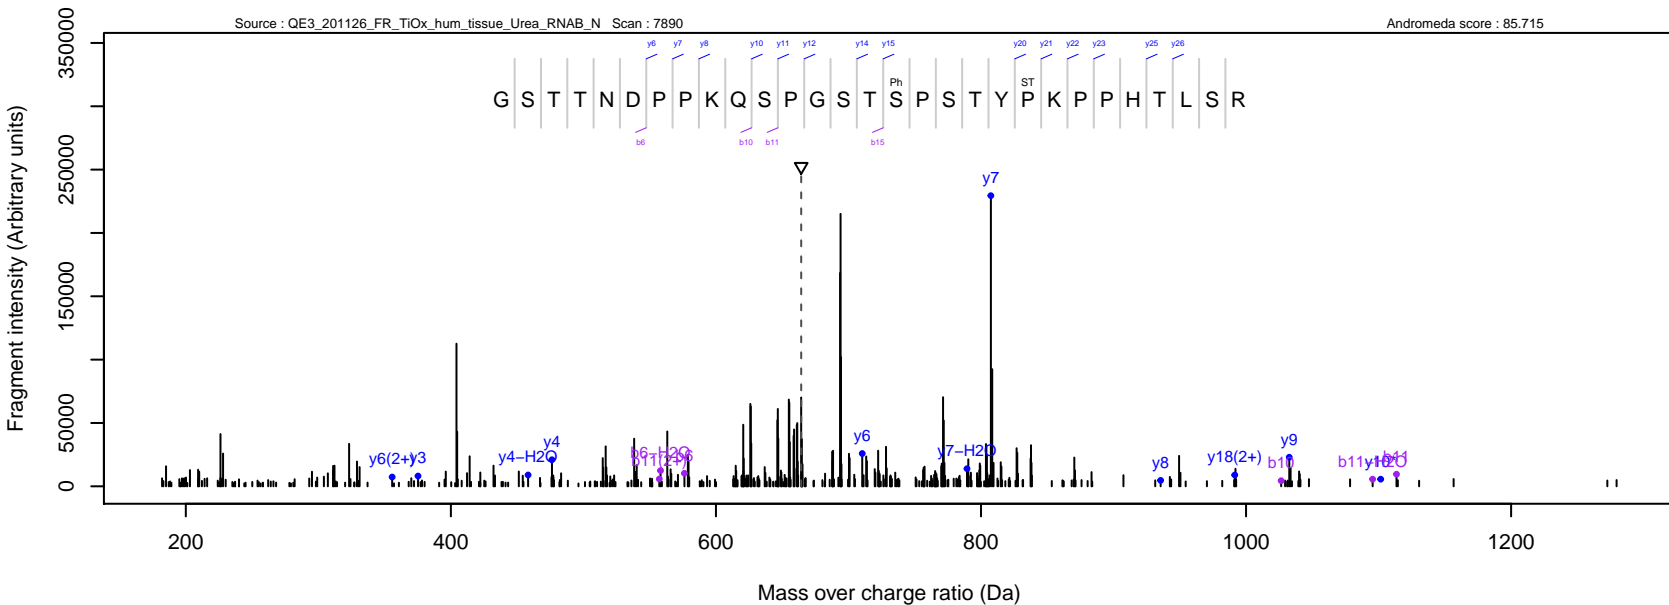

INS(Phospho (STY))LTFKK-2+

Source : QE3\_201126\_FR\_TiOx\_hum\_tissue\_Urea\_RNAB\_H Scan : 12553

Andromeda score : 85.622

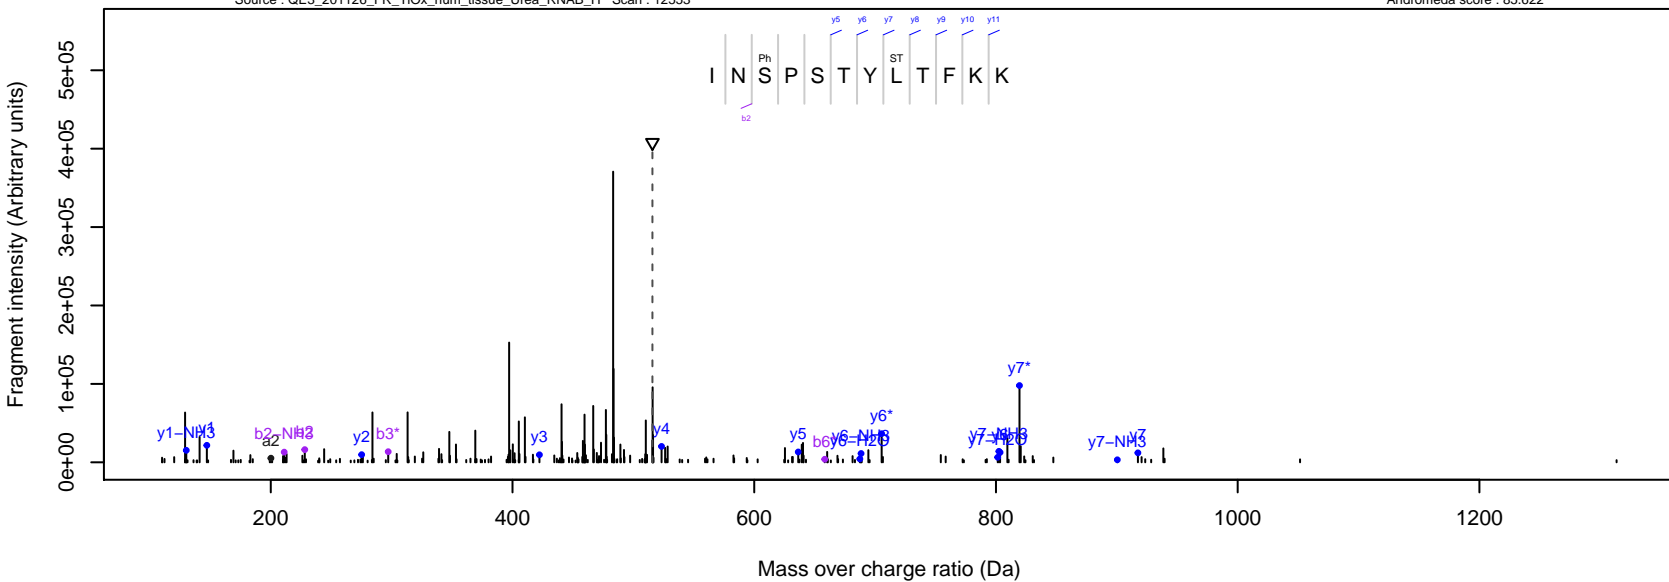

DSNAPKS(Phospho (STY))PLTGYVR-3+

Source : QE3\_201126\_FR\_TiOx\_hum\_tissue\_Urea\_RNAB\_N Scan : 20059

Andromeda score : 85.563

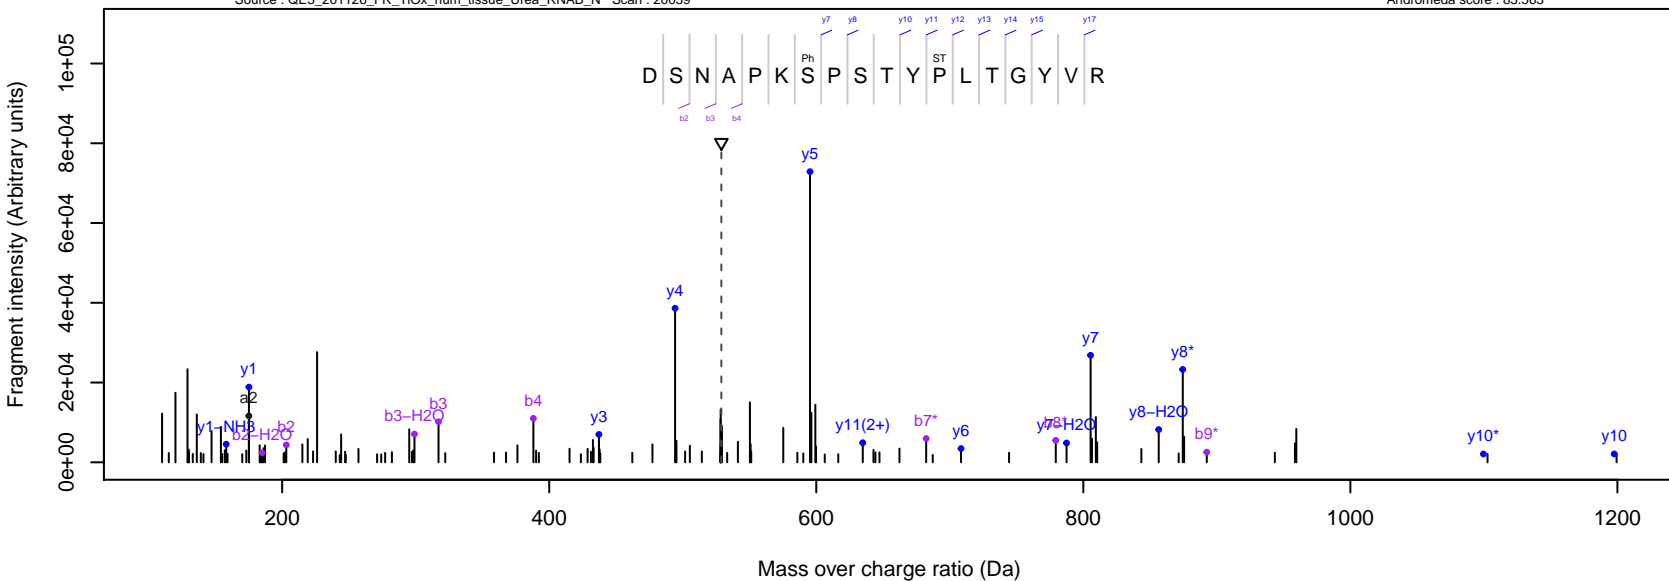

IDEDGENTQIEDTEPMS(Phospho (STY))PVLNSK-3+

Source : QE3\_201126\_FR\_TiOx\_hum\_tissue\_Urea\_RNAB\_B Scan : 36835

Andromeda score : 85.537

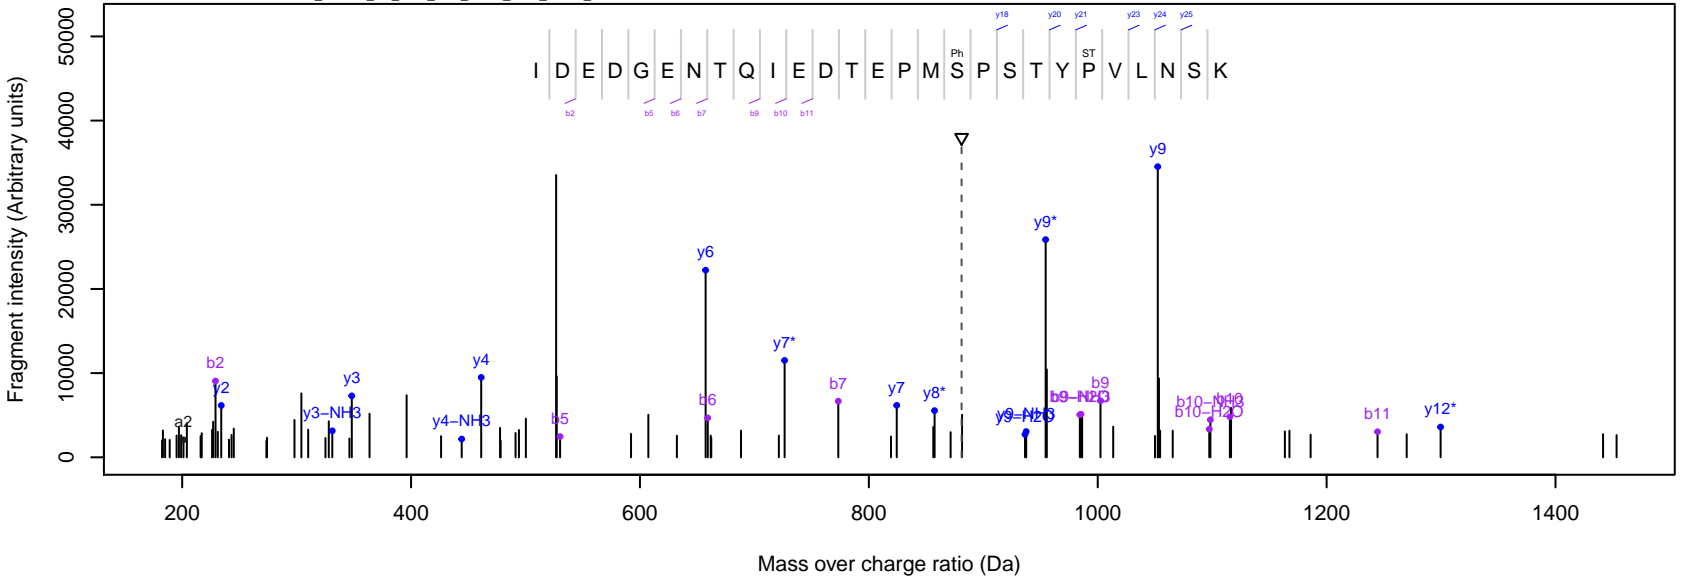

KADRQSPSTY(Phospho (STY))PFSK-3+

Source : QE3\_201126\_FR\_TiOx\_hum\_tissue\_Urea\_RNAB\_H Scan : 4697

Andromeda score : 85.536

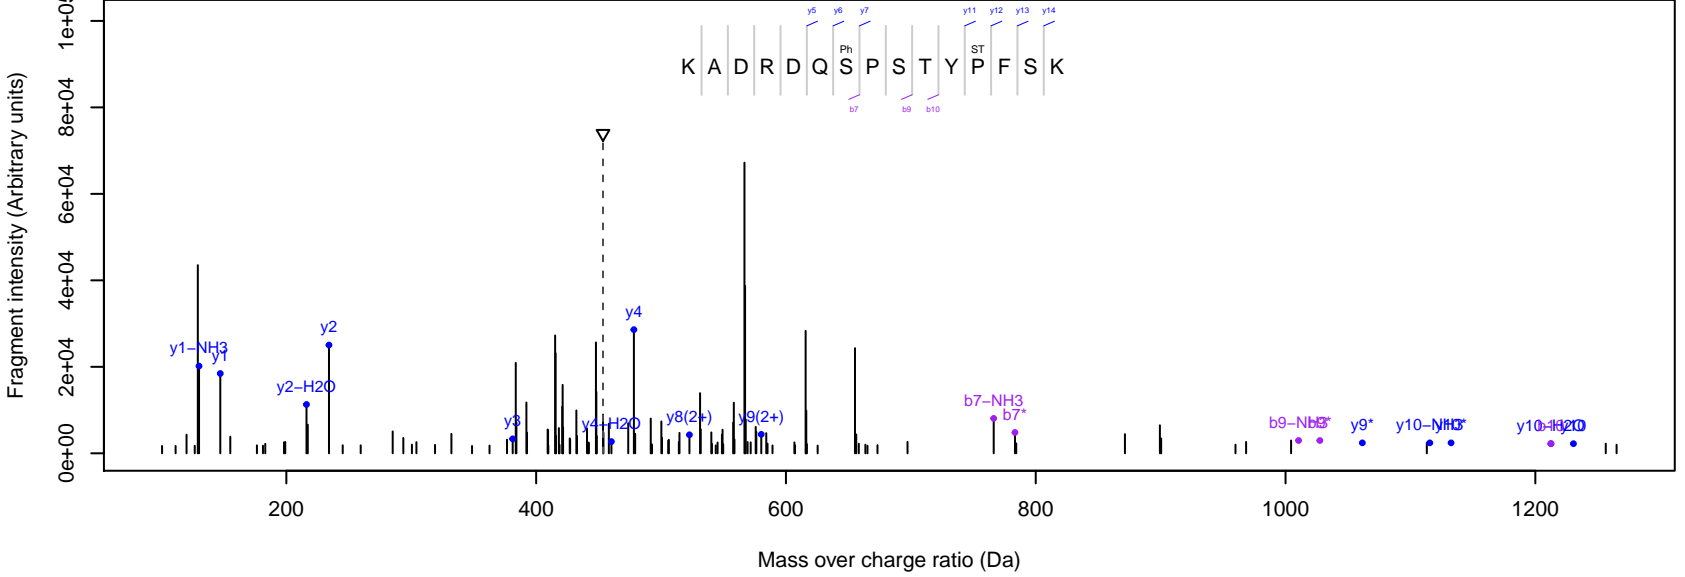

NYDPYKPLDITPSTY(Phospho (STY))PPDQK-3+

Source : QE3\_201126\_FR\_TiOx\_hum\_tissue\_Urea\_RNAB\_N Scan : 34854

Andromeda score : 85.518

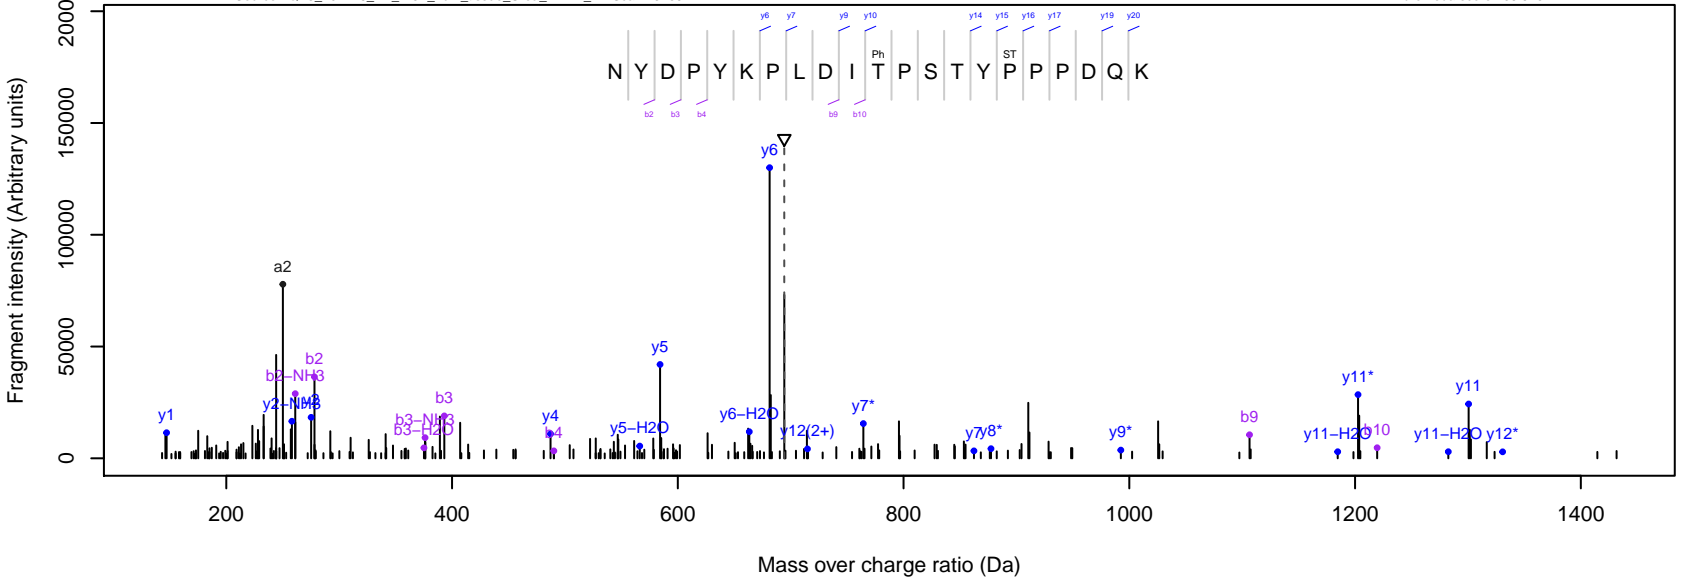

M(Oxidation (M))APPPKEVEEEDSEEM(Oxidation (M))SEDEEDS(Phospho (STY))S(Phospho (STY))GEEVVPQKK-4+

Source : QE3\_201126\_FR\_TIOx\_hum\_tissue\_Urea\_RNAB\_B Scan : 23575

Andromeda score : 85.507

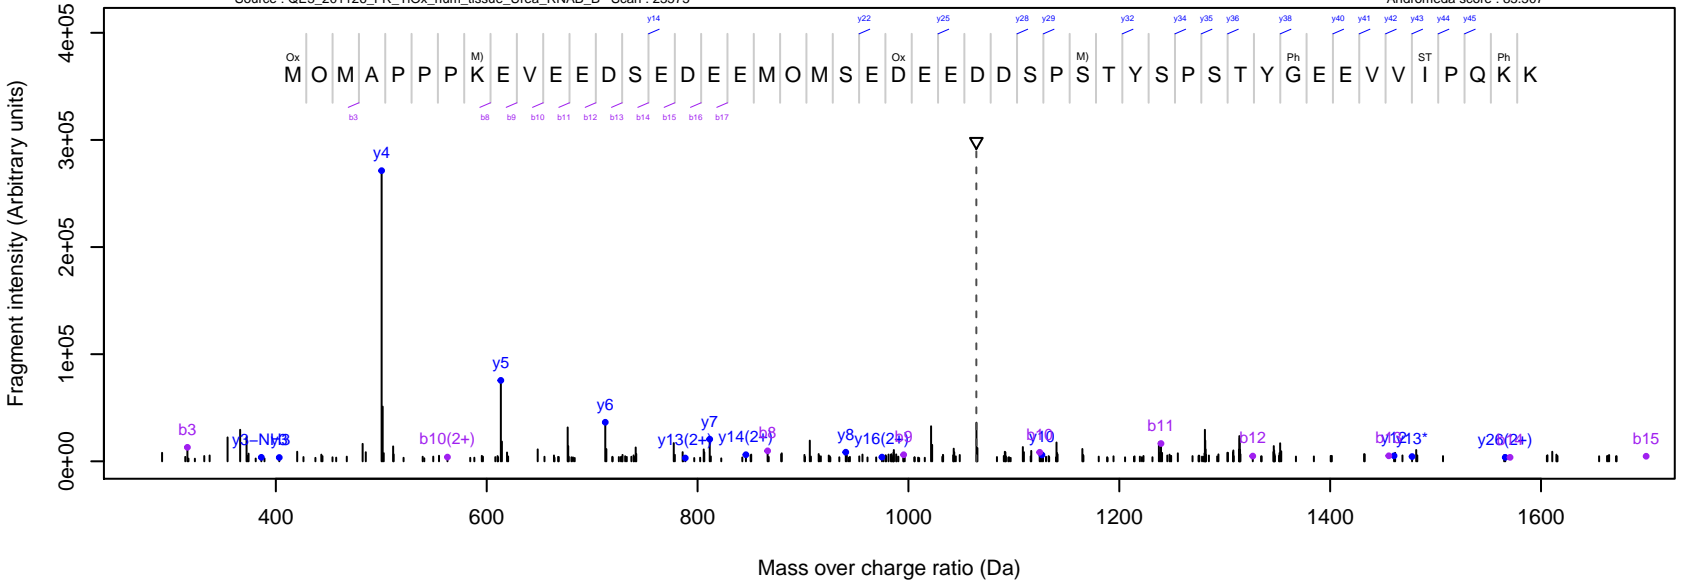

DVM(Oxidation (M))SDETNEETES(Phospho (STY))PSQEFVNITK-3+

Source : QE3\_201126\_FR\_TIOx\_hum\_tissue\_Urea\_RNAB\_B Scan : 41961

Andromeda score : 85.489

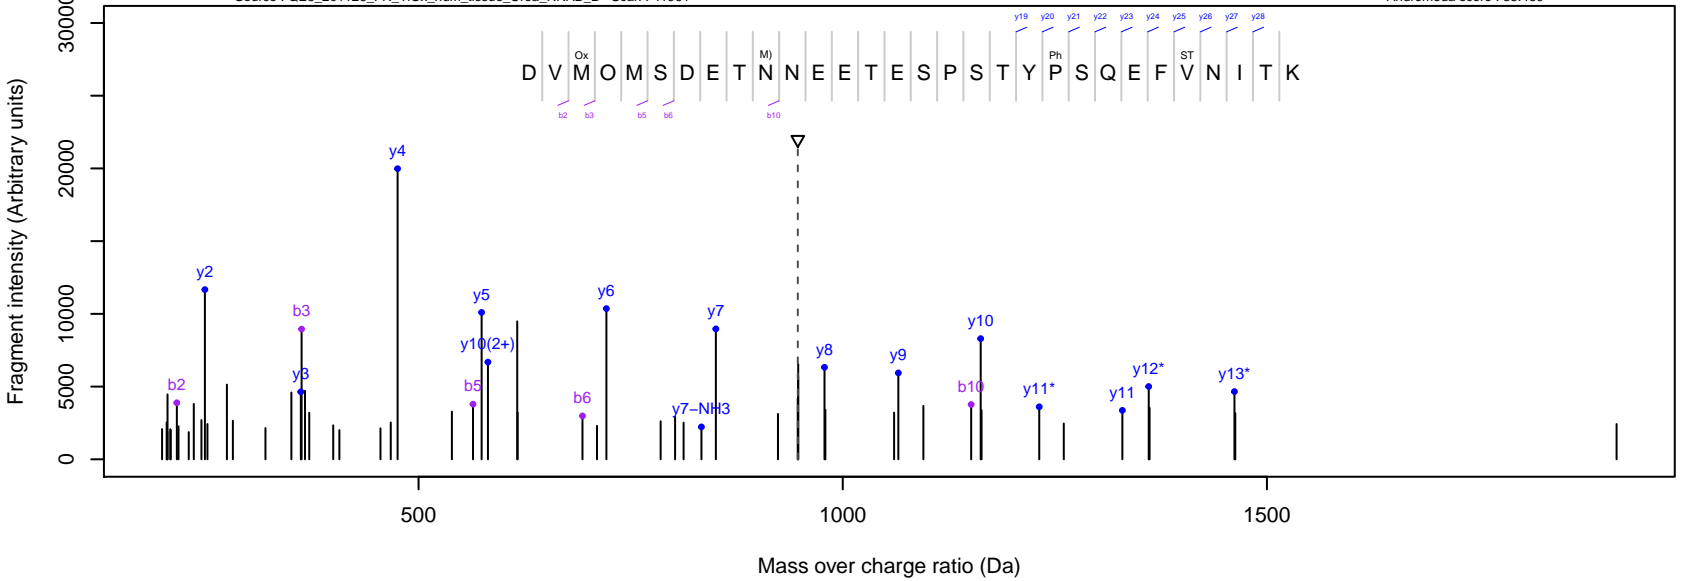

(Acetyl (Protein N-term))MDGFAGSLDDISAAS(Phospho (STY))TSDVQDR-3+

Source : QE3\_201126\_FR\_TIOx\_hum\_tissue\_Urea\_RNAB\_N Scan : 60426

Andromeda score : 85.489

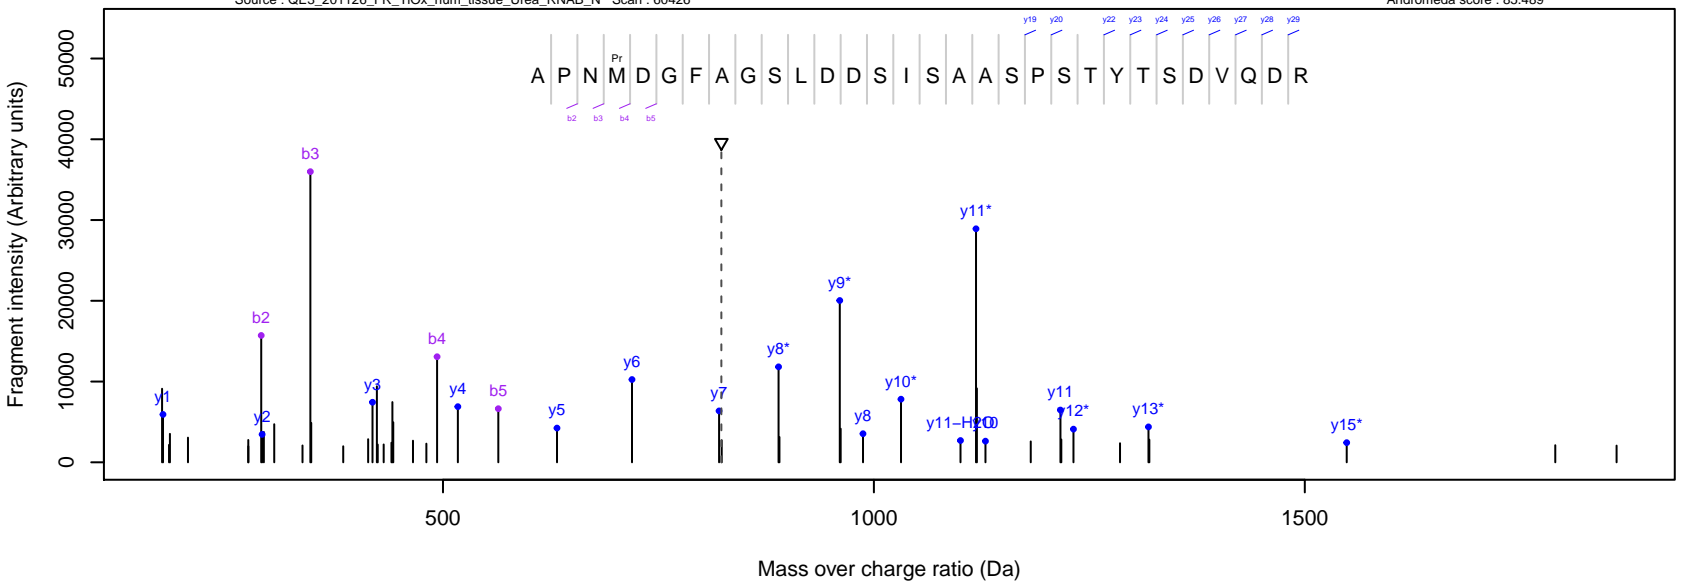



GGs(Phospho (STY))PIIQEPEEPSEHREESSPR-3+

Source : QE3\_201126\_FR\_TiOx\_hum\_tissue\_Urea\_RNAB\_N Scan : 14422

Andromeda score : 85.467

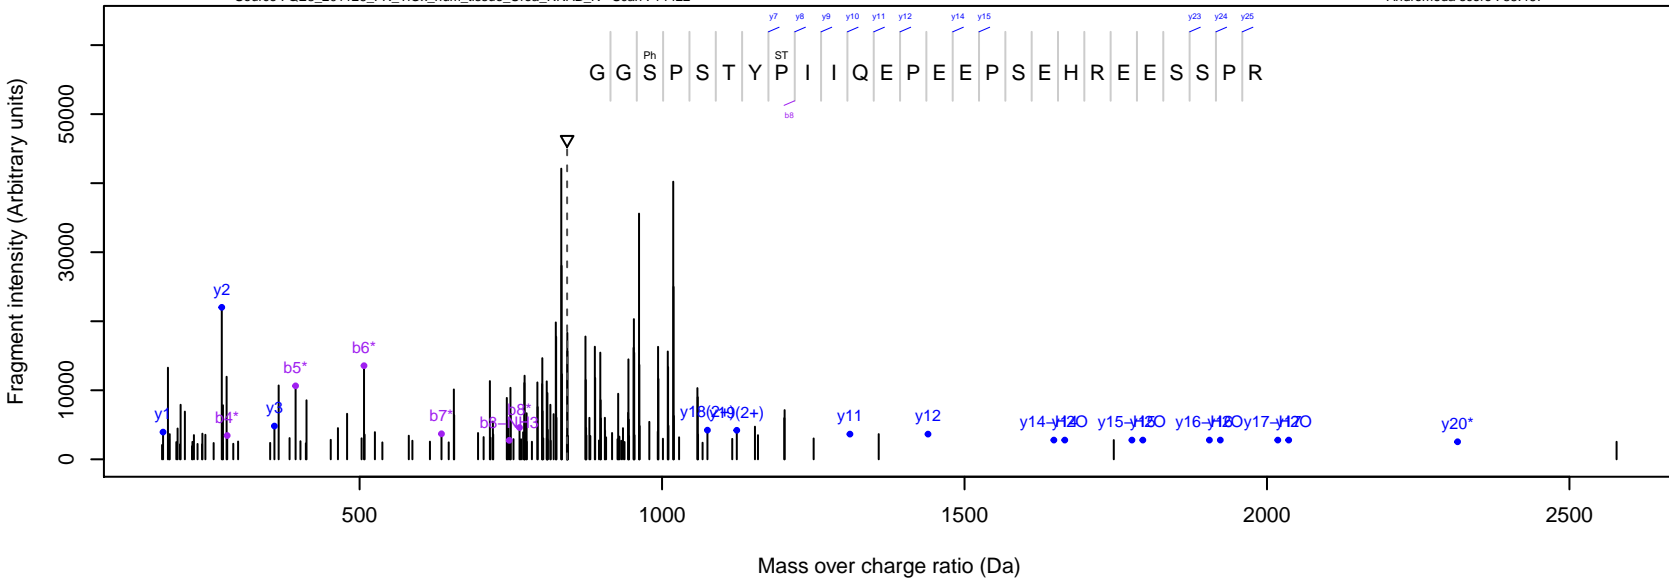

ENFT(Phospho (STY))AGSDCVTLK-2+

Source : QE3\_201126\_FR\_TiOx\_hum\_tissue\_Urea\_RNAB\_H Scan : 26322

Andromeda score : 85.457

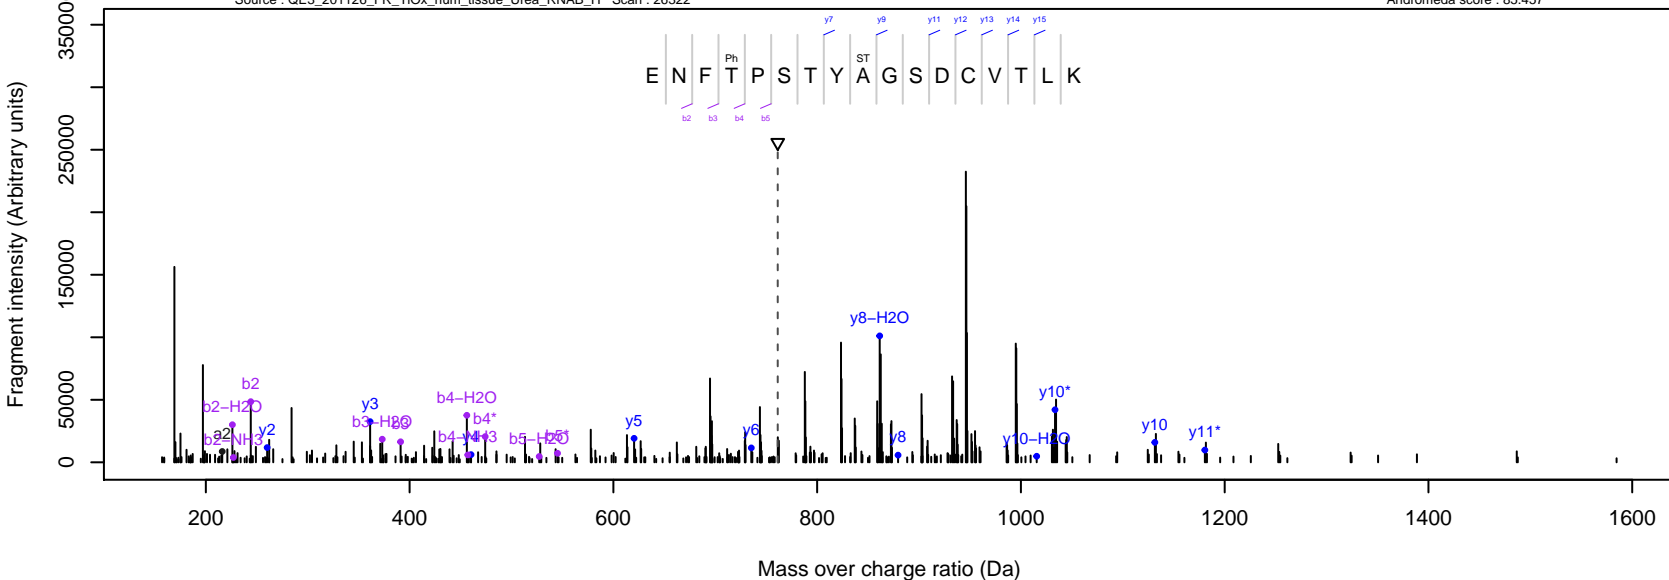

KPLAHYSS(Phospho (STY))LVR-3+

Source : QE3\_201126\_FR\_TiOx\_hum\_tissue\_Urea\_RNAB\_B Scan : 13678

Andromeda score : 85.457

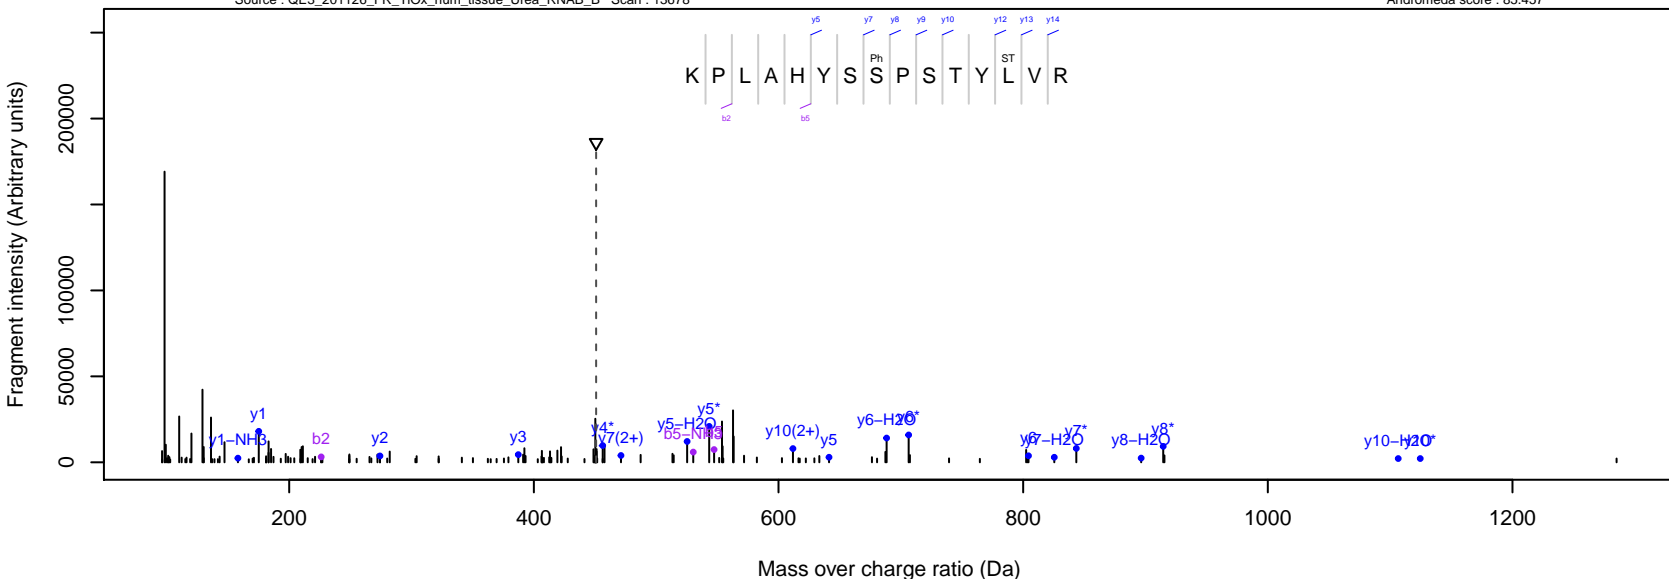

(Acetyl (Protein N-term))S(Phospho (STY))FTTRS(Phospho (STY))T(Phospho (STY))FSTNYR-2+

Source : QE3\_201126\_FR\_TIOx\_hum\_tissue\_Urea\_RNAB\_N Scan : 49505

Andromeda score : 85.457

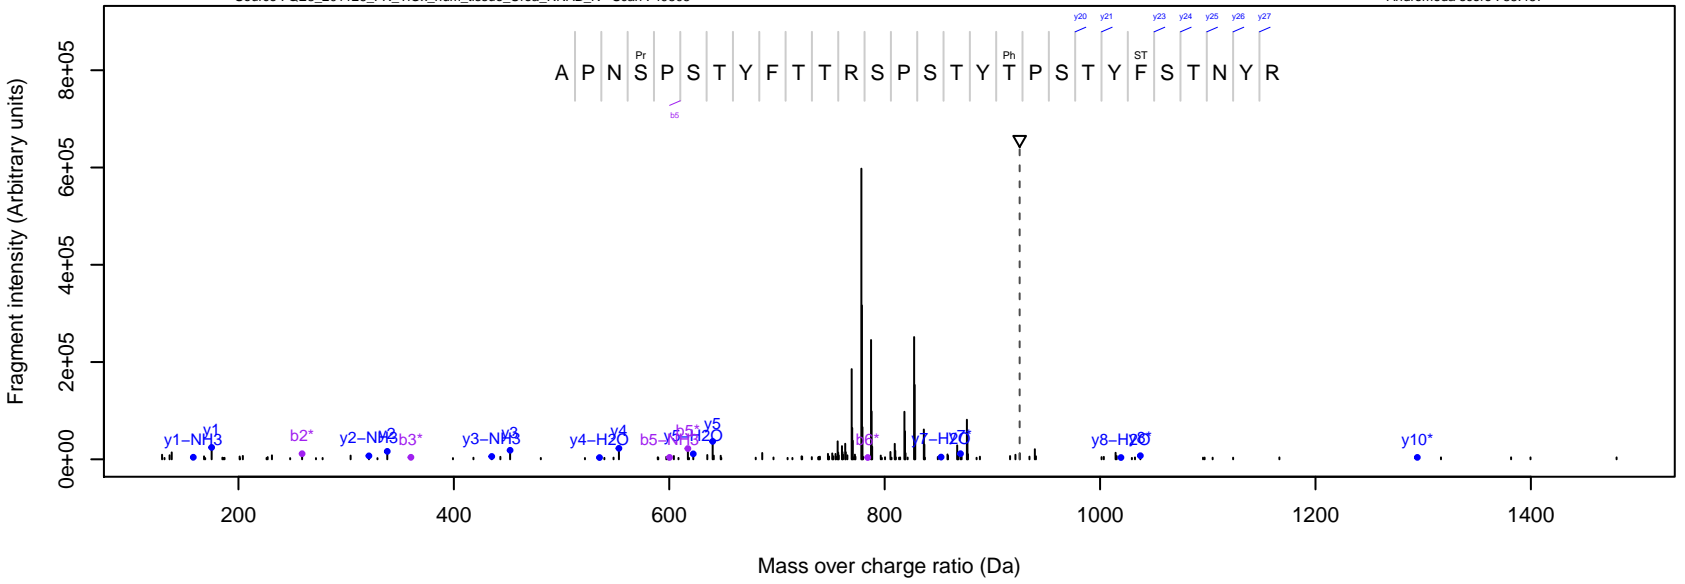

EHNSM(Oxidation (M))WASLS(Phospho (STY))SPDAEAVEPDFSSIER-3+

Source : QE3\_201126\_FR\_TIOx\_hum\_tissue\_Urea\_RNAB\_H Scan : 46478

Andromeda score : 85.423

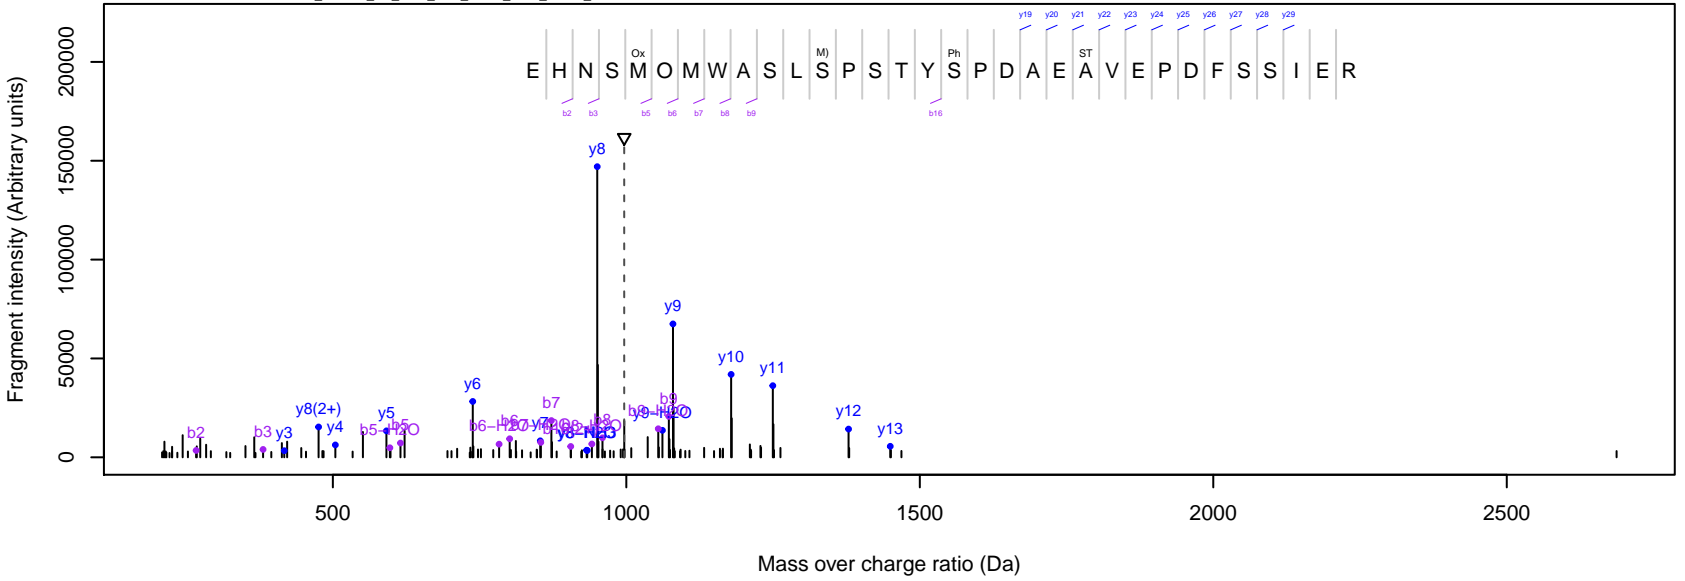

DLLLLCNS(Phospho (STY))PCISK-2+

Source : QE3\_201126\_FR\_TIOx\_hum\_tissue\_Urea\_RNAB\_N Scan : 50165

Andromeda score : 85.42

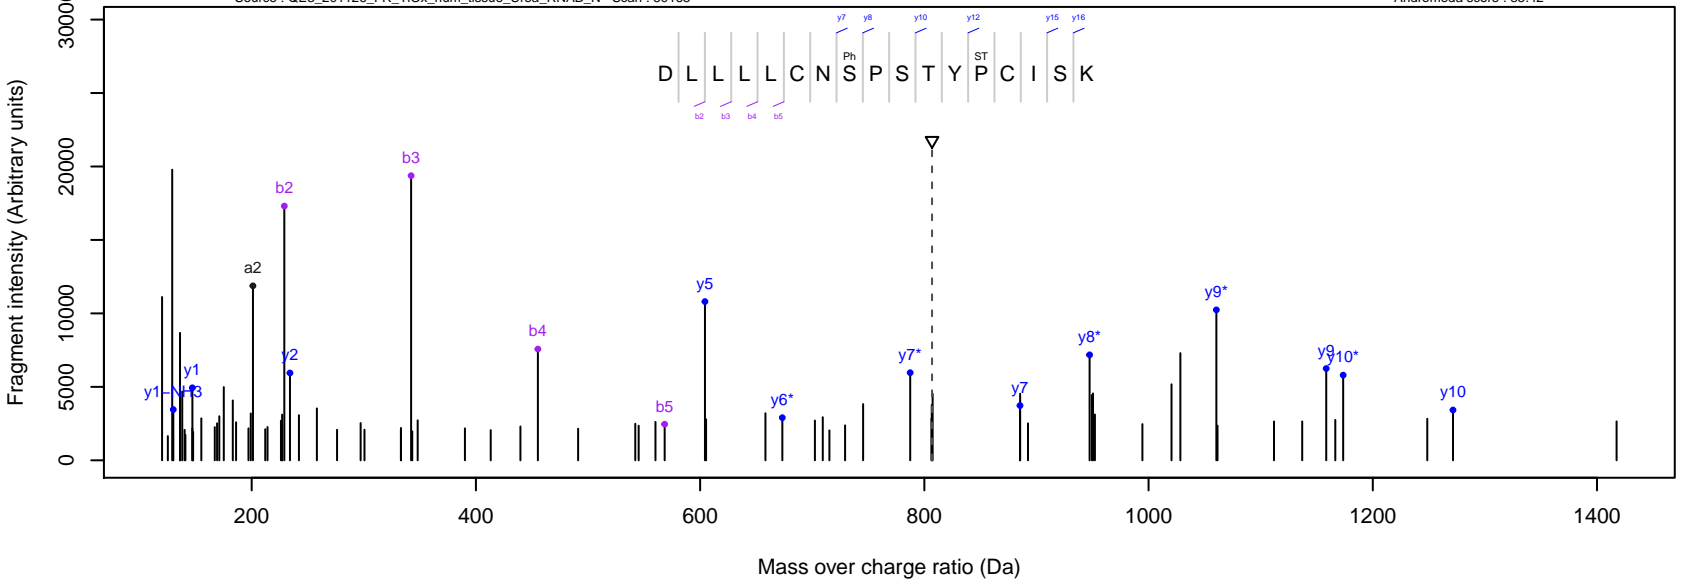

ETM(Oxidation (M))QS(Phospho (STY))LNDRSLASYLDR-3+

Source : QE3\_201126\_FR\_TiOx\_hum\_tissue\_Urea\_RNAB\_N Scan : 38802

Andromeda score : 85.42

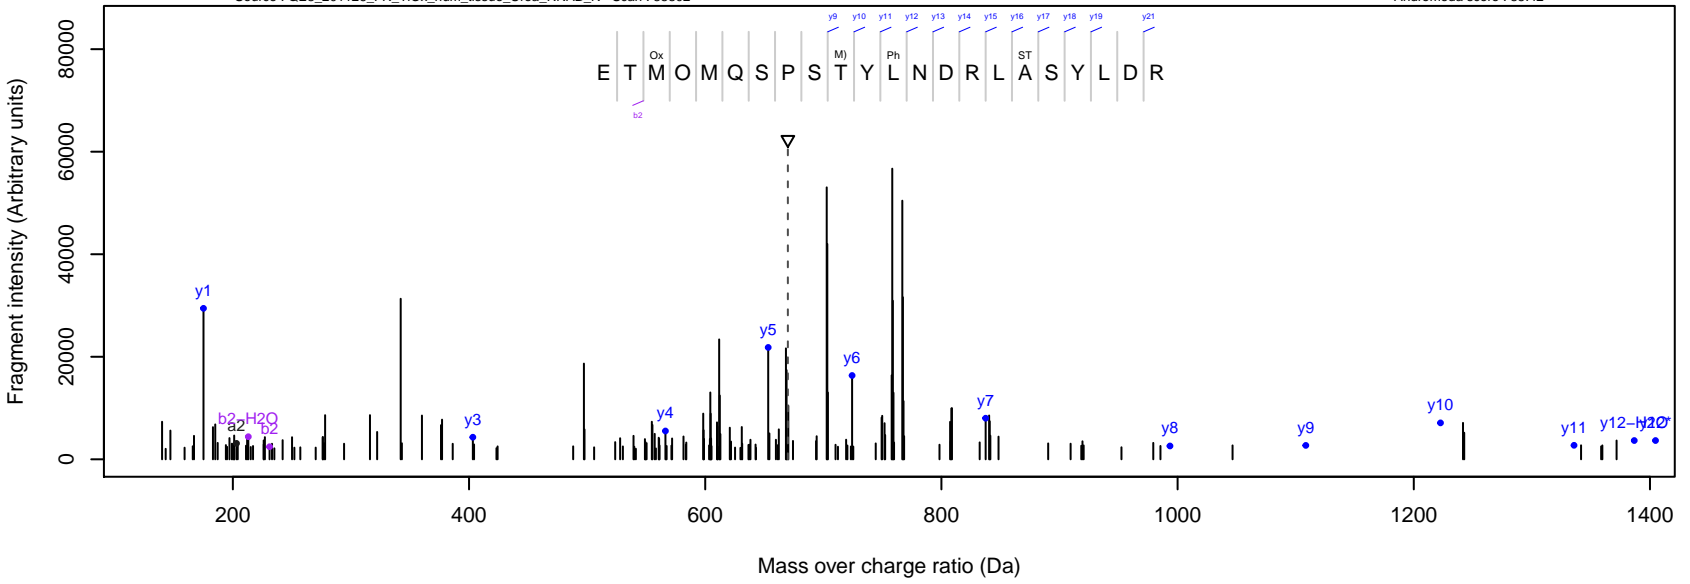

KAES(Phospho (STY))AEDFPILFR-2+

Source : QE3\_201126\_FR\_TiOx\_hum\_tissue\_Urea\_RNAB\_B Scan : 43870

Andromeda score : 85.42

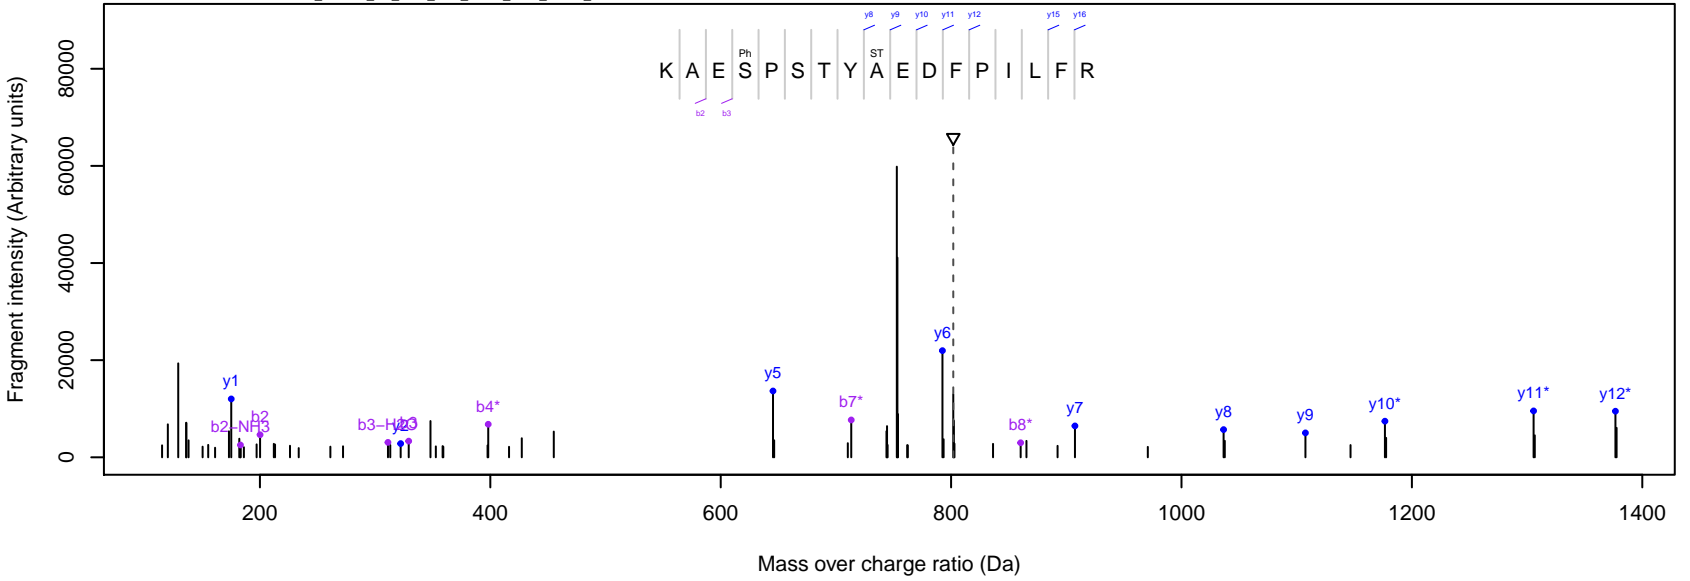

SEGTY(Phospho (STY))CCGPVPVR-2+

Source : QE3\_201126\_FR\_TiOx\_hum\_tissue\_Urea\_RNAB\_H Scan : 18137

Andromeda score : 85.377

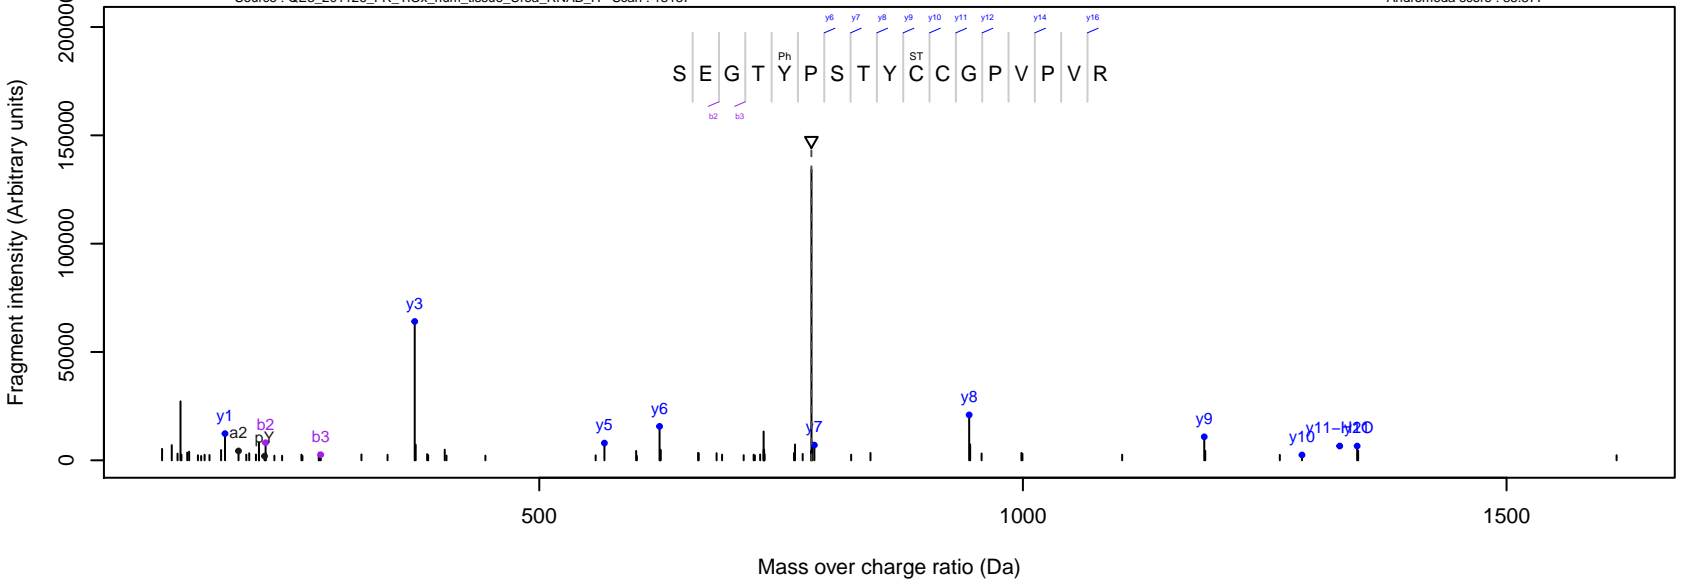

LQEEGGS(Phospho (STY))DEETGSPSEDGMQSAR-3+

Source : QE3\_201126\_FR\_TiOx\_hum\_tissue\_Urea\_RNAB\_N Scan : 17508

Andromeda score : 85.376

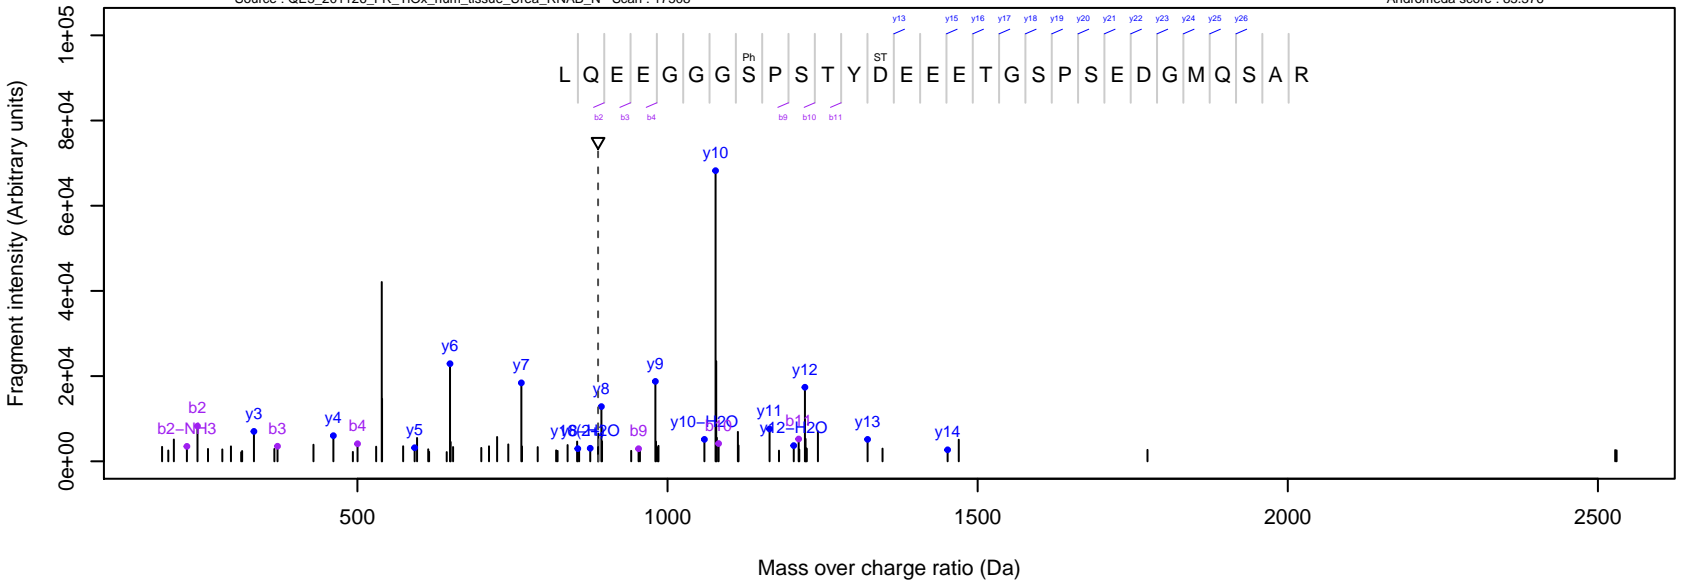

NS(Phospho (STY))IQFTDGYEVK-2+

Source : QE3\_201126\_FR\_TiOx\_hum\_tissue\_Urea\_RNAB\_H Scan : 31450

Andromeda score : 85.355

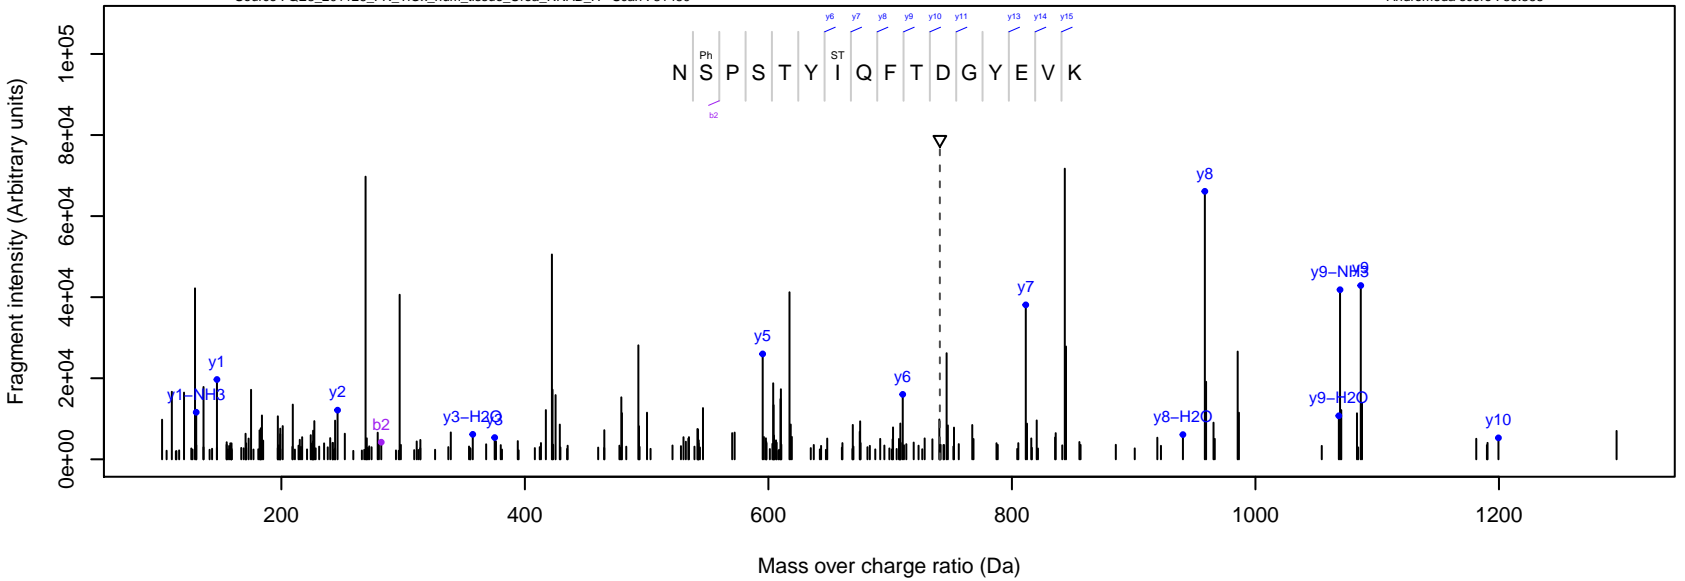

LKNGFPHPEPCNPSEAASEESNS(Phospho (STY))EIEQEIPVEQK-4+

Source : QE3\_201126\_FR\_TiOx\_hum\_tissue\_Urea\_RNAB\_N Scan : 33063

Andromeda score : 85.297

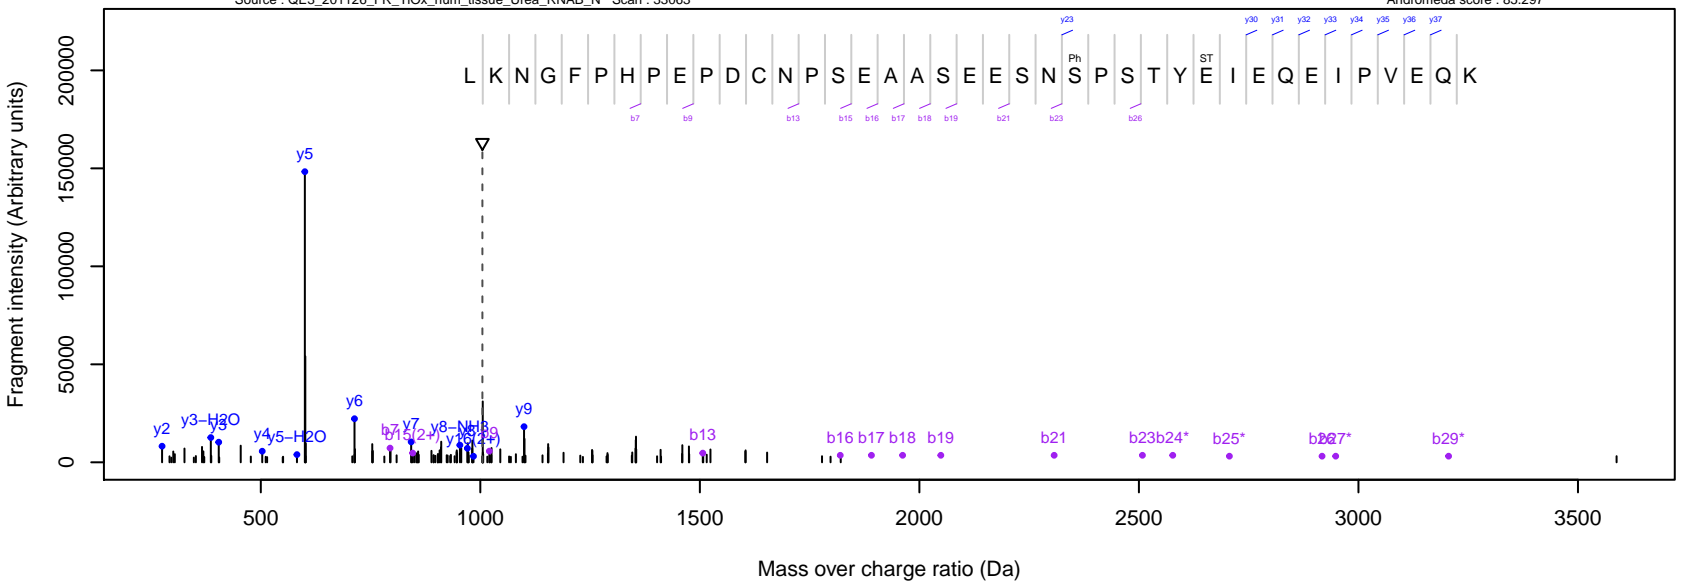



SGT(Phospho (STY))PPRQGSITS(Phospho (STY))PQANEQSVTPQR-3+

Source : QE3\_201126\_FR\_TiOx\_hum\_tissue\_Urea\_RNAB\_N Scan : 18592

Andromeda score : 85.19

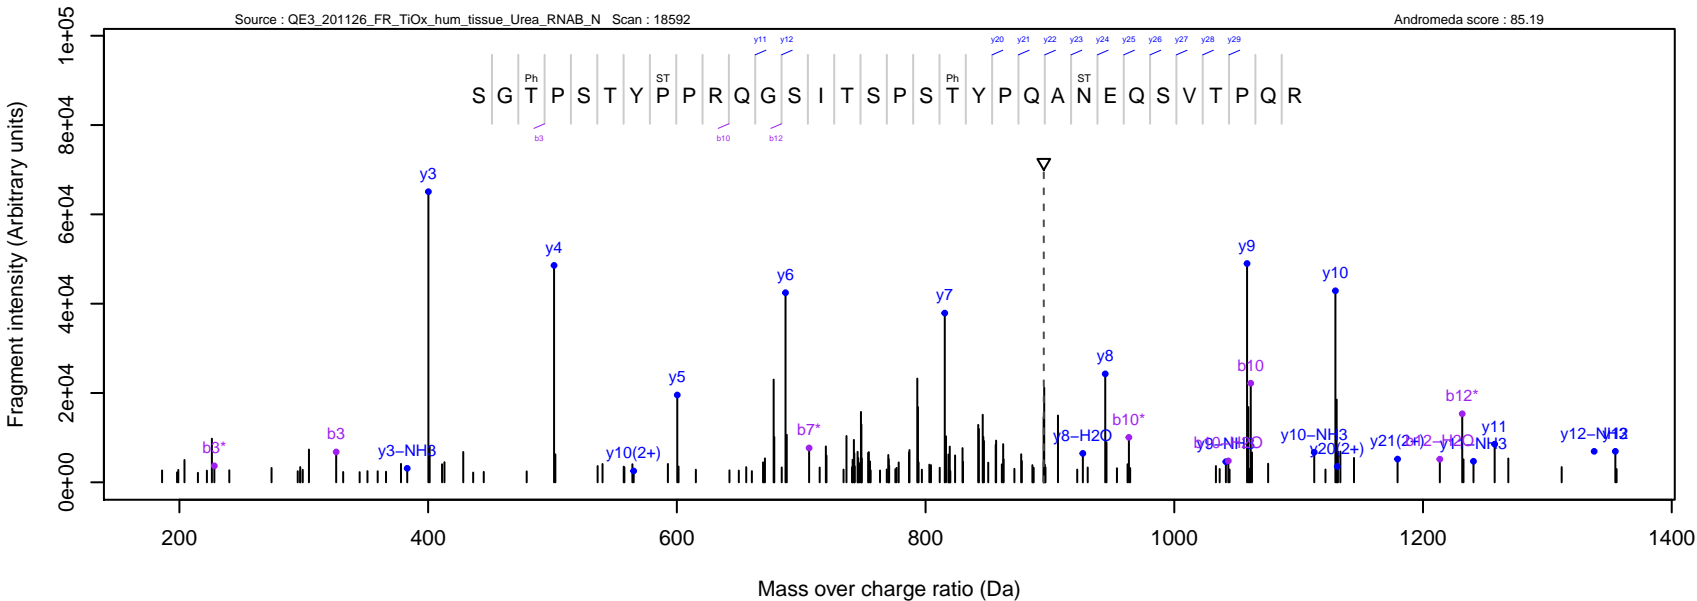

LKS(Phospho (STY))VEDEM(Oxidation (M))DSPGEEPFYTGQGR-3+

Source : QE3\_201126\_FR\_TiOx\_hum\_tissue\_Urea\_RNAB\_N Scan : 25626

Andromeda score : 85.185

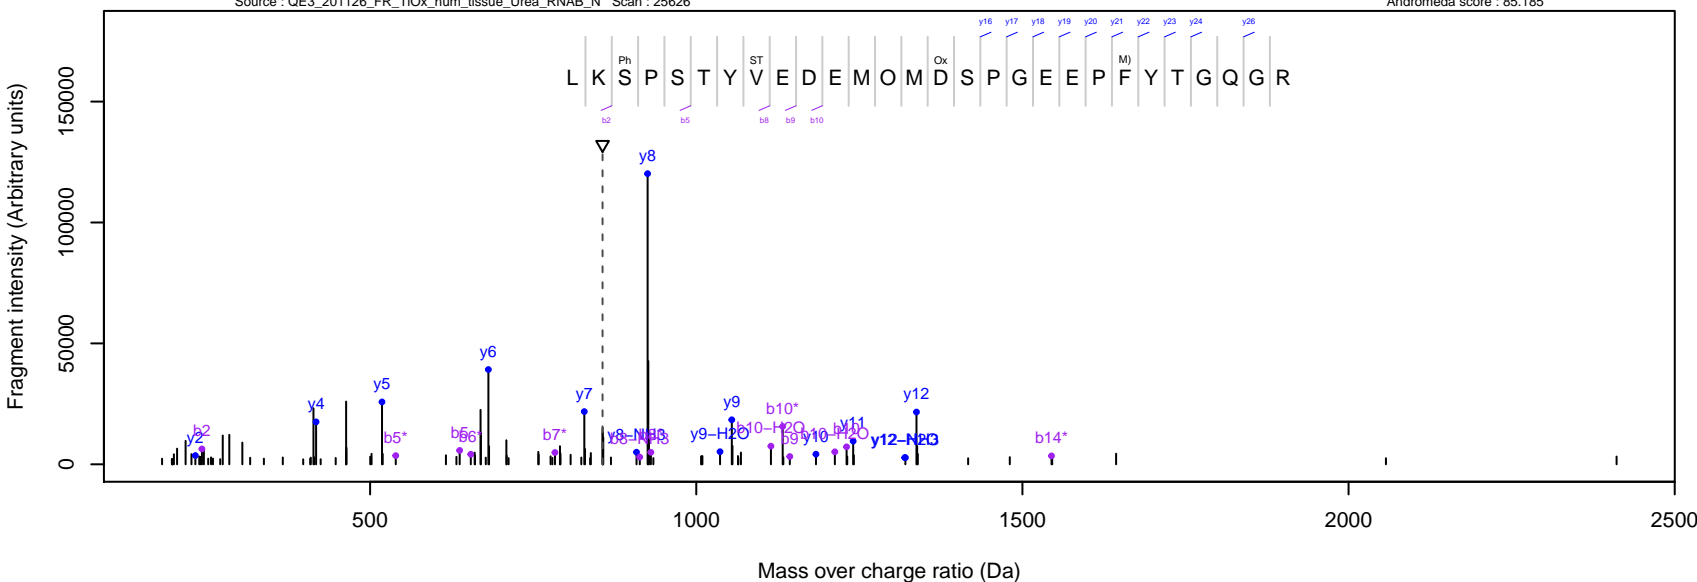

M(Oxidation (M))RAHS(Phospho (STY))PAEGASVESSSPGPK-3+

Source : QE3\_201126\_FR\_TiOx\_hum\_tissue\_Urea\_RNAB\_H Scan : 6403

Andromeda score : 85.185

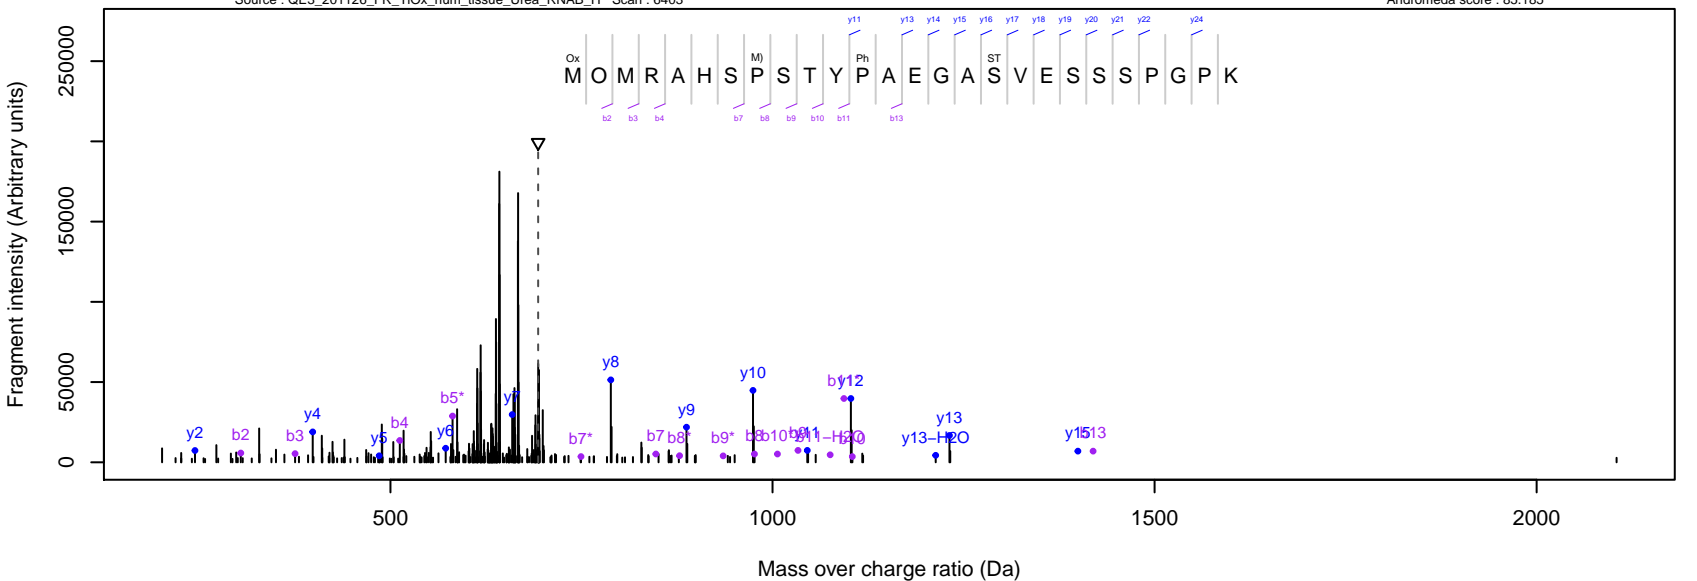

S(Phospho (STY))IGVSNFNHR-2+

Source : QE3\_201126\_FR\_TiOx\_hum\_tissue\_Urea\_RNAB\_B Scan : 15895

Andromeda score : 85.161

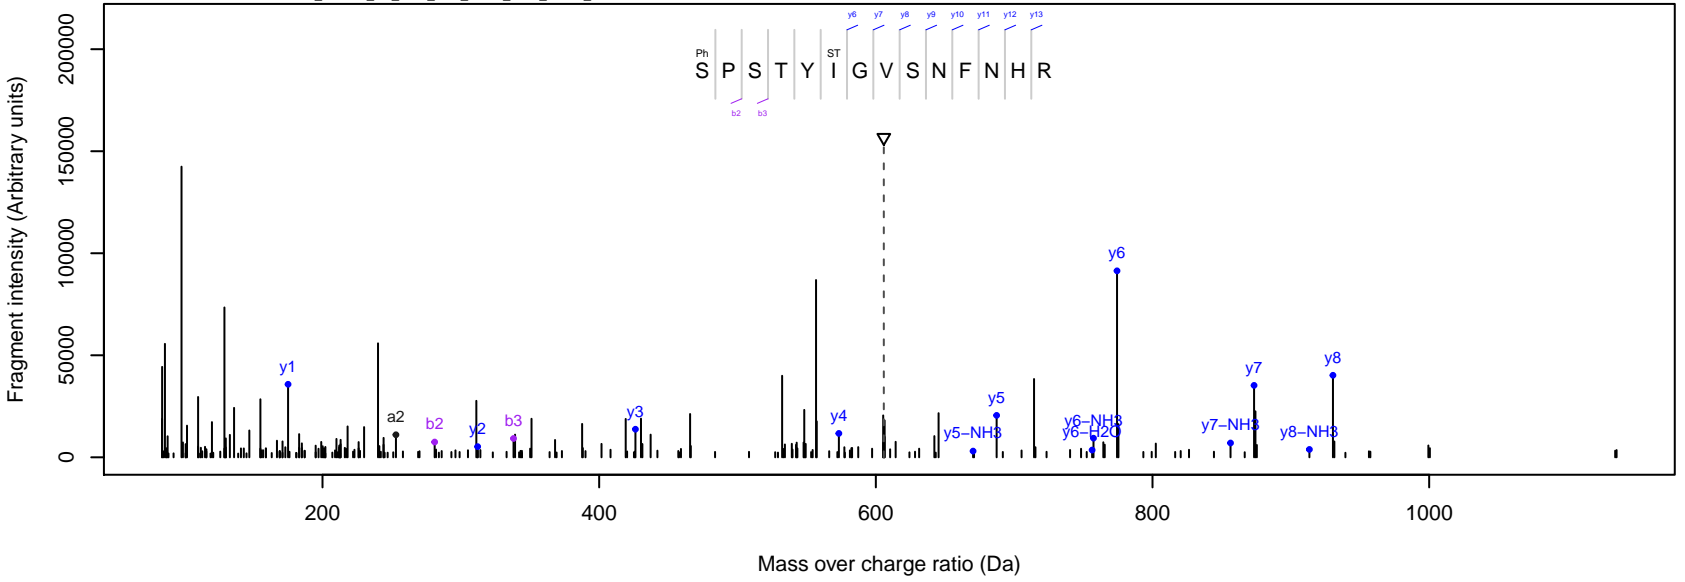

QHYQKETES(Phospho (STY))APGSPR-3+

Source : QE3\_201126\_FR\_TiOx\_hum\_tissue\_Urea\_RNAB\_H Scan : 5073

Andromeda score : 85.146

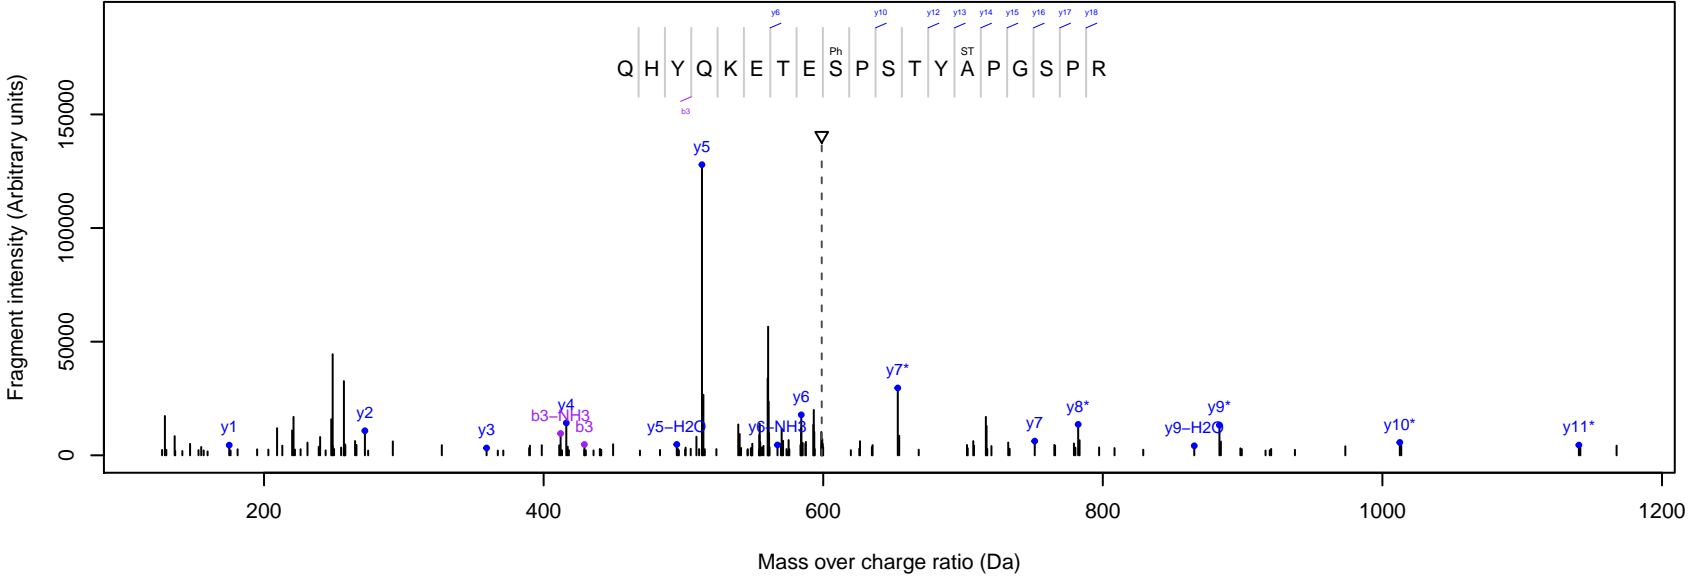

AVPAPSPGPT(Phospho (STY))HNSPELGRPPAAGVLAPDMSDKDK-4+

Source : QE3\_201126\_FR\_TiOx\_hum\_tissue\_Urea\_RNAB\_H Scan : 25966

Andromeda score : 85.097

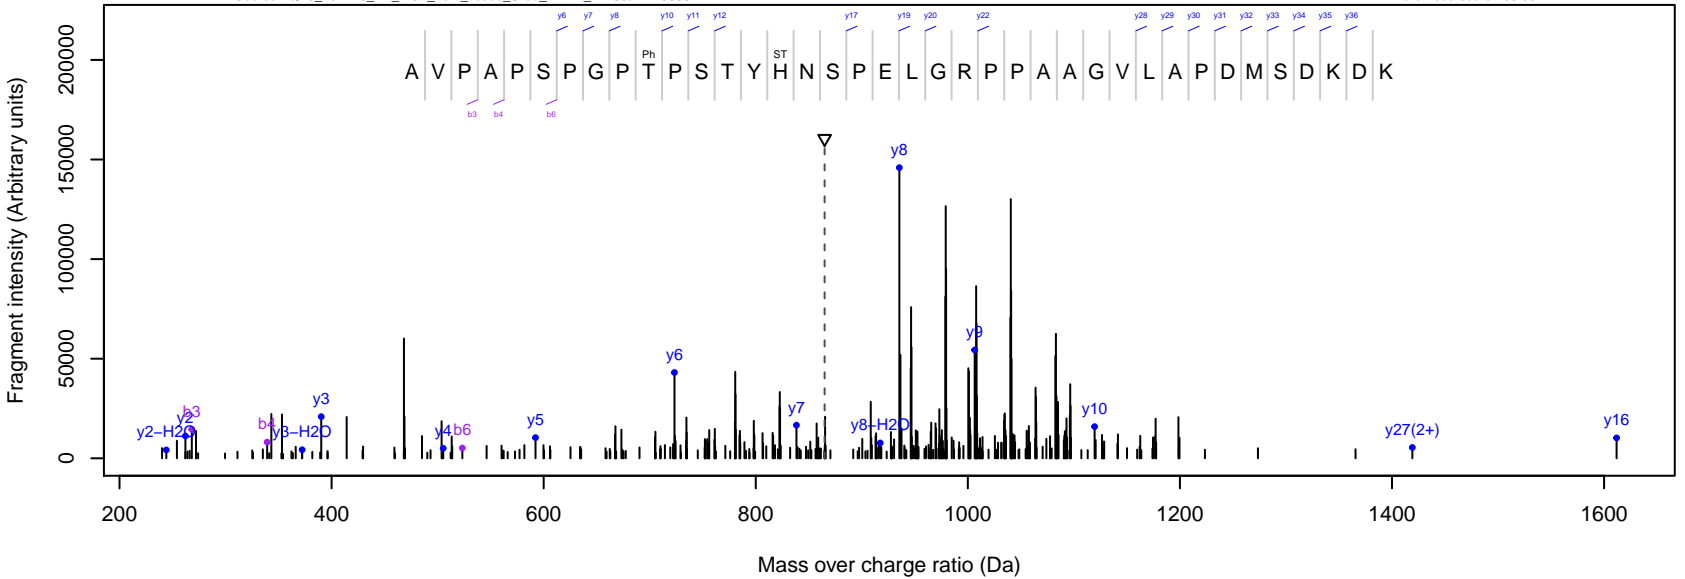

RVDAGHTDQPVPVSGS(Phospho (STY))VGGPARPASGPR-4+

Source : QE3\_201126\_FR\_TiOx\_hum\_tissue\_Urea\_RNAB\_N Scan : 11452

Andromeda score : 85.087

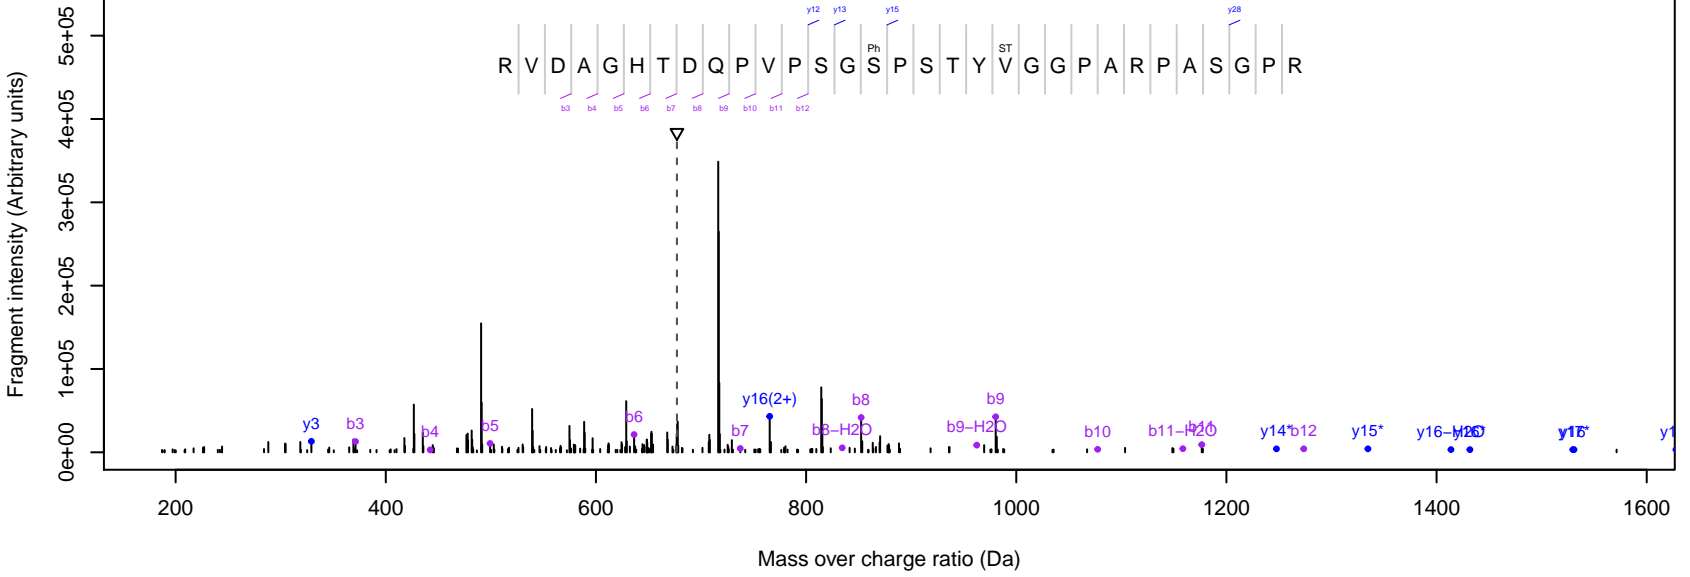

GEPGRPALYFCGS(Phospho (STY))IR-3+

Source : QE3\_201126\_FR\_TiOx\_hum\_tissue\_Urea\_RNAB\_H Scan : 30669

Andromeda score : 85.087

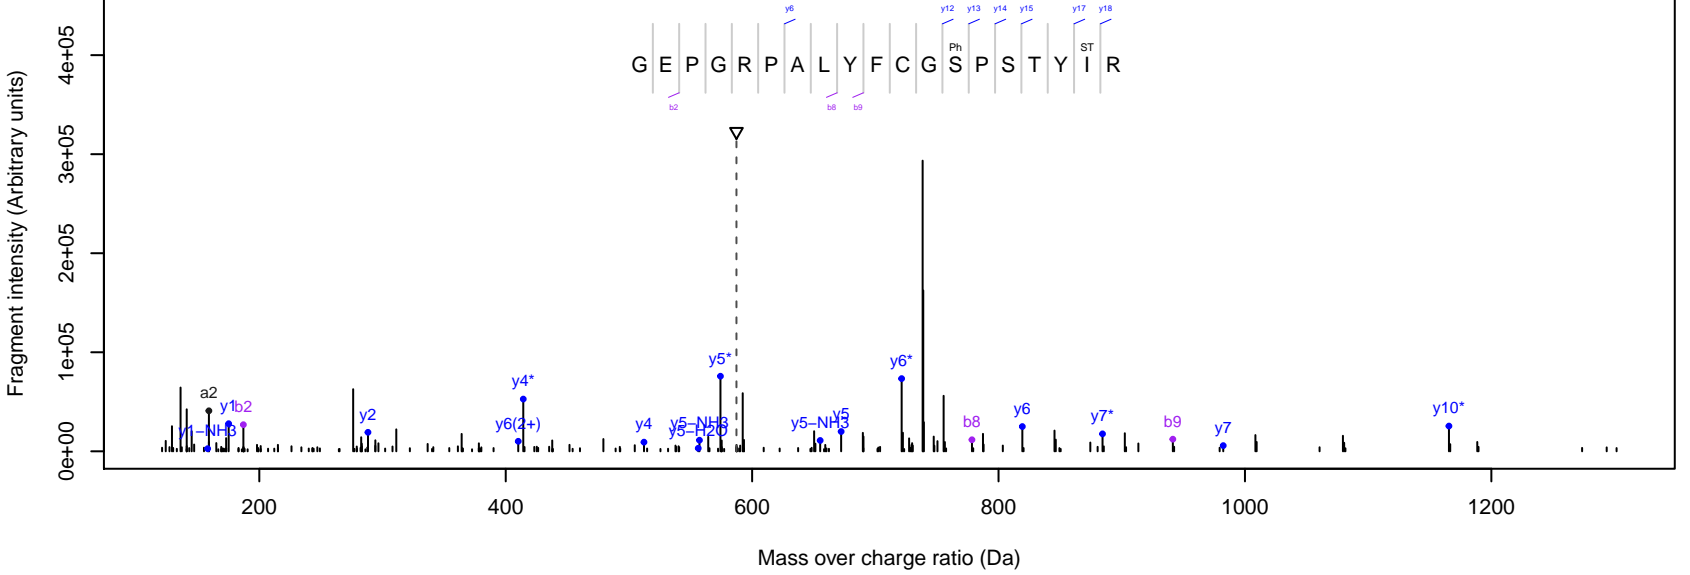

KPES(Phospho (STY))PYGNLCDAPDSPRPVK-3+

Source : QE3\_201126\_FR\_TiOx\_hum\_tissue\_Urea\_RNAB\_N Scan : 17333

Andromeda score : 85.087

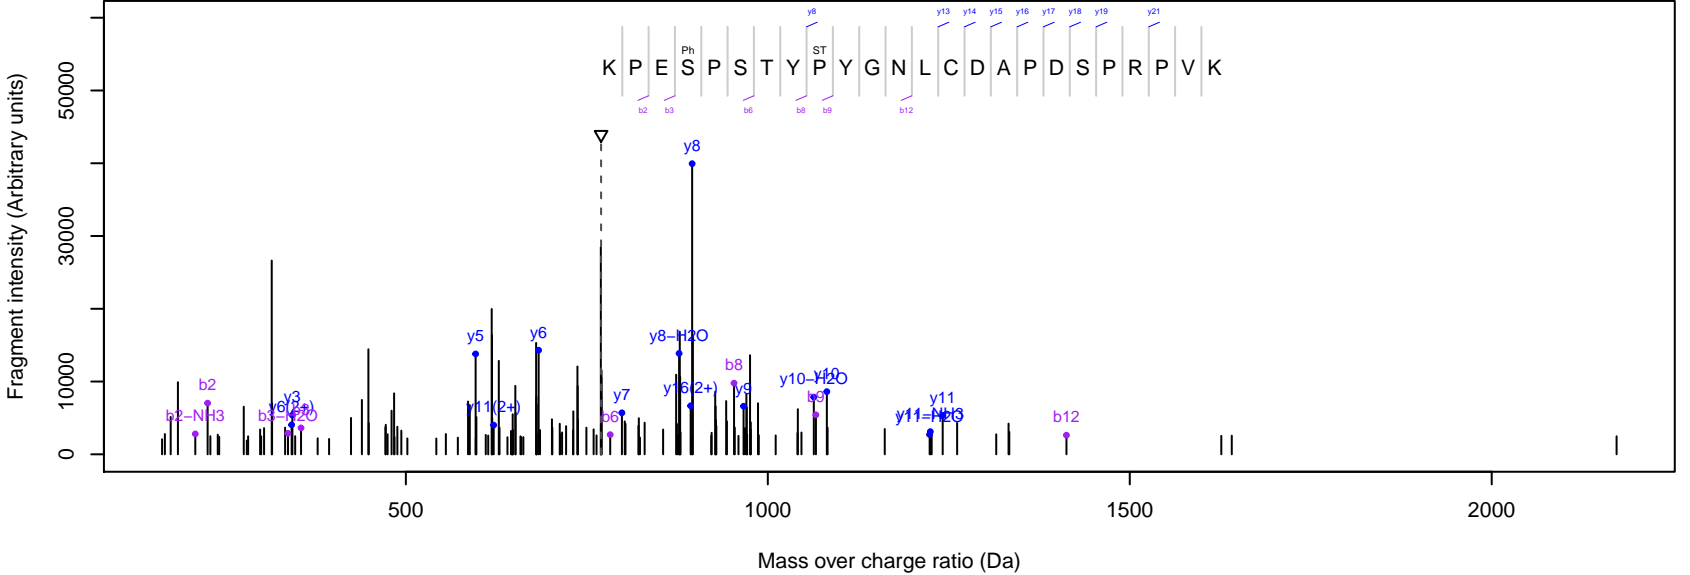



LPTTDGAHPQPISSIPGGVSPSTYSSGLSR-3+

Source : QE3\_201126\_FR\_TiOx\_hum\_tissue\_Urea\_RNAB\_H Scan : 33997

Andromeda score : 85.044

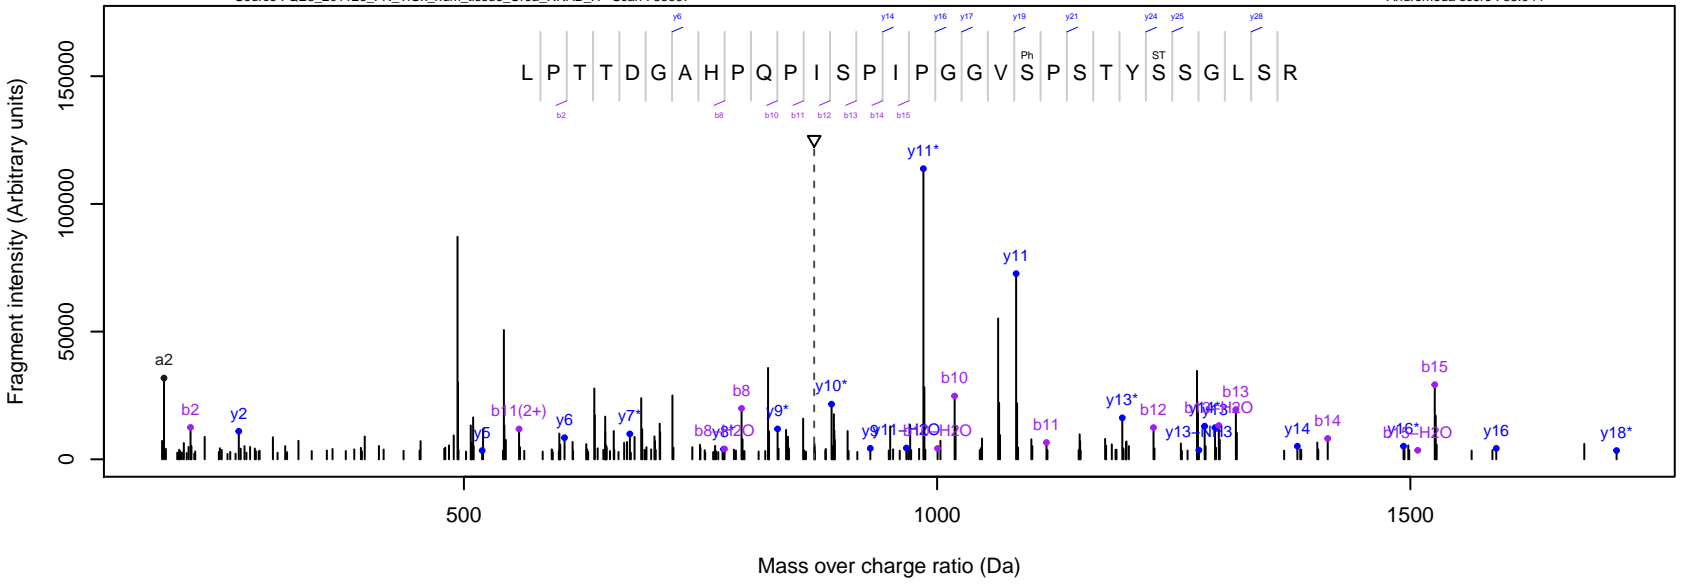

SLGGESS(Phospho (STY))GGTT(Phospho (STY))PVGSFHTEAAR-3+

Source : QE3\_201126\_FR\_TiOx\_hum\_tissue\_Urea\_RNAB\_H Scan : 25207

Andromeda score : 85.002

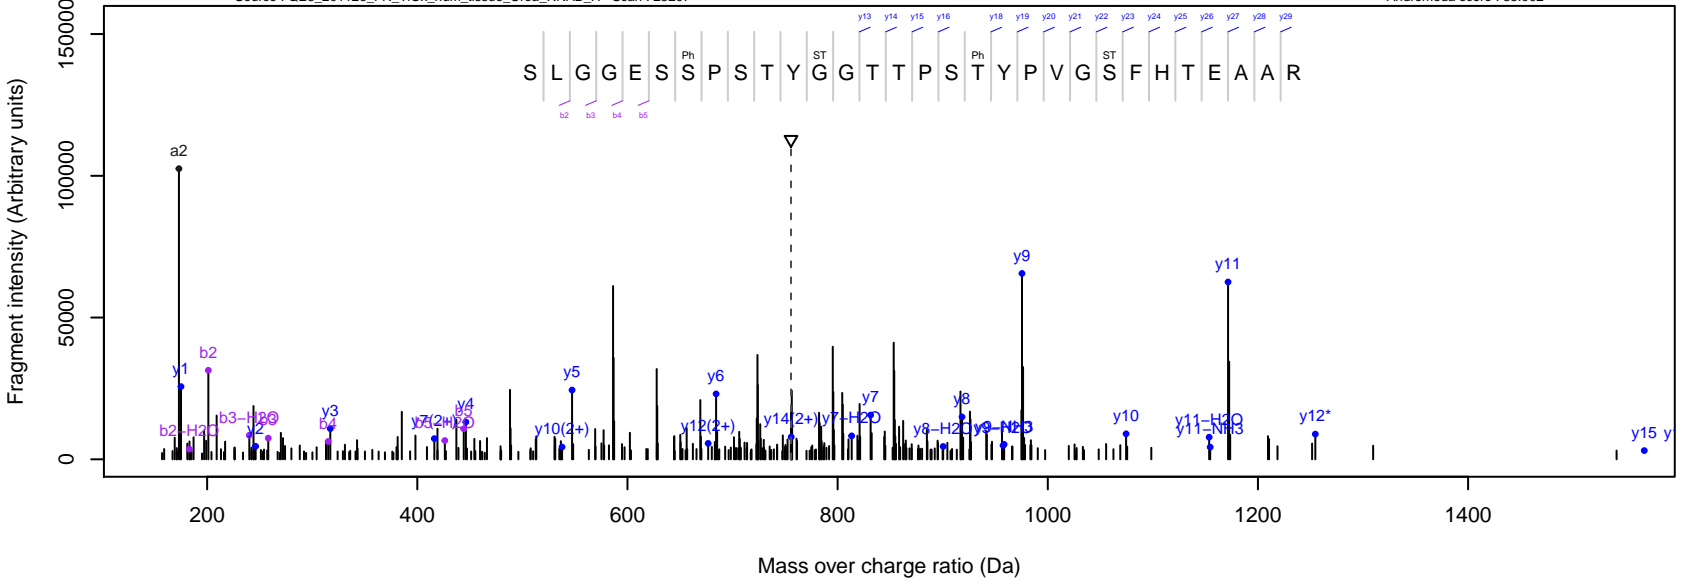

EQGT(Phospho (STY))ESRS(Phospho (STY))STPLPTISSAENTR-3+

Source : QE3\_201126\_FR\_TiOx\_hum\_tissue\_Urea\_RNAB\_H Scan : 21637

Andromeda score : 85

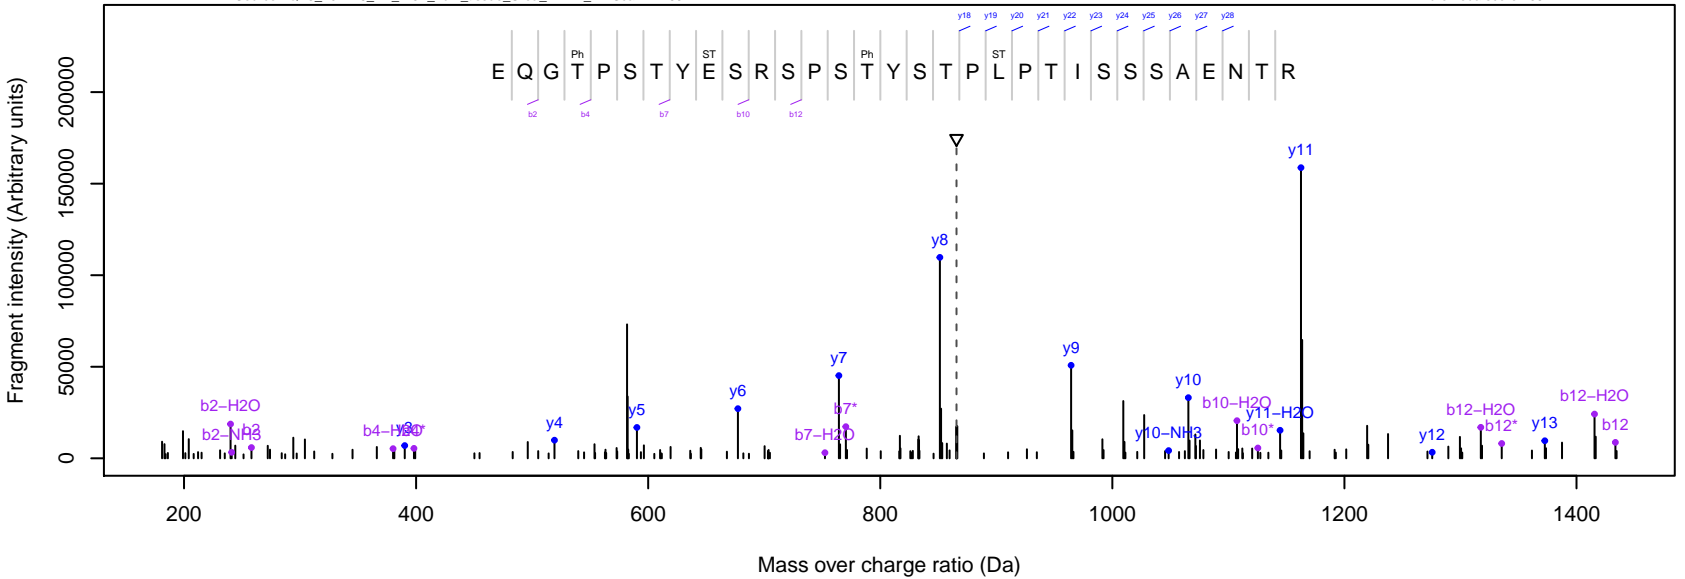



**TDLEKDIISDTS(Phospho (STY))GDFRK-3+**

Source : QE3\_201126\_FR\_TIOx\_hum\_tissue\_Urea\_RNAB\_N Scan : 28440

Andromeda score : 84.975

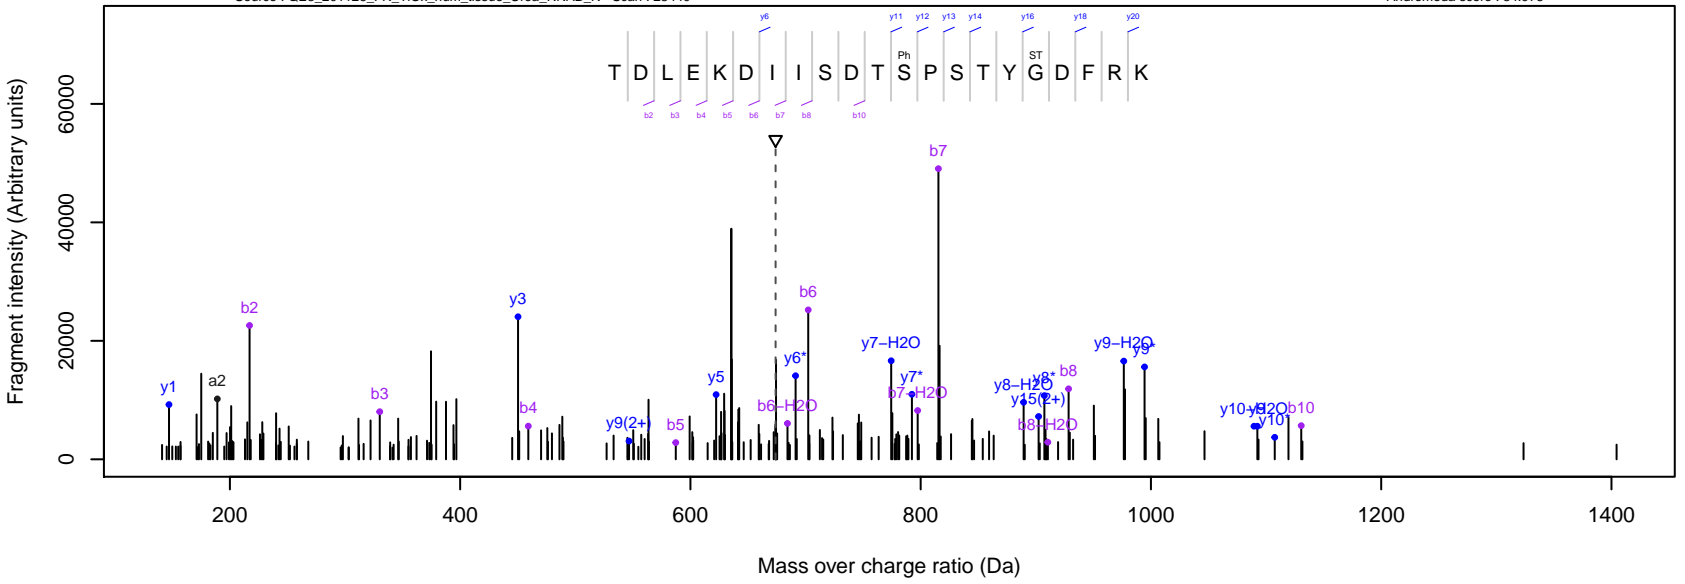

**KVTEETEPIVECQECET(Phospho (STY))EVSPSQTGSSGDLGDISSFSSK-4+**

Source : QE3\_201126\_FR\_TIOx\_hum\_tissue\_Urea\_RNAB\_H Scan : 39369

Andromeda score : 84.969

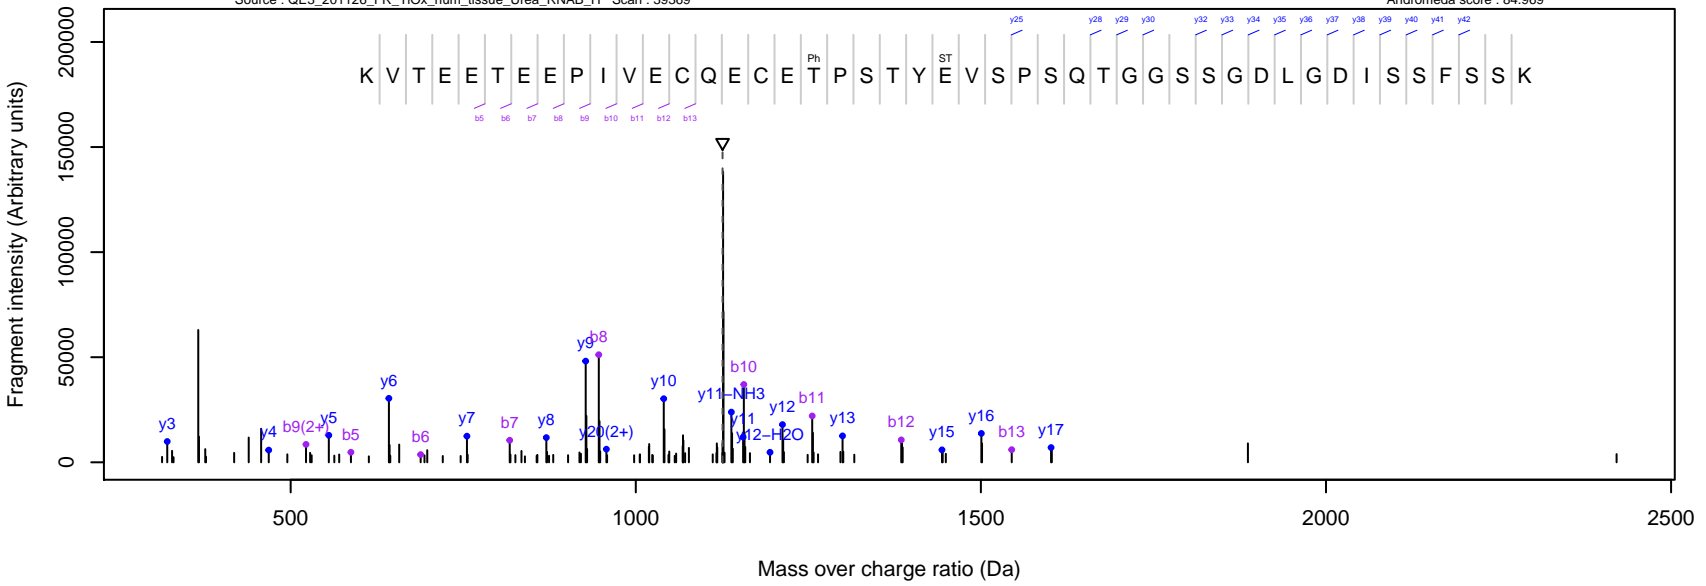

**HAQRS(Phospho (STY))PEASQTDSPSTYPVESPR-3+**

Source : QE3\_201126\_FR\_TIOx\_hum\_tissue\_Urea\_RNAB\_N Scan : 7145

Andromeda score : 84.948

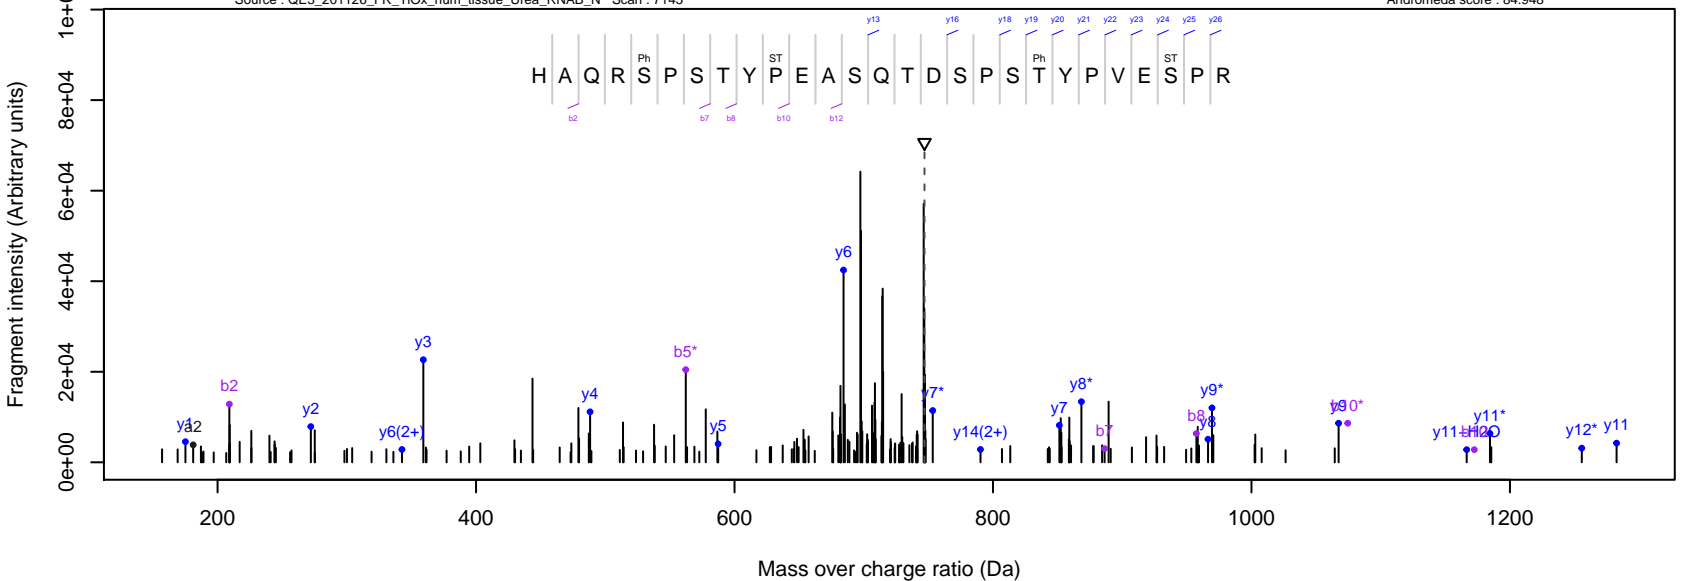

SRPTSEGS(Phospho (STY))DIESTEPQKCSK-3+

Source : QE3\_201126\_FR\_TIOx\_hum\_tissue\_Urea\_RNAB\_N Scan : 7118

Andromeda score : 84.948

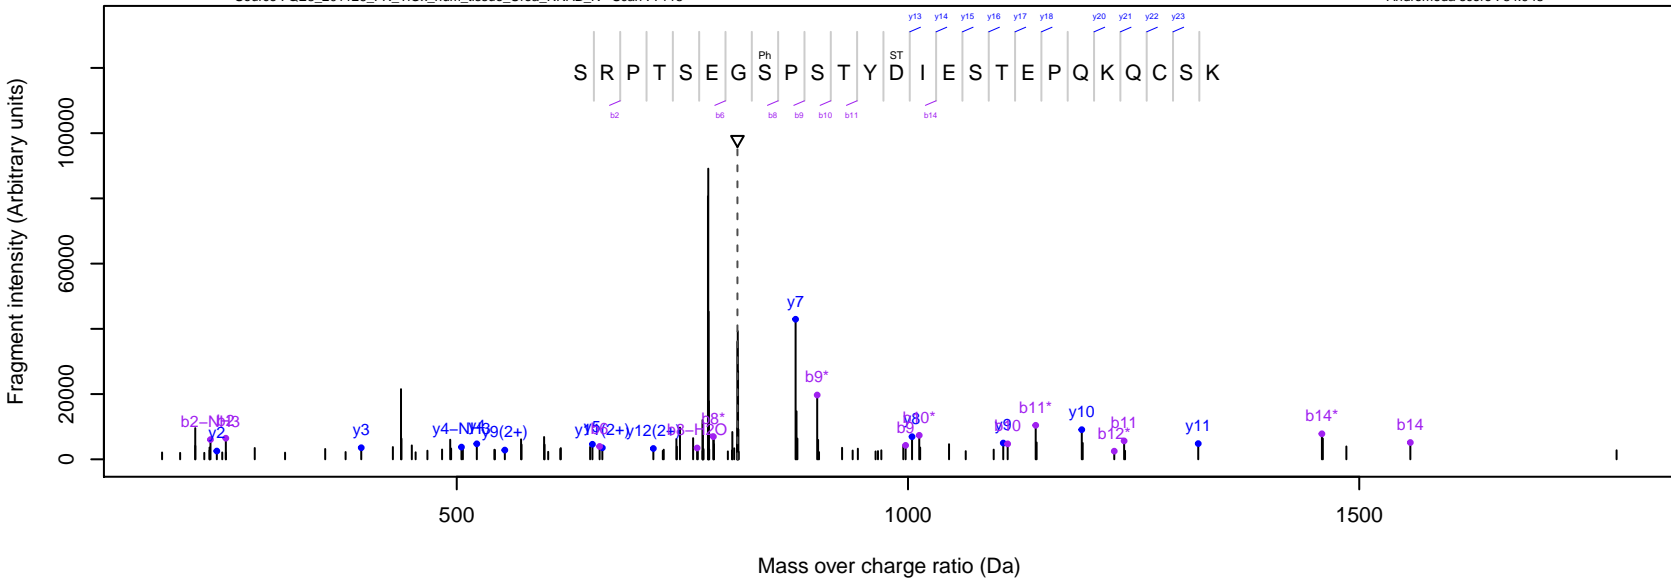

FLET(Phospho (STY))DS(Phospho (STY))EEEQEEVNEKK-2+

Source : QE3\_201126\_FR\_TIOx\_hum\_tissue\_Urea\_RNAB\_N Scan : 21358

Andromeda score : 84.94

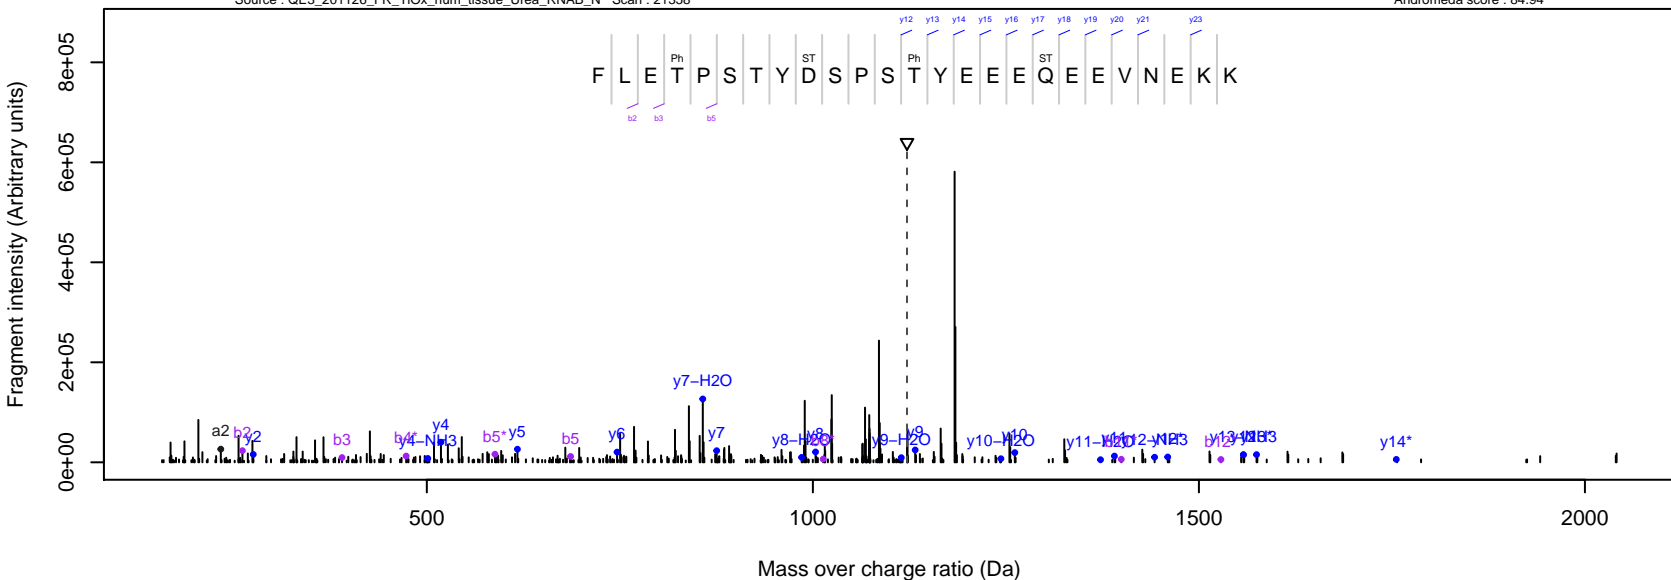

DVTNFTVGGFAPMS(Phospho (STY))PR-2+

Source : QE3\_201126\_FR\_TIOx\_hum\_tissue\_Urea\_RNAB\_N Scan : 53243

Andromeda score : 84.874

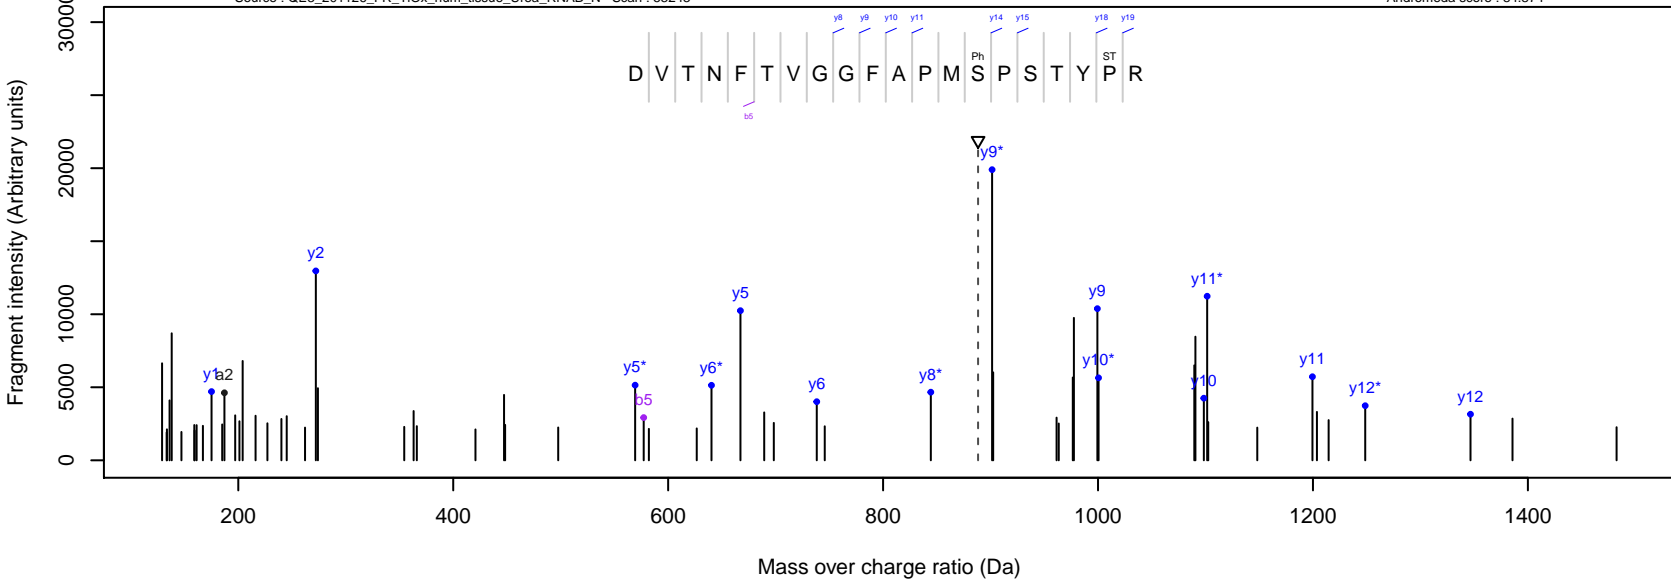

SNS(Phospho (STY))IKRNPAPVVR-3+

Source : QE3\_201126\_FR\_TiOx\_hum\_tissue\_Urea\_RNAB\_N Scan : 6466

Andromeda score : 84.874

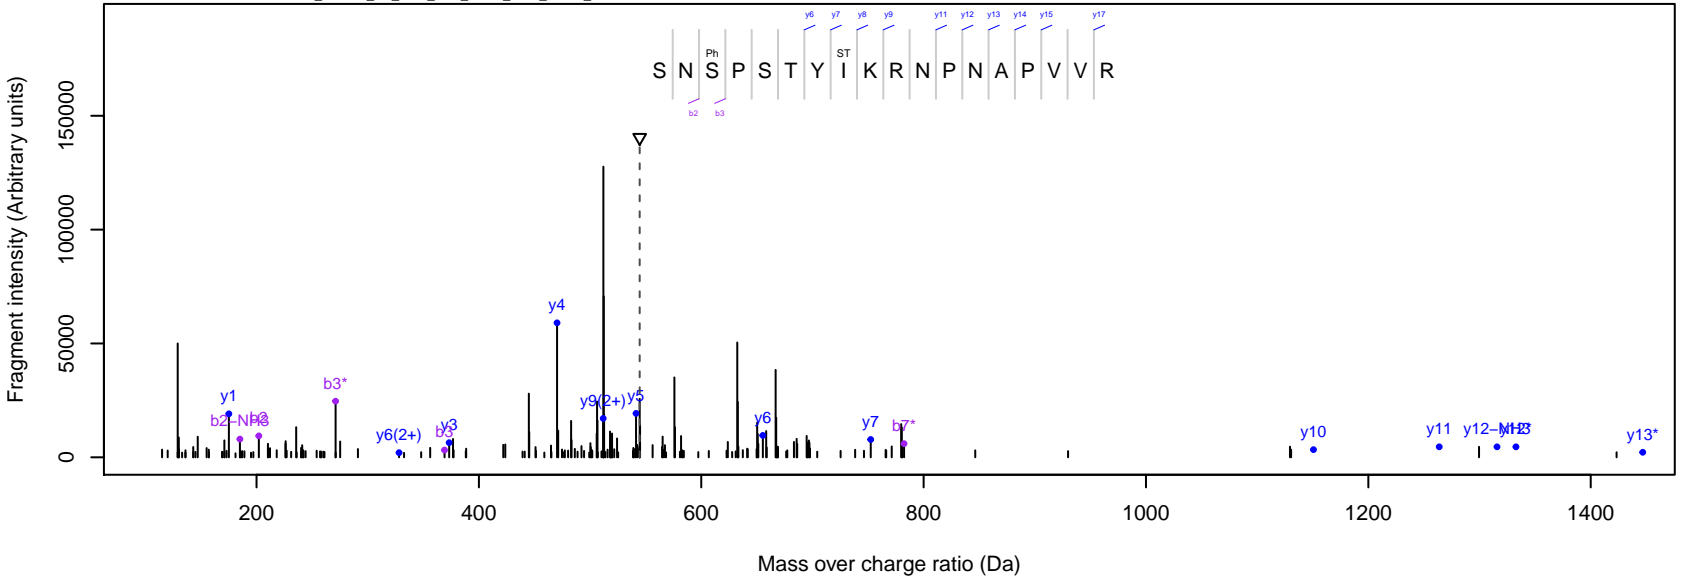

RGNDPLTSS(Phospho (STY))PGR-2+

Source : QE3\_201126\_FR\_TiOx\_hum\_tissue\_Urea\_RNAB\_N Scan : 8836

Andromeda score : 84.859

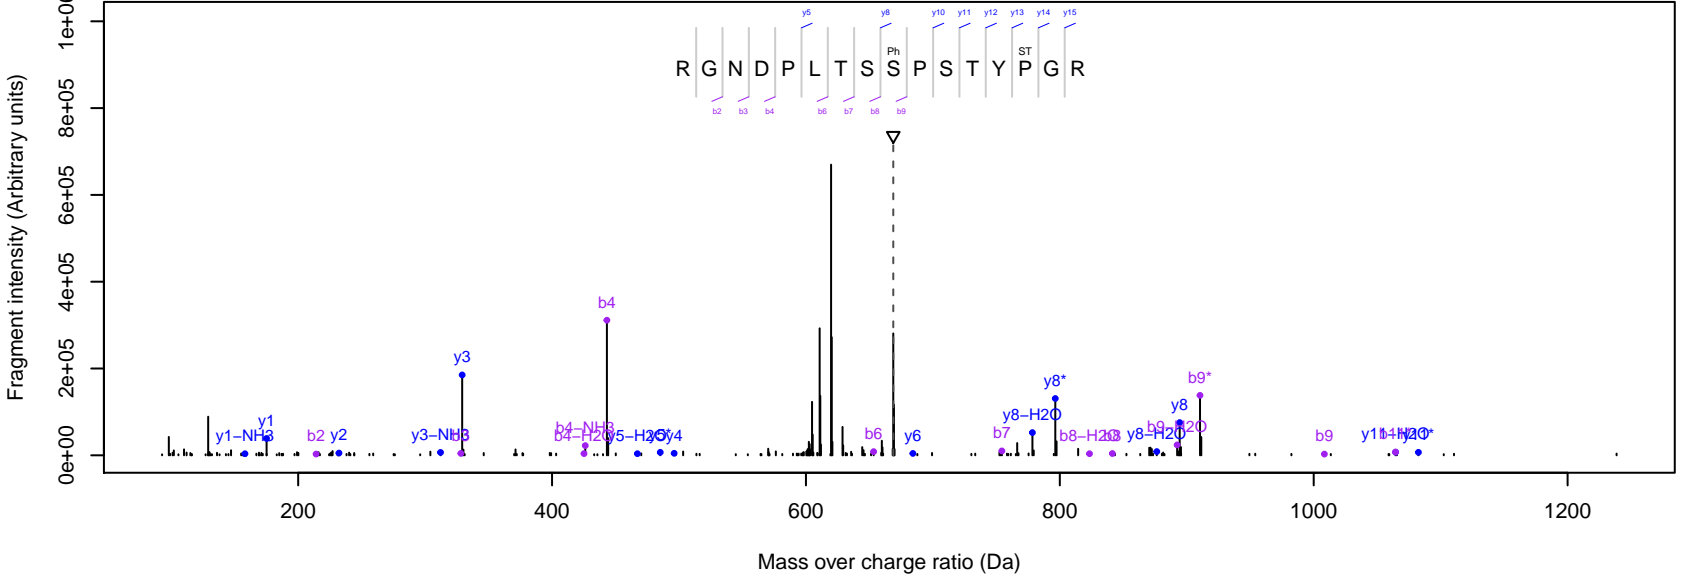

RLS(Phospho (STY))NVS(Phospho (STY))LTGVSTIR-2+

Source : QE3\_201126\_FR\_TiOx\_hum\_tissue\_Urea\_RNAB\_B Scan : 34552

Andromeda score : 84.842

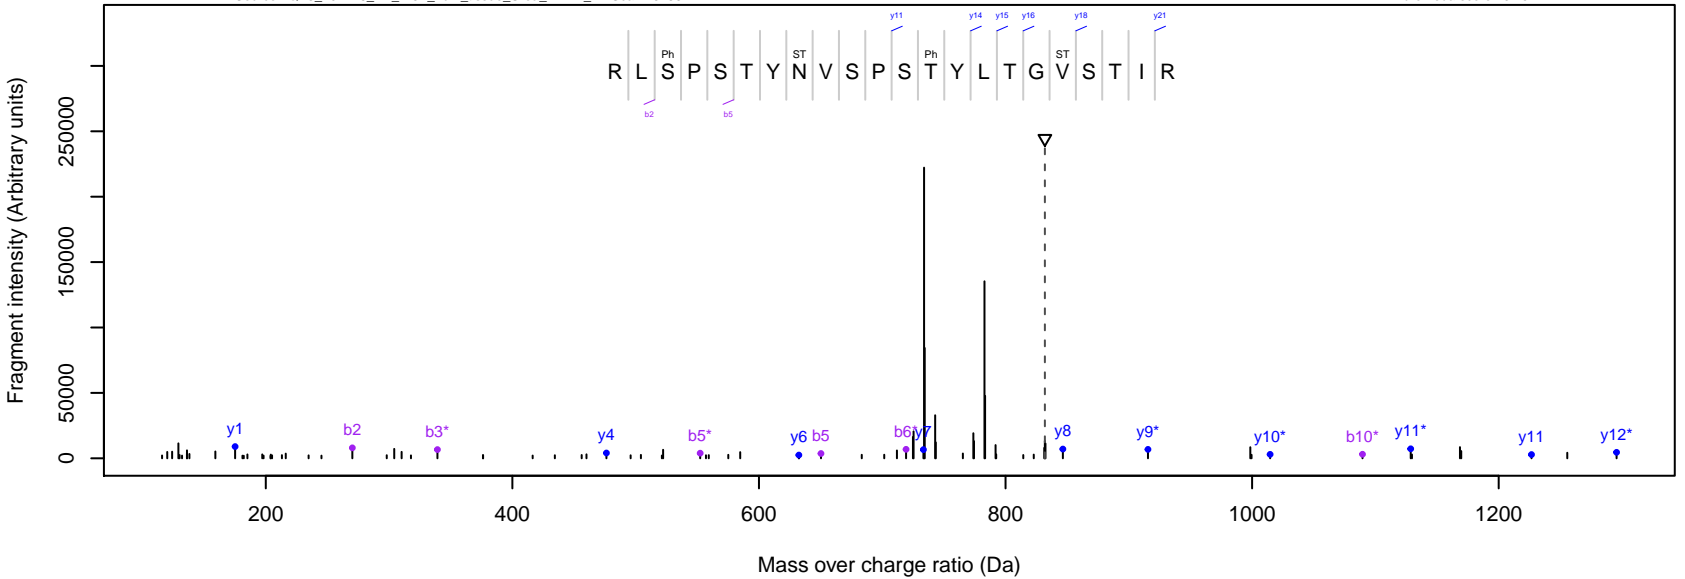

SSLAETLDST(Phospho (STY))GS(Phospho (STY))LDPQR-2+

Source : QE3\_201126\_FR\_TiOx\_hum\_tissue\_Urea\_RNAB\_N Scan : 40447

Andromeda score : 84.842

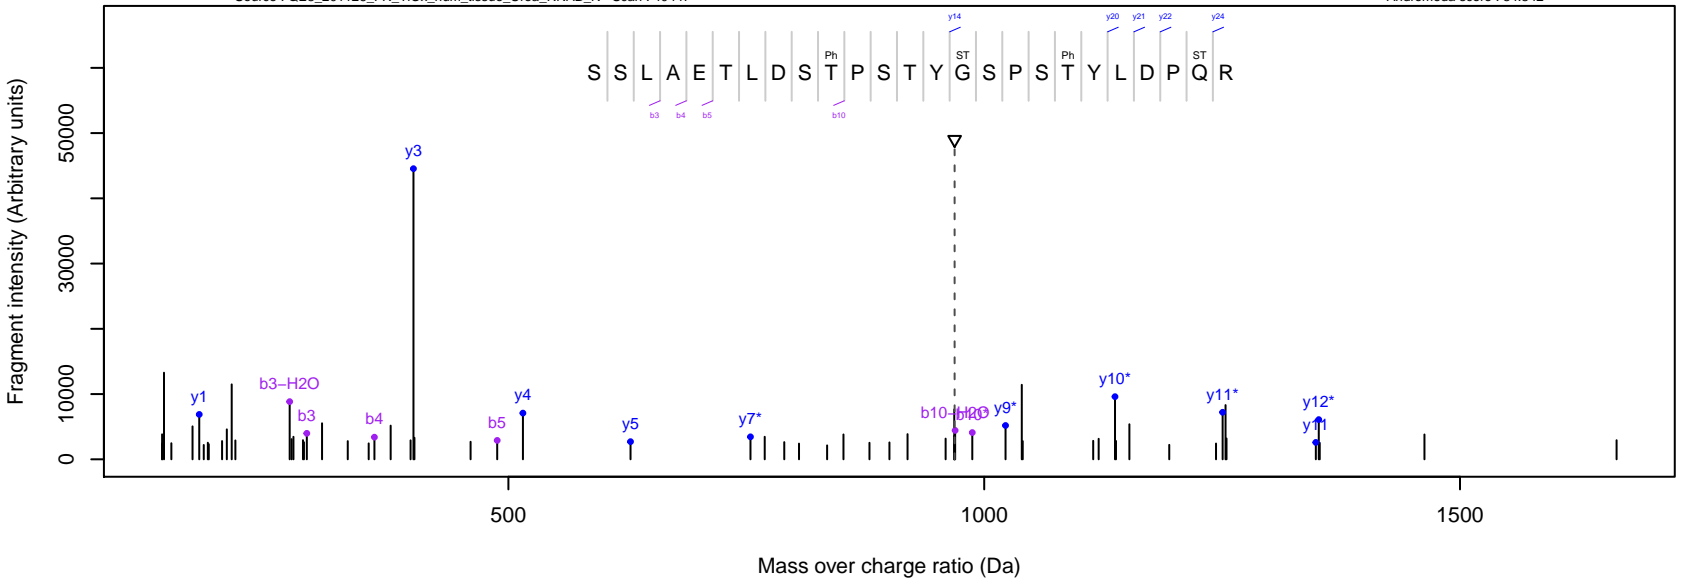

KPTGSLPS(Phospho (STY))PSGVRK-3+

Source : QE3\_201126\_FR\_TiOx\_hum\_tissue\_Urea\_RNAB\_N Scan : 8677

Andromeda score : 84.829

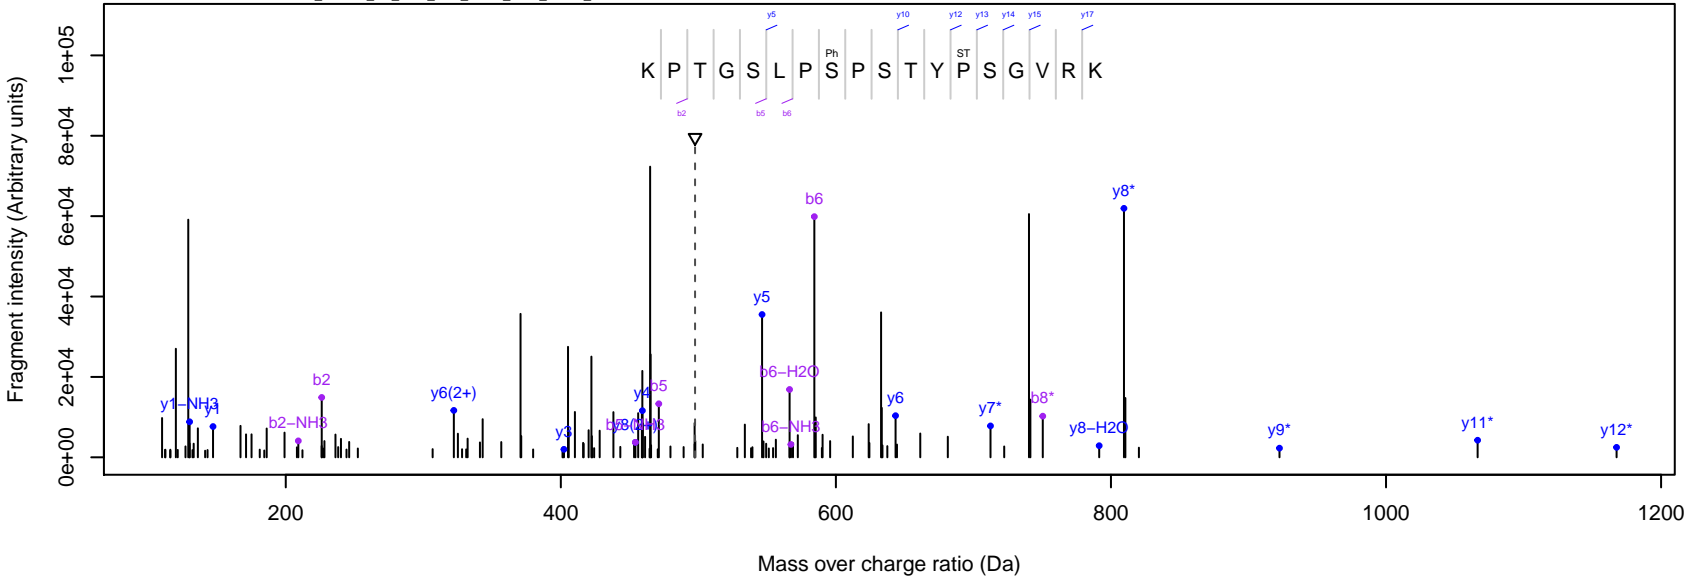

NS(Phospho (STY))PEDLGLSLTGDSCK-2+

Source : QE3\_201126\_FR\_TiOx\_hum\_tissue\_Urea\_RNAB\_N Scan : 38062

Andromeda score : 84.829

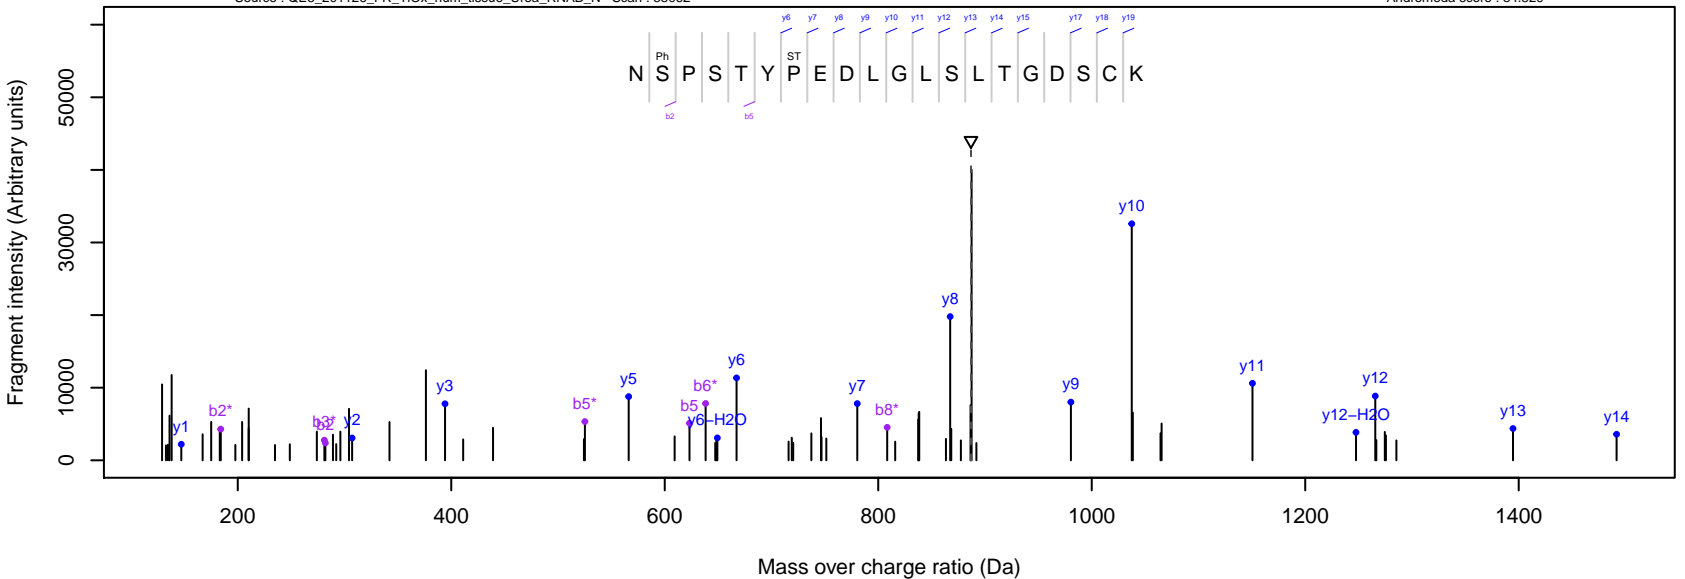

S(Phospho (STY))NSLSEQLAINTSPDAVK-2+

Source : QE3\_201126\_FR\_TIOx\_hum\_tissue\_Urea\_RNAB\_H Scan : 35404

Andromeda score : 84.829

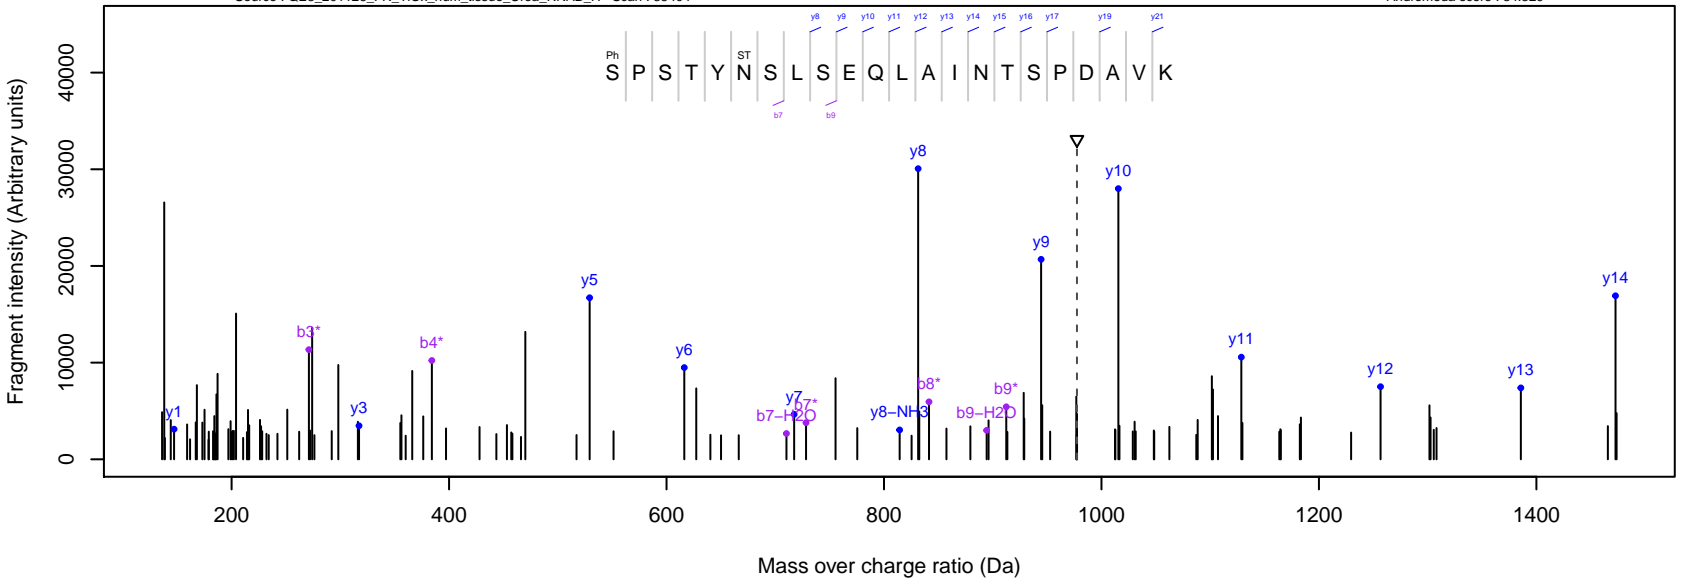

SRT(Phospho (STY))AS(Phospho (STY))LTSAAASVDGNNR-2+

Source : QE3\_201126\_FR\_TIOx\_hum\_tissue\_Urea\_RNAB\_H Scan : 17452

Andromeda score : 84.829

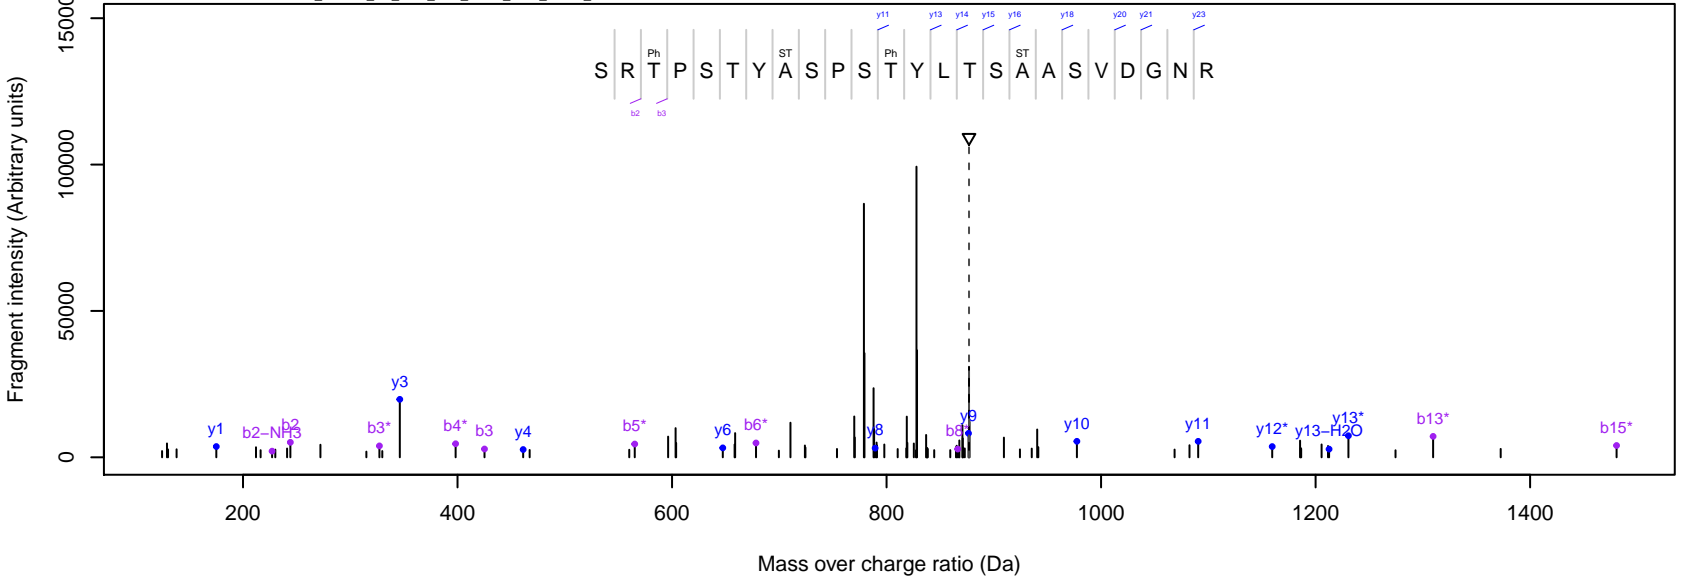

SRTHS(Phospho (STY))TSSSLGSGESPFNR-3+

Source : QE3\_201126\_FR\_TIOx\_hum\_tissue\_Urea\_RNAB\_N Scan : 13188

Andromeda score : 84.822

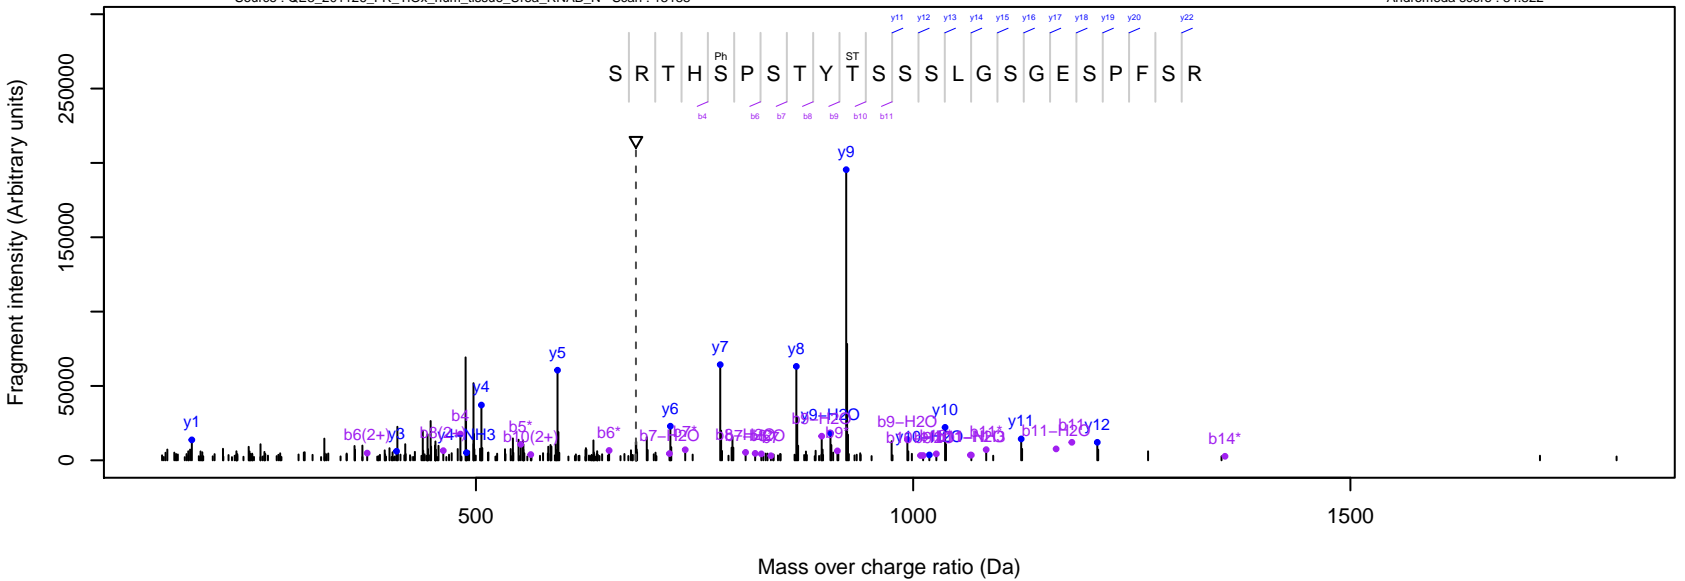

SRTS(Phospho (STY))PAPWK-2+

Source : QE3\_201126\_FR\_TiOx\_hum\_tissue\_Urea\_RNAB\_H Scan : 9326

Andromeda score : 84.821

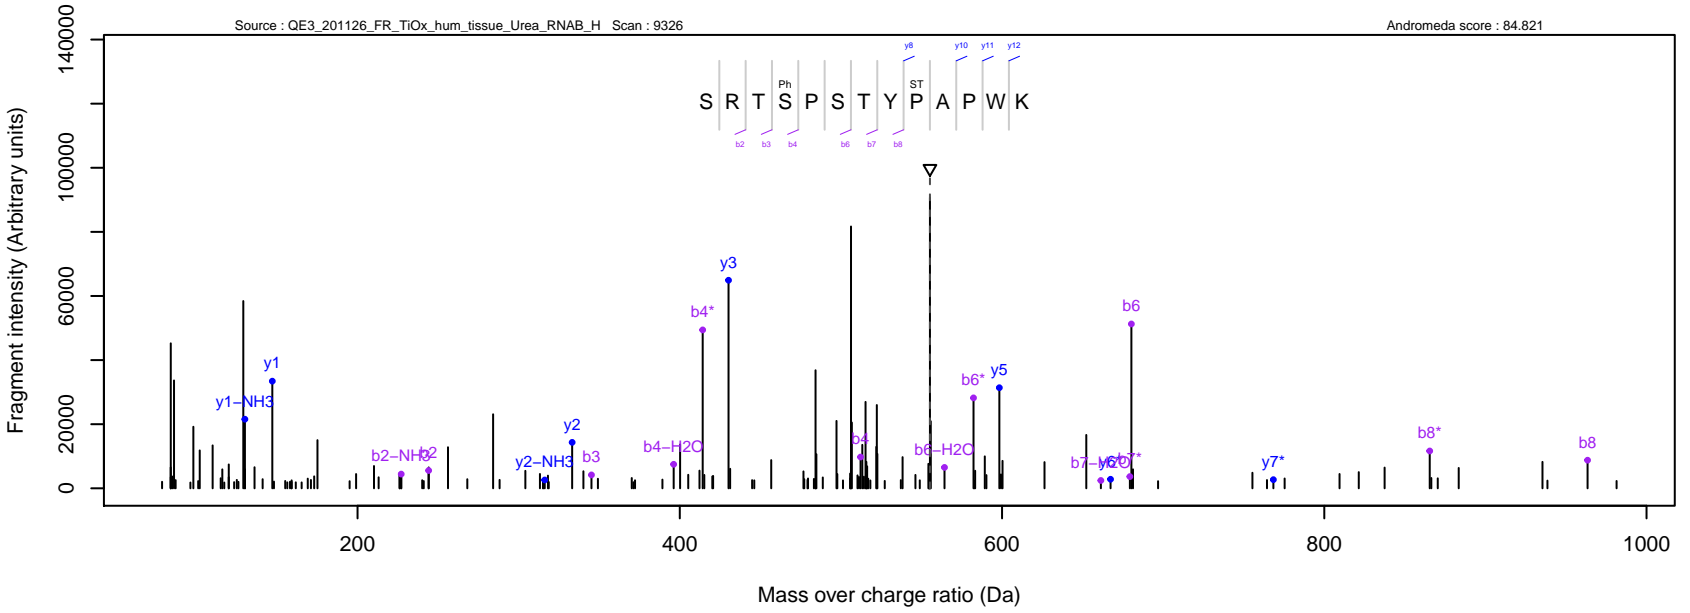

VKSS(Phospho (STY))PLIEK-2+

Source : QE3\_201126\_FR\_TiOx\_hum\_tissue\_Urea\_RNAB\_N Scan : 7659

Andromeda score : 84.821

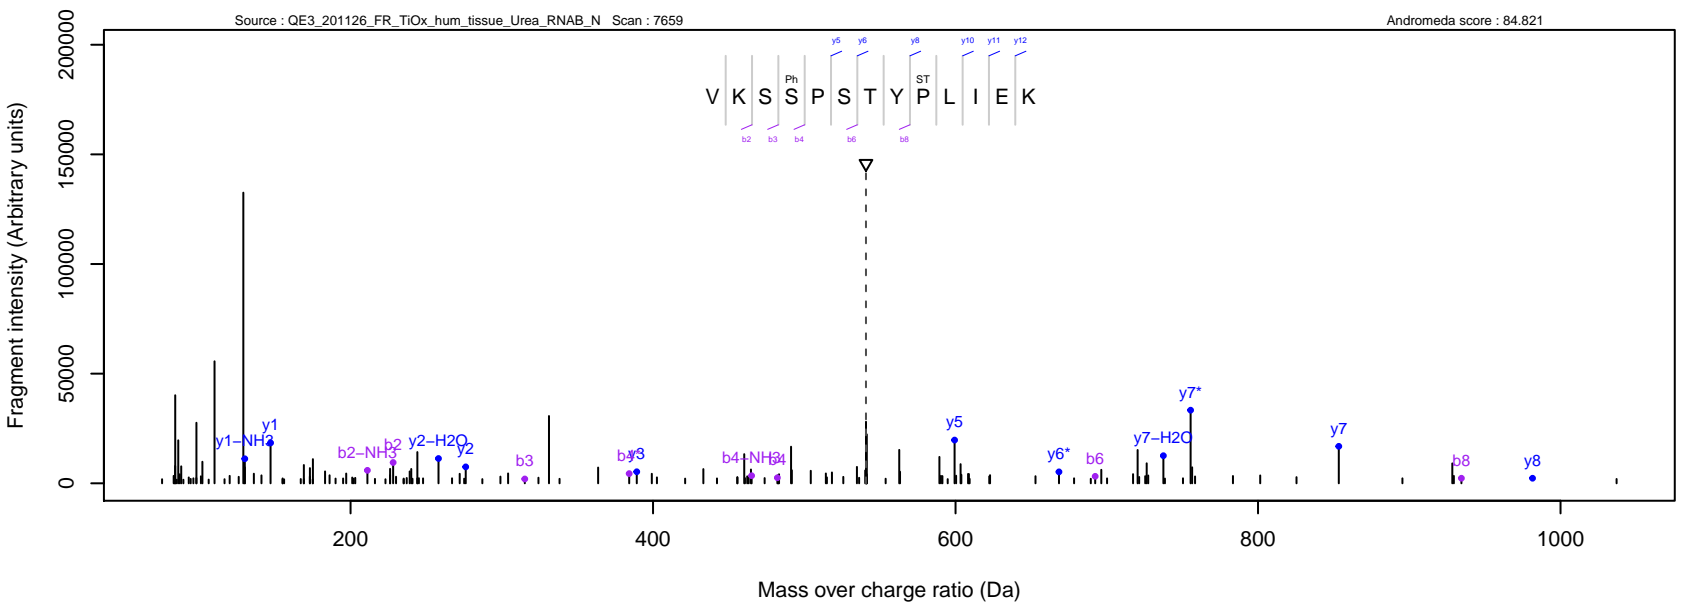

ESS(Phospho (STY))PIPSPTSDR-2+

Source : QE3\_201126\_FR\_TiOx\_hum\_tissue\_Urea\_RNAB\_B Scan : 15765

Andromeda score : 84.817

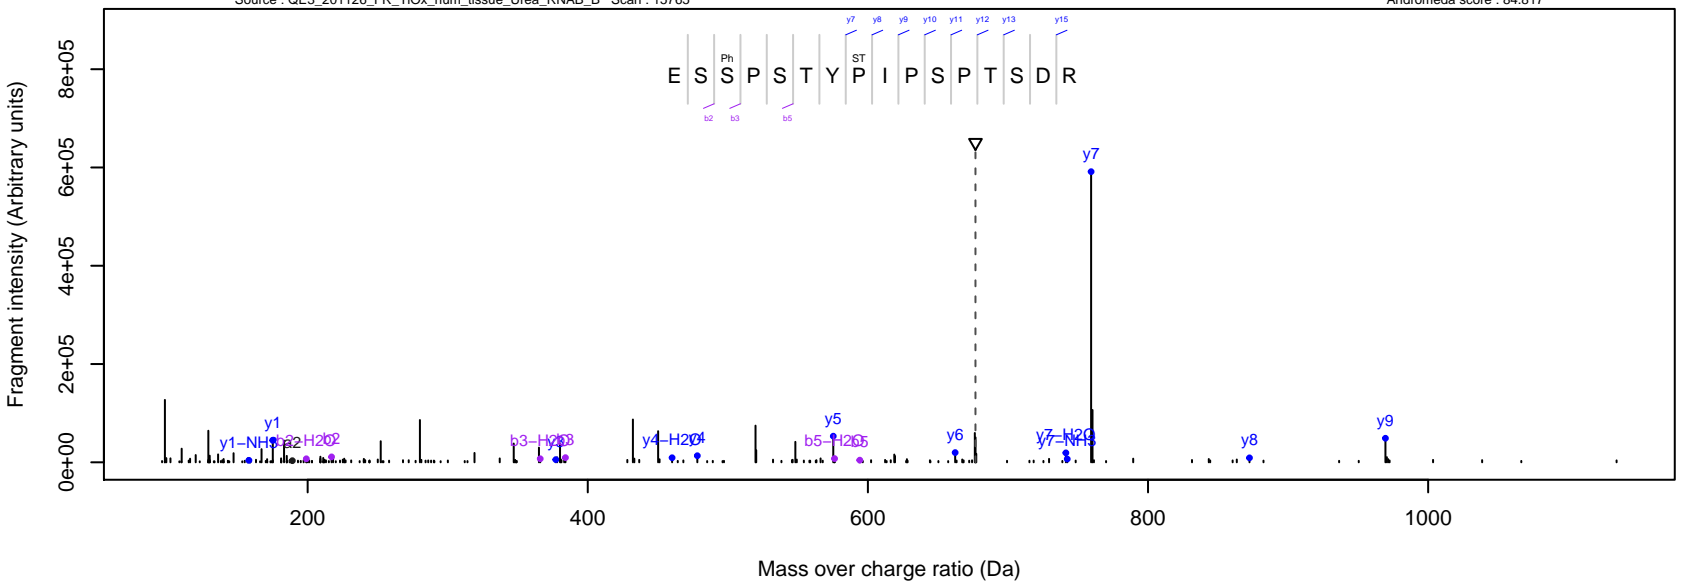



GPVPGDLS(Phospho (STY))QT(Phospho (STY))SEDQSLSDFEISNR-3+

Source : QE3\_201126\_FR\_TiOx\_hum\_tissue\_Urea\_RNAB\_N Scan : 55831

Andromeda score : 84.762

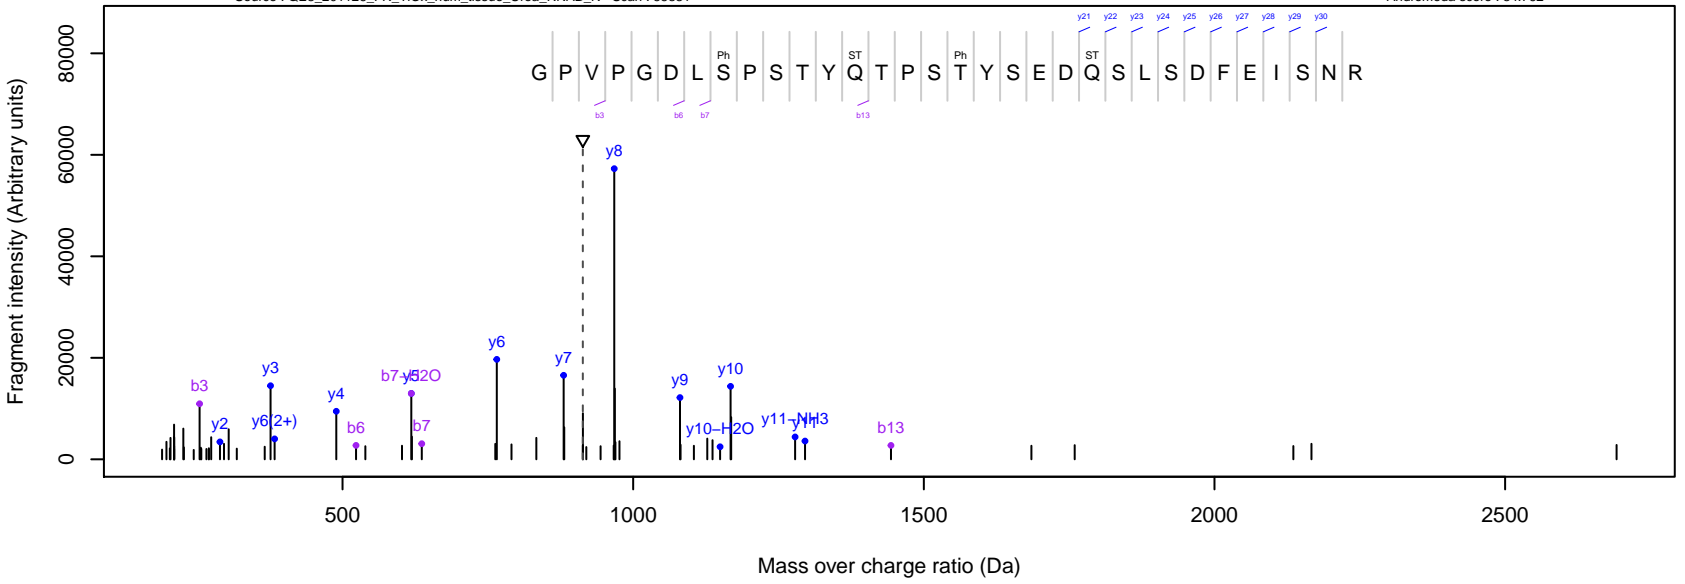

ALS(Phospho (STY))S(Phospho (STY))DSILSPADAR-2+

Source : QE3\_201126\_FR\_TiOx\_hum\_tissue\_Urea\_RNAB\_N Scan : 46807

Andromeda score : 84.759

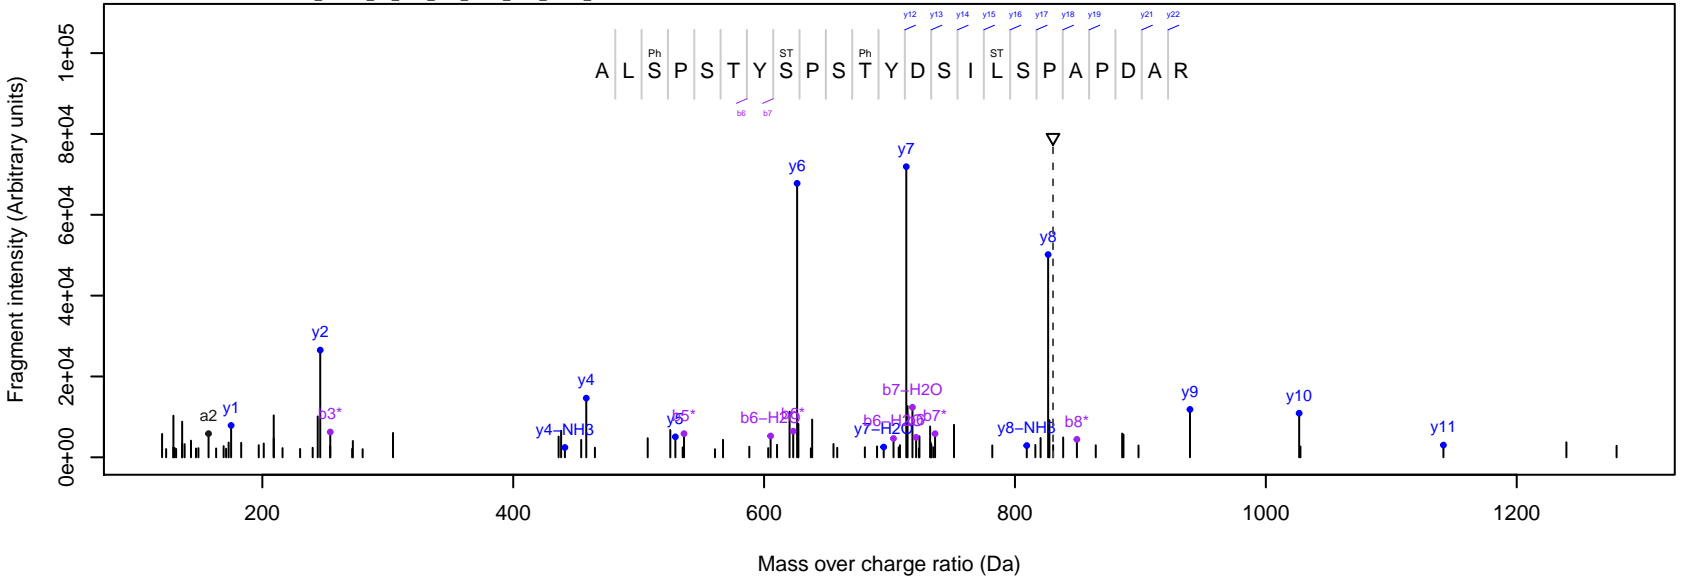

AM(Oxidation (M))S(Phospho (STY))TTSIS(Phospho (STY))SPQPGK-2+

Source : QE3\_201126\_FR\_TiOx\_hum\_tissue\_Urea\_RNAB\_H Scan : 13978

Andromeda score : 84.753

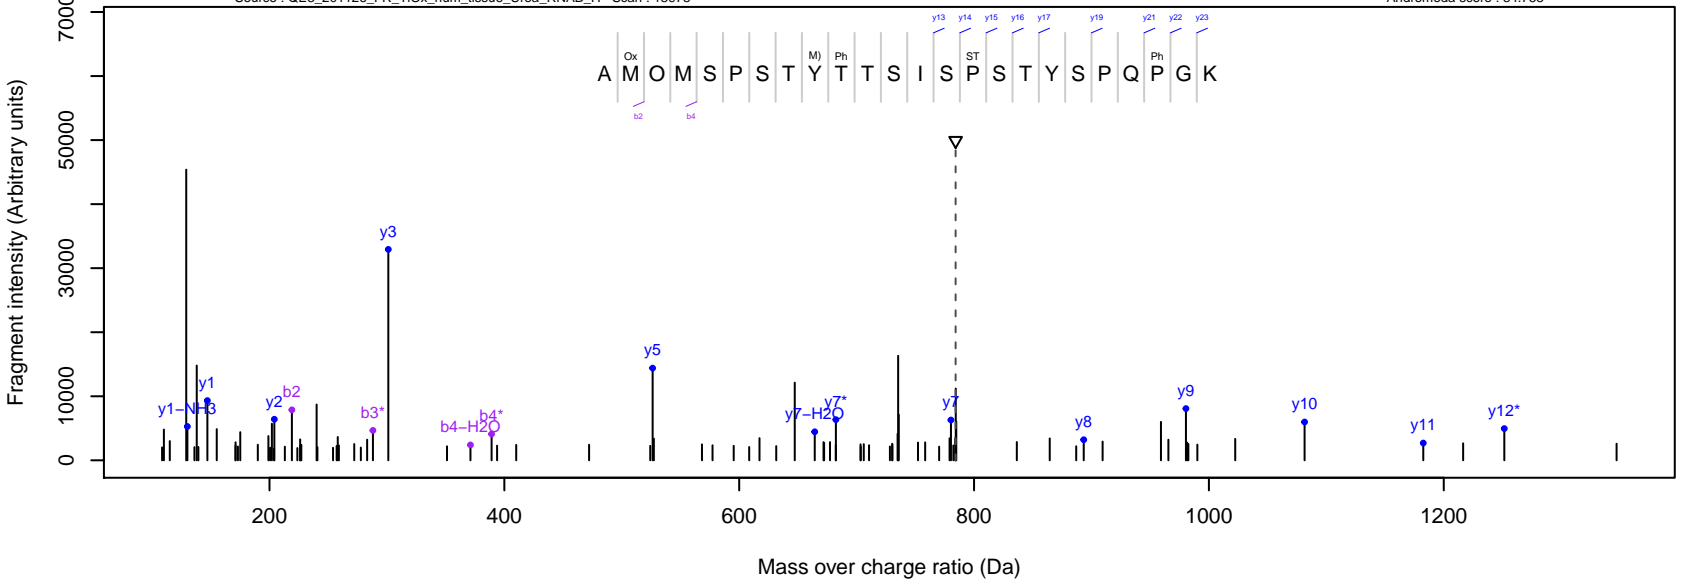

APS(Phospho (STY))PPLSQVFQTR-2+

Source : QE3\_201126\_FR\_TiOx\_hum\_tissue\_Urea\_RNAB\_N Scan : 42178

Andromeda score : 84.753

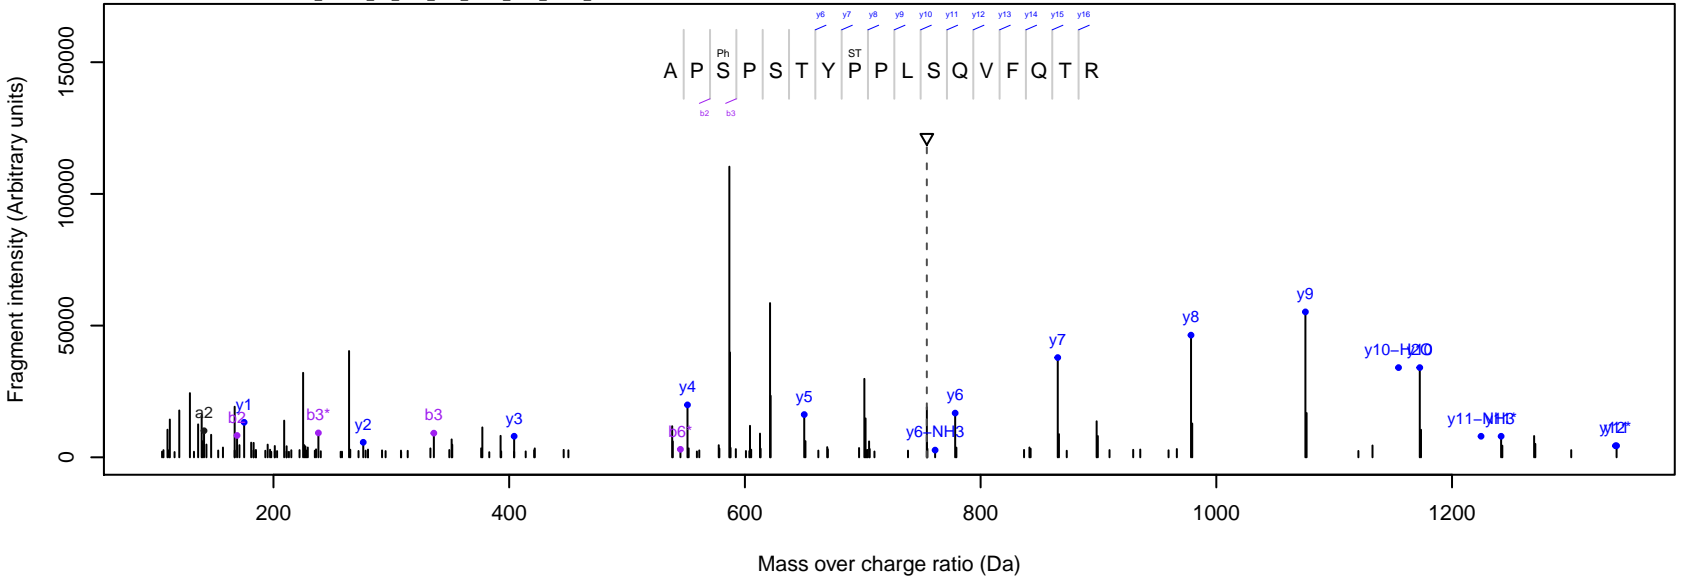

RQS(Phospho (STY))SSYDDPWK-2+

Source : QE3\_201126\_FR\_TiOx\_hum\_tissue\_Urea\_RNAB\_N Scan : 16798

Andromeda score : 84.718

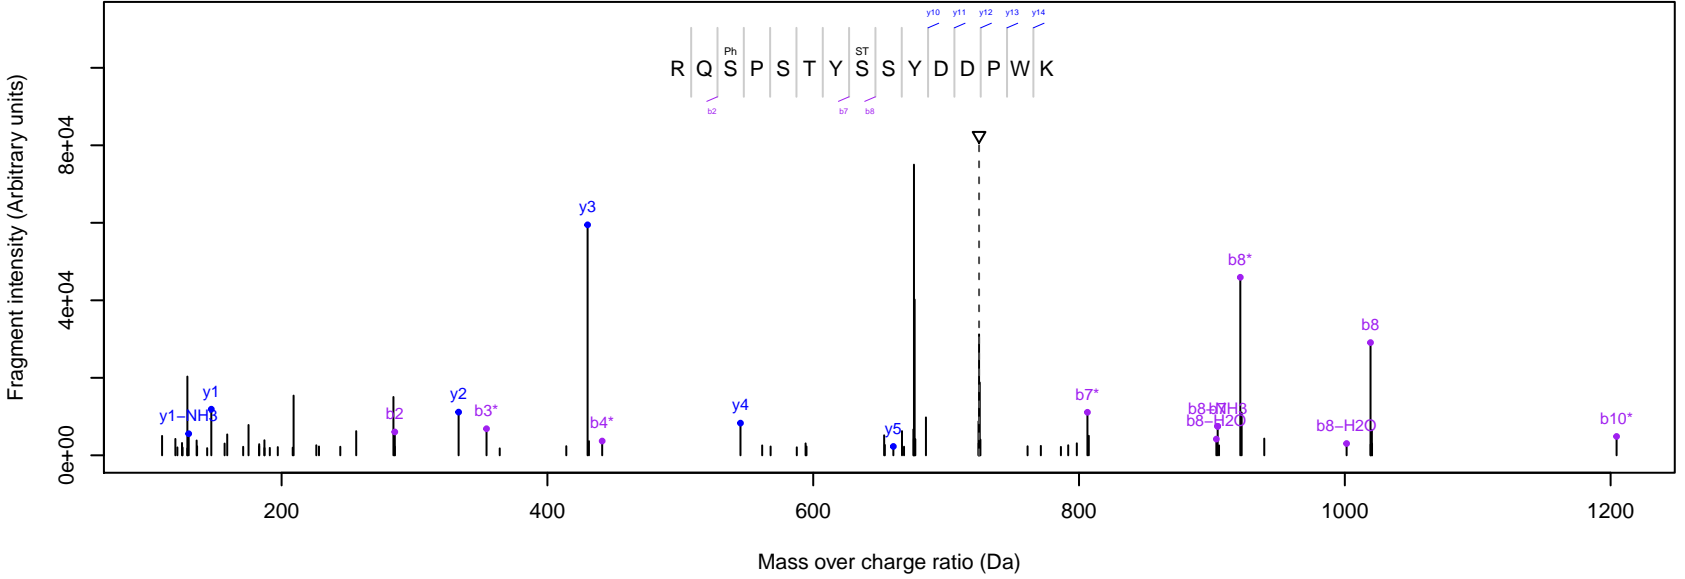

S(Phospho (STY))SLDLSYPTSSSTFSMSSSSSSSWLTR-3+

Source : QE3\_201126\_FR\_TiOx\_hum\_tissue\_Urea\_RNAB\_H Scan : 57041

Andromeda score : 84.713

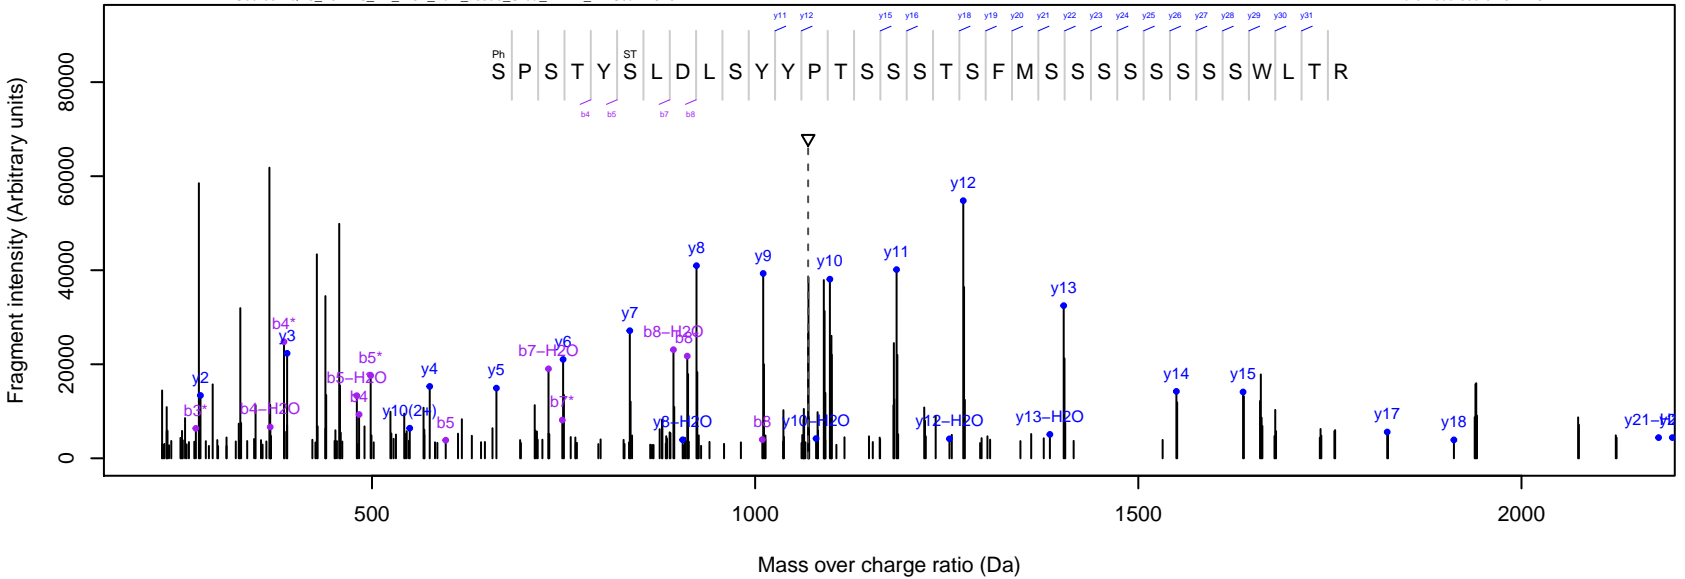

TFS(Phospho (STY))DGLATR-2+

Source : QE3\_201126\_FR\_TiOx\_hum\_tissue\_Urea\_RNAB\_H Scan : 22012

Andromeda score : 84.687

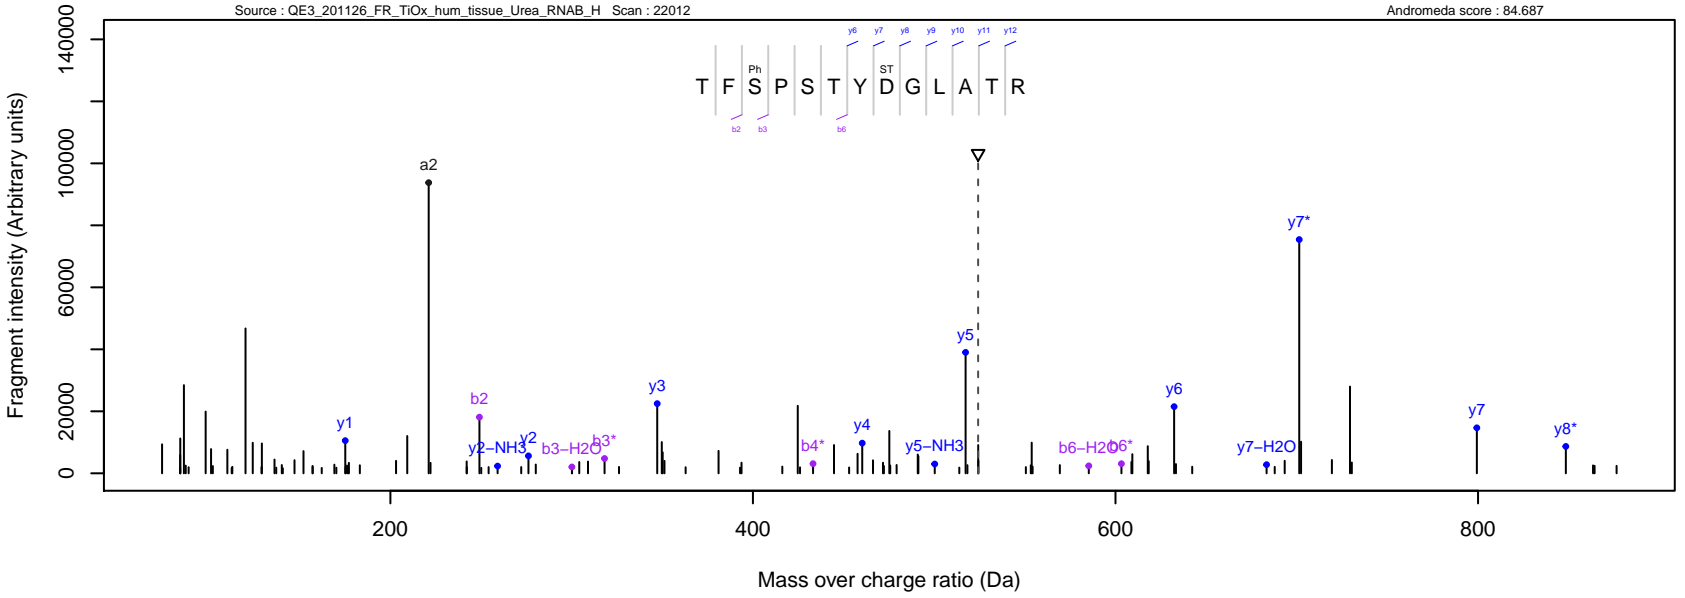

SYEDM(Oxidation (M))IGEEVPSDQYYWAPLAQHERGS(Phospho (STY))LAS(Phospho (STY))LDS(Phospho (STY))LRK-4+

Source : QE3\_201126\_FR\_TiOx\_hum\_tissue\_Urea\_RNAB\_H Scan : 53645

Andromeda score : 84.608

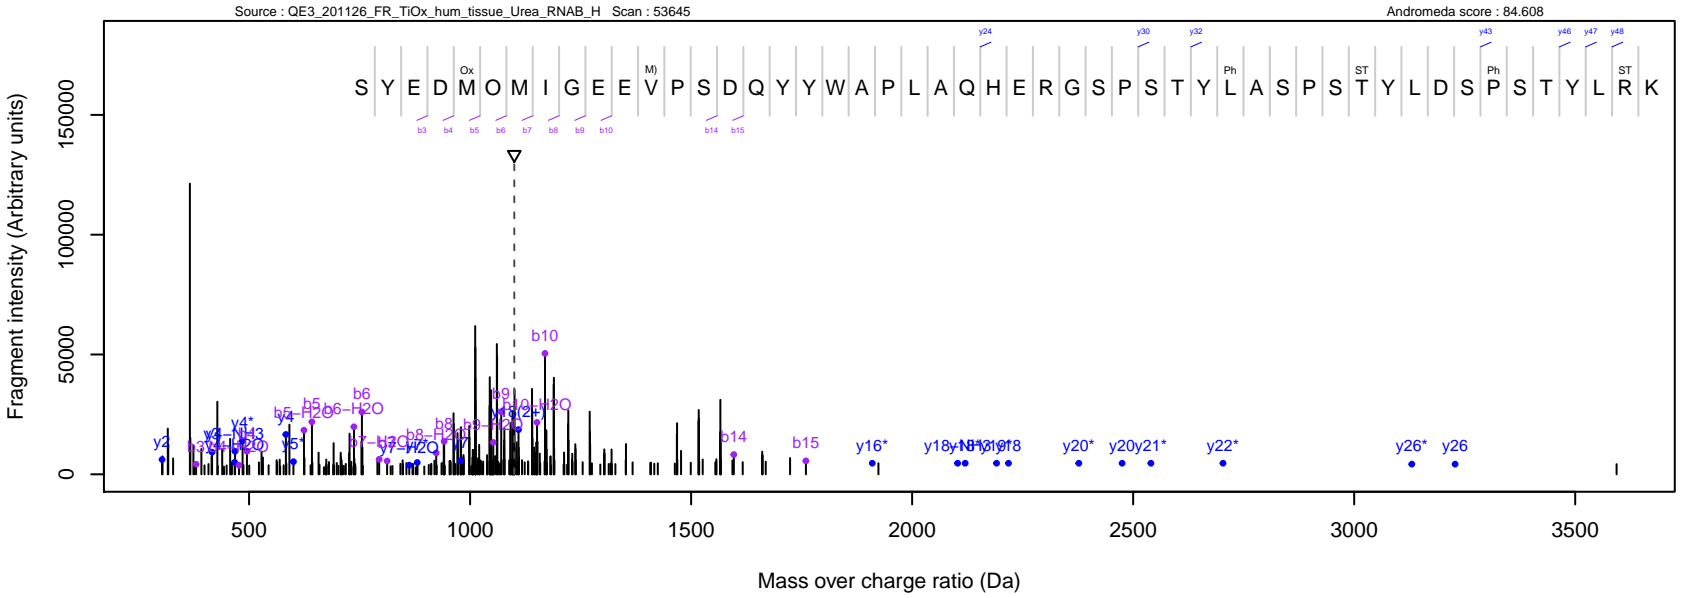

VRRPIGSDQTTTMSGEGEGEGEDVSSDS(Phospho (STY))APDSAPGPAK-4+

Source : QE3\_201126\_FR\_TiOx\_hum\_tissue\_Urea\_RNAB\_H Scan : 21191

Andromeda score : 84.608

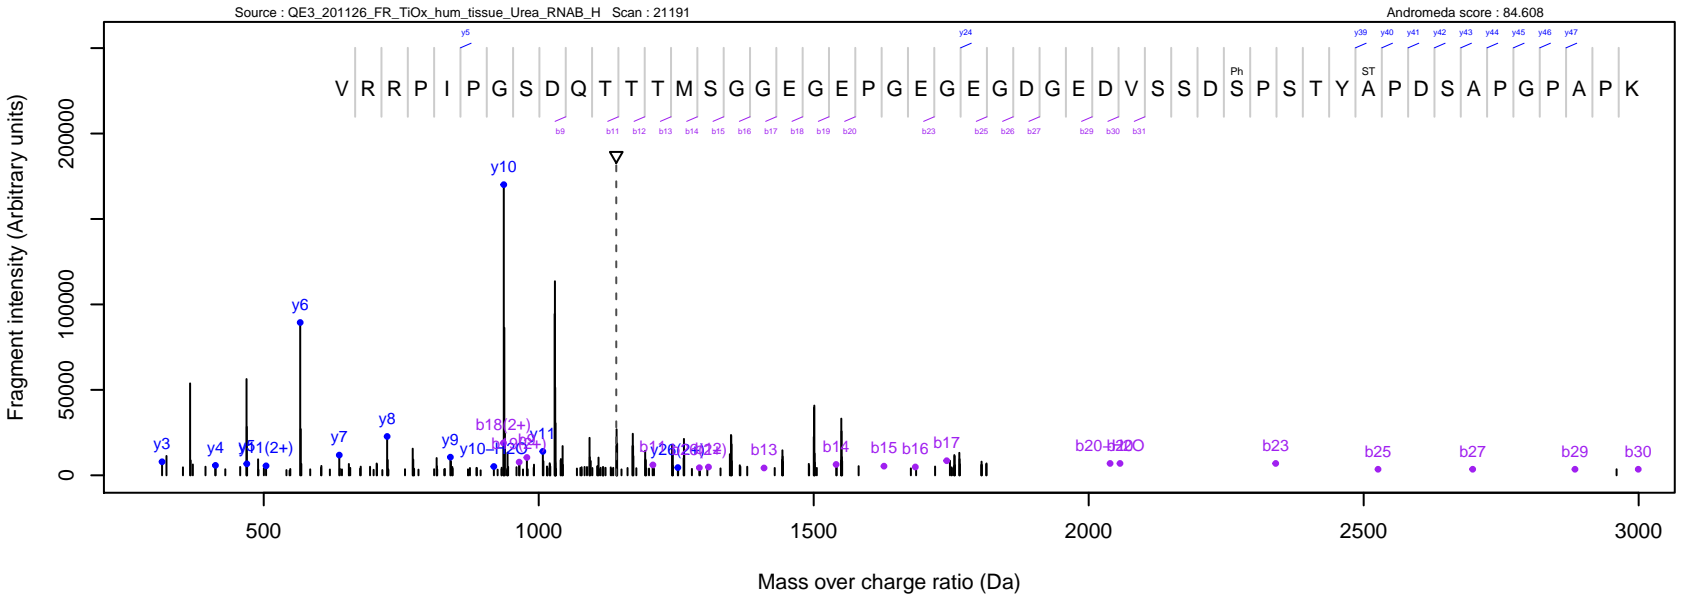

SKPIPIMPAS(Phospho (STY))PQKGHAVNLLDVPVVAR-4+

Source : QE3\_201126\_FR\_TiOx\_hum\_tissue\_Urea\_RNAB\_B Scan : 39914

Andromeda score : 84.58

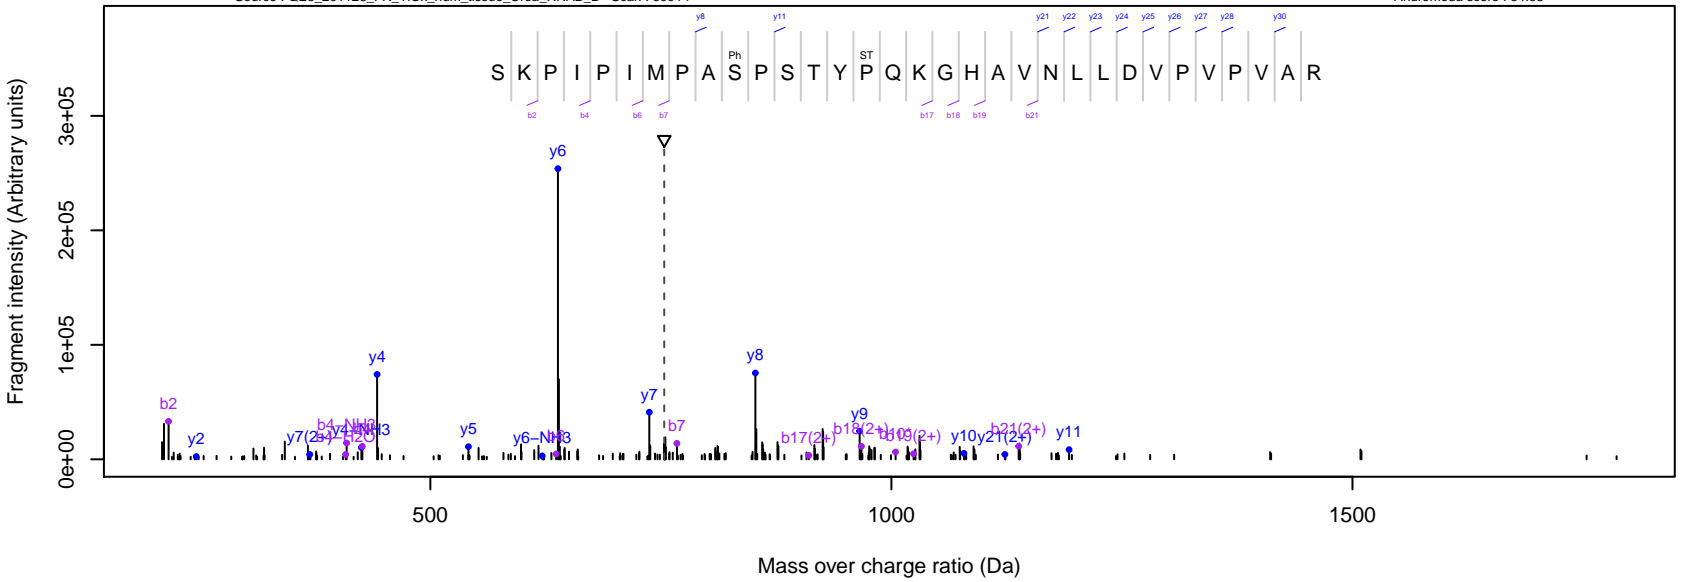

QGS(Phospho (STY))FSEDVISHKGLR-3+

Source : QE3\_201126\_FR\_TiOx\_hum\_tissue\_Urea\_RNAB\_H Scan : 20526

Andromeda score : 84.559

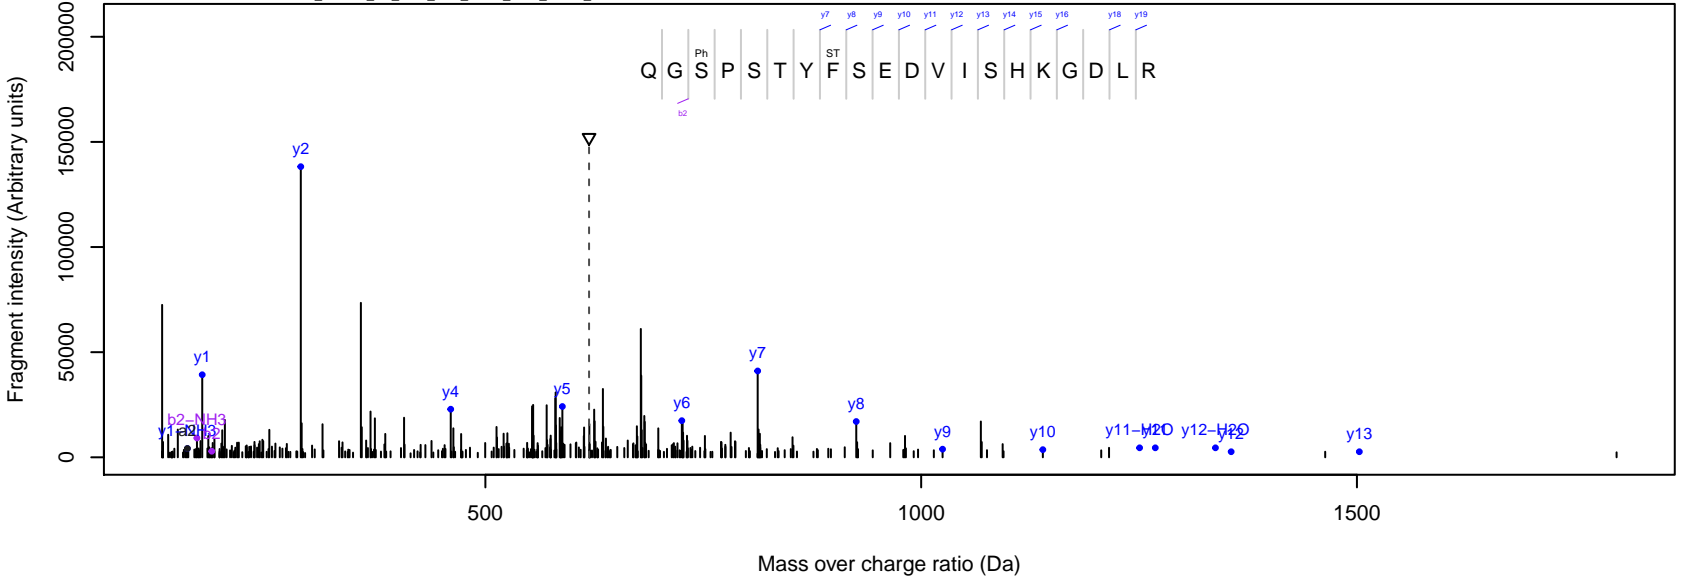

AVSETPAVPPV(Phospho (STY))EDED D D D D D A T P P P V I A P R P E H T K-3+

Source : QE3\_201126\_FR\_TiOx\_hum\_tissue\_Urea\_RNAB\_B Scan : 30219

Andromeda score : 84.529

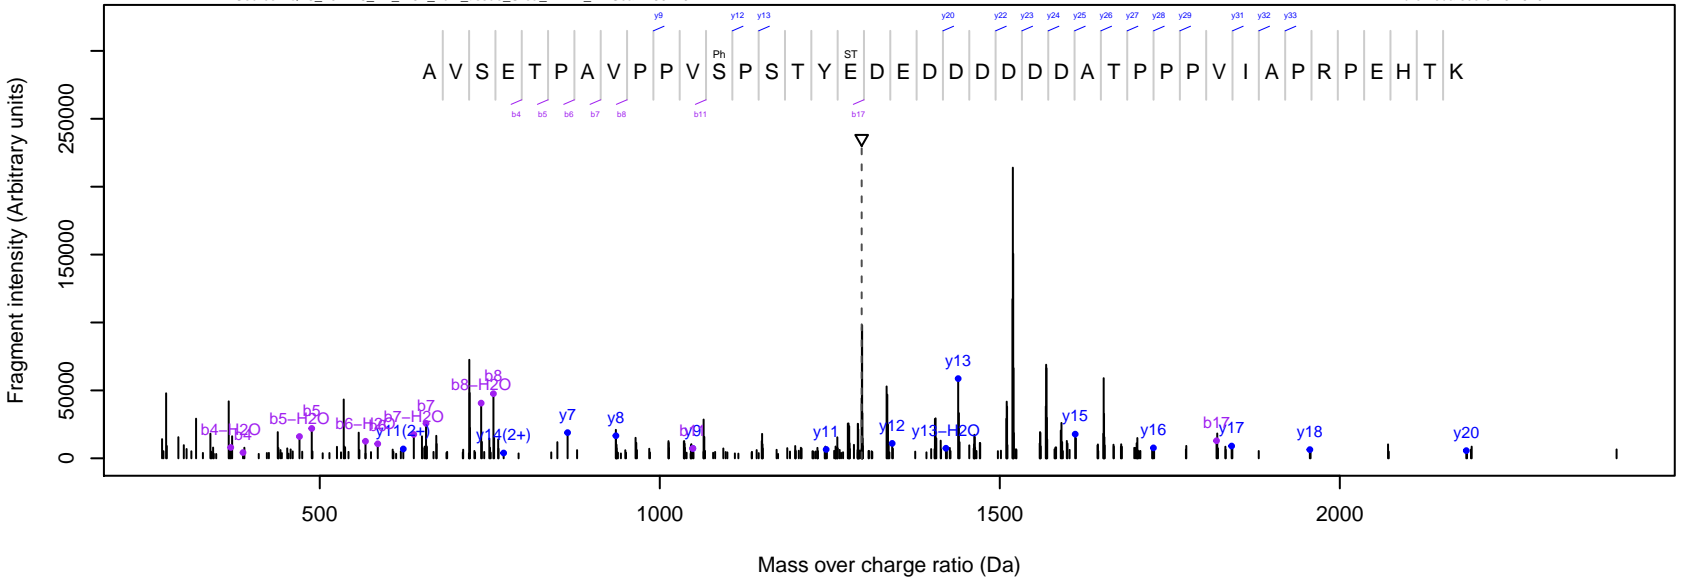

SQEEPKDTFEHDPSES(Phospho (STY))IDFNK-3+

Source : QE3\_201126\_FR\_TiOx\_hum\_tissue\_Urea\_RNAB\_H Scan : 23169

Andromeda score : 84.529

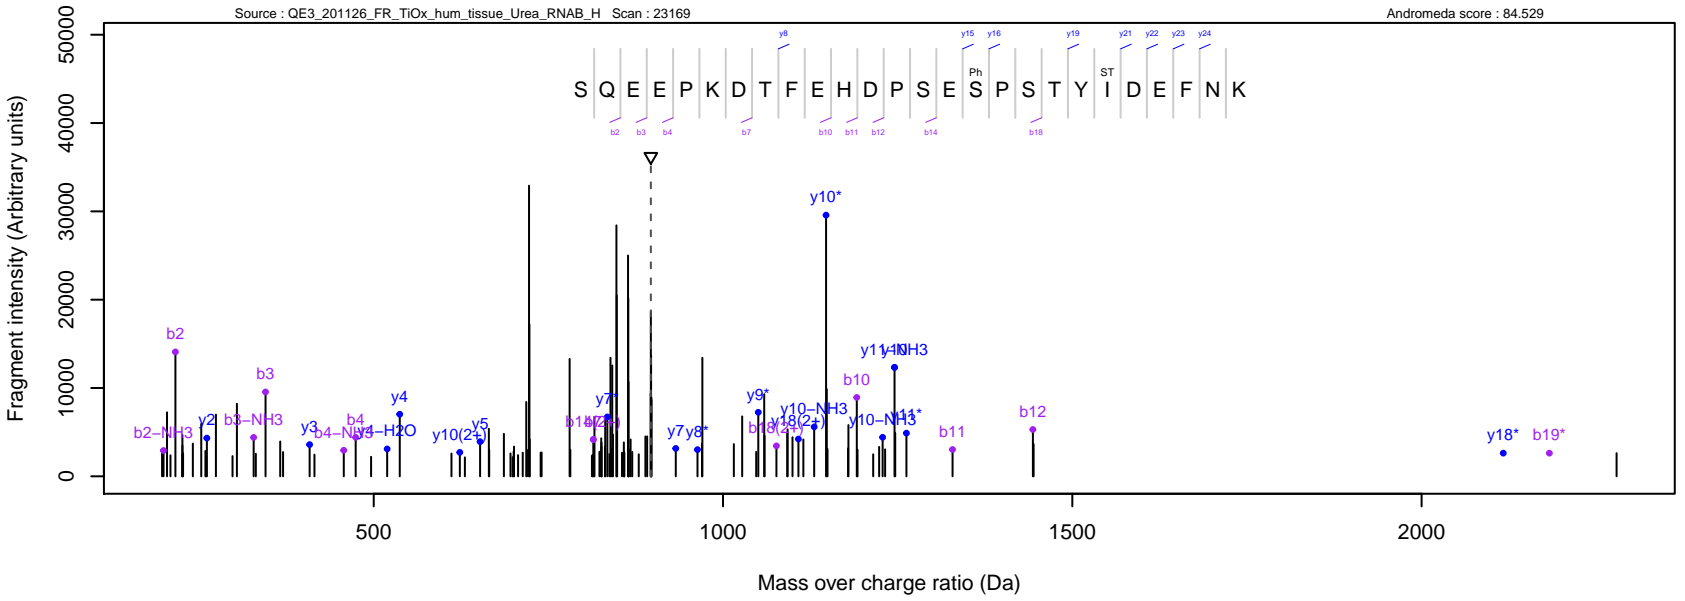

TAS(Phospho (STY))ELLDR-2+

Source : QE3\_201126\_FR\_TiOx\_hum\_tissue\_Urea\_RNAB\_H Scan : 33036

Andromeda score : 84.507

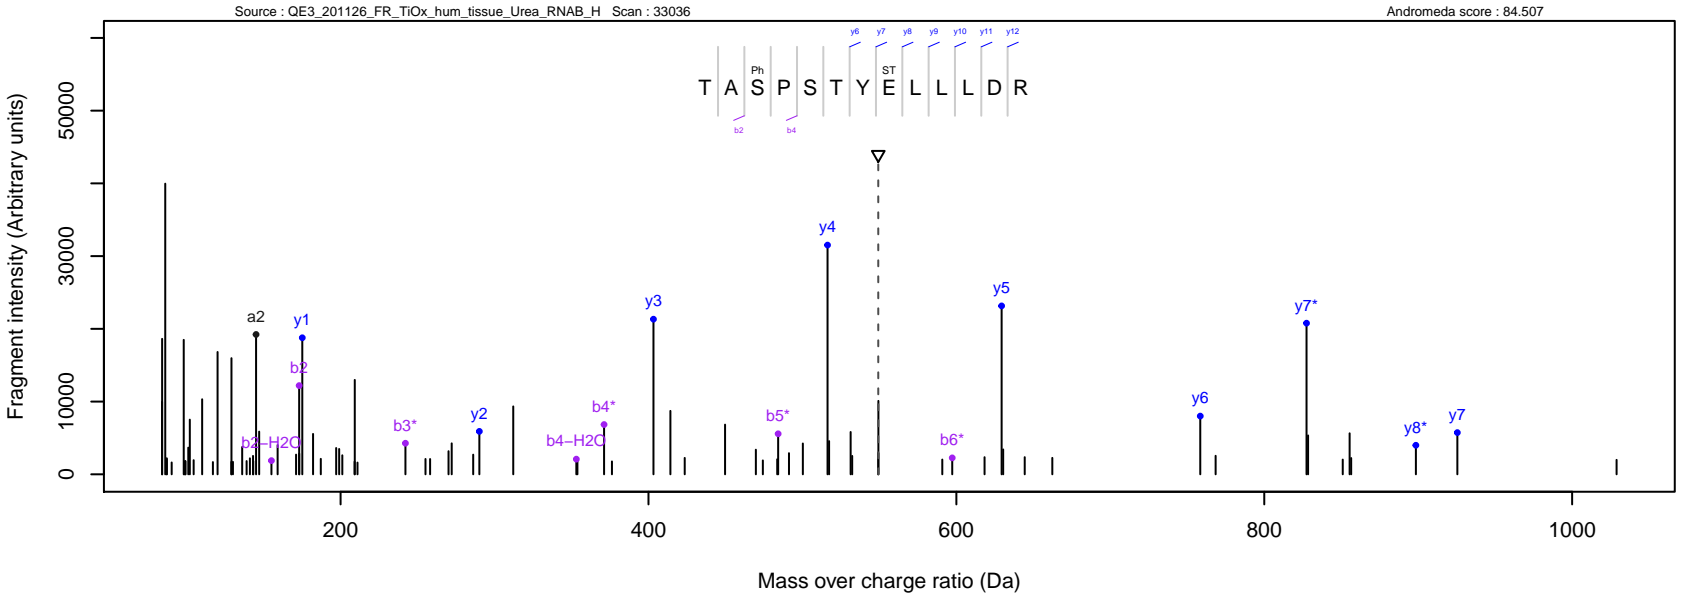

AS(Phospho (STY))ESS(Phospho (STY))SEEKDDYEIVK-3+

Source : QE3\_201126\_FR\_TiOx\_hum\_tissue\_Urea\_RNAB\_B Scan : 38572

Andromeda score : 84.499

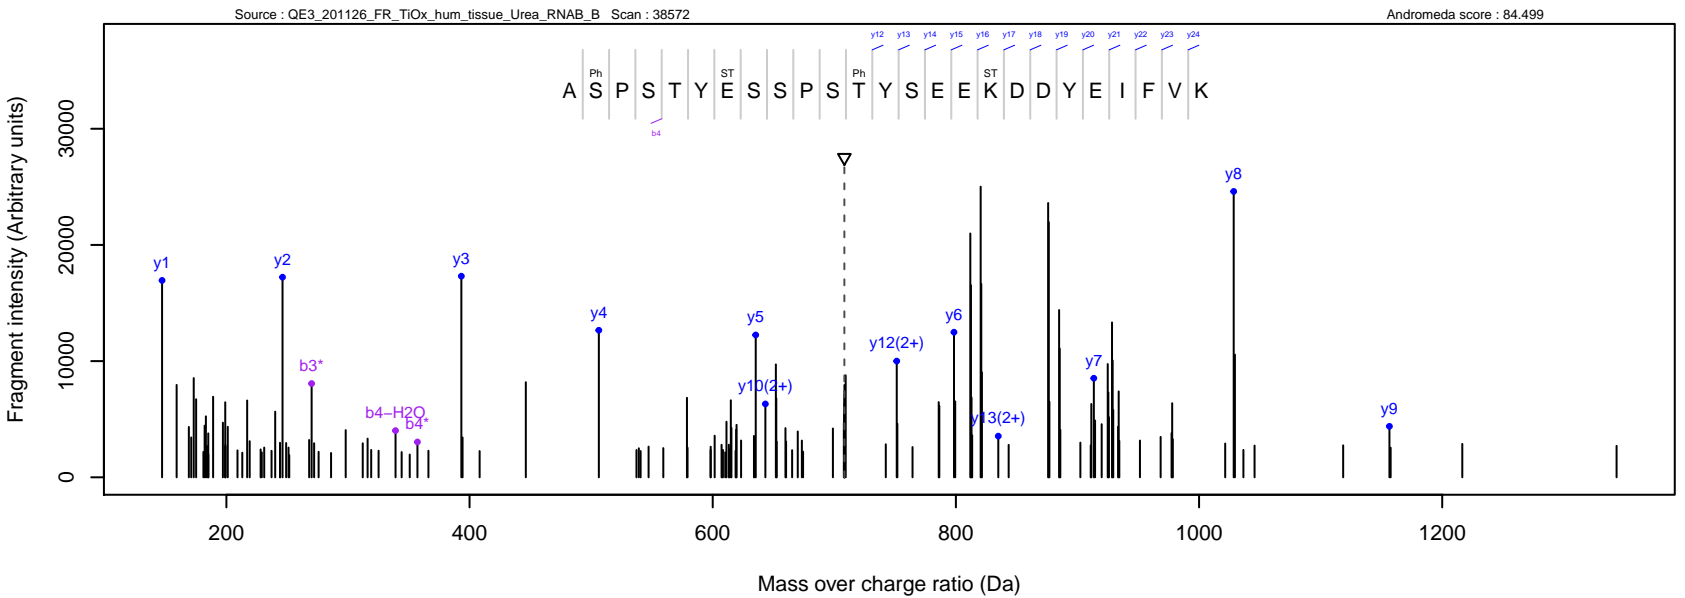

TRTDS(Phospho (STY))TSDGRPAWM(Oxidation (M))R-3+

Source : QE3\_201126\_FR\_TIOx\_hum\_tissue\_Urea\_RNAB\_N Scan : 8435

Andromeda score : 84.493

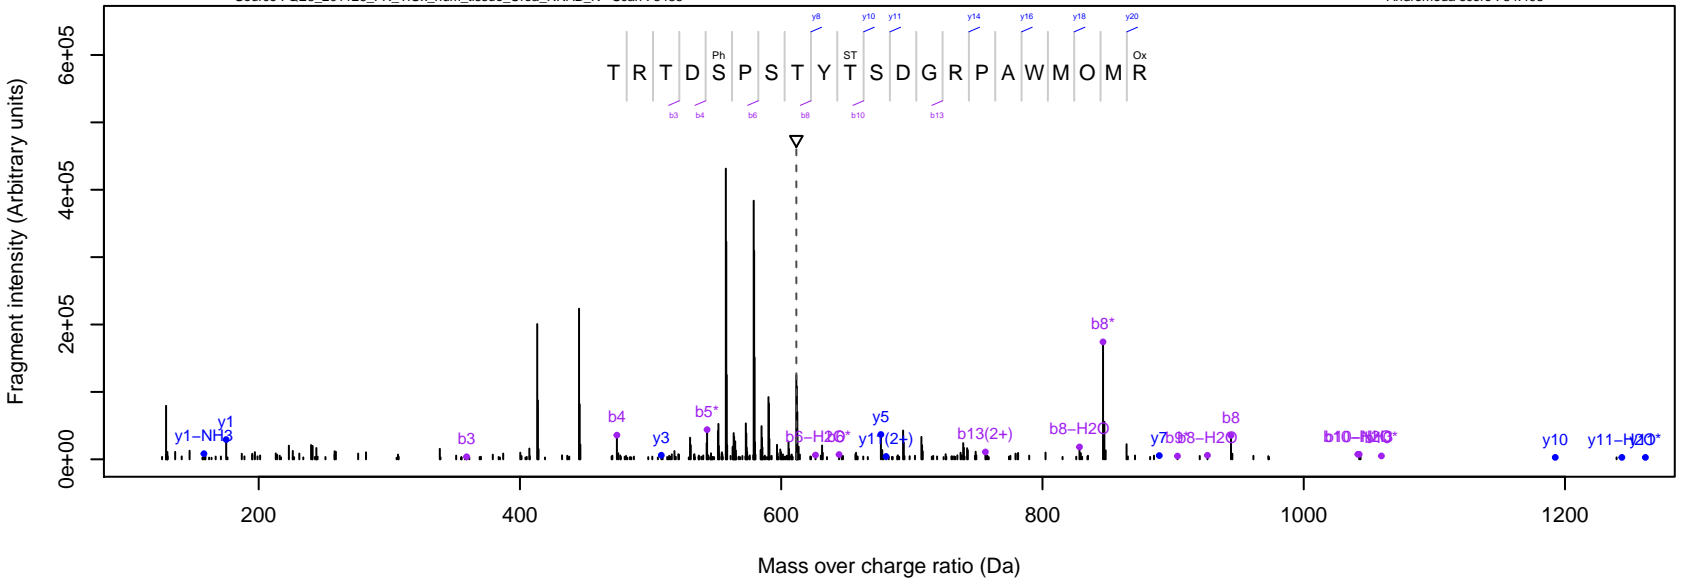

TVFS(Phospho (STY))PTLPAAR-2+

Source : QE3\_201126\_FR\_TIOx\_hum\_tissue\_Urea\_RNAB\_B Scan : 35696

Andromeda score : 84.479

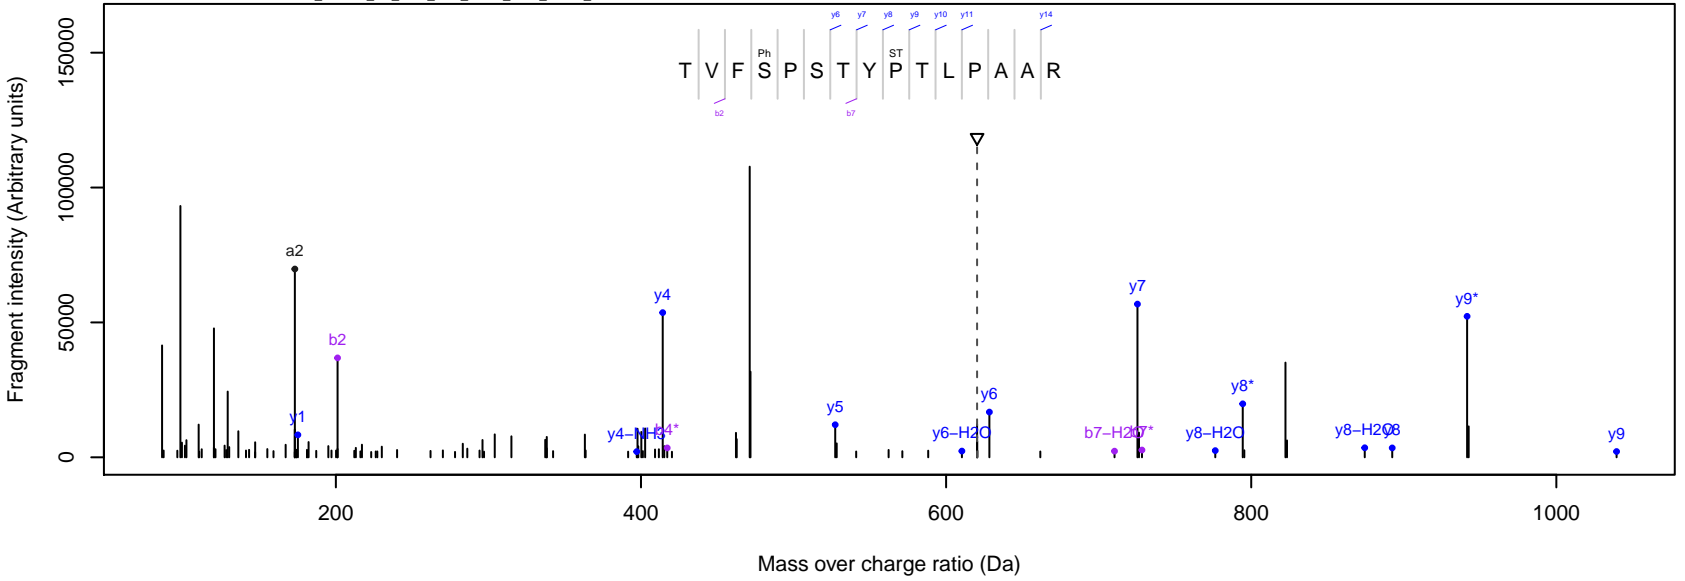

SRS(Phospho (STY))TTELDYSTNK-3+

Source : QE3\_201126\_FR\_TIOx\_hum\_tissue\_Urea\_RNAB\_N Scan : 11767

Andromeda score : 84.436

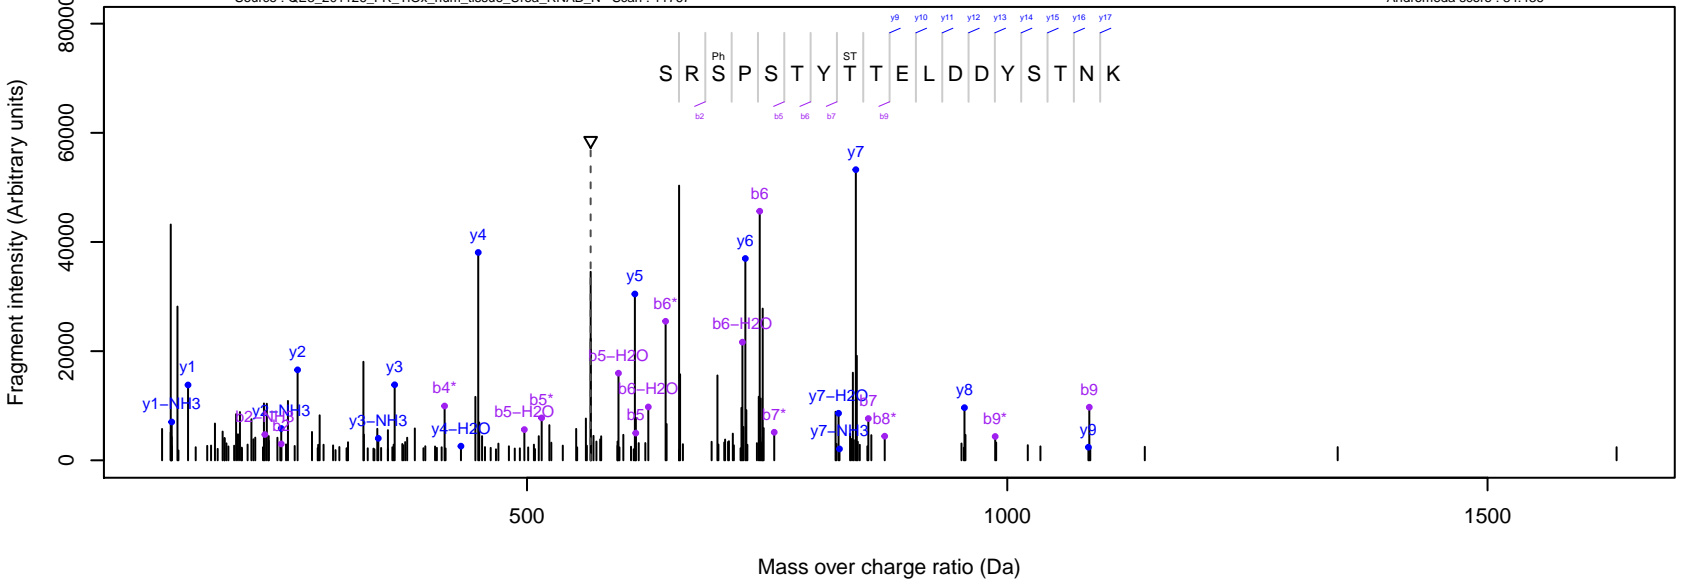

VSPSKS(Phospho (STY))PS(Phospho (STY))LSPSPS(Phospho (STY))PLEK-3+

Source : QE3\_201126\_FR\_TIOx\_hum\_tissue\_Urea\_RNAB\_N Scan : 30731

Andromeda score : 84.404

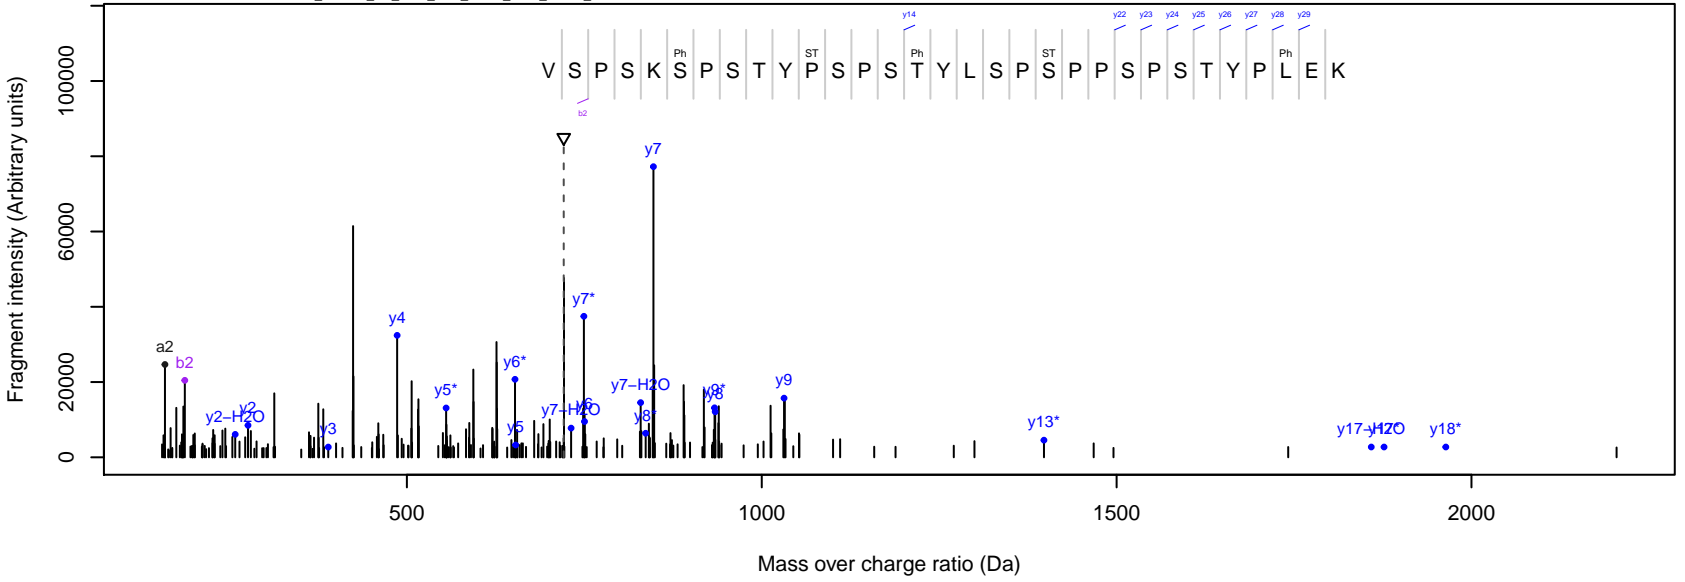

RVS(Phospho (STY))ADSQPFQHGDK-3+

Source : QE3\_201126\_FR\_TIOx\_hum\_tissue\_Urea\_RNAB\_N Scan : 7527

Andromeda score : 84.375

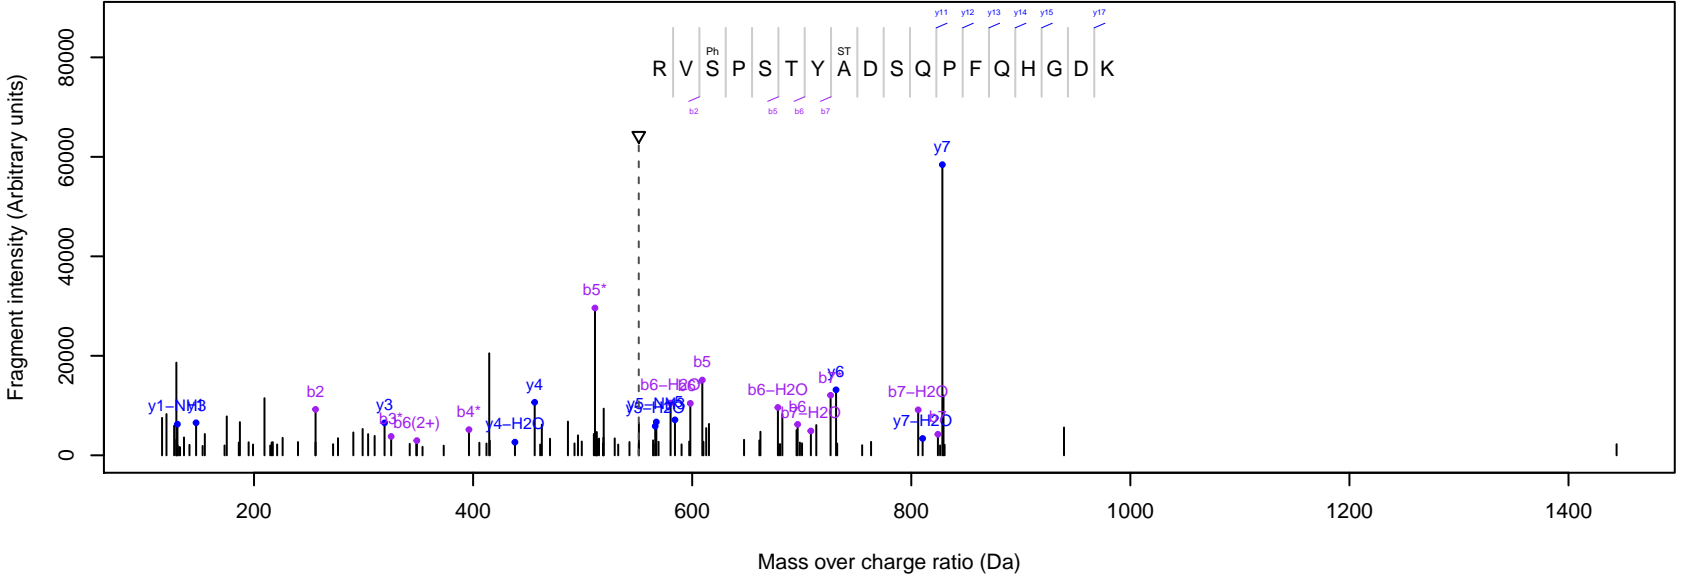

DHS(Phospho (STY))S(Phospho (STY))QS(Phospho (STY))EEEEVEGEKEVEALKK-3+

Source : QE3\_201126\_FR\_TIOx\_hum\_tissue\_Urea\_RNAB\_B Scan : 33585

Andromeda score : 84.365

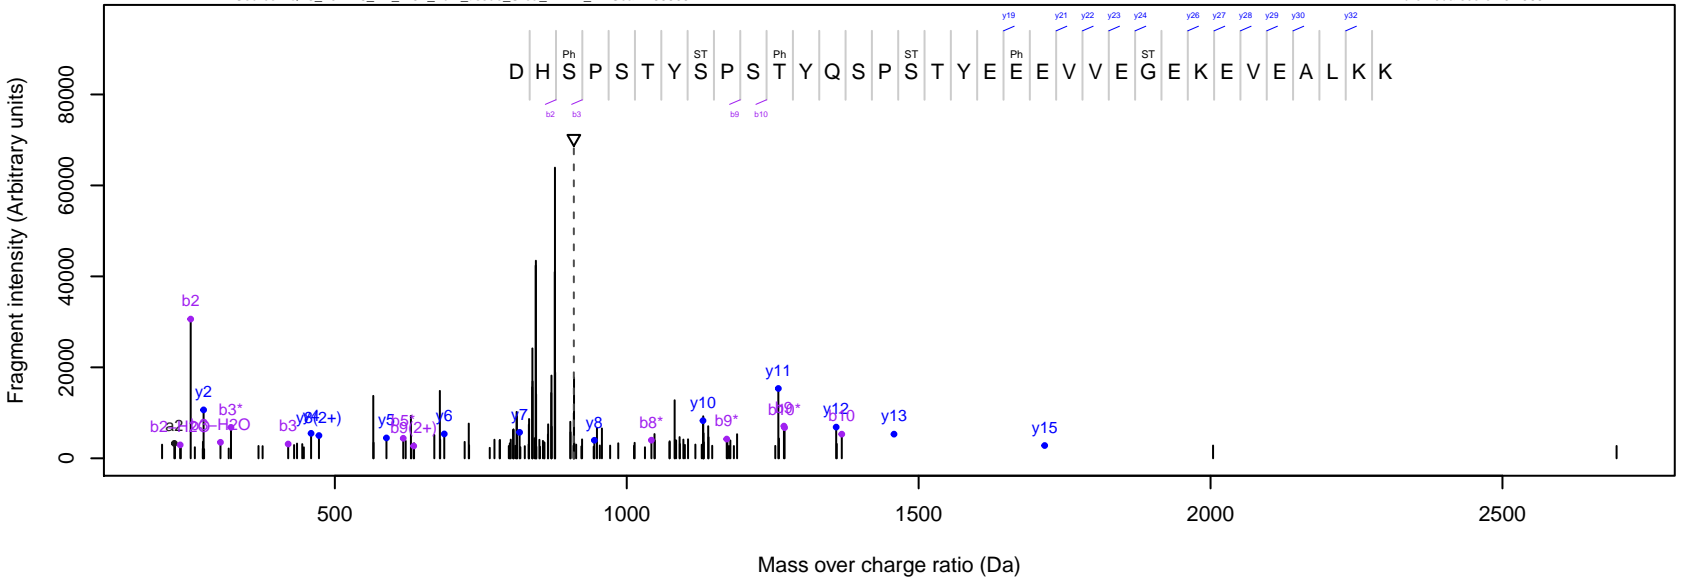





S(Phospho (STY))SPGQDEGGFM(Oxidation (M))AQGK-2+

Source : QE3\_201126\_FR\_TiOx\_hum\_tissue\_Urea\_RNAB\_B Scan : 12183

Andromeda score : 84.289

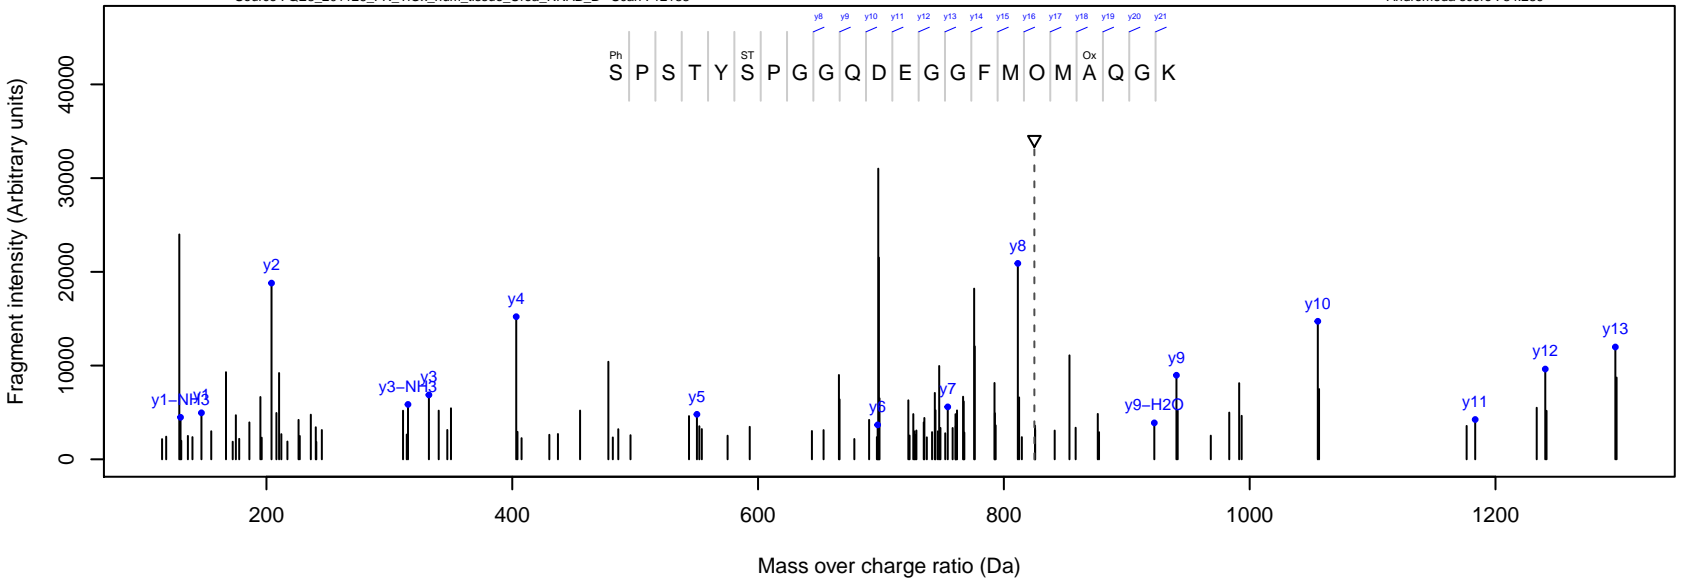

M(Oxidation (M))AESPSPSGQQPPSPPS(Phospho (STY))PELPA NVK-3+

Source : QE3\_201126\_FR\_TiOx\_hum\_tissue\_Urea\_RNAB\_H Scan : 31377

Andromeda score : 84.285

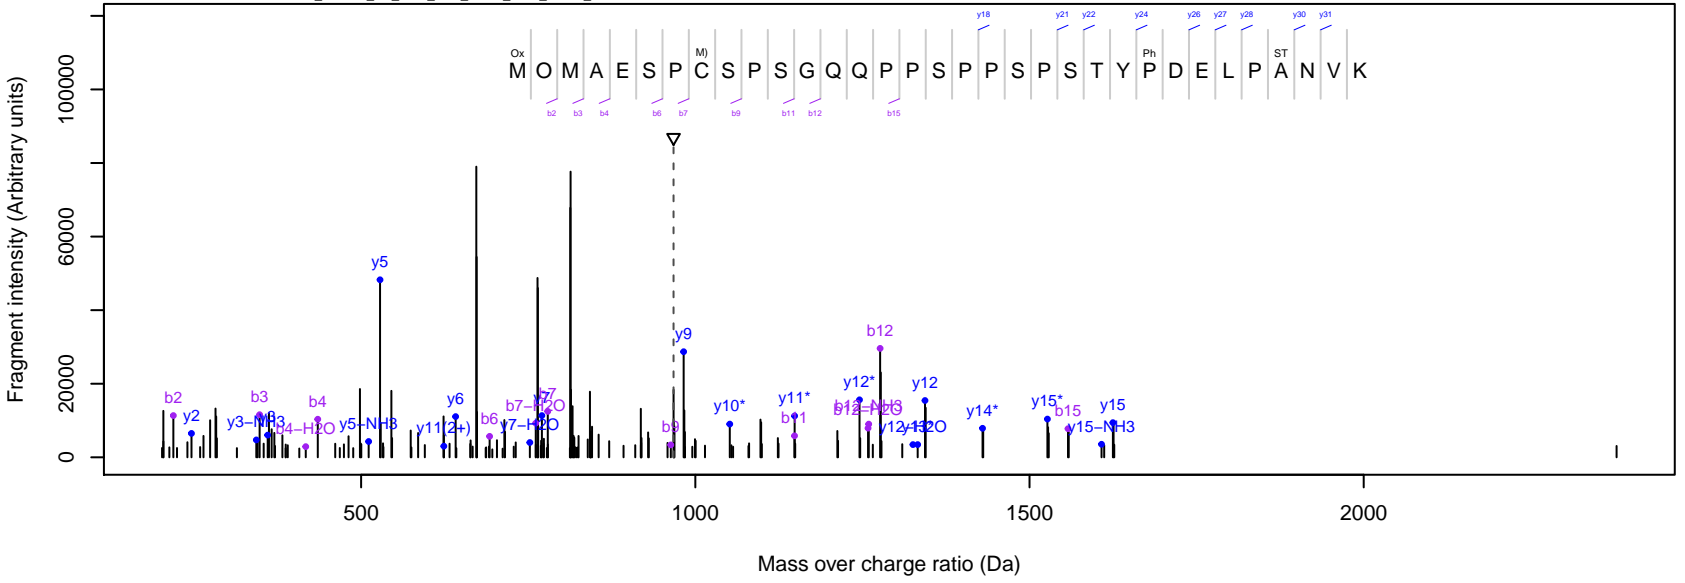

GSS(Phospho (STY))LKIEER-2+

Source : QE3\_201126\_FR\_TiOx\_hum\_tissue\_Urea\_RNAB\_N Scan : 9685

Andromeda score : 84.198

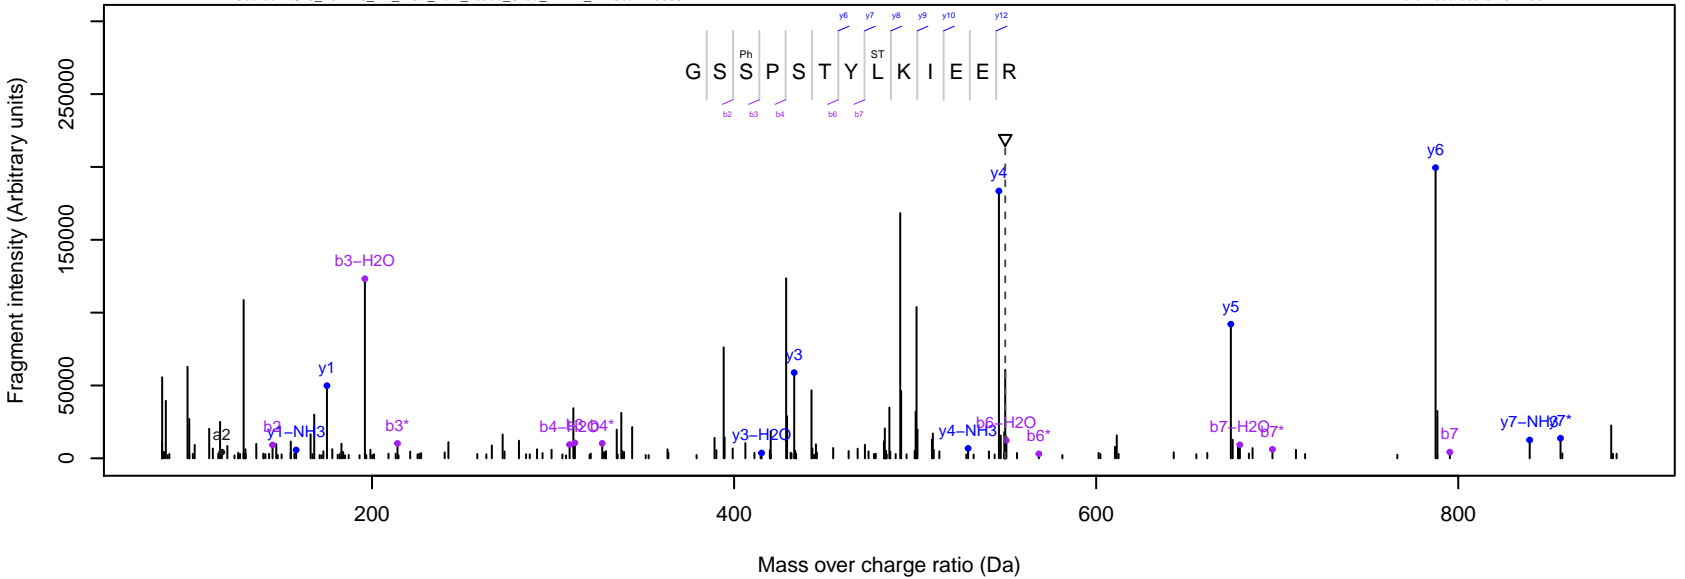

NLS(Phospho (STY))FEIKK-2+

Source : QE3\_201126\_FR\_TiOx\_hum\_tissue\_Urea\_RNAB\_N Scan : 20748

Andromeda score : 84.198

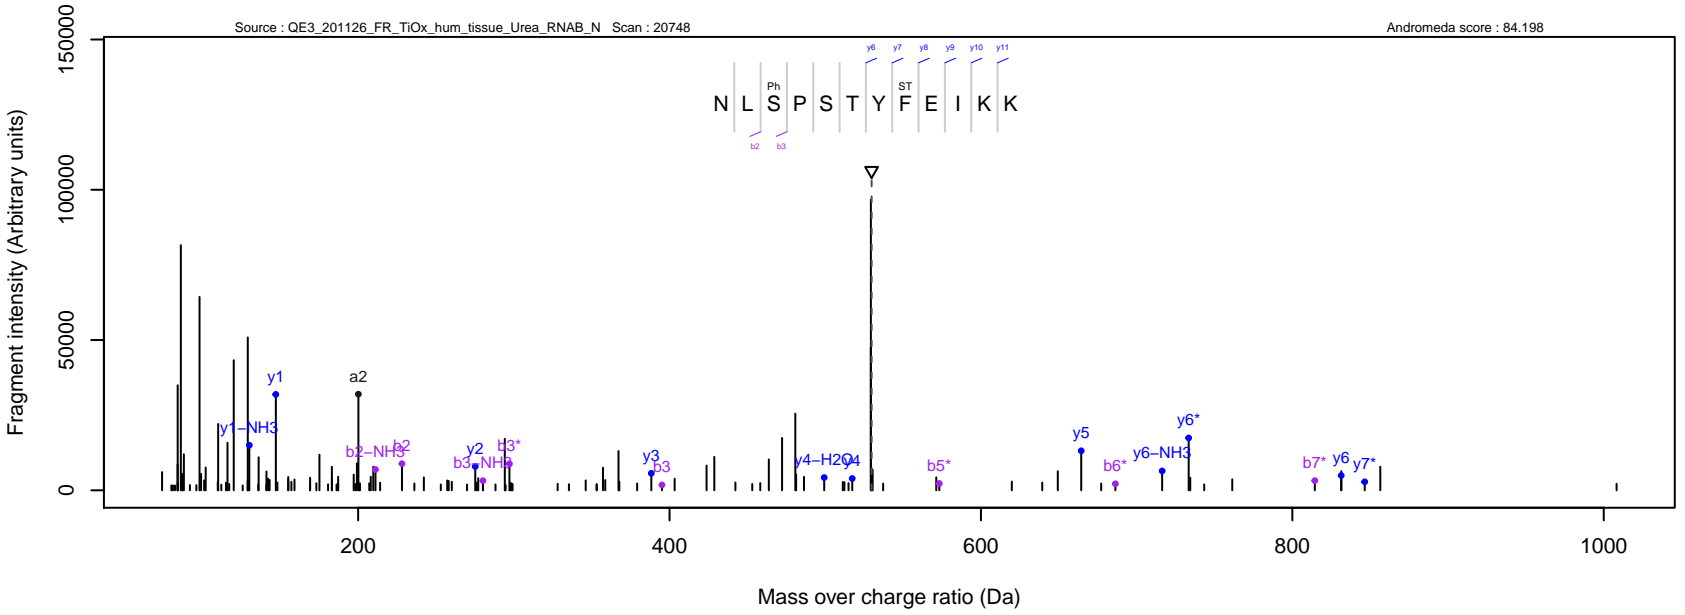

SDISPLT(Phospho (STY))PR-2+

Source : QE3\_201126\_FR\_TiOx\_hum\_tissue\_Urea\_RNAB\_H Scan : 20465

Andromeda score : 84.198

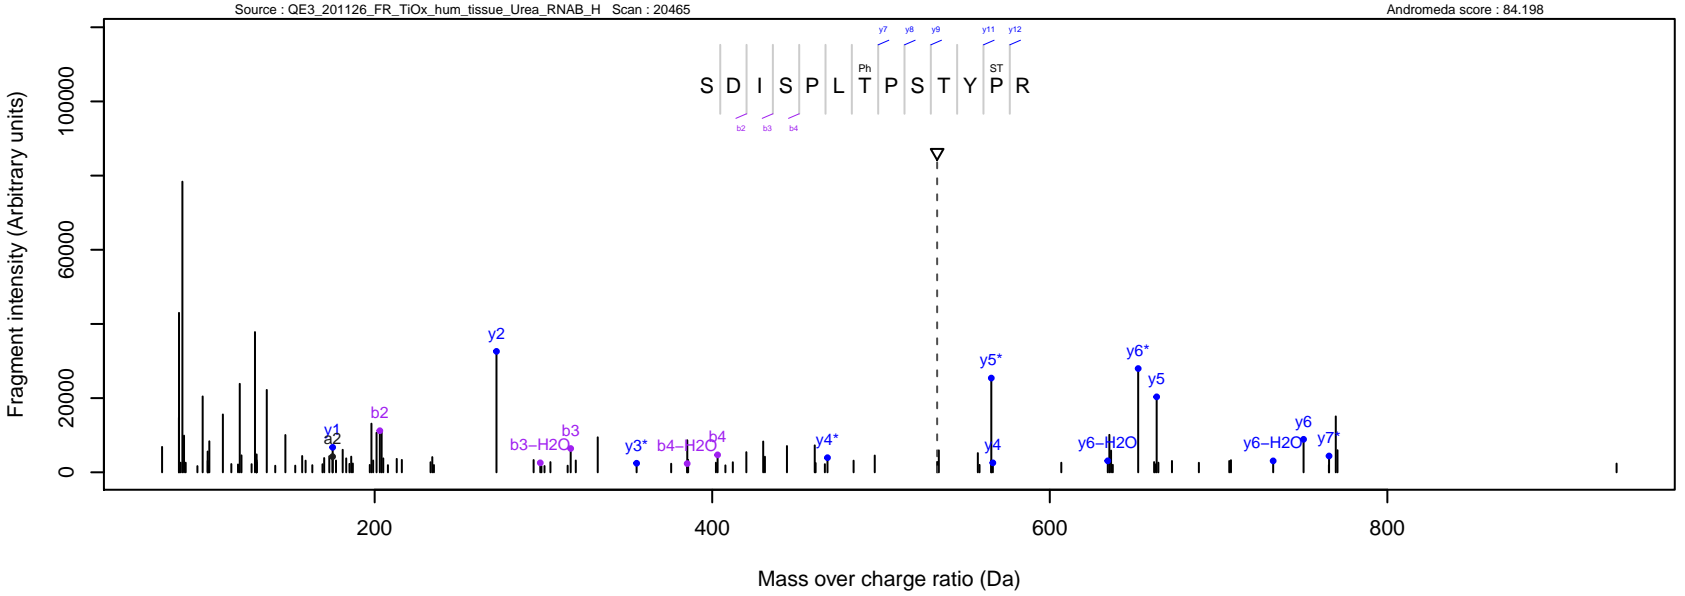

S(Phospho (STY))ISTVNLSENSVIPPDPYLECLSMGAAADR-3+

Source : QE3\_201126\_FR\_TiOx\_hum\_tissue\_Urea\_RNAB\_B Scan : 57664

Andromeda score : 84.198

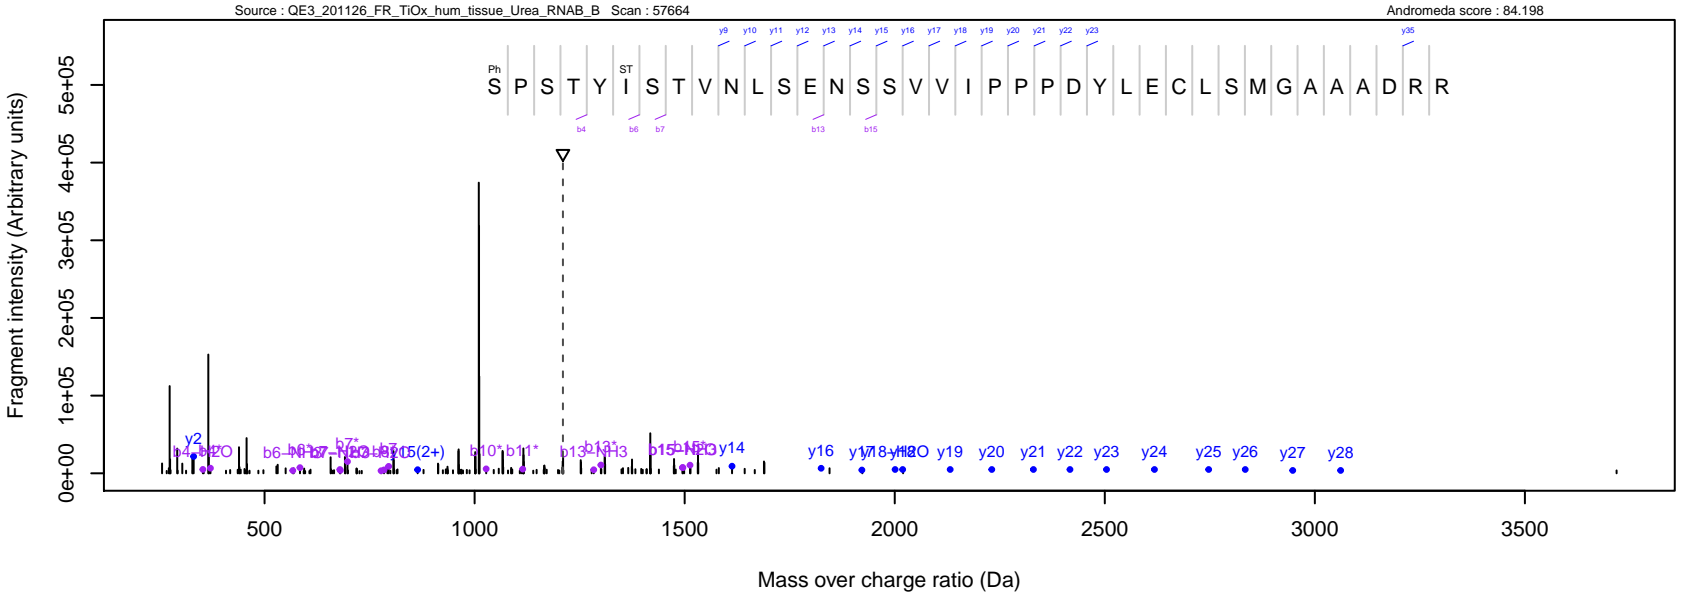

EHS(Phospho (STY))PY(Phospho (STY))GPSPLGWPSSETR-3+

Source : QE3\_201126\_FR\_TiOx\_hum\_tissue\_Urea\_RNAB\_H Scan : 38208

Andromeda score : 84.166

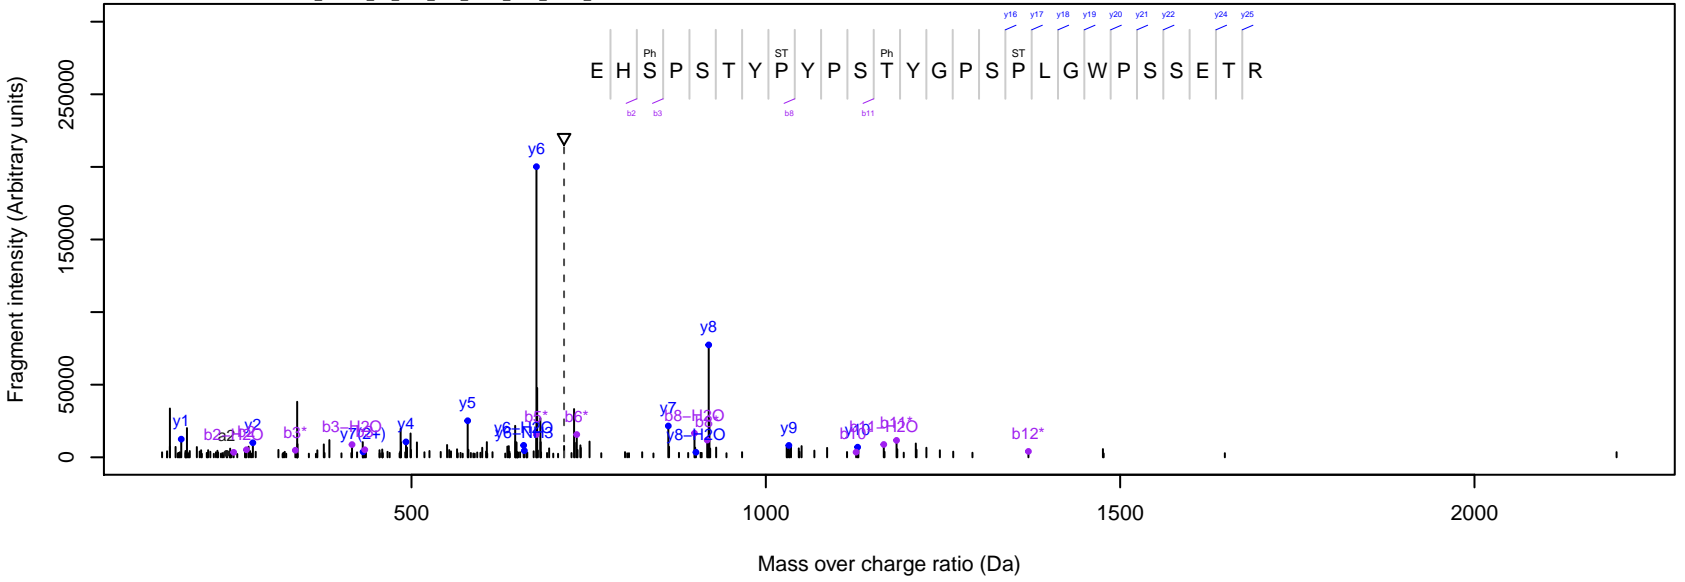

SKS(Phospho (STY))DGEAKPEPSPR-3+

Source : QE3\_201126\_FR\_TiOx\_hum\_tissue\_Urea\_RNAB\_H Scan : 4055

Andromeda score : 84.166

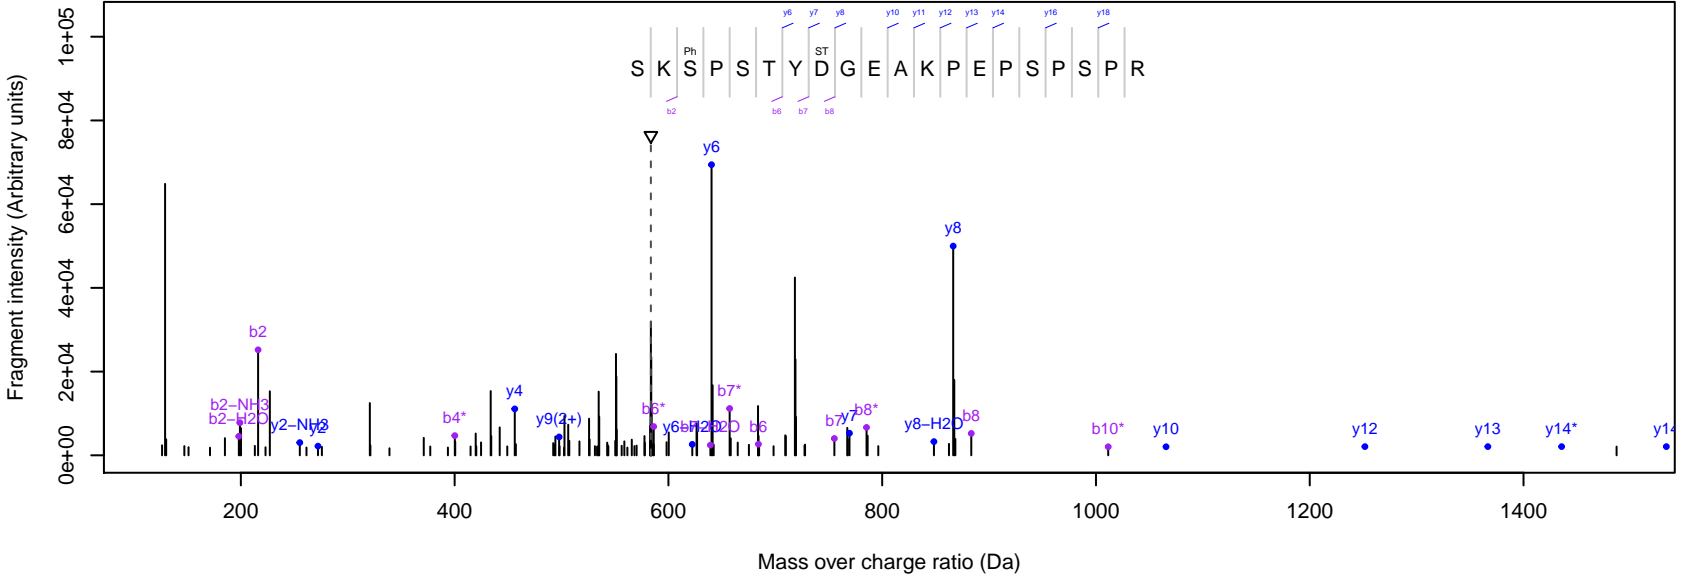

S(Phospho (STY))LDS(Phospho (STY))LDKCDMQILEER-3+

Source : QE3\_201126\_FR\_TiOx\_hum\_tissue\_Urea\_RNAB\_N Scan : 50246

Andromeda score : 84.166

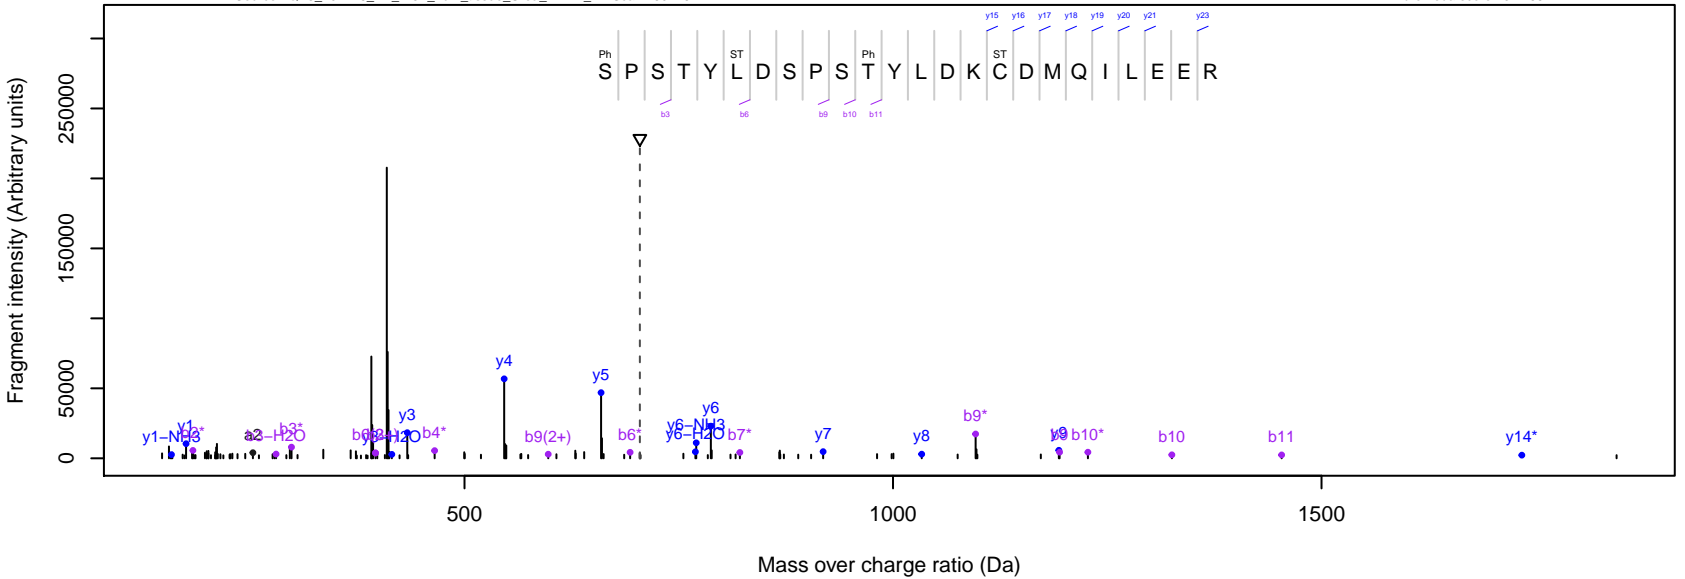

NQS(Phospho (STY))PTEAEKPASSSLPSSPPPQLLTR-3+

Source : QE3\_201126\_FR\_TiOx\_hum\_tissue\_Urea\_RNAB\_B Scan : 30067

Andromeda score : 84.152

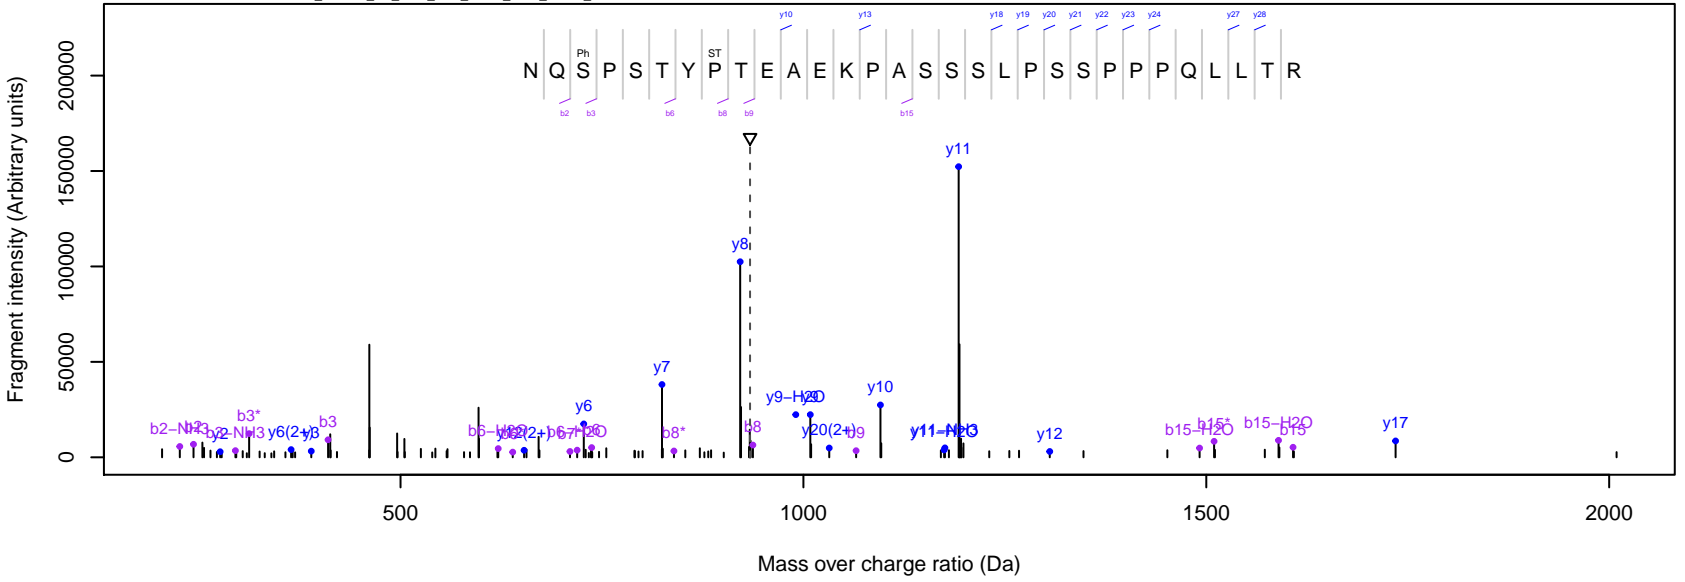

NTGVSPASRSPGTPTS(Phospho (STY))PSNLTSLGLK-3+

Source : QE3\_201126\_FR\_TiOx\_hum\_tissue\_Urea\_RNAB\_N Scan : 24236

Andromeda score : 84.152

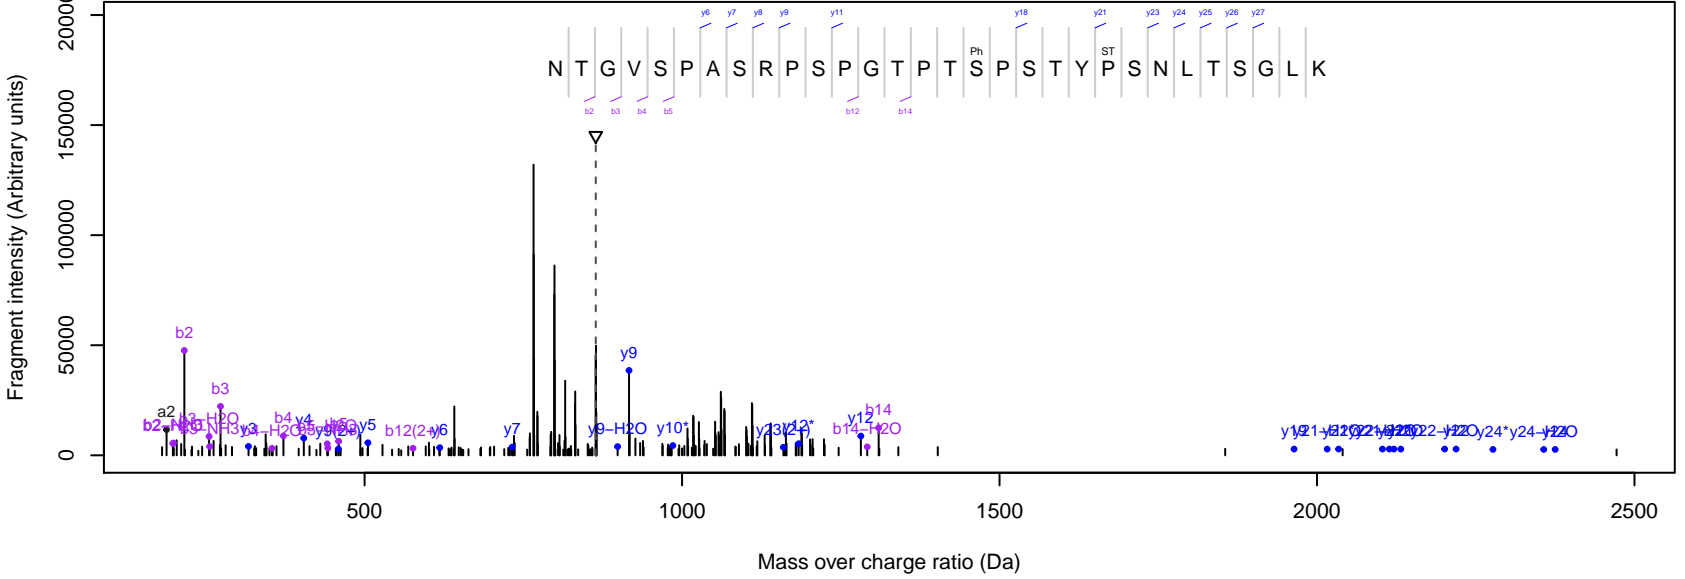

SQS(Phospho (STY))SEGVSSLSLSSPSNSLETQSQSLSR-3+

Source : QE3\_201126\_FR\_TiOx\_hum\_tissue\_Urea\_RNAB\_N Scan : 30090

Andromeda score : 84.107

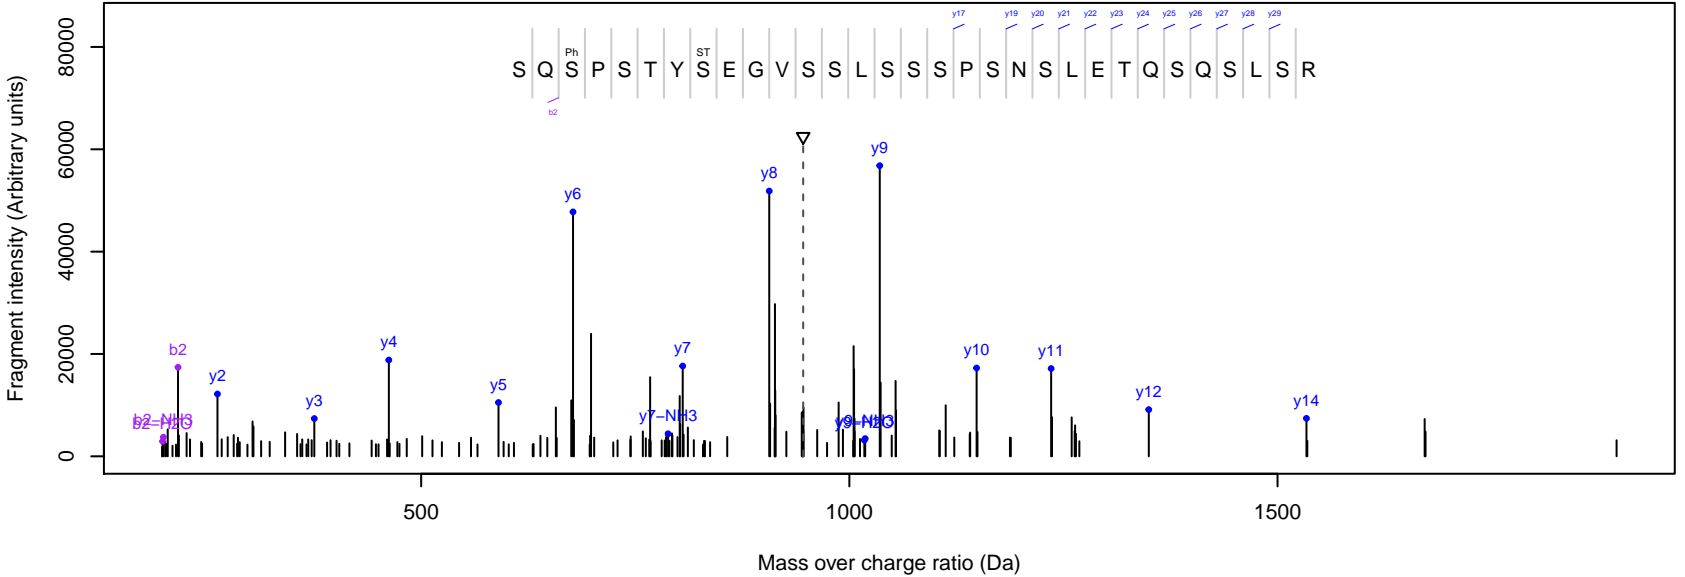



LGLPLLTDCAQPSRPHGS(Phospho (STY))PSR-3+

Source : QE3\_201126\_FR\_TiOx\_hum\_tissue\_Urea\_RNAB\_N Scan : 30566

Andromeda score : 83.992

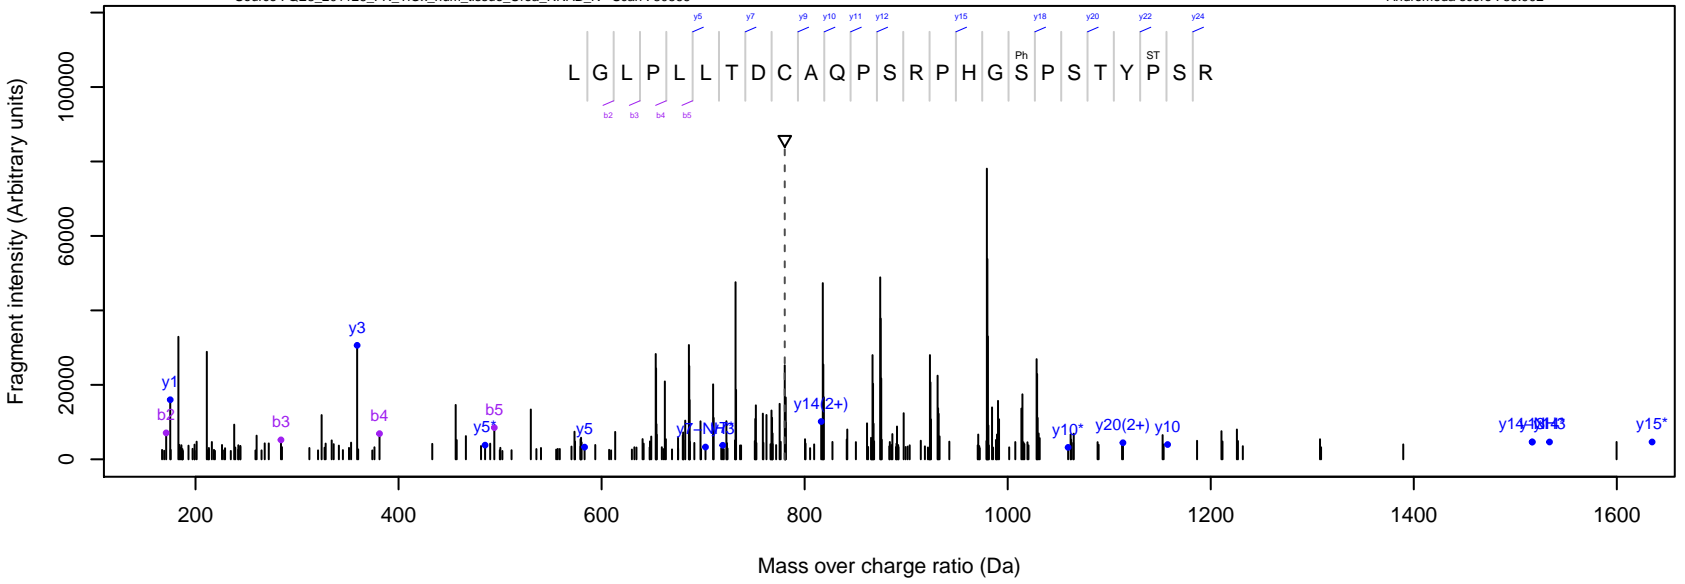

S(Phospho (STY))YDVPPPPM(Oxidation (M))EPDHPFYSNISK-3+

Source : QE3\_201126\_FR\_TiOx\_hum\_tissue\_Urea\_RNAB\_N Scan : 34928

Andromeda score : 83.992

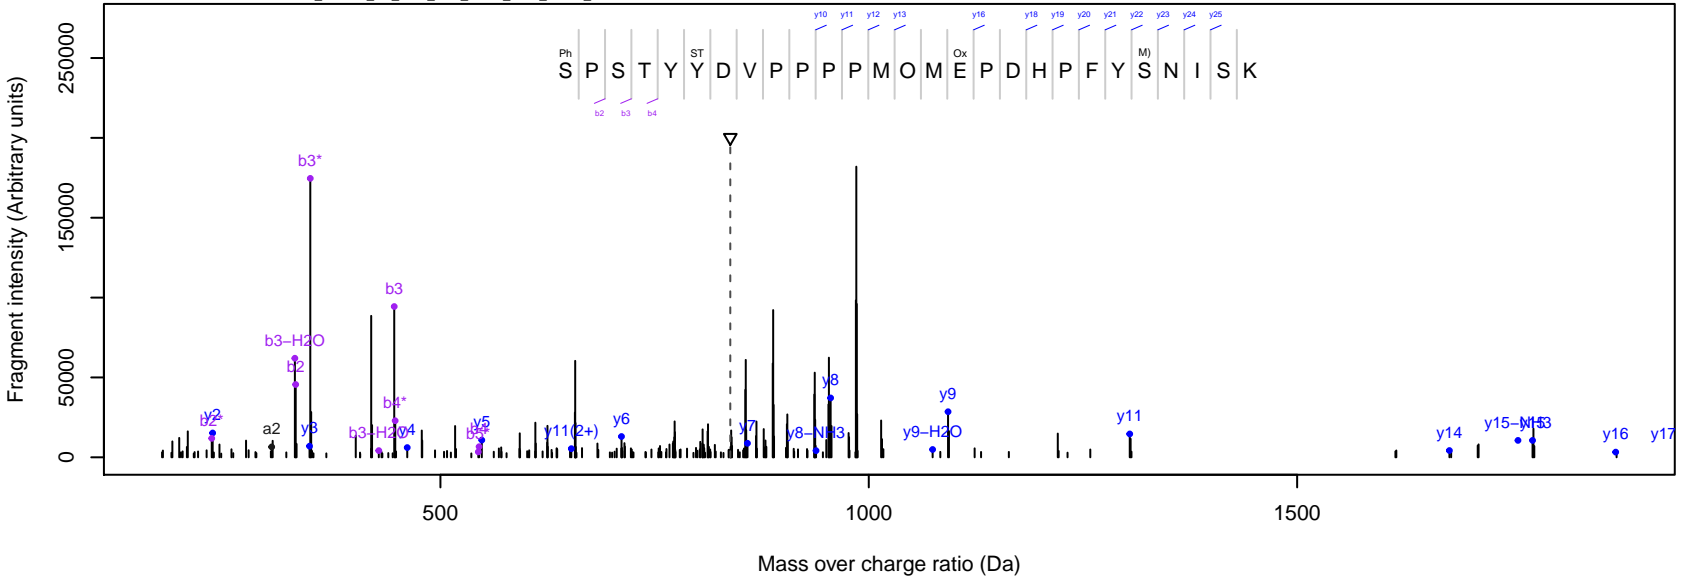

VEHGSGLTRT(Phospho (STY))PS(Phospho (STY))SEEISPTKFPGLYR-4+

Source : QE3\_201126\_FR\_TiOx\_hum\_tissue\_Urea\_RNAB\_B Scan : 32058

Andromeda score : 83.975

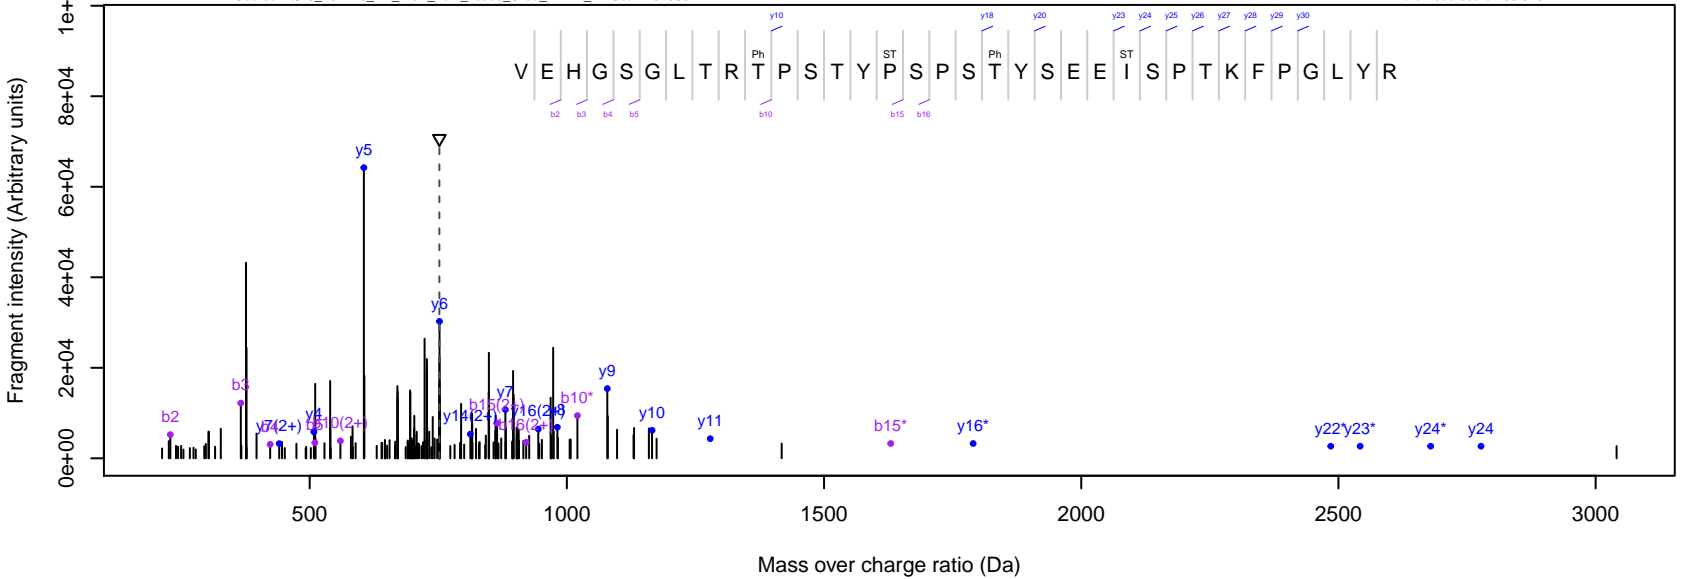

LSLS(Phospho (STY))PLR-2+

Source : QE3\_201126\_FR\_TiOx\_hum\_tissue\_Urea\_RNAB\_H Scan : 33431

Andromeda score : 83.948

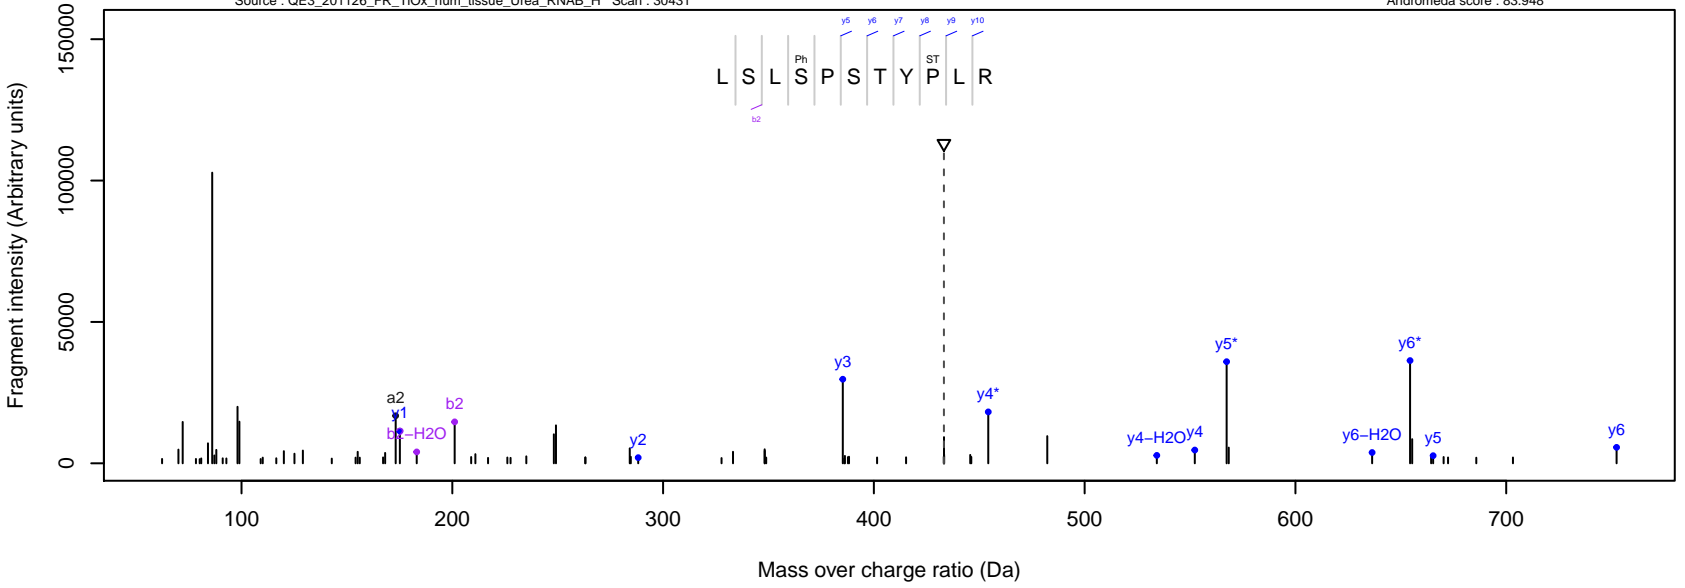

RGS(Phospho (STY))LGEEGSEPPPPPLPLAR-3+

Source : QE3\_201126\_FR\_TiOx\_hum\_tissue\_Urea\_RNAB\_H Scan : 33406

Andromeda score : 83.934

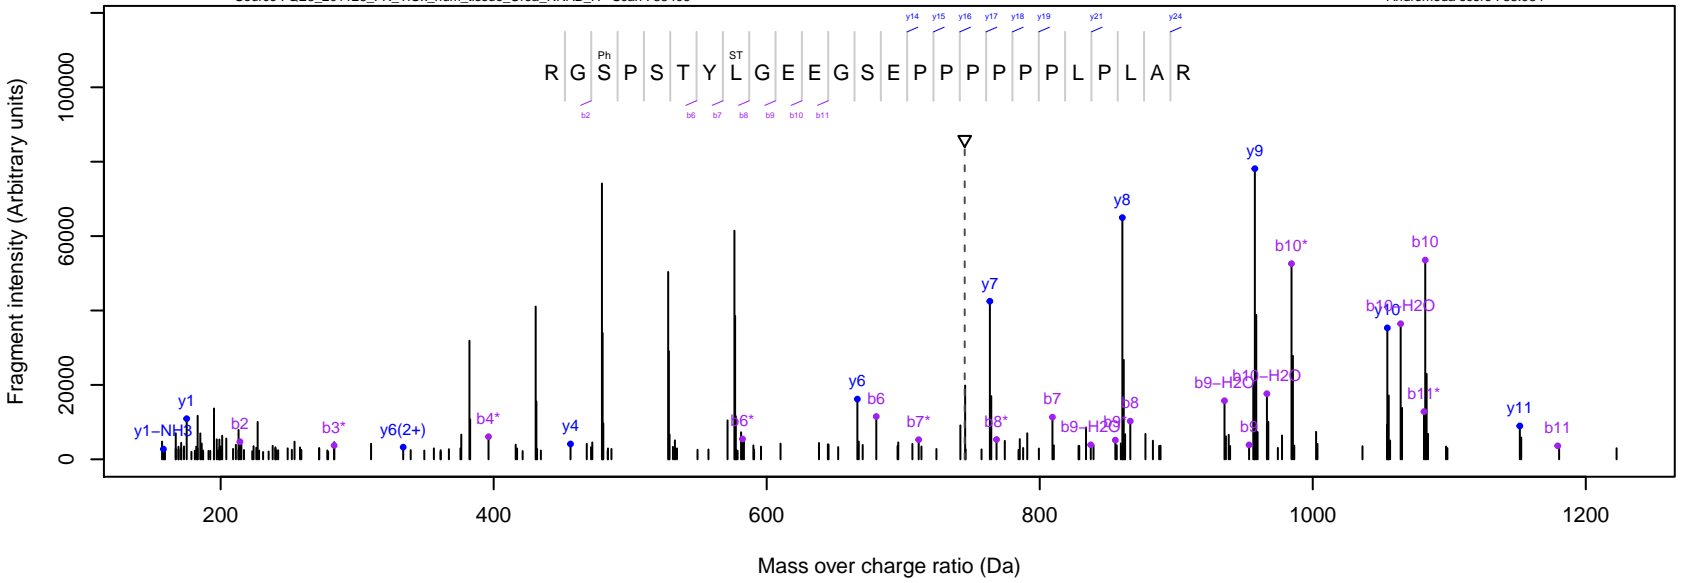

KMT(Phospho (STY))LVEEGFNPAVIKDALYFLDDTAK-3+

Source : QE3\_201126\_FR\_TiOx\_hum\_tissue\_Urea\_RNAB\_H Scan : 61757

Andromeda score : 83.917

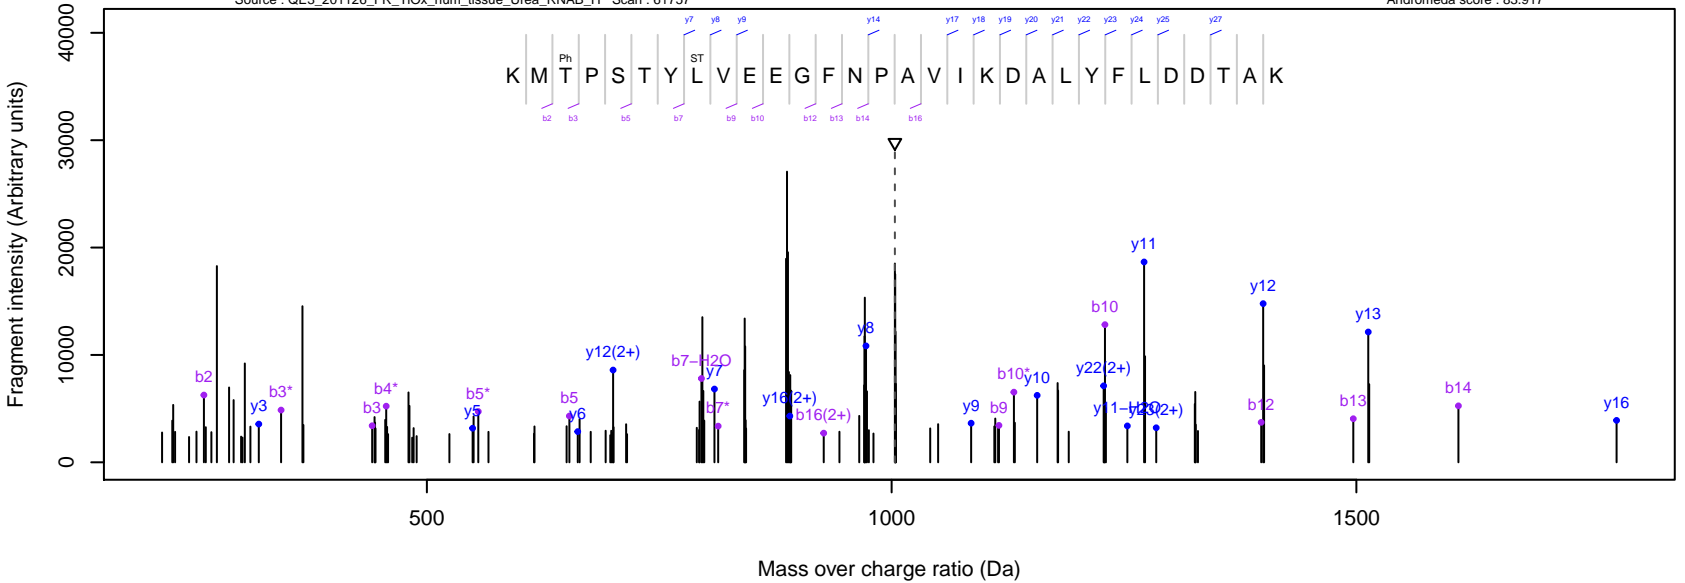

DYEPPS(Phospho (STY))PSPAPGAPPPPQR-3+

Source : QE3\_201126\_FR\_TiOx\_hum\_tissue\_Urea\_RNAB\_N Scan : 25673

Andromeda score : 83.905

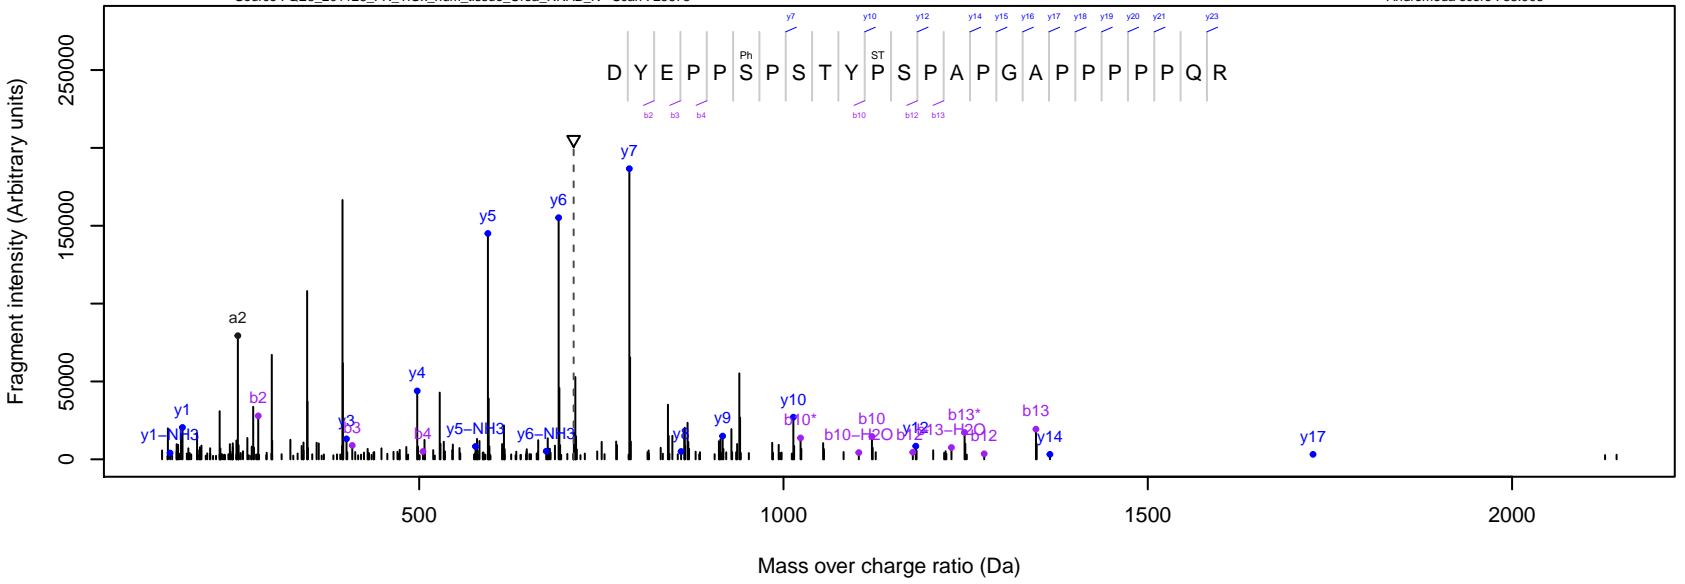

MCDFGISGLVDS(Phospho (STY))VAK-2+

Source : QE3\_201126\_FR\_TiOx\_hum\_tissue\_Urea\_RNAB\_B Scan : 53710

Andromeda score : 83.894

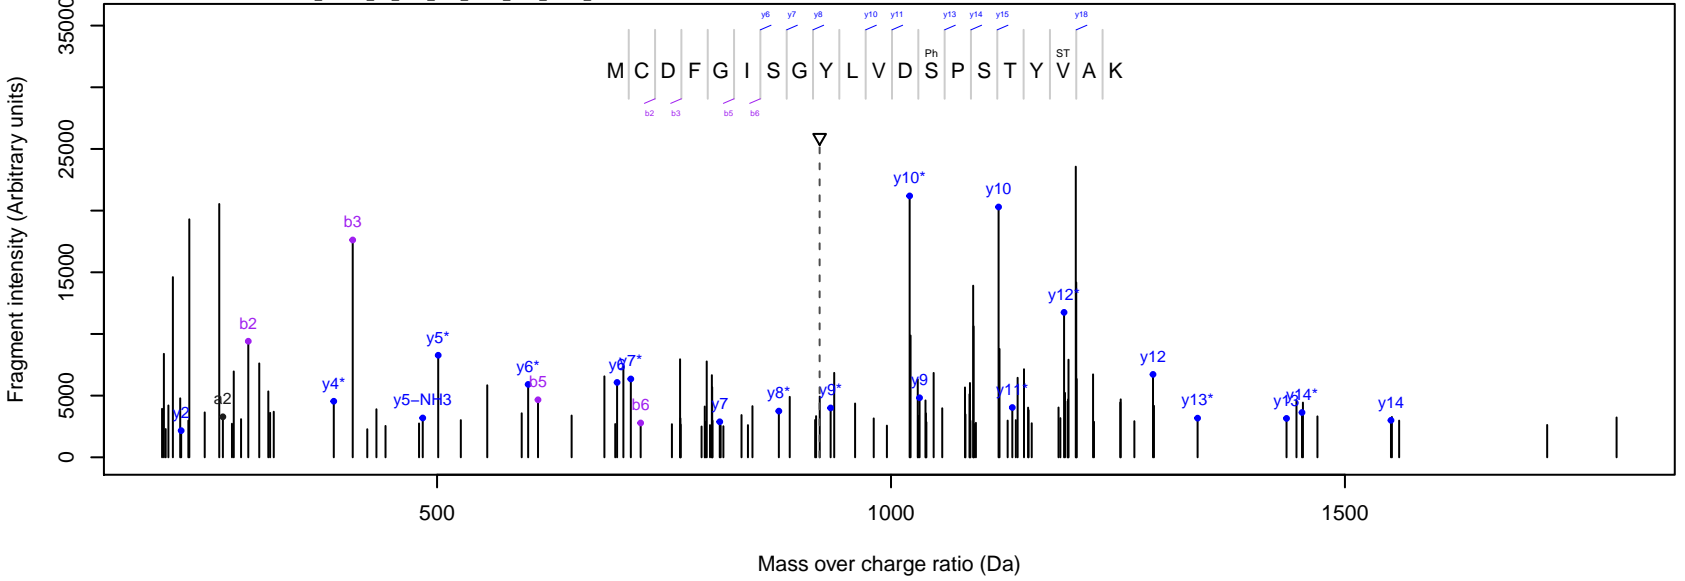

KLS(Phospho (STY))SGDLR-2+

Source : QE3\_201126\_FR\_TiOx\_hum\_tissue\_Urea\_RNAB\_H Scan : 8046

Andromeda score : 83.883

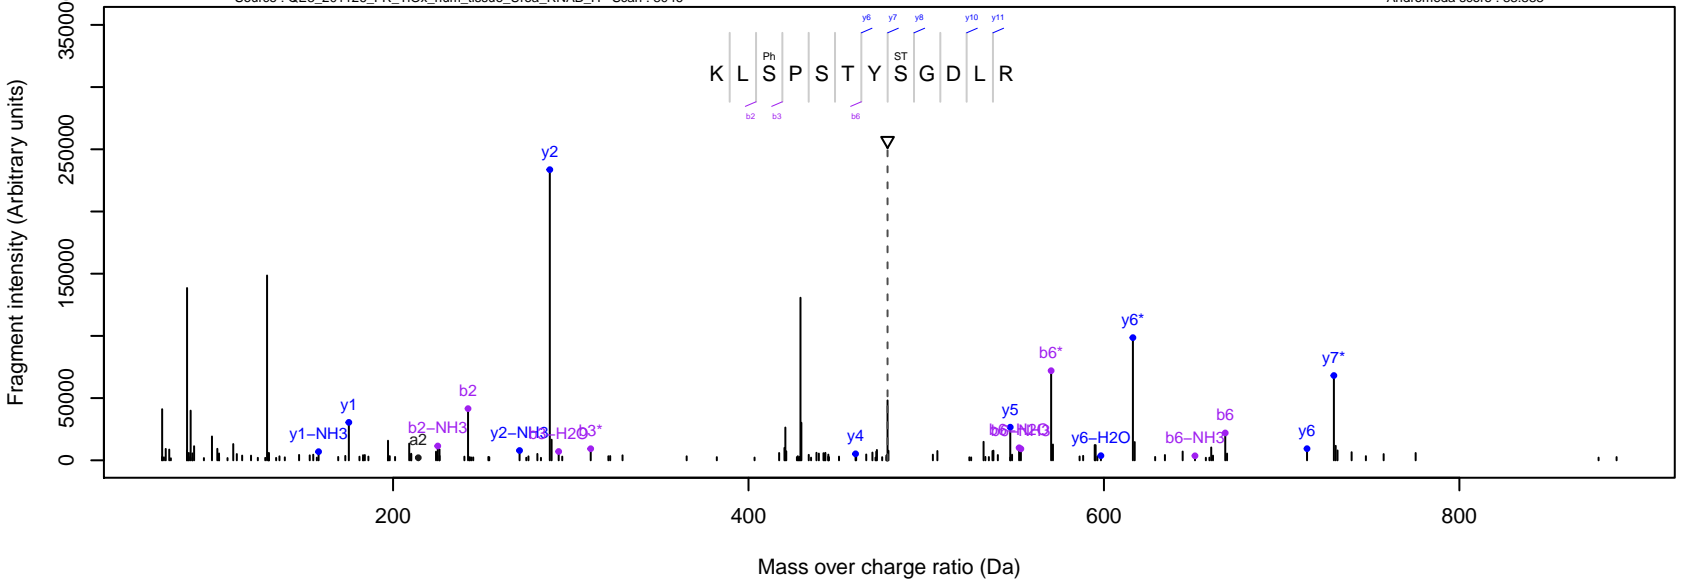



**GNKSPS(Phospho (STY))PPDGS(Phospho (STY))PAATPEIR-3+**

Source : QE3\_201126\_FR\_TIOx\_hum\_tissue\_Urea\_RNAB\_N Scan : 18683

Andromeda score : 83.881

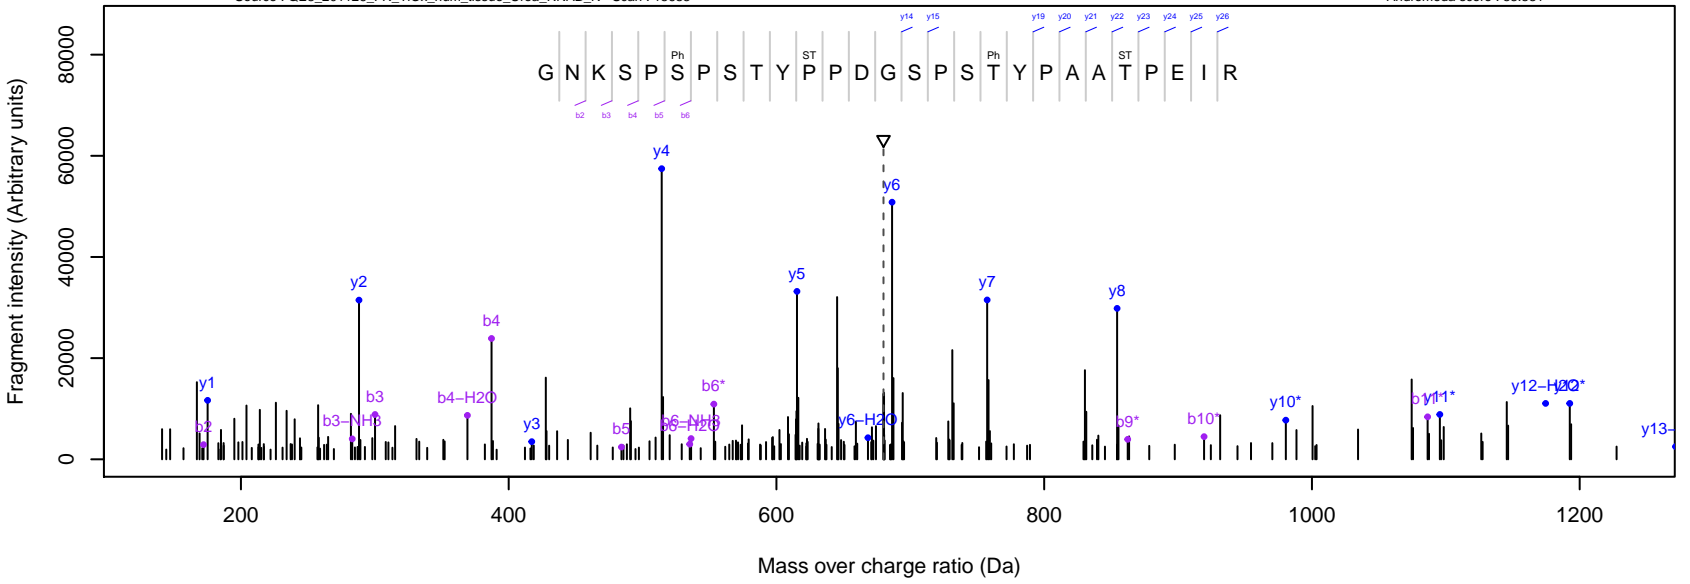

**AGEQQLS(Phospho (STY))EPEDM(Oxidation (M))EM(Oxidation (M))EAGDTDDPPR-3+**

Source : QE3\_201126\_FR\_TIOx\_hum\_tissue\_Urea\_RNAB\_N Scan : 20341

Andromeda score : 83.879

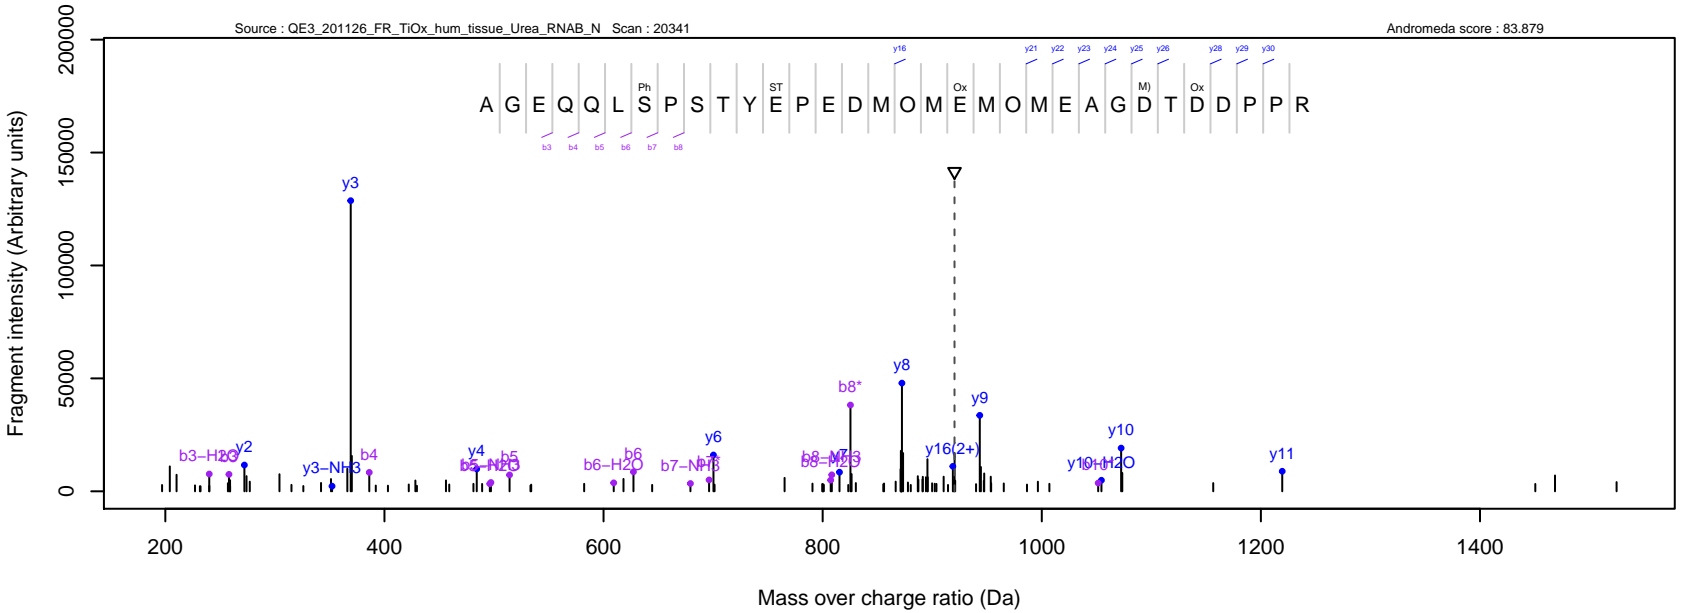

**SISREPS(Phospho (STY))PALGNLDGSGLLPR-3+**

Source : QE3\_201126\_FR\_TIOx\_hum\_tissue\_Urea\_RNAB\_H Scan : 40888

Andromeda score : 83.879

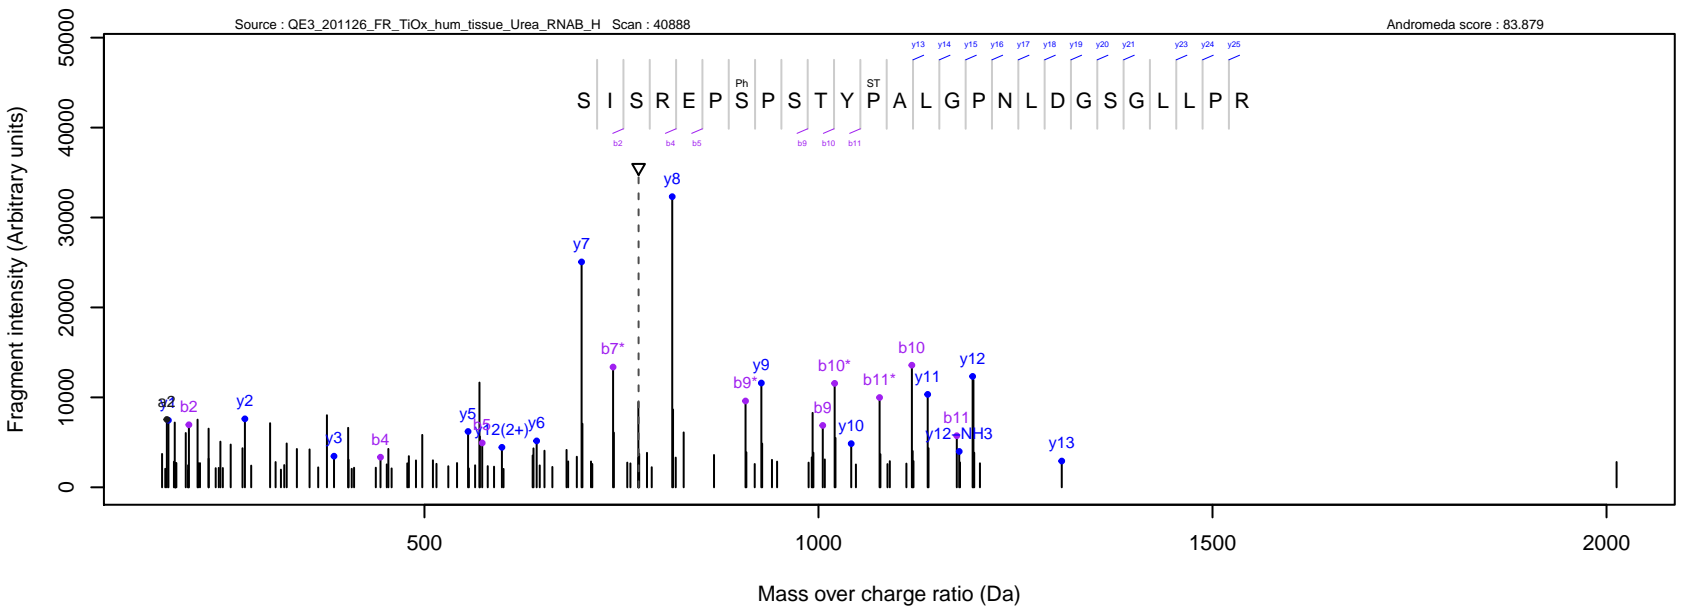

SPFEIIS(Phospho (STY))PPAS(Phospho (STY))PPEMVGQR-3+

Source : QE3\_201126\_FR\_TiOx\_hum\_tissue\_Urea\_RNAB\_H Scan : 58746

Andromeda score : 83.871

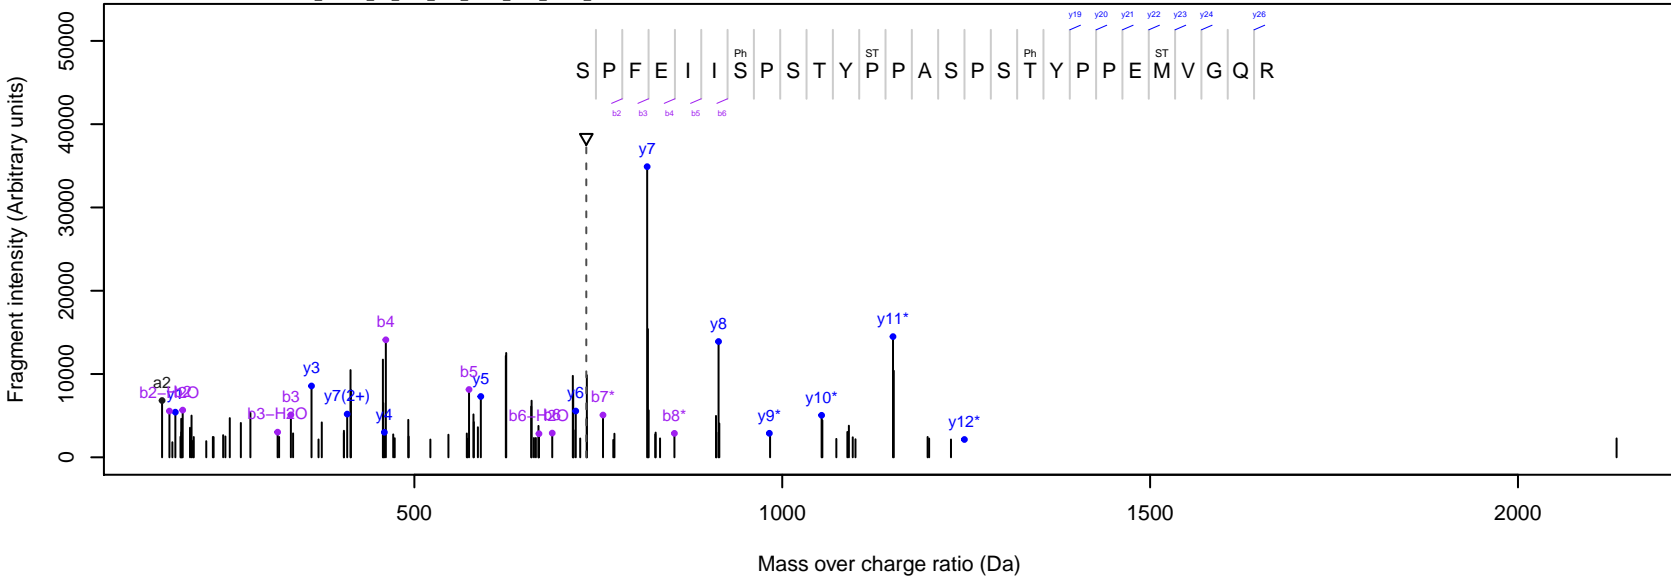

DLS(Phospho (STY))LEEIQK-2+

Source : QE3\_201126\_FR\_TiOx\_hum\_tissue\_Urea\_RNAB\_N Scan : 30440

Andromeda score : 83.869

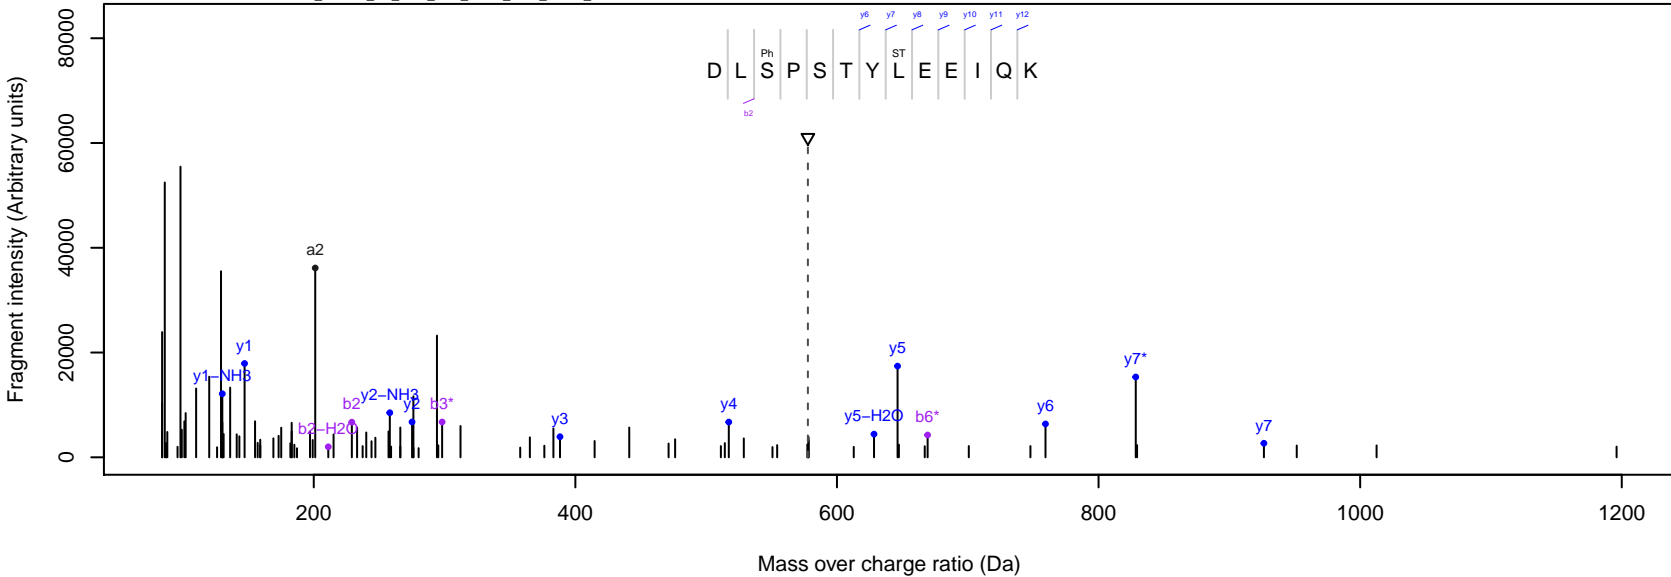

QGS(Phospho (STY))GVILRQEEAEYVR-3+

Source : QE3\_201126\_FR\_TiOx\_hum\_tissue\_Urea\_RNAB\_B Scan : 27089

Andromeda score : 83.849

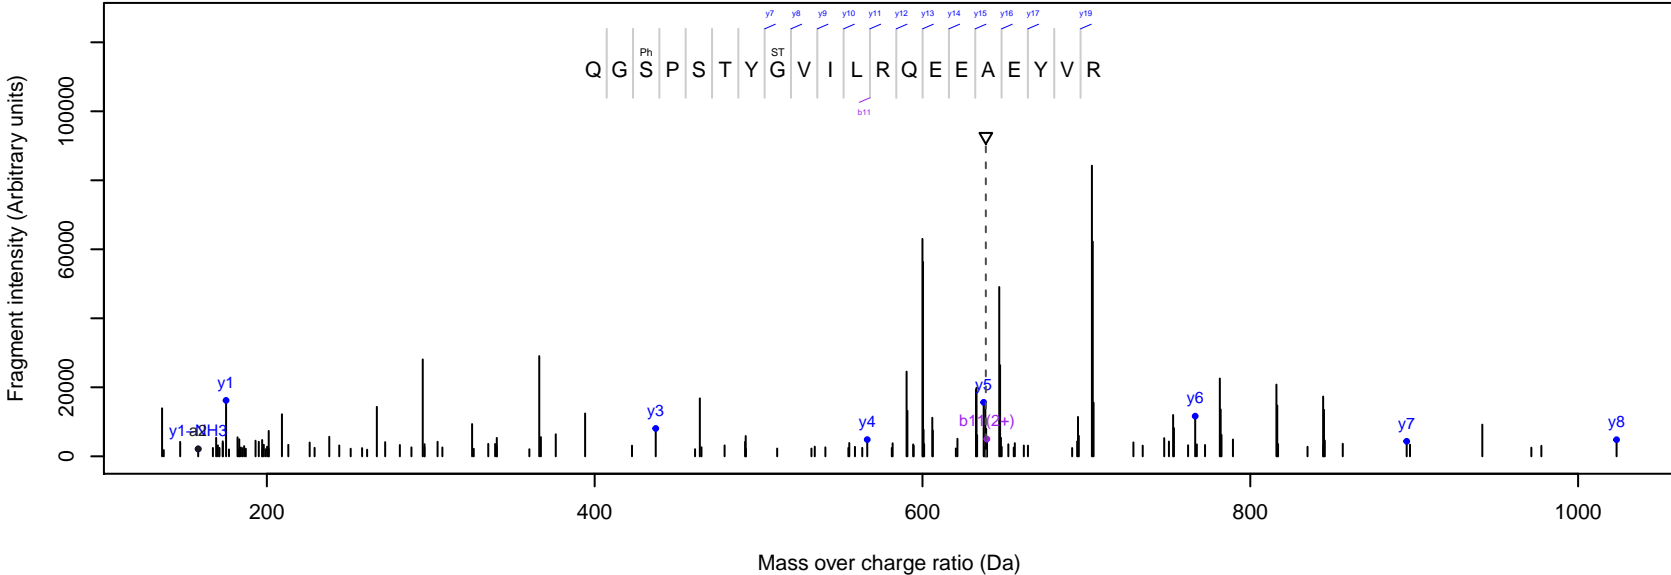



VVPGQFDDADS(Phospho (STY))SDSENRLK-3+

Source : QE3\_201126\_FR\_TiOx\_hum\_tissue\_Urea\_RNAB\_H Scan : 20272

Andromeda score : 83.826

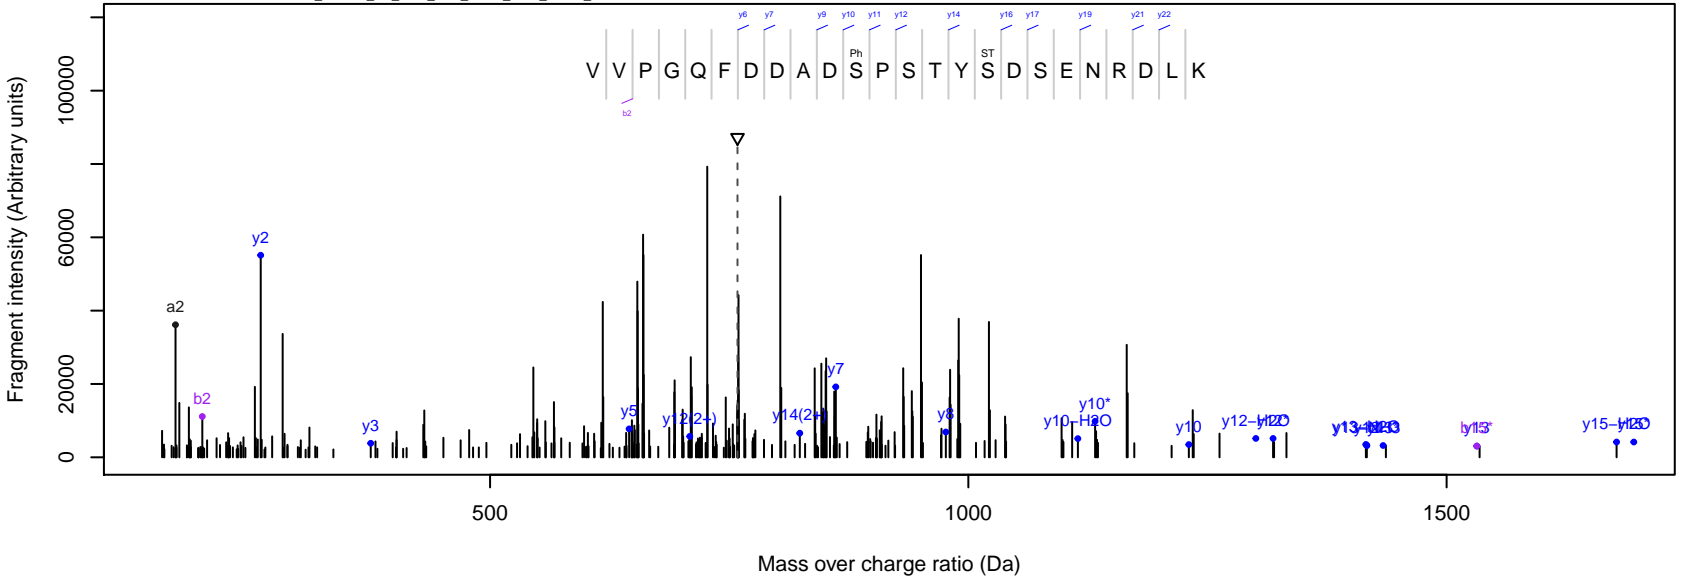

YSHSYLS(Phospho (STY))DS(Phospho (STY))DTEAK-2+

Source : QE3\_201126\_FR\_TiOx\_hum\_tissue\_Urea\_RNAB\_N Scan : 17908

Andromeda score : 83.729

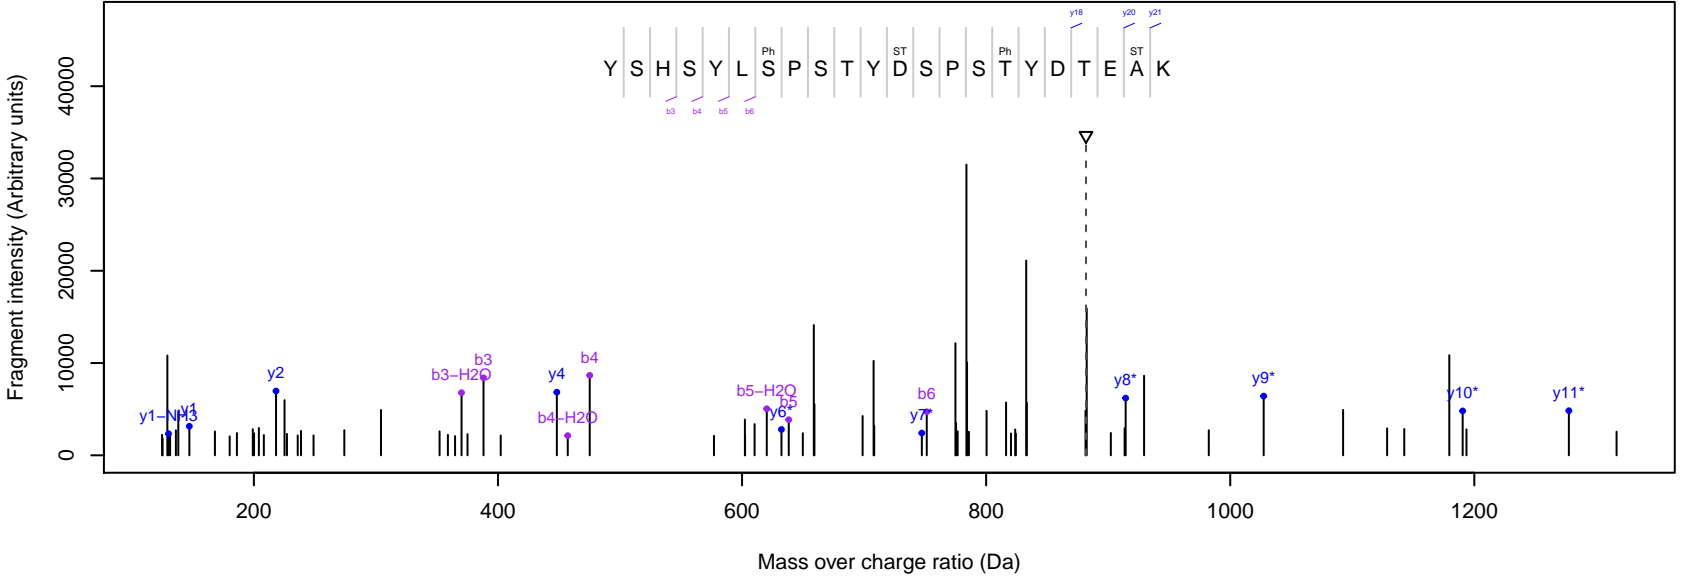

VIPAKS(Phospho (STY))PPPPHSTQLGAPSR-3+

Source : QE3\_201126\_FR\_TiOx\_hum\_tissue\_Urea\_RNAB\_N Scan : 12603

Andromeda score : 83.701

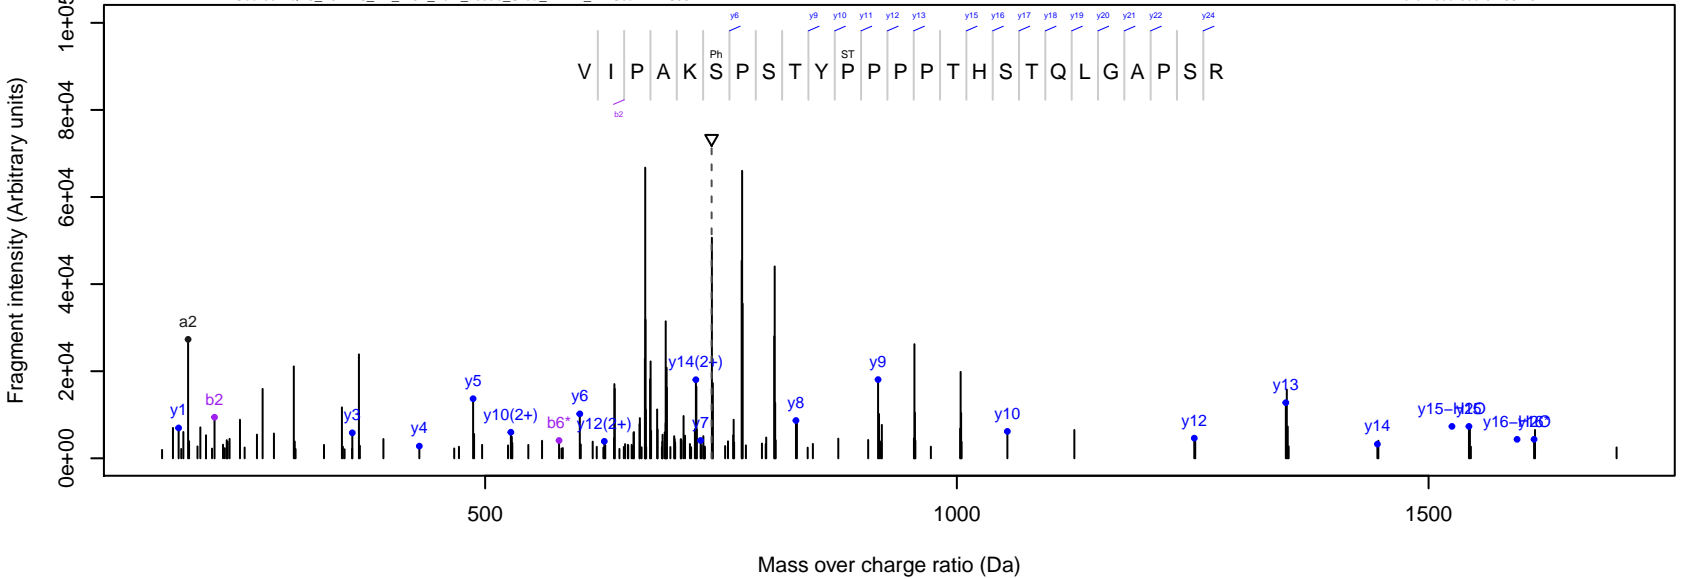



QRS(Phospho (STY))LS(Phospho (STY))PVAAPPLREPR-3+

Source : QE3\_201126\_FR\_TiOx\_hum\_tissue\_Urea\_RNAB\_B Scan : 21403

Andromeda score : 83.666

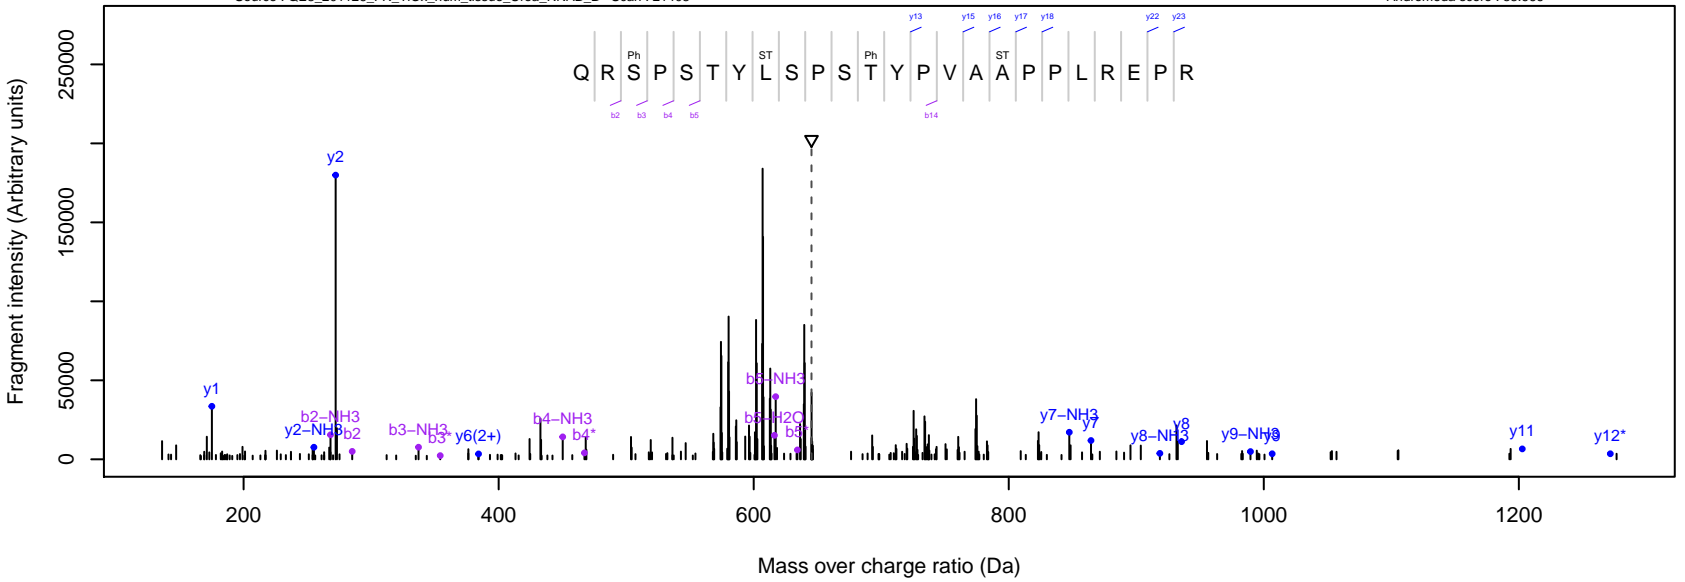

FHPEPYGLEDDQRS(Phospho (STY))MGYDDL DYGM(Oxidation (M))MSDYGTAR-4+

Source : QE3\_201126\_FR\_TiOx\_hum\_tissue\_Urea\_RNAB\_N Scan : 43560

Andromeda score : 83.59

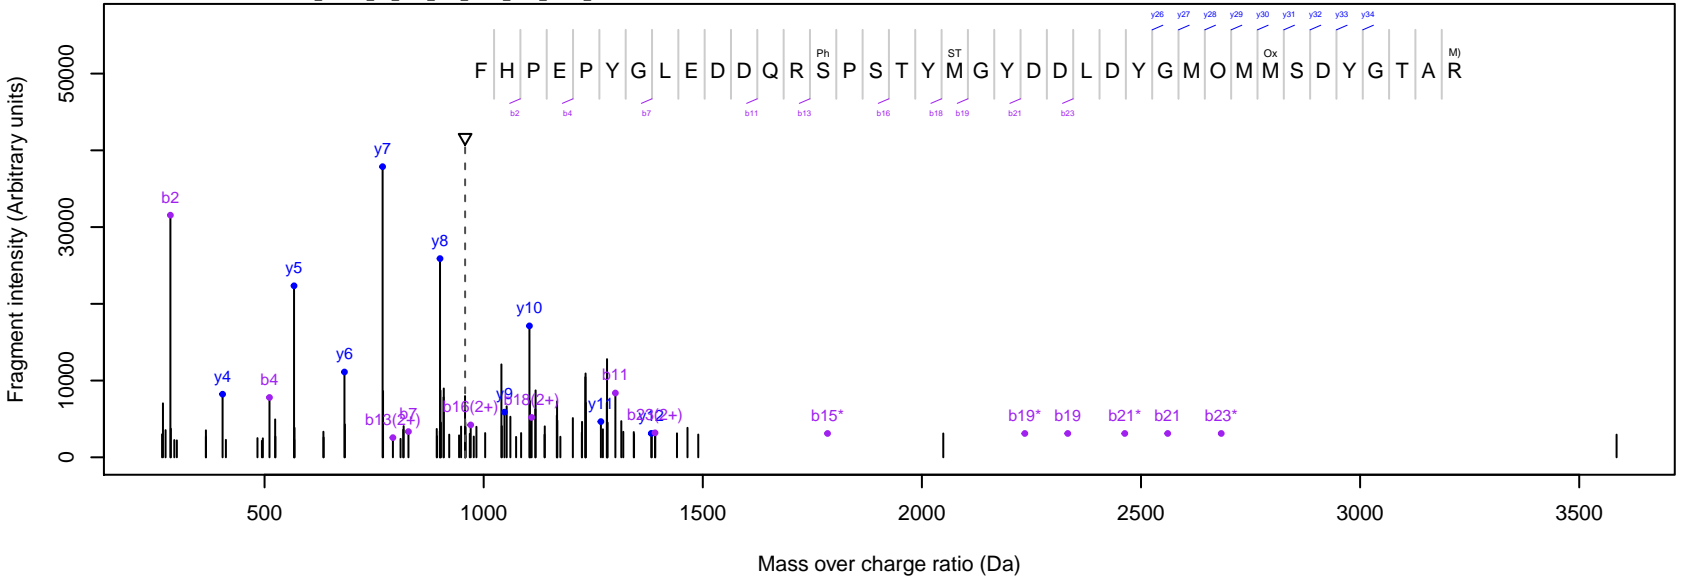

GISLNPEQWSQLKEIQIS(Phospho (STY))DIDDAVR-3+

Source : QE3\_201126\_FR\_TiOx\_hum\_tissue\_Urea\_RNAB\_B Scan : 58304

Andromeda score : 83.559

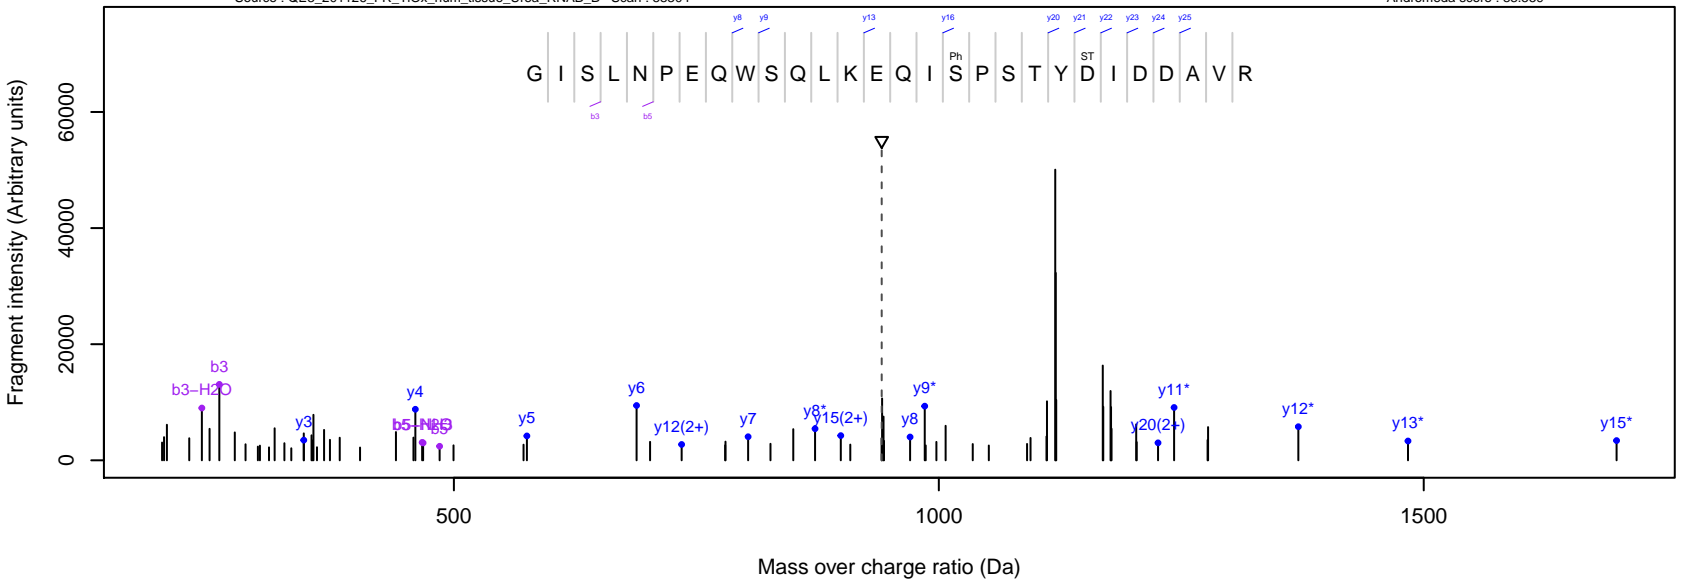

SEHSYS(Phospho (STY))ESGASGSSFEELDLEGEPLGESR-3+

Source : QE3\_201126\_FR\_TiOx\_hum\_tissue\_Urea\_RNAB\_N Scan : 43114

Andromeda score : 83.559

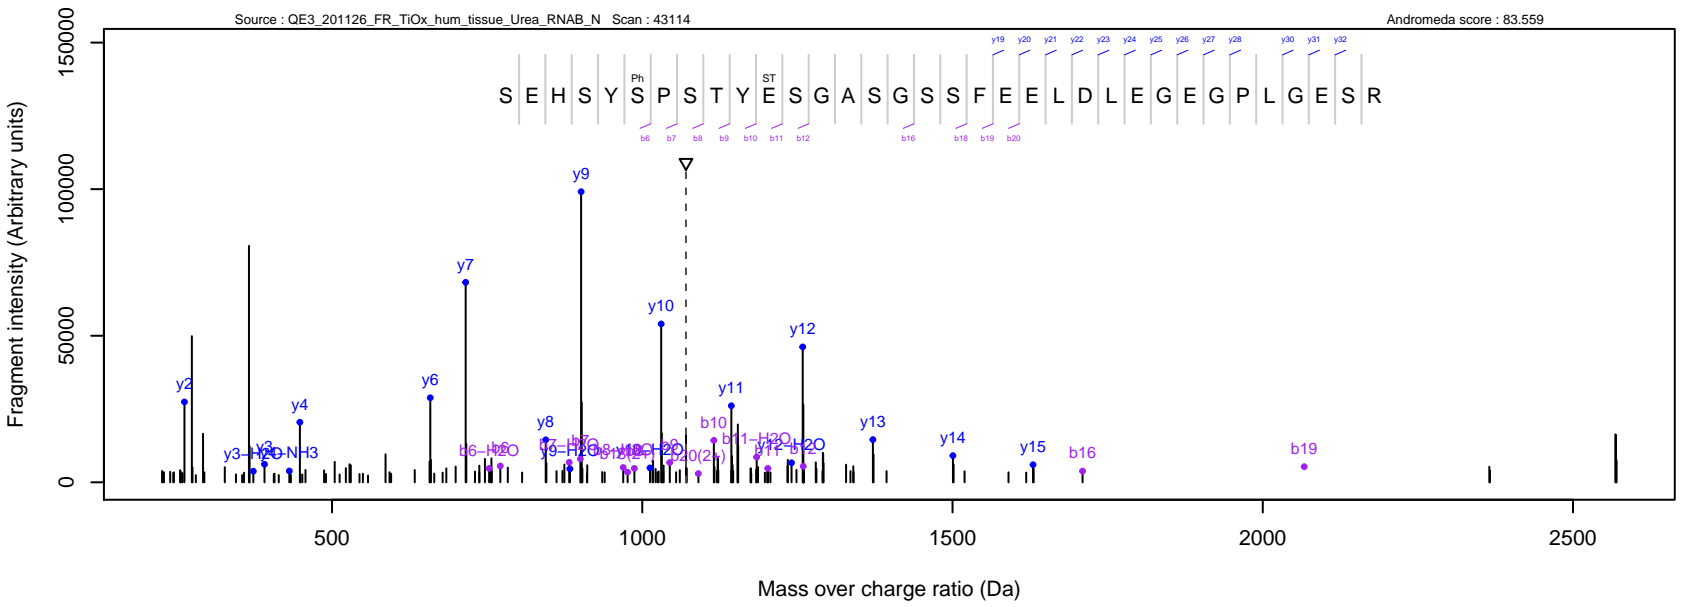

S(Phospho (STY))LEPAENVHGAGGAFPASQTPSKPASADGHR-4+

Source : QE3\_201126\_FR\_TiOx\_hum\_tissue\_Urea\_RNAB\_N Scan : 16387

Andromeda score : 83.559

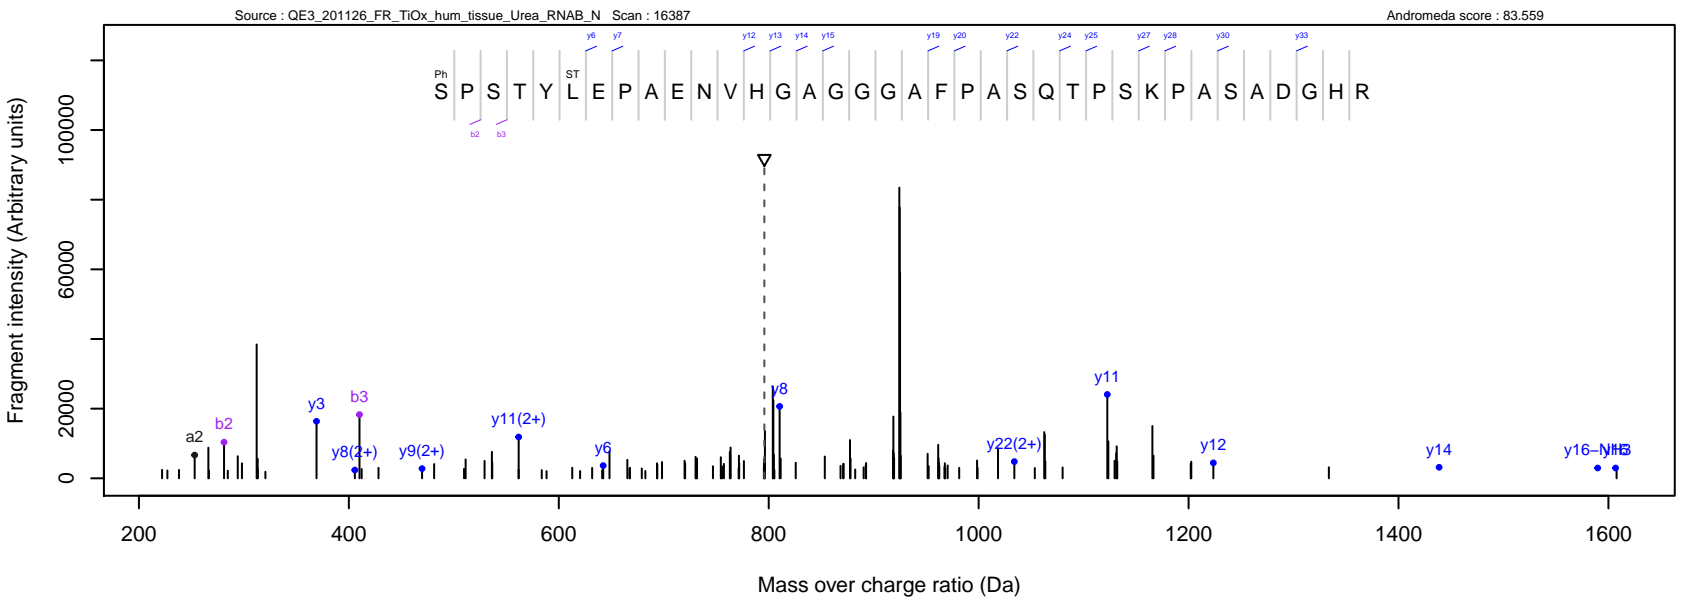

LKLEDDS(Phospho (STY))EES(Phospho (STY))DAEFDEGFKVPGLFK-3+

Source : QE3\_201126\_FR\_TiOx\_hum\_tissue\_Urea\_RNAB\_H Scan : 59154

Andromeda score : 83.557

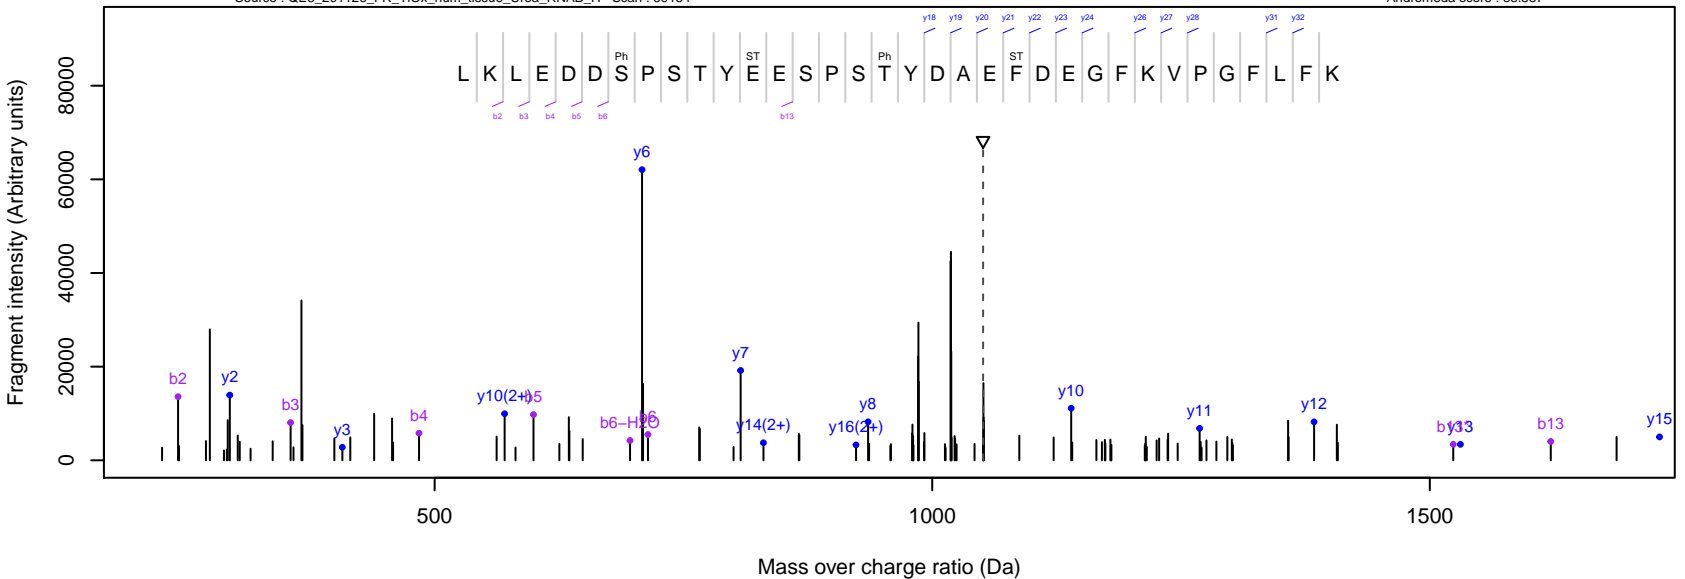

SHSESASPALSPPNLS(Phospho (STY))PTGWSQPK-3+

Source : QE3\_201126\_FR\_TIOx\_hum\_tissue\_Urea\_RNAB\_H Scan : 28478

Andromeda score : 83.557

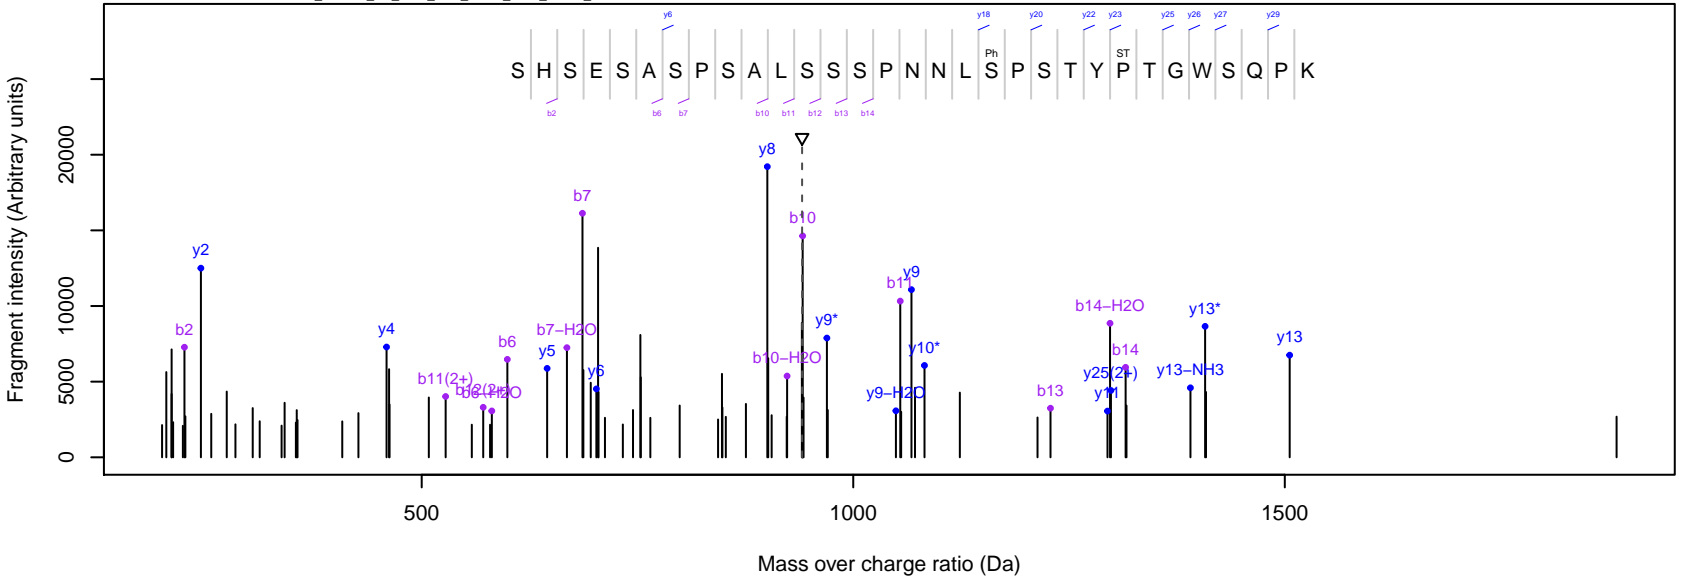

(Acetyl (Protein N-term))SSS(Phospho (STY))PVNVKK-2+

Source : QE3\_201126\_FR\_TIOx\_hum\_tissue\_Urea\_RNAB\_H Scan : 7580

Andromeda score : 83.499

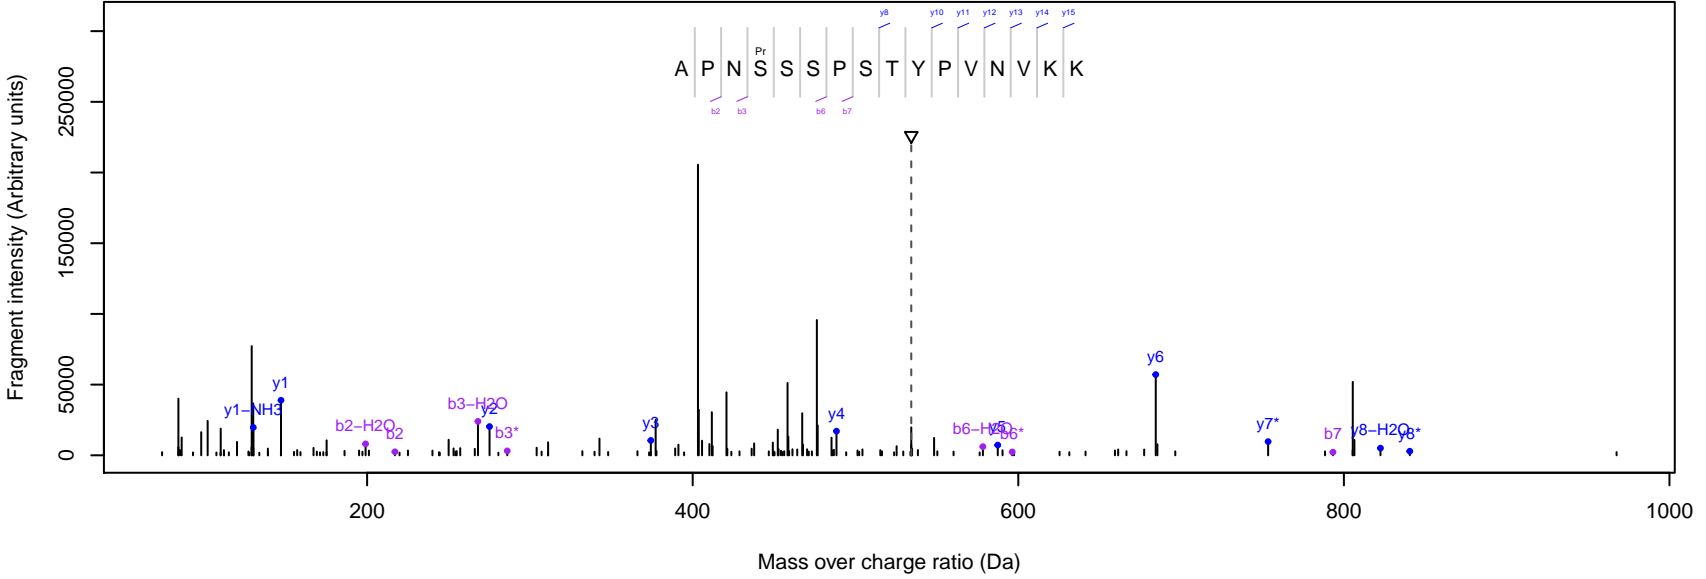

VSIGNITLSPAIS(Phospho (STY))RHSPVQM(Oxidation (M))NR-3+

Source : QE3\_201126\_FR\_TIOx\_hum\_tissue\_Urea\_RNAB\_H Scan : 29357

Andromeda score : 83.467

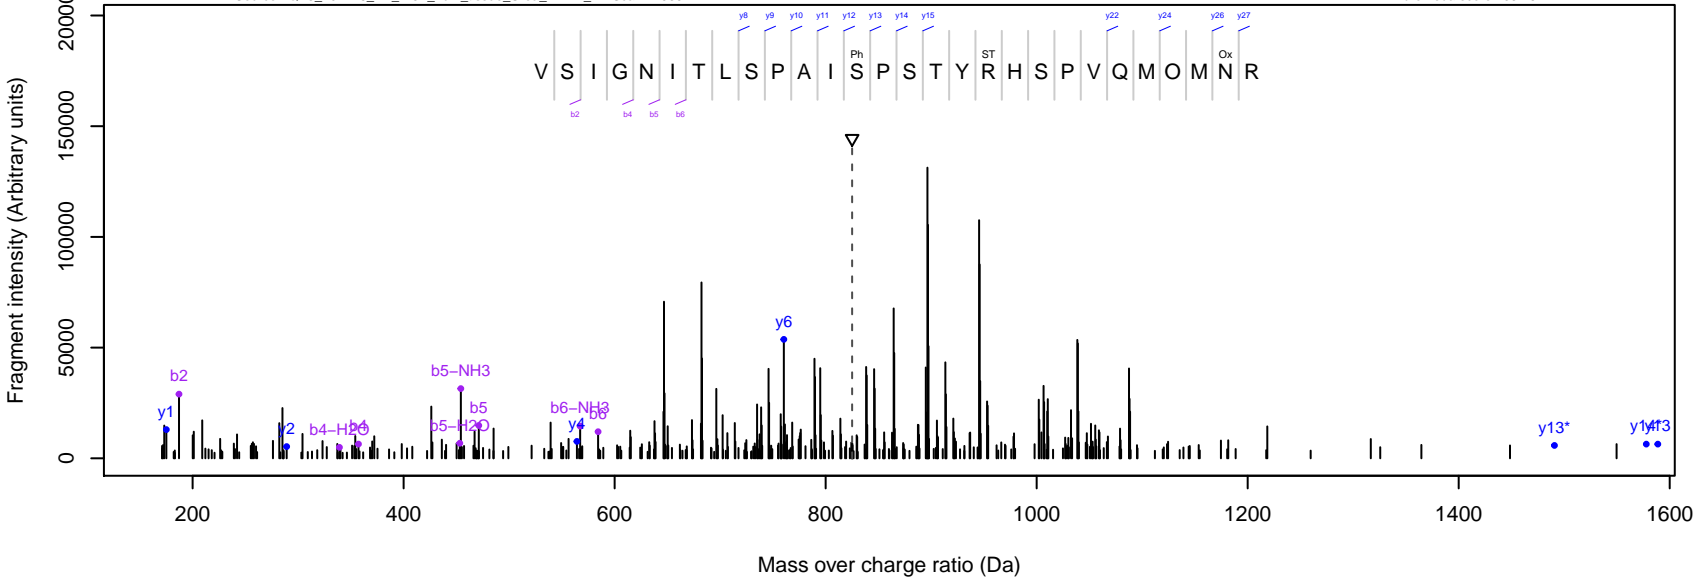



SAS(Phospho (STY))EP SLHR-2+

Source : QE3\_201126\_FR\_TiOx\_hum\_tissue\_Urea\_RNAB\_H Scan : 6596

Andromeda score : 83.438

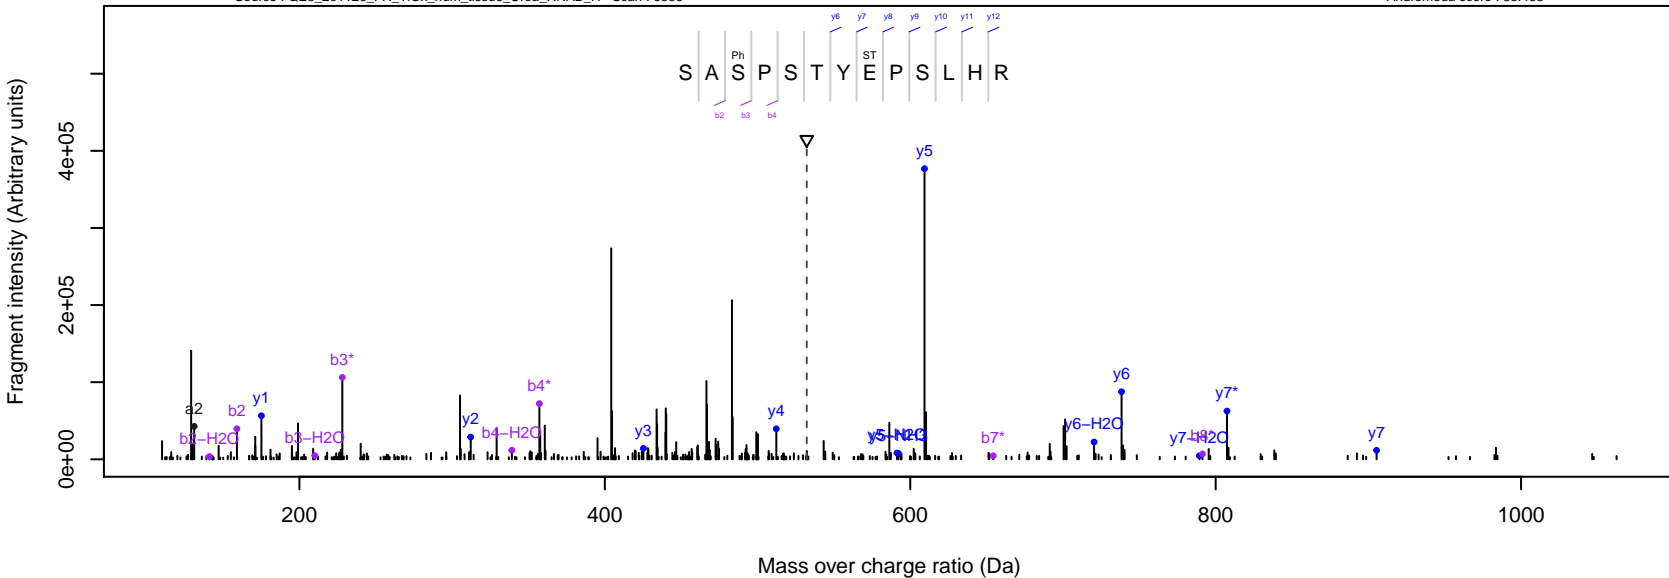

KASS(Phospho (STY))PS(Phospho (STY))PLTIGTPESQR-3+

Source : QE3\_201126\_FR\_TiOx\_hum\_tissue\_Urea\_RNAB\_N Scan : 22527

Andromeda score : 83.436

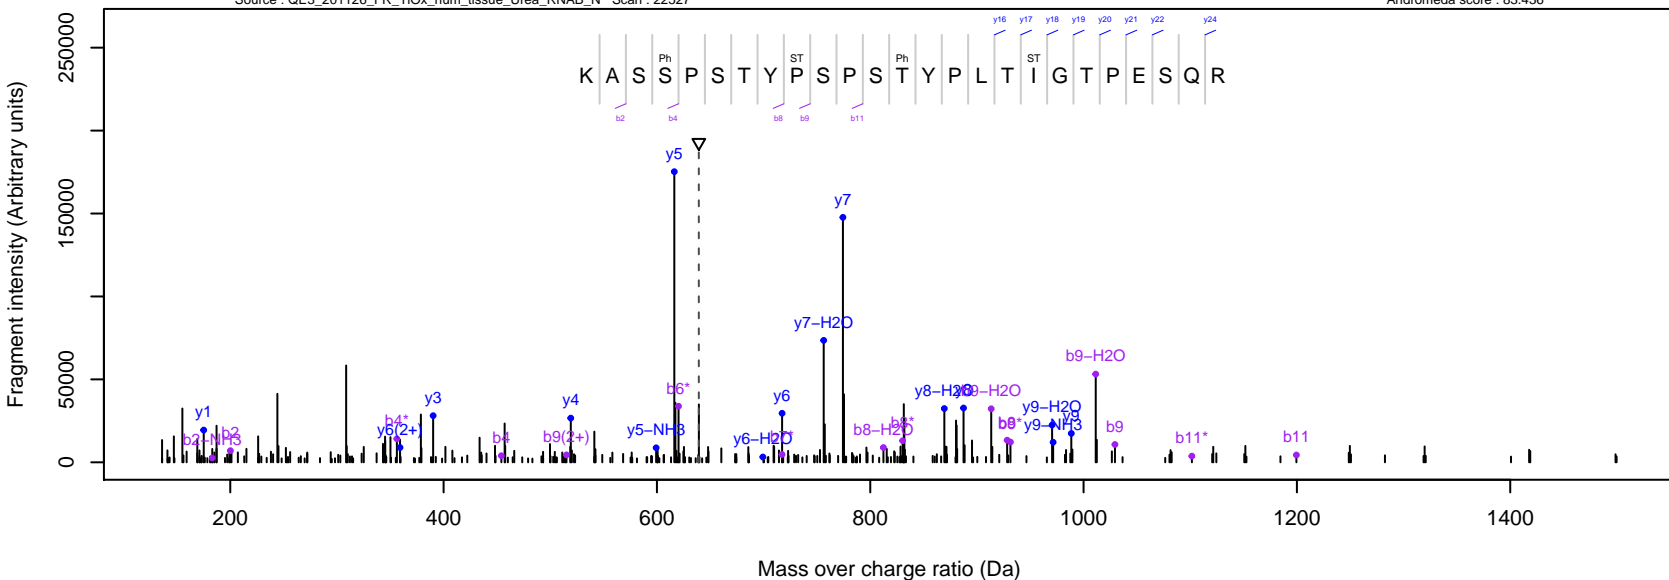

LQEDPNYS(Phospho (STY))PQRFPNAQR-3+

Source : QE3\_201126\_FR\_TiOx\_hum\_tissue\_Urea\_RNAB\_N Scan : 20179

Andromeda score : 83.423

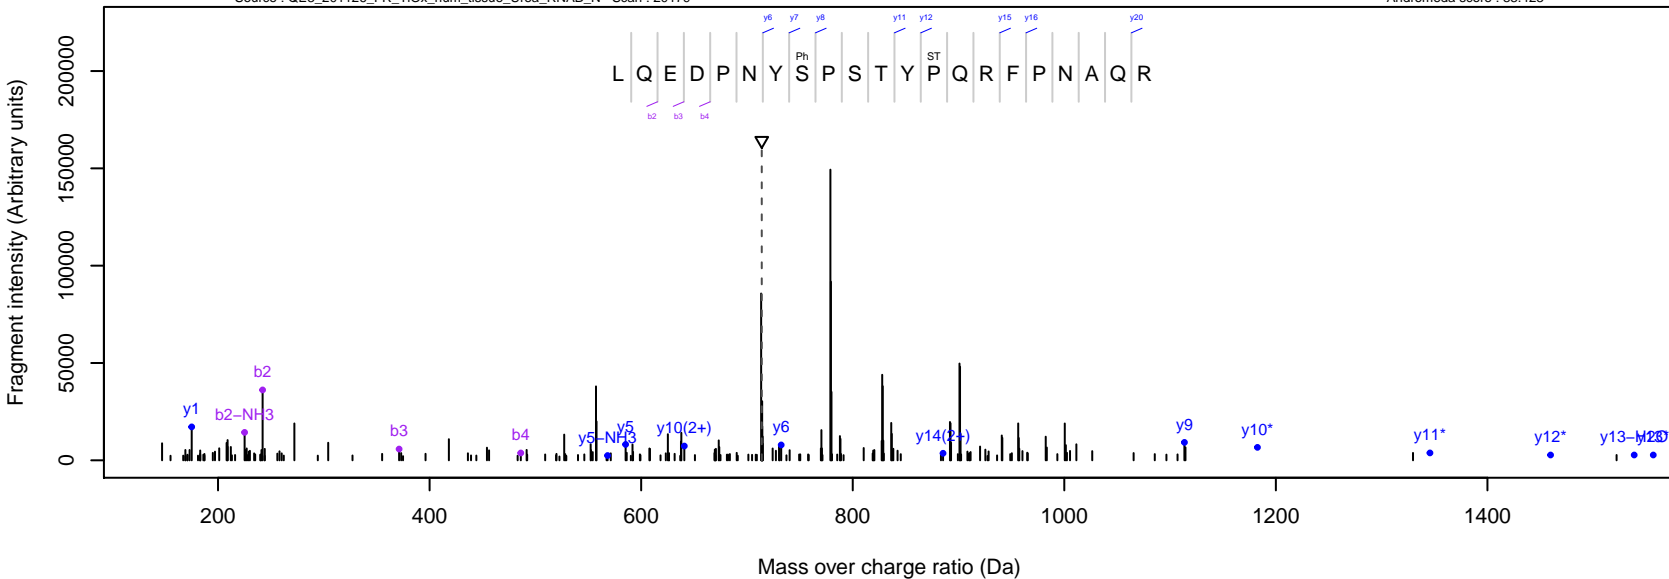

IM(Oxidation (M))VS(Phospho (STY))RSEIDLNIR-3+

Source : QE3\_201126\_FR\_TiOx\_hum\_tissue\_Urea\_RNAB\_H Scan : 44072

Andromeda score : 83.418

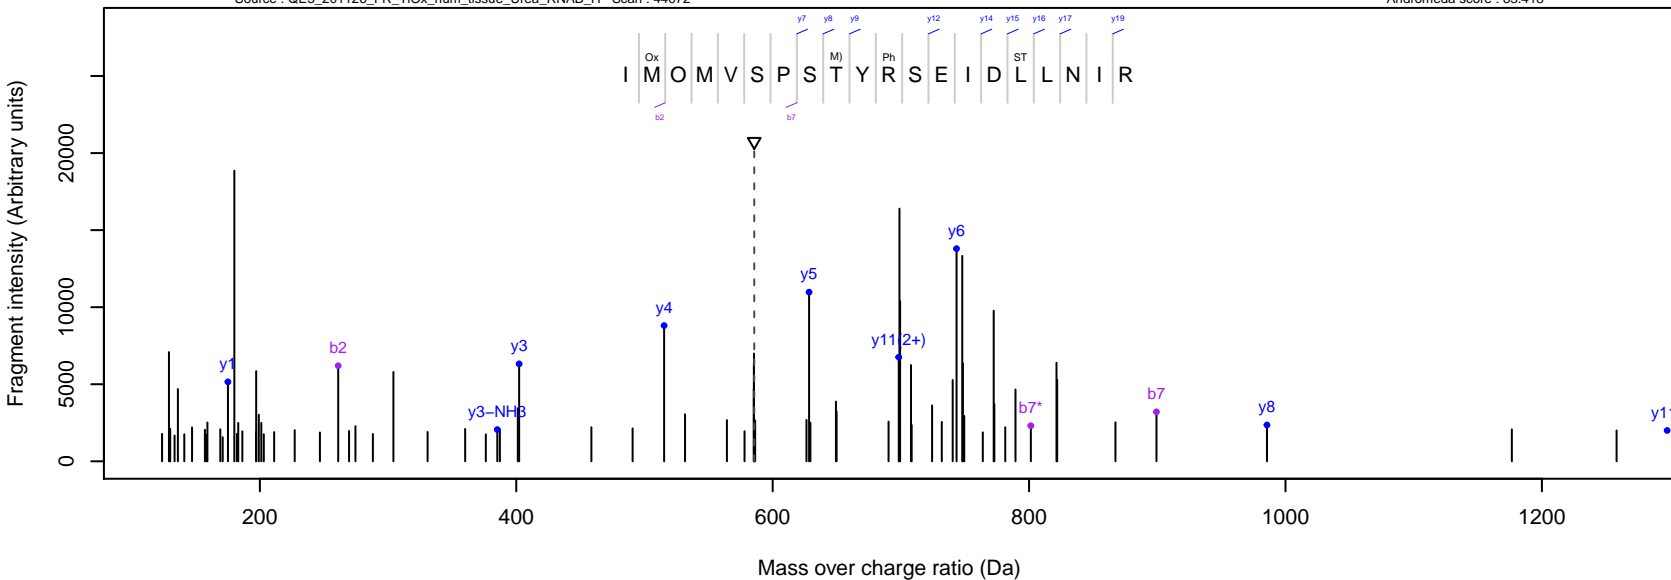

SAT(Phospho (STY))FPNAGPR-2+

Source : QE3\_201126\_FR\_TiOx\_hum\_tissue\_Urea\_RNAB\_H Scan : 15735

Andromeda score : 83.397

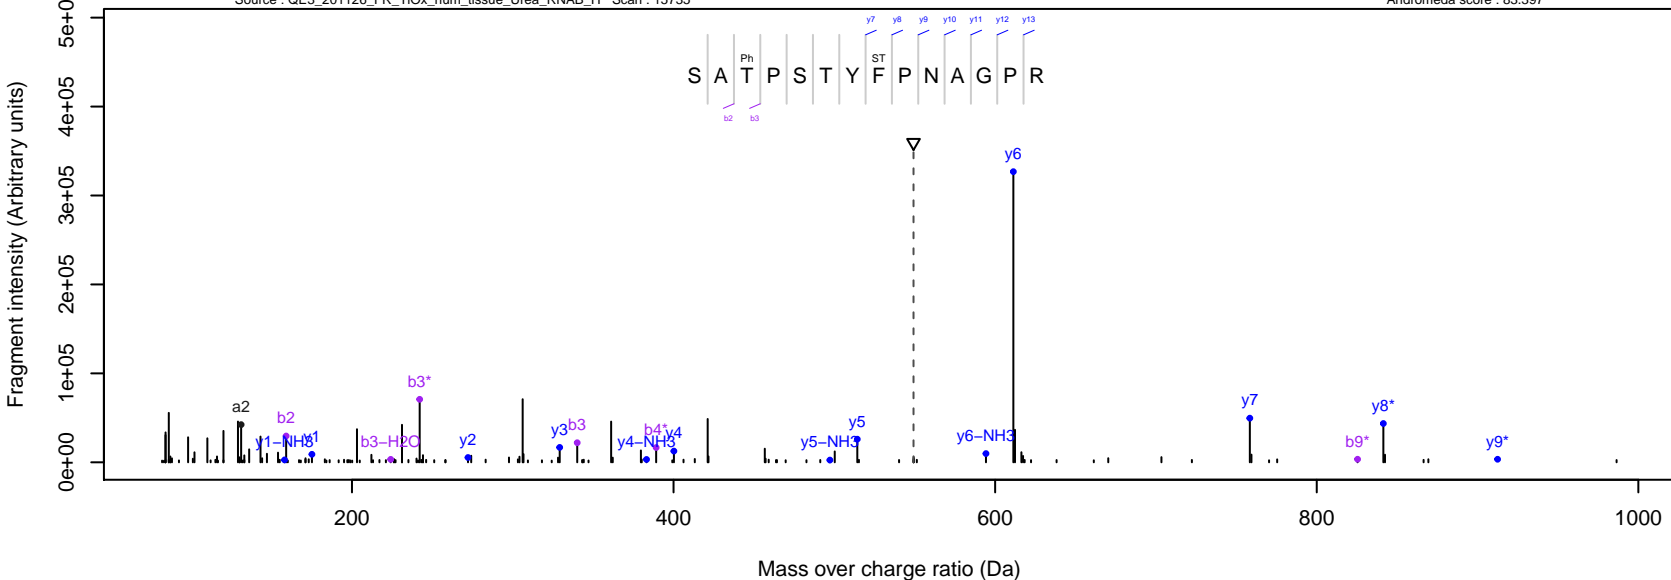

AGGLQDS(Phospho (STY))DTEDECWSDTEAVPR-3+

Source : QE3\_201126\_FR\_TiOx\_hum\_tissue\_Urea\_RNAB\_N Scan : 35322

Andromeda score : 83.362

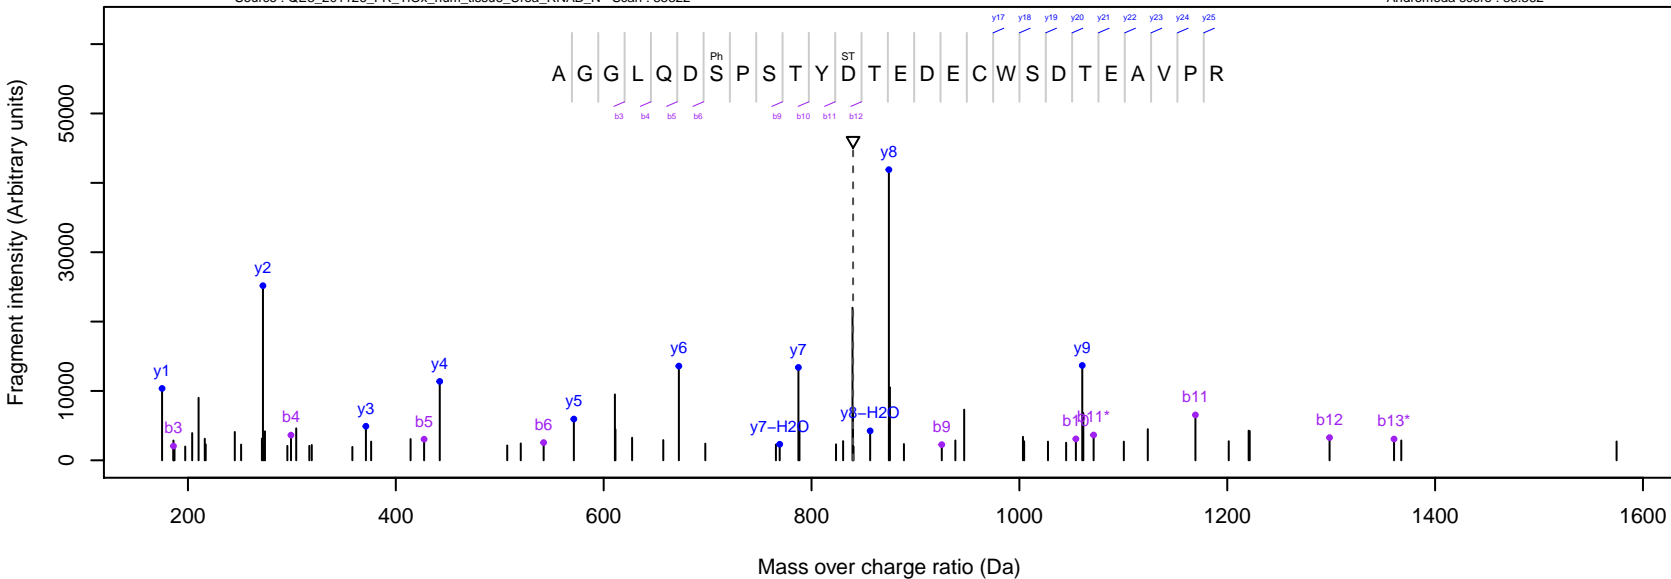

SFSTGSDLGHWVT(Phospho (STY))PPDIPGSR-3+

Source : QE3\_201126\_FR\_TIOx\_hum\_tissue\_Urea\_RNAB\_H Scan : 46027

Andromeda score : 83.362

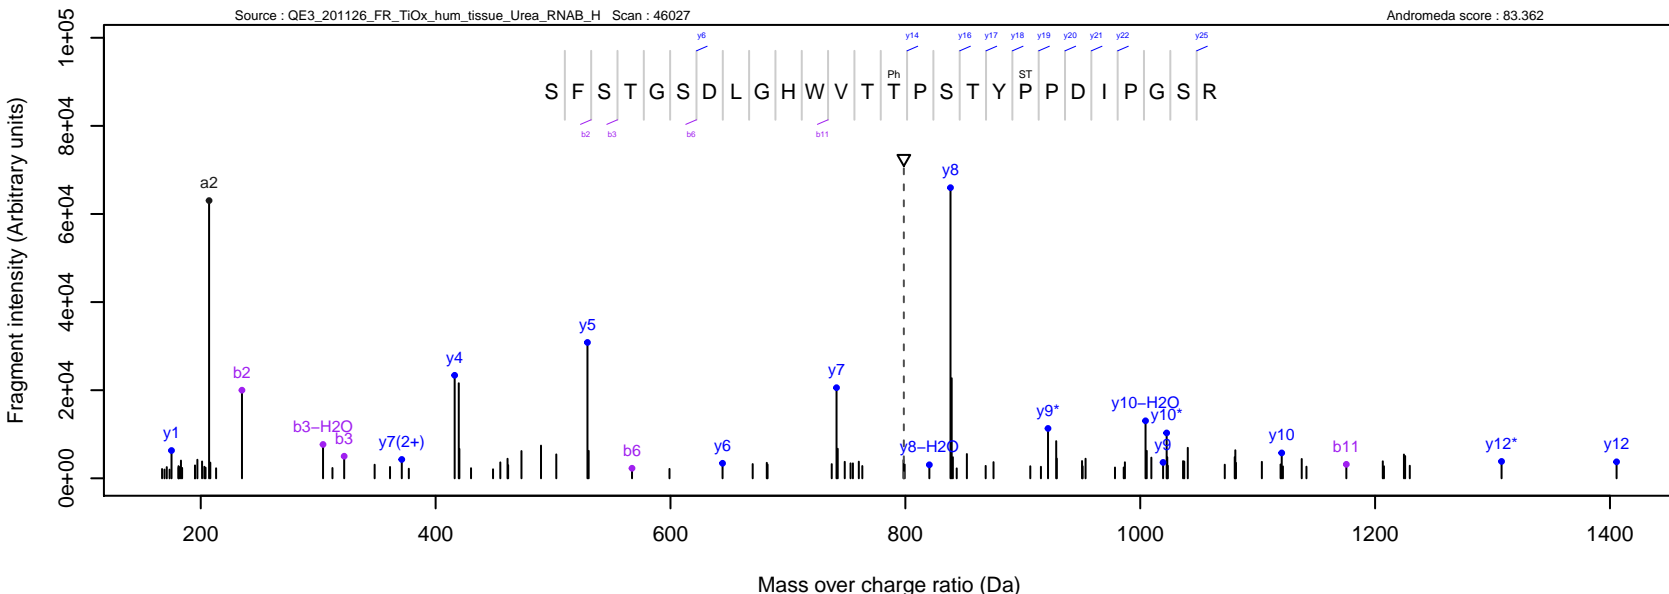

EKPSFIDLETFNAGS(Phospho (STY))DVGS(Phospho (STY))DSEYSPFM(Oxidation (M))GGAR-3+

Source : QE3\_201126\_FR\_TIOx\_hum\_tissue\_Urea\_RNAB\_N Scan : 58496

Andromeda score : 83.332

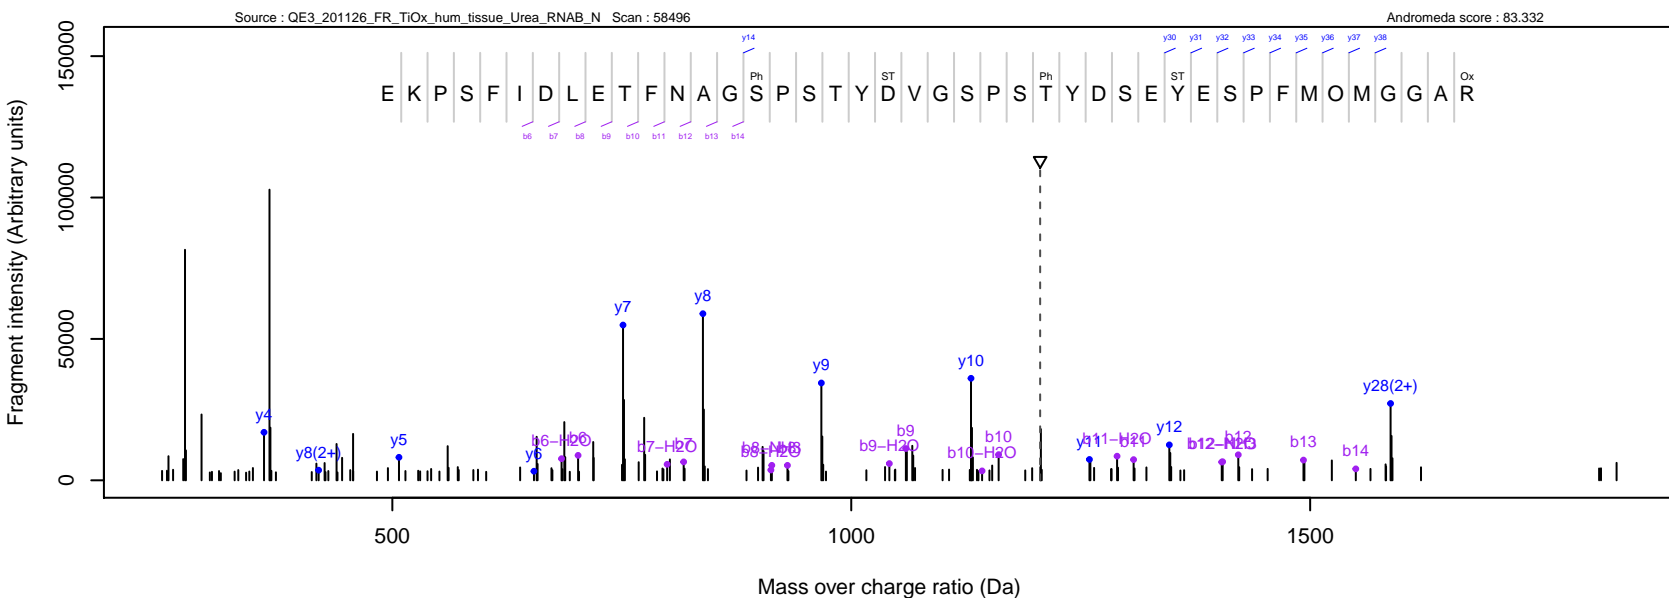

TTNS(Phospho (STY))SLEEIM(Oxidation (M))DK-2+

Source : QE3\_201126\_FR\_TIOx\_hum\_tissue\_Urea\_RNAB\_N Scan : 16522

Andromeda score : 83.314

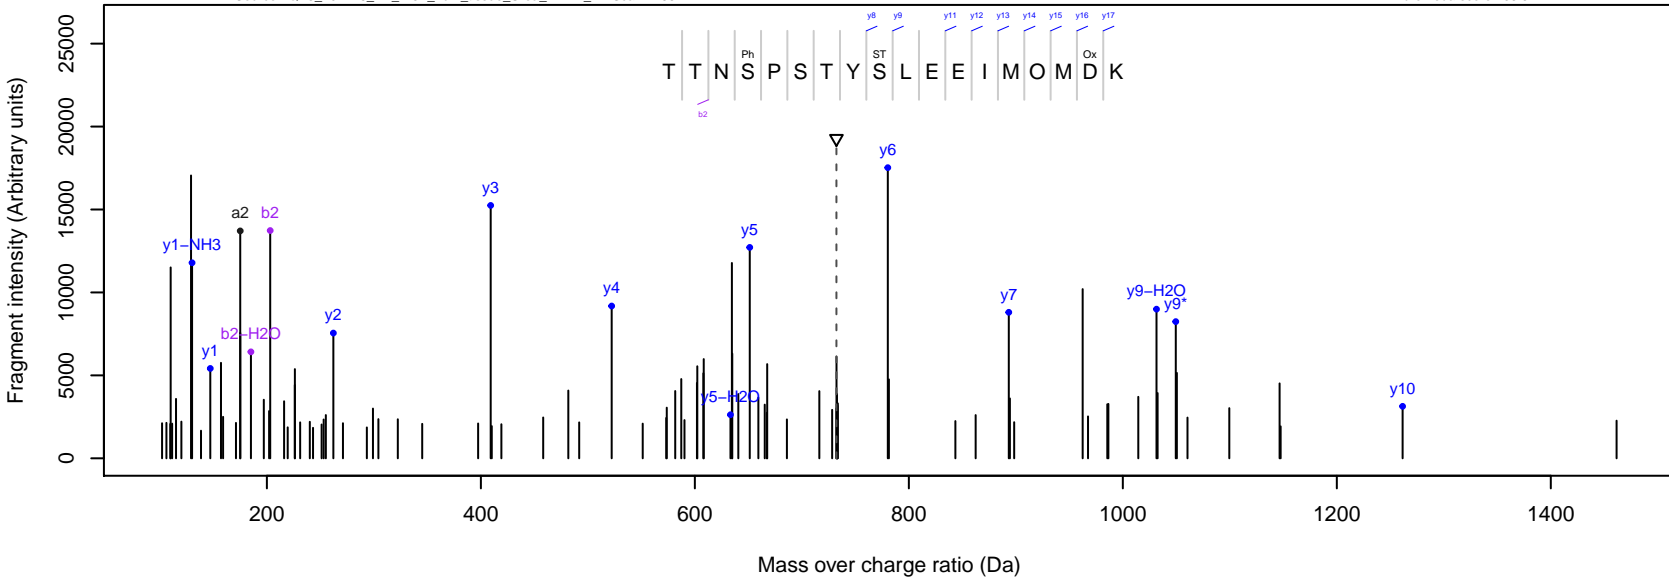

YFDS(Phospho (STY))GDYNMAK-2+

Source : QE3\_201126\_FR\_TiOx\_hum\_tissue\_Urea\_RNAB\_N Scan : 28126

Andromeda score : 83.314

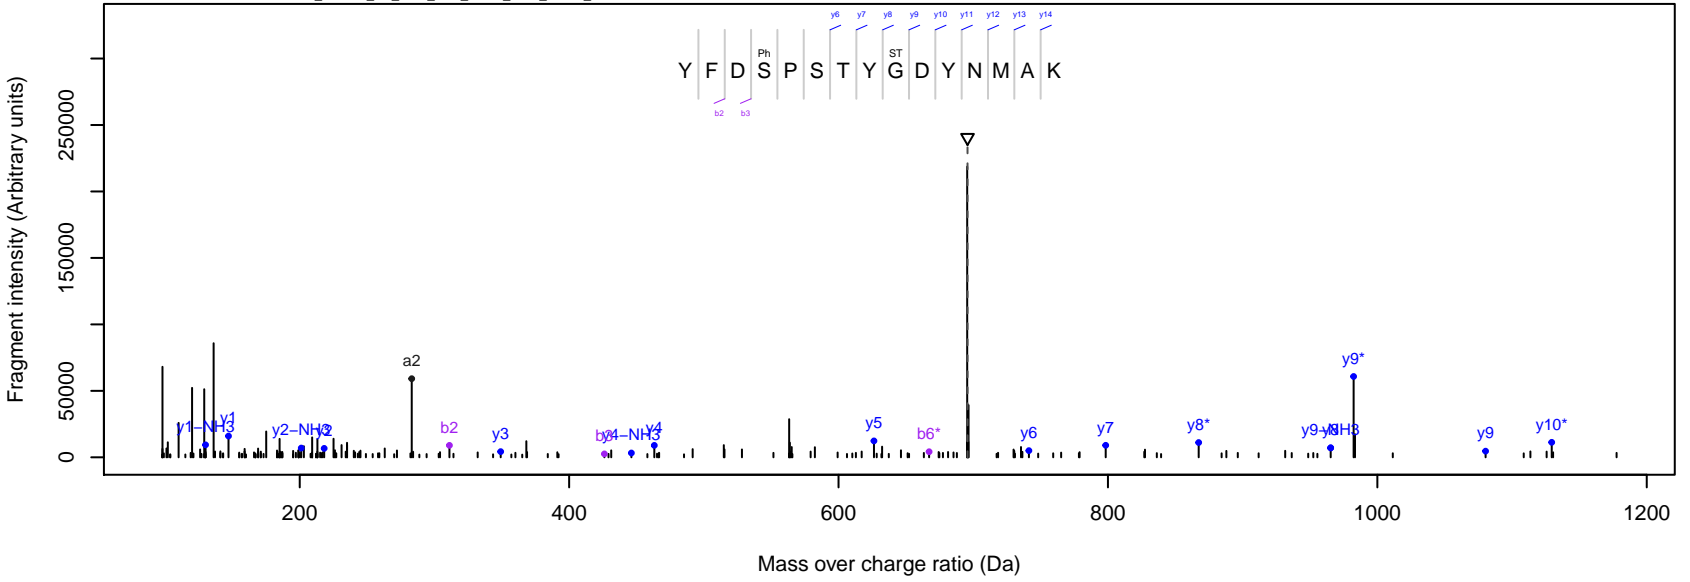

LKRGS(Phospho (STY))LPAEASCTT-3+

Source : QE3\_201126\_FR\_TiOx\_hum\_tissue\_Urea\_RNAB\_N Scan : 11603

Andromeda score : 83.253

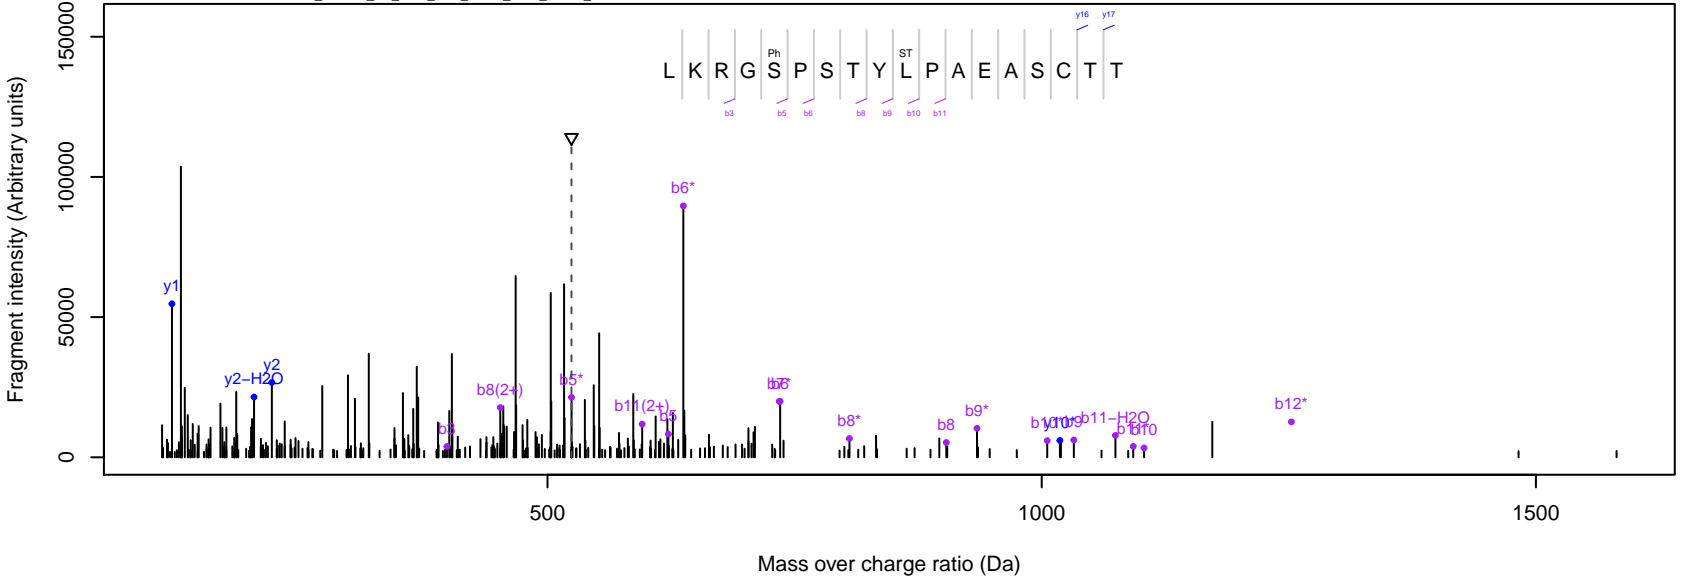

RS(Phospho (STY))GSPLEKDSGLR-3+

Source : QE3\_201126\_FR\_TiOx\_hum\_tissue\_Urea\_RNAB\_N Scan : 7902

Andromeda score : 83.253

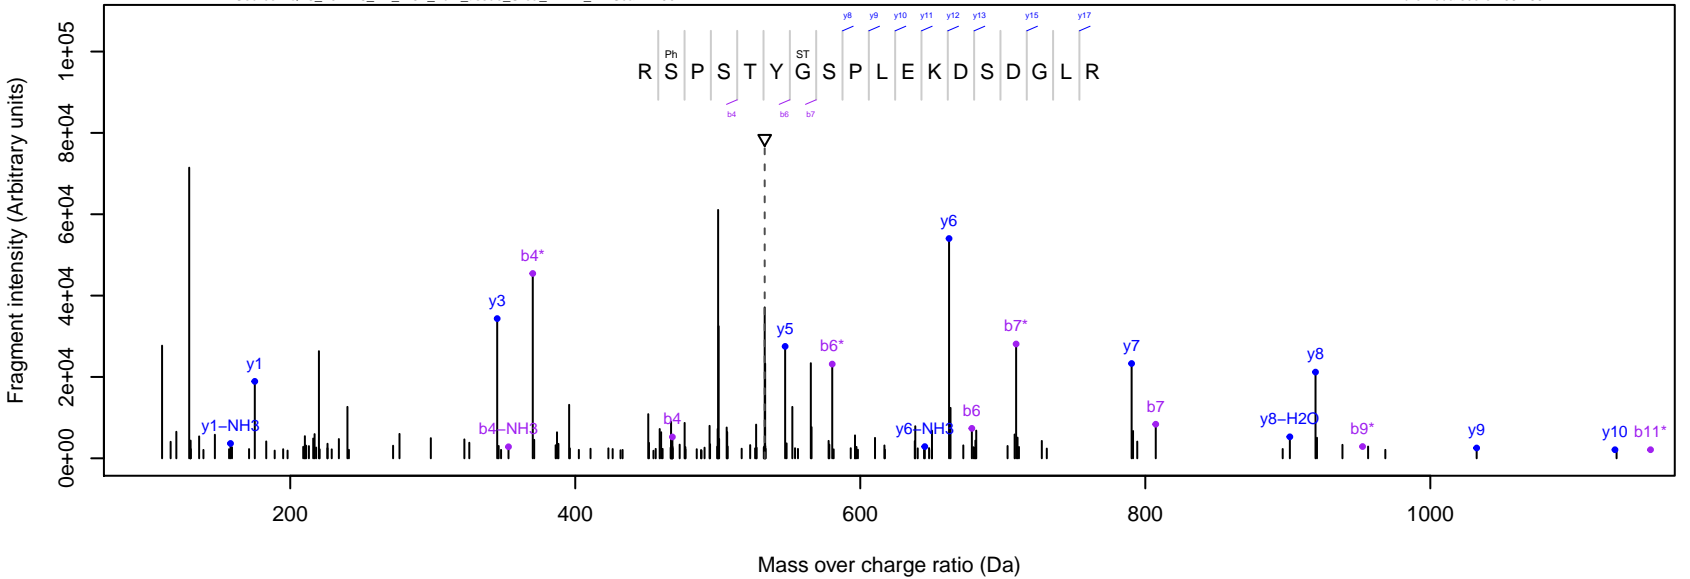

**GPLTSGS(Phospho (STY))DEENVALPLGDNVLTHNLGIPLVVCTK-3+**

Source : QE3\_201126\_FR\_TiOx\_hum\_tissue\_Urea\_RNAB\_B Scan : 61404

Andromeda score : 83.25

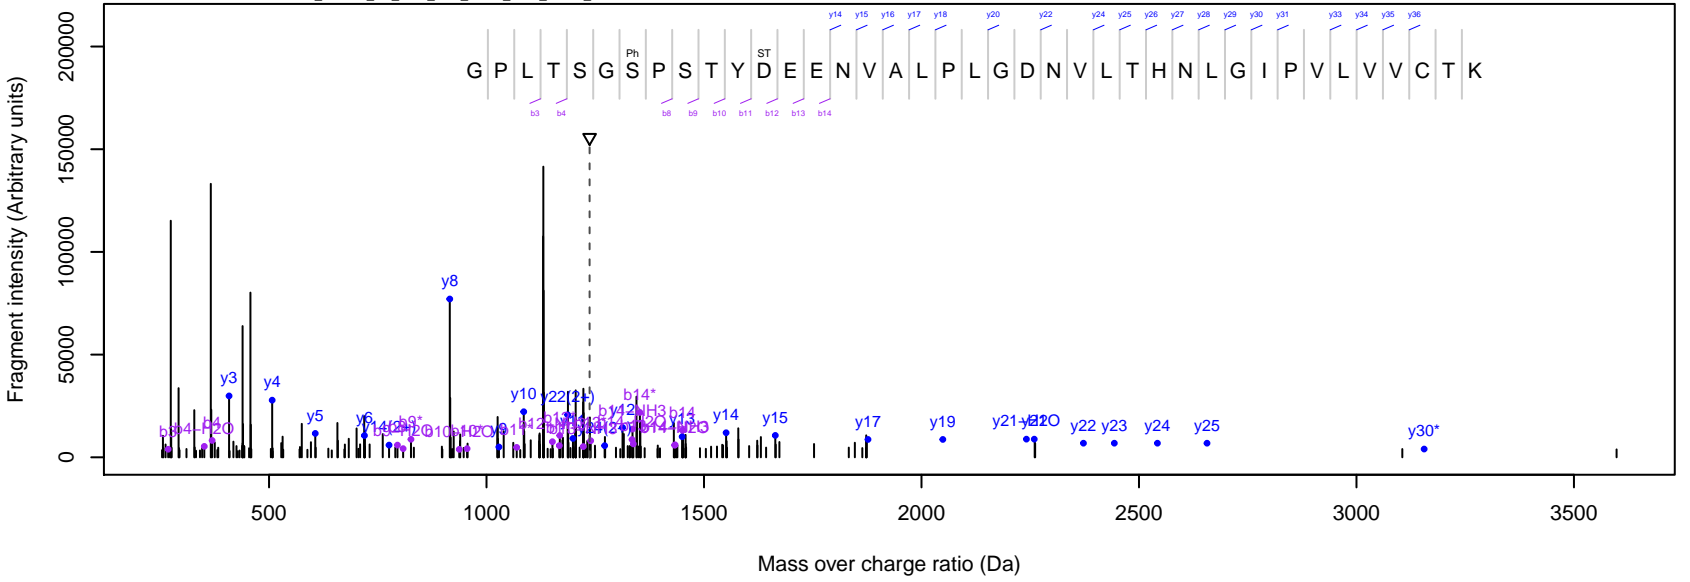

**RFS(Phospho (STY))DQAGPAIPTNSYSK-3+**

Source : QE3\_201126\_FR\_TiOx\_hum\_tissue\_Urea\_RNAB\_B Scan : 20966

Andromeda score : 83.247

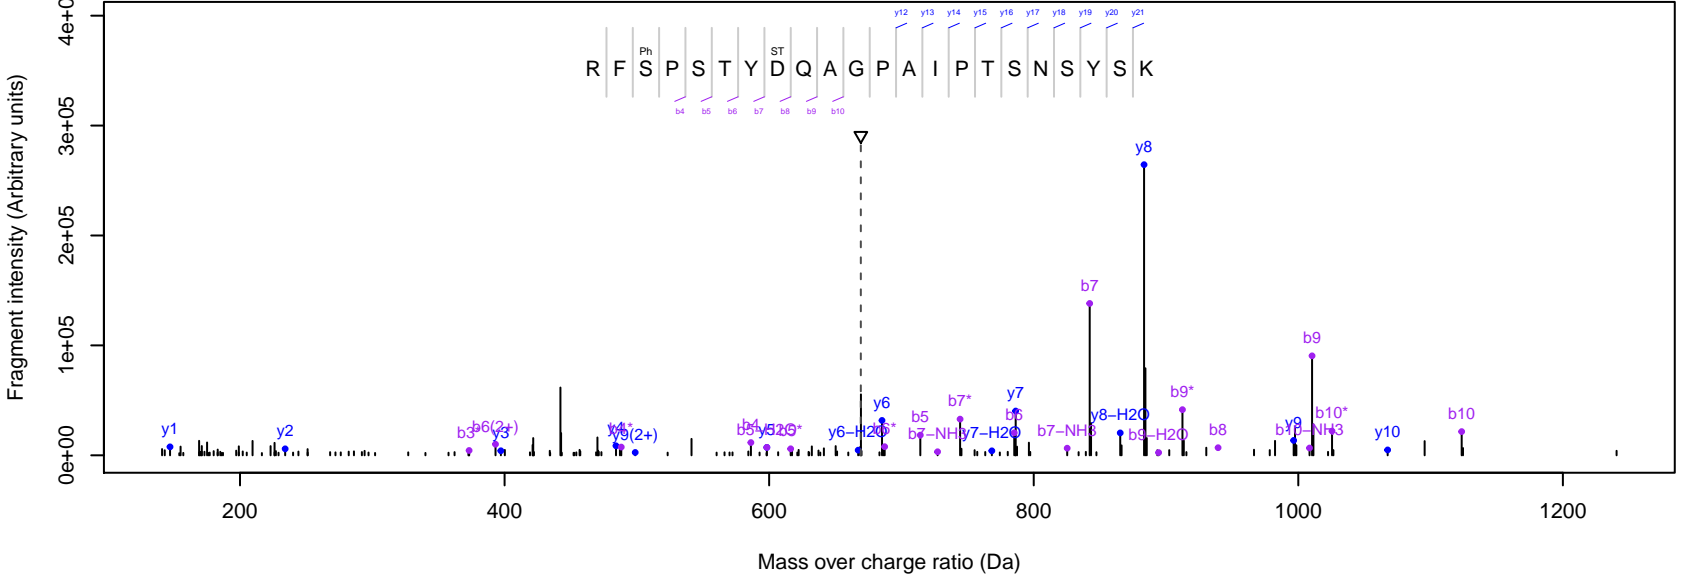

**ALGS(Phospho (STY))PTKQLLPCEMACNEK-3+**

Source : QE3\_201126\_FR\_TiOx\_hum\_tissue\_Urea\_RNAB\_H Scan : 29614

Andromeda score : 83.245

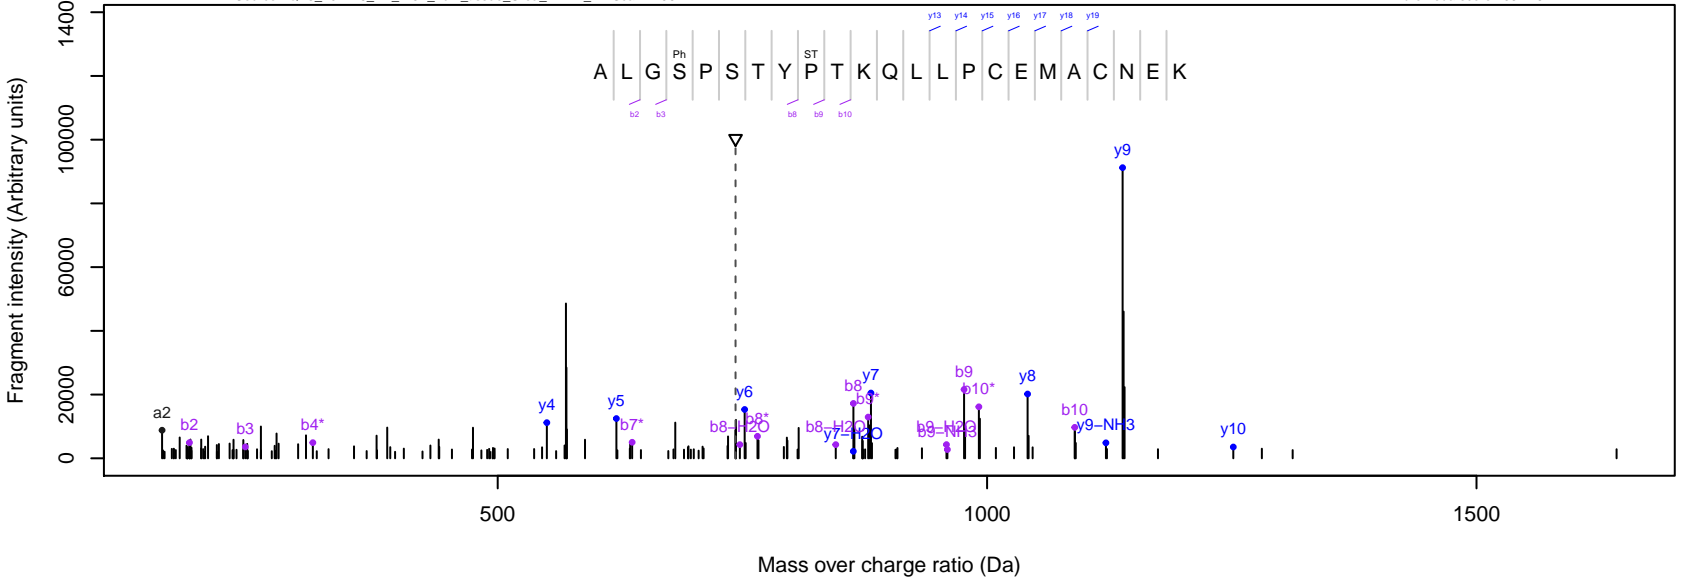

DFDIAEQNES(Phospho (STY))S(Phospho (STY))DEESLRKER-3+

Source : QE3\_201126\_FR\_TiOx\_hum\_tissue\_Urea\_RNAB\_B Scan : 26989

Andromeda score : 83.245

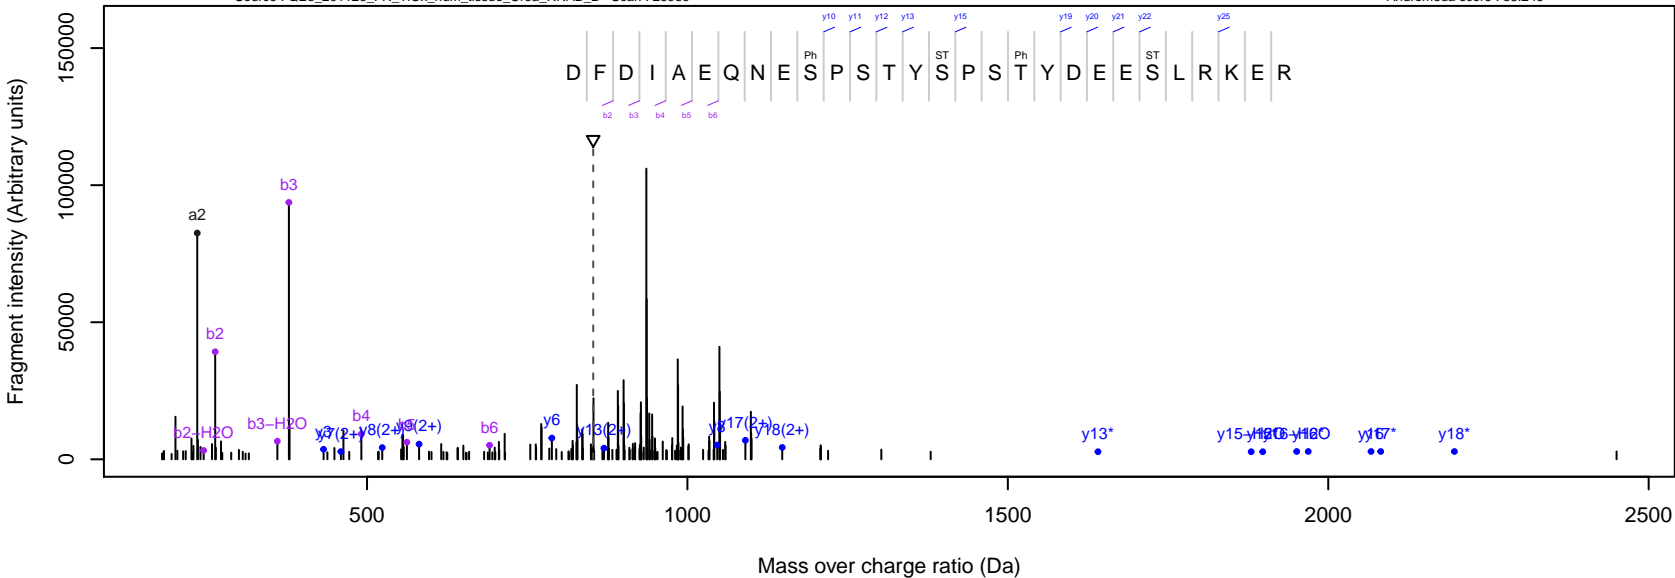

DFDIAEQNESSDEES(Phospho (STY))LRKER-3+

Source : QE3\_201126\_FR\_TiOx\_hum\_tissue\_Urea\_RNAB\_H Scan : 22246

Andromeda score : 83.245

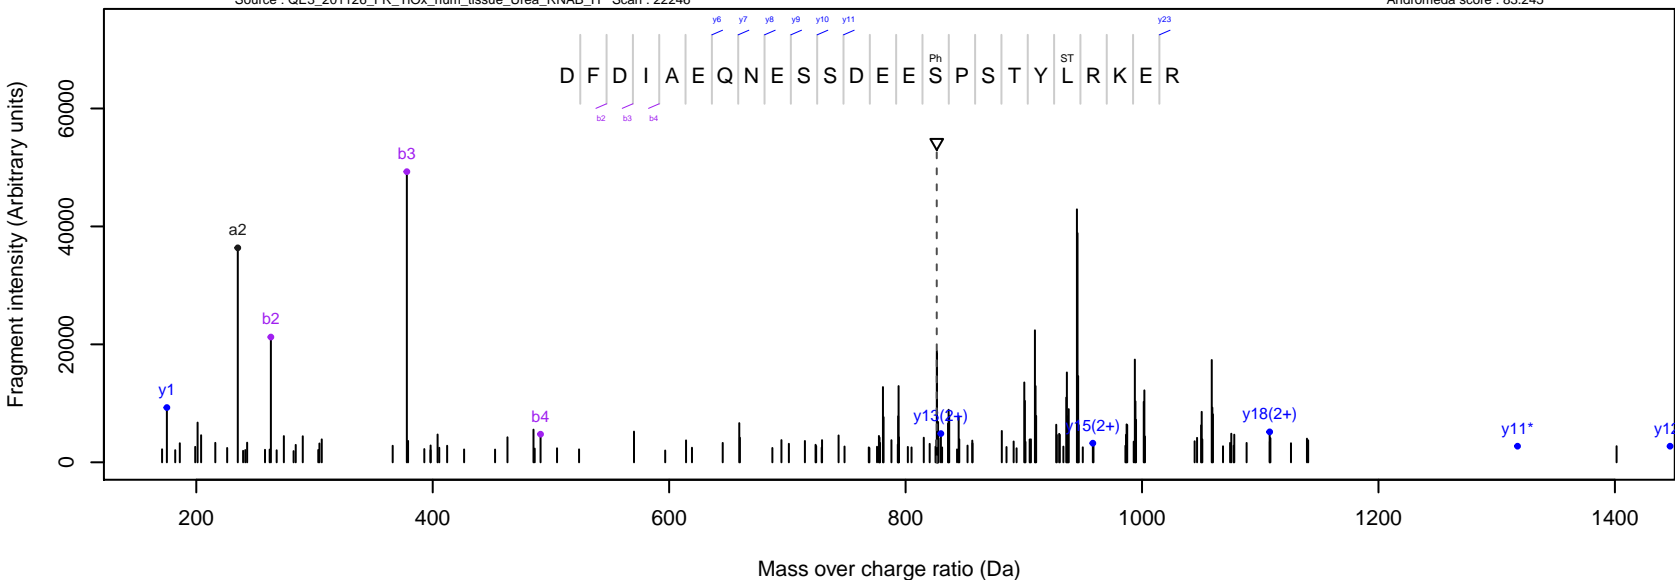

(Acetyl (Protein N-term))GT(Phospho (STY))PQKDVIIK-2+

Source : QE3\_201126\_FR\_TiOx\_hum\_tissue\_Urea\_RNAB\_B Scan : 20176

Andromeda score : 83.204

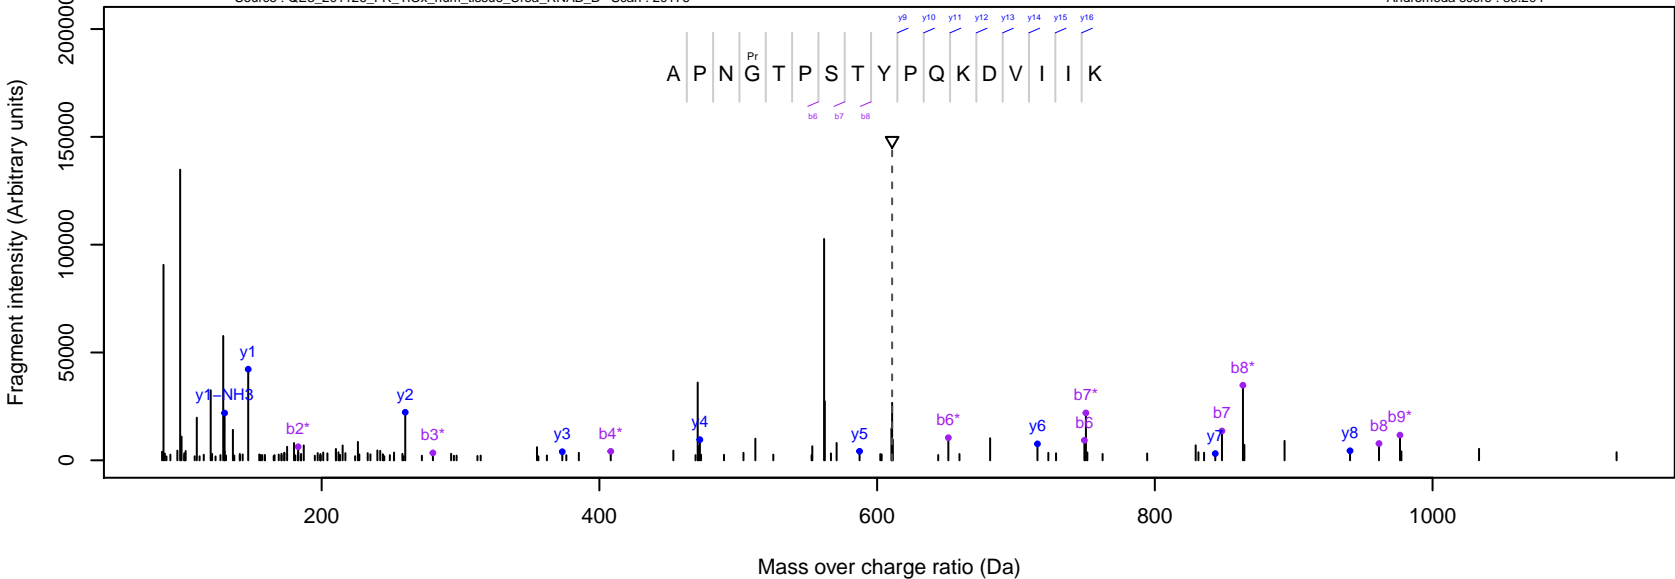

M(Oxidation (M))ES(Phospho (STY))GLSDVTKDQ-2+

Source : QE3\_201126\_FR\_TIOx\_hum\_tissue\_Urea\_RNAB\_N Scan : 16846

Andromeda score : 83.204

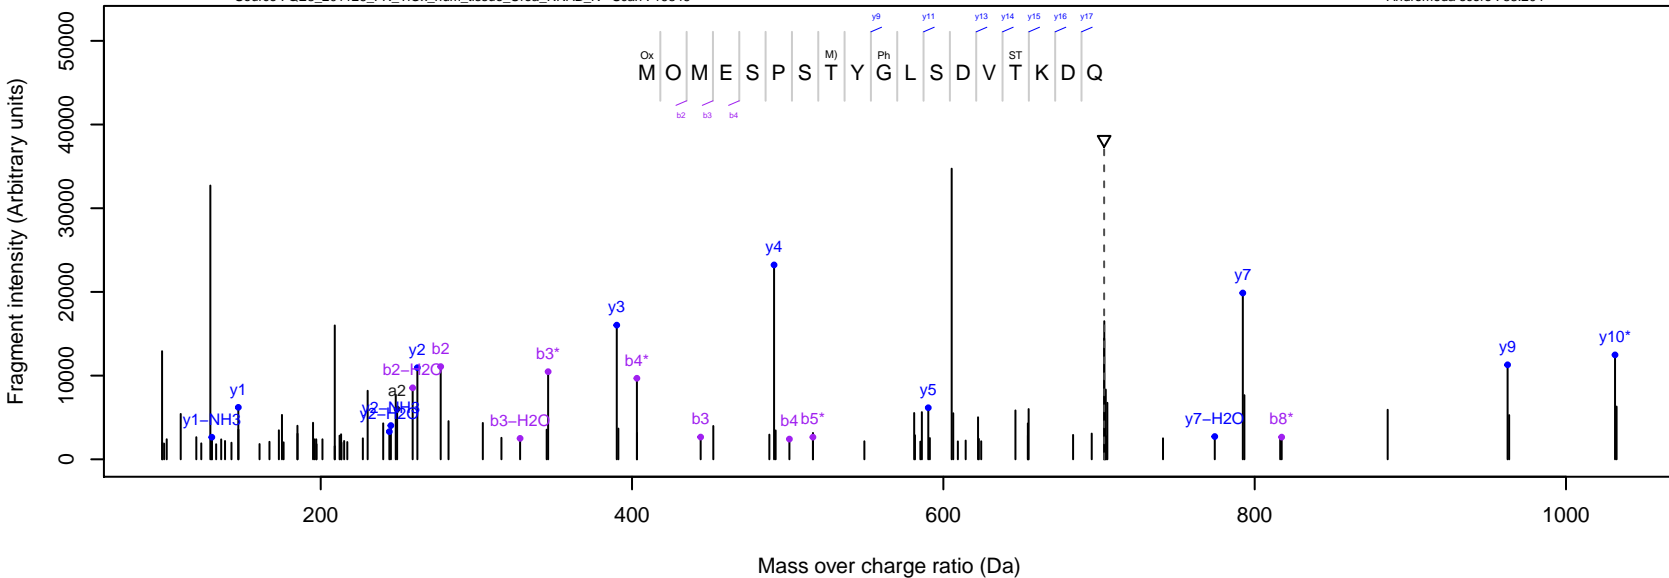

RAAS(Phospho (STY))LNYLNQPSAAPLQVSR-3+

Source : QE3\_201126\_FR\_TIOx\_hum\_tissue\_Urea\_RNAB\_B Scan : 31942

Andromeda score : 83.202

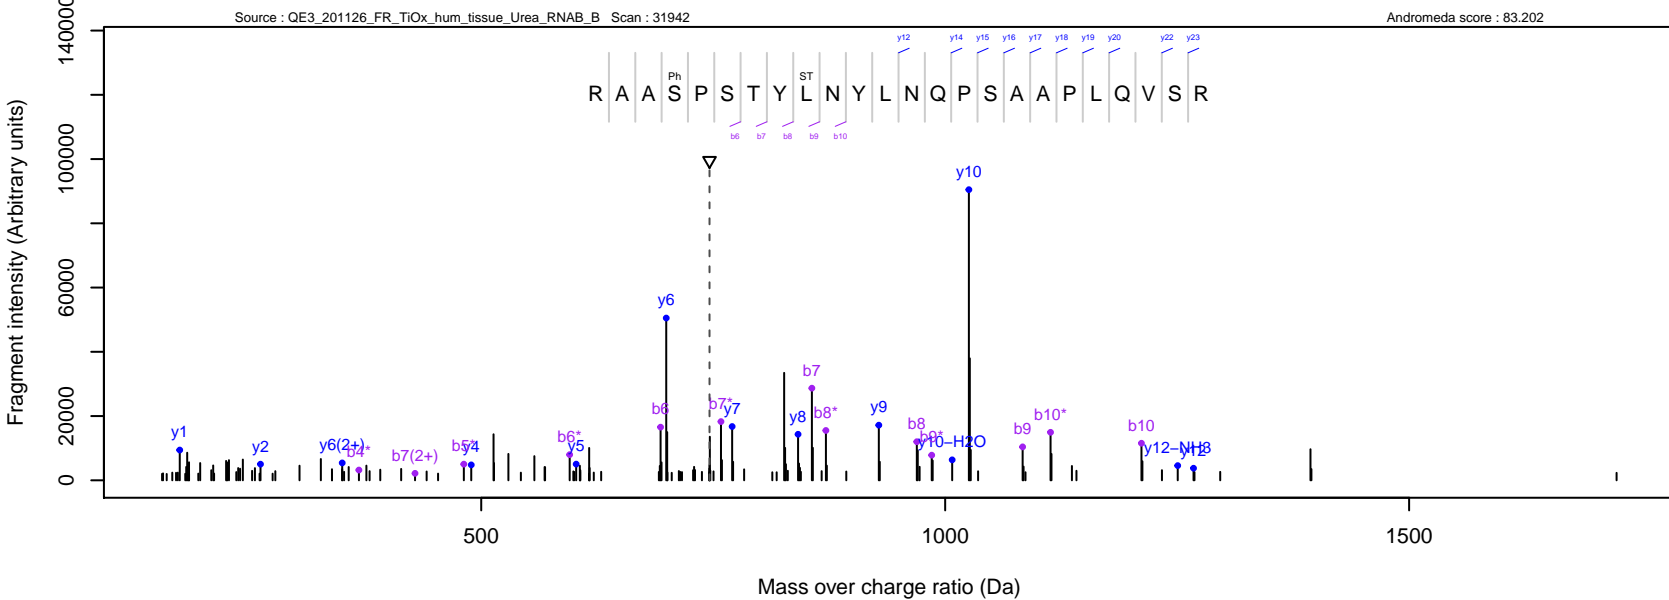

VADALTNAVAHVDDMPNALS(Phospho (STY))ALSDLHAHK-4+

Source : QE3\_201126\_FR\_TIOx\_hum\_tissue\_Urea\_RNAB\_H Scan : 51160

Andromeda score : 83.198

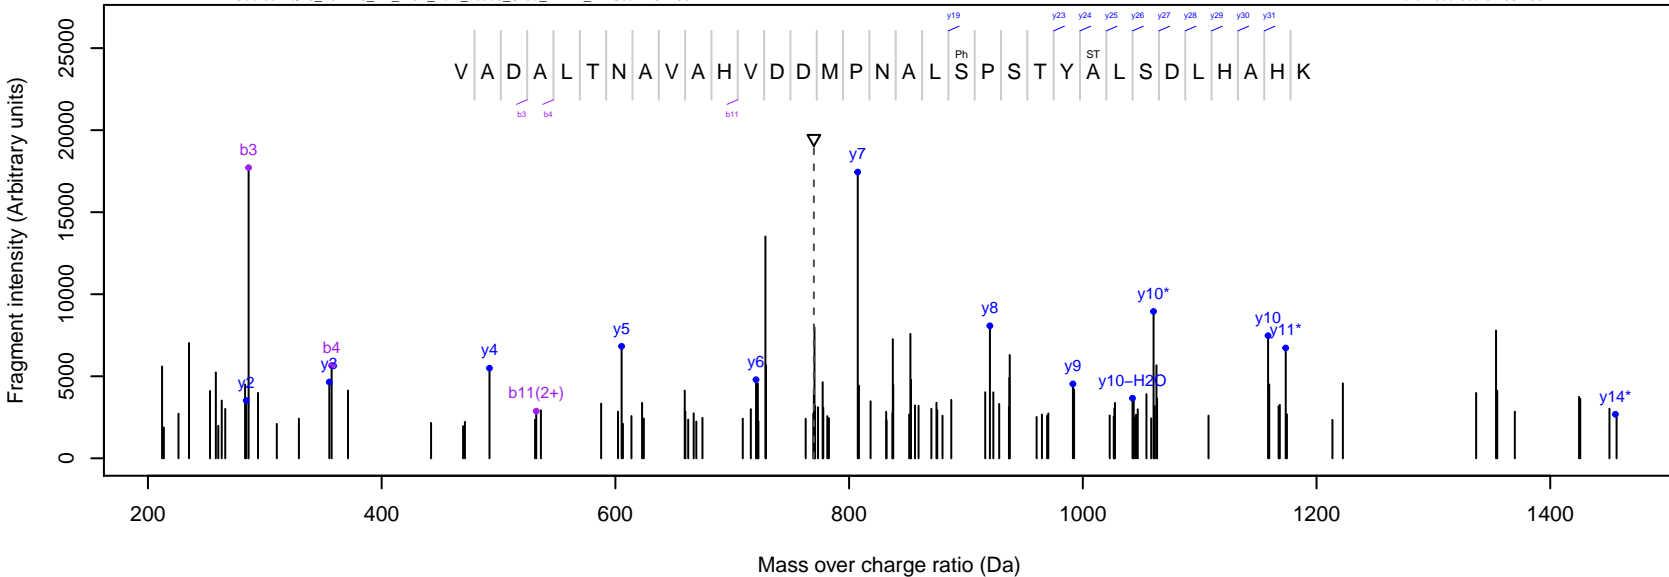





QHAADTSEARPFRRGSPSTYVGR-4+

Source : QE3\_201126\_FR\_TIOx\_hum\_tissue\_Urea\_RNAB\_N Scan : 8057

Andromeda score : 83.082

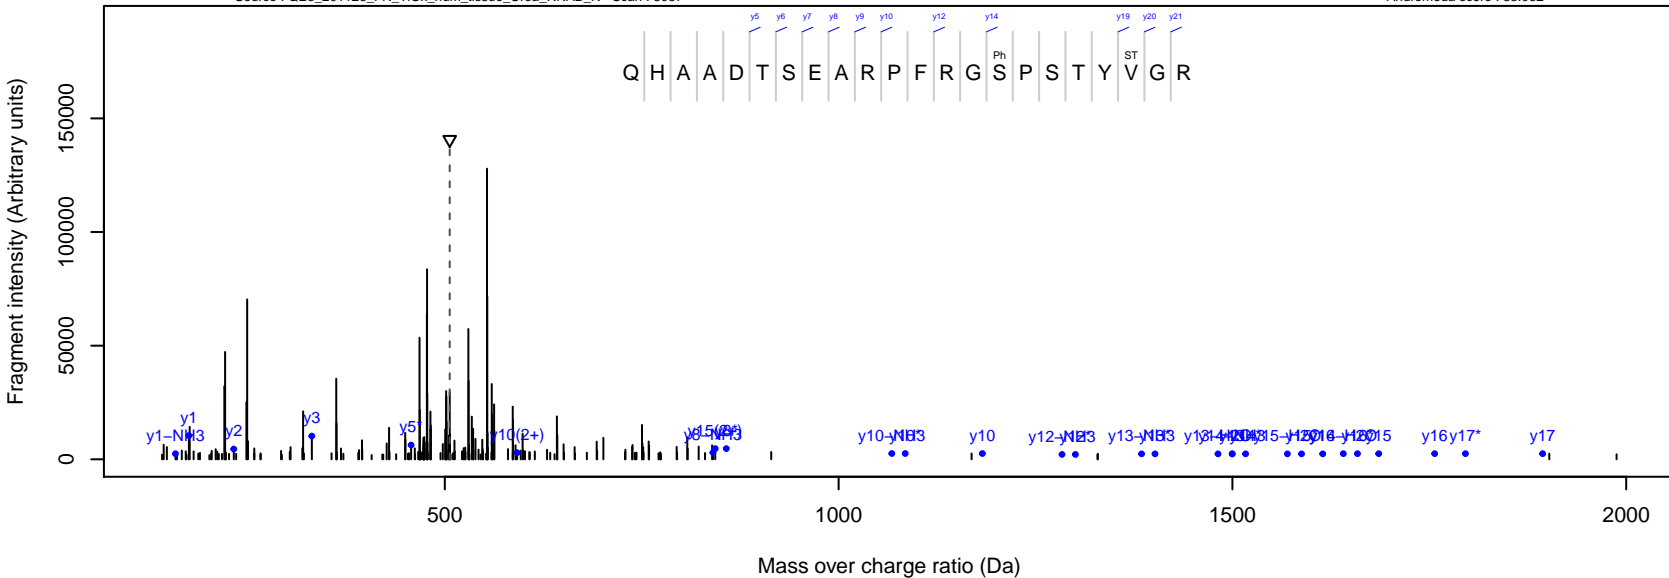

DLS(Phospho (STY))PQHMVVR-2+

Source : QE3\_201126\_FR\_TIOx\_hum\_tissue\_Urea\_RNAB\_B Scan : 20552

Andromeda score : 83.081

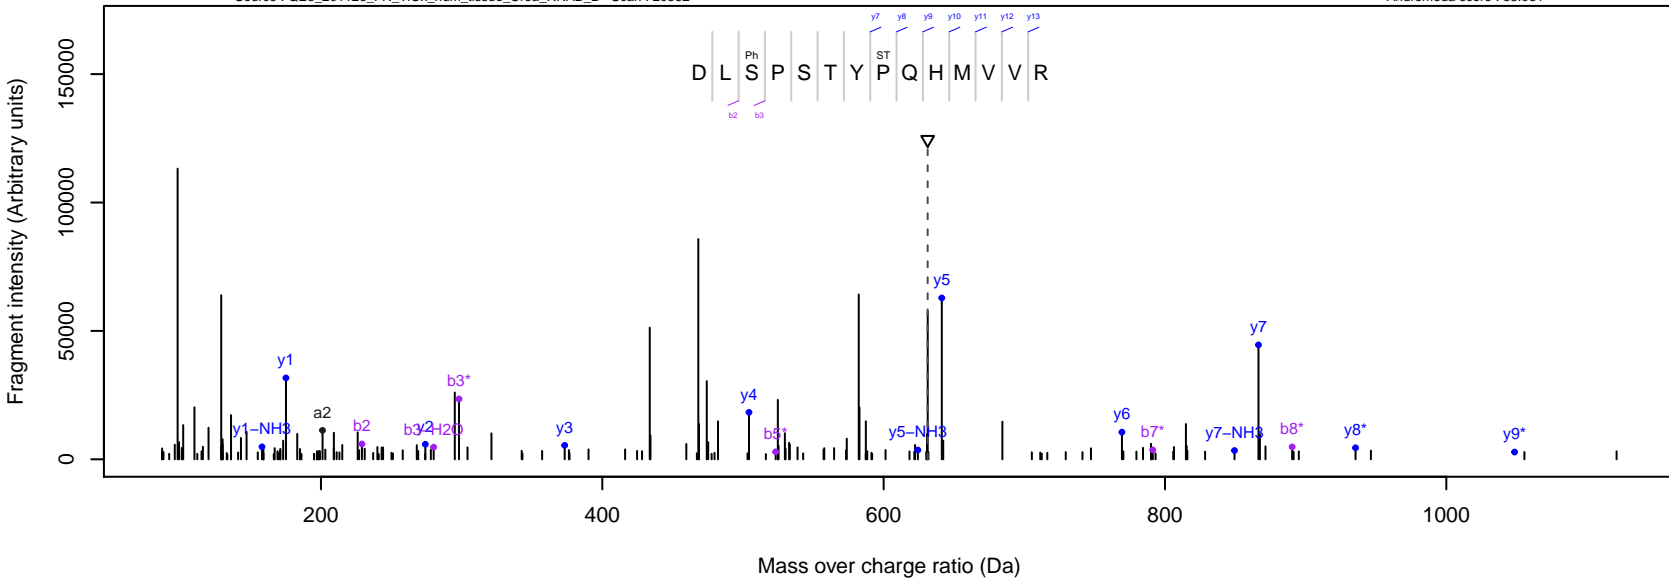

ENQECPRS(Phospho (STY))LEEDLETLK-3+

Source : QE3\_201126\_FR\_TIOx\_hum\_tissue\_Urea\_RNAB\_N Scan : 37731

Andromeda score : 83.063

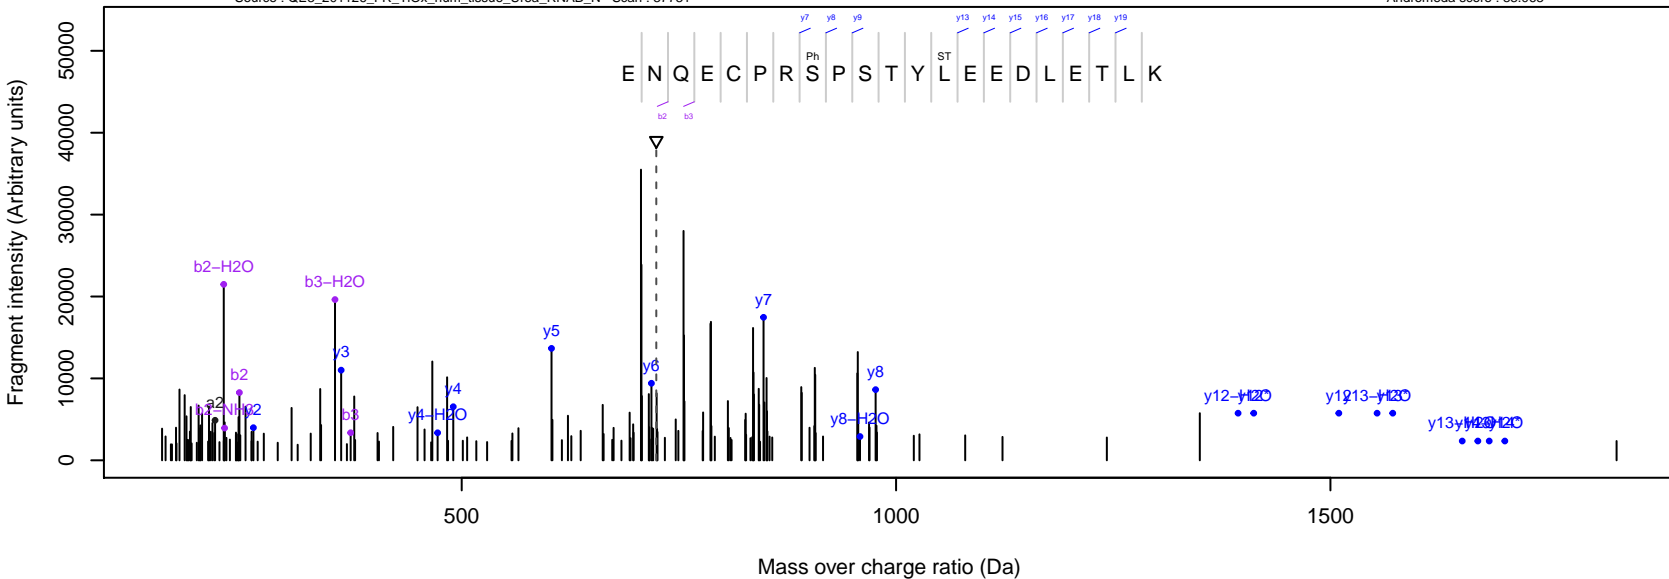



S(Phospho (STY))SVQDFICVSYLEPEQQR-2+

Source : QE3\_201126\_FR\_TIOx\_hum\_tissue\_Urea\_RNAB\_N Scan : 54705

Andromeda score : 83.047

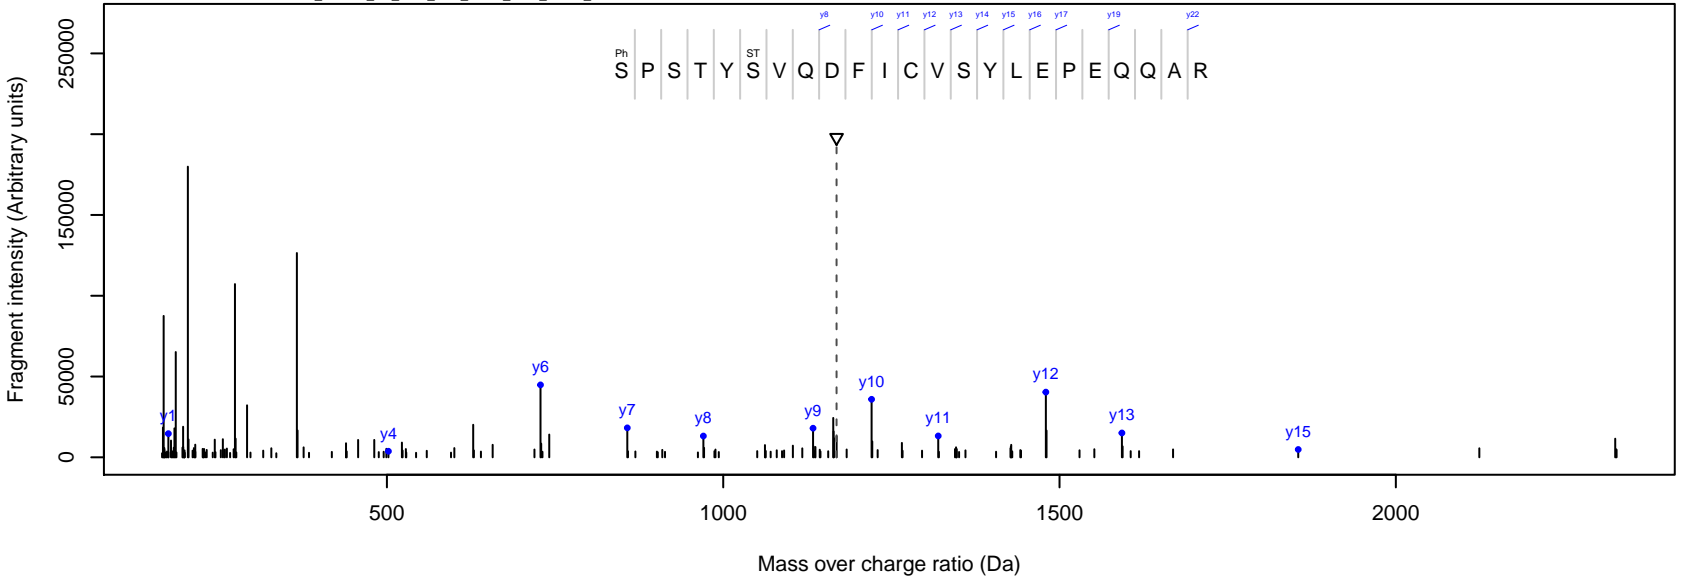

GGNFGFGDS(Phospho (STY))R-2+

Source : QE3\_201126\_FR\_TIOx\_hum\_tissue\_Urea\_RNAB\_H Scan : 23348

Andromeda score : 83.045

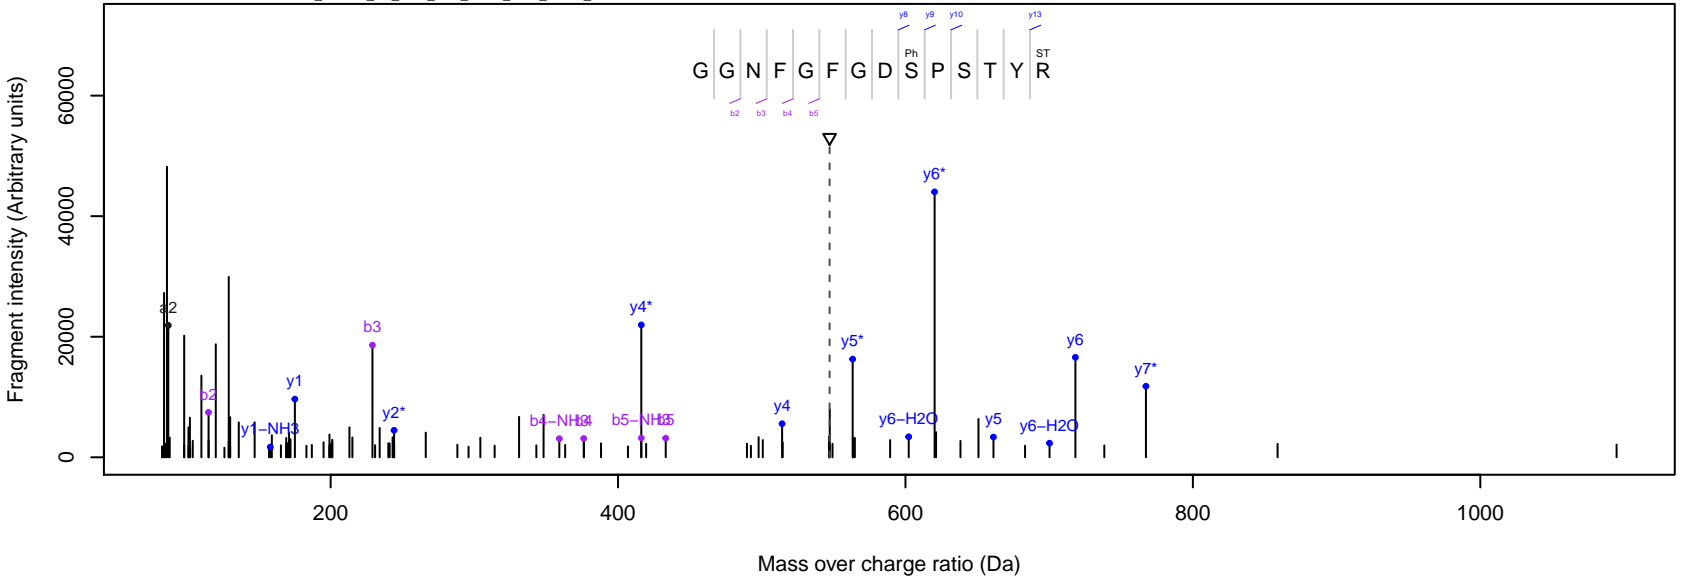

ENHGQADHS(Phospho (STY))PSM(Oxidation (M))TATHFPR-4+

Source : QE3\_201126\_FR\_TIOx\_hum\_tissue\_Urea\_RNAB\_N Scan : 7686

Andromeda score : 83.039

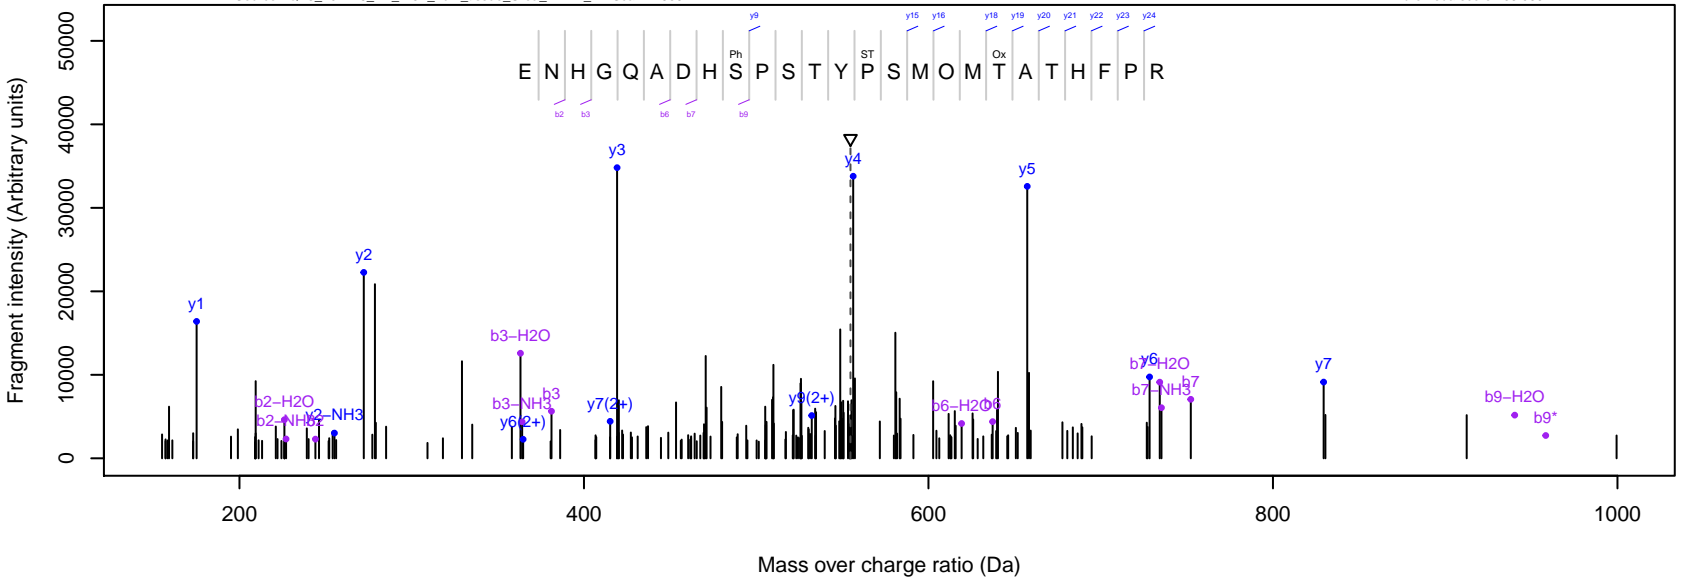

DGT(Phospho (STY))SPEEEIEIER-2+

Source : QE3\_201126\_FR\_TiOx\_hum\_tissue\_Urea\_RNAB\_N Scan : 29279

Andromeda score : 83

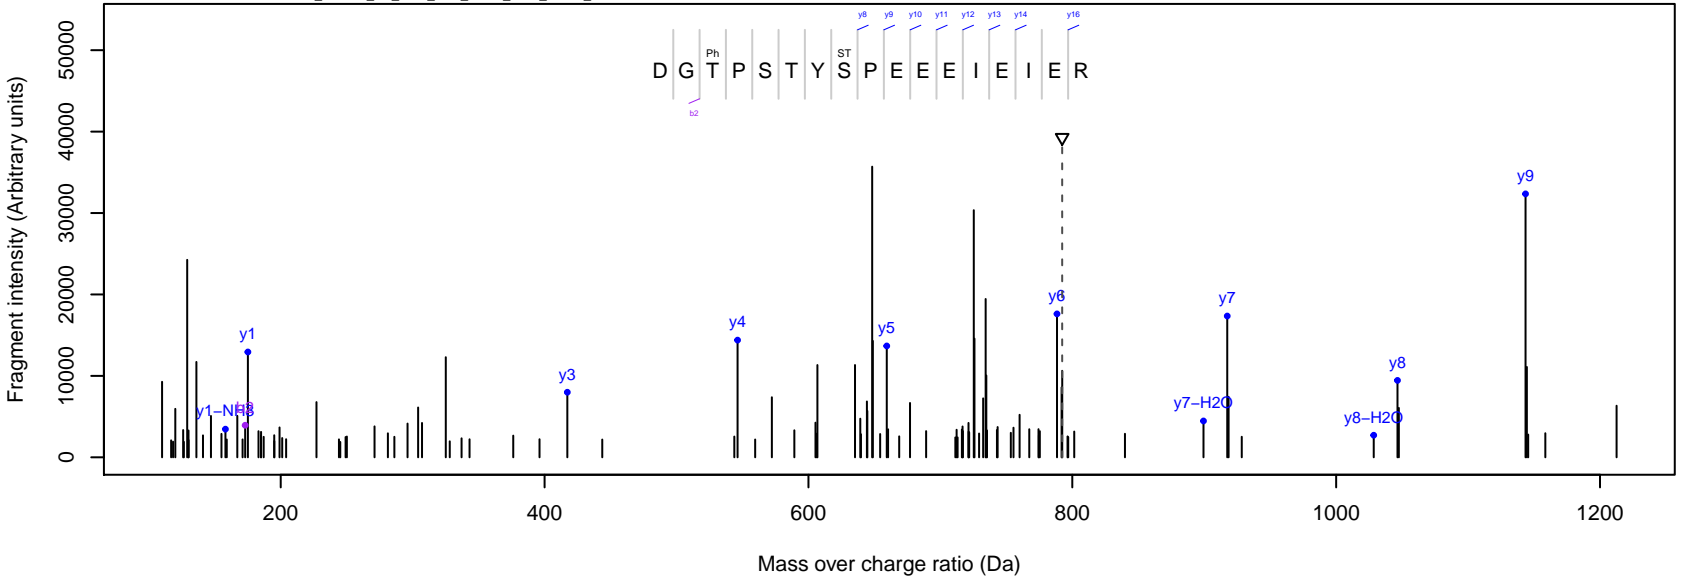

GAAPPDS(Phospho (STY))PVVYSDR-2+

Source : QE3\_201126\_FR\_TiOx\_hum\_tissue\_Urea\_RNAB\_H Scan : 19024

Andromeda score : 82.908

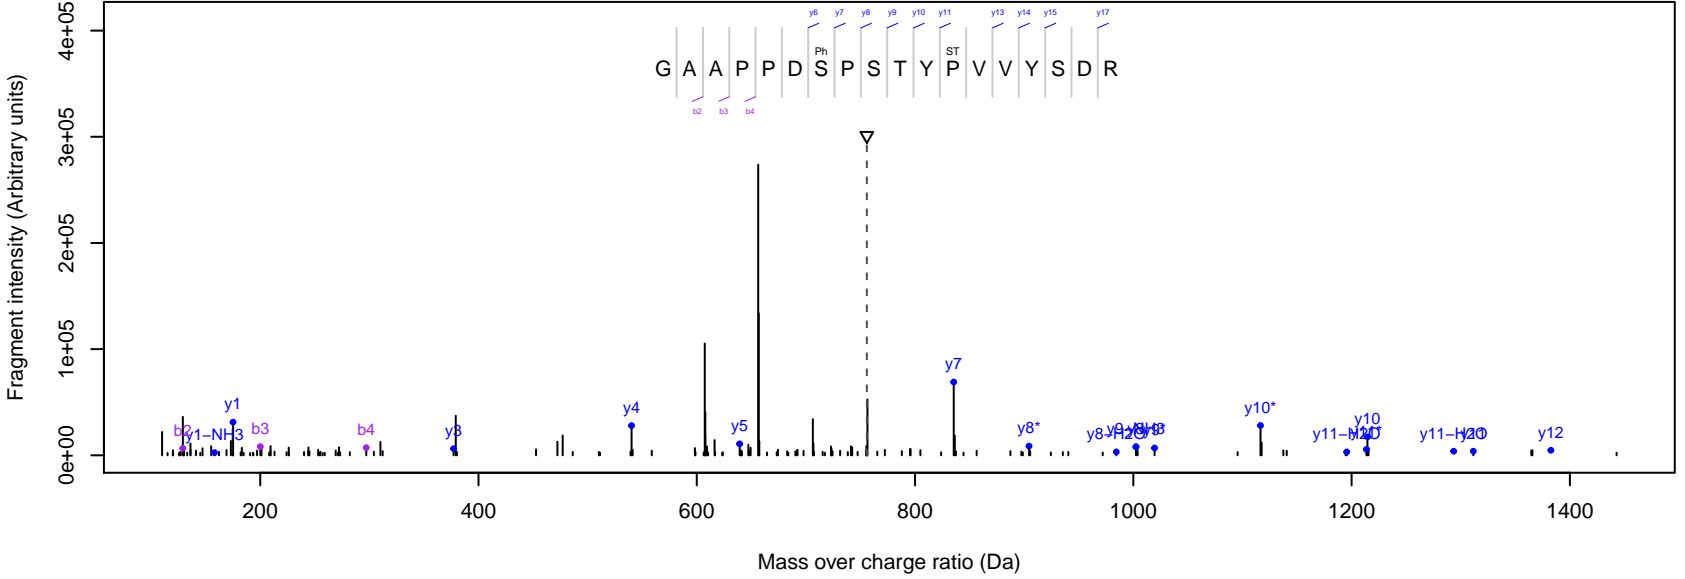

LLS(Phospho (STY))TQAEESQGPVLK-2+

Source : QE3\_201126\_FR\_TiOx\_hum\_tissue\_Urea\_RNAB\_N Scan : 30886

Andromeda score : 82.908

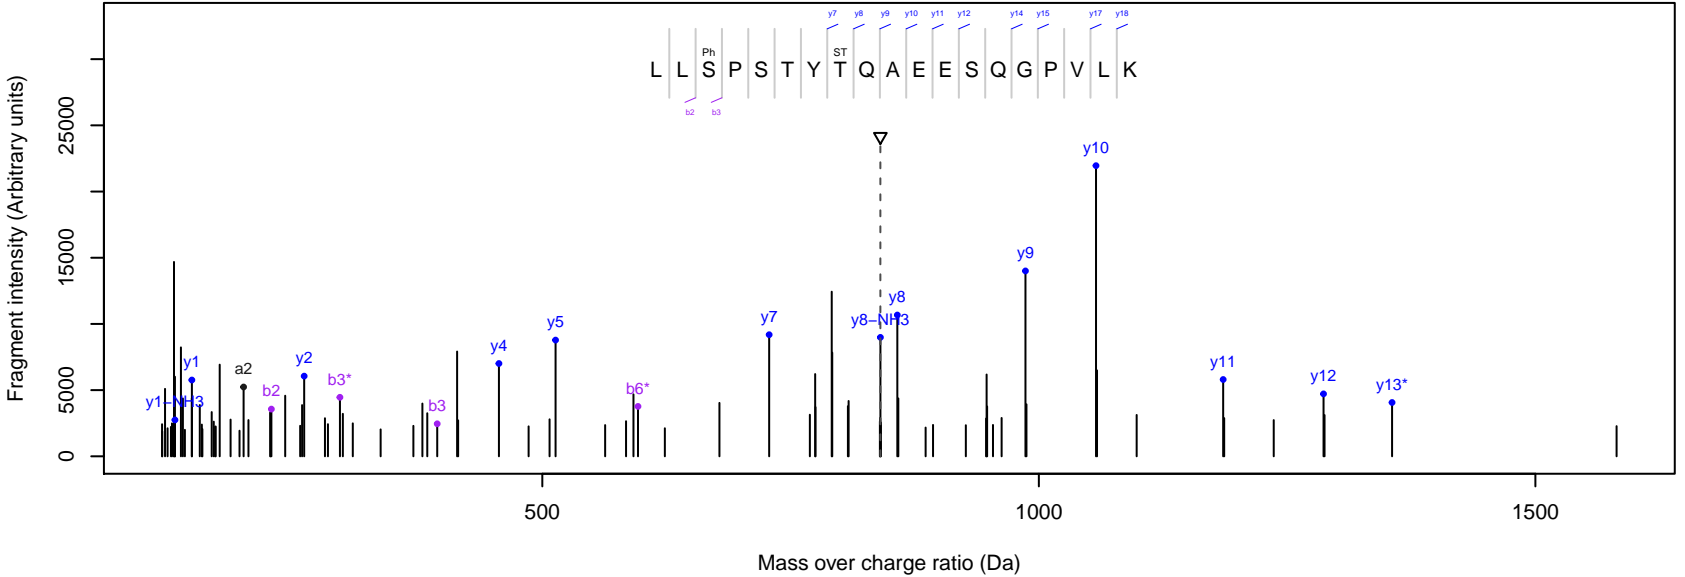

S(Phospho (STY))SDKLNLVTK-2+

Source : QE3\_201126\_FR\_TiOx\_hum\_tissue\_Urea\_RNAB\_H Scan : 13651

Andromeda score : 82.85

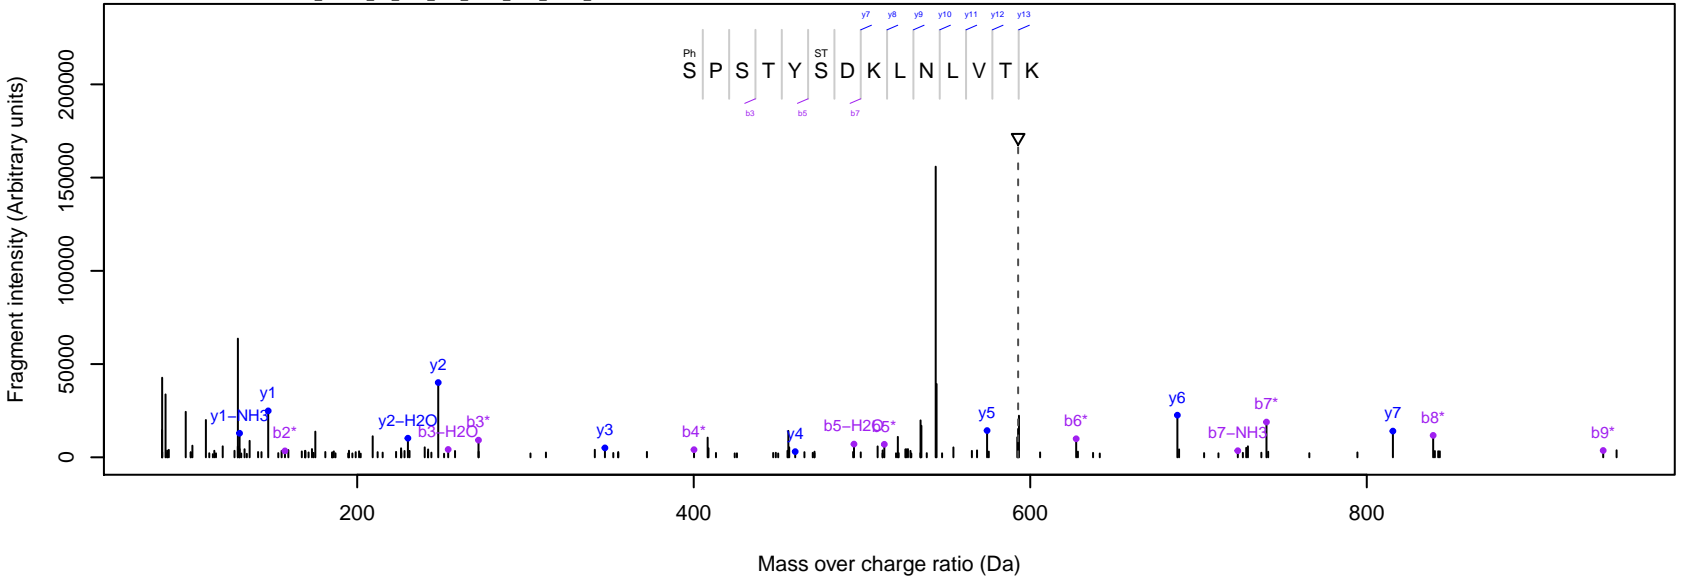

NKFGS(Phospho (STY))ADNIAHLK-3+

Source : QE3\_201126\_FR\_TiOx\_hum\_tissue\_Urea\_RNAB\_H Scan : 15210

Andromeda score : 82.822

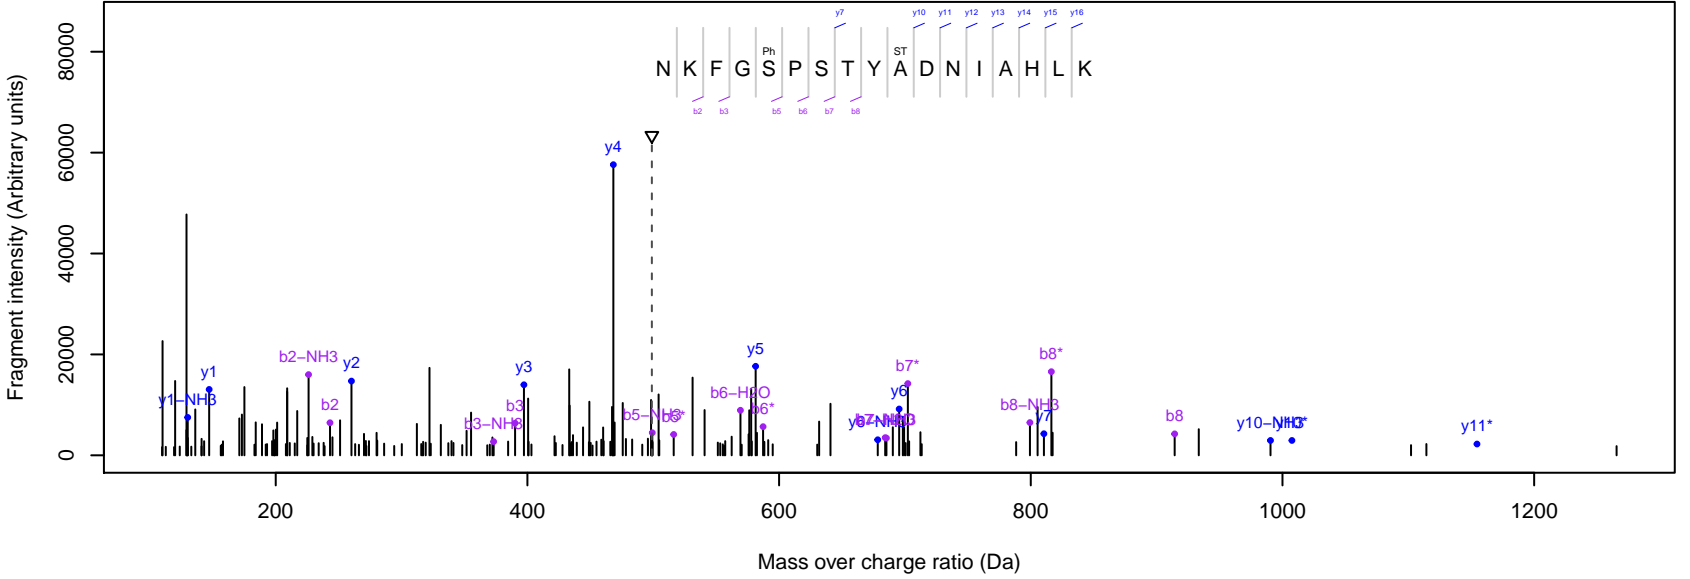

EQLSAQELMESGLQIKS(Phospho (STY))PEPEVLSTQEDLFDQSNK-4+

Source : QE3\_201126\_FR\_TiOx\_hum\_tissue\_Urea\_RNAB\_N Scan : 56423

Andromeda score : 82.808

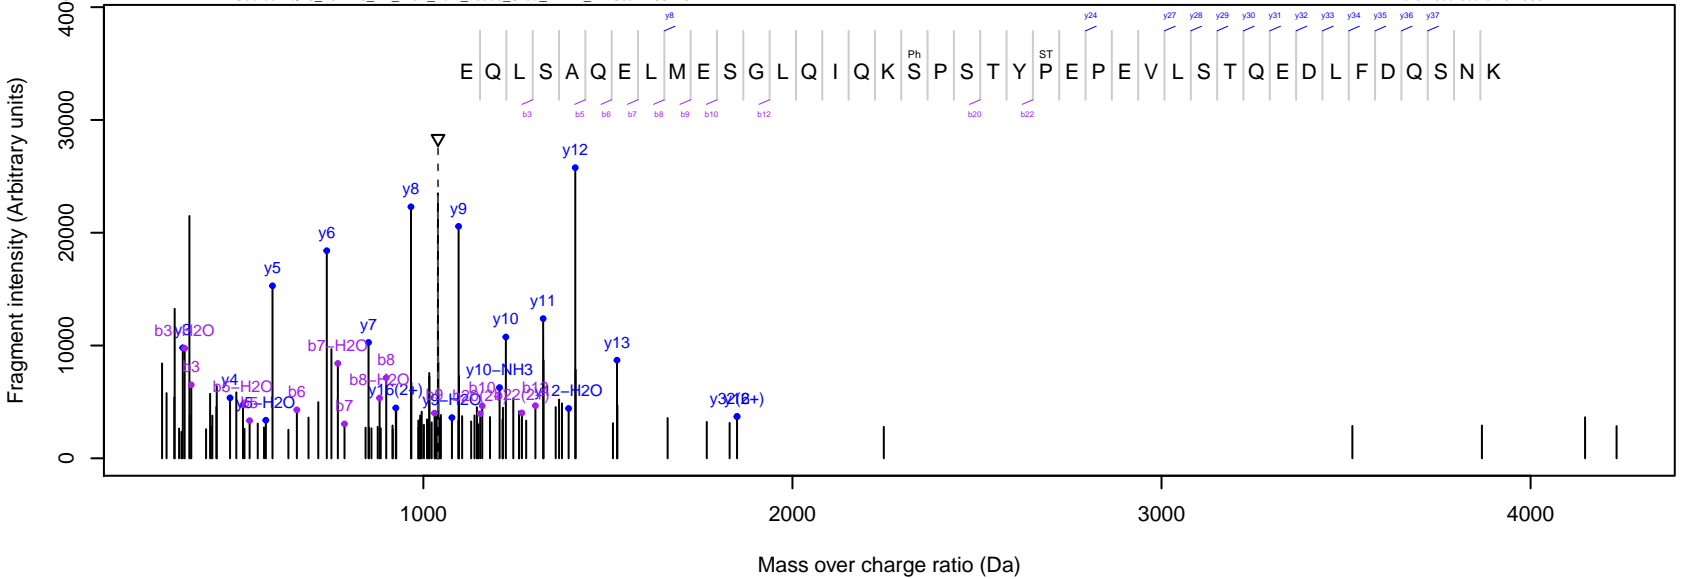

EKDAESVECPDADS(Phospho (STY))LNIPDVDEEGYSIKPETNQNDTK-4+

Source : QE3\_201126\_FR\_TiOx\_hum\_tissue\_Urea\_RNAB\_N Scan : 37043

Andromeda score : 82.789

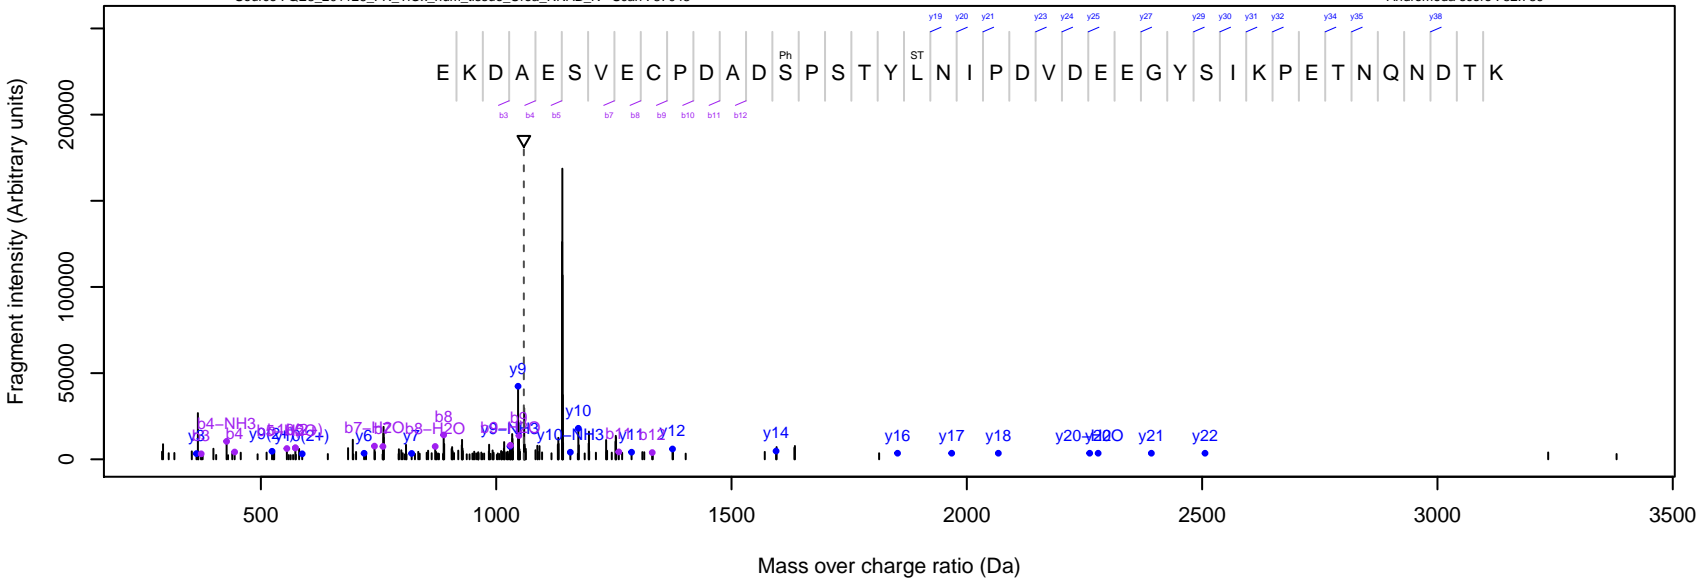

S(Phospho (STY))RSPGSPVGEGTGSPKWKIQIGEQEFELMR-4+

Source : QE3\_201126\_FR\_TiOx\_hum\_tissue\_Urea\_RNAB\_H Scan : 49262

Andromeda score : 82.784

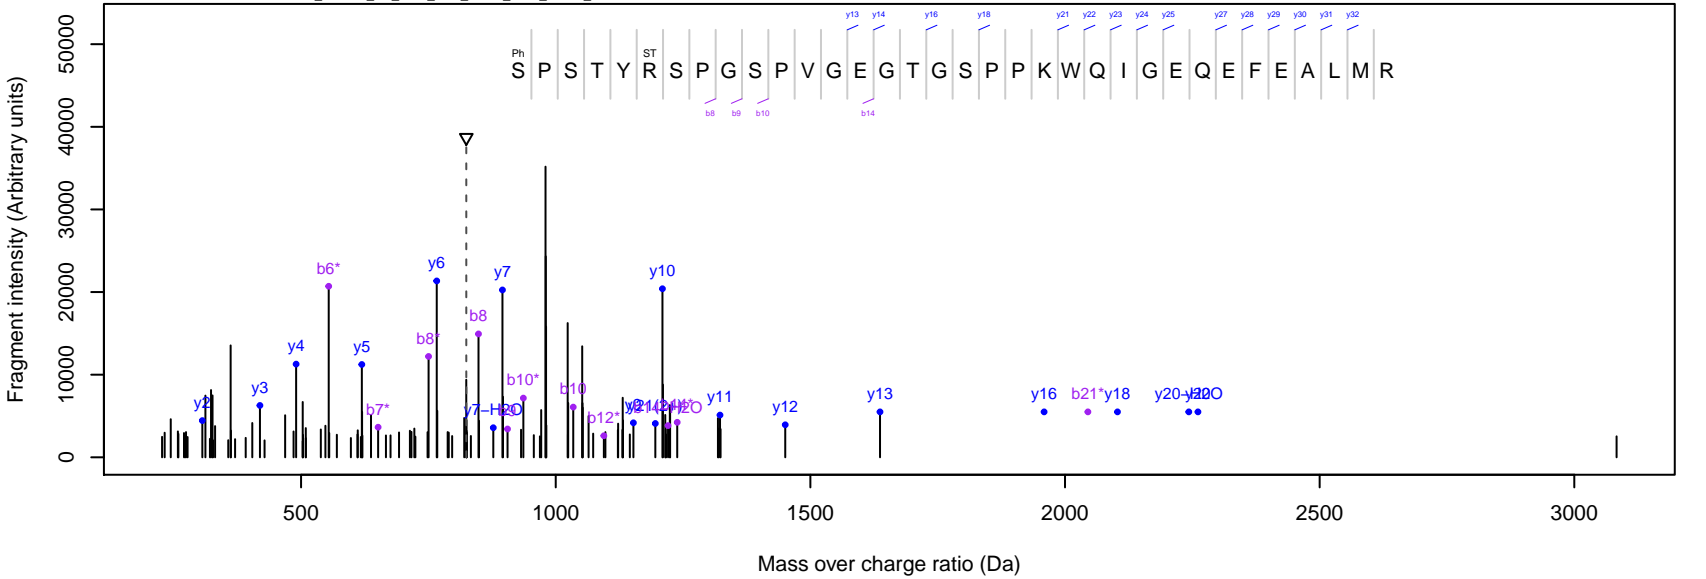

SDGS(Phospho (STY))FIGYK-2+

Source : QE3\_201126\_FR\_TiOx\_hum\_tissue\_Urea\_RNAB\_H Scan : 23202

Andromeda score : 82.749

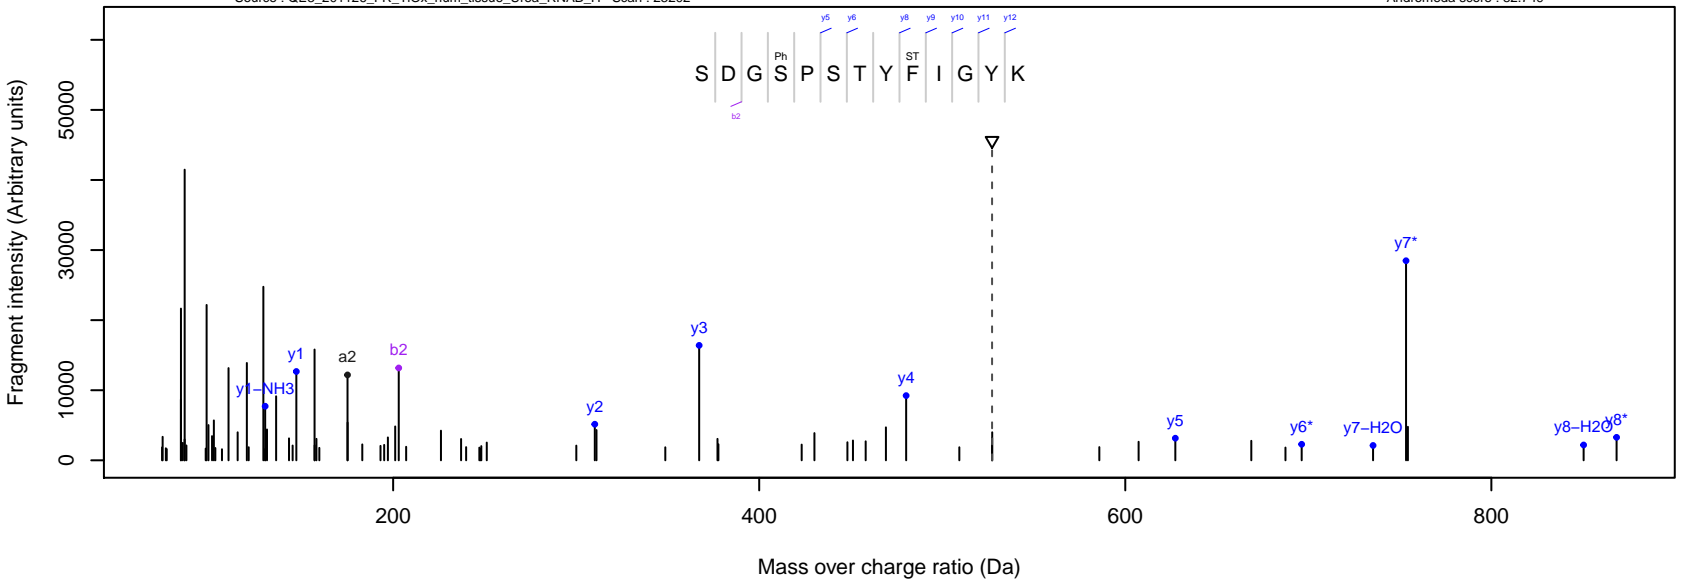

IHG VNSG S S E G A Q P N T E N G V P E I T D A A T D Q G P A E S P S T Y P P T S P S T Y P S S A

Source : QE3\_201126\_FR\_TiOx\_hum\_tissue\_Urea\_RNAB\_H Scan : 33453

Andromeda score : 82.716

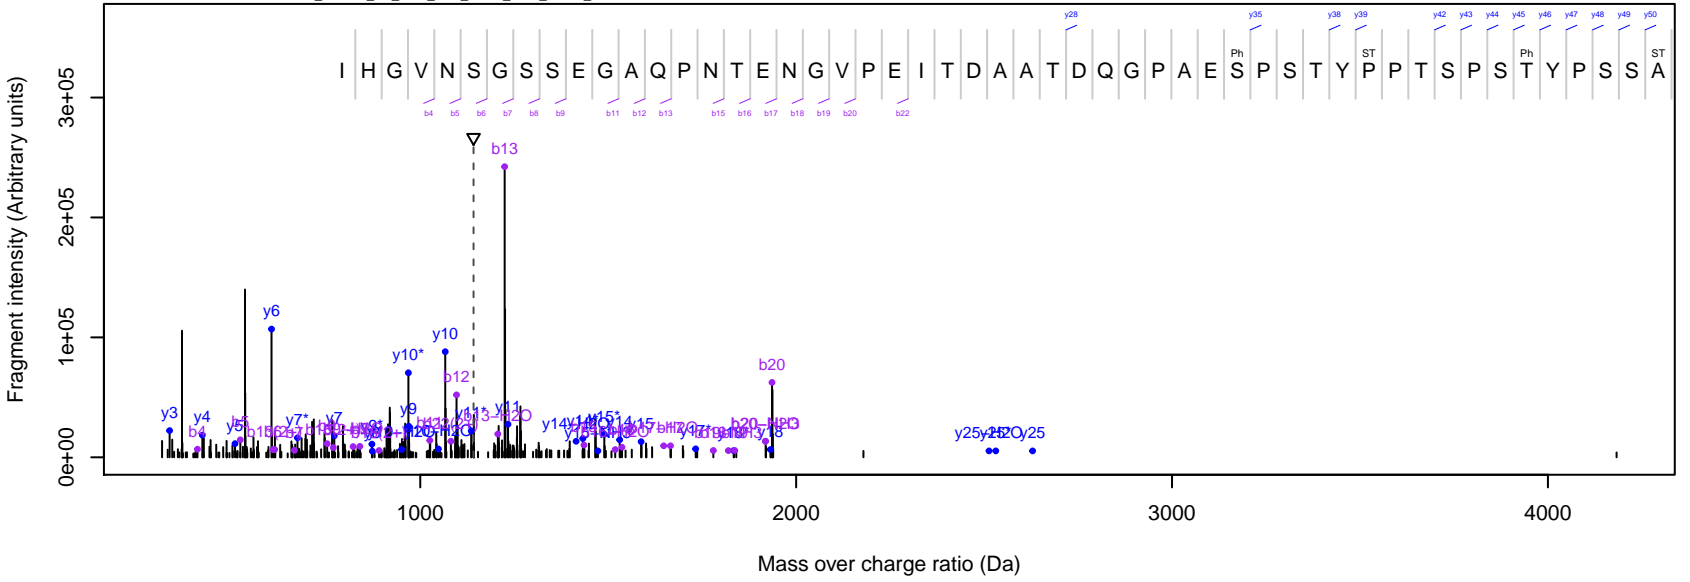

SWEDS(Phospho (STY))PERGRPHER-3+

Source : QE3\_201126\_FR\_TiOx\_hum\_tissue\_Urea\_RNAB\_B Scan : 6556

Andromeda score : 82.707

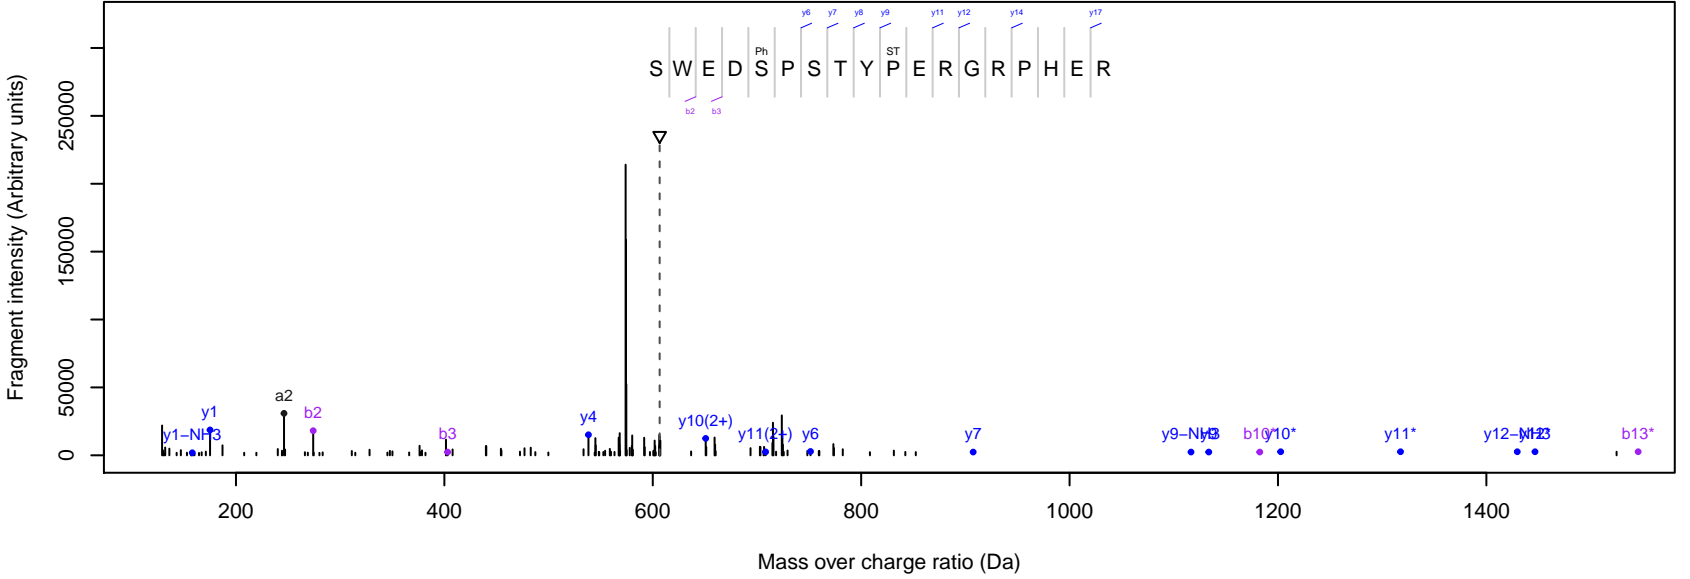

S(Phospho (STY))NPSIQATLNK-2+

Source : QE3\_201126\_FR\_TiOx\_hum\_tissue\_Urea\_RNAB\_B Scan : 19564

Andromeda score : 82.705

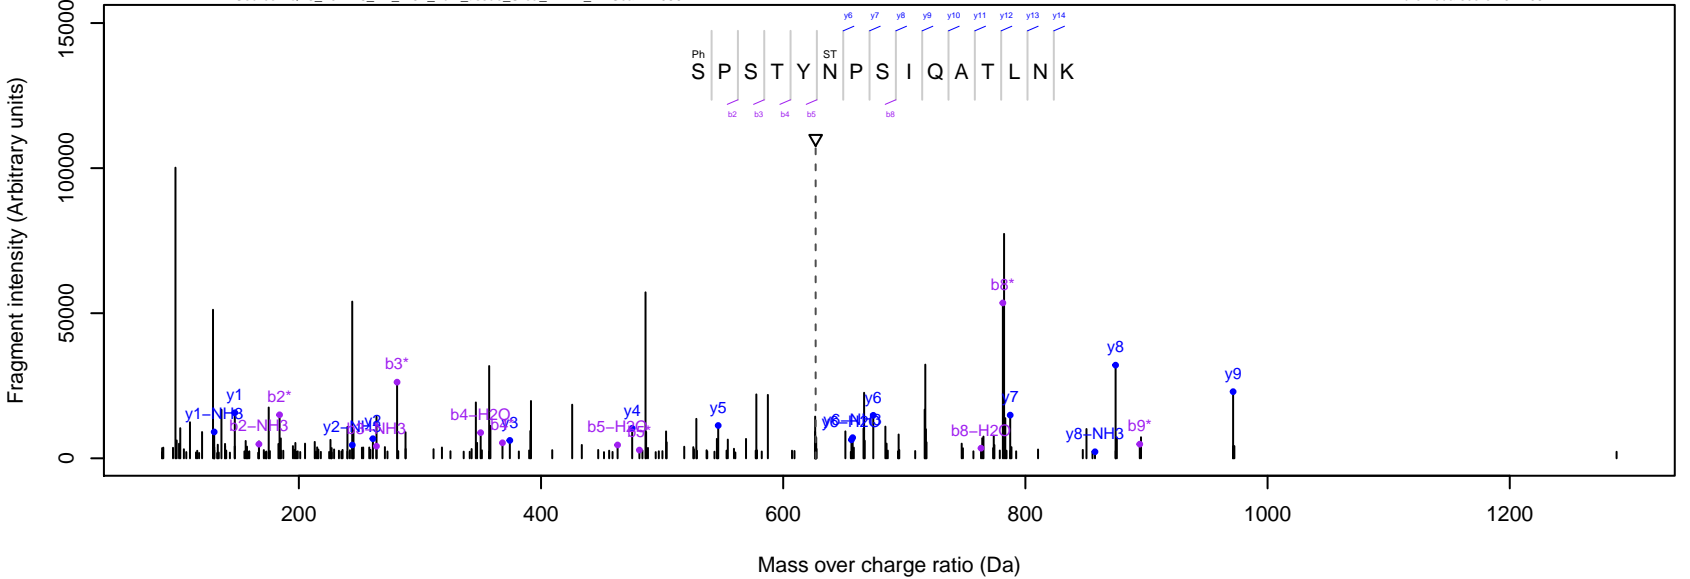

IRAEEDLAAVPFLAS(Phospho (STY))DNEEEDEKNGSLIR-4+

Source : QE3\_201126\_FR\_TiOx\_hum\_tissue\_Urea\_RNAB\_B Scan : 44767

Andromeda score : 82.684

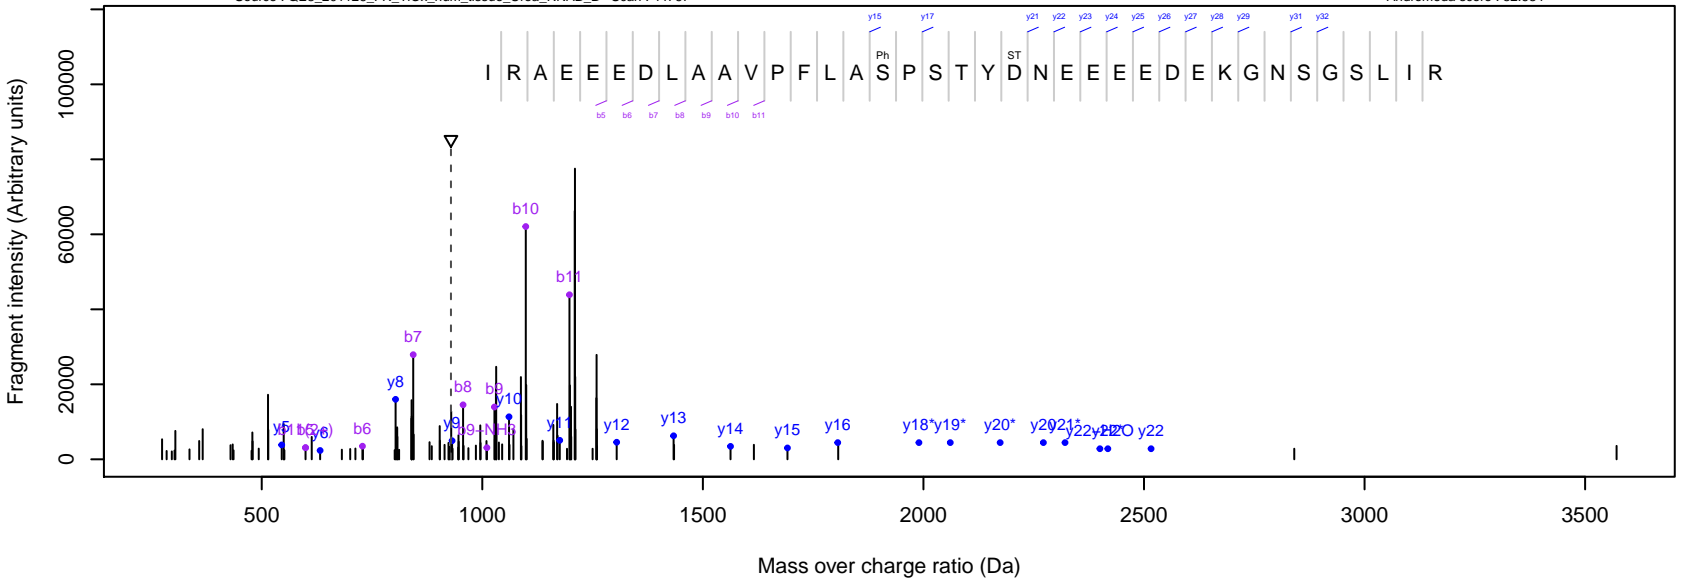

KPS(Phospho (STY))ISITTESLK-2+

Source : QE3\_201126\_FR\_TiOx\_hum\_tissue\_Urea\_RNAB\_H Scan : 21574

Andromeda score : 82.663

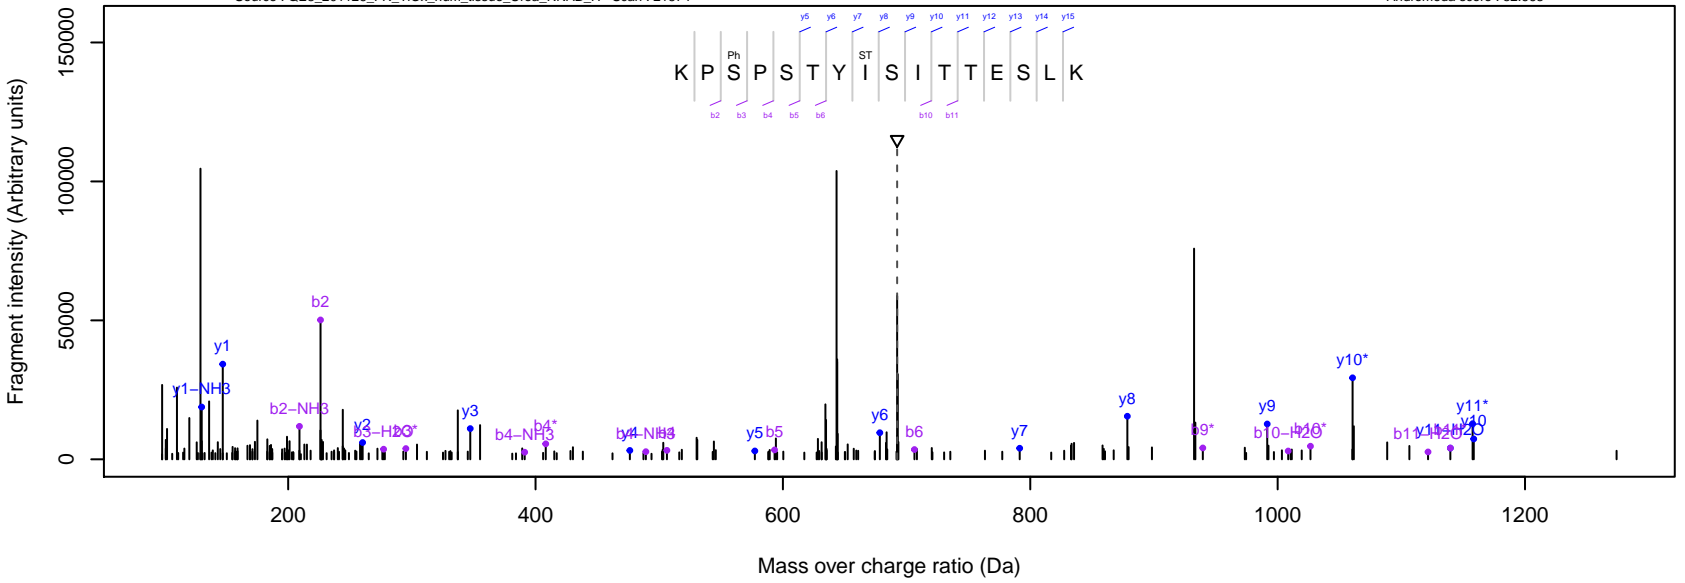

APPVAYNPIHS(Phospho (STY))PSYPLAALK-3+

Source : QE3\_201126\_FR\_TiOx\_hum\_tissue\_Urea\_RNAB\_H Scan : 44215

Andromeda score : 82.639

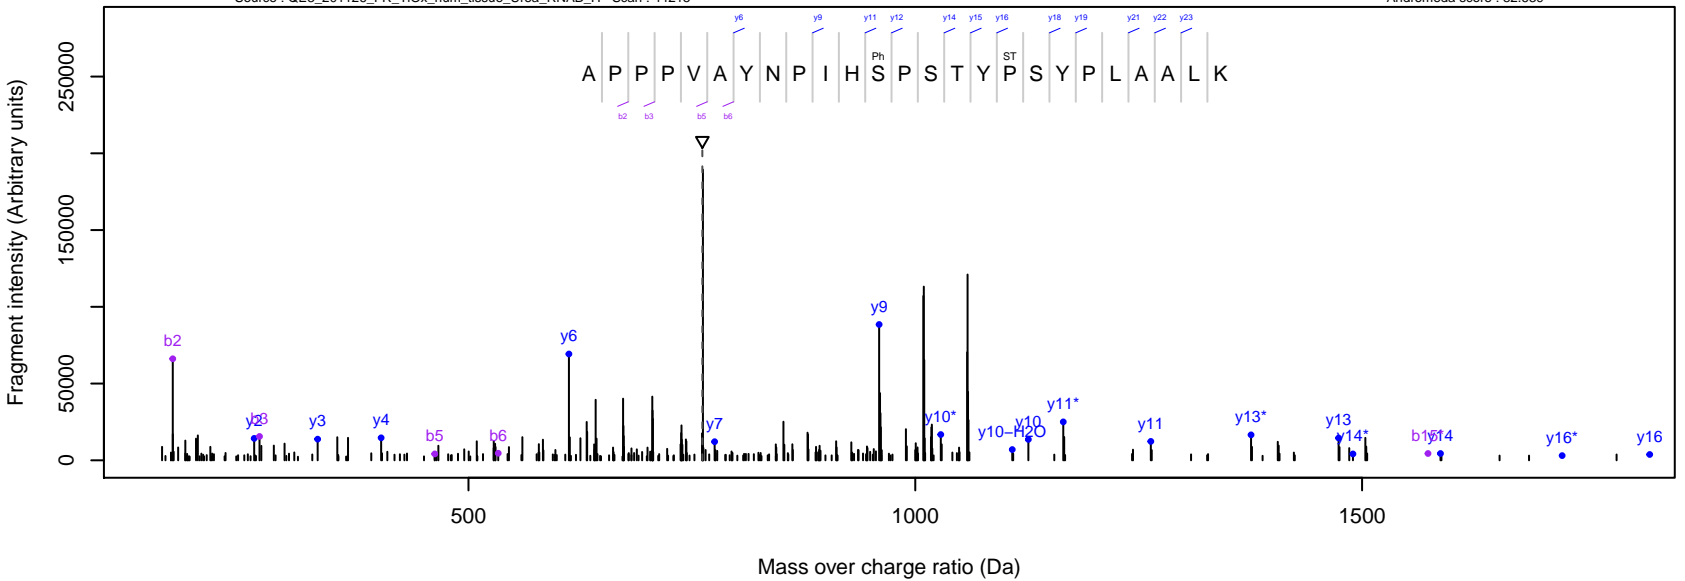



KLS(Phospho (STY))MGSDDAAYTQALLVHQQ-3+

Source : QE3\_201126\_FR\_TiOx\_hum\_tissue\_Urea\_RNAB\_N Scan : 32095

Andromeda score : 82.639

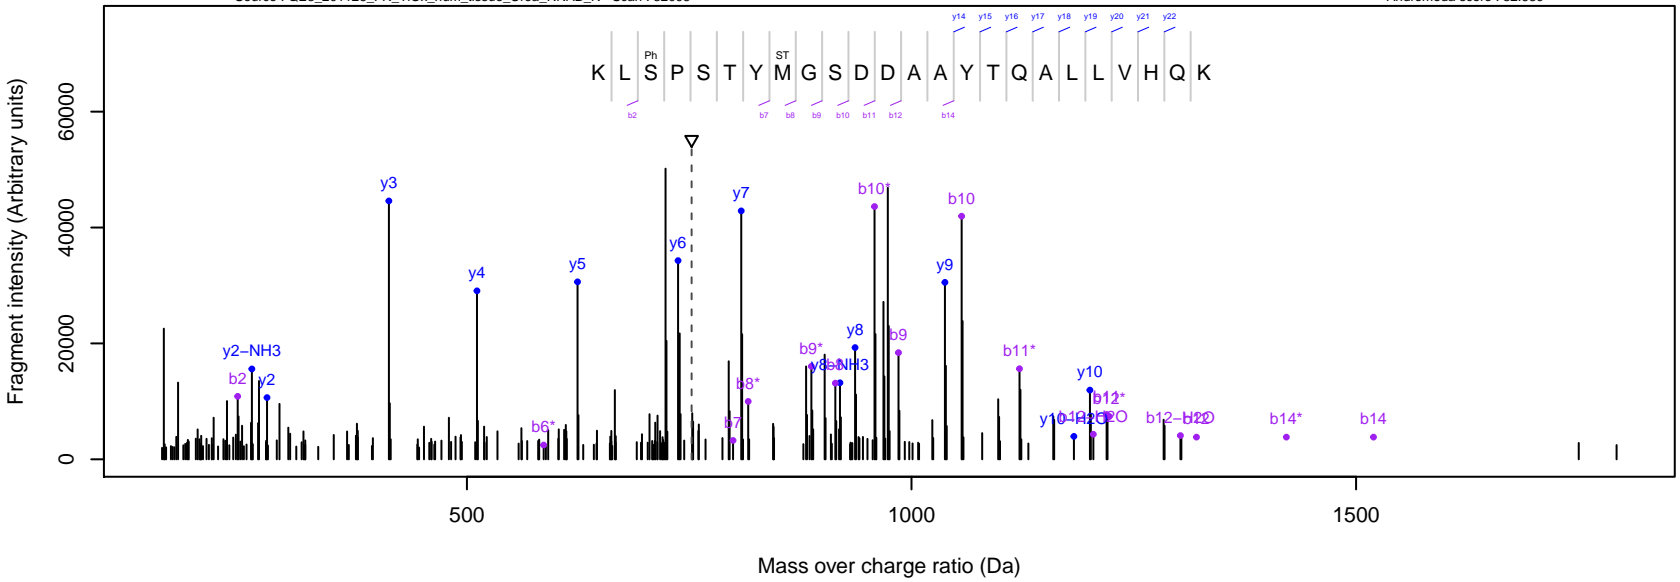

ARGEIGGLSLSPS(Phospho (STY))PER-3+

Source : QE3\_201126\_FR\_TiOx\_hum\_tissue\_Urea\_RNAB\_H Scan : 25491

Andromeda score : 82.635

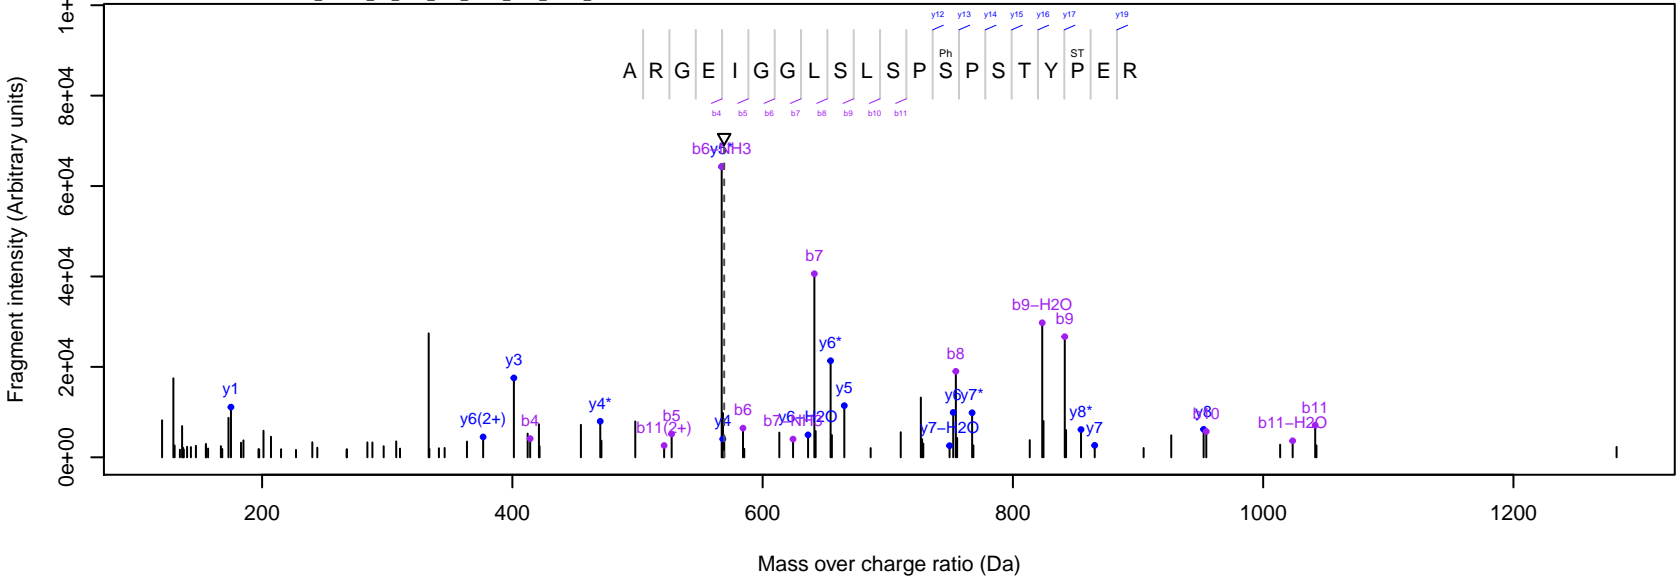

DRDS(Phospho (STY))QRDLVEAVAHILGIR-4+

Source : QE3\_201126\_FR\_TiOx\_hum\_tissue\_Urea\_RNAB\_N Scan : 61106

Andromeda score : 82.593

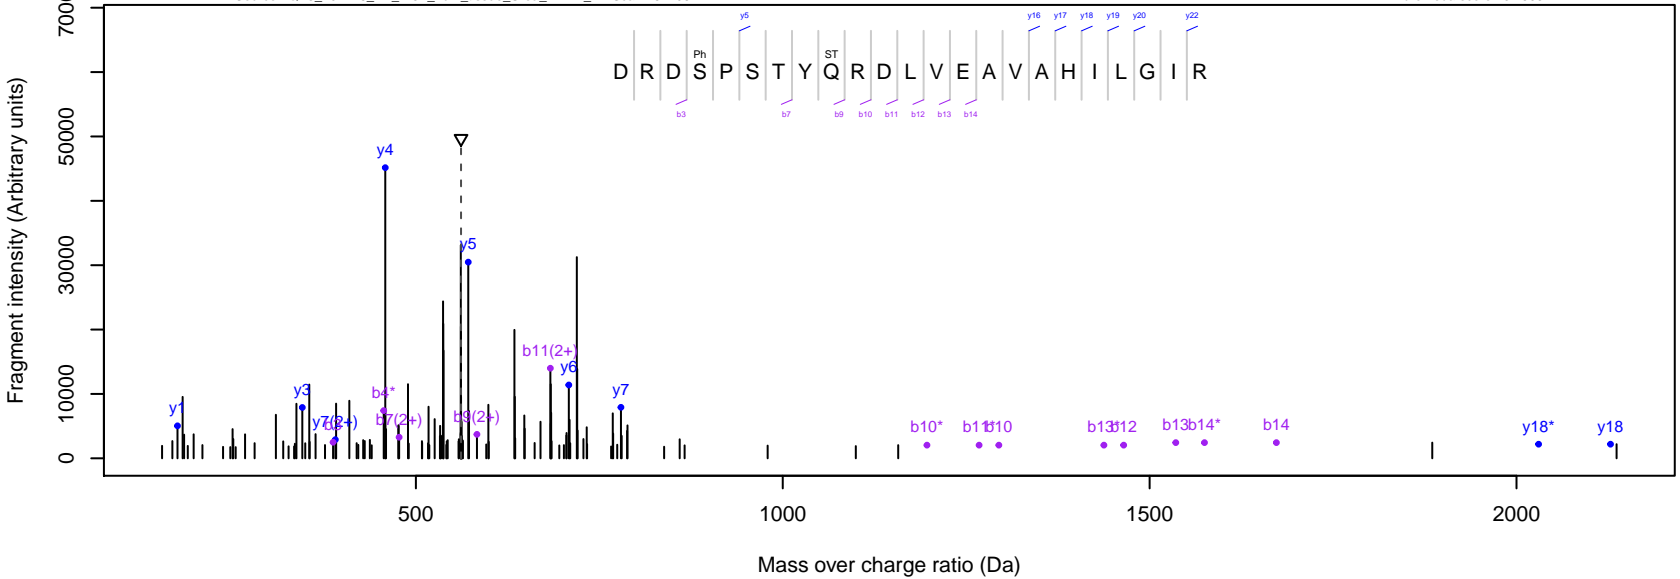

SGT(Phospho (STY))PPRQGSIT(Phospho (STY))SPQANEQSVT(Phospho (STY))PQRR-4+

Source : QE3\_201126\_FR\_TIOx\_hum\_tissue\_Urea\_RNAB\_N Scan : 16092

Andromeda score : 82.581

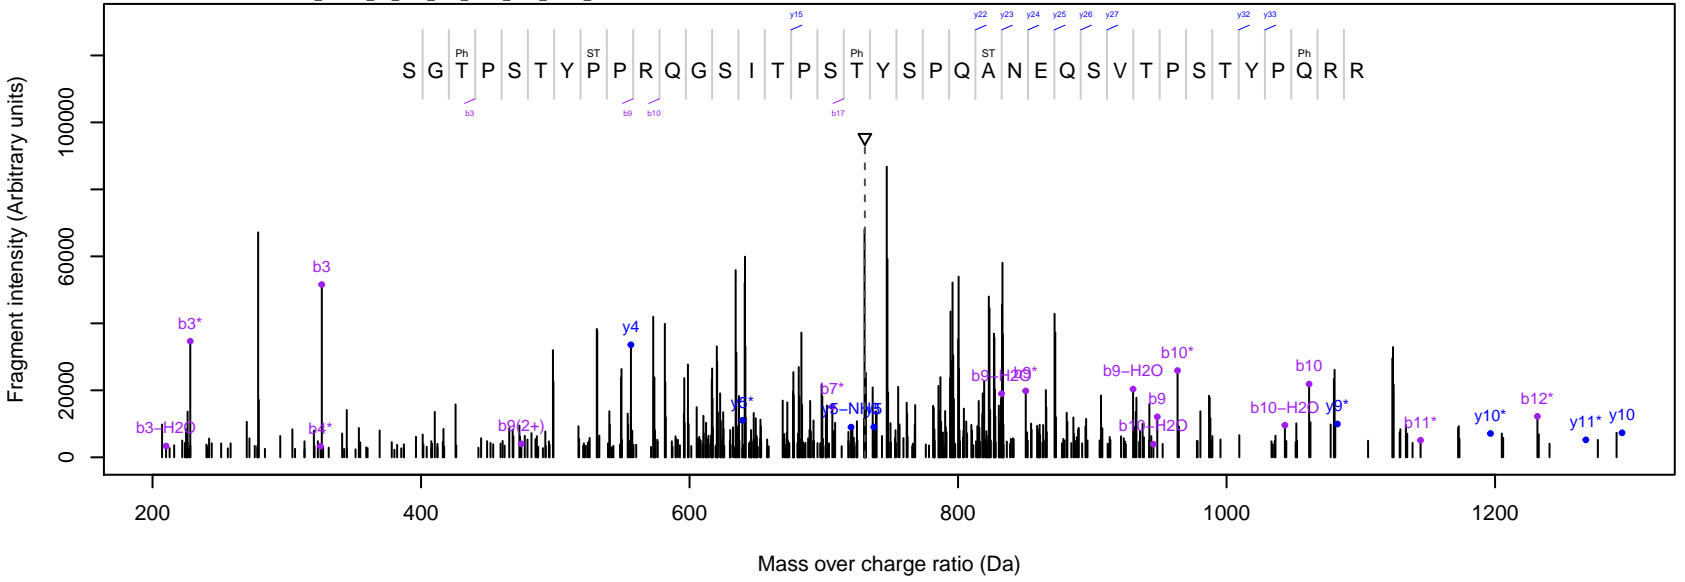

NSSTDQGS(Phospho (STY))DEEGLQKEQESAM(Oxidation (M))DKHNLER-4+

Source : QE3\_201126\_FR\_TIOx\_hum\_tissue\_Urea\_RNAB\_H Scan : 12496

Andromeda score : 82.554

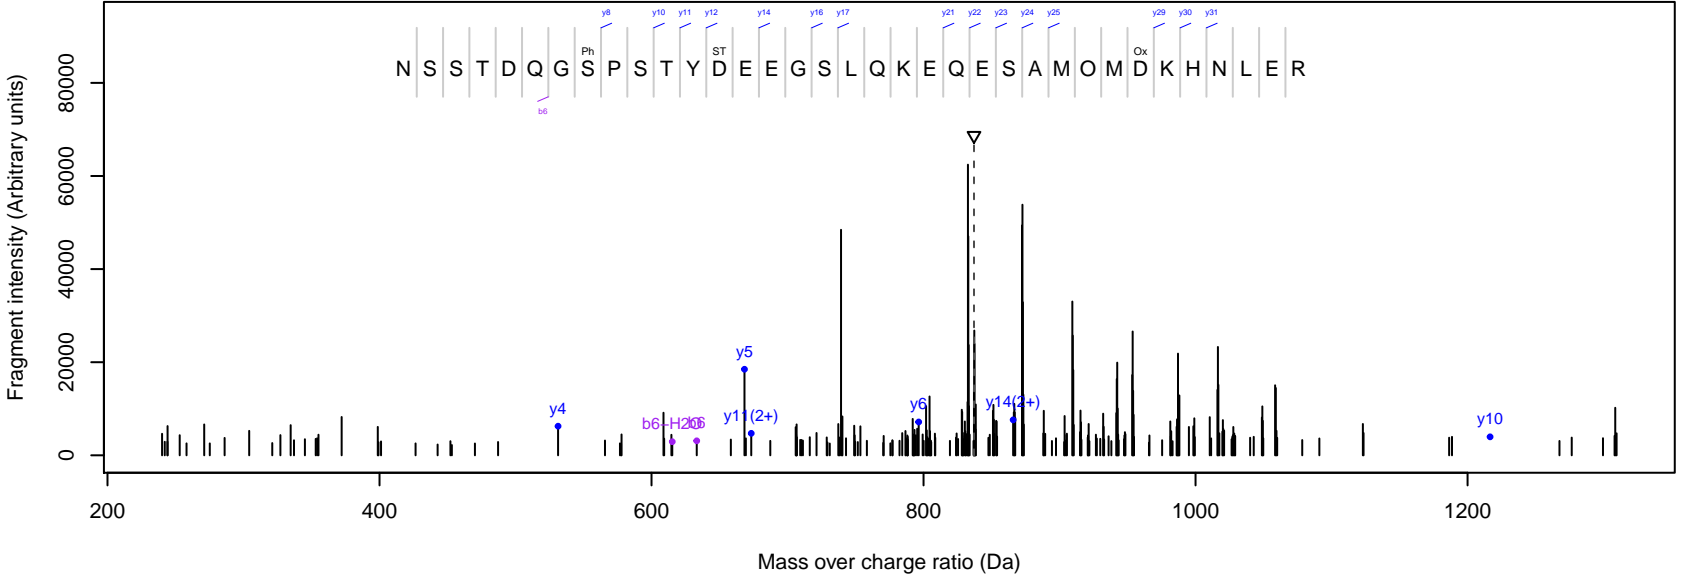

QGPPCS(Phospho (STY))DS(Phospho (STY))EEEEV-2+

Source : QE3\_201126\_FR\_TIOx\_hum\_tissue\_Urea\_RNAB\_H Scan : 16244

Andromeda score : 82.55

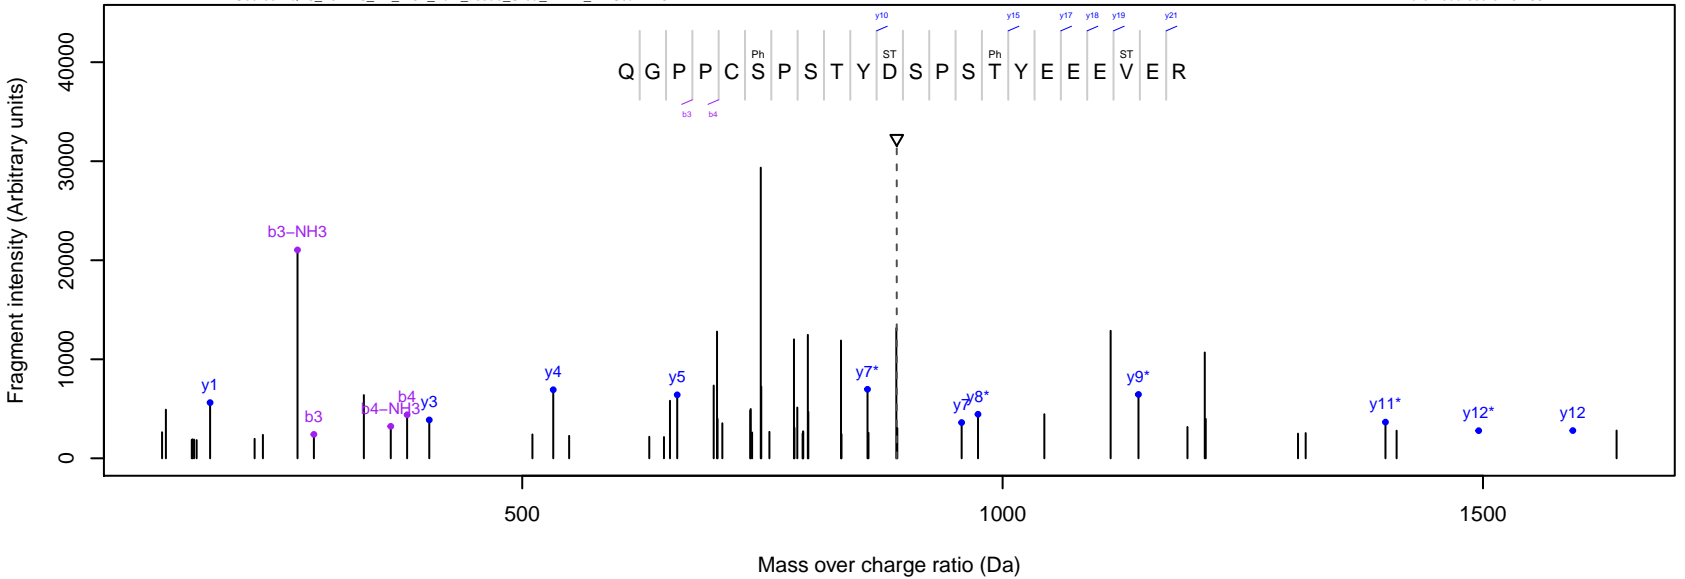

S(Phospho (STY))RS(Phospho (STY))RS(Phospho (STY))FDYNYR-2+

Source : QE3\_201126\_FR\_TiOx\_hum\_tissue\_Urea\_RNAB\_B Scan : 19540

Andromeda score : 82.55

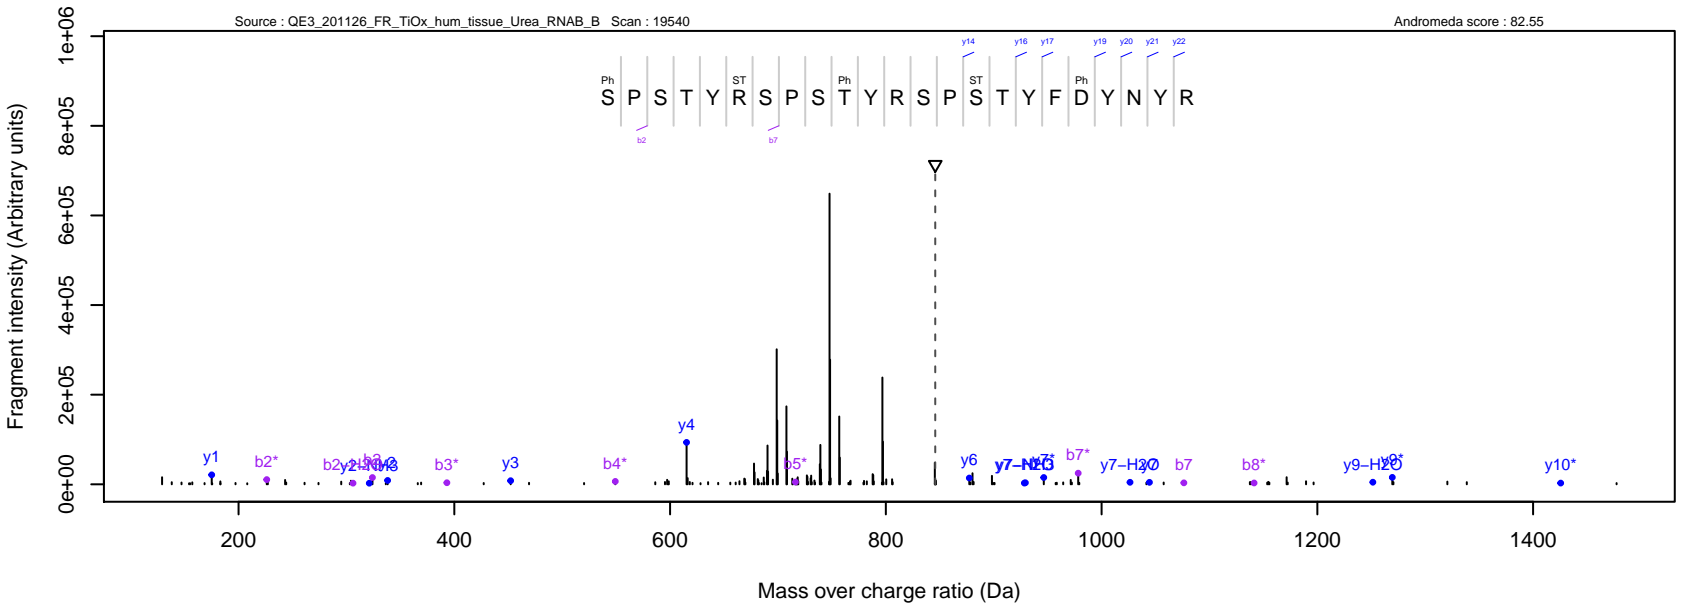

FSEMNNMGDEDVLDPEVDGADDDSQDS(Phospho (STY))DDEKMPDLE-4+

Source : QE3\_201126\_FR\_TiOx\_hum\_tissue\_Urea\_RNAB\_H Scan : 57025

Andromeda score : 82.536

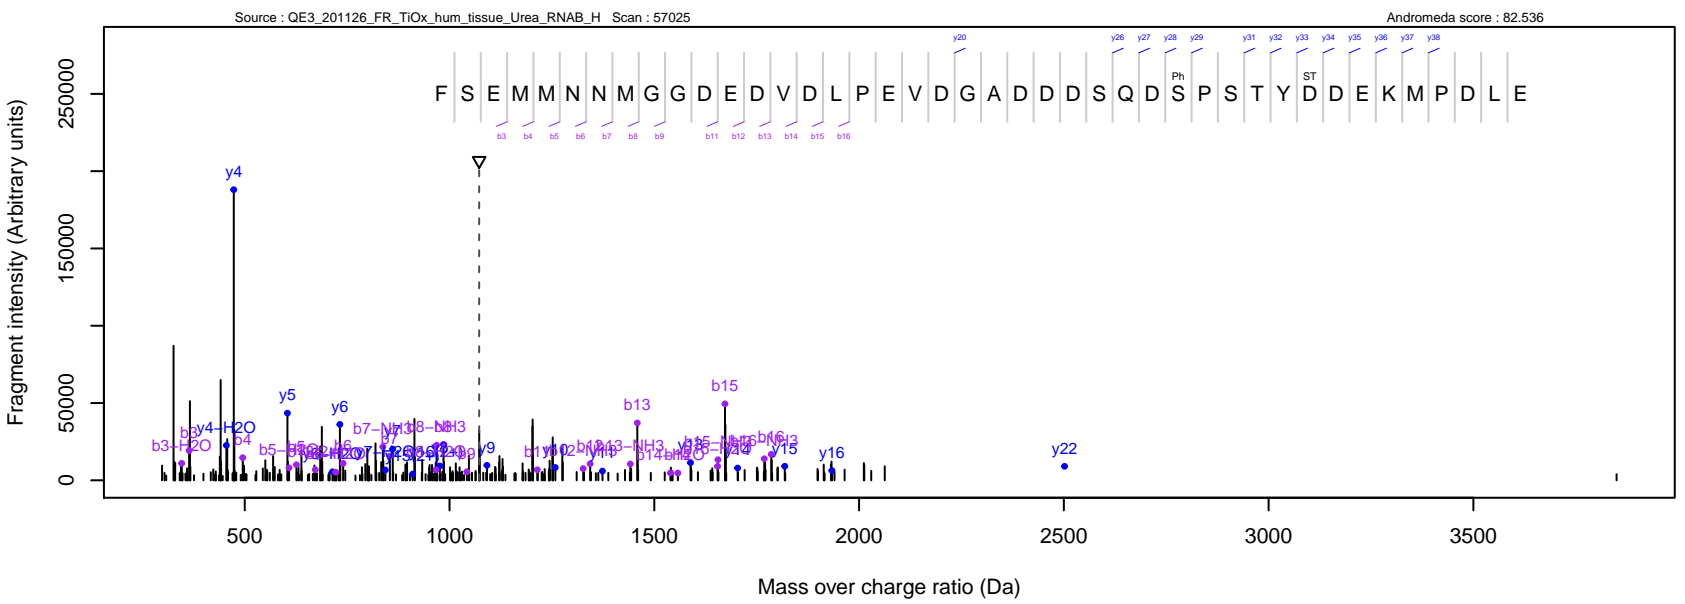

ENPPVEDS(Phospho (STY))S(Phospho (STY))DEDDKR-2+

Source : QE3\_201126\_FR\_TiOx\_hum\_tissue\_Urea\_RNAB\_H Scan : 8770

Andromeda score : 82.529

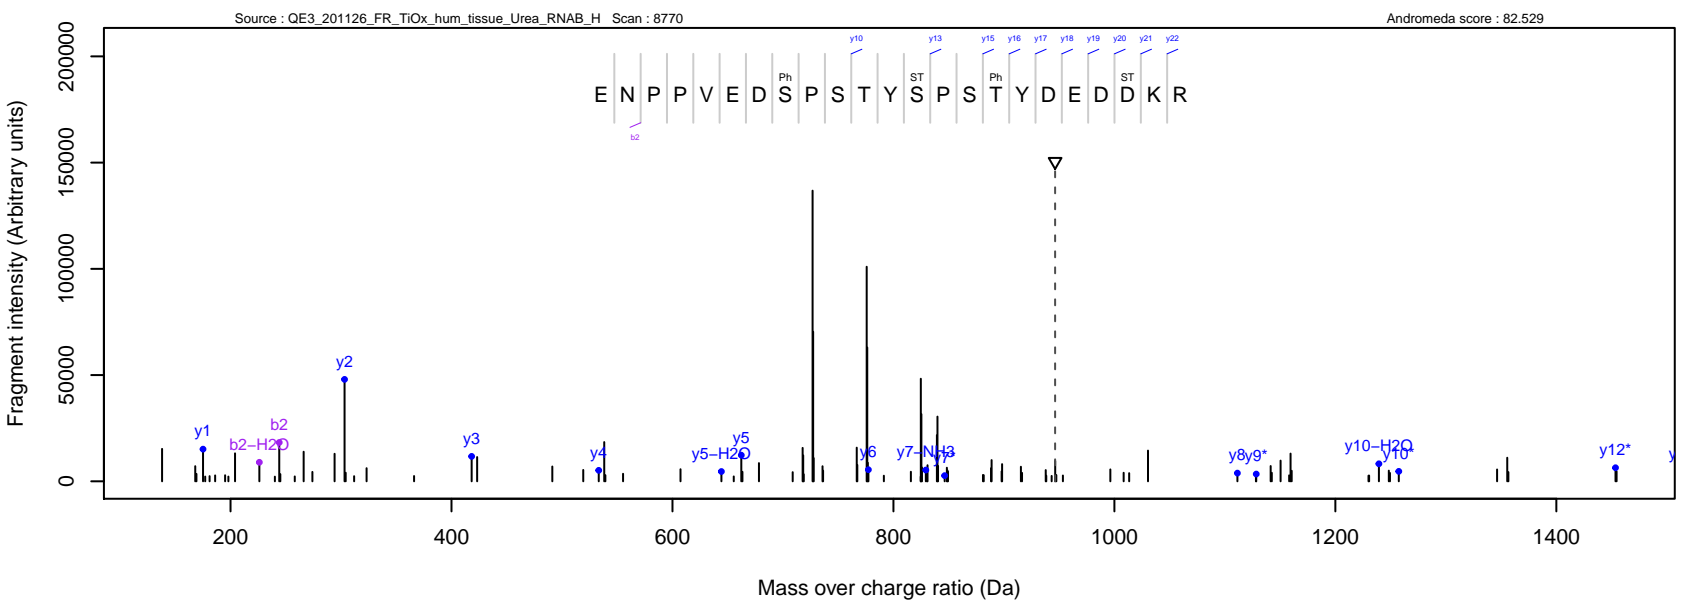

VTLYNTDQDGS(Phospho (STY))PR-2+

Source : QE3\_201126\_FR\_TiOx\_hum\_tissue\_Urea\_RNAB\_N Scan : 19920

Andromeda score : 82.529

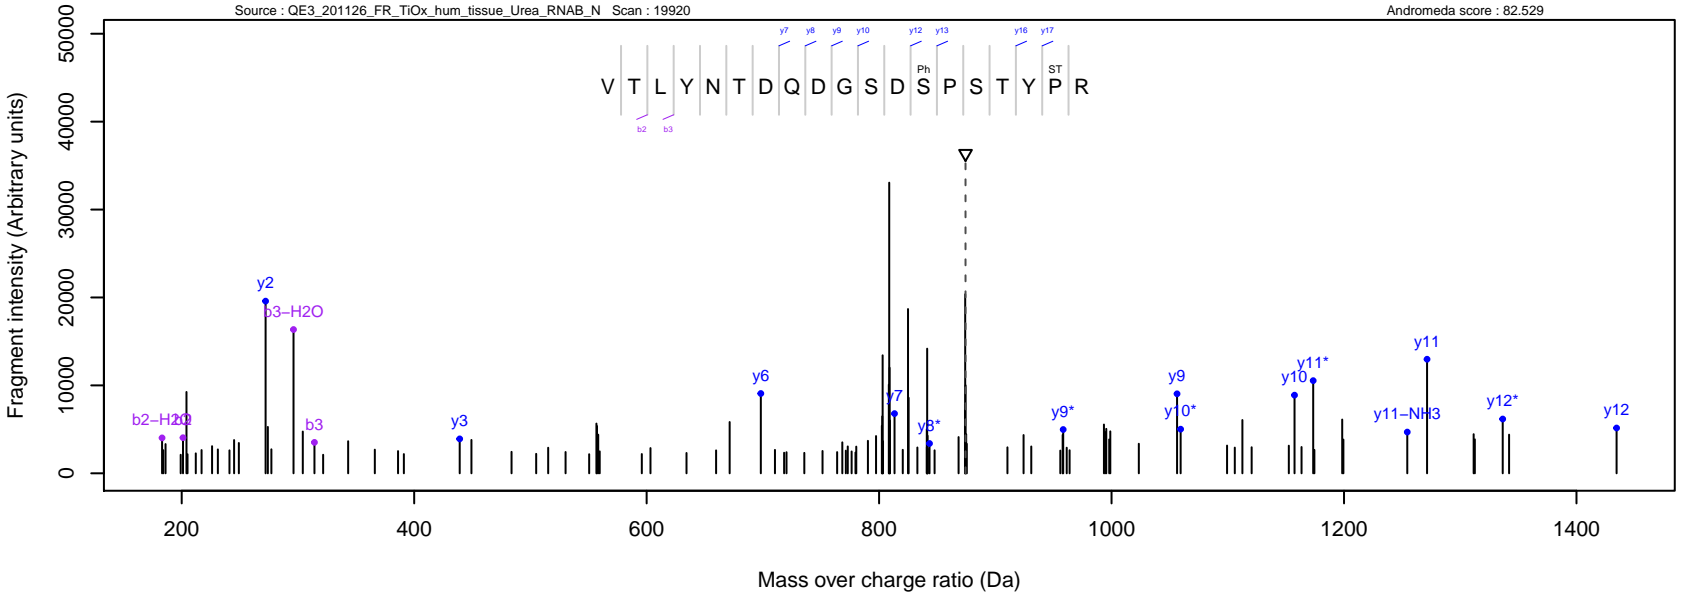

REHASIDAQSGAGVNPSTSAS(Phospho (STY))PK-3+

Source : QE3\_201126\_FR\_TiOx\_hum\_tissue\_Urea\_RNAB\_N Scan : 13220

Andromeda score : 82.508

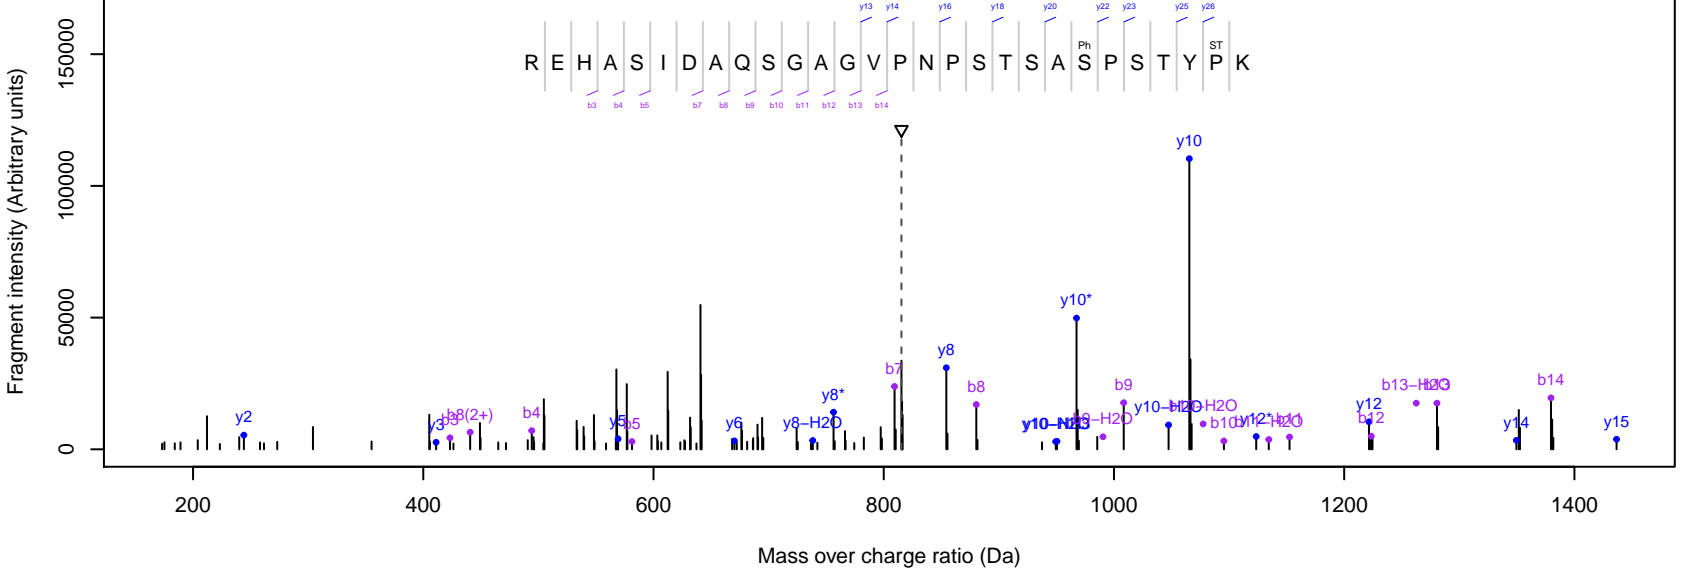

AEAPSPDVAPAGKEDSPSTYPSASGR-3+

Source : QE3\_201126\_FR\_TiOx\_hum\_tissue\_Urea\_RNAB\_H Scan : 12029

Andromeda score : 82.492

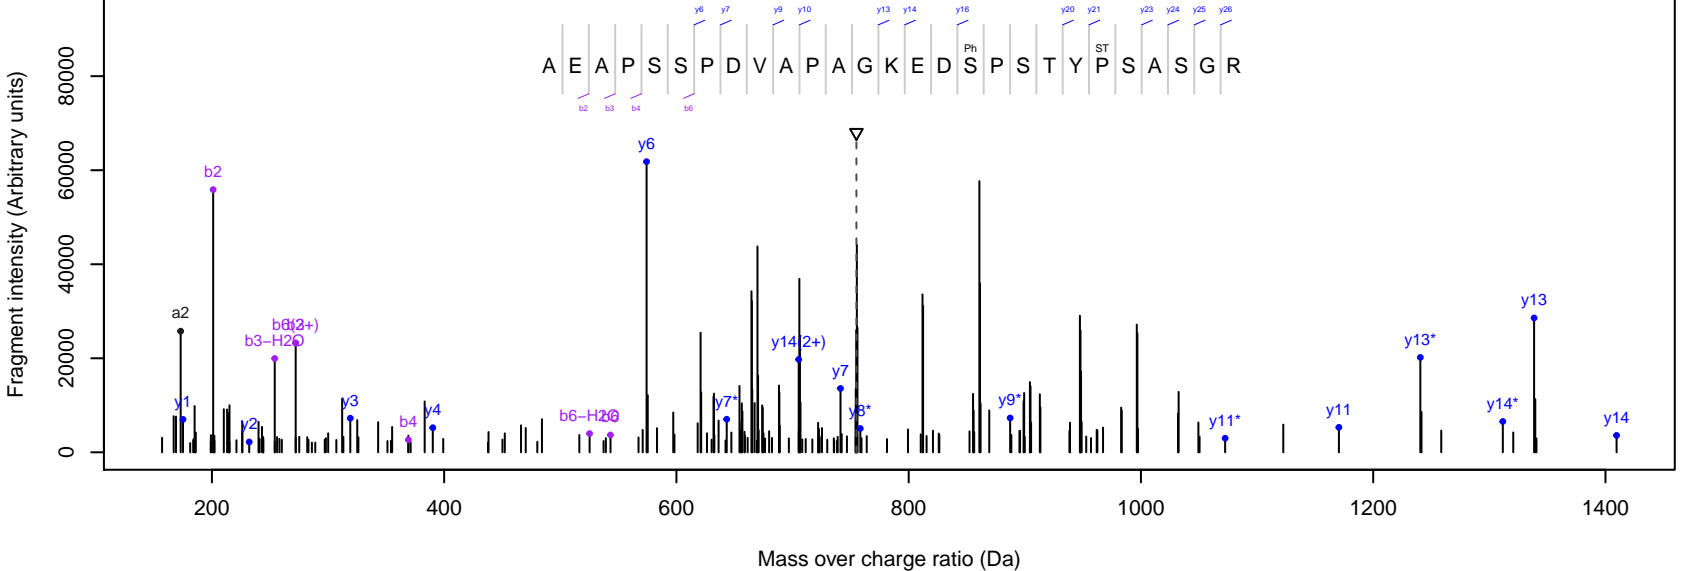

ISSGKS(Phospho (STY))SPFKVS(Phospho (STY))PLTFGR-3+

Source : QE3\_201126\_FR\_TiOx\_hum\_tissue\_Urea\_RNAB\_H Scan : 35994

Andromeda score : 82.486

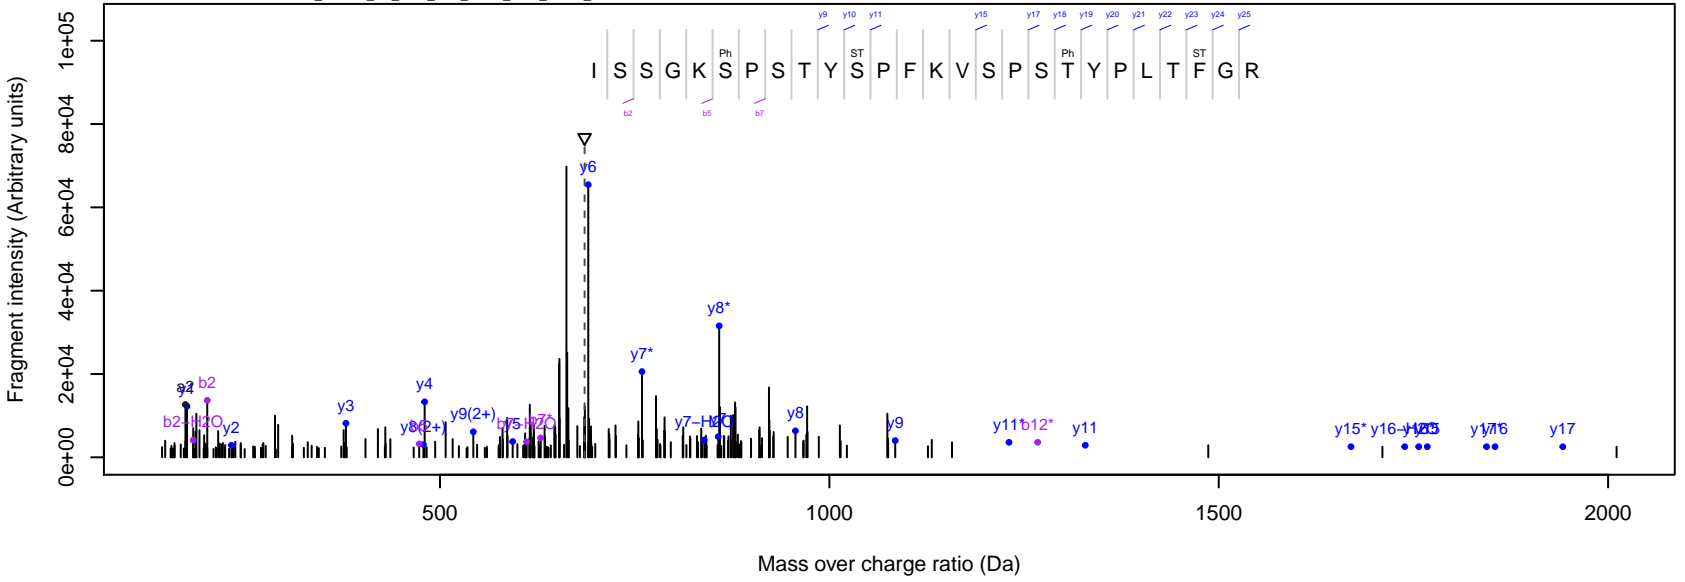

LS(Phospho (STY))LQGHPTDLQTSNVKNEEK-3+

Source : QE3\_201126\_FR\_TiOx\_hum\_tissue\_Urea\_RNAB\_N Scan : 16764

Andromeda score : 82.486

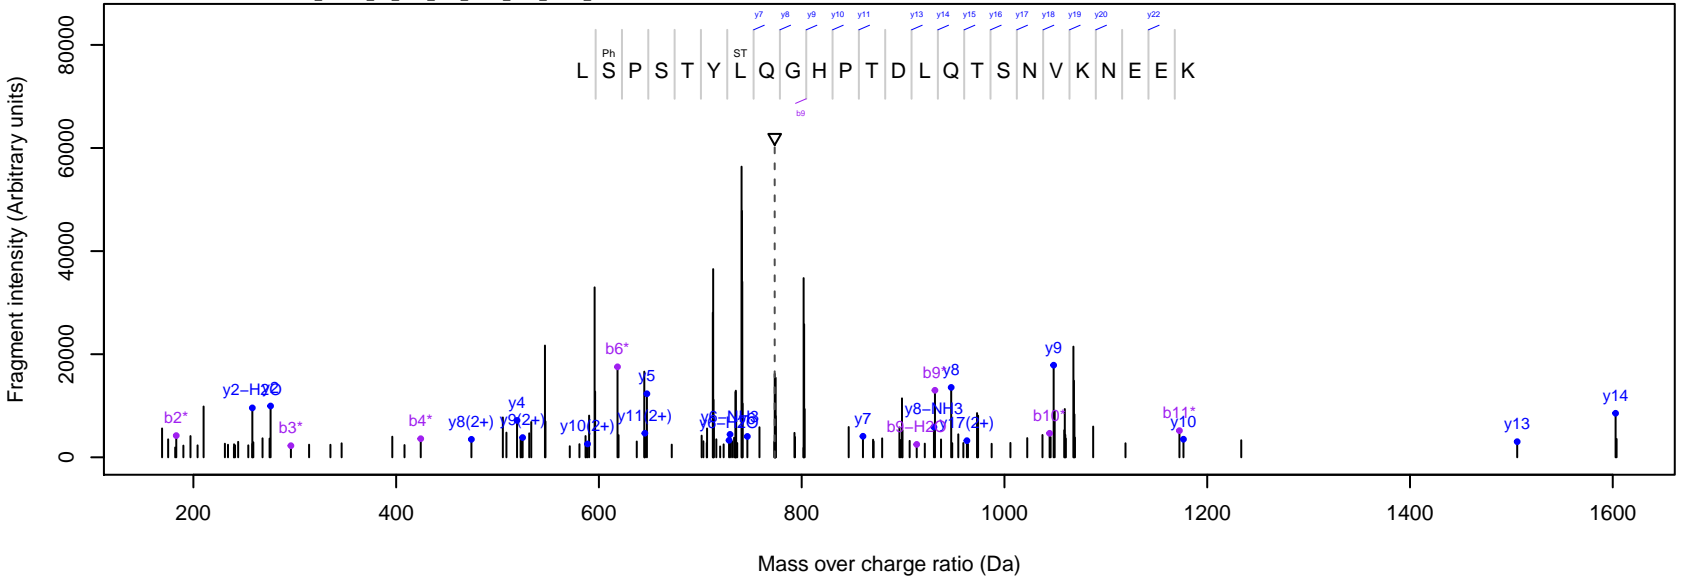

GDS(Phospho (STY))PKIDLAGSSLSGLDKLSDR-3+

Source : QE3\_201126\_FR\_TiOx\_hum\_tissue\_Urea\_RNAB\_N Scan : 49012

Andromeda score : 82.477

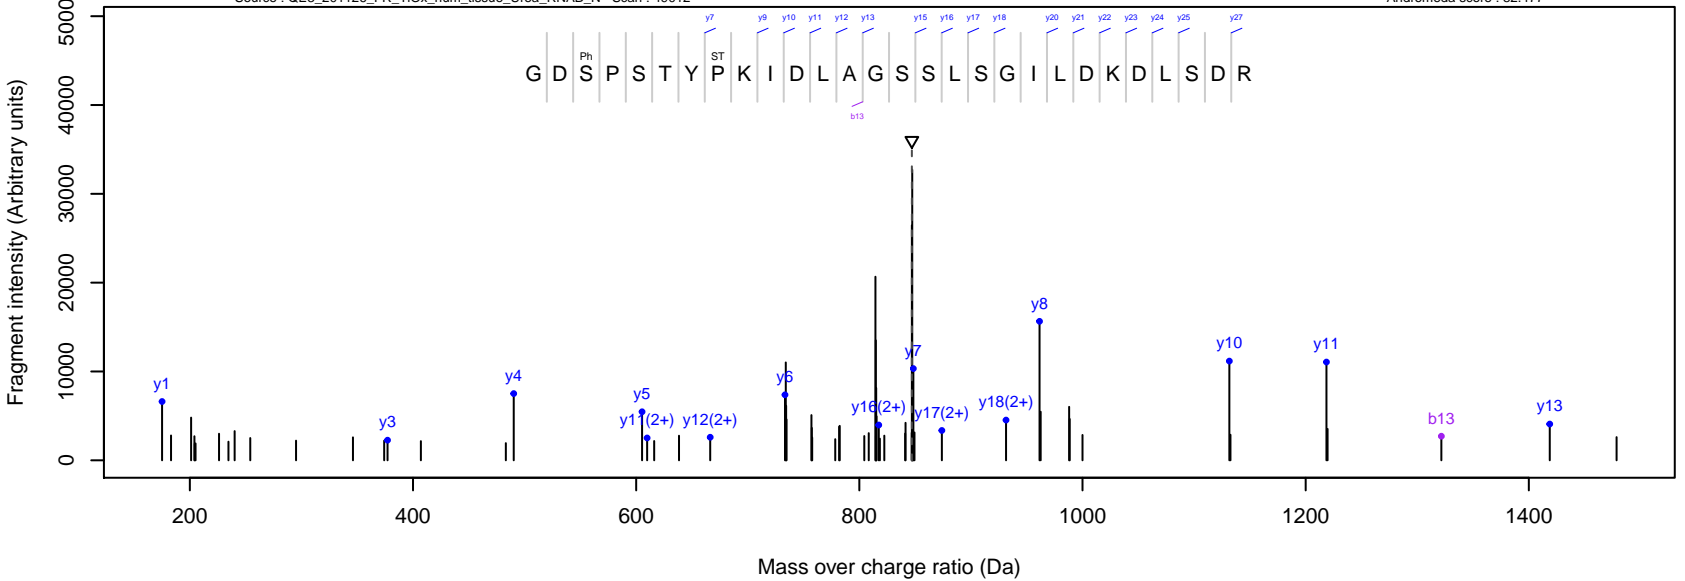

QEDVGFGRGNS(Phospho (STY))PEM(Oxidation (M))R-3+

Source : QE3\_201126\_FR\_TiOx\_hum\_tissue\_Urea\_RNAB\_N Scan : 10659

Andromeda score : 82.449

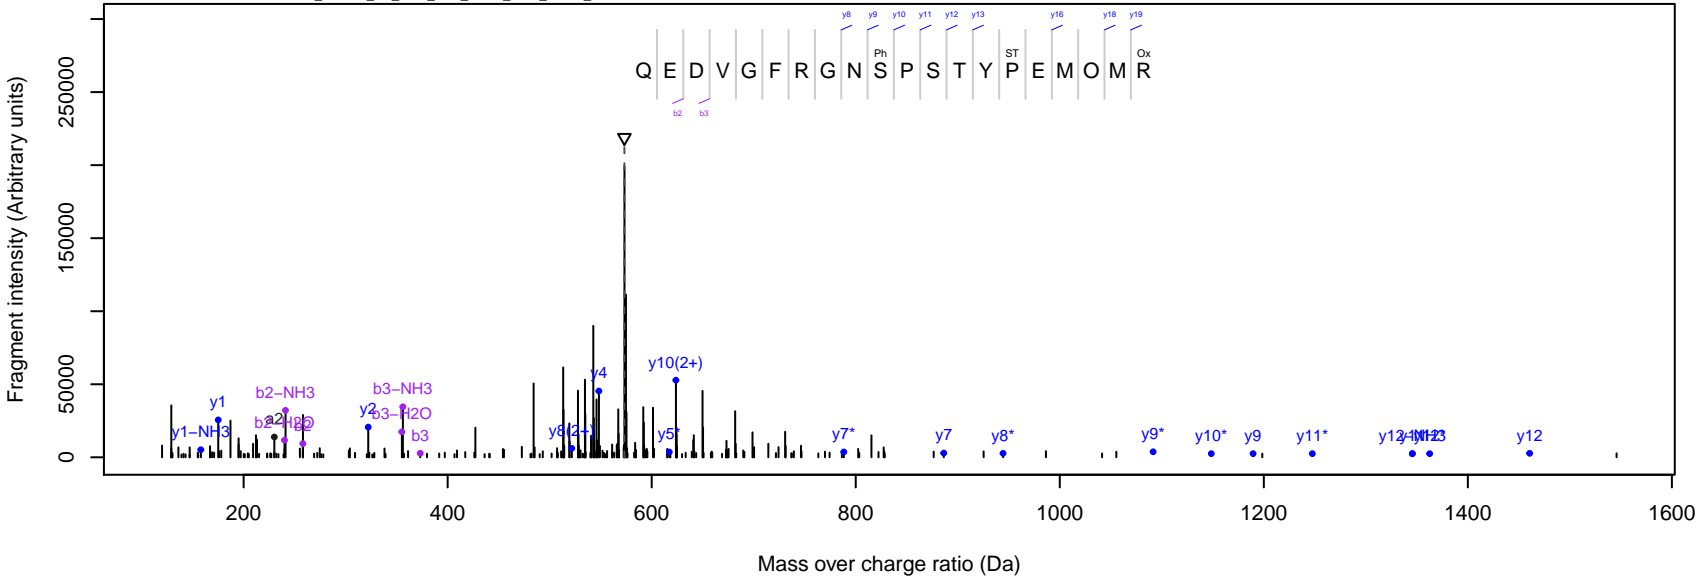

KGLAYIQS(Phospho (STY))R-2+

Source : QE3\_201126\_FR\_TiOx\_hum\_tissue\_Urea\_RNAB\_H Scan : 13794

Andromeda score : 82.417

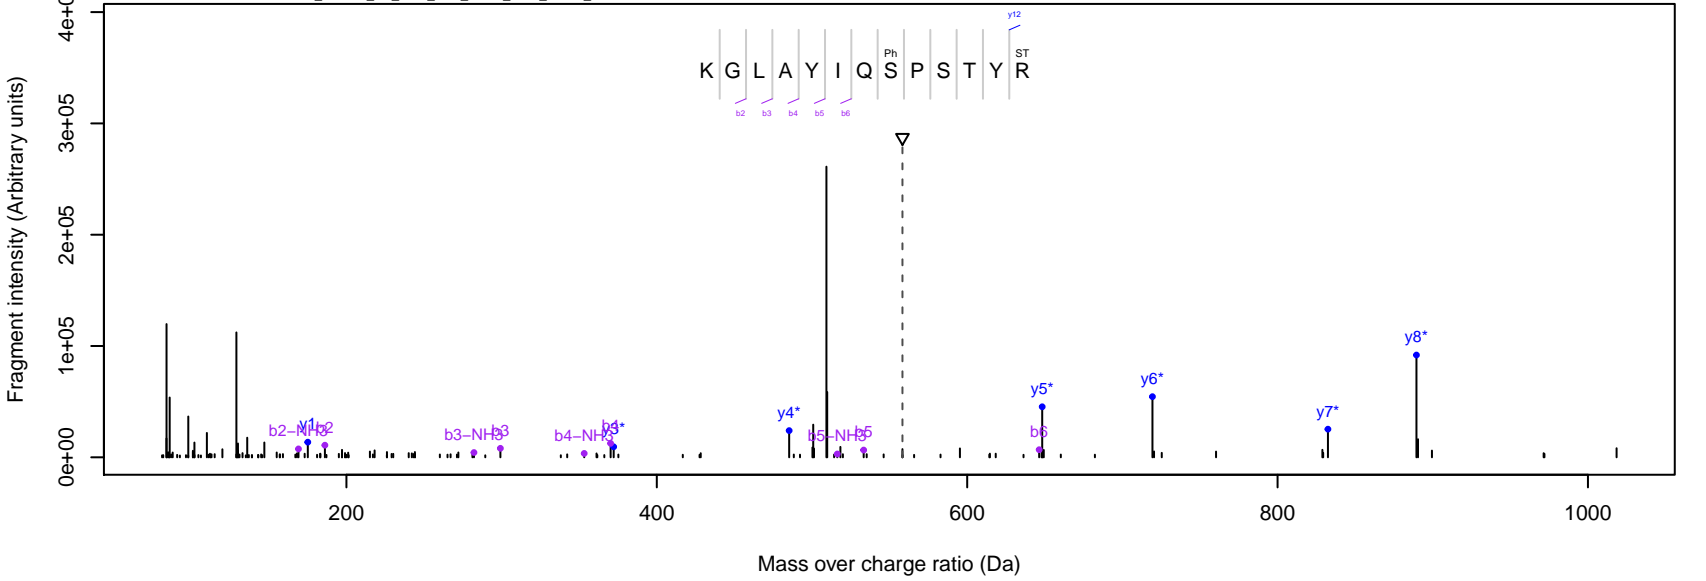

HTGPGILSMANAGPNTNGSPSTYQFFICTAK-3+

Source : QE3\_201126\_FR\_TiOx\_hum\_tissue\_Urea\_RNAB\_H Scan : 47218

Andromeda score : 82.413

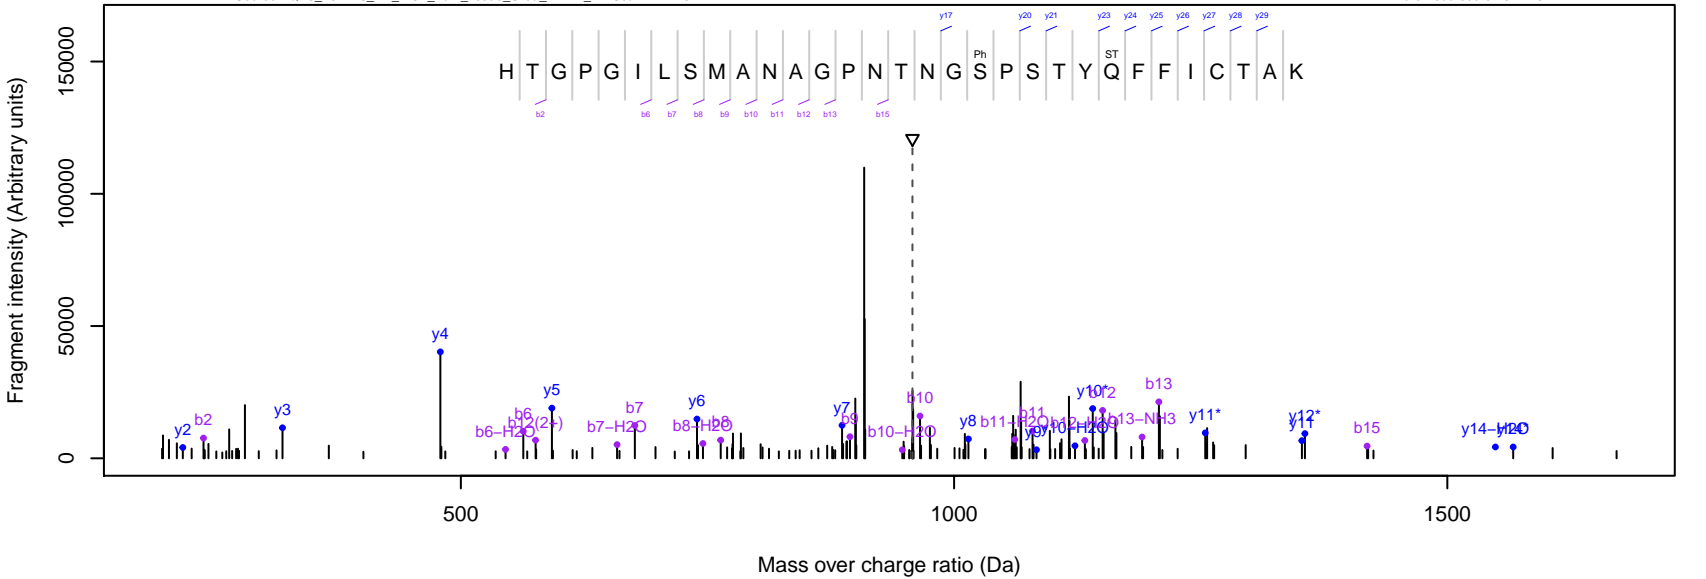

M(Oxidation (M))EIDESNAGSSKEEAGETS(Phospho (STY))PADESGAPK-3+

Source : QE3\_201126\_FR\_TiOx\_hum\_tissue\_Urea\_RNAB\_B Scan : 12240

Andromeda score : 82.413

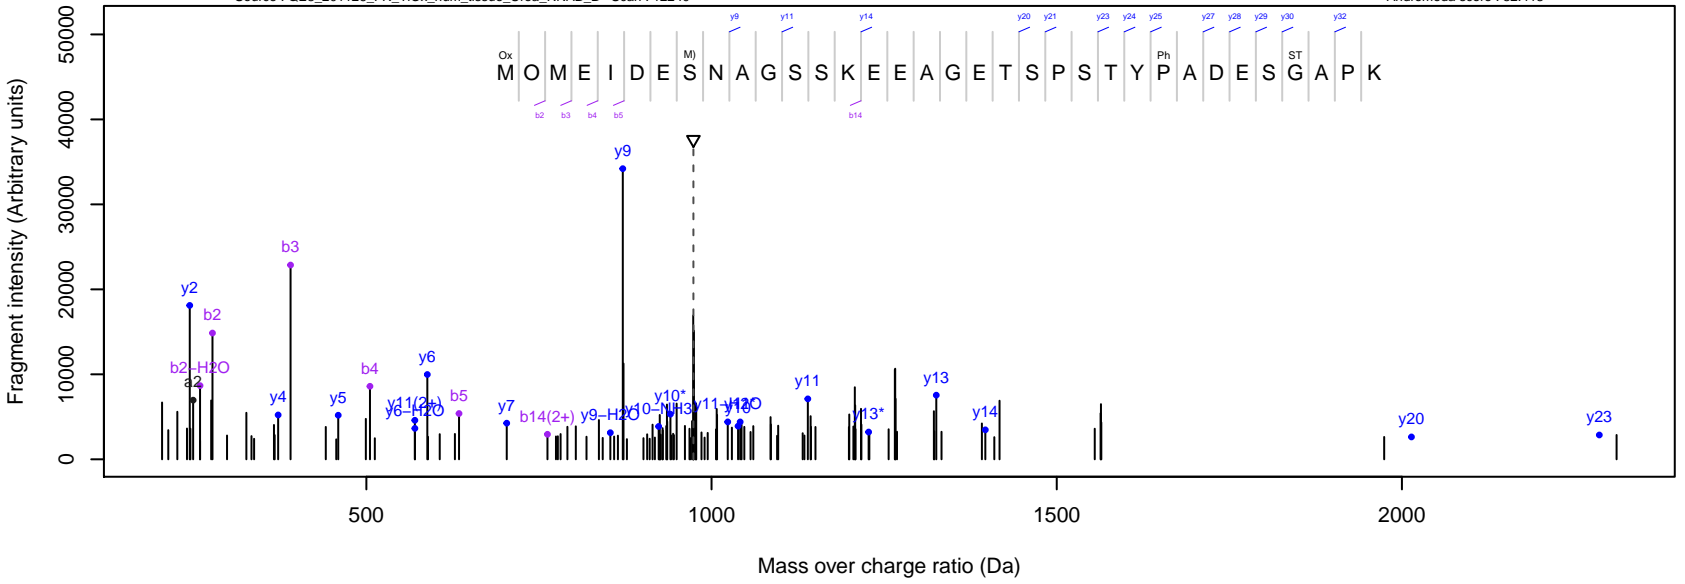

SSSS(Phospho (STY))ELLTGPAAEDPLPLIVQDQYVQEAR-3+

Source : QE3\_201126\_FR\_TiOx\_hum\_tissue\_Urea\_RNAB\_N Scan : 61481

Andromeda score : 82.384

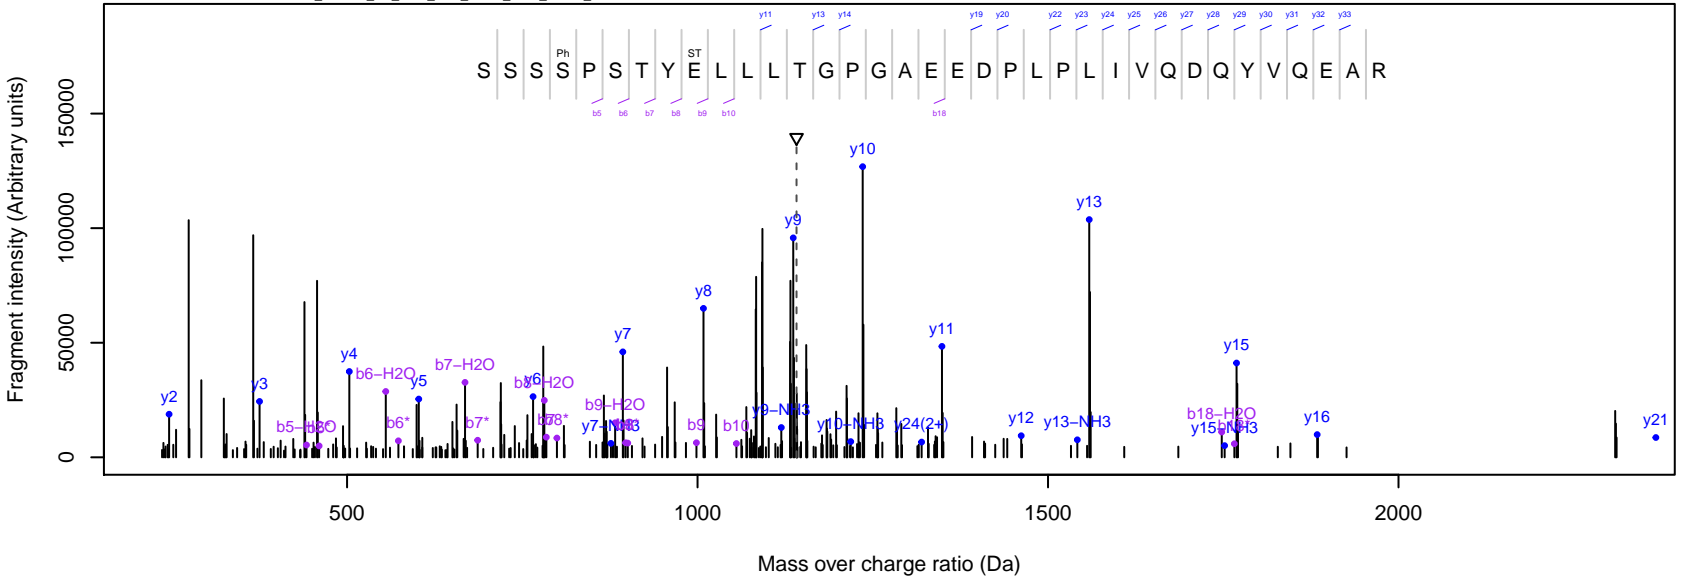

KLS(Phospho (STY))S(Phospho (STY))S(Phospho (STY))SEPYEEDFNDDQSIKK-3+

Source : QE3\_201126\_FR\_TiOx\_hum\_tissue\_Urea\_RNAB\_N Scan : 28522

Andromeda score : 82.36

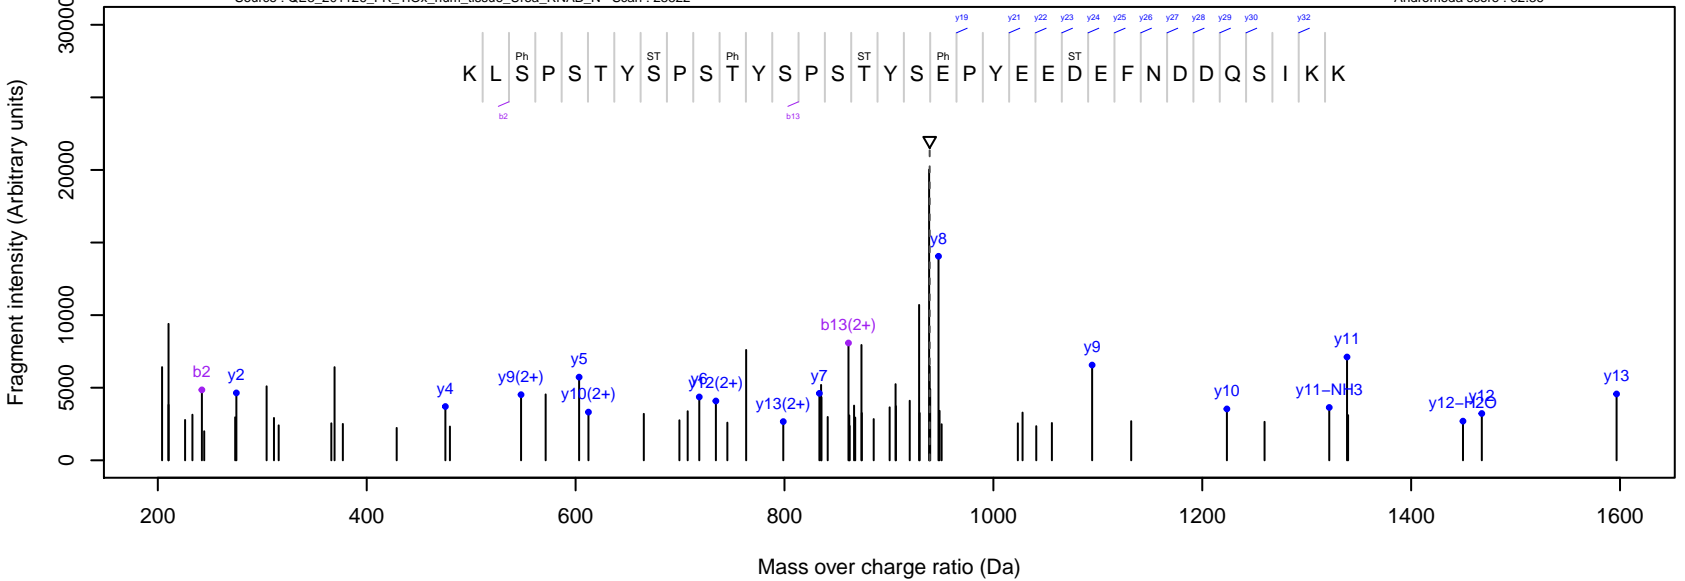

S(Phospho (STY))SQIGAVVSHQSSVIPDREYLR-3+

Source : QE3\_201126\_FR\_TiOx\_hum\_tissue\_Urea\_RNAB\_N Scan : 31487

Andromeda score : 82.342

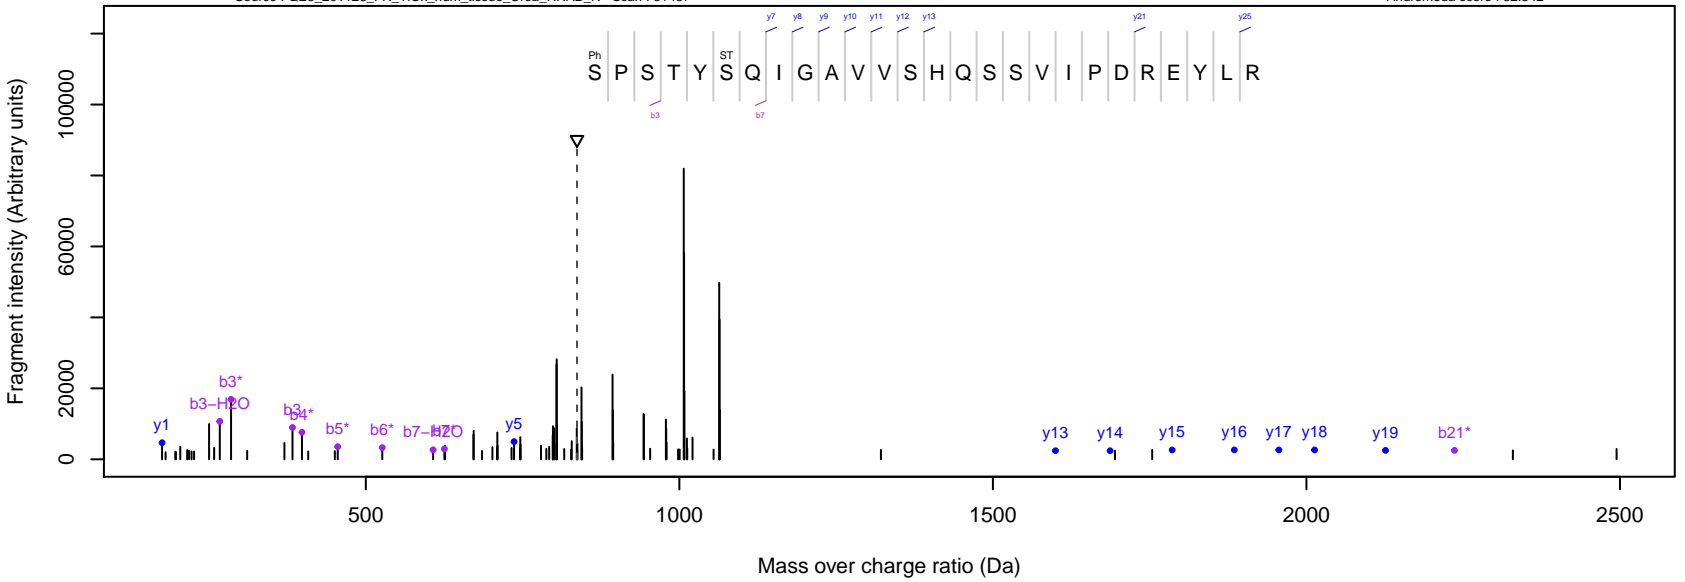

TSTS(Phospho (STY))PPPEKS(Phospho (STY))GDEGS(Phospho (STY))EDEAPS(Phospho (STY))GED-2+

Source : QE3\_201126\_FR\_TiOx\_hum\_tissue\_Urea\_RNAB\_H Scan : 27161

Andromeda score : 82.302

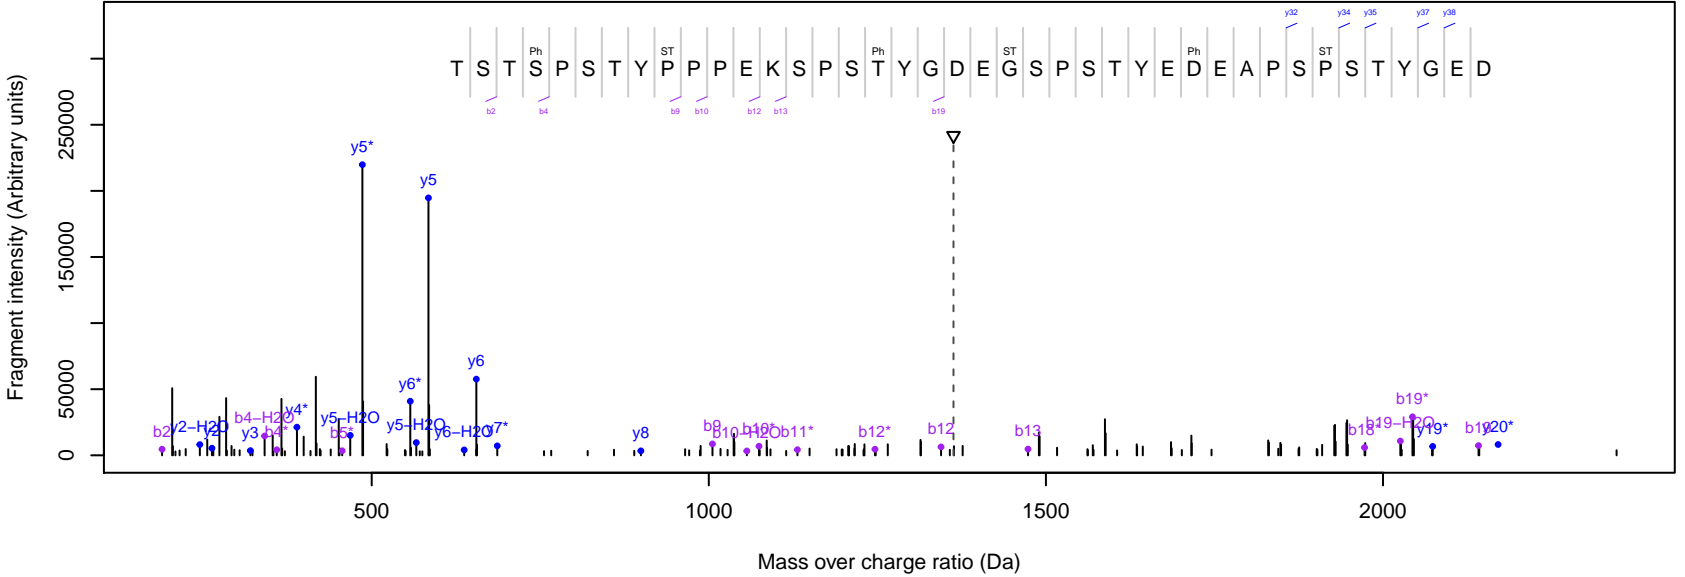

M(Oxidation (M))NS(Phospho (STY))LTFKK-2+

Source : QE3\_201126\_FR\_TiOx\_hum\_tissue\_Urea\_RNAB\_H Scan : 9216

Andromeda score : 82.261

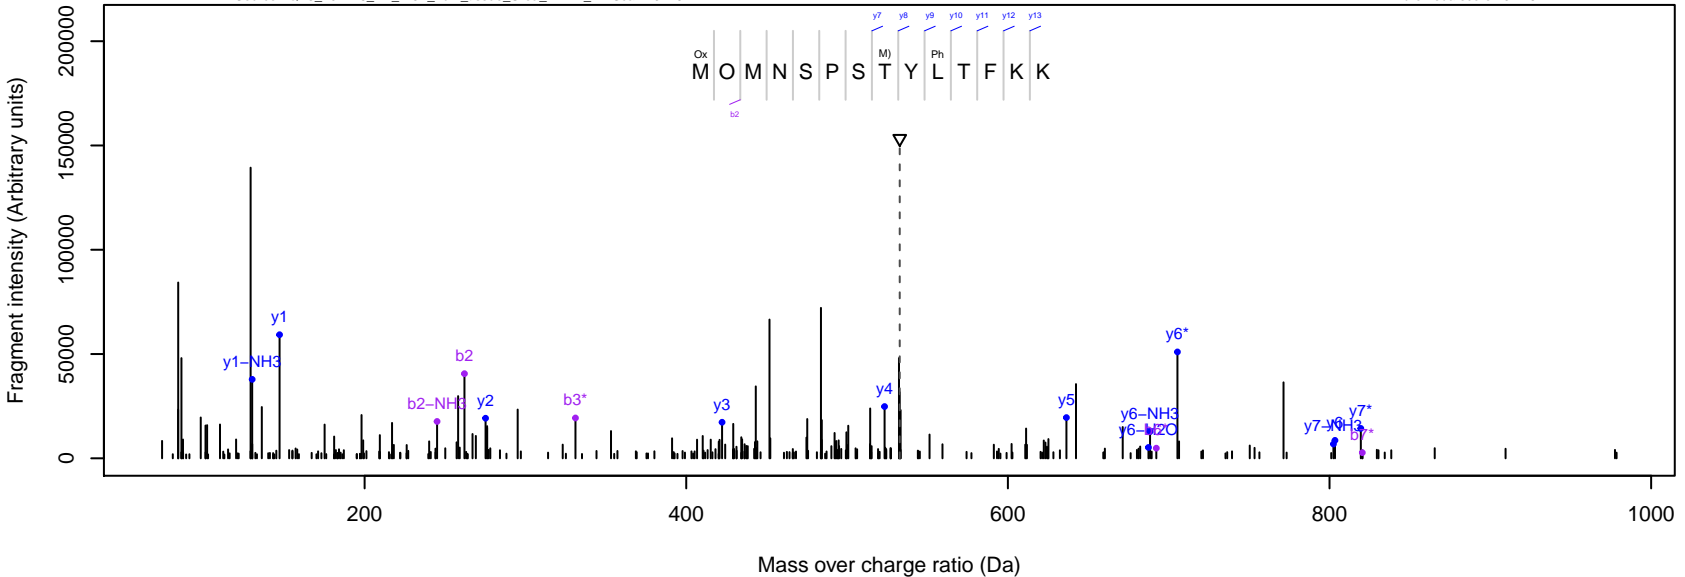



SYS(Phospho (STY))HDVLPK-2+

Source : QE3\_201126\_FR\_TIOx\_hum\_tissue\_Urea\_RNAB\_B Scan : 13641

Andromeda score : 82.261

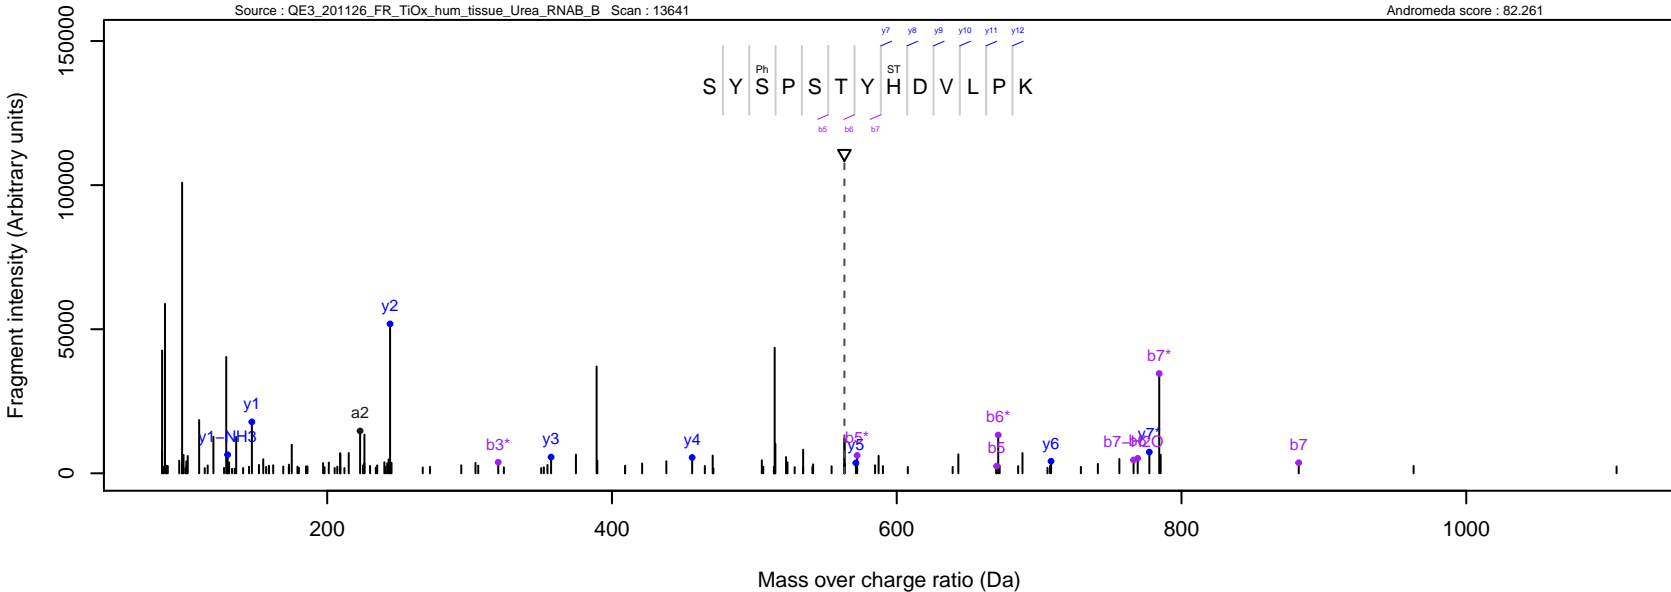

ENS(Phospho (STY))IEILSSTIKPYNAEDNENFK-3+

Source : QE3\_201126\_FR\_TIOx\_hum\_tissue\_Urea\_RNAB\_N Scan : 44221

Andromeda score : 82.157

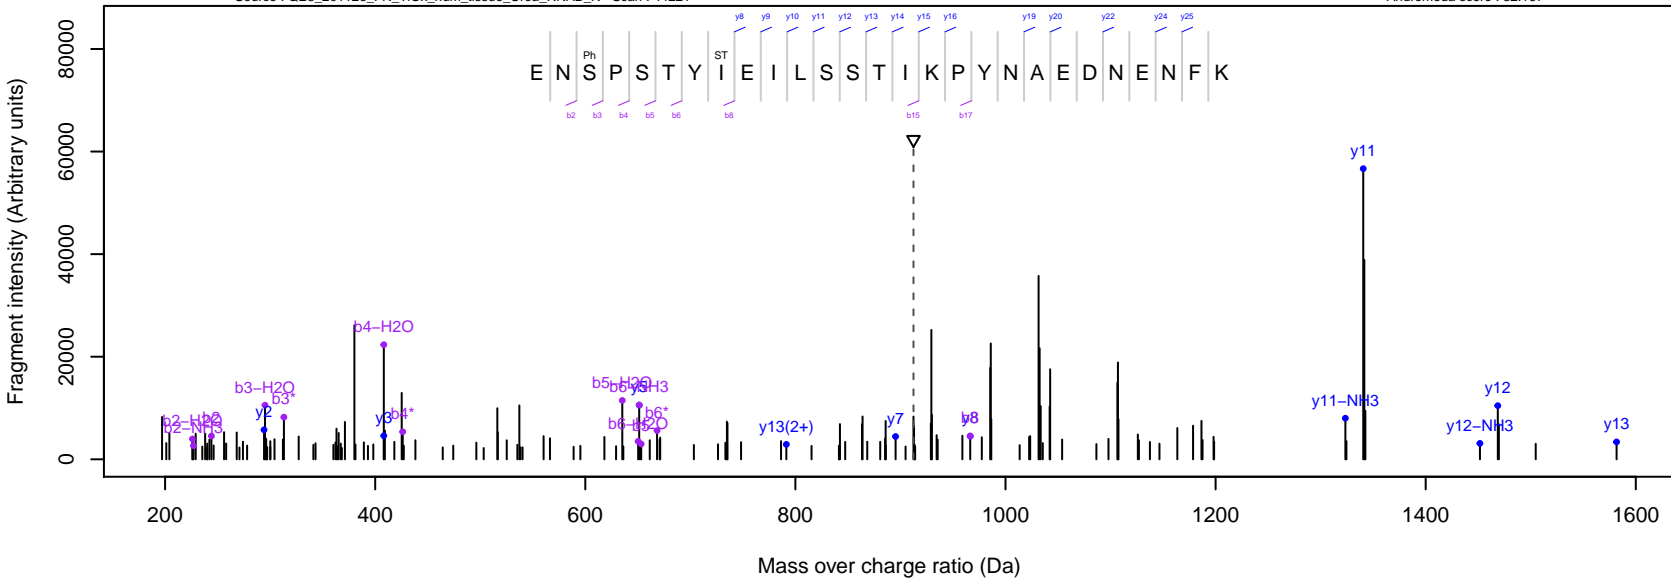

S(Phospho (STY))PQPPVEEEDHFDVTVCVCLDLYNCDLHFK-3+

Source : QE3\_201126\_FR\_TIOx\_hum\_tissue\_Urea\_RNAB\_N Scan : 48649

Andromeda score : 82.157

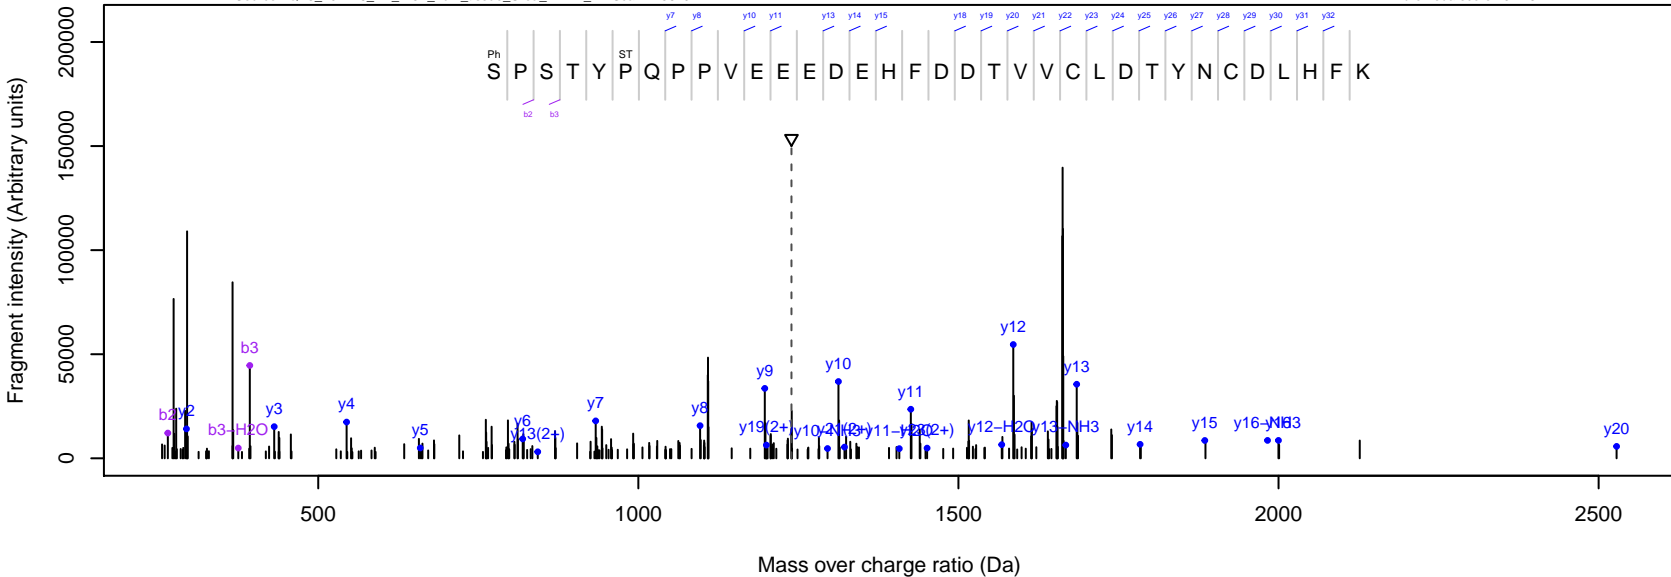

GLPNGPTHAFSSPSES(Phospho (STY))PDSTVDR-3+

Source : QE3\_201126\_FR\_TiOx\_hum\_tissue\_Urea\_RNAB\_H Scan : 23829

Andromeda score : 82.089

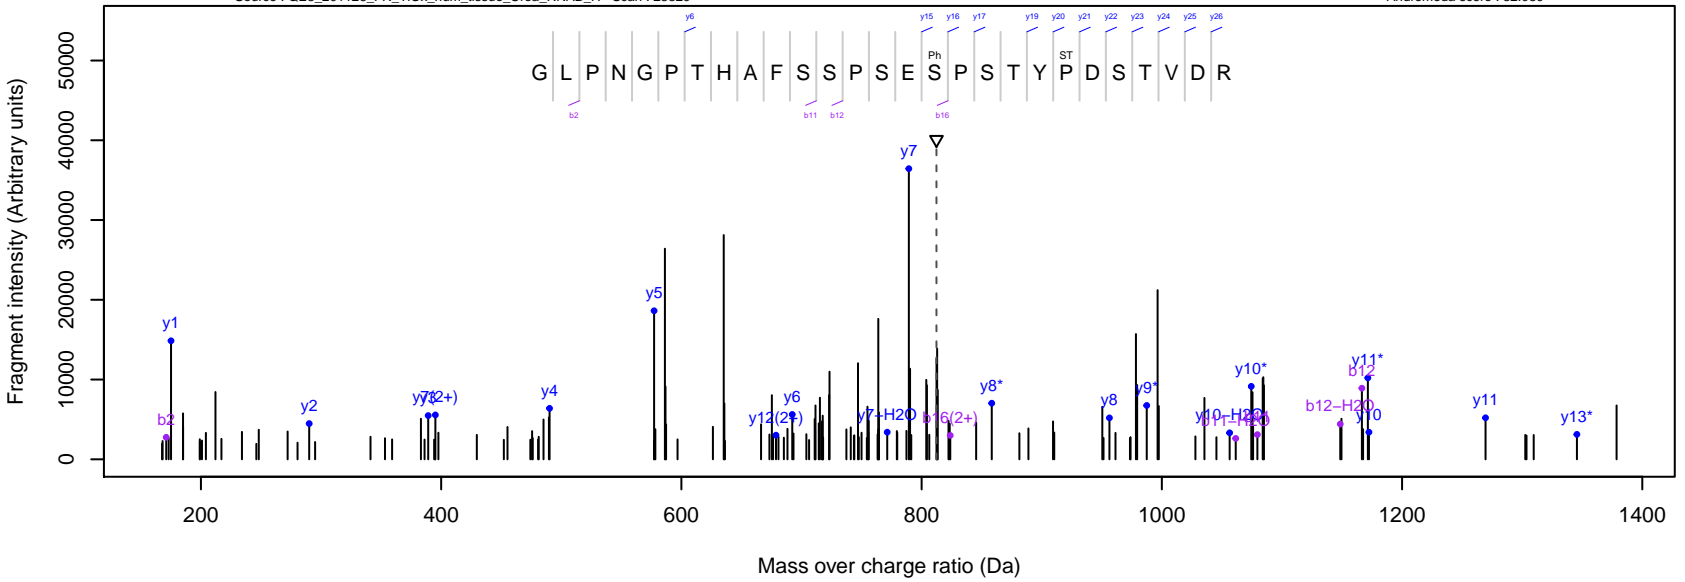

KET(Phospho (STY))PPPLVPPAAR-2+

Source : QE3\_201126\_FR\_TiOx\_hum\_tissue\_Urea\_RNAB\_B Scan : 19645

Andromeda score : 82.069

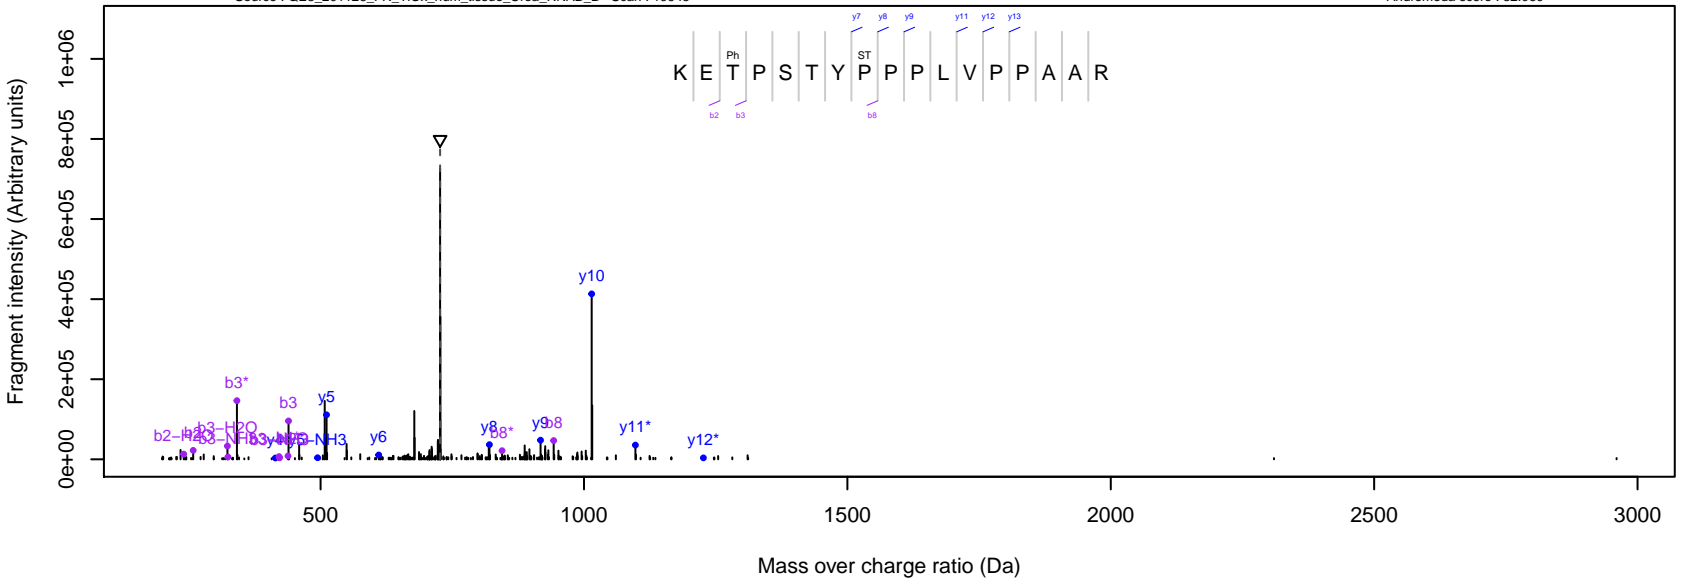

ALFKPPEDS(Phospho (STY))QDDES(Phospho (STY))DS(Phospho (STY))DAEEEQTTKR-3+

Source : QE3\_201126\_FR\_TiOx\_hum\_tissue\_Urea\_RNAB\_H Scan : 27770

Andromeda score : 82.058

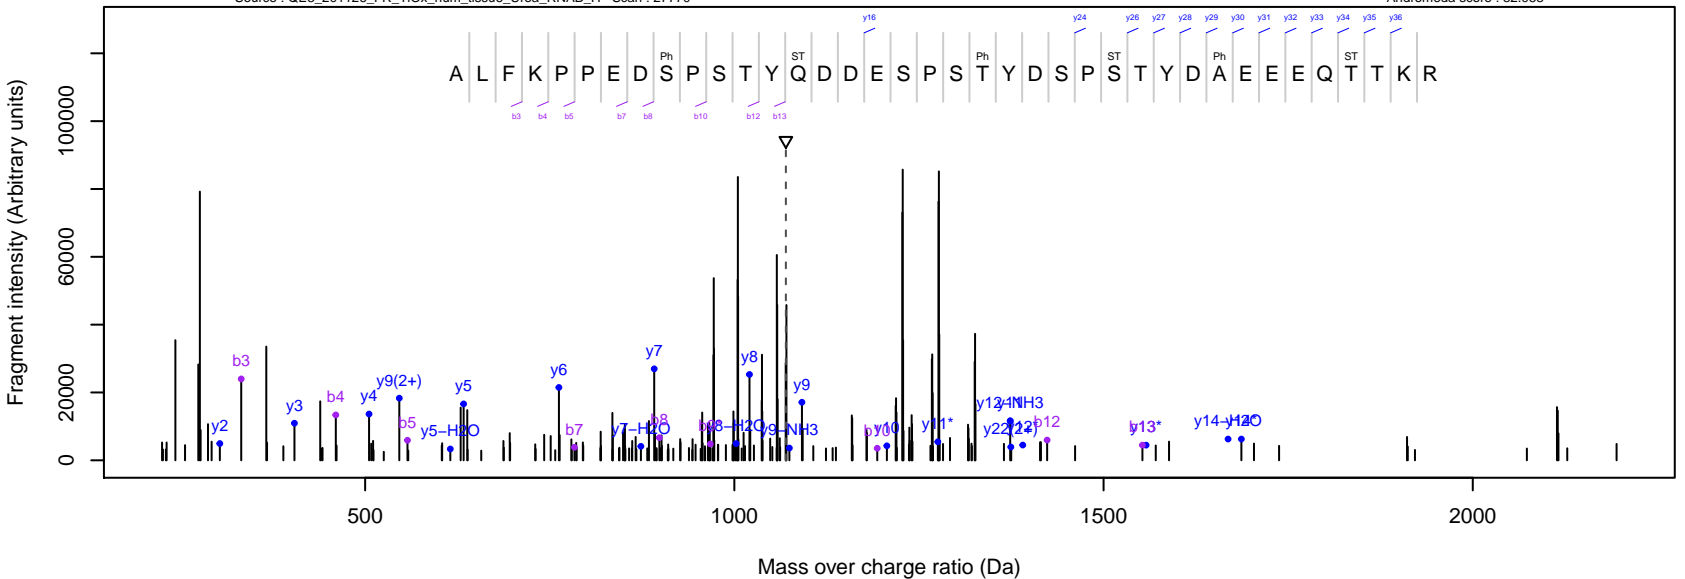



EAAESDRELNEDD<sup>Ph</sup>SPSTY<sup>ST</sup>TPSTYDCDD<sup>ST</sup>VDVQR

Source : QE3\_201126\_FR\_TiOx\_hum\_tissue\_Urea\_RNAB\_H Scan : 16885

Andromeda score : 81.949

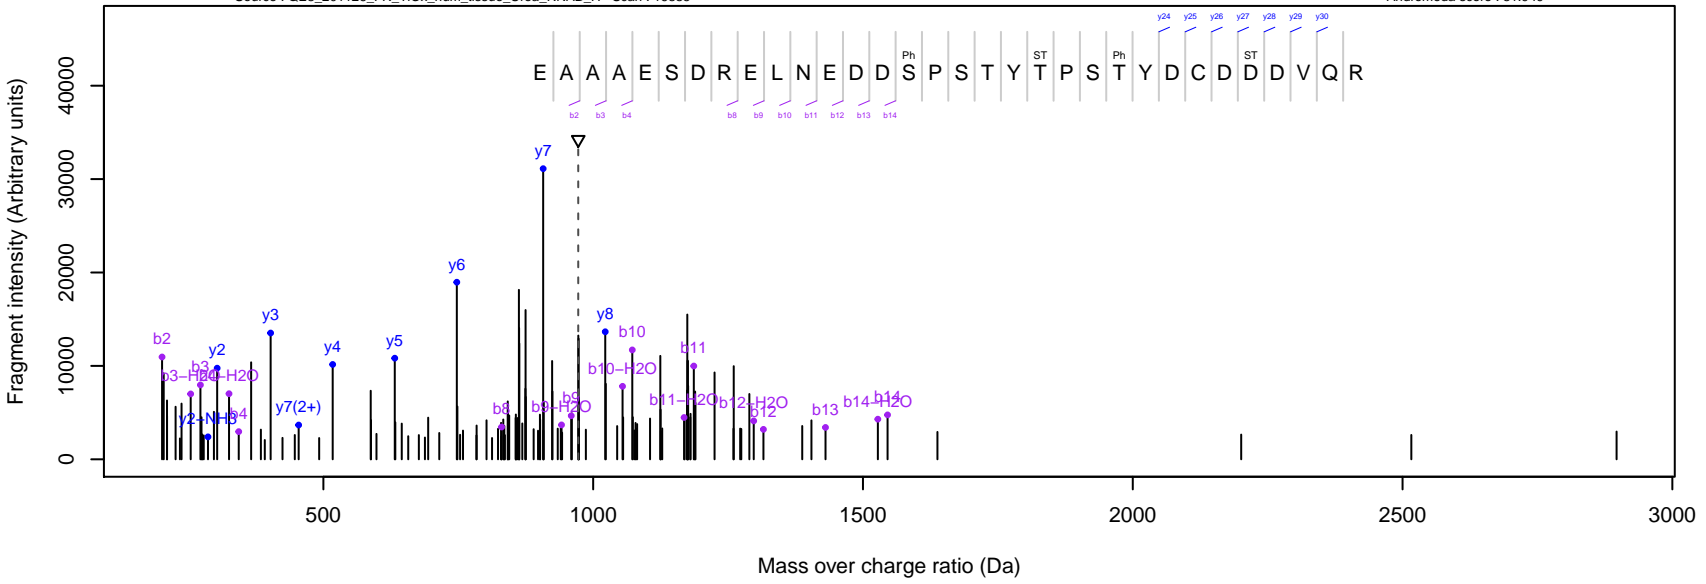

IGTLQDRPP<sup>Ph</sup>SPSTY<sup>ST</sup>PFREPPG<sup>ST</sup>SER

Source : QE3\_201126\_FR\_TiOx\_hum\_tissue\_Urea\_RNAB\_H Scan : 22854

Andromeda score : 81.949

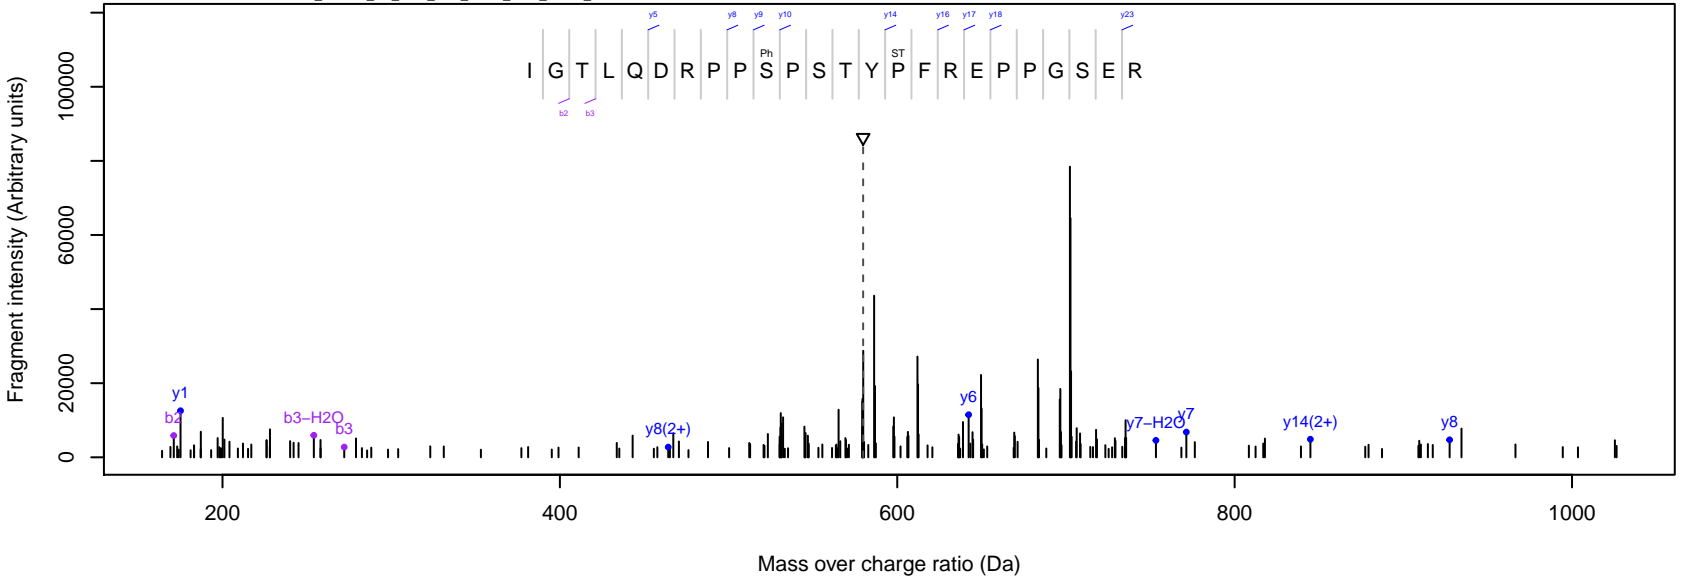

LADSGDGAG<sup>Ph</sup>SPSTY<sup>ST</sup>PEEKDFLK

Source : QE3\_201126\_FR\_TiOx\_hum\_tissue\_Urea\_RNAB\_H Scan : 24150

Andromeda score : 81.949

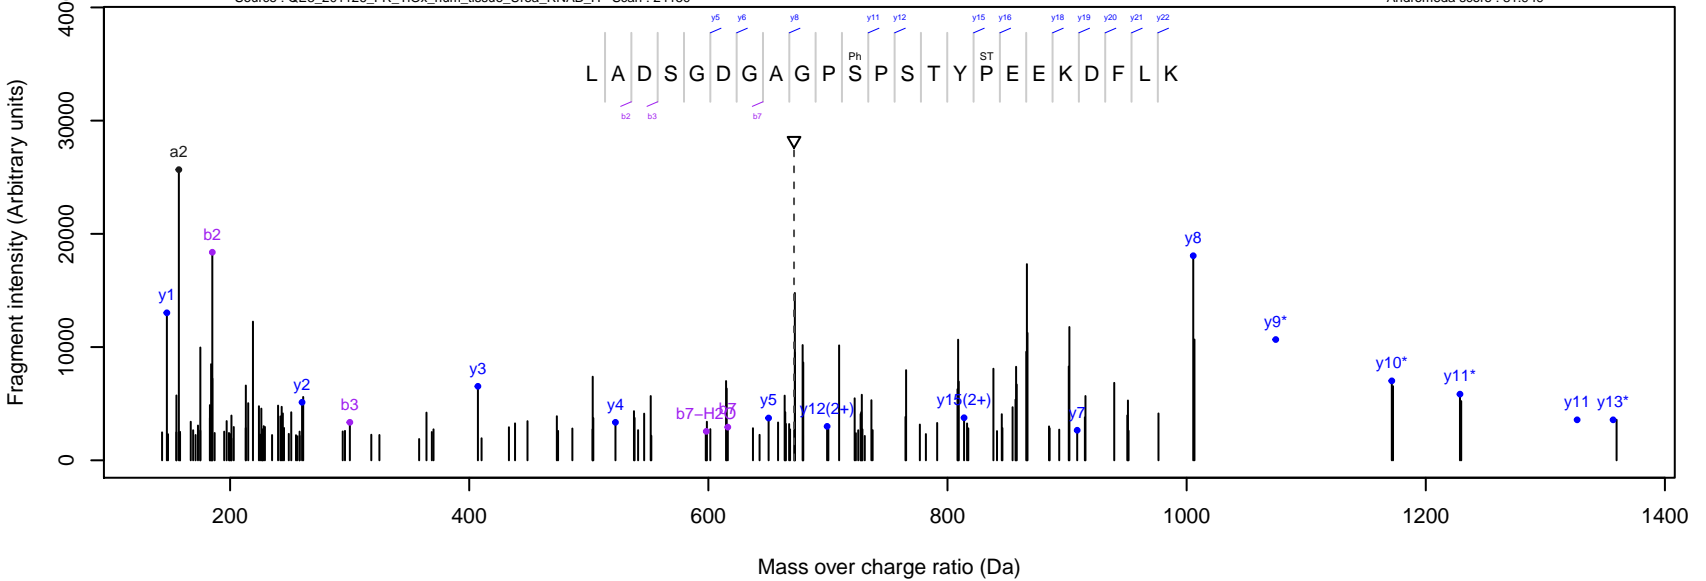

### HS(Phospho (STY))FSAGPELLR-2+

Source : QE3\_201126\_FR\_TiOx\_hum\_tissue\_Urea\_RNAB\_N Scan : 26016

Andromeda score : 81.92

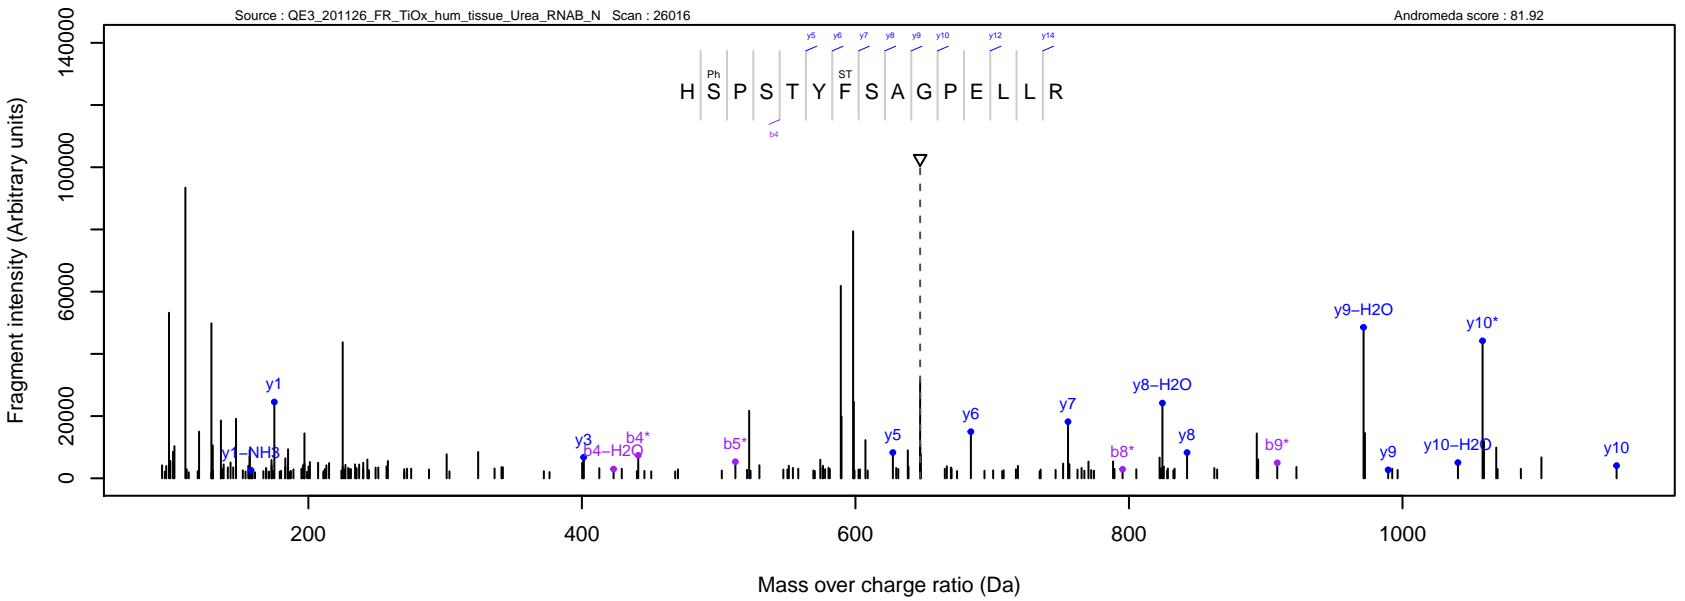

### KKDDS(Phospho (STY))FLGK-3+

Source : QE3\_201126\_FR\_TiOx\_hum\_tissue\_Urea\_RNAB\_H Scan : 6965

Andromeda score : 81.92

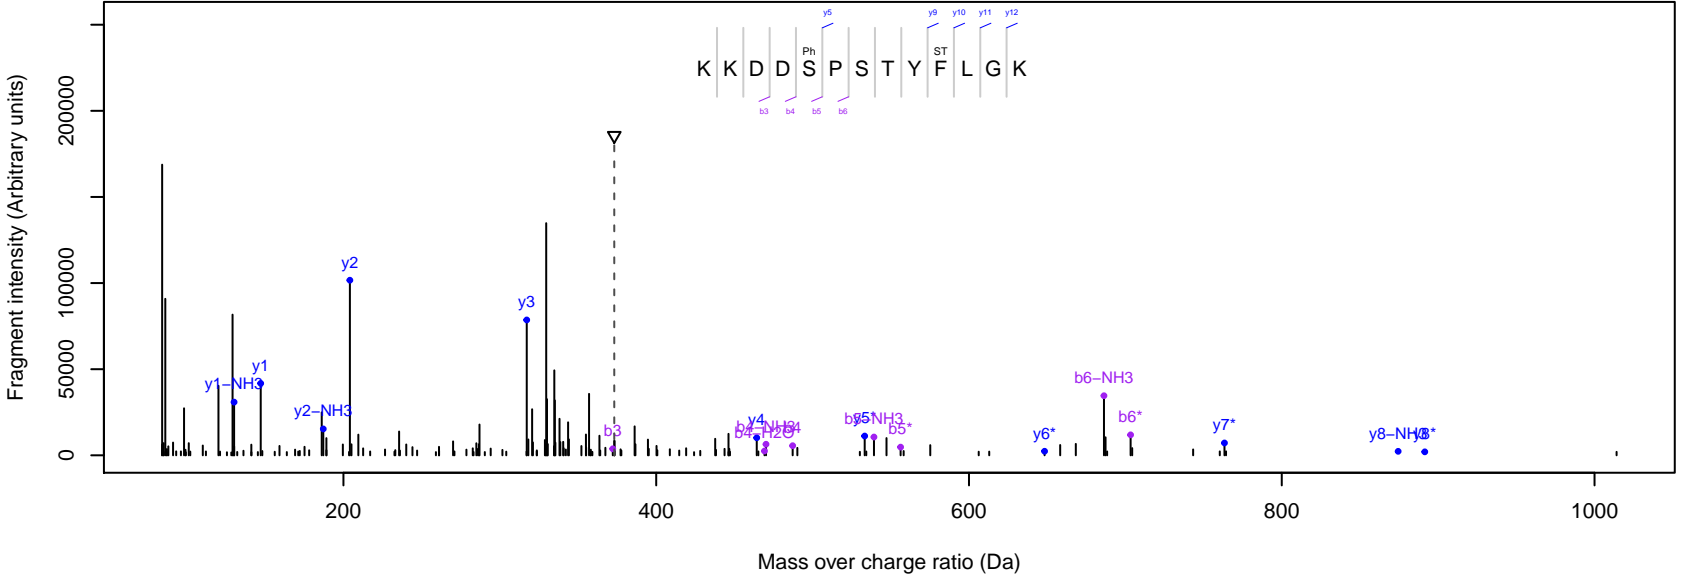

### LDSS(Phospho (STY))PSVSTLAAK-2+

Source : QE3\_201126\_FR\_TiOx\_hum\_tissue\_Urea\_RNAB\_B Scan : 21309

Andromeda score : 81.904

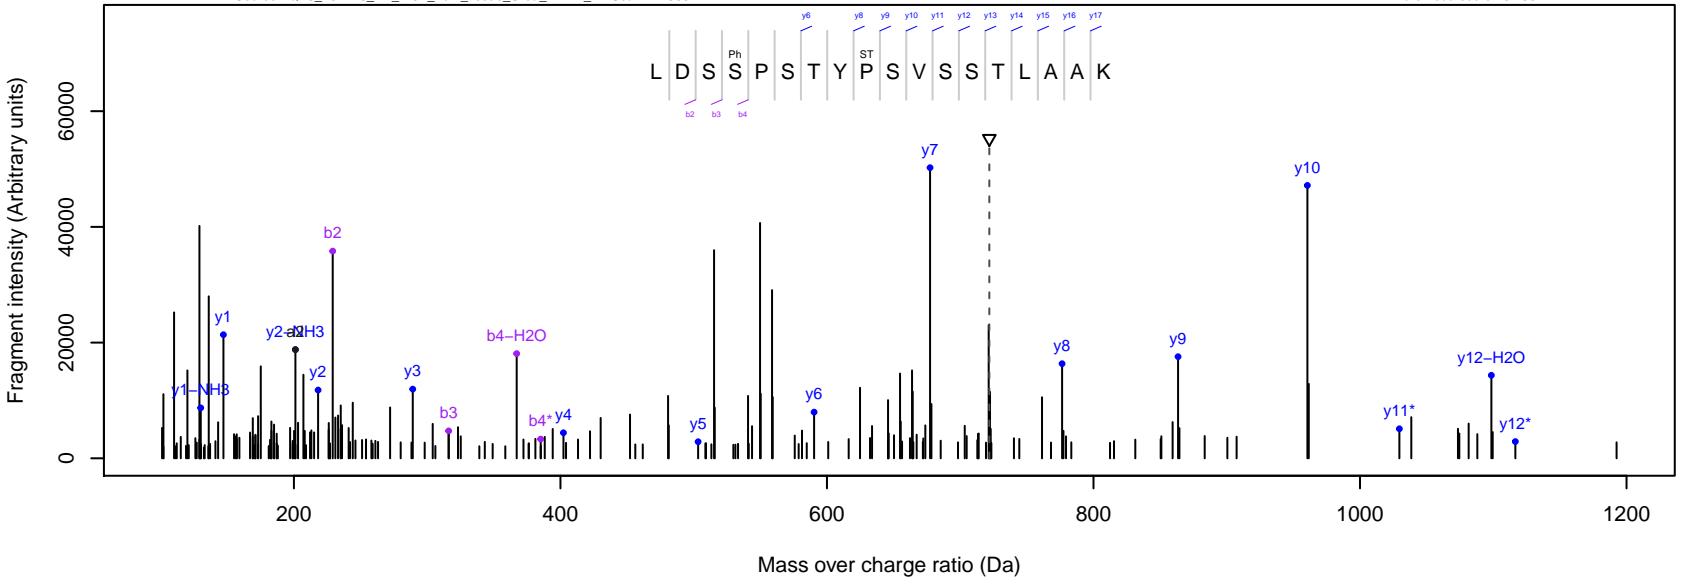

SIQSAQQDS(Phospho (STY))IKK-2+

Source : QE3\_201126\_FR\_TiOx\_hum\_tissue\_Urea\_RNAB\_H Scan : 12295

Andromeda score : 81.904

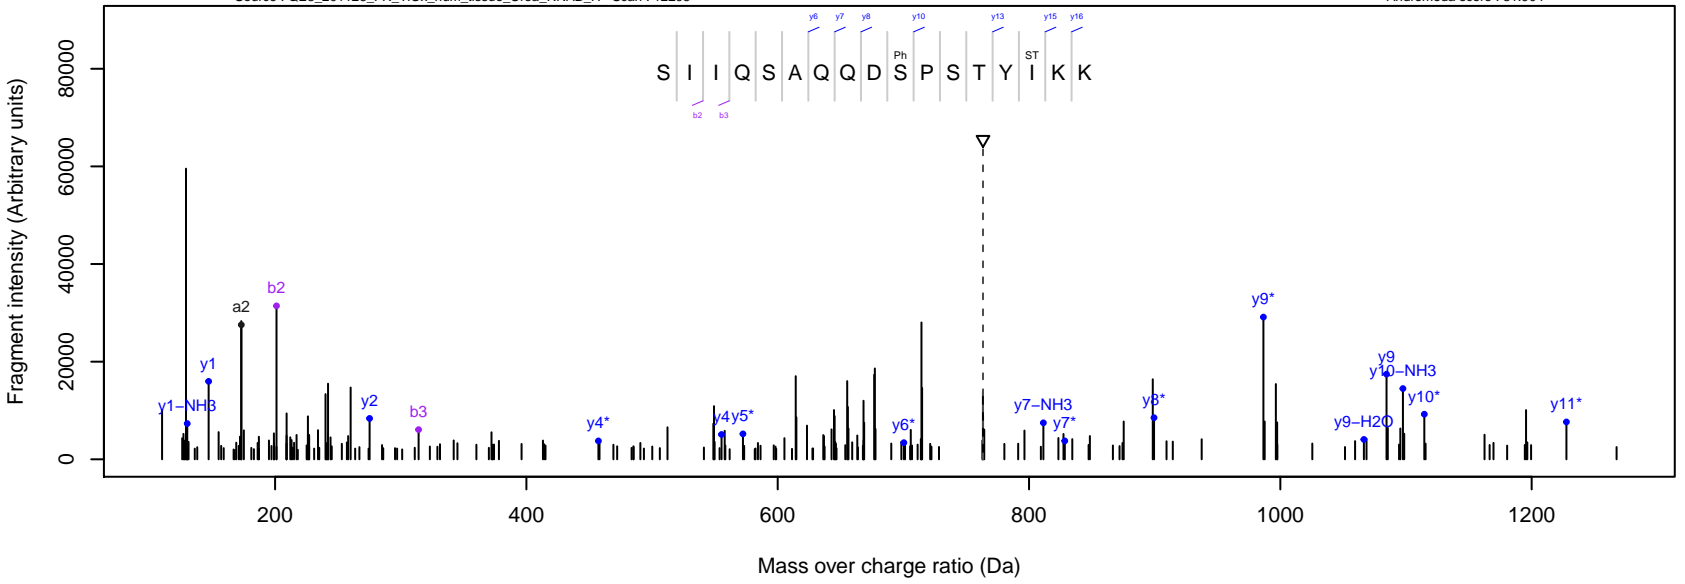

VRAS(Phospho (STY))LSDLSLDDVEGMSVR-3+

Source : QE3\_201126\_FR\_TiOx\_hum\_tissue\_Urea\_RNAB\_N Scan : 45416

Andromeda score : 81.888

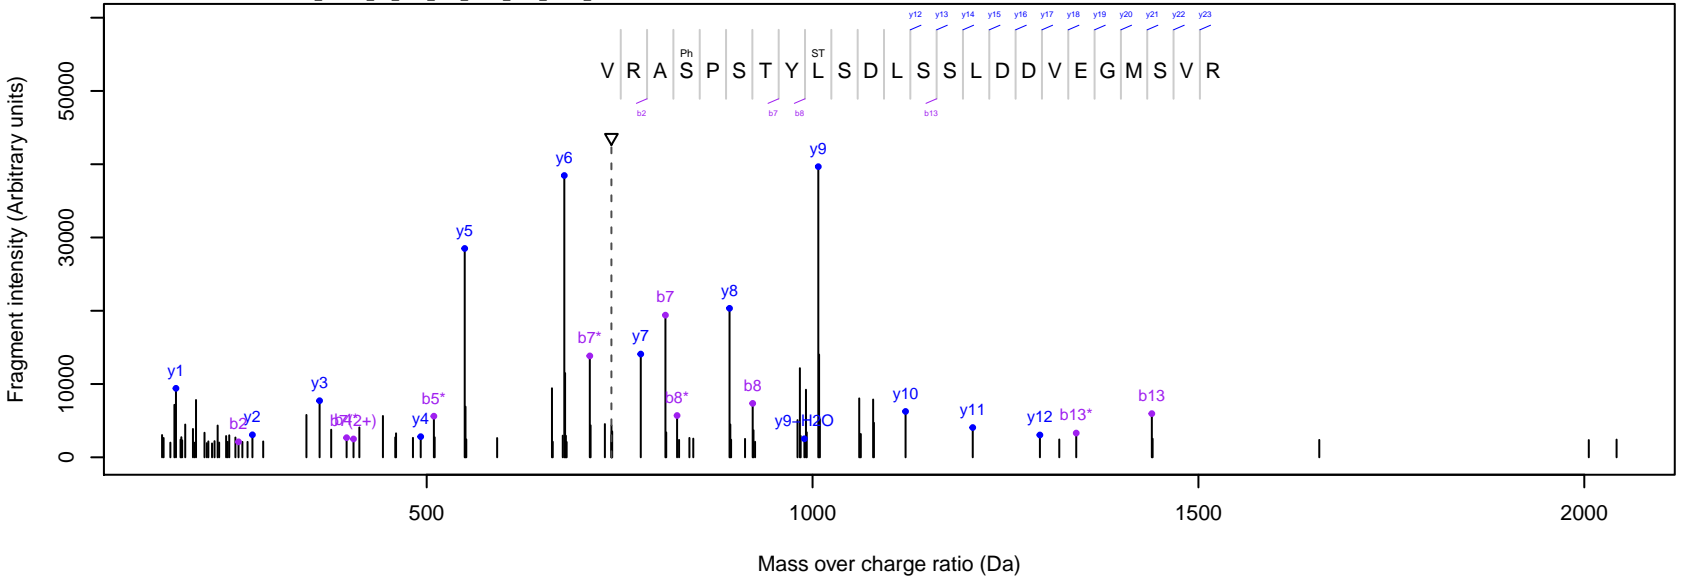

ASS(Phospho (STY))RVSGSPEDSSKER-3+

Source : QE3\_201126\_FR\_TiOx\_hum\_tissue\_Urea\_RNAB\_N Scan : 8551

Andromeda score : 81.884

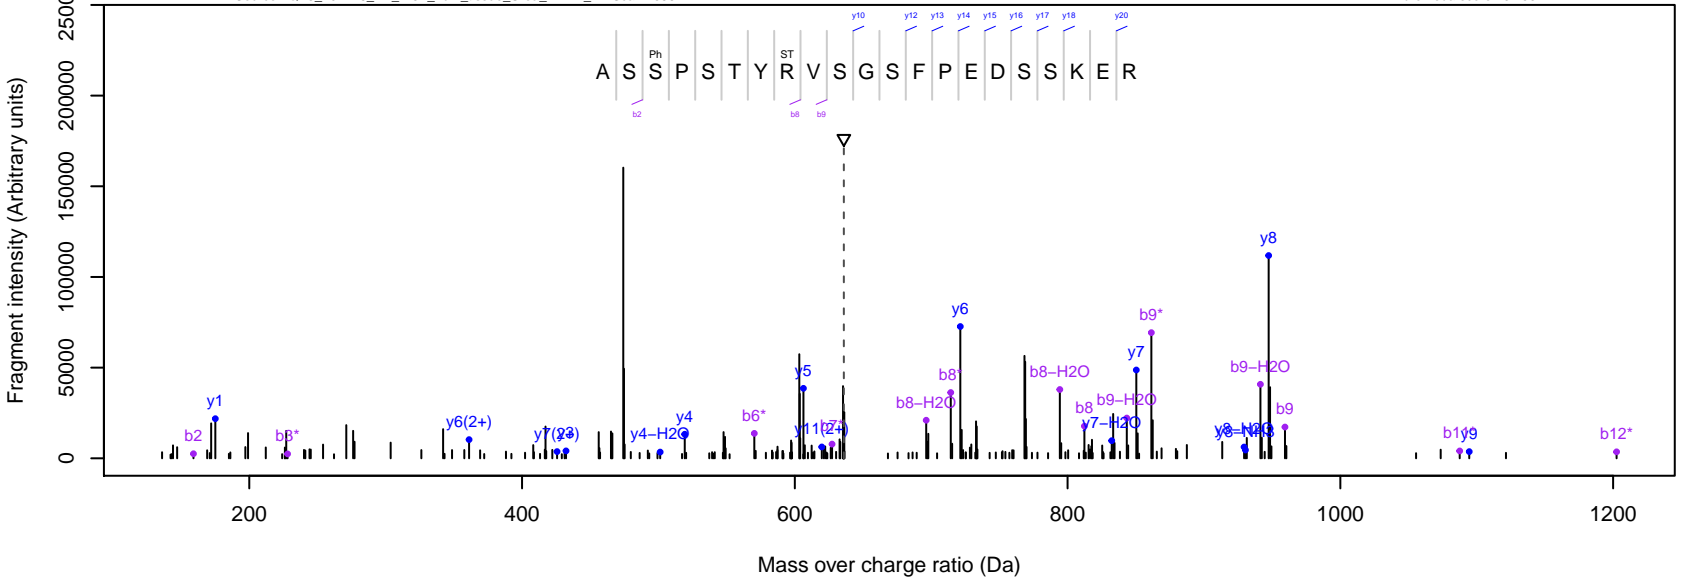

HGLQLGAQS(Phospho (STY))PGRGTTLAR-3+

Source : QE3\_201126\_FR\_TiOx\_hum\_tissue\_Urea\_RNAB\_H Scan : 15530

Andromeda score : 81.884

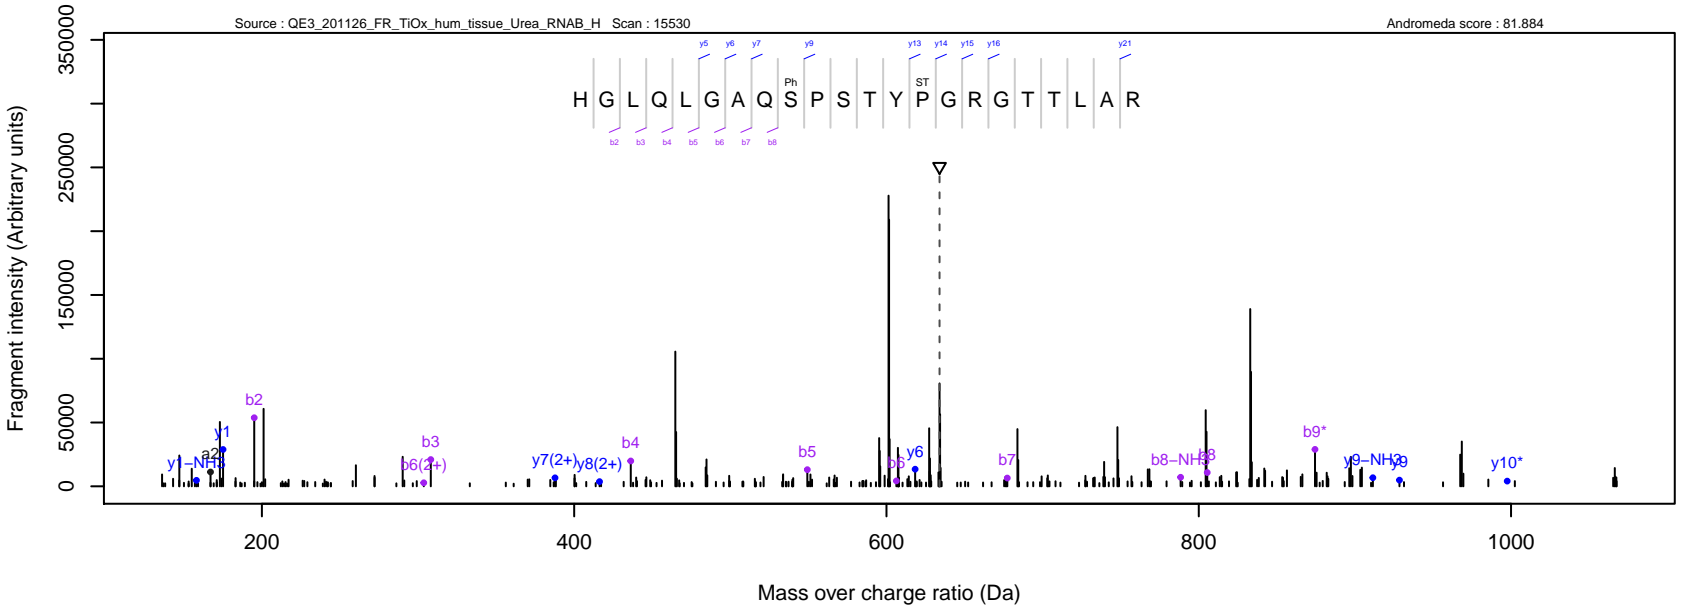

NSIPVS(Phospho (STY))PVRPKIEK-3+

Source : QE3\_201126\_FR\_TiOx\_hum\_tissue\_Urea\_RNAB\_H Scan : 14750

Andromeda score : 81.854

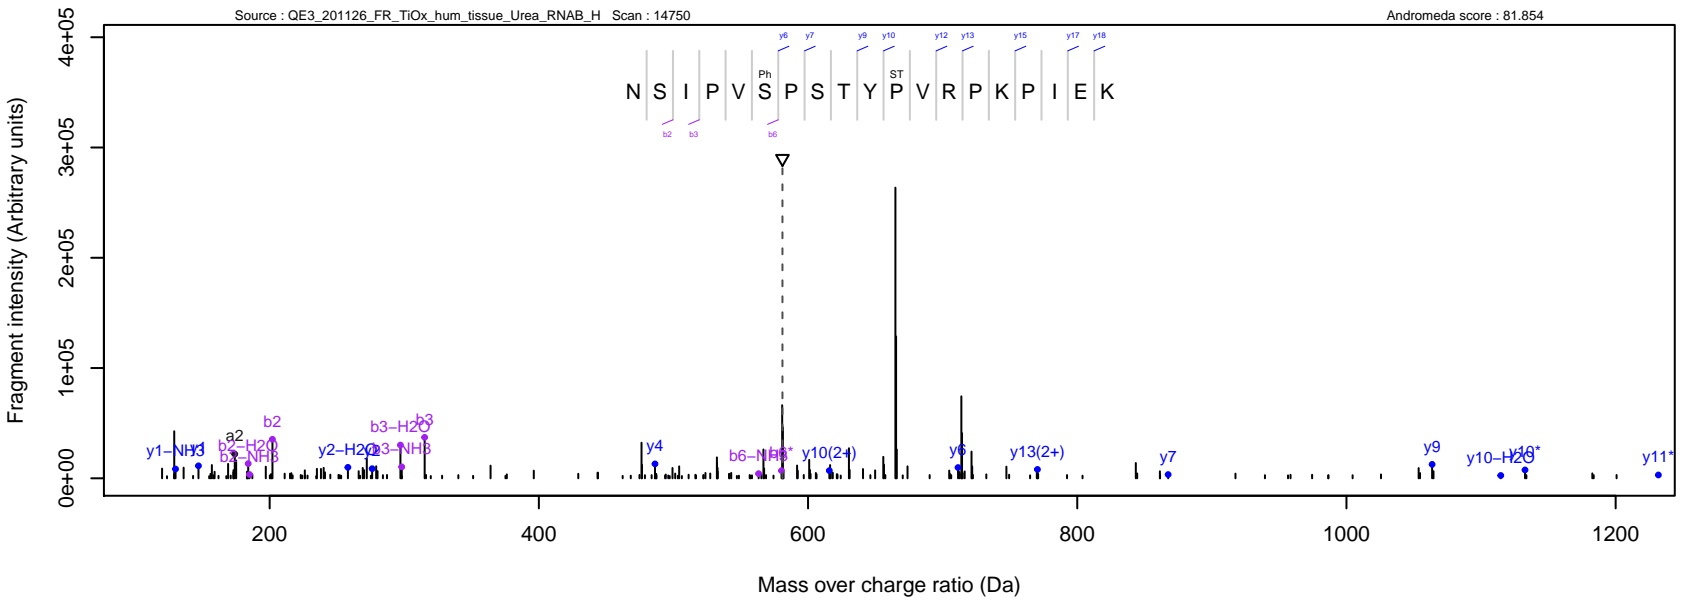

DQS(Phospho (STY))PPPS(Phospho (STY))PPPSYHPPPPPTK-3+

Source : QE3\_201126\_FR\_TiOx\_hum\_tissue\_Urea\_RNAB\_B Scan : 21741

Andromeda score : 81.839

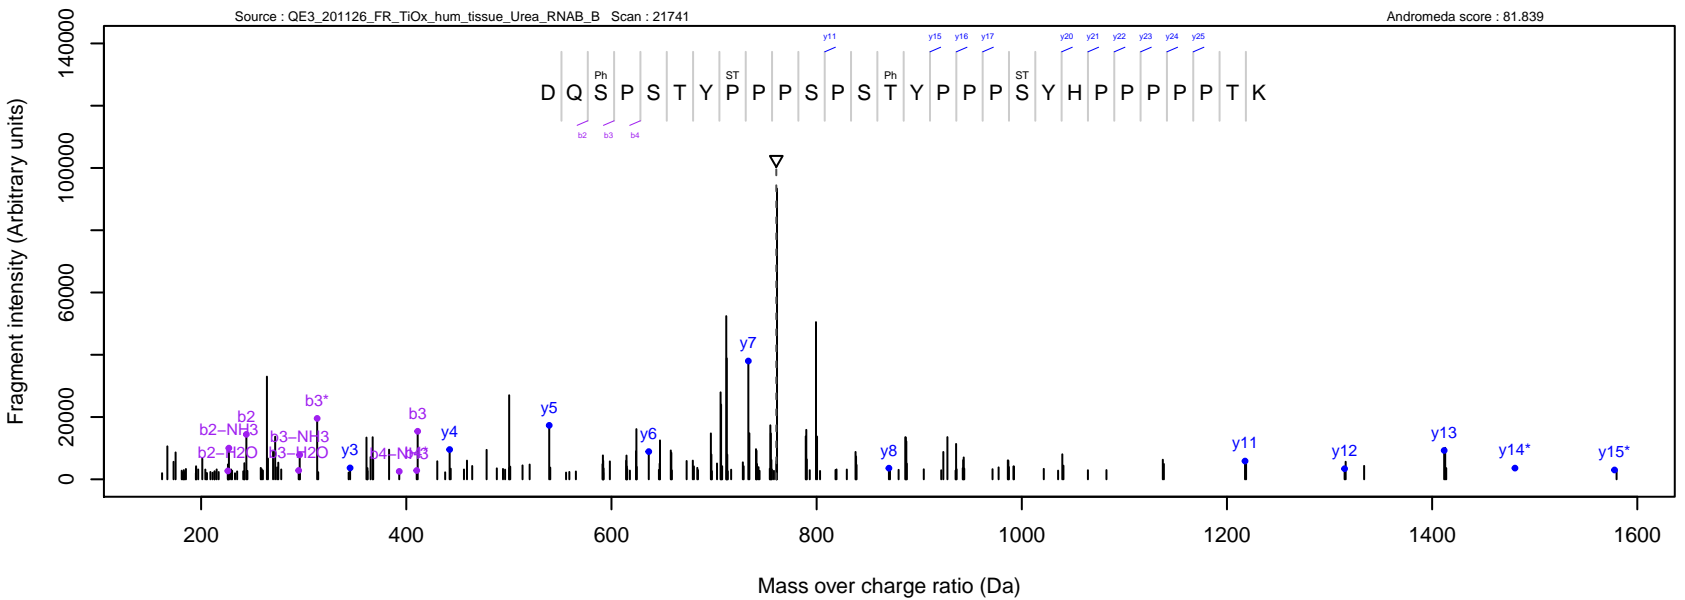

GKGFVPAGES(Phospho (STY))SSEAGGENYKDADECLLFGEICK-3+

Source : QE3\_201126\_FR\_TiOx\_hum\_tissue\_Urea\_RNAB\_B Scan : 39939

Andromeda score : 81.831

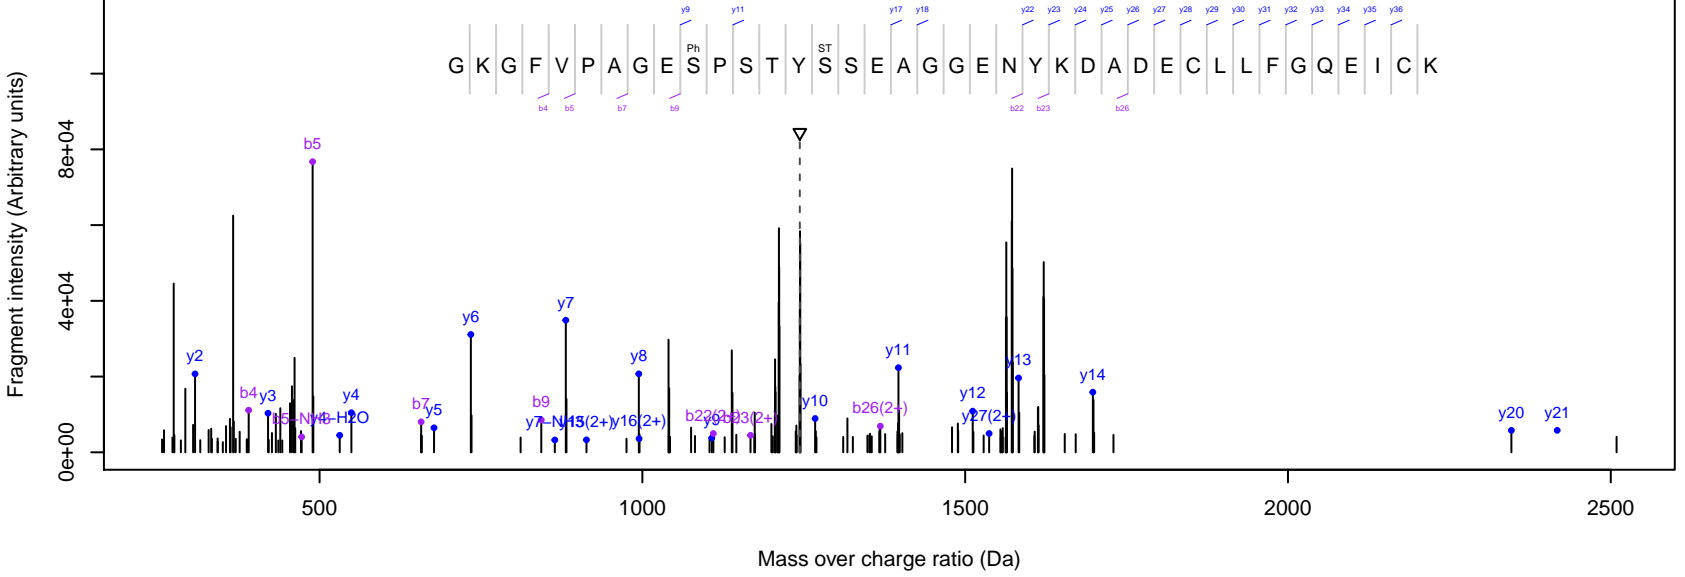

EVEDKES(Phospho (STY))EGEEDEDEDLSKYK-3+

Source : QE3\_201126\_FR\_TiOx\_hum\_tissue\_Urea\_RNAB\_N Scan : 16493

Andromeda score : 81.807

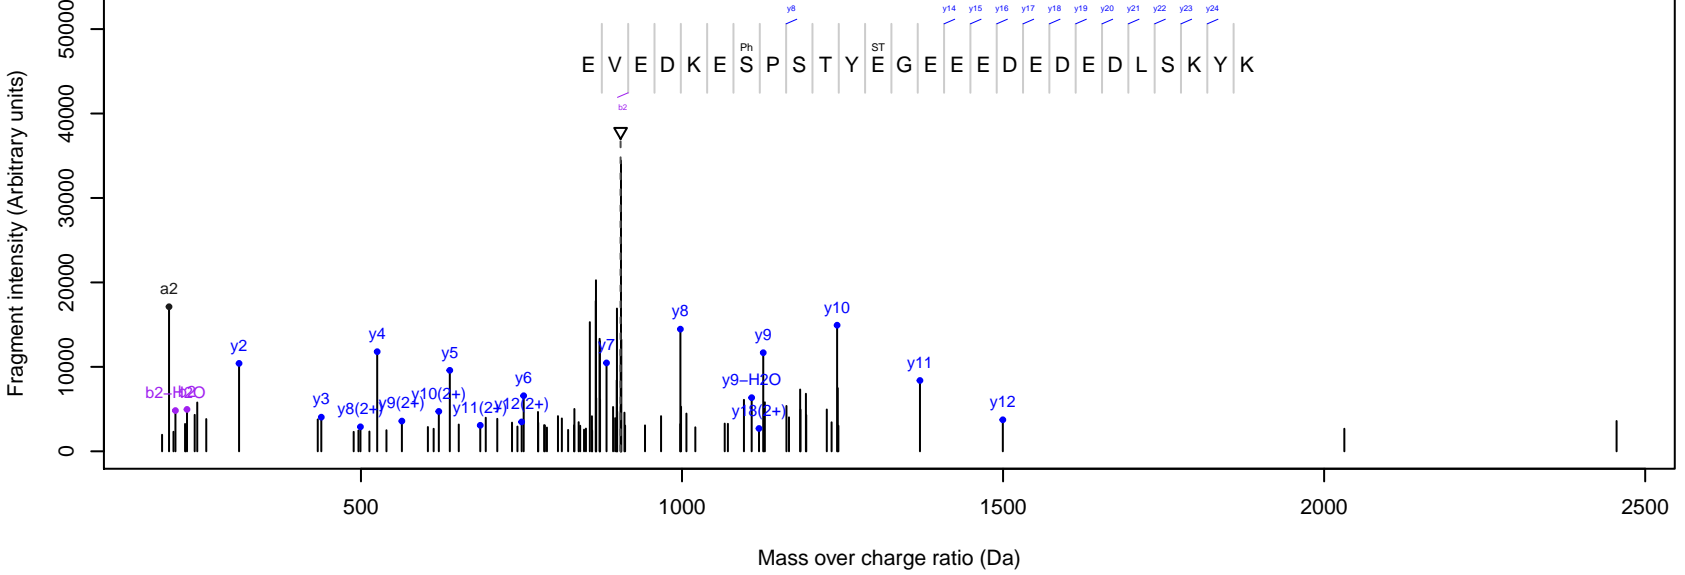

IPRPLS(Phospho (STY))PTK-2+

Source : QE3\_201126\_FR\_TiOx\_hum\_tissue\_Urea\_RNAB\_B Scan : 11678

Andromeda score : 81.799

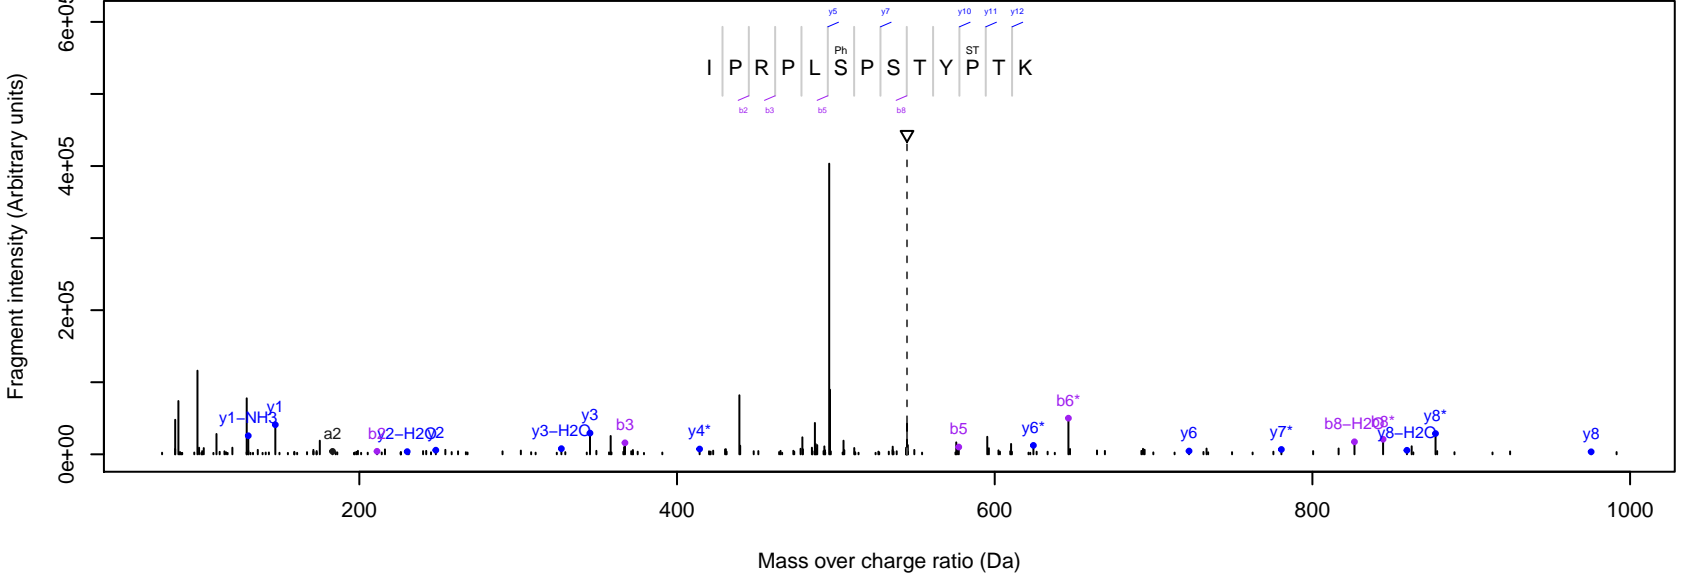



KEPDDSRDEDEDES(Phospho (STY))S(Phospho (STY))EEDS(Phospho (STY))EDEEPPPK-3+

Source : QE3\_201126\_FR\_TiOx\_hum\_tissue\_Urea\_RNAB\_H Scan : 14600

Andromeda score : 81.732

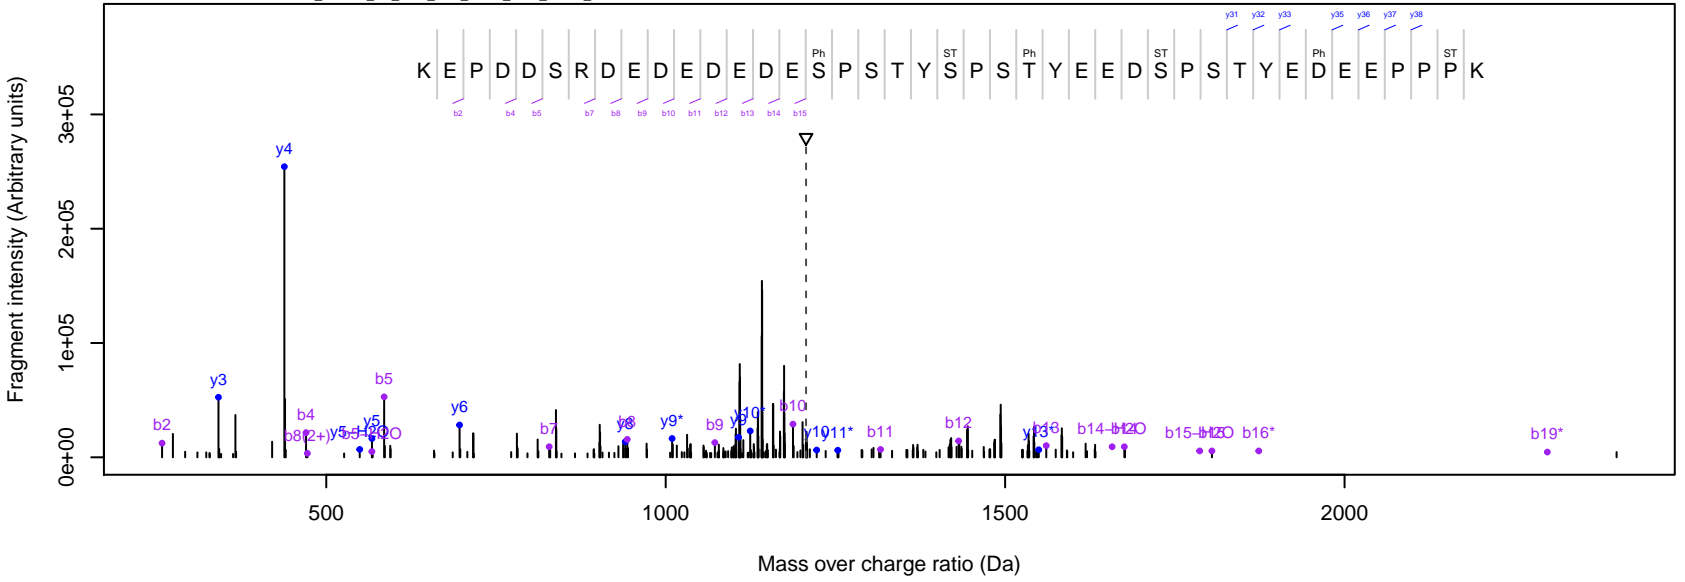

RKT(Phospho (STY))S(Phospho (STY))SDEDES(Phospho (STY))EEDDLLQR-3+

Source : QE3\_201126\_FR\_TiOx\_hum\_tissue\_Urea\_RNAB\_N Scan : 23833

Andromeda score : 81.723

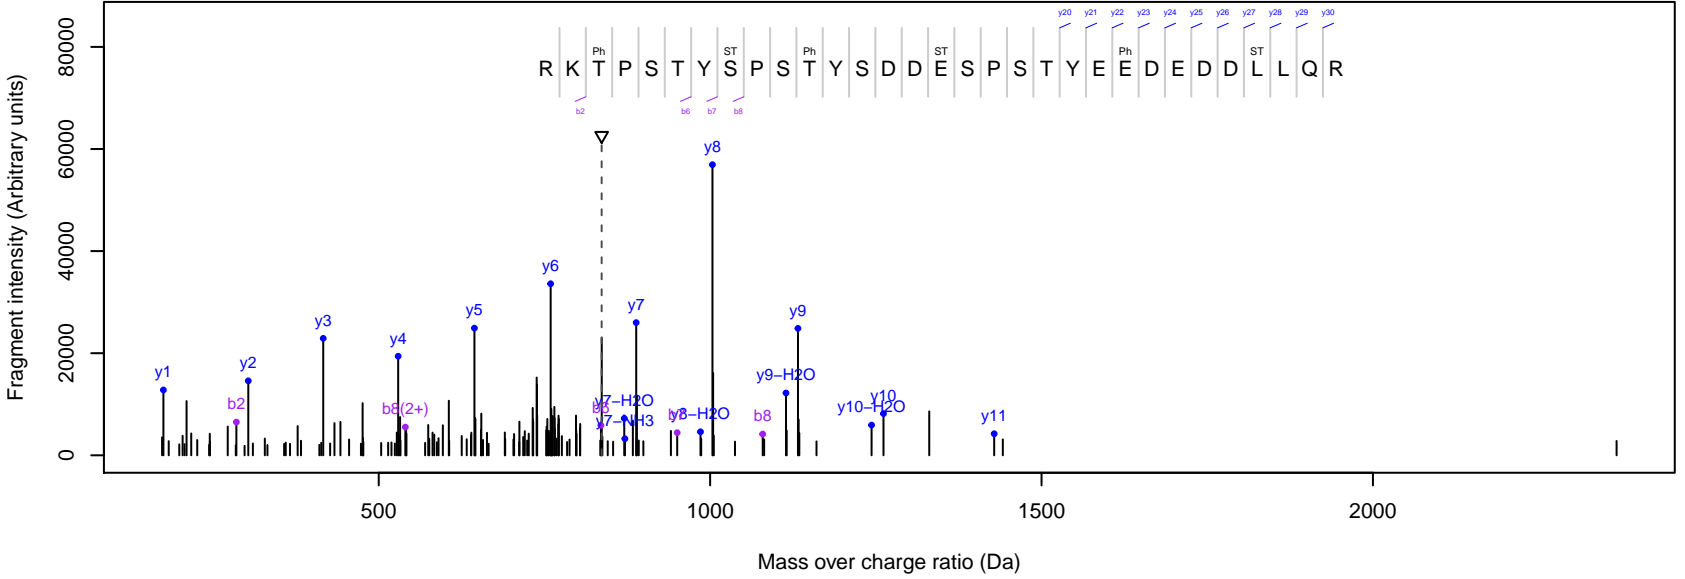

SPSPGGPQLS(Phospho (STY))PQLPR-2+

Source : QE3\_201126\_FR\_TiOx\_hum\_tissue\_Urea\_RNAB\_H Scan : 28149

Andromeda score : 81.656

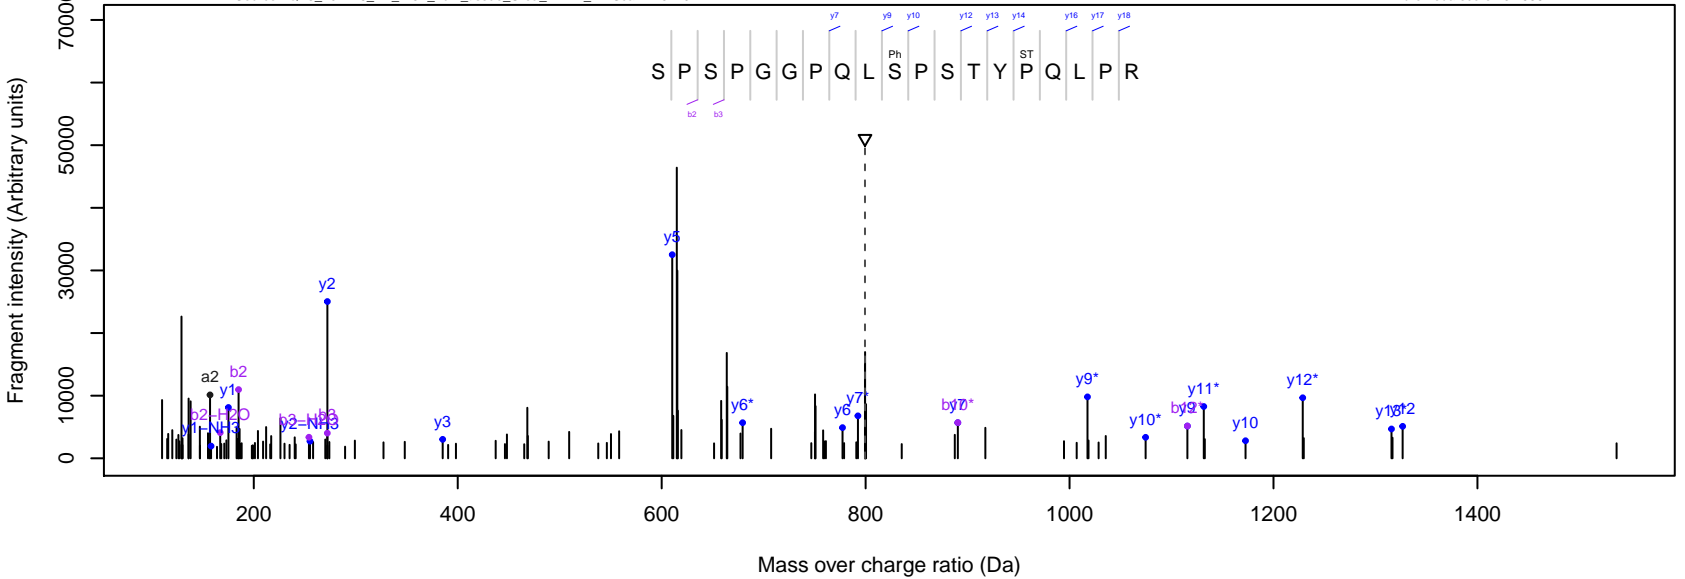

GRS(Phospho (STY))PRS(Phospho (STY))PSGHPHVR-4+

Source : QE3\_201126\_FR\_TIOx\_hum\_tissue\_Urea\_RNAB\_H Scan : 3180

Andromeda score : 81.643

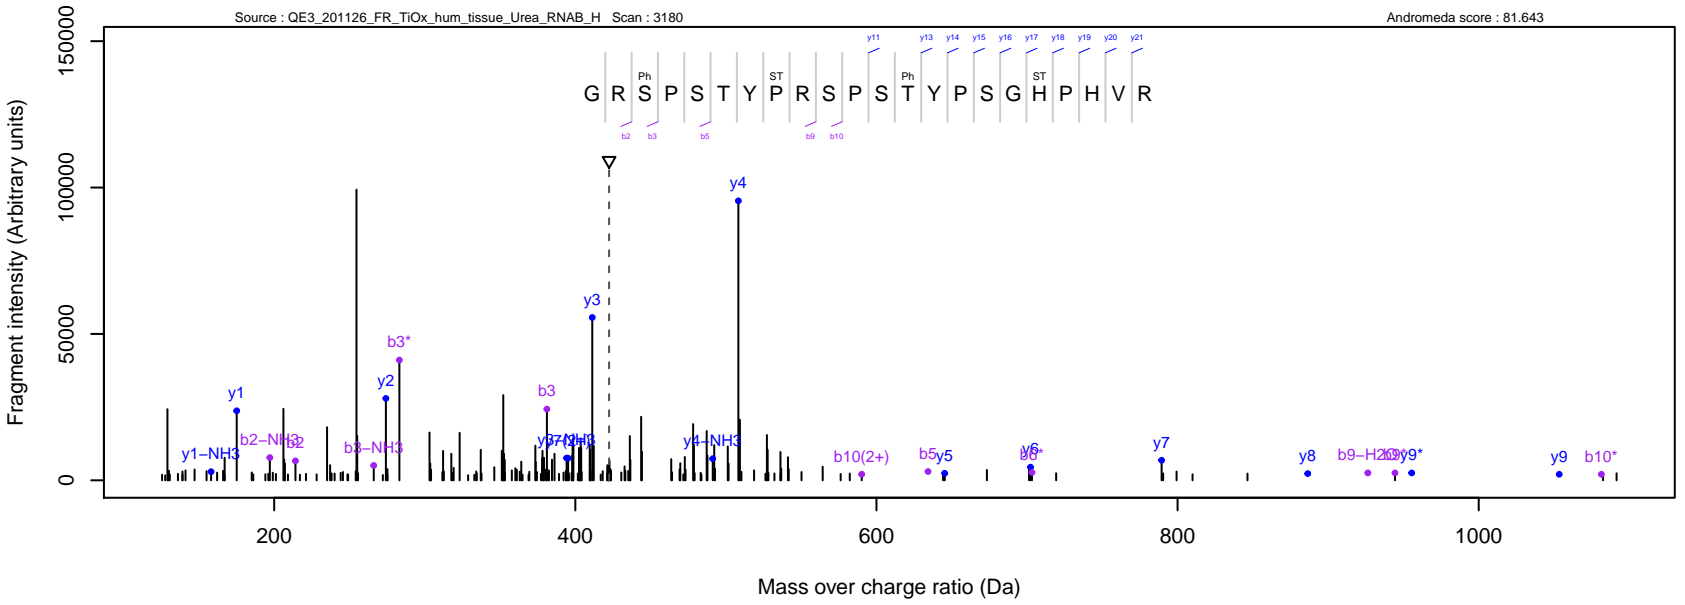

QLS(Phospho (STY))LGQGSYTVVQPGDSLEQG-2+

Source : QE3\_201126\_FR\_TIOx\_hum\_tissue\_Urea\_RNAB\_H Scan : 53458

Andromeda score : 81.643

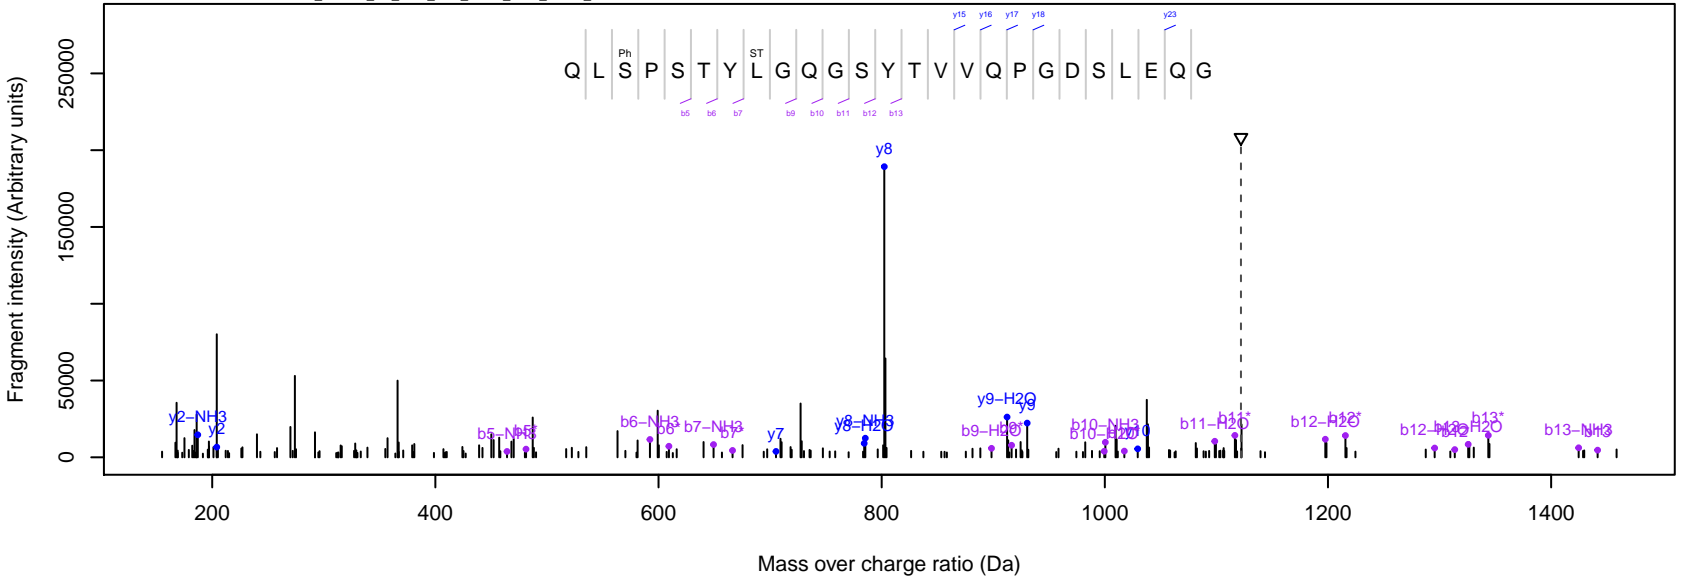

VVLVS(Phospho (STY))SASDIPVQSHR-3+

Source : QE3\_201126\_FR\_TIOx\_hum\_tissue\_Urea\_RNAB\_B Scan : 25436

Andromeda score : 81.632

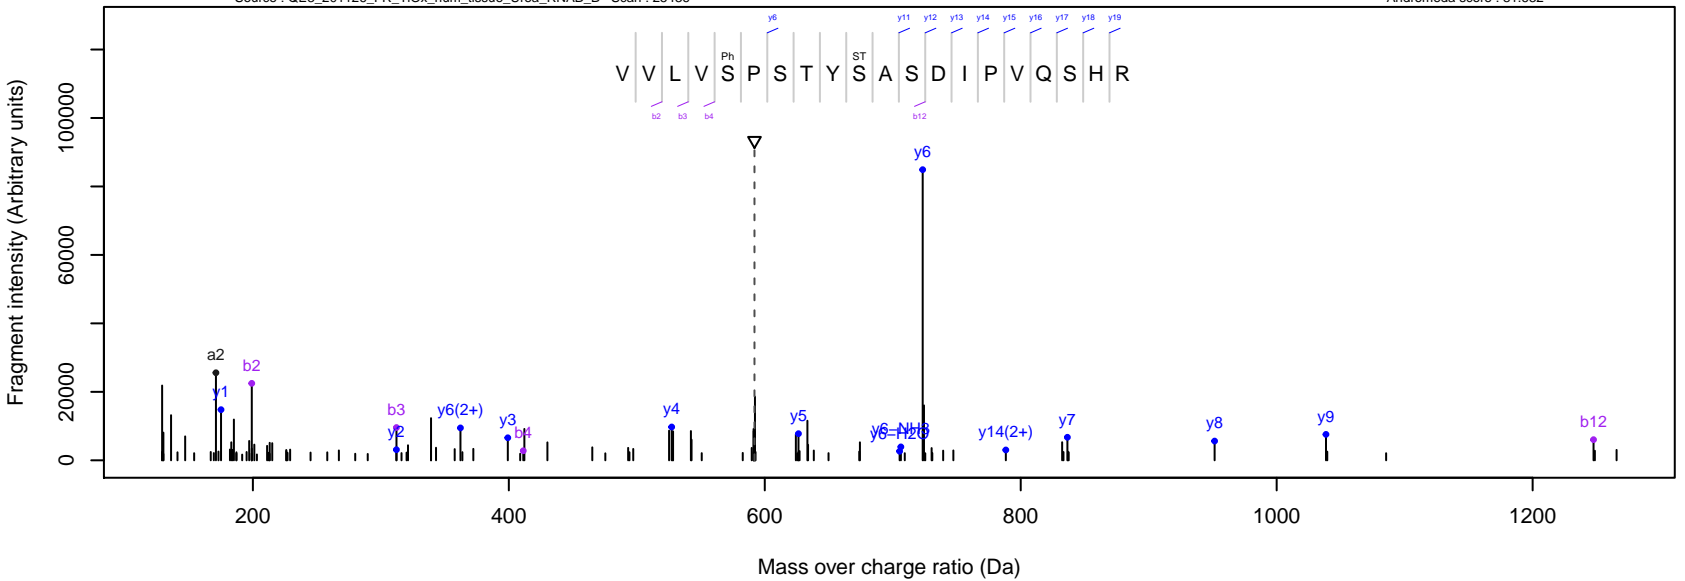

ADS(Phospho (STY))PDGLAAGR-2+

Source : QE3\_201126\_FR\_TiOx\_hum\_tissue\_Urea\_RNAB\_H Scan : 13236

Andromeda score : 81.625

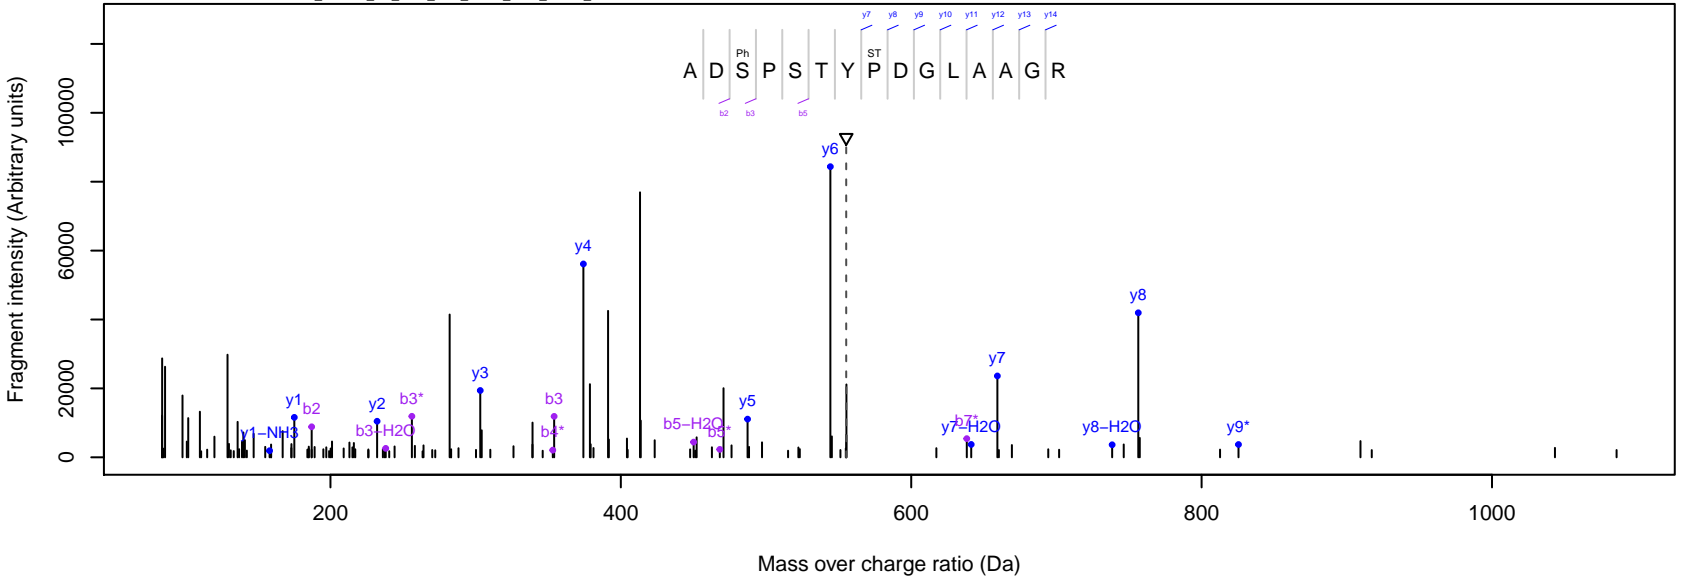

DNTFFRES(Phospho (STY))PVGRK-3+

Source : QE3\_201126\_FR\_TiOx\_hum\_tissue\_Urea\_RNAB\_B Scan : 16838

Andromeda score : 81.619

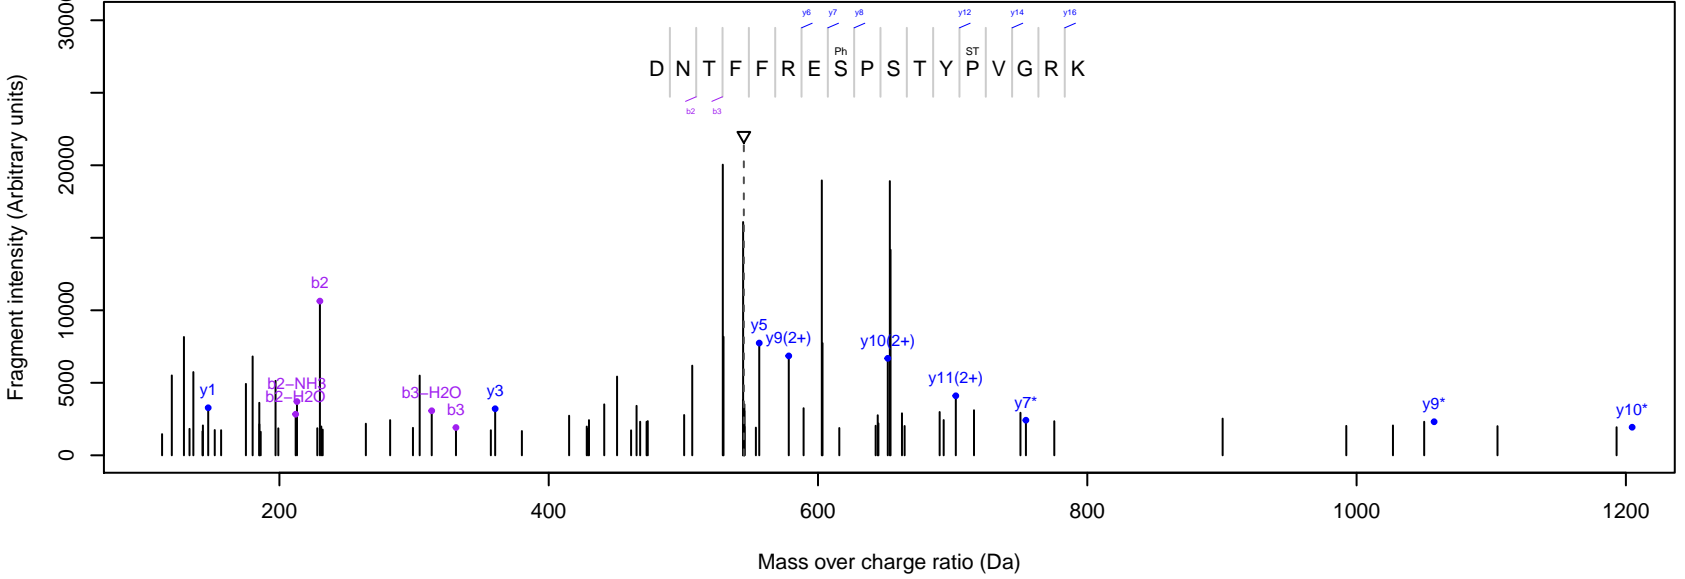

IS(Phospho (STY))MSEVDLNVAAPK-2+

Source : QE3\_201126\_FR\_TiOx\_hum\_tissue\_Urea\_RNAB\_H Scan : 41996

Andromeda score : 81.619

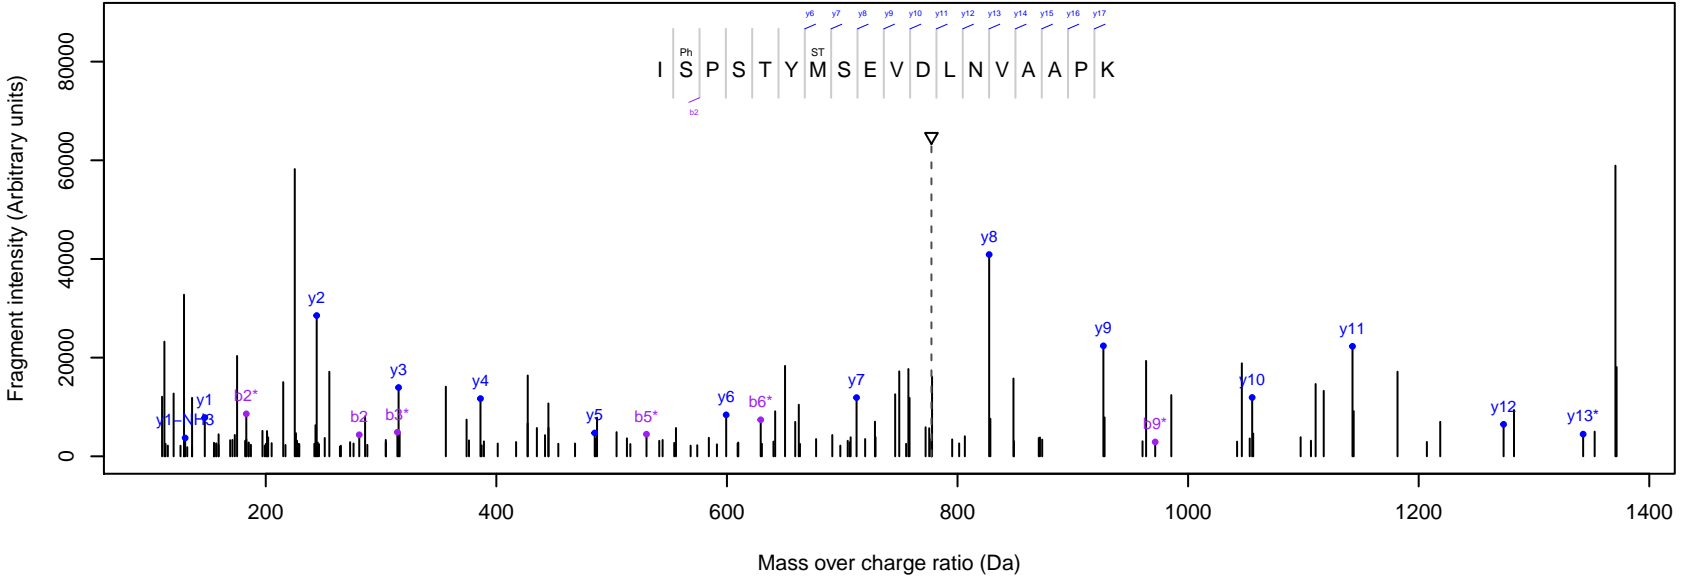

RLPVPSPFDAS(Phospho (STY))AS(Phospho (STY))EEEEEEEEEEDEEEEAAR-4+

Source : QE3\_201126\_FR\_TIOx\_hum\_tissue\_Urea\_RNAB\_B Scan : 50212

Andromeda score : 81.573

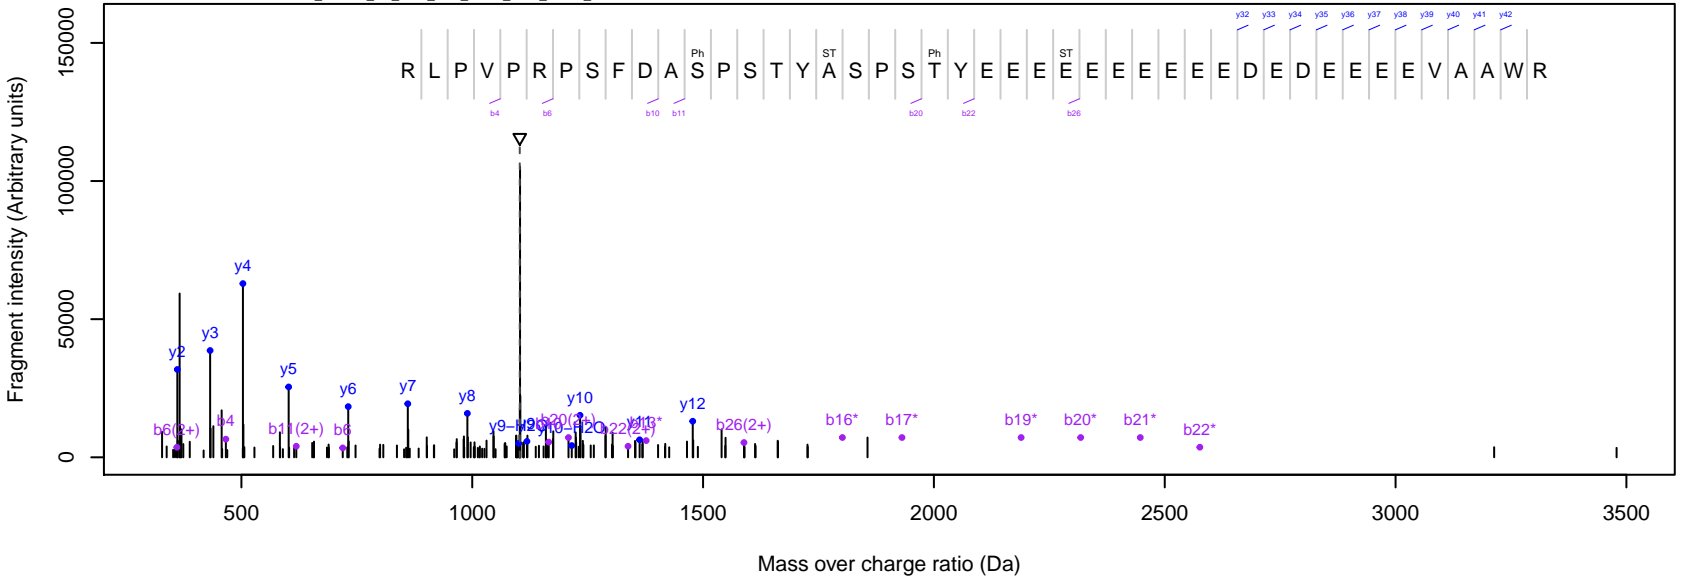

LEDSEVRS(Phospho (STY))VAS(Phospho (STY))NQS(Phospho (STY))EMEFSSLQDM(Oxidation (M))PK-3+

Source : QE3\_201126\_FR\_TIOx\_hum\_tissue\_Urea\_RNAB\_N Scan : 44624

Andromeda score : 81.566

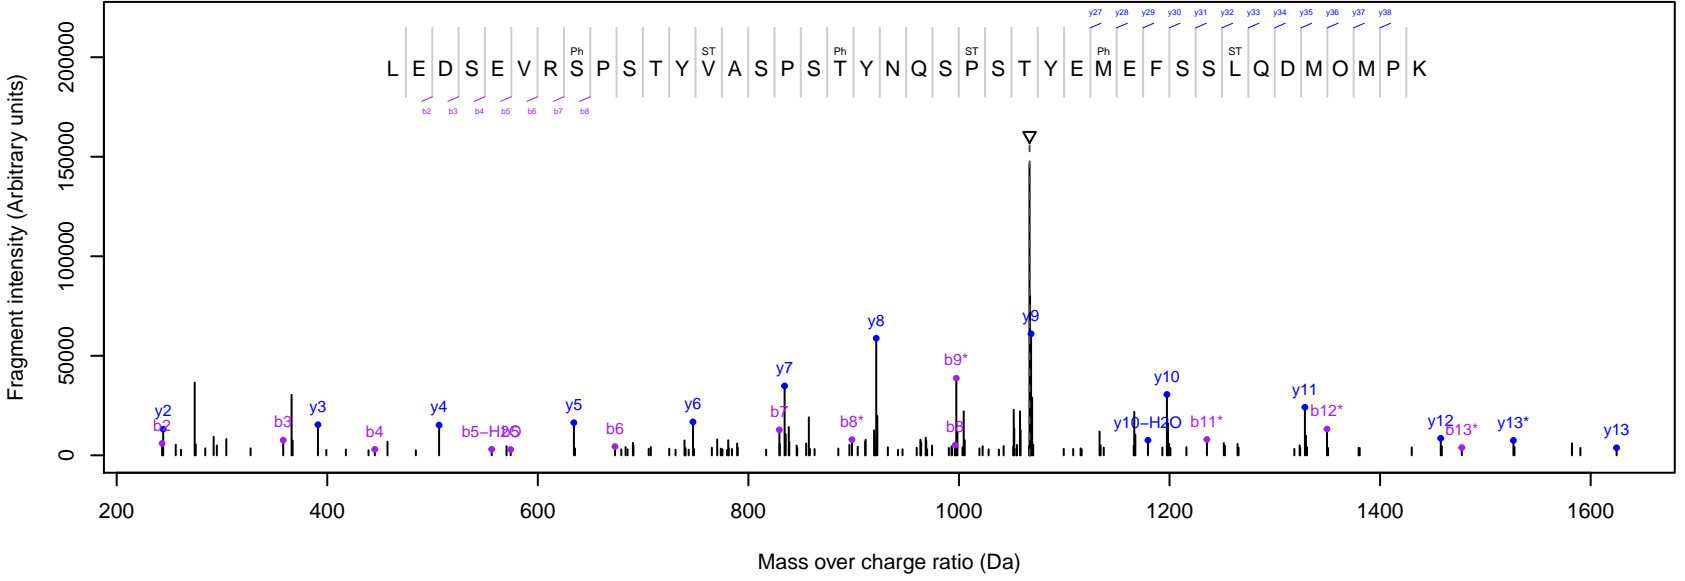

SPS(Phospho (STY))ESFIGR-2+

Source : QE3\_201126\_FR\_TIOx\_hum\_tissue\_Urea\_RNAB\_N Scan : 21253

Andromeda score : 81.548

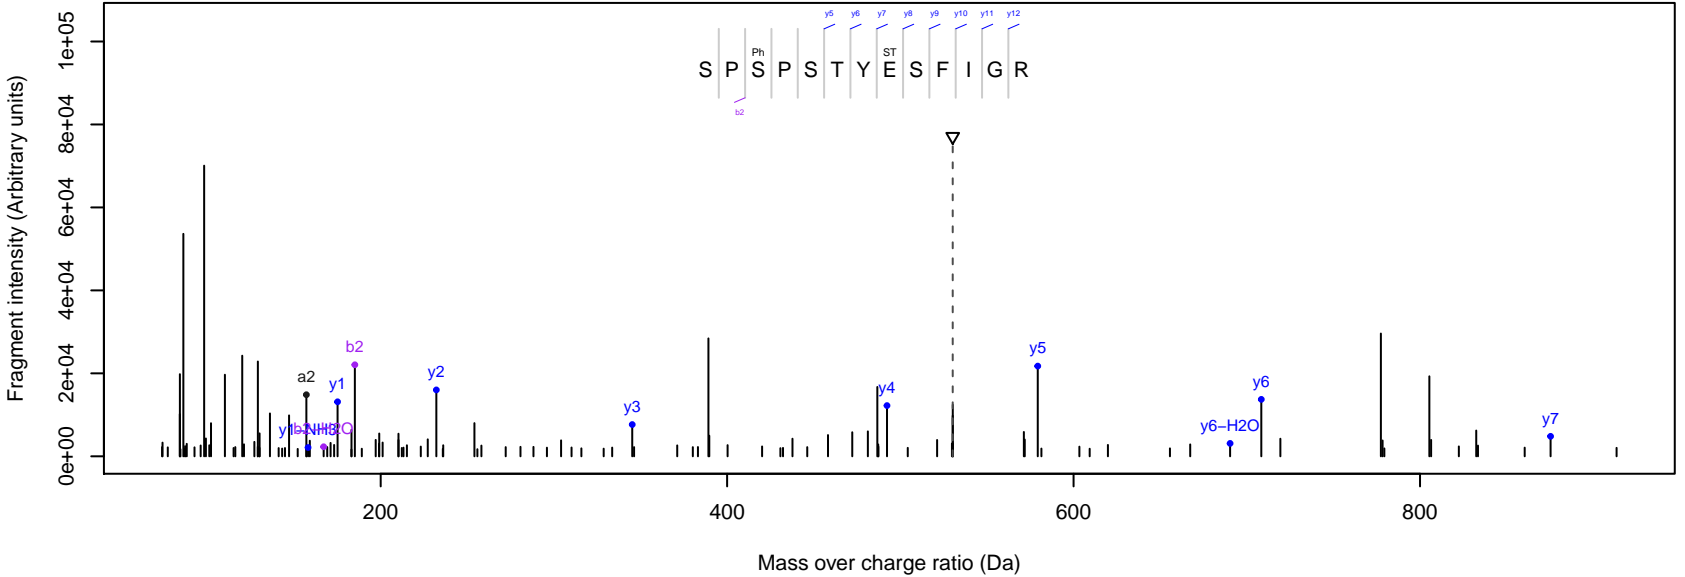

GHLTSLQDAMCETMEQQLS(Phospho (STY))SDPDS(Phospho (STY))DPD-3+

Source : QE3\_201126\_FR\_TiOx\_hum\_tissue\_Urea\_RNAB\_H Scan : 59135

Andromeda score : 81.519

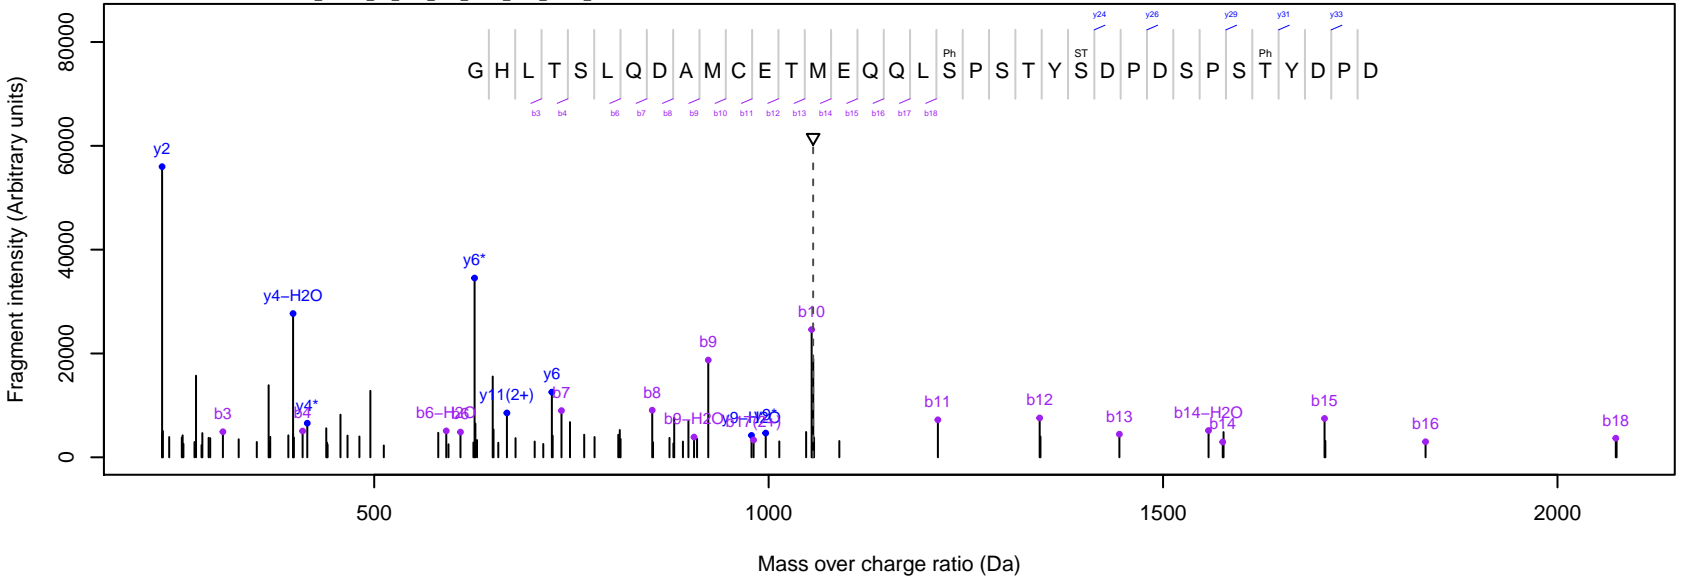

TLS(Phospho (STY))DPPSPLPHGPPNK-3+

Source : QE3\_201126\_FR\_TiOx\_hum\_tissue\_Urea\_RNAB\_H Scan : 22111

Andromeda score : 81.51

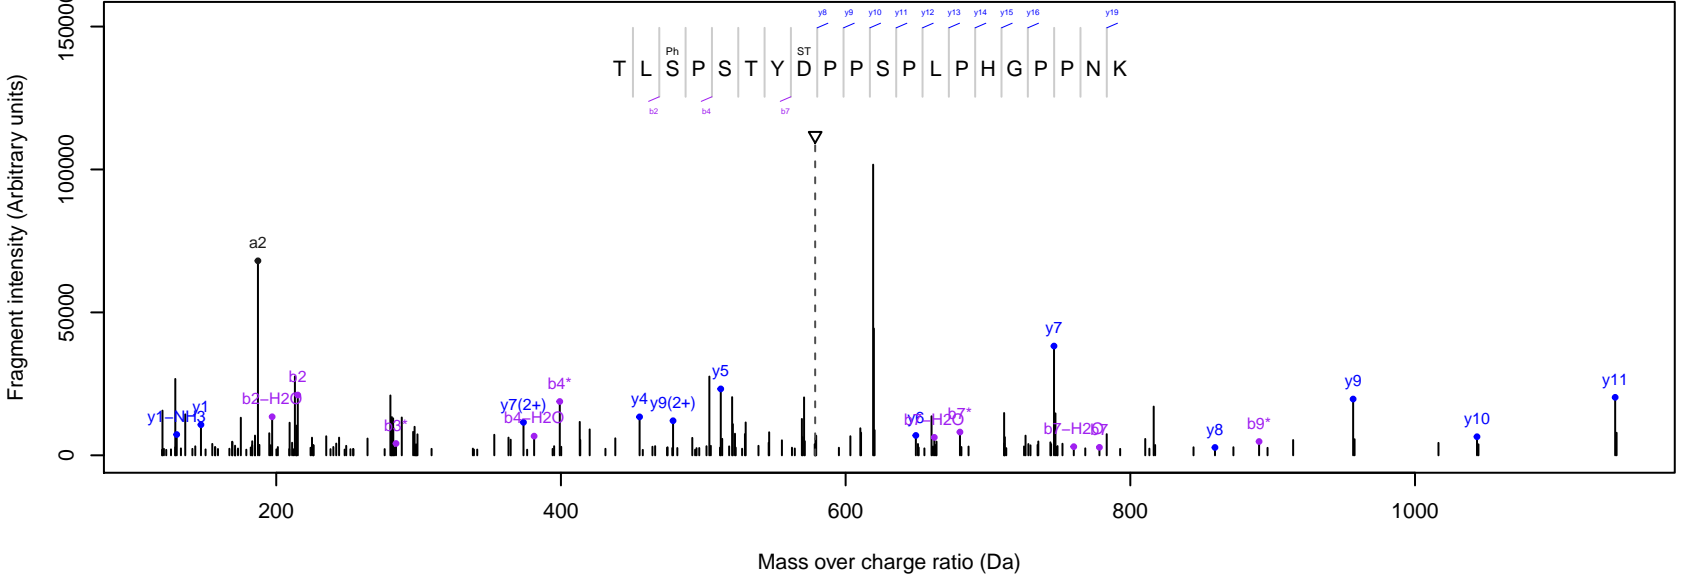

KLS(Phospho (STY))DAS(Phospho (STY))DERGEPDLASGSDVNGSTESFEMVIEEATIDSATK-4+

Source : QE3\_201126\_FR\_TiOx\_hum\_tissue\_Urea\_RNAB\_N Scan : 58669

Andromeda score : 81.505

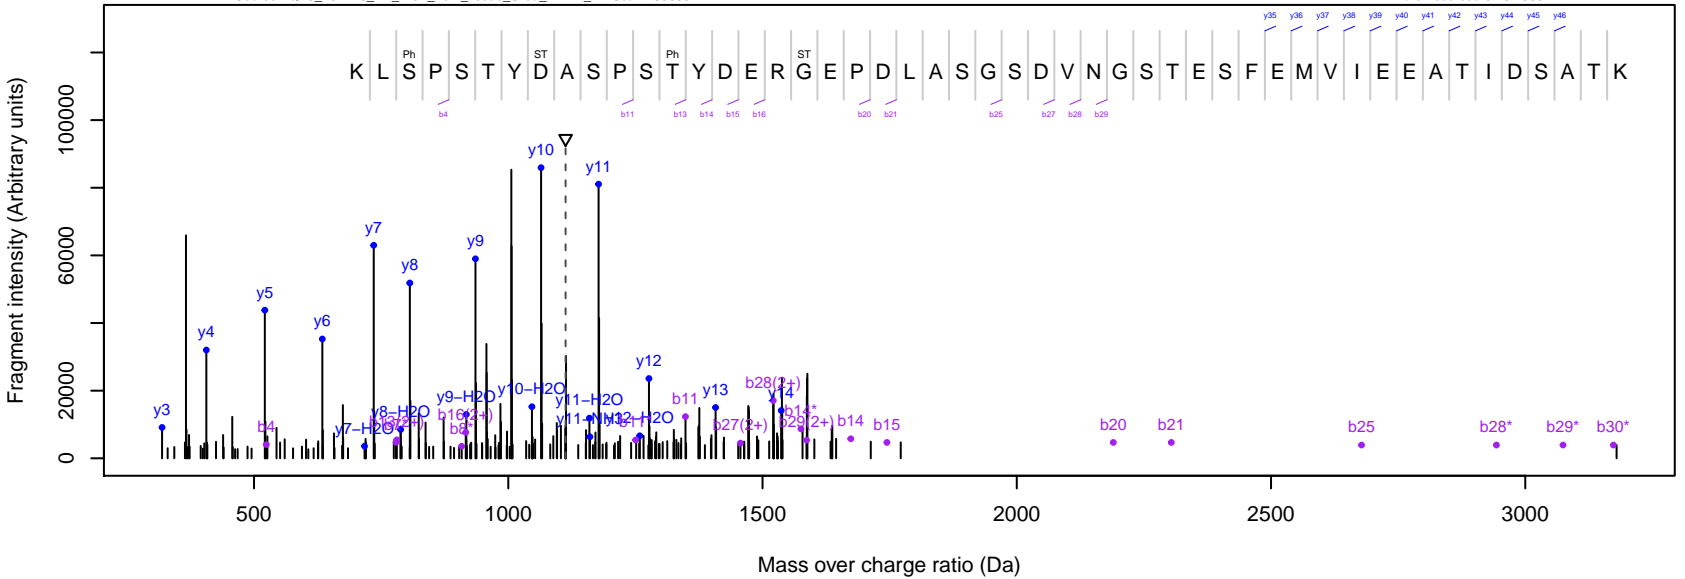

LS(Phospho (STY))SSQGTIETSLQDIDSR-2+

Source : QE3\_201126\_FR\_TiOx\_hum\_tissue\_Urea\_RNAB\_N Scan : 40363

Andromeda score : 81.494

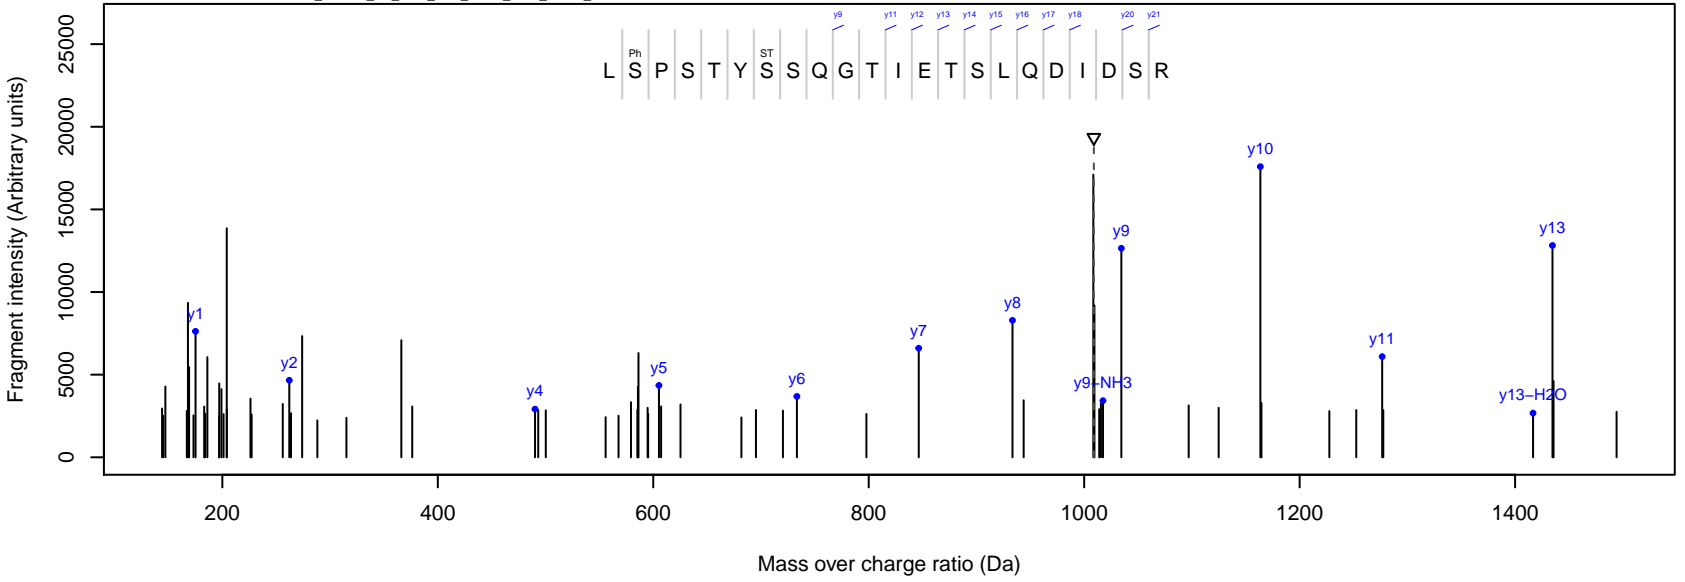

EGEELGGERPEEDAALELS(Phospho (STY))S(Phospho (STY))DEAVEVEEIEESR-4+

Source : QE3\_201126\_FR\_TiOx\_hum\_tissue\_Urea\_RNAB\_N Scan : 61083

Andromeda score : 81.487

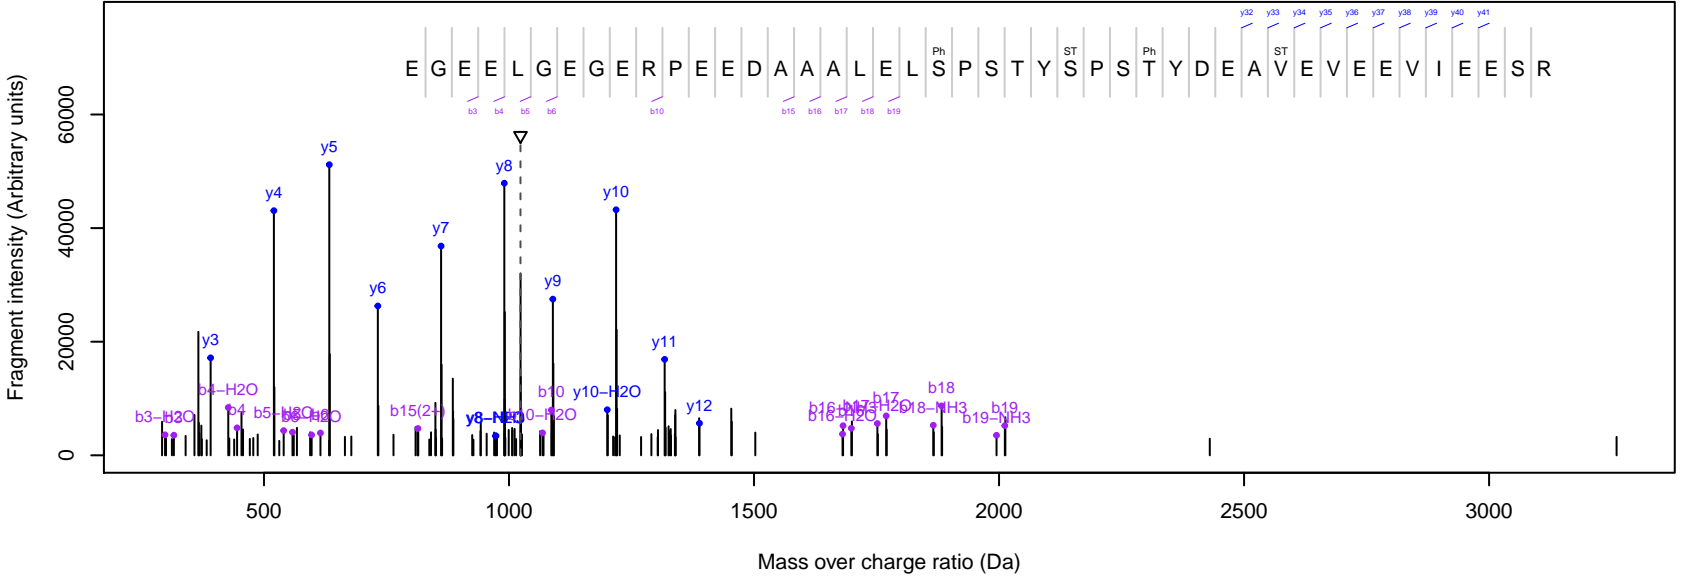

QSPAS(Phospho (STY))PPPLGGGAPVR-2+

Source : QE3\_201126\_FR\_TiOx\_hum\_tissue\_Urea\_RNAB\_B Scan : 23959

Andromeda score : 81.448

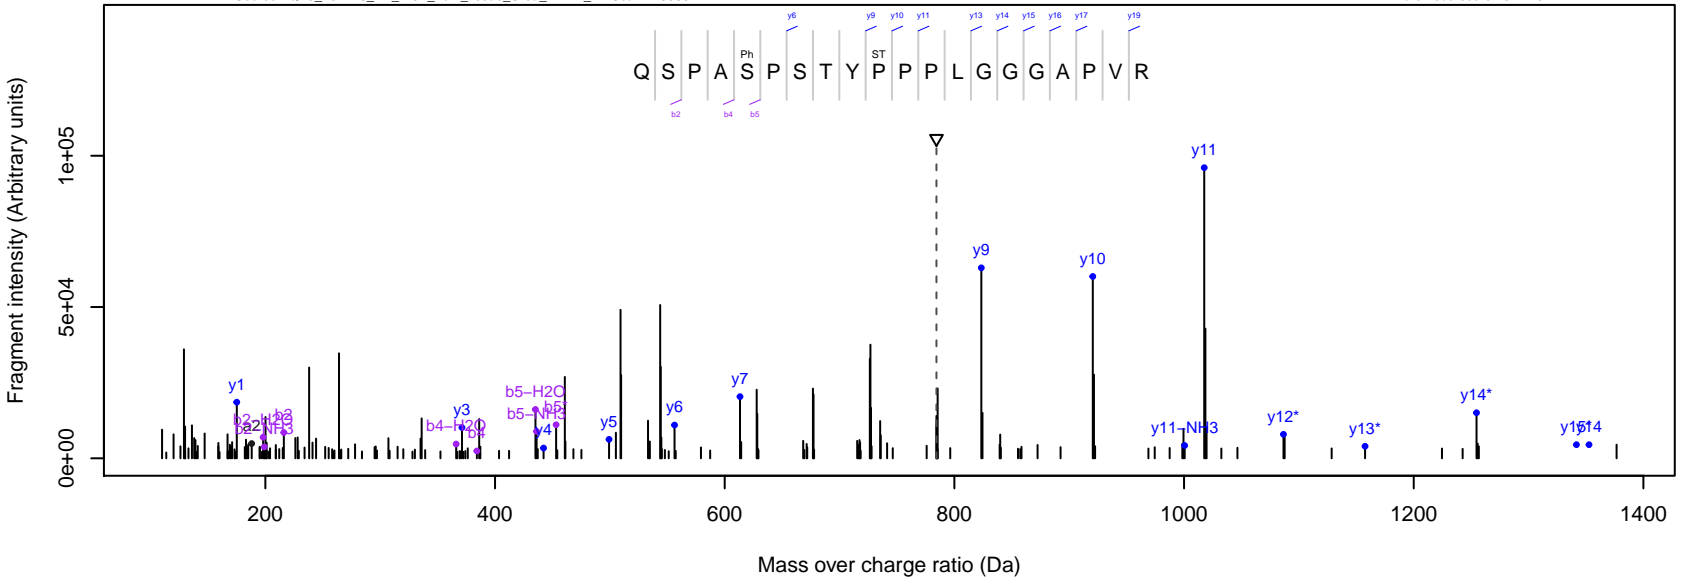

SEHKVWS(Phospho (STY))PLVTEEGKR-4+

Source : QE3\_201126\_FR\_TiOx\_hum\_tissue\_Urea\_RNAB\_H Scan : 18456

Andromeda score : 81.448

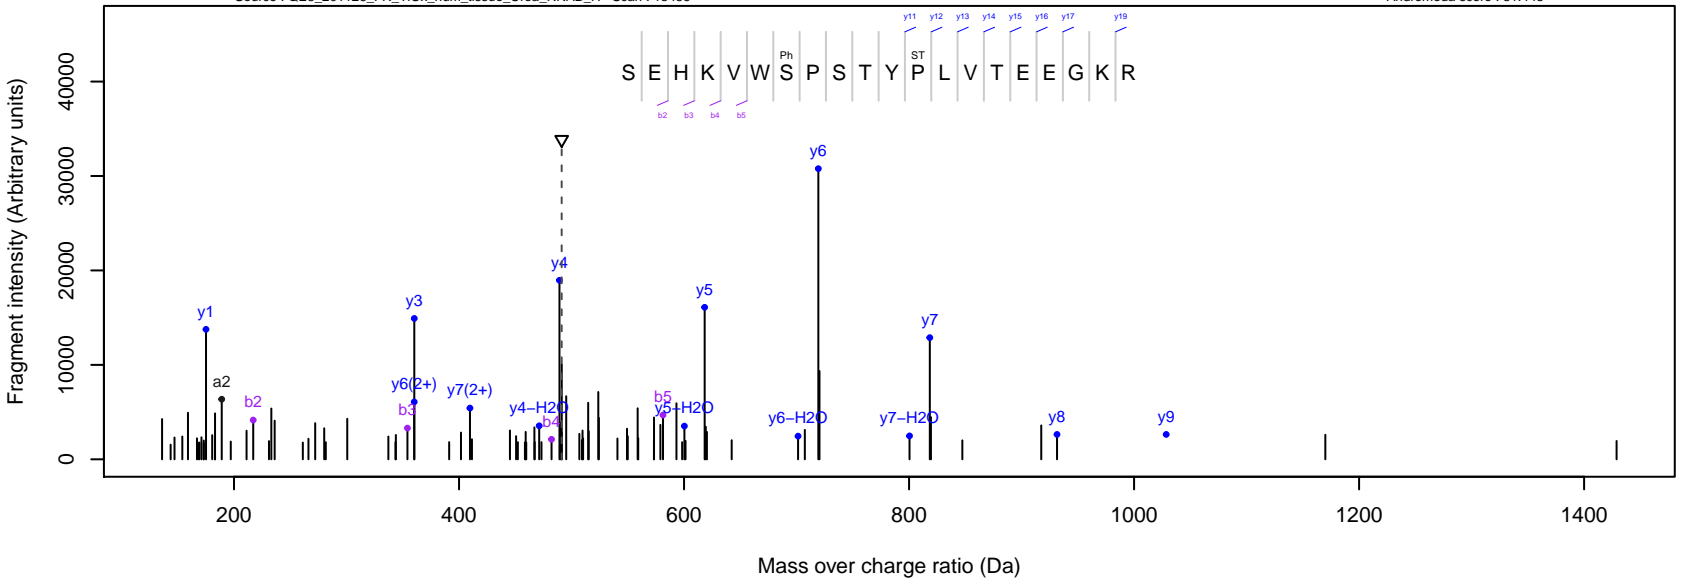

GSKS(Phospho (STY))PSPRPNPVR-3+

Source : QE3\_201126\_FR\_TiOx\_hum\_tissue\_Urea\_RNAB\_B Scan : 7532

Andromeda score : 81.428

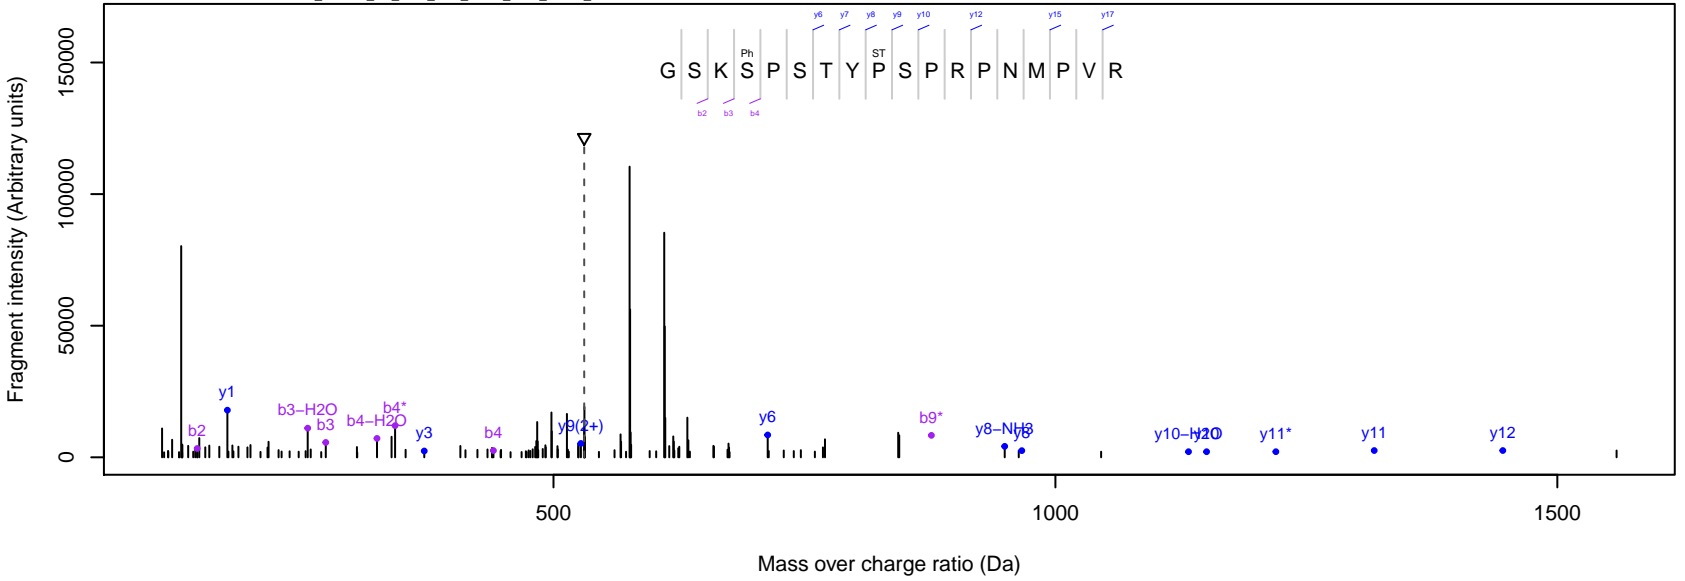

VVPSFLPVDQGG(Phospho (STY))LVGR-2+

Source : QE3\_201126\_FR\_TiOx\_hum\_tissue\_Urea\_RNAB\_B Scan : 52115

Andromeda score : 81.428

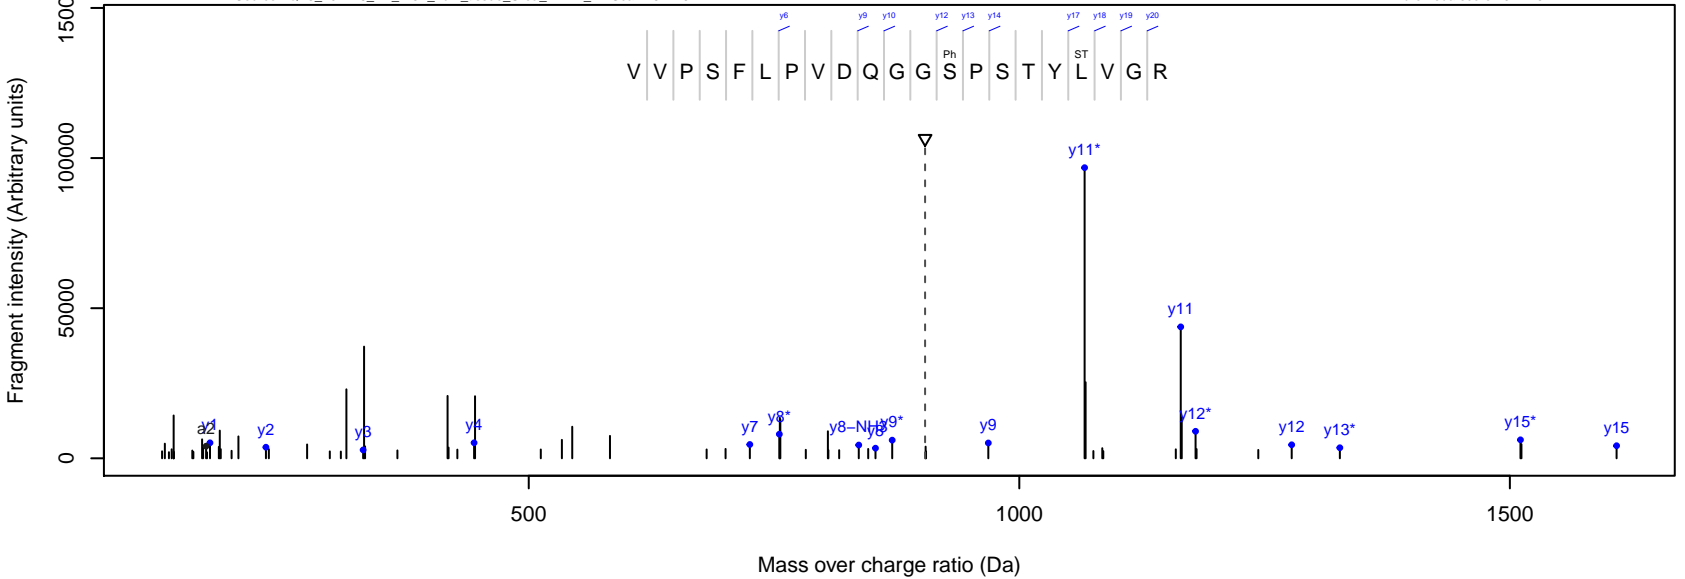





ESSTSEGADQKMS(Phospho (STY))S(Phospho (STY))PEDDSDTKR-3+

Source : QE3\_201126\_FR\_TiOx\_hum\_tissue\_Urea\_RNAB\_B Scan : 7585

Andromeda score : 81.346

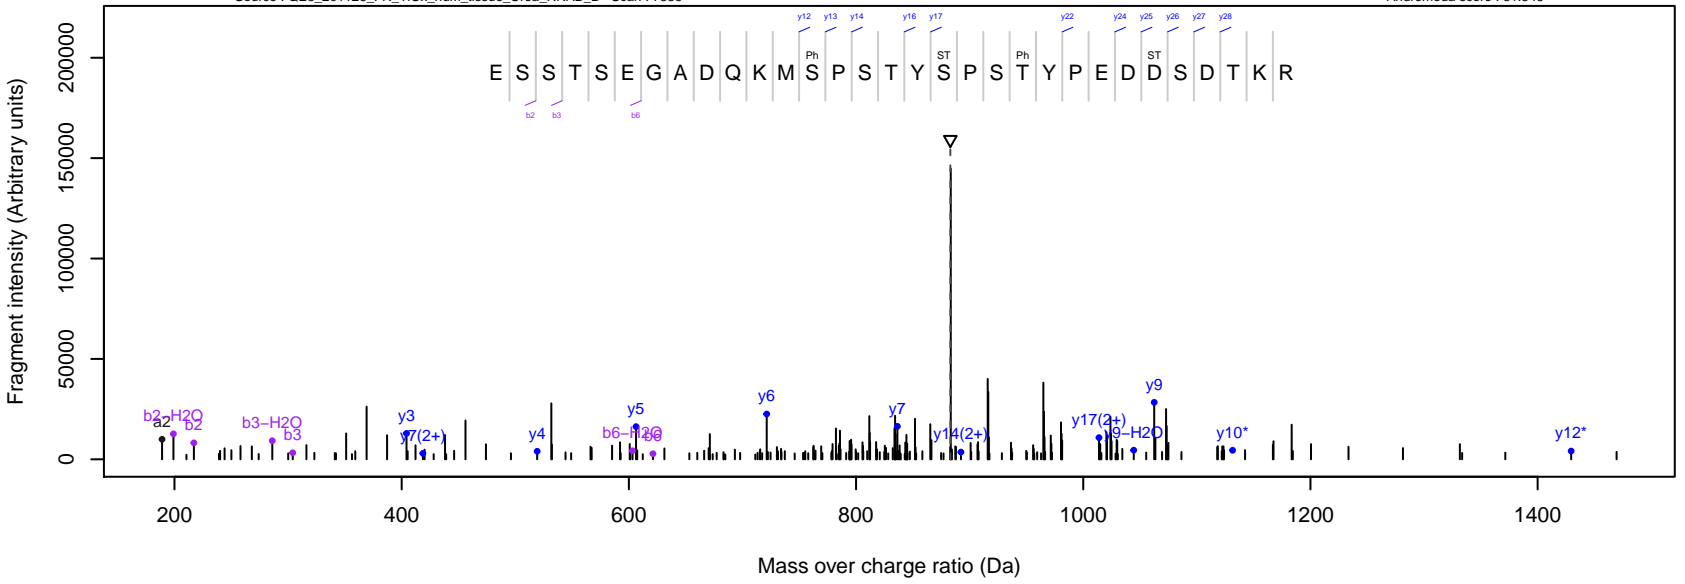

LSGINEIPRPFSPVTSNT(Phospho (STY))SPPPAALAR-3+

Source : QE3\_201126\_FR\_TiOx\_hum\_tissue\_Urea\_RNAB\_H Scan : 46624

Andromeda score : 81.341

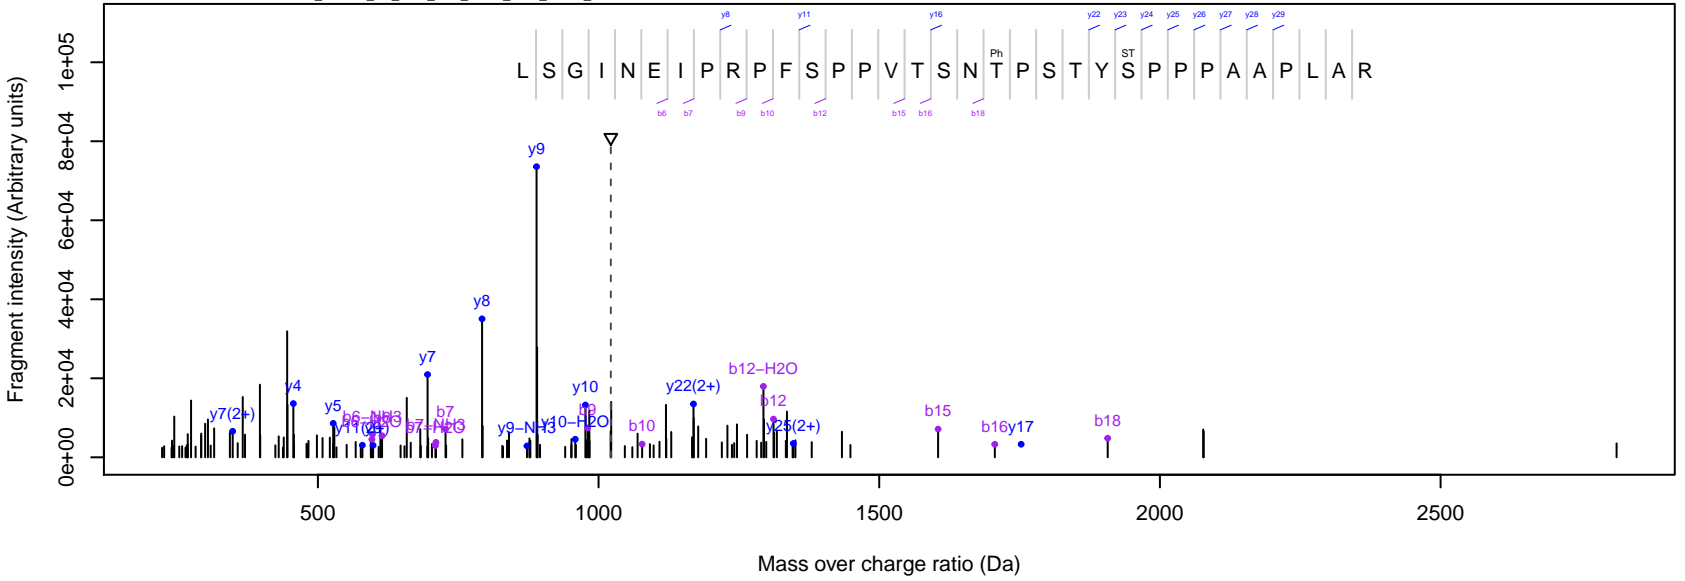

S(Phospho (STY))LSEGLYPPEMKGKPATGDFGYR-3+

Source : QE3\_201126\_FR\_TiOx\_hum\_tissue\_Urea\_RNAB\_H Scan : 48033

Andromeda score : 81.341

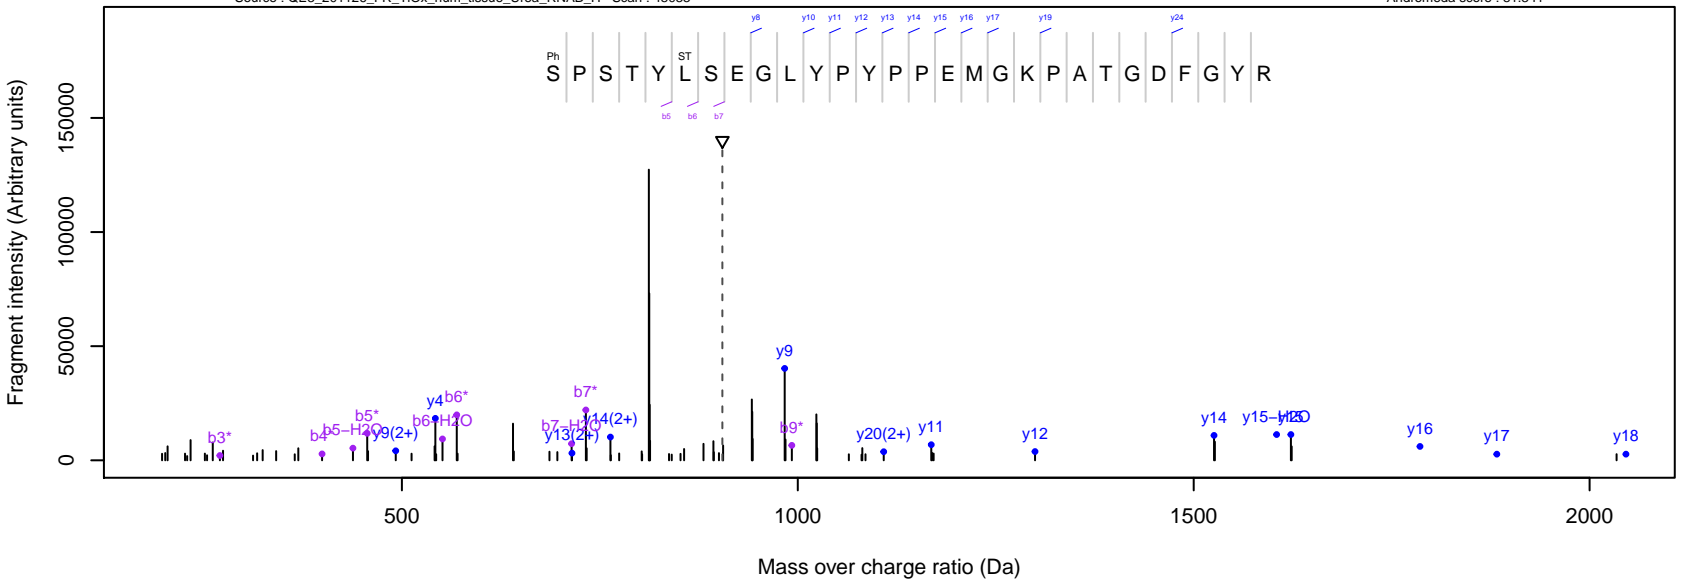



M(Oxidation (M))QNN(SPhospho (STY))SPSISPNTSFTSDGSPSPGLGGIK-3+

Source : QE3\_201126\_FR\_TIOx\_hum\_tissue\_Urea\_RNAB\_N Scan : 41535

Andromeda score : 81.292

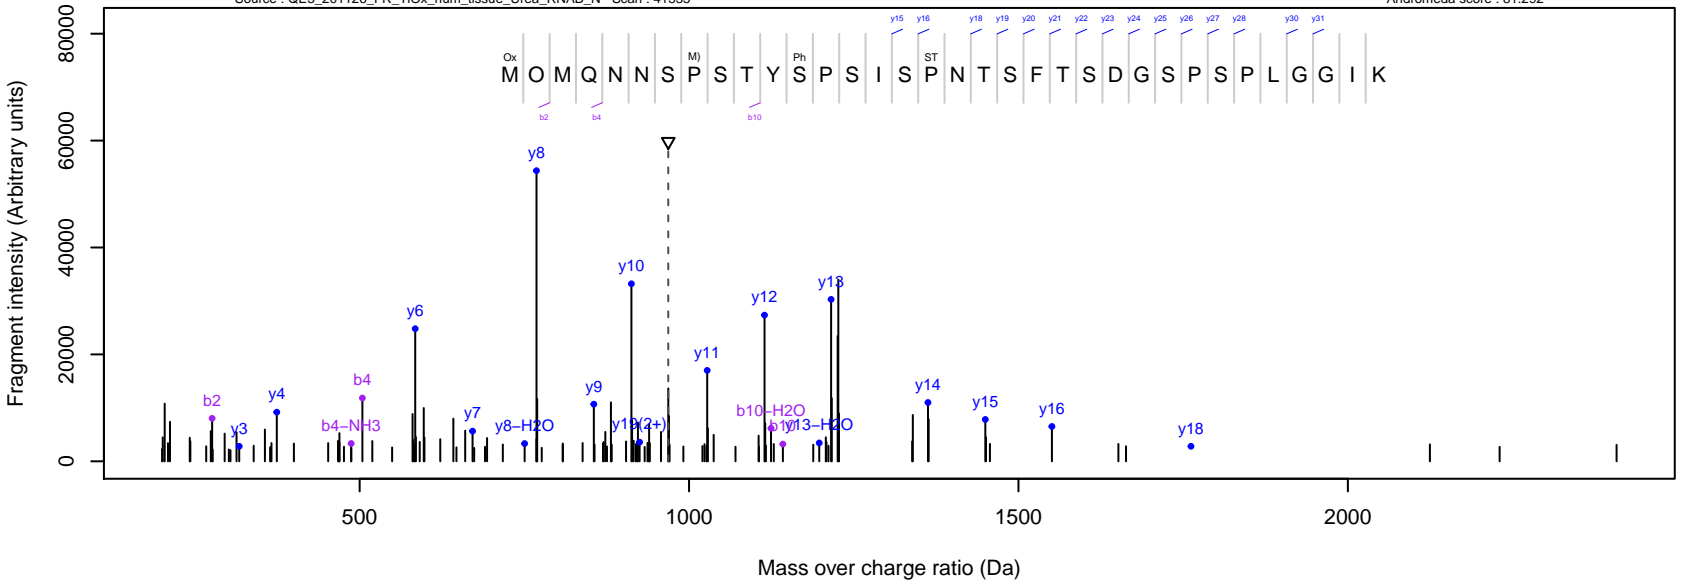

RIDIS(Phospho (STY))PSTFR-3+

Source : QE3\_201126\_FR\_TIOx\_hum\_tissue\_Urea\_RNAB\_H Scan : 26239

Andromeda score : 81.278

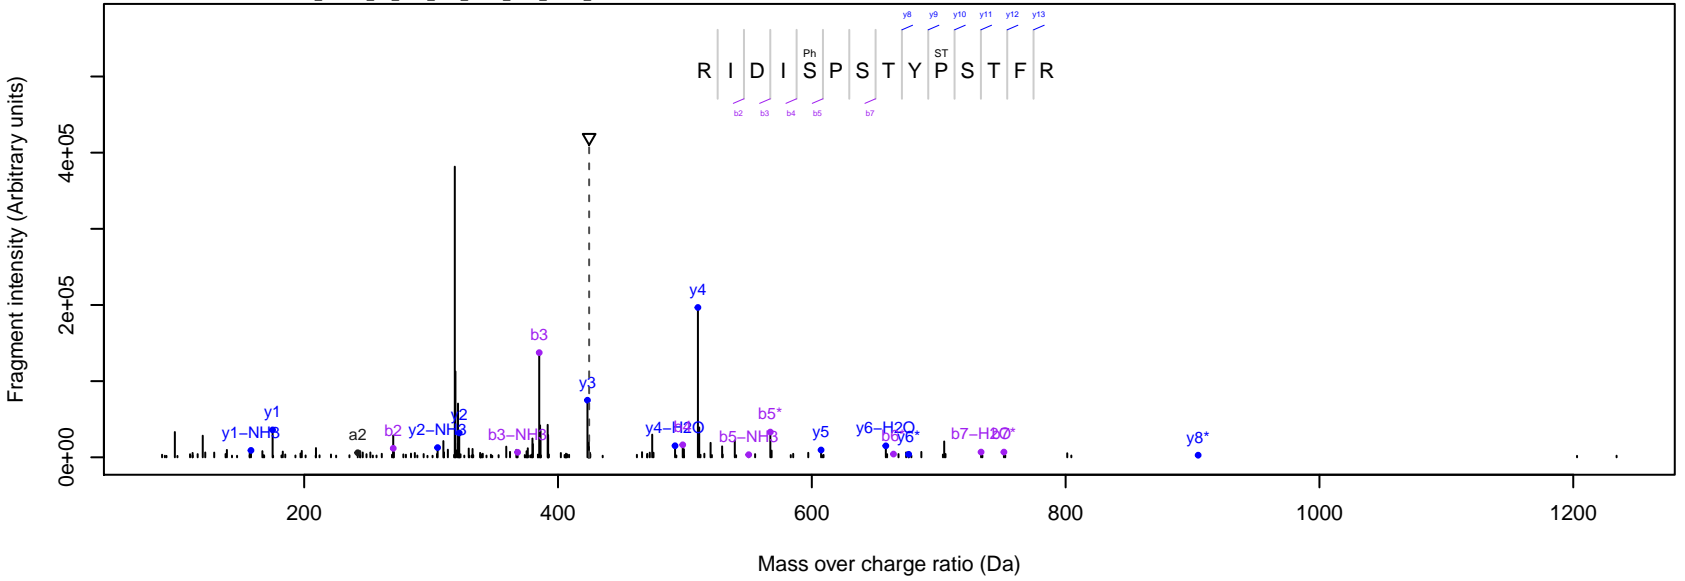

HCDSINSDFGSESGGDS(Phospho (STY))SPGPSASQGPR-3+

Source : QE3\_201126\_FR\_TIOx\_hum\_tissue\_Urea\_RNAB\_N Scan : 19476

Andromeda score : 81.197

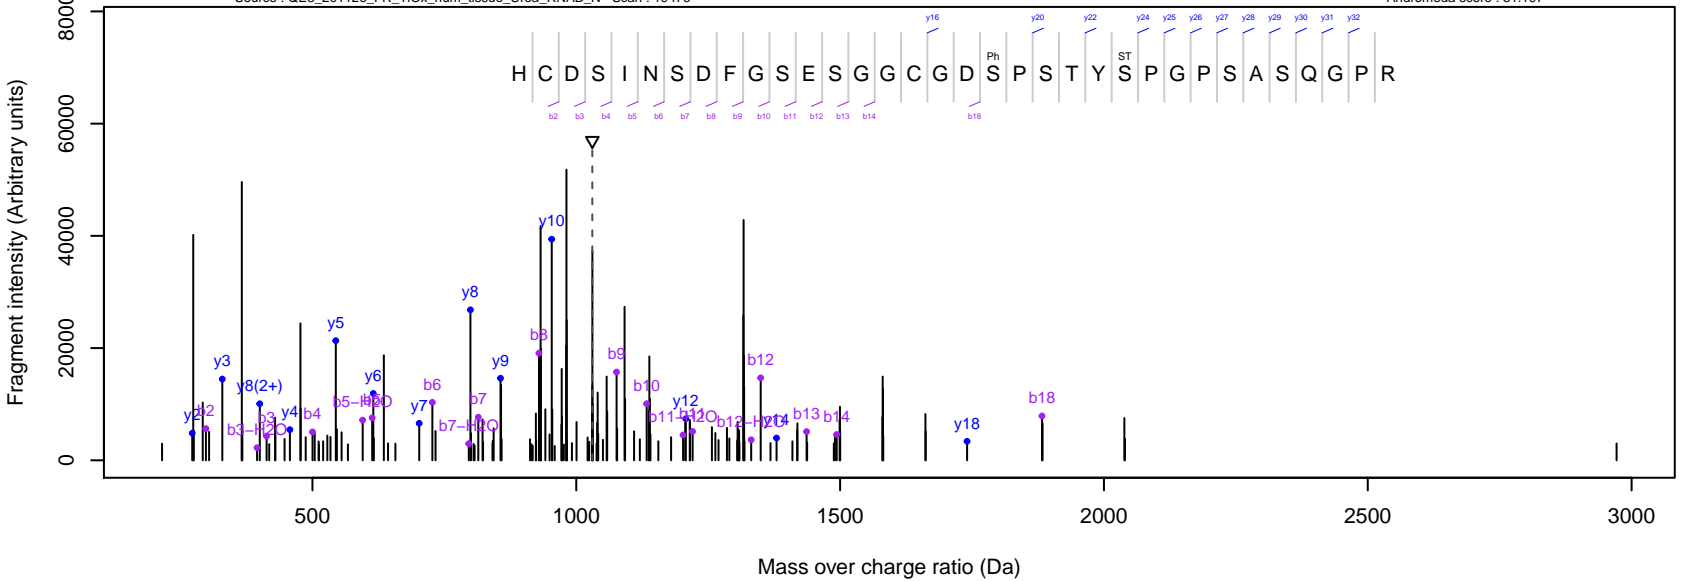

RRPS(Phospho (STY))PQPSPR-3+

Source : QE3\_201126\_FR\_TiOx\_hum\_tissue\_Urea\_RNAB\_H Scan : 3158

Andromeda score : 81.185

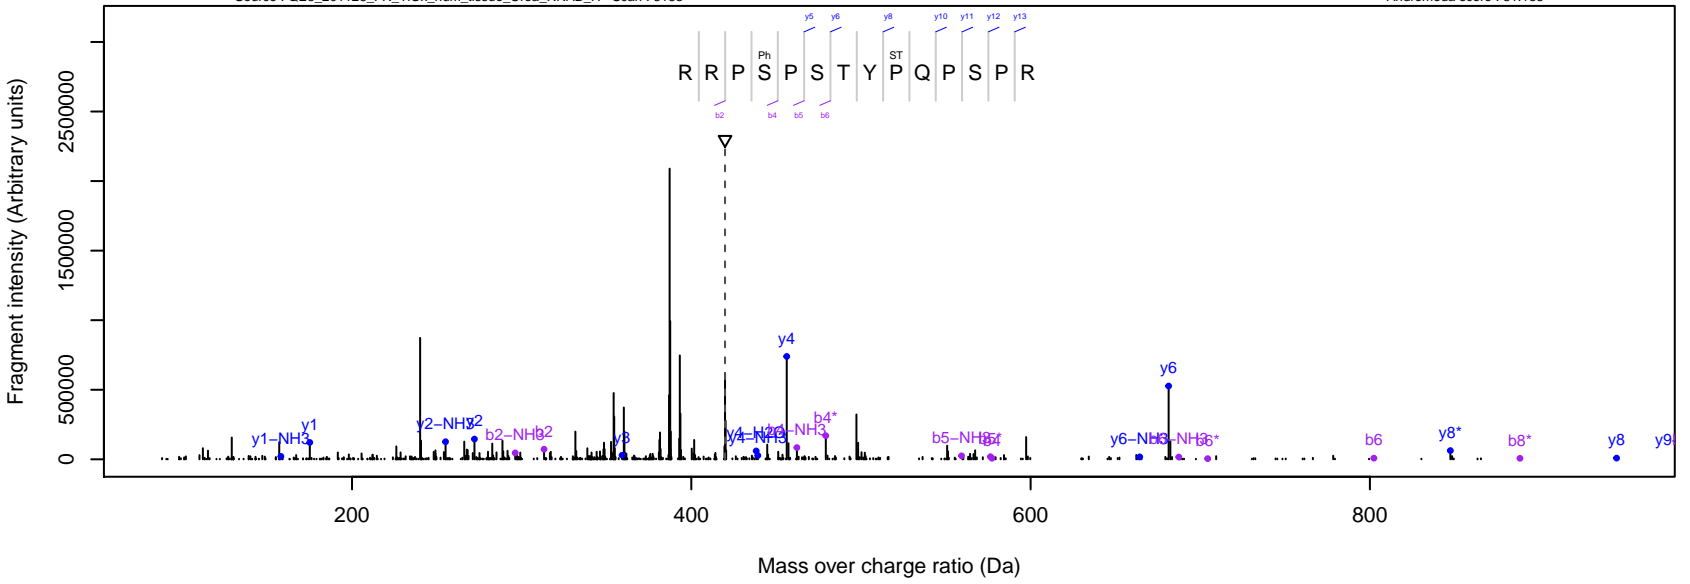

EAVVDLHADD(Phospho (STY))RISEDETERNGDDGTHDK-4+

Source : QE3\_201126\_FR\_TiOx\_hum\_tissue\_Urea\_RNAB\_N Scan : 15623

Andromeda score : 81.068

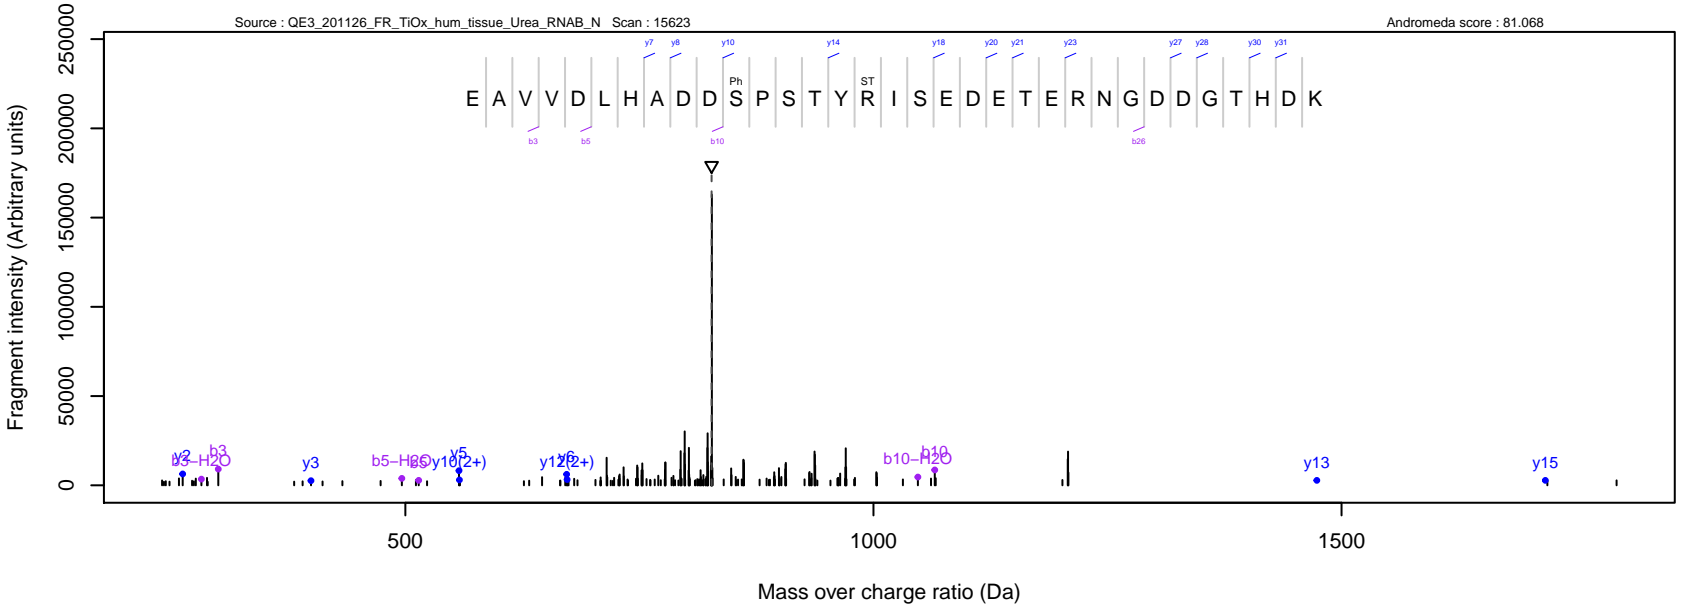

ALPTSKPEGLHSS(Phospho (STY))PVGSSSK-3+

Source : QE3\_201126\_FR\_TiOx\_hum\_tissue\_Urea\_RNAB\_N Scan : 11883

Andromeda score : 81.055

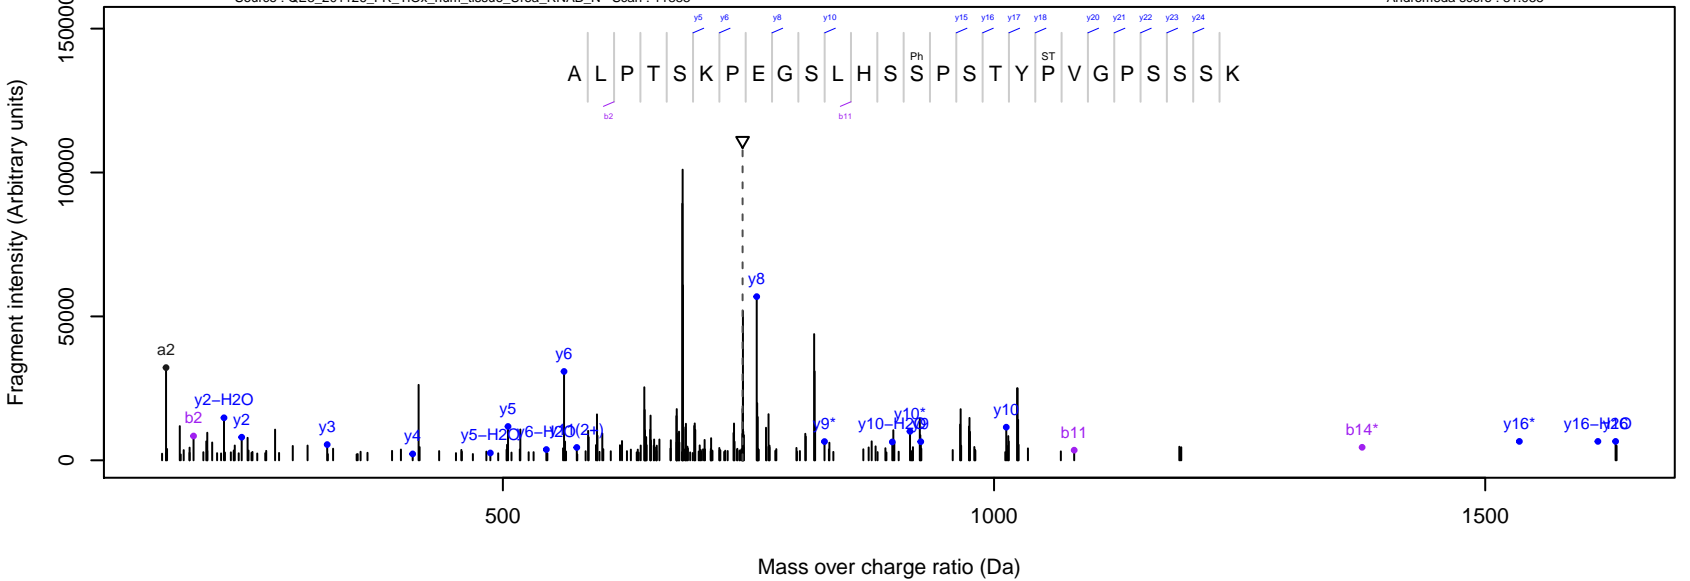

KLS(Phospho (STY))S(Phospho (STY))SSEPYEEDEFNDQSIKK-3+

Source : QE3\_201126\_FR\_TiOx\_hum\_tissue\_Urea\_RNAB\_N Scan : 22762

Andromeda score : 81.055

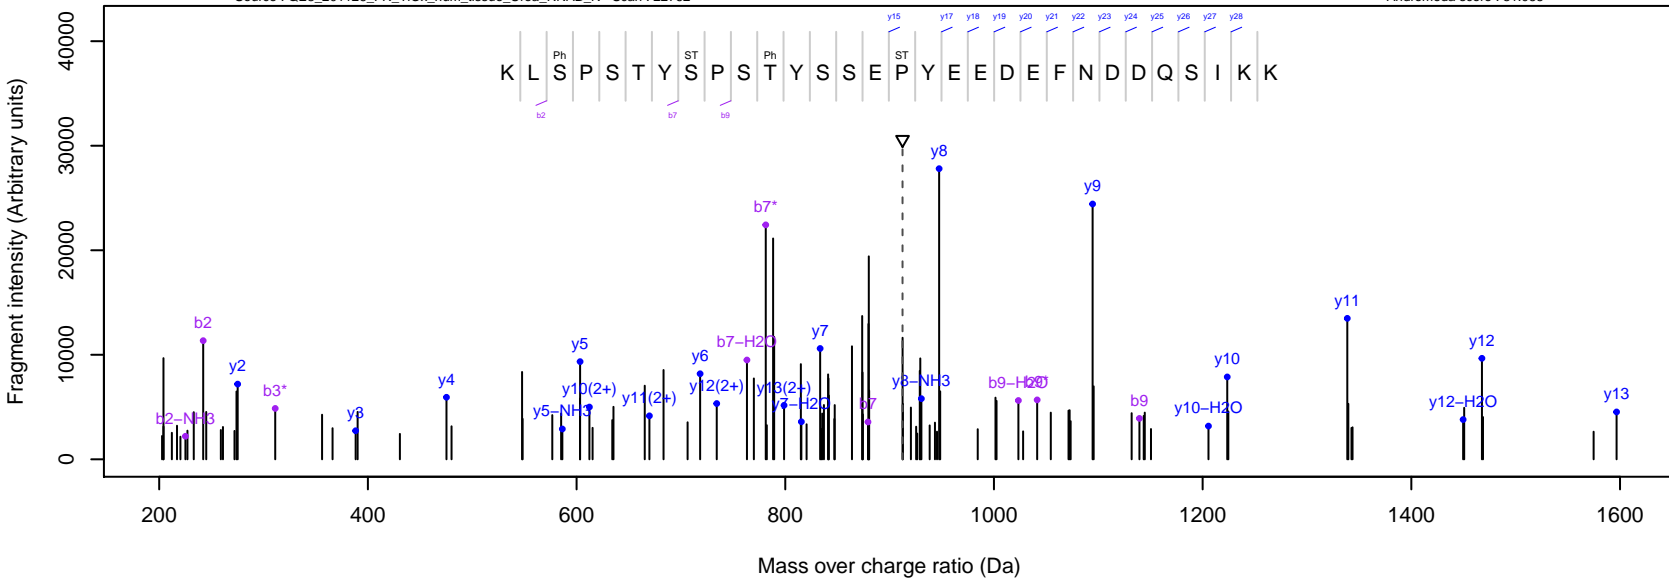

TALETESQDSAEP(SPhospho (STY))GS(Phospho (STY))EEESDPVSLER-3+

Source : QE3\_201126\_FR\_TiOx\_hum\_tissue\_Urea\_RNAB\_H Scan : 38490

Andromeda score : 81.055

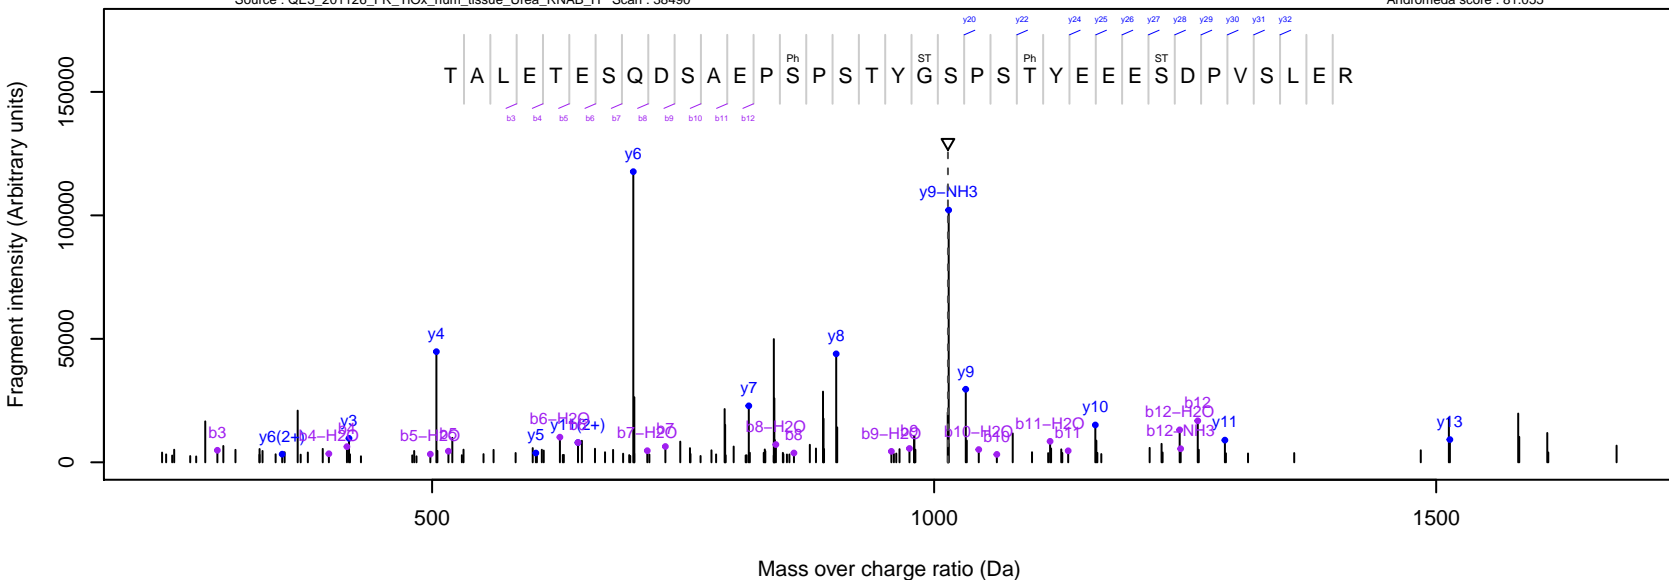

GS(Phospho (STY))PHYFSPFR-2+

Source : QE3\_201126\_FR\_TiOx\_hum\_tissue\_Urea\_RNAB\_H Scan : 28806

Andromeda score : 81.017

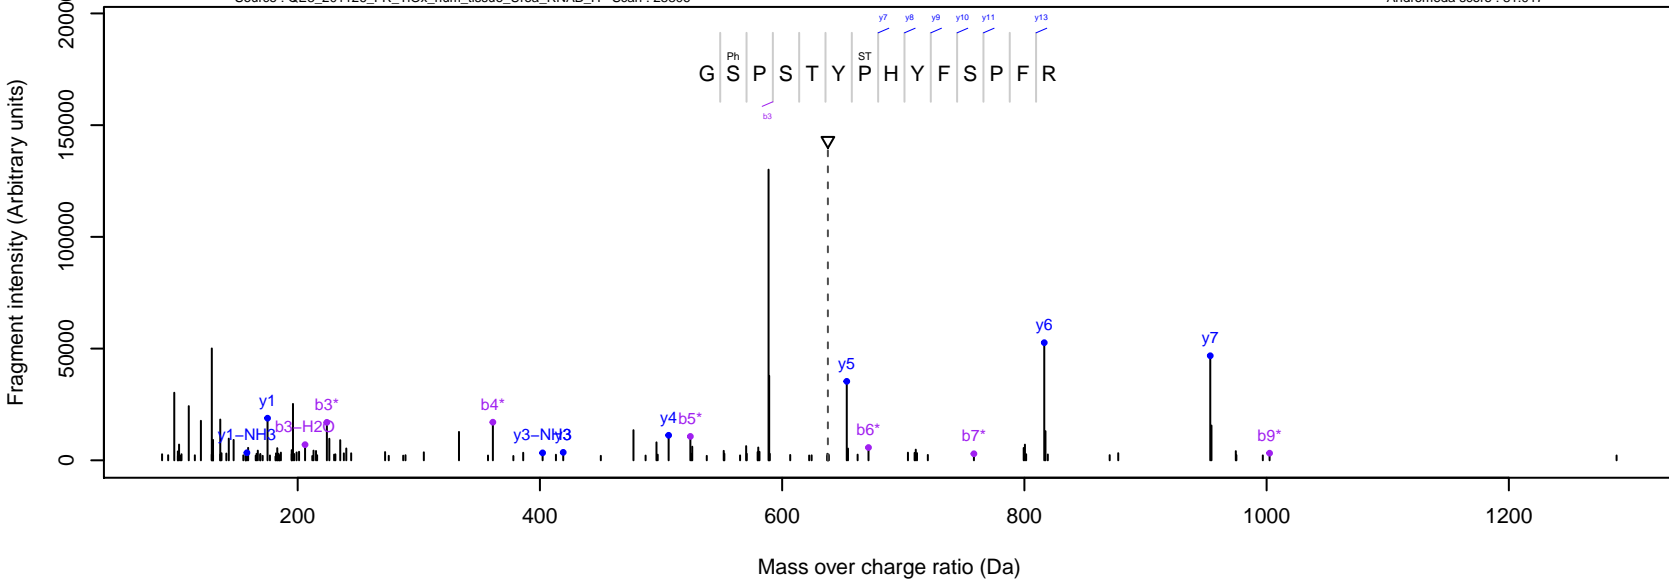

EFHS(Phospho (STY))HEFHSHEDM(Oxidation (M))LVVDPK-4+

Source : QE3\_201126\_FR\_TiOx\_hum\_tissue\_Urea\_RNAB\_B Scan : 15194

Andromeda score : 81.016

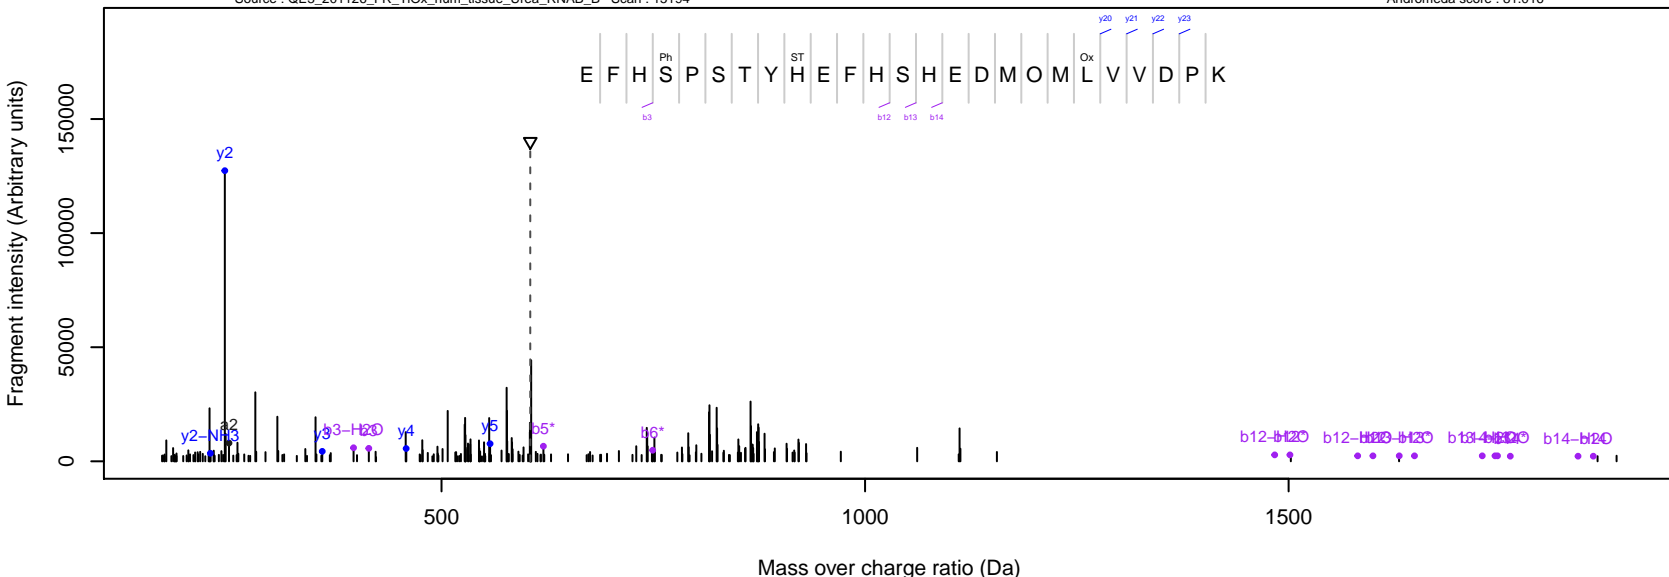

IKEKGS(Phospho (STY))FSDTGLGDGK-3+

Source : QE3\_201126\_FR\_TiOx\_hum\_tissue\_Urea\_RNAB\_H Scan : 10891

Andromeda score : 81.016

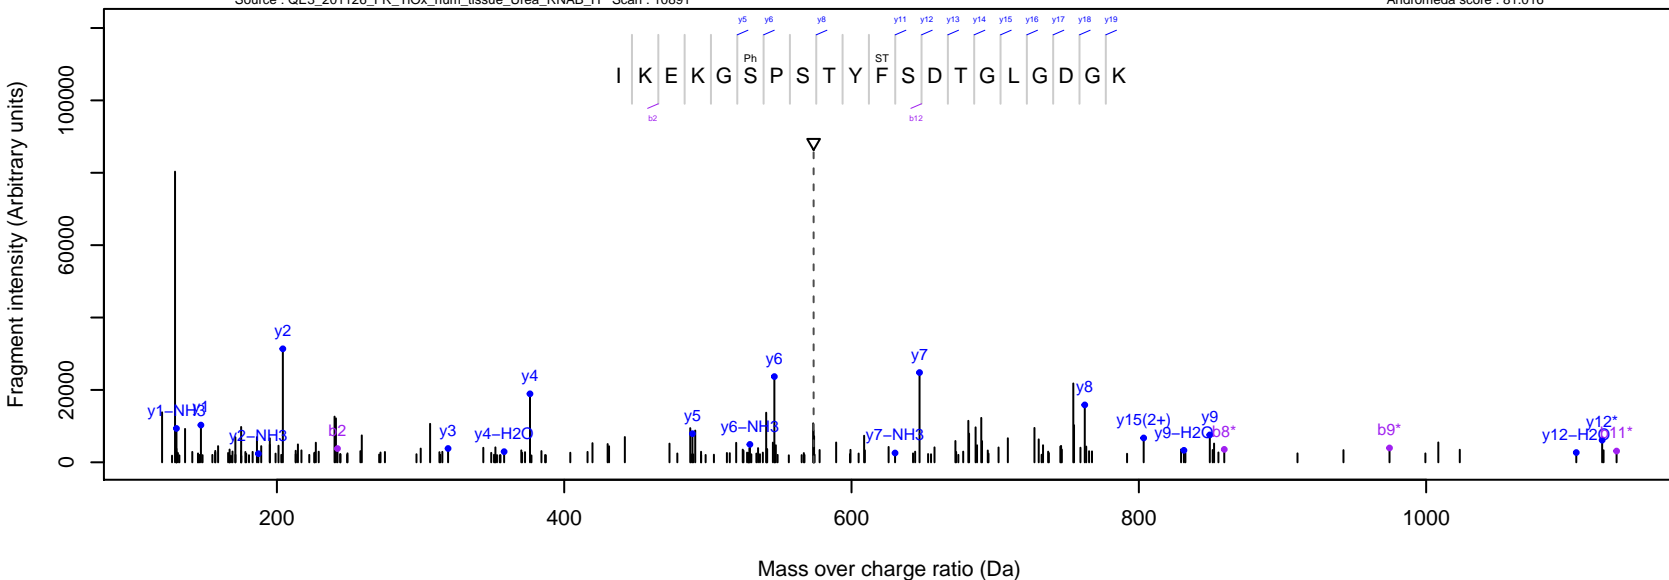

SSRSDS(Phospho (STY))NFQVPNGGIPR-3+

Source : QE3\_201126\_FR\_TiOx\_hum\_tissue\_Urea\_RNAB\_H Scan : 23047

Andromeda score : 81.016

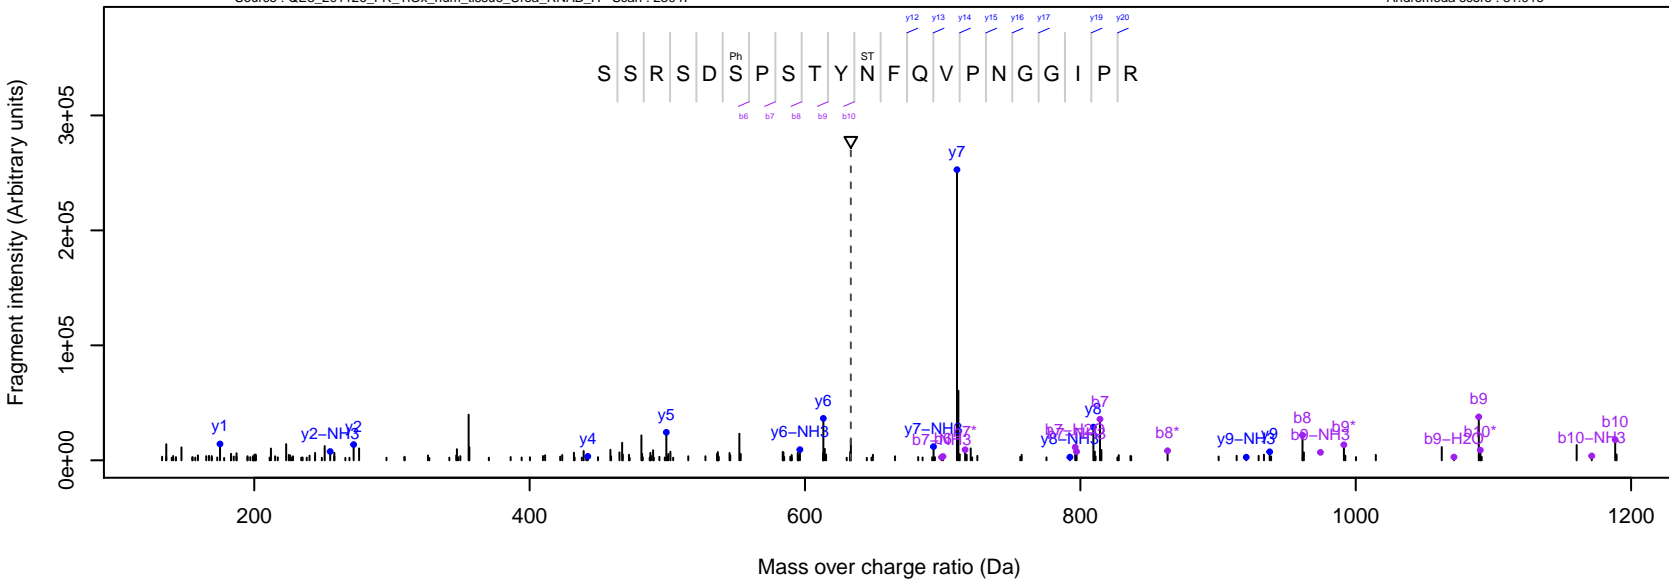

RPHFPQFSYS(Phospho (STY))ASGRE-3+

Source : QE3\_2011126\_FR\_TiOx\_hum\_tissue\_Urea\_RNAB\_H Scan : 23676

Andromeda score : 81.003

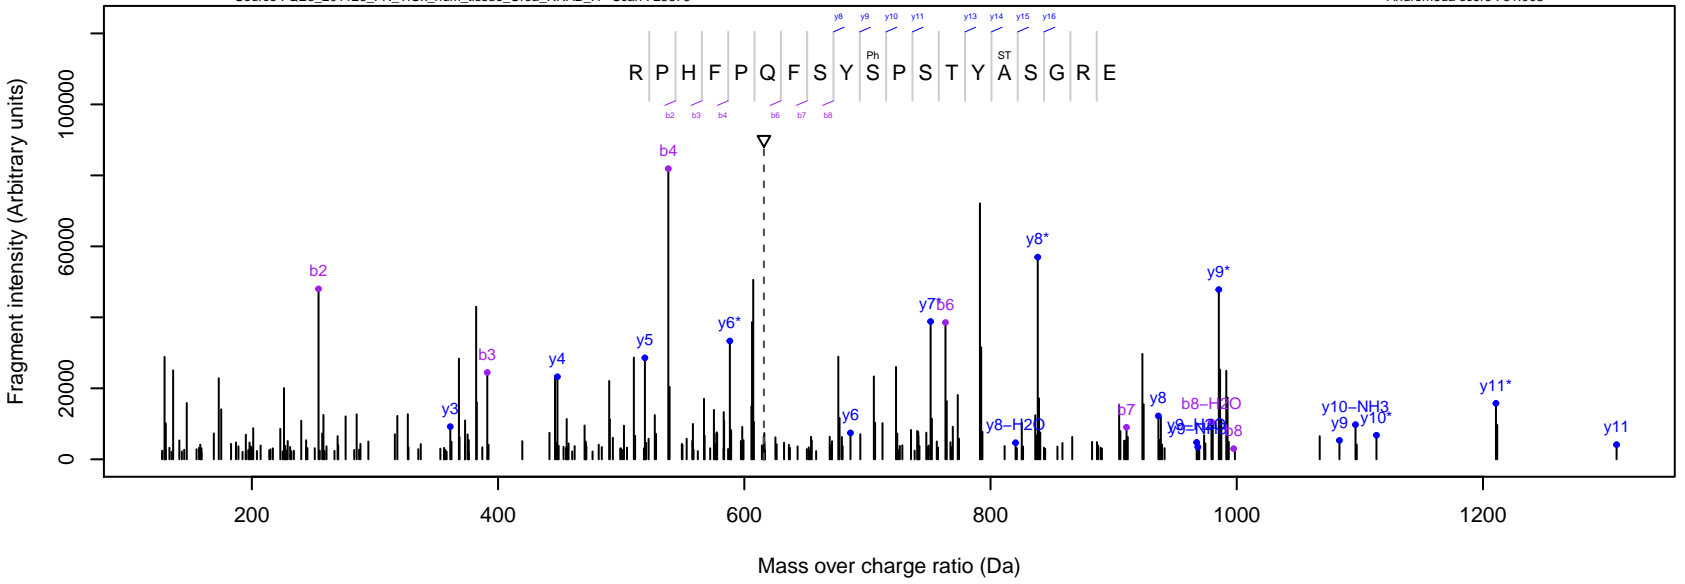

RVSADS(Phospho (STY))QPFQHGDKVK-3+

Source : QE3\_2011126\_FR\_TiOx\_hum\_tissue\_Urea\_RNAB\_B Scan : 7297

Andromeda score : 81.003

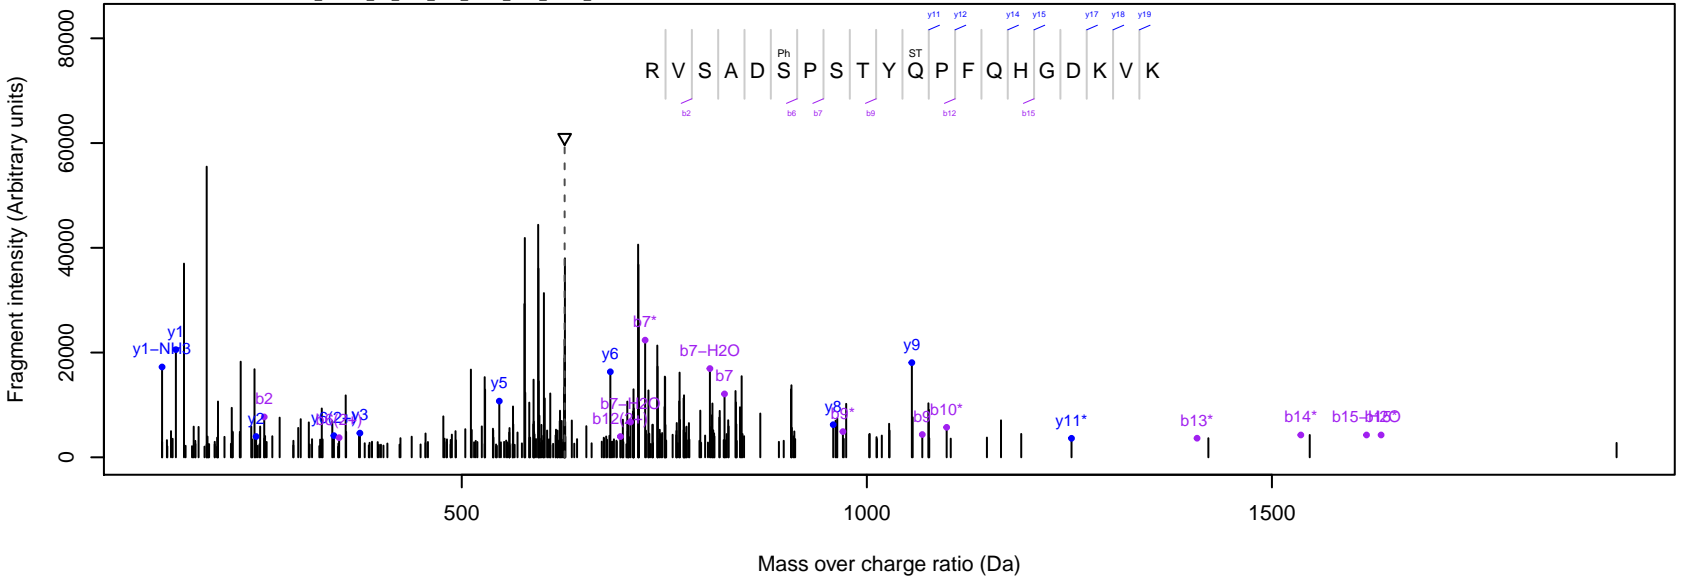

EVVKPVPITS(Phospho (STY))PAVSK-3+

Source : QE3\_2011126\_FR\_TiOx\_hum\_tissue\_Urea\_RNAB\_H Scan : 20142

Andromeda score : 80.975

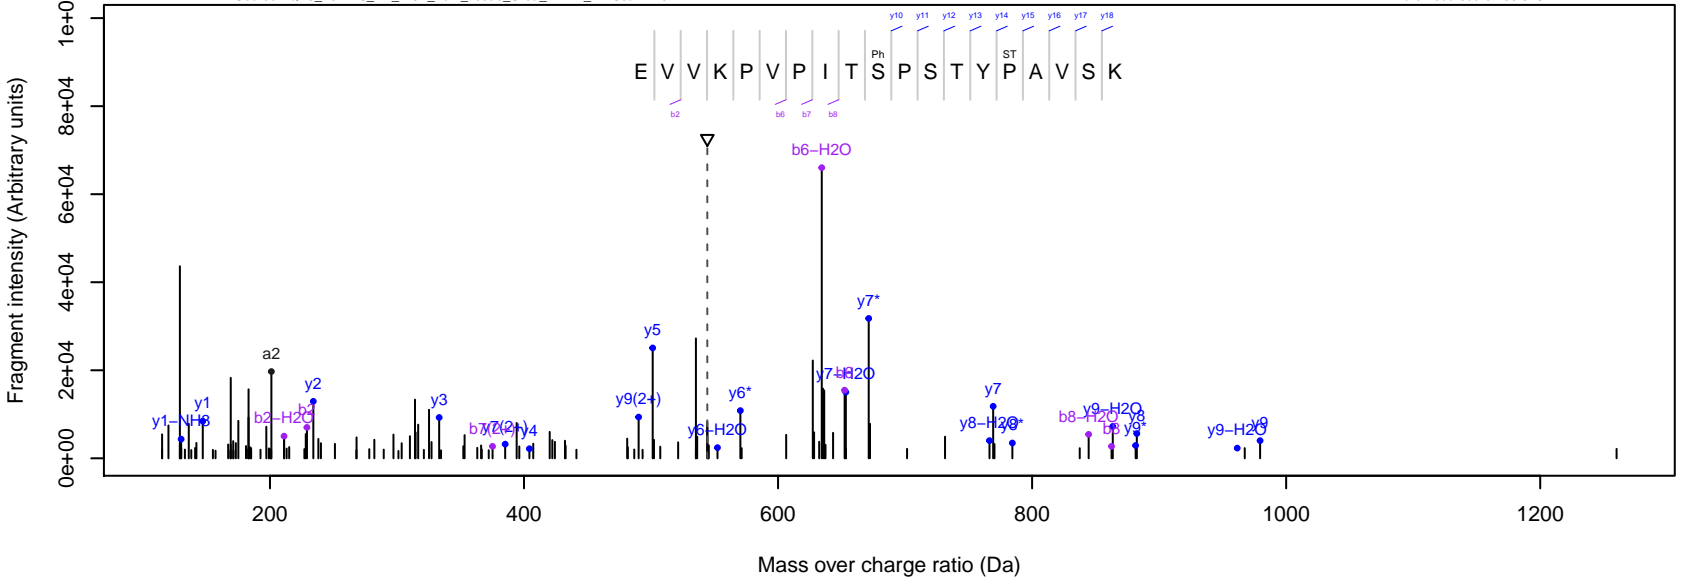

S(Phospho (STY))QVIEKFEALDIEK-3+

Source : QE3\_201126\_FR\_TIOx\_hum\_tissue\_Urea\_RNAB\_H Scan : 40096

Andromeda score : 80.975

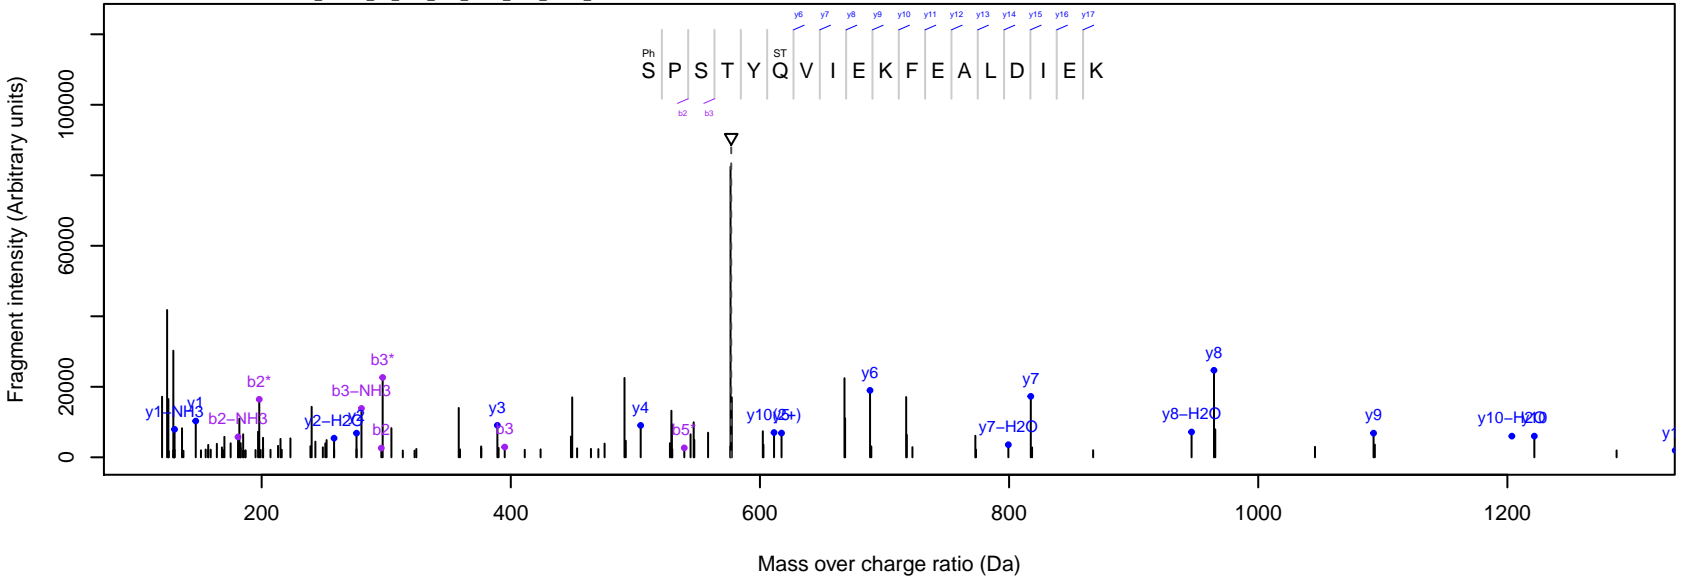

TEFLHSQNS(Phospho (STY))LSPR-2+

Source : QE3\_201126\_FR\_TIOx\_hum\_tissue\_Urea\_RNAB\_B Scan : 18146

Andromeda score : 80.96

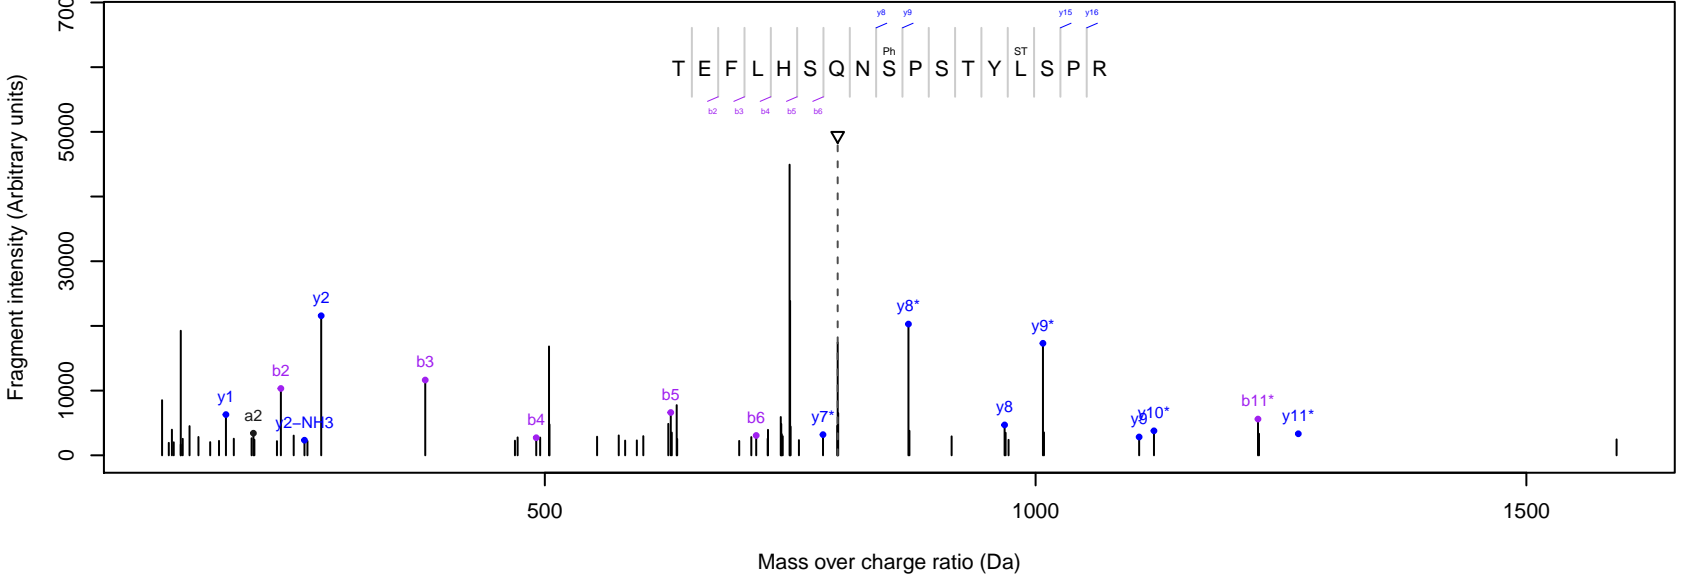

YFDTNSEVEEES(Phospho (STY))EEDYIPSEDWKK-3+

Source : QE3\_201126\_FR\_TIOx\_hum\_tissue\_Urea\_RNAB\_H Scan : 39754

Andromeda score : 80.93

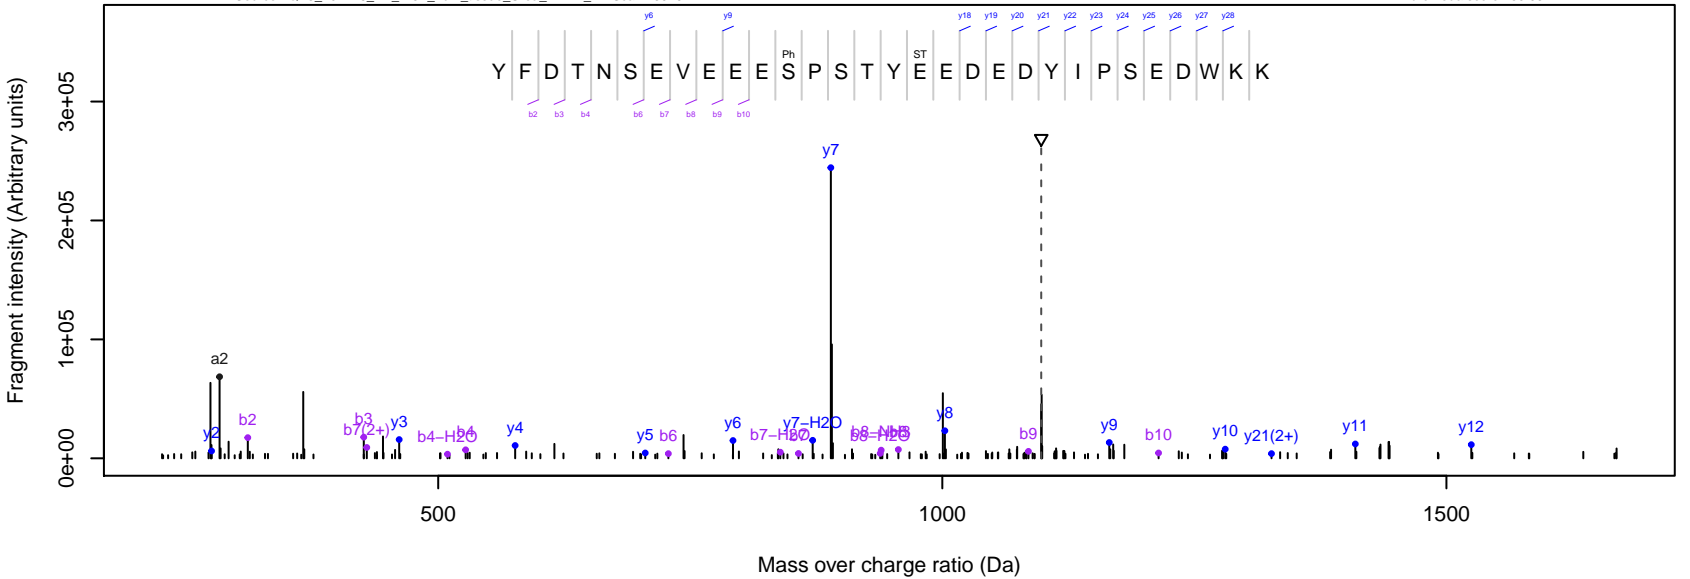



MAPPKVEEDS(Phospho (STY))EDEEMS(Phospho (STY))EDEDSDS(Phospho (STY))S(Phospho (STY))GEEVIPQKK-4+

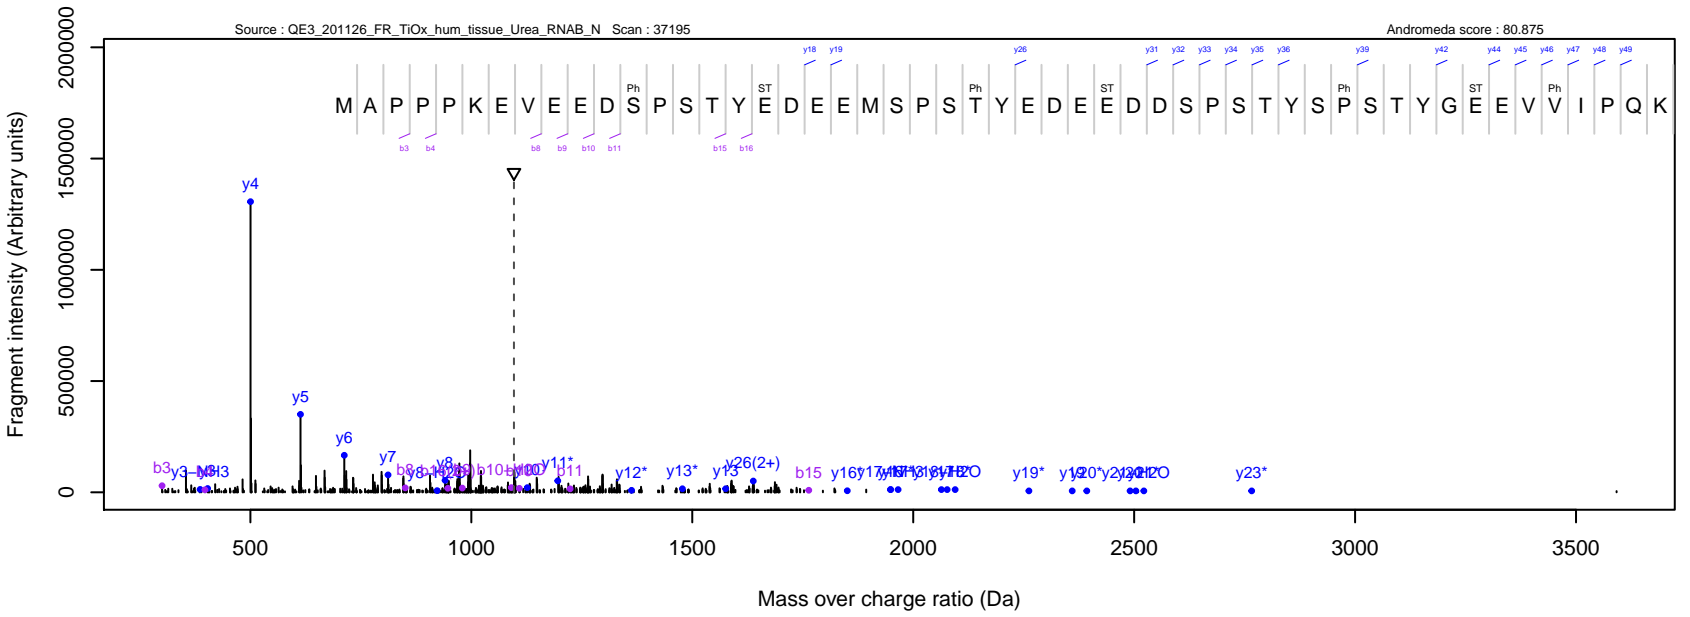

GRNDS(Phospho (STY))GEEVPLDLTREPSDNL-3+

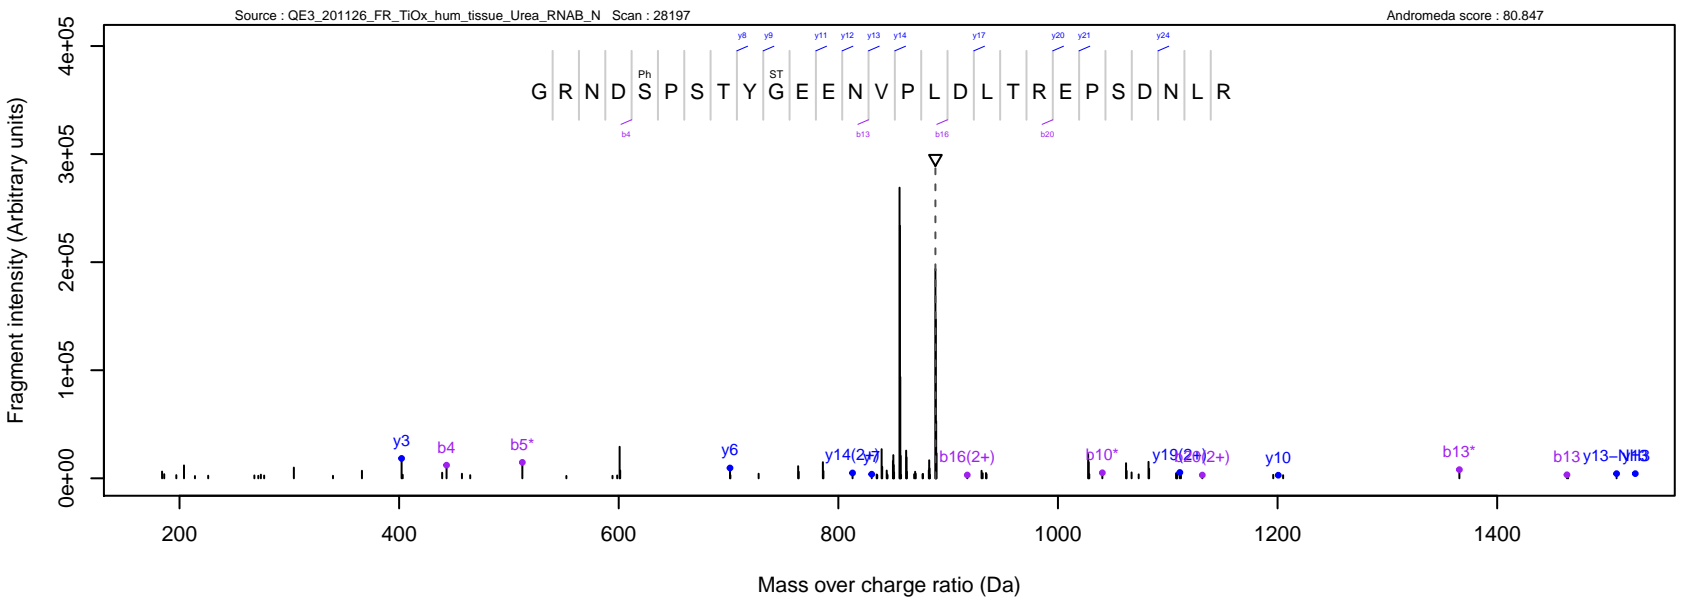

EEDEPEERS(Phospho (STY))GDET(Phospho (STY))PGS(Phospho (STY))EVPGDKAAEEQGDDQDSEK-4+

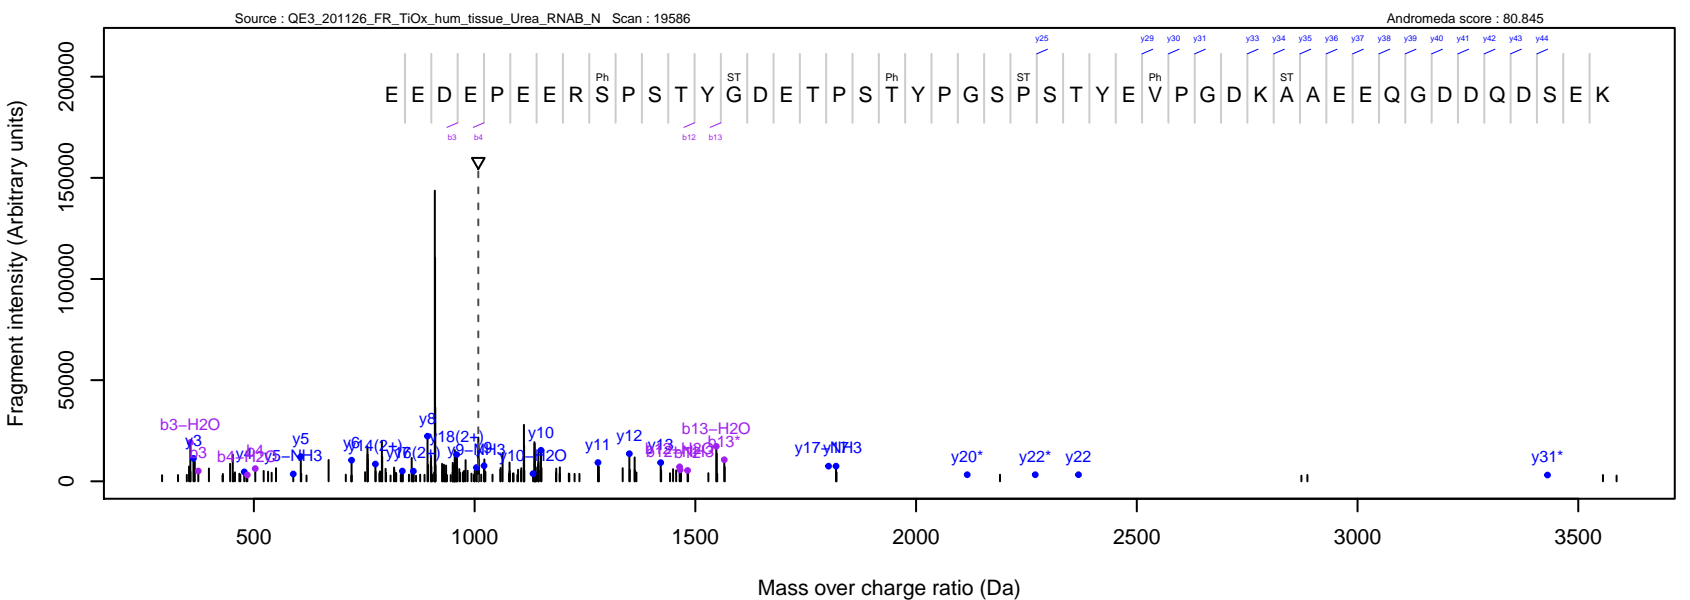

QNSS(Phospho (STY))DSISLNSITSHSSIGSSK-3+

Source : QE3\_201126\_FR\_TiOx\_hum\_tissue\_Urea\_RNAB\_H Scan : 28270

Andromeda score : 80.83

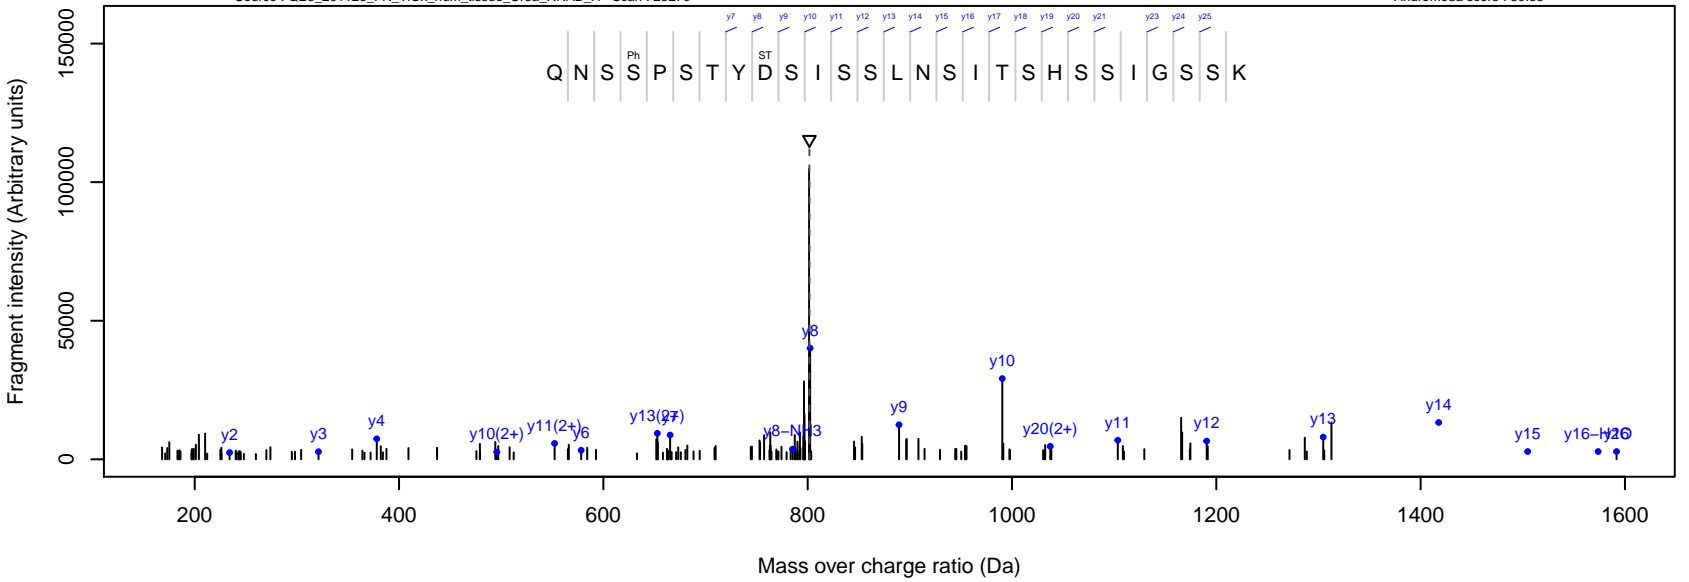

(Acetyl (Protein N-term))SEGDS(Phospho (STY))VGESVHGKPSVVYR-3+

Source : QE3\_201126\_FR\_TiOx\_hum\_tissue\_Urea\_RNAB\_H Scan : 18612

Andromeda score : 80.83

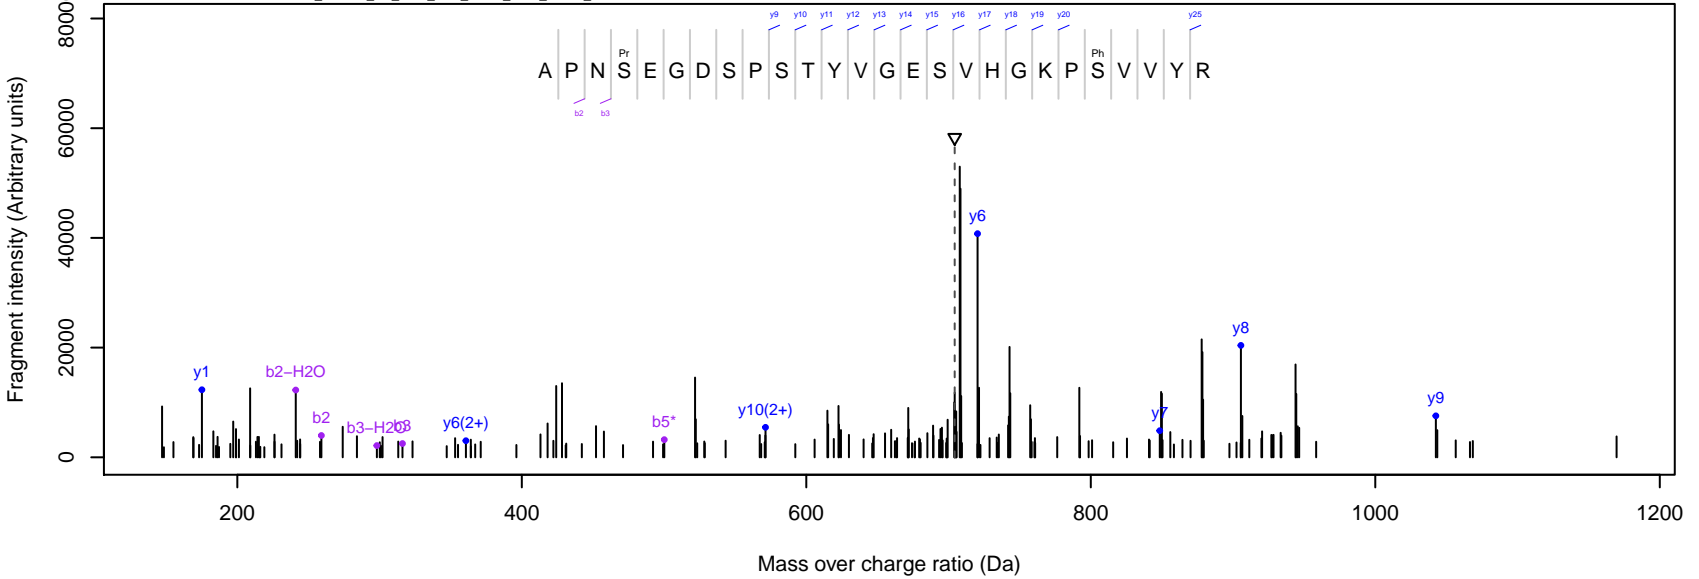

S(Phospho (STY))LT(Phospho (STY))RS(Phospho (STY))PPAIR-2+

Source : QE3\_201126\_FR\_TiOx\_hum\_tissue\_Urea\_RNAB\_N Scan : 22564

Andromeda score : 80.815

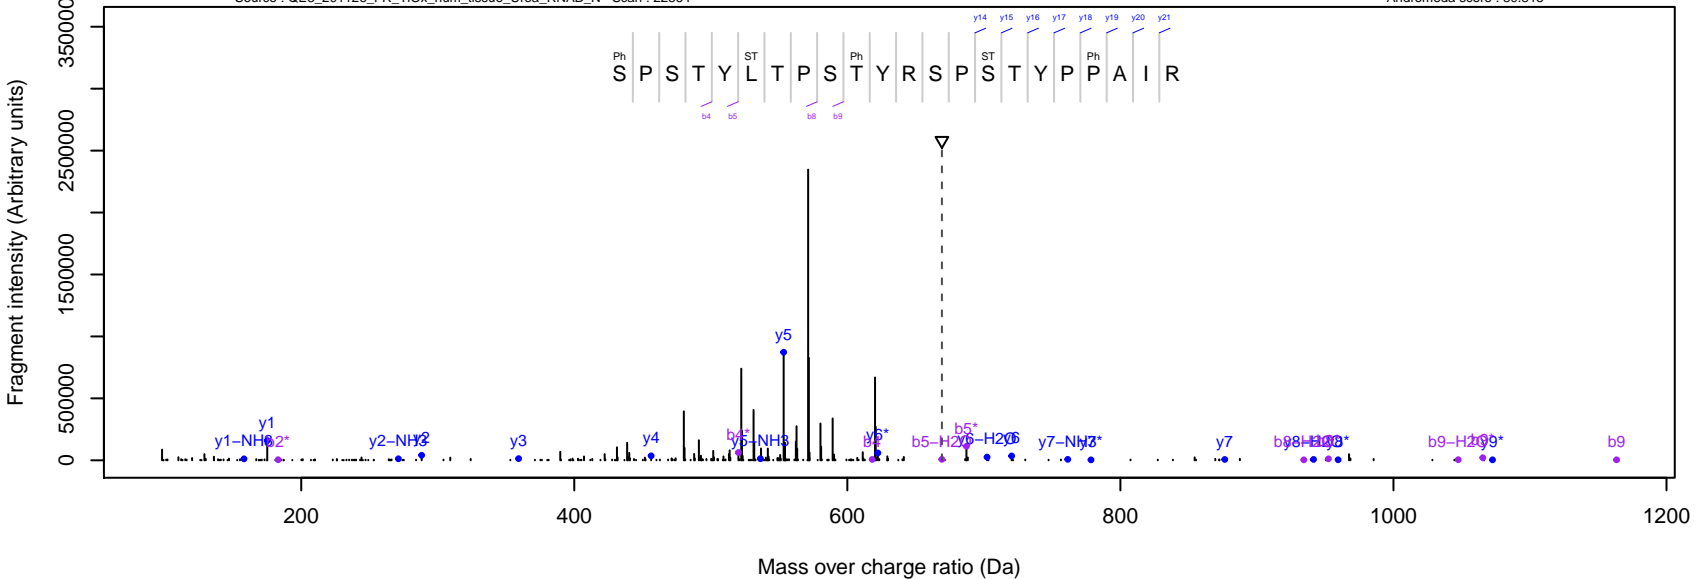

SASPT(Phospho (STY))IEAQGTSPAHDNIAFDSTSK-3+

Source : QE3\_201126\_FR\_TiOx\_hum\_tissue\_Urea\_RNAB\_N Scan : 24082

Andromeda score : 80.79

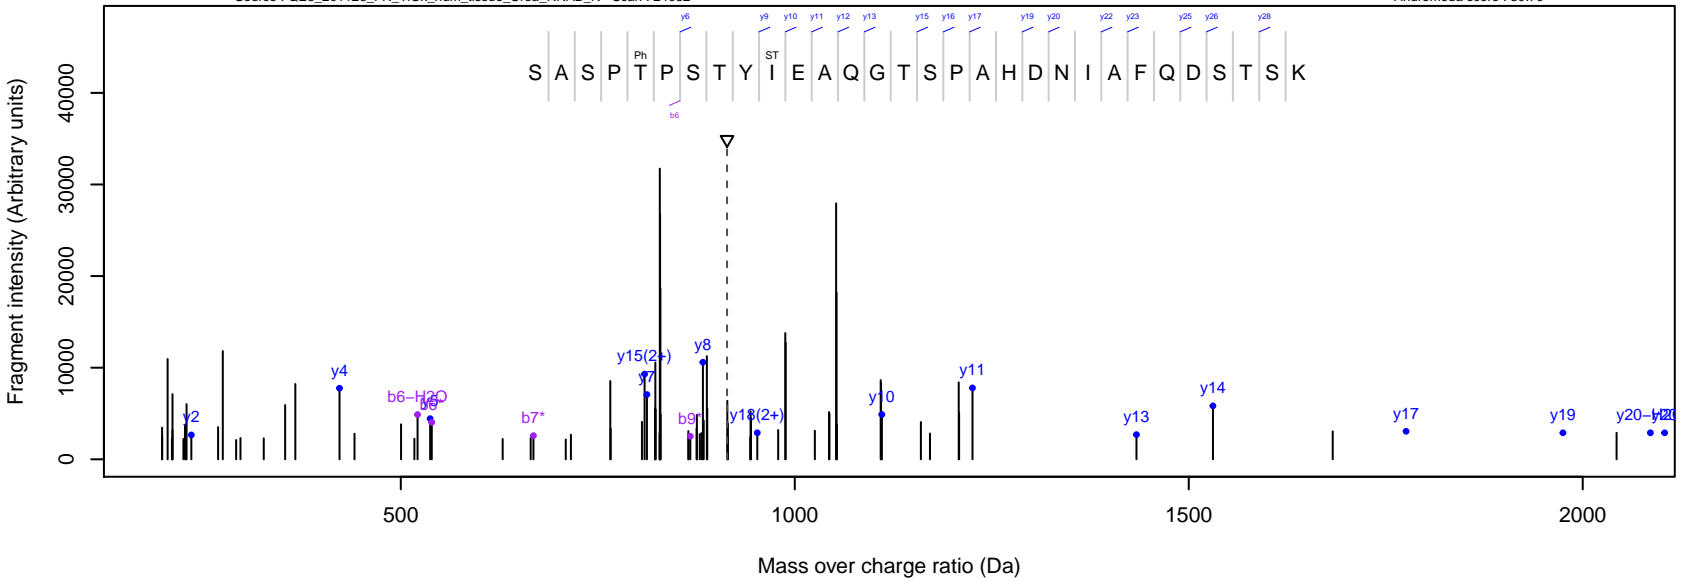

S(Phospho (STY))RS(Phospho (STY))RS(Phospho (STY))PHEAGFCVYLK-3+

Source : QE3\_201126\_FR\_TiOx\_hum\_tissue\_Urea\_RNAB\_N Scan : 27422

Andromeda score : 80.786

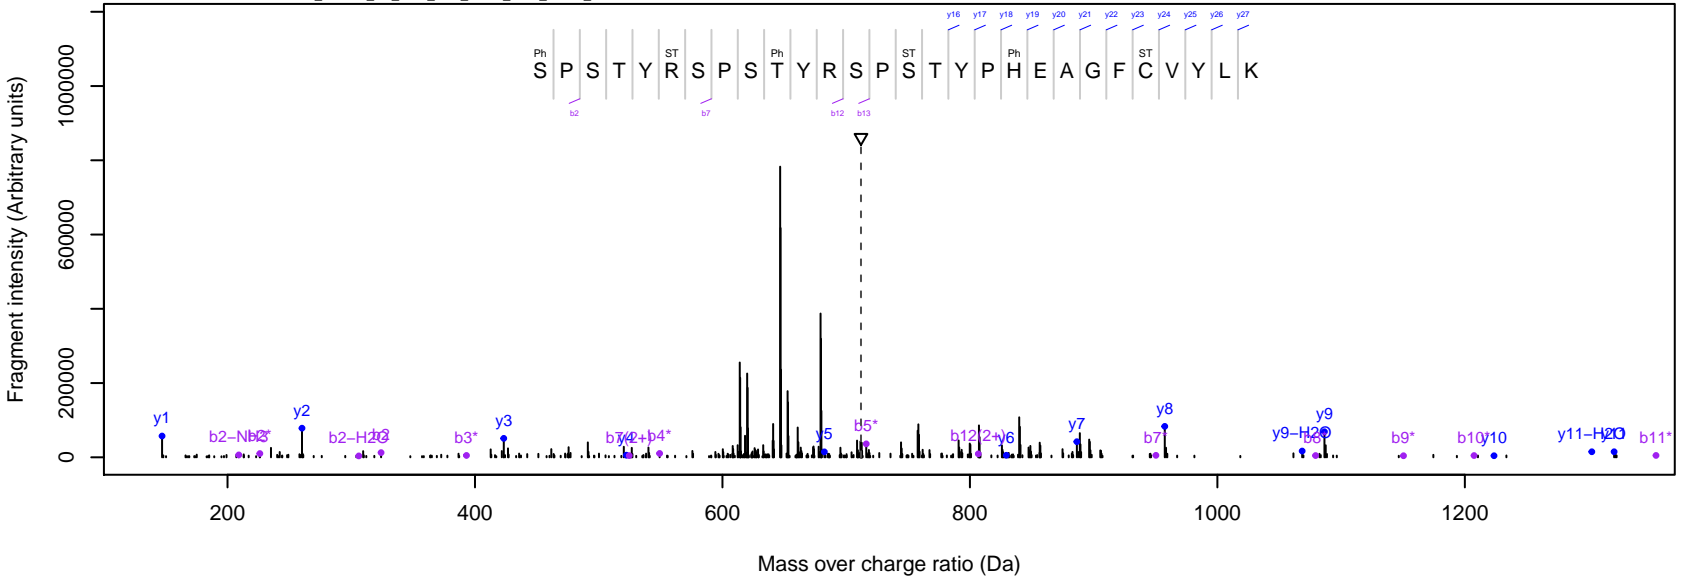

LNDS(Phospho (STY))PTLK-2+

Source : QE3\_201126\_FR\_TiOx\_hum\_tissue\_Urea\_RNAB\_N Scan : 11608

Andromeda score : 80.755

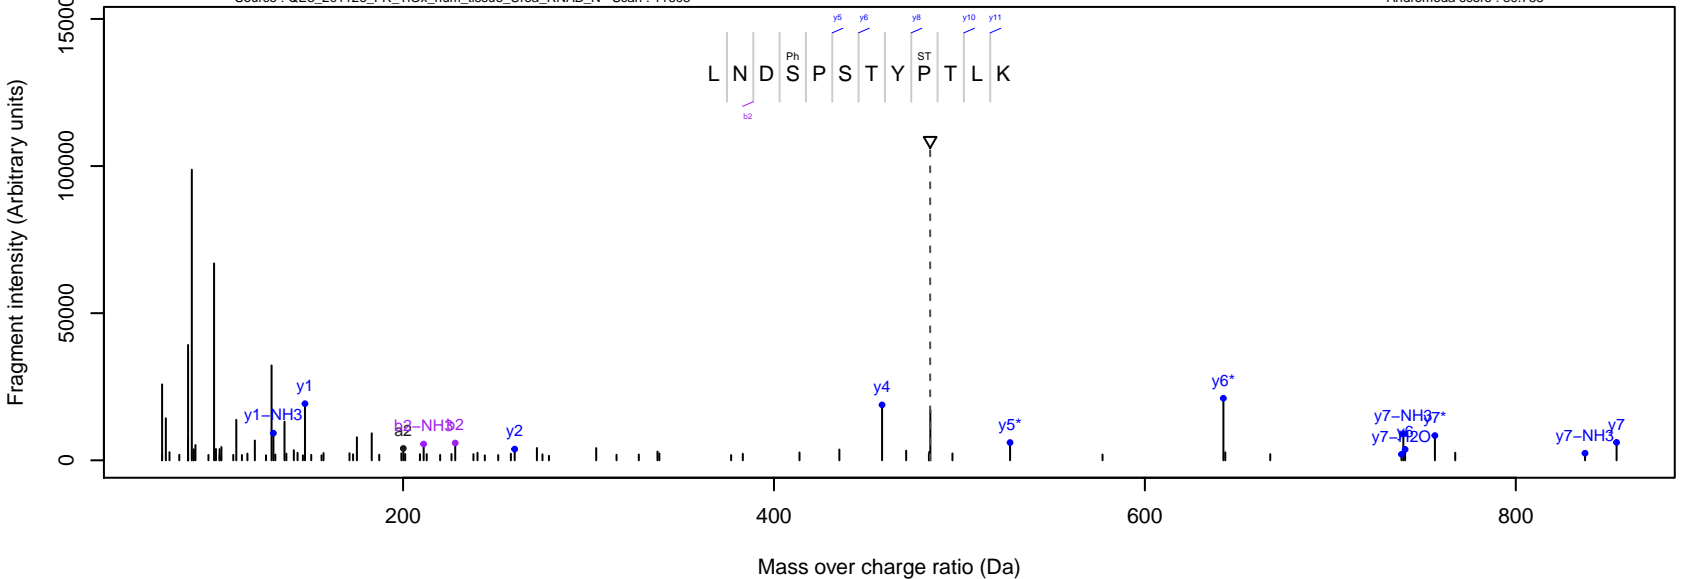

TS(Phospho (STY))PPLDDR-2+

Source : QE3\_201126\_FR\_TIOx\_hum\_tissue\_Urea\_RNAB\_H Scan : 20267

Andromeda score : 80.755

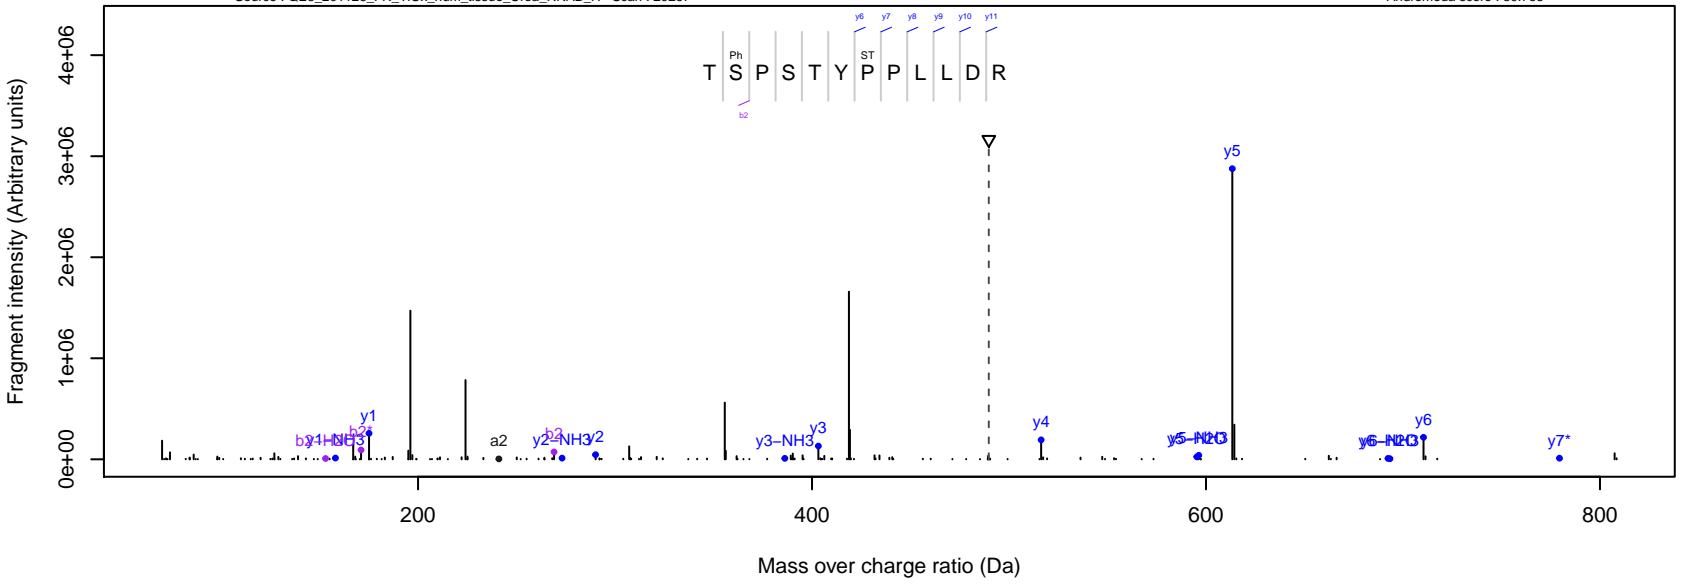

(Acetyl (Protein N-term))MNS(Phospho (STY))S(Phospho (STY))DEEKQLQILTSLK-3+

Source : QE3\_201126\_FR\_TIOx\_hum\_tissue\_Urea\_RNAB\_N Scan : 62190

Andromeda score : 80.752

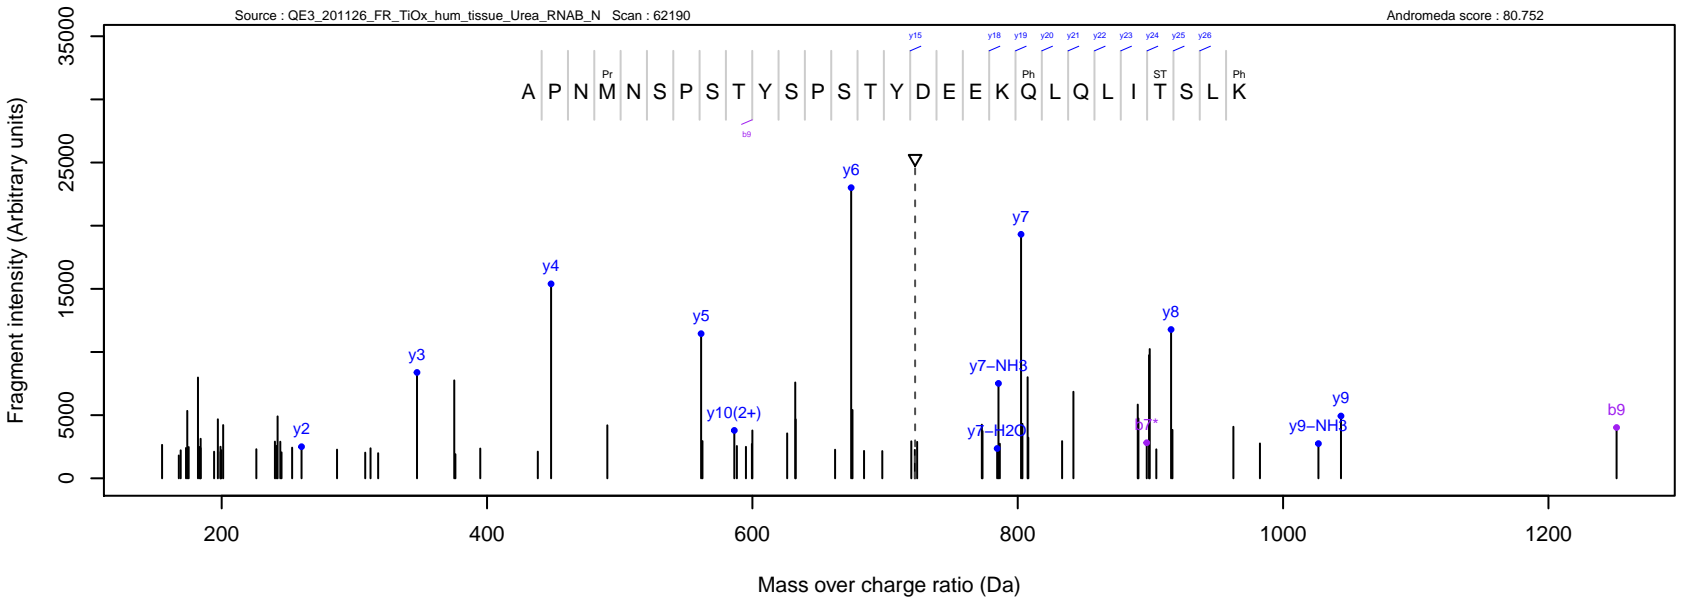

ESLPTS(Phospho (STY))PPWTPGASR-2+

Source : QE3\_201126\_FR\_TIOx\_hum\_tissue\_Urea\_RNAB\_H Scan : 37703

Andromeda score : 80.746

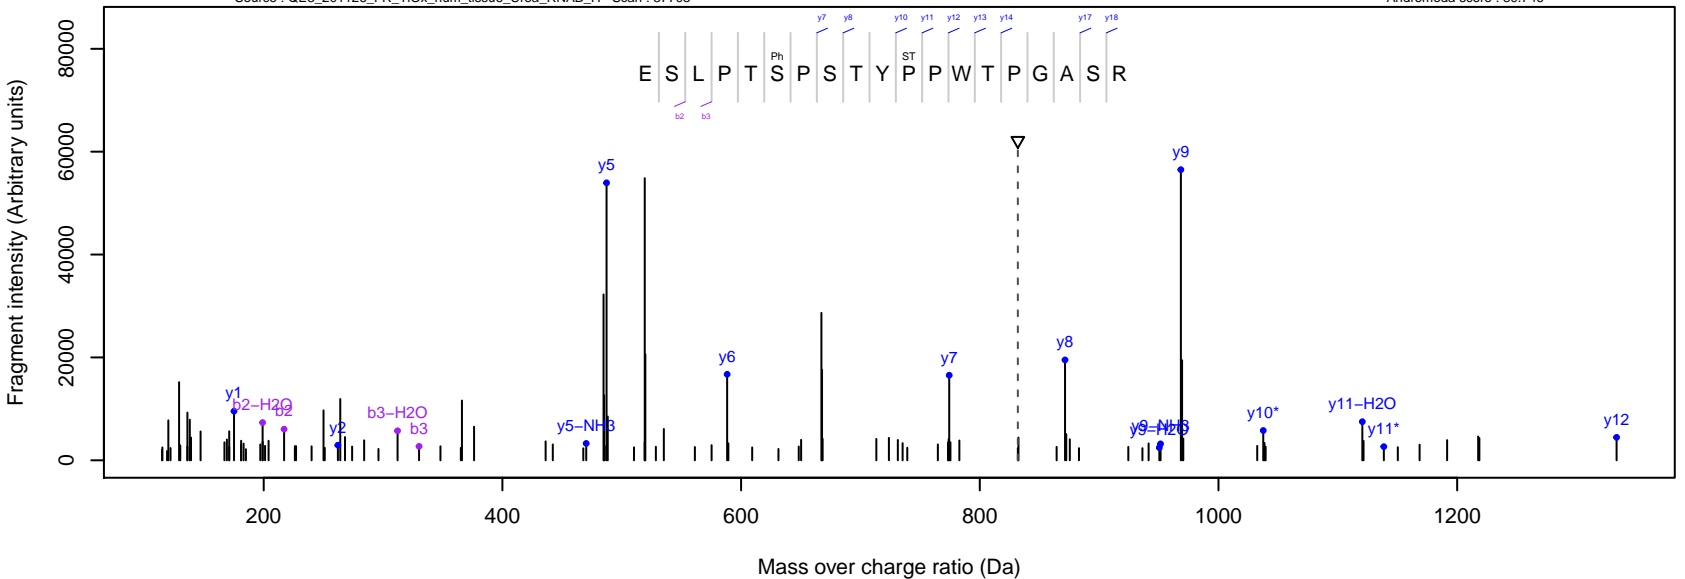

VKPET(Phospho (STY))PPRQSHSGSIS(Phospho (STY))PYPK-3+

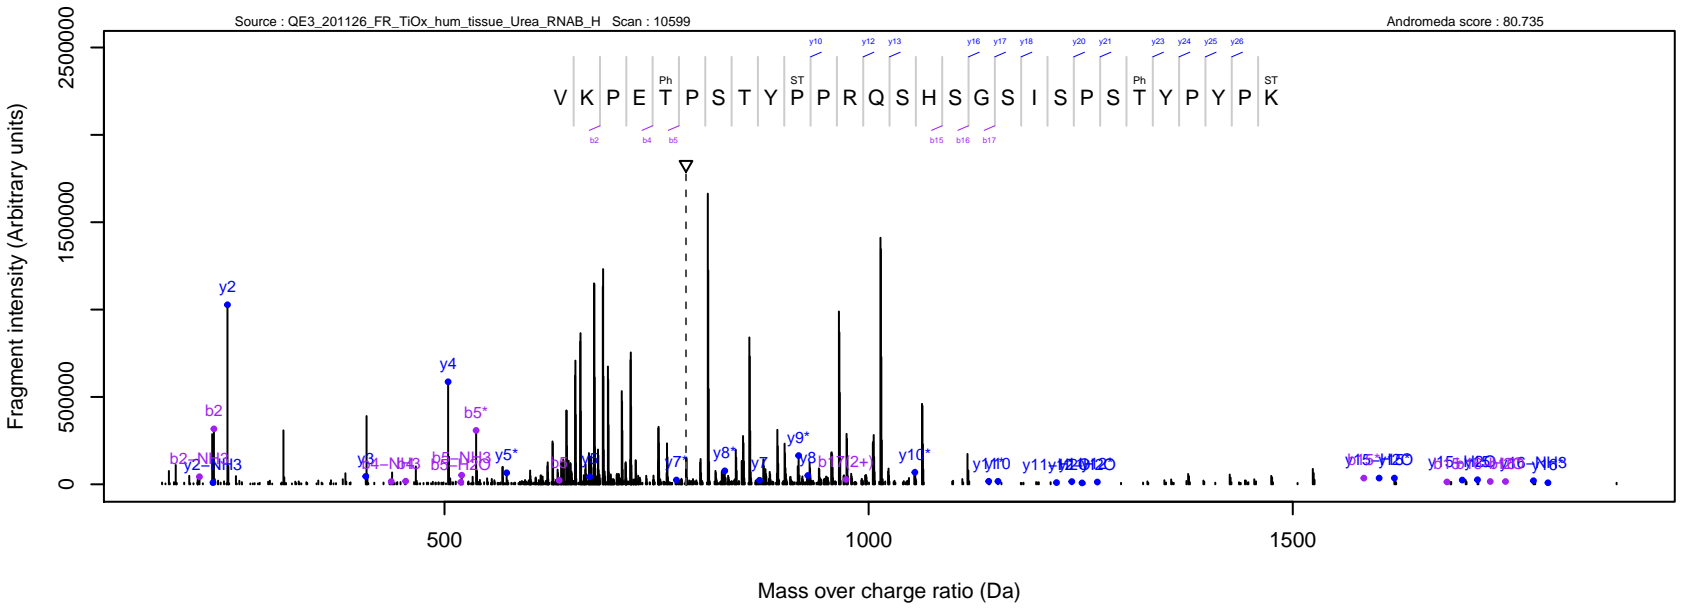

DLVLPTQALPAS(Phospho (STY))PALK-2+

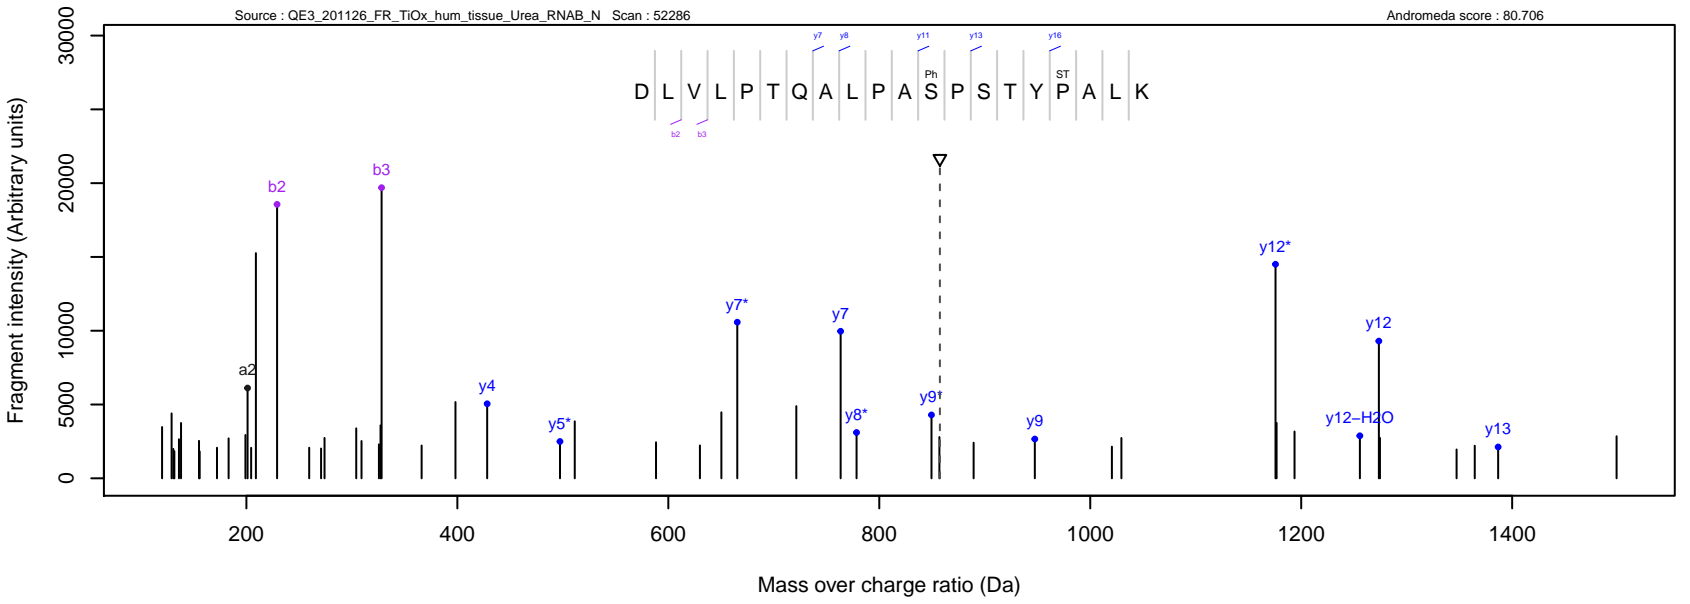

GTSGS(Phospho (STY))LADVANTR-2+

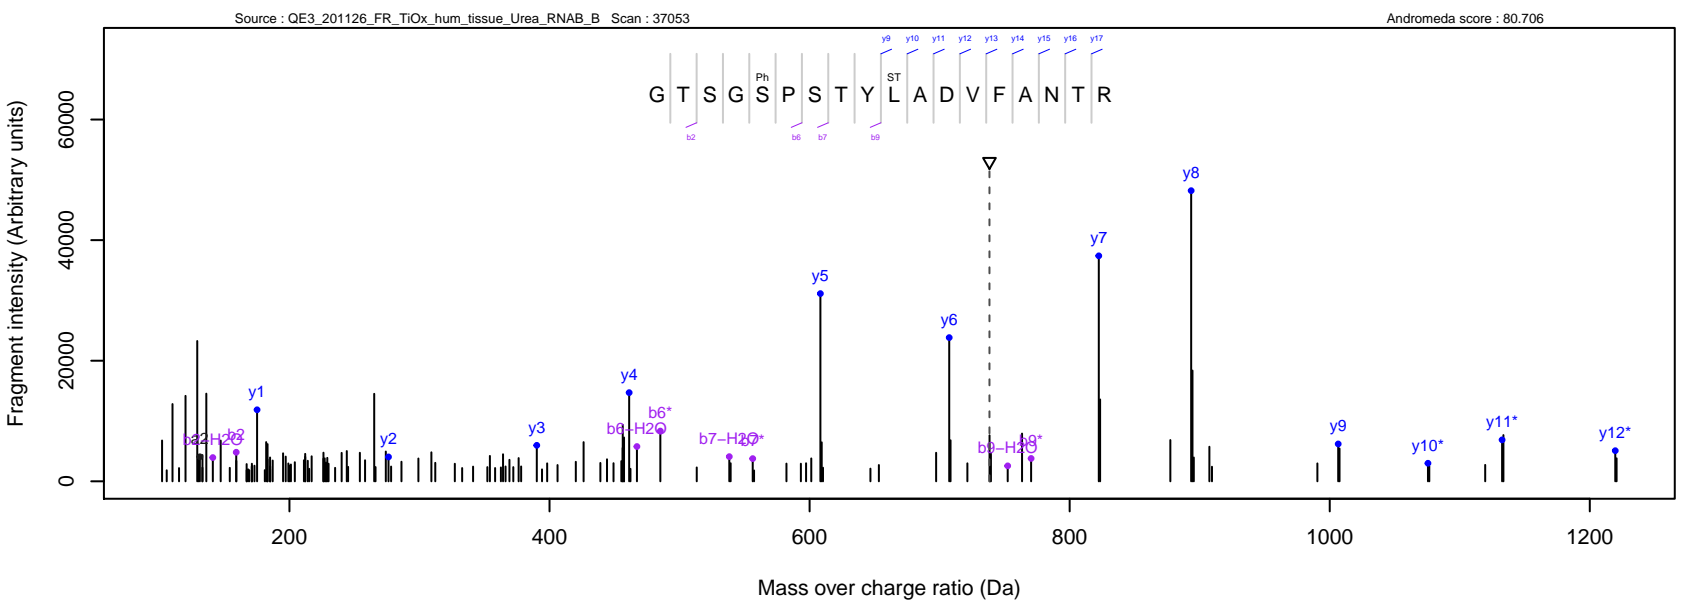

ITS(Phospho (STY))PLM(Oxidation (M))EPSSIEK-2+

Source : QE3\_201126\_FR\_TiOx\_hum\_tissue\_Urea\_RNAB\_H Scan : 23661

Andromeda score : 80.706

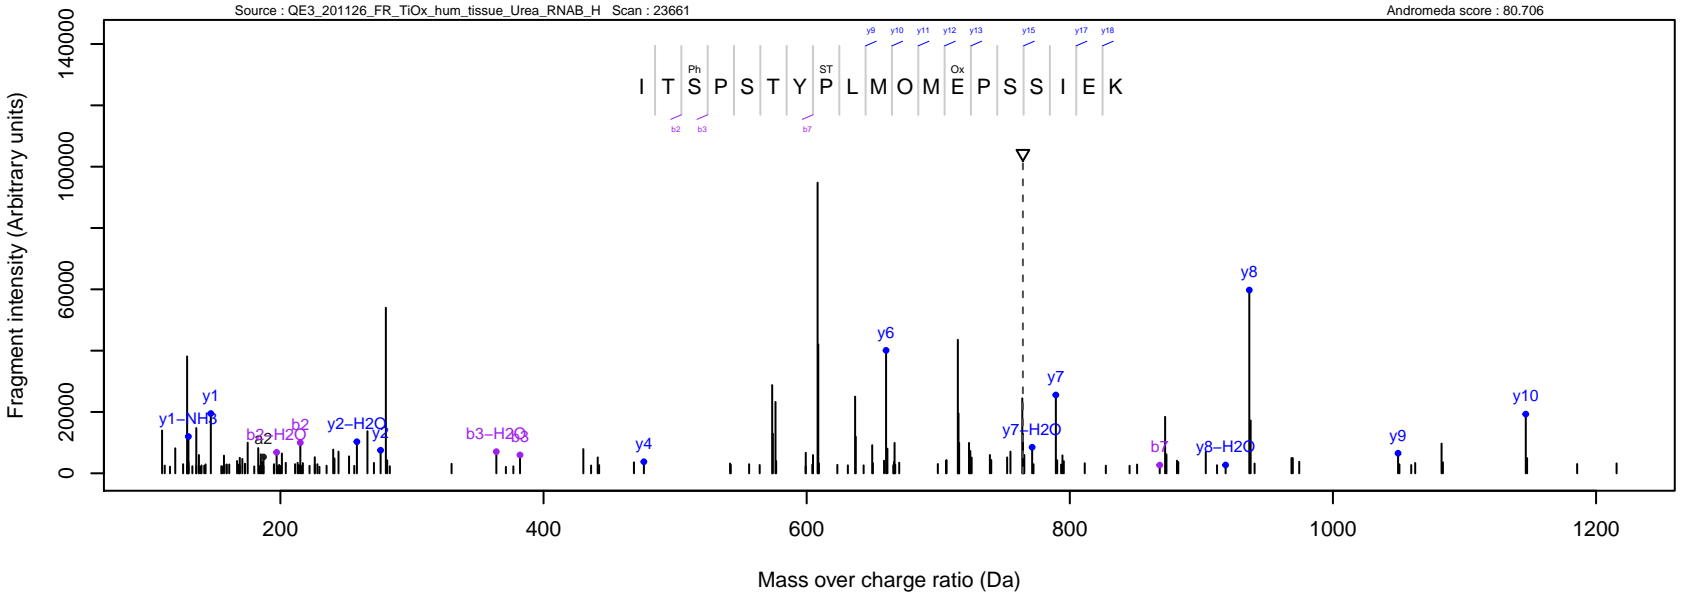

HSVTAAT(Phospho (STY))PPPS(Phospho (STY))PTSGESGDLLSNLLQSPSSAK-3+

Source : QE3\_201126\_FR\_TiOx\_hum\_tissue\_Urea\_RNAB\_N Scan : 54742

Andromeda score : 80.693

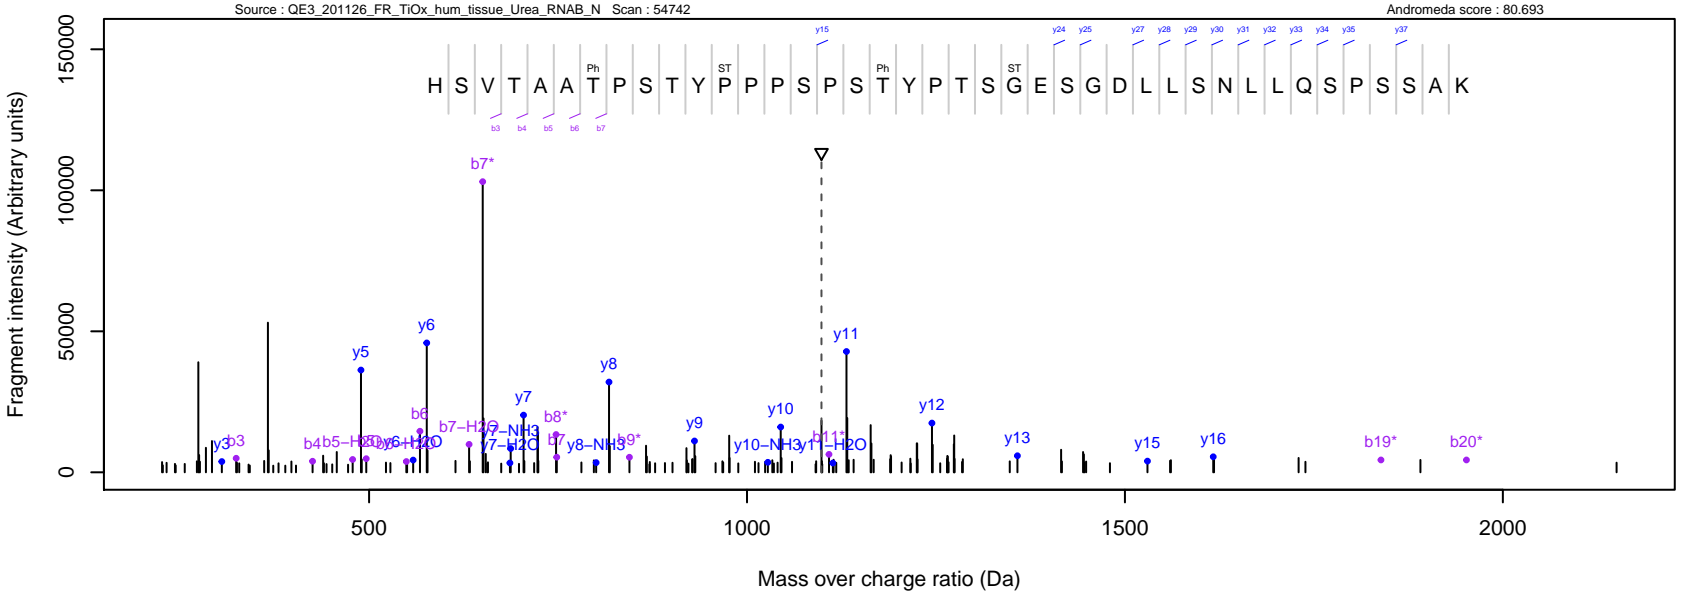

IGEGT(Phospho (STY))Y(Phospho (STY))GVVYK-2+

Source : QE3\_201126\_FR\_TiOx\_hum\_tissue\_Urea\_RNAB\_N Scan : 29059

Andromeda score : 80.69

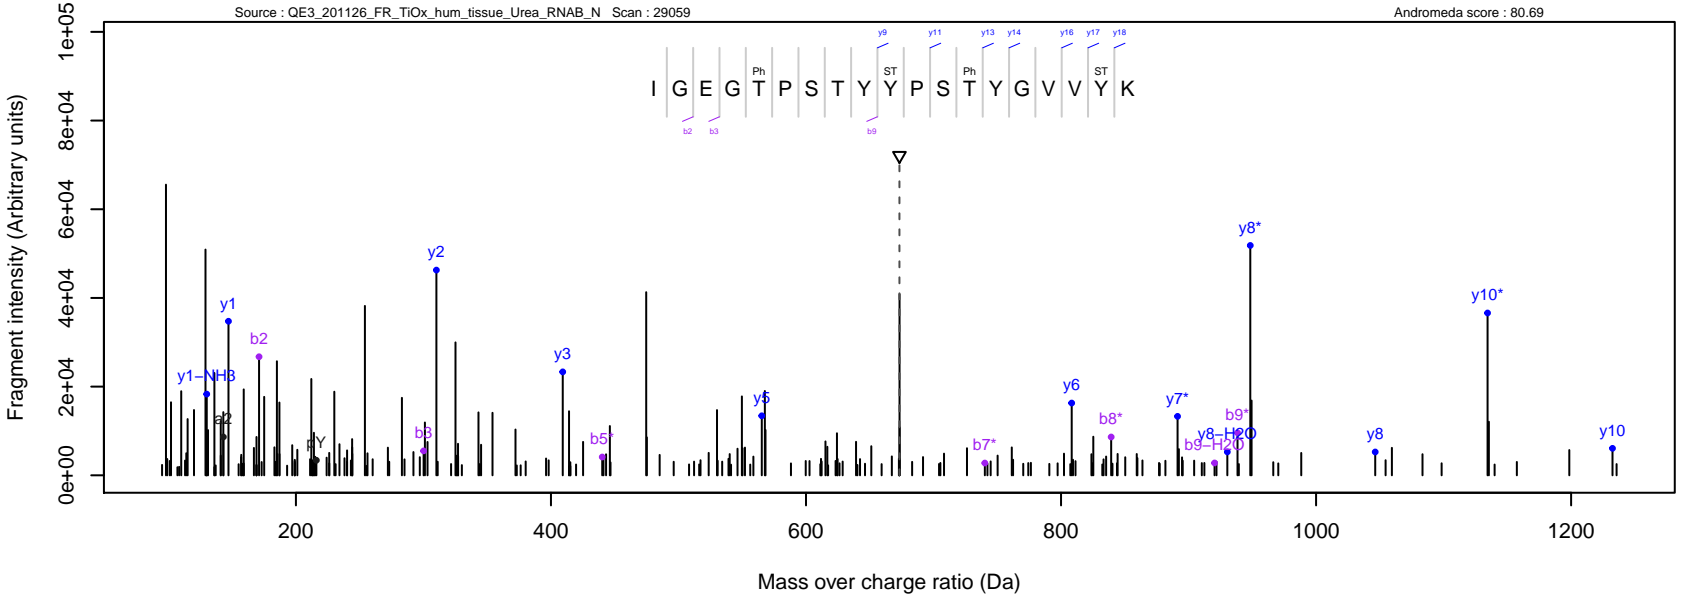

IS(Phospho (STY))MPDFDLHLK-2+

Source : QE3\_201126\_FR\_TiOx\_hum\_tissue\_Urea\_RNAB\_H Scan : 47245

Andromeda score : 80.69

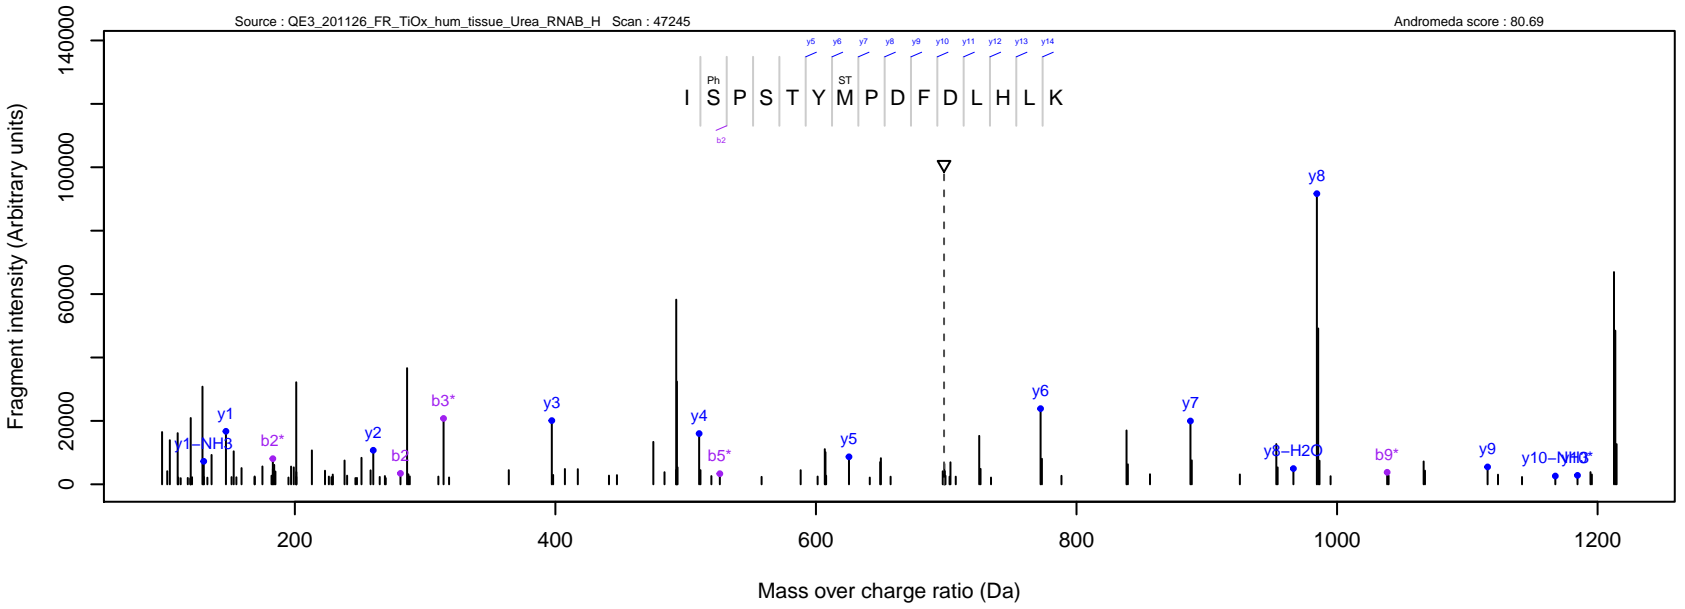

AKKPEEESSEEGS(Phospho (STY))ES(Phospho (STY))EEEEAPAGTR-3+

Source : QE3\_201126\_FR\_TiOx\_hum\_tissue\_Urea\_RNAB\_N Scan : 8103

Andromeda score : 80.652

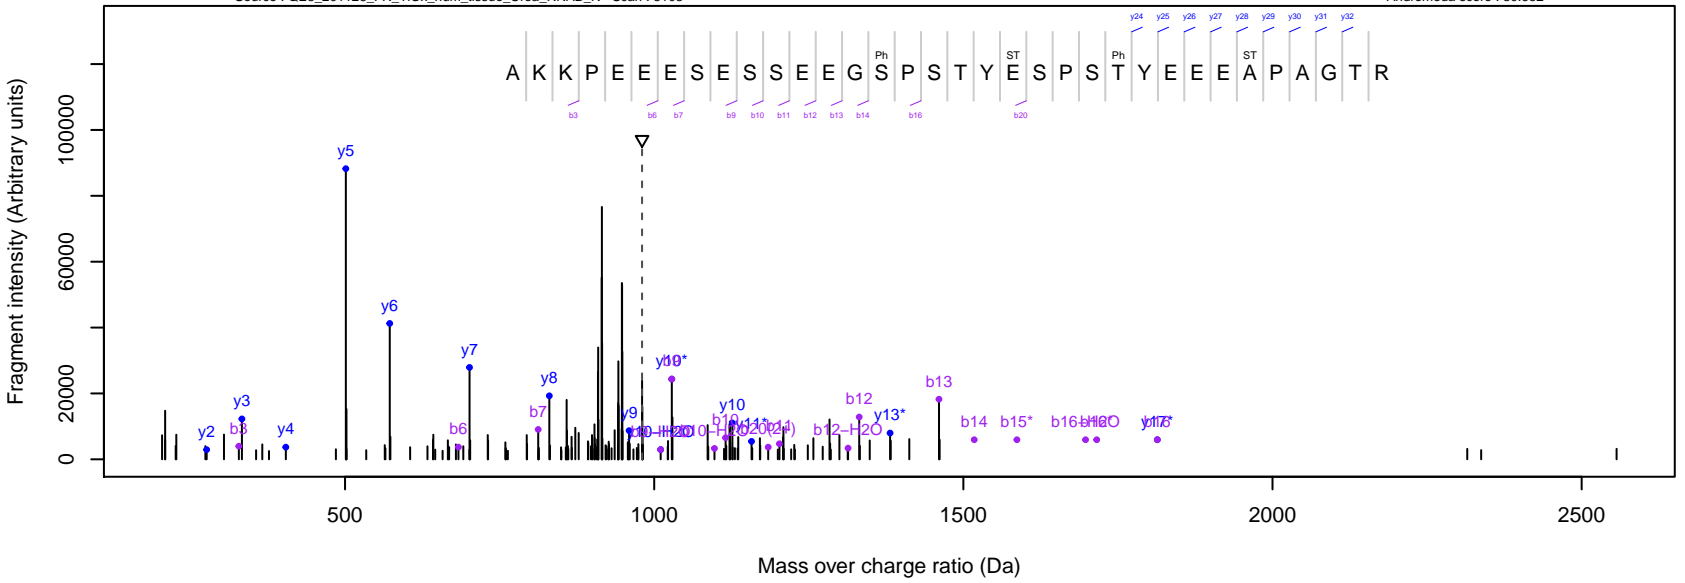

AAGISLIVPGKS(Phospho (STY))PTR-2+

Source : QE3\_201126\_FR\_TiOx\_hum\_tissue\_Urea\_RNAB\_B Scan : 27513

Andromeda score : 80.632

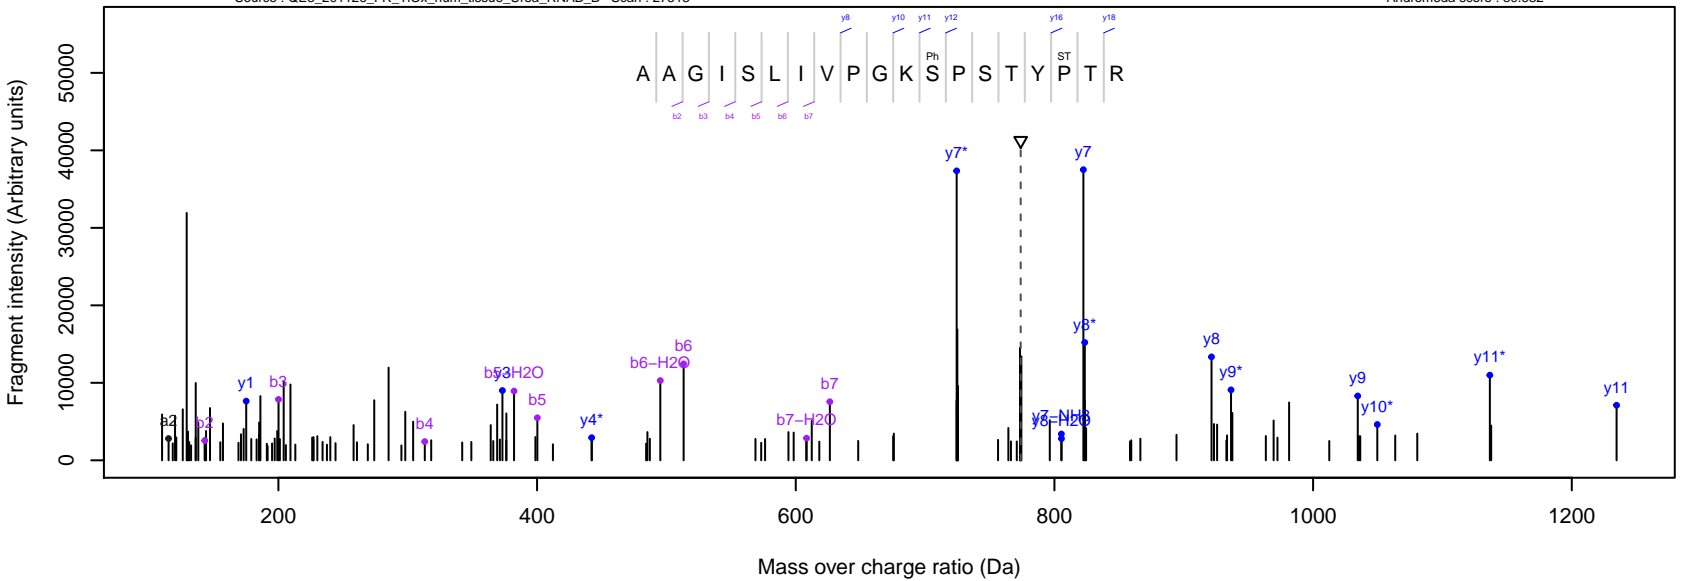

RS(Phospho (STY))SITEPEGPGPNIQK-2+

Source : QE3\_201126\_FR\_TiOx\_hum\_tissue\_Urea\_RNAB\_N Scan : 14557

Andromeda score : 80.609

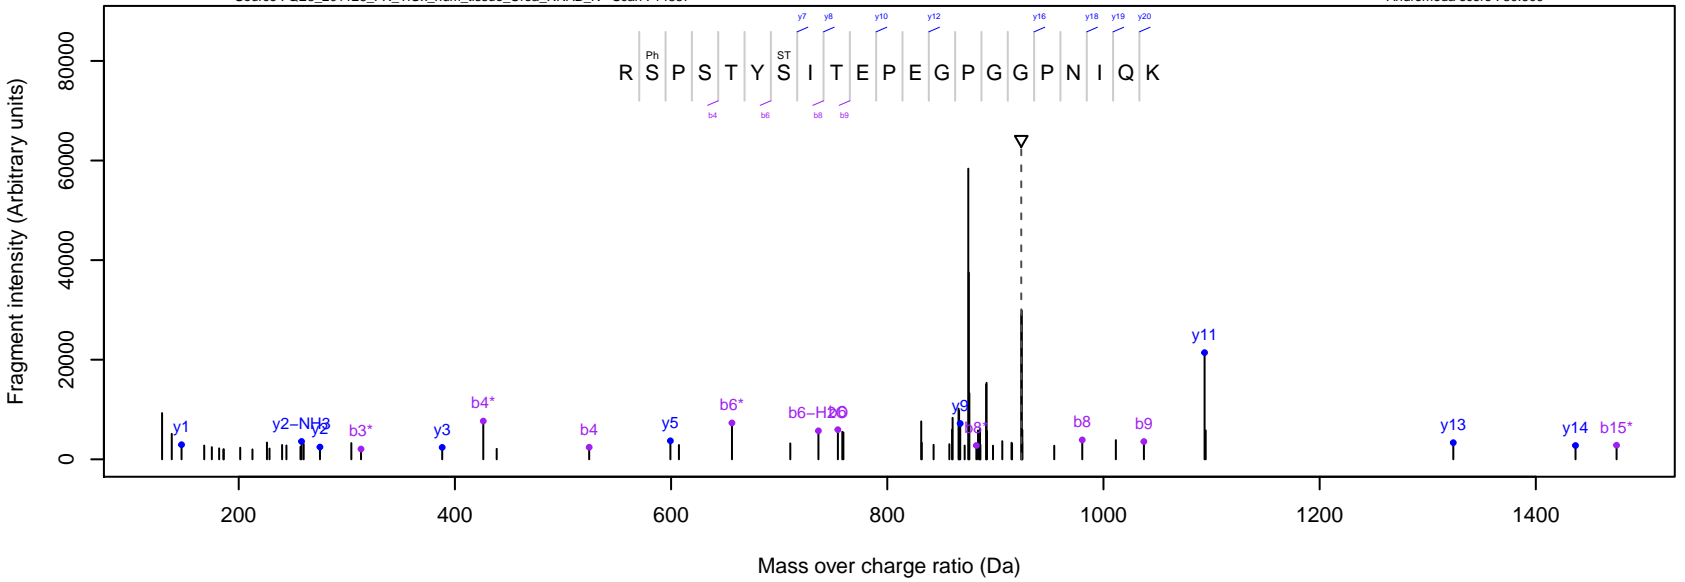

M(Oxidation (M))AETVDTSEMVGATEQRTS(Phospho (STY))S(Phospho (STY))KESSPIPSPTSDR-3+

Source : QE3\_201126\_FR\_TiOx\_hum\_tissue\_Urea\_RNAB\_N Scan : 29143

Andromeda score : 80.605

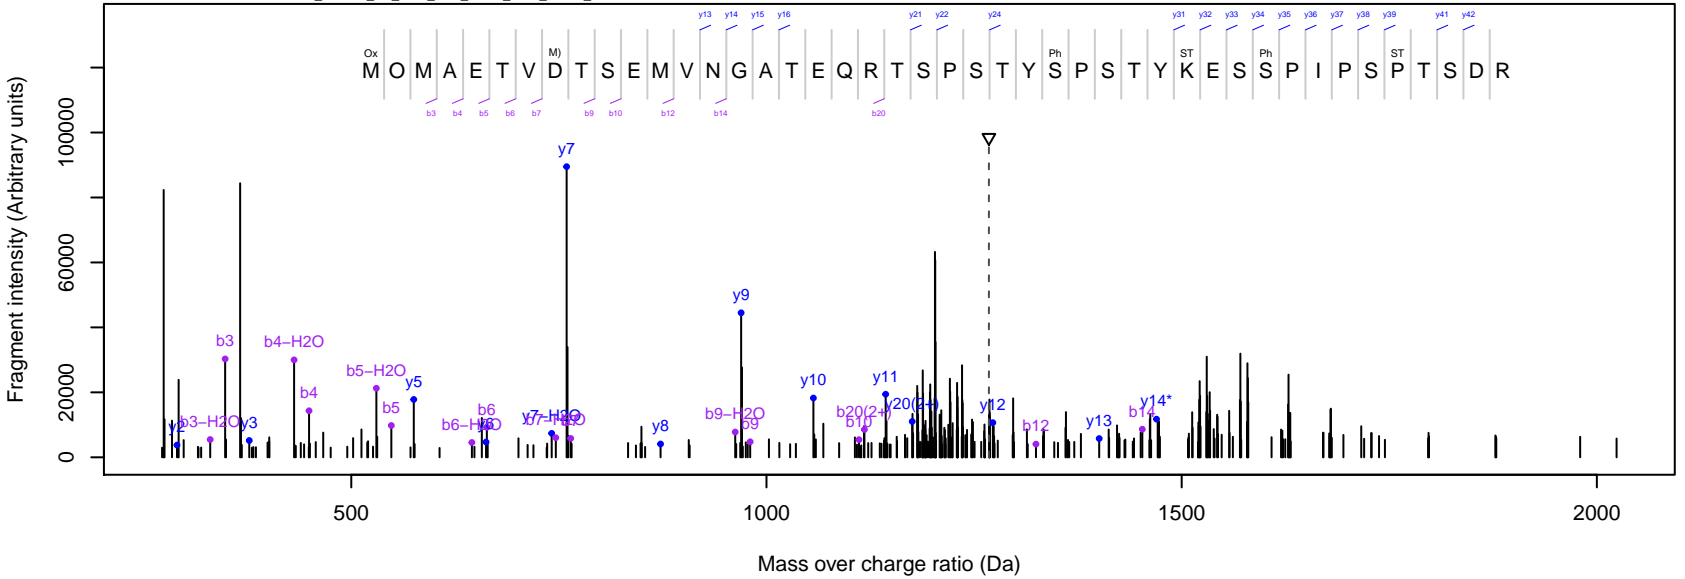

ASET(Phospho (STY))PPPVAQPKPEAPHGLETTLQER-4+

Source : QE3\_201126\_FR\_TiOx\_hum\_tissue\_Urea\_RNAB\_H Scan : 23470

Andromeda score : 80.593

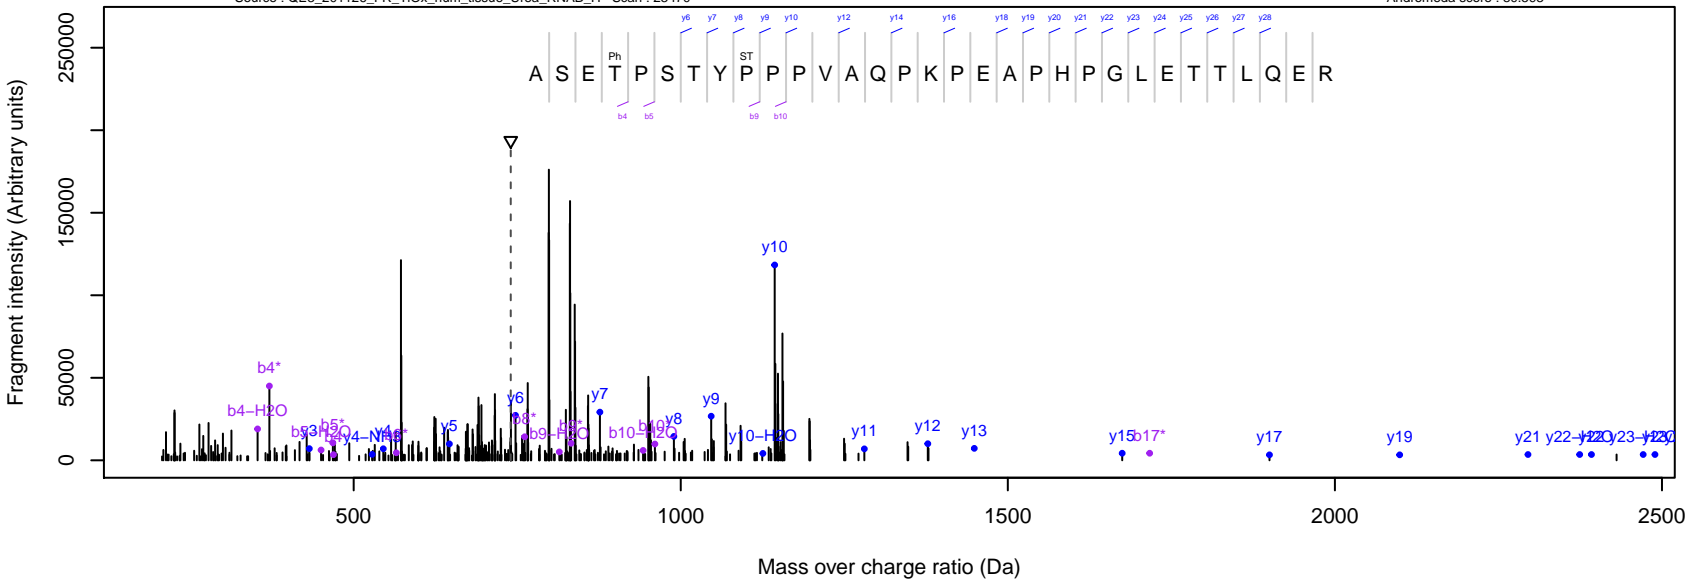



KFS(Phospho (STY))AGGSDPPLKR-3+

Source : QE3\_201126\_FR\_TiOx\_hum\_tissue\_Urea\_RNAB\_N Scan : 10038

Andromeda score : 80.545

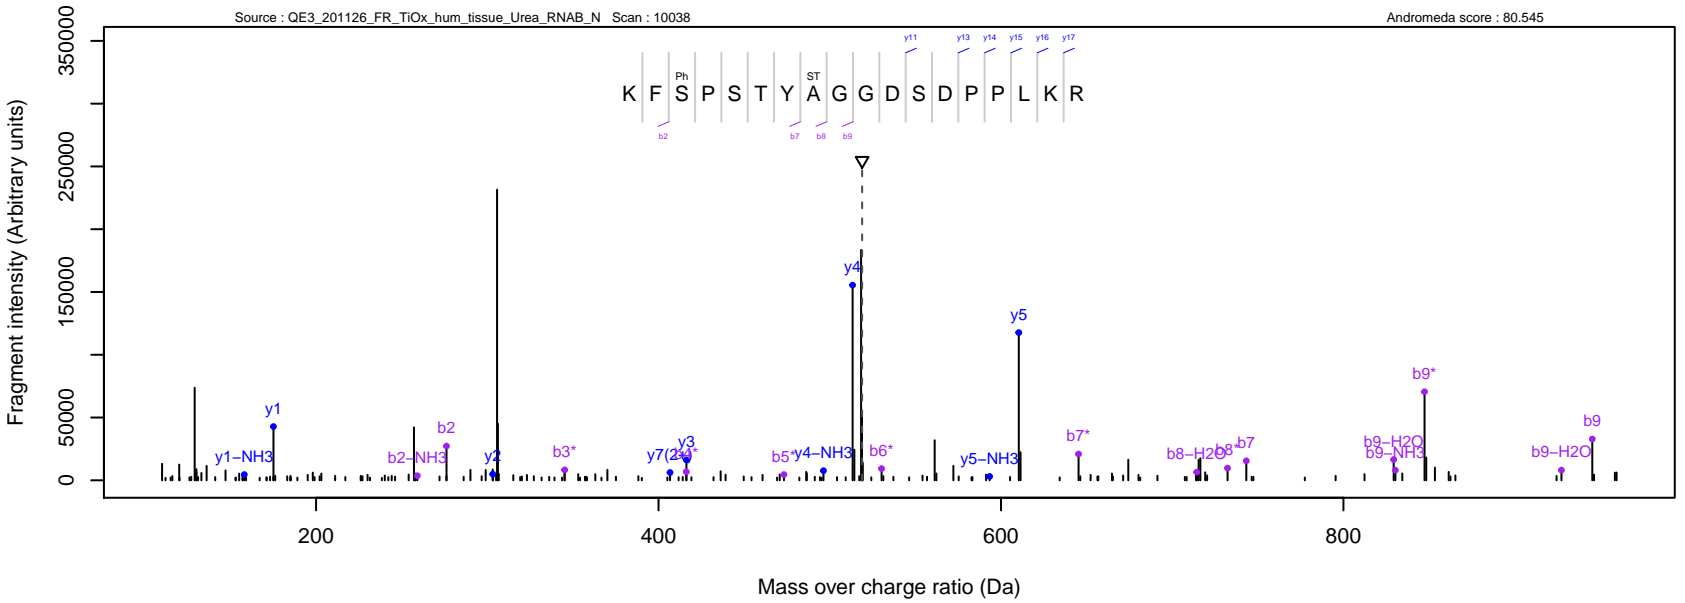

S(Phospho (STY))SLDLSYYPTSSSTSM(Oxidation (M))SSSSSSSWLTR-3+

Source : QE3\_201126\_FR\_TiOx\_hum\_tissue\_Urea\_RNAB\_B Scan : 53791

Andromeda score : 80.538

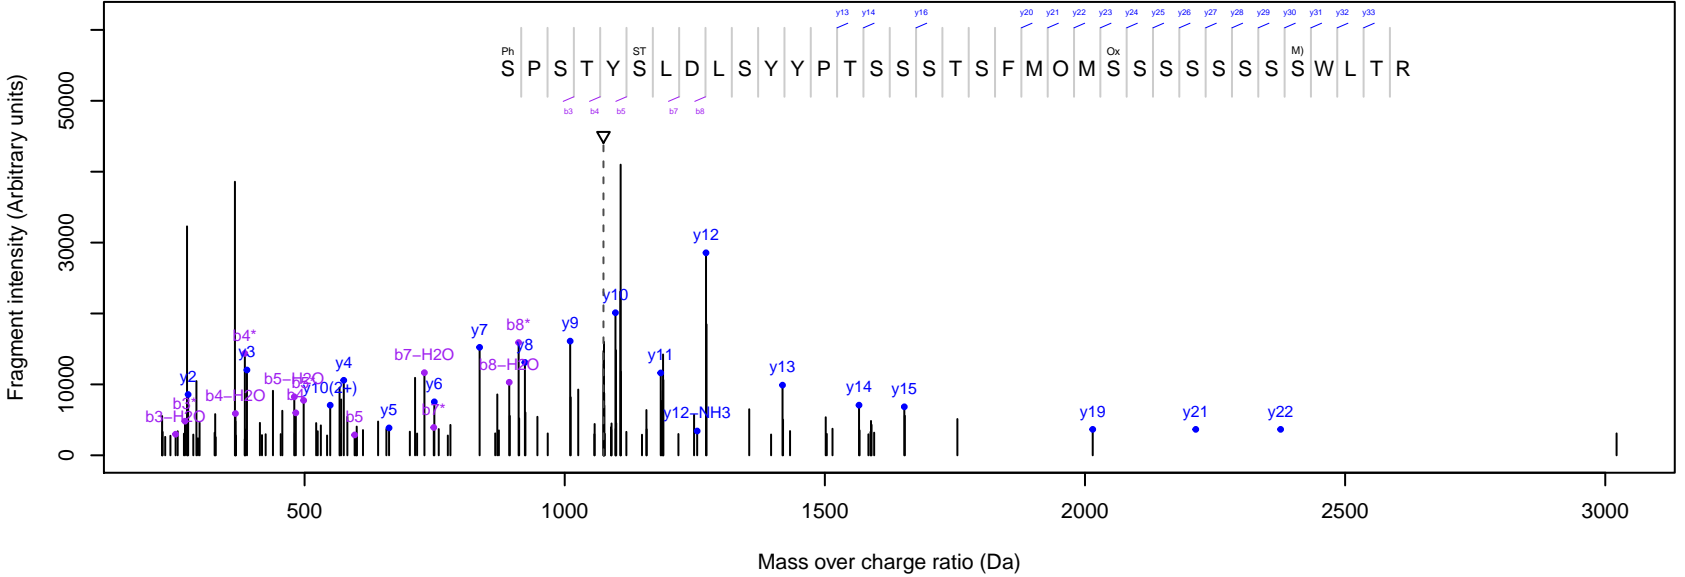

DTIIDVVGAPLT(Phospho (STY))PNSR-2+

Source : QE3\_201126\_FR\_TiOx\_hum\_tissue\_Urea\_RNAB\_H Scan : 49805

Andromeda score : 80.534

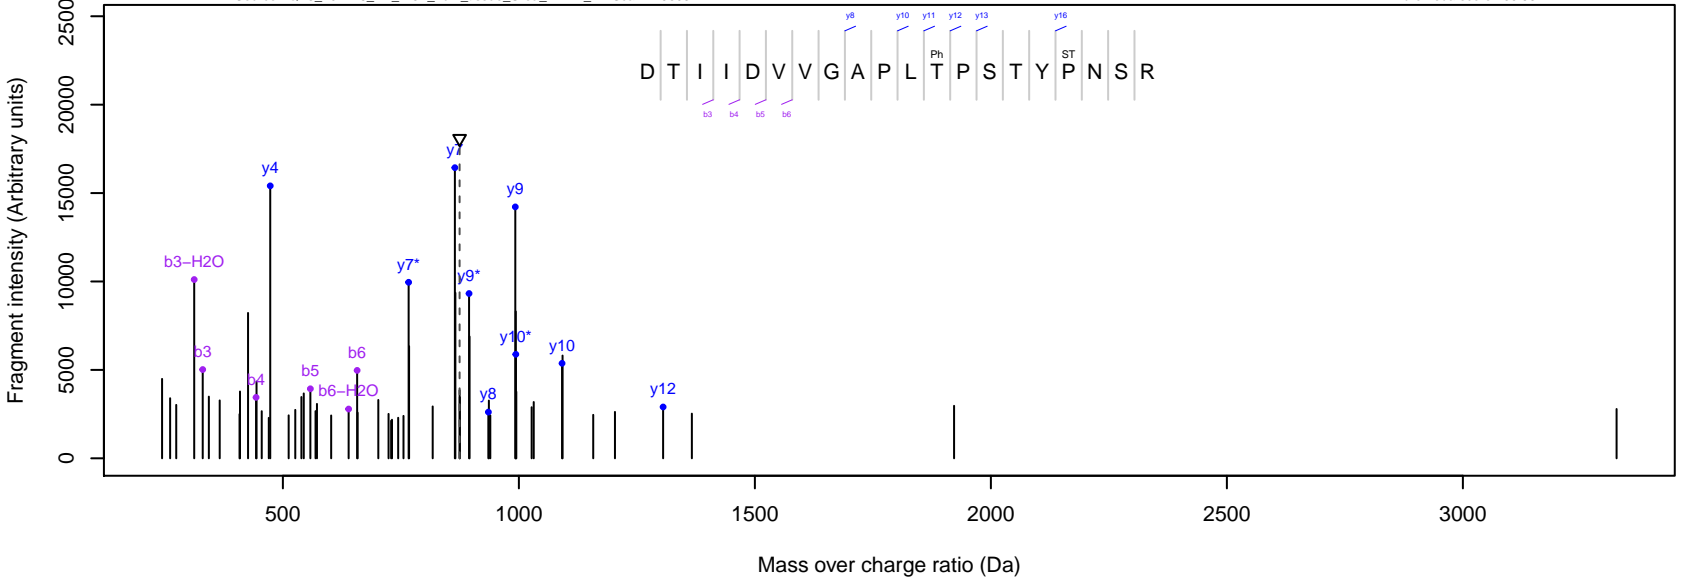

QTFLS(Phospho (STY))HGDDFR-2+

Source : QE3\_201126\_FR\_TiOx\_hum\_tissue\_Urea\_RNAB\_H Scan : 23612

Andromeda score : 80.522

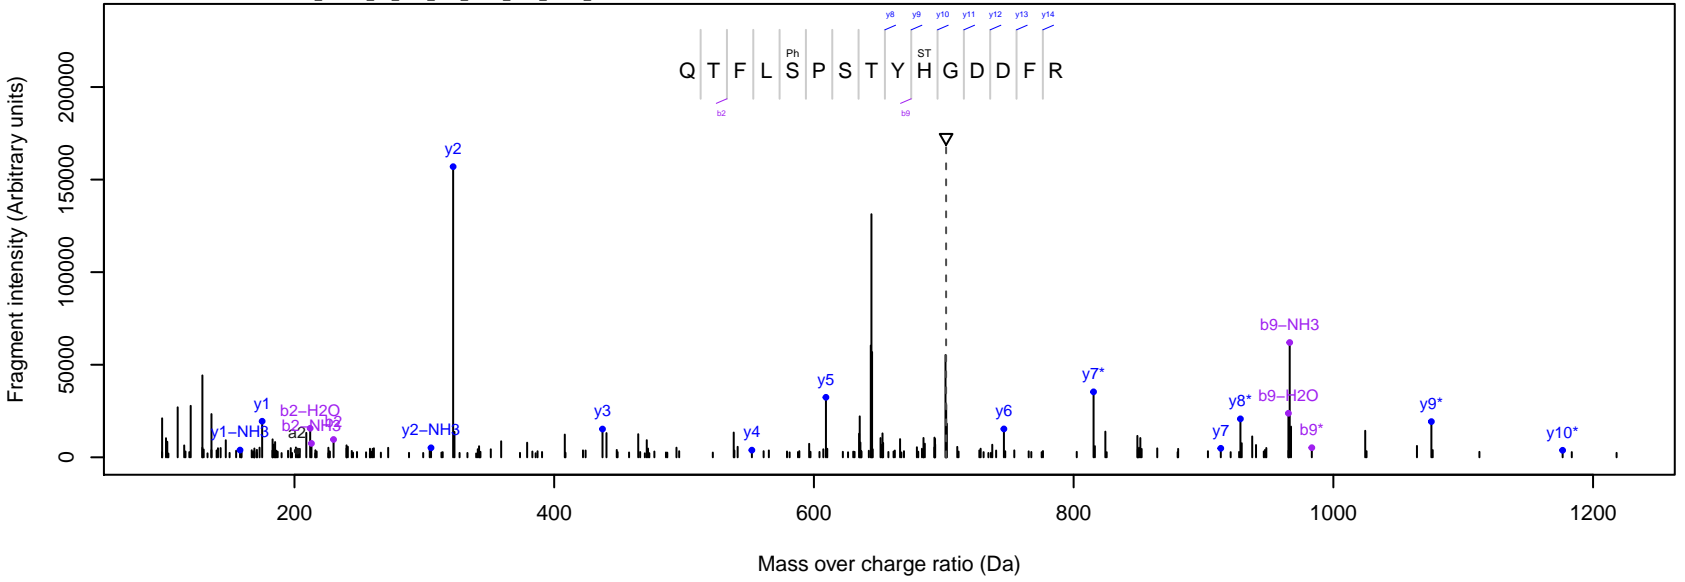

S(Phospho (STY))GSWAAIYQDIR-2+

Source : QE3\_201126\_FR\_TiOx\_hum\_tissue\_Urea\_RNAB\_B Scan : 49232

Andromeda score : 80.522

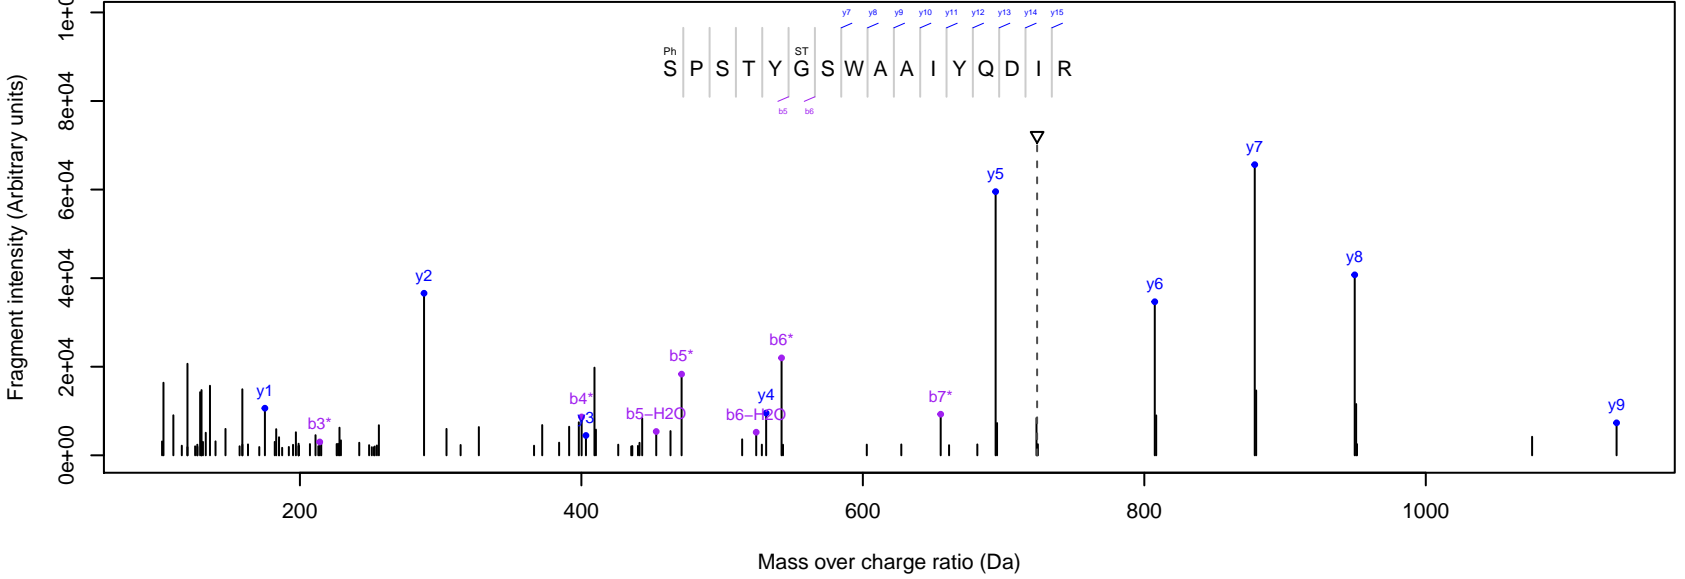

IRKS(Phospho (STY))NQIPTEVR-3+

Source : QE3\_201126\_FR\_TiOx\_hum\_tissue\_Urea\_RNAB\_N Scan : 8498

Andromeda score : 80.507

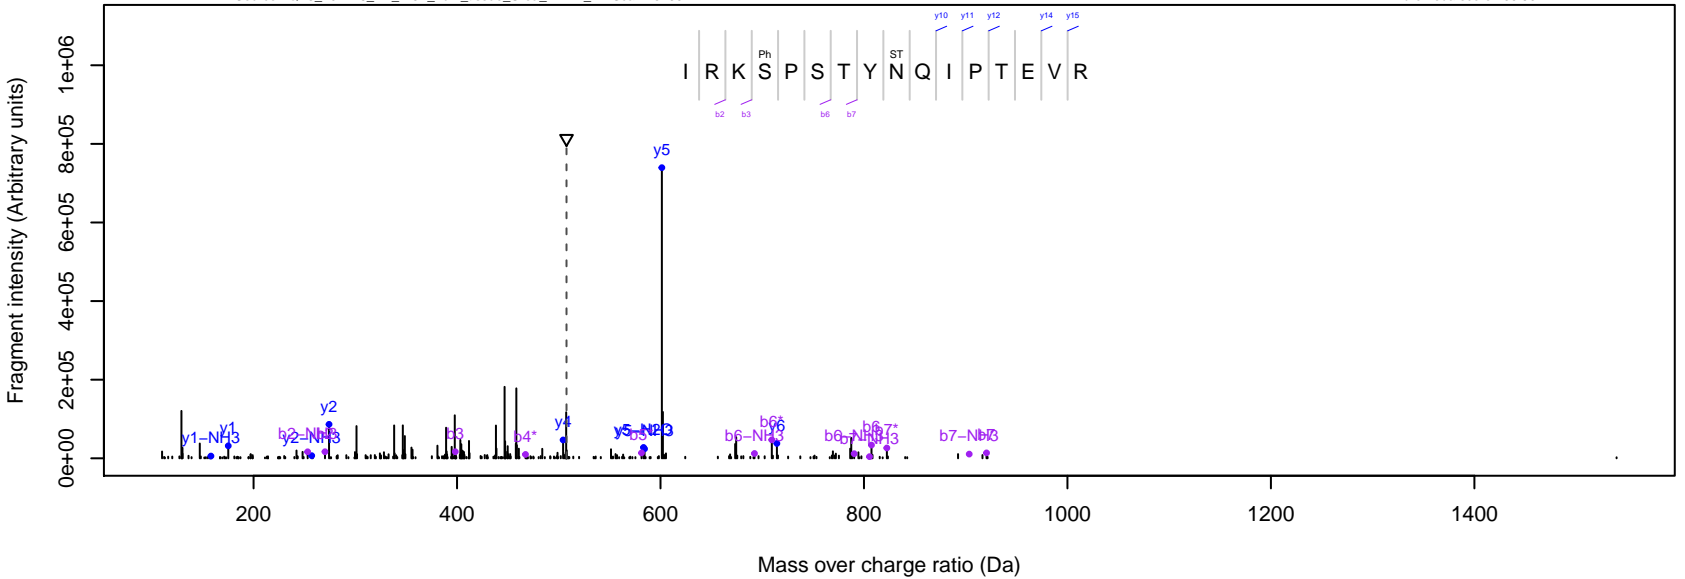

S(Phospho (STY))RS(Phospho (STY))PLLNDRR-3+

Source : QE3\_201126\_FR\_TiOx\_hum\_tissue\_Urea\_RNAB\_N Scan : 8354

Andromeda score : 80.507

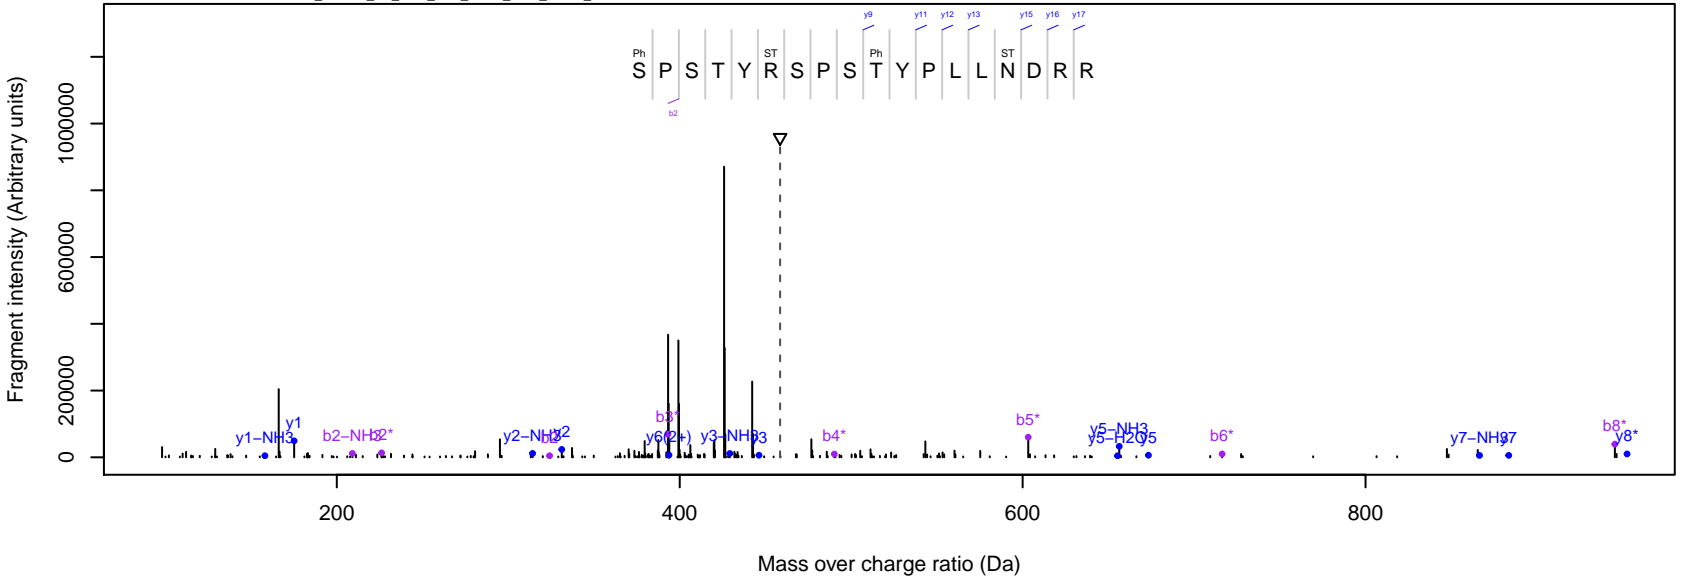

GPSQEEEDNHS(Phospho (STY))DEEDRAS(Phospho (STY))EPKSQDQDSEVNELSR-4+

Source : QE3\_201126\_FR\_TiOx\_hum\_tissue\_Urea\_RNAB\_B Scan : 14650

Andromeda score : 80.484

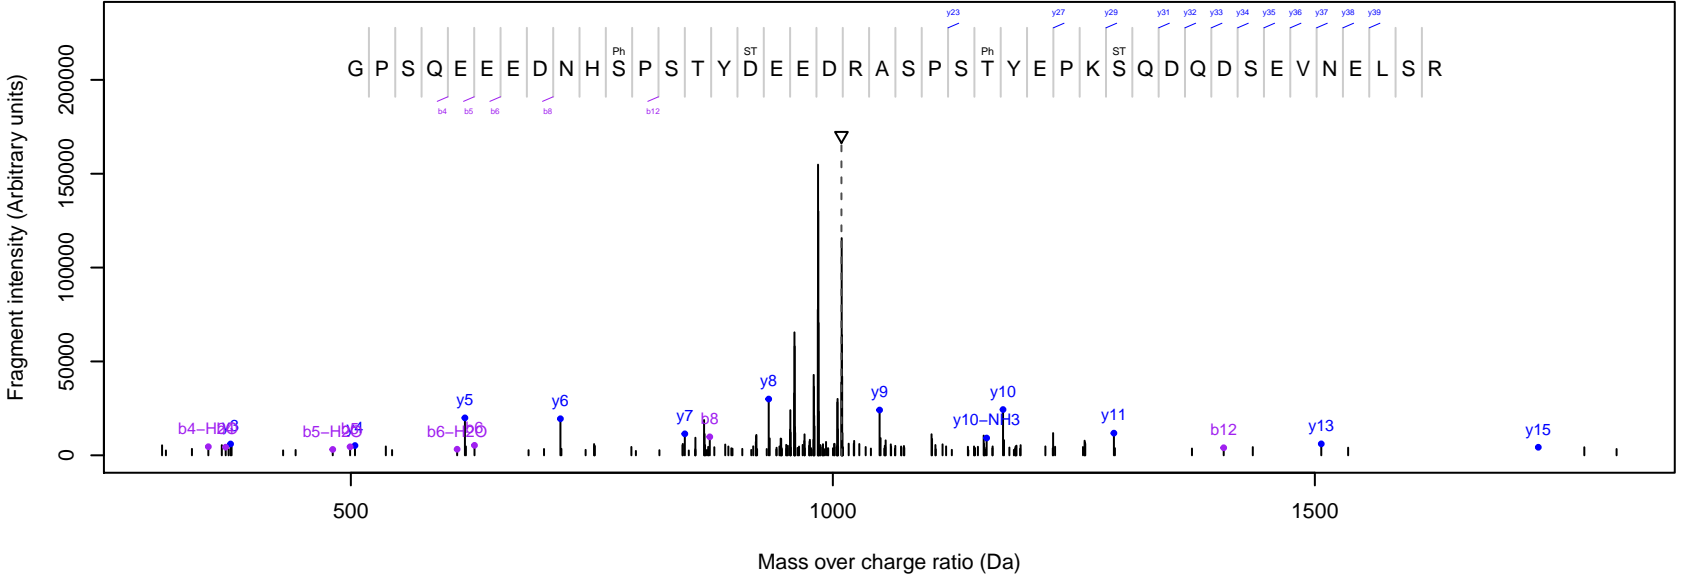

LASPSGST(Phospho (STY))S(Phospho (STY))SGLEVVAPEGTSAPGGPGTLDDSATICR-3+

Source : QE3\_201126\_FR\_TiOx\_hum\_tissue\_Urea\_RNAB\_B Scan : 52261

Andromeda score : 80.475

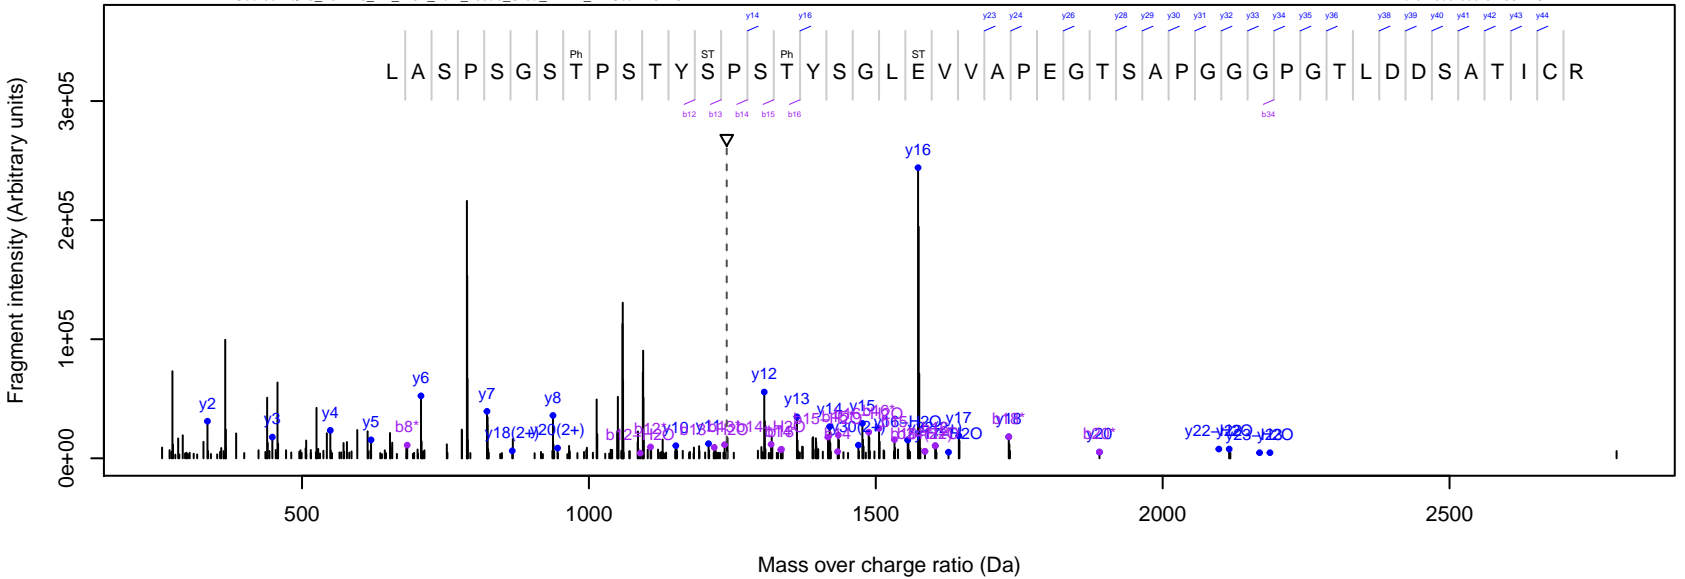

SNS(Phospho (STY))REHLGGSES DNWRDR-4+

Source : QE3\_201126\_FR\_TiOx\_hum\_tissue\_Urea\_RNAB\_N Scan : 8475

Andromeda score : 80.412

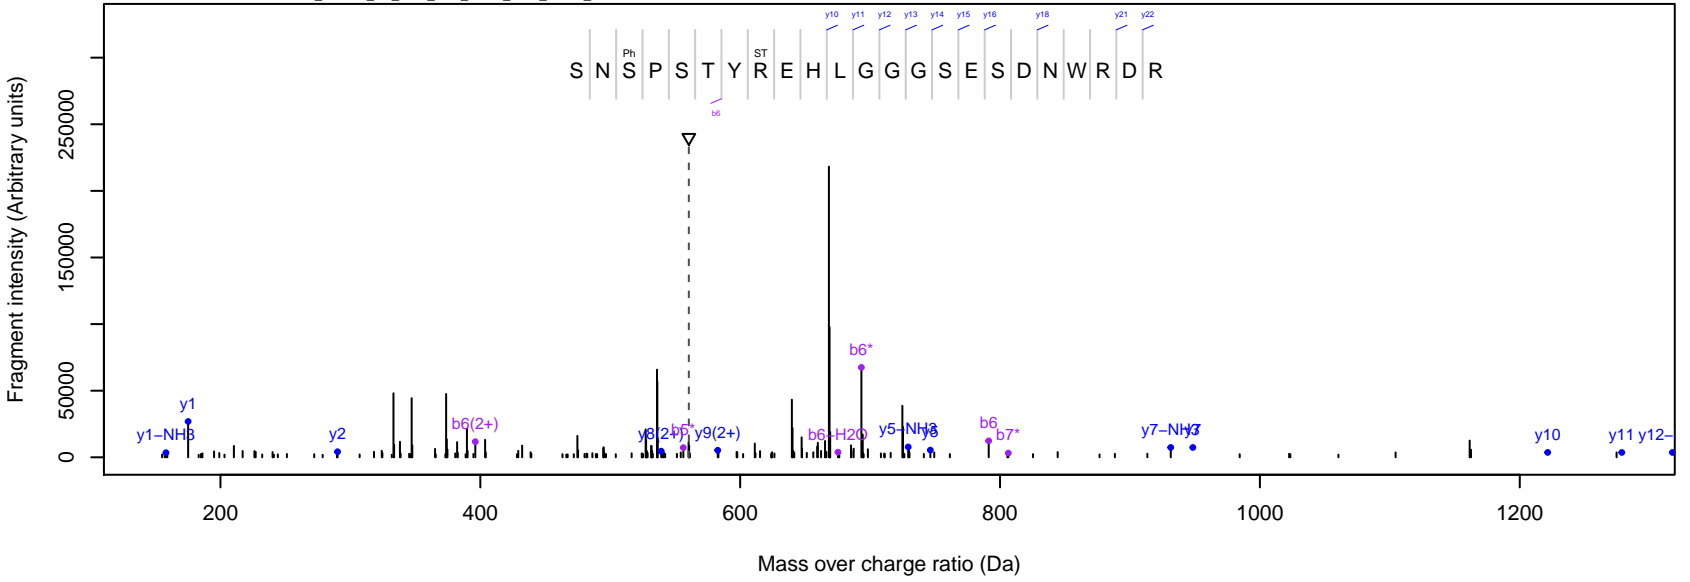

T(Phospho (STY))SPINLGLNVNDLLK-2+

Source : QE3\_201126\_FR\_TiOx\_hum\_tissue\_Urea\_RNAB\_B Scan : 57839

Andromeda score : 80.387

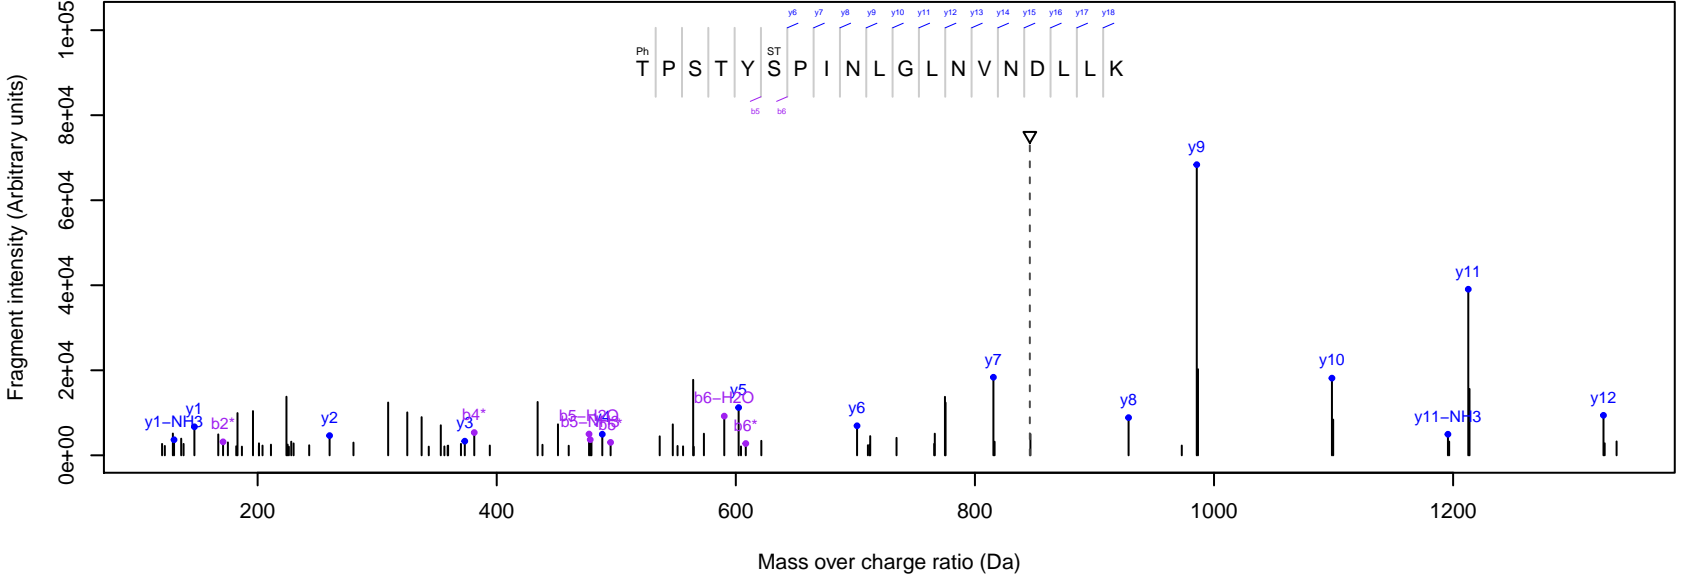

KLS(Phospho (STY))LTSP LNSK-2+

Source : QE3\_201126\_FR\_TiOx\_hum\_tissue\_Urea\_RNAB\_H Scan : 22786

Andromeda score : 80.379

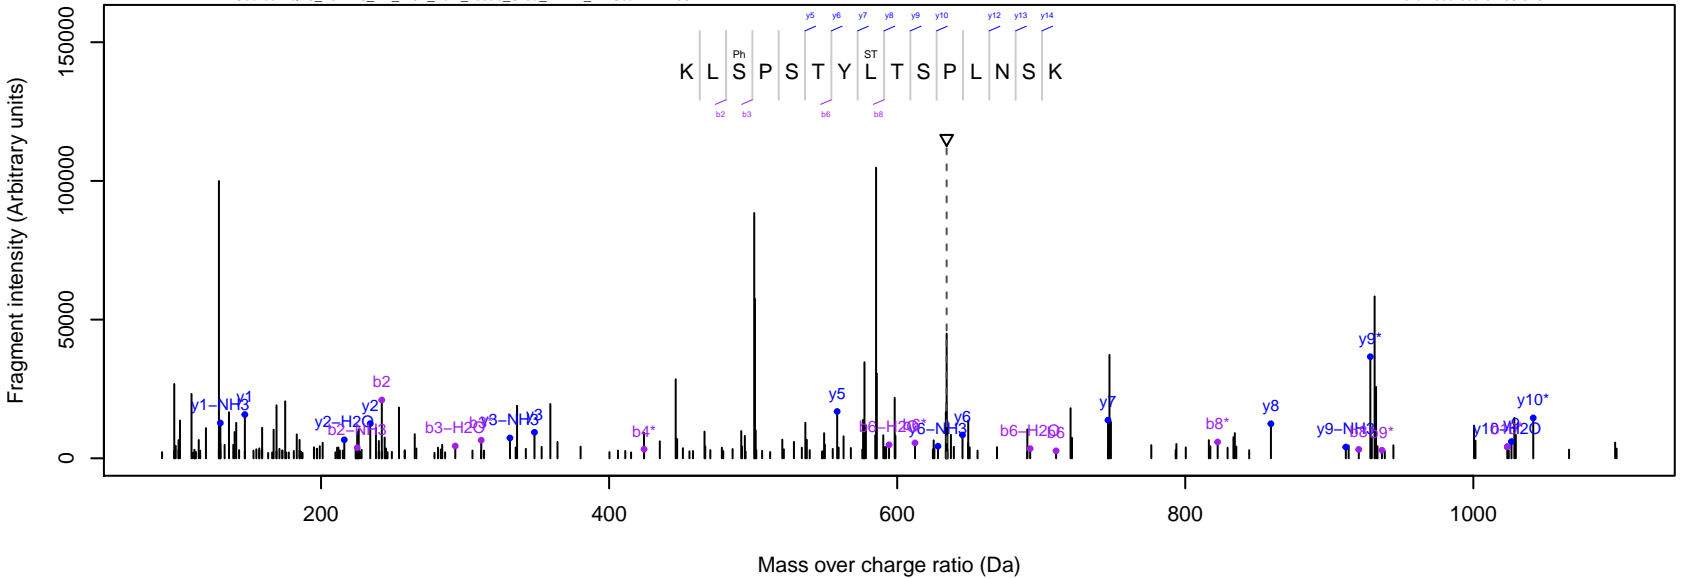

GRSDRGS(Phospho (STY))GQGDSLYPVGYLDK-3+

Source : QE3\_201126\_FR\_TIOx\_hum\_tissue\_Urea\_RNAB\_N Scan : 26649

Andromeda score : 80.359

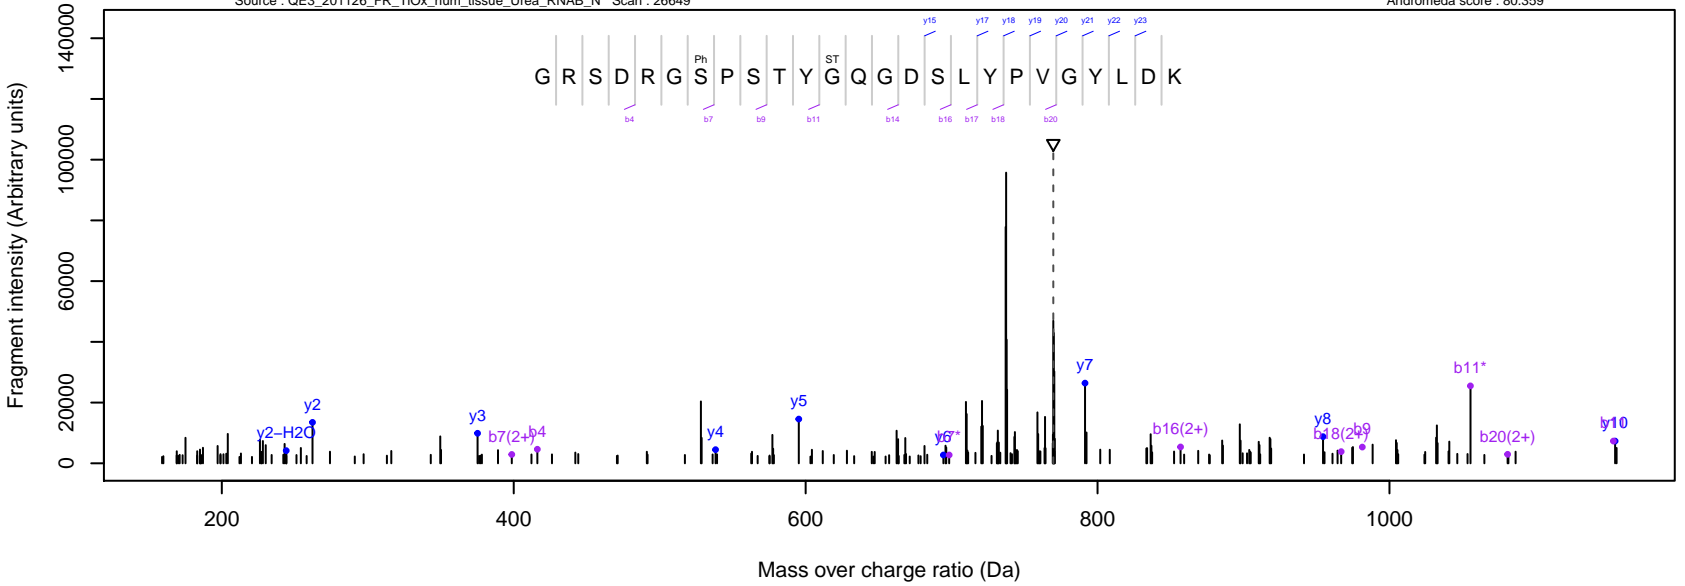

VWTSGQVEEYLDADDINS(Phospho (STY))RVMKPK-4+

Source : QE3\_201126\_FR\_TIOx\_hum\_tissue\_Urea\_RNAB\_N Scan : 36469

Andromeda score : 80.342

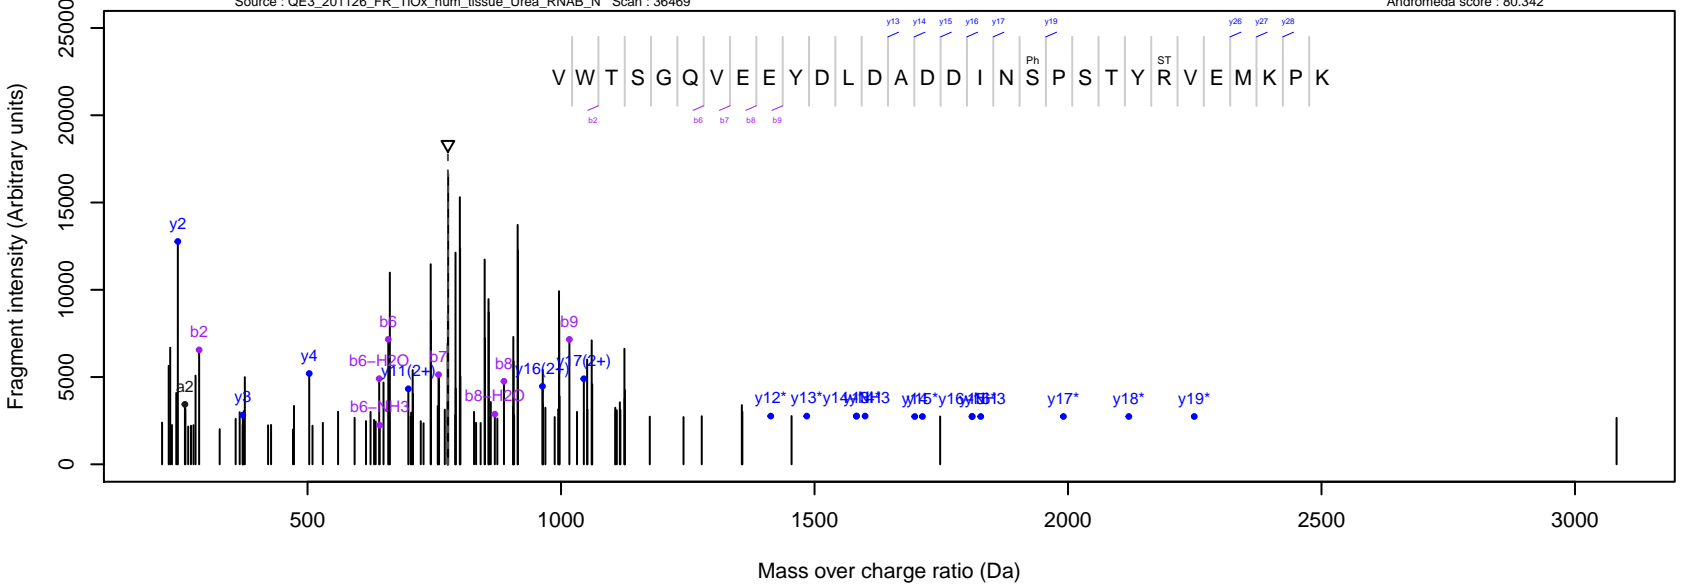

FKT(Phospho (STY))QPVTDFEIQVEEEGVSP(Phospho (STY))PM(Oxidation (M))EEEEK-3+

Source : QE3\_201126\_FR\_TIOx\_hum\_tissue\_Urea\_RNAB\_H Scan : 49374

Andromeda score : 80.319

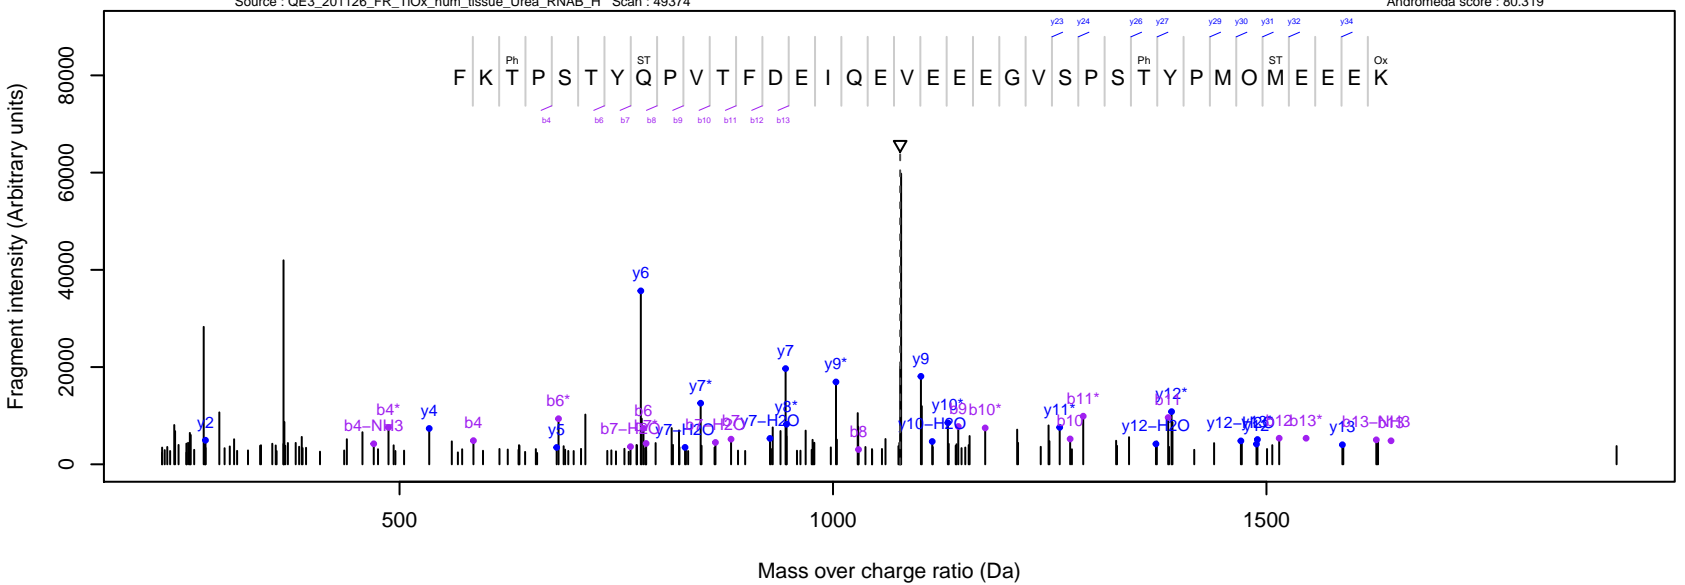

TVSDNS(Phospho (STY))LSNSRGEGKPDLK-3+

Source : QE3\_201126\_FR\_TiOx\_hum\_tissue\_Urea\_RNAB\_B Scan : 9233

Andromeda score : 80.303

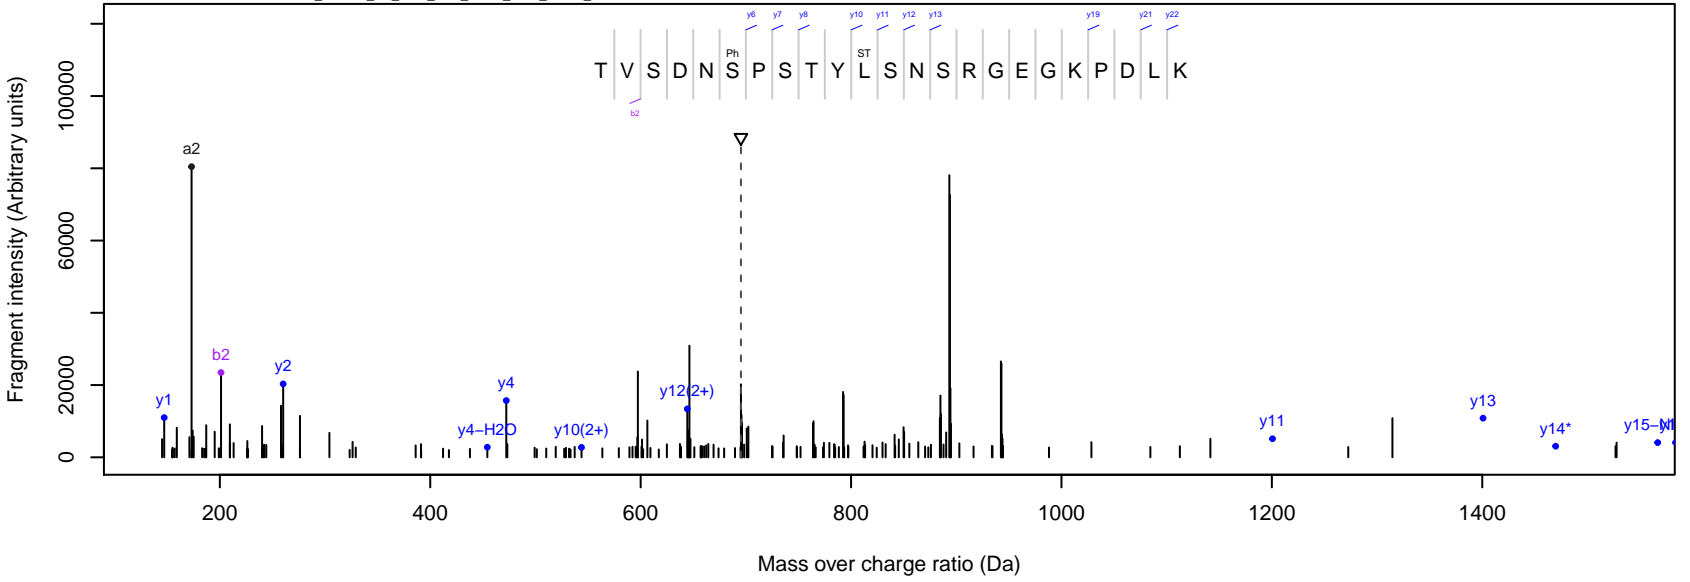

SSWS(Phospho (STY))VPDALQK-2+

Source : QE3\_201126\_FR\_TiOx\_hum\_tissue\_Urea\_RNAB\_N Scan : 35839

Andromeda score : 80.245

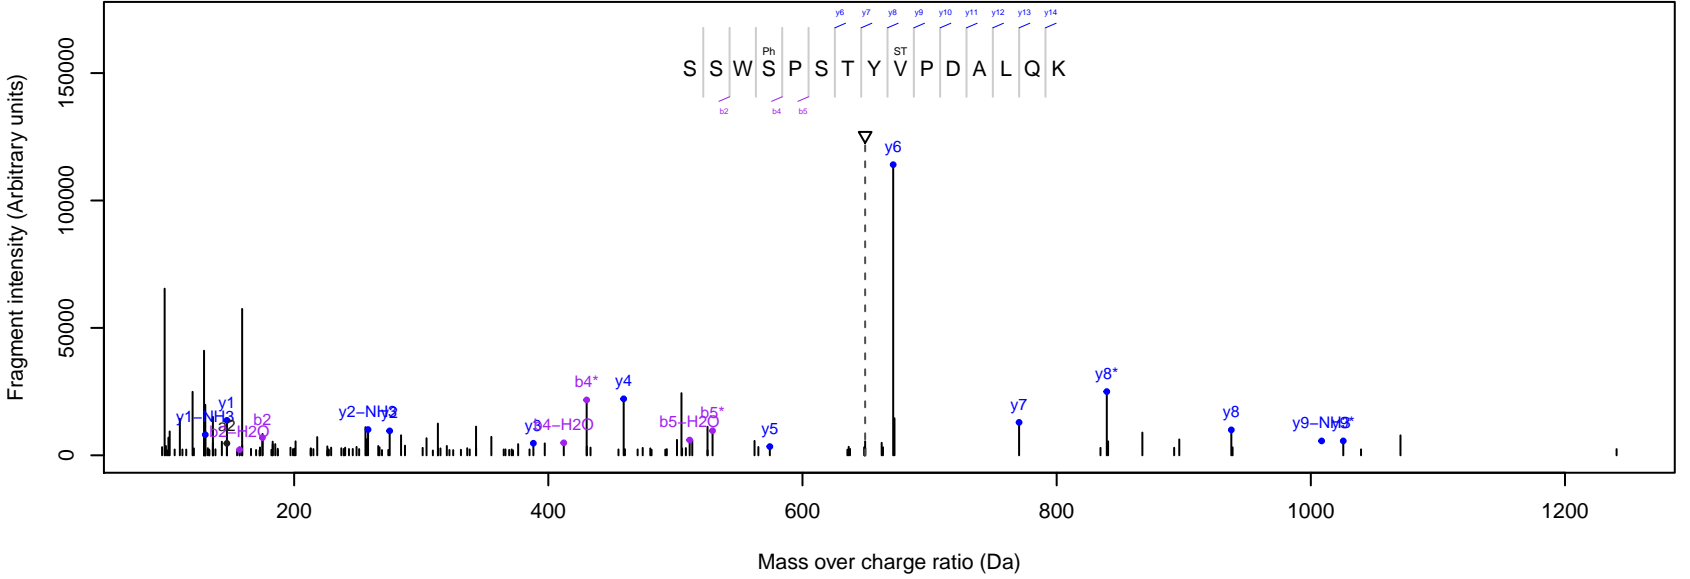

HVSS(Phospho (STY))TSSSFLEV-2+

Source : QE3\_201126\_FR\_TiOx\_hum\_tissue\_Urea\_RNAB\_H Scan : 36112

Andromeda score : 80.24

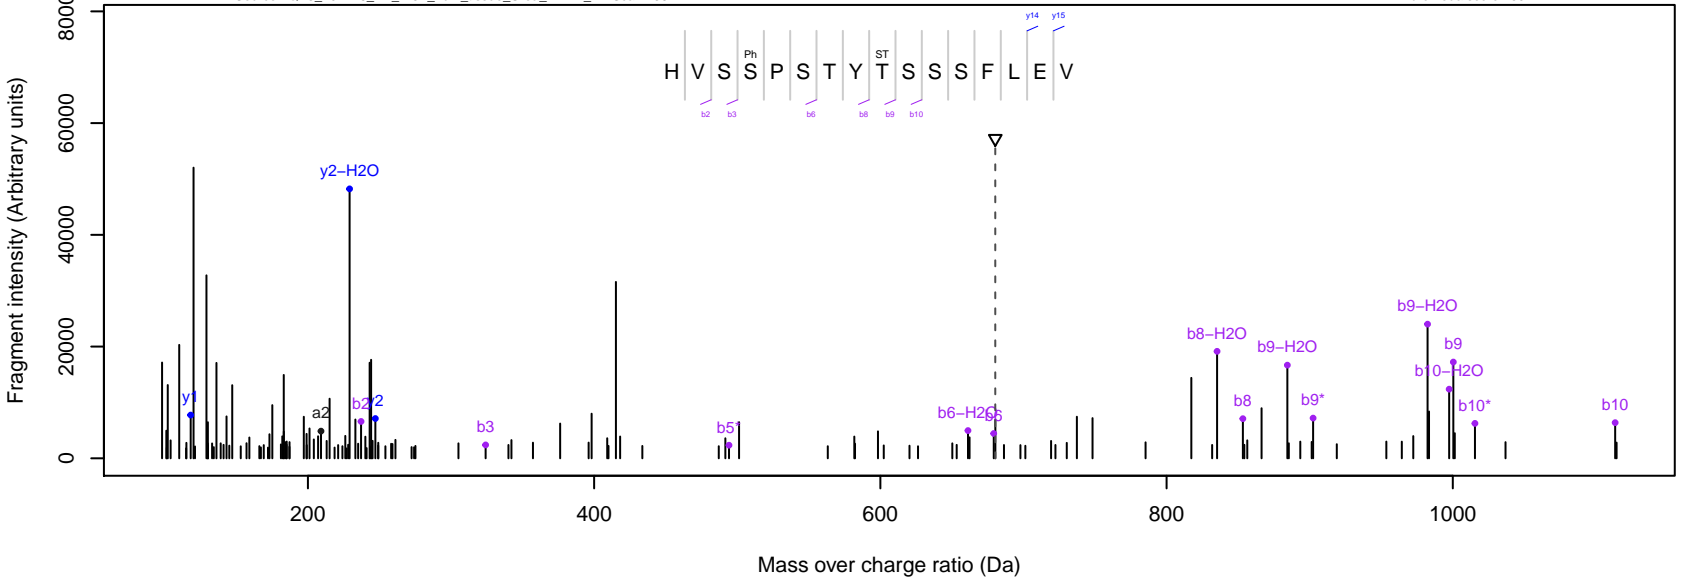

SGS(Phospho (STY))TES(Phospho (STY))LNPRPQTTISPADLHGMWYPTVR-4+

Source : QE3\_201126\_FR\_TiOx\_hum\_tissue\_Urea\_RNAB\_N Scan : 49863

Andromeda score : 80.239

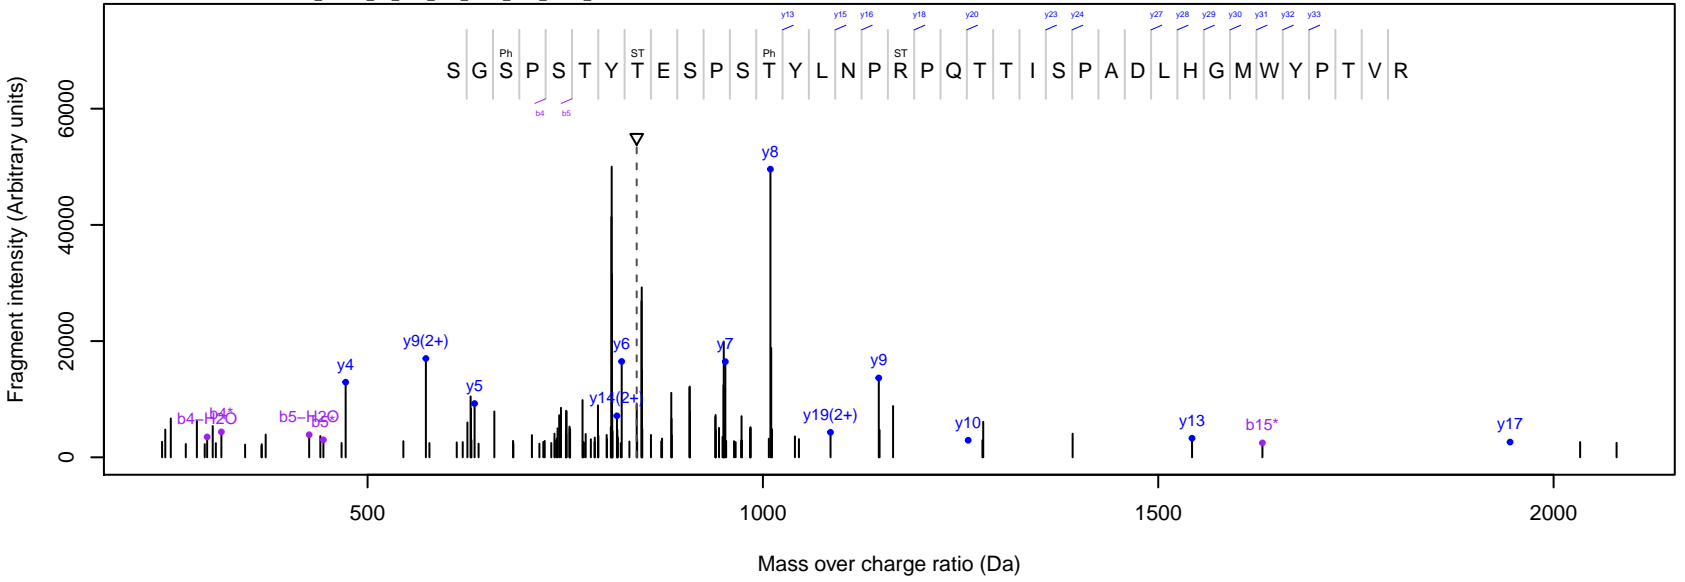

VAVNALVGEPTASKPAS(Phospho (STY))PIGGPTQEEK-3+

Source : QE3\_201126\_FR\_TiOx\_hum\_tissue\_Urea\_RNAB\_H Scan : 28339

Andromeda score : 80.239

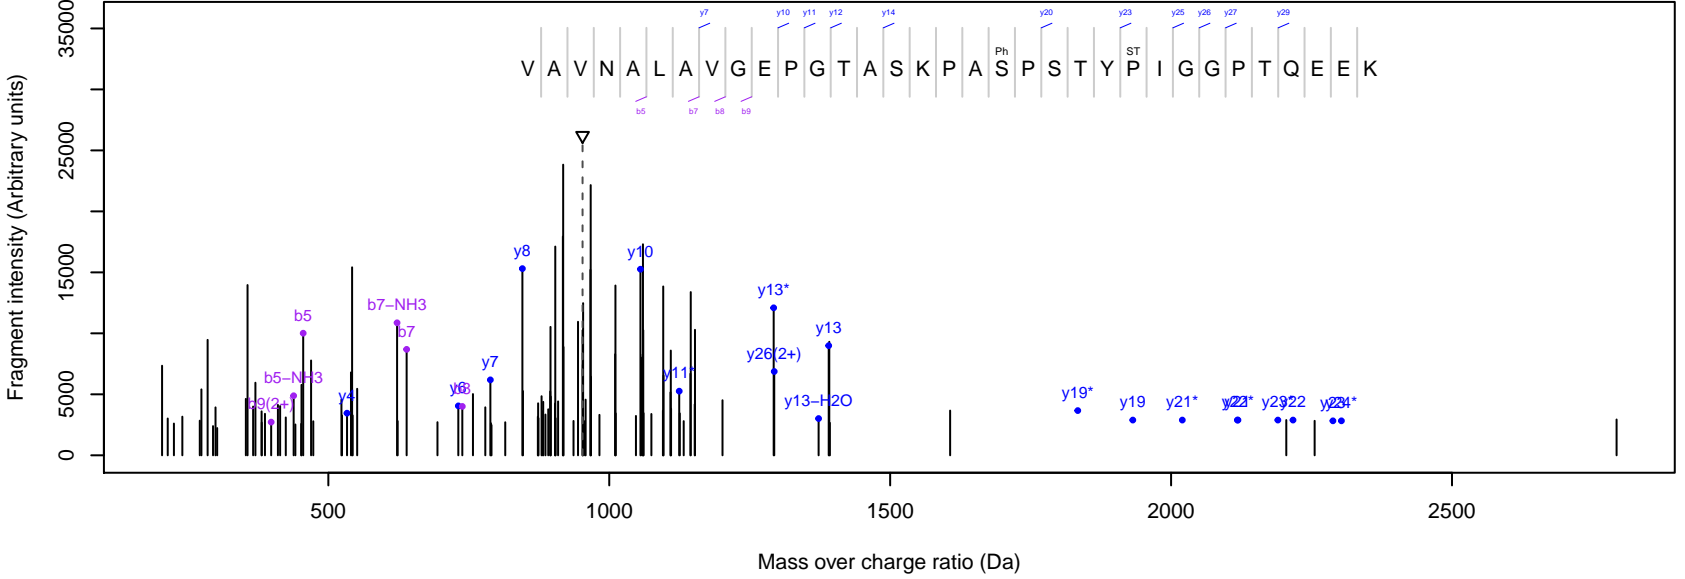

VPPAPVPCPPS(Phospho (STY))PGSAVPS(Phospho (STY))SPKSVATEER-3+

Source : QE3\_201126\_FR\_TiOx\_hum\_tissue\_Urea\_RNAB\_H Scan : 33869

Andromeda score : 80.239

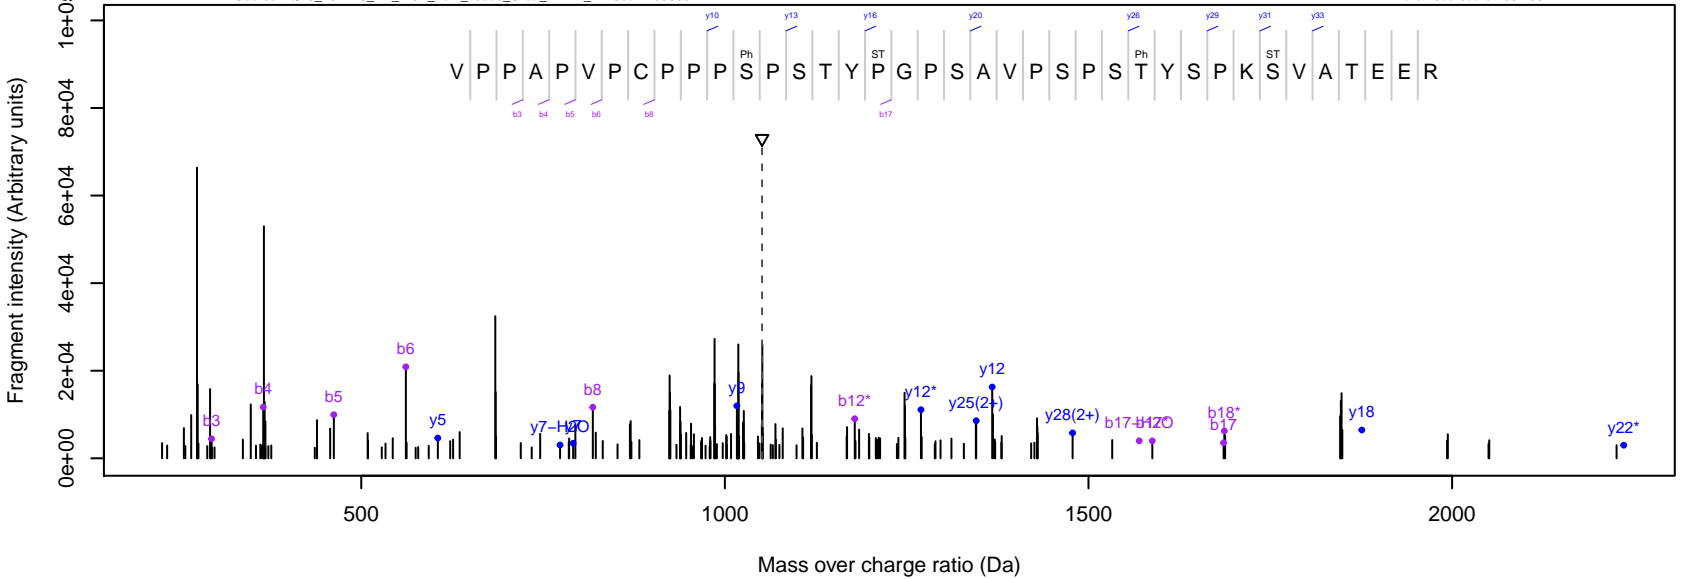

AHPTLQAPS(Phospho (STY))LEDVTK-3+

Source : QE3\_201126\_FR\_TIOx\_hum\_tissue\_Urea\_RNAB\_N Scan : 26617

Andromeda score : 80.238

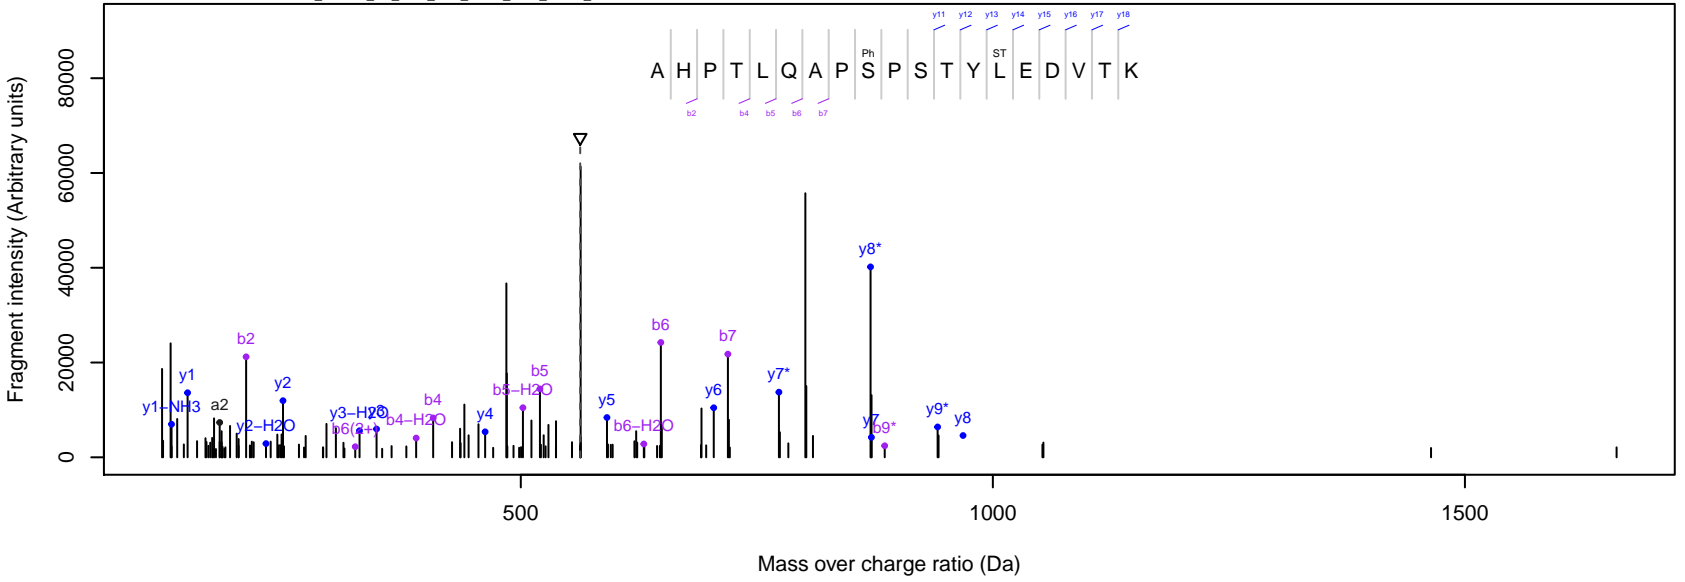

RGS(Phospho (STY))CVTQVGLLESVYEMFR-3+

Source : QE3\_201126\_FR\_TIOx\_hum\_tissue\_Urea\_RNAB\_H Scan : 61656

Andromeda score : 80.238

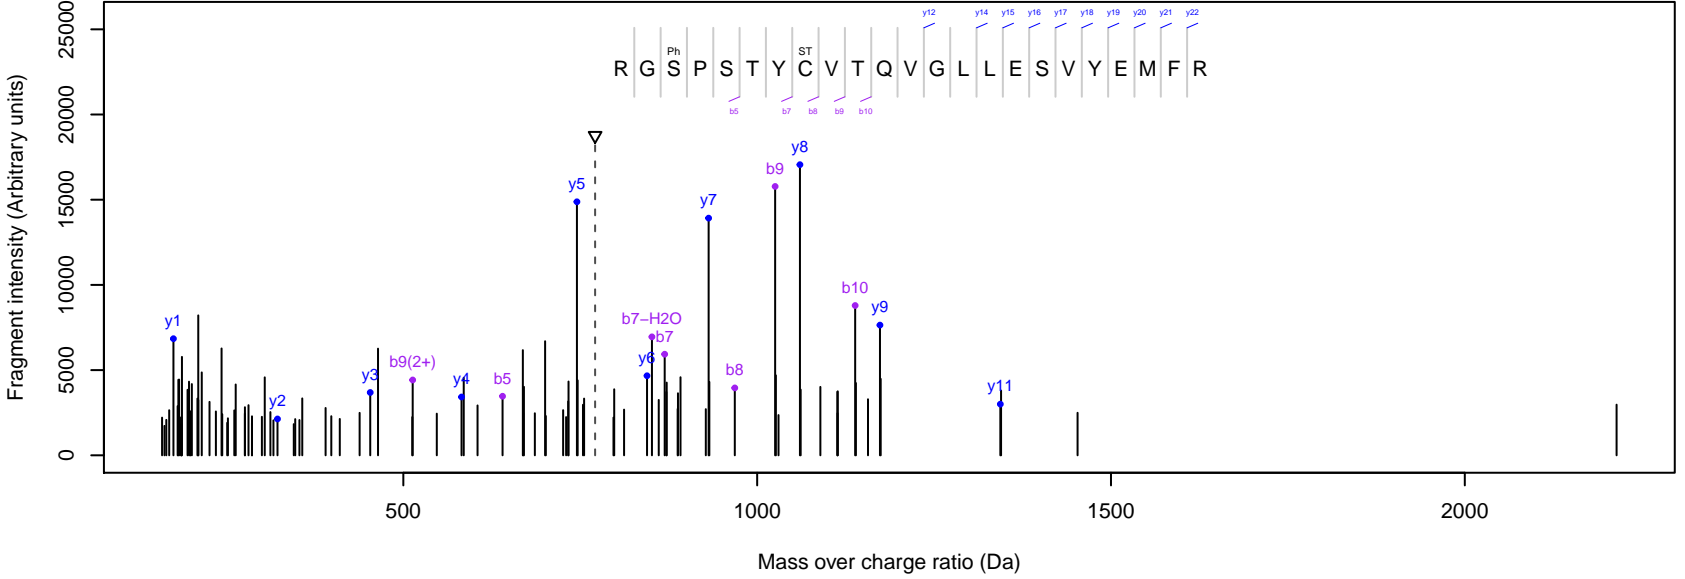

RLS(Phospho (STY))QPESAEKHVTR-4+

Source : QE3\_201126\_FR\_TIOx\_hum\_tissue\_Urea\_RNAB\_N Scan : 6947

Andromeda score : 80.238

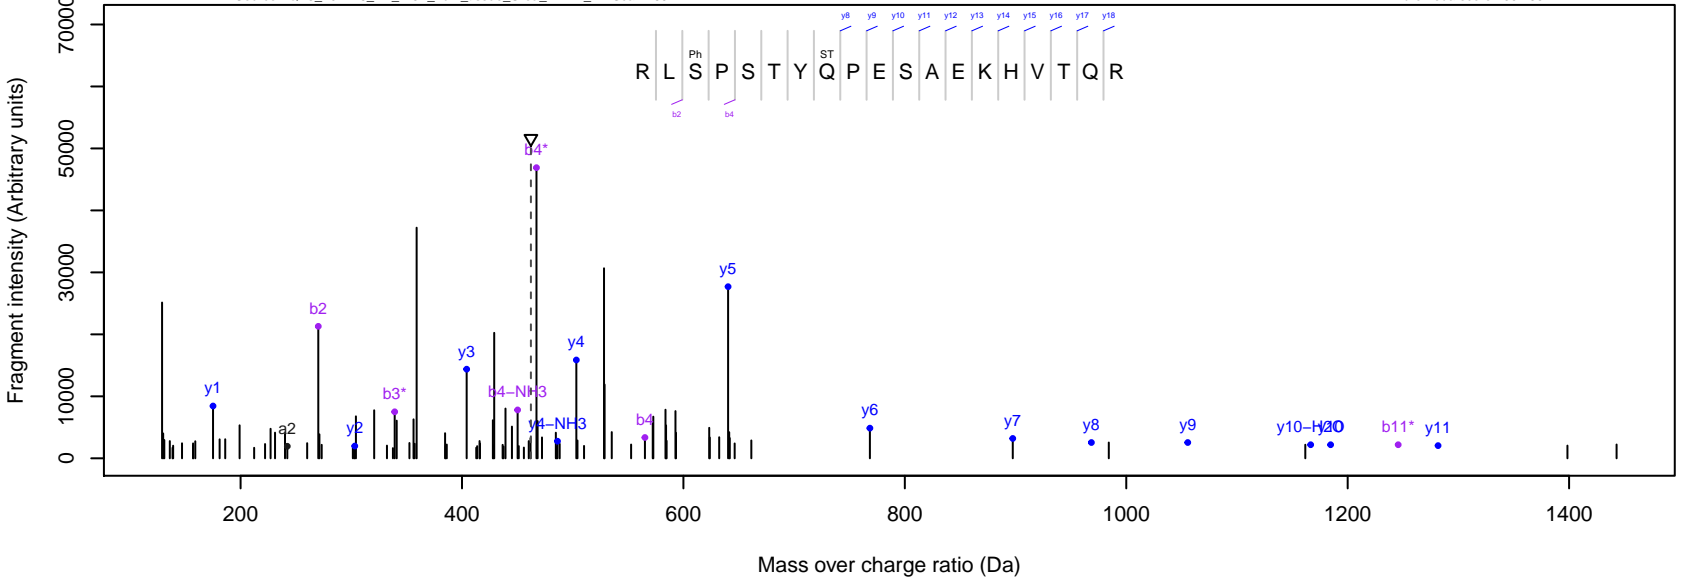



AESIS(Phospho (STY))S(Phospho (STY))DEEVHESVDSNDNQNK-3+

Source : QE3\_201126\_FR\_TiOx\_hum\_tissue\_Urea\_RNAB\_B Scan : 13706

Andromeda score : 80.236

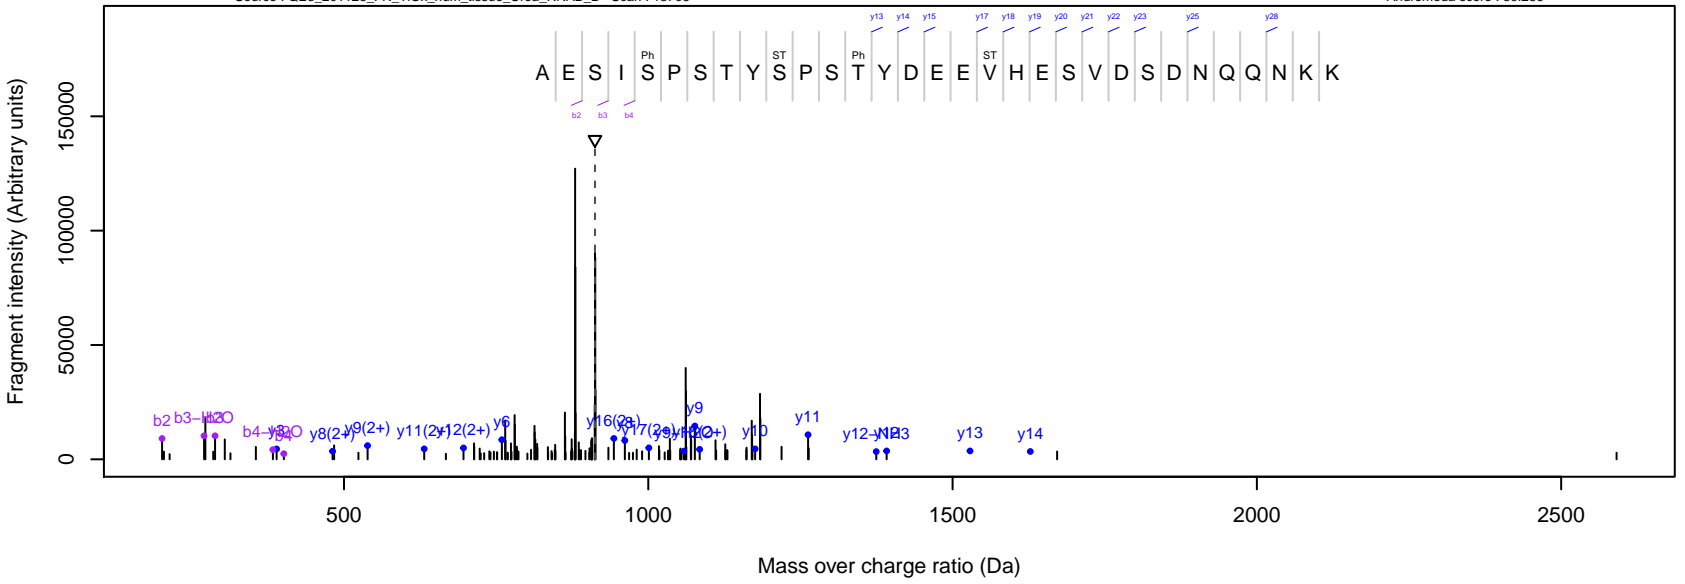

FHPEPYGLEDDQRS(Phospho (STY))M(Oxidation (M))GYDDL DYGM(Oxidation (M))M(Oxidation (M))SDYGTAR-4+

Source : QE3\_201126\_FR\_TiOx\_hum\_tissue\_Urea\_RNAB\_B Scan : 35475

Andromeda score : 80.235

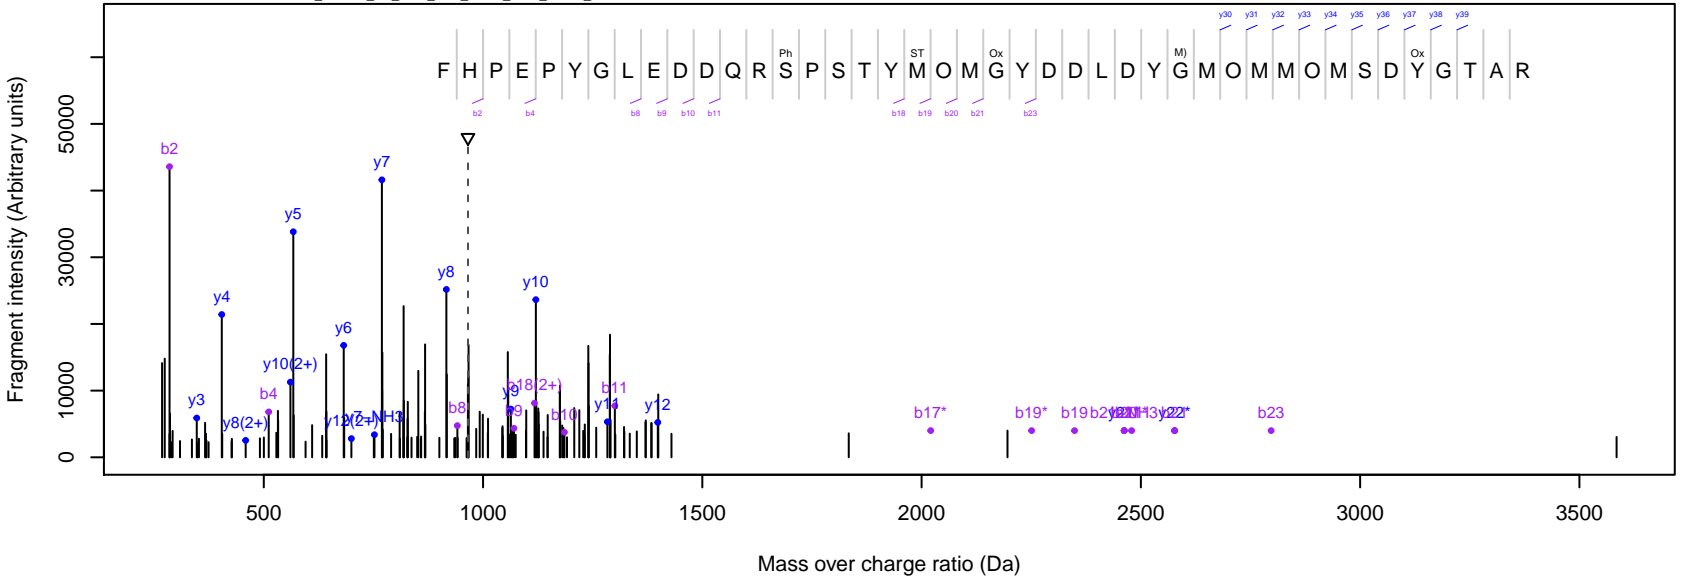

SQT(Phospho (STY))LPIIR-2+

Source : QE3\_201126\_FR\_TiOx\_hum\_tissue\_Urea\_RNAB\_N Scan : 29031

Andromeda score : 80.231

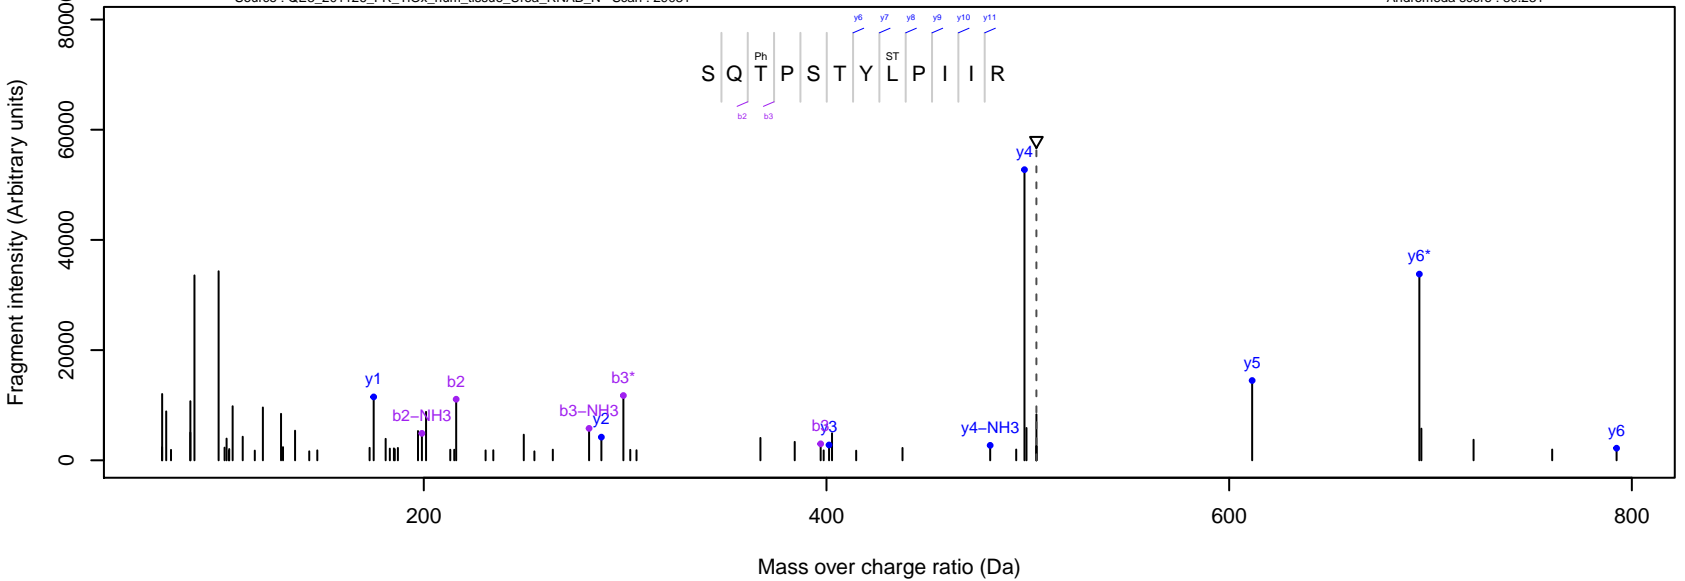

ENDSSEVDVFGSS(Phospho (STY))PVDDIPQEEETEEVSTVNVNR-3+

Source : QE3\_201126\_FR\_TiOx\_hum\_tissue\_Urea\_RNAB\_N Scan : 53797

Andromeda score : 80.174

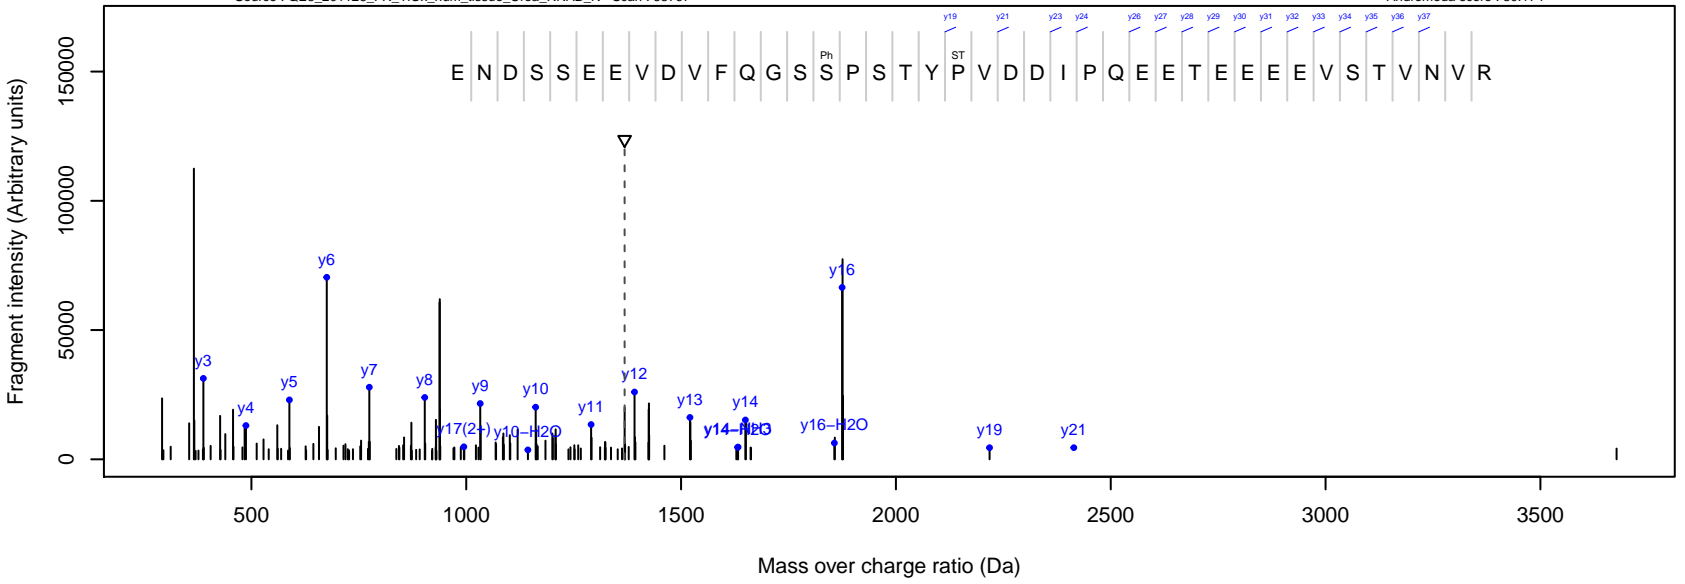

KRPS(Phospho (STY))LPSS(Phospho (STY))PSPGLPK-3+

Source : QE3\_201126\_FR\_TiOx\_hum\_tissue\_Urea\_RNAB\_H Scan : 18269

Andromeda score : 80.142

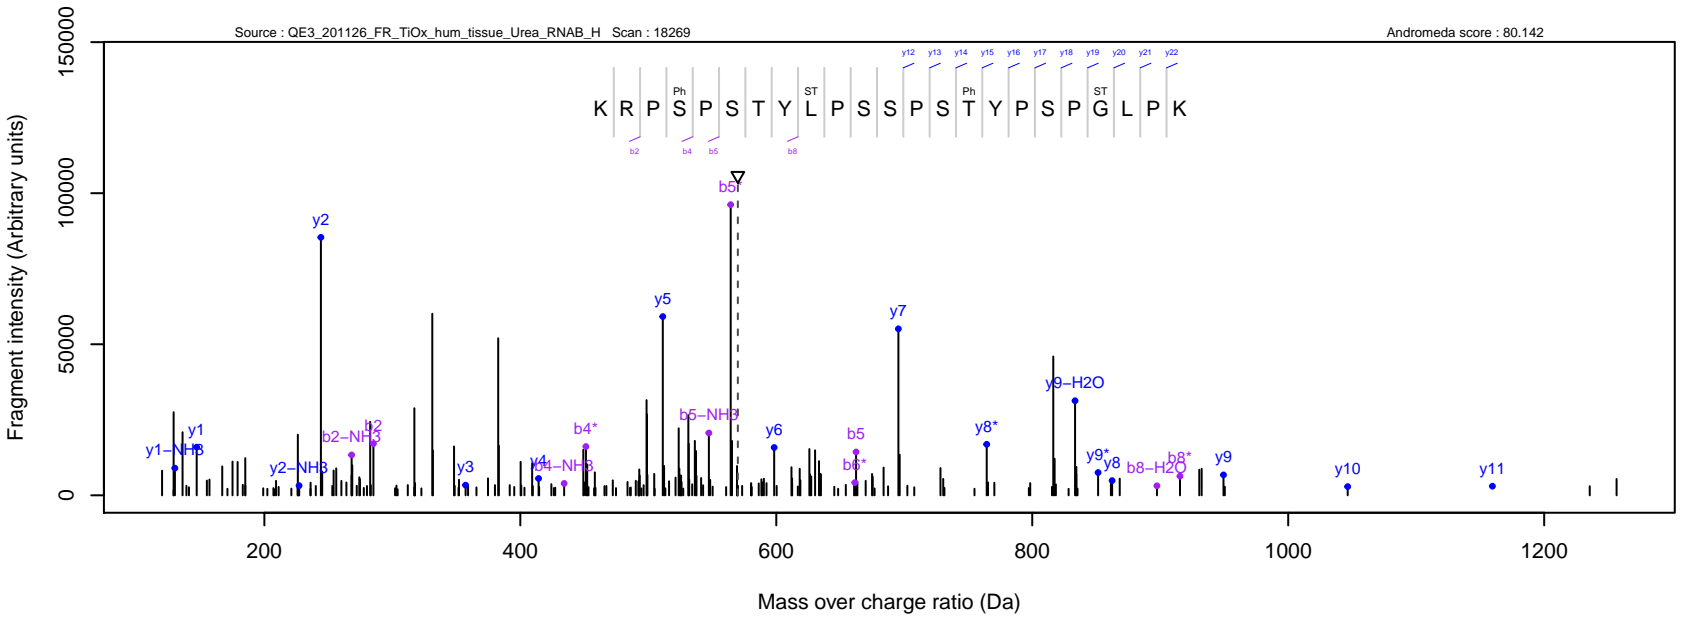

RKDS(Phospho (STY))VWGSQQSVNHLVK-4+

Source : QE3\_201126\_FR\_TiOx\_hum\_tissue\_Urea\_RNAB\_B Scan : 13897

Andromeda score : 80.102

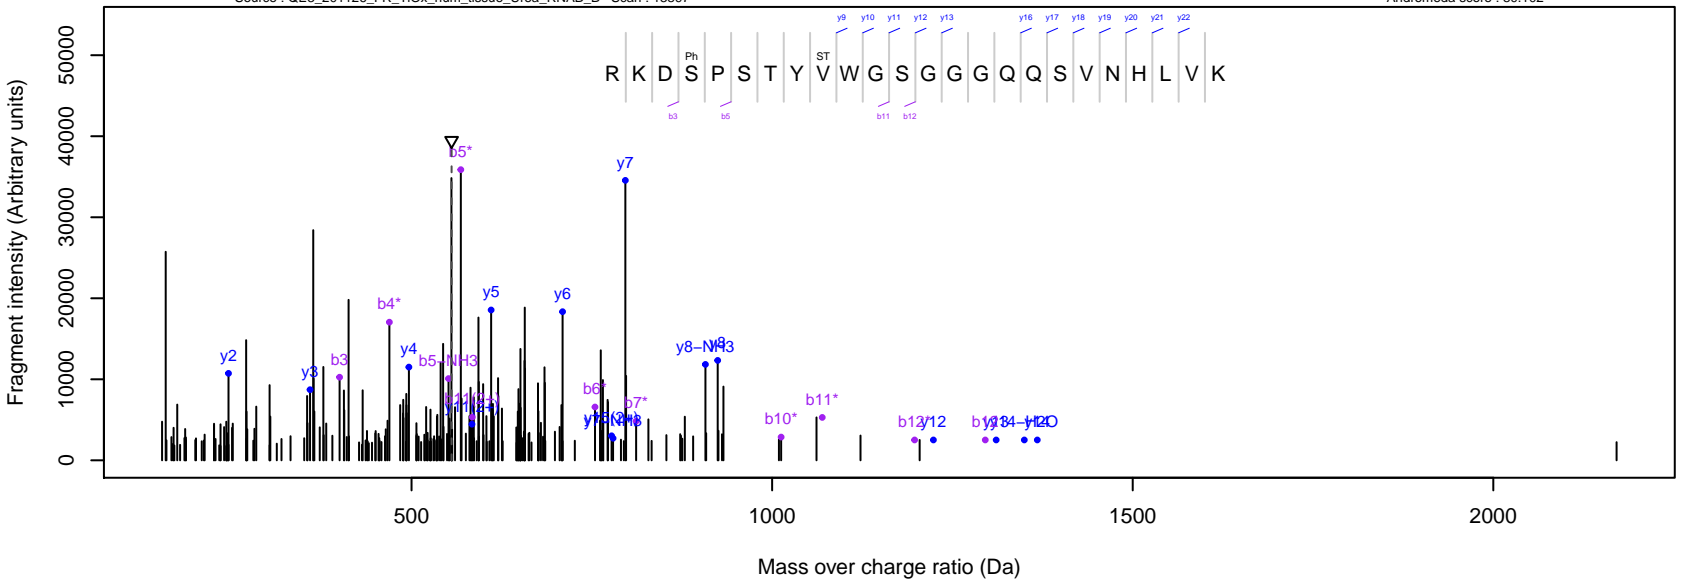

QVT(Phospho (STY))ITGSAASISLAQYLINAR-3+

Source : QE3\_201126\_FR\_TIOx\_hum\_tissue\_Urea\_RNAB\_N Scan : 60650

Andromeda score : 80.031

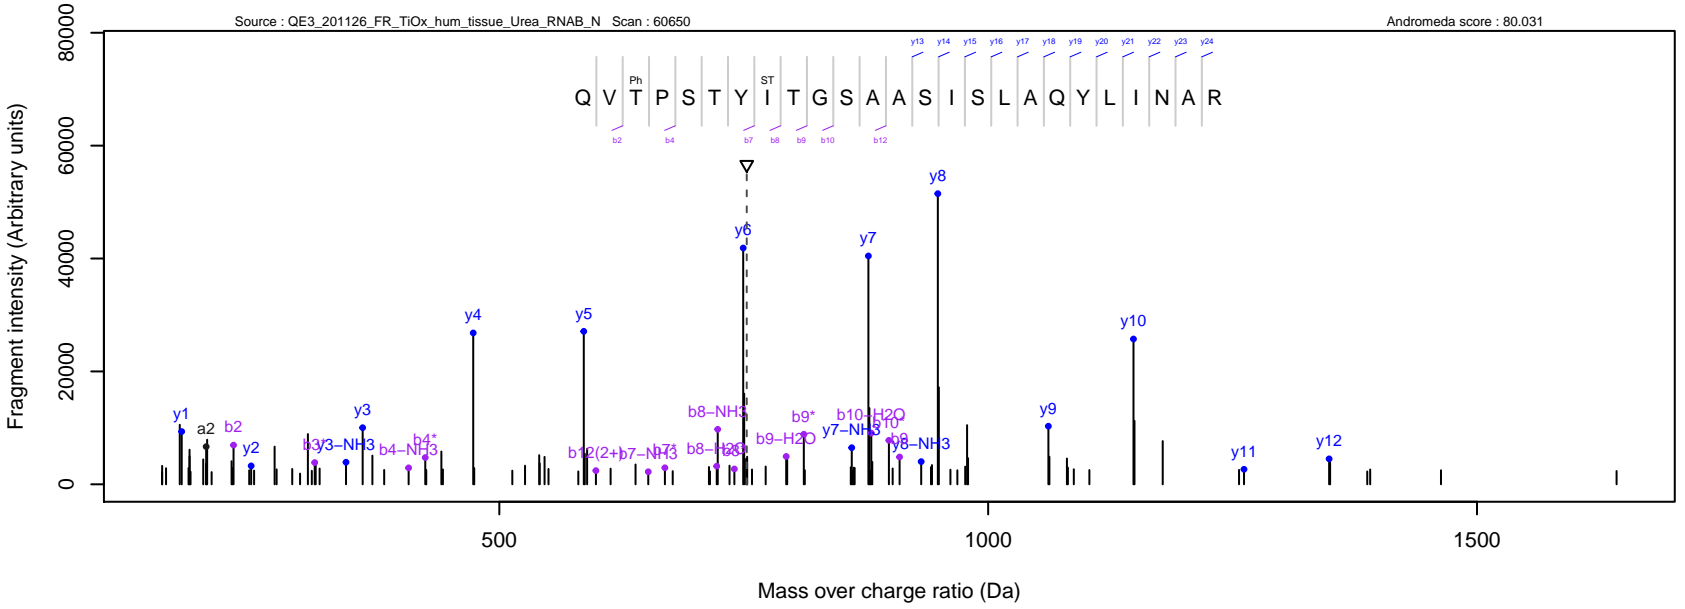

SWEDS(Phospho (STY))PER-2+

Source : QE3\_201126\_FR\_TIOx\_hum\_tissue\_Urea\_RNAB\_B Scan : 13455

Andromeda score : 79.974

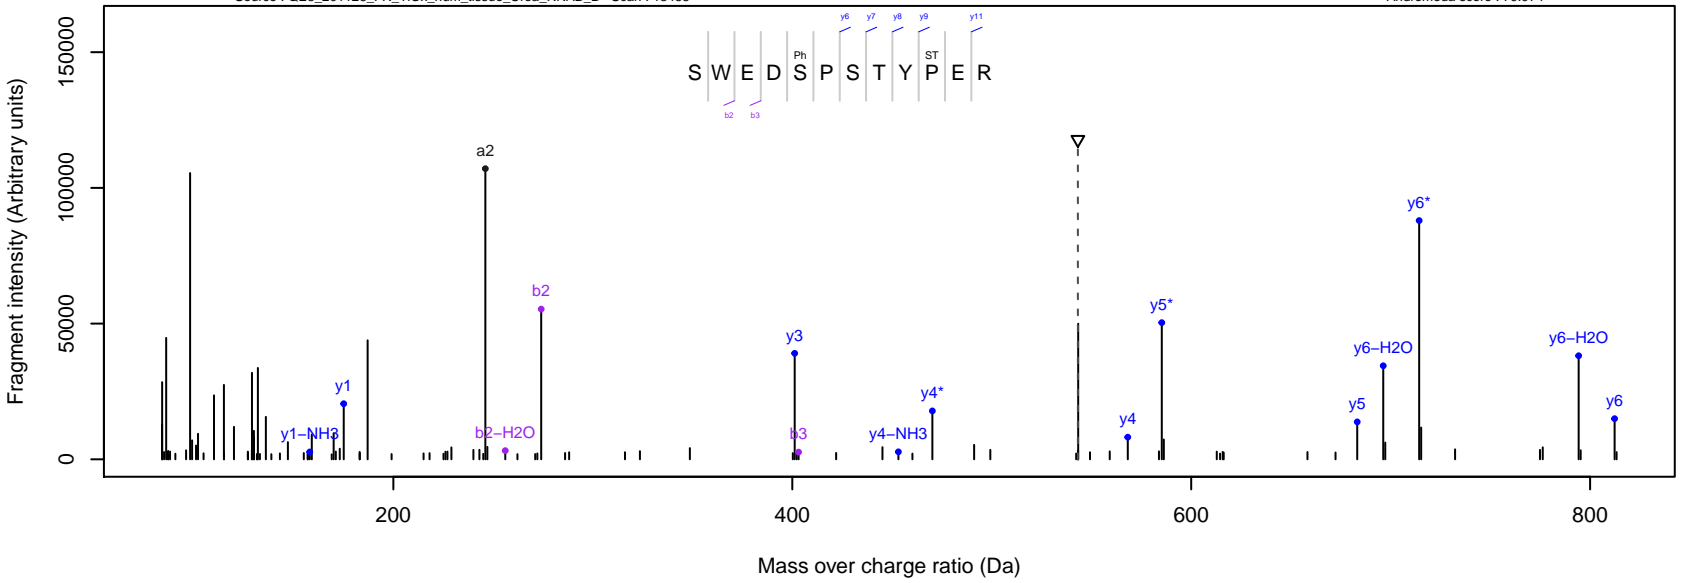

YDDYRDYD(Phospho (STY))PERER-3+

Source : QE3\_201126\_FR\_TIOx\_hum\_tissue\_Urea\_RNAB\_N Scan : 12917

Andromeda score : 79.97

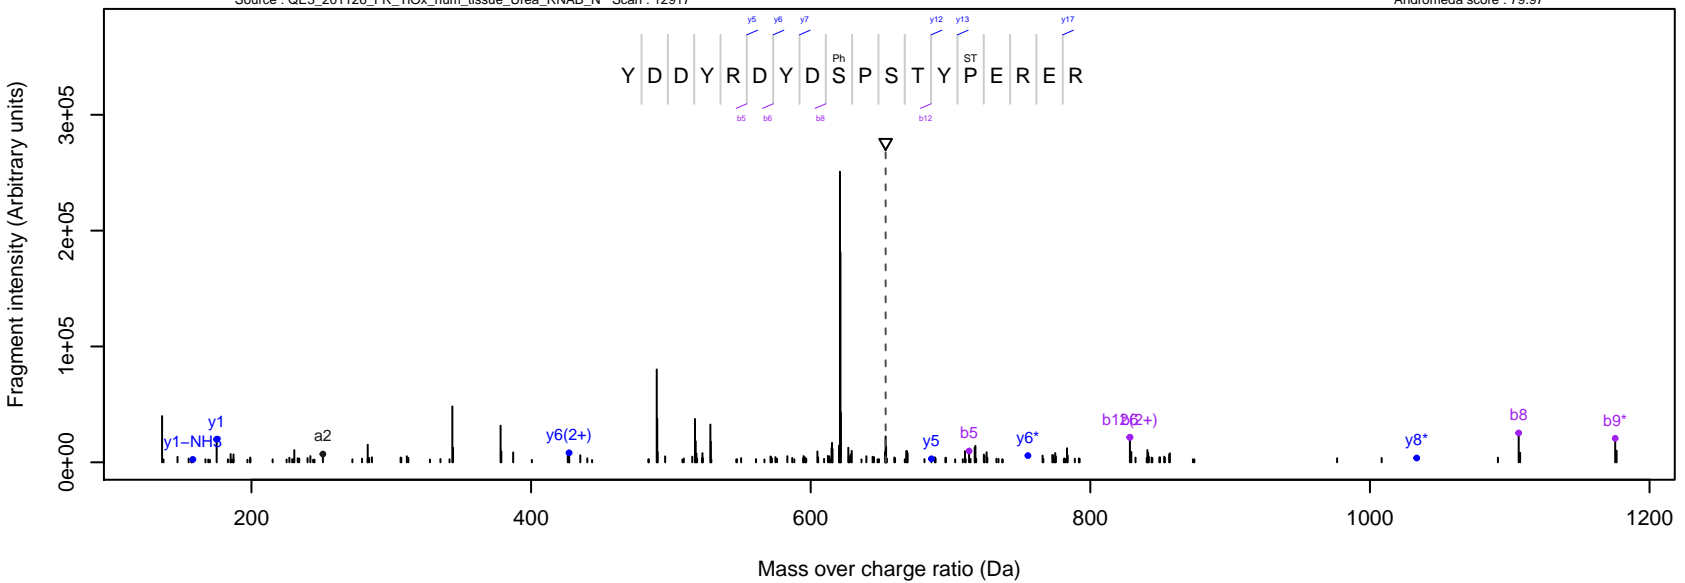

S(Phospho (STY))SGLSTPVPSPSAGHLAHR-3+

Source : QE3\_201126\_FR\_TiOx\_hum\_tissue\_Urea\_RNAB\_N Scan : 20237

Andromeda score : 79.942

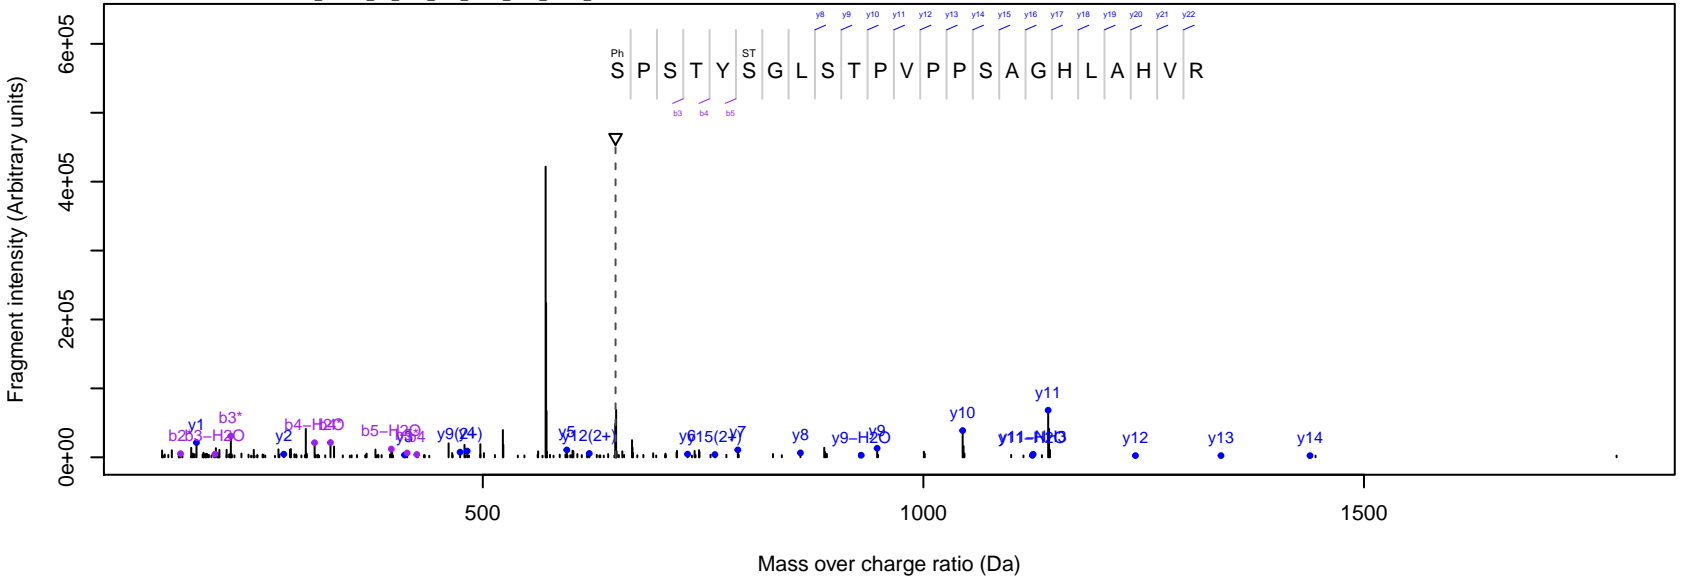

SVGKVEPSSQS(Phospho (STY))PGRS(Phospho (STY))PR-3+

Source : QE3\_201126\_FR\_TiOx\_hum\_tissue\_Urea\_RNAB\_H Scan : 6451

Andromeda score : 79.935

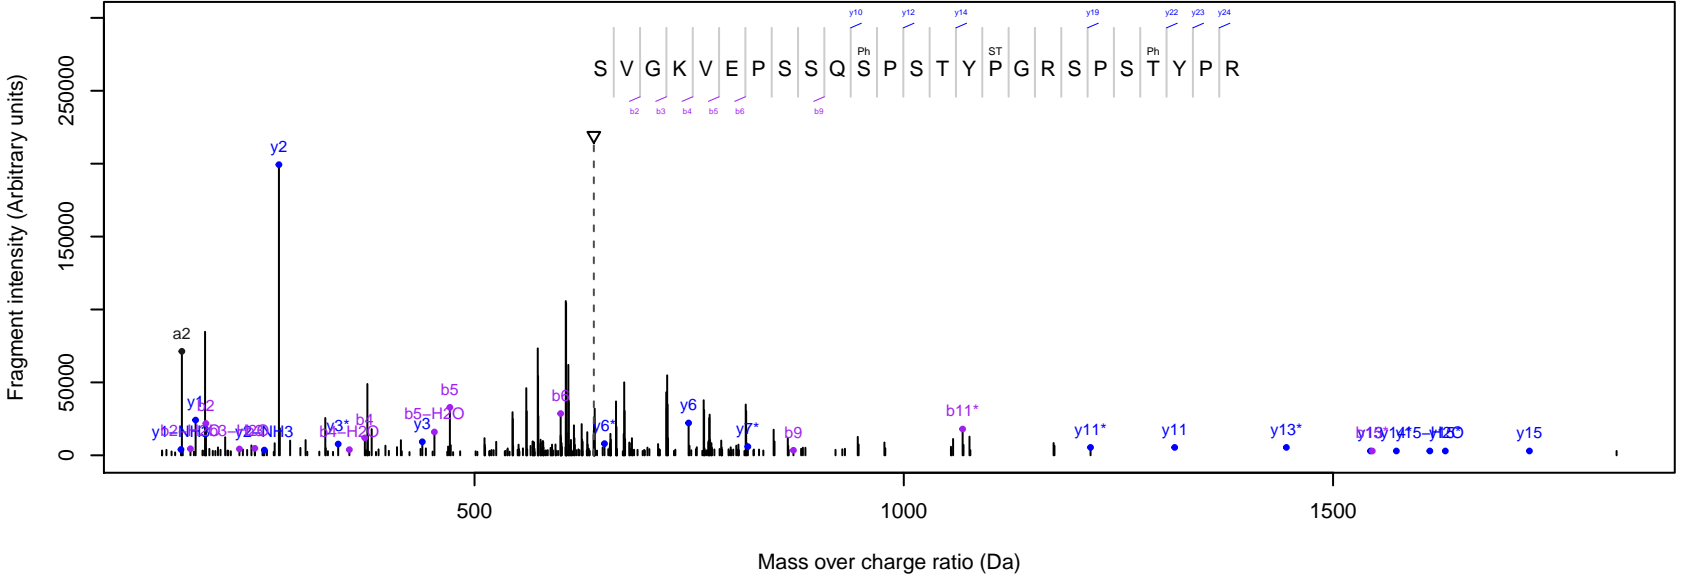

GTGGGQLQLDCLS(Phospho (STY))S(Phospho (STY))S(Phospho (STY))DDEGAAQNSTKPSATK-3+

Source : QE3\_201126\_FR\_TiOx\_hum\_tissue\_Urea\_RNAB\_H Scan : 23364

Andromeda score : 79.917

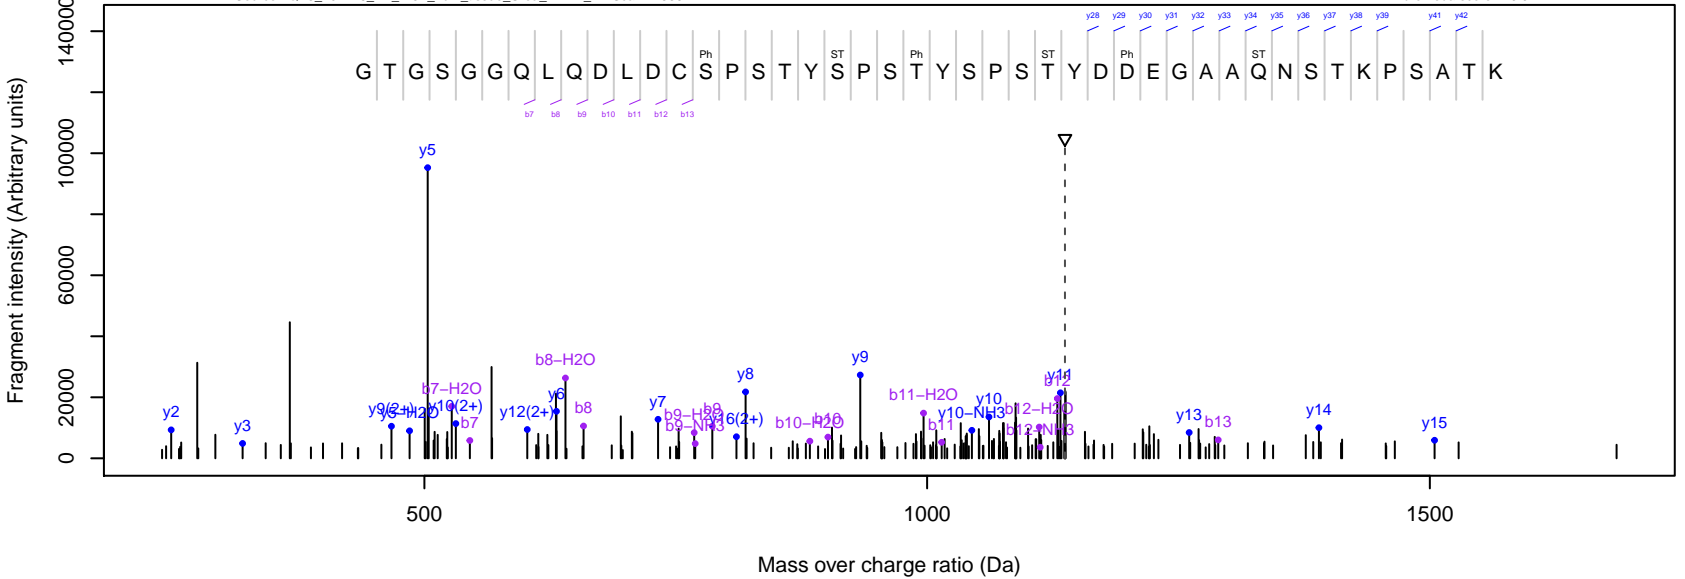

HQNS(Phospho (STY))LPELEAAEAGAPGSGPVDLFR-3+

Source : QE3\_201126\_FR\_TiOx\_hum\_tissue\_Urea\_RNAB\_N Scan : 50267

Andromeda score : 79.911

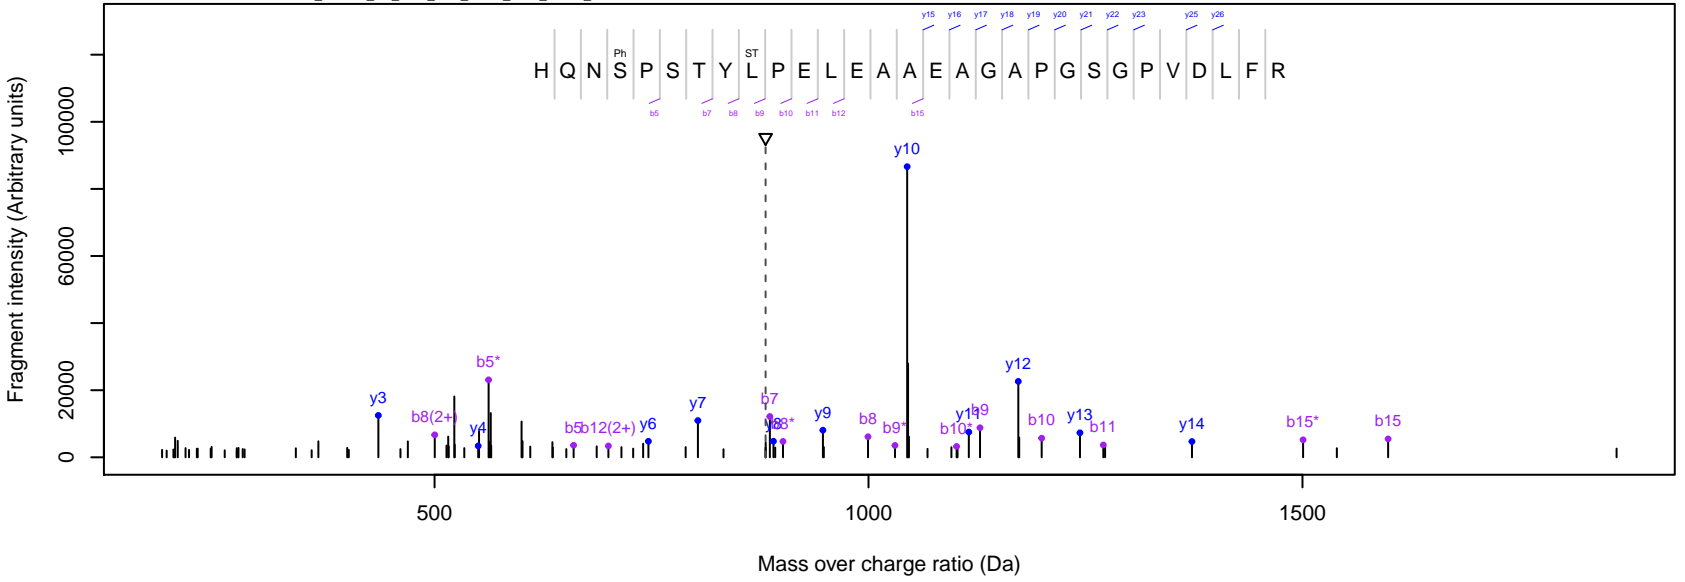

YREYS(Phospho (STY))PPYAPSHQQYPPSHATPLPK-4+

Source : QE3\_201126\_FR\_TiOx\_hum\_tissue\_Urea\_RNAB\_H Scan : 20433

Andromeda score : 79.911

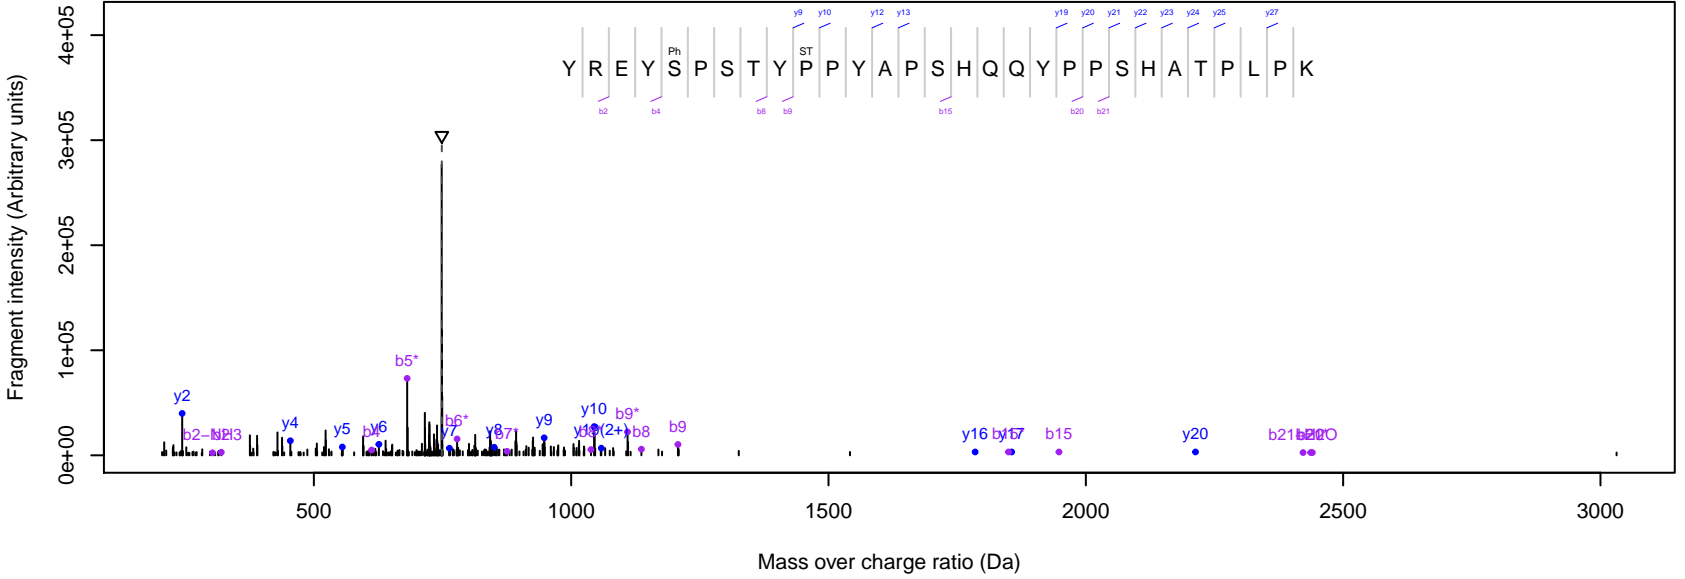

TSSSEIYSRPGSSIPGSPSTYPGHTIYAK-3+

Source : QE3\_201126\_FR\_TiOx\_hum\_tissue\_Urea\_RNAB\_B Scan : 21920

Andromeda score : 79.898

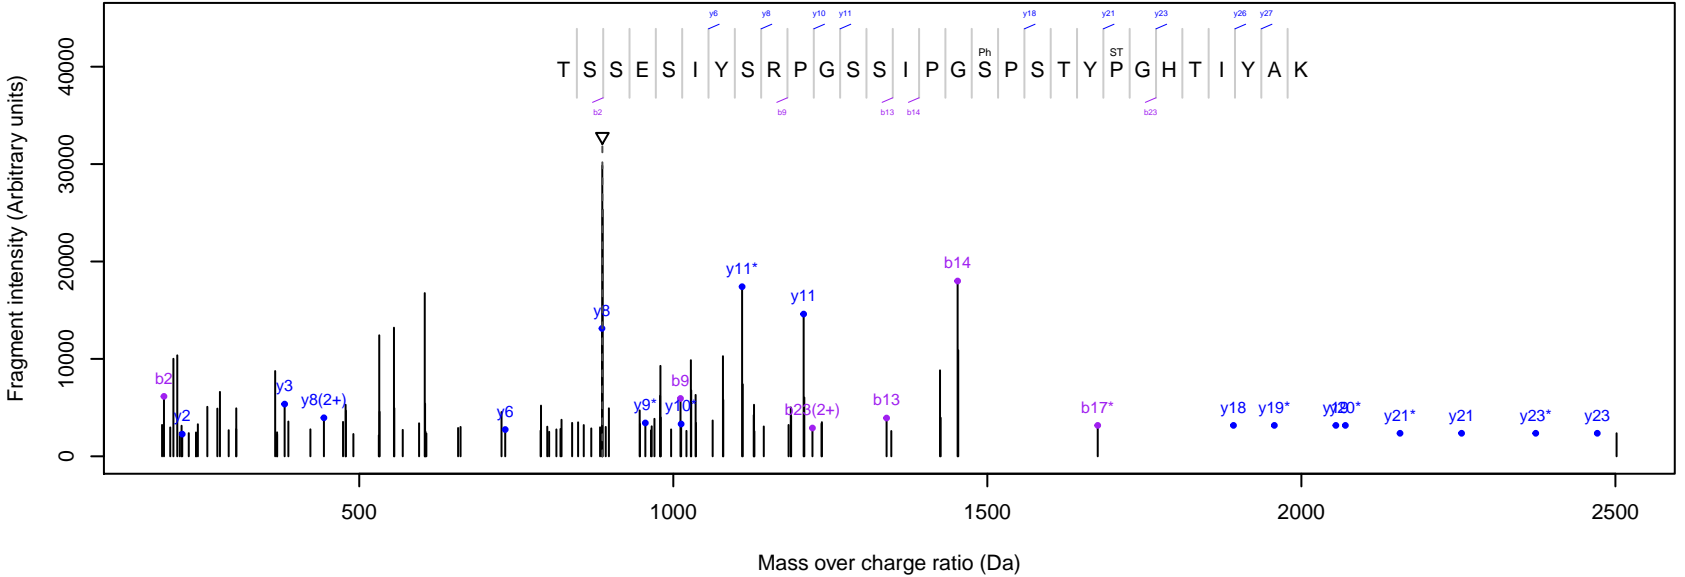

QLS(Phospho (STY))EEQPSGNGVK-2+

Source : QE3\_201126\_FR\_TiOx\_hum\_tissue\_Urea\_RNAB\_B Scan : 10901

Andromeda score : 79.886

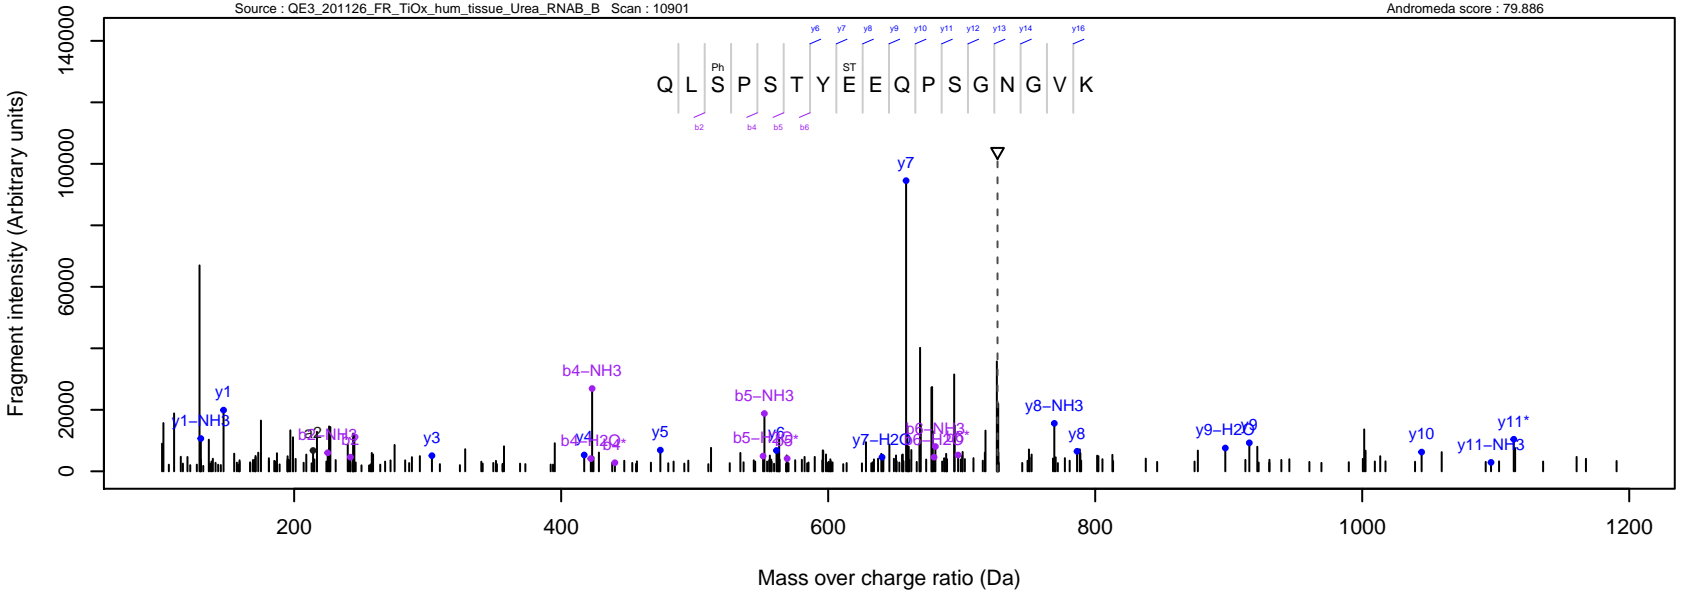

QRGSETGS(Phospho (STY))ETHESDLAPSDKEAPTPK-4+

Source : QE3\_201126\_FR\_TiOx\_hum\_tissue\_Urea\_RNAB\_H Scan : 9071

Andromeda score : 79.884

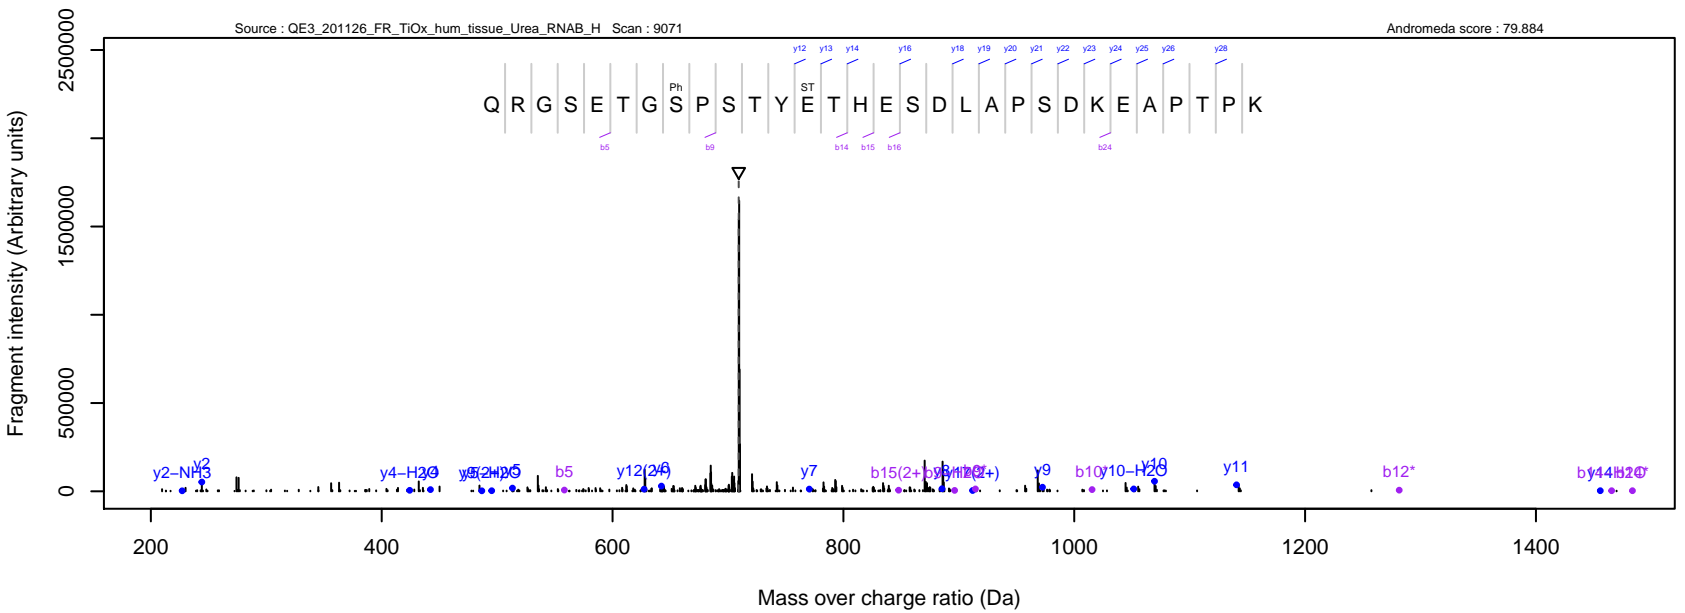

HSS(Phospho (STY))IS(Phospho (STY))PSTLTLK-2+

Source : QE3\_201126\_FR\_TiOx\_hum\_tissue\_Urea\_RNAB\_B Scan : 27273

Andromeda score : 79.875

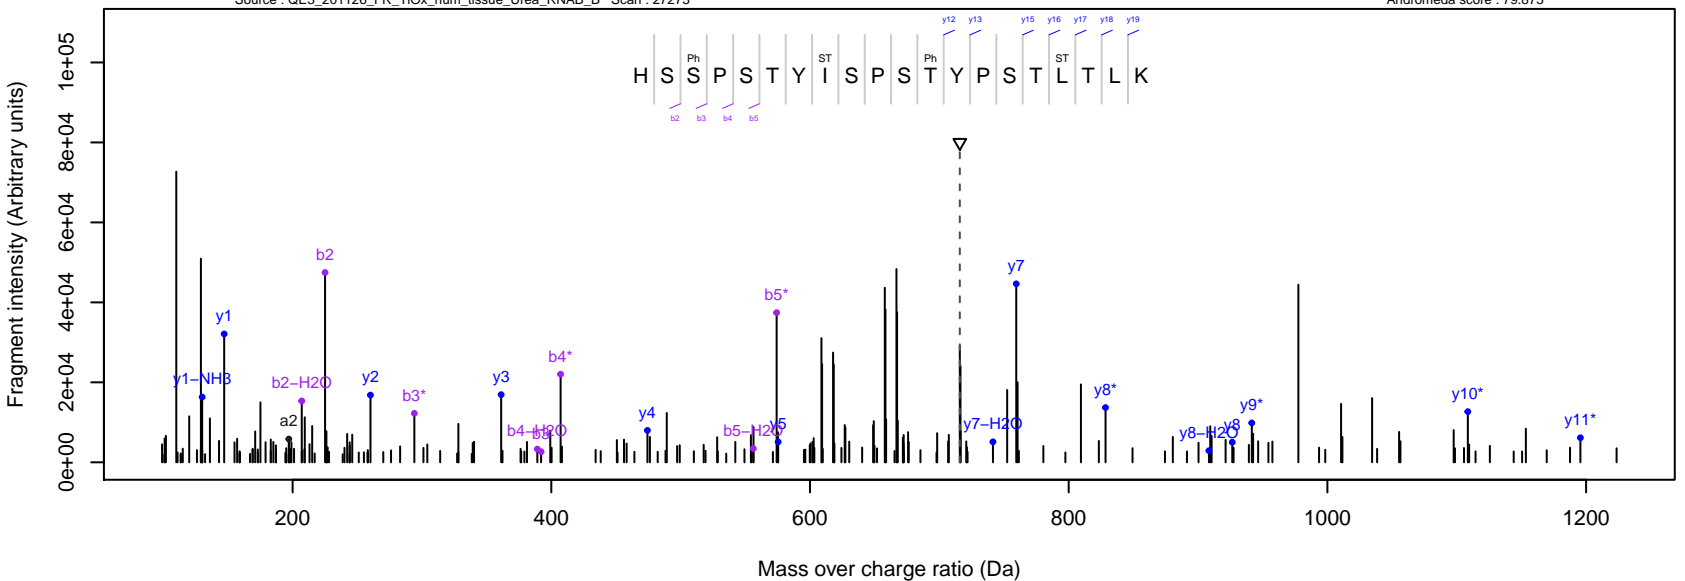

VHS(Phospho (STY))PSGAL EECYVTEIDQDKYAVR-3+

Source : QE3\_201126\_FR\_TiOx\_hum\_tissue\_Urea\_RNAB\_H Scan : 35375

Andromeda score : 79.875

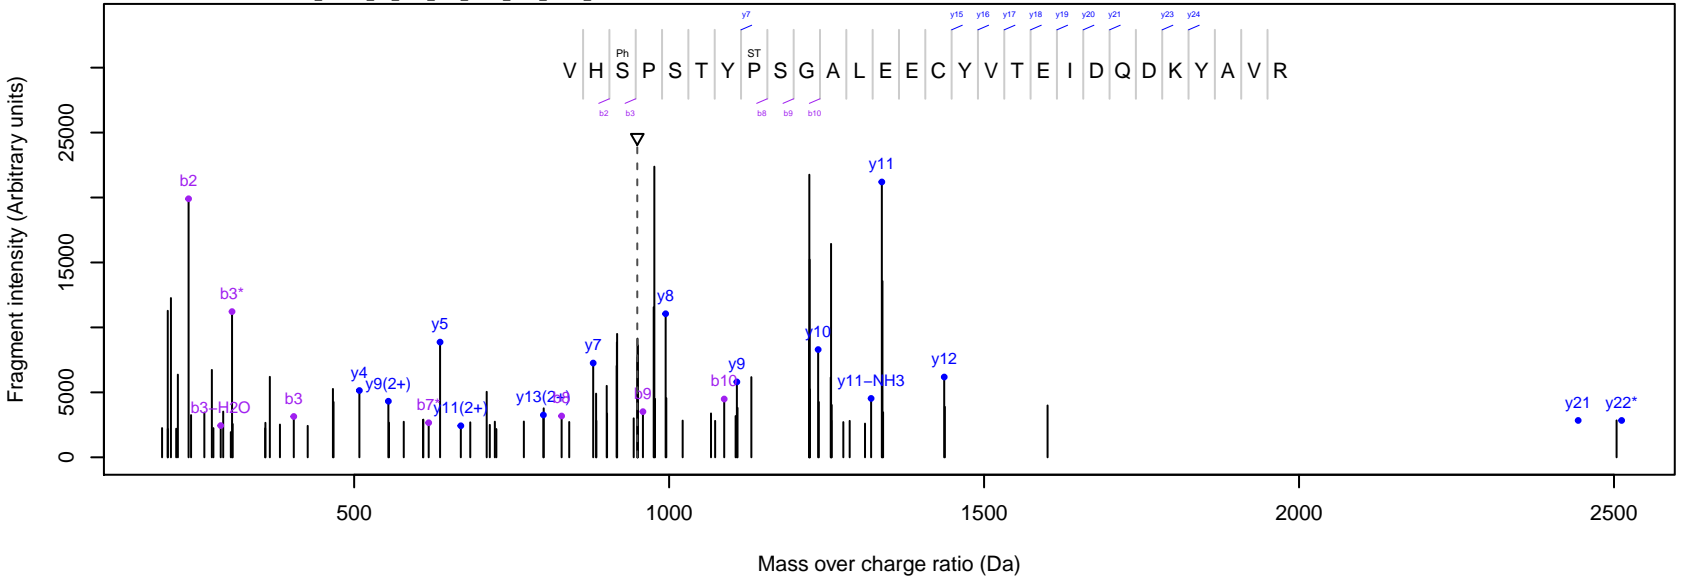

NQGET(Phospho (STY))PTTEVPAPFFLPASLSANNTPTRR-3+

Source : QE3\_201126\_FR\_TiOx\_hum\_tissue\_Urea\_RNAB\_H Scan : 53308

Andromeda score : 79.829

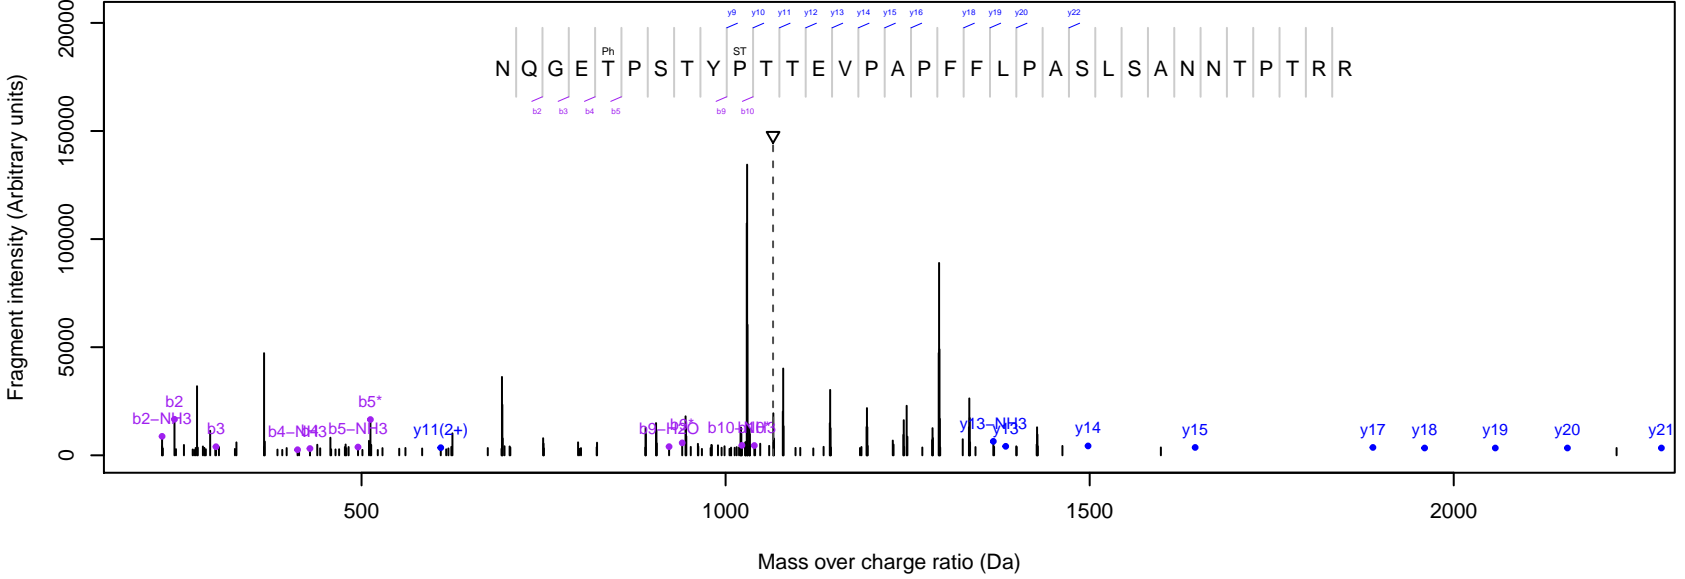

TGSGS(Phospho (STY))PFAGNS(Phospho (STY))PAREGEQDAASLKDVFK-3+

Source : QE3\_201126\_FR\_TiOx\_hum\_tissue\_Urea\_RNAB\_H Scan : 42208

Andromeda score : 79.829

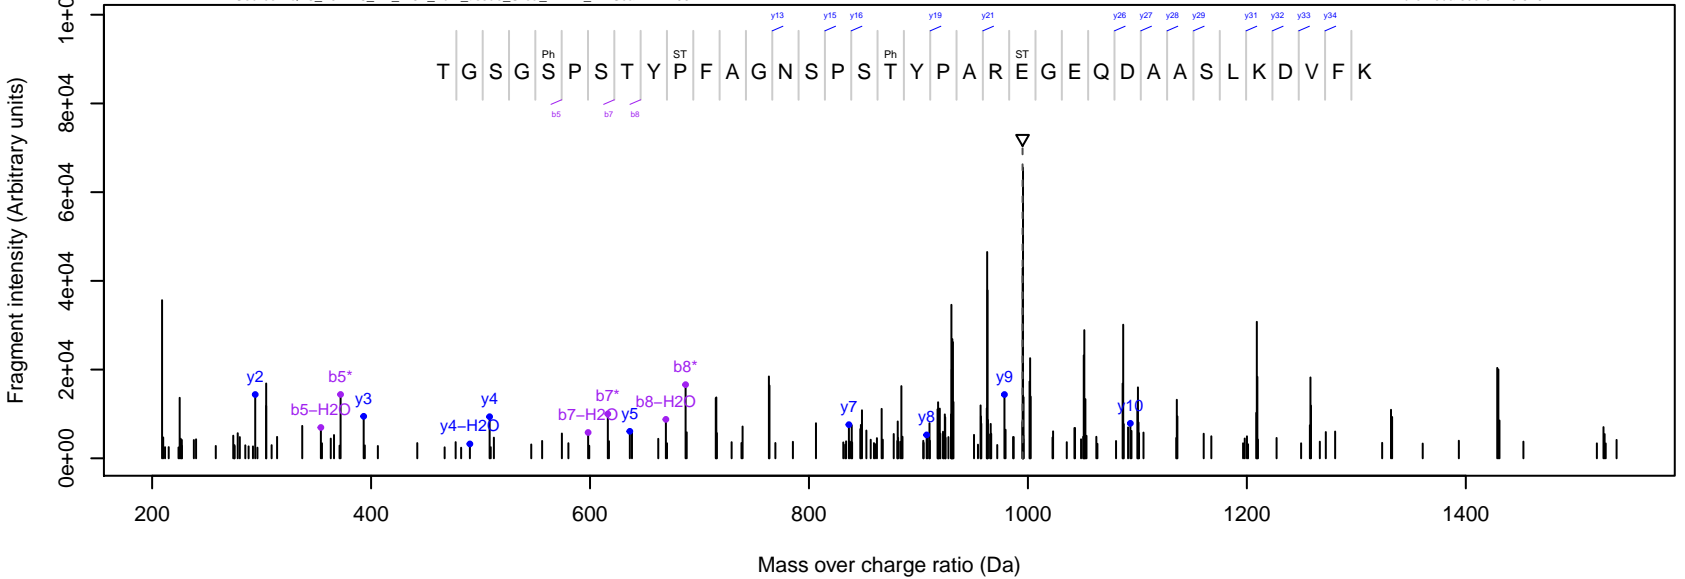

M(Oxidation (M))FGS(Phospho (STY))SVDLGNLGG-2+

Source : QE3\_201126\_FR\_TiOx\_hum\_tissue\_Urea\_RNAB\_H Scan : 53603

Andromeda score : 79.82

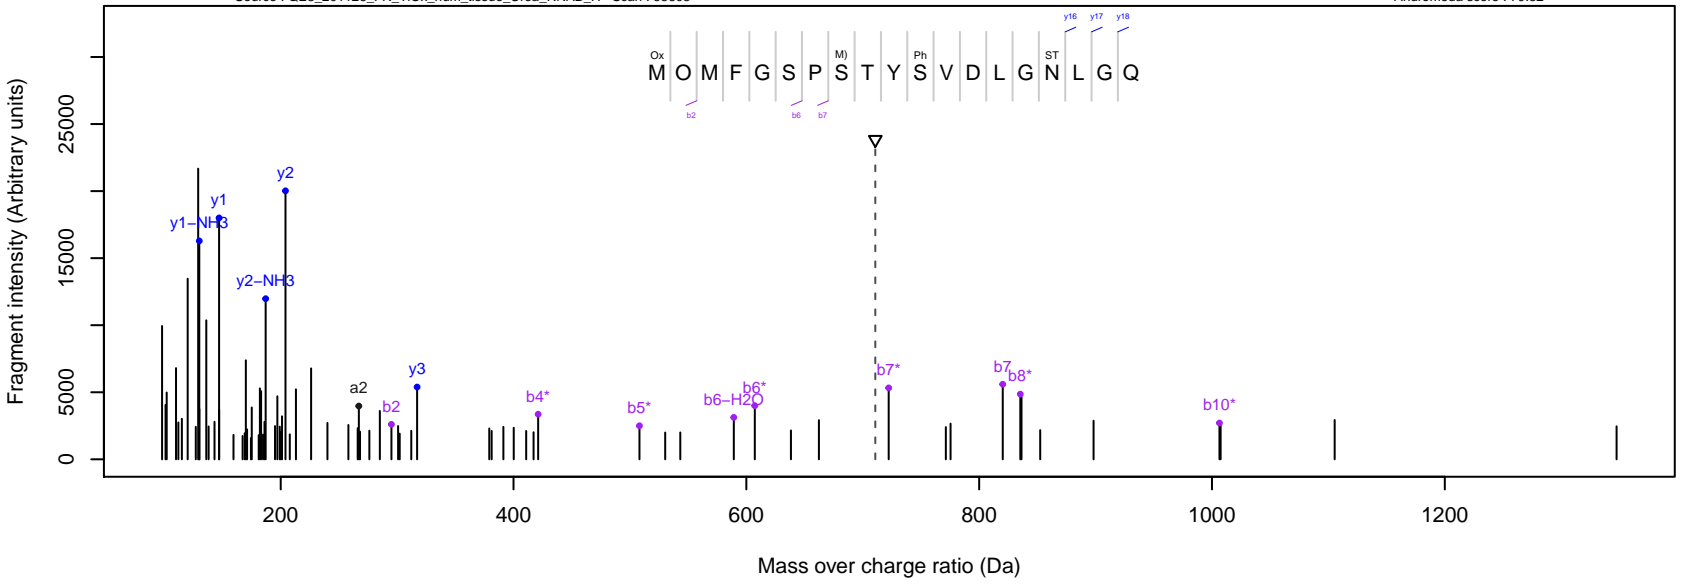

SKS(Phospho (STY))NPDFLK-2+

Source : QE3\_201126\_FR\_TiOx\_hum\_tissue\_Urea\_RNAB\_B Scan : 11866

Andromeda score : 79.82

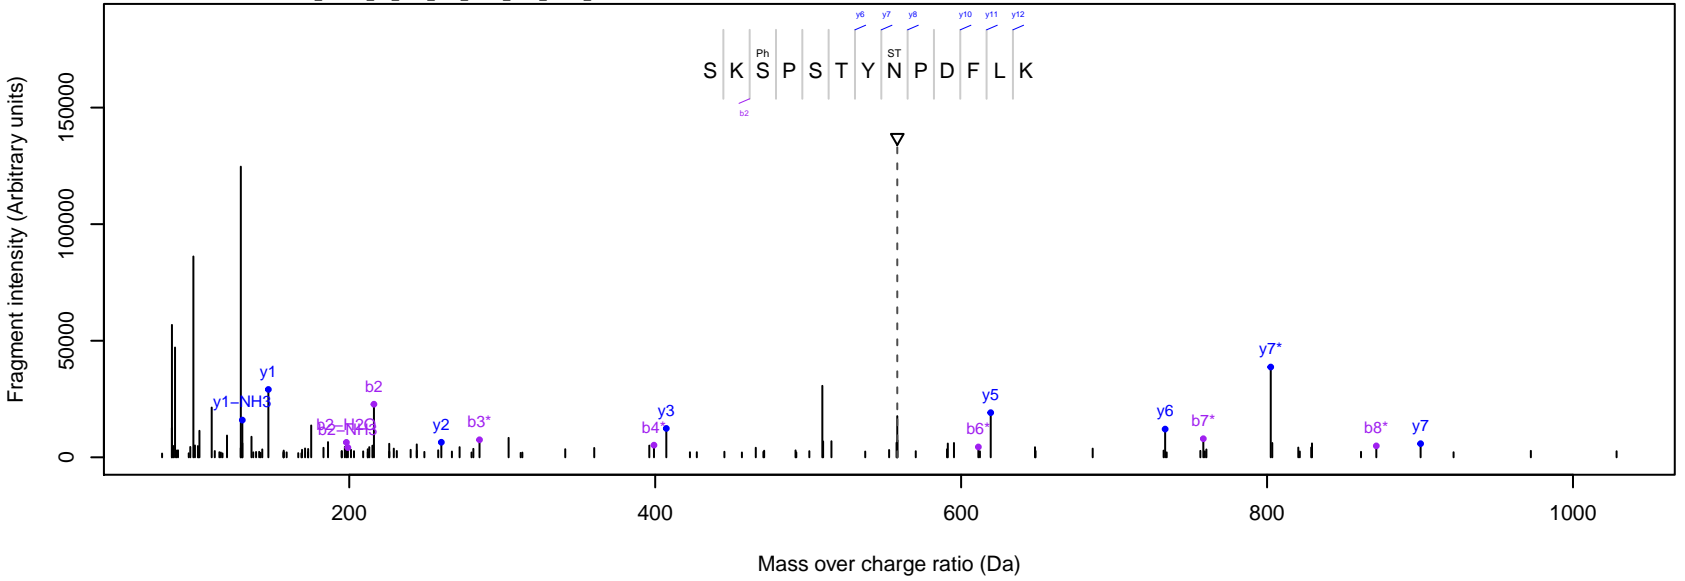

TLSS(Phospho (STY))PTEPVKR-2+

Source : QE3\_201126\_FR\_TiOx\_hum\_tissue\_Urea\_RNAB\_H Scan : 9303

Andromeda score : 79.82

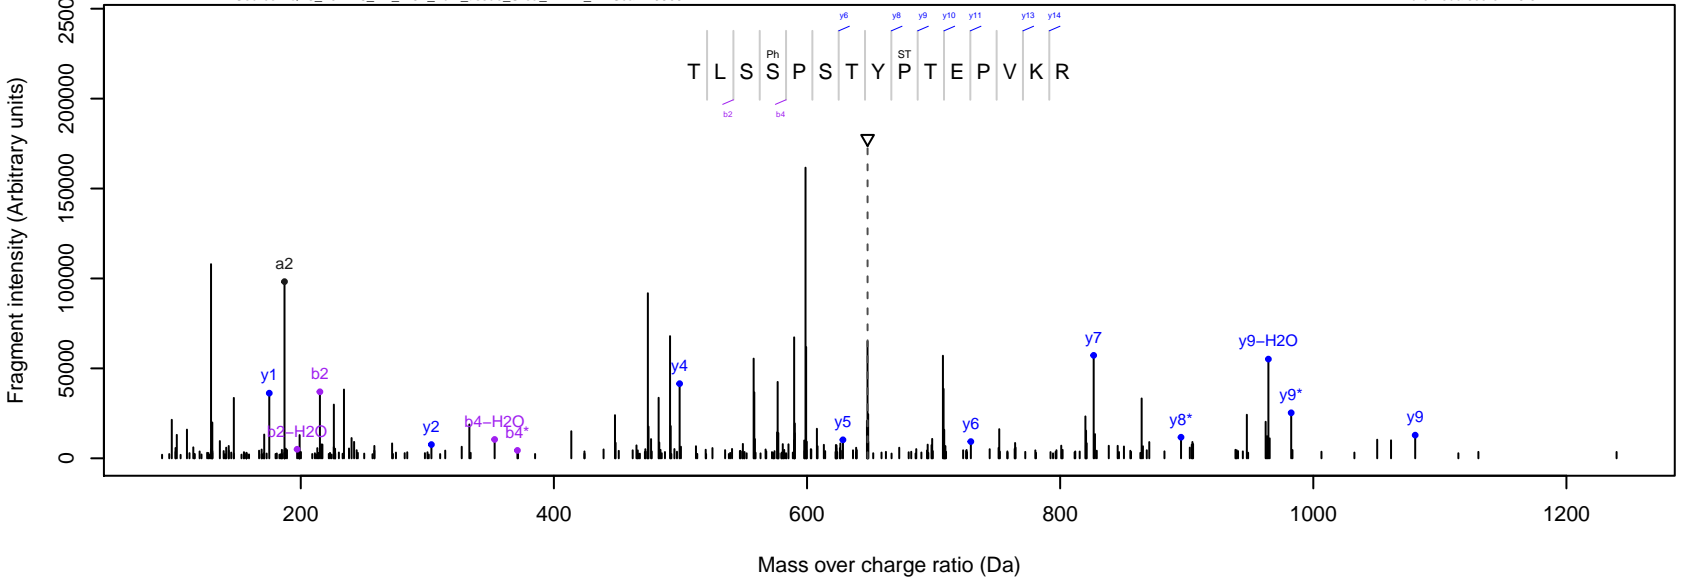



FALGLSGGS(Phospho (STY))LVSMLAR-2+

Source : QE3\_201126\_FR\_TiOx\_hum\_tissue\_Urea\_RNAB\_H Scan : 61481

Andromeda score : 79.81

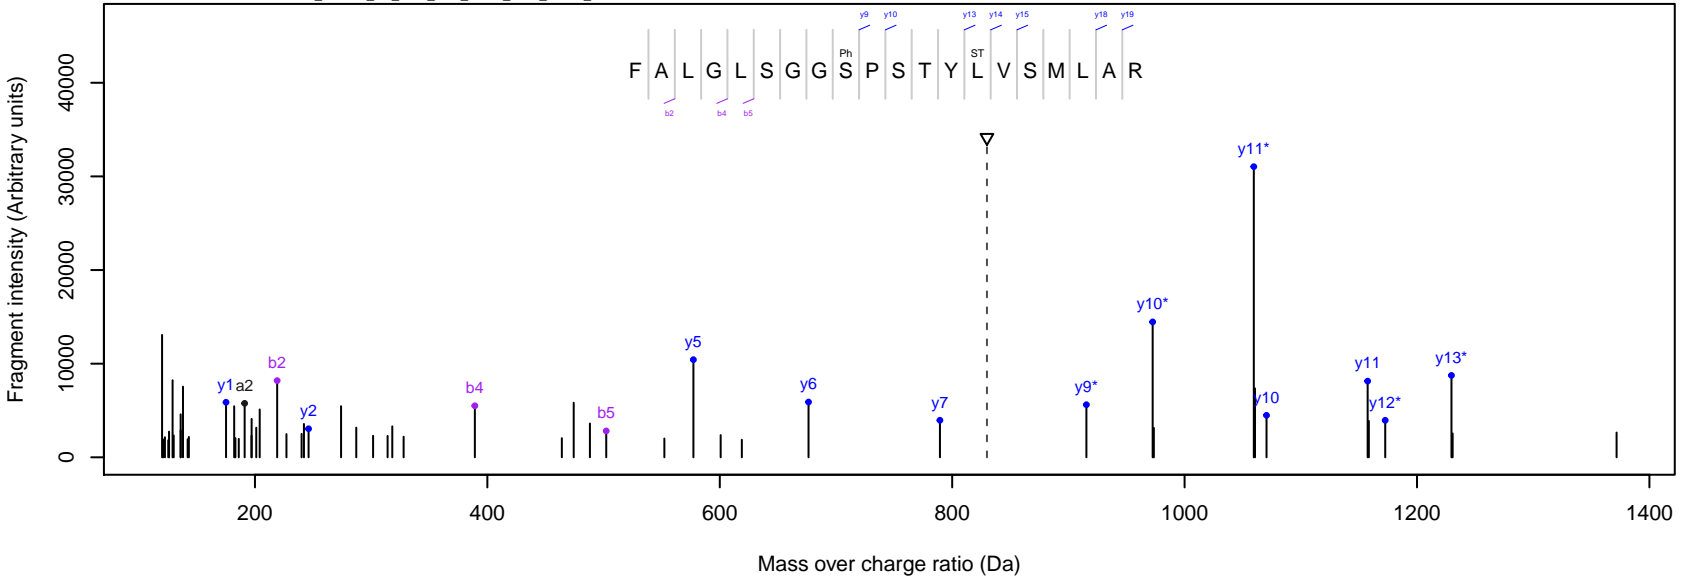

DS(Phospho (STY))SGSVSPNTLSQEEGDQICLYHIR-3+

Source : QE3\_201126\_FR\_TiOx\_hum\_tissue\_Urea\_RNAB\_B Scan : 42225

Andromeda score : 79.783

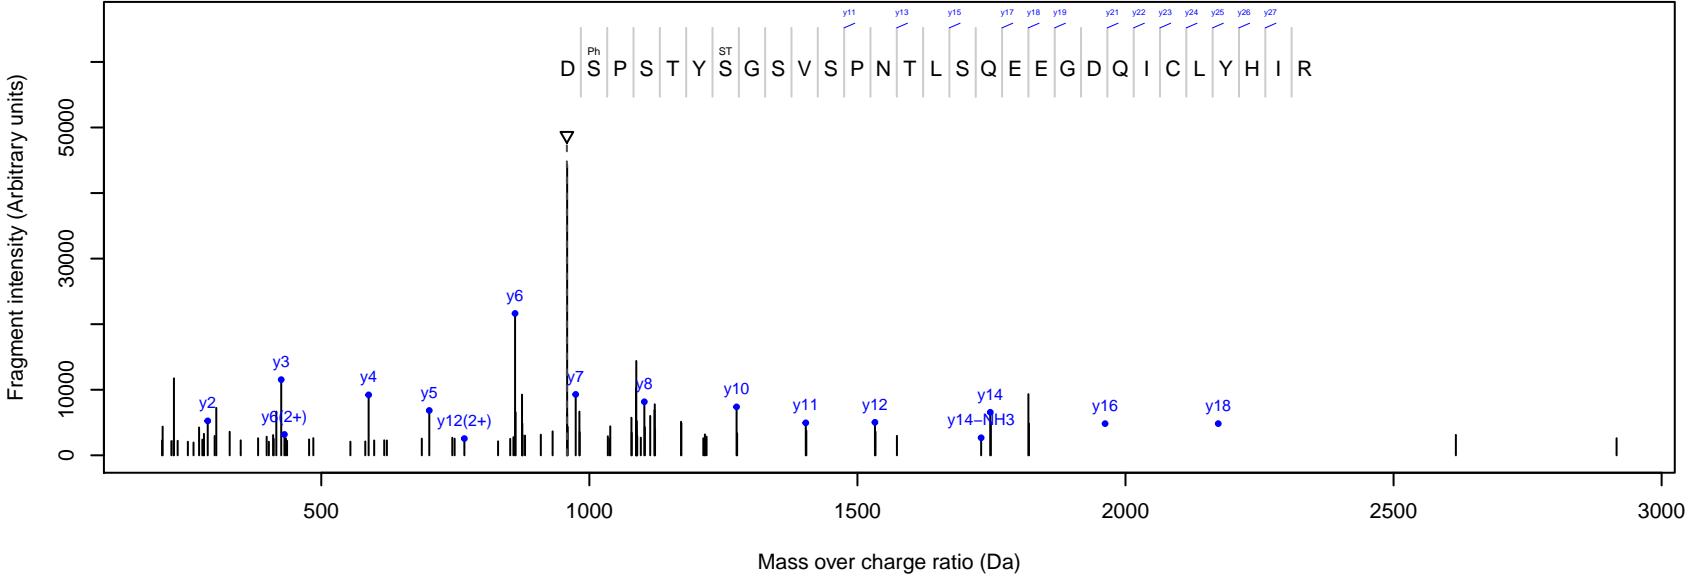

ALAPS(Phospho (STY))PPAEFIYYCVDEDELQPYTNRR-3+

Source : QE3\_201126\_FR\_TiOx\_hum\_tissue\_Urea\_RNAB\_H Scan : 54847

Andromeda score : 79.762

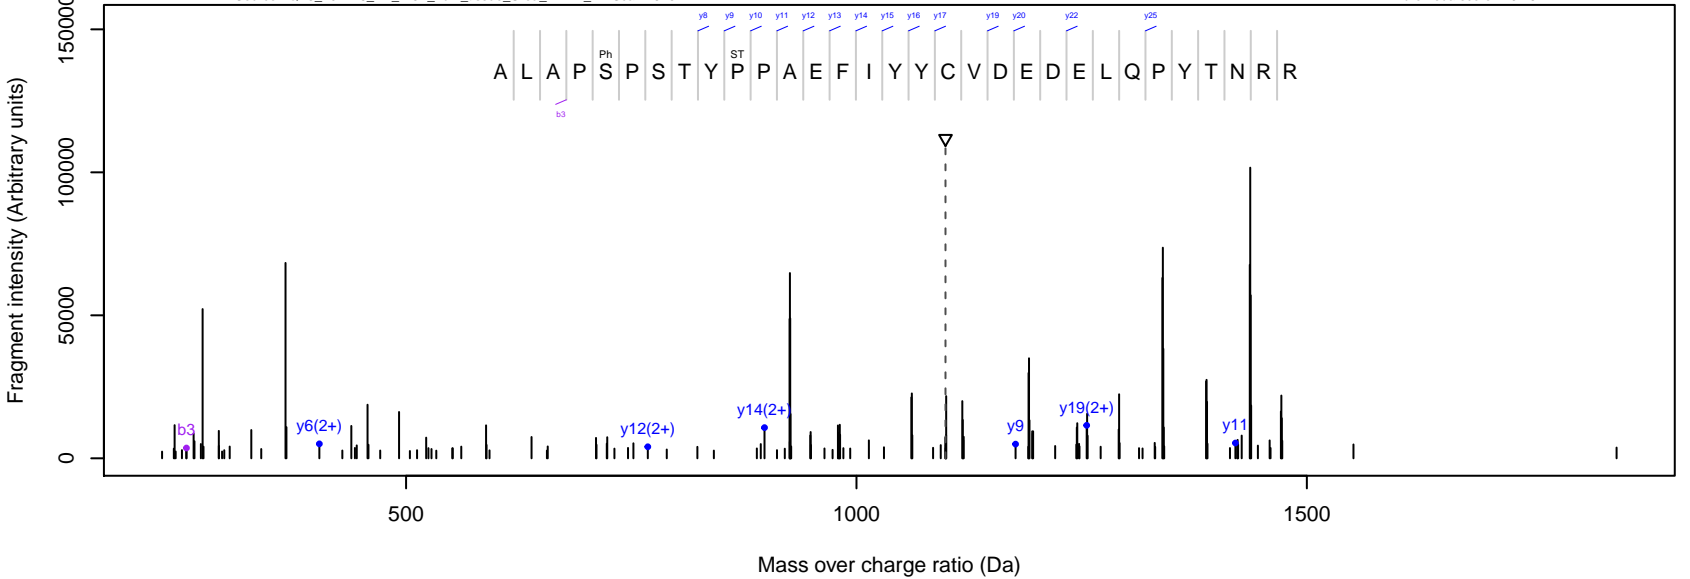

EGPPAPPVKPPPS(Phospho (STY))PVNIR-3+

Source : QE3\_201126\_FR\_TiOx\_hum\_tissue\_Urea\_RNAB\_B Scan : 26066

Andromeda score : 79.762

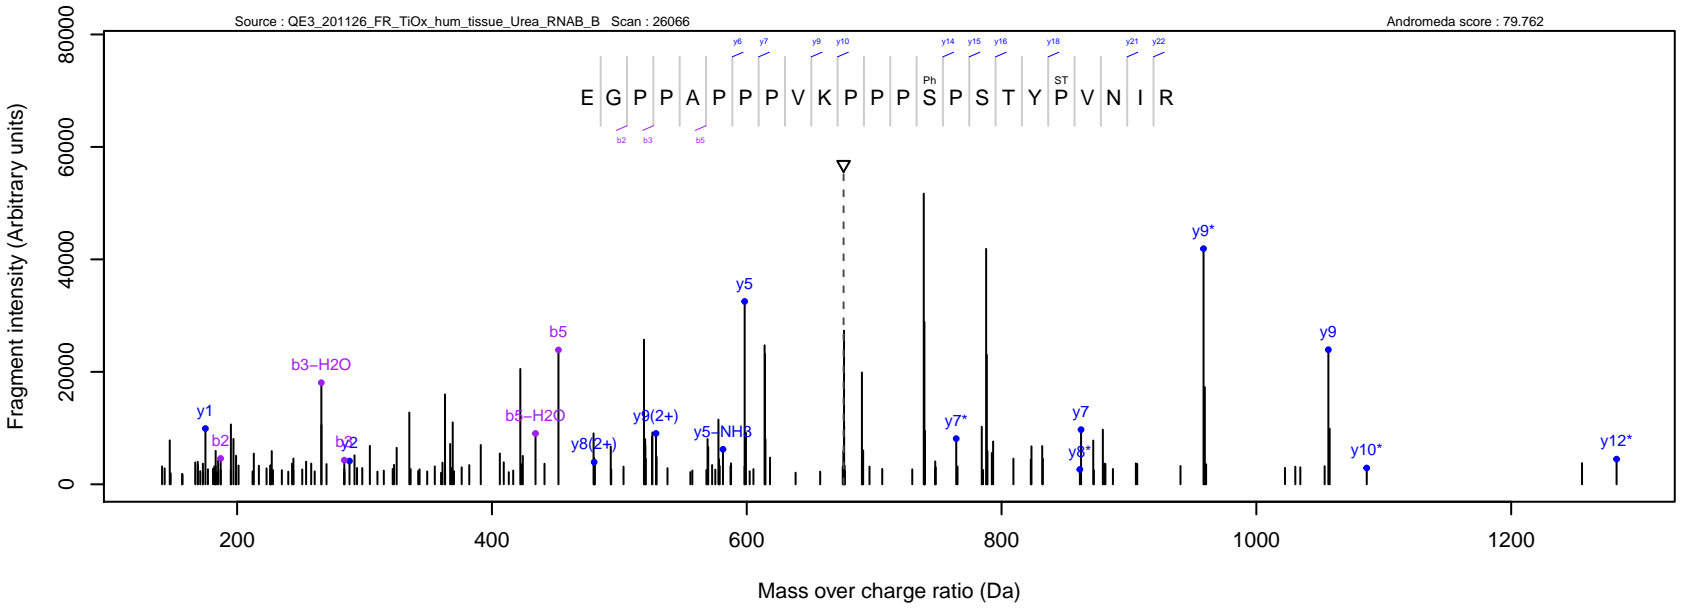

GHLTSLQDAMCETMEQQLSSDPDS(Phospho (STY))DPD-3+

Source : QE3\_201126\_FR\_TiOx\_hum\_tissue\_Urea\_RNAB\_H Scan : 54872

Andromeda score : 79.731

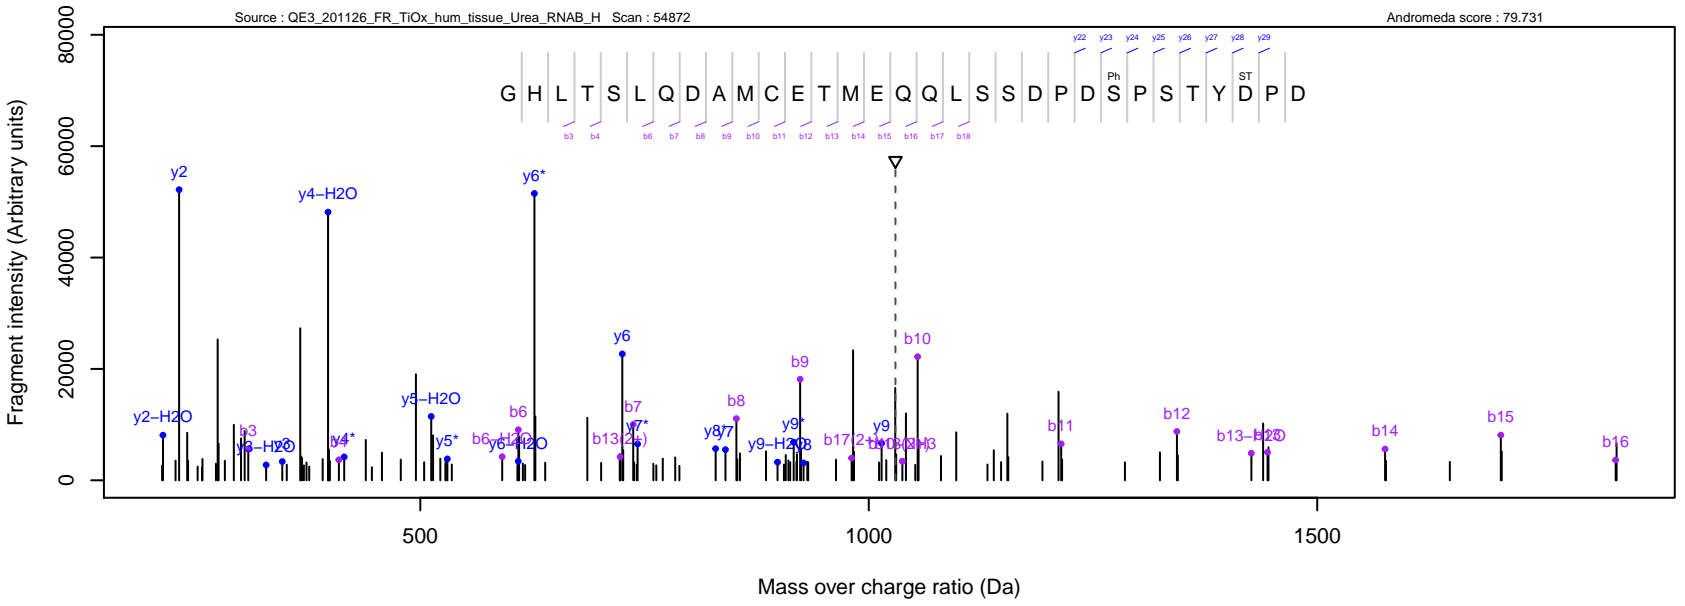

GS(Phospho (STY))FTLLWPSR-2+

Source : QE3\_201126\_FR\_TiOx\_hum\_tissue\_Urea\_RNAB\_H Scan : 54198

Andromeda score : 79.659

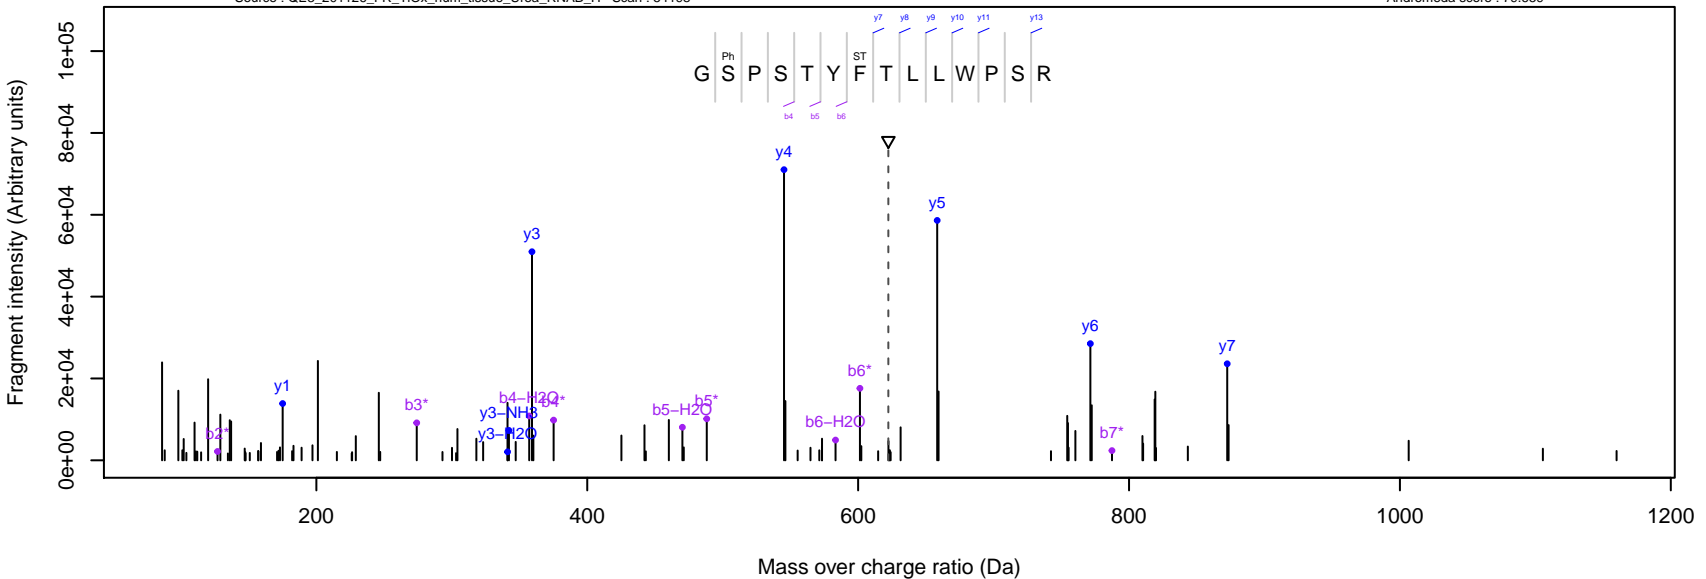

RCS(Phospho (STY))LSVAQE-2+

Source : QE3\_201126\_FR\_TiOx\_hum\_tissue\_Urea\_RNAB\_H Scan : 13654

Andromeda score : 79.659

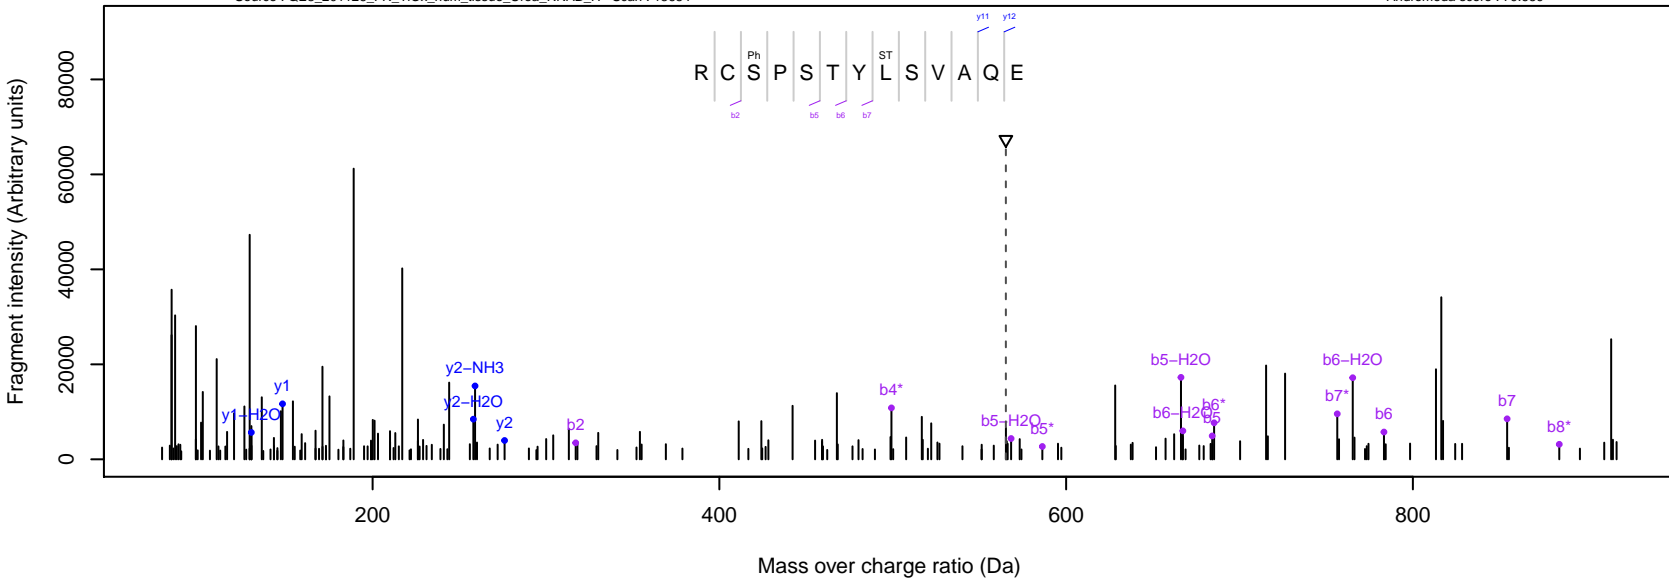

ITVHKIS(Phospho (STY))PQHR-3+

Source : QE3\_201126\_FR\_TiOx\_hum\_tissue\_Urea\_RNAB\_H Scan : 5967

Andromeda score : 79.652

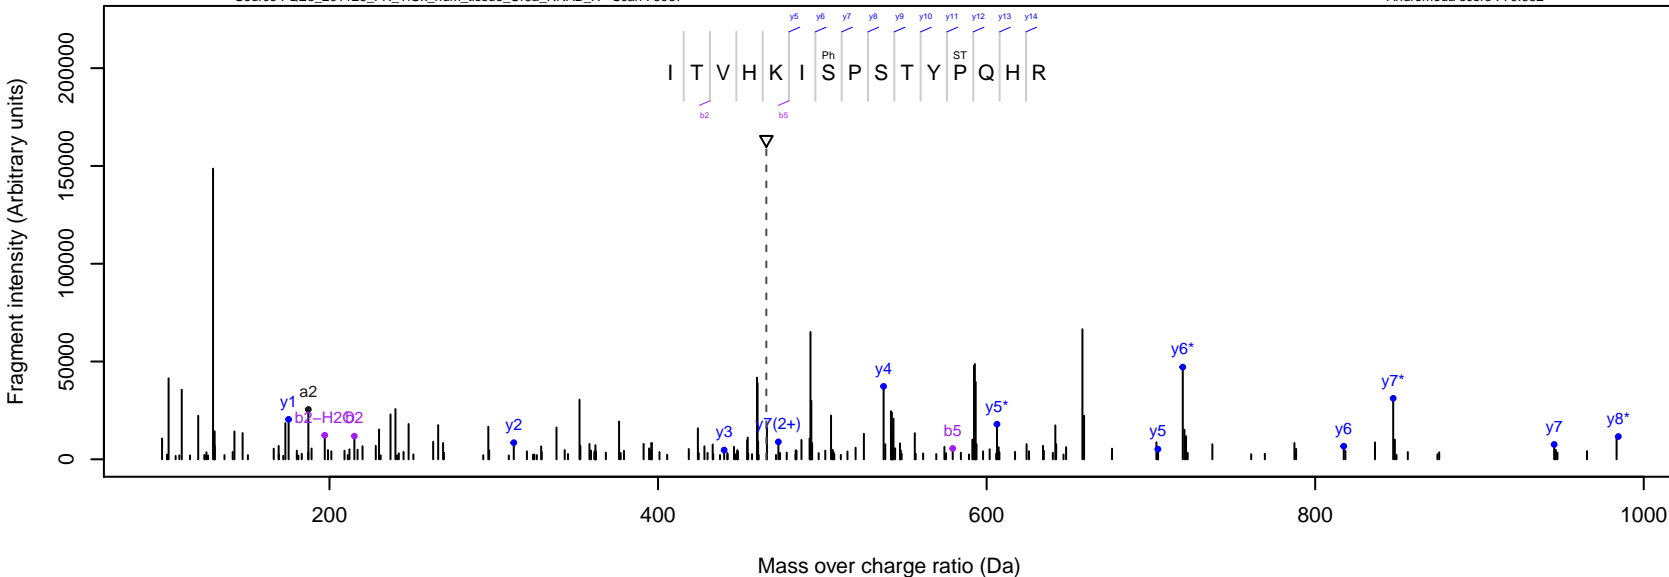

YSPTS(Phospho (STY))PTYSPTPK-2+

Source : QE3\_201126\_FR\_TiOx\_hum\_tissue\_Urea\_RNAB\_N Scan : 20419

Andromeda score : 79.652

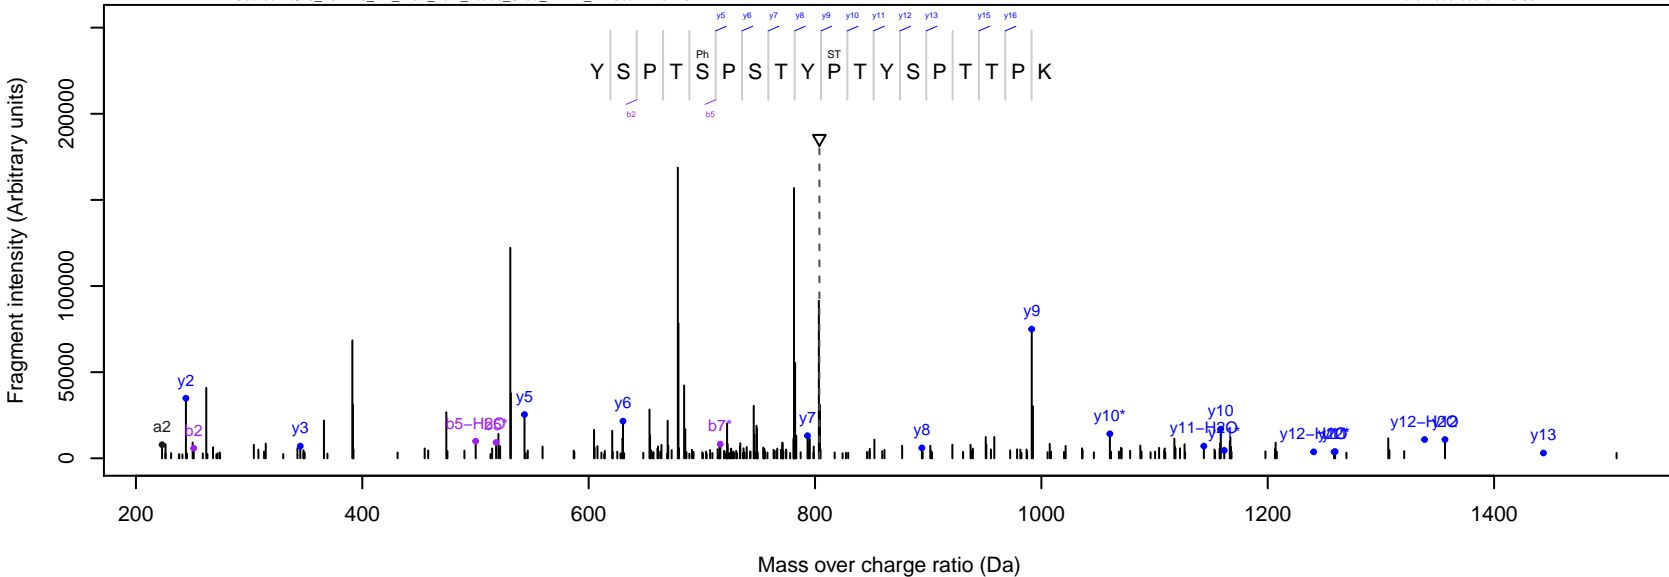

RVASGPSGEGIS(Phospho (STY))PQSAQAPQAPGDNHVPVLR-4+

Source : QE3\_201126\_FR\_TiOx\_hum\_tissue\_Urea\_RNAB\_N Scan : 28322

Andromeda score : 79.643

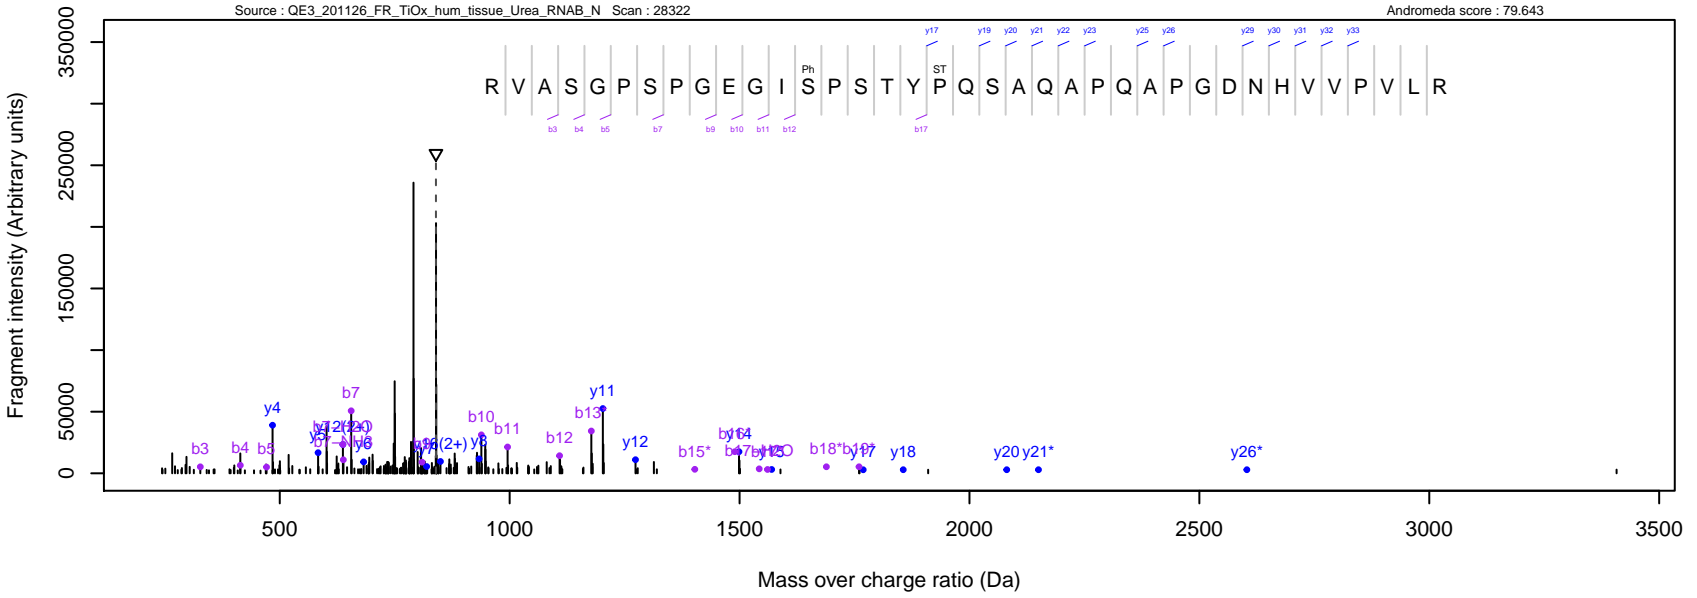

LDKLPVHVYEVDEVDKDEDAAS(Phospho (STY))LGSQK-4+

Source : QE3\_201126\_FR\_TiOx\_hum\_tissue\_Urea\_RNAB\_B Scan : 31338

Andromeda score : 79.636

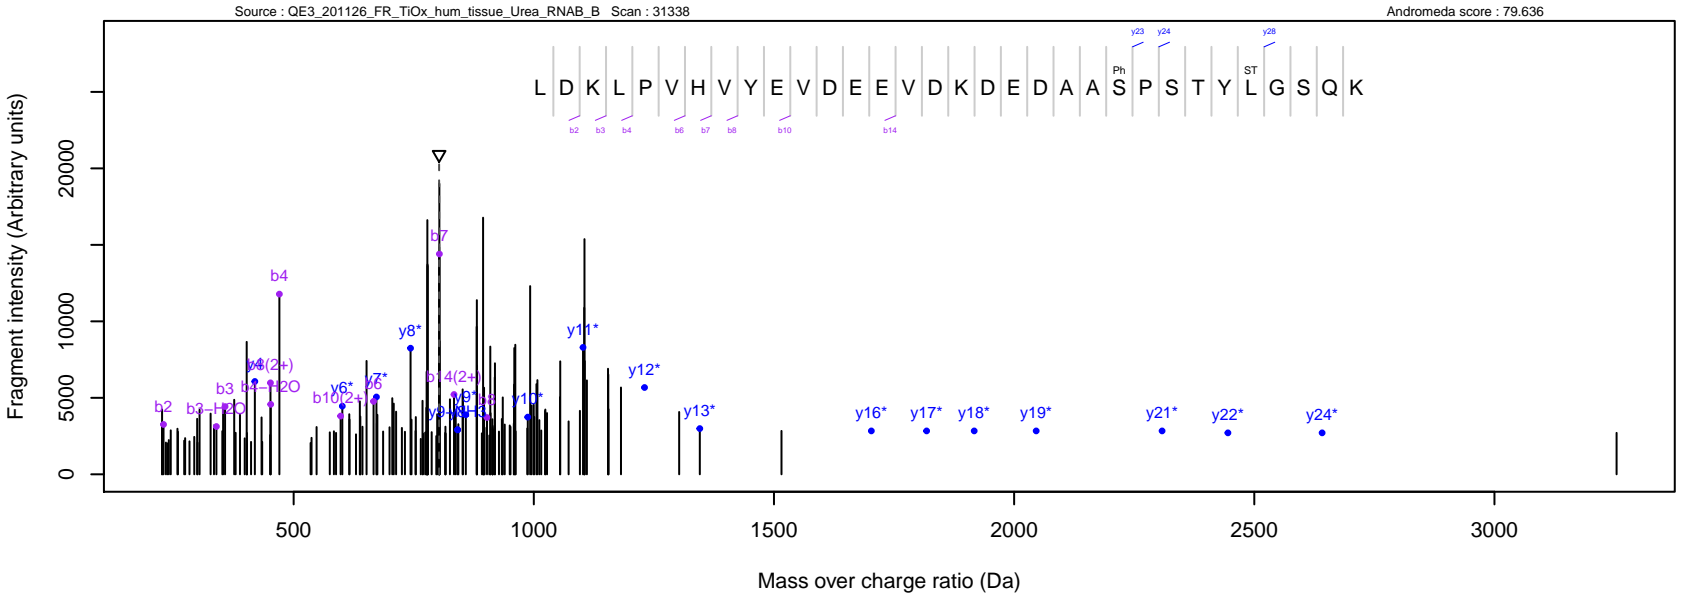

ELAPEPWVERAT(Phospho (STY))PT-2+

Source : QE3\_201126\_FR\_TiOx\_hum\_tissue\_Urea\_RNAB\_H Scan : 38078

Andromeda score : 79.614

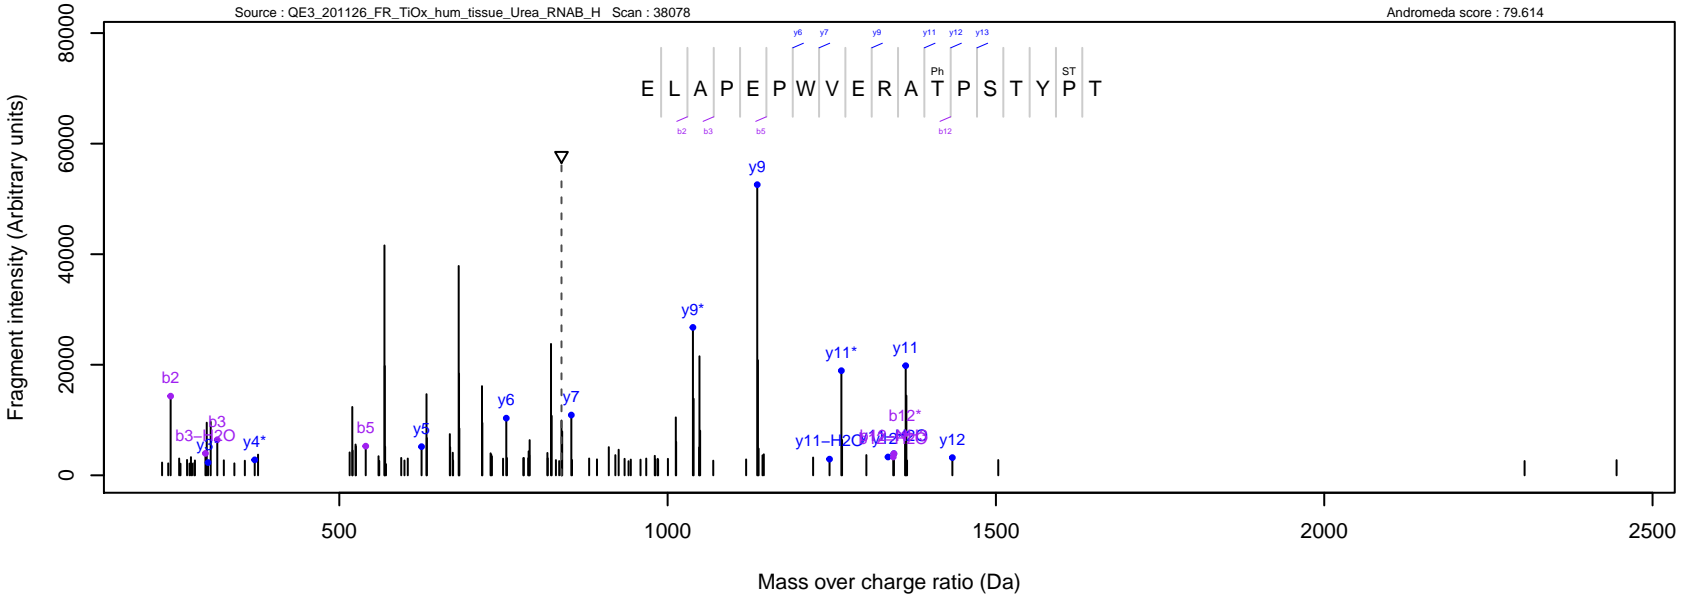

ASLPAGLVGTPPEESPSTYPSSEPREEDVLGFLPGPR-3+

Source : QE3\_201126\_FR\_TiOx\_hum\_tissue\_Urea\_RNAB\_B Scan : 56085

Andromeda score : 79.59

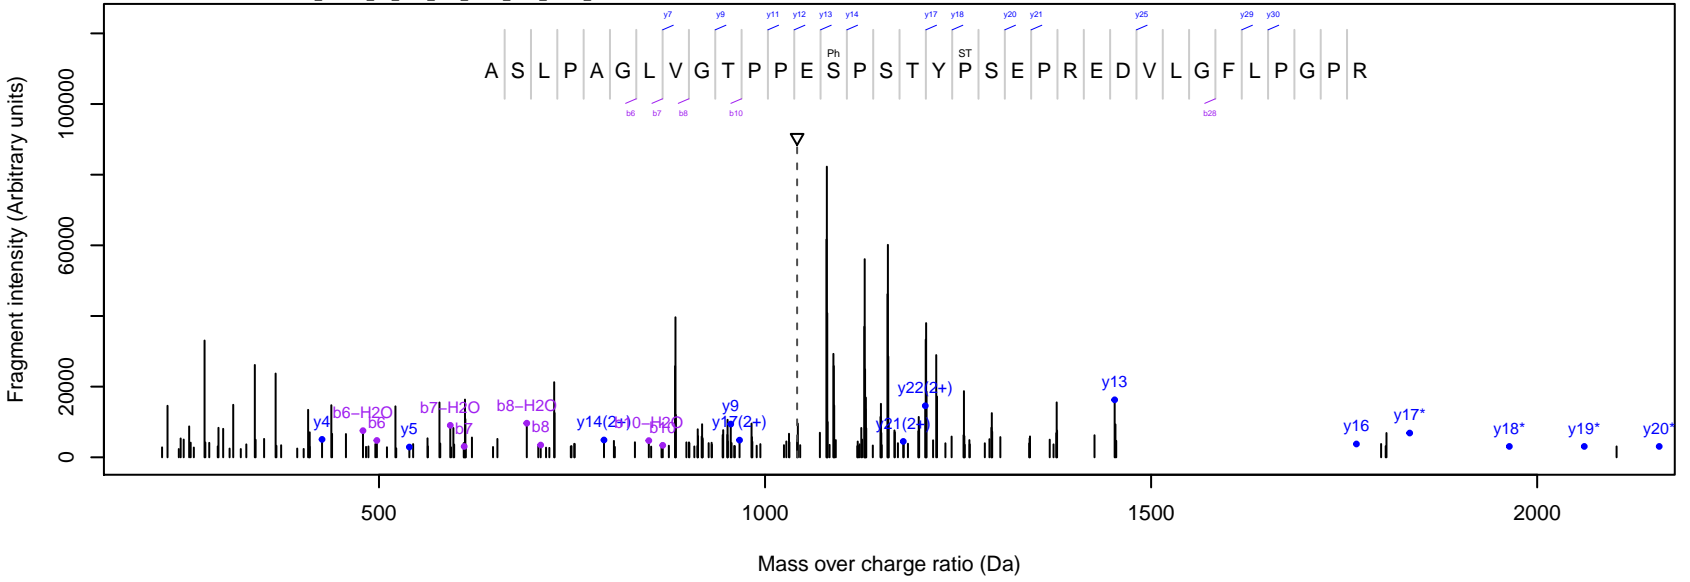

SPASSS(Phospho (STY))LPAFLPTTHSPGPQPASLPGLTAQLLSPK-3+

Source : QE3\_201126\_FR\_TiOx\_hum\_tissue\_Urea\_RNAB\_H Scan : 55521

Andromeda score : 79.574

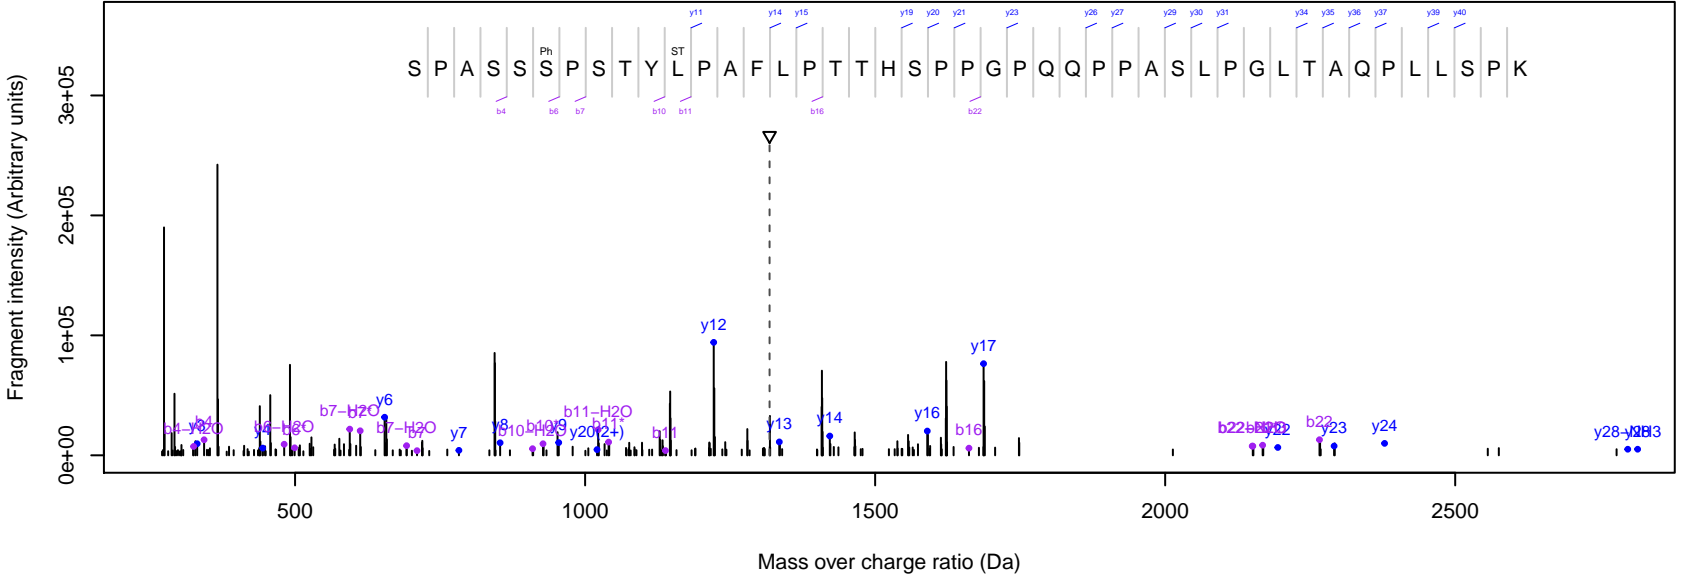

QS(Phospho (STY))SFEIPDDVPLPAGWEMAK-2+

Source : QE3\_201126\_FR\_TiOx\_hum\_tissue\_Urea\_RNAB\_N Scan : 59729

Andromeda score : 79.565

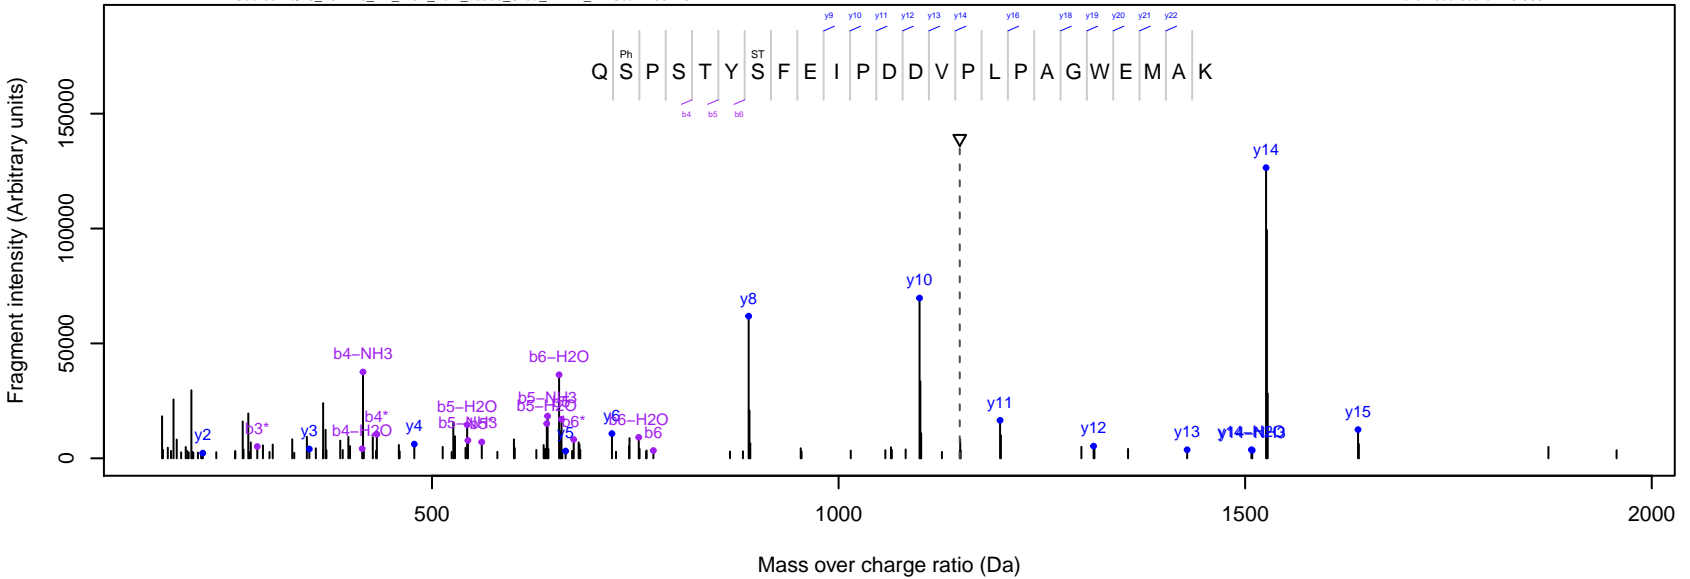

DLTHS(Phospho (STY))DS(Phospho (STY))ESS(Phospho (STY))LHM(Oxidation (M))SDR-3+

Source : QE3\_201126\_FR\_TiOx\_hum\_tissue\_Urea\_RNAB\_N Scan : 12806

Andromeda score : 79.511

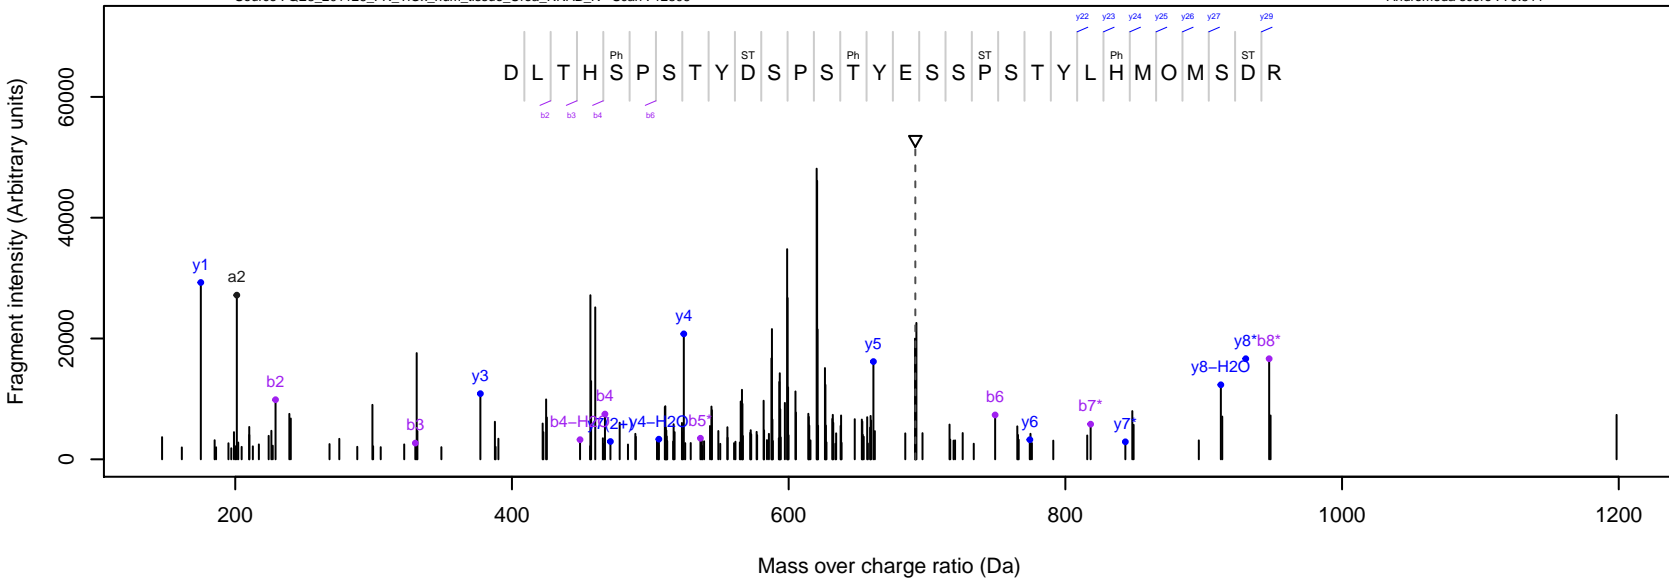

NDS(Phospho (STY))LPVLR-2+

Source : QE3\_201126\_FR\_TiOx\_hum\_tissue\_Urea\_RNAB\_H Scan : 28468

Andromeda score : 79.489

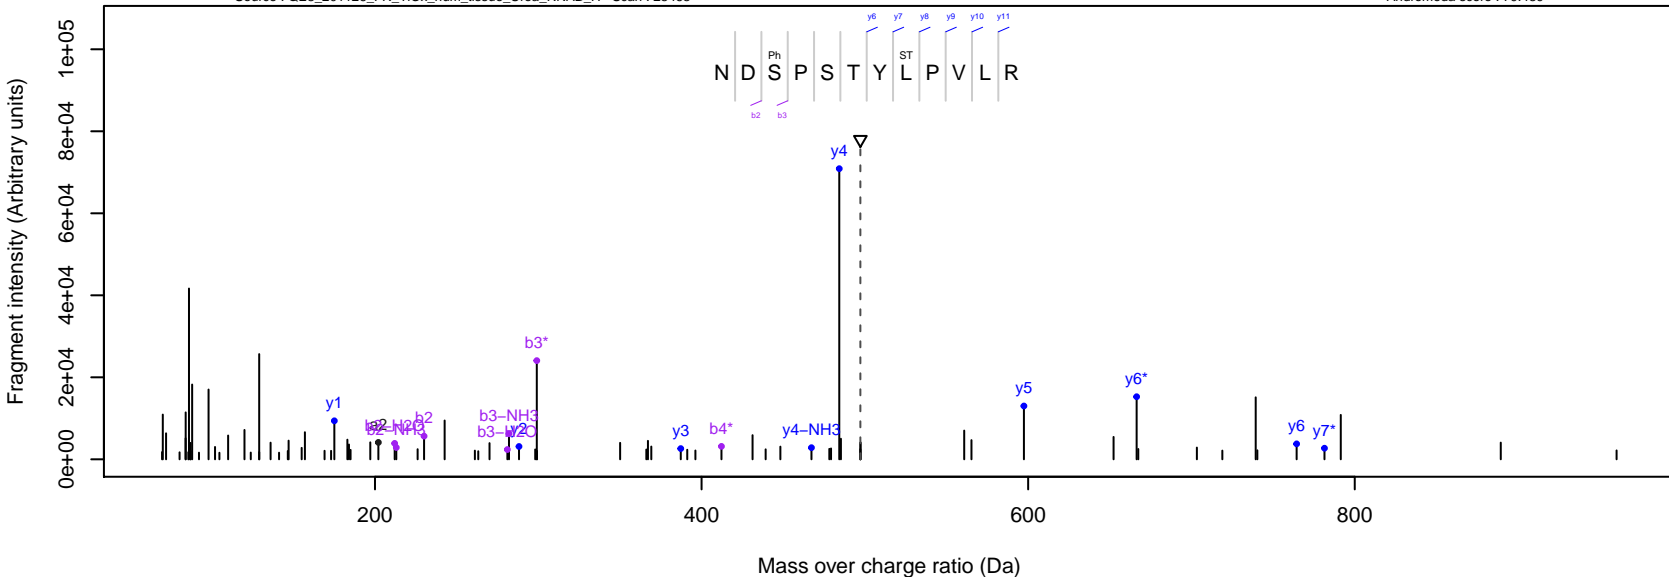

IS(Phospho (STY))MPDFDLHLKGPK-3+

Source : QE3\_201126\_FR\_TiOx\_hum\_tissue\_Urea\_RNAB\_N Scan : 39043

Andromeda score : 79.466

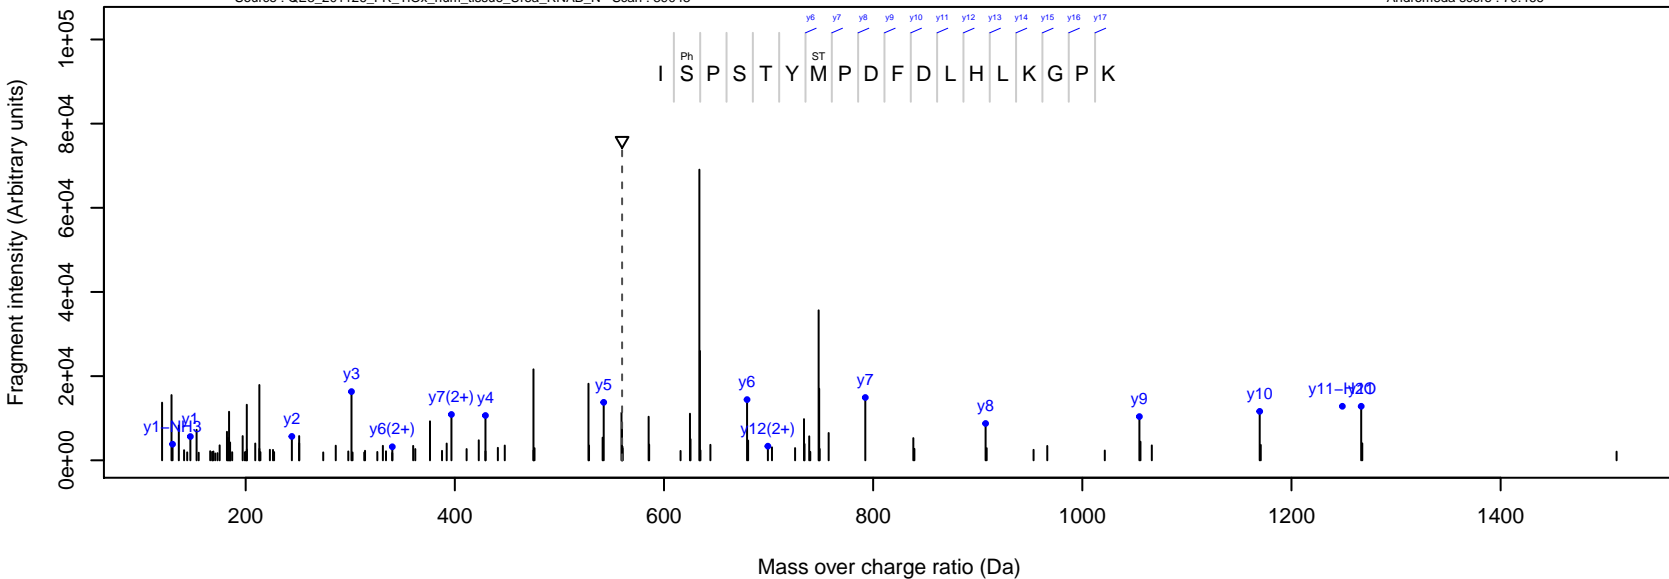

KDEET(Phospho (STY))EES(Phospho (STY))EYDS(Phospho (STY))EHENSEPVTNIR-3+

Source : QE3\_201126\_FR\_TIOx\_hum\_tissue\_Urea\_RNAB\_B Scan : 22126

Andromeda score : 79.458

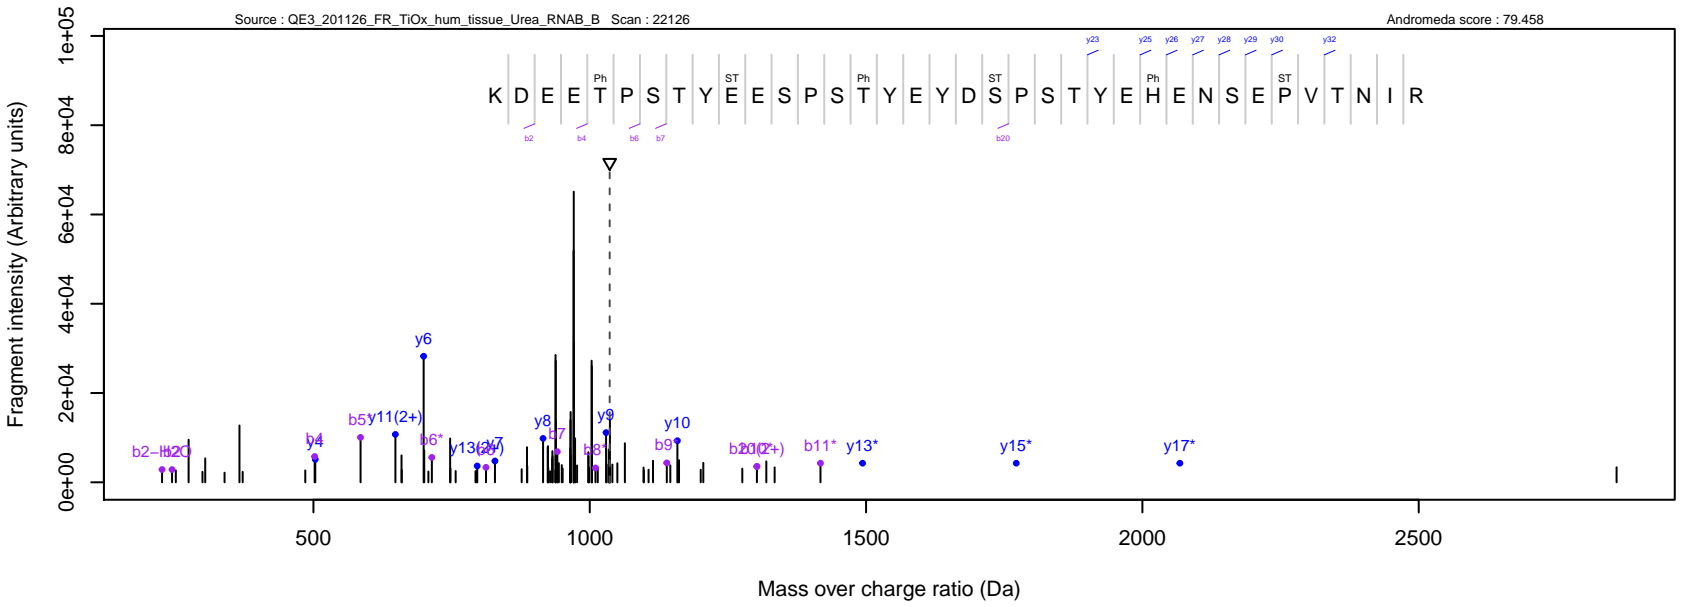

KGSDDDGGDS(Phospho (STY))PVQDIDTPEVDLYQLQVNTLR-3+

Source : QE3\_201126\_FR\_TIOx\_hum\_tissue\_Urea\_RNAB\_H Scan : 55336

Andromeda score : 79.458

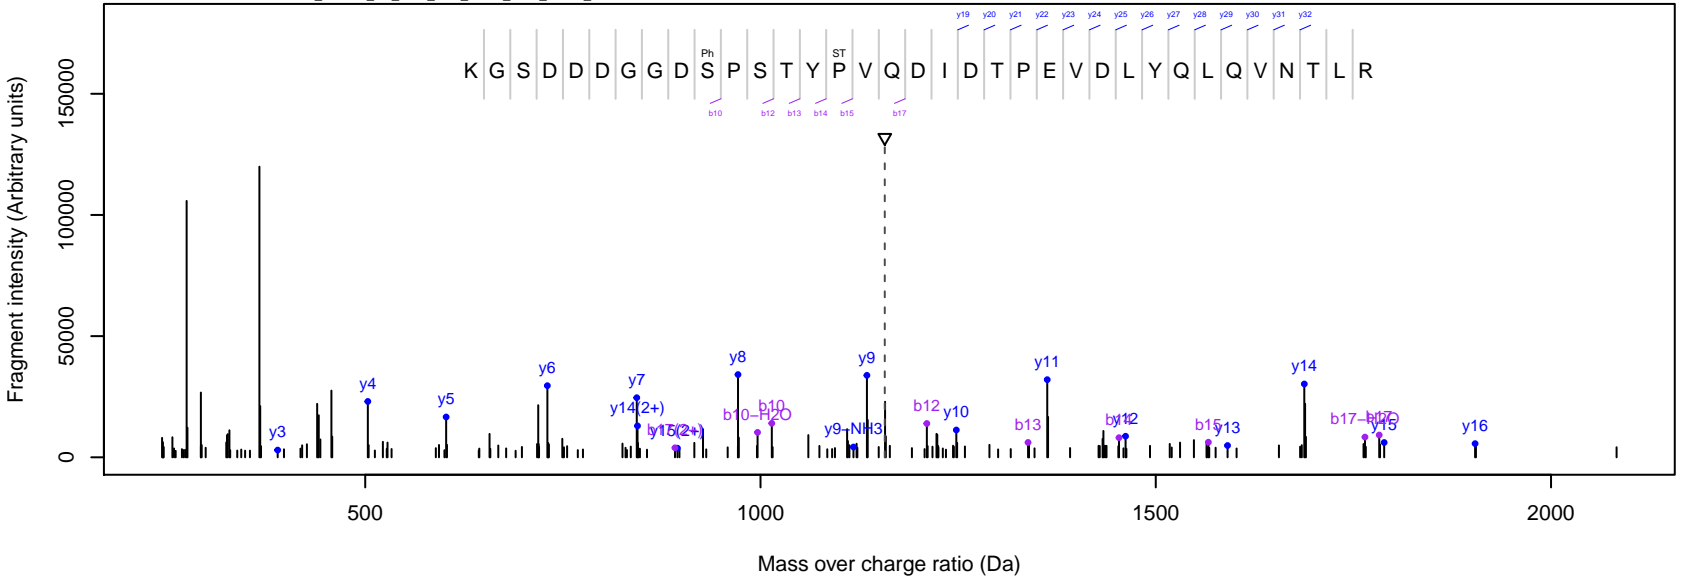

M(Oxidation (M))VIQGPSS(Phospho (STY))PQGEAM(Oxidation (M))VTDVLEDQKEGR-3+

Source : QE3\_201126\_FR\_TIOx\_hum\_tissue\_Urea\_RNAB\_B Scan : 33461

Andromeda score : 79.458

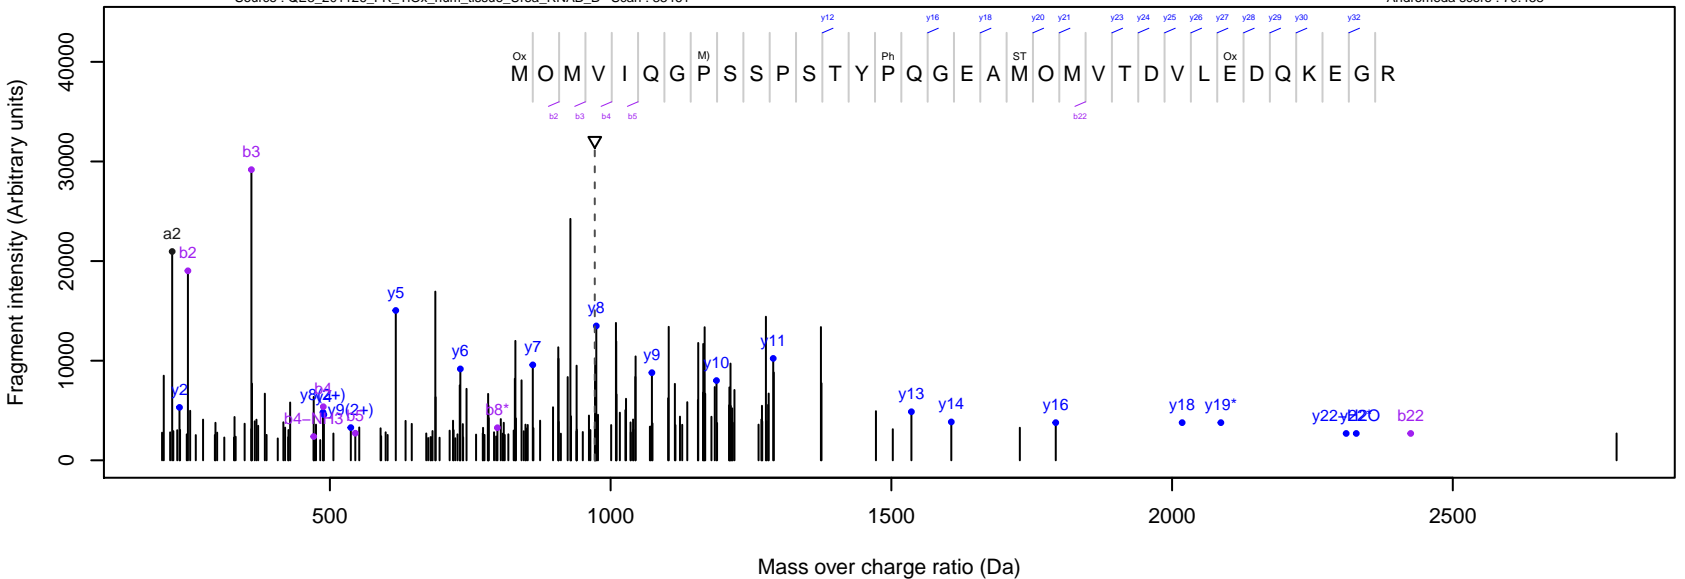

GDLKS(Phospho (STY))S(Phospho (STY))KASLGSLGEGEAEAEASSPK-3+

Source : QE3\_201126\_FR\_TiOx\_hum\_tissue\_Urea\_RNAB\_N Scan : 33734

Andromeda score : 79.445

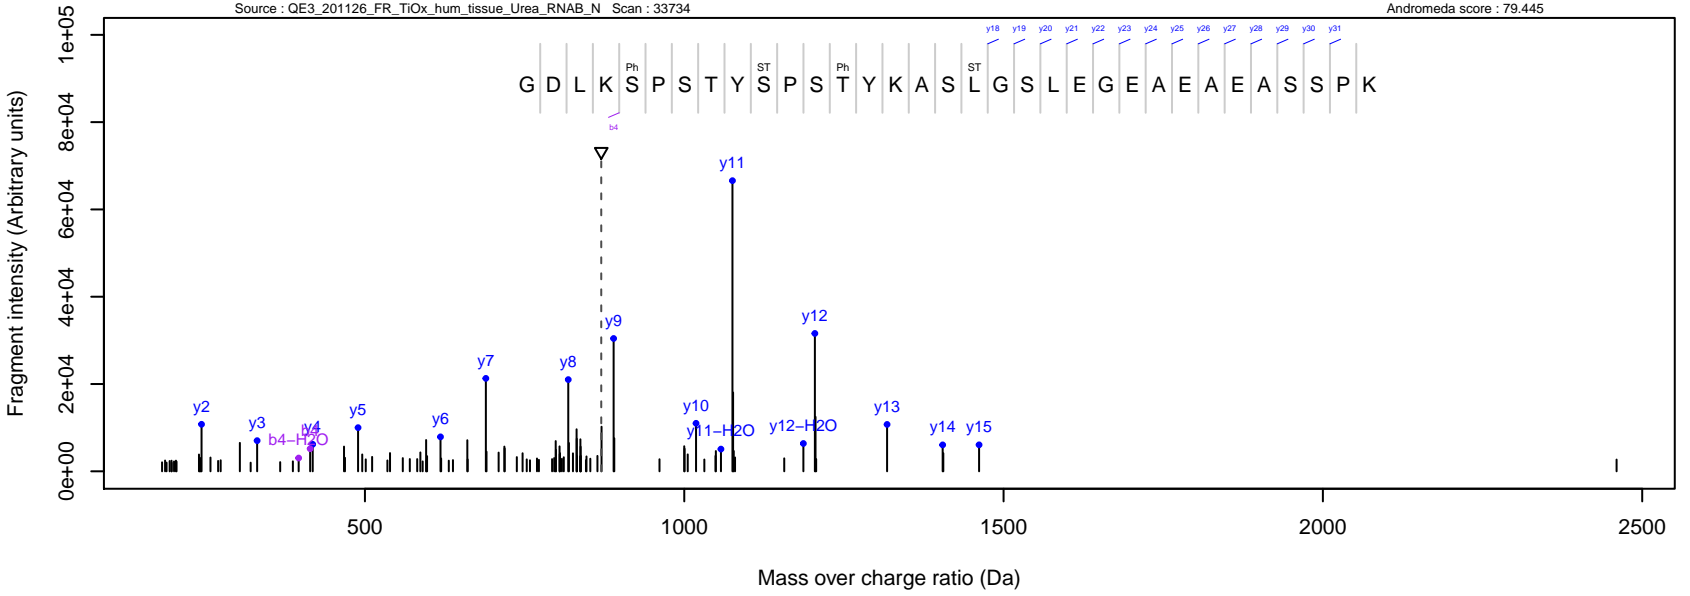

SPSFGDPQLS(Phospho (STY))PEARPSTGKPK-3+

Source : QE3\_201126\_FR\_TiOx\_hum\_tissue\_Urea\_RNAB\_N Scan : 17198

Andromeda score : 79.445

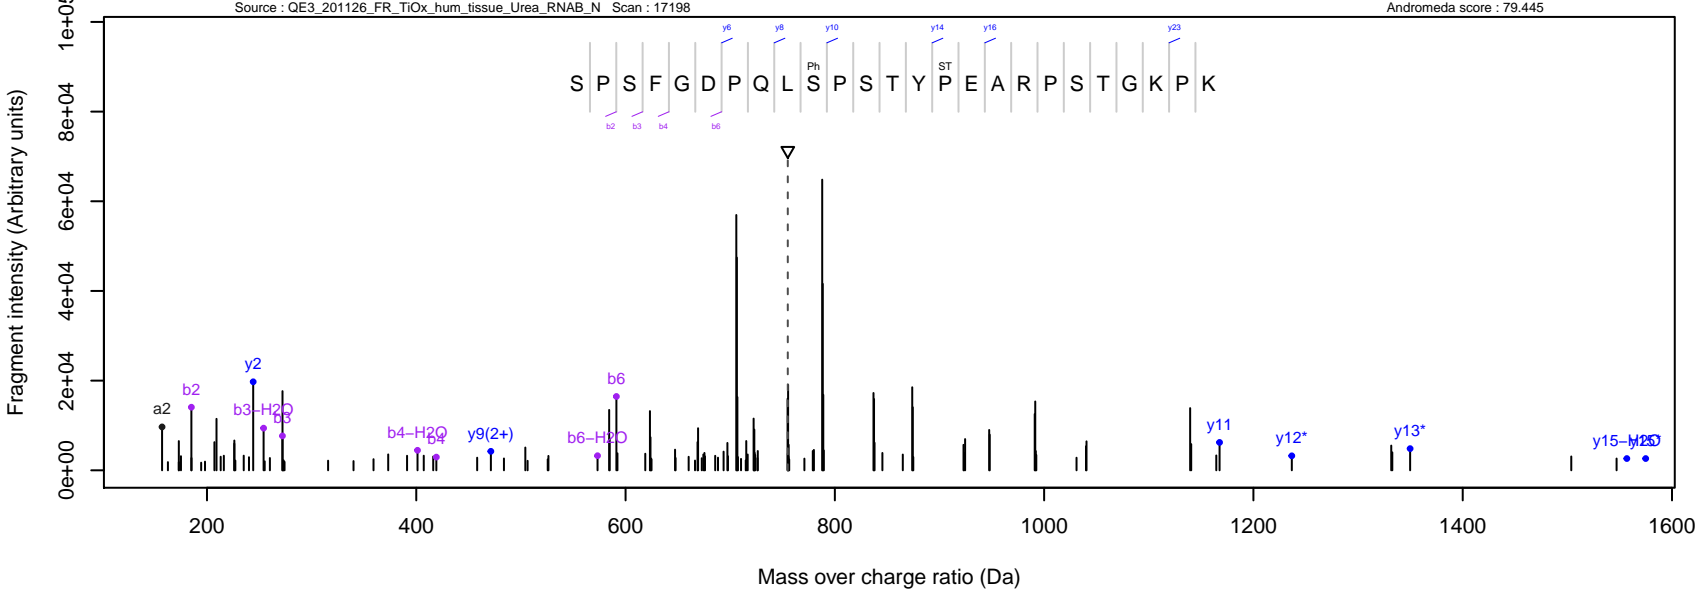

S(Phospho (STY))NSGLGGEVSGVM(Oxidation (M))SKPNVDPQPWFQDGPK-3+

Source : QE3\_201126\_FR\_TiOx\_hum\_tissue\_Urea\_RNAB\_B Scan : 40539

Andromeda score : 79.422

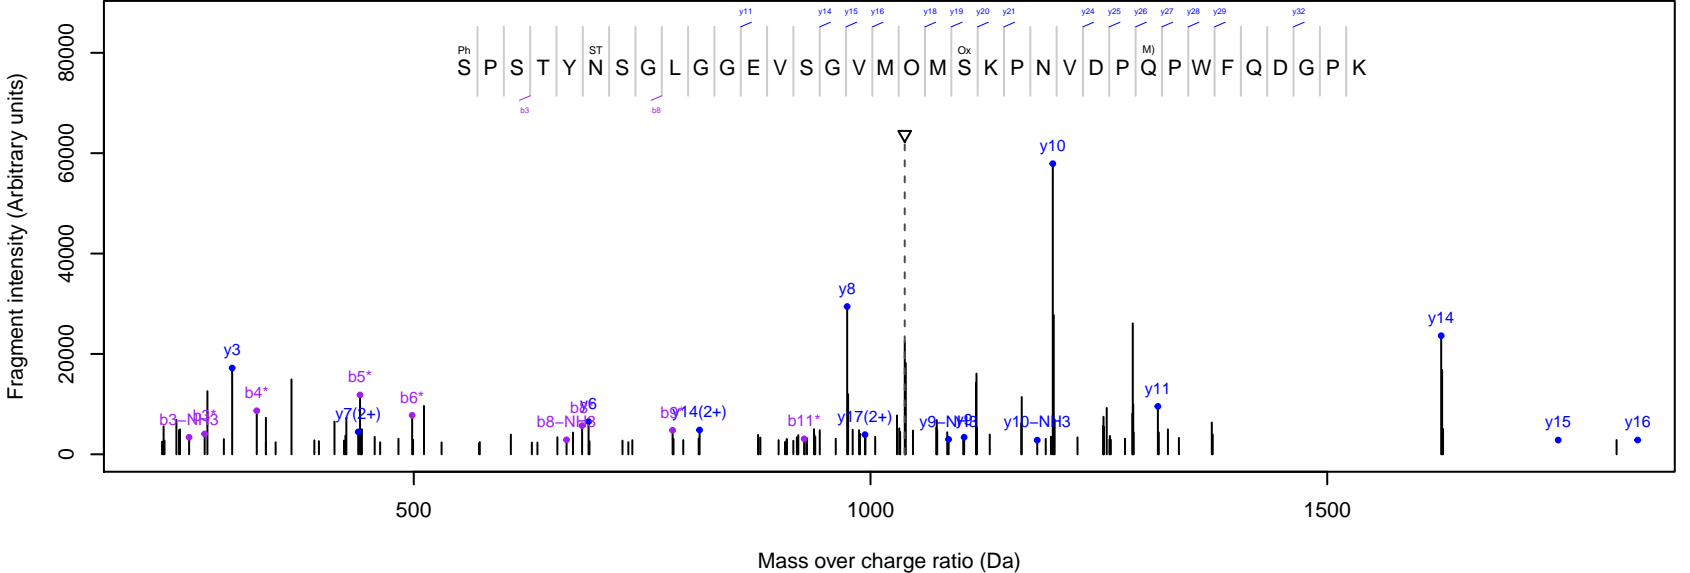



SQLQALHGLDSS(Phospho (STY))SIGSGPGDAEADDGFPESR-3+

Source : QE3\_201126\_FR\_TiOx\_hum\_tissue\_Urea\_RNAB\_B Scan : 47136

Andromeda score : 79.408

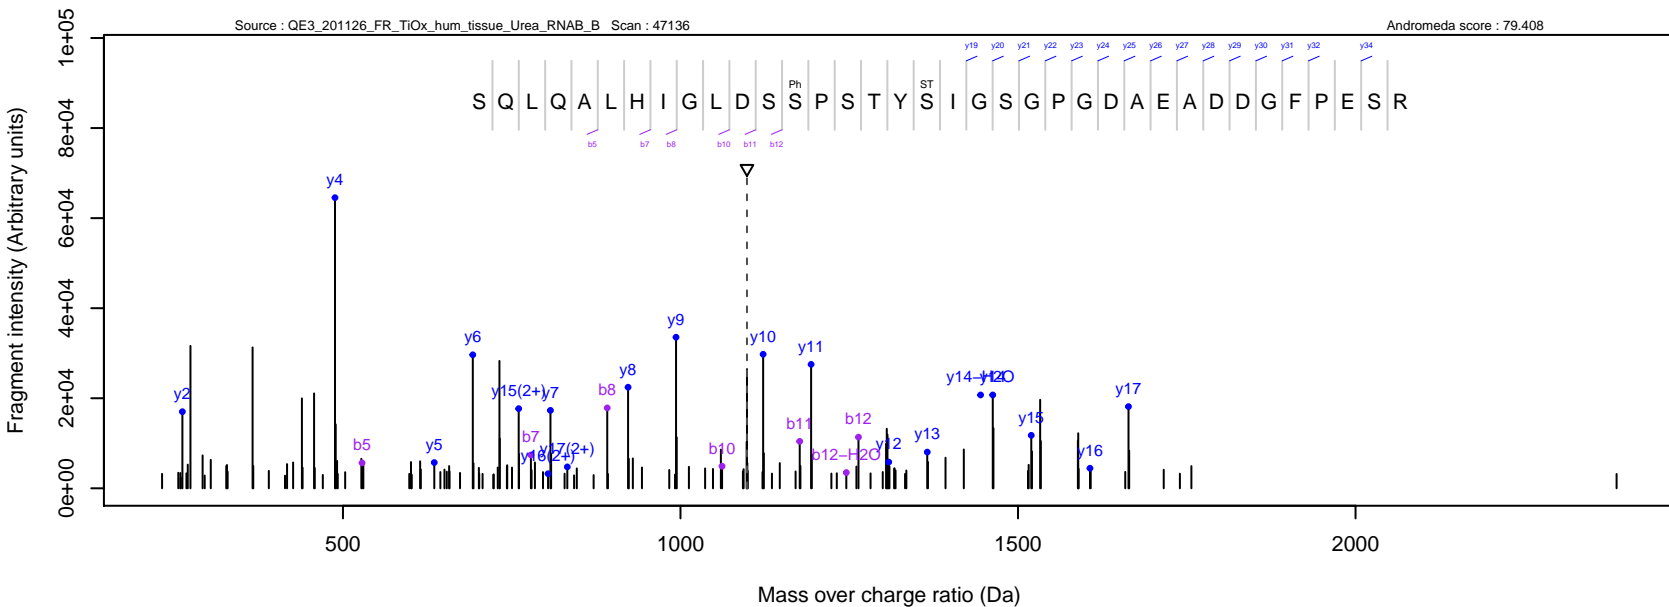

(Acetyl (Protein N-term))AQES(Phospho (STY))PKNSAAEIPVTSNGEVDDSR-3+

Source : QE3\_201126\_FR\_TiOx\_hum\_tissue\_Urea\_RNAB\_N Scan : 27305

Andromeda score : 79.407

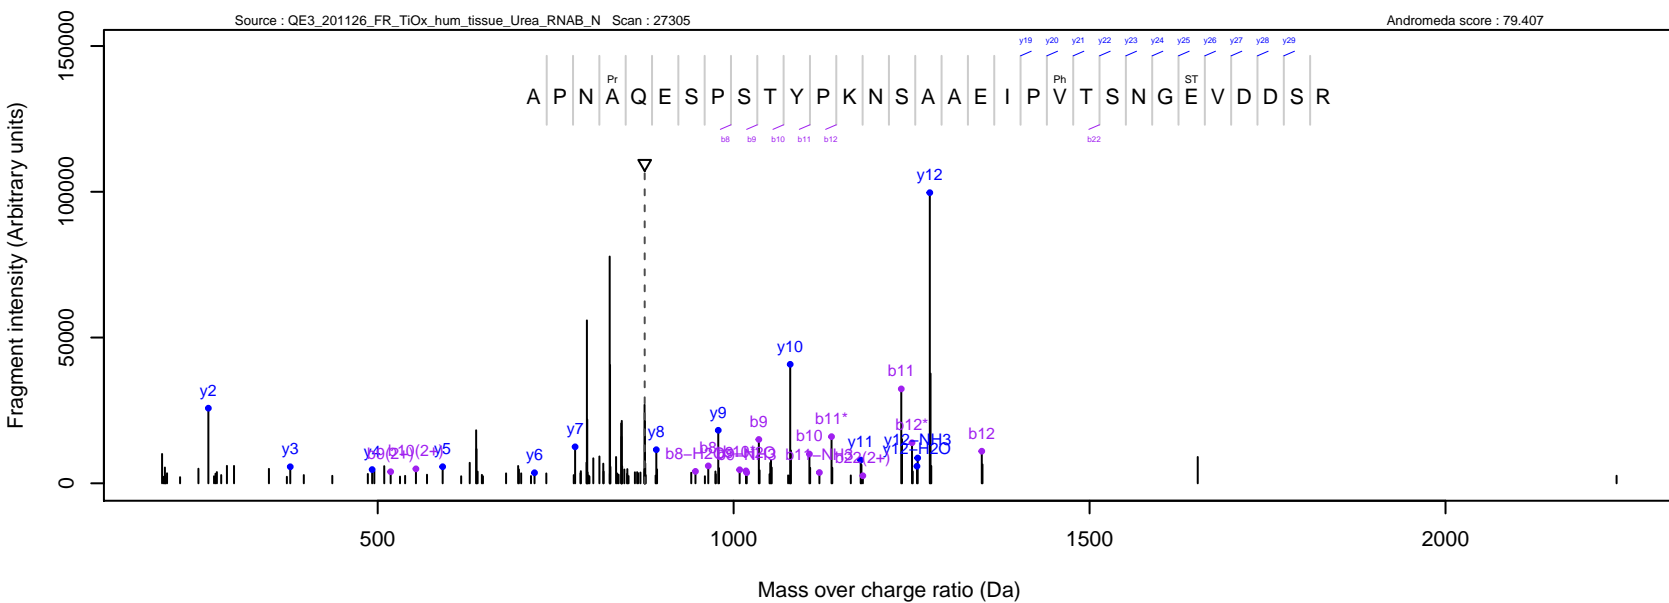

ASALLFS(Phospho (STY))S(Phospho (STY))DEEDQWNIPASQTHLASDSR-3+

Source : QE3\_201126\_FR\_TiOx\_hum\_tissue\_Urea\_RNAB\_N Scan : 55465

Andromeda score : 79.395

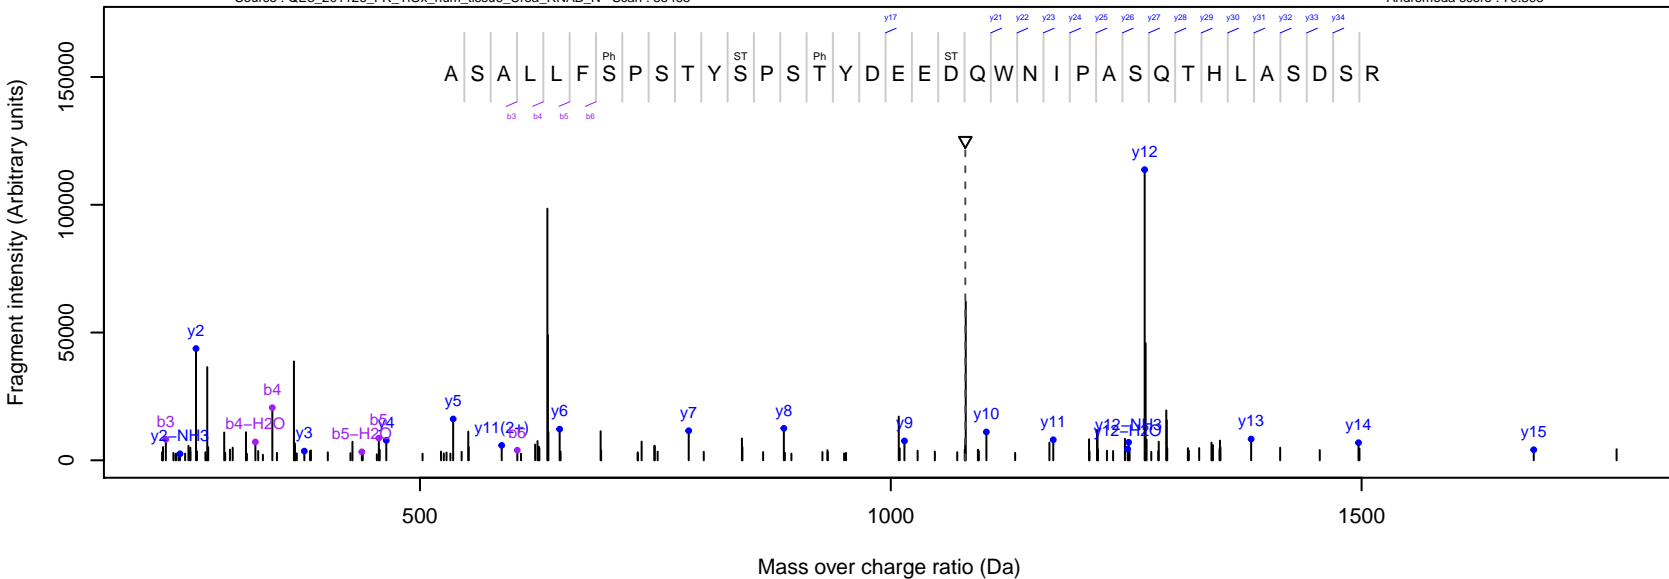

KNS(Phospho (STY))APQLPLQSSGPFVEGSIVR-3+

Source : QE3\_201126\_FR\_TiOx\_hum\_tissue\_Urea\_RNAB\_N Scan : 52348

Andromeda score : 79.395

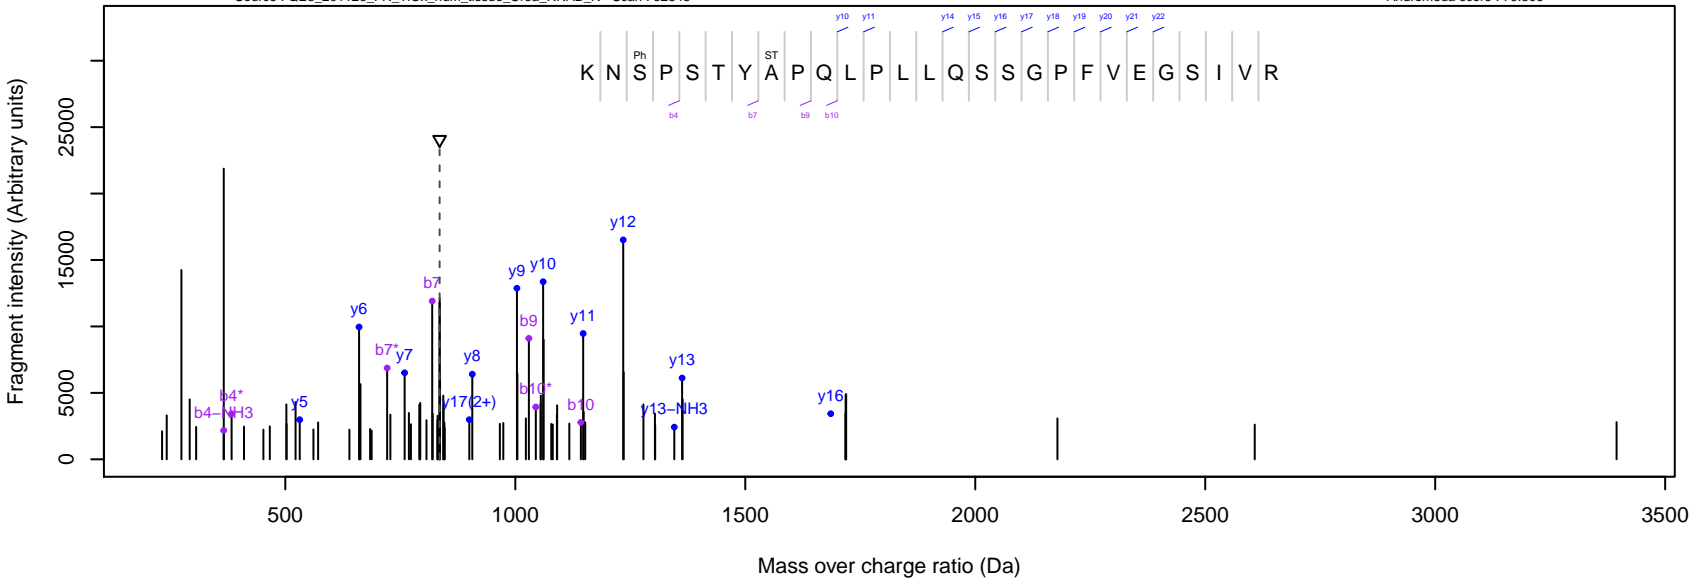

NTPVYVSS(Phospho (STY))PTWENHNAVFSAGFK-3+

Source : QE3\_201126\_FR\_TiOx\_hum\_tissue\_Urea\_RNAB\_H Scan : 45907

Andromeda score : 79.395

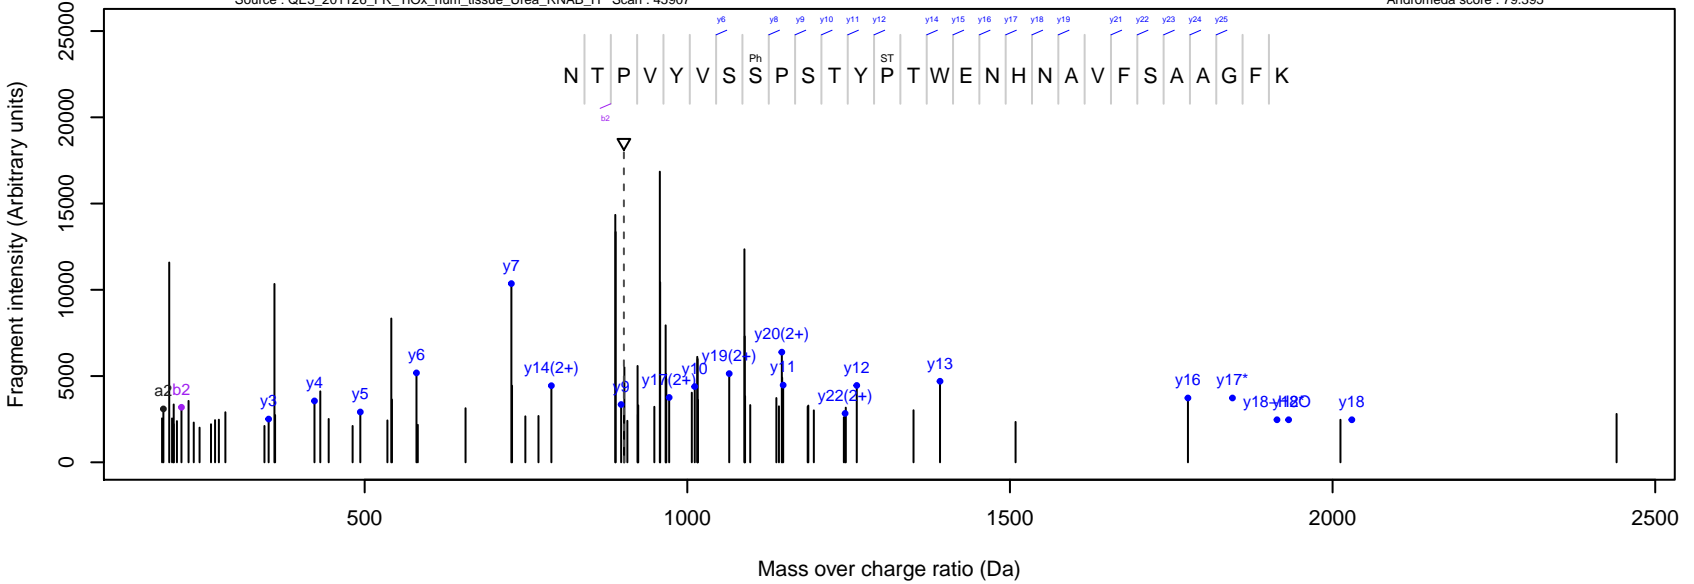

LIDRTESLNRS(Phospho (STY))IEK-3+

Source : QE3\_201126\_FR\_TiOx\_hum\_tissue\_Urea\_RNAB\_B Scan : 12591

Andromeda score : 79.393

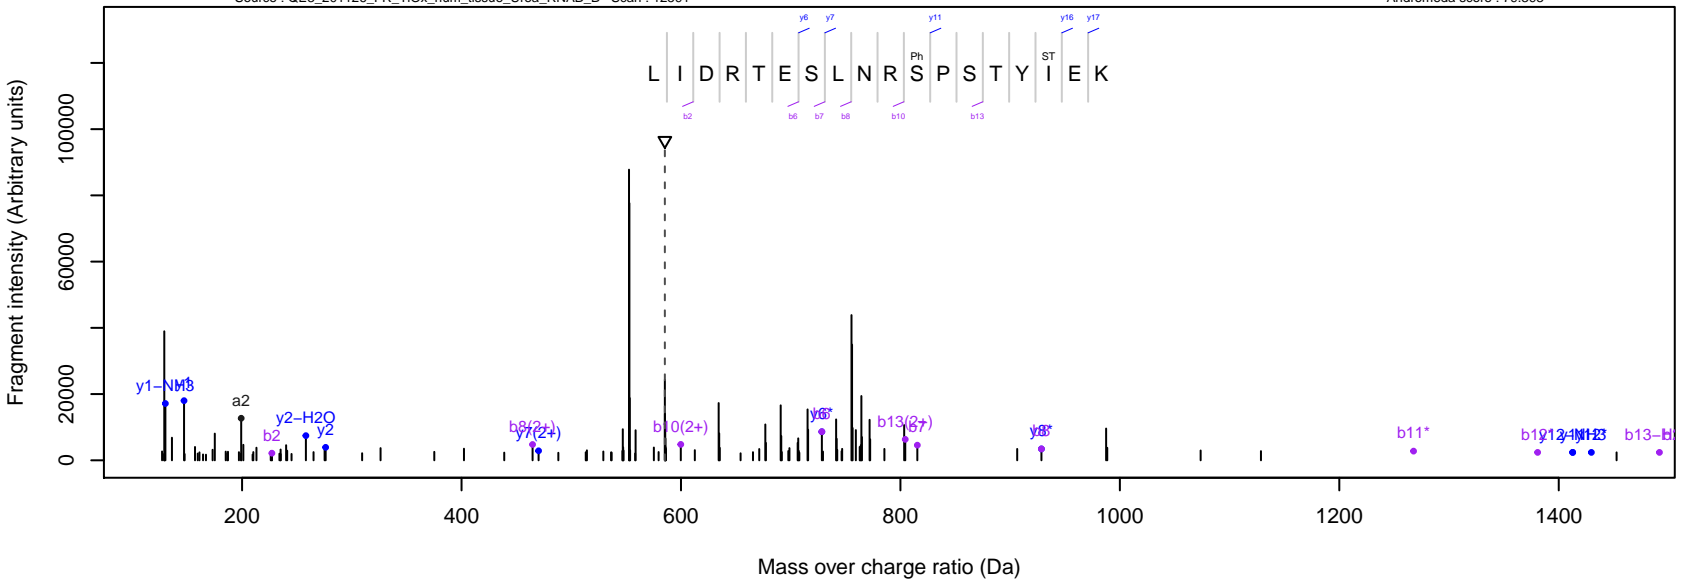

EKVS(Phospho (STY))SIDLEISLSSLLDDM(Oxidation (M))TKNDPFK-3+

Source : QE3\_201126\_FR\_TiOx\_hum\_tissue\_Urea\_RNAB\_H Scan : 58967

Andromeda score : 79.382

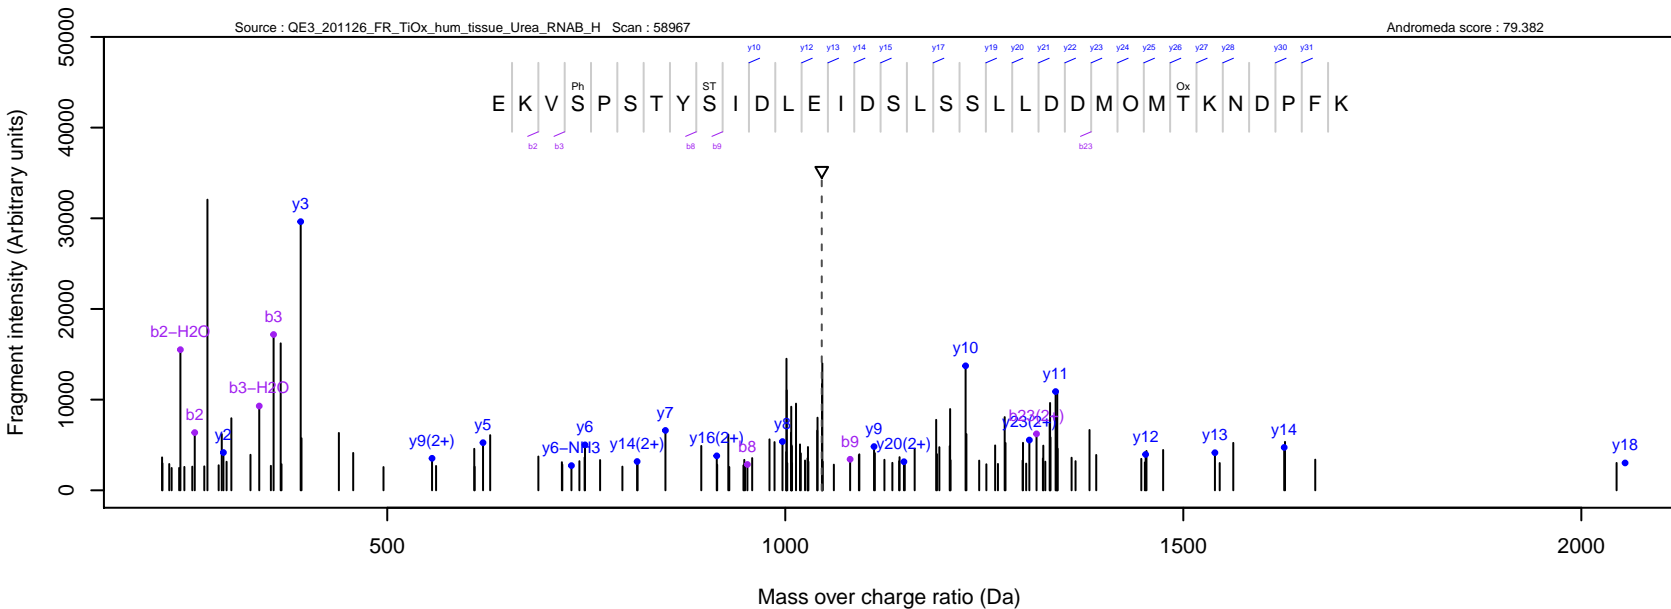

GLLGTSLLDT(Phospho (STY))VES(Phospho (STY))ESDDEYFDAEDGEPQTCK-3+

Source : QE3\_201126\_FR\_TiOx\_hum\_tissue\_Urea\_RNAB\_N Scan : 63171

Andromeda score : 79.365

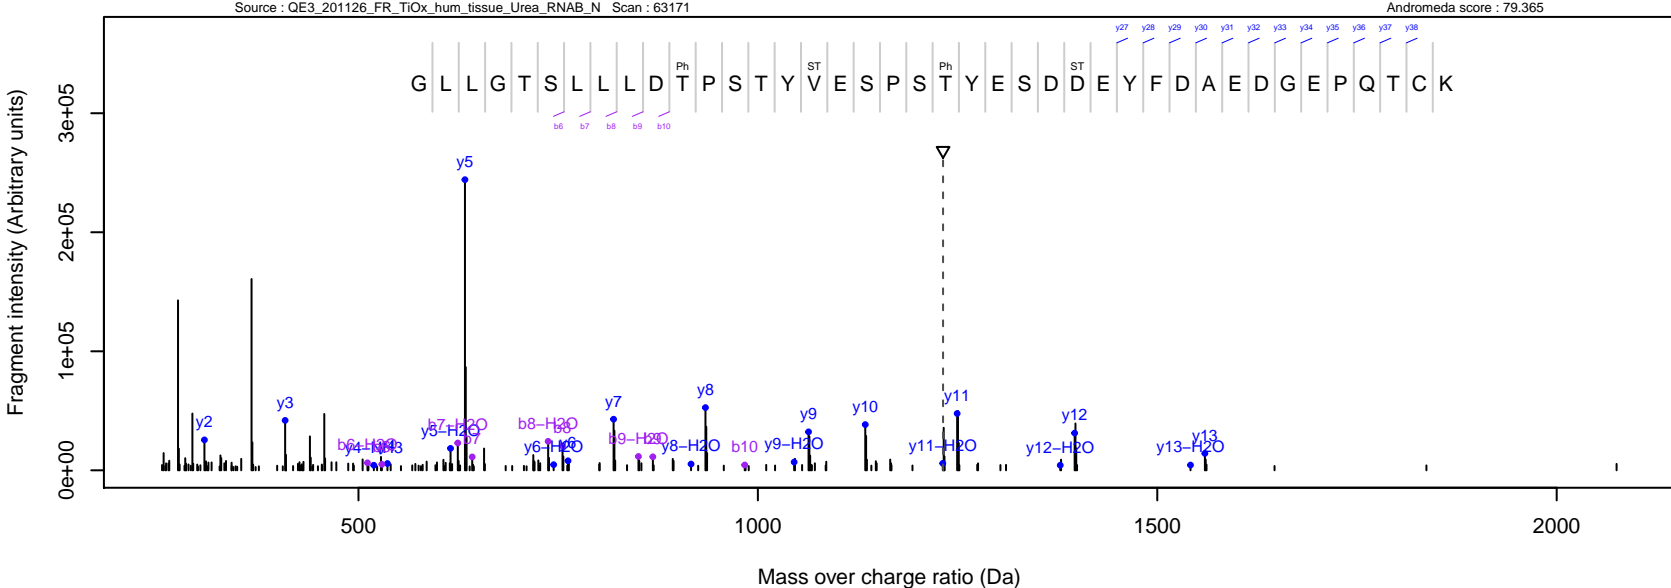

EGHGSS(Phospho (STY))SFDRELER-3+

Source : QE3\_201126\_FR\_TiOx\_hum\_tissue\_Urea\_RNAB\_H Scan : 11249

Andromeda score : 79.346

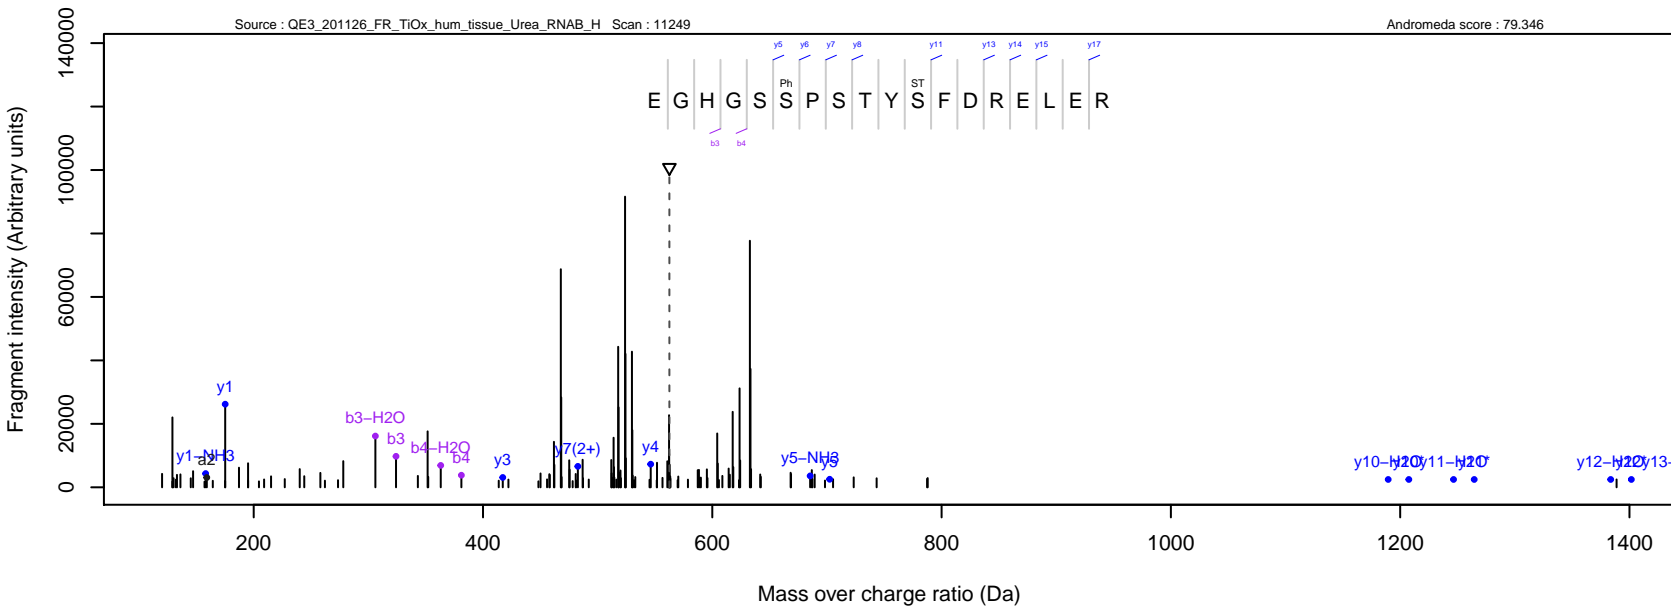

RAEVLGHKT(Phospho (STY))PEPAPR-4+

Source : QE3\_201126\_FR\_TIOx\_hum\_tissue\_Urea\_RNAB\_B Scan : 6590

Andromeda score : 79.311

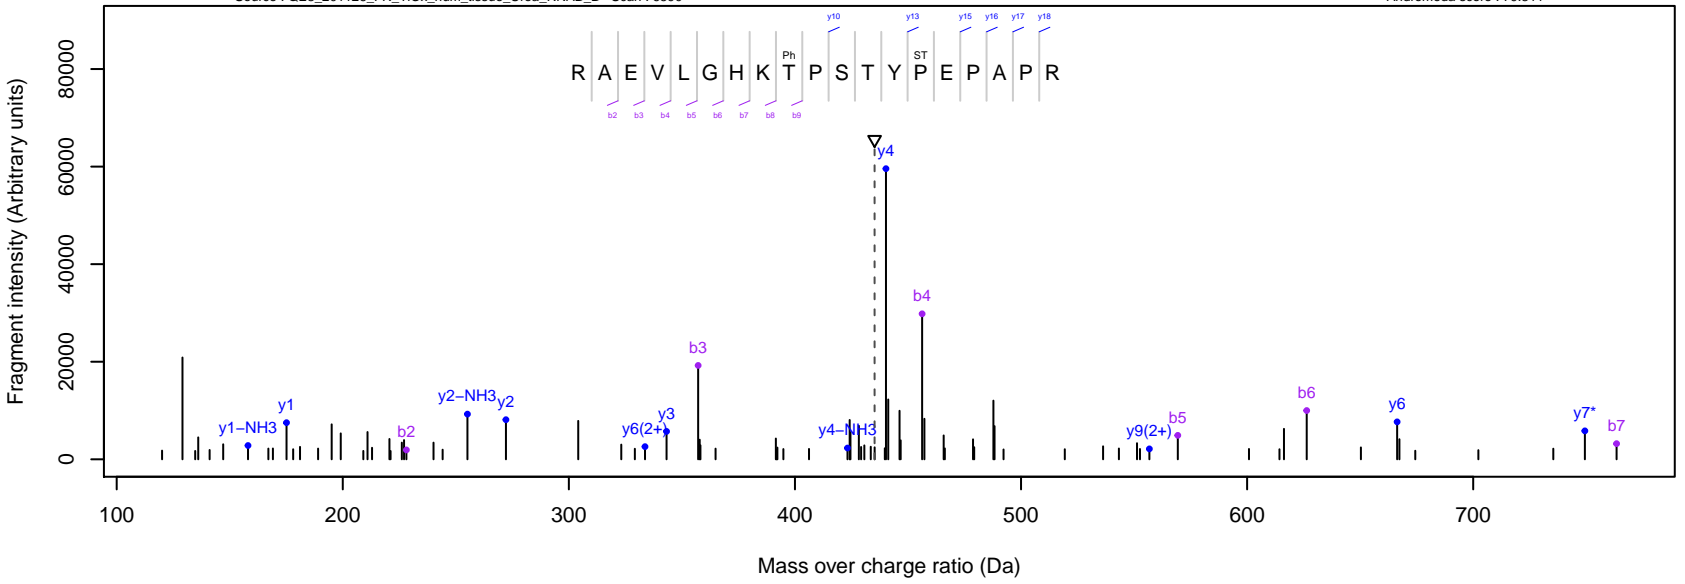

S(Phospho (STY))RSDVDMDAAEATR-3+

Source : QE3\_201126\_FR\_TIOx\_hum\_tissue\_Urea\_RNAB\_H Scan : 14973

Andromeda score : 79.293

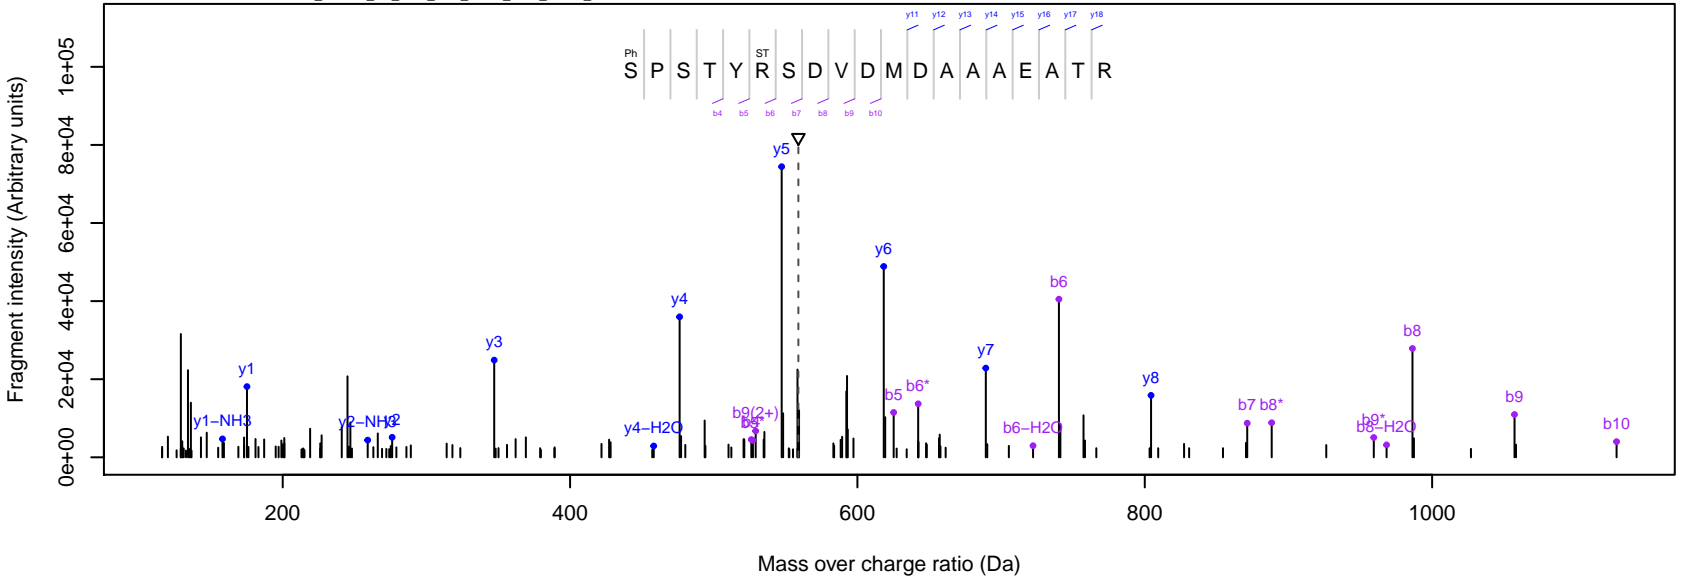

ASGDGES(Phospho (STY))LDEDEFTLASDFEIGHFFR-3+

Source : QE3\_201126\_FR\_TIOx\_hum\_tissue\_Urea\_RNAB\_N Scan : 61520

Andromeda score : 79.237

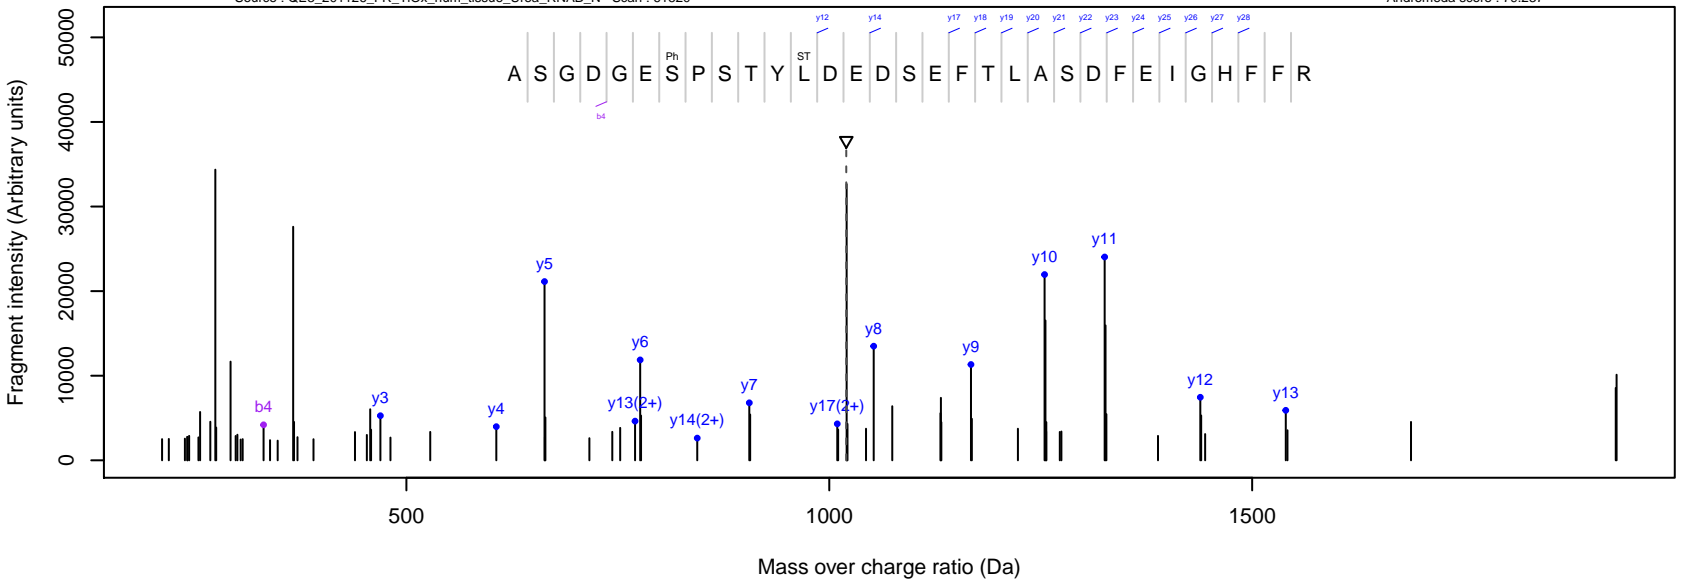

S(Phospho (STY))RS(Phospho (STY))HS(Phospho (STY))DNDRPNC SWNTQYSSAYTSR-3+

Source : QE3\_201126\_FR\_TiOx\_hum\_tissue\_Urea\_RNAB\_N Scan : 26488

Andromeda score : 79.163

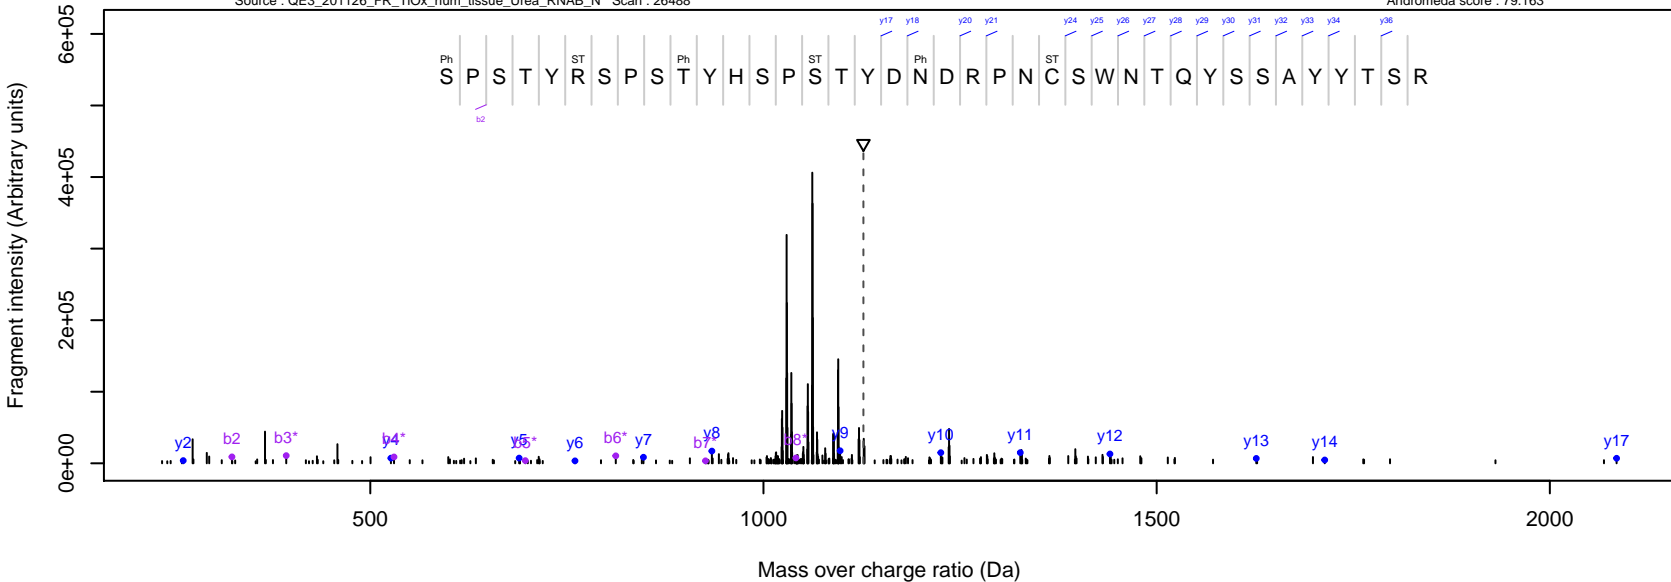

KASSPS(Phospho (STY))PLTIGTPESQR-3+

Source : QE3\_201126\_FR\_TiOx\_hum\_tissue\_Urea\_RNAB\_N Scan : 18107

Andromeda score : 79.143

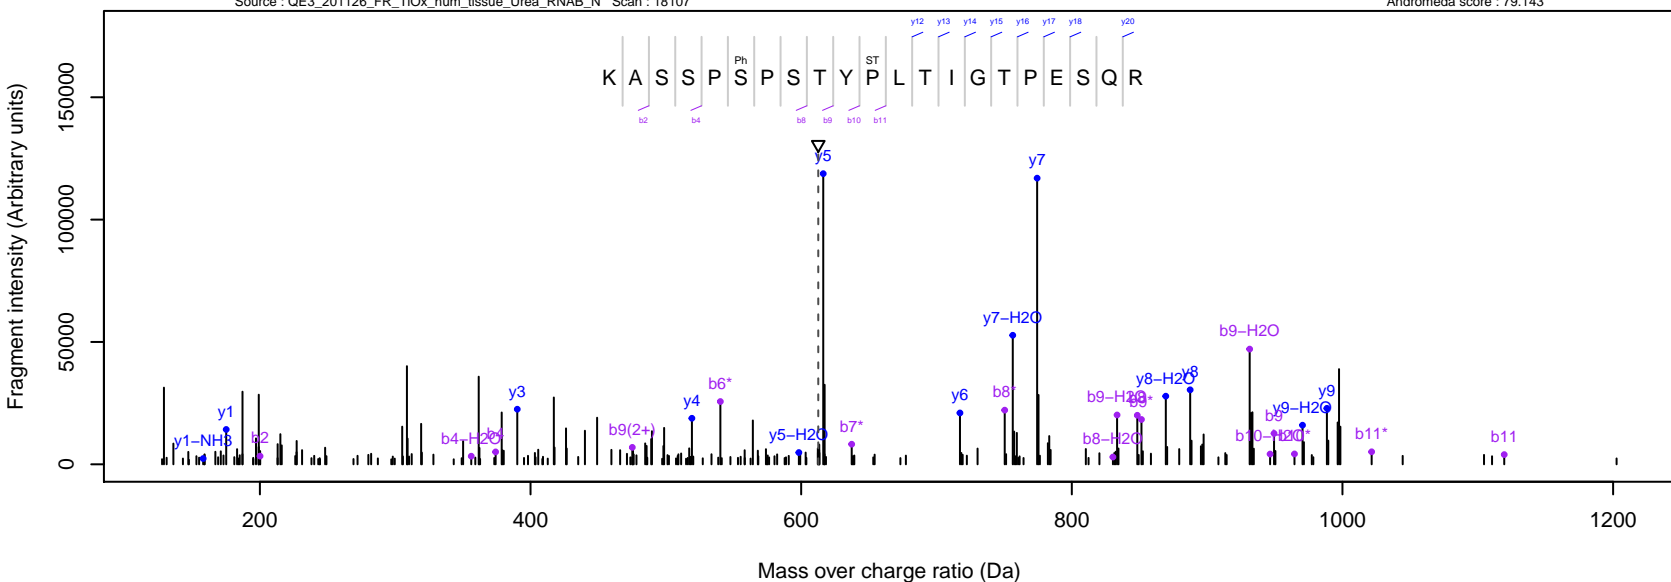

DISEGGES(Phospho (STY))PVVQS(Phospho (STY))DEEEVQVD TALATSH TDR-3+

Source : QE3\_201126\_FR\_TiOx\_hum\_tissue\_Urea\_RNAB\_N Scan : 44850

Andromeda score : 79.112

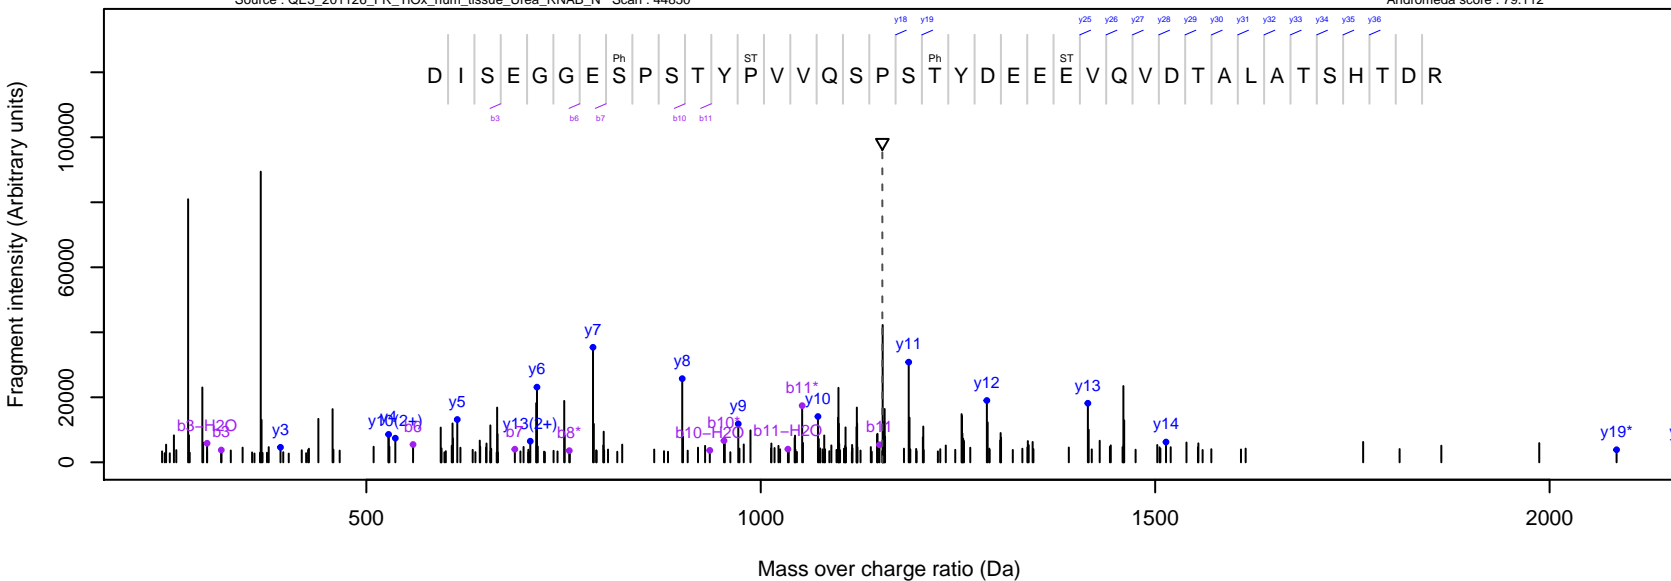

S(Phospho (STY))NQIPTEVR-2+

Source : QE3\_201126\_FR\_TiOx\_hum\_tissue\_Urea\_RNAB\_N Scan : 16175

Andromeda score : 79.036

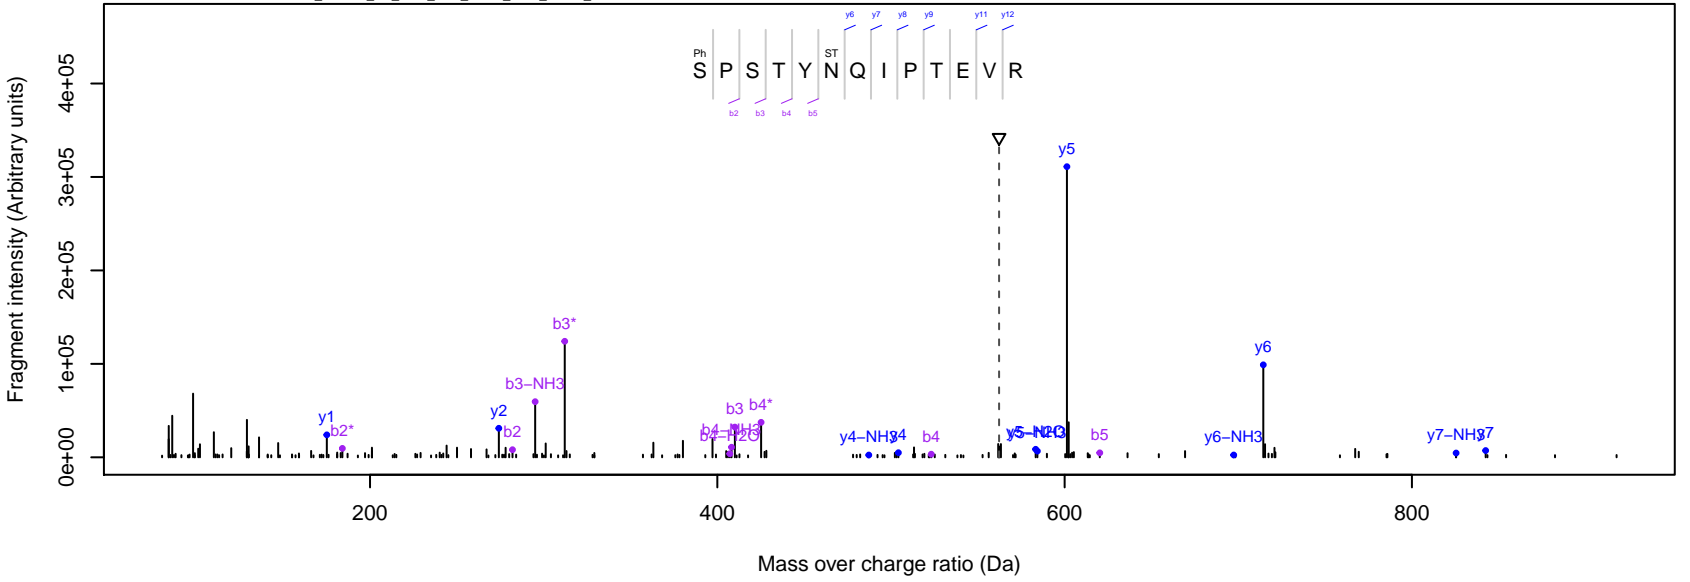

T(Phospho (STY))SSKHKEDVYENLHTK-4+

Source : QE3\_201126\_FR\_TiOx\_hum\_tissue\_Urea\_RNAB\_H Scan : 6453

Andromeda score : 79.022

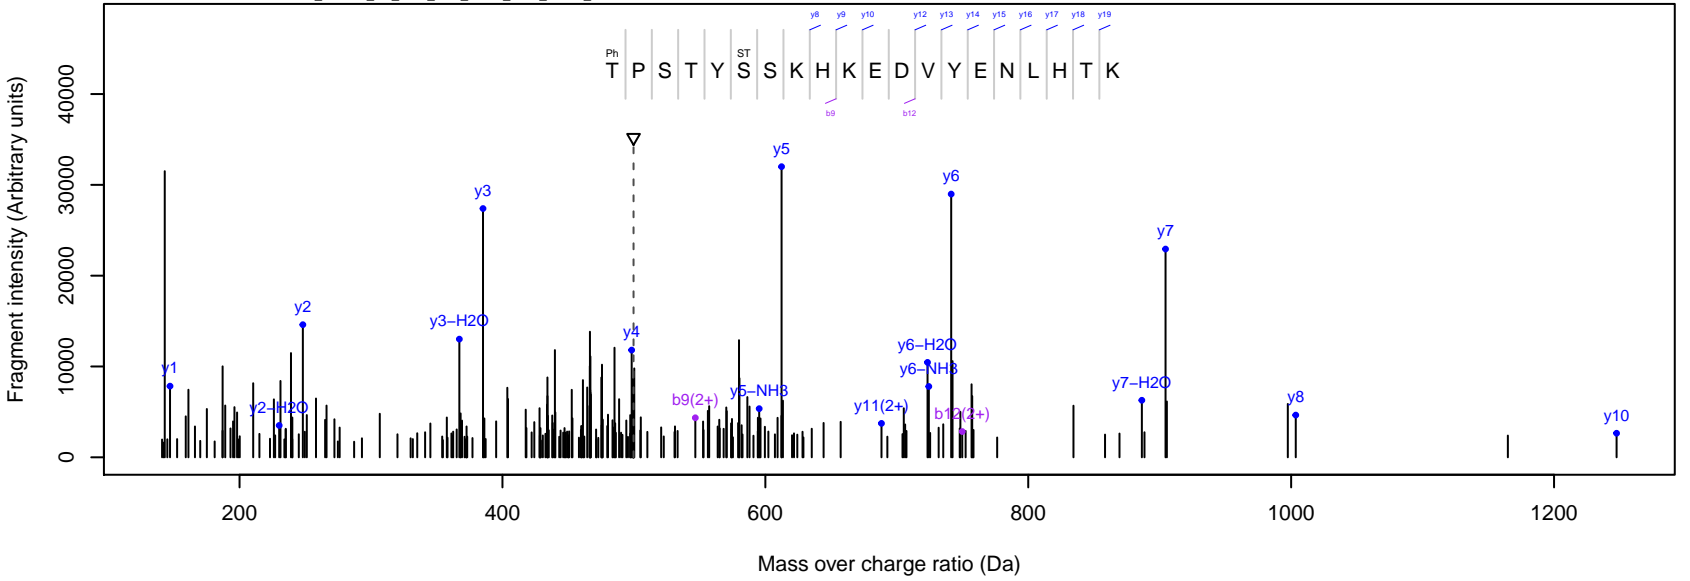

TQLWASEPGT(Phospho (STY))PPLPTSLPSQNPILK-3+

Source : QE3\_201126\_FR\_TiOx\_hum\_tissue\_Urea\_RNAB\_H Scan : 56338

Andromeda score : 79.021

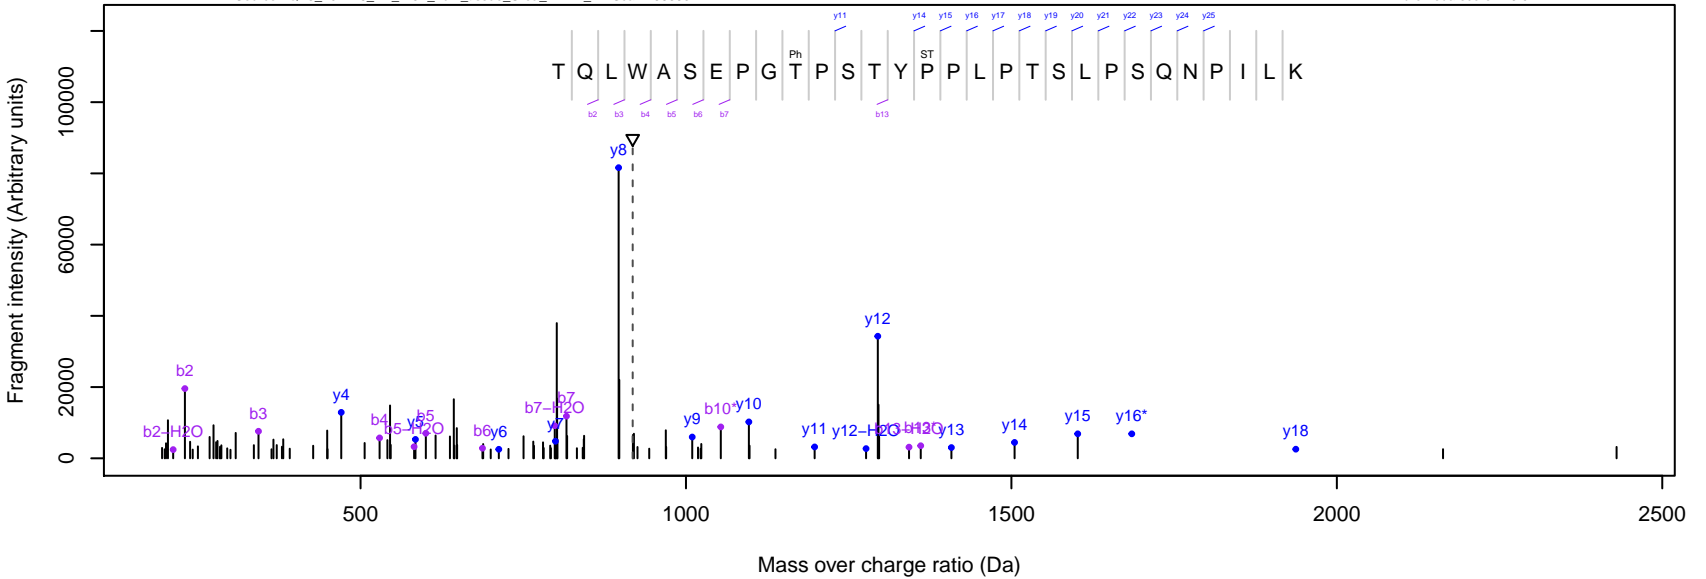

EGS(Phospho (STY))LKGHTLAGEEFMGLGLNLSVGGVDKR-4+

Source : QE3\_201126\_FR\_TIOx\_hum\_tissue\_Urea\_RNAB\_N Scan : 48694

Andromeda score : 79.017

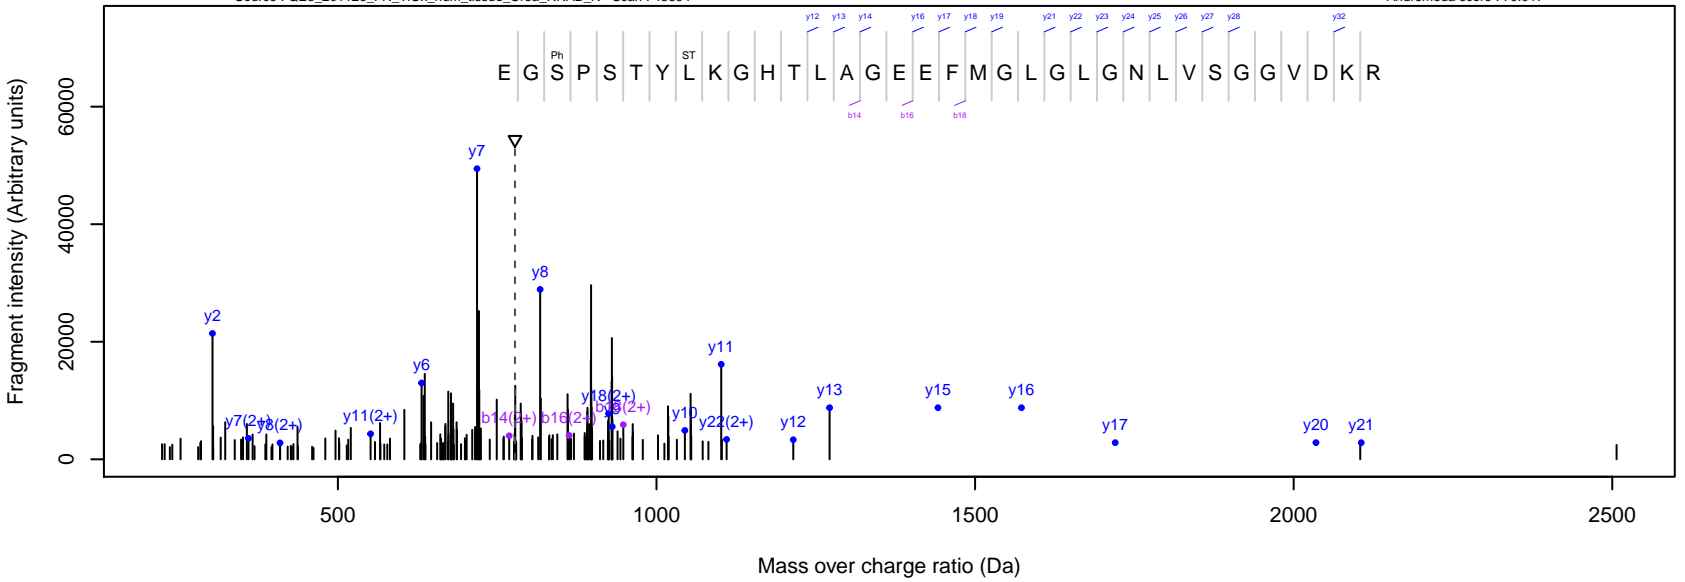

KSPSSDS(Phospho (STY))WTCADTSTER-3+

Source : QE3\_201126\_FR\_TIOx\_hum\_tissue\_Urea\_RNAB\_H Scan : 13251

Andromeda score : 78.987

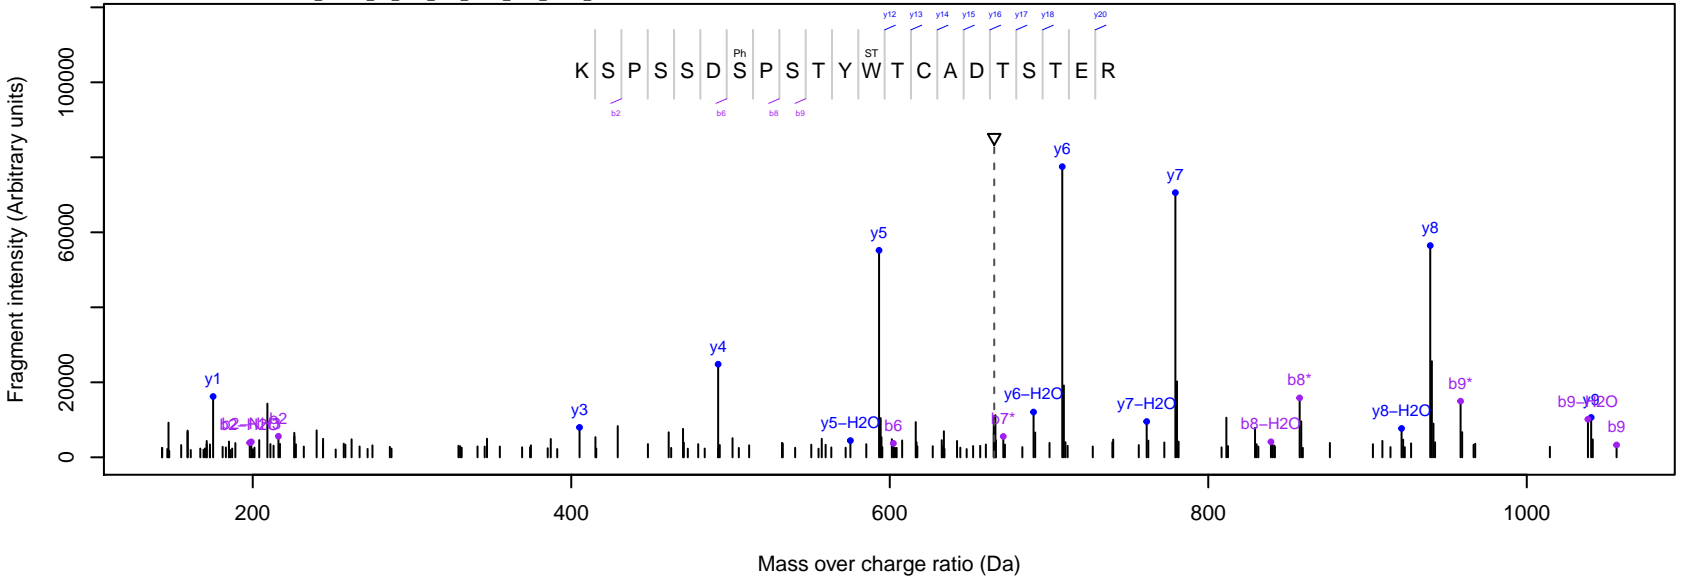

LTQYHGGS(Phospho (STY))LPNVSQLR-3+

Source : QE3\_201126\_FR\_TIOx\_hum\_tissue\_Urea\_RNAB\_H Scan : 28189

Andromeda score : 78.987

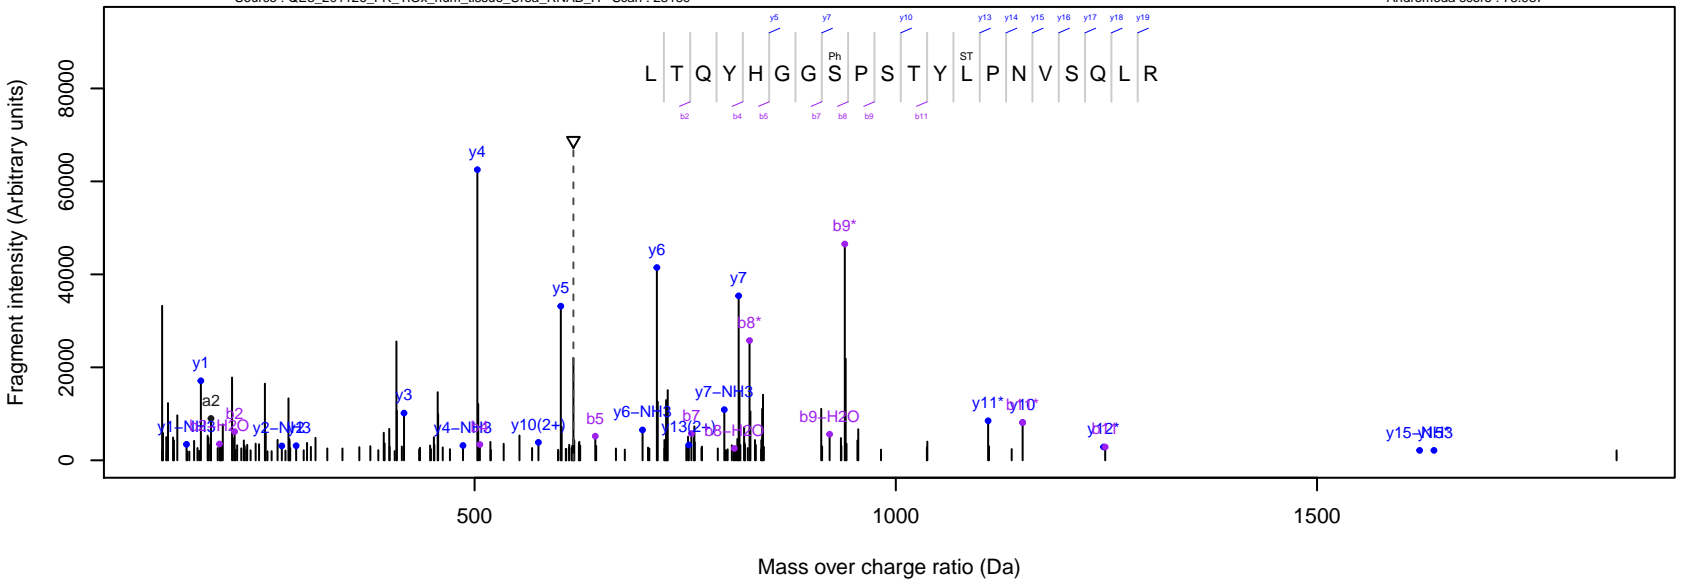

RS(Phospho (STY))RLTPVSPESSTEEK-3+

Source : QE3\_201126\_FR\_TiOx\_hum\_tissue\_Urea\_RNAB\_N Scan : 8618

Andromeda score : 78.987

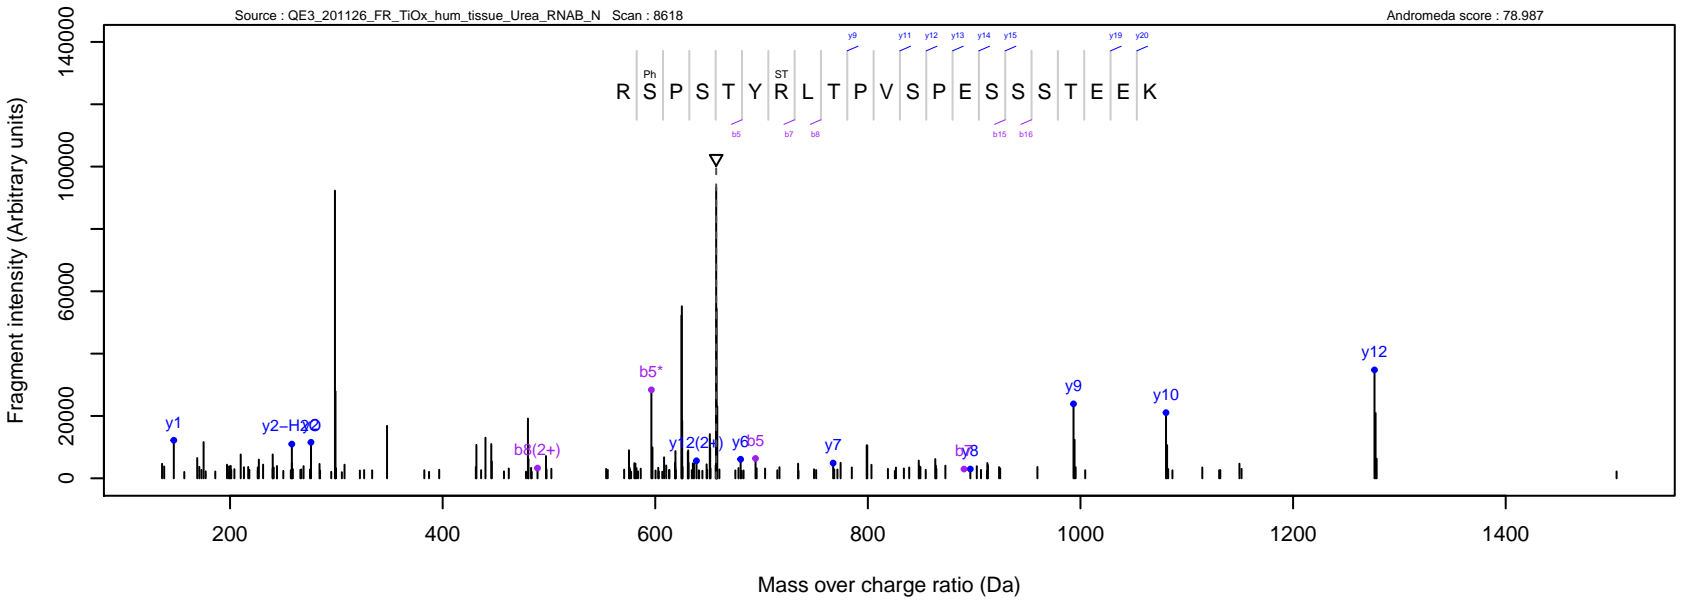

RSRPTSEGS(Phospho (STY))DIESTEPQK-3+

Source : QE3\_201126\_FR\_TiOx\_hum\_tissue\_Urea\_RNAB\_B Scan : 6938

Andromeda score : 78.987

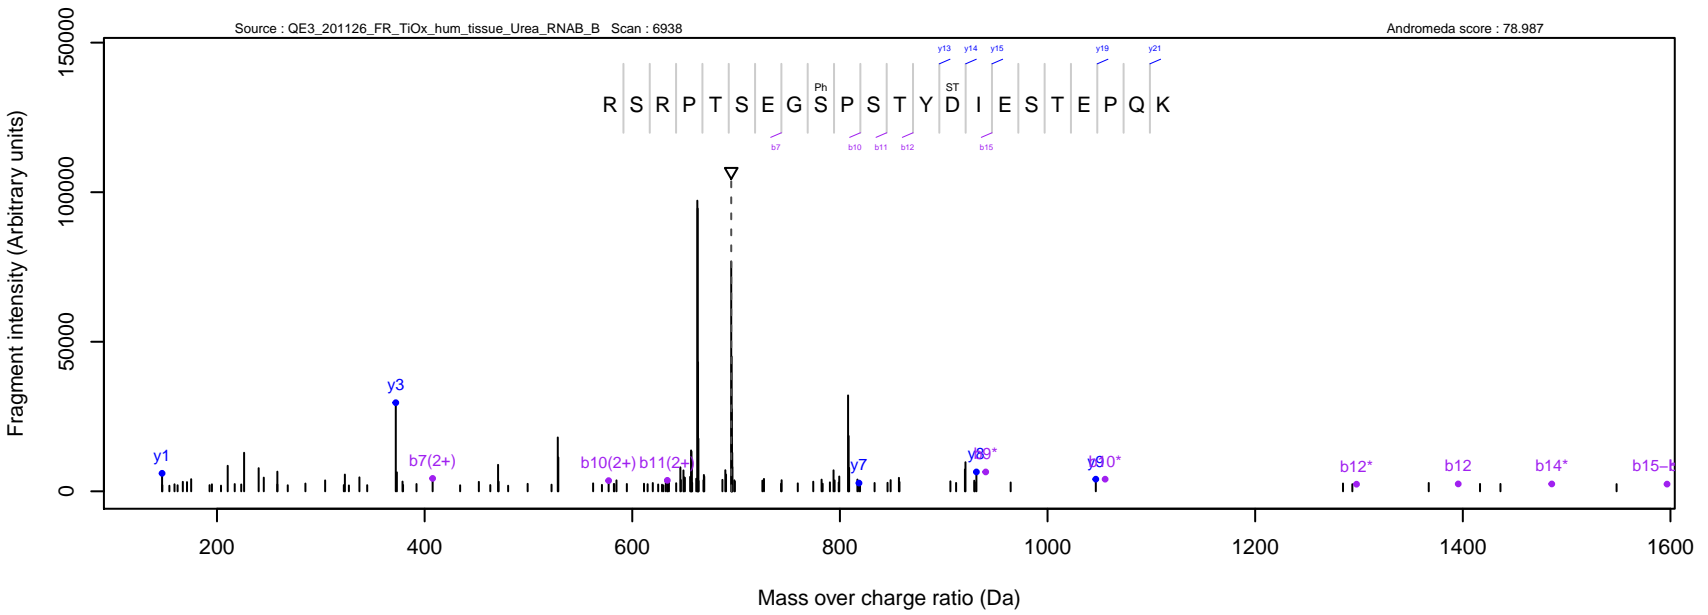

TKEY(Phospho (STY))QDLQHLDNEESDHHQLR-4+

Source : QE3\_201126\_FR\_TiOx\_hum\_tissue\_Urea\_RNAB\_B Scan : 12236

Andromeda score : 78.975

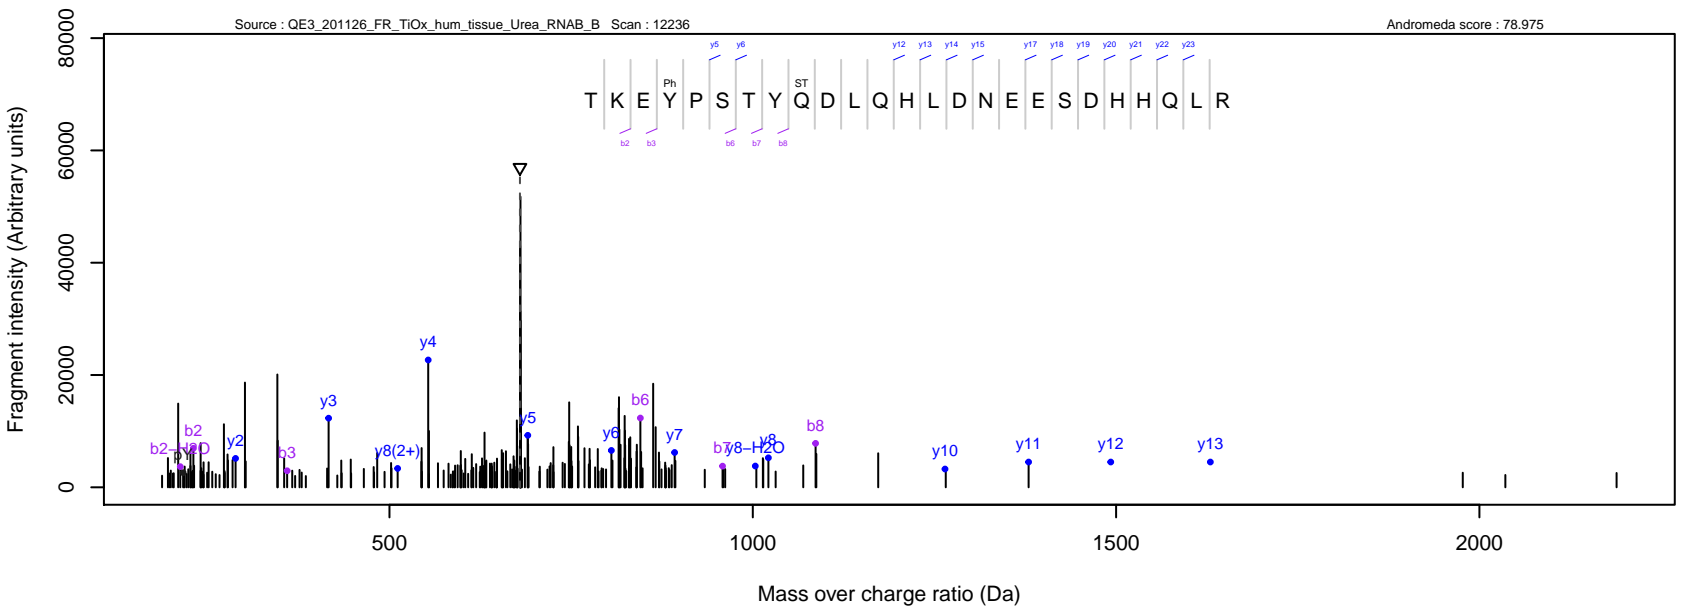



SLS(Phospho (STY))APGNLLTK-2+

Source : QE3\_201126\_FR\_TiOx\_hum\_tissue\_Urea\_RNAB\_H Scan : 31988

Andromeda score : 78.964

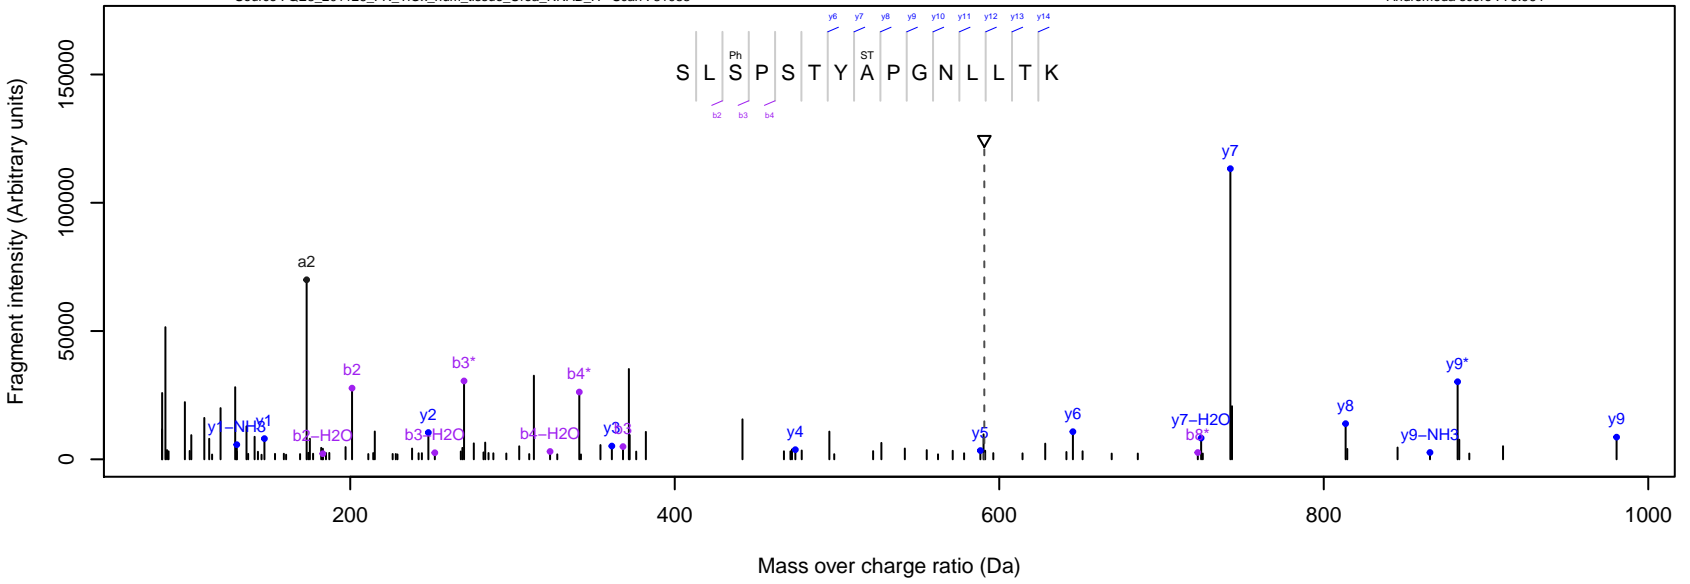

LQS(Phospho (STY))IGTENEEENRR-3+

Source : QE3\_201126\_FR\_TiOx\_hum\_tissue\_Urea\_RNAB\_H Scan : 9773

Andromeda score : 78.95

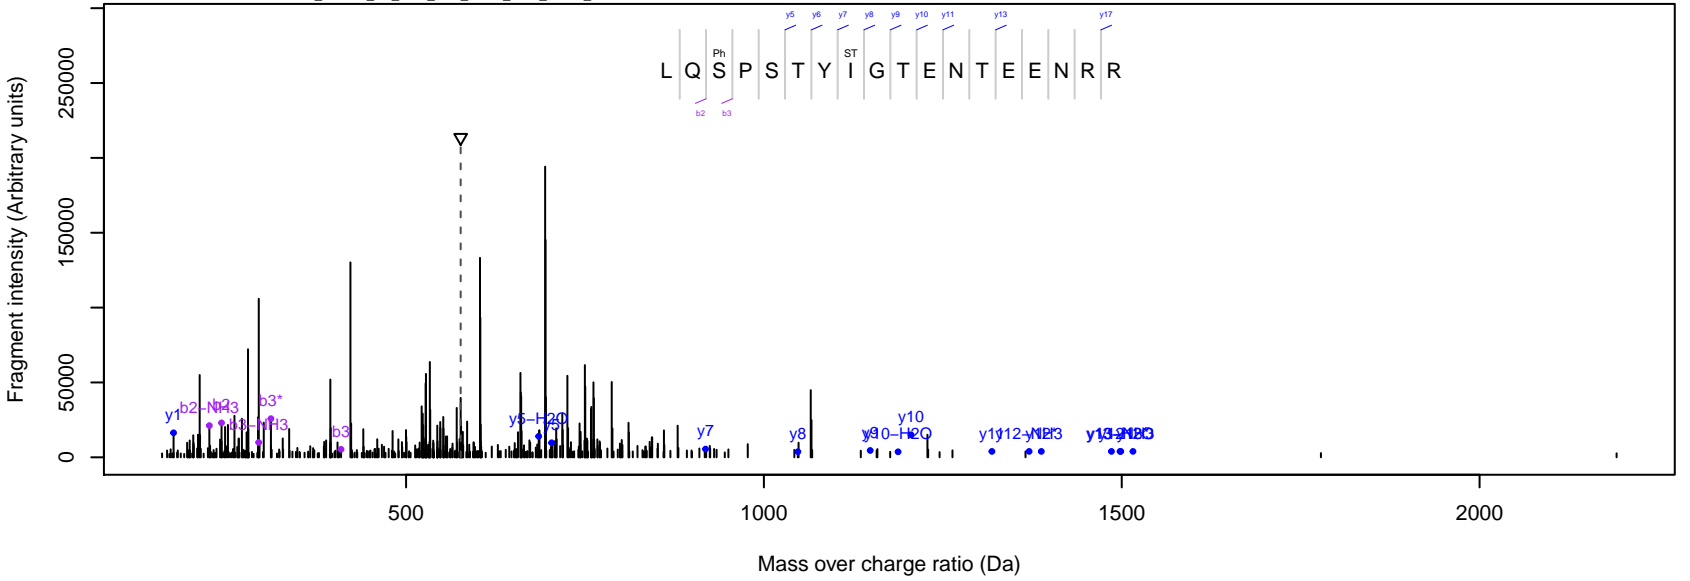

VDIDT(Phospho (STY))PDINIEGSEGK-2+

Source : QE3\_201126\_FR\_TiOx\_hum\_tissue\_Urea\_RNAB\_N Scan : 35178

Andromeda score : 78.932

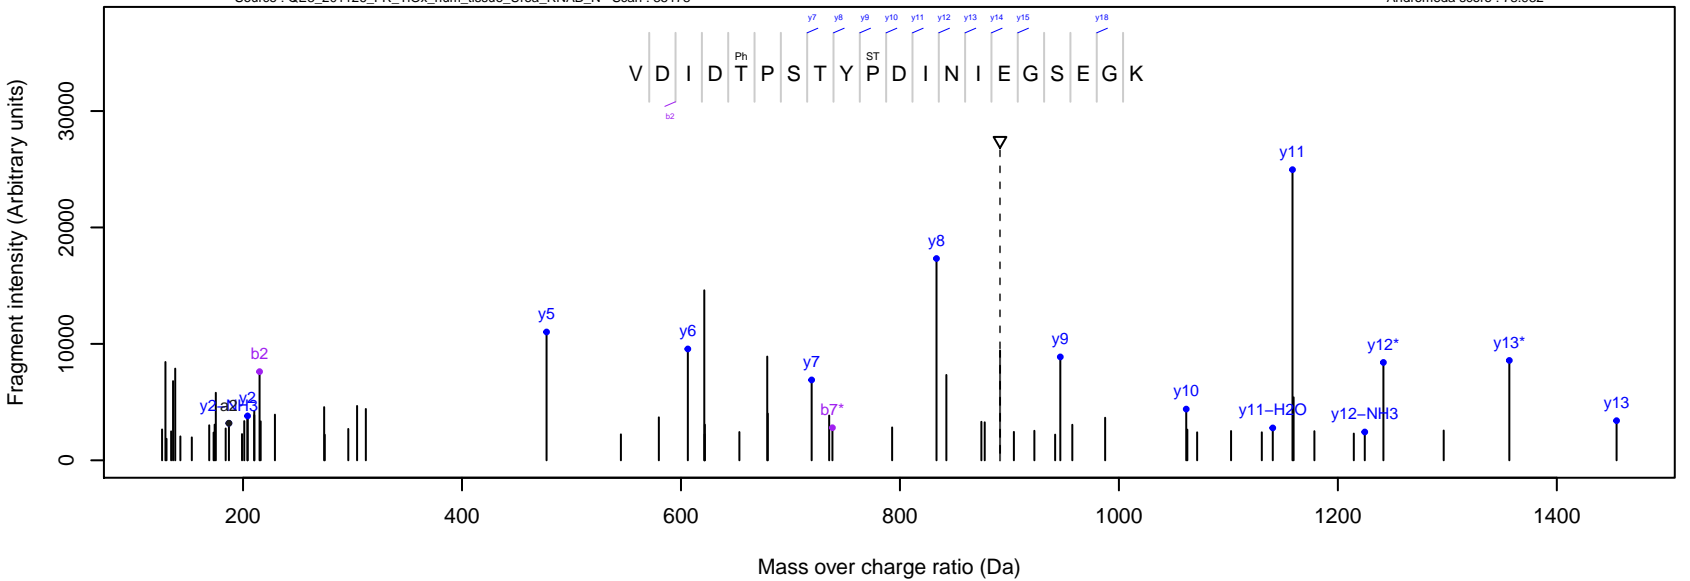

RLS(Phospho (STY))AQGQAISVVGSLSSMSPLLEEAPQAK-3+

Source : QE3\_201126\_FR\_TiOx\_hum\_tissue\_Urea\_RNAB\_B Scan : 51180

Andromeda score : 78.921

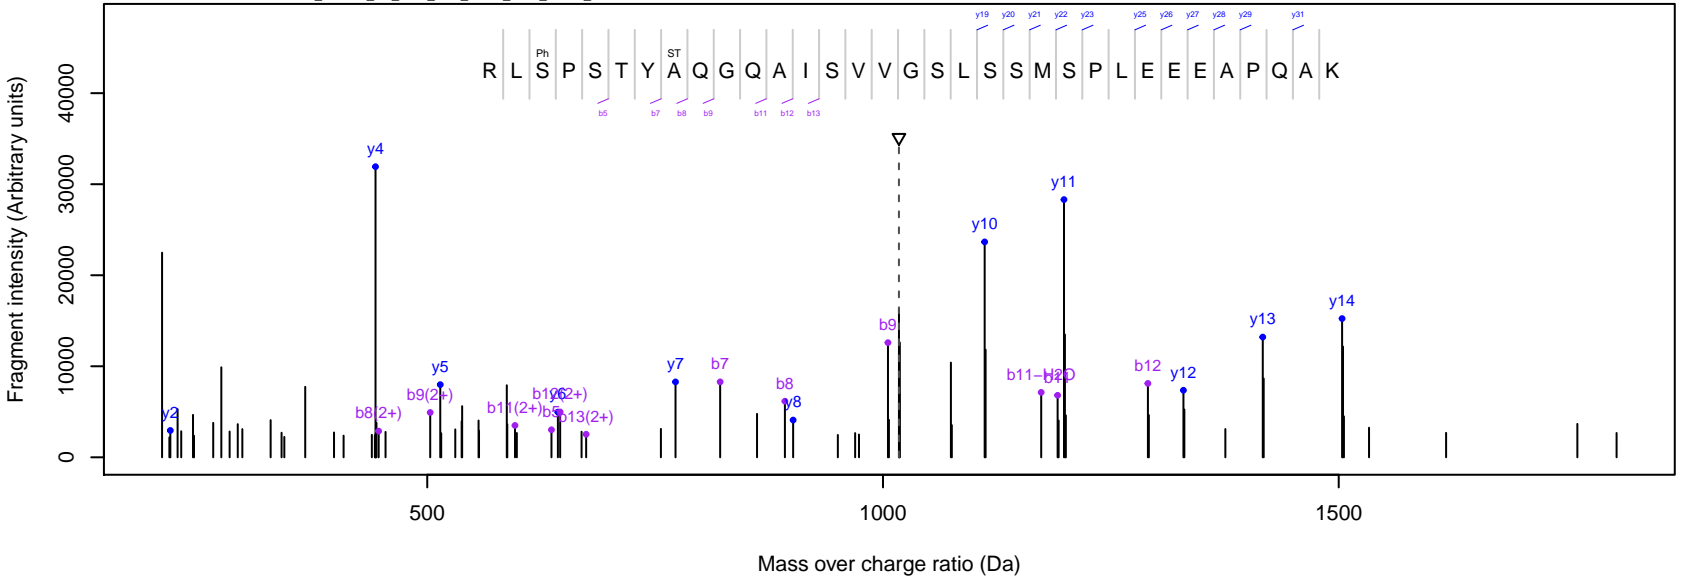

VVIDS(Phospho (STY))DT(Phospho (STY))EDSGDENLDQELLSLAK-3+

Source : QE3\_201126\_FR\_TiOx\_hum\_tissue\_Urea\_RNAB\_H Scan : 62692

Andromeda score : 78.916

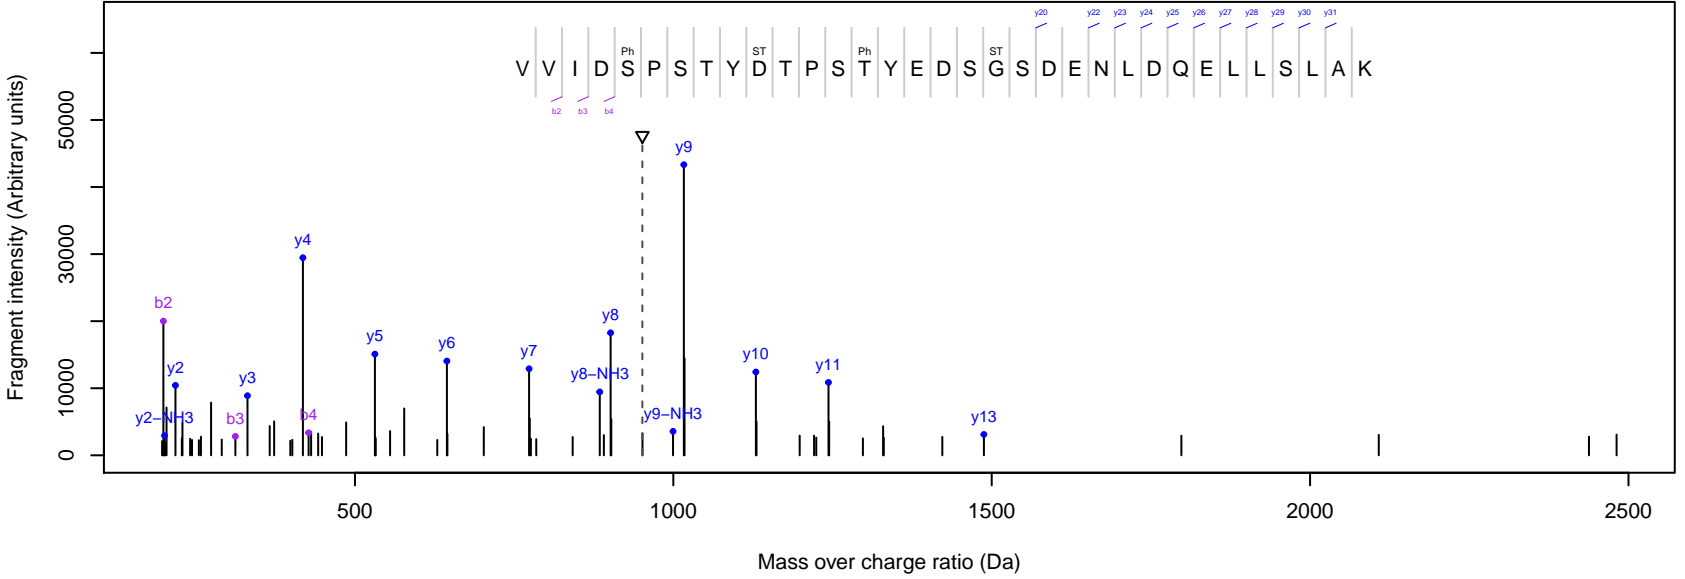

SLSKS(Phospho (STY))DSDLTCSPTEDATMGSR-3+

Source : QE3\_201126\_FR\_TiOx\_hum\_tissue\_Urea\_RNAB\_H Scan : 29924

Andromeda score : 78.913

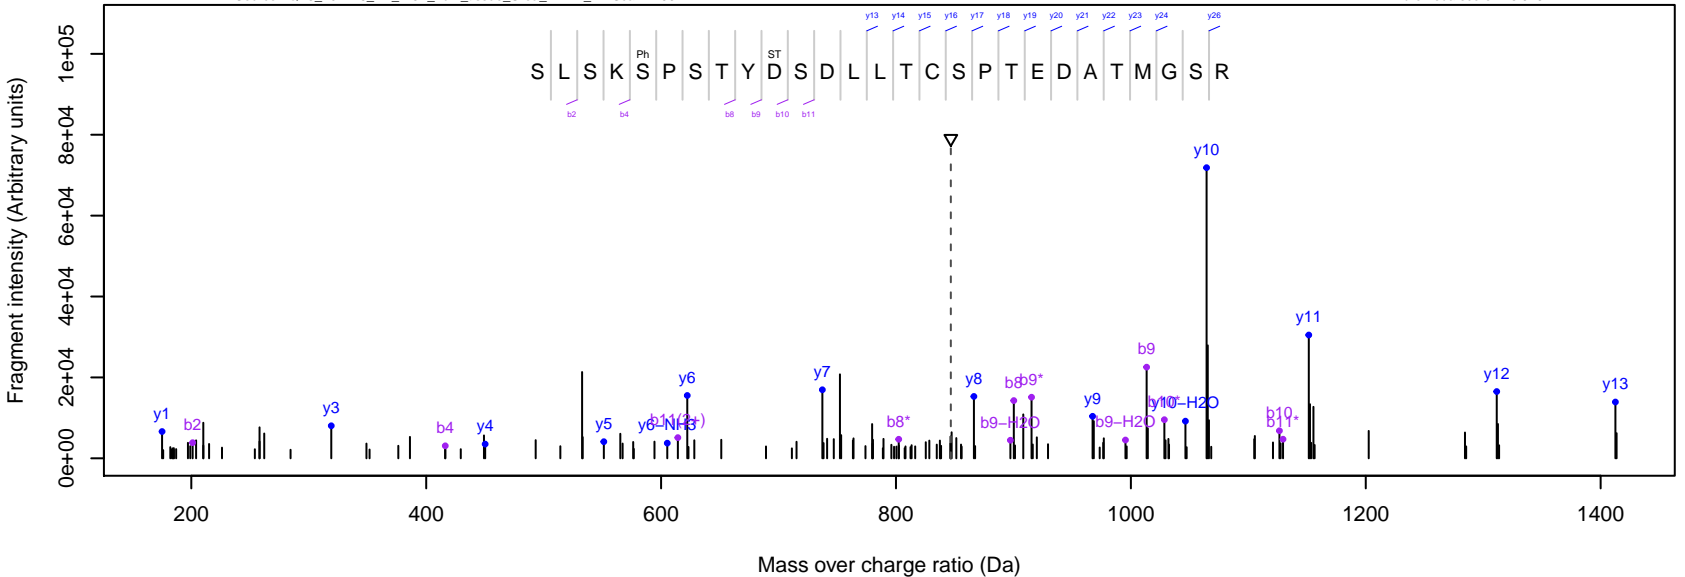

KANDES(Phospho (STY))NEHSVDVDSQELSKVSPSTYR-4+

Source : QE3\_201126\_FR\_TiOx\_hum\_tissue\_Urea\_RNAB\_N Scan : 16243

Andromeda score : 78.909

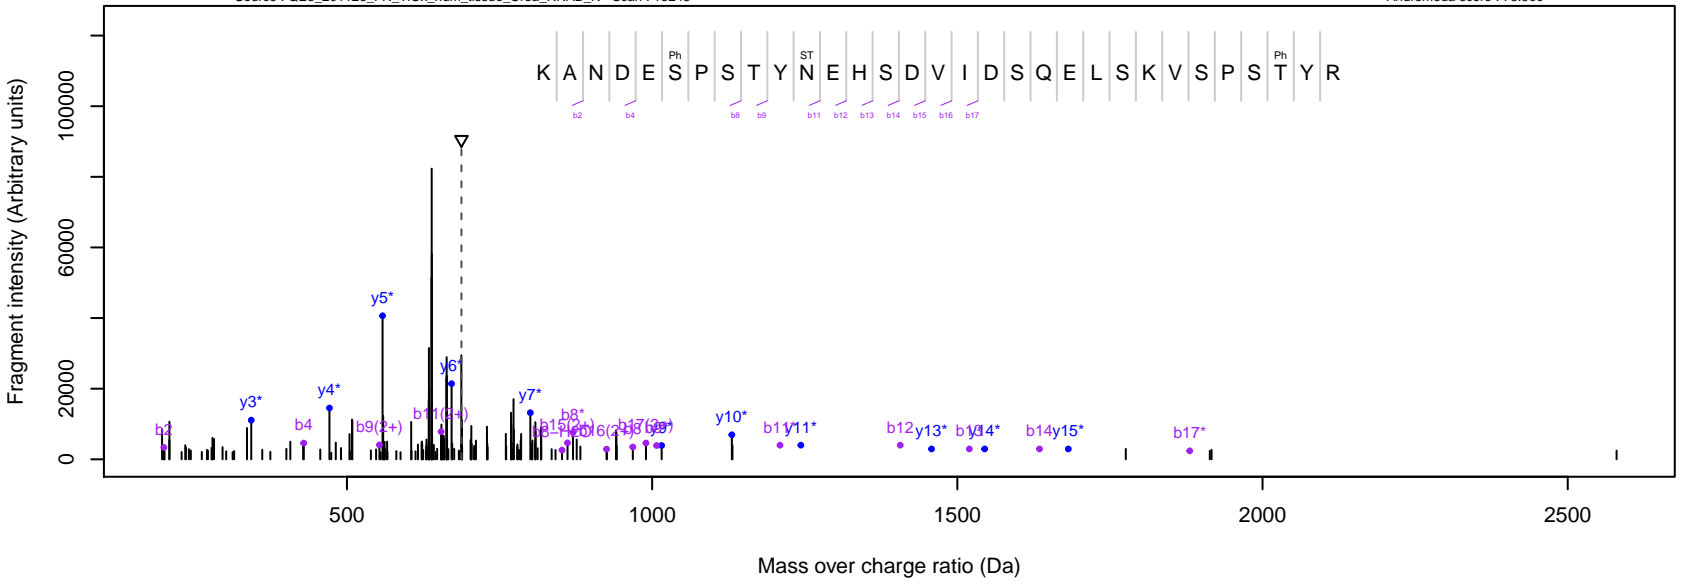

DNLTLWTS(Phospho (STY))DTQGDEAEAGEGGEN-2+

Source : QE3\_201126\_FR\_TiOx\_hum\_tissue\_Urea\_RNAB\_N Scan : 55697

Andromeda score : 78.902

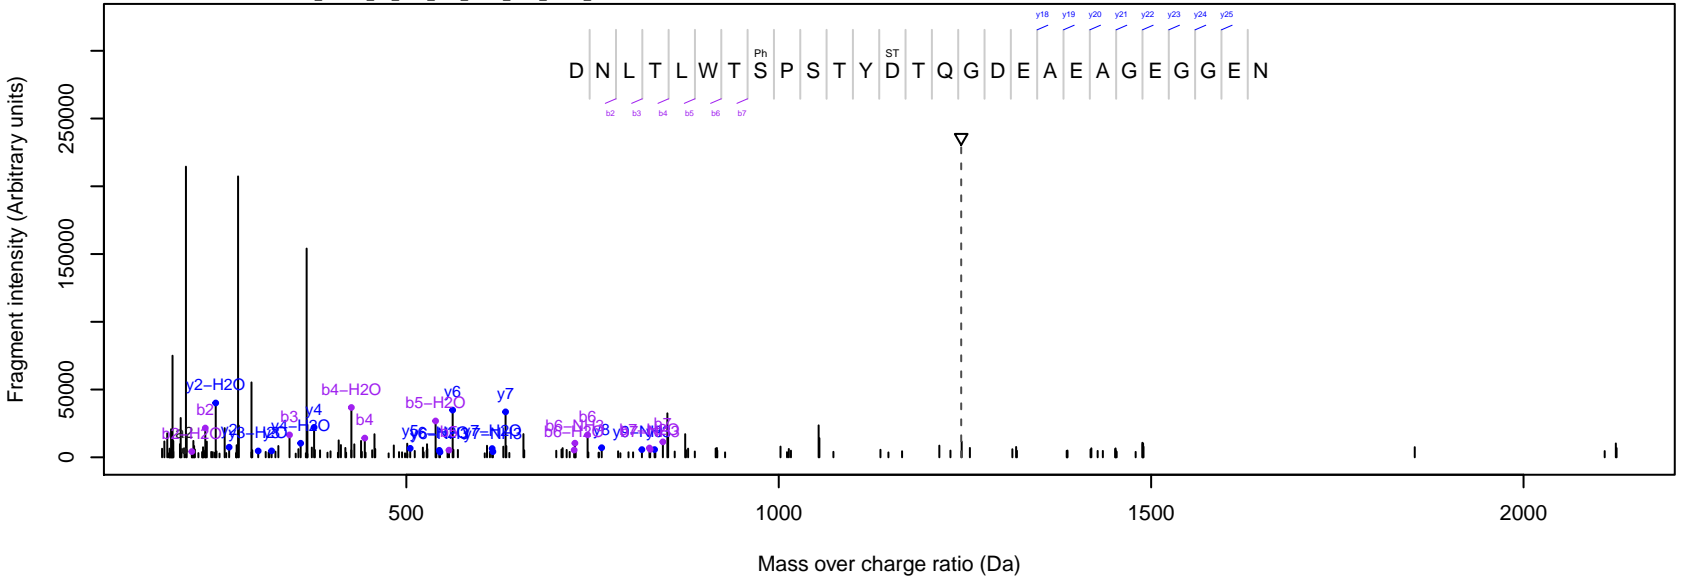

GT(Phospho (STY))GAGGDSGPEEDYLSLGAECNFMOMQSSSAK-3+

Source : QE3\_201126\_FR\_TiOx\_hum\_tissue\_Urea\_RNAB\_B Scan : 49701

Andromeda score : 78.892

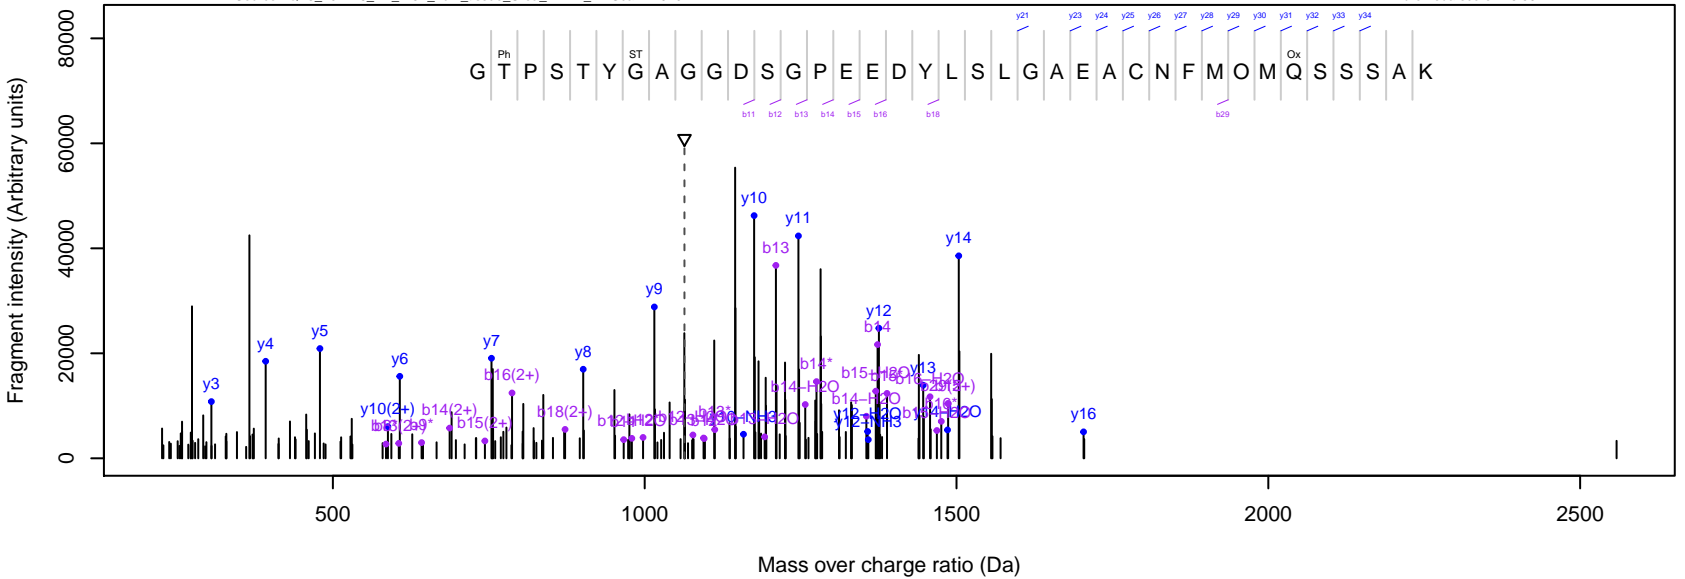

SFS(Phospho (STY))ASQSTDREGASPVTEVR-3+

Source : QE3\_201126\_FR\_TiOx\_hum\_tissue\_Urea\_RNAB\_B Scan : 18706

Andromeda score : 78.837

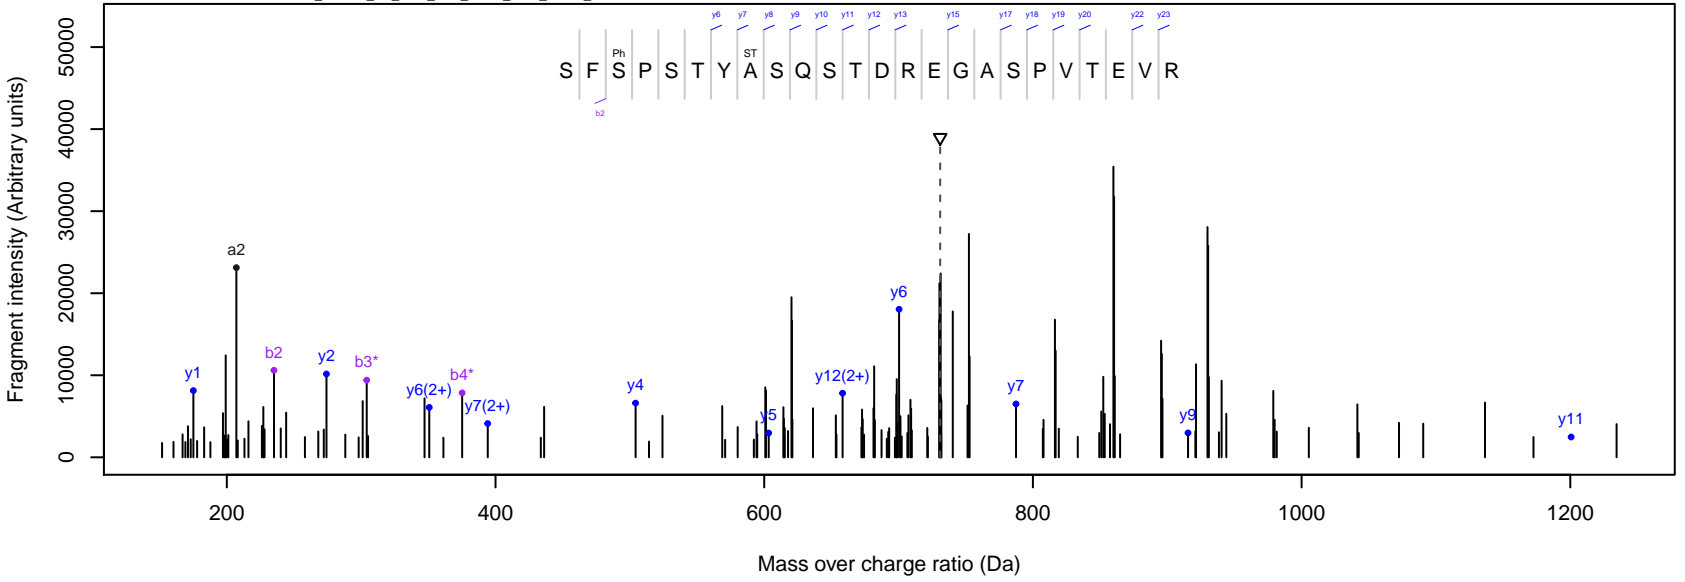

GELS(Phospho (STY))PSFLNPPLPPSIDDRDLSTEEVR-3+

Source : QE3\_201126\_FR\_TiOx\_hum\_tissue\_Urea\_RNAB\_H Scan : 54603

Andromeda score : 78.836

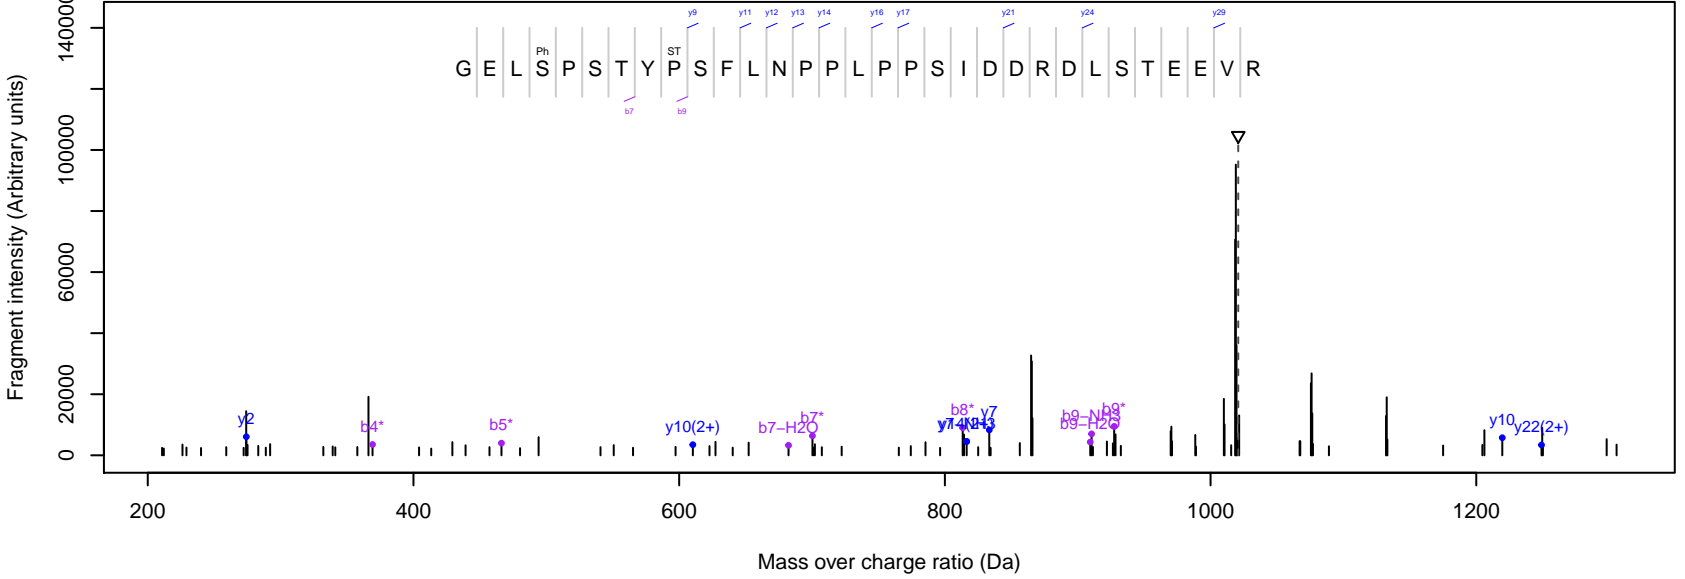

RPS(Phospho (STY))SSEITEGK-2+

Source : QE3\_201126\_FR\_TiOx\_hum\_tissue\_Urea\_RNAB\_H Scan : 11119

Andromeda score : 78.814

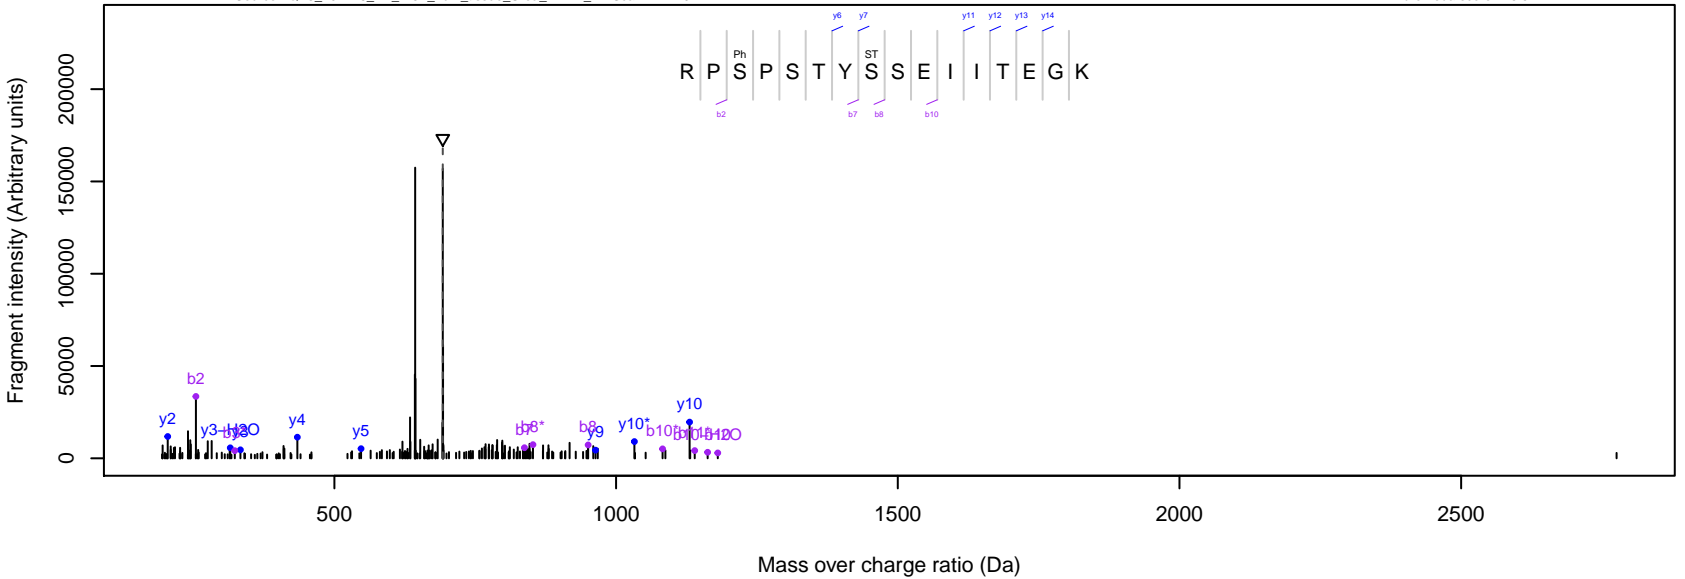

S(Phospho (STY))GEQITSSPSPK-2+

Source : QE3\_201126\_FR\_TiOx\_hum\_tissue\_Urea\_RNAB\_H Scan : 16479

Andromeda score : 78.814

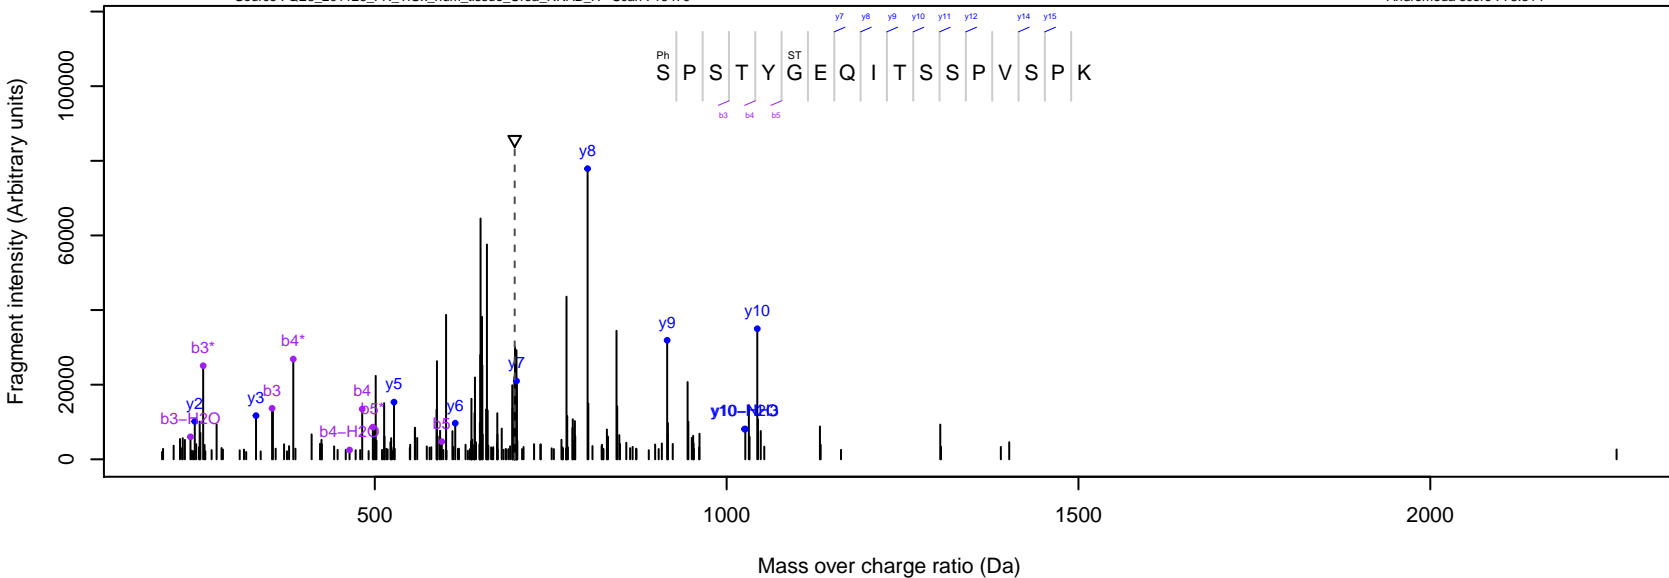

LLLAEDS(Phospho (STY))EEVDFLSER-3+

Source : QE3\_201126\_FR\_TiOx\_hum\_tissue\_Urea\_RNAB\_H Scan : 55652

Andromeda score : 78.794

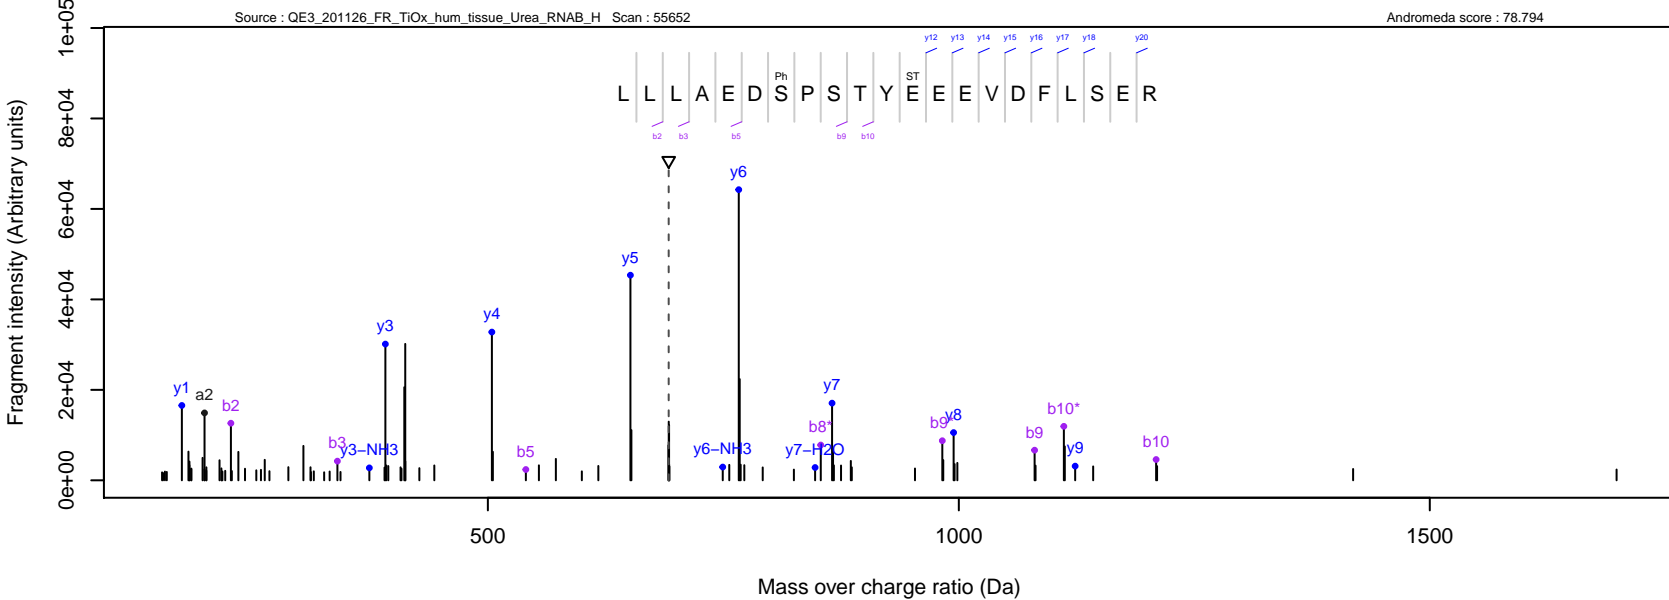

SSS(Phospho (STY))SESLSDKGSELKK-3+

Source : QE3\_201126\_FR\_TiOx\_hum\_tissue\_Urea\_RNAB\_N Scan : 6891

Andromeda score : 78.78

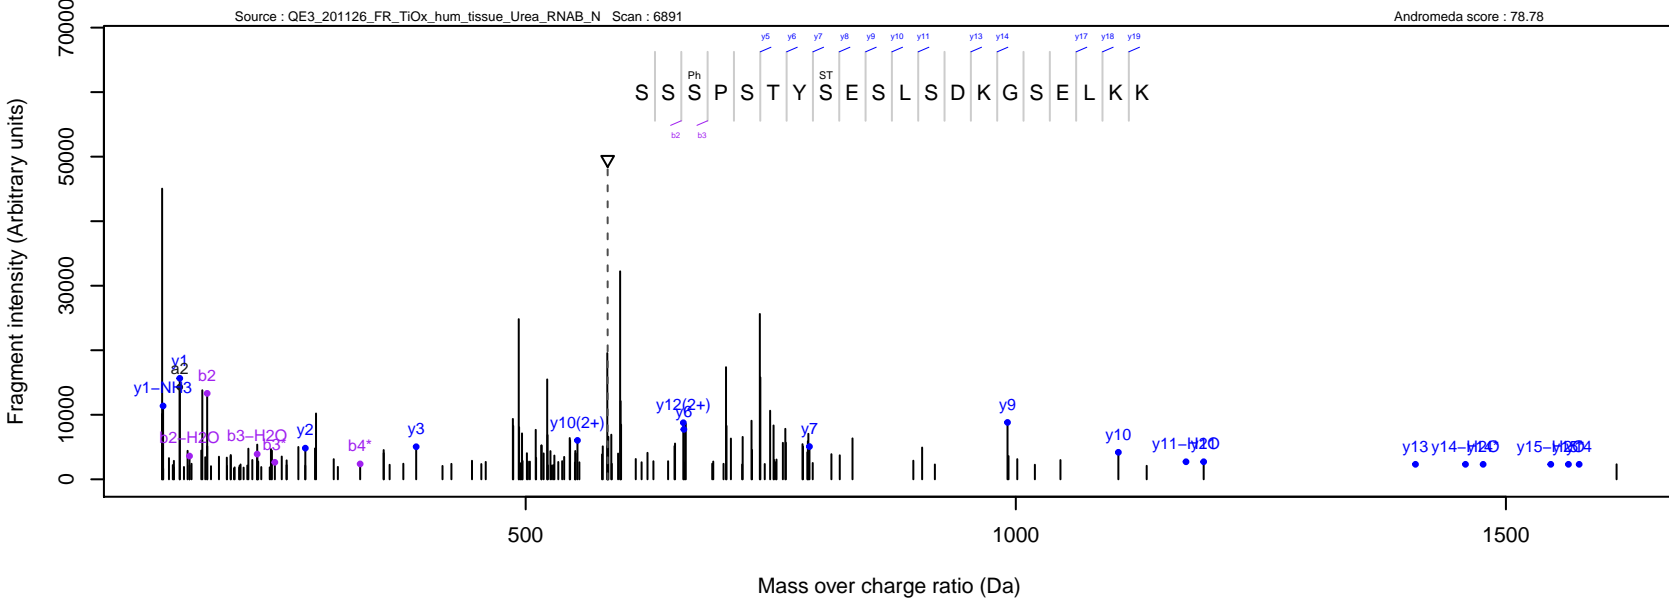

RVS(Phospho (STY))SGSCFALE-2+

Source : QE3\_201126\_FR\_TiOx\_hum\_tissue\_Urea\_RNAB\_H Scan : 26742

Andromeda score : 78.763

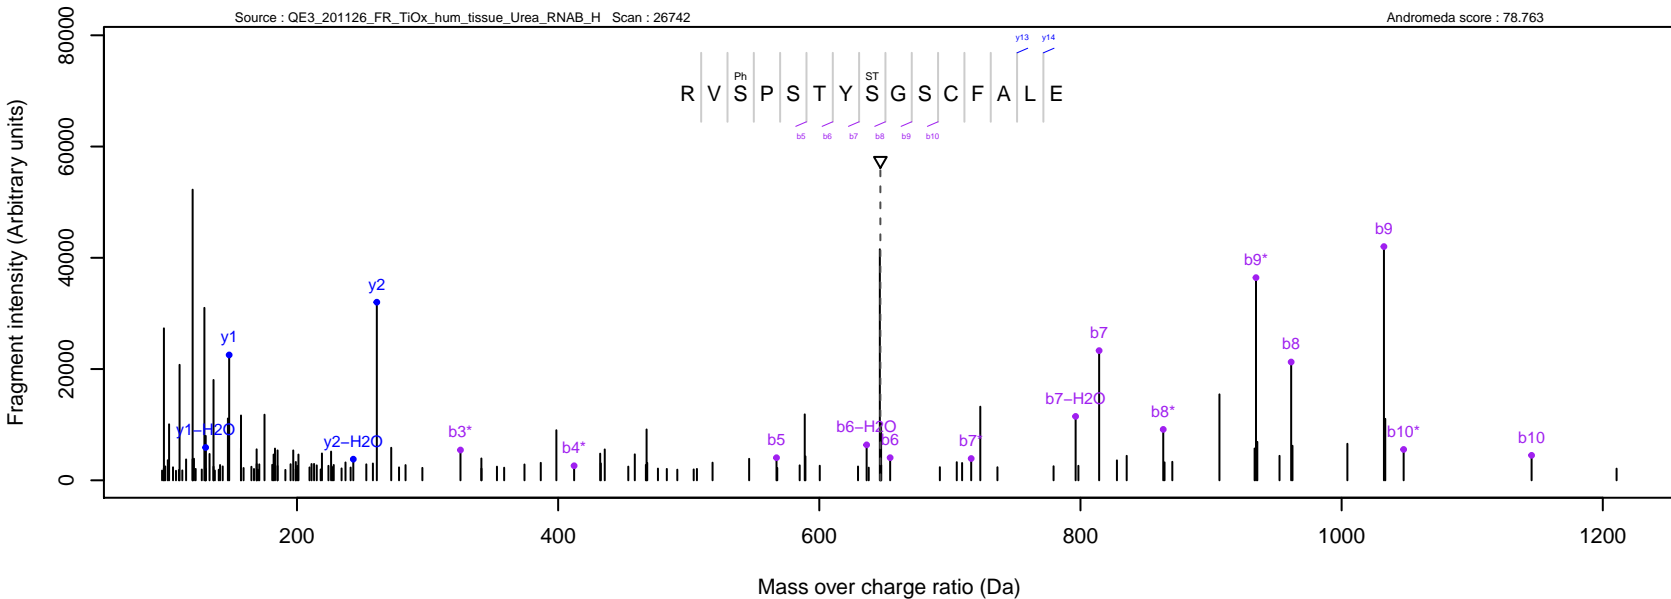

VKPAS(Phospho (STY))PVAQPK-2+

Source : QE3\_201126\_FR\_TiOx\_hum\_tissue\_Urea\_RNAB\_H Scan : 5905

Andromeda score : 78.763

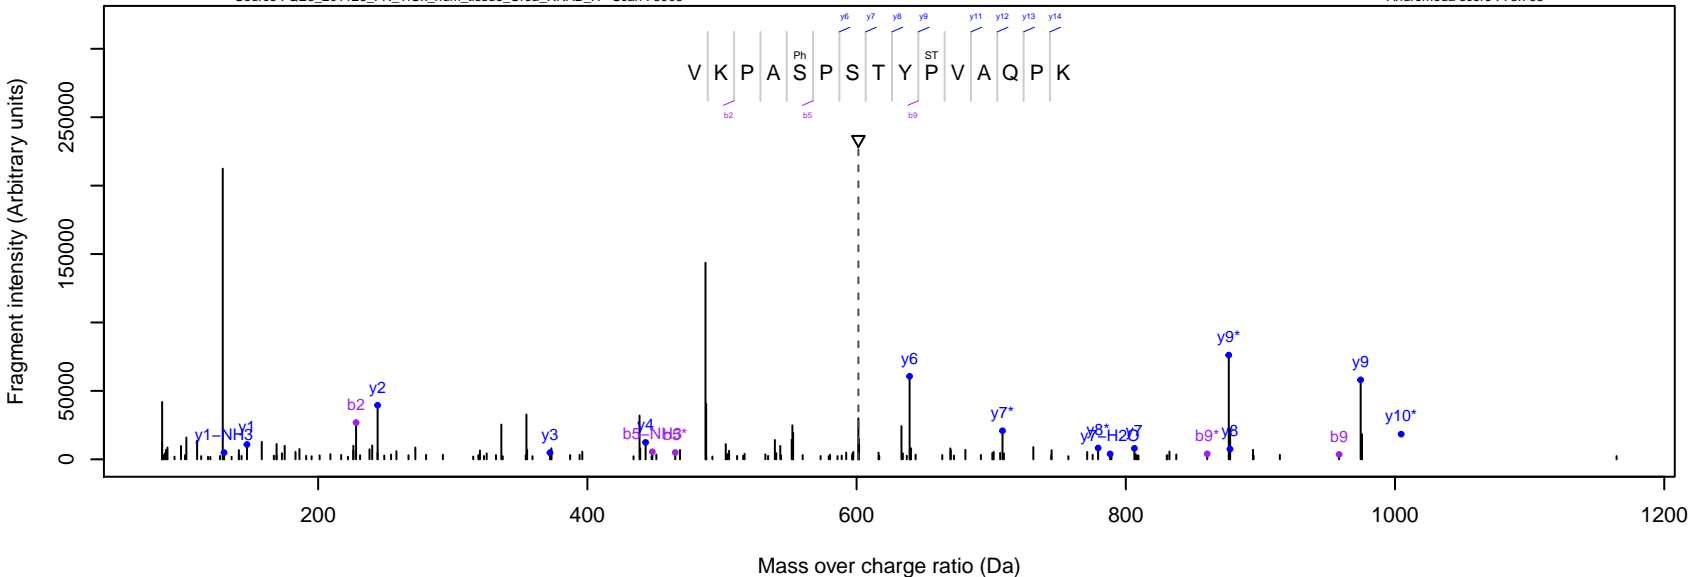

NTLQPEEALSTSDPRVS(Phospho (STY))PR-3+

Source : QE3\_201126\_FR\_TiOx\_hum\_tissue\_Urea\_RNAB\_N Scan : 24600

Andromeda score : 78.758

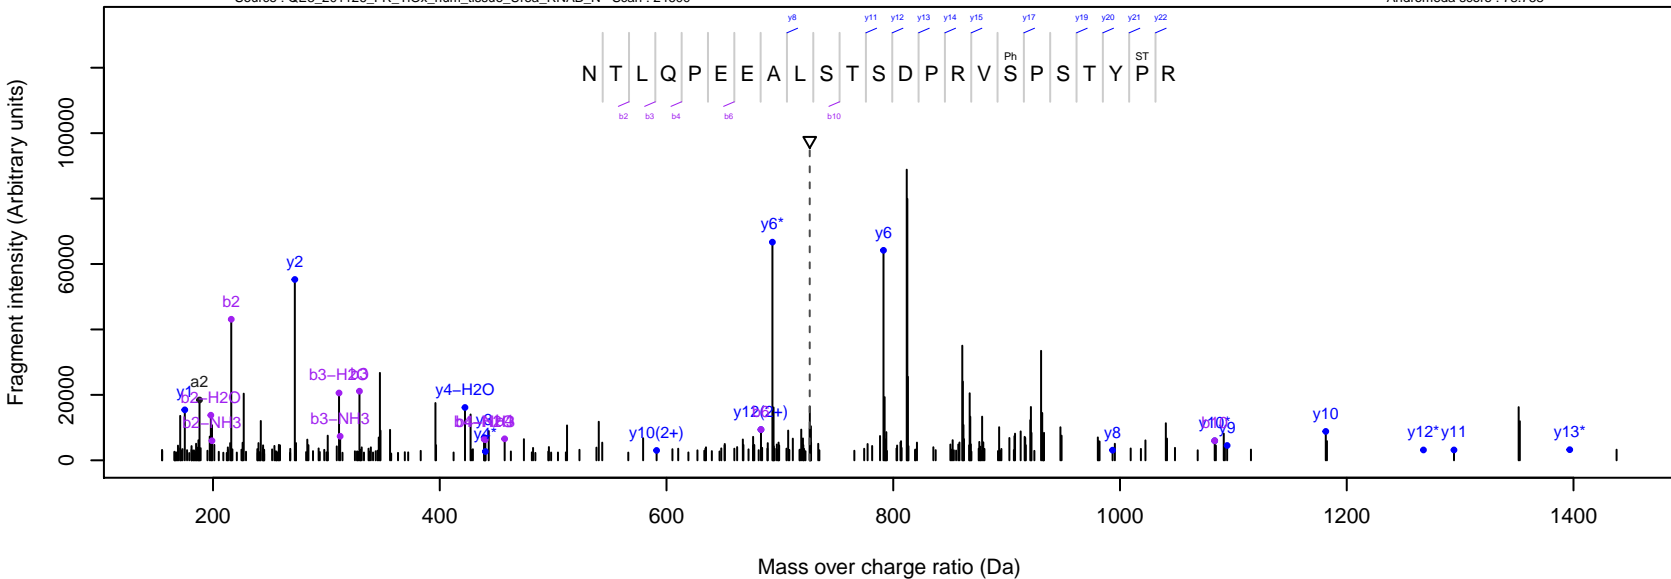

KAEGAATEEGT(Phospho (STY))PKESEPQAAAEPAEK-3+

Source : QE3\_201126\_FR\_TiOx\_hum\_tissue\_Urea\_RNAB\_H Scan : 9685

Andromeda score : 78.755

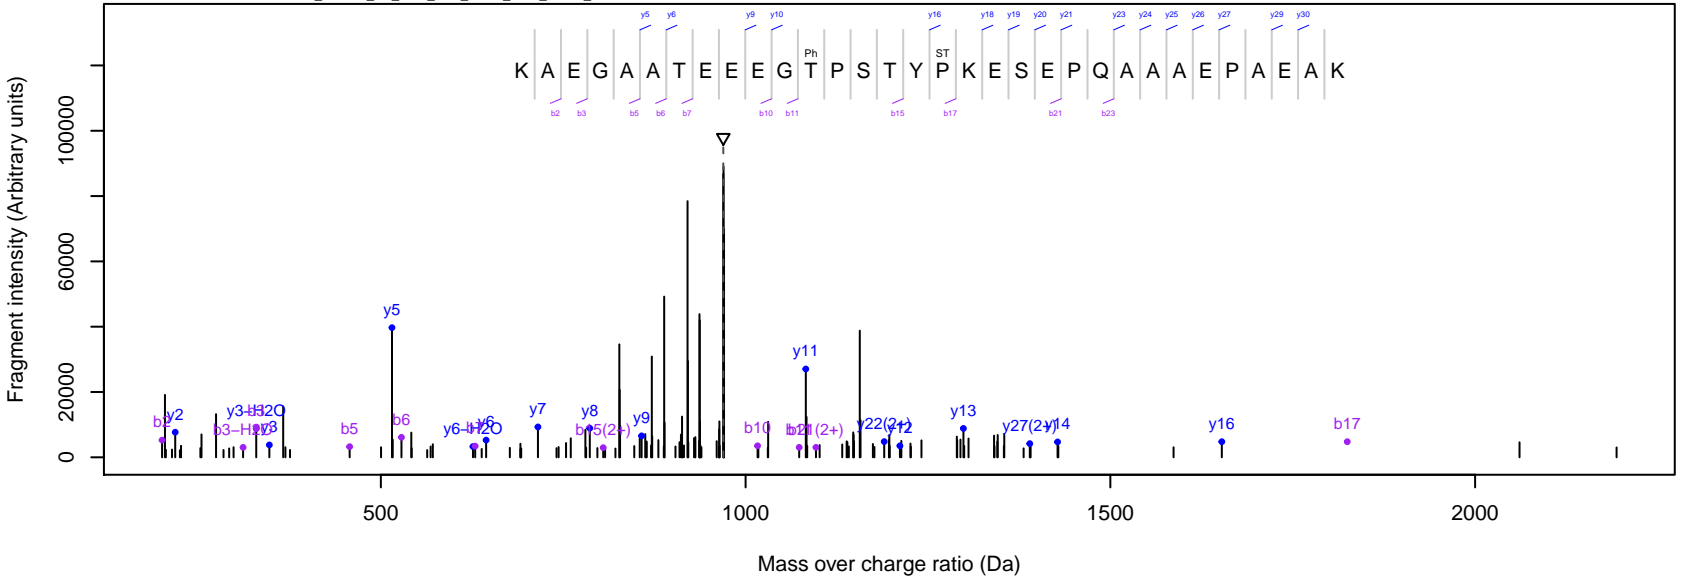

QQWIDAIQHKTES(Phospho (STY))GYGSESSLRR-4+

Source : QE3\_201126\_FR\_TiOx\_hum\_tissue\_Urea\_RNAB\_N Scan : 25872

Andromeda score : 78.752

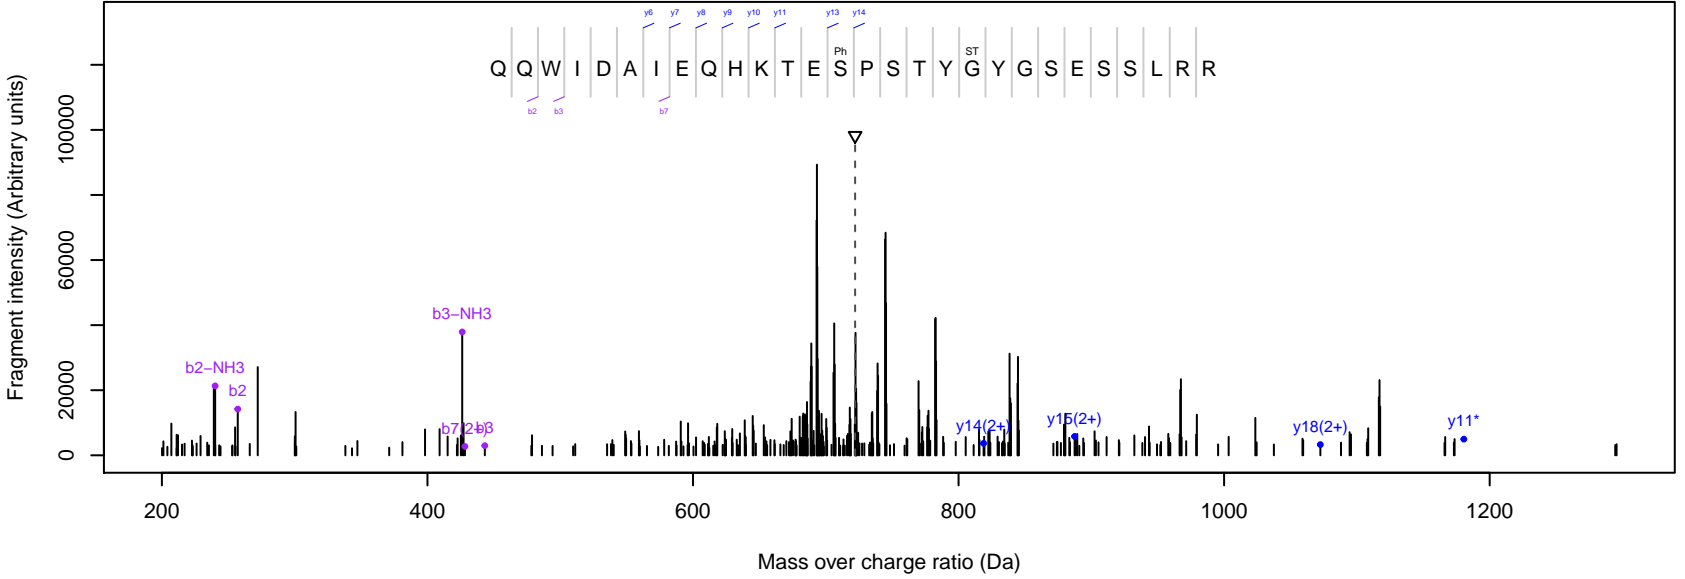

RGS(Phospho (STY))NVALMLDVR-2+

Source : QE3\_201126\_FR\_TiOx\_hum\_tissue\_Urea\_RNAB\_N Scan : 31356

Andromeda score : 78.71

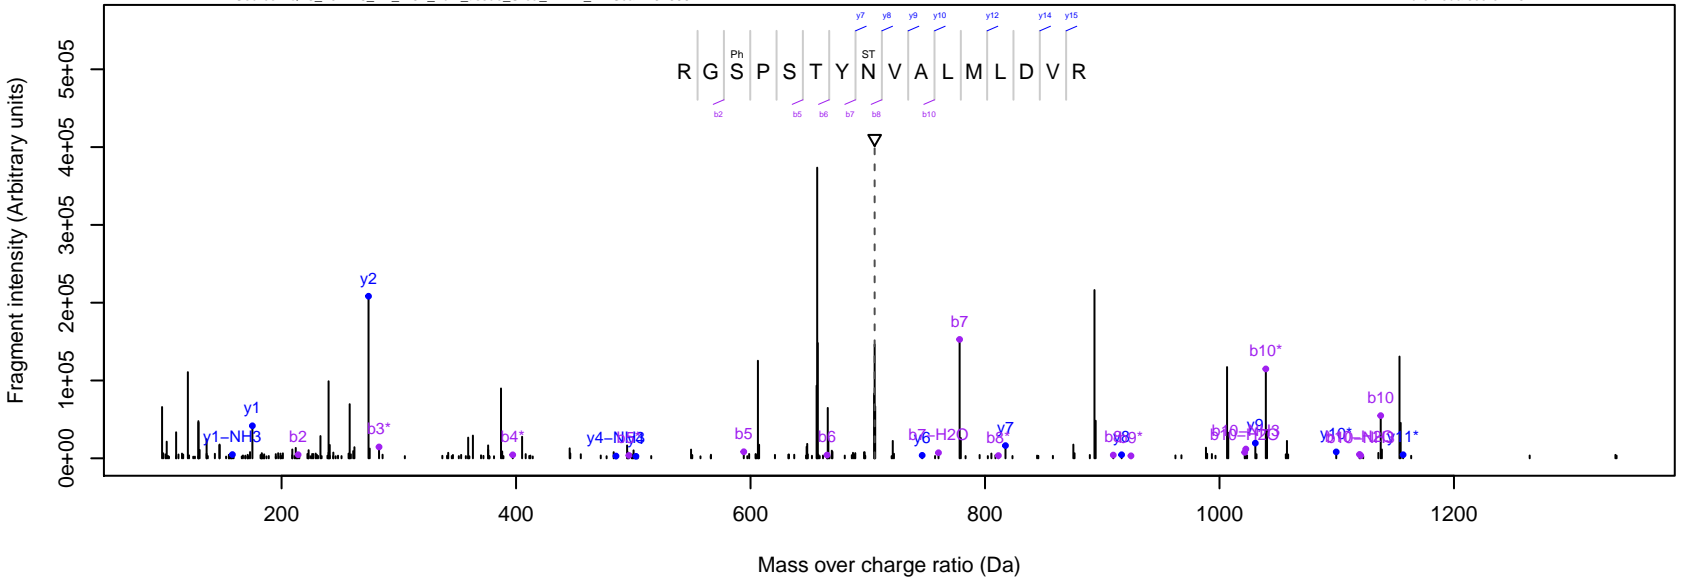

KVIYSQPS(SPho(STY))AR-2+

Source : QE3\_201126\_FR\_TiOx\_hum\_tissue\_Urea\_RNAB\_N Scan : 8693

Andromeda score : 78.705

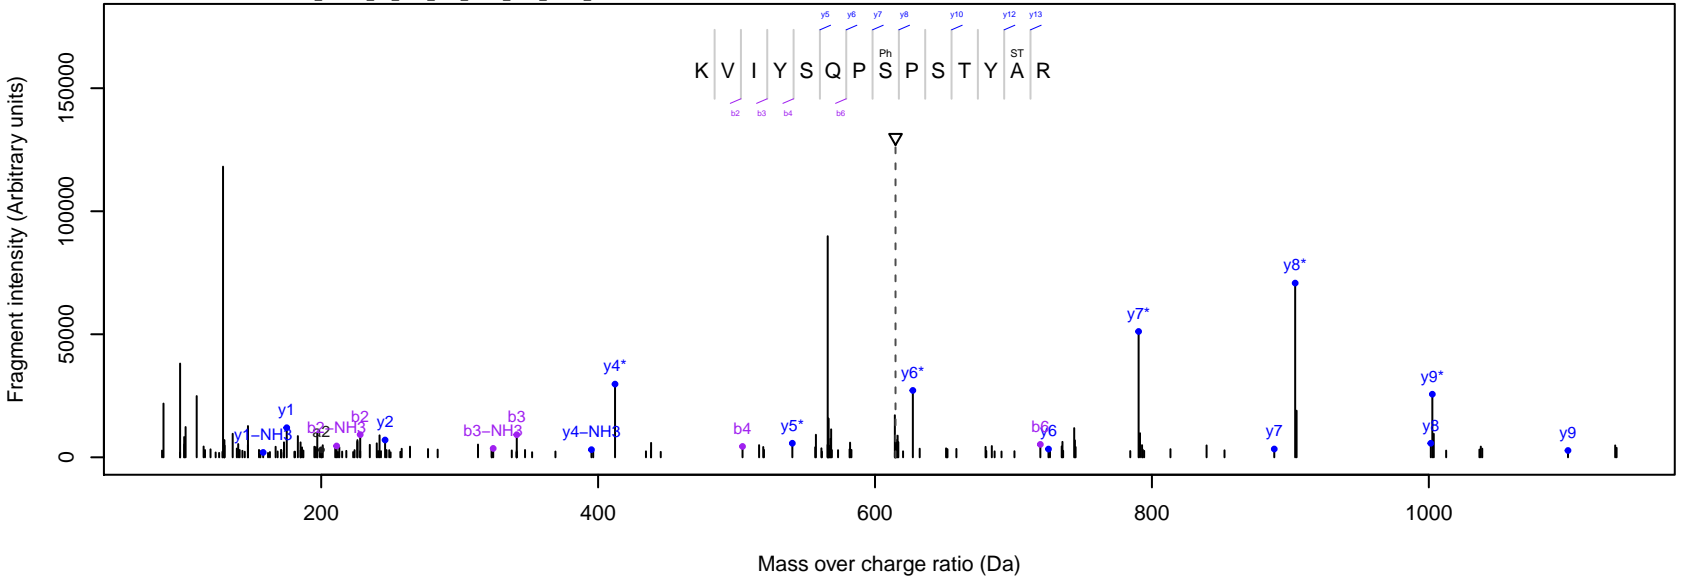

RIS(Phospho(STY))MEDLNKR-3+

Source : QE3\_201126\_FR\_TiOx\_hum\_tissue\_Urea\_RNAB\_H Scan : 11767

Andromeda score : 78.705

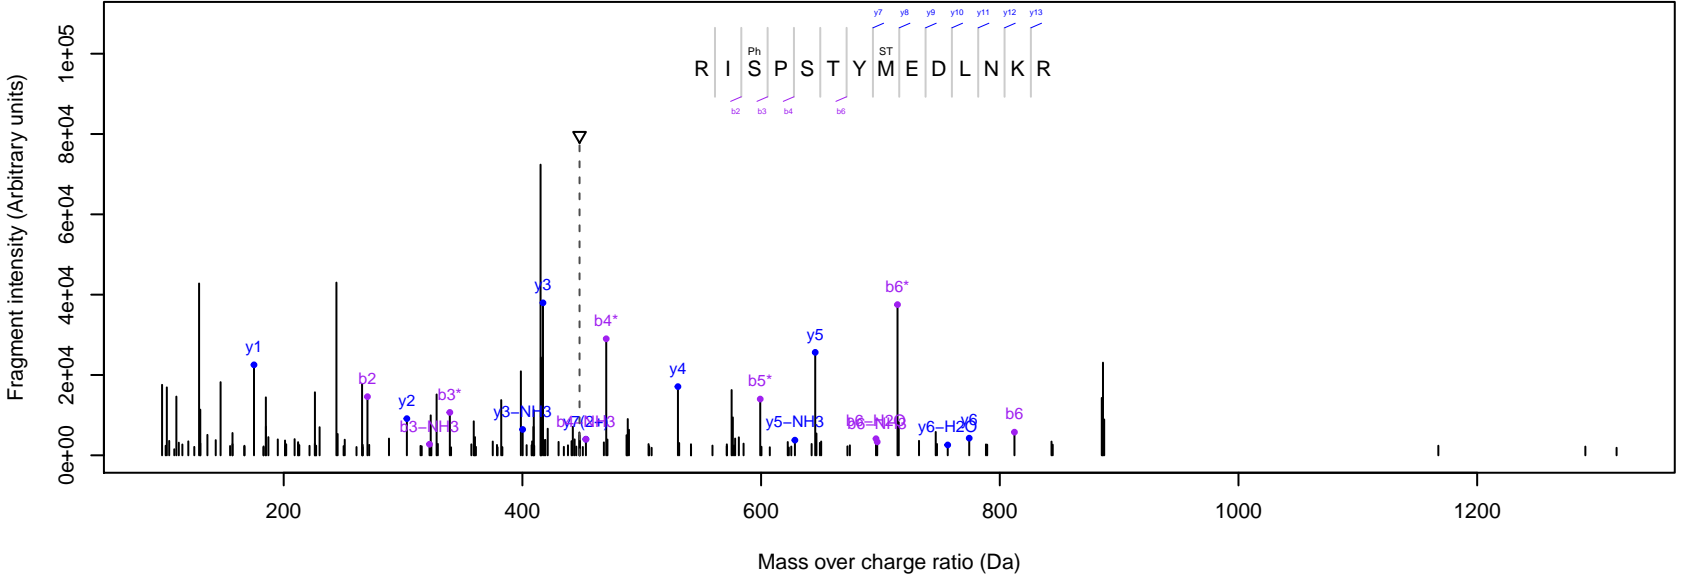

LRS(Phospho(STY))YEDMIGEEVPSDQYYWAPLAQHER-3+

Source : QE3\_201126\_FR\_TiOx\_hum\_tissue\_Urea\_RNAB\_N Scan : 49921

Andromeda score : 78.694

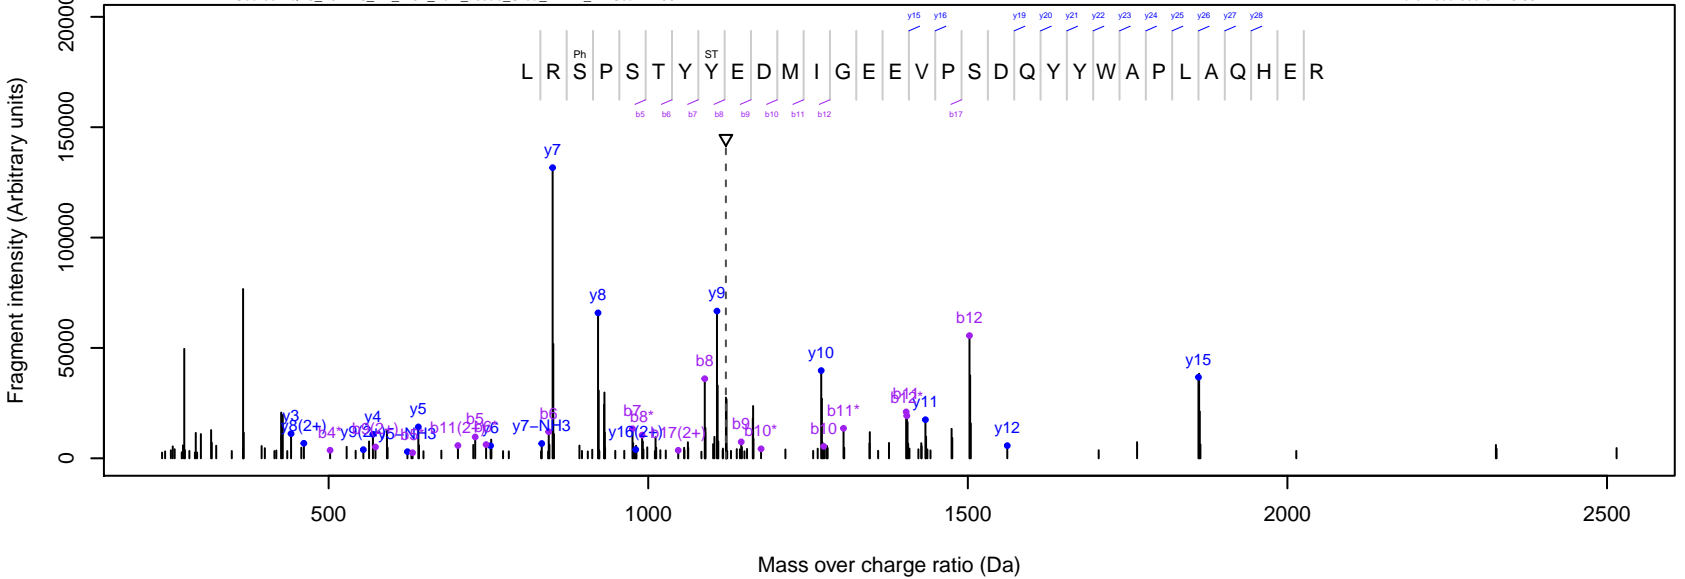



SGSM(Oxidation (M))EEDVDTSPSTY(P Ph)GGDYITSPSS(Phospho (STY))PTSSSR-3+

Source : QE3\_201126\_FR\_TiOx\_hum\_tissue\_Urea\_RNAB\_N Scan : 28421

Andromeda score : 78.694

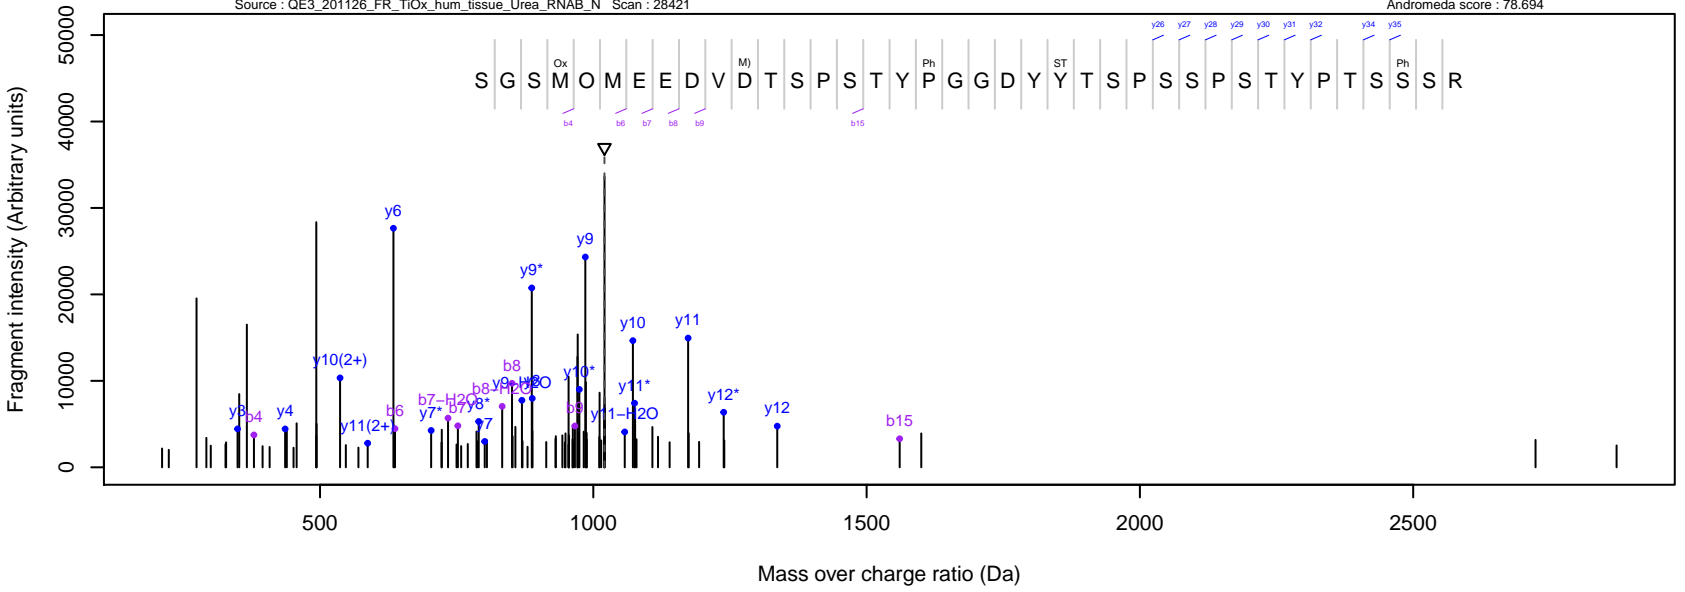

LQLELS(Phospho (STY))KVREEFK-3+

Source : QE3\_201126\_FR\_TiOx\_hum\_tissue\_Urea\_RNAB\_H Scan : 36325

Andromeda score : 78.69

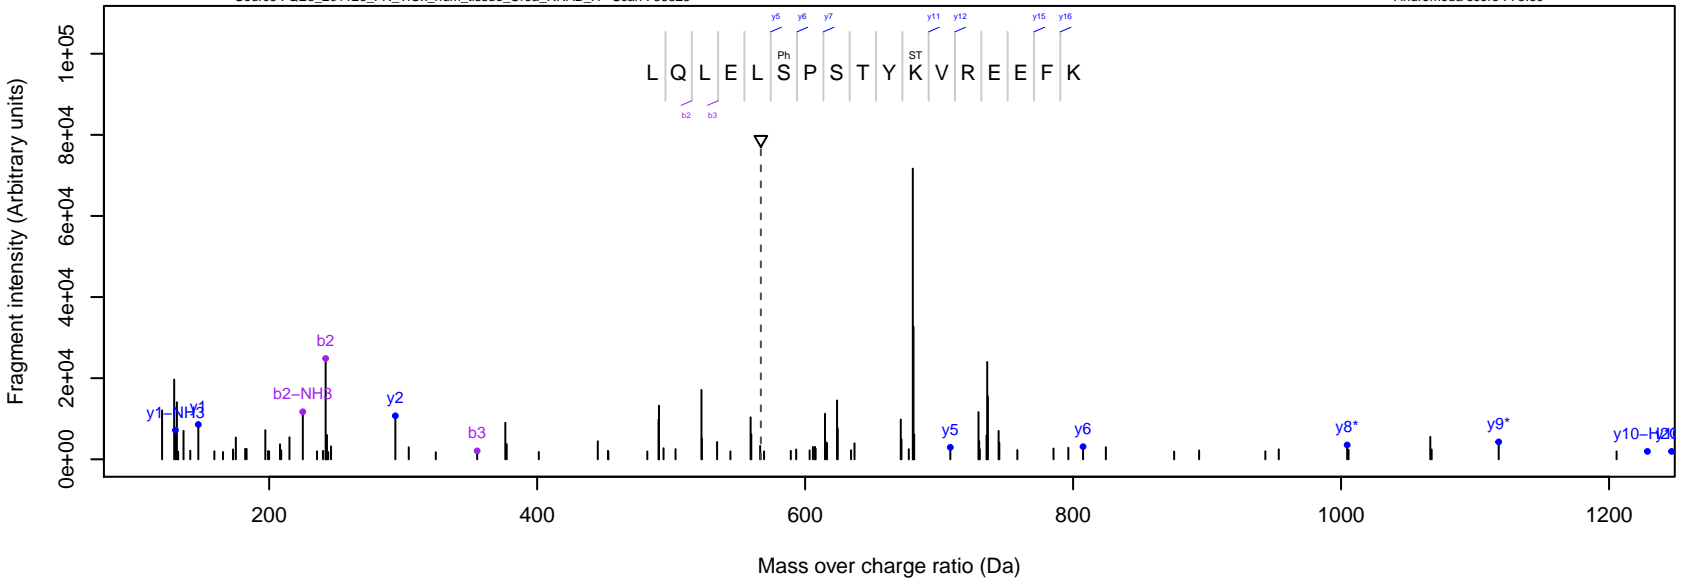

STS(Phospho (STY))IQSFKDK-2+

Source : QE3\_201126\_FR\_TiOx\_hum\_tissue\_Urea\_RNAB\_H Scan : 9889

Andromeda score : 78.683

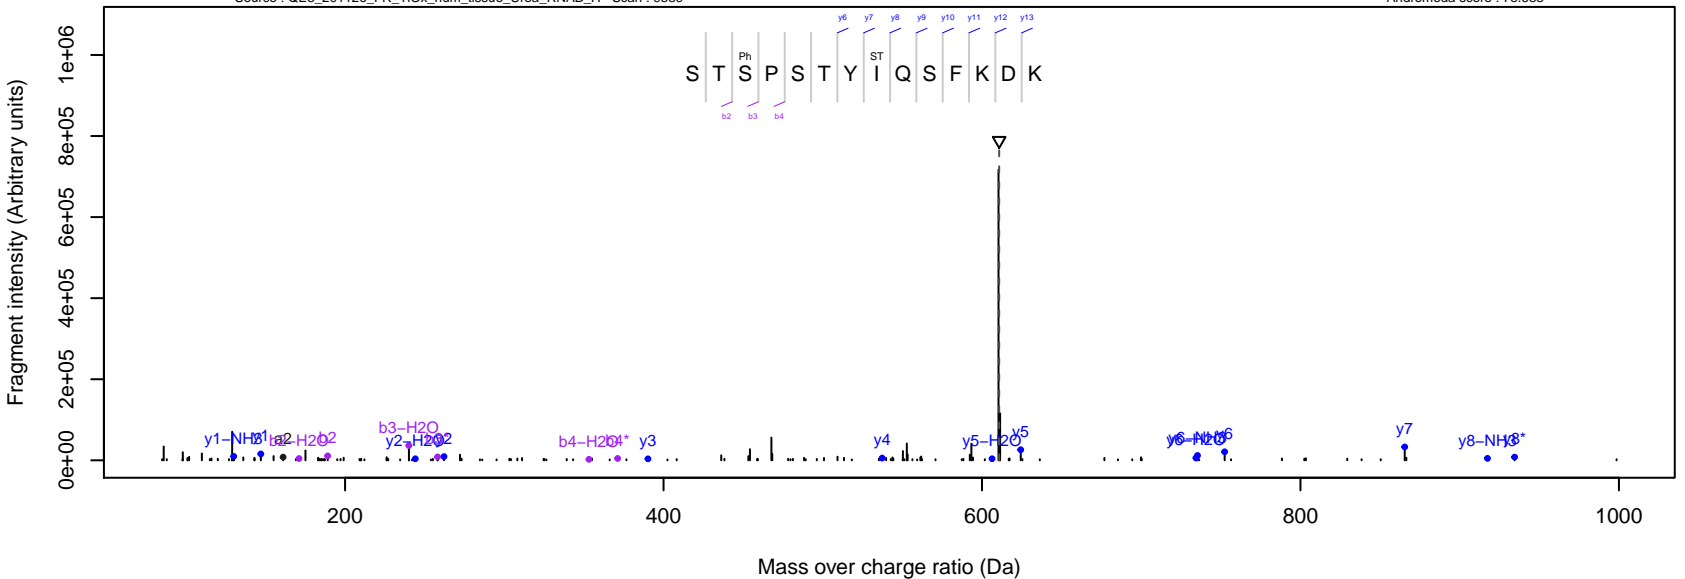

HAIM(Oxidation (M))RS(Phospho (STY))PQMVSAIVR-3+

Source : QE3\_201126\_FR\_TIOx\_hum\_tissue\_Urea\_RNAB\_H Scan : 18066

Andromeda score : 78.674

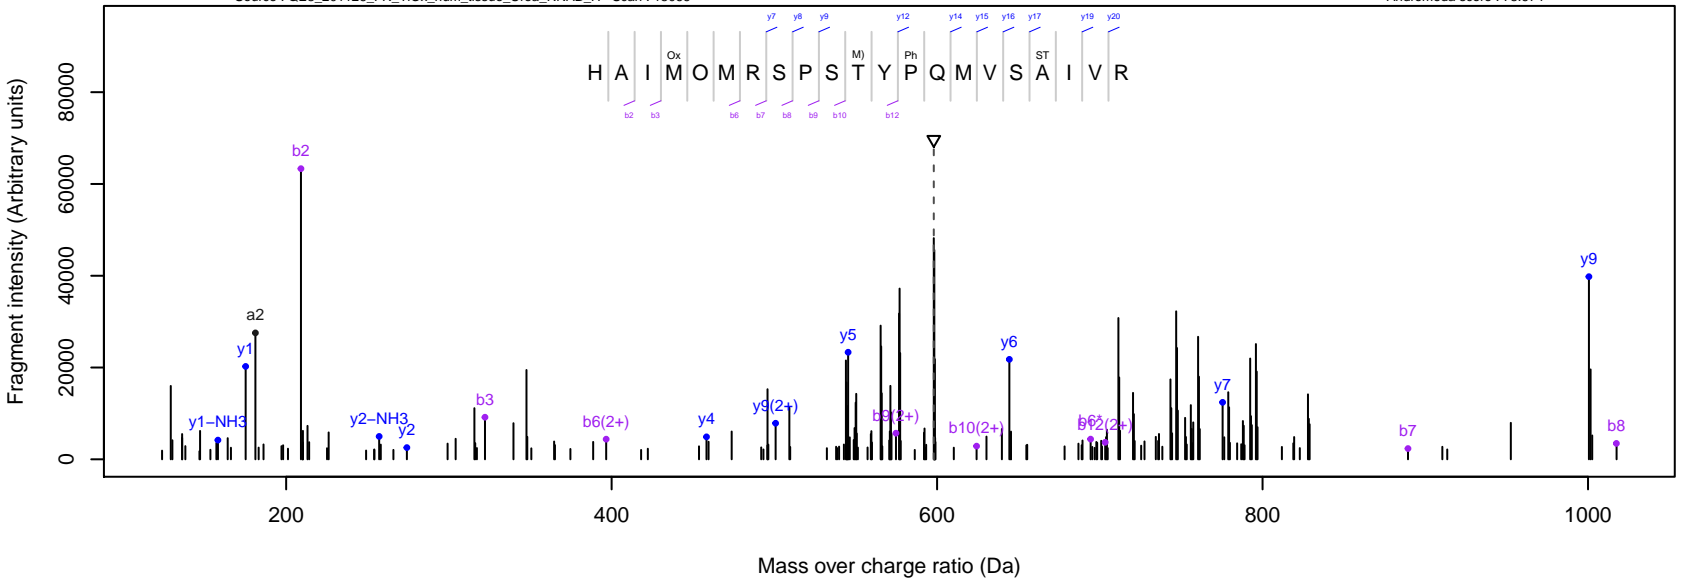

NHEEEVKGLQAQIASSGLTVEVDAPK(Phospho (STY))QDLAK-4+

Source : QE3\_201126\_FR\_TIOx\_hum\_tissue\_Urea\_RNAB\_N Scan : 35540

Andromeda score : 78.667

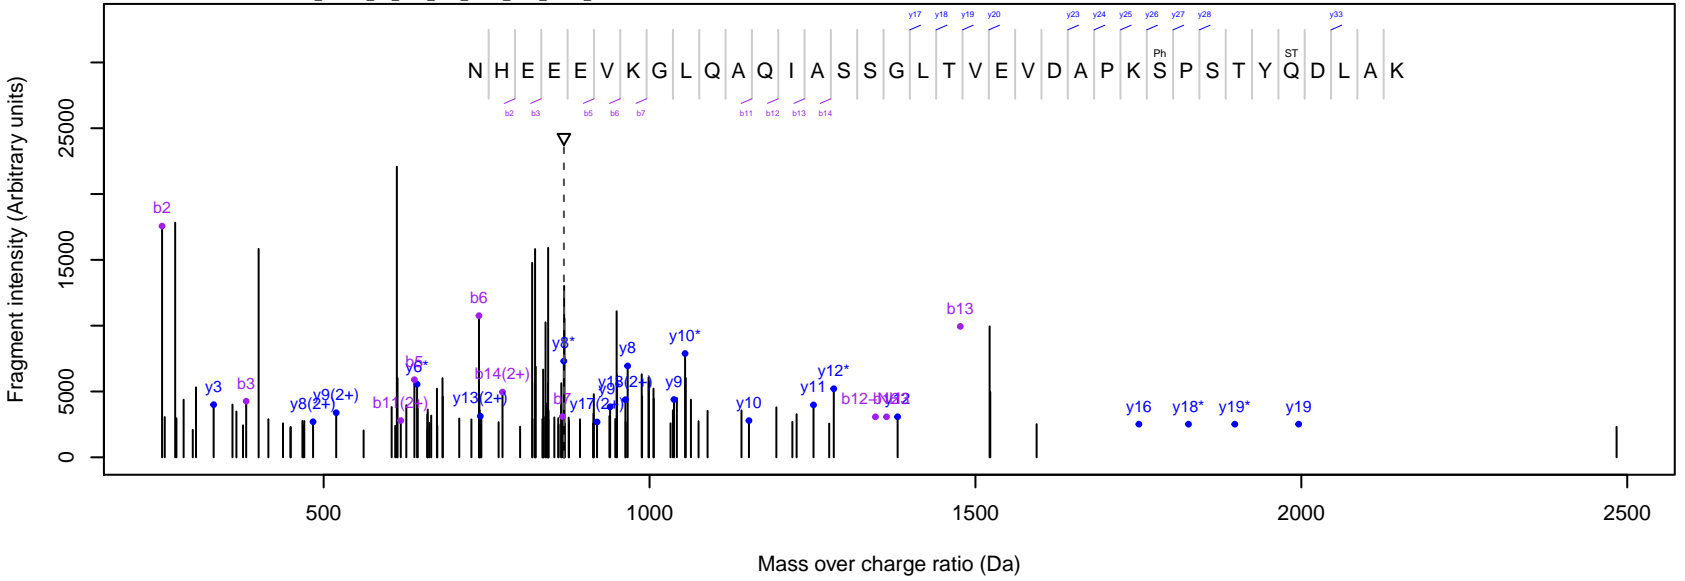

TLTGDVKT(Phospho (STY))SPRTAPK-3+

Source : QE3\_201126\_FR\_TIOx\_hum\_tissue\_Urea\_RNAB\_H Scan : 10314

Andromeda score : 78.661

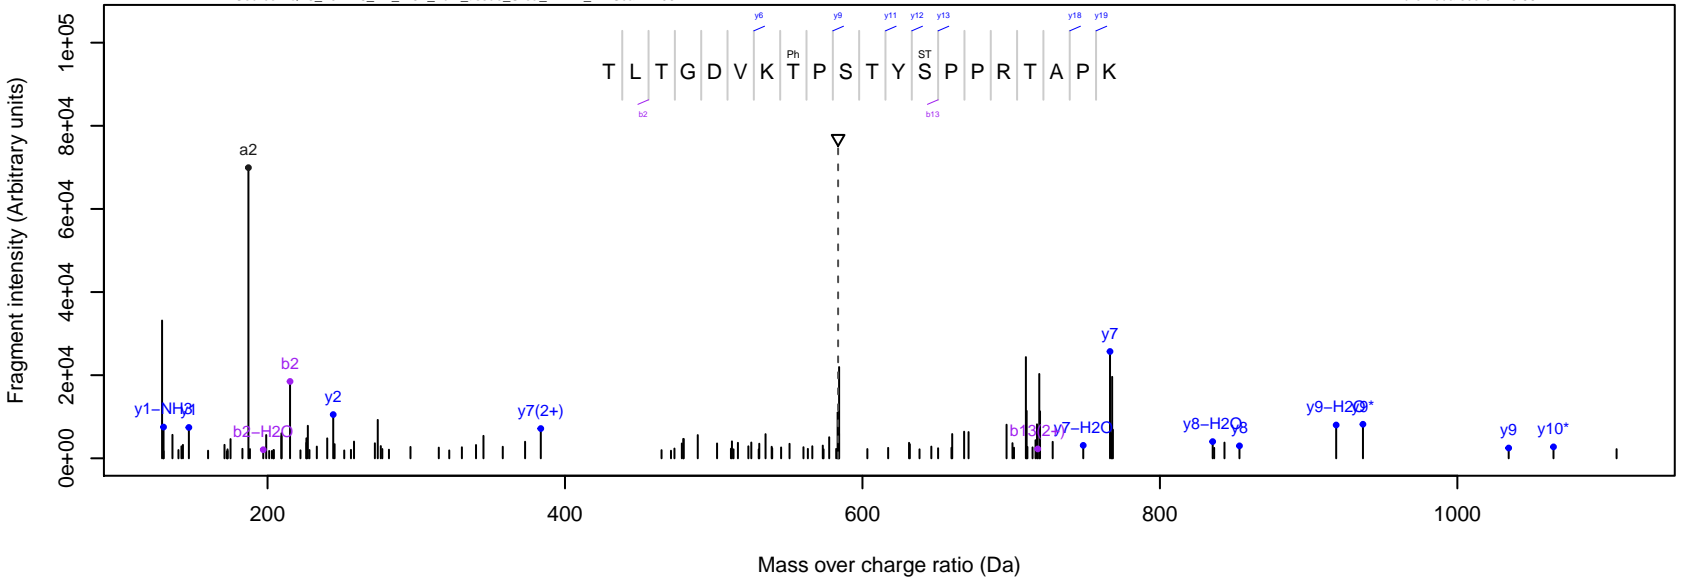

KNQKPSQVNGAPGS(Phospho (STY))PTEPAGQK-3+

Source : QE3\_201126\_FR\_TiOx\_hum\_tissue\_Urea\_RNAB\_H Scan : 6144

Andromeda score : 78.645

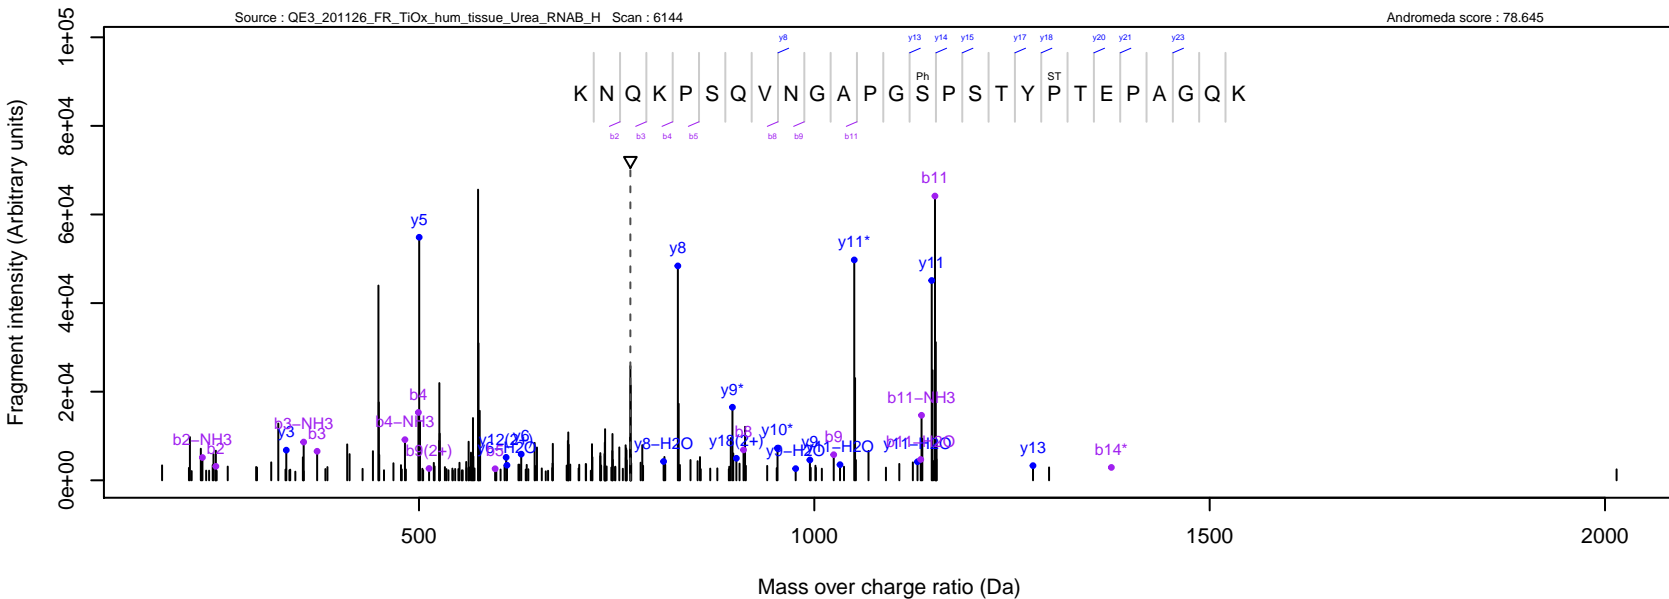

YRDVS(Phospho (STY))PFDHSR-3+

Source : QE3\_201126\_FR\_TiOx\_hum\_tissue\_Urea\_RNAB\_B Scan : 11457

Andromeda score : 78.615

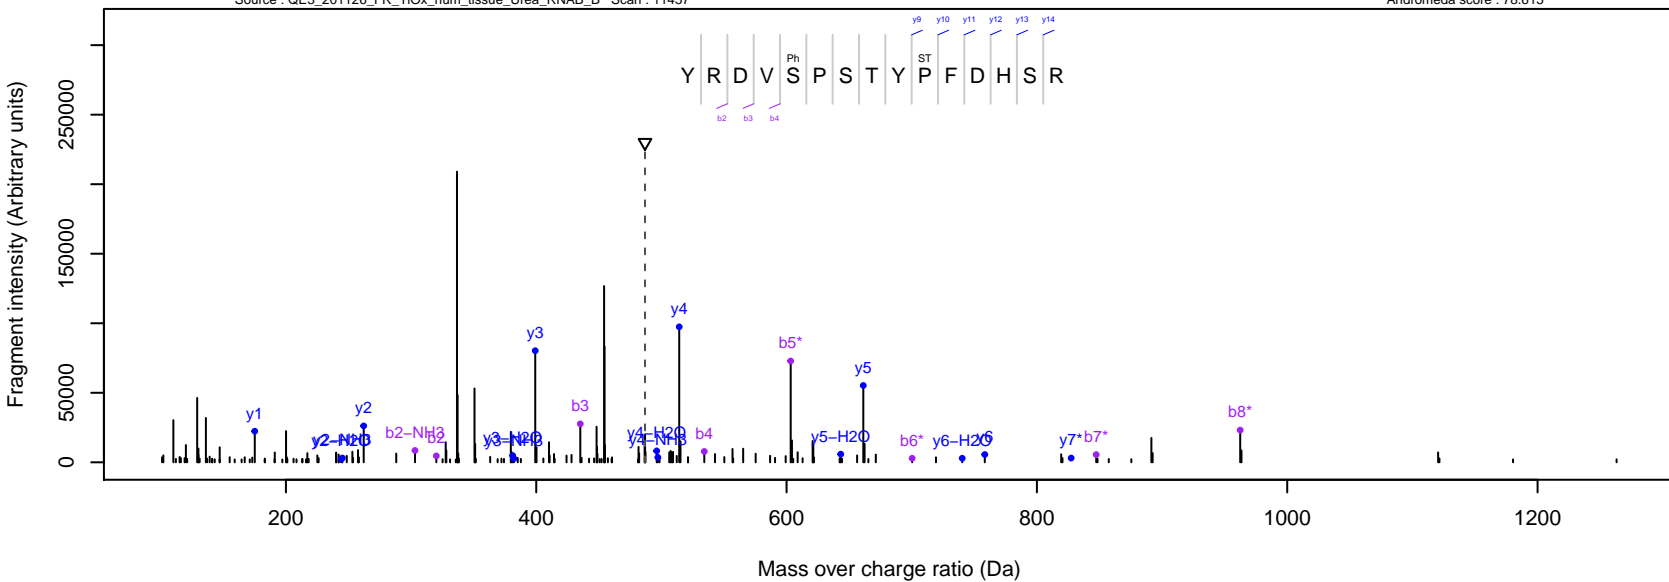

RLS(Phospho (STY))S(Phospho (STY))LRAS(Phospho (STY))TSK-2+

Source : QE3\_201126\_FR\_TiOx\_hum\_tissue\_Urea\_RNAB\_H Scan : 14164

Andromeda score : 78.597

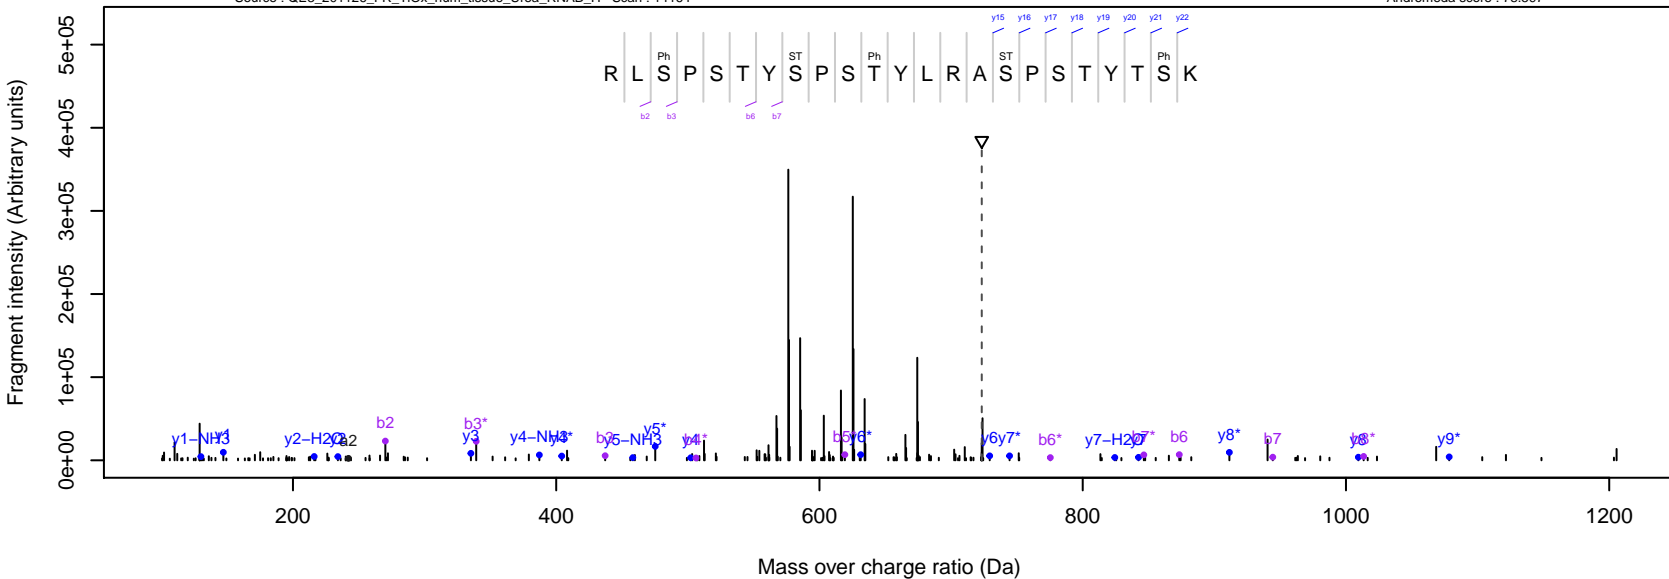

GGG(Phospho (STY))PDLWK-2+

Source : QE3\_201126\_FR\_TIOx\_hum\_tissue\_Urea\_RNAB\_N Scan : 23640

Andromeda score : 78.556

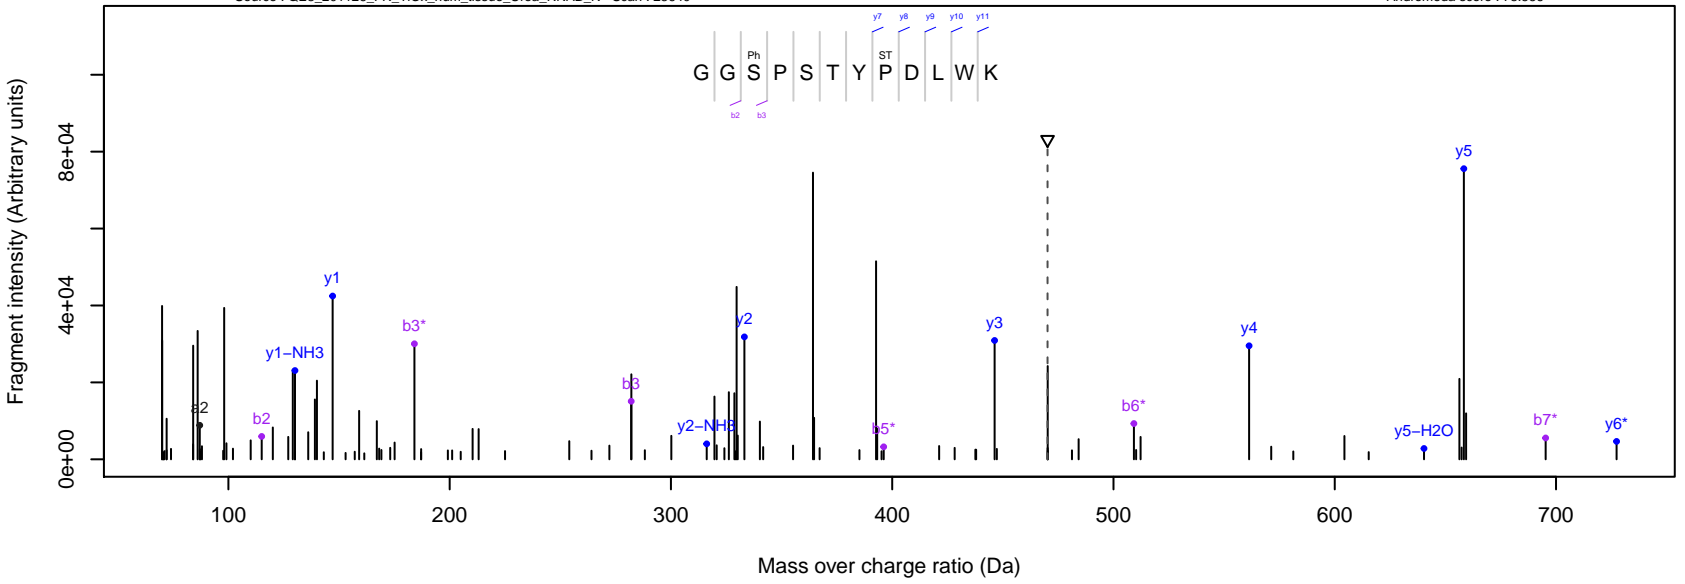

S(Phospho (STY))PQAEKFK-2+

Source : QE3\_201126\_FR\_TIOx\_hum\_tissue\_Urea\_RNAB\_B Scan : 11695

Andromeda score : 78.556

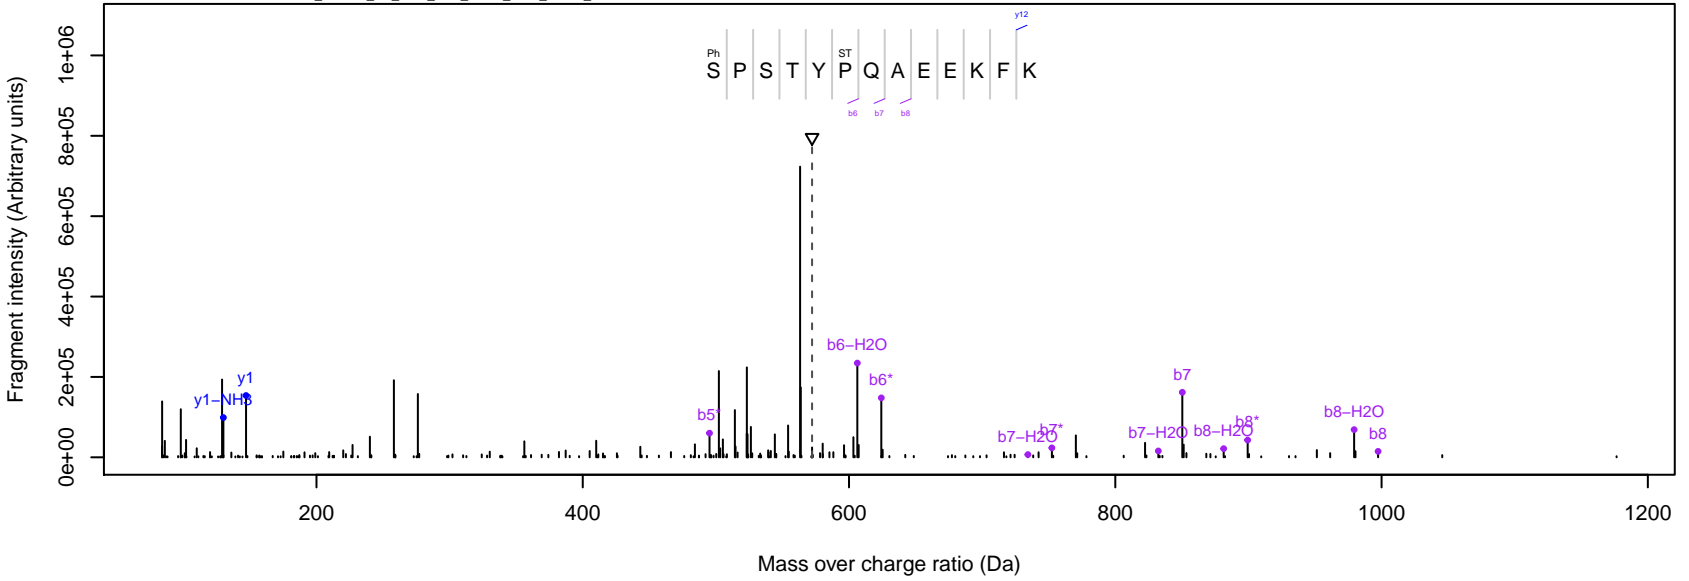

S(Phospho (STY))KDAS(Phospho (STY))PINRWS(Phospho (STY))PTR-3+

Source : QE3\_201126\_FR\_TIOx\_hum\_tissue\_Urea\_RNAB\_N Scan : 20741

Andromeda score : 78.554

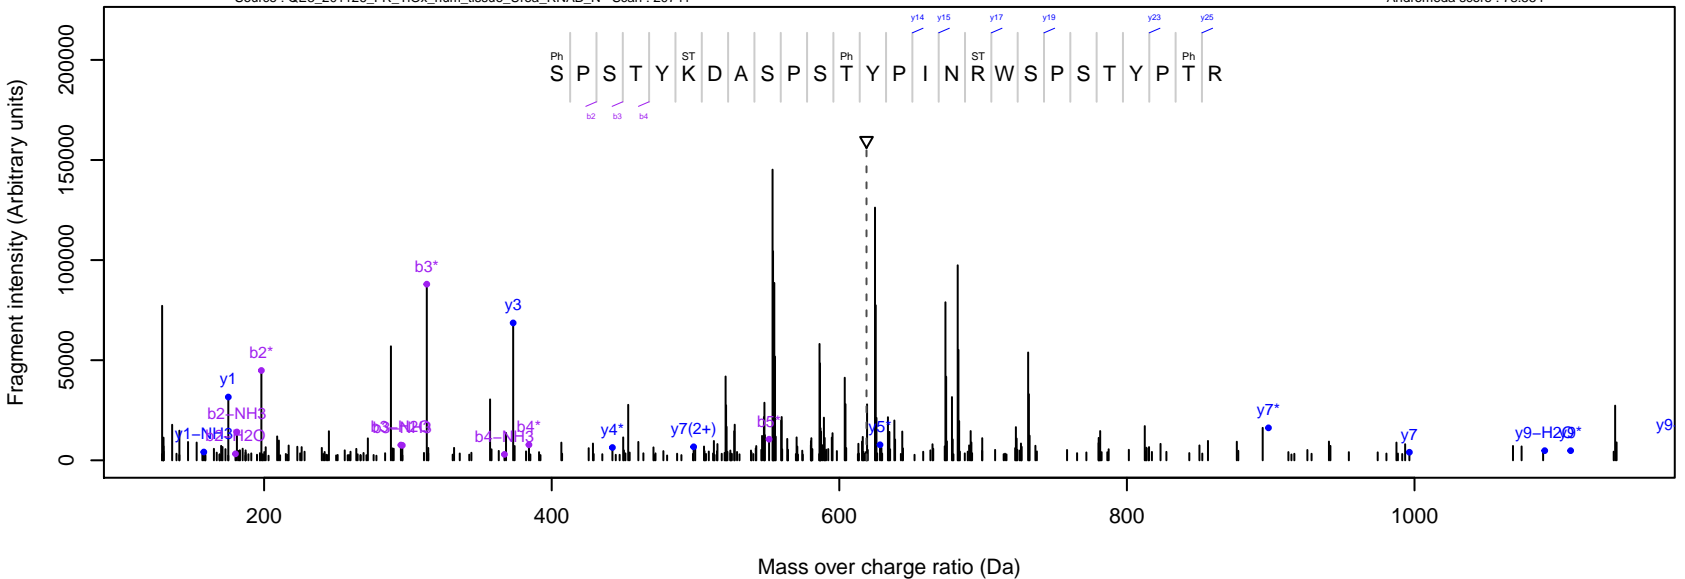

VIIKEGDVDS(Phospho (STY))DS(Phospho (STY))DDEDDNLNLPANFDTCHR-3+

Source : QE3\_201126\_FR\_TIOx\_hum\_tissue\_Urea\_RNAB\_N Scan : 38810

Andromeda score : 78.552

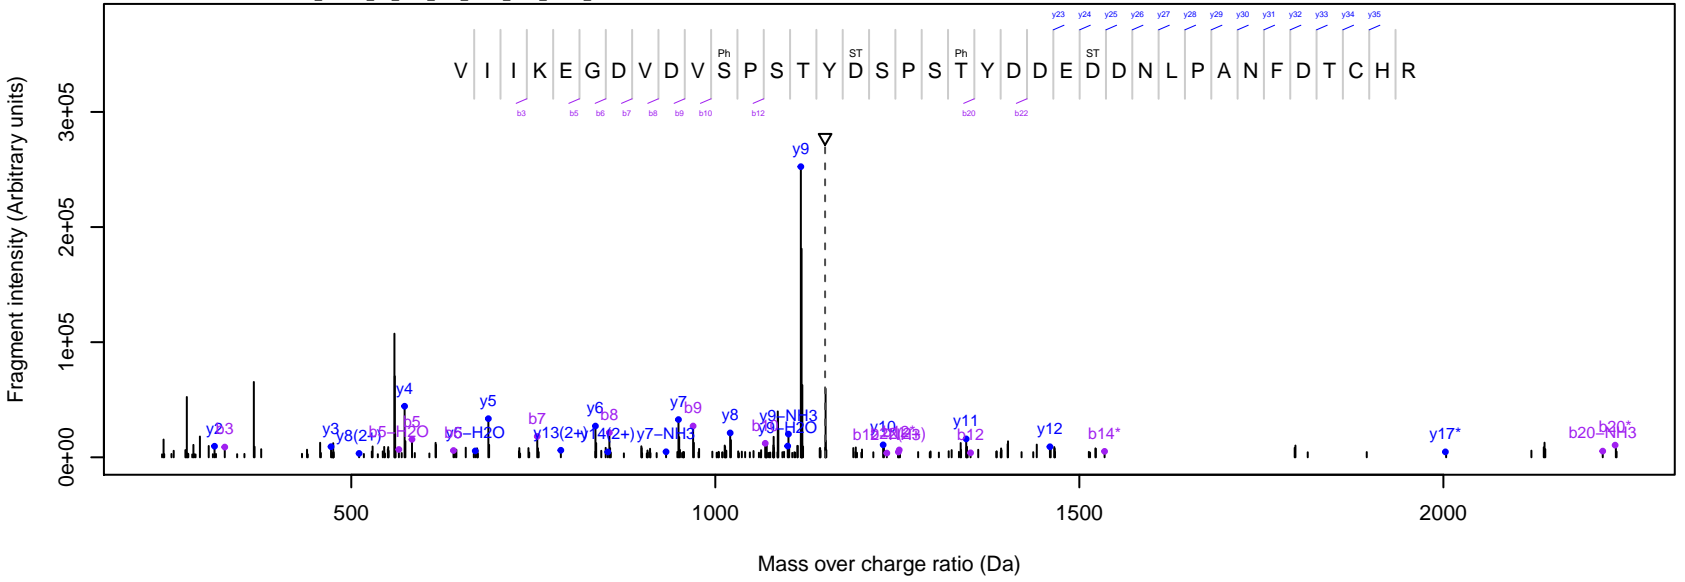

RFS(Phospho (STY))LM(Oxidation (M))TLR-2+

Source : QE3\_201126\_FR\_TIOx\_hum\_tissue\_Urea\_RNAB\_N Scan : 23828

Andromeda score : 78.513

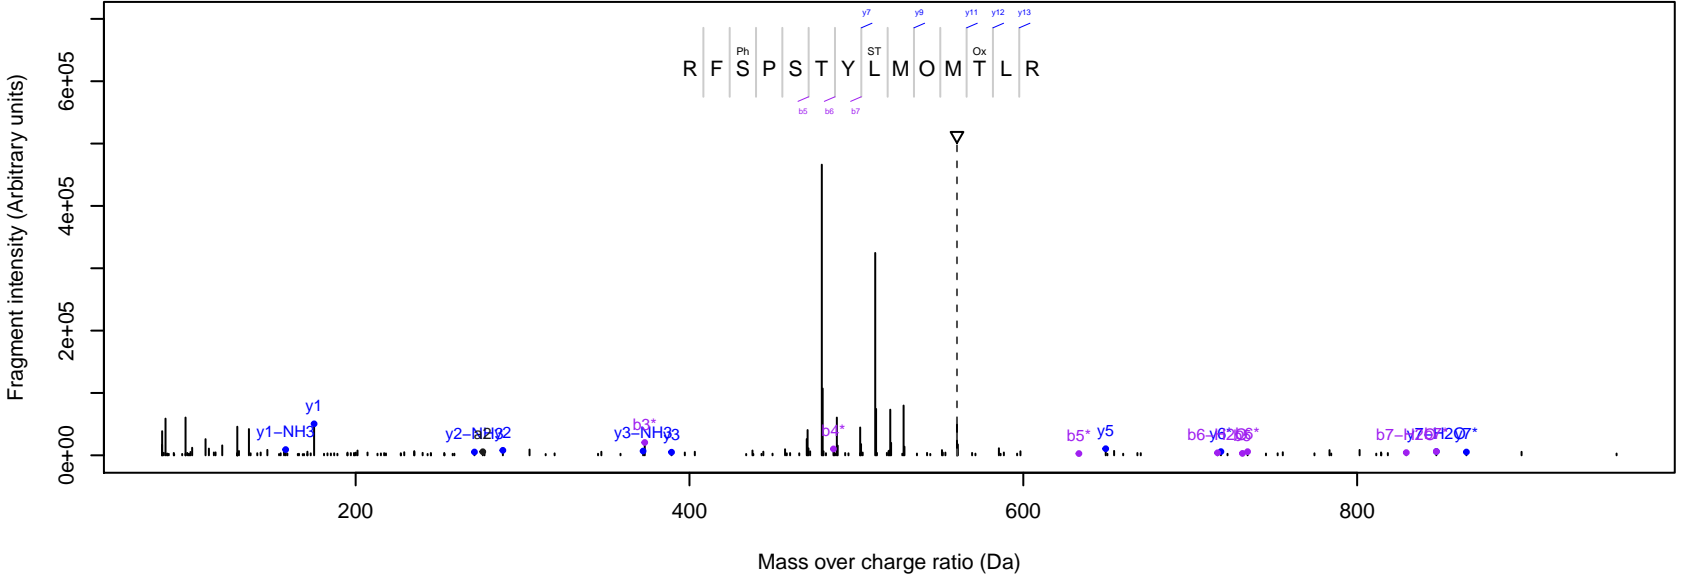

RSLS(Phospho (STY))VEHLETK-3+

Source : QE3\_201126\_FR\_TIOx\_hum\_tissue\_Urea\_RNAB\_N Scan : 10989

Andromeda score : 78.505

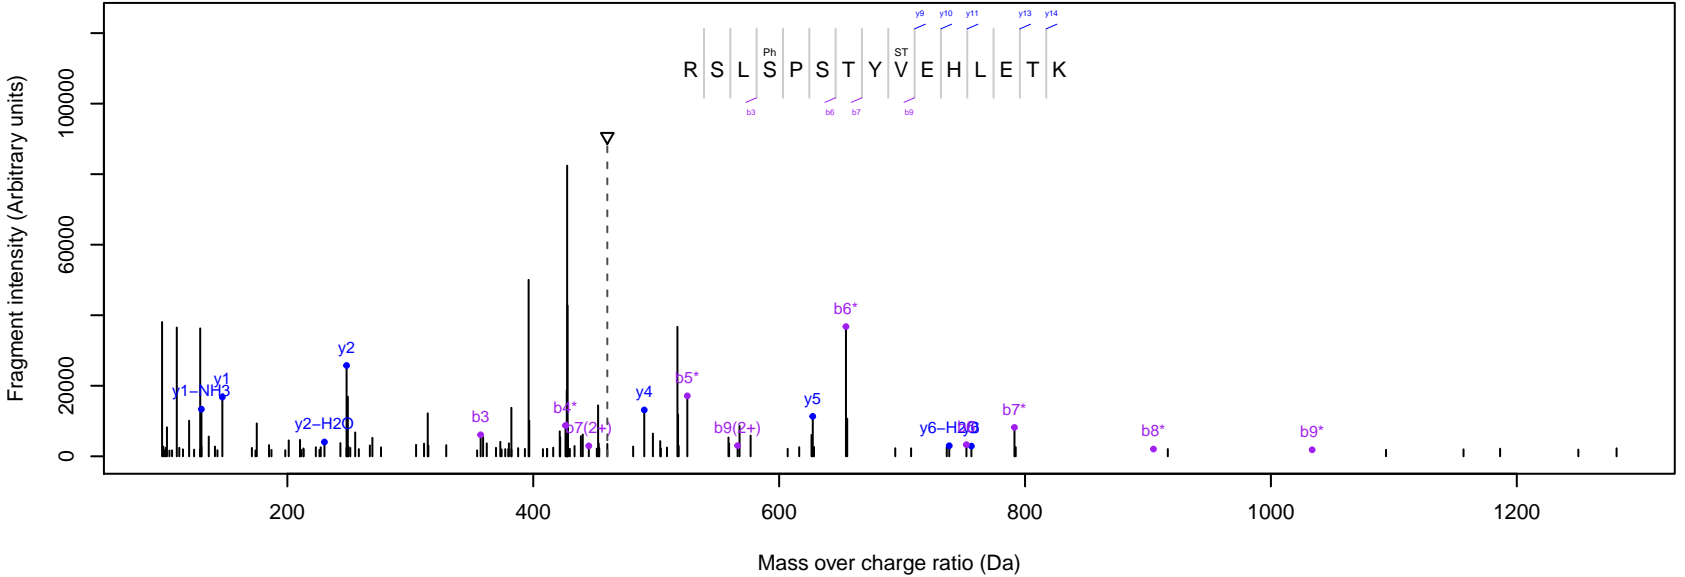

SLAES(Phospho (STY))IDDALNCR-2+

Source : QE3\_201126\_FR\_TiOx\_hum\_tissue\_Urea\_RNAB\_B Scan : 40541

Andromeda score : 78.486

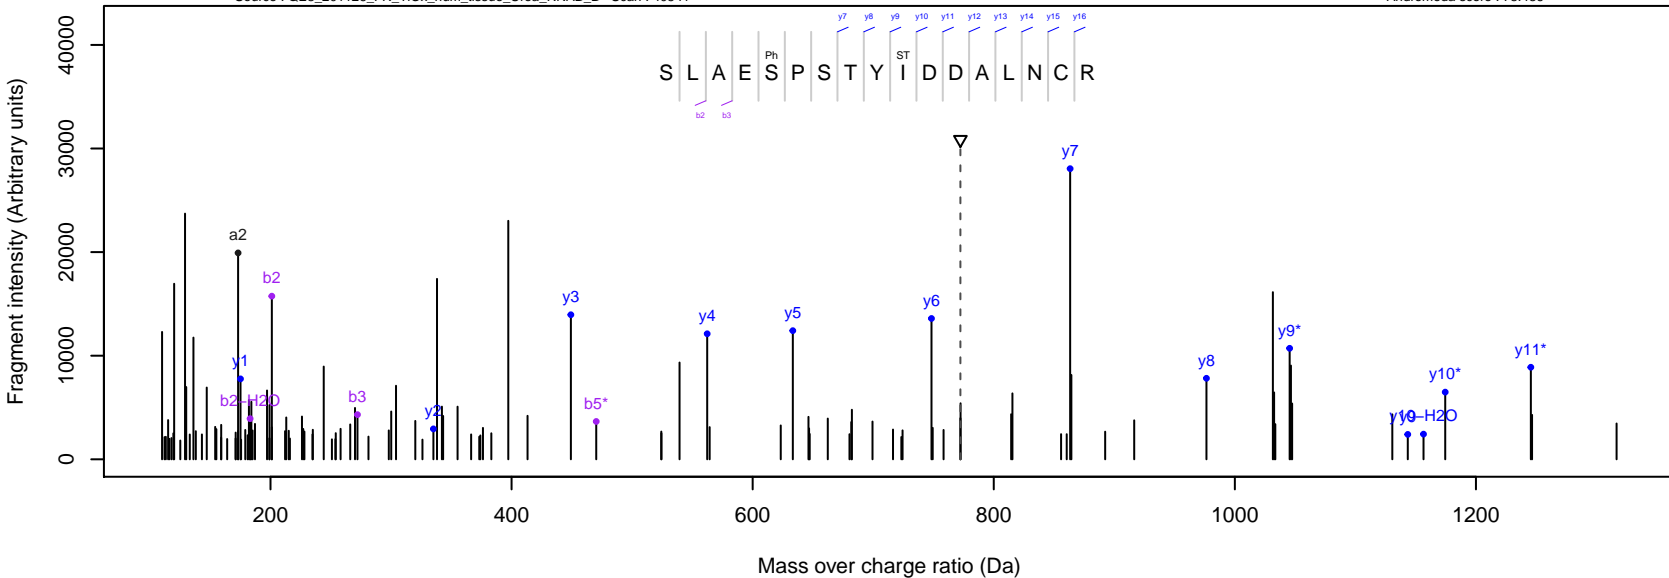

(Acetyl (Protein N-term))SRDPGS(Phospho (STY))GGWEEAPR-2+

Source : QE3\_201126\_FR\_TiOx\_hum\_tissue\_Urea\_RNAB\_N Scan : 22127

Andromeda score : 78.486

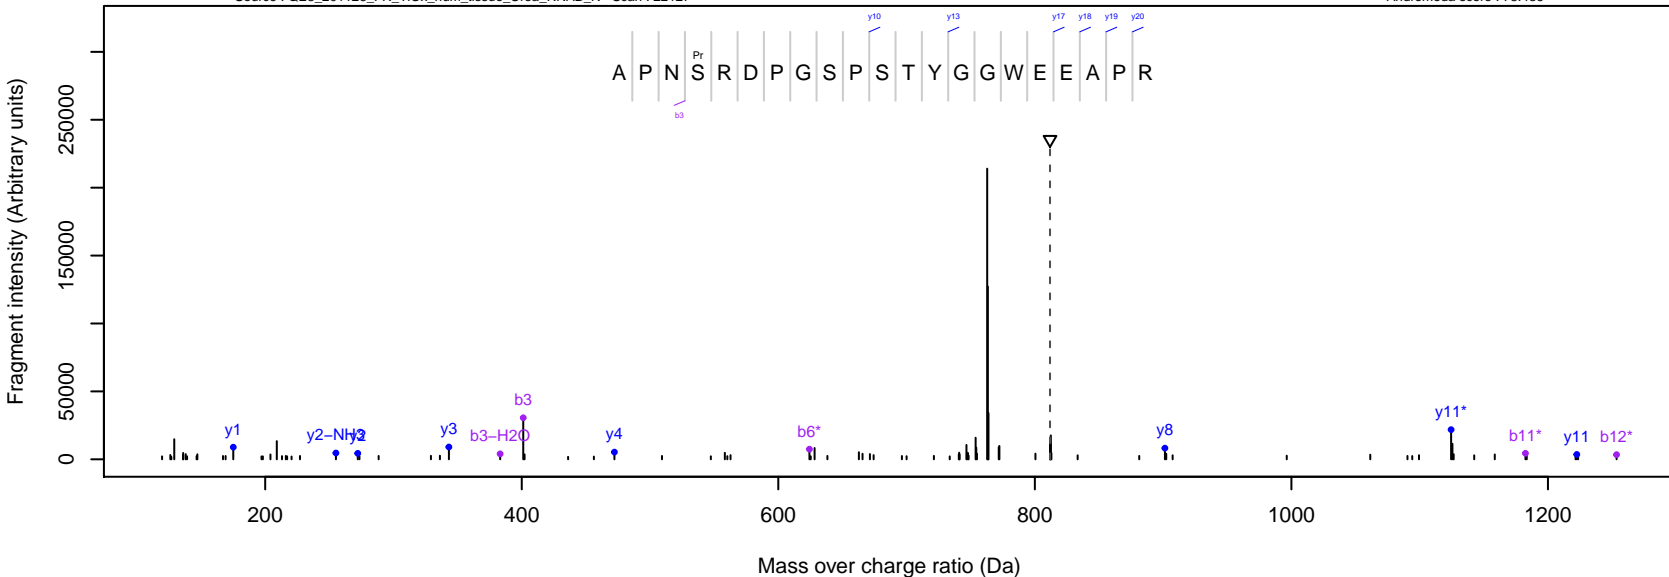

KKSGVS(Phospho (STY))SDNEDDDEEDGNYLHPSLFASK-4+

Source : QE3\_201126\_FR\_TiOx\_hum\_tissue\_Urea\_RNAB\_H Scan : 25526

Andromeda score : 78.45

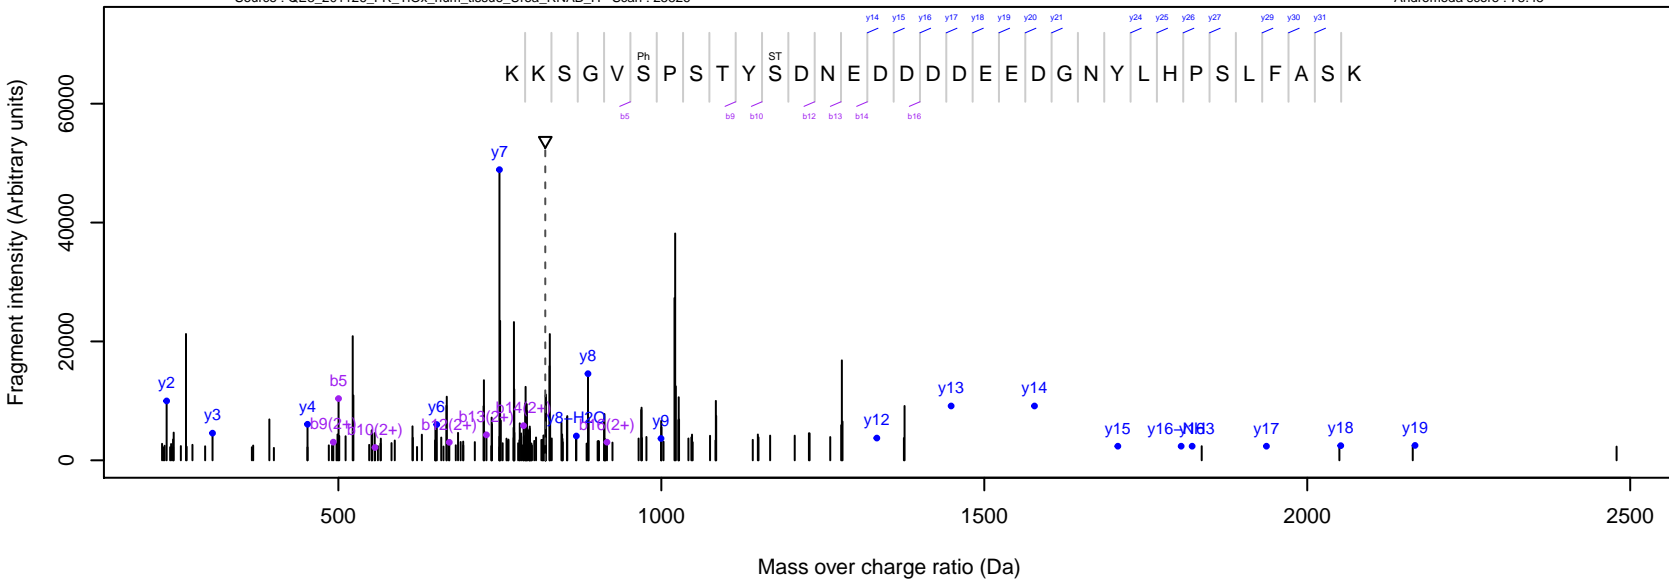

SAS(Phospho (STY))YPCAAPRPGAPETTALHGGFQR-3+

Source : QE3\_201126\_FR\_TiOx\_hum\_tissue\_Urea\_RNAB\_N Scan : 22890

Andromeda score : 78.45

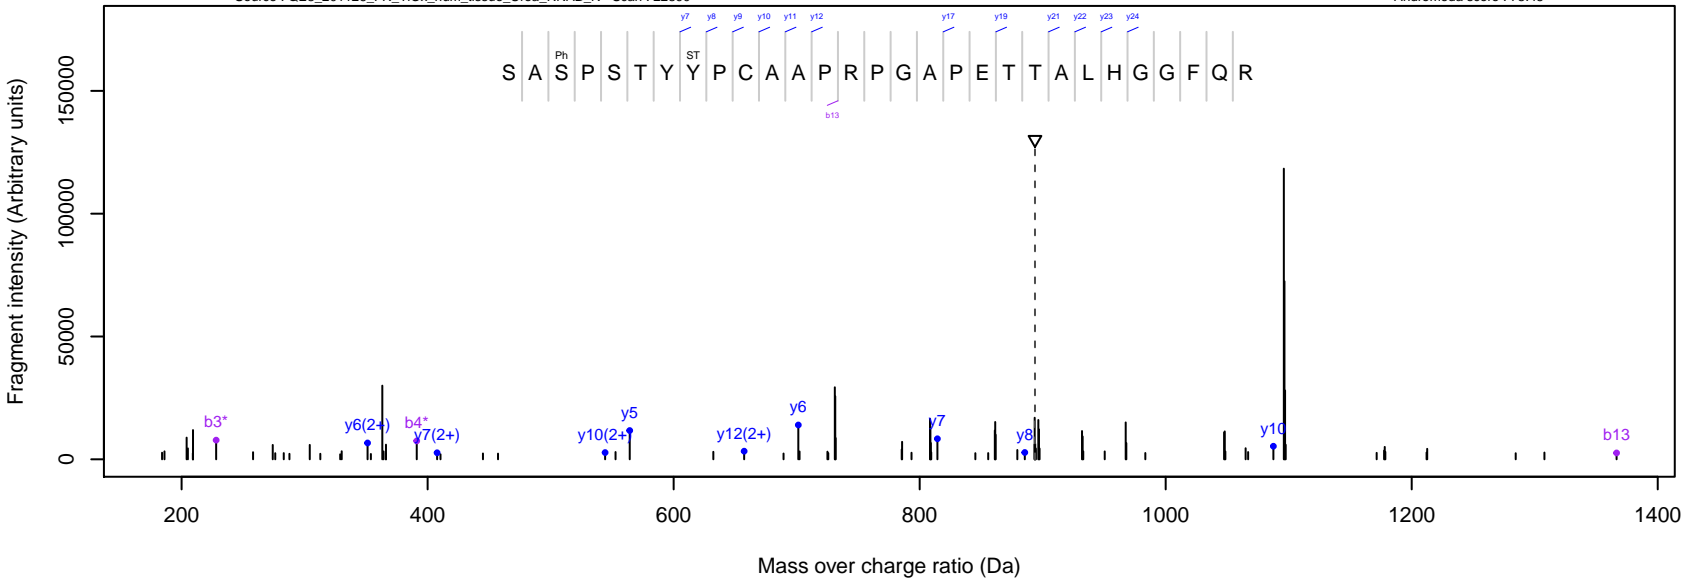

VSSPVAS(Phospho (STY))GM(Oxidation (M))SSPSGGSTVSFHTLPDFSK-3+

Source : QE3\_201126\_FR\_TiOx\_hum\_tissue\_Urea\_RNAB\_N Scan : 38904

Andromeda score : 78.45

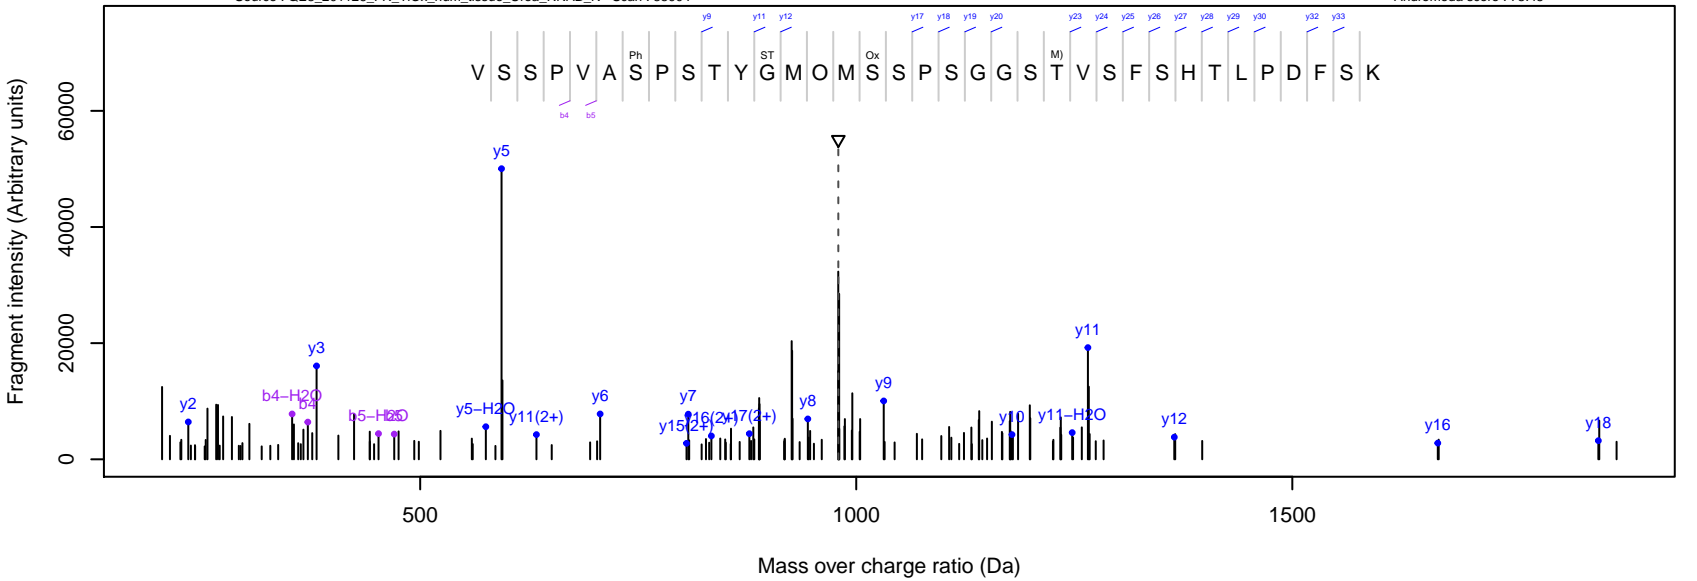

LQAGEY(Phospho (STY))VSLGKVEAALK-3+

Source : QE3\_201126\_FR\_TiOx\_hum\_tissue\_Urea\_RNAB\_H Scan : 41629

Andromeda score : 78.441

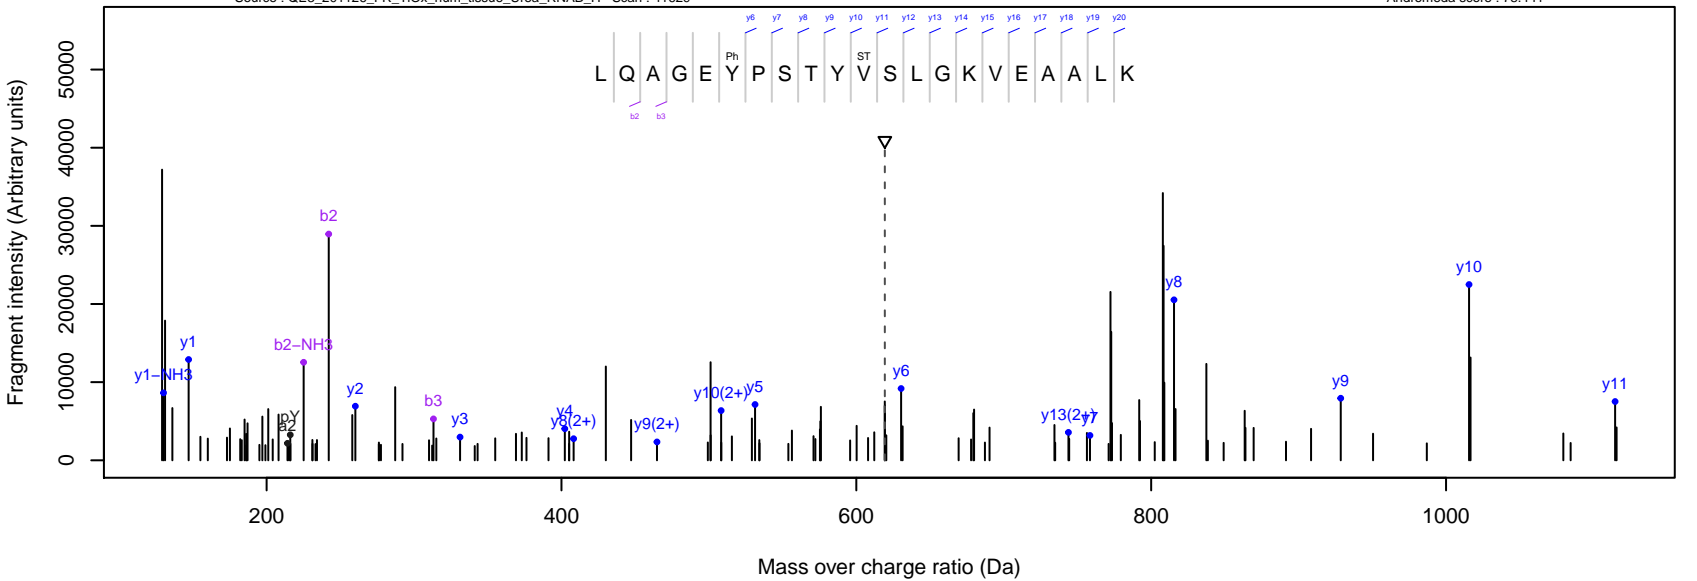

AAGGNS(Phospho (STY))REPS(Phospho (STY))PLPELALR-3+

Source : QE3\_201126\_FR\_TiOx\_hum\_tissue\_Urea\_RNAB\_N Scan : 39646

Andromeda score : 78.428

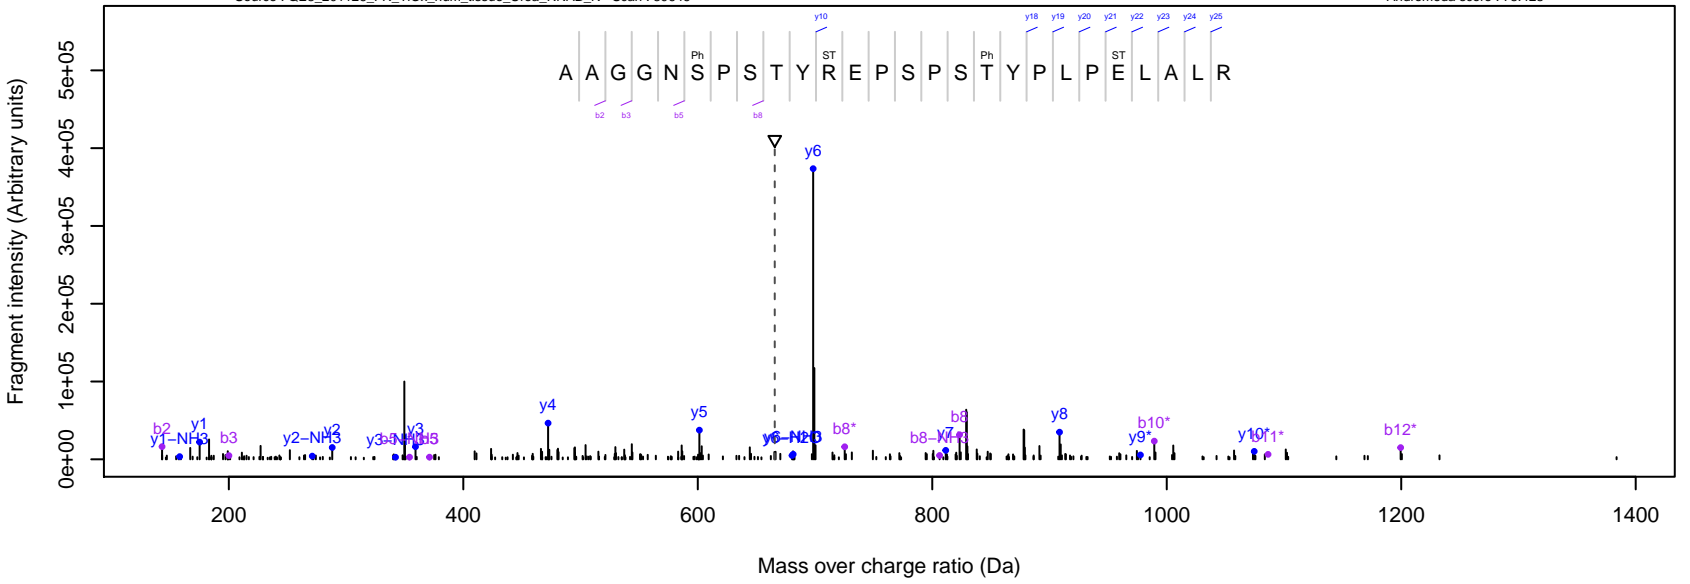

HIKEEPLS(Phospho (STY))EEEEPTSTAIAS(Phospho (STY))PEK-3+

Source : QE3\_201126\_FR\_TiOx\_hum\_tissue\_Urea\_RNAB\_B Scan : 22411

Andromeda score : 78.415

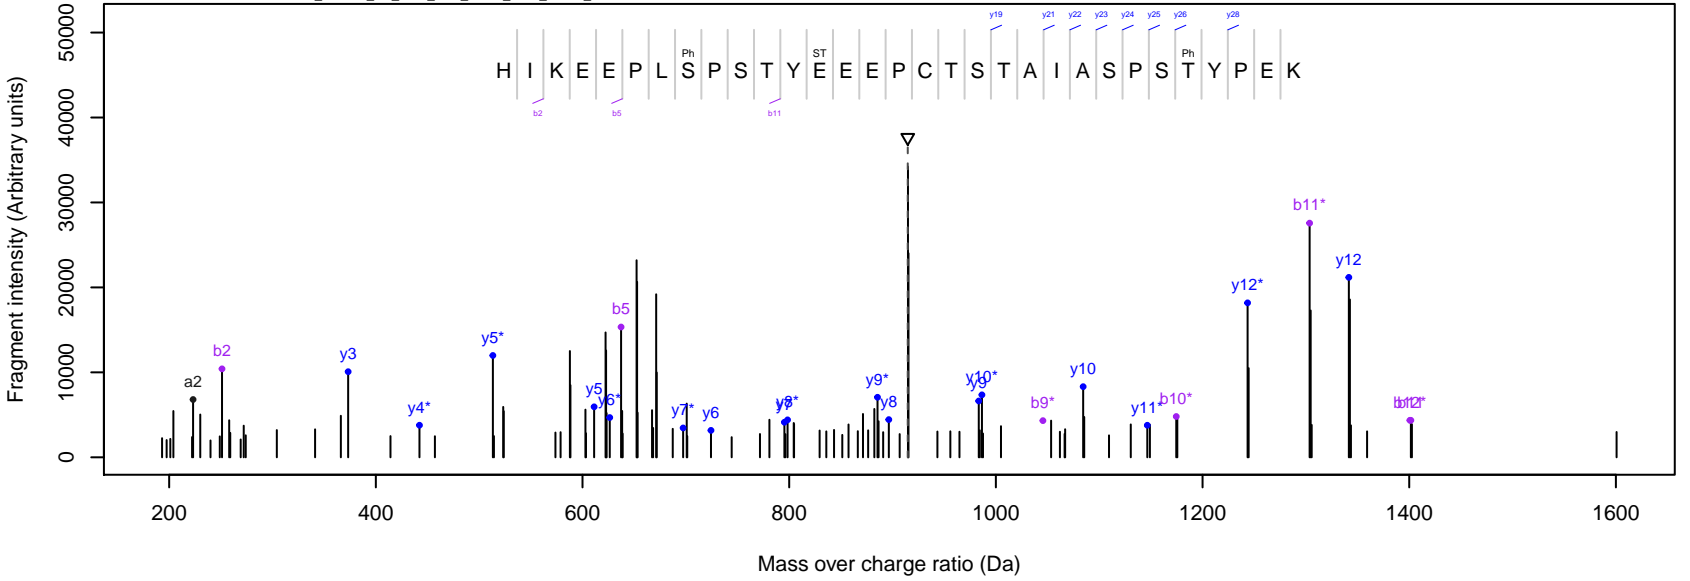

QQSSSSKGDSP(Phospho (STY))PELKPR-3+

Source : QE3\_201126\_FR\_TiOx\_hum\_tissue\_Urea\_RNAB\_H Scan : 4788

Andromeda score : 78.413

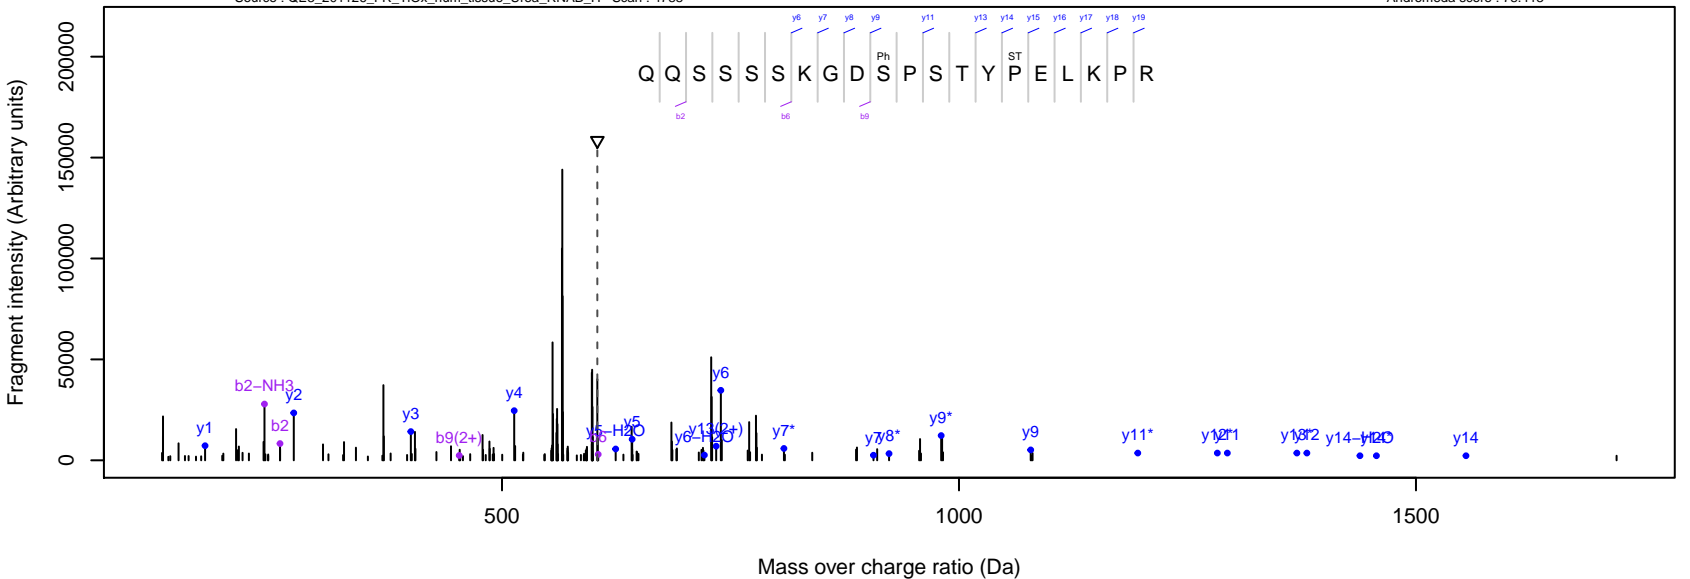



RM(Oxidation (M))S(Phospho (STY))LIEEGSKR-3+

Source : QE3\_201126\_FR\_TIOx\_hum\_tissue\_Urea\_RNAB\_B Scan : 7086

Andromeda score : 78.326

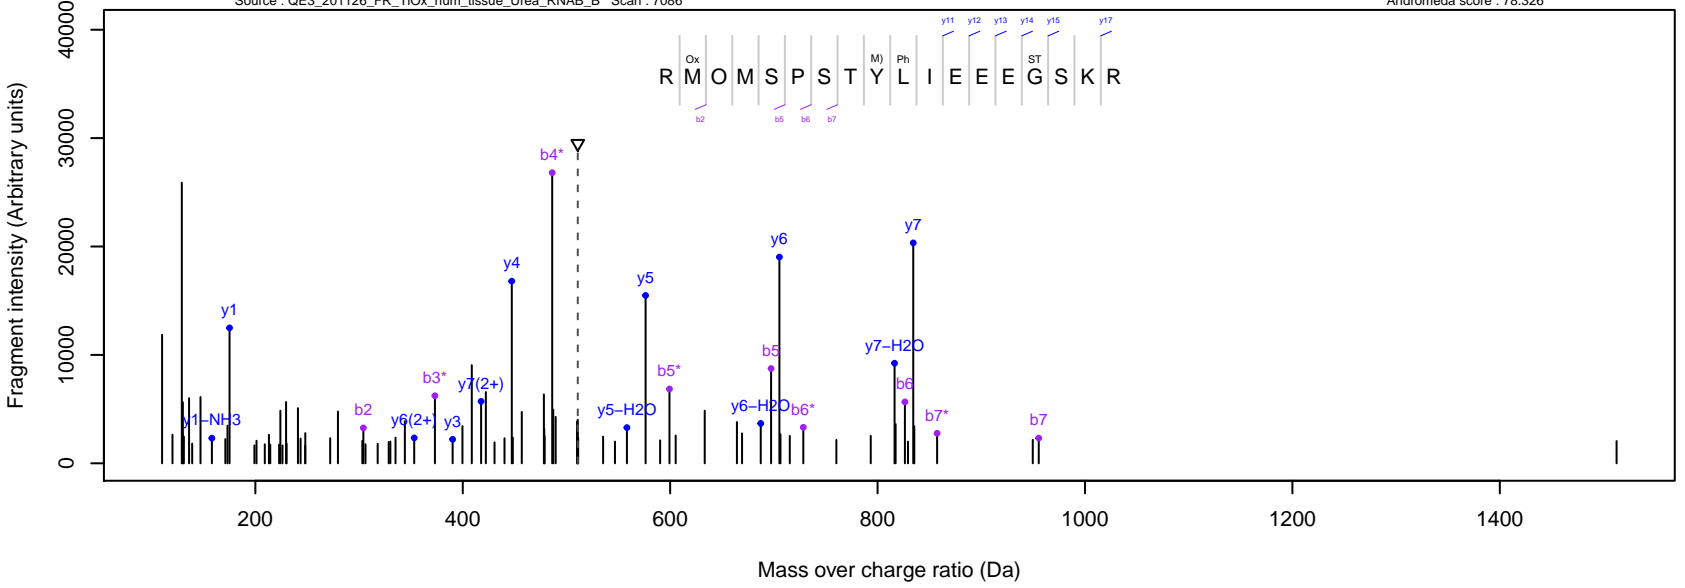

SQDSYPGS(Phospho (STY))PSSL(Phospho (STY))PR-2+

Source : QE3\_201126\_FR\_TIOx\_hum\_tissue\_Urea\_RNAB\_H Scan : 25941

Andromeda score : 78.326

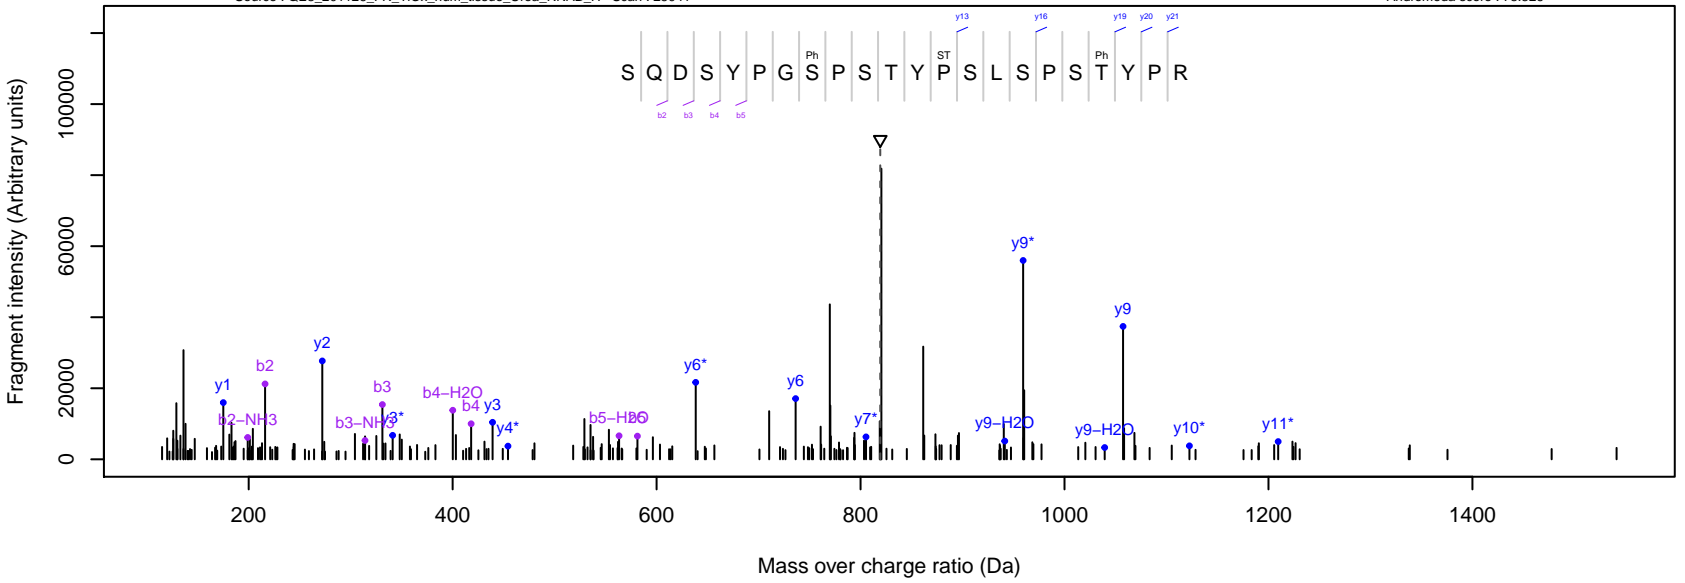

WAHDKFS(Phospho (STY))GEEGEI EDD(Phospho (STY))GTENR-3+

Source : QE3\_201126\_FR\_TIOx\_hum\_tissue\_Urea\_RNAB\_B Scan : 22895

Andromeda score : 78.311

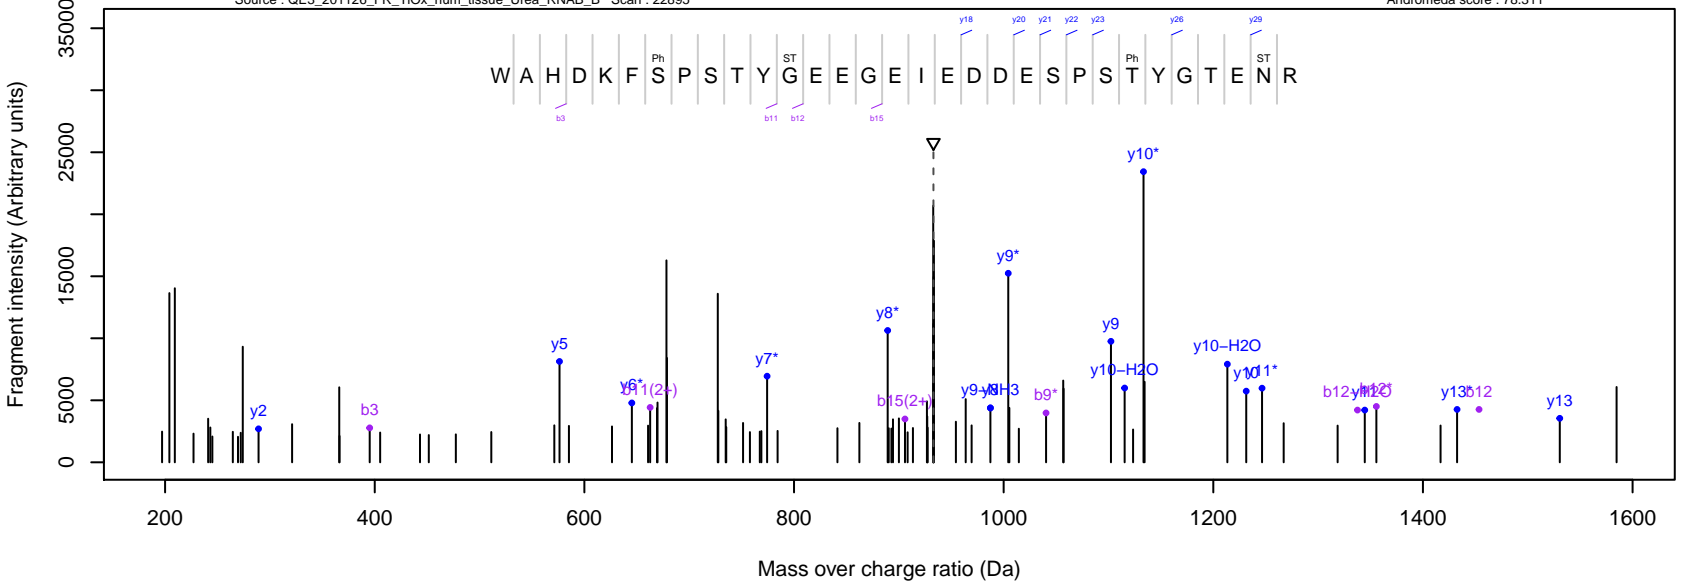

HGSMVSLVSGASGYSA T P S T Y S T S S F K K

Source : QE3\_201126\_FR\_TiOx\_hum\_tissue\_Urea\_RNAB\_N Scan : 26666

Andromeda score : 78.3

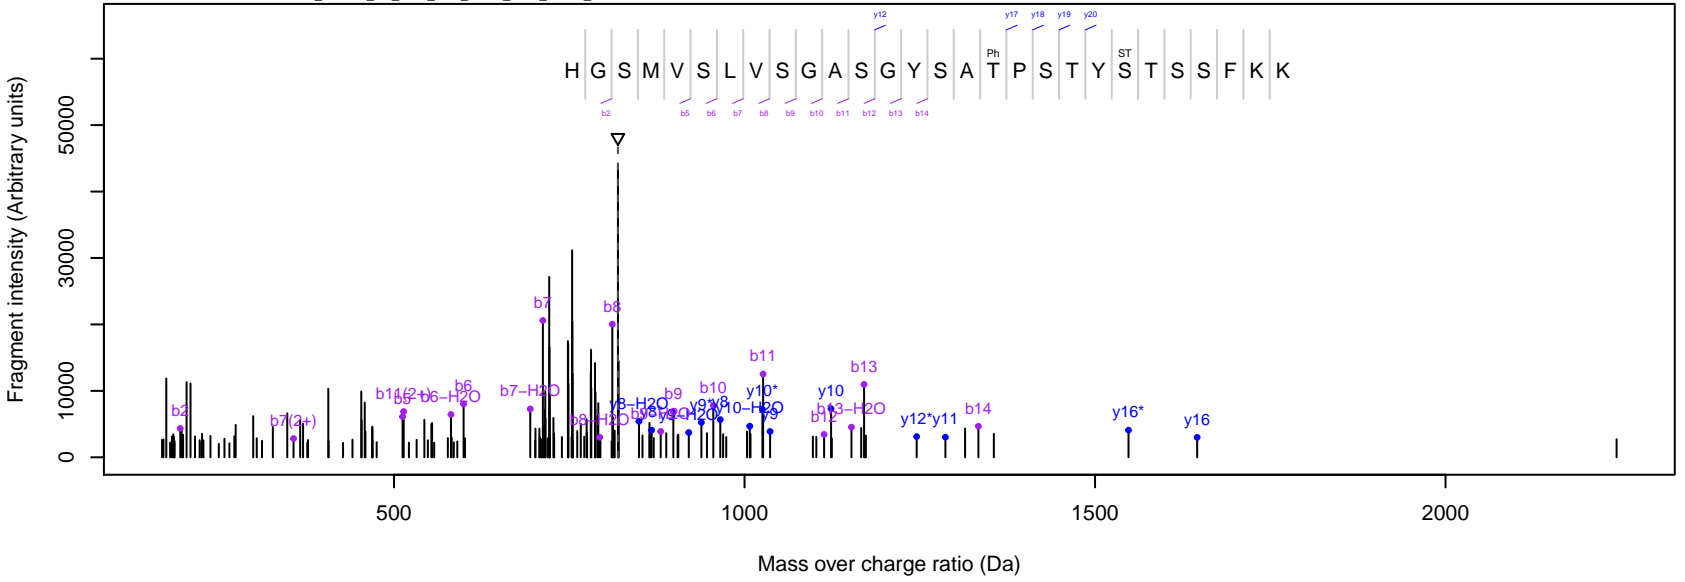

M(Oxidation (M))QS(Phospho (STY))LQLDCVAVPSSR

Source : QE3\_201126\_FR\_TiOx\_hum\_tissue\_Urea\_RNAB\_H Scan : 34622

Andromeda score : 78.285

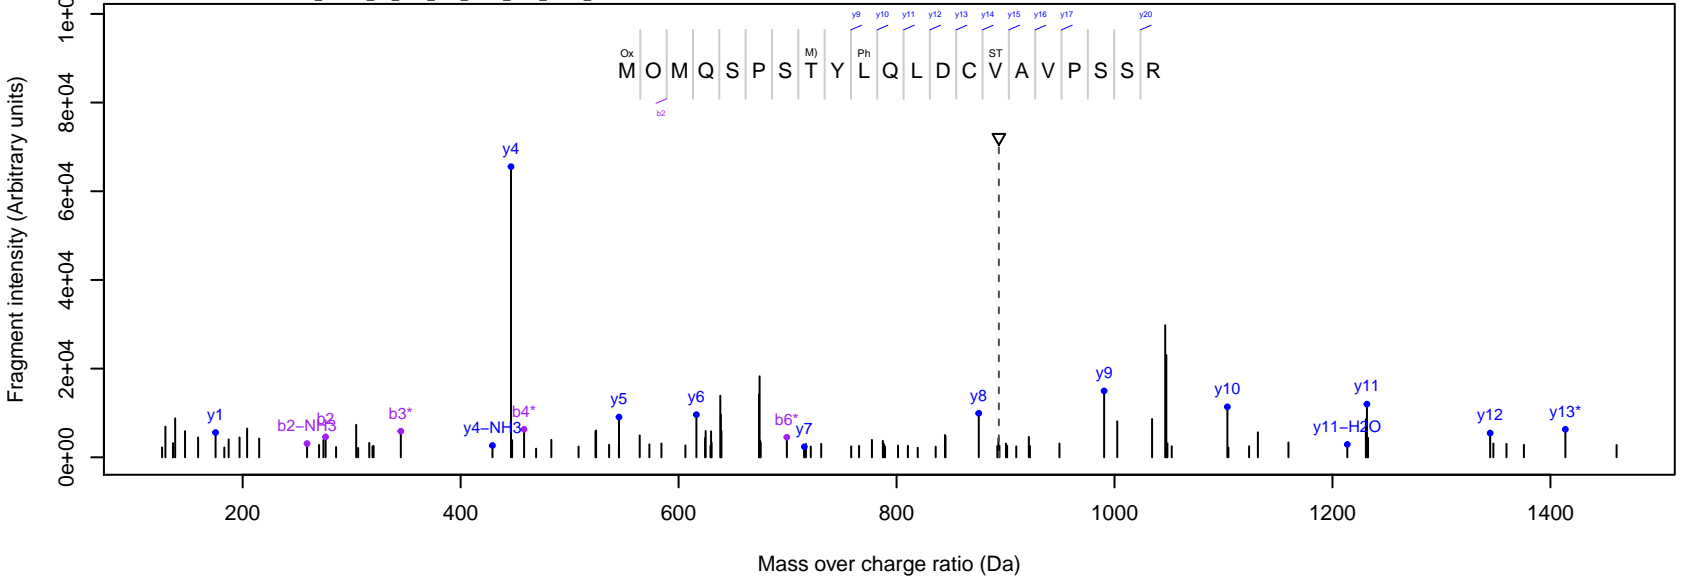

GSKS(Phospho (STY))PS(Phospho (STY))PRPNM(Oxidation (M))PVR

Source : QE3\_201126\_FR\_TiOx\_hum\_tissue\_Urea\_RNAB\_H Scan : 5142

Andromeda score : 78.234

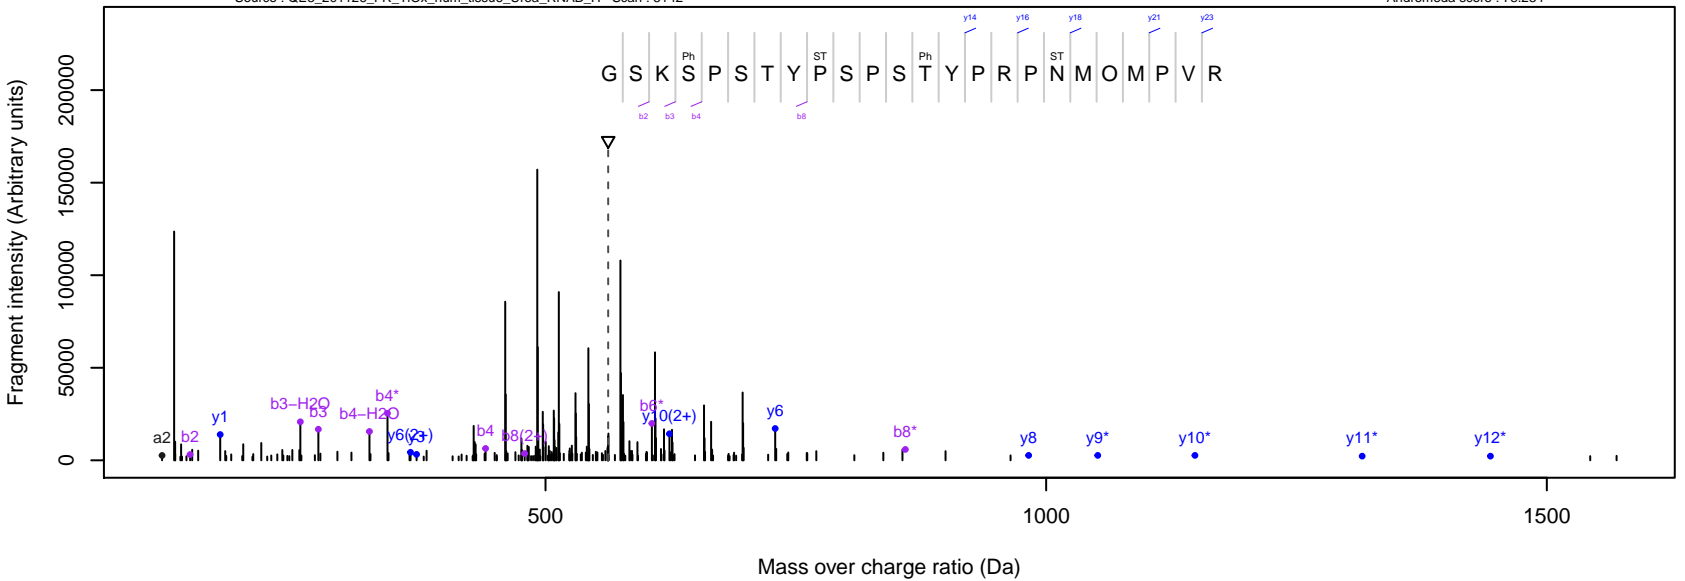

SQQQQQQGLAPPAQPAPPSATLPAGAAAPPS(Phospho (STY))PPFSFQLPR-4+

Source : QE3\_201126\_FR\_TiOx\_hum\_tissue\_Urea\_RNAB\_B Scan : 57306

Andromeda score : 78.139

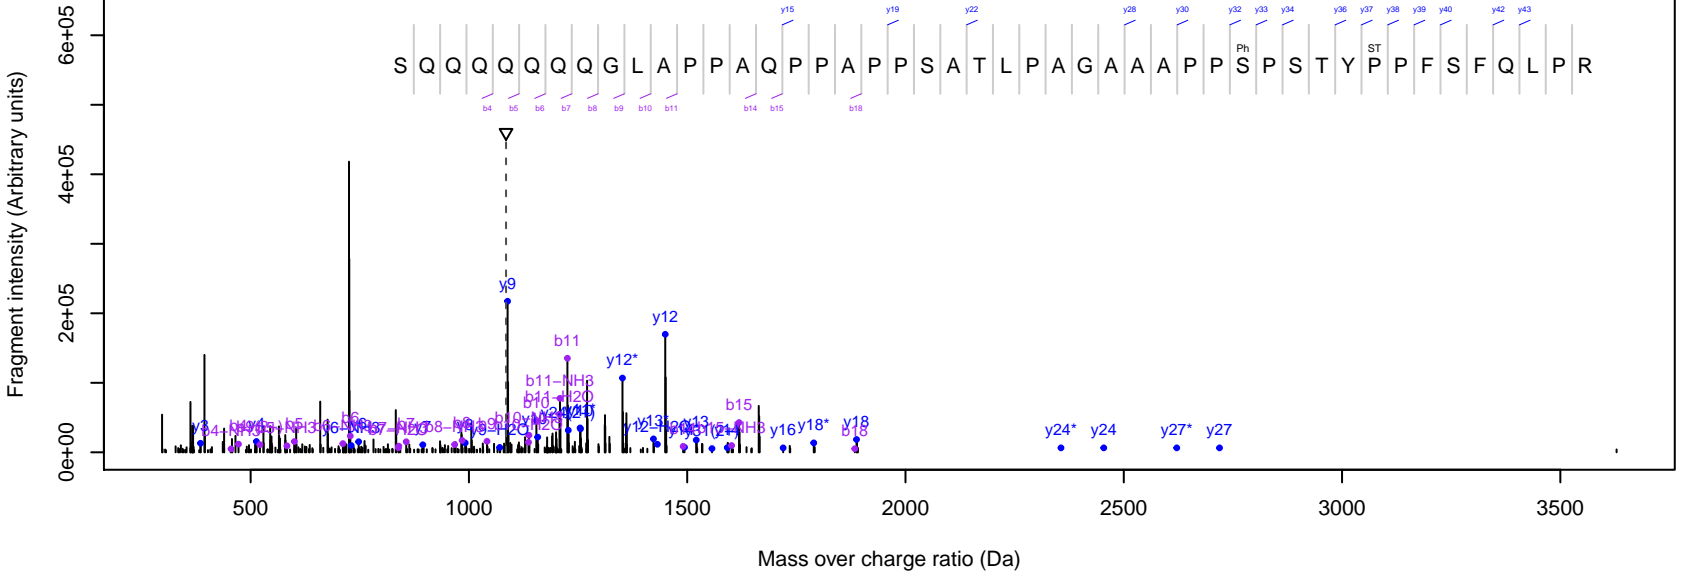

ITS(Phospho (STY))DRLLIK-2+

Source : QE3\_201126\_FR\_TiOx\_hum\_tissue\_Urea\_RNAB\_N Scan : 18895

Andromeda score : 78.098

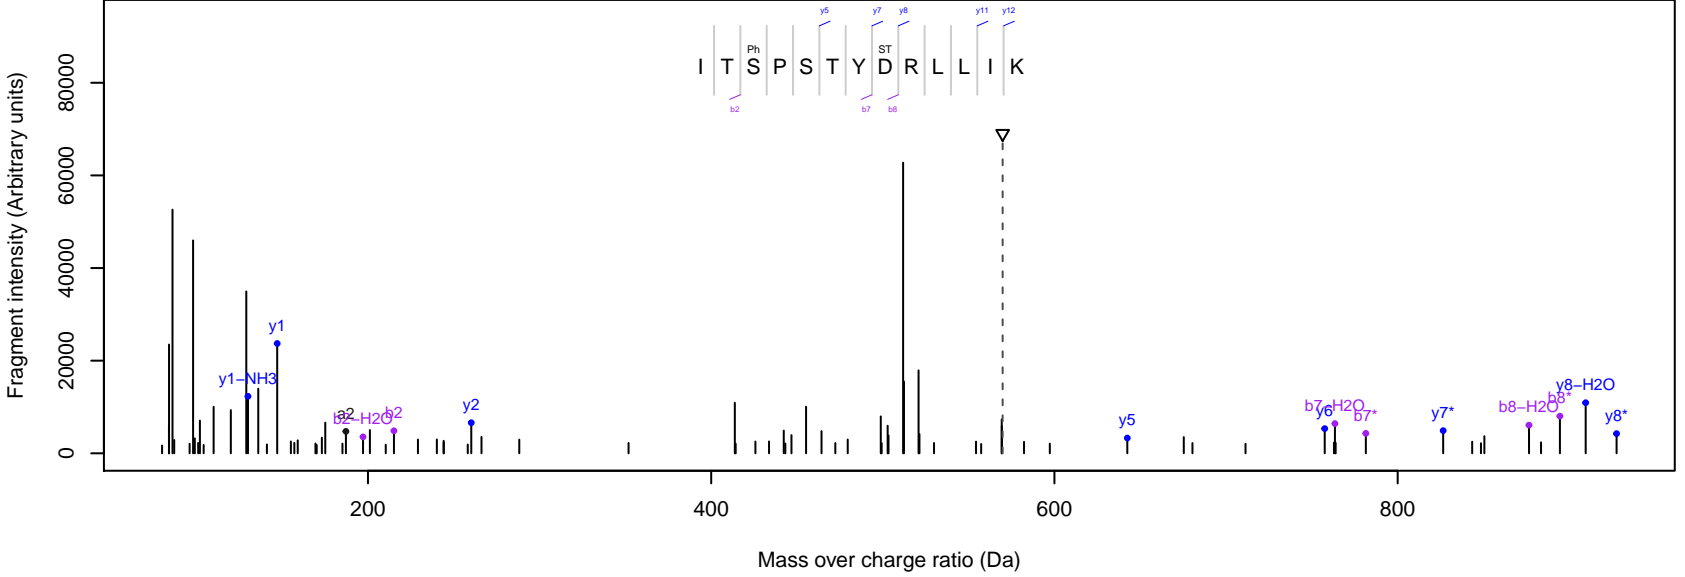

TIDRFS(Phospho (STY))PT-2+

Source : QE3\_201126\_FR\_TiOx\_hum\_tissue\_Urea\_RNAB\_N Scan : 18891

Andromeda score : 78.098

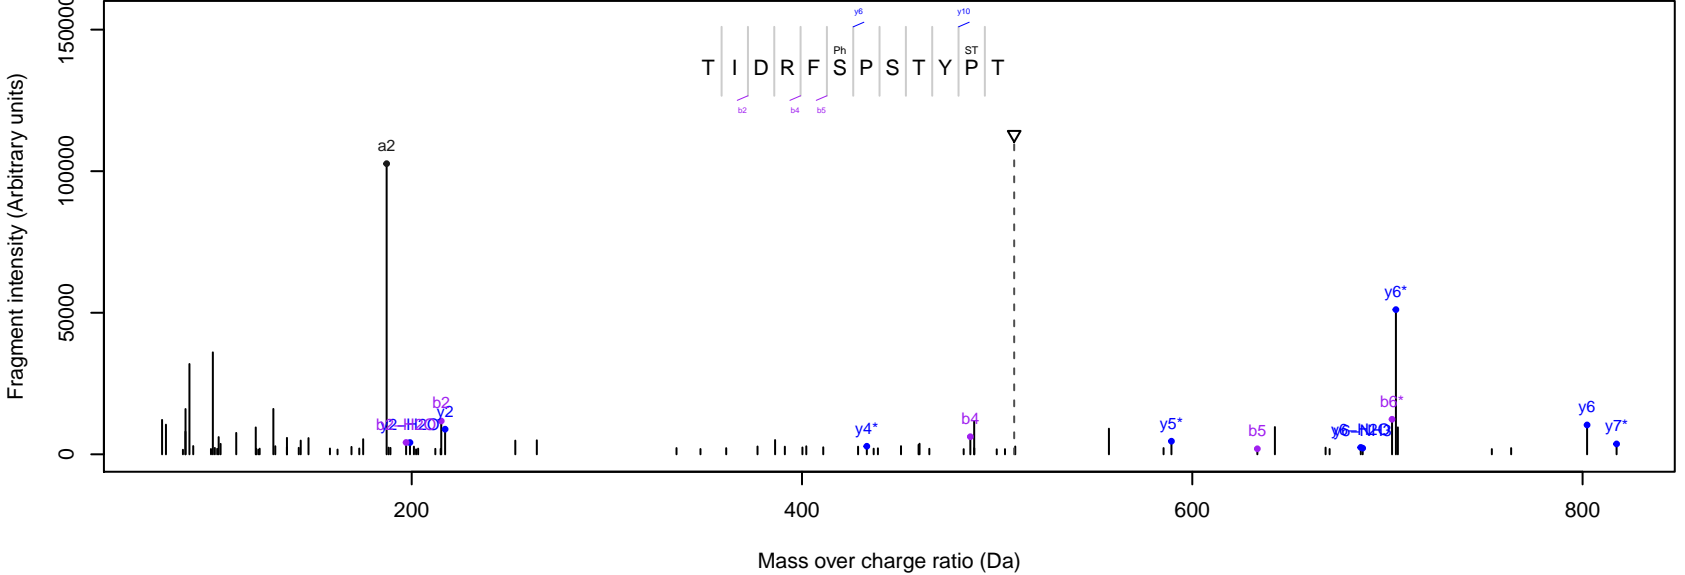

LIS(Phospho (STY))VEPRPEQPEPDR-3+

Source : QE3\_201126\_FR\_TiOx\_hum\_tissue\_Urea\_RNAB\_H Scan : 31433

Andromeda score : 78.088

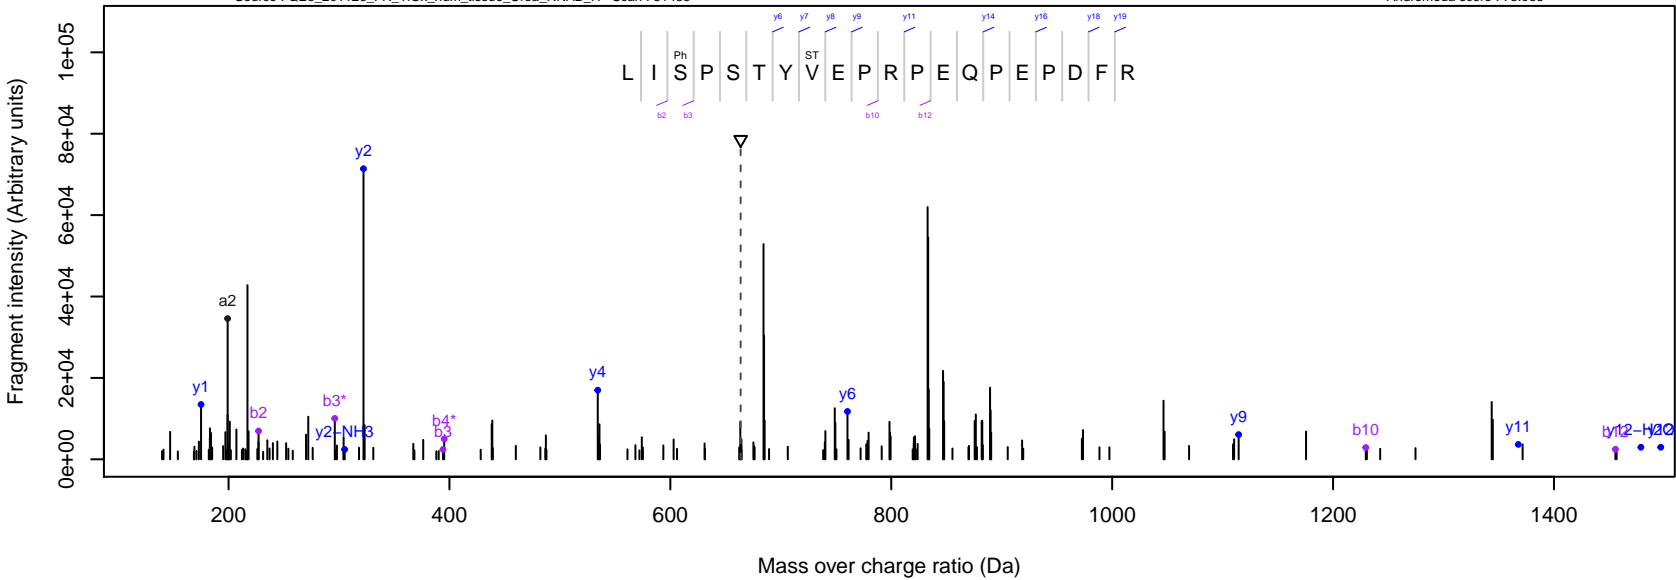

SSLGQS(Phospho (STY))AS(Phospho (STY))ETEEDTVSVSK-2+

Source : QE3\_201126\_FR\_TiOx\_hum\_tissue\_Urea\_RNAB\_B Scan : 26723

Andromeda score : 78.088

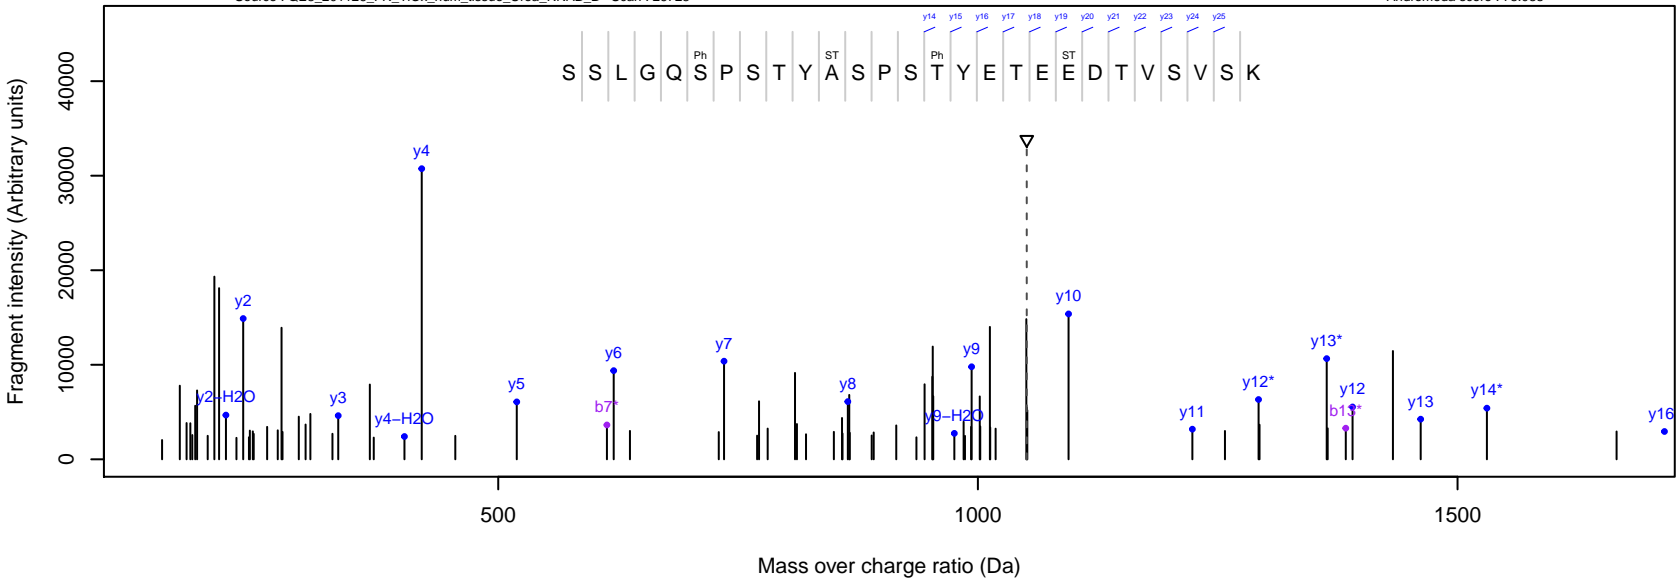

KDS(Phospho (STY))IPQVLLPEEEK-2+

Source : QE3\_201126\_FR\_TiOx\_hum\_tissue\_Urea\_RNAB\_B Scan : 33032

Andromeda score : 78.069

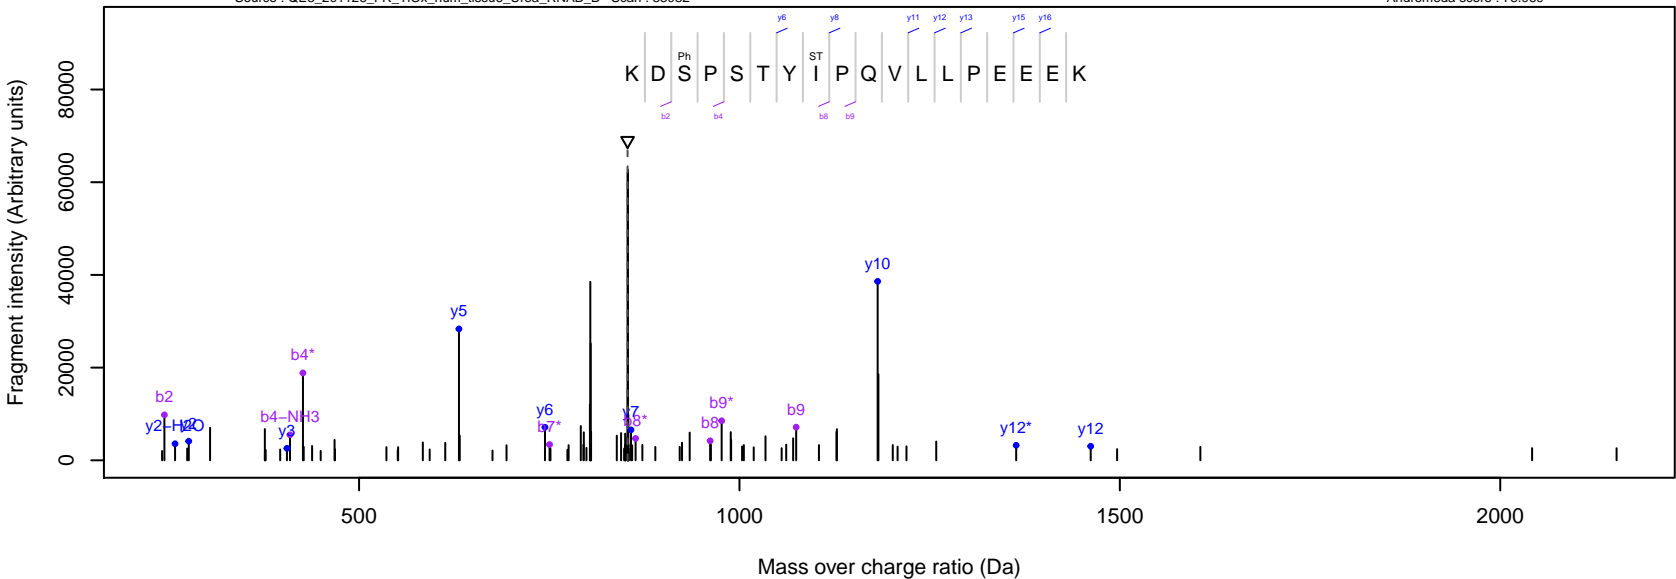

RRPPGPPLQVTS DLS(Phospho (STY))L-3+

Source : QE3\_201126\_FR\_TiOx\_hum\_tissue\_Urea\_RNAB\_N Scan : 38819

Andromeda score : 78.021

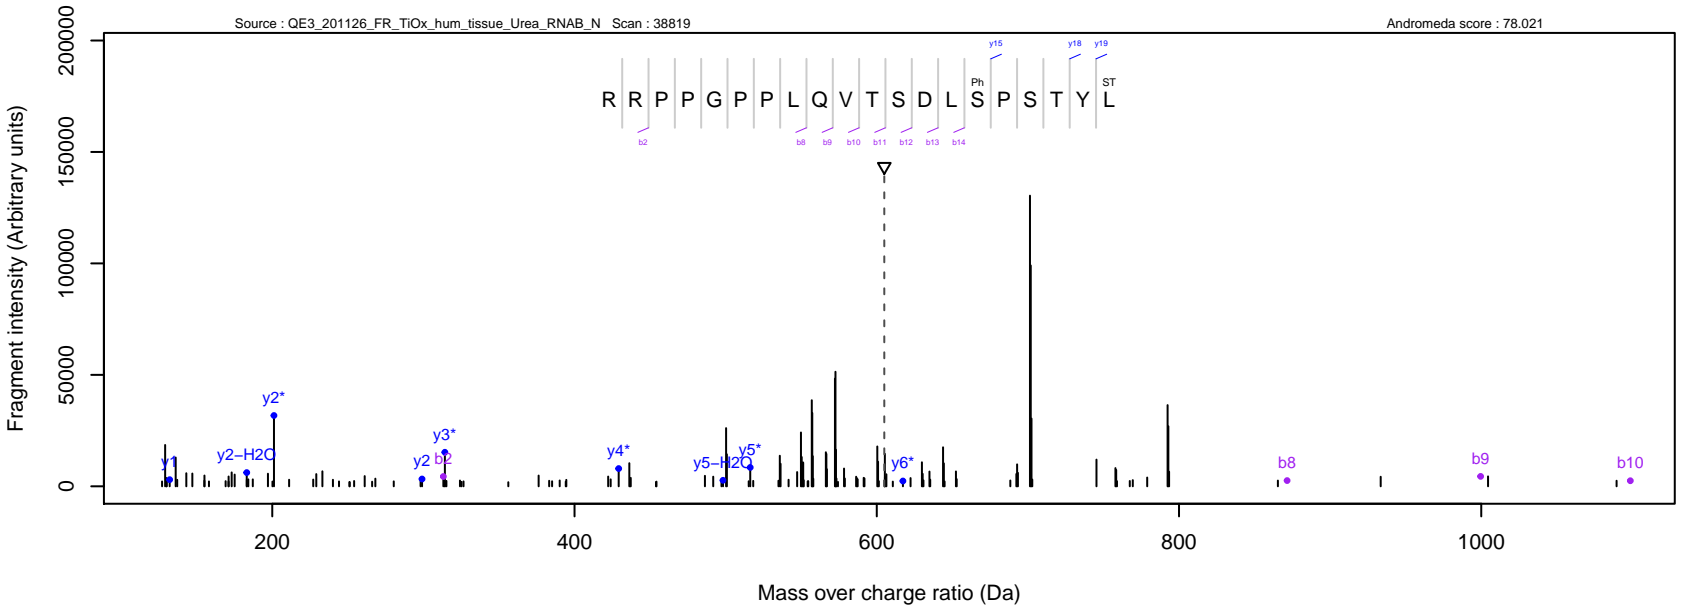

T(Phospho (STY))RTDSYSAGQSVEILDGVELGEPAHKK-4+

Source : QE3\_201126\_FR\_TiOx\_hum\_tissue\_Urea\_RNAB\_H Scan : 30803

Andromeda score : 77.995

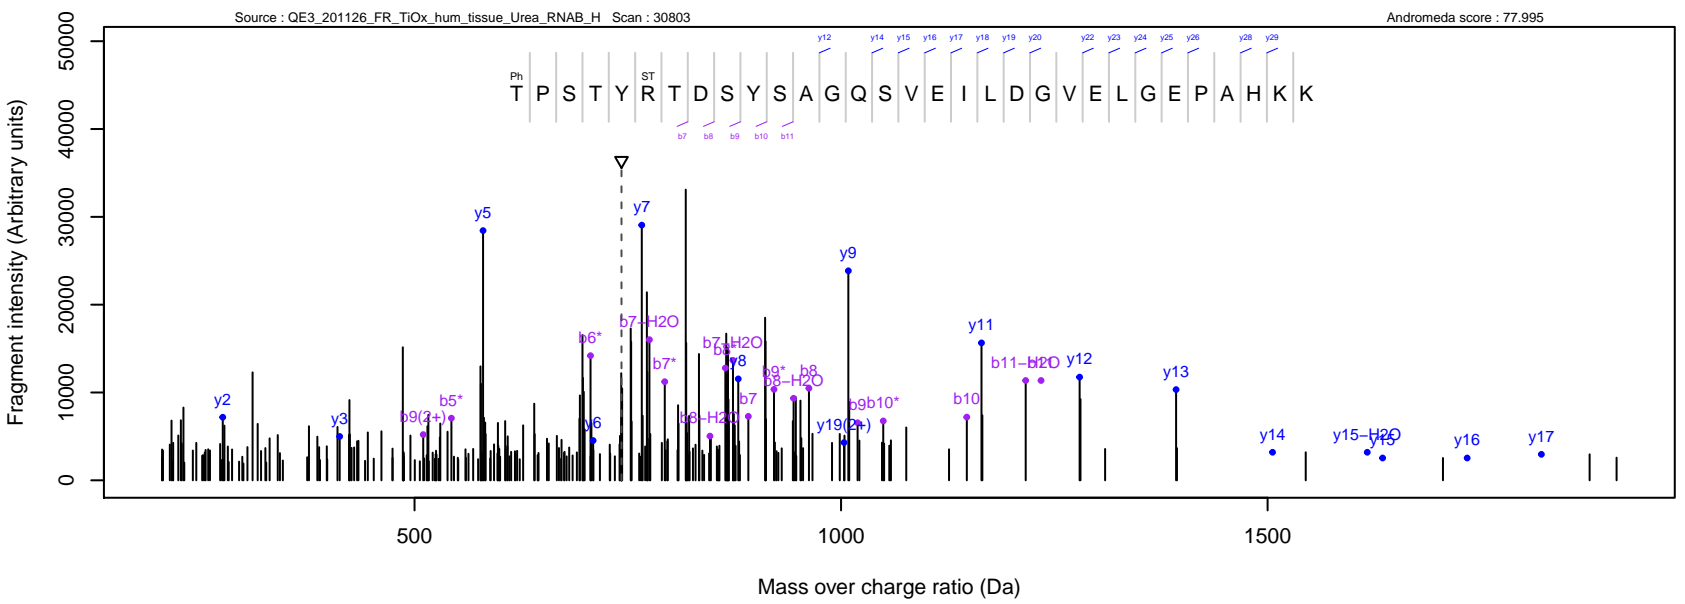

DSGSEDFLM(Oxidation (M))EDDDDS(Phospho (STY))DYGSSKK-3+

Source : QE3\_201126\_FR\_TiOx\_hum\_tissue\_Urea\_RNAB\_H Scan : 26980

Andromeda score : 77.984

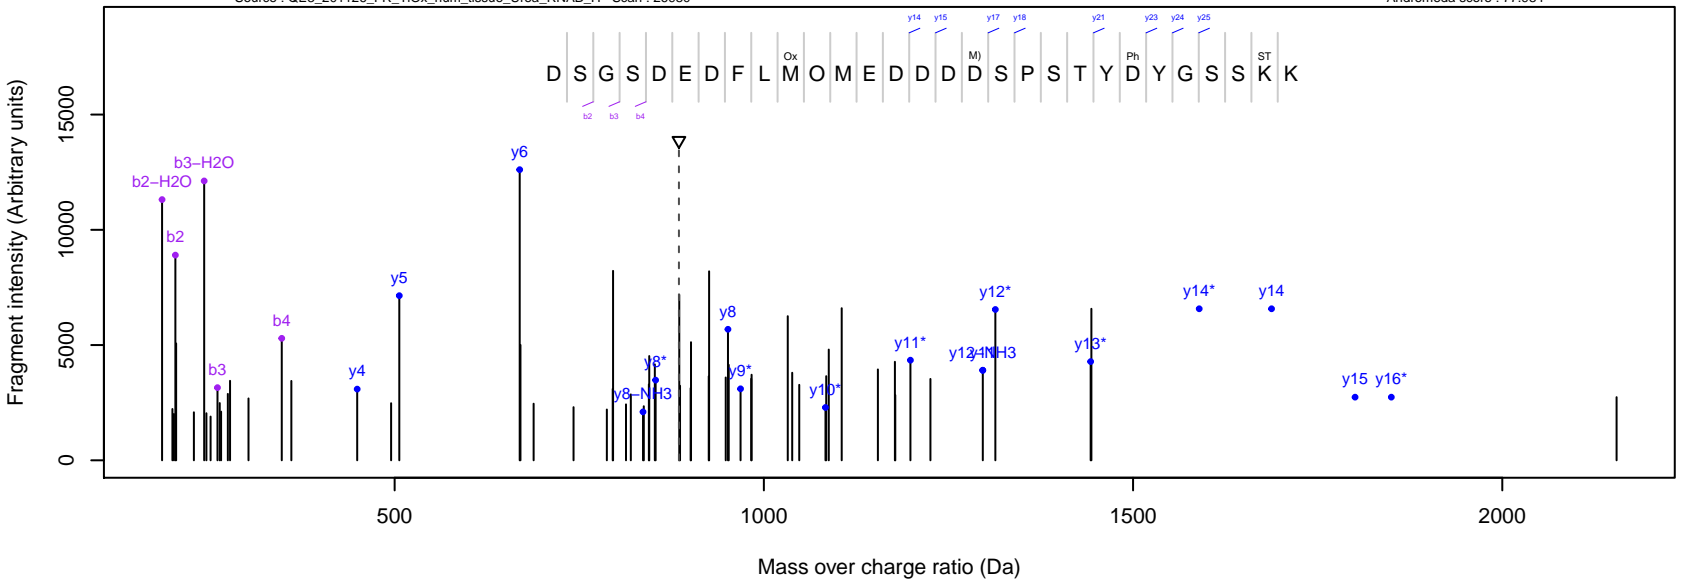

NQKPSQVNGAPGS(Phospho (STY))PTEPAGQKQHKK-4+

Source : QE3\_201126\_FR\_TiOx\_hum\_tissue\_Urea\_RNAB\_B Scan : 4315

Andromeda score : 77.984

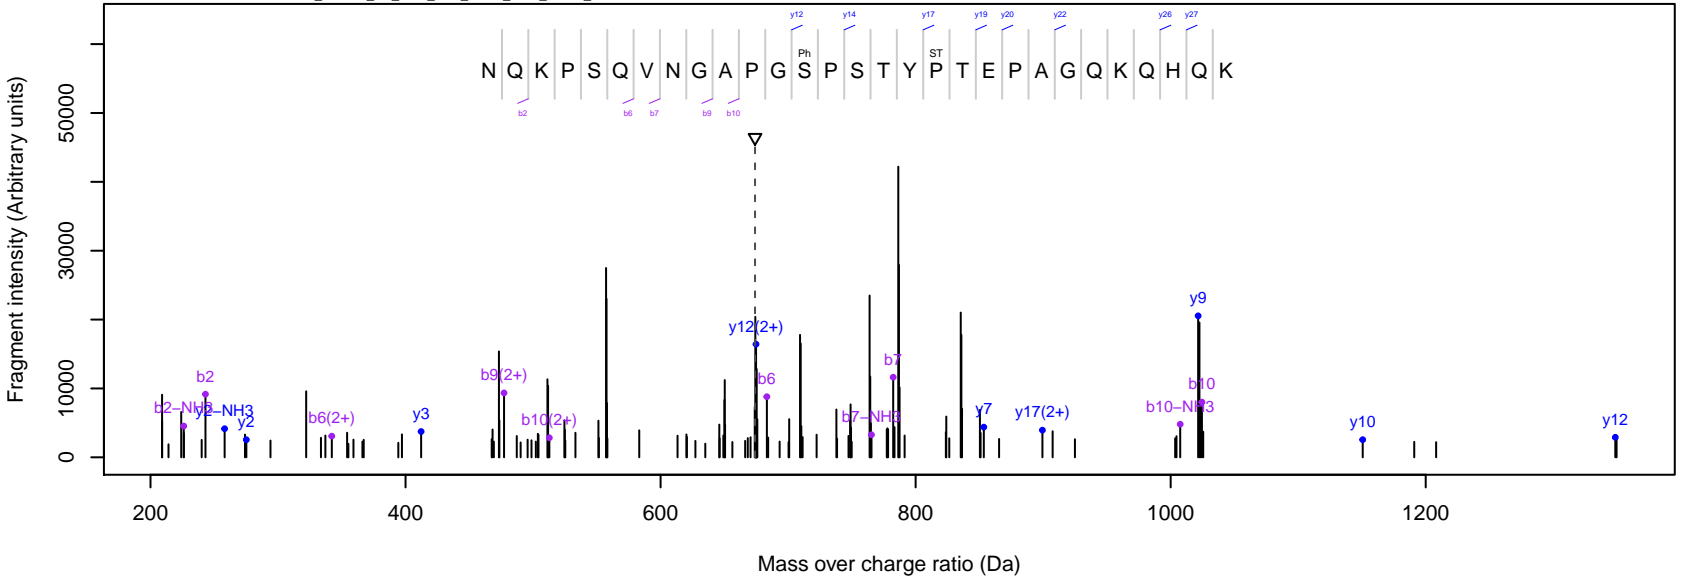

QQS(Phospho (STY))T(Phospho (STY))SSDRVSQTPESLDFLKVPDQGAAGVR-3+

Source : QE3\_201126\_FR\_TiOx\_hum\_tissue\_Urea\_RNAB\_N Scan : 44706

Andromeda score : 77.984

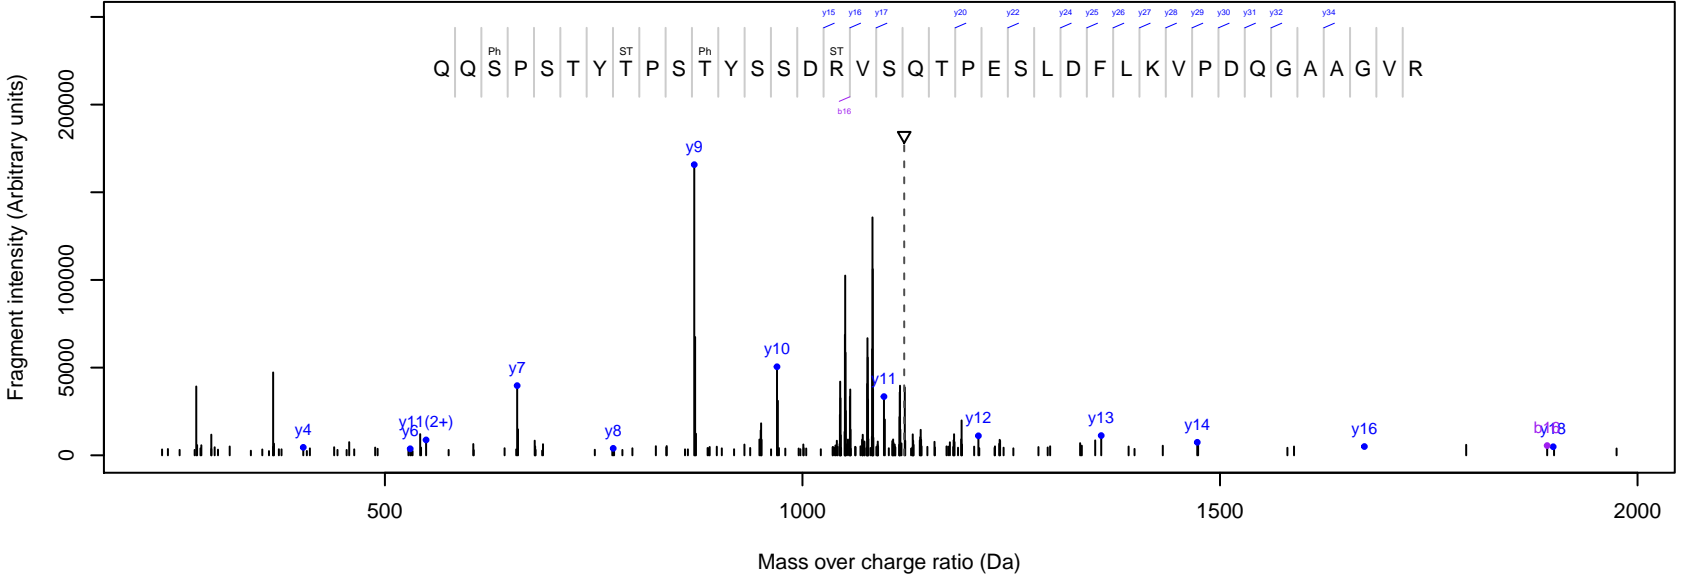

NLS(Phospho (STY))YGDNSDPALEASSLPDPWLETSSSPAEPAPQGCAR-4+

Source : QE3\_201126\_FR\_TiOx\_hum\_tissue\_Urea\_RNAB\_N Scan : 56896

Andromeda score : 77.982

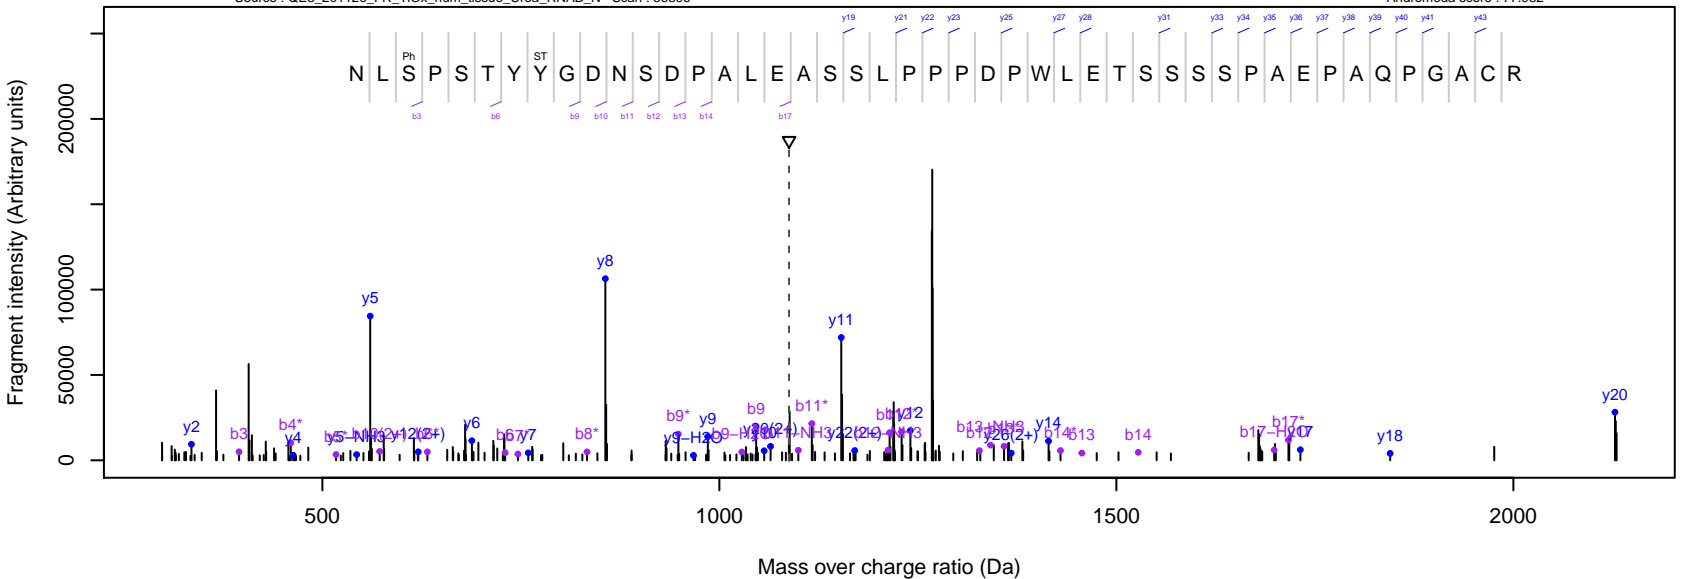

RHQYSDYDYS(Phospho (STY))SS(Phospho (STY))EKLK-3+

Source : QE3\_201126\_FR\_TiOx\_hum\_tissue\_Urea\_RNAB\_N Scan : 10077

Andromeda score : 77.959

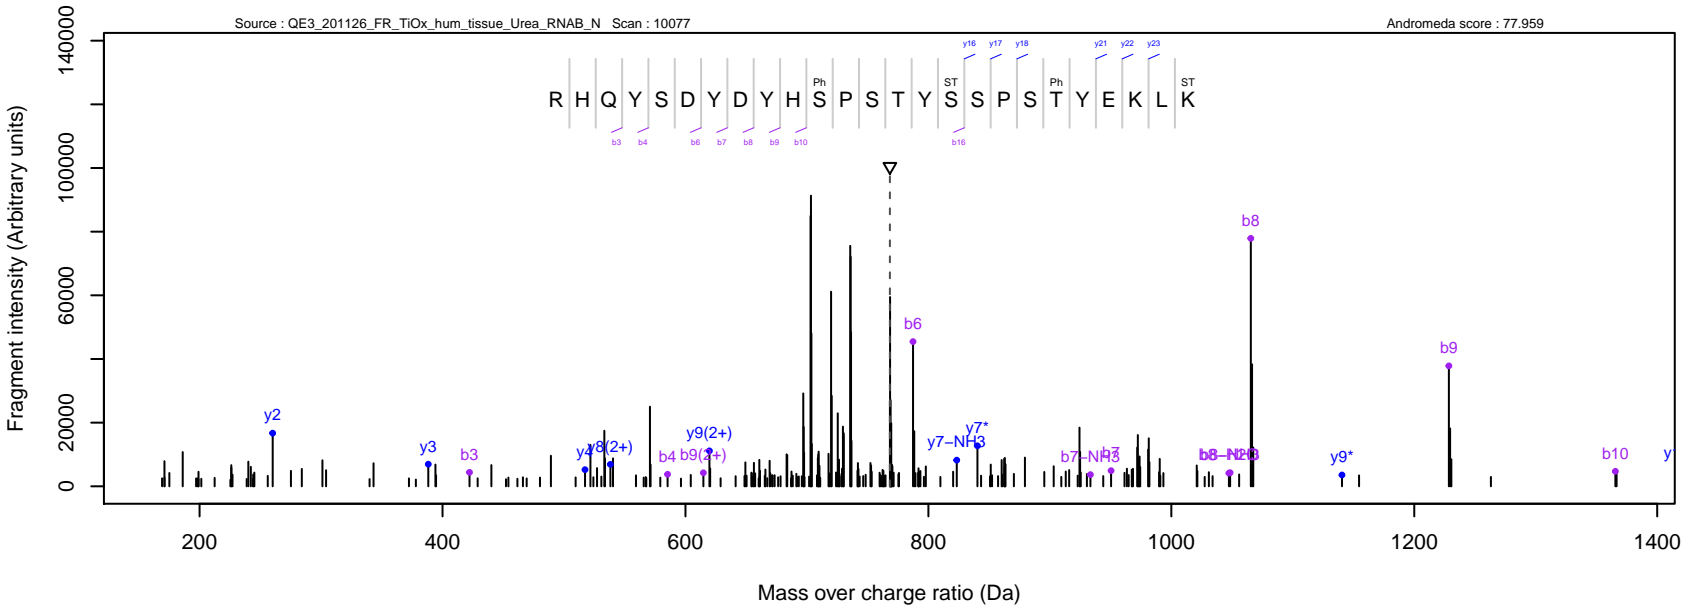

FAS(Phospho (STY))ENDLPEWK-2+

Source : QE3\_201126\_FR\_TiOx\_hum\_tissue\_Urea\_RNAB\_H Scan : 39371

Andromeda score : 77.912

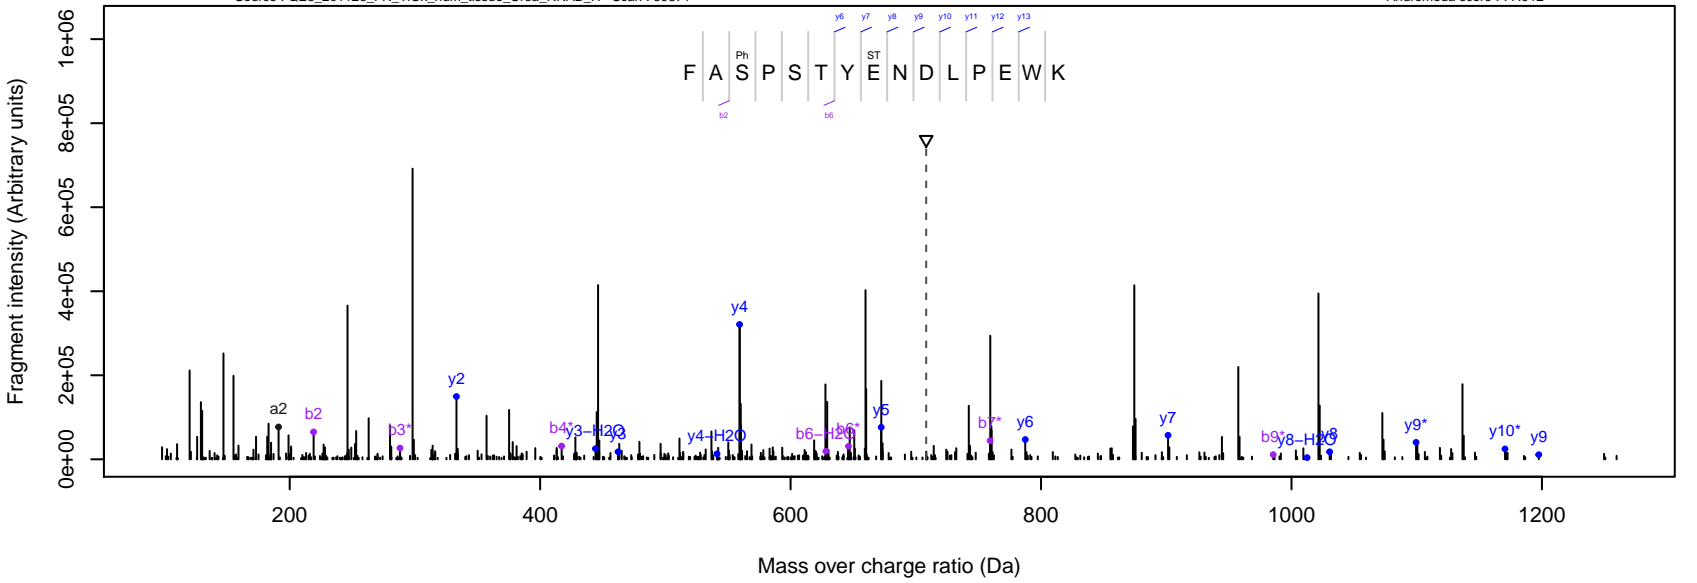

VRS(Phospho (STY))LETENRR-3+

Source : QE3\_201126\_FR\_TiOx\_hum\_tissue\_Urea\_RNAB\_H Scan : 4586

Andromeda score : 77.894

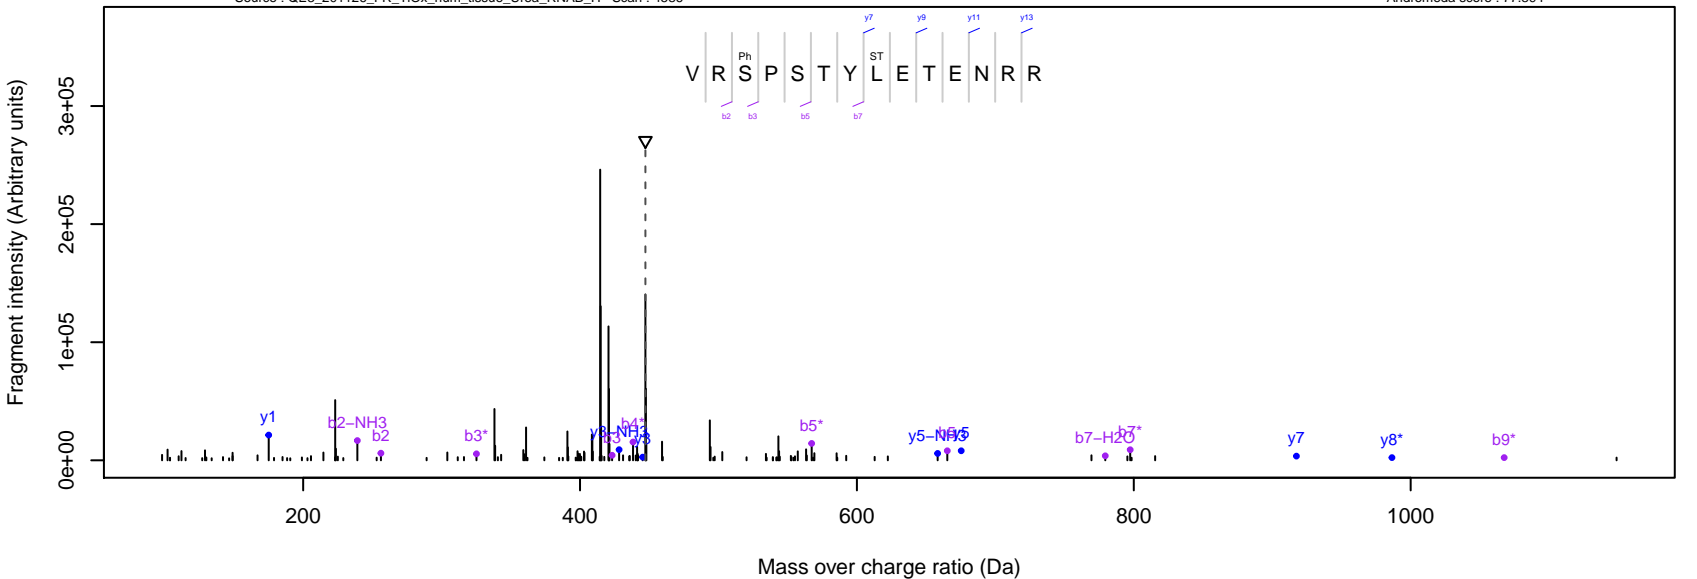

AASSDQLRDNS(Phospho (STY))PPPAFKPEPPK-3+

Source : QE3\_201126\_FR\_TiOx\_hum\_tissue\_Urea\_RNAB\_N Scan : 18619

Andromeda score : 77.873

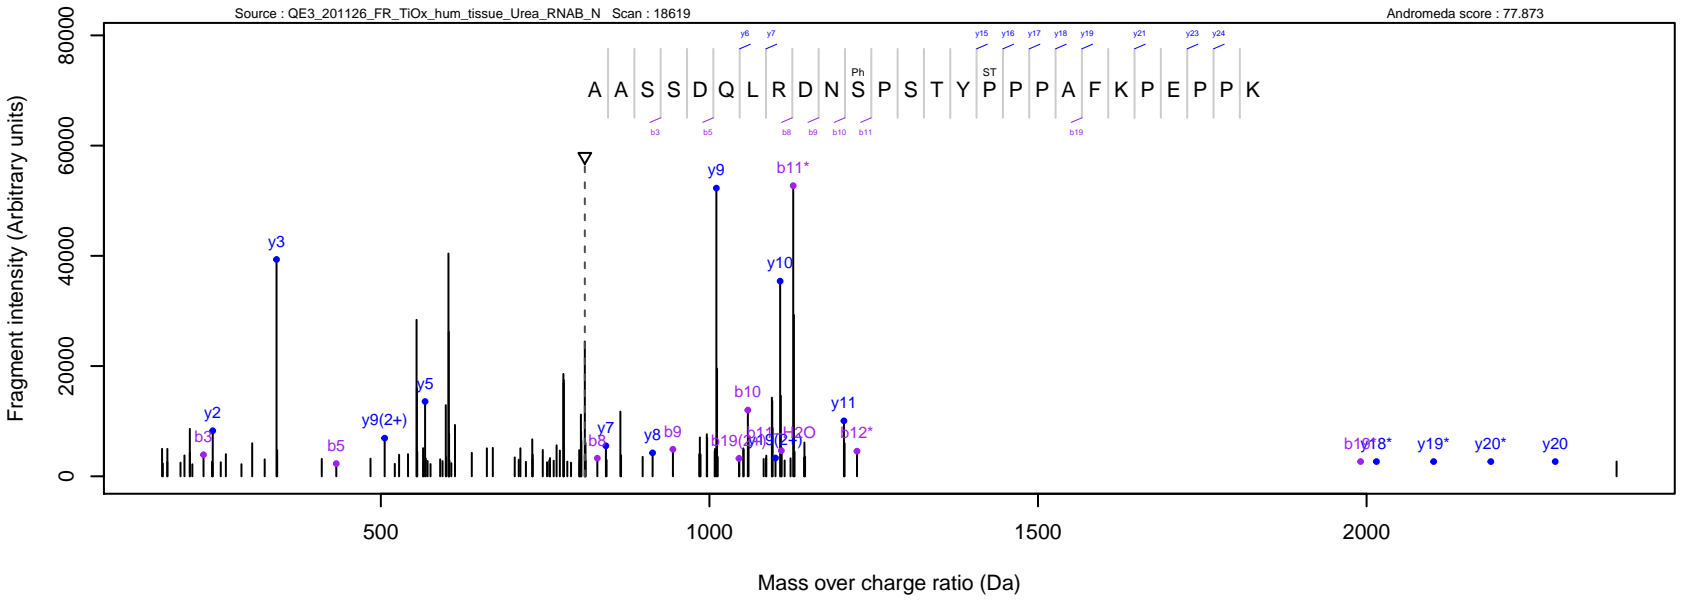

AS(Phospho (STY))WESLDEEWRAQAGSR-3+

Source : QE3\_201126\_FR\_TiOx\_hum\_tissue\_Urea\_RNAB\_N Scan : 39005

Andromeda score : 77.847

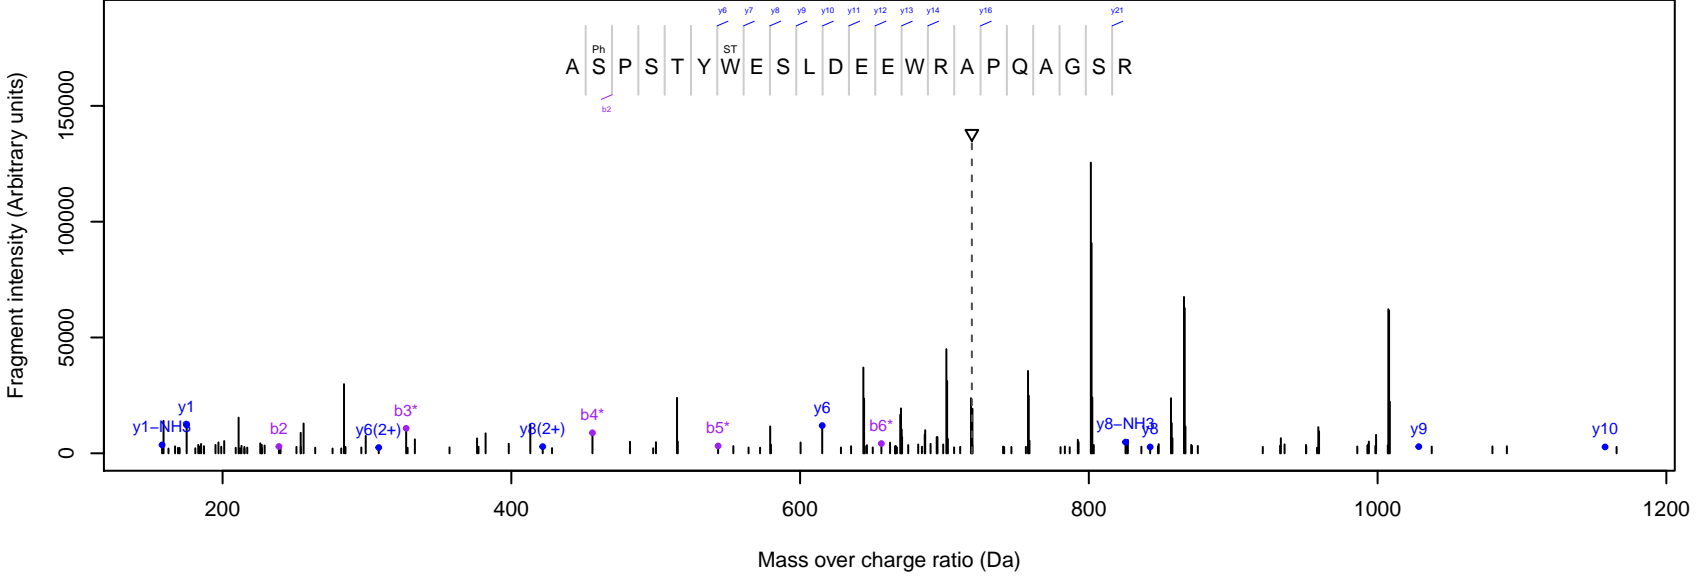

TVAS(Phospho (STY))DLQKCDSPSTYVEHLR-3+

Source : QE3\_201126\_FR\_TiOx\_hum\_tissue\_Urea\_RNAB\_H Scan : 24519

Andromeda score : 77.847

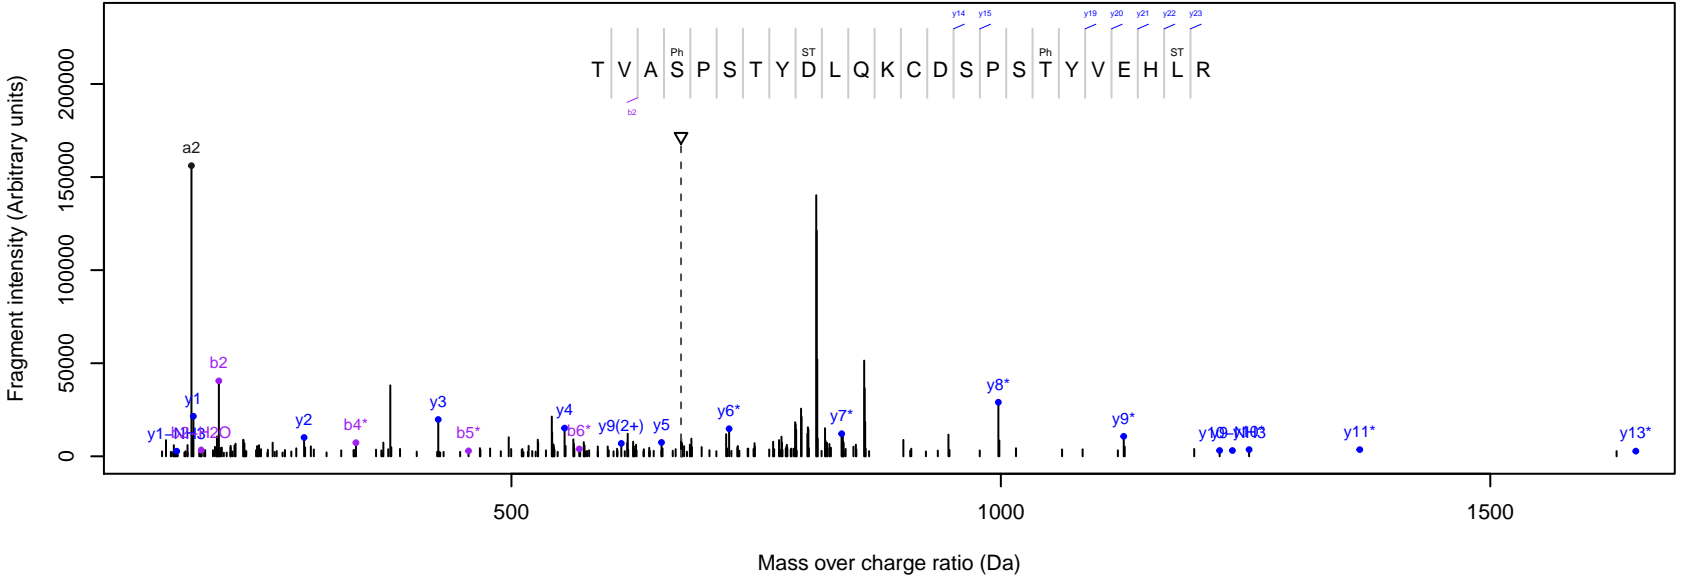



FLET(Phospho (STY))DS(Phospho (STY))EEEEEEVNEKKTAEEEEELAEK-3+

Source : QE3\_201126\_FR\_TiOx\_hum\_tissue\_Urea\_RNAB\_N Scan : 31564

Andromeda score : 77.825

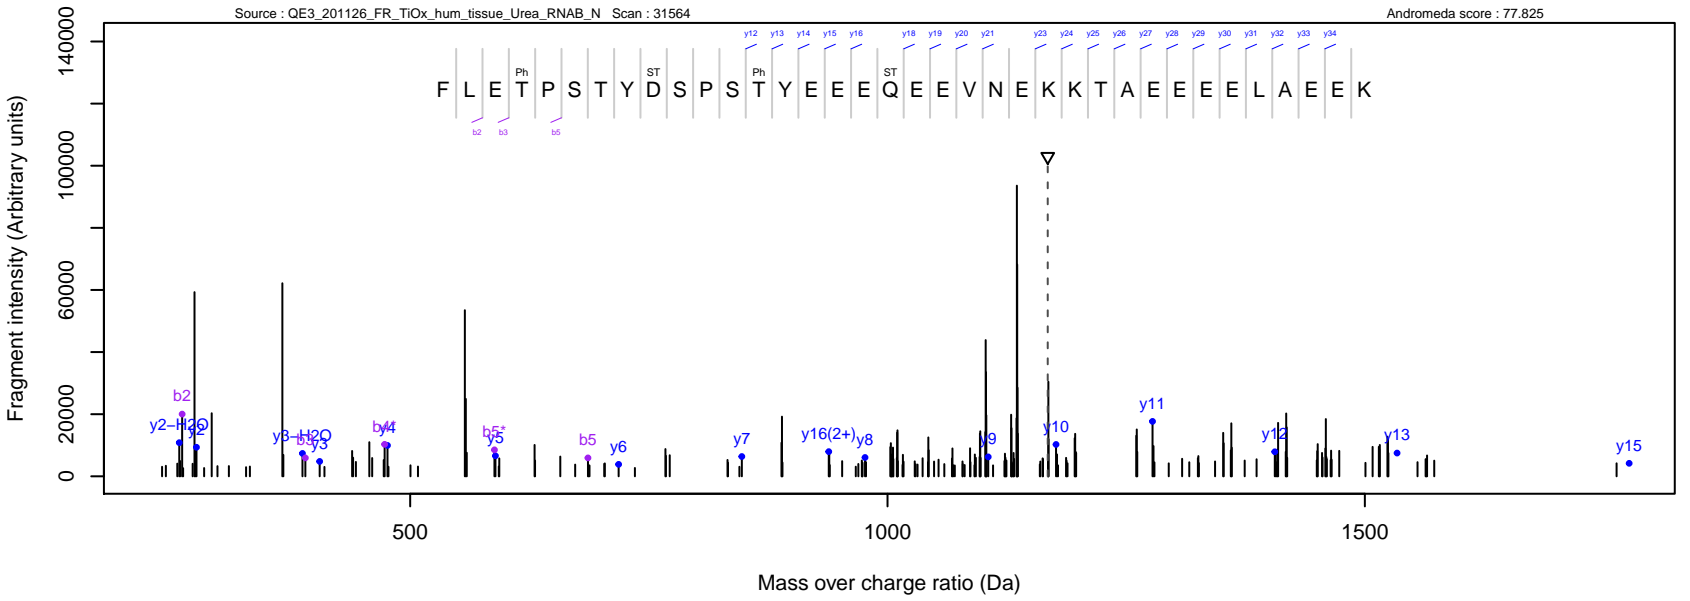

SSS(Phospho (STY))PTQYGLTK-2+

Source : QE3\_201126\_FR\_TiOx\_hum\_tissue\_Urea\_RNAB\_B Scan : 15739

Andromeda score : 77.813

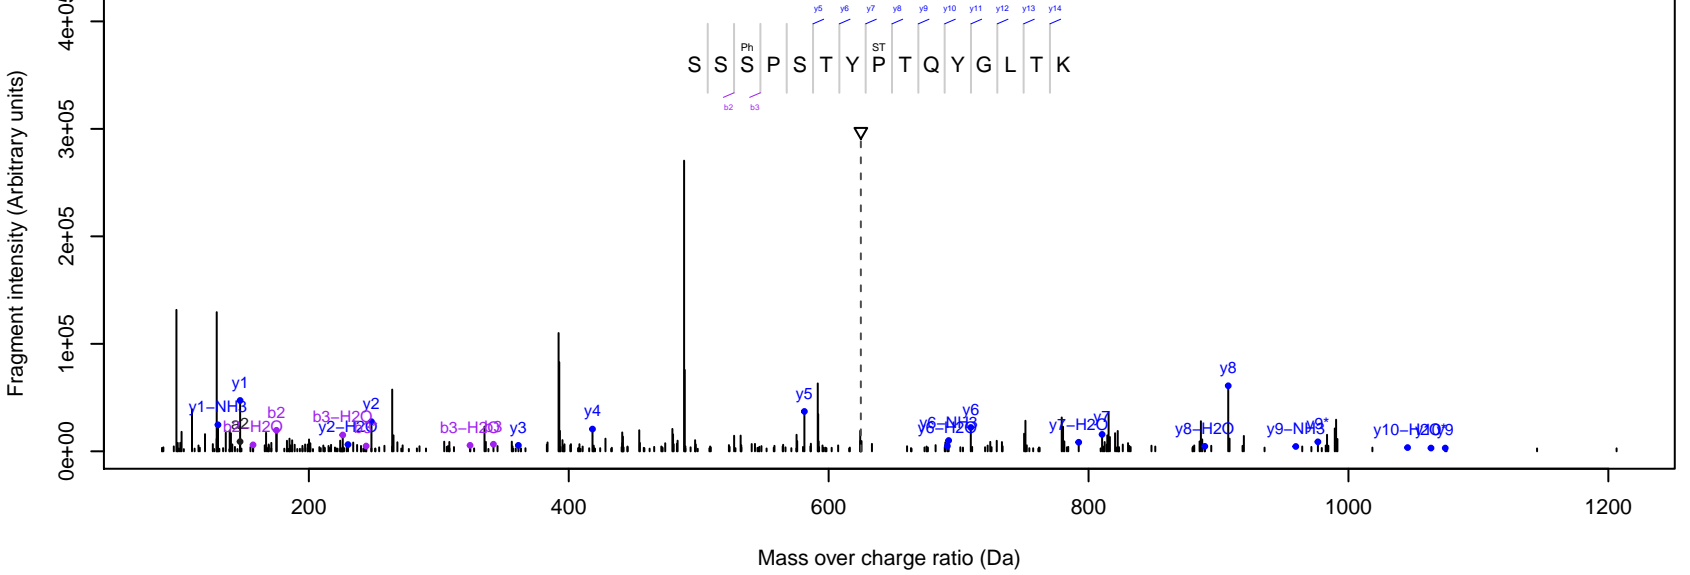

TGSSS(Phospho (STY))PPGGPPKPGSQLDMLGS(Phospho (STY))LQSDLNK-3+

Source : QE3\_201126\_FR\_TiOx\_hum\_tissue\_Urea\_RNAB\_N Scan : 55886

Andromeda score : 77.804

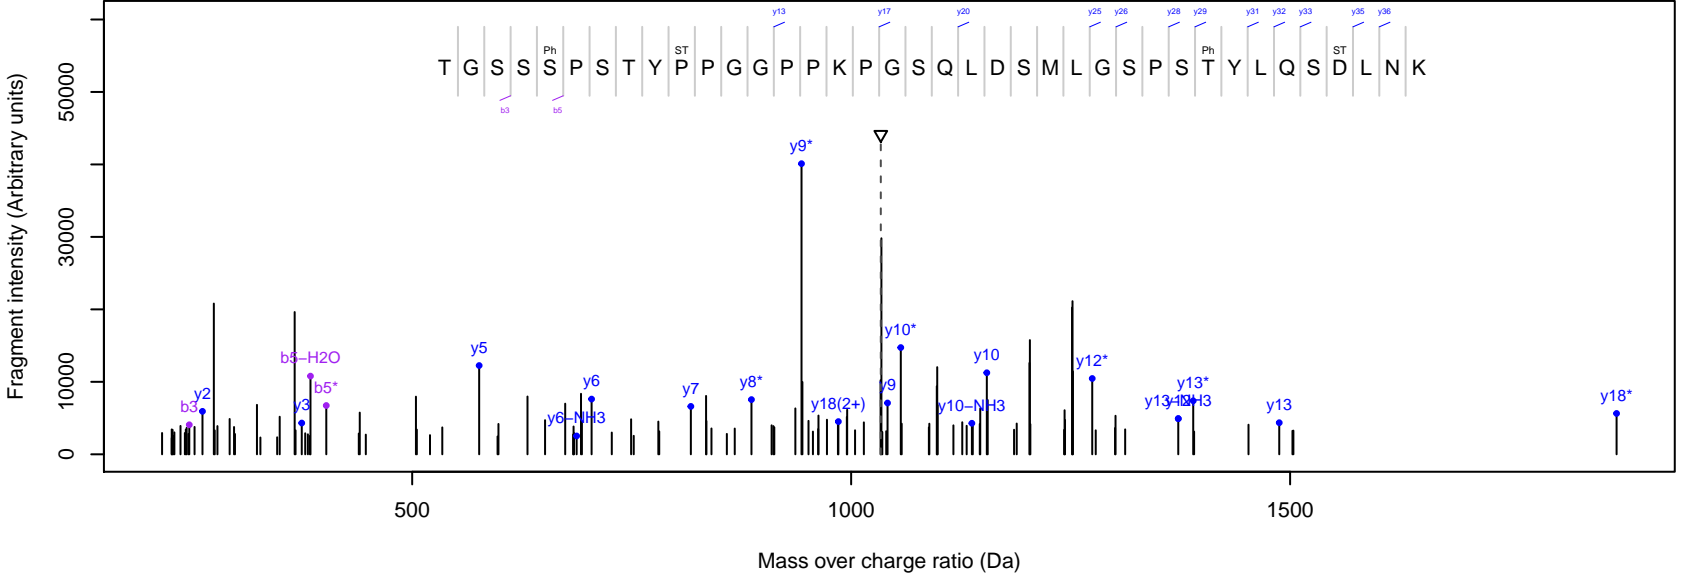

S(Phospho (STY))PEAVGPELEEEK-2+

Source : QE3\_201126\_FR\_TIOx\_hum\_tissue\_Urea\_RNAB\_N Scan : 24177

Andromeda score : 77.776

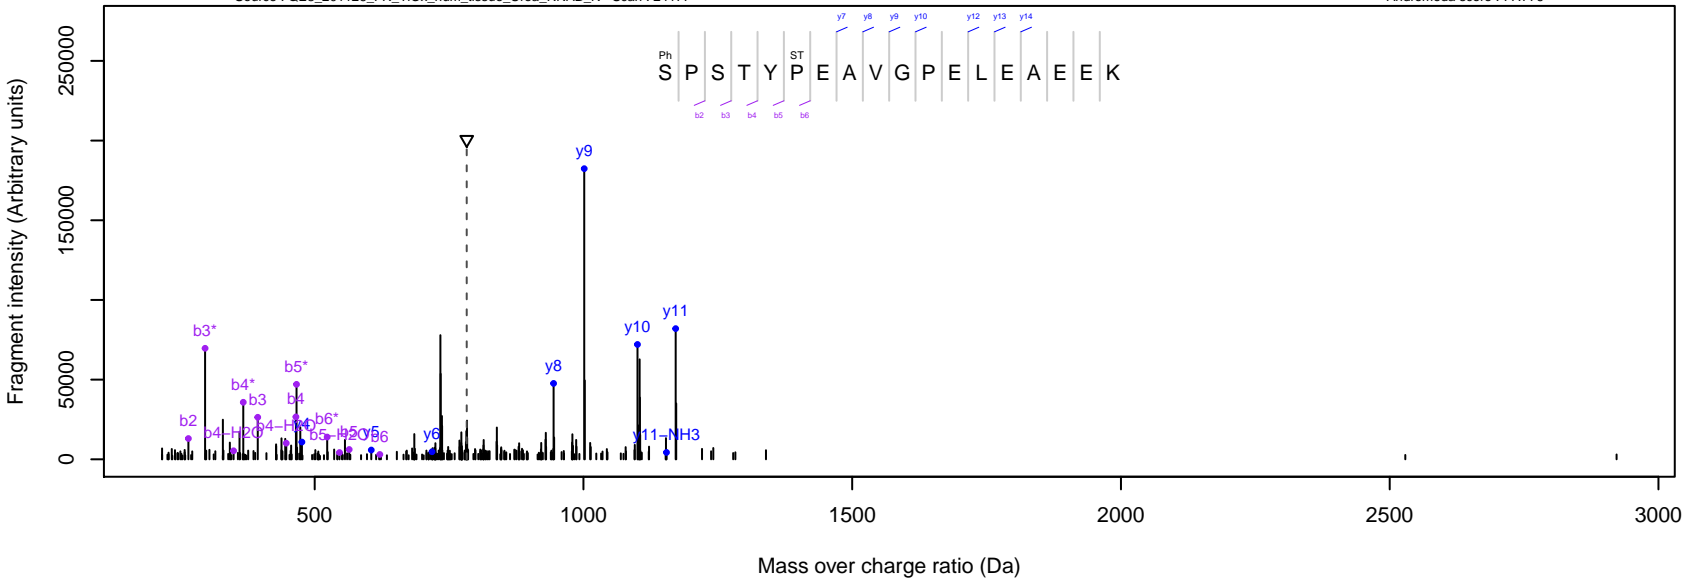

HIADLAGNS(Phospho (STY))EVILPVPAPAFNVINGGSHAGNK-4+

Source : QE3\_201126\_FR\_TIOx\_hum\_tissue\_Urea\_RNAB\_H Scan : 51606

Andromeda score : 77.766

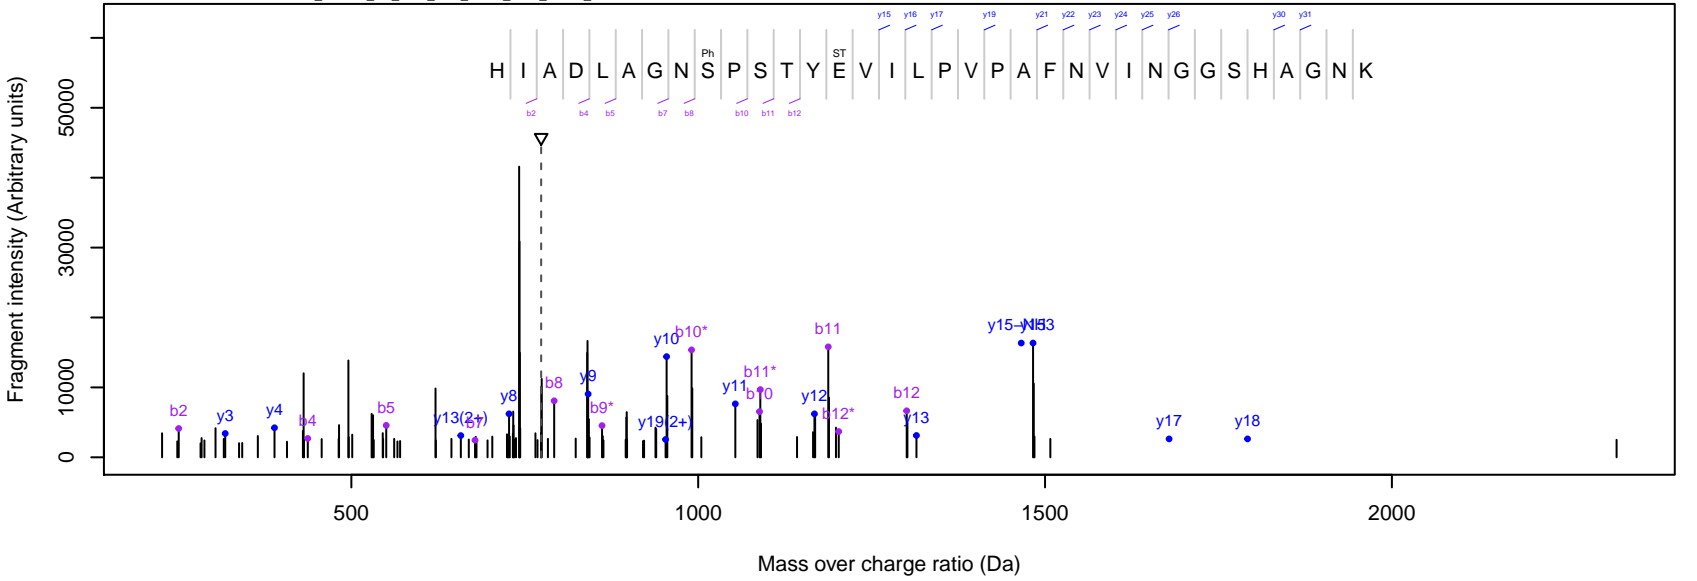

LDLLEEKGS(Phospho (STY))LS(Phospho (STY))PASVGS DTLSDLGISSLQDGLALHIR-4+

Source : QE3\_201126\_FR\_TIOx\_hum\_tissue\_Urea\_RNAB\_H Scan : 61866

Andromeda score : 77.766

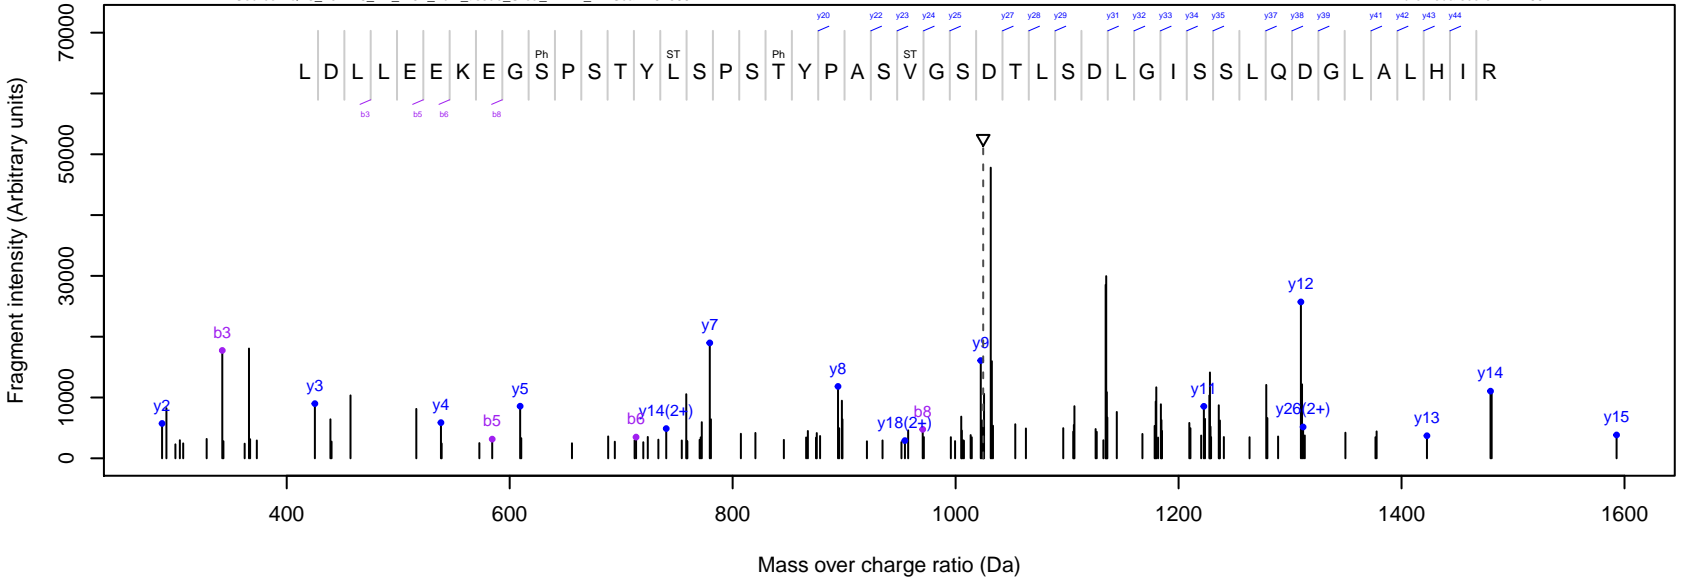

**QTS(Phospho (STY))ITQTI R-2+**

Source : QE3\_201126\_FR\_TiOx\_hum\_tissue\_Urea\_RNAB\_N Scan : 15794

Andromeda score : 77.744

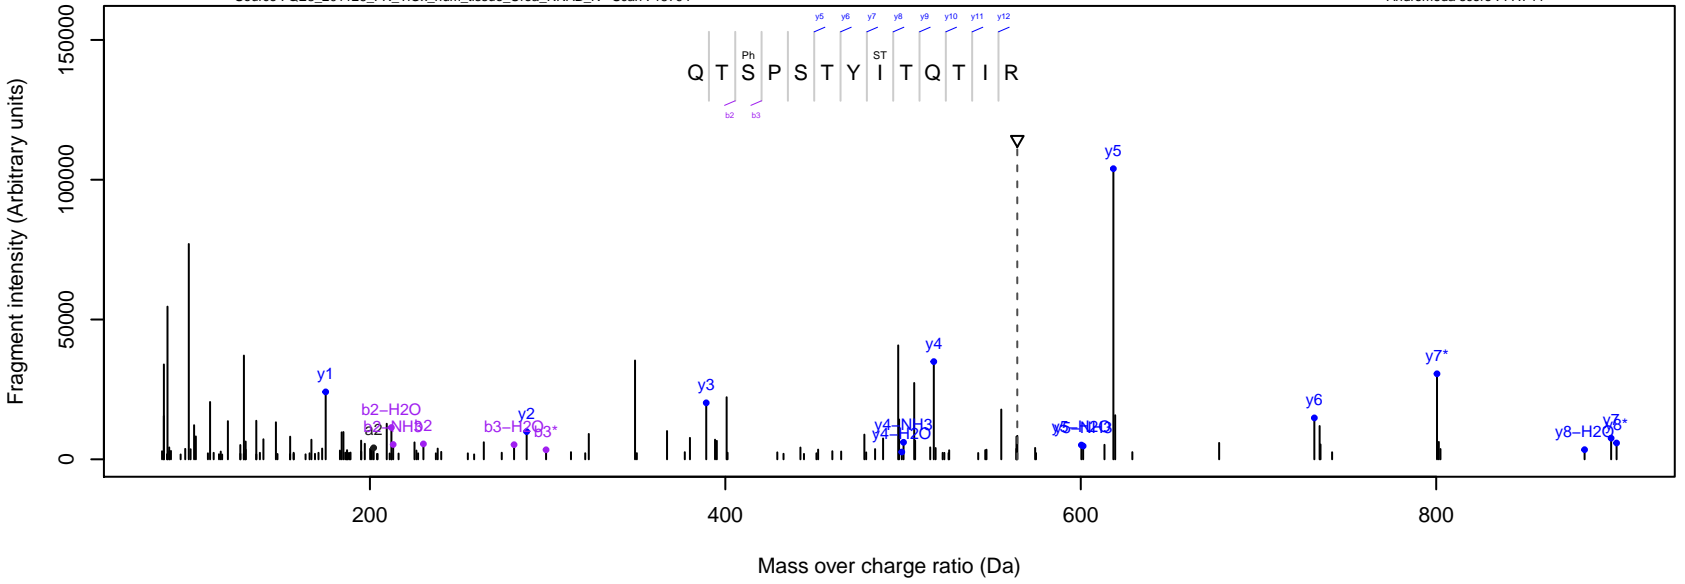

**KKAS(Phospho (STY))LVALPEQTASEEETPPPLTK-3+**

Source : QE3\_201126\_FR\_TiOx\_hum\_tissue\_Urea\_RNAB\_H Scan : 33351

Andromeda score : 77.733

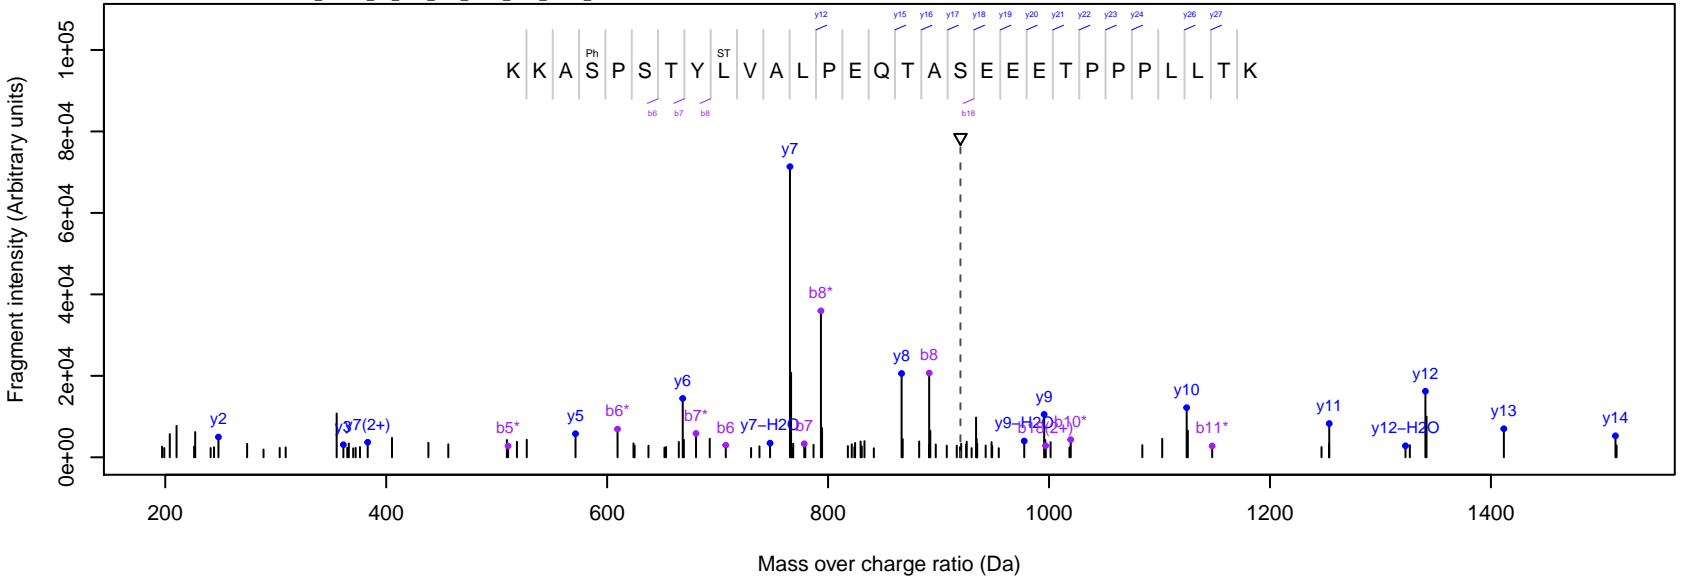

**KLPVDSVFNKFEDEDS(Phospho (STY))DDVPR-3+**

Source : QE3\_201126\_FR\_TiOx\_hum\_tissue\_Urea\_RNAB\_H Scan : 39467

Andromeda score : 77.693

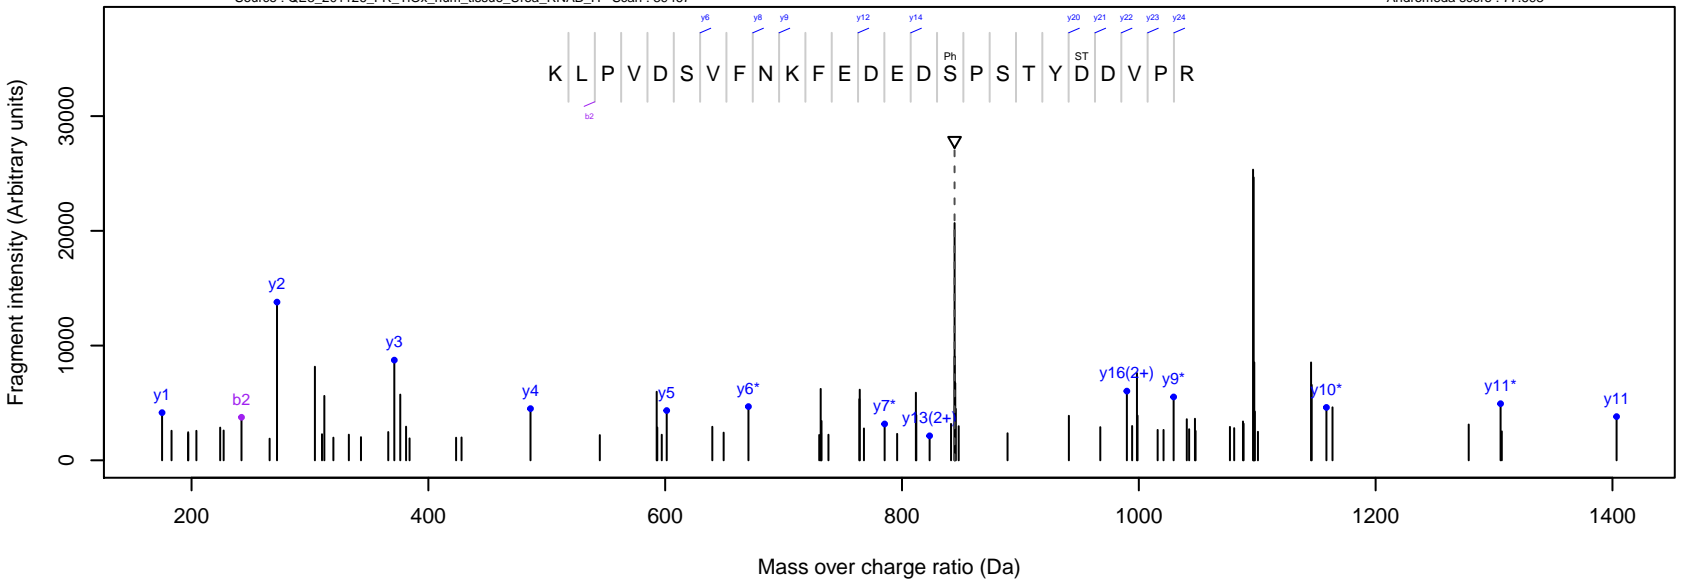

SFLDSGY(Phospho (STY))R-2+

Source : QE3\_201126\_FR\_TiOx\_hum\_tissue\_Urea\_RNAB\_H Scan : 23102

Andromeda score : 77.674

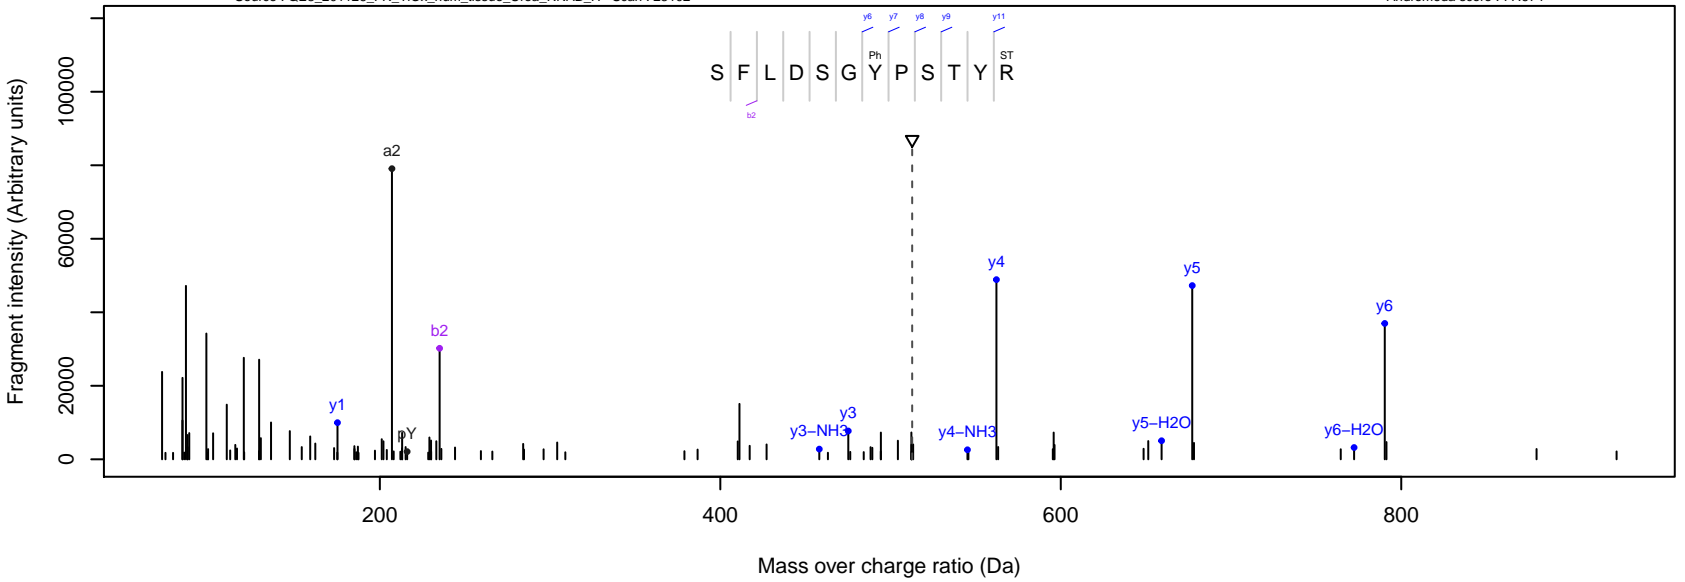

SDS(Phospho (STY))LLSFR-2+

Source : QE3\_201126\_FR\_TiOx\_hum\_tissue\_Urea\_RNAB\_N Scan : 36788

Andromeda score : 77.662

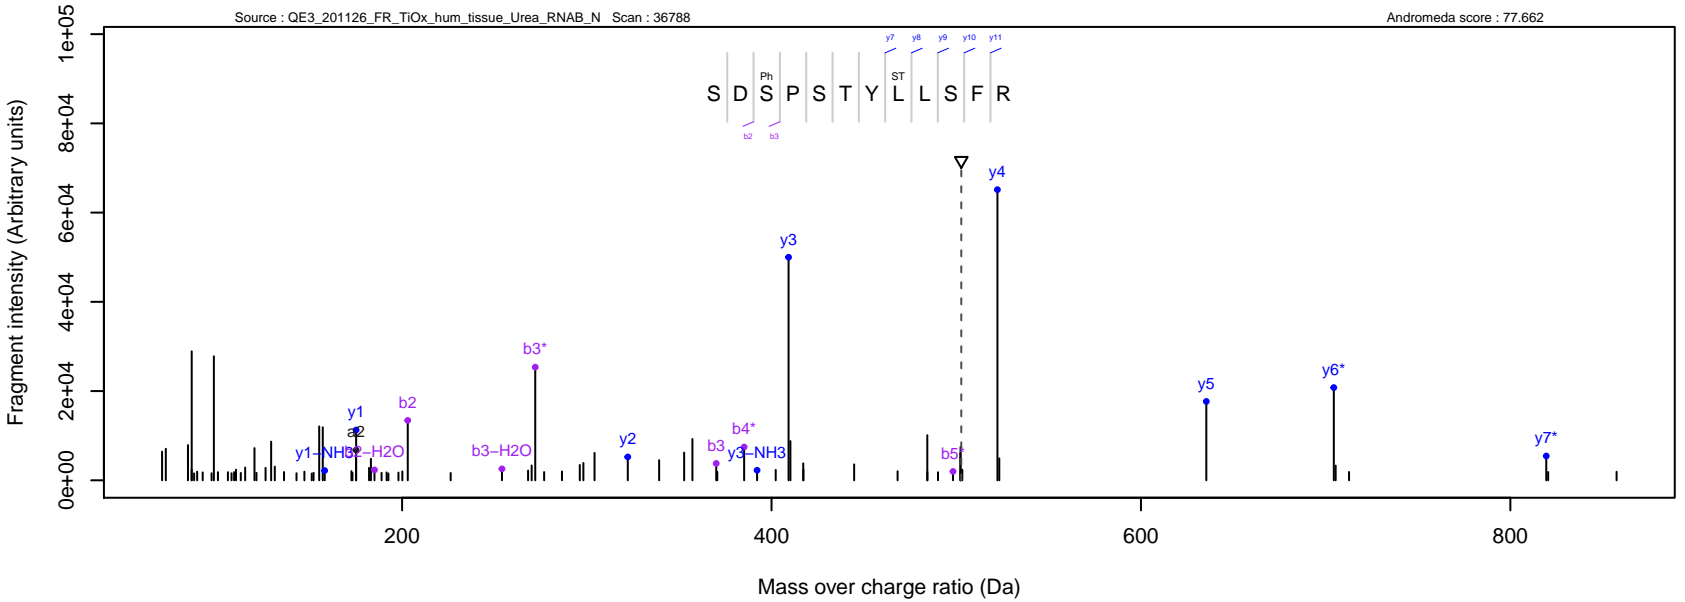

(Acetyl (Protein N-term))ATSPQKS(Phospho (STY))PSVPKSPTPK-3+

Source : QE3\_201126\_FR\_TiOx\_hum\_tissue\_Urea\_RNAB\_B Scan : 11562

Andromeda score : 77.66

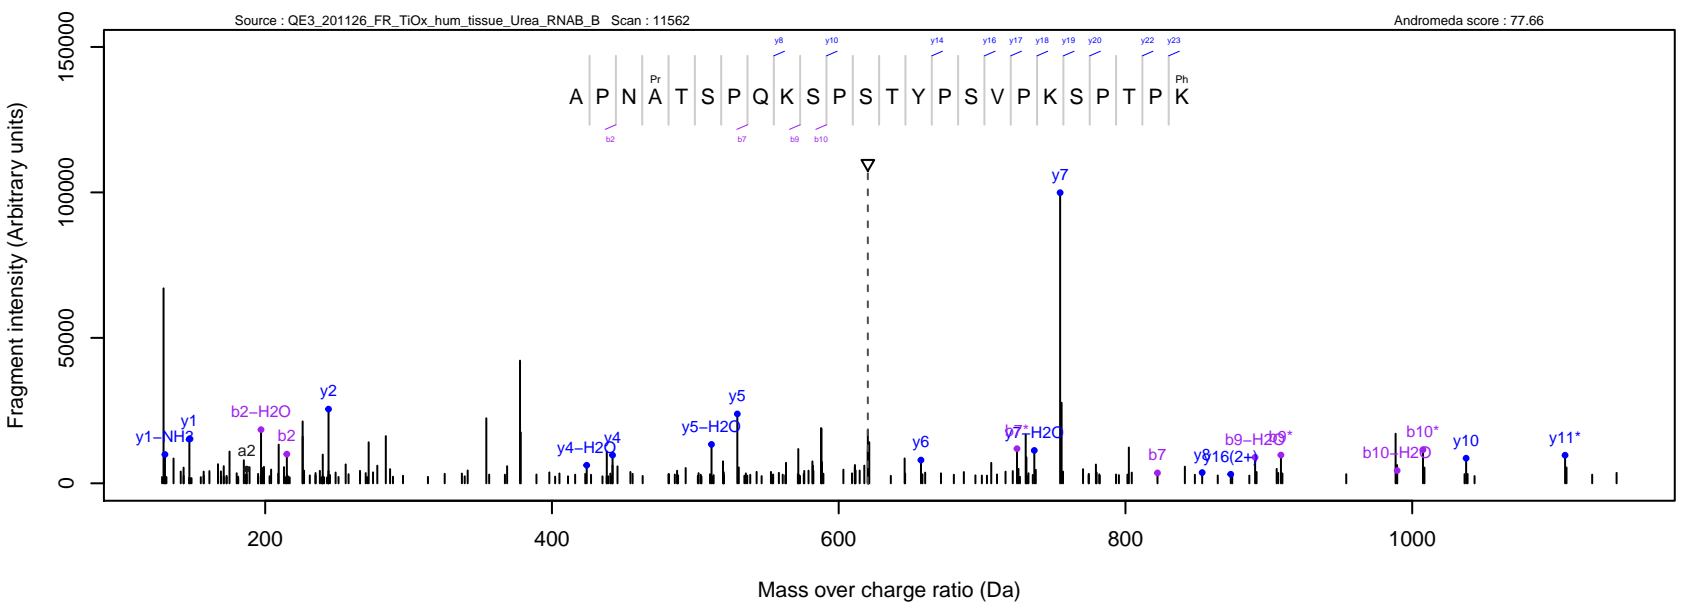

NHSGSRT(Phospho (STY))PPVALNSSR-3+

Source : QE3\_201126\_FR\_TiOx\_hum\_tissue\_Urea\_RNAB\_H Scan : 7678

Andromeda score : 77.66

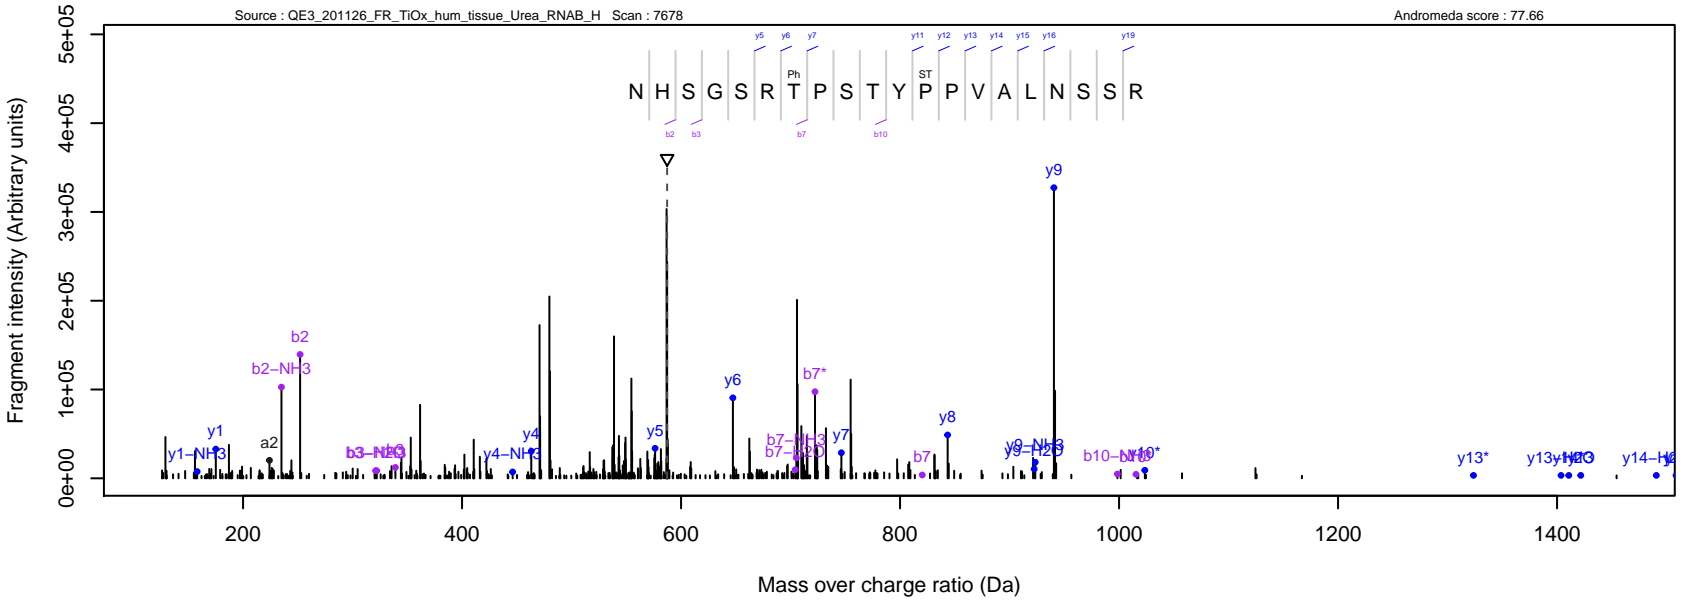

TPS(Phospho (STY))EGGKLQSTFVFEEIGR-3+

Source : QE3\_201126\_FR\_TiOx\_hum\_tissue\_Urea\_RNAB\_H Scan : 43865

Andromeda score : 77.649

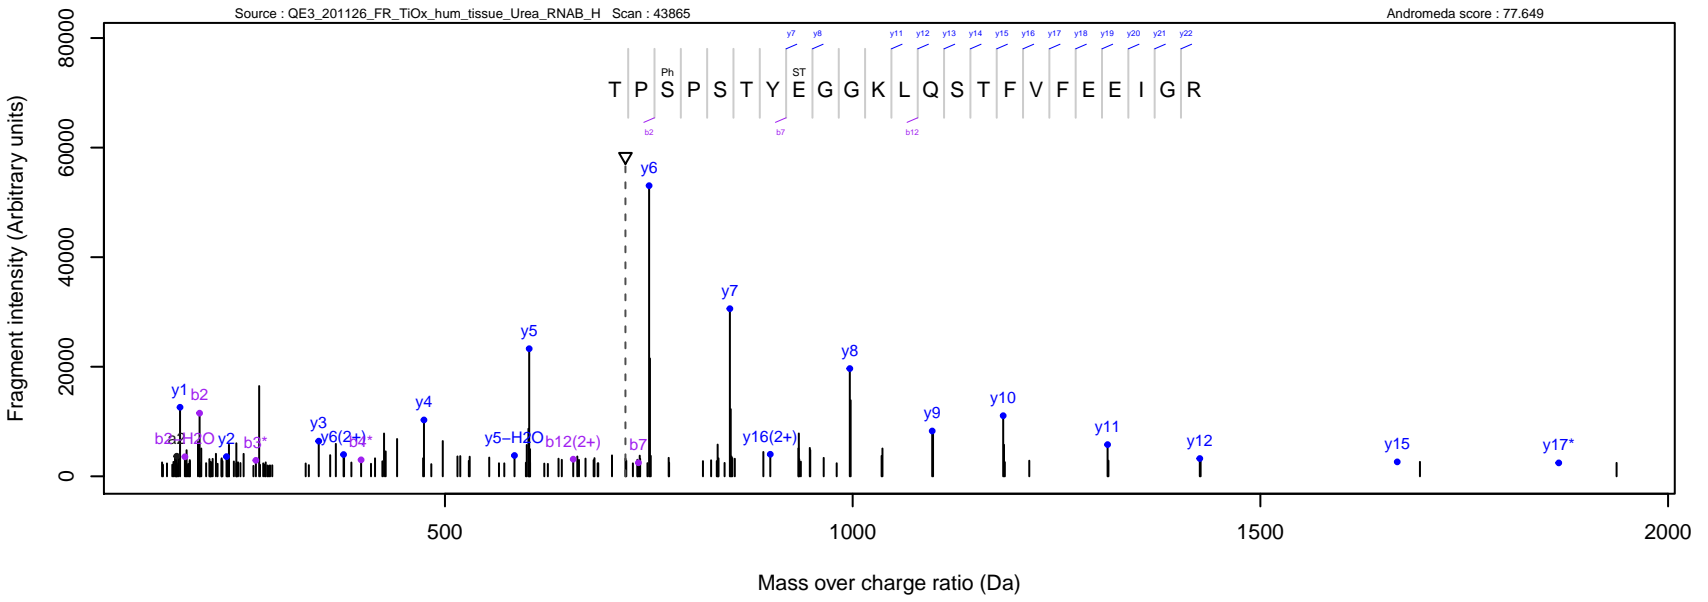

GKIPDVPGF(Phospho (STY))WVTPCISAK-3+

Source : QE3\_201126\_FR\_TiOx\_hum\_tissue\_Urea\_RNAB\_H Scan : 55426

Andromeda score : 77.641

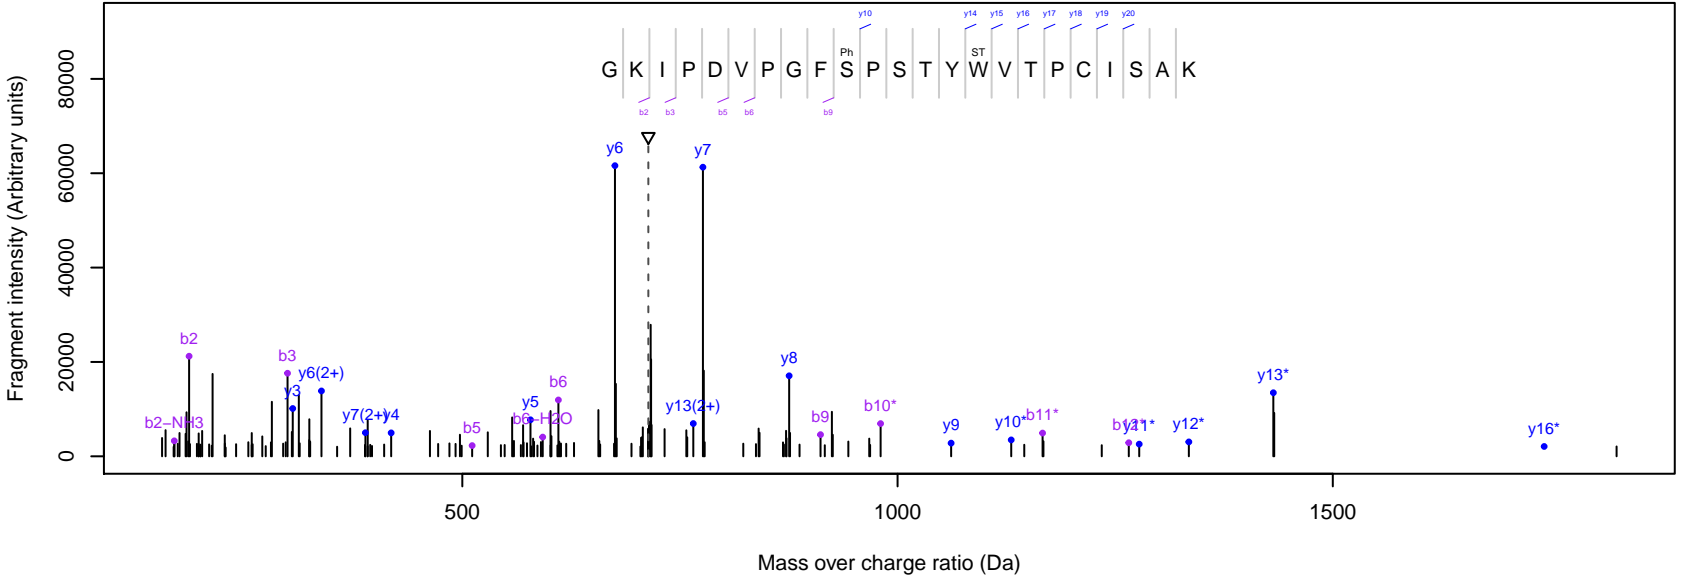

RTPS(Phospho (STY))EADRWLEEVSK-3+

Source : QE3\_201126\_FR\_TiOx\_hum\_tissue\_Urea\_RNAB\_H Scan : 29153

Andromeda score : 77.631

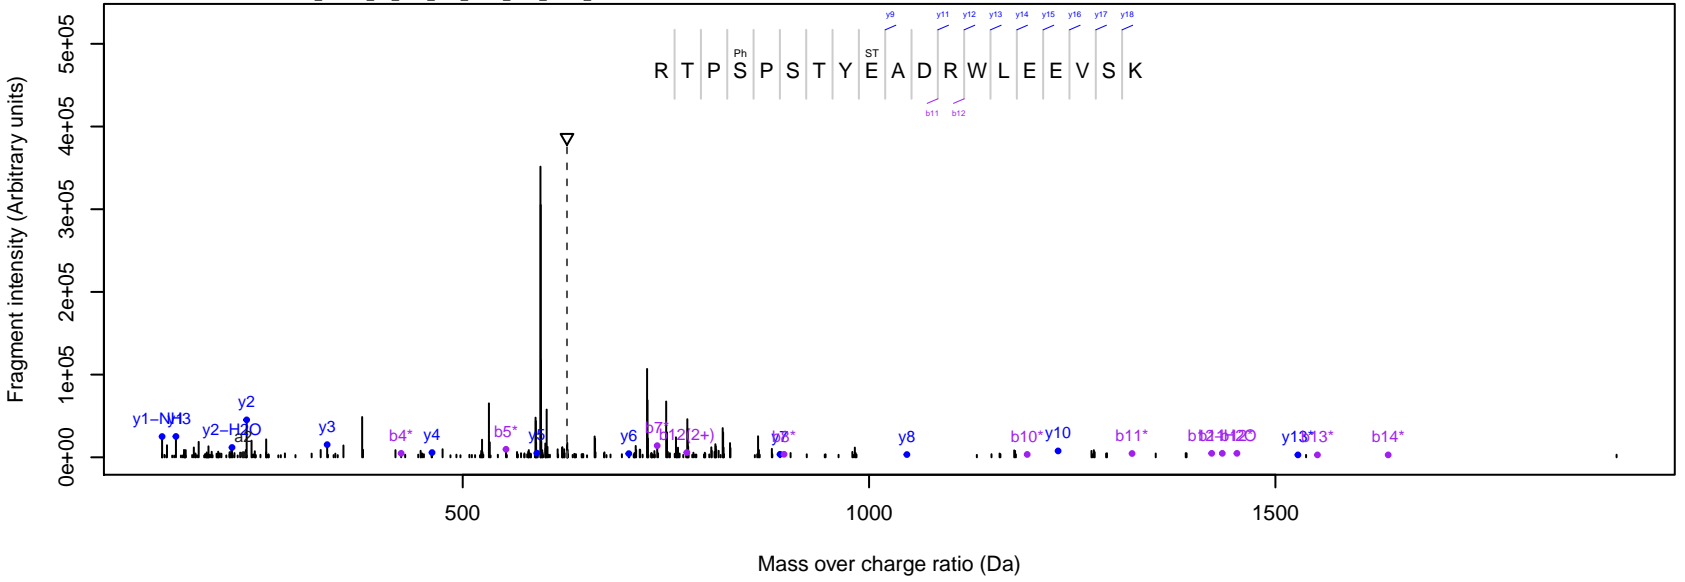

LGHPEALSAGTGS(Phospho (STY))PQPPSFTYAQQR-3+

Source : QE3\_201126\_FR\_TiOx\_hum\_tissue\_Urea\_RNAB\_N Scan : 30665

Andromeda score : 77.63

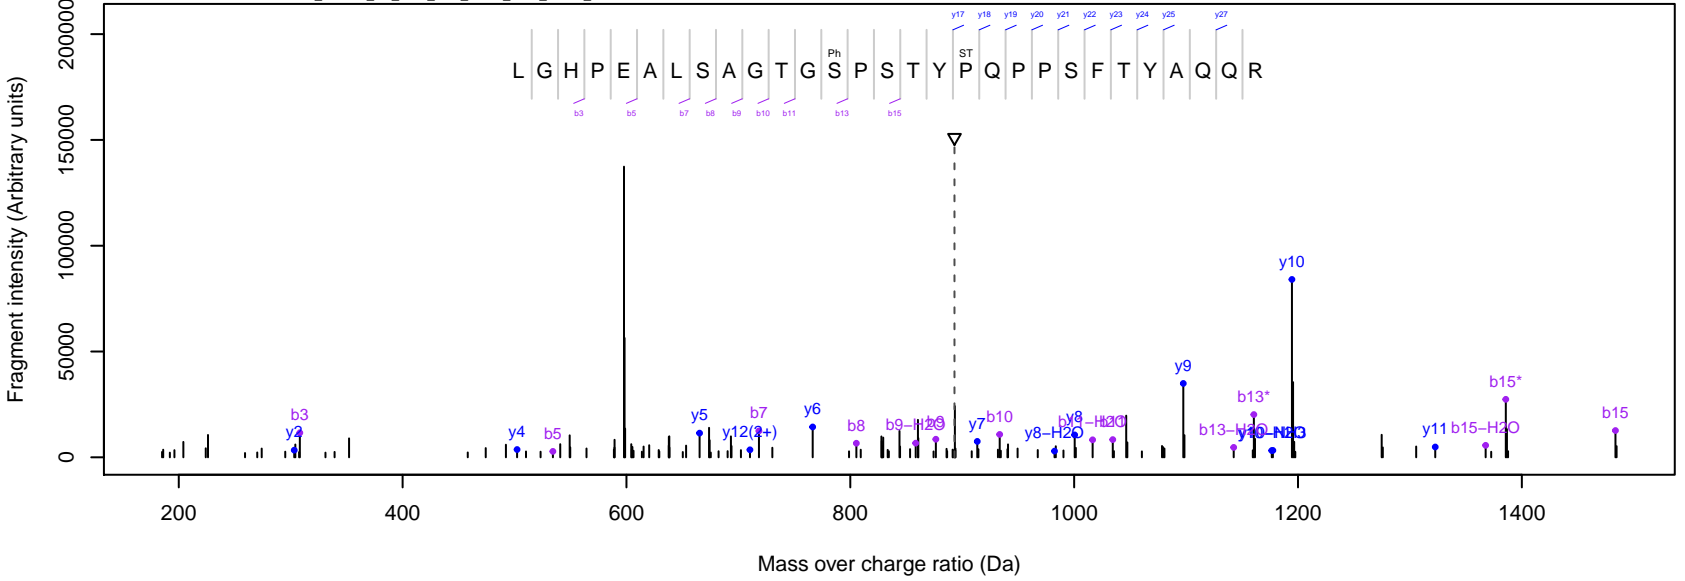

KLSCS(Phospho (STY))LEDLRSEVDK-3+

Source : QE3\_201126\_FR\_TiOx\_hum\_tissue\_Urea\_RNAB\_N Scan : 19713

Andromeda score : 77.576

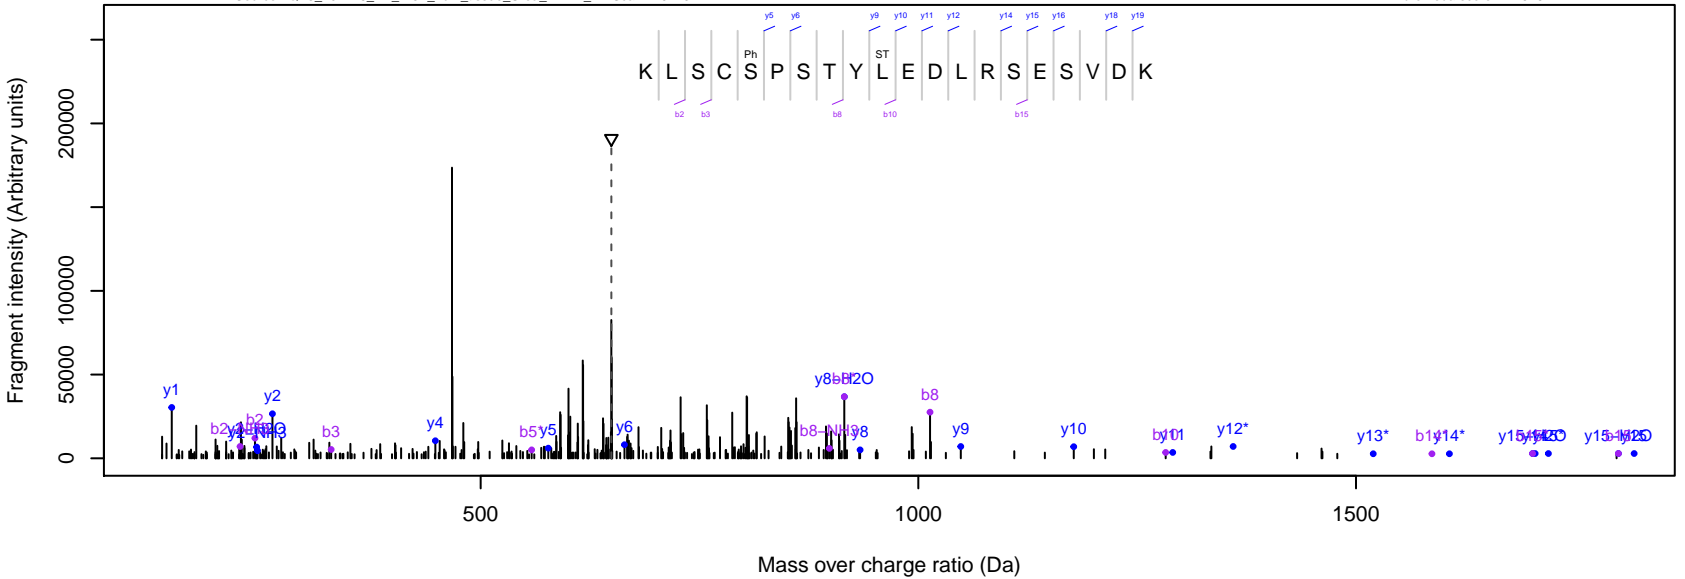

TLS(Phospho (STY))DPPS(Phospho (STY))PLPHGPPNK-2+

Source : QE3\_201126\_FR\_TiOx\_hum\_tissue\_Urea\_RNAB\_N Scan : 26914

Andromeda score : 77.562

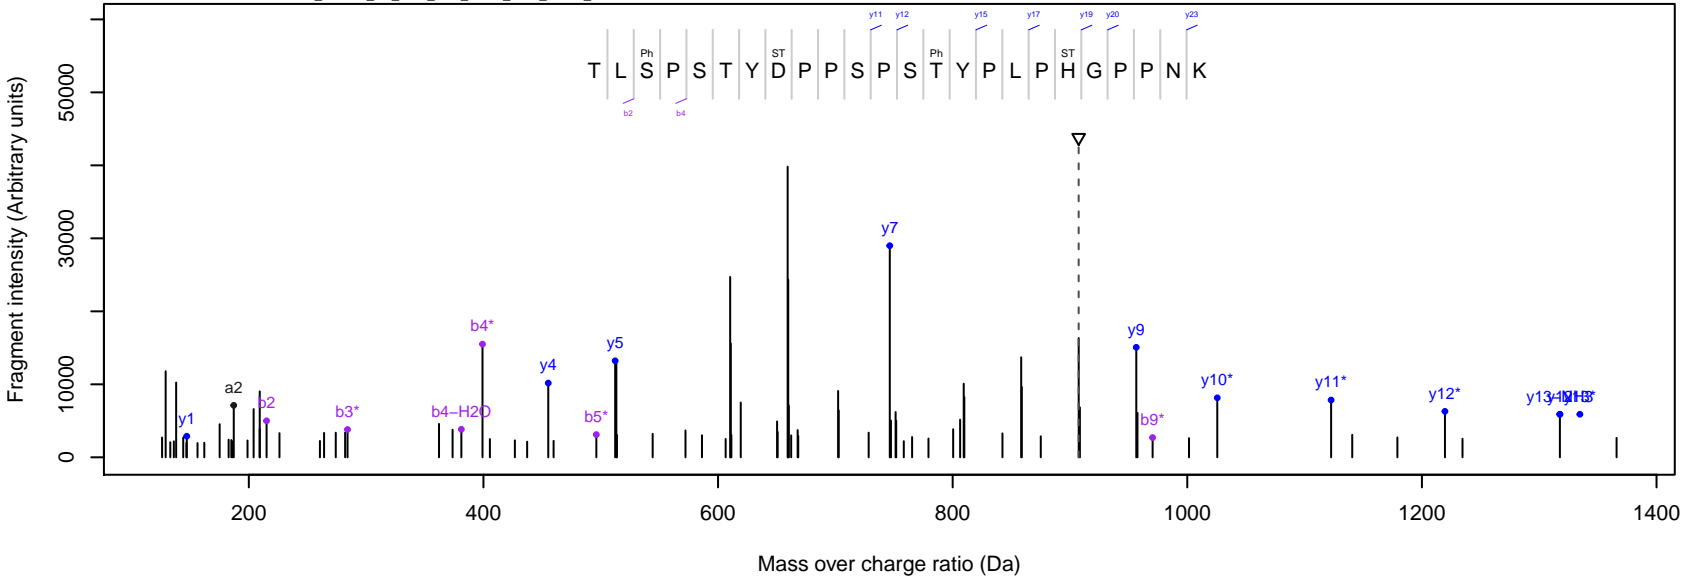

CALSS(Phospho (STY))PSLAFTPIIK-2+

Source : QE3\_201126\_FR\_TiOx\_hum\_tissue\_Urea\_RNAB\_B Scan : 47776

Andromeda score : 77.527

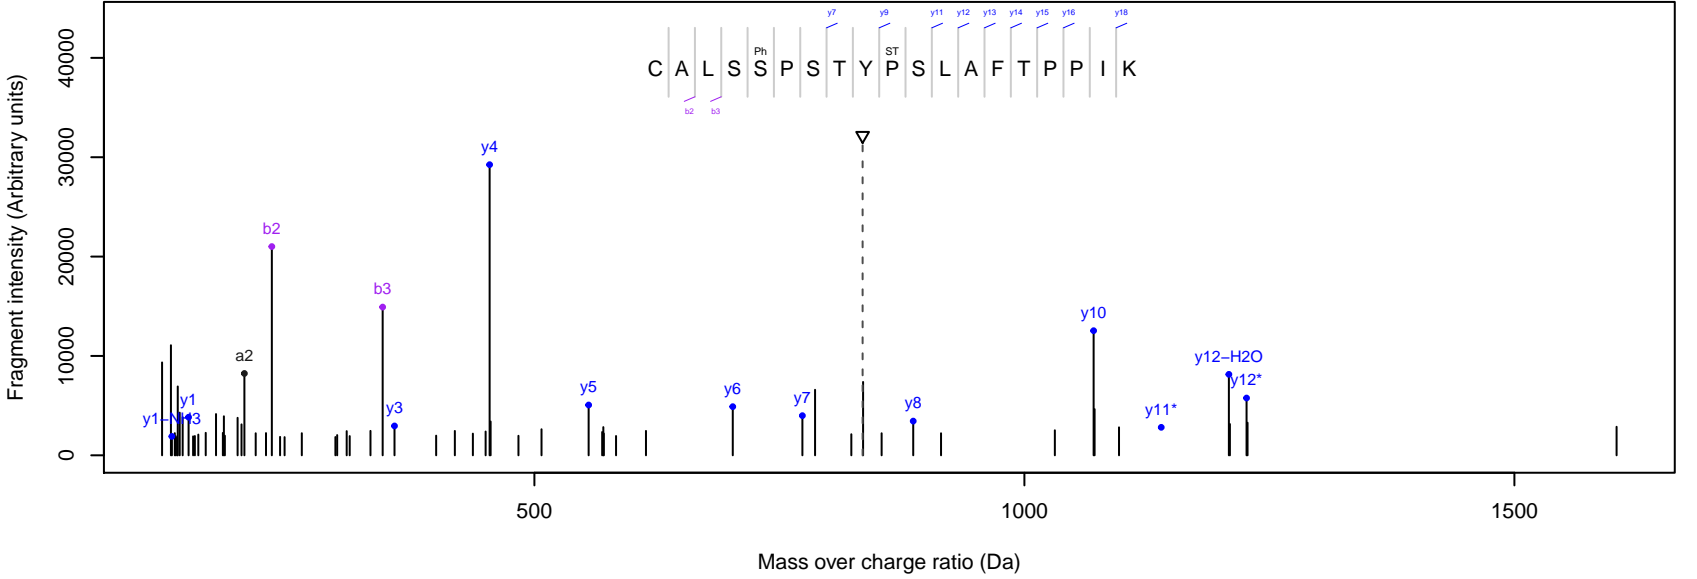

LKS(Phospho (STY))STSFANIQENS N-2+

Source : QE3\_201126\_FR\_TiOx\_hum\_tissue\_Urea\_RNAB\_N Scan : 22332

Andromeda score : 77.527

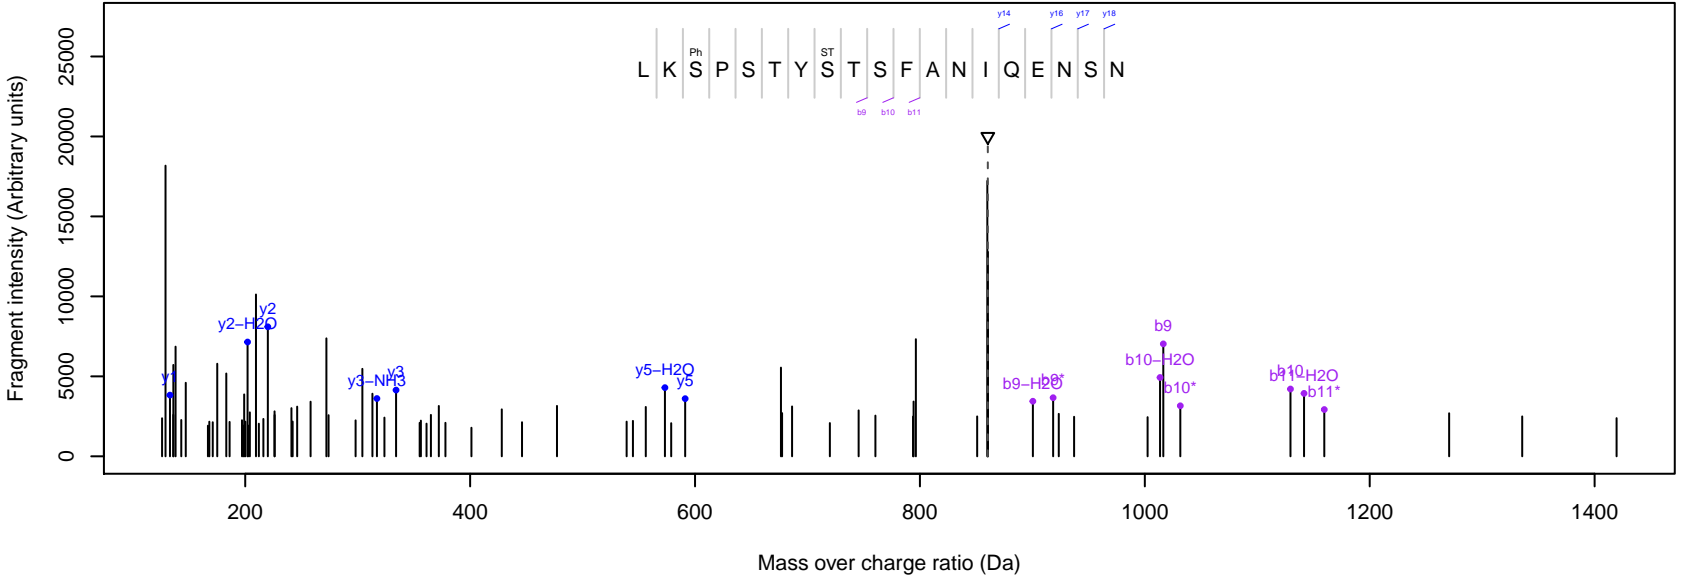

LGATPETDEDLAWDS(Phospho (STY))DNDSSSSVLQYAGVLK-3+

Source : QE3\_201126\_FR\_TiOx\_hum\_tissue\_Urea\_RNAB\_N Scan : 58718

Andromeda score : 77.51

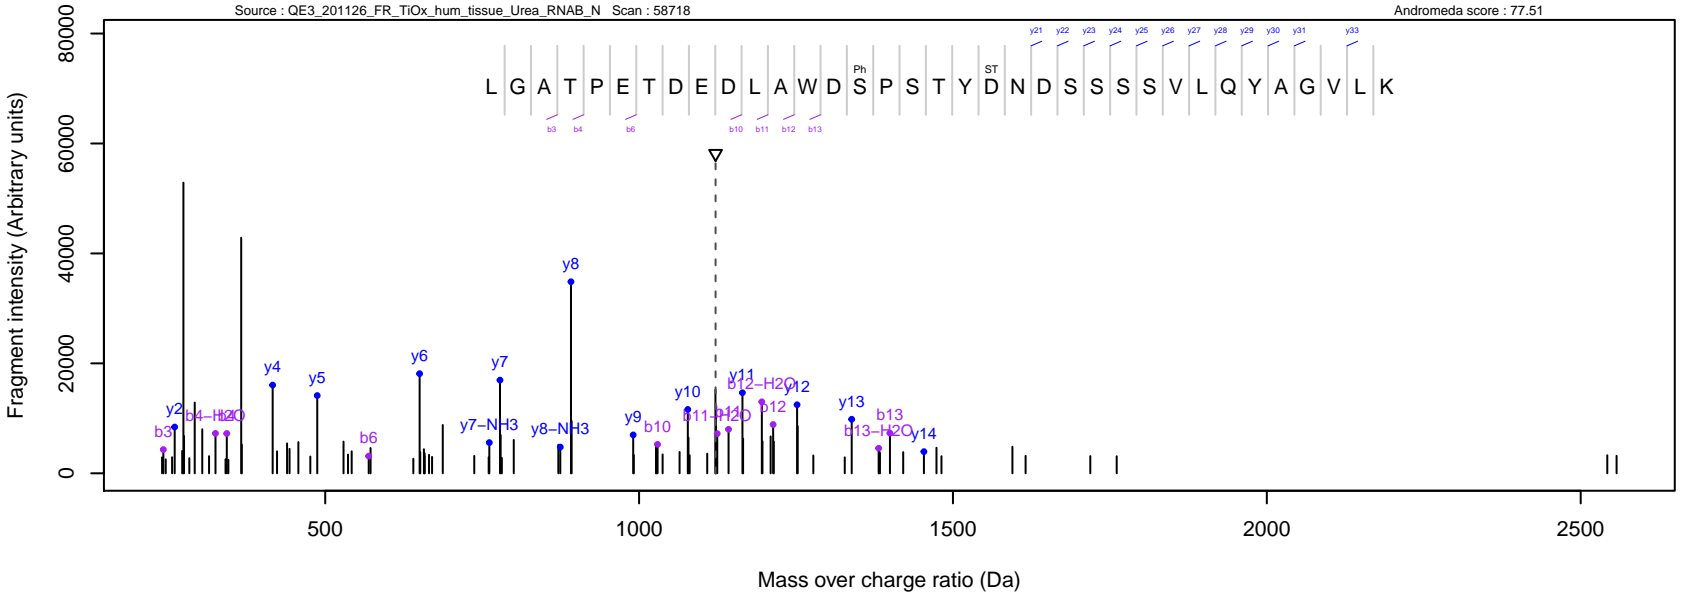

AVDS(Phospho (STY))S(Phospho (STY))SEEIEVVPVDRR-3+

Source : QE3\_201126\_FR\_TiOx\_hum\_tissue\_Urea\_RNAB\_B Scan : 40257

Andromeda score : 77.468

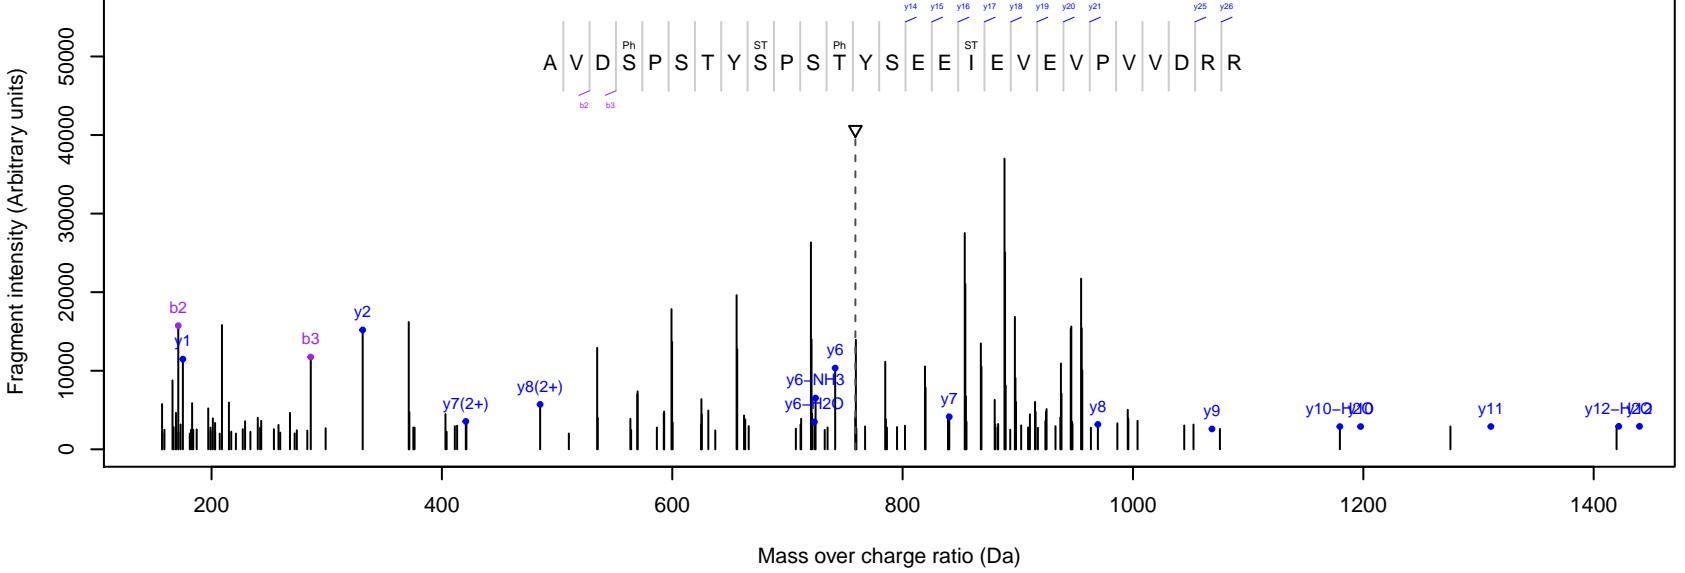

S(Phospho (STY))LPAGDALYLSFNPPQPSR-2+

Source : QE3\_201126\_FR\_TiOx\_hum\_tissue\_Urea\_RNAB\_B Scan : 55723

Andromeda score : 77.468

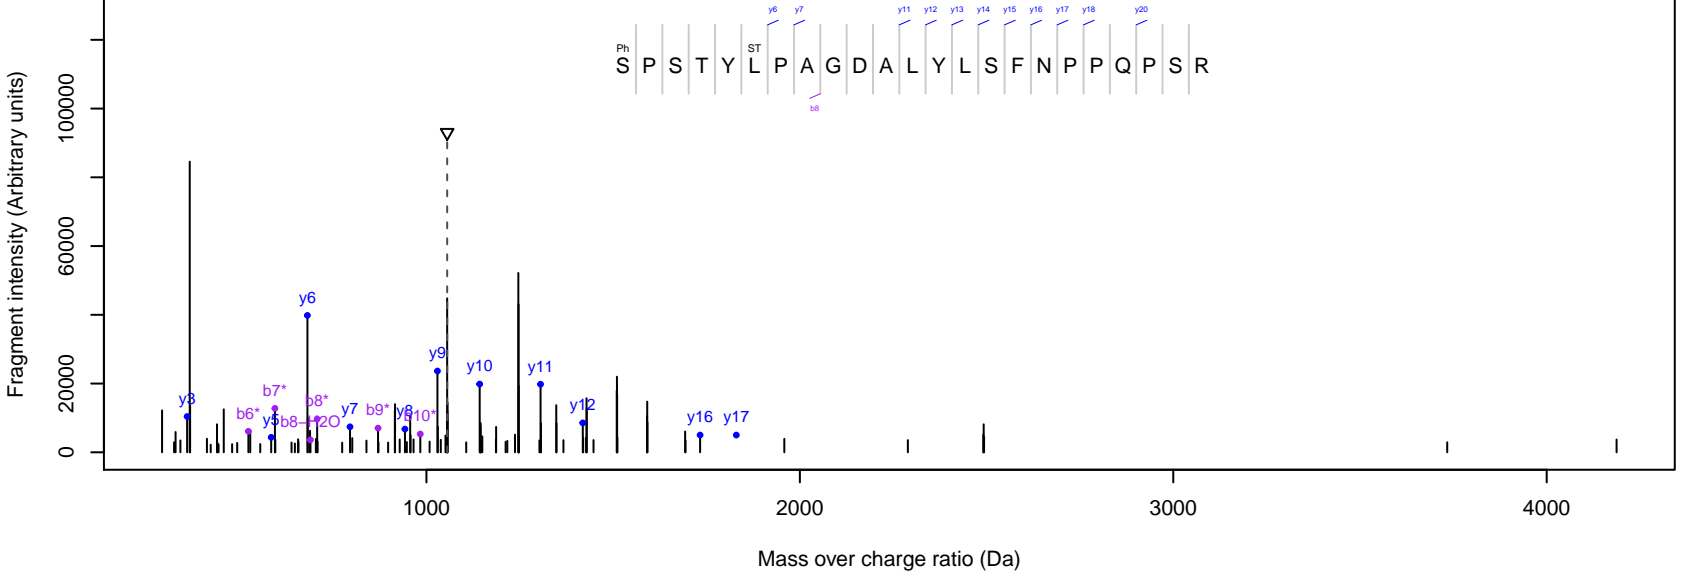



IPEDEIWQS(Phospho (STY))EPESVDVPAQPITTTFLER-3+

Source : QE3\_201126\_FR\_TiOx\_hum\_tissue\_Urea\_RNAB\_B Scan : 59770

Andromeda score : 77.439

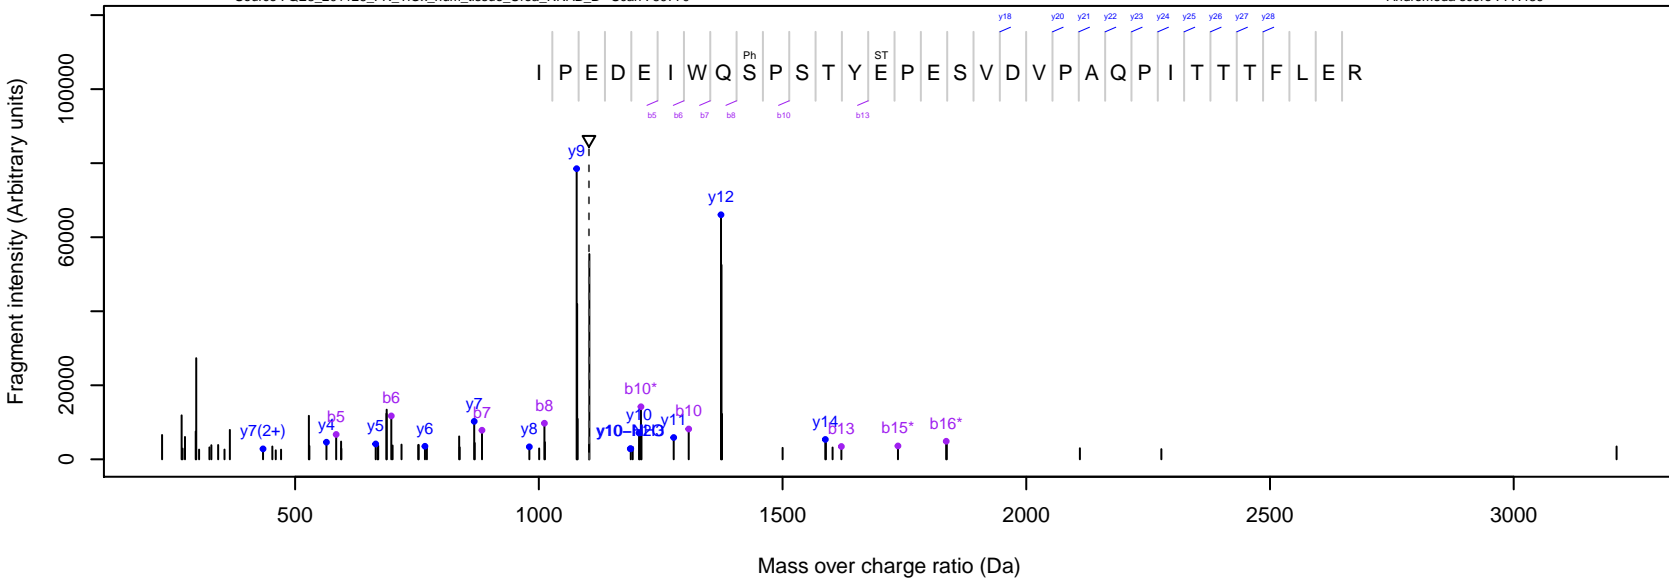

LEDSEVRS(Phospho (STY))VAS(Phospho (STY))NQS(Phospho (STY))EM(Oxidation (M))EFSSLQDM(Oxidation (M))PK-3+

Source : QE3\_201126\_FR\_TiOx\_hum\_tissue\_Urea\_RNAB\_B Scan : 38692

Andromeda score : 77.439

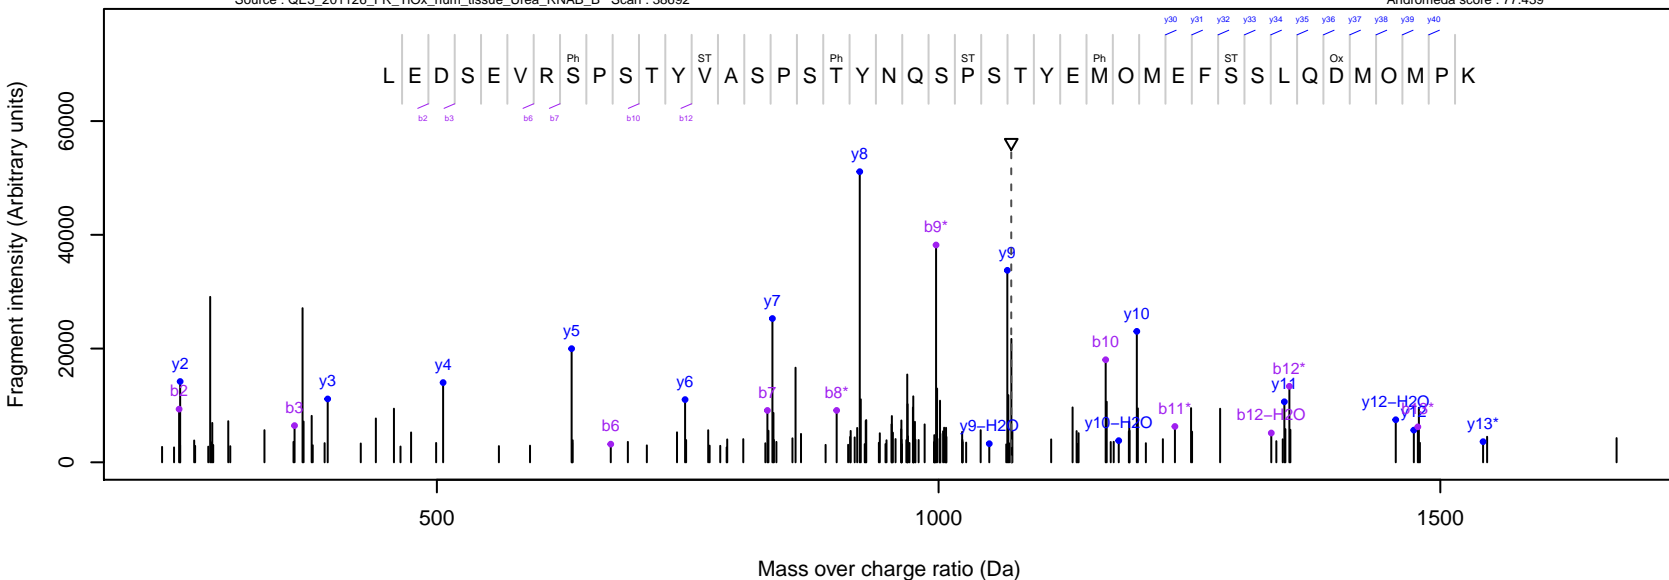

SAGQENLETLK(Phospho (STY))PETQAPLWTPPEEINQGAMNPLEK-3+

Source : QE3\_201126\_FR\_TiOx\_hum\_tissue\_Urea\_RNAB\_N Scan : 52445

Andromeda score : 77.439

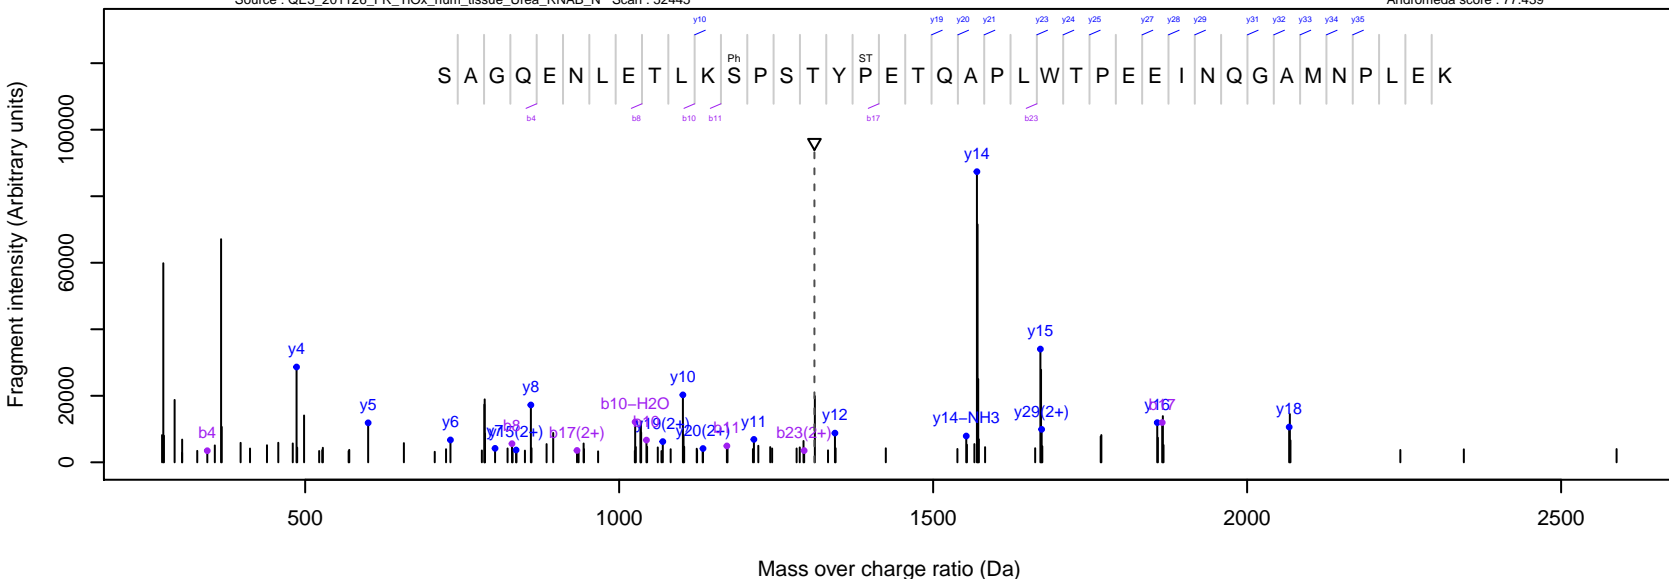

APRPSAPS(Phospho (STY))PPPR-3+

Source : QE3\_201126\_FR\_TIOx\_hum\_tissue\_Urea\_RNAB\_N Scan : 8537

Andromeda score : 77.42

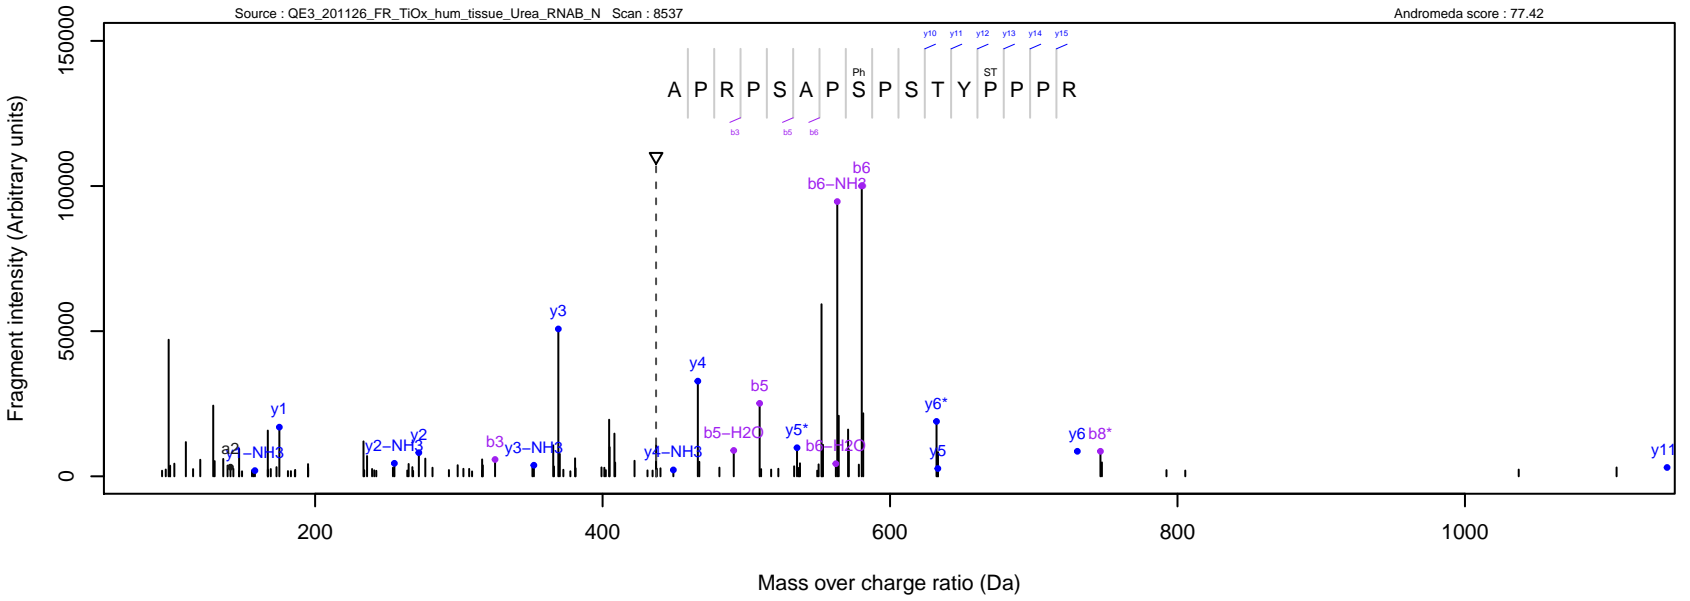

CSGPGLS(Phospho (STY))PGM(Oxidation (M))VR-2+

Source : QE3\_201126\_FR\_TIOx\_hum\_tissue\_Urea\_RNAB\_N Scan : 18253

Andromeda score : 77.42

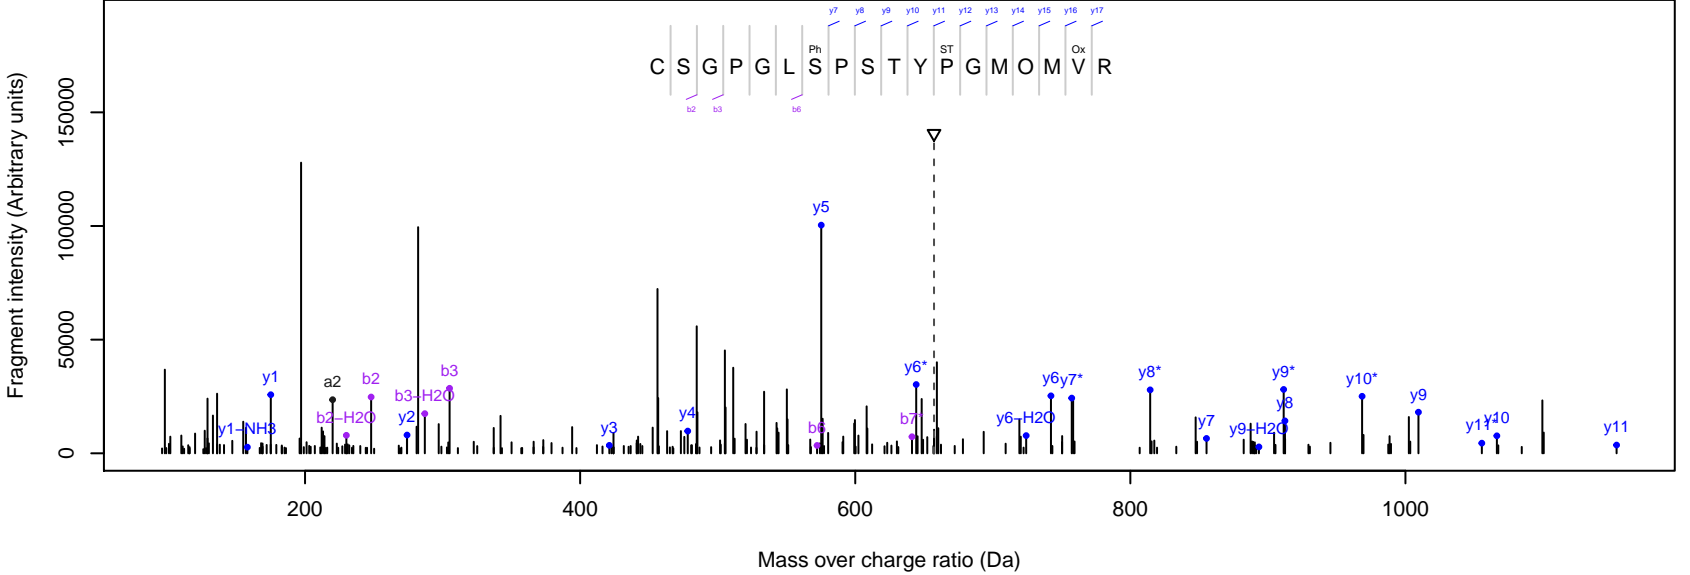

NVT(Phospho (STY))KDHIMEIFSTY GK-3+

Source : QE3\_201126\_FR\_TIOx\_hum\_tissue\_Urea\_RNAB\_N Scan : 40121

Andromeda score : 77.391

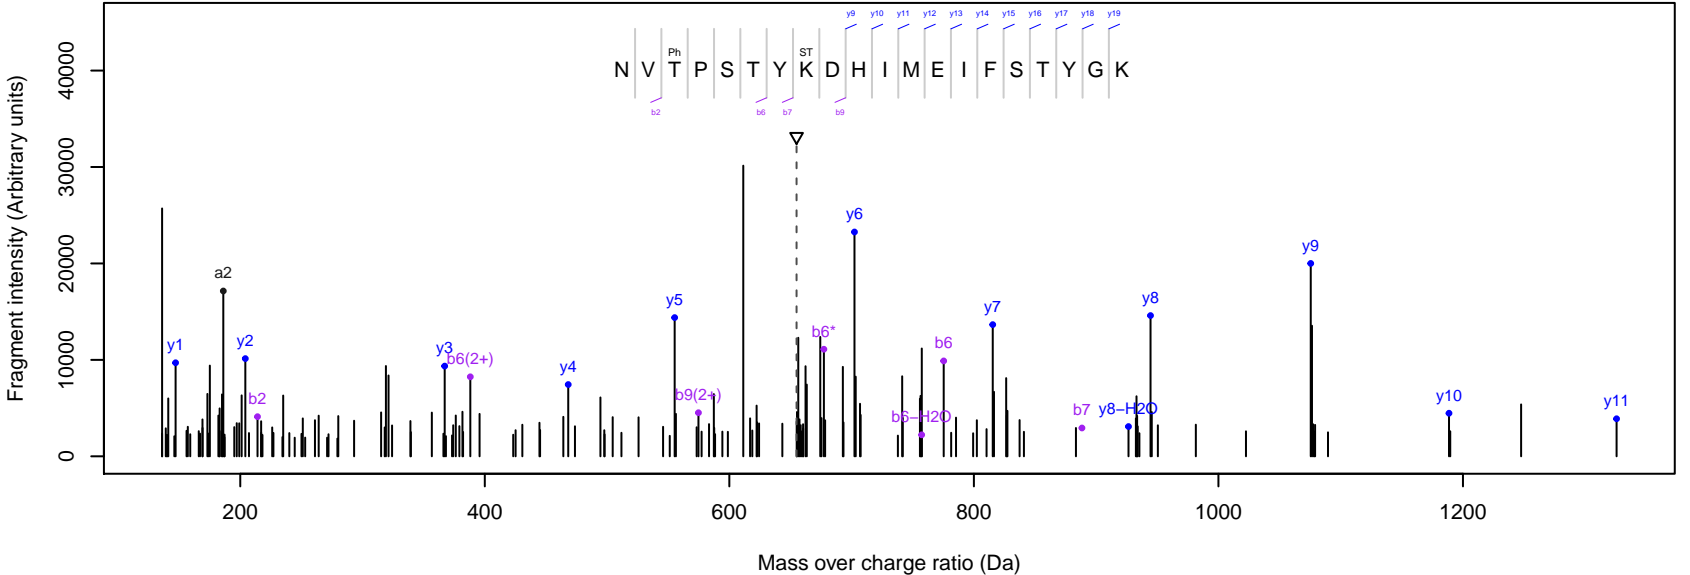

RLQS(Phospho (STY))IGTENTEENRR-3+

Source : QE3\_201126\_FR\_TiOx\_hum\_tissue\_Urea\_RNAB\_N Scan : 8922

Andromeda score : 77.391

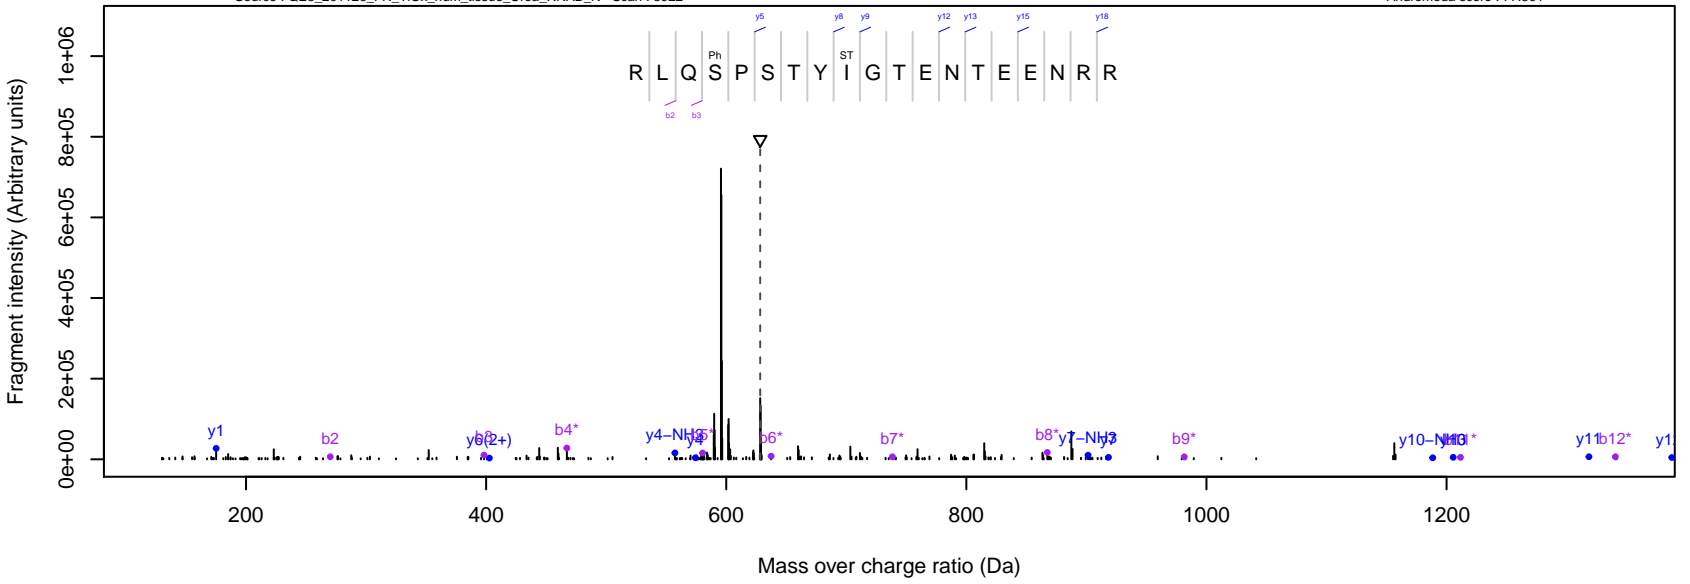

RVQS(Phospho (STY))LPSVPLSCAAYR-3+

Source : QE3\_201126\_FR\_TiOx\_hum\_tissue\_Urea\_RNAB\_H Scan : 32395

Andromeda score : 77.391

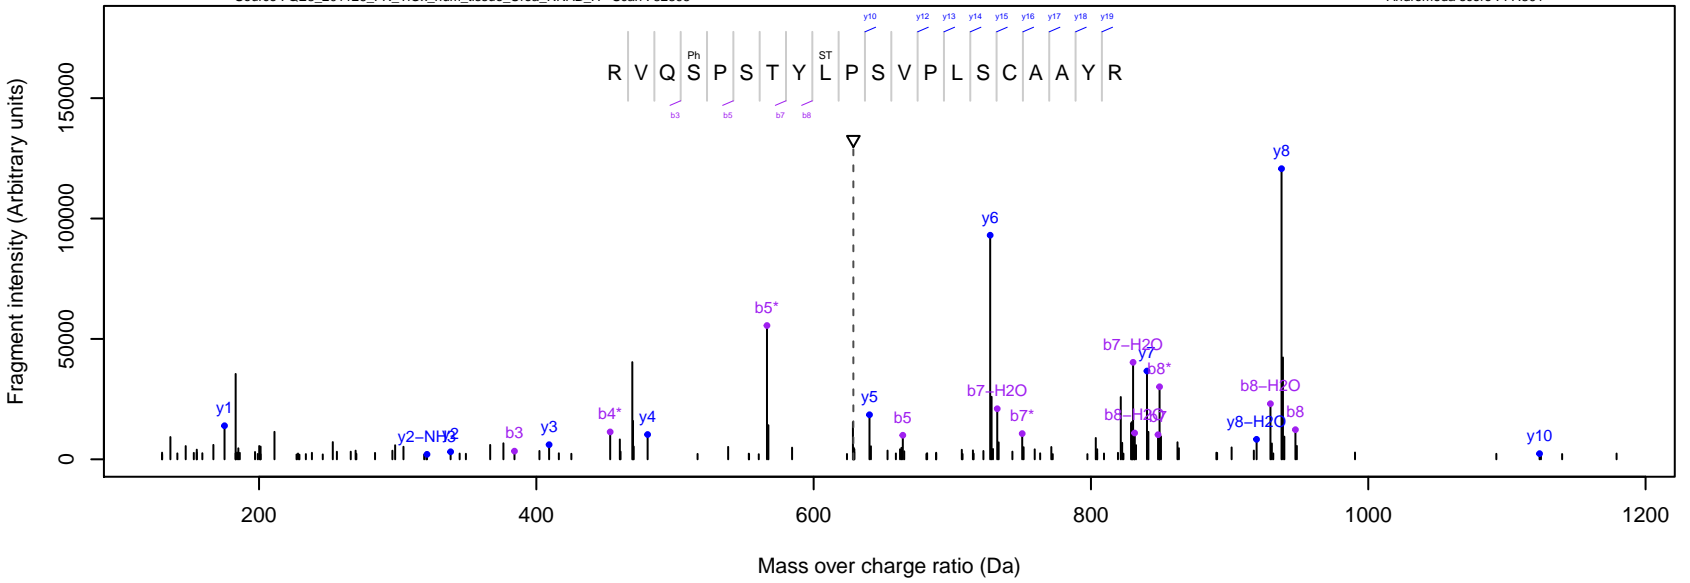

GAES(Phospho (STY))PFEEK-2+

Source : QE3\_201126\_FR\_TiOx\_hum\_tissue\_Urea\_RNAB\_N Scan : 14070

Andromeda score : 77.379

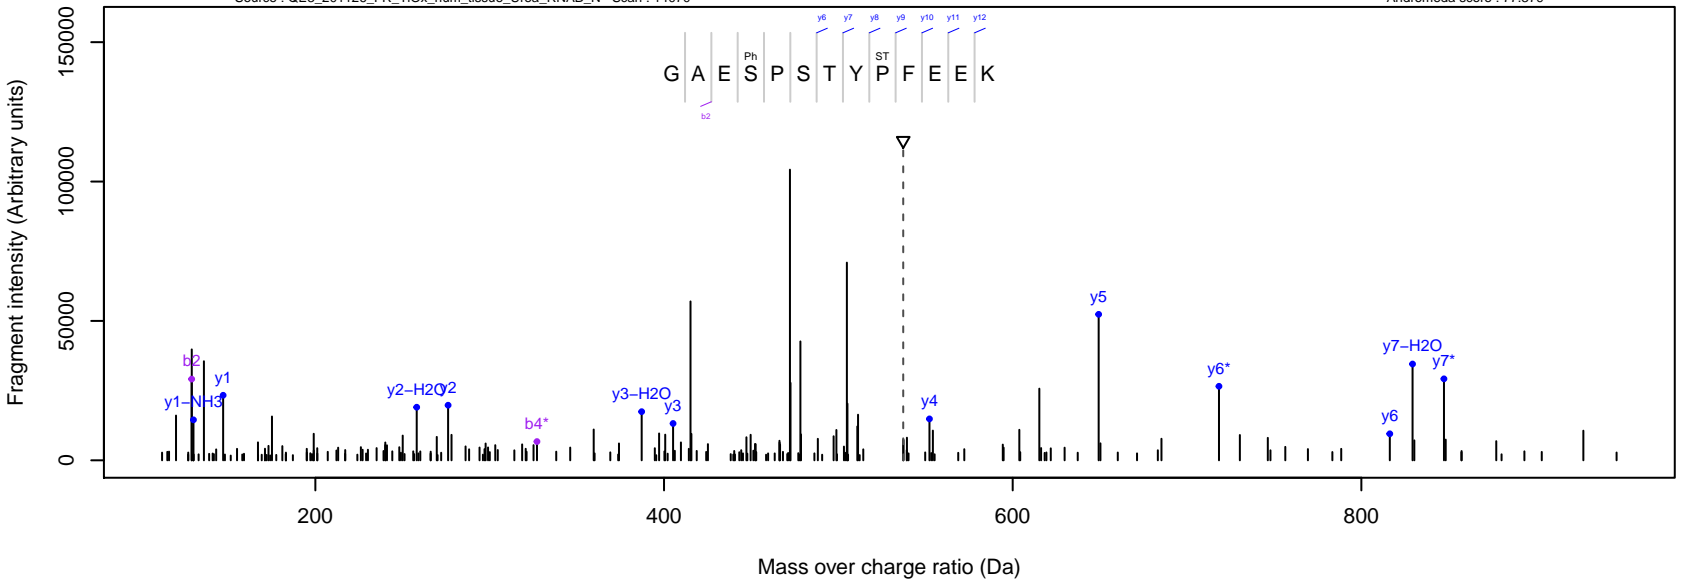

SFS(Phospho (STY))M(Oxidation (M))QDLR-2+

Source : QE3\_201126\_FR\_TiOx\_hum\_tissue\_Urea\_RNAB\_B Scan : 17278

Andromeda score : 77.379

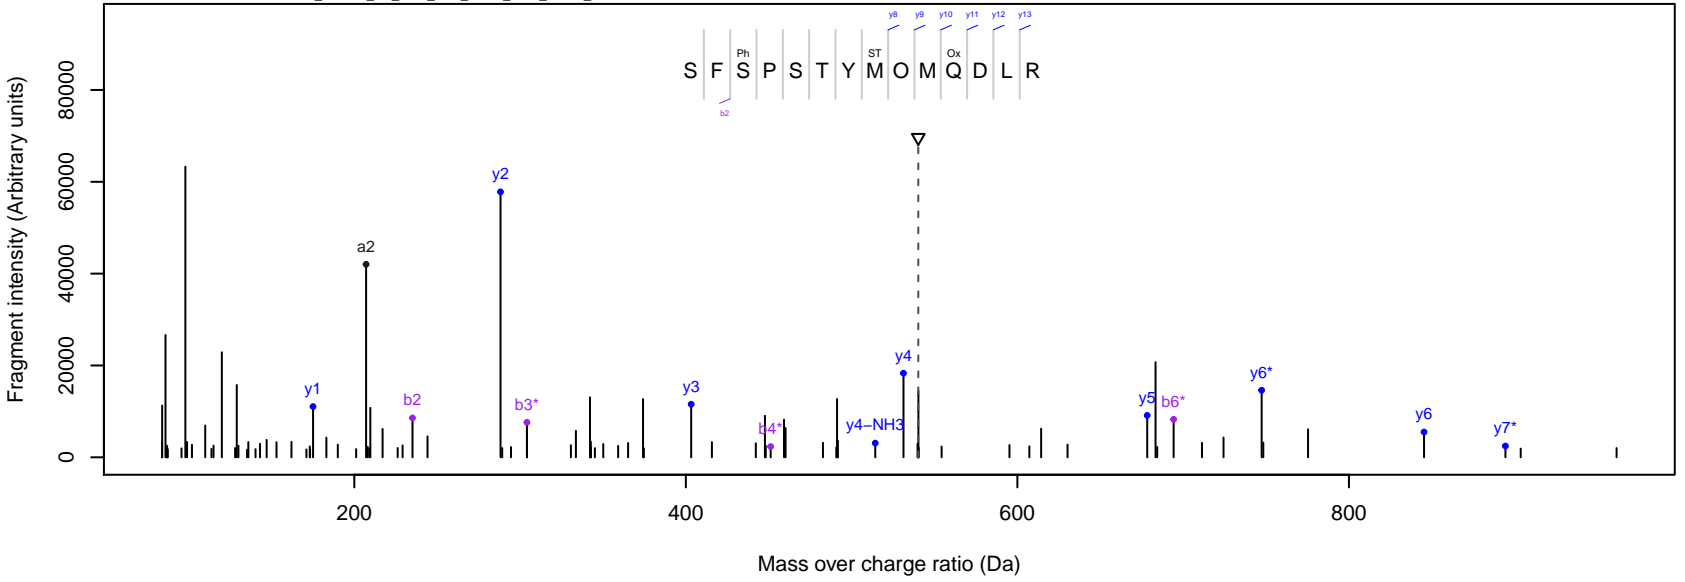

SLDNNY(Phospho (STY))STPNER-2+

Source : QE3\_201126\_FR\_TiOx\_hum\_tissue\_Urea\_RNAB\_N Scan : 9832

Andromeda score : 77.379

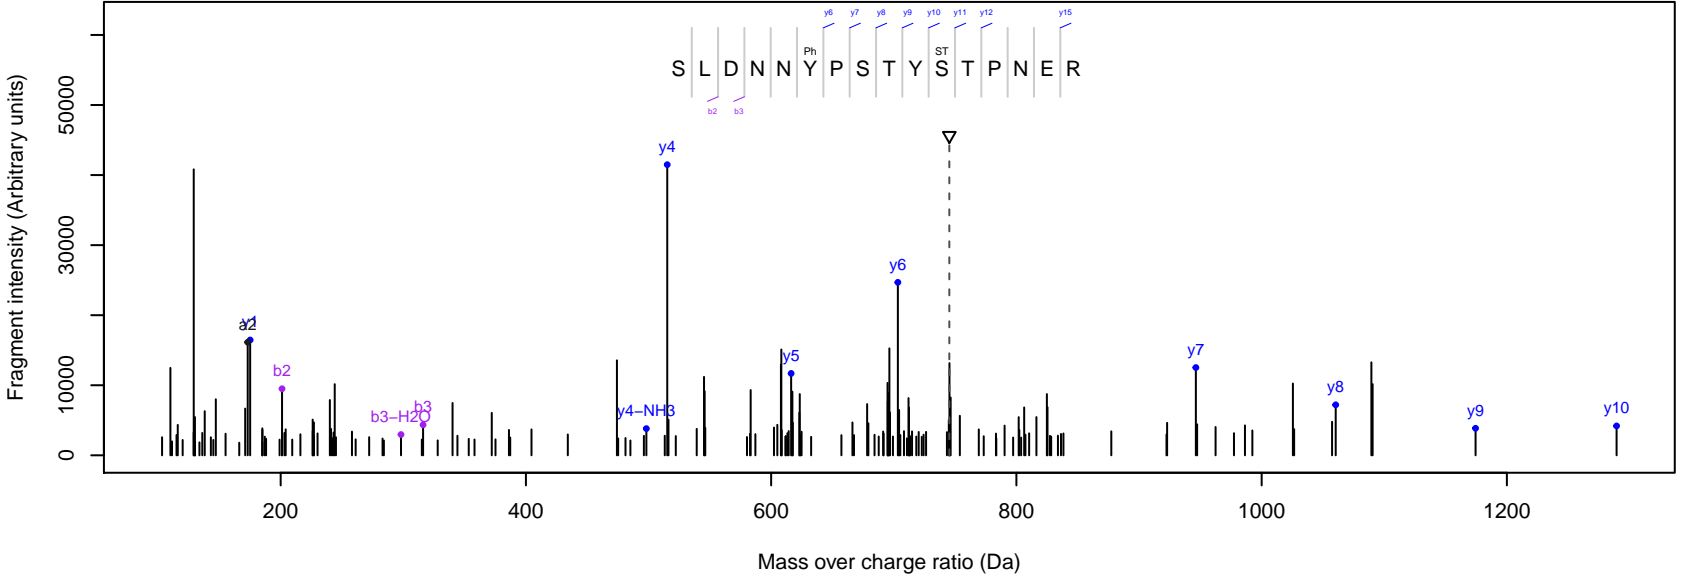

KDS(Phospho (STY))GEDPATCAFQR-3+

Source : QE3\_201126\_FR\_TiOx\_hum\_tissue\_Urea\_RNAB\_N Scan : 15433

Andromeda score : 77.359

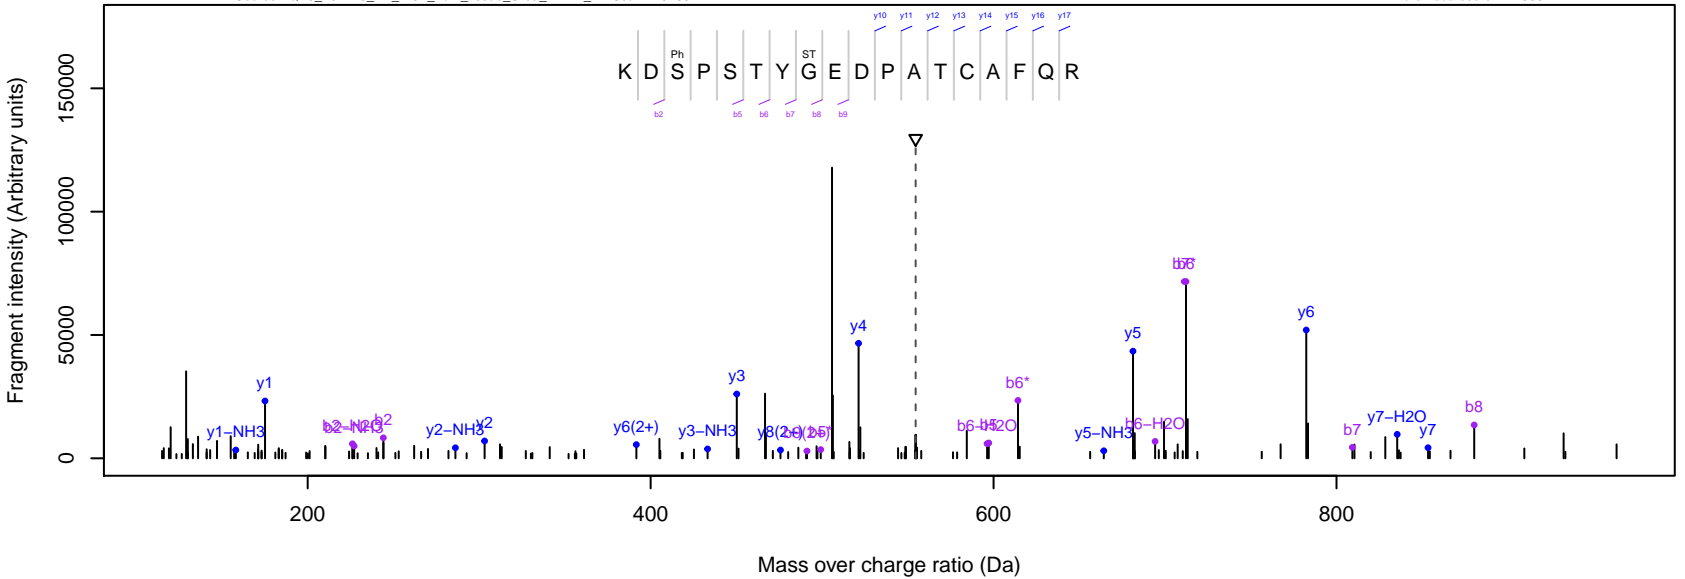

HSQPAT(Phospho (STY))PTPLQSR-3+

Source : QE3\_201126\_FR\_TiOx\_hum\_tissue\_Urea\_RNAB\_N Scan : 9301

Andromeda score : 77.324

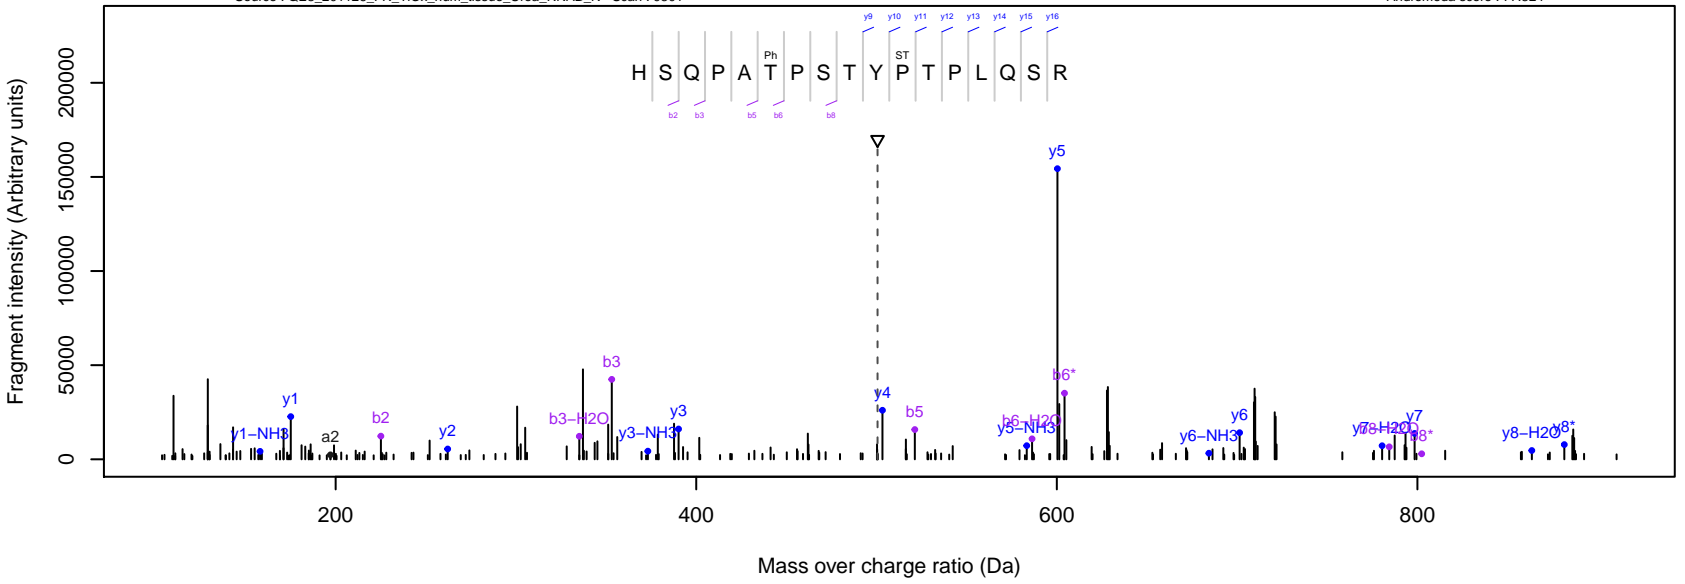

EFITGDVEPTDAES(Phospho (STY))EWHSPSTYENEEELKLAGDMK-3+

Source : QE3\_201126\_FR\_TiOx\_hum\_tissue\_Urea\_RNAB\_N Scan : 46764

Andromeda score : 77.321

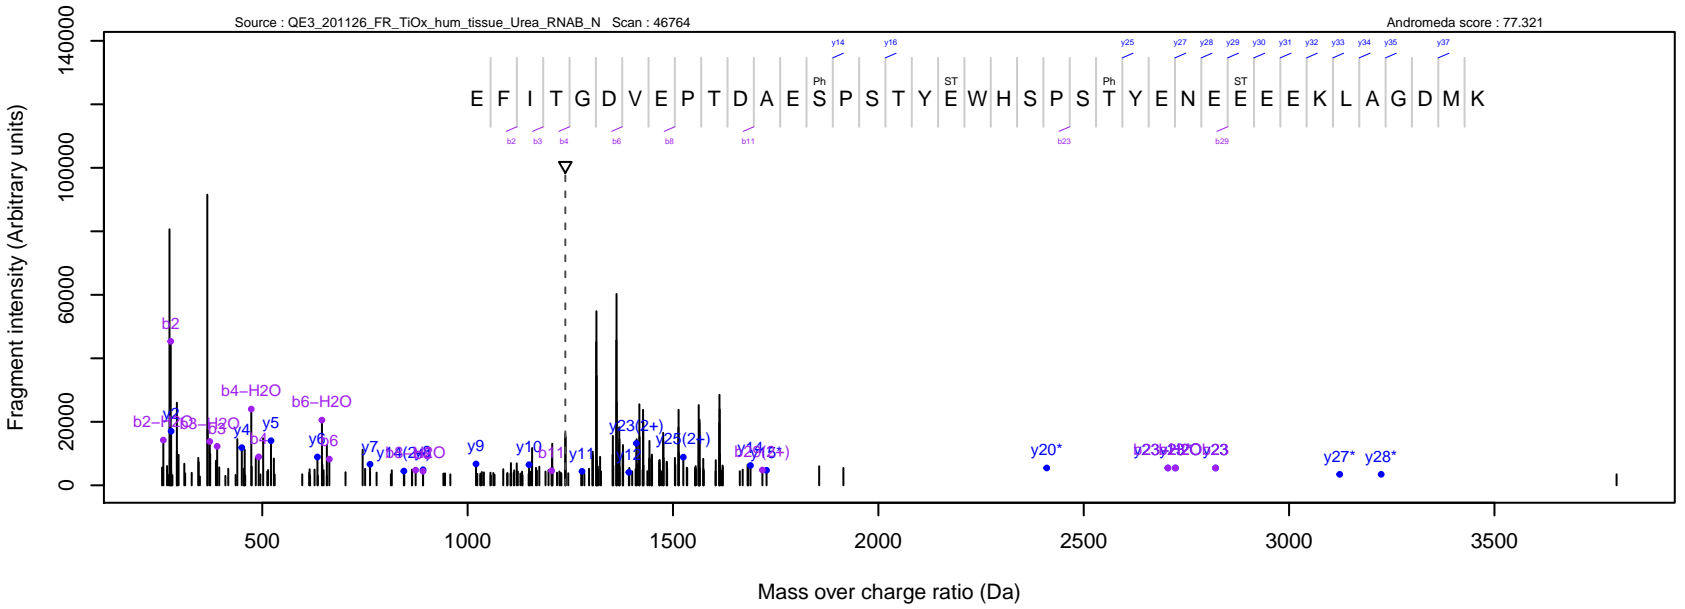

CHS(Phospho (STY))LGYNFYHK-3+

Source : QE3\_201126\_FR\_TiOx\_hum\_tissue\_Urea\_RNAB\_B Scan : 18840

Andromeda score : 77.279

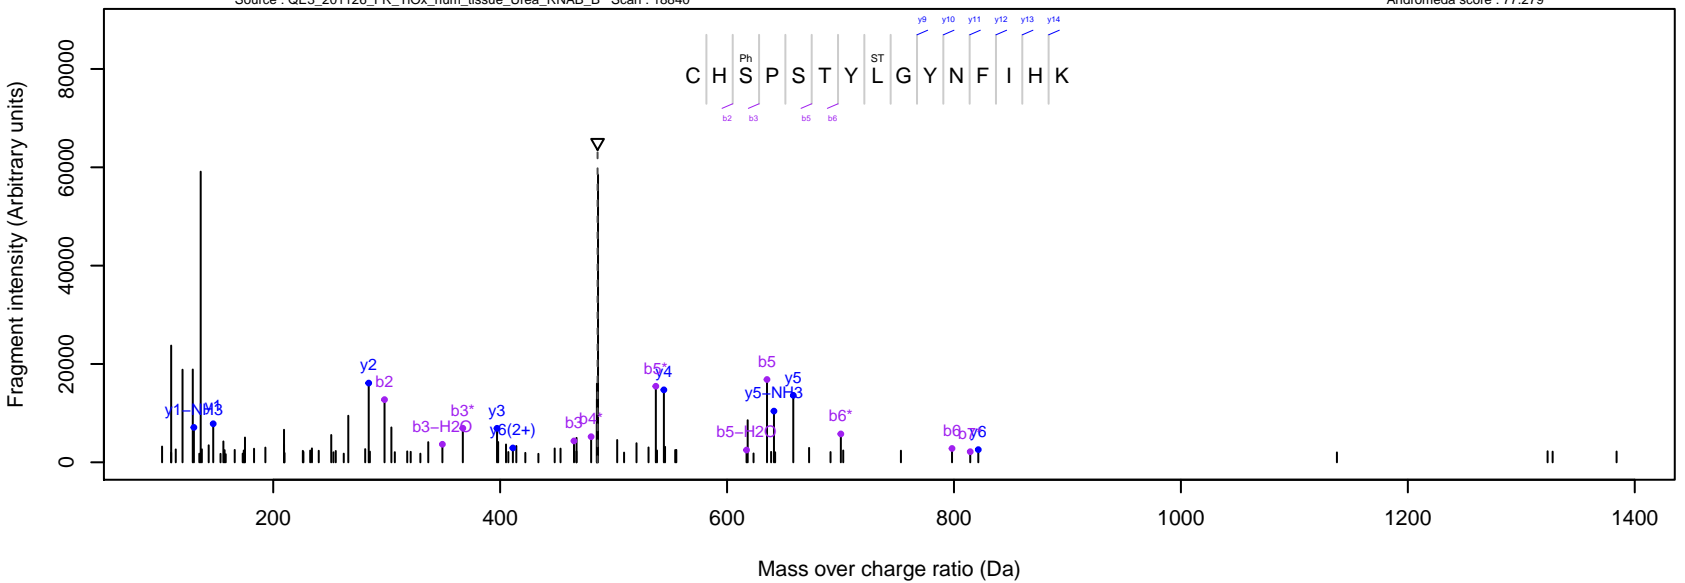

KLGPRPLPTFPTSECT(Phospho (STY))SDVEPDTR-3+

Source : QE3\_201126\_FR\_TiOx\_hum\_tissue\_Urea\_RNAB\_B Scan : 28895

Andromeda score : 77.276

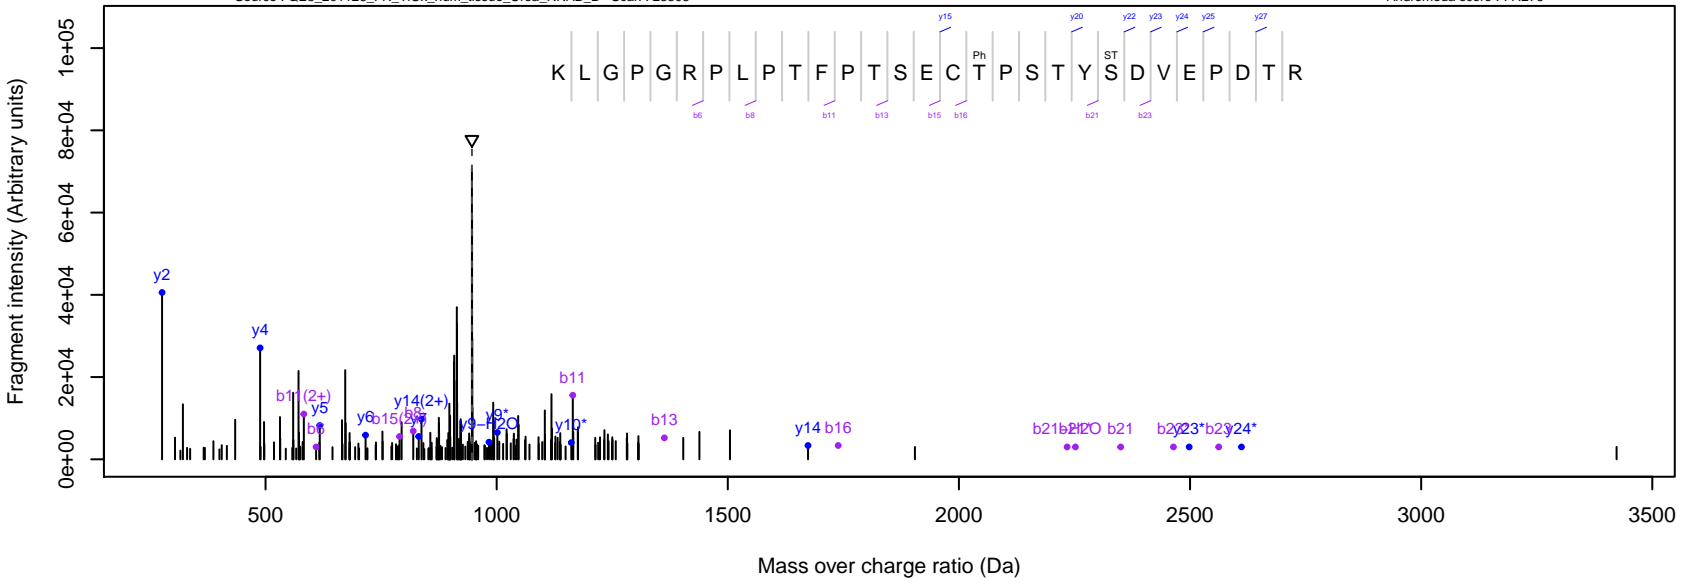

DSVDSAGTS(Phospho (STY))PTAVLAAGEEVGAGGGPGGRRPGAGTPLR-3+

Source : QE3\_201126\_FR\_TiOx\_hum\_tissue\_Urea\_RNAB\_H Scan : 43013

Andromeda score : 77.252

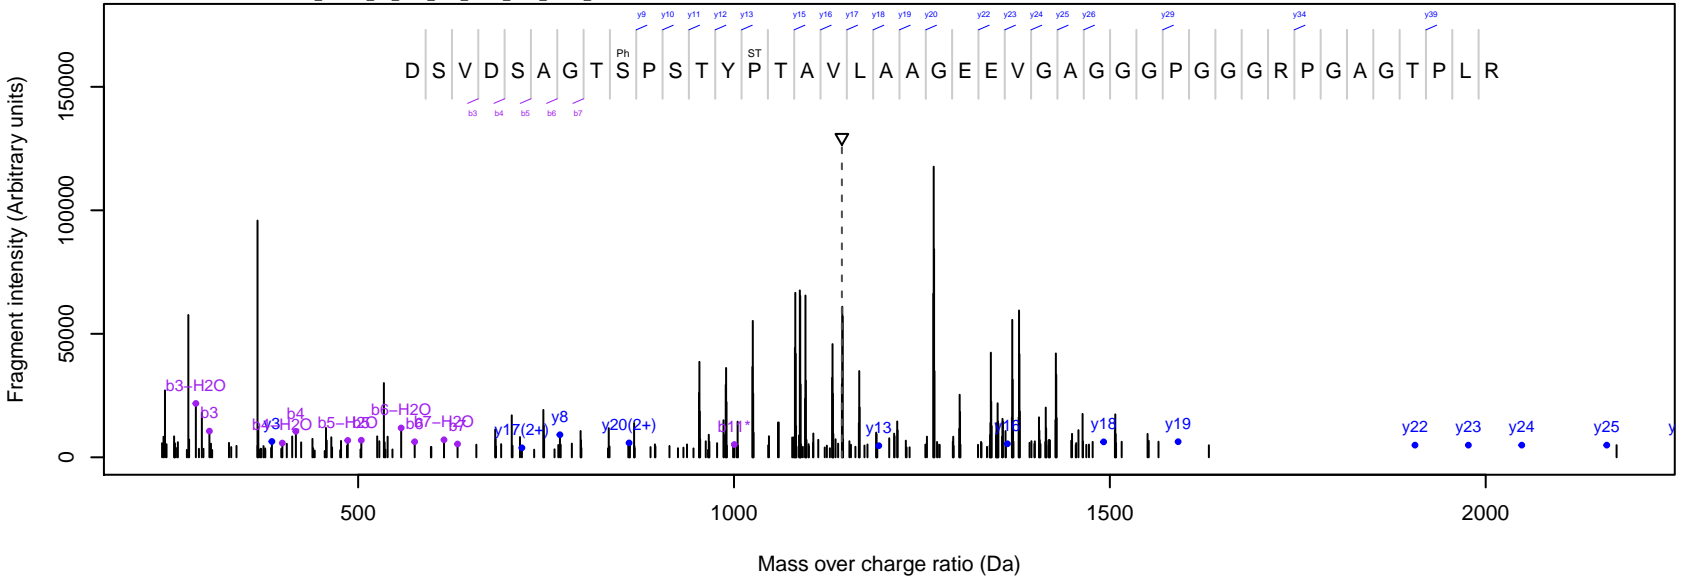

RRS(Phospho (STY))QS(Phospho (STY))IEQESQEK-3+

Source : QE3\_201126\_FR\_TiOx\_hum\_tissue\_Urea\_RNAB\_H Scan : 4570

Andromeda score : 77.221

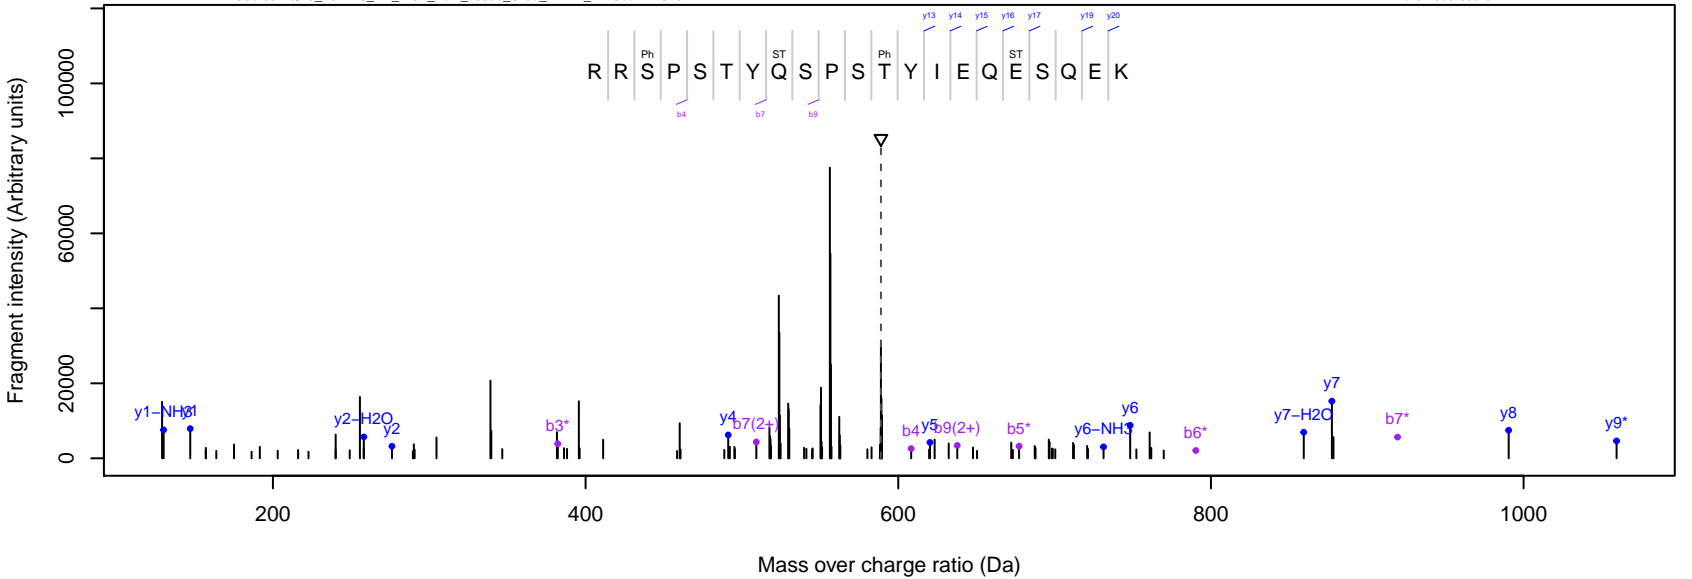

S(Phospho (STY))RLSAIEIDIPVVSHTT-3+

Source : QE3\_201126\_FR\_TiOx\_hum\_tissue\_Urea\_RNAB\_N Scan : 46558

Andromeda score : 77.221

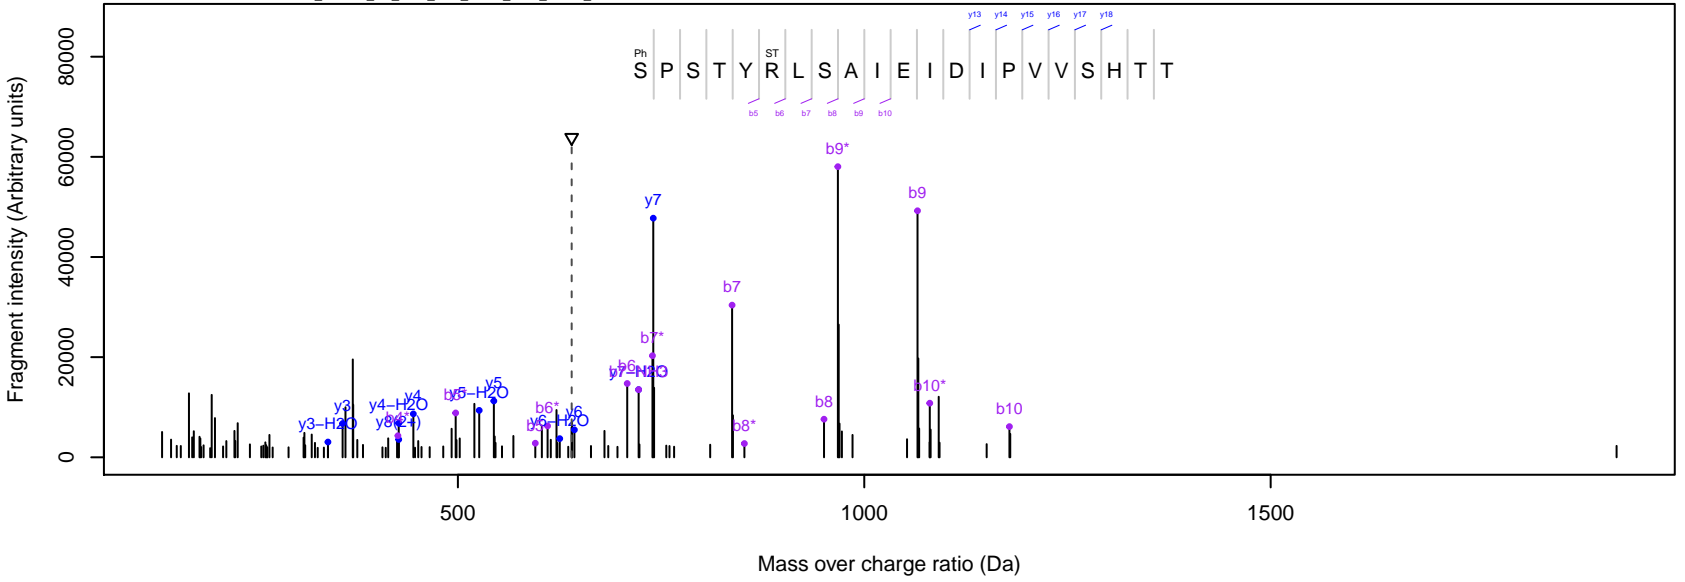

GEALSALDS(Phospho (STY))K-2+

Source : QE3\_201126\_FR\_TiOx\_hum\_tissue\_Urea\_RNAB\_H Scan : 19001

Andromeda score : 77.22

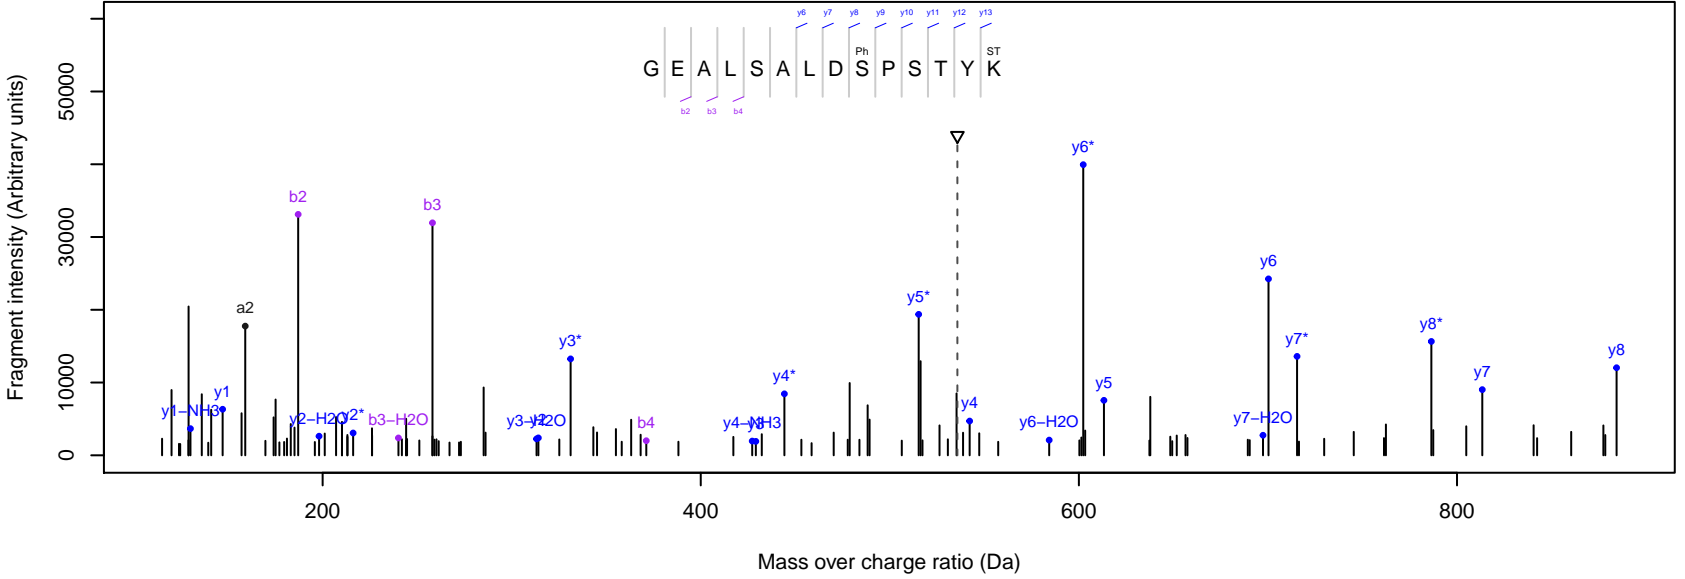

LSS(Phospho (STY))MAM(Oxidation (M))ISGLSGR-2+

Source : QE3\_201126\_FR\_TiOx\_hum\_tissue\_Urea\_RNAB\_H Scan : 32513

Andromeda score : 77.204

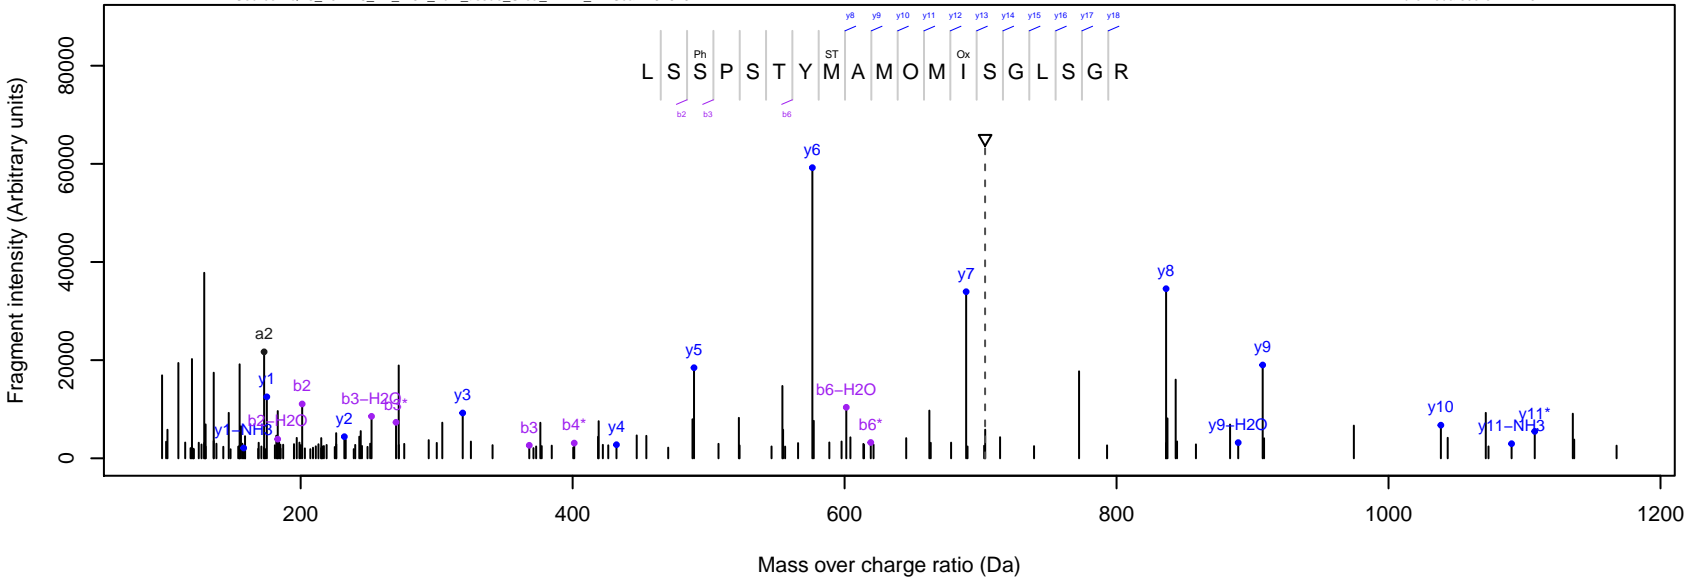

ATLQALLEVVASDDGDVLDVSFQTSPS(Phospho (STY))TESLK-3+

Source : QE3\_201126\_FR\_TIOx\_hum\_tissue\_Urea\_RNAB\_N Scan : 63056

Andromeda score : 77.15

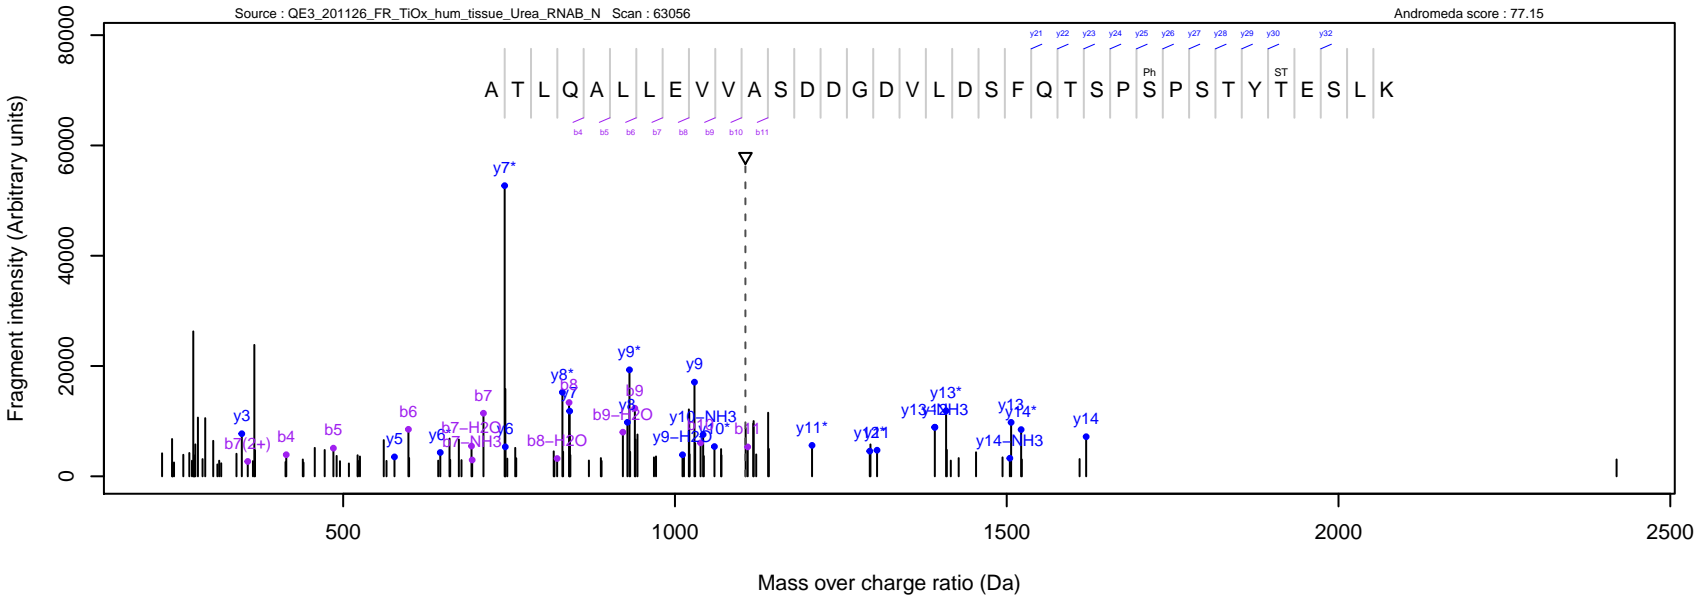

DFS(Phospho (STY))VQIKFPDREENAVHSTEPVQENGDEAGEGR-4+

Source : QE3\_201126\_FR\_TIOx\_hum\_tissue\_Urea\_RNAB\_H Scan : 34338

Andromeda score : 77.1

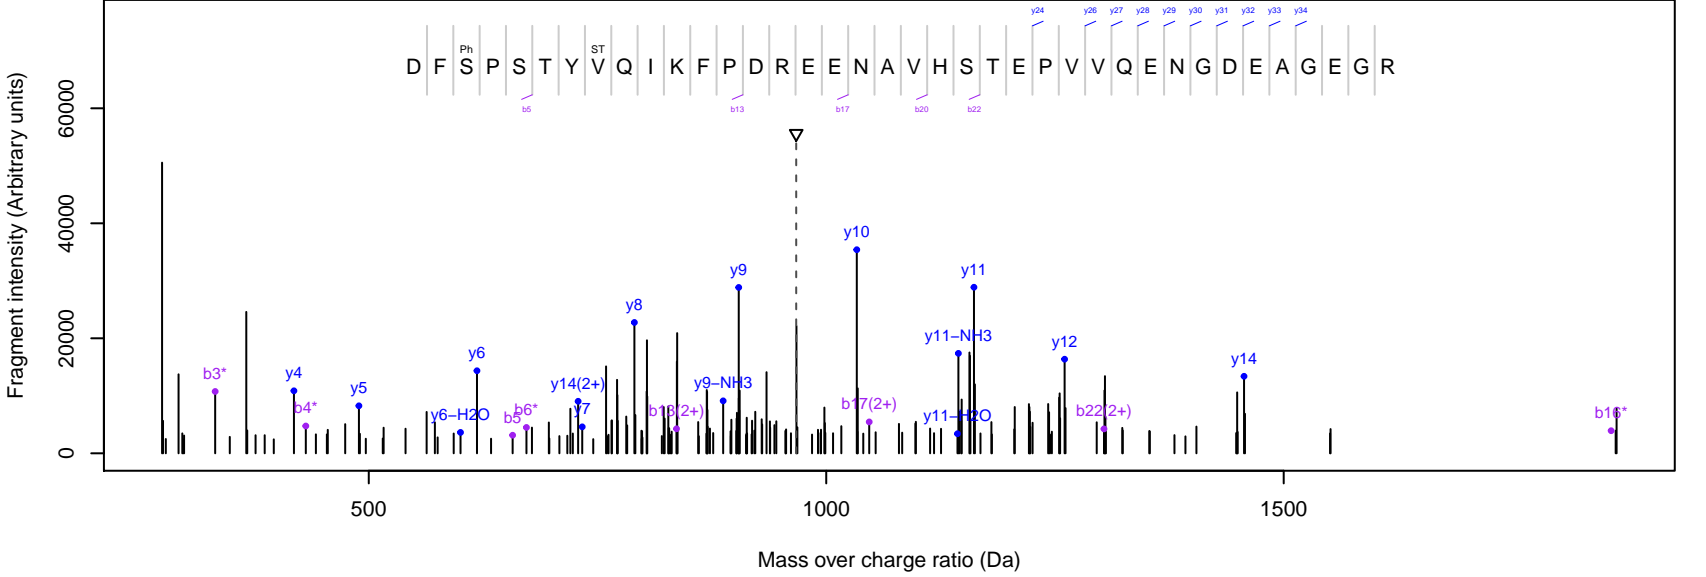

NLKAS(Phospho (STY))LENSLREVEAR-3+

Source : QE3\_201126\_FR\_TIOx\_hum\_tissue\_Urea\_RNAB\_N Scan : 32454

Andromeda score : 77.08

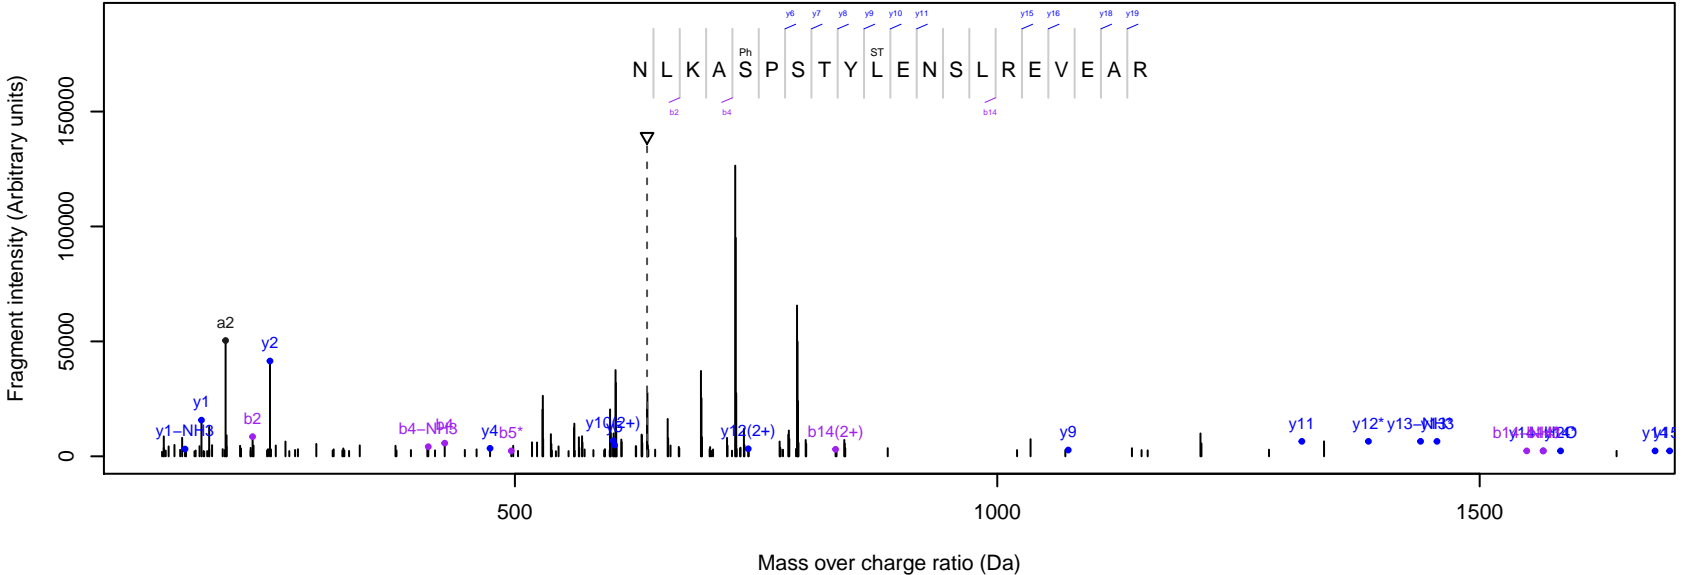



AFS(Phospho (STY))FSLPRPGR-2+

Source : QE3\_201126\_FR\_TIOx\_hum\_tissue\_Urea\_RNAB\_B Scan : 37851

Andromeda score : 77.062

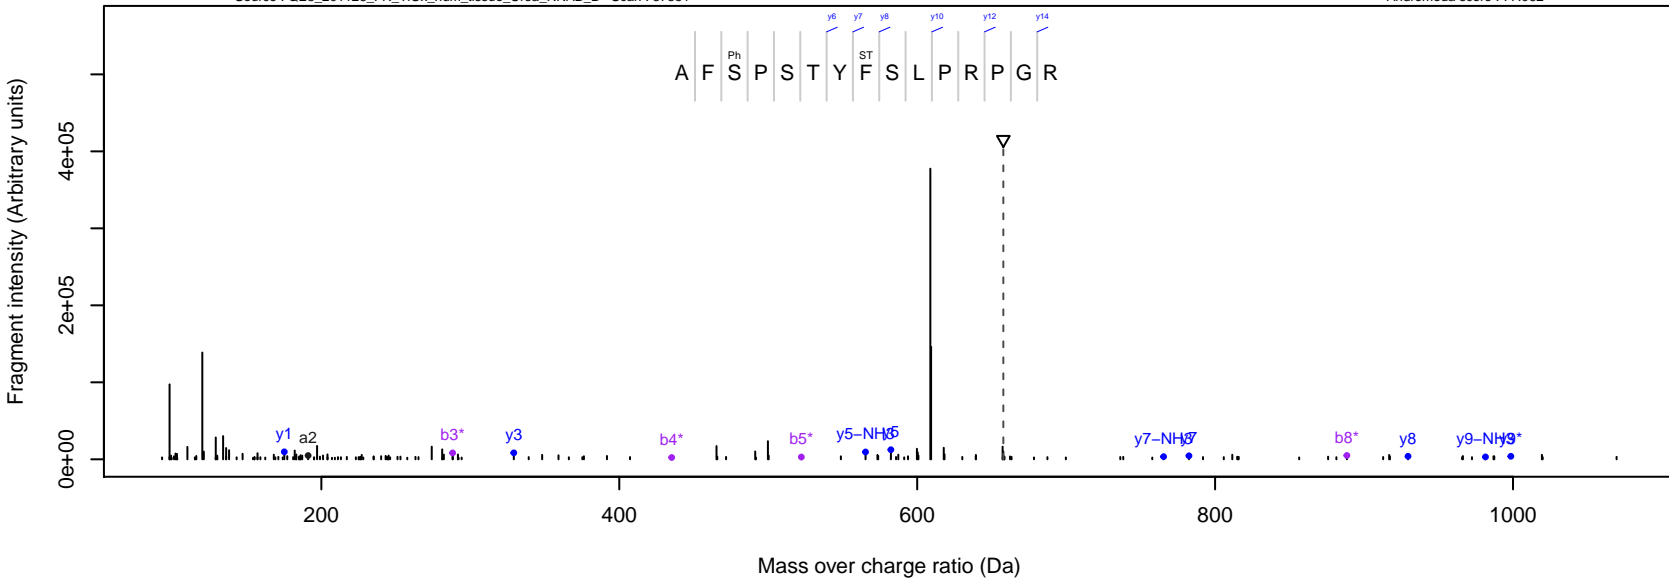

KVAS(Phospho (STY))PSPSGSVLFTDEGVPK-3+

Source : QE3\_201126\_FR\_TIOx\_hum\_tissue\_Urea\_RNAB\_H Scan : 30879

Andromeda score : 77.053

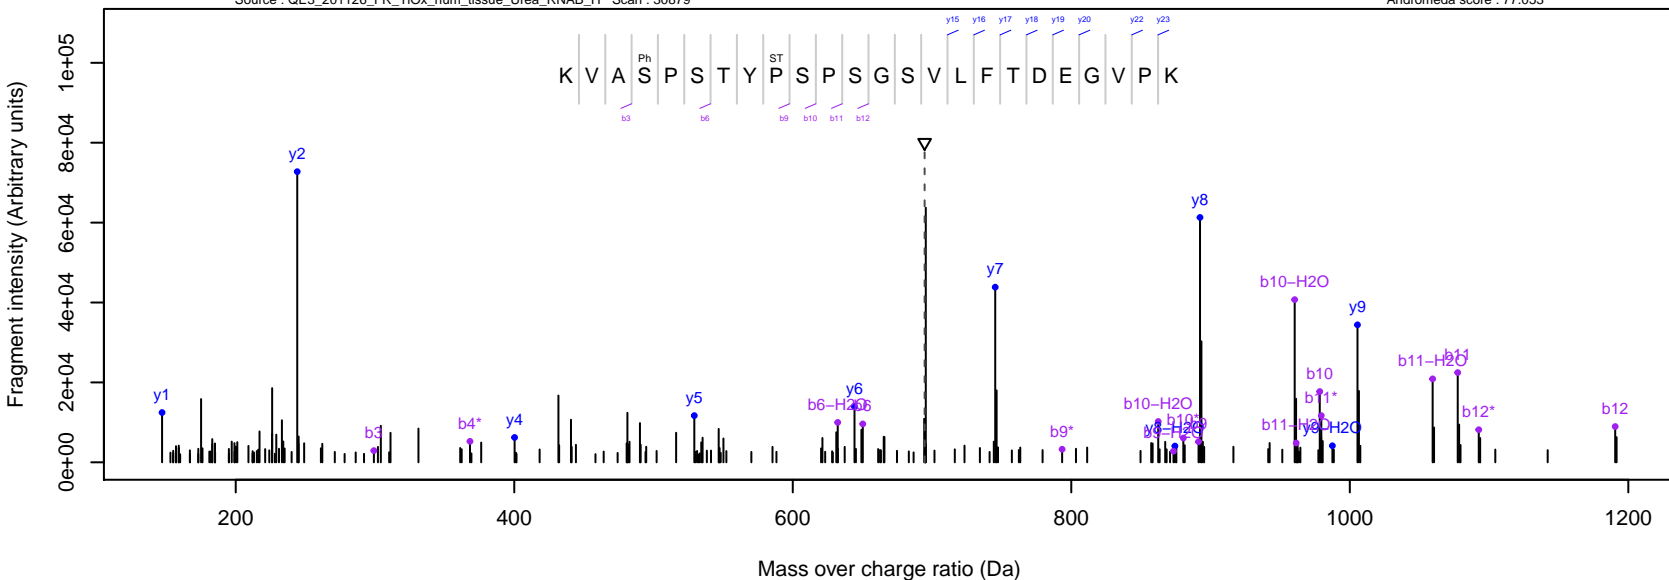

AASDDGS(Phospho (STY))LKS(Phospho (STY))SSPTS<sup>YWK</sup>-3+

Source : QE3\_201126\_FR\_TIOx\_hum\_tissue\_Urea\_RNAB\_N Scan : 28729

Andromeda score : 77.045

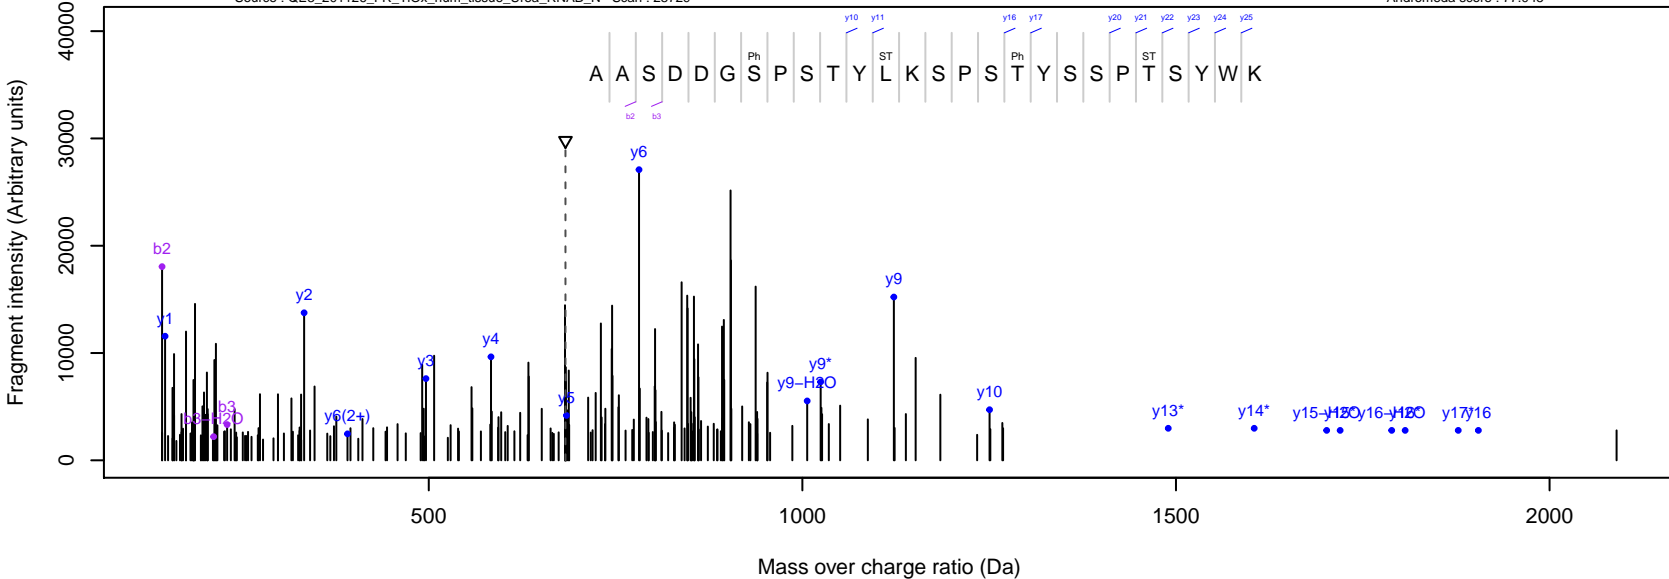

YGGVSGSQQPPVVAPEEPGPVPSPSTYSPSQEPTKR-3+

Source : QE3\_201126\_FR\_TIOx\_hum\_tissue\_Urea\_RNAB\_H Scan : 24780

Andromeda score : 77.044

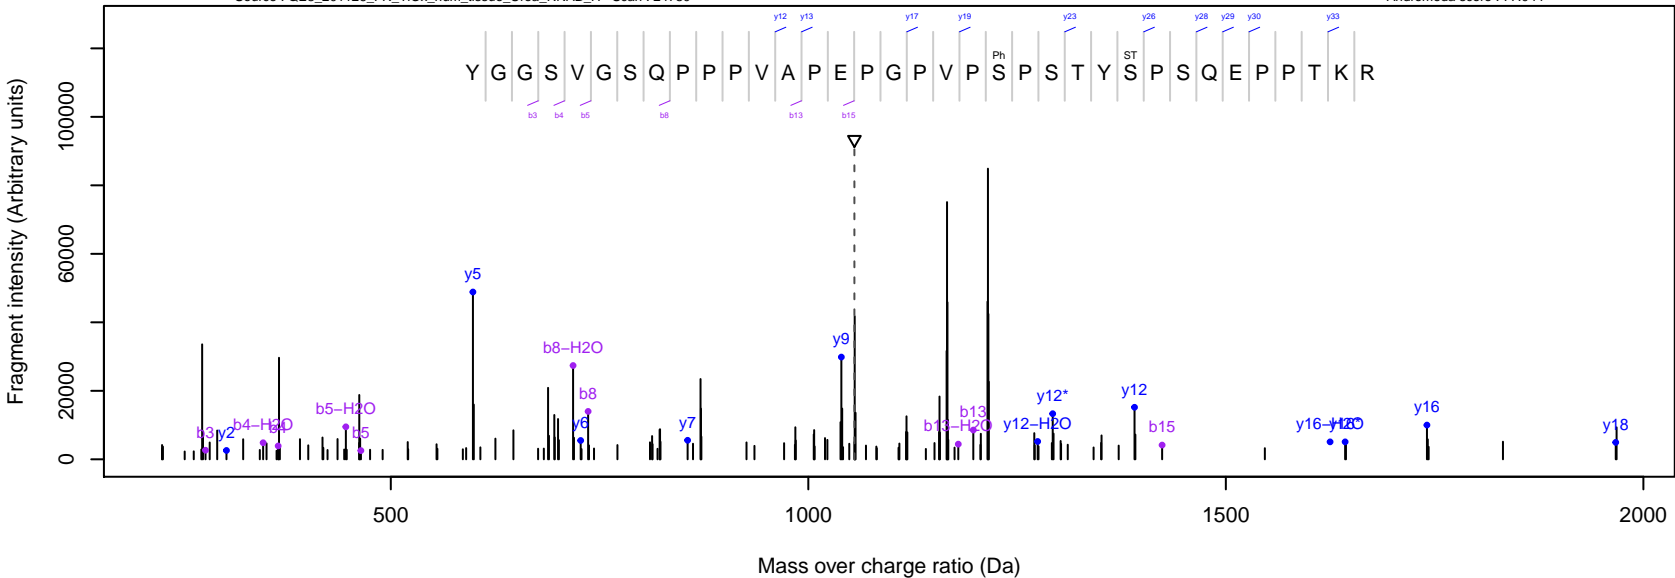

REDS(Phospho (STY))PGPEVQPMOMDK-3+

Source : QE3\_201126\_FR\_TIOx\_hum\_tissue\_Urea\_RNAB\_H Scan : 7423

Andromeda score : 77.037

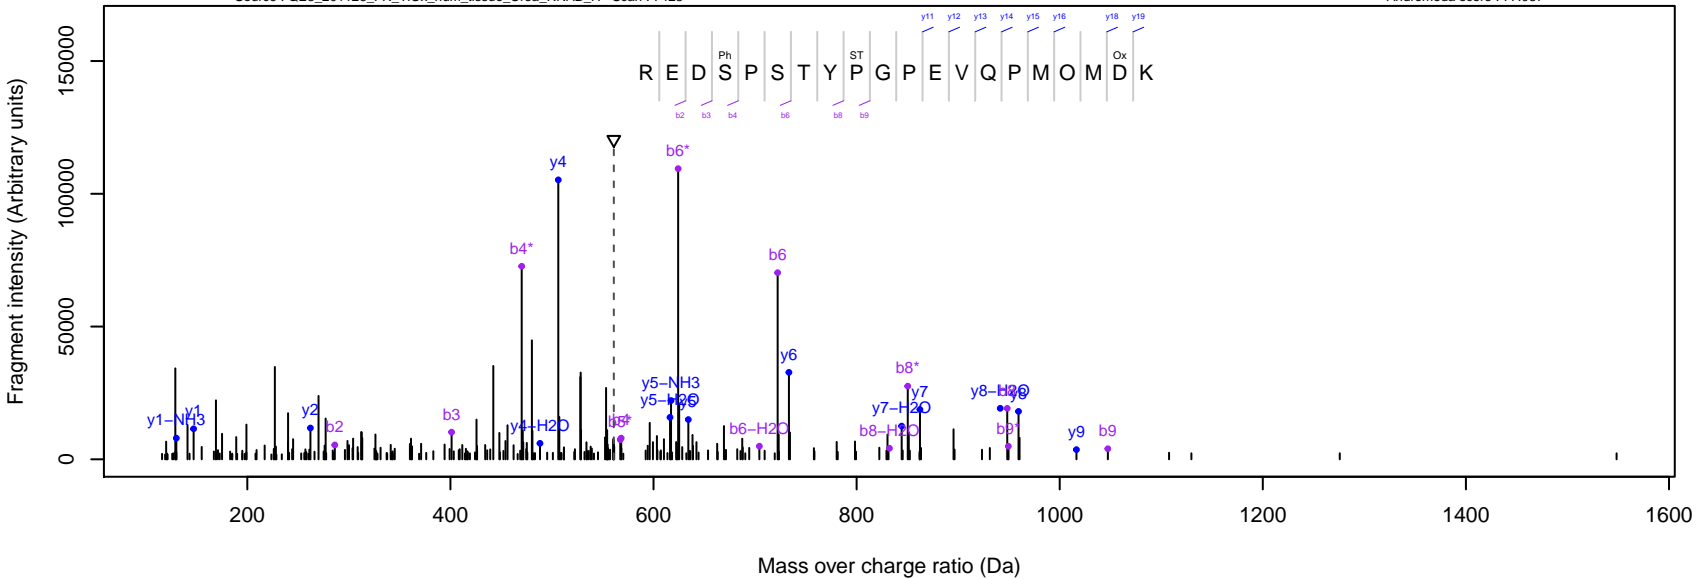

HT(Phospho (STY))HRSSESDHFSYVQLR-4+

Source : QE3\_201126\_FR\_TIOx\_hum\_tissue\_Urea\_RNAB\_H Scan : 15677

Andromeda score : 77.023

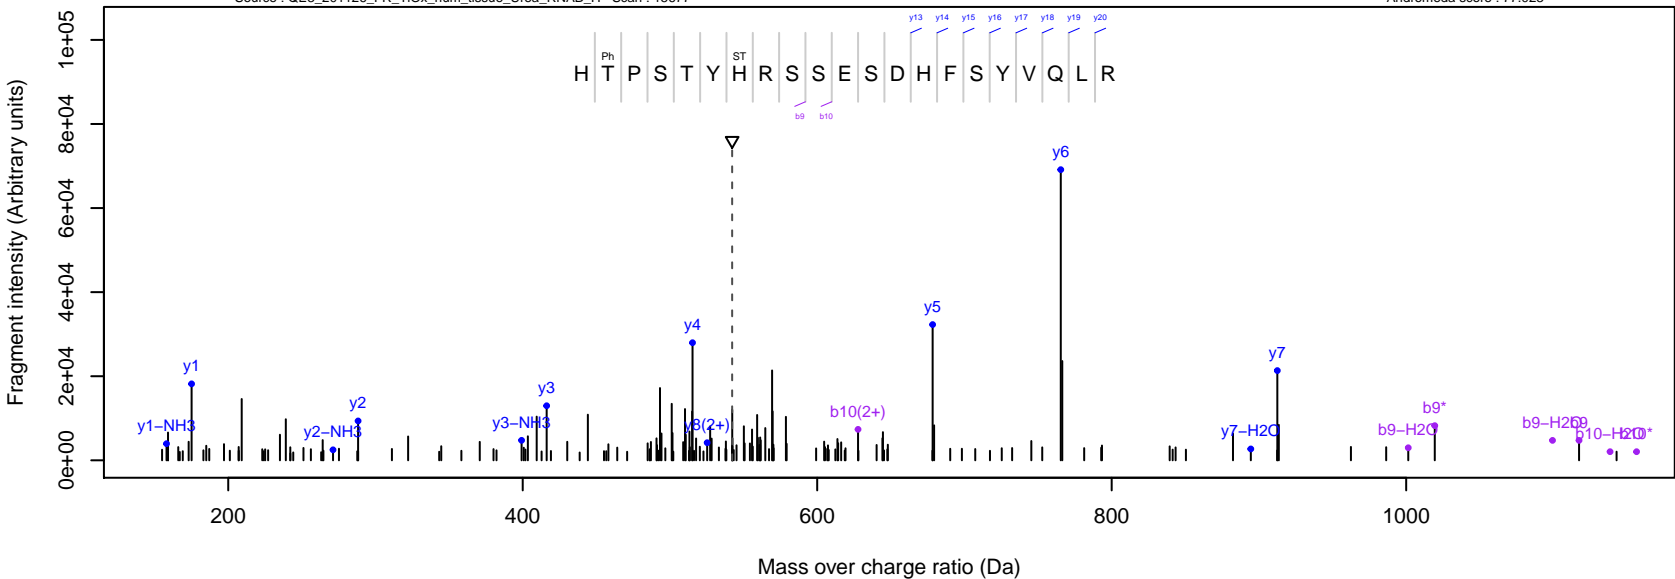

SDAEEVDFAGWLCSTIGLNQPSSTPSTYPTHTAAGV-3+

Source : QE3\_201126\_FR\_TiOx\_hum\_tissue\_Urea\_RNAB\_H Scan : 62470

Andromeda score : 76.97

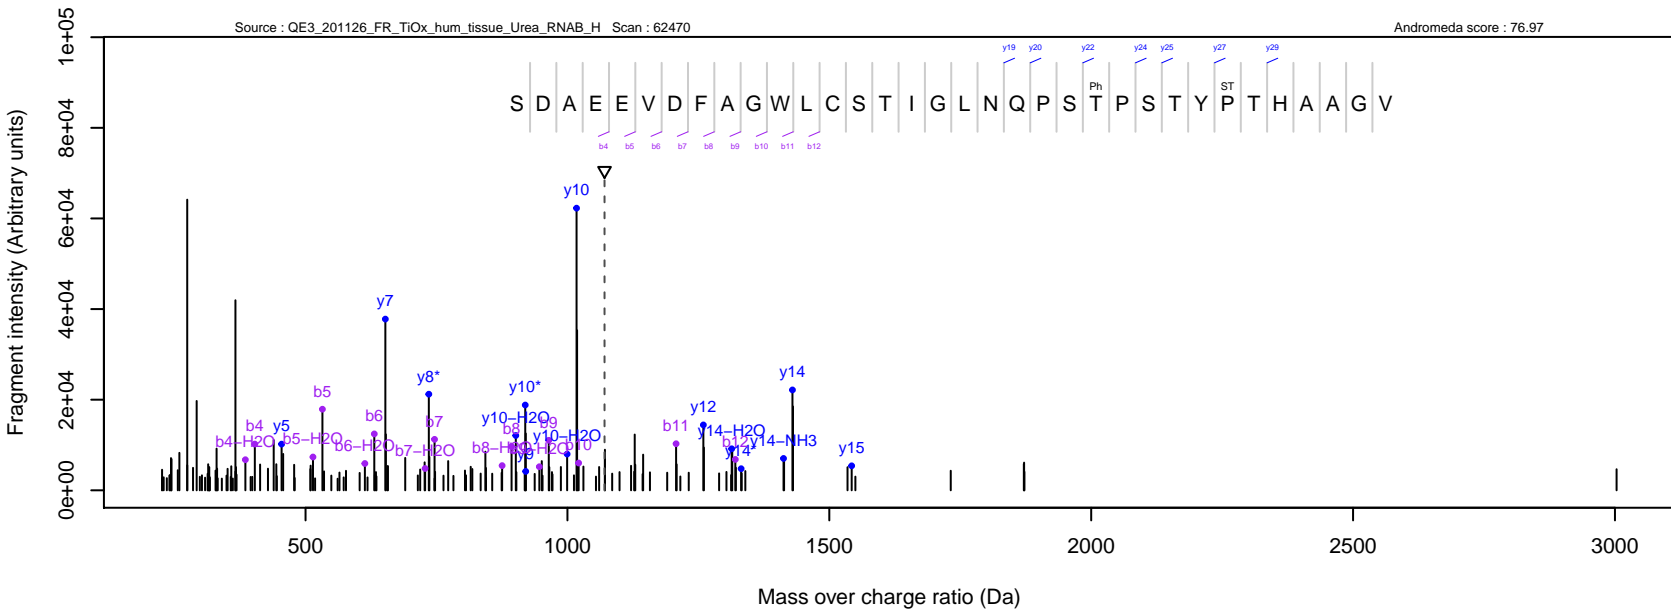

INNYLTPAHKLDS(Phospho (STY))PTM(Oxidation (M))SR-3+

Source : QE3\_201126\_FR\_TiOx\_hum\_tissue\_Urea\_RNAB\_N Scan : 22173

Andromeda score : 76.959

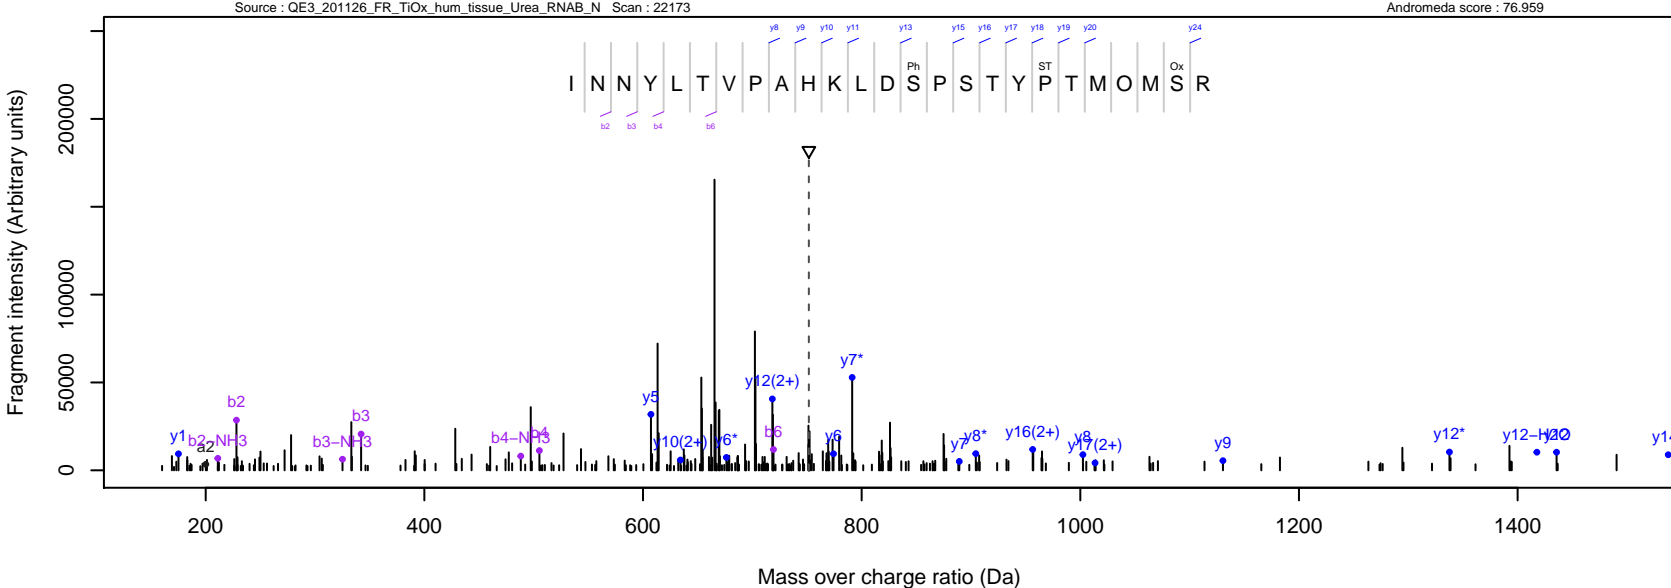

AAFDDAIELDTPSTYLSSEESYK DSTLIMQLLR-3+

Source : QE3\_201126\_FR\_TiOx\_hum\_tissue\_Urea\_RNAB\_H Scan : 62575

Andromeda score : 76.956

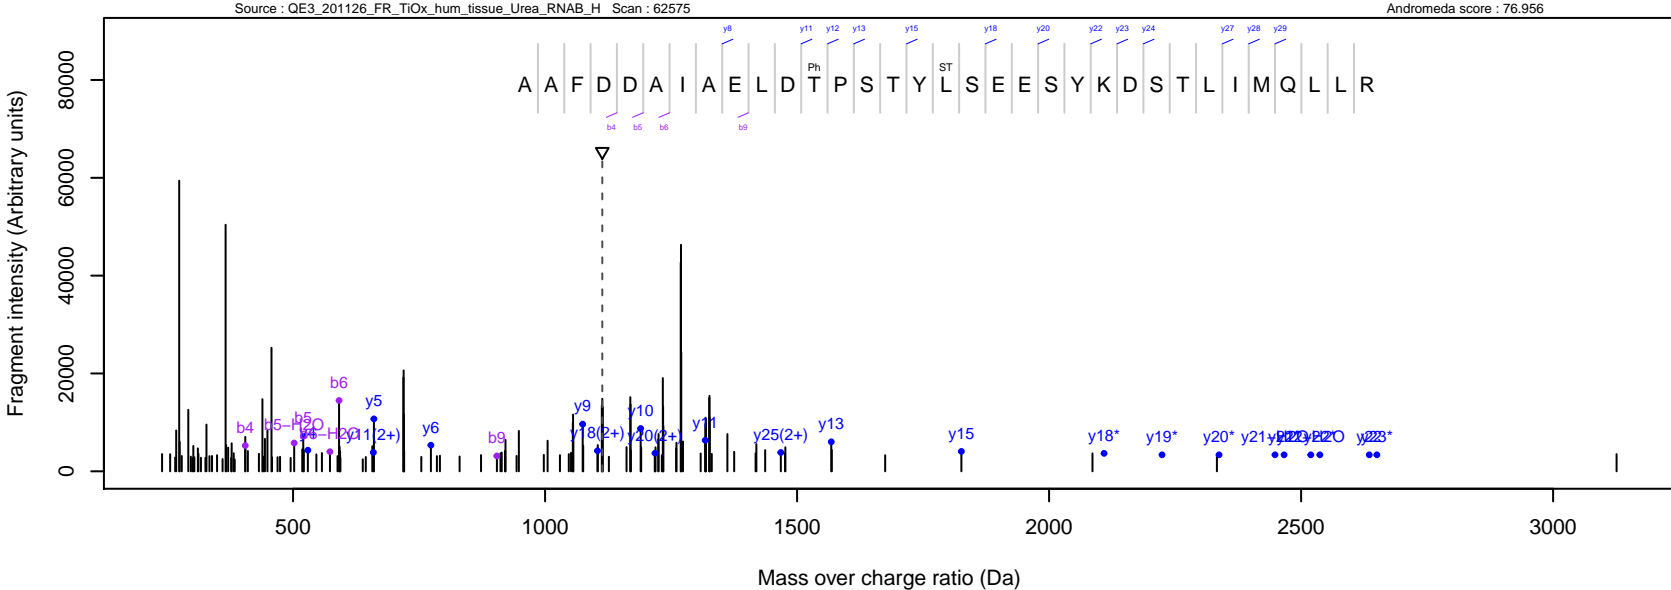

SAS(Phospho (STY))PTIEAQGTSPAHDNIAFDSTSKDK-3+

Source : QE3\_201126\_FR\_TiOx\_hum\_tissue\_Urea\_RNAB\_N Scan : 19871

Andromeda score : 76.956

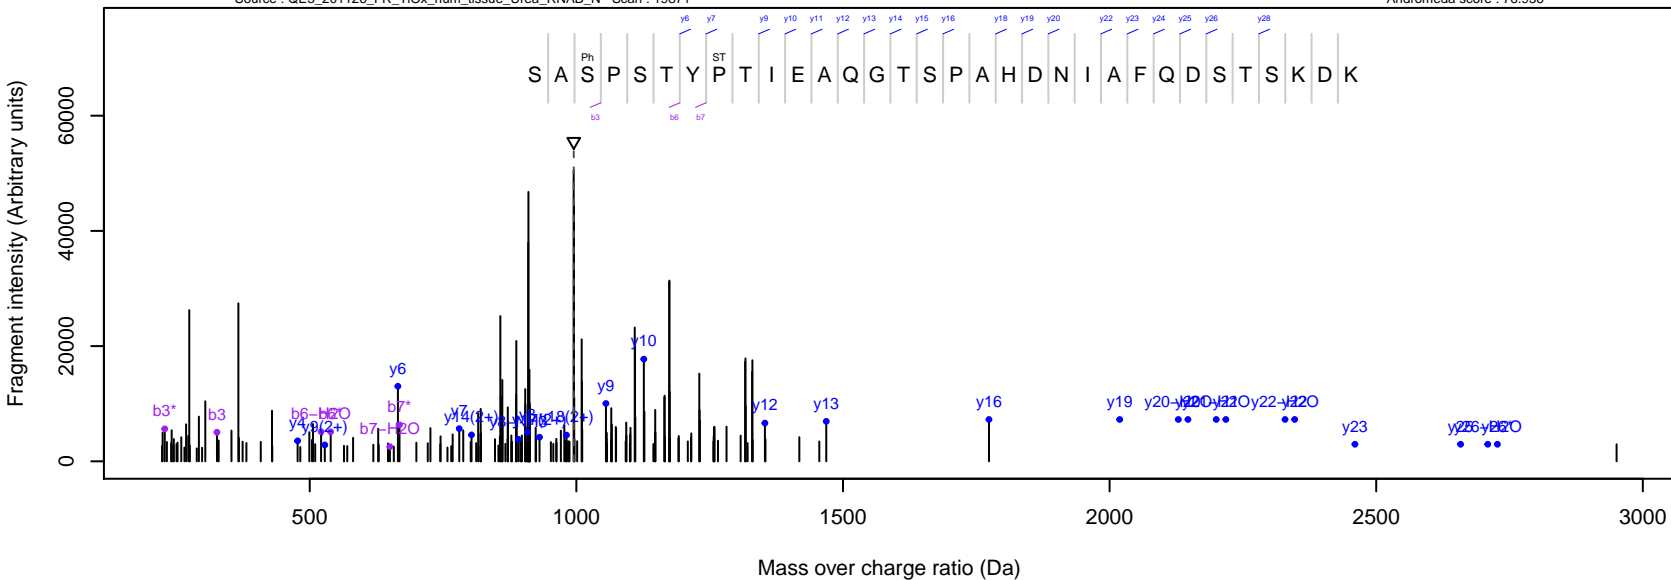

IEIIQLLDM(Oxidation (M))AAGTSNAAPVAENVTNNEGS(Phospho (STY))PPPPVK-3+

Source : QE3\_201126\_FR\_TiOx\_hum\_tissue\_Urea\_RNAB\_H Scan : 55547

Andromeda score : 76.938

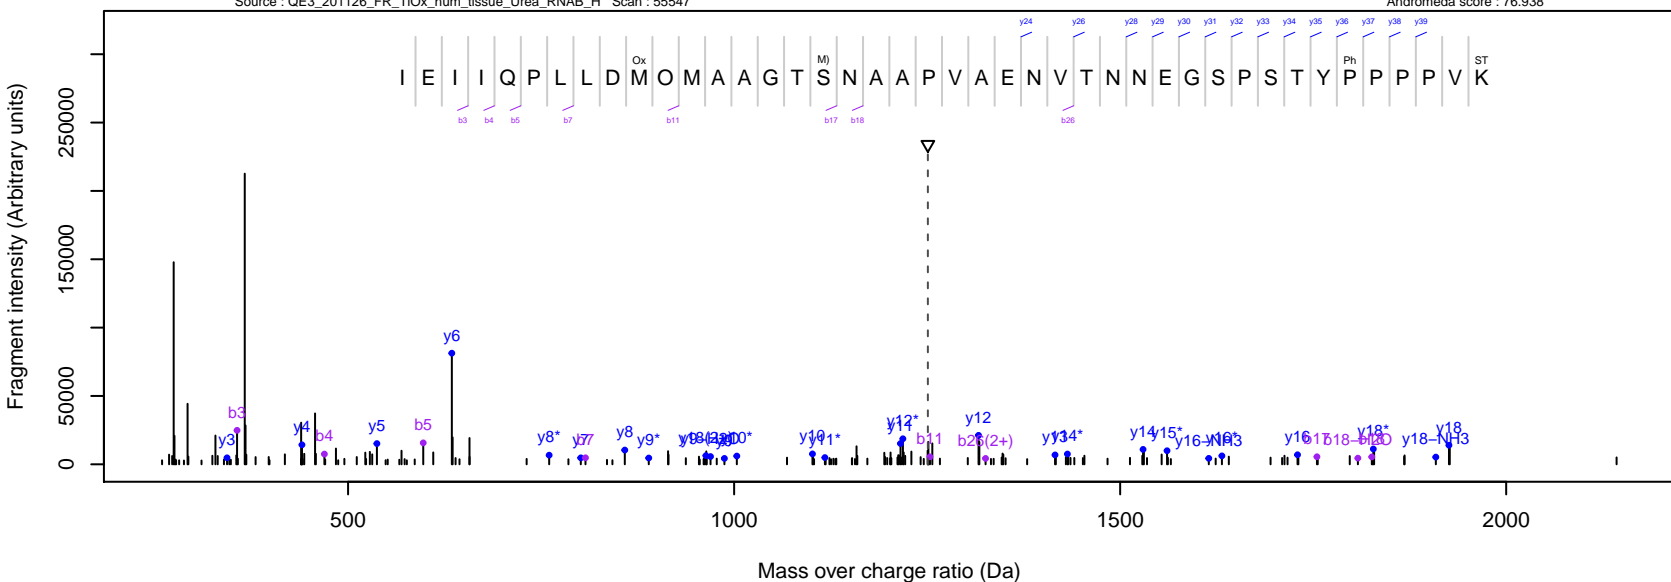

SGGTQVQQTPASCPLDS(Phospho (STY))DLSEDEDLQLAMAYSLSMEMEAAAGK-4+

Source : QE3\_201126\_FR\_TiOx\_hum\_tissue\_Urea\_RNAB\_N Scan : 62511

Andromeda score : 76.921

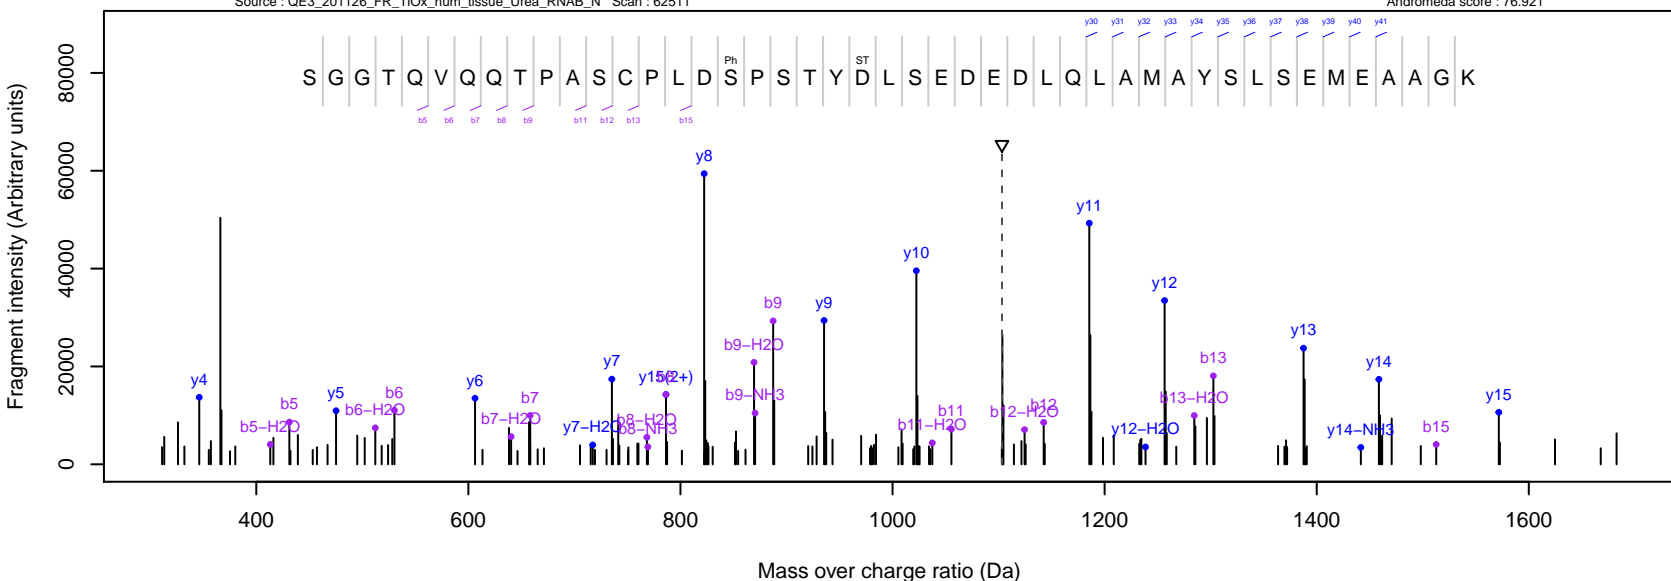

AQS(Phospho (STY))VSLGSA P S P M(Oxidation (M))HSHHHR-4+

Source : QE3\_201126\_FR\_TiOx\_hum\_tissue\_Urea\_RNAB\_N Scan : 9418

Andromeda score : 76.899

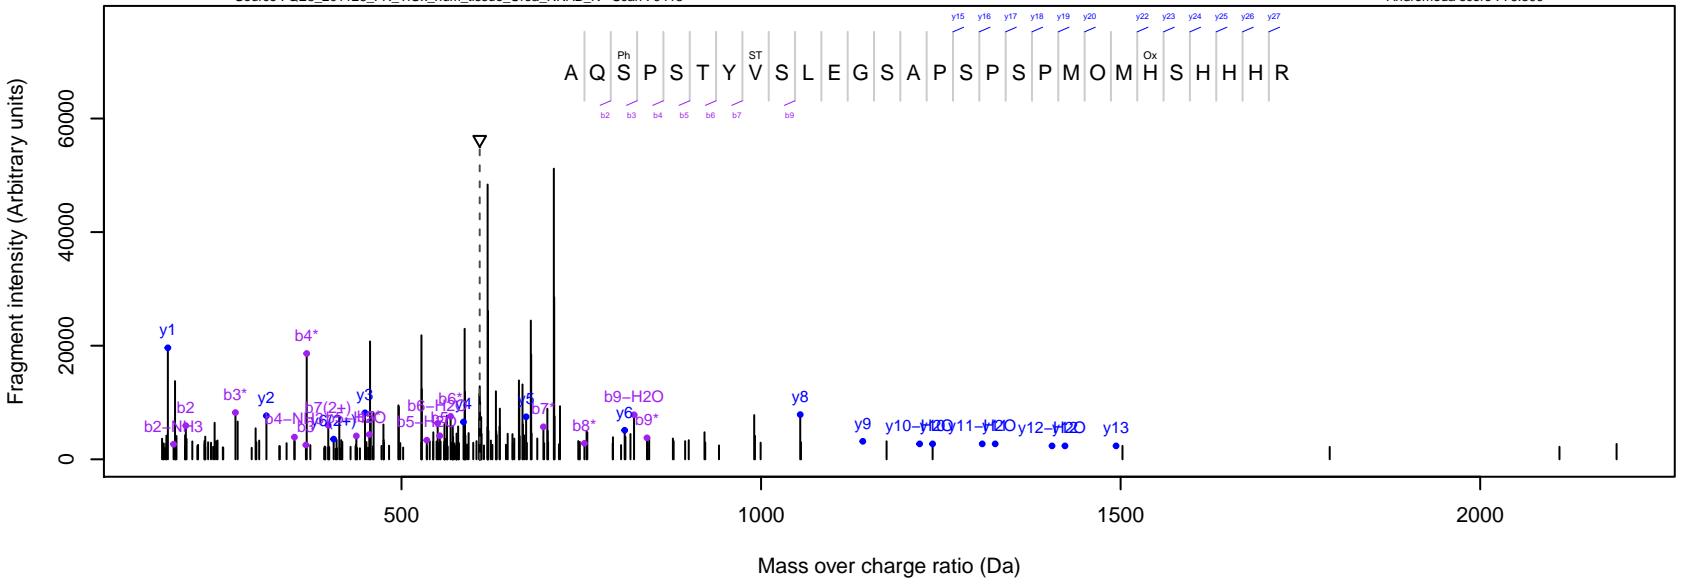

SLKQPLEQNQTIS(Phospho (STY))PLSTYEESK-3+

Source : QE3\_201126\_FR\_TiOx\_hum\_tissue\_Urea\_RNAB\_N Scan : 33177

Andromeda score : 76.899

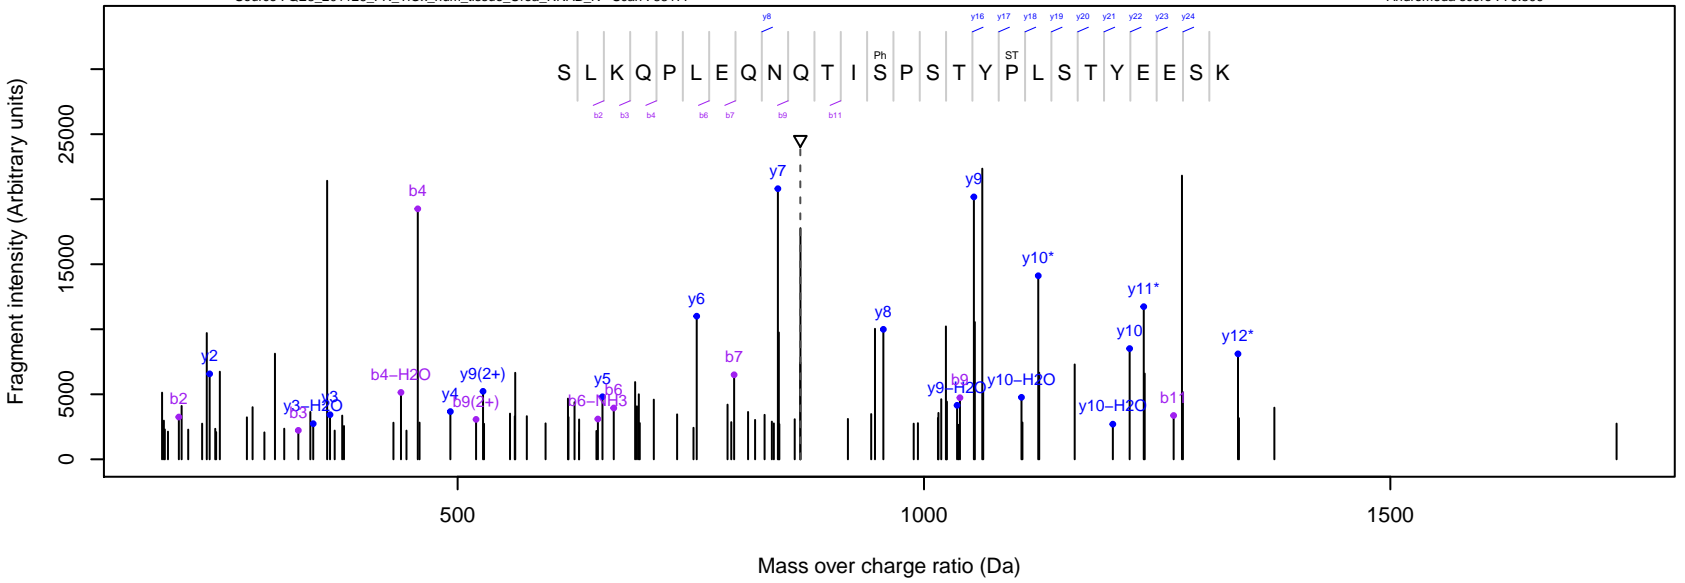

FAELPEFRPEEVLPS(Phospho (STY))PTLQSLAT(Phospho (STY))SPR-3+

Source : QE3\_201126\_FR\_TiOx\_hum\_tissue\_Urea\_RNAB\_H Scan : 59484

Andromeda score : 76.891

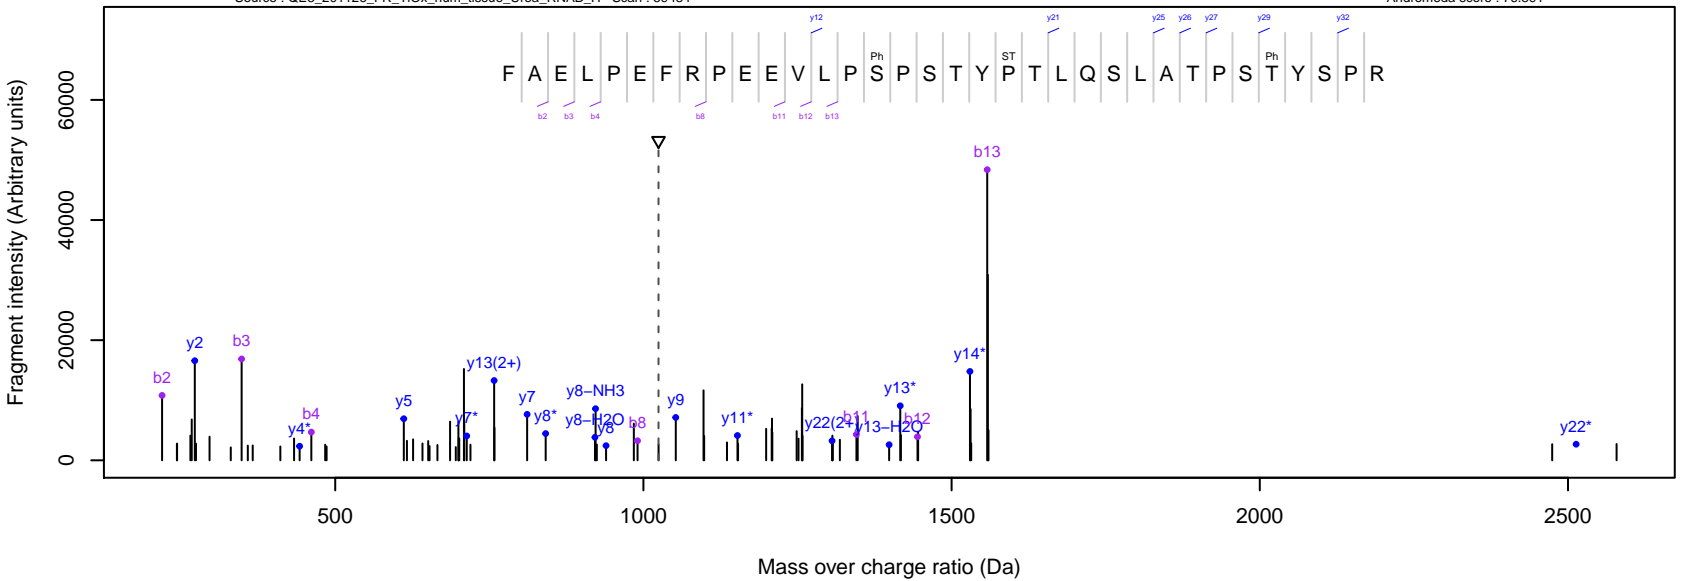

LTQTS(Phospho (STY))STEQLNVLETETEVLNKEAVEVK-3+

Source : QE3\_201126\_FR\_TIOx\_hum\_tissue\_Urea\_RNAB\_B Scan : 52237

Andromeda score : 76.891

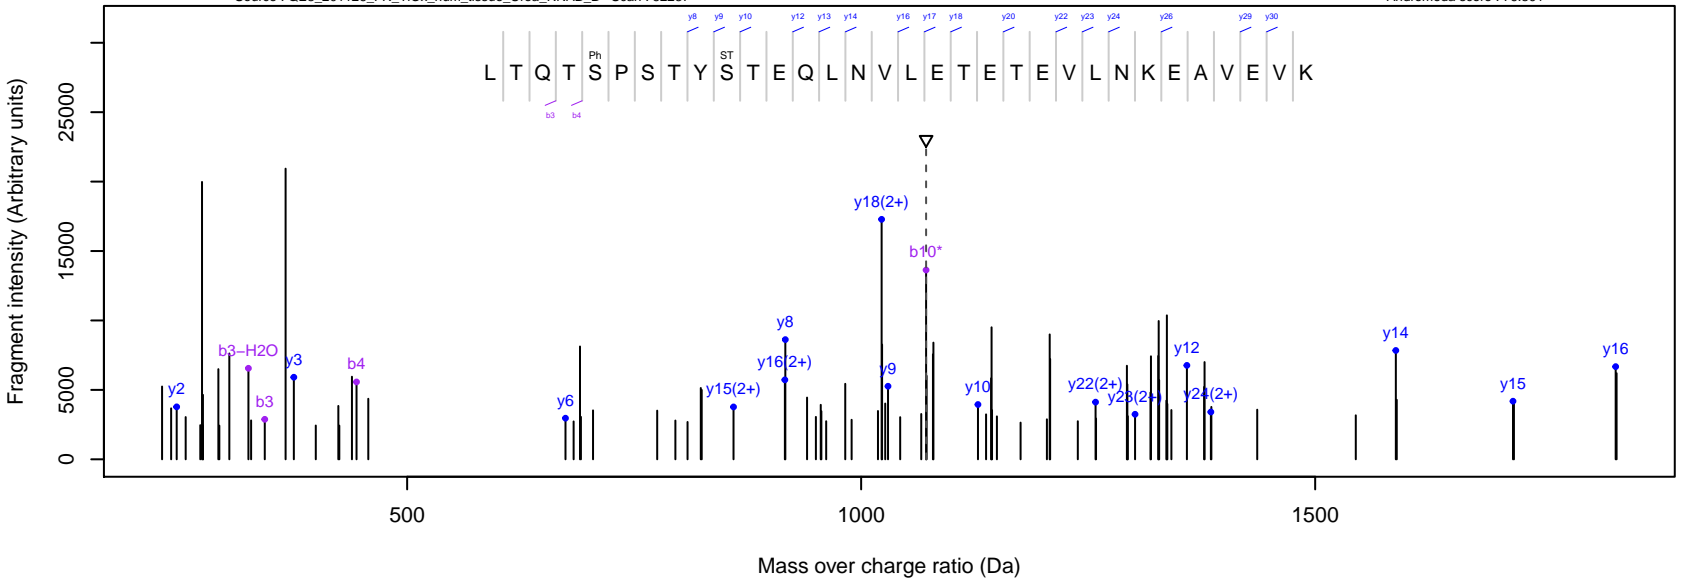

RGAAAADLLSS(Phospho (STY))SPESQHGGTQSPGGGQPLLQPTK-3+

Source : QE3\_201126\_FR\_TIOx\_hum\_tissue\_Urea\_RNAB\_N Scan : 27075

Andromeda score : 76.891

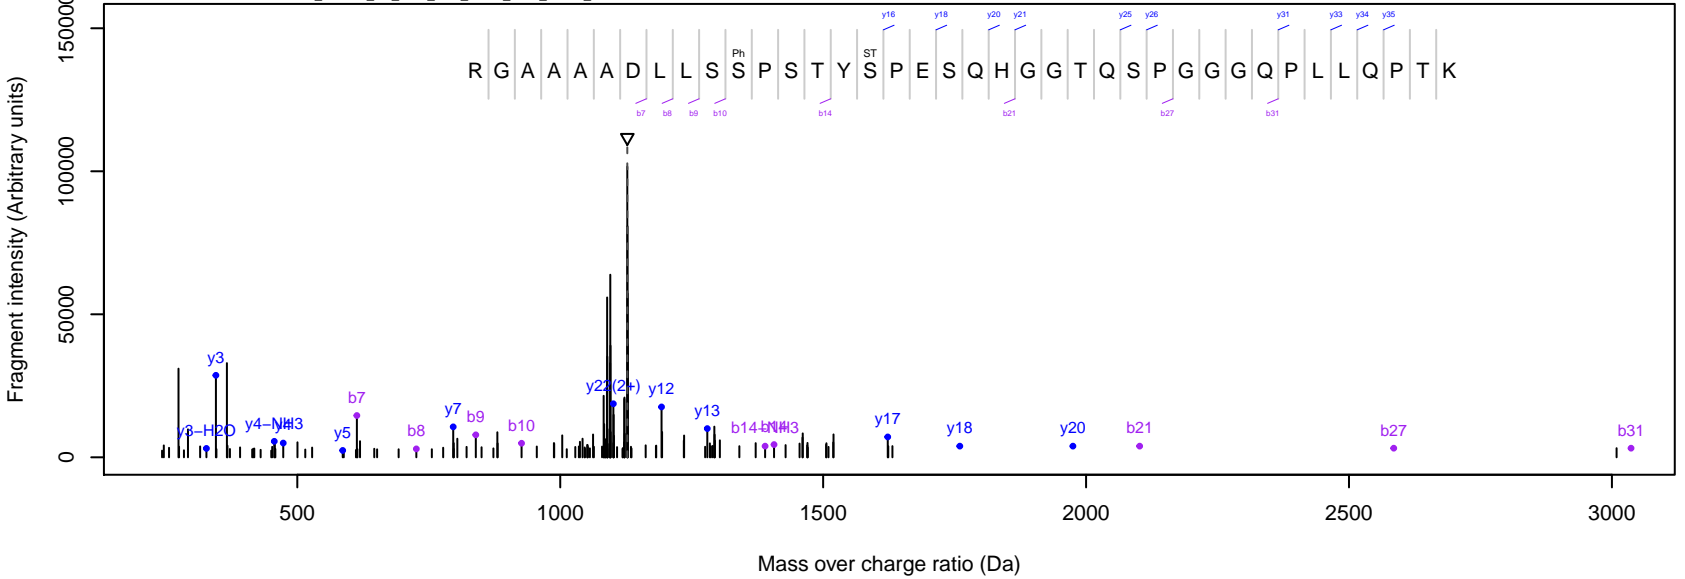

GRNS(Phospho (STY))ATSADEQPHIGNYR-3+

Source : QE3\_201126\_FR\_TIOx\_hum\_tissue\_Urea\_RNAB\_N Scan : 10653

Andromeda score : 76.889

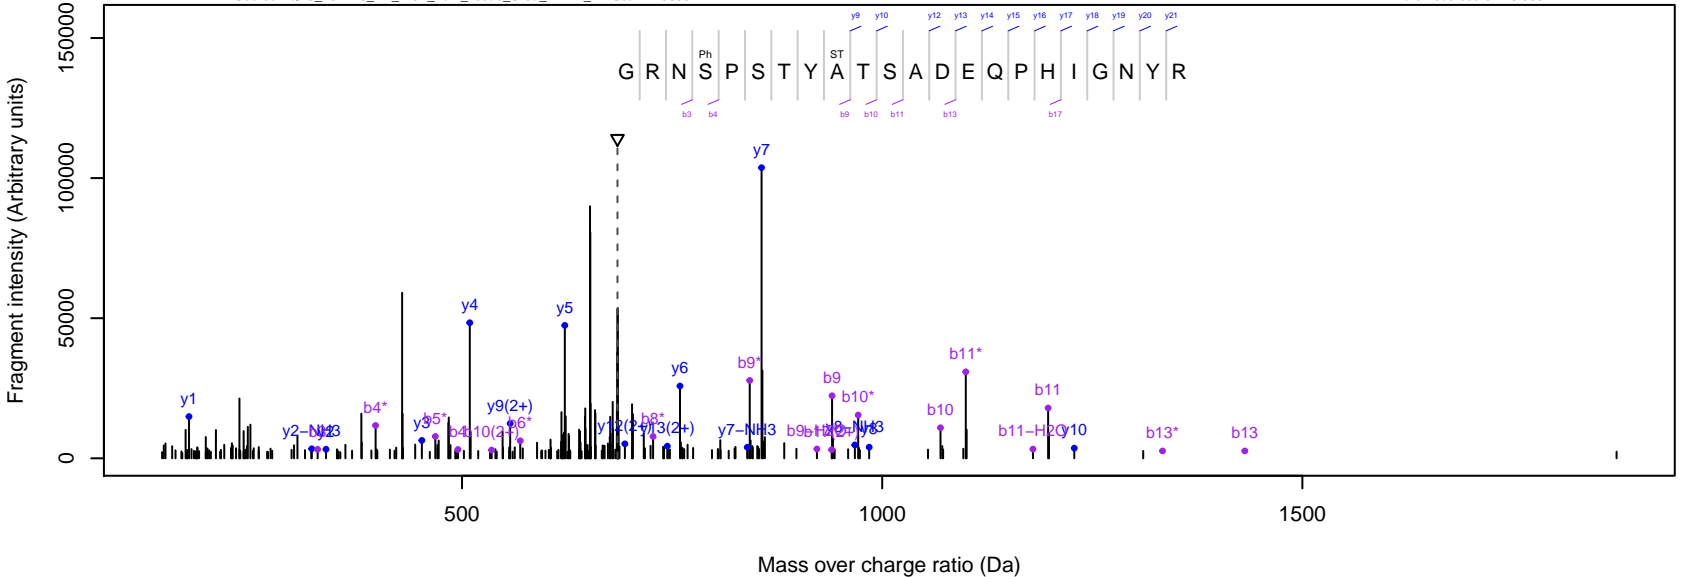

SLHGEFSAS(Phospho (STY))DSS(Phospho (STY))LTDIQETR-3+

Source : QE3\_201126\_FR\_TiOx\_hum\_tissue\_Urea\_RNAB\_B Scan : 35098

Andromeda score : 76.889

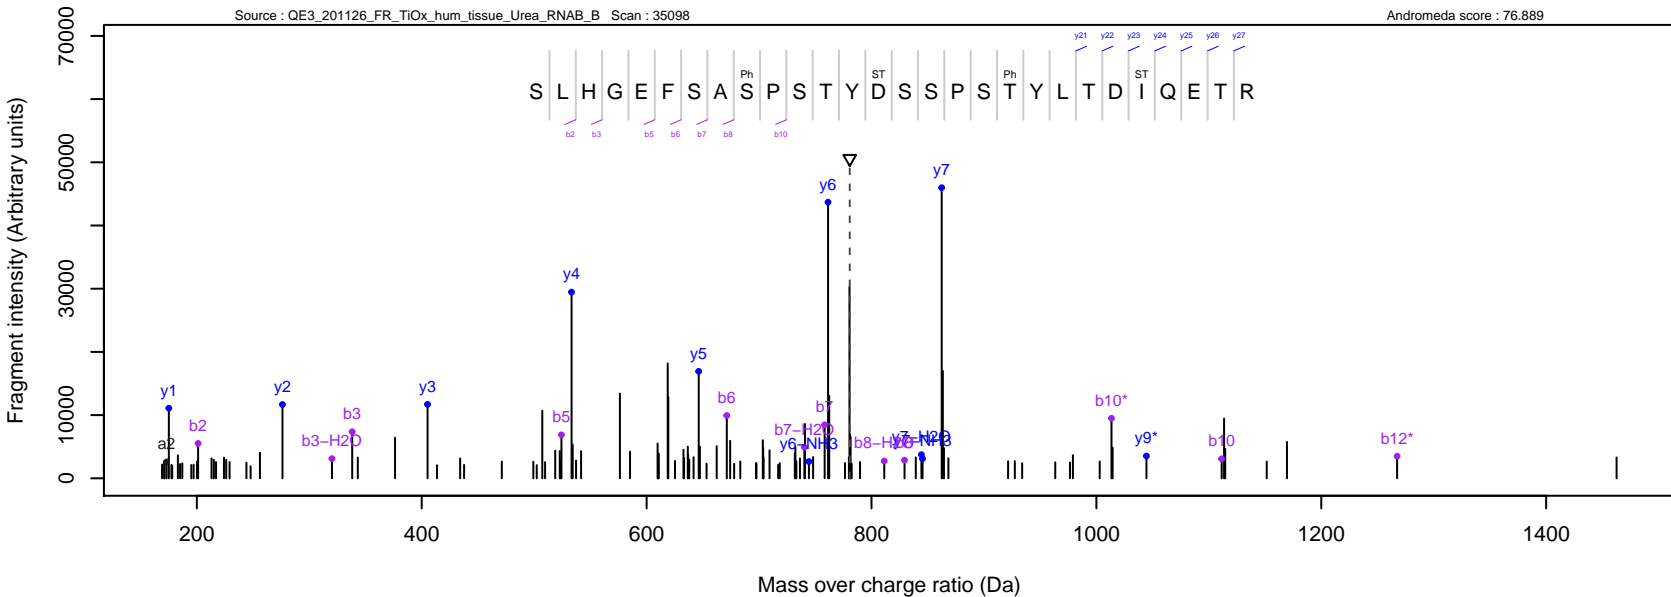

VRPAST(Phospho (STY))GGLSLLPPPPGGK-3+

Source : QE3\_201126\_FR\_TiOx\_hum\_tissue\_Urea\_RNAB\_H Scan : 33773

Andromeda score : 76.807

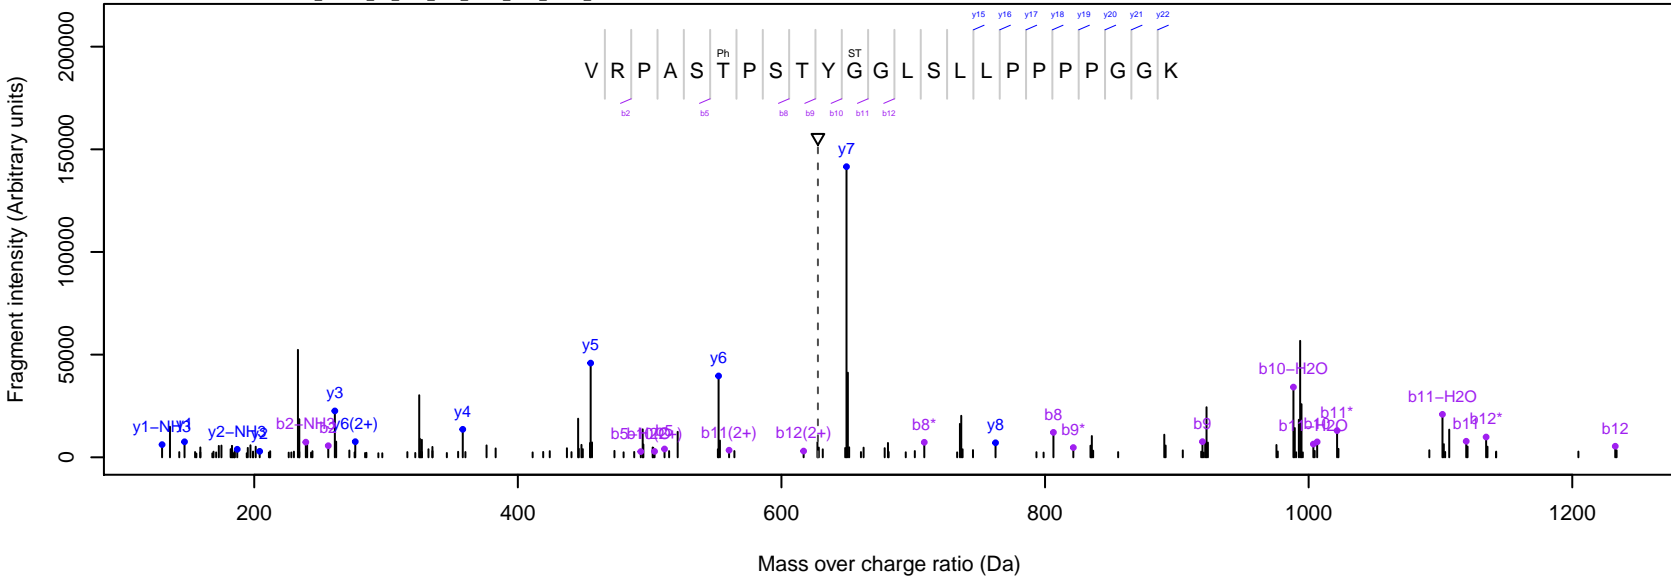

DQSTSM(Oxidation (M))S(Phospho (STY))HINLLFSR-3+

Source : QE3\_201126\_FR\_TiOx\_hum\_tissue\_Urea\_RNAB\_H Scan : 36518

Andromeda score : 76.768

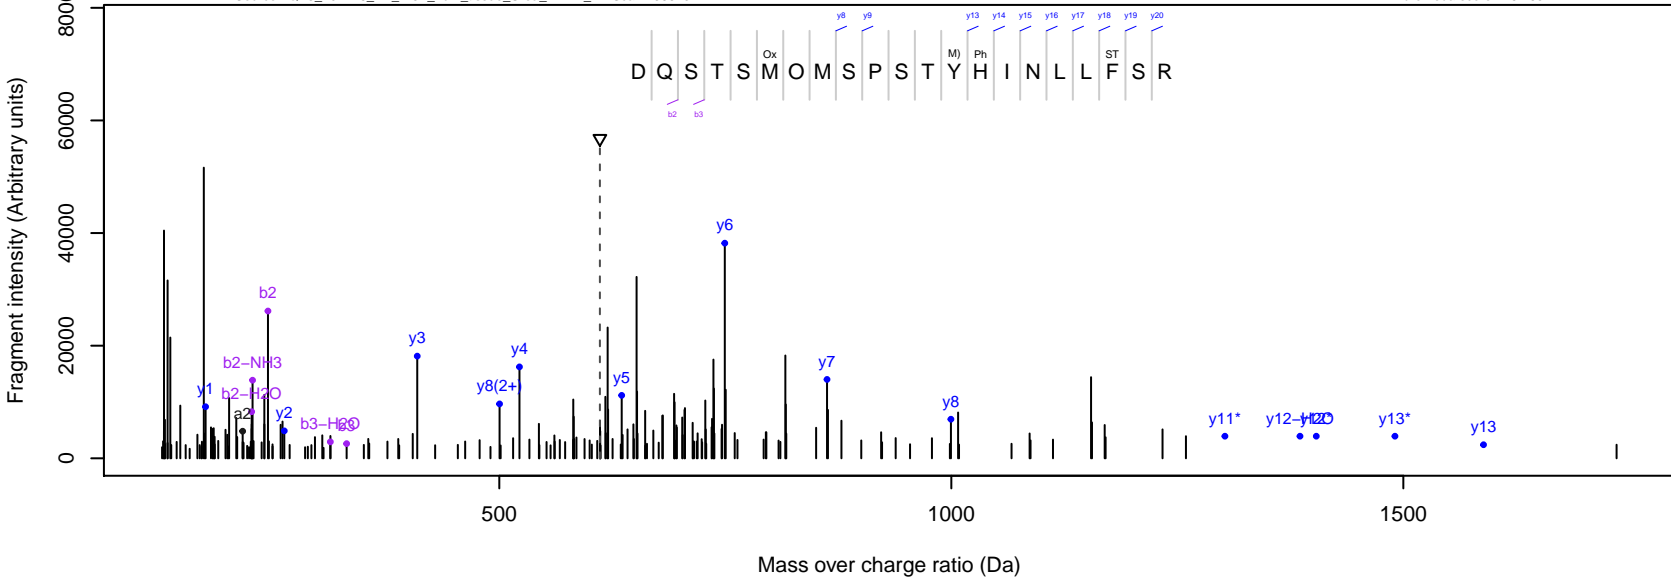

RNS(Phospho (STY))TDSRPVSVTYR-3+

Source : QE3\_201126\_FR\_TiOx\_hum\_tissue\_Urea\_RNAB\_N Scan : 8772

Andromeda score : 76.768

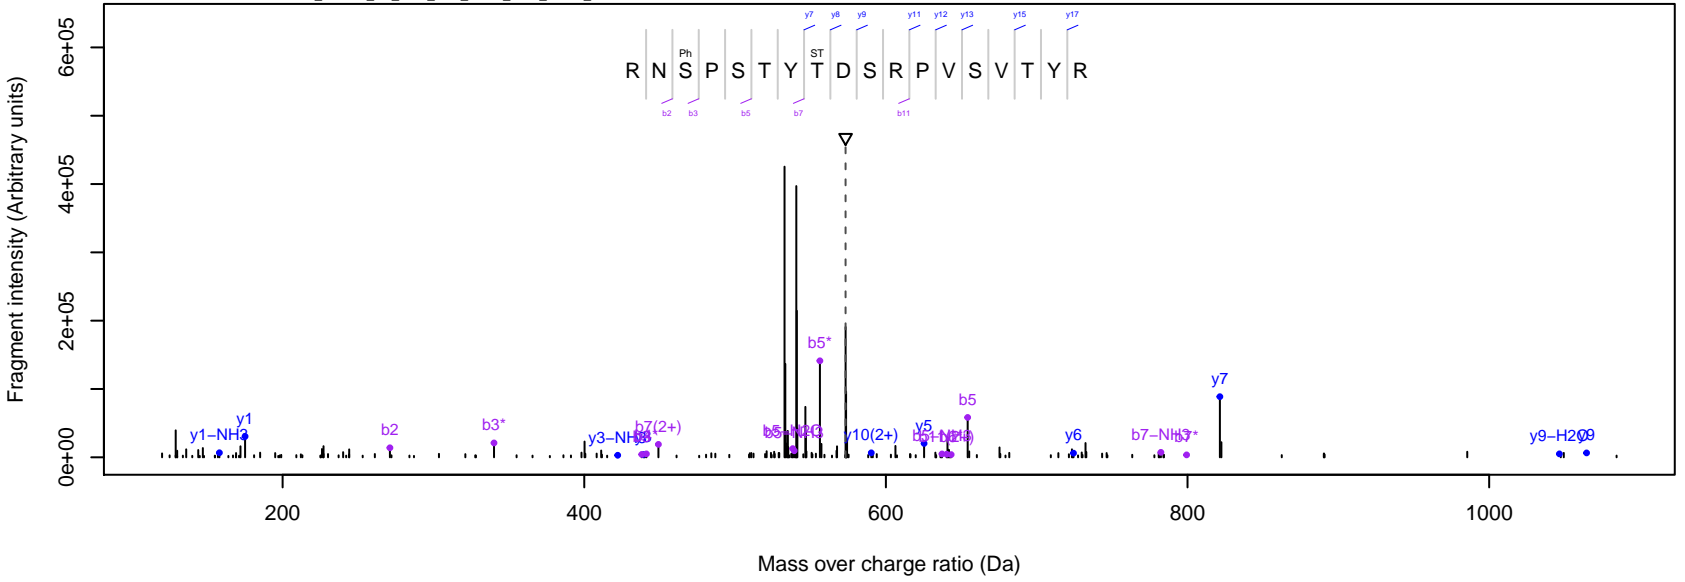

TRTDS(Phospho (STY))TSDGRPAWMR-3+

Source : QE3\_201126\_FR\_TiOx\_hum\_tissue\_Urea\_RNAB\_B Scan : 14666

Andromeda score : 76.768

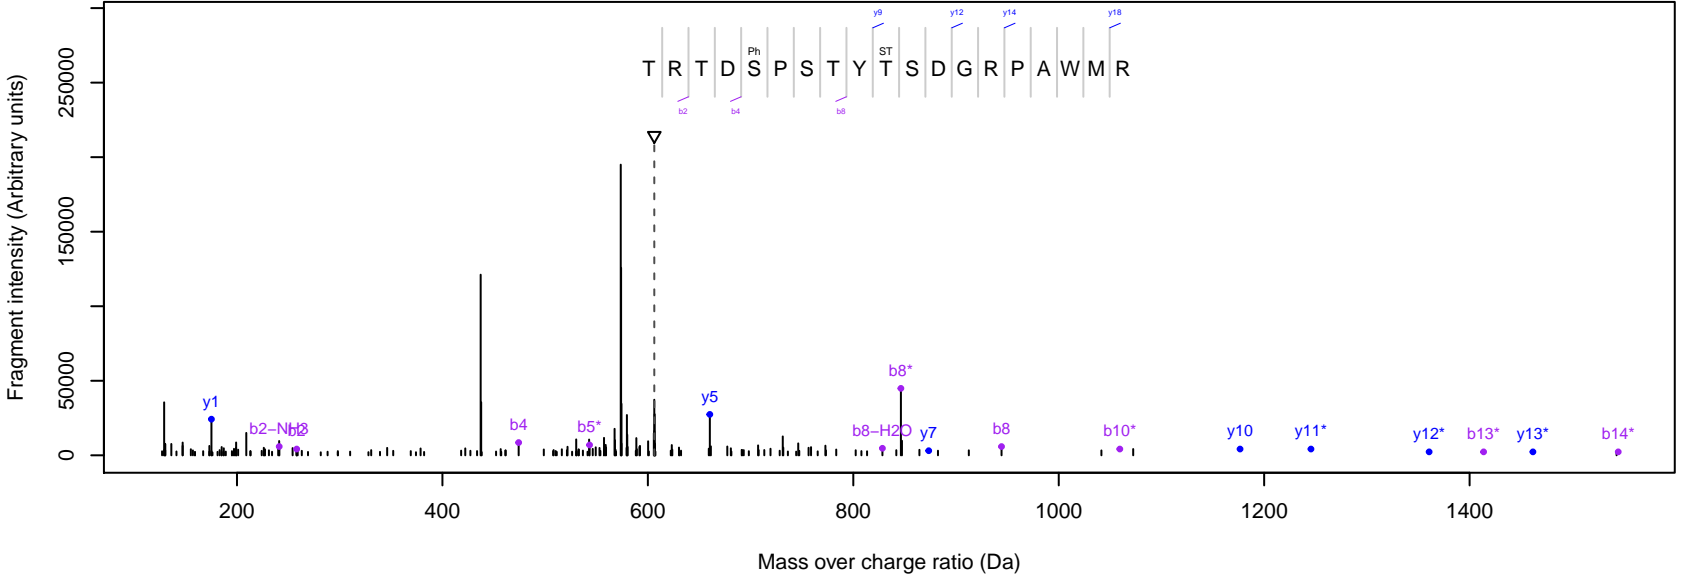

KVAHSDKPGSTS(Phospho (STY))TASFR-3+

Source : QE3\_201126\_FR\_TiOx\_hum\_tissue\_Urea\_RNAB\_N Scan : 5496

Andromeda score : 76.733

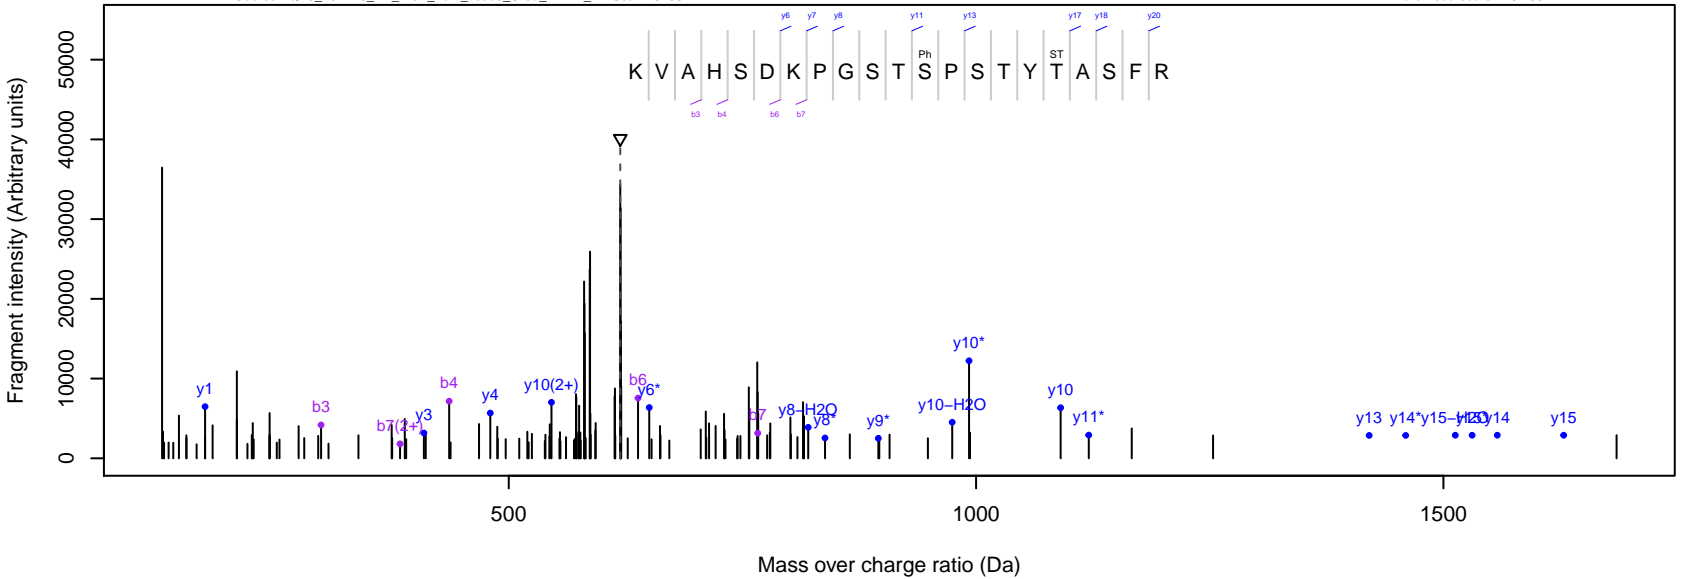



TAM(Oxidation (M))RVS(Phospho (STY))PHHPAPTNP R-4+

Source : QE3\_201126\_FR\_TiOx\_hum\_tissue\_Urea\_RNAB\_N Scan : 5402

Andromeda score : 76.704

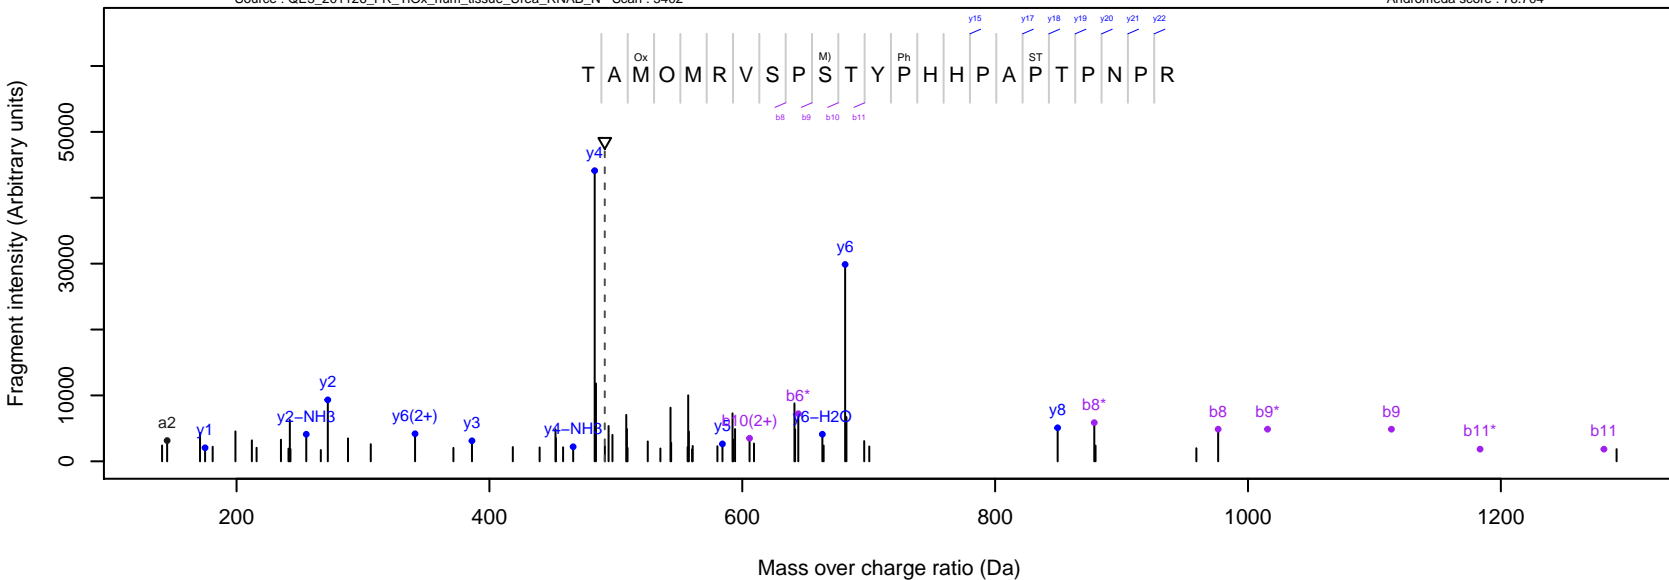

EKT(Phospho (STY))PS(Phospho (STY))PKEEDEEPES(Phospho (STY))PPEK-3+

Source : QE3\_201126\_FR\_TiOx\_hum\_tissue\_Urea\_RNAB\_H Scan : 11820

Andromeda score : 76.691

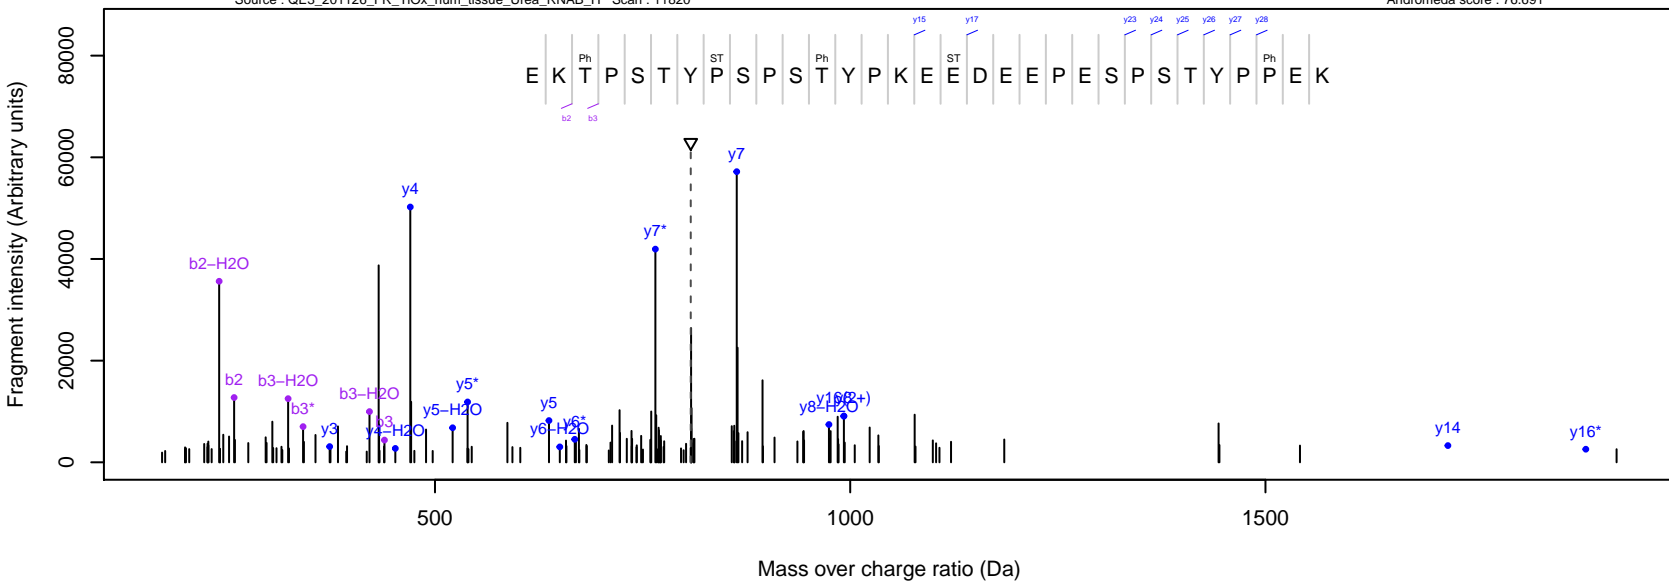

IDTHPS(Phospho (STY))PSHSSTVKDSLIELK-4+

Source : QE3\_201126\_FR\_TiOx\_hum\_tissue\_Urea\_RNAB\_H Scan : 20185

Andromeda score : 76.691

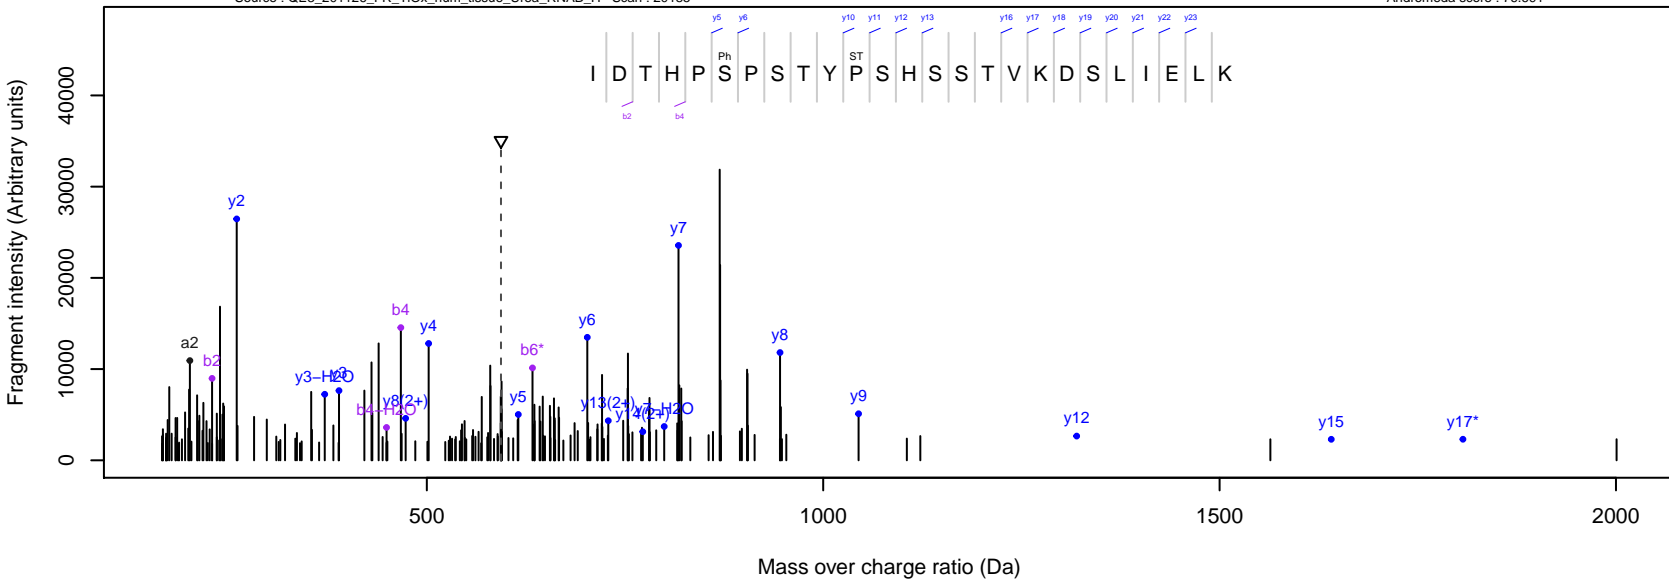



DASVAEAWLIAQEPYLA S G D F G H T V D S P S T Y V E K

Source : QE3\_201126\_FR\_TiOx\_hum\_tissue\_Urea\_RNAB\_H Scan : 60883

Andromeda score : 76.658

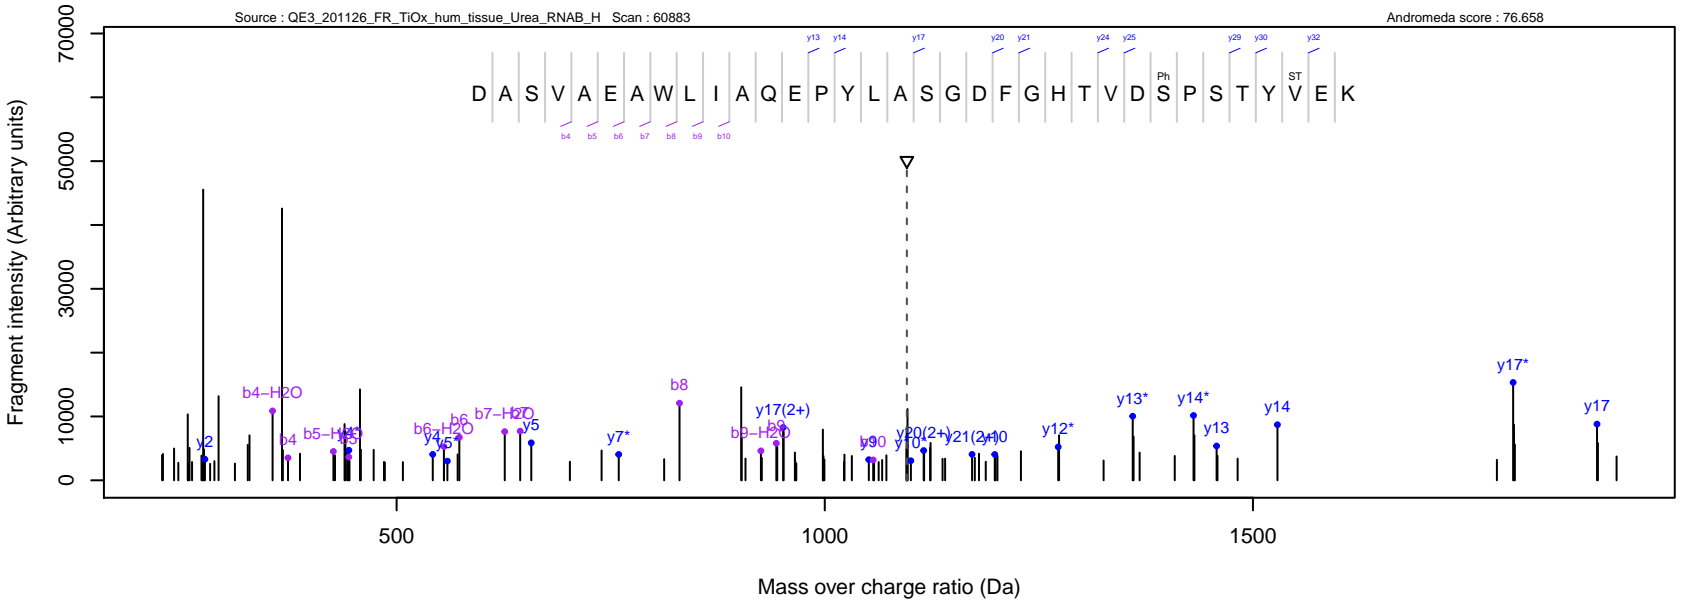

DITDPLSLNTCTDEGHVVLAS P S T Y P L K

Source : QE3\_201126\_FR\_TiOx\_hum\_tissue\_Urea\_RNAB\_N Scan : 51664

Andromeda score : 76.611

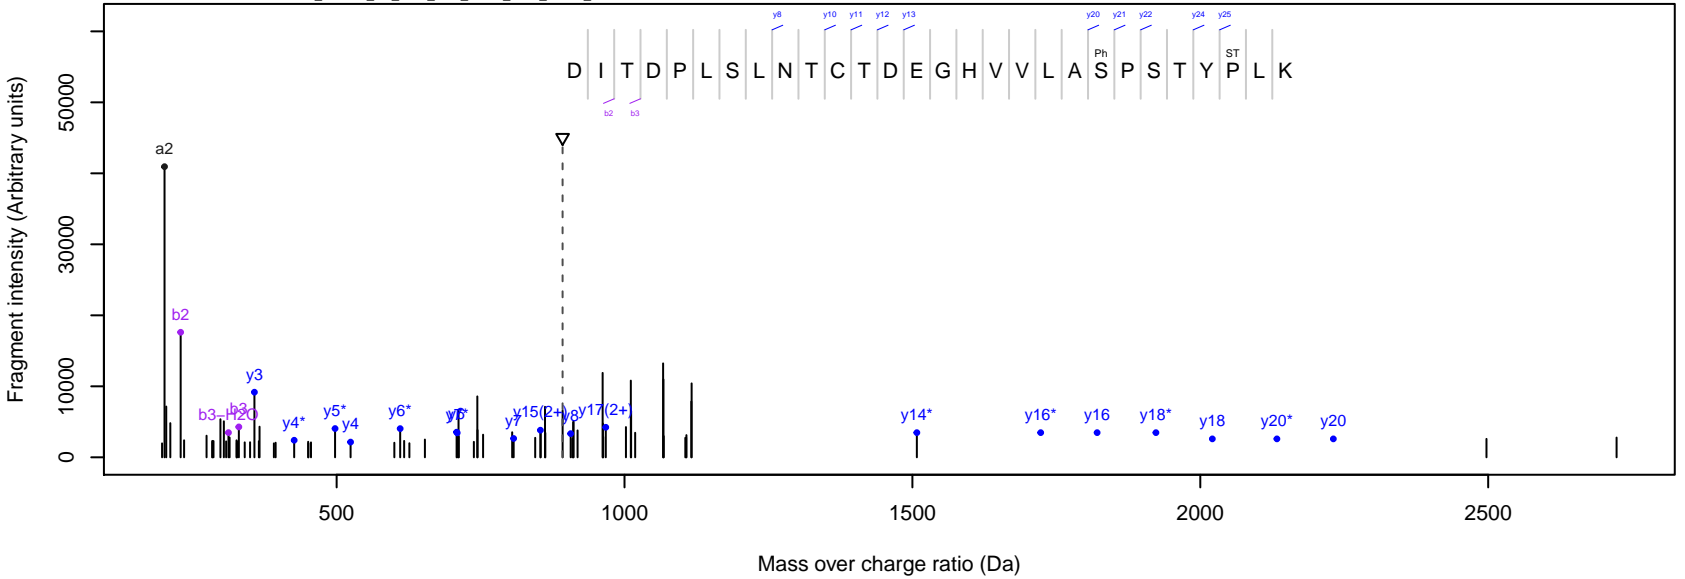

RAS P S T Y W A S P S T Y E N G E T D A E G T Q M O M T P A K

Source : QE3\_201126\_FR\_TiOx\_hum\_tissue\_Urea\_RNAB\_N Scan : 16850

Andromeda score : 76.611

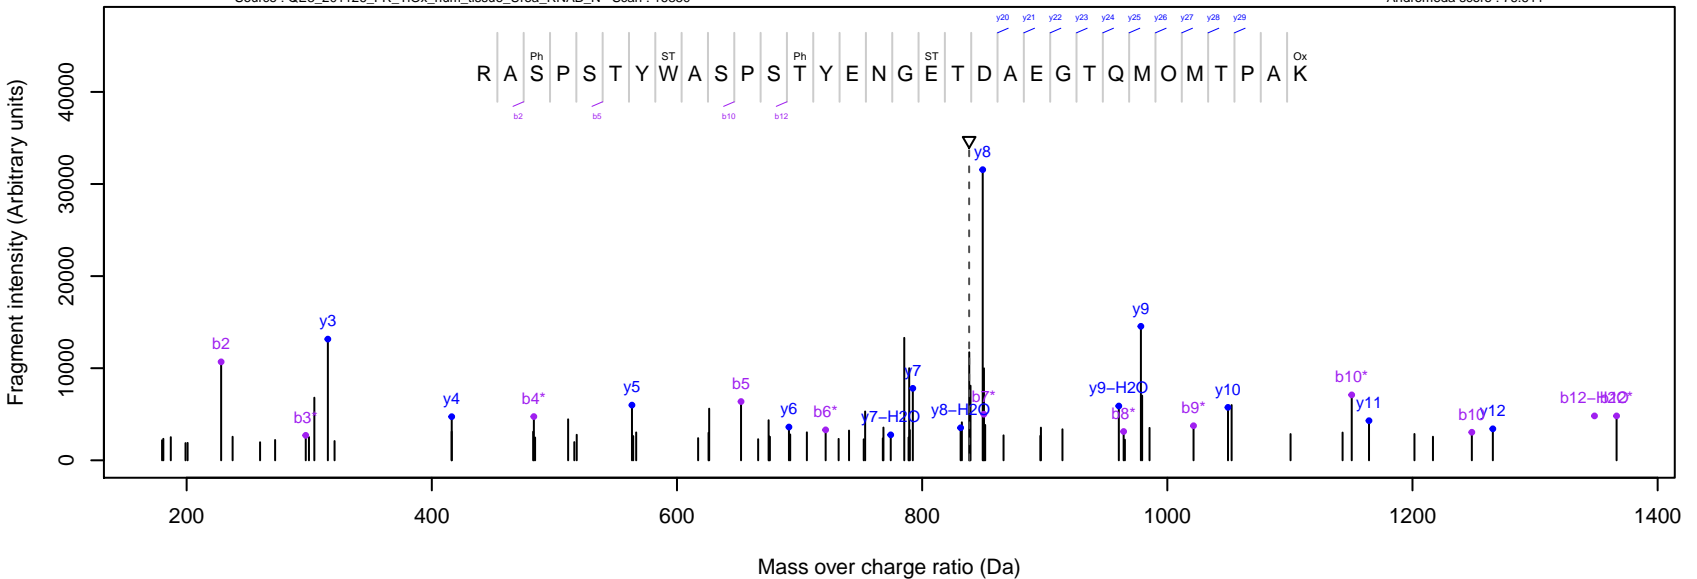

NNLSAS(Phospho (STY))MFDLSMK-2+

Source : QE3\_201126\_FR\_TiOx\_hum\_tissue\_Urea\_RNAB\_N Scan : 50304

Andromeda score : 76.588

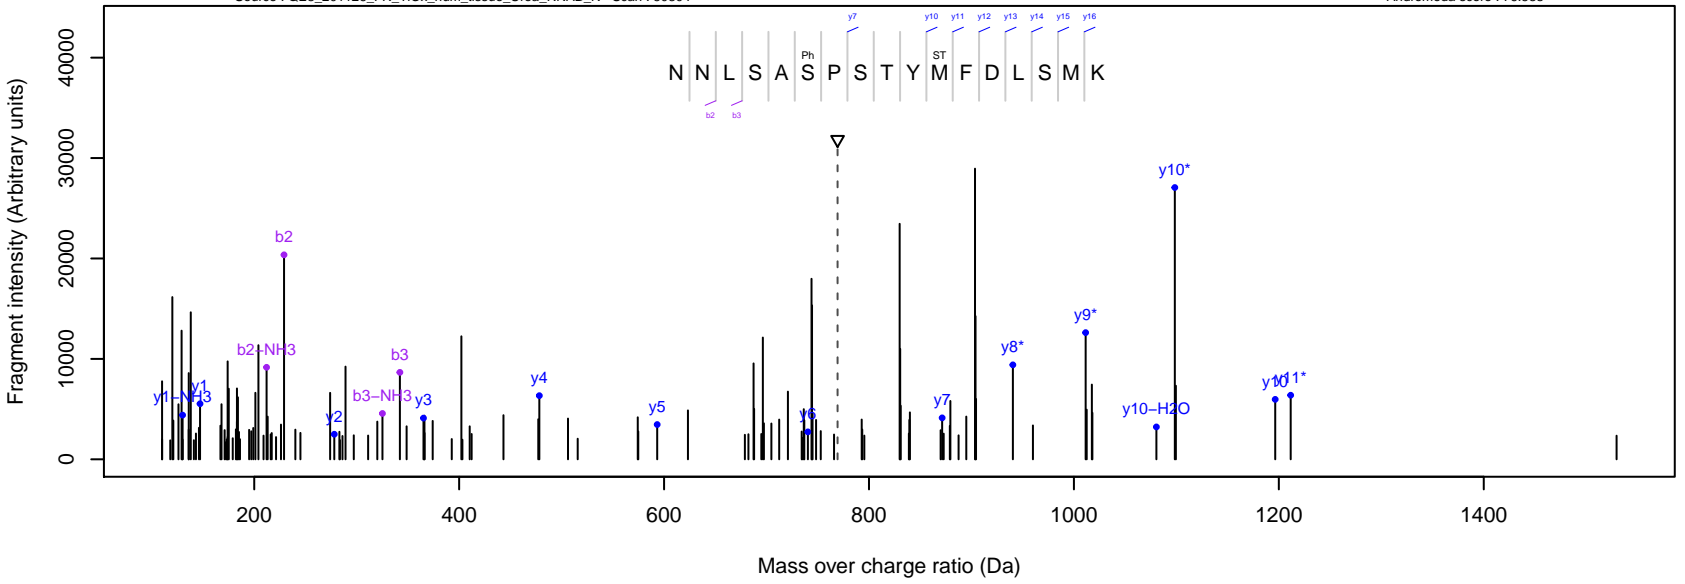

S(Phospho (STY))GS(Phospho (STY))PSDNS(Phospho (STY))GAEEMVSLAKPK-3+

Source : QE3\_201126\_FR\_TiOx\_hum\_tissue\_Urea\_RNAB\_N Scan : 37995

Andromeda score : 76.539

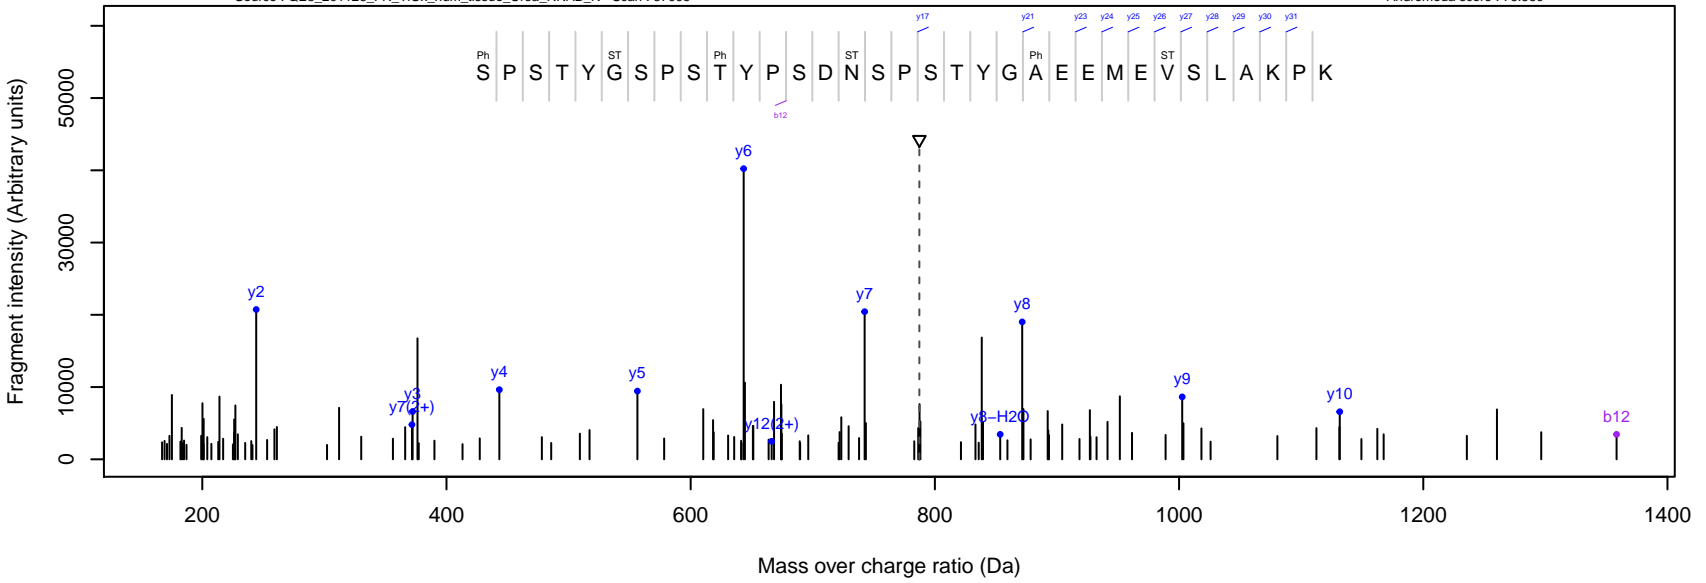

VALS(Phospho (STY))DDETKETENM(Oxidation (M))R-3+

Source : QE3\_201126\_FR\_TiOx\_hum\_tissue\_Urea\_RNAB\_B Scan : 11178

Andromeda score : 76.526

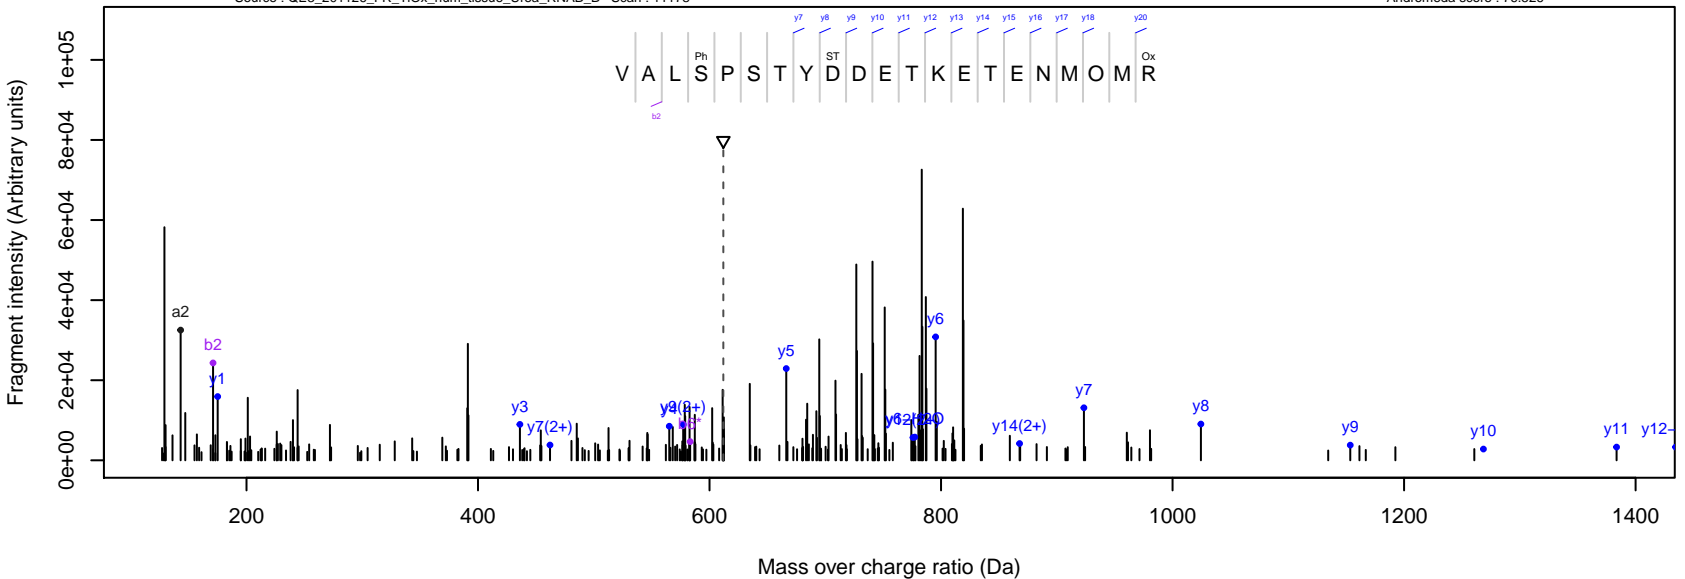

RSDAEEVDFAGWLCSTIGLNQPS<sup>Ph</sup>TPST<sup>ST</sup>YPT<sup>ST</sup>HAAGV

Source : QE3\_201126\_FR\_TiOx\_hum\_tissue\_Urea\_RNAB\_B Scan : 60543

Andromeda score : 76.525

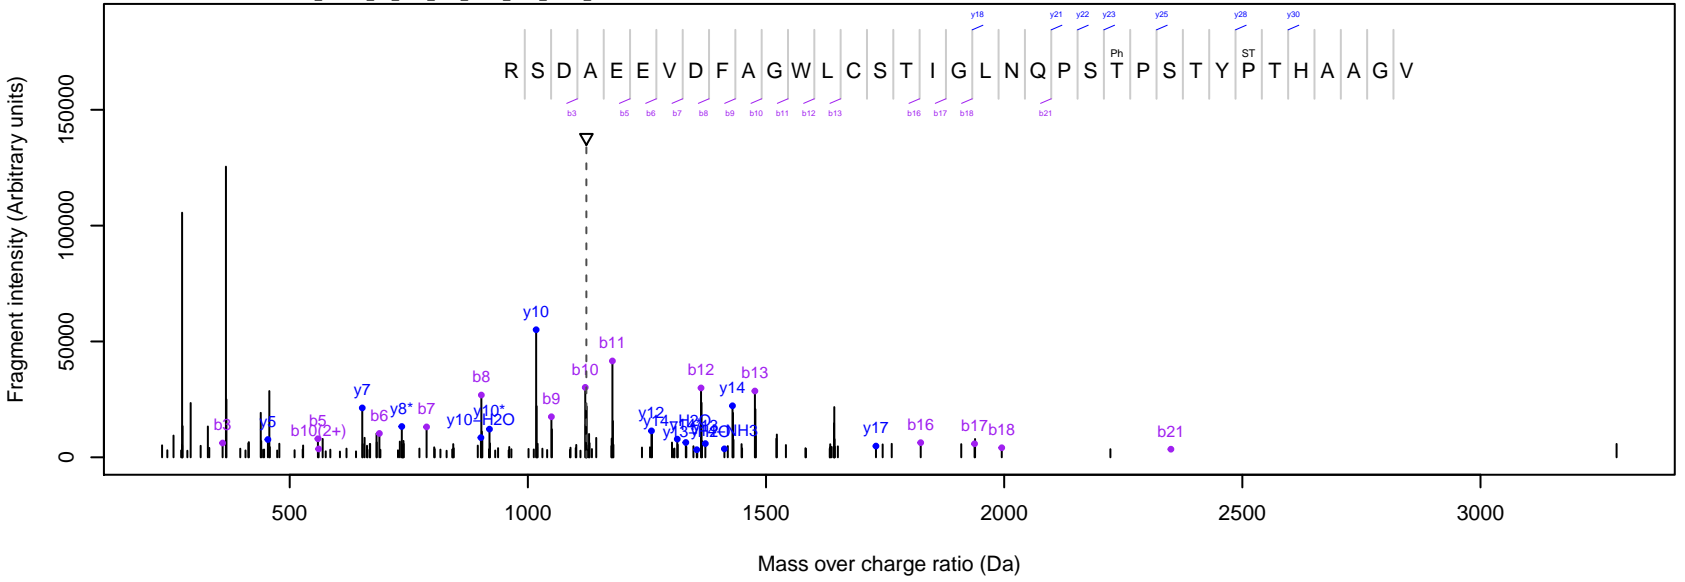

QQAS(Phospho (STY))KSPYNGVR-2+

Source : QE3\_201126\_FR\_TiOx\_hum\_tissue\_Urea\_RNAB\_H Scan : 5685

Andromeda score : 76.522

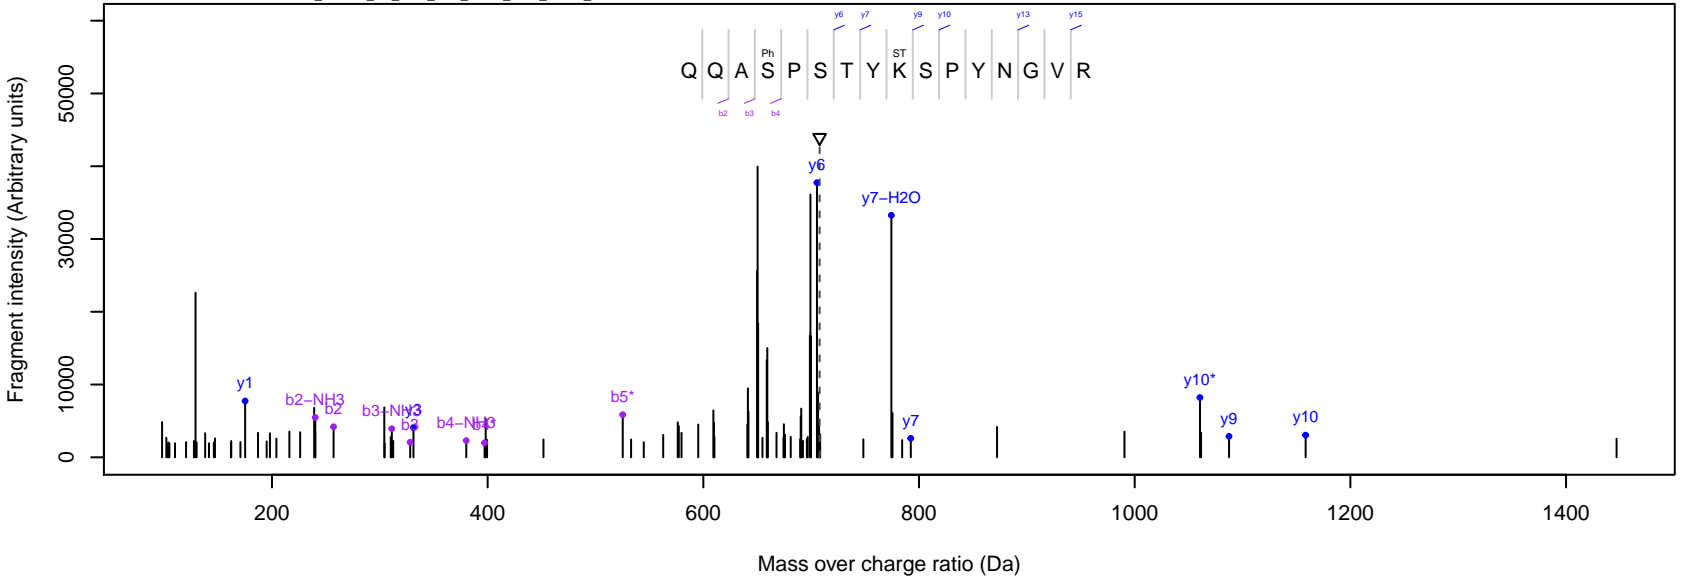

T(Phospho (STY))PTQLLESGFR-2+

Source : QE3\_201126\_FR\_TiOx\_hum\_tissue\_Urea\_RNAB\_H Scan : 36998

Andromeda score : 76.522

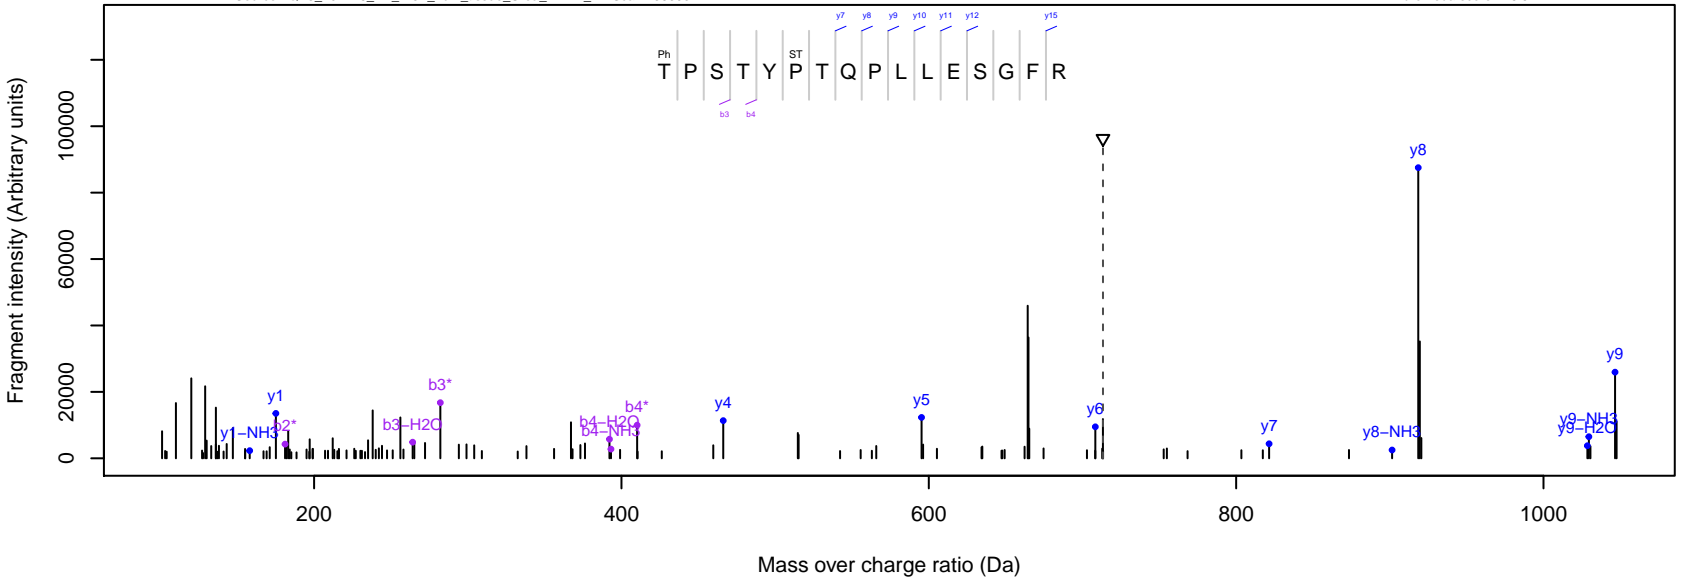

GFINDDDDEGEDEEGS(Phospho (STY))DS(Phospho (STY))GDS(Phospho (STY))EDDVGHKKR-3+

Source : QE3\_201126\_FR\_TiOx\_hum\_tissue\_Urea\_RNAB\_H Scan : 20390

Andromeda score : 76.492

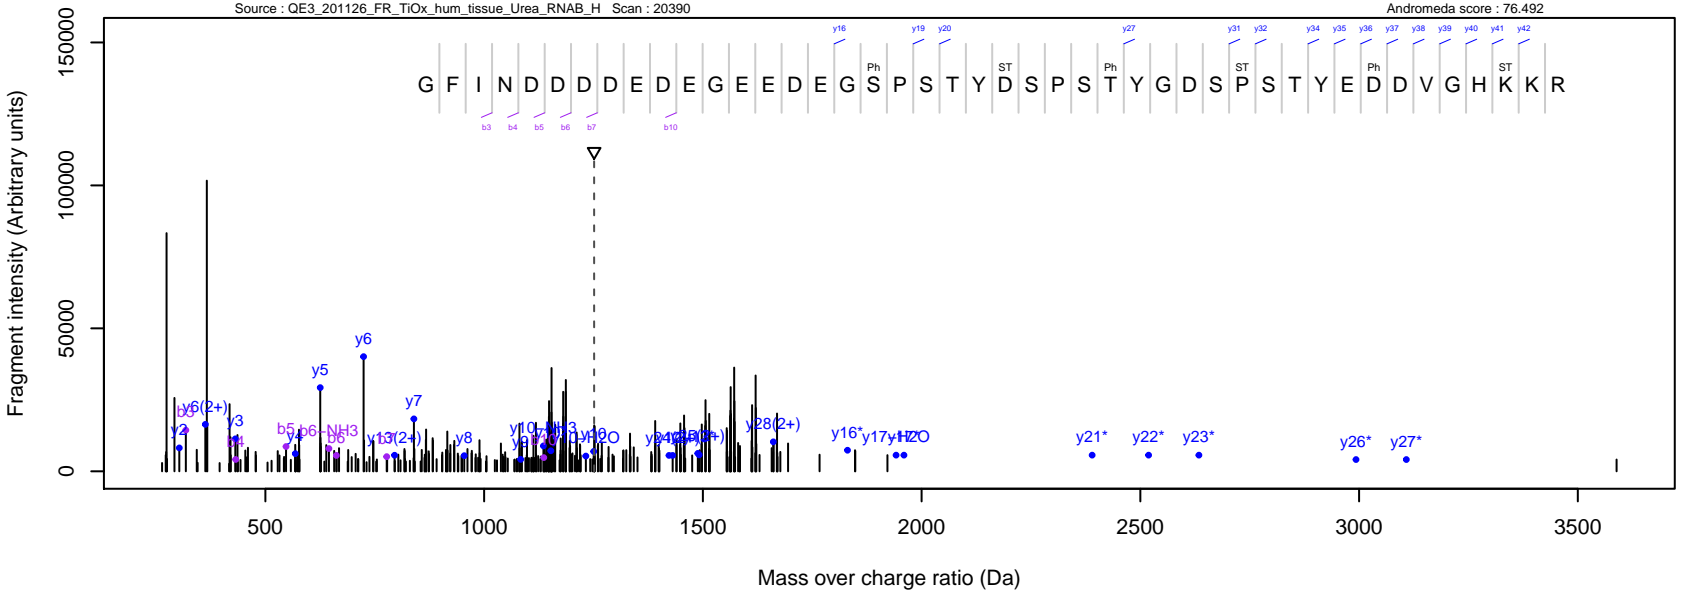

VQSGM(Oxidation (M))GLILQGYES(Phospho (STY))GS(Phospho (STY))EEEEIHEK-3+

Source : QE3\_201126\_FR\_TiOx\_hum\_tissue\_Urea\_RNAB\_B Scan : 37249

Andromeda score : 76.481

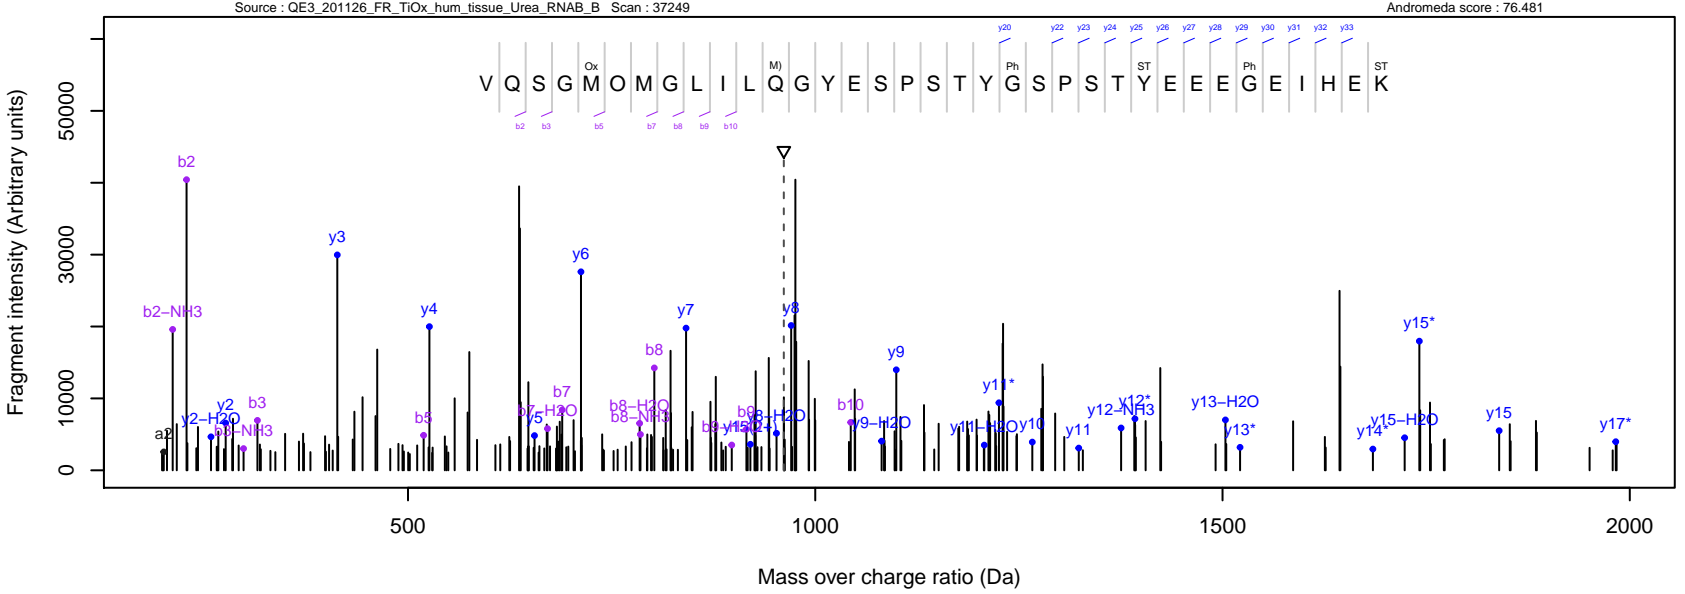

KAALLAQYADVT(Phospho (STY))DEEDEADEKDDSGATTMNIIGSDK-4+

Source : QE3\_201126\_FR\_TiOx\_hum\_tissue\_Urea\_RNAB\_H Scan : 35154

Andromeda score : 76.478

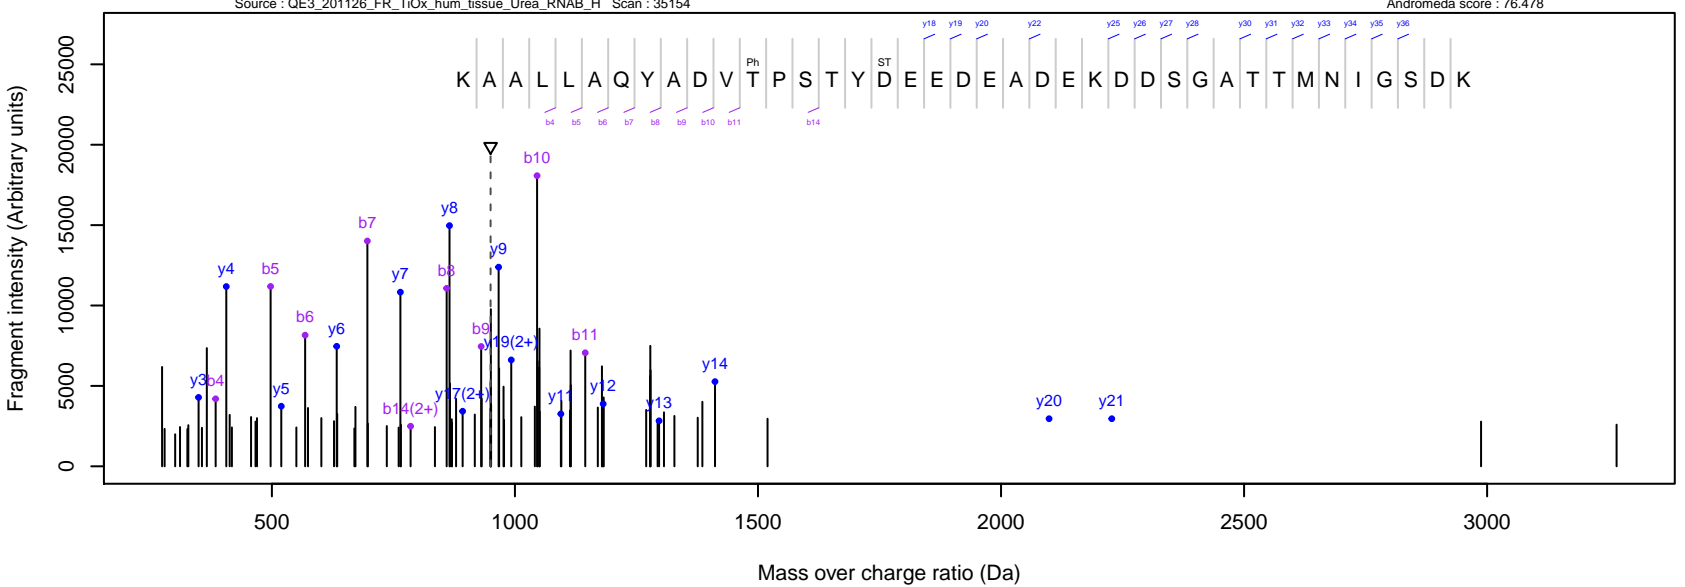

S(Phospho (STY))PGSGSQSSGWHEVEPGMPSPPTLLKK-3+

Source : QE3\_201126\_FR\_TiOx\_hum\_tissue\_Urea\_RNAB\_N Scan : 24955

Andromeda score : 76.476

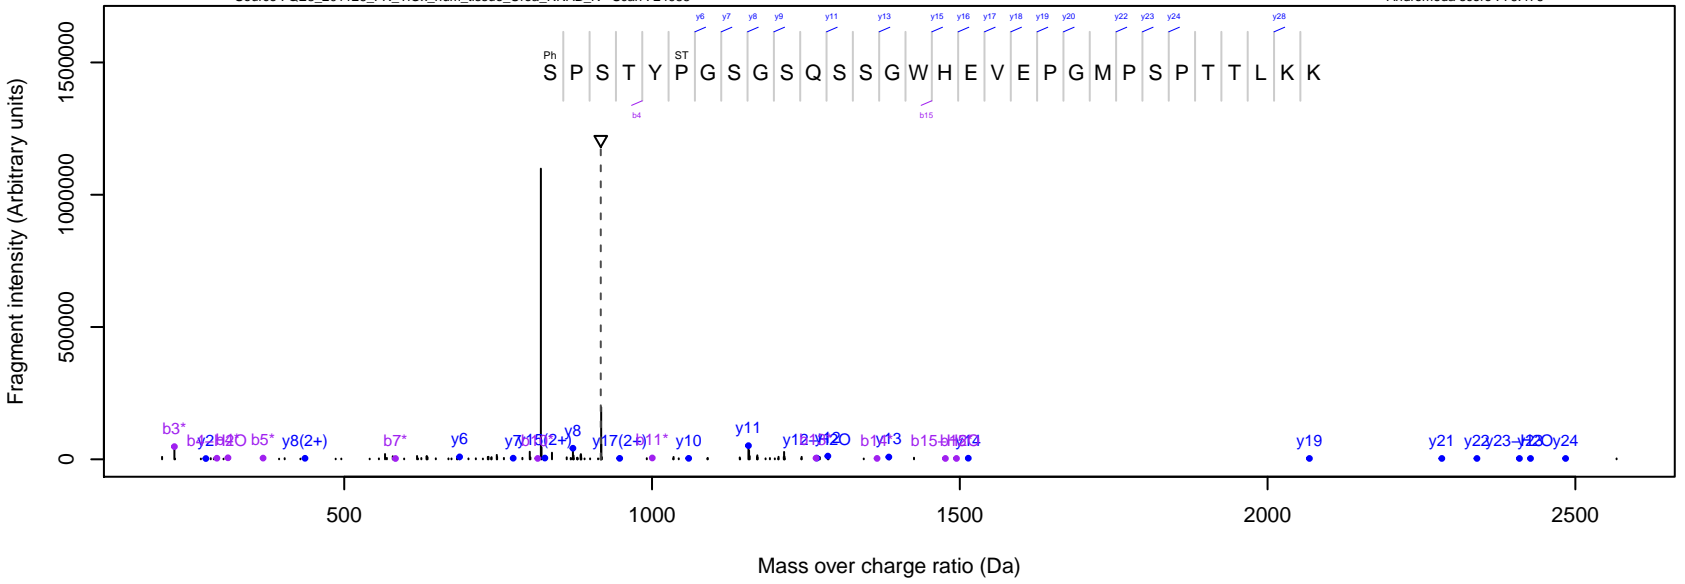

S(Phospho (STY))AASREDLVGPEVGASPGQSGR-3+

Source : QE3\_201126\_FR\_TiOx\_hum\_tissue\_Urea\_RNAB\_H Scan : 19718

Andromeda score : 76.439

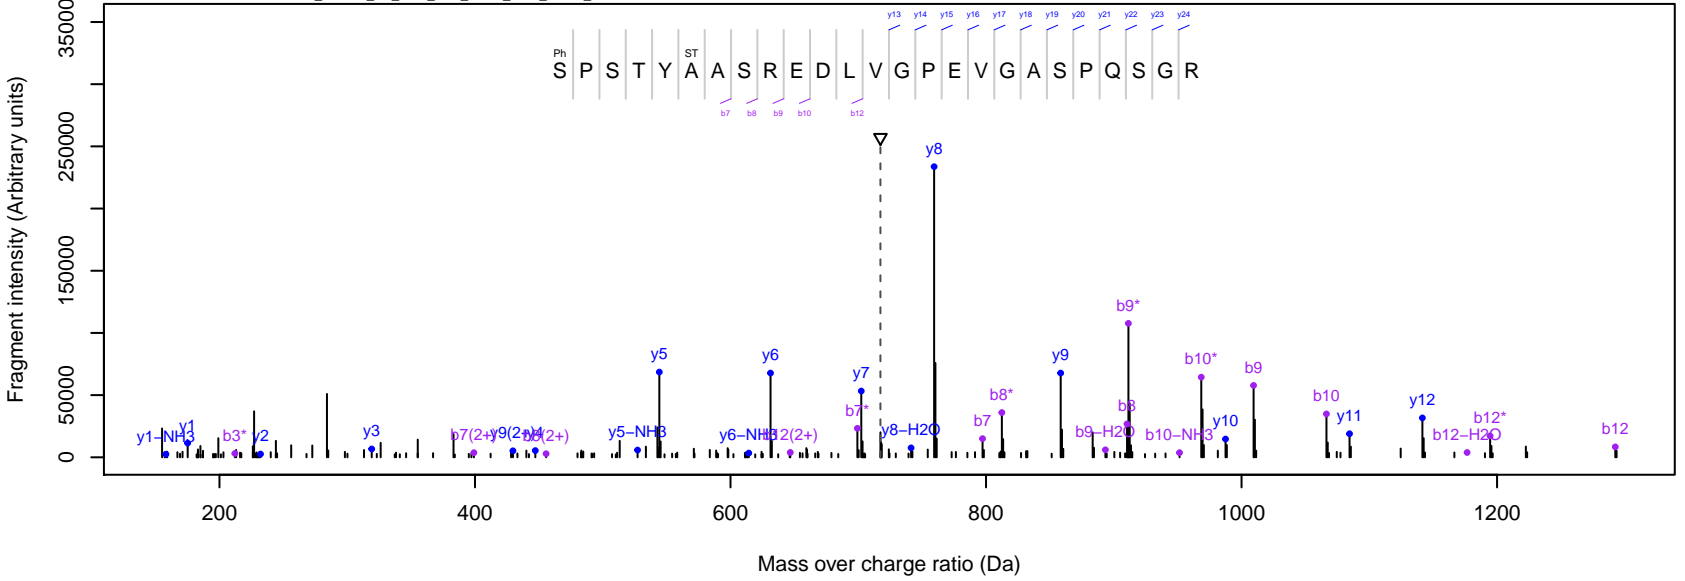

LISDFEDTDGEGGAYT(Phospho (STY))DNELEPEAEPLVSSITR-3+

Source : QE3\_201126\_FR\_TiOx\_hum\_tissue\_Urea\_RNAB\_B Scan : 57989

Andromeda score : 76.423

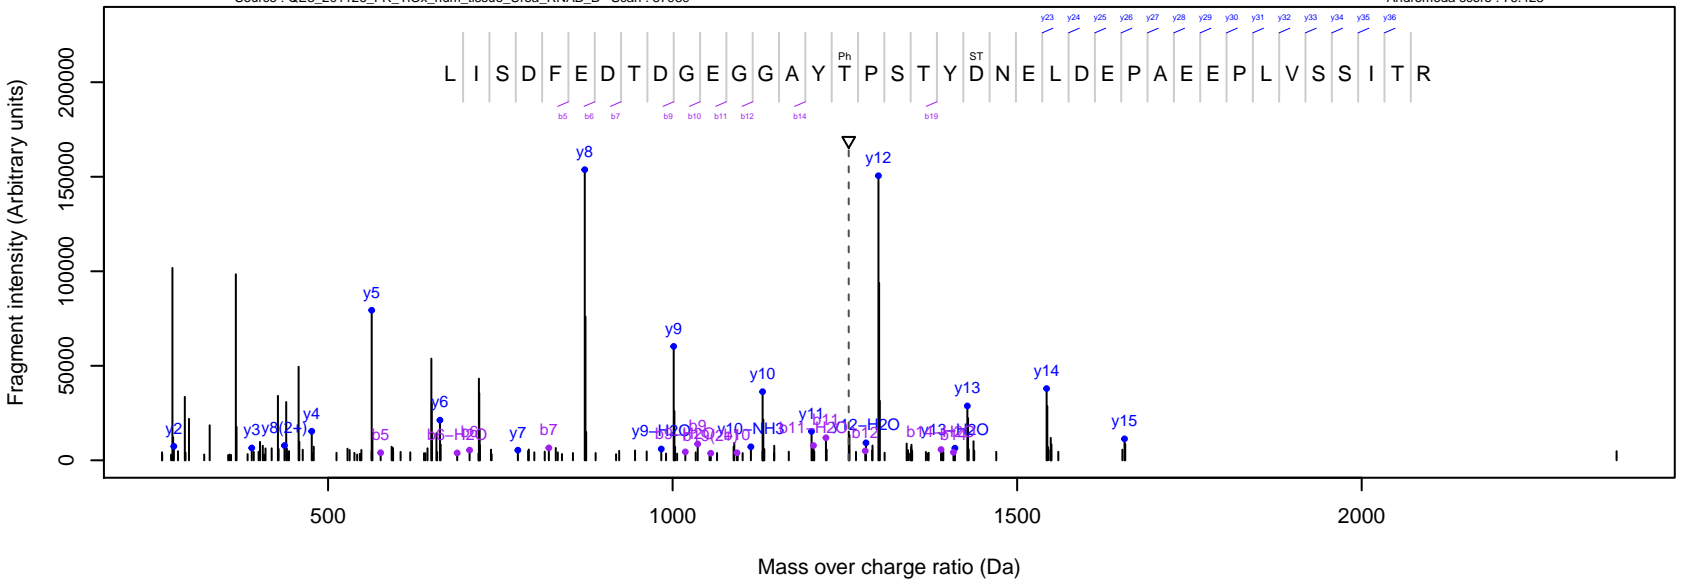

CHS(Phospho (STY))ADDILDVSLDPQERPQHVGHR-4+

Source : QE3\_201126\_FR\_TiOx\_hum\_tissue\_Urea\_RNAB\_N Scan : 24258

Andromeda score : 76.417

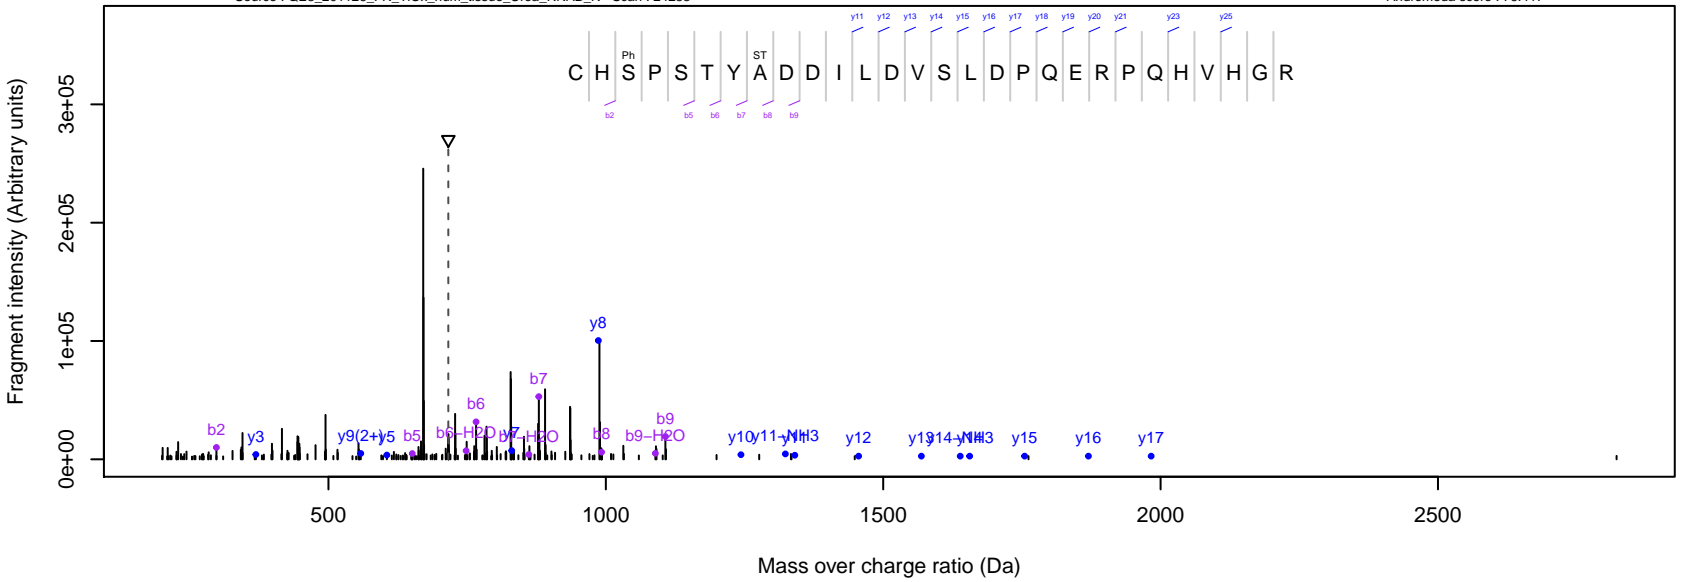

SIDDEITEAKS(Phospho (STY))GTATPQR-3+

Source : QE3\_201126\_FR\_TiOx\_hum\_tissue\_Urea\_RNAB\_B Scan : 18859

Andromeda score : 76.417

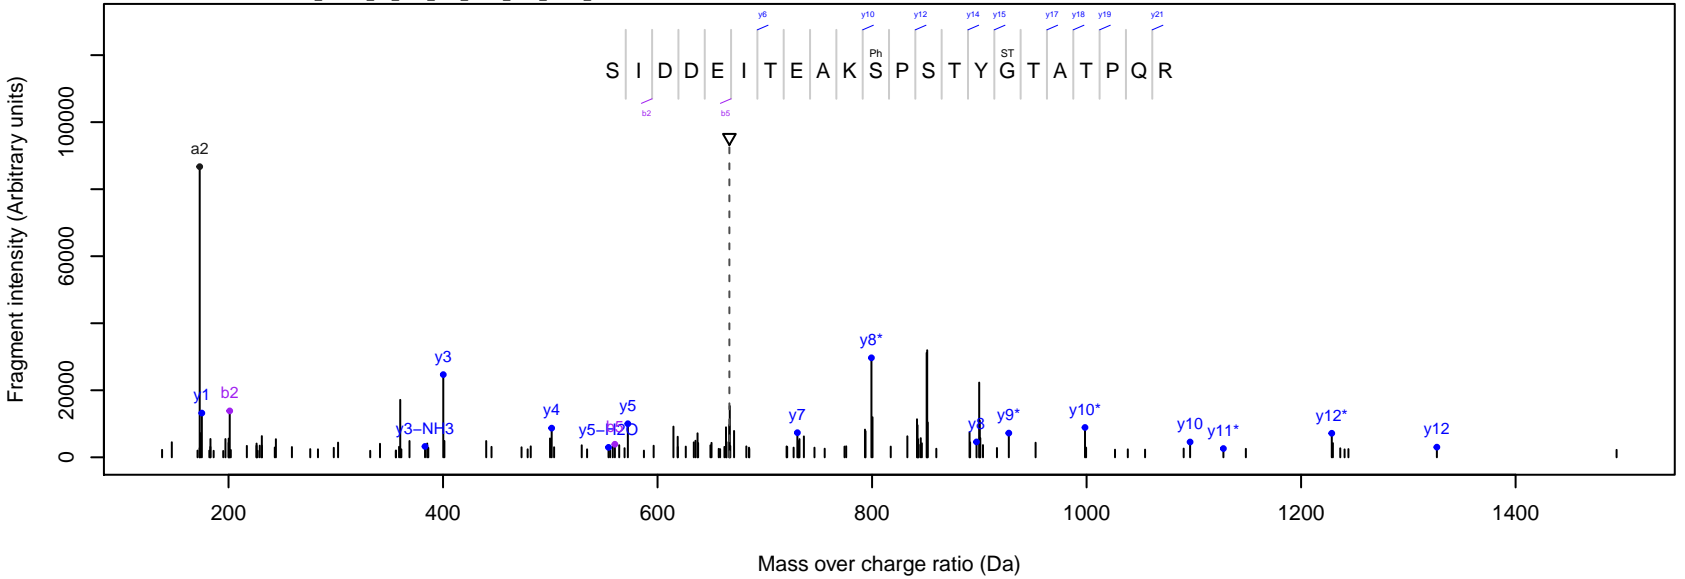

T(Phospho (STY))RSFGHFPGPEFLDVEK-3+

Source : QE3\_201126\_FR\_TiOx\_hum\_tissue\_Urea\_RNAB\_H Scan : 39903

Andromeda score : 76.417

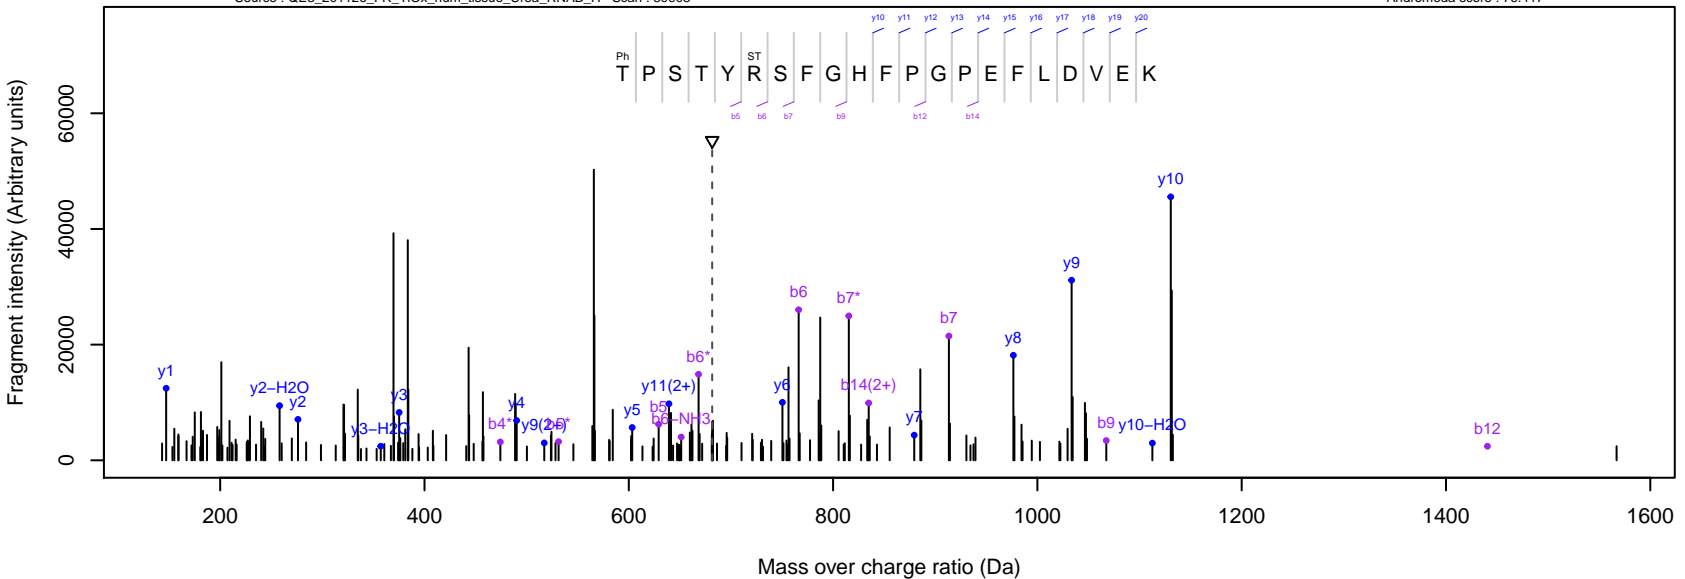



RGS(Phospho (STY))FDATGSGFSMTFSSSS(Phospho (STY))YSSSGYGR-3+

Source : QE3\_201126\_FR\_TiOx\_hum\_tissue\_Urea\_RNAB\_B Scan : 48192

Andromeda score : 76.402

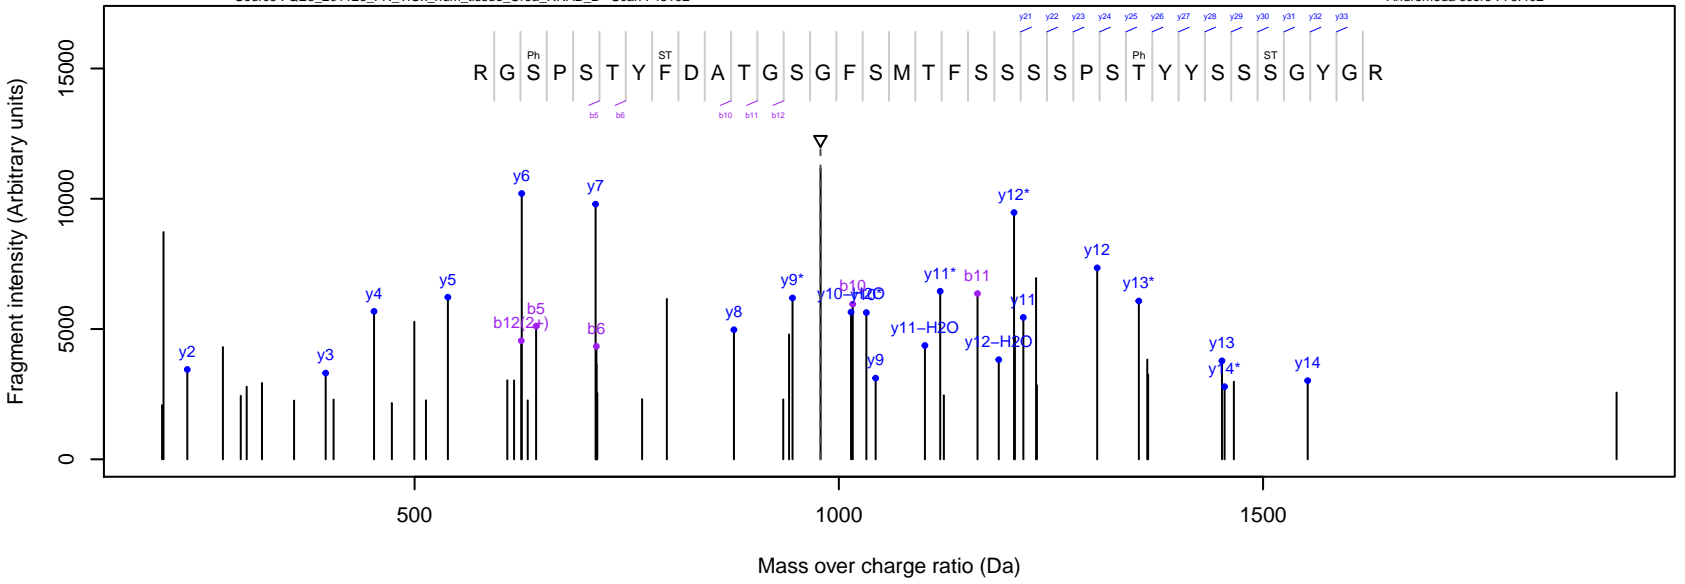

ELRAPS(Phospho (STY))PPVEHPR-3+

Source : QE3\_201126\_FR\_TiOx\_hum\_tissue\_Urea\_RNAB\_B Scan : 13772

Andromeda score : 76.391

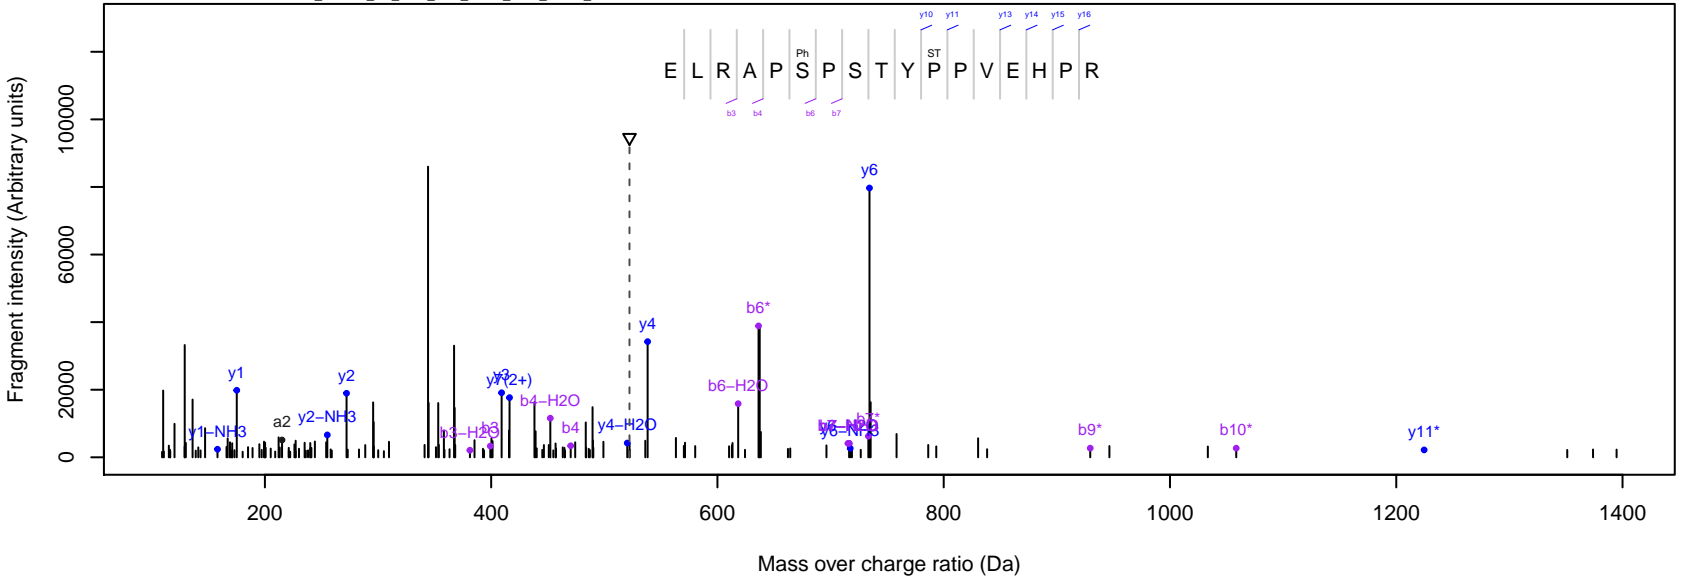

(Acetyl (Protein N-term))ADLNKEQS(Phospho (STY))ELDQDLDDVEEVEEETGEEK-3+

Source : QE3\_201126\_FR\_TiOx\_hum\_tissue\_Urea\_RNAB\_N Scan : 59954

Andromeda score : 76.358

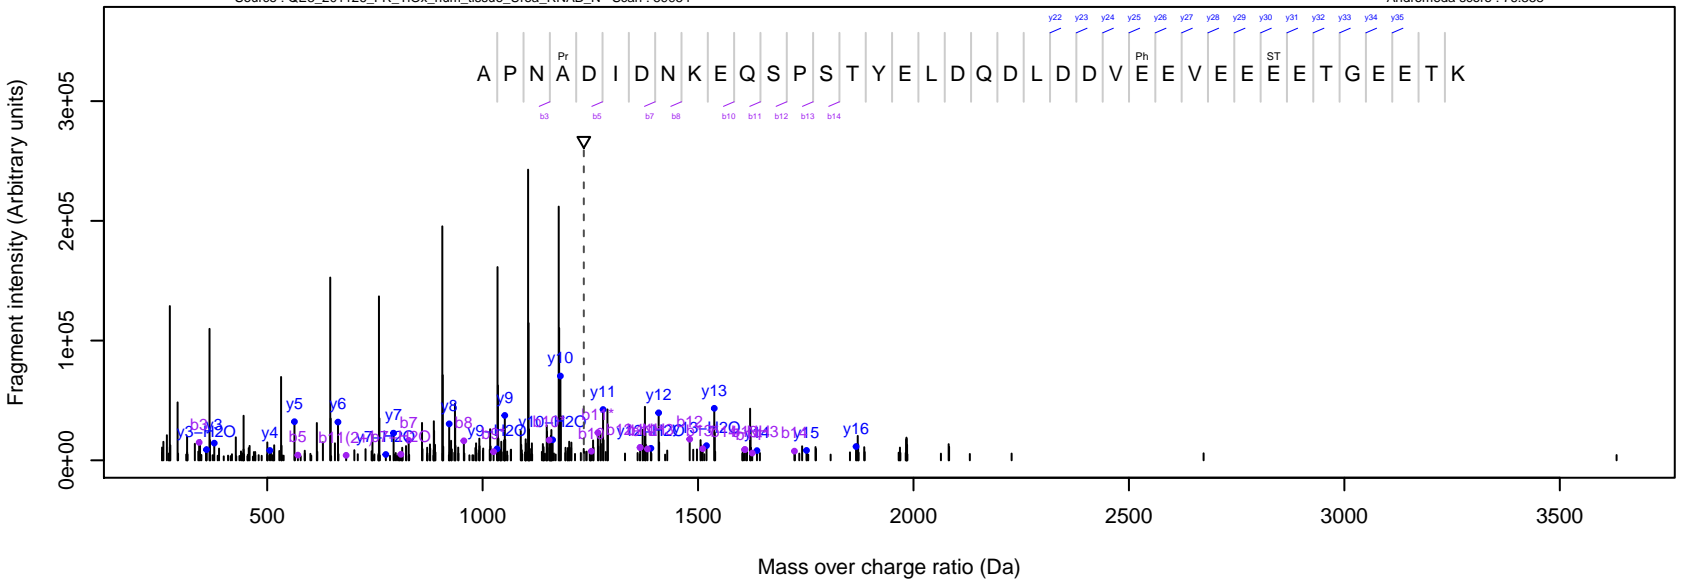

RRDFT(Phospho (STY))PAELR-3+

Source : QE3\_2011126\_FR\_TiOx\_hum\_tissue\_Urea\_RNAB\_N Scan : 13627

Andromeda score : 76.357

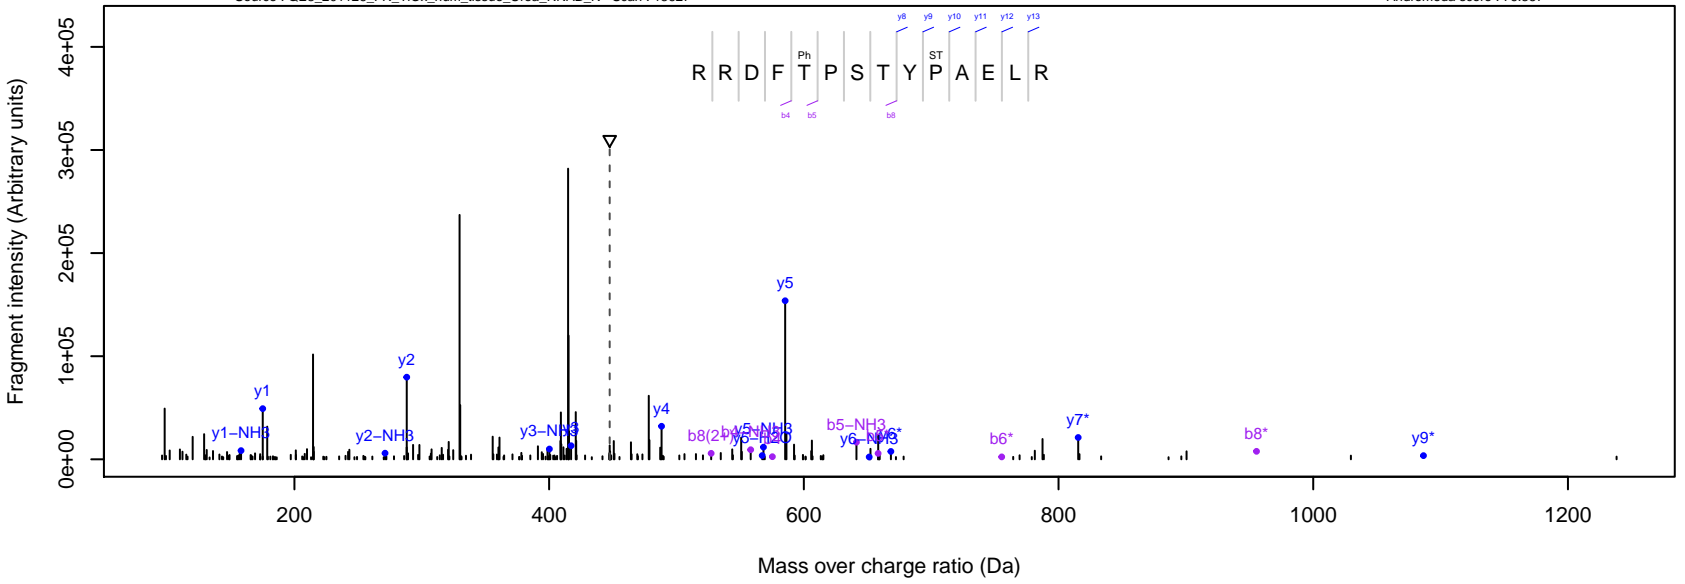

TVS(Phospho (STY))DNLNSNR-2+

Source : QE3\_2011126\_FR\_TiOx\_hum\_tissue\_Urea\_RNAB\_N Scan : 9150

Andromeda score : 76.357

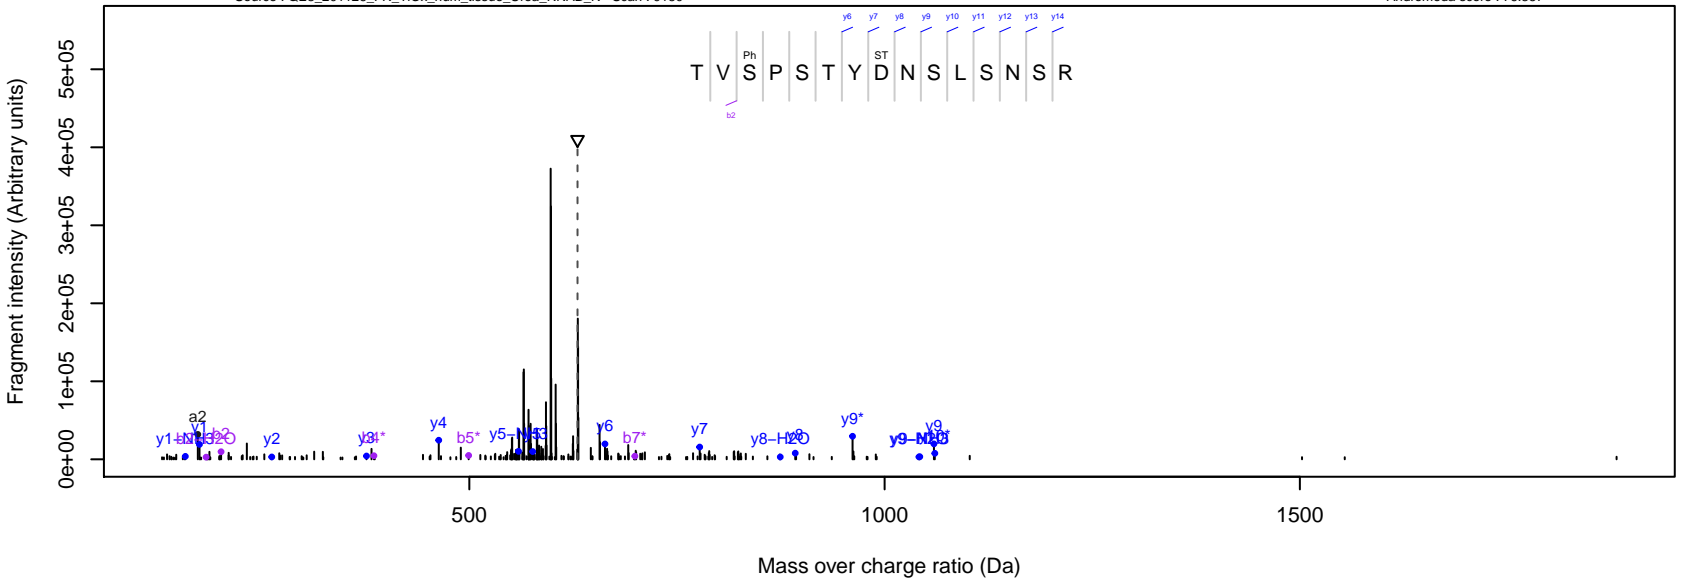

EHGPFRS(Phospho (STY))VEDLVR-3+

Source : QE3\_2011126\_FR\_TiOx\_hum\_tissue\_Urea\_RNAB\_B Scan : 27086

Andromeda score : 76.341

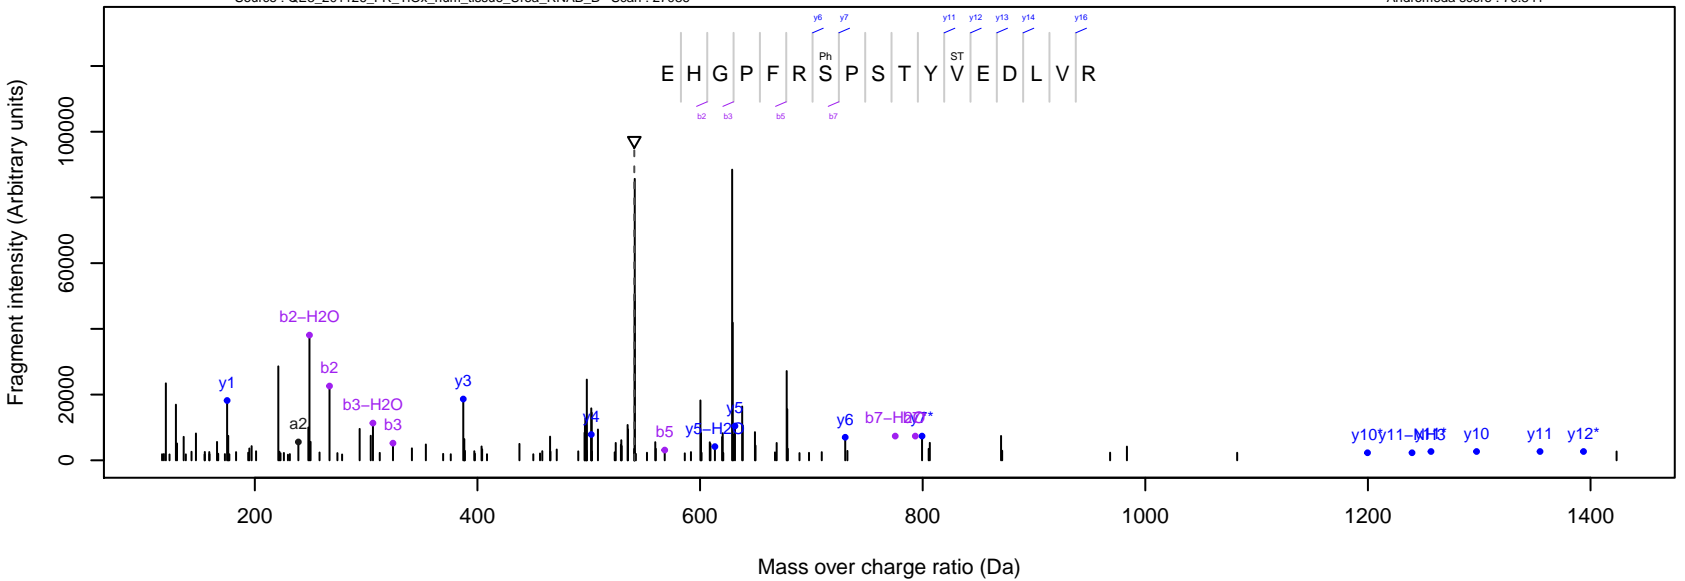

IDTHPS(Phospho (STY))PSHSSTVK-3+

Source : QE3\_2011126\_FR\_TiOx\_hum\_tissue\_Urea\_RNAB\_N Scan : 4540

Andromeda score : 76.341

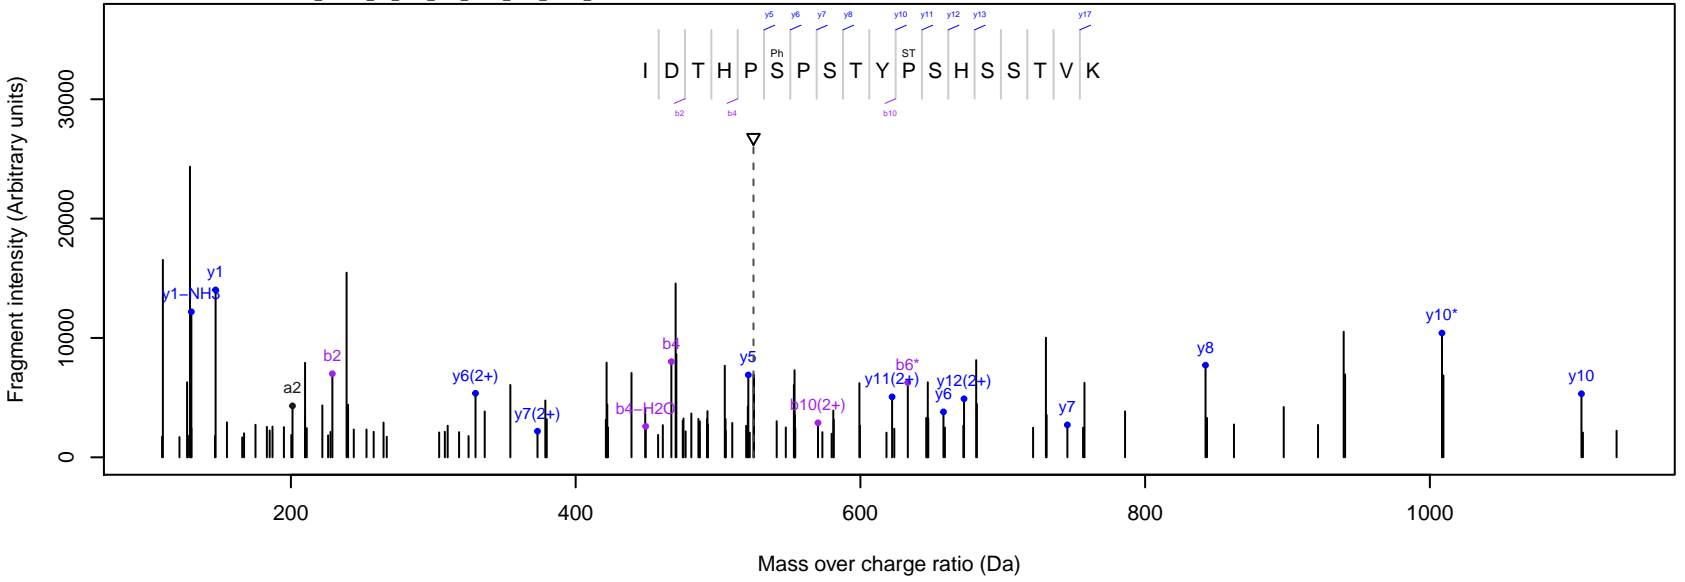

LQLQVTVS(Phospho (STY))SAK-2+

Source : QE3\_2011126\_FR\_TiOx\_hum\_tissue\_Urea\_RNAB\_B Scan : 26395

Andromeda score : 76.326

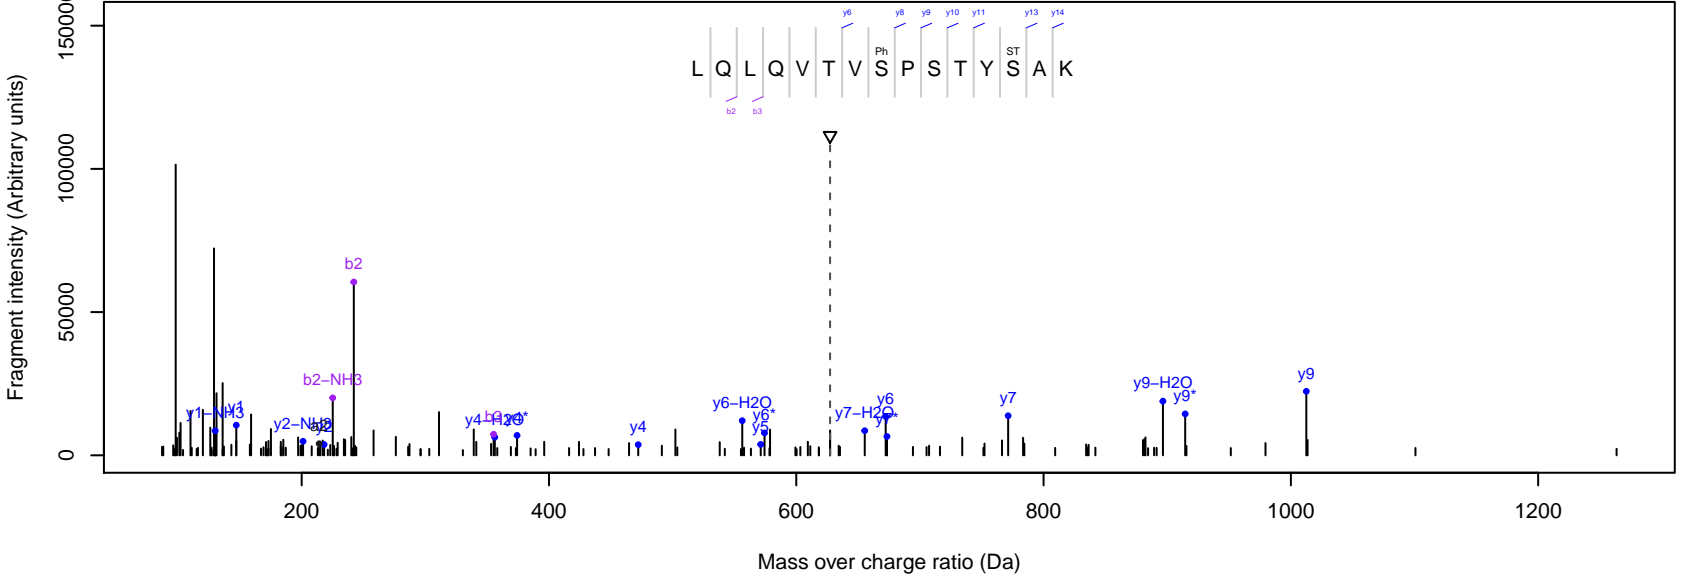

VHGEPTS(Phospho (STY))DLS(Phospho (STY))DID-2+

Source : QE3\_2011126\_FR\_TiOx\_hum\_tissue\_Urea\_RNAB\_N Scan : 32960

Andromeda score : 76.326

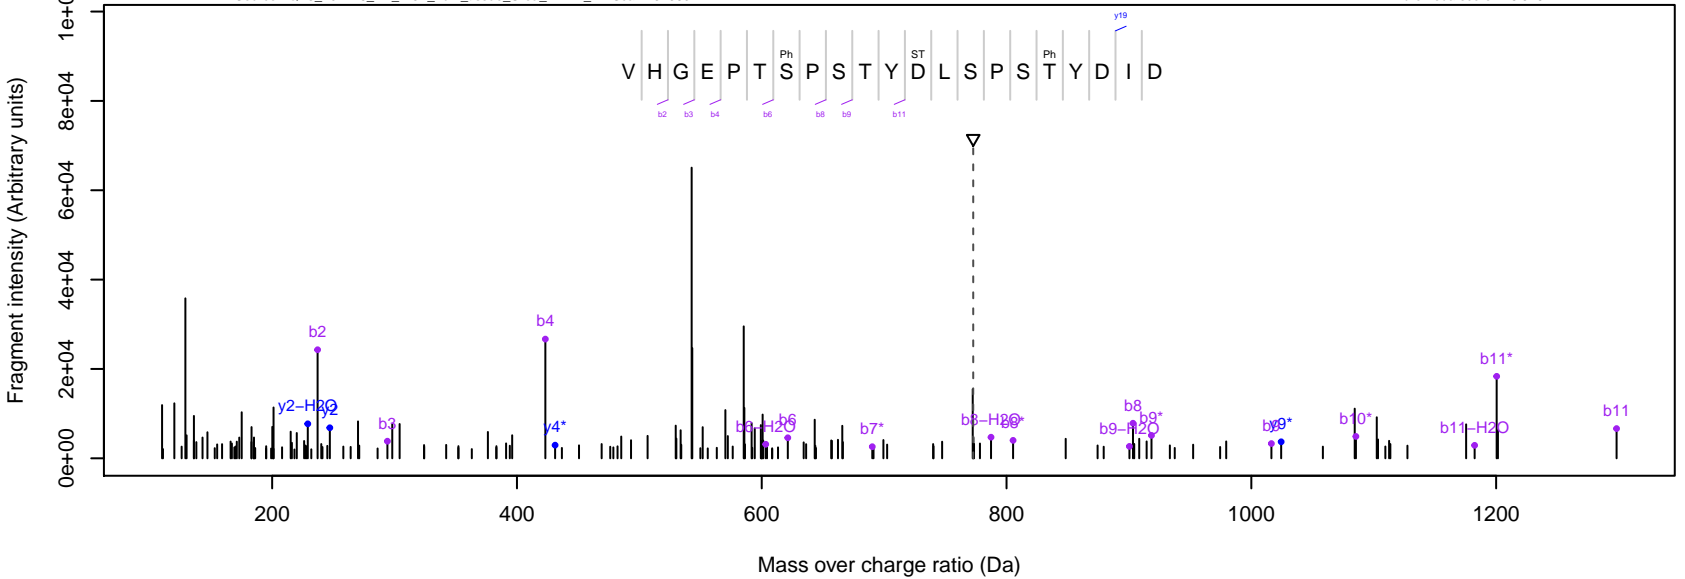

S(Phospho (STY))RT(Phospho (STY))PPAIR-2+

Source : QE3\_201126\_FR\_TIOx\_hum\_tissue\_Urea\_RNAB\_B Scan : 10419

Andromeda score : 76.302

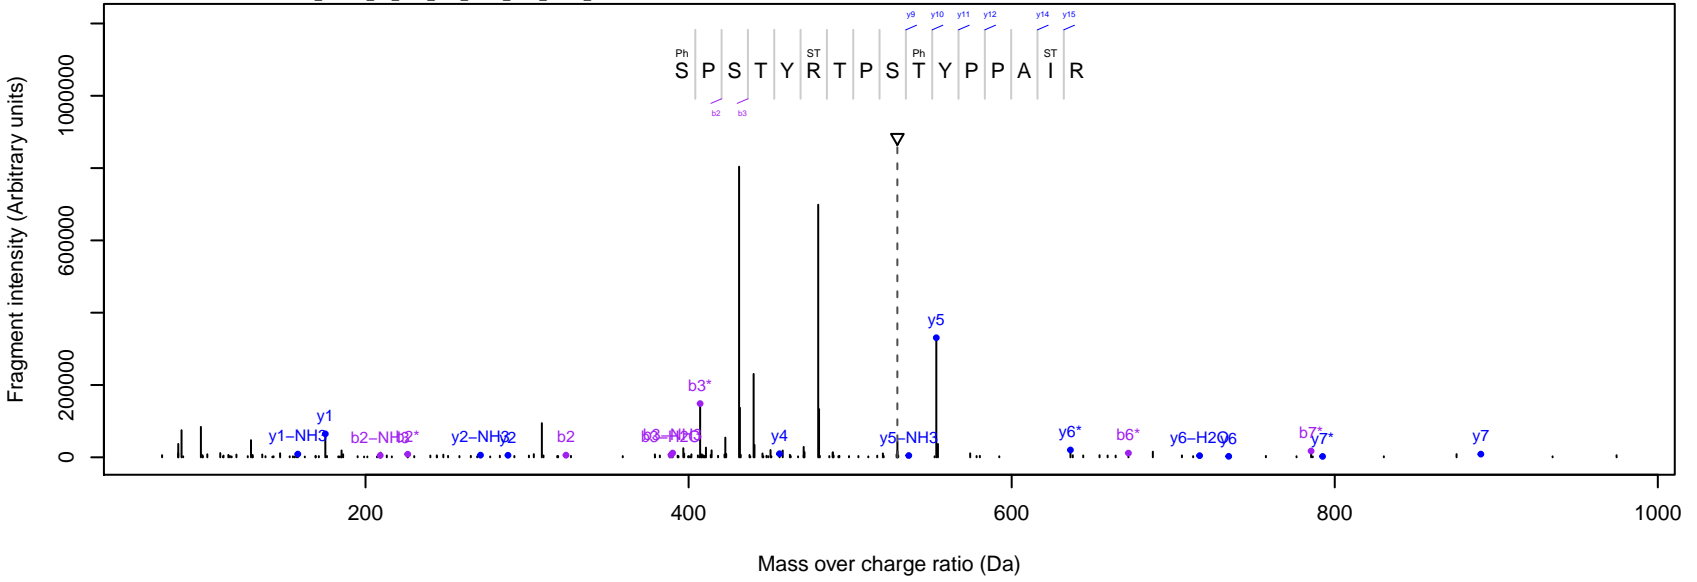

GSKS(Phospho (STY))PDLLM(Oxidation (M))YQGPPDTAEIIK-3+

Source : QE3\_201126\_FR\_TIOx\_hum\_tissue\_Urea\_RNAB\_N Scan : 39689

Andromeda score : 76.267

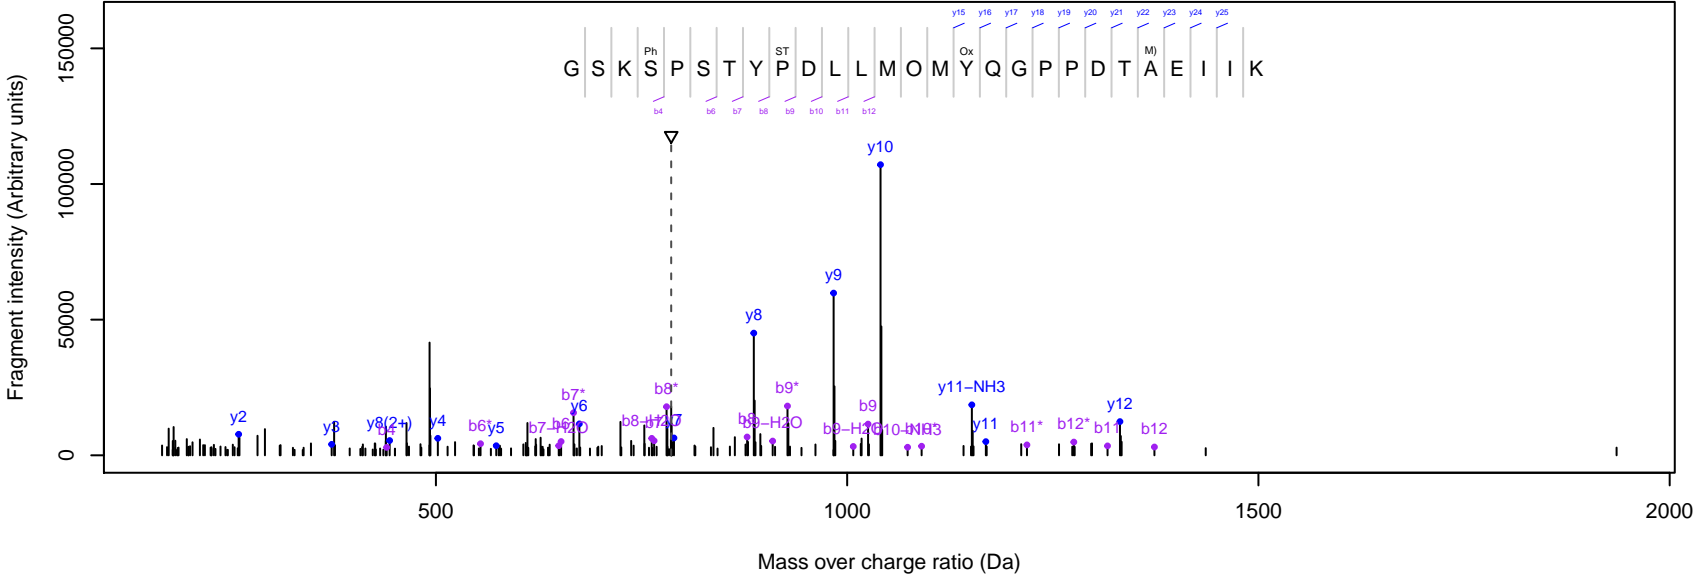

ARGDS(Phospho (STY))EALDEES-2+

Source : QE3\_201126\_FR\_TIOx\_hum\_tissue\_Urea\_RNAB\_H Scan : 11214

Andromeda score : 76.262

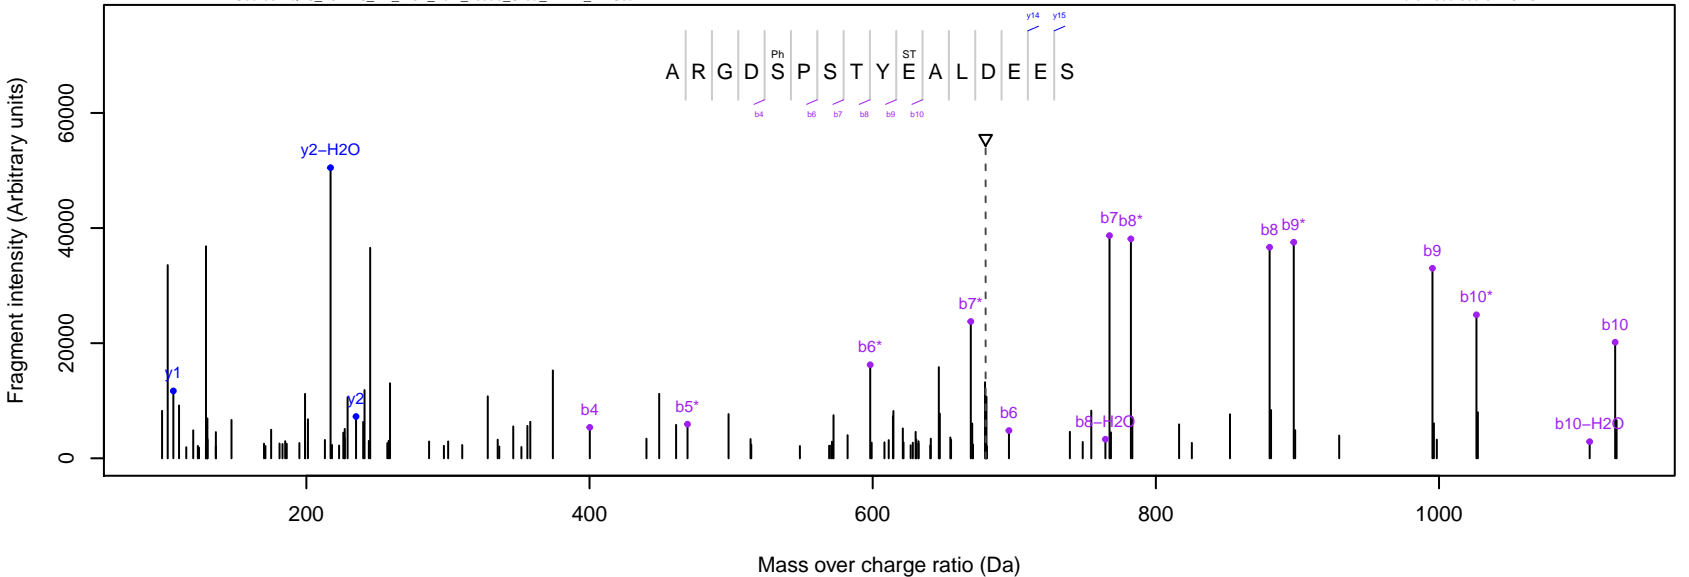

M(Oxidation (M))TVPISIT(Phospho (STY))NPDLLR-2+

Source : QE3\_201126\_FR\_TiOx\_hum\_tissue\_Urea\_RNAB\_B Scan : 48988

Andromeda score : 76.262

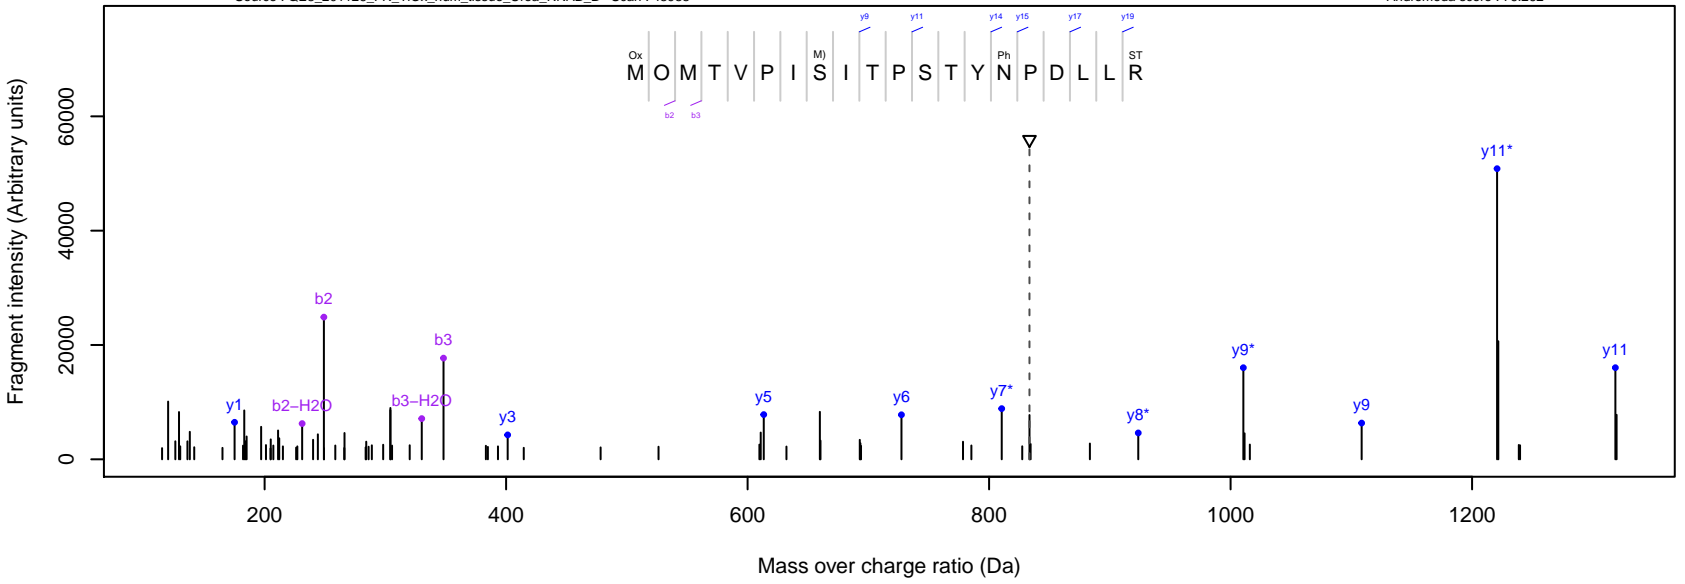

SELLHIES(Phospho (STY))QVELLR-2+

Source : QE3\_201126\_FR\_TiOx\_hum\_tissue\_Urea\_RNAB\_H Scan : 49601

Andromeda score : 76.262

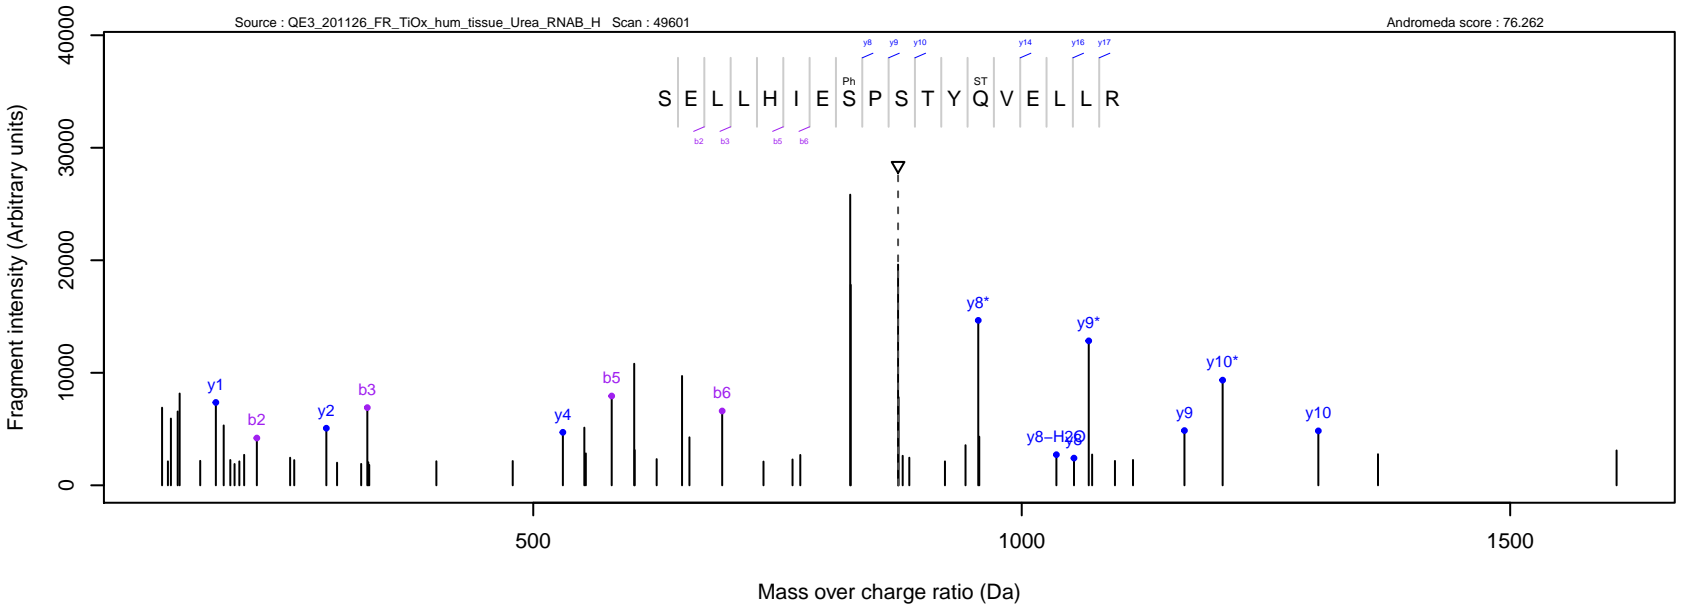

S(Phospho (STY))PGPPALKHPATK-3+

Source : QE3\_201126\_FR\_TiOx\_hum\_tissue\_Urea\_RNAB\_N Scan : 6742

Andromeda score : 76.262

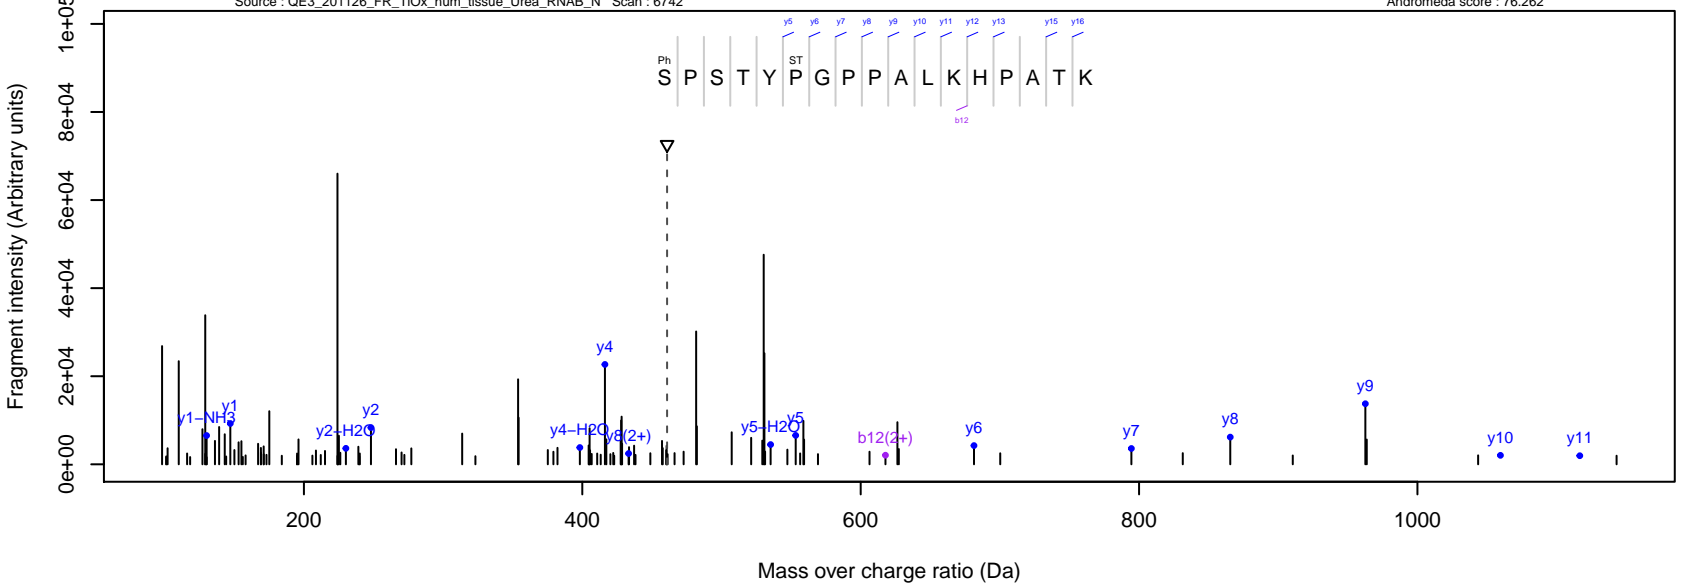

**GEAERGS(Phospho (STY))GGS(Phospho (STY))S(Phospho (STY))GDELREDEPVK-3+**

Source : QE3\_201126\_FR\_TiOx\_hum\_tissue\_Urea\_RNAB\_N Scan : 17231

Andromeda score : 76.259

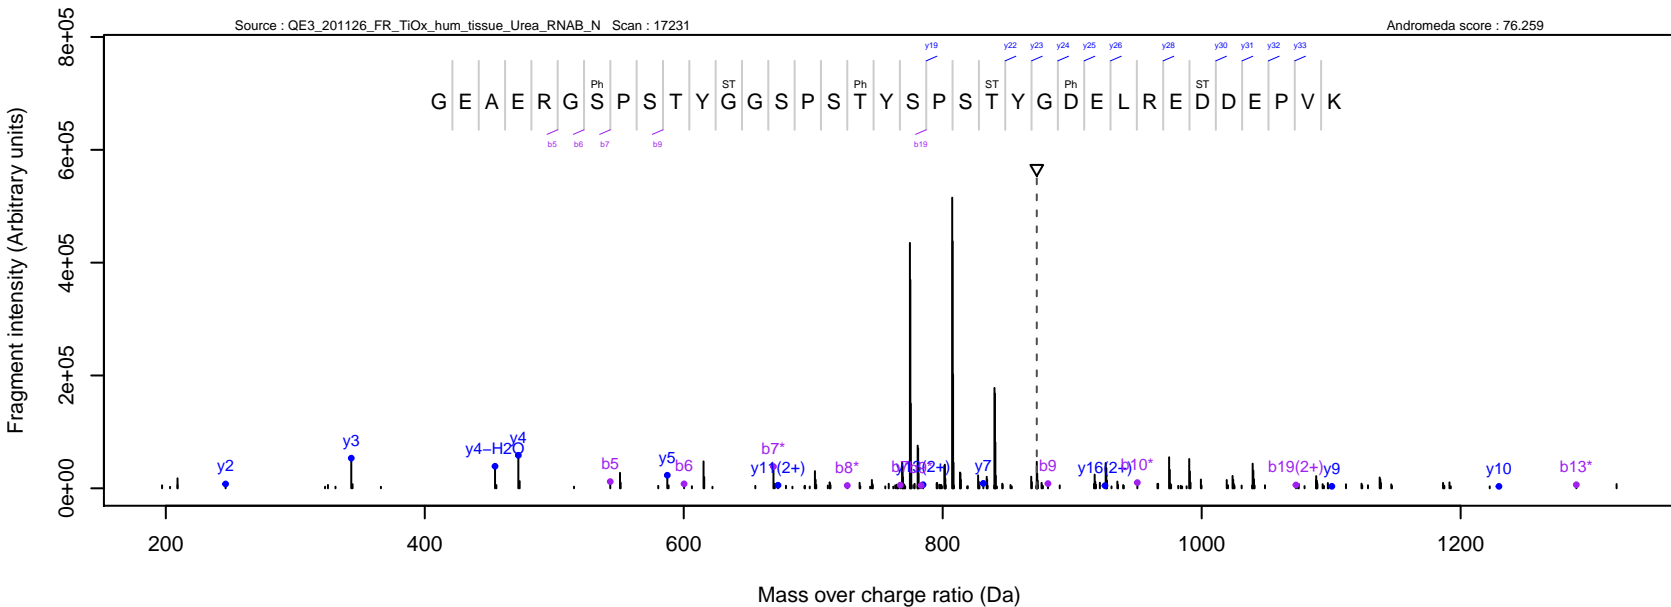

**NLEEEEEKST(Phospho (STY))TPPPAEPVSLPQEPVK-3+**

Source : QE3\_201126\_FR\_TiOx\_hum\_tissue\_Urea\_RNAB\_B Scan : 35113

Andromeda score : 76.259

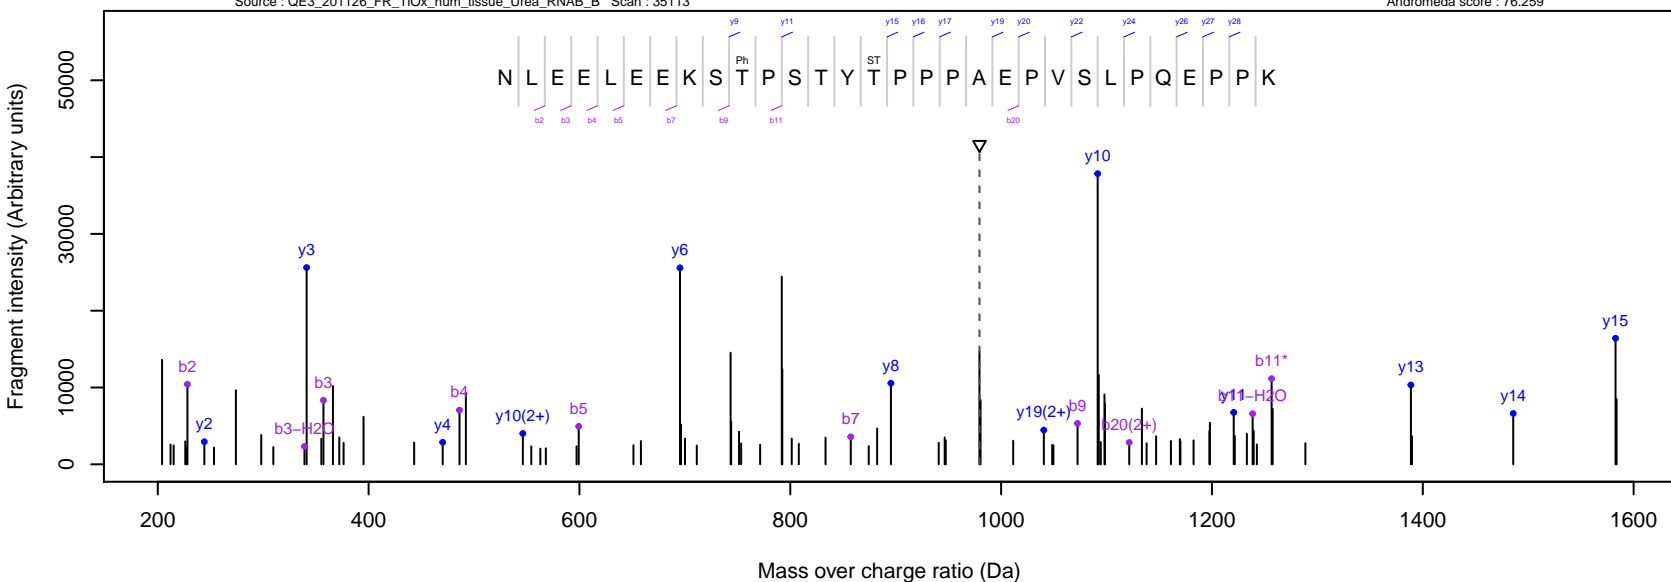

**WDS(Phospho (STY))YDNFSGHRDDGM(Oxidation (M))EEVVGHTQGPLDGSLYAK-4+**

Source : QE3\_201126\_FR\_TiOx\_hum\_tissue\_Urea\_RNAB\_N Scan : 35409

Andromeda score : 76.259

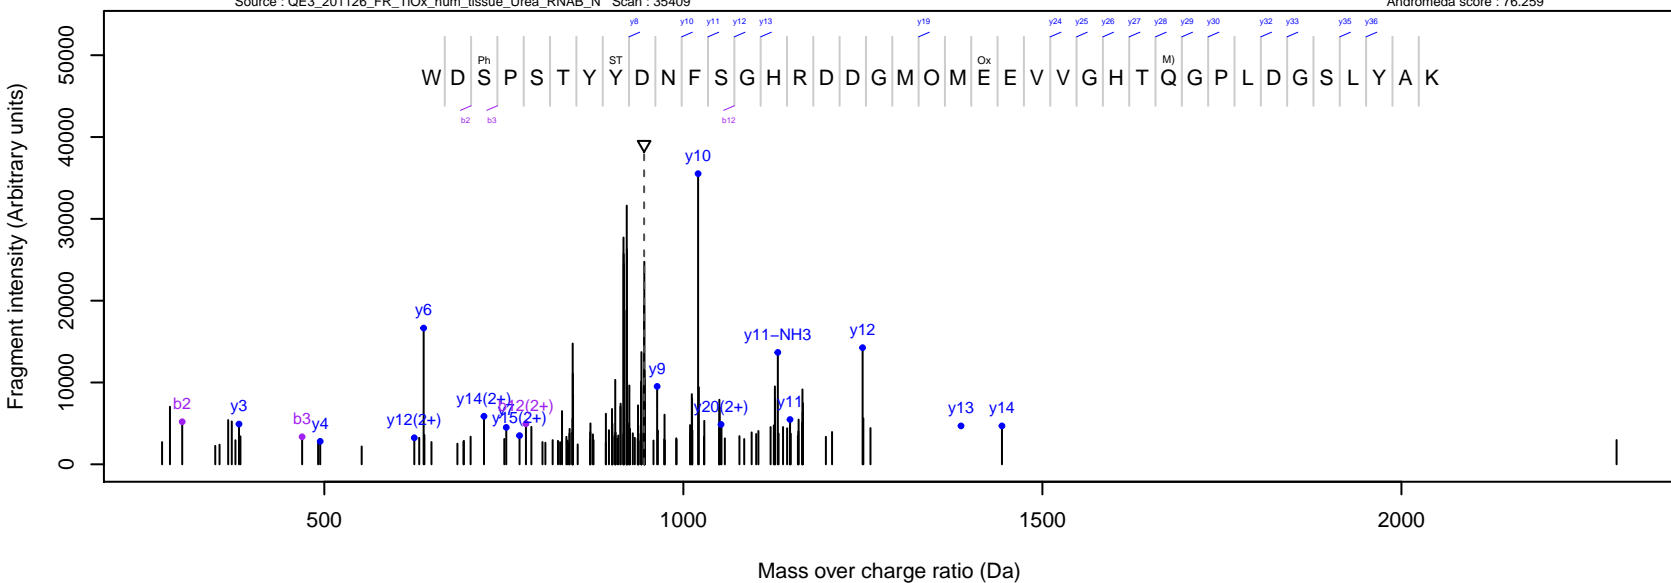

**AEEQLPPPLS(Phospho (STY))PPS(Phospho (STY))PSTPNHR-3+**

Source : QE3\_201126\_FR\_TiOx\_hum\_tissue\_Urea\_RNAB\_N Scan : 31389

Andromeda score : 76.198

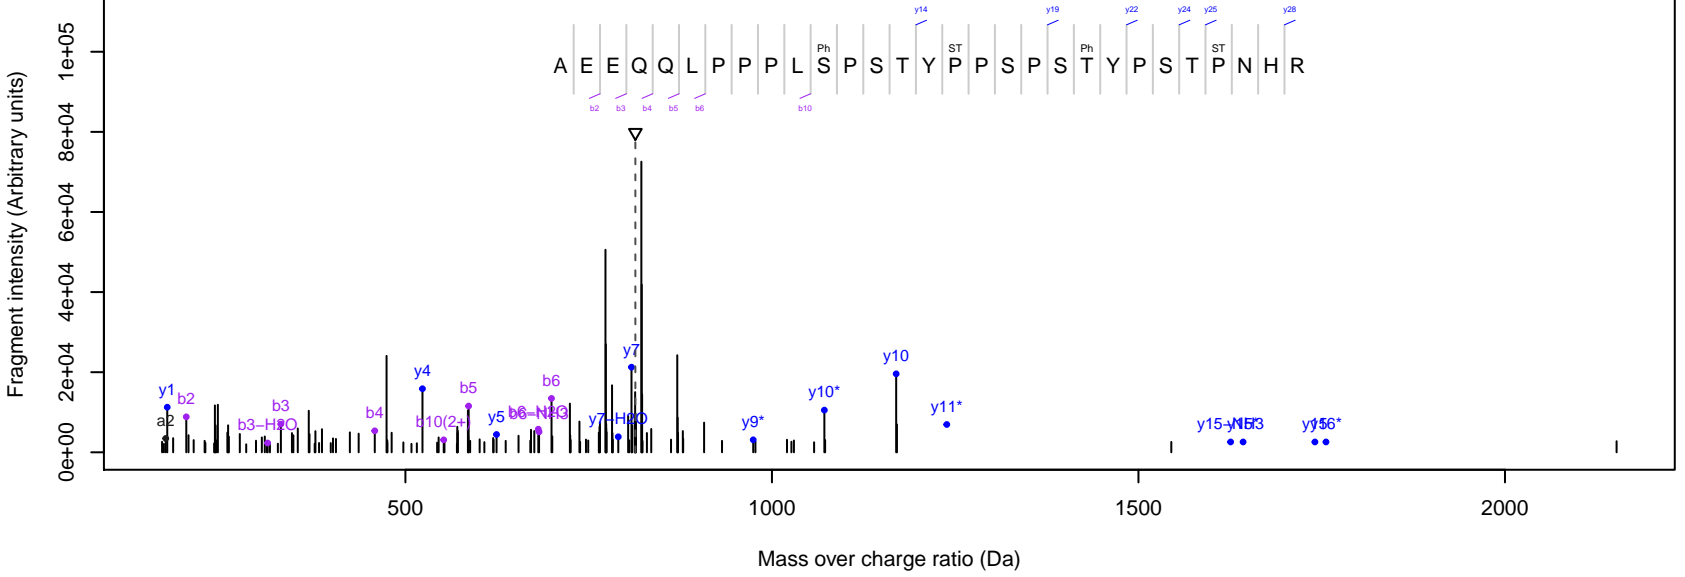

**LKPGGVGAPSSSS(Phospho (STY))PSPSPSAR-3+**

Source : QE3\_201126\_FR\_TiOx\_hum\_tissue\_Urea\_RNAB\_H Scan : 11819

Andromeda score : 76.198

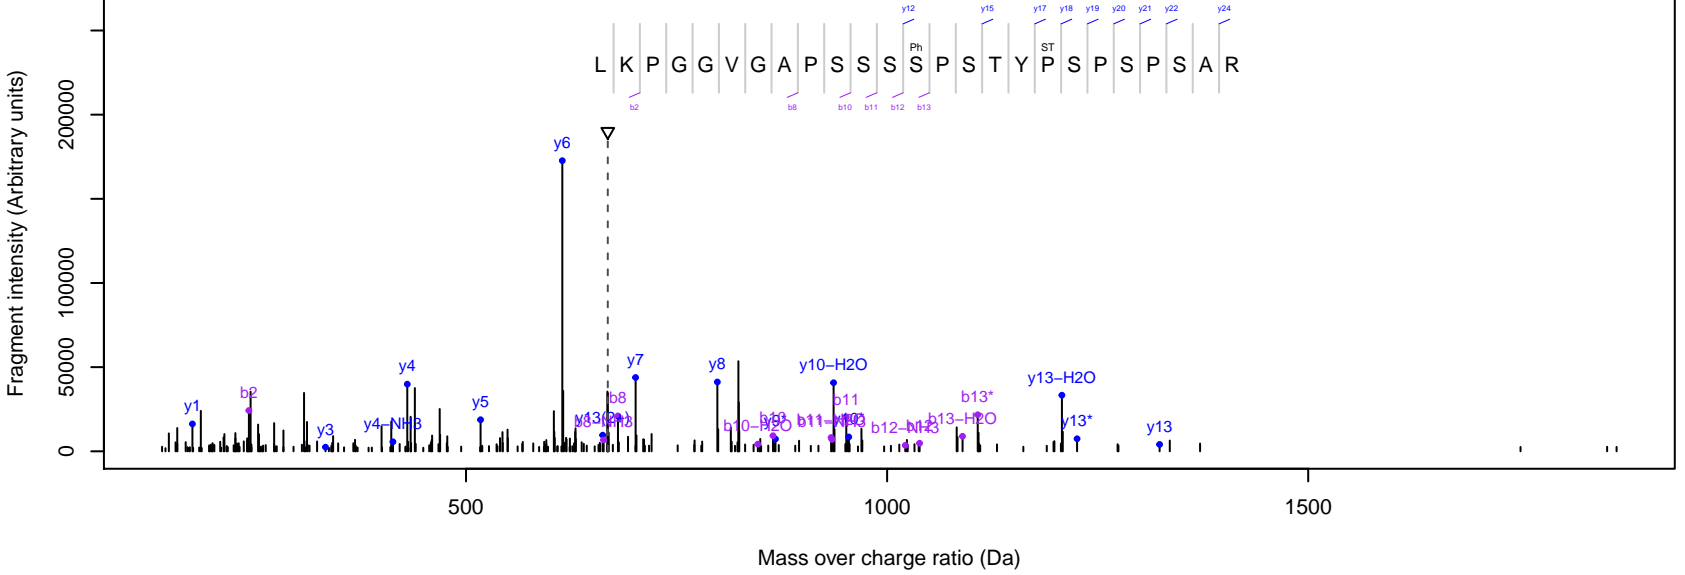

**SLPELDRDKS(Phospho (STY))DS(Phospho (STY))DTEGLLFSR-2+**

Source : QE3\_201126\_FR\_TiOx\_hum\_tissue\_Urea\_RNAB\_H Scan : 43046

Andromeda score : 76.186

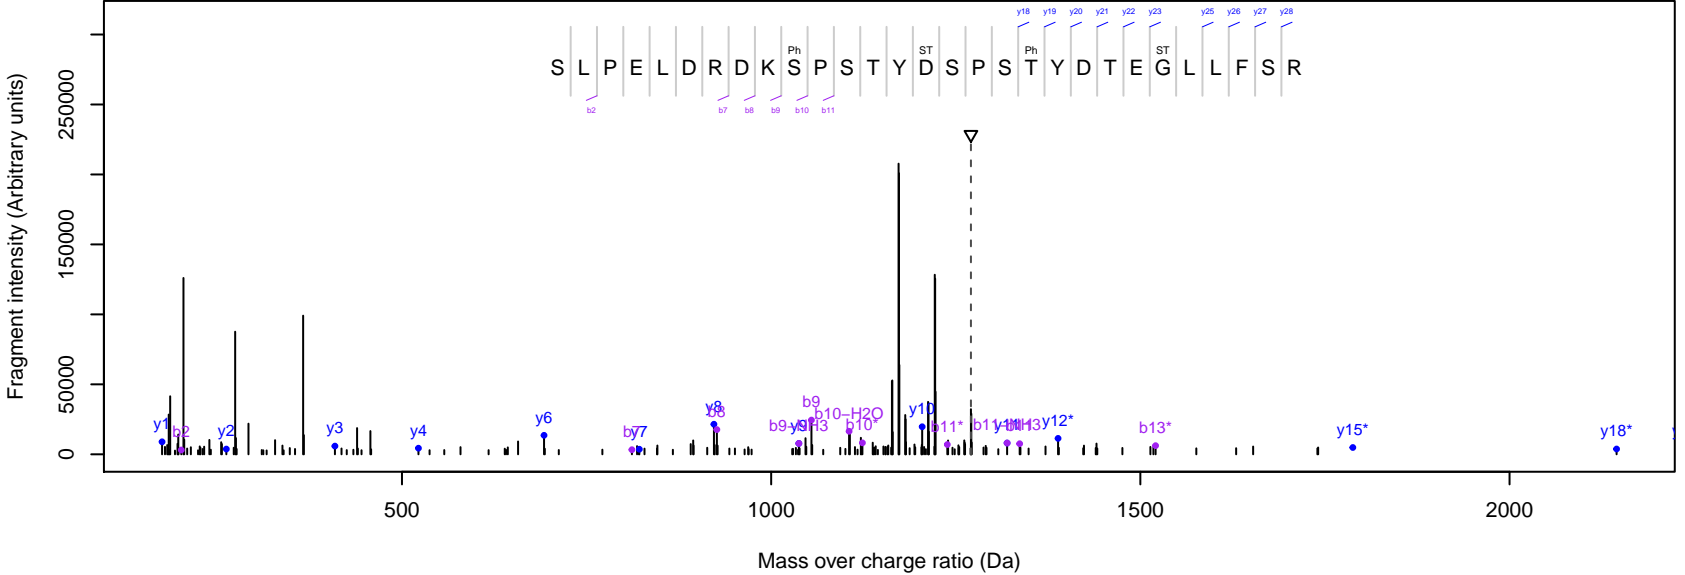

SLS(Phospho (STY))AIDR-2+

Source : QE3\_201126\_FR\_TiOx\_hum\_tissue\_Urea\_RNAB\_N Scan : 16113

Andromeda score : 76.17

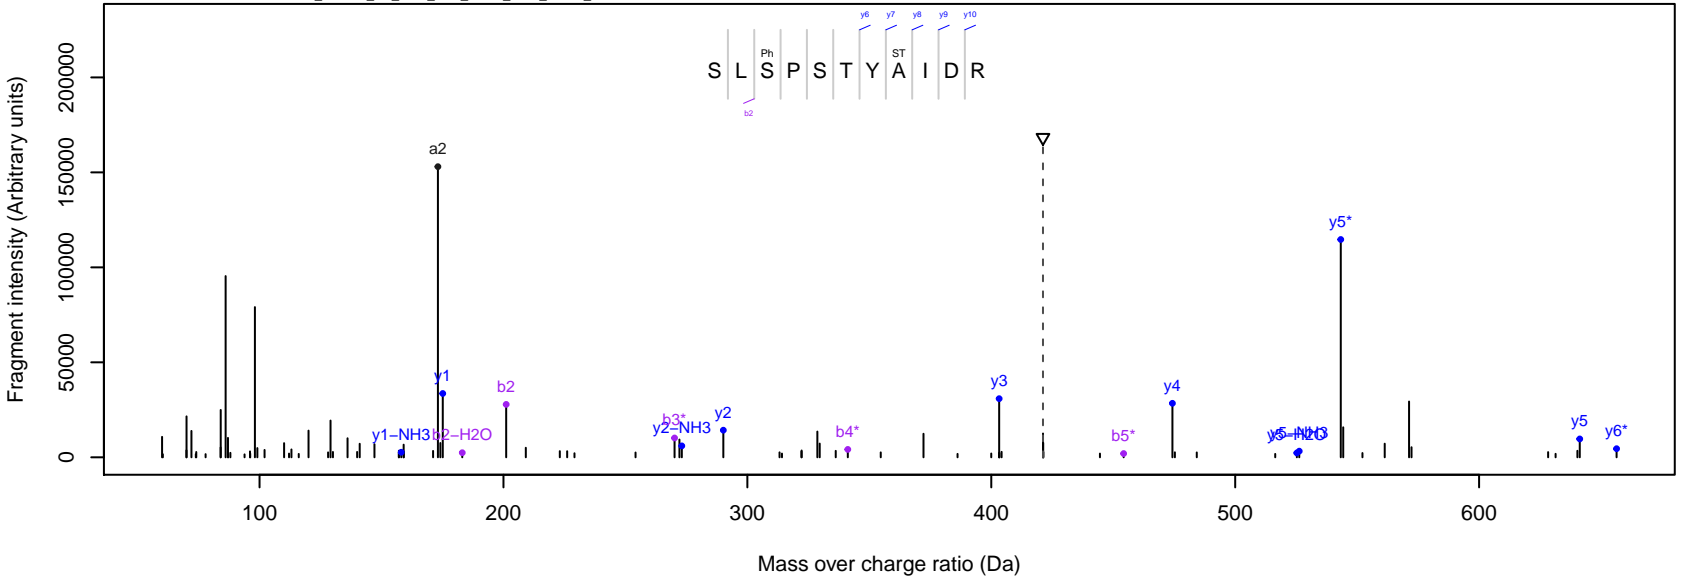

S(Phospho (STY))RTLAVHDAILEDLVFPSEIVGK-3+

Source : QE3\_201126\_FR\_TiOx\_hum\_tissue\_Urea\_RNAB\_H Scan : 57280

Andromeda score : 76.162

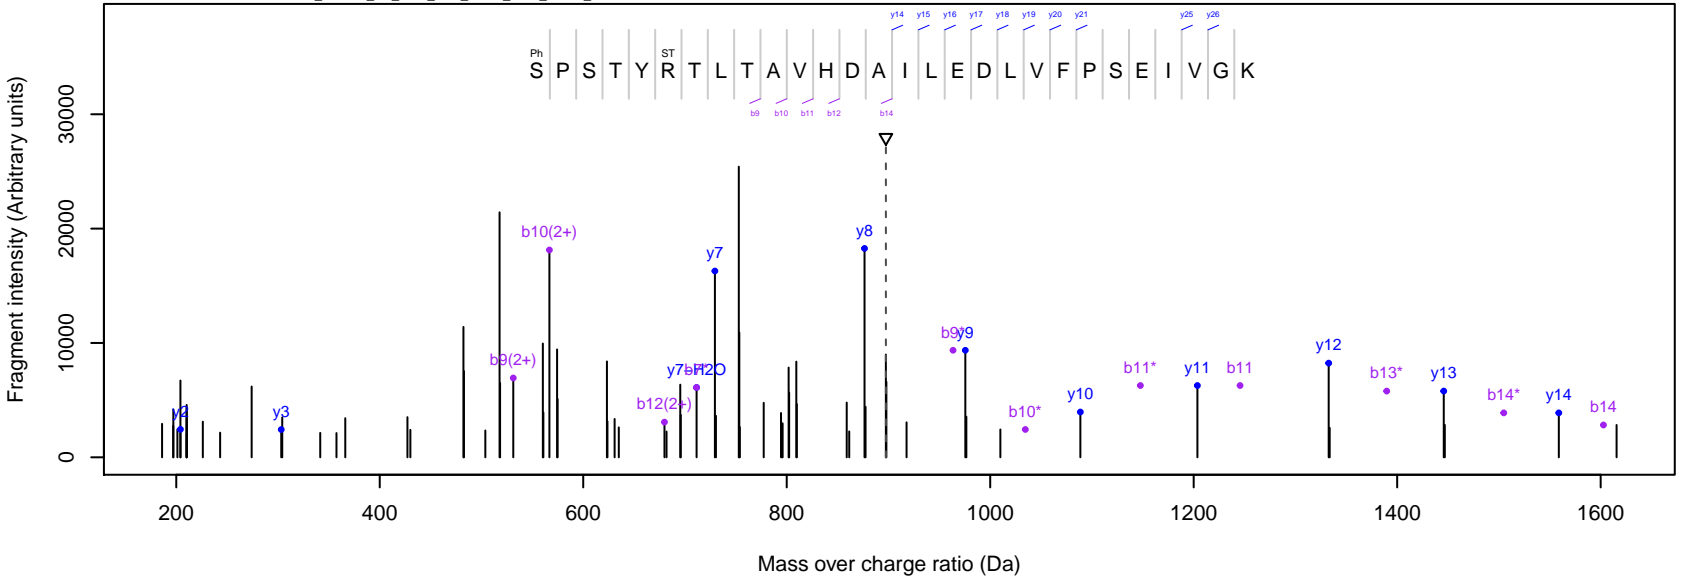

TPTHQPPKPGS(Phospho (STY))PGRPACPLSNLLQSYEER-4+

Source : QE3\_201126\_FR\_TiOx\_hum\_tissue\_Urea\_RNAB\_N Scan : 36386

Andromeda score : 76.162

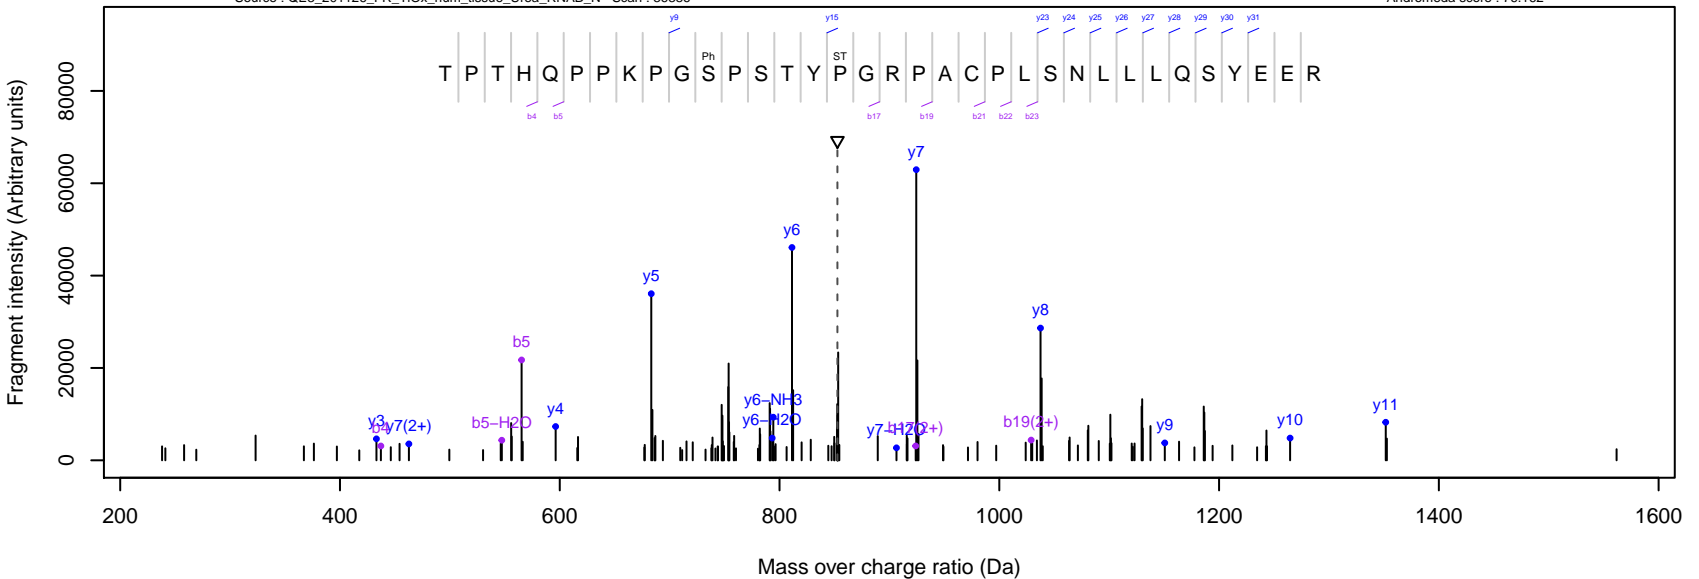



GLLS(Phospho (STY))DSM(Oxidation (M))TDVPVDTGVAAR-2+

Source : QE3\_201126\_FR\_TiOx\_hum\_tissue\_Urea\_RNAB\_B Scan : 40384

Andromeda score : 76.158

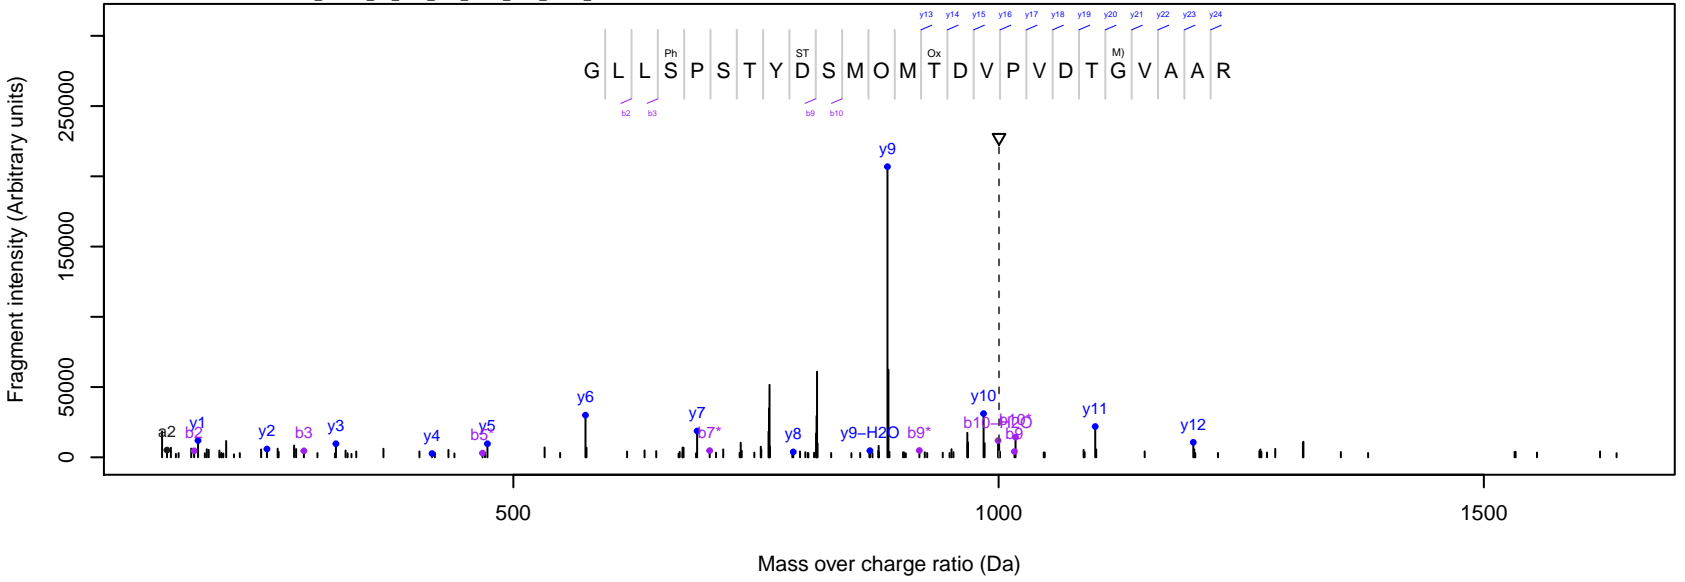

RQS(Phospho (STY))ENISAPPVLSIEDIKHR-4+

Source : QE3\_201126\_FR\_TiOx\_hum\_tissue\_Urea\_RNAB\_H Scan : 21094

Andromeda score : 76.152

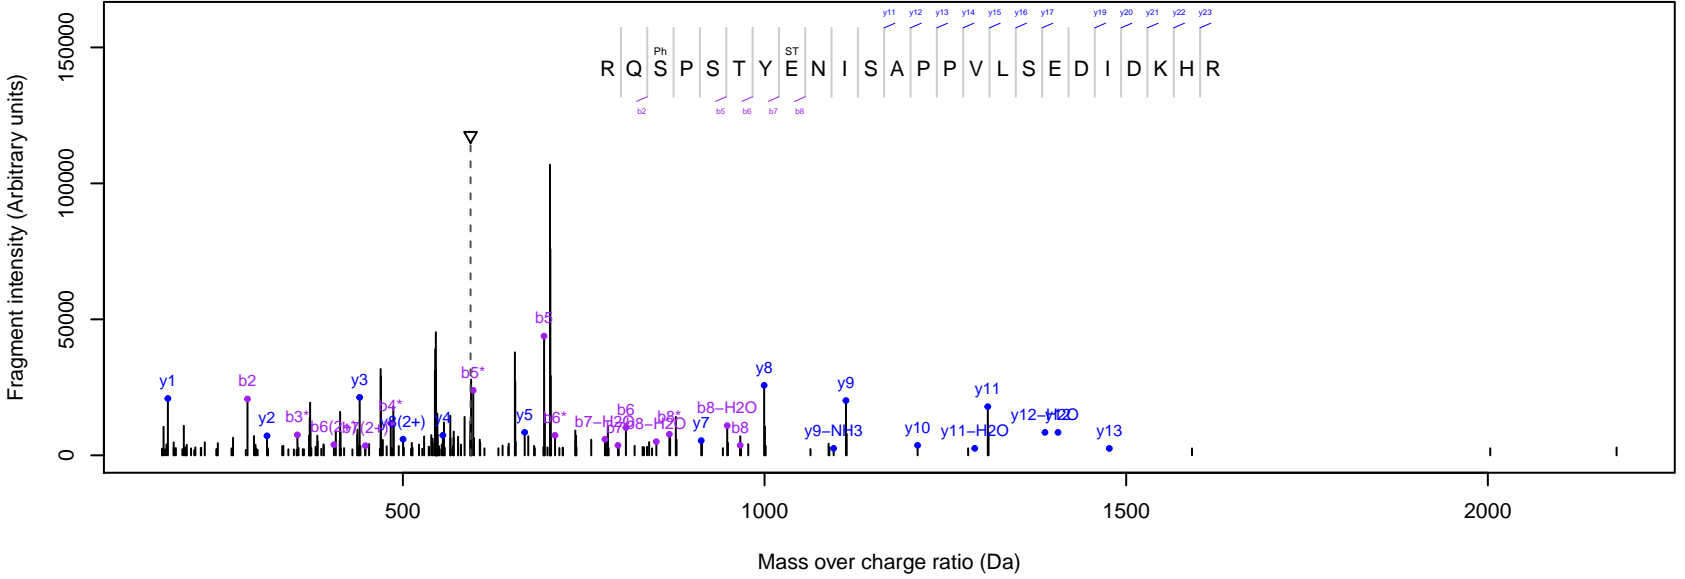

YLS(Phospho (STY))FTPPEK-2+

Source : QE3\_201126\_FR\_TiOx\_hum\_tissue\_Urea\_RNAB\_H Scan : 33428

Andromeda score : 76.143

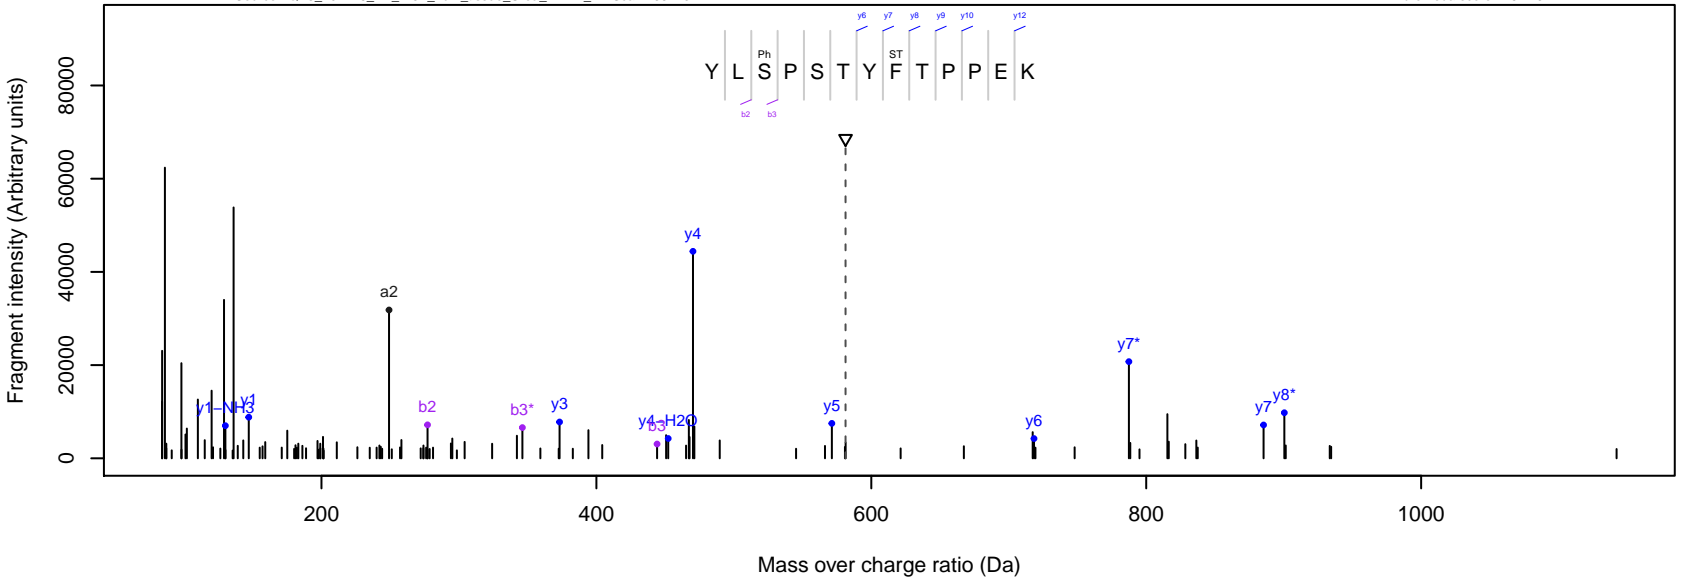

FGLGS(Phospho (STY))PLPS(Phospho (STY))PR-2+

Source : QE3\_201126\_FR\_TiOx\_hum\_tissue\_Urea\_RNAB\_N Scan : 49688

Andromeda score : 76.073

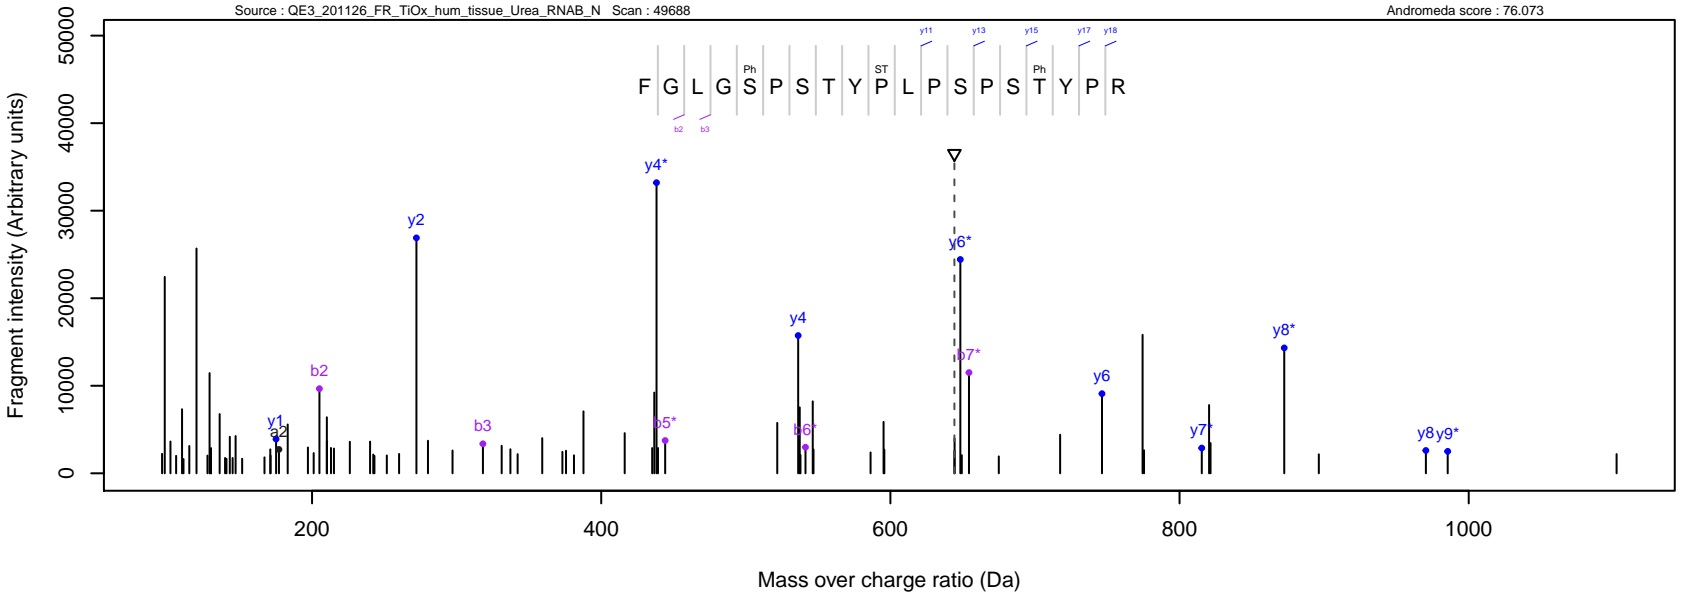

KNPS(Phospho (STY))DPKLAHLK-4+

Source : QE3\_201126\_FR\_TiOx\_hum\_tissue\_Urea\_RNAB\_N Scan : 6258

Andromeda score : 76.073

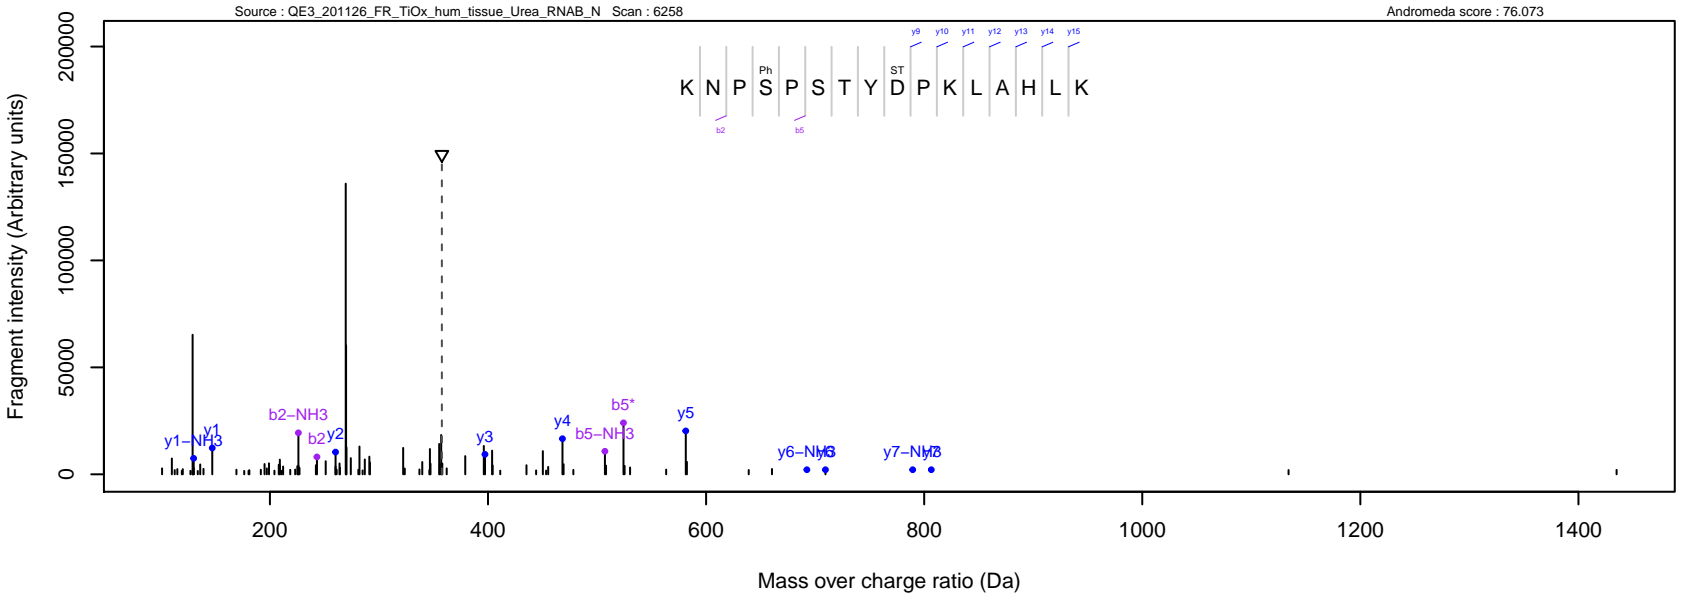

SPS(Phospho (STY))PQFAPQK-2+

Source : QE3\_201126\_FR\_TiOx\_hum\_tissue\_Urea\_RNAB\_H Scan : 14192

Andromeda score : 76.068

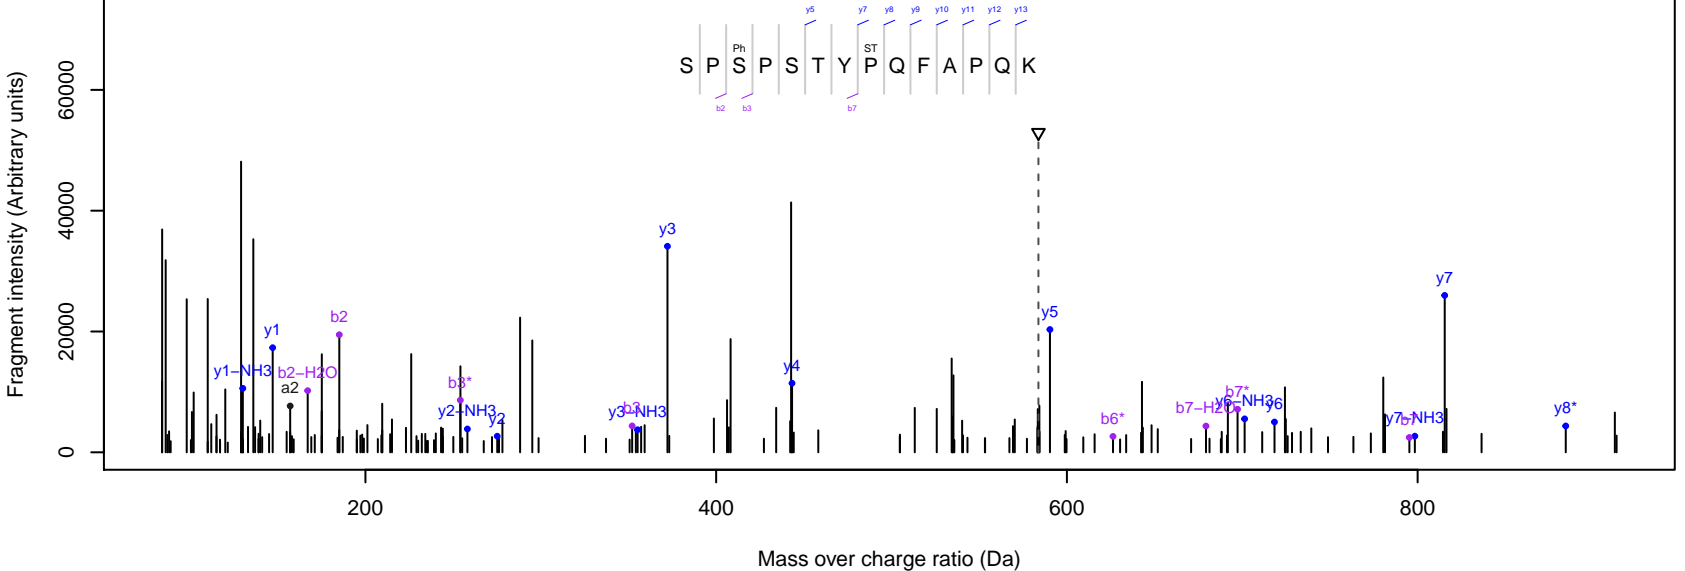

SAAESALKNEGLSSPSTYDEEFDSVYDPSISIASLLTESNLQTS SC-4+

Source : QE3\_201126\_FR\_TiOx\_hum\_tissue\_Urea\_RNAB\_N Scan : 62451

Andromeda score : 76.066

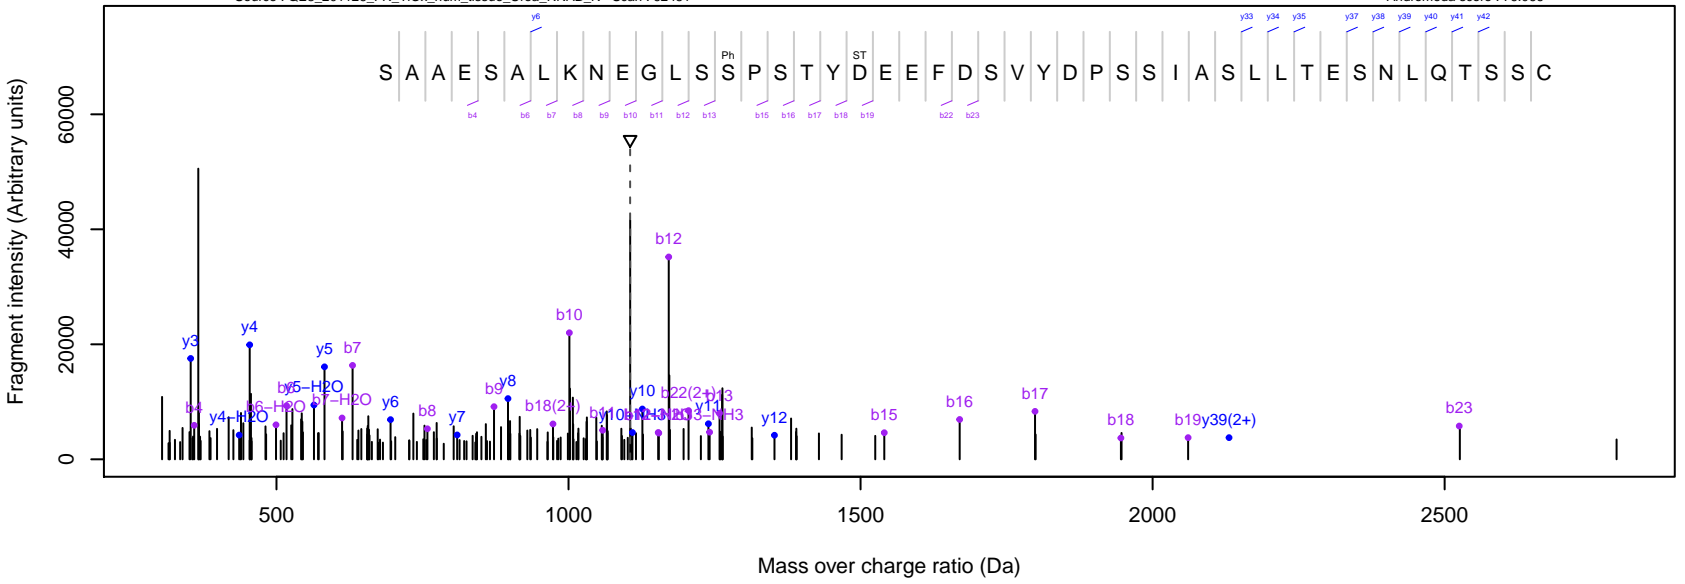

TPGESSAISMSOMGI VSVSPSTYS PDVSSVSEL TNK-3+

Source : QE3\_201126\_FR\_TiOx\_hum\_tissue\_Urea\_RNAB\_H Scan : 47113

Andromeda score : 76.063

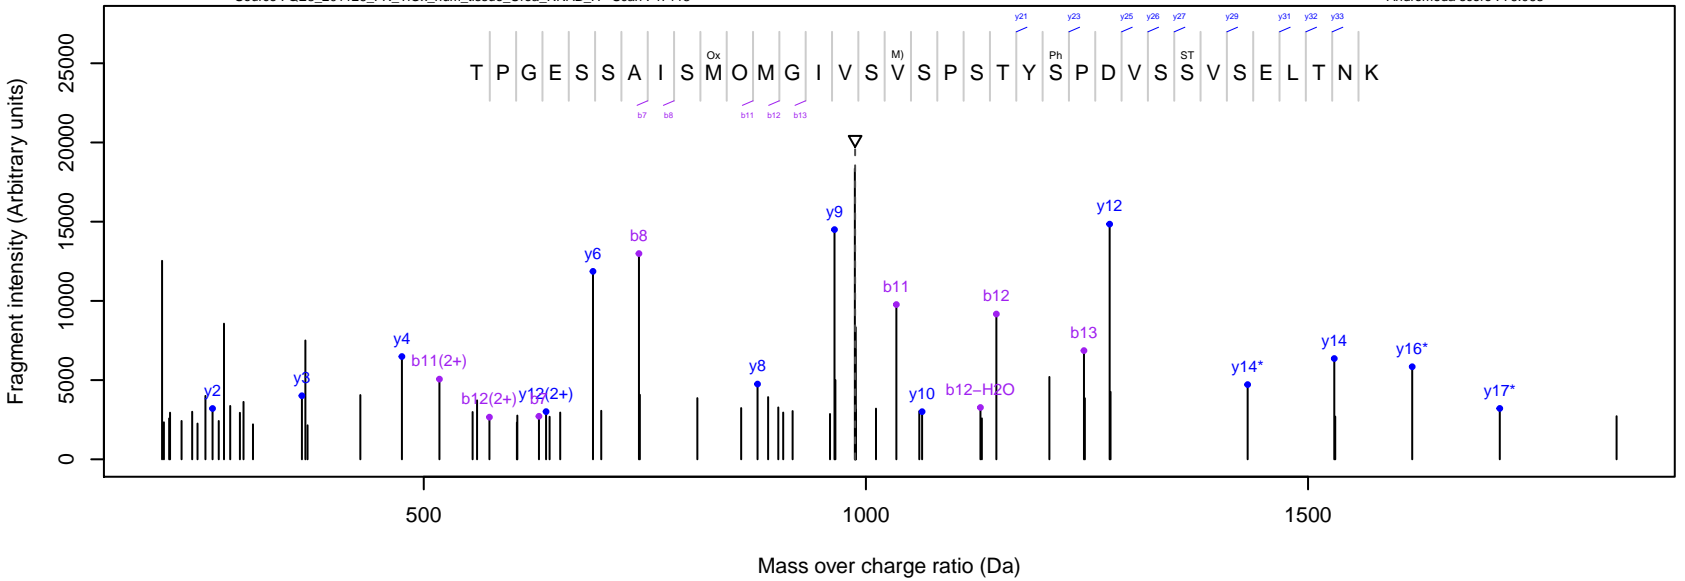

M(Oxidation (M))APPKVEEDS(Phospho (STY))EDEEMS(Phospho (STY))EDEEDS(Phospho (STY))S(Phospho (STY))GEEVIPQKK-4+

Source : QE3\_201126\_FR\_TiOx\_hum\_tissue\_Urea\_RNAB\_N Scan : 33421

Andromeda score : 76.044

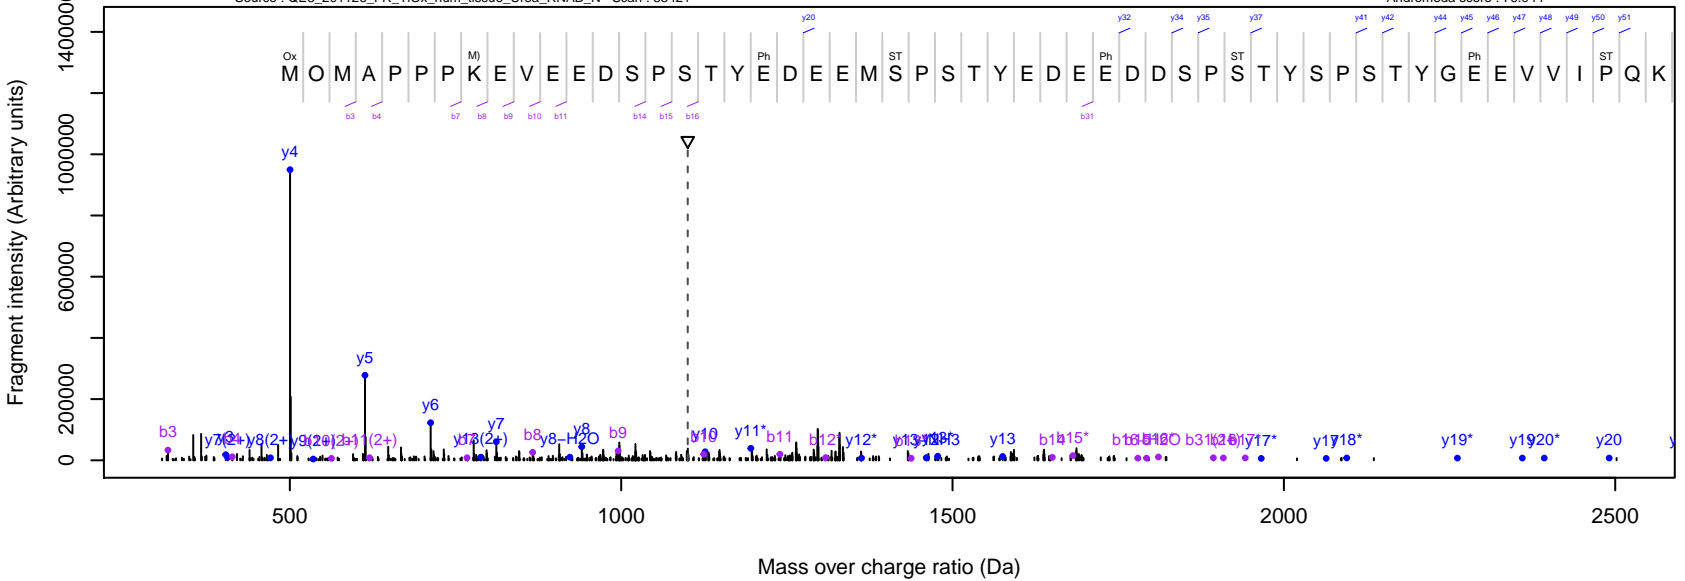

NSPFQIPPPS(Phospho (STY))PDSK-2+

Source : QE3\_201126\_FR\_TIOx\_hum\_tissue\_Urea\_RNAB\_B Scan : 32079

Andromeda score : 76.01

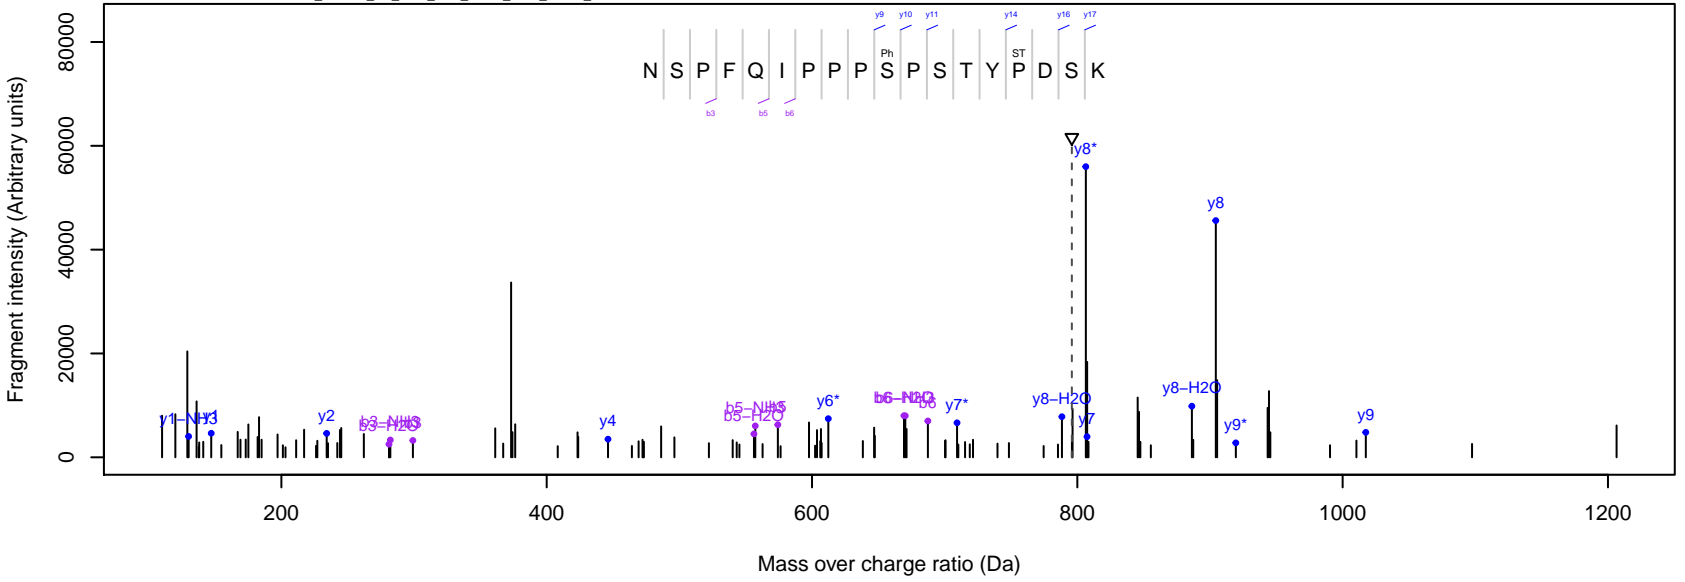

RSS(Phospho (STY))GELSSPLR-2+

Source : QE3\_201126\_FR\_TIOx\_hum\_tissue\_Urea\_RNAB\_H Scan : 12482

Andromeda score : 76.01

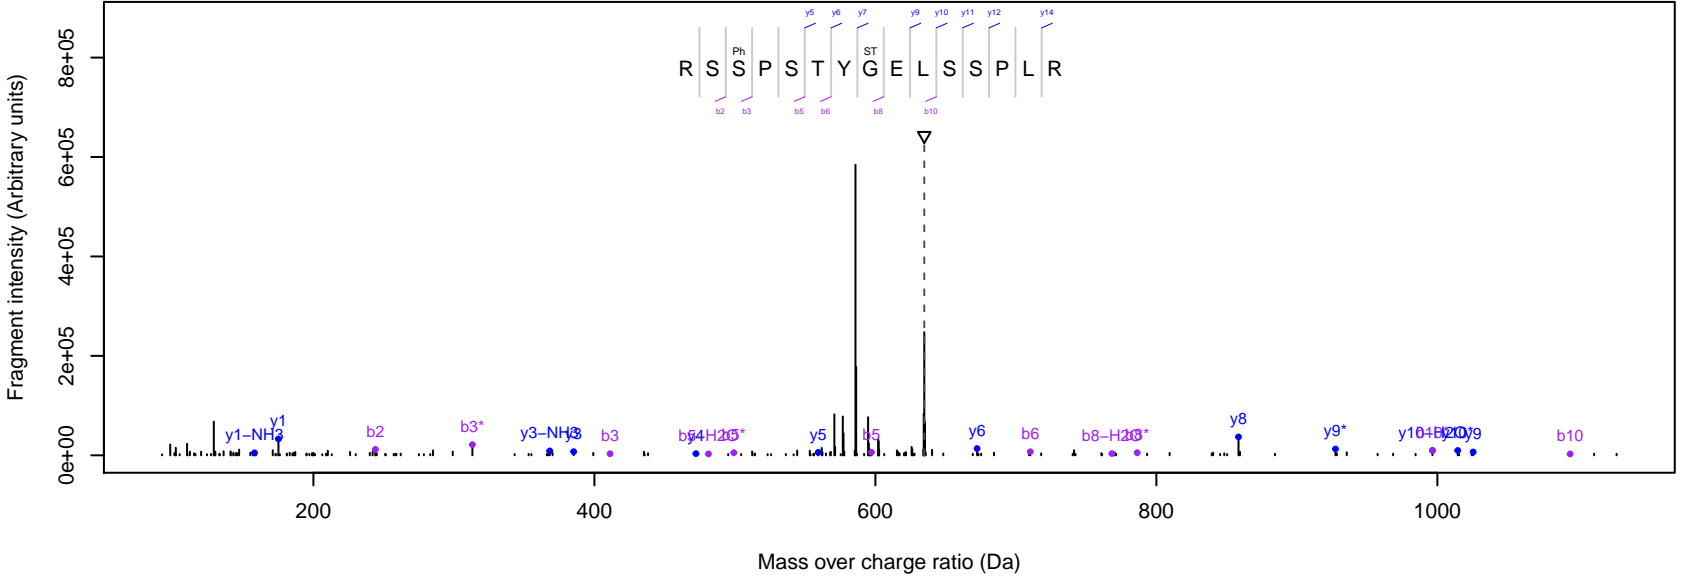

RLS(Phospho (STY))LPGLLSQVSPR-3+

Source : QE3\_201126\_FR\_TIOx\_hum\_tissue\_Urea\_RNAB\_H Scan : 49383

Andromeda score : 75.97

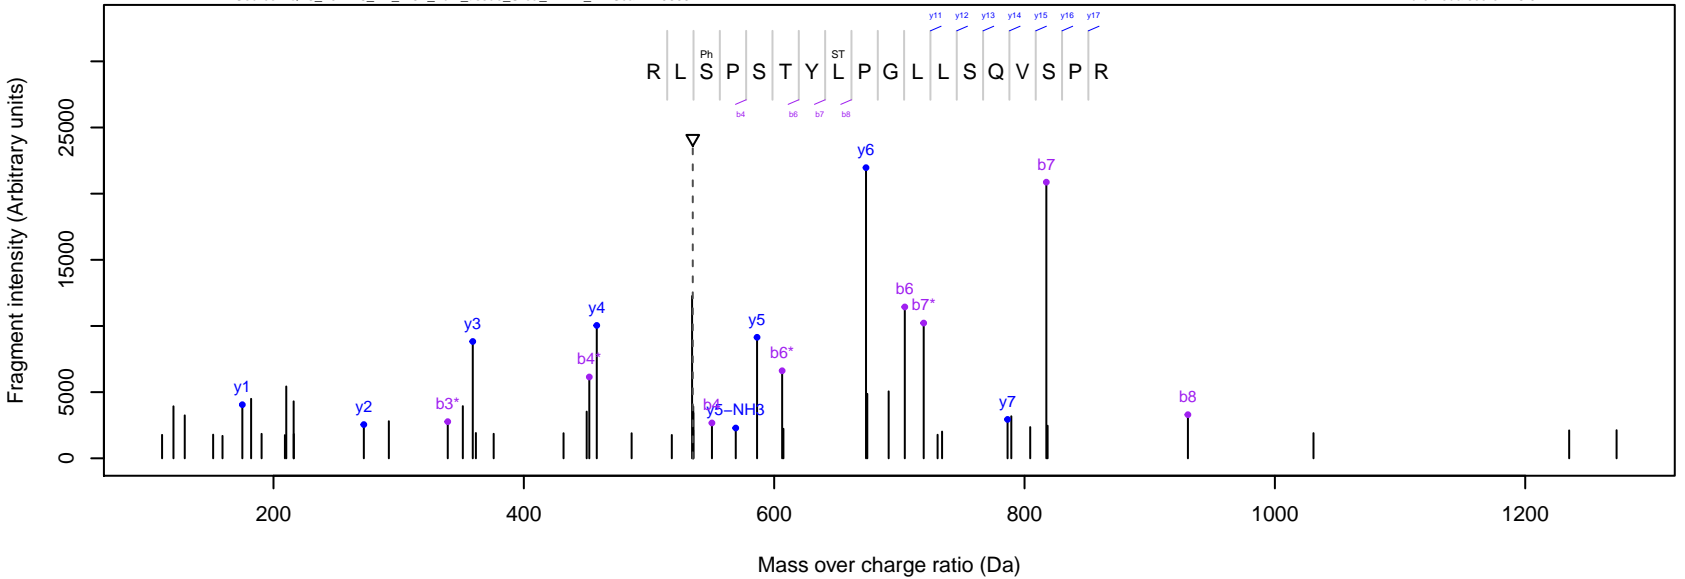

ALQLSNS(Phospho (STY))PGASSAFLK-2+

Source : QE3\_201126\_FR\_TiOx\_hum\_tissue\_Urea\_RNAB\_B Scan : 38725

Andromeda score : 75.961

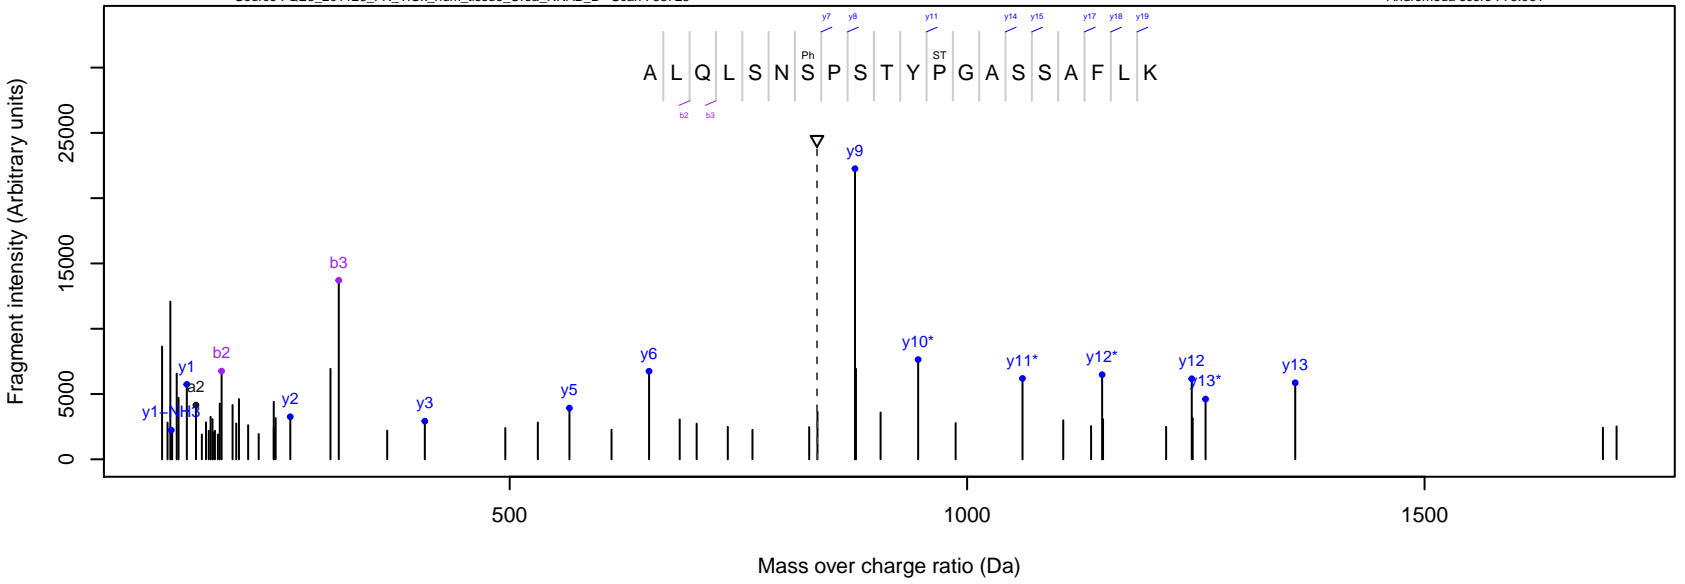

S(Phospho (STY))APDLKESGAAV-2+

Source : QE3\_201126\_FR\_TiOx\_hum\_tissue\_Urea\_RNAB\_H Scan : 19291

Andromeda score : 75.911

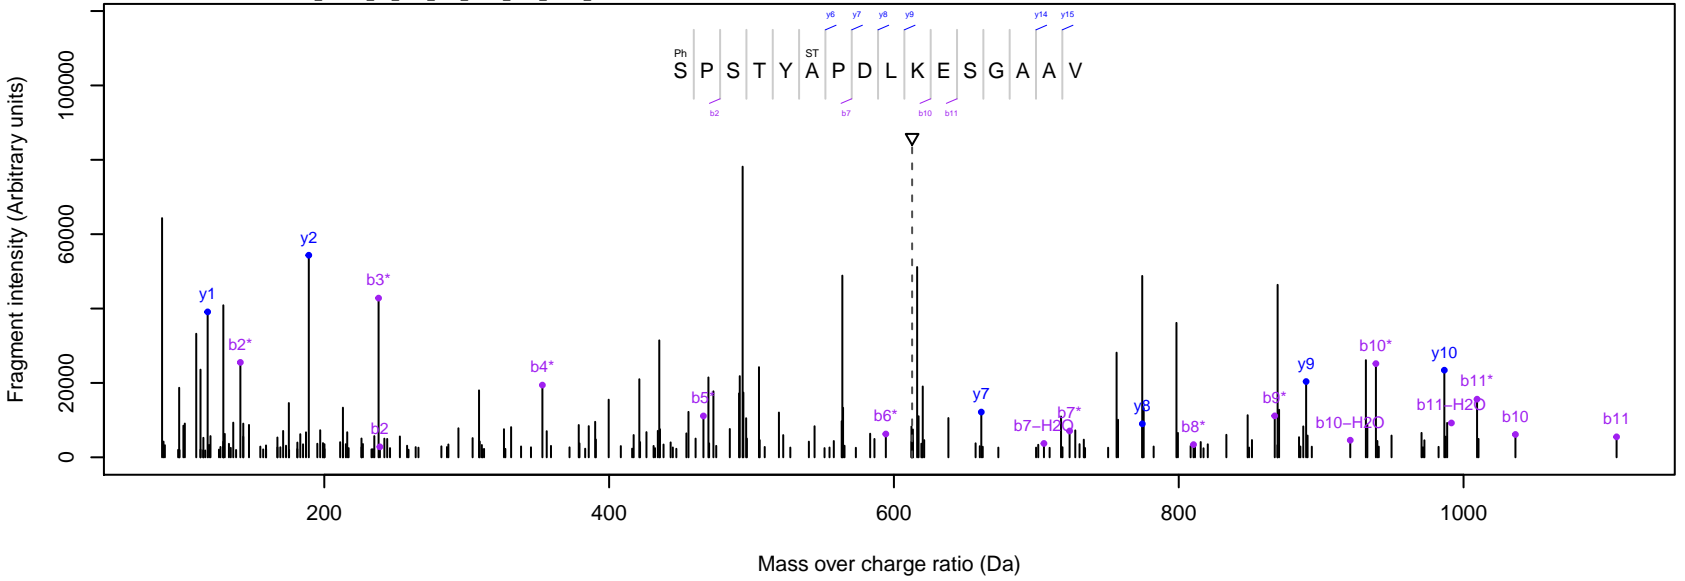

KVS(Phospho (STY))QSTSSLVDTSVTSRPR-3+

Source : QE3\_201126\_FR\_TiOx\_hum\_tissue\_Urea\_RNAB\_B Scan : 16671

Andromeda score : 75.896

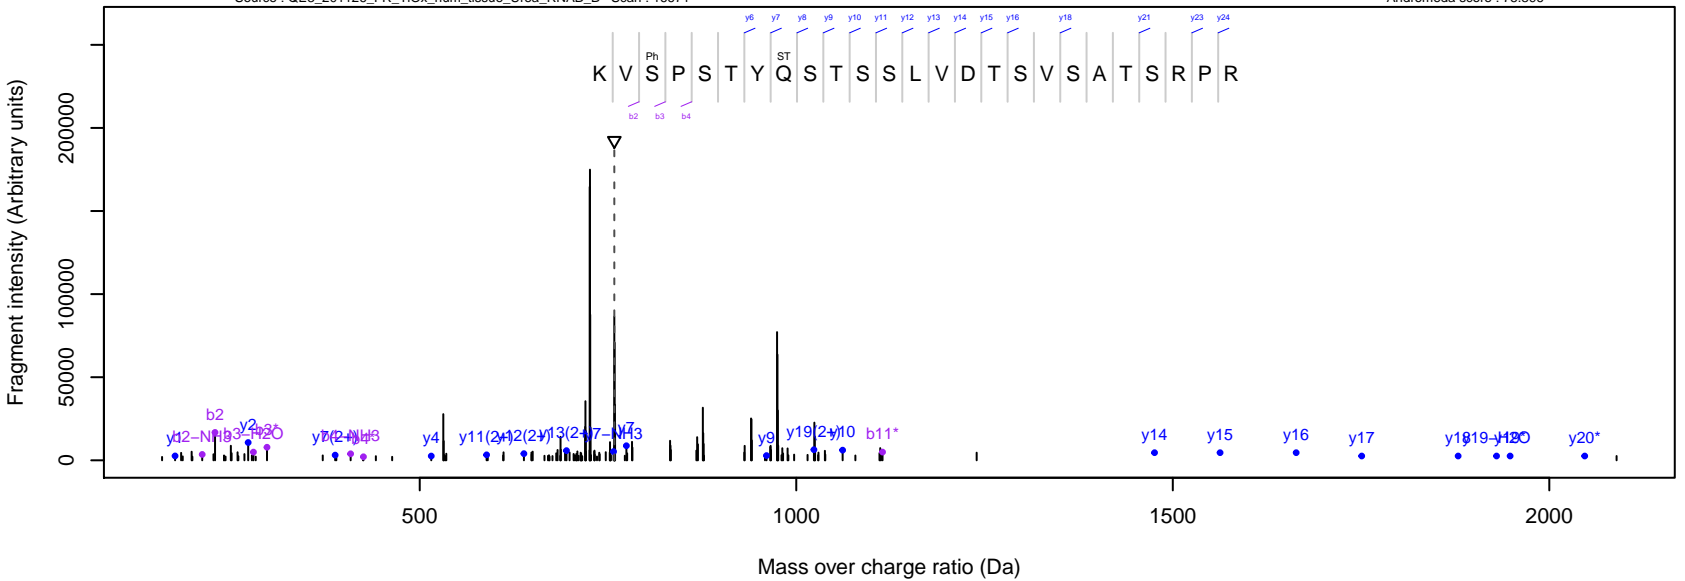

GREGS(Phospho (STY))LTGTDKQAPDEFVGLGLVGGNVDWK-3+

Source : QE3\_201126\_FR\_TiOx\_hum\_tissue\_Urea\_RNAB\_B Scan : 47971

Andromeda score : 75.893

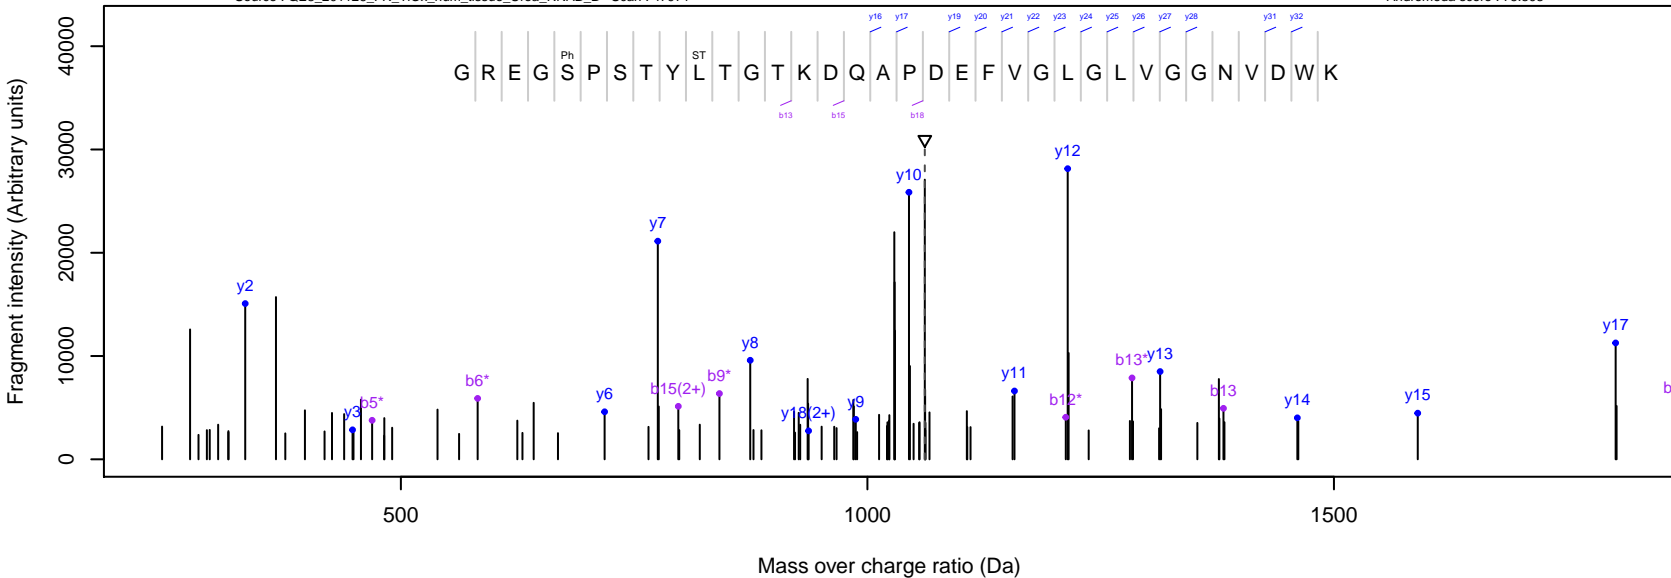

SLGYHGSSYS(Phospho (STY))PEGVEPVS(Phospho (STY))PVSSPLTHDK-3+

Source : QE3\_201126\_FR\_TiOx\_hum\_tissue\_Urea\_RNAB\_H Scan : 31455

Andromeda score : 75.893

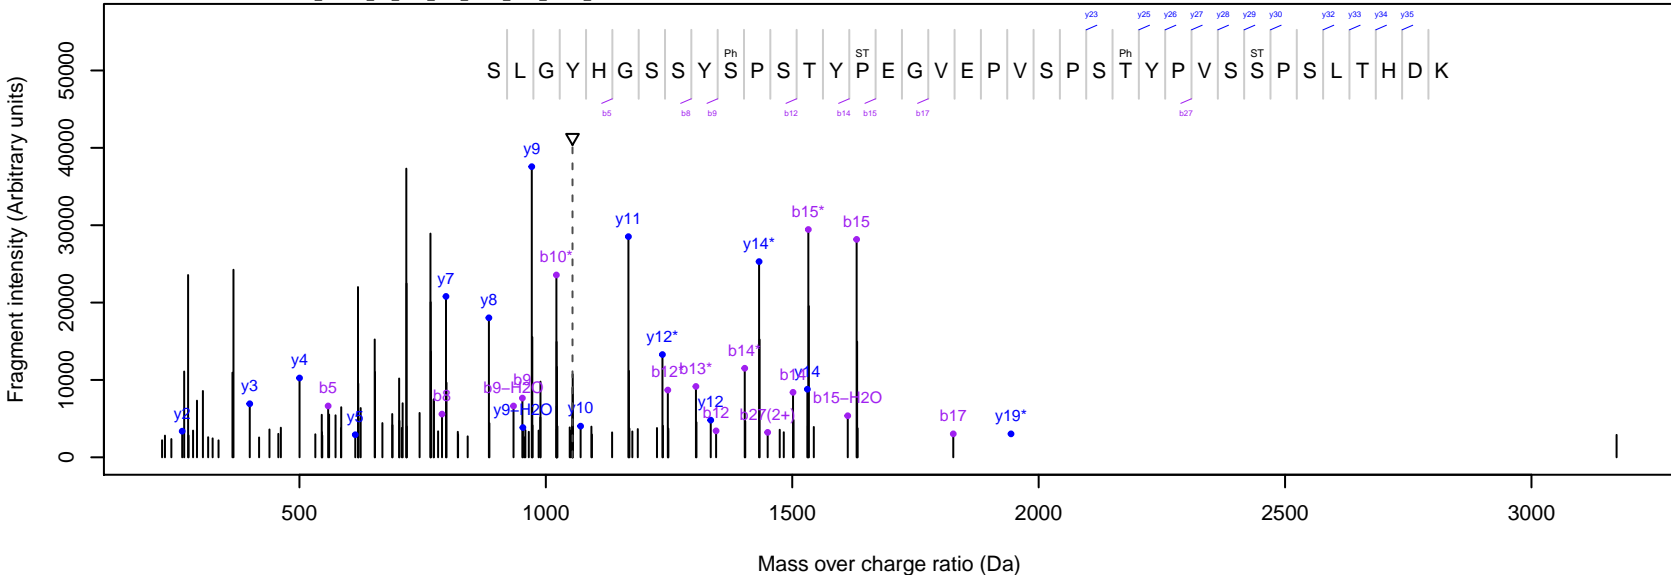

RDS(Phospho (STY))GVGSGLEAQESWER-3+

Source : QE3\_201126\_FR\_TiOx\_hum\_tissue\_Urea\_RNAB\_B Scan : 23962

Andromeda score : 75.868

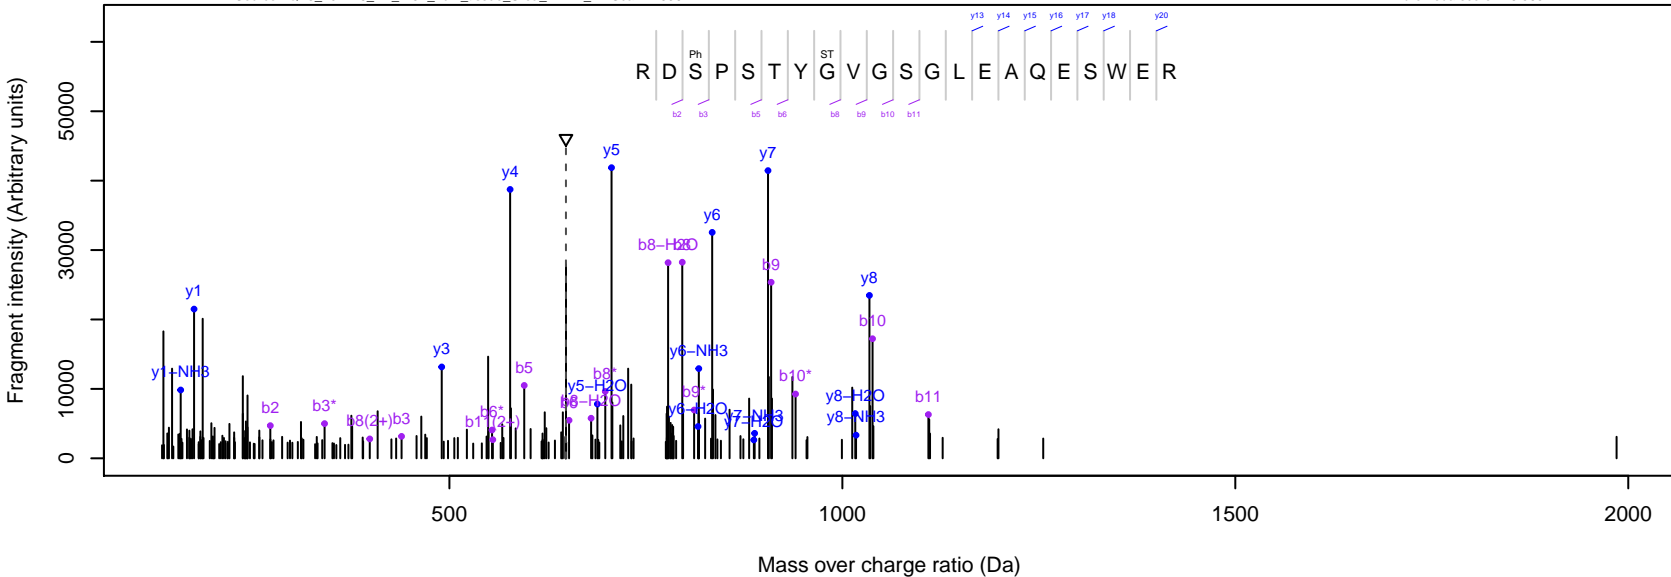

KNTFTDWSNDNDSPSTYDYPSSTYEIDDQDLNK-3+

Source : QE3\_201126\_FR\_TiOx\_hum\_tissue\_Urea\_RNAB\_H Scan : 45607

Andromeda score : 75.797

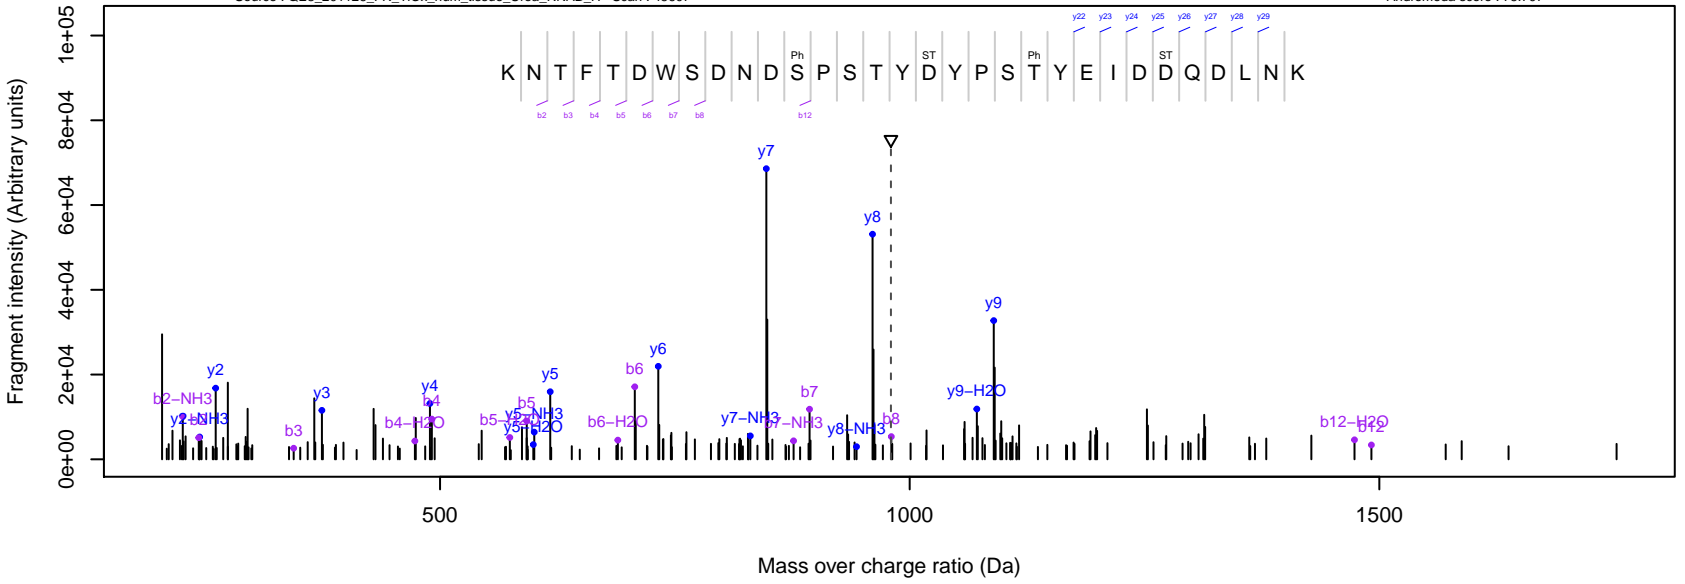

GPPS(Phospho (STY))PPAPVMHS(Phospho (STY))PSR-3+

Source : QE3\_201126\_FR\_TiOx\_hum\_tissue\_Urea\_RNAB\_H Scan : 20004

Andromeda score : 75.773

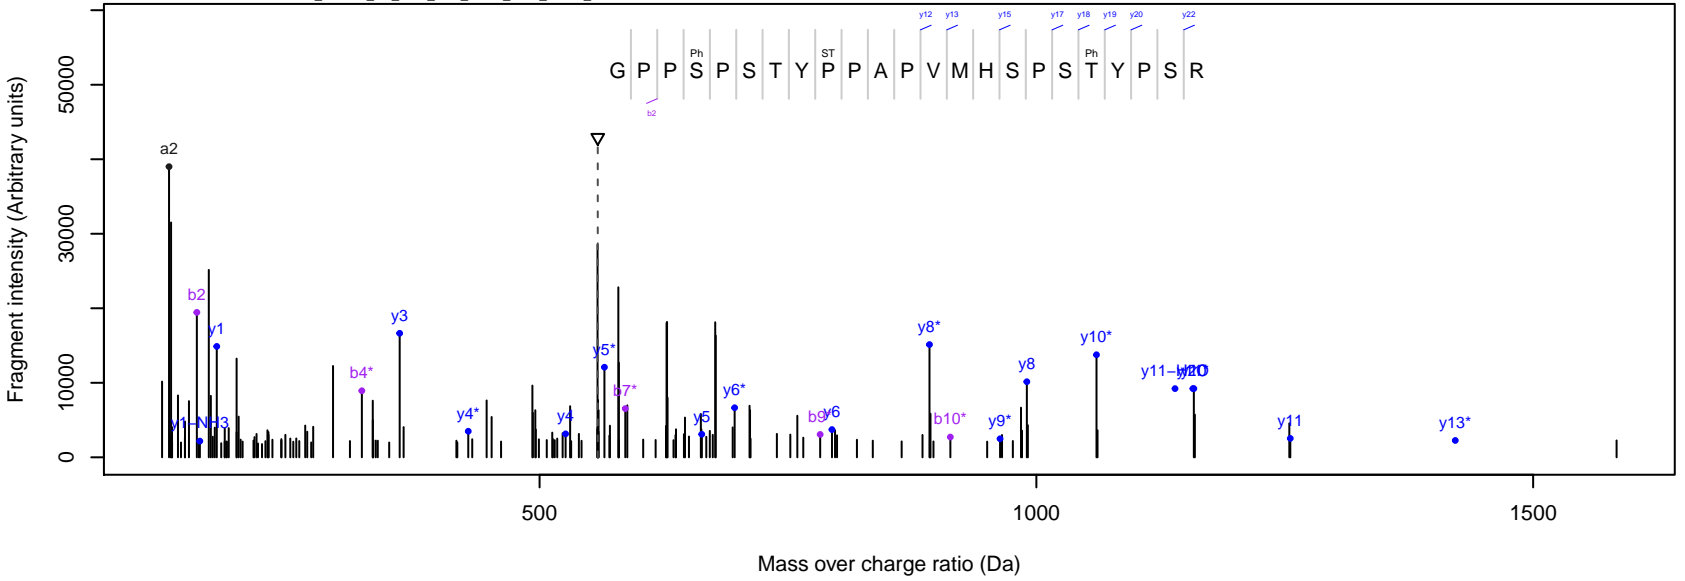

QS(Phospho (STY))SLTFQSSDPEQM(Oxidation (M))R-2+

Source : QE3\_201126\_FR\_TiOx\_hum\_tissue\_Urea\_RNAB\_B Scan : 21865

Andromeda score : 75.764

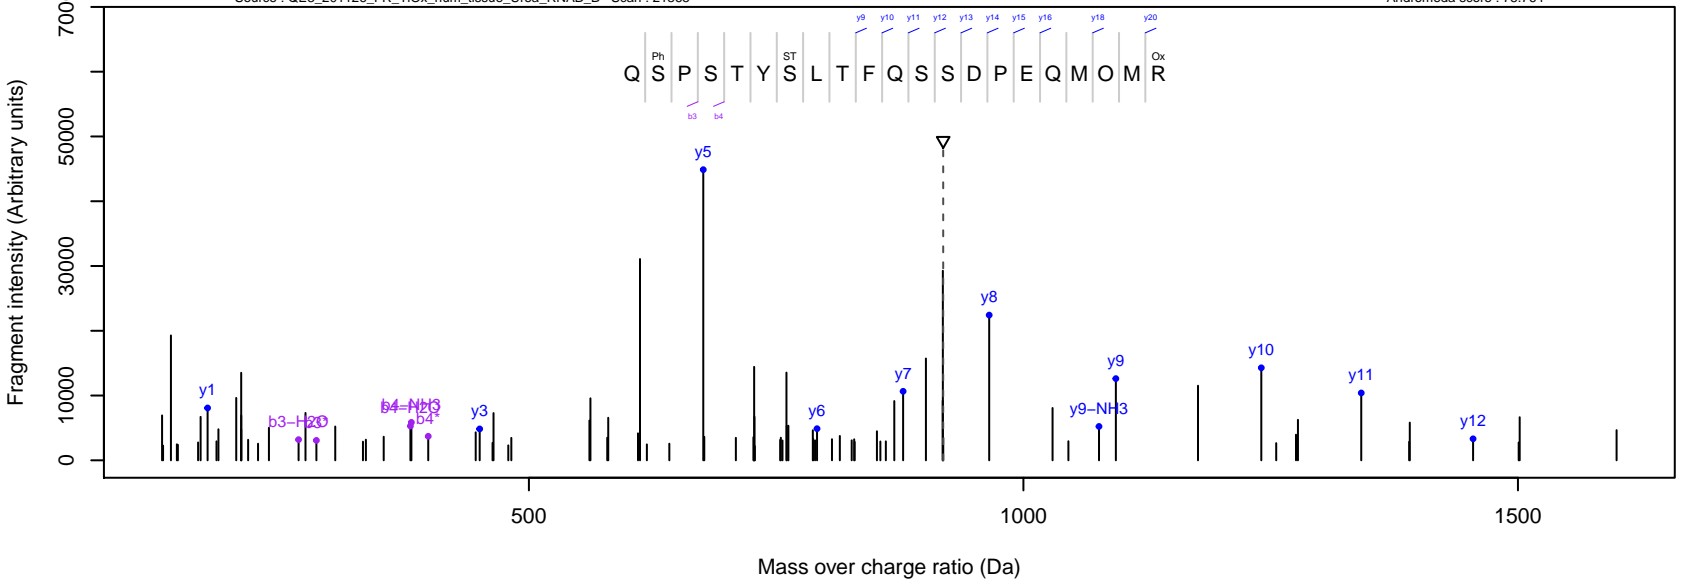

RDS(Phospho (STY))PTYDPYKR-3+

Source : QE3\_201126\_FR\_TiOx\_hum\_tissue\_Urea\_RNAB\_B Scan : 8734

Andromeda score : 75.764

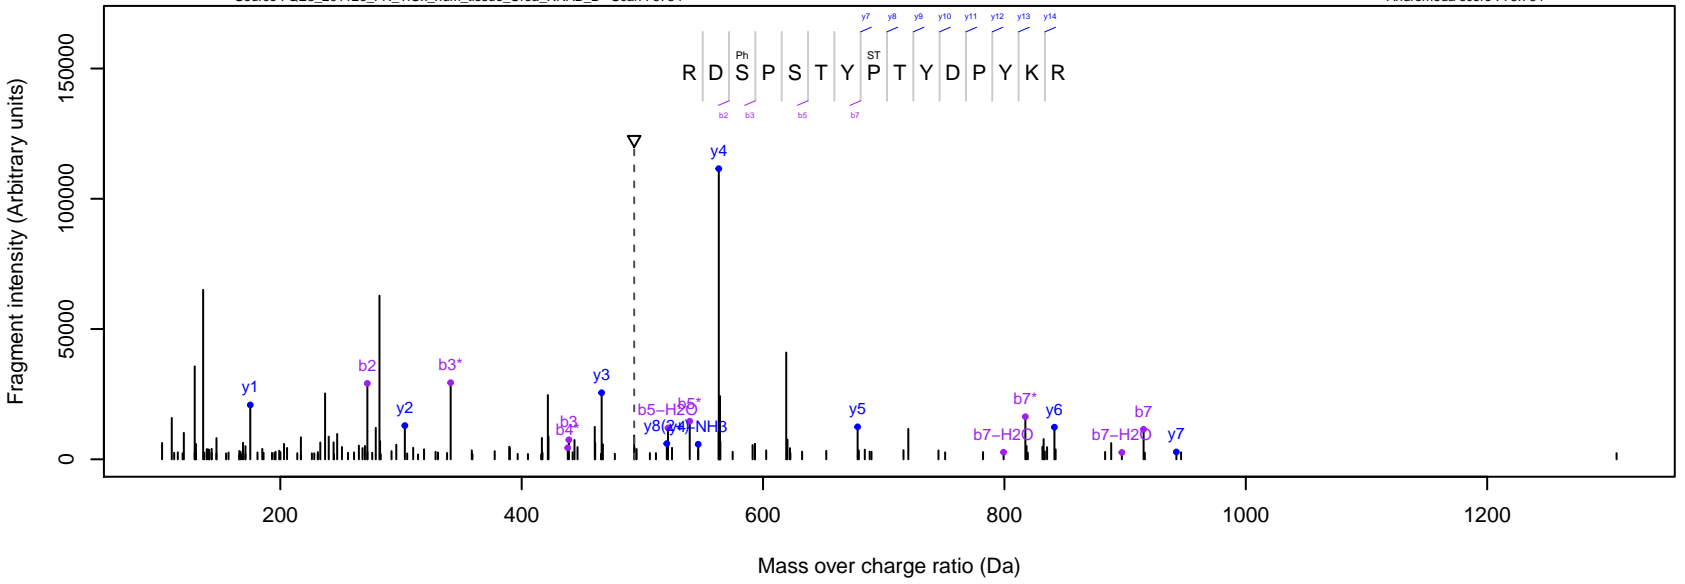

GAASQARGS(Phospho (STY))DS(Phospho (STY))EDGEFEIQAEDDAR-3+

Source : QE3\_201126\_FR\_TiOx\_hum\_tissue\_Urea\_RNAB\_N Scan : 28628

Andromeda score : 75.758

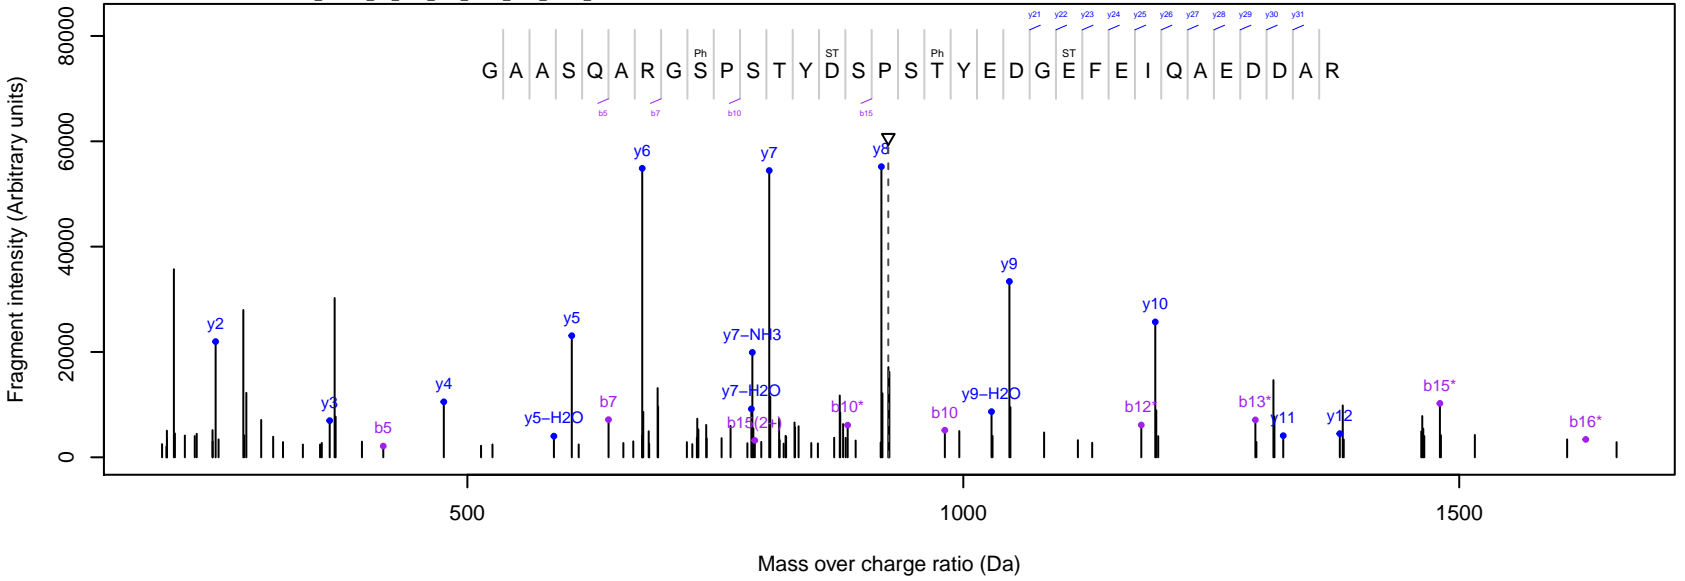

EQYVPPRS(Phospho (STY))PK-2+

Source : QE3\_201126\_FR\_TiOx\_hum\_tissue\_Urea\_RNAB\_N Scan : 9098

Andromeda score : 75.739

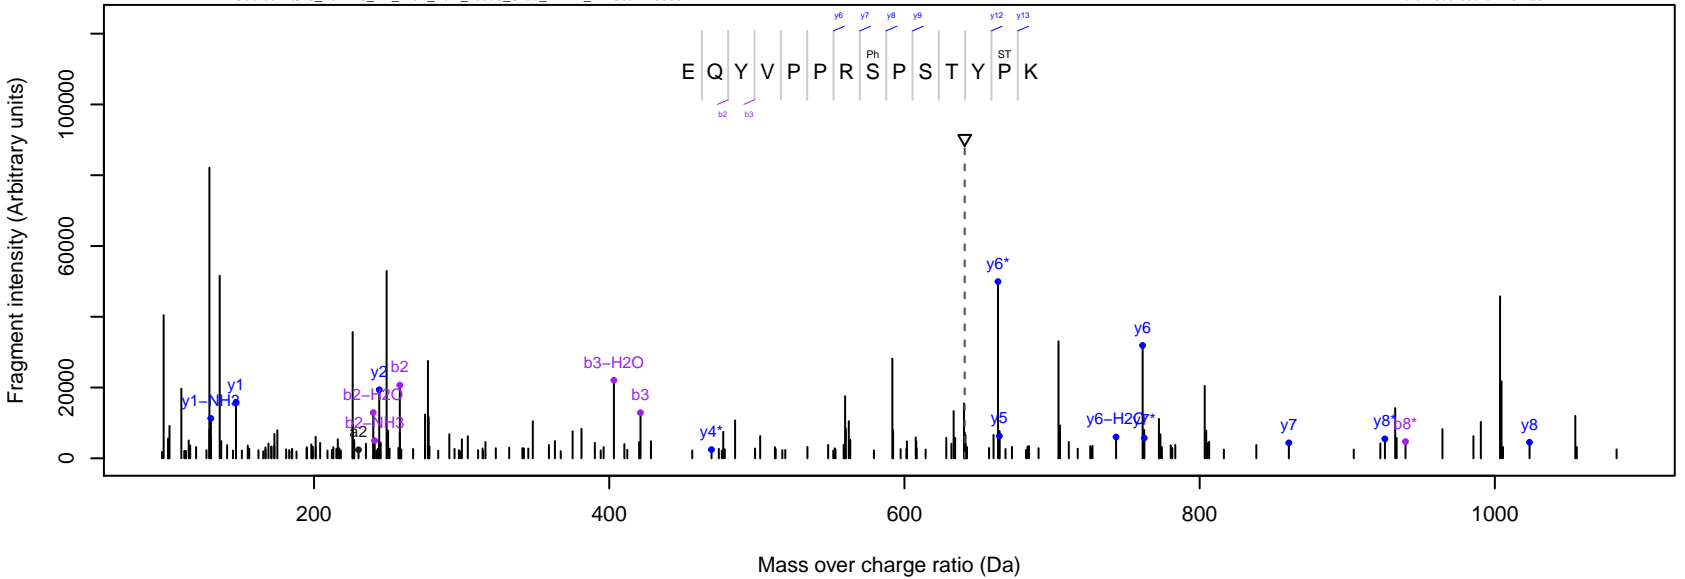



LLEDGEDFNLGDALDS(Phospho (STY))S(Phospho (STY))NS(Phospho (STY))MQTIQK-3+

Source : QE3\_201126\_FR\_TiOx\_hum\_tissue\_Urea\_RNAB\_H Scan : 64328

Andromeda score : 75.717

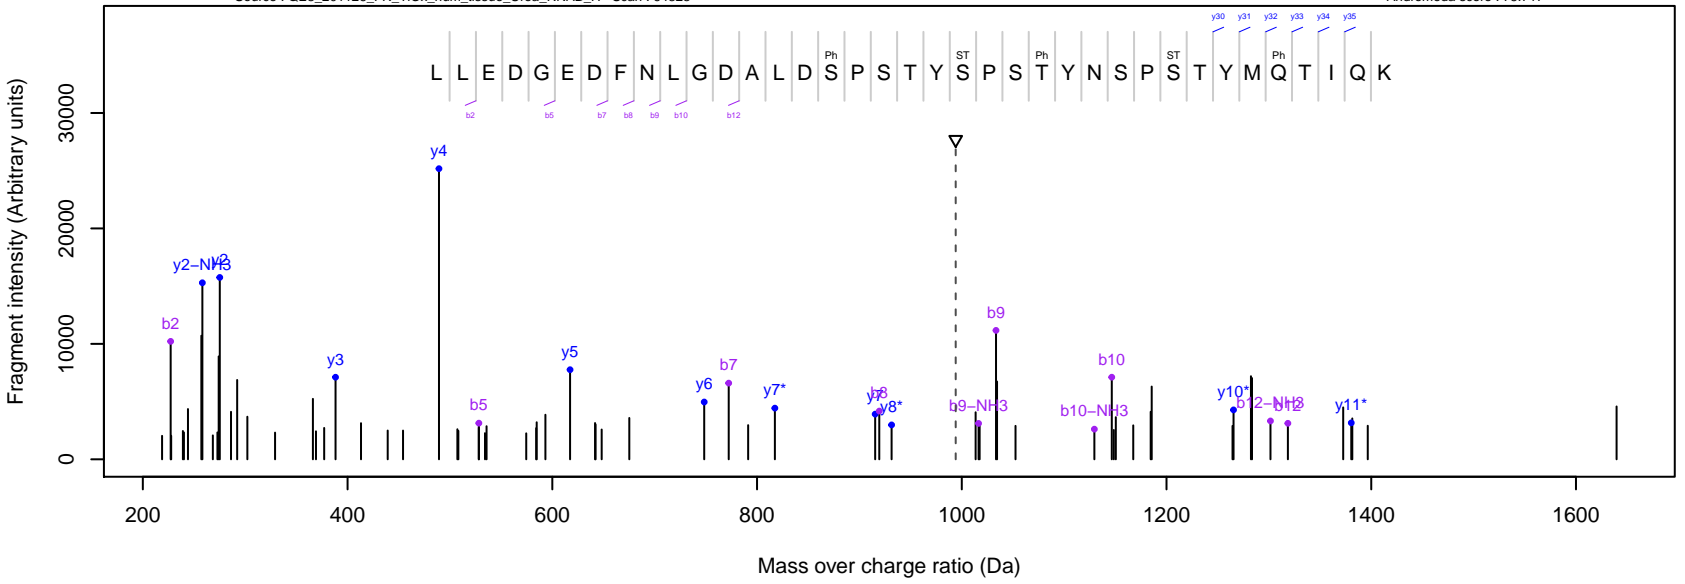

DGPSSAPATPTKAPYS(Phospho (STY))PTTSK-3+

Source : QE3\_201126\_FR\_TiOx\_hum\_tissue\_Urea\_RNAB\_H Scan : 15967

Andromeda score : 75.703

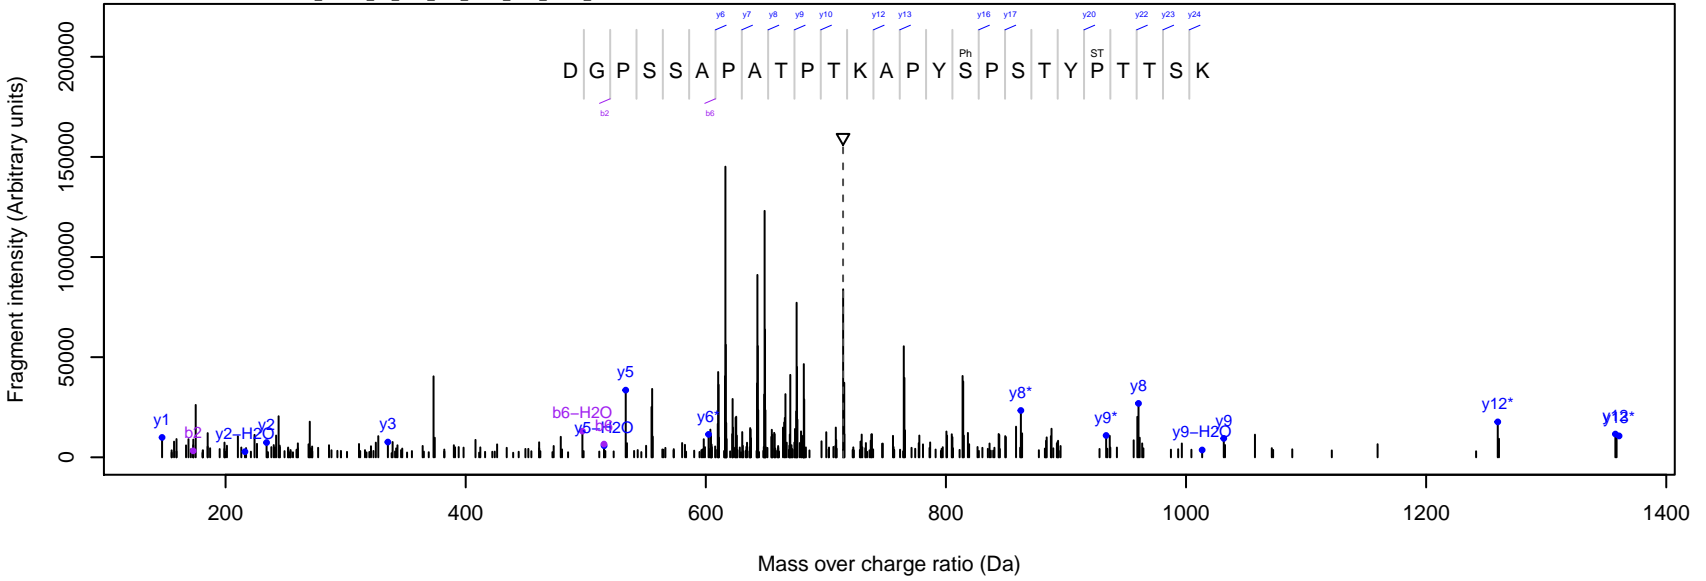

RPAS(Phospho (STY))PSSPEHLPATPAESPAQR-3+

Source : QE3\_201126\_FR\_TiOx\_hum\_tissue\_Urea\_RNAB\_H Scan : 14138

Andromeda score : 75.703

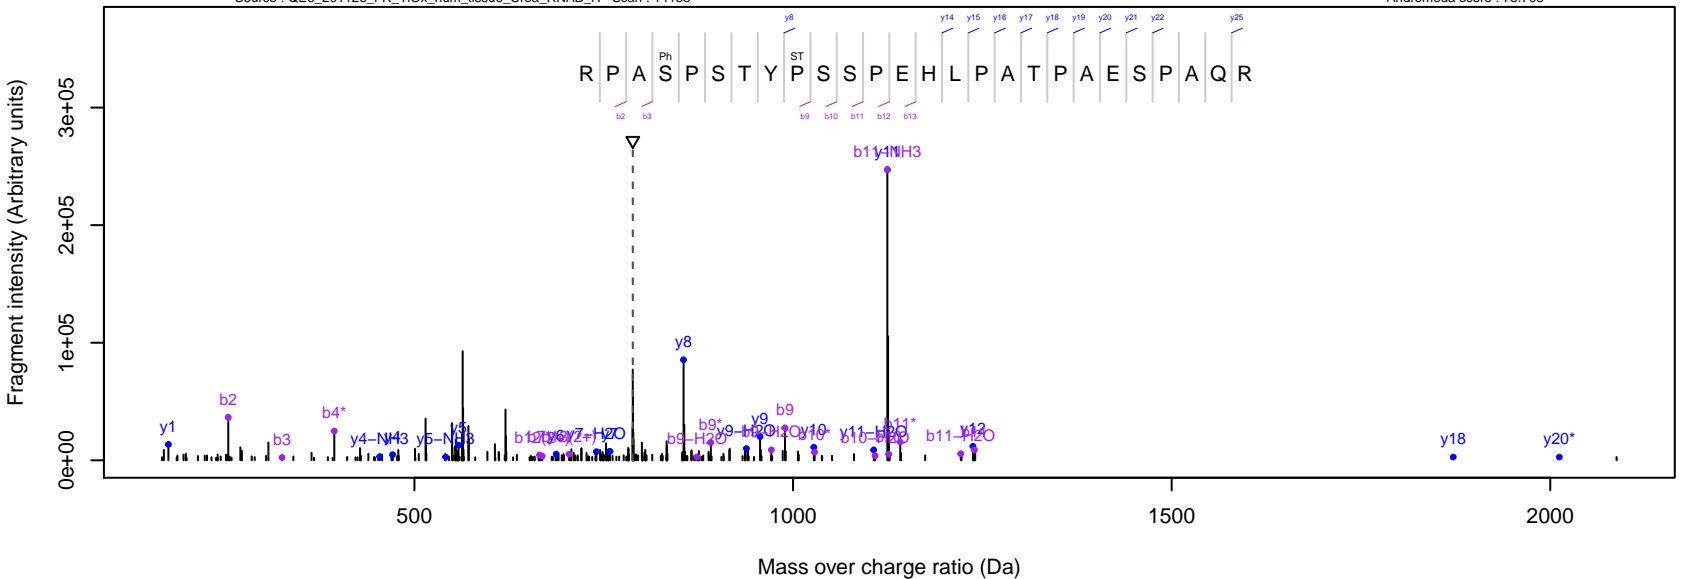

GMYDGPVFDLT(Phospho (STY))TTPK-2+

Source : QE3\_201126\_FR\_TiOx\_hum\_tissue\_Urea\_RNAB\_N Scan : 50816

Andromeda score : 75.685

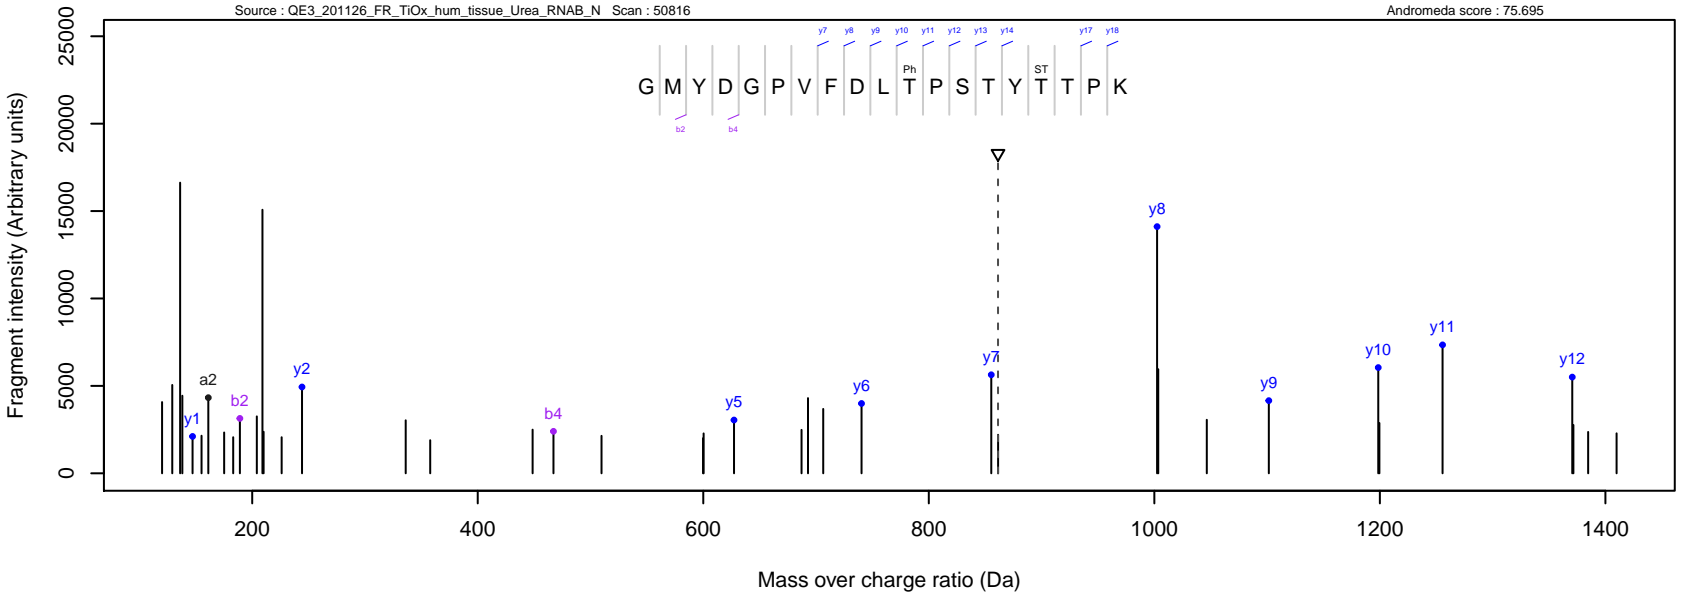

EGPSGHS(Phospho (STY))TLPRSPR-3+

Source : QE3\_201126\_FR\_TiOx\_hum\_tissue\_Urea\_RNAB\_H Scan : 6443

Andromeda score : 75.682

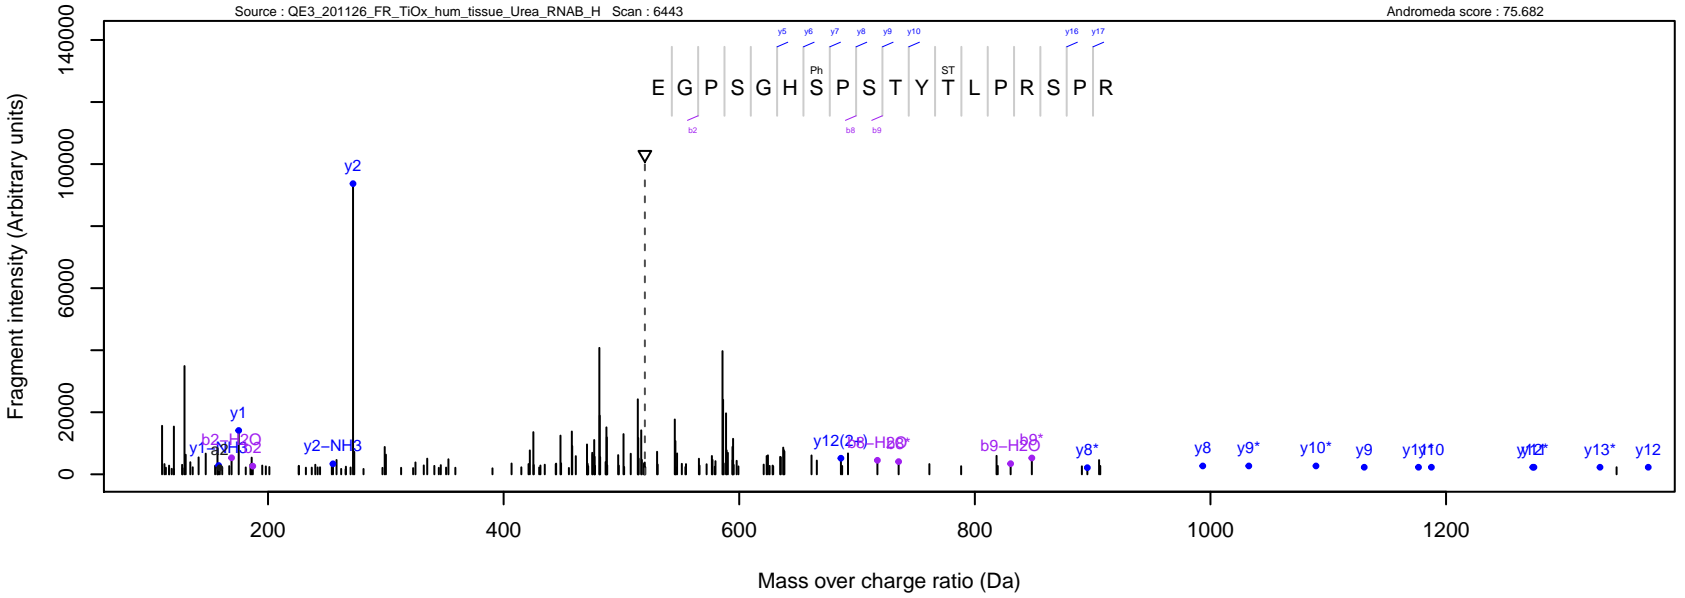

LSST(Phospho (STY))DDGYIDLQFKK-3+

Source : QE3\_201126\_FR\_TiOx\_hum\_tissue\_Urea\_RNAB\_H Scan : 33635

Andromeda score : 75.682

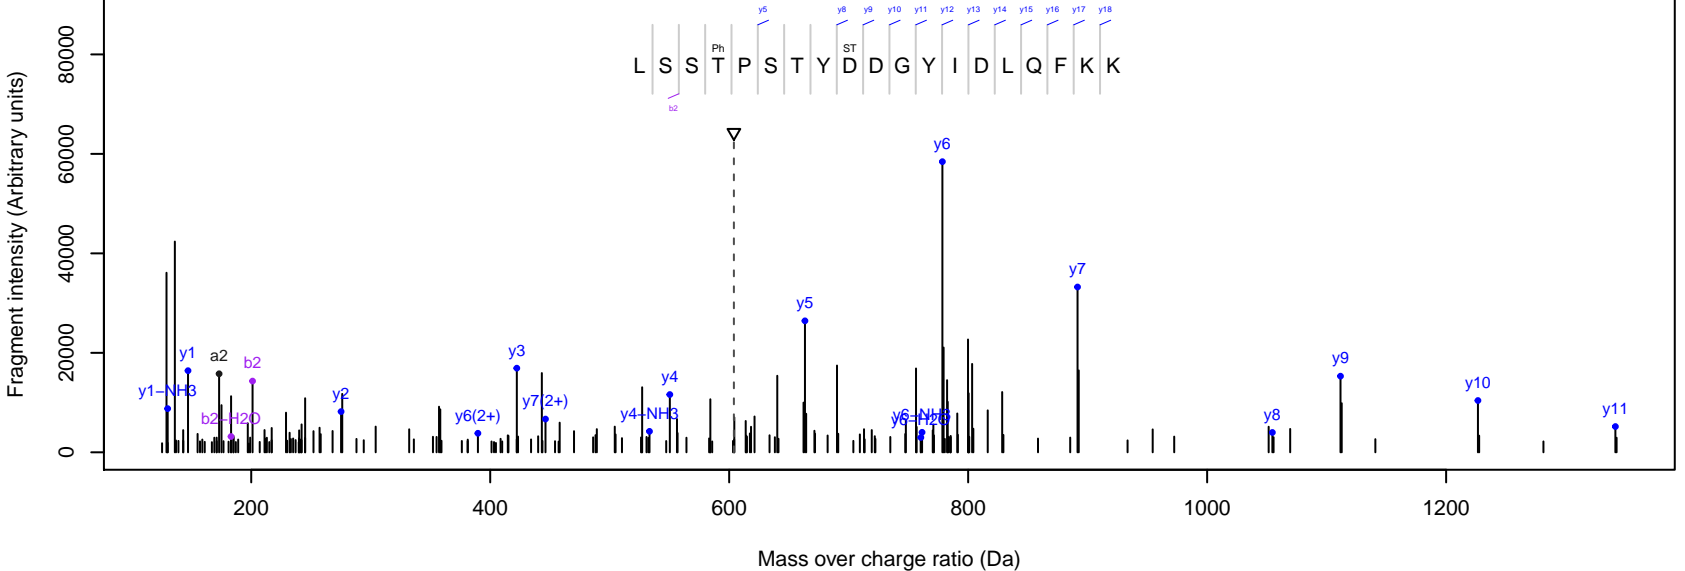

IVS(Phospho (STY))AQS(Phospho (STY))LAEDDVE-2+

Source : QE3\_201126\_FR\_TiOx\_hum\_tissue\_Urea\_RNAB\_N Scan : 52165

Andromeda score : 75.669

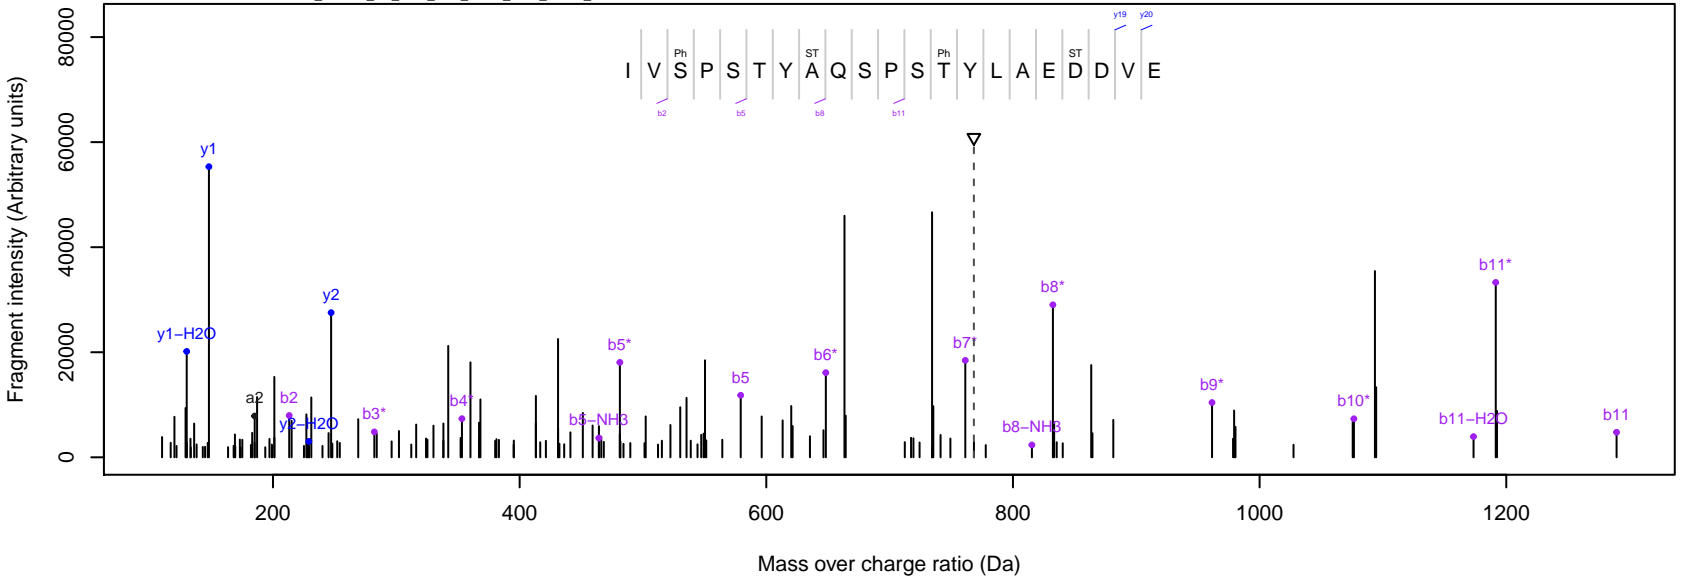

SGS(Phospho (STY))TGSSLSVSVR-2+

Source : QE3\_201126\_FR\_TiOx\_hum\_tissue\_Urea\_RNAB\_H Scan : 18544

Andromeda score : 75.669

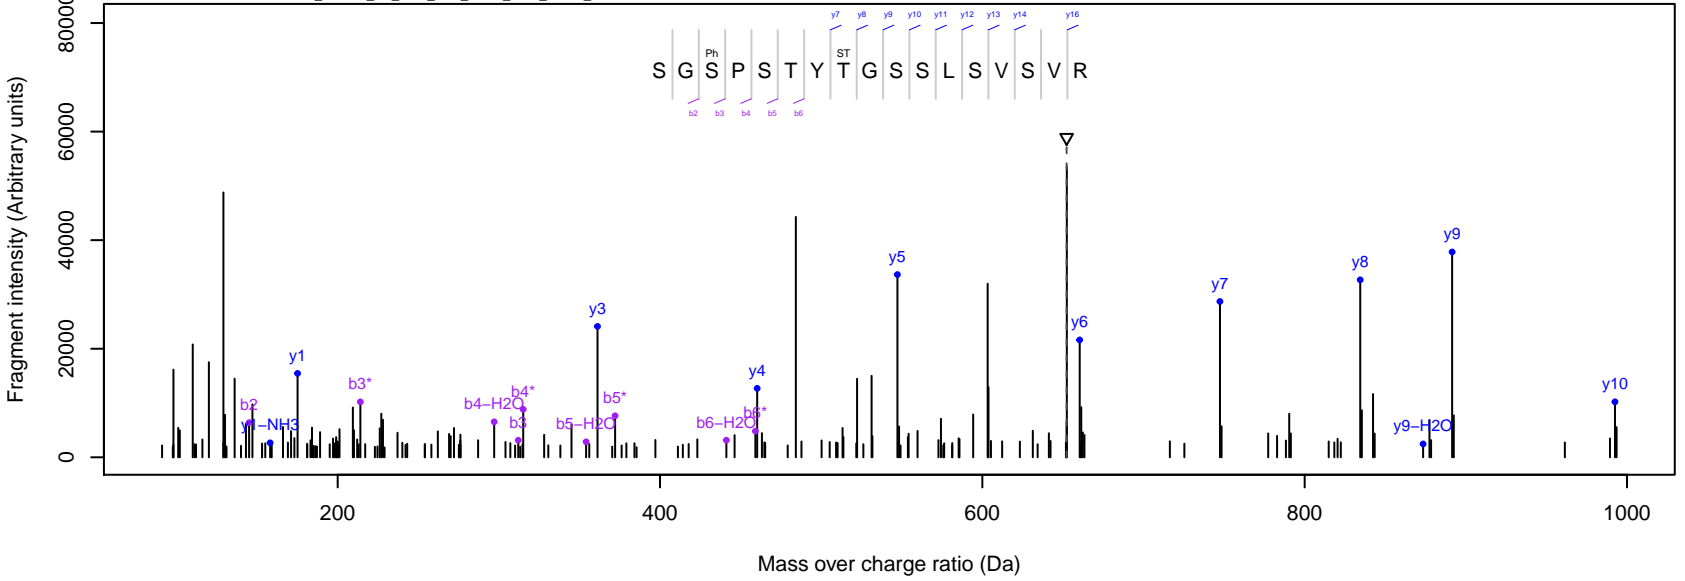

SCT(Phospho (STY))PS(Phospho (STY))PDQISHRAS(Phospho (STY))LEDAPVDDLTR-3+

Source : QE3\_201126\_FR\_TiOx\_hum\_tissue\_Urea\_RNAB\_N Scan : 38984

Andromeda score : 75.654

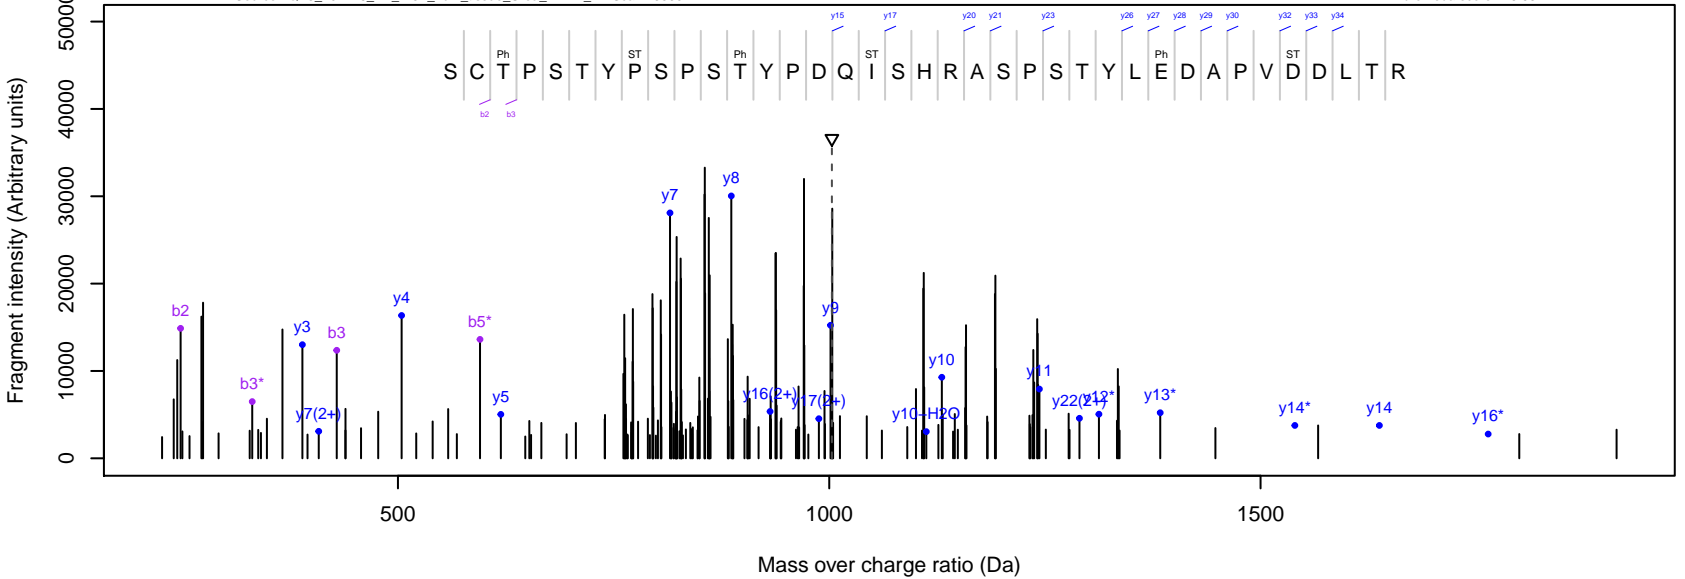

VGSQGS(Phospho (STY))LDSSATPINTVDVNNESSEGFICPQCMK-3+

Source : QE3\_201126\_FR\_TiOx\_hum\_tissue\_Urea\_RNAB\_H Scan : 49511

Andromeda score : 75.648

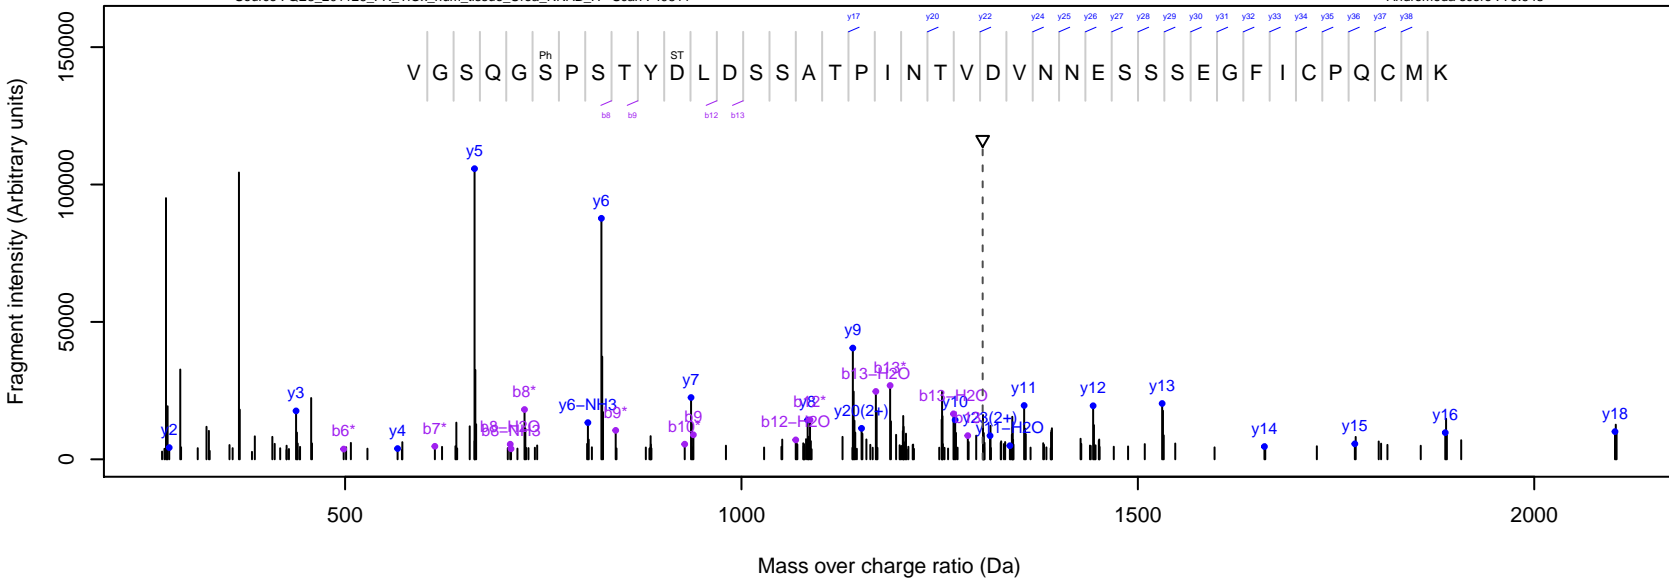

VLVNLEDALVLSSEEGAAAYNGIGTATNGSPSTYFCR-3+

Source : QE3\_201126\_FR\_TiOx\_hum\_tissue\_Urea\_RNAB\_N Scan : 60540

Andromeda score : 75.648

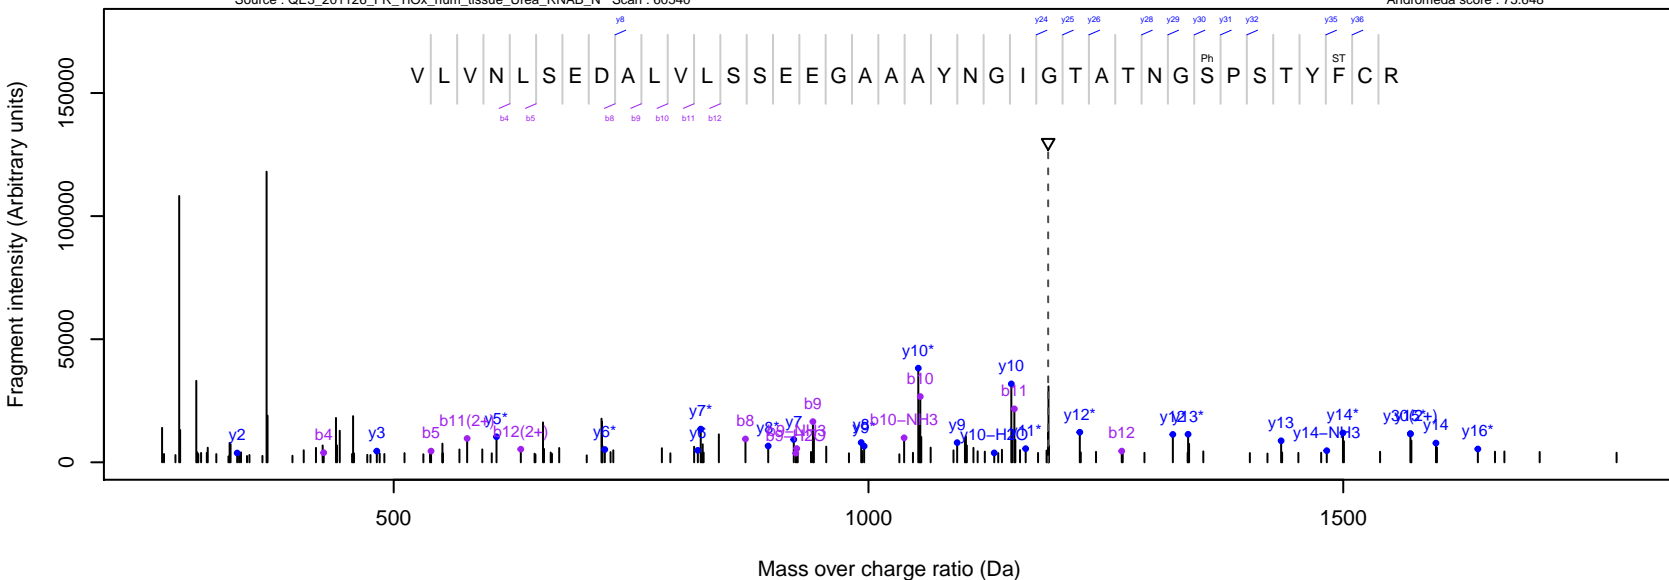

HAASYS(Phospho (STY))SDSENQGSYSGVIPPGR-3+

Source : QE3\_201126\_FR\_TiOx\_hum\_tissue\_Urea\_RNAB\_N Scan : 24942

Andromeda score : 75.646

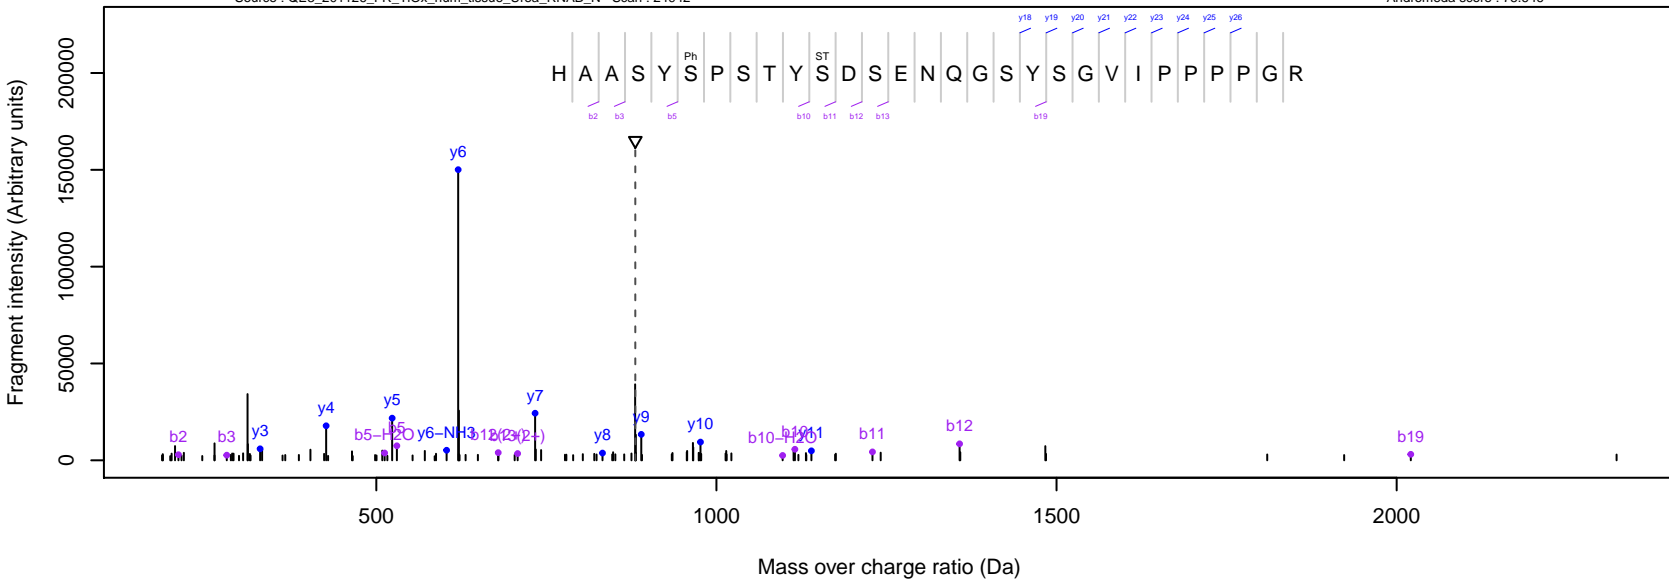

STS(Phospho (STY))PIIGSPVVR-2+

Source : QE3\_201126\_FR\_TIOx\_hum\_tissue\_Urea\_RNAB\_H Scan : 23939

Andromeda score : 75.618

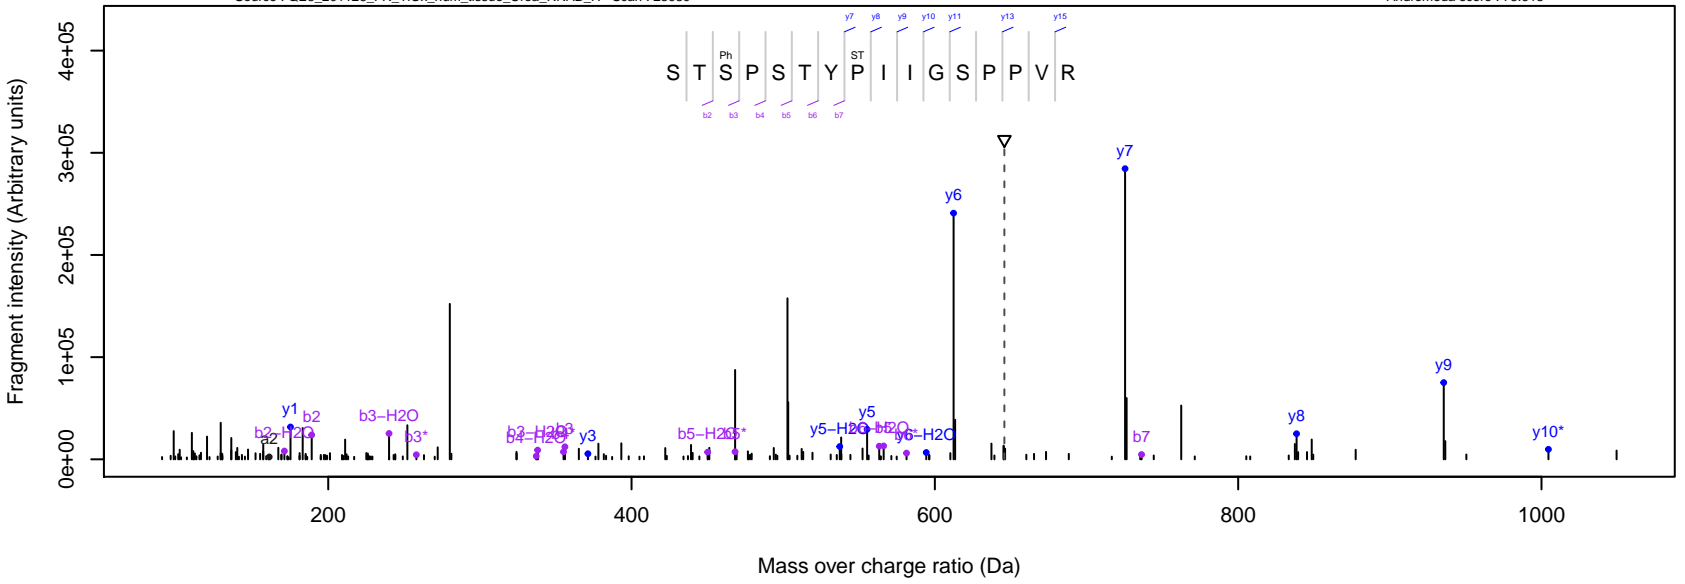

KVHPY(Phospho (STY))EDS(Phospho (STY))DS(Phospho (STY))SEVDWQDTR-3+

Source : QE3\_201126\_FR\_TIOx\_hum\_tissue\_Urea\_RNAB\_N Scan : 30154

Andromeda score : 75.589

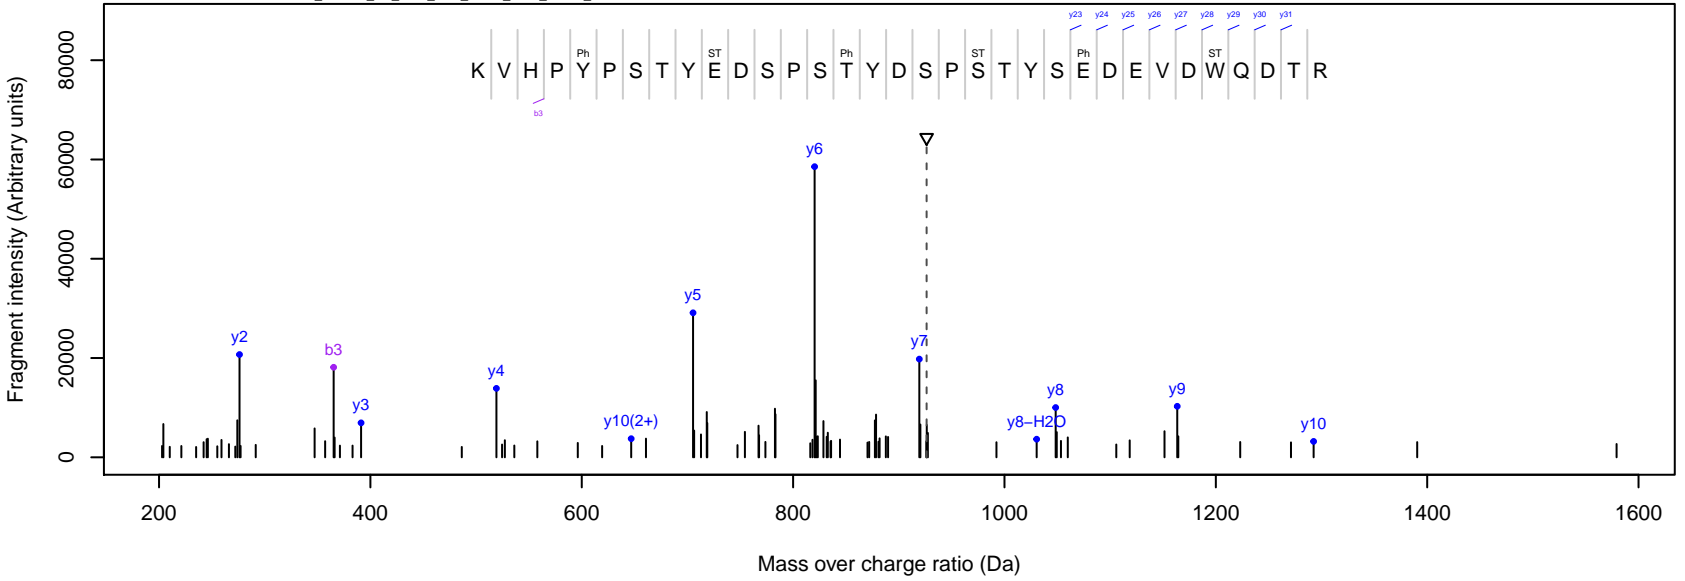

DVAVS(Phospho (STY))YYHFYHMAK-3+

Source : QE3\_201126\_FR\_TIOx\_hum\_tissue\_Urea\_RNAB\_B Scan : 31548

Andromeda score : 75.574

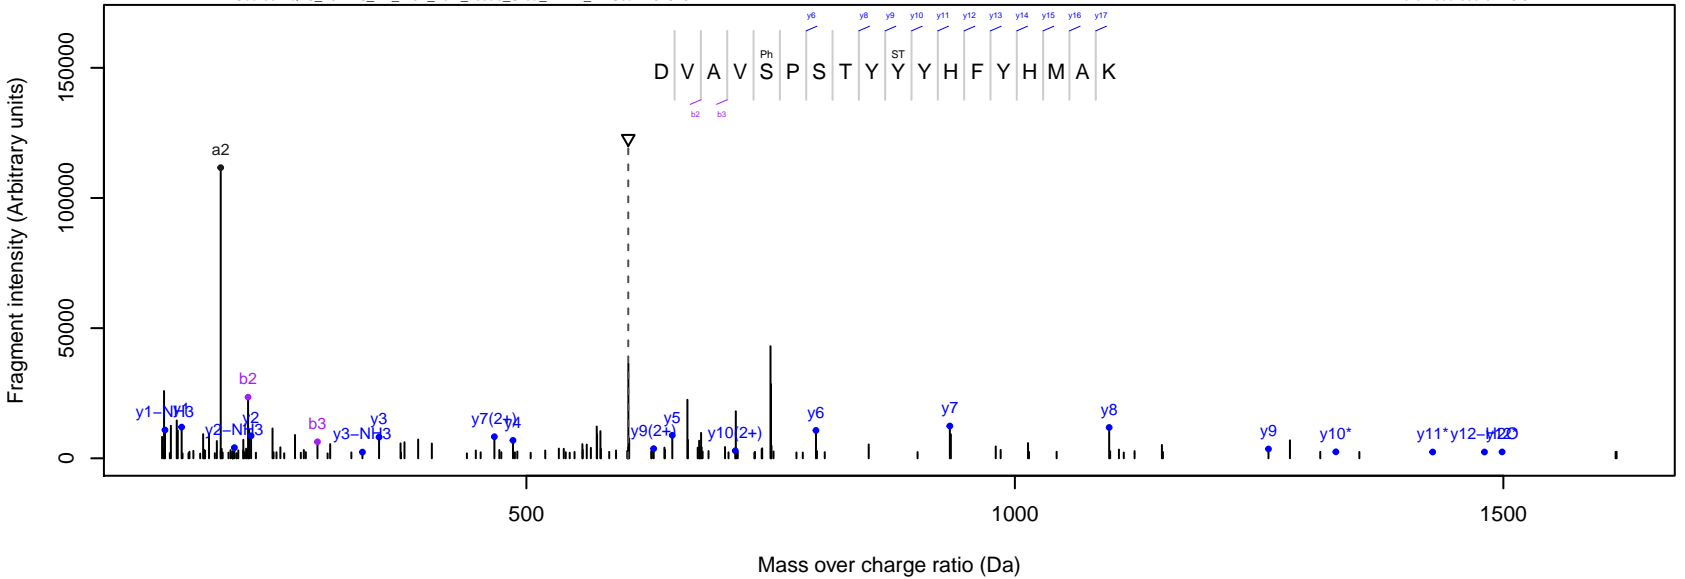

FGKADS(Phospho (STY))YEKLEK-3+

Source : QE3\_201126\_FR\_TiOx\_hum\_tissue\_Urea\_RNAB\_N Scan : 12678

Andromeda score : 75.574

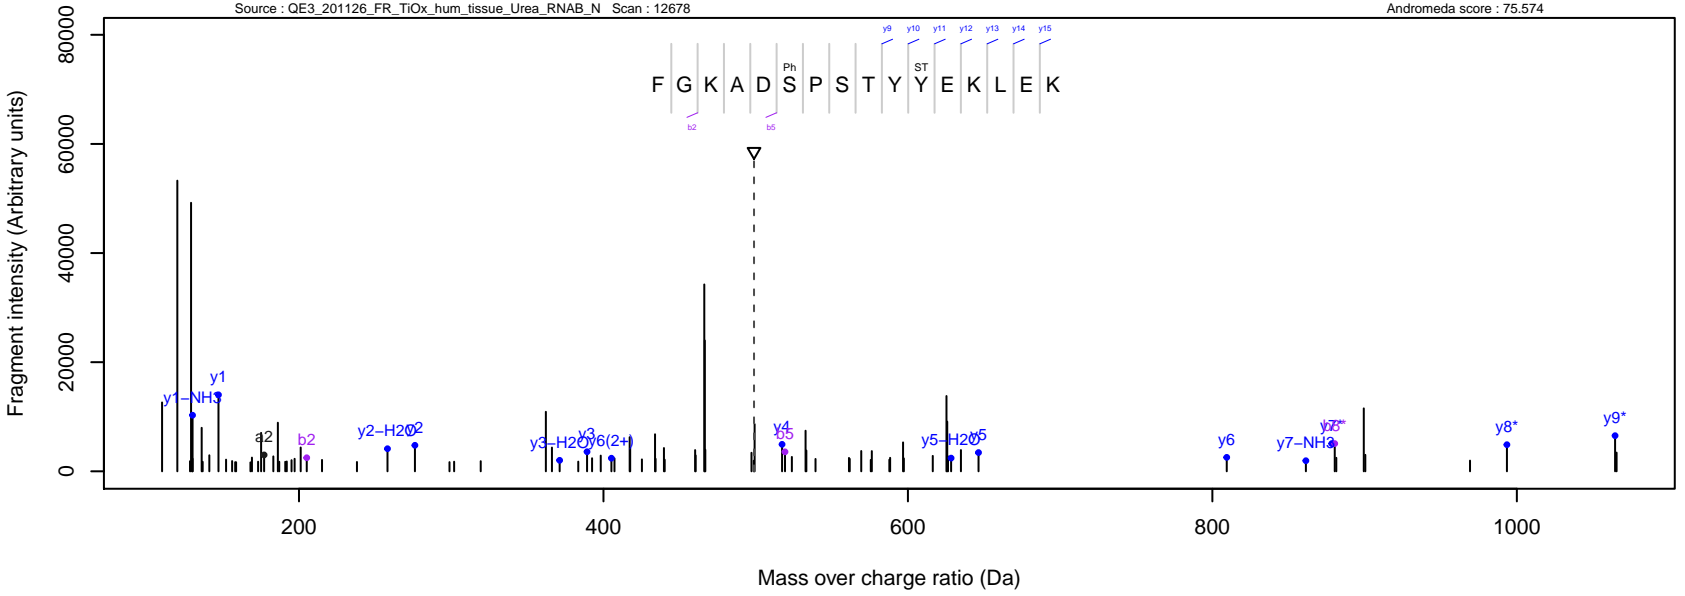

KNGSTAVAESV(Phospho (STY))PQK-2+

Source : QE3\_201126\_FR\_TiOx\_hum\_tissue\_Urea\_RNAB\_B Scan : 8234

Andromeda score : 75.574

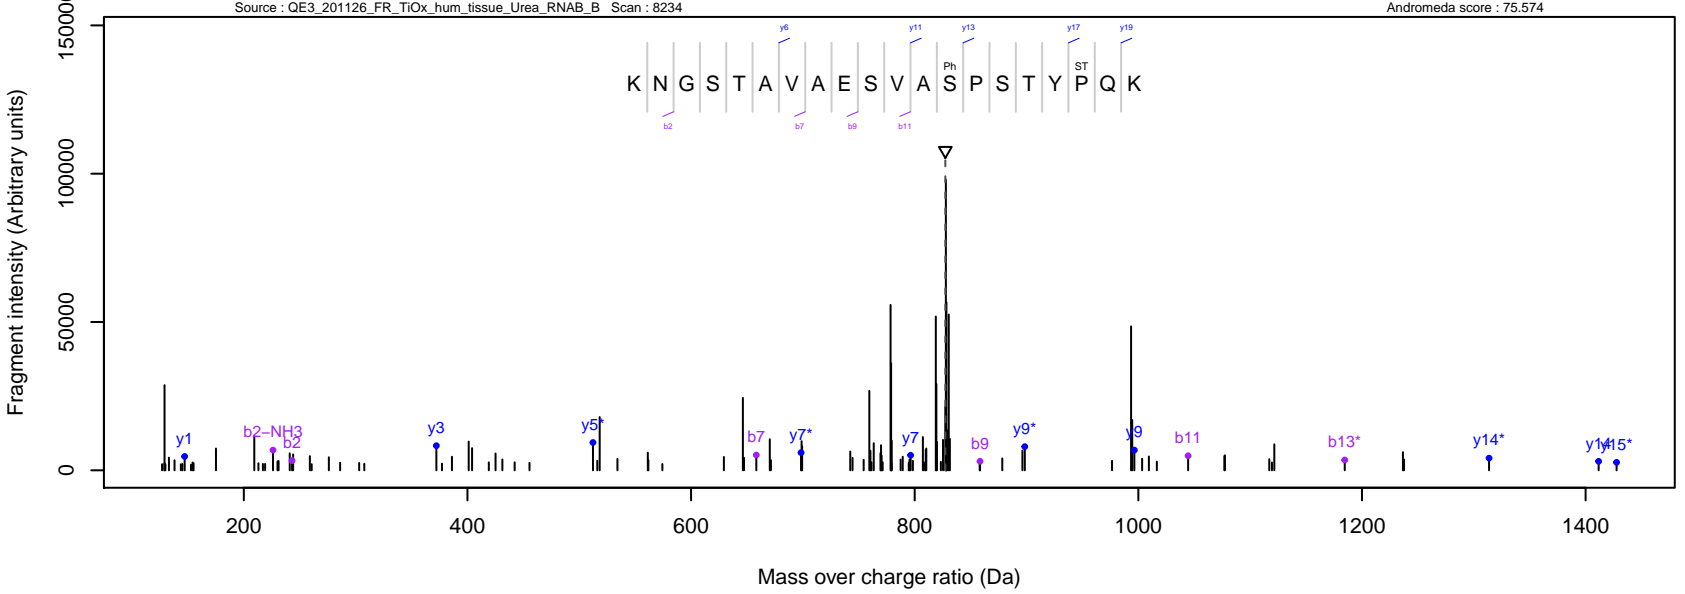

EVFS(Phospho (STY))SCSSEVLSGDDDEEYQR-3+

Source : QE3\_201126\_FR\_TiOx\_hum\_tissue\_Urea\_RNAB\_H Scan : 37521

Andromeda score : 75.55

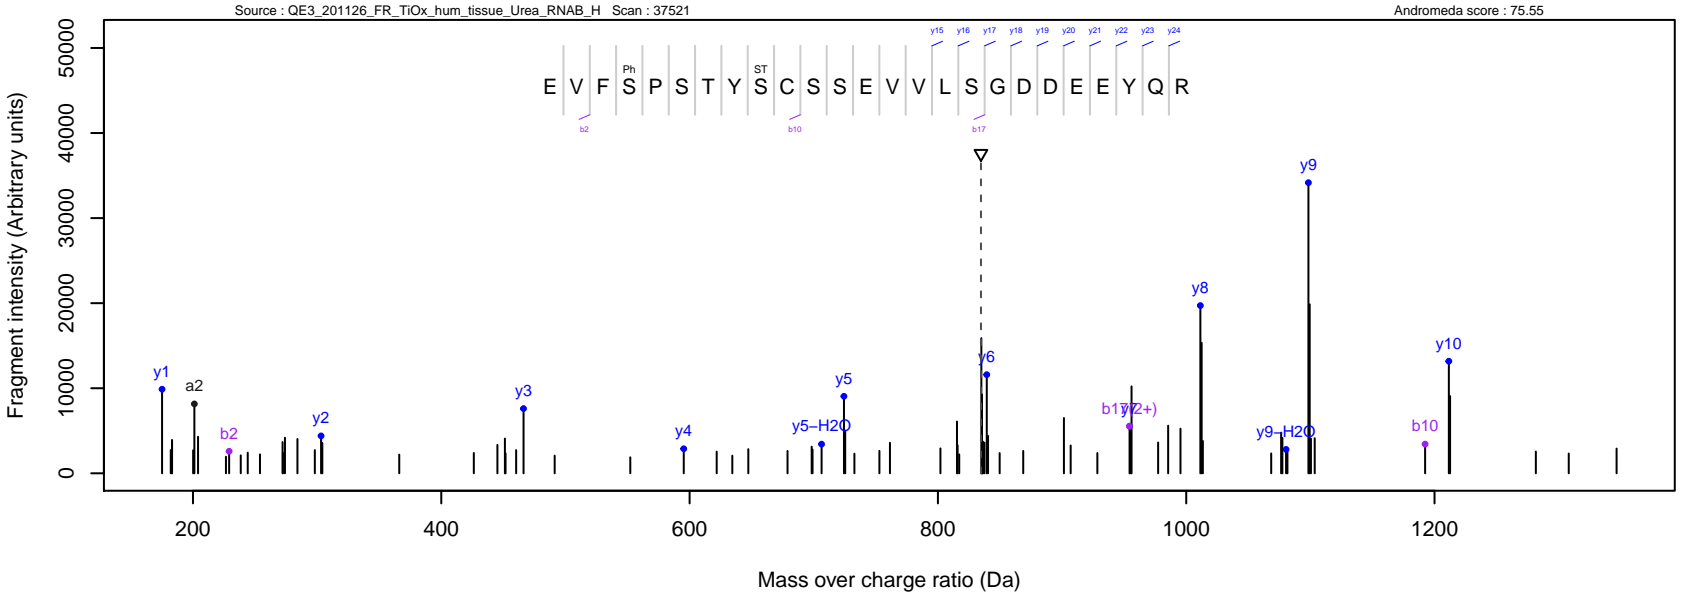

DKPVY(Phospho (STY))DELFYTLSPINGK-3+

Source : QE3\_201126\_FR\_TiOx\_hum\_tissue\_Urea\_RNAB\_H Scan : 54744

Andromeda score : 75.548

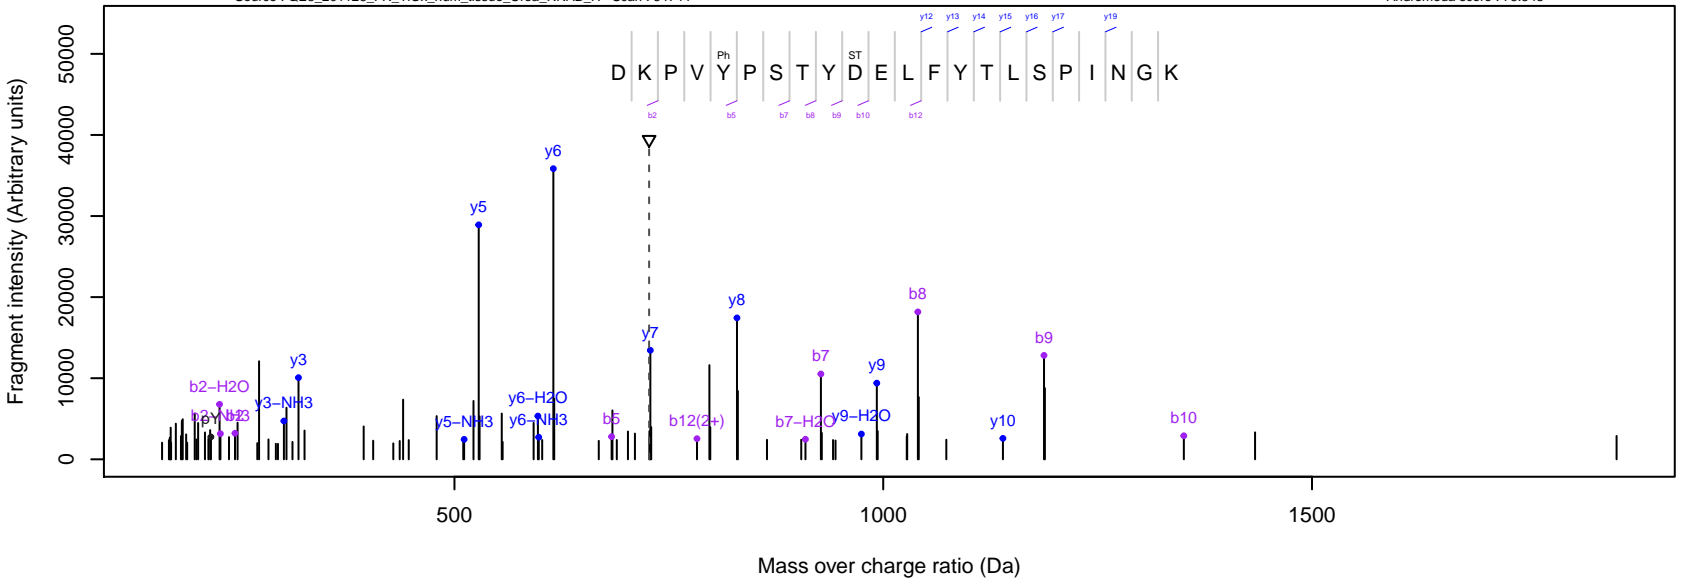

FRIS(Phospho (STY))HELDS(Phospho (STY))ASS(Phospho (STY))EVN-2+

Source : QE3\_201126\_FR\_TiOx\_hum\_tissue\_Urea\_RNAB\_B Scan : 39132

Andromeda score : 75.548

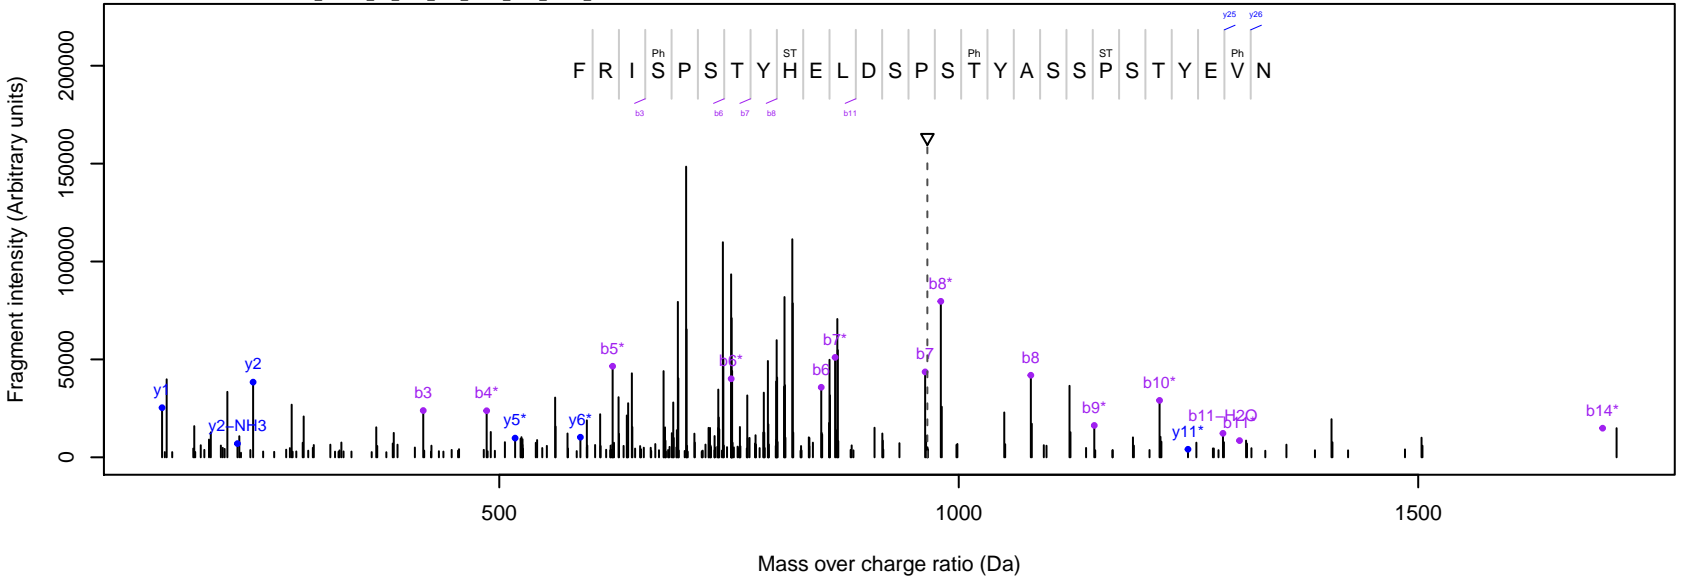

SSETGAFRVPS(Phospho (STY))PGMEEAGCSR-3+

Source : QE3\_201126\_FR\_TiOx\_hum\_tissue\_Urea\_RNAB\_N Scan : 28457

Andromeda score : 75.529

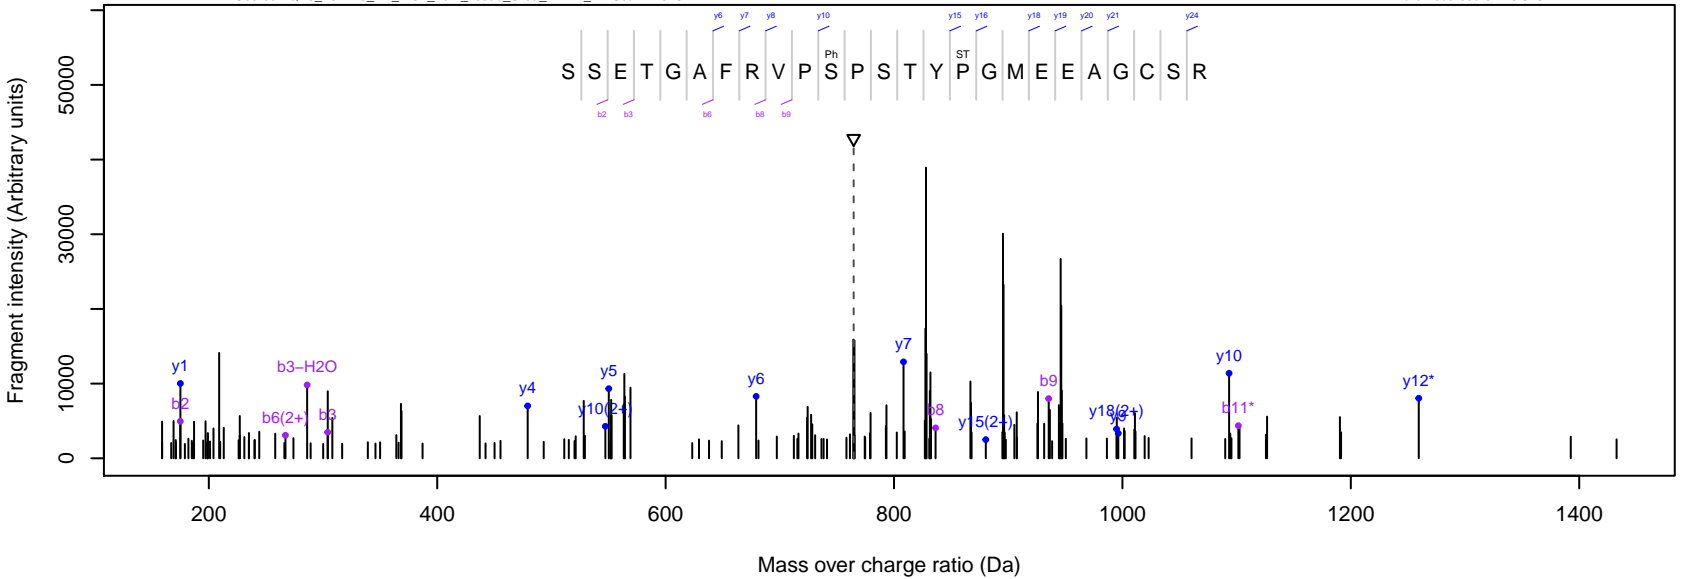

VDGPRS(Phospho (STY))PS(Phospho (STY))YGR-2+

Source : QE3\_201126\_FR\_TiOx\_hum\_tissue\_Urea\_RNAB\_H Scan : 9438

Andromeda score : 75.483

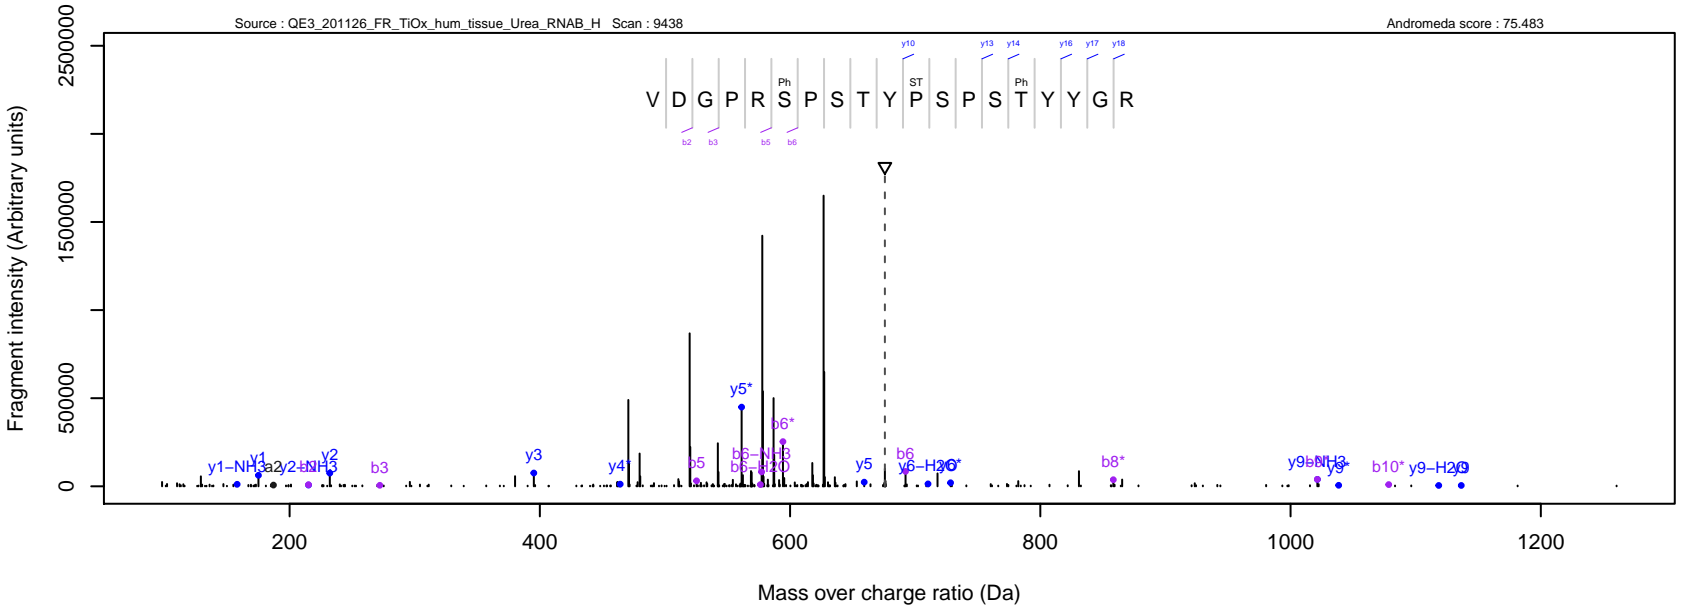

ISTAS(Phospho (STY))GDGRHYCYPHFTCAVDTENIR-4+

Source : QE3\_201126\_FR\_TiOx\_hum\_tissue\_Urea\_RNAB\_B Scan : 25455

Andromeda score : 75.479

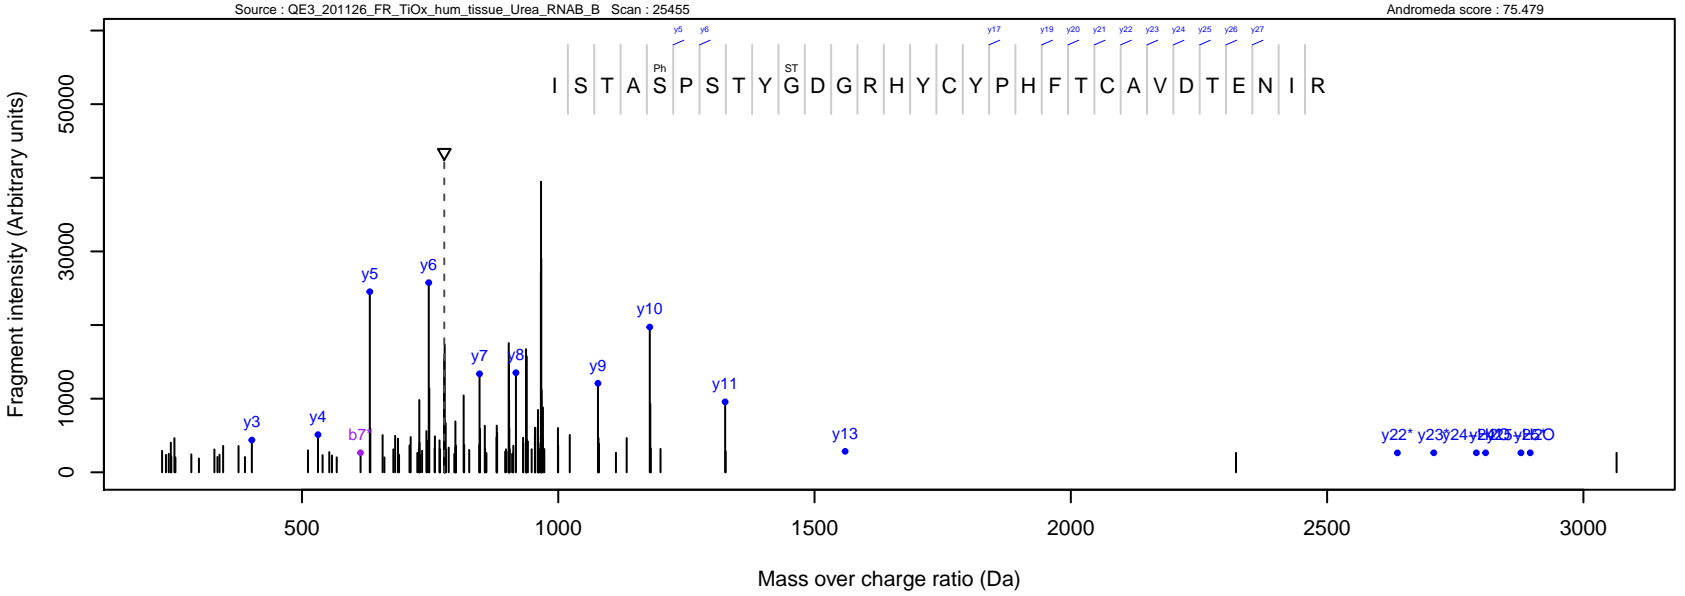

NLALS(Phospho (STY))RESLVV-2+

Source : QE3\_201126\_FR\_TiOx\_hum\_tissue\_Urea\_RNAB\_N Scan : 39161

Andromeda score : 75.479

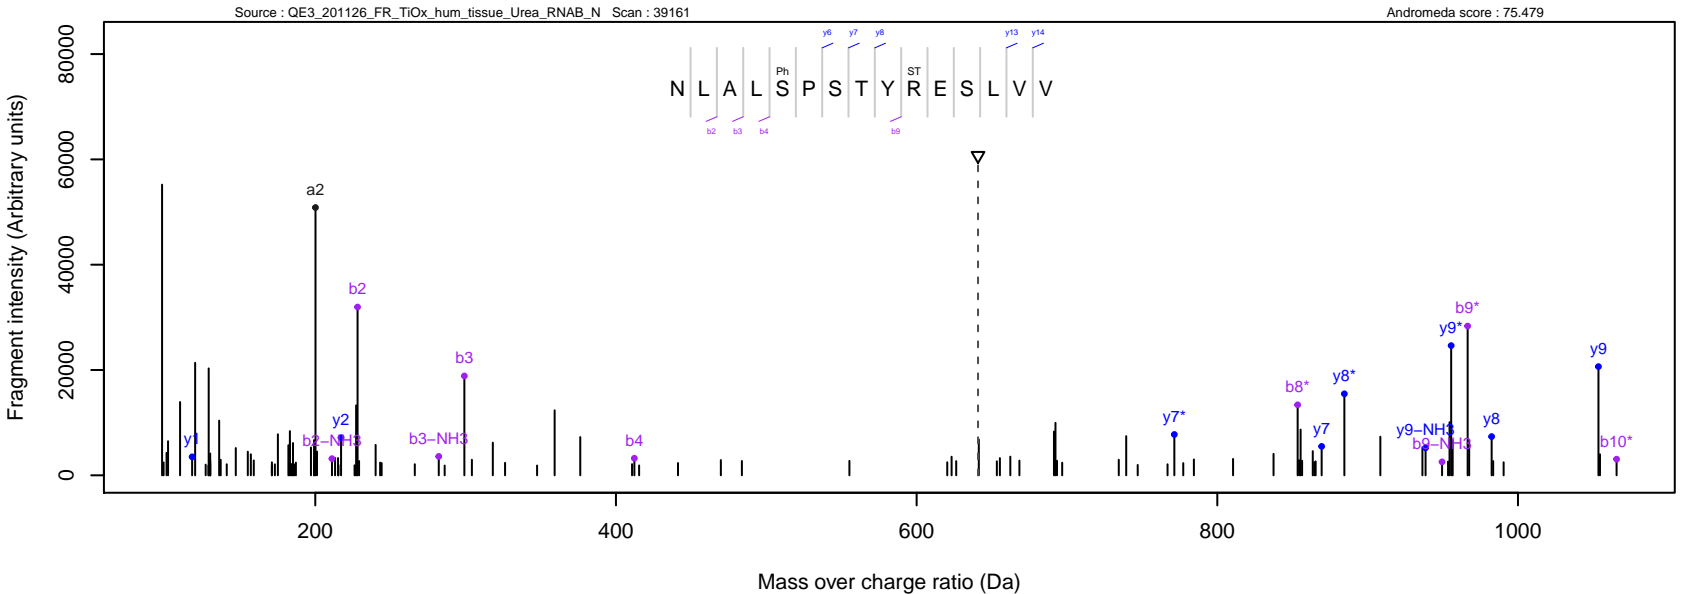



SEGEFKQTSS(Phospho (STY))FLV-2+

Source : QE3\_201126\_FR\_TiOx\_hum\_tissue\_Urea\_RNAB\_B Scan : 39422

Andromeda score : 75.479

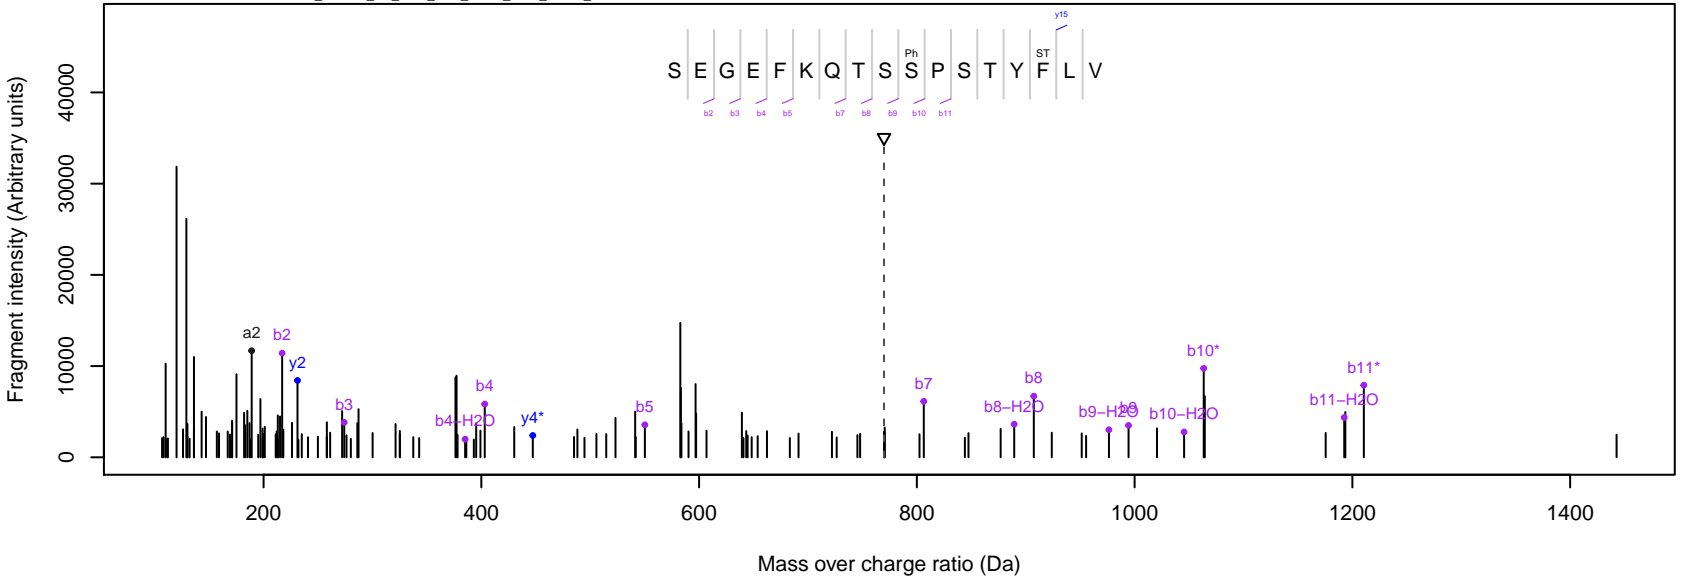

DLLHPS(Phospho (STY))PEEEKR-4+

Source : QE3\_201126\_FR\_TiOx\_hum\_tissue\_Urea\_RNAB\_N Scan : 9992

Andromeda score : 75.463

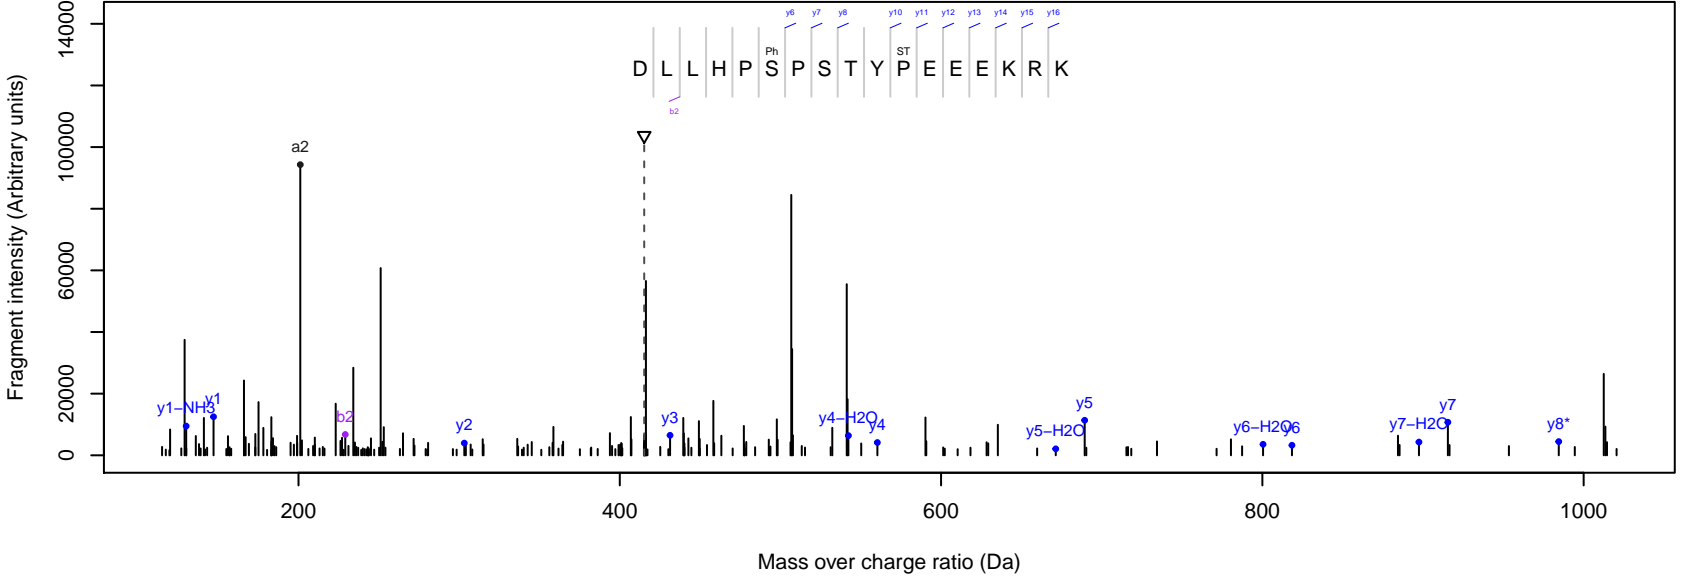

KFS(Phospho (STY))TMEELVEHYK-3+

Source : QE3\_201126\_FR\_TiOx\_hum\_tissue\_Urea\_RNAB\_H Scan : 38218

Andromeda score : 75.376

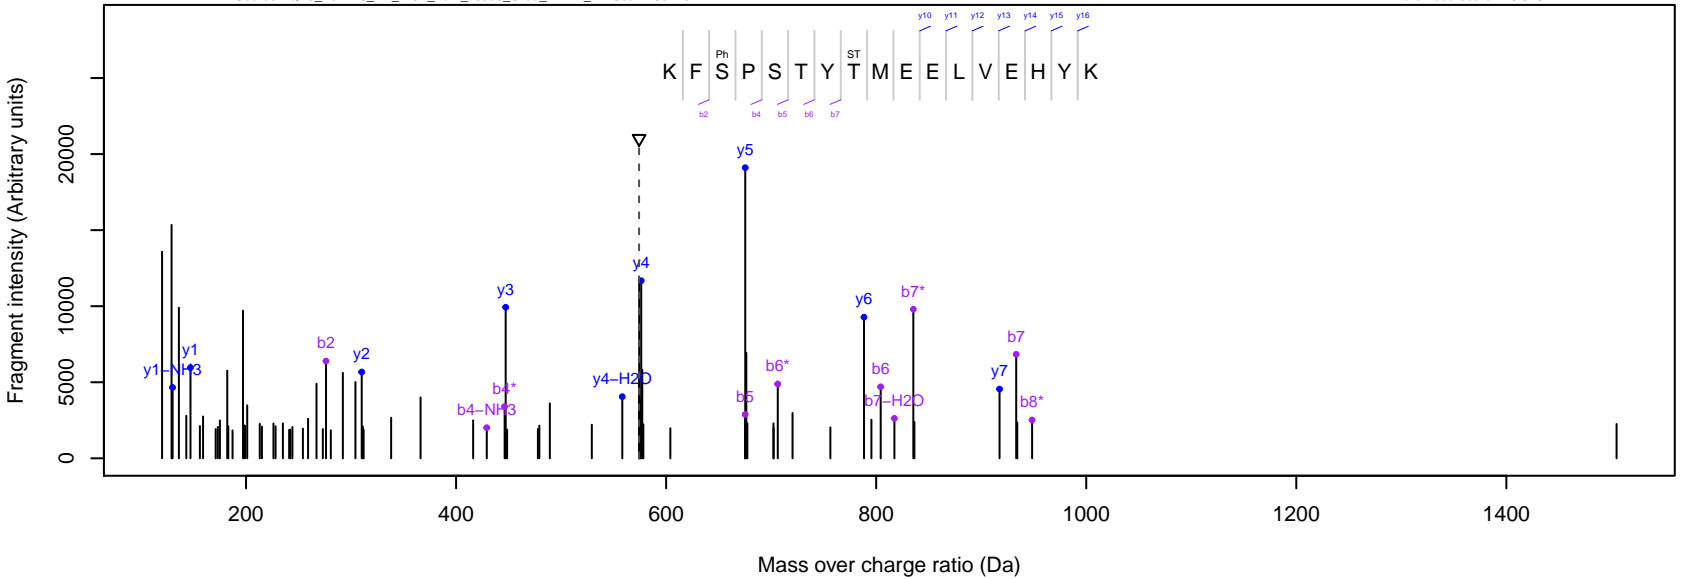

QGSGRES(Phospho (STY))PSLASR-3+

Source : QE3\_201126\_FR\_TIOx\_hum\_tissue\_Urea\_RNAB\_H Scan : 6128

Andromeda score : 75.376

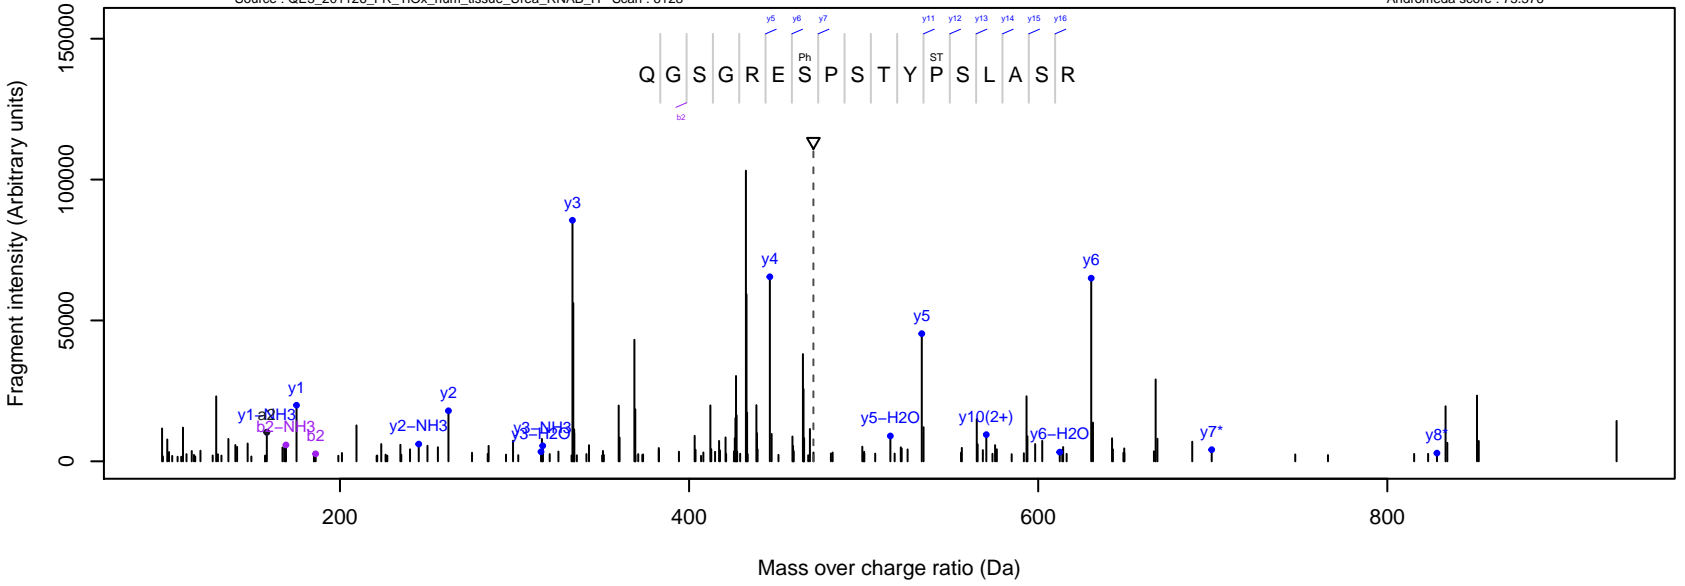

SRS(Phospho (STY))PLGFYVHLK-3+

Source : QE3\_201126\_FR\_TIOx\_hum\_tissue\_Urea\_RNAB\_H Scan : 28289

Andromeda score : 75.376

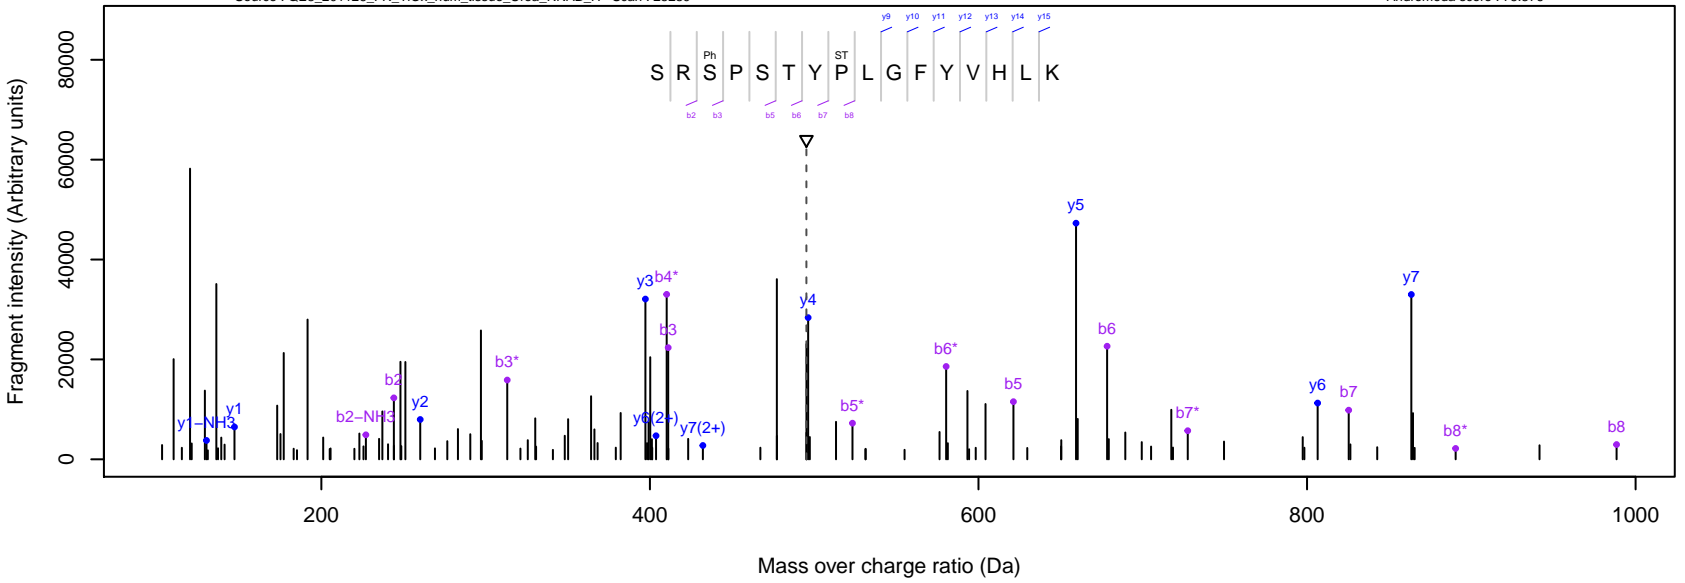

HEHPNPPVS(Phospho (STY))PGKTVNDVNSNNM(Oxidation (M))SYR-4+

Source : QE3\_201126\_FR\_TIOx\_hum\_tissue\_Urea\_RNAB\_H Scan : 15288

Andromeda score : 75.326

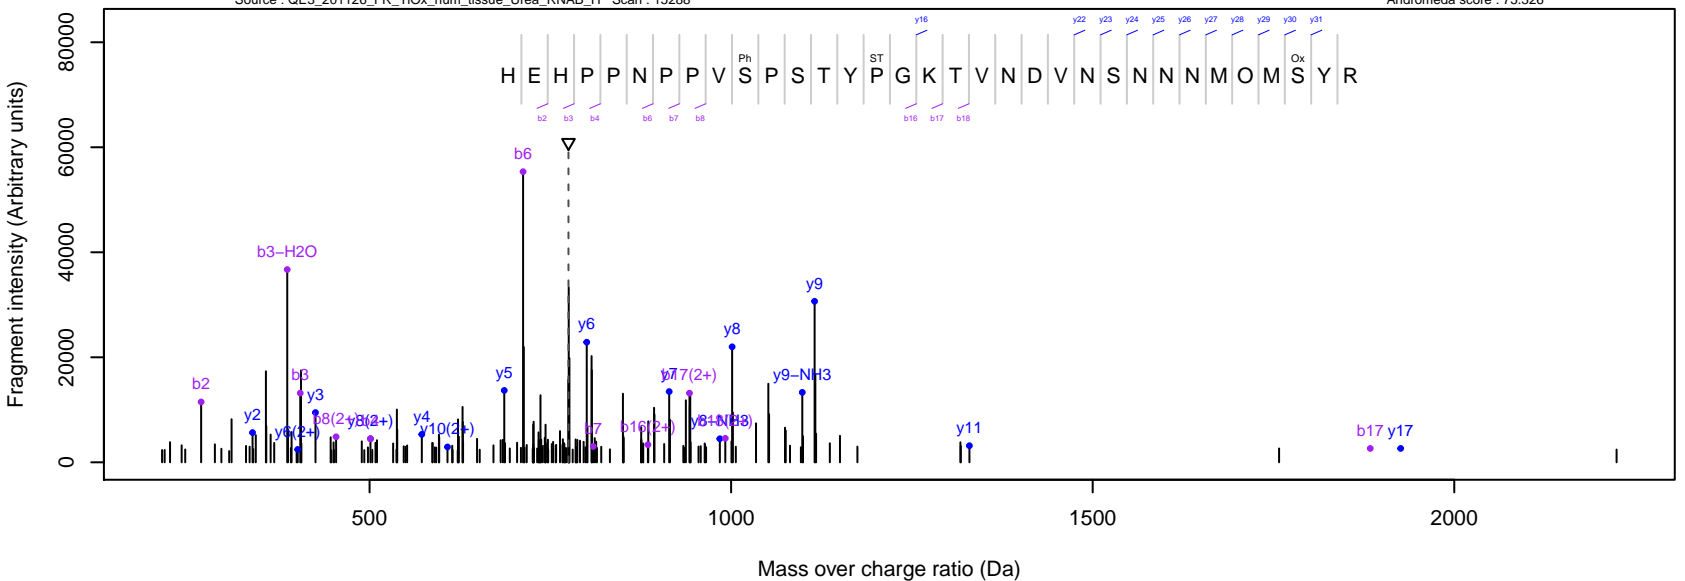

STVLTPMFVET(Phospho (STY))QAS(Phospho (STY))QGTLQTR-3+

Source : QE3\_201126\_FR\_TiOx\_hum\_tissue\_Urea\_RNAB\_B Scan : 57365

Andromeda score : 75.326

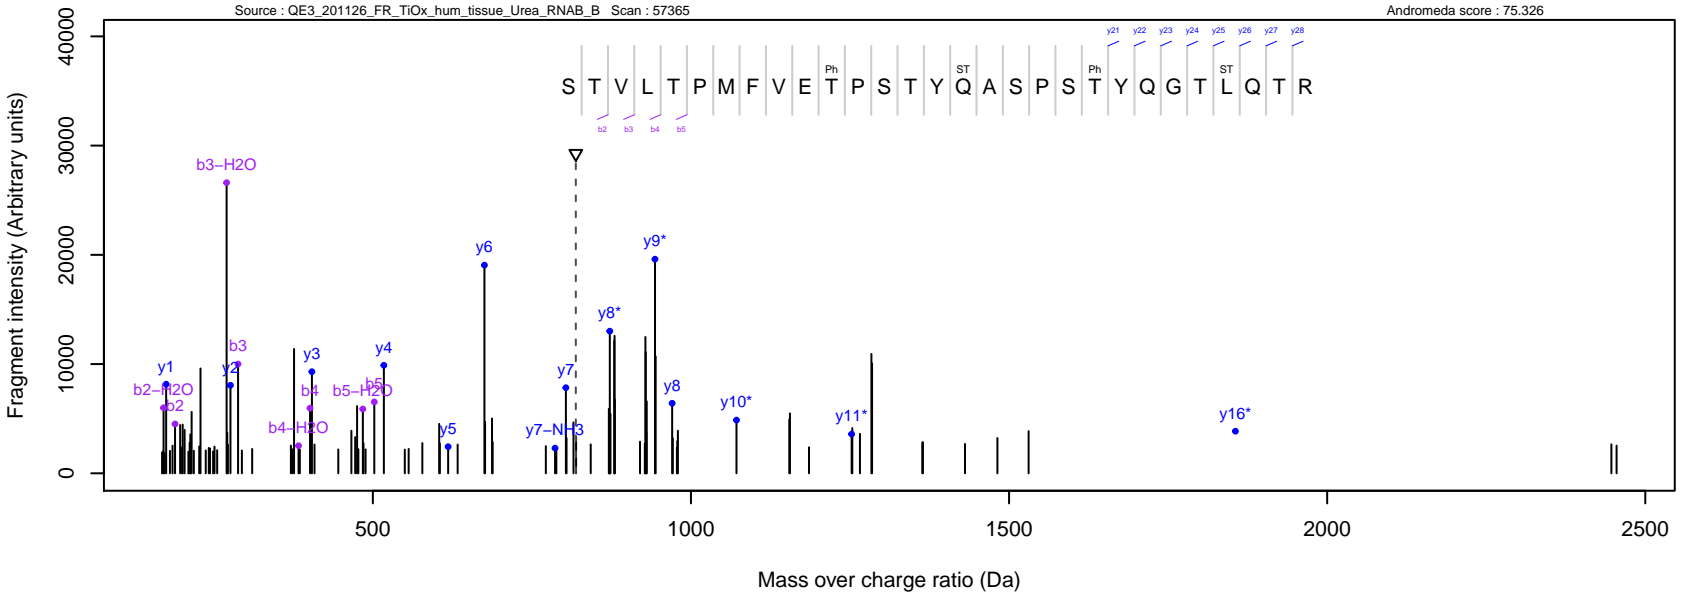

RDS(Phospho (STY))IVAELDR-2+

Source : QE3\_201126\_FR\_TiOx\_hum\_tissue\_Urea\_RNAB\_B Scan : 21221

Andromeda score : 75.316

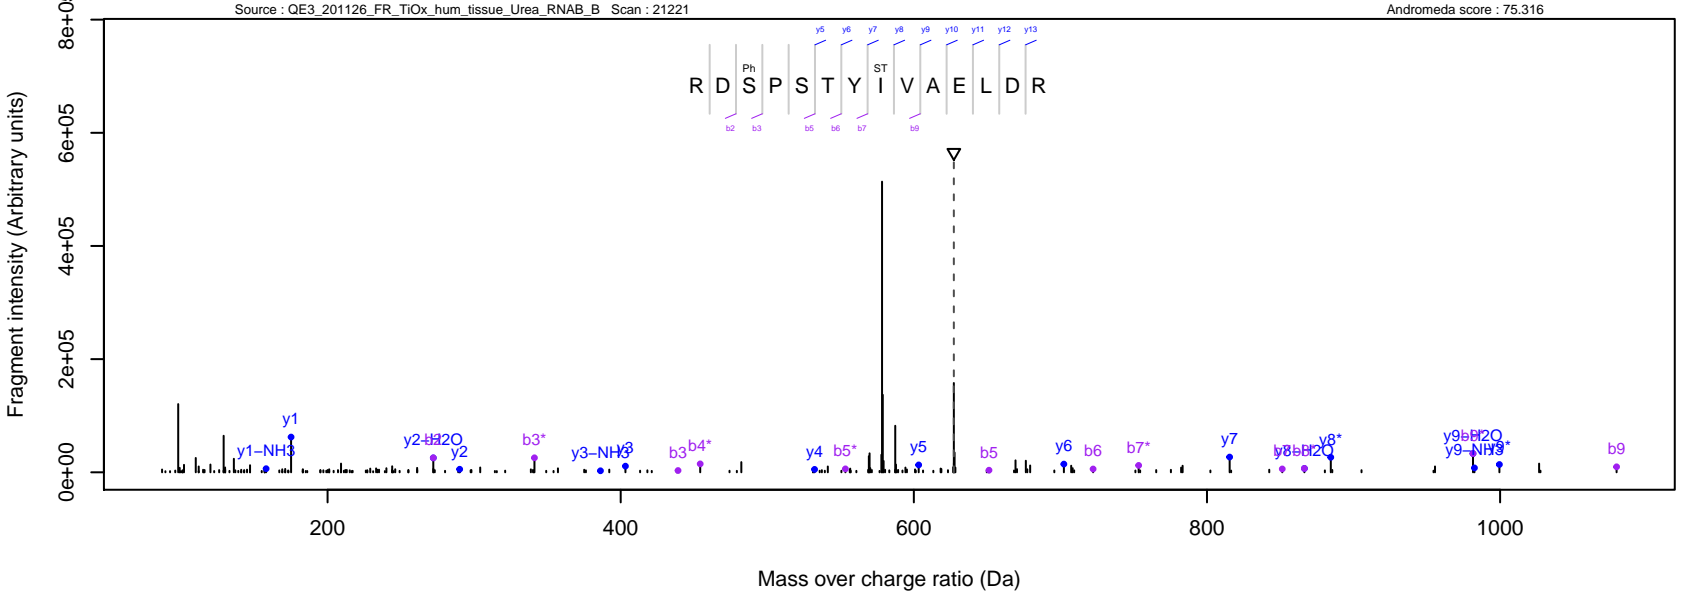

ITKPGSIDSNNQLFAPGGR(Phospho (STY))WGK-3+

Source : QE3\_201126\_FR\_TiOx\_hum\_tissue\_Urea\_RNAB\_H Scan : 35349

Andromeda score : 75.275

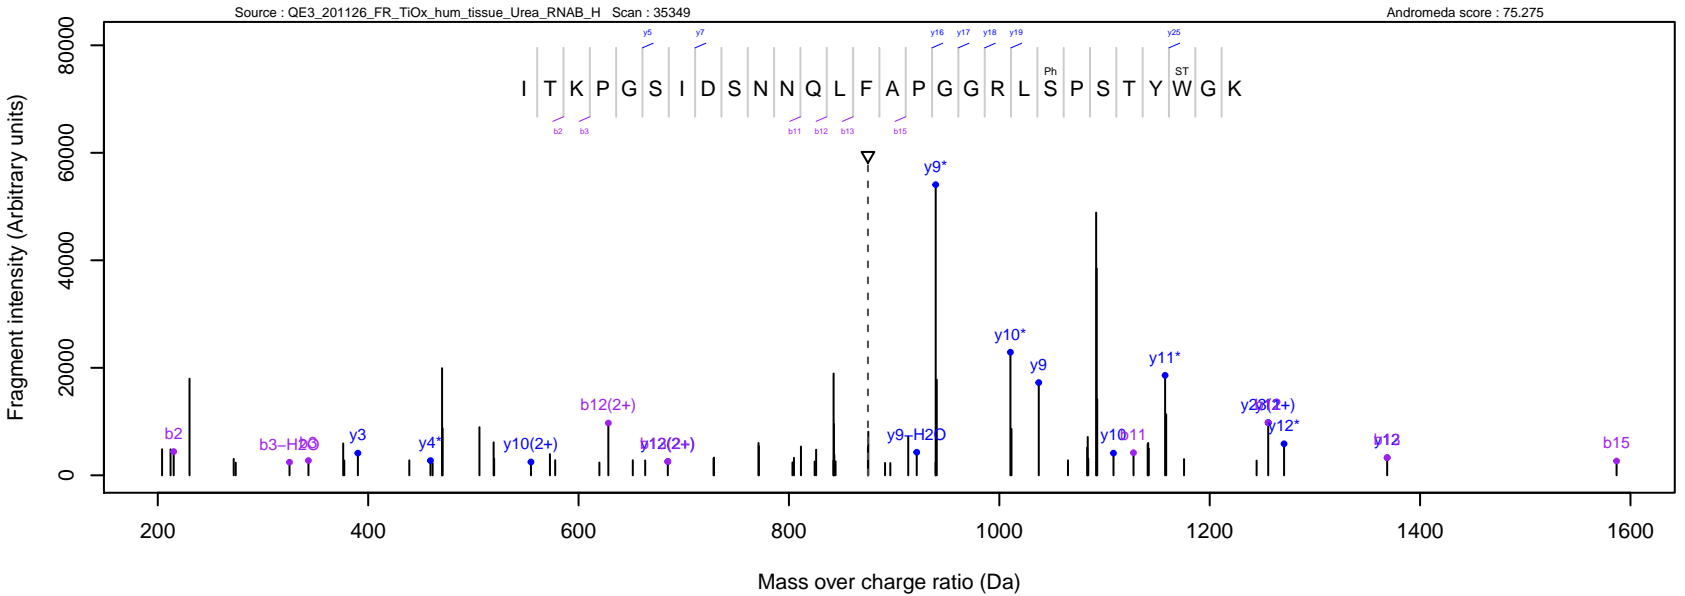

QQFHSKPVDS(Phospho (STY))DS(Phospho (STY))DDDPLEAFM(Oxidation (M))AEVEDQAAR-3+

Source : QE3\_201126\_FR\_TiOx\_hum\_tissue\_Urea\_RNAB\_H Scan : 55060

Andromeda score : 75.275

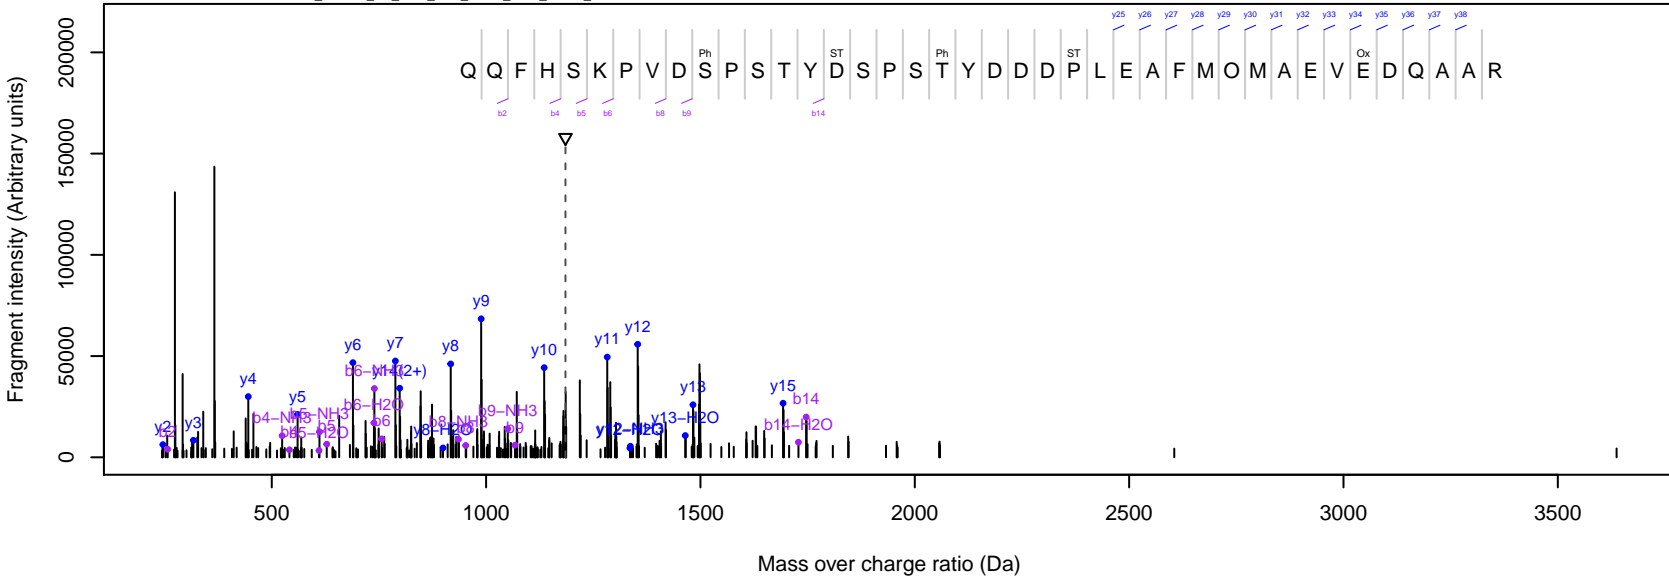

S(Phospho (STY))GTPPRQGSITSPQANEQSVTPQR-3+

Source : QE3\_201126\_FR\_TiOx\_hum\_tissue\_Urea\_RNAB\_N Scan : 15349

Andromeda score : 75.275

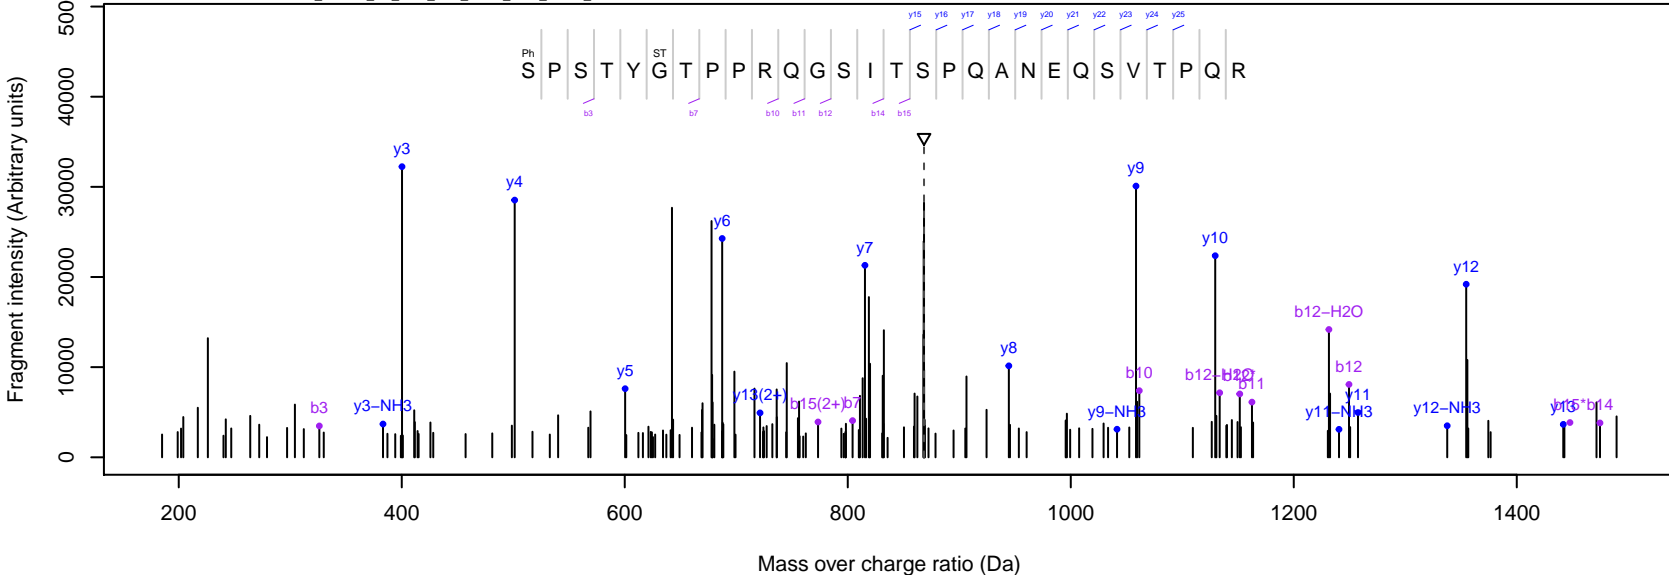

GSVILDSGHLSTAS(Phospho (STY))S(Phospho (STY))SDDLKGEESFR-3+

Source : QE3\_201126\_FR\_TiOx\_hum\_tissue\_Urea\_RNAB\_B Scan : 34031

Andromeda score : 75.261

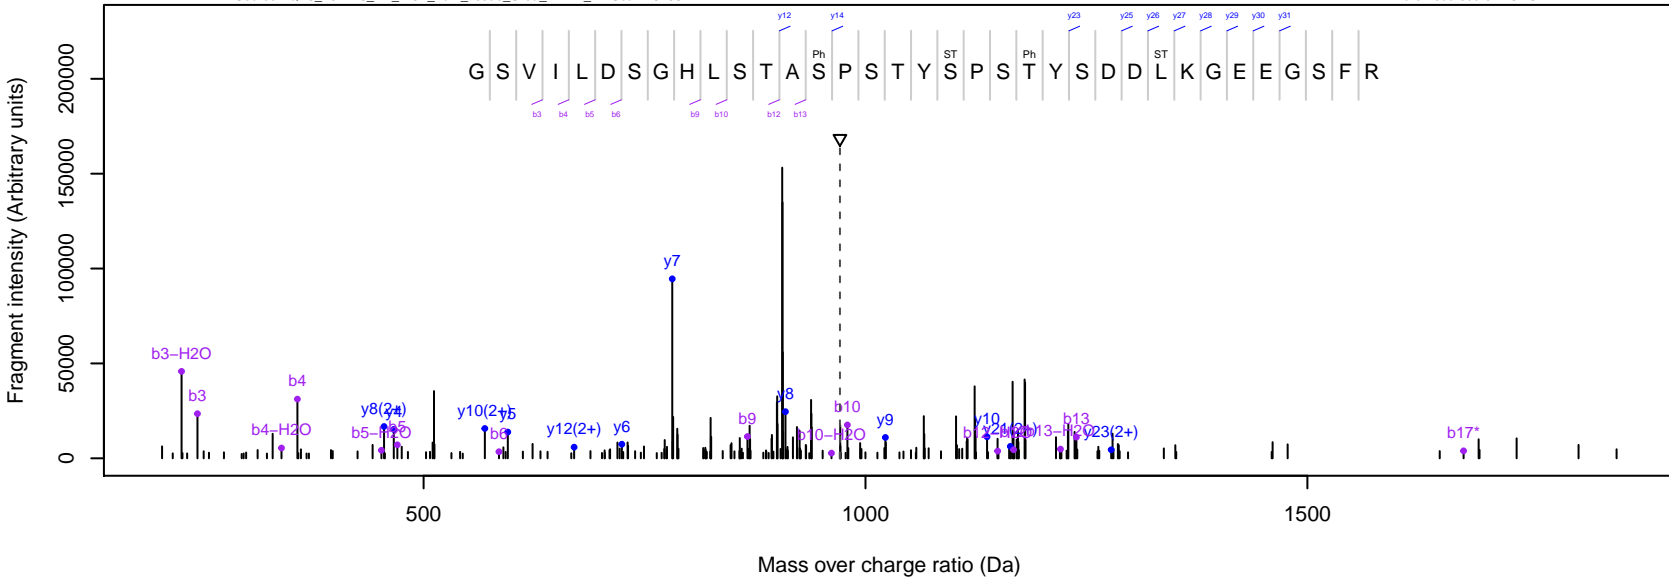

HAHSSLQQAAS(Phospho (STY))RSPSFGDPQLSPEAR-4+

Source : QE3\_201126\_FR\_TIOx\_hum\_tissue\_Urea\_RNAB\_N Scan : 19876

Andromeda score : 75.261

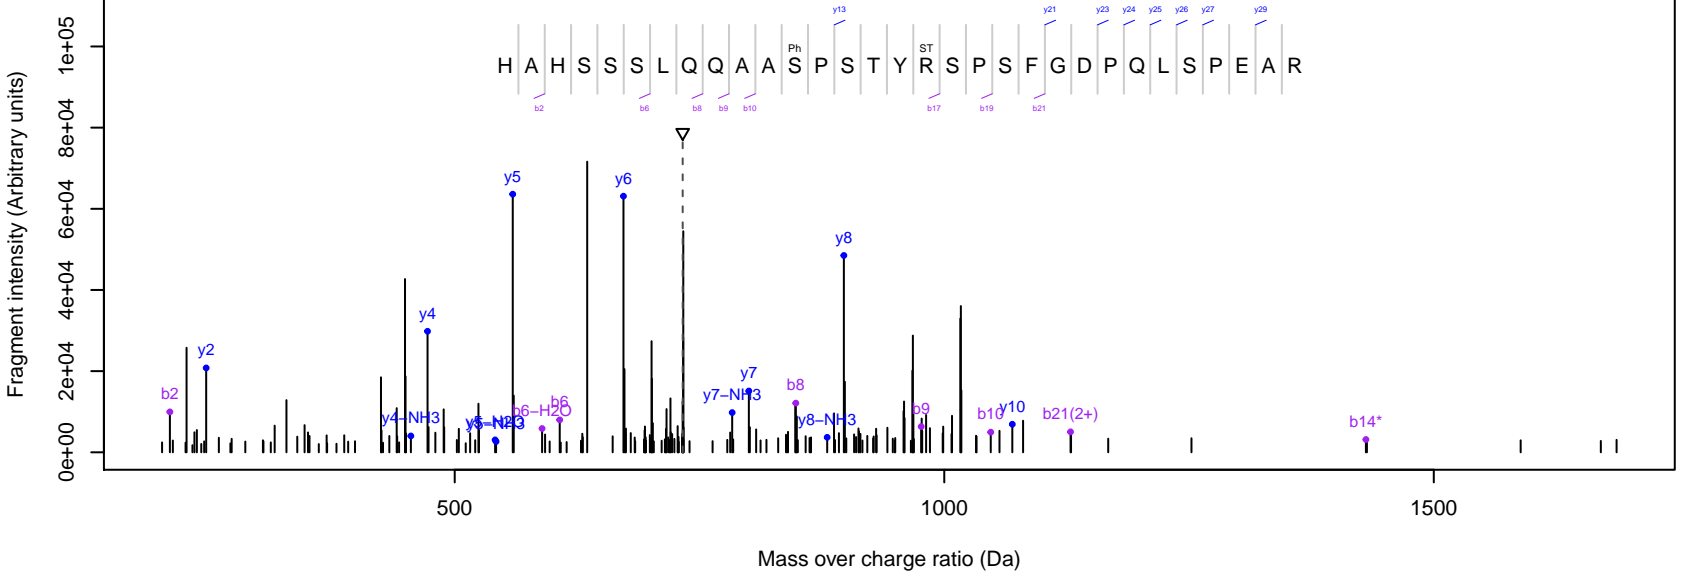

LQDSRS(Phospho (STY))LDGLSEACGGAGSSGSAESGAGGR-3+

Source : QE3\_201126\_FR\_TIOx\_hum\_tissue\_Urea\_RNAB\_H Scan : 20389

Andromeda score : 75.261

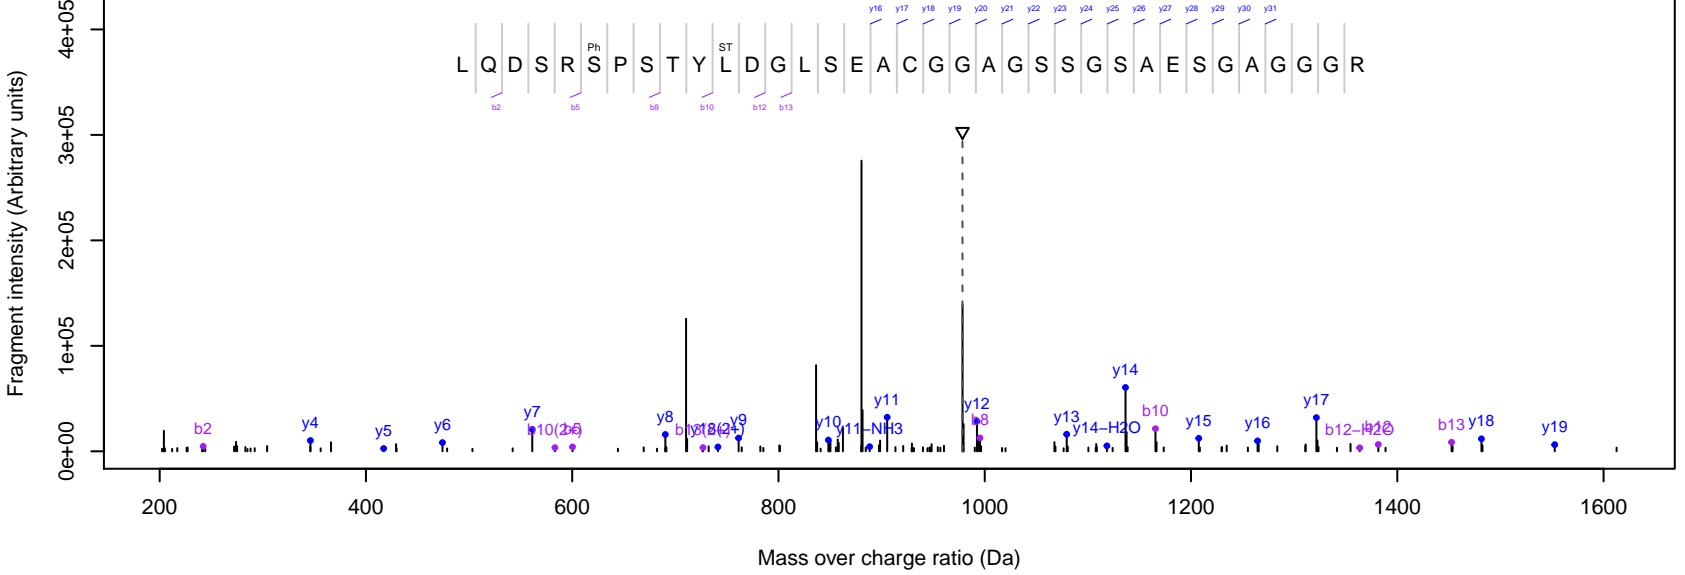

DSGSDTASAIIPSTTPSVDS(Phospho (STY))DDESVKDKK-3+

Source : QE3\_201126\_FR\_TIOx\_hum\_tissue\_Urea\_RNAB\_N Scan : 28326

Andromeda score : 75.248

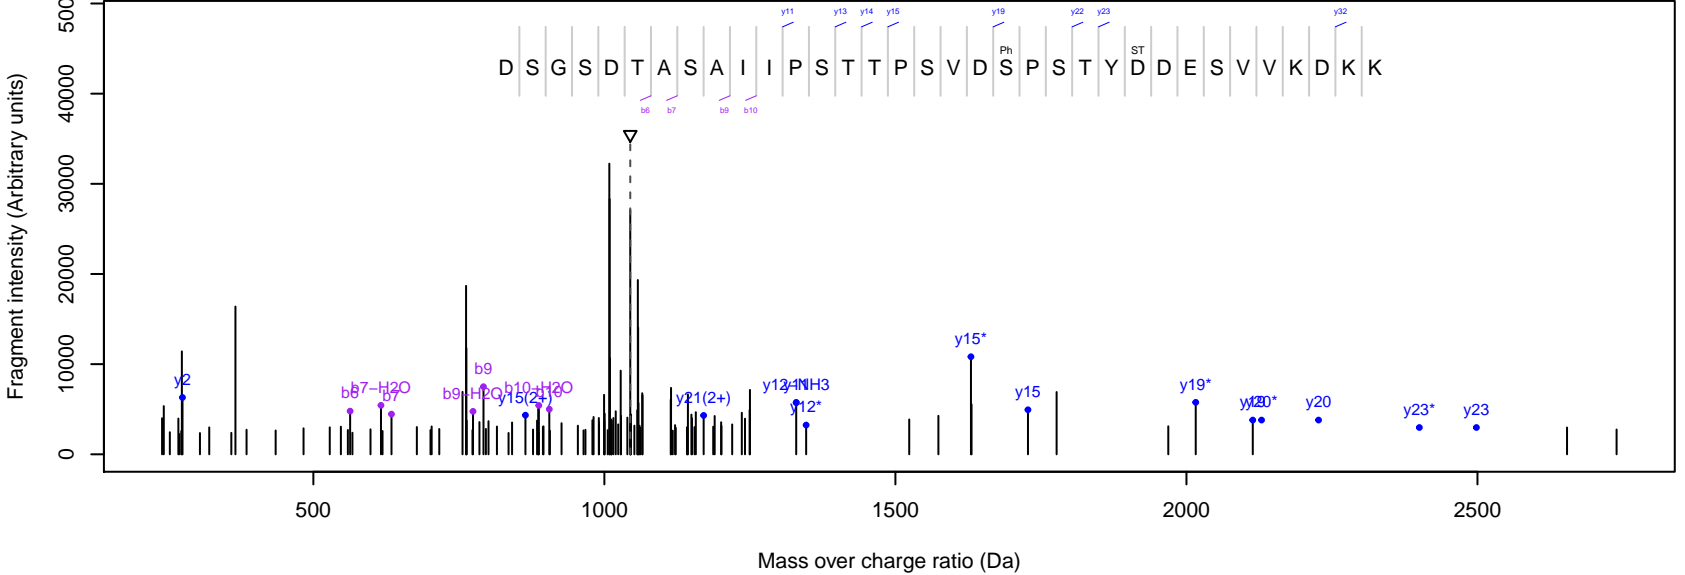

T(Phospho (STY))NSGISSAGSGSTEPTTDPSEPAQALLR-3+

Source : QE3\_201126\_FR\_TiOx\_hum\_tissue\_Urea\_RNAB\_N Scan : 27117

Andromeda score : 75.248

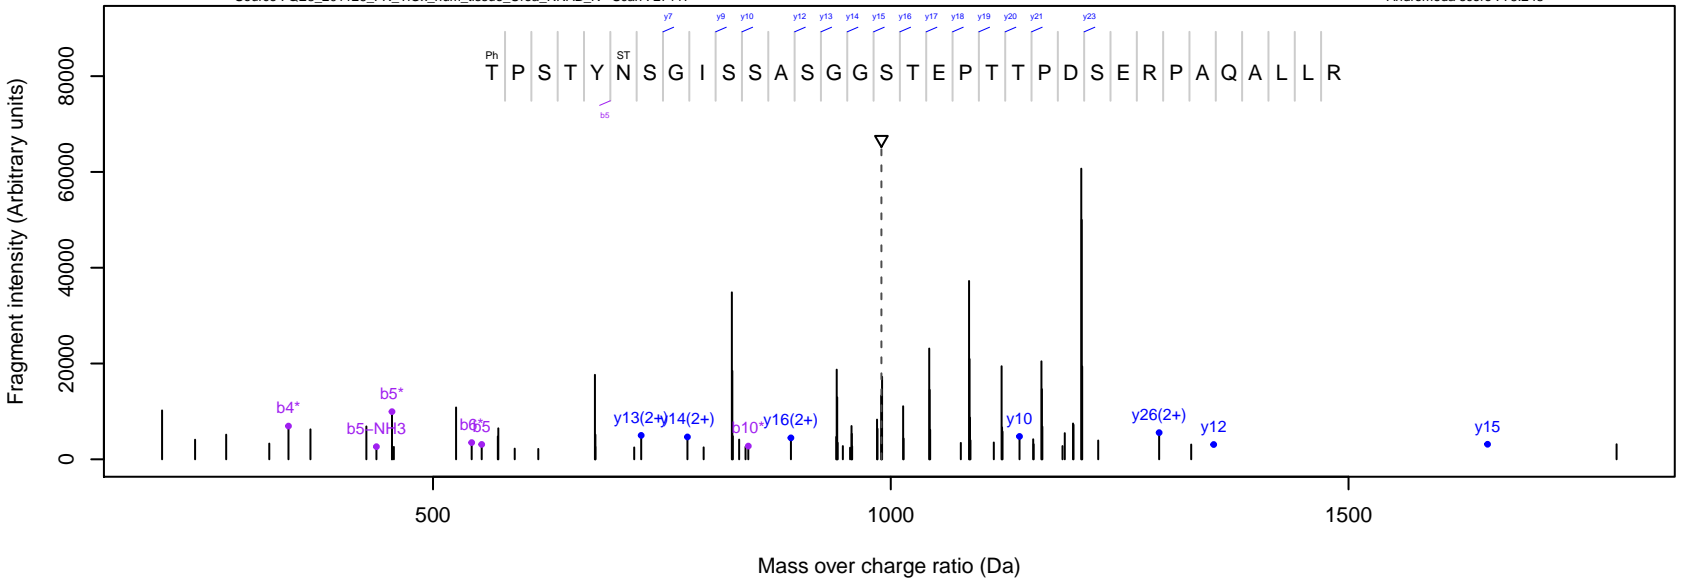

M(Oxidation (M))SCFSRPS(Phospho (STY))M(Oxidation (M))S(Phospho (STY))PTPLDR-3+

Source : QE3\_201126\_FR\_TiOx\_hum\_tissue\_Urea\_RNAB\_H Scan : 21874

Andromeda score : 75.224

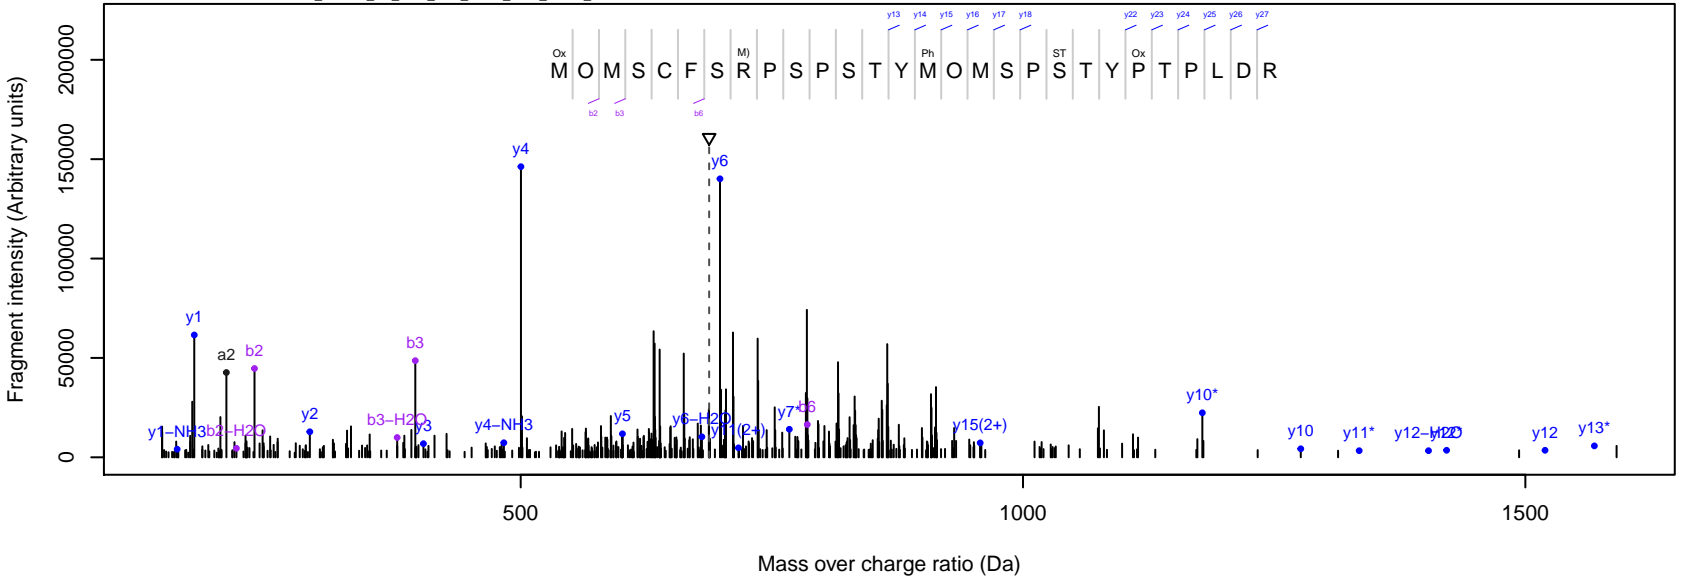

TSDPS(Phospho (STY))AAVNHVSSTTSLGENYEDDDLVLNSDEVM(Oxidation (M))K-3+

Source : QE3\_201126\_FR\_TiOx\_hum\_tissue\_Urea\_RNAB\_H Scan : 35270

Andromeda score : 75.224

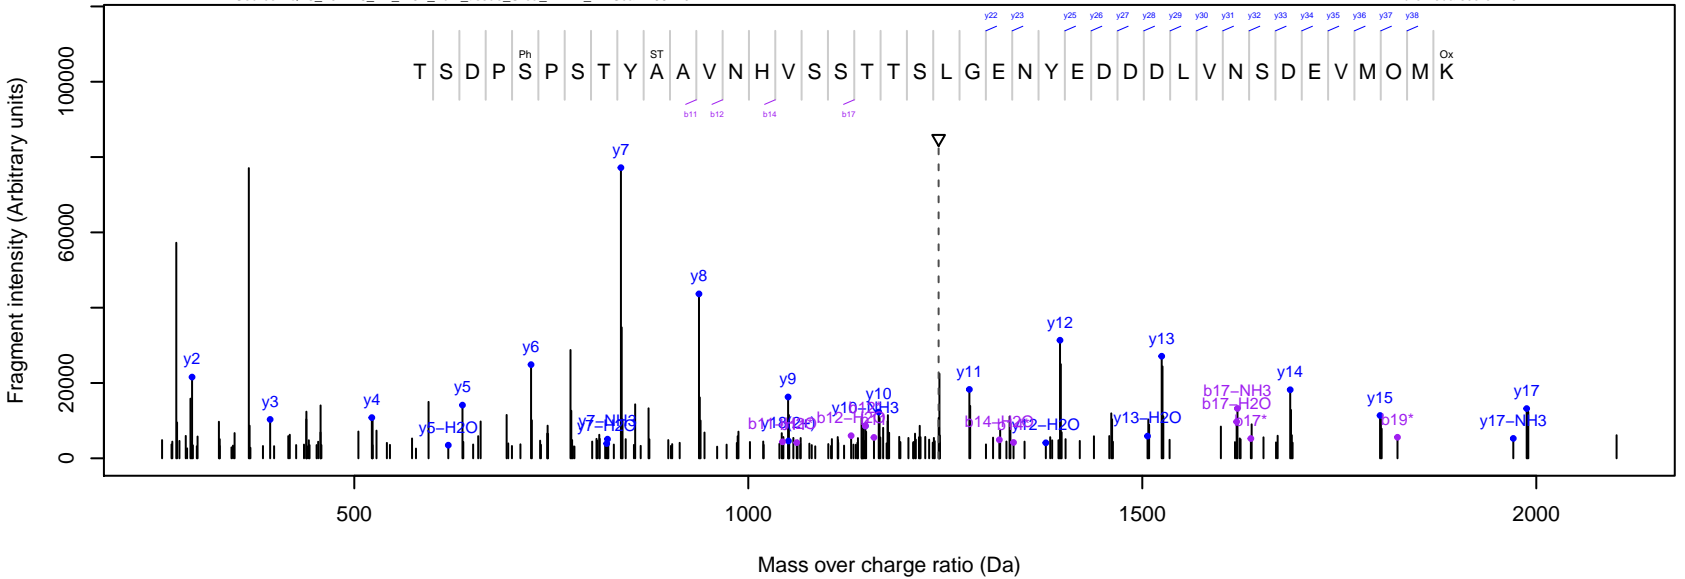

VRRPIGSDQTTT(M)SGGEGEGEGEGDGEDVSSDS(Phospho (STY))APDSAPGPAPK-4+

Source : QE3\_201126\_FR\_TiOx\_hum\_tissue\_Urea\_RNAB\_B Scan : 18708

Andromeda score : 75.21

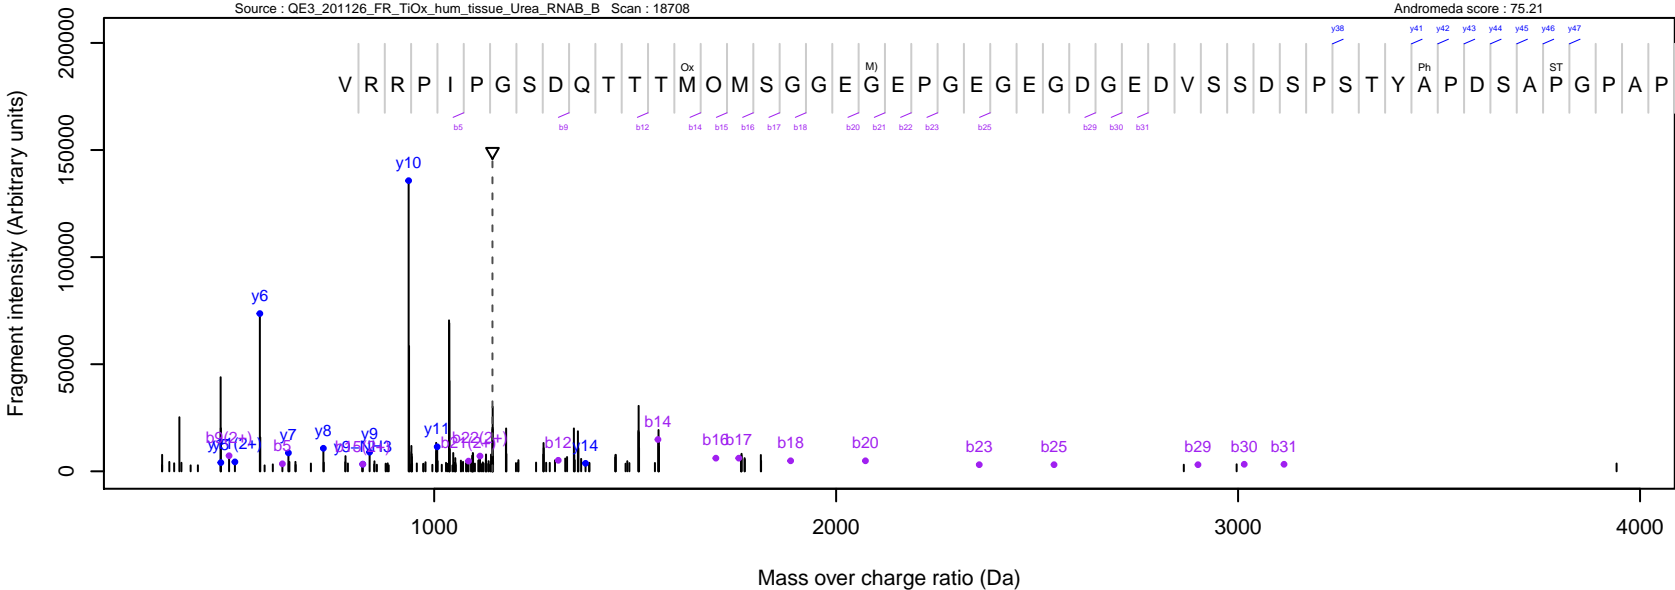

AES(Phospho (STY))PAEKVPEESVLPVQK-3+

Source : QE3\_201126\_FR\_TiOx\_hum\_tissue\_Urea\_RNAB\_H Scan : 35199

Andromeda score : 75.184

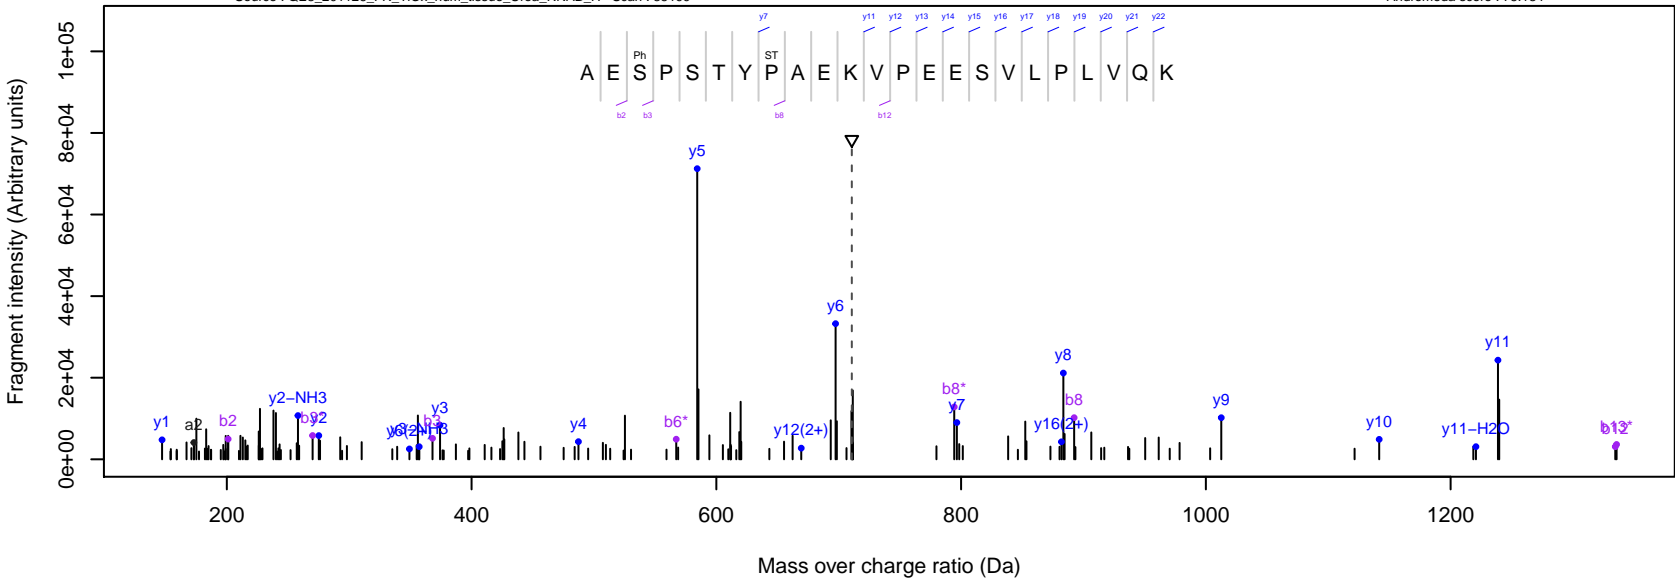

SLS(Phospho (STY))KSDSLLTCSPTE DATM(Oxidation (M))GSR-3+

Source : QE3\_201126\_FR\_TiOx\_hum\_tissue\_Urea\_RNAB\_H Scan : 25558

Andromeda score : 75.184

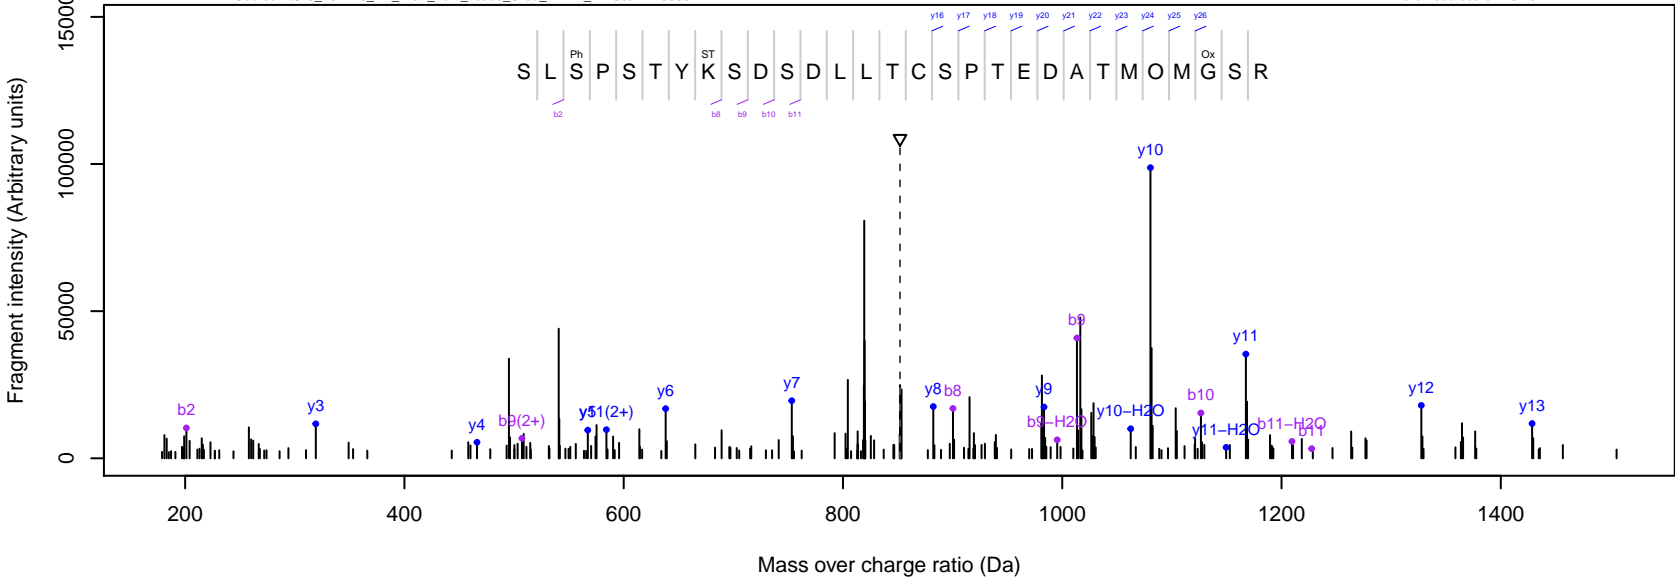

S(Phospho (STY))CHDLDDLGGQSPGWGQTQAVETNIVCK-3+

Source : QE3\_201126\_FR\_TiOx\_hum\_tissue\_Urea\_RNAB\_H Scan : 49295

Andromeda score : 75.171

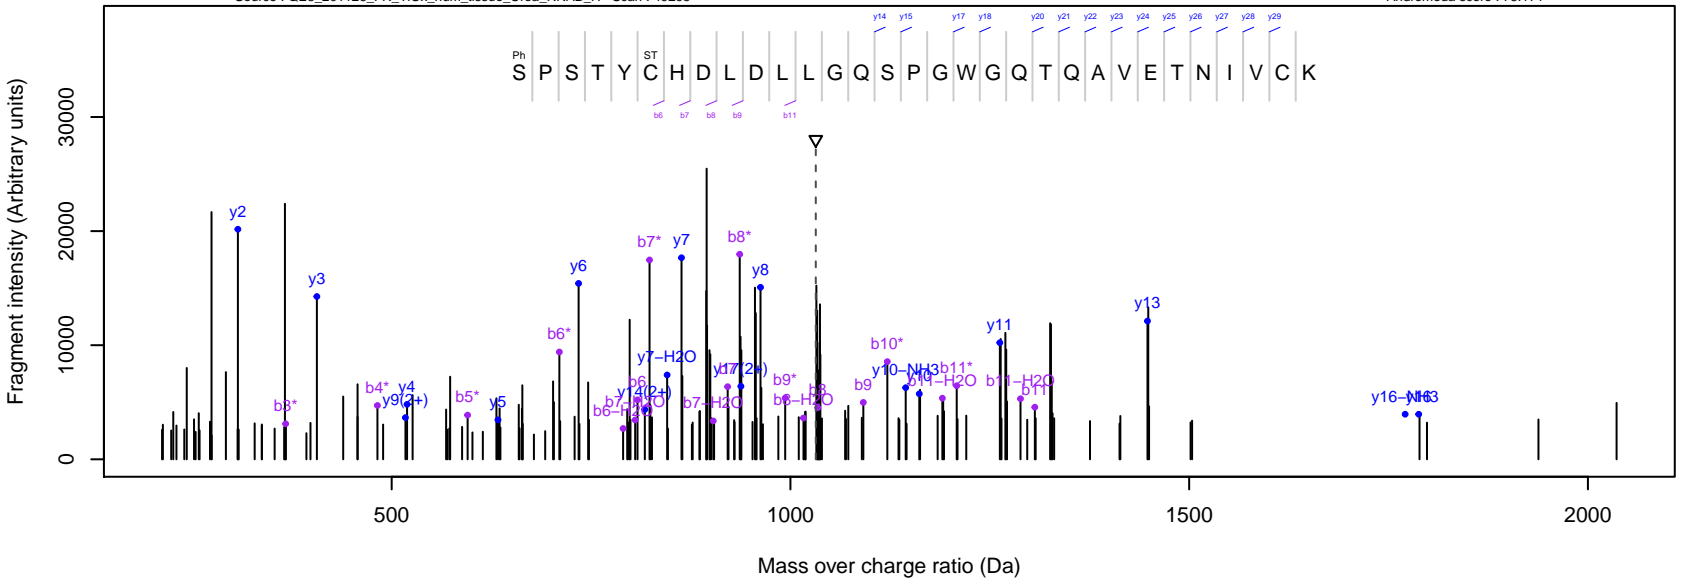

DLQQSIAREPS(Phospho (STY))APSIPTPAYQSSPAGGHAPTPTPAPR-4+

Source : QE3\_201126\_FR\_TiOx\_hum\_tissue\_Urea\_RNAB\_H Scan : 35214

Andromeda score : 75.14

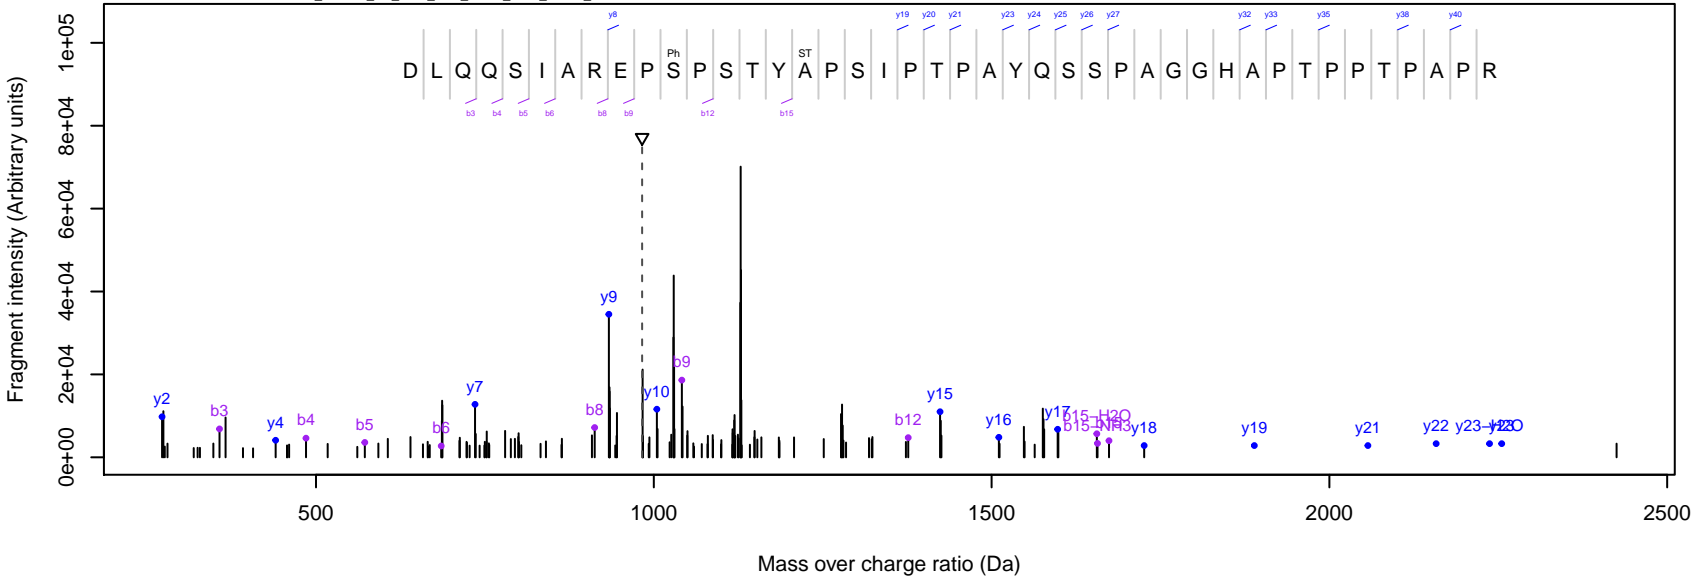

TEAGAETRSPGKAEAES(Phospho (STY))DALPDDTVIESEALPSDIAAEAR-4+

Source : QE3\_201126\_FR\_TiOx\_hum\_tissue\_Urea\_RNAB\_H Scan : 42600

Andromeda score : 75.14

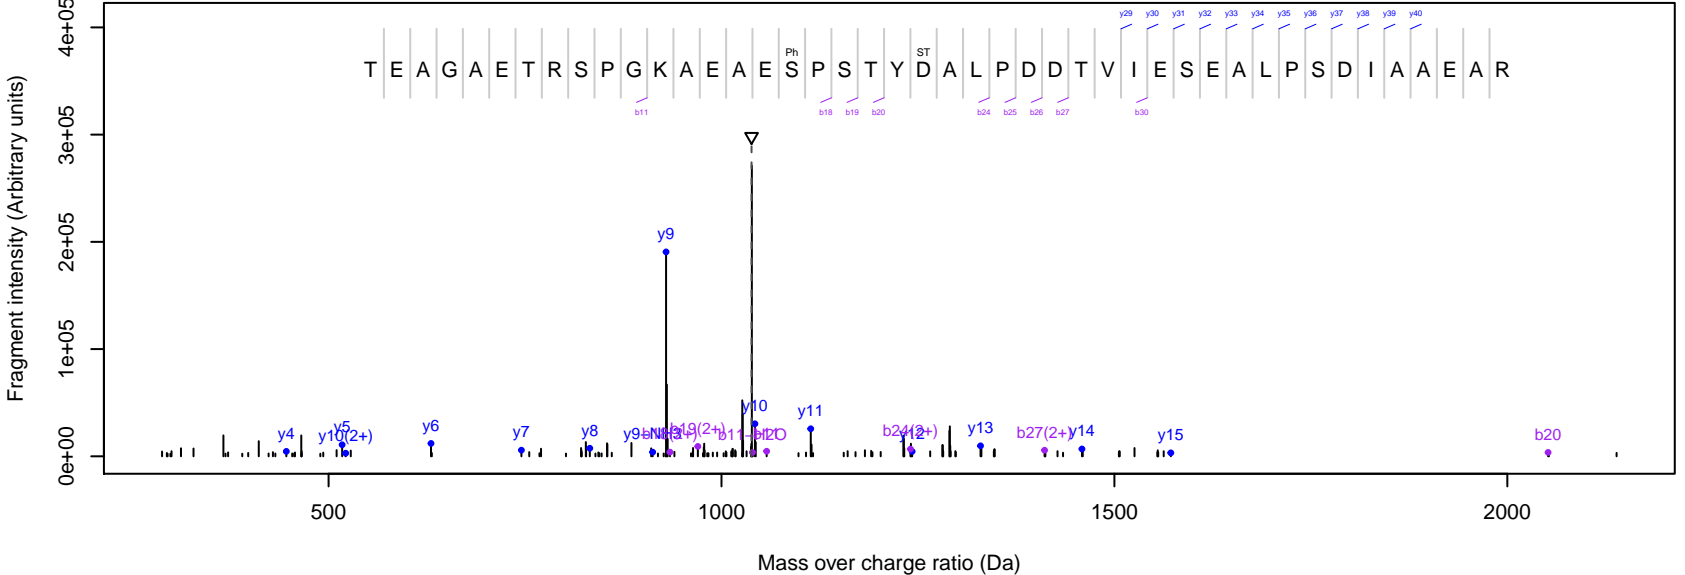



S(Phospho (STY))GRLSKELDLVSHHVR-4+

Source : QE3\_201126\_FR\_TiOx\_hum\_tissue\_Urea\_RNAB\_H Scan : 21237

Andromeda score : 75.122

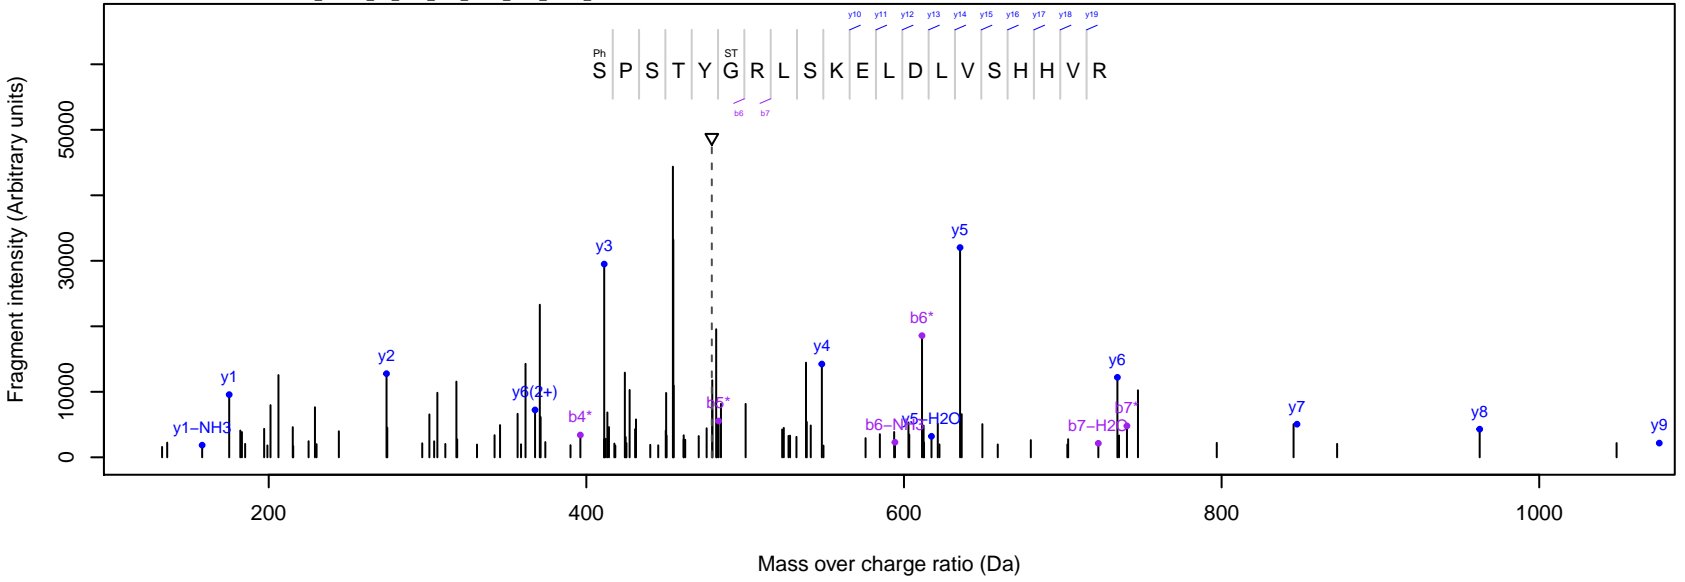

AFGSGIDIKPGT(Phospho (STY))PPIAGR-3+

Source : QE3\_201126\_FR\_TiOx\_hum\_tissue\_Urea\_RNAB\_N Scan : 32884

Andromeda score : 75.112

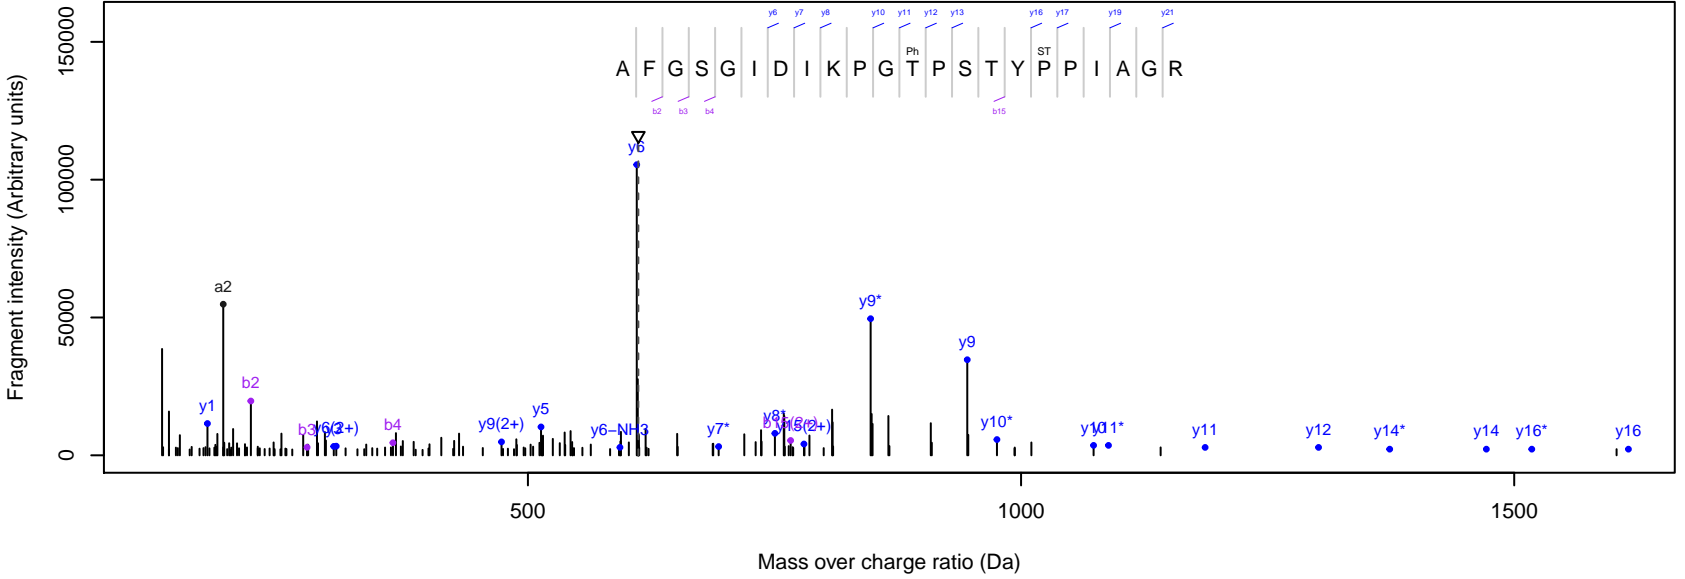

GLLT(Phospho (STY))PPAS(Phospho (STY))PELLEAKPK-3+

Source : QE3\_201126\_FR\_TiOx\_hum\_tissue\_Urea\_RNAB\_N Scan : 60427

Andromeda score : 75.112

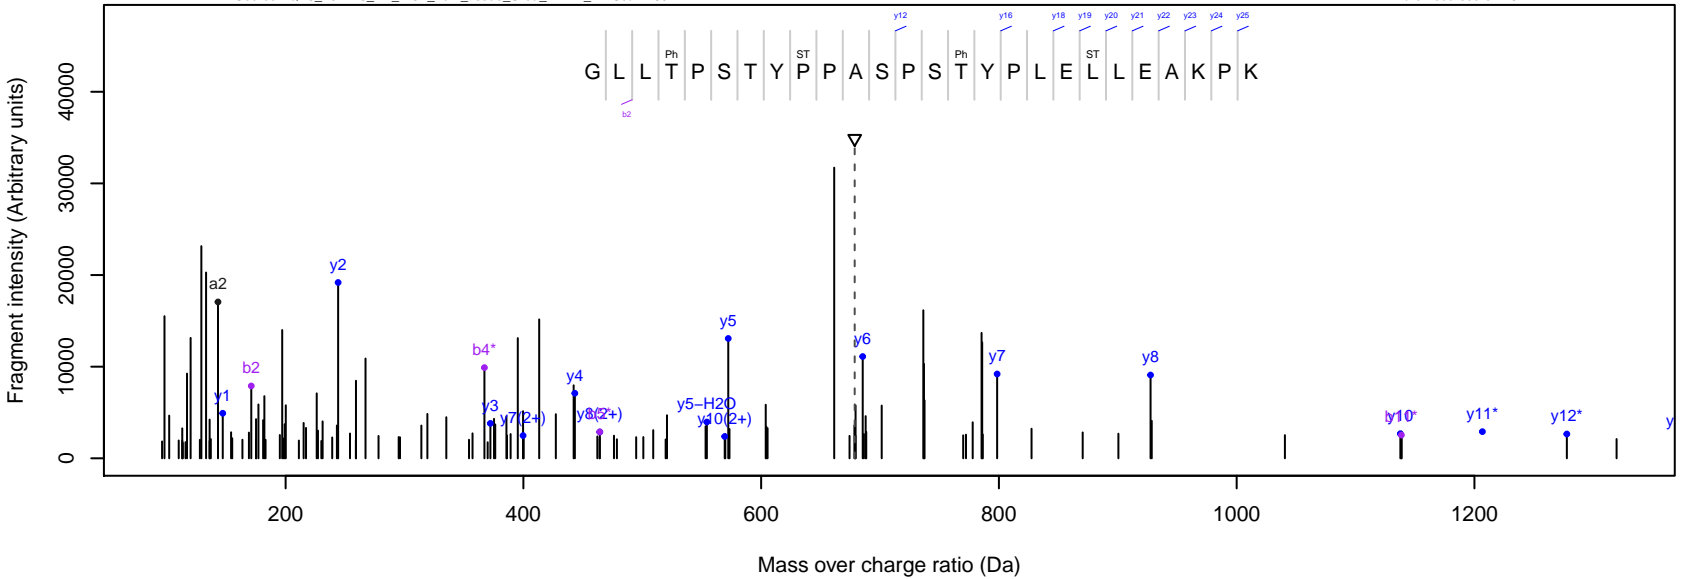

LHFFMPGFAPLT(Phospho (STY))SRGSQQYR-3+

Source : QE3\_201126\_FR\_TiOx\_hum\_tissue\_Urea\_RNAB\_H Scan : 48581

Andromeda score : 75.112

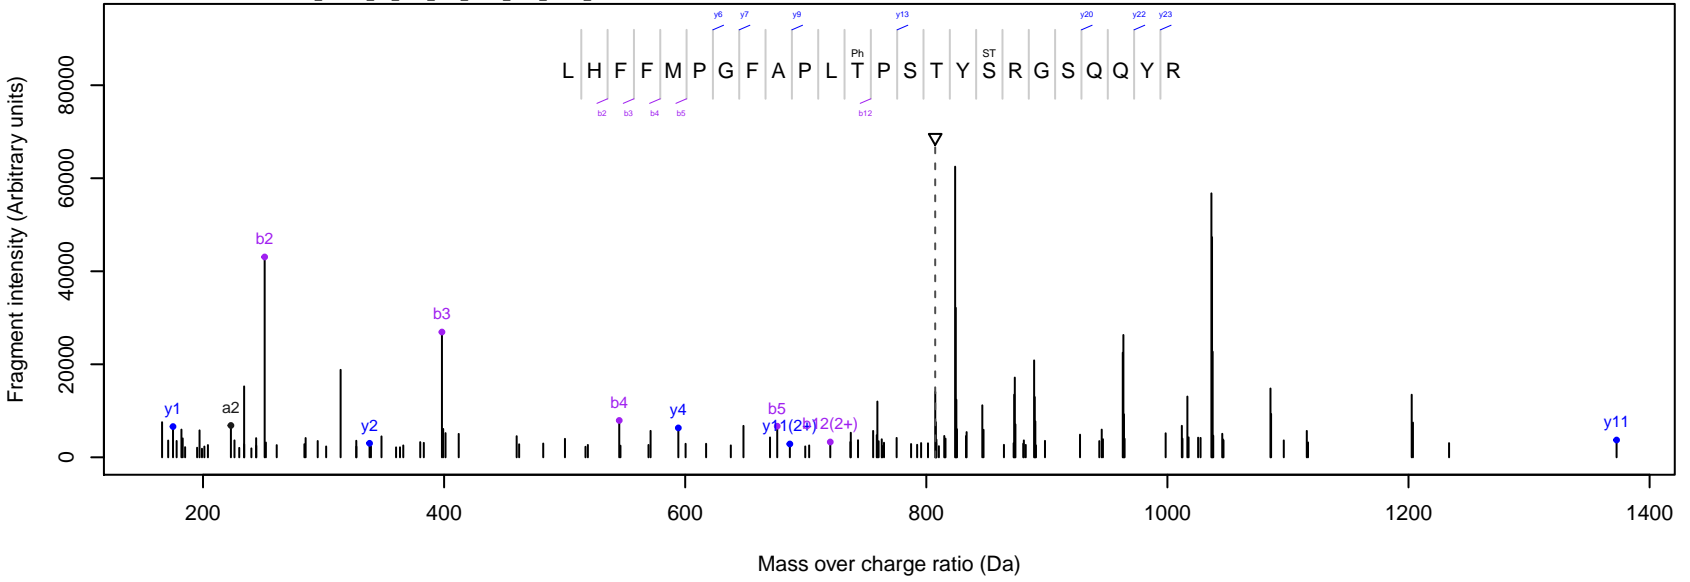

LAESLLALSQQEELADLPKDYLLS(Phospho (STY))ES(Phospho (STY))EDEGDNDGER-4+

Source : QE3\_201126\_FR\_TiOx\_hum\_tissue\_Urea\_RNAB\_N Scan : 61243

Andromeda score : 75.105

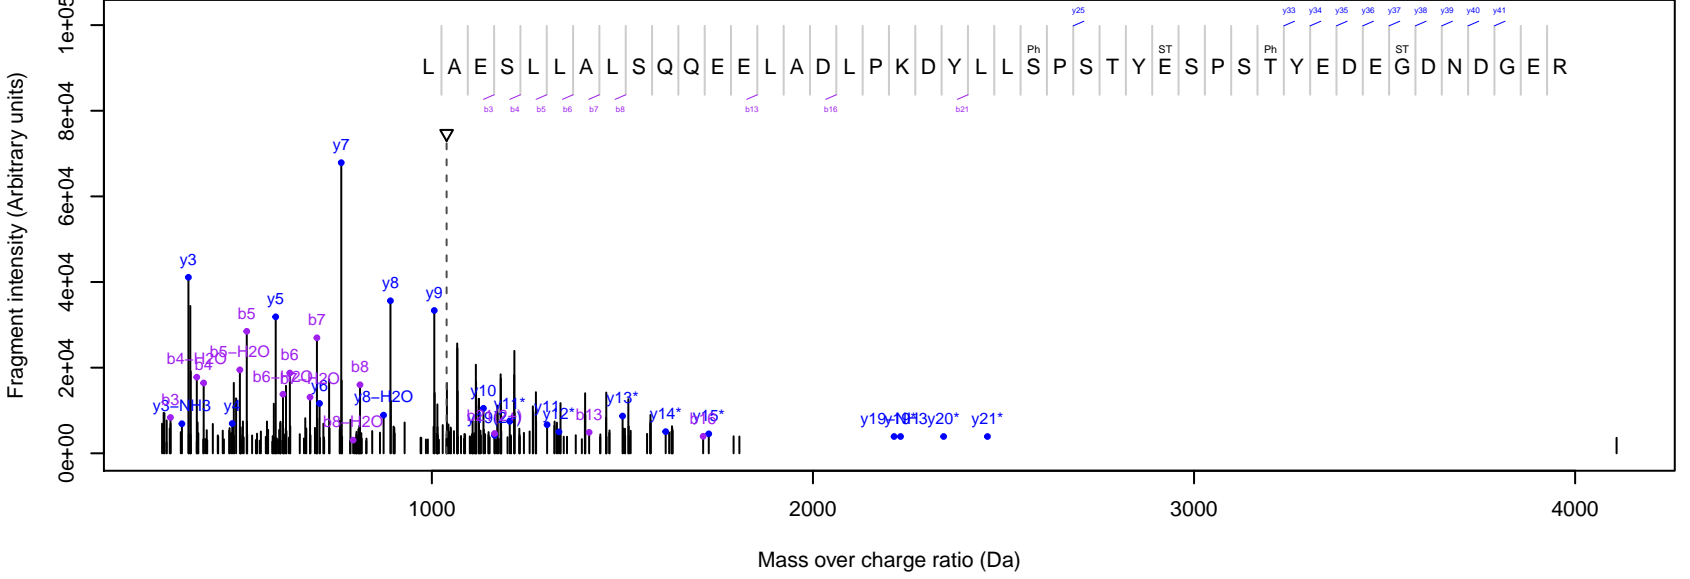

SESGGLGVMVEYVLS(Phospho (STY))PGDSCLR-3+

Source : QE3\_201126\_FR\_TiOx\_hum\_tissue\_Urea\_RNAB\_N Scan : 60679

Andromeda score : 75.103

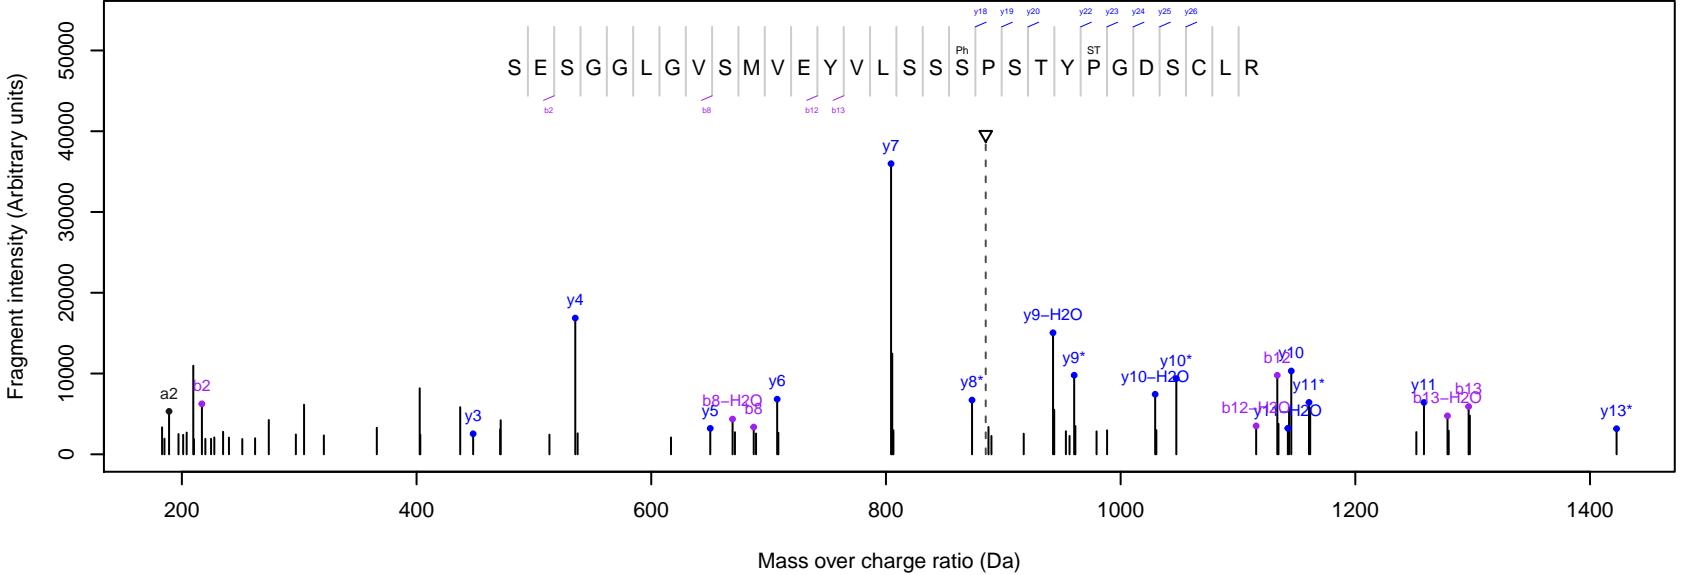

S(Phospho (STY))LPEEDVAEIQHAAEEFLIKPESK-3+

Source : QE3\_201126\_FR\_TiOx\_hum\_tissue\_Urea\_RNAB\_H Scan : 52274

Andromeda score : 75.103

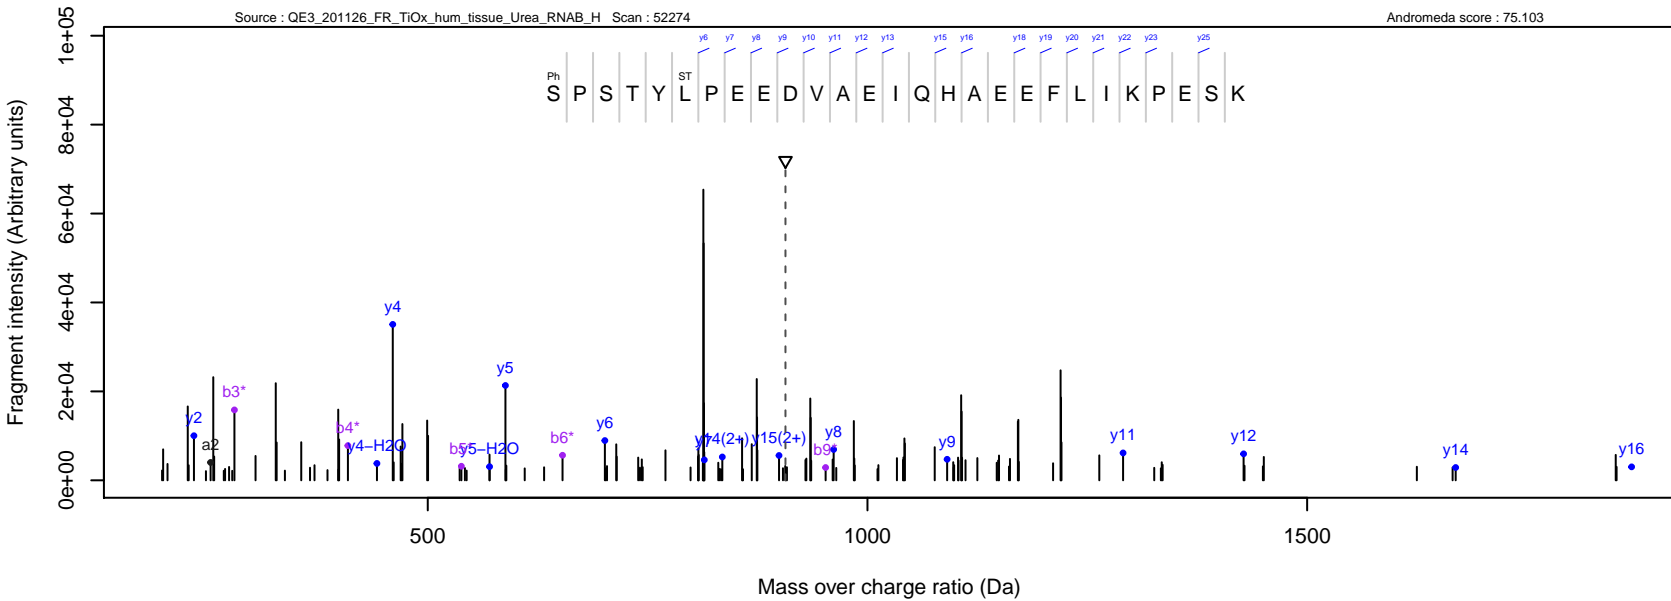

QLS(Phospho (STY))SGVS(Phospho (STY))EIR-2+

Source : QE3\_201126\_FR\_TiOx\_hum\_tissue\_Urea\_RNAB\_B Scan : 28935

Andromeda score : 75.102

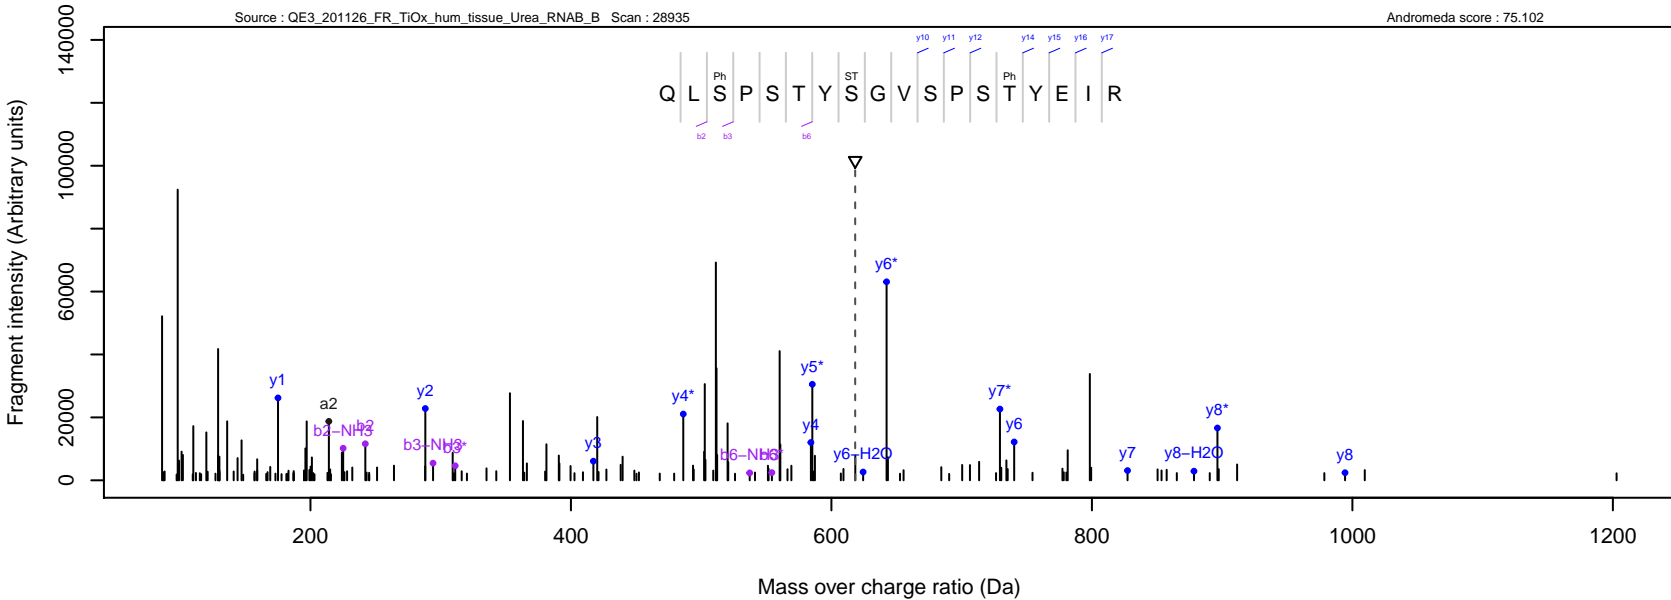

SGFGEIS(Phospho (STY))SPVIR-2+

Source : QE3\_201126\_FR\_TiOx\_hum\_tissue\_Urea\_RNAB\_N Scan : 37893

Andromeda score : 75.102

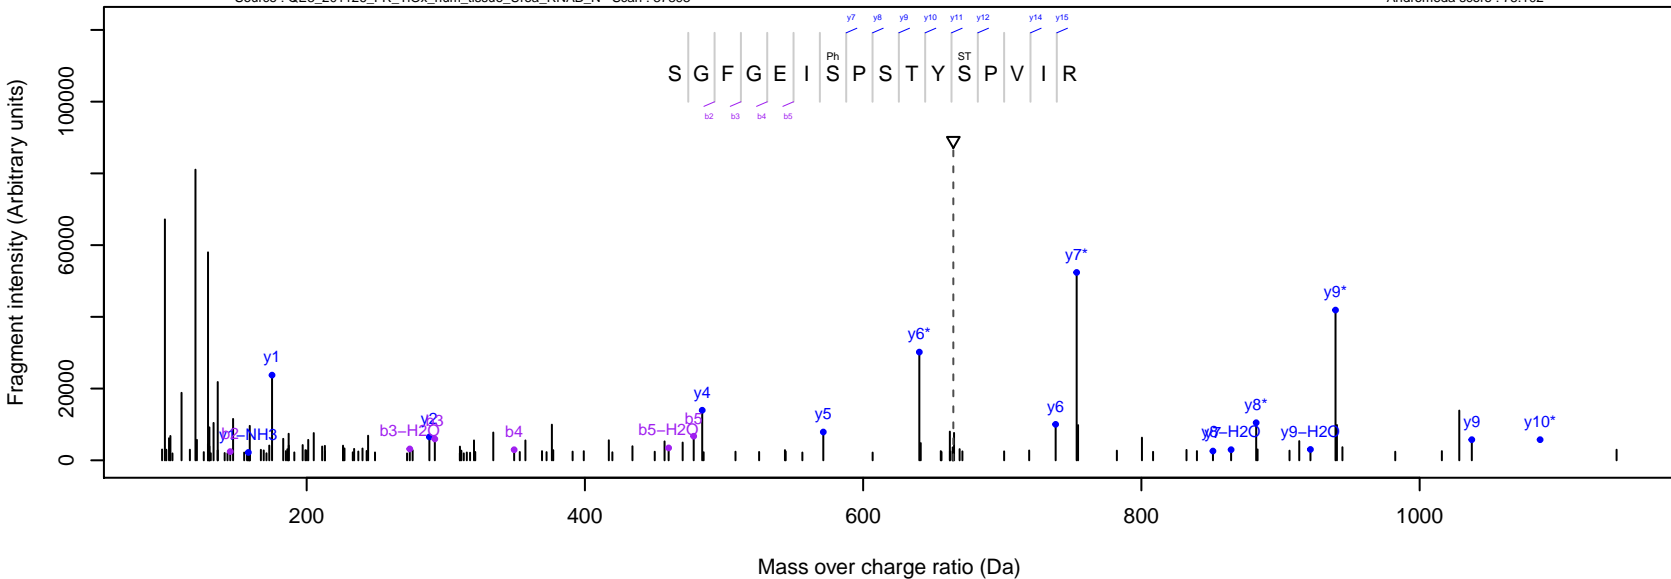

S(Phospho (STY))TDNAFENPFK-2+

Source : QE3\_201126\_FR\_TiOx\_hum\_tissue\_Urea\_RNAB\_H Scan : 51920

Andromeda score : 75.088

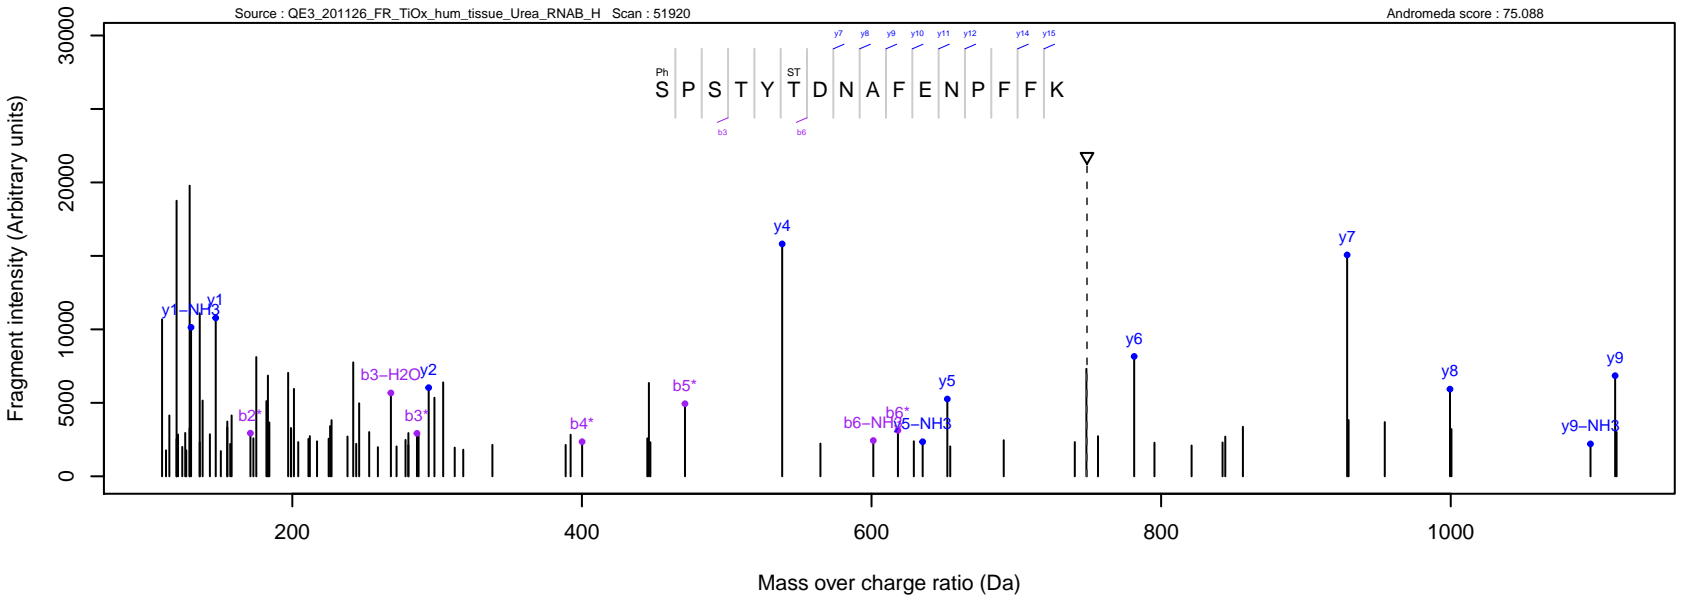

VLGNPKS(Phospho (STY))DEM(Oxidation (M))NVK-2+

Source : QE3\_201126\_FR\_TiOx\_hum\_tissue\_Urea\_RNAB\_B Scan : 8897

Andromeda score : 75.088

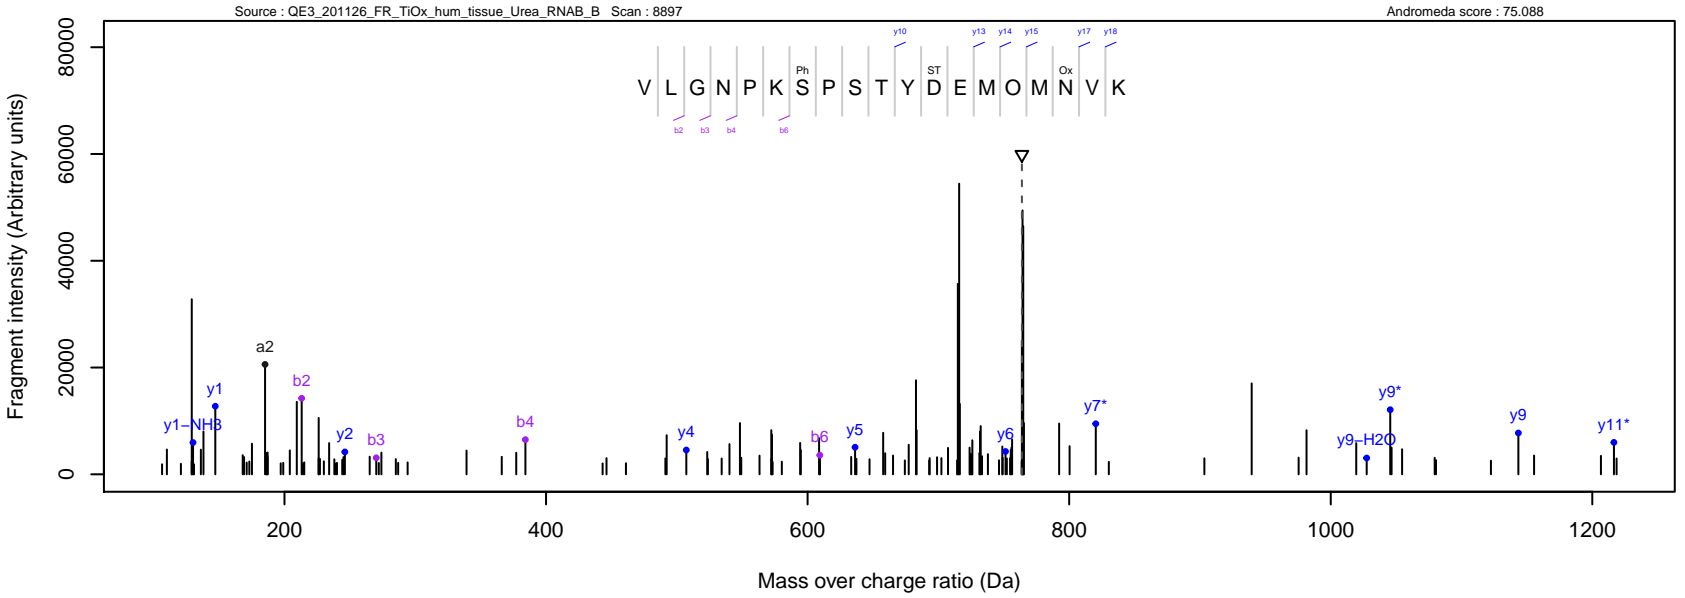

SILKPSTPIPPQEGEEVGESS(Phospho (STY))EEQDNAPK-3+

Source : QE3\_201126\_FR\_TiOx\_hum\_tissue\_Urea\_RNAB\_N Scan : 27737

Andromeda score : 75.068

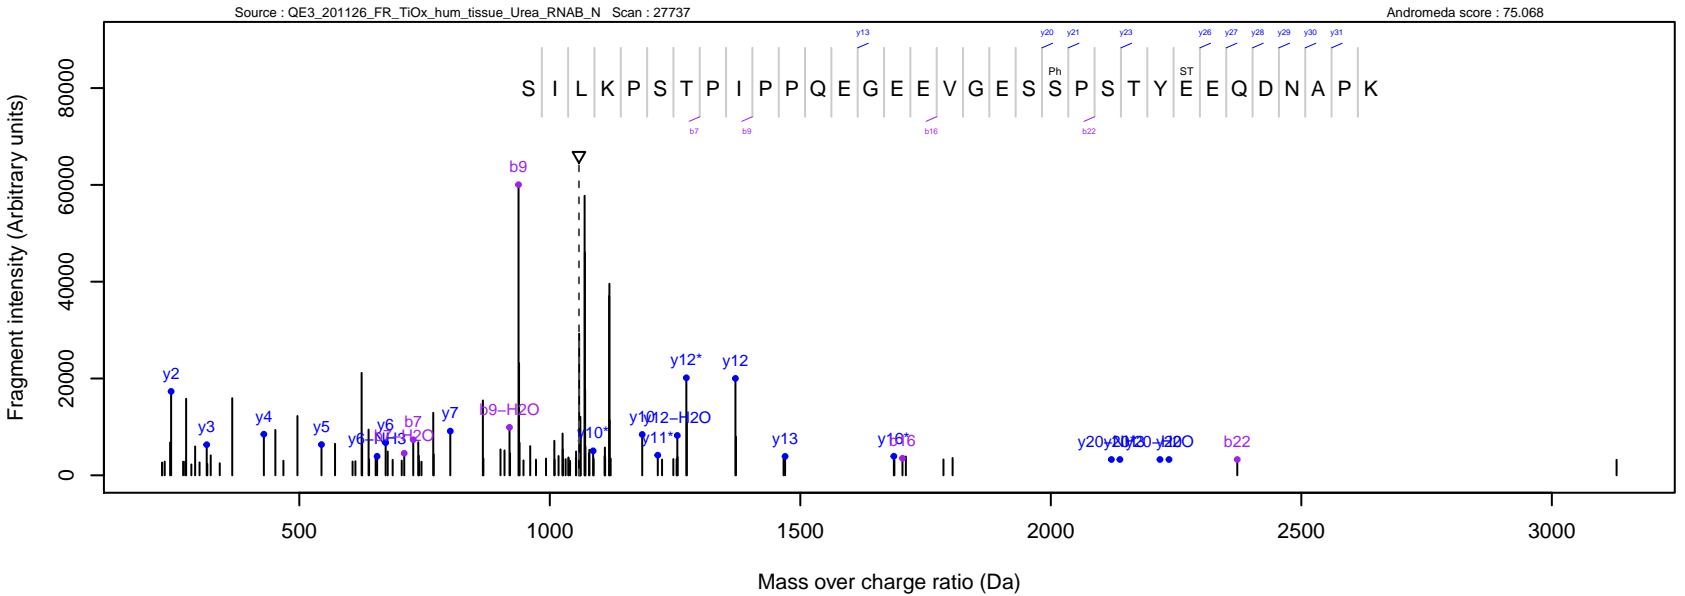

T(Phospho (STY))PSYSISSTLNPAPEFILGCTASK-3+

Source : QE3\_201126\_FR\_TiOx\_hum\_tissue\_Urea\_RNAB\_N Scan : 56973

Andromeda score : 75.018

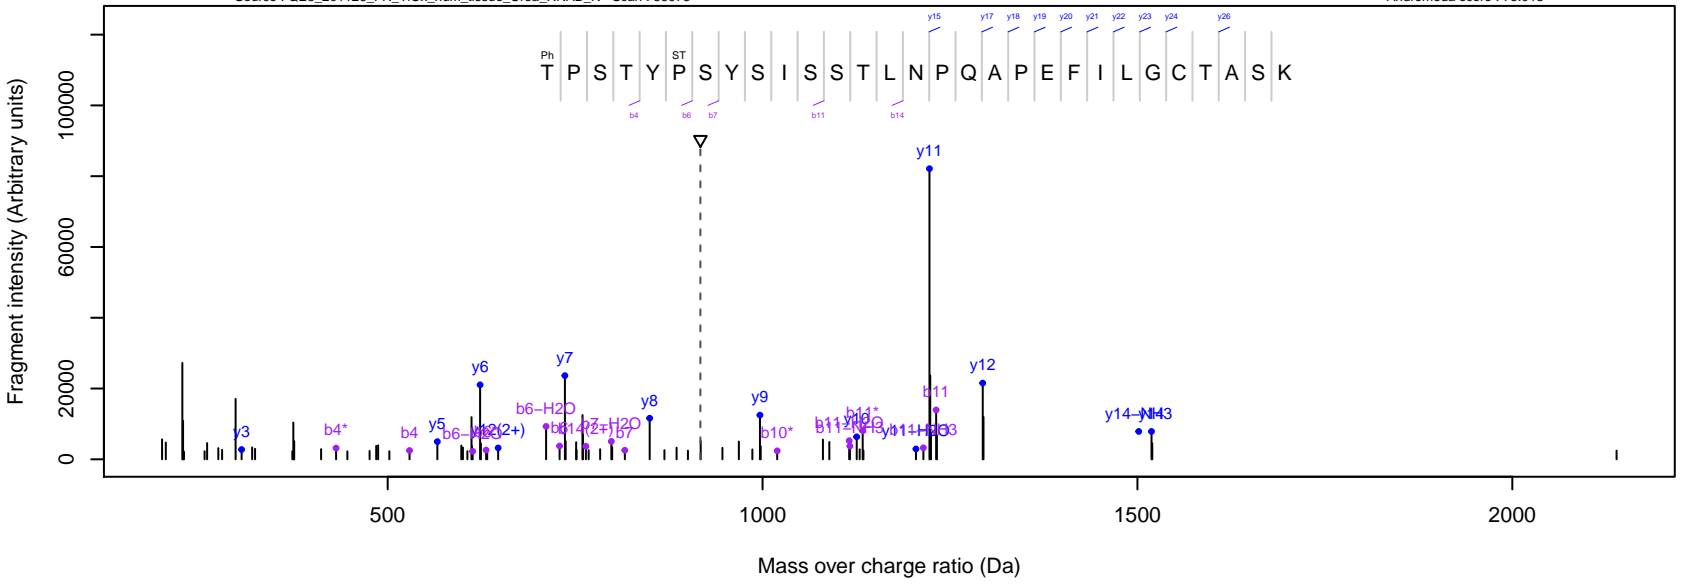

SESGT(Phospho (STY))DLREHSPSESEKVVGVADPR-4+

Source : QE3\_201126\_FR\_TiOx\_hum\_tissue\_Urea\_RNAB\_H Scan : 14257

Andromeda score : 74.973

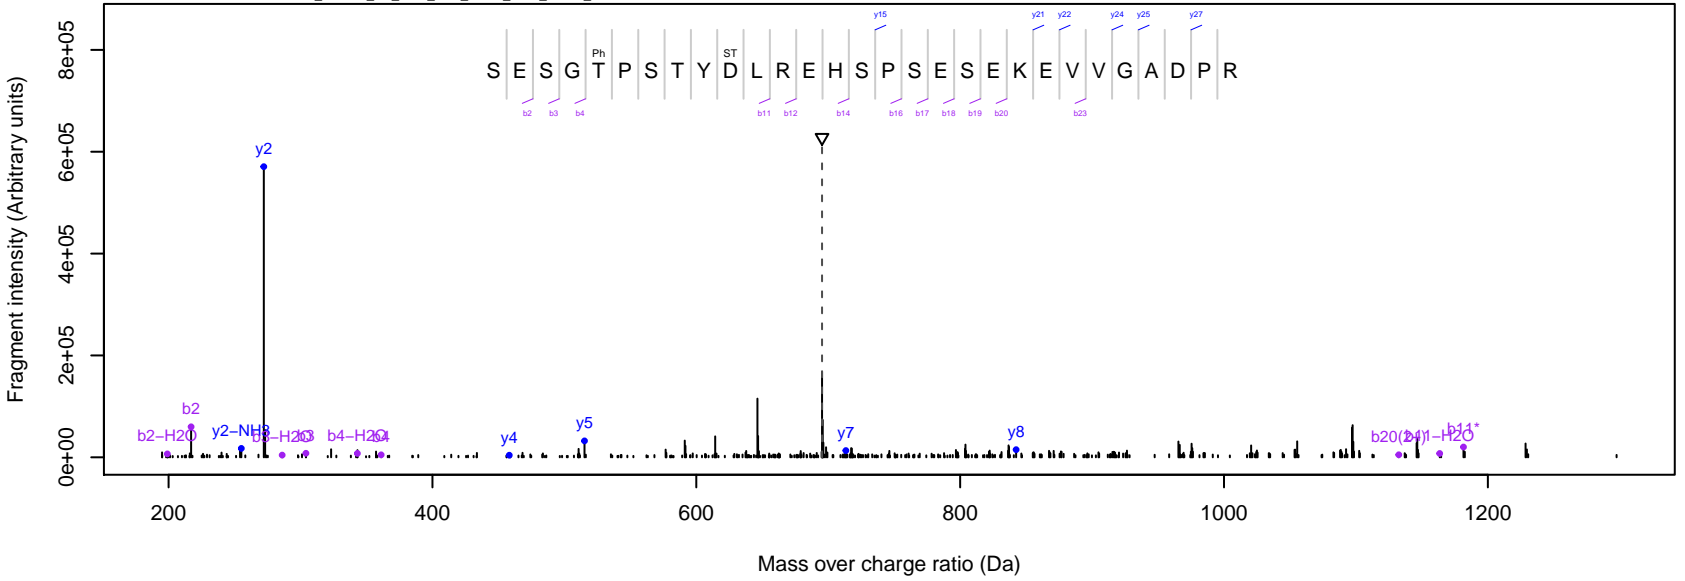

S(Phospho (STY))TSPFGIPEEASEMLEAKPK-3+

Source : QE3\_201126\_FR\_TiOx\_hum\_tissue\_Urea\_RNAB\_H Scan : 50135

Andromeda score : 74.953

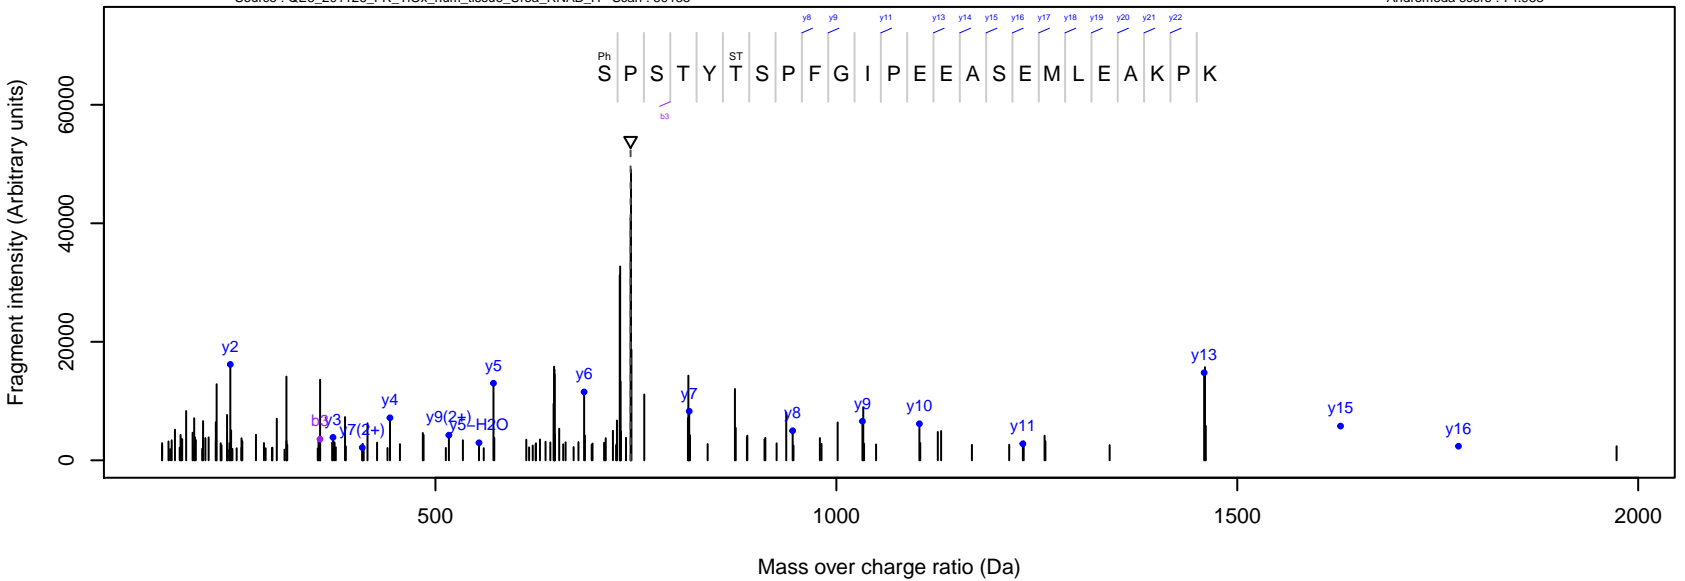

(Acetyl (Protein N-term))M(Oxidation (M))DS(Phospho (STY))DDEMVEEAEGHLDDGLPHGFCTVYSSSTR-4+

Source : QE3\_201126\_FR\_TIOx\_hum\_tissue\_Urea\_RNAB\_N Scan : 57294

Andromeda score : 74.949

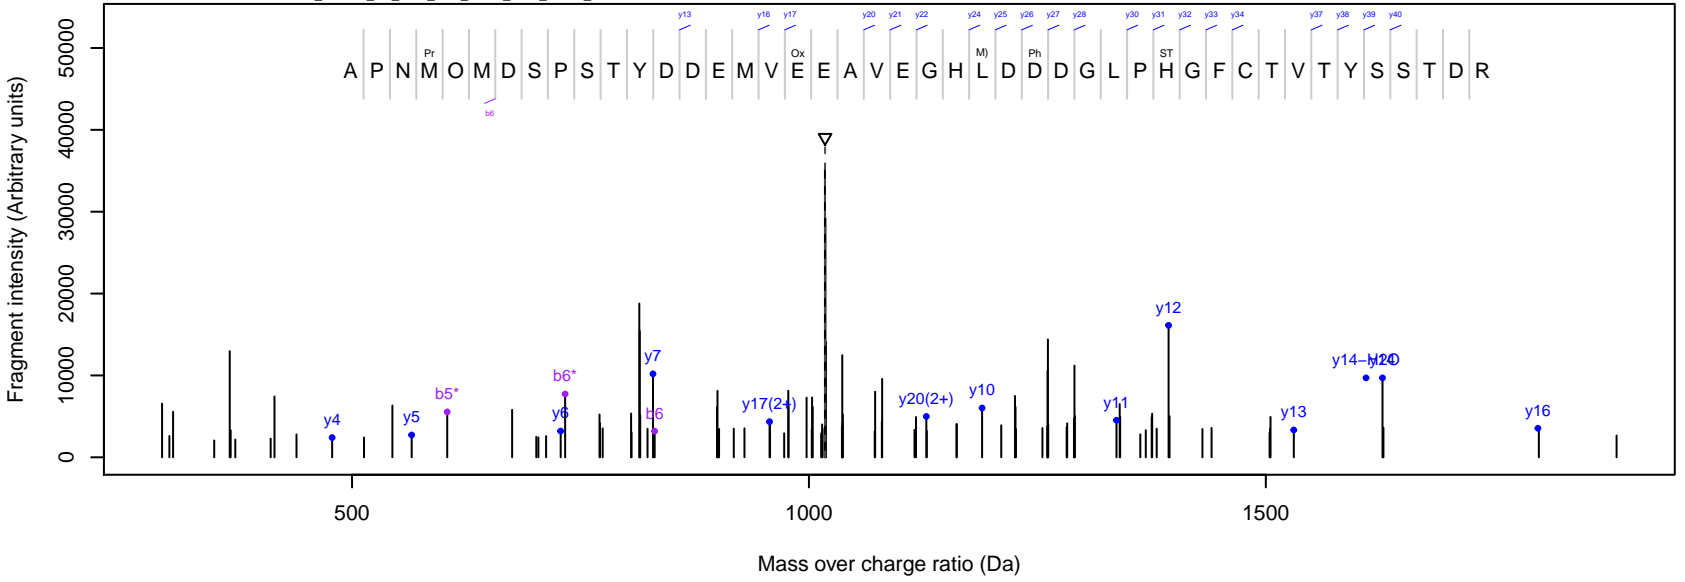

SLFALS(Phospho (STY))RGY(Phospho (STY))VK-2+

Source : QE3\_201126\_FR\_TIOx\_hum\_tissue\_Urea\_RNAB\_B Scan : 54411

Andromeda score : 74.944

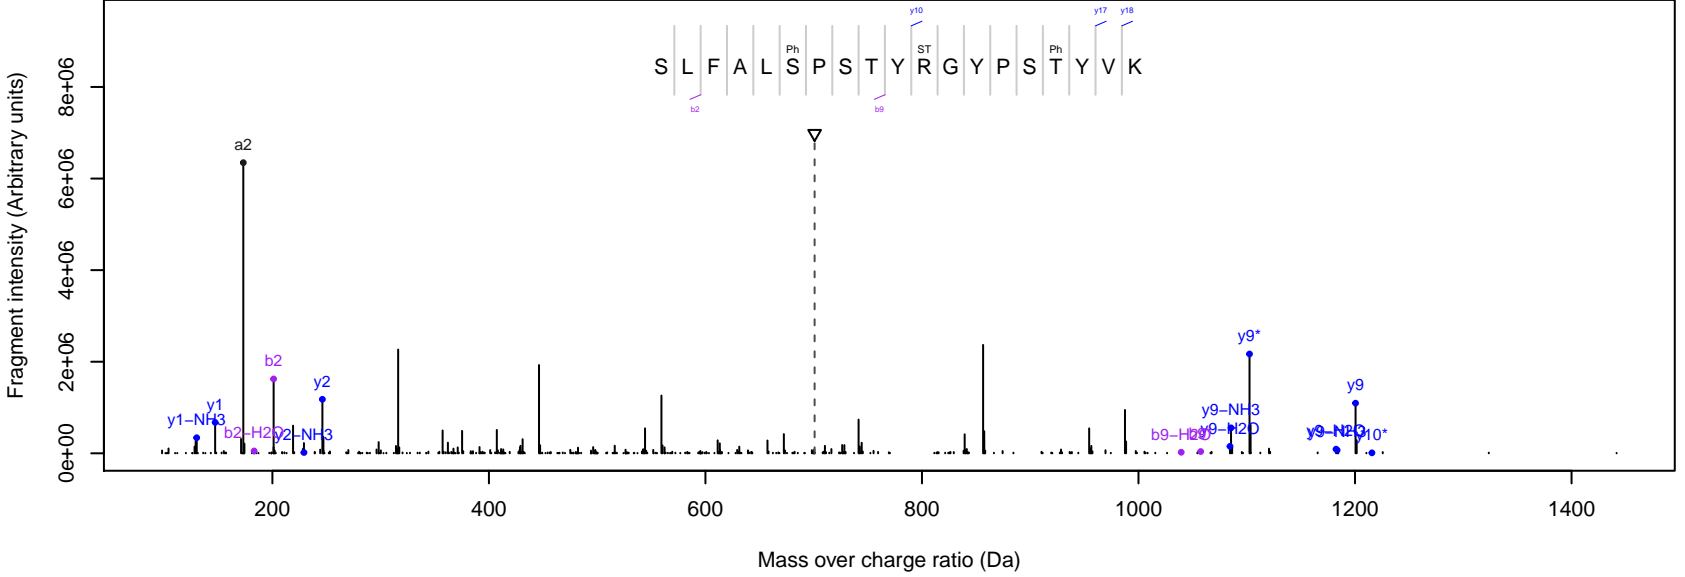

TVS(Phospho (STY))LSQMLR-2+

Source : QE3\_201126\_FR\_TIOx\_hum\_tissue\_Urea\_RNAB\_N Scan : 41173

Andromeda score : 74.944

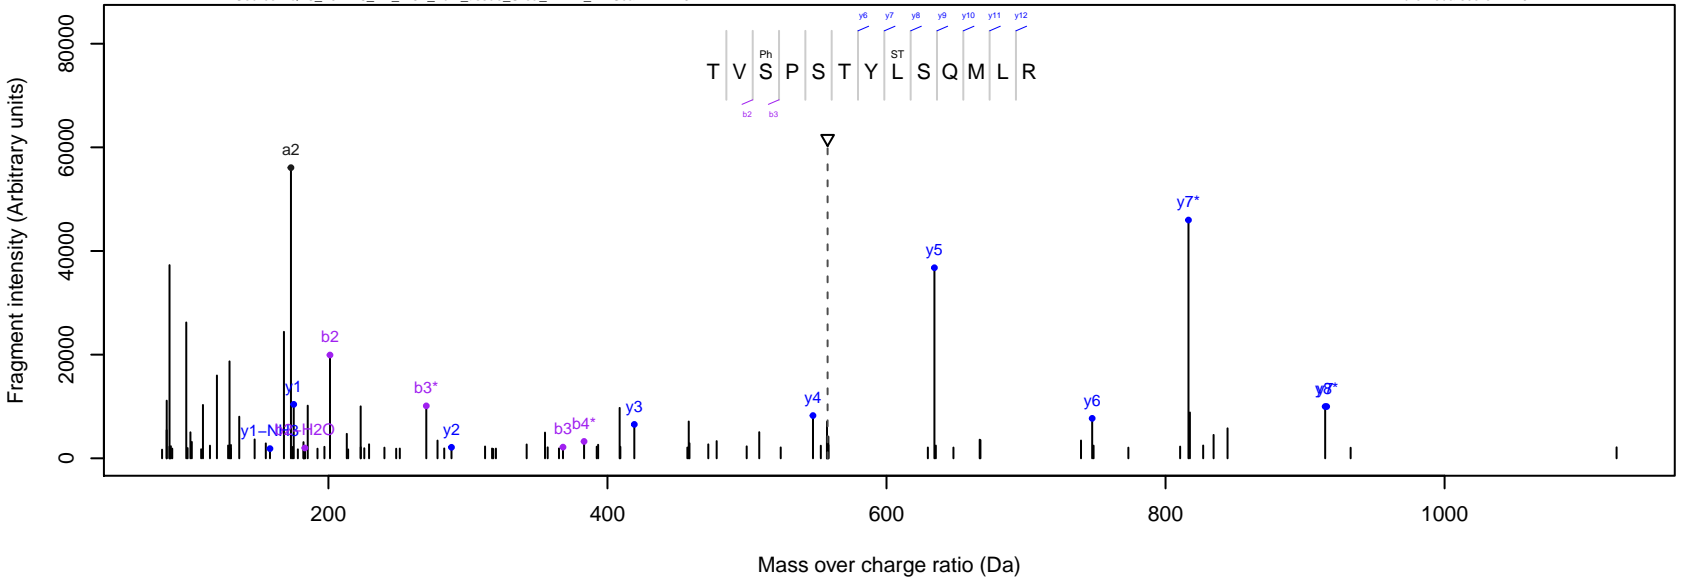

YS(Phospho (STY))PSQNS(Phospho (STY))PIHHIPS(Phospho (STY))RRSPAK-4+

Source : QE3\_201126\_FR\_TiOx\_hum\_tissue\_Urea\_RNAB\_H Scan : 11272

Andromeda score : 74.905

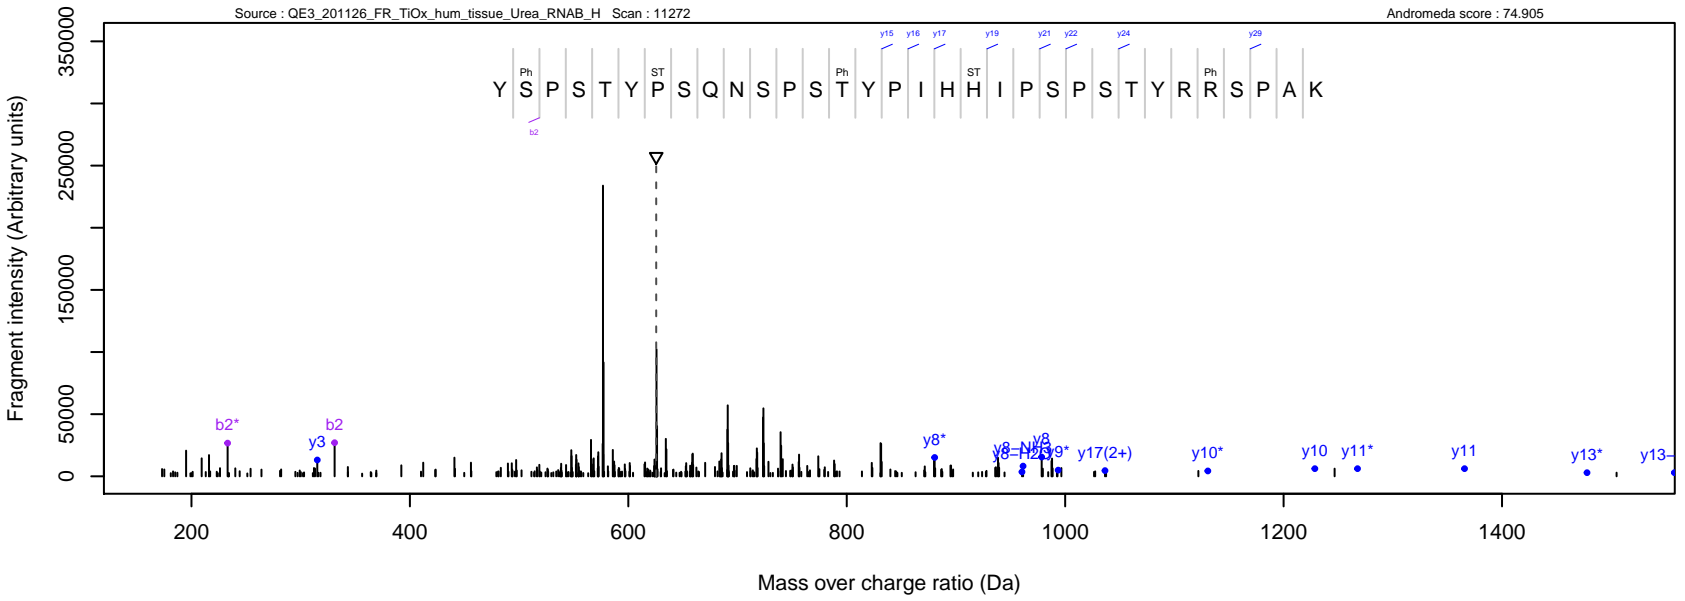

QLIHQPFLDAEQPDYDLDS(Phospho (STY))EDEVFNK-3+

Source : QE3\_201126\_FR\_TiOx\_hum\_tissue\_Urea\_RNAB\_H Scan : 56863

Andromeda score : 74.874

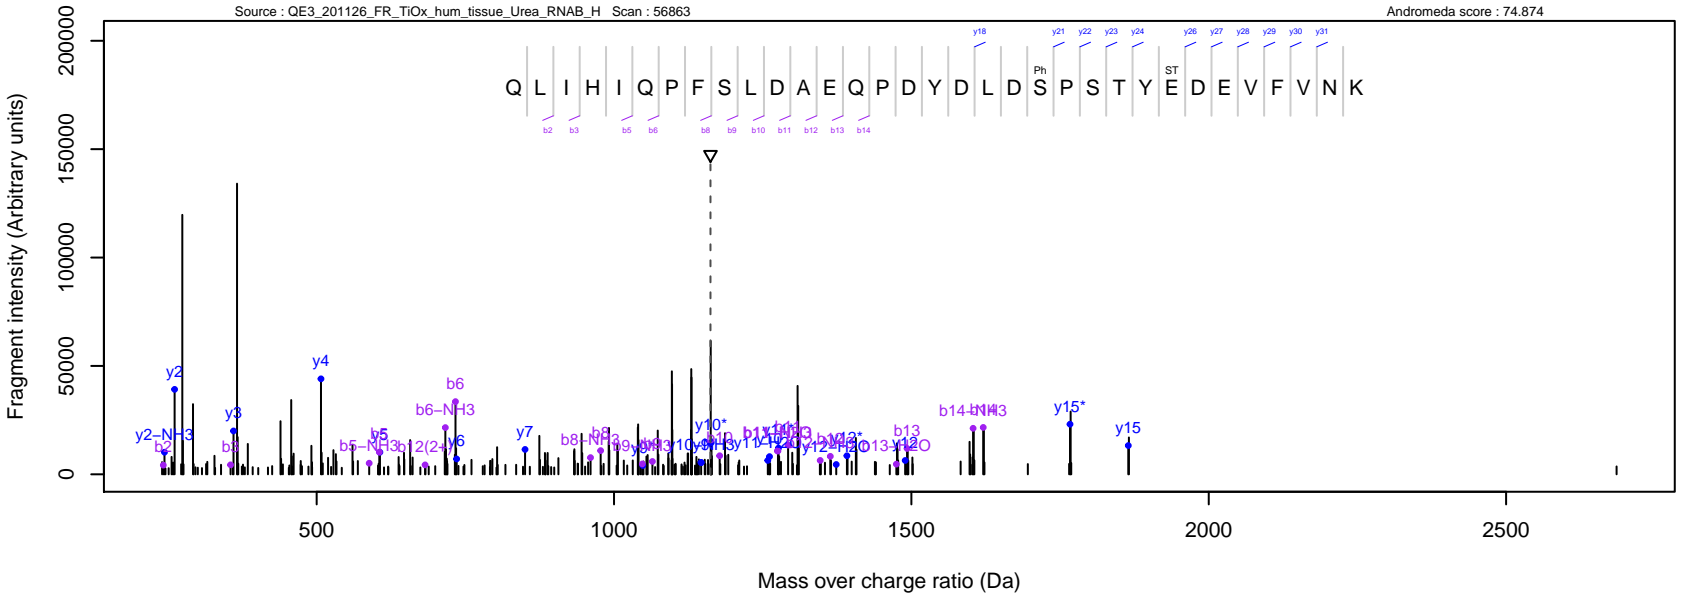

ILVPKS(Phospho (STY))PVK-2+

Source : QE3\_201126\_FR\_TiOx\_hum\_tissue\_Urea\_RNAB\_N Scan : 13399

Andromeda score : 74.841

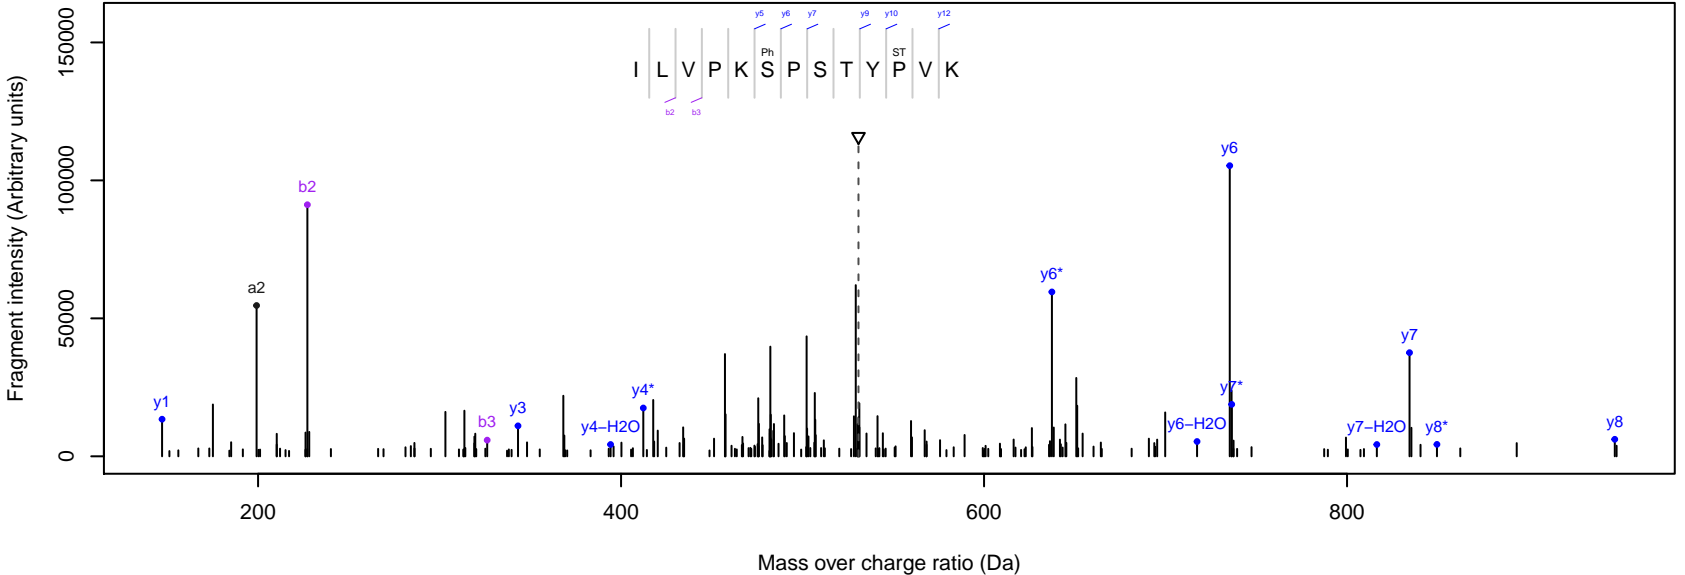

S(Phospho (STY))TFS(Phospho (STY))TNYR-2+

Source : QE3\_201126\_FR\_TiOx\_hum\_tissue\_Urea\_RNAB\_B Scan : 23004

Andromeda score : 74.841

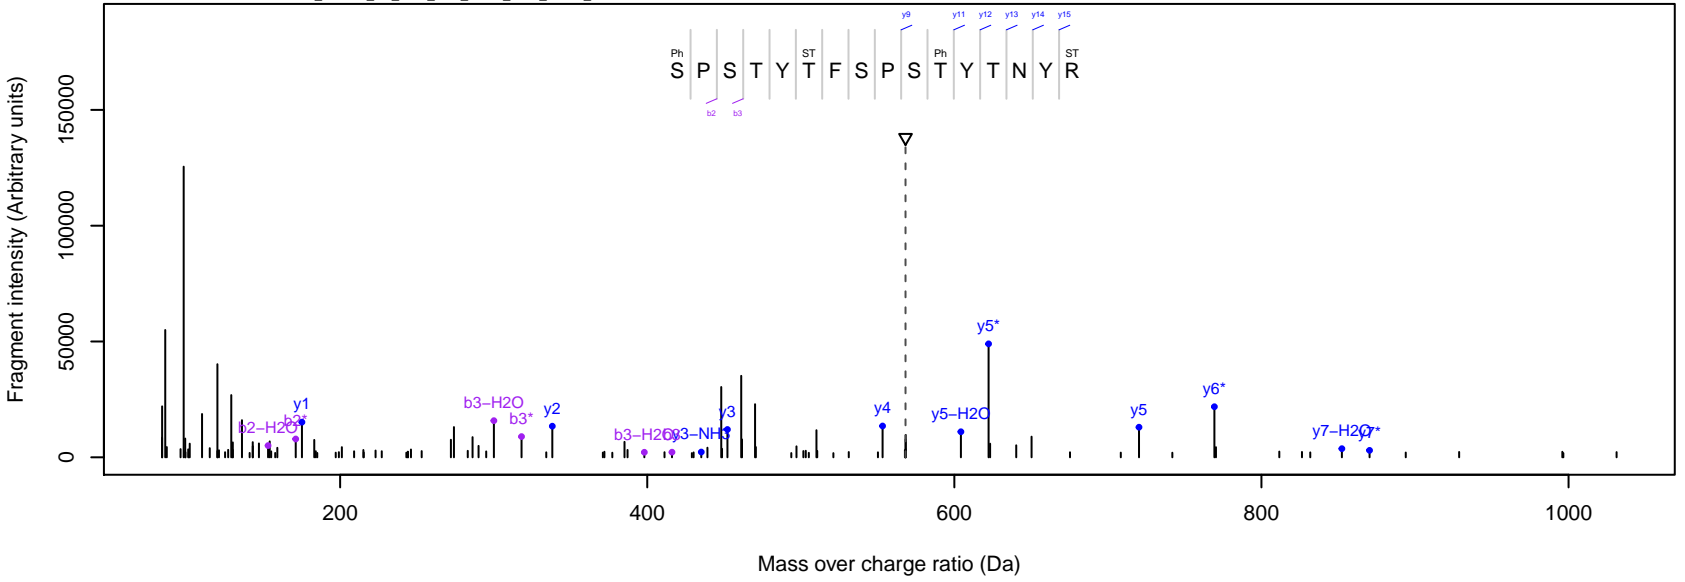

SCTPSPDQIS(Phospho (STY))HRASLEDAPVDDLTR-3+

Source : QE3\_201126\_FR\_TiOx\_hum\_tissue\_Urea\_RNAB\_N Scan : 28531

Andromeda score : 74.838

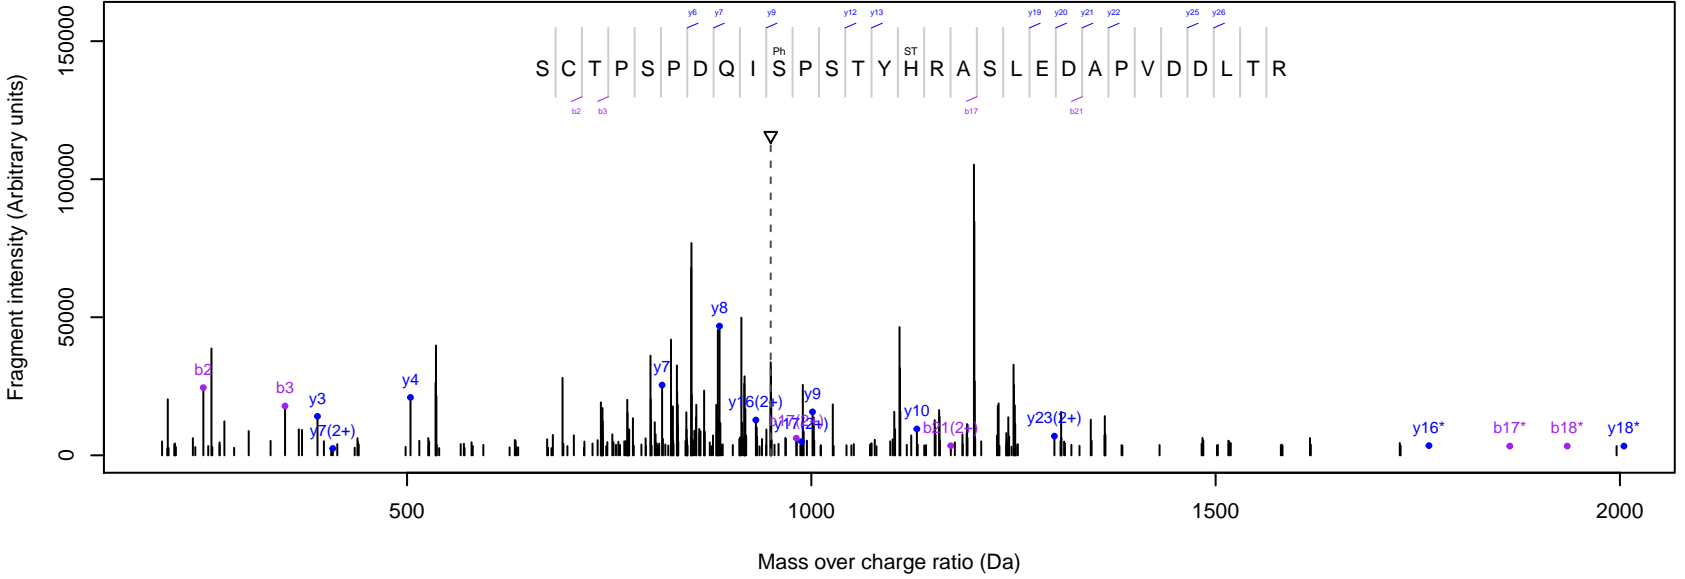

KES(Phospho (STY))M(Oxidation (M))GPPGLESDPEPAALGSSSAHCTNNGVK-4+

Source : QE3\_201126\_FR\_TiOx\_hum\_tissue\_Urea\_RNAB\_H Scan : 19860

Andromeda score : 74.807

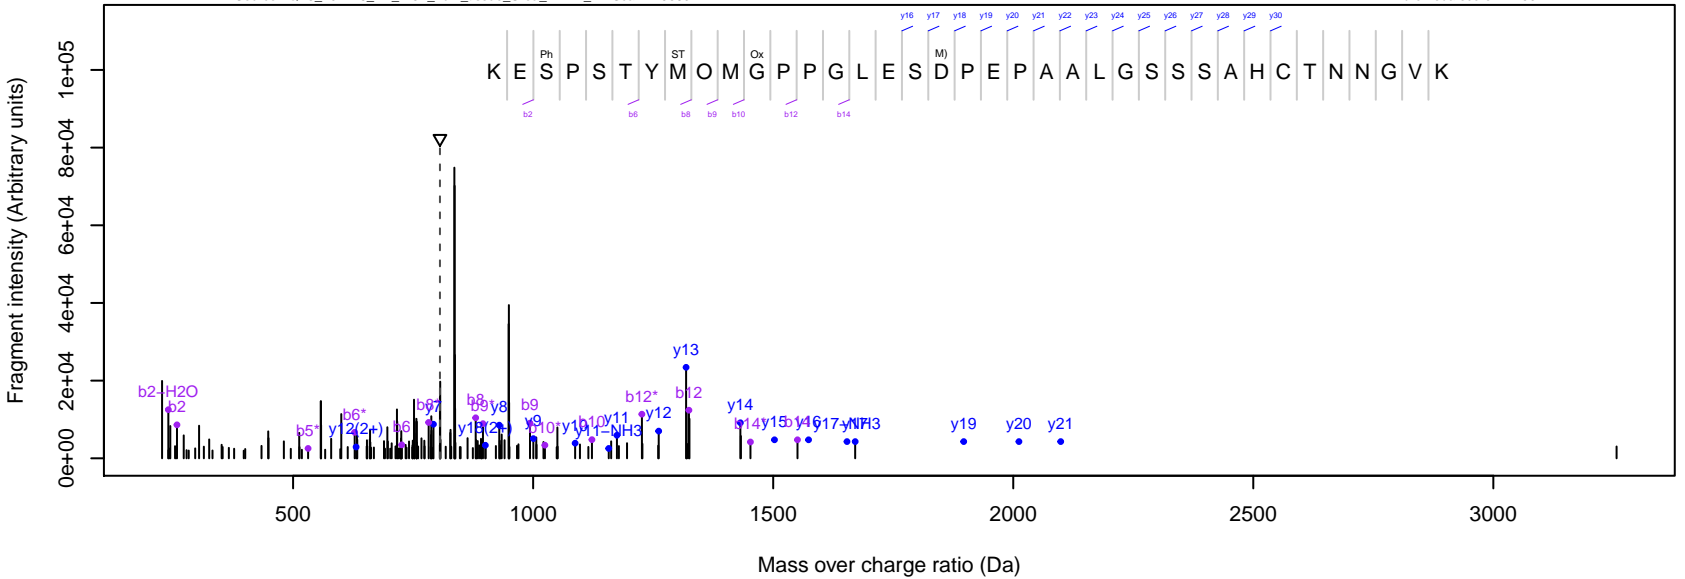



VAAAAGSGPS(Phospho (STY))PPGSPGHDR-2+

Source : QE3\_201126\_FR\_TiOx\_hum\_tissue\_Urea\_RNAB\_H Scan : 9220

Andromeda score : 74.793

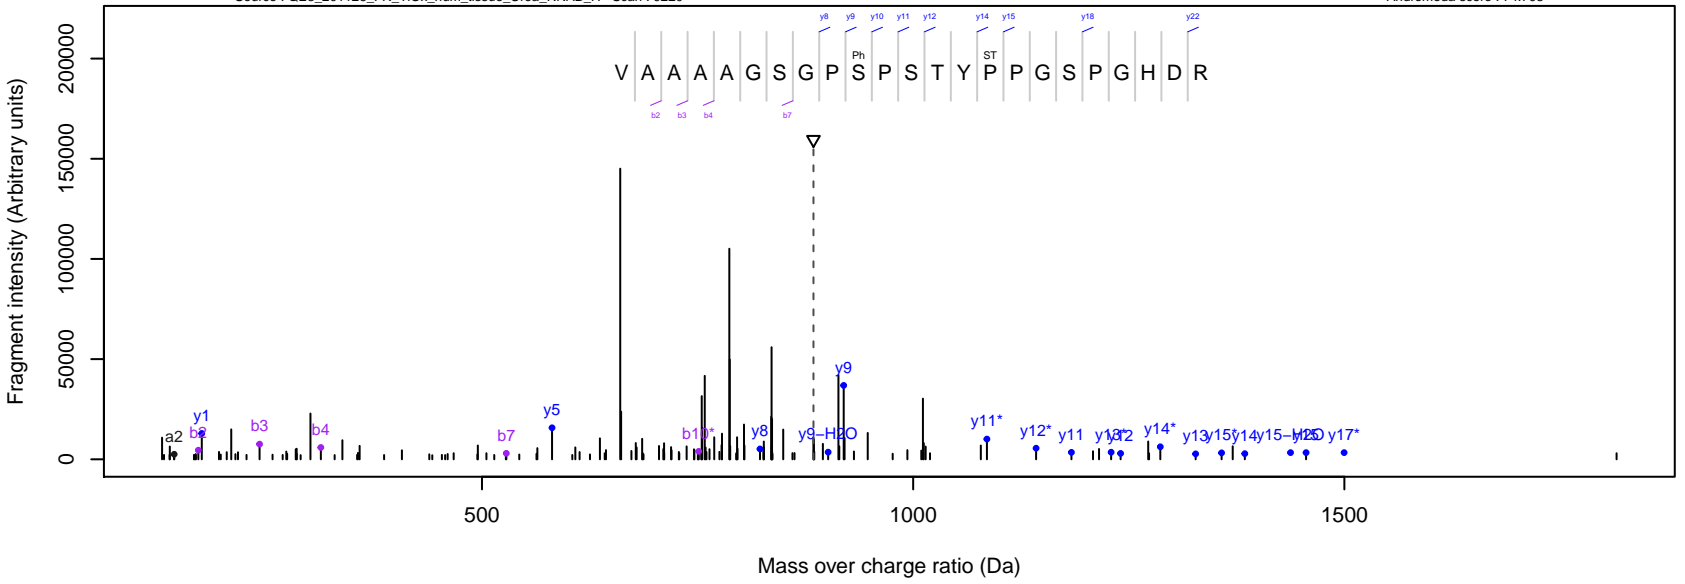

EGHLS(Phospho (STY))PDIVAEQK-3+

Source : QE3\_201126\_FR\_TiOx\_hum\_tissue\_Urea\_RNAB\_H Scan : 18096

Andromeda score : 74.789

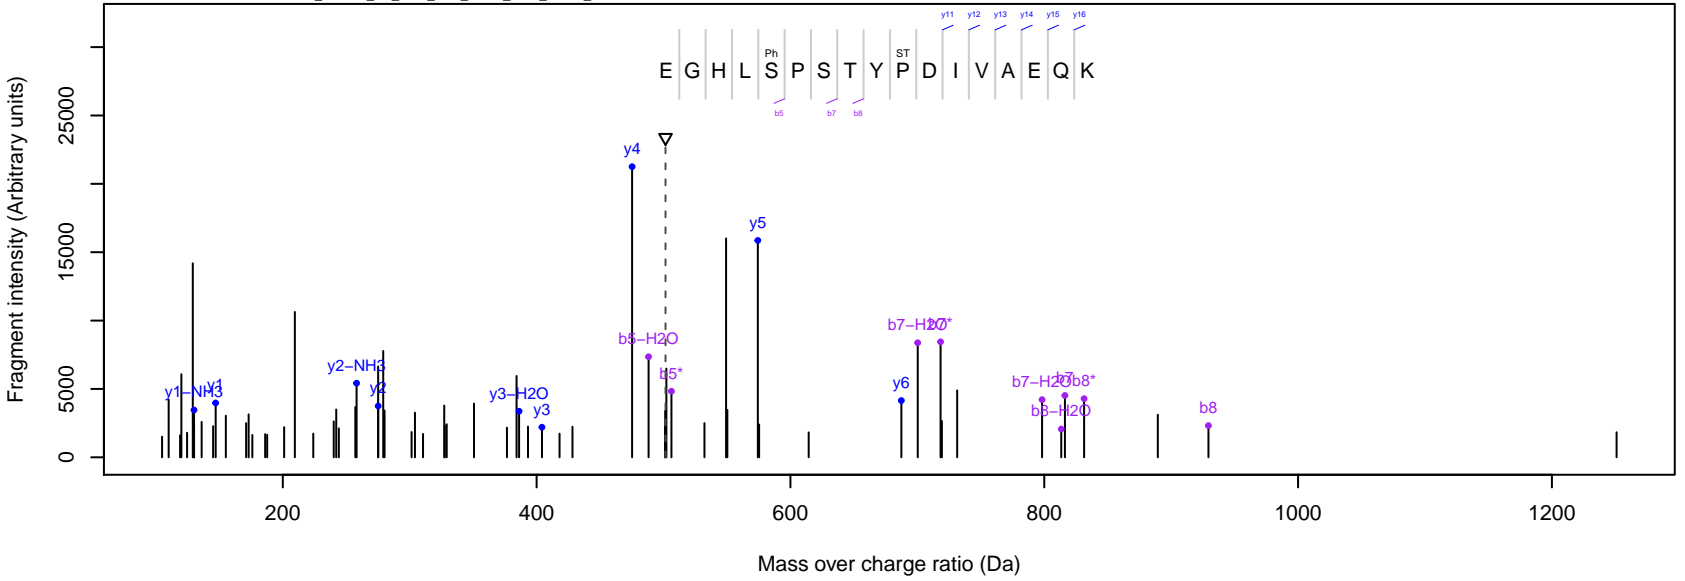

AES(Phospho (STY))VERLEEAASR-3+

Source : QE3\_201126\_FR\_TiOx\_hum\_tissue\_Urea\_RNAB\_H Scan : 19200

Andromeda score : 74.786

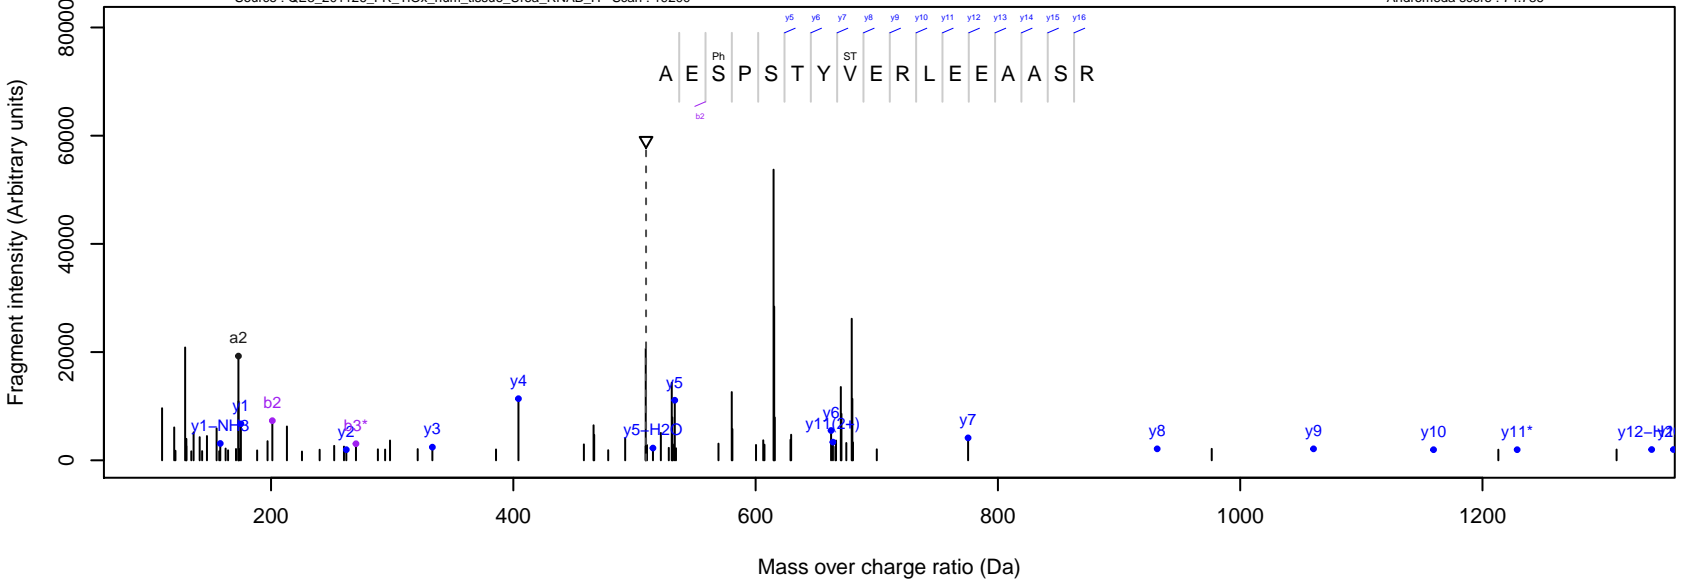

KHS(Phospho (STY))EAEFTPLK-3+

Source : QE3\_201126\_FR\_TiOx\_hum\_tissue\_Urea\_RNAB\_B Scan : 15307

Andromeda score : 74.78

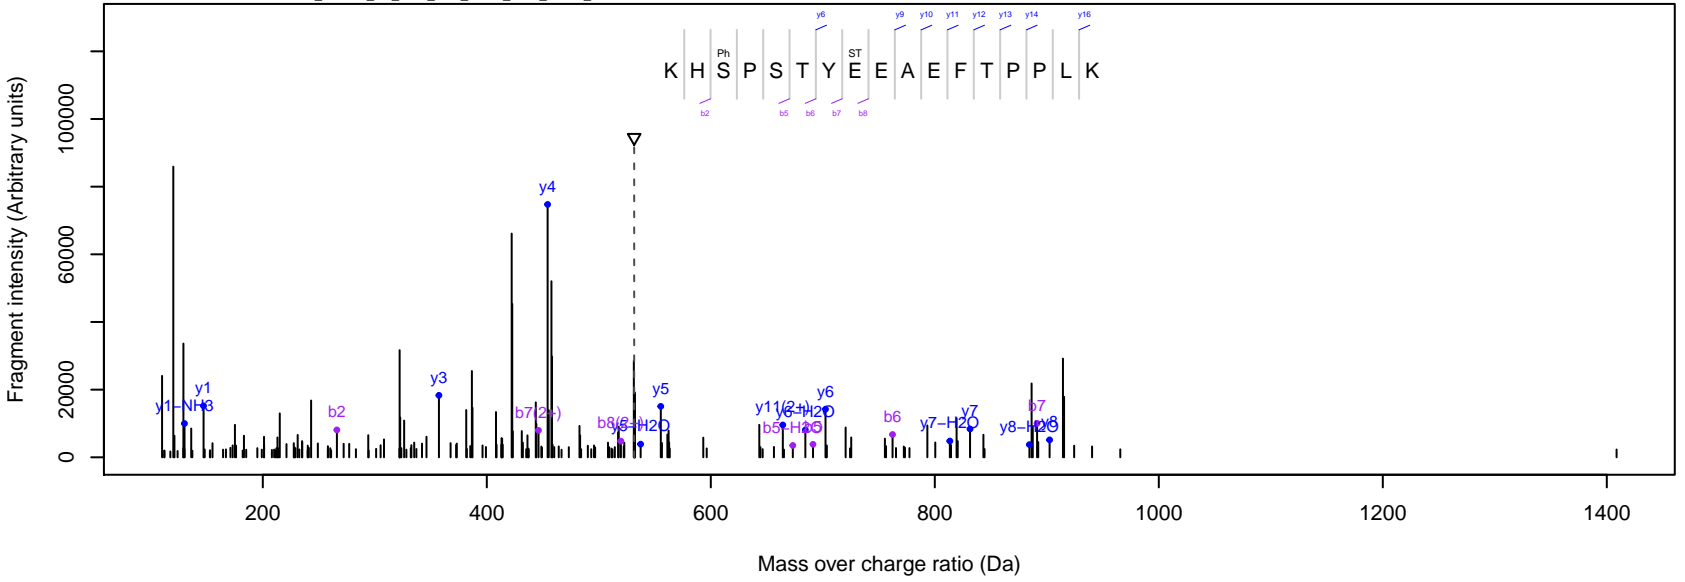

RDS(Phospho (STY))VAELDREM(Oxidation (M))SR-3+

Source : QE3\_201126\_FR\_TiOx\_hum\_tissue\_Urea\_RNAB\_B Scan : 20438

Andromeda score : 74.776

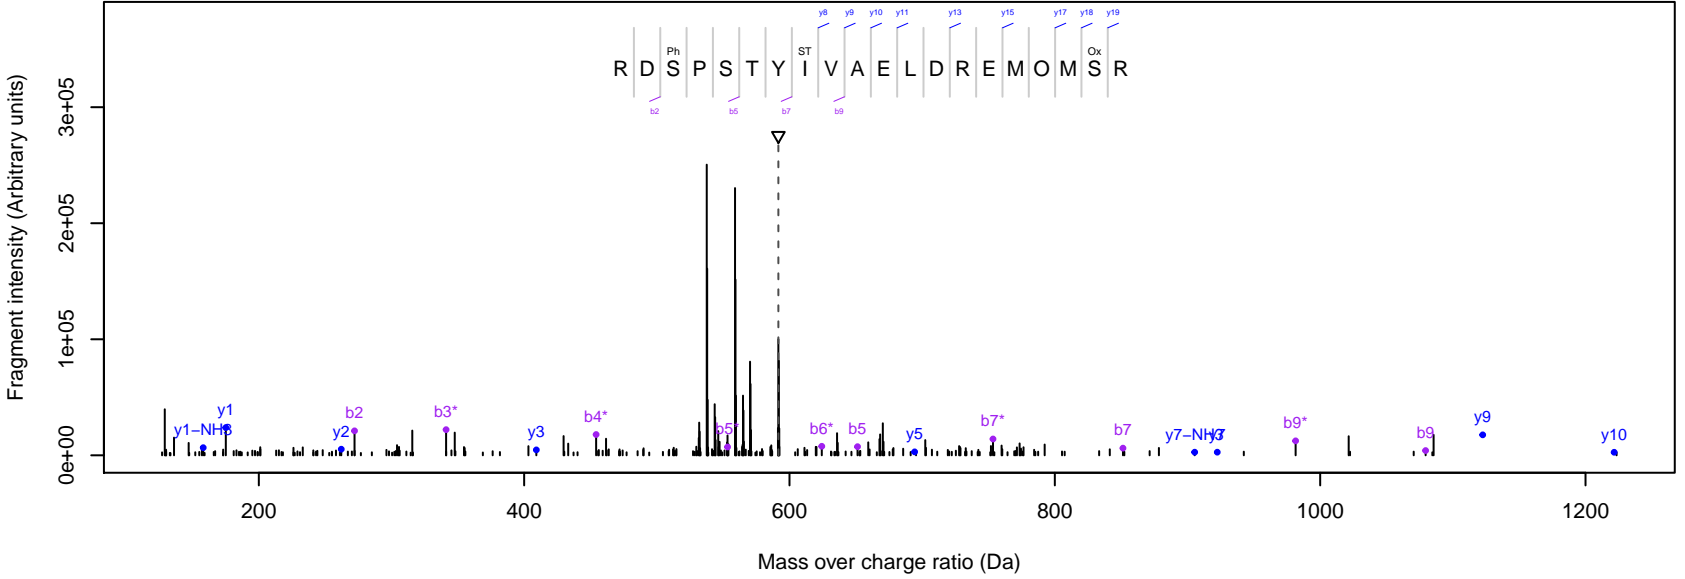

RHS(Phospho (STY))LIGPDIK-3+

Source : QE3\_201126\_FR\_TiOx\_hum\_tissue\_Urea\_RNAB\_H Scan : 11691

Andromeda score : 74.769

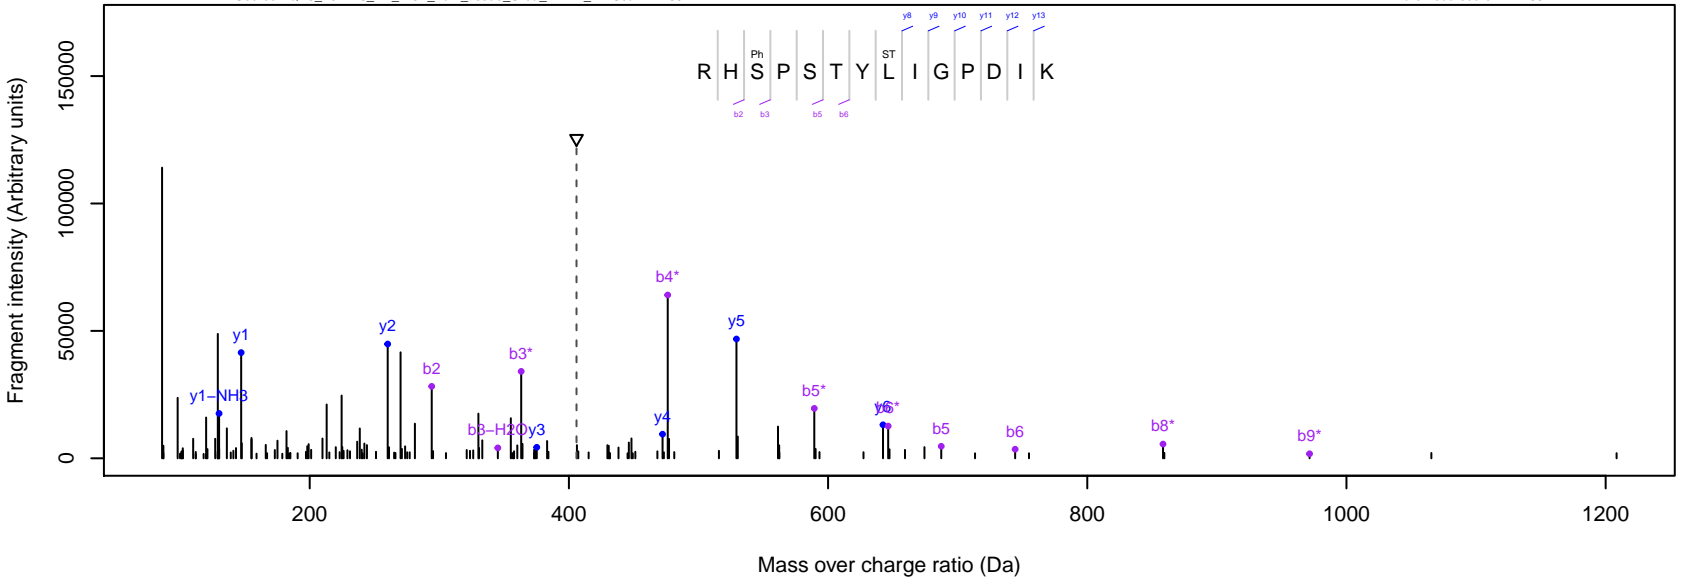

VTEHGT(Phospho (STY))PKPFR-3+

Source : QE3\_201126\_FR\_TIOx\_hum\_tissue\_Urea\_RNAB\_B Scan : 6396

Andromeda score : 74.769

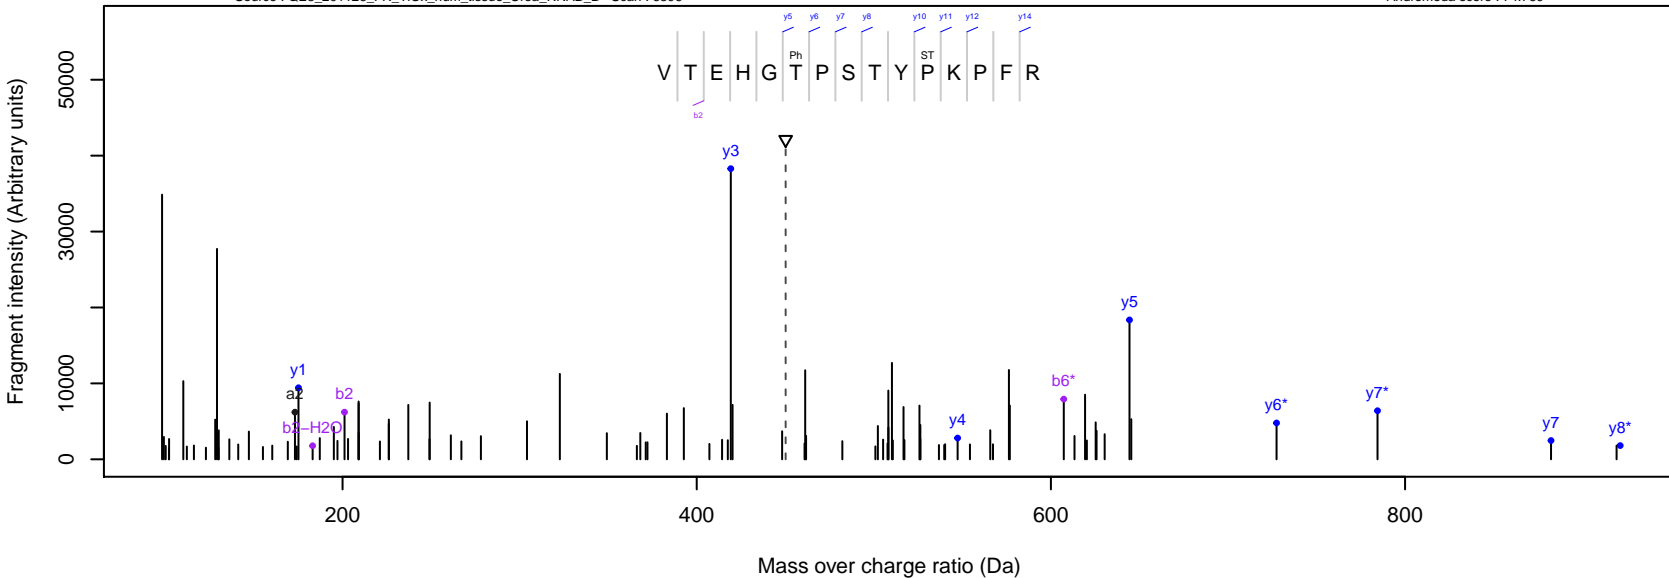

SDSIRPALNSPVERPS(Phospho (STY))SDQEEGETSAQTER-4+

Source : QE3\_201126\_FR\_TIOx\_hum\_tissue\_Urea\_RNAB\_N Scan : 18932

Andromeda score : 74.767

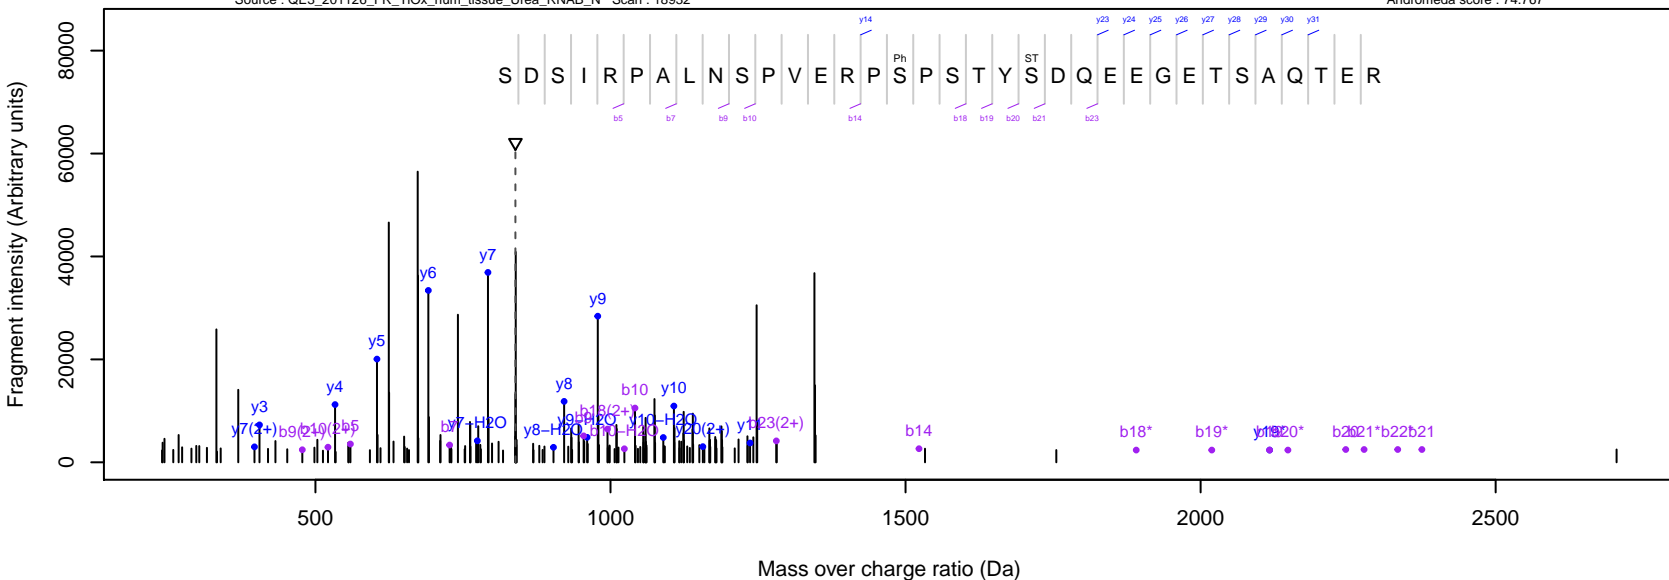

VAS(Phospho (STY))MPLISSTCDMVSAAYASTK-3+

Source : QE3\_201126\_FR\_TIOx\_hum\_tissue\_Urea\_RNAB\_H Scan : 58377

Andromeda score : 74.748

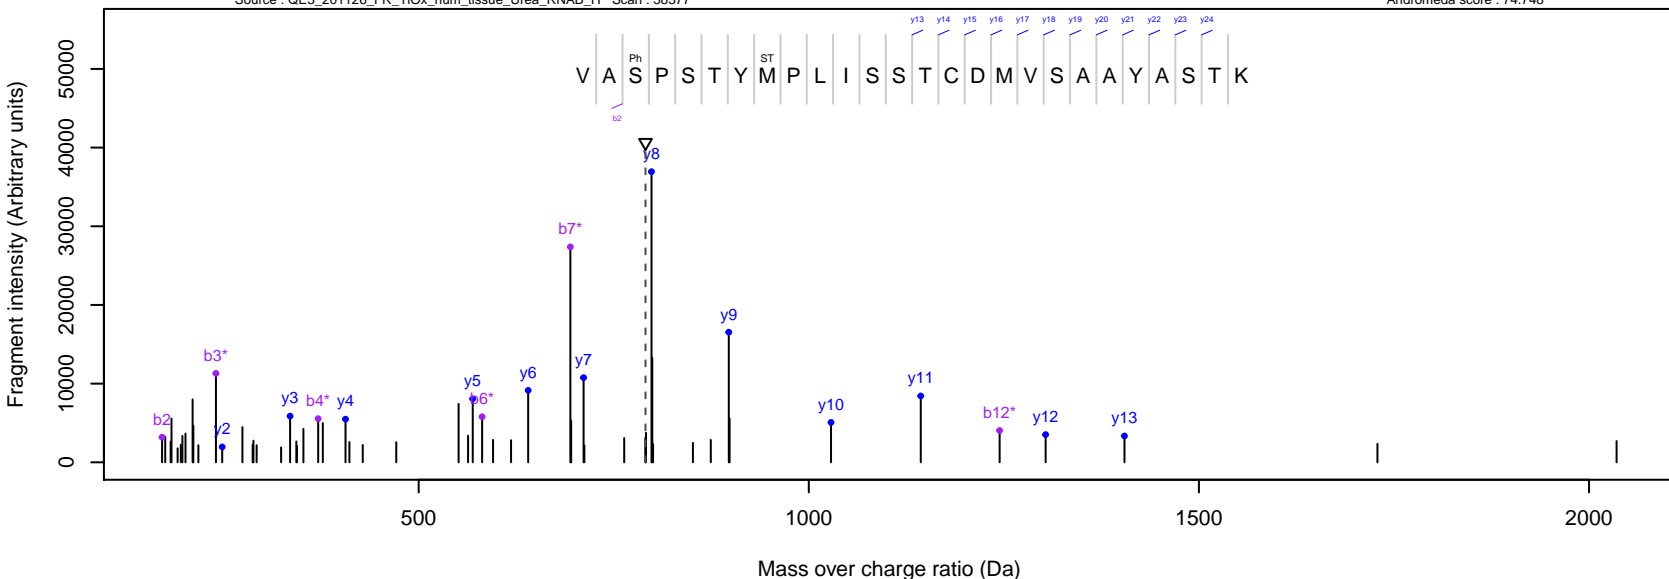

LQLASFYQSKS(Phospho (STY))PS(Phospho (STY))L-2+

Source : QE3\_201126\_FR\_TiOx\_hum\_tissue\_Urea\_RNAB\_N Scan : 54005

Andromeda score : 74.678

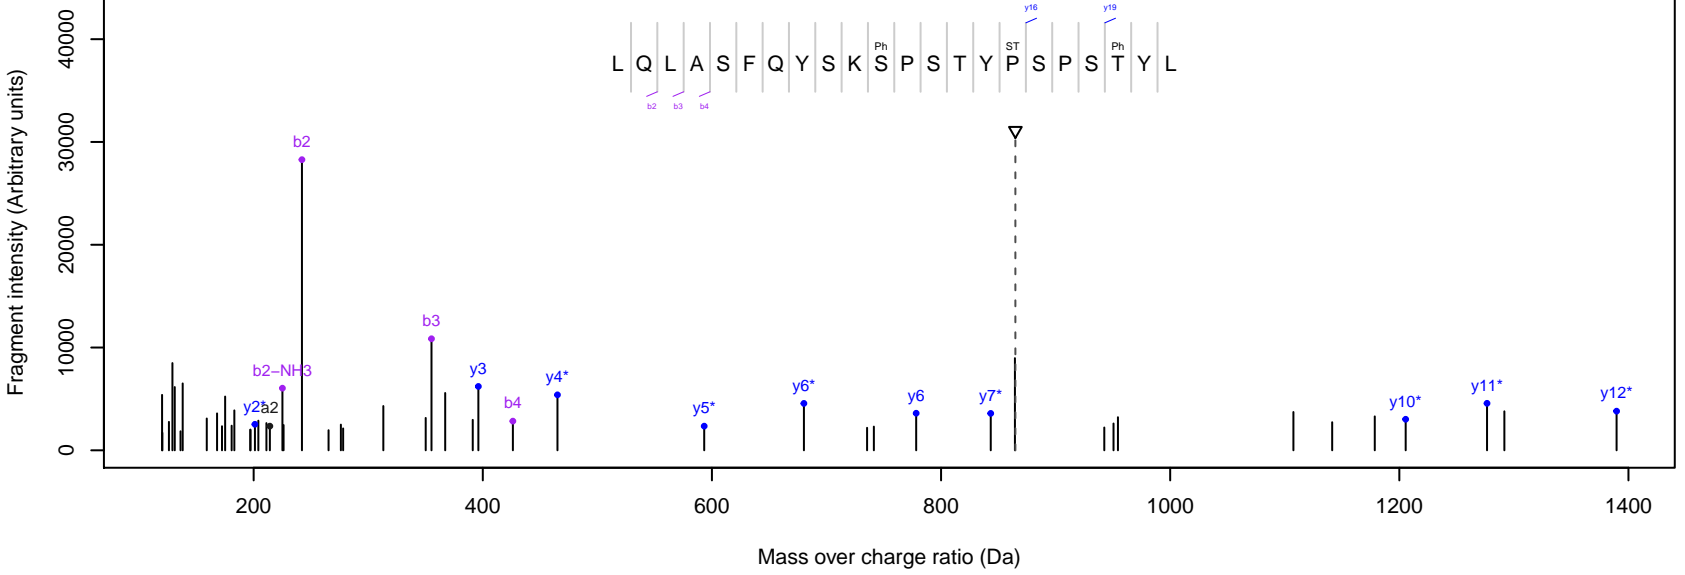

TEVALAKDMESPT(Phospho (STY))KLDVTLAK-3+

Source : QE3\_201126\_FR\_TiOx\_hum\_tissue\_Urea\_RNAB\_B Scan : 33763

Andromeda score : 74.665

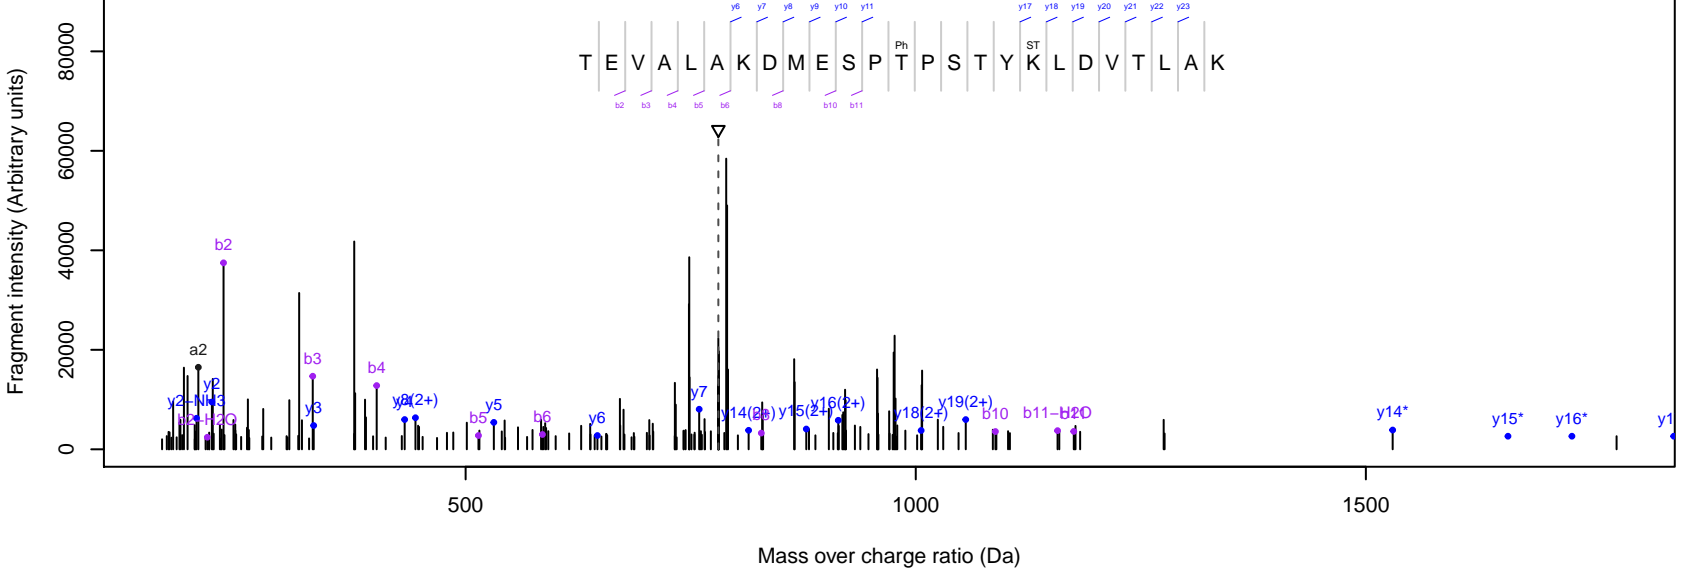

GKGNIE(TPSTYS)SEDEDD(TPSTY)ADLFPEESGFHAWR-3+

Source : QE3\_201126\_FR\_TiOx\_hum\_tissue\_Urea\_RNAB\_H Scan : 56225

Andromeda score : 74.65

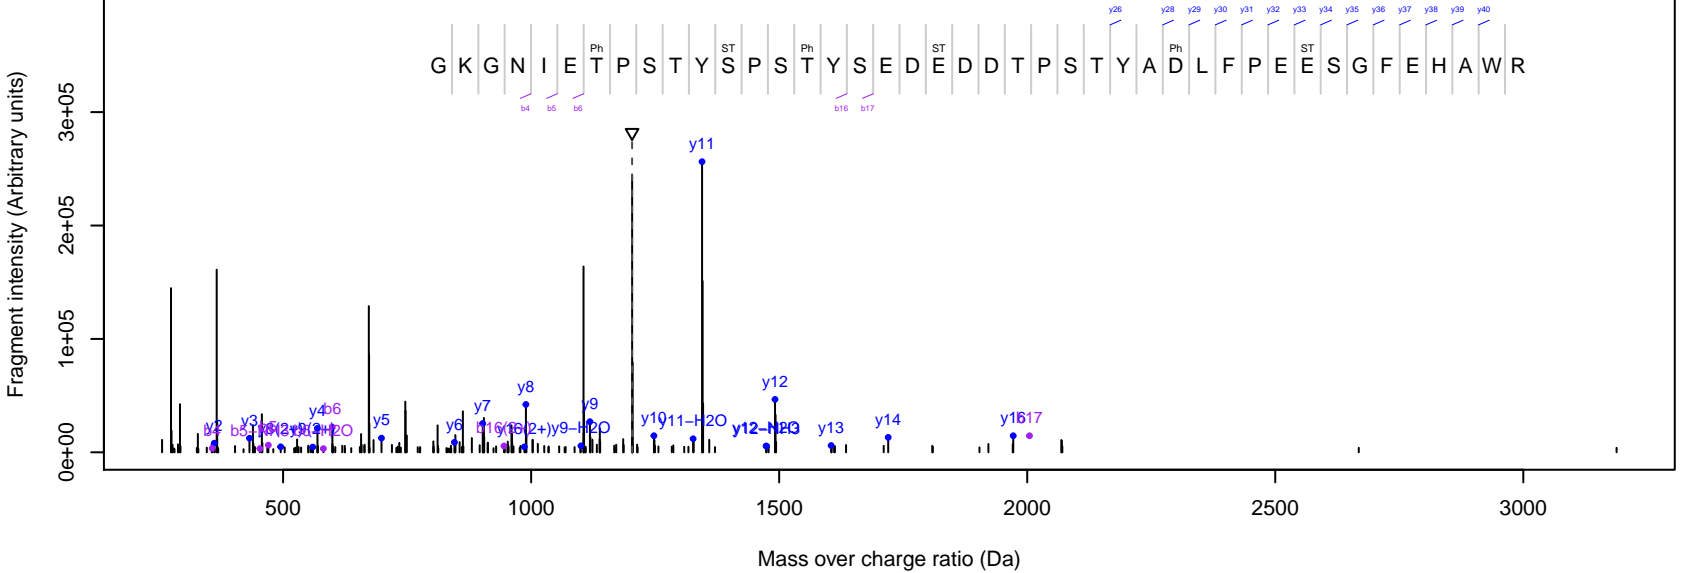

GAS(Phospho (STY))QAGM(Oxidation (M))TGYGM(Oxidation (M))PR-2+

Source : QE3\_201126\_FR\_TiOx\_hum\_tissue\_Urea\_RNAB\_B Scan : 11004

Andromeda score : 74.649

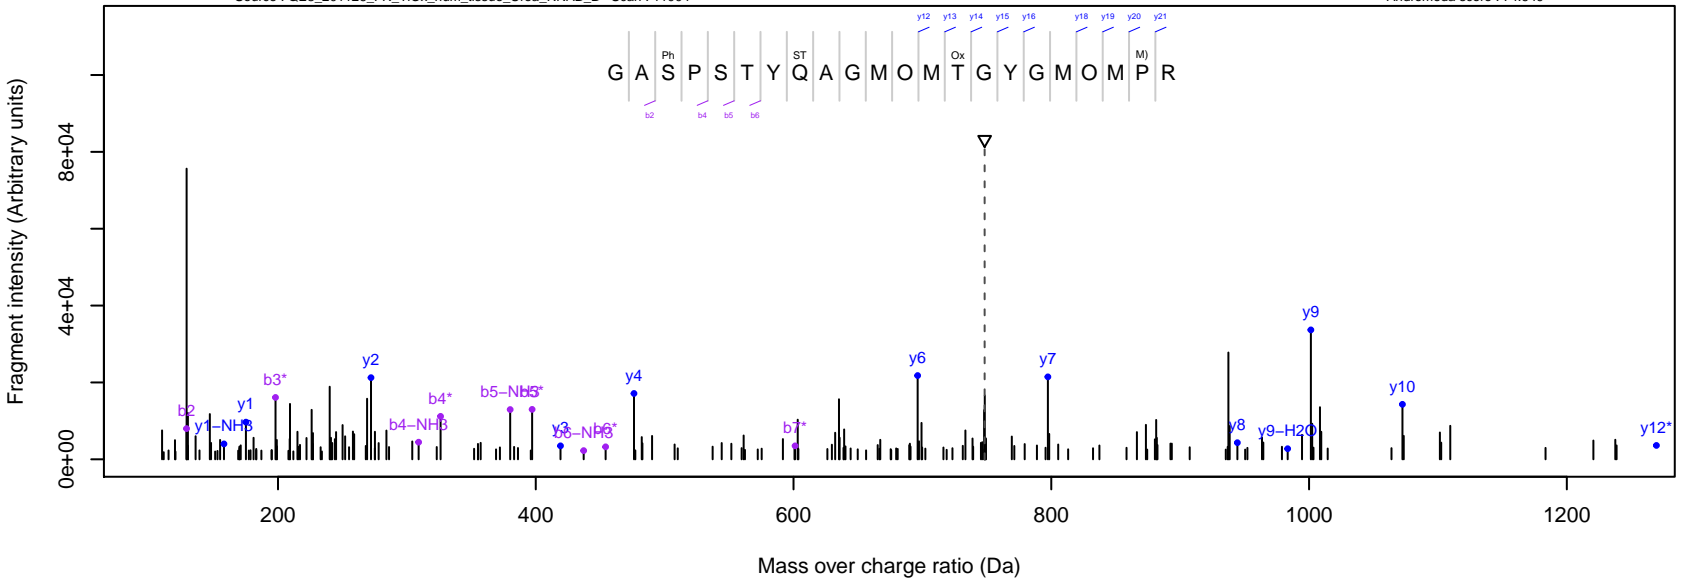

TS(Phospho (STY))PTPPESATTVK-2+

Source : QE3\_201126\_FR\_TiOx\_hum\_tissue\_Urea\_RNAB\_N Scan : 11909

Andromeda score : 74.649

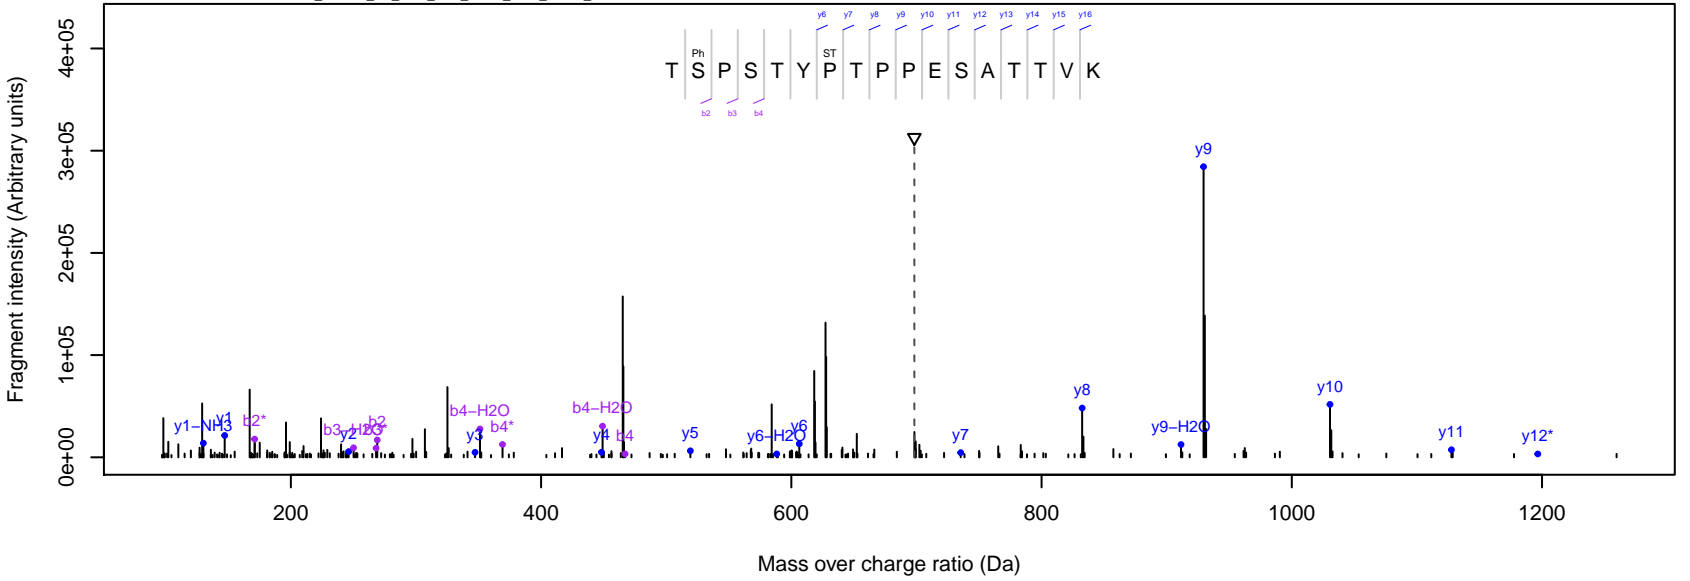

RSS(Phospho (STY))QPS(Phospho (STY))PTAVPASDSPPTK-3+

Source : QE3\_201126\_FR\_TiOx\_hum\_tissue\_Urea\_RNAB\_H Scan : 14795

Andromeda score : 74.627

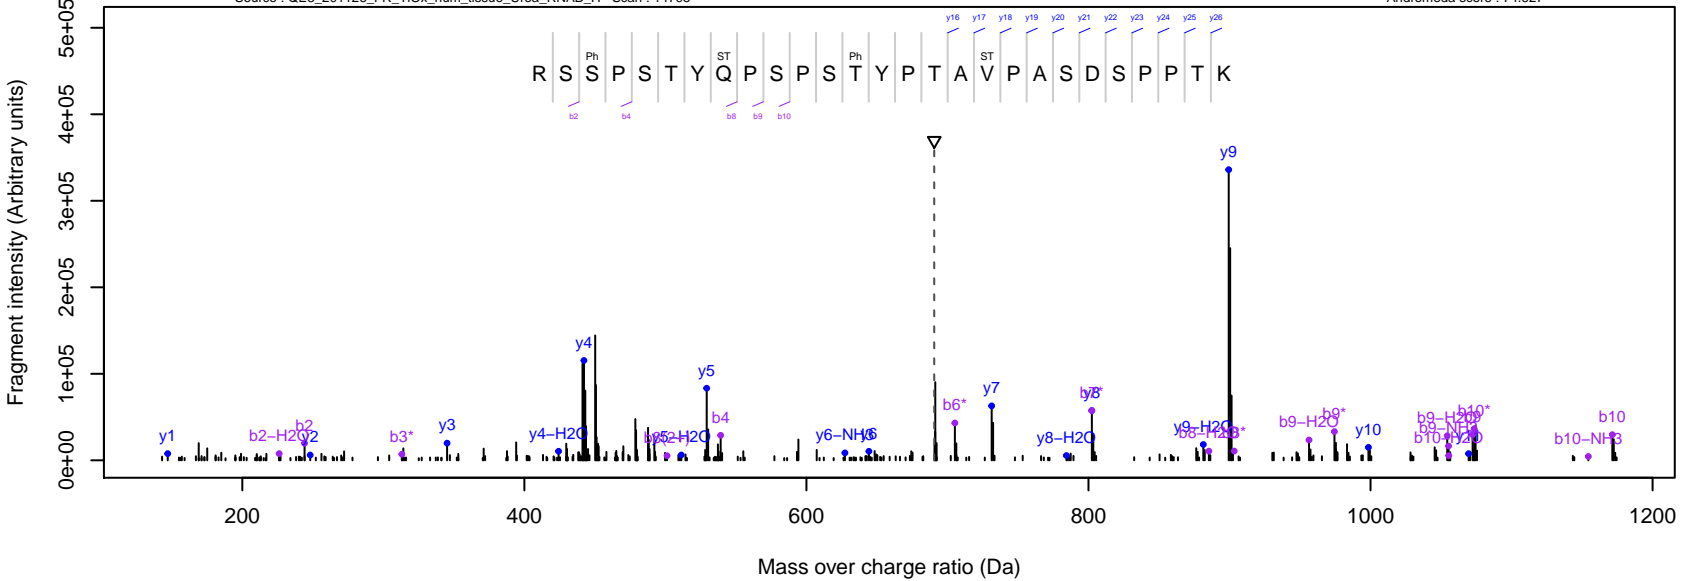

M(Oxidation (M))ADGGS(Phospho (STY))PFLGR-2+

Source : QE3\_201126\_FR\_TIOx\_hum\_tissue\_Urea\_RNAB\_H Scan : 21270

Andromeda score : 74.611

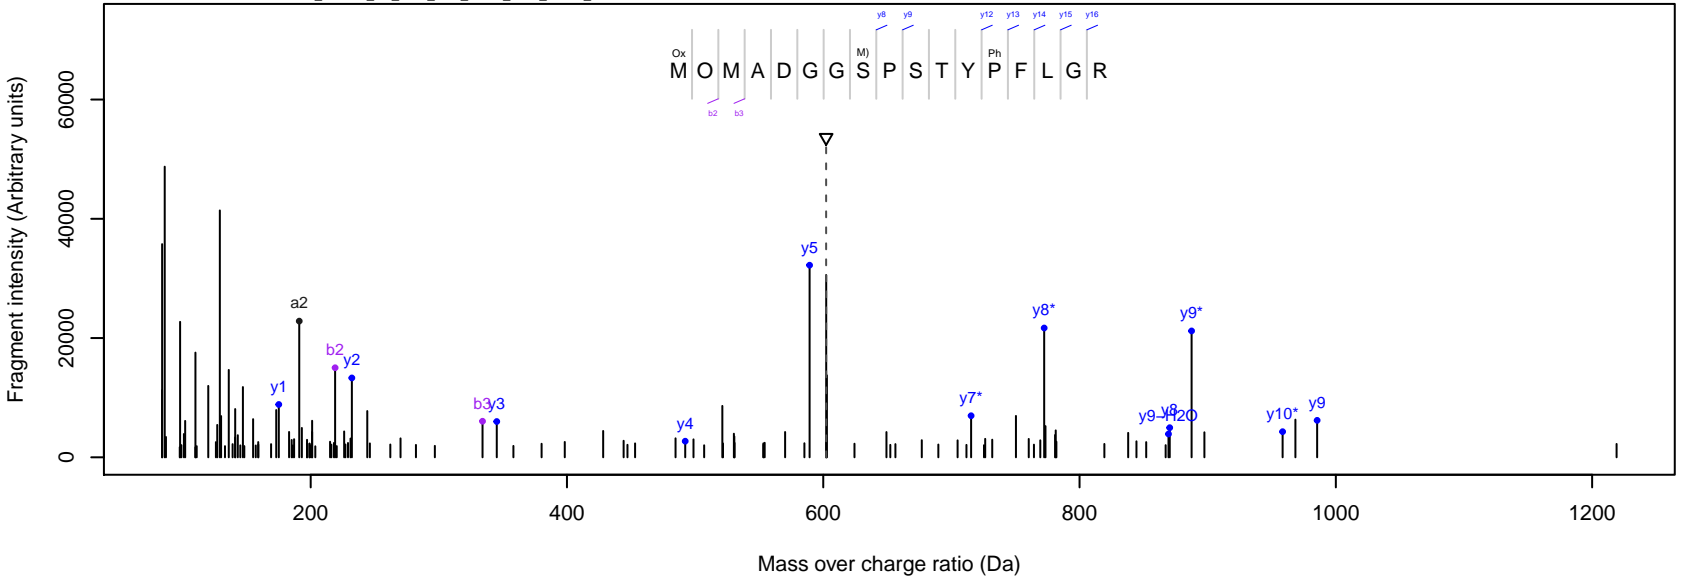

VVPEDGS(Phospho (STY))PEKR-2+

Source : QE3\_201126\_FR\_TIOx\_hum\_tissue\_Urea\_RNAB\_H Scan : 5699

Andromeda score : 74.611

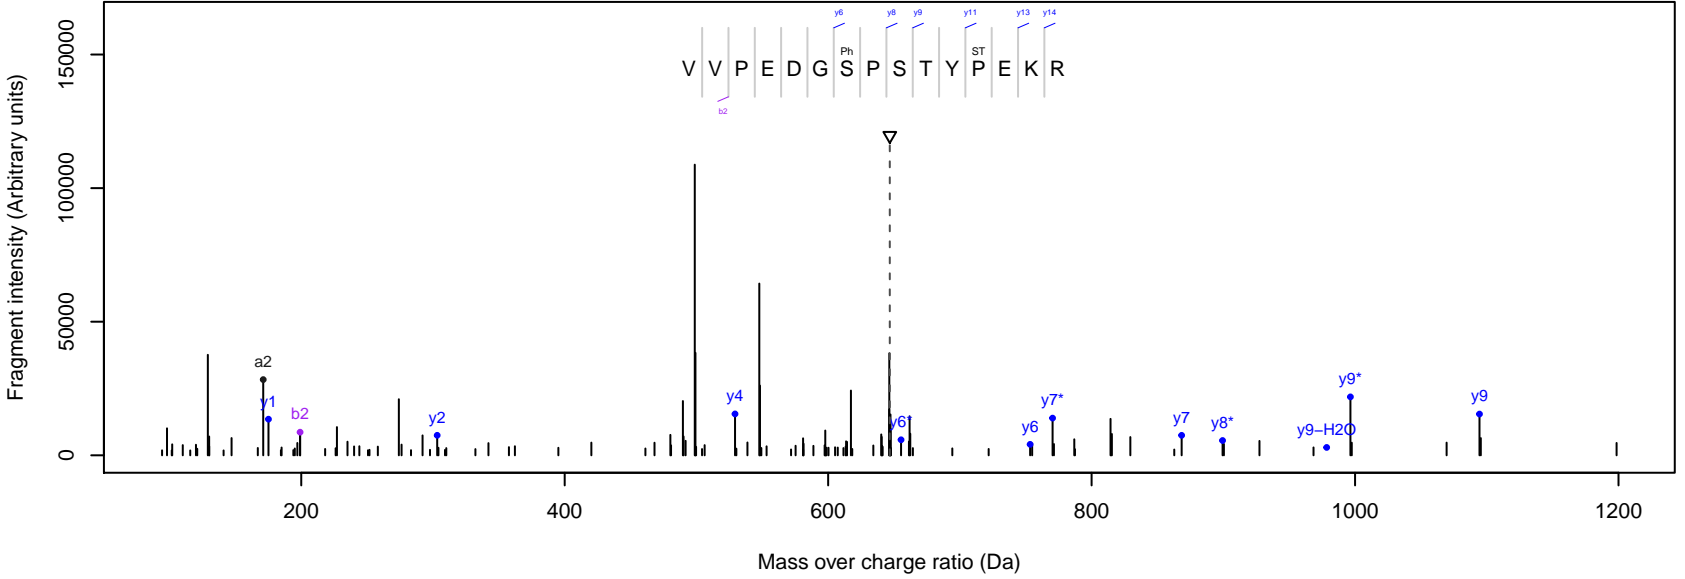

S(Phospho (STY))TSTPNVHMVSTTAPM(Oxidation (M))DSNLIQLTGQSFSTDAAGSR-3+

Source : QE3\_201126\_FR\_TIOx\_hum\_tissue\_Urea\_RNAB\_N Scan : 47032

Andromeda score : 74.605

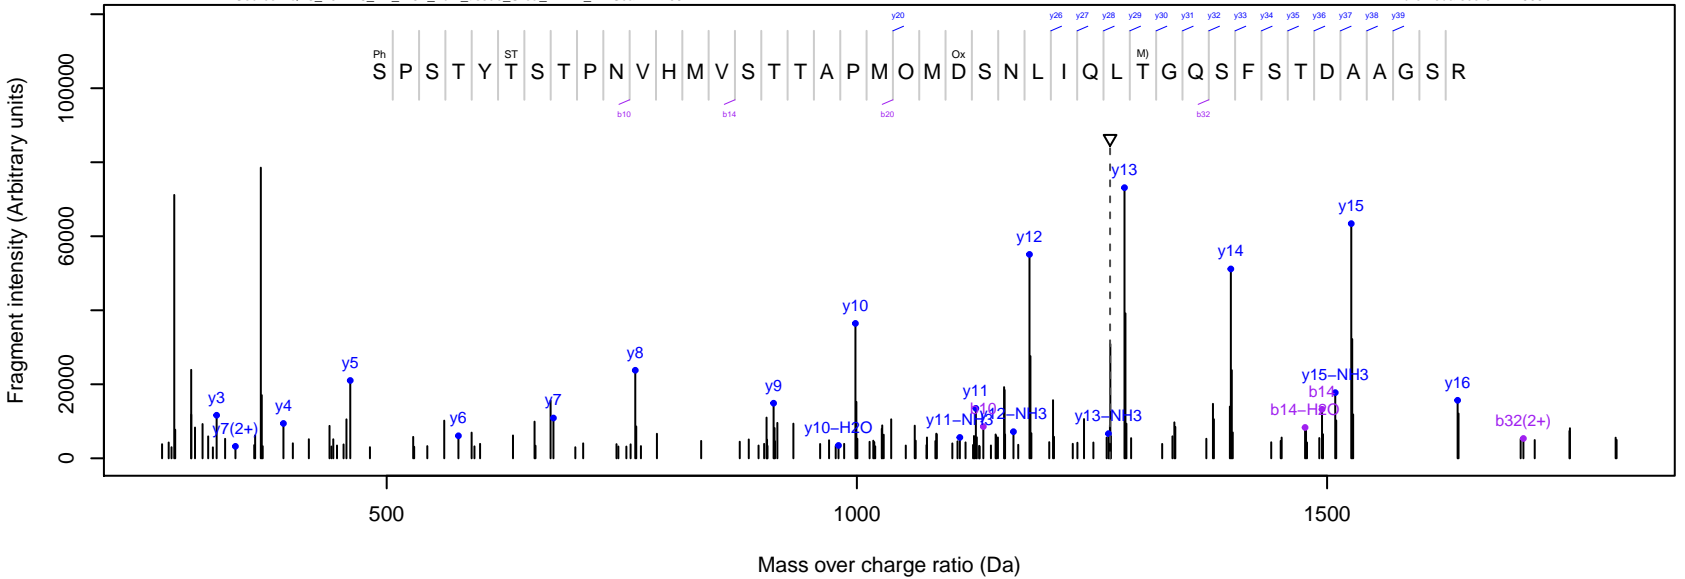

QVS(Phospho (STY))LPVTK-2+

Source : QE3\_201126\_FR\_TiOx\_hum\_tissue\_Urea\_RNAB\_H Scan : 19901

Andromeda score : 74.6

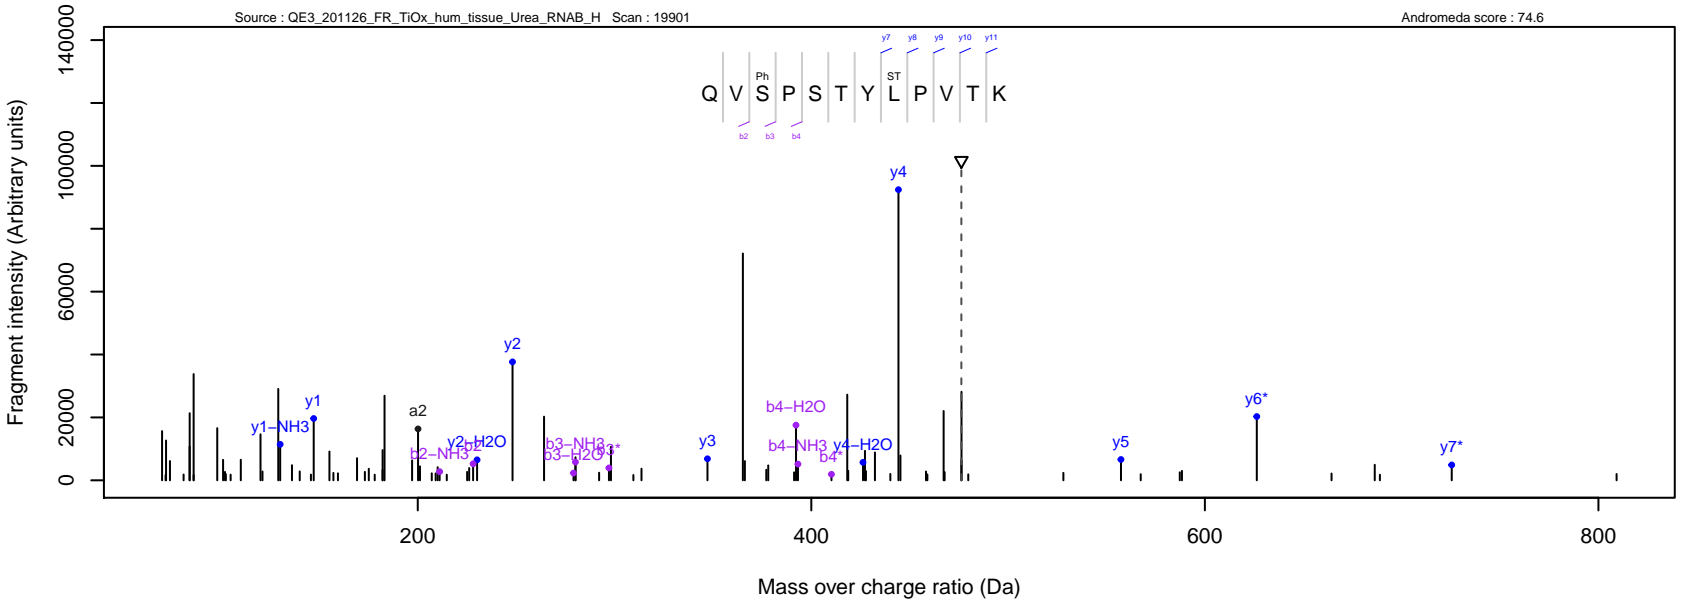

FHS(Phospho (STY))PSTTWS(Phospho (STY))PNKDTPQEK-3+

Source : QE3\_201126\_FR\_TiOx\_hum\_tissue\_Urea\_RNAB\_H Scan : 17199

Andromeda score : 74.584

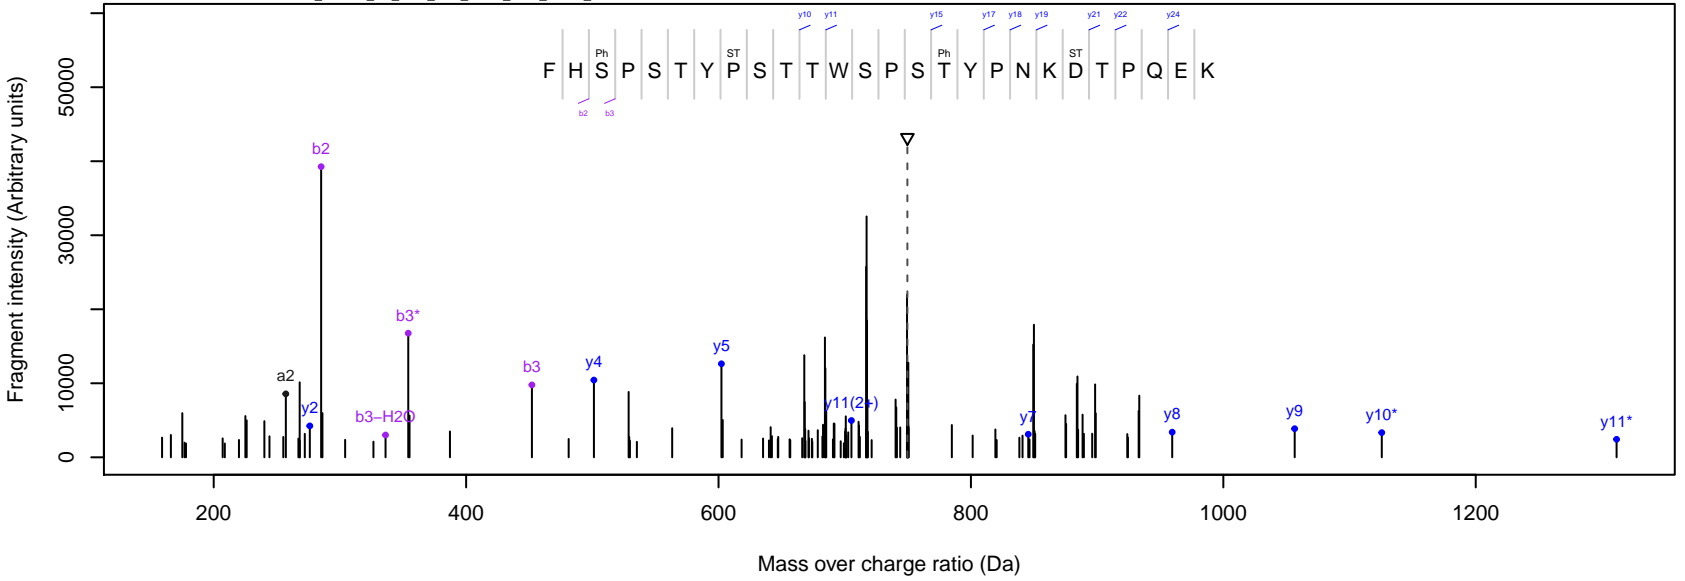

DQDS(Phospho (STY))S(Phospho (STY))DDERALEDWVSSSETSA LPR-3+

Source : QE3\_201126\_FR\_TiOx\_hum\_tissue\_Urea\_RNAB\_B Scan : 62369

Andromeda score : 74.579

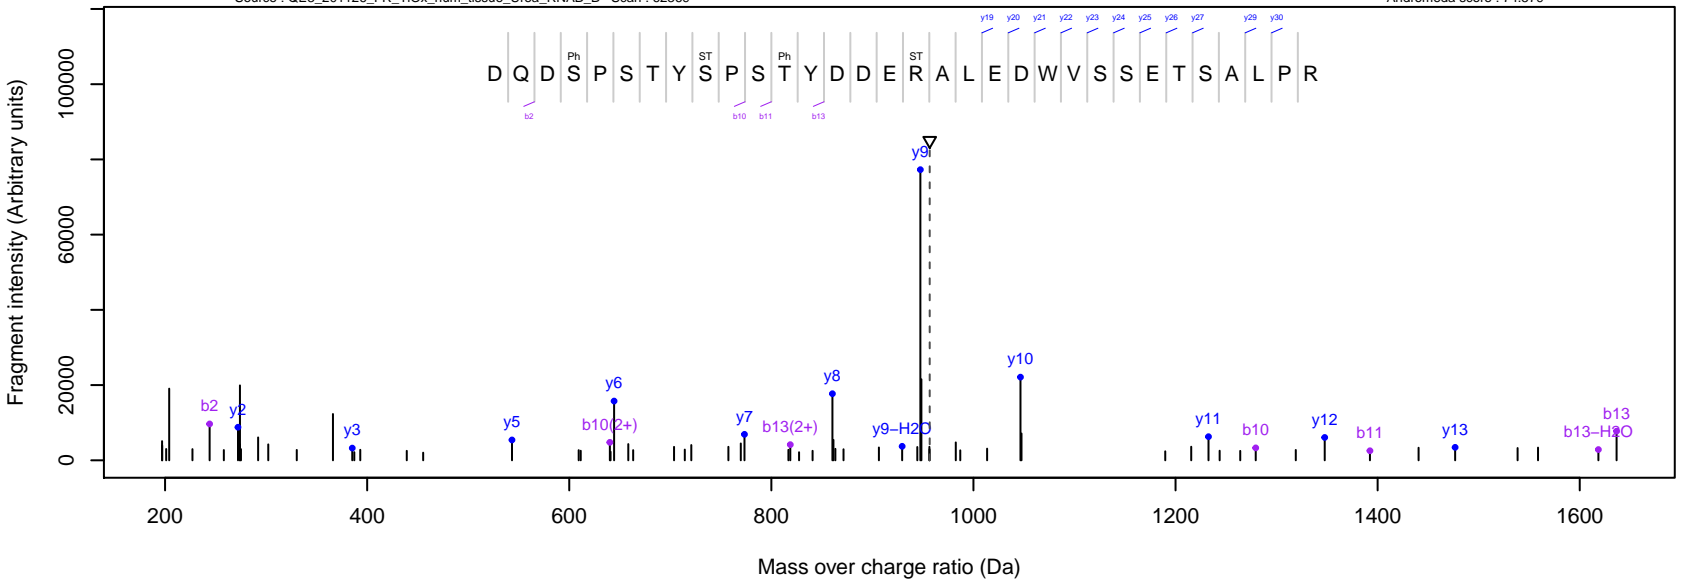

DLSTS(Phospho (STY))PKPS(Phospho (STY))PIPS(Phospho (STY))PVLGR-2+

Source : QE3\_201126\_FR\_TiOx\_hum\_tissue\_Urea\_RNAB\_N Scan : 45837

Andromeda score : 74.519

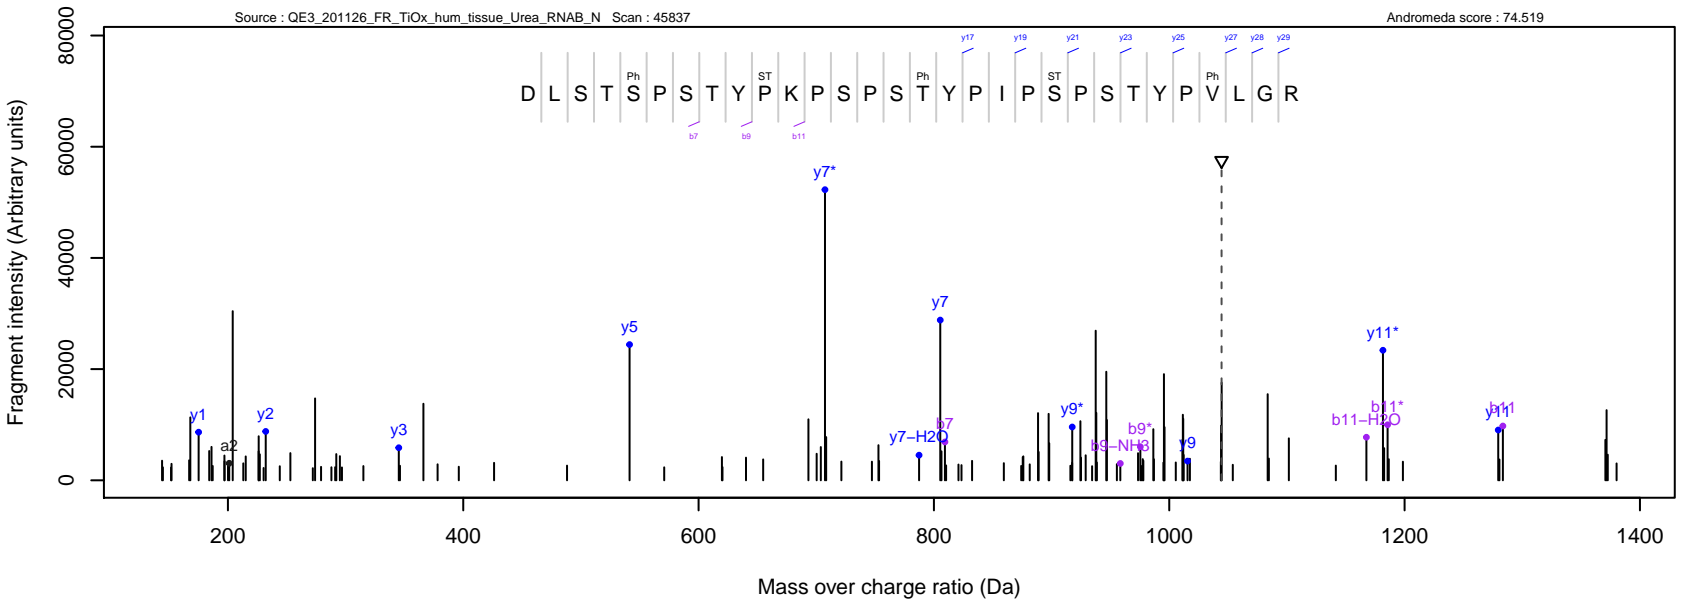

RLSGGS(Phospho (STY))HSYGGESPR-3+

Source : QE3\_201126\_FR\_TiOx\_hum\_tissue\_Urea\_RNAB\_N Scan : 5830

Andromeda score : 74.519

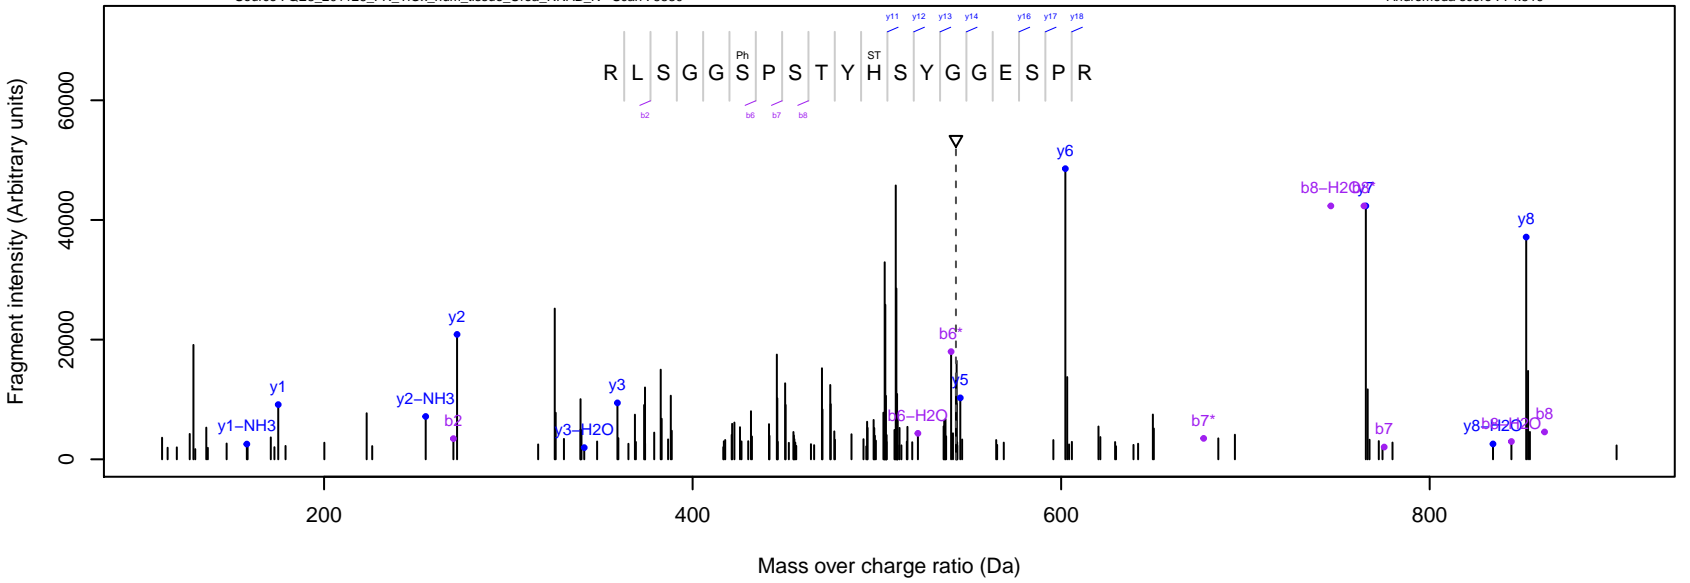

NM(Oxidation (M))PGLSAATLASLGGT(Phospho (STY))SSR-2+

Source : QE3\_201126\_FR\_TiOx\_hum\_tissue\_Urea\_RNAB\_N Scan : 41063

Andromeda score : 74.505

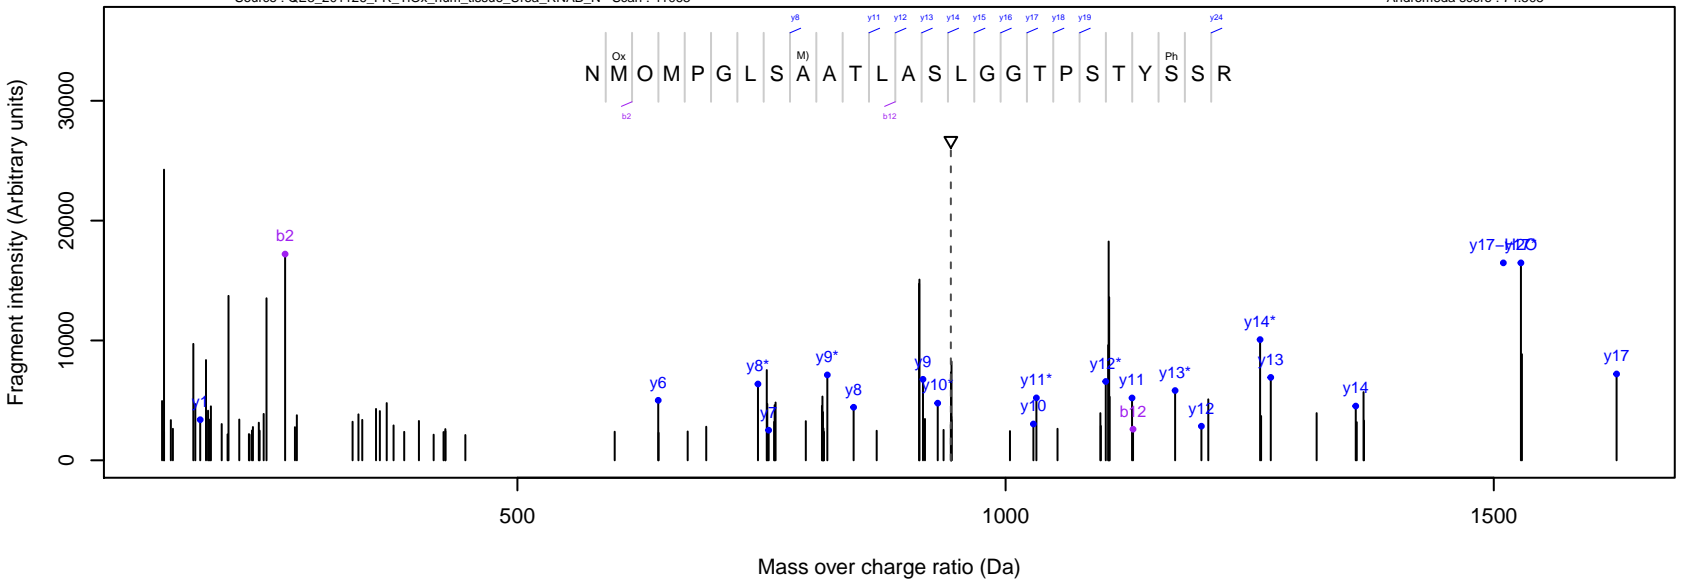



M(Oxidation (M))AGQEIPEEGREVEEFSEDDDEDDSPSTYDDSPSTYEAEKQSQK-4+

Source : QE3\_201126\_FR\_TIOx\_hum\_tissue\_Urea\_RNAB\_N Scan : 30072

Andromeda score : 74.491

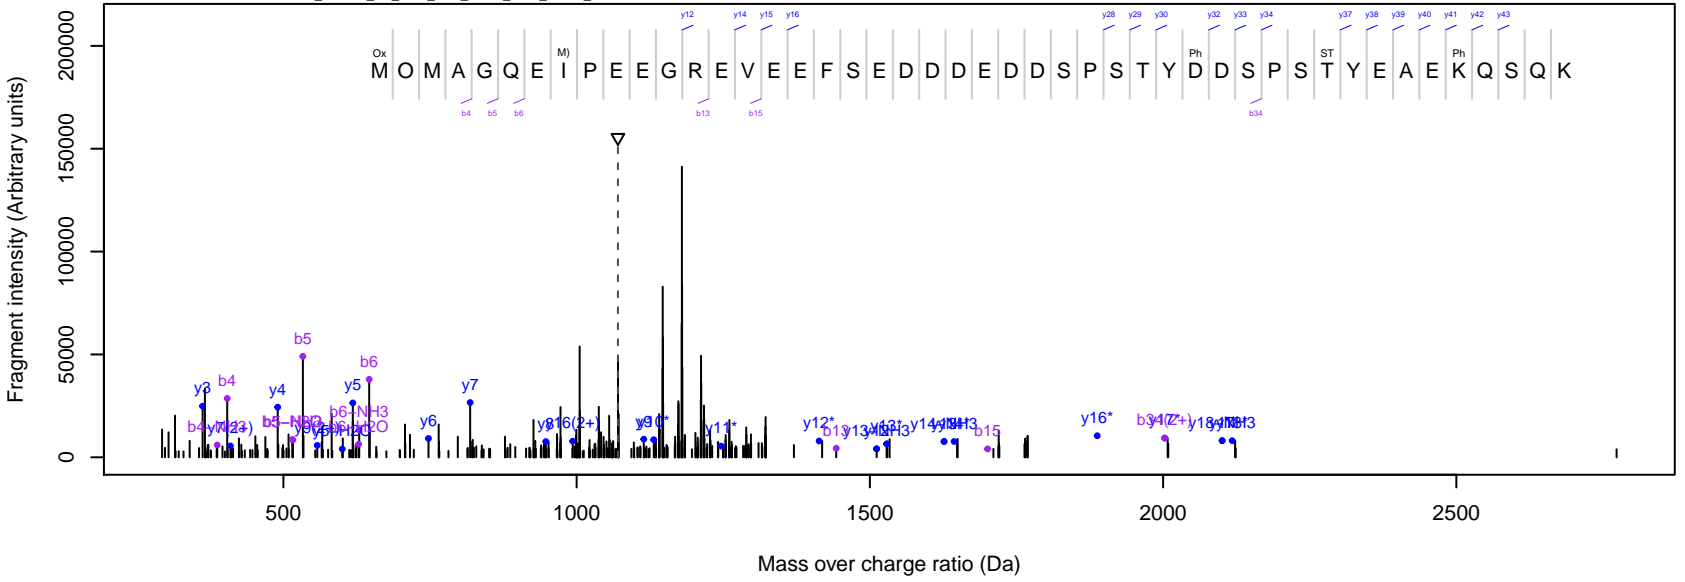

S(Phospho (STY))APDISFTIDANK-2+

Source : QE3\_201126\_FR\_TIOx\_hum\_tissue\_Urea\_RNAB\_B Scan : 39523

Andromeda score : 74.475

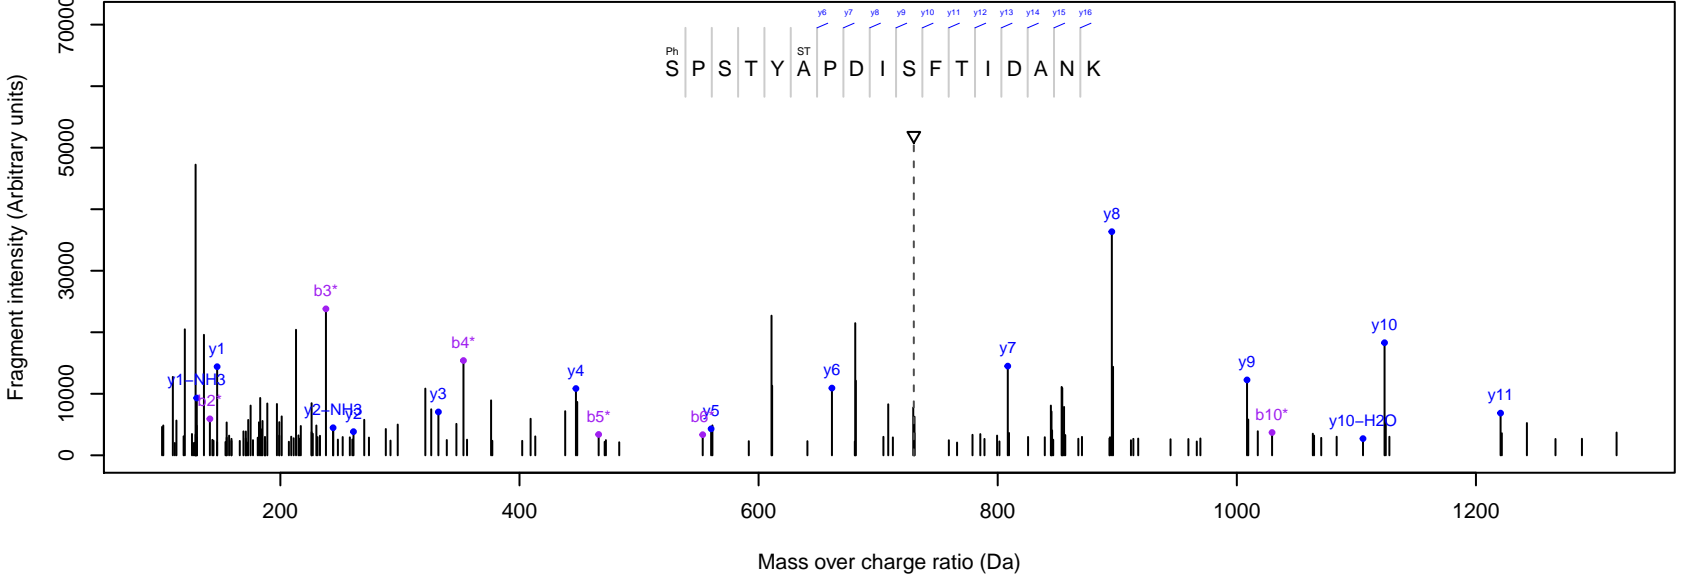

S(Phospho (STY))LQPLAPR-2+

Source : QE3\_201126\_FR\_TIOx\_hum\_tissue\_Urea\_RNAB\_N Scan : 20075

Andromeda score : 74.464

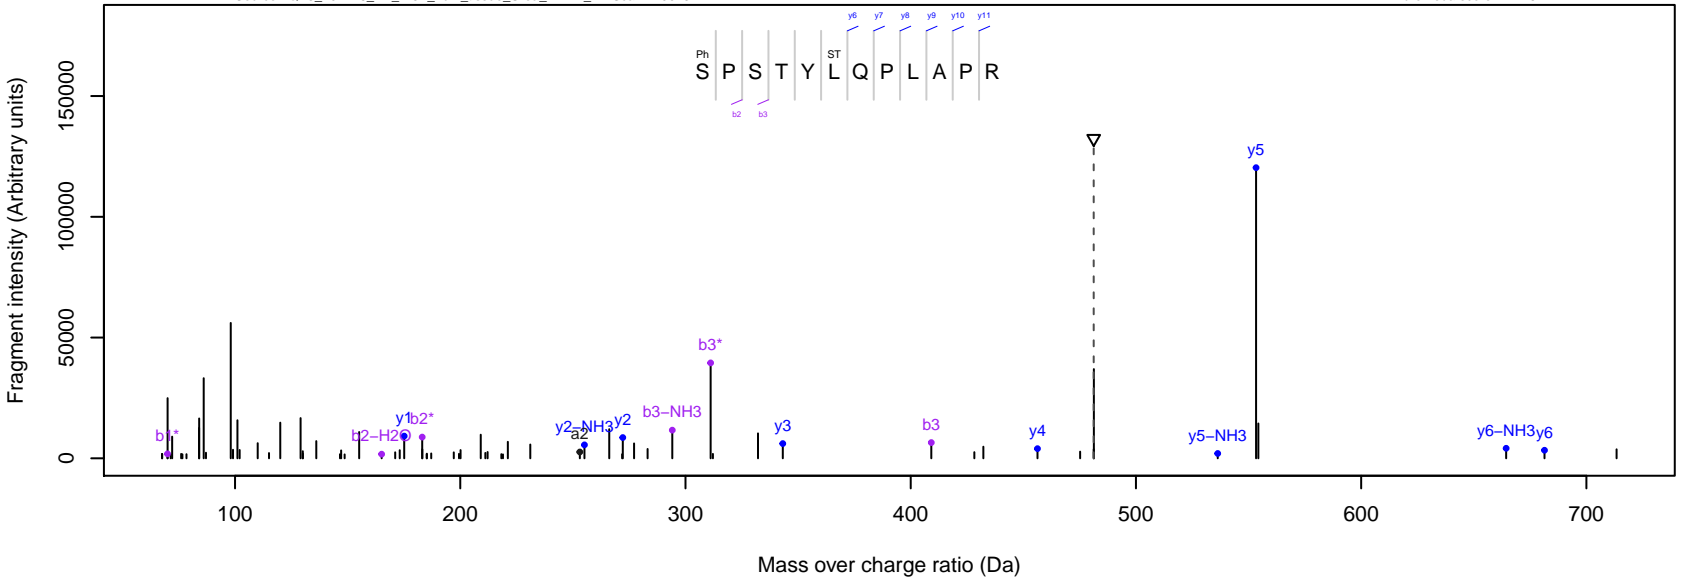

GAKS(Phospho (STY))DPSIVR-2+

Source : QE3\_201126\_FR\_TiOx\_hum\_tissue\_Urea\_RNAB\_H Scan : 6863

Andromeda score : 74.46

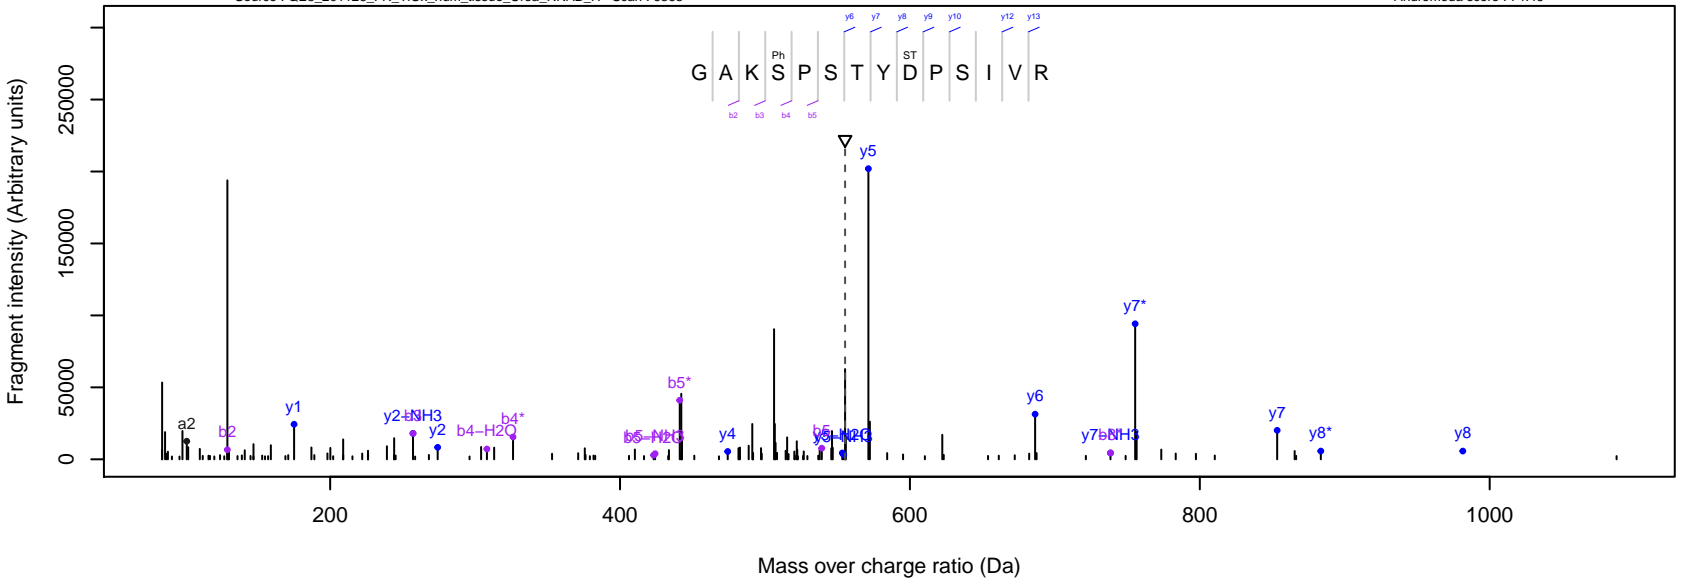

NSDLLTVLS(Phospho (STY))R-2+

Source : QE3\_201126\_FR\_TiOx\_hum\_tissue\_Urea\_RNAB\_N Scan : 39968

Andromeda score : 74.46

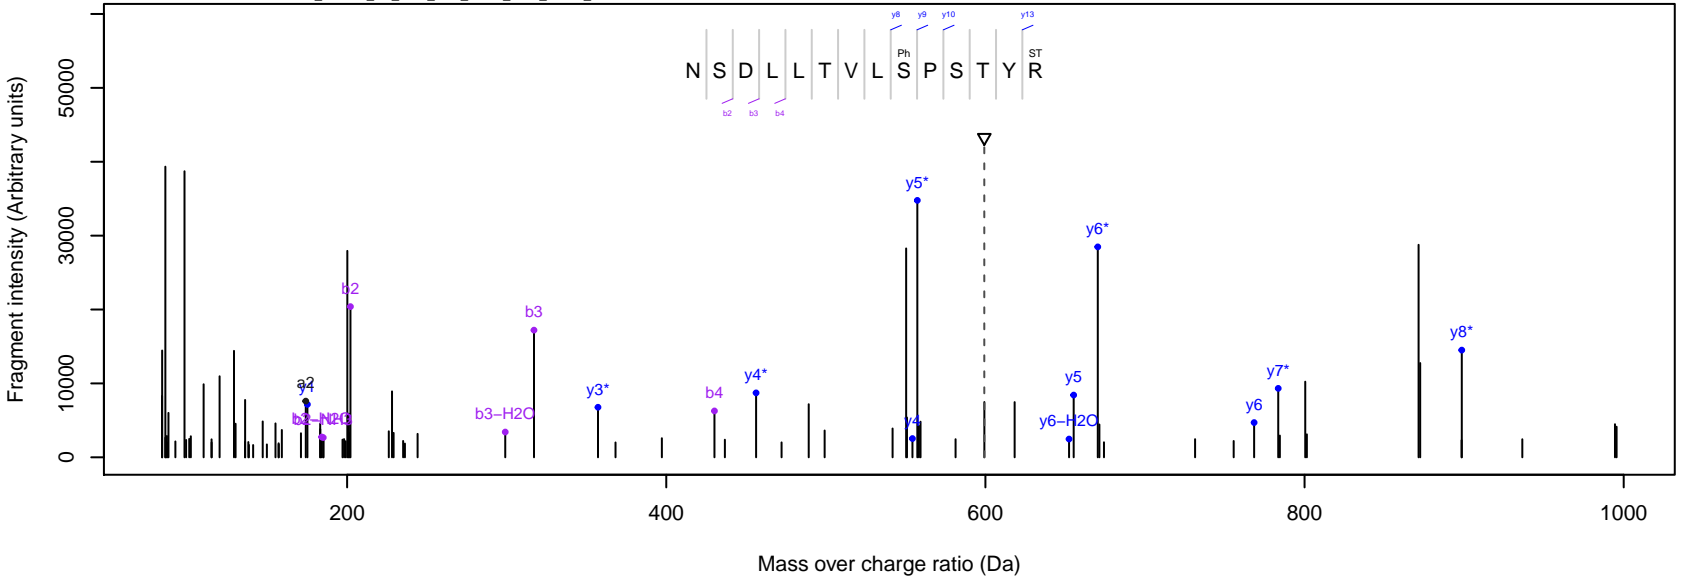

RLT(Phospho (STY))SLPIVAK-2+

Source : QE3\_201126\_FR\_TiOx\_hum\_tissue\_Urea\_RNAB\_H Scan : 26324

Andromeda score : 74.46

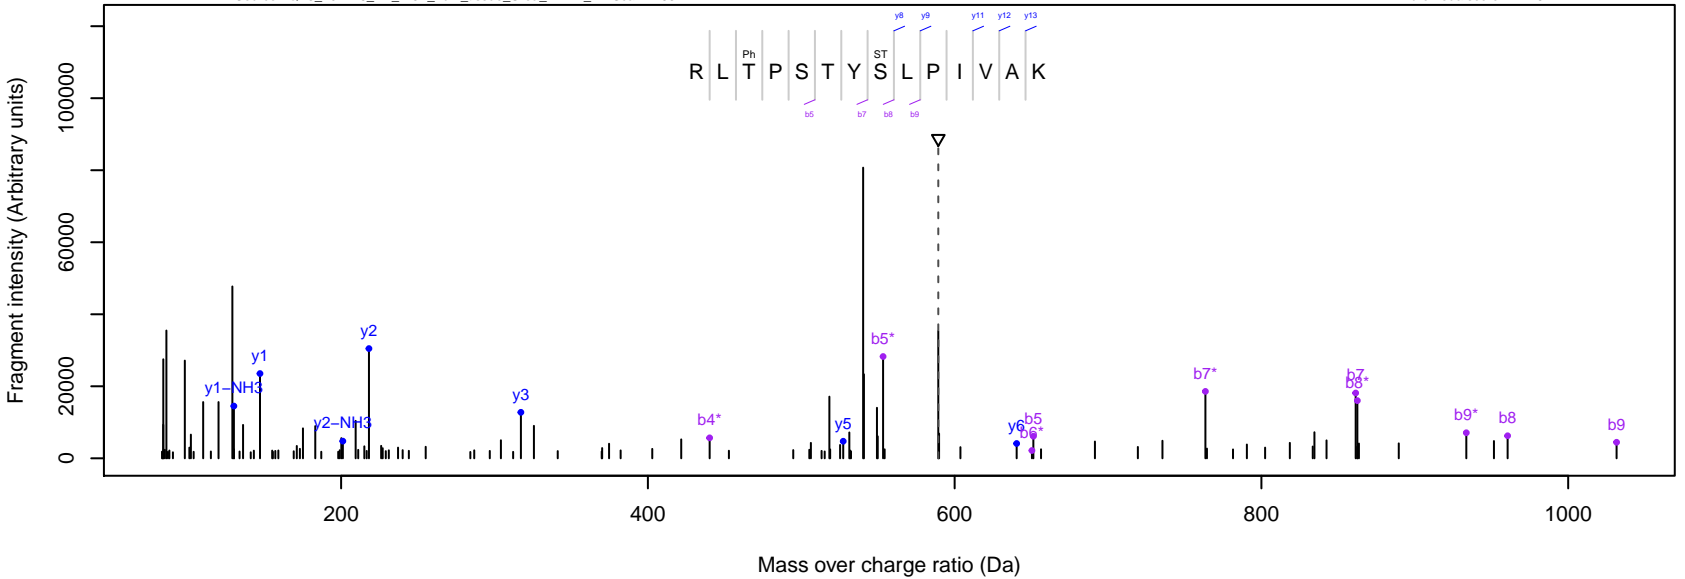

TSSAFVGKT(Phospho (STY))PEAS(Phospho (STY))PEPKDQTLK-3+

Source : QE3\_201126\_FR\_TiOx\_hum\_tissue\_Urea\_RNAB\_N Scan : 17556

Andromeda score : 74.456

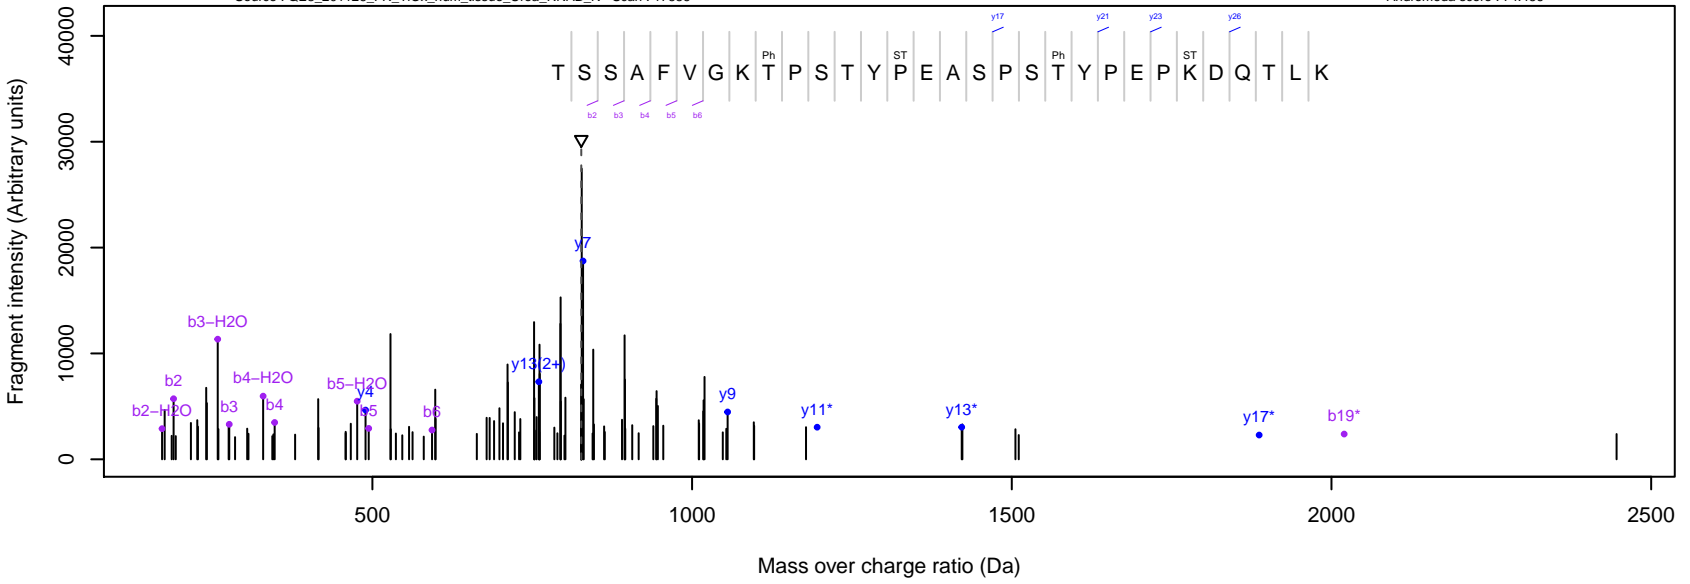

SGKS(Phospho (STY))PS(Phospho (STY))PSPTSPGSLRK-3+

Source : QE3\_201126\_FR\_TiOx\_hum\_tissue\_Urea\_RNAB\_N Scan : 8302

Andromeda score : 74.444

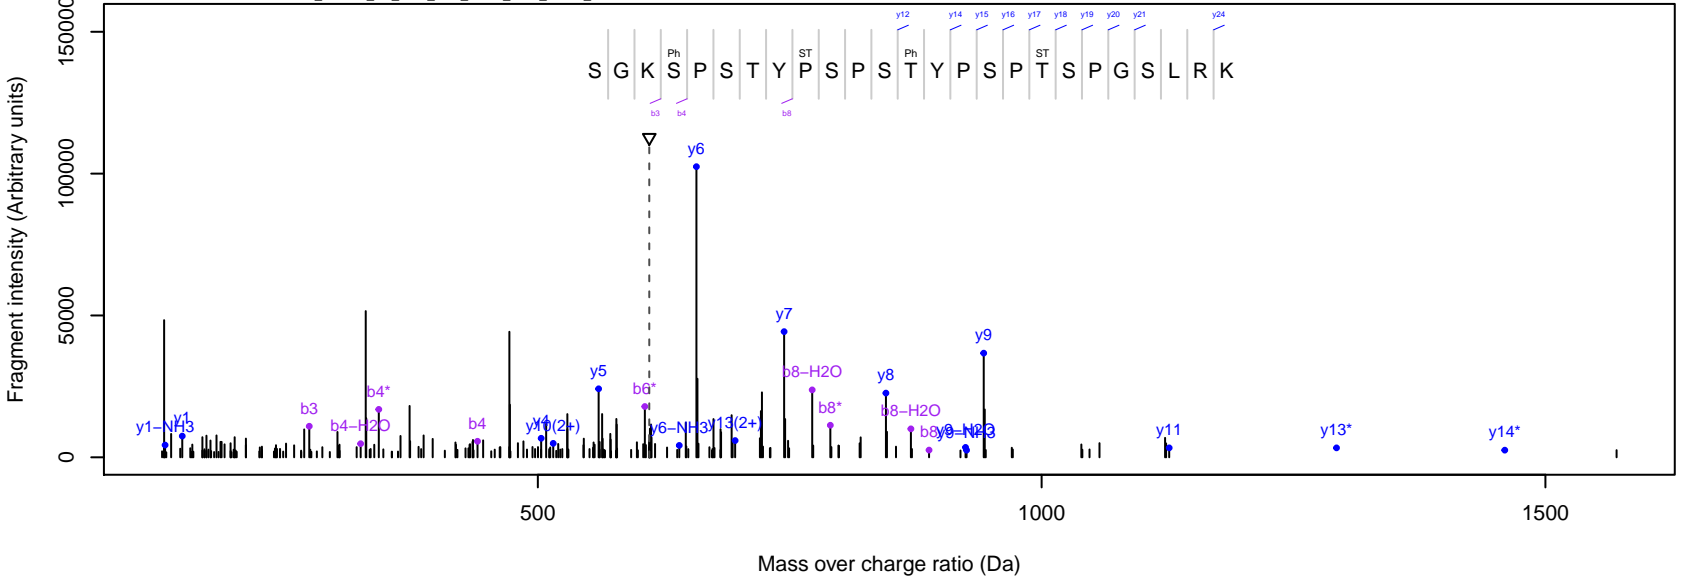

RPS(Phospho (STY))SSEITEGKR-3+

Source : QE3\_201126\_FR\_TiOx\_hum\_tissue\_Urea\_RNAB\_N Scan : 8792

Andromeda score : 74.428

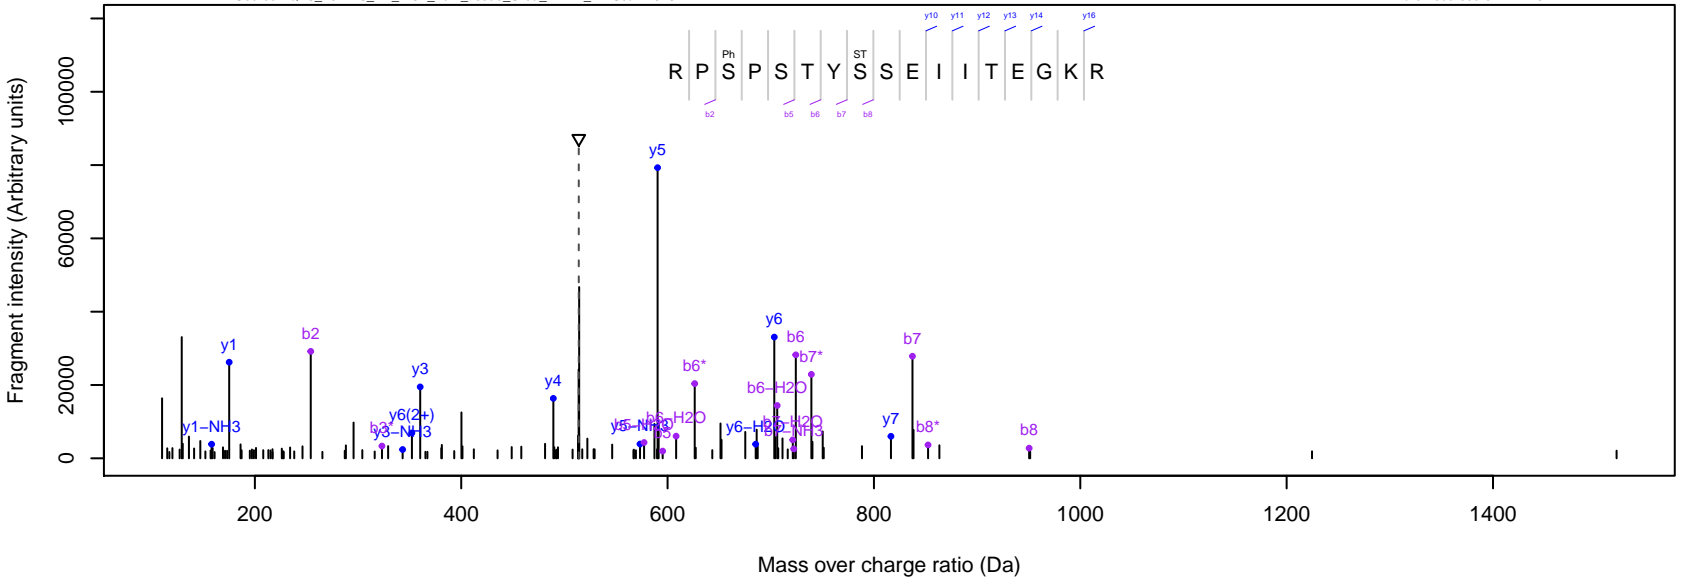

### S(Phospho (STY))RSVIEQGGIQTV DQLIK-3+

Source : QE3\_201126\_FR\_TIOx\_hum\_tissue\_Urea\_RNAB\_B Scan : 39831

Andromeda score : 74.408

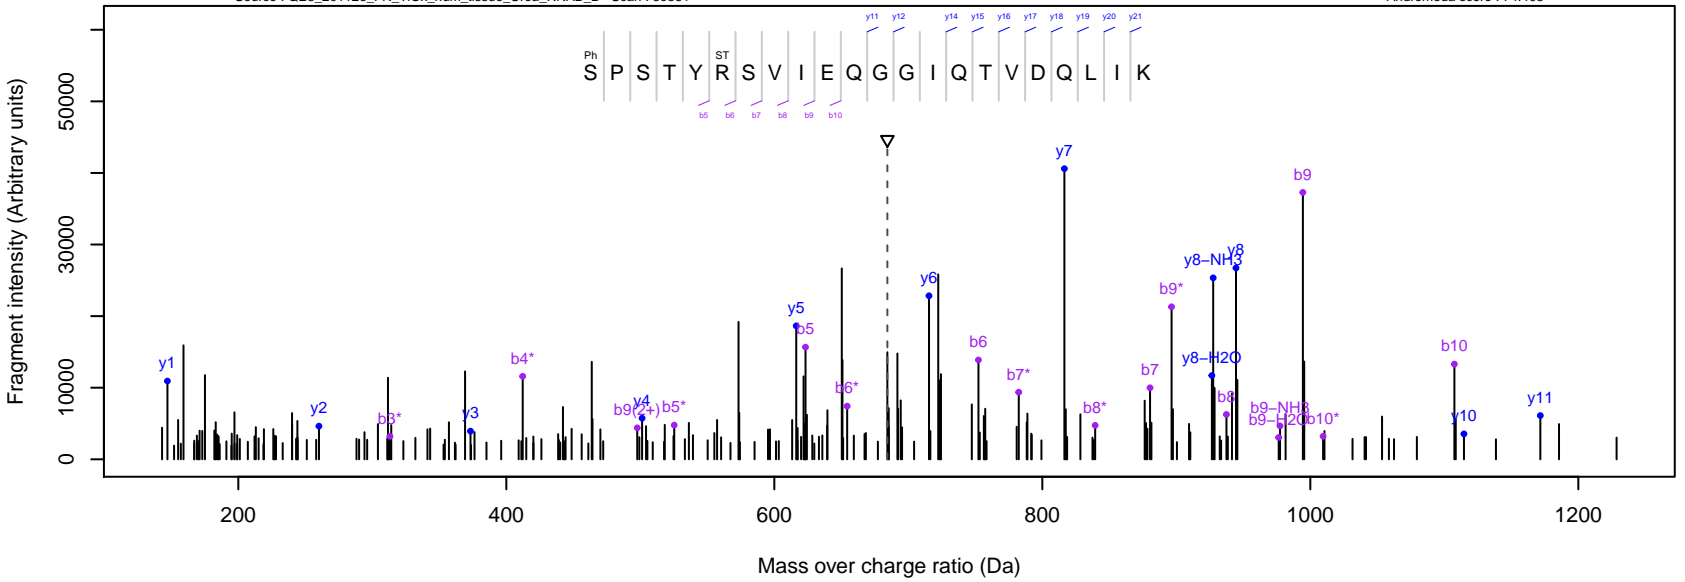

### AES(Phospho (STY))SSSISSSASLSAANTPTVGVSR-3+

Source : QE3\_201126\_FR\_TIOx\_hum\_tissue\_Urea\_RNAB\_N Scan : 30225

Andromeda score : 74.404

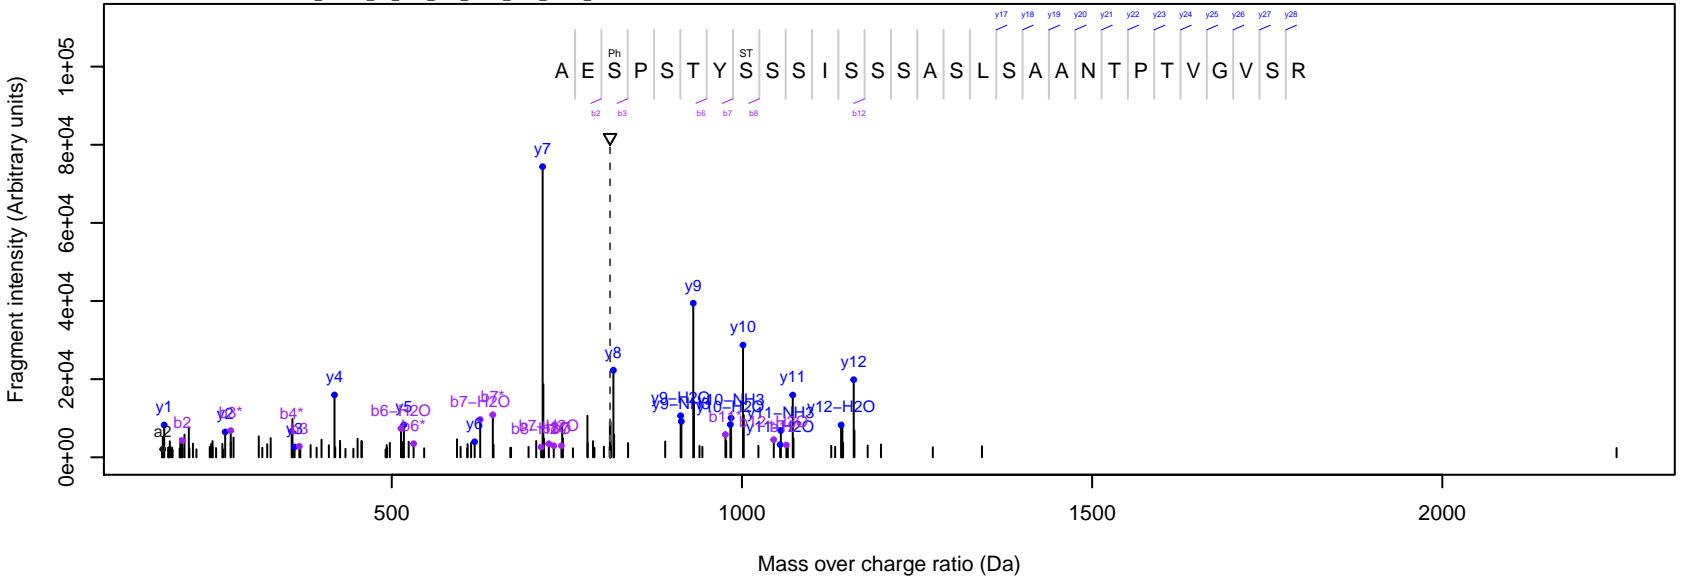

### GRLS(Phospho (STY))GDEGS(Phospho (STY))EDGDDYDTPPI LK-3+

Source : QE3\_201126\_FR\_TIOx\_hum\_tissue\_Urea\_RNAB\_B Scan : 38742

Andromeda score : 74.404

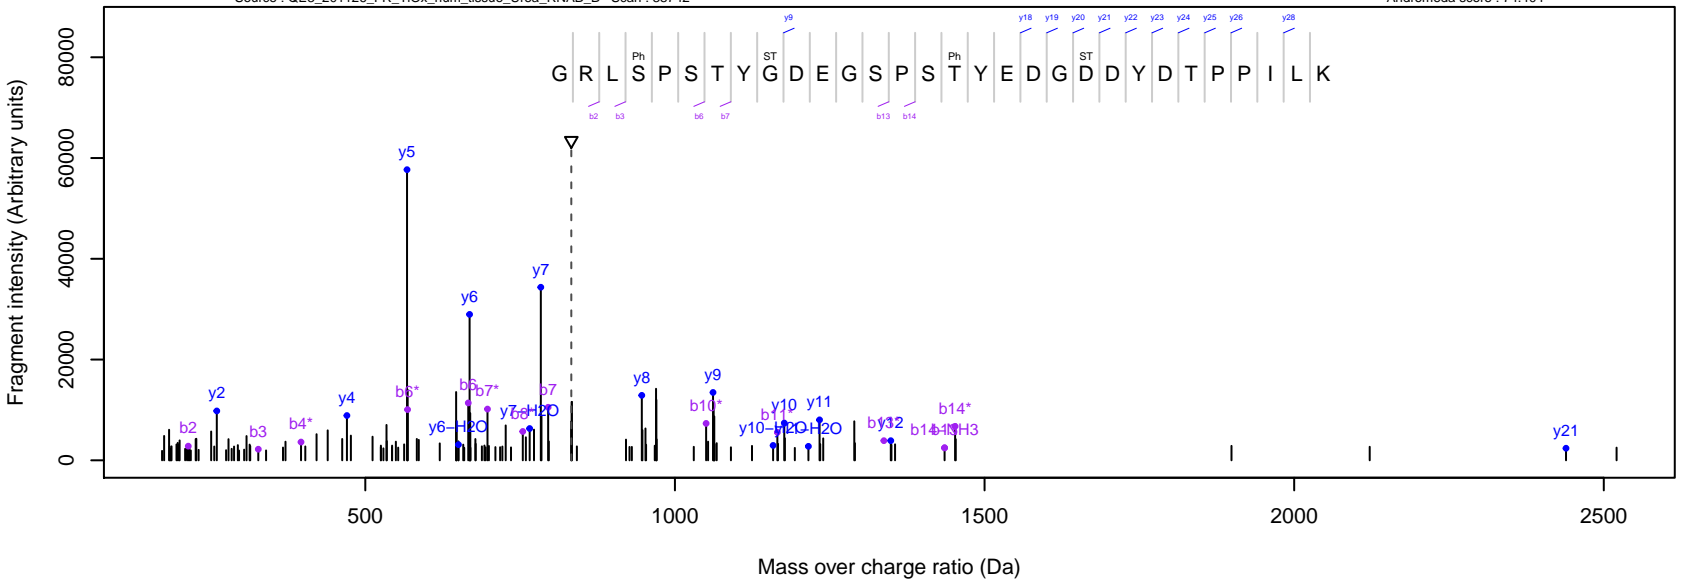

LFDHPES(Phospho (STY))PTNPTEPLFLAQAEVYK-3+

Source : QE3\_201126\_FR\_TiOx\_hum\_tissue\_Urea\_RNAB\_H Scan : 54721

Andromeda score : 74.404

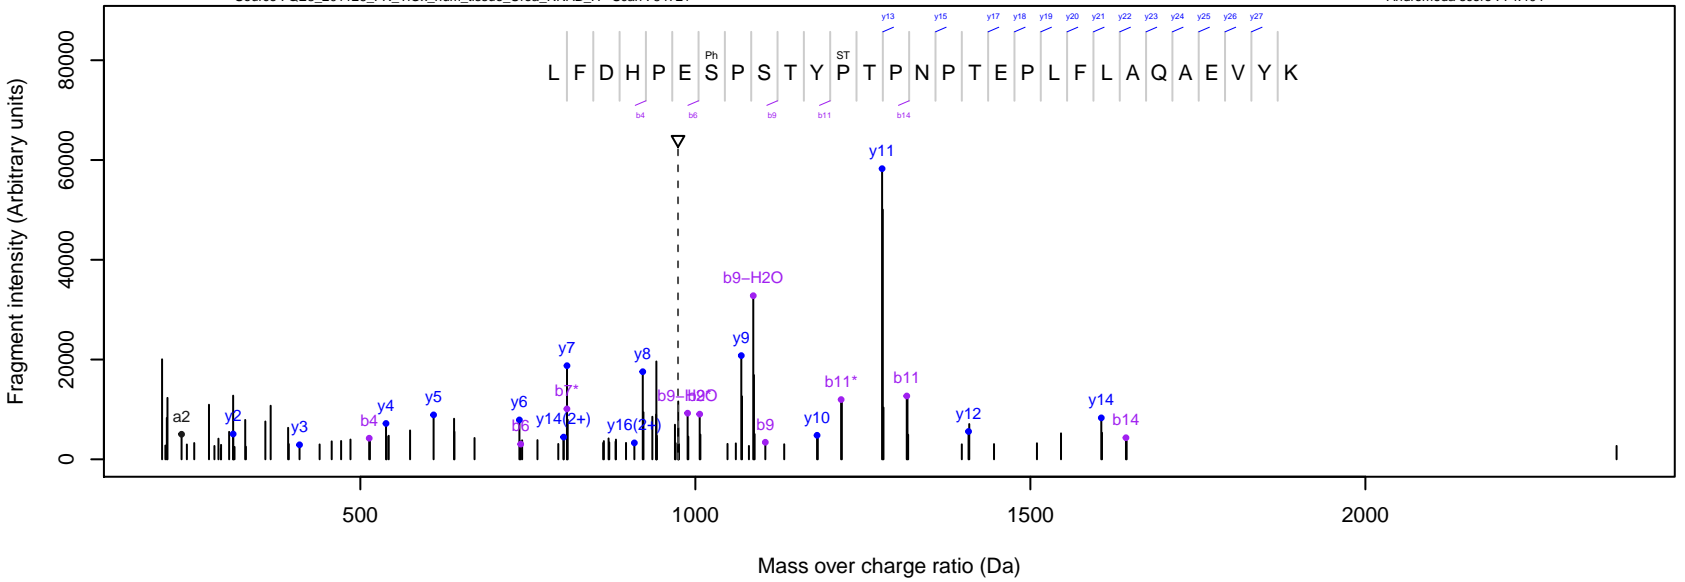

SRGS(Phospho (STY))TNLFSK-2+

Source : QE3\_201126\_FR\_TiOx\_hum\_tissue\_Urea\_RNAB\_N Scan : 11223

Andromeda score : 74.392

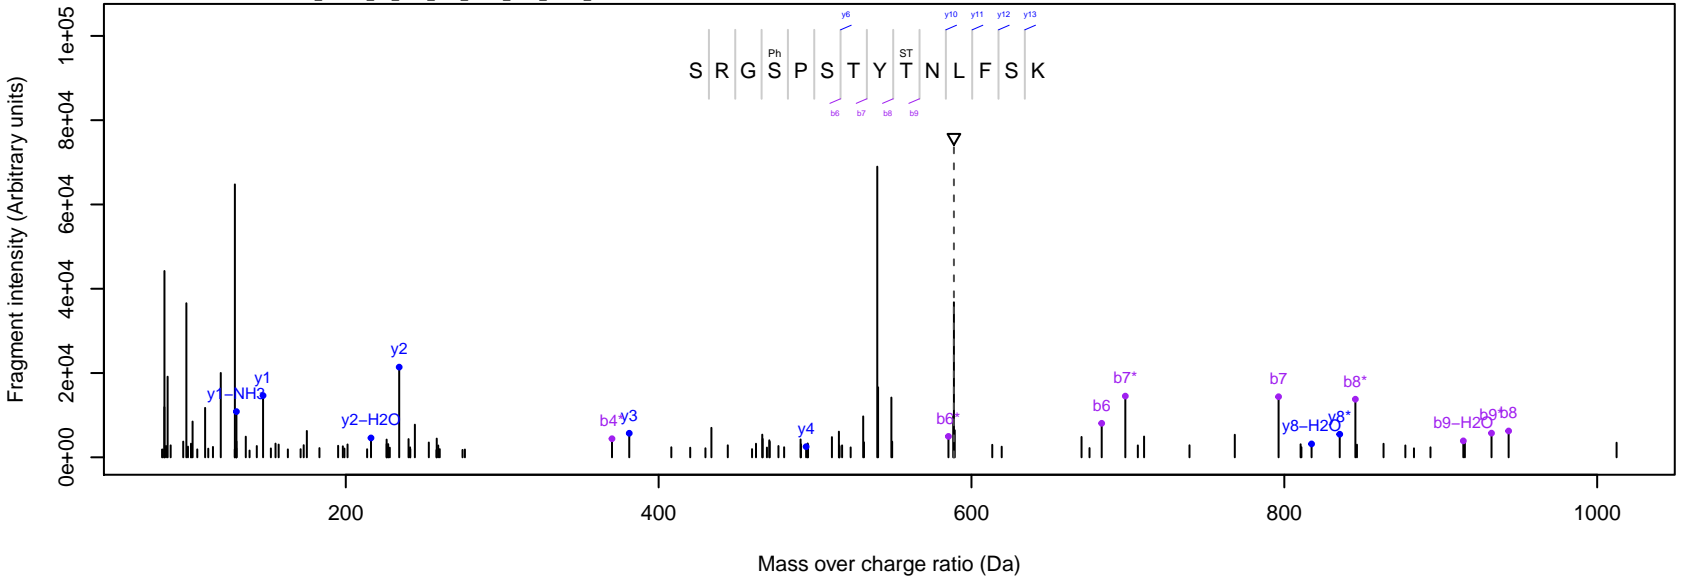

GSSDGRGSDS(Phospho (STY))ESDLPHR-3+

Source : QE3\_201126\_FR\_TiOx\_hum\_tissue\_Urea\_RNAB\_N Scan : 6265

Andromeda score : 74.364

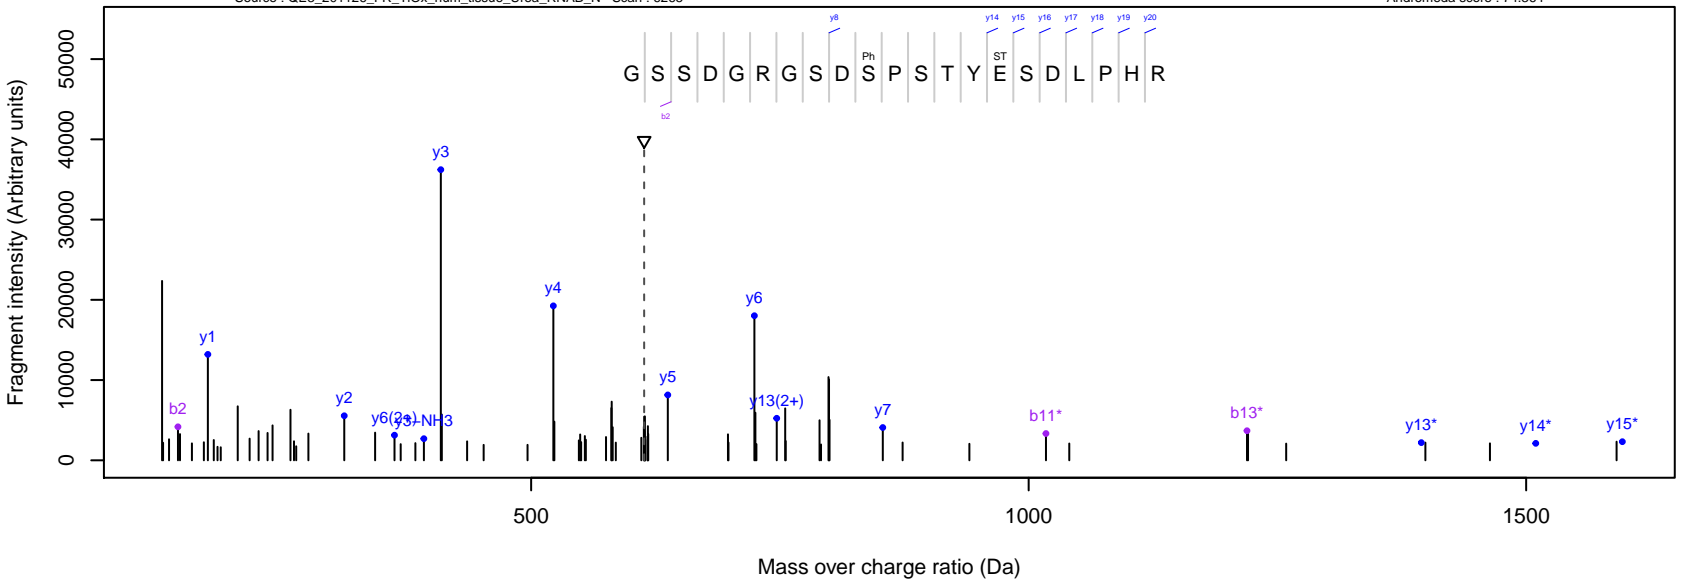

RKS(Phospho (STY))QVNGEAGSYEMTNQHVK-4+

Source : QE3\_201126\_FR\_TiOx\_hum\_tissue\_Urea\_RNAB\_N Scan : 7930

Andromeda score : 74.364

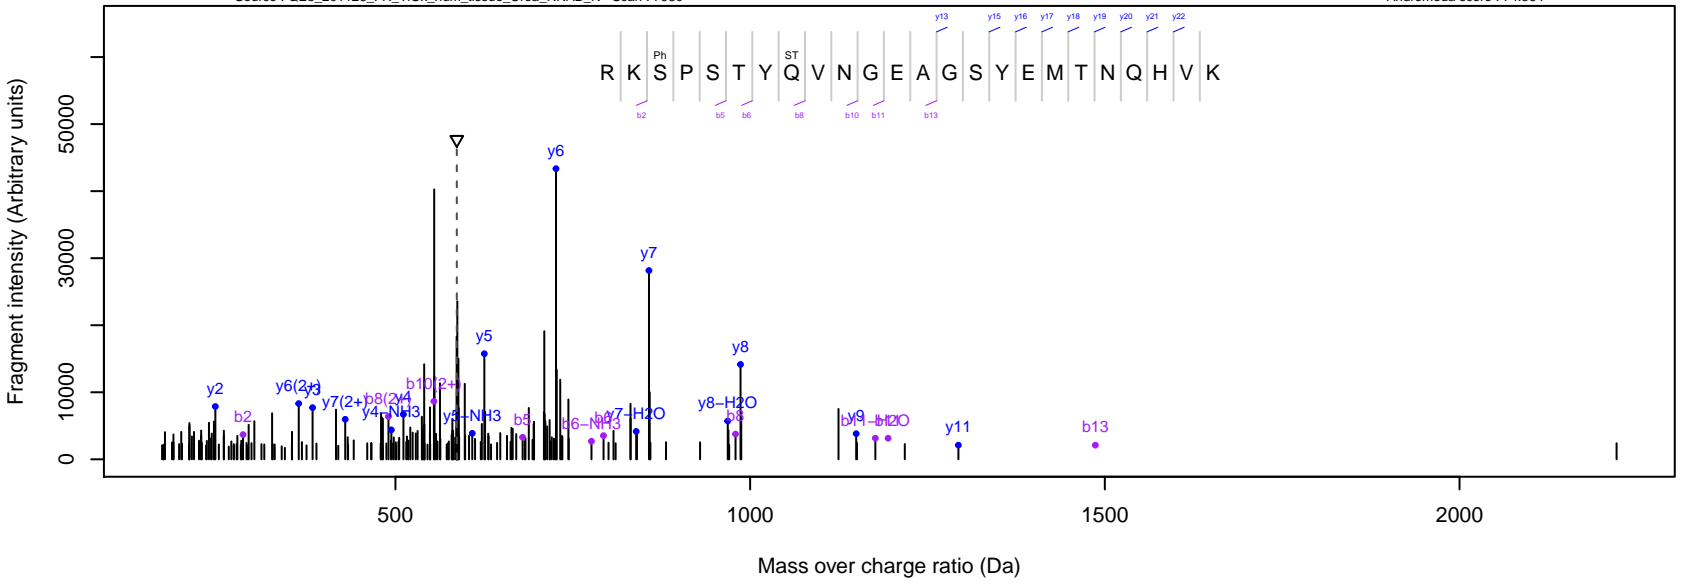

TQLS(Phospho (STY))QGRSS(Phospho (STY))PQLDPLRK-3+

Source : QE3\_201126\_FR\_TiOx\_hum\_tissue\_Urea\_RNAB\_N Scan : 20564

Andromeda score : 74.364

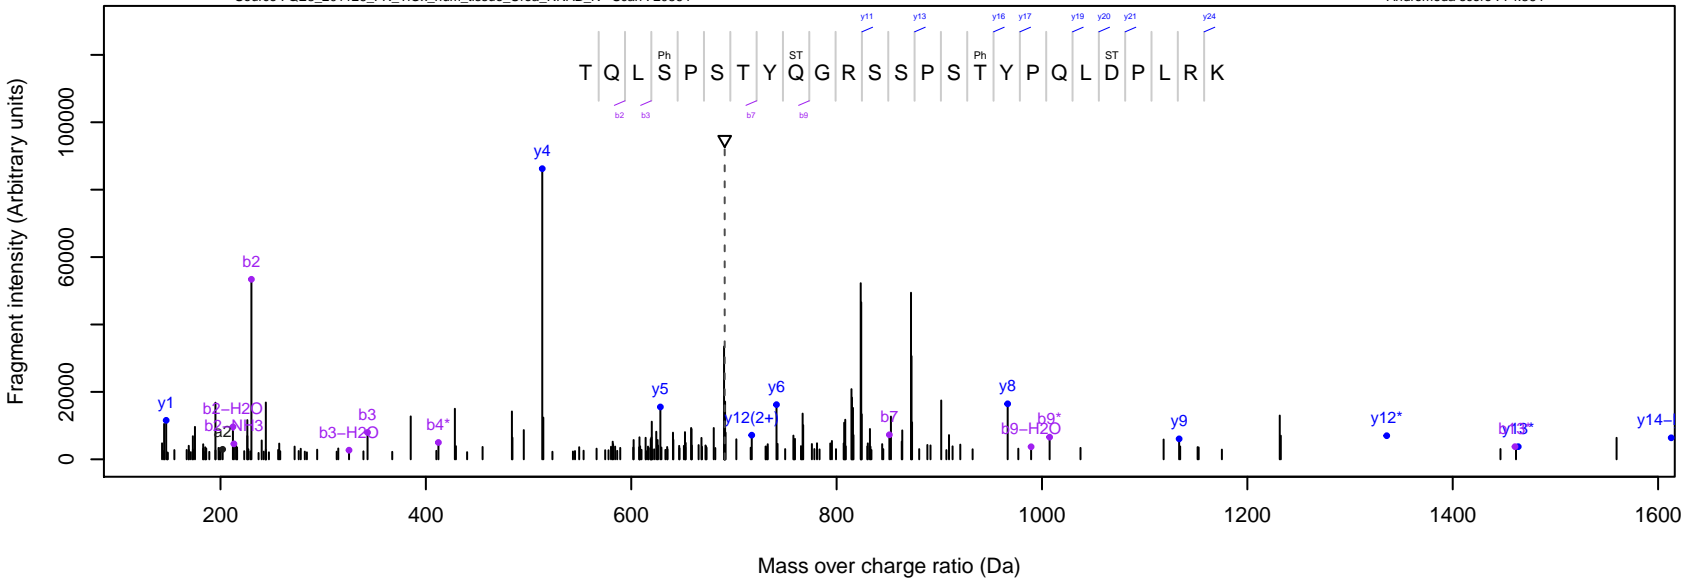

SATLSST(Phospho (STY))ESTAS(Phospho (STY))EMQEEMKGSVEEPKPEEPK-3+

Source : QE3\_201126\_FR\_TiOx\_hum\_tissue\_Urea\_RNAB\_H Scan : 33797

Andromeda score : 74.328

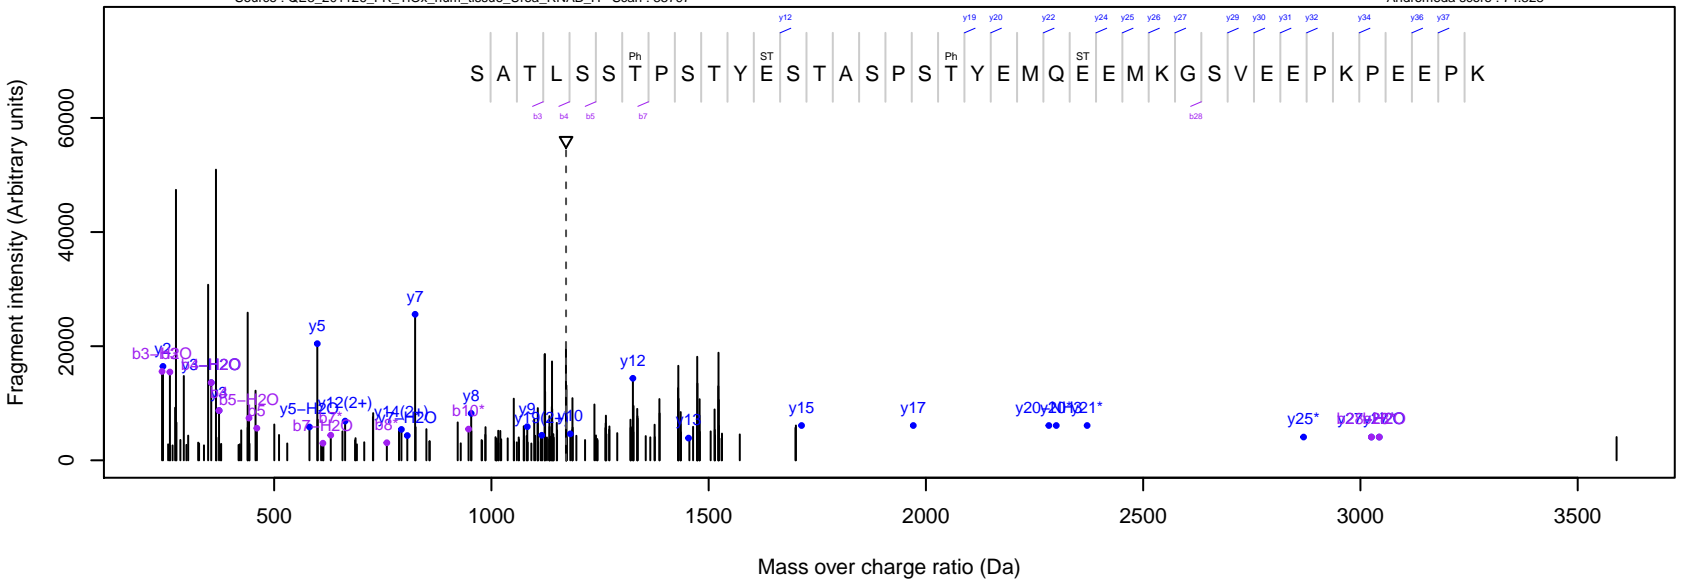

TRLS(Phospho (STY))DFTGPPQLQALK-3+

Source : QE3\_201126\_FR\_TiOx\_hum\_tissue\_Urea\_RNAB\_B Scan : 38012

Andromeda score : 74.325

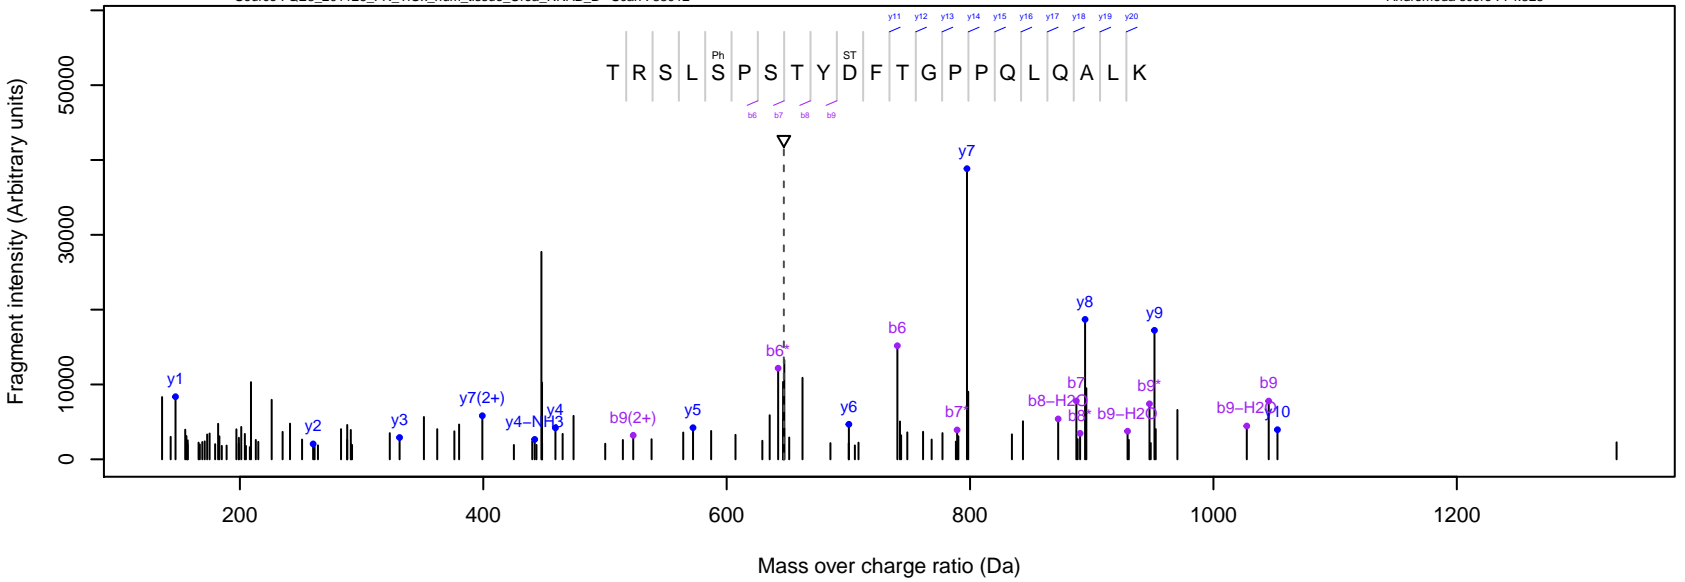

KGSPVSEIGWETPPPE(Phospho (STY))PRLGGSTSDPPSSQSFHHR-4+

Source : QE3\_201126\_FR\_TiOx\_hum\_tissue\_Urea\_RNAB\_H Scan : 36377

Andromeda score : 74.315

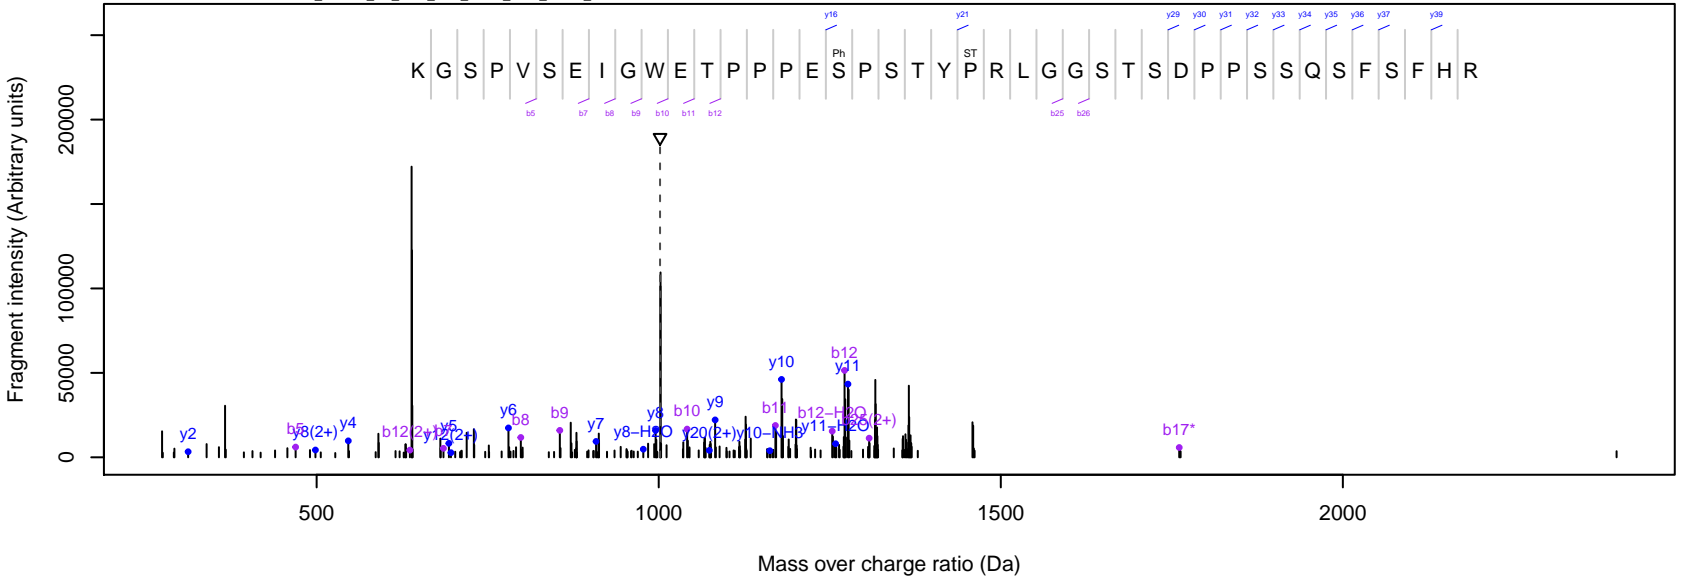

SQATS(Phospho (STY))PGQTNGDSSLEVLATR-3+

Source : QE3\_201126\_FR\_TiOx\_hum\_tissue\_Urea\_RNAB\_H Scan : 33013

Andromeda score : 74.287

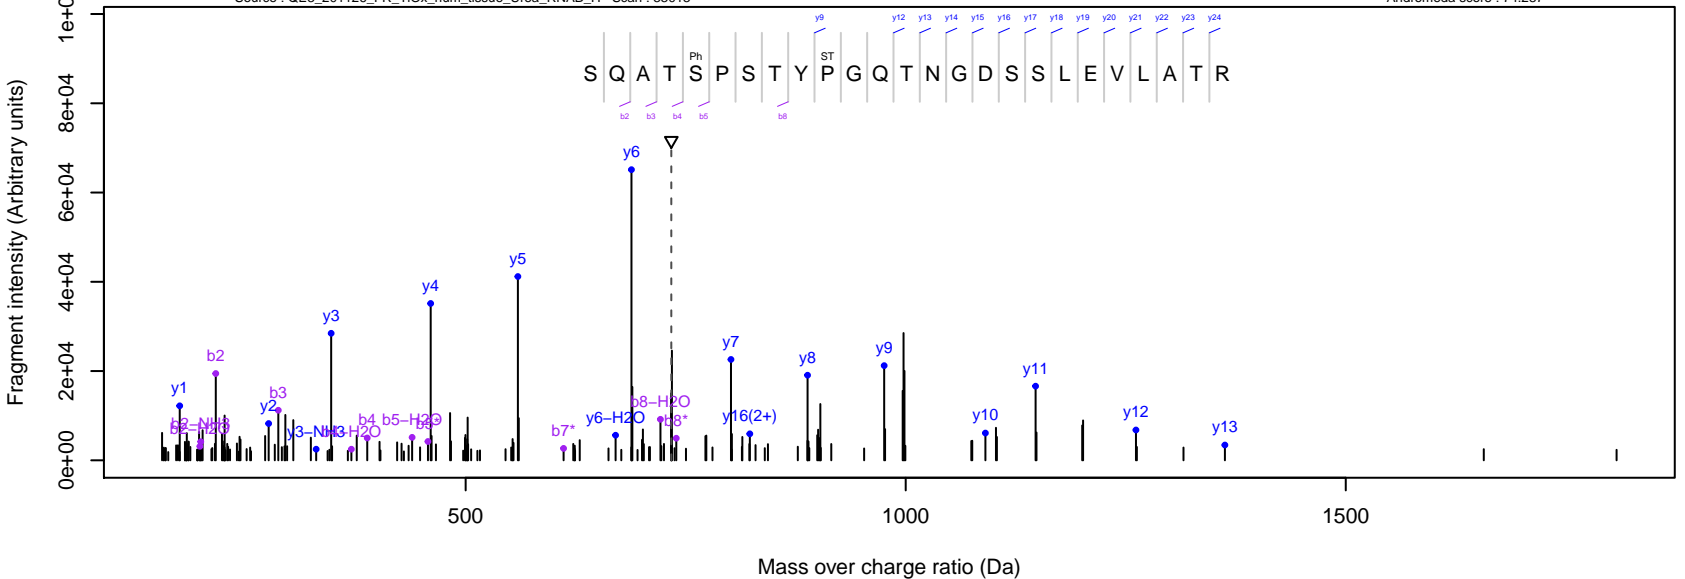

FDIYDPFHPTDEAYS(Phospho (STY))PPPAPEQK-3+

Source : QE3\_201126\_FR\_TiOx\_hum\_tissue\_Urea\_RNAB\_H Scan : 50798

Andromeda score : 74.274

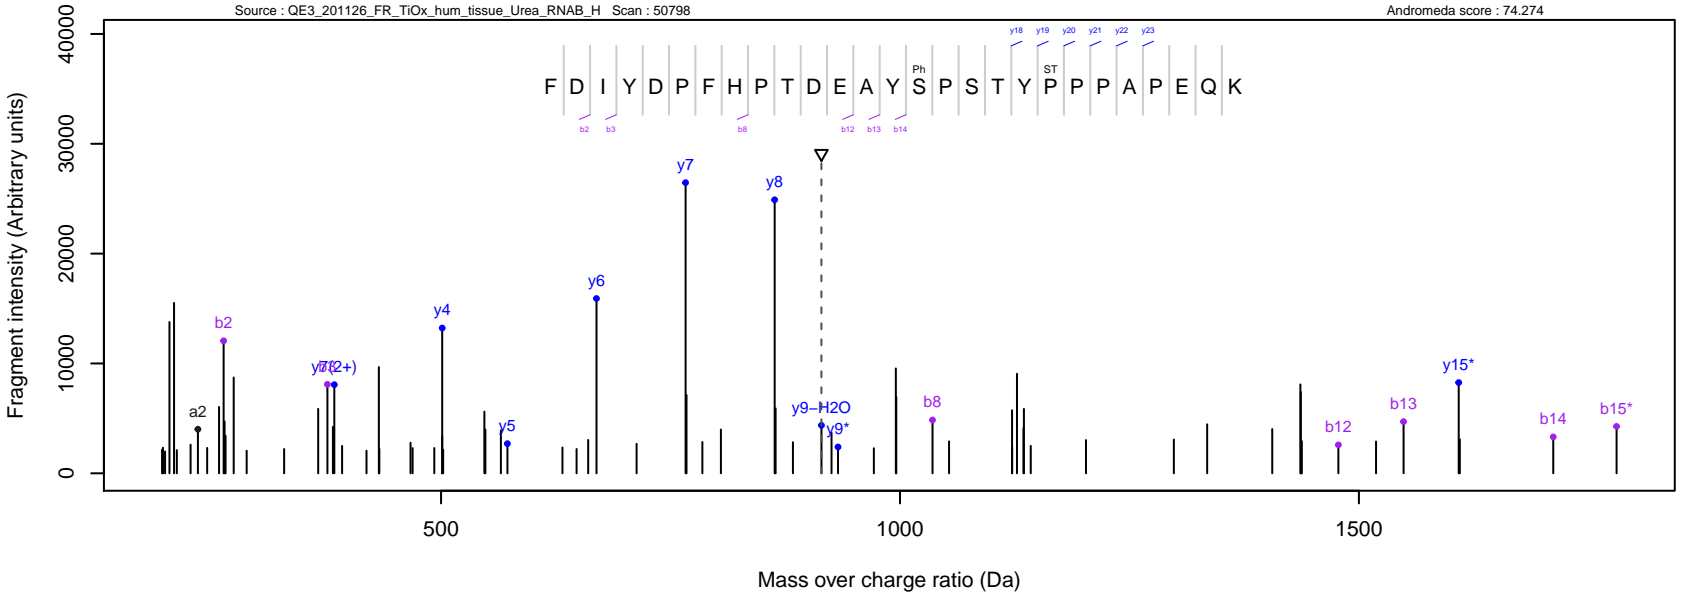

LAALKDEPQTVDPVPSFGES(Phospho (STY))PPLS(Phospho (STY))PIDMDTQER-3+

Source : QE3\_201126\_FR\_TiOx\_hum\_tissue\_Urea\_RNAB\_N Scan : 55685

Andromeda score : 74.258

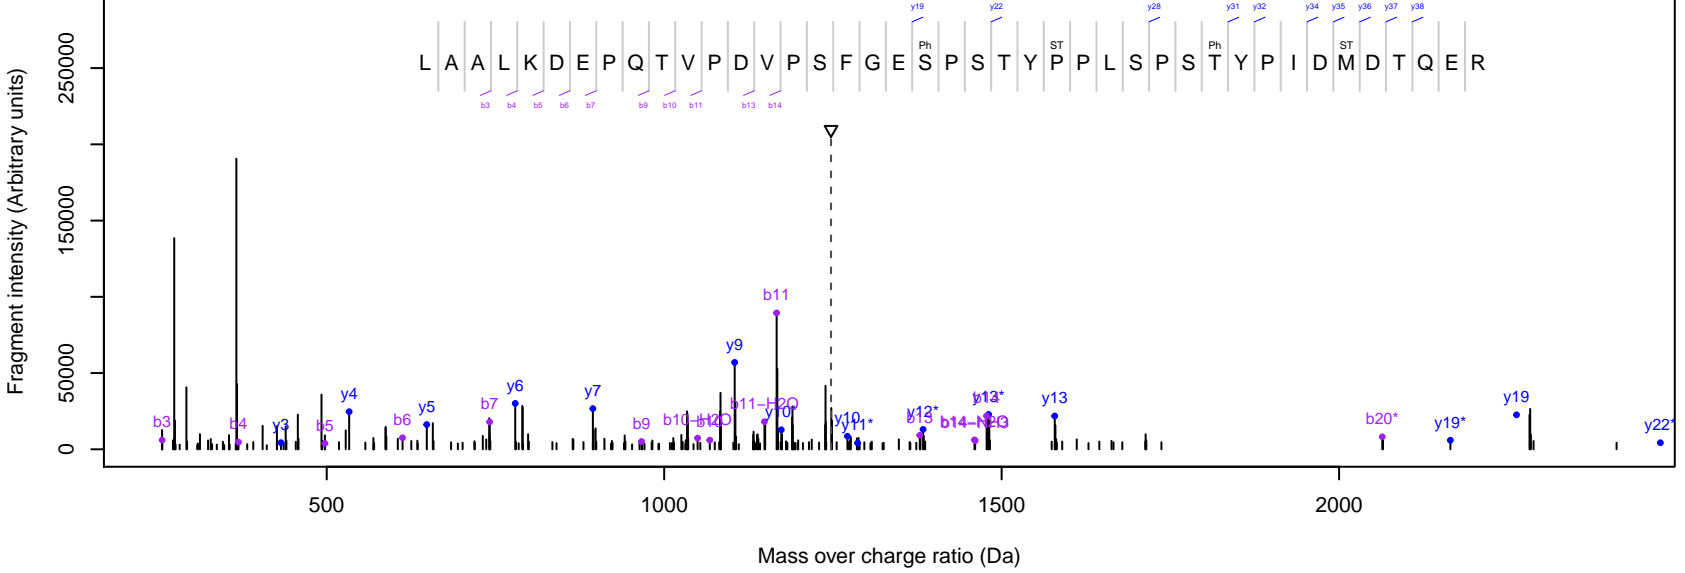

KAYS(Phospho (STY))FCGTVEYM(Oxidation (M))APEVVNR-3+

Source : QE3\_201126\_FR\_TiOx\_hum\_tissue\_Urea\_RNAB\_N Scan : 33862

Andromeda score : 74.222

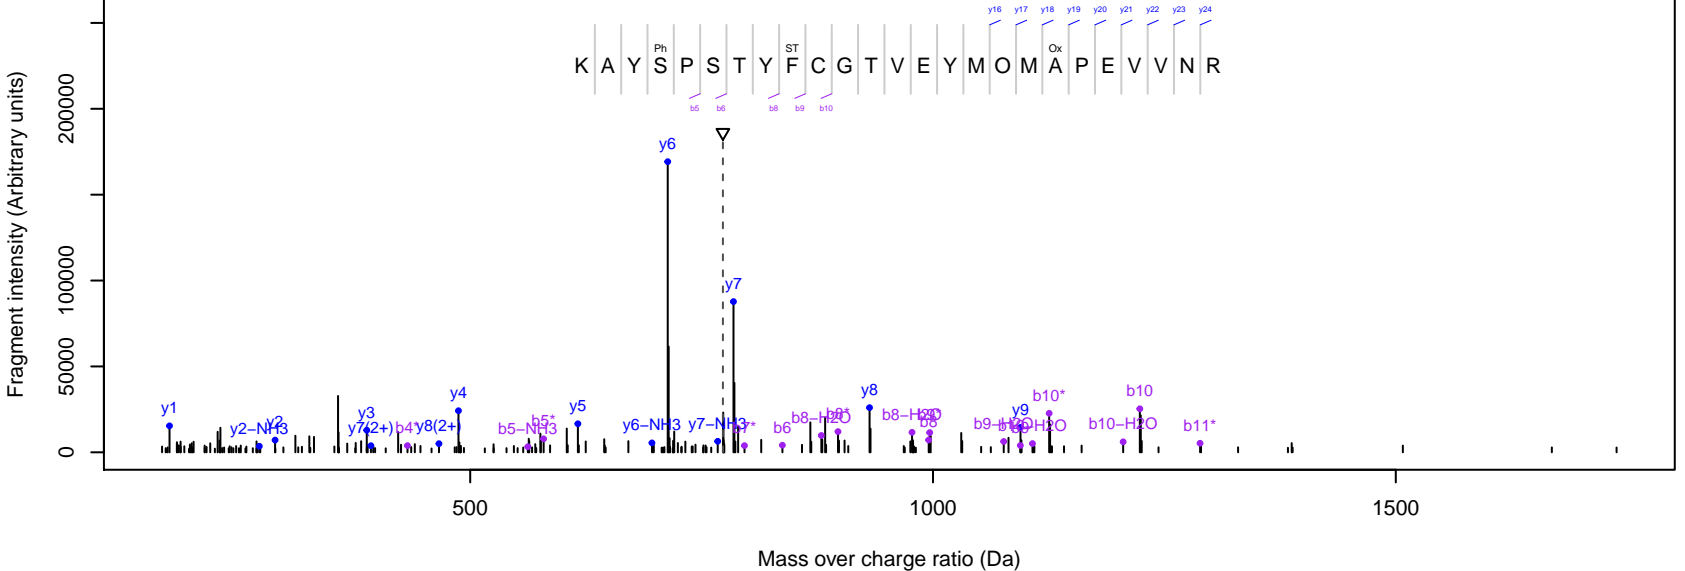



NRLGS(Phospho (STY))GGSPSTYGGSPSTYGDGPVSWSR-3+

Source : QE3\_201126\_FR\_TiOx\_hum\_tissue\_Urea\_RNAB\_N Scan : 26460

Andromeda score : 74.222

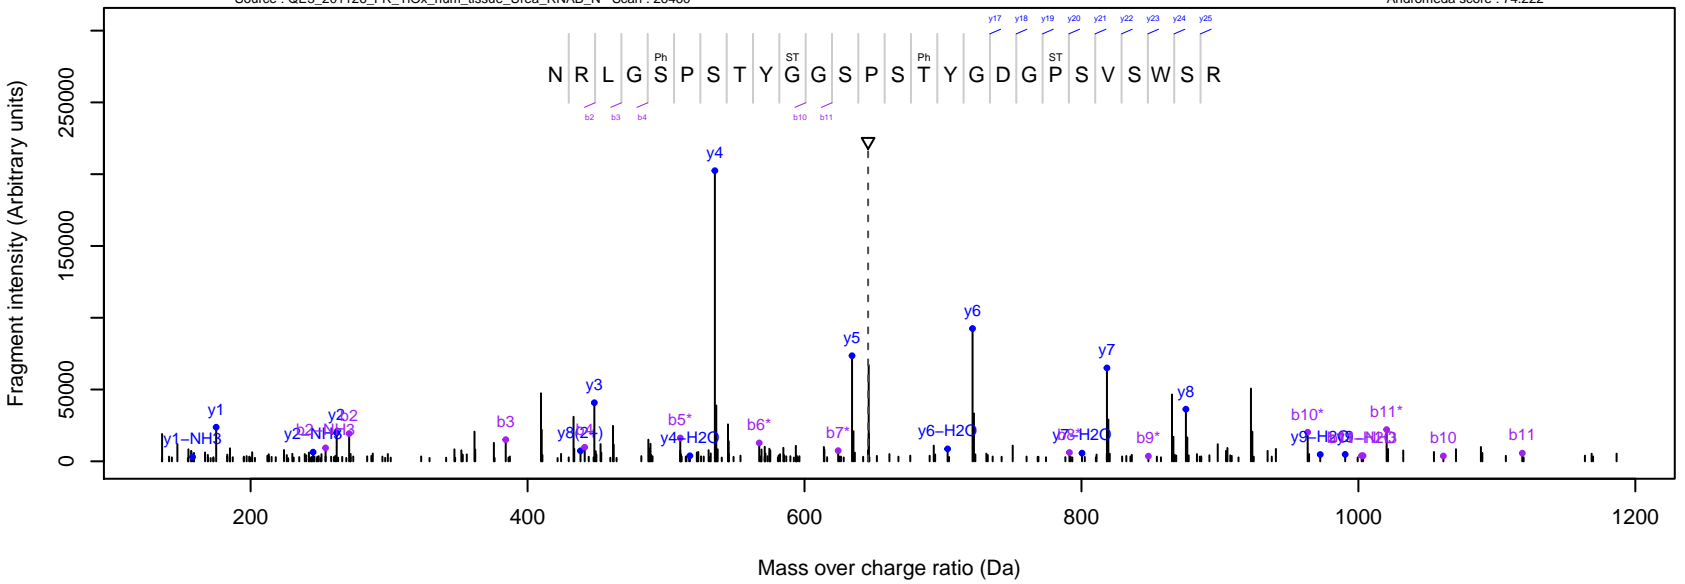

SSSTEPPPPVRQEPS(Phospho (STY))PKPNNK-3+

Source : QE3\_201126\_FR\_TiOx\_hum\_tissue\_Urea\_RNAB\_N Scan : 7657

Andromeda score : 74.222

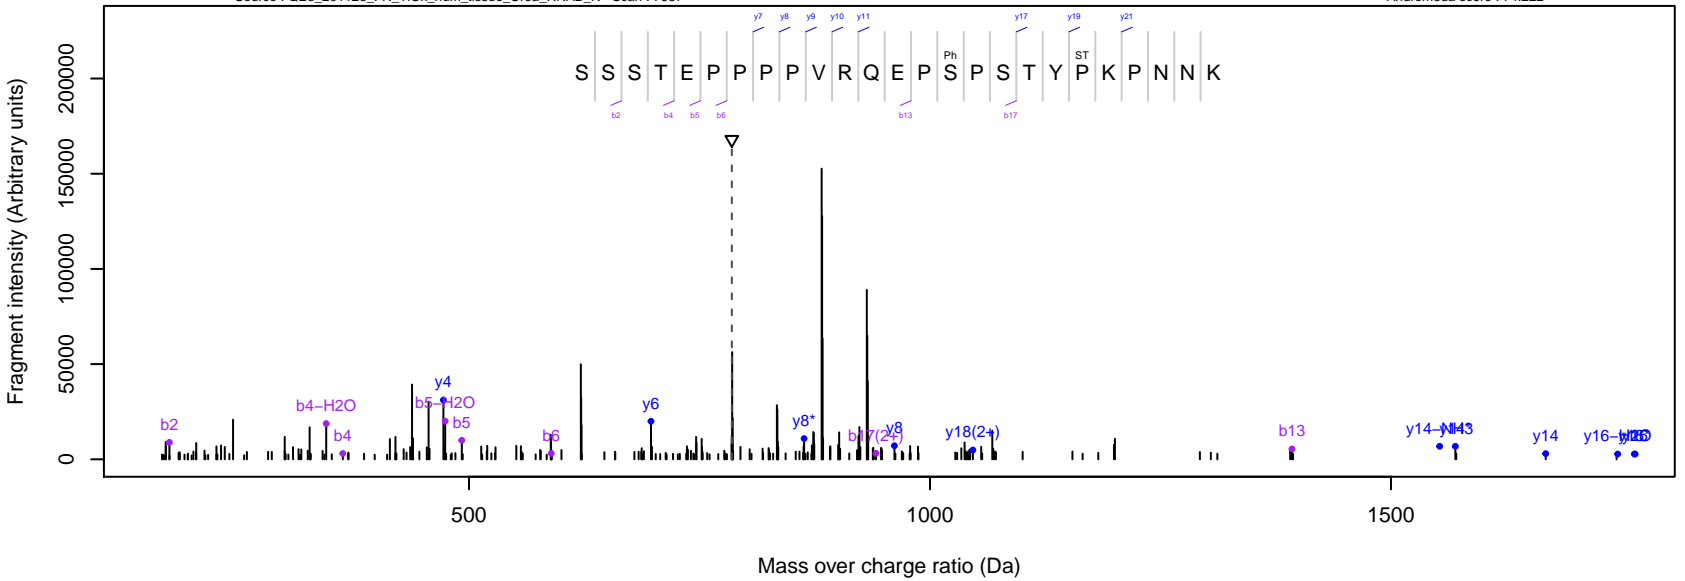

DLQS(Phospho (STY))SPPSLPLGLGEGDAVTK-3+

Source : QE3\_201126\_FR\_TiOx\_hum\_tissue\_Urea\_RNAB\_N Scan : 61369

Andromeda score : 74.206

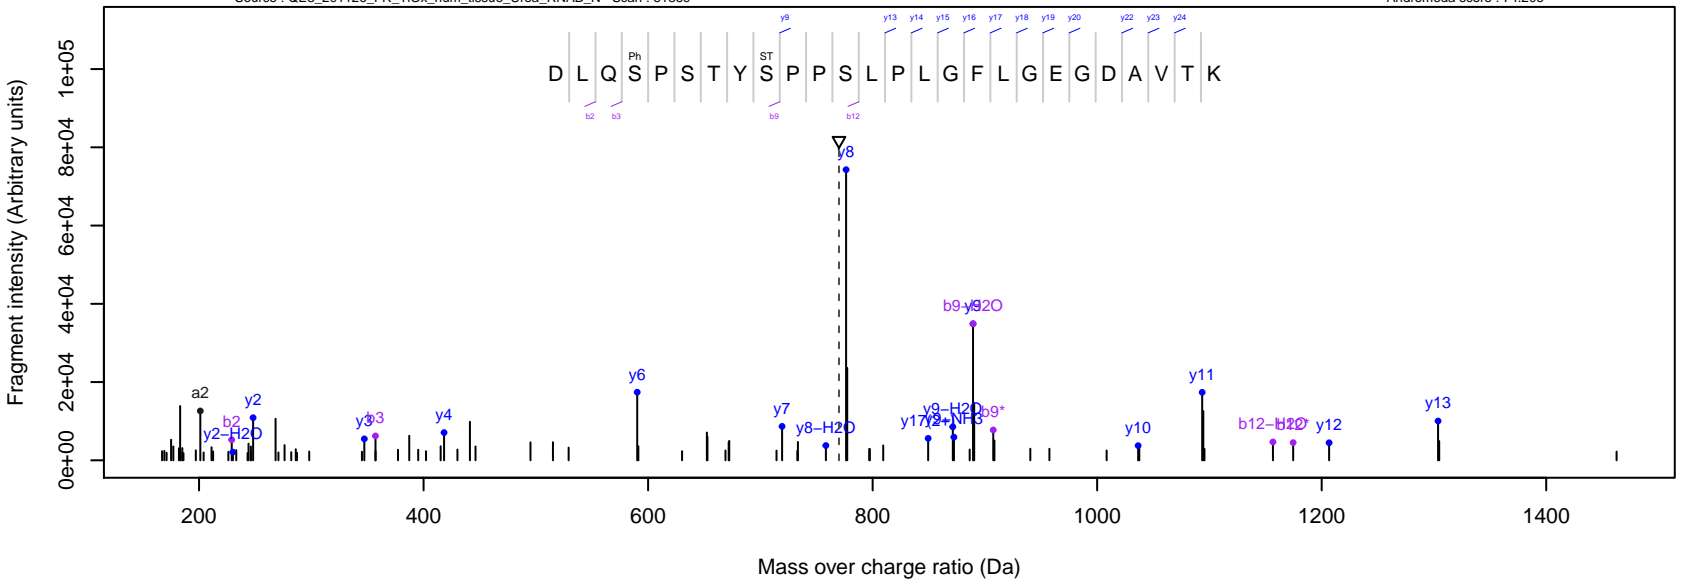

**AFAAVPTSHPPEDAPPAQPPT(Phospho (STY))PGPAASPEQLSFR-3+**

Source : QE3\_201126\_FR\_TiOx\_hum\_tissue\_Urea\_RNAB\_H Scan : 39857

Andromeda score : 74.196

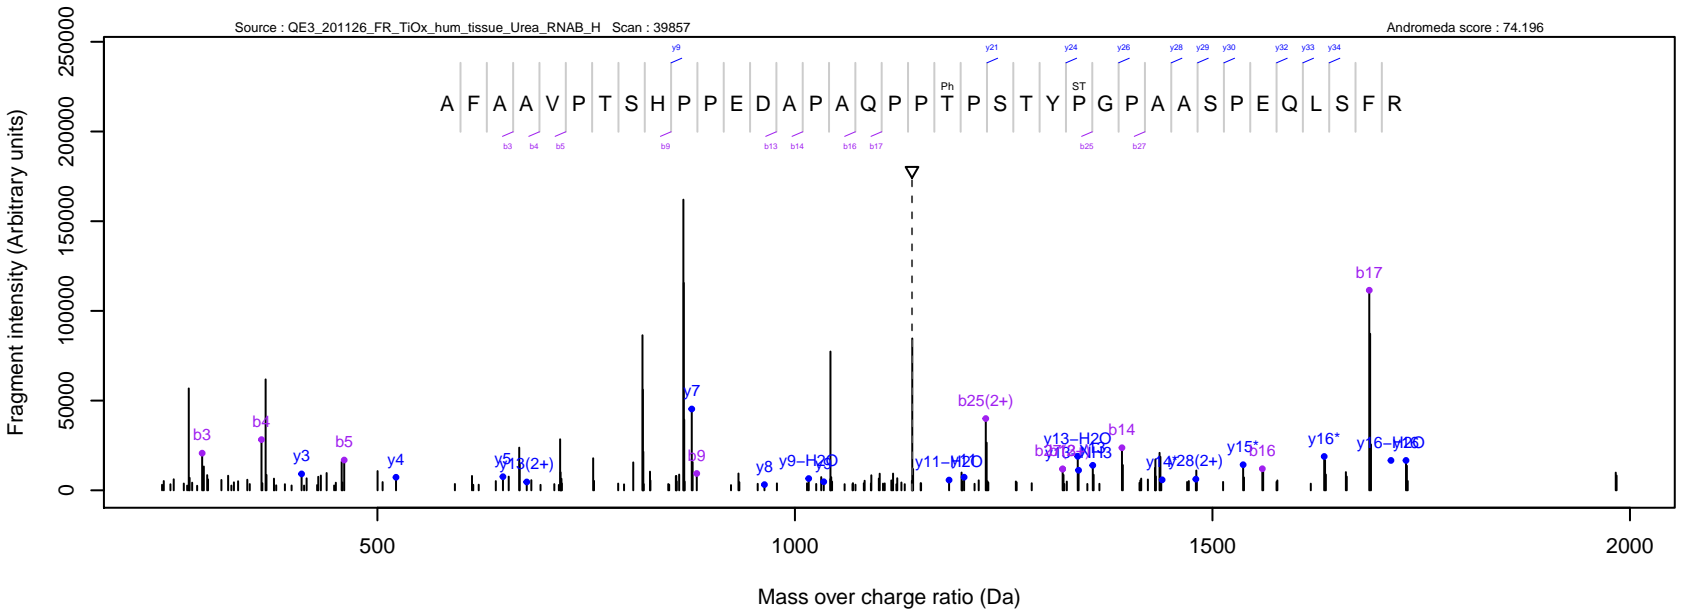

**LSGFS(Phospho (STY))FK-2+**

Source : QE3\_201126\_FR\_TiOx\_hum\_tissue\_Urea\_RNAB\_H Scan : 34124

Andromeda score : 74.173

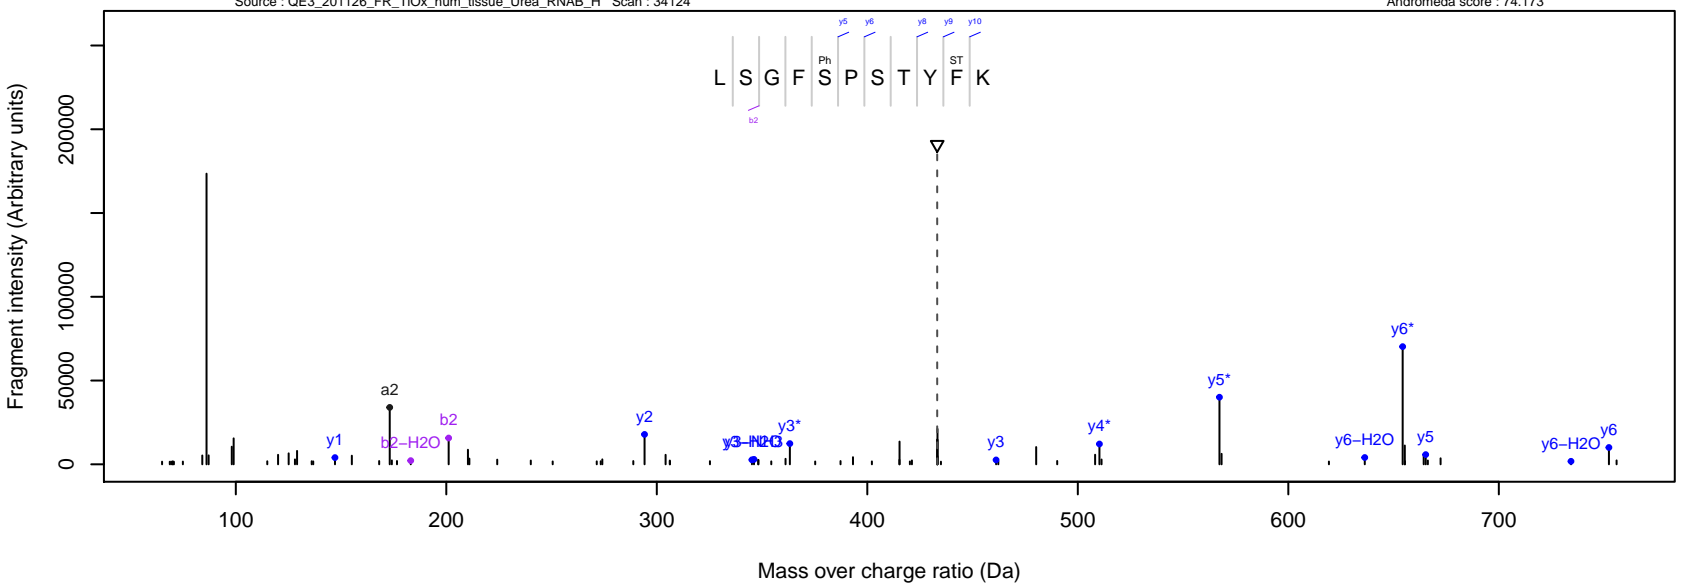

**SSS(Phospho (STY))LPAYGR-2+**

Source : QE3\_201126\_FR\_TiOx\_hum\_tissue\_Urea\_RNAB\_H Scan : 15084

Andromeda score : 74.165

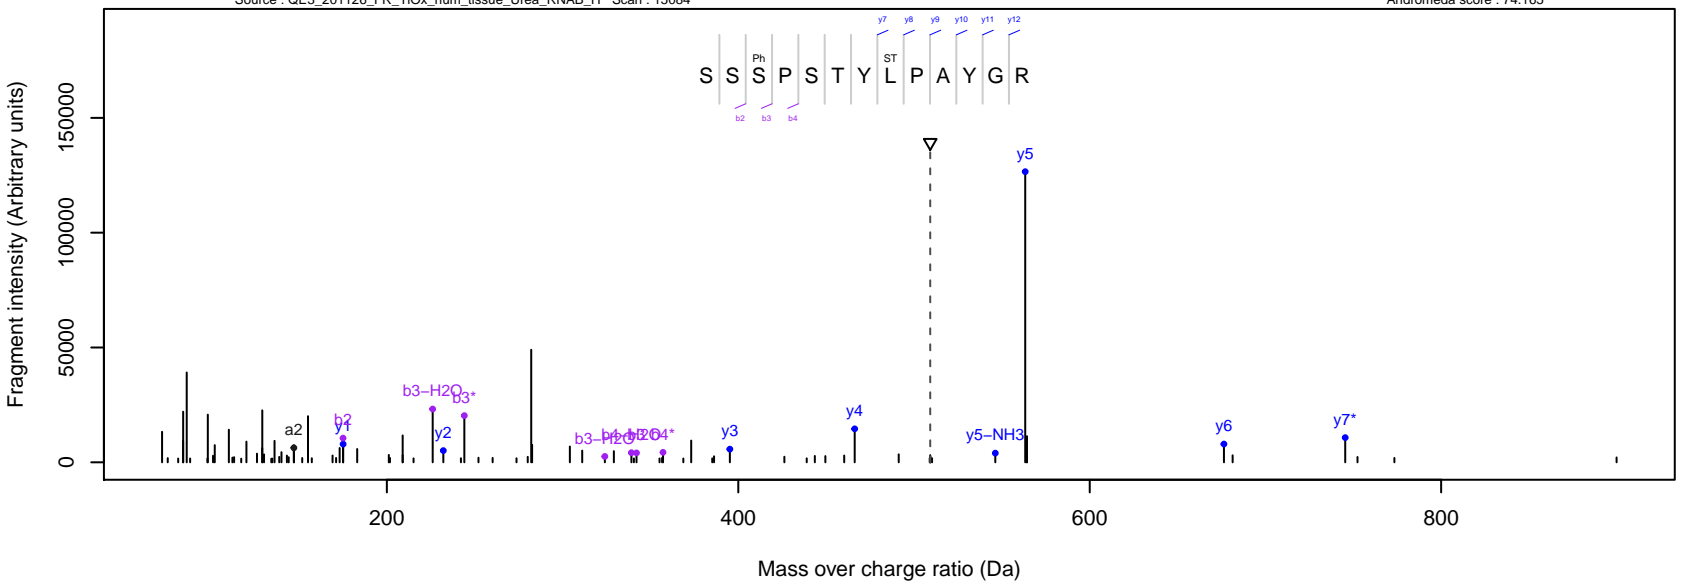

FHINWEDNTEKLEDAES(Phospho (STY))SNPNLQSLSTDALPSASK-4+

Source : QE3\_201126\_FR\_TiOx\_hum\_tissue\_Urea\_RNAB\_N Scan : 54059

Andromeda score : 74.146

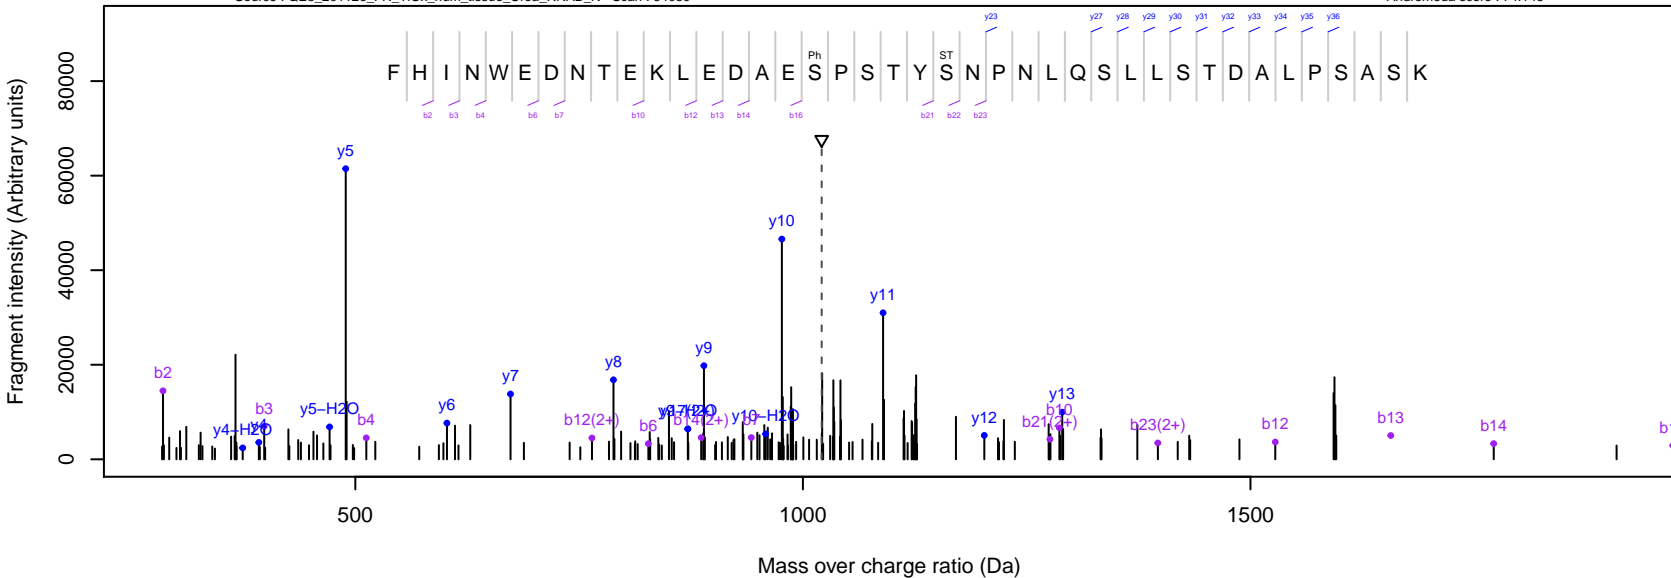

AGYLSGDGS(Phospho (STY))PERPAGPPS(Phospho (STY))PTSFRPYEVGPAAR-4+

Source : QE3\_201126\_FR\_TiOx\_hum\_tissue\_Urea\_RNAB\_N Scan : 41248

Andromeda score : 74.03

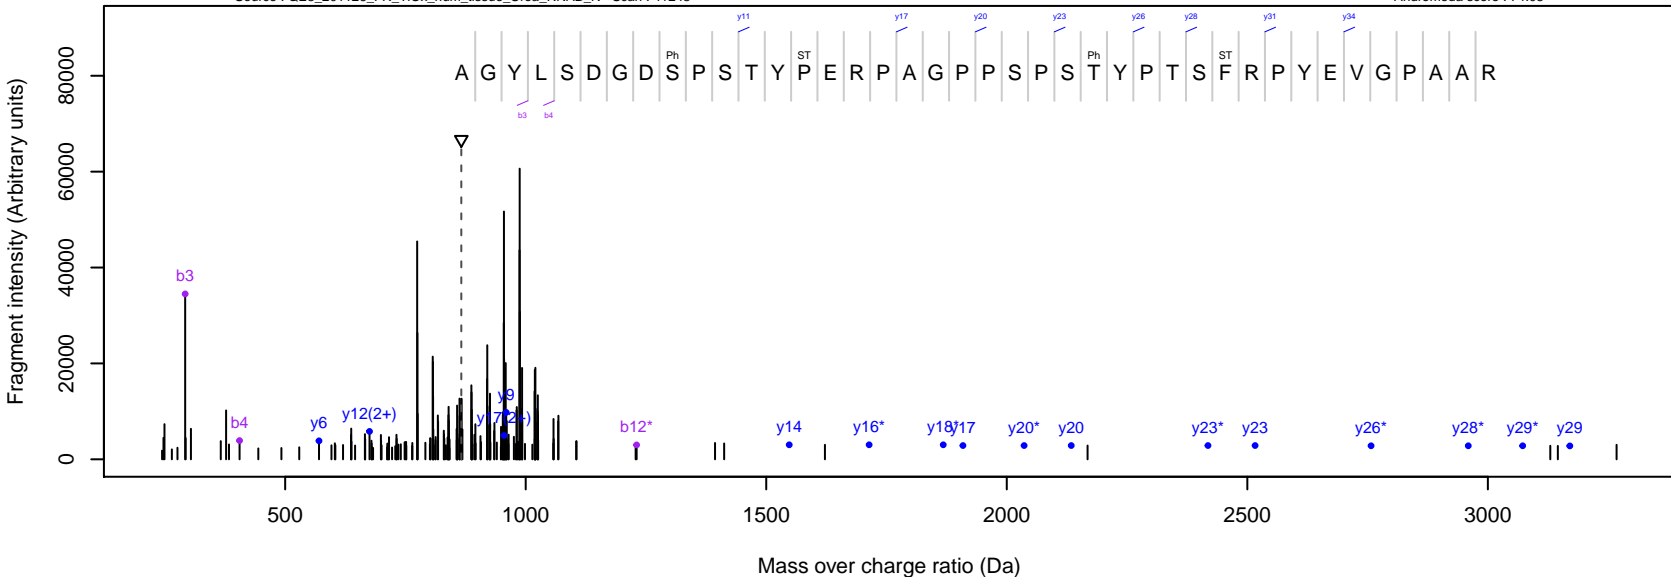

DGAEQQGPEATVEEAAAFGSEKPKQSMFEPQVSPVQEK(Phospho (STY))SPVQEK-4+

Source : QE3\_201126\_FR\_TiOx\_hum\_tissue\_Urea\_RNAB\_N Scan : 57095

Andromeda score : 74.021

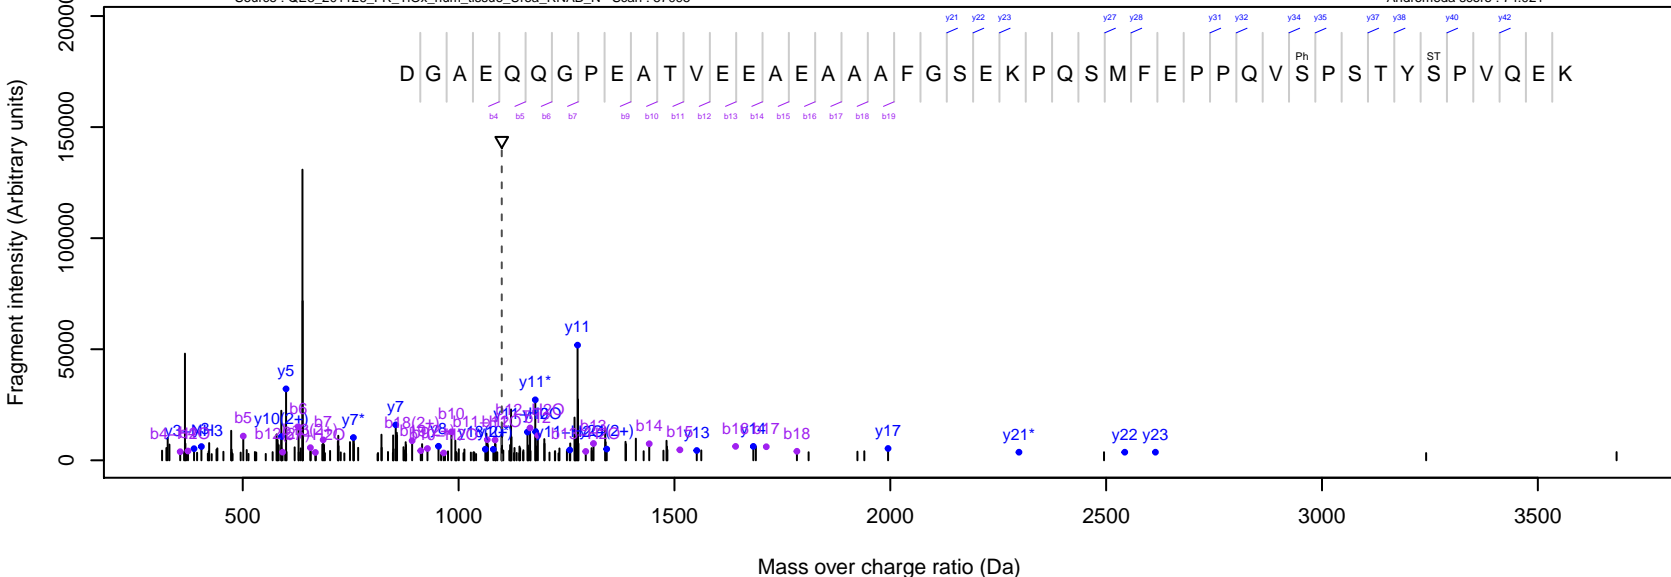

DVES(Phospho (STY))PSWR-2+

Source : QE3\_2011126\_FR\_TiOx\_hum\_tissue\_Urea\_RNAB\_H Scan : 20626

Andromeda score : 73.985

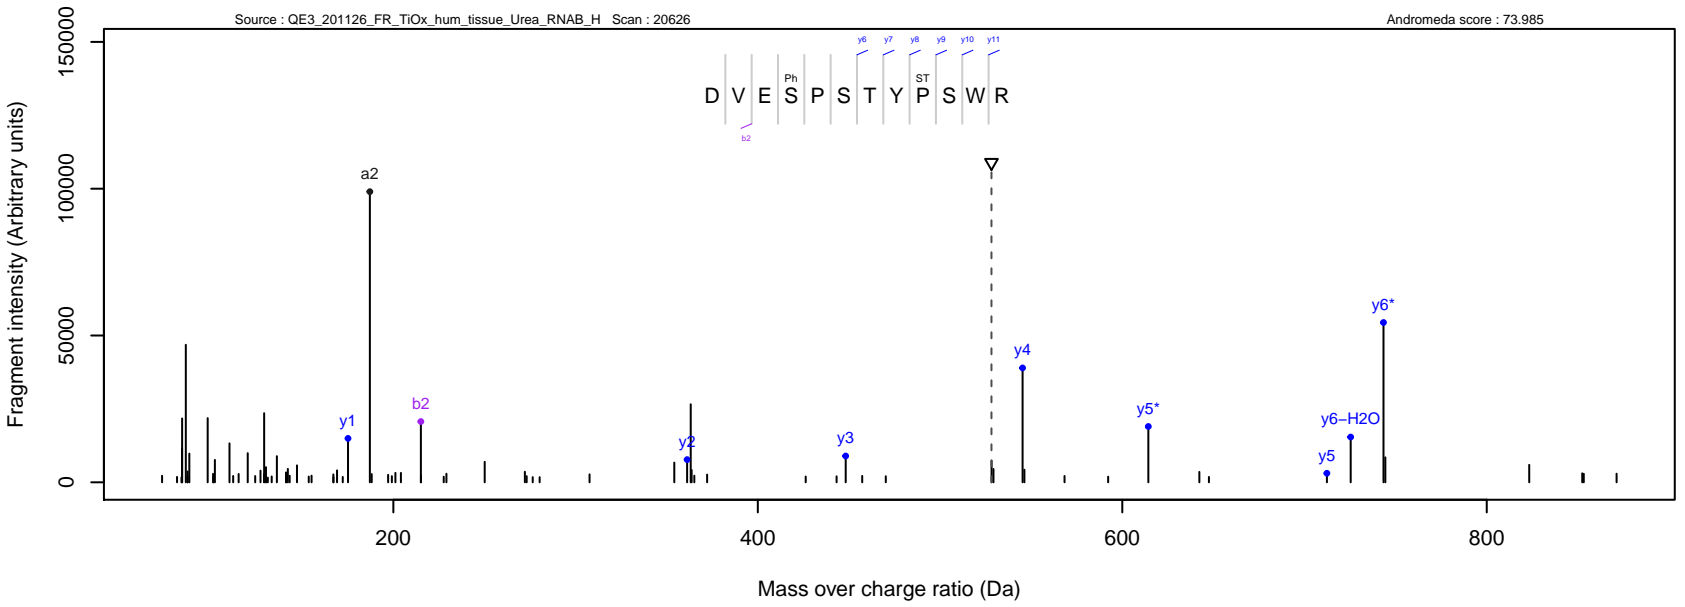

RFS(Phospho (STY))FSQR-2+

Source : QE3\_2011126\_FR\_TiOx\_hum\_tissue\_Urea\_RNAB\_B Scan : 13607

Andromeda score : 73.985

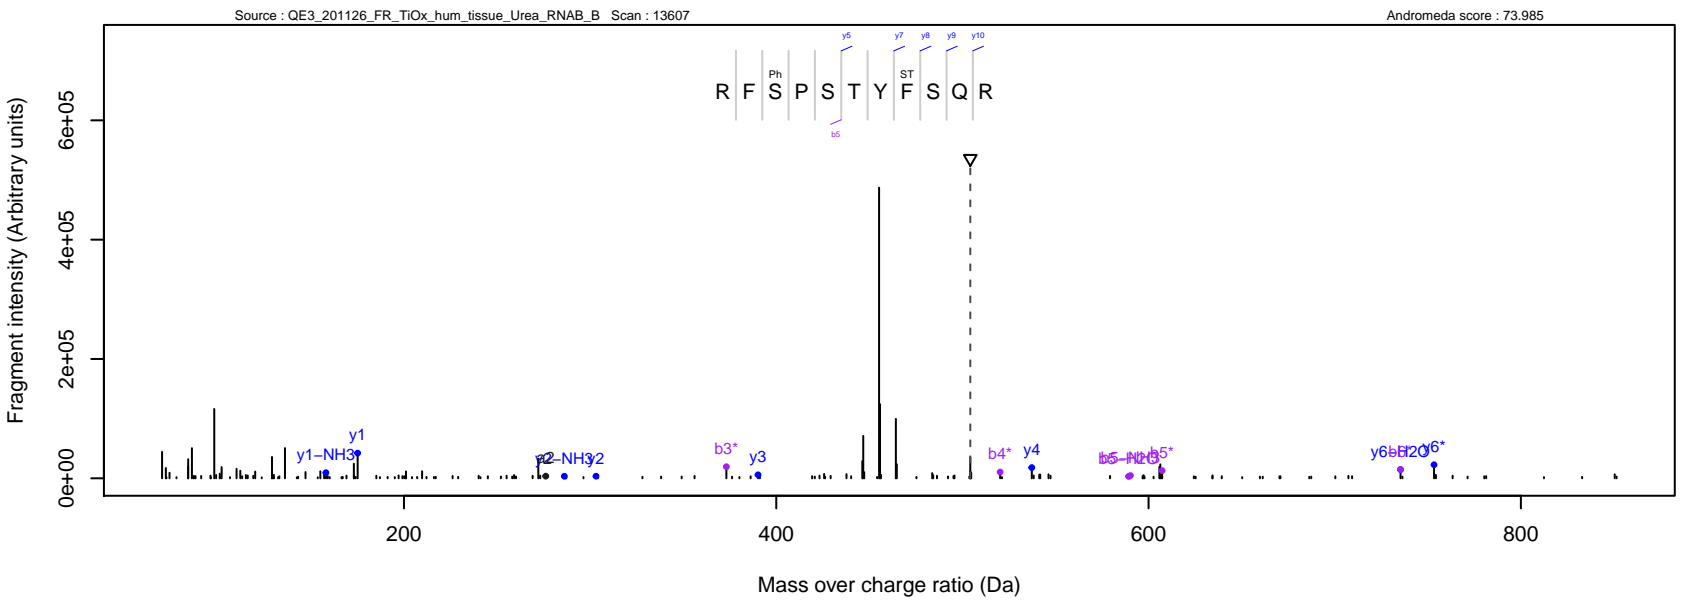

TAEDLS(Phospho (STY))FR-2+

Source : QE3\_2011126\_FR\_TiOx\_hum\_tissue\_Urea\_RNAB\_H Scan : 22050

Andromeda score : 73.985

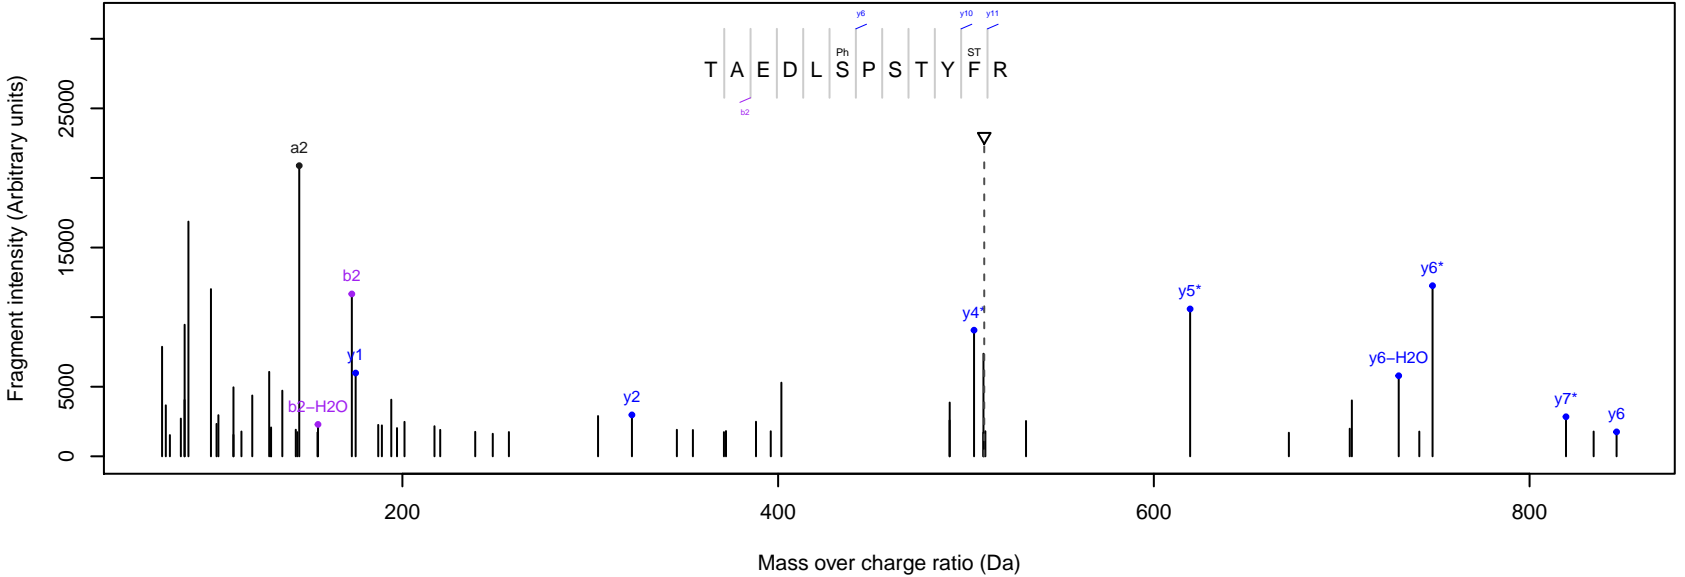

RLEDAFIVIS(Phospho (STY))DS(Phospho (STY))DGEEPKEENGLQK-3+

Source : QE3\_201126\_FR\_TiOx\_hum\_tissue\_Urea\_RNAB\_H Scan : 41267

Andromeda score : 73.975

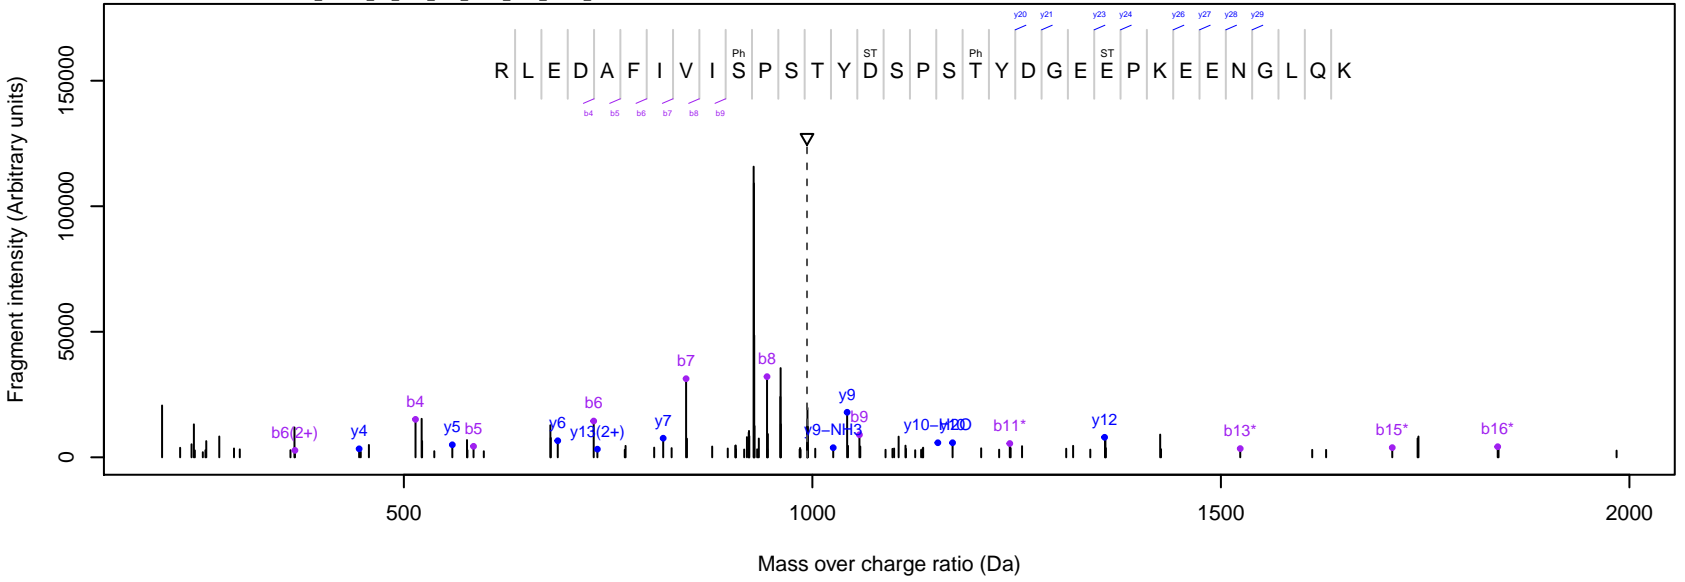

KSS(Phospho (STY))PSVKPAVDPAAK-3+

Source : QE3\_201126\_FR\_TiOx\_hum\_tissue\_Urea\_RNAB\_N Scan : 7898

Andromeda score : 73.948

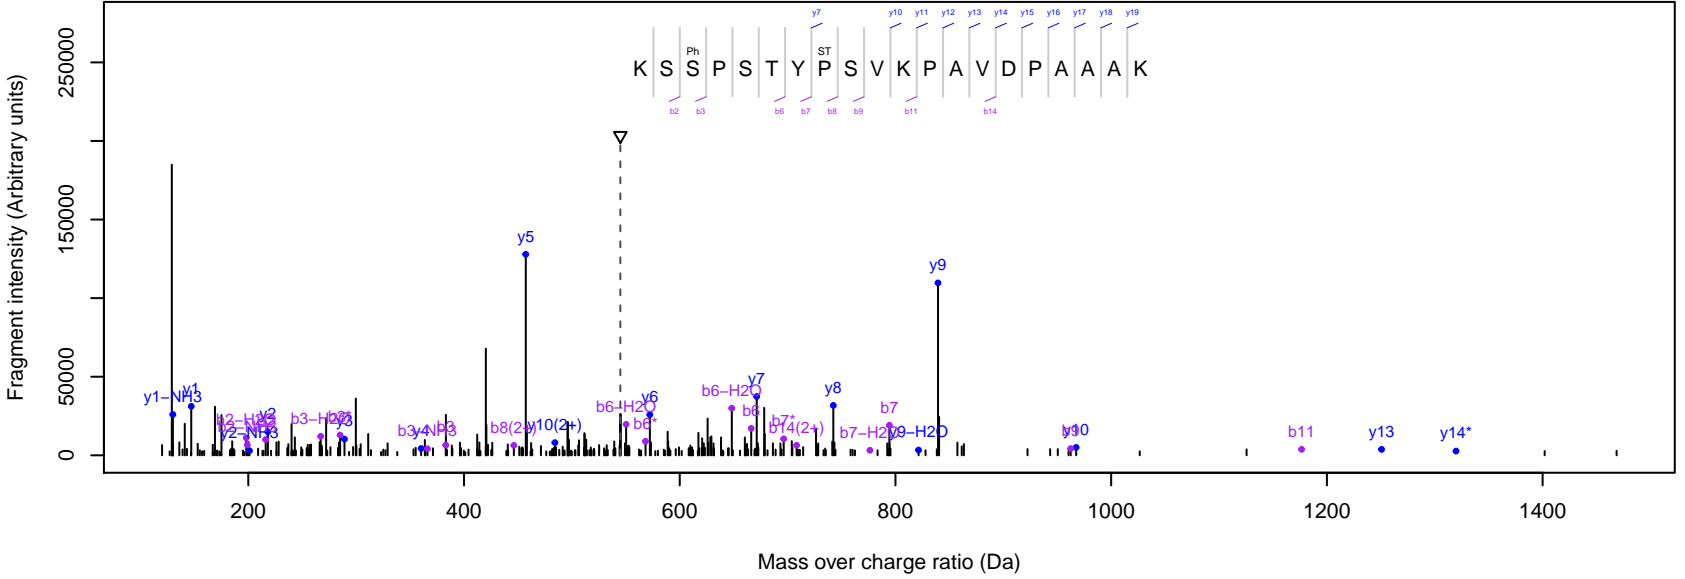

ISM(Oxidation (M))PDLHLK(Phospho (STY))PK-3+

Source : QE3\_201126\_FR\_TiOx\_hum\_tissue\_Urea\_RNAB\_H Scan : 23120

Andromeda score : 73.918

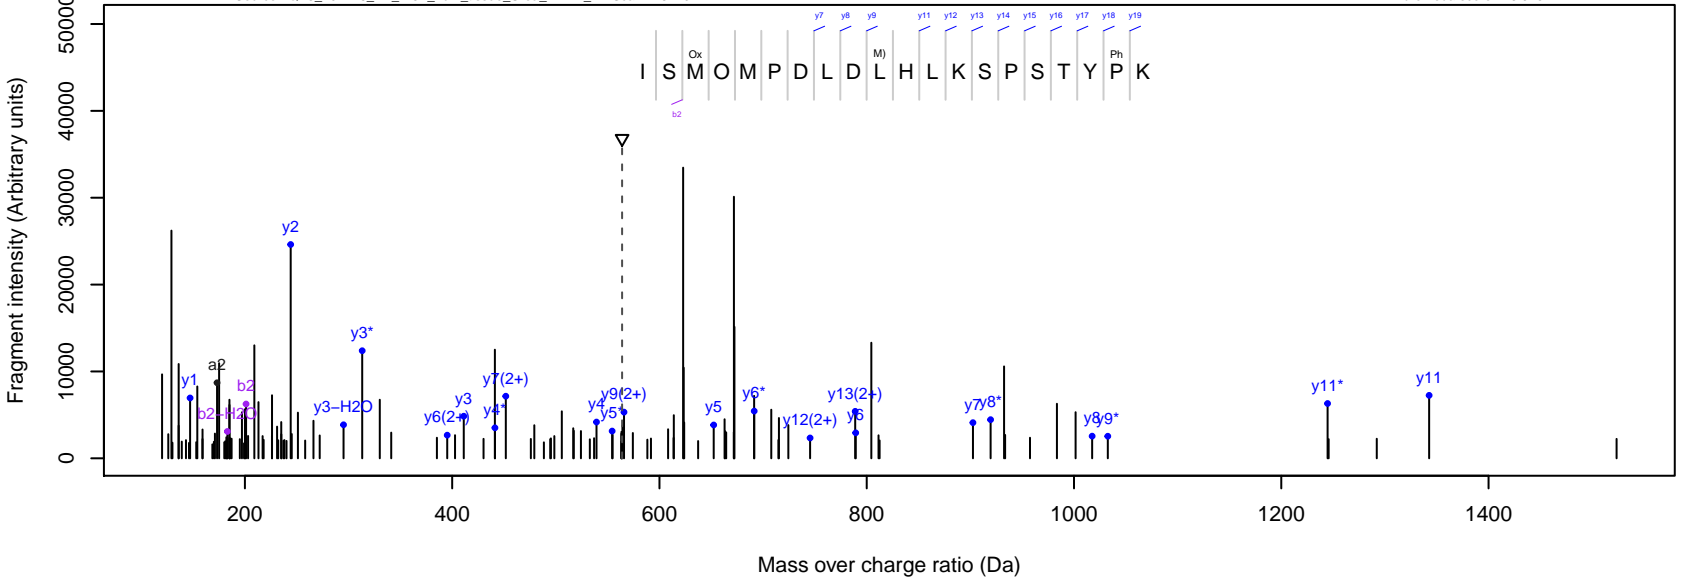

RQFS(Phospho (STY))APNLK-2+

Source : QE3\_201126\_FR\_TiOx\_hum\_tissue\_Urea\_RNAB\_H Scan : 14624

Andromeda score : 73.9

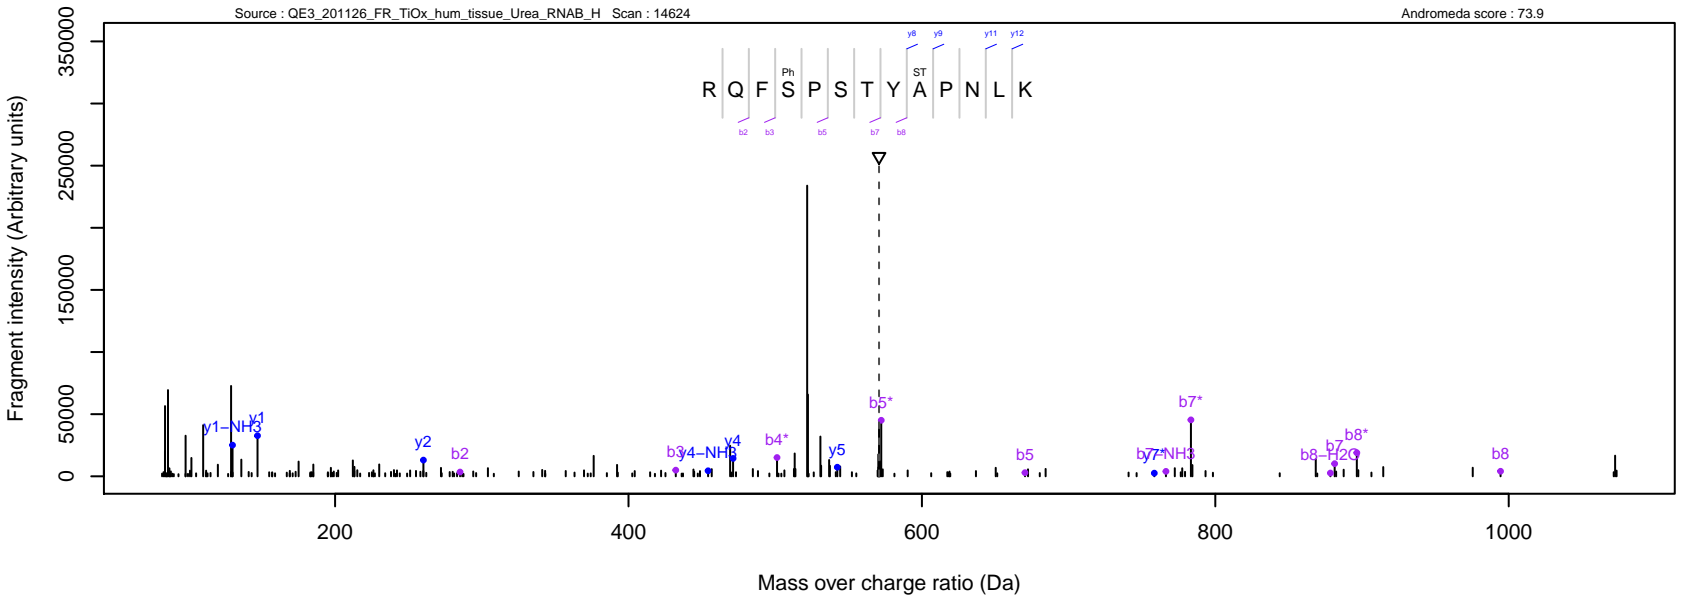

S(Phospho (STY))SPQLDPLRK-2+

Source : QE3\_201126\_FR\_TiOx\_hum\_tissue\_Urea\_RNAB\_H Scan : 15860

Andromeda score : 73.9

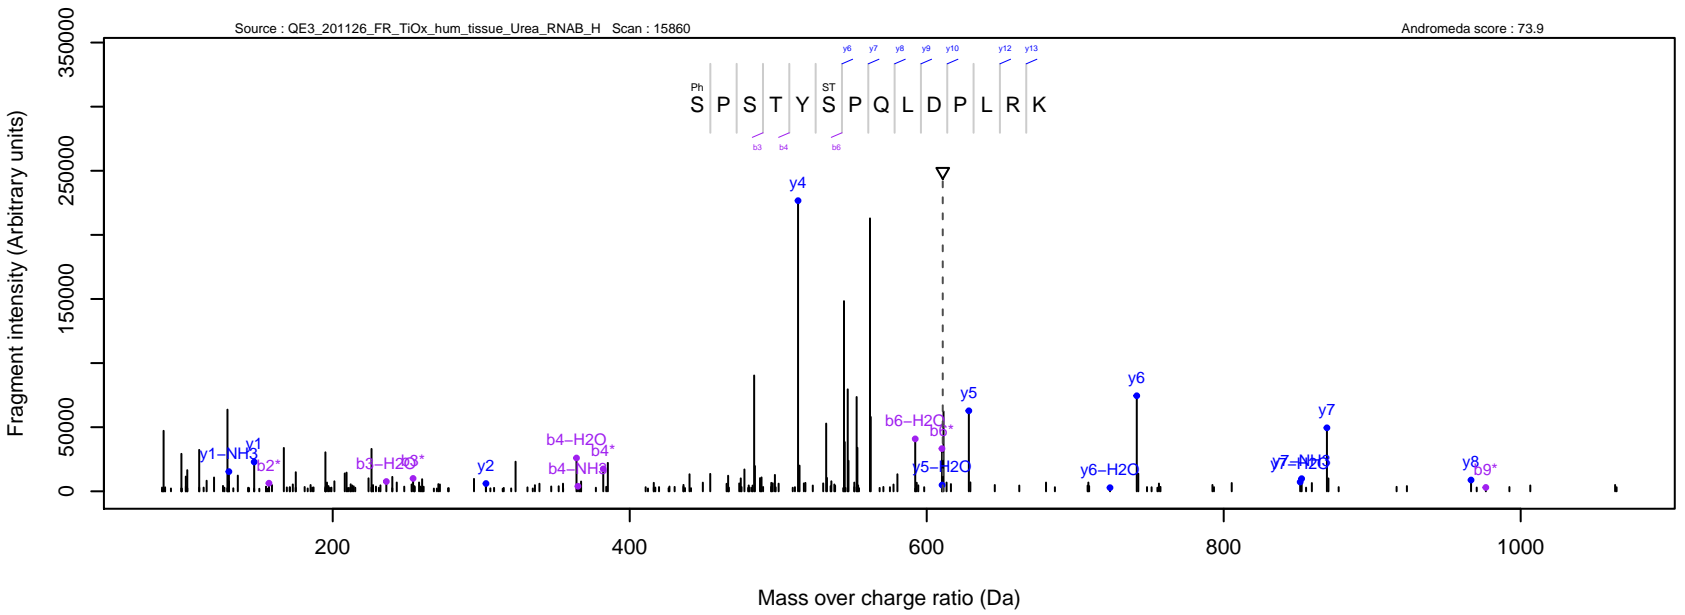

ASS(Phospho (STY))FADMMGILK-2+

Source : QE3\_201126\_FR\_TiOx\_hum\_tissue\_Urea\_RNAB\_H Scan : 55316

Andromeda score : 73.881

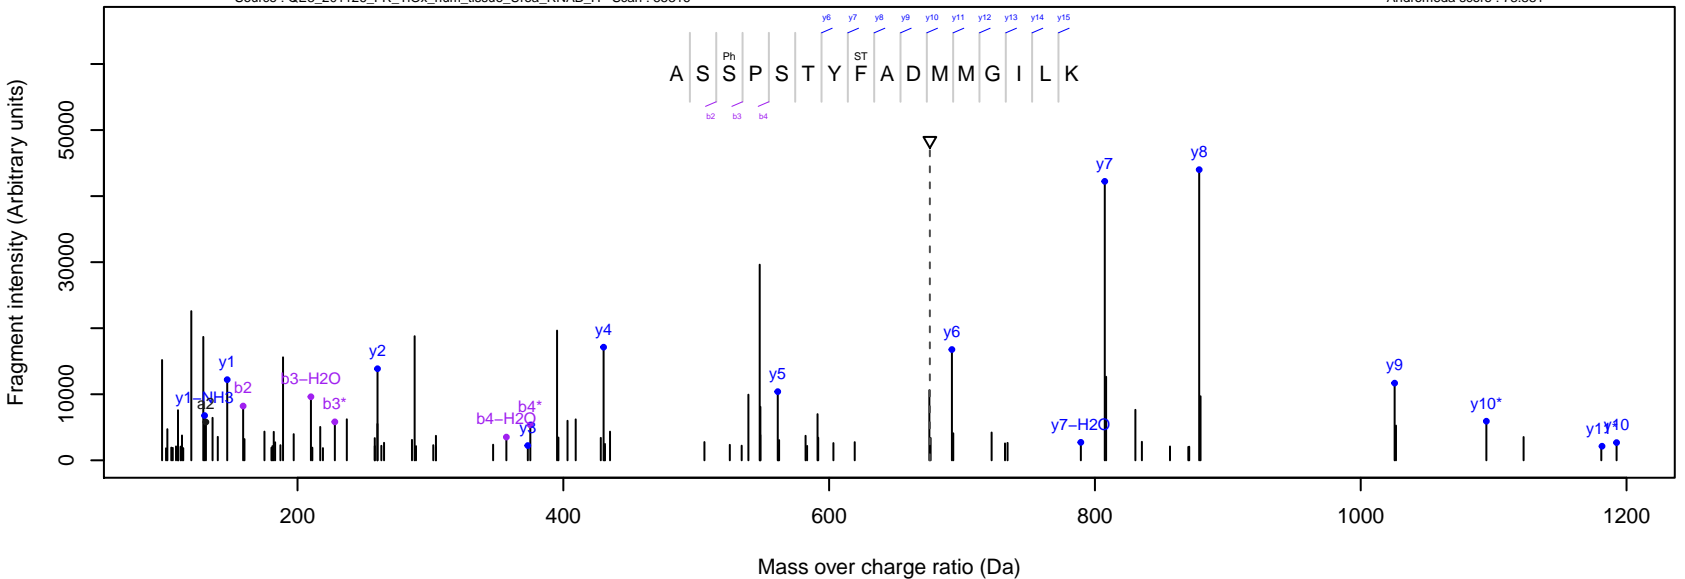

SSS(Phospho (STY))LEGFHHFK-3+

Source : QE3\_201126\_FR\_TiOx\_hum\_tissue\_Urea\_RNAB\_B Scan : 13848

Andromeda score : 73.877

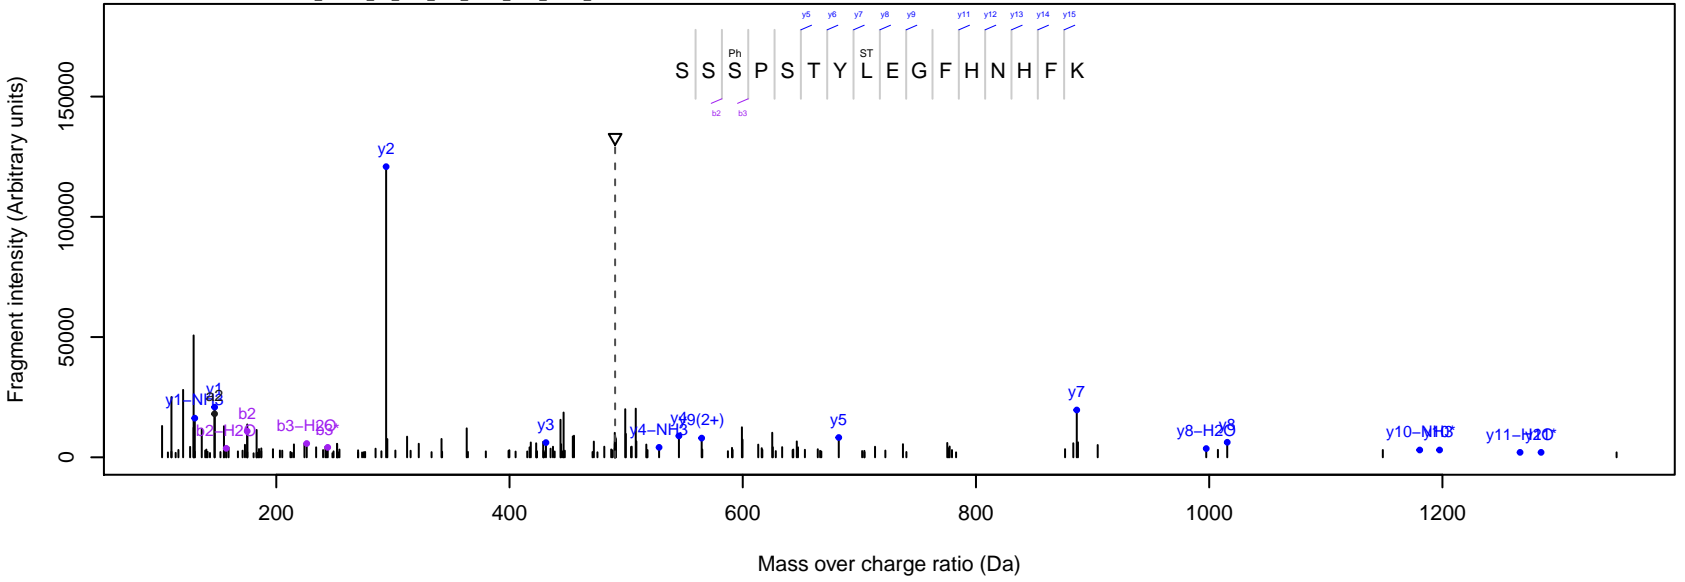

ELS(Phospho (STY))PAALEK-2+

Source : QE3\_201126\_FR\_TiOx\_hum\_tissue\_Urea\_RNAB\_H Scan : 22031

Andromeda score : 73.841

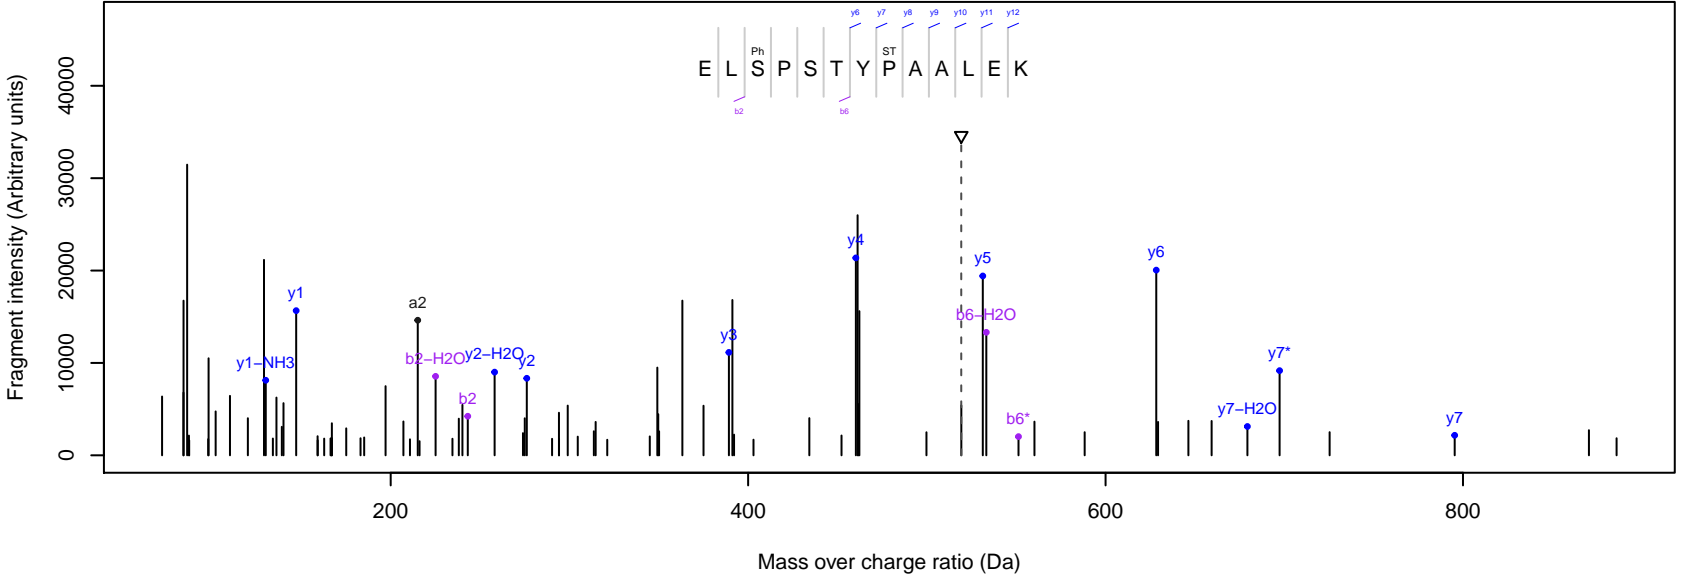

LRS(Phospho (STY))PPEALVQGR-3+

Source : QE3\_201126\_FR\_TiOx\_hum\_tissue\_Urea\_RNAB\_H Scan : 17327

Andromeda score : 73.834

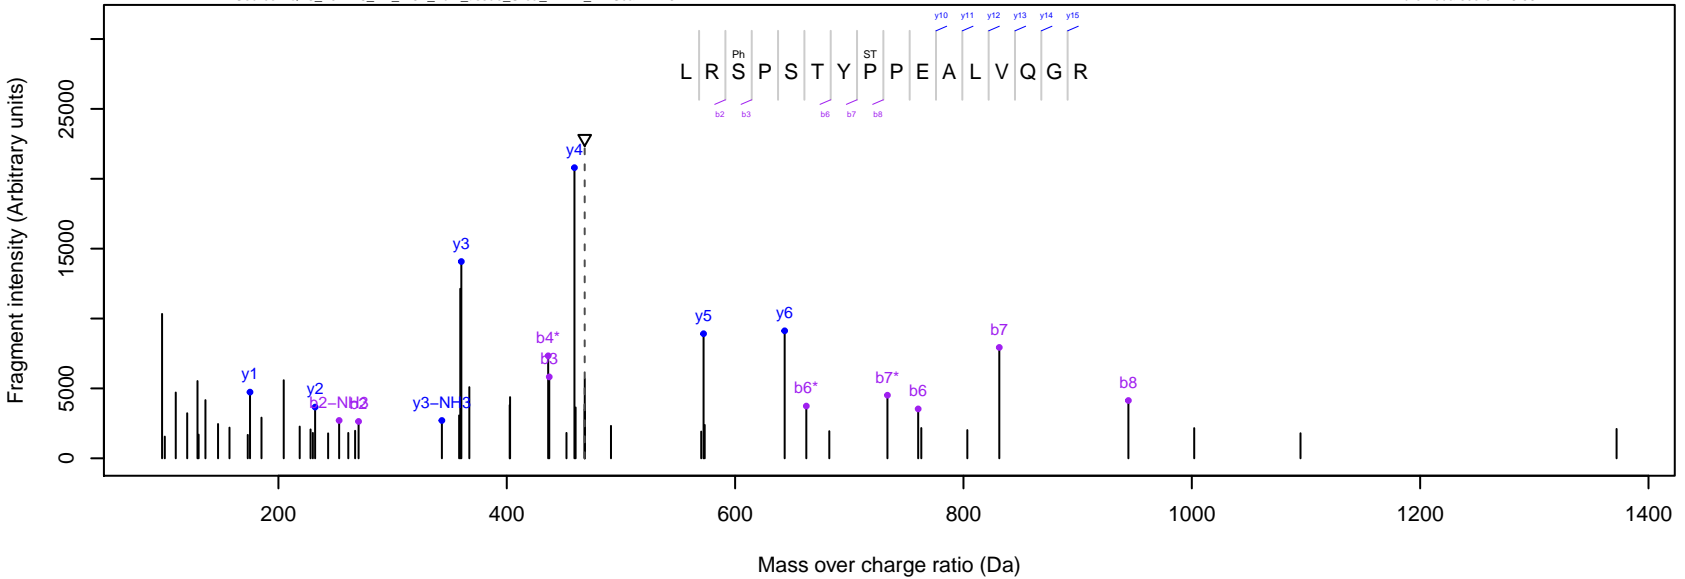

SFS(Phospho (STY))PLQPGQAPTGR-2+

Source : QE3\_201126\_FR\_TiOx\_hum\_tissue\_Urea\_RNAB\_H Scan : 27687

Andromeda score : 73.834

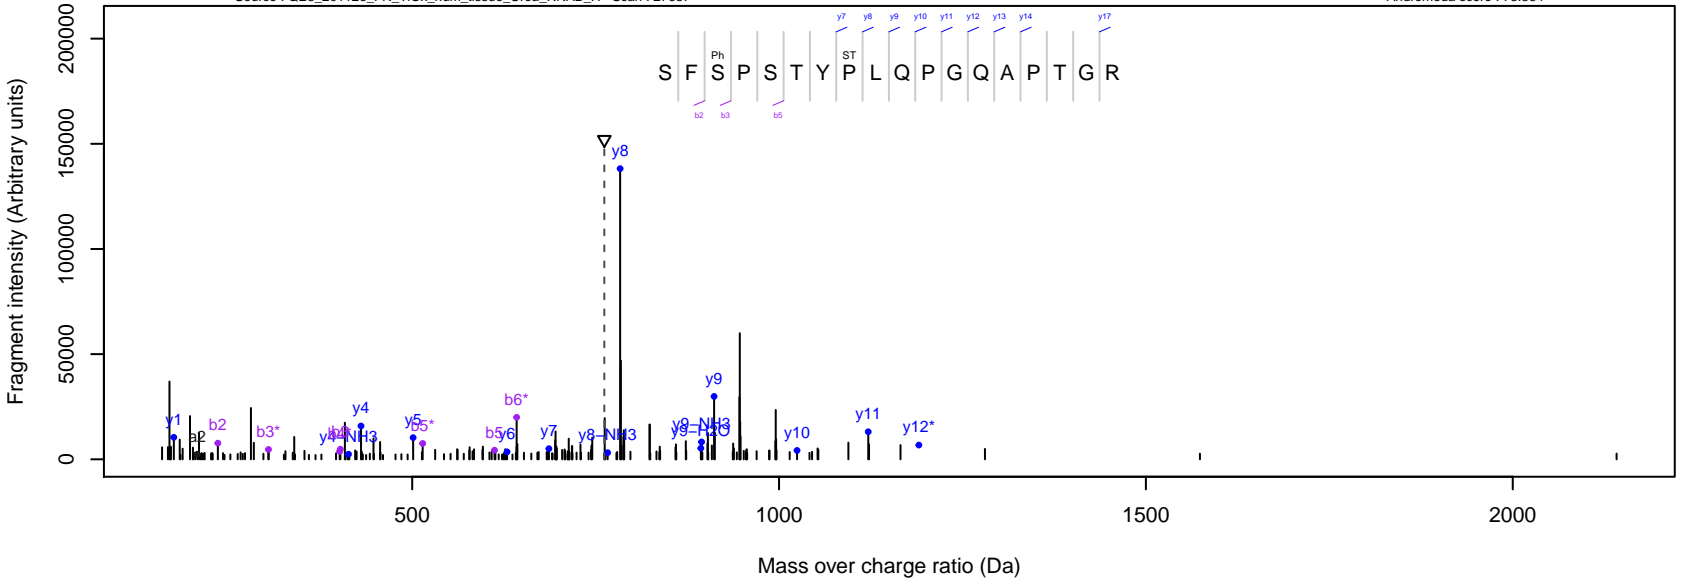

HPPVLT(Phospho (STY))PPDQEVIR-3+

Source : QE3\_201126\_FR\_TiOx\_hum\_tissue\_Urea\_RNAB\_N Scan : 26905

Andromeda score : 73.833

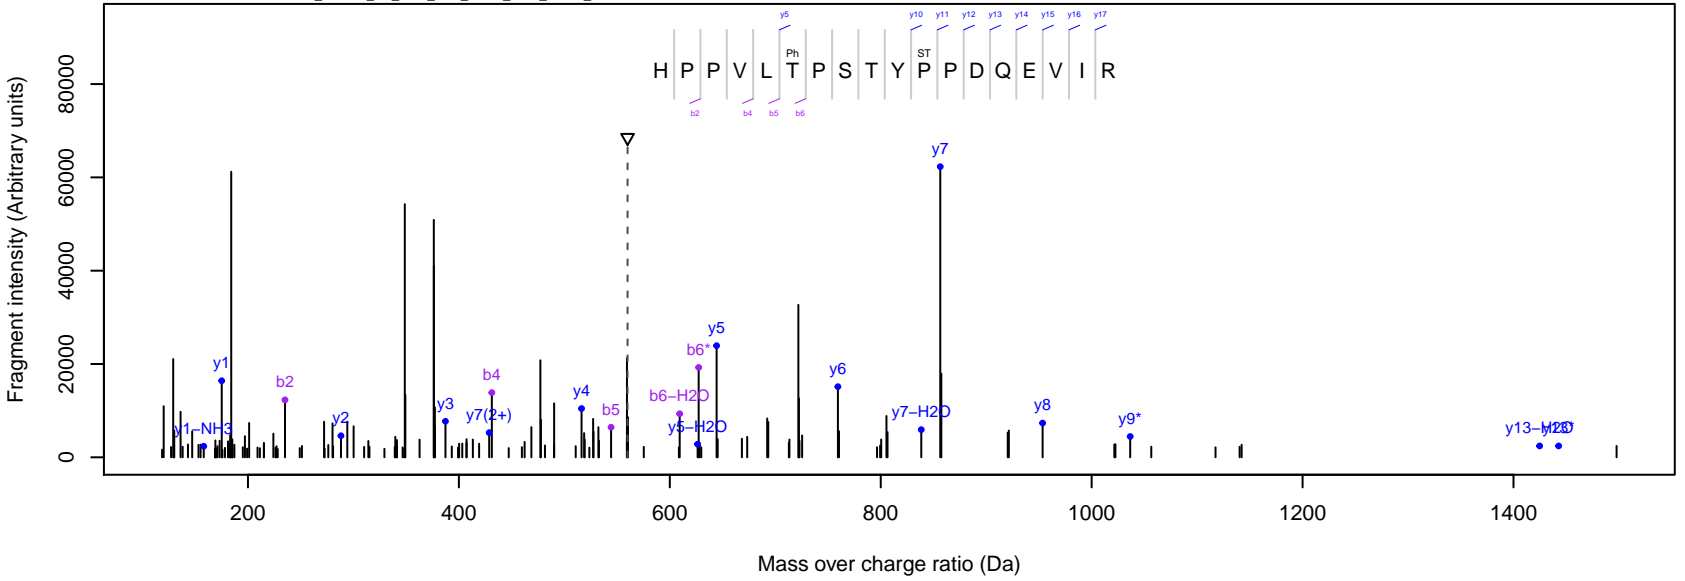

KSFLQS(Phospho (STY))LECLRR-3+

Source : QE3\_201126\_FR\_TiOx\_hum\_tissue\_Urea\_RNAB\_H Scan : 32287

Andromeda score : 73.833

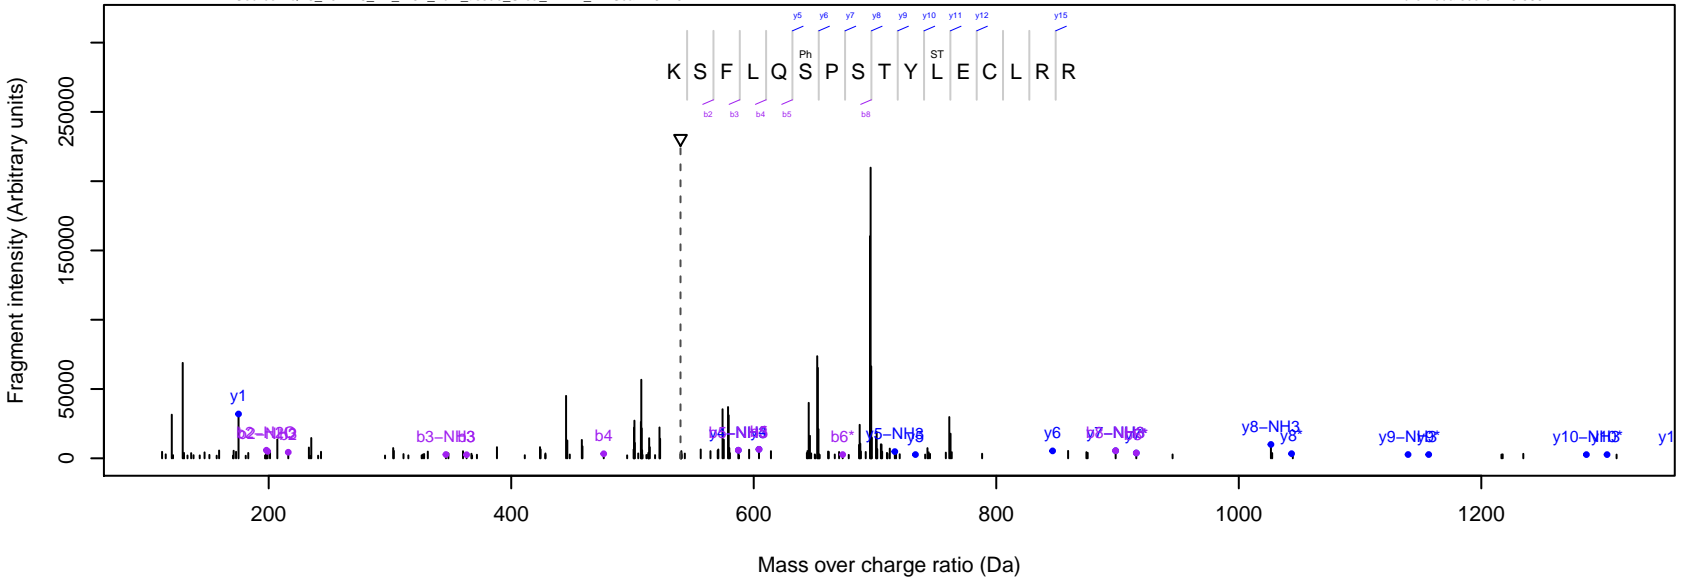



AGLGSPERPPKTS(Phospho (STY))PGS(Phospho (STY))PR-3+

Source : QE3\_201126\_FR\_TiOx\_hum\_tissue\_Urea\_RNAB\_H Scan : 11276

Andromeda score : 73.831

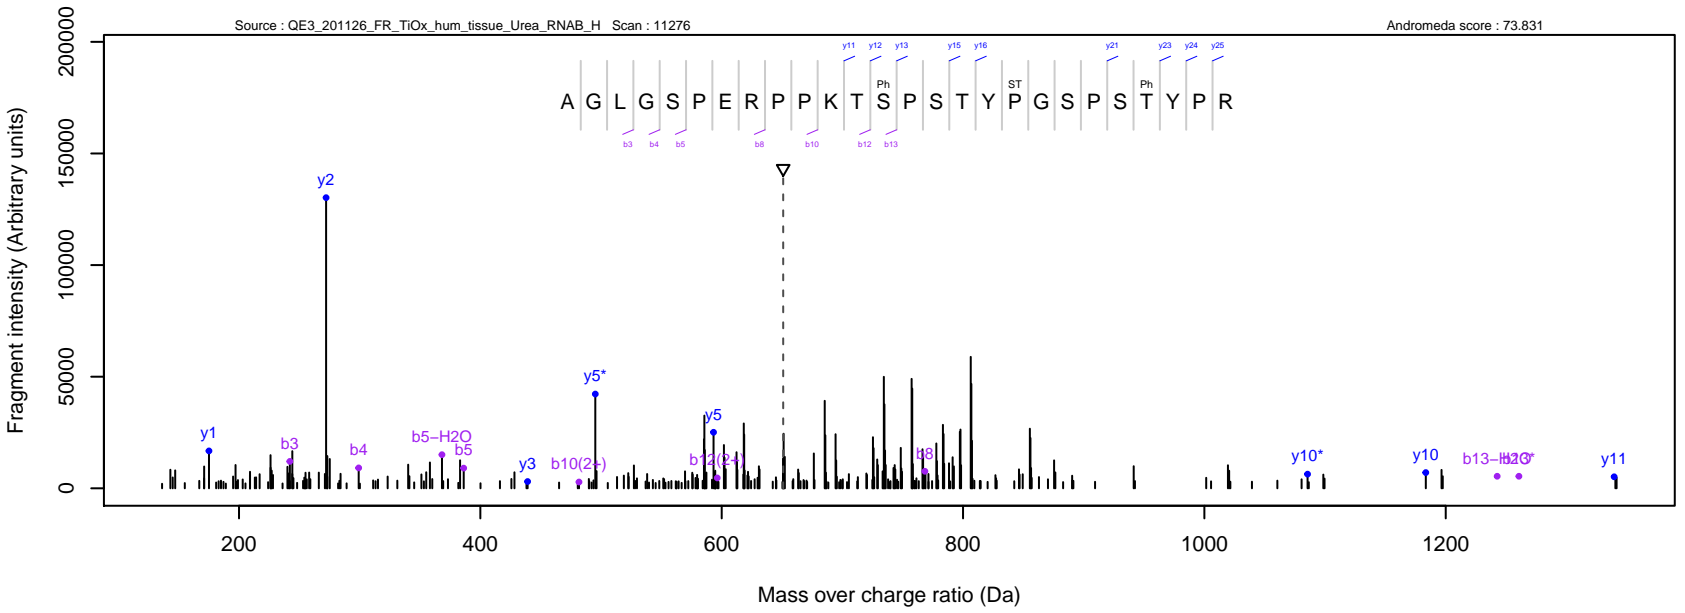

RKGT(Phospho (STY))DVNVFNTILTR-3+

Source : QE3\_201126\_FR\_TiOx\_hum\_tissue\_Urea\_RNAB\_H Scan : 35722

Andromeda score : 73.809

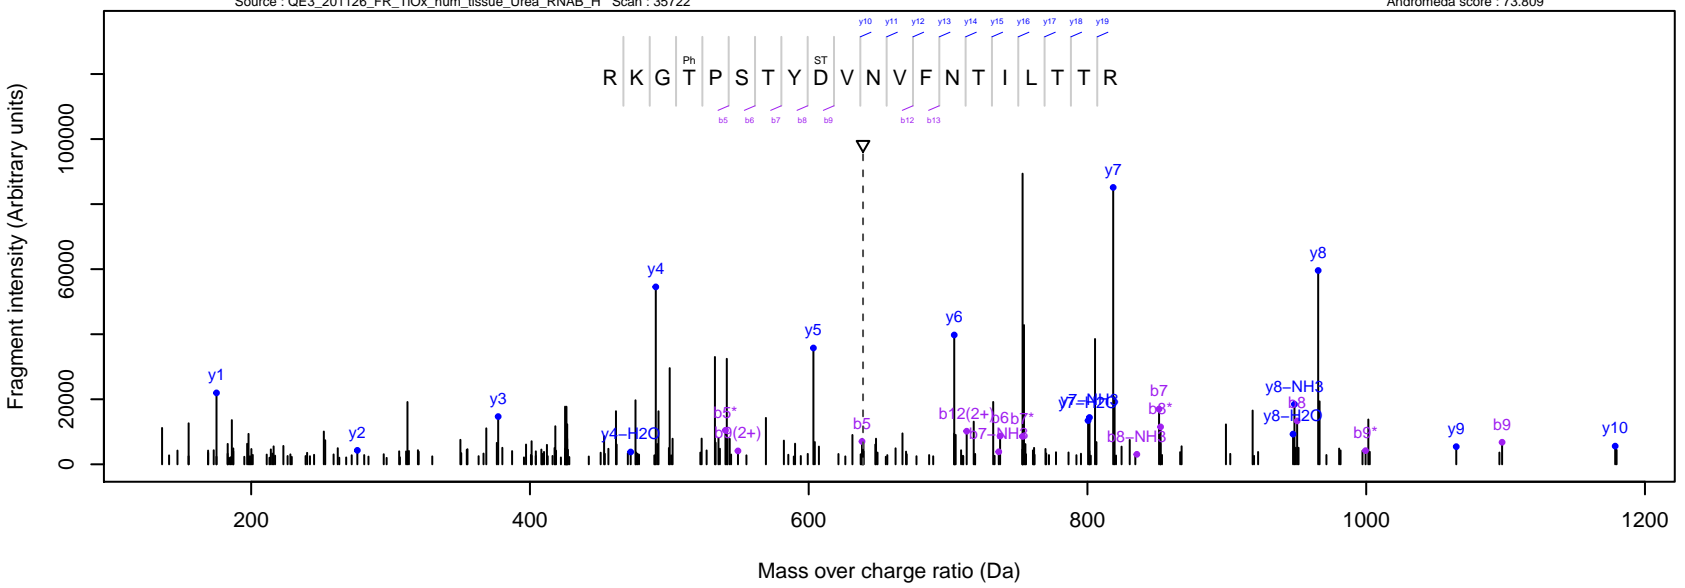

TGEITASSNKS(Phospho (STY))LNLK-3+

Source : QE3\_201126\_FR\_TiOx\_hum\_tissue\_Urea\_RNAB\_H Scan : 24429

Andromeda score : 73.809

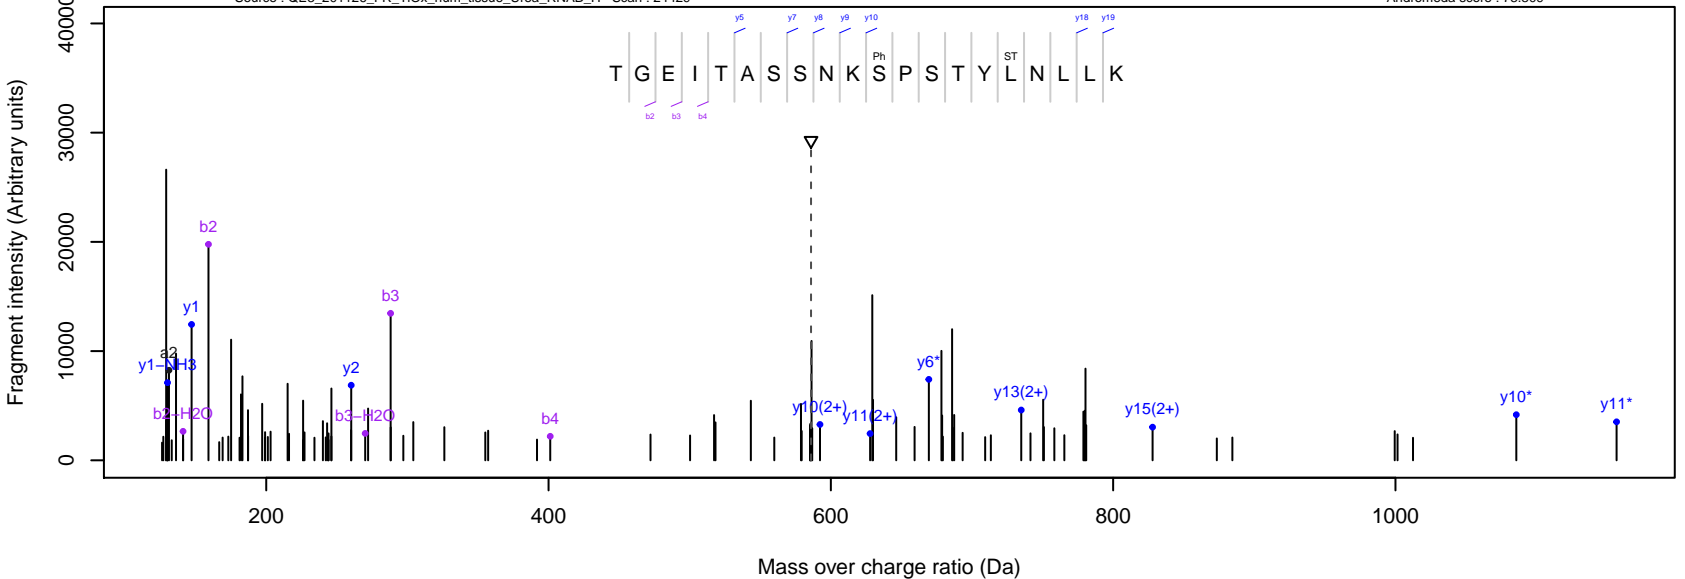

EAQQKVPDEEENE(SPh)DNEKETEK-3+

Source : QE3\_201126\_FR\_TiOx\_hum\_tissue\_Urea\_RNAB\_B Scan : 7421

Andromeda score : 73.805

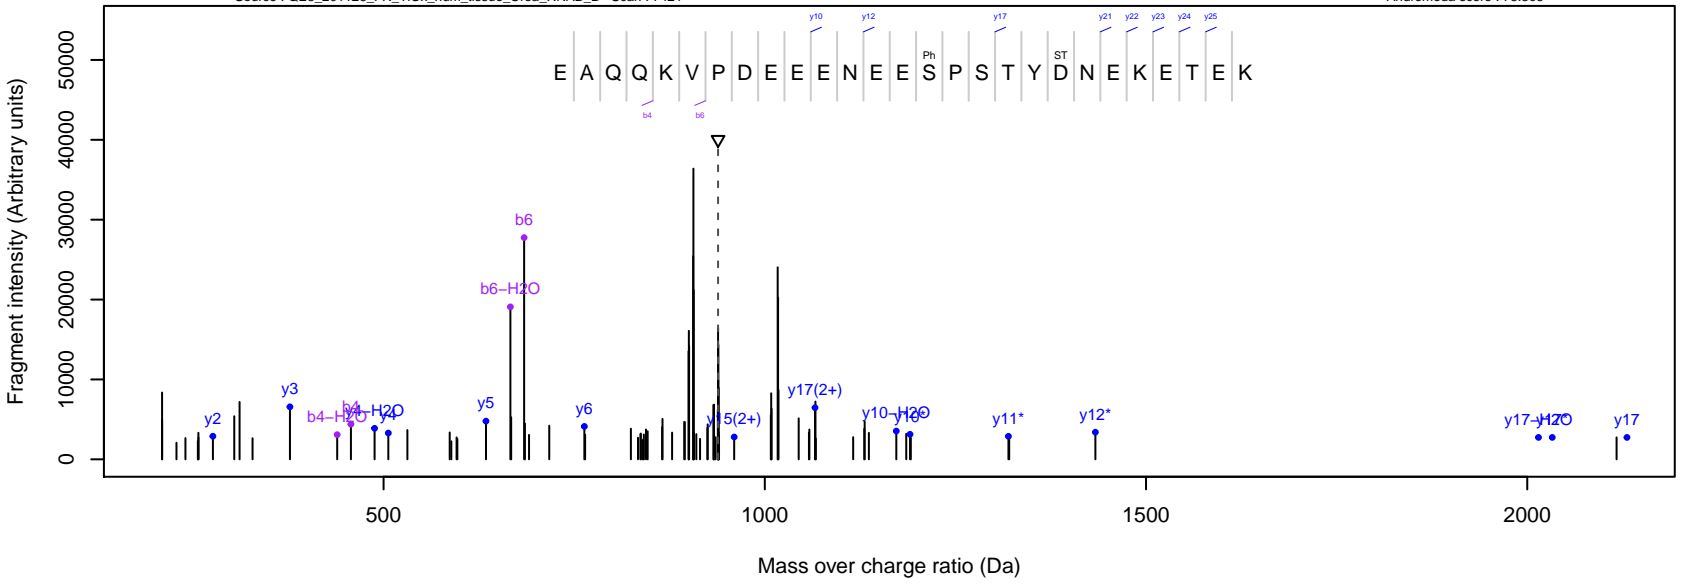

HGLTSGSAS(Phospho(SPh))PPPPALPLYPDPVR-3+

Source : QE3\_201126\_FR\_TiOx\_hum\_tissue\_Urea\_RNAB\_N Scan : 41769

Andromeda score : 73.805

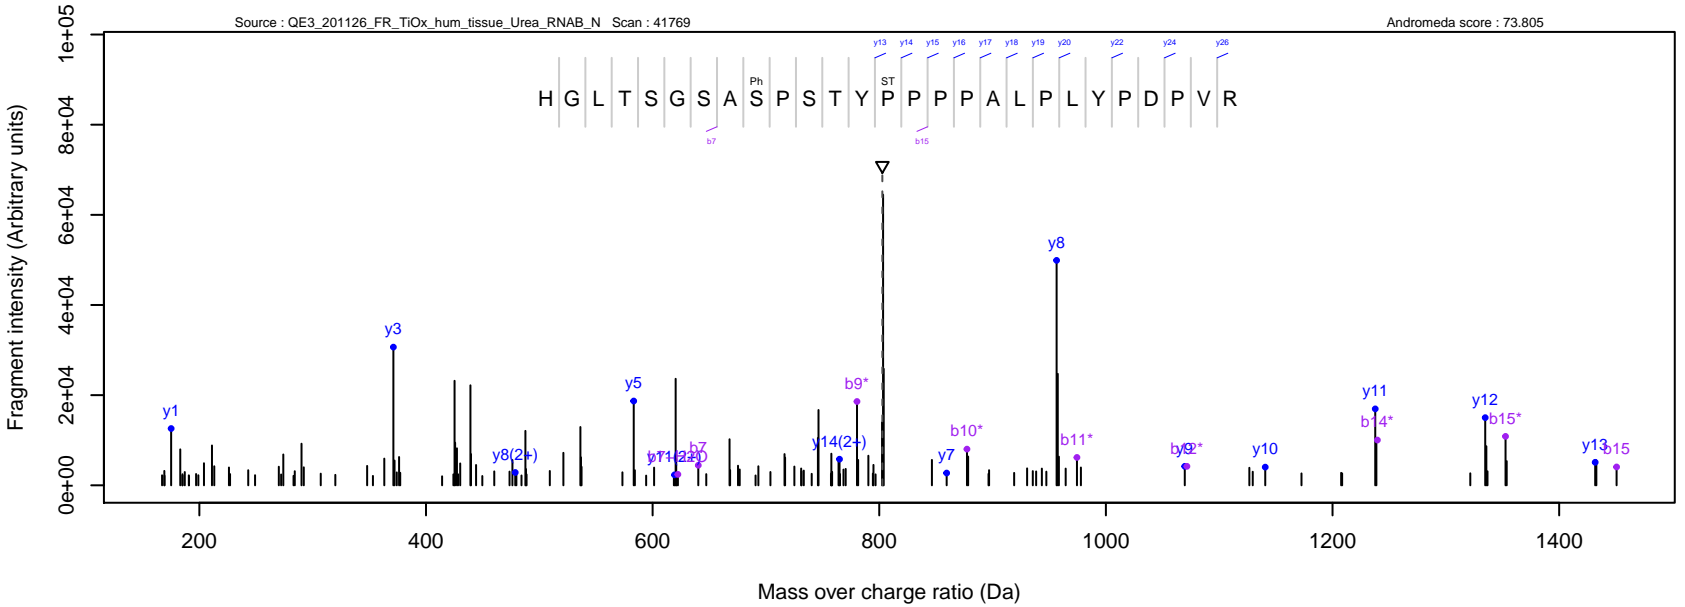

RNS(Phospho(SPh))TIVLR-2+

Source : QE3\_201126\_FR\_TiOx\_hum\_tissue\_Urea\_RNAB\_H Scan : 10315

Andromeda score : 73.781

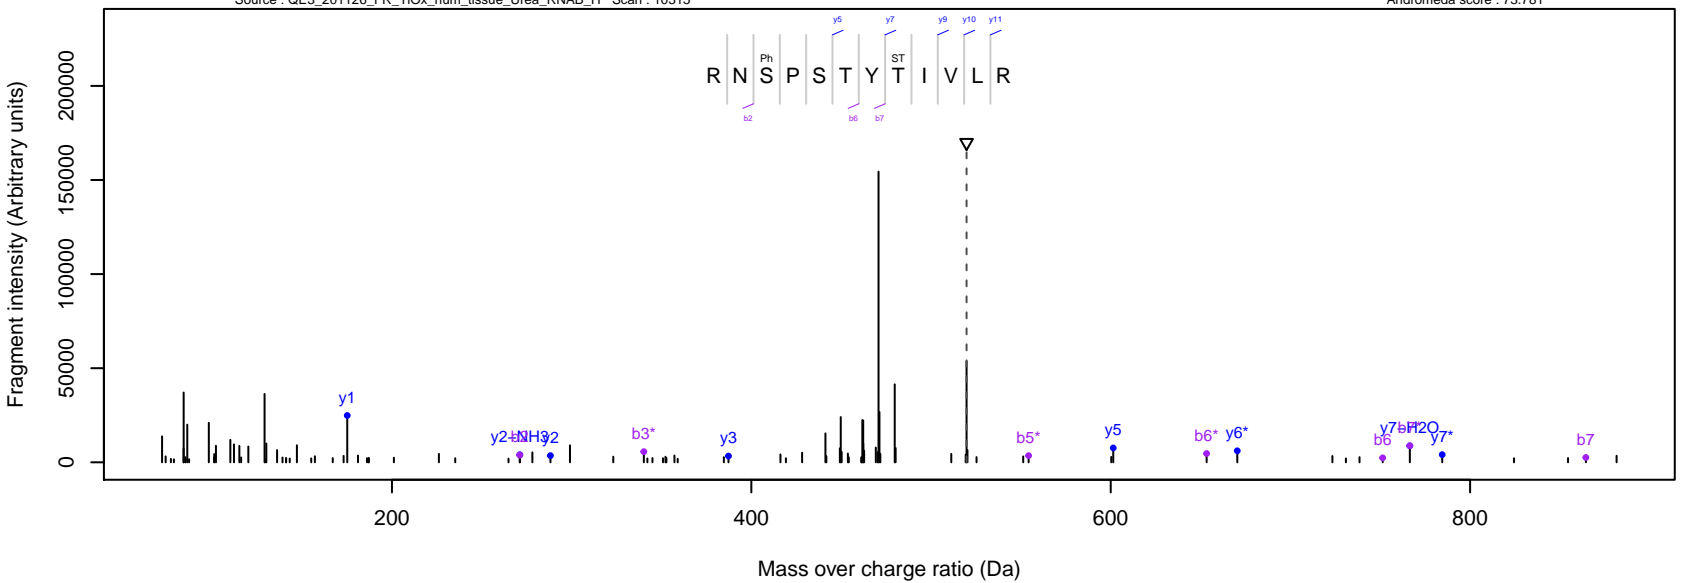

RPS(Phospho (STY))TFGIPR-2+

Source : QE3\_201126\_FR\_TiOx\_hum\_tissue\_Urea\_RNAB\_H Scan : 18513

Andromeda score : 73.781

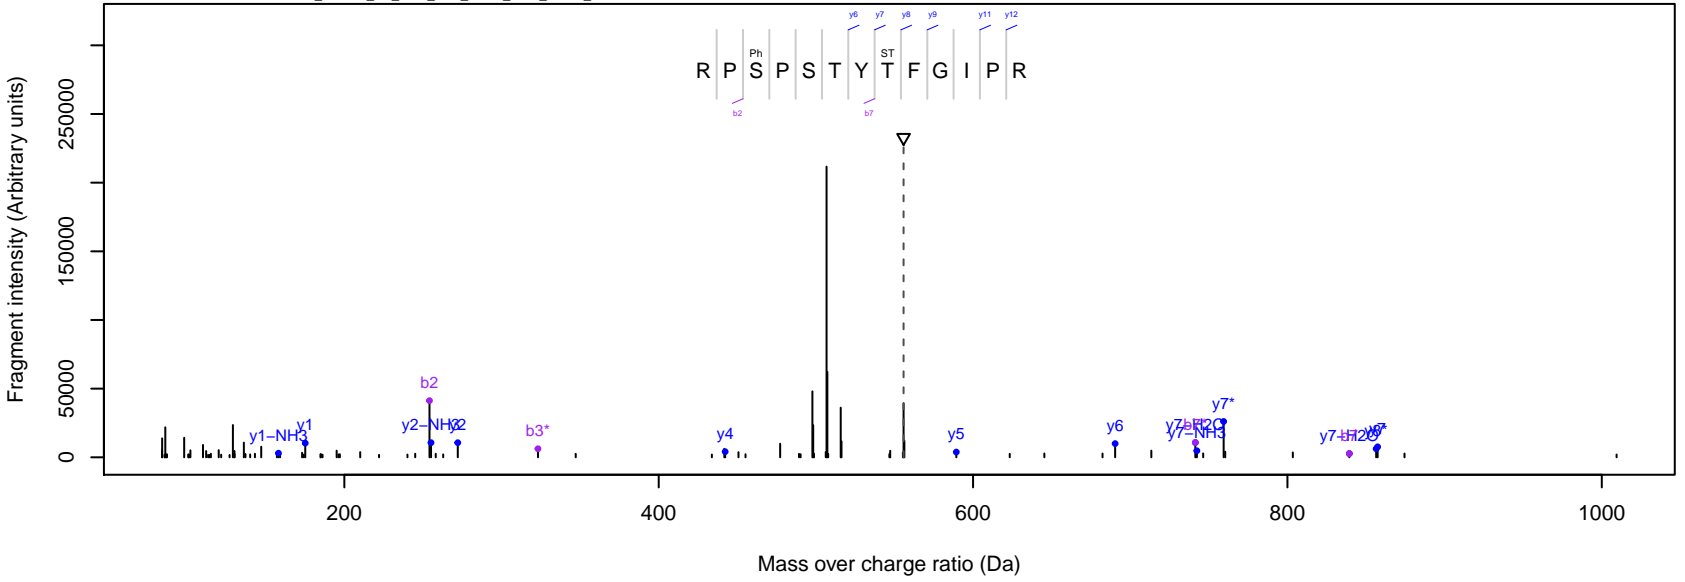

FKAEAPLPS(Phospho (STY))PKLEGELQAPDLELSPAIHVEGLDIK-4+

Source : QE3\_201126\_FR\_TiOx\_hum\_tissue\_Urea\_RNAB\_N Scan : 56760

Andromeda score : 73.691

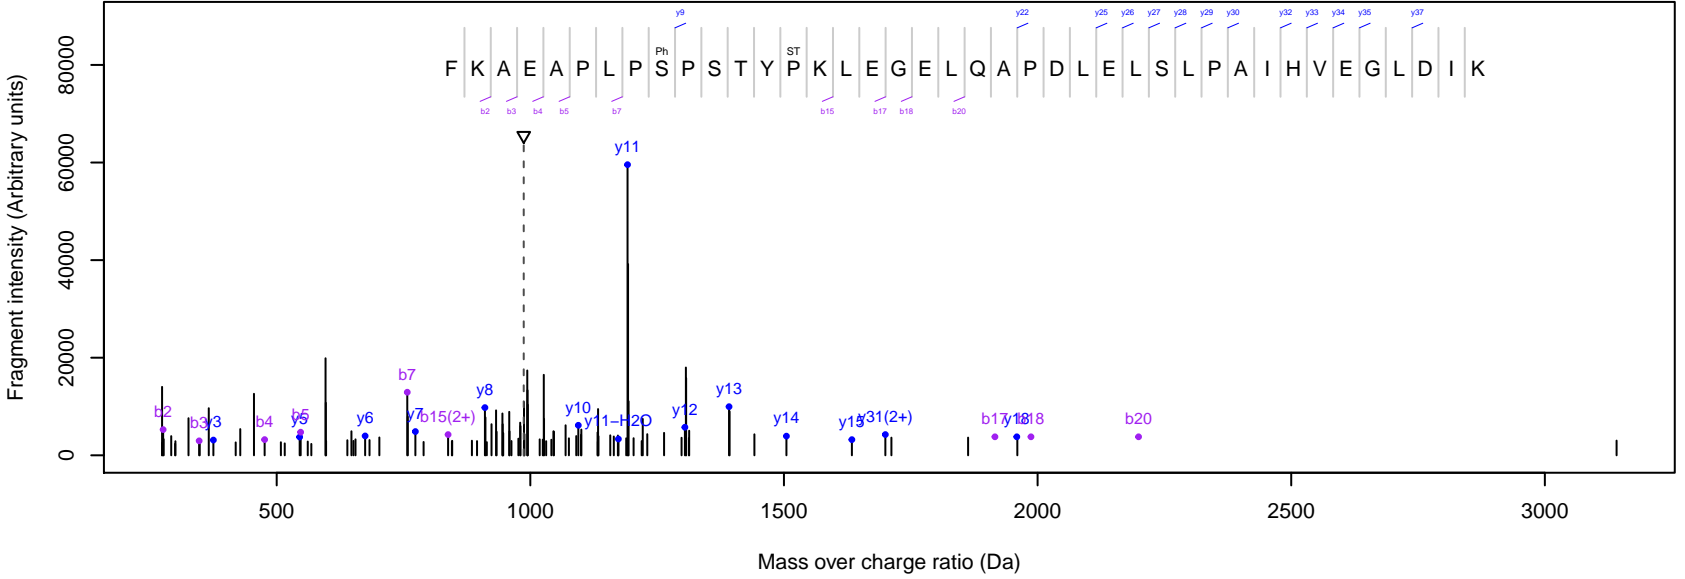

SISASKAS(Phospho (STY))PPGDLQNPK-3+

Source : QE3\_201126\_FR\_TiOx\_hum\_tissue\_Urea\_RNAB\_H Scan : 13366

Andromeda score : 73.672

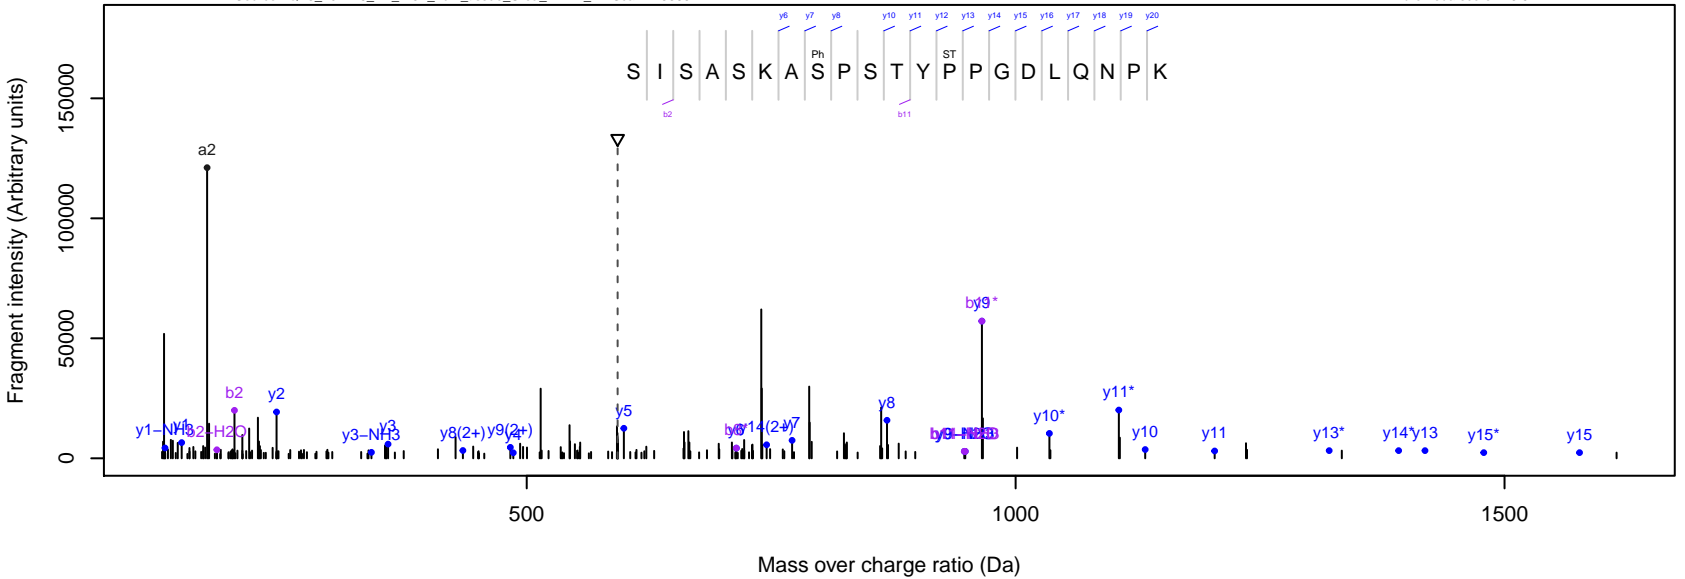

SPEGEQEDRPGLHAYEKEDS(Phospho (STY))DEVHLEELSLK-4+

Source : QE3\_201126\_FR\_TiOx\_hum\_tissue\_Urea\_RNAB\_B Scan : 28268

Andromeda score : 73.665

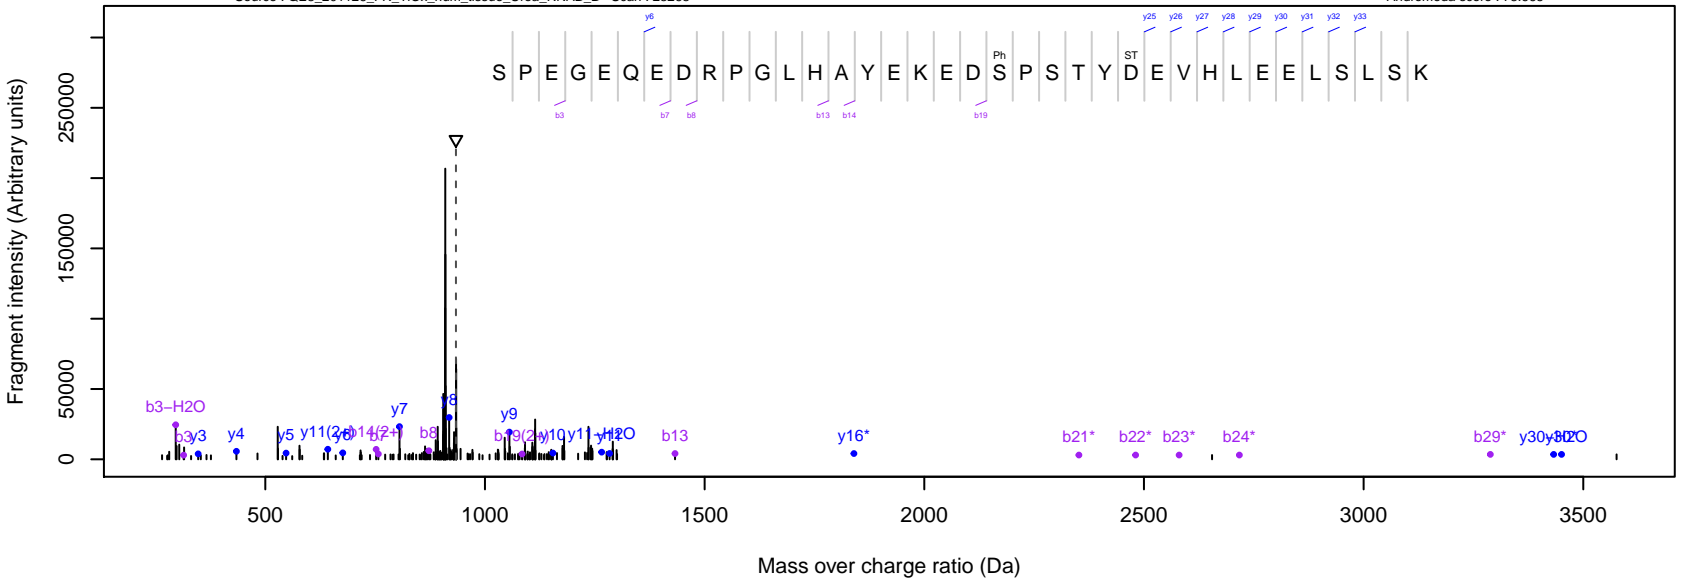

AKS(Phospho (STY))IVDKEGVPR-3+

Source : QE3\_201126\_FR\_TiOx\_hum\_tissue\_Urea\_RNAB\_N Scan : 7799

Andromeda score : 73.632

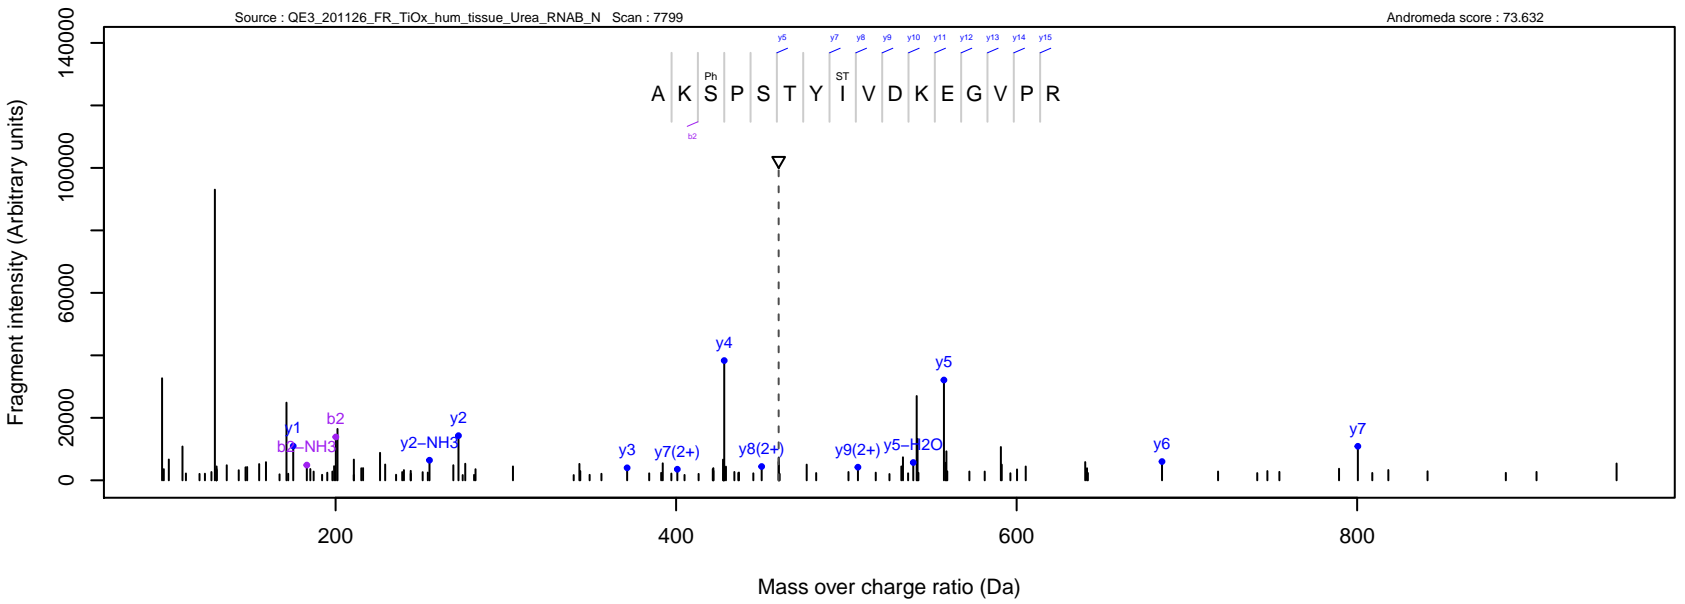

TETLVEETAES(Phospho (STY))S(Phospho (STY))EDDVAPSQSLLSGYMTPGLTPANSQASK-4+

Source : QE3\_201126\_FR\_TiOx\_hum\_tissue\_Urea\_RNAB\_H Scan : 62009

Andromeda score : 73.617

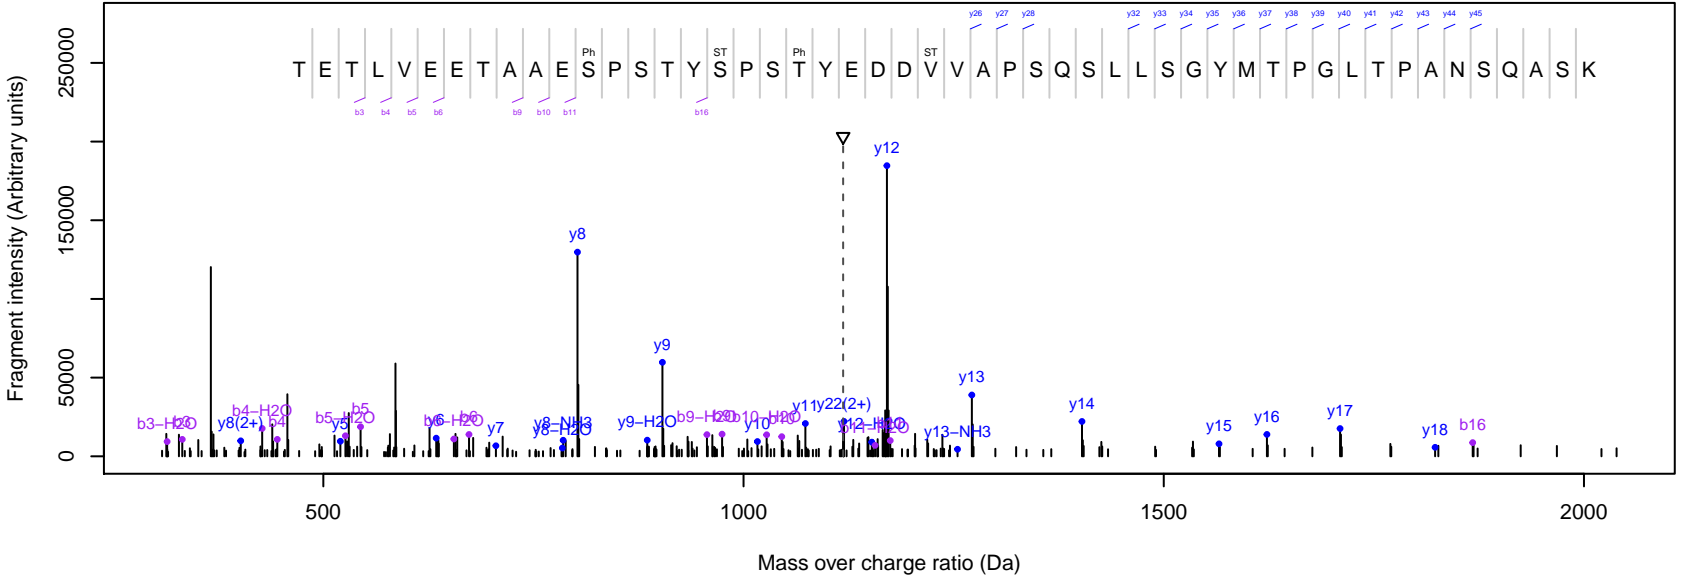

NYS(Phospho (STY))PTMVCISLLPDGGEGPSATANGGLSK-3+

Source : QE3\_201126\_FR\_TiOx\_hum\_tissue\_Urea\_RNAB\_B Scan : 58266

Andromeda score : 73.602

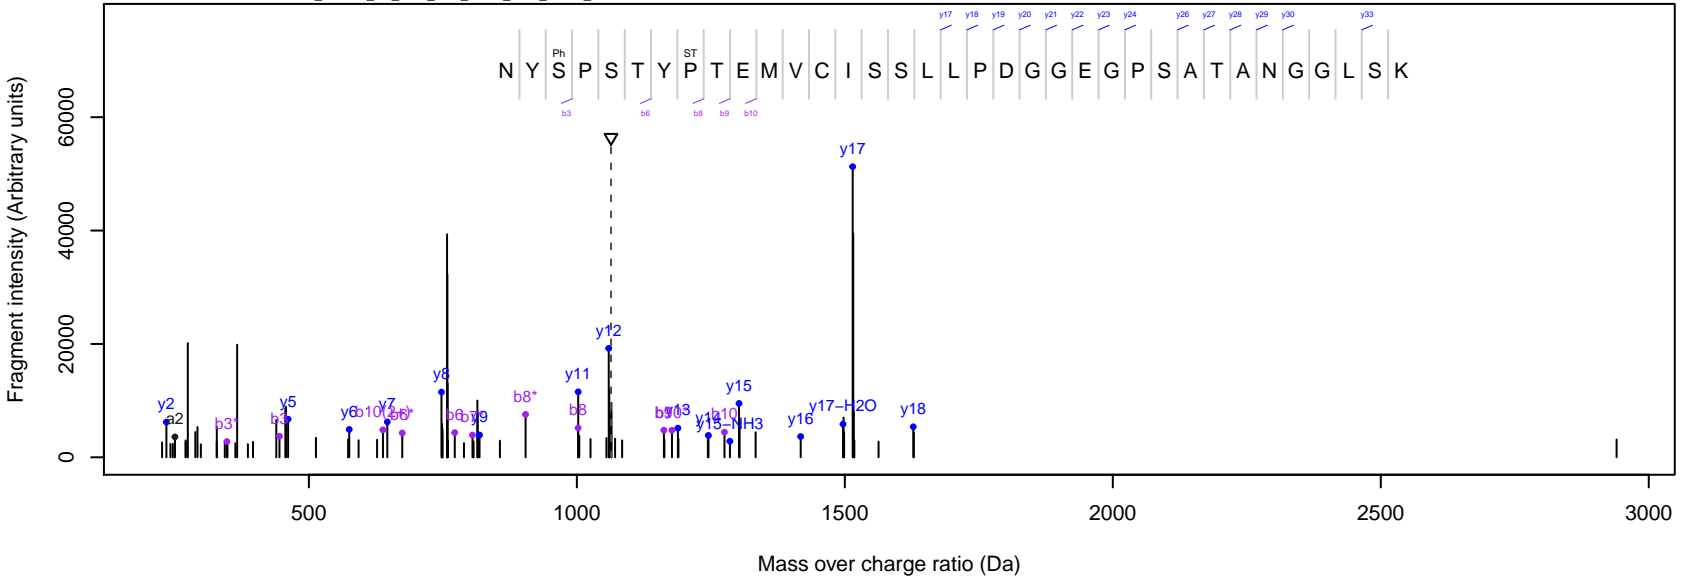

SPS(Phospho (STY))PLVSLQAVK-2+

Source : QE3\_201126\_FR\_TiOx\_hum\_tissue\_Urea\_RNAB\_B Scan : 35827

Andromeda score : 73.466

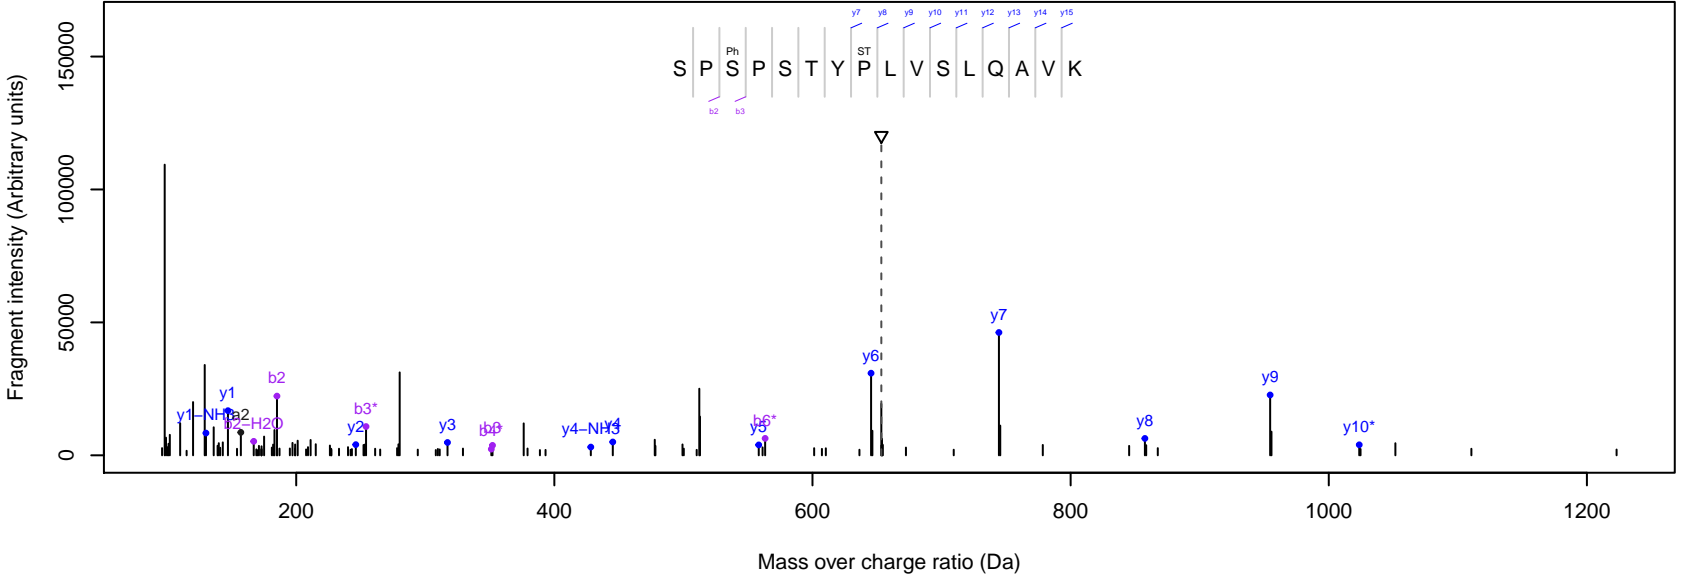

VPS(Phospho (STY))GIFDVNSR-2+

Source : QE3\_201126\_FR\_TiOx\_hum\_tissue\_Urea\_RNAB\_N Scan : 36814

Andromeda score : 73.466

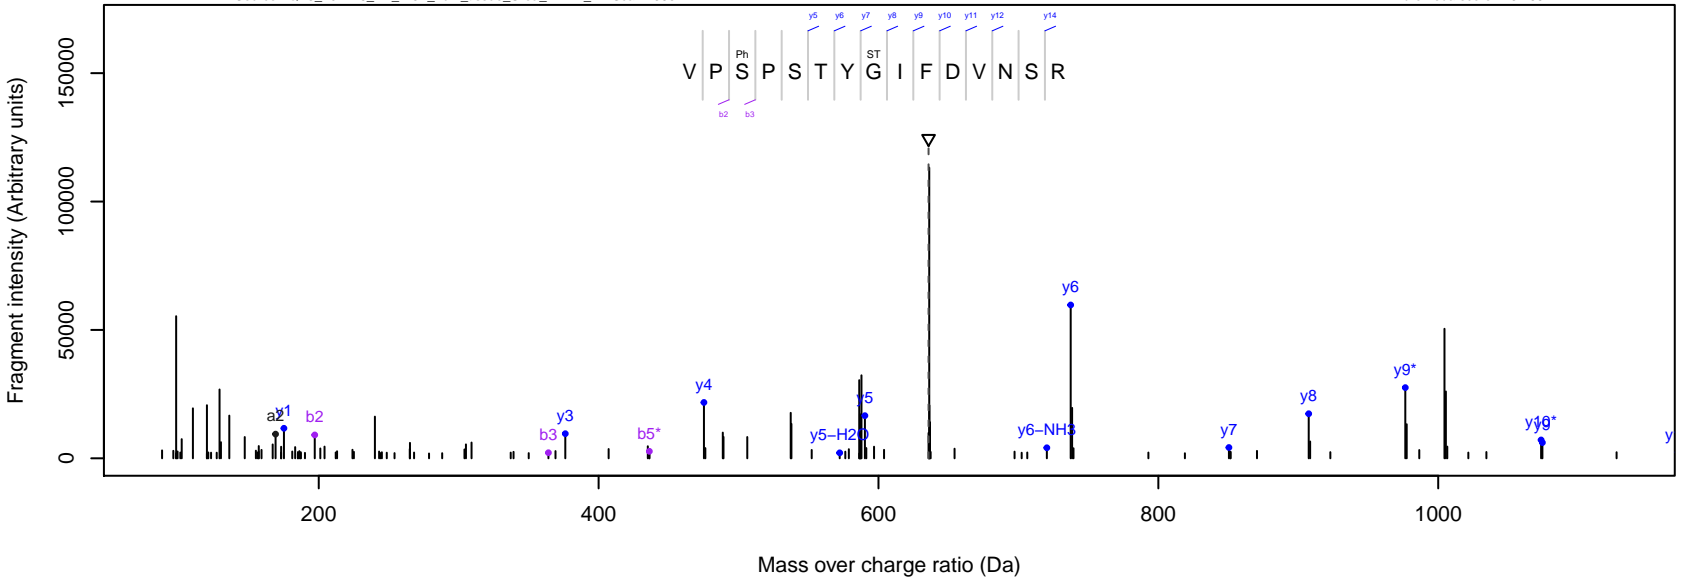

KSAS(Phospho (STY))LSNLHSLDR-3+

Source : QE3\_201126\_FR\_TiOx\_hum\_tissue\_Urea\_RNAB\_H Scan : 12858

Andromeda score : 73.464

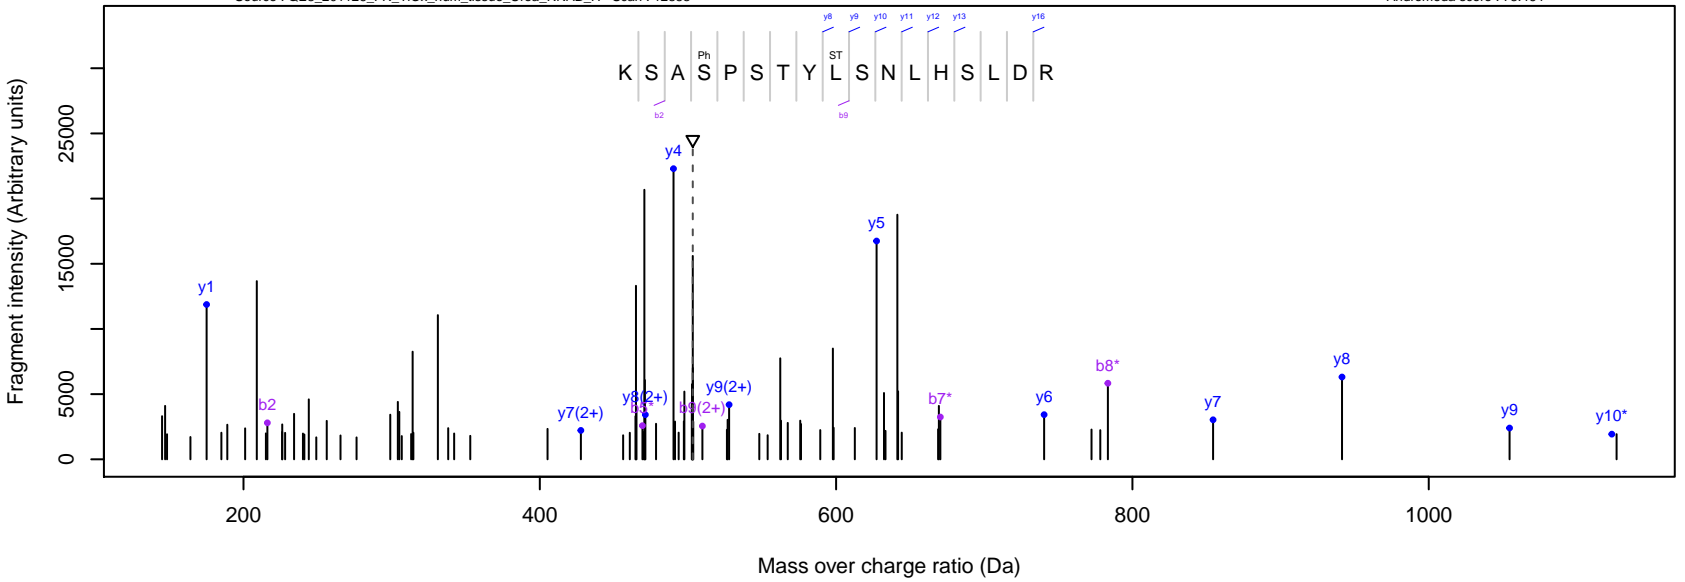

NLVEQHK(SPhospho (STY))SSWINK-3+

Source : QE3\_201126\_FR\_TiOx\_hum\_tissue\_Urea\_RNAB\_N Scan : 13719

Andromeda score : 73.464

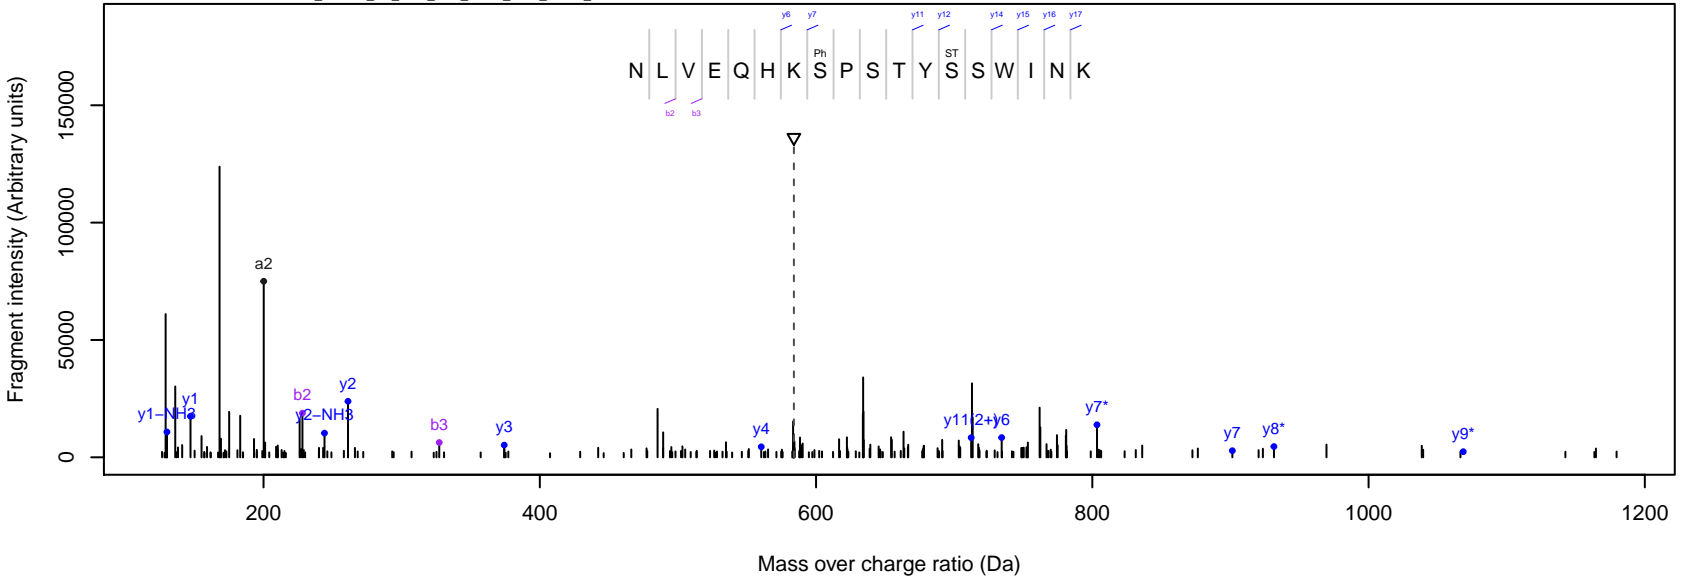

SQLQALHIGLDSS(SPhospho (STY))SIGSPSTYGP(GPhospho (STY))GDAEADDGFPESR-3+

Source : QE3\_201126\_FR\_TiOx\_hum\_tissue\_Urea\_RNAB\_H Scan : 53474

Andromeda score : 73.458

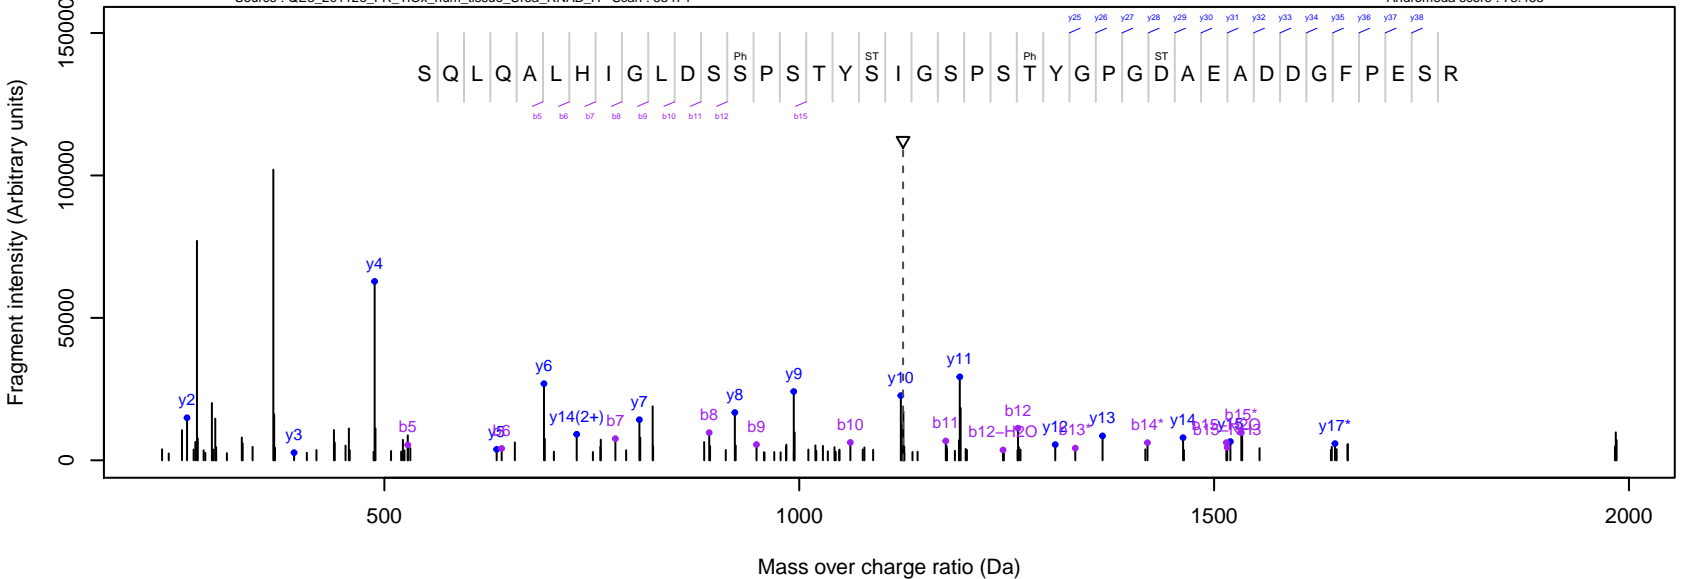

RS(Phospho (STY))SSDLITLPPATTPCPTKK-3+

Source : QE3\_201126\_FR\_TiOx\_hum\_tissue\_Urea\_RNAB\_B Scan : 24053

Andromeda score : 73.435

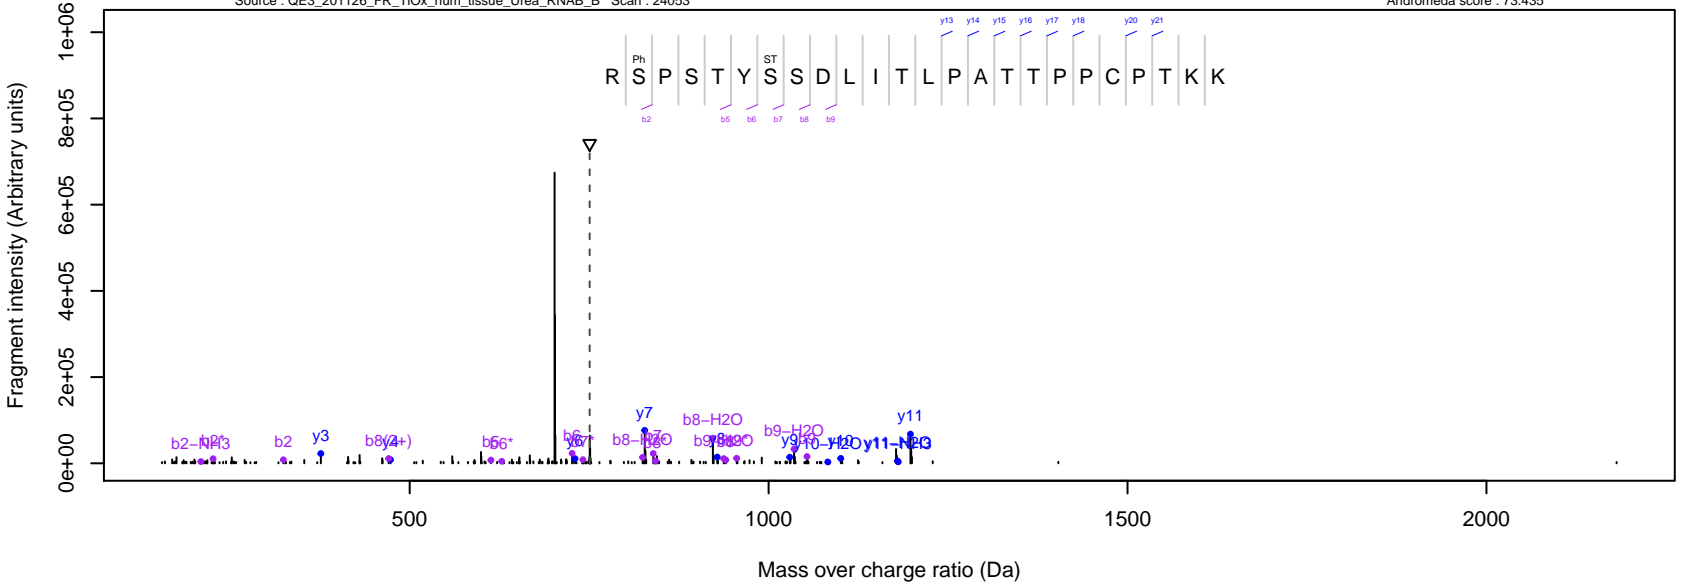

KSS(Phospho (STY))ISS(Phospho (STY))ISGRDDLMOXDYHR-3+

Source : QE3\_201126\_FR\_TiOx\_hum\_tissue\_Urea\_RNAB\_N Scan : 17572

Andromeda score : 73.405

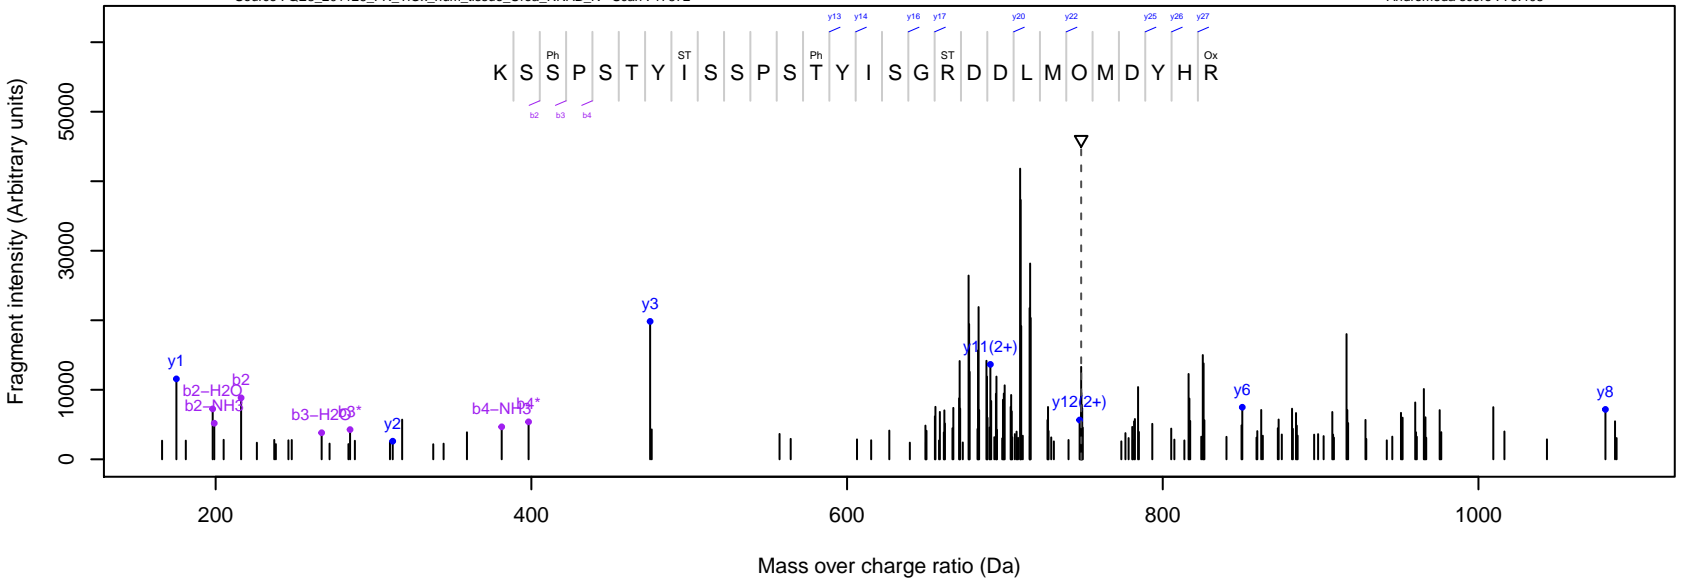

GLEDRVPSVESLLDEESSVPSVPAITVNQGEMSPQR-4+

Source : QE3\_201126\_FR\_TiOx\_hum\_tissue\_Urea\_RNAB\_N Scan : 62609

Andromeda score : 73.394

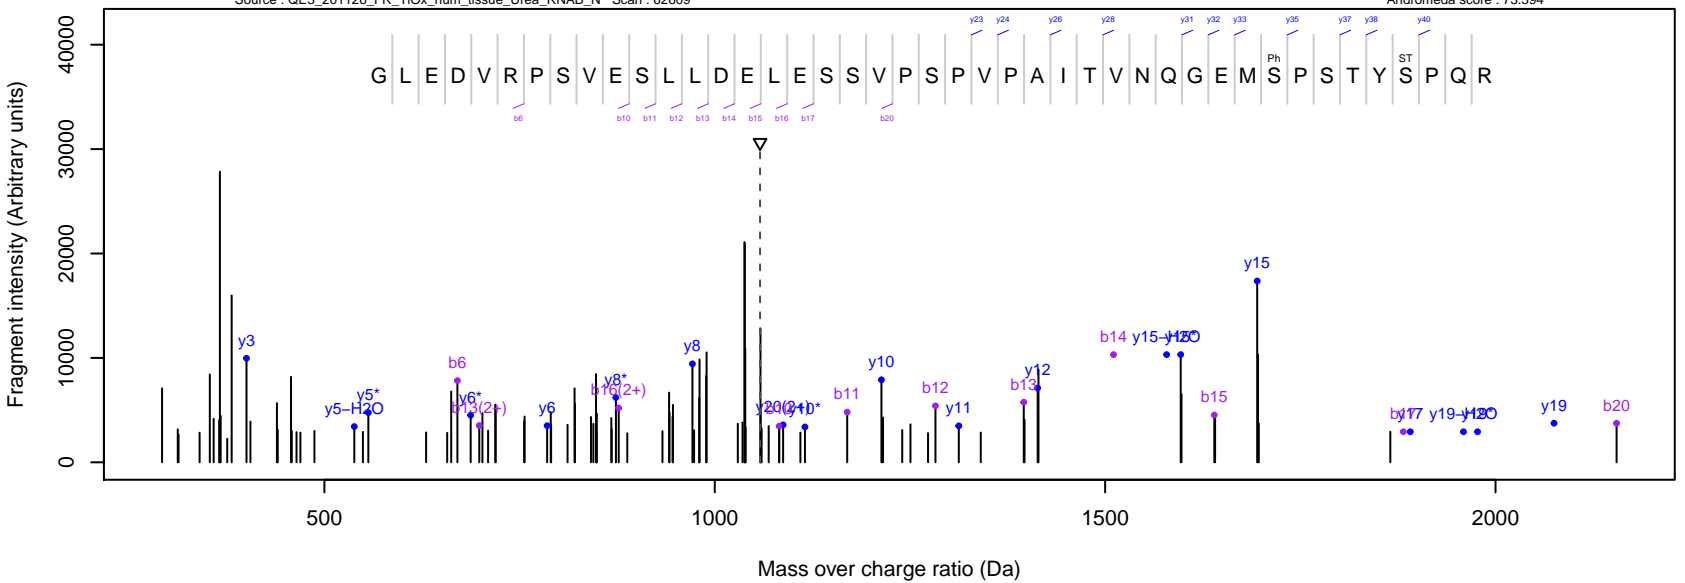

AVPALGKS(Phospho (STY))PPHSGFQQYQQADASK-4+

Source : QE3\_201126\_FR\_TiOx\_hum\_tissue\_Urea\_RNAB\_B Scan : 15085

Andromeda score : 73.389

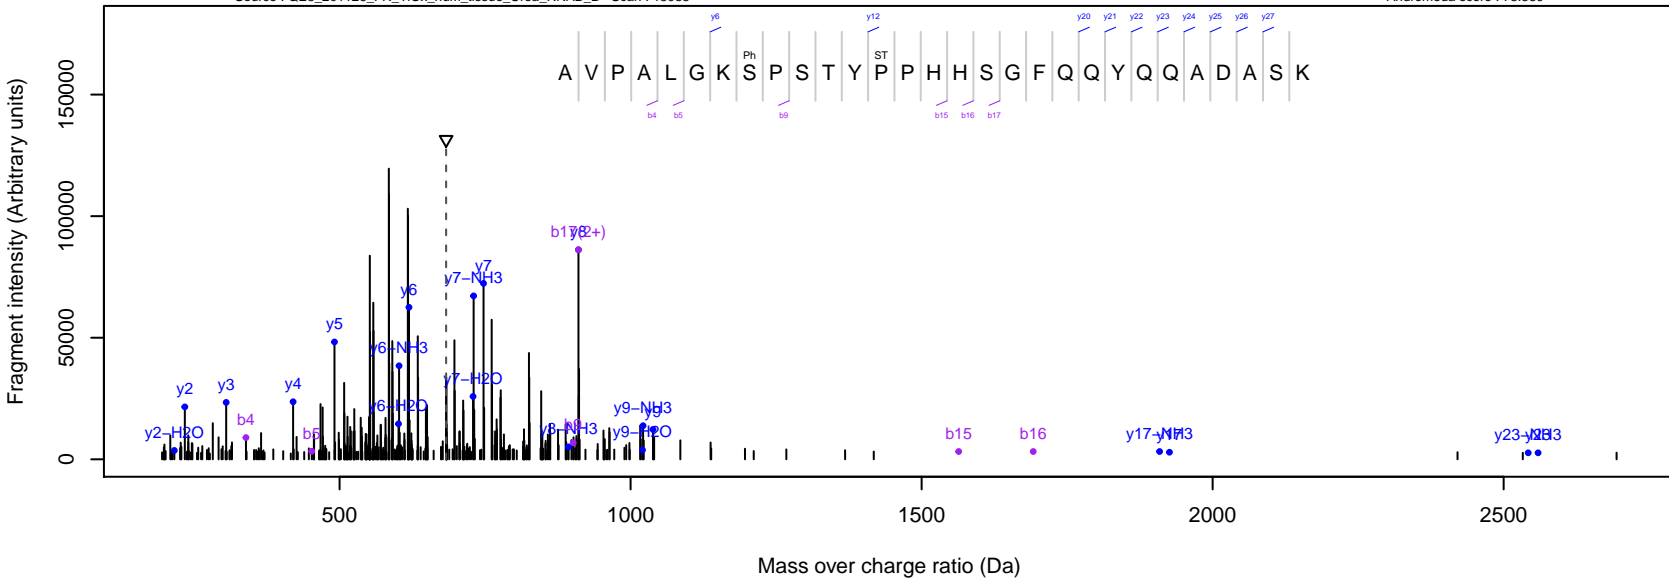

M(Oxidation (M))LQAIS(Phospho (STY))PKQS(Phospho (STY))PS(Phospho (STY))SPTREER-3+

Source : QE3\_201126\_FR\_TiOx\_hum\_tissue\_Urea\_RNAB\_B Scan : 15413

Andromeda score : 73.389

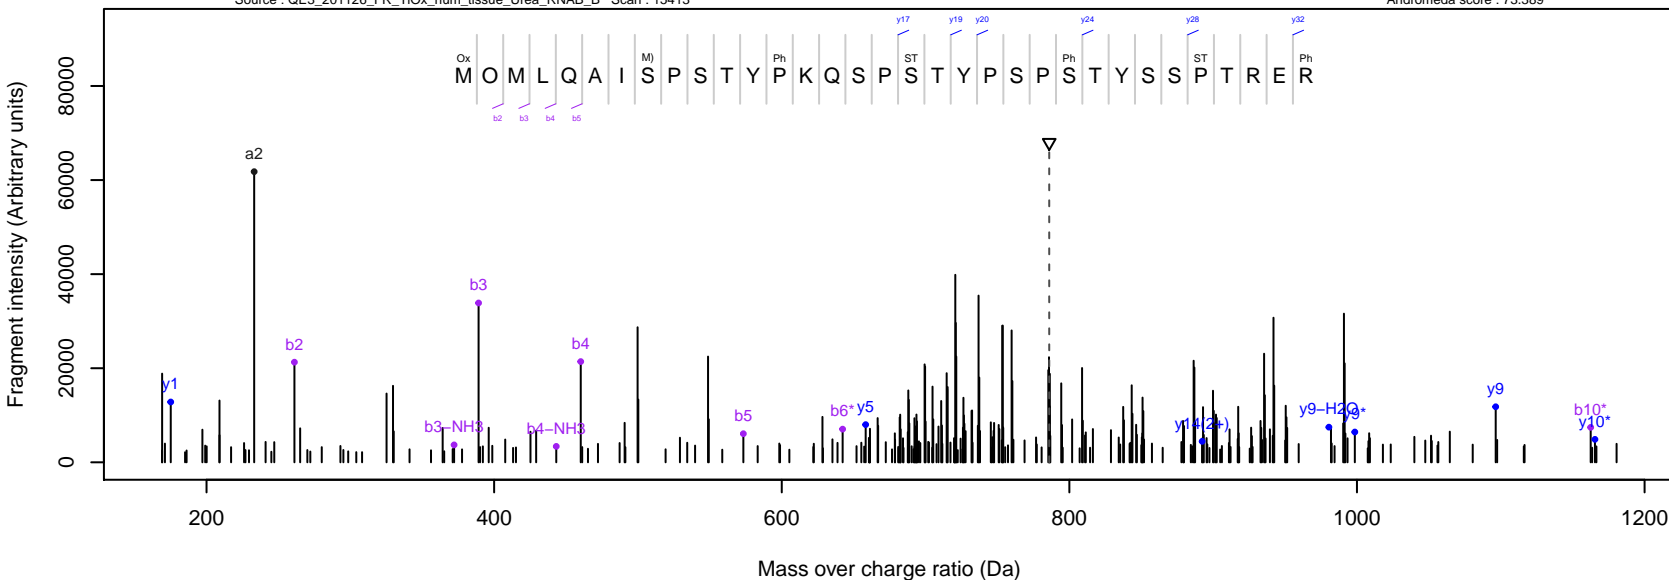

RANS(Phospho (STY))YEDAMMPFGATIIISQLLK-3+

Source : QE3\_201126\_FR\_TiOx\_hum\_tissue\_Urea\_RNAB\_H Scan : 62269

Andromeda score : 73.361

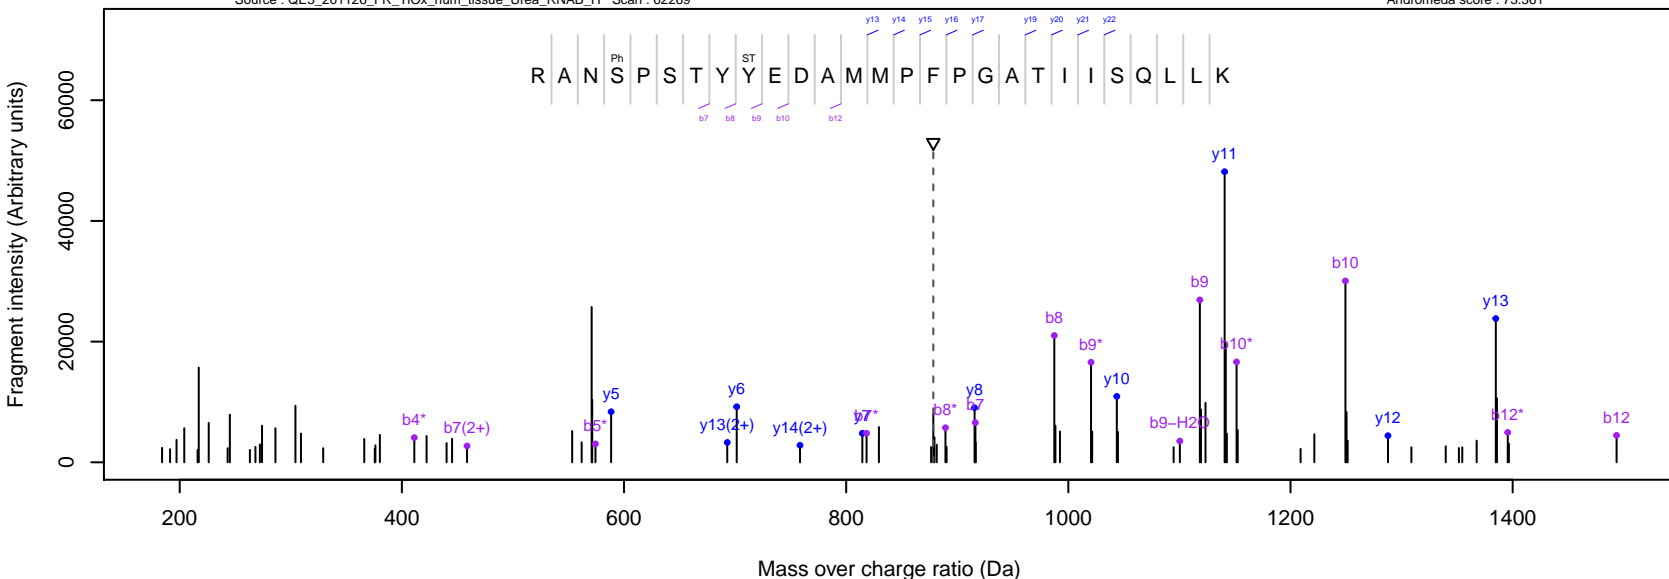



S(Phospho (STY))GSEDEM(Oxidation (M))KEADESTGSGDGPVK-3+

Source : QE3\_201126\_FR\_TiOx\_hum\_tissue\_Urea\_RNAB\_H Scan : 11046

Andromeda score : 73.341

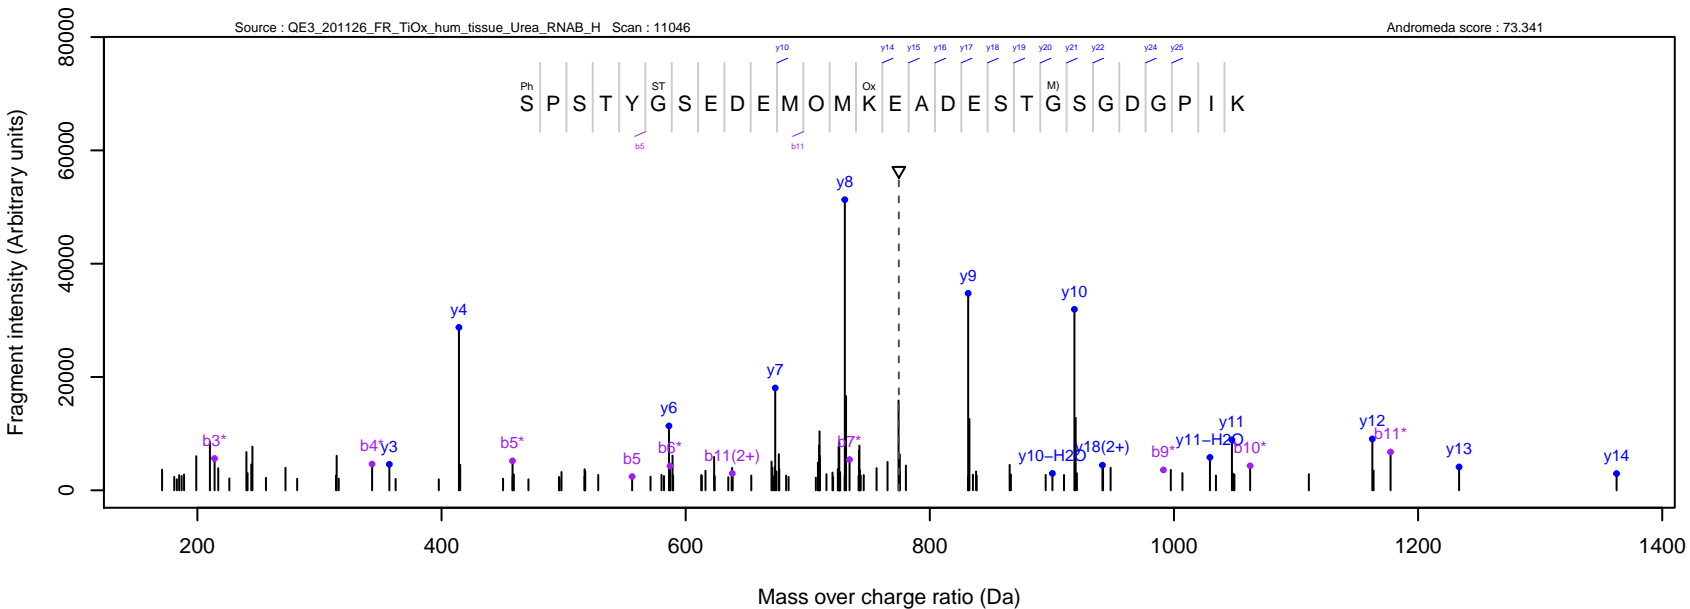

GTGAGGDS(Phospho (STY))GPEEDYLS(Phospho (STY))LGAEACNFMQSSSAK-3+

Source : QE3\_201126\_FR\_TiOx\_hum\_tissue\_Urea\_RNAB\_N Scan : 61578

Andromeda score : 73.337

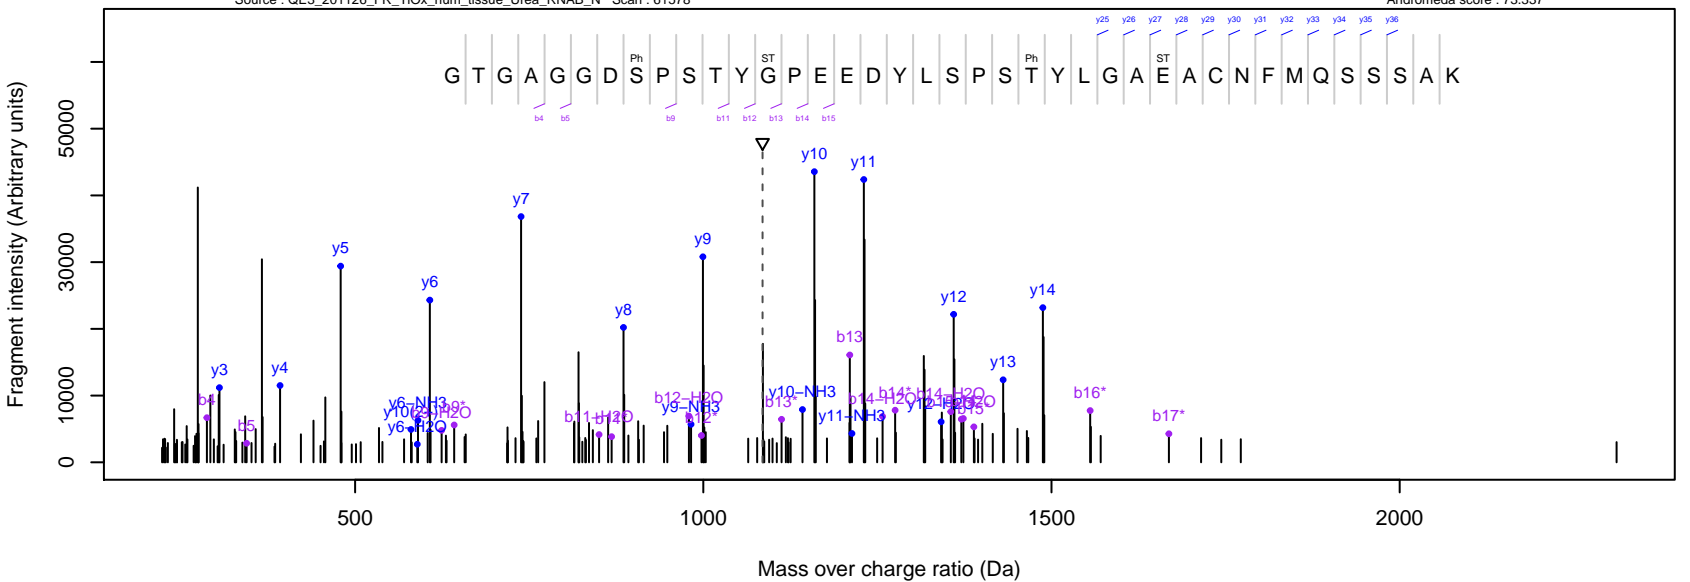

LLDLS(Phospho (STY))DS(Phospho (STY))TSVASFSADETDGNLPESR-3+

Source : QE3\_201126\_FR\_TiOx\_hum\_tissue\_Urea\_RNAB\_H Scan : 57603

Andromeda score : 73.322

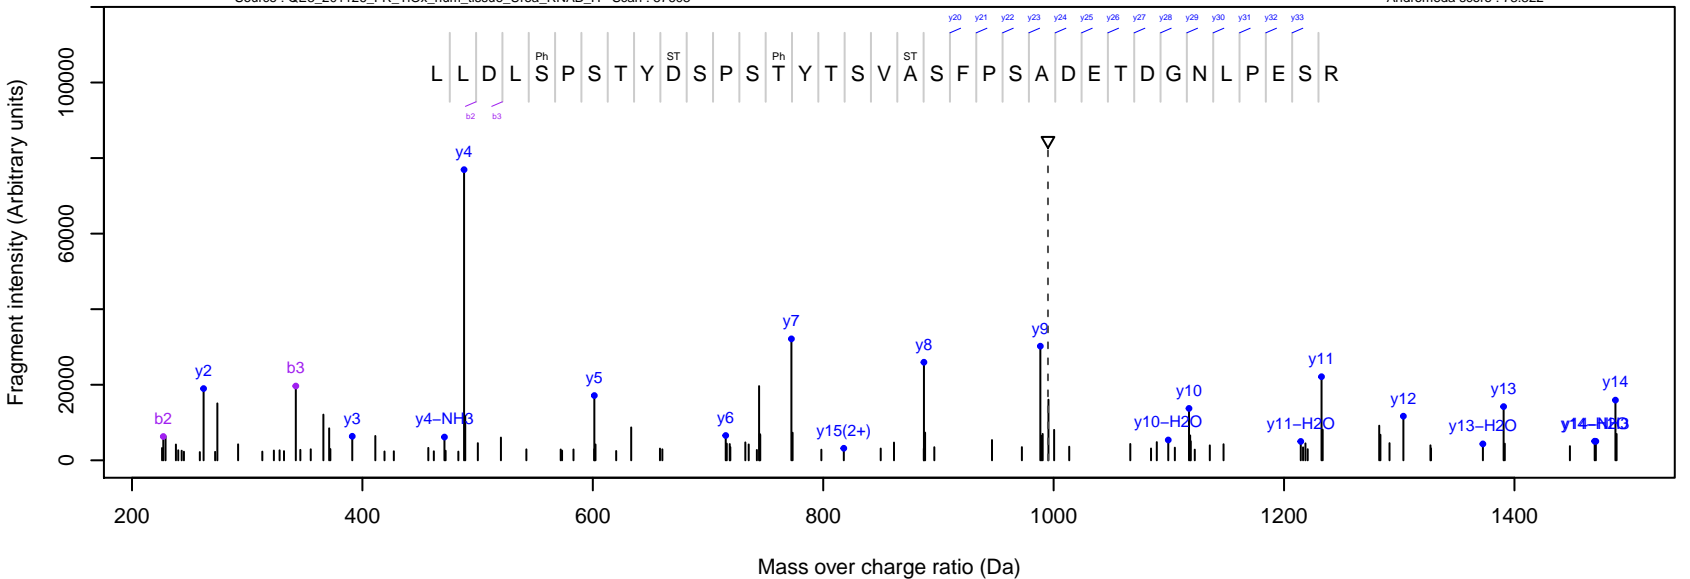

SPPQNIPNYLEDTPINVCGGHS(Phospho (STY))QQSPTEK-3+

Source : QE3\_201126\_FR\_TIOx\_hum\_tissue\_Urea\_RNAB\_H Scan : 40186

Andromeda score : 73.303

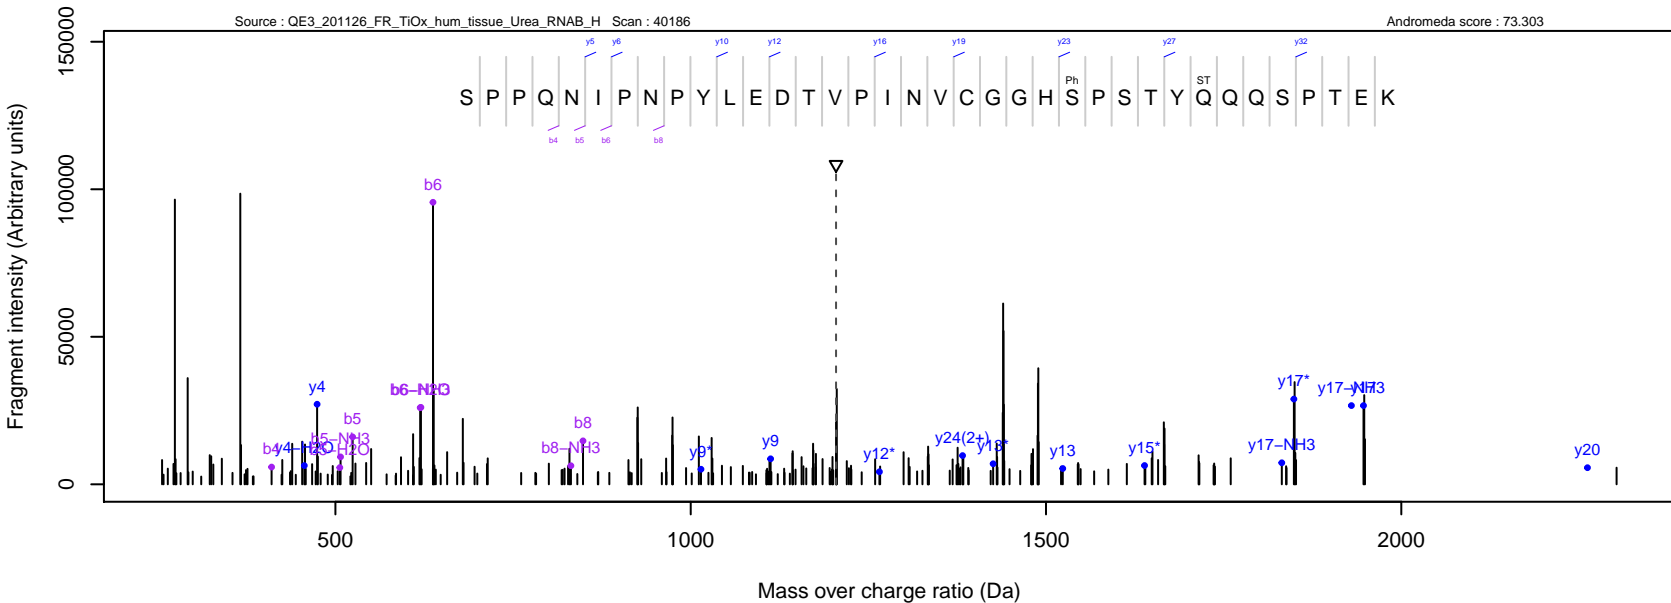

VQDLSAGGQSLTDSGPERRPEGGPGAQAAPS(Phospho (STY))SPR-4+

Source : QE3\_201126\_FR\_TIOx\_hum\_tissue\_Urea\_RNAB\_H Scan : 18017

Andromeda score : 73.303

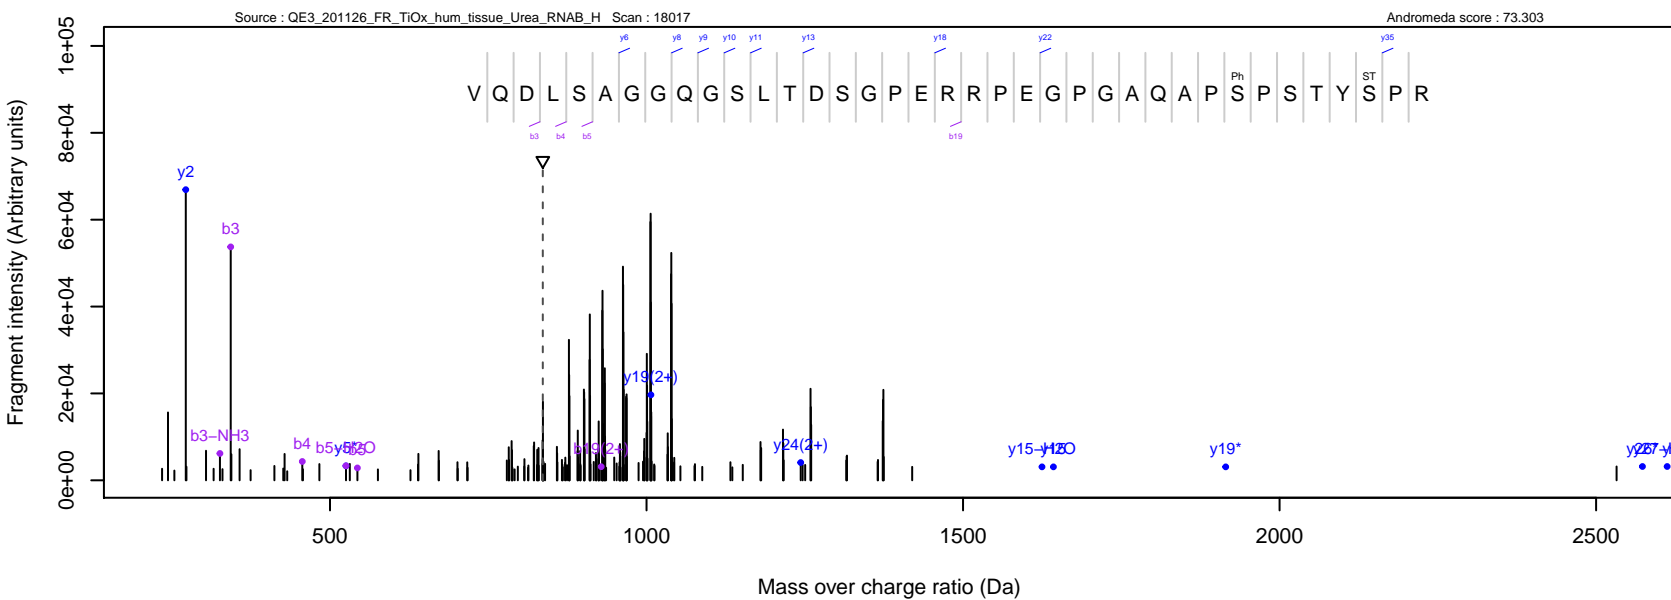

RHS(Phospho (STY))TSDKM(Oxidation (M))HFPR-3+

Source : QE3\_201126\_FR\_TIOx\_hum\_tissue\_Urea\_RNAB\_H Scan : 4797

Andromeda score : 73.279

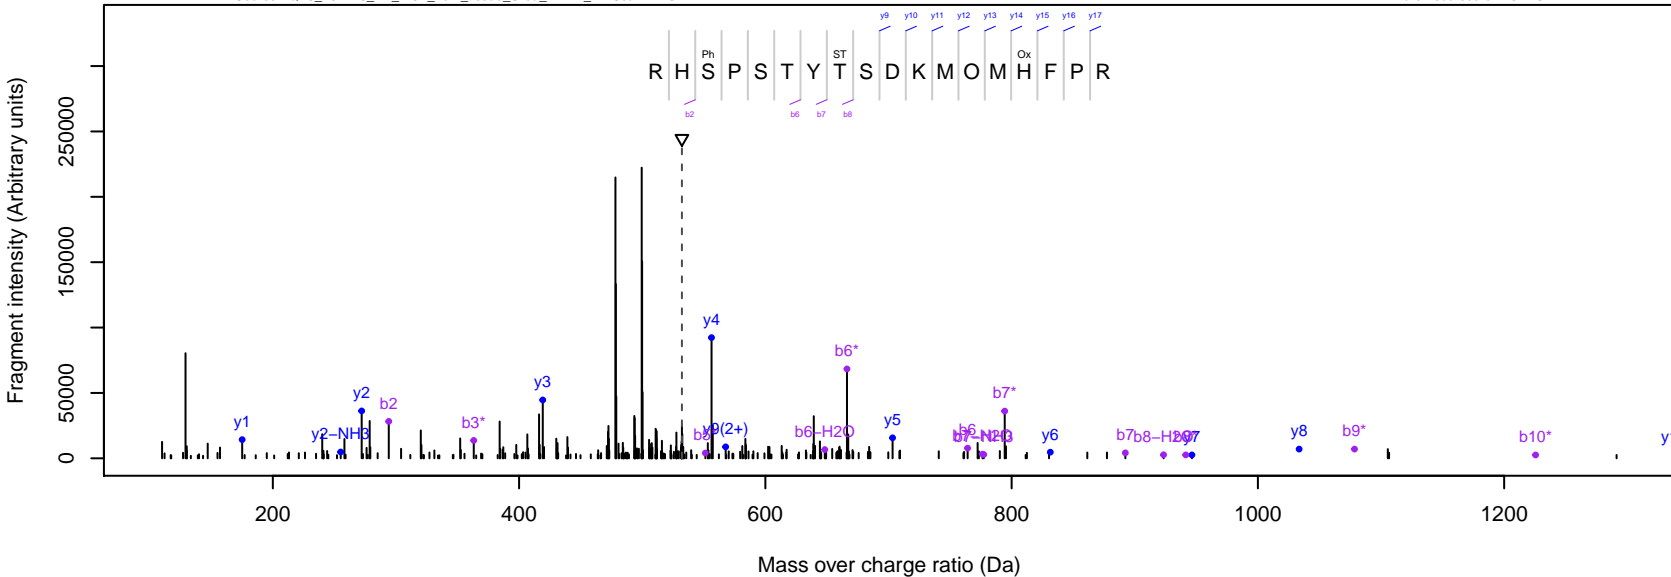



VKEEPPS(Phospho (STY))PPQSPR-3+

Source : QE3\_201126\_FR\_TiOx\_hum\_tissue\_Urea\_RNAB\_H Scan : 10521

Andromeda score : 73.168

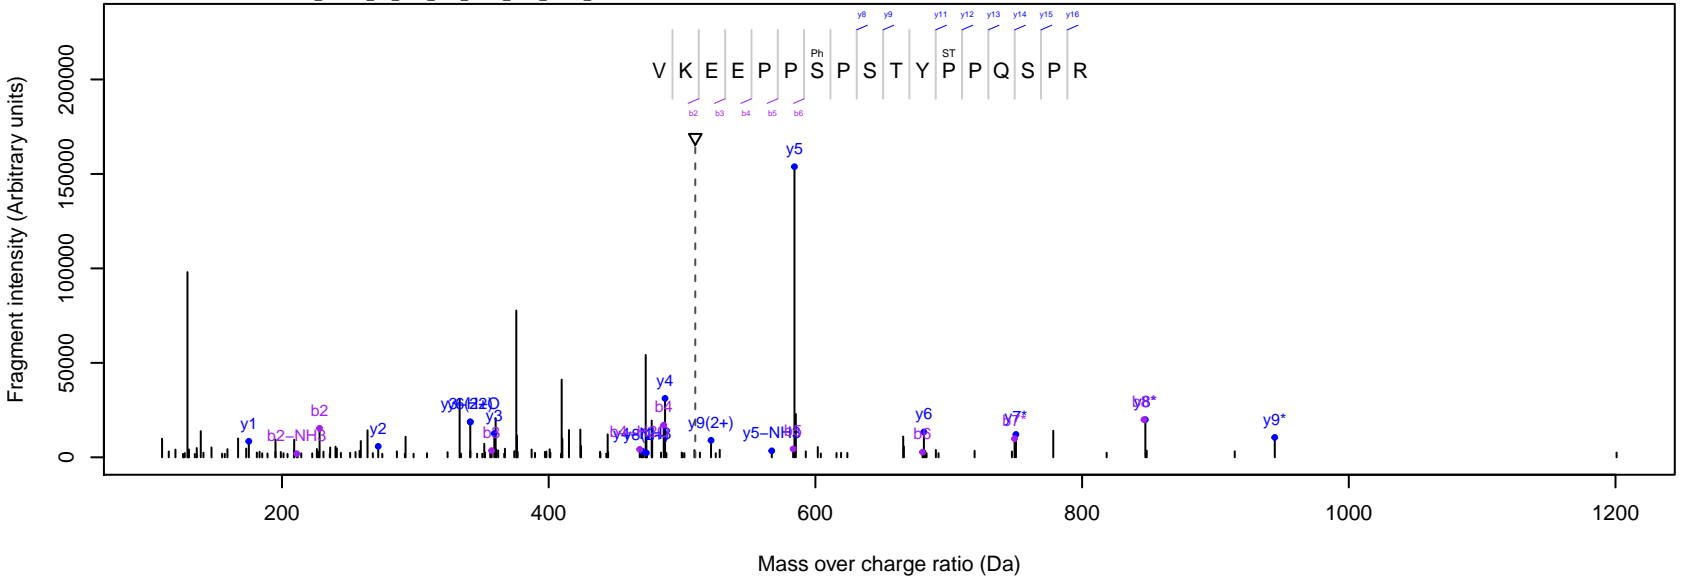

SEEHS(Phospho (STY))PPRGINDR-3+

Source : QE3\_201126\_FR\_TiOx\_hum\_tissue\_Urea\_RNAB\_N Scan : 5218

Andromeda score : 73.156

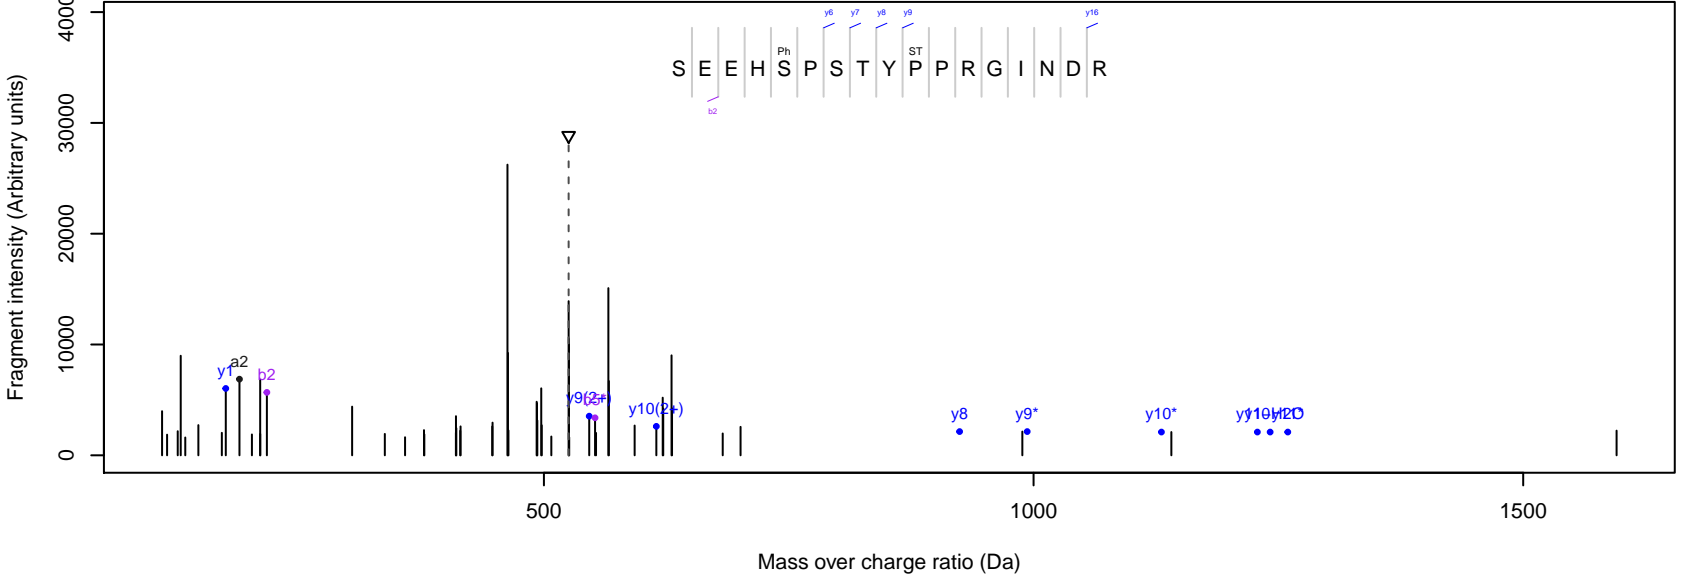

QNTASPGS(Phospho (STY))PVNSHLPGS(Phospho (STY))PK-3+

Source : QE3\_201126\_FR\_TiOx\_hum\_tissue\_Urea\_RNAB\_N Scan : 17940

Andromeda score : 73.109

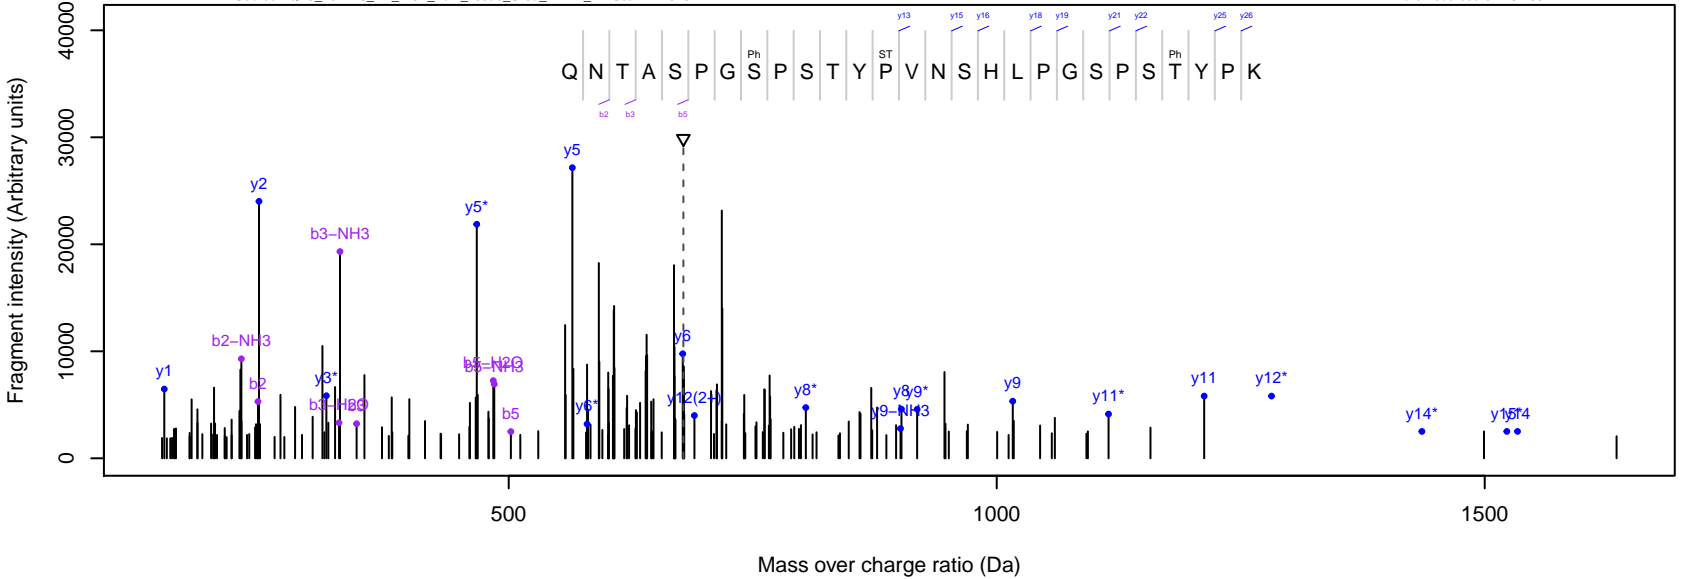

ERVDDSTGTVIS(Phospho (STY))DVEEDAGELSR-3+

Source : QE3\_201126\_FR\_TIOx\_hum\_tissue\_Urea\_RNAB\_H Scan : 49090

Andromeda score : 73.107

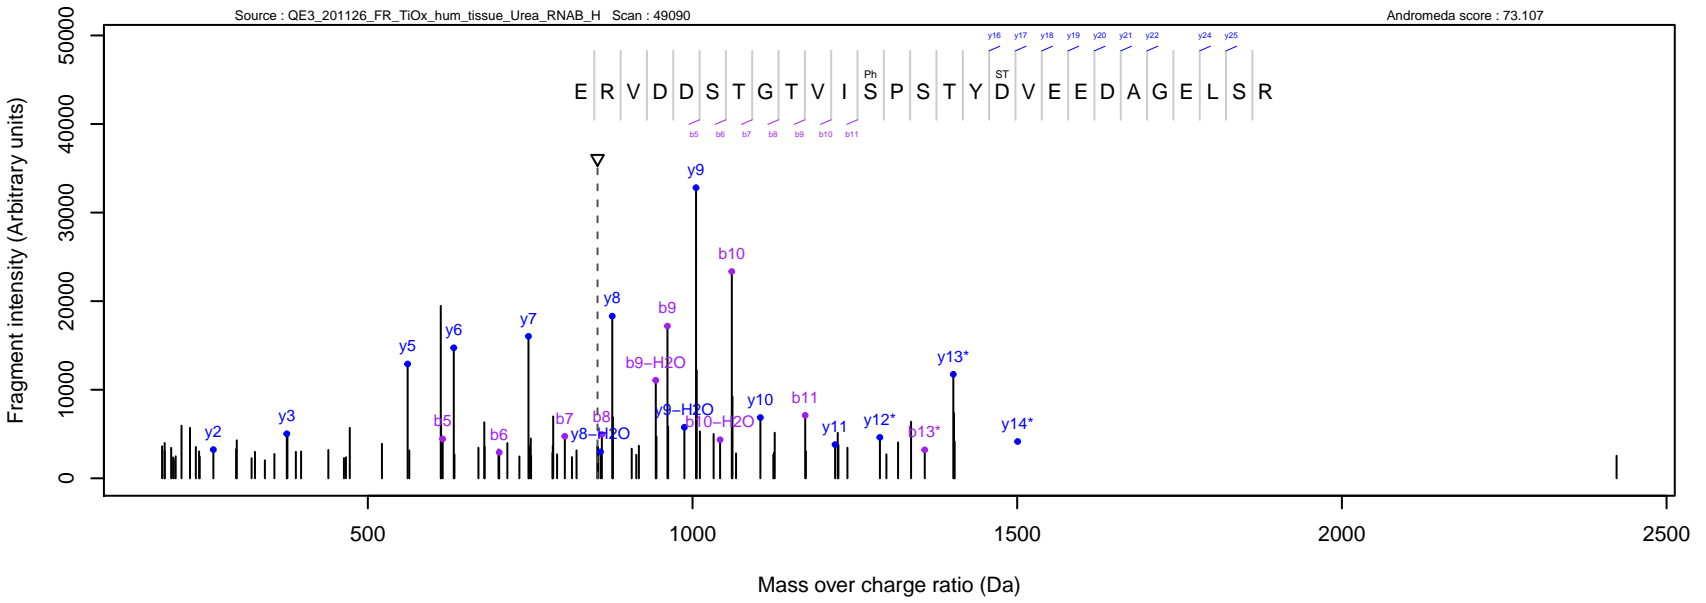

M(Oxidation (M))SS(Phospho (STY))PPS(Phospho (STY))SPQKCPSP(Phospho (STY))PINEHNLGIK-3+

Source : QE3\_201126\_FR\_TIOx\_hum\_tissue\_Urea\_RNAB\_B Scan : 23477

Andromeda score : 73.107

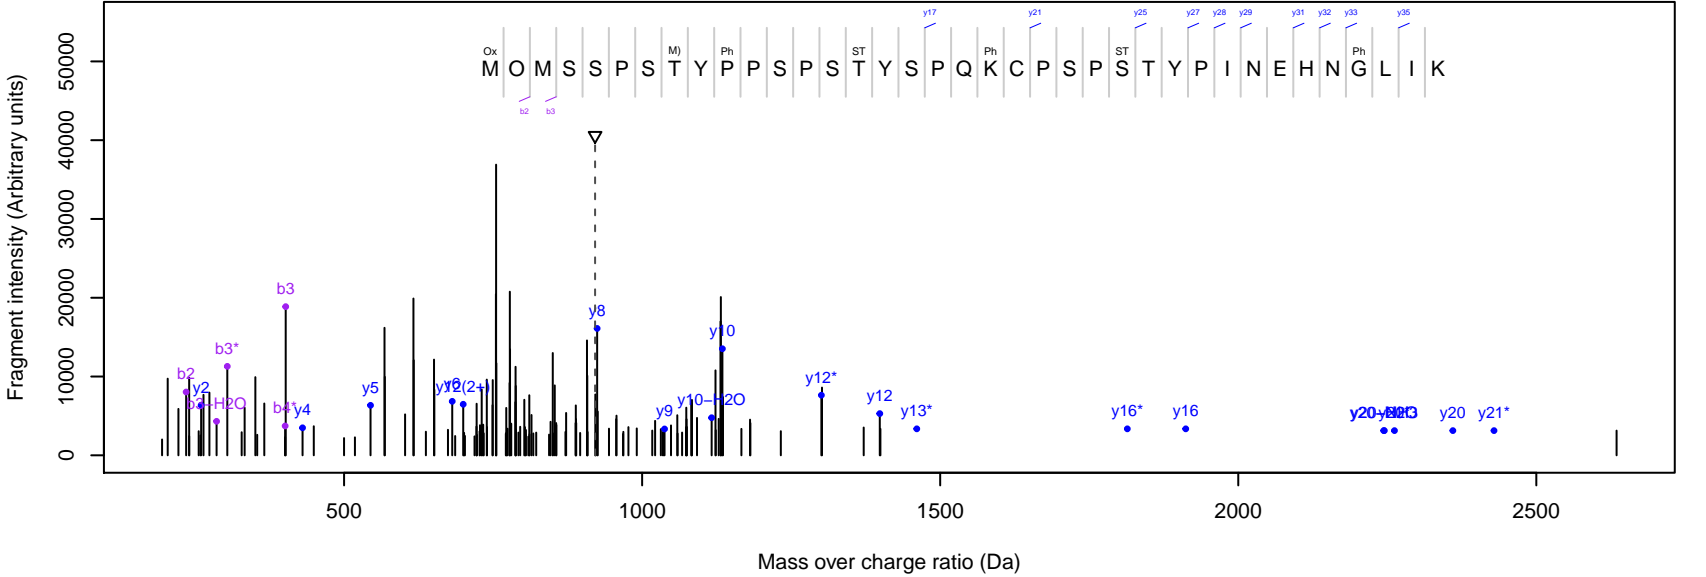

KGPS(Phospho (STY))YGFNLSHSDK-3+

Source : QE3\_201126\_FR\_TIOx\_hum\_tissue\_Urea\_RNAB\_H Scan : 15943

Andromeda score : 72.968

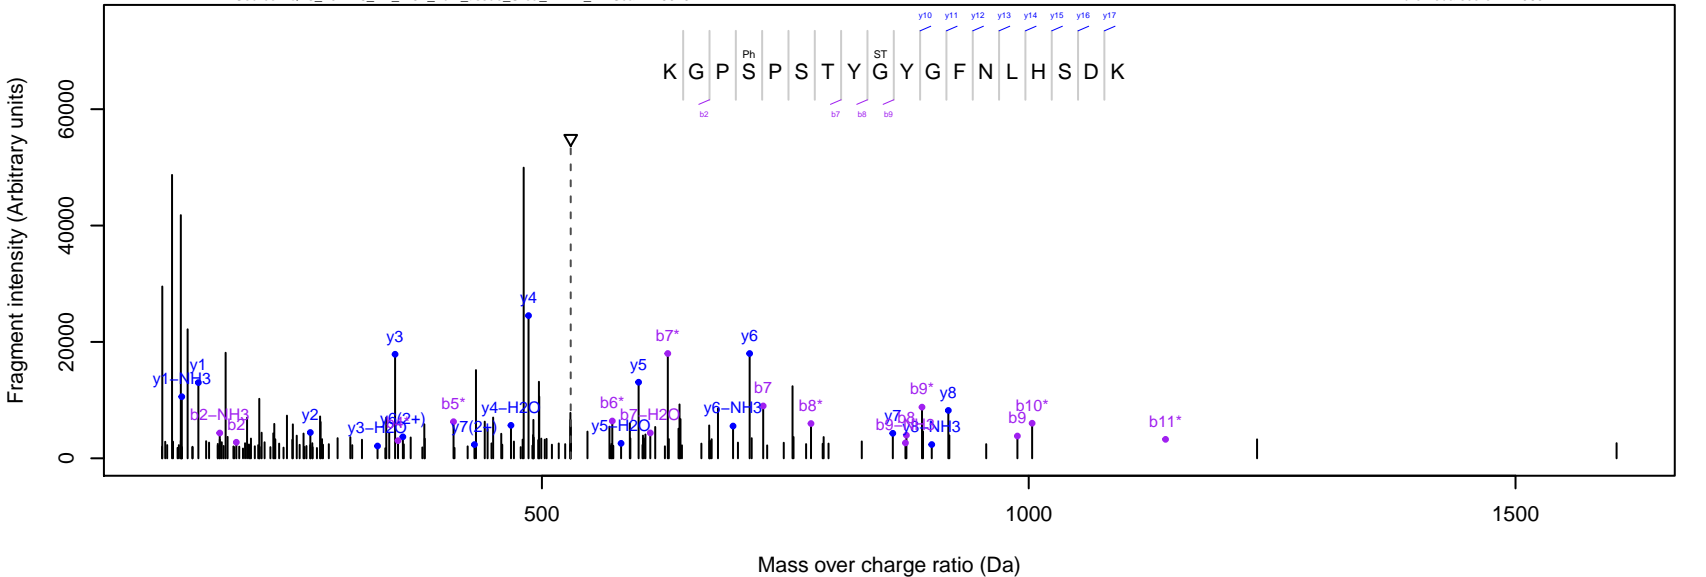

RGGIPAS(Phospho (STY))PIDPFQSR-3+

Source : QE3\_201126\_FR\_TiOx\_hum\_tissue\_Urea\_RNAB\_H Scan : 33066

Andromeda score : 72.968

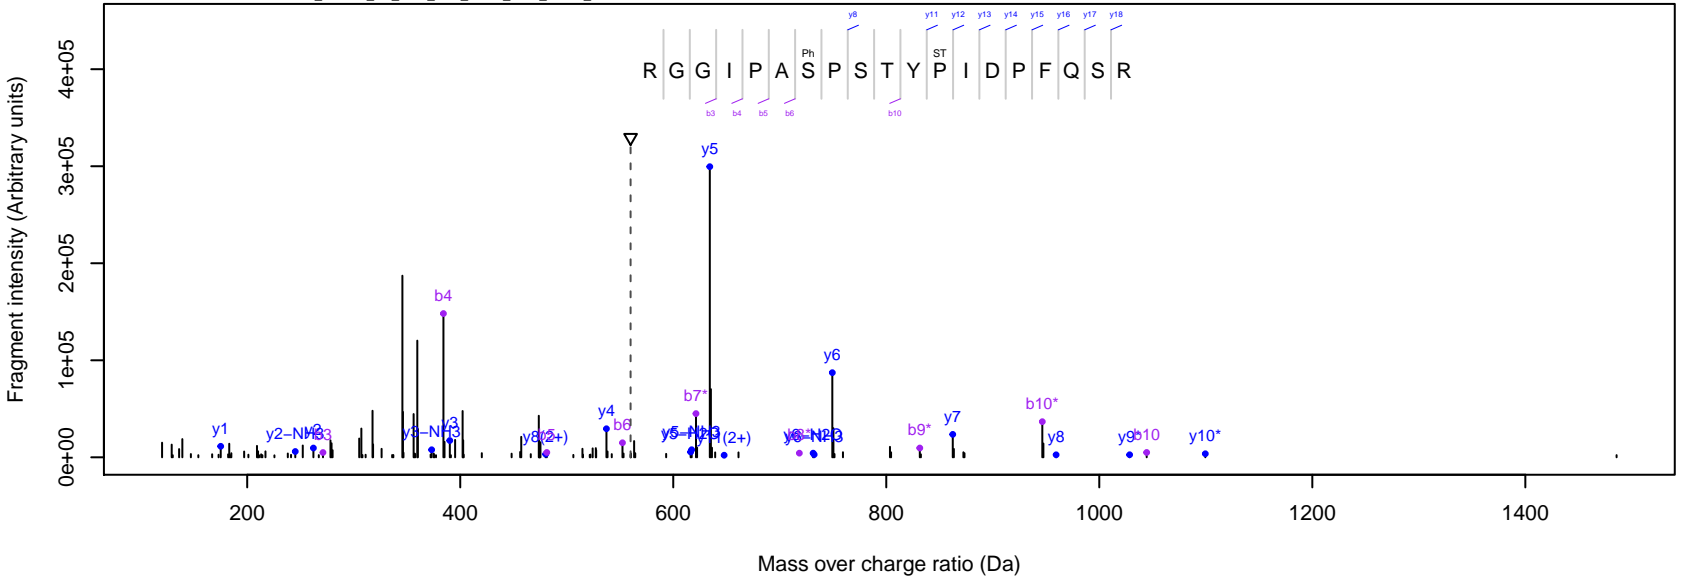

AQPSAS(Phospho (STY))LGVGYR-2+

Source : QE3\_201126\_FR\_TiOx\_hum\_tissue\_Urea\_RNAB\_N Scan : 21915

Andromeda score : 72.958

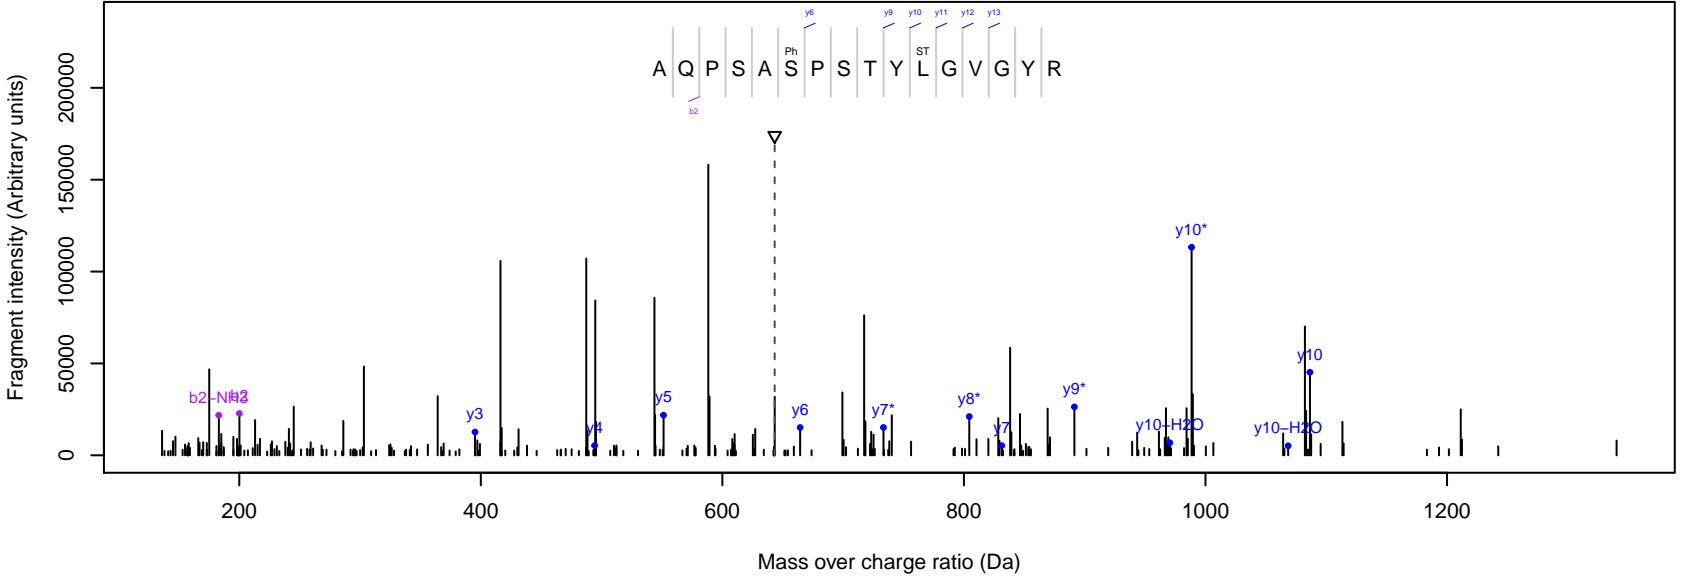

VHHEPQLS(Phospho (STY))DKVHND AQSFDYDHD A FLGAE EAK-3+

Source : QE3\_201126\_FR\_TiOx\_hum\_tissue\_Urea\_RNAB\_B Scan : 25562

Andromeda score : 72.943

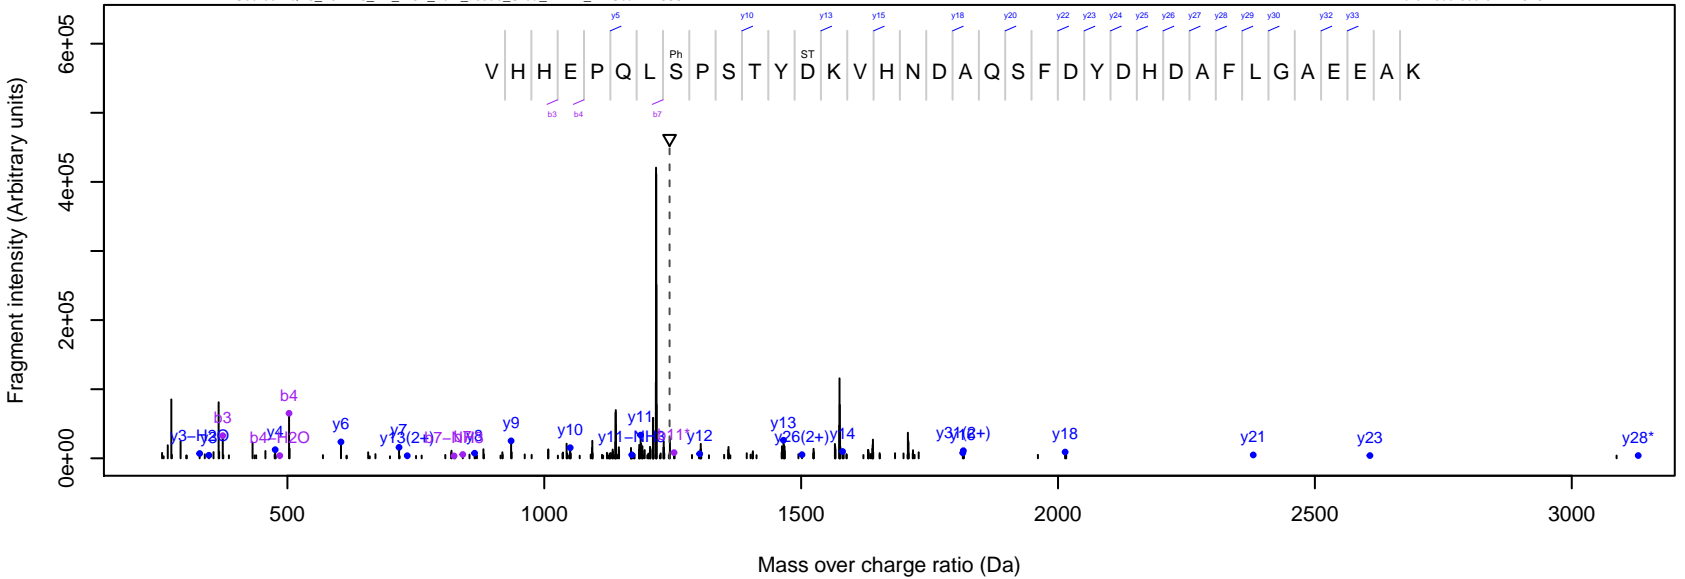

VIHDFNGIVEGLM(Oxidation (M))TTVHAITAT(Phospho (STY))QKTVDGPSGK-4+

Source : QE3\_201126\_FR\_TIOx\_hum\_tissue\_Urea\_RNAB\_H Scan : 46127

Andromeda score : 72.943

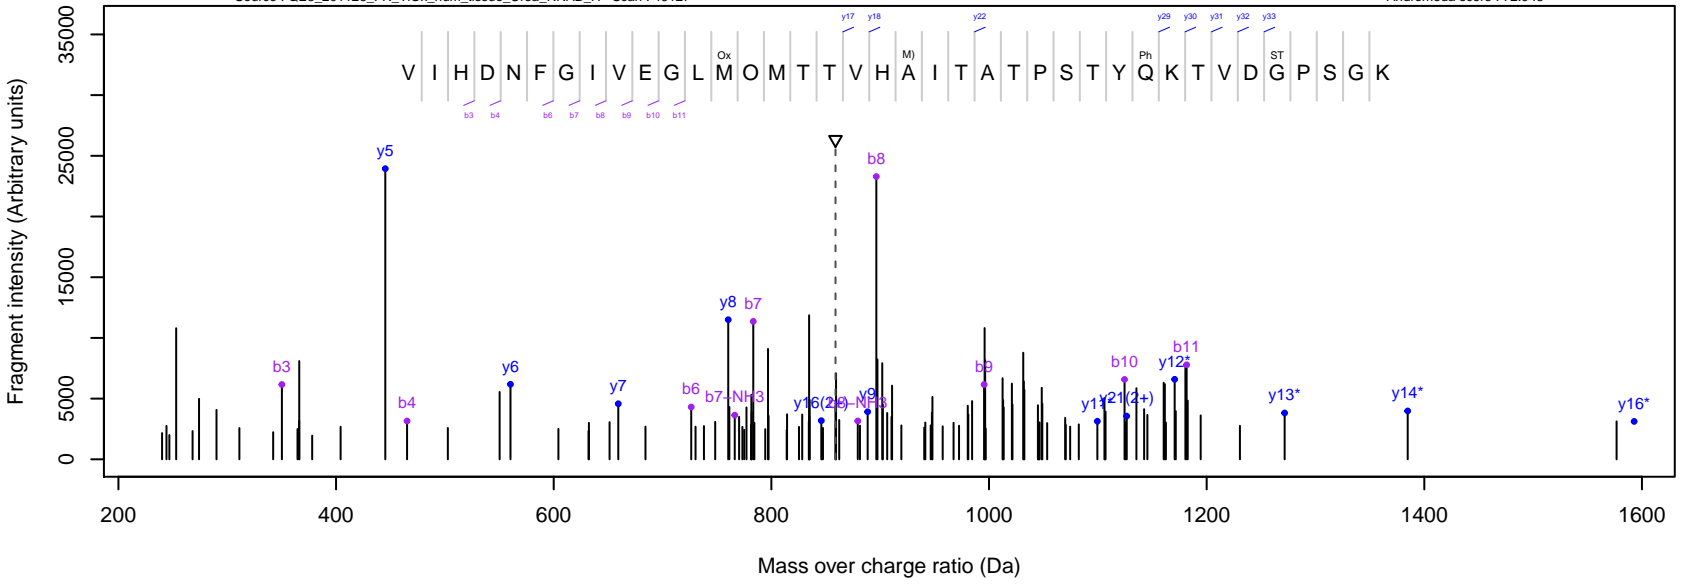

(Acetyl (Protein N-term))TTYS(Phospho (STY))DKGAKPER-2+

Source : QE3\_201126\_FR\_TIOx\_hum\_tissue\_Urea\_RNAB\_H Scan : 6440

Andromeda score : 72.937

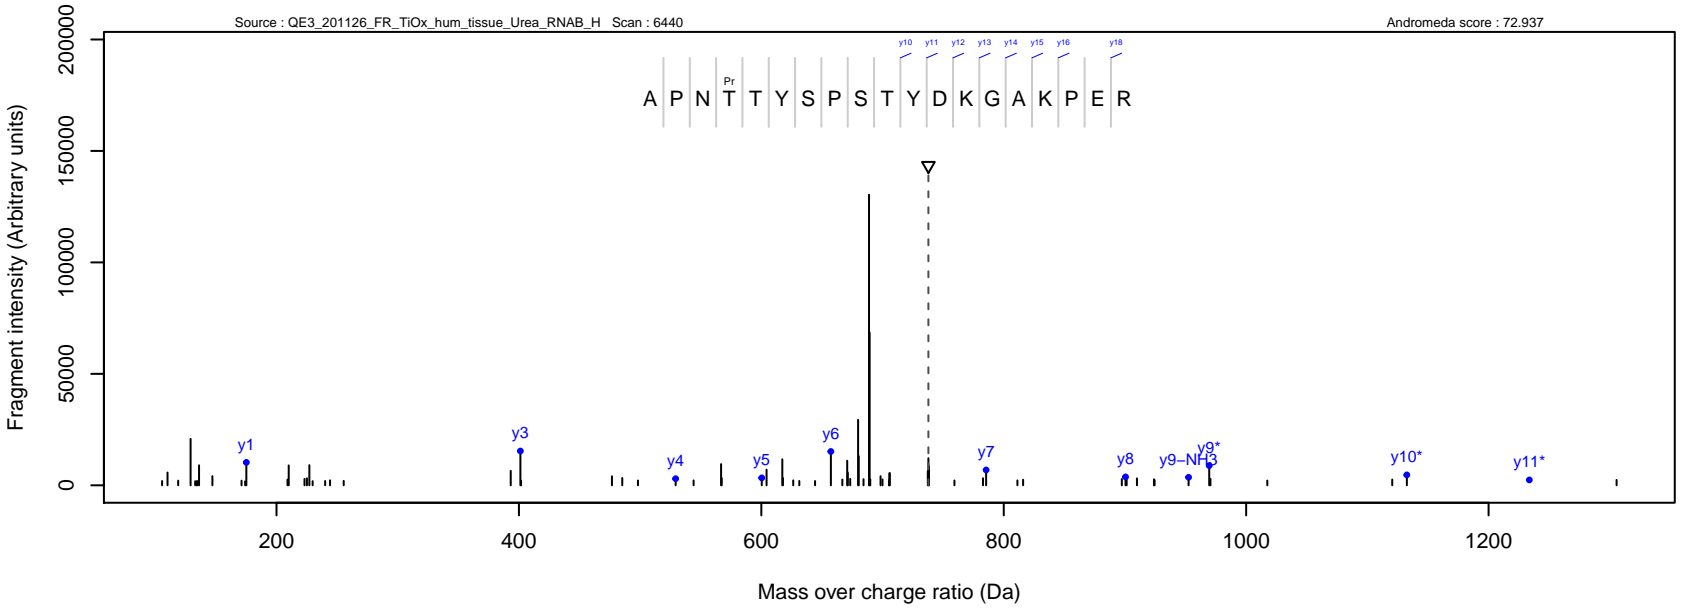

M(Oxidation (M))LQAIS(Phospho (STY))PKQS(Phospho (STY))PSSSPTR-3+

Source : QE3\_201126\_FR\_TIOx\_hum\_tissue\_Urea\_RNAB\_N Scan : 15385

Andromeda score : 72.916

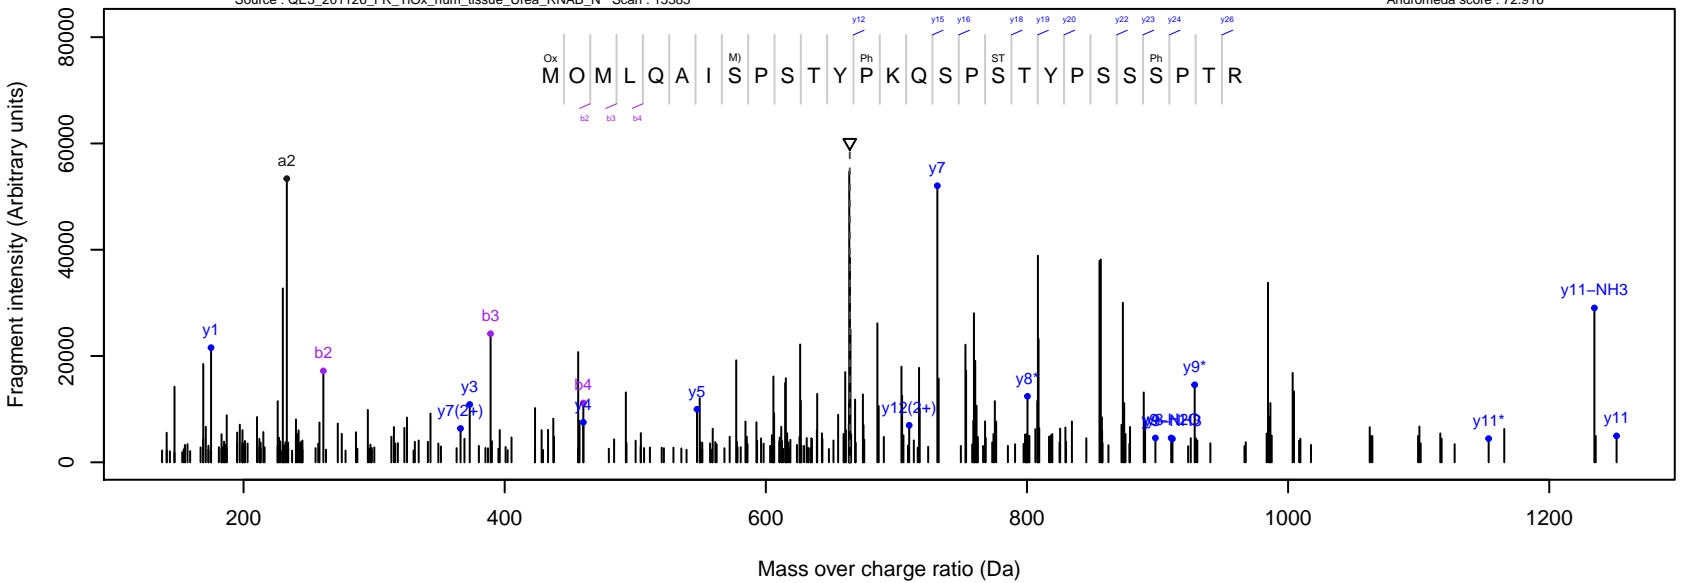

SAKPET(Phospho (STY))VIDSLLQ-2+

Source : QE3\_201126\_FR\_TiOx\_hum\_tissue\_Urea\_RNAB\_N Scan : 53129

Andromeda score : 72.891

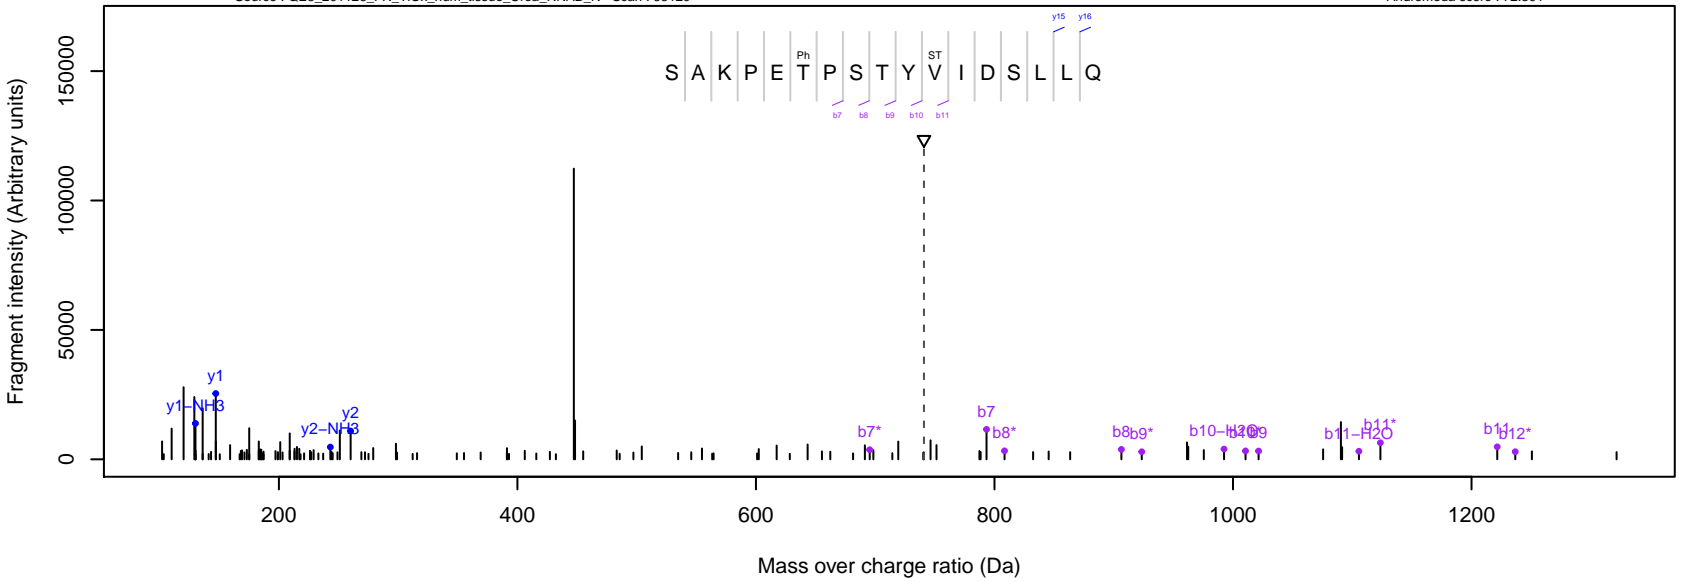

EKVS(Phospho (STY))SIDLEISLSSLLDDM(Oxidation (M))TK-3+

Source : QE3\_201126\_FR\_TiOx\_hum\_tissue\_Urea\_RNAB\_N Scan : 60015

Andromeda score : 72.876

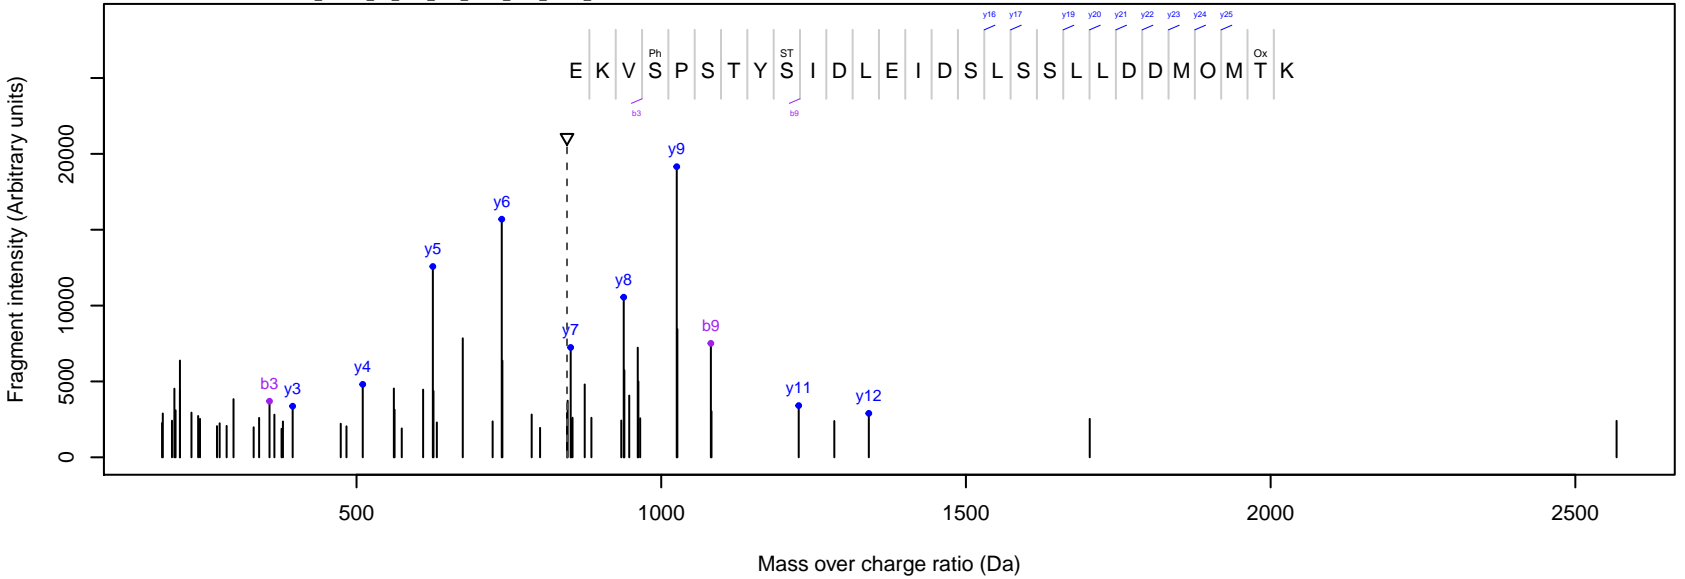

LIRPEYAWIVQPVSGAVYDRPGAS(Phospho (STY))PK-3+

Source : QE3\_201126\_FR\_TiOx\_hum\_tissue\_Urea\_RNAB\_H Scan : 45917

Andromeda score : 72.842

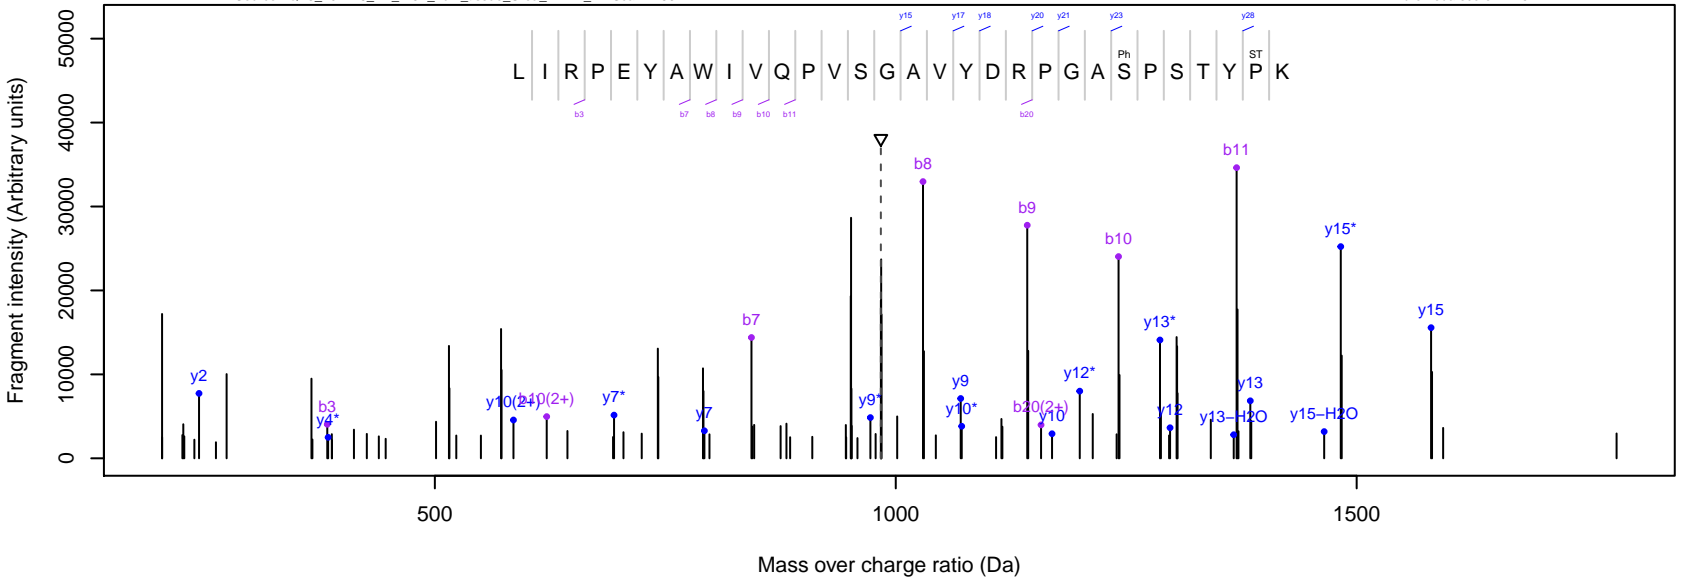



**KEVLAS(Phospho (STY))PDLRWGSR-3+**

Source : QE3\_201126\_FR\_TiOx\_hum\_tissue\_Urea\_RNAB\_N Scan : 26320

Andromeda score : 72.819

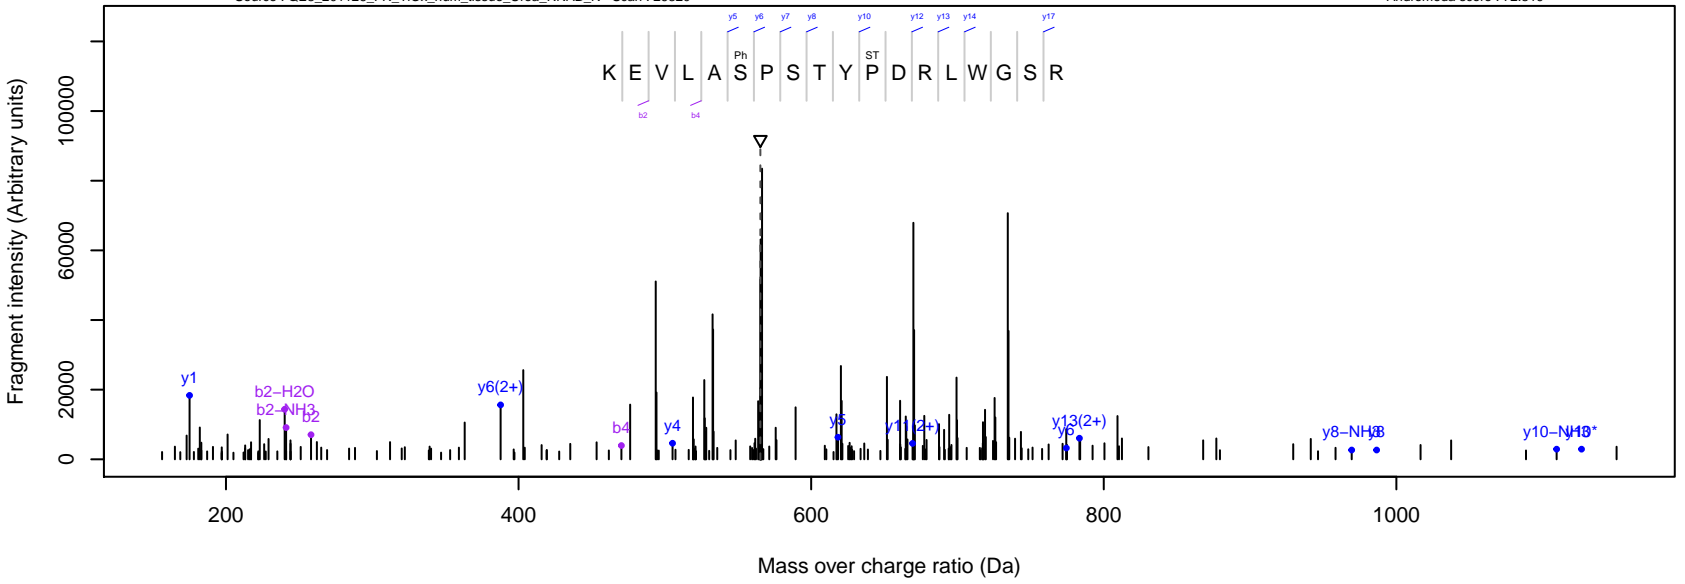

**S(Phospho (STY))MPVLGSVSSVTK-2+**

Source : QE3\_201126\_FR\_TiOx\_hum\_tissue\_Urea\_RNAB\_H Scan : 36517

Andromeda score : 72.815

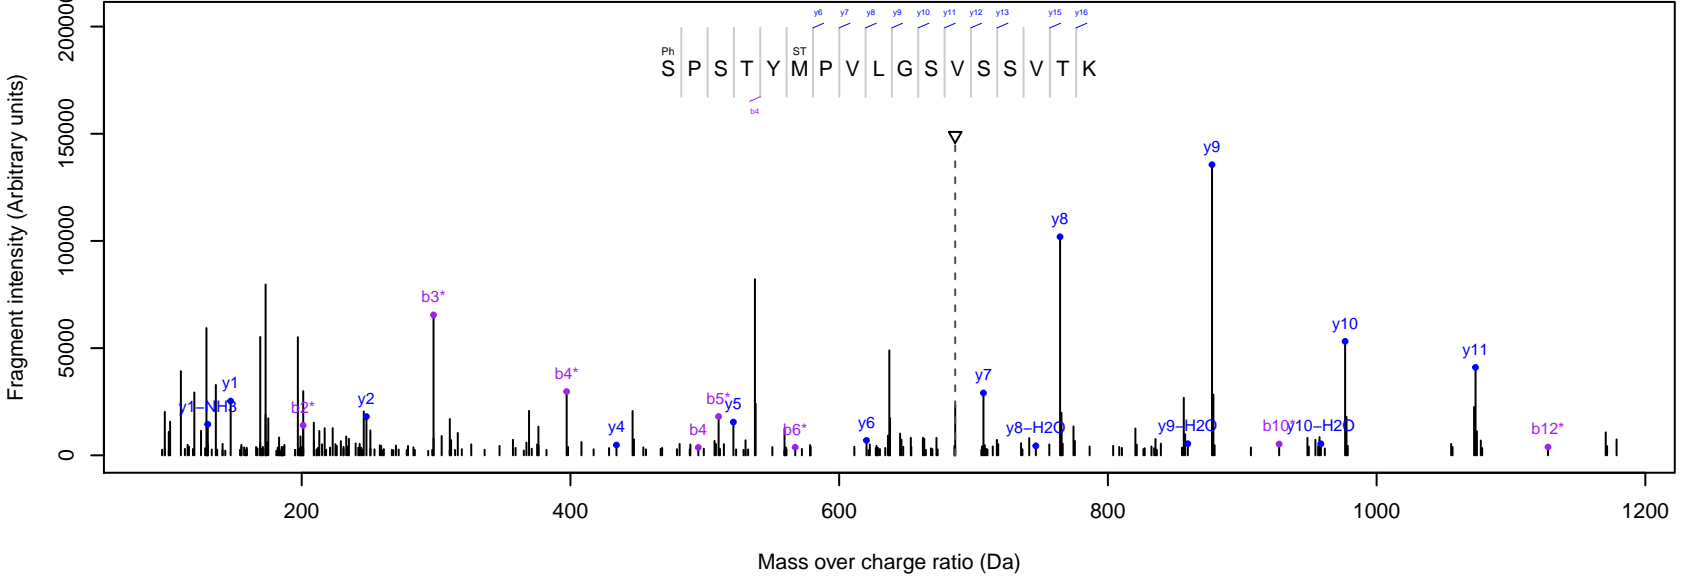

**RGS(Phospho (STY))LEENLFHEMETCLK-3+**

Source : QE3\_201126\_FR\_TiOx\_hum\_tissue\_Urea\_RNAB\_H Scan : 48105

Andromeda score : 72.805

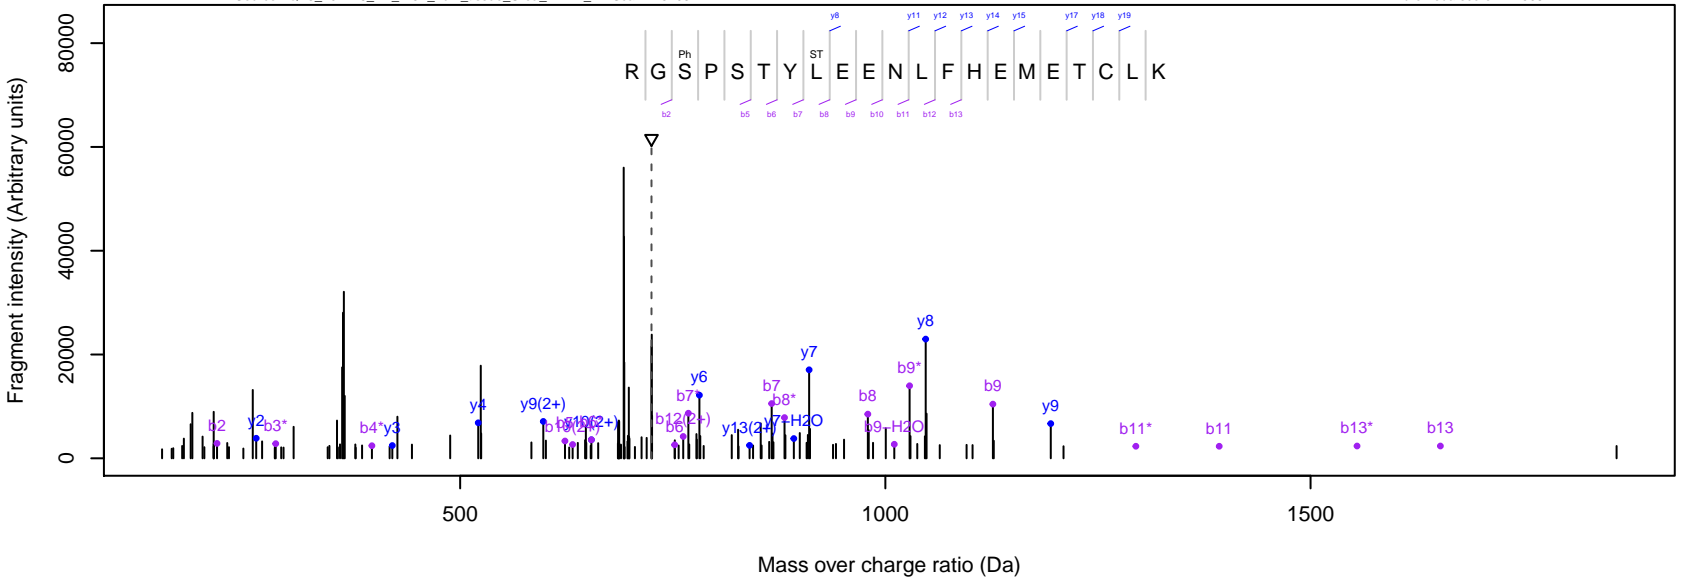

S(Phospho (STY))LQLPASPAPDPSPRPAYK-3+

Source : QE3\_201126\_FR\_TiOx\_hum\_tissue\_Urea\_RNAB\_N Scan : 28944

Andromeda score : 72.805

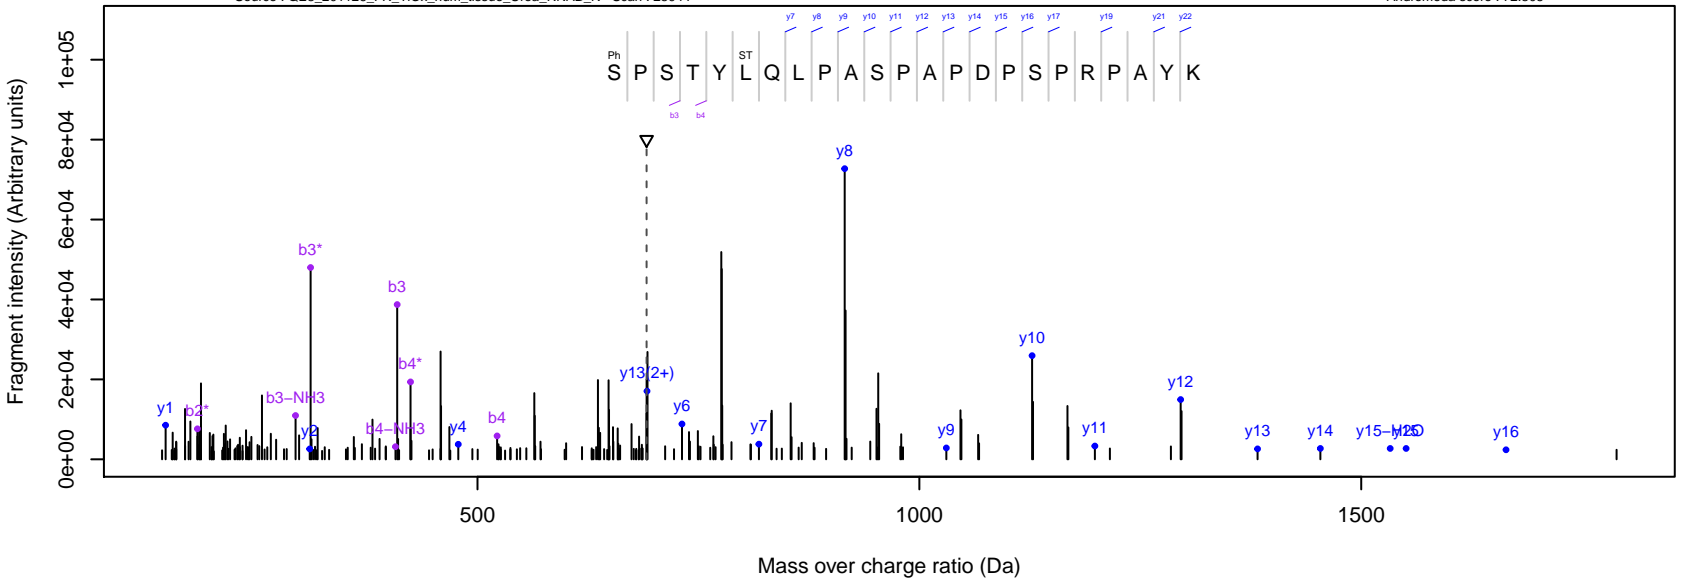

GAPSS(Phospho (STY))PATGVLSPQGK-2+

Source : QE3\_201126\_FR\_TiOx\_hum\_tissue\_Urea\_RNAB\_B Scan : 23208

Andromeda score : 72.797

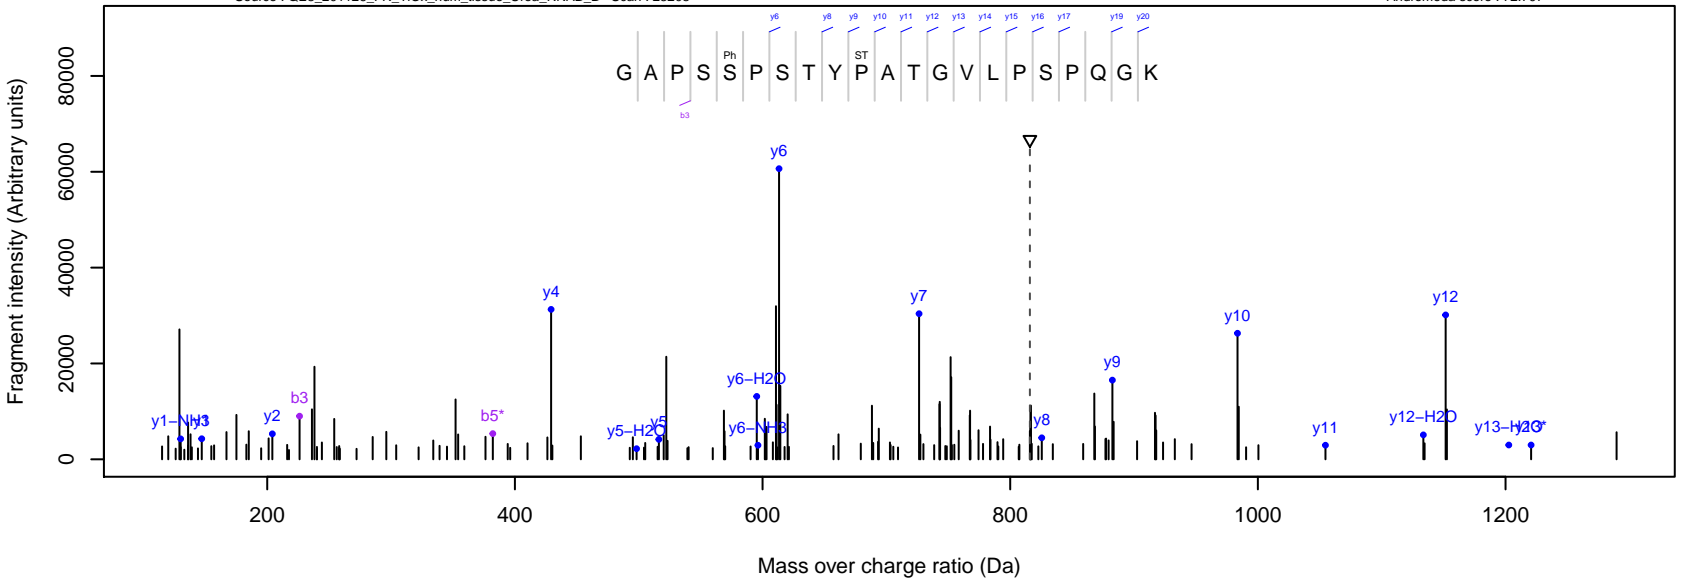

AVLLTAVELLQEYDS(Phospho (STY))NS(Phospho (STY))DQSGSQEK-3+

Source : QE3\_201126\_FR\_TiOx\_hum\_tissue\_Urea\_RNAB\_H Scan : 62843

Andromeda score : 72.791

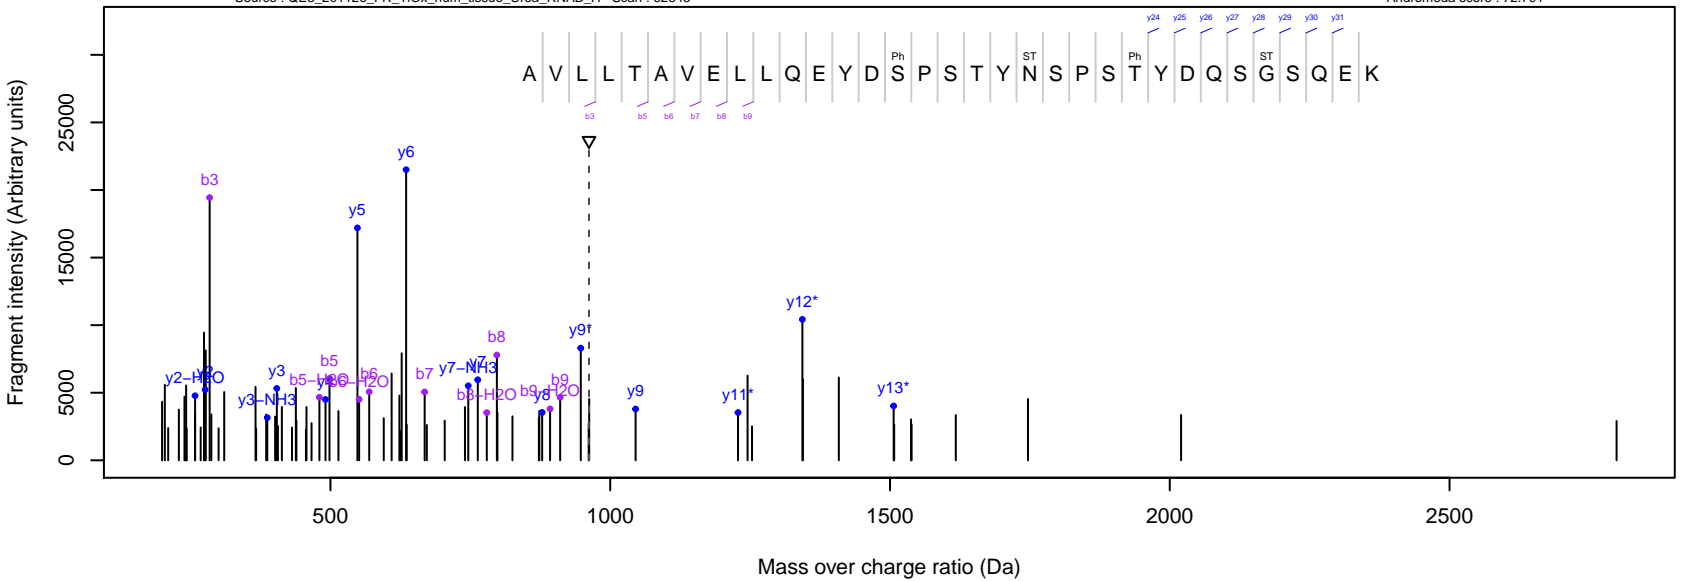

LEKPETQSS(Phospho (STY))PITVQSSK-3+

Source : QE3\_201126\_FR\_TiOx\_hum\_tissue\_Urea\_RNAB\_B Scan : 12610

Andromeda score : 72.771

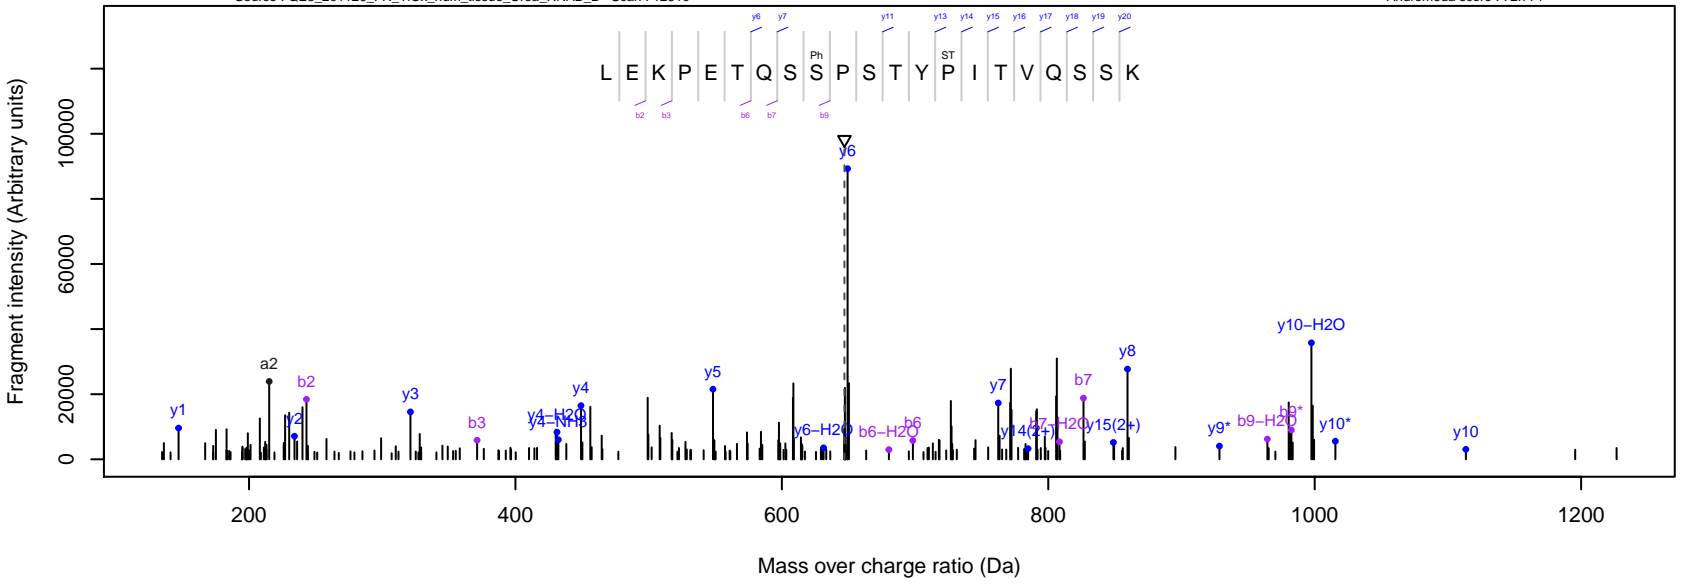

SS(Phospho (STY))S(Phospho (STY))PEDPERDEEVLNHVLR-3+

Source : QE3\_201126\_FR\_TiOx\_hum\_tissue\_Urea\_RNAB\_N Scan : 39289

Andromeda score : 72.771

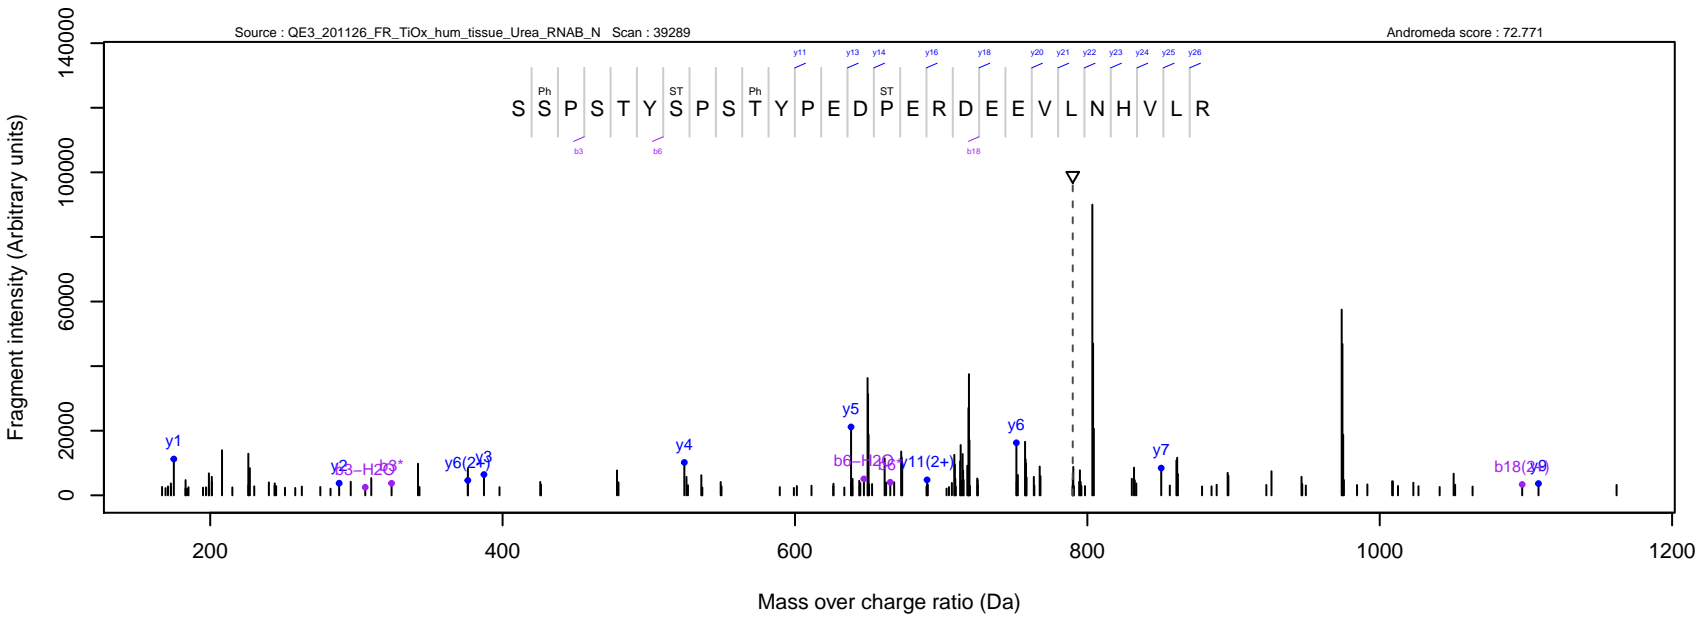

KGS(Phospho (STY))DALRPPVQGEDEVK-3+

Source : QE3\_201126\_FR\_TiOx\_hum\_tissue\_Urea\_RNAB\_N Scan : 19937

Andromeda score : 72.755

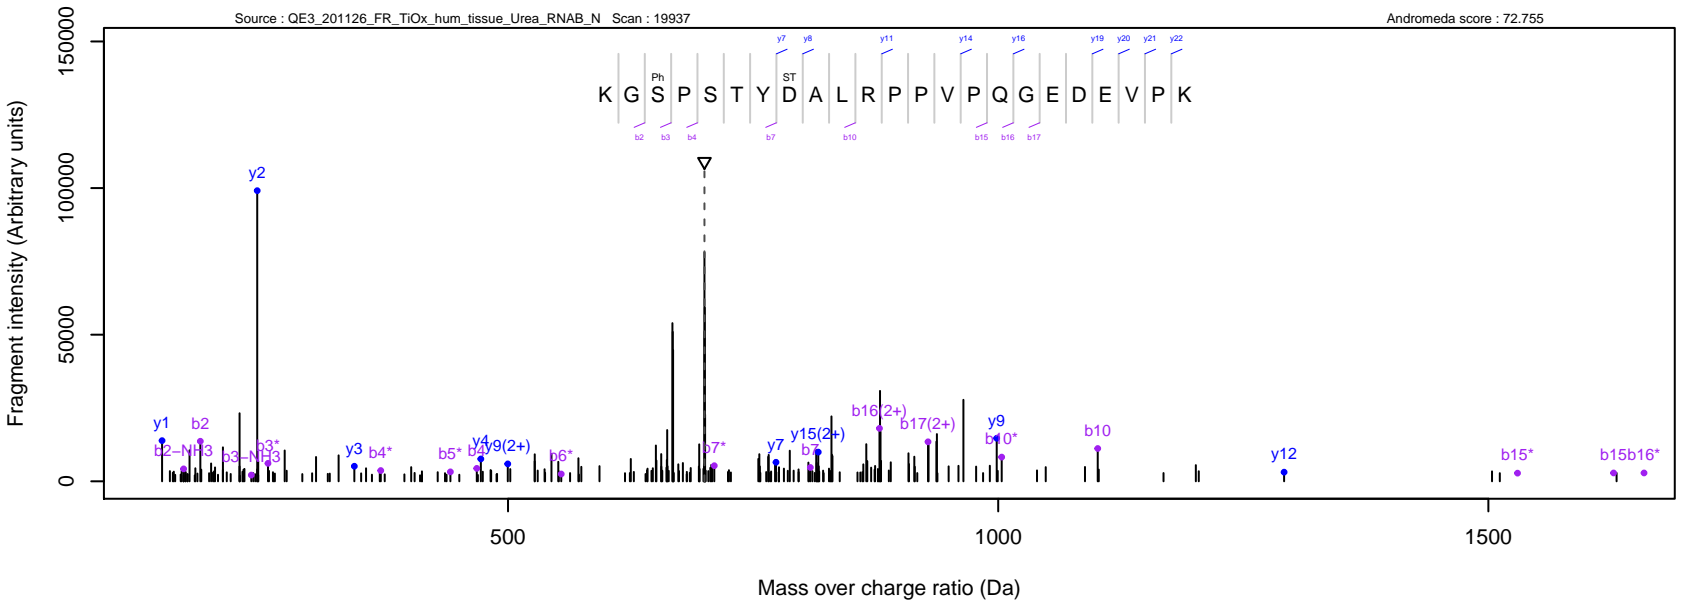

DS(Phospho (STY))PTLSNSGIR-2+

Source : QE3\_201126\_FR\_TiOx\_hum\_tissue\_Urea\_RNAB\_B Scan : 18310

Andromeda score : 72.731

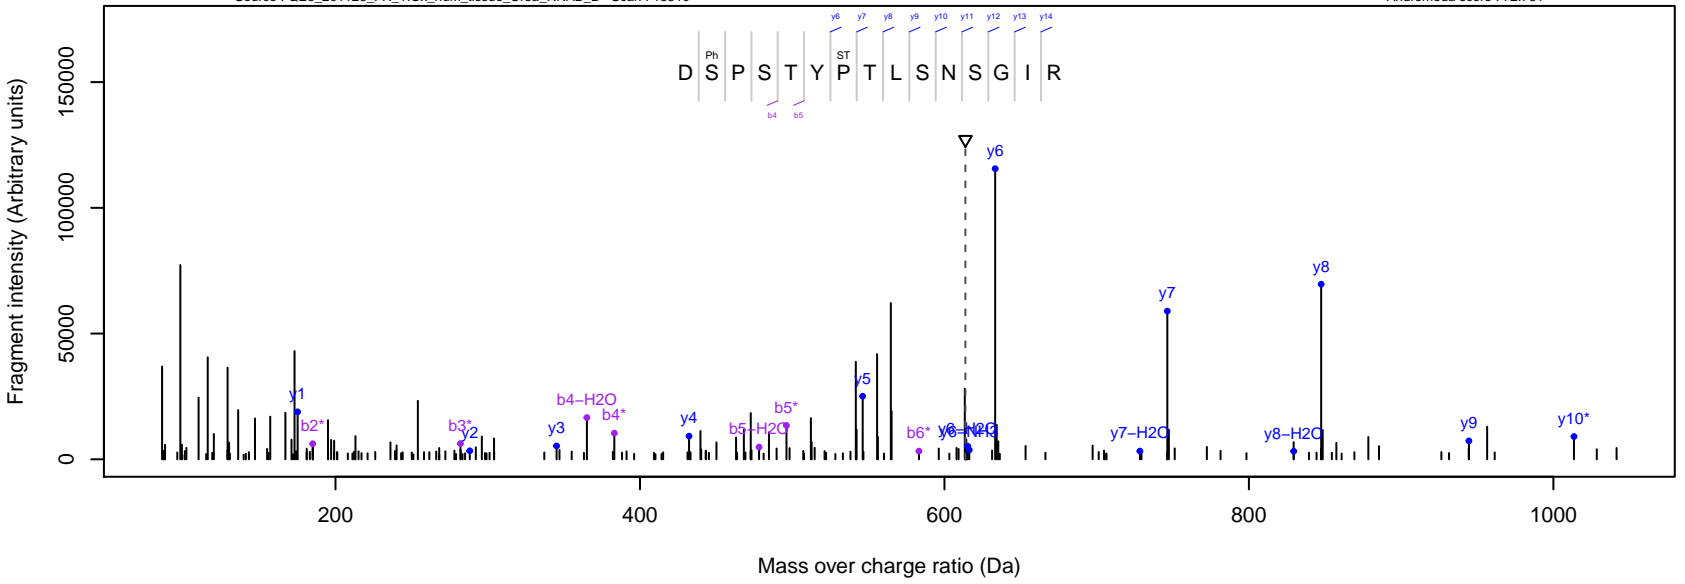

LVIPNRDPTDESKDSSGPANS(Phospho (STY))TADLLK-4+

Source : QE3\_201126\_FR\_TiOx\_hum\_tissue\_Urea\_RNAB\_H Scan : 28555

Andromeda score : 72.726

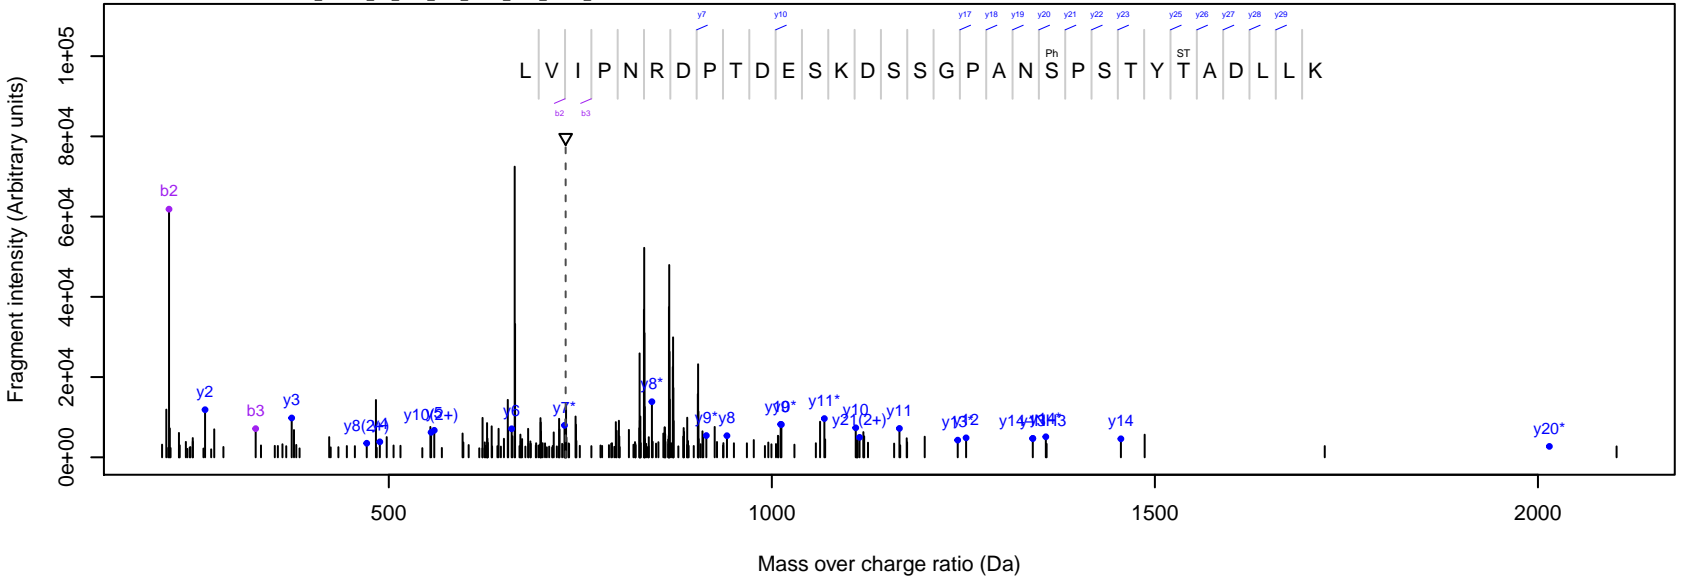

VQS(Phospho (STY))S(Phospho (STY))PNLLAAGR-2+

Source : QE3\_201126\_FR\_TiOx\_hum\_tissue\_Urea\_RNAB\_N Scan : 31676

Andromeda score : 72.705

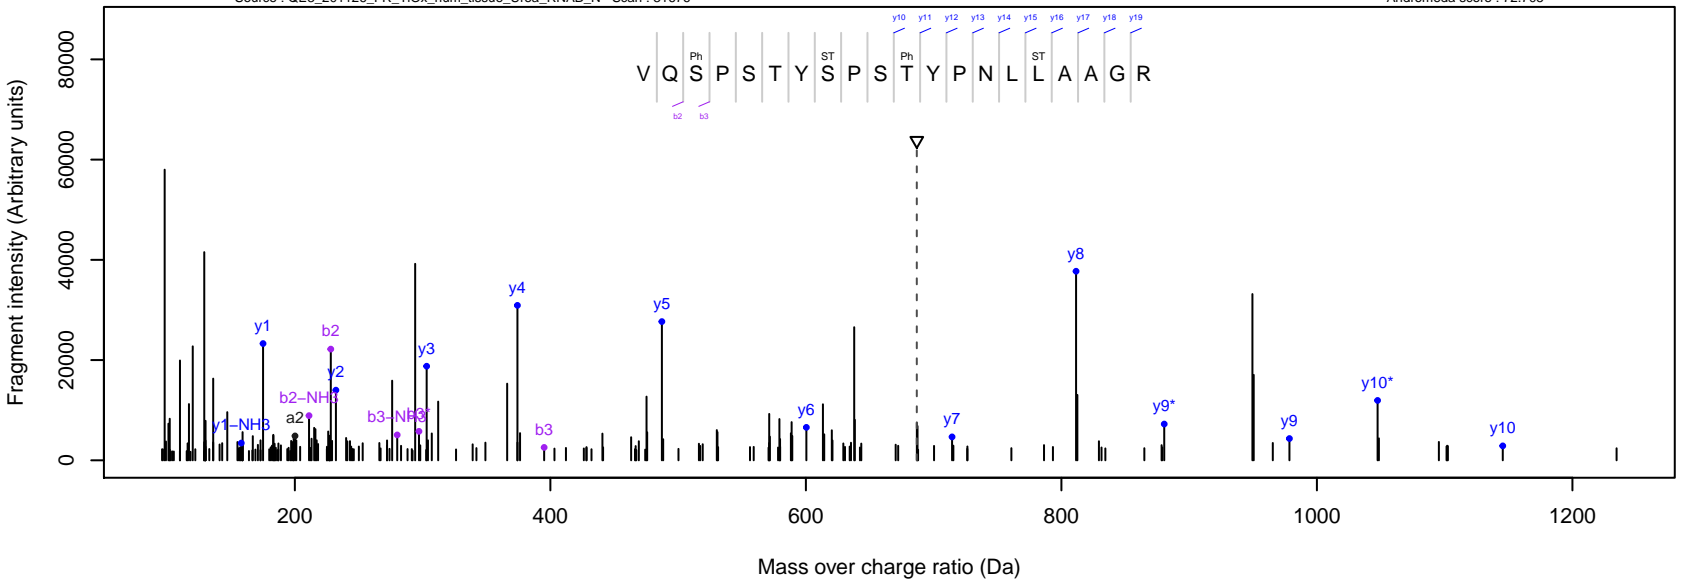

YADEEIPRS(Phospho (STY))PFK-2+

Source : QE3\_201126\_FR\_TiOx\_hum\_tissue\_Urea\_RNAB\_H Scan : 23566

Andromeda score : 72.705

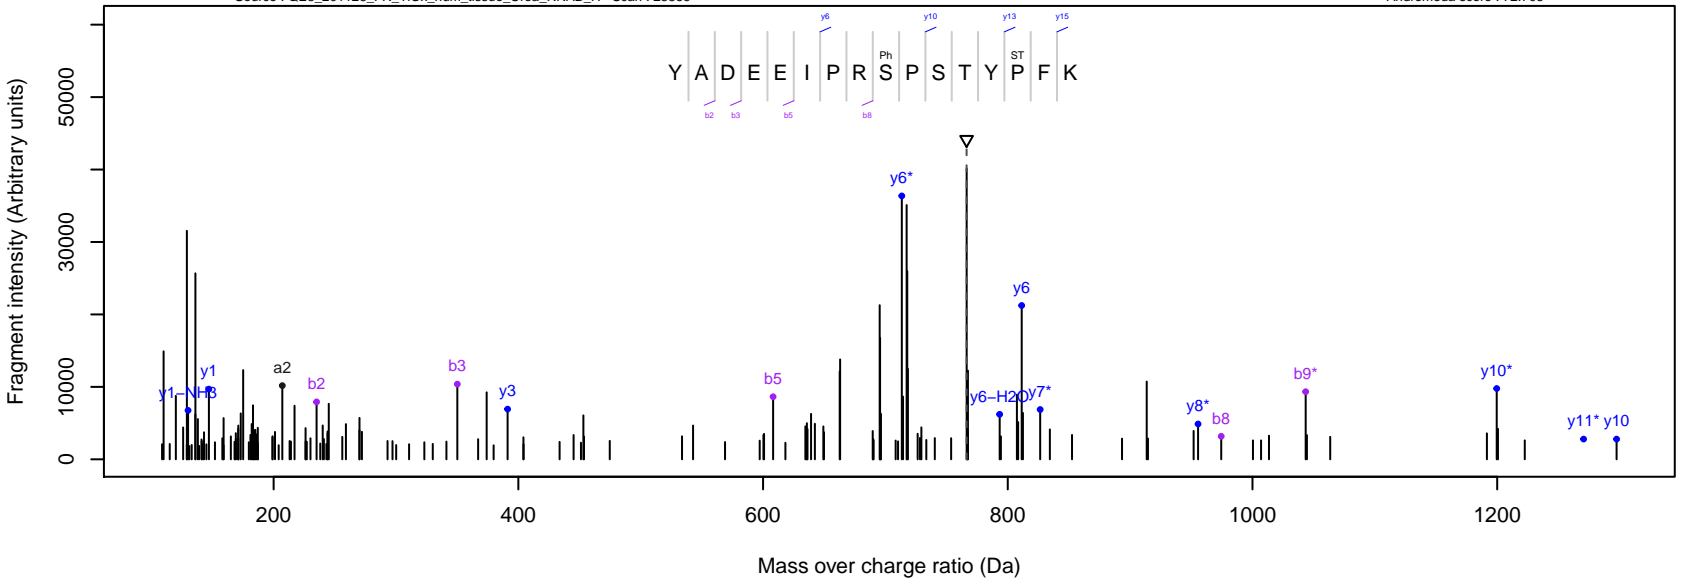

GRLT(Phospho (STY))PS(Phospho (STY))PDIIVLS(Phospho (STY))DNEASS(Phospho (STY))PR-3+

Source : QE3\_201126\_FR\_TiOx\_hum\_tissue\_Urea\_RNAB\_H Scan : 58289

Andromeda score : 72.687

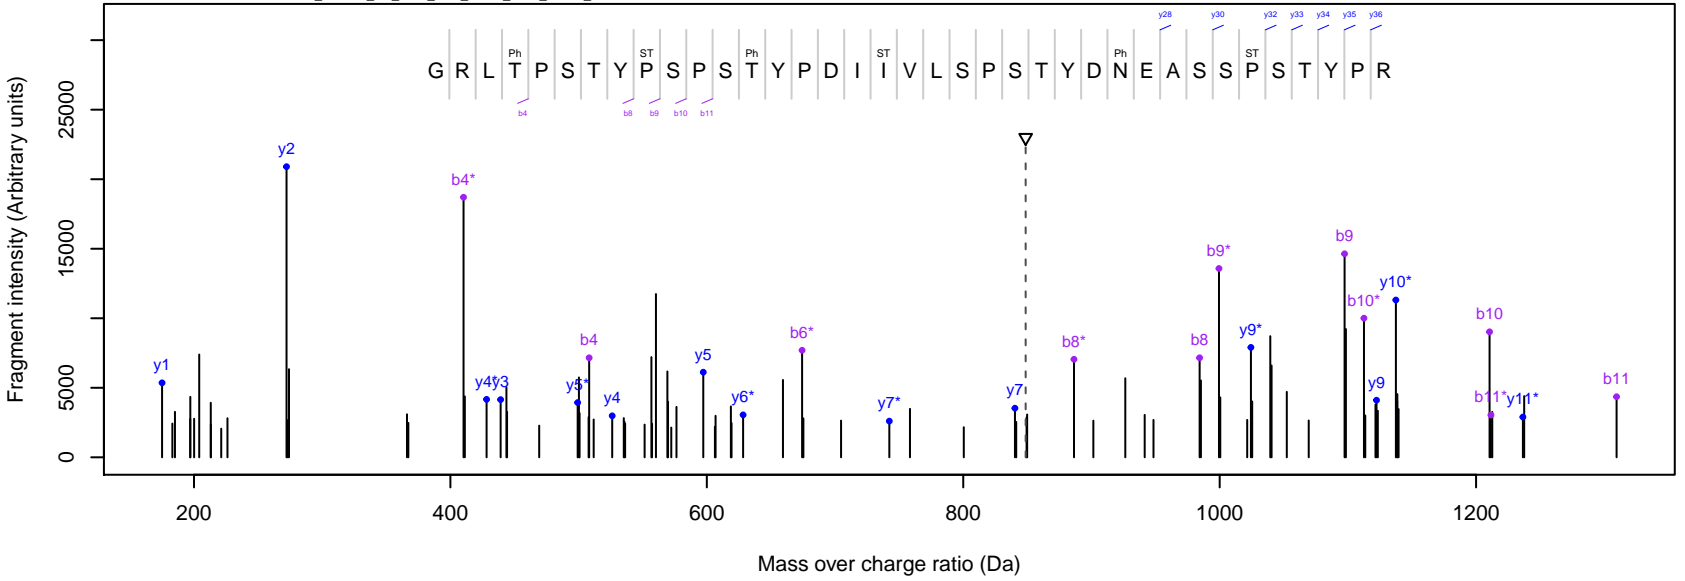

TSSAFVGKT(Phospho (STY))PEAS(Phospho (STY))PEPK-3+

Source : QE3\_201126\_FR\_TiOx\_hum\_tissue\_Urea\_RNAB\_H Scan : 17193

Andromeda score : 72.676

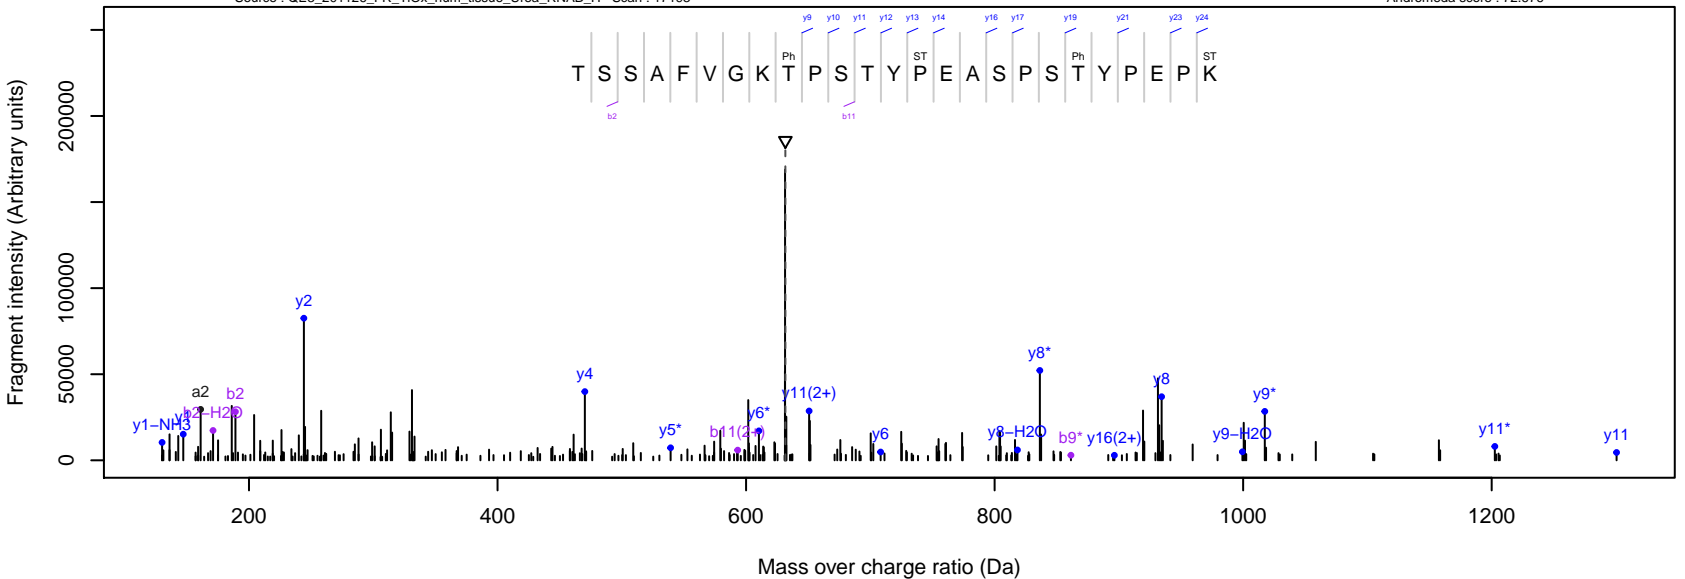

RGT(Phospho (STY))LQSYLD-2+

Source : QE3\_201126\_FR\_TiOx\_hum\_tissue\_Urea\_RNAB\_B Scan : 29393

Andromeda score : 72.652

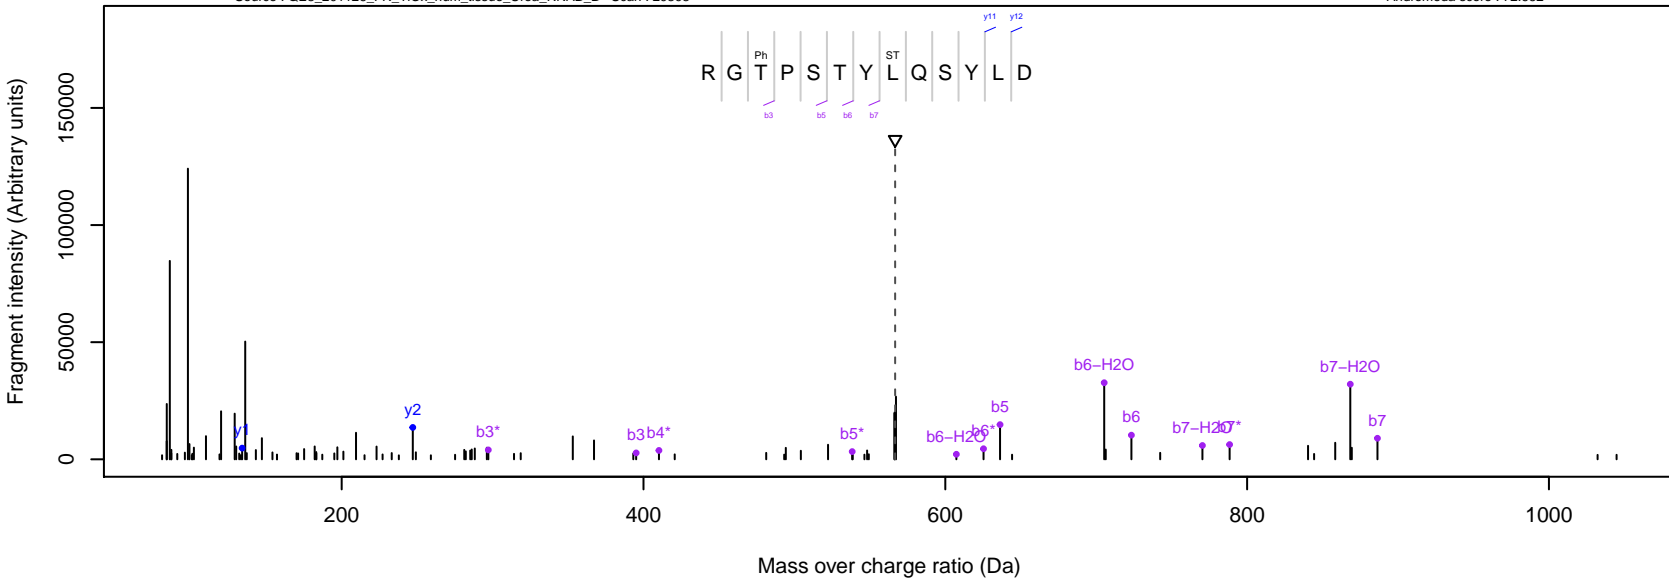

SSS(Phospho (STY))FSLPSR-2+

Source : QE3\_201126\_FR\_TiOx\_hum\_tissue\_Urea\_RNAB\_H Scan : 23060

Andromeda score : 72.652

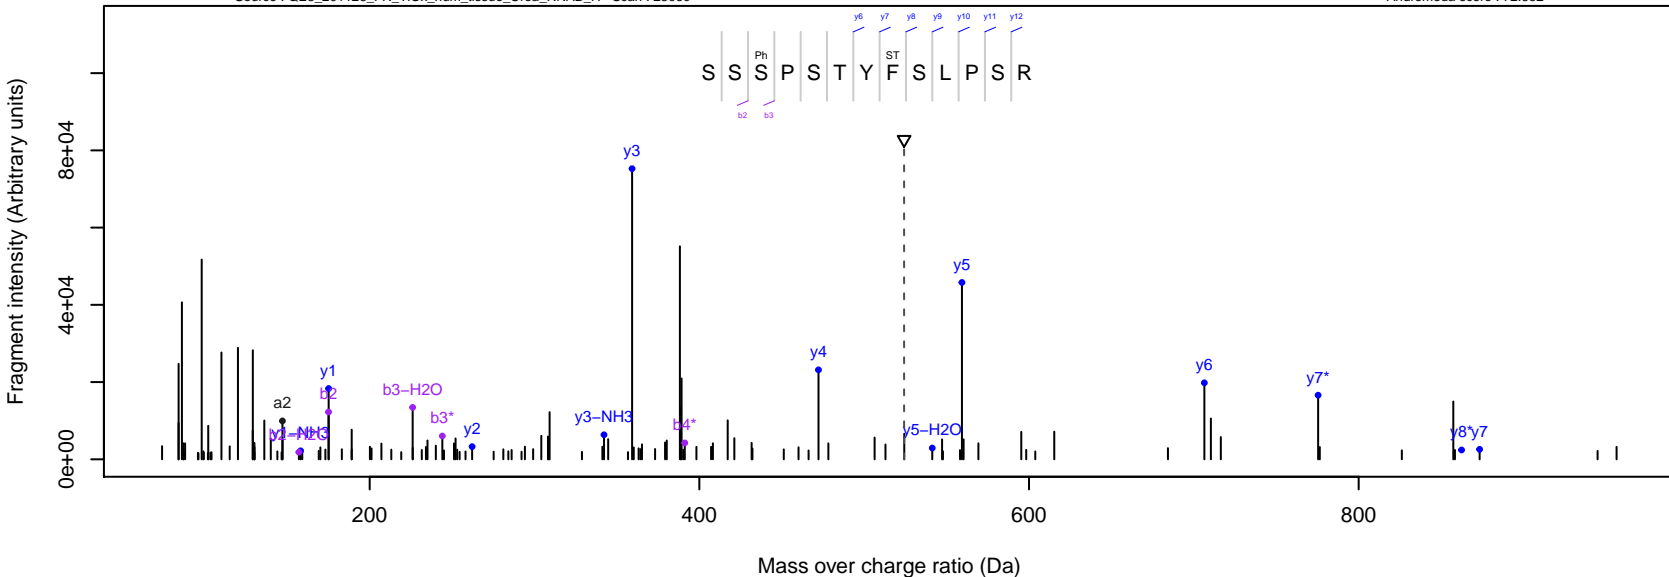

M(Oxidation (M))PSARPPS(Phospho (STY))PPLSSWER-3+

Source : QE3\_201126\_FR\_TiOx\_hum\_tissue\_Urea\_RNAB\_H Scan : 27216

Andromeda score : 72.644

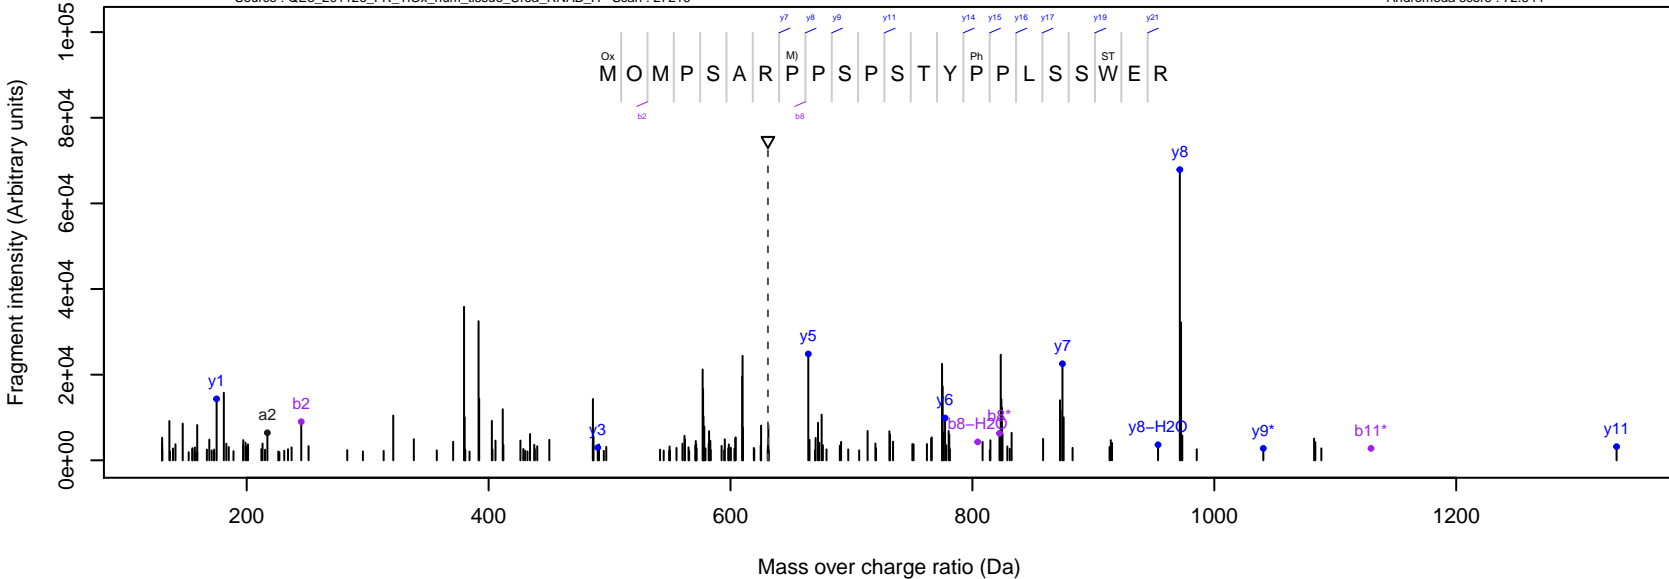

SFS(Phospho (STY))MQDLR-2+

Source : QE3\_201126\_FR\_TiOx\_hum\_tissue\_Urea\_RNAB\_H Scan : 30365

Andromeda score : 72.643

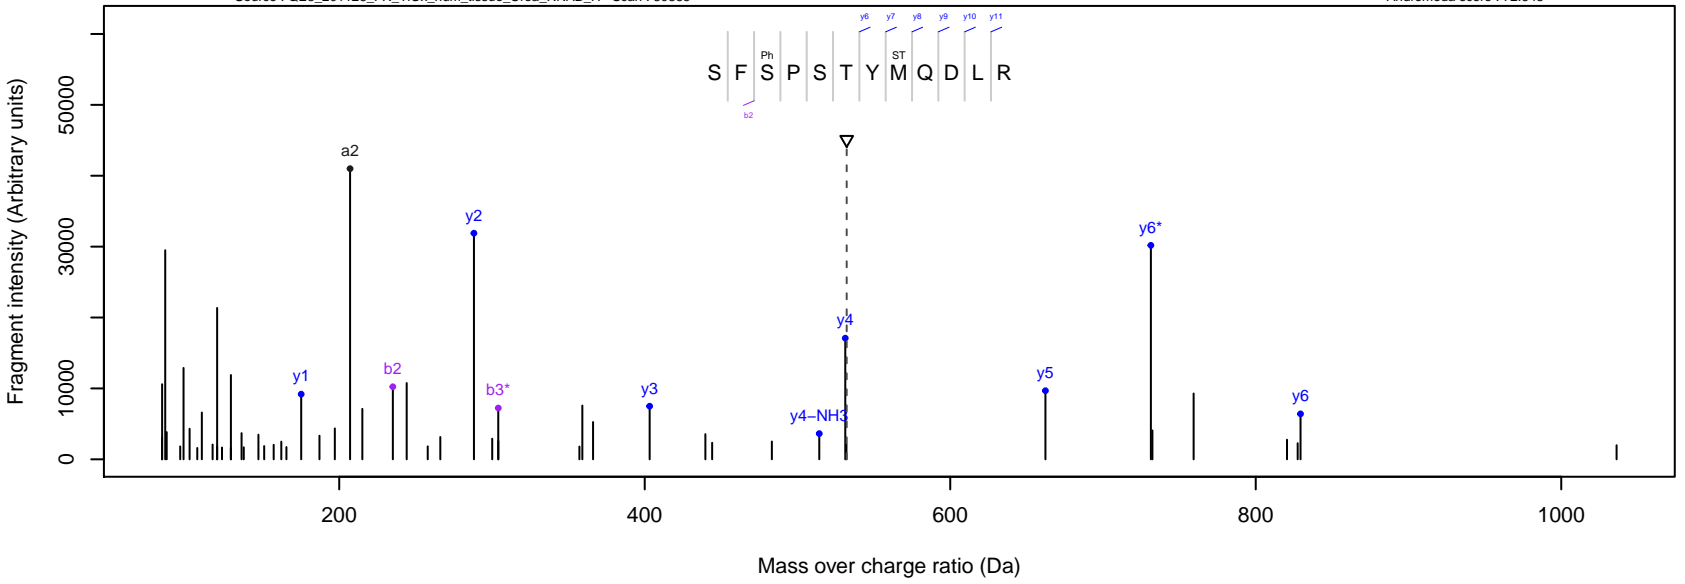

SFS(Phospho (STY))QPGLR-2+

Source : QE3\_201126\_FR\_TiOx\_hum\_tissue\_Urea\_RNAB\_B Scan : 19342

Andromeda score : 72.643

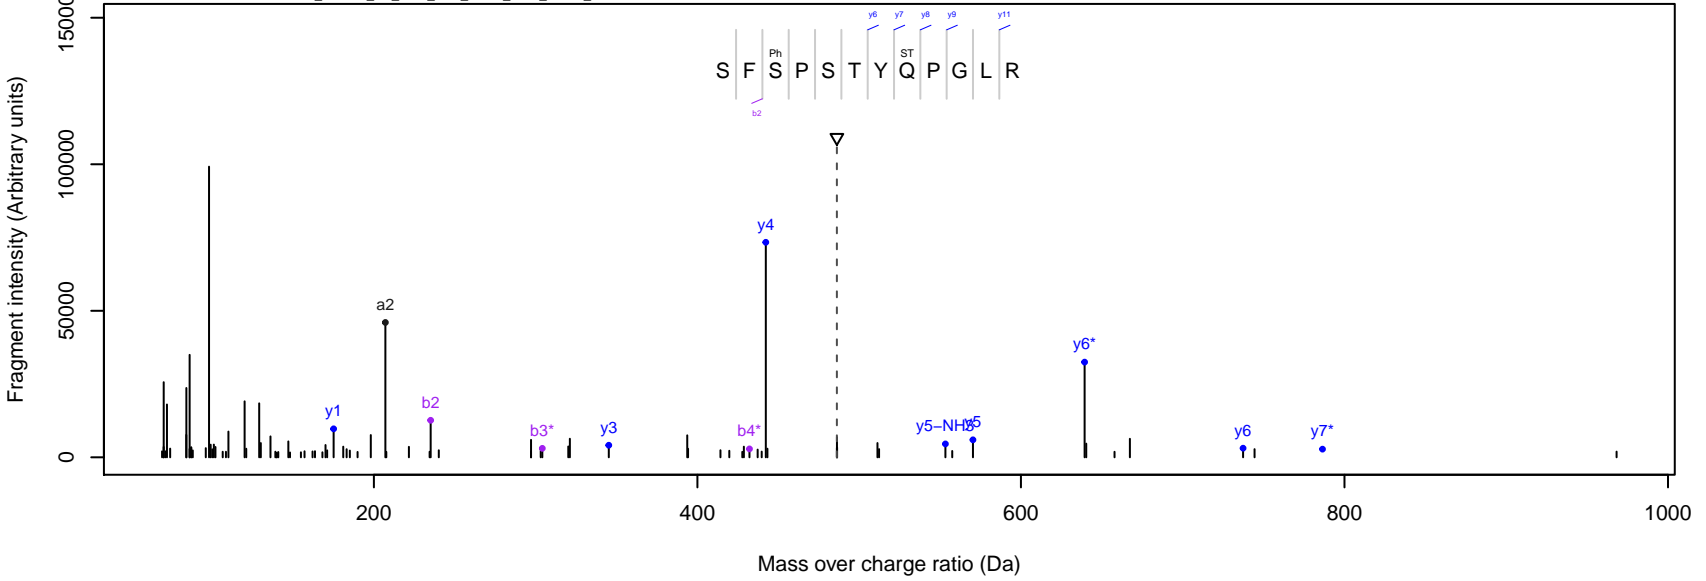

QSHSGSIS(Phospho (STY))PYPK-3+

Source : QE3\_201126\_FR\_TiOx\_hum\_tissue\_Urea\_RNAB\_H Scan : 8464

Andromeda score : 72.615

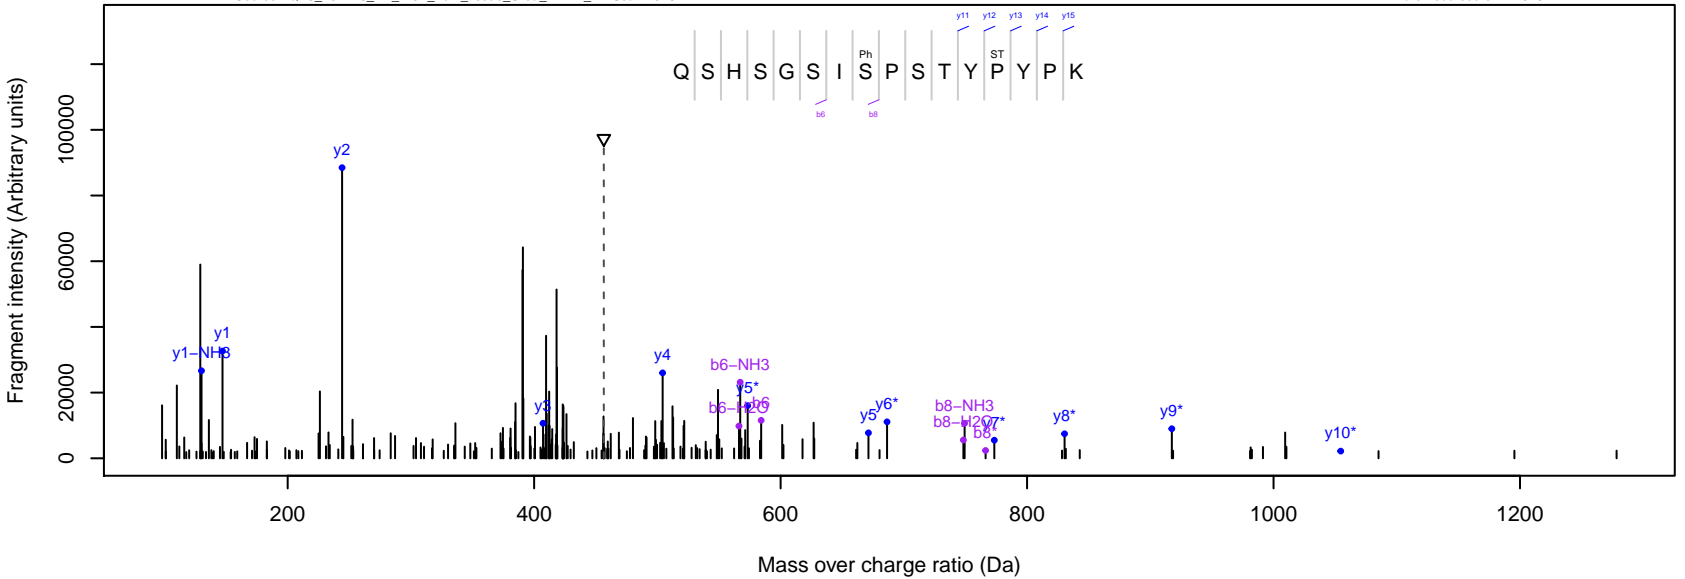

VFDES(Phospho (STY))DEKEDEEYADEKLEAADK-3+

Source : QE3\_201126\_FR\_TiOx\_hum\_tissue\_Urea\_RNAB\_H Scan : 25226

Andromeda score : 72.603

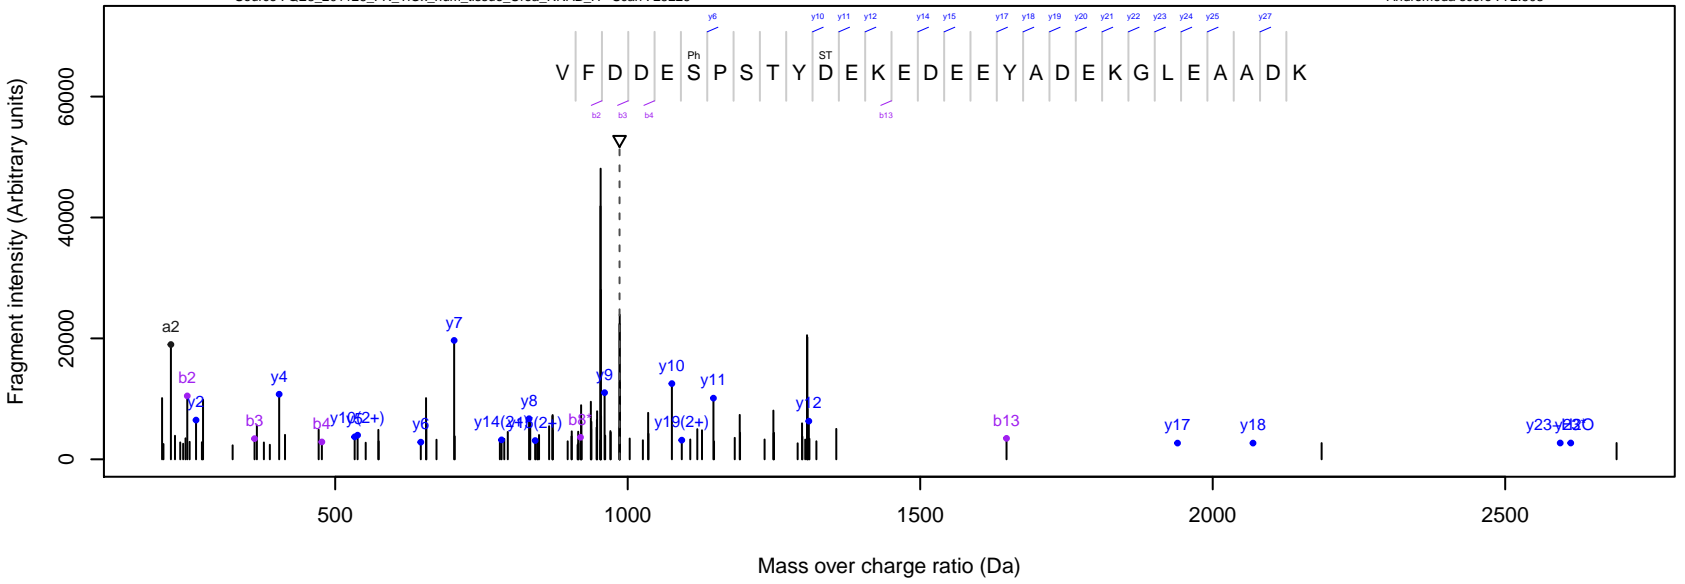

GIPLATGDT(Phospho (STY))S(Phospho (STY))PEPELLPGAPLPPPKEVINGNIK-3+

Source : QE3\_201126\_FR\_TiOx\_hum\_tissue\_Urea\_RNAB\_N Scan : 57800

Andromeda score : 72.585

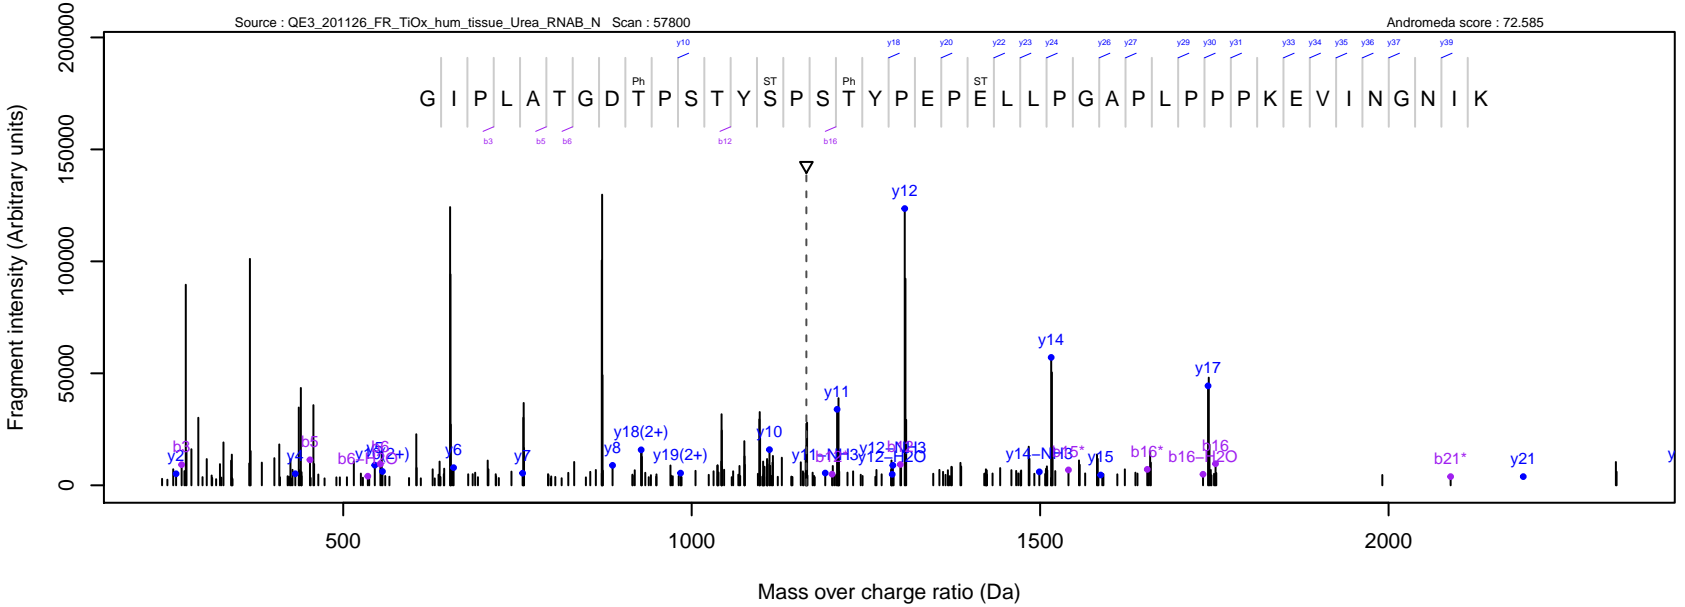

LPKS(Phospho (STY))PPYTAFLGNLPYDVTEESIKEFFR-4+

Source : QE3\_201126\_FR\_TiOx\_hum\_tissue\_Urea\_RNAB\_H Scan : 61944

Andromeda score : 72.584

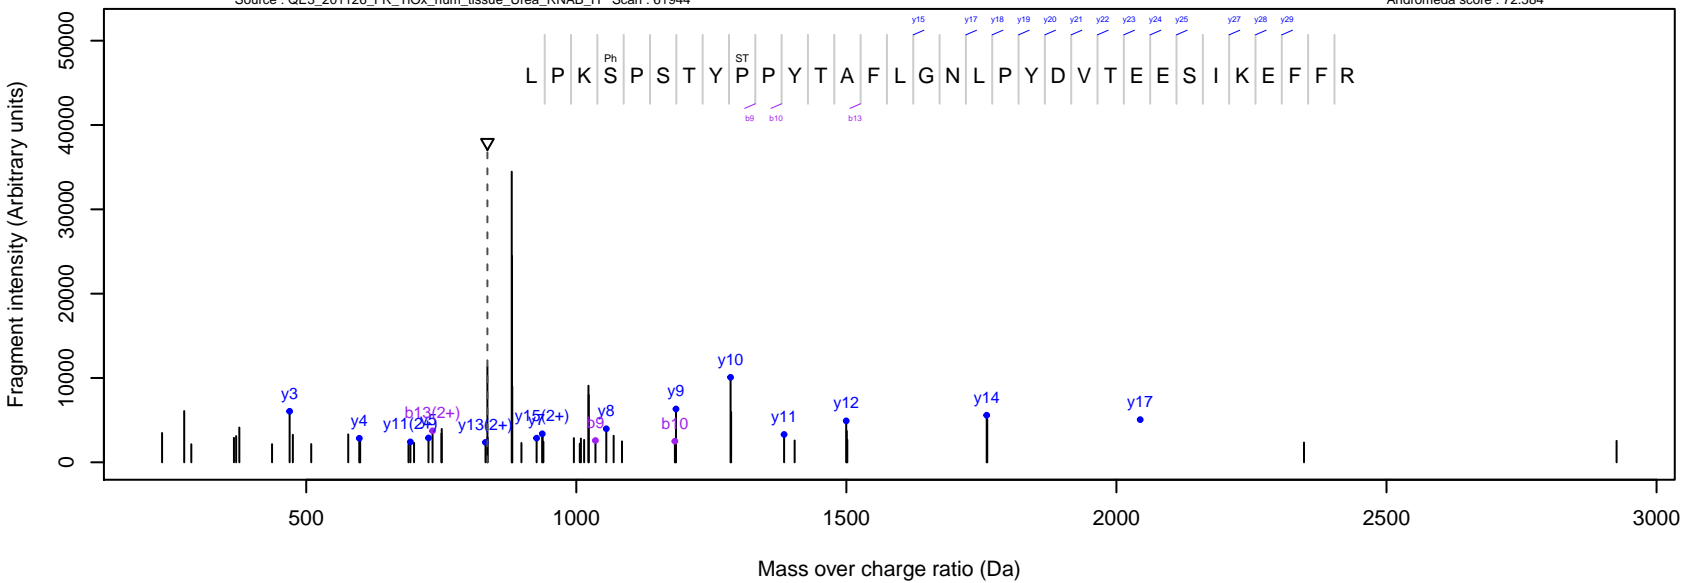



KKLDDQS(Phospho (STY))EDEALELEGLITPGSGSIYSSPGLYSK-4+

Source : QE3\_201126\_FR\_TiOx\_hum\_tissue\_Urea\_RNAB\_H Scan : 49500

Andromeda score : 72.533

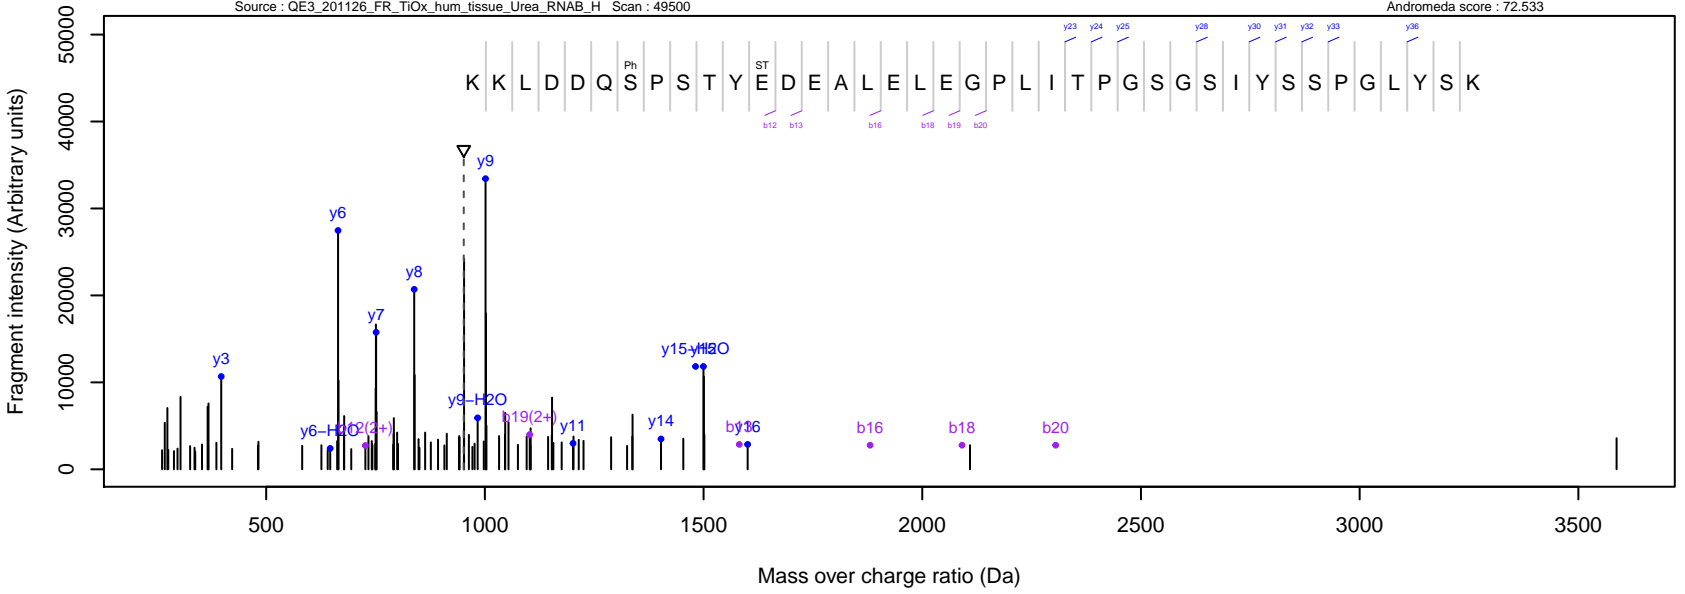

TTES(Phospho (STY))GS(Phospho (STY))DSESKPDQEAEPQEAAGAQR-3+

Source : QE3\_201126\_FR\_TiOx\_hum\_tissue\_Urea\_RNAB\_N Scan : 12934

Andromeda score : 72.533

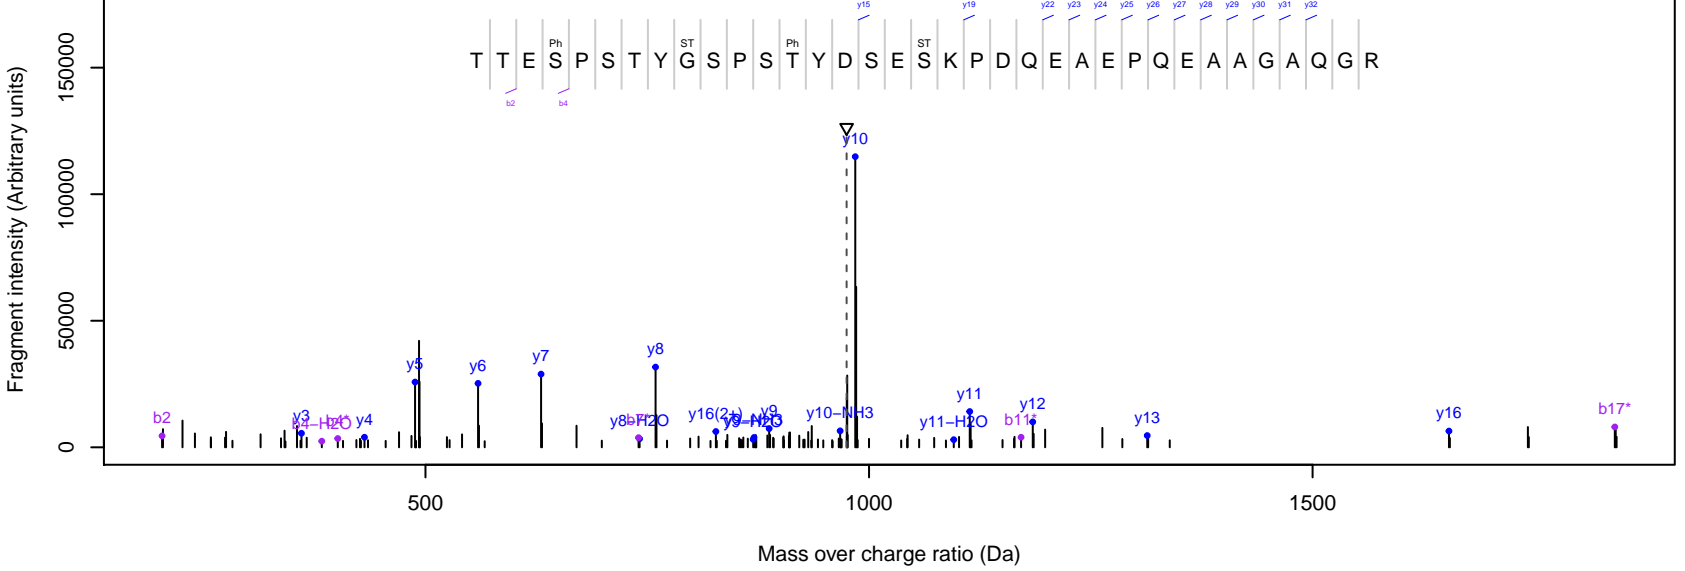

RPDHSGGS(Phospho (STY))PS(Phospho (STY))PPTSEPAR-3+

Source : QE3\_201126\_FR\_TiOx\_hum\_tissue\_Urea\_RNAB\_N Scan : 6661

Andromeda score : 72.532

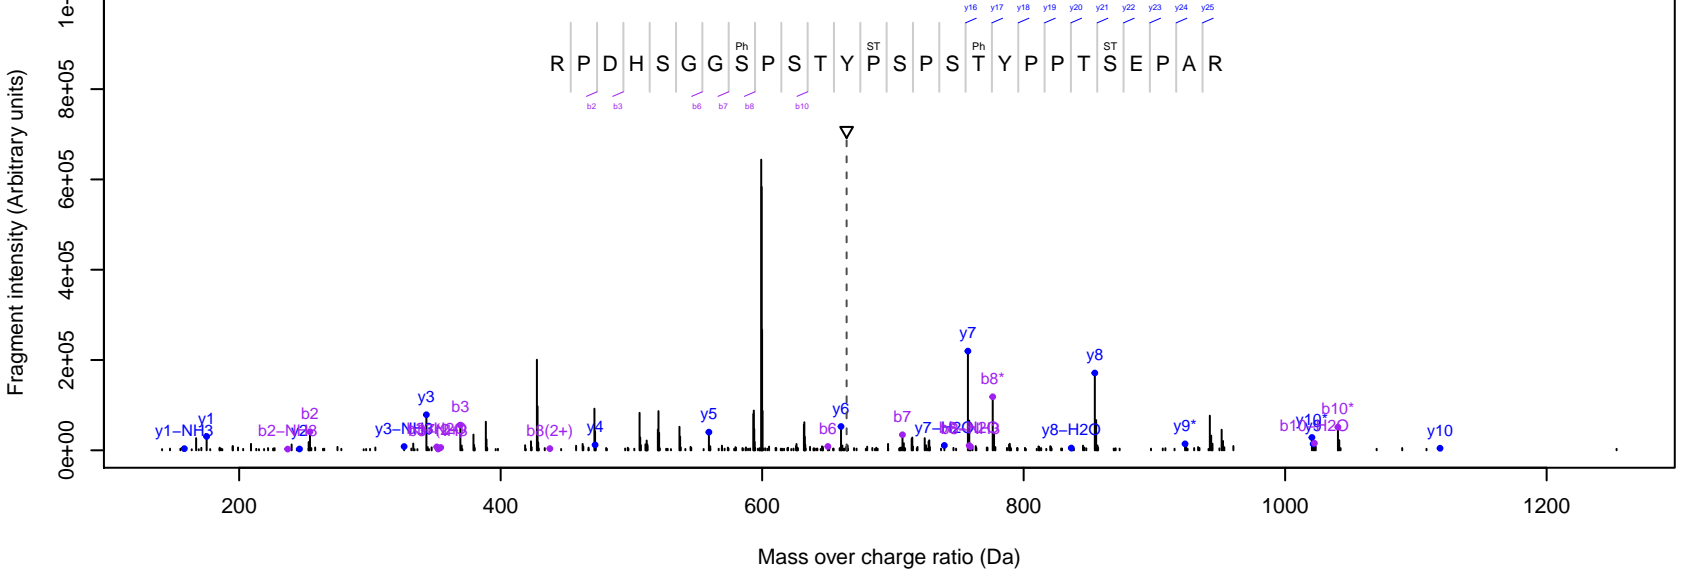

LKRPTTFHS(Phospho (STY))SR-3+

Source : QE3\_201126\_FR\_TIOx\_hum\_tissue\_Urea\_RNAB\_H Scan : 7256

Andromeda score : 72.523

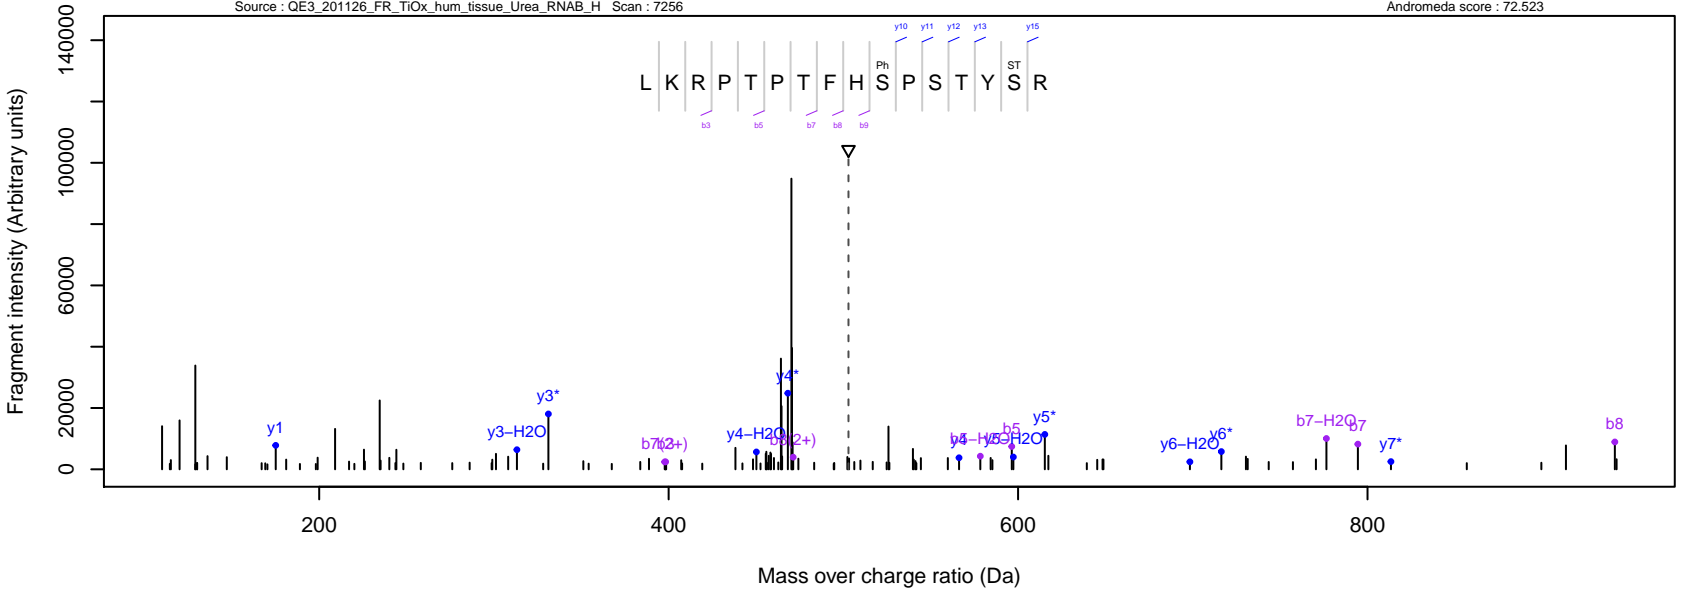

TSS(Phospho (STY))EPEVSLPK-2+

Source : QE3\_201126\_FR\_TIOx\_hum\_tissue\_Urea\_RNAB\_B Scan : 27403

Andromeda score : 72.496

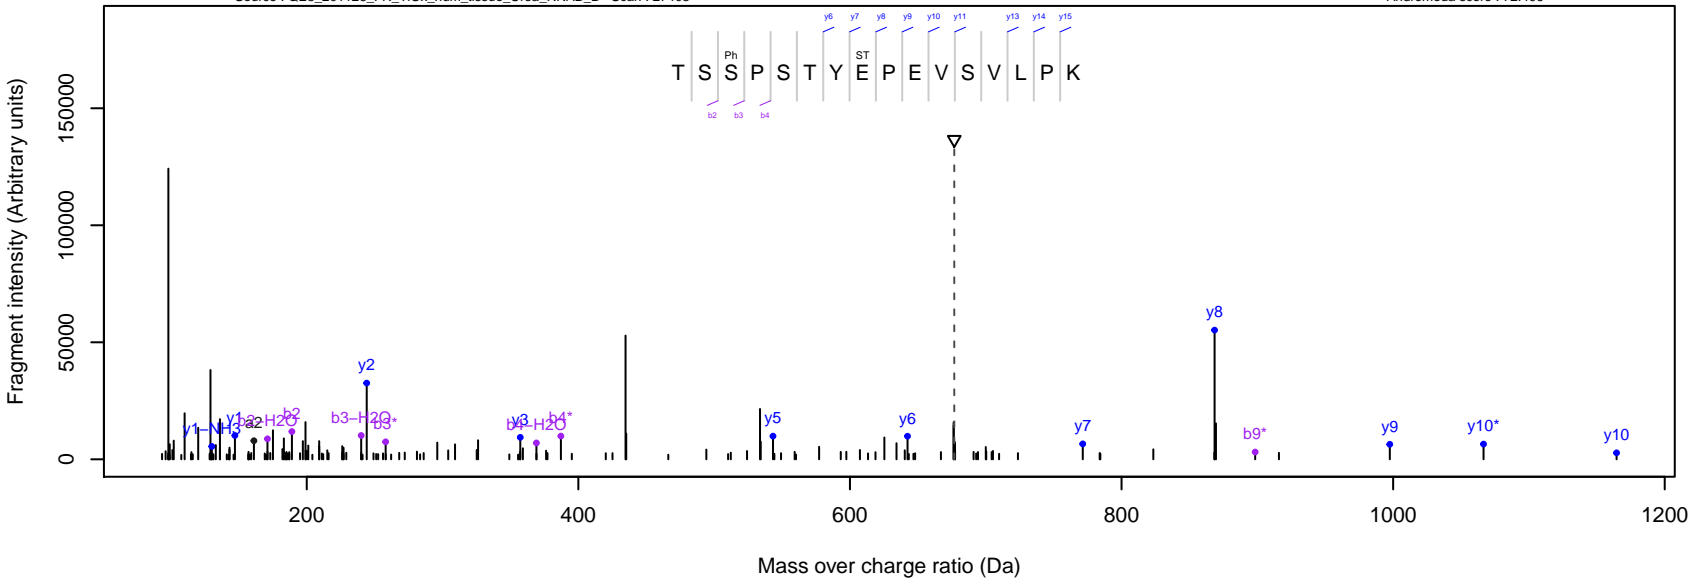

TQS(Phospho (STY))APLPQNAQALQHLVIQQHQHFLEK-4+

Source : QE3\_201126\_FR\_TIOx\_hum\_tissue\_Urea\_RNAB\_N Scan : 42997

Andromeda score : 72.495

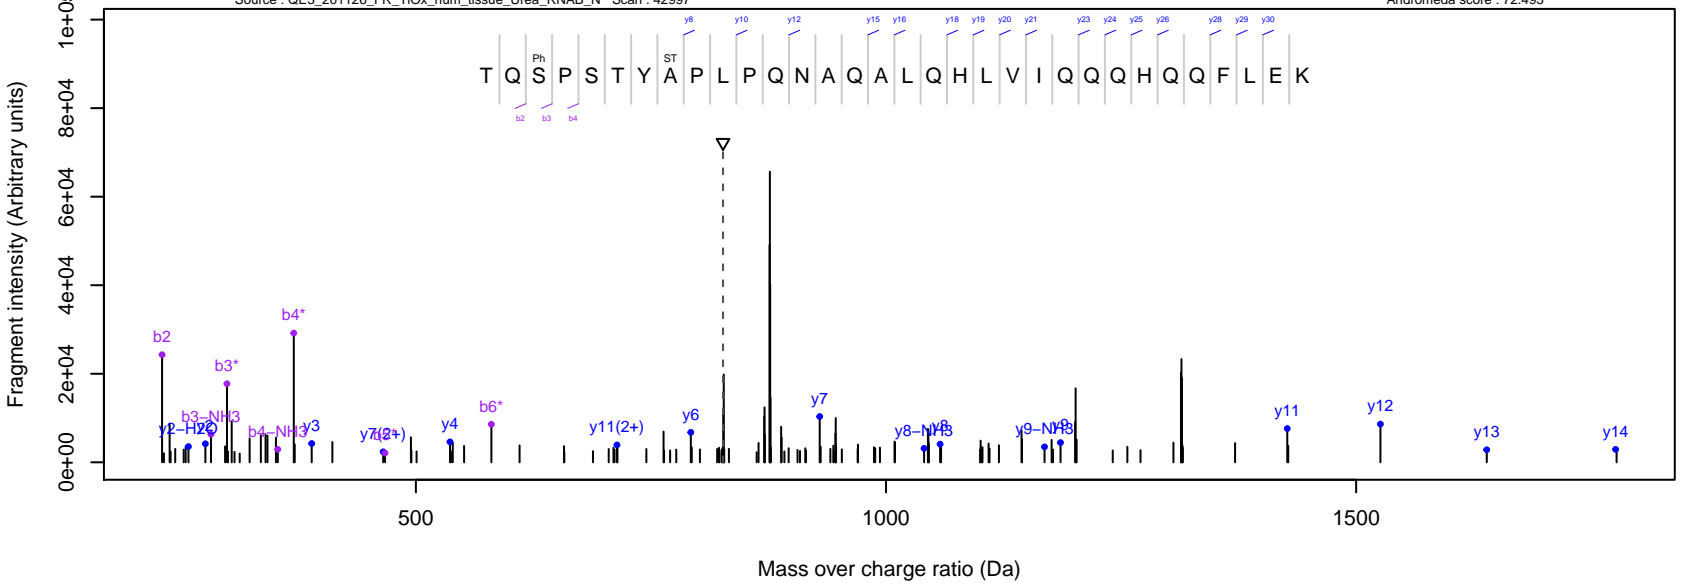

EVEEDS(Phospho (STY))EDEEM(Oxidation (M))SEDEEDDS(Phospho (STY))S(Phospho (STY))GEEVVPQKK-3+

Source : QE3\_201126\_FR\_TiOx\_hum\_tissue\_Urea\_RNAB\_H Scan : 31240

Andromeda score : 72.491

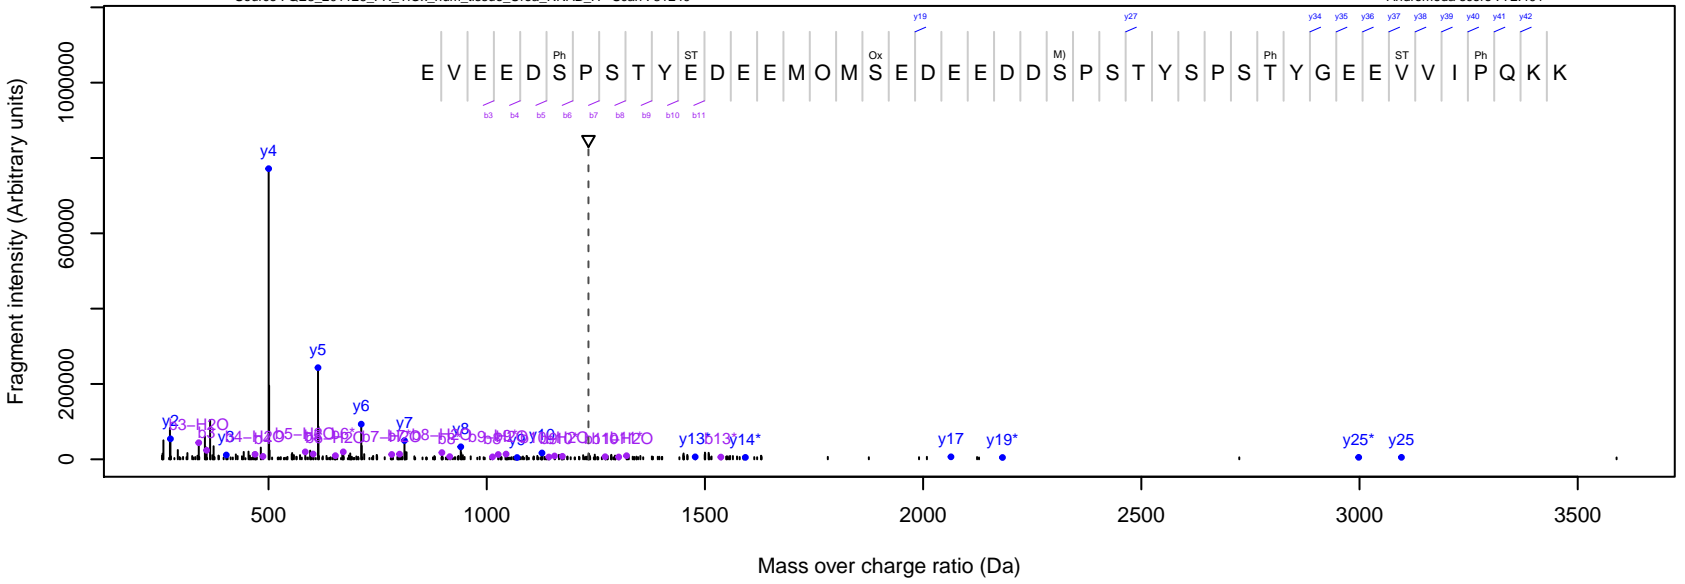

(Acetyl (Protein N-term))AQLVHPAPFPGT(Phospho (STY))PGPAS(Phospho (STY))PPAFPAKDPDPYSVETPYGYR-4+

Source : QE3\_201126\_FR\_TiOx\_hum\_tissue\_Urea\_RNAB\_B Scan : 60117

Andromeda score : 72.451

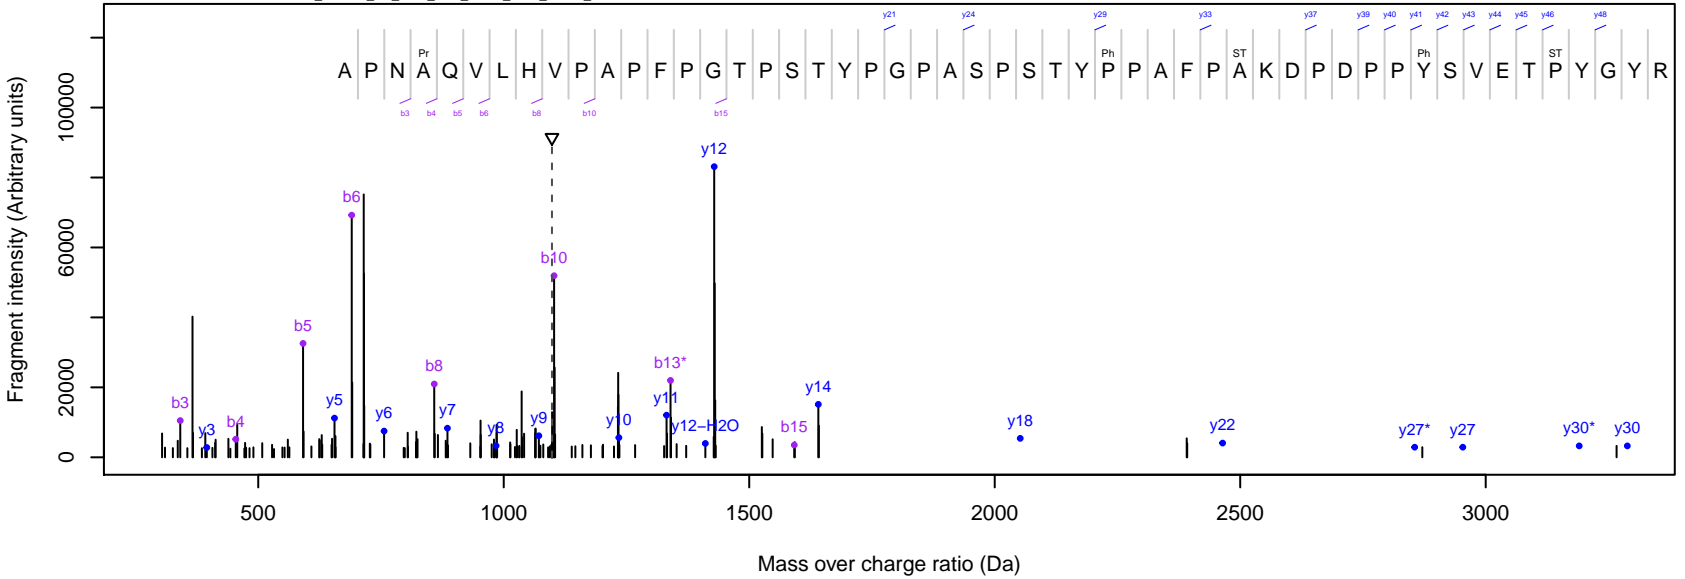

ARS(Phospho (STY))FPLTR-2+

Source : QE3\_201126\_FR\_TiOx\_hum\_tissue\_Urea\_RNAB\_N Scan : 13332

Andromeda score : 72.434

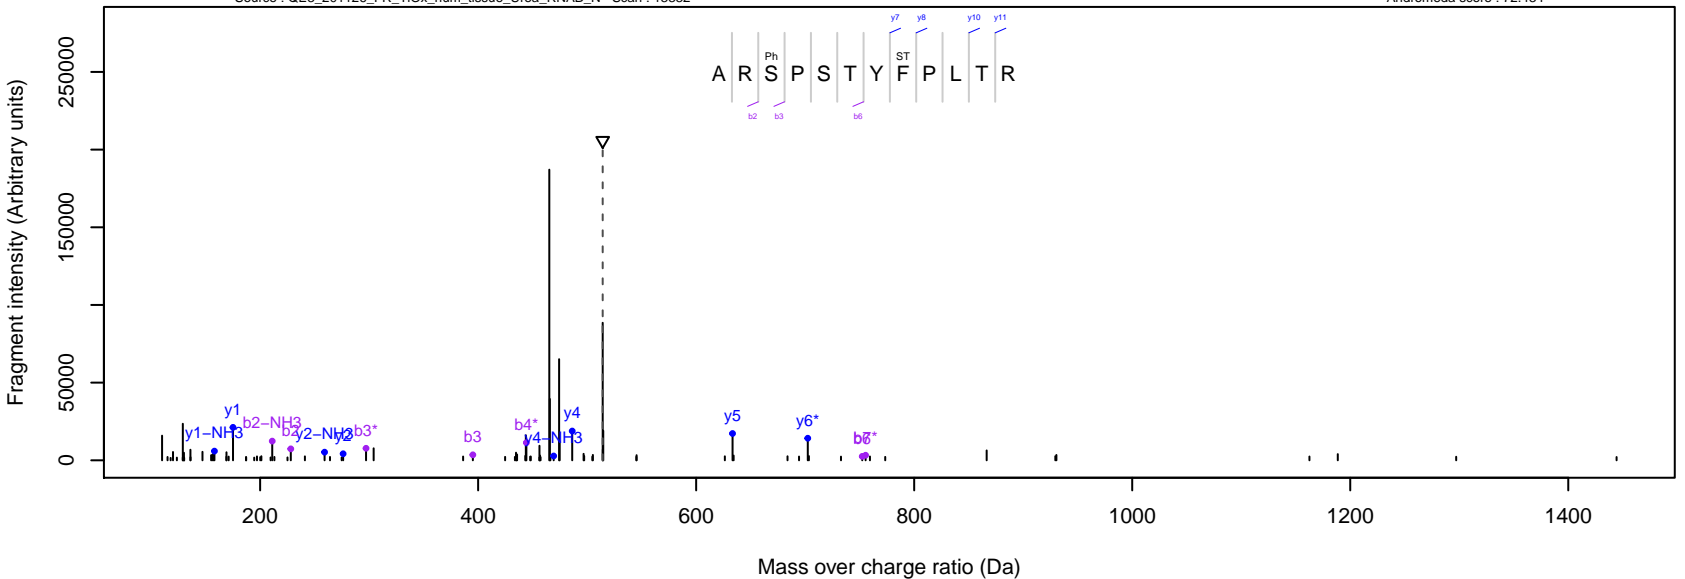

TLQPPE(Phospho (STY))PR-2+

Source : QE3\_201126\_FR\_TiOx\_hum\_tissue\_Urea\_RNAB\_B Scan : 12906

Andromeda score : 72.434

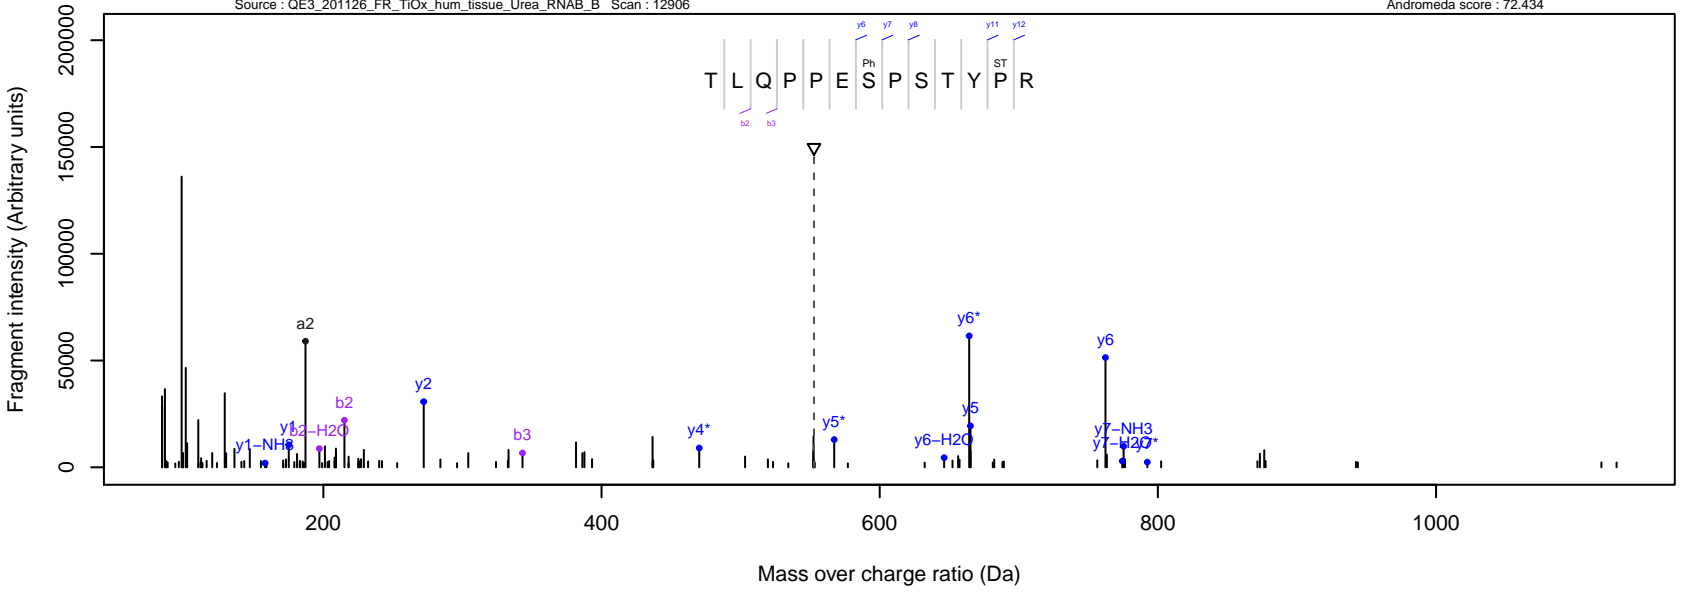

TS(Phospho (STY))PVSLWSR-2+

Source : QE3\_201126\_FR\_TiOx\_hum\_tissue\_Urea\_RNAB\_H Scan : 33545

Andromeda score : 72.434

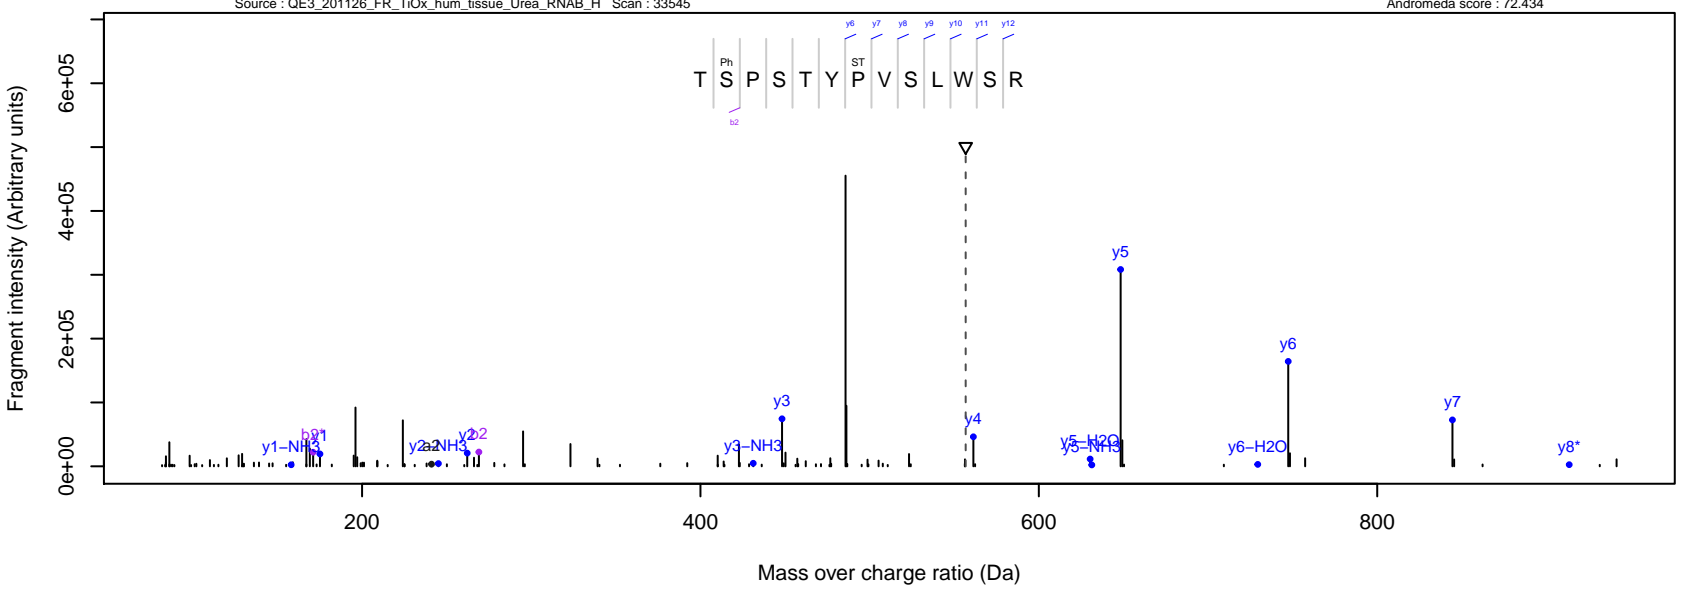

SAS(Phospho (STY))AKS(Phospho (STY))IDS(Phospho (STY))KVADAATEVQHK-3+

Source : QE3\_201126\_FR\_TiOx\_hum\_tissue\_Urea\_RNAB\_H Scan : 28682

Andromeda score : 72.425

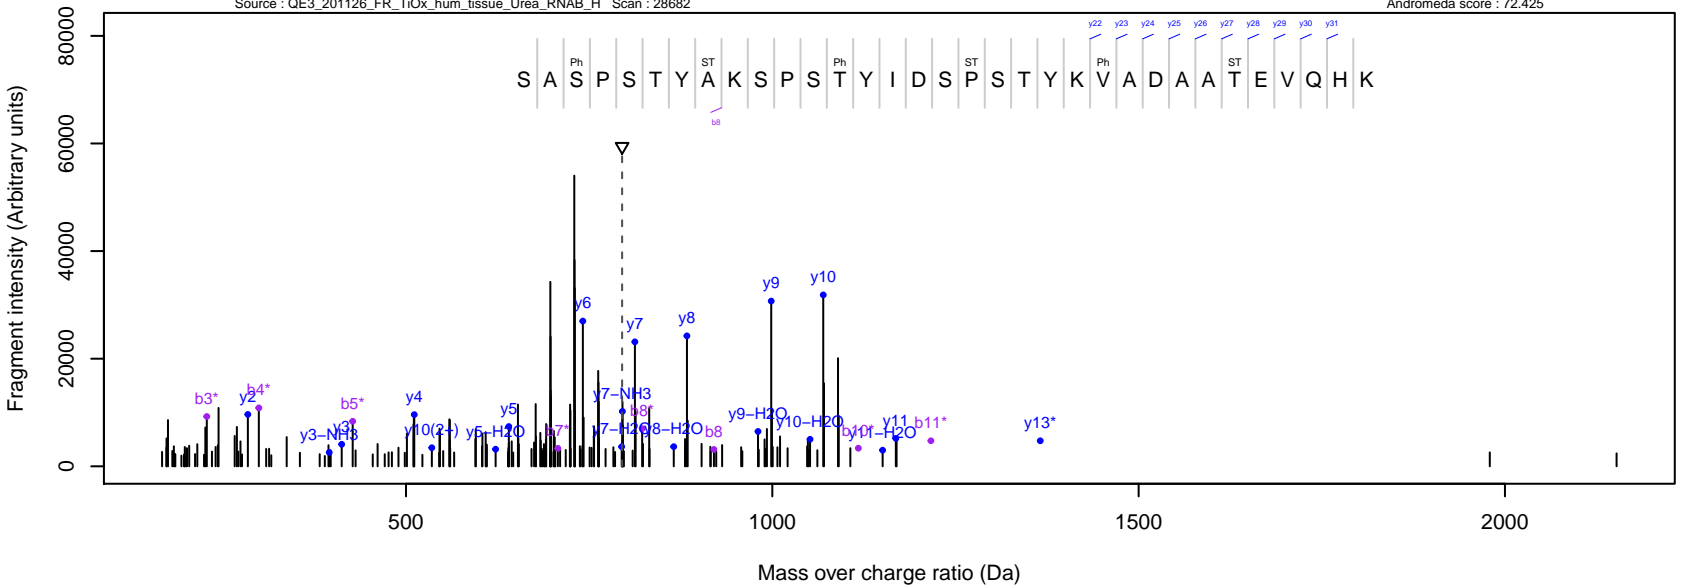

AAVQELSSS(Phospho (STY))ILAGEDPEER-2+

Source : QE3\_201126\_FR\_TiOx\_hum\_tissue\_Urea\_RNAB\_N Scan : 39559

Andromeda score : 72.421

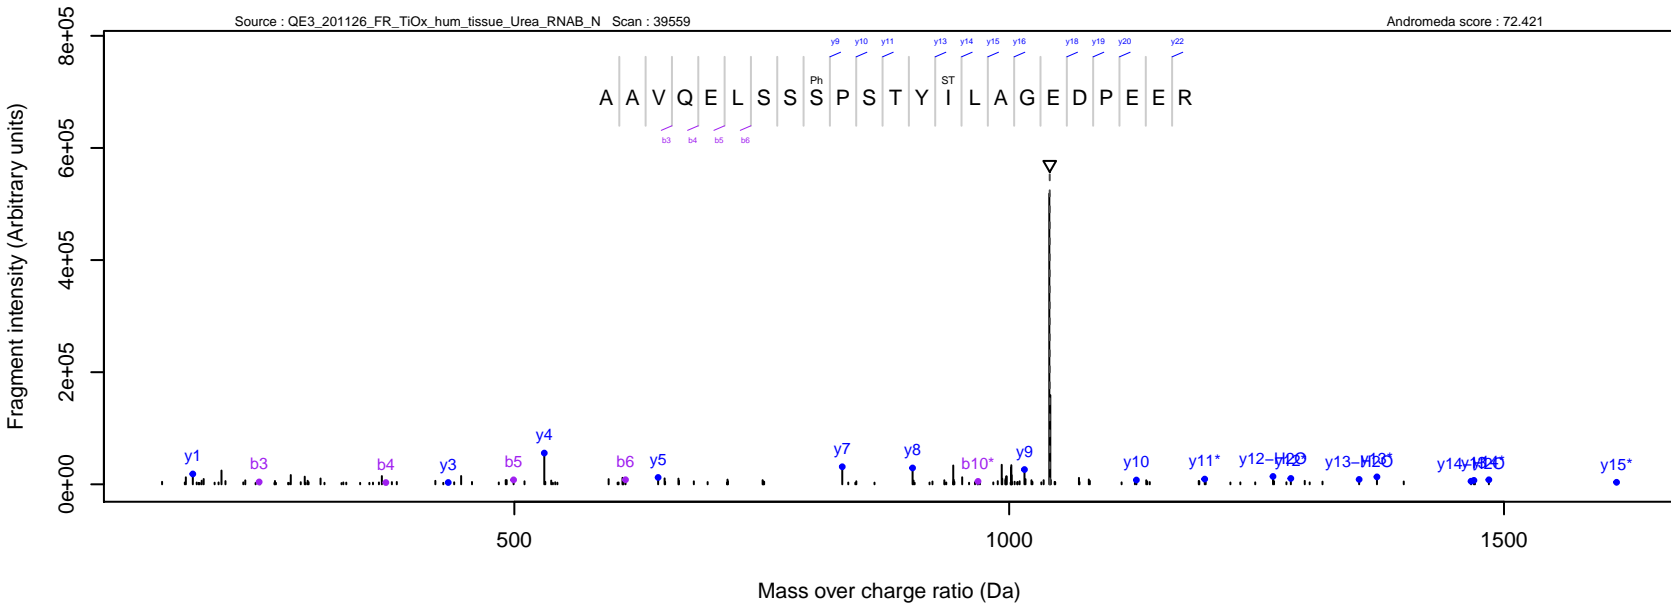

SYS(Phospho (STY))LSELS(Phospho (STY))VLQAK-2+

Source : QE3\_201126\_FR\_TiOx\_hum\_tissue\_Urea\_RNAB\_H Scan : 55242

Andromeda score : 72.417

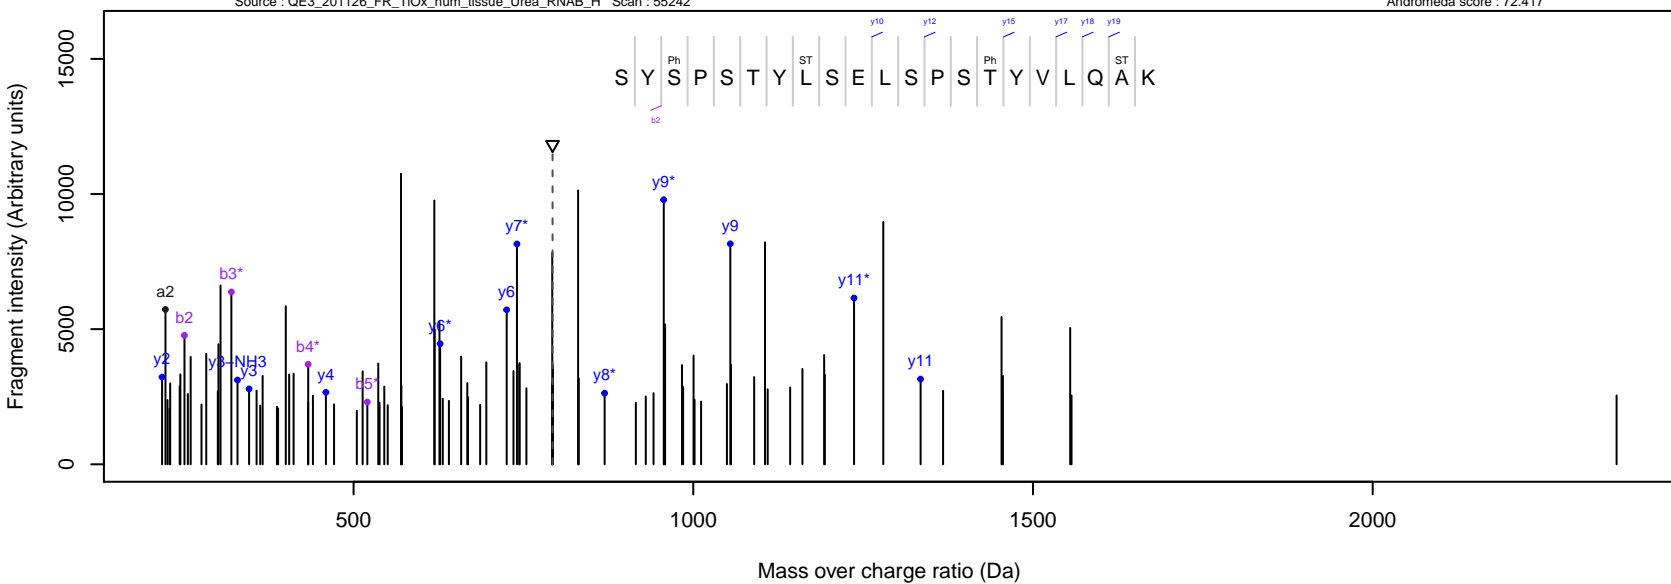

SGT(Phospho (STY))PTQDEMMDKPTSSSVDTMSLLSK-3+

Source : QE3\_201126\_FR\_TiOx\_hum\_tissue\_Urea\_RNAB\_H Scan : 38221

Andromeda score : 72.37

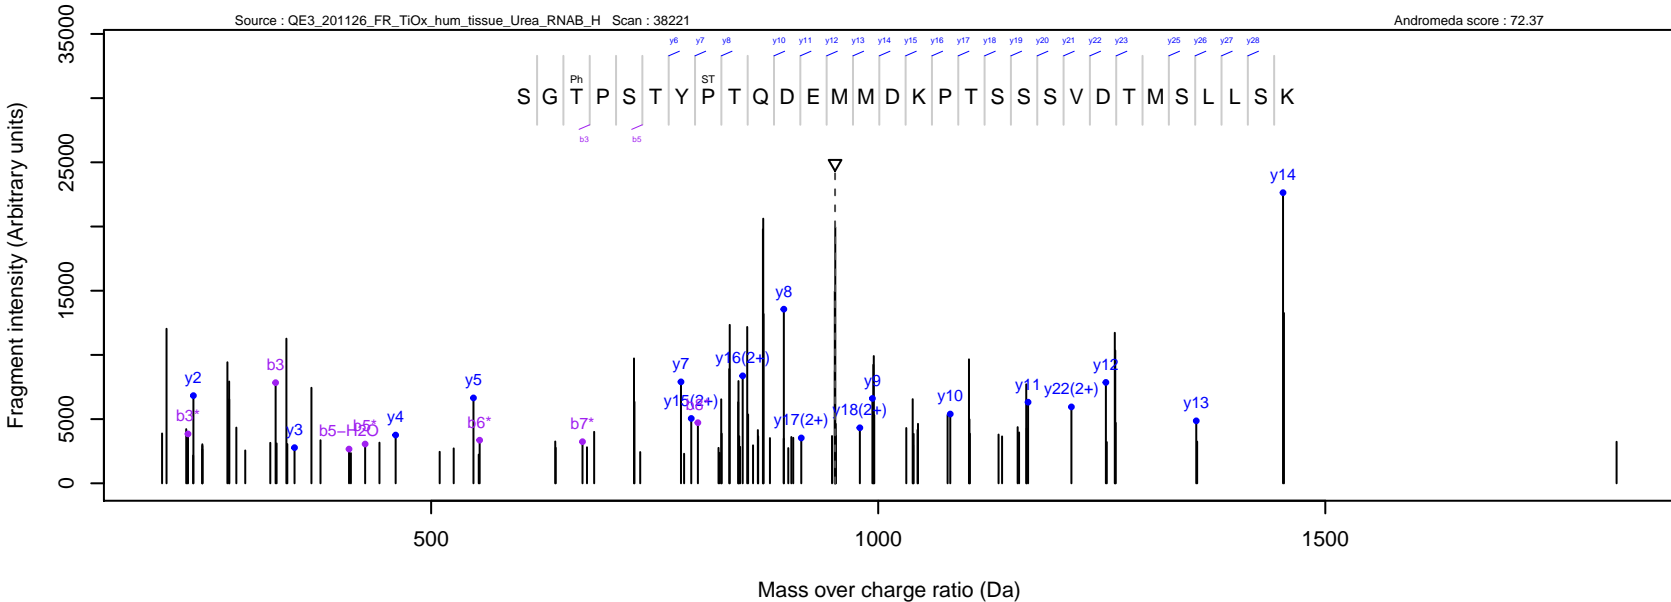

HHAS(Phospho (STY))ISELKK-3+

Source : QE3\_201126\_FR\_TiOx\_hum\_tissue\_Urea\_RNAB\_H Scan : 5730

Andromeda score : 72.34

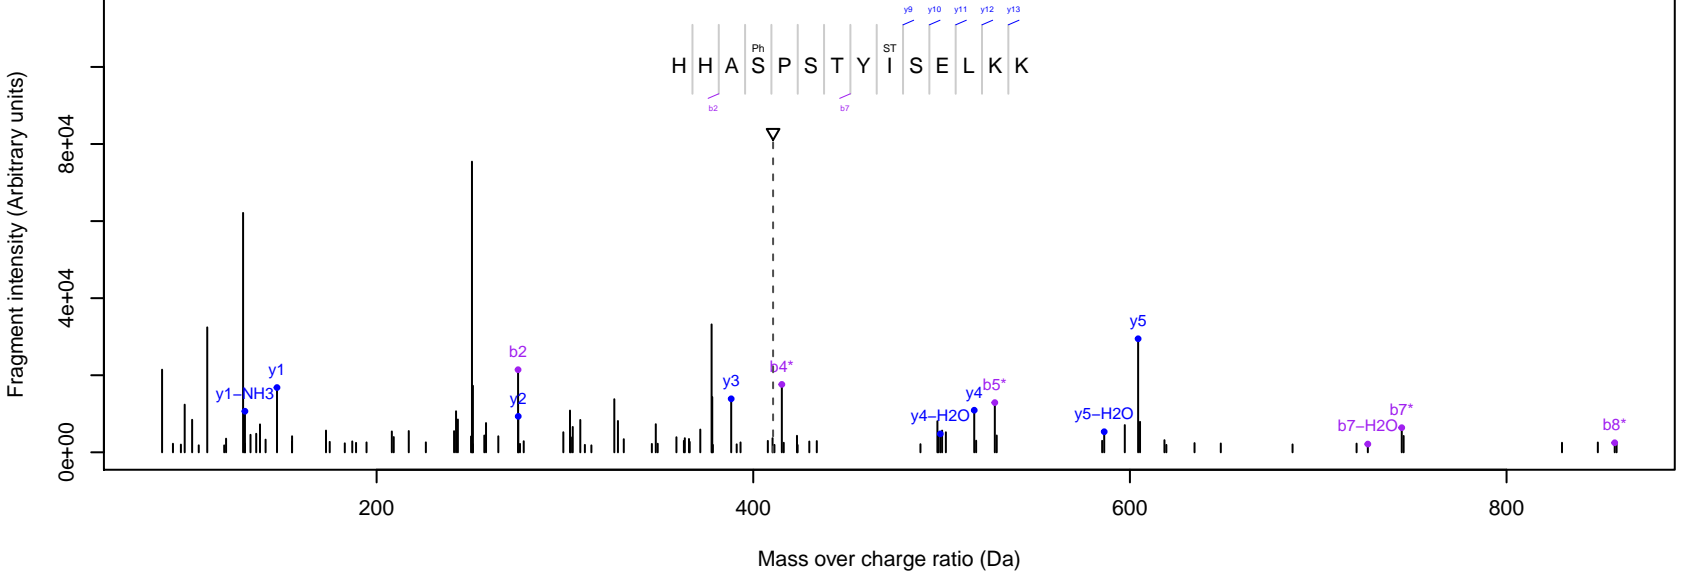

KVVVS(Phospho (STY))PTKK-3+

Source : QE3\_201126\_FR\_TiOx\_hum\_tissue\_Urea\_RNAB\_H Scan : 3179

Andromeda score : 72.34

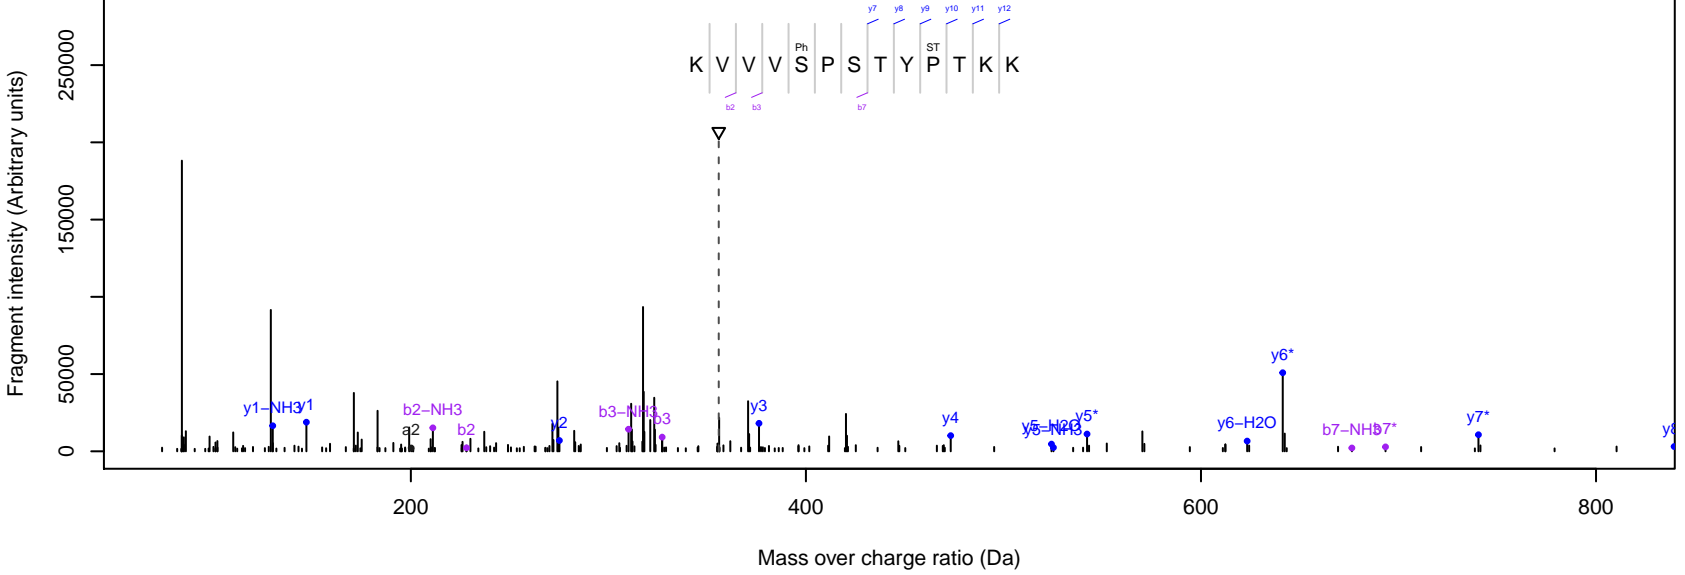

IS(Phospho (STY))PPIKEETKGDSEVEK-3+

Source : QE3\_201126\_FR\_TiOx\_hum\_tissue\_Urea\_RNAB\_B Scan : 13669

Andromeda score : 72.316

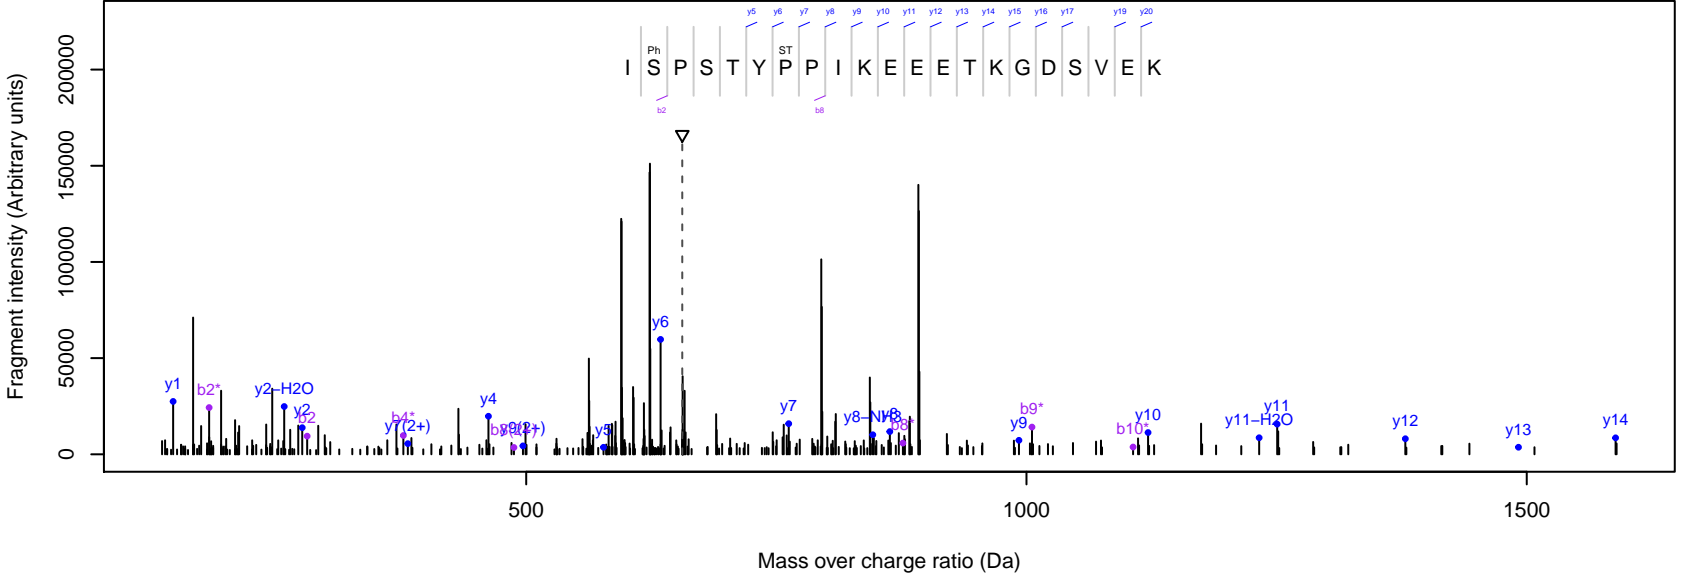

VAAAAGSGPS(Phospho (STY))PPGS(Phospho (STY))PGHDR-3+

Source : QE3\_201126\_FR\_TiOx\_hum\_tissue\_Urea\_RNAB\_H Scan : 11393

Andromeda score : 72.302

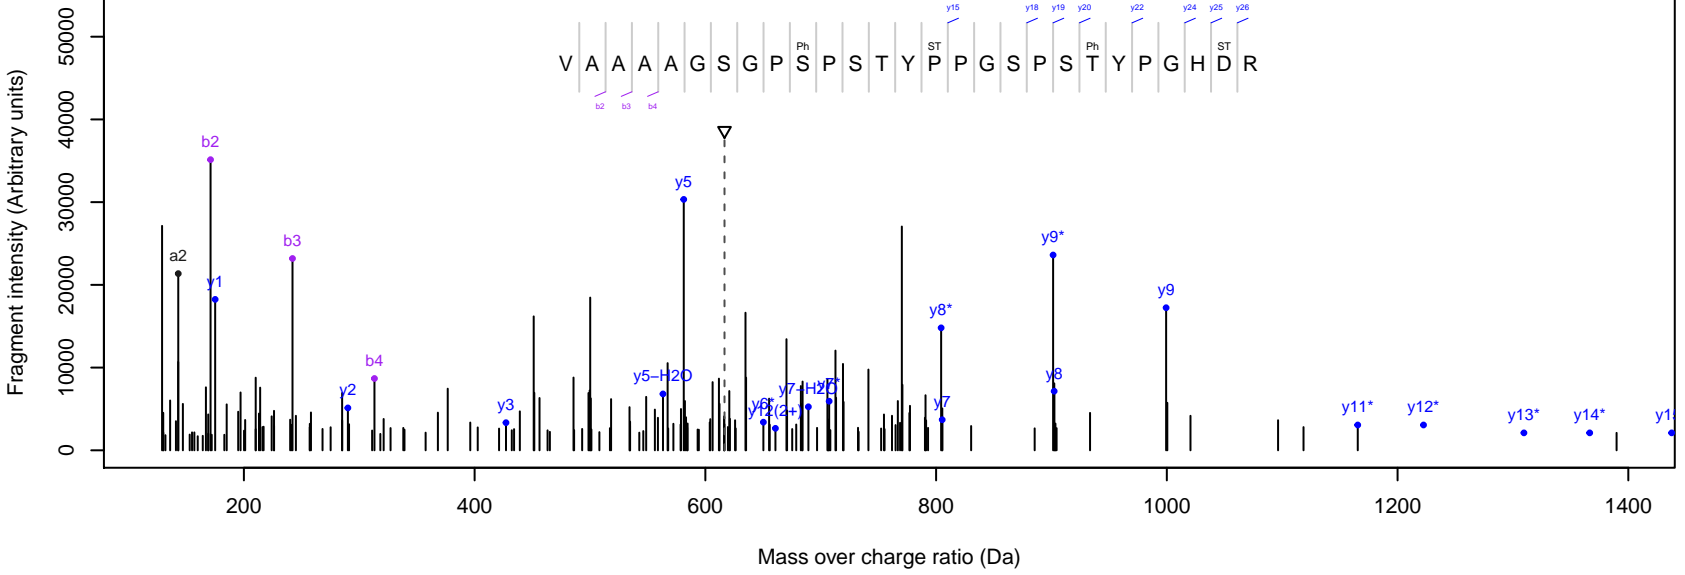

LLES(Phospho (STY))PGVEAGEGEAEKEEAGAQRPLR-4+

Source : QE3\_201126\_FR\_TiOx\_hum\_tissue\_Urea\_RNAB\_B Scan : 23528

Andromeda score : 72.292

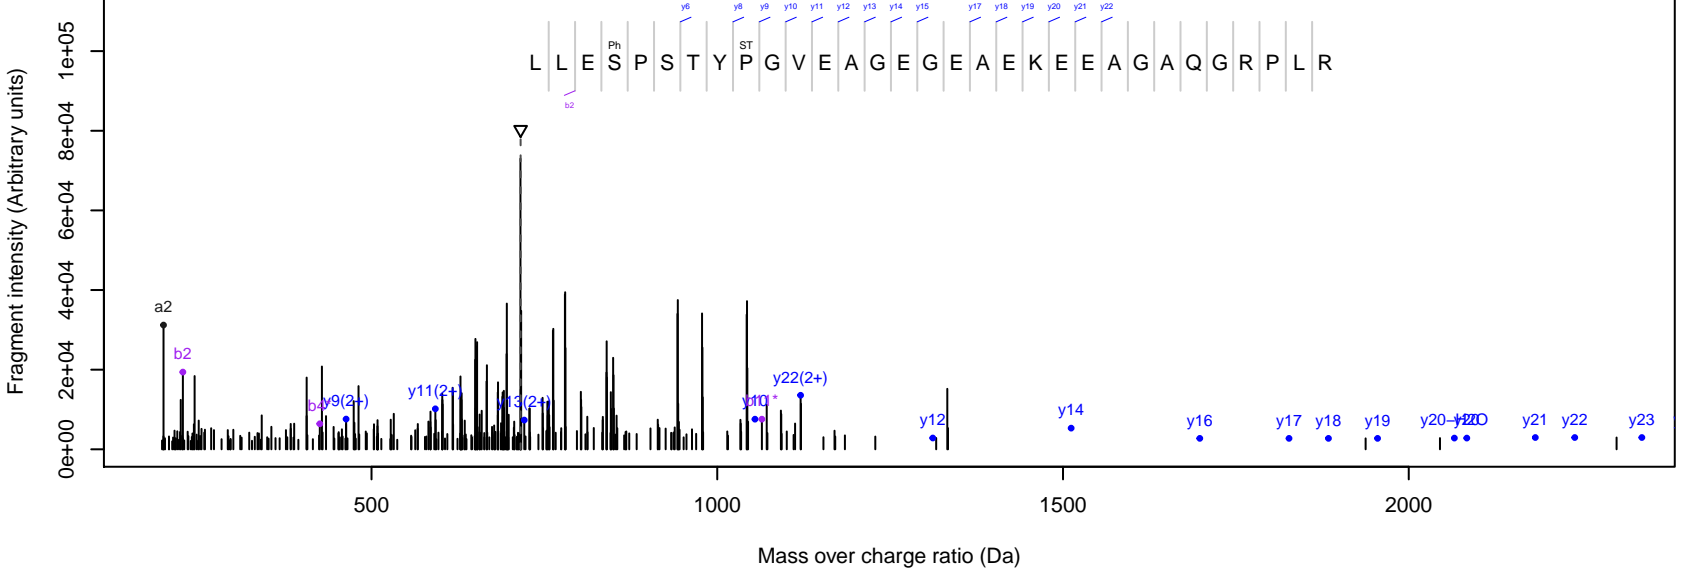

DLS(Phospho (STY))M(Oxidation (M))SEEDQM(Oxidation (M))M(Oxidation (M))R-2+

Source : QE3\_201126\_FR\_TiOx\_hum\_tissue\_Urea\_RNAB\_H Scan : 11102

Andromeda score : 72.29

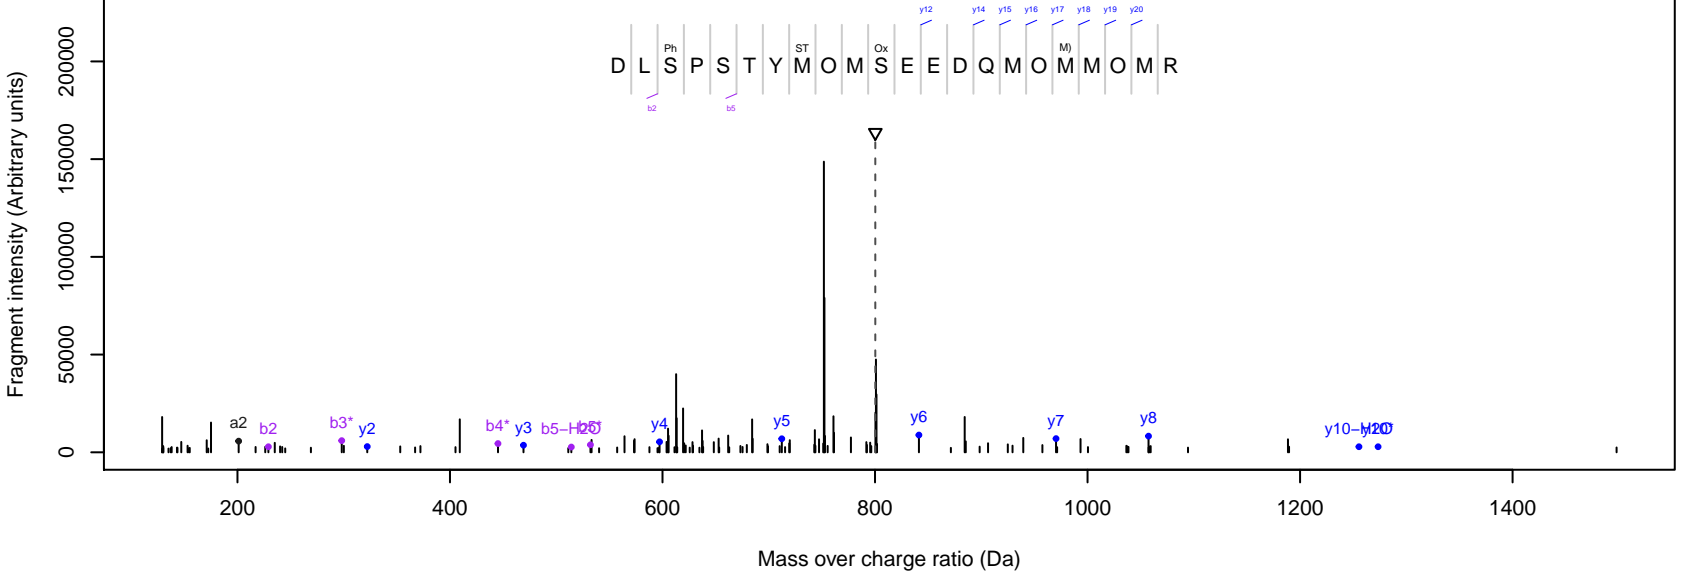

S(Phospho (STY))RTSPAPWKR-3+

Source : QE3\_201126\_FR\_TiOx\_hum\_tissue\_Urea\_RNAB\_H Scan : 7154

Andromeda score : 72.29

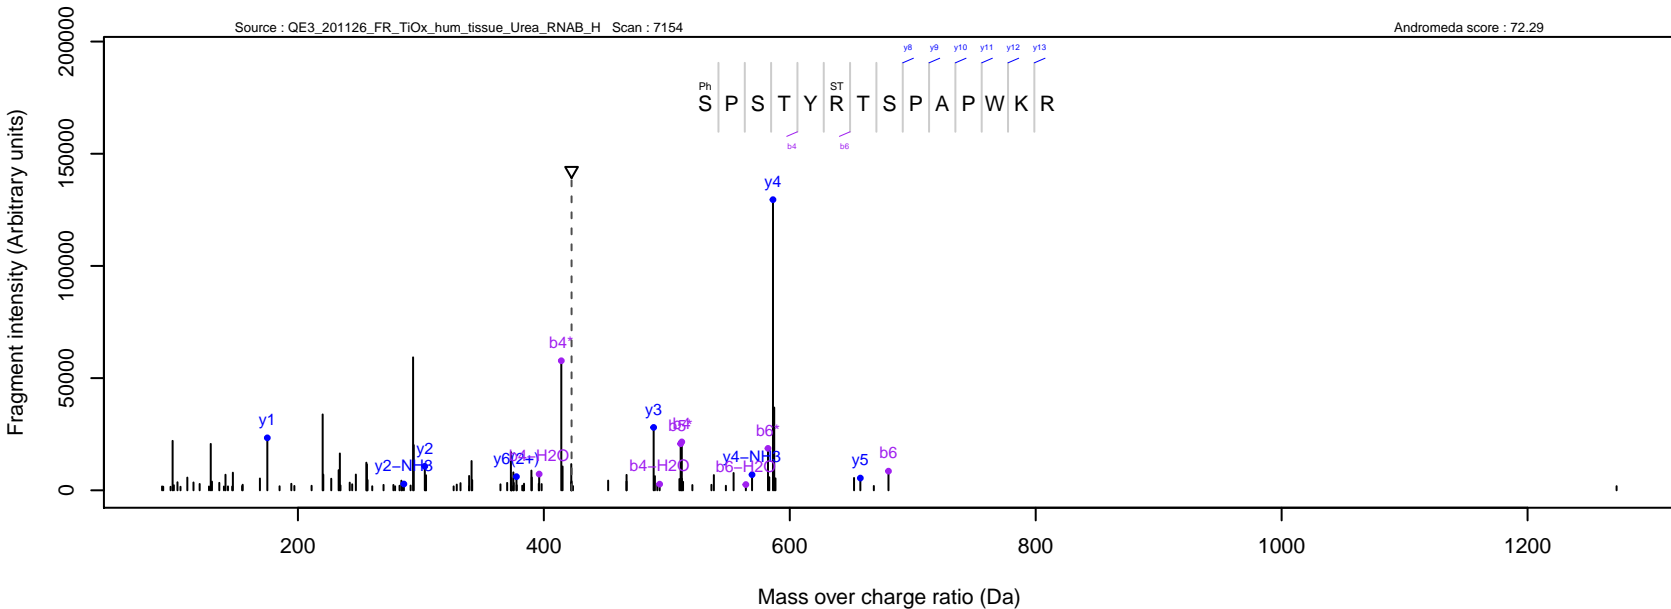

(Acetyl (Protein N-term))AAAM(Oxidation (M))VPGRS(Phospho (STY))ESWER-2+

Source : QE3\_201126\_FR\_TiOx\_hum\_tissue\_Urea\_RNAB\_H Scan : 25106

Andromeda score : 72.265

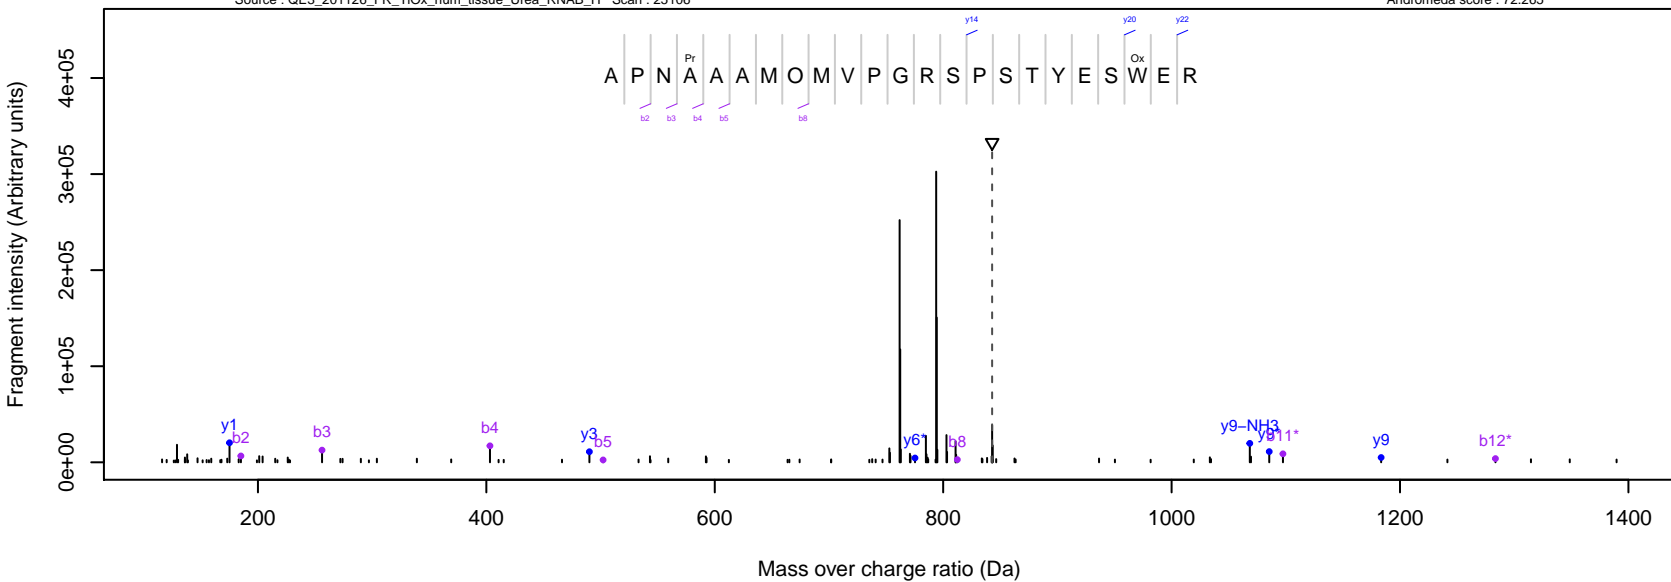

AESSGGTVPSSAGILEQGPS(DG)PPKPKDPVSAVPAPGR-4+

Source : QE3\_201126\_FR\_TiOx\_hum\_tissue\_Urea\_RNAB\_N Scan : 32313

Andromeda score : 72.236

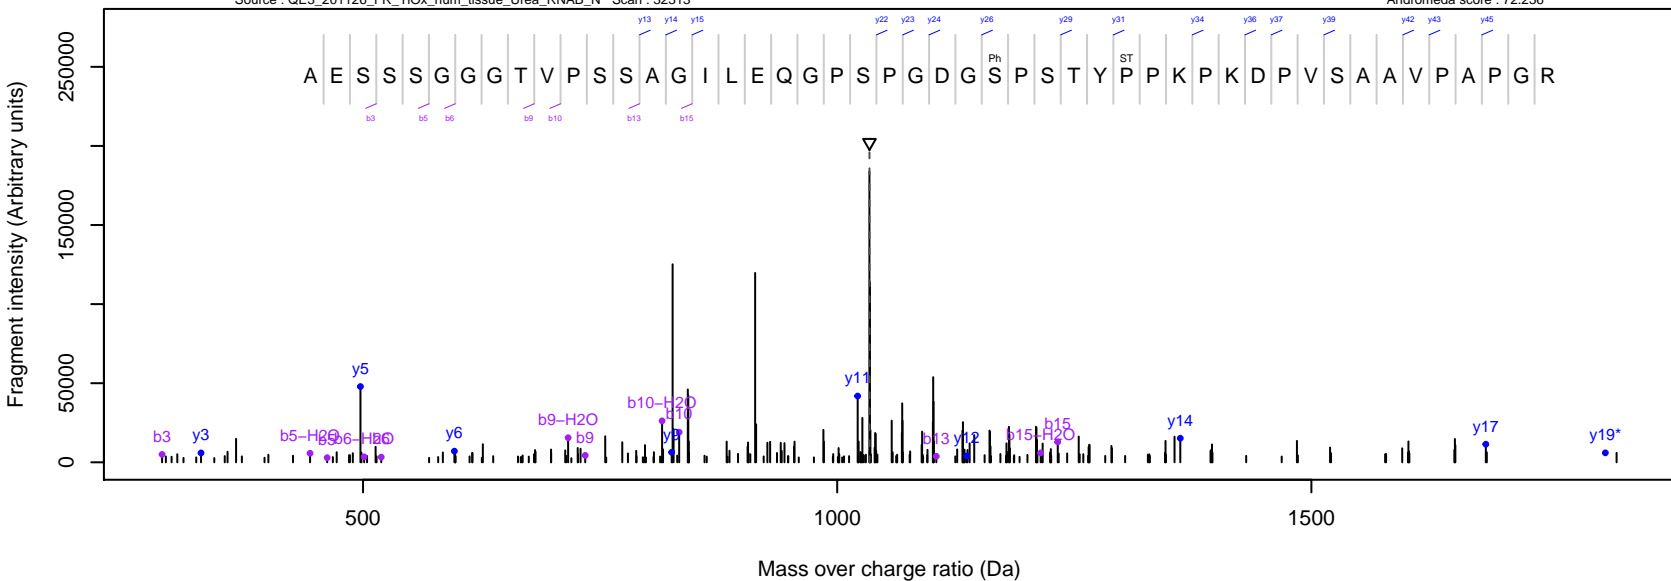



DQPDGSSLS(Phospho (STY))PAQS(Phospho (STY))PSQSPPAASSLREPGLESK-3+

Source : QE3\_201126\_FR\_TiOx\_hum\_tissue\_Urea\_RNAB\_B Scan : 32809

Andromeda score : 72.231

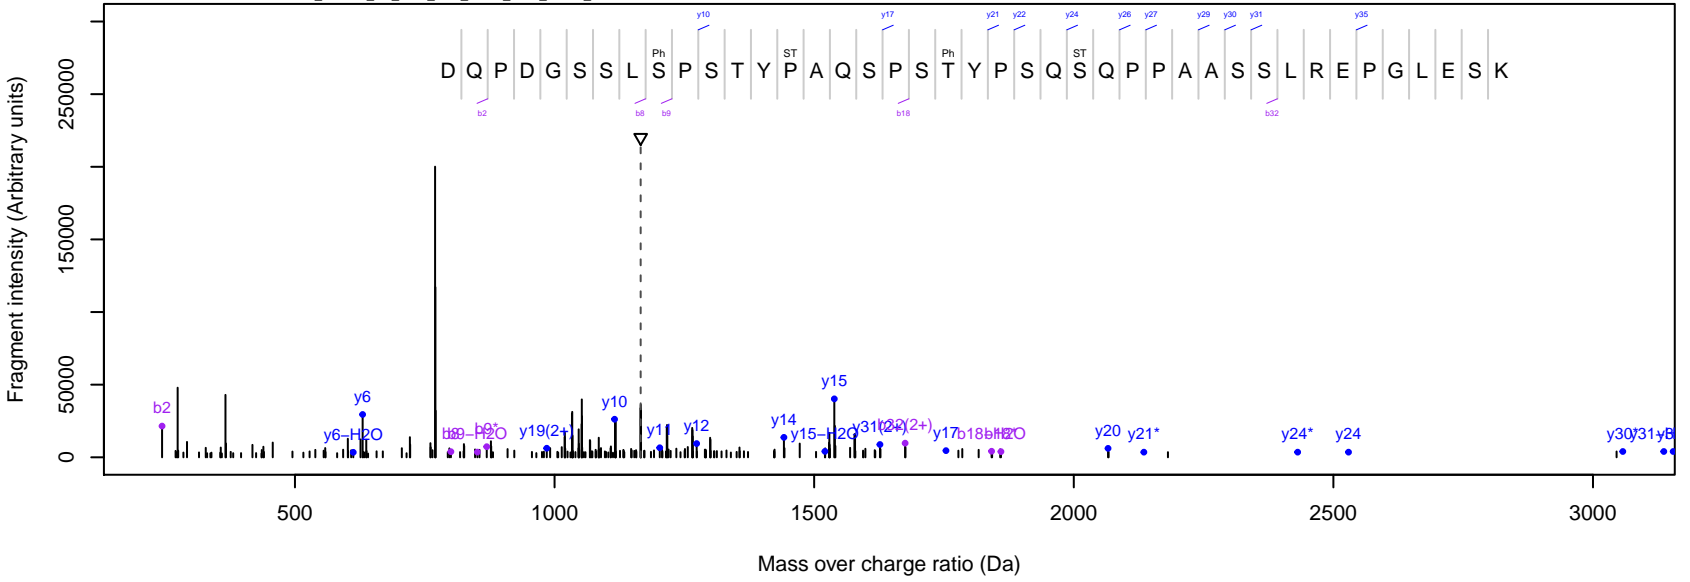

AGAAAGDS(Phospho (STY))DEESRADDKGV(M)DYLLK-3+

Source : QE3\_201126\_FR\_TiOx\_hum\_tissue\_Urea\_RNAB\_N Scan : 19629

Andromeda score : 72.228

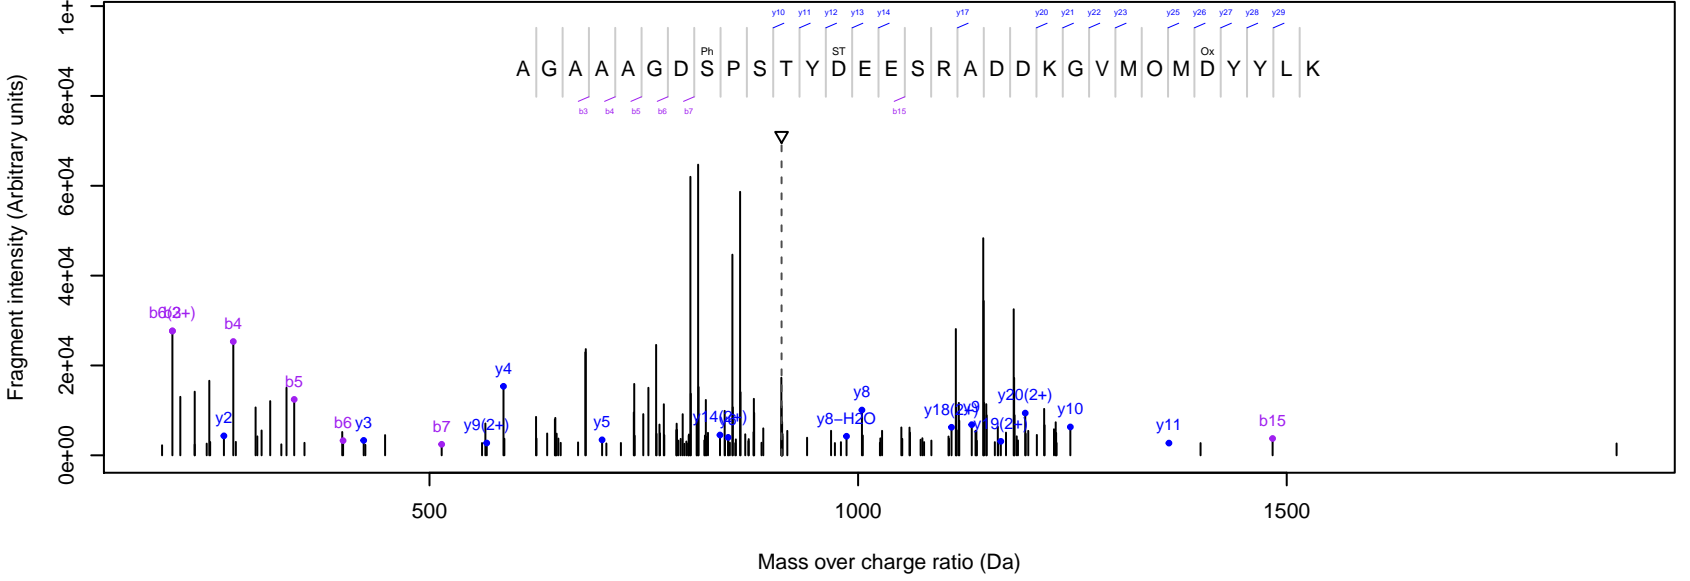

QAS(Phospho (STY))PETSASPDGSQLVYETELLR-3+

Source : QE3\_201126\_FR\_TiOx\_hum\_tissue\_Urea\_RNAB\_B Scan : 49321

Andromeda score : 72.228

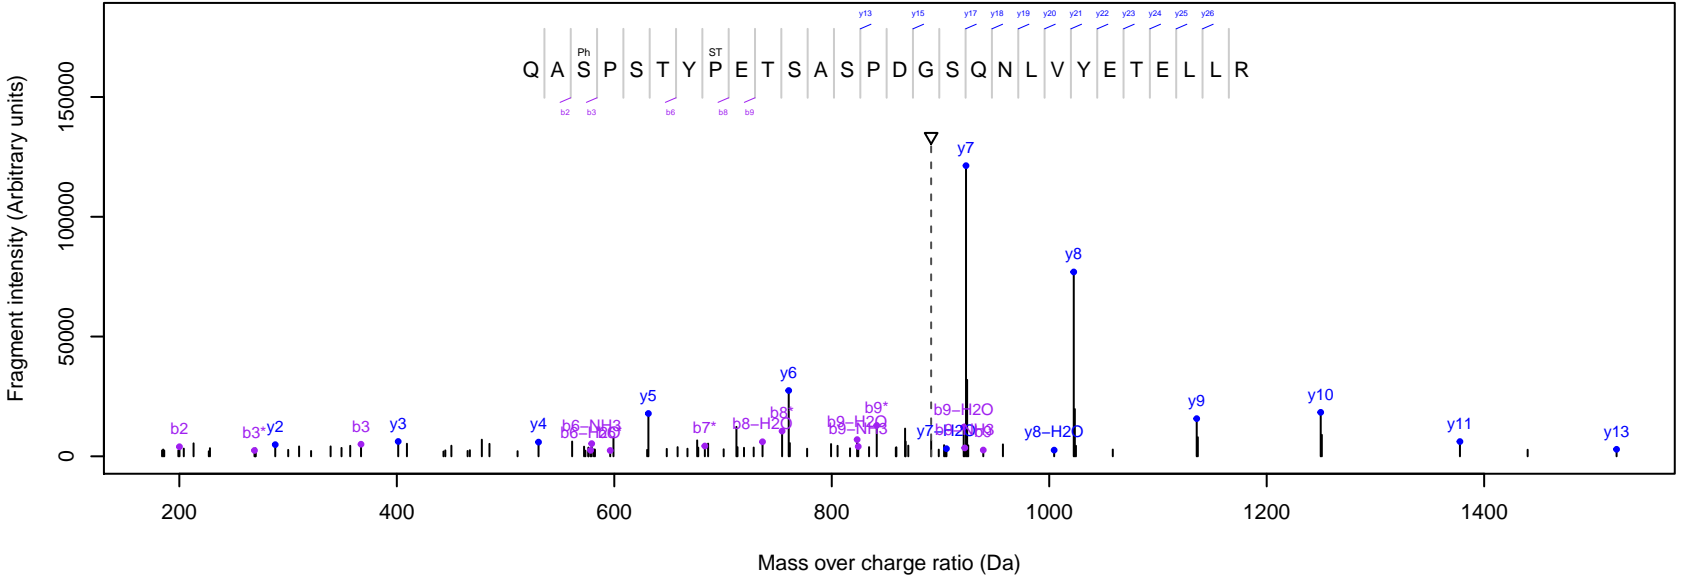

LKEGHETPM(Oxidation (M))DIDS(Phospho (STY))DDSK-3+

Source : QE3\_201126\_FR\_TiOx\_hum\_tissue\_Urea\_RNAB\_N Scan : 7976

Andromeda score : 72.227

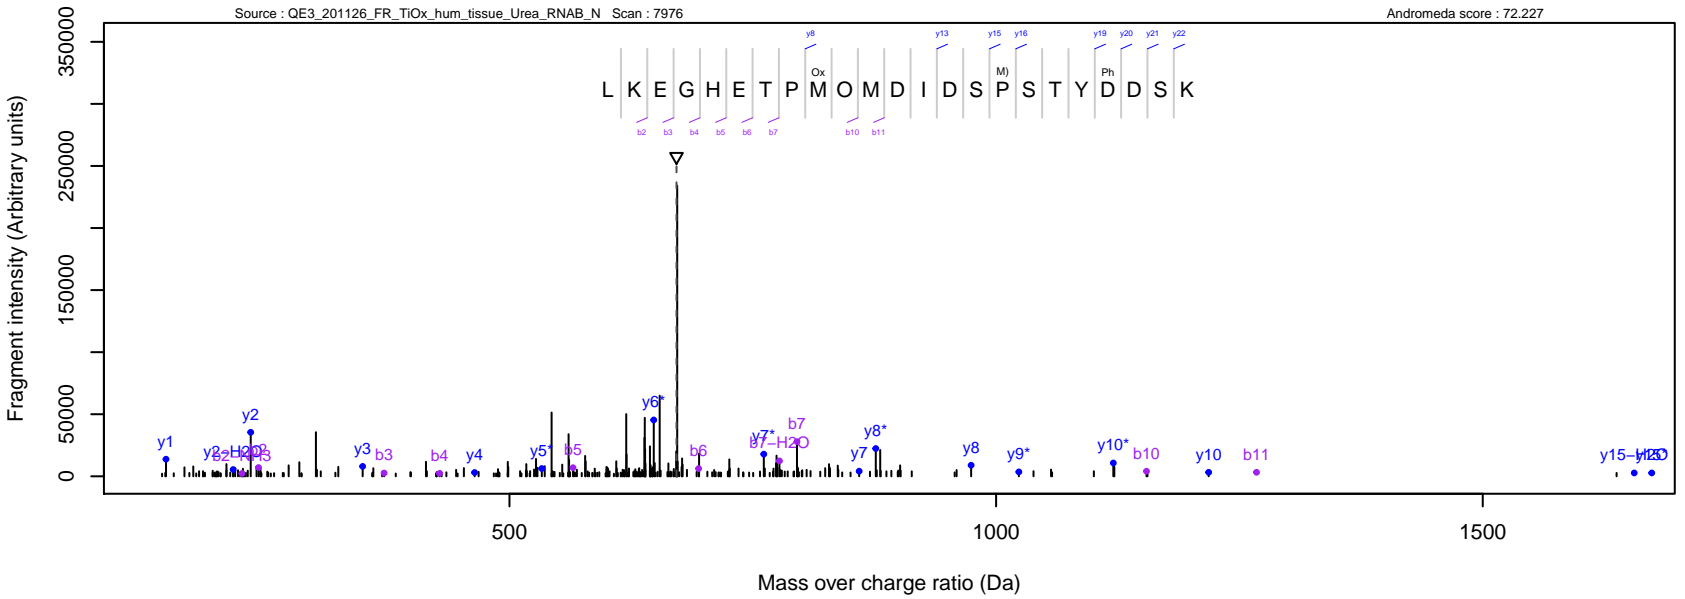

M(Oxidation (M))EVDRS(Phospho (STY))PGLPMSDLK-3+

Source : QE3\_201126\_FR\_TiOx\_hum\_tissue\_Urea\_RNAB\_N Scan : 25239

Andromeda score : 72.21

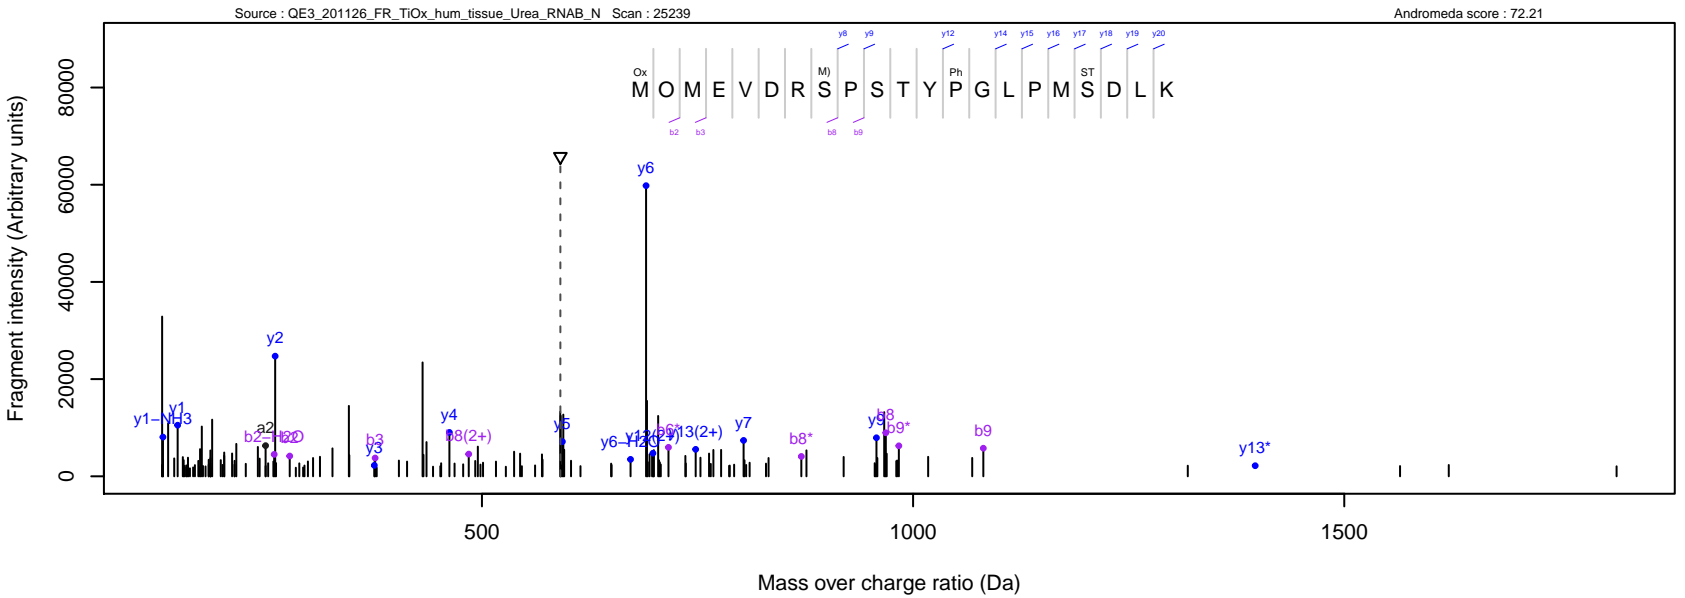

AIS(Phospho (STY))SANLLVR-2+

Source : QE3\_201126\_FR\_TiOx\_hum\_tissue\_Urea\_RNAB\_B Scan : 31827

Andromeda score : 72.2

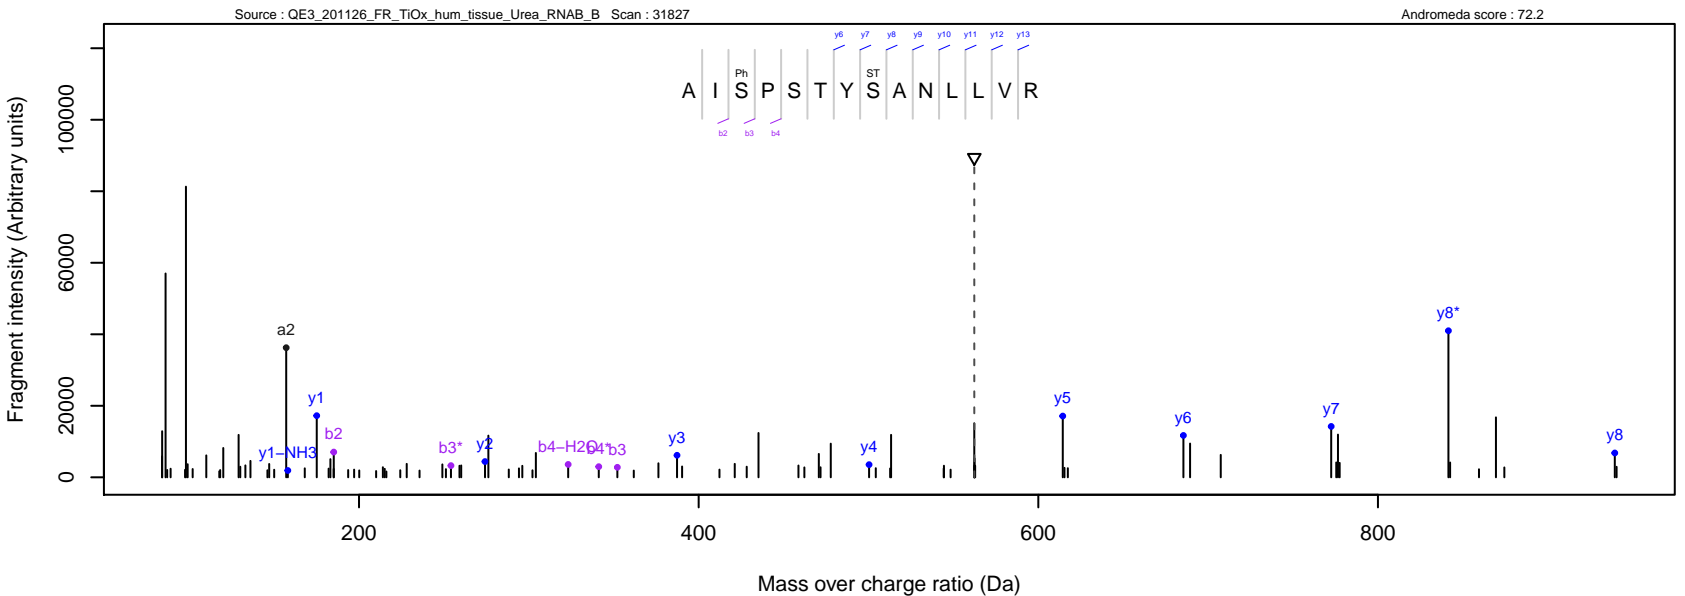

SAS(Phospho (STY))ASHQADIKEAR-3+

Source : QE3\_201126\_FR\_TIOx\_hum\_tissue\_Urea\_RNAB\_H Scan : 4438

Andromeda score : 72.184

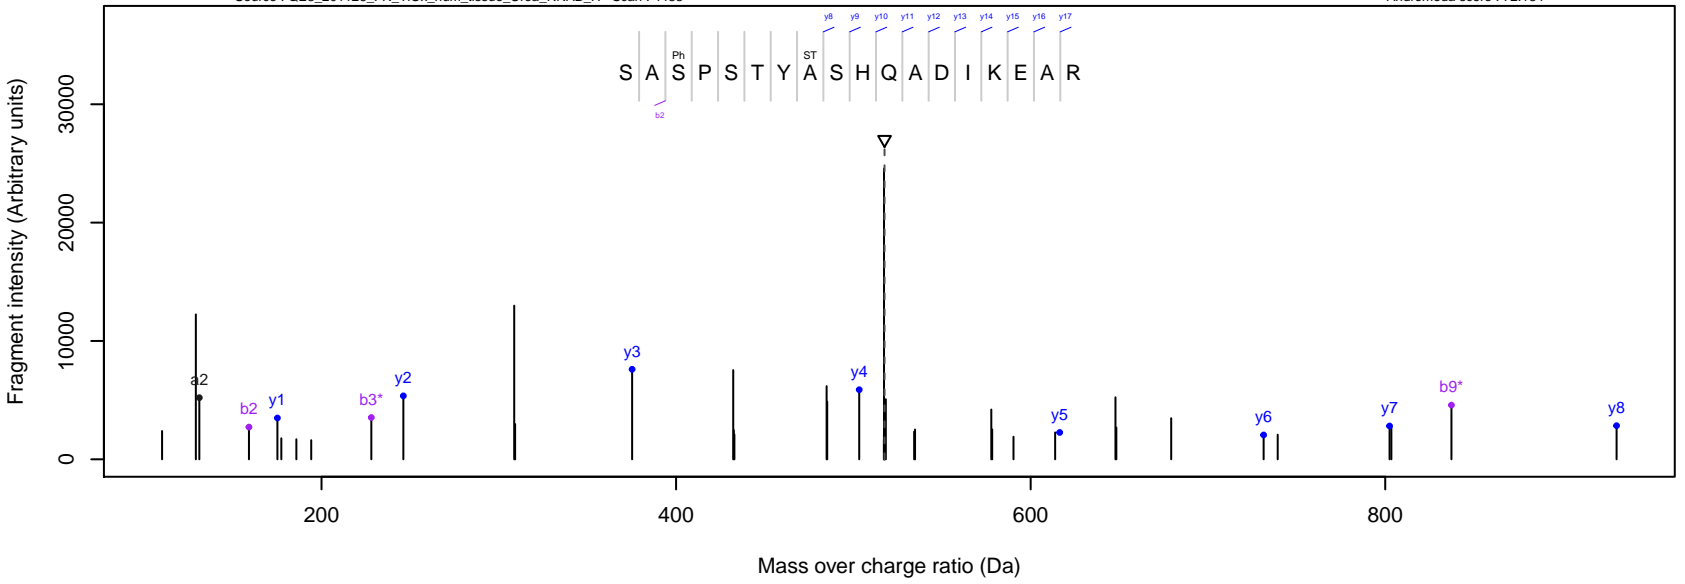

VNS(Phospho (STY))INIQGSITFAGGPGR-2+

Source : QE3\_201126\_FR\_TIOx\_hum\_tissue\_Urea\_RNAB\_H Scan : 40747

Andromeda score : 72.184

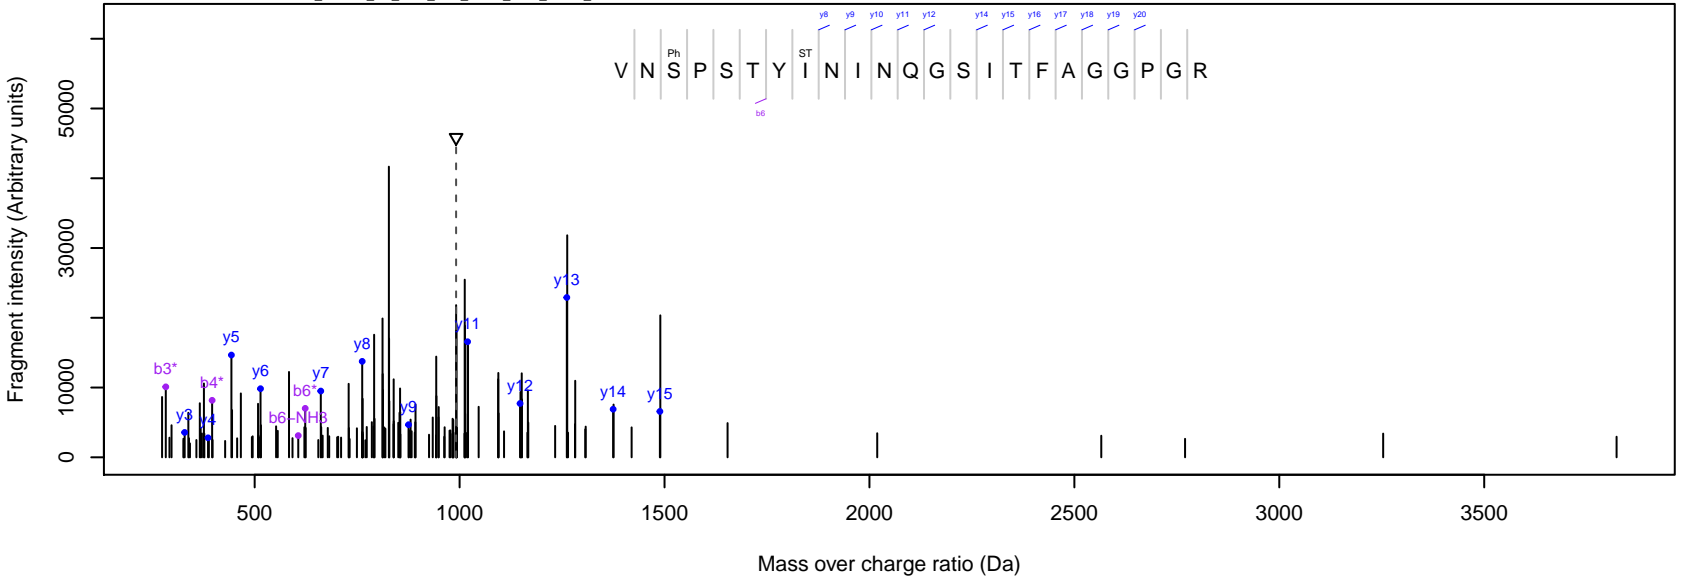

(Acetyl (Protein N-term))AHS(Phospho (STY))PVQSGLPGM(Oxidation (M))QNLK-2+

Source : QE3\_201126\_FR\_TIOx\_hum\_tissue\_Urea\_RNAB\_N Scan : 23576

Andromeda score : 72.175

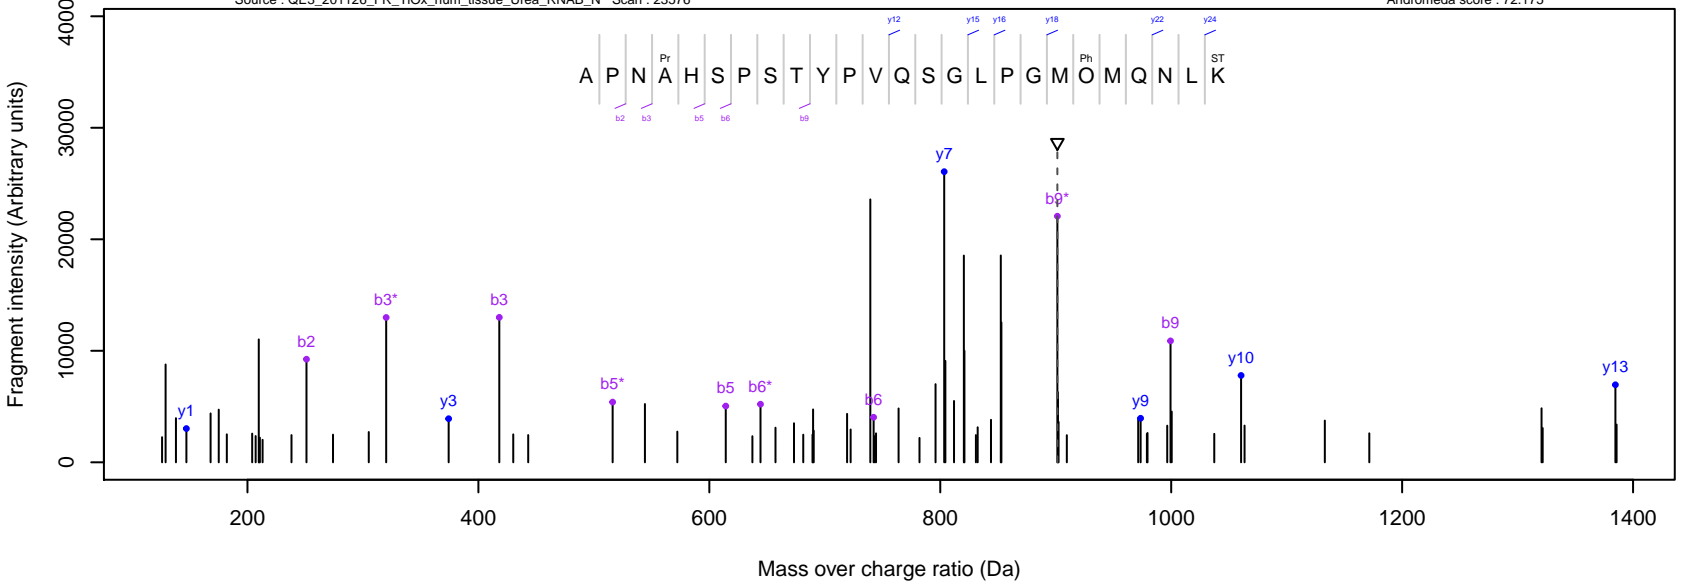

IPEISIQDM(Oxidation (M))TAQVTS(Phospho (STY))PSGK-2+

Source : QE3\_201126\_FR\_TIOx\_hum\_tissue\_Urea\_RNAB\_N Scan : 35434

Andromeda score : 72.175

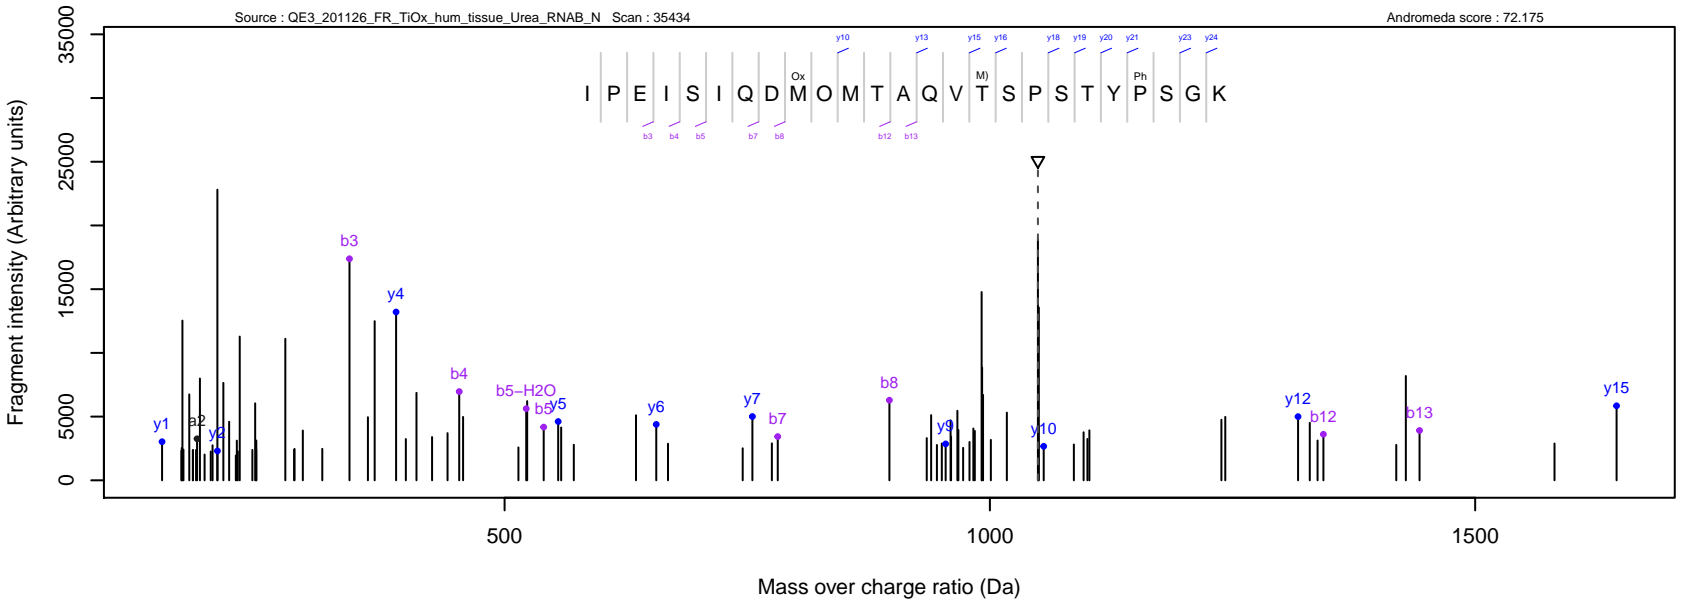

LASDDRRS(Phospho (STY))PPR-3+

Source : QE3\_201126\_FR\_TIOx\_hum\_tissue\_Urea\_RNAB\_B Scan : 8742

Andromeda score : 72.175

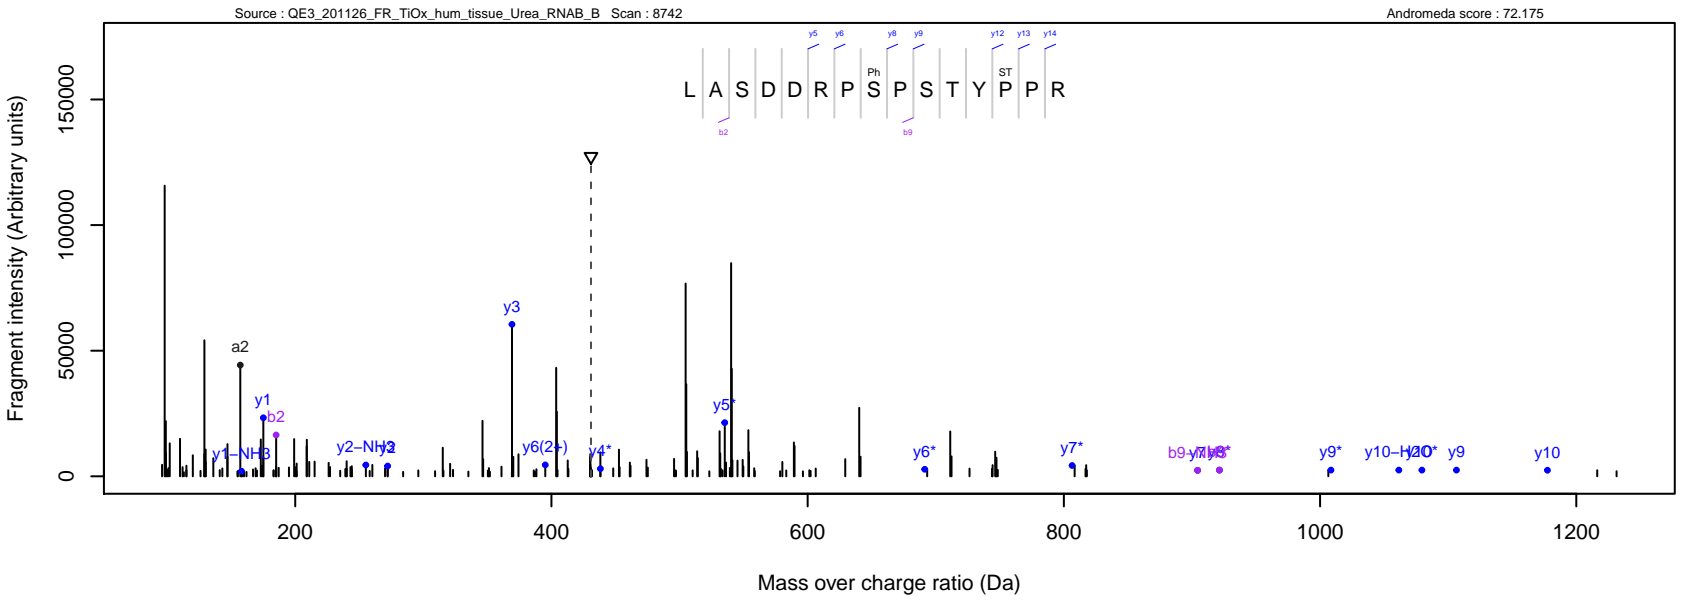

LPTGQIS(Phospho (STY))GPEIK-2+

Source : QE3\_201126\_FR\_TIOx\_hum\_tissue\_Urea\_RNAB\_H Scan : 26244

Andromeda score : 72.175

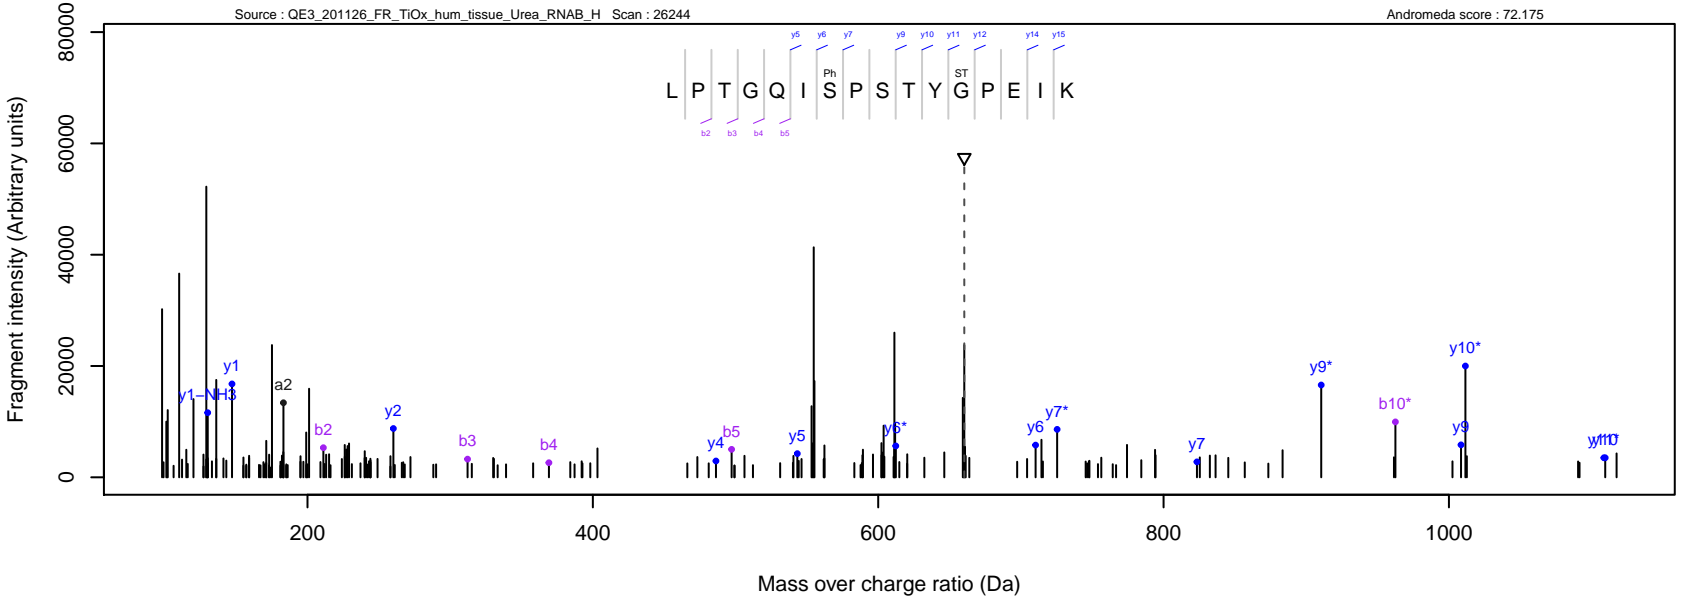

VKEVHDELEDLPS(Phospho (STY))PPPPLSPPTTSPHK-4+

Source : QE3\_201126\_FR\_TiOx\_hum\_tissue\_Urea\_RNAB\_H Scan : 30816

Andromeda score : 72.163

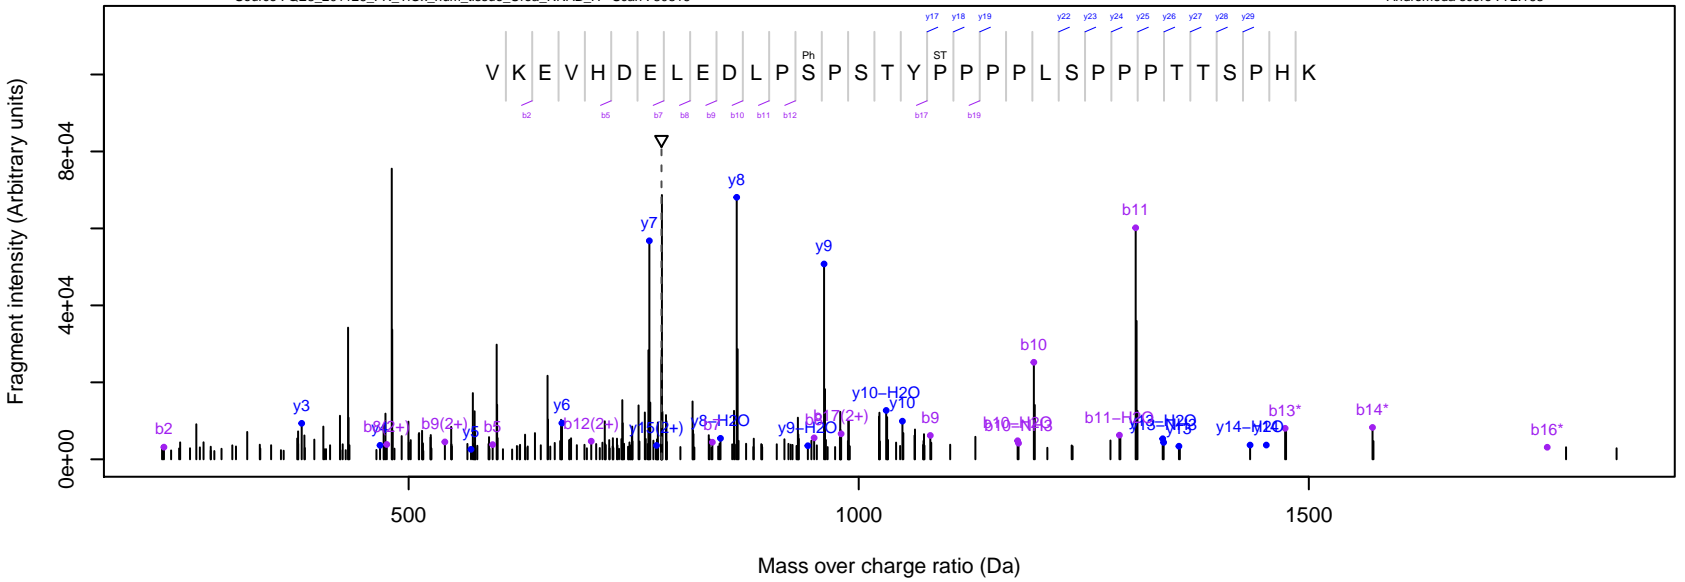

TSADAQEPASPVSPQQS(Phospho (STY))PPT(Phospho (STY))SPHTWR-3+

Source : QE3\_201126\_FR\_TiOx\_hum\_tissue\_Urea\_RNAB\_N Scan : 31151

Andromeda score : 72.152

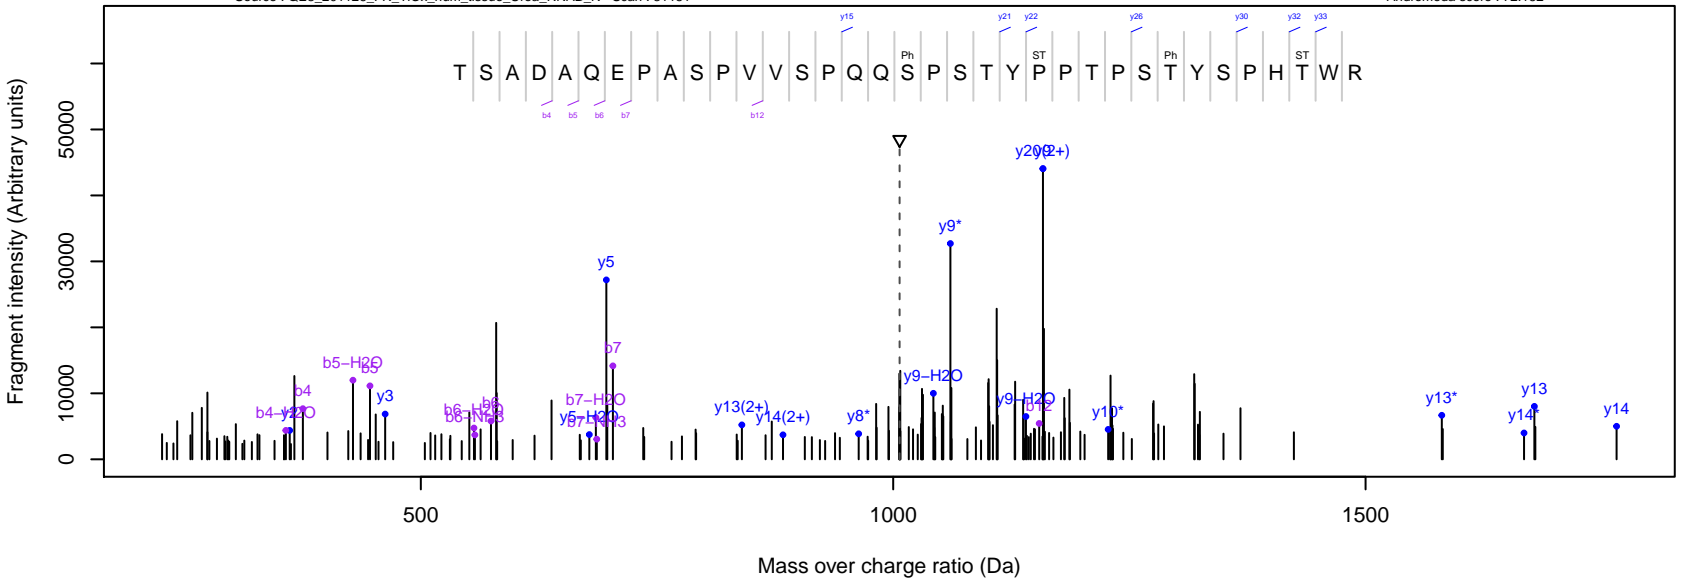

VLTLSERPLDFLDERPPT(Phospho (STY))TPQNEEIR-4+

Source : QE3\_201126\_FR\_TiOx\_hum\_tissue\_Urea\_RNAB\_H Scan : 53039

Andromeda score : 72.152

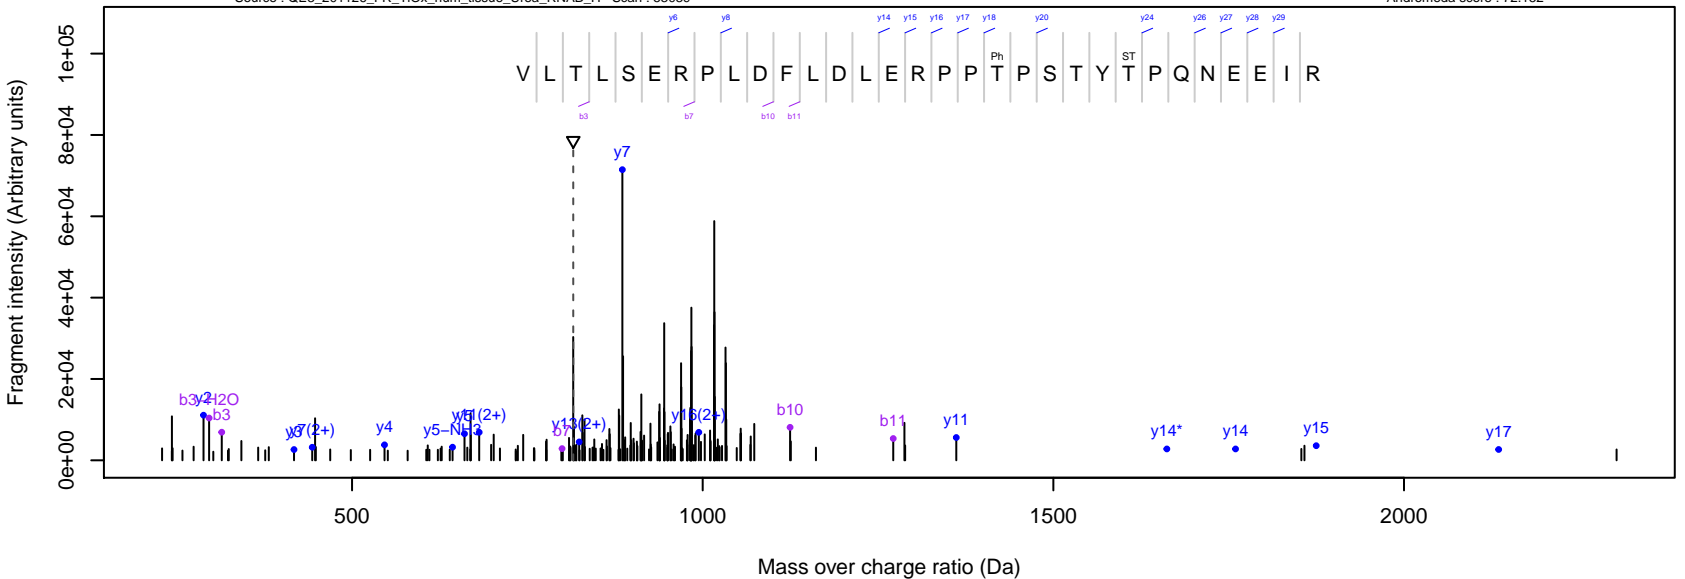

QQGSSLSGS(Phospho (STY))KDNVELILK-3+

Source : QE3\_201126\_FR\_TiOx\_hum\_tissue\_Urea\_RNAB\_H Scan : 29696

Andromeda score : 72.145

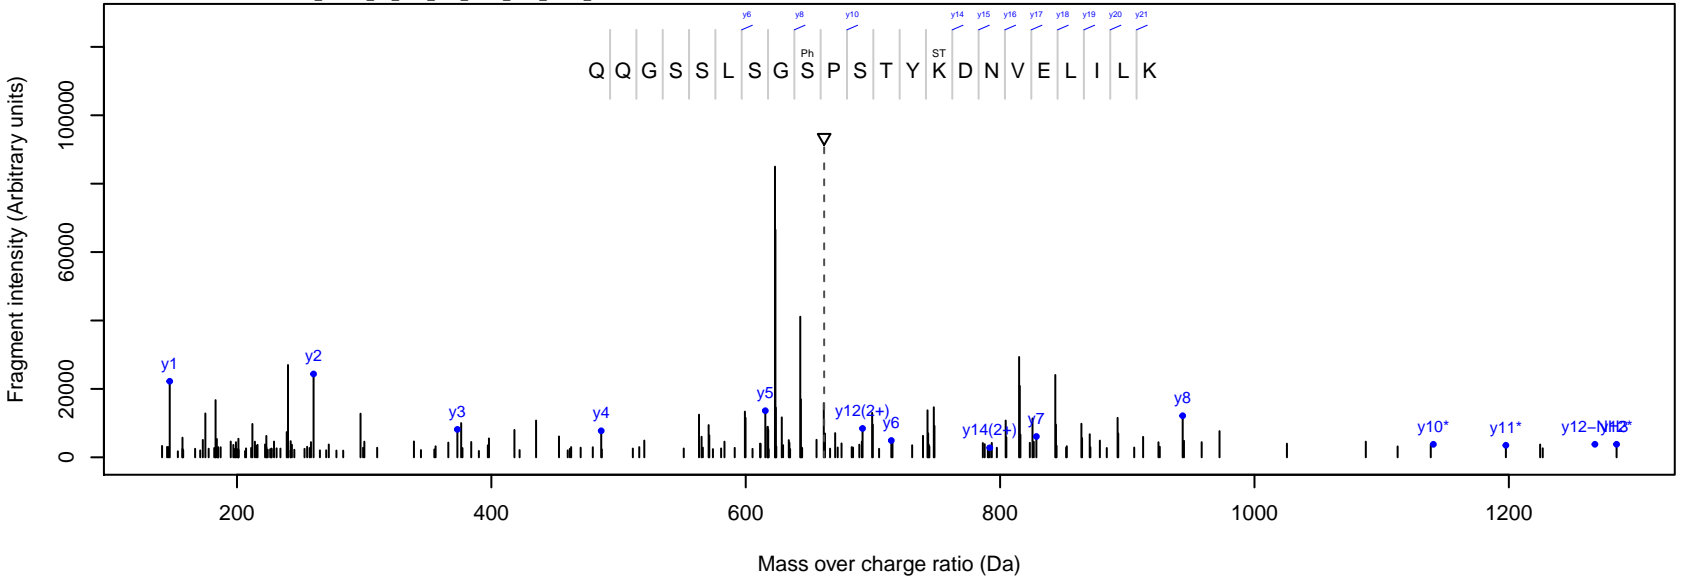

HRRS(Phospho (STY))PS(Phospho (STY))VS(Phospho (STY))S(Phospho (STY))PEPAEK-3+

Source : QE3\_201126\_FR\_TiOx\_hum\_tissue\_Urea\_RNAB\_B Scan : 6263

Andromeda score : 72.1

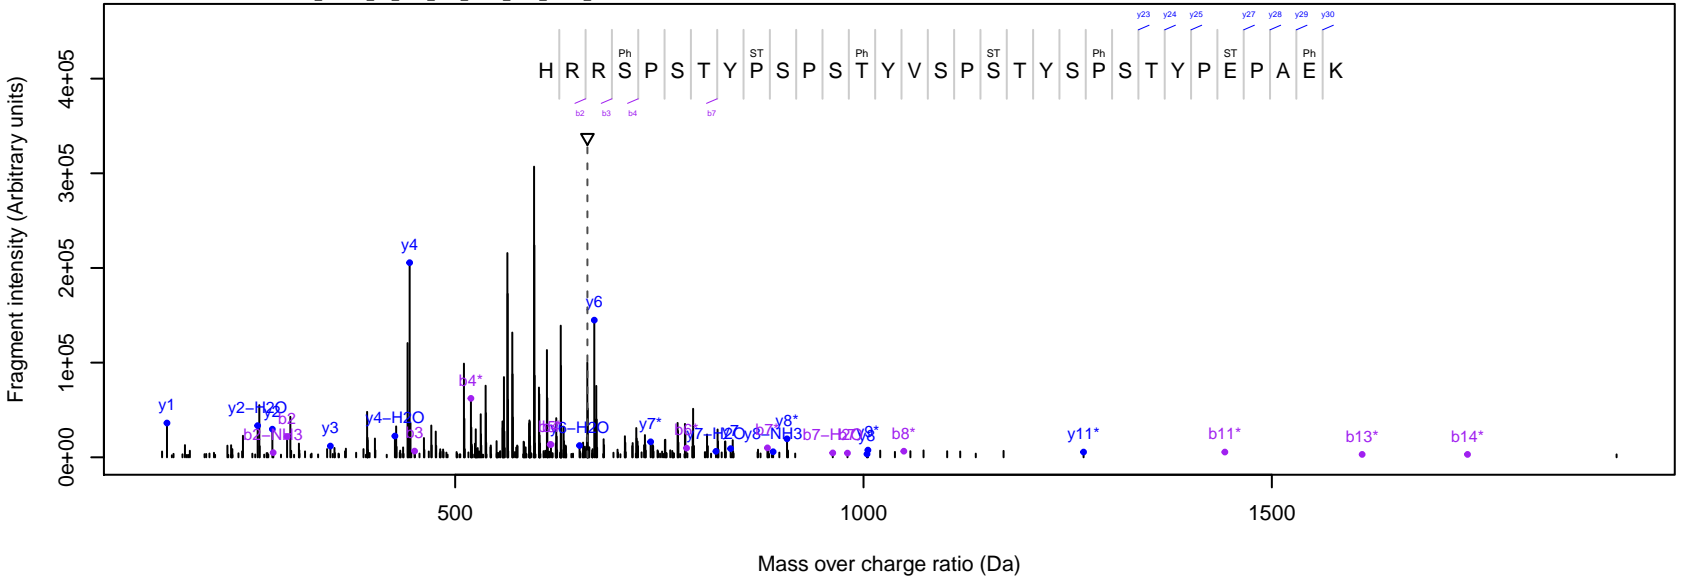

DKKS(Phospho (STY))PLIESTANMDDNNSQK-3+

Source : QE3\_201126\_FR\_TiOx\_hum\_tissue\_Urea\_RNAB\_B Scan : 12500

Andromeda score : 72.09

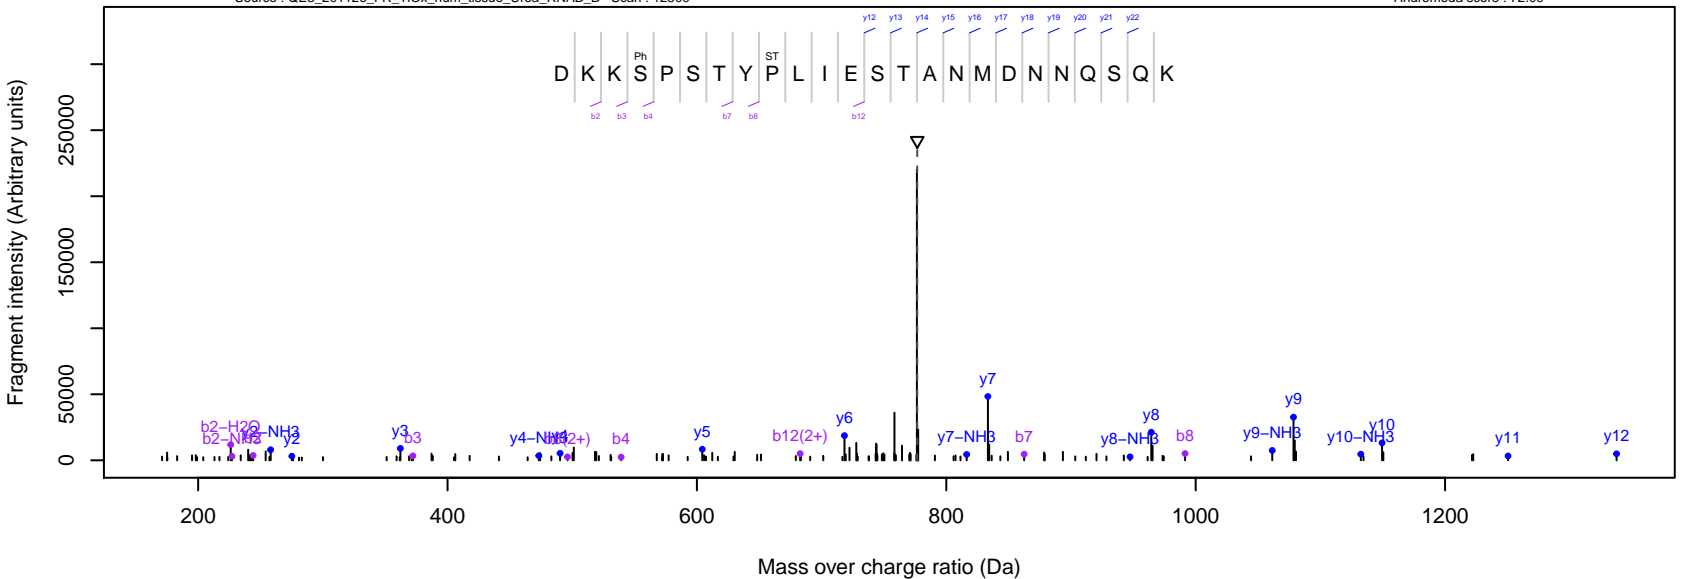

LDIDS(Phospho (STY))PPITAR-2+

Source : QE3\_201126\_FR\_TiOx\_hum\_tissue\_Urea\_RNAB\_N Scan : 32498

Andromeda score : 72.089

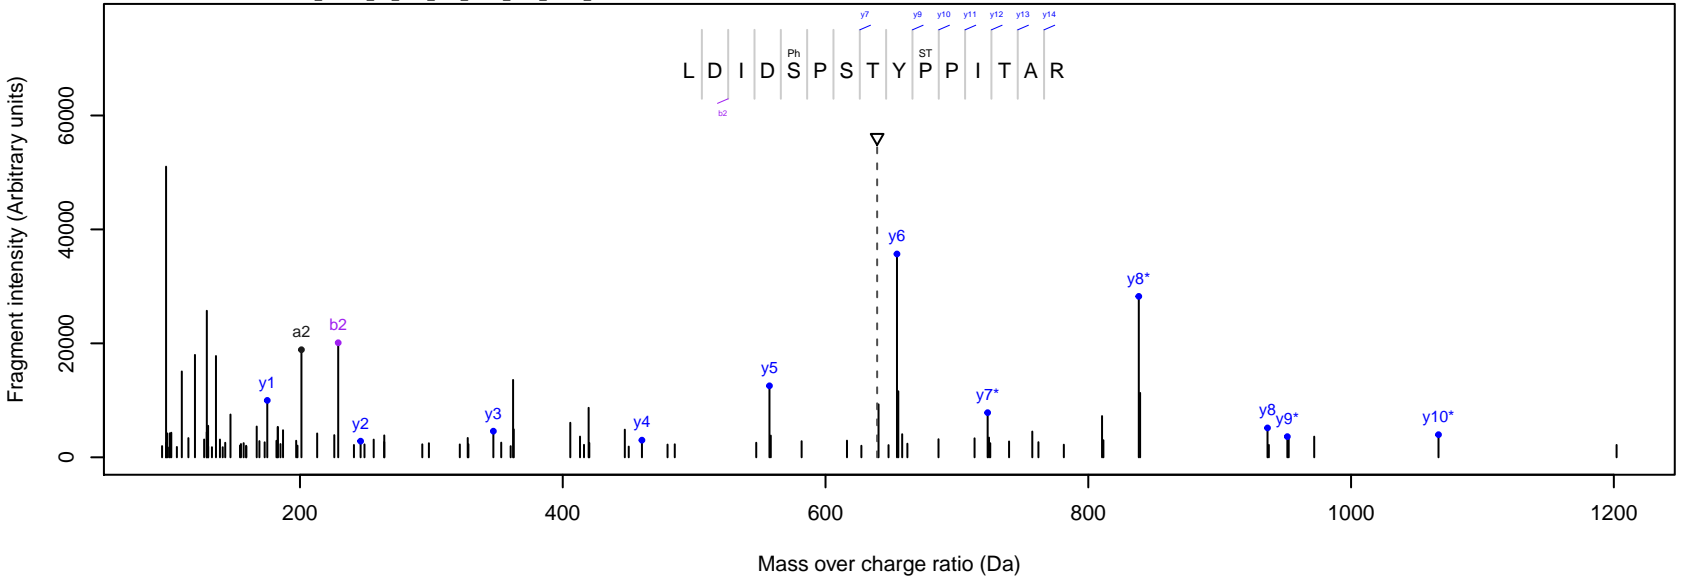

AAVLS(Phospho (STY))DS(Phospho (STY))EDEEKASAK-3+

Source : QE3\_201126\_FR\_TiOx\_hum\_tissue\_Urea\_RNAB\_N Scan : 13551

Andromeda score : 72.086

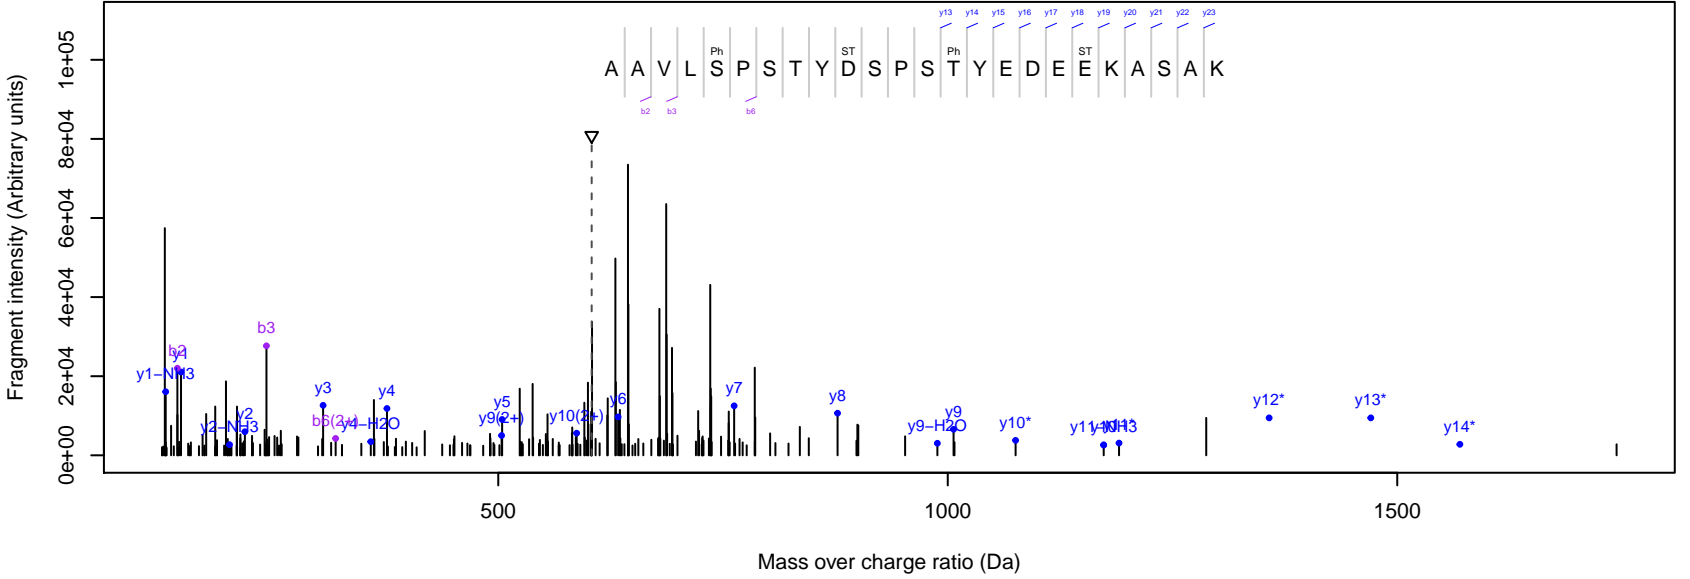

SQS(Phospho (STY))LPGADSLAKPIDK-3+

Source : QE3\_201126\_FR\_TiOx\_hum\_tissue\_Urea\_RNAB\_H Scan : 33292

Andromeda score : 72.086

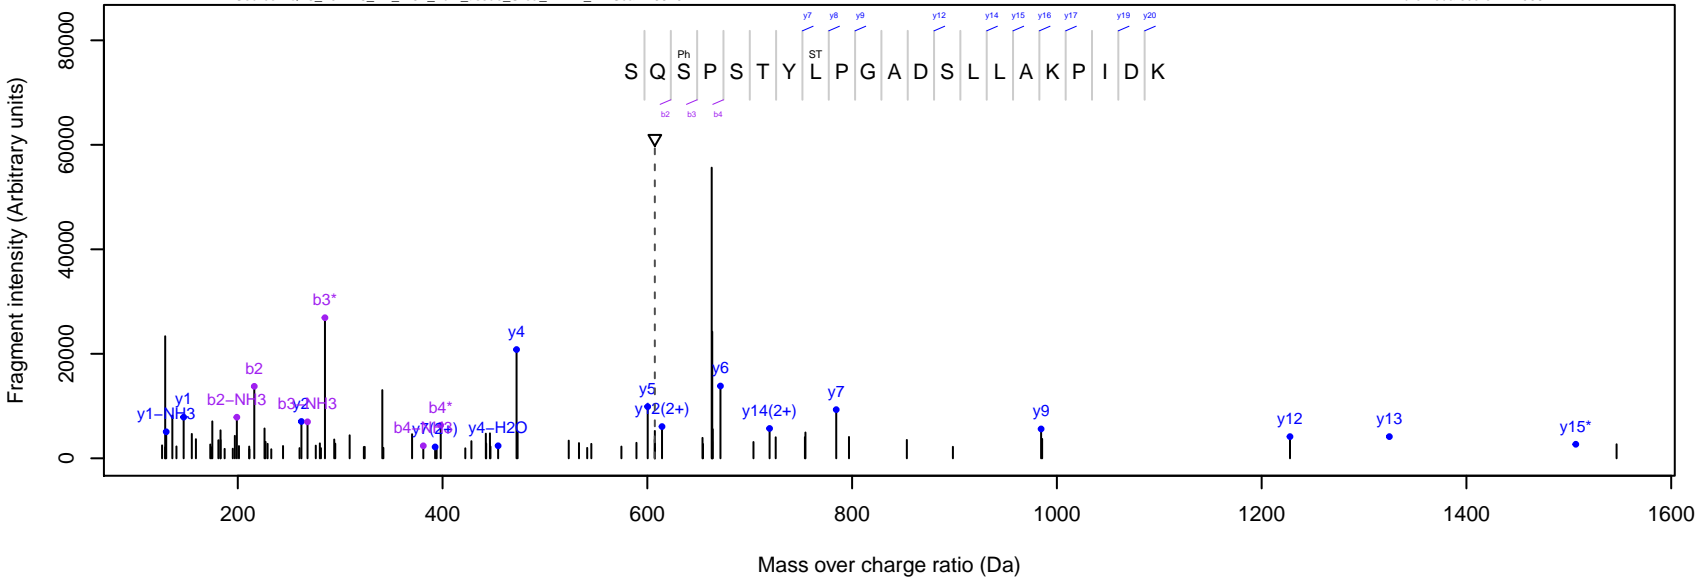

RAT(Phospho (STY))SPSSSVSGDFDDGHHSVSTPGPSR-4+

Source : QE3\_201126\_FR\_TiOx\_hum\_tissue\_Urea\_RNAB\_B Scan : 13658

Andromeda score : 72.035

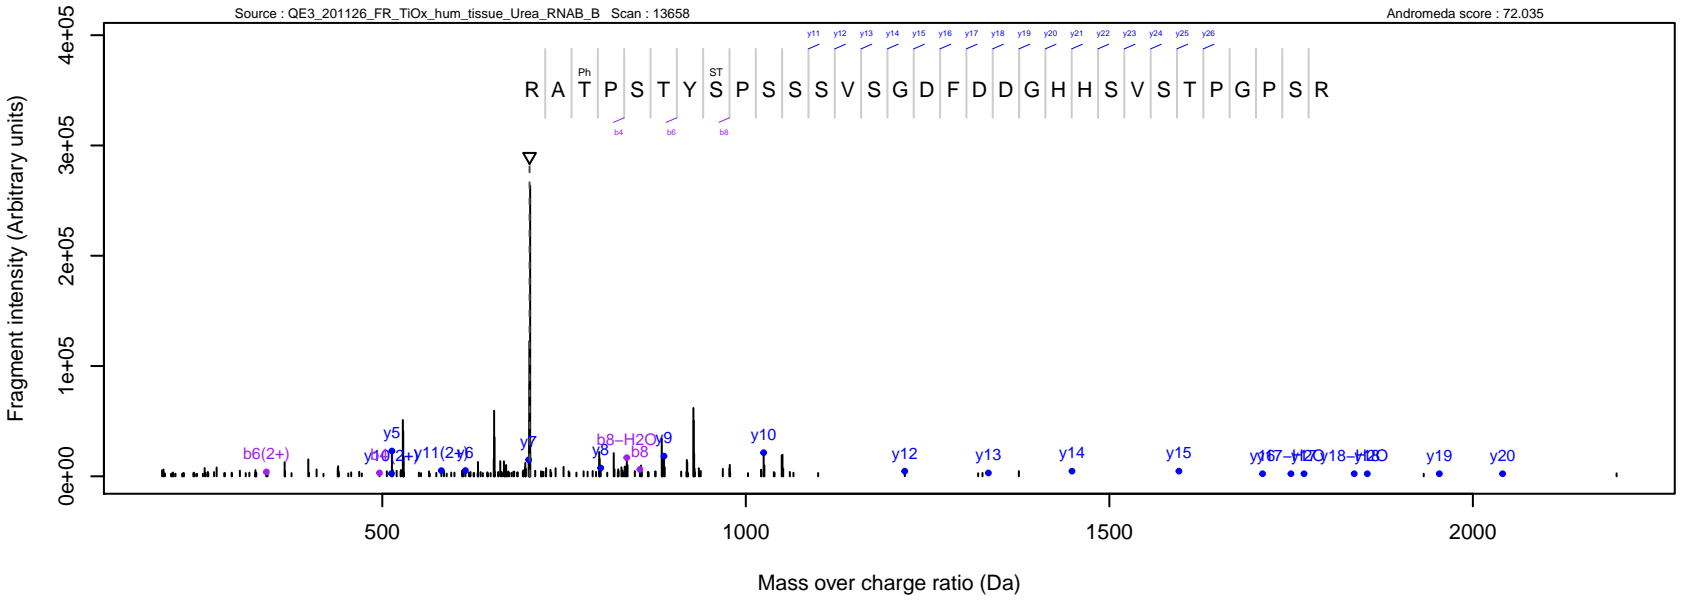

VTDKDCNES(Phospho (STY))T(Phospho (STY))DNELEDEPEEPEFYR-3+

Source : QE3\_201126\_FR\_TiOx\_hum\_tissue\_Urea\_RNAB\_N Scan : 37757

Andromeda score : 72.033

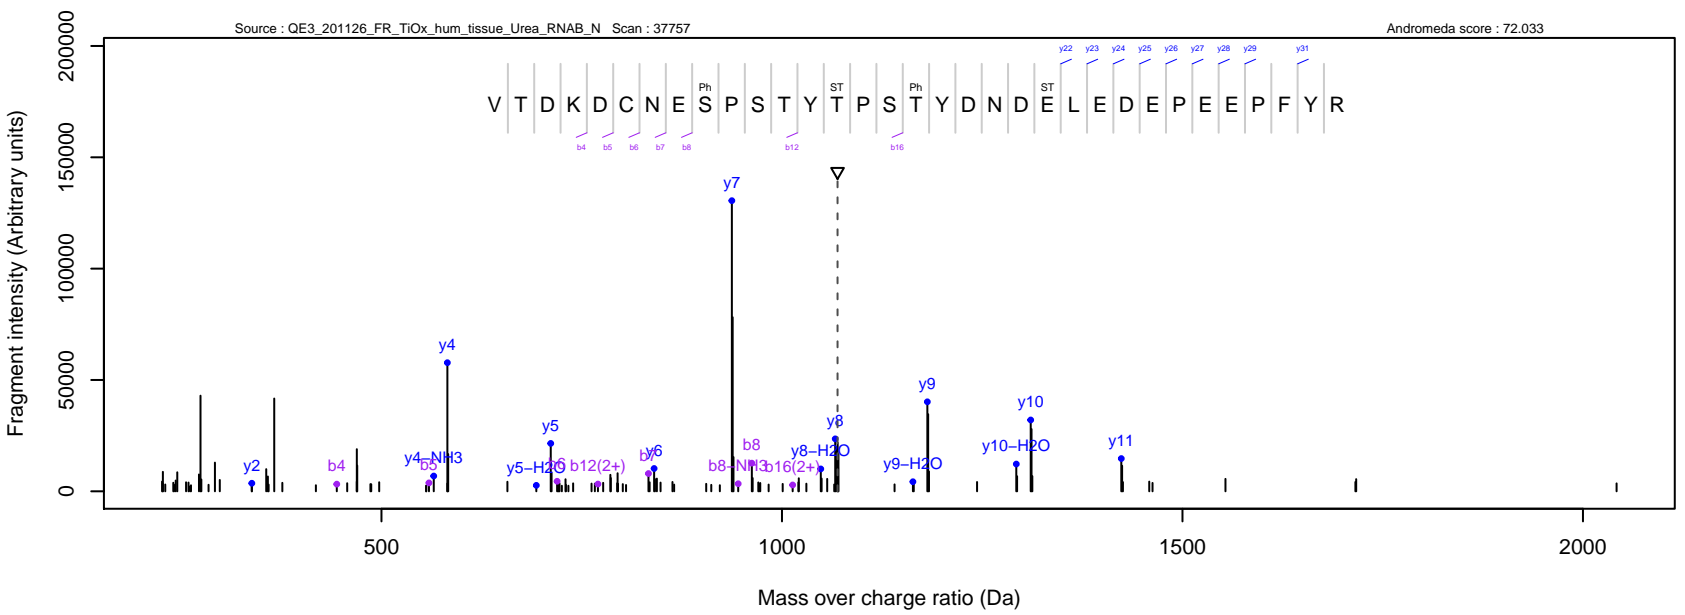

NNSQIASGQNQPQAAGSHQLSM(Oxidation (M))GQPHNAAGPS(Phospho (STY))PHTLR-4+

Source : QE3\_201126\_FR\_TiOx\_hum\_tissue\_Urea\_RNAB\_N Scan : 13588

Andromeda score : 72.006

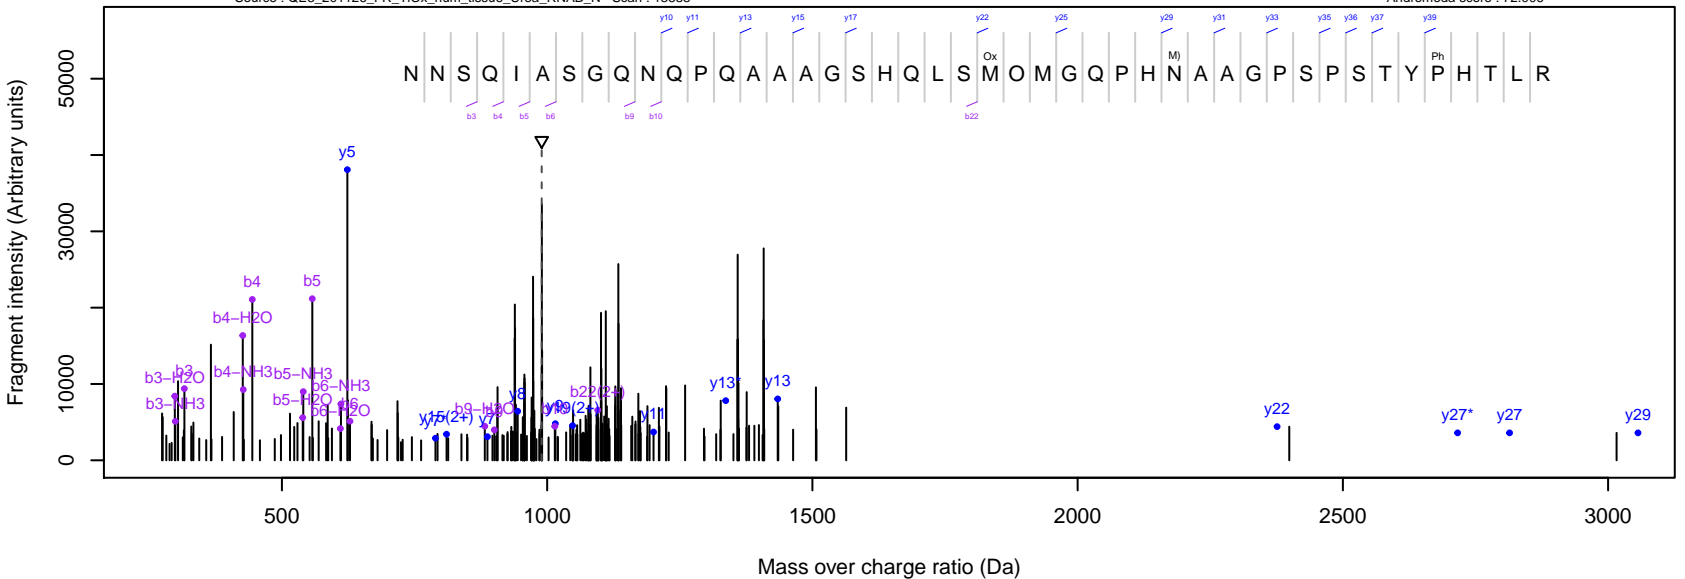



(Acetyl (Protein N-term))MNTAPS(Phospho (STY))RPSPTRR-3+

Source : QE3\_201126\_FR\_TIOx\_hum\_tissue\_Urea\_RNAB\_H Scan : 10690

Andromeda score : 71.98

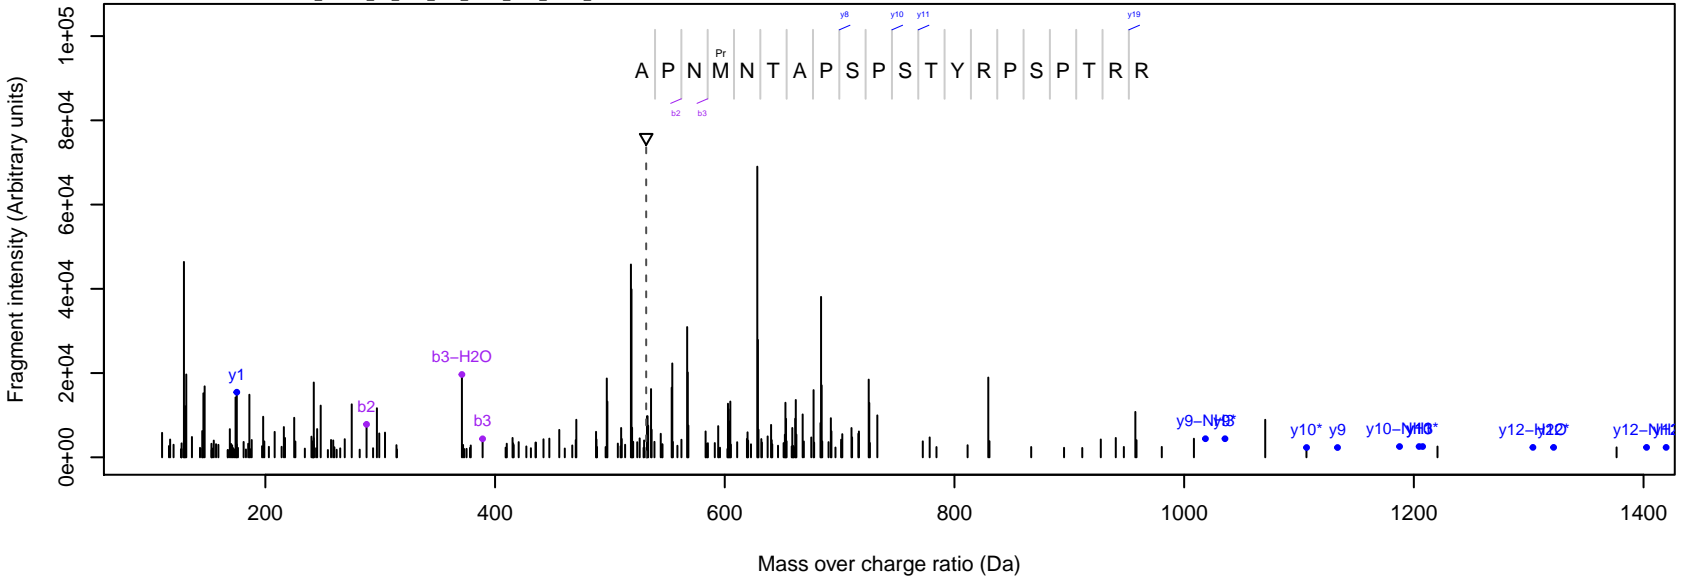

RLS(Phospho (STY))KPGTAAELR-3+

Source : QE3\_201126\_FR\_TIOx\_hum\_tissue\_Urea\_RNAB\_B Scan : 8619

Andromeda score : 71.98

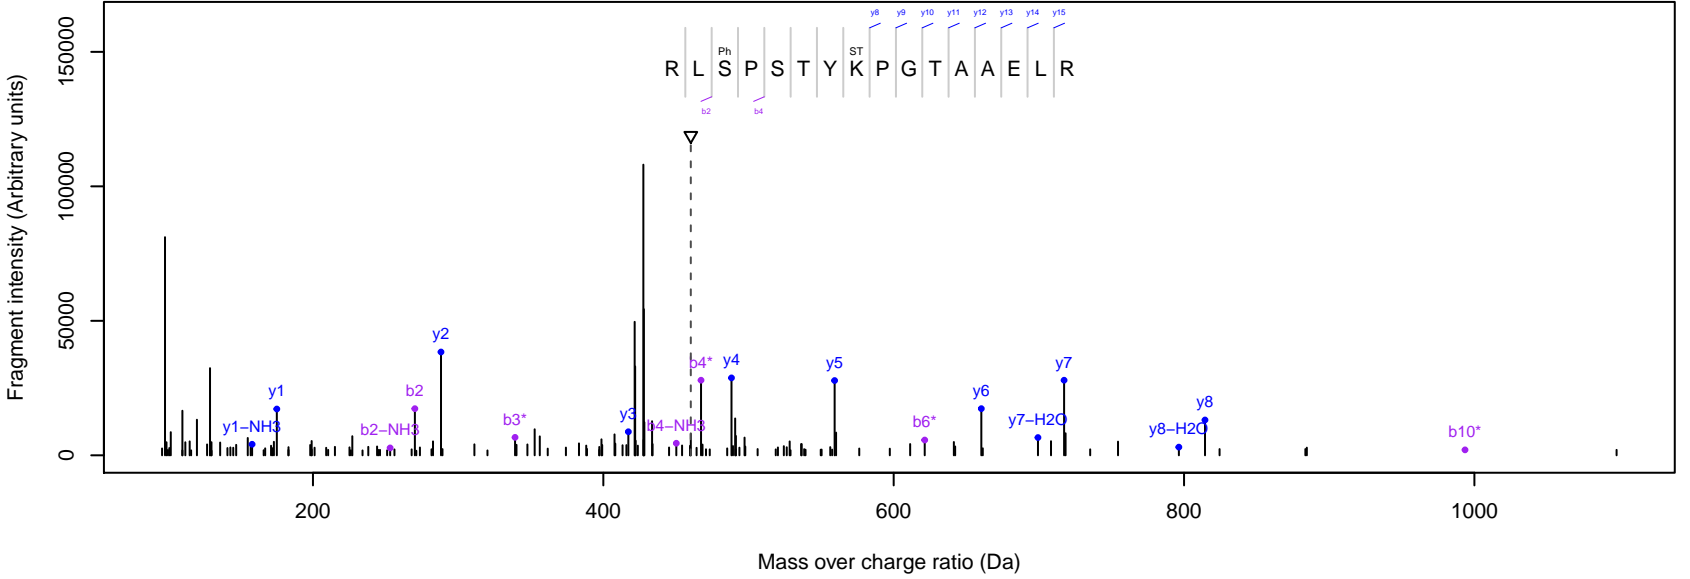

RRFS(Phospho (STY))DFLGLHSK-3+

Source : QE3\_201126\_FR\_TIOx\_hum\_tissue\_Urea\_RNAB\_B Scan : 23800

Andromeda score : 71.98

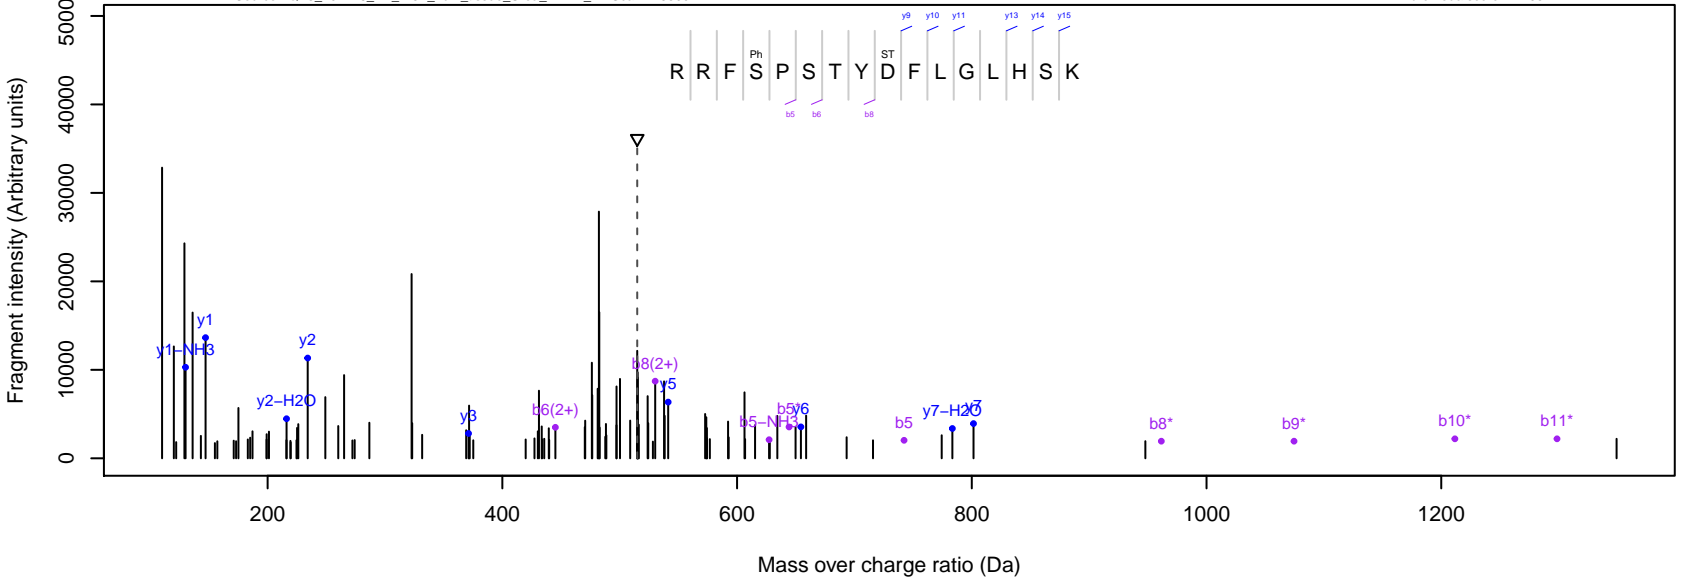

S(Phospho (STY))RS(Phospho (STY))PMHYMRPR-3+

Source : QE3\_201126\_FR\_TIOx\_hum\_tissue\_Urea\_RNAB\_H Scan : 15183

Andromeda score : 71.98

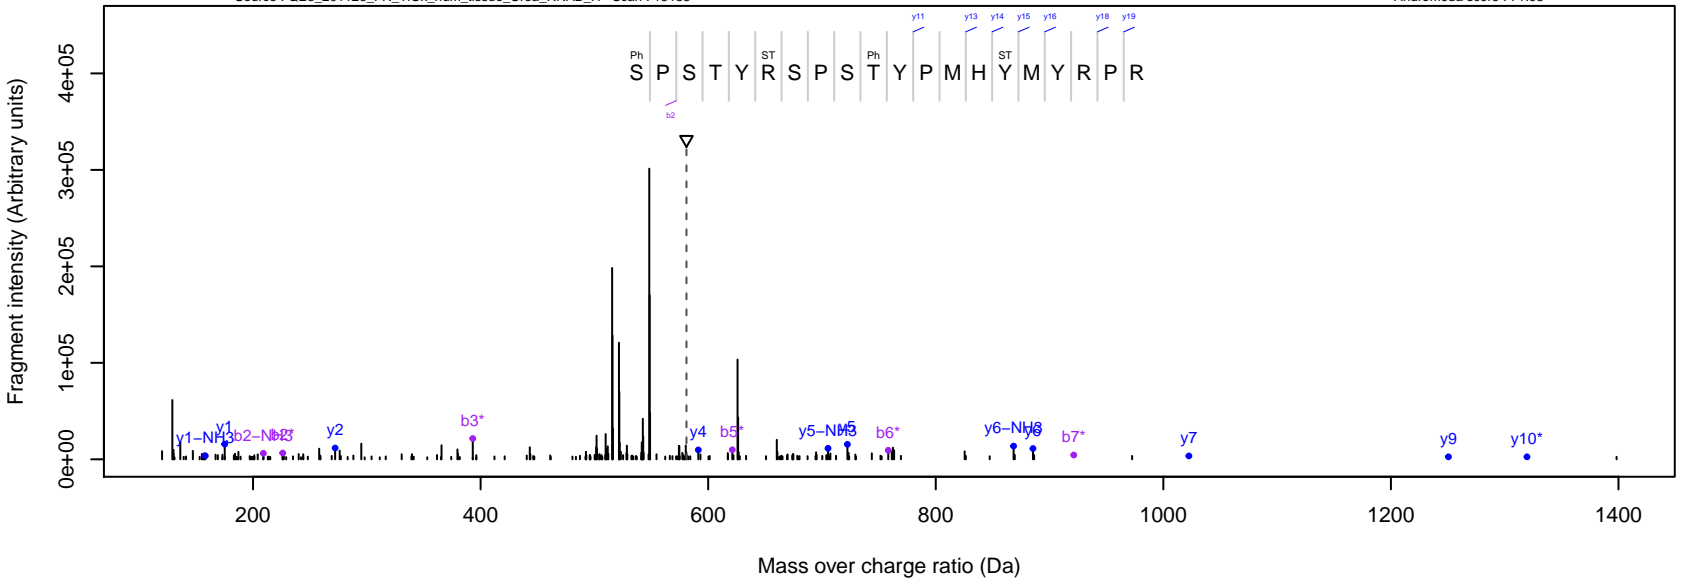

NYLSAS(Phospho (STY))ASALWNDKAEQLR-3+

Source : QE3\_201126\_FR\_TIOx\_hum\_tissue\_Urea\_RNAB\_N Scan : 58173

Andromeda score : 71.974

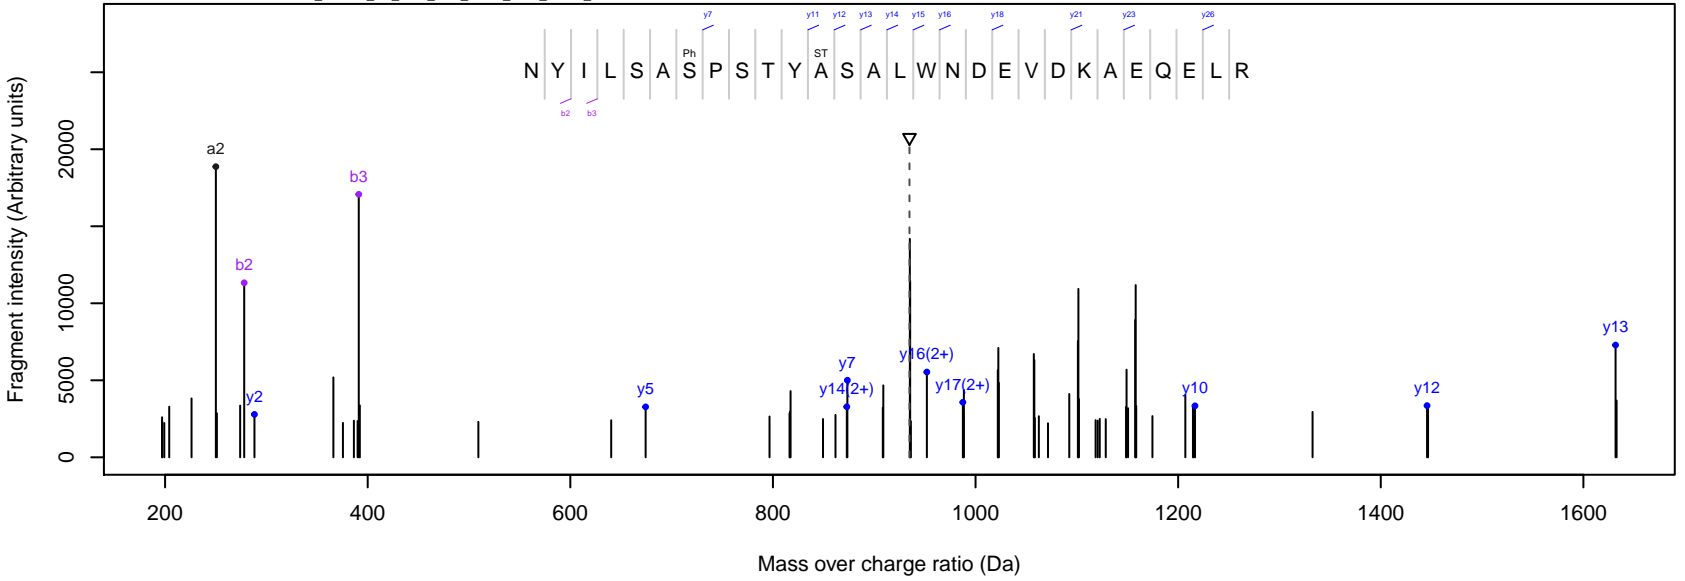

QPS(Phospho (STY))PSPS(Phospho (STY))PTERAPASEEEFQFLR-3+

Source : QE3\_201126\_FR\_TIOx\_hum\_tissue\_Urea\_RNAB\_B Scan : 45911

Andromeda score : 71.974

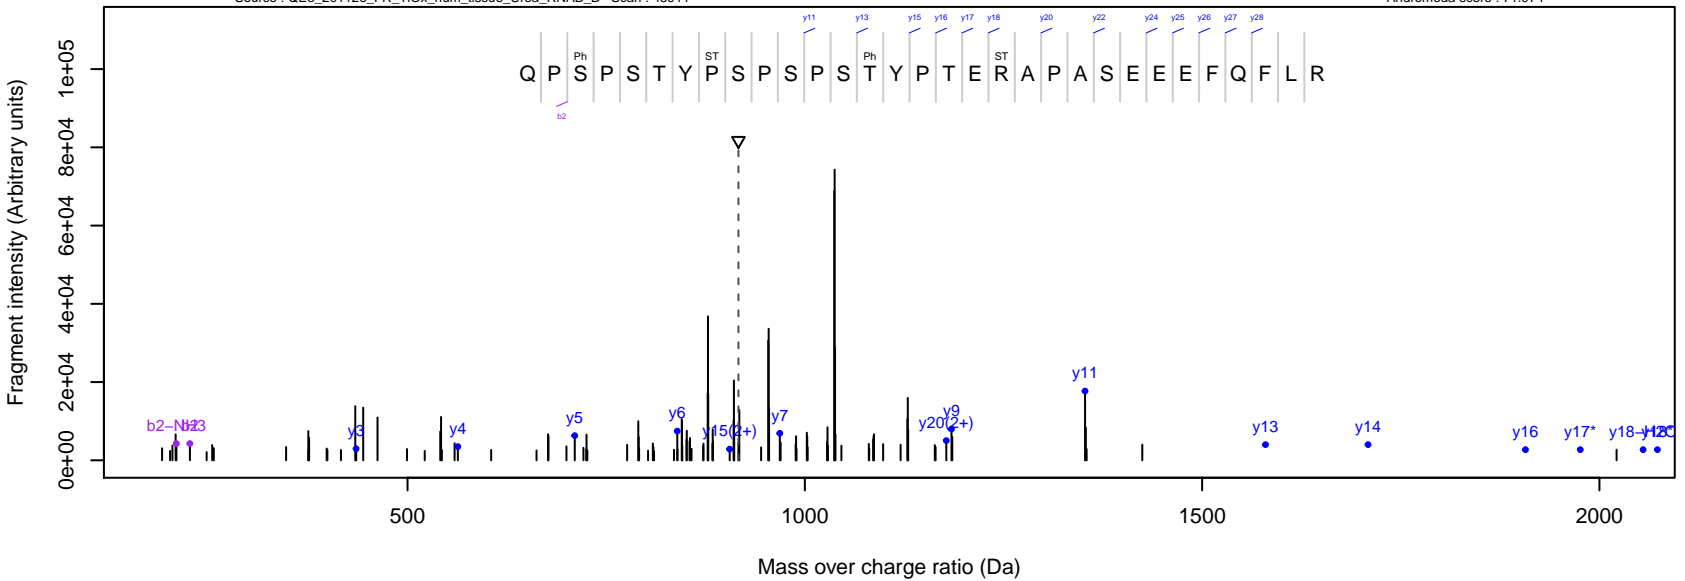

DSAGVPAPDSALDSAPTASAPAPALQAPALS(Phospho (STY))PSLASAPEEAK-4+

Source : QE3\_201126\_FR\_TIOx\_hum\_tissue\_Urea\_RNAB\_N Scan : 55116

Andromeda score : 71.93

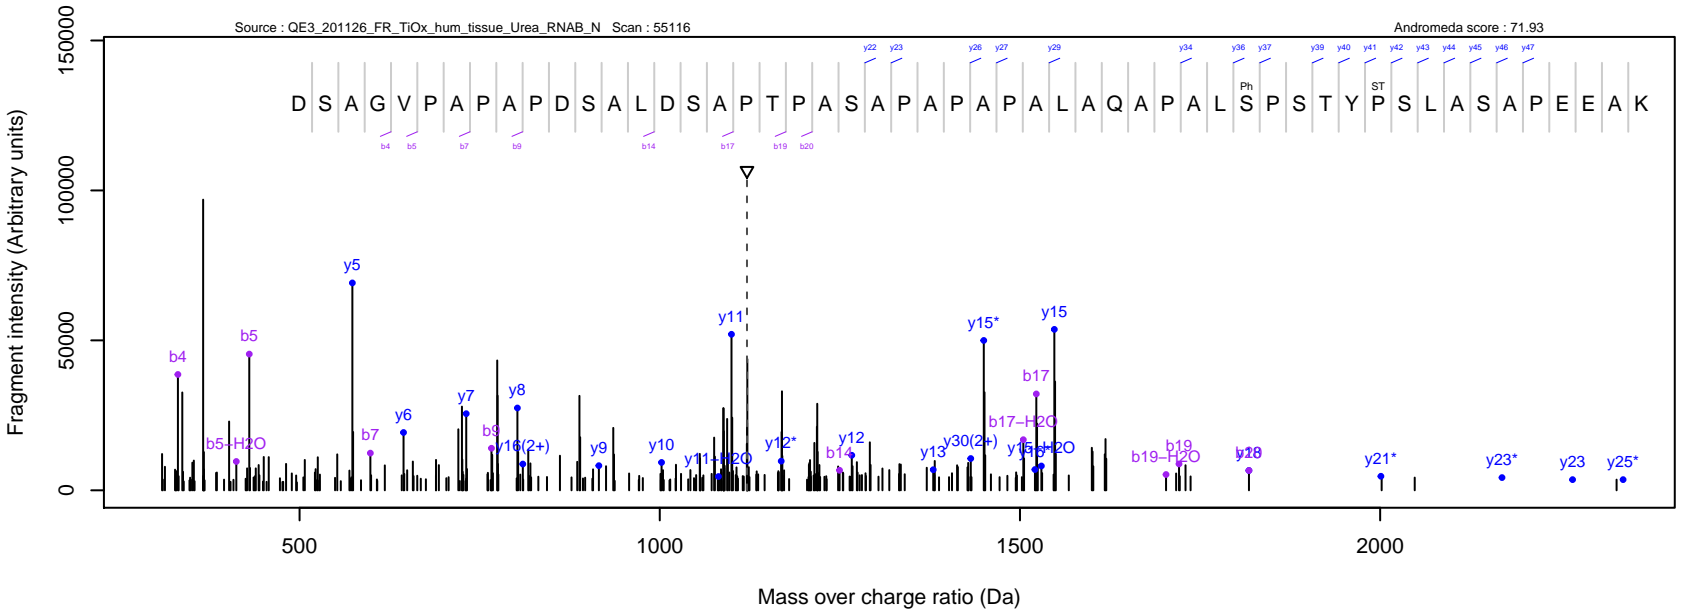

ESS(Phospho (STY))PIPS(Phospho (STY))PTSDRK-2+

Source : QE3\_201126\_FR\_TIOx\_hum\_tissue\_Urea\_RNAB\_N Scan : 11261

Andromeda score : 71.912

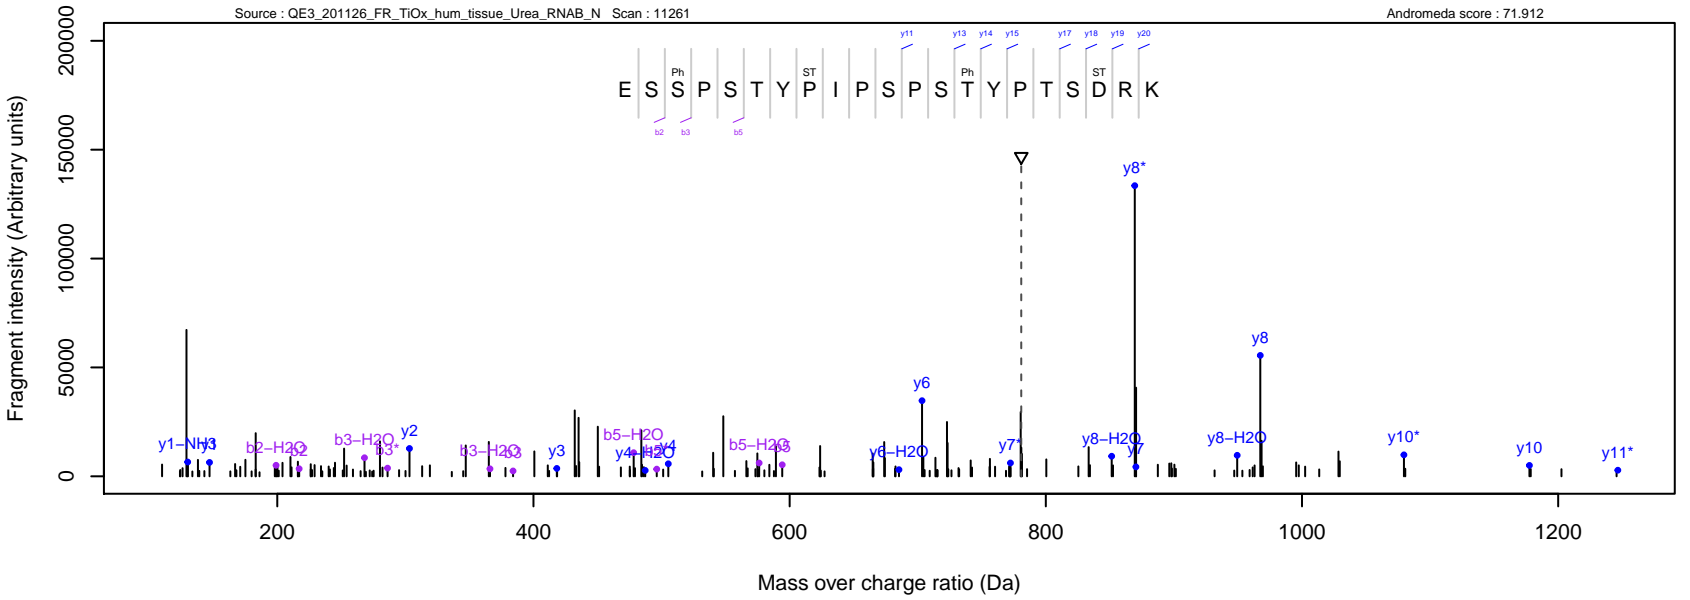

VGSQGS(Phospho (STY))DLDSATPINTVDVNNESSEGFICPQCM(Oxidation (M))K-3+

Source : QE3\_201126\_FR\_TIOx\_hum\_tissue\_Urea\_RNAB\_H Scan : 45265

Andromeda score : 71.908

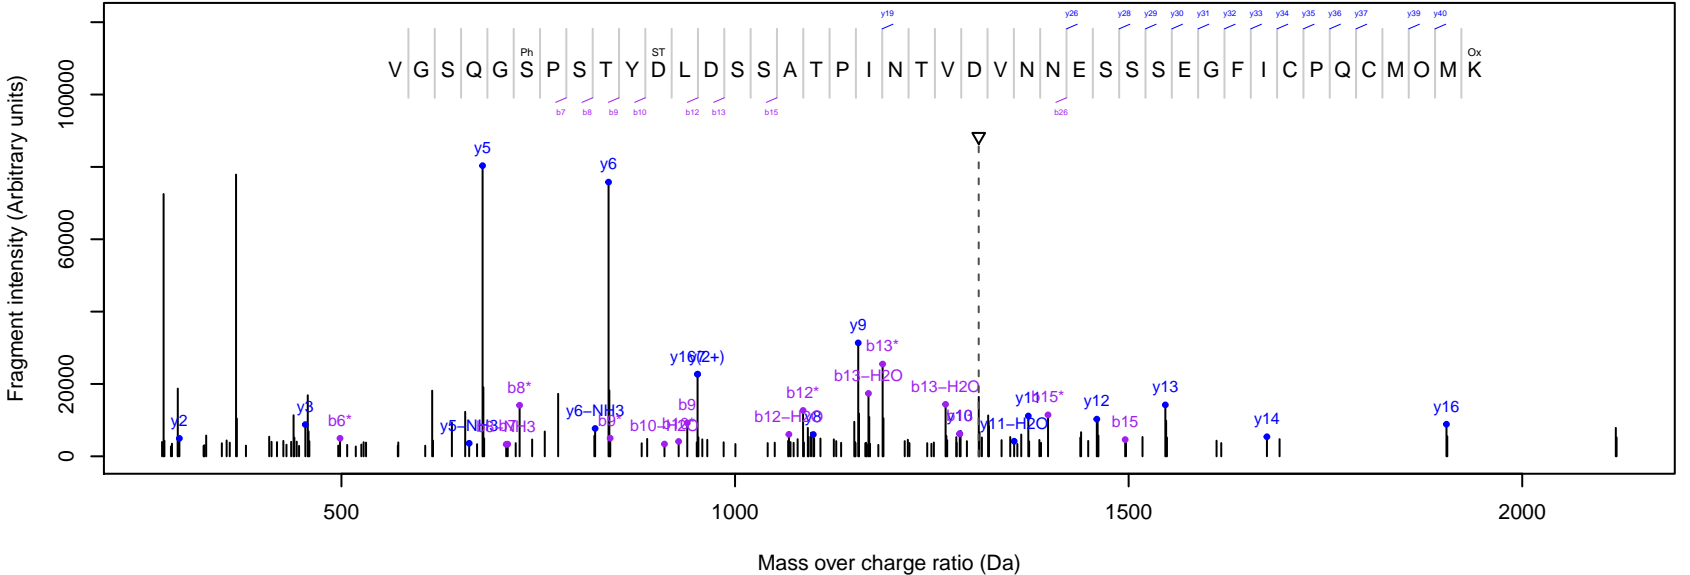

GVS(Phospho (STY))MPNMLEPK-2+

Source : QE3\_201126\_FR\_TiOx\_hum\_tissue\_Urea\_RNAB\_H Scan : 38071

Andromeda score : 71.888

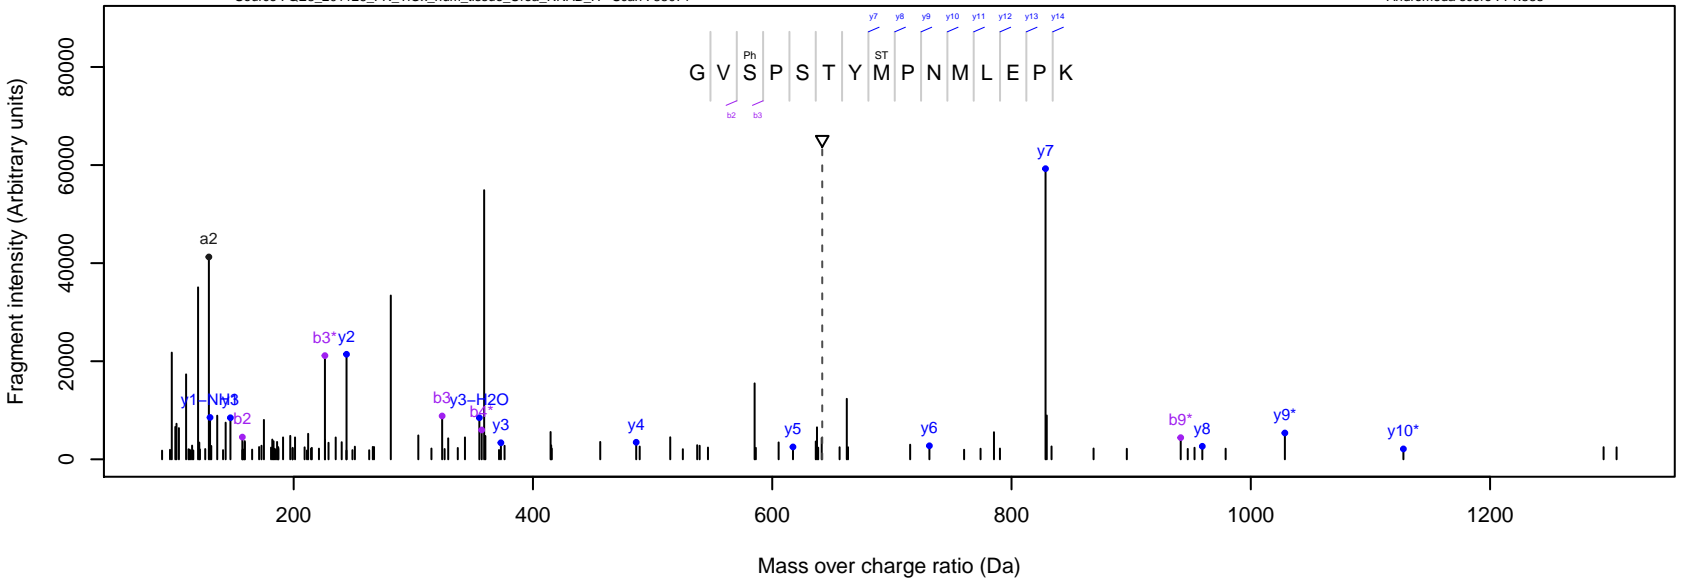

GTEAS(Phospho (STY))PPQNNSSSS(Phospho (STY))PVFTFR-3+

Source : QE3\_201126\_FR\_TiOx\_hum\_tissue\_Urea\_RNAB\_N Scan : 44848

Andromeda score : 71.882

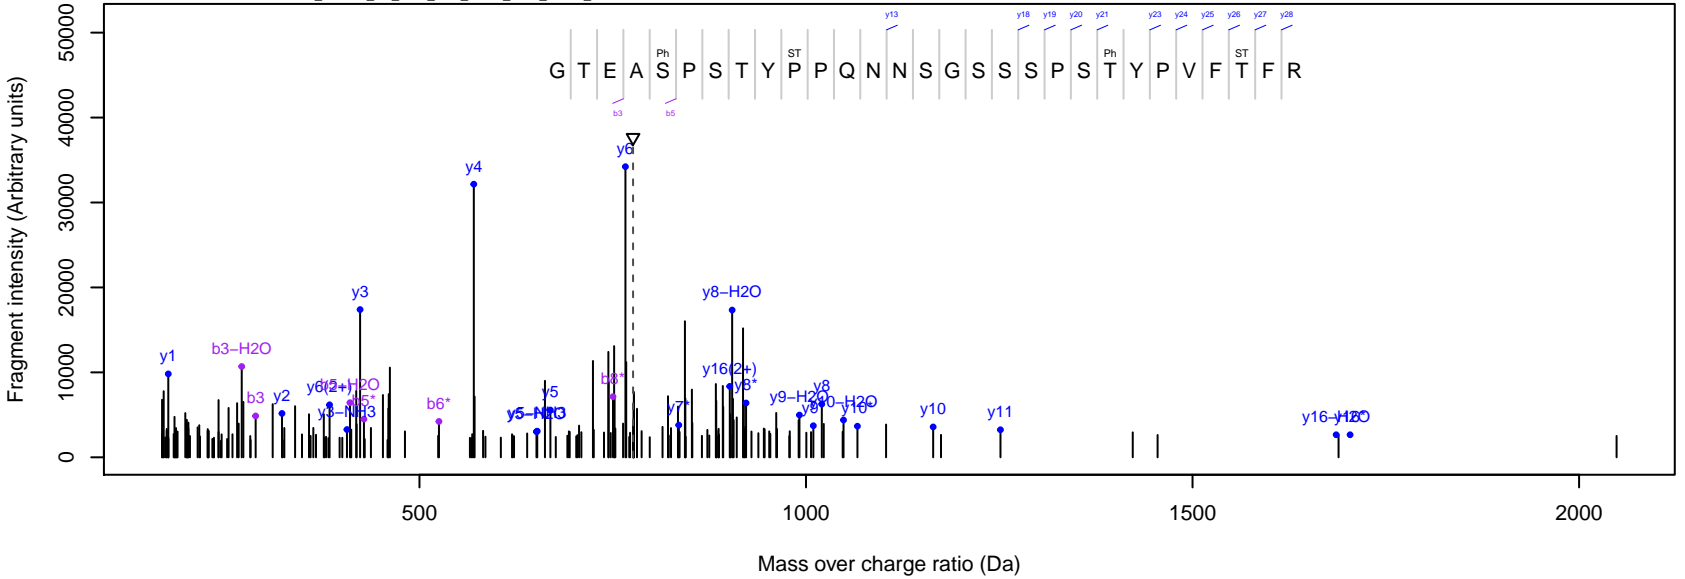

TDKTDEPVGASSATAALS(Phospho (STY))PQEKR-3+

Source : QE3\_201126\_FR\_TiOx\_hum\_tissue\_Urea\_RNAB\_B Scan : 17288

Andromeda score : 71.881

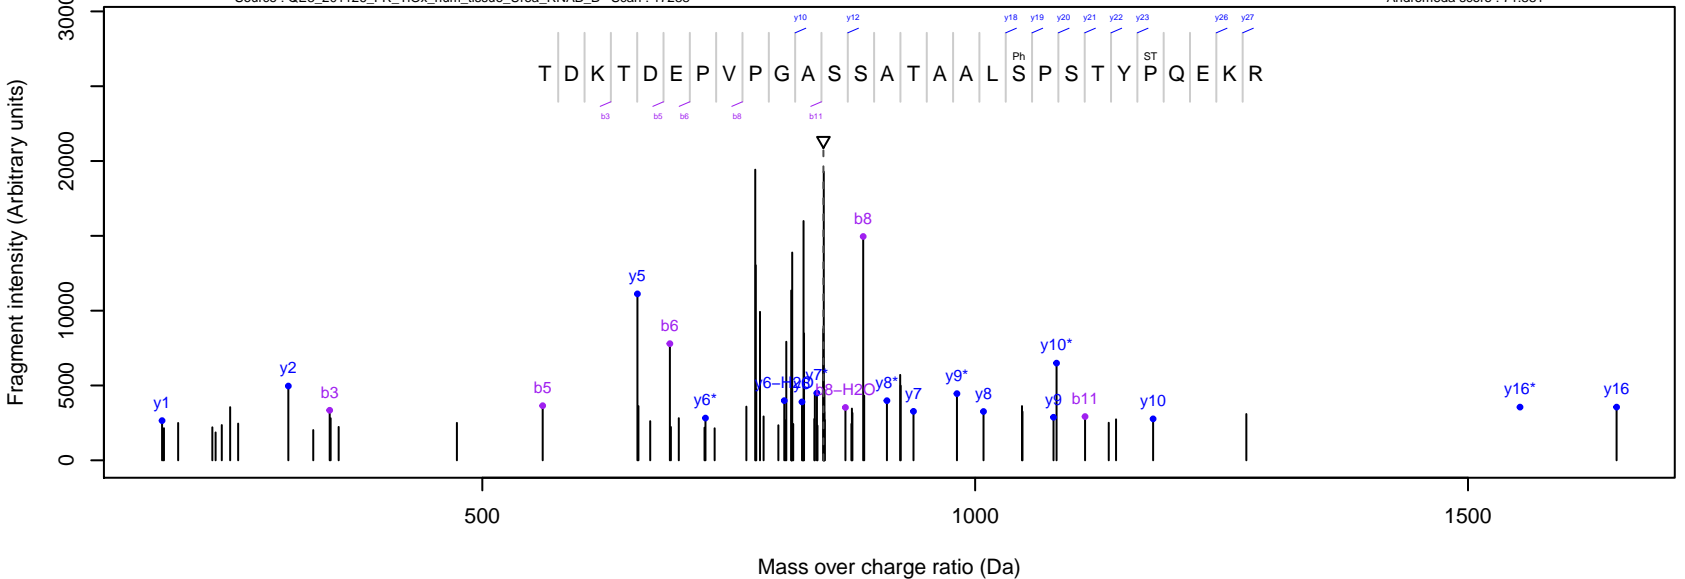

TAVIPINGS(Pospho (STY))PR-2+

Source : QE3\_201126\_FR\_TiOx\_hum\_tissue\_Urea\_RNAB\_N Scan : 23783

Andromeda score : 71.879

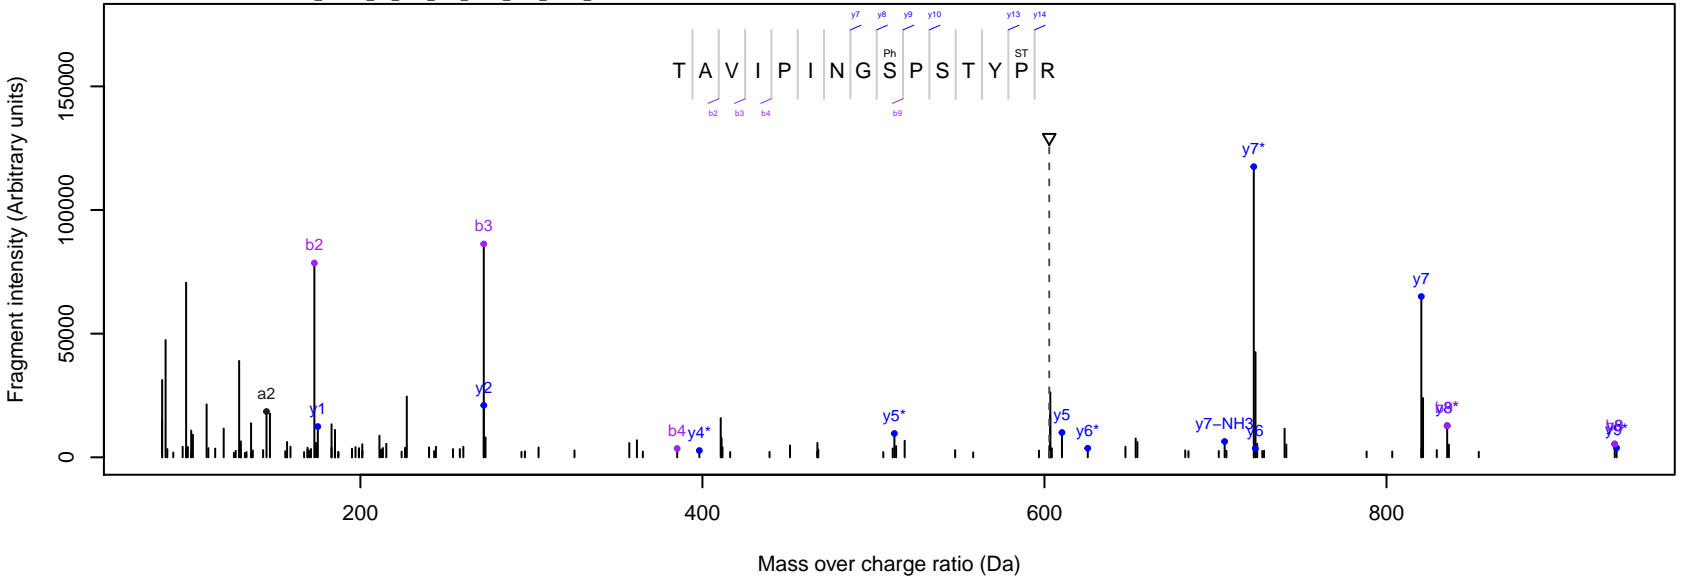

LDS(Phospho (STY))SEM(Oxidation (M))DHSENEYTM(Oxidation (M))SSPLPGKK-3+

Source : QE3\_201126\_FR\_TiOx\_hum\_tissue\_Urea\_RNAB\_N Scan : 14750

Andromeda score : 71.86

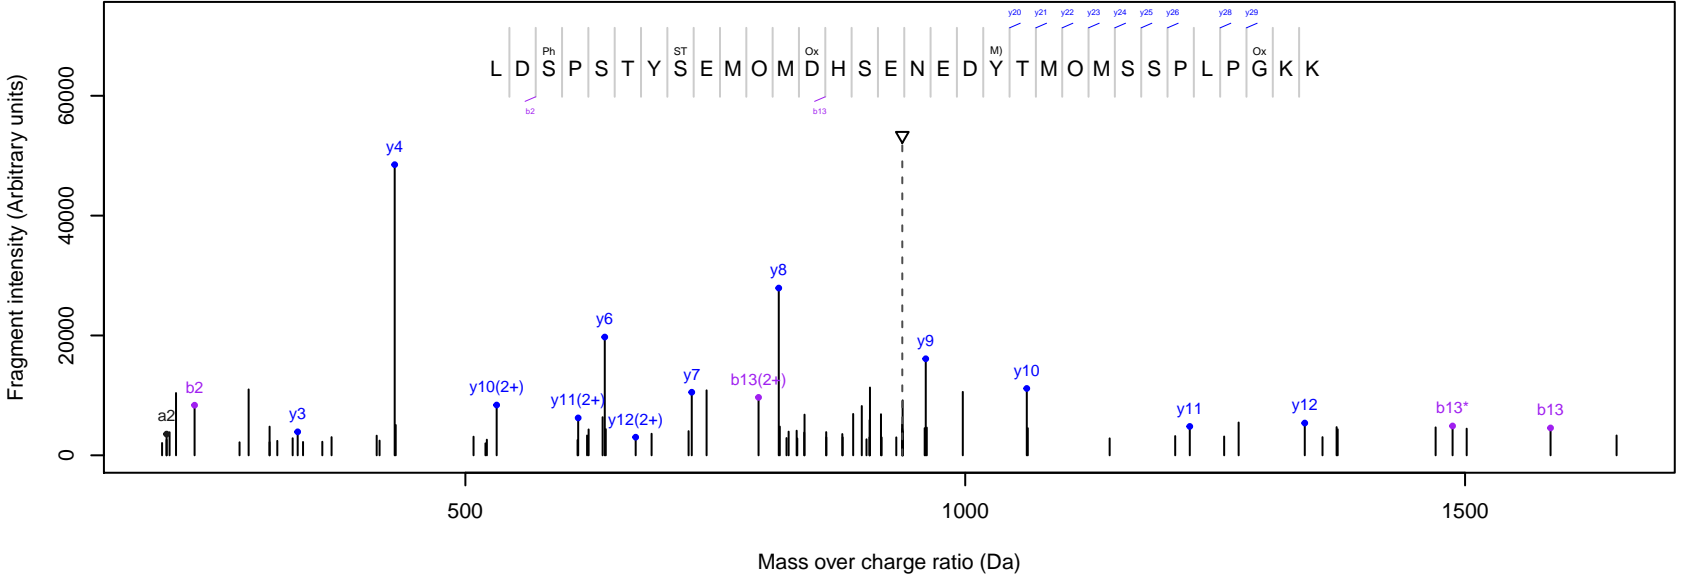

LLS(Phospho (STY))PRPSLLTPTGDPR-3+

Source : QE3\_201126\_FR\_TiOx\_hum\_tissue\_Urea\_RNAB\_H Scan : 34351

Andromeda score : 71.853

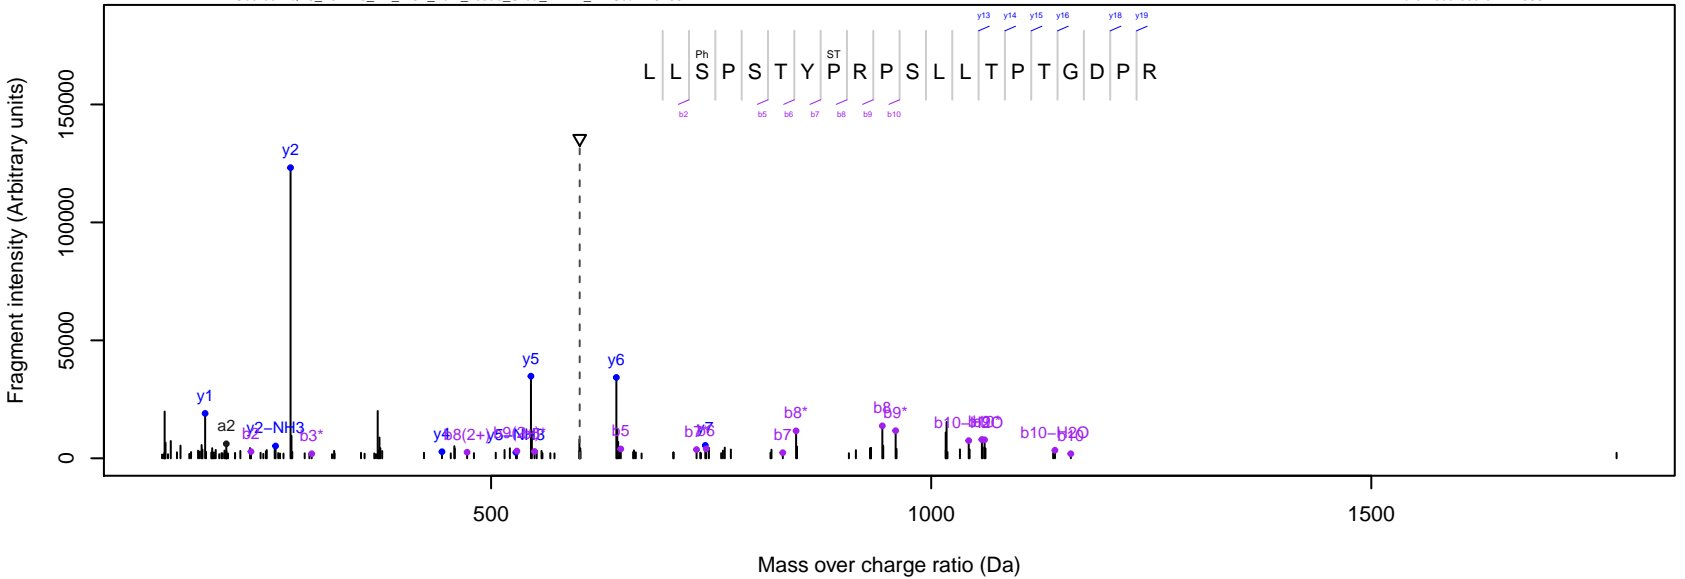

FTGYQAIQQSSSETEGEGGNT(Phospho (STY))ADASSEEEDRVEEDGK-4+

Source : QE3\_201126\_FR\_TIOx\_hum\_tissue\_Urea\_RNAB\_H Scan : 20931

Andromeda score : 71.831

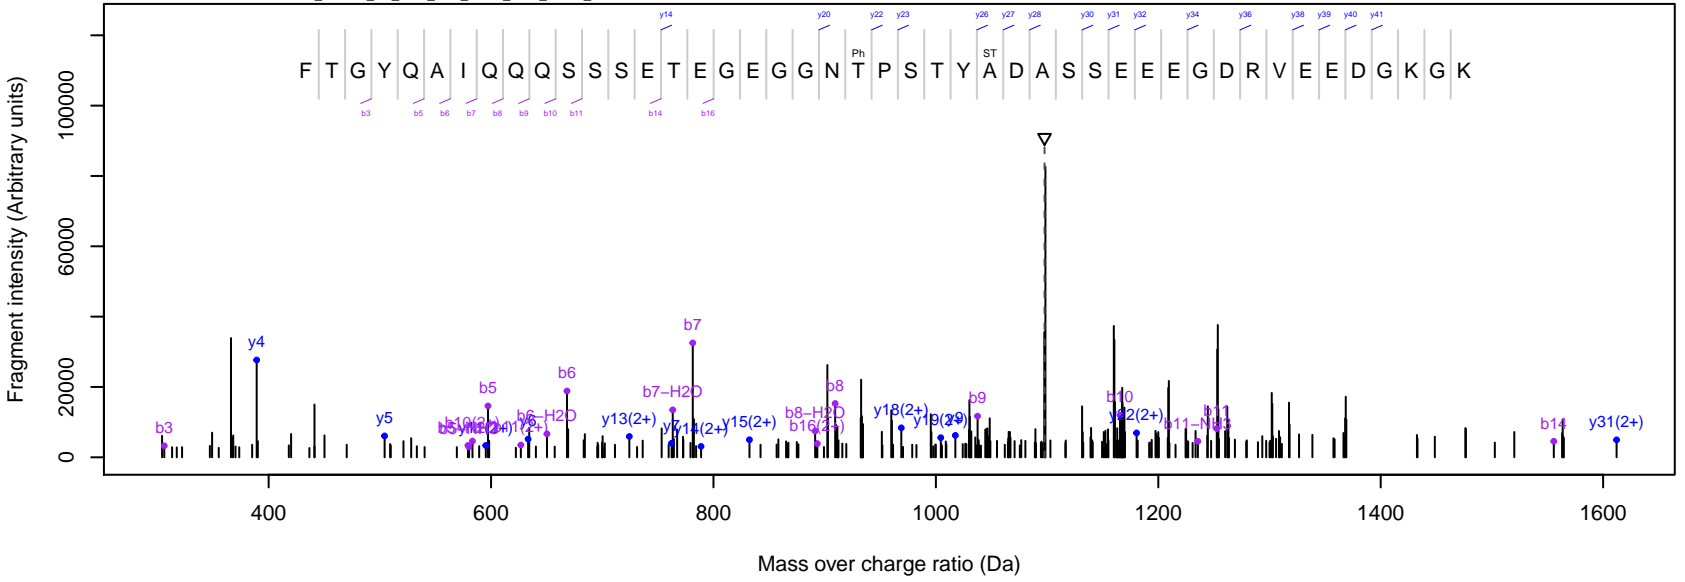

IPYKDTFWKGT(Phospho (STY))TR-3+

Source : QE3\_201126\_FR\_TIOx\_hum\_tissue\_Urea\_RNAB\_B Scan : 21405

Andromeda score : 71.742

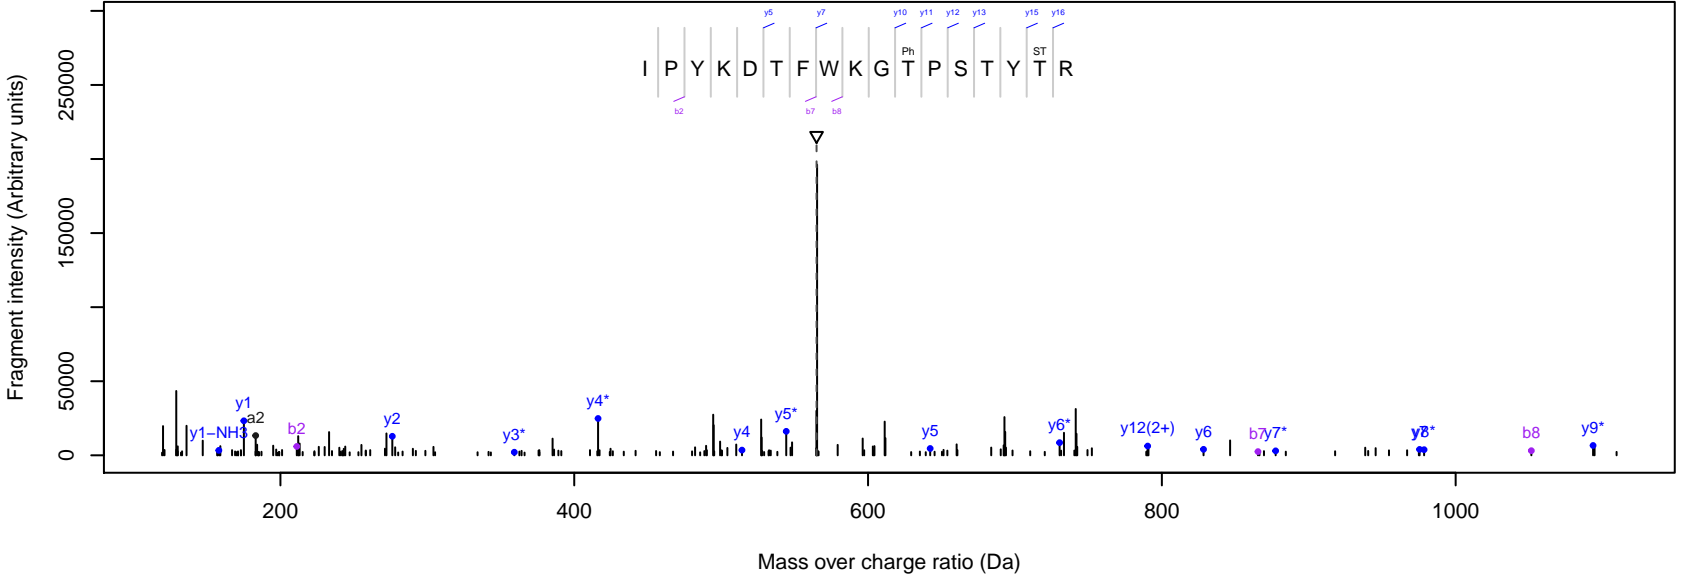

(Acetyl (Protein N-term))MLPS(Phospho (STY))TSVNSLVQGNGVLNSR-3+

Source : QE3\_201126\_FR\_TIOx\_hum\_tissue\_Urea\_RNAB\_N Scan : 61977

Andromeda score : 71.742

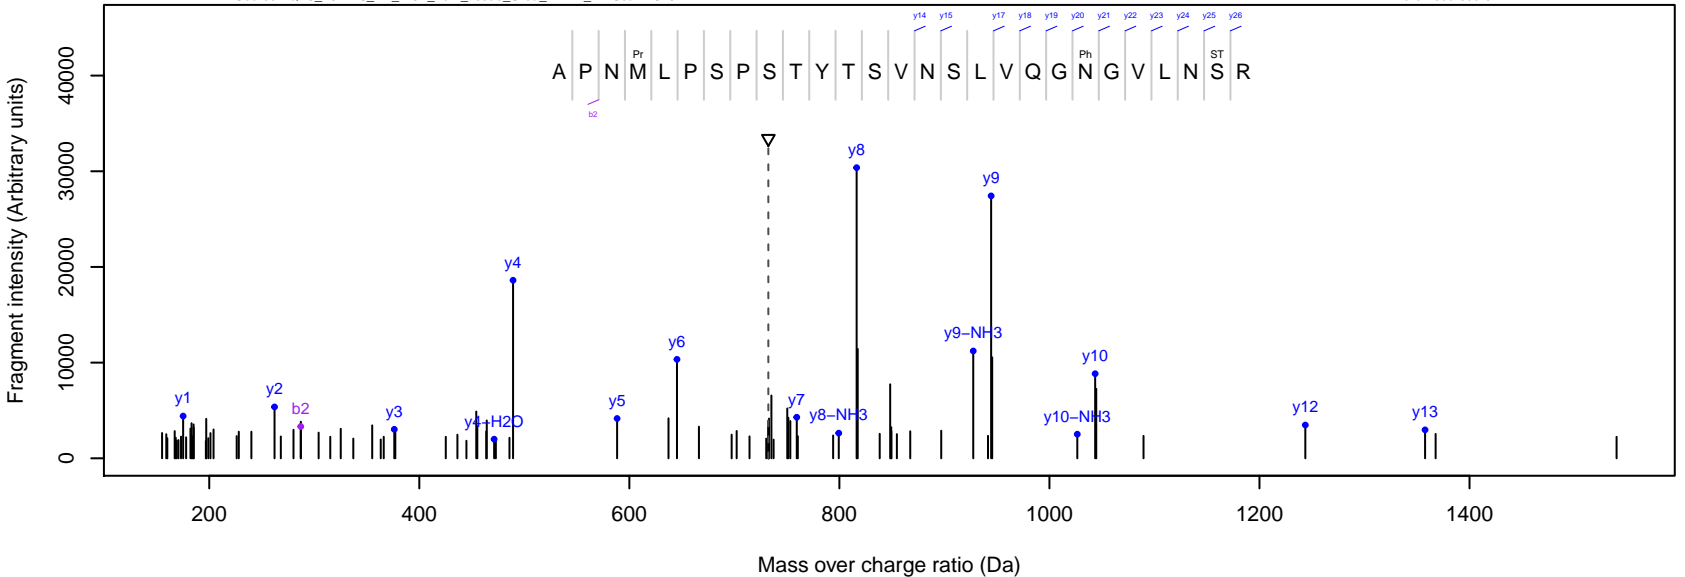

MPIVGLTWKS(Phospho (STY))PLGK-3+

Source : QE3\_201126\_FR\_TiOx\_hum\_tissue\_Urea\_RNAB\_H Scan : 44552

Andromeda score : 71.742

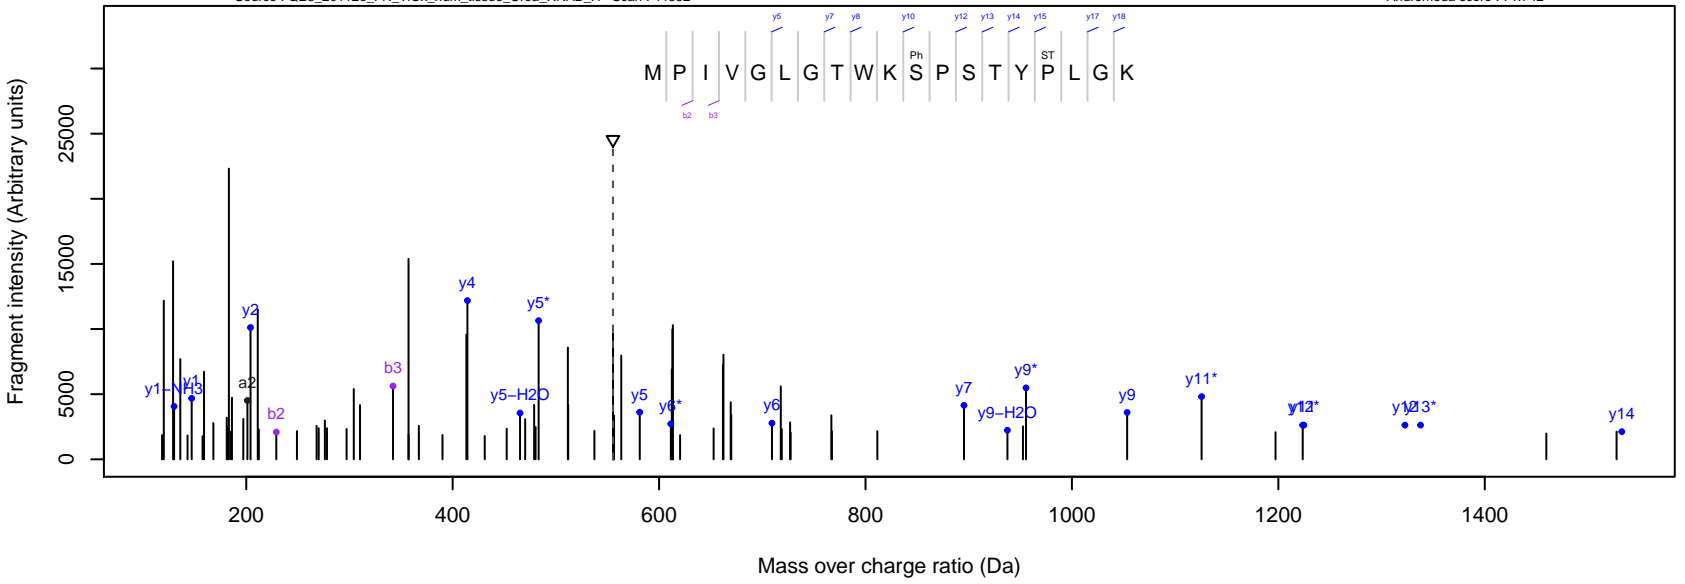

LFRPPS(Phospho (STY))PAPAAPGAR-3+

Source : QE3\_201126\_FR\_TiOx\_hum\_tissue\_Urea\_RNAB\_H Scan : 20814

Andromeda score : 71.697

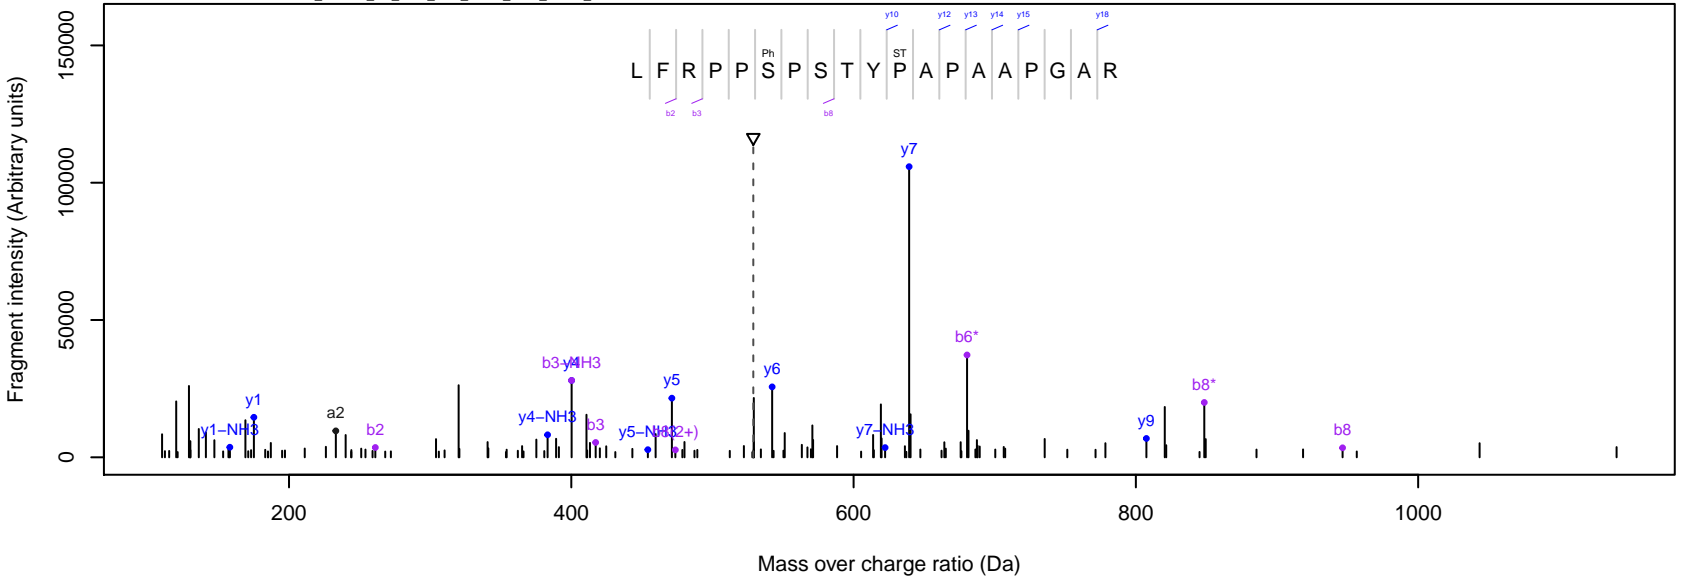

RAS(Phospho (STY))RGPIAFWAR-3+

Source : QE3\_201126\_FR\_TiOx\_hum\_tissue\_Urea\_RNAB\_H Scan : 25697

Andromeda score : 71.692

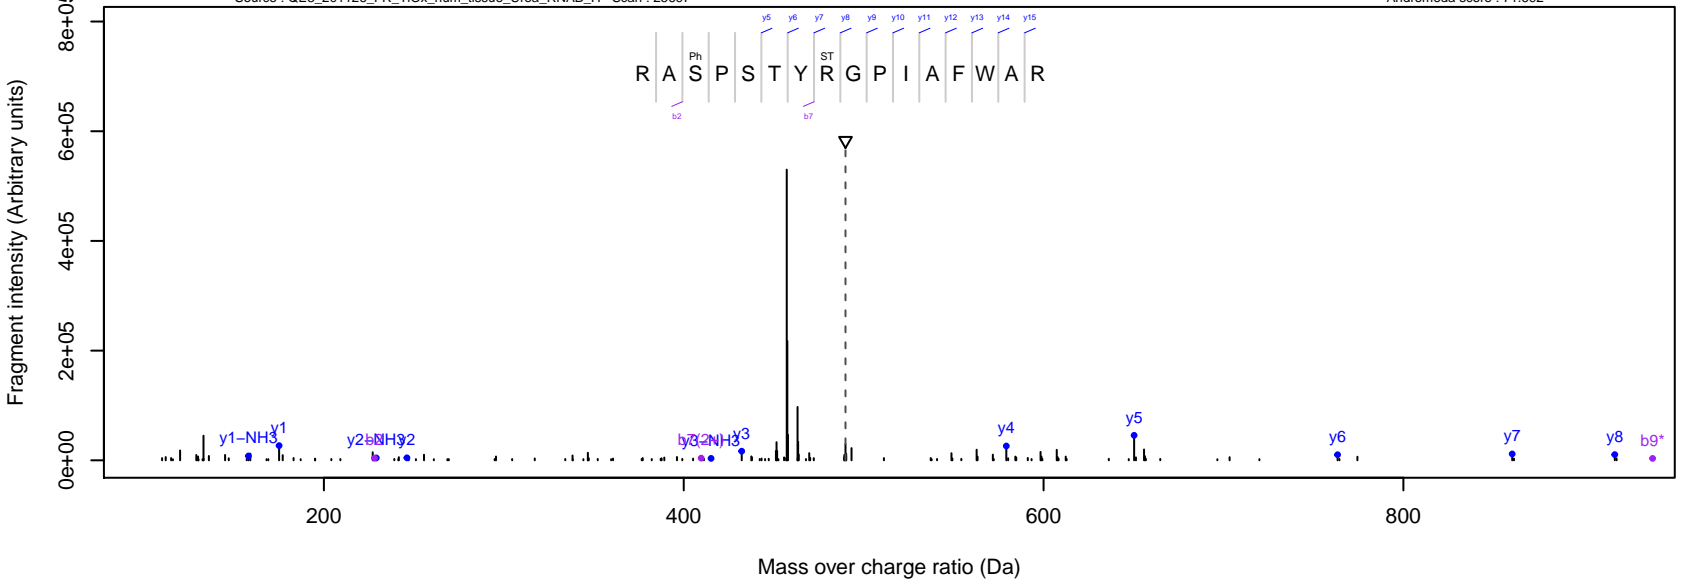

ARSDEGQLS(Phospho (STY))PATR-3+

Source : QE3\_201126\_FR\_TiOx\_hum\_tissue\_Urea\_RNAB\_B Scan : 6808

Andromeda score : 71.685

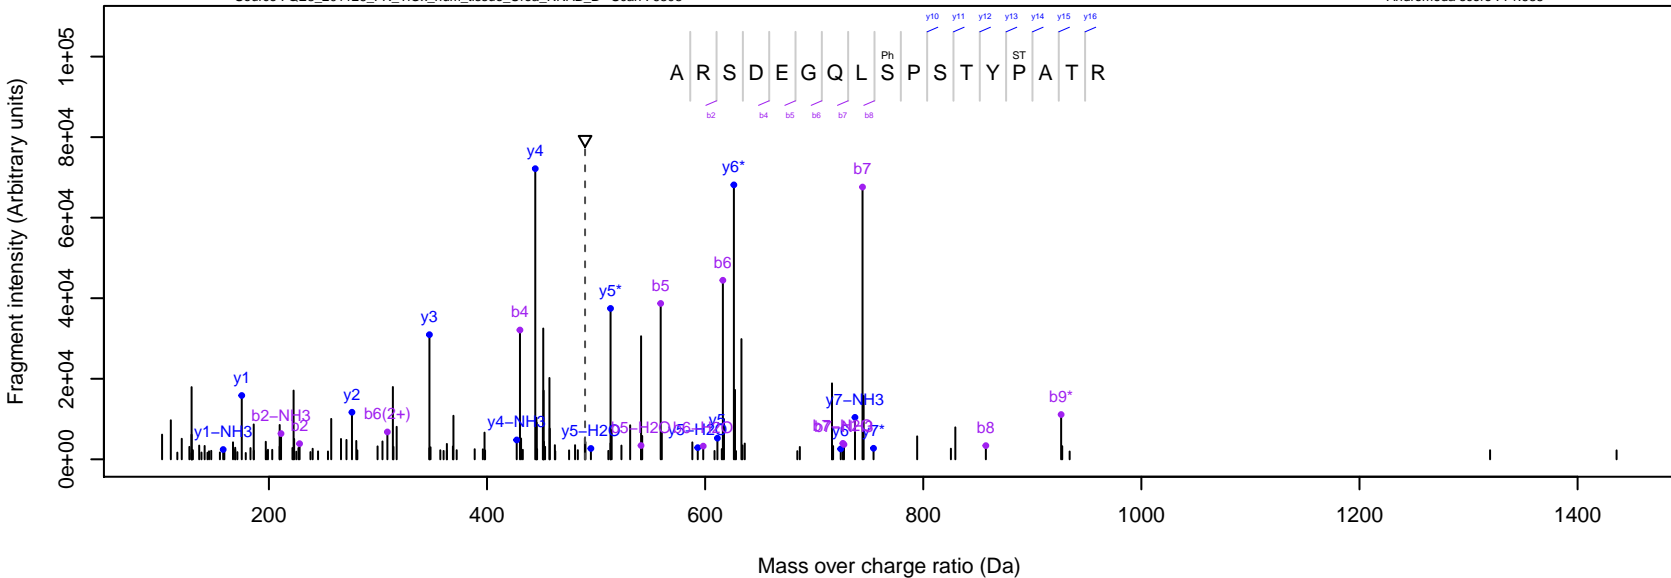

GEKDTAKS(Phospho (STY))LQLAPR-3+

Source : QE3\_201126\_FR\_TiOx\_hum\_tissue\_Urea\_RNAB\_B Scan : 11322

Andromeda score : 71.685

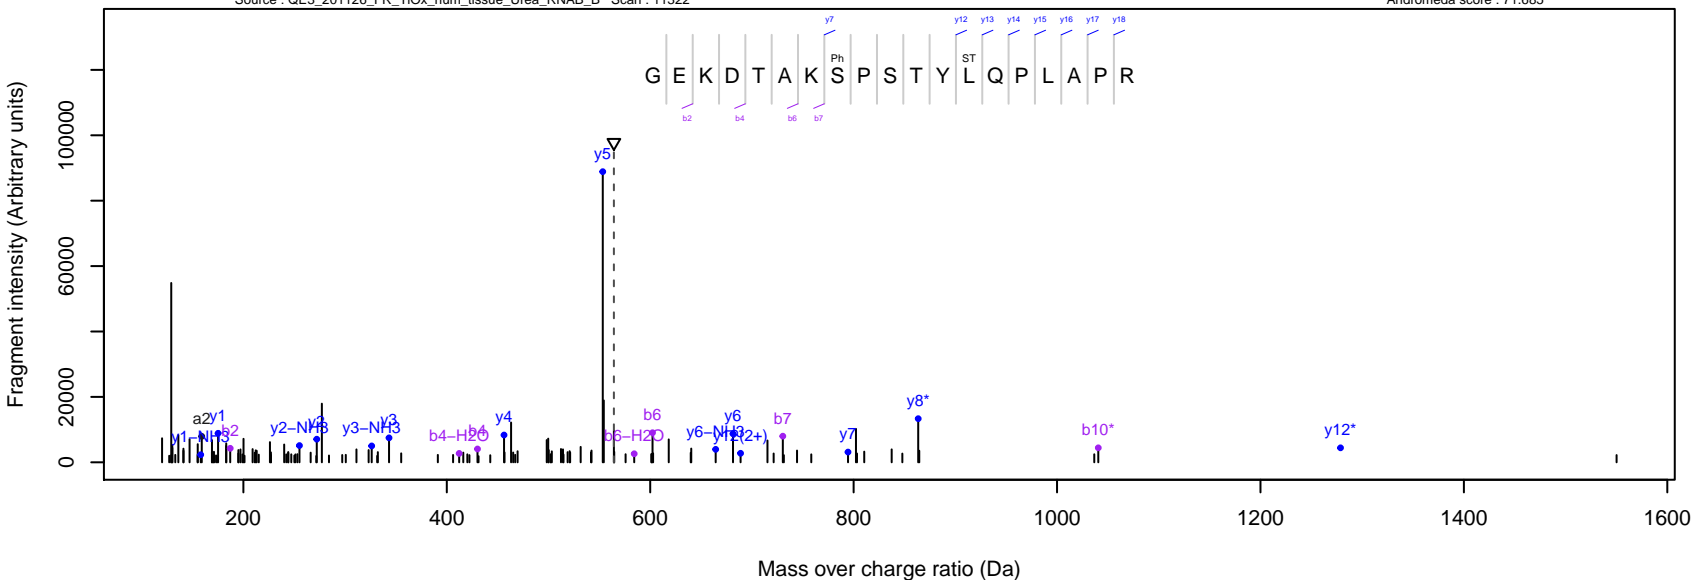

SPT(Phospho (STY))KAPHLQLEIGK-3+

Source : QE3\_201126\_FR\_TiOx\_hum\_tissue\_Urea\_RNAB\_H Scan : 17888

Andromeda score : 71.685

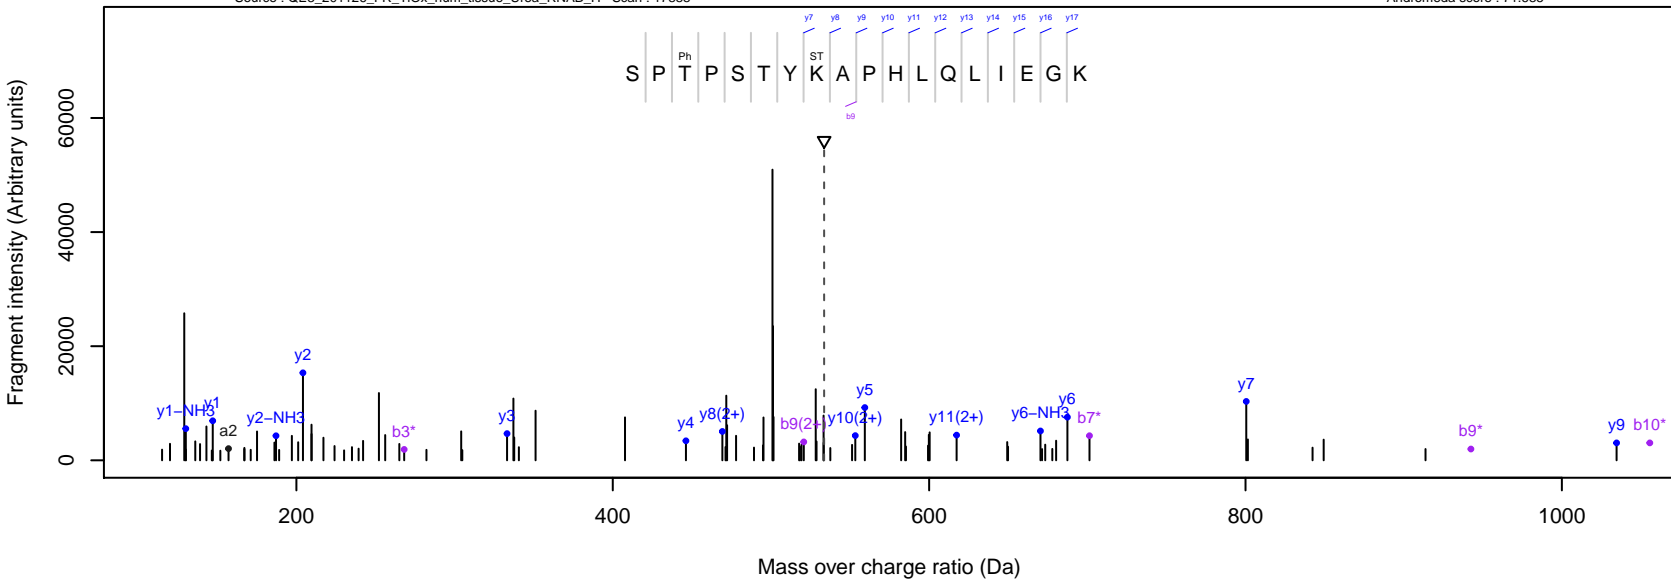



LLNQVLNLPISQQTIAETDGD(Phospho (STY))AGSDSPVGR-3+

Source : QE3\_201126\_FR\_TIOx\_hum\_tissue\_Urea\_RNAB\_N Scan : 60807

Andromeda score : 71.661

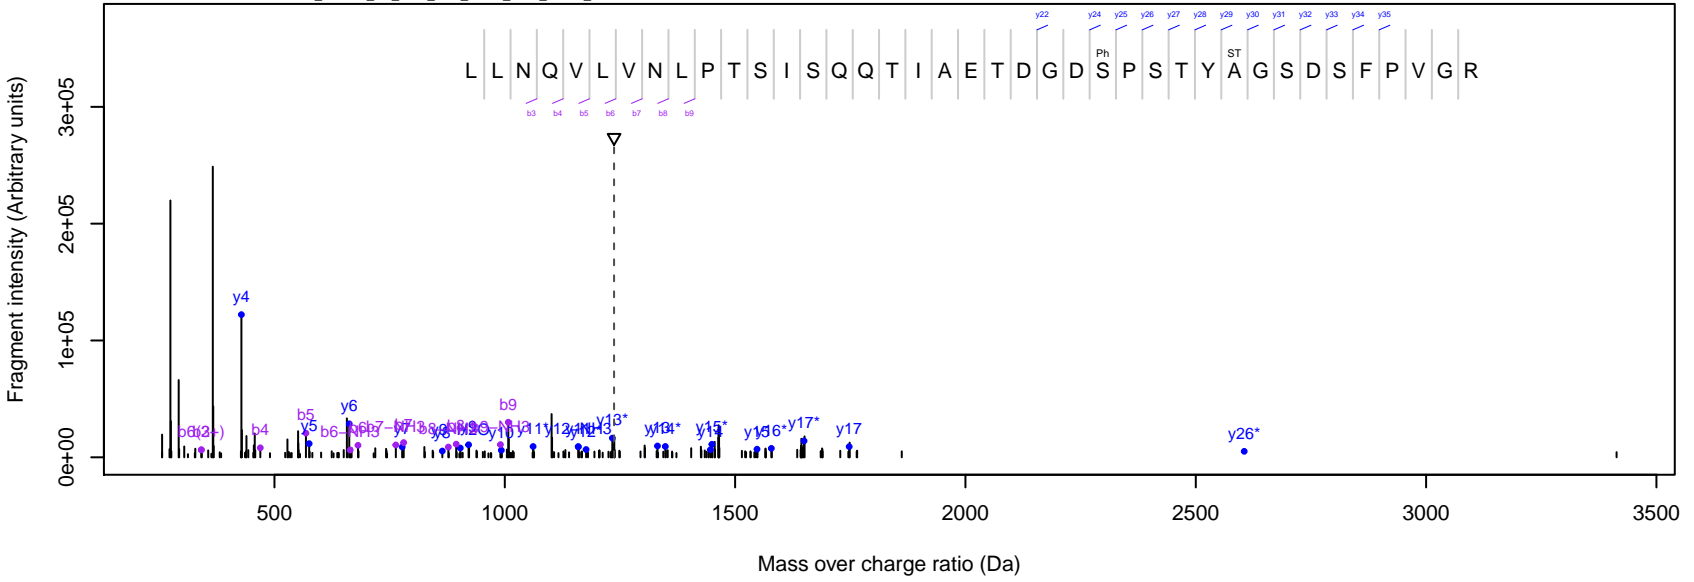

SM(Oxidation (M))S(Phospho (STY))FQGIR-2+

Source : QE3\_201126\_FR\_TIOx\_hum\_tissue\_Urea\_RNAB\_H Scan : 17146

Andromeda score : 71.614

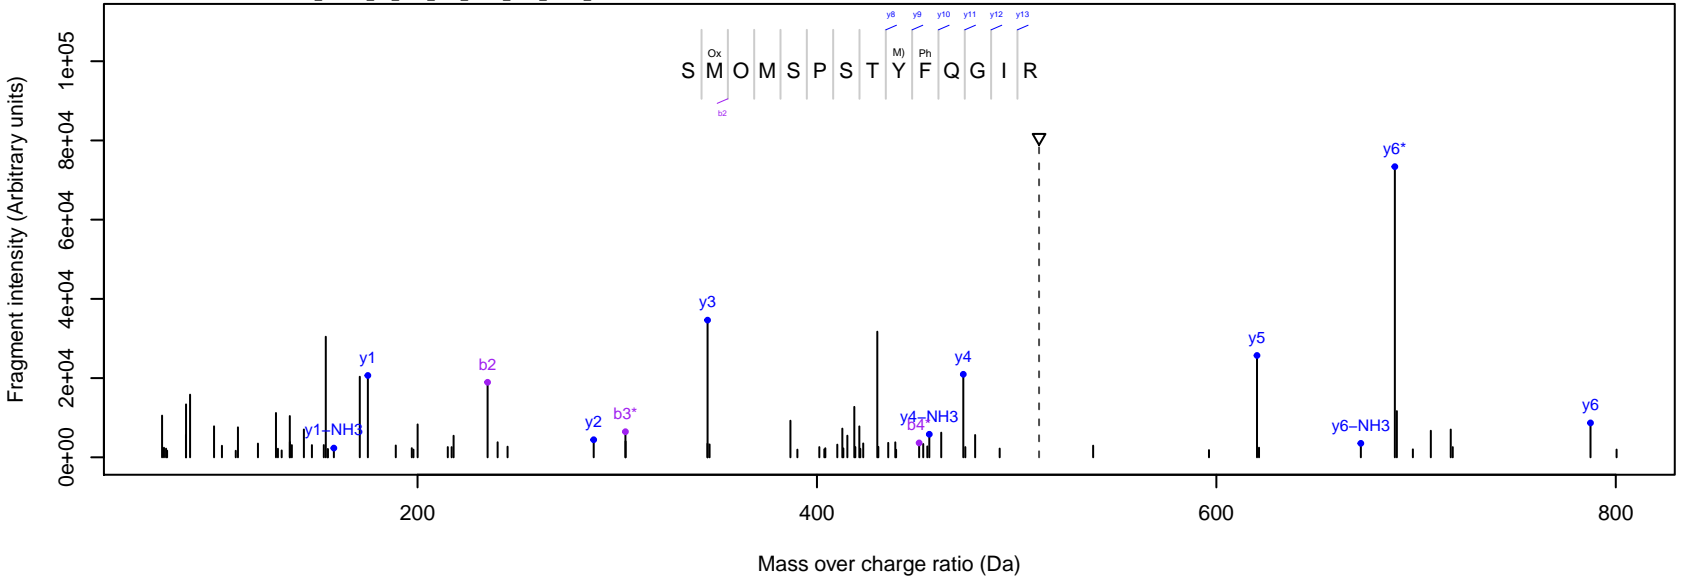

EVDGLLTSEPMGS(Phospho (STY))PVSSK-2+

Source : QE3\_201126\_FR\_TIOx\_hum\_tissue\_Urea\_RNAB\_N Scan : 38745

Andromeda score : 71.601

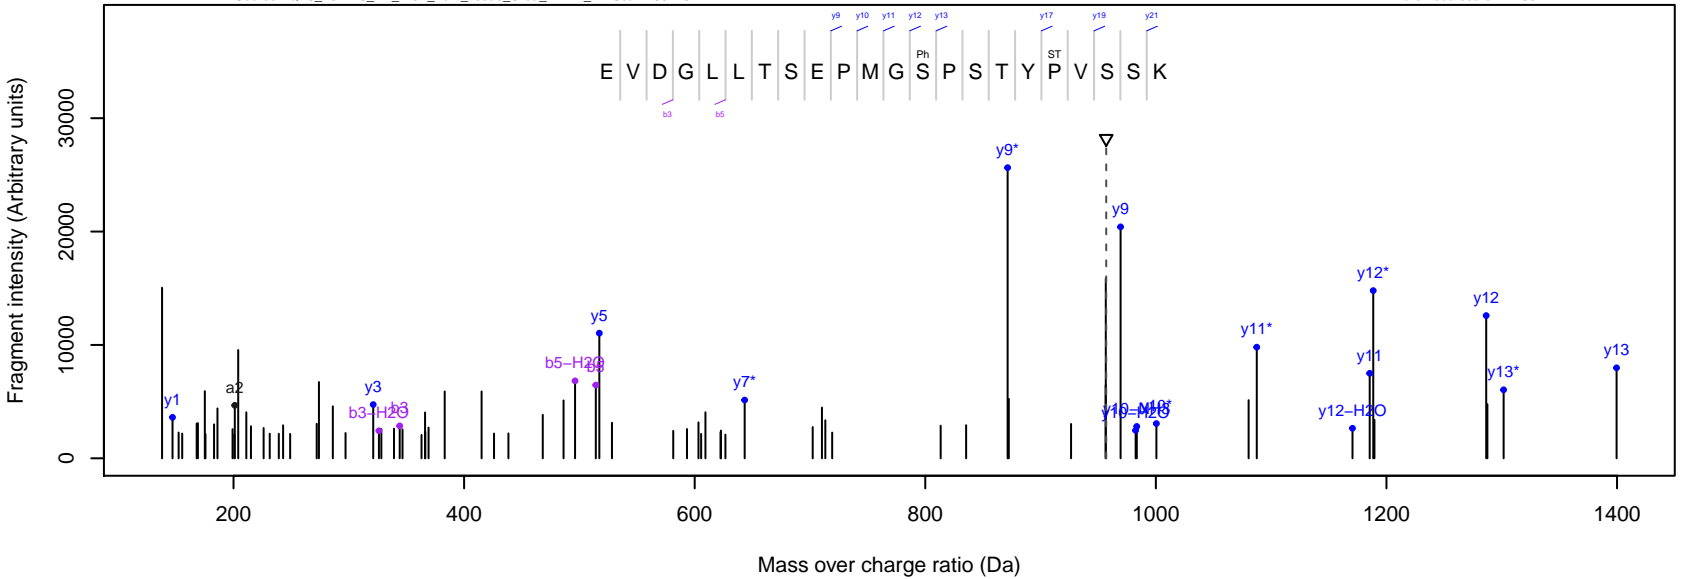

DQCCS(Phospho (STY))GKGDM(Oxidation (M))SDEDDENEFFDAPEITMPENLGHKR-4+

Source : QE3\_201126\_FR\_TiOx\_hum\_tissue\_Urea\_RNAB\_B Scan : 48031

Andromeda score : 71.596

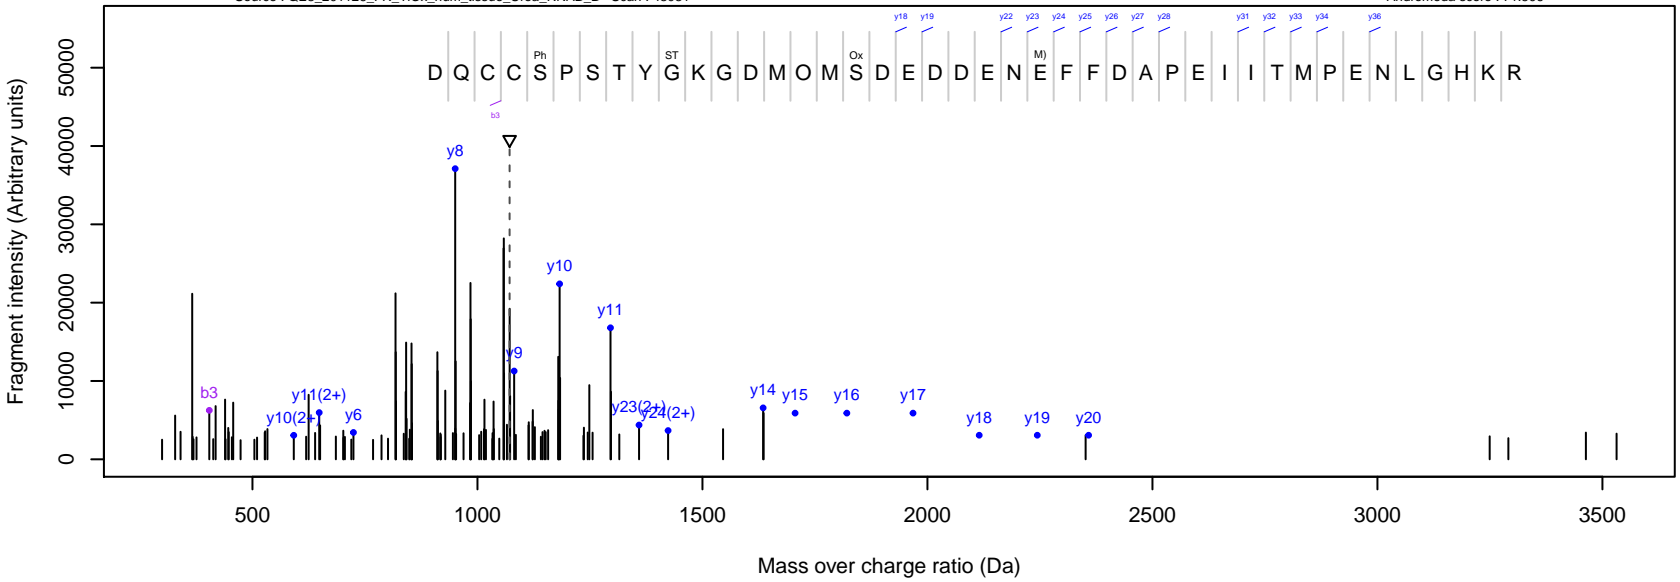

GQES(Phospho (STY))S(Phospho (STY))SDQEQVDVESIDFSKENK-3+

Source : QE3\_201126\_FR\_TiOx\_hum\_tissue\_Urea\_RNAB\_N Scan : 34597

Andromeda score : 71.592

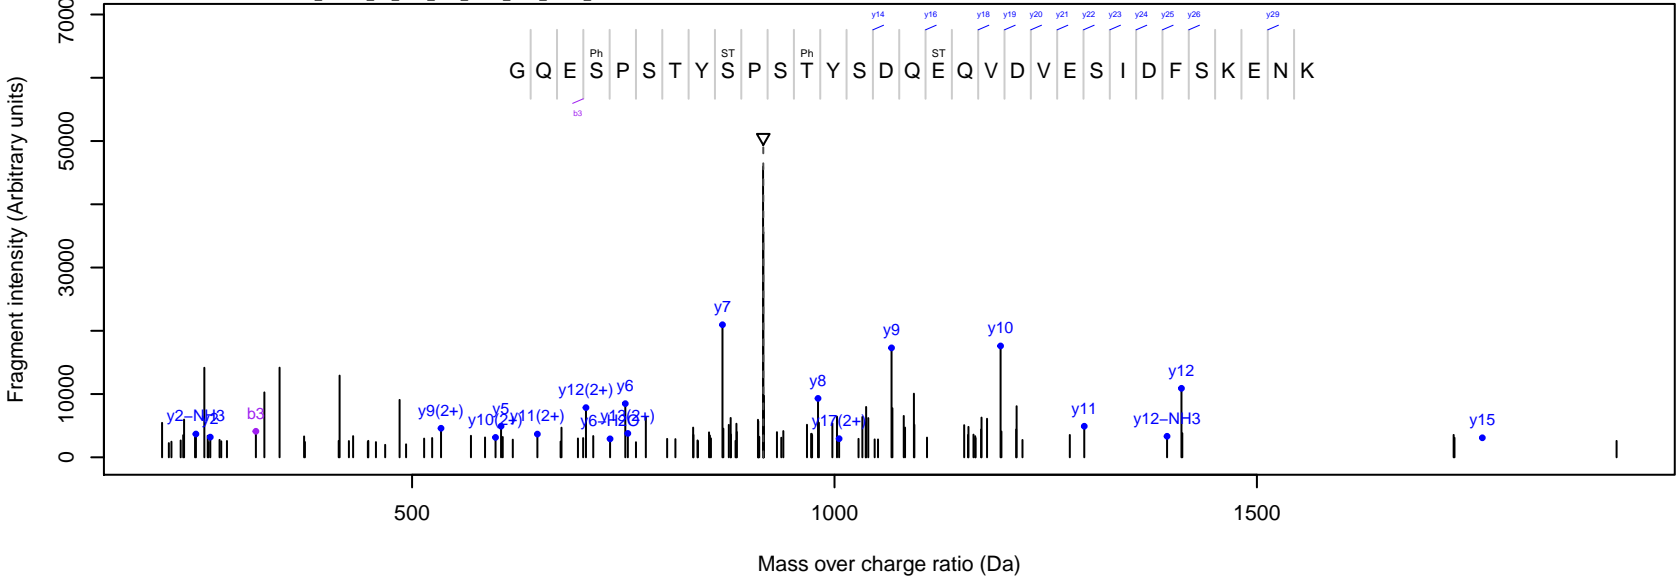

AEQLVLSGADS(Phospho (STY))DEDTSR-2+

Source : QE3\_201126\_FR\_TiOx\_hum\_tissue\_Urea\_RNAB\_H Scan : 24887

Andromeda score : 71.558

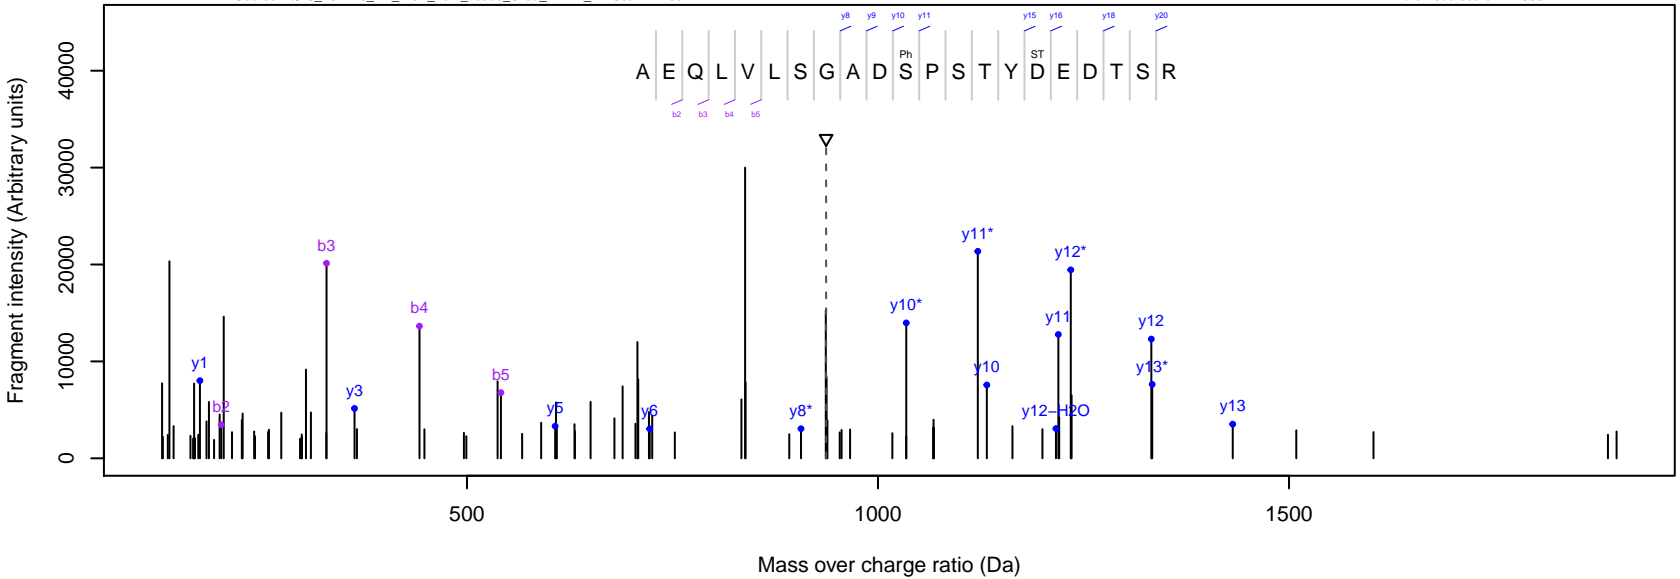

ASS(Phospho (STY))FSGILTR-2+

Source : QE3\_201126\_FR\_TIOx\_hum\_tissue\_Urea\_RNAB\_N Scan : 46052

Andromeda score : 71.558

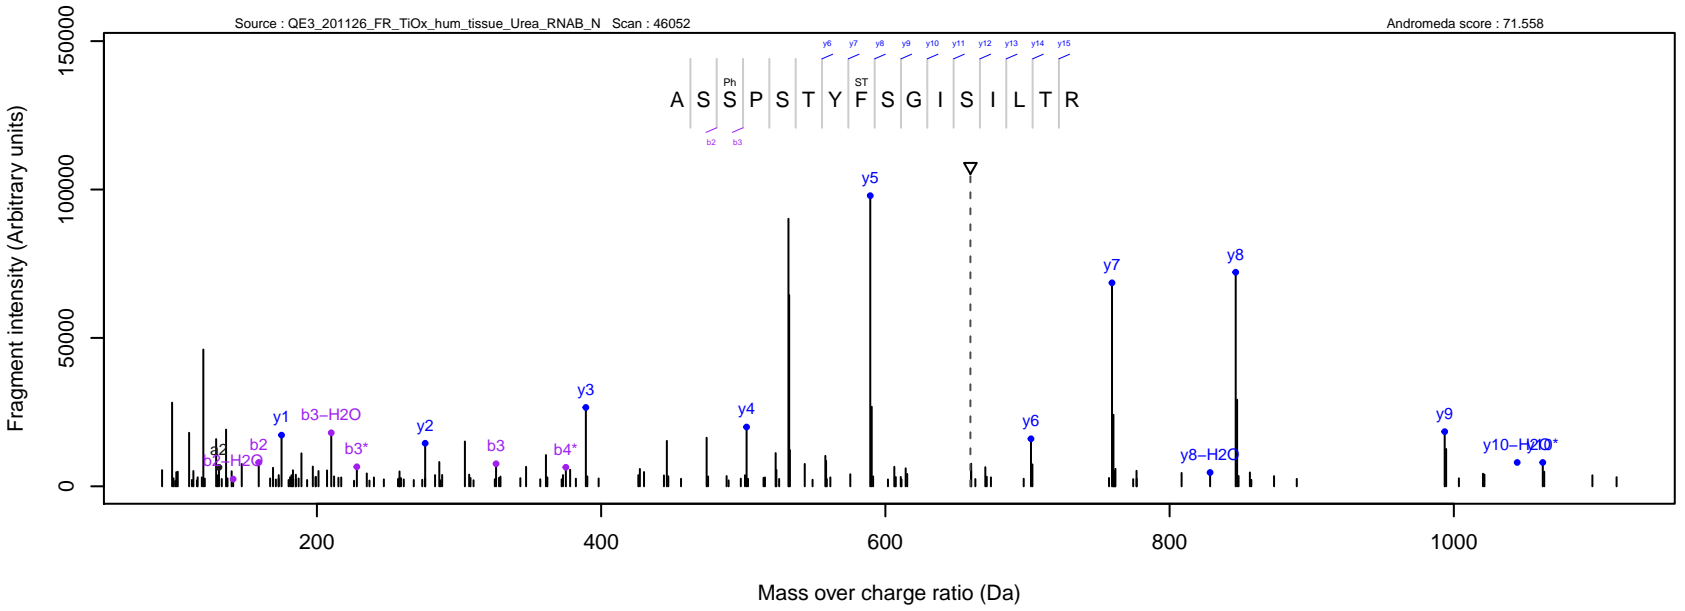

YGGDEIPF(Phospho (STY))PYR-2+

Source : QE3\_201126\_FR\_TIOx\_hum\_tissue\_Urea\_RNAB\_N Scan : 40054

Andromeda score : 71.558

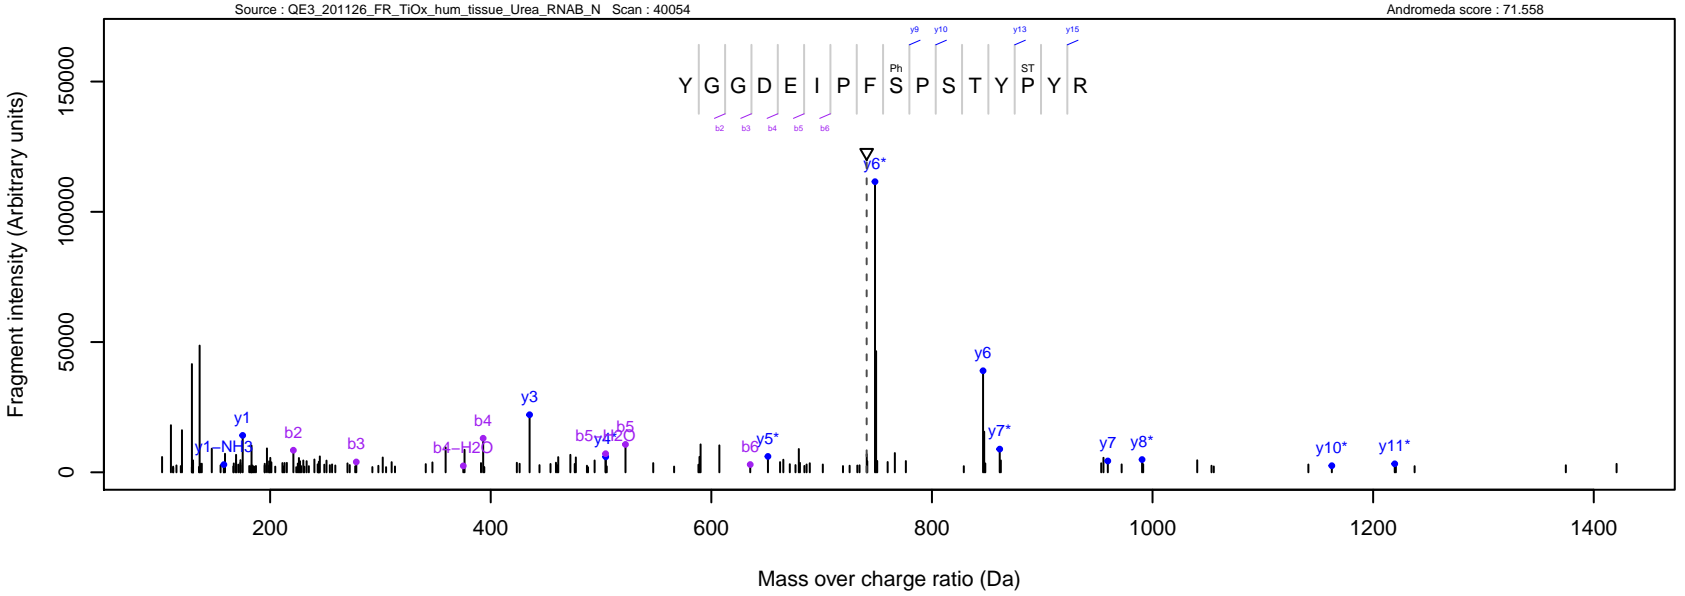

ELFDDPSY(Phospho (STY))VNVQLDK-2+

Source : QE3\_201126\_FR\_TIOx\_hum\_tissue\_Urea\_RNAB\_H Scan : 46662

Andromeda score : 71.548

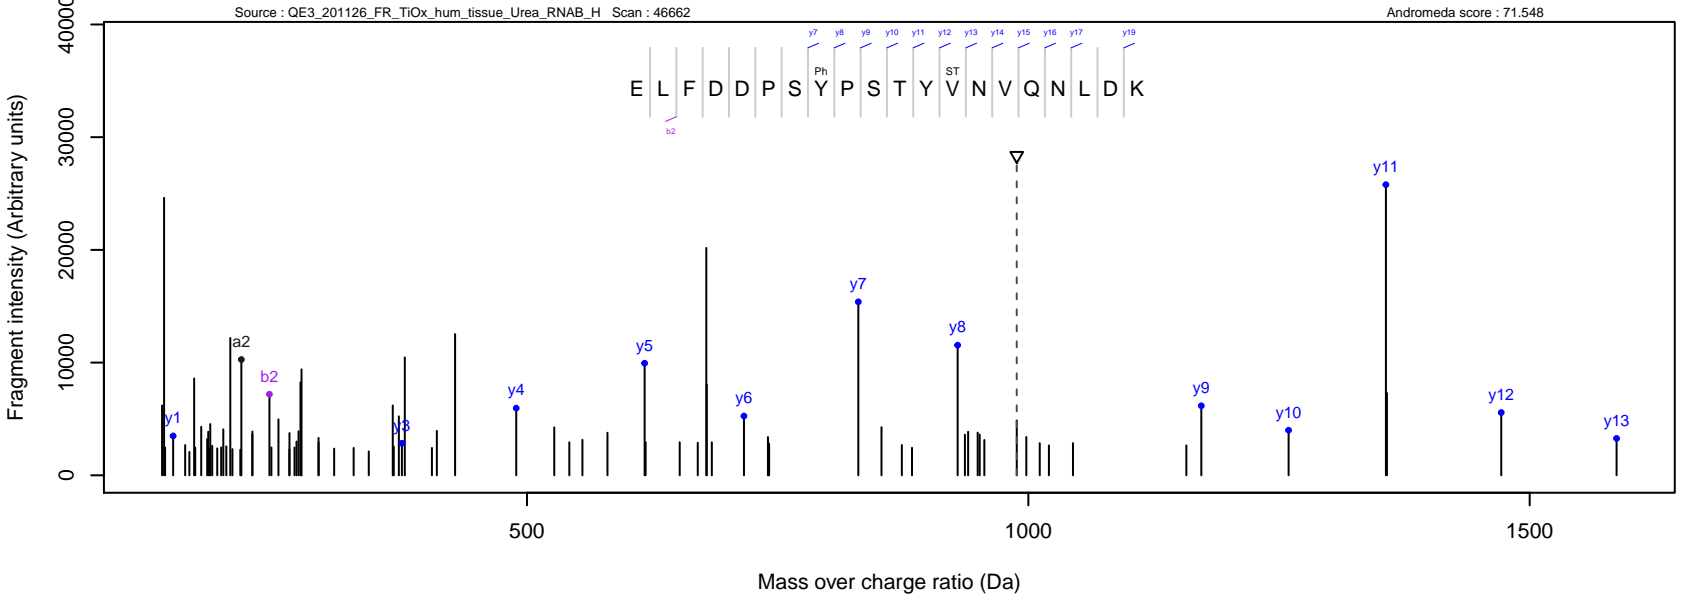

GS(Phospho (STY))PVPPVPERR-3+

Source : QE3\_201126\_FR\_TiOx\_hum\_tissue\_Urea\_RNAB\_H Scan : 10736

Andromeda score : 71.548

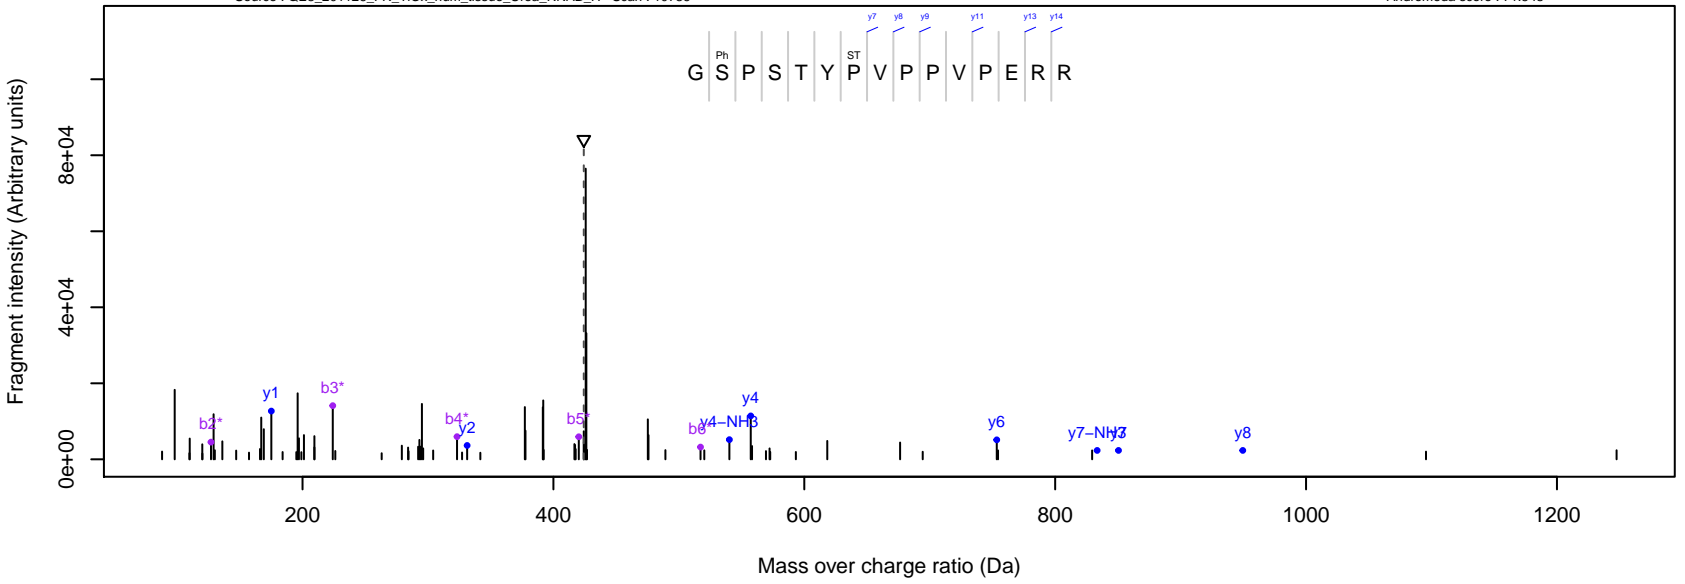

KS(Phospho (STY))SADTEFSDECTTAER-2+

Source : QE3\_201126\_FR\_TiOx\_hum\_tissue\_Urea\_RNAB\_N Scan : 12794

Andromeda score : 71.548

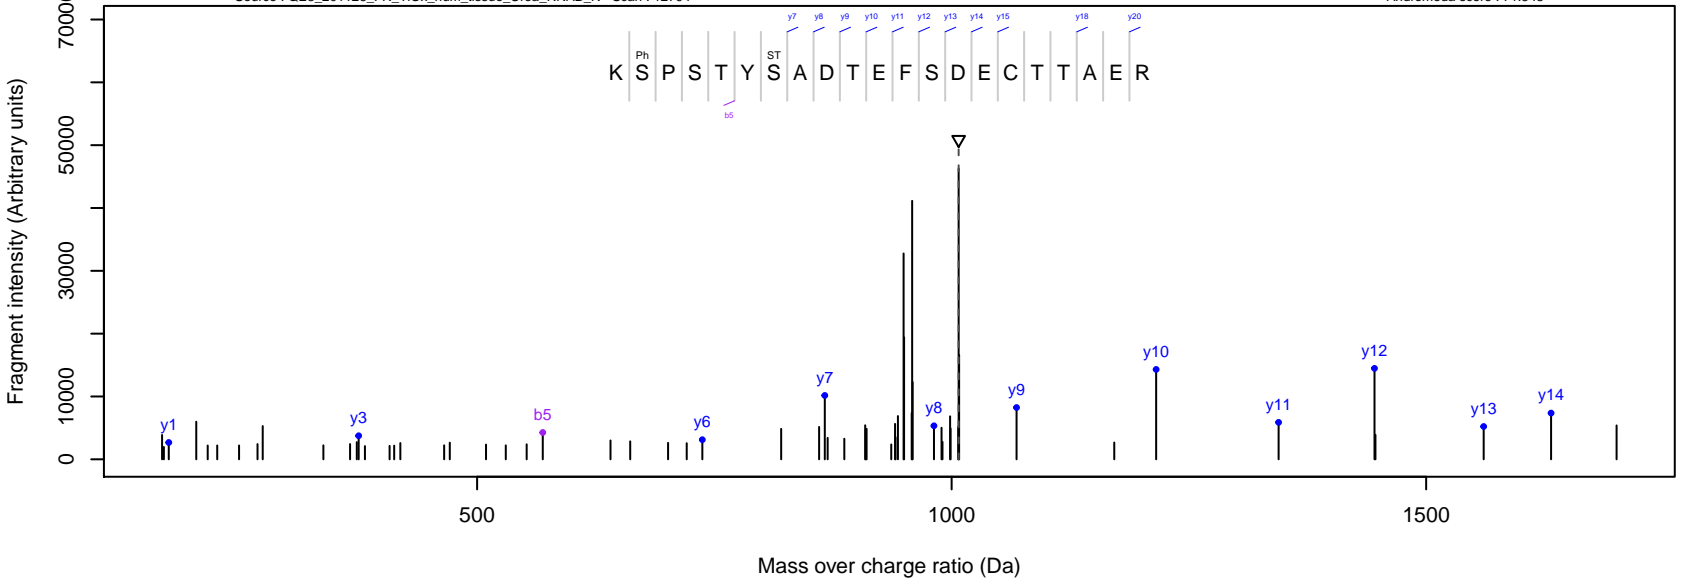

RRS(Phospho (STY))PQEGPTWSR-3+

Source : QE3\_201126\_FR\_TiOx\_hum\_tissue\_Urea\_RNAB\_B Scan : 7676

Andromeda score : 71.548

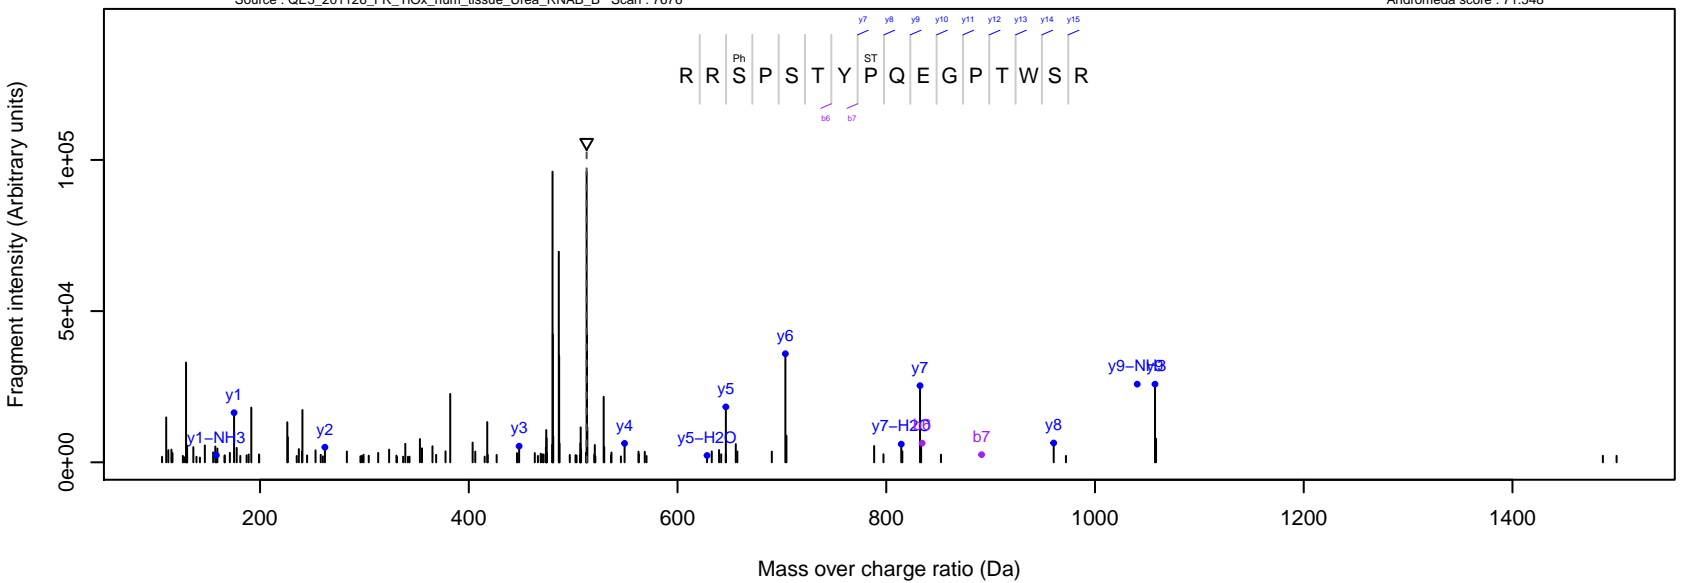

ERERDHS(Phospho (STY))PTPSVFNSDEER-3+

Source : QE3\_201126\_FR\_TiOx\_hum\_tissue\_Urea\_RNAB\_H Scan : 10958

Andromeda score : 71.54

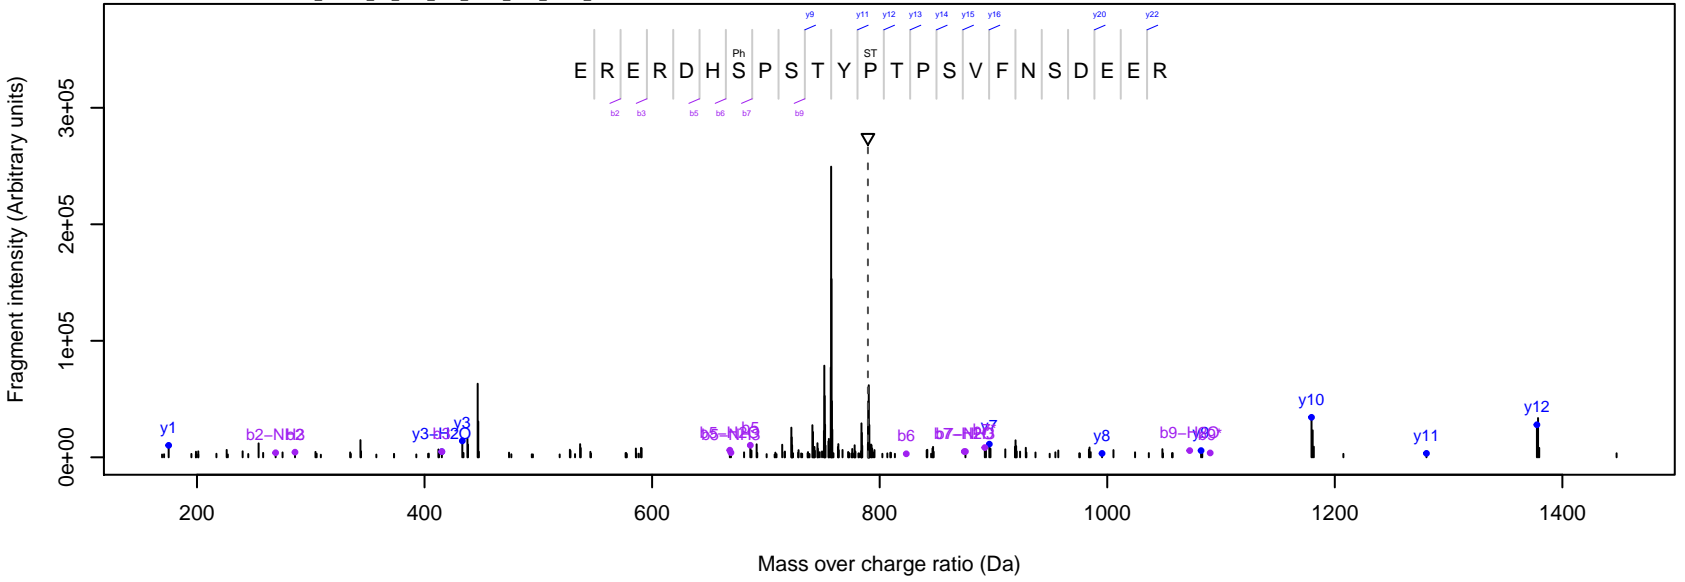

GAQPGRHS(Phospho (STY))VTGYGDCAVGAR-3+

Source : QE3\_201126\_FR\_TiOx\_hum\_tissue\_Urea\_RNAB\_B Scan : 10300

Andromeda score : 71.54

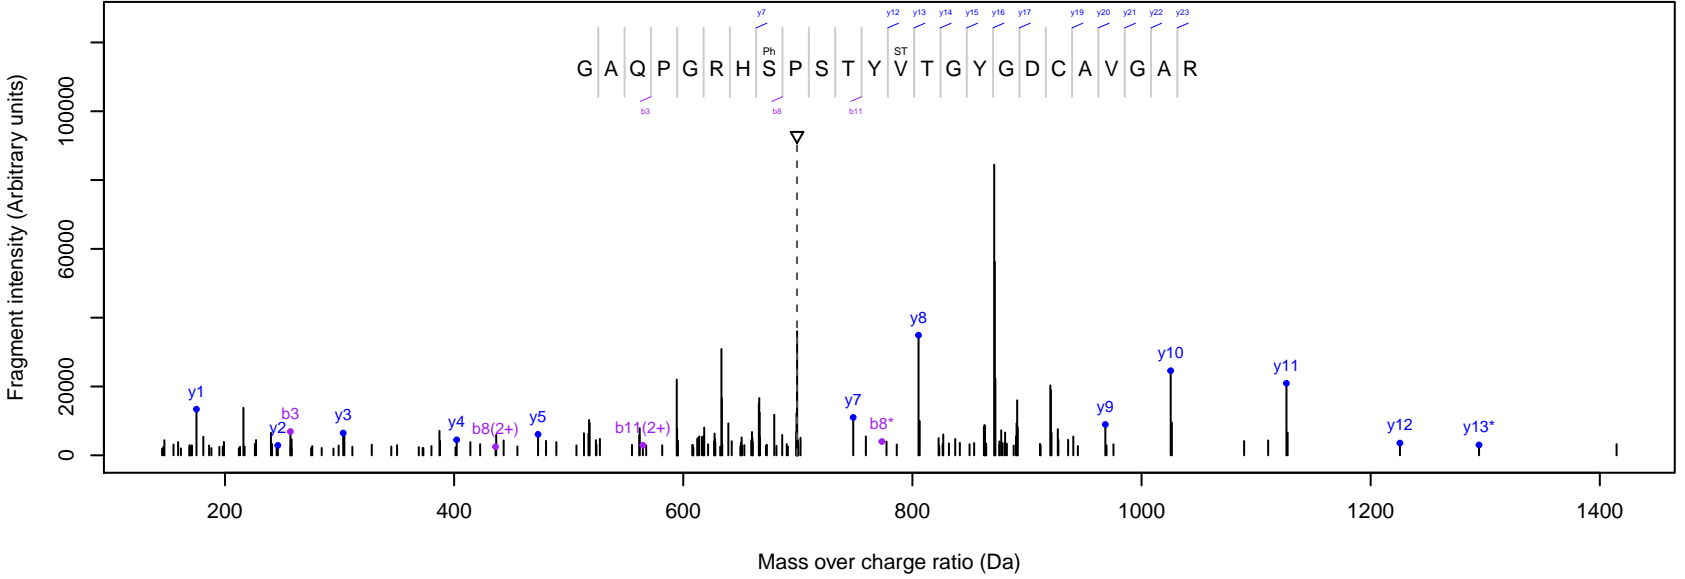

AGEPNS(Phospho (STY))PDAEEANS(Phospho (STY))PDVTAGCDPAGVHPPR-3+

Source : QE3\_201126\_FR\_TiOx\_hum\_tissue\_Urea\_RNAB\_N Scan : 26026

Andromeda score : 71.528

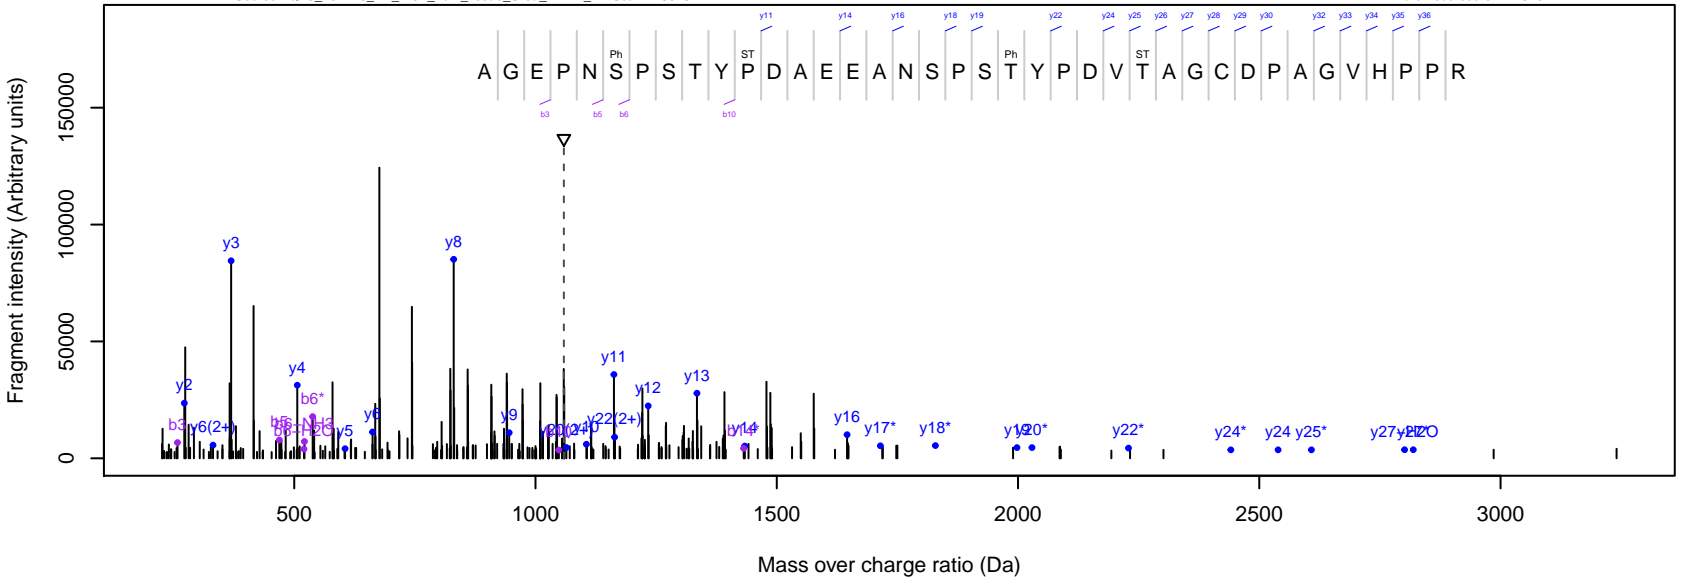

ASPDS(Phospho (STY))RHSPATISSSTR-3+

Source : QE3\_201126\_FR\_TiOx\_hum\_tissue\_Urea\_RNAB\_B Scan : 5267

Andromeda score : 71.527

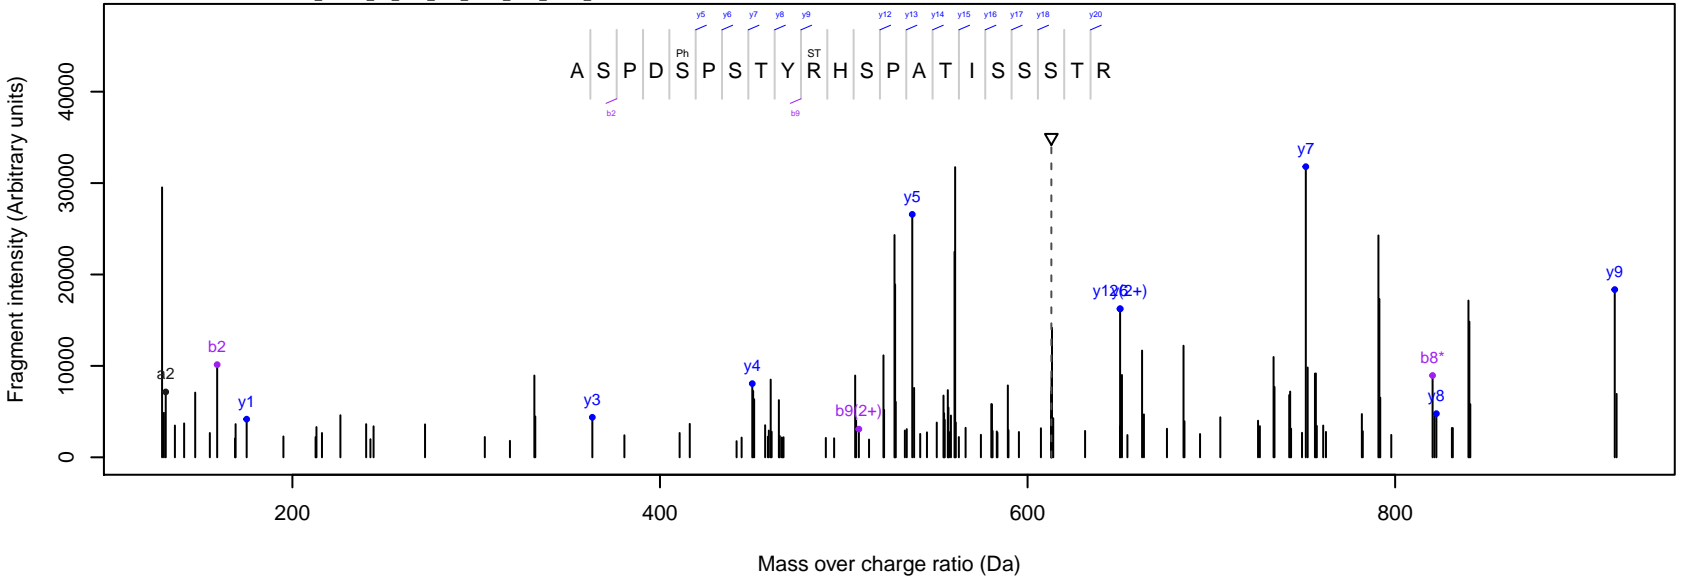

LIESLSQMLS(Phospho (STY))MGFS(Phospho (STY))DEGGWLTR-3+

Source : QE3\_201126\_FR\_TiOx\_hum\_tissue\_Urea\_RNAB\_N Scan : 63173

Andromeda score : 71.506

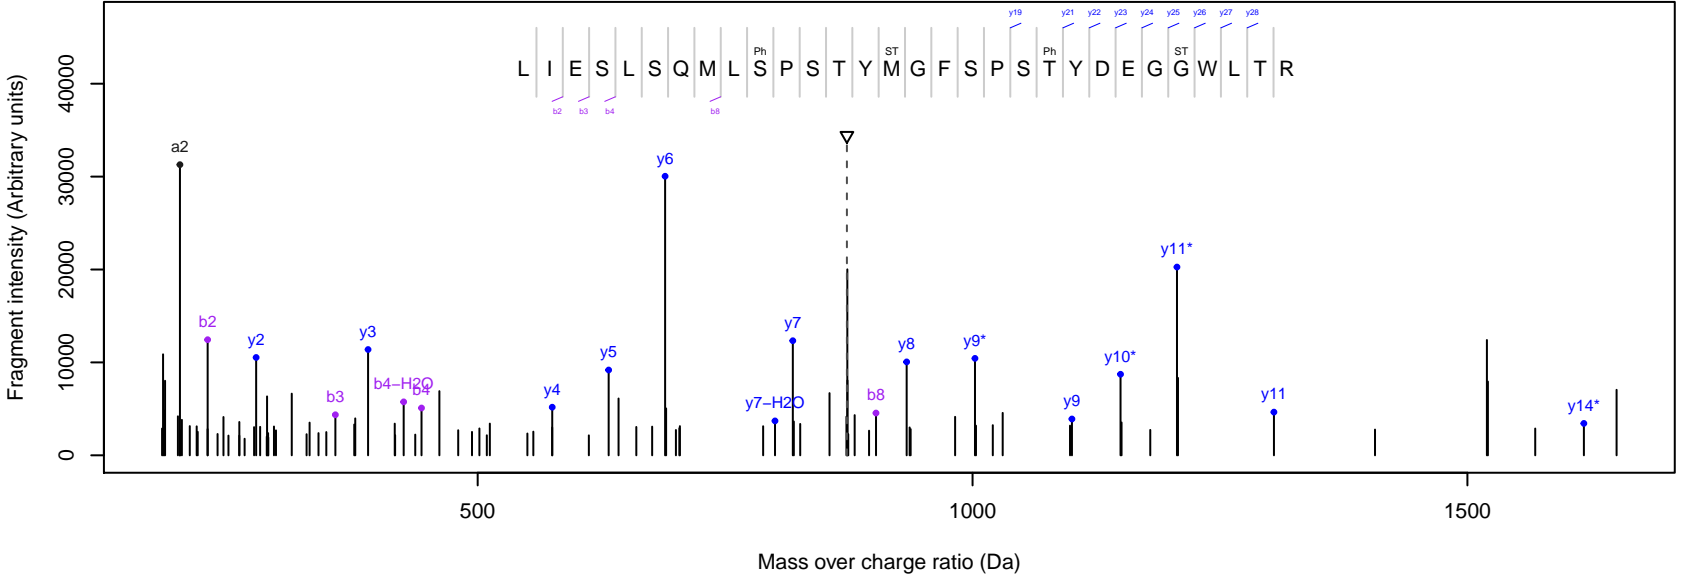

LNDGHFMPVLGFGT(Phospho (STY))YAPAEVPK-3+

Source : QE3\_201126\_FR\_TiOx\_hum\_tissue\_Urea\_RNAB\_B Scan : 53377

Andromeda score : 71.506

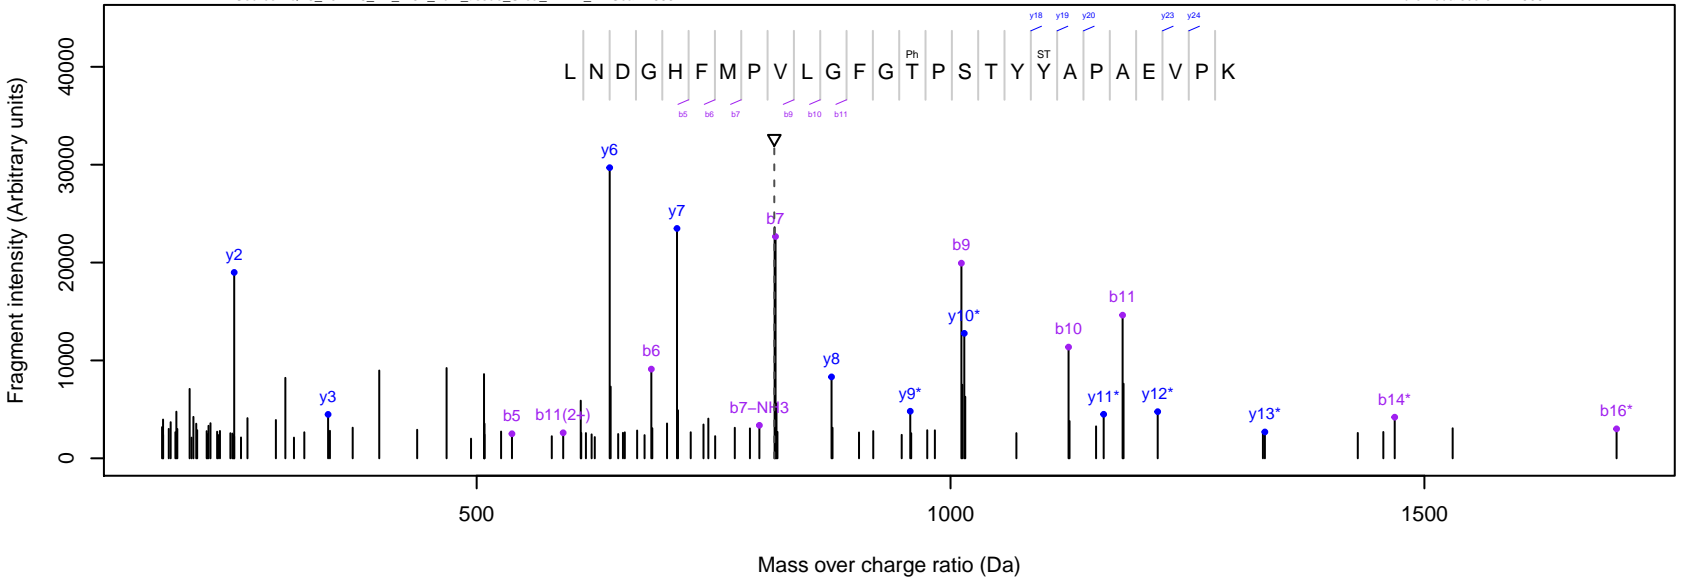

TVS(Phospho (STY))PSTIR-2+

Source : QE3\_201126\_FR\_TIOx\_hum\_tissue\_Urea\_RNAB\_B Scan : 11766

Andromeda score : 71.451

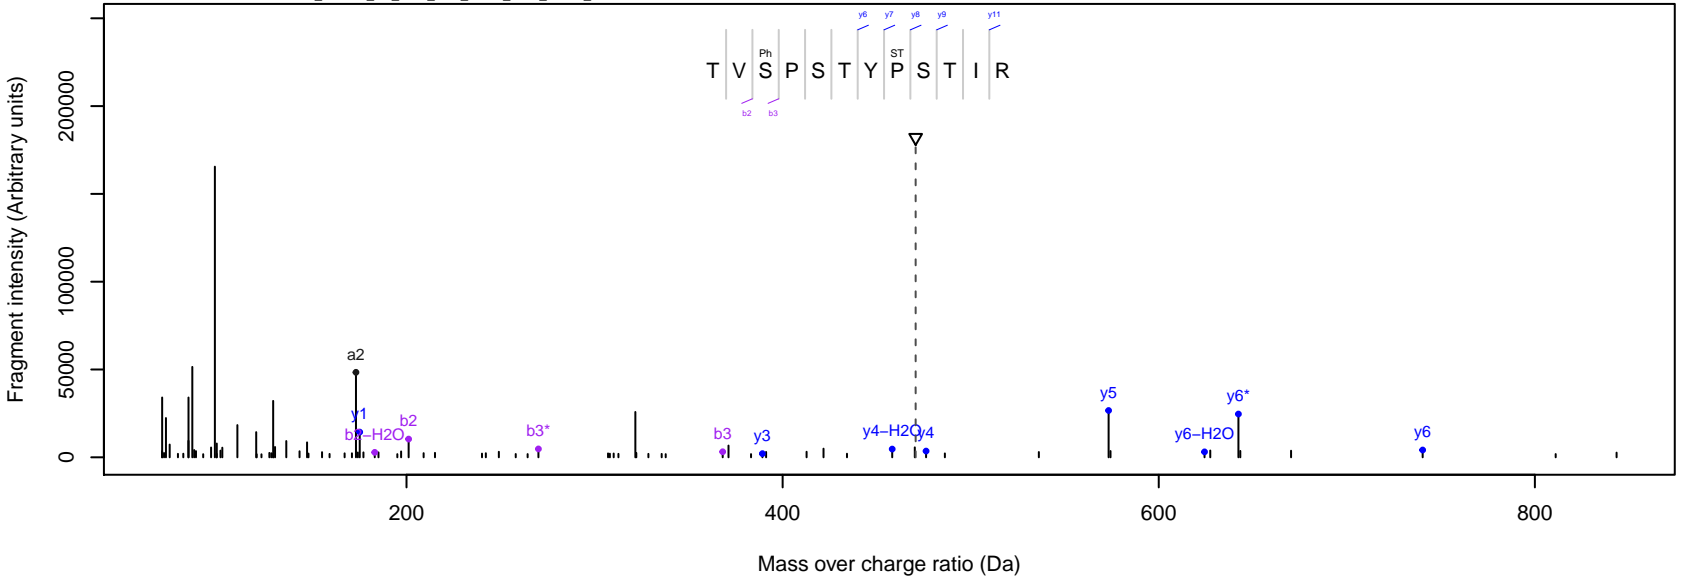

GPSS(Phospho (STY))PPAPVMHS(Phospho (STY))PSRK-3+

Source : QE3\_201126\_FR\_TIOx\_hum\_tissue\_Urea\_RNAB\_N Scan : 14076

Andromeda score : 71.428

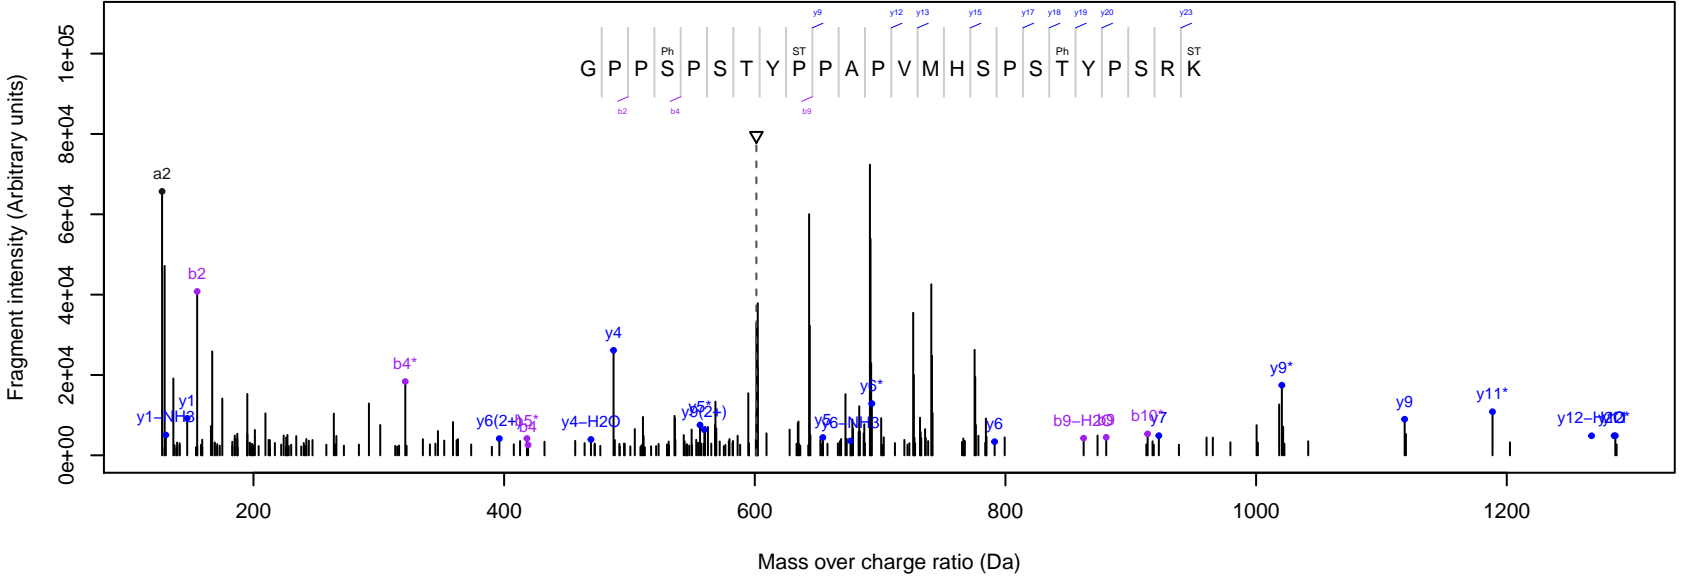

LES(Phospho (STY))TSPKGGPPPPPPPPR-3+

Source : QE3\_201126\_FR\_TIOx\_hum\_tissue\_Urea\_RNAB\_N Scan : 15343

Andromeda score : 71.428

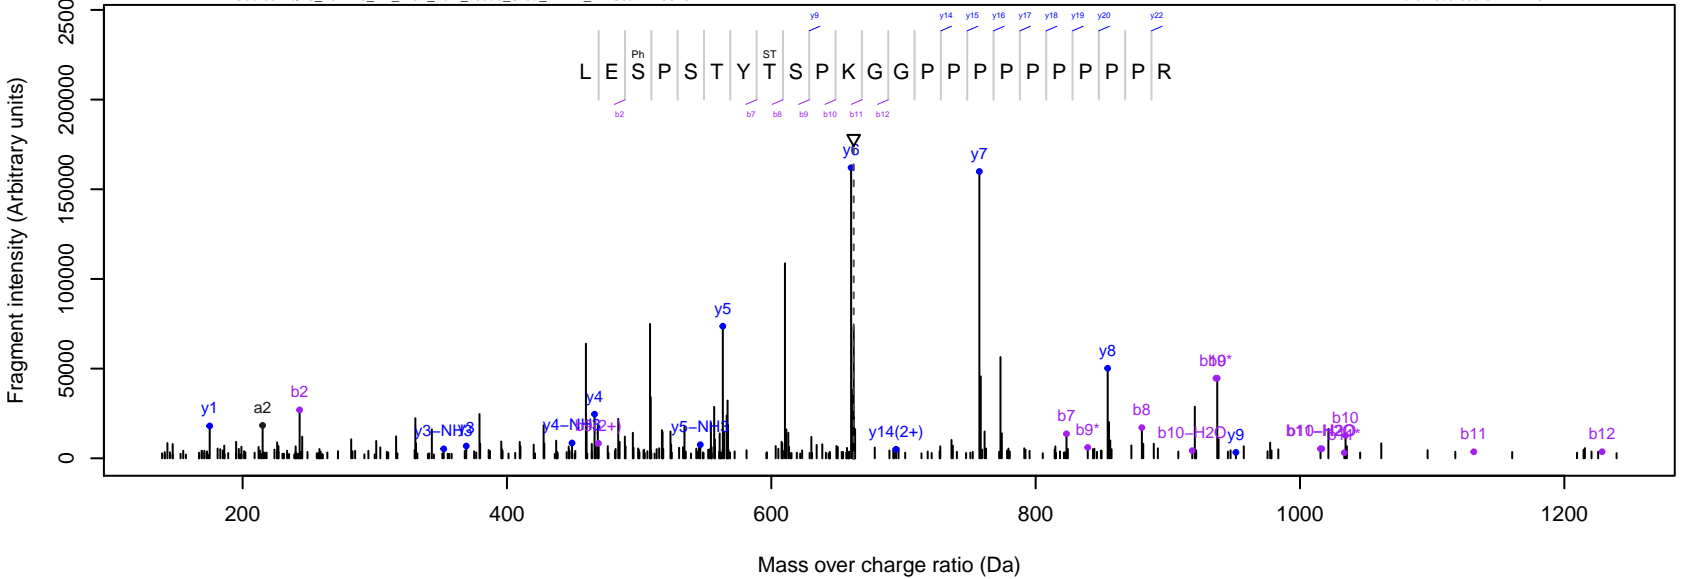

IHDLEDDLEM(Oxidation (M))SS(Phospho (STY))DAS(Phospho (STY))DAS(Phospho (STY))GEEGGRVPK-3+

Source : QE3\_201126\_FR\_TiOx\_hum\_tissue\_Urea\_RNAB\_N Scan : 33414

Andromeda score : 71.408

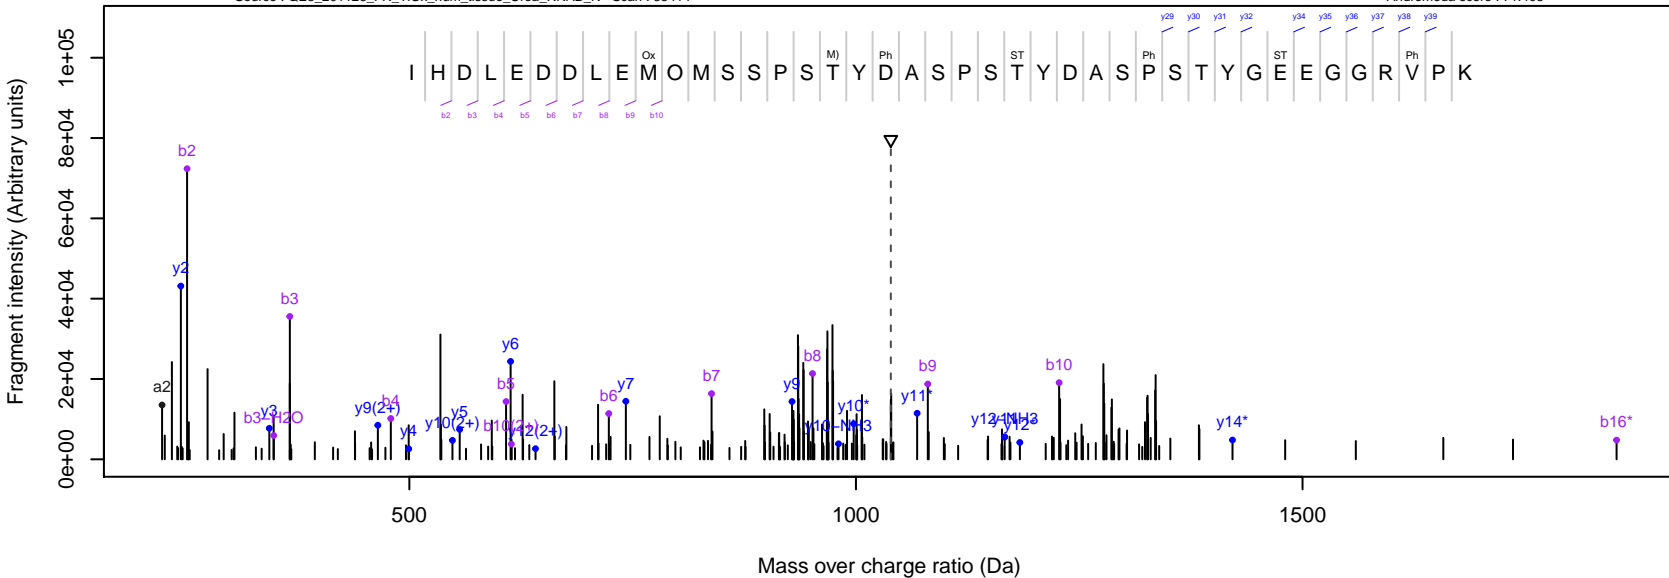

SVS(Phospho (STY))SYGNIR-2+

Source : QE3\_201126\_FR\_TiOx\_hum\_tissue\_Urea\_RNAB\_B Scan : 15974

Andromeda score : 71.349

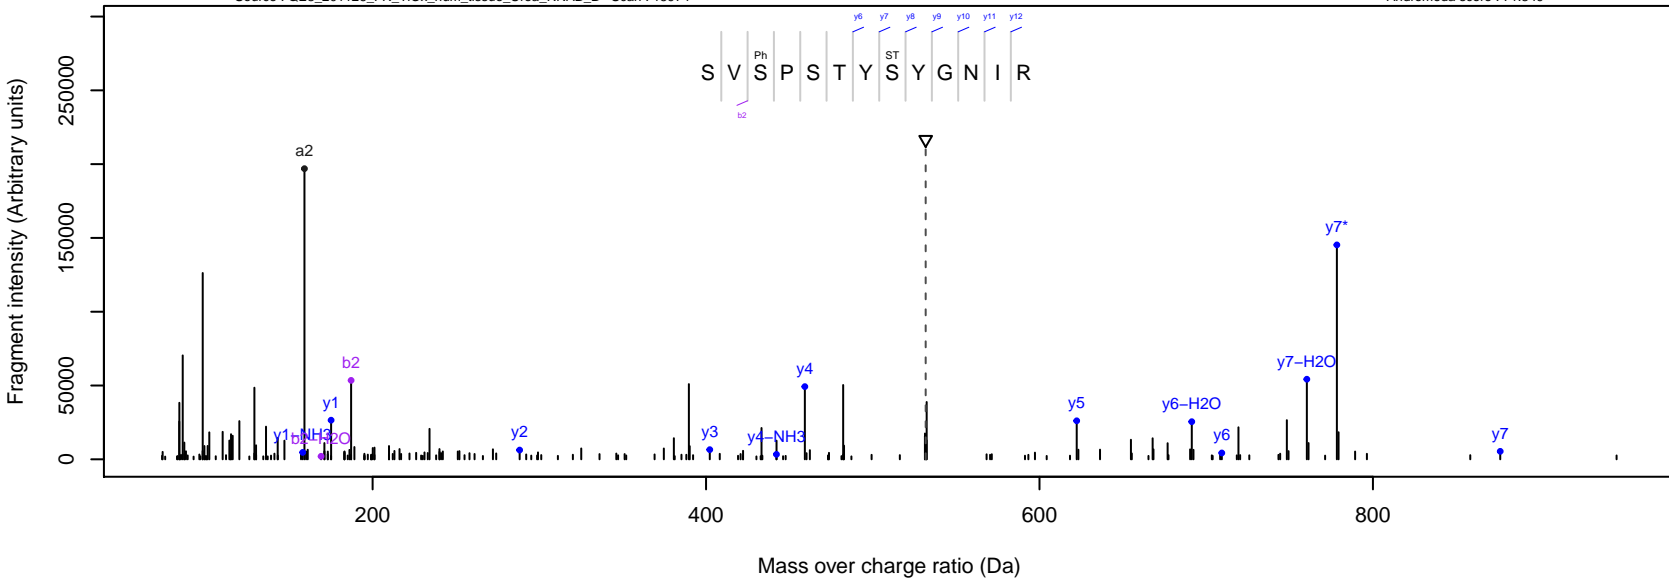

STS(Phospho (STY))PPPSPEVWADSR-2+

Source : QE3\_201126\_FR\_TiOx\_hum\_tissue\_Urea\_RNAB\_H Scan : 30699

Andromeda score : 71.344

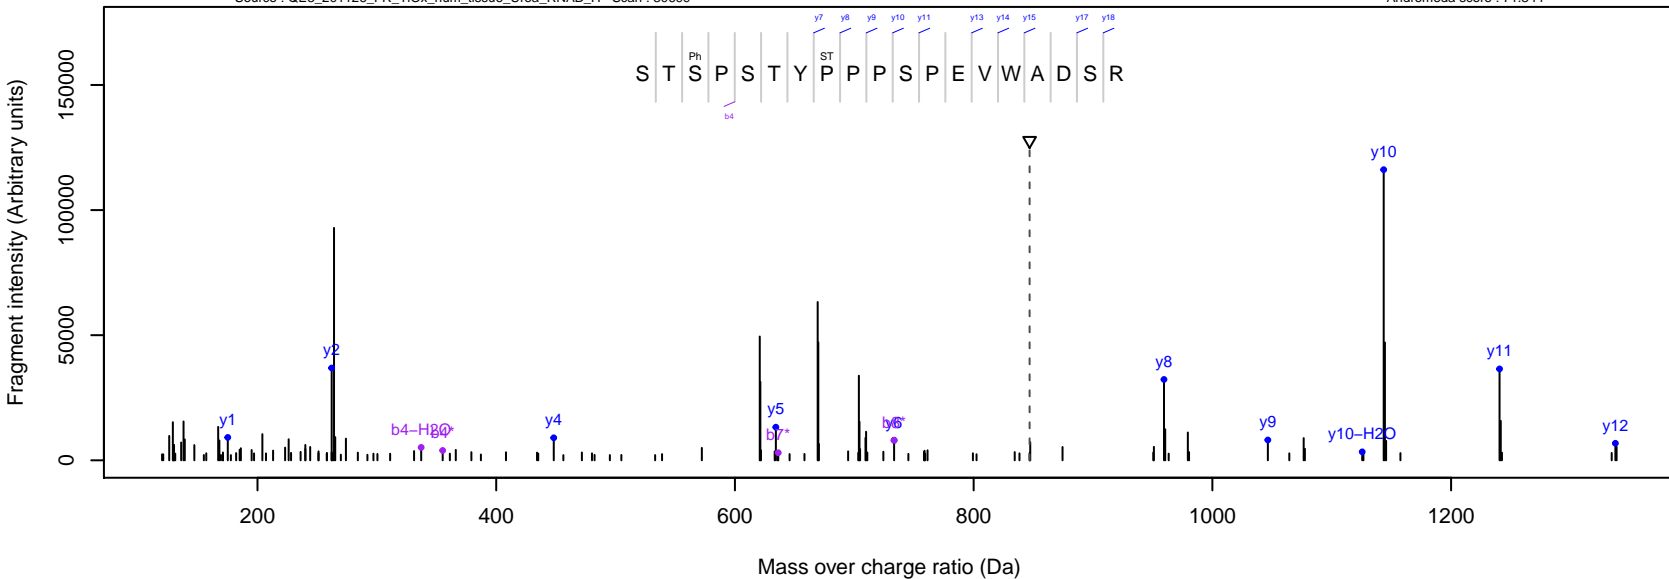



RSS(Phospho (STY))DPALIGLSTSVS(Phospho (STY))DSNFSSEEPSR-3+

Source : QE3\_201126\_FR\_TIOx\_hum\_tissue\_Urea\_RNAB\_H Scan : 44842

Andromeda score : 71.338

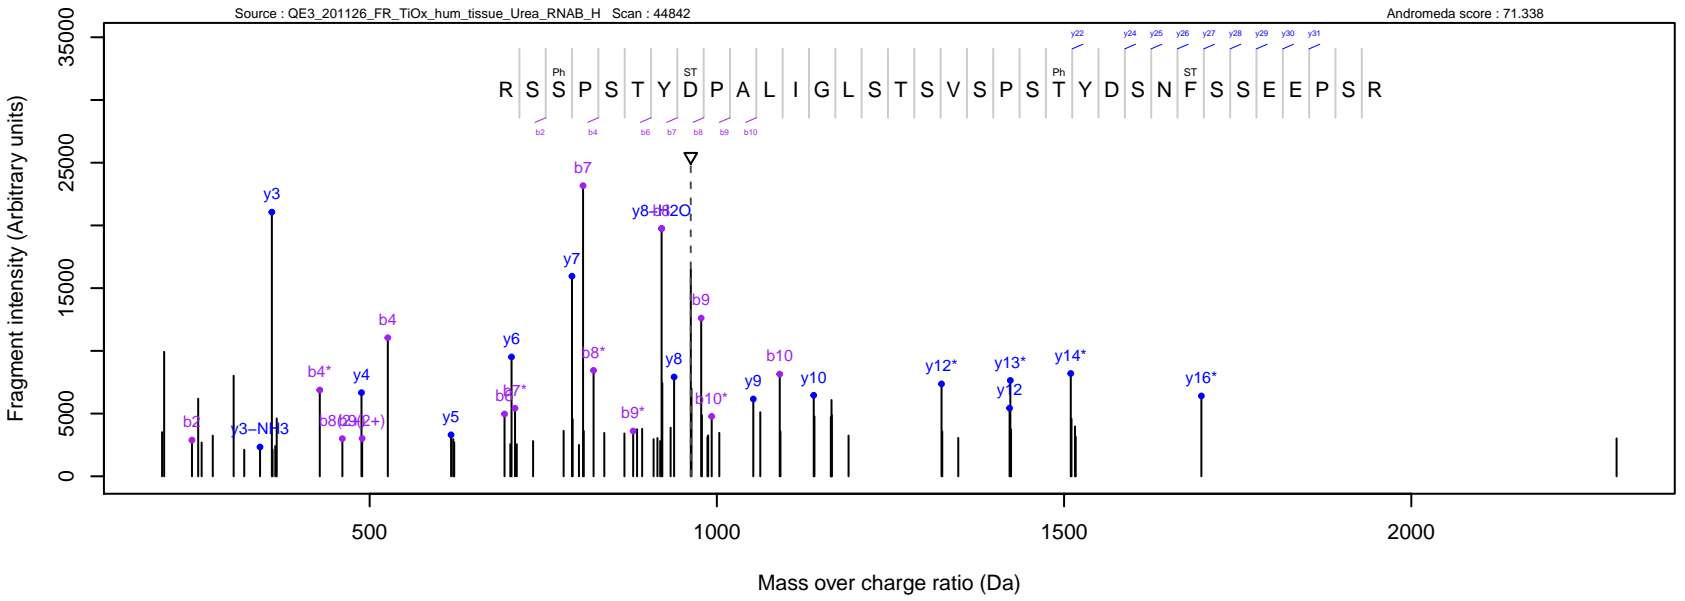

S(Phospho (STY))TSEGAWQLPSGLSM(Oxidation (M))M(Oxidation (M))R-2+

Source : QE3\_201126\_FR\_TIOx\_hum\_tissue\_Urea\_RNAB\_H Scan : 45804

Andromeda score : 71.286

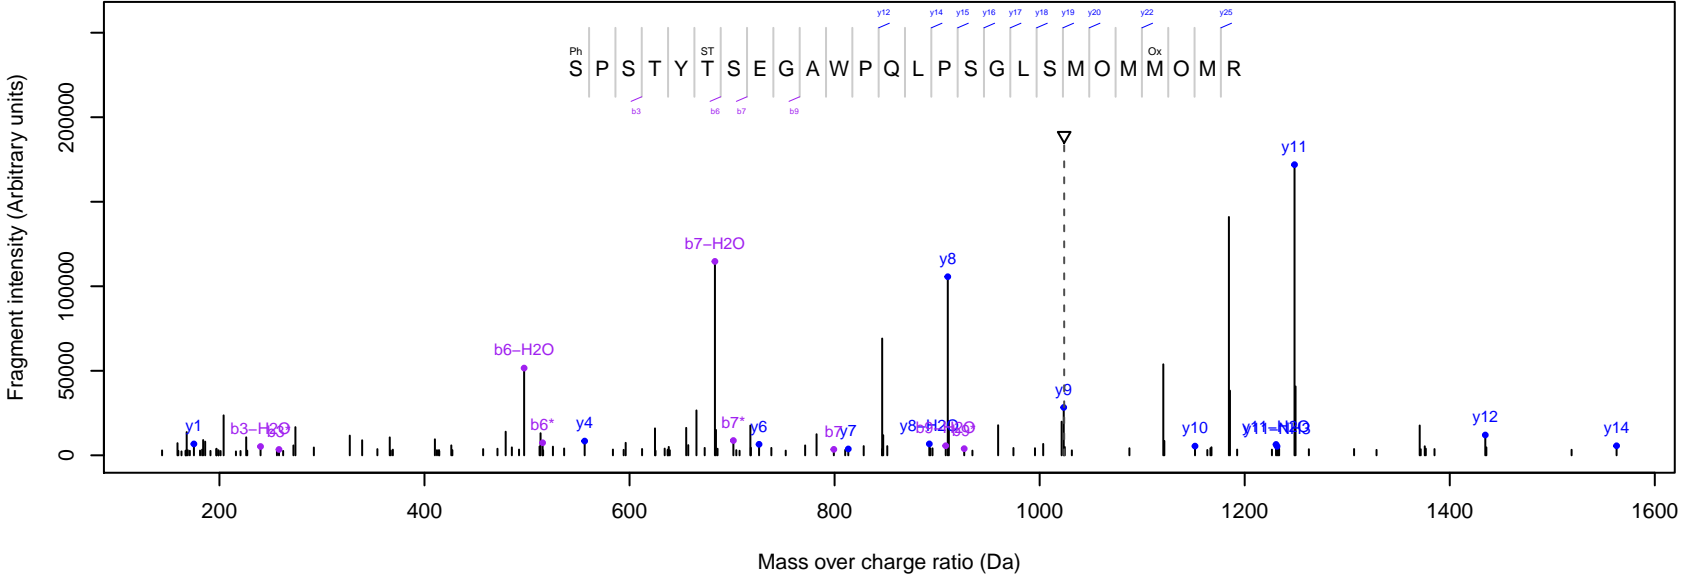

KIS(Phospho (STY))LEDIQAFEK-2+

Source : QE3\_201126\_FR\_TIOx\_hum\_tissue\_Urea\_RNAB\_H Scan : 38045

Andromeda score : 71.279

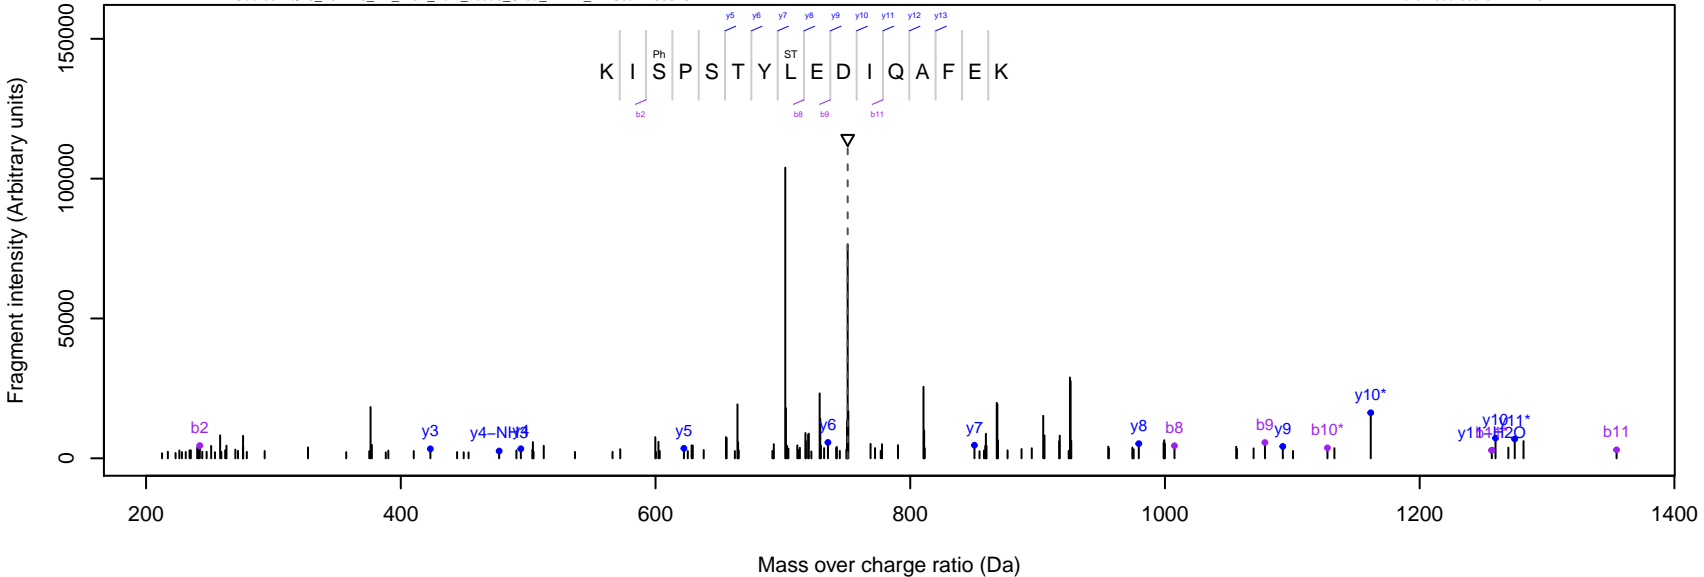

RFS(Phospho (STY))GLLHGSPK-3+

Source : QE3\_201126\_FR\_TiOx\_hum\_tissue\_Urea\_RNAB\_H Scan : 17262

Andromeda score : 71.279

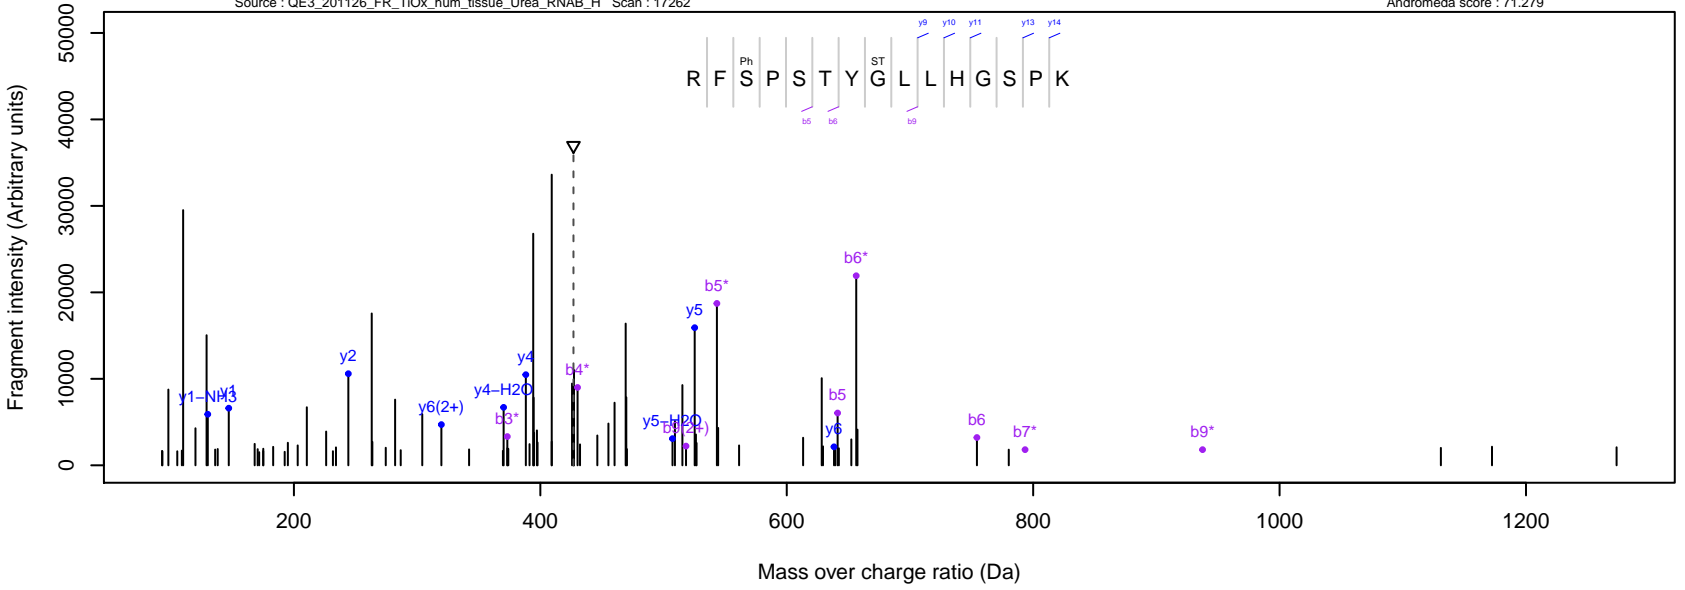

(Acetyl (Protein N-term))M(Oxidation (M))HRDS(Phospho (STY))CPLDCK-2+

Source : QE3\_201126\_FR\_TiOx\_hum\_tissue\_Urea\_RNAB\_N Scan : 8397

Andromeda score : 71.241

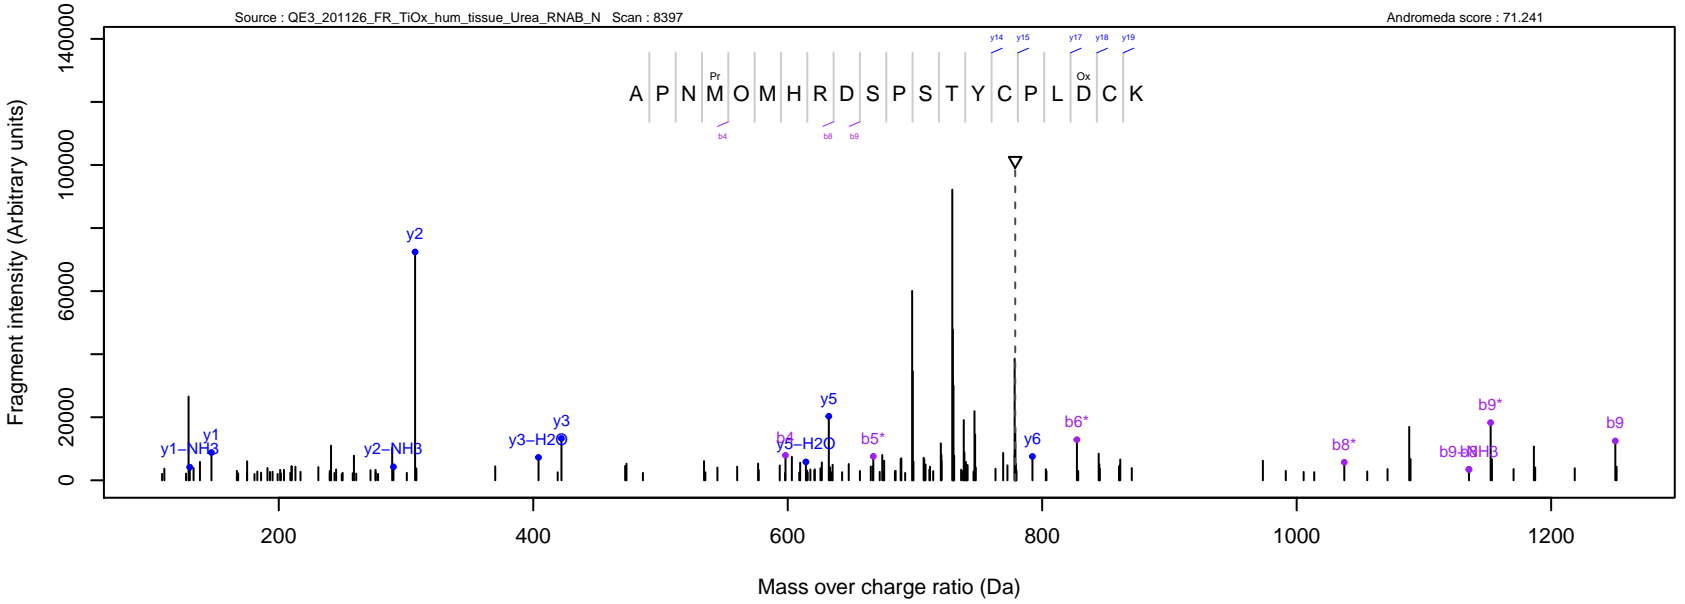

RYS(Phospho (STY))DFEWLK-2+

Source : QE3\_201126\_FR\_TiOx\_hum\_tissue\_Urea\_RNAB\_B Scan : 38779

Andromeda score : 71.241

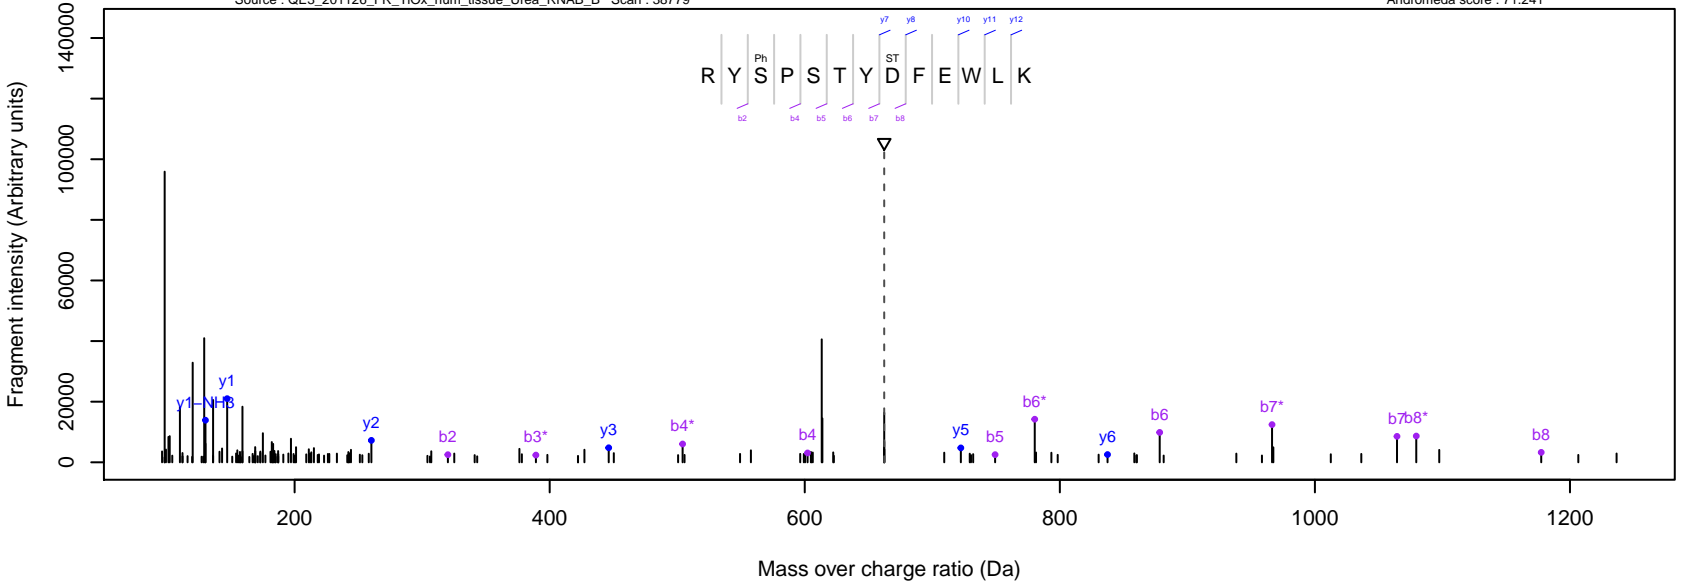

T(Phospho (STY))SSIADEGTYLDSILR-2+

Source : QE3\_201126\_FR\_TiOx\_hum\_tissue\_Urea\_RNAB\_N Scan : 55676

Andromeda score : 71.241

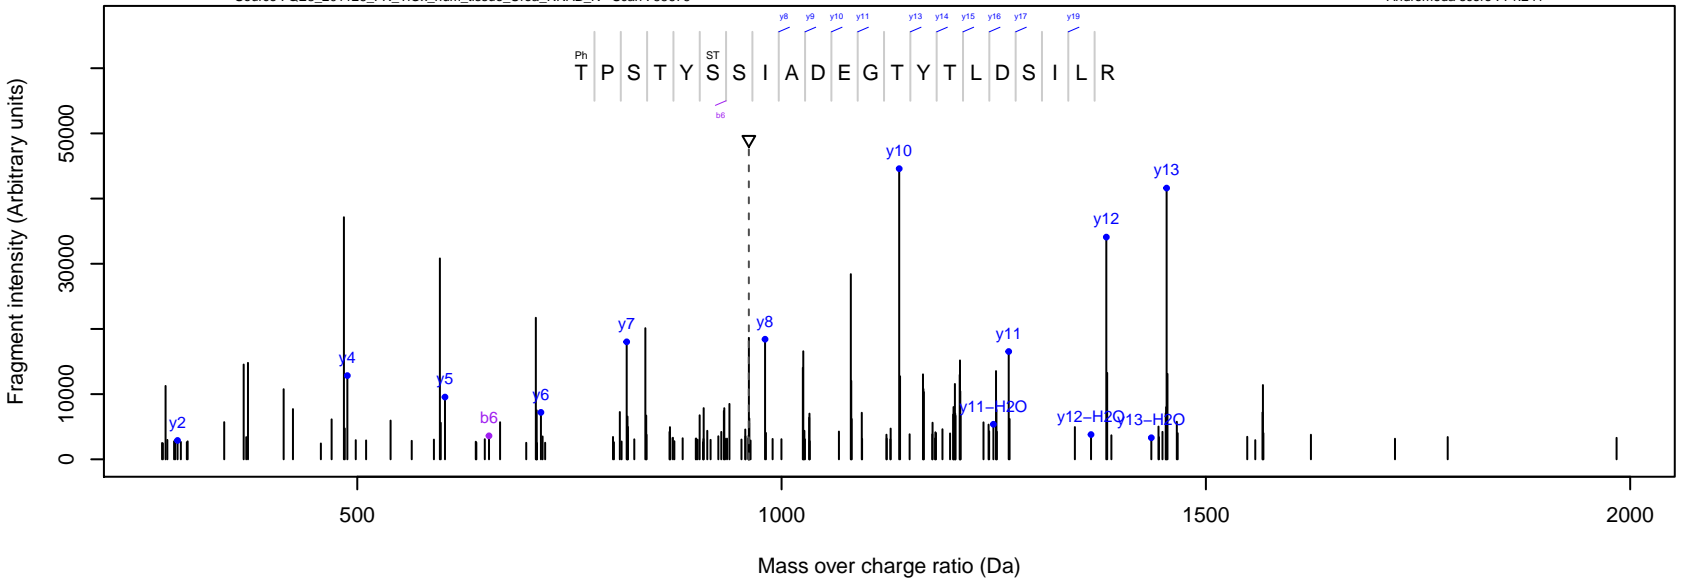

NIGS(Phospho (STY))DFIPR-2+

Source : QE3\_201126\_FR\_TiOx\_hum\_tissue\_Urea\_RNAB\_H Scan : 39706

Andromeda score : 71.221

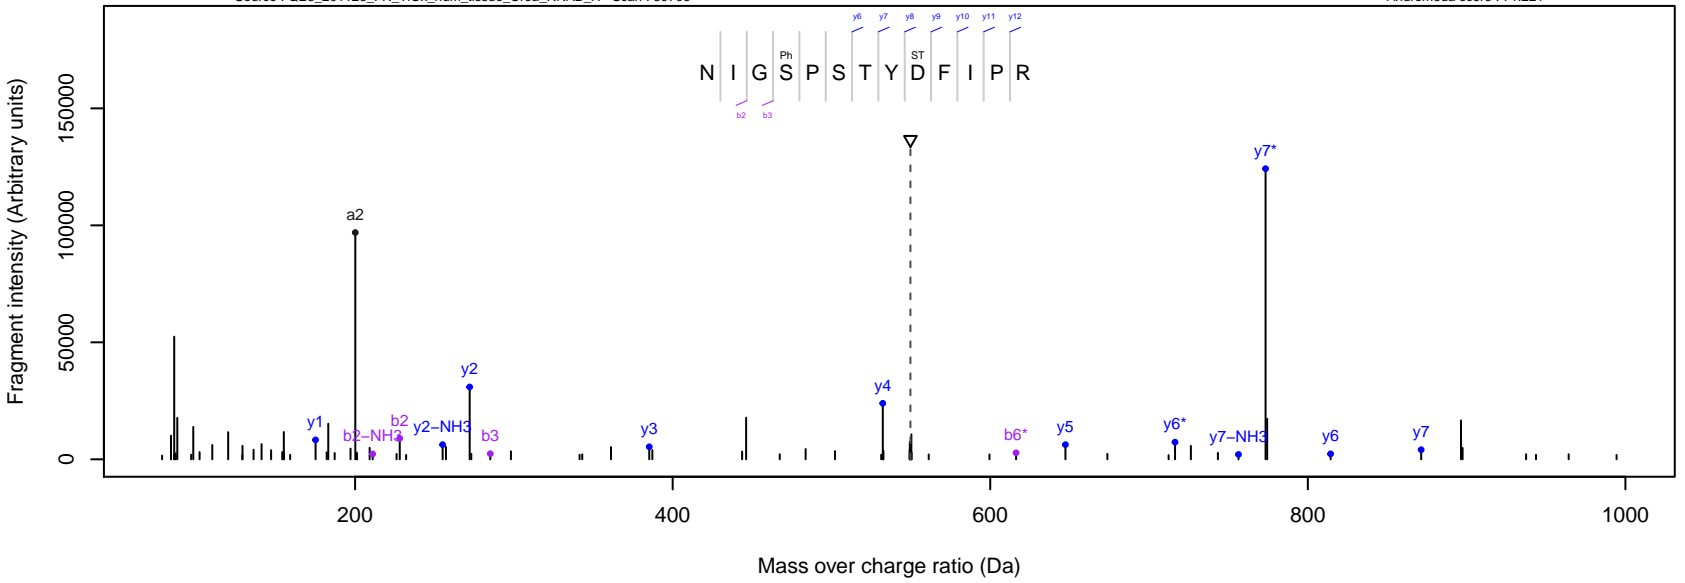

ATIS(Phospho (STY))DEEIER-2+

Source : QE3\_201126\_FR\_TiOx\_hum\_tissue\_Urea\_RNAB\_B Scan : 17816

Andromeda score : 71.153

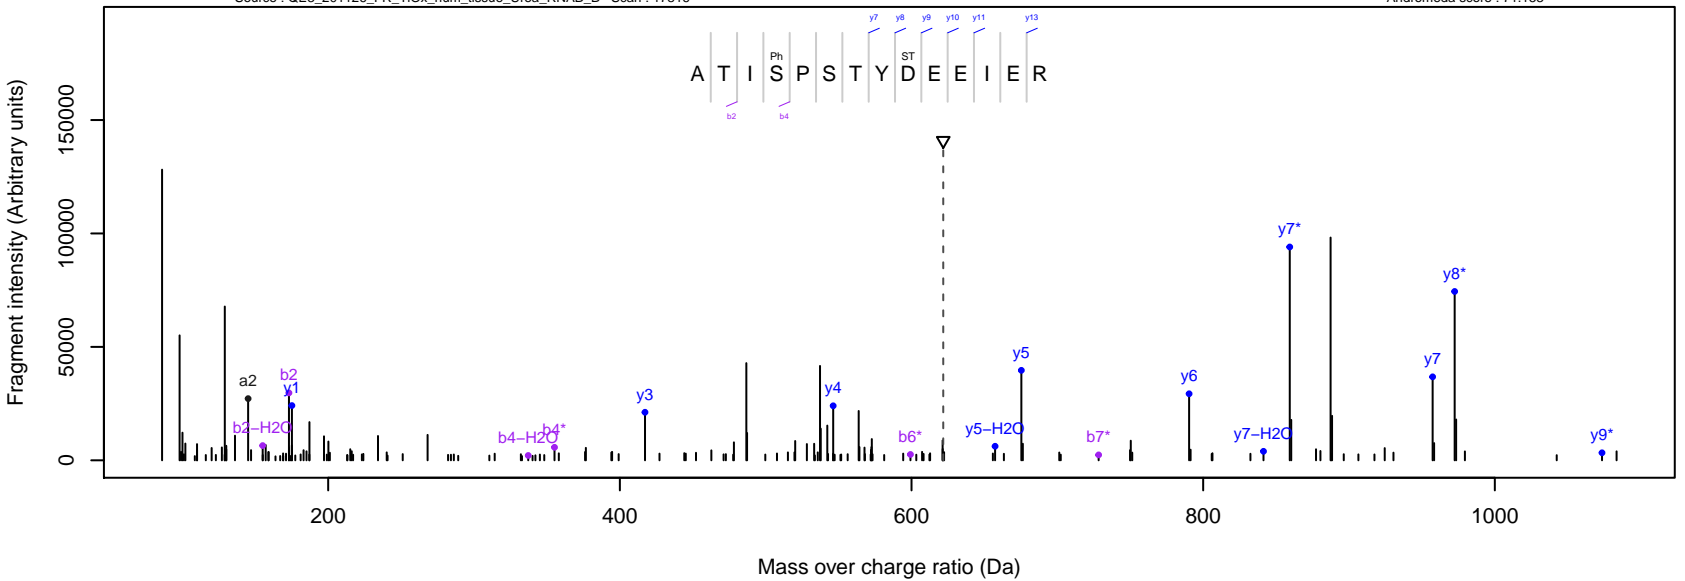

LLPYPTLSPAS(Phospho (STY))D-2+

Source : QE3\_201126\_FR\_TiOx\_hum\_tissue\_Urea\_RNAB\_H Scan : 56224

Andromeda score : 71.153

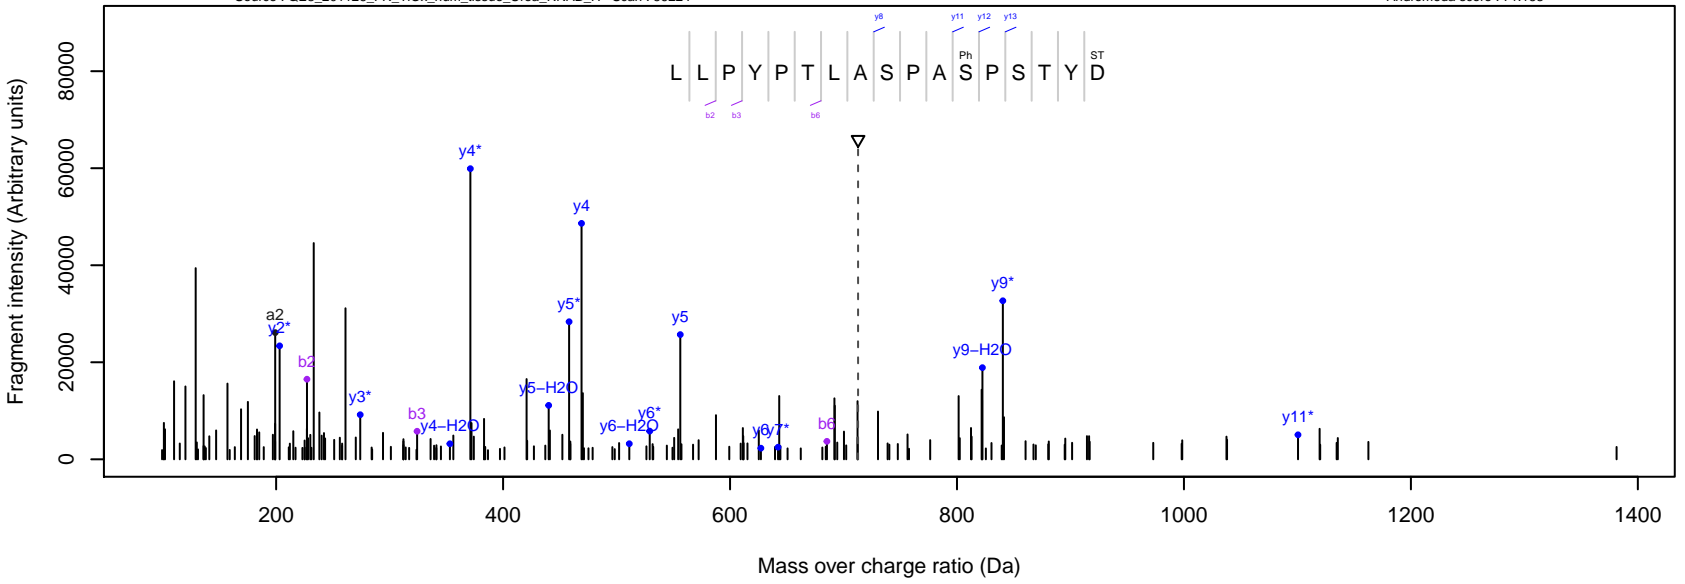

LQHSTS(Phospho (STY))ILRK-3+

Source : QE3\_201126\_FR\_TiOx\_hum\_tissue\_Urea\_RNAB\_H Scan : 8084

Andromeda score : 71.153

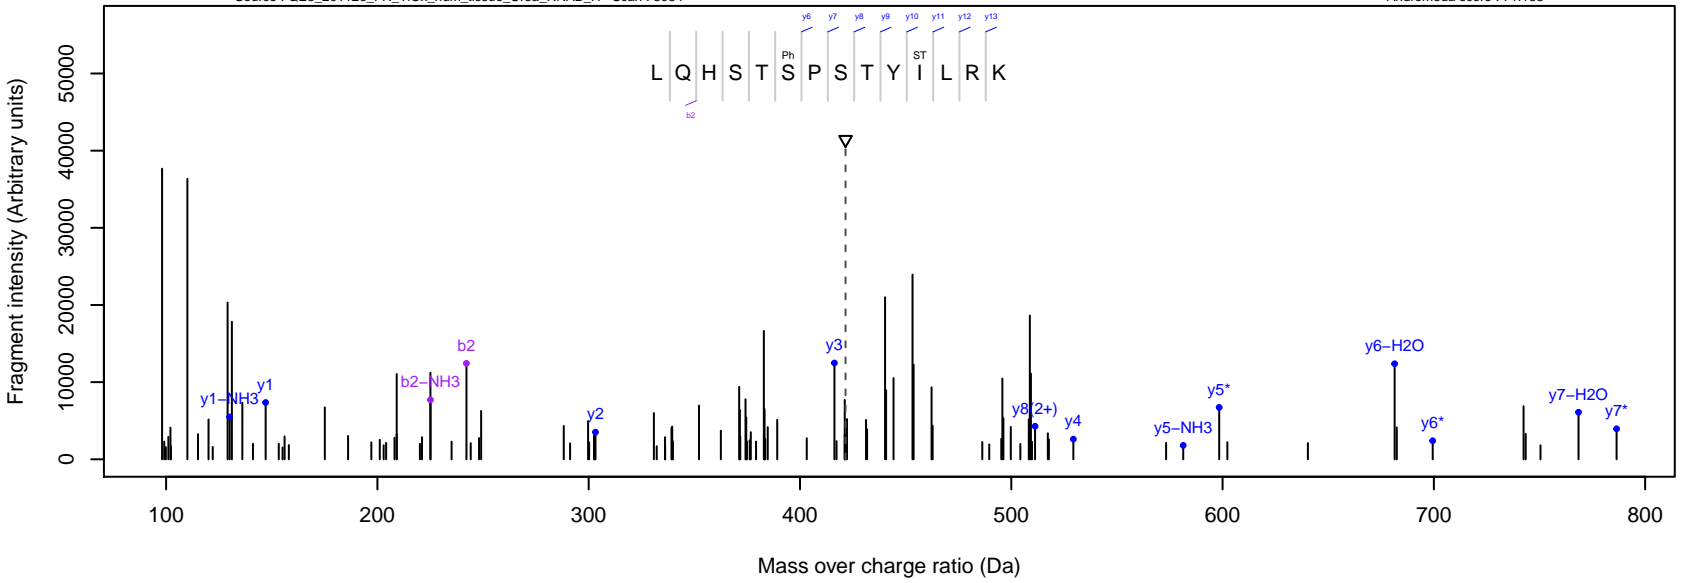

HQPWQS(Phospho (STY))PERPLSRLSPER-4+

Source : QE3\_201126\_FR\_TiOx\_hum\_tissue\_Urea\_RNAB\_H Scan : 19181

Andromeda score : 71.148

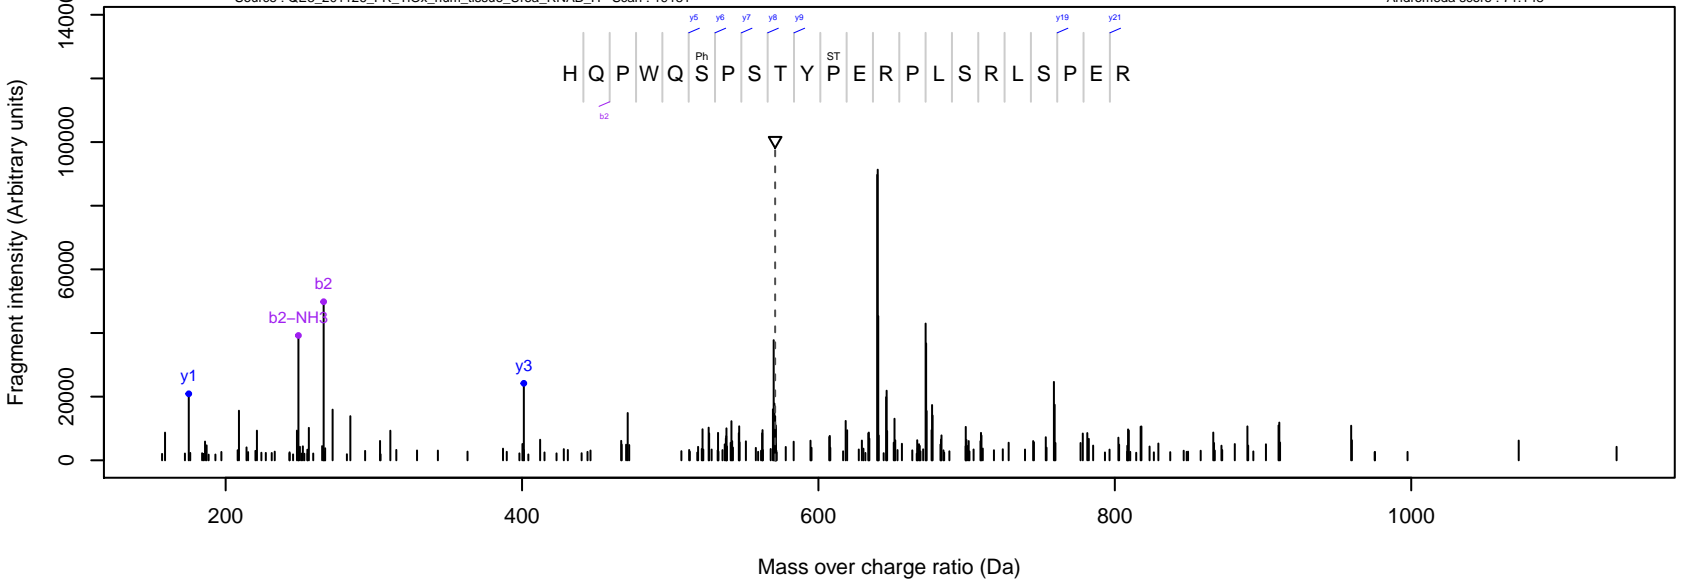

SRS(Phospho (STY))PT(Phospho (STY))PPSSAGLGSNSAPPIDSR-3+

Source : QE3\_201126\_FR\_TiOx\_hum\_tissue\_Urea\_RNAB\_N Scan : 27489

Andromeda score : 71.118

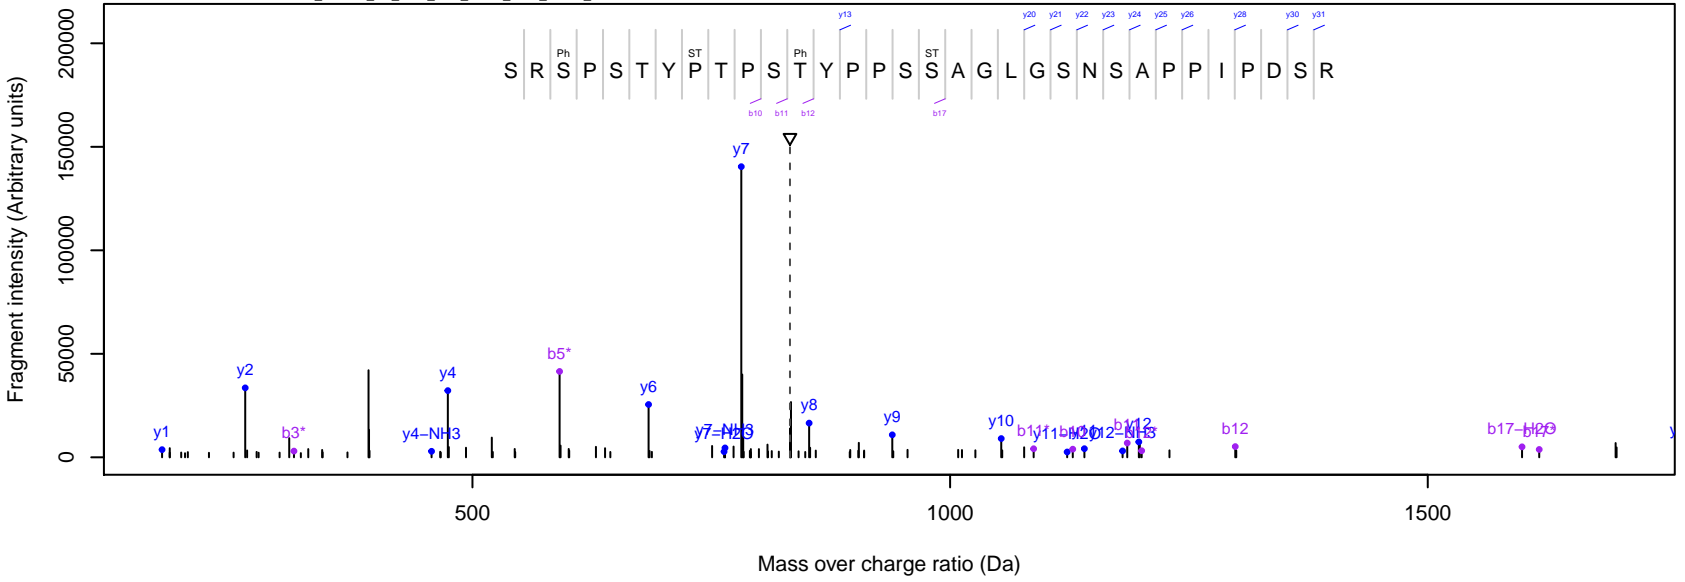

SSGEIVYCGQVFEKS(Phospho (STY))PLR-3+

Source : QE3\_201126\_FR\_TiOx\_hum\_tissue\_Urea\_RNAB\_N Scan : 32322

Andromeda score : 71.091

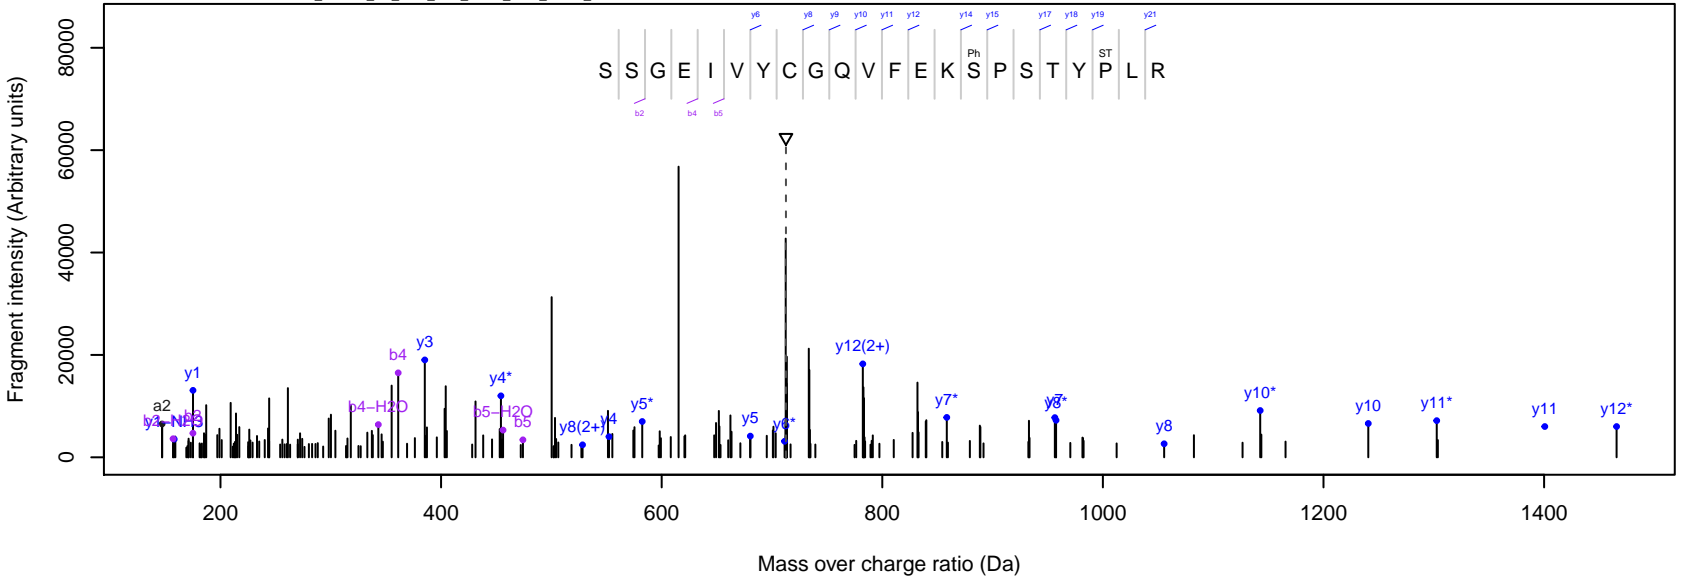

M(Oxidation (M))APPPKEVEEEDSEDEM(Oxidation (M))SEDEEDS(Phospho (STY))SGEEVIPQKK-4+

Source : QE3\_201126\_FR\_TiOx\_hum\_tissue\_Urea\_RNAB\_N Scan : 20837

Andromeda score : 71.086

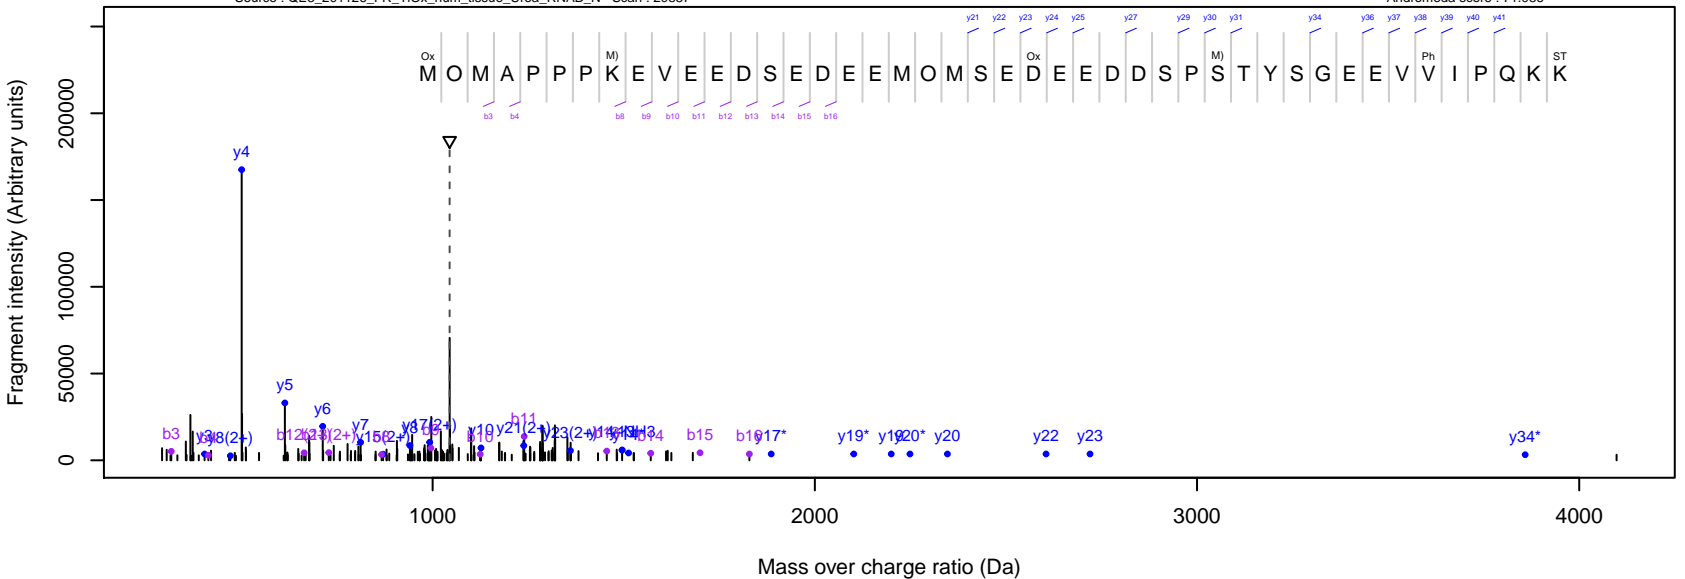

RVS(Phospho (STY))EVEEEEKVPVQPLPSDDTR-3+

Source : QE3\_201126\_FR\_TiOx\_hum\_tissue\_Urea\_RNAB\_H Scan : 20137

Andromeda score : 71.085

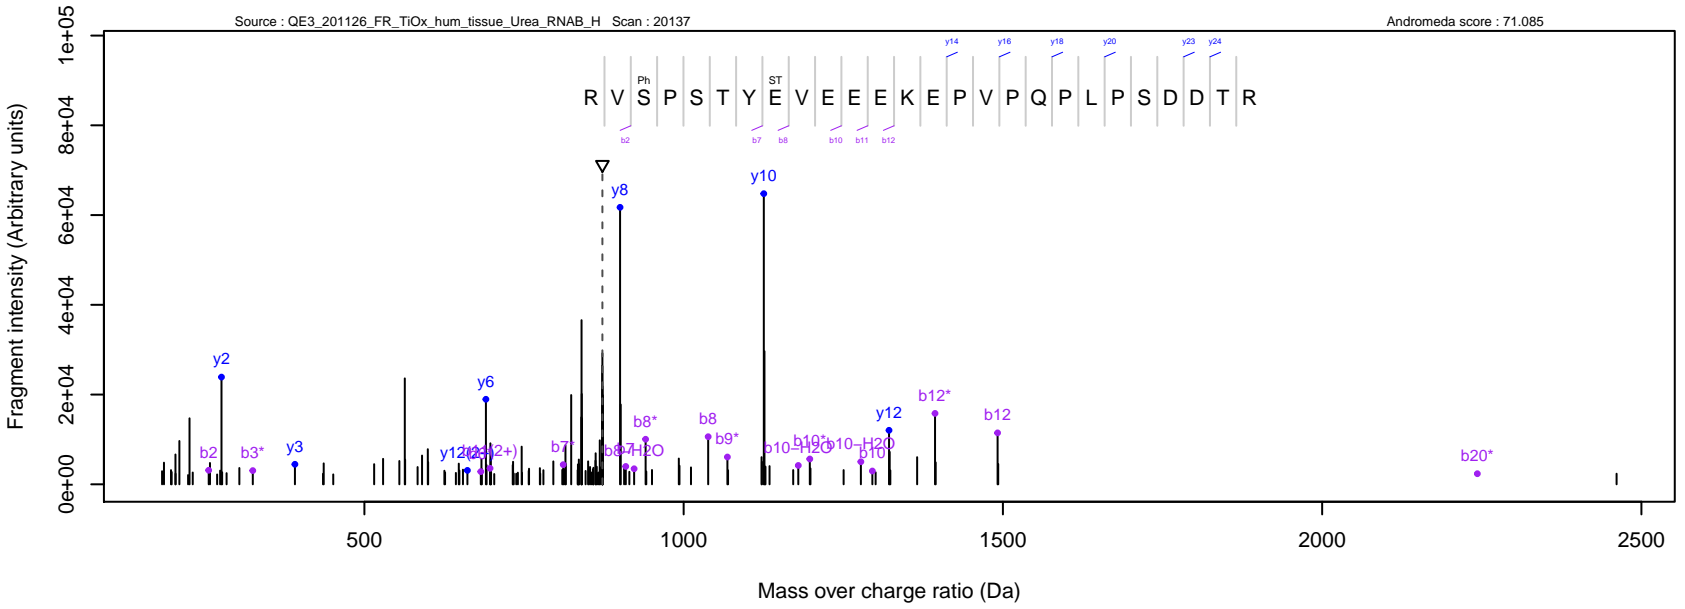

SKLS(Phospho (STY))PSPSLR-2+

Source : QE3\_201126\_FR\_TiOx\_hum\_tissue\_Urea\_RNAB\_H Scan : 10701

Andromeda score : 71.085

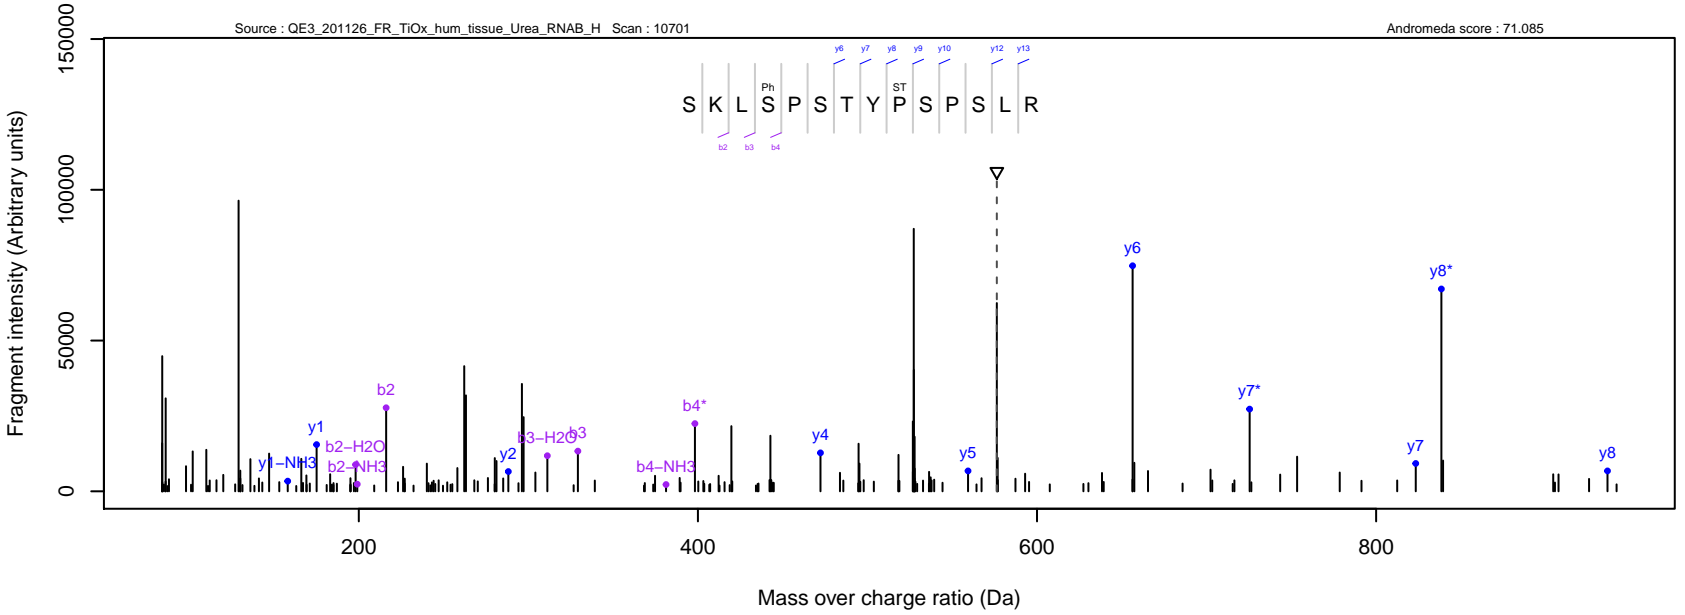

TAS(Phospho (STY))PPPPPKR-3+

Source : QE3\_201126\_FR\_TiOx\_hum\_tissue\_Urea\_RNAB\_H Scan : 5260

Andromeda score : 71.085

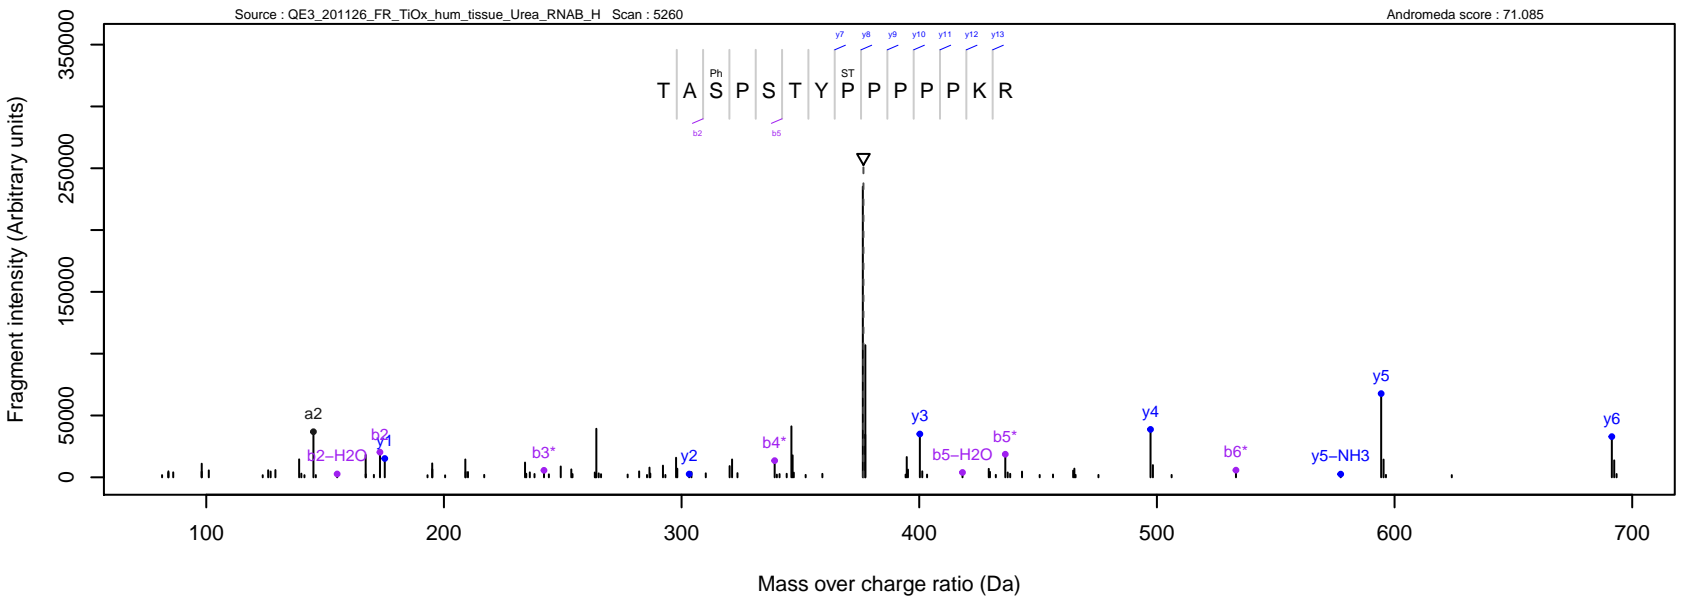

DLELPSQEAPSFQGT(Phospho (STY))ESPKCK-3+

Source : QE3\_201126\_FR\_TiOx\_hum\_tissue\_Urea\_RNAB\_N Scan : 33735

Andromeda score : 71.06

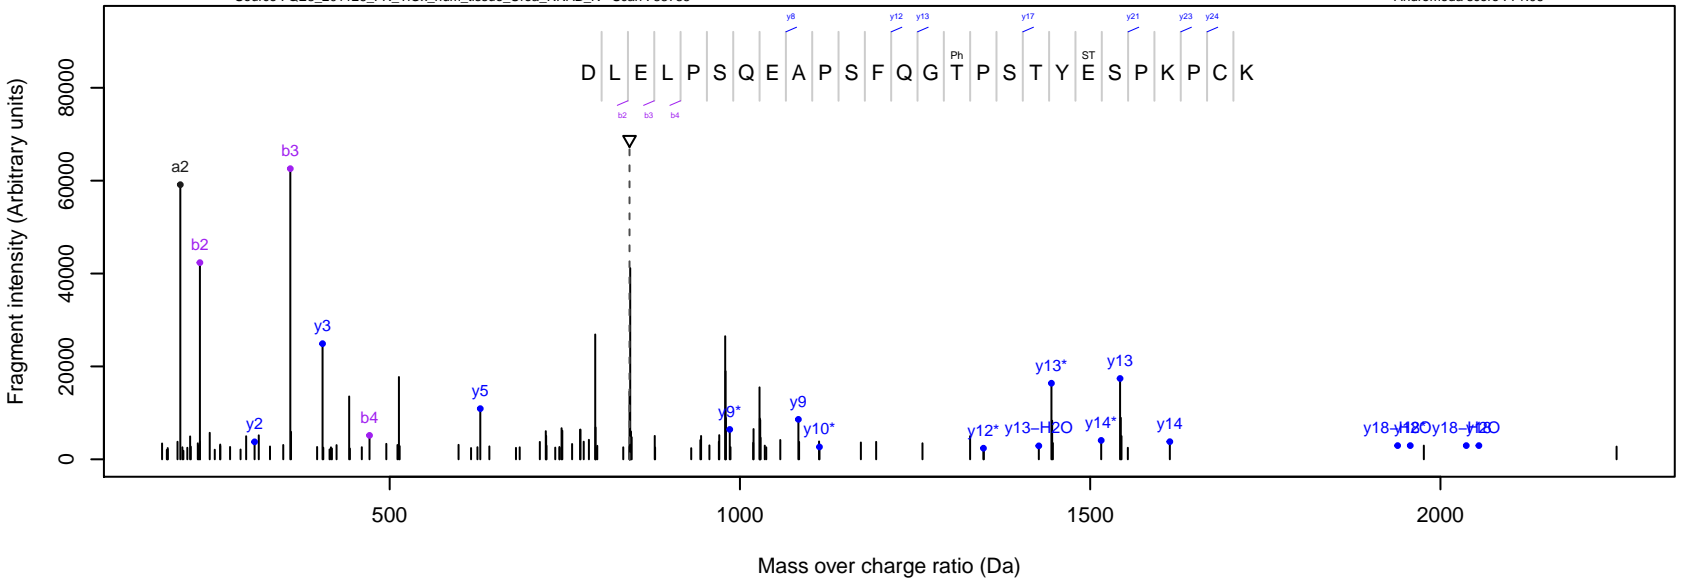

RLELDGEDFNLDALDS(Phospho (STY))S(Phospho (STY))NS(Phospho (STY))MQTIQK-3+

Source : QE3\_201126\_FR\_TiOx\_hum\_tissue\_Urea\_RNAB\_N Scan : 59997

Andromeda score : 71.052

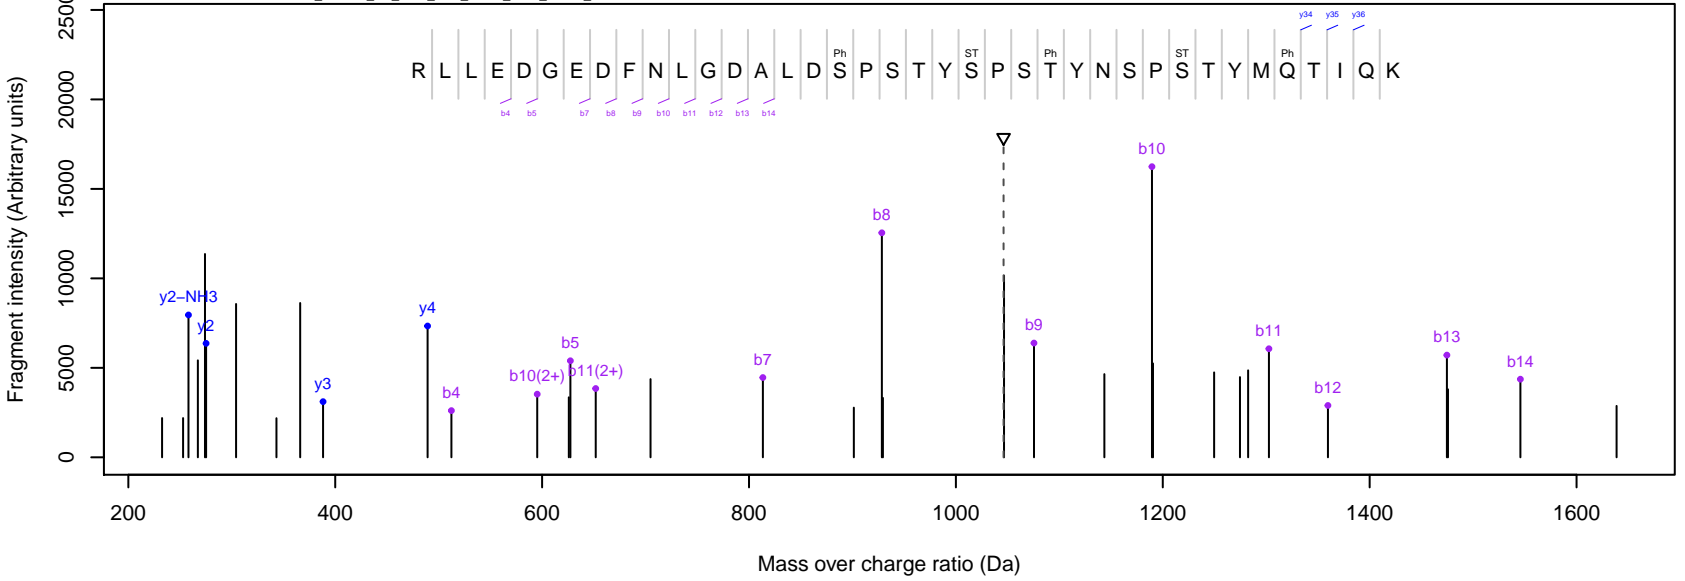

KDS(Phospho (STY))LESDSSTAIIPHELIR-3+

Source : QE3\_201126\_FR\_TiOx\_hum\_tissue\_Urea\_RNAB\_B Scan : 32121

Andromeda score : 71.002

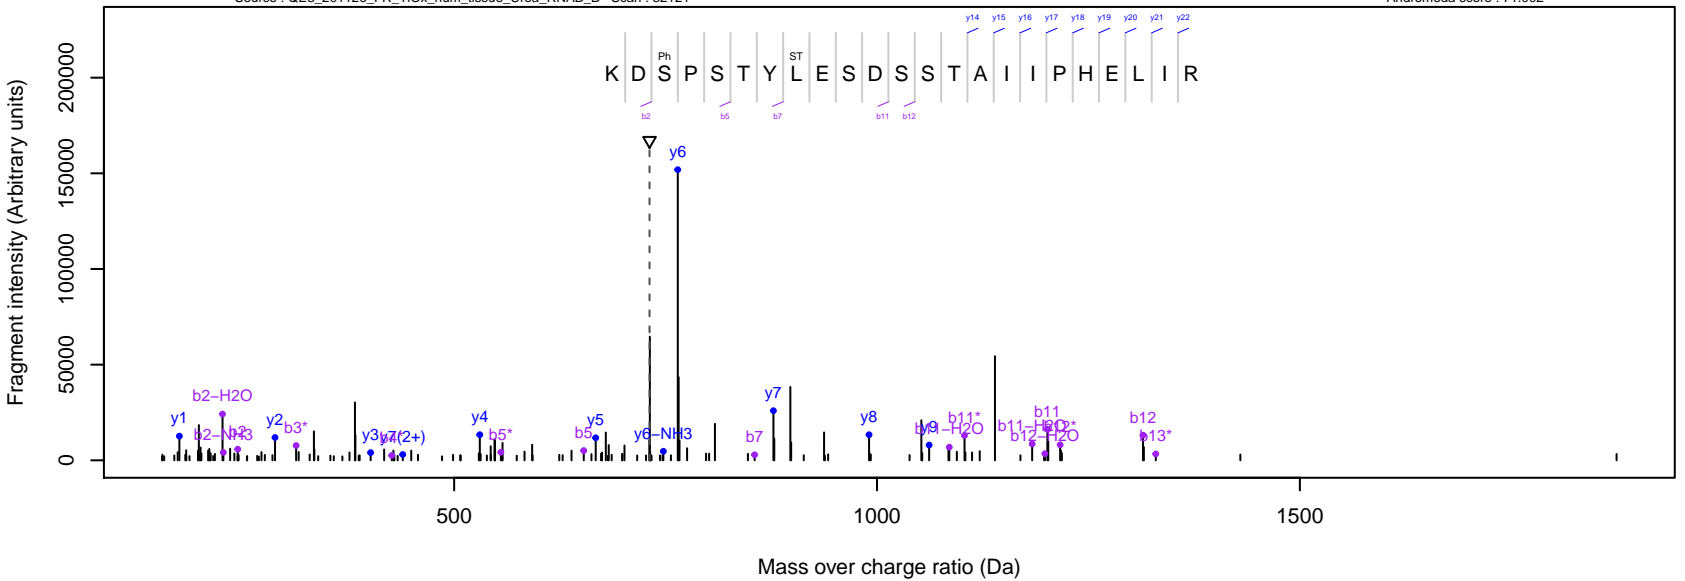

GSVHS(Phospho (STY))LDAGLLPSGDPPFSK-3+

Source : QE3\_201126\_FR\_TiOx\_hum\_tissue\_Urea\_RNAB\_N Scan : 51263

Andromeda score : 70.994

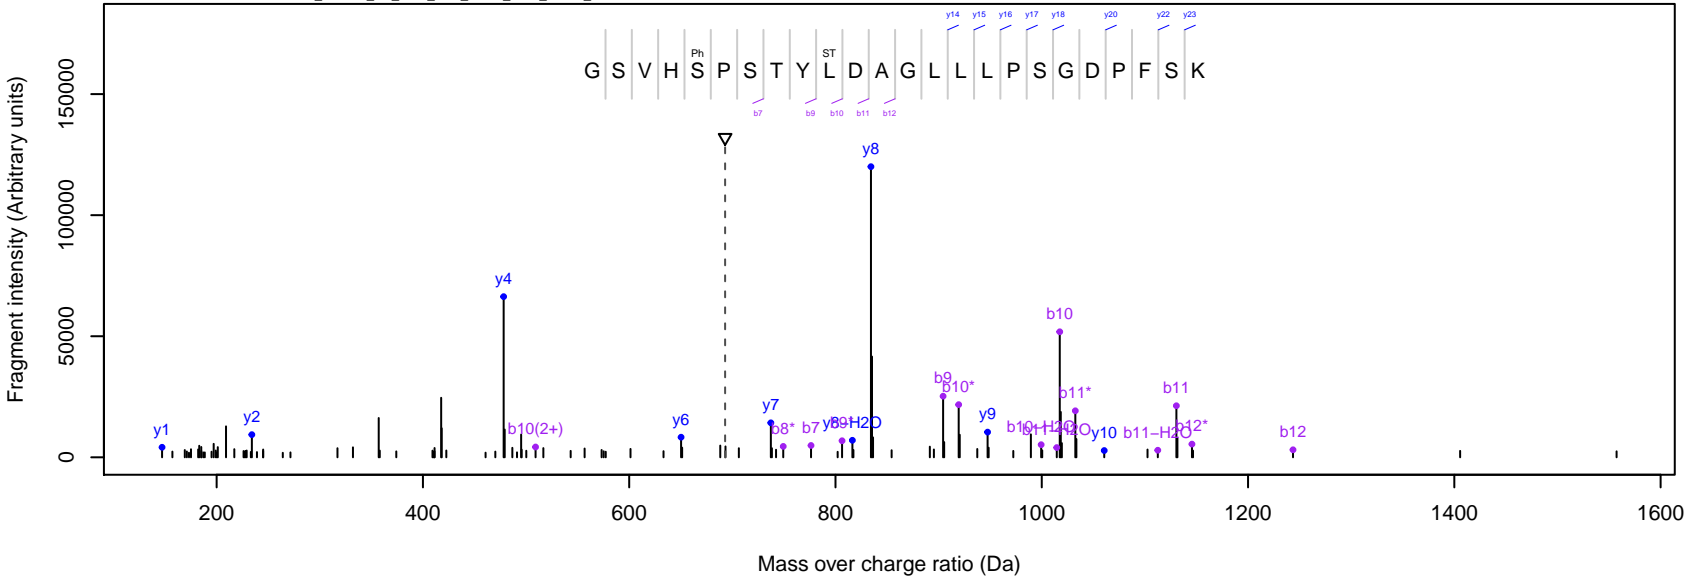

ALEEALSQT(Phospho (STY))PPS(Phospho (STY))SPPTAFGSPEGAGALLR-3+

Source : QE3\_201126\_FR\_TiOx\_hum\_tissue\_Urea\_RNAB\_N Scan : 61726

Andromeda score : 70.986

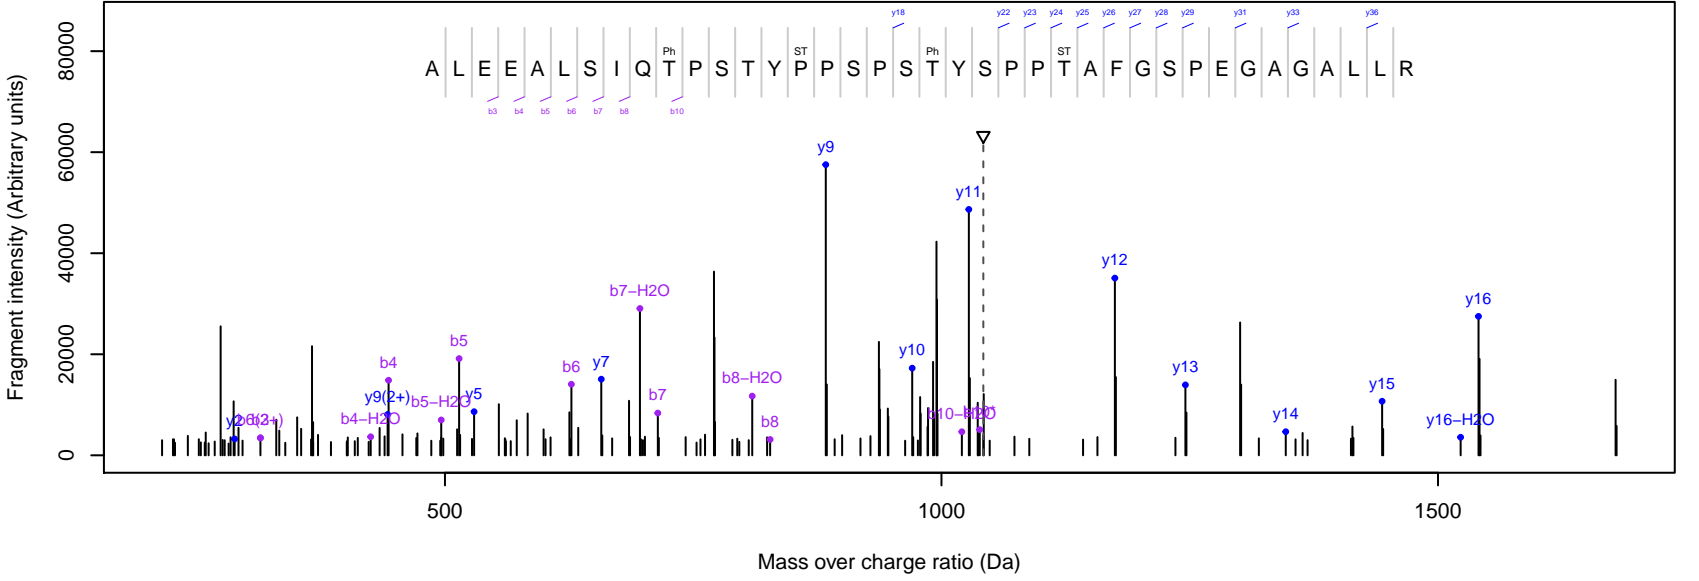

QNPEQS(Phospho (STY))AEDAEKNEEDS(Phospho (STY))EGS(Phospho (STY))SDEDEDEDGVSAAATFLK-4+

Source : QE3\_201126\_FR\_TiOx\_hum\_tissue\_Urea\_RNAB\_N Scan : 51644

Andromeda score : 70.986

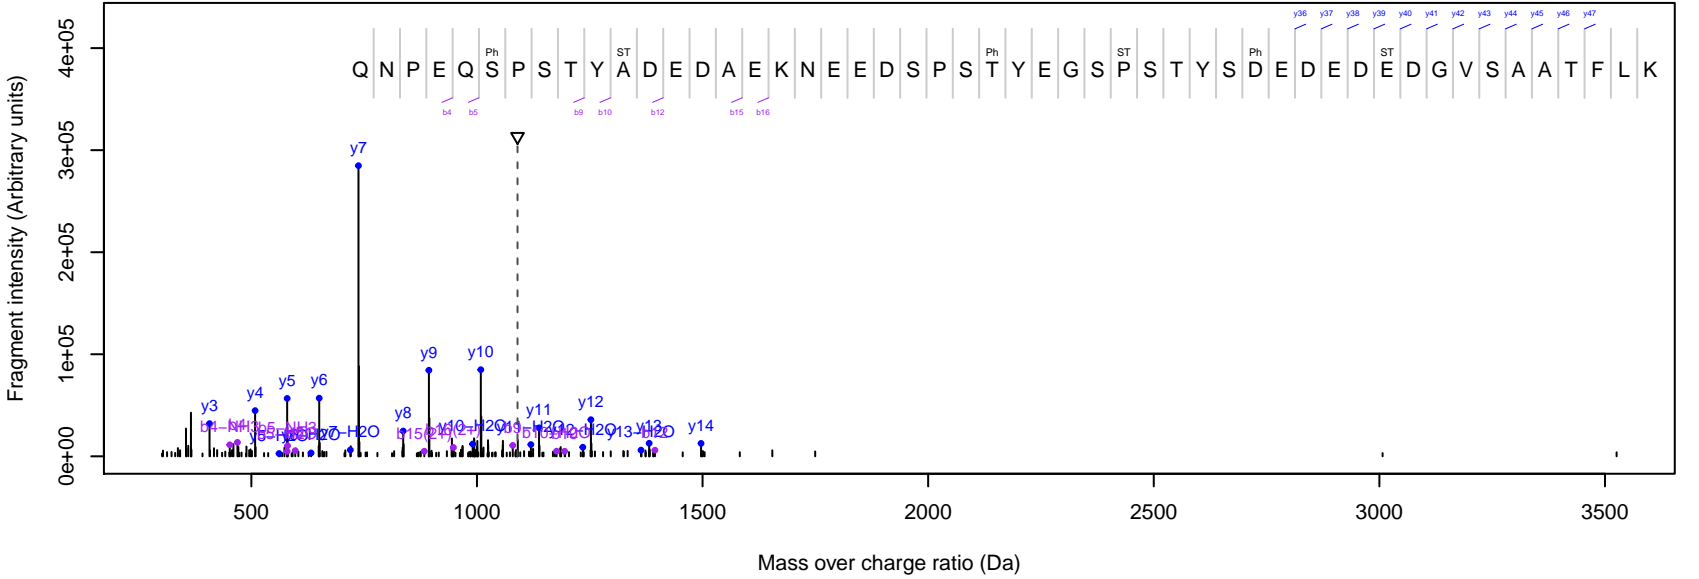



SEHS(Phospho (STY))YS(Phospho (STY))ESGASGSSFEELDELEGPLGESR-3+

Source : QE3\_201126\_FR\_TiOx\_hum\_tissue\_Urea\_RNAB\_B Scan : 50574

Andromeda score : 70.986

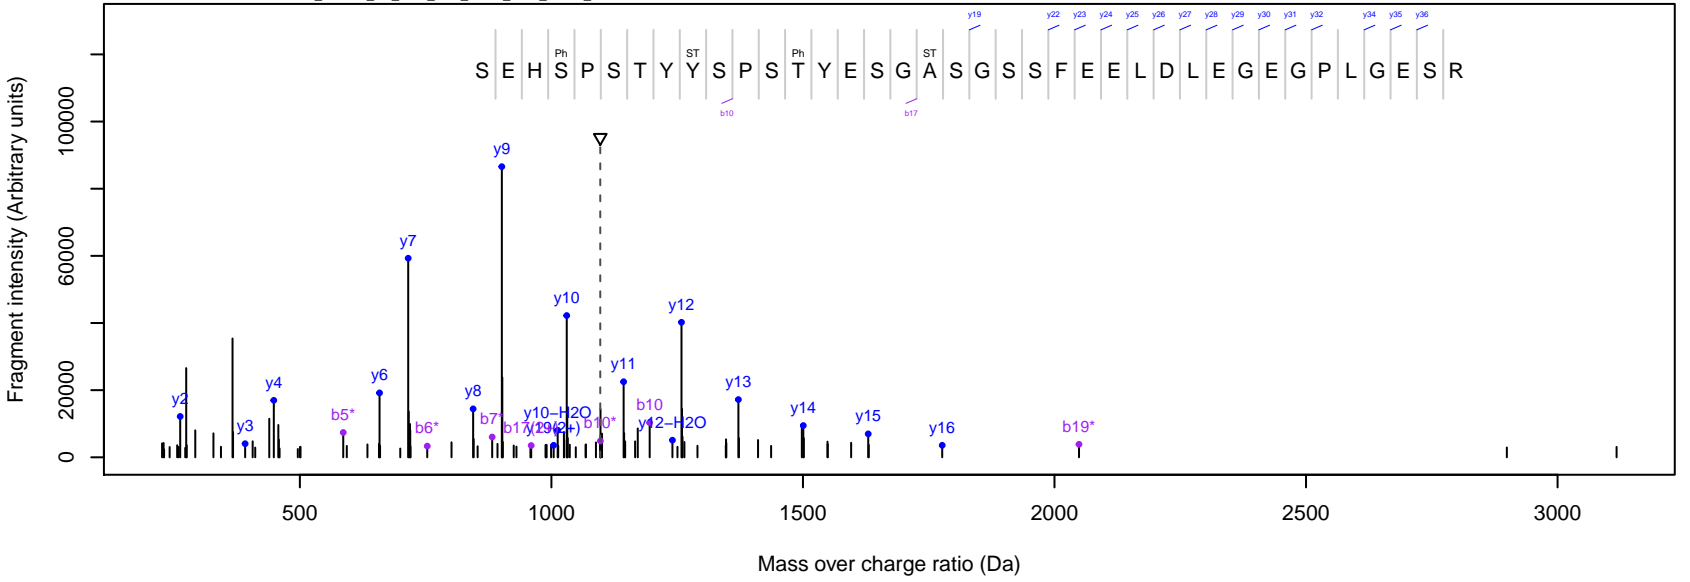

S(Phospho (STY))GSTESLNPRPQTISPADLHGM(Oxidation (M))WYPTVR-3+

Source : QE3\_201126\_FR\_TiOx\_hum\_tissue\_Urea\_RNAB\_B Scan : 38108

Andromeda score : 70.986

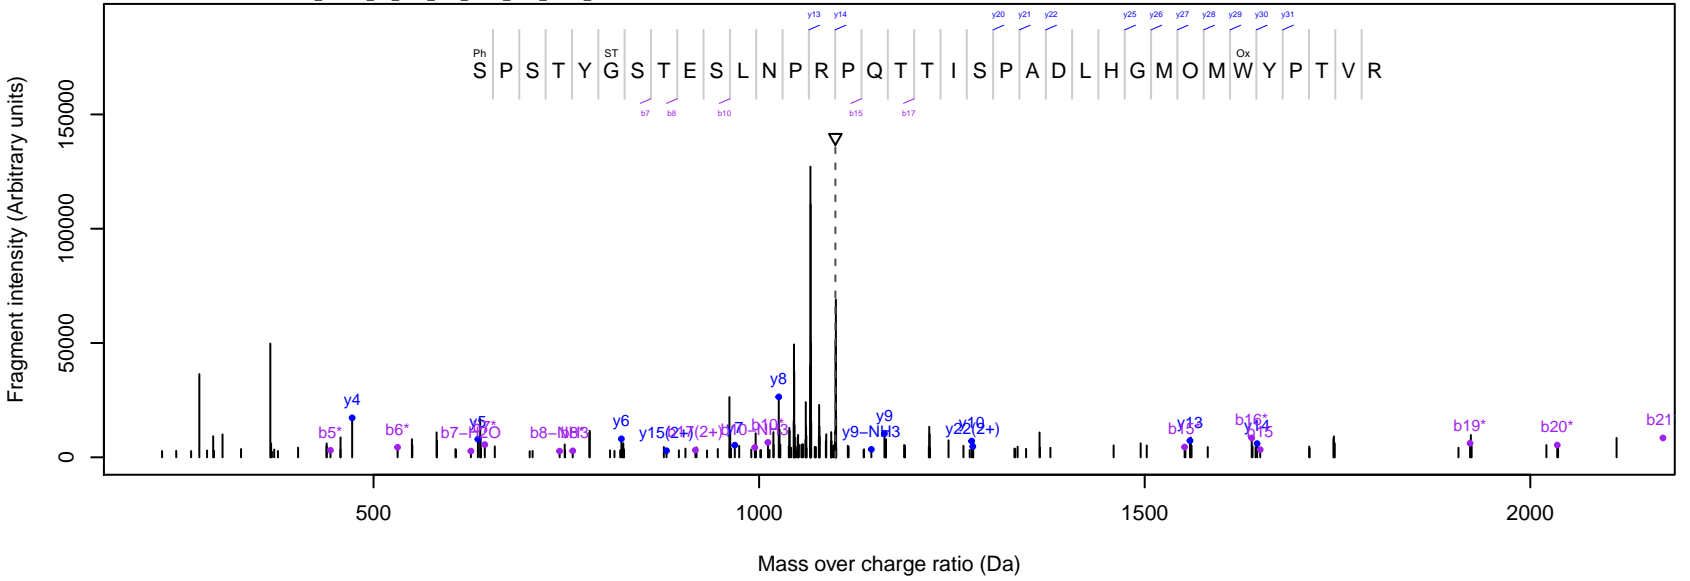

IGFPETEEEELEEIAS(Phospho (STY))ENS(Phospho (STY))DCIFPSAPDVK-3+

Source : QE3\_201126\_FR\_TiOx\_hum\_tissue\_Urea\_RNAB\_N Scan : 62862

Andromeda score : 70.983

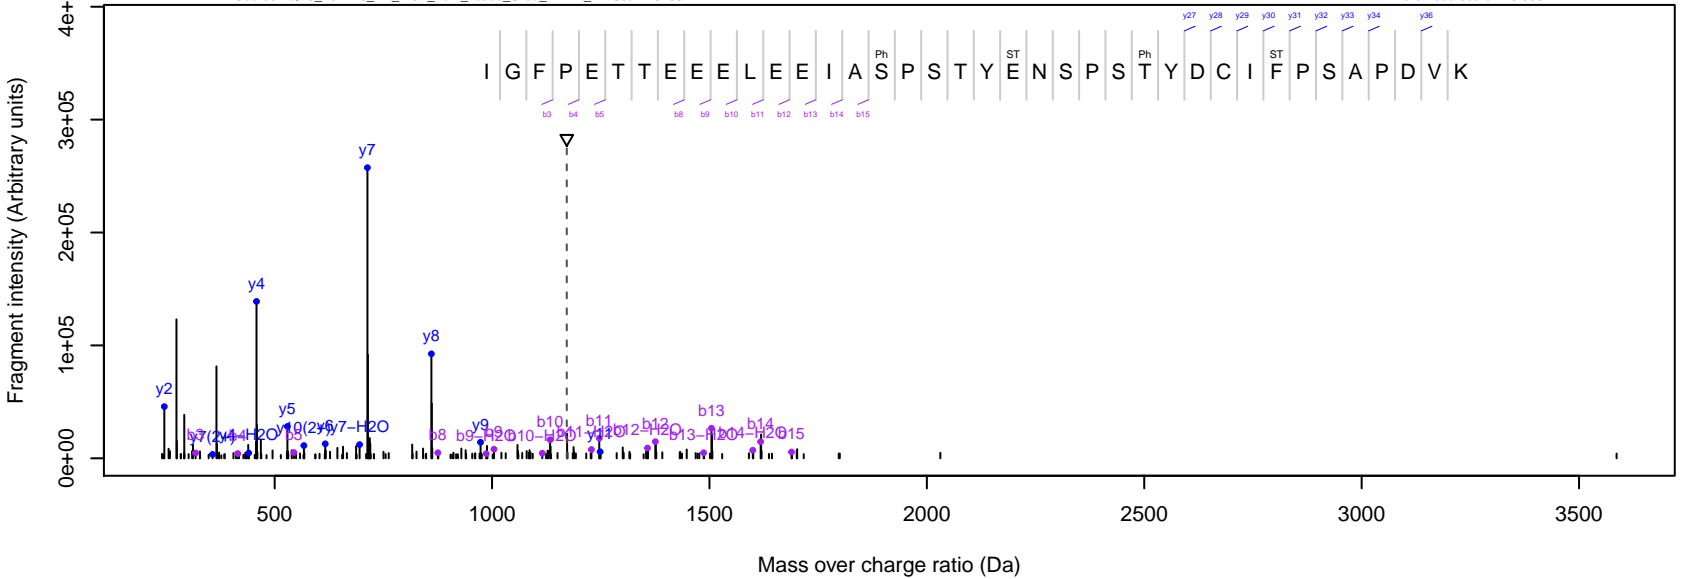

RLS(Phospho (STY))LPGLLS(Phospho (STY))QVSPR-2+

Source : QE3\_201126\_FR\_TiOx\_hum\_tissue\_Urea\_RNAB\_B Scan : 52690

Andromeda score : 70.98

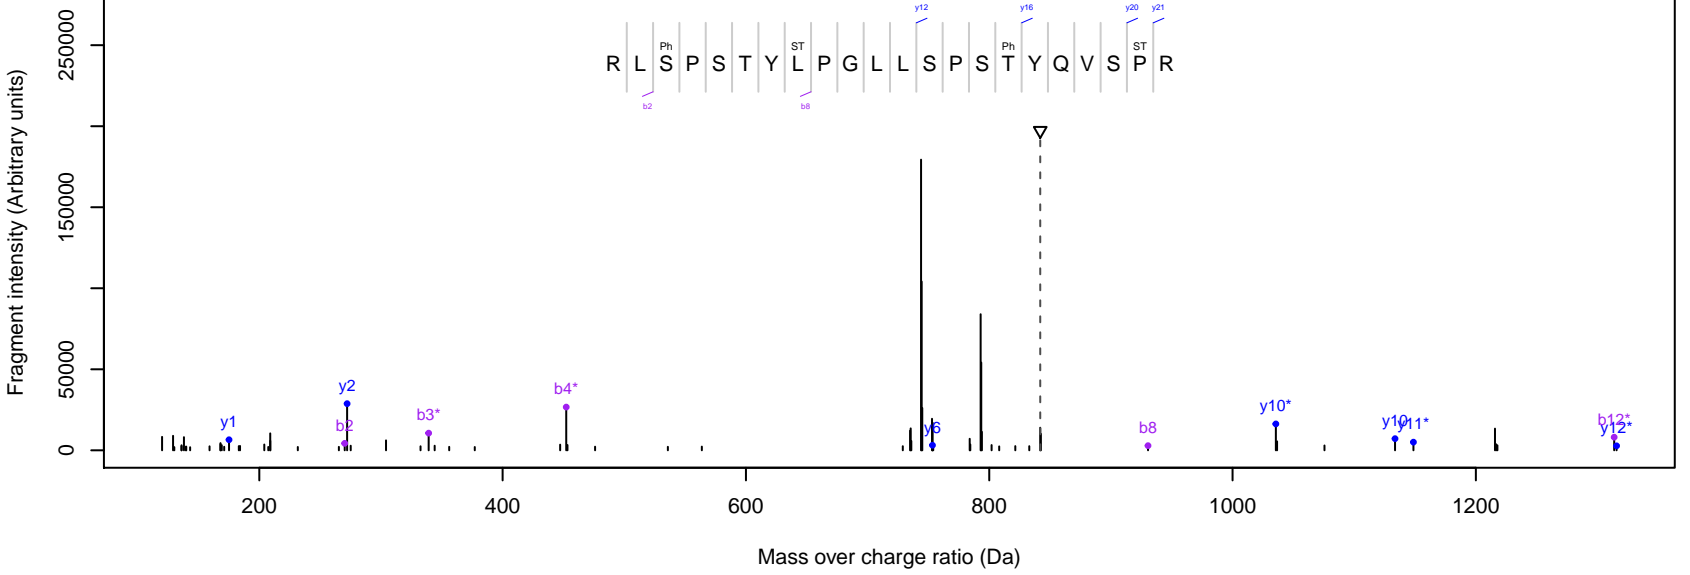

RFS(Phospho (STY))LMLTR-2+

Source : QE3\_201126\_FR\_TiOx\_hum\_tissue\_Urea\_RNAB\_N Scan : 32920

Andromeda score : 70.942

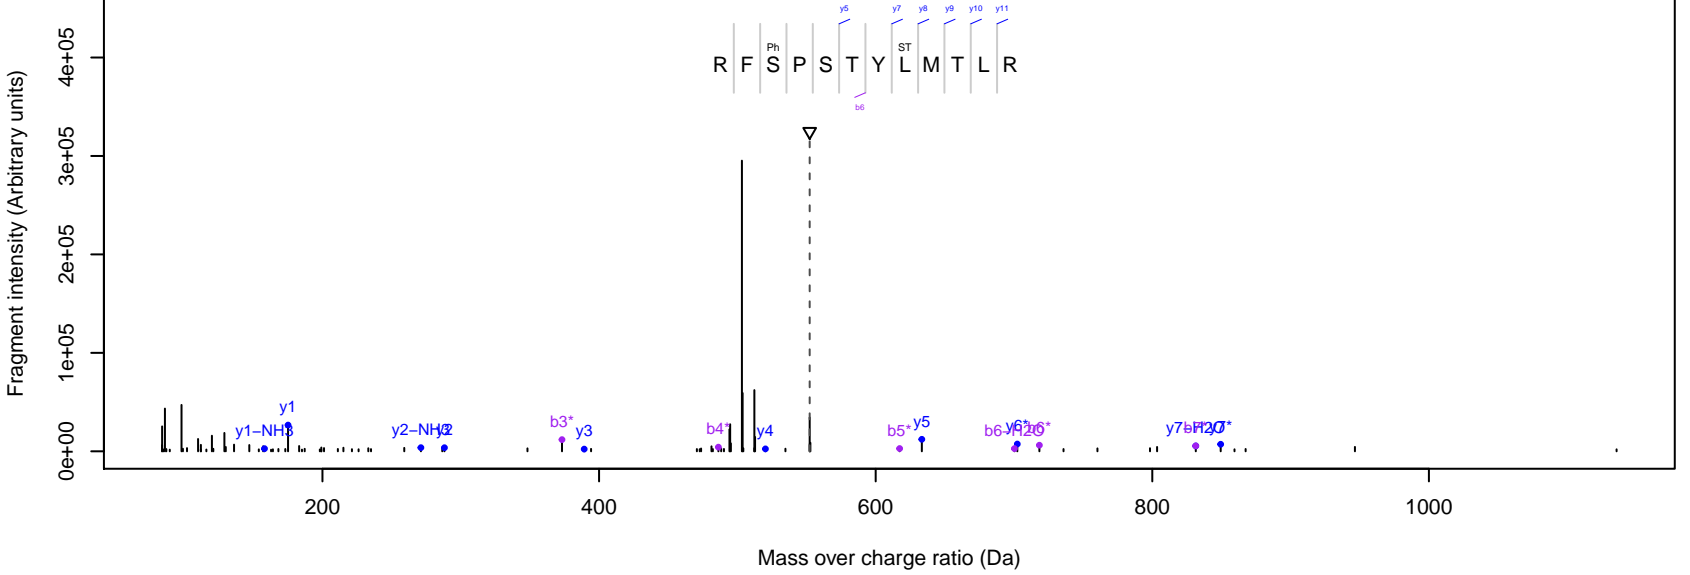

RREPGGYDSSSTLMSSELETTSFDD(Phospho (STY))DEDDSTR-4+

Source : QE3\_201126\_FR\_TiOx\_hum\_tissue\_Urea\_RNAB\_B Scan : 44753

Andromeda score : 70.935

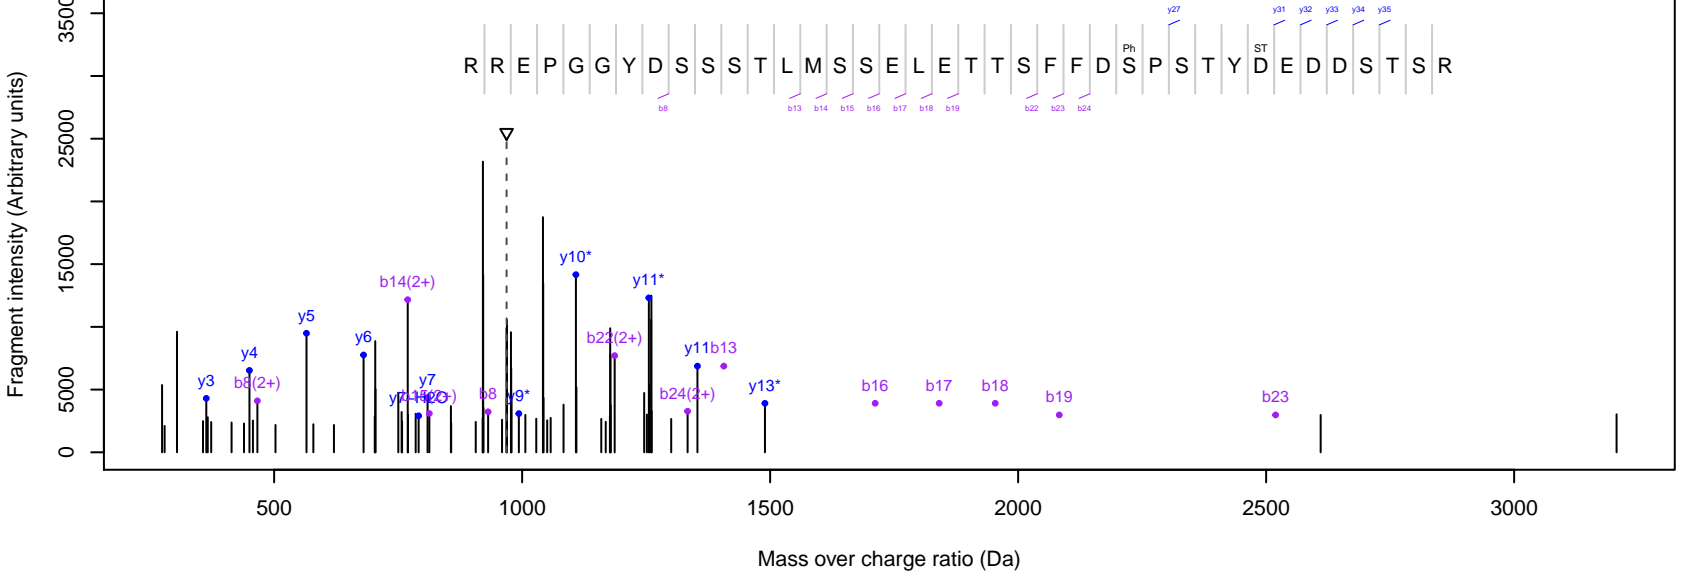

DRS(Phospho (STY))SFYVNGLTLLGGQK-3+

Source : QE3\_201126\_FR\_TiOx\_hum\_tissue\_Urea\_RNAB\_B Scan : 35886

Andromeda score : 70.897

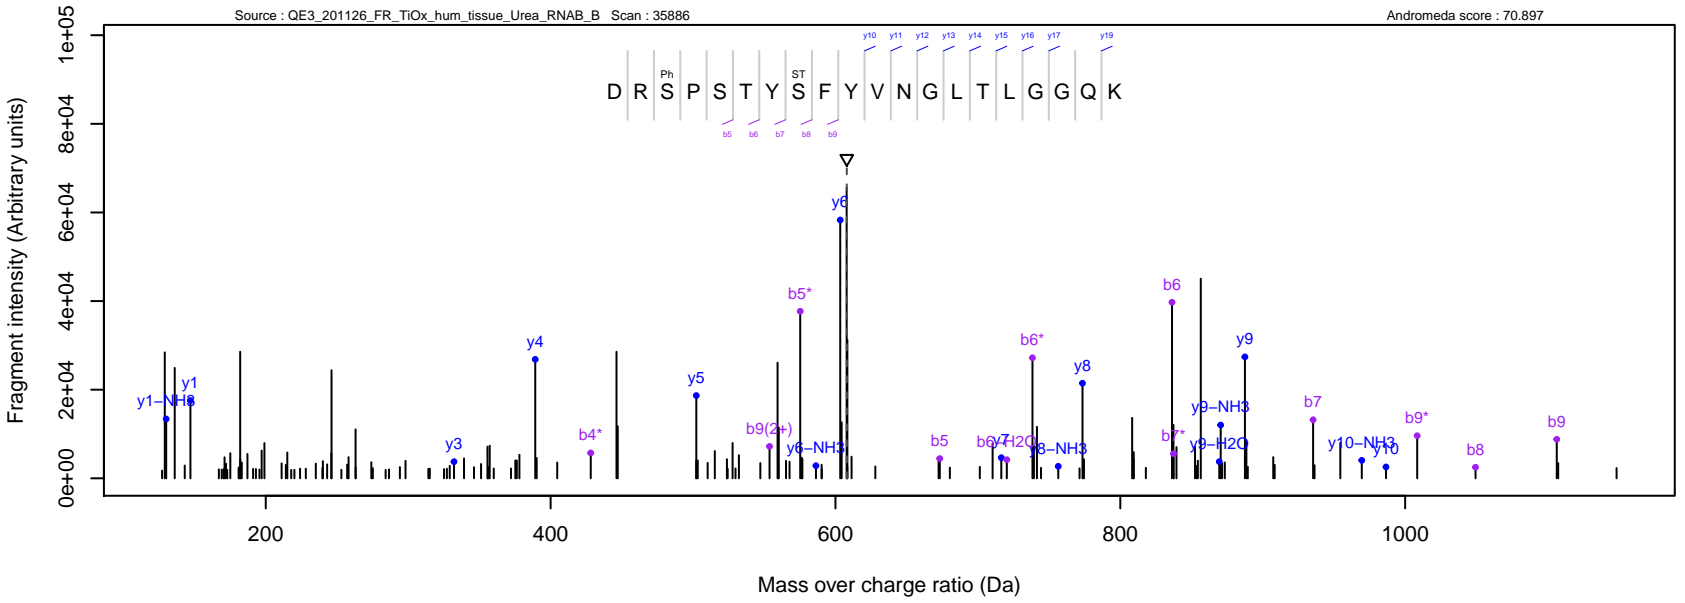

SRS(Phospho (STY))FSSSAEEHS-2+

Source : QE3\_201126\_FR\_TiOx\_hum\_tissue\_Urea\_RNAB\_H Scan : 6357

Andromeda score : 70.889

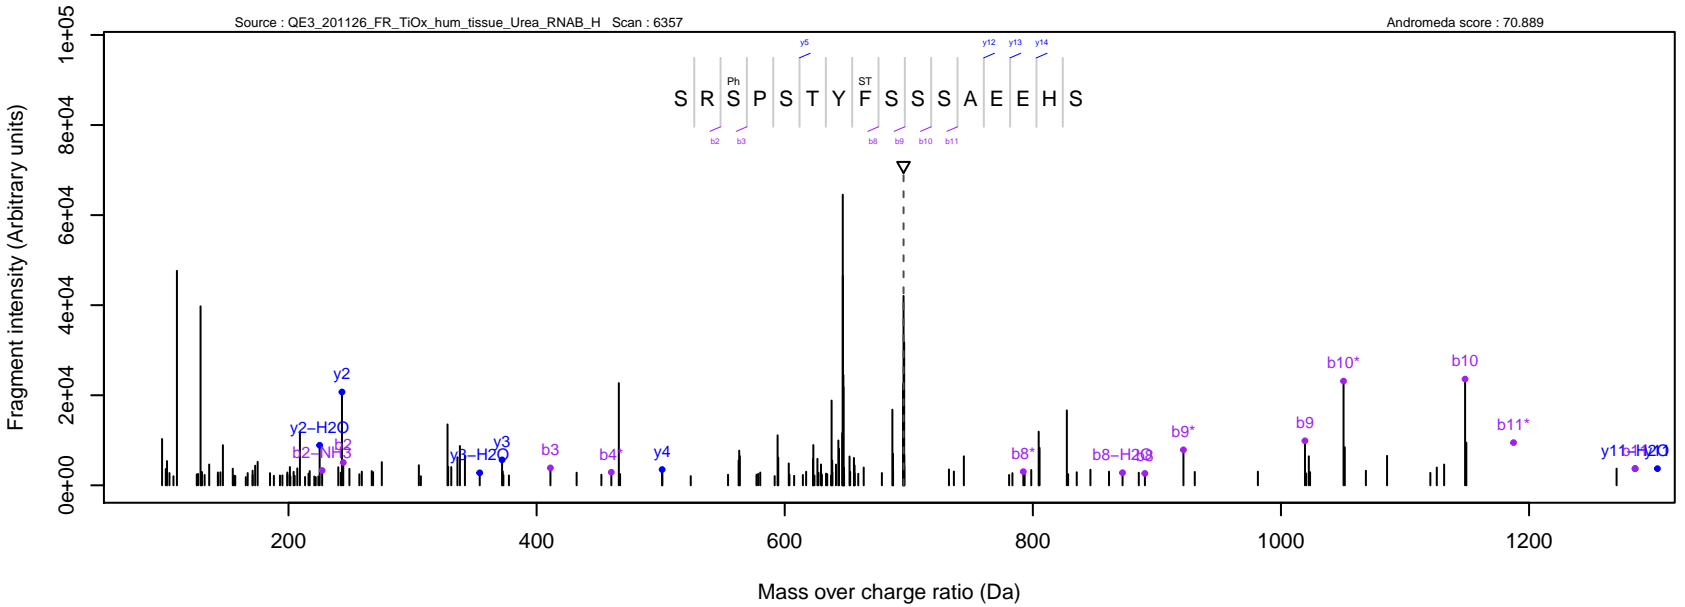

EES(Phospho (STY))PLRIK-2+

Source : QE3\_201126\_FR\_TiOx\_hum\_tissue\_Urea\_RNAB\_N Scan : 11491

Andromeda score : 70.816

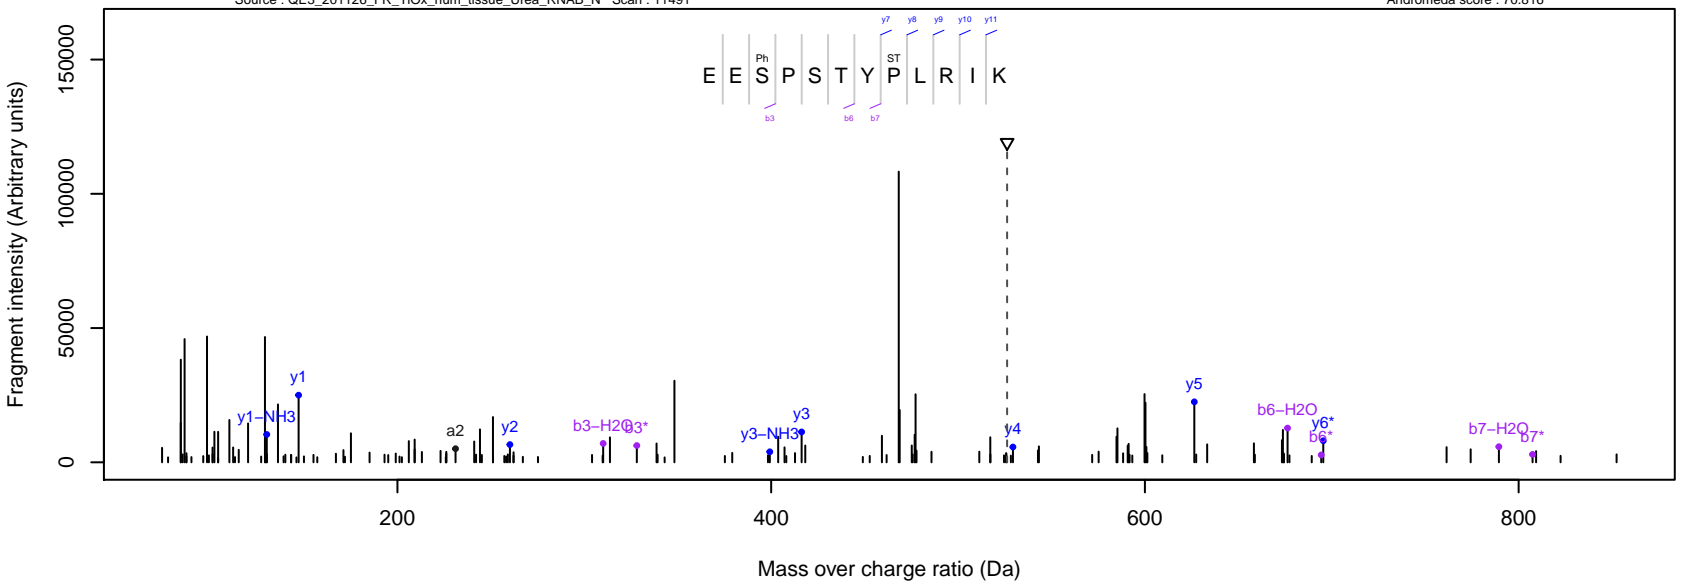

KVYQYSNRS(Phospho (STY))PSLER-3+

Source : QE3\_201126\_FR\_TiOx\_hum\_tissue\_Urea\_RNAB\_N Scan : 10283

Andromeda score : 70.802

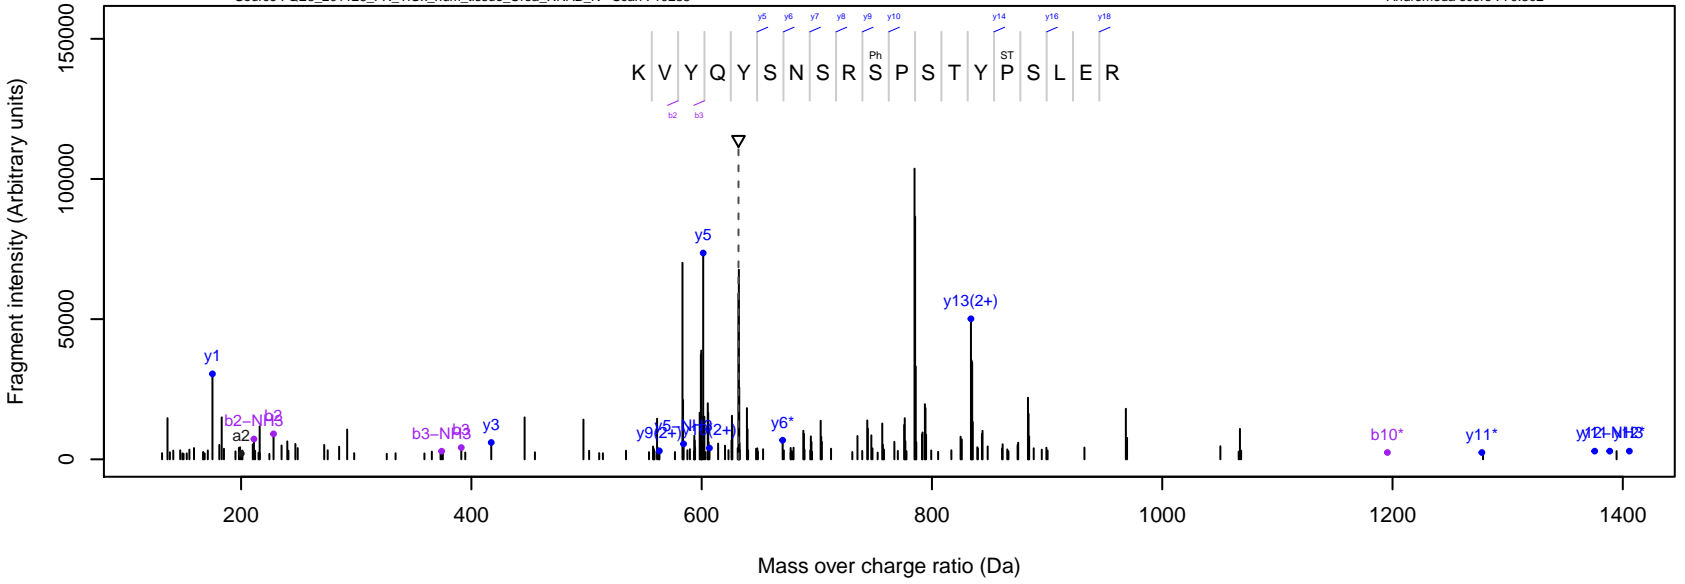

RPHT(Phospho (STY))PTPGIYM(Oxidation (M))GR-3+

Source : QE3\_201126\_FR\_TiOx\_hum\_tissue\_Urea\_RNAB\_N Scan : 9764

Andromeda score : 70.802

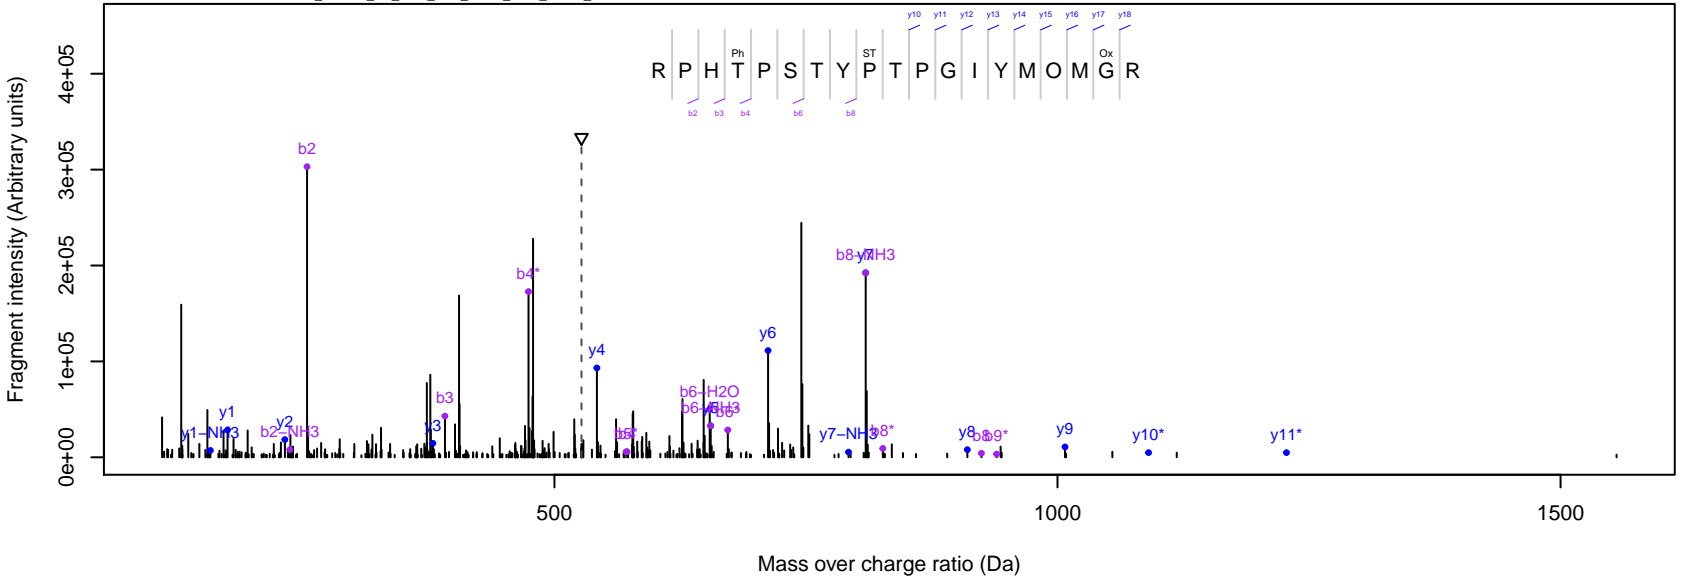

SSS(Phospho (STY))YSEANEPDLQM(Oxidation (M))ANGGK-2+

Source : QE3\_201126\_FR\_TiOx\_hum\_tissue\_Urea\_RNAB\_H Scan : 18375

Andromeda score : 70.802

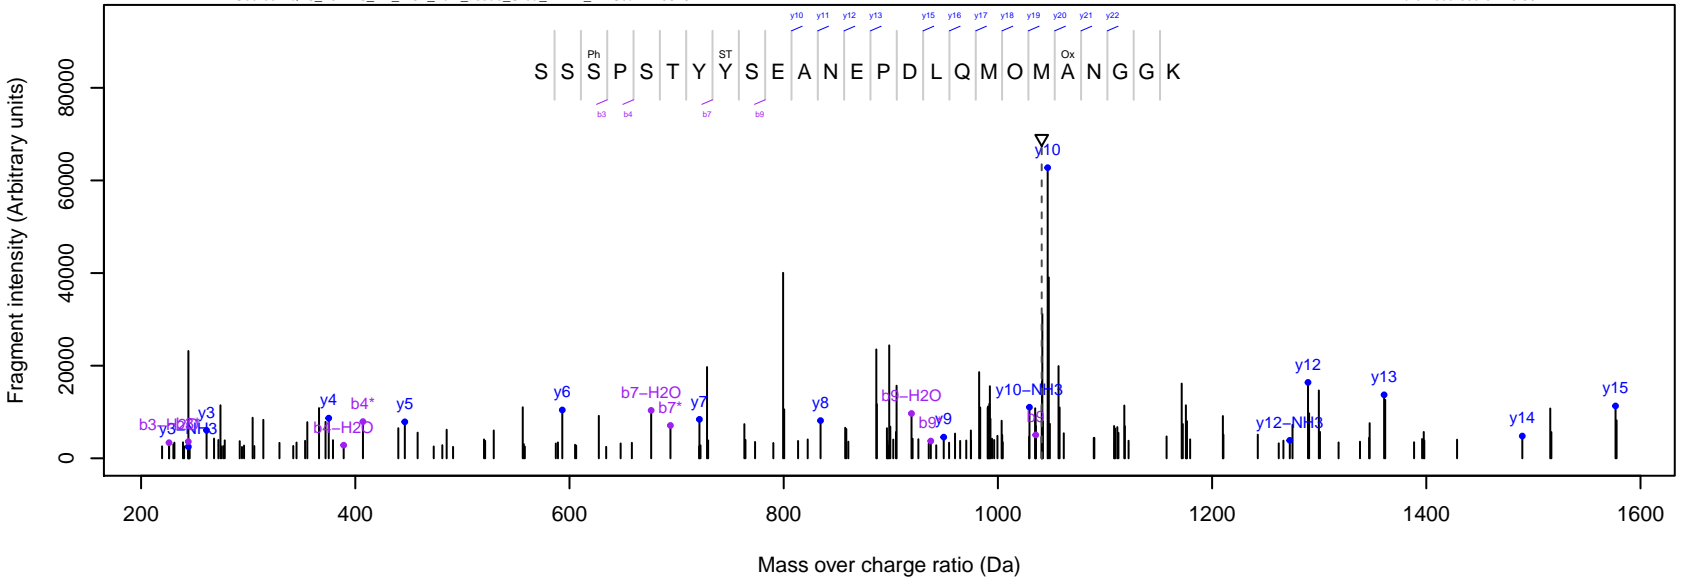

KIS(Phospho (STY))ENSYSLDDLEIGPGQLSSSTFDSEK-3+

Source : QE3\_201126\_FR\_TiOx\_hum\_tissue\_Urea\_RNAB\_B Scan : 50381

Andromeda score : 70.71

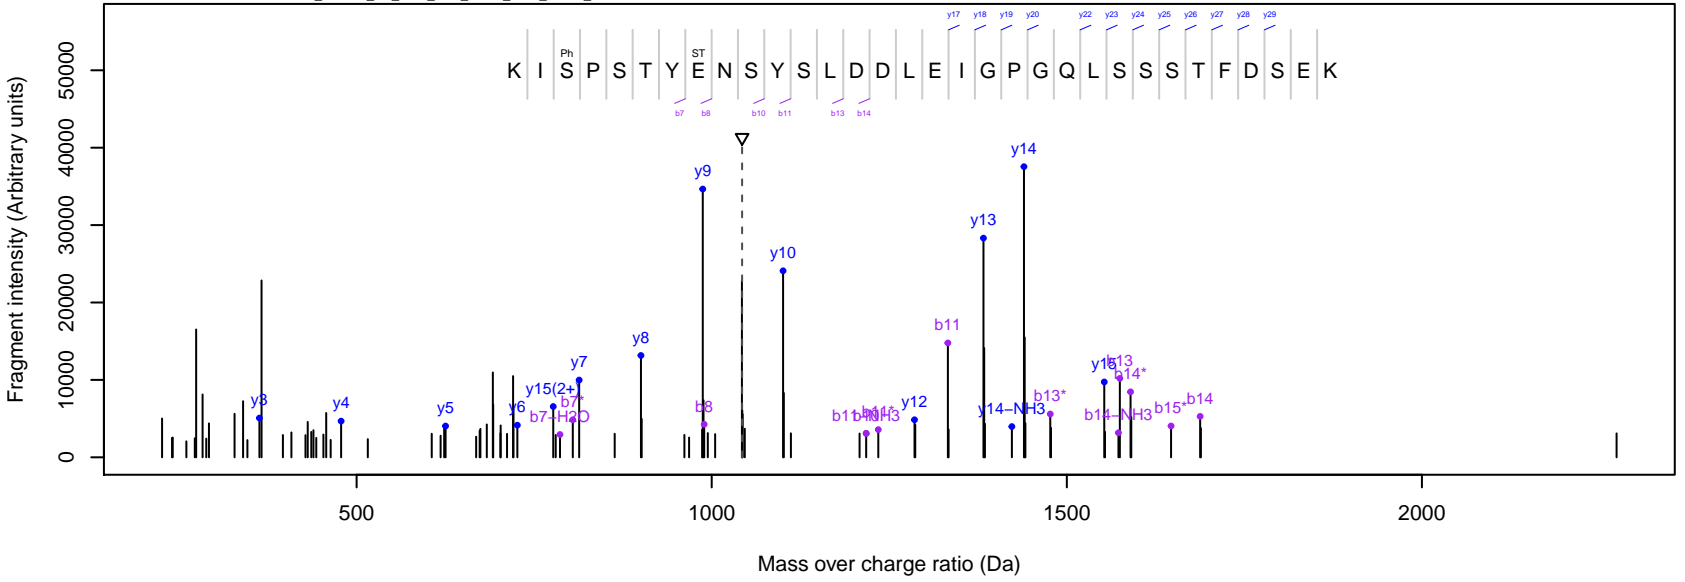

LAS(Phospho (STY))YLSGCHGEDGGDGLPAPMEAEAYEDDLVLPGGR-3+

Source : QE3\_201126\_FR\_TiOx\_hum\_tissue\_Urea\_RNAB\_H Scan : 53156

Andromeda score : 70.679

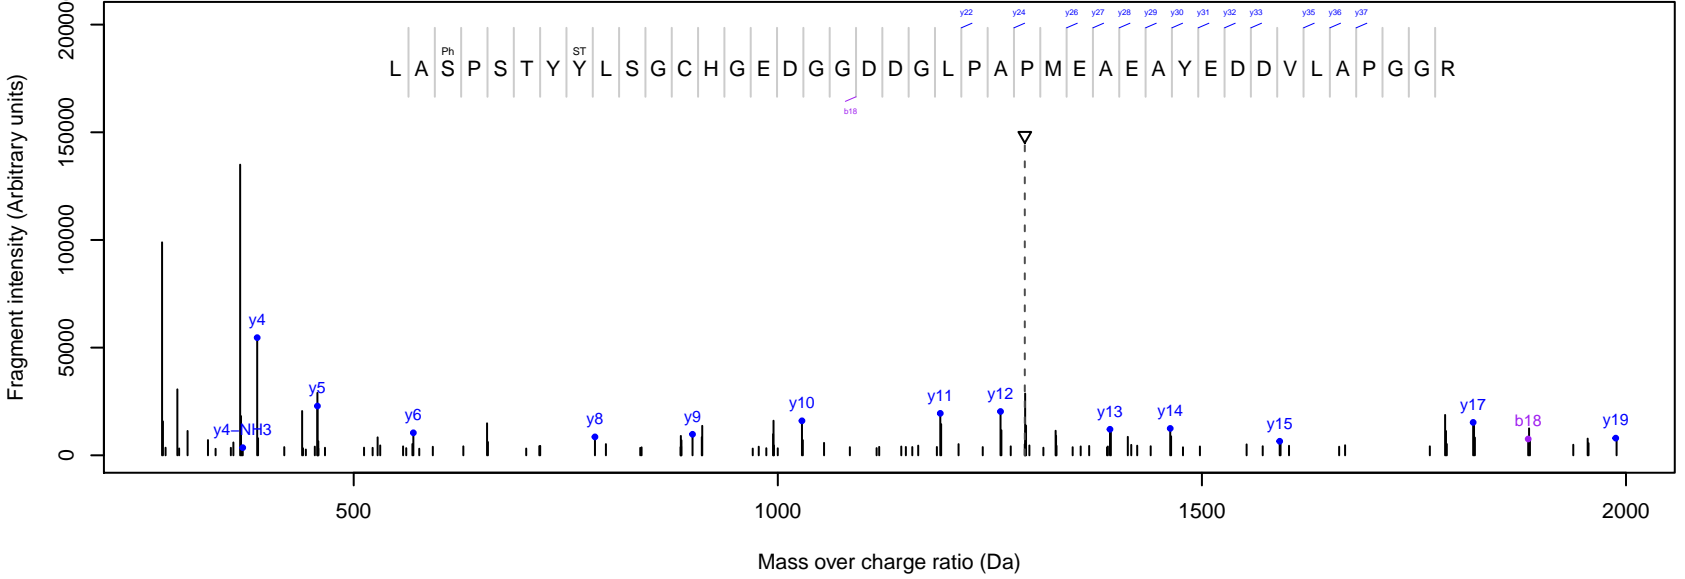

ATASPRPSSGNIPSS(Phospho (STY))PTASGGGS(Phospho (STY))PTSPR-3+

Source : QE3\_201126\_FR\_TiOx\_hum\_tissue\_Urea\_RNAB\_B Scan : 16673

Andromeda score : 70.616

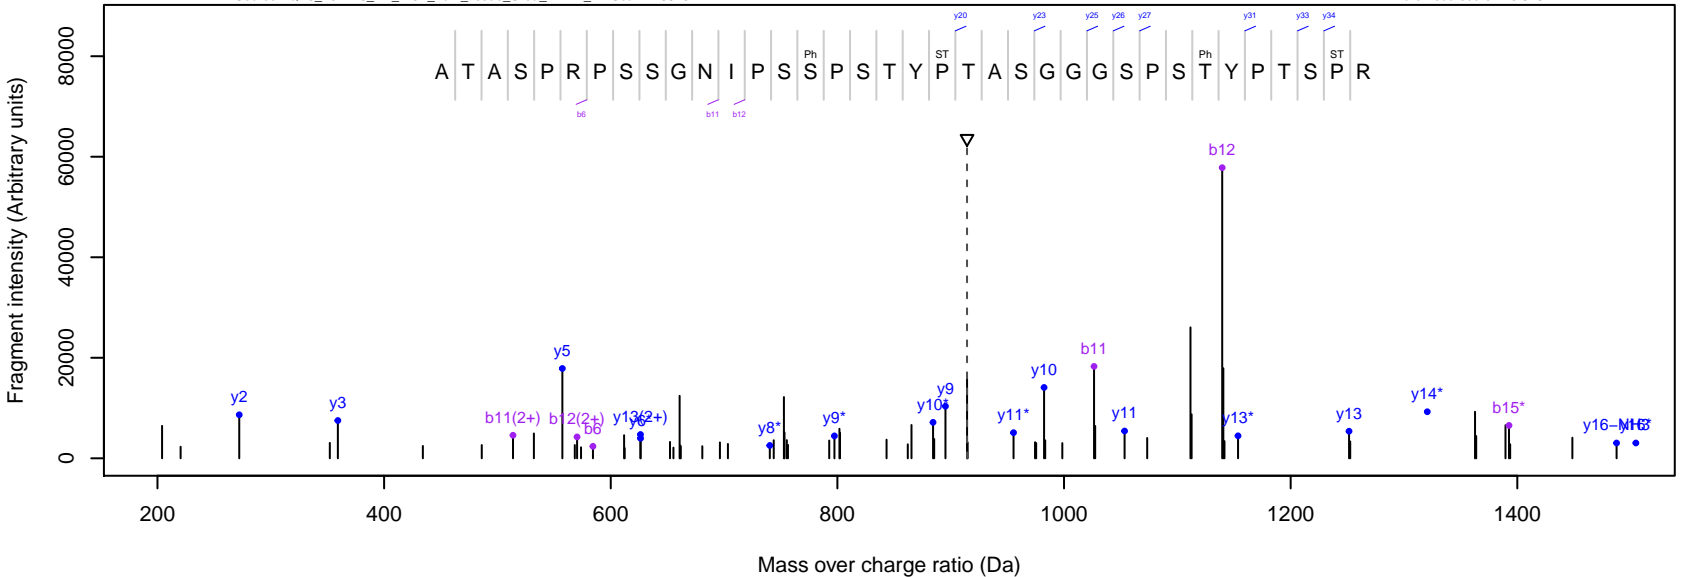

**GEDS(Phospho (STY))AEETEAKPAVVAPVVEAVSTPSAAFPDATAEQGPILTK-4+**

Source : QE3\_201126\_FR\_TIOx\_hum\_tissue\_Urea\_RNAB\_N Scan : 52412

Andromeda score : 70.61

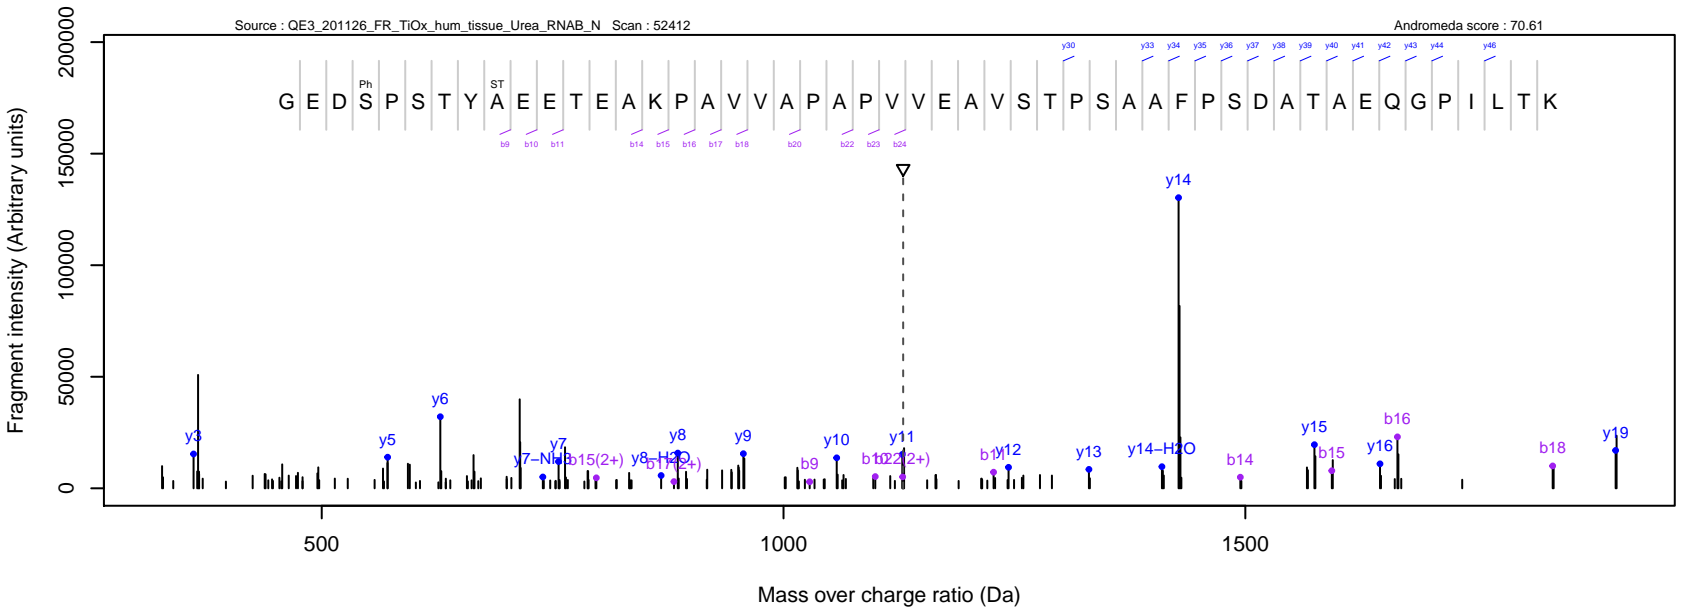

**AFGES(Phospho (STY))S(Phospho (STY))TES(Phospho (STY))DEEEEECGHTHCVR-3+**

Source : QE3\_201126\_FR\_TIOx\_hum\_tissue\_Urea\_RNAB\_H Scan : 19148

Andromeda score : 70.57

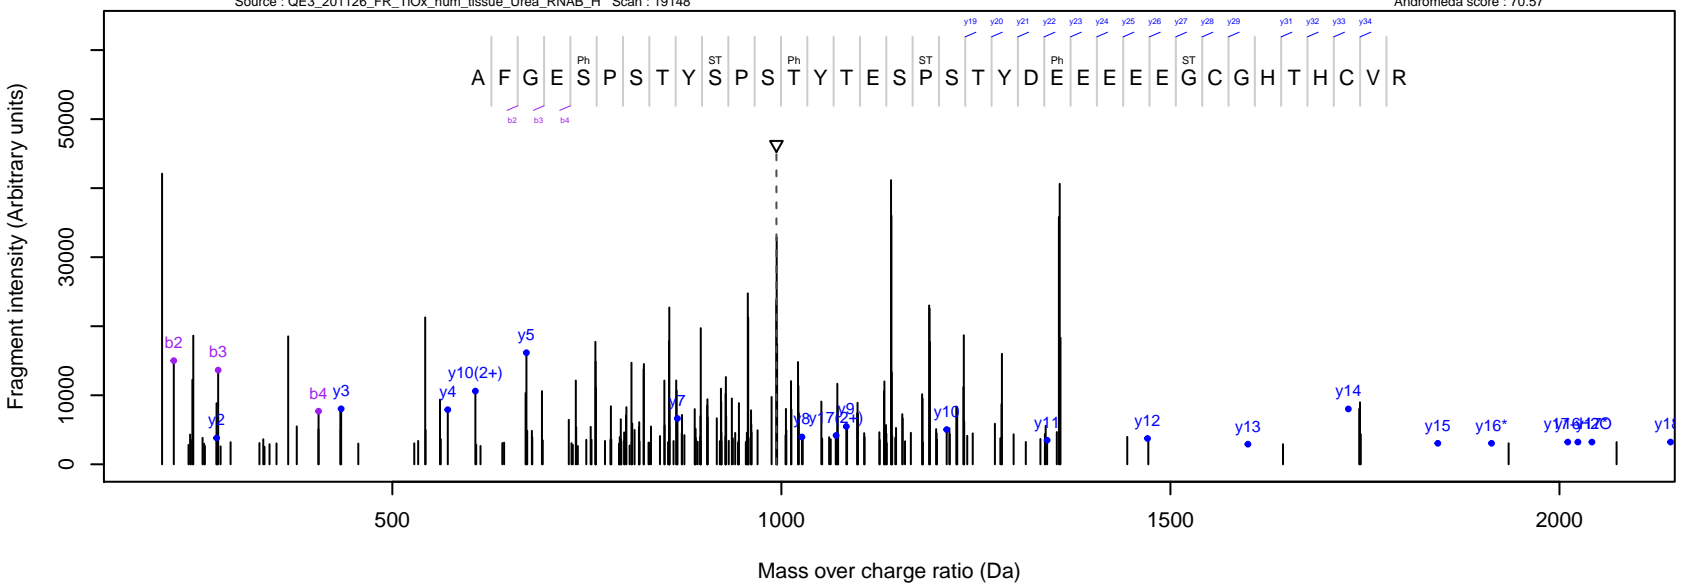

**S(Phospho (STY))SPANLAPASPGAQLQLVR-3+**

Source : QE3\_201126\_FR\_TIOx\_hum\_tissue\_Urea\_RNAB\_H Scan : 43170

Andromeda score : 70.569

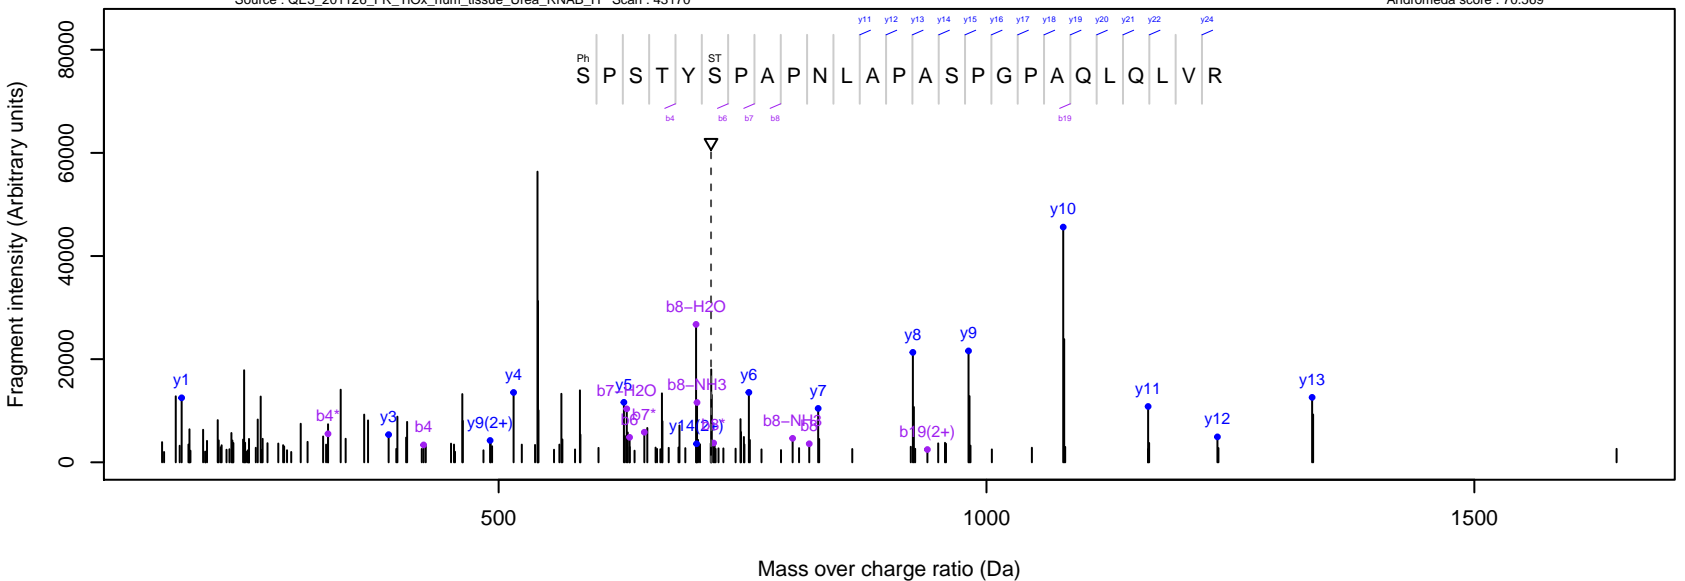

SALSSS(Phospho (STY))LRDLSEAGKR-3+

Source : QE3\_201126\_FR\_TiOx\_hum\_tissue\_Urea\_RNAB\_N Scan : 17738

Andromeda score : 70.555

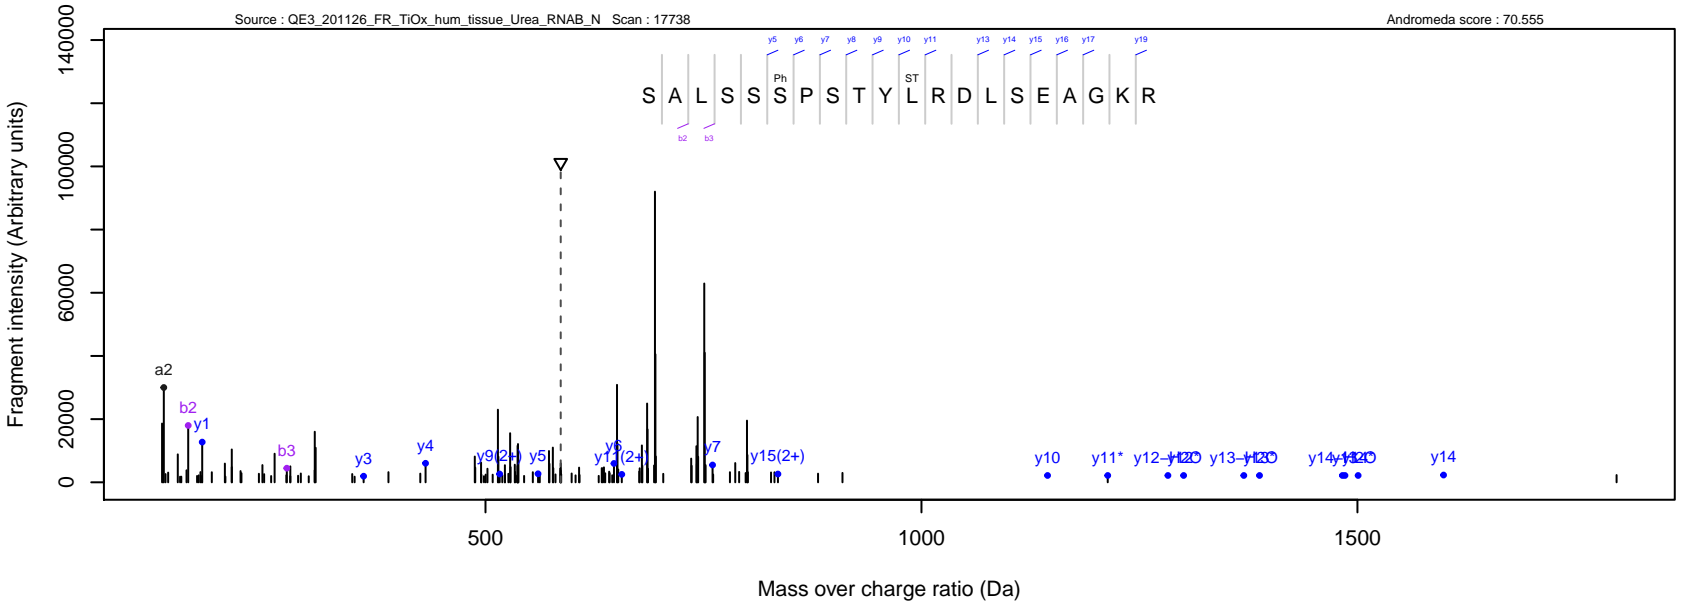

QKS(Phospho (STY))LDSLDSDGVPVTVEFMEVK-3+

Source : QE3\_201126\_FR\_TiOx\_hum\_tissue\_Urea\_RNAB\_N Scan : 51784

Andromeda score : 70.538

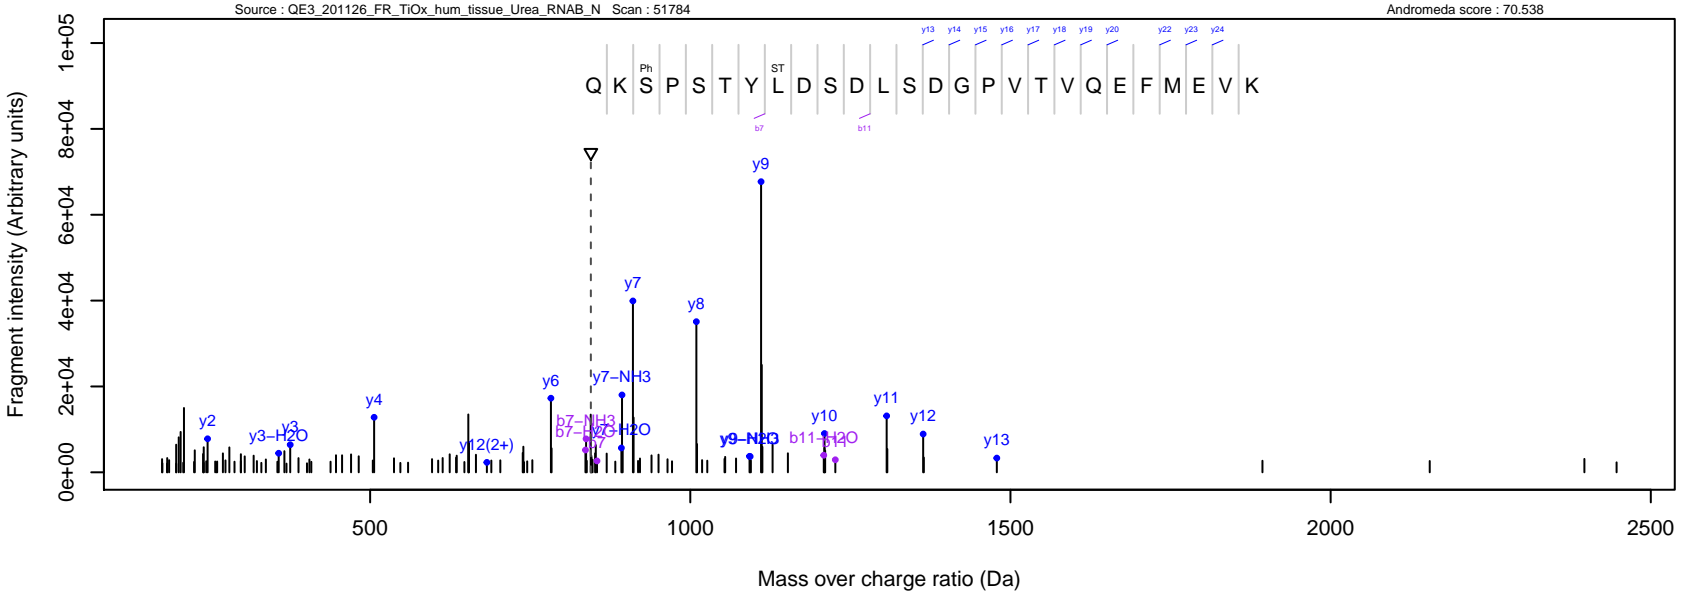

AM(Oxidation (M))DNHS(Phospho (STY))DSEEEAALFCPQLDDSTVAR-3+

Source : QE3\_201126\_FR\_TiOx\_hum\_tissue\_Urea\_RNAB\_H Scan : 42125

Andromeda score : 70.533

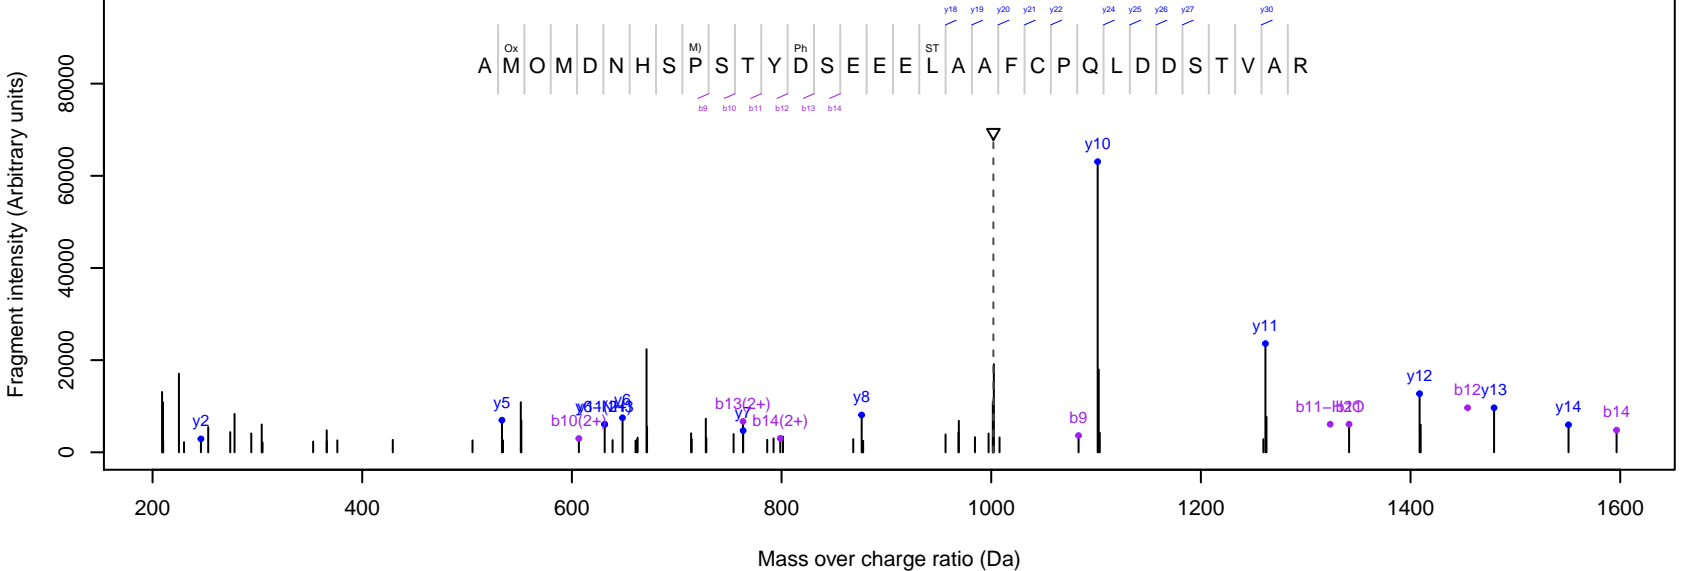

APVPEGLDLS(Phospho (STY))LSPRPDSPQPR-3+

Source : QE3\_201126\_FR\_TiOx\_hum\_tissue\_Urea\_RNAB\_H Scan : 38291

Andromeda score : 70.533

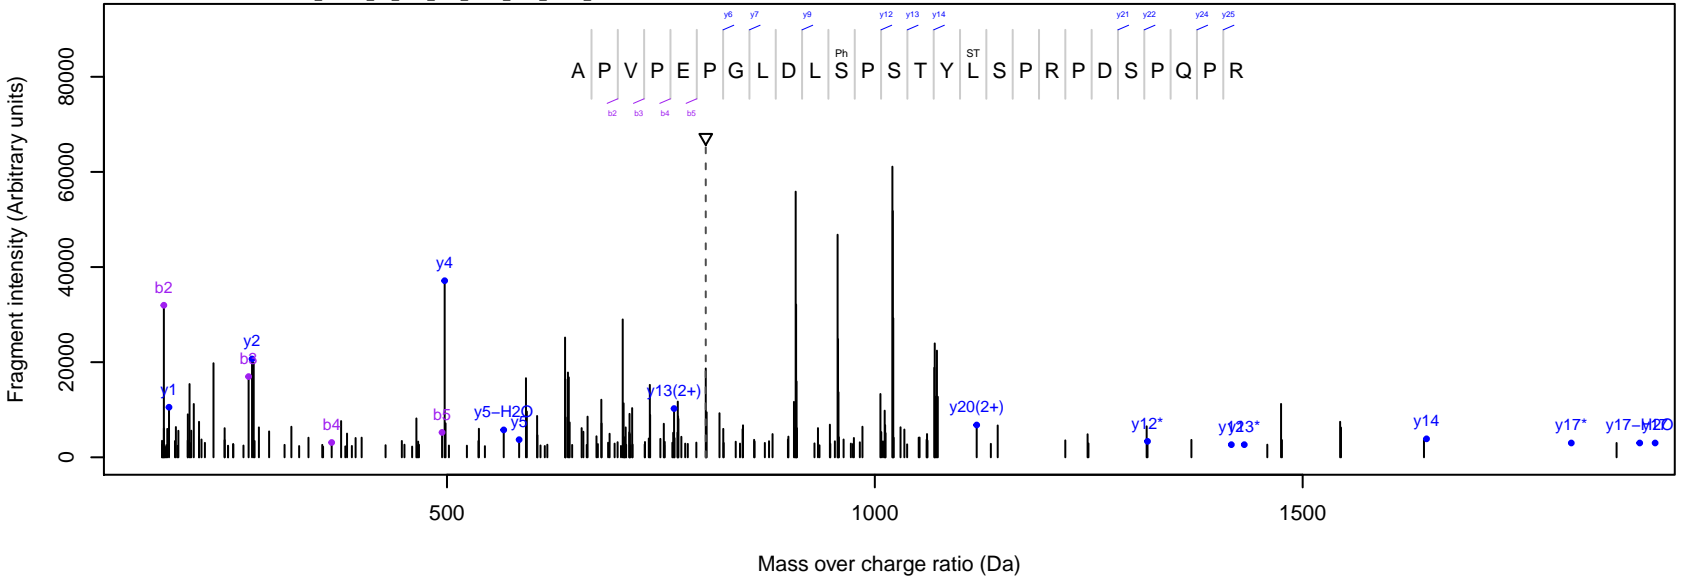

GLPSPYNMS(Phospho (STY))SAPGS(Phospho (STY))R-2+

Source : QE3\_201126\_FR\_TiOx\_hum\_tissue\_Urea\_RNAB\_N Scan : 37953

Andromeda score : 70.529

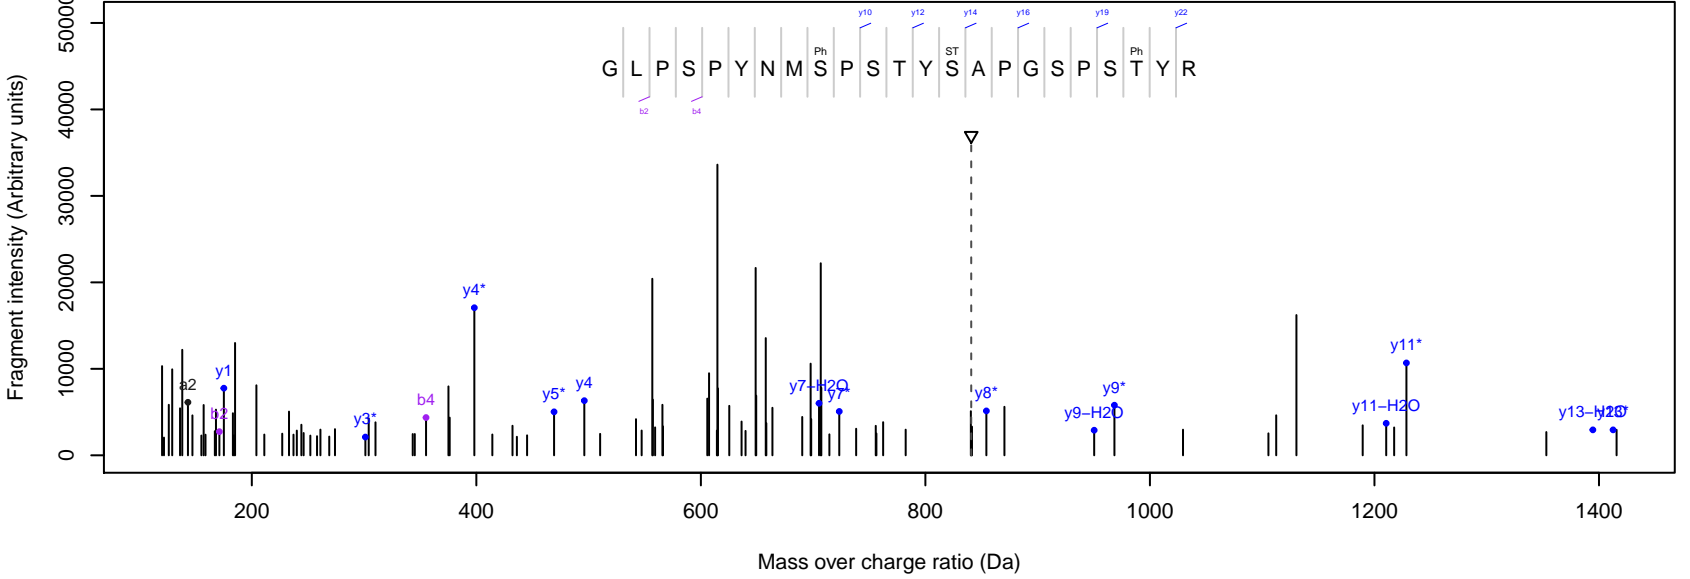

LLLINNAGS(Phospho (STY))LGDVSK-2+

Source : QE3\_201126\_FR\_TiOx\_hum\_tissue\_Urea\_RNAB\_N Scan : 45482

Andromeda score : 70.529

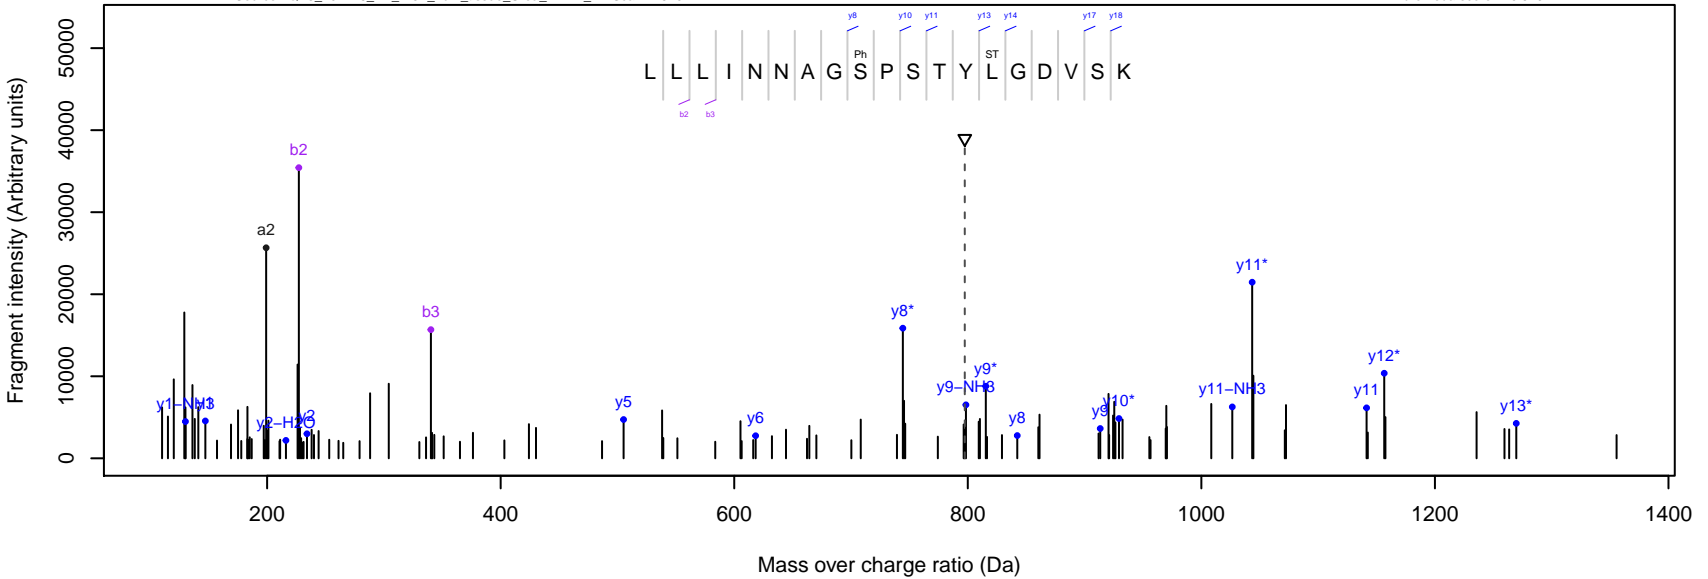



TAS(Phospho (STY))GSS(Phospho (STY))VT(Phospho (STY))SLDGTR-2+

Source : QE3\_201126\_FR\_TiOx\_hum\_tissue\_Urea\_RNAB\_N Scan : 26831

Andromeda score : 70.529

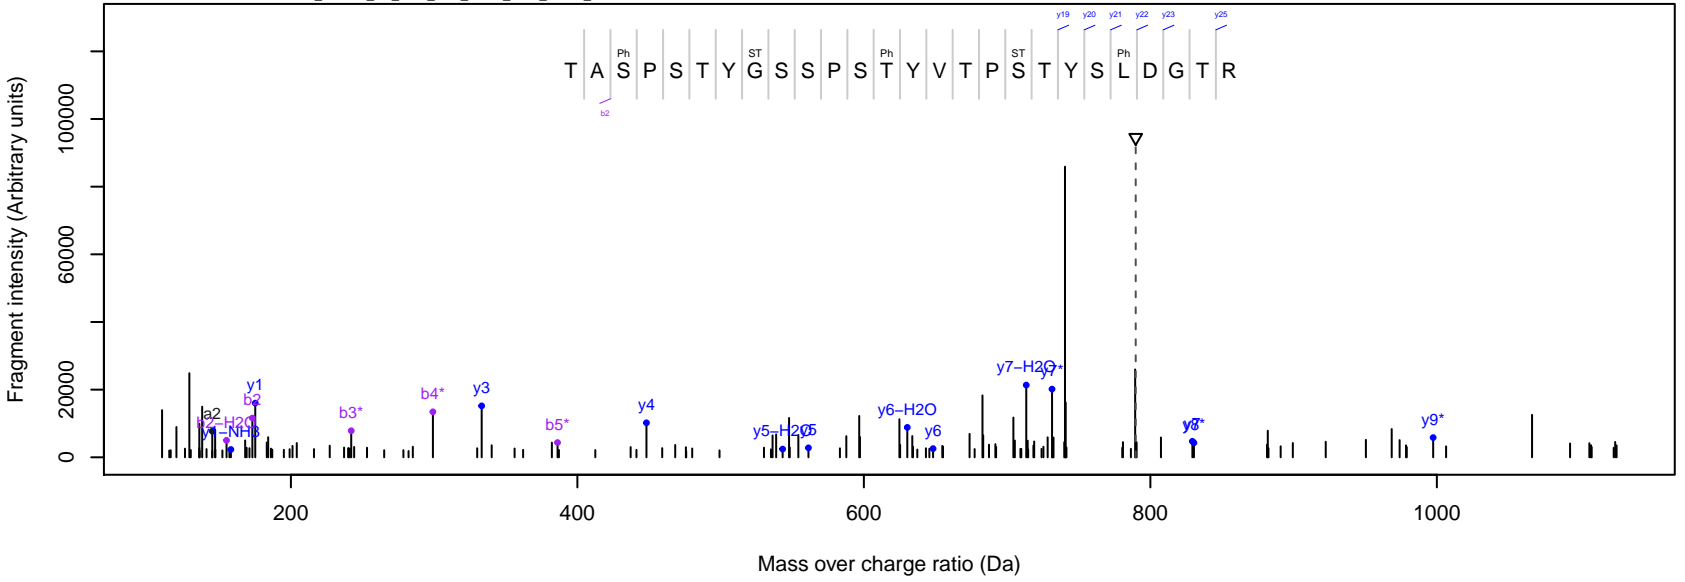

EDS(Phospho (STY))GTFSLGK-2+

Source : QE3\_201126\_FR\_TiOx\_hum\_tissue\_Urea\_RNAB\_H Scan : 23116

Andromeda score : 70.488

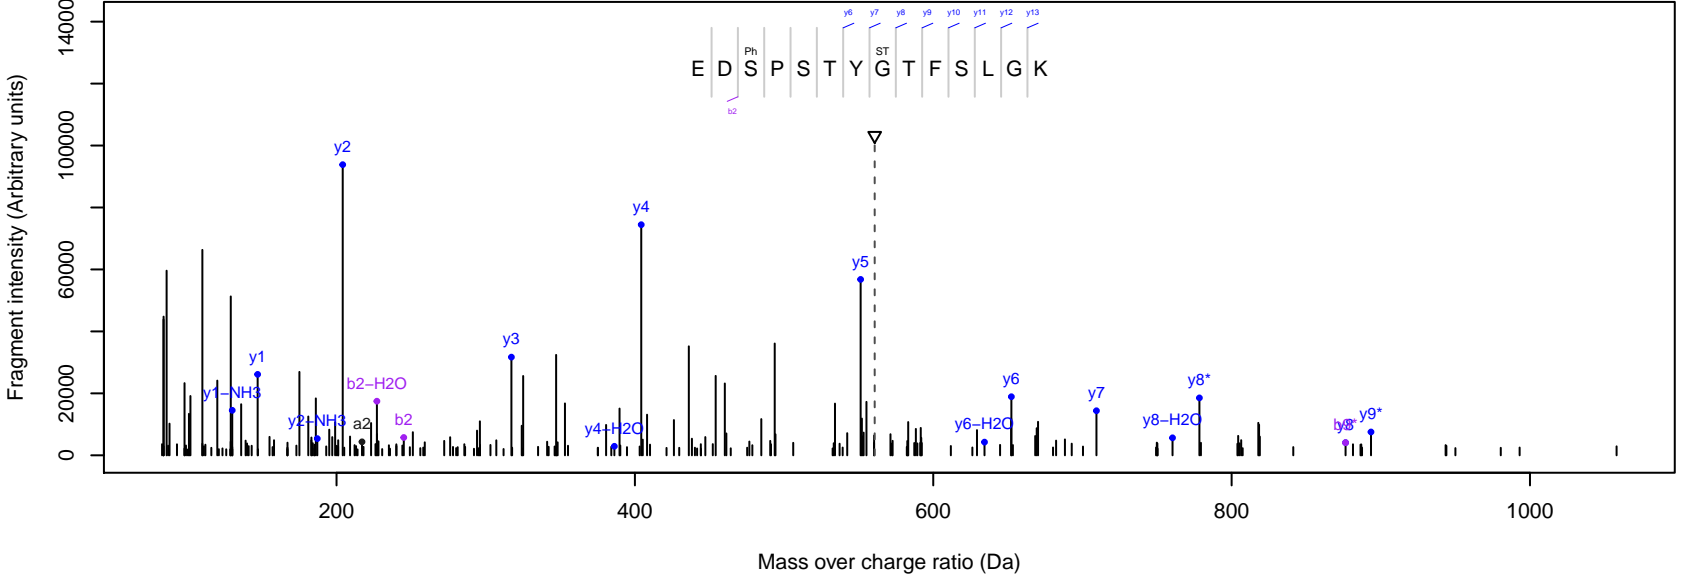

TQS(Phospho (STY))LSALPK-2+

Source : QE3\_201126\_FR\_TiOx\_hum\_tissue\_Urea\_RNAB\_N Scan : 19897

Andromeda score : 70.488

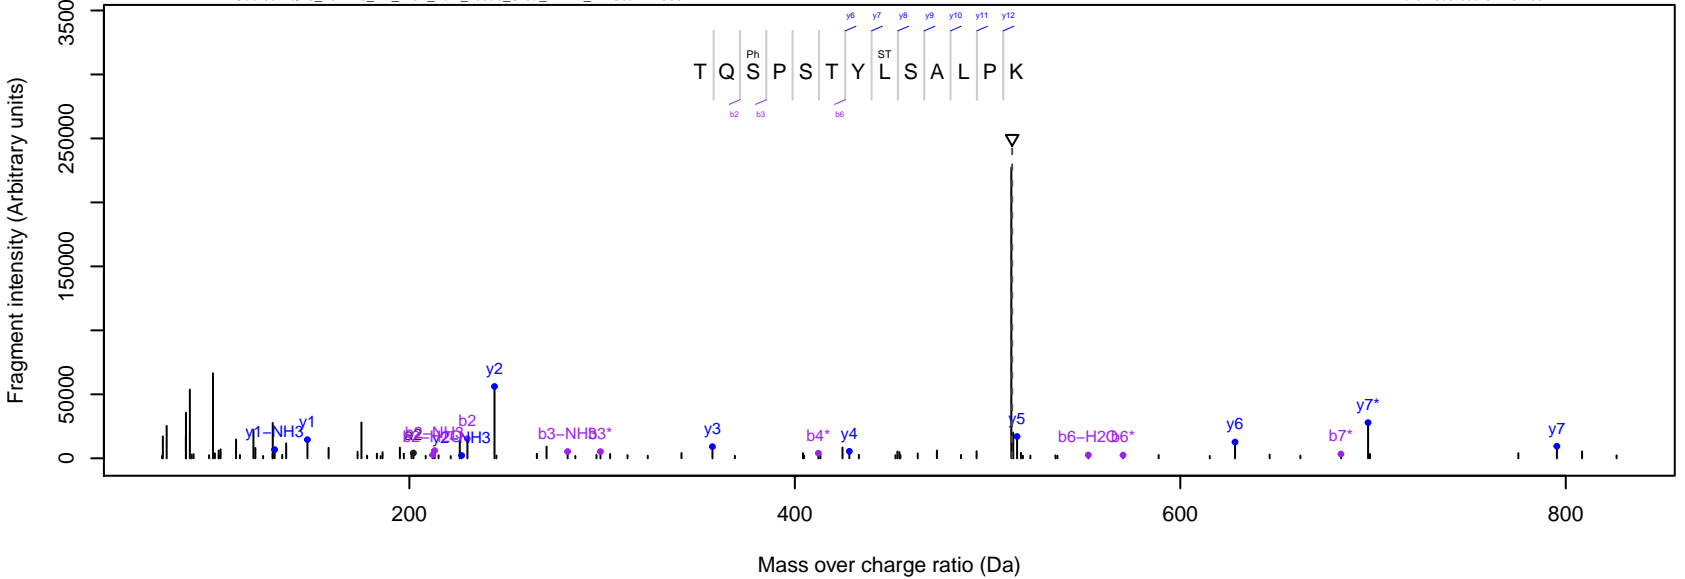

GVS(Phospho (STY))QEKEAQISSAIVSSVQSK-3+

Source : QE3\_201126\_FR\_TIOx\_hum\_tissue\_Urea\_RNAB\_H Scan : 34375

Andromeda score : 70.465

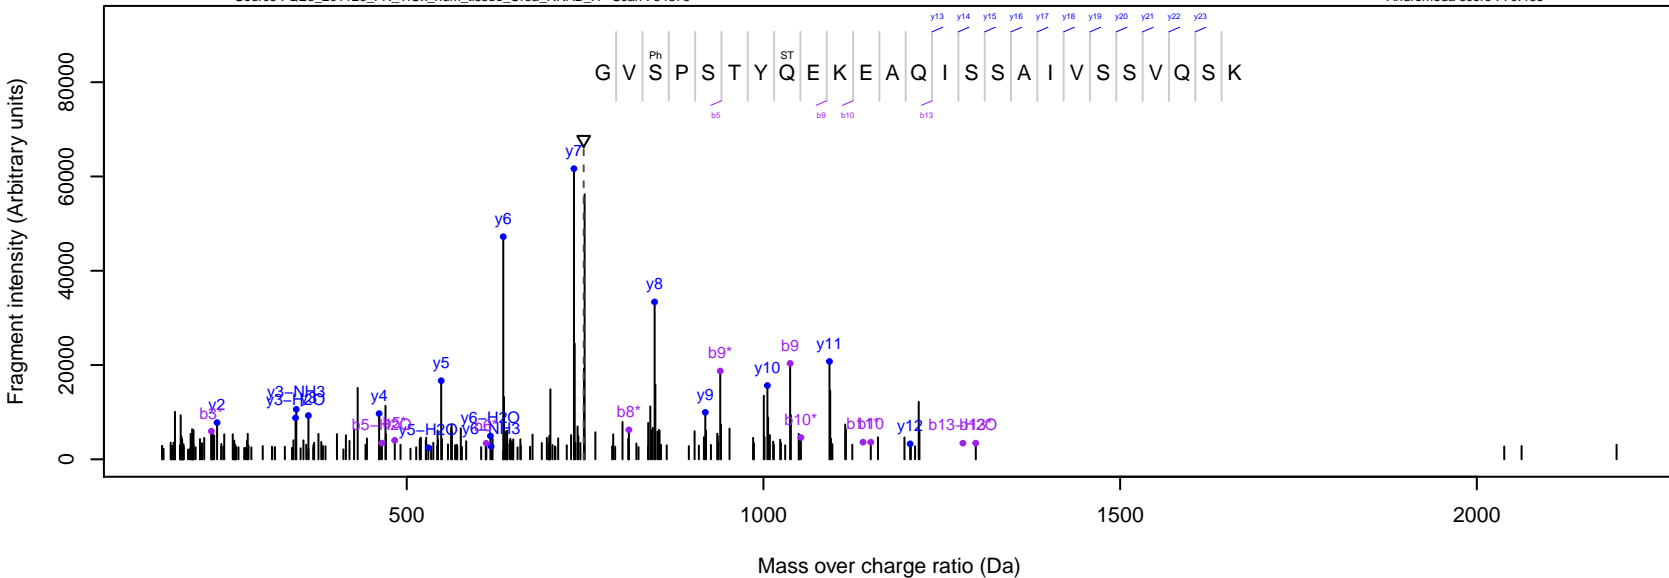

SLKES(Phospho (STY))EQES(Phospho (STY))EEEILAQK-3+

Source : QE3\_201126\_FR\_TIOx\_hum\_tissue\_Urea\_RNAB\_B Scan : 24126

Andromeda score : 70.453

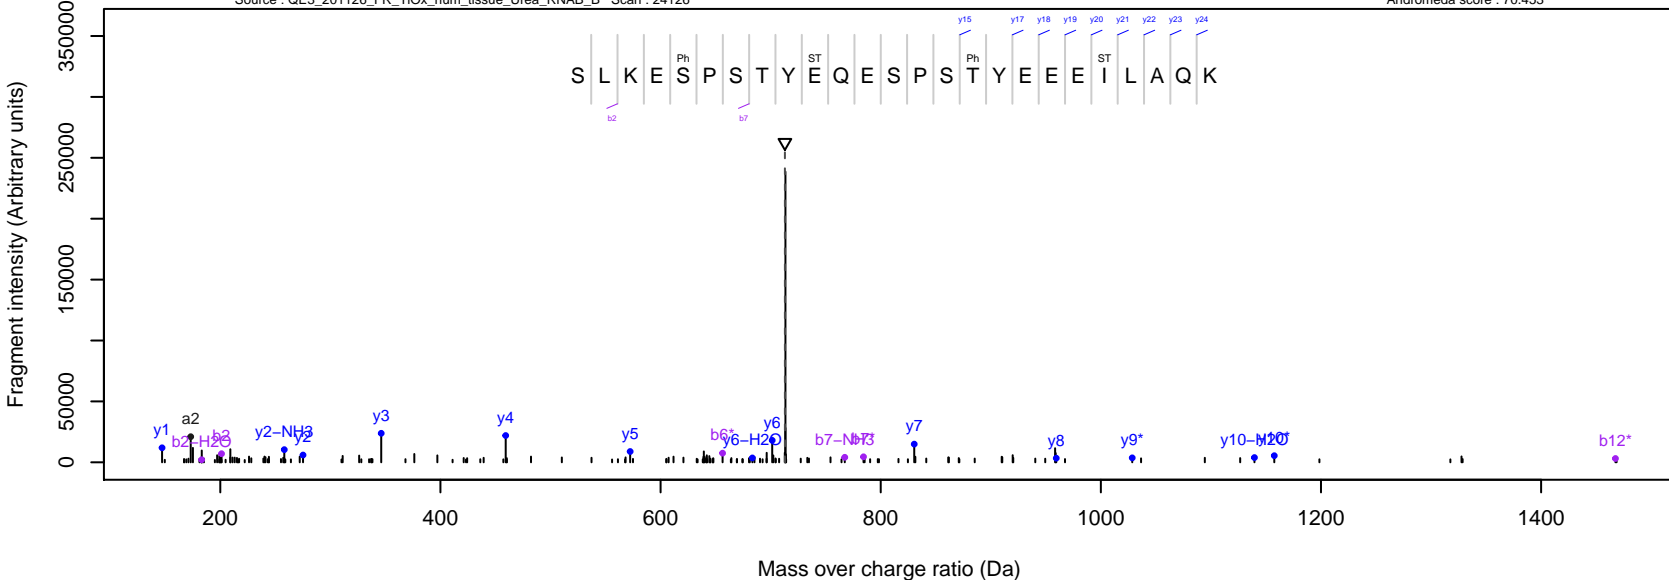

DLSTSPKPSPIPS(Phospho (STY))PVLGR-3+

Source : QE3\_201126\_FR\_TIOx\_hum\_tissue\_Urea\_RNAB\_H Scan : 33697

Andromeda score : 70.452

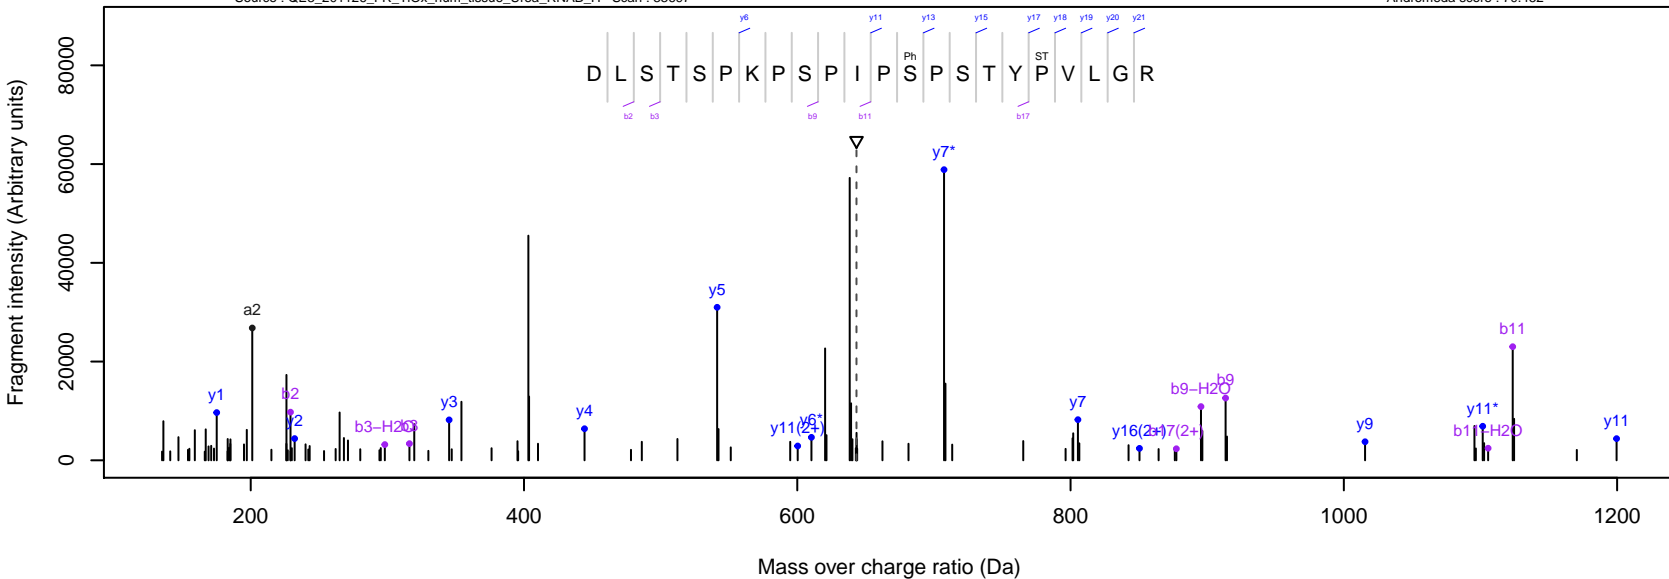

DTSQSDKDDLDKLS(Phospho (STY))DSLQGR-3+

Source : QE3\_201126\_FR\_TiOx\_hum\_tissue\_Urea\_RNAB\_H Scan : 37551

Andromeda score : 70.451

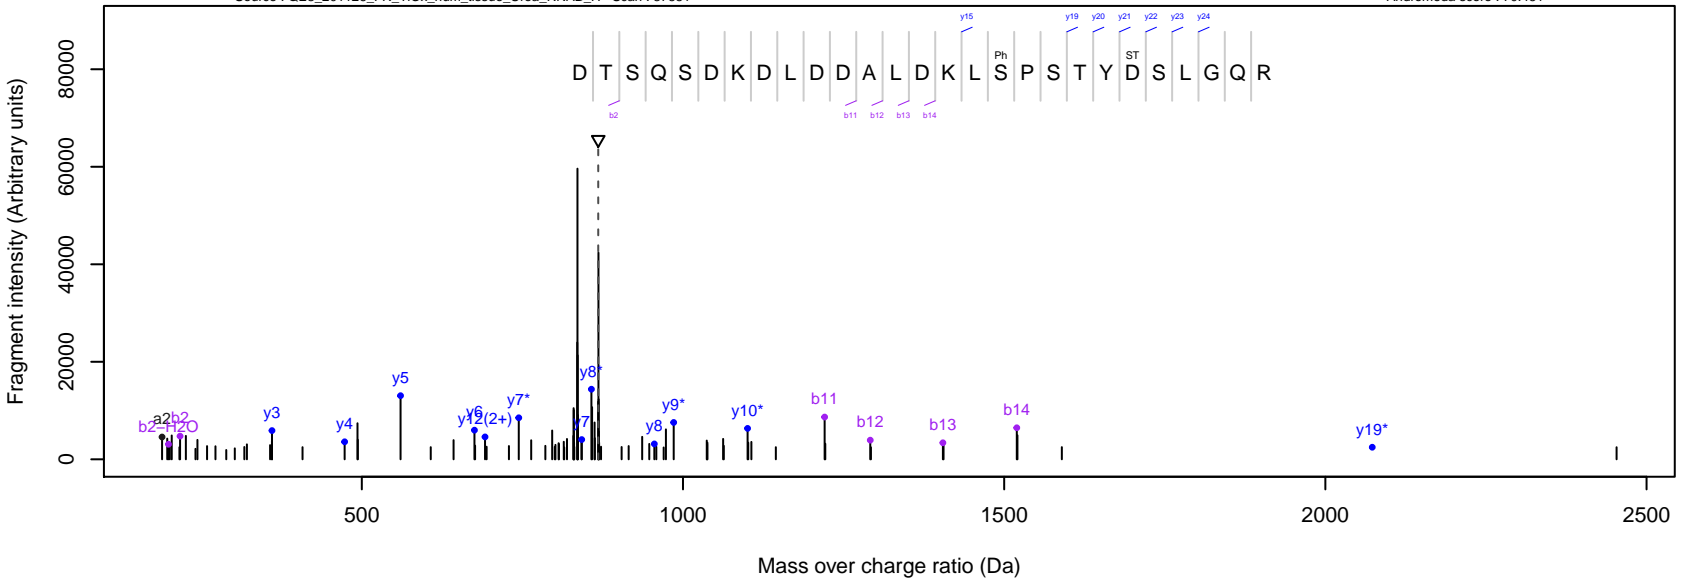

LNHVAAGLVS(Phospho (STY))PSLKSDTSSK-3+

Source : QE3\_201126\_FR\_TiOx\_hum\_tissue\_Urea\_RNAB\_B Scan : 18400

Andromeda score : 70.449

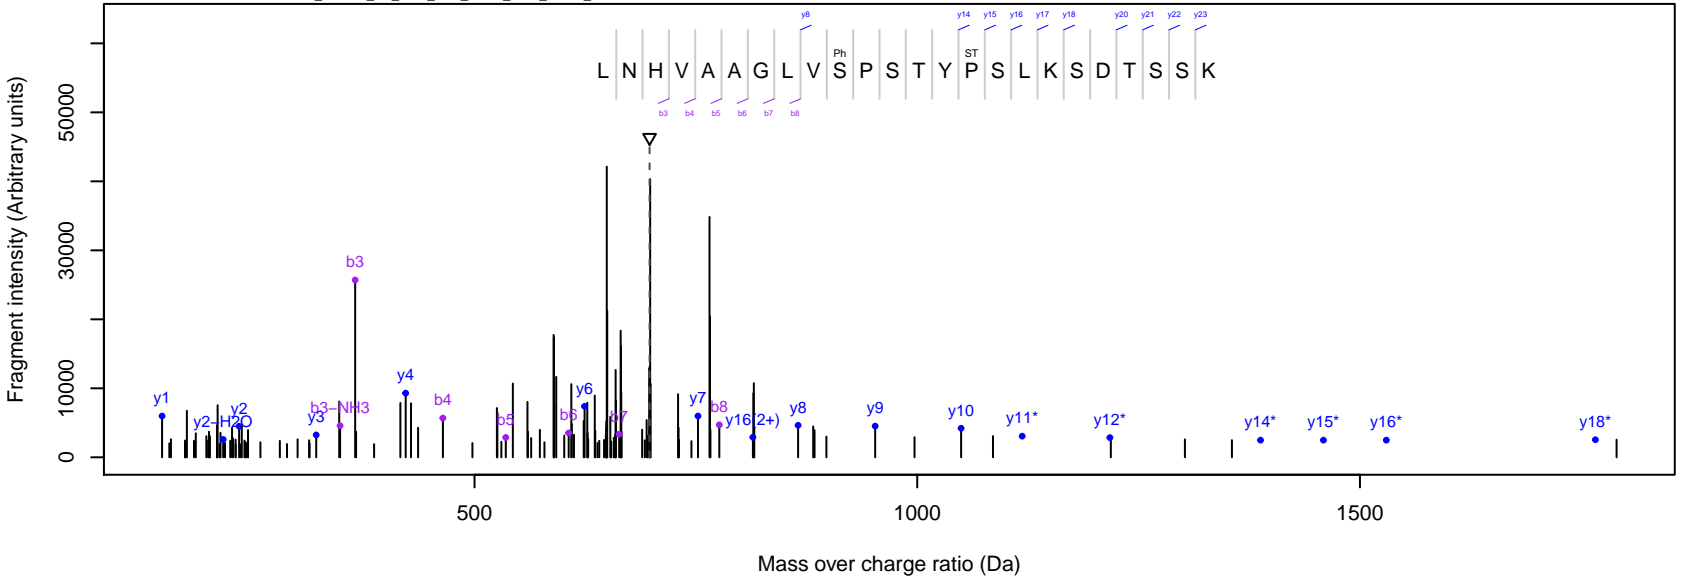

SLPELDRDKS(Phospho (STY))DSDTEGLLFSR-3+

Source : QE3\_201126\_FR\_TiOx\_hum\_tissue\_Urea\_RNAB\_N Scan : 37239

Andromeda score : 70.449

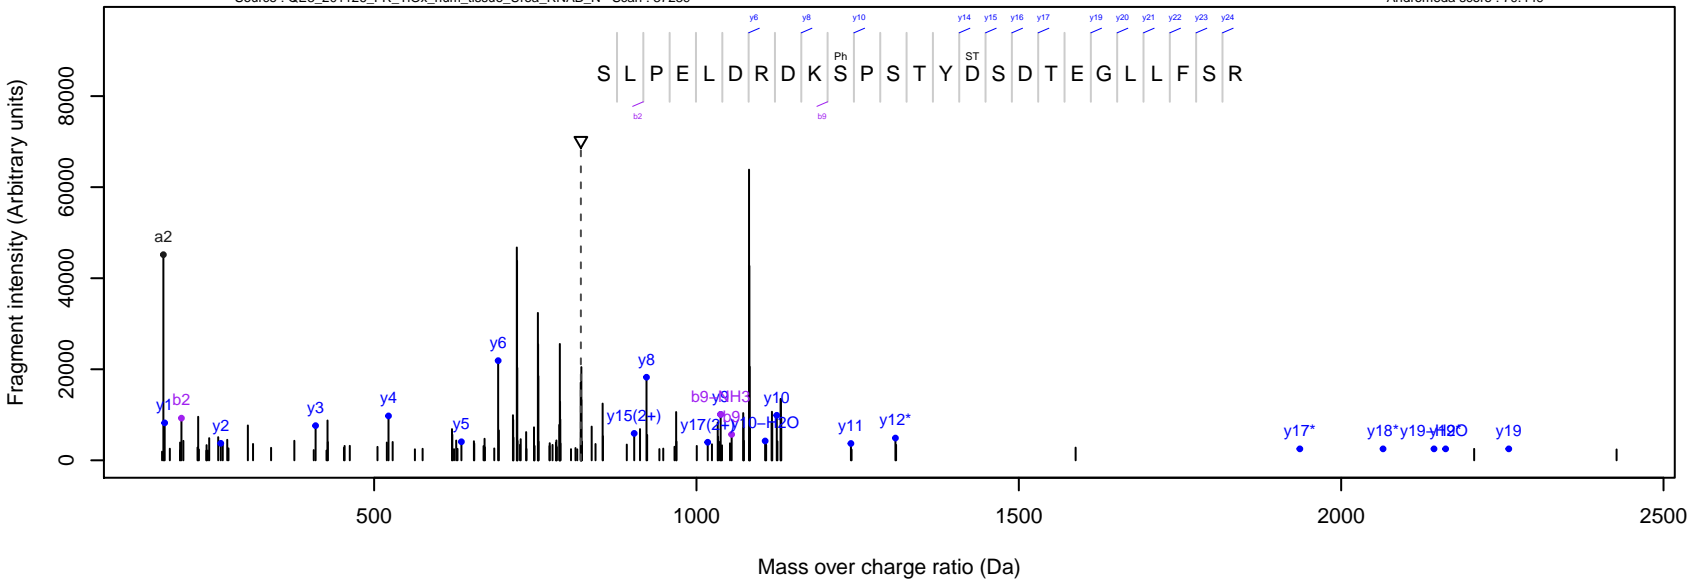

**TYS(Phospho (STY))APAINAIQVPKPFSGPVR-3+**

Source : QE3\_201126\_FR\_TiOx\_hum\_tissue\_Urea\_RNAB\_H Scan : 45798

Andromeda score : 70.449

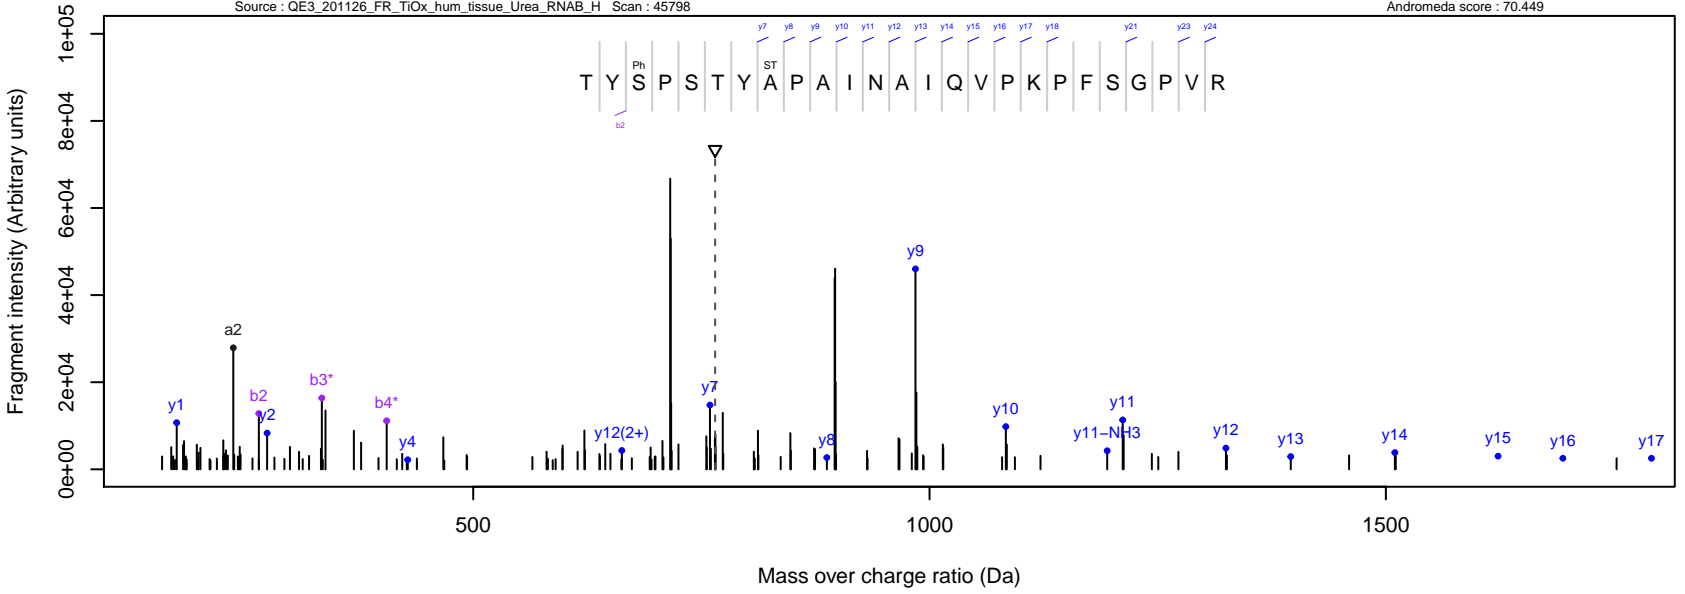

**FLSHS(Phospho (STY))TDS(Phospho (STY))LNK-2+**

Source : QE3\_201126\_FR\_TiOx\_hum\_tissue\_Urea\_RNAB\_B Scan : 16594

Andromeda score : 70.438

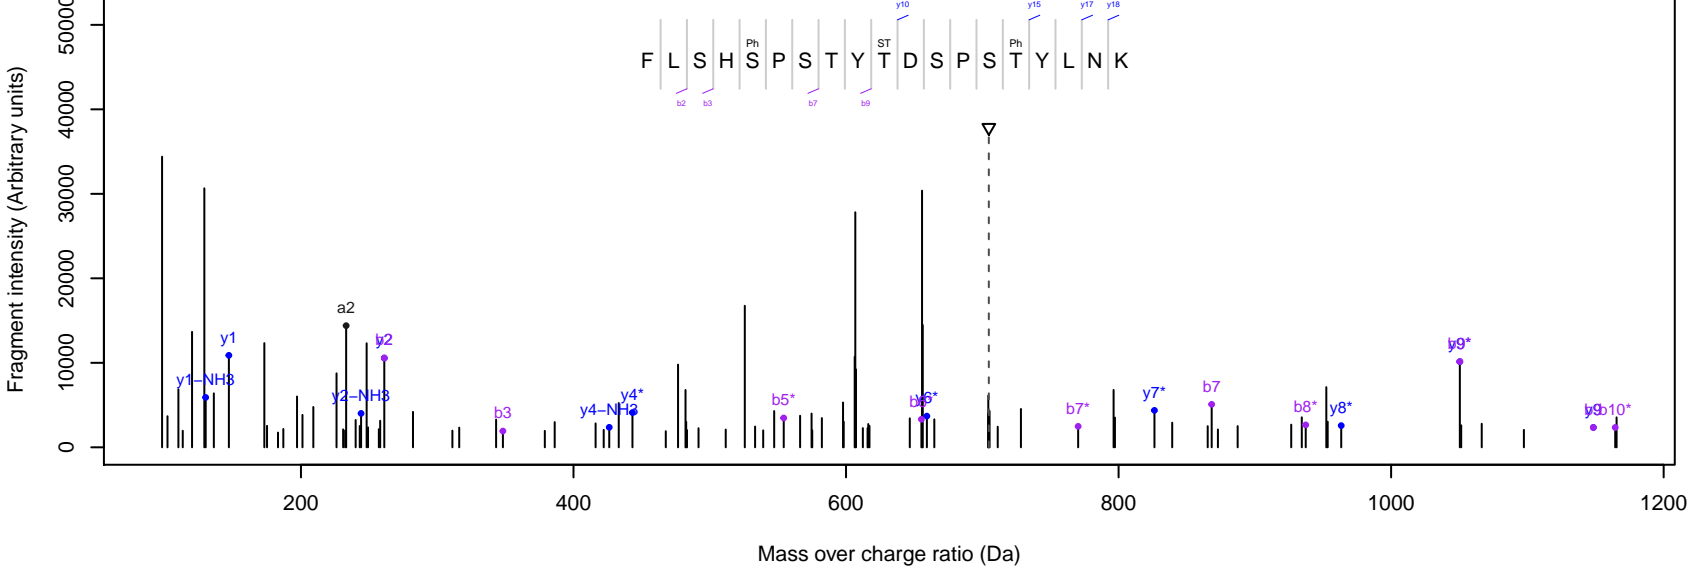

**RAS(Phospho (STY))AYEALEK-2+**

Source : QE3\_201126\_FR\_TiOx\_hum\_tissue\_Urea\_RNAB\_N Scan : 11763

Andromeda score : 70.438

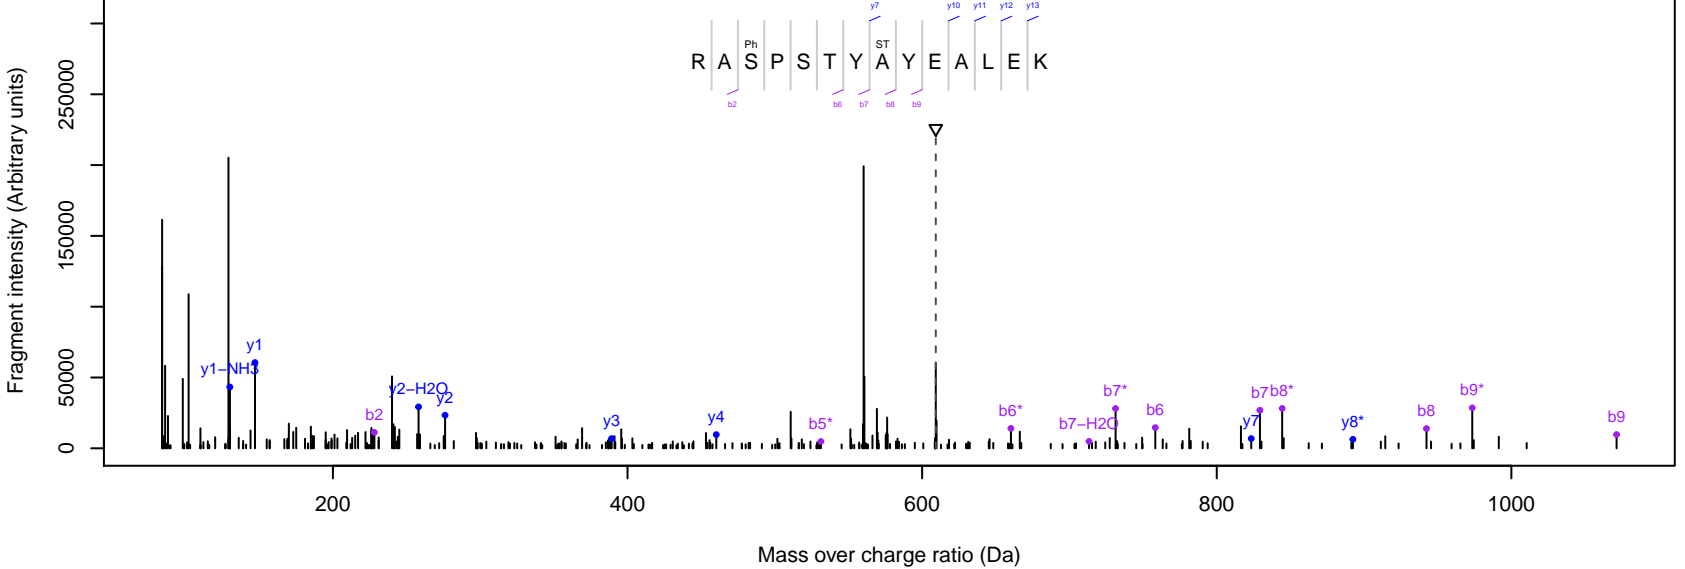

NYSS(Phospho (STY))PPPCHLRSR-2+

Source : QE3\_201126\_FR\_TiOx\_hum\_tissue\_Urea\_RNAB\_H Scan : 11103

Andromeda score : 70.412

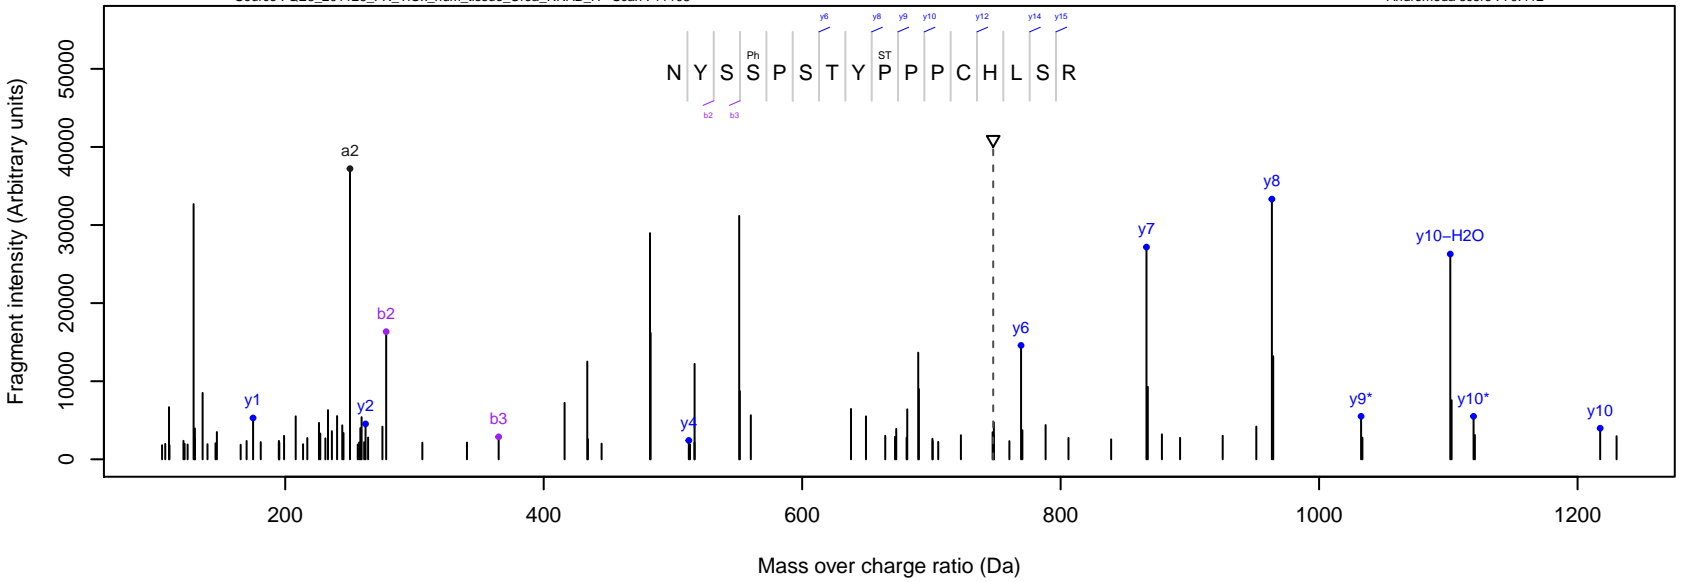

S(Phospho (STY))AEPAEALVLACK-2+

Source : QE3\_201126\_FR\_TiOx\_hum\_tissue\_Urea\_RNAB\_B Scan : 37045

Andromeda score : 70.412

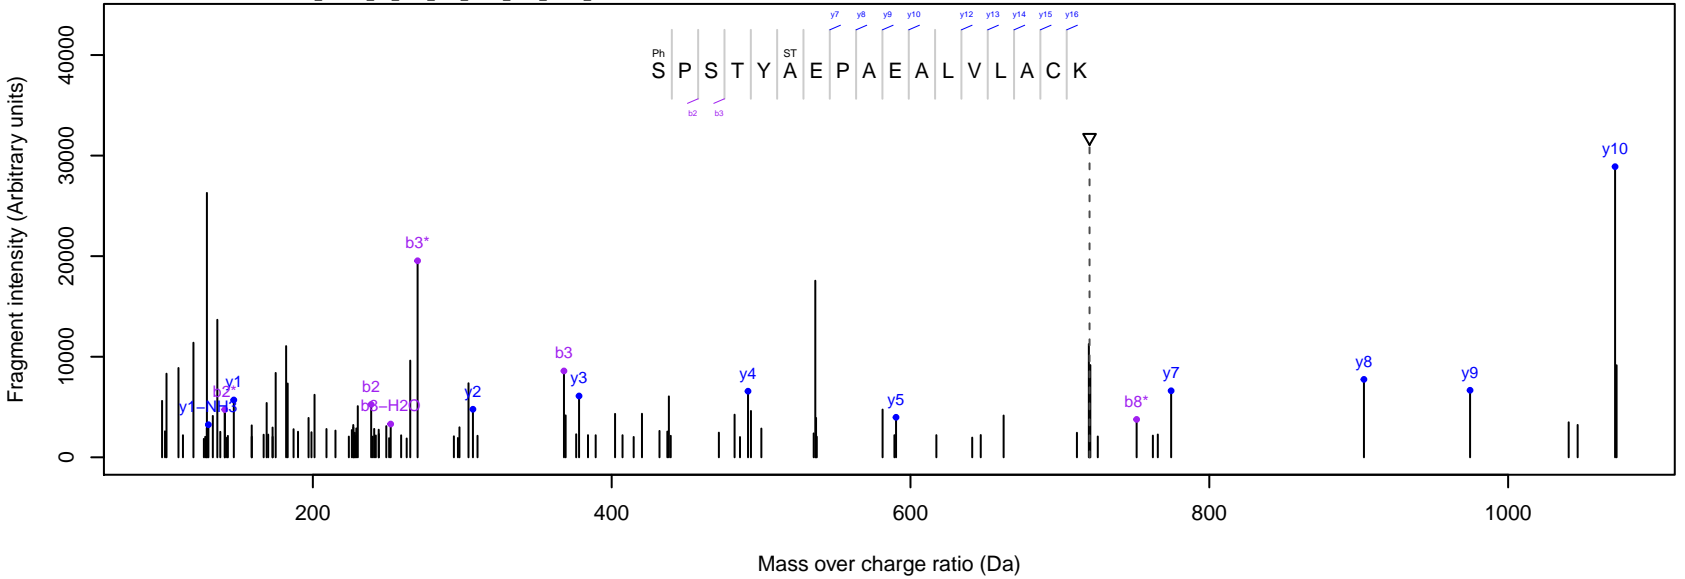

NGS(Phospho (STY))RLDIVHENLK-3+

Source : QE3\_201126\_FR\_TiOx\_hum\_tissue\_Urea\_RNAB\_N Scan : 17180

Andromeda score : 70.41

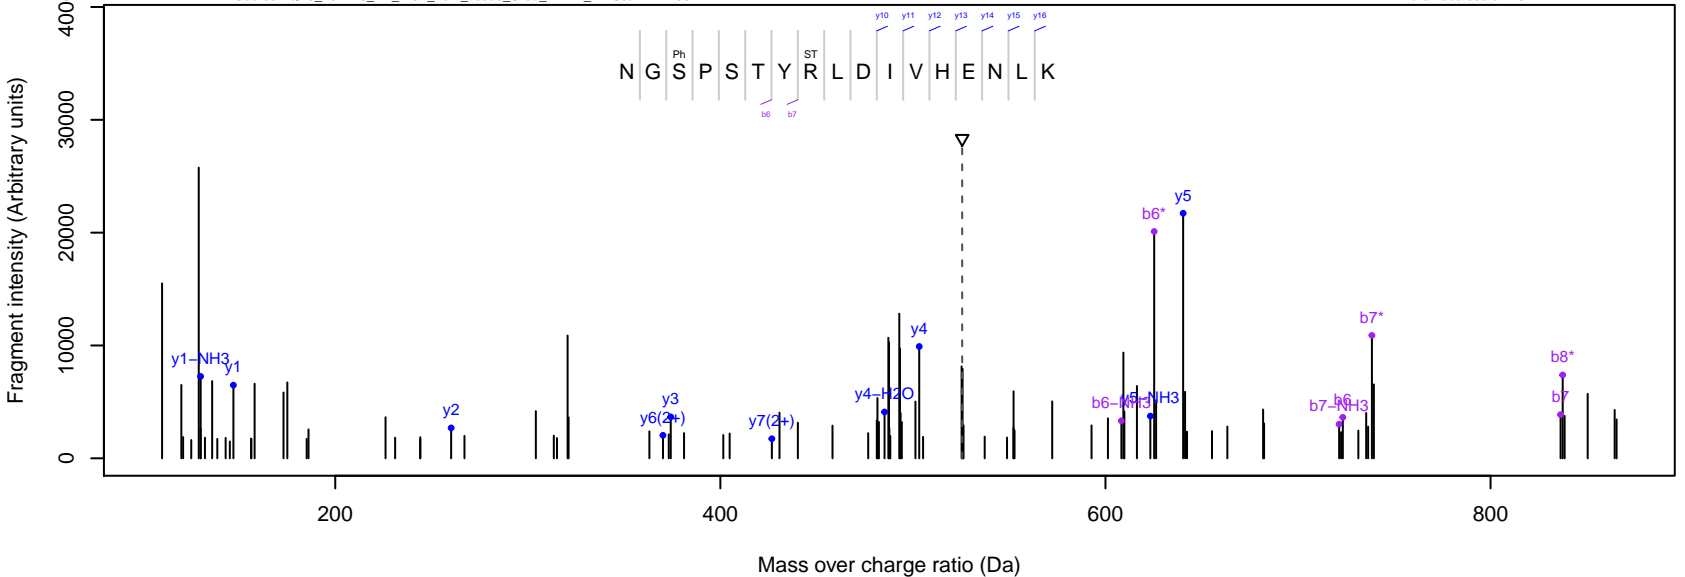

SLLGDS(Phospho (STY))APTLHLNK-3+

Source : QE3\_201126\_FR\_TiOx\_hum\_tissue\_Urea\_RNAB\_N Scan : 32290

Andromeda score : 70.41

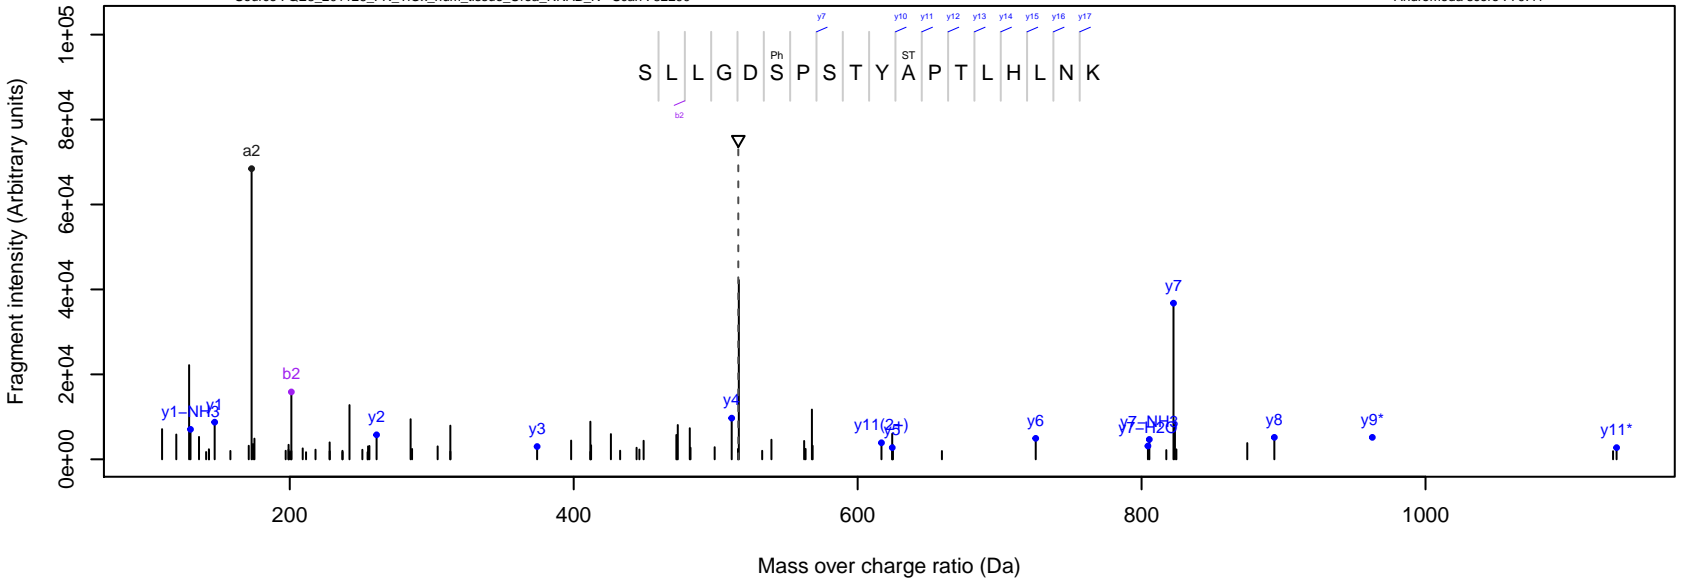

SPLPGPS(Phospho (STY))EEK-2+

Source : QE3\_201126\_FR\_TiOx\_hum\_tissue\_Urea\_RNAB\_H Scan : 16379

Andromeda score : 70.399

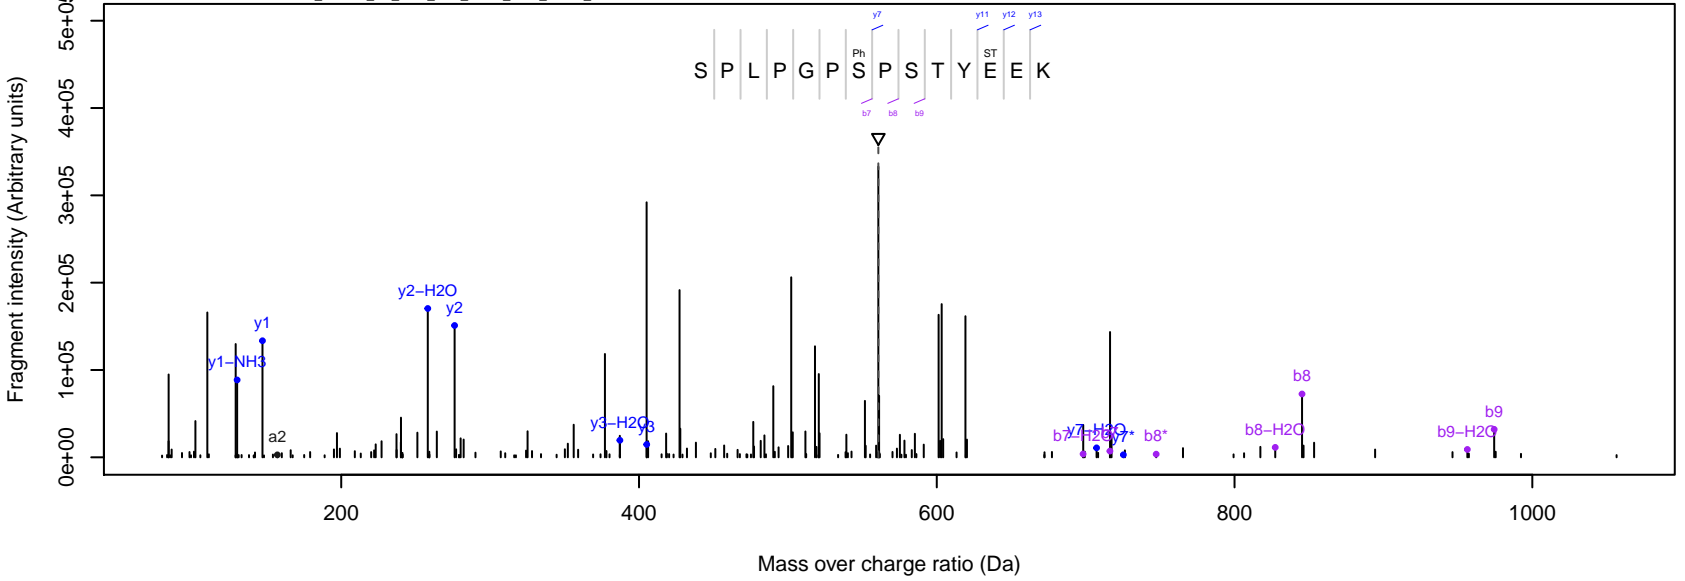

HSLGSS(Phospho (STY))PGM(Oxidation (M))KDIPRT(Phospho (STY))PSR-3+

Source : QE3\_201126\_FR\_TiOx\_hum\_tissue\_Urea\_RNAB\_B Scan : 8974

Andromeda score : 70.391

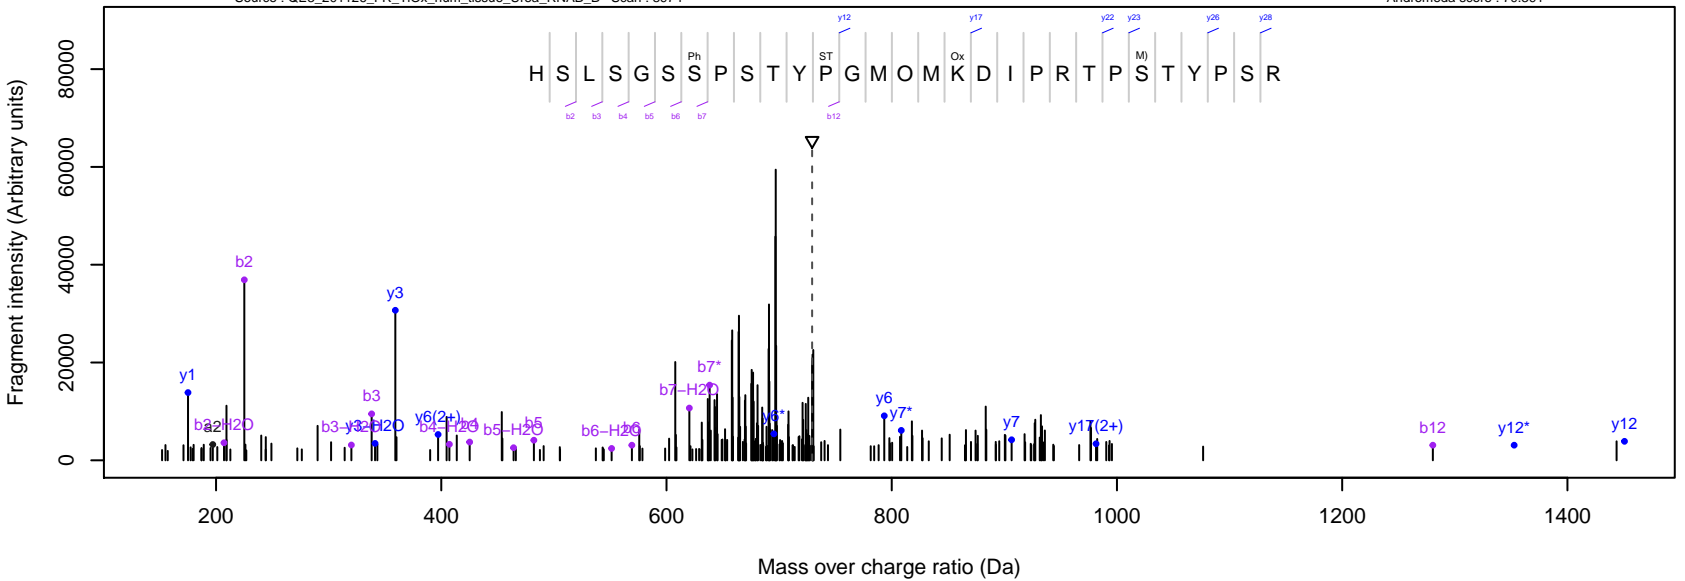

S(Phospho (STY))RS(Phospho (STY))FDYNYRR-3+

Source : QE3\_201126\_FR\_TiOx\_hum\_tissue\_Urea\_RNAB\_N Scan : 14297

Andromeda score : 70.373

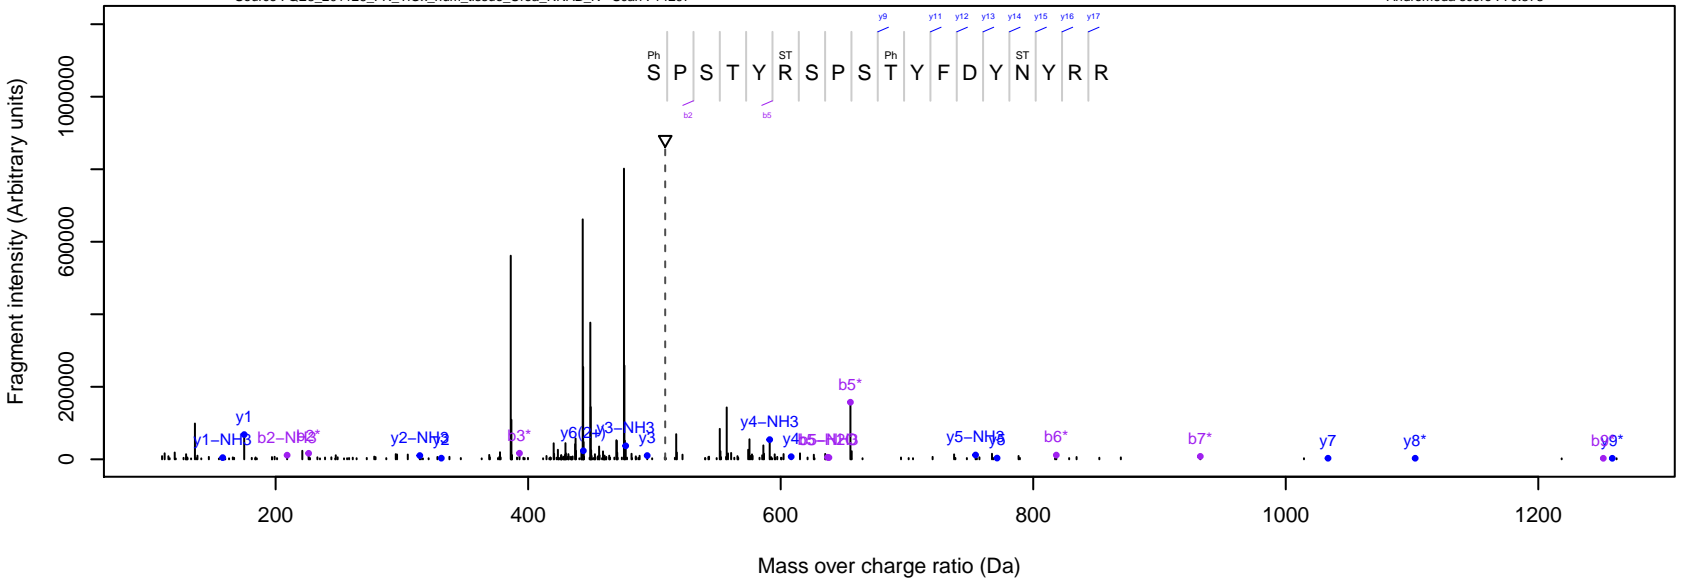

KPS(Phospho (STY))VSAQM(Oxidation (M))QAYGQSSYSTQTWVR-3+

Source : QE3\_201126\_FR\_TiOx\_hum\_tissue\_Urea\_RNAB\_N Scan : 26540

Andromeda score : 70.345

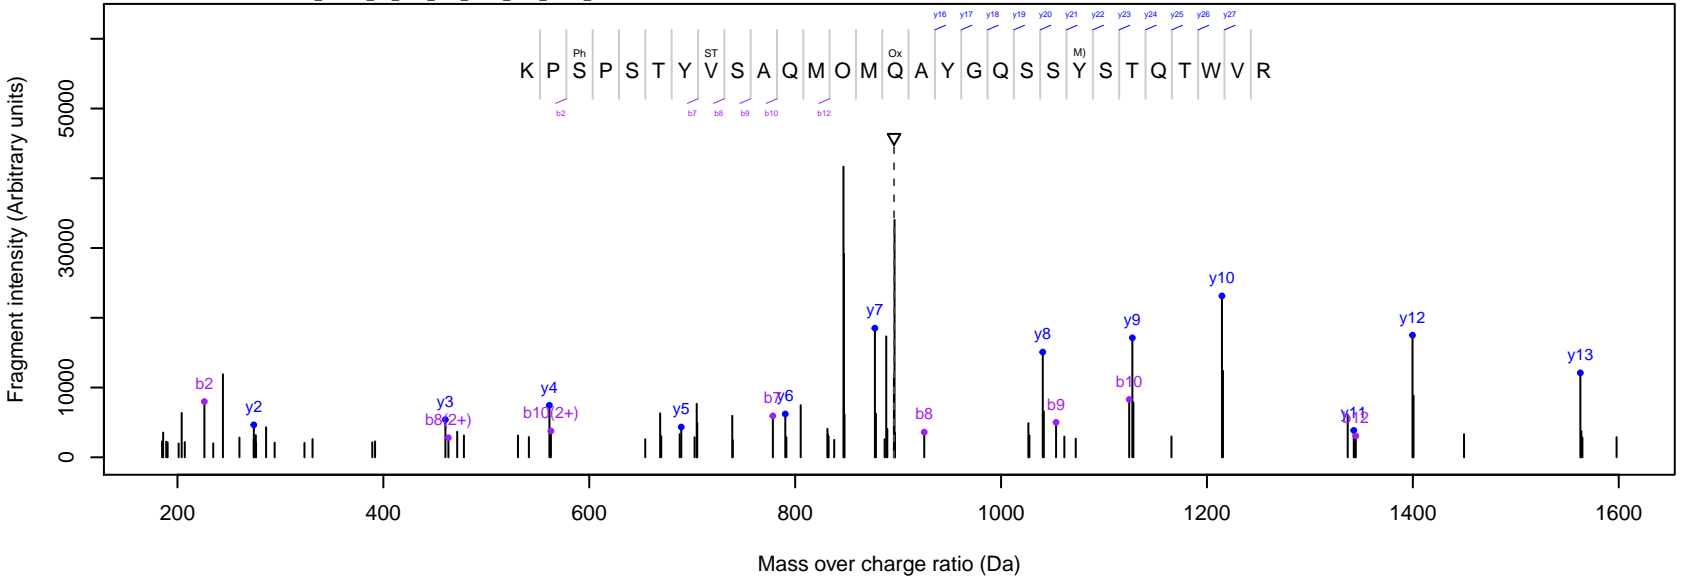

AGS(Phospho (STY))GGGGDPGDAFGIVAPFAR-2+

Source : QE3\_201126\_FR\_TiOx\_hum\_tissue\_Urea\_RNAB\_H Scan : 55843

Andromeda score : 70.335

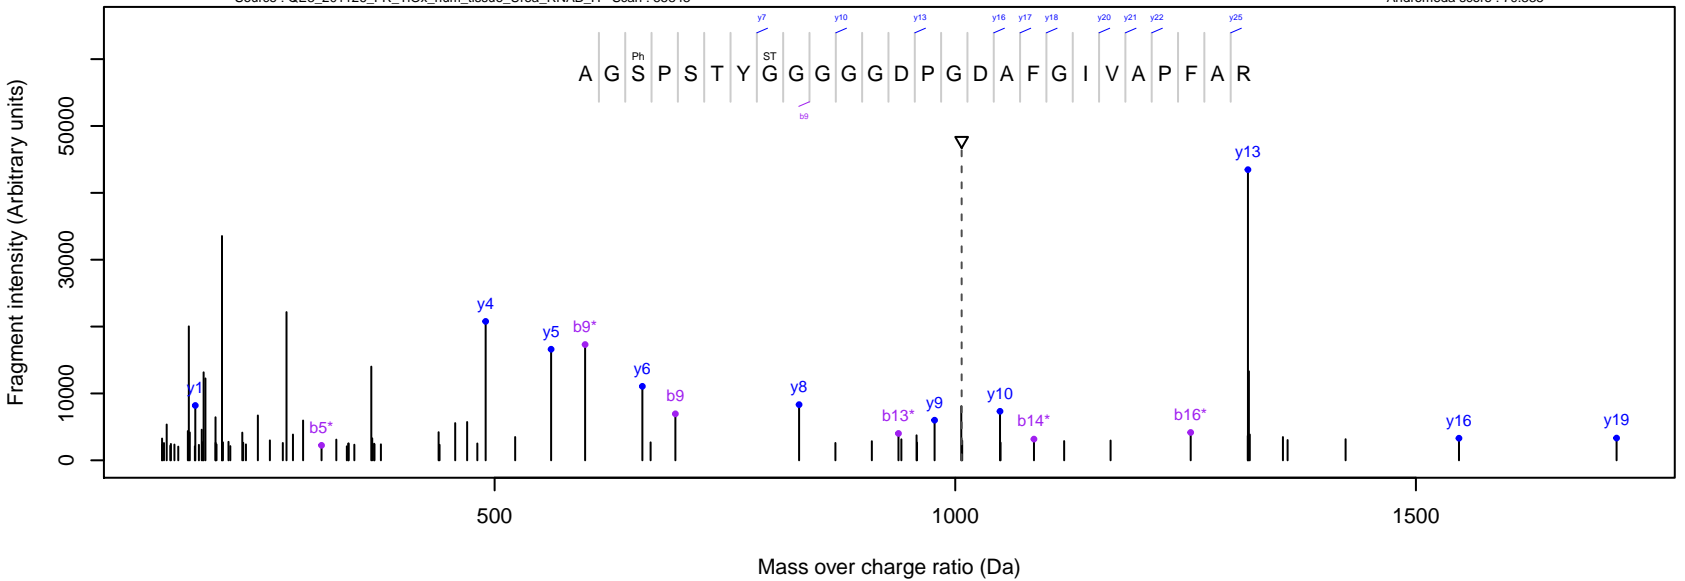

LGGKS(Phospho (STY))PPPPPPPPRR-3+

Source : QE3\_201126\_FR\_TiOx\_hum\_tissue\_Urea\_RNAB\_N Scan : 8462

Andromeda score : 70.335

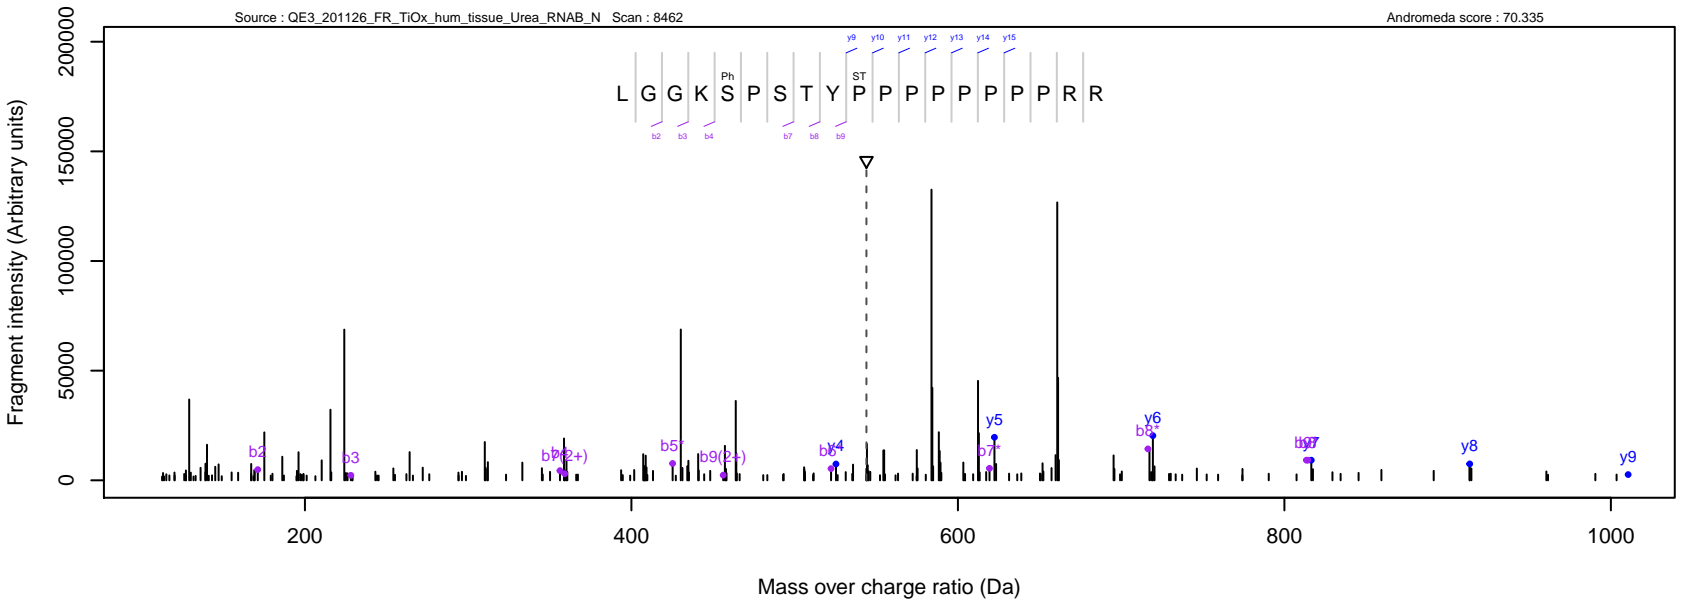

SEAGHAS(Phospho (STY))SPDSEVTSLCQK-3+

Source : QE3\_201126\_FR\_TiOx\_hum\_tissue\_Urea\_RNAB\_H Scan : 16051

Andromeda score : 70.335

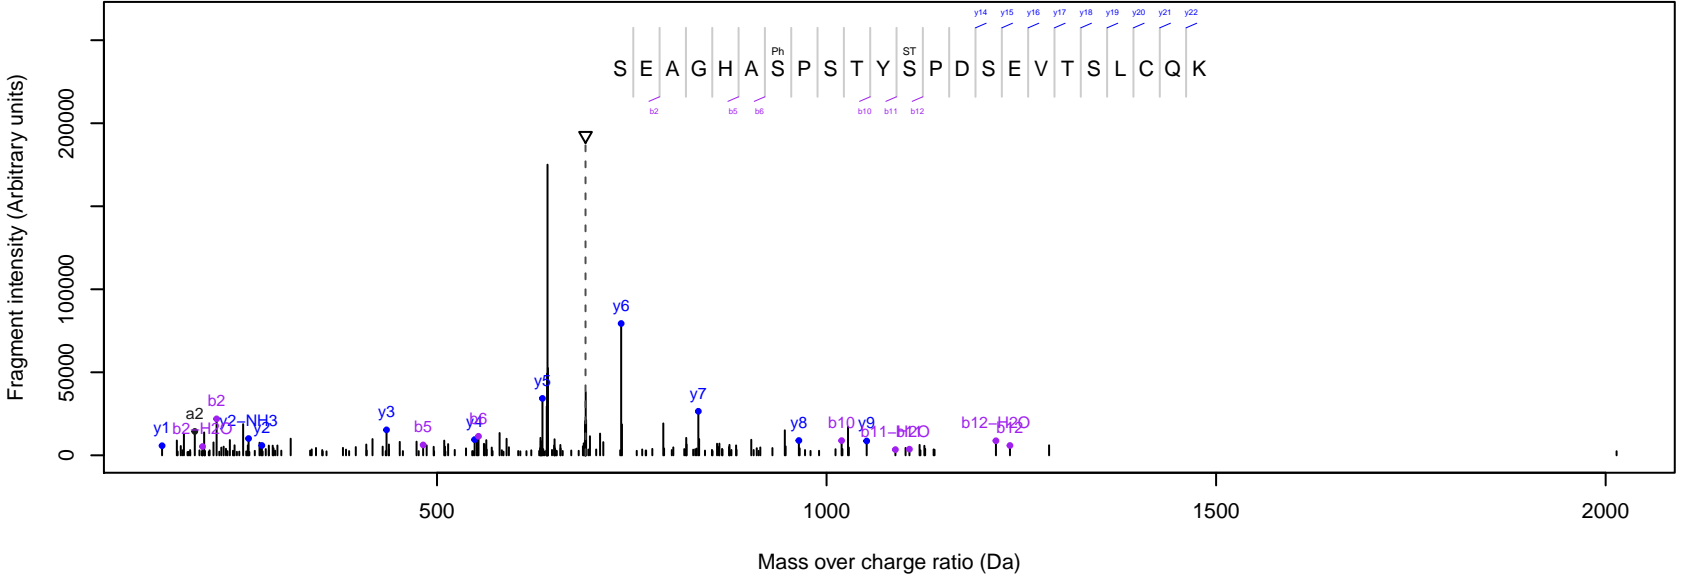

EALHTAGYEMSLNGS(Phospho (STY))PR-3+

Source : QE3\_201126\_FR\_TiOx\_hum\_tissue\_Urea\_RNAB\_N Scan : 24495

Andromeda score : 70.315

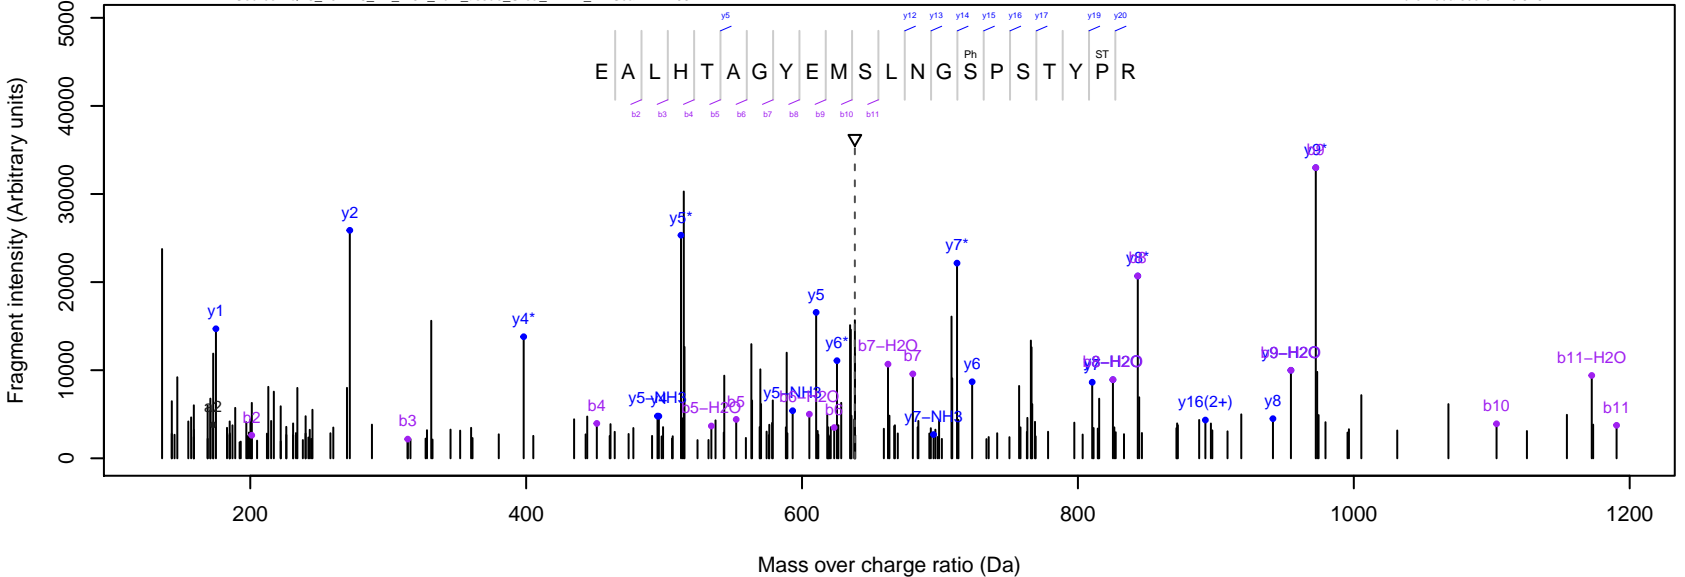



EATNTTSEPSQDLLDLS(Phospho (STY))PR-2+

Source : QE3\_201126\_FR\_TIOx\_hum\_tissue\_Urea\_RNAB\_B Scan : 42783

Andromeda score : 70.315

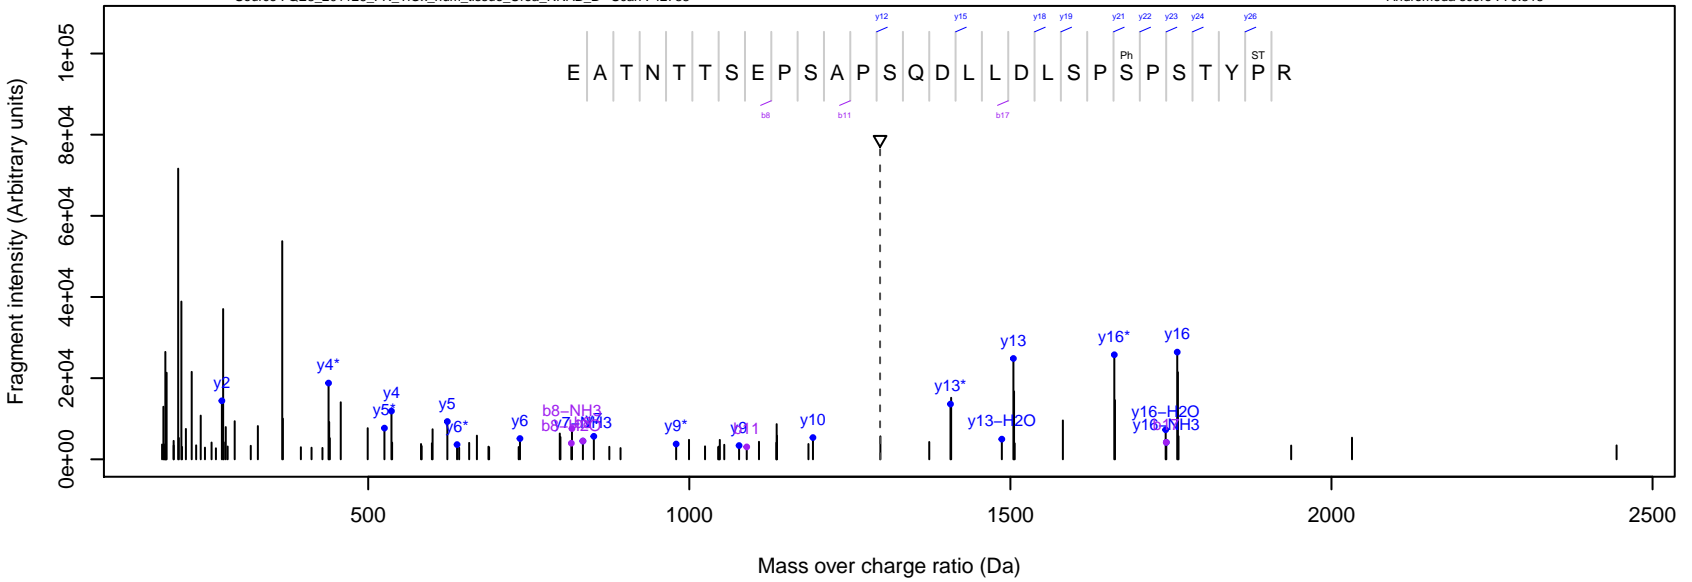

S(Phospho (STY))PS(Phospho (STY))PLRGNVVPSPLPTR-3+

Source : QE3\_201126\_FR\_TIOx\_hum\_tissue\_Urea\_RNAB\_H Scan : 37625

Andromeda score : 70.315

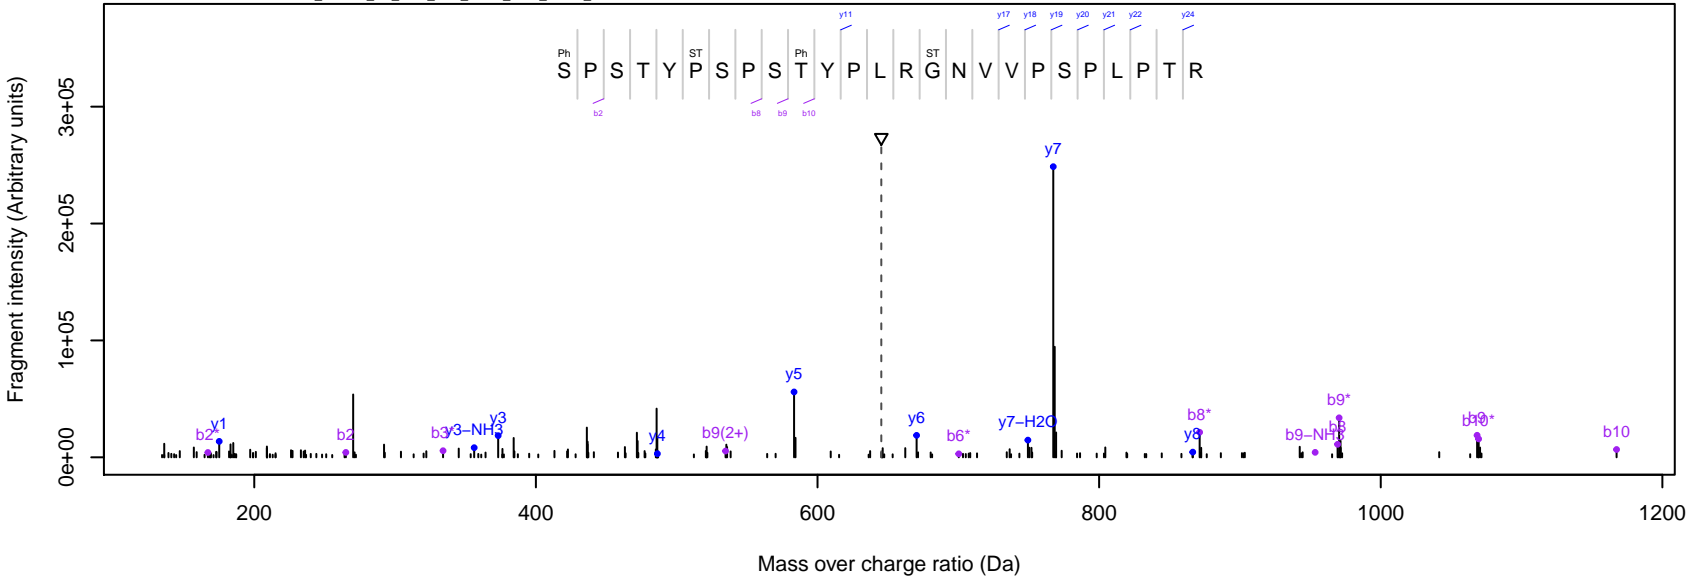

S(Phospho (STY))SFSHYSG LKHEDKR-4+

Source : QE3\_201126\_FR\_TIOx\_hum\_tissue\_Urea\_RNAB\_N Scan : 7173

Andromeda score : 70.281

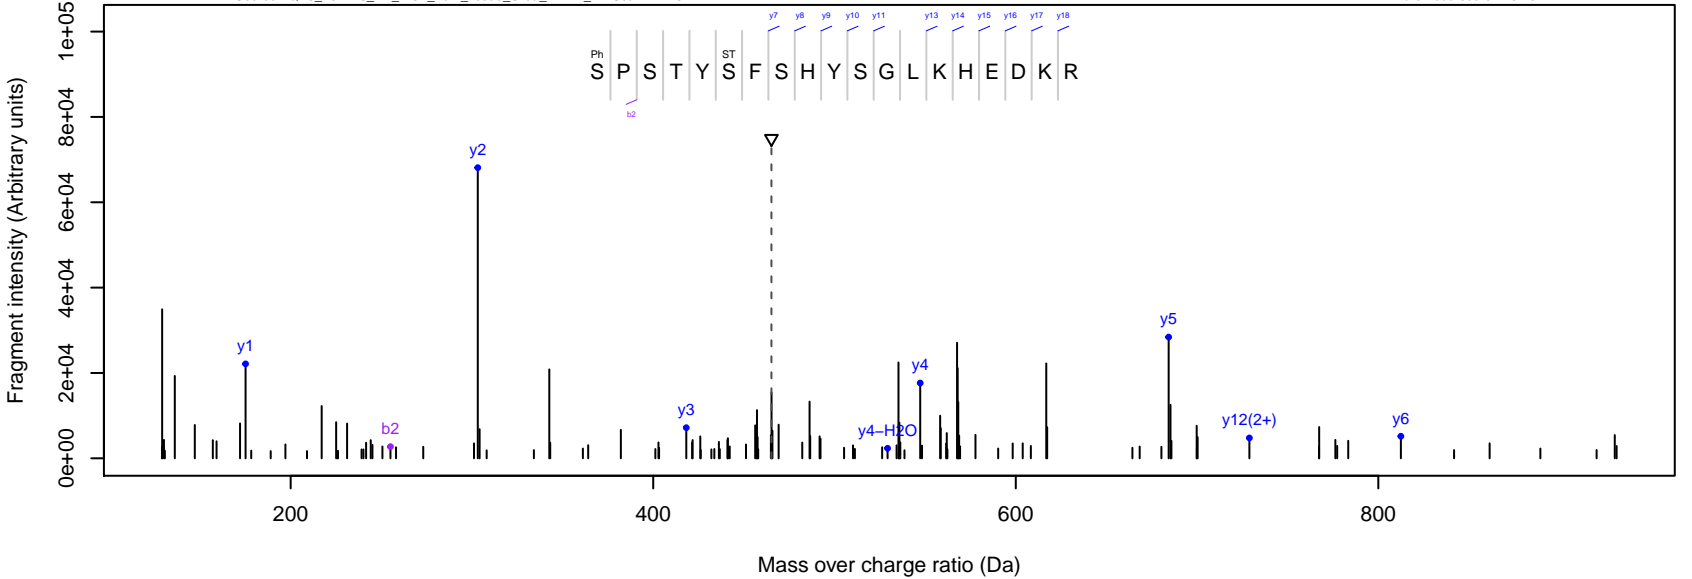

S(Phospho (STY))YTLVVAK-2+

Source : QE3\_201126\_FR\_TiOx\_hum\_tissue\_Urea\_RNAB\_N Scan : 24625

Andromeda score : 70.256

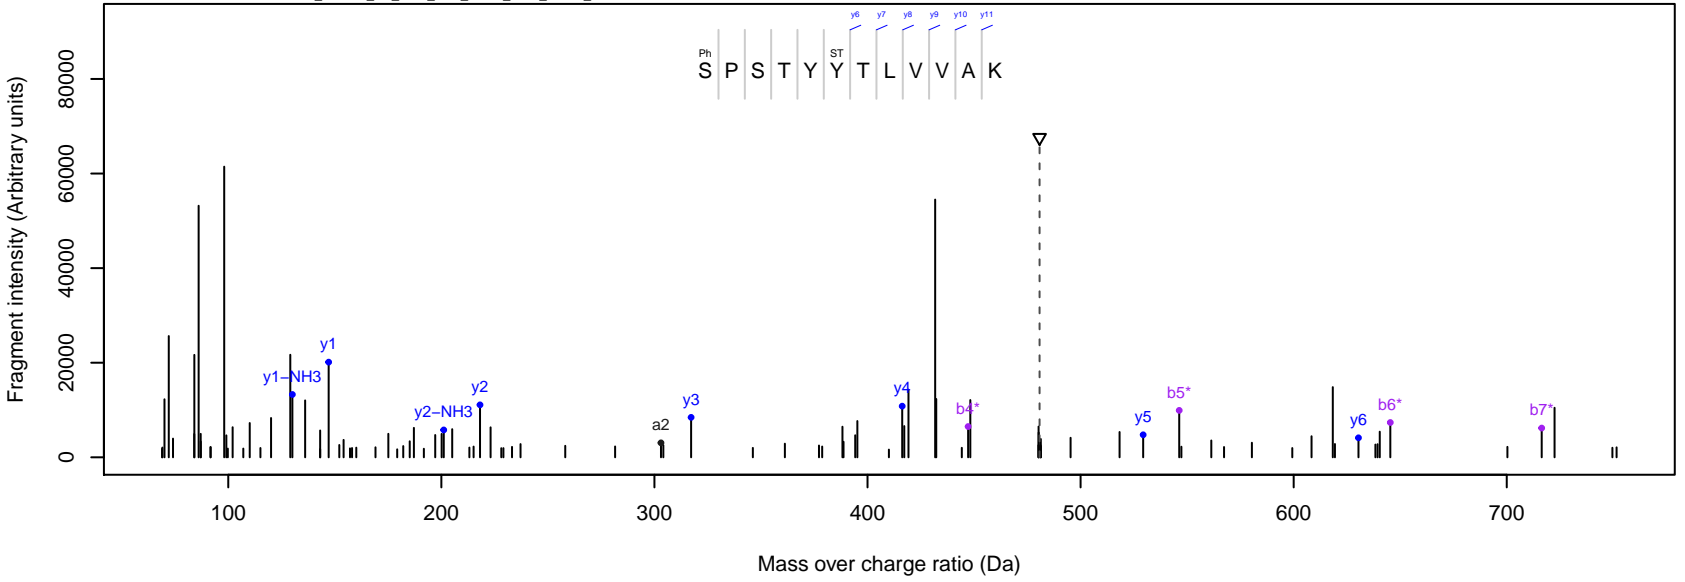

GNHVIRDEEVS(Phospho (STY))SADISSSEVISQHLVSYR-4+

Source : QE3\_201126\_FR\_TiOx\_hum\_tissue\_Urea\_RNAB\_H Scan : 35148

Andromeda score : 70.213

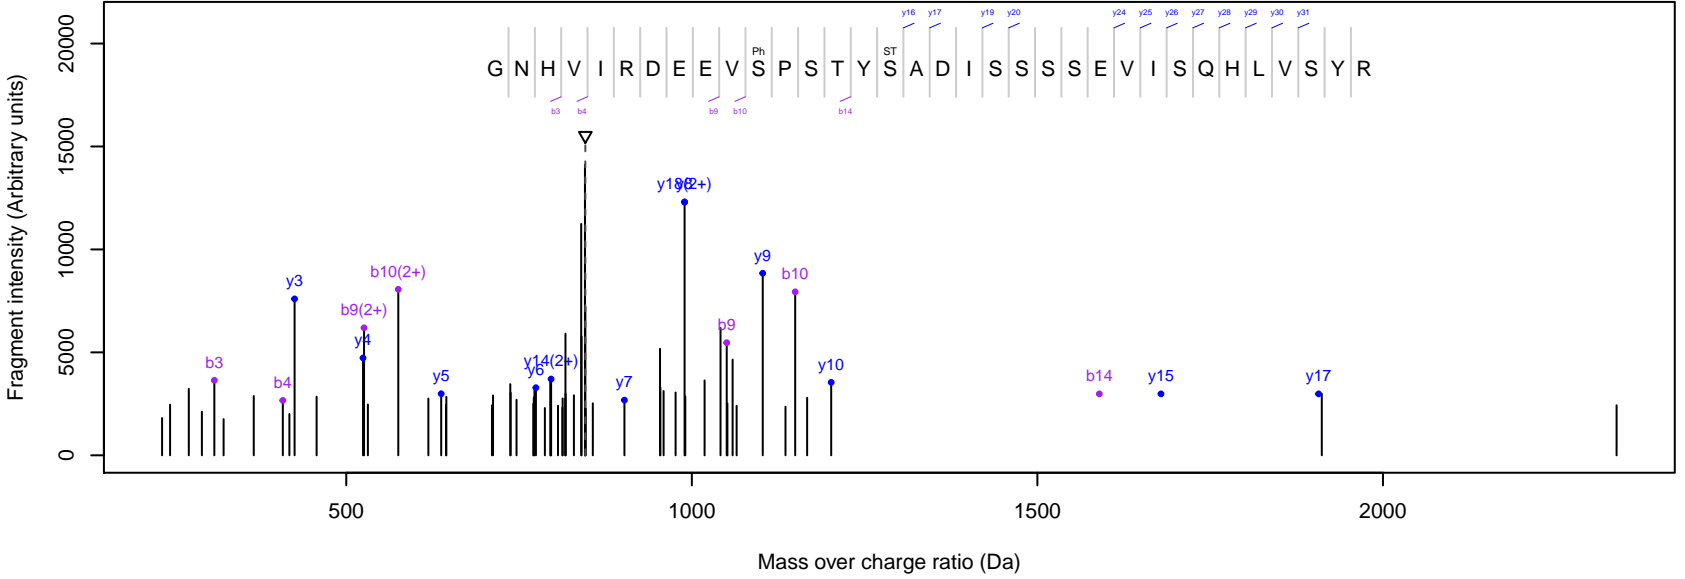

(Acetyl (Protein N-term))SDFVES(Phospho (STY))EAEES(Phospho (STY))EEEYNDEGEVPR-3+

Source : QE3\_201126\_FR\_TiOx\_hum\_tissue\_Urea\_RNAB\_H Scan : 61036

Andromeda score : 70.213

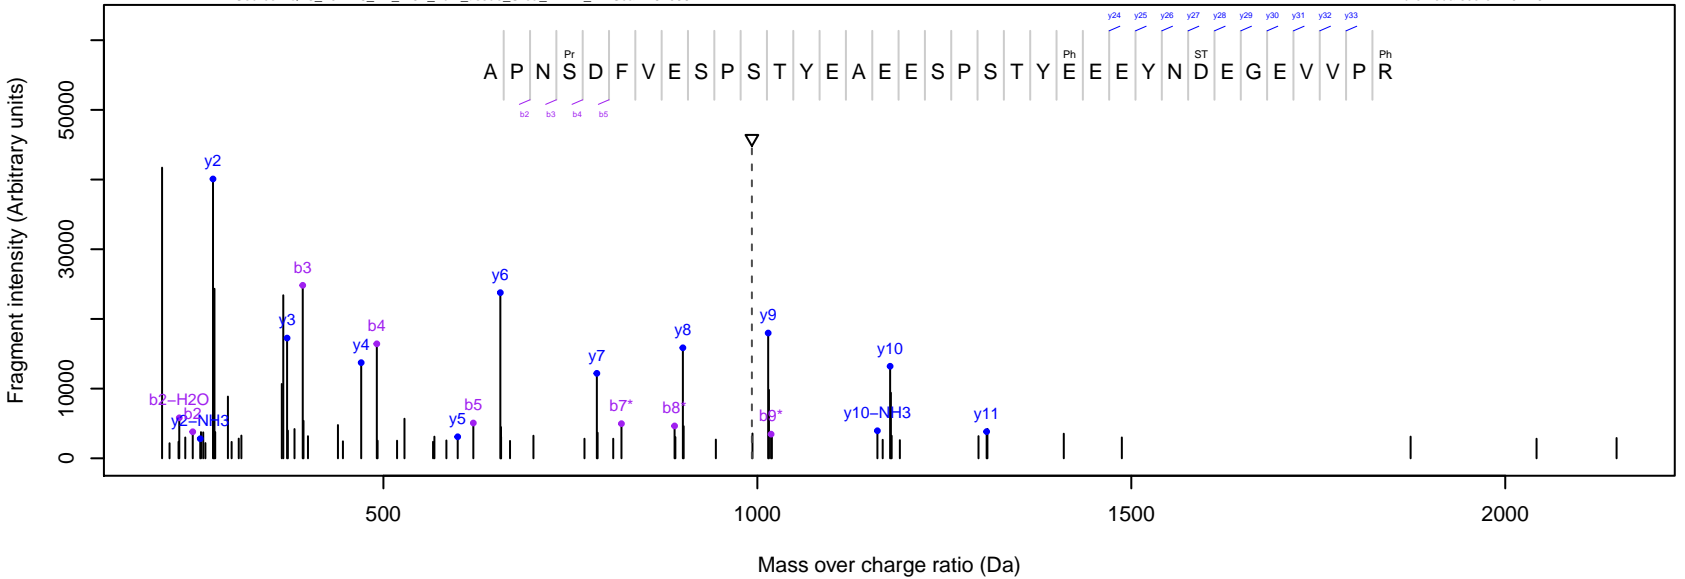

EKGPTTGEGALDLSDVHS(Phospho (STY))PPKSPEGK-4+

Source : QE3\_201126\_FR\_TiOx\_hum\_tissue\_Urea\_RNAB\_H Scan : 18400

Andromeda score : 70.154

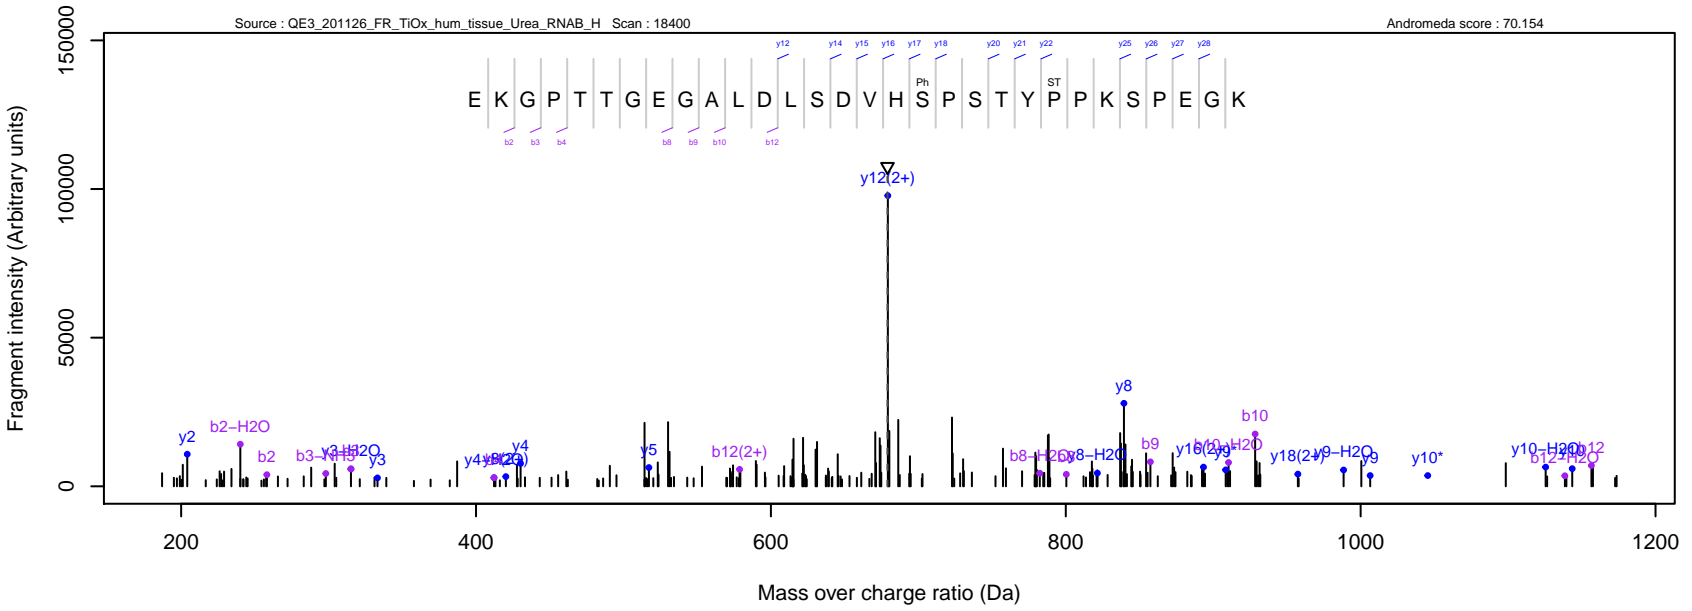

NNTAAET(Phospho (STY))EDDES(Phospho (STY))DGEDRGGGTSGSLRR-3+

Source : QE3\_201126\_FR\_TiOx\_hum\_tissue\_Urea\_RNAB\_N Scan : 8746

Andromeda score : 70.151

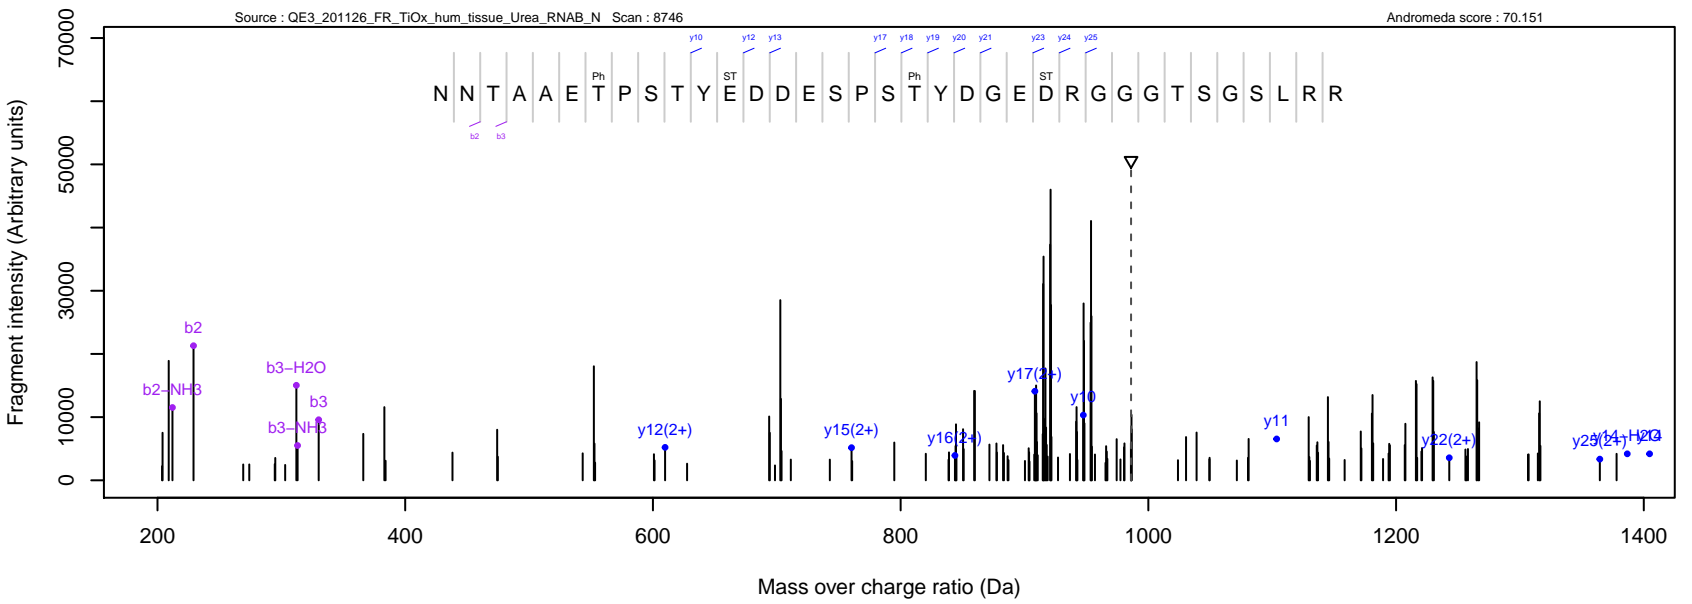

QQSHFAMMHGGTFAGIDSS(Phospho (STY))PEVK-4+

Source : QE3\_201126\_FR\_TiOx\_hum\_tissue\_Urea\_RNAB\_H Scan : 29014

Andromeda score : 70.151

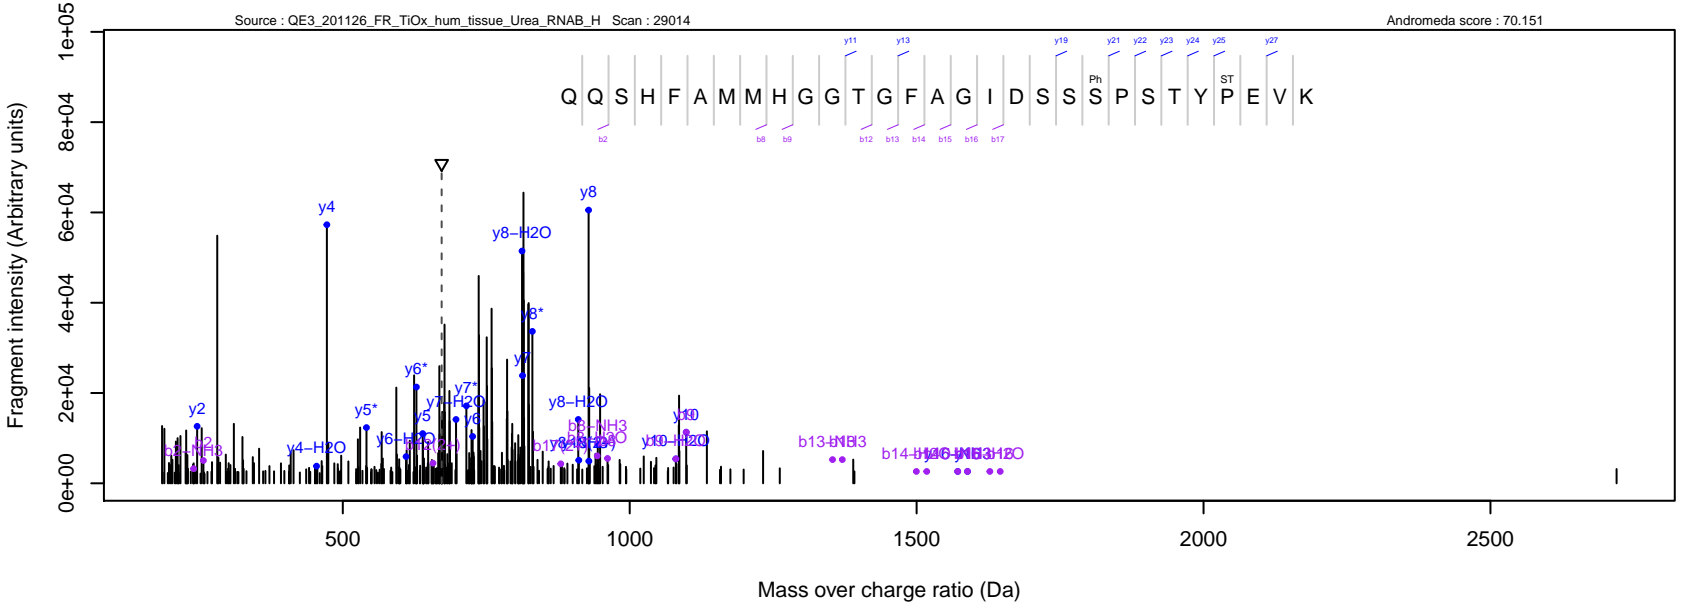



S(Phospho (STY))LVISPPV-2+

Source : QE3\_201126\_FR\_TiOx\_hum\_tissue\_Urea\_RNAB\_H Scan : 31260

Andromeda score : 70.1

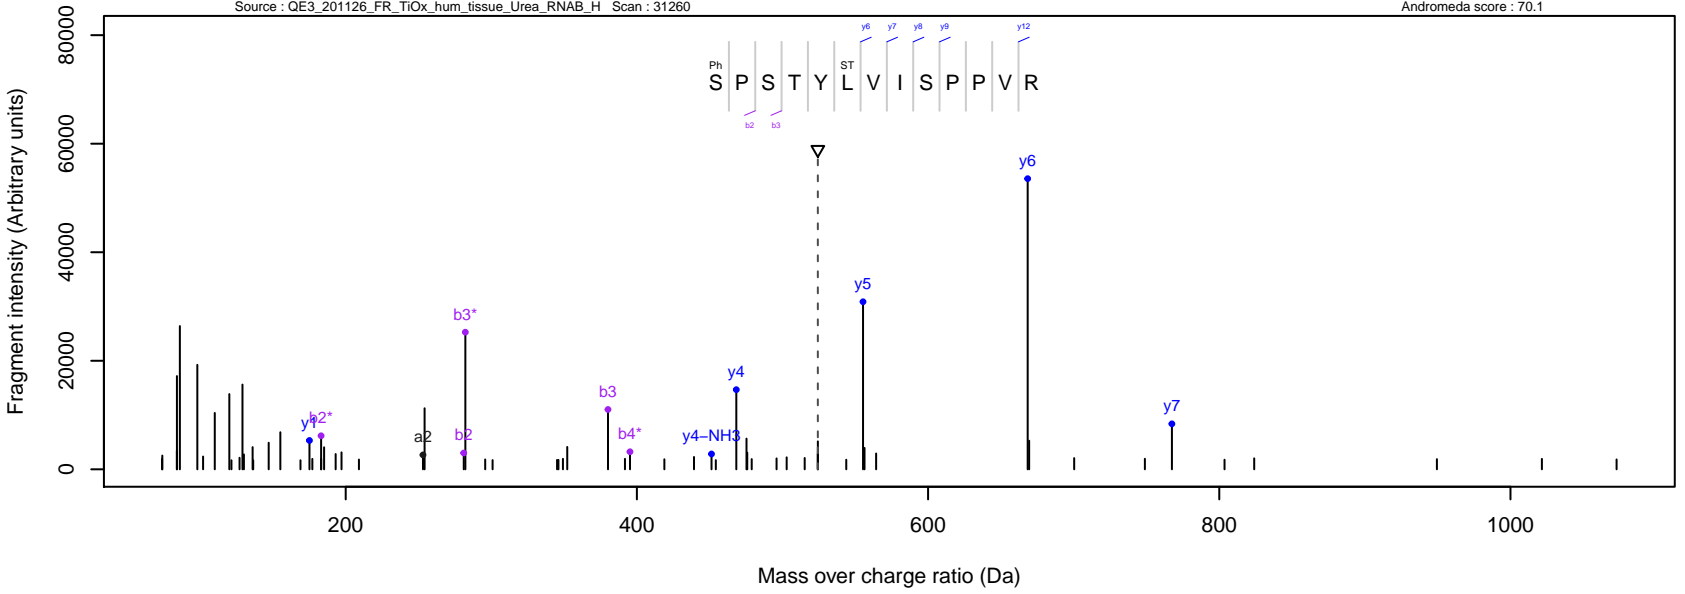

TISINS(Phospho (STY))PK-2+

Source : QE3\_201126\_FR\_TiOx\_hum\_tissue\_Urea\_RNAB\_N Scan : 12836

Andromeda score : 70.1

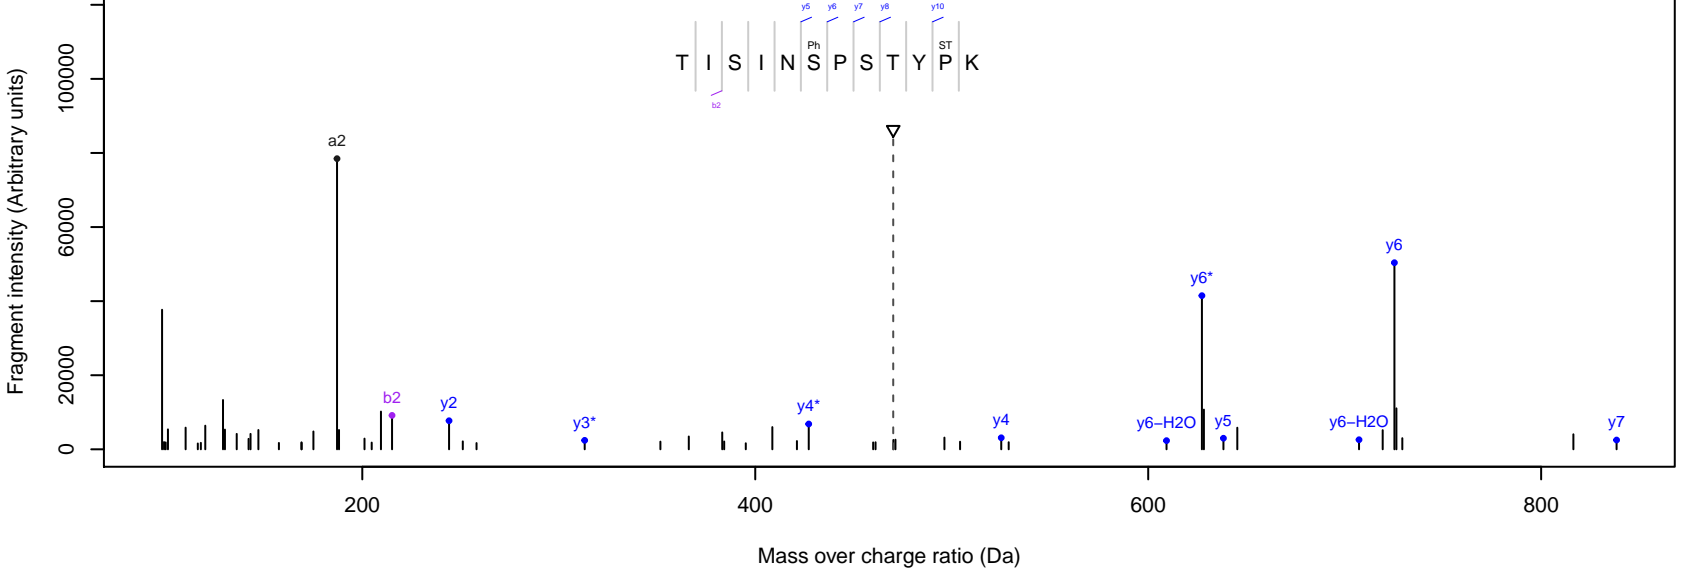

RFSSSDFS(Phospho (STY))DLSNGEELQETCSSLR-3+

Source : QE3\_201126\_FR\_TiOx\_hum\_tissue\_Urea\_RNAB\_B Scan : 39194

Andromeda score : 70.091

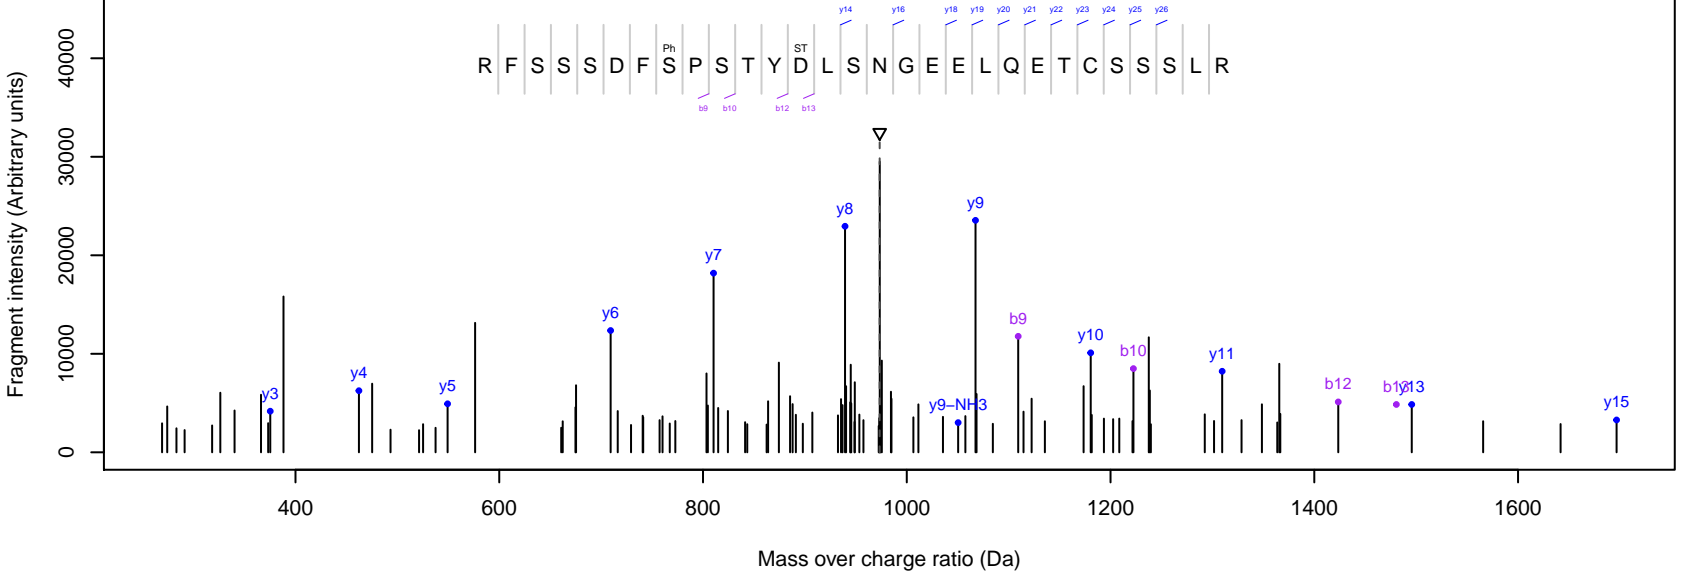

QSS(Phospho (STY))DPMLSEFK-2+

Source : QE3\_201126\_FR\_TiOx\_hum\_tissue\_Urea\_RNAB\_H Scan : 35466

Andromeda score : 70.089

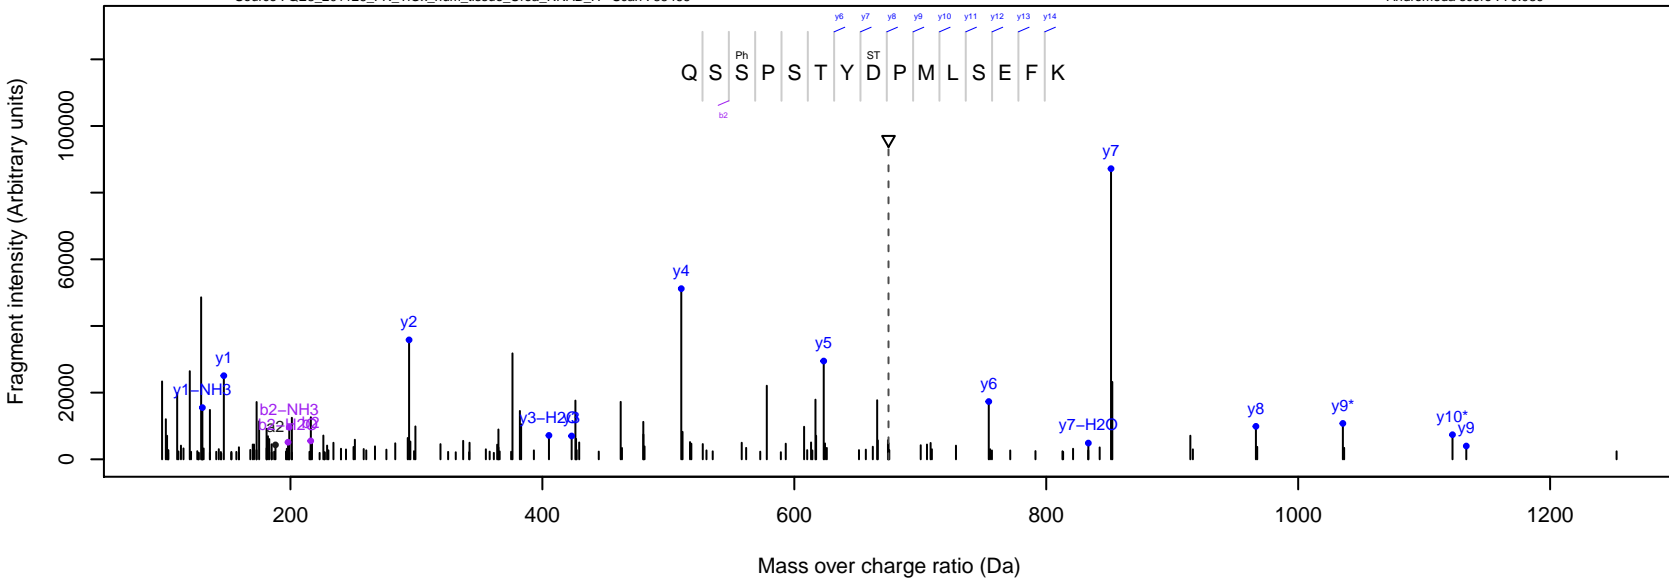

TNPPTQKPPS(Phospho (STY))PPMSGR-3+

Source : QE3\_201126\_FR\_TiOx\_hum\_tissue\_Urea\_RNAB\_B Scan : 12773

Andromeda score : 70.072

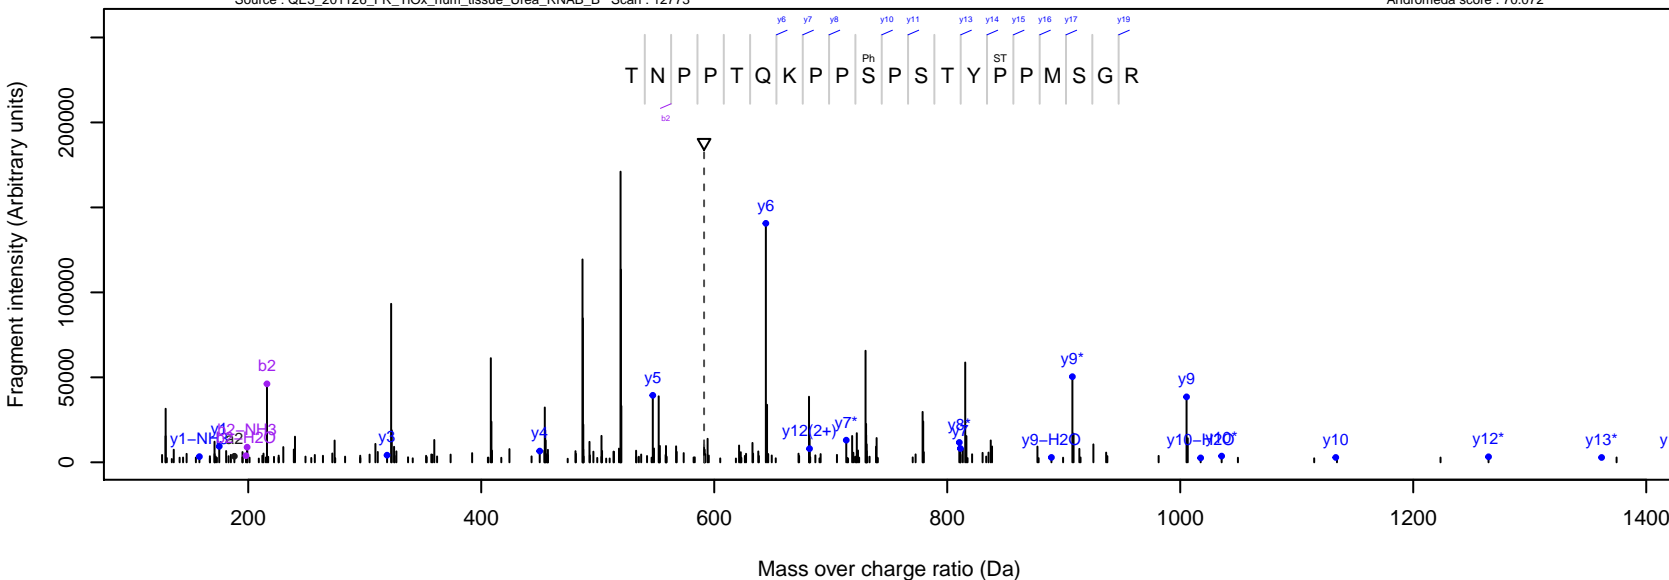

LAS(Phospho (STY))PELER-2+

Source : QE3\_201126\_FR\_TiOx\_hum\_tissue\_Urea\_RNAB\_H Scan : 15739

Andromeda score : 70.028

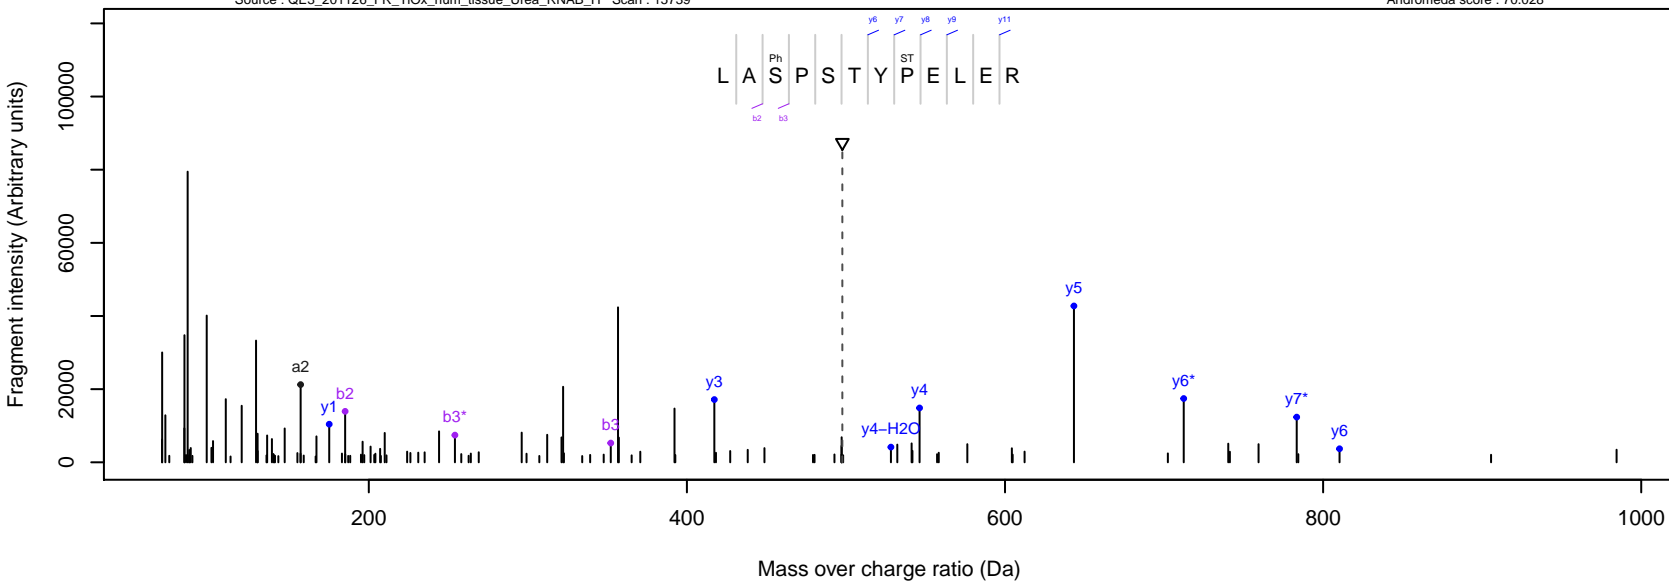

**VIHFVSGETM(Oxidation (M))EEYS(Phospho (STY))T(Phospho (STY))DEDEVGLEKK-3+**

Source : QE3\_201126\_FR\_TiOx\_hum\_tissue\_Urea\_RNAB\_N Scan : 34708

Andromeda score : 70.028

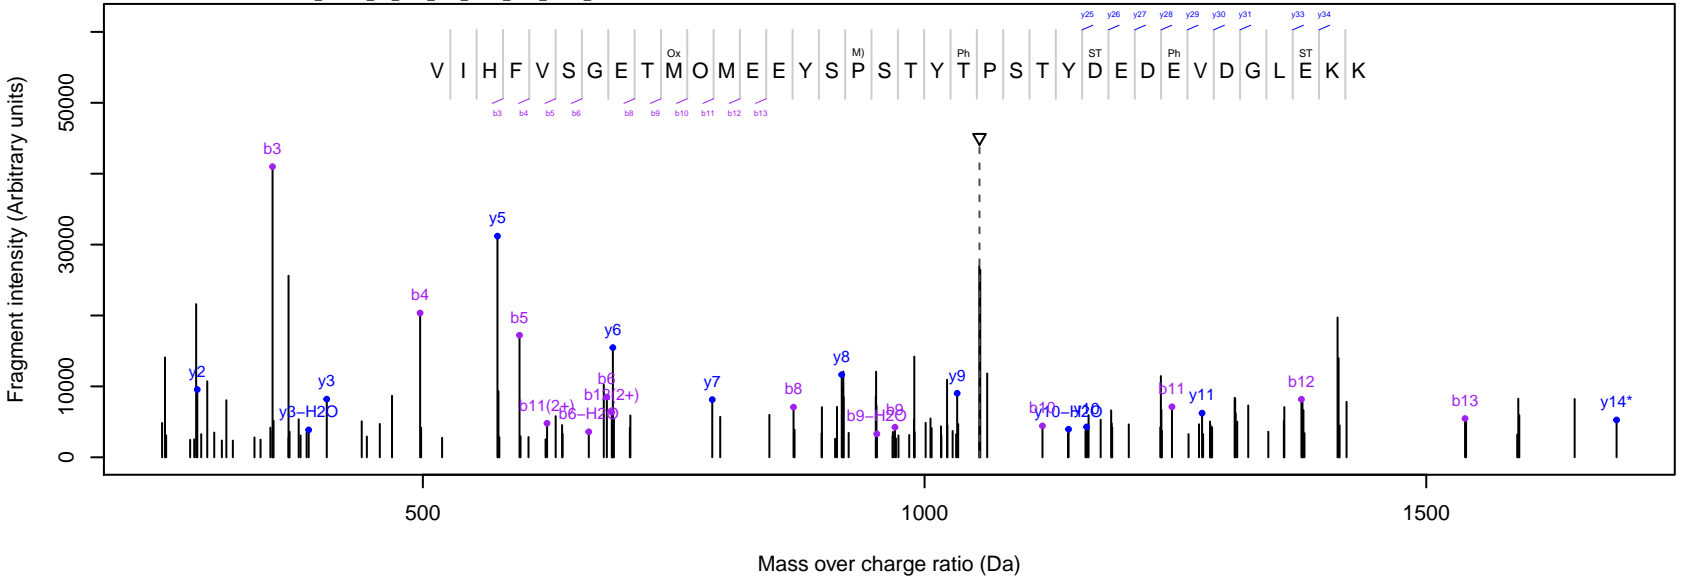

**SPSPTLGESLAPHKGS(Phospho (STY))FSGR-3+**

Source : QE3\_201126\_FR\_TiOx\_hum\_tissue\_Urea\_RNAB\_H Scan : 19378

Andromeda score : 69.981

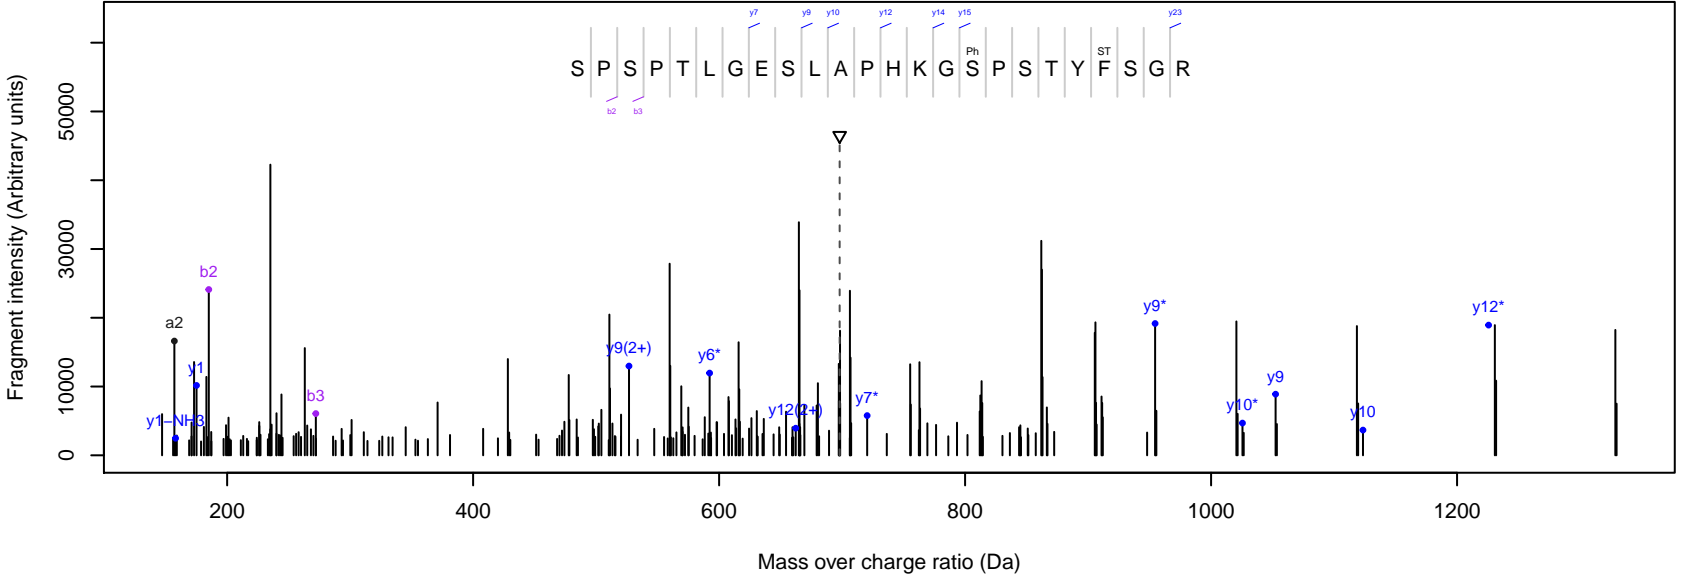

**IT(Phospho (STY))SEAEDLVANFFPK-2+**

Source : QE3\_201126\_FR\_TiOx\_hum\_tissue\_Urea\_RNAB\_B Scan : 62502

Andromeda score : 69.979

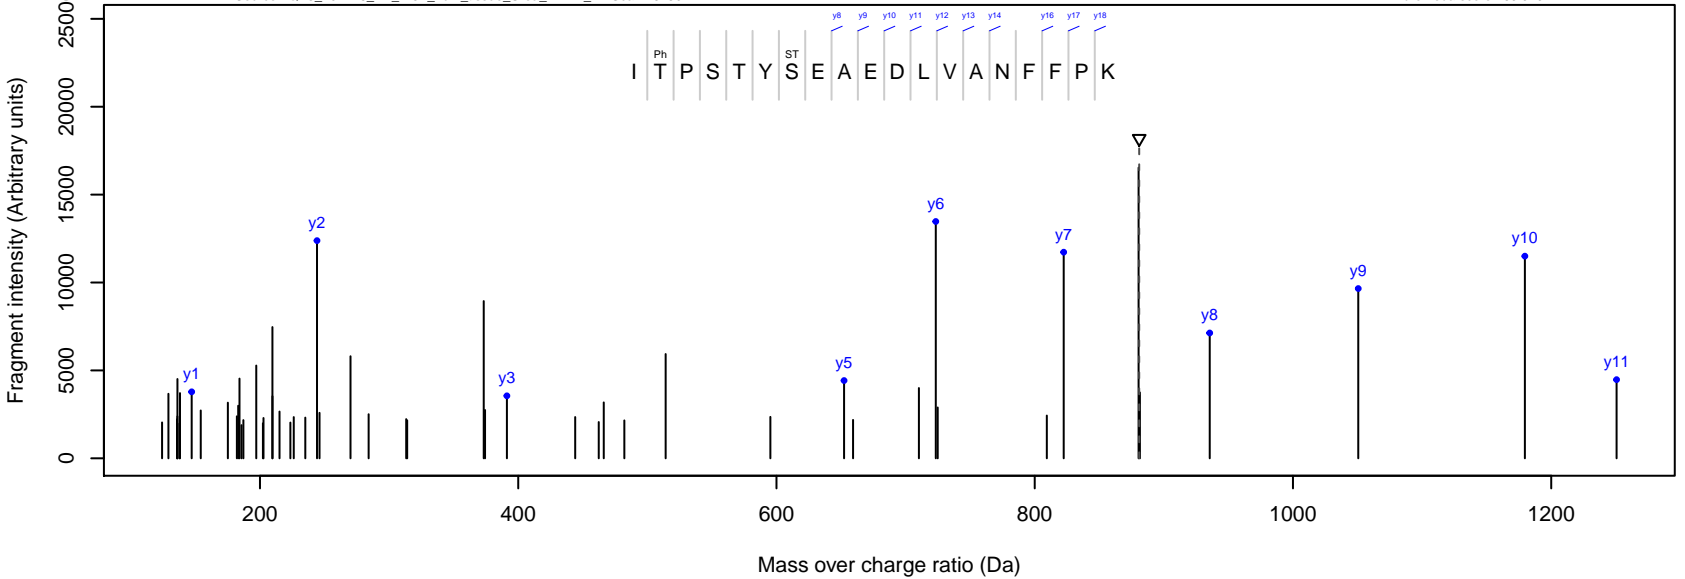

(Acetyl (Protein N-term))S(Phospho (STY))SIKIECVLPENCR-2+

Source : QE3\_201126\_FR\_TiOx\_hum\_tissue\_Urea\_RNAB\_N Scan : 42128

Andromeda score : 69.979

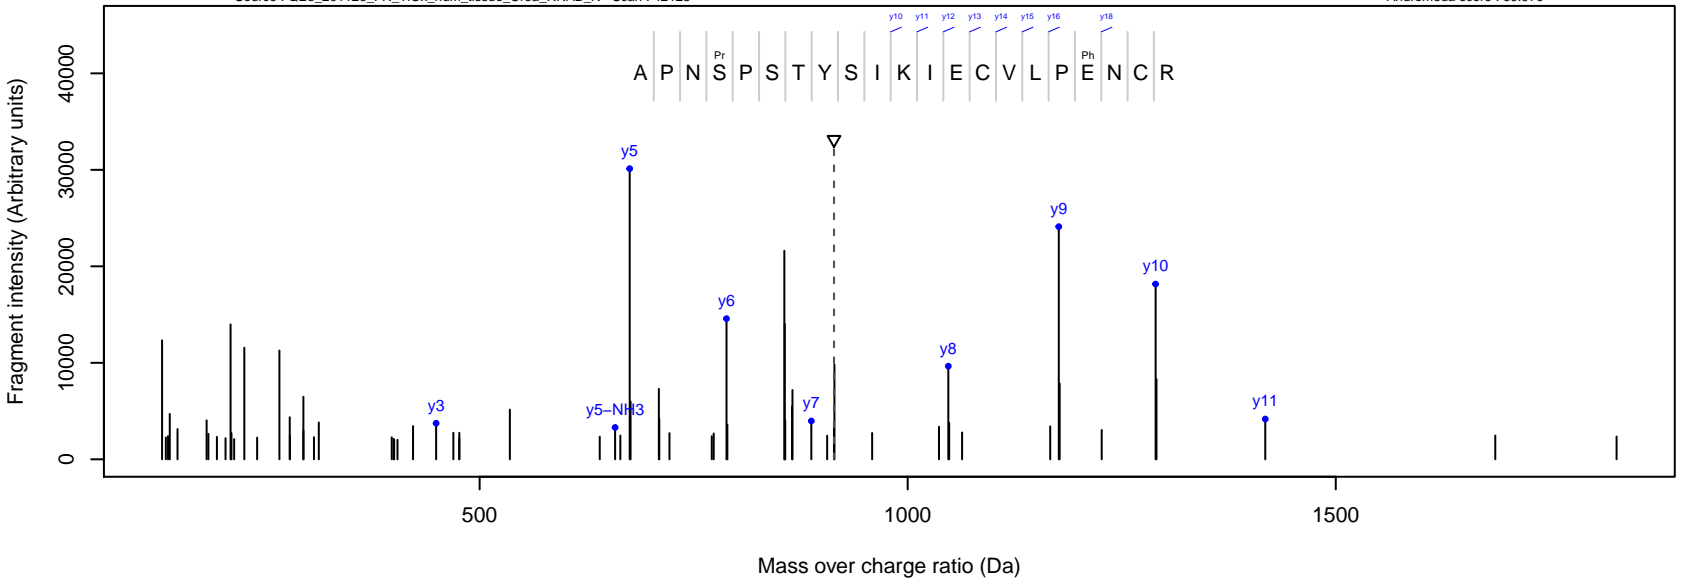

TS(Phospho (STY))ETSI(Phospho (STY))PPGSSIGSPNR-2+

Source : QE3\_201126\_FR\_TiOx\_hum\_tissue\_Urea\_RNAB\_N Scan : 28981

Andromeda score : 69.979

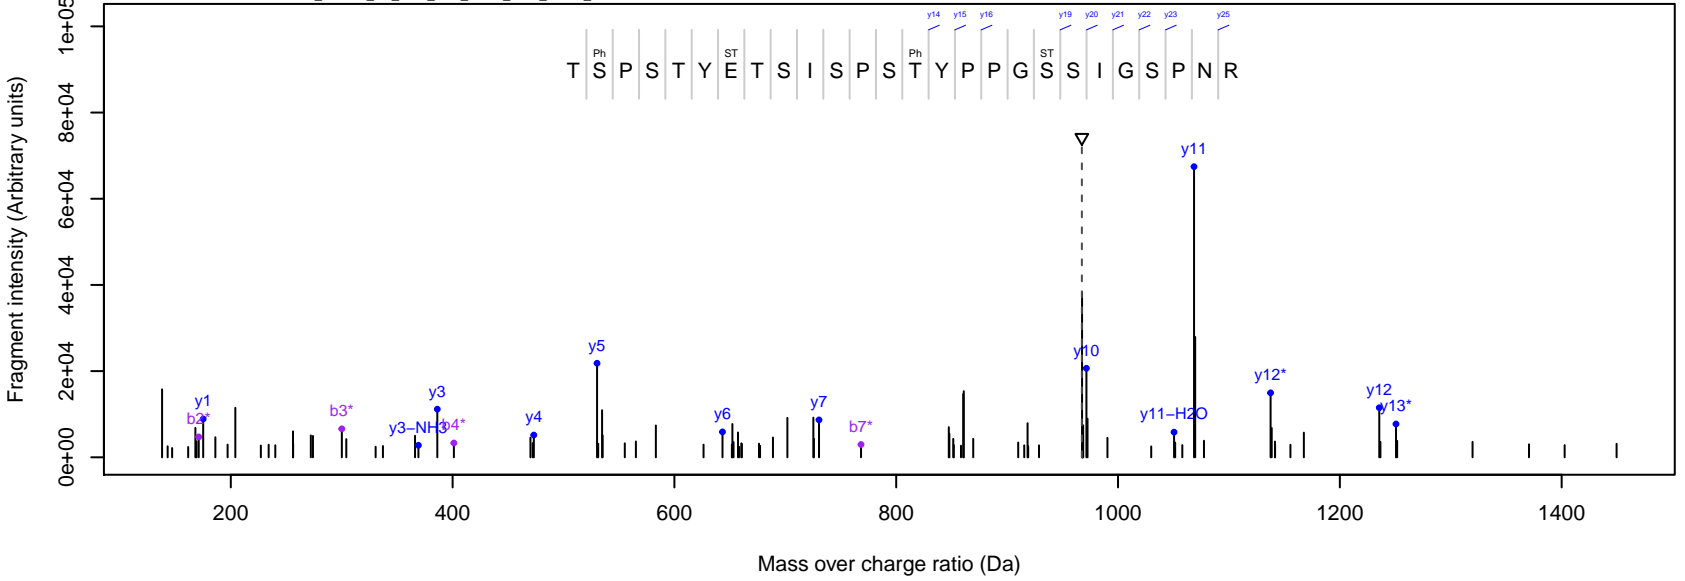

LIKEPAPDSGLLGLFQQNS(Phospho (STY))LLH-3+

Source : QE3\_201126\_FR\_TiOx\_hum\_tissue\_Urea\_RNAB\_B Scan : 57360

Andromeda score : 69.952

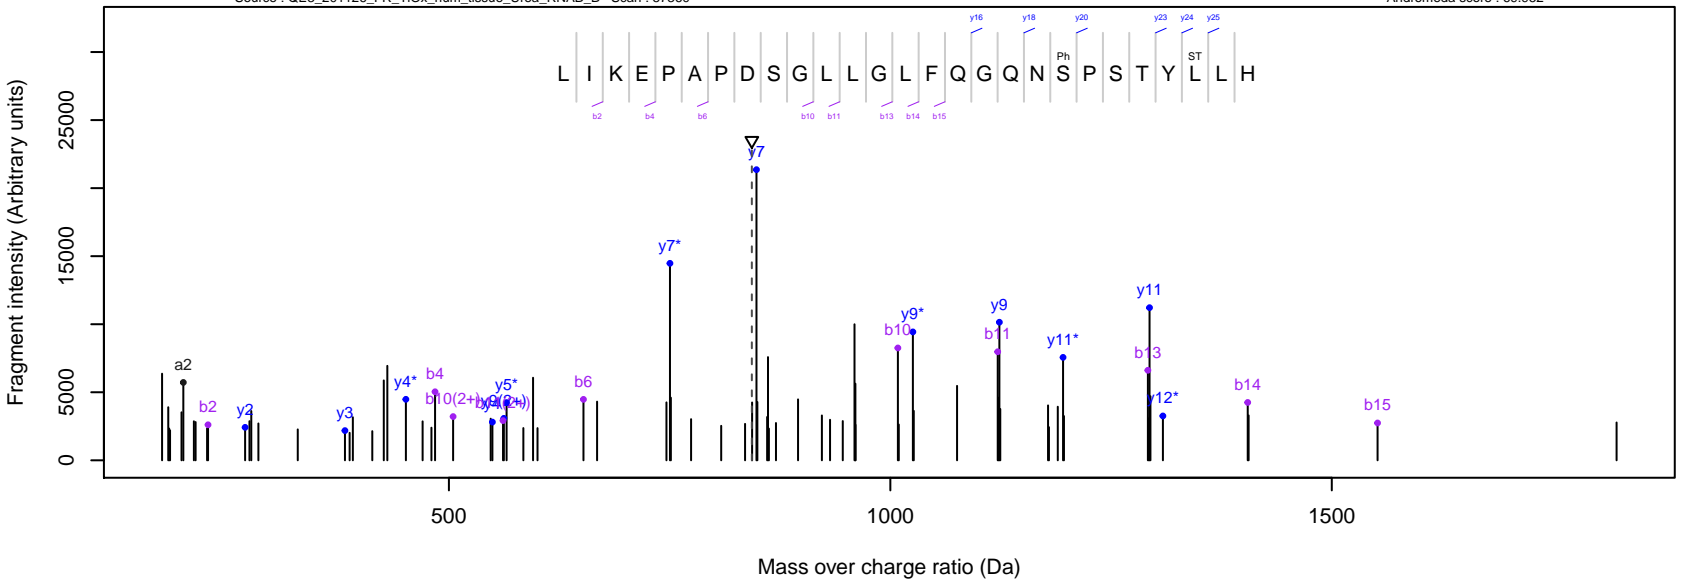



KS(Phospho (STY))REDLSAQPVQTK-3+

Source : QE3\_201126\_FR\_TiOx\_hum\_tissue\_Urea\_RNAB\_H Scan : 6736

Andromeda score : 69.935

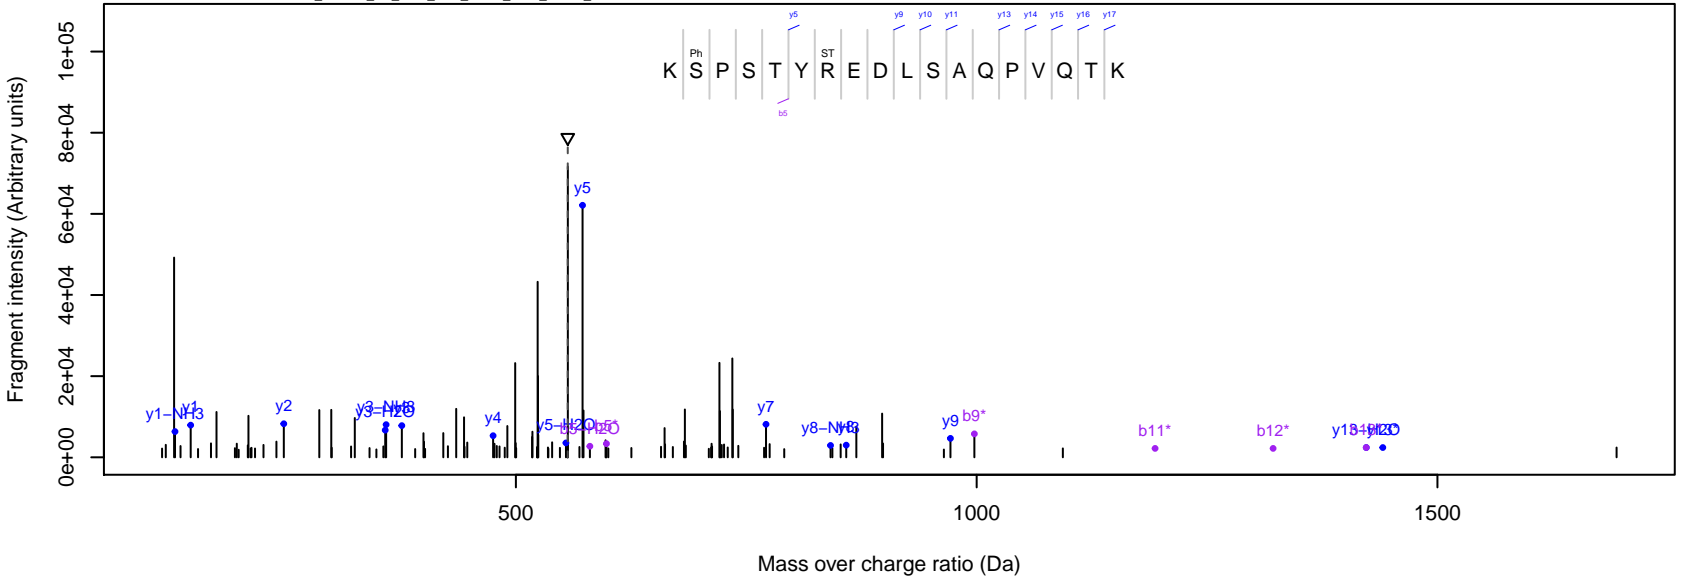

KFS(Phospho (STY))PSQVPVQTR-2+

Source : QE3\_201126\_FR\_TiOx\_hum\_tissue\_Urea\_RNAB\_B Scan : 17174

Andromeda score : 69.92

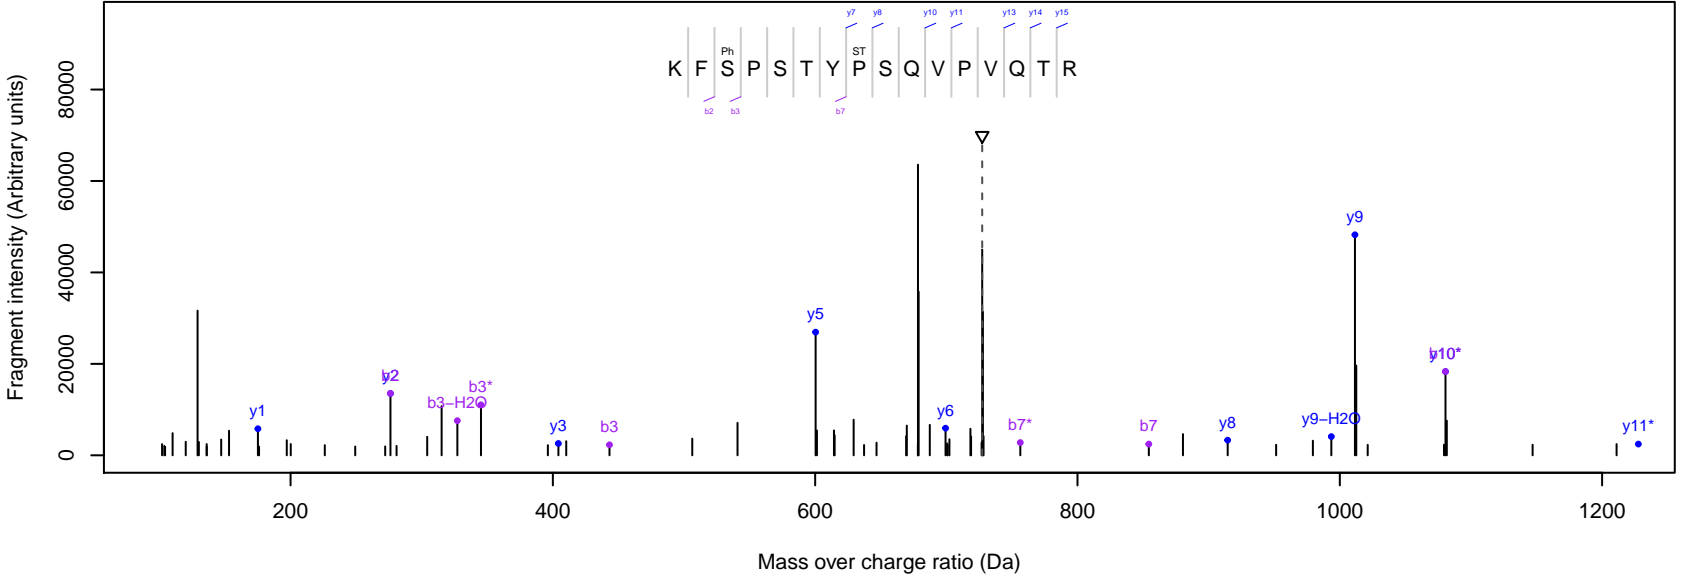

SGSSS(Phospho (STY))PDSEITELK-2+

Source : QE3\_201126\_FR\_TiOx\_hum\_tissue\_Urea\_RNAB\_H Scan : 24471

Andromeda score : 69.92

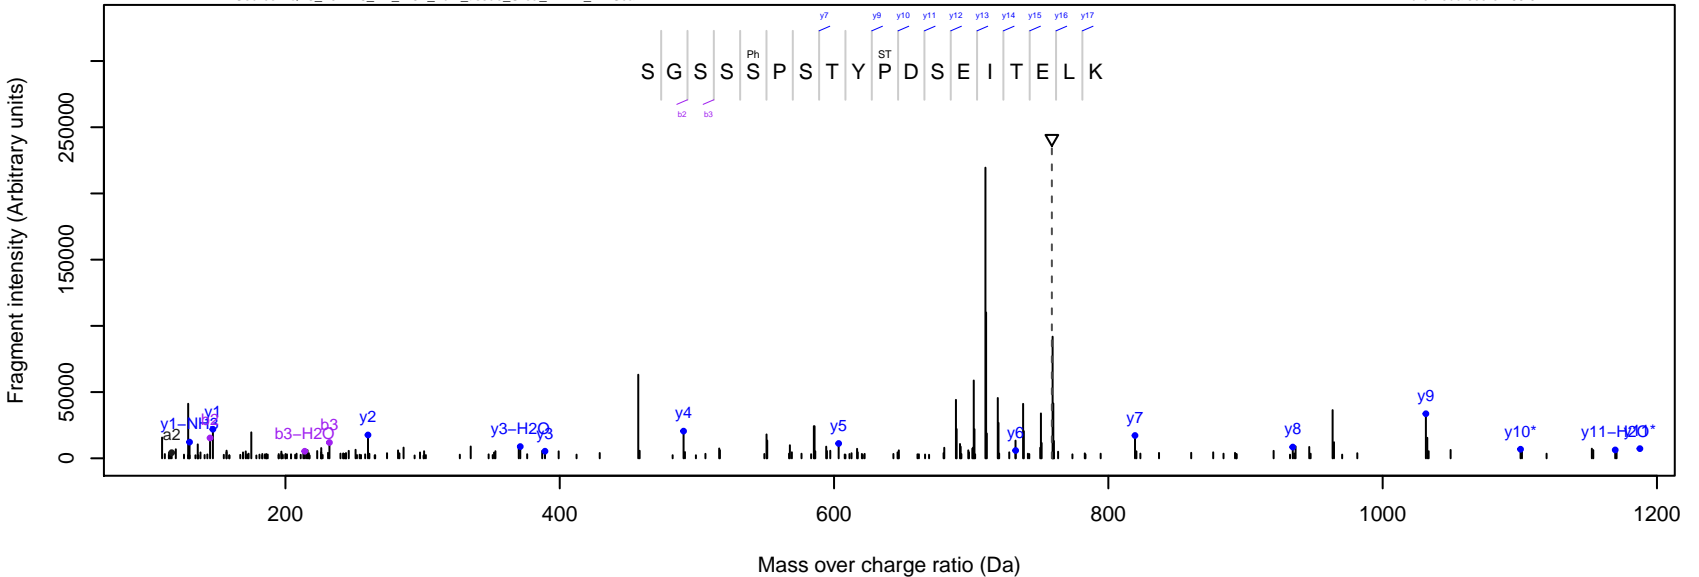

S(Phospho (STY))LLPTDYLV E I N K-2+

Source : QE3\_201126\_FR\_TIOx\_hum\_tissue\_Urea\_RNAB\_N Scan : 54731

Andromeda score : 69.92

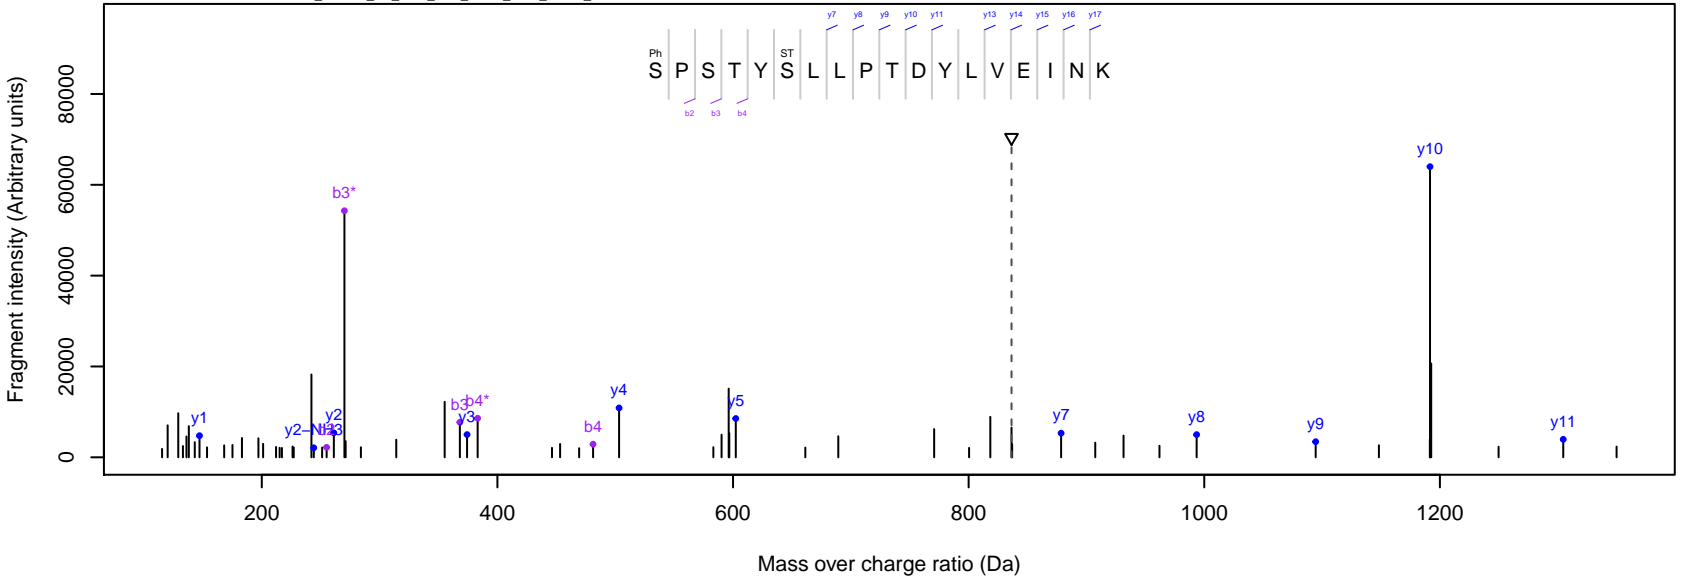

TGSSS(Phospho (STY))PPGGPPKPGSQLDSM(Oxidation (M))LGS LQSDLN K-3+

Source : QE3\_201126\_FR\_TIOx\_hum\_tissue\_Urea\_RNAB\_H Scan : 38264

Andromeda score : 69.885

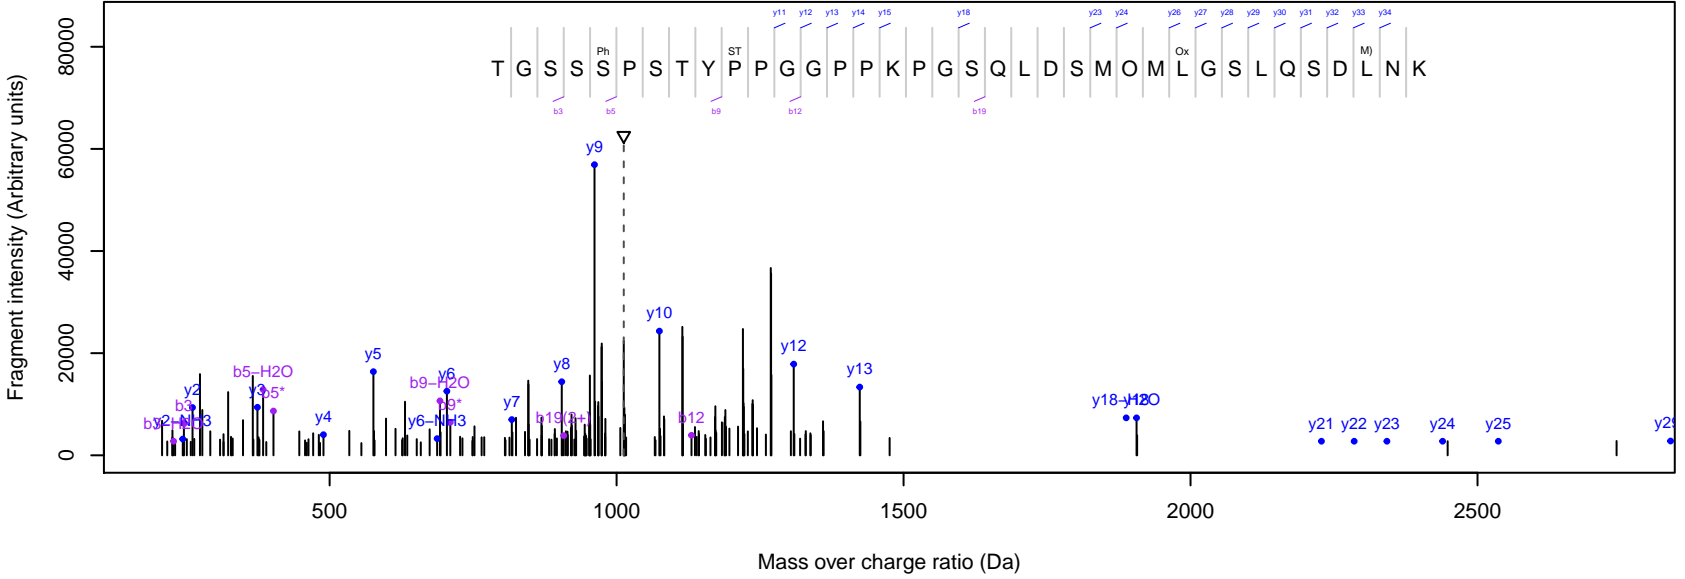

RFS(Phospho (STY))DFLGLHSK-3+

Source : QE3\_201126\_FR\_TIOx\_hum\_tissue\_Urea\_RNAB\_N Scan : 31671

Andromeda score : 69.878

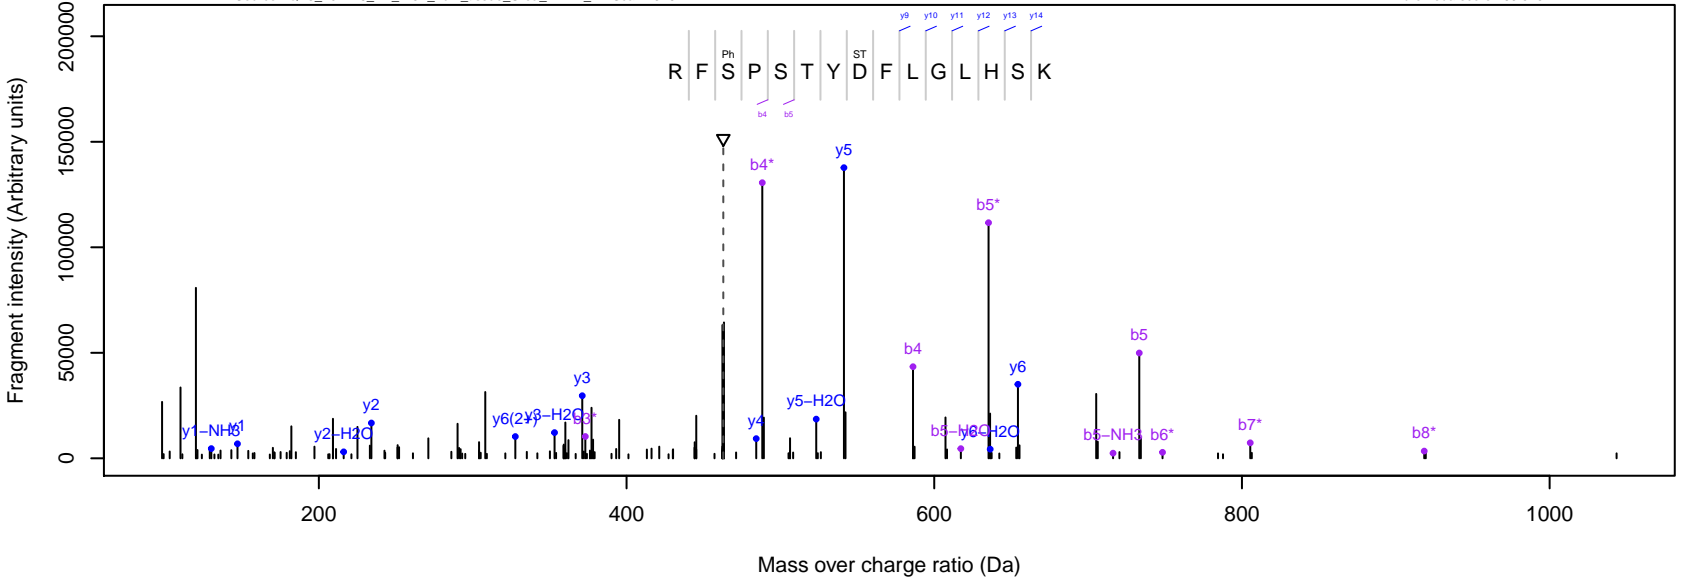

AGM(Oxidation (M))SSNQSIS(Phospho (STY))SPVLDAVPRT(Phospho (STY))PSRER-3+

Source : QE3\_201126\_FR\_TiOx\_hum\_tissue\_Urea\_RNAB\_B Scan : 25959

Andromeda score : 69.873

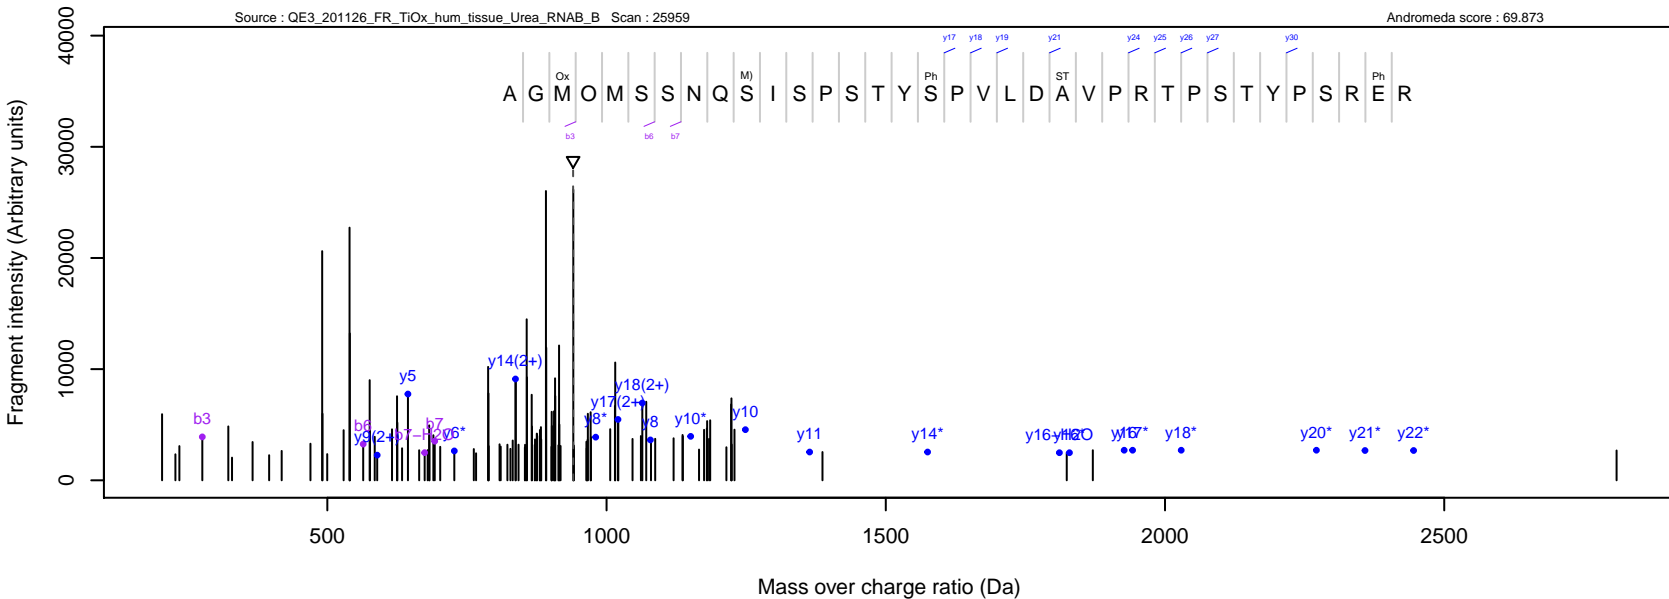

HQVLLEDPEQEGS(Phospho (STY))AEEEEELGVLPSTSLDGENR-4+

Source : QE3\_201126\_FR\_TiOx\_hum\_tissue\_Urea\_RNAB\_H Scan : 49743

Andromeda score : 69.873

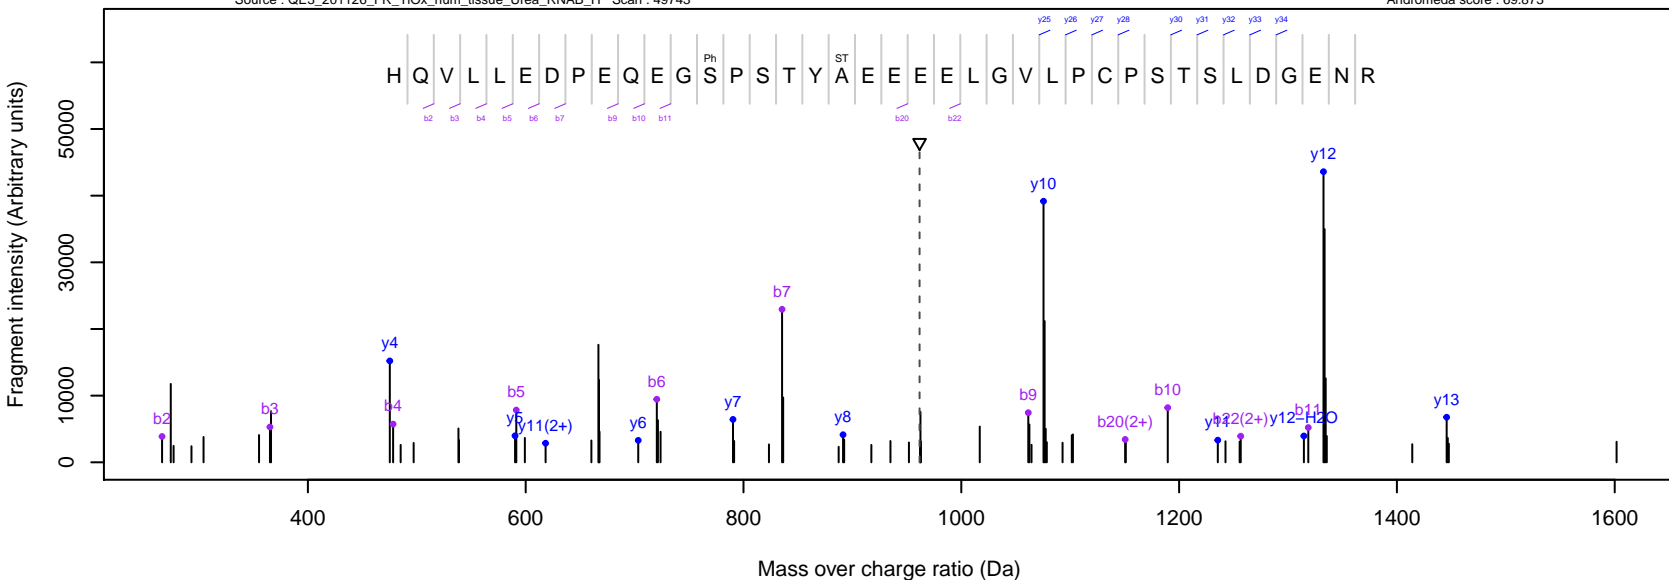

KVPVPEGLDLDAWINEPLSDSPSTY(ESEDERPR)-4+

Source : QE3\_201126\_FR\_TiOx\_hum\_tissue\_Urea\_RNAB\_B Scan : 52682

Andromeda score : 69.873

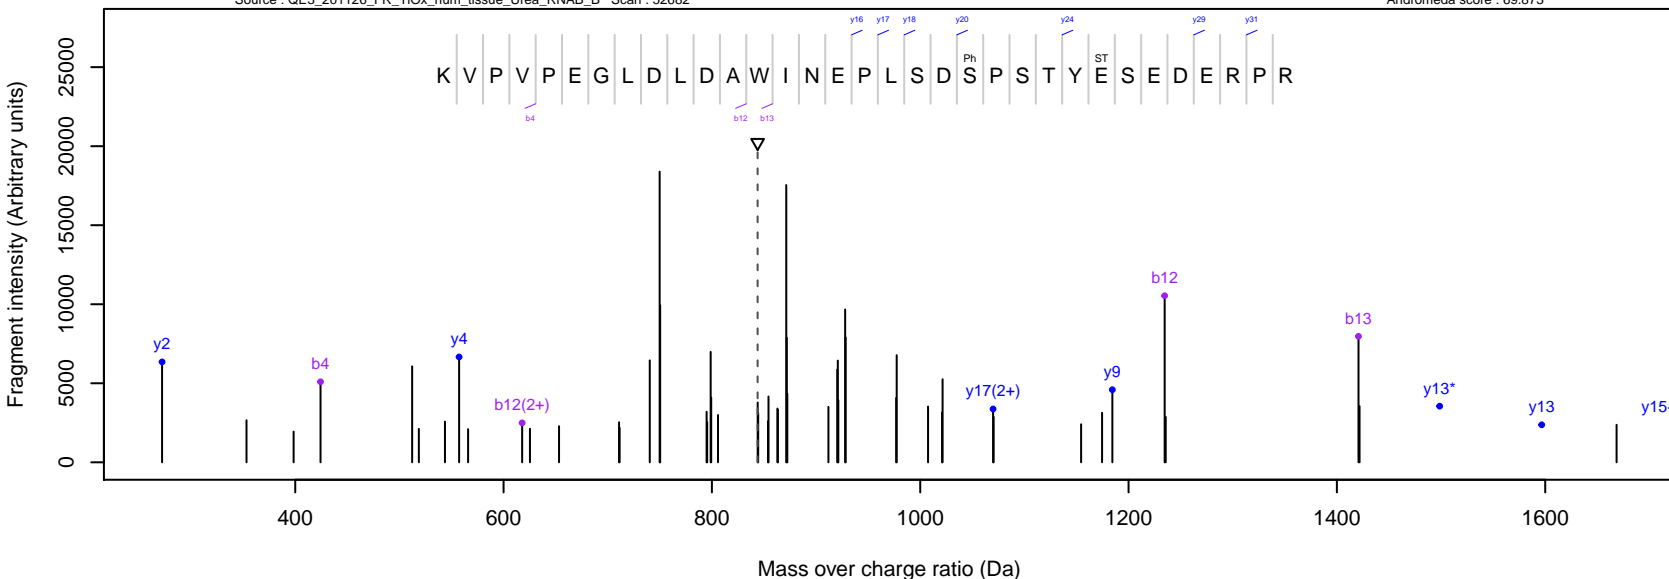

SKAESPKTPS(Phospho (STY))SPLTPTFASSMCLLAPCYLTGDSVR-4+

Source : QE3\_201126\_FR\_TIOx\_hum\_tissue\_Urea\_RNAB\_H Scan : 53969

Andromeda score : 69.873

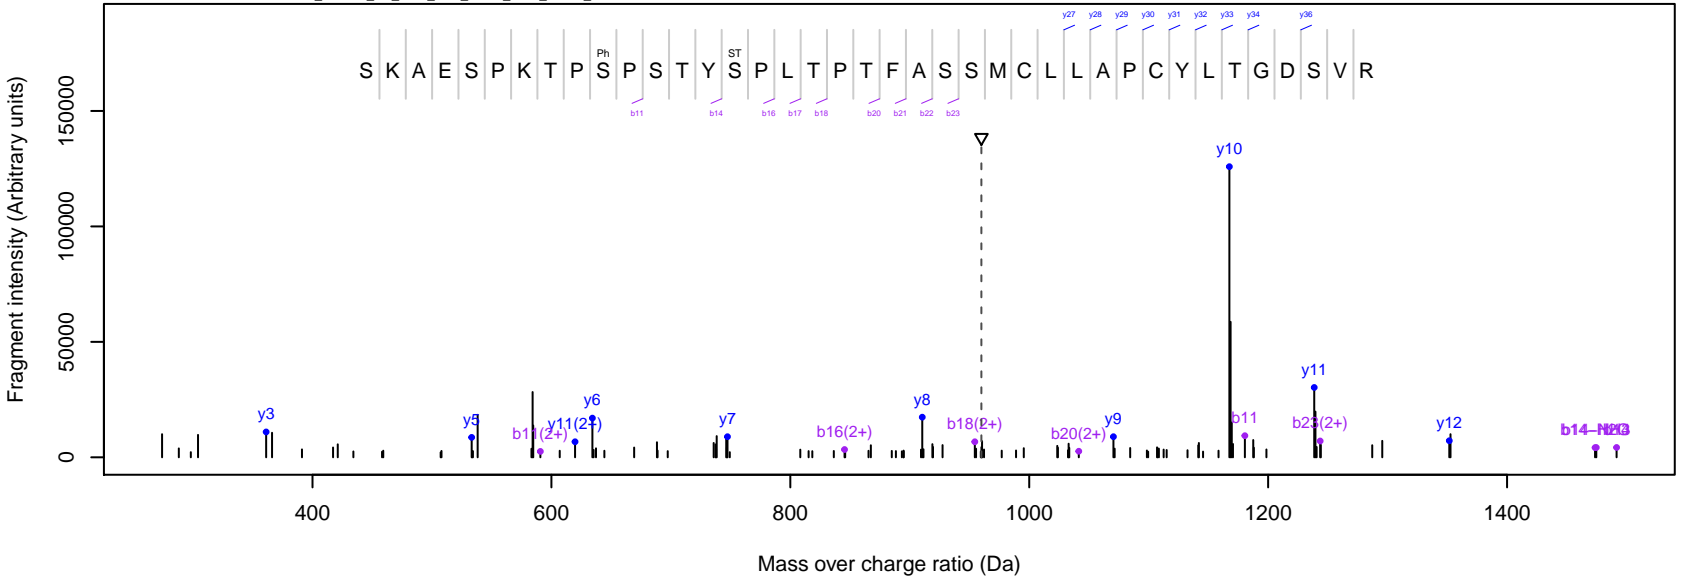

ASS(Phospho (STY))RS(Phospho (STY))PVFTPR-2+

Source : QE3\_201126\_FR\_TIOx\_hum\_tissue\_Urea\_RNAB\_B Scan : 16818

Andromeda score : 69.864

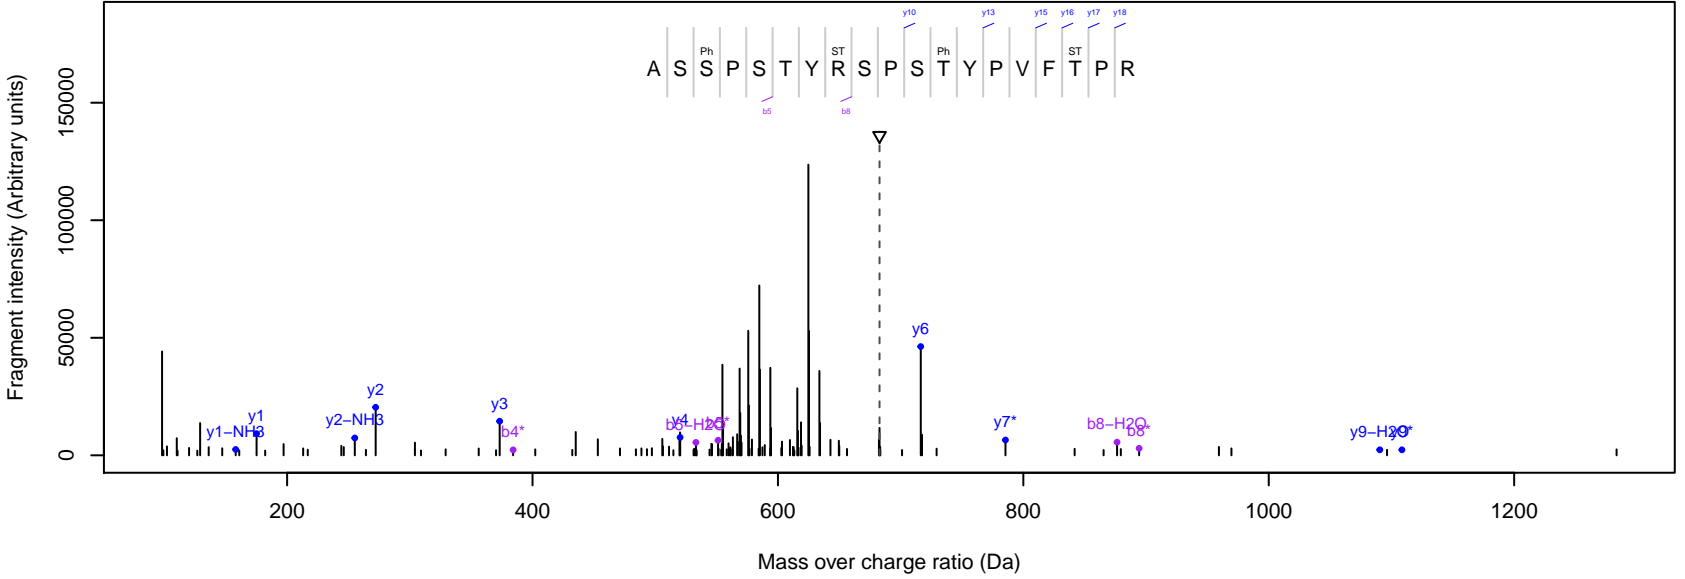

EFGSLPTTPS(Phospho (STY))EQR-2+

Source : QE3\_201126\_FR\_TIOx\_hum\_tissue\_Urea\_RNAB\_B Scan : 26459

Andromeda score : 69.864

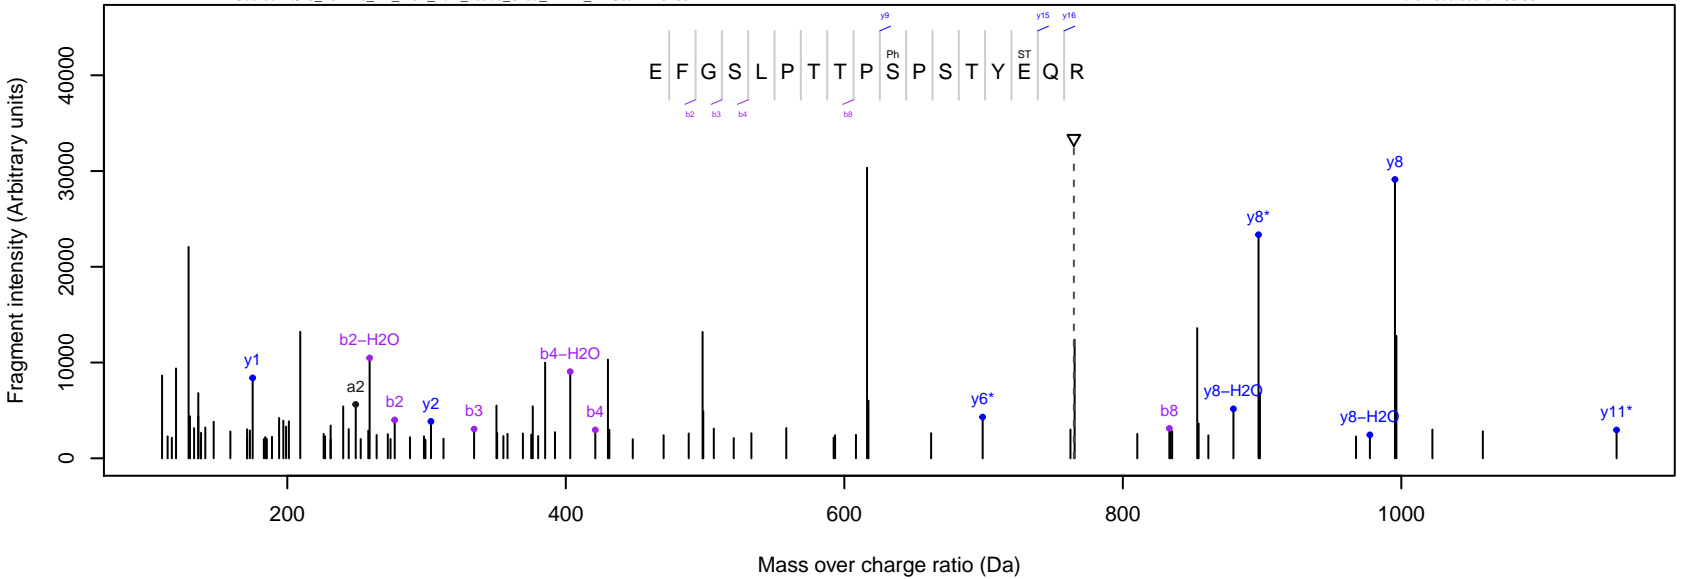

EFGYDSPHDLDS(Phospho (STY))D-2+

Source : QE3\_201126\_FR\_TIOx\_hum\_tissue\_Urea\_RNAB\_N Scan : 30937

Andromeda score : 69.864

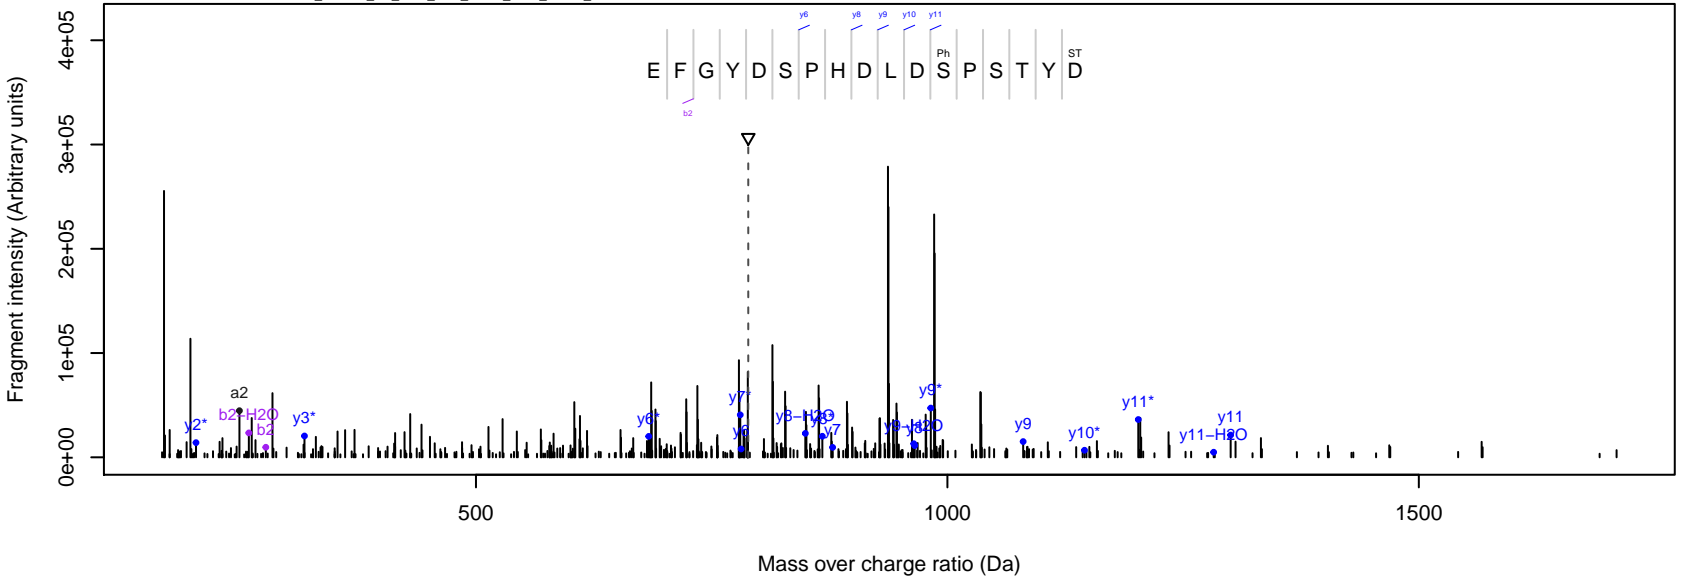

AES(Phospho (STY))PEEVACR-2+

Source : QE3\_201126\_FR\_TIOx\_hum\_tissue\_Urea\_RNAB\_H Scan : 10899

Andromeda score : 69.825

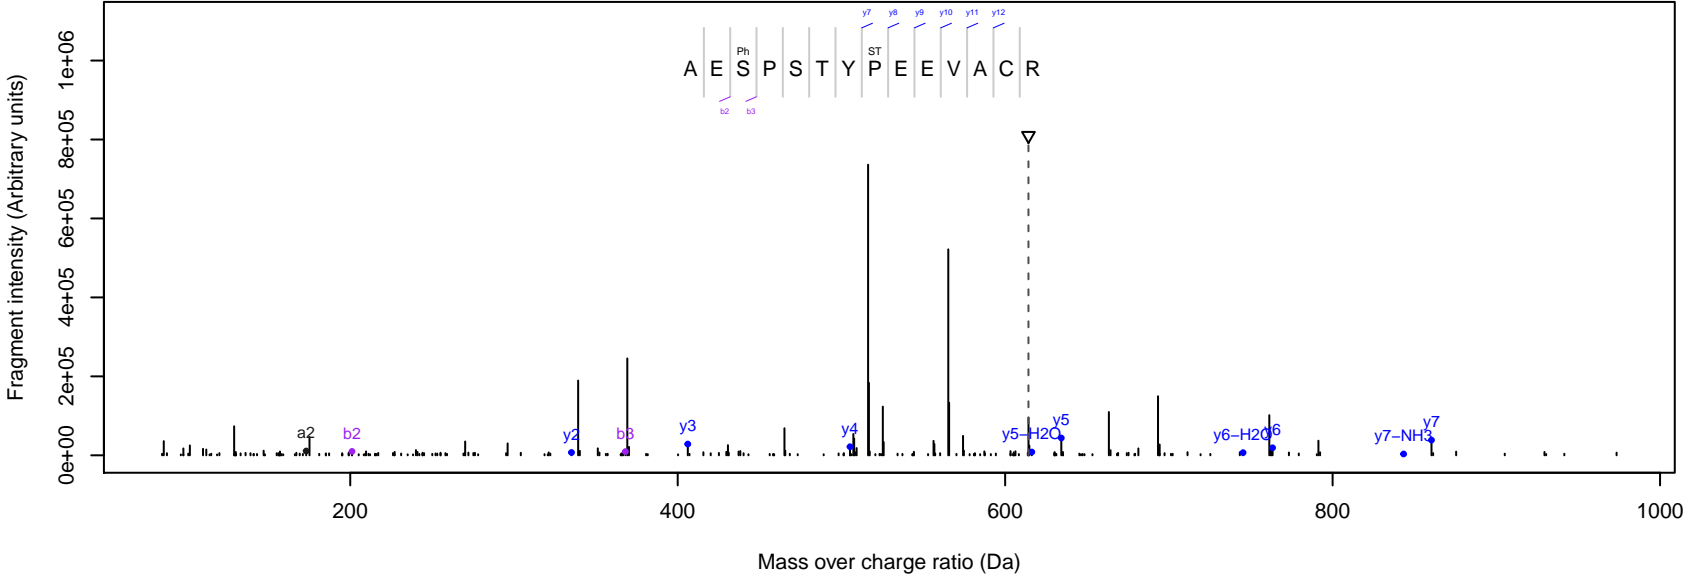

SSDRNPPLS(Phospho (STY))PQSSIDSELSASELDEDSIGSNYK-3+

Source : QE3\_201126\_FR\_TIOx\_hum\_tissue\_Urea\_RNAB\_H Scan : 44950

Andromeda score : 69.813

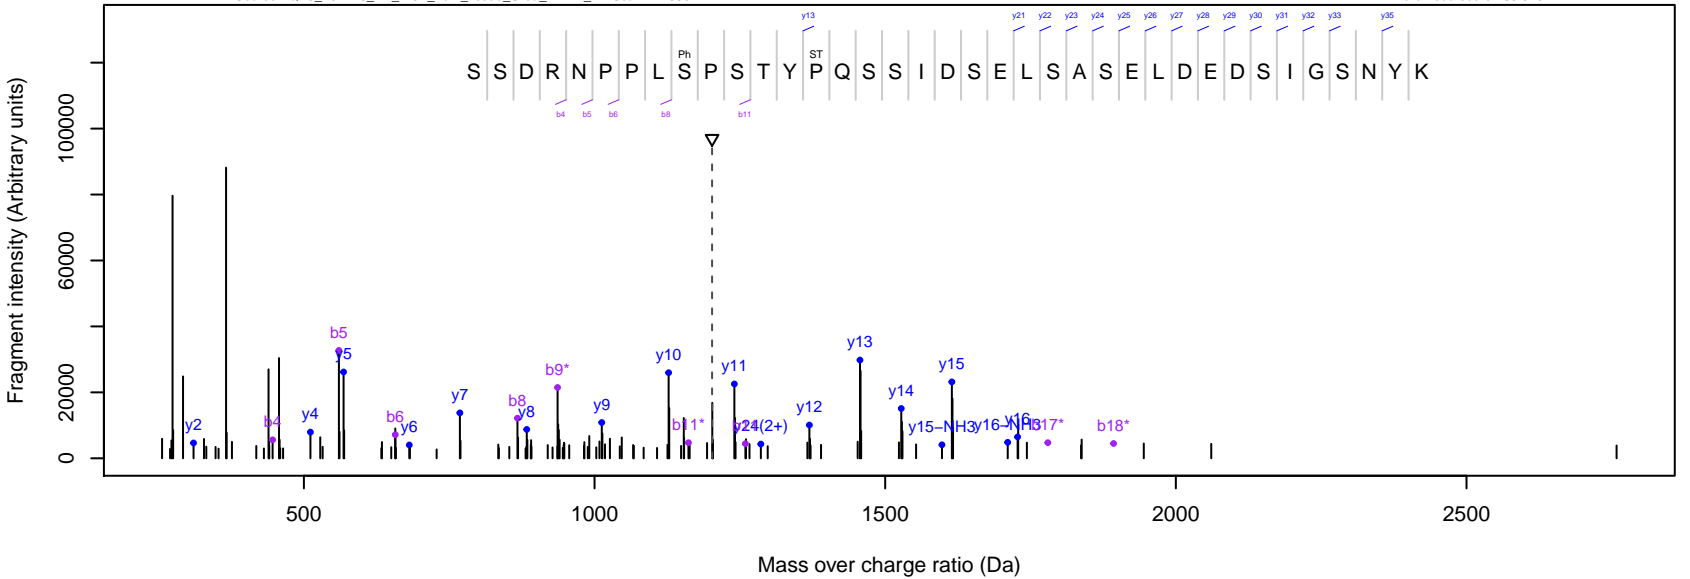

YS(Phospho (STY))SVHTIEK-2+

Source : QE3\_201126\_FR\_TiOx\_hum\_tissue\_Urea\_RNAB\_H Scan : 11475

Andromeda score : 69.812

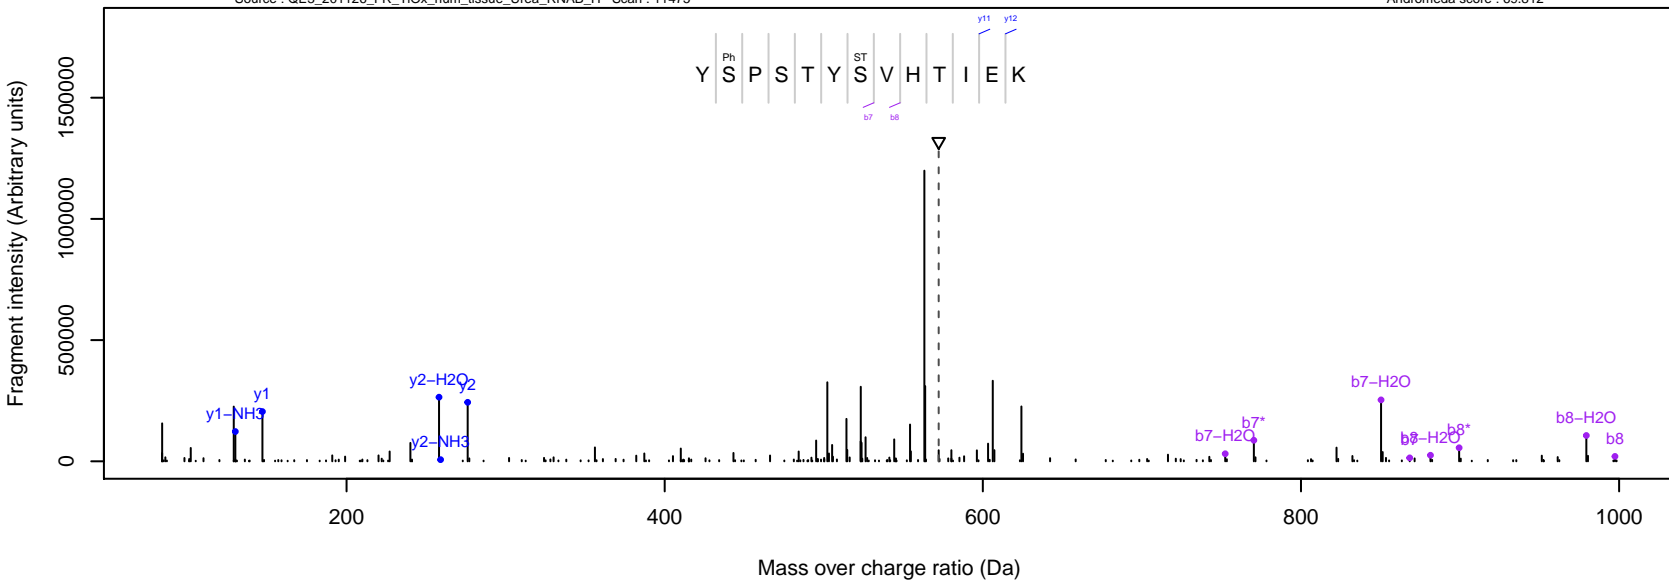

EQNSALPTS(Phospho (STY))SQDELMEVVEKSEEPAGQILSHLSSELK-4+

Source : QE3\_201126\_FR\_TiOx\_hum\_tissue\_Urea\_RNAB\_H Scan : 61585

Andromeda score : 69.784

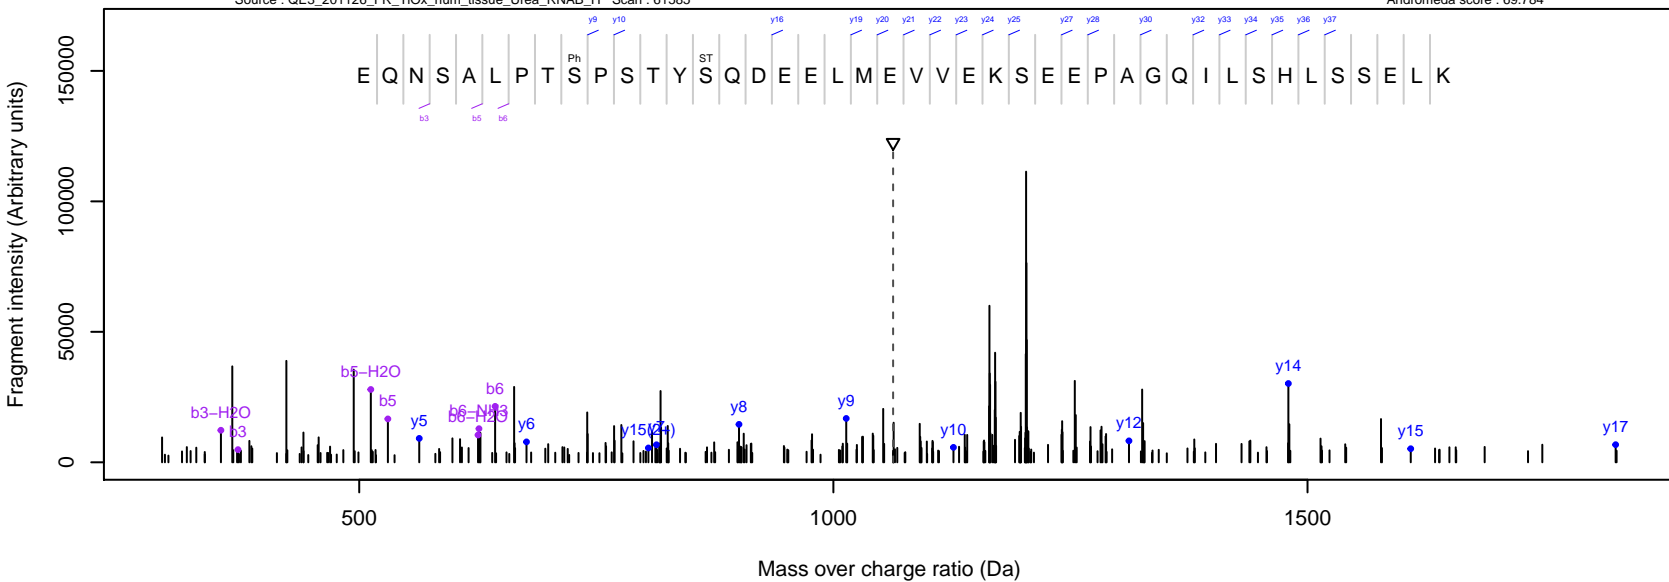

T(Phospho (STY))SPADHGGSVGSEGGSAVDSVAGEHSVSGR-3+

Source : QE3\_201126\_FR\_TiOx\_hum\_tissue\_Urea\_RNAB\_H Scan : 14925

Andromeda score : 69.782

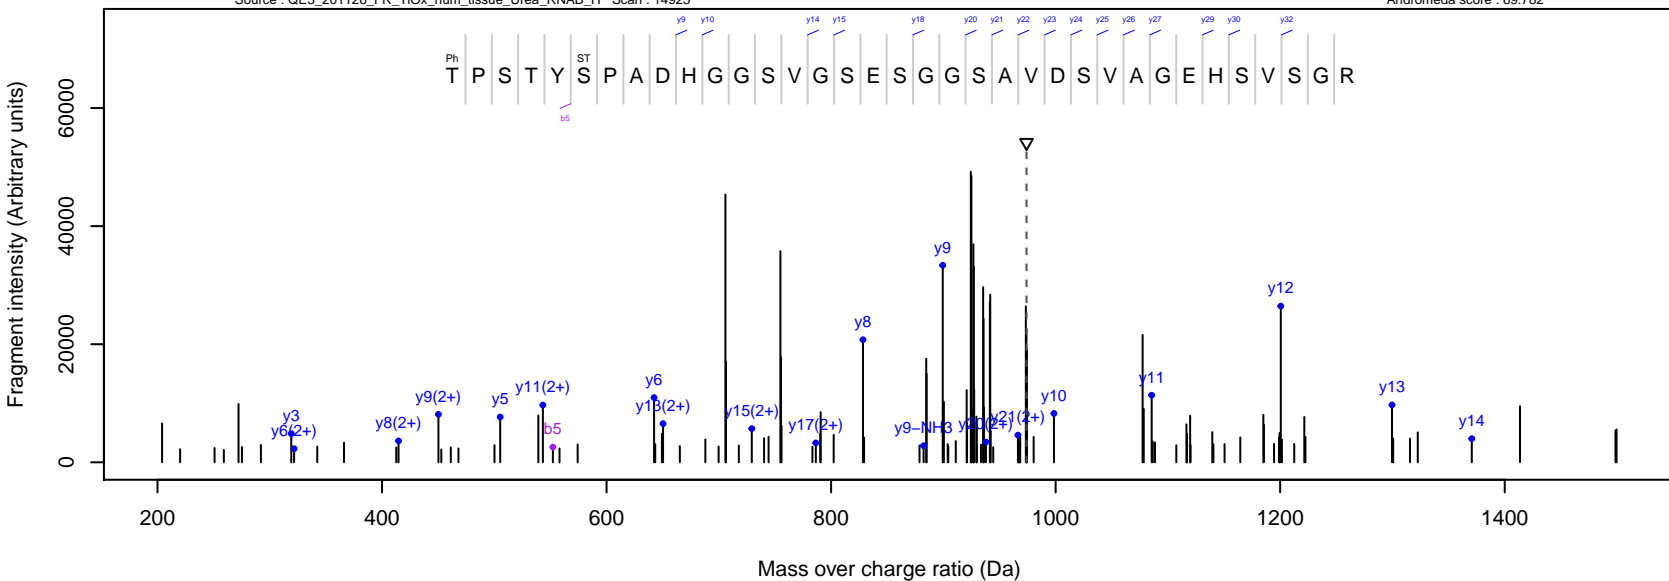



ADPSLLGFSVNAS(Phospho (STY))SER-2+

Source : QE3\_201126\_FR\_TiOx\_hum\_tissue\_Urea\_RNAB\_B Scan : 47409

Andromeda score : 69.729

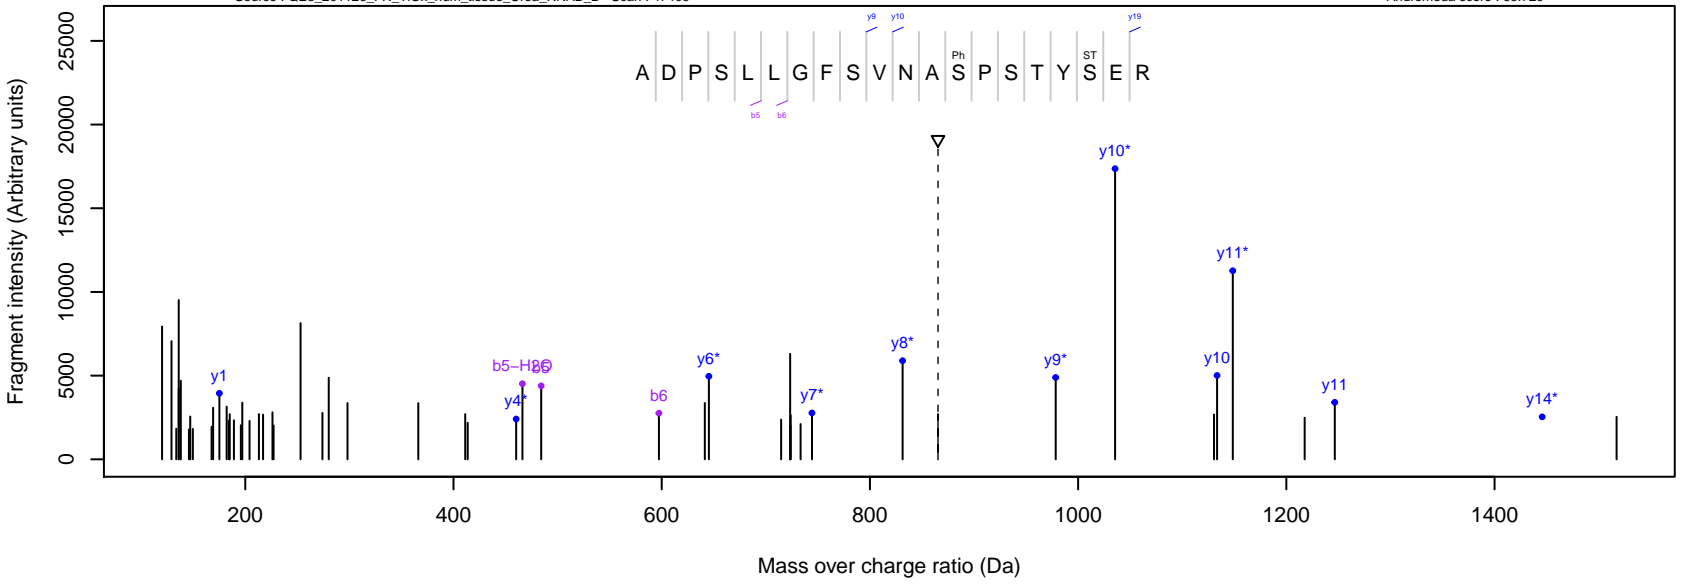

SS(Phospho (STY))LGS(Phospho (STY))LQTPEAVTTR-2+

Source : QE3\_201126\_FR\_TiOx\_hum\_tissue\_Urea\_RNAB\_N Scan : 38500

Andromeda score : 69.729

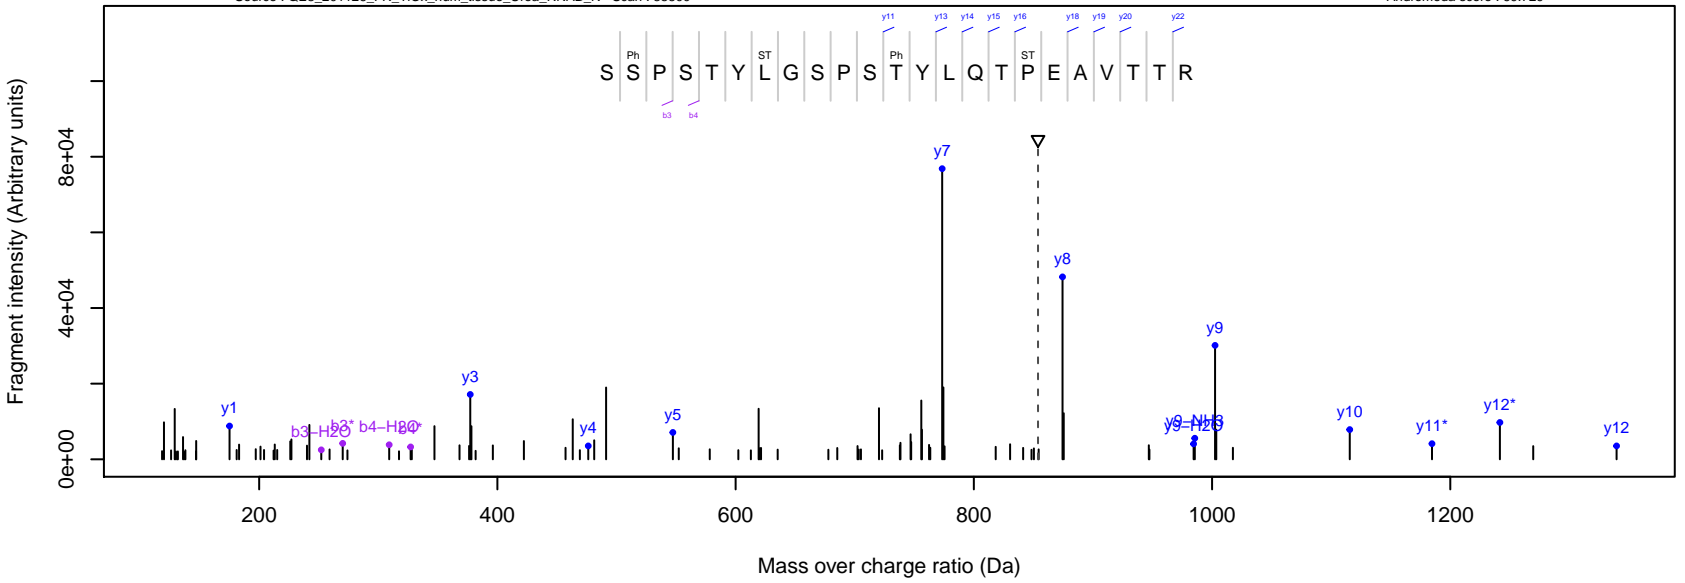

YFQSPS(Phospho (STY))RS(Phospho (STY))R-2+

Source : QE3\_201126\_FR\_TiOx\_hum\_tissue\_Urea\_RNAB\_N Scan : 10599

Andromeda score : 69.721

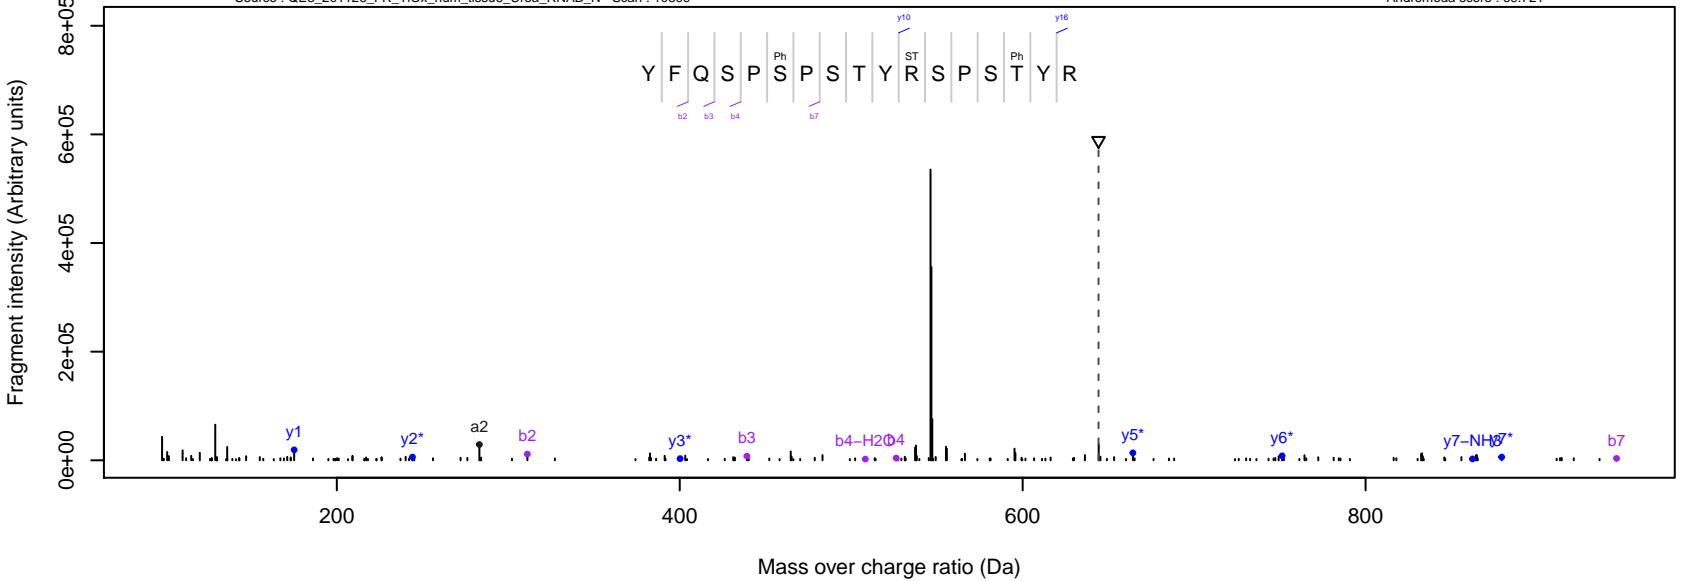



GS(Phospho (STY))ASQGNLTESWADDNPR-2+

Source : QE3\_201126\_FR\_TiOx\_hum\_tissue\_Urea\_RNAB\_B Scan : 29082

Andromeda score : 69.714

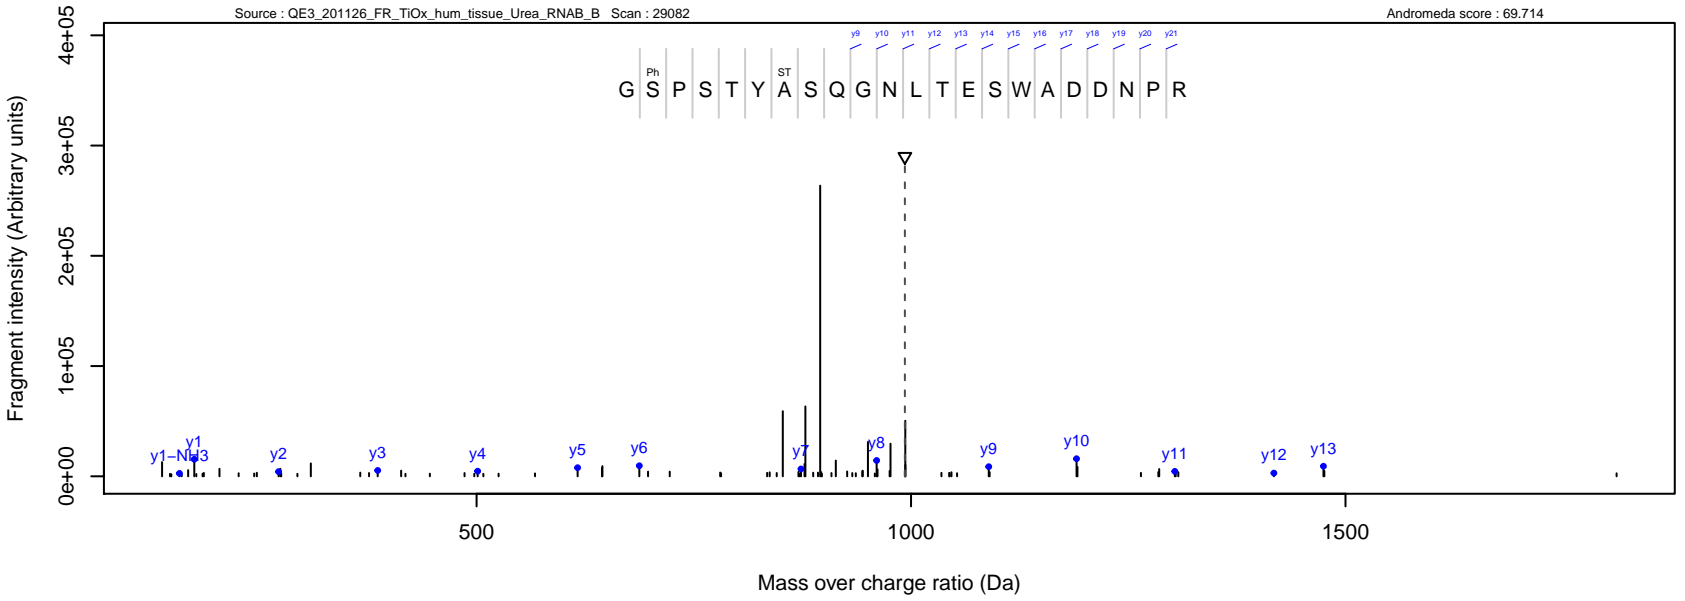

VPVASPS(Phospho (STY))AHNISSGGAPDR-3+

Source : QE3\_201126\_FR\_TiOx\_hum\_tissue\_Urea\_RNAB\_B Scan : 14130

Andromeda score : 69.704

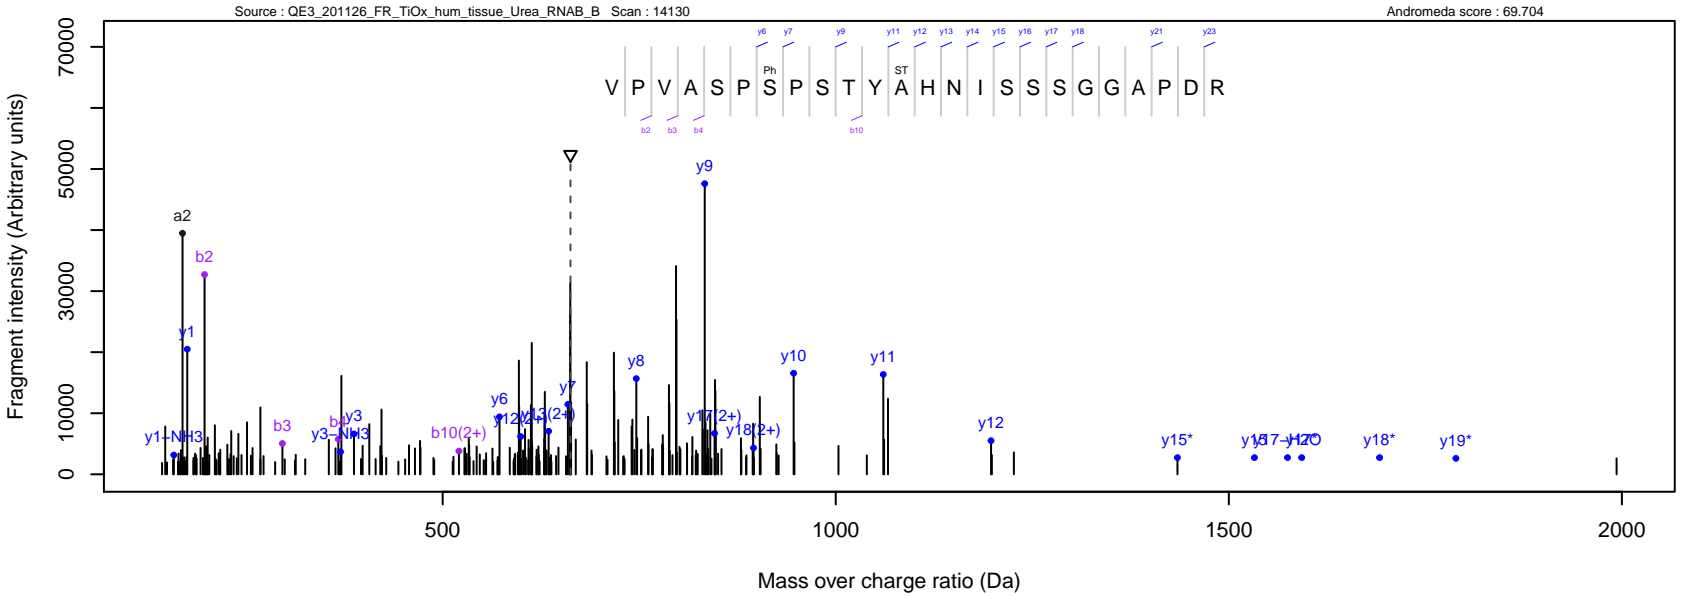

AFLS(Phospho (STY))PPTLLEGLRLS(Phospho (STY))PLLPGGGGR-3+

Source : QE3\_201126\_FR\_TiOx\_hum\_tissue\_Urea\_RNAB\_H Scan : 62799

Andromeda score : 69.674

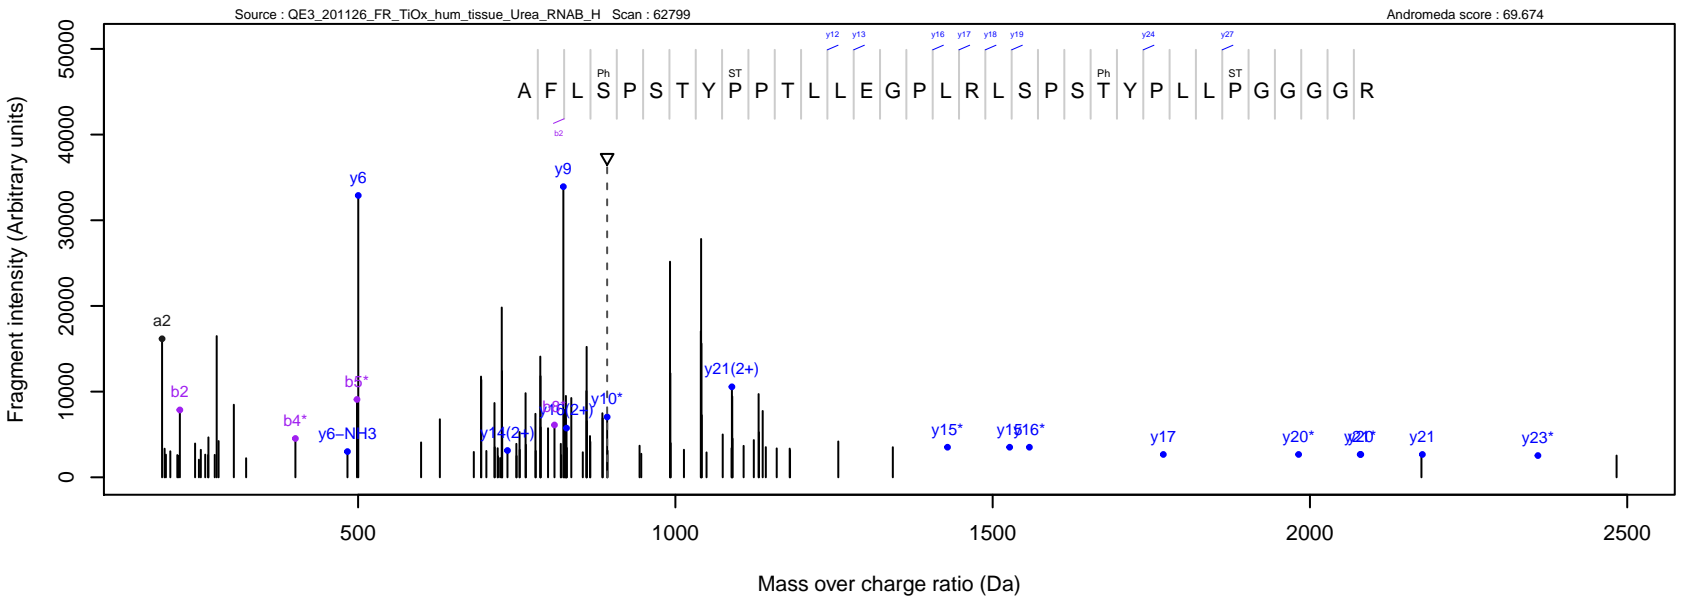

LKS(Phospho (STY))LNANTDITSLAR-3+

Source : QE3\_201126\_FR\_TiOx\_hum\_tissue\_Urea\_RNAB\_N Scan : 28767

Andromeda score : 69.612

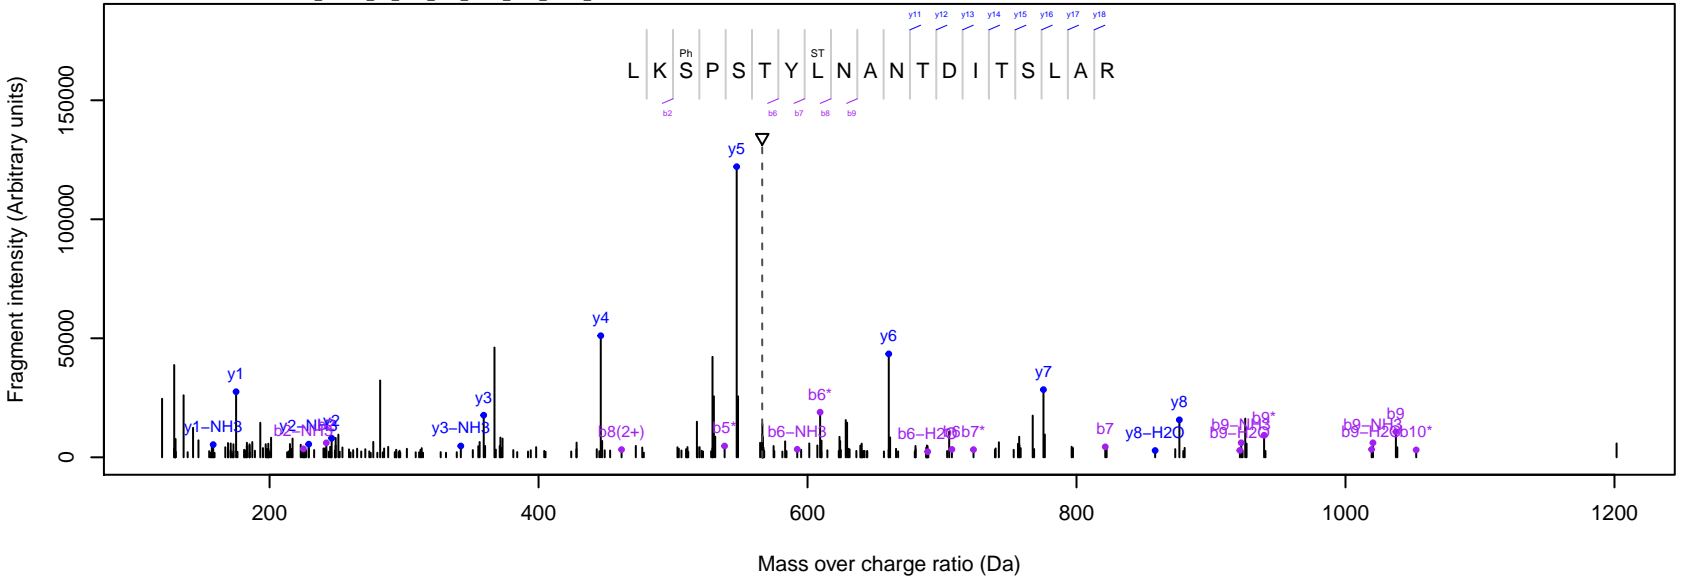

AS(Phospho (STY))INS(Phospho (STY))LLSDKR-2+

Source : QE3\_201126\_FR\_TiOx\_hum\_tissue\_Urea\_RNAB\_N Scan : 35573

Andromeda score : 69.602

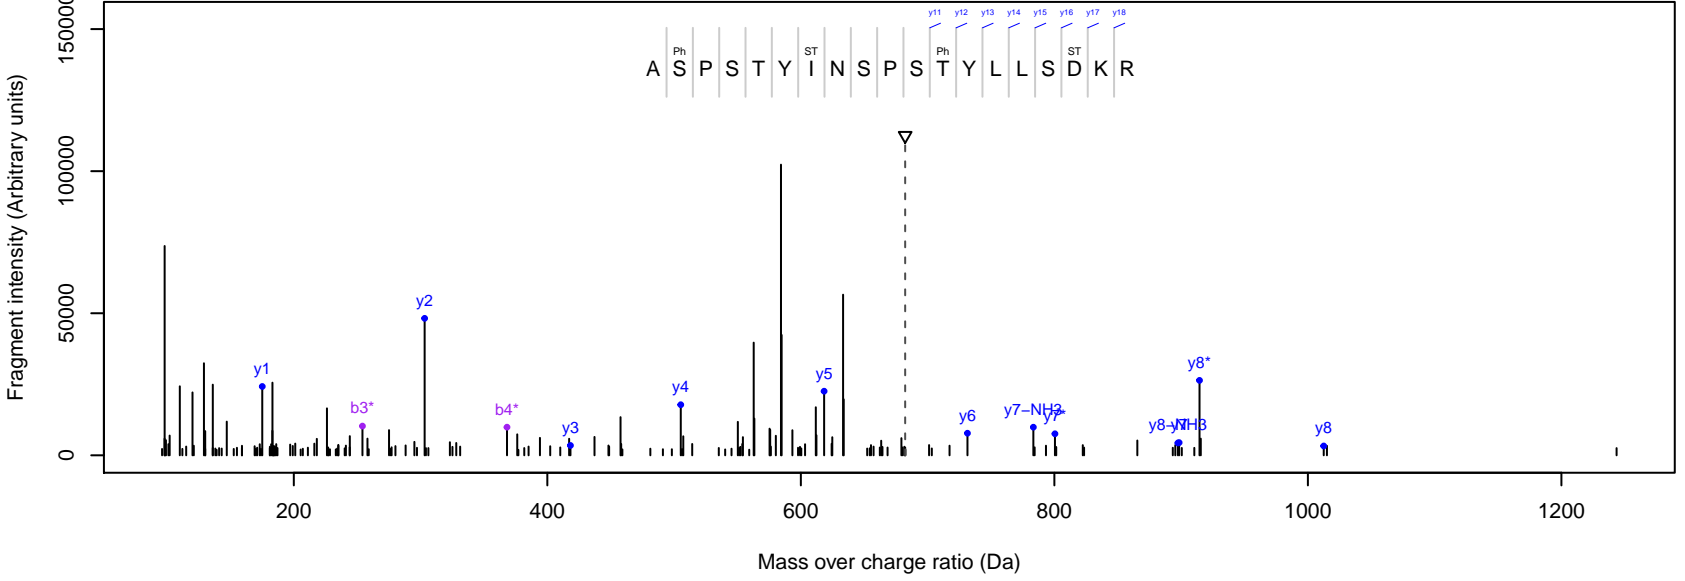

KWDGS(Phospho (STY))EEDEDNSKK-3+

Source : QE3\_201126\_FR\_TiOx\_hum\_tissue\_Urea\_RNAB\_H Scan : 4622

Andromeda score : 69.522

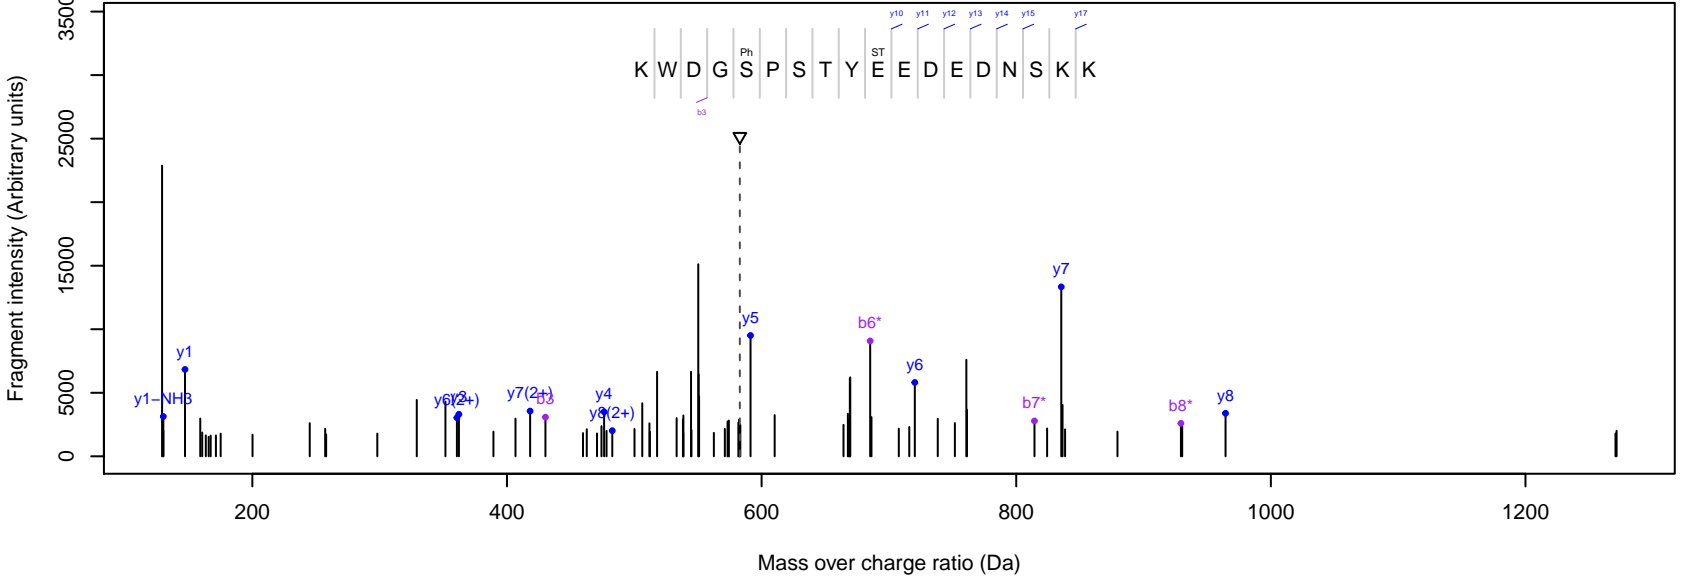

TNTMNGSKS(Phospho (STY))PVISR-3+

Source : QE3\_201126\_FR\_TiOx\_hum\_tissue\_Urea\_RNAB\_B Scan : 8302

Andromeda score : 69.522

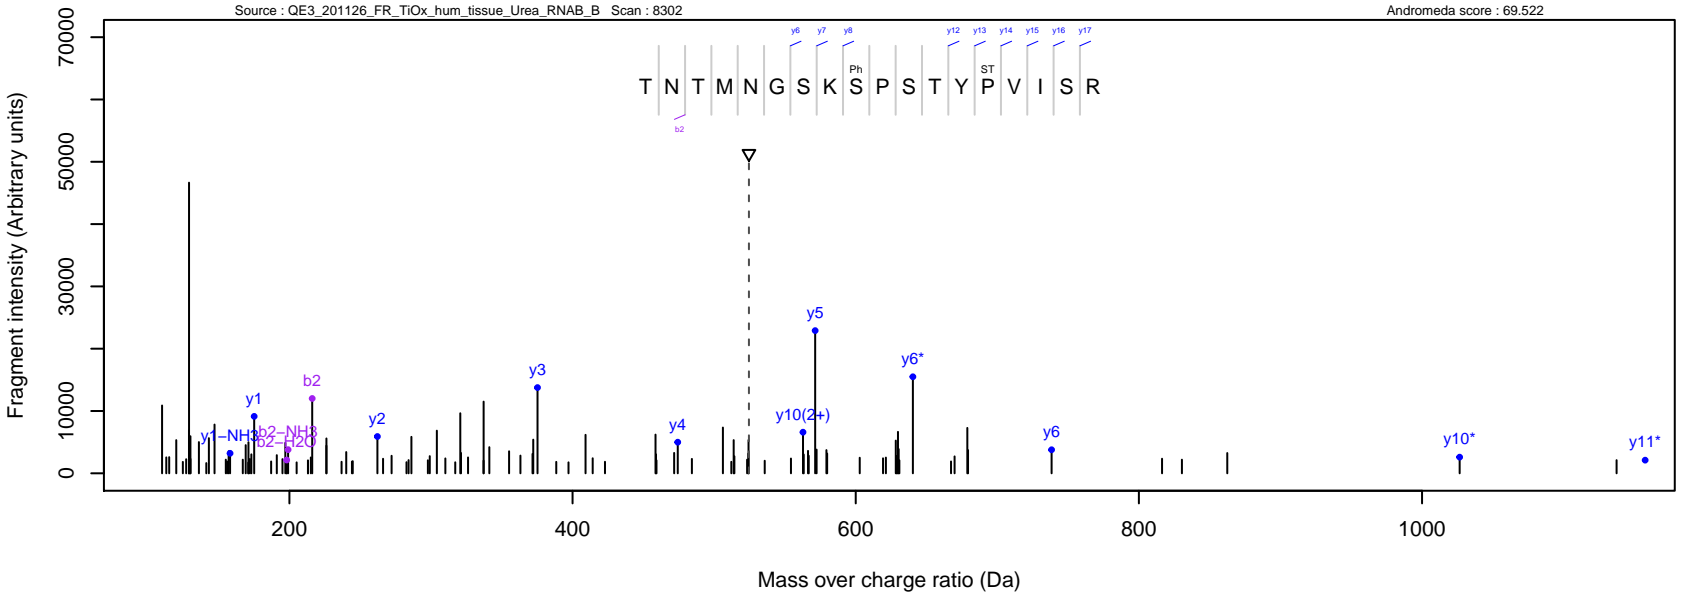

GGSPSTYS(Phospho (STY))SDLSEDEDAEDSSANIITDLVYQGASLQAQTDR-3+

Source : QE3\_201126\_FR\_TiOx\_hum\_tissue\_Urea\_RNAB\_B Scan : 62885

Andromeda score : 69.485

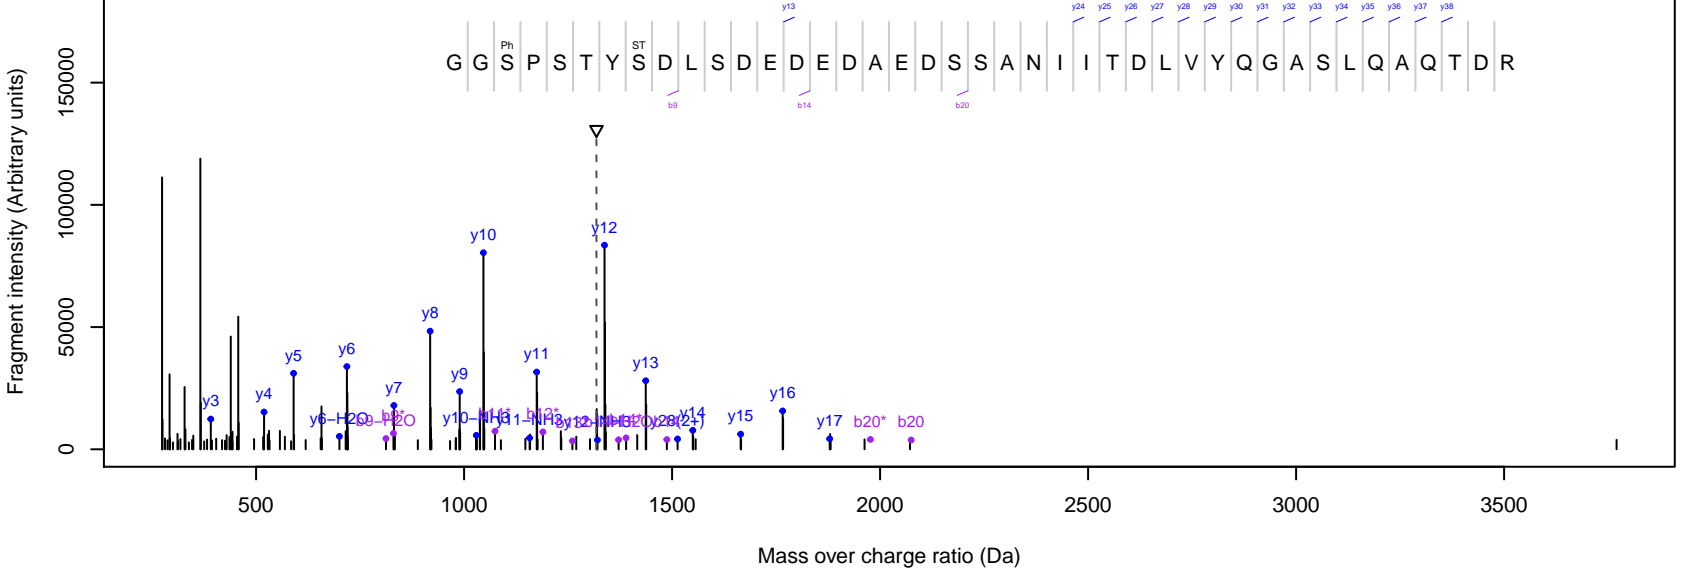

SLQKVDEEDS(Phospho (STY))HHEMSEEEEELEDDPTVVK-4+

Source : QE3\_201126\_FR\_TiOx\_hum\_tissue\_Urea\_RNAB\_N Scan : 25082

Andromeda score : 69.477

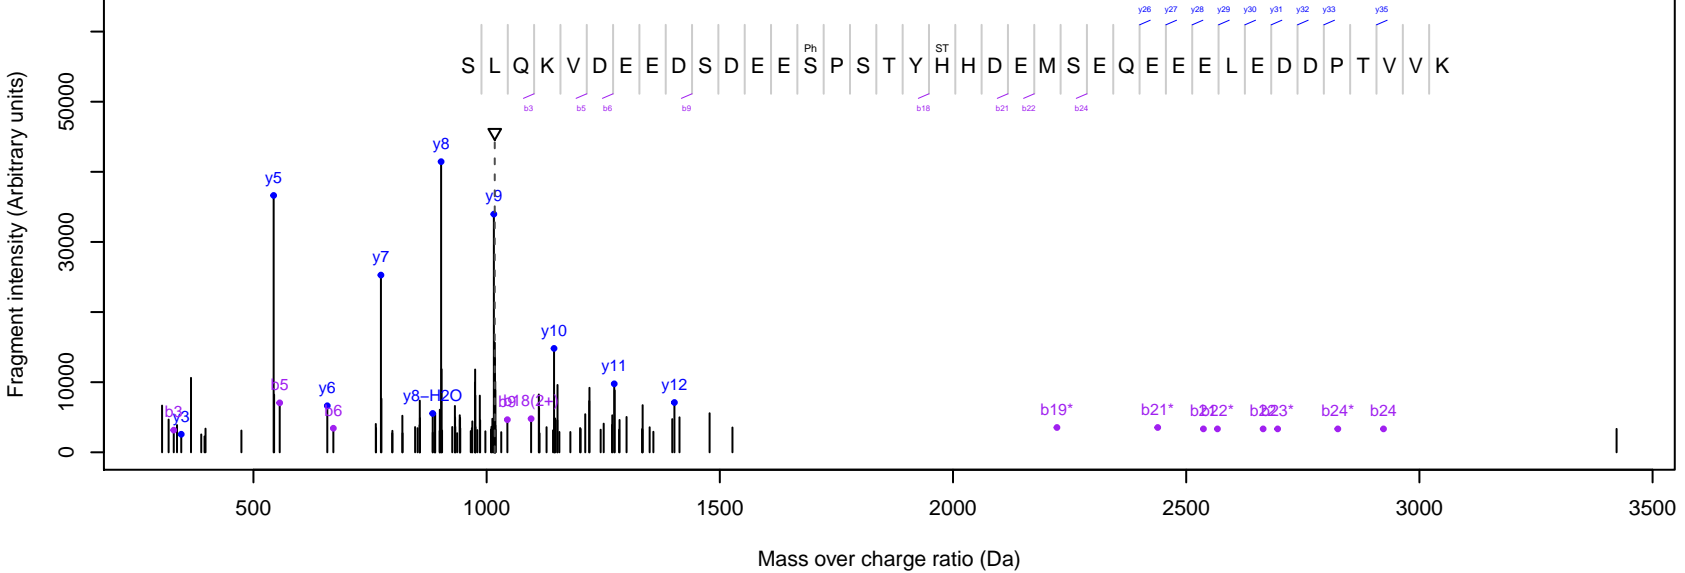

NPLPPLIGS(Phospho (STY))PTK-2+

Source : QE3\_201126\_FR\_TIOx\_hum\_tissue\_Urea\_RNAB\_H Scan : 38339

Andromeda score : 69.456

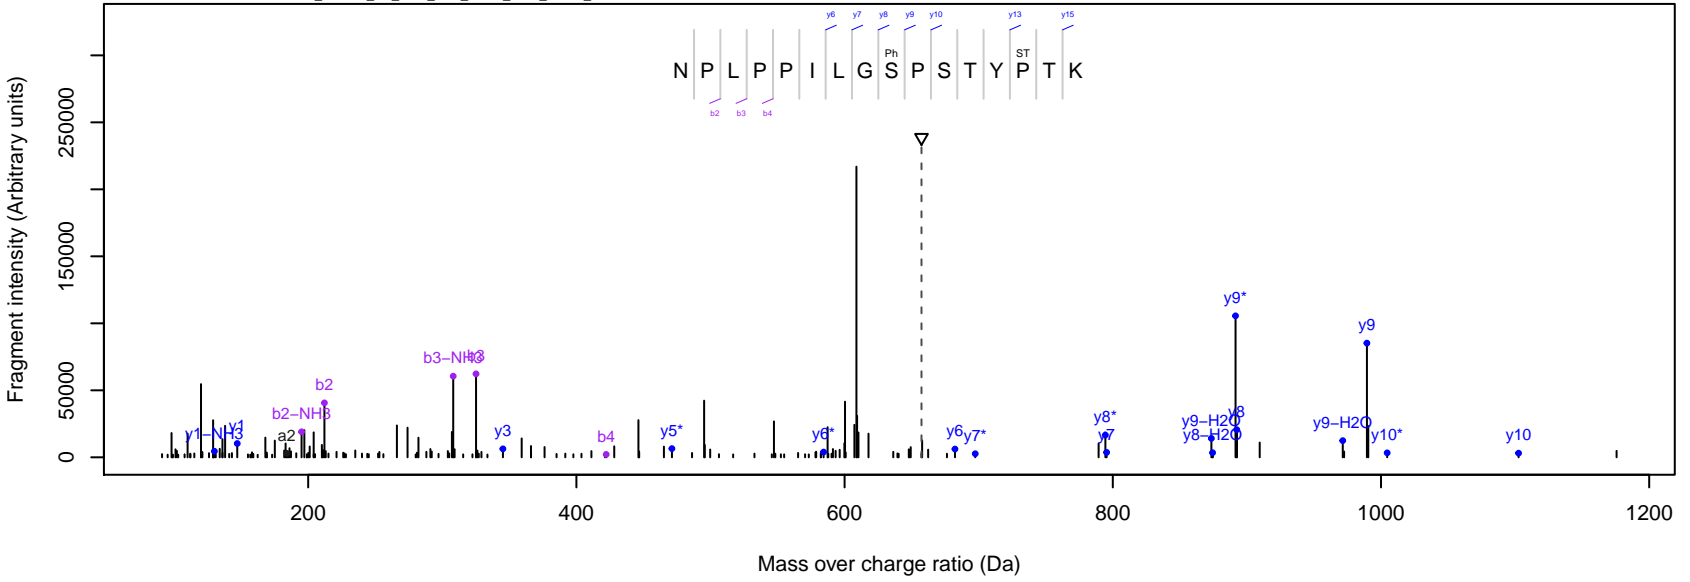

AELGMDSTSQS(Phospho (STY))PPIKR-3+

Source : QE3\_201126\_FR\_TIOx\_hum\_tissue\_Urea\_RNAB\_N Scan : 18621

Andromeda score : 69.398

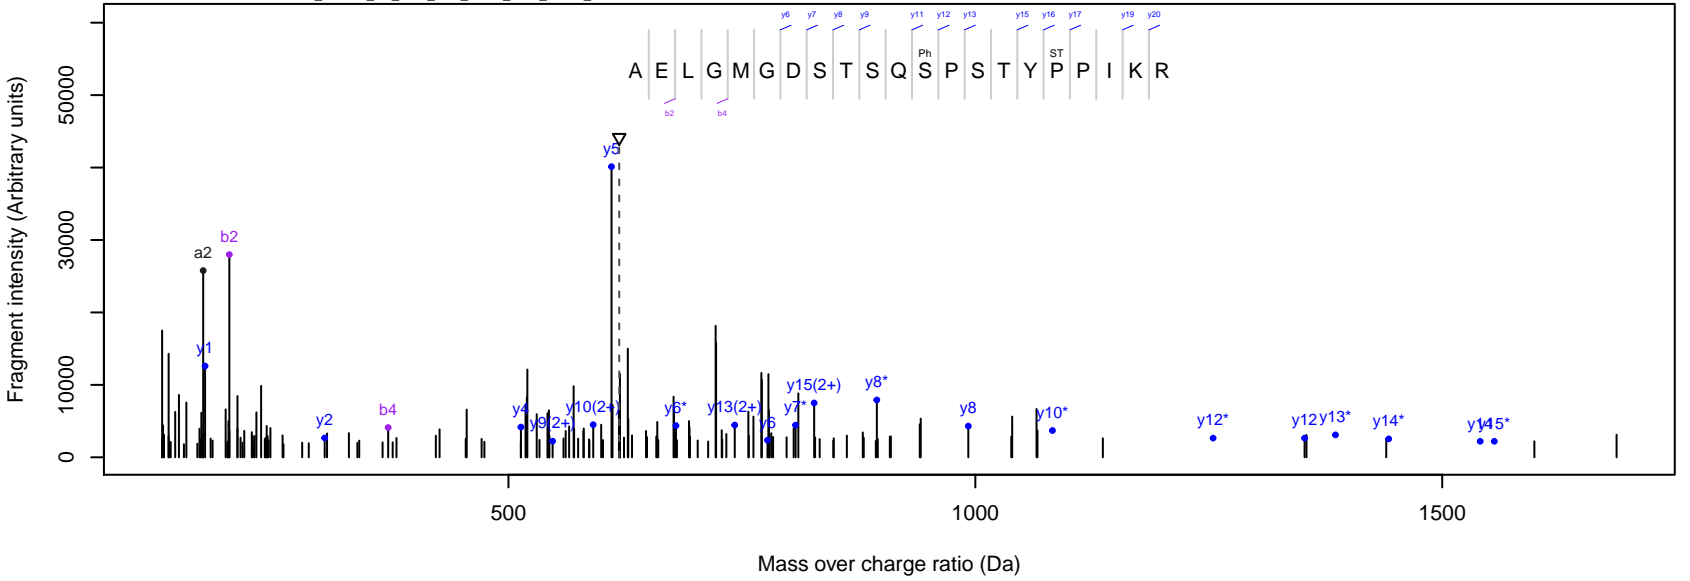

ETVFTKS(Phospho (STY))PYQEFTDHLVK-3+

Source : QE3\_201126\_FR\_TIOx\_hum\_tissue\_Urea\_RNAB\_B Scan : 37869

Andromeda score : 69.398

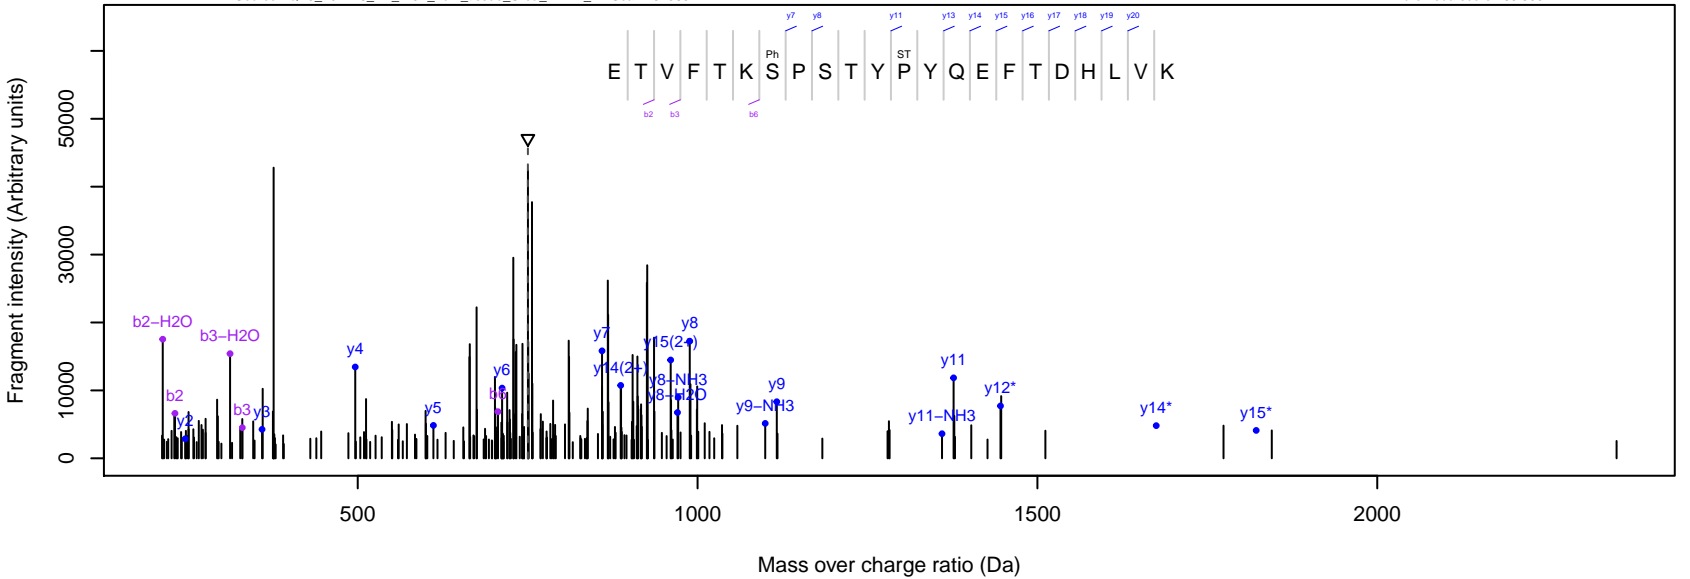

S(Phospho (STY))PGTTPPPGASK-2+

Source : QE3\_201126\_FR\_TIOx\_hum\_tissue\_Urea\_RNAB\_H Scan : 6279

Andromeda score : 69.352

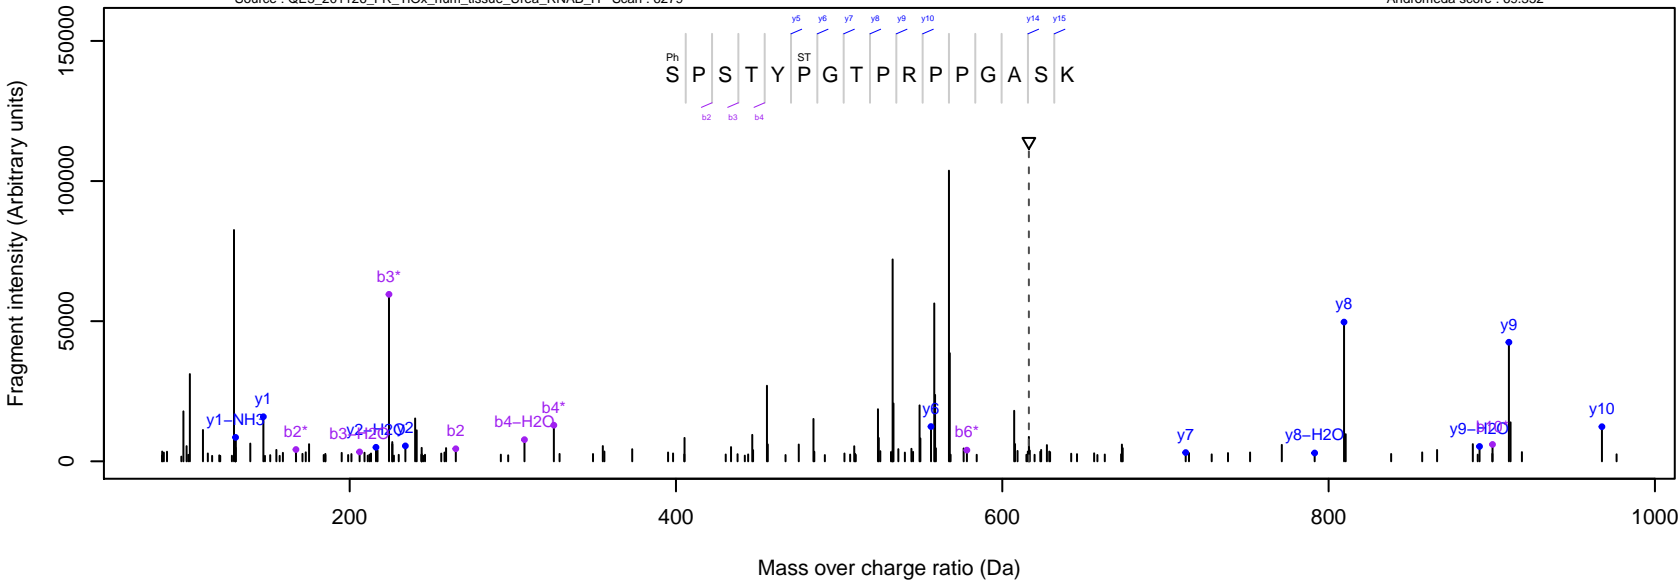

S(Phospho (STY))TTELGENLQELR-2+

Source : QE3\_201126\_FR\_TIOx\_hum\_tissue\_Urea\_RNAB\_B Scan : 35014

Andromeda score : 69.345

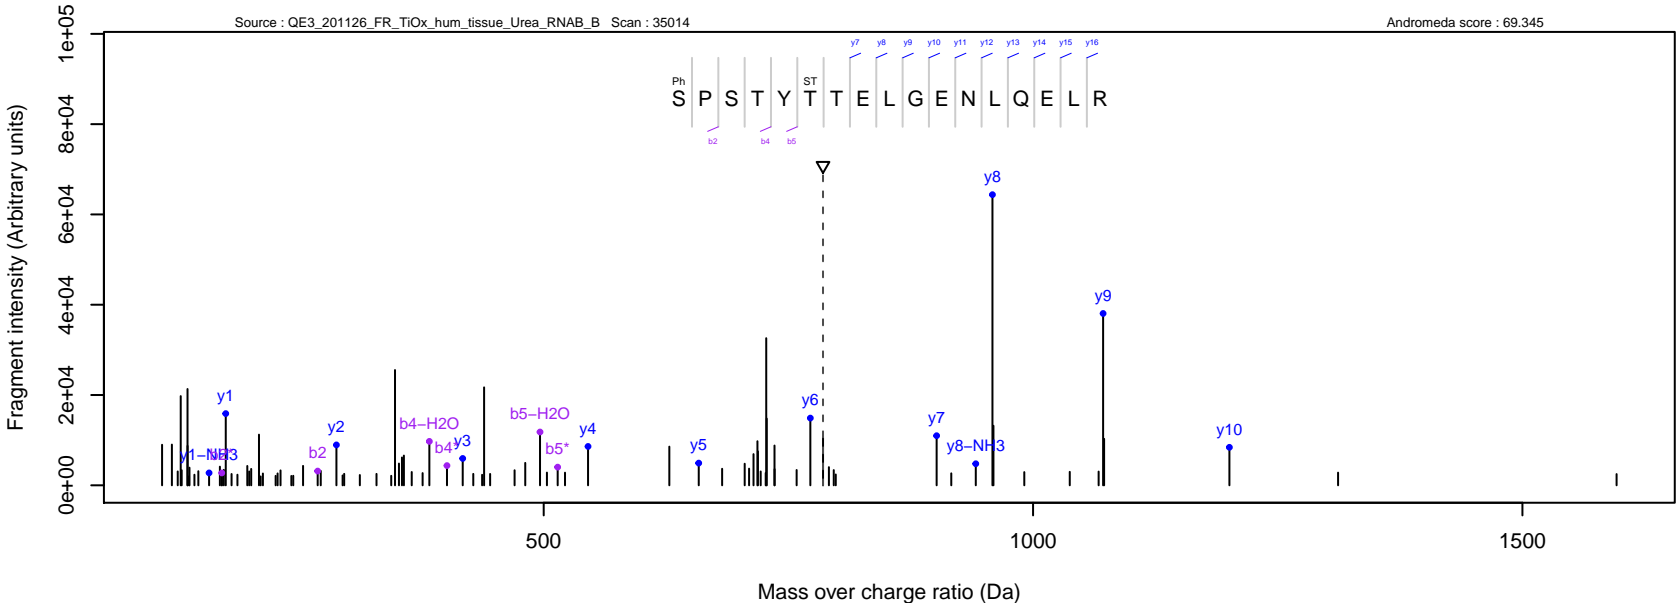

RVS(Phospho (STY))LVGADDLRK-3+

Source : QE3\_201126\_FR\_TIOx\_hum\_tissue\_Urea\_RNAB\_N Scan : 15413

Andromeda score : 69.331

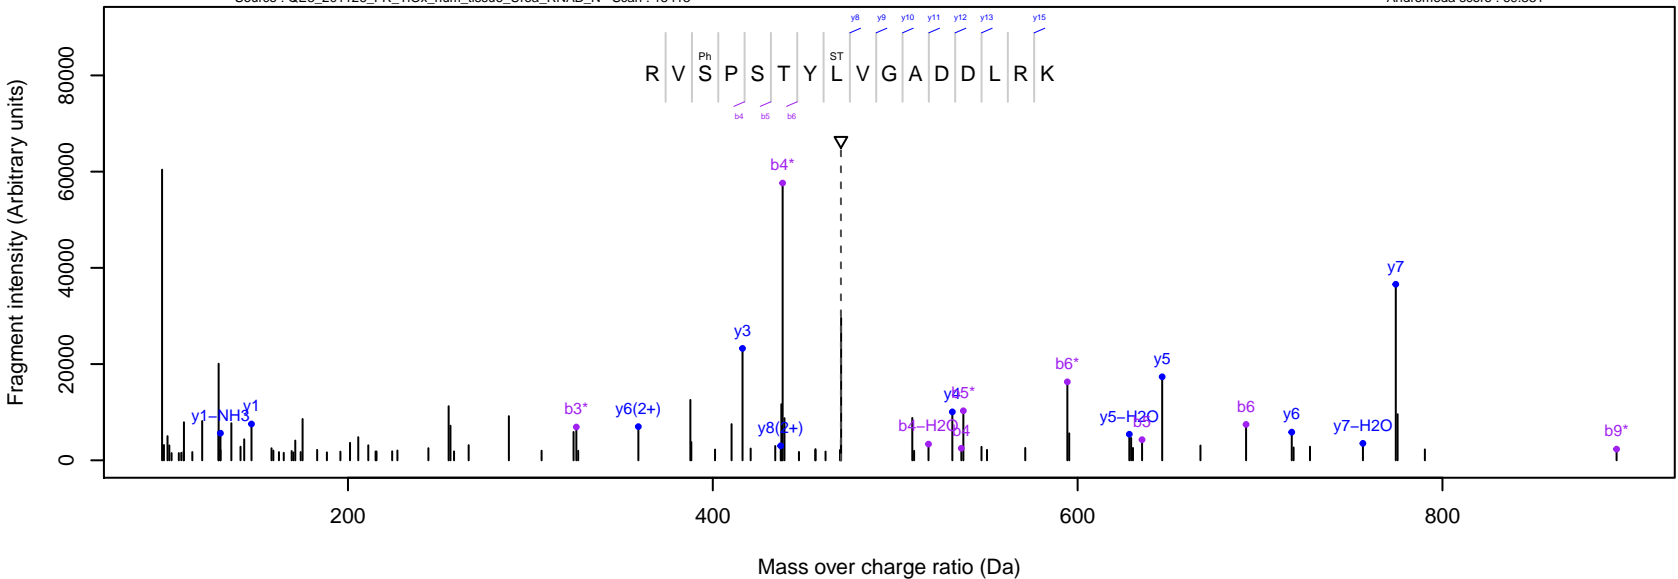

TEEARSPAPGPGT(Phospho (STY))PTGTPTR-3+

Source : QE3\_201126\_FR\_TiOx\_hum\_tissue\_Urea\_RNAB\_B Scan : 11589

Andromeda score : 69.284

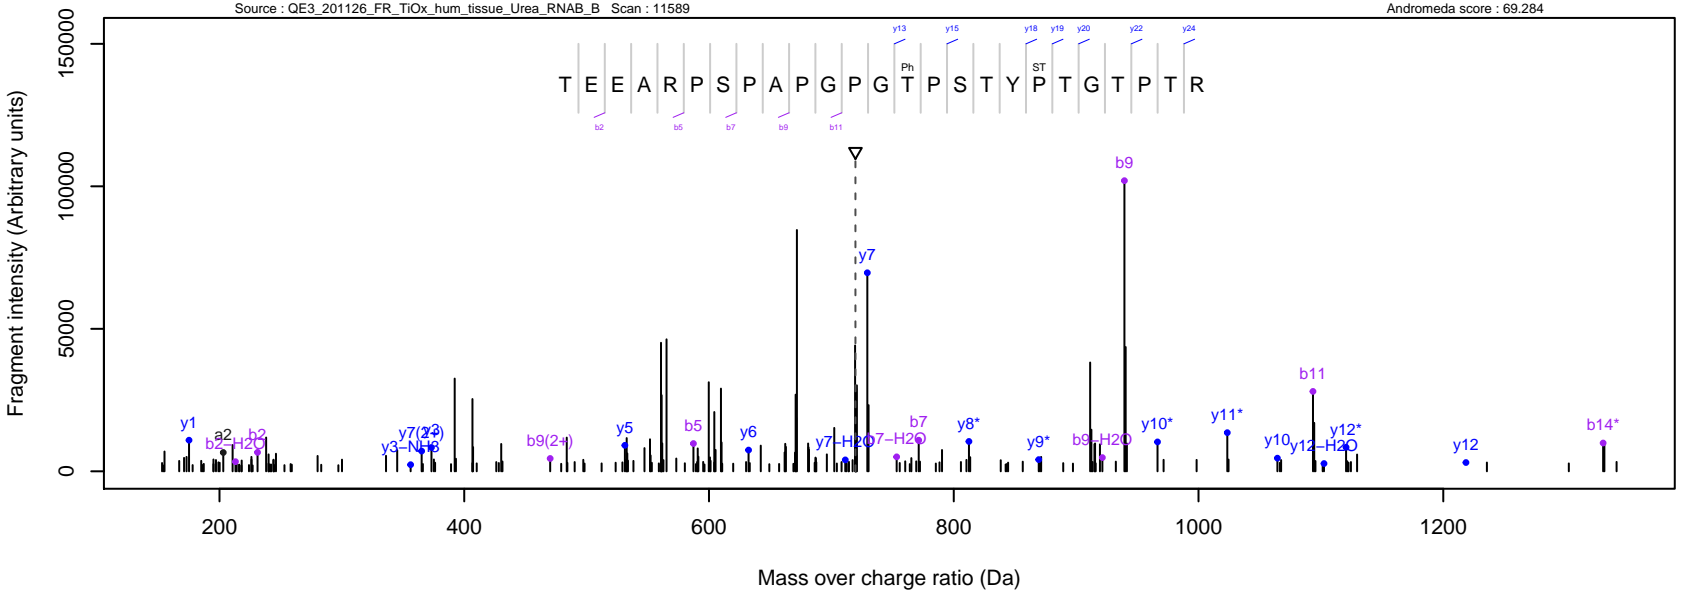

TLS(Phospho (STY))M(Oxidation (M))DKGF-2+

Source : QE3\_201126\_FR\_TiOx\_hum\_tissue\_Urea\_RNAB\_H Scan : 19065

Andromeda score : 69.276

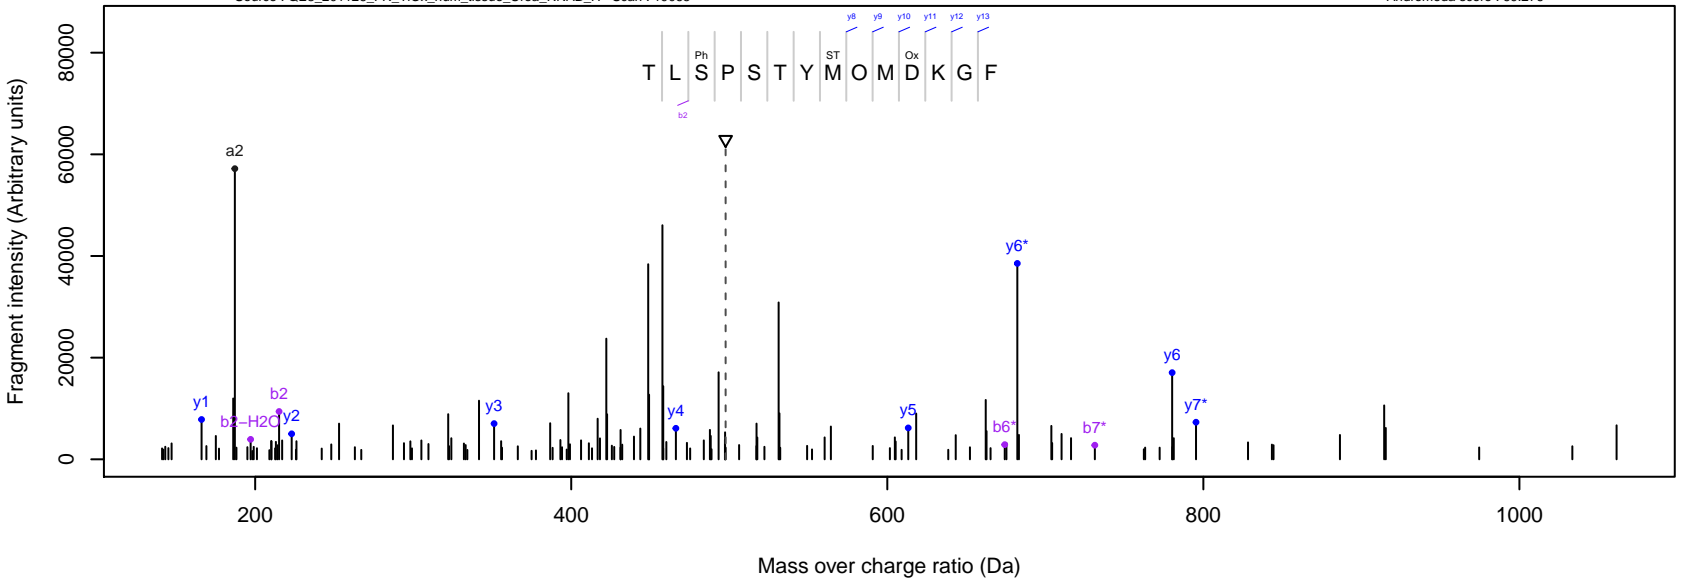

DSNELS(Phospho (STY))DS(Phospho (STY))AGEEDSADLKR-3+

Source : QE3\_201126\_FR\_TiOx\_hum\_tissue\_Urea\_RNAB\_H Scan : 19031

Andromeda score : 69.27

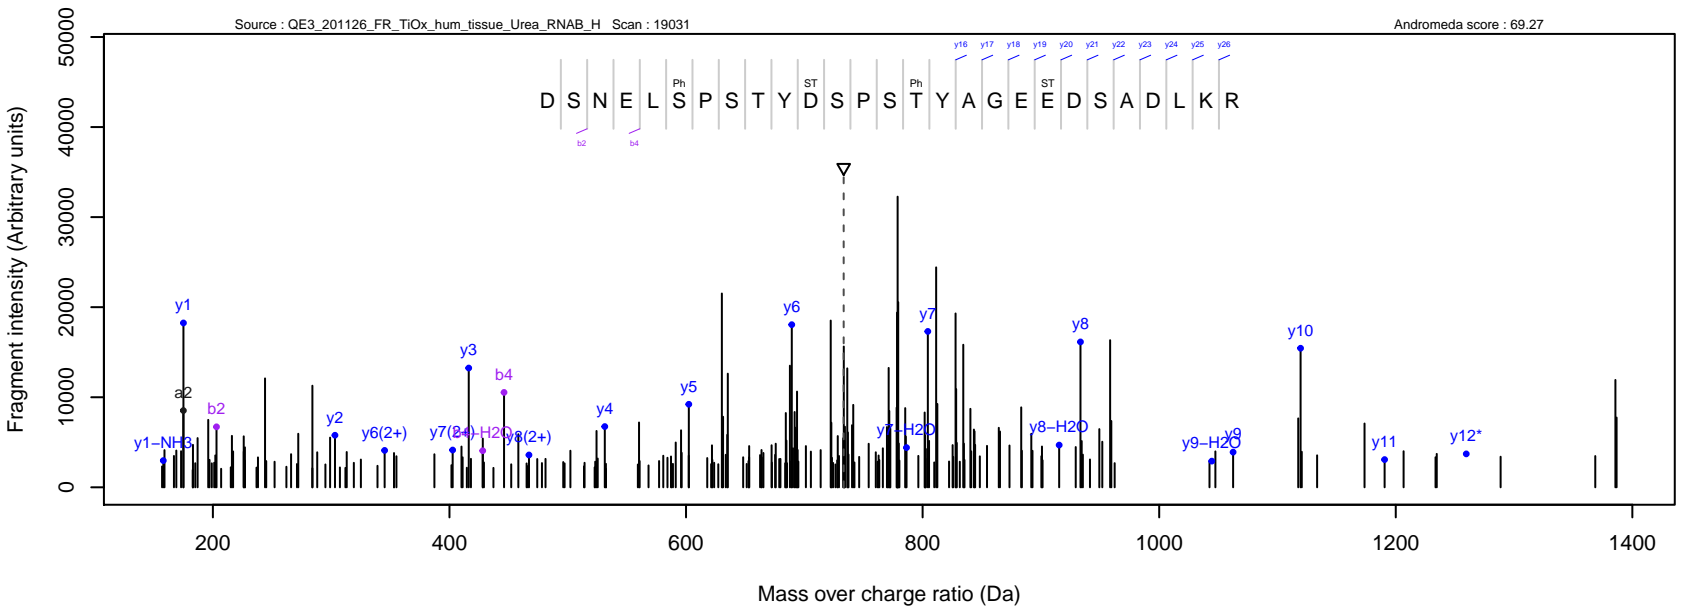

GHS(Phospho (STY))RS(Phospho (STY))RS(Phospho (STY))PQWR-3+

Source : QE3\_201126\_FR\_TIOx\_hum\_tissue\_Urea\_RNAB\_H Scan : 6430

Andromeda score : 69.261

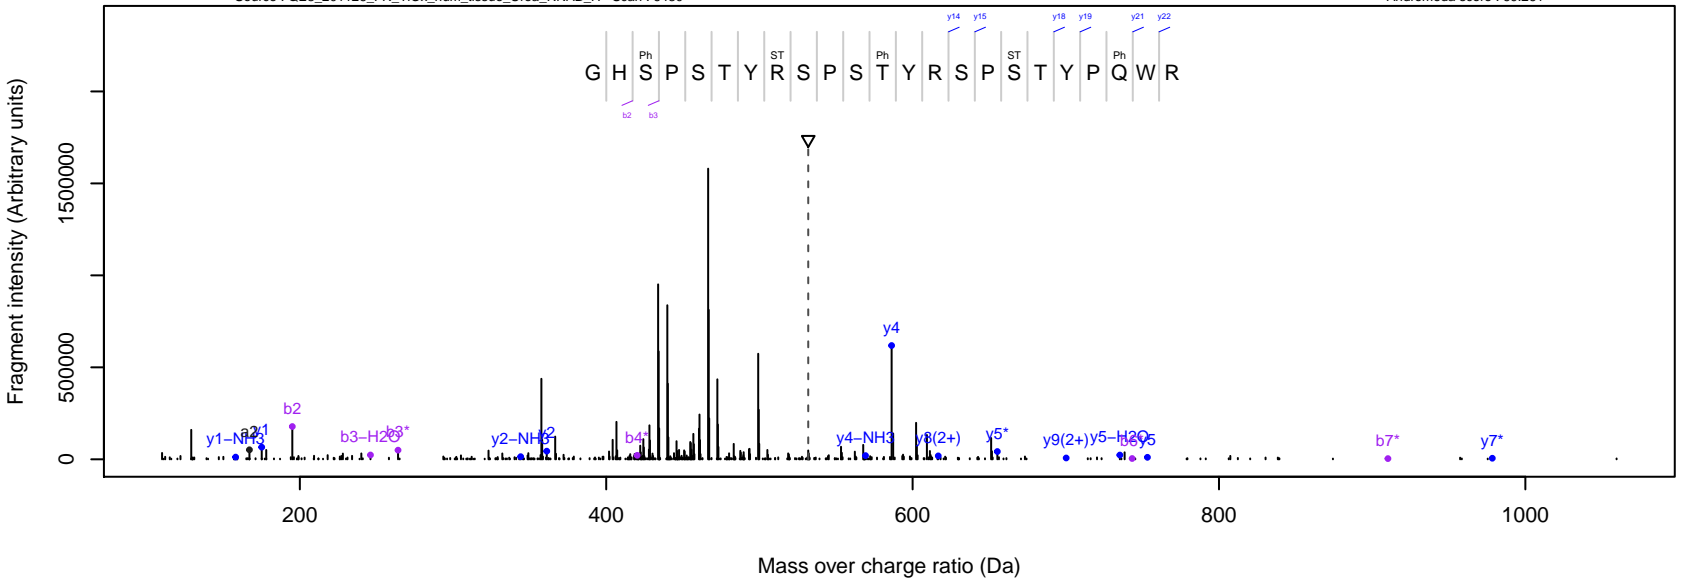

LNEAQPSTIATSMRDS(Phospho (STY))LIDSLT-2+

Source : QE3\_201126\_FR\_TIOx\_hum\_tissue\_Urea\_RNAB\_H Scan : 54558

Andromeda score : 69.261

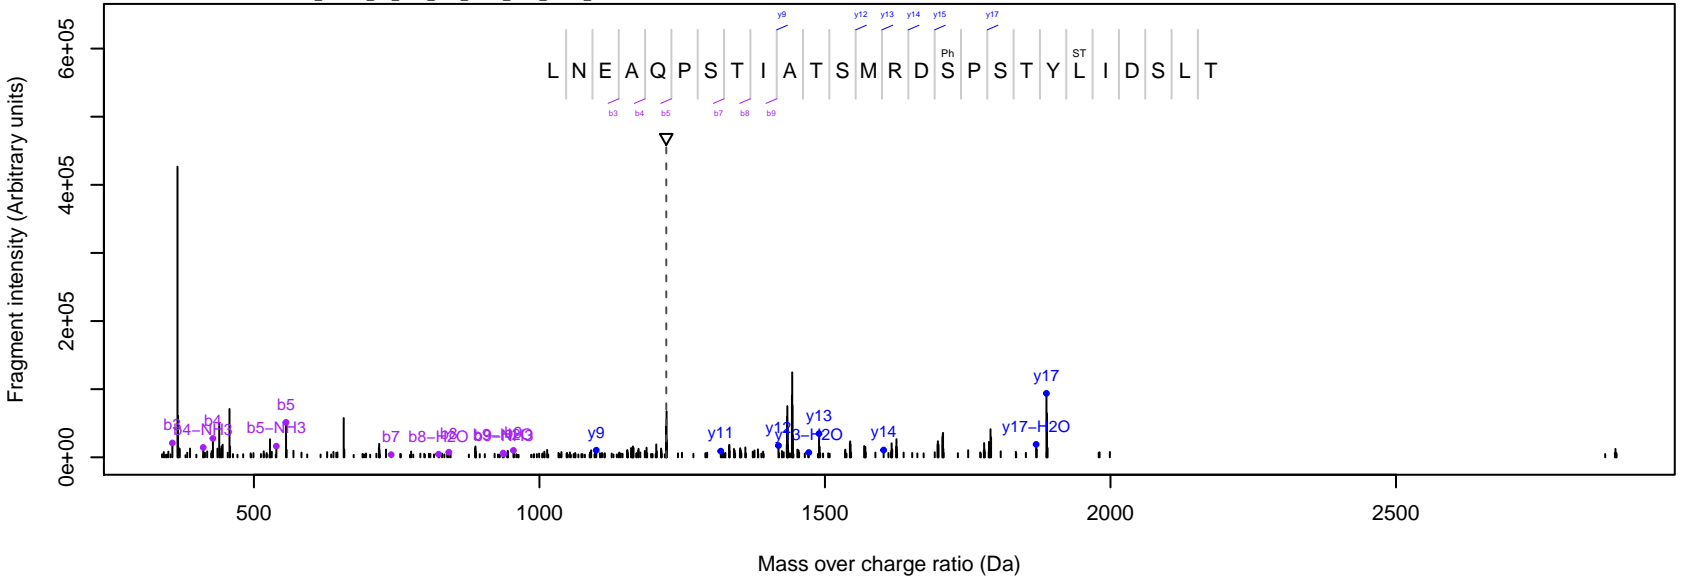

EARN(SPhospho (STY))WDSPAFSNDVIR-3+

Source : QE3\_201126\_FR\_TIOx\_hum\_tissue\_Urea\_RNAB\_N Scan : 34393

Andromeda score : 69.259

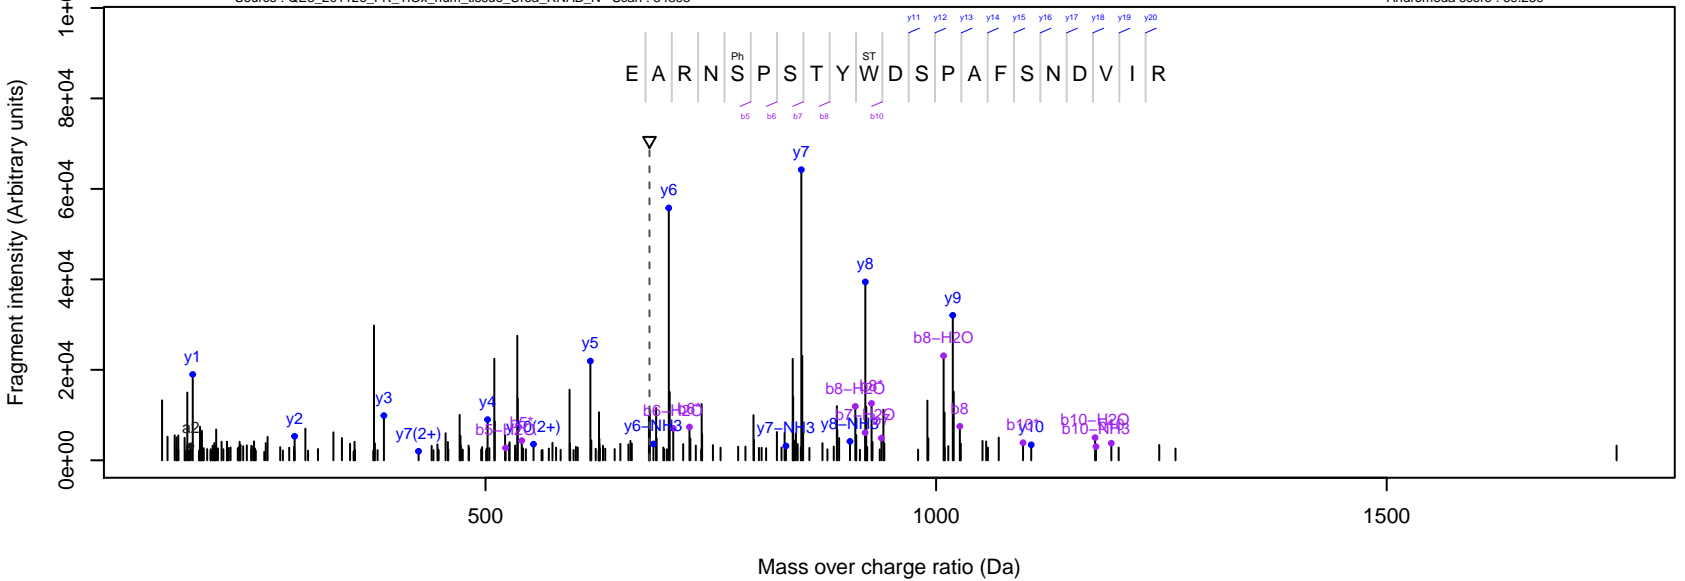

KNHT(Phospho (STY))LSELLQLR-3+

Source : QE3\_201126\_FR\_TiOx\_hum\_tissue\_Urea\_RNAB\_H Scan : 33693

Andromeda score : 69.258

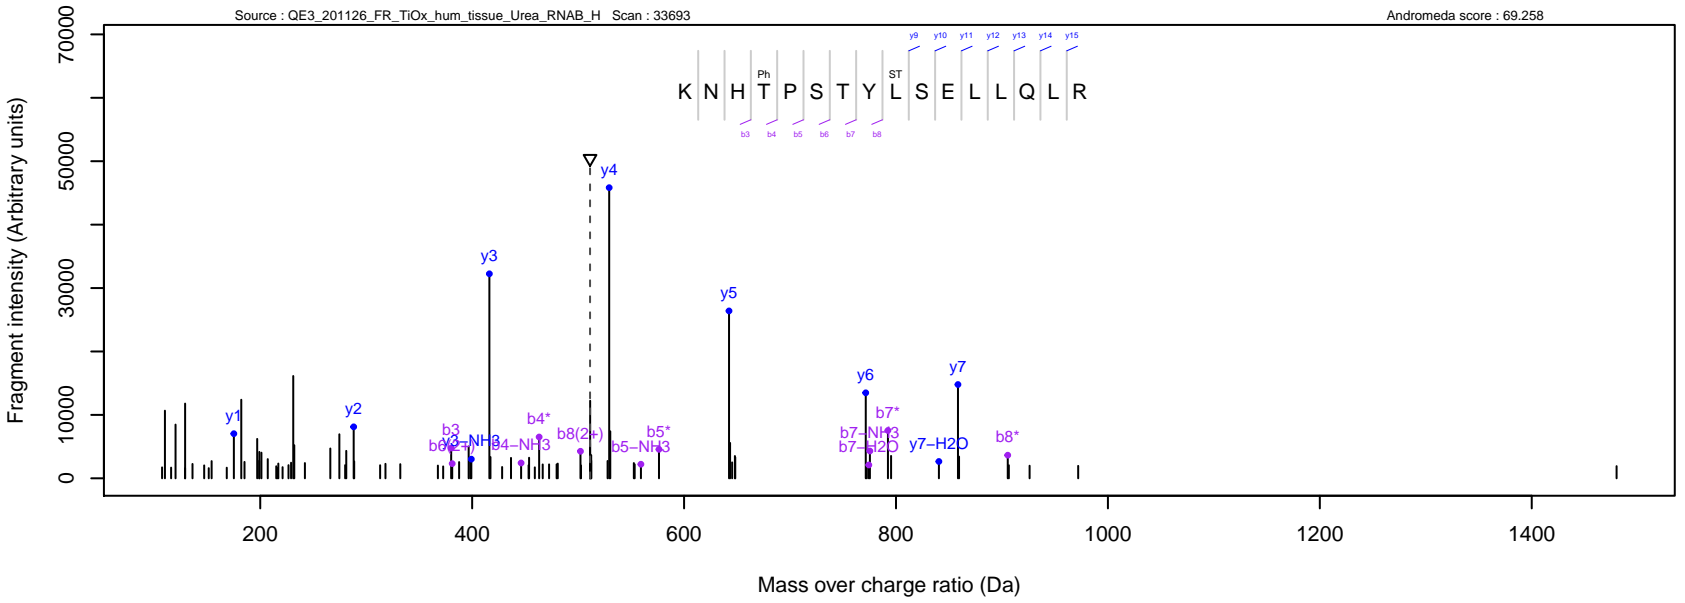

QLSSGVS(Phospho (STY))EIRHTADR-3+

Source : QE3\_201126\_FR\_TiOx\_hum\_tissue\_Urea\_RNAB\_B Scan : 15620

Andromeda score : 69.223

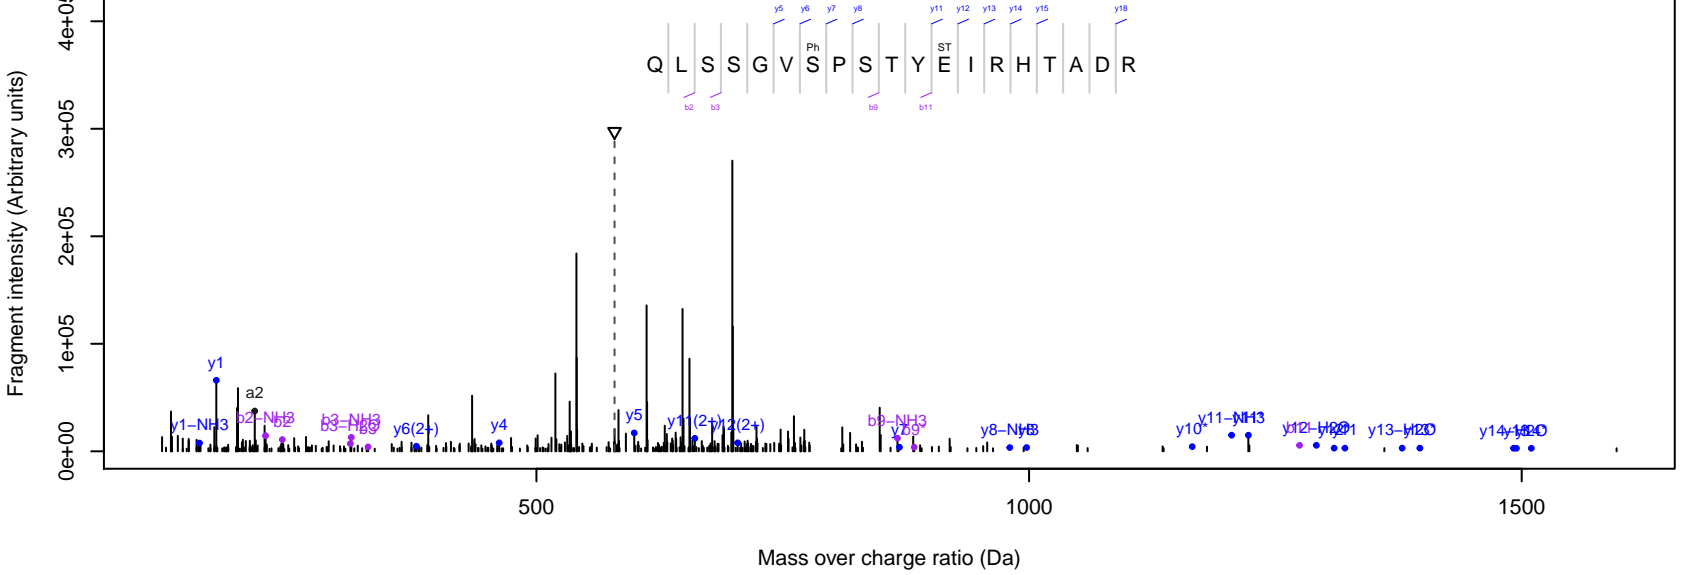

QLMTNFI(LG)SFDYSS(Phospho (STY))DEDSVAGSSR-3+

Source : QE3\_201126\_FR\_TiOx\_hum\_tissue\_Urea\_RNAB\_H Scan : 61644

Andromeda score : 69.201

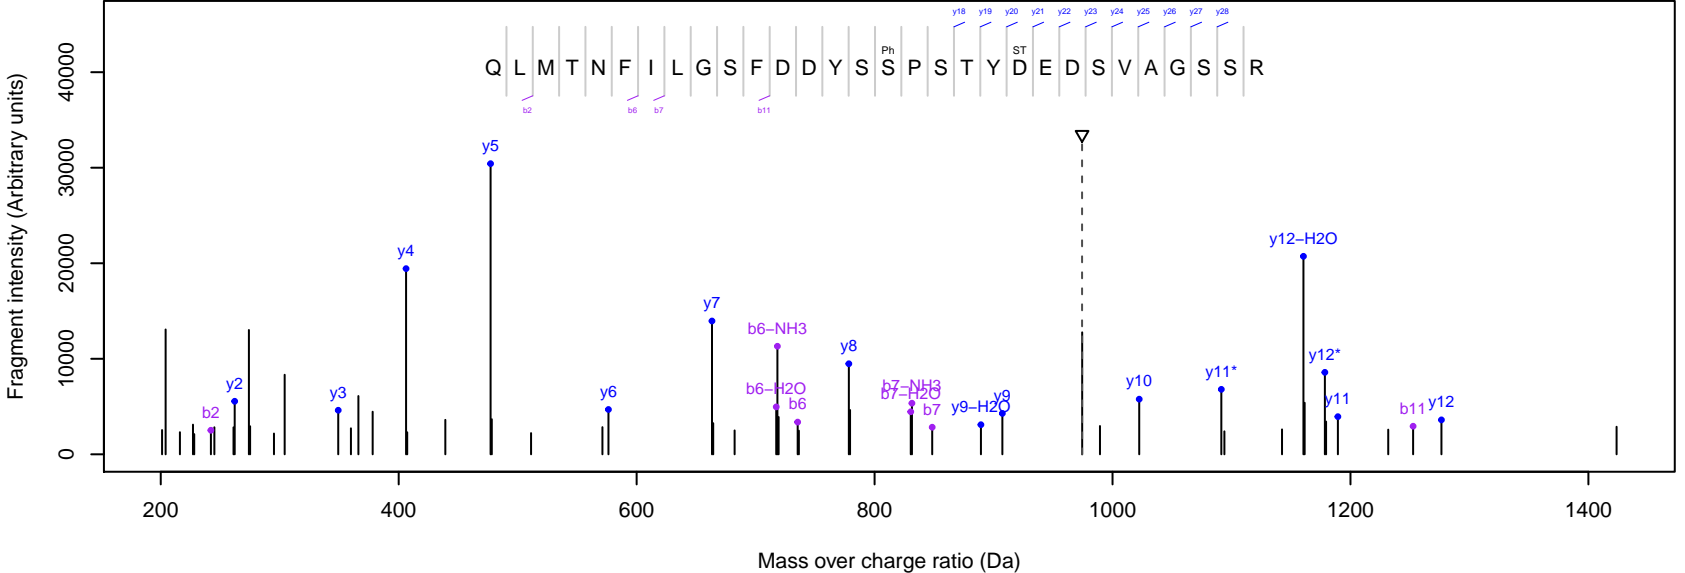



RHSS(Phospho (STY))DINHLVTQGR-4+

Source : QE3\_201126\_FR\_TiOx\_hum\_tissue\_Urea\_RNAB\_H Scan : 9971

Andromeda score : 69.188

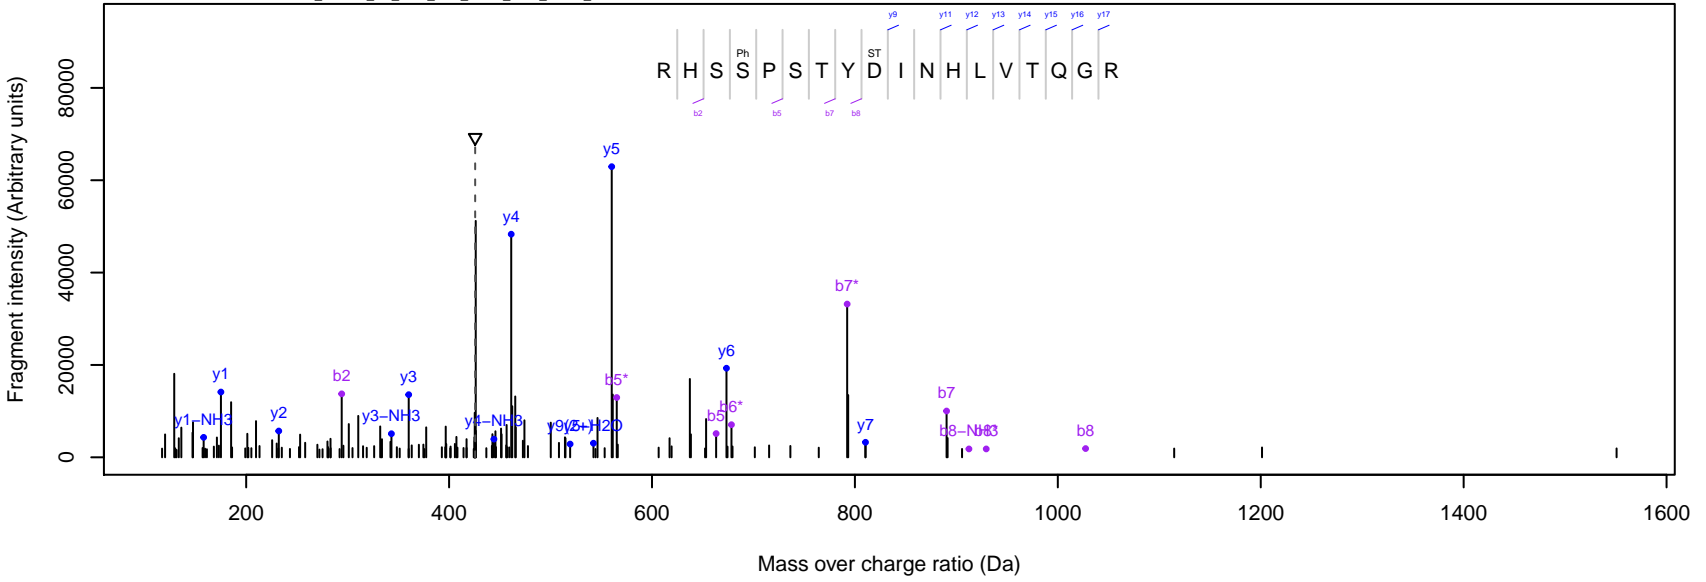

TEATQGLDYVPSAGTIS(Phospho (STY))PTSLEEDKGFK-3+

Source : QE3\_201126\_FR\_TiOx\_hum\_tissue\_Urea\_RNAB\_H Scan : 41731

Andromeda score : 69.181

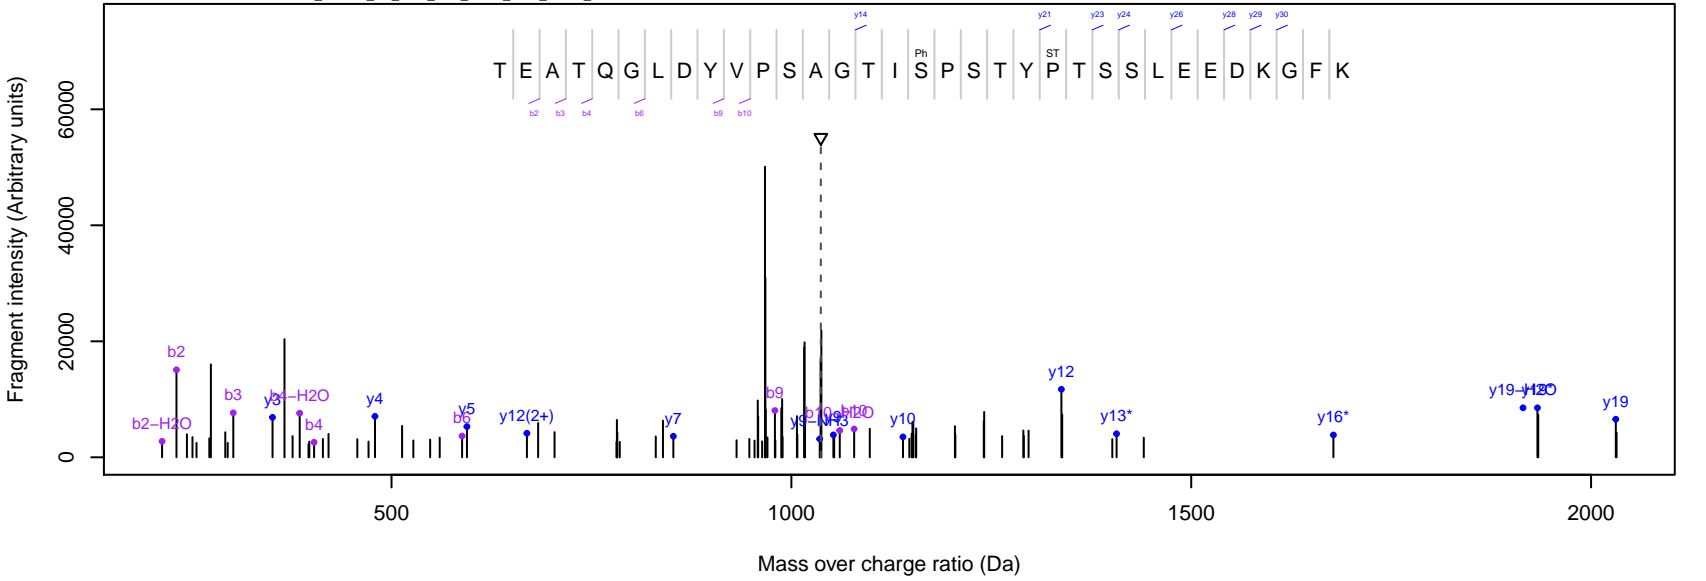

AMDNHS(Phospho (STY))DSEEEAFCPLDDSTVAR-3+

Source : QE3\_201126\_FR\_TiOx\_hum\_tissue\_Urea\_RNAB\_N Scan : 43199

Andromeda score : 69.152

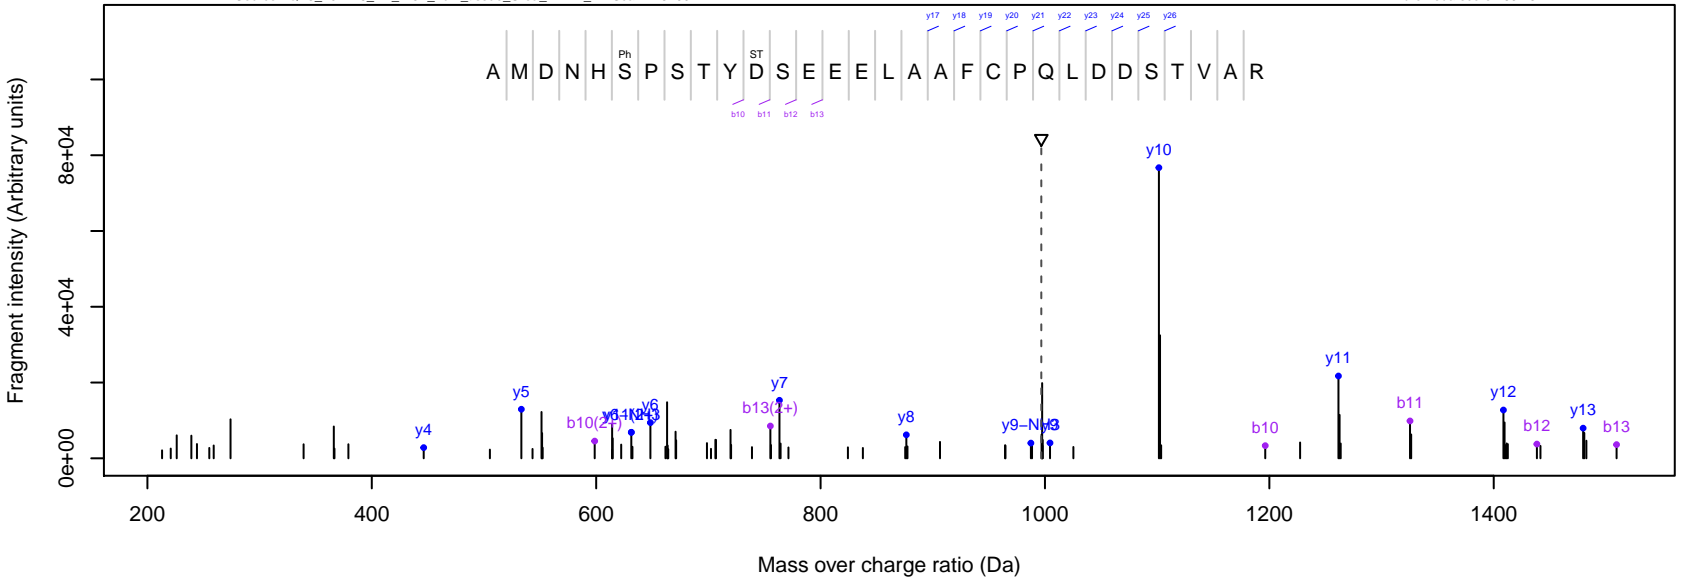

SLESVLSLGP RPT(Phospho (STY))GGGSSPPEIR-3+

Source : QE3\_201126\_FR\_TiOx\_hum\_tissue\_Urea\_RNAB\_N Scan : 43518

Andromeda score : 69.152

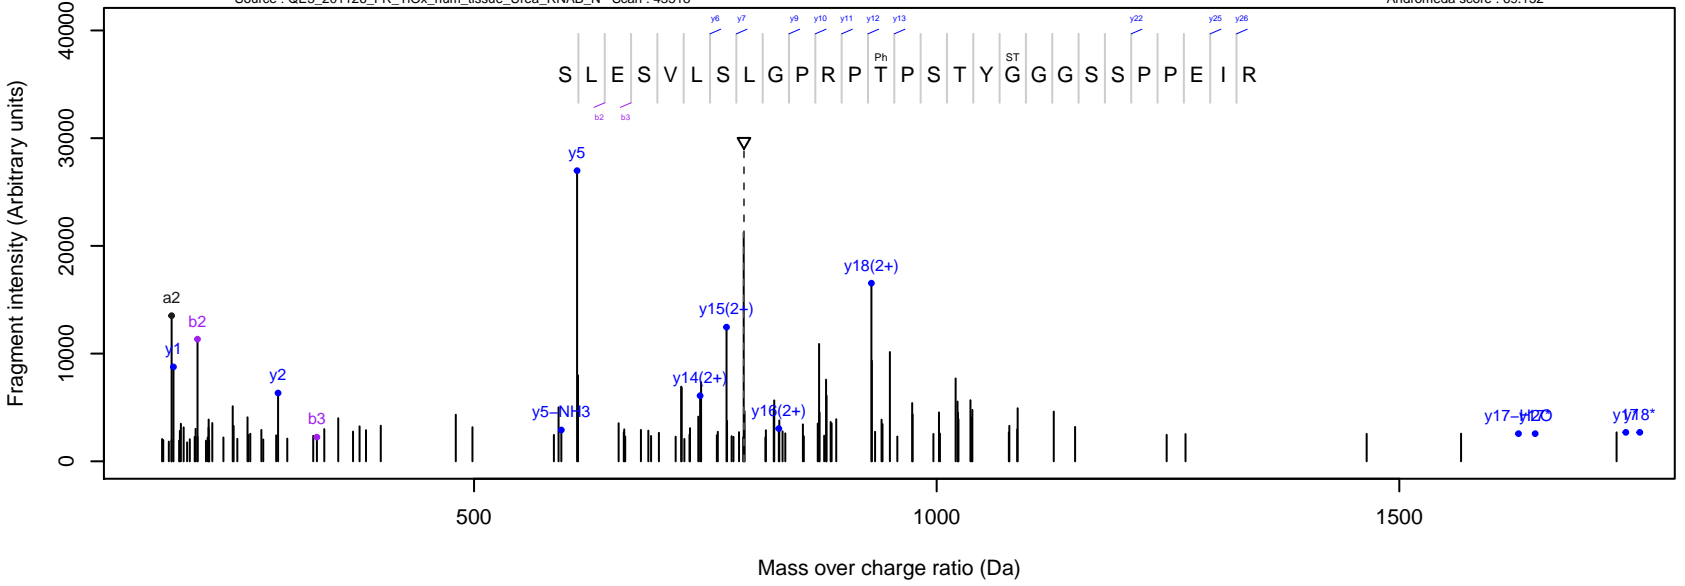

TMII(Phospho (STY))PERLDPFADGGKTPDPK-3+

Source : QE3\_201126\_FR\_TiOx\_hum\_tissue\_Urea\_RNAB\_N Scan : 43846

Andromeda score : 69.152

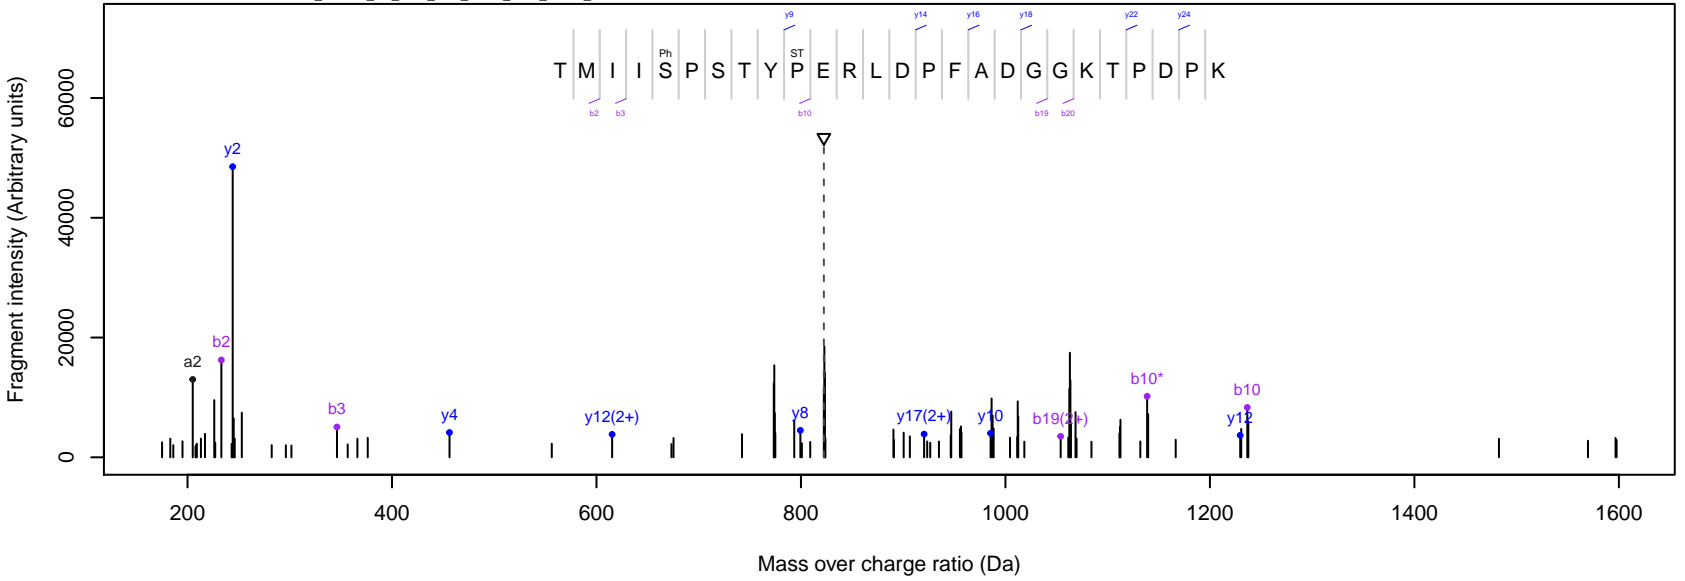

REDS(Phospho (STY))FESLDSLGR-3+

Source : QE3\_201126\_FR\_TiOx\_hum\_tissue\_Urea\_RNAB\_H Scan : 28121

Andromeda score : 69.148

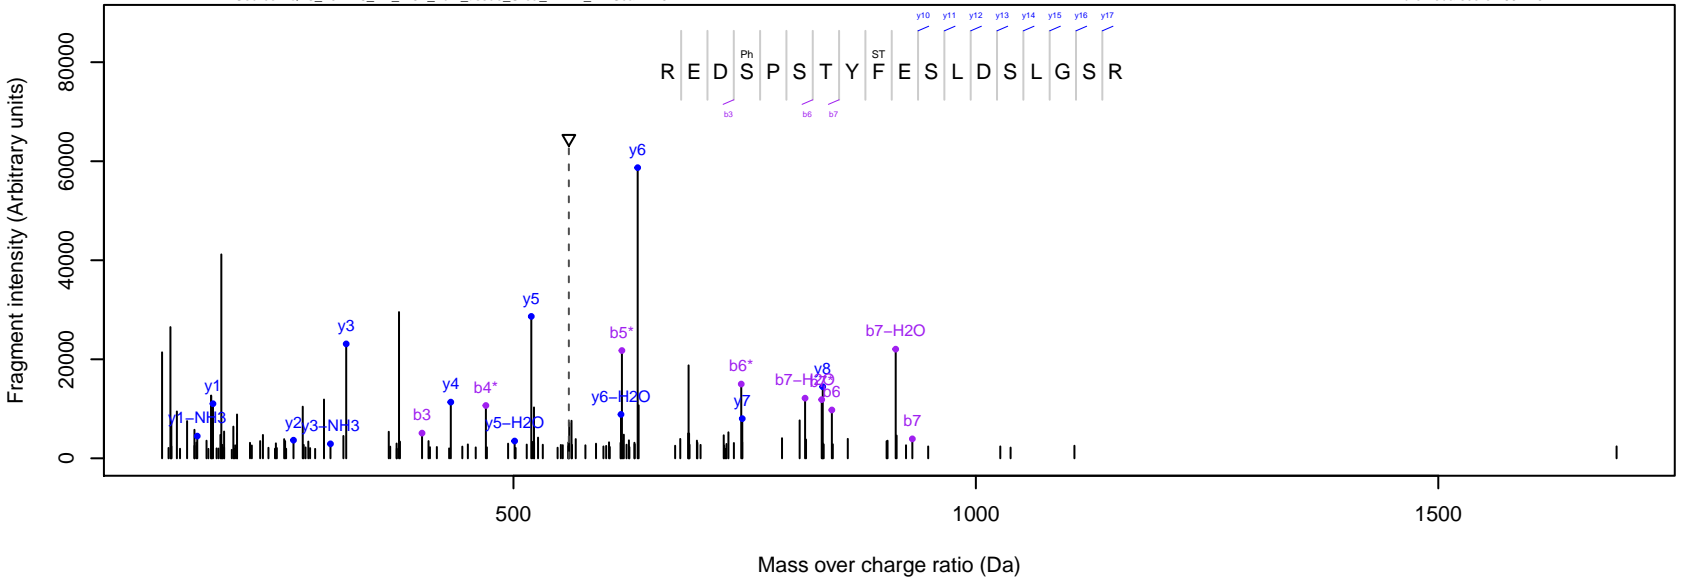

DVAGATWNGS(Phospho (STY))GEEEEEDGPAVLVEQQTDSAMEPTGPTQER-4+

Source : QE3\_201126\_FR\_TiOx\_hum\_tissue\_Urea\_RNAB\_B Scan : 55623

Andromeda score : 69.143

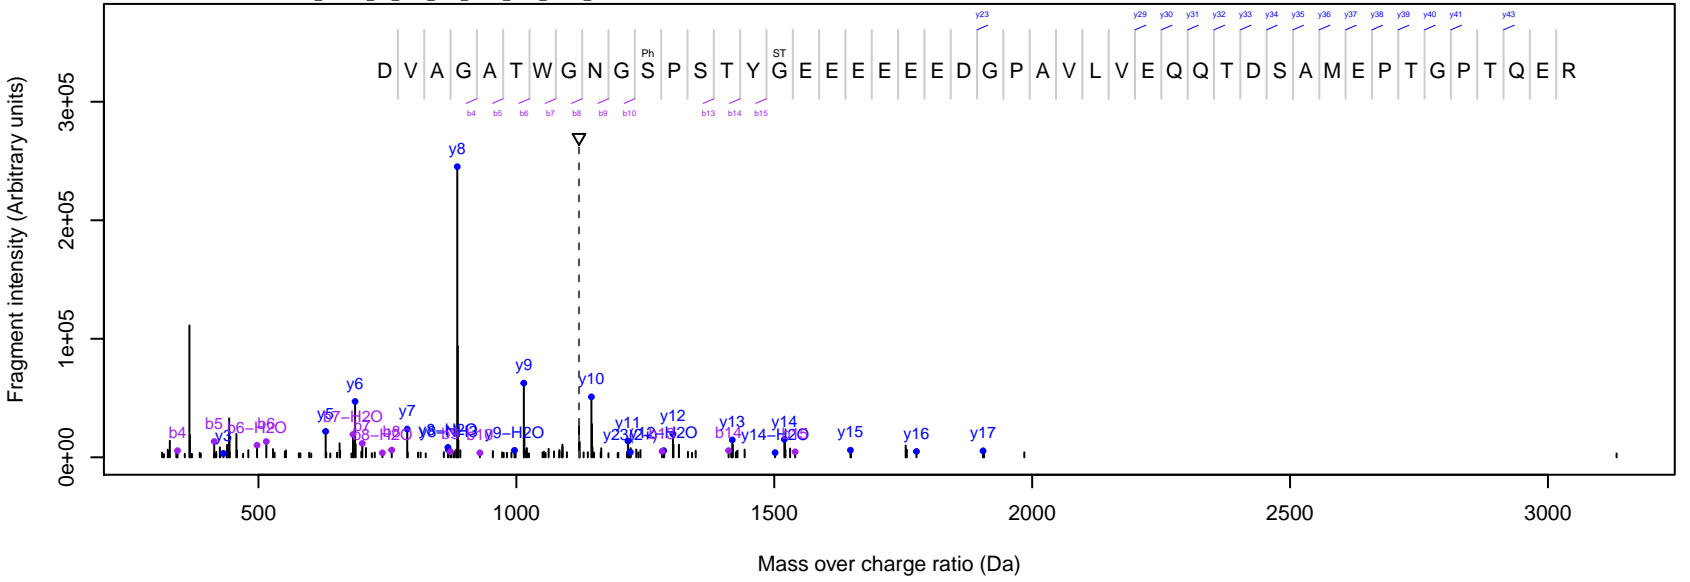

KSS(Phospho (STY))ISS(Phospho (STY))ISGRDDLMDYHR-3+

Source : QE3\_201126\_FR\_TiOx\_hum\_tissue\_Urea\_RNAB\_H Scan : 22516

Andromeda score : 69.133

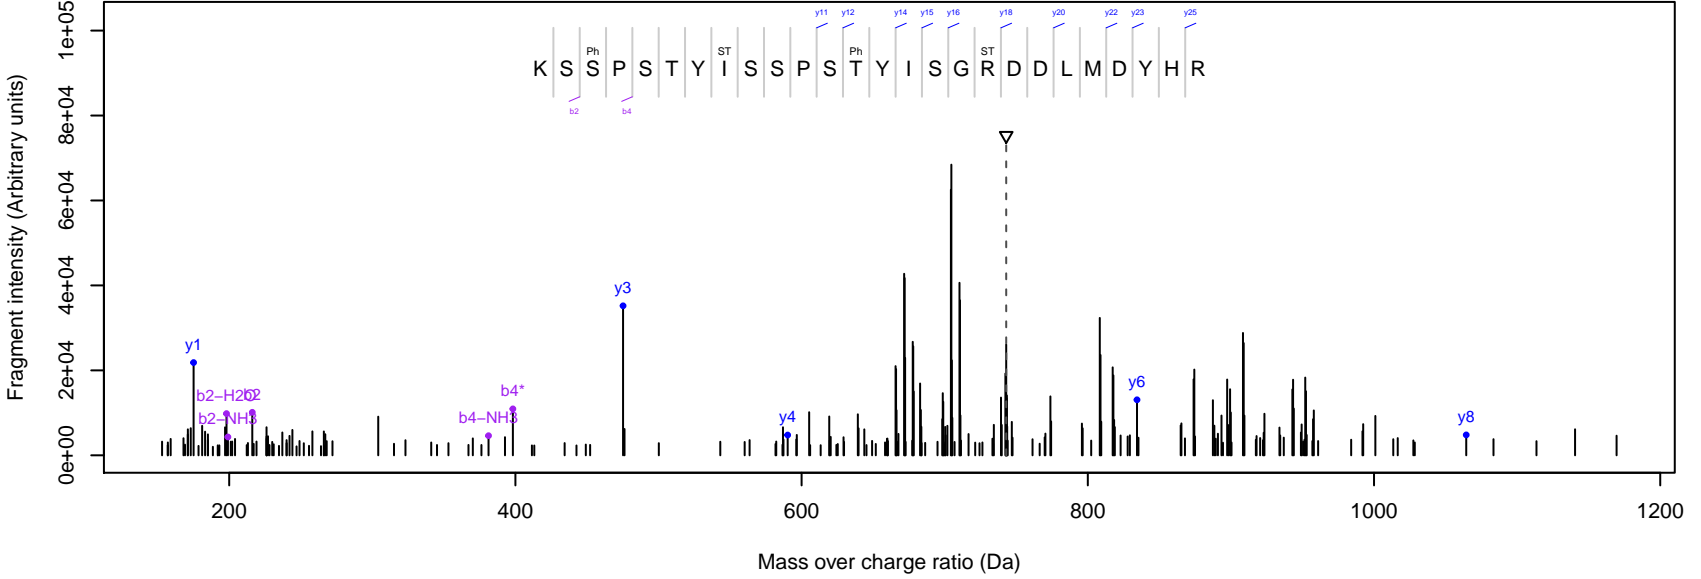

STHCPSNNVISERNS(Phospho (STY))TTV-3+

Source : QE3\_201126\_FR\_TiOx\_hum\_tissue\_Urea\_RNAB\_N Scan : 13390

Andromeda score : 69.133

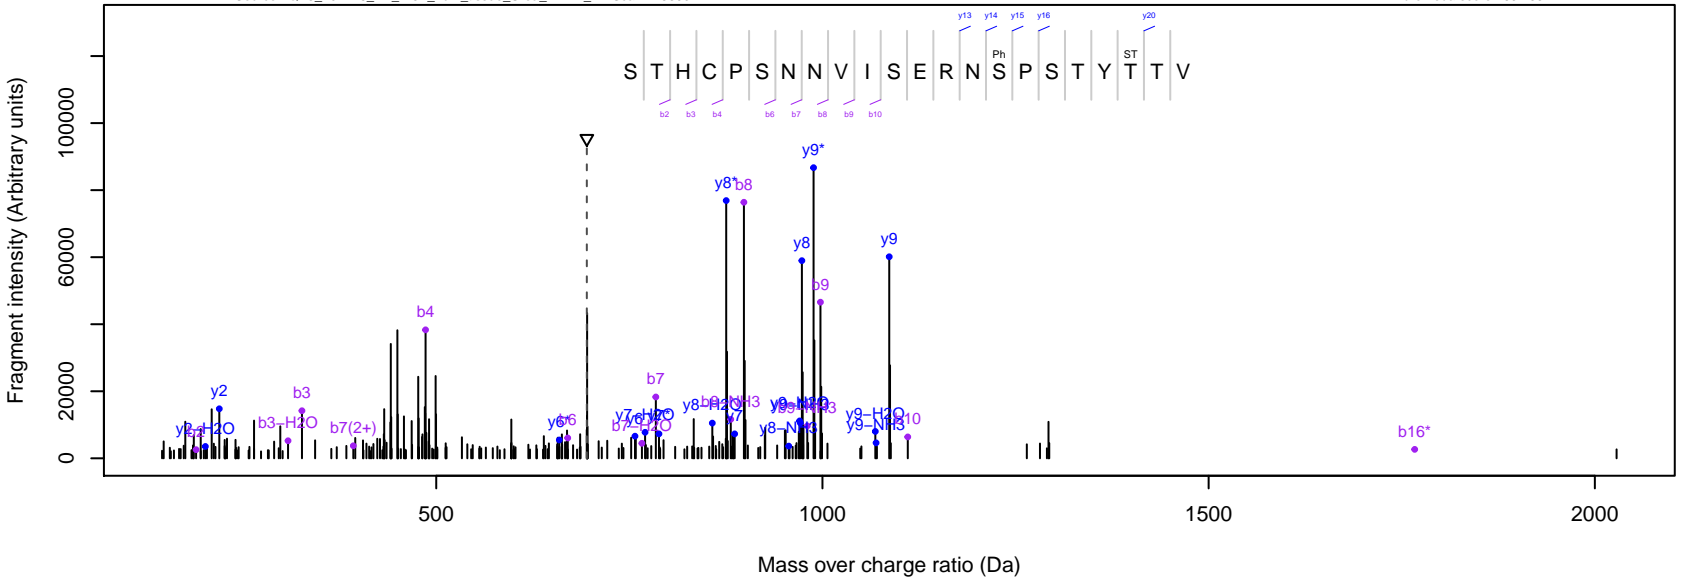

APSDTGS(Phospho (STY))LSPPWDQDRR-3+

Source : QE3\_201126\_FR\_TiOx\_hum\_tissue\_Urea\_RNAB\_H Scan : 28076

Andromeda score : 69.122

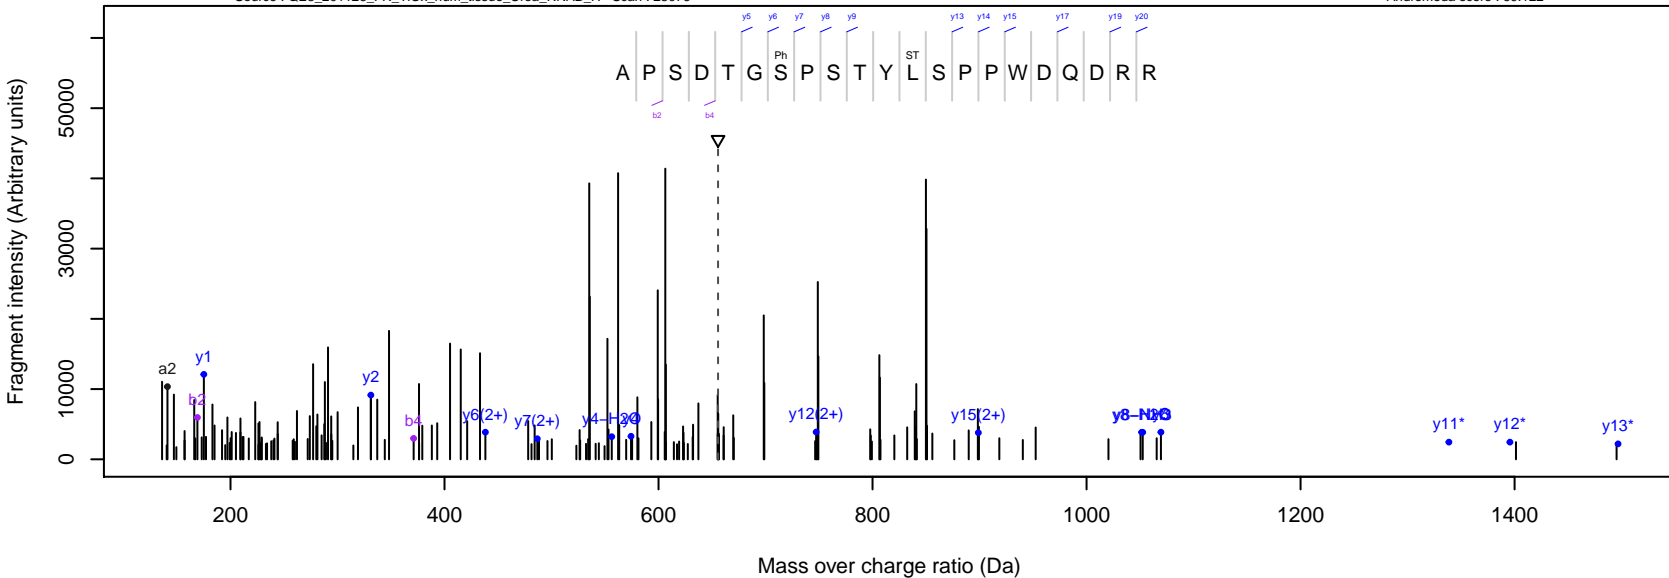

YLDEHHYENQHS(Phospho (STY))PFGTNS(Phospho (STY))ETHFQNSNR-4+

Source : QE3\_201126\_FR\_TiOx\_hum\_tissue\_Urea\_RNAB\_H Scan : 18472

Andromeda score : 69.094

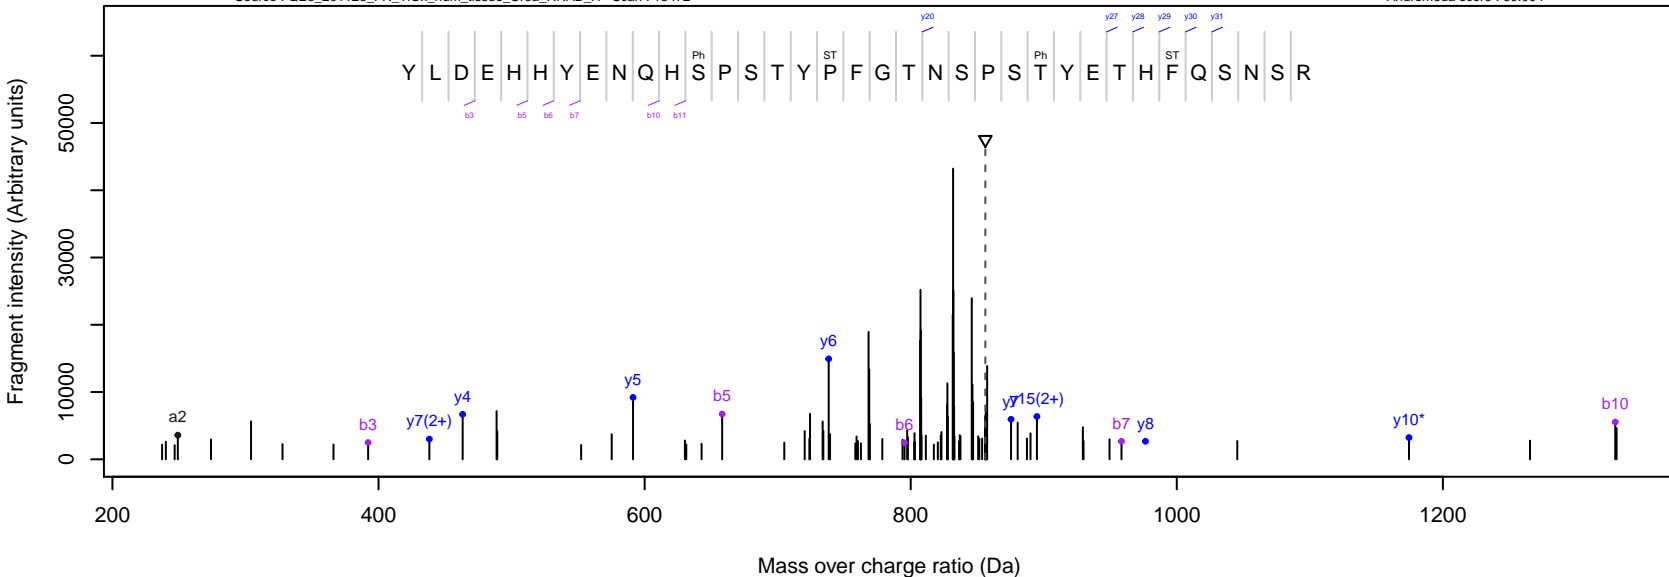

RYS(Phospho (STY))DFEWLRELER-3+

Source : QE3\_201126\_FR\_TiOx\_hum\_tissue\_Urea\_RNAB\_H Scan : 47454

Andromeda score : 69.081

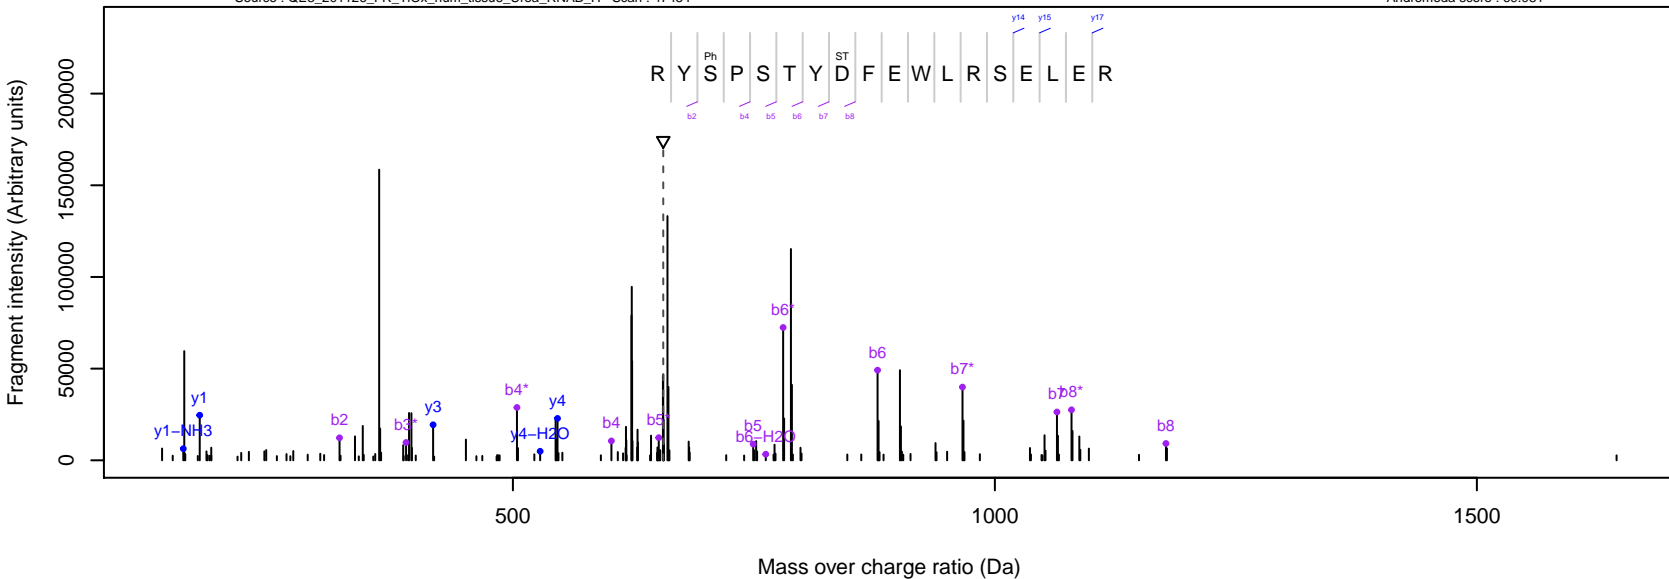

VRGPVSGS(Phospho (STY))PDSM(Oxidation (M))NASR-3+

Source : QE3\_201126\_FR\_TiOx\_hum\_tissue\_Urea\_RNAB\_N Scan : 6923

Andromeda score : 68.952

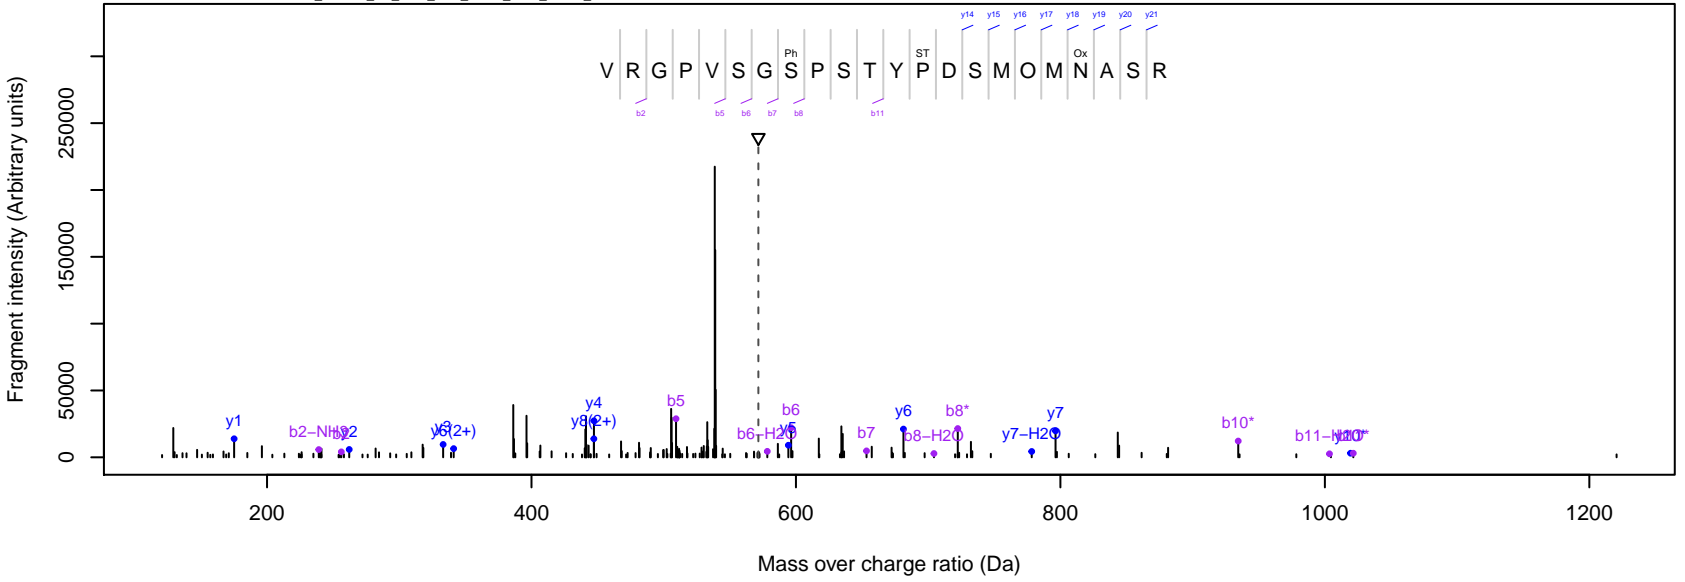

TASFS(Phospho (STY))ESRADEVAPAK-2+

Source : QE3\_201126\_FR\_TiOx\_hum\_tissue\_Urea\_RNAB\_B Scan : 14652

Andromeda score : 68.944

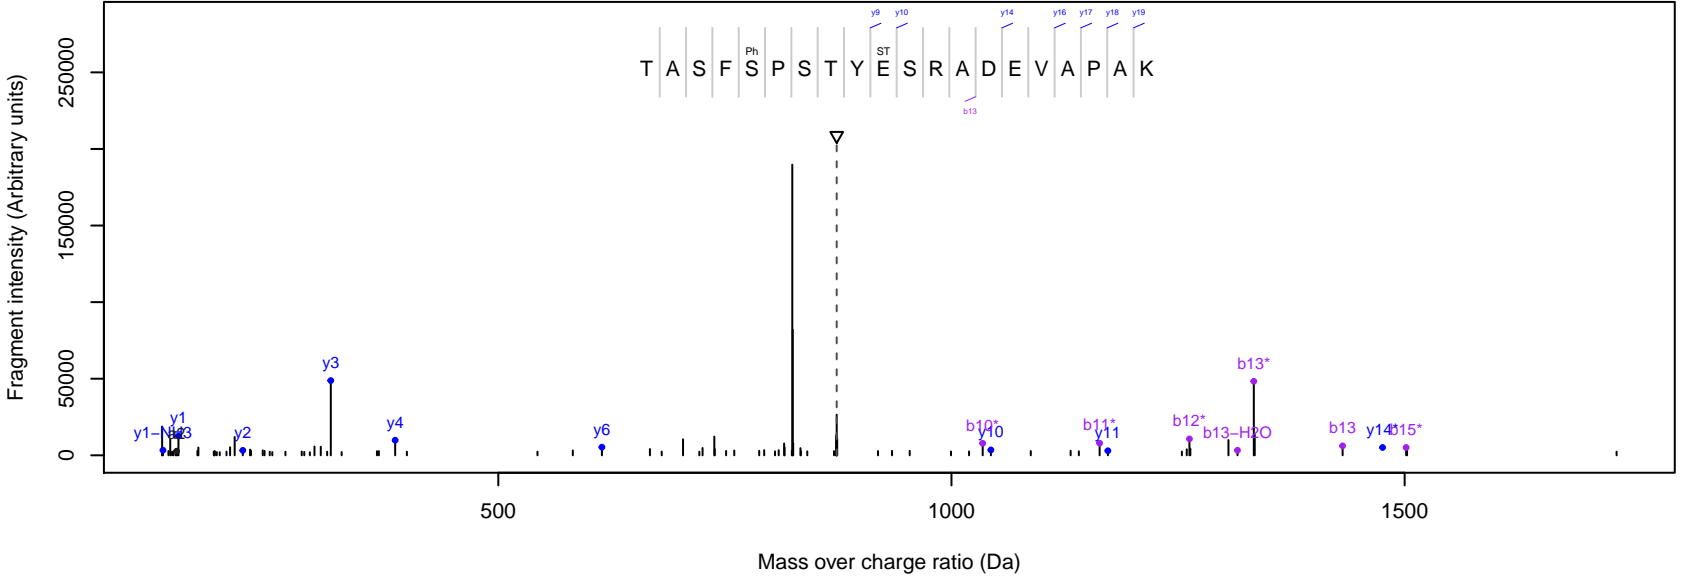

SDLRKS(Phospho (STY))PVFS(Phospho (STY))DEDS(Phospho (STY))DLDFDISK-3+

Source : QE3\_201126\_FR\_TiOx\_hum\_tissue\_Urea\_RNAB\_N Scan : 46582

Andromeda score : 68.934

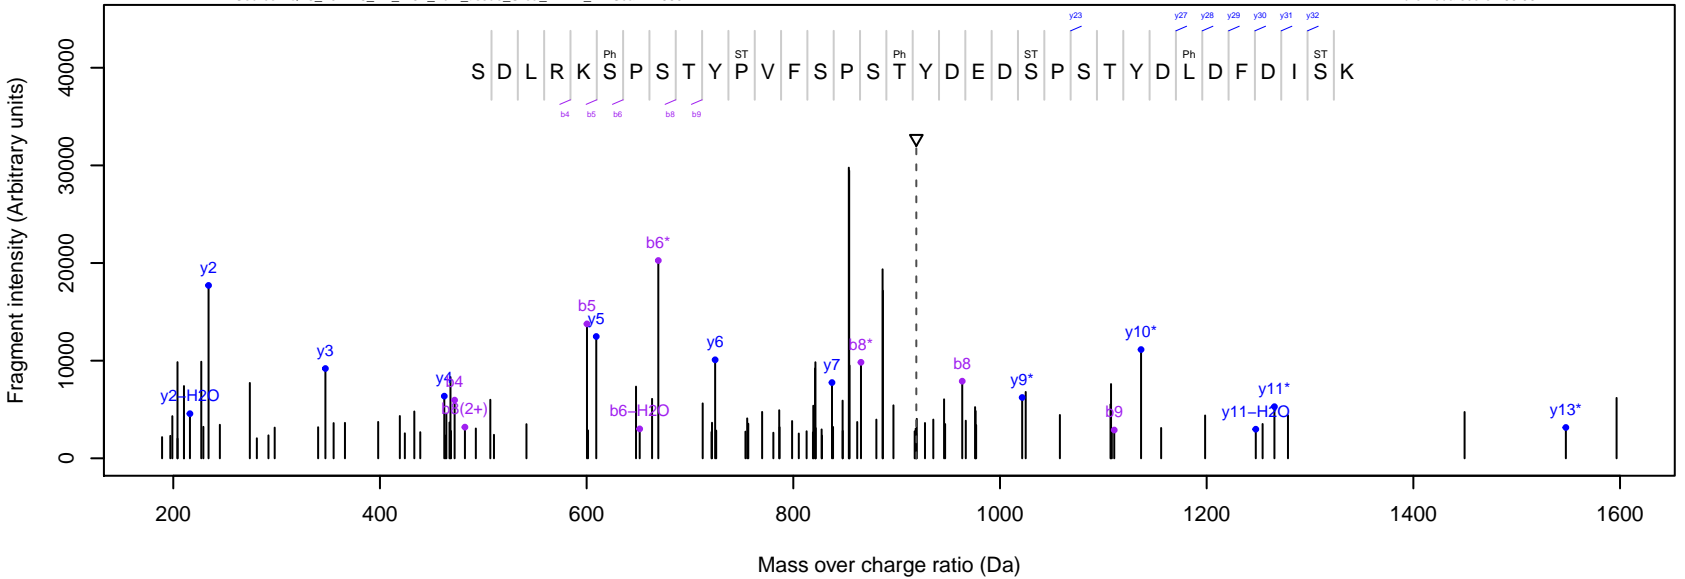

SNS(Phospho (STY))ISK(Phospho (STY))PGPS(Phospho (STY))SPKEPLLSR-3+

Source : QE3\_201126\_FR\_TiOx\_hum\_tissue\_Urea\_RNAB\_H Scan : 36172

Andromeda score : 68.934

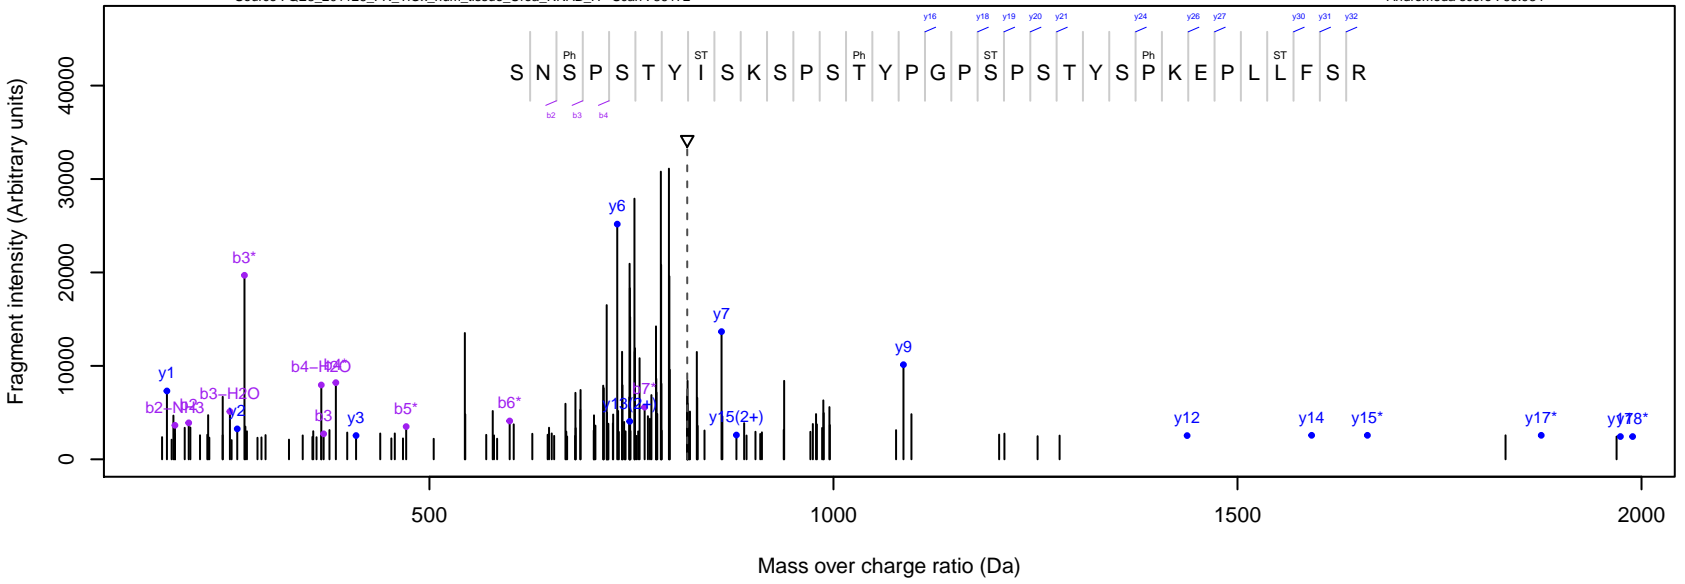

VLTDSGSLDS(Phospho (STY))TIPGIENITVTTEQLTASFVGSK-3+

Source : QE3\_201126\_FR\_TiOx\_hum\_tissue\_Urea\_RNAB\_B Scan : 63019

Andromeda score : 68.907

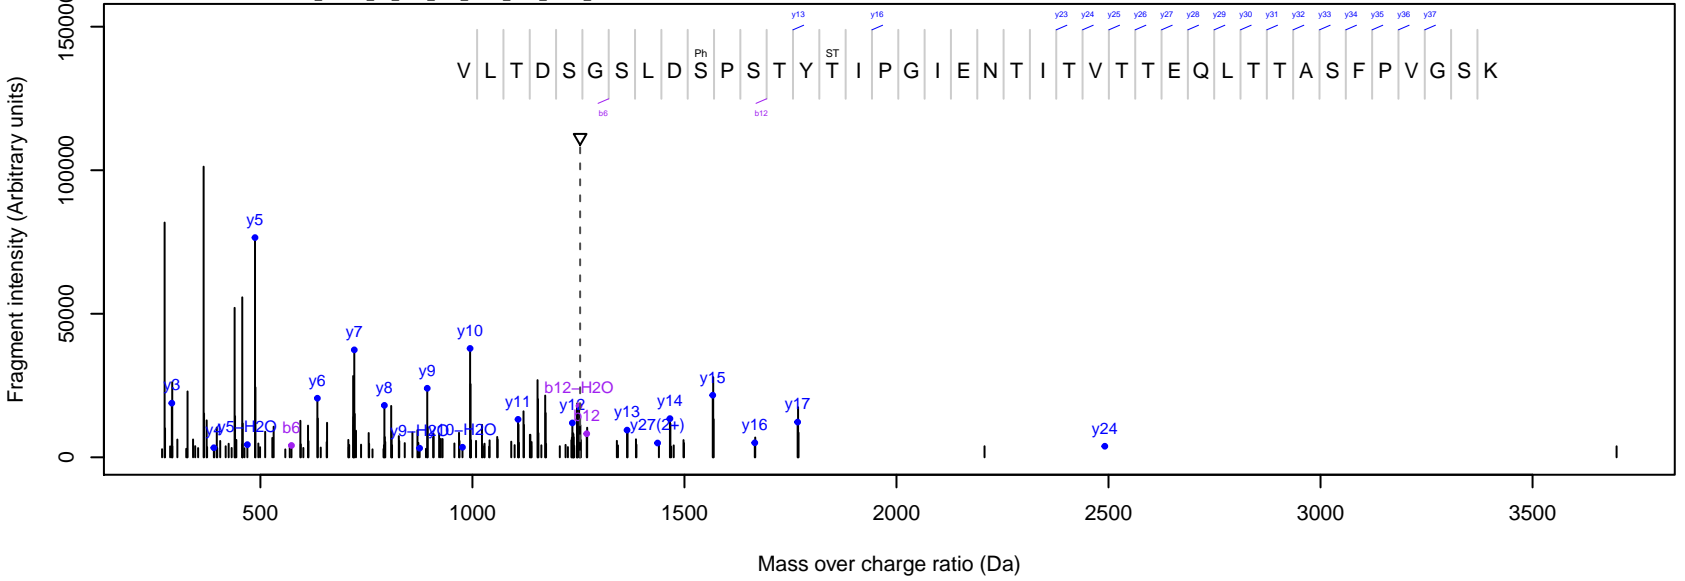

M(Oxidation (M))ECNPSQVNGS(Phospho (STY))RNSPDECSVAK-3+

Source : QE3\_201126\_FR\_TiOx\_hum\_tissue\_Urea\_RNAB\_N Scan : 9501

Andromeda score : 68.895

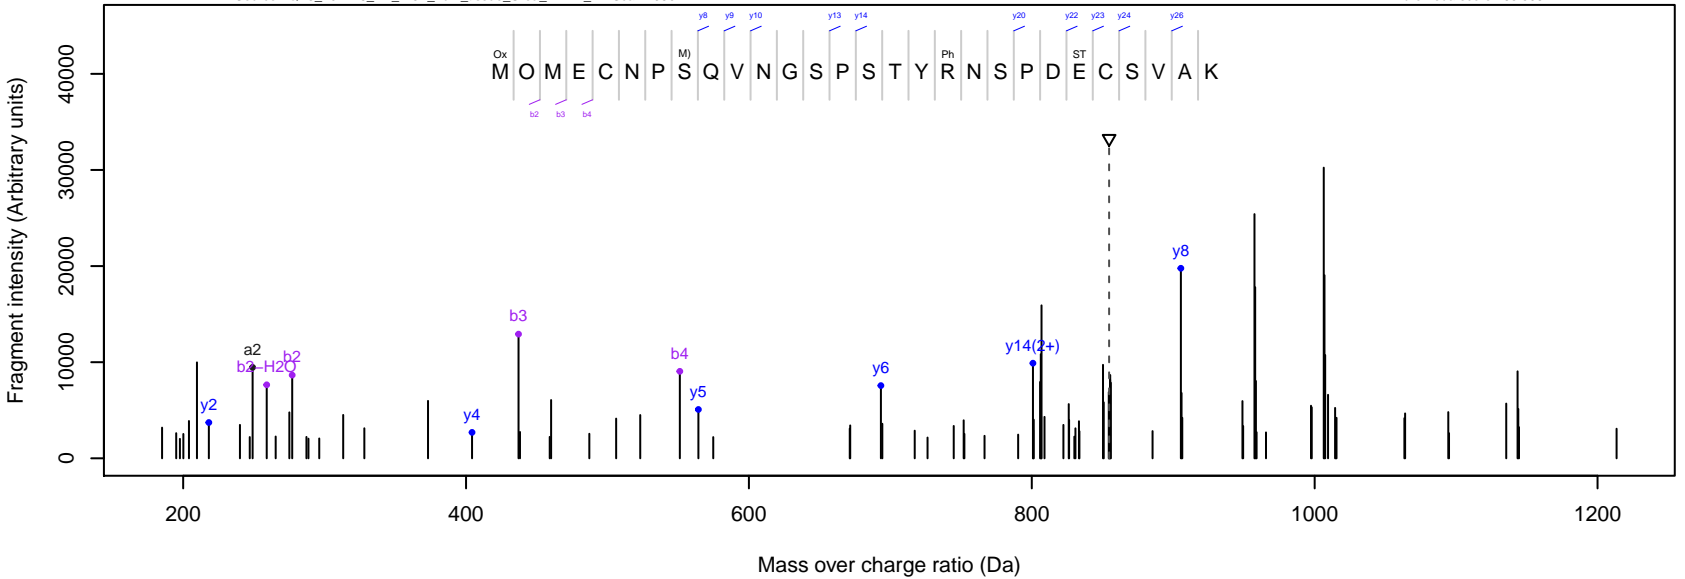

MVVPGLDGAQIPRDPS(Phospho (STY))QQELPR-3+

Source : QE3\_201126\_FR\_TiOx\_hum\_tissue\_Urea\_RNAB\_H Scan : 40732

Andromeda score : 68.895

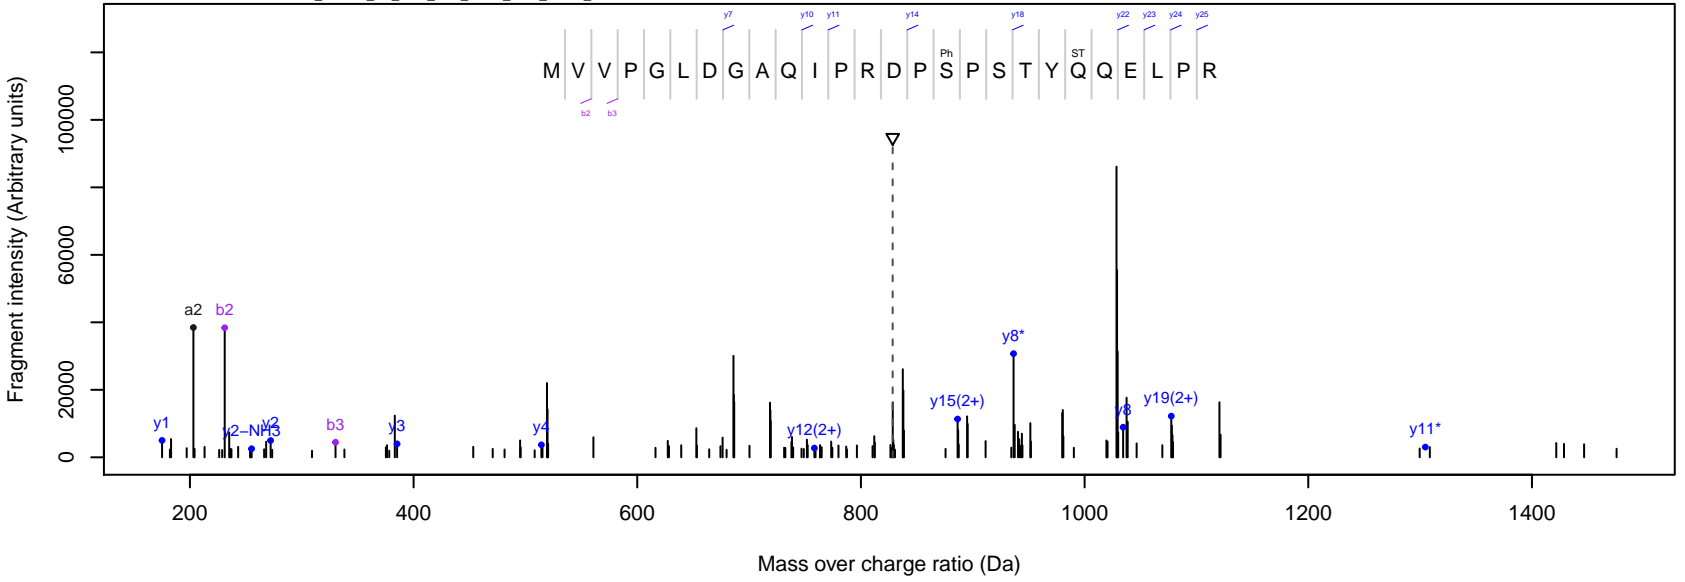

TLS(Phospho (STY))SPSNRPSGETSVPPPPAVGR-3+

Source : QE3\_201126\_FR\_TiOx\_hum\_tissue\_Urea\_RNAB\_N Scan : 20172

Andromeda score : 68.895

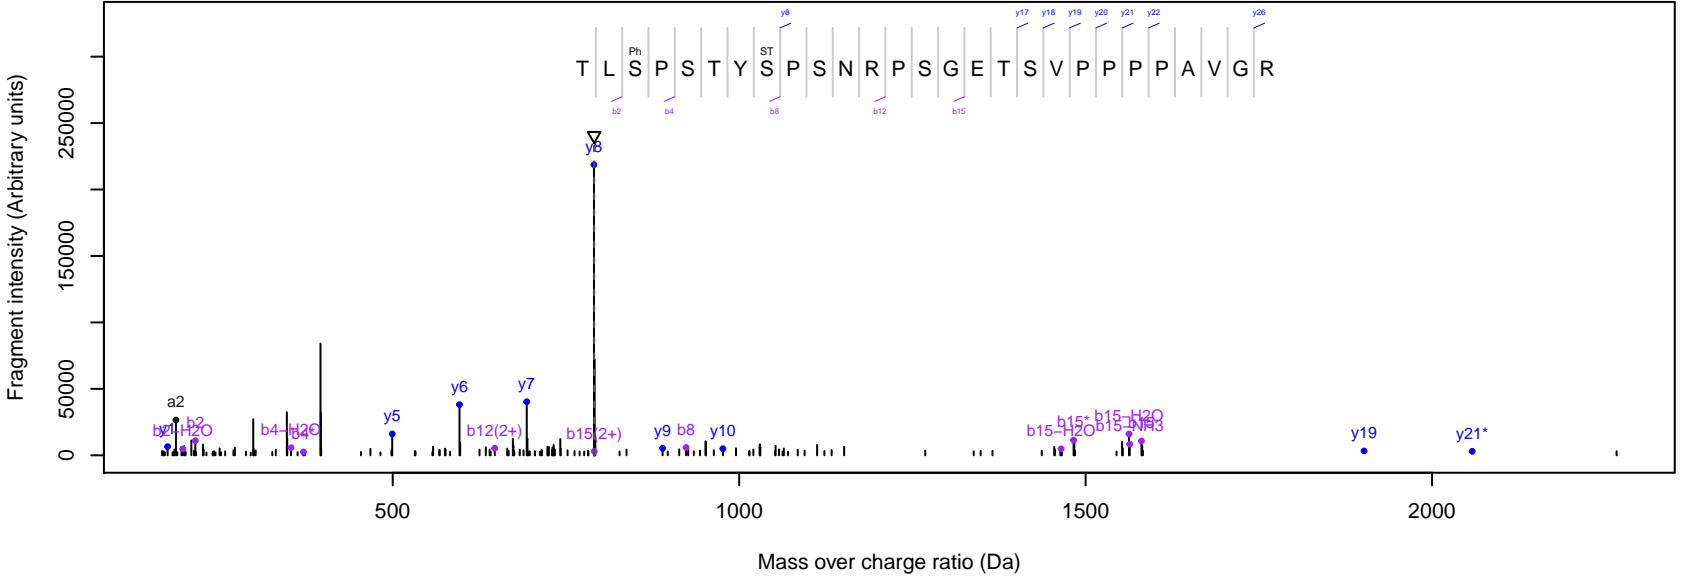

QWTSLS(Phospho (STY))LR-2+

Source : QE3\_201126\_FR\_TiOx\_hum\_tissue\_Urea\_RNAB\_H Scan : 34062

Andromeda score : 68.893

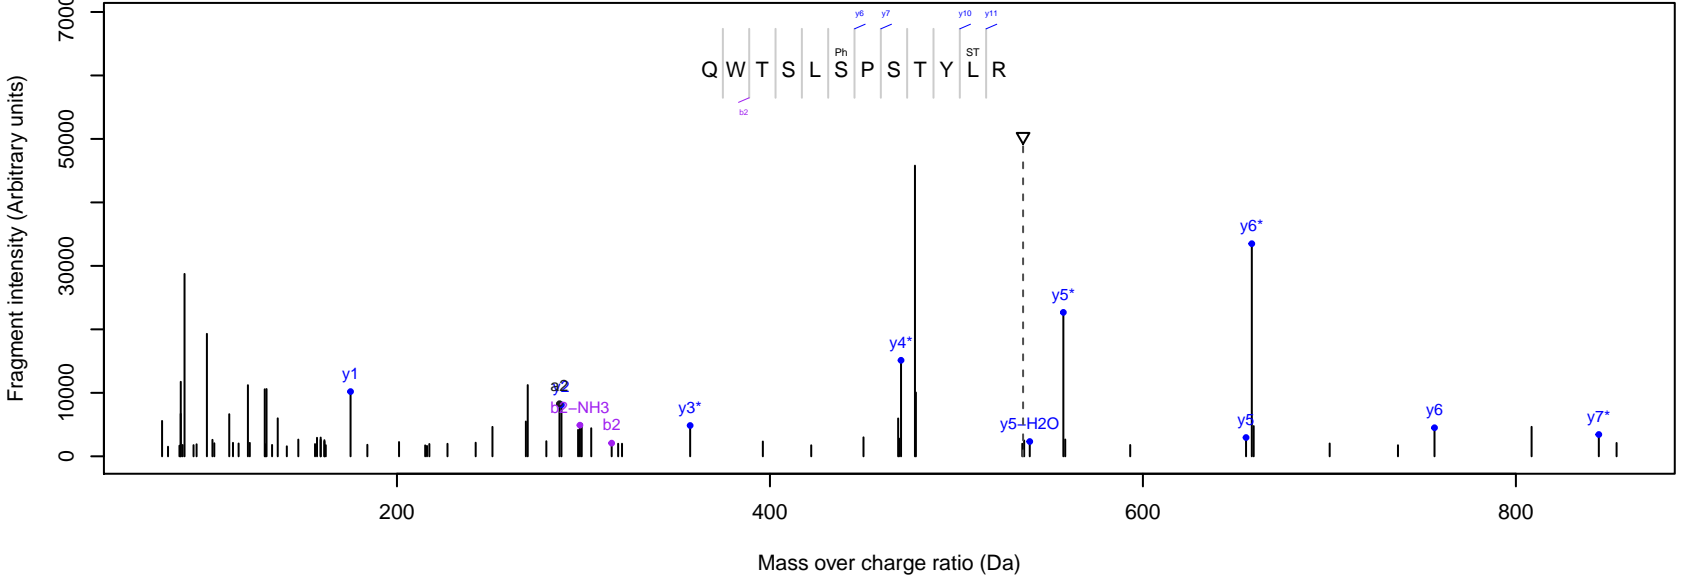

EYDHM(Oxidation (M))NGS(Phospho (STY))RESPVDCSVSK-3+

Source : QE3\_201126\_FR\_TIOx\_hum\_tissue\_Urea\_RNAB\_B Scan : 7504

Andromeda score : 68.88

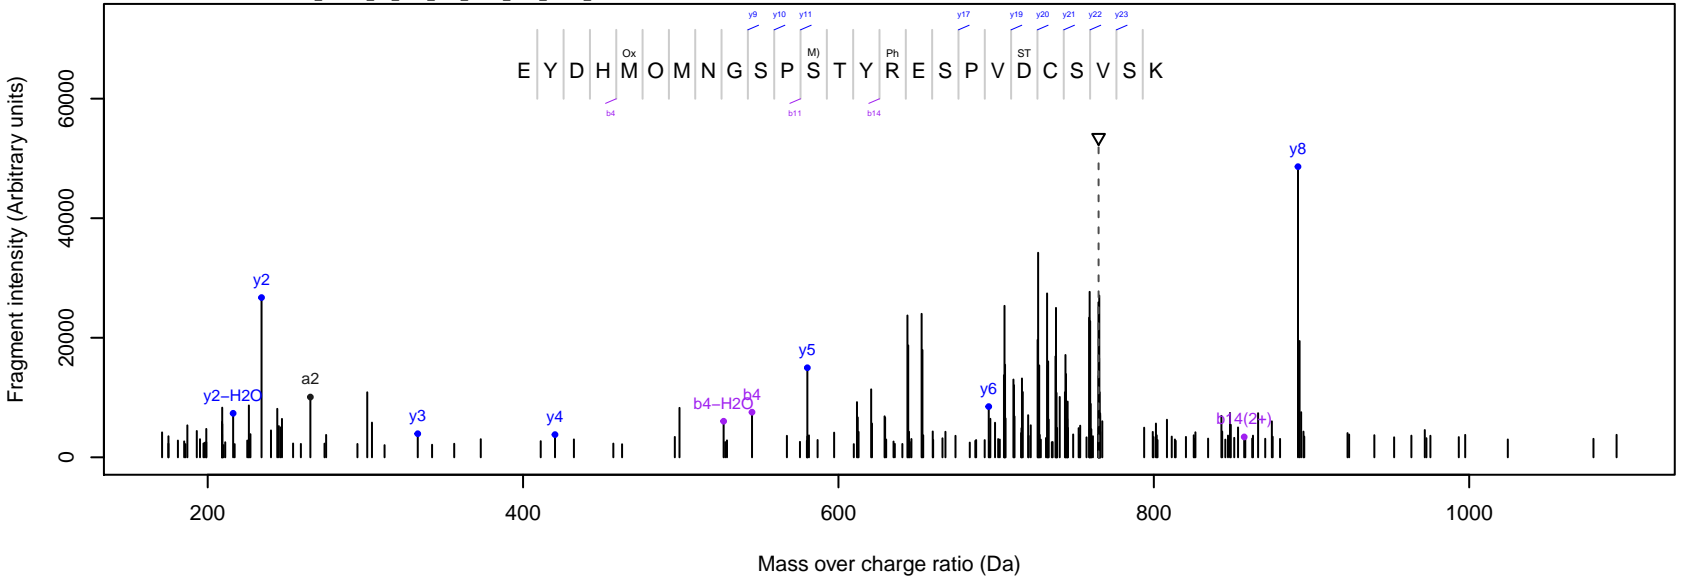

SHS(Phospho (STY))VGGPLQNIDFTQRPFHGISTVSPSTYLPNSLQEVVDPLGK-4+

Source : QE3\_201126\_FR\_TIOx\_hum\_tissue\_Urea\_RNAB\_N Scan : 58651

Andromeda score : 68.836

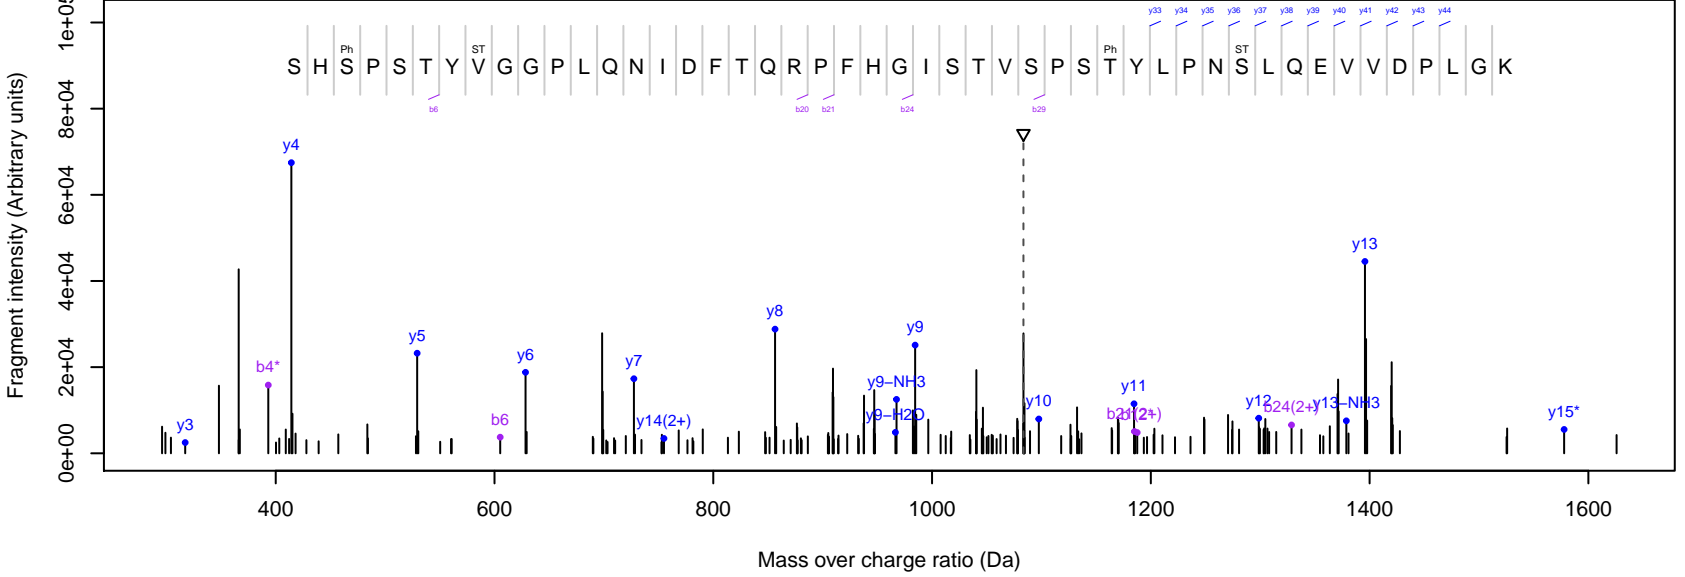

S(Phospho (STY))RT(Phospho (STY))PLISR-2+

Source : QE3\_201126\_FR\_TIOx\_hum\_tissue\_Urea\_RNAB\_N Scan : 13901

Andromeda score : 68.836

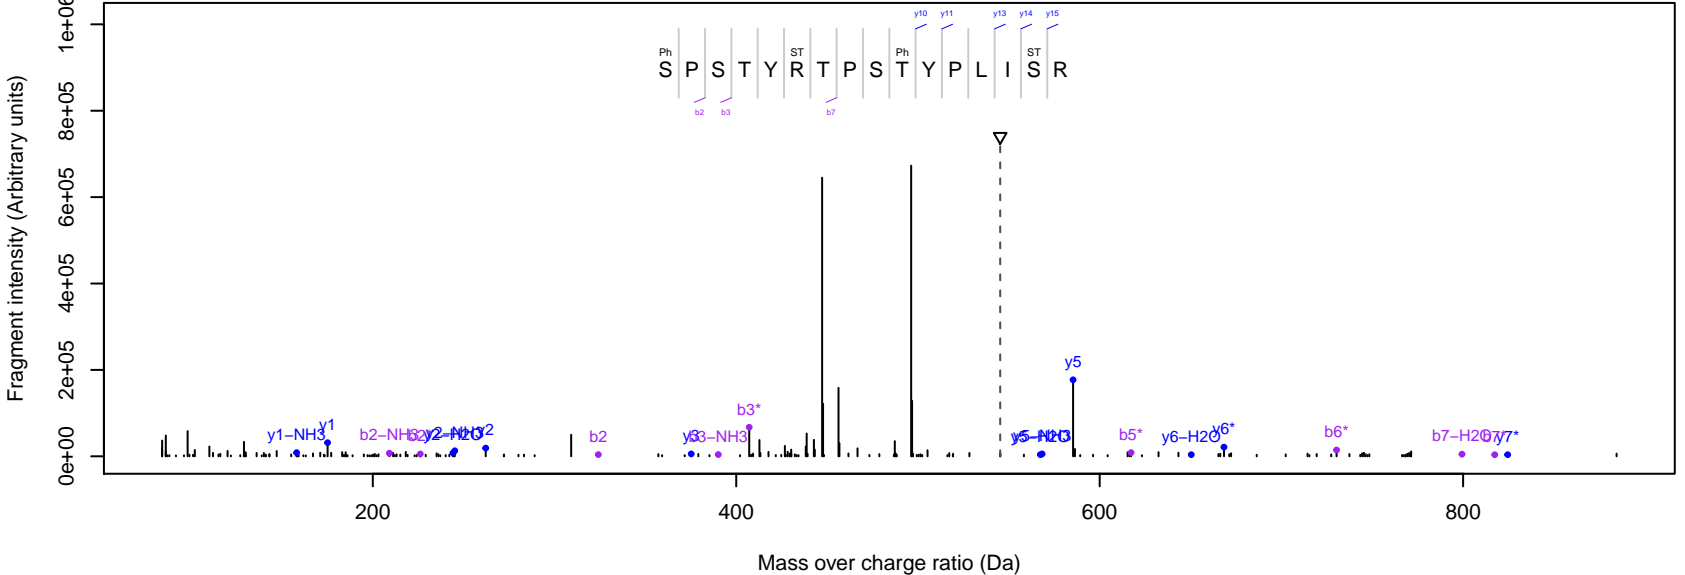



RPDS(Phospho (STY))PTRPTLR-3+

Source : QE3\_201126\_FR\_TiOx\_hum\_tissue\_Urea\_RNAB\_B Scan : 6856

Andromeda score : 68.83

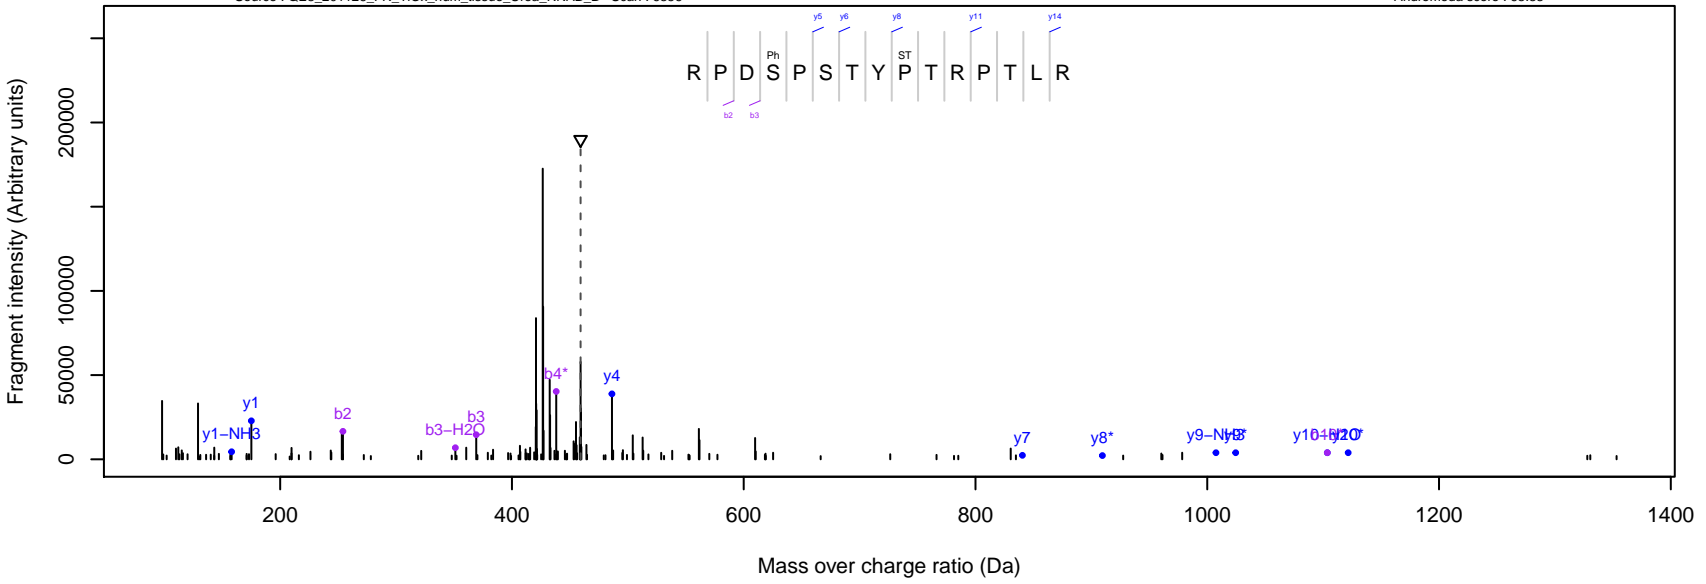

ALASQAPSR(Phospho (STY))PTPVHS(Phospho (STY))PDADRPGLFVDVQAR-4+

Source : QE3\_201126\_FR\_TiOx\_hum\_tissue\_Urea\_RNAB\_H Scan : 30846

Andromeda score : 68.811

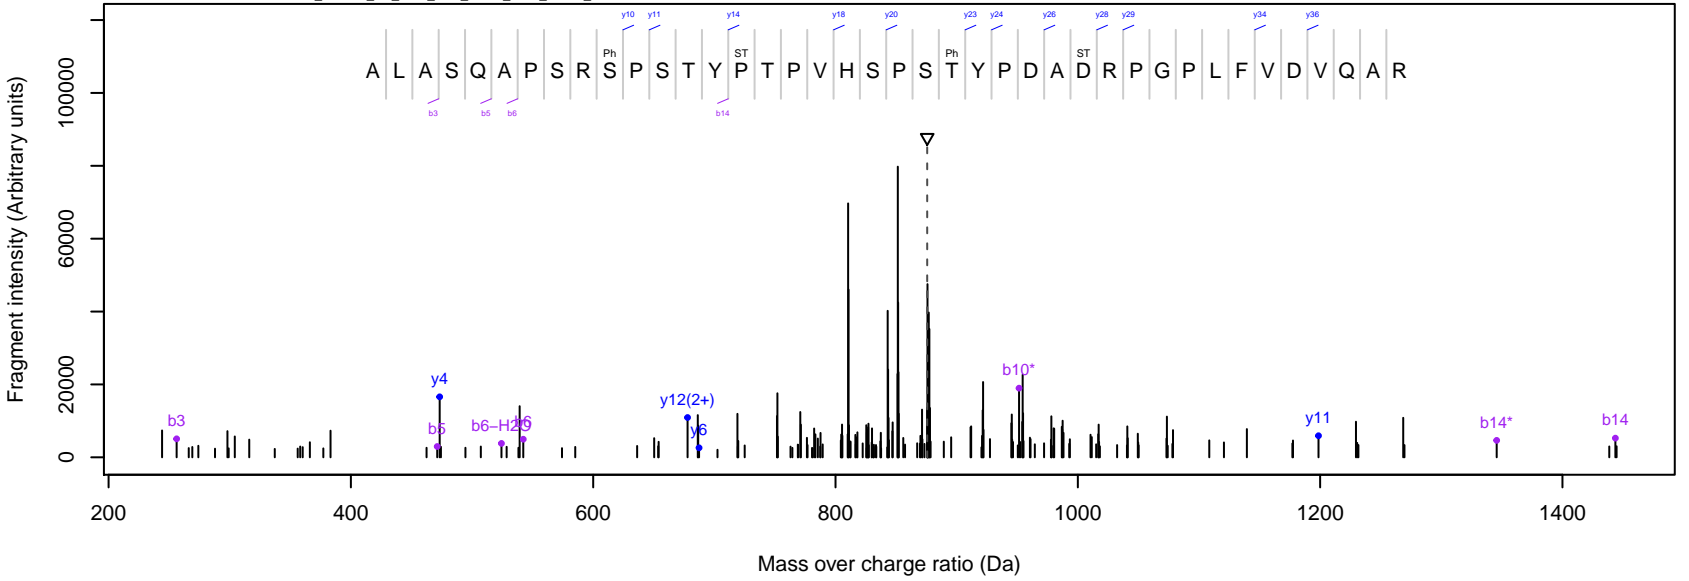

NLS(Phospho (STY))GGVLMGFMLNR-2+

Source : QE3\_201126\_FR\_TiOx\_hum\_tissue\_Urea\_RNAB\_N Scan : 61100

Andromeda score : 68.809

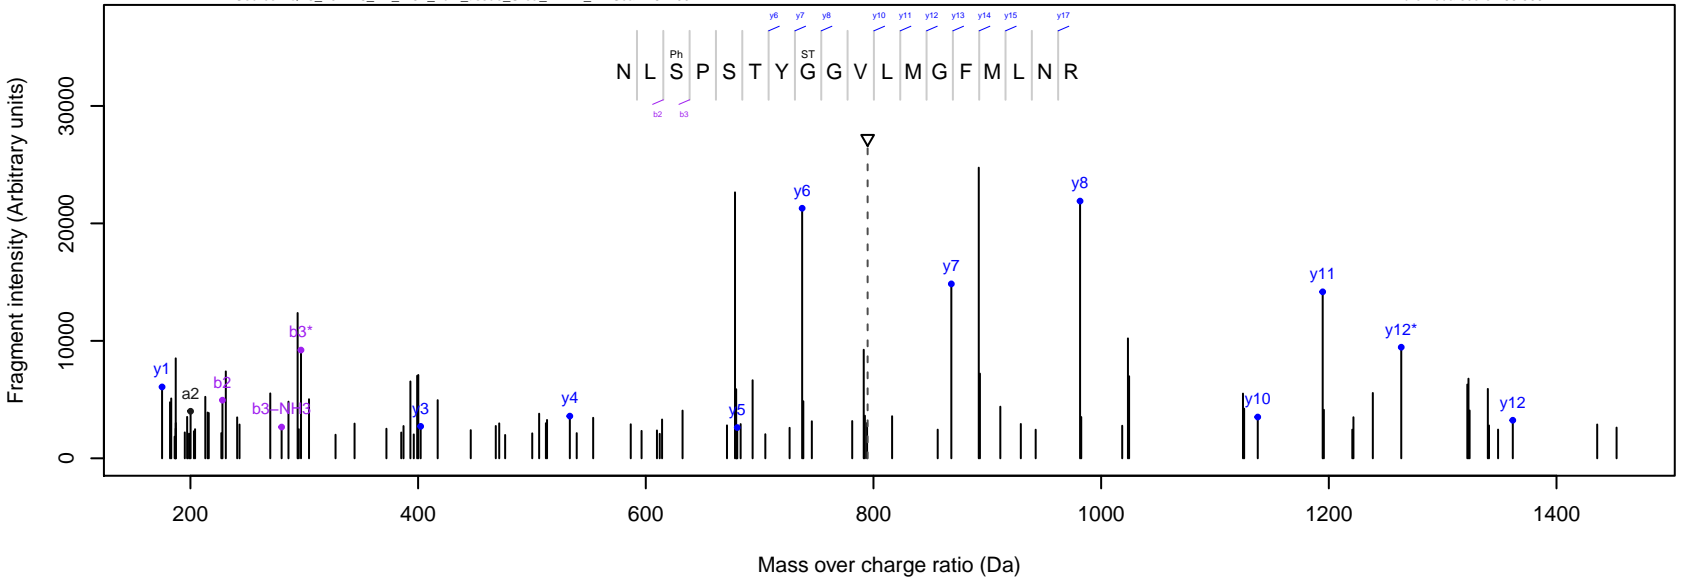

(Acetyl (Protein N-term))S(Phospho (STY))DQQLDLCALDLM(Oxidation (M))R-2+

Source : QE3\_201126\_FR\_TIOx\_hum\_tissue\_Urea\_RNAB\_N Scan : 51328

Andromeda score : 68.809

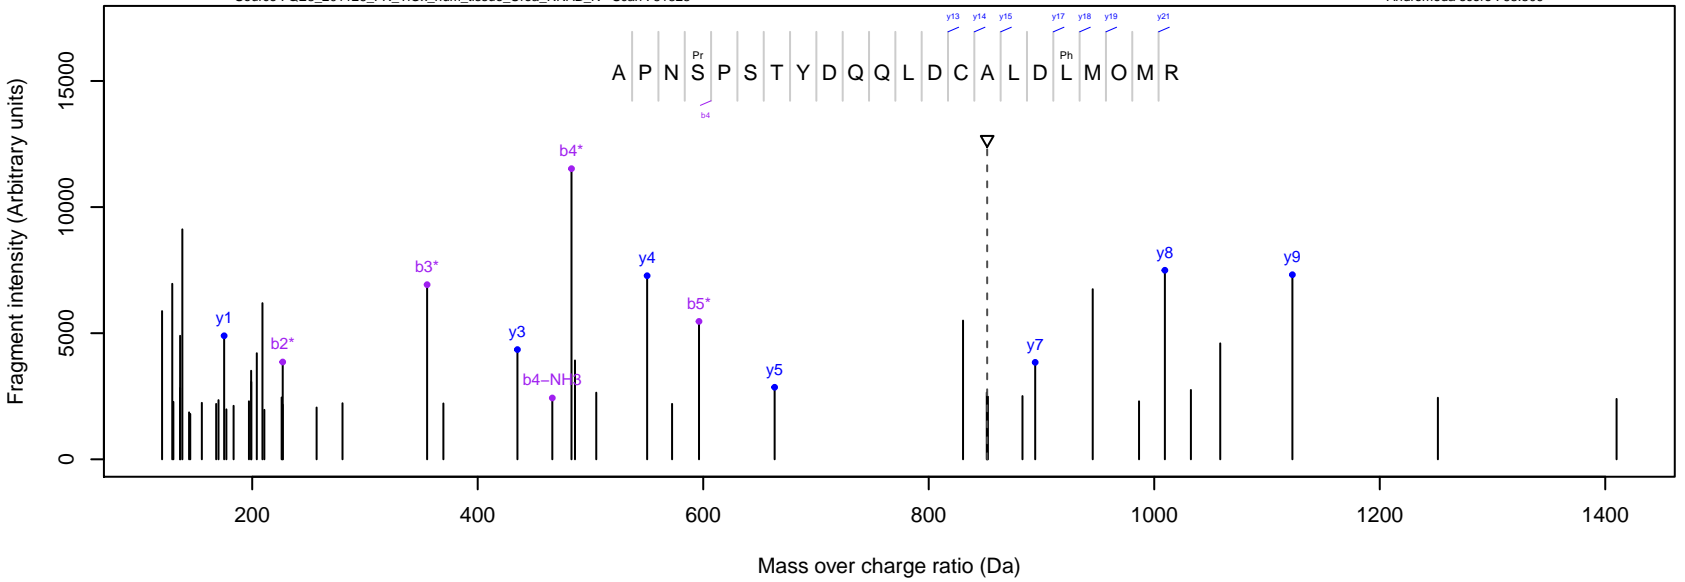

STS(Phospho (STY))M(Oxidation (M))PQLGER-2+

Source : QE3\_201126\_FR\_TIOx\_hum\_tissue\_Urea\_RNAB\_N Scan : 10740

Andromeda score : 68.786

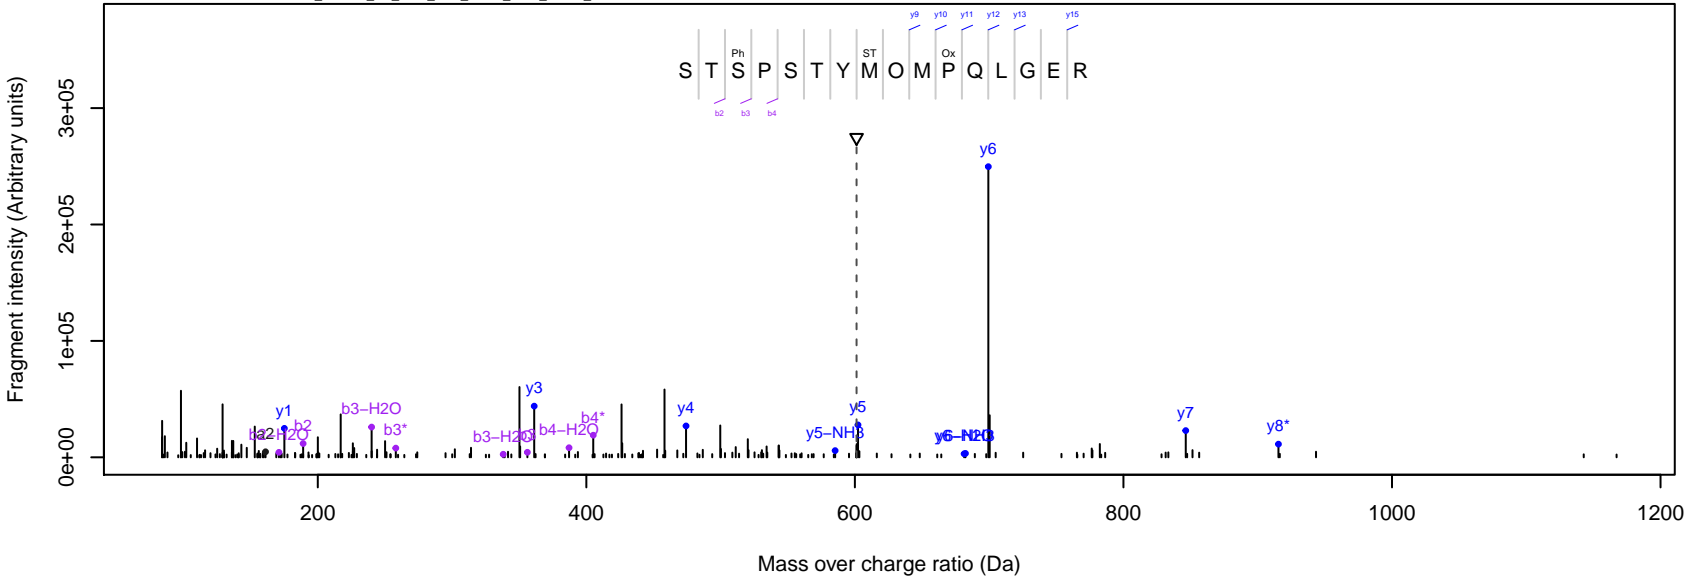

ADIKS(Phospho (STY))PSLDVTVPPEAELELNLETPEISVGK-3+

Source : QE3\_201126\_FR\_TIOx\_hum\_tissue\_Urea\_RNAB\_N Scan : 52999

Andromeda score : 68.741

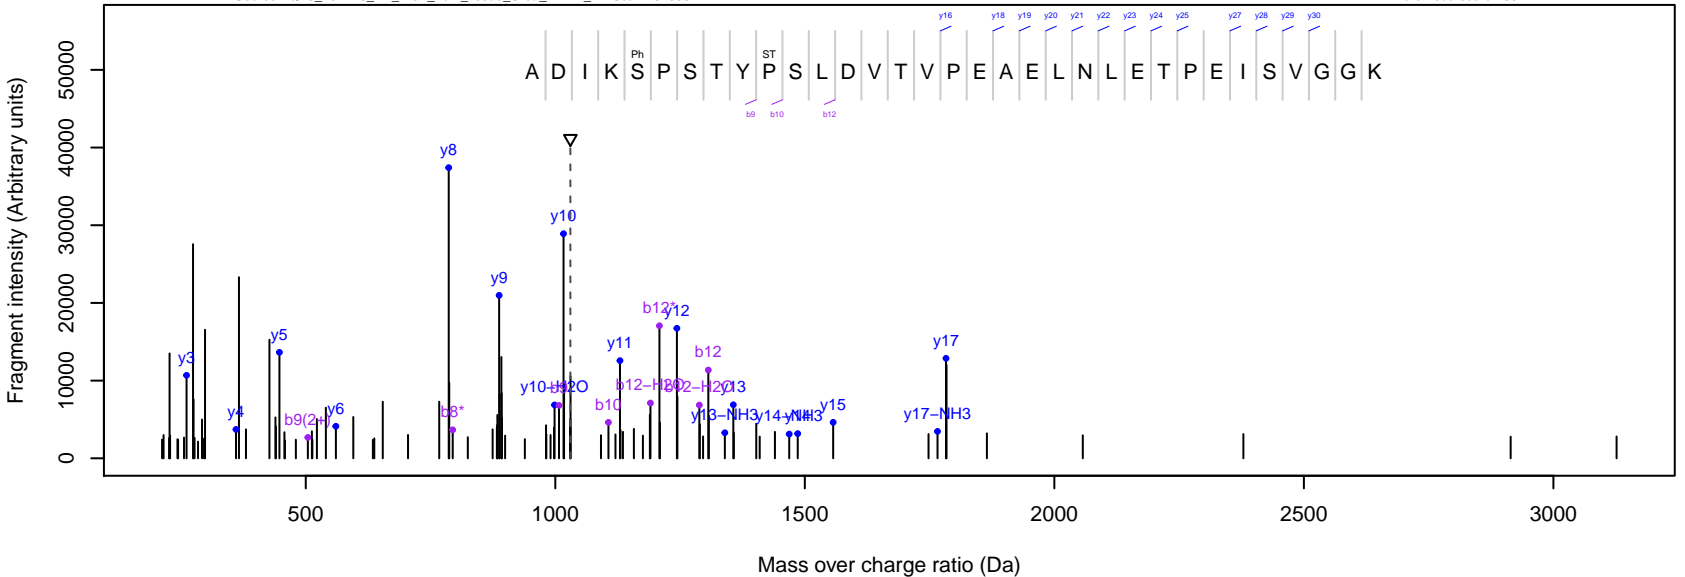

HT(Phospho (STY))SDYEDTDTEGGAYTDQELDELNDEVGTPPESAITR-4+

Source : QE3\_201126\_FR\_TiOx\_hum\_tissue\_Urea\_RNAB\_H Scan : 46234

Andromeda score : 68.741

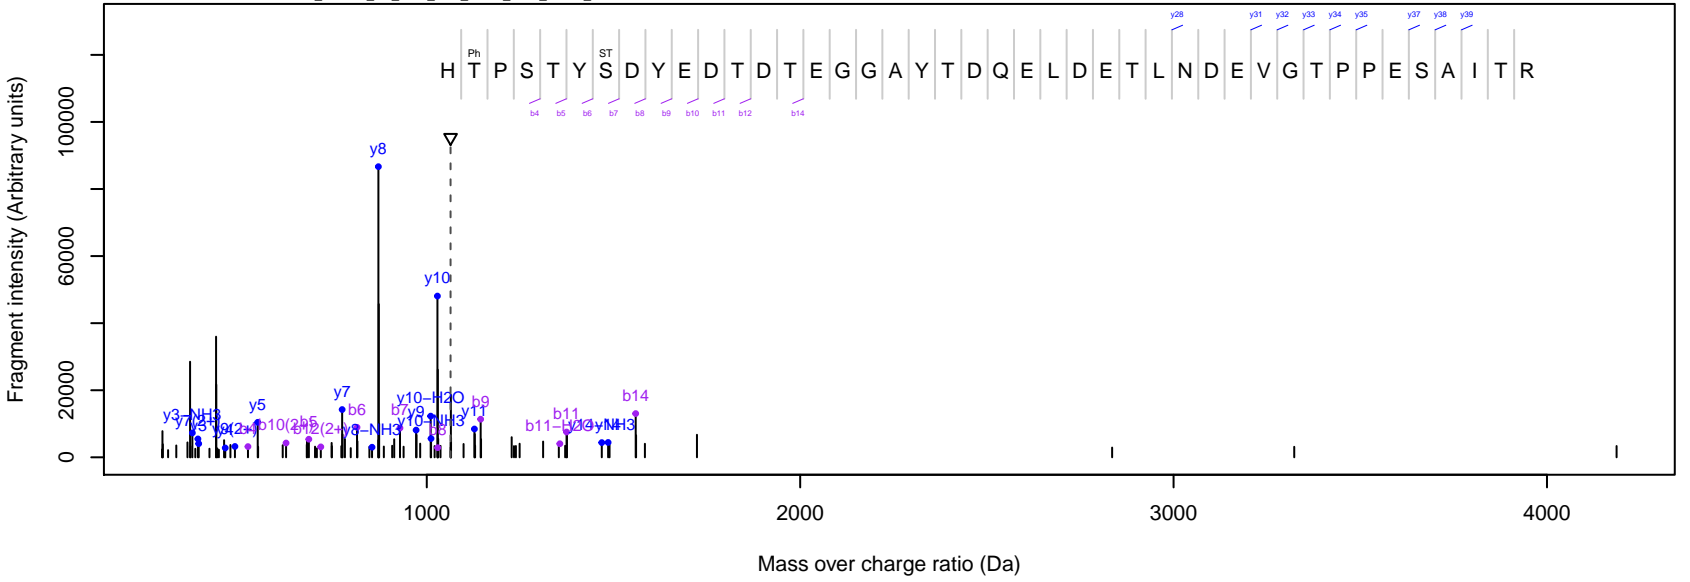

GYSSPEPIQDS(Phospho (STY))S(Phospho (STY))GS(Phospho (STY))EAQSVKPTR-3+

Source : QE3\_201126\_FR\_TiOx\_hum\_tissue\_Urea\_RNAB\_N Scan : 26820

Andromeda score : 68.733

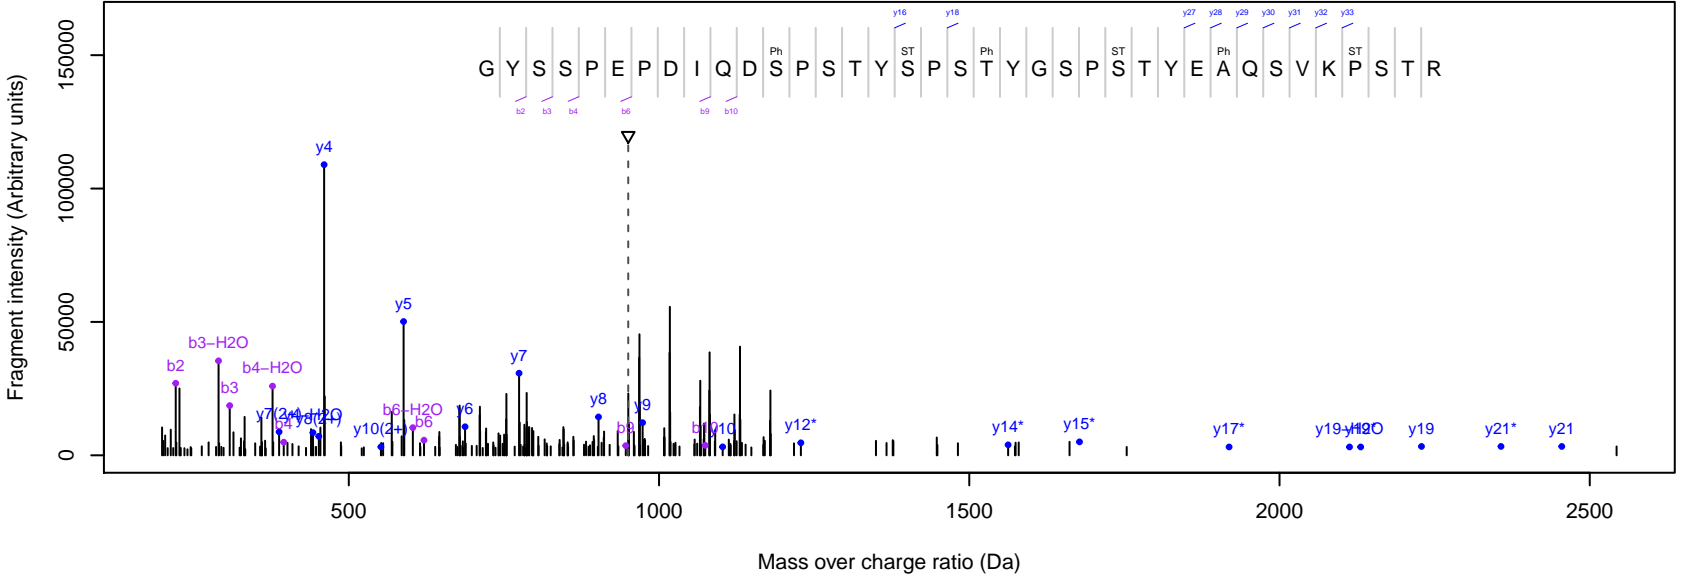

WSEGGKEVFISGS(Phospho (STY))FNNWSTK-3+

Source : QE3\_201126\_FR\_TiOx\_hum\_tissue\_Urea\_RNAB\_N Scan : 42958

Andromeda score : 68.689

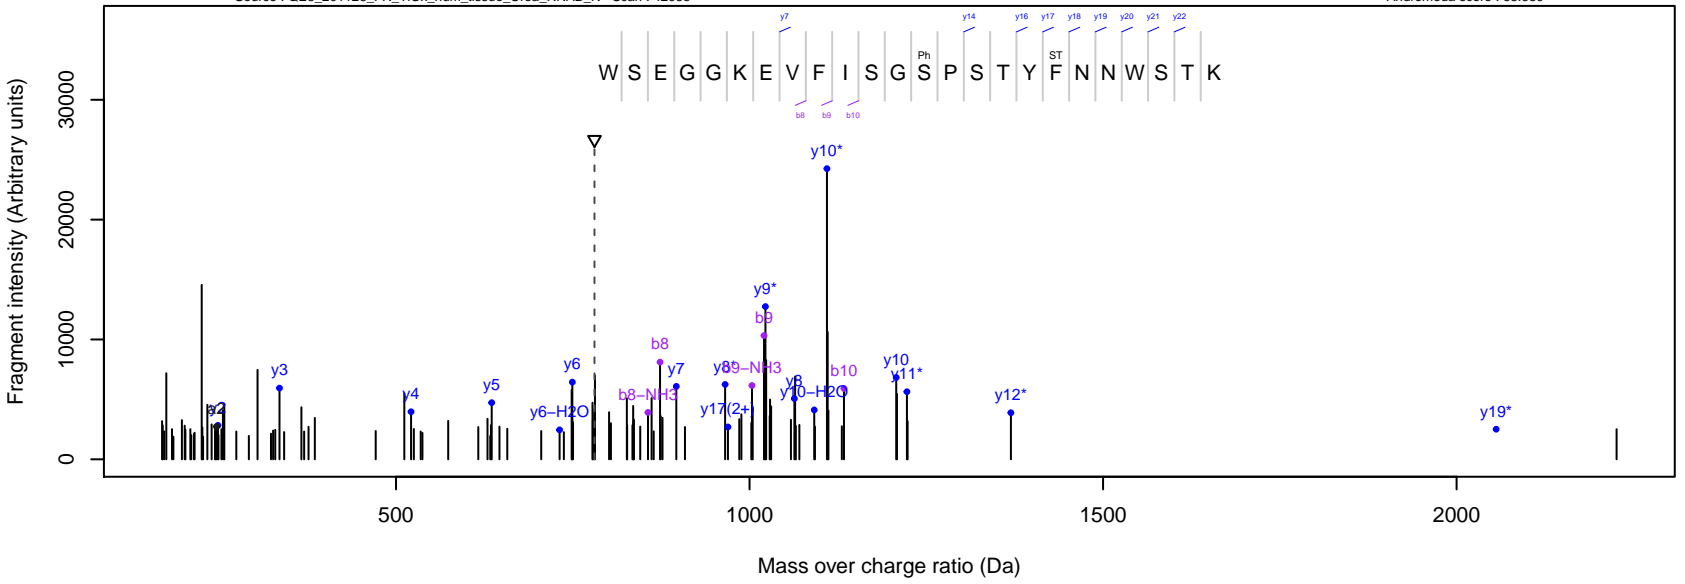

LSS(Phospho (STY))LSDPVSER-2+

Source : QE3\_201126\_FR\_TiOx\_hum\_tissue\_Urea\_RNAB\_N Scan : 21951

Andromeda score : 68.676

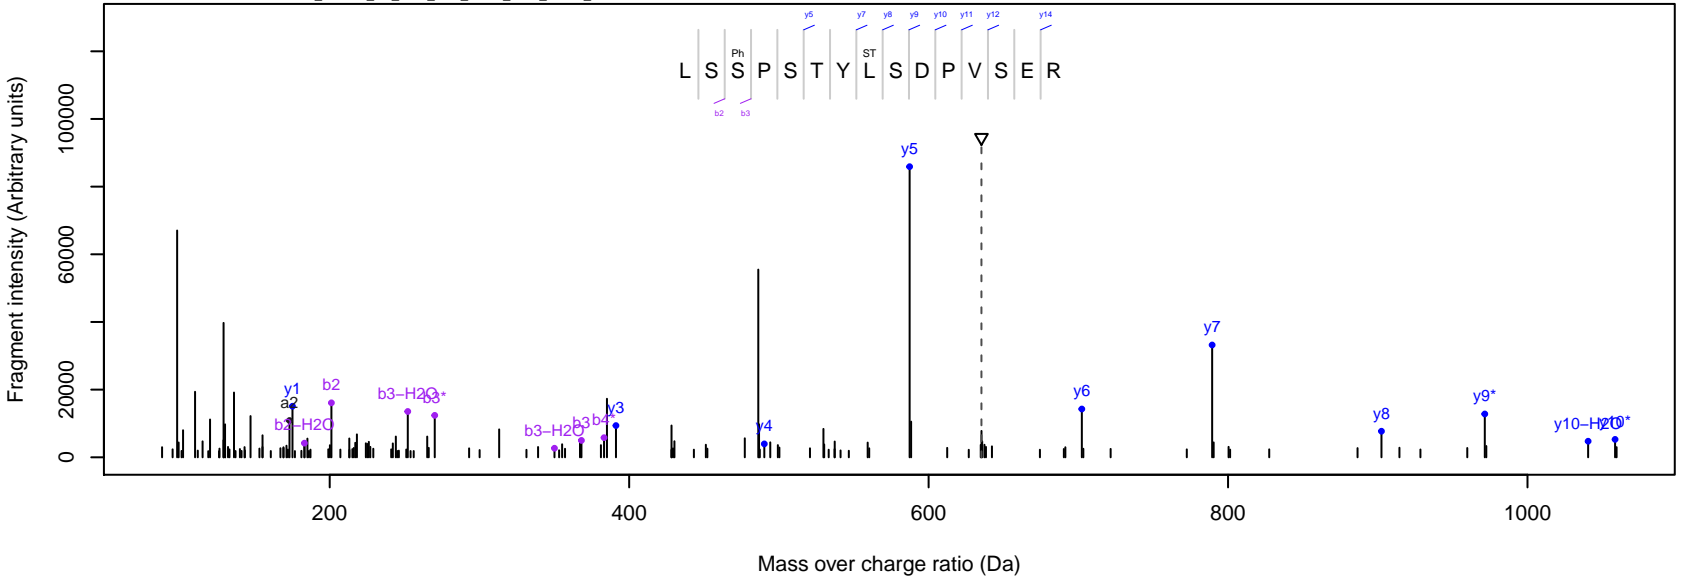

HSGPNS(Phospho (STY))ADSANDGFVR-3+

Source : QE3\_201126\_FR\_TiOx\_hum\_tissue\_Urea\_RNAB\_H Scan : 11026

Andromeda score : 68.639

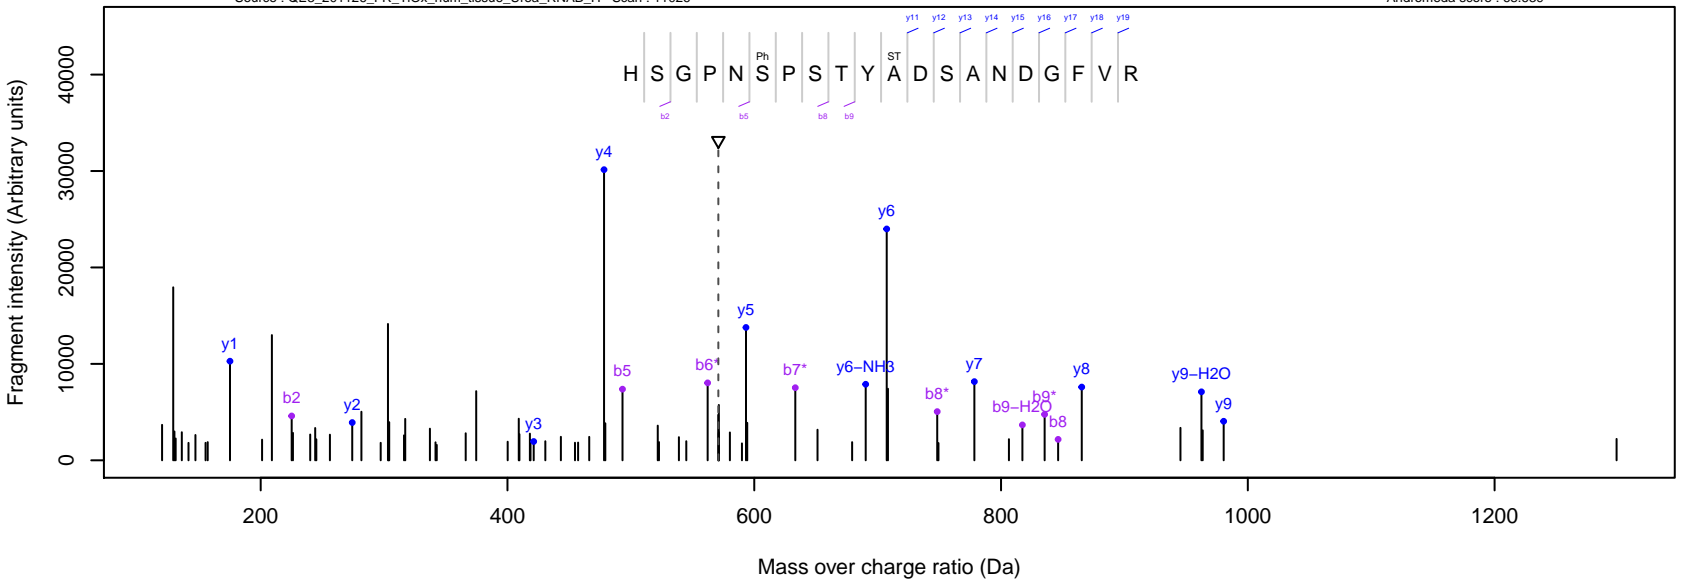

KHS(Phospho (STY))EEAEFTPLKCS(Phospho (STY))PK-3+

Source : QE3\_201126\_FR\_TiOx\_hum\_tissue\_Urea\_RNAB\_H Scan : 16198

Andromeda score : 68.634

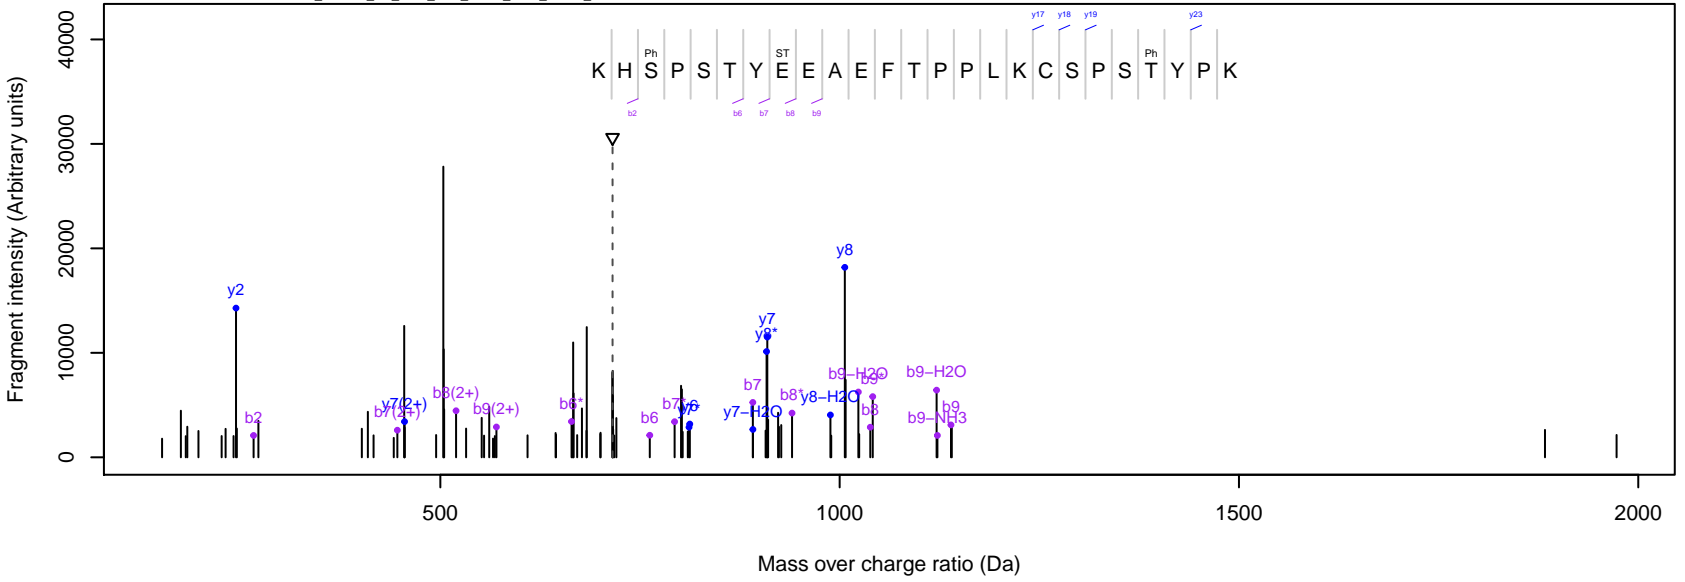

AMVSPFHS(Phospho (STY))PPSTPSSPGVR-3+

Source : QE3\_201126\_FR\_TiOx\_hum\_tissue\_Urea\_RNAB\_N Scan : 26849

Andromeda score : 68.552

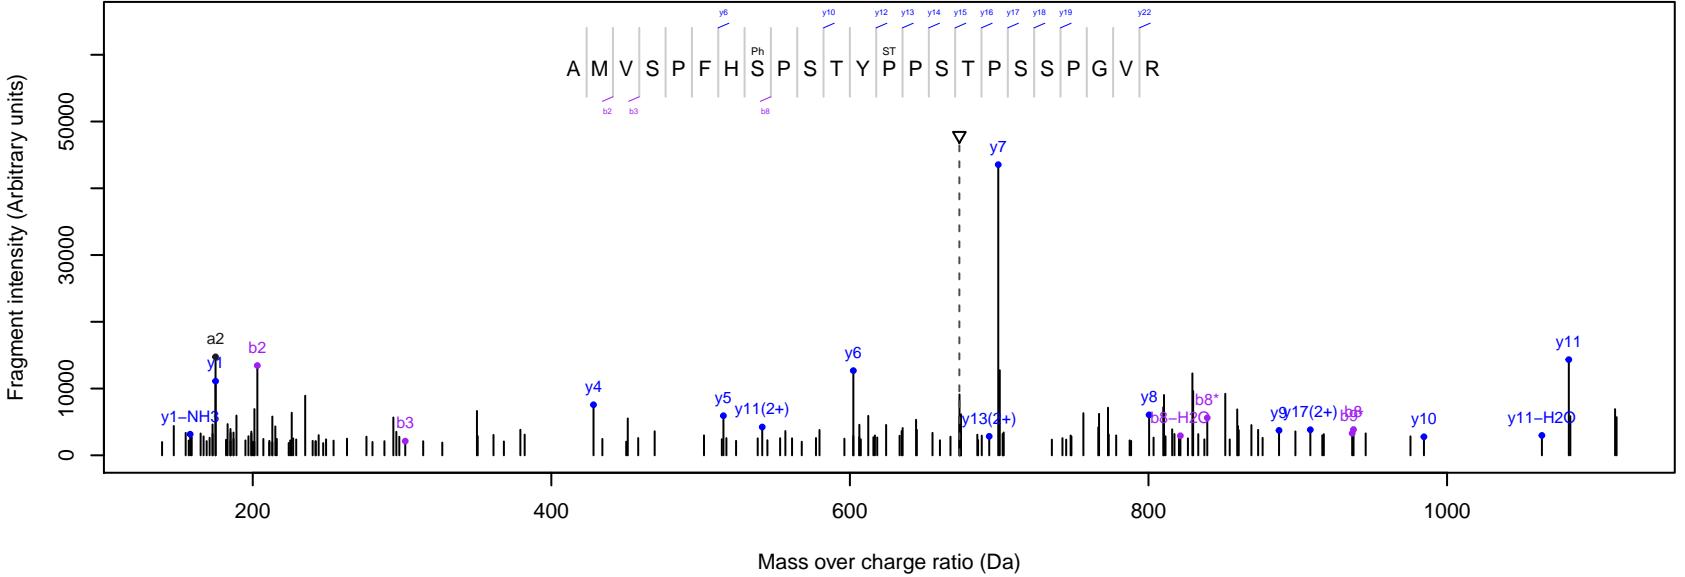

DTPRPDHPHDGHS(Phospho (STY))PASR-4+

Source : QE3\_201126\_FR\_TiOx\_hum\_tissue\_Urea\_RNAB\_H Scan : 4210

Andromeda score : 68.552

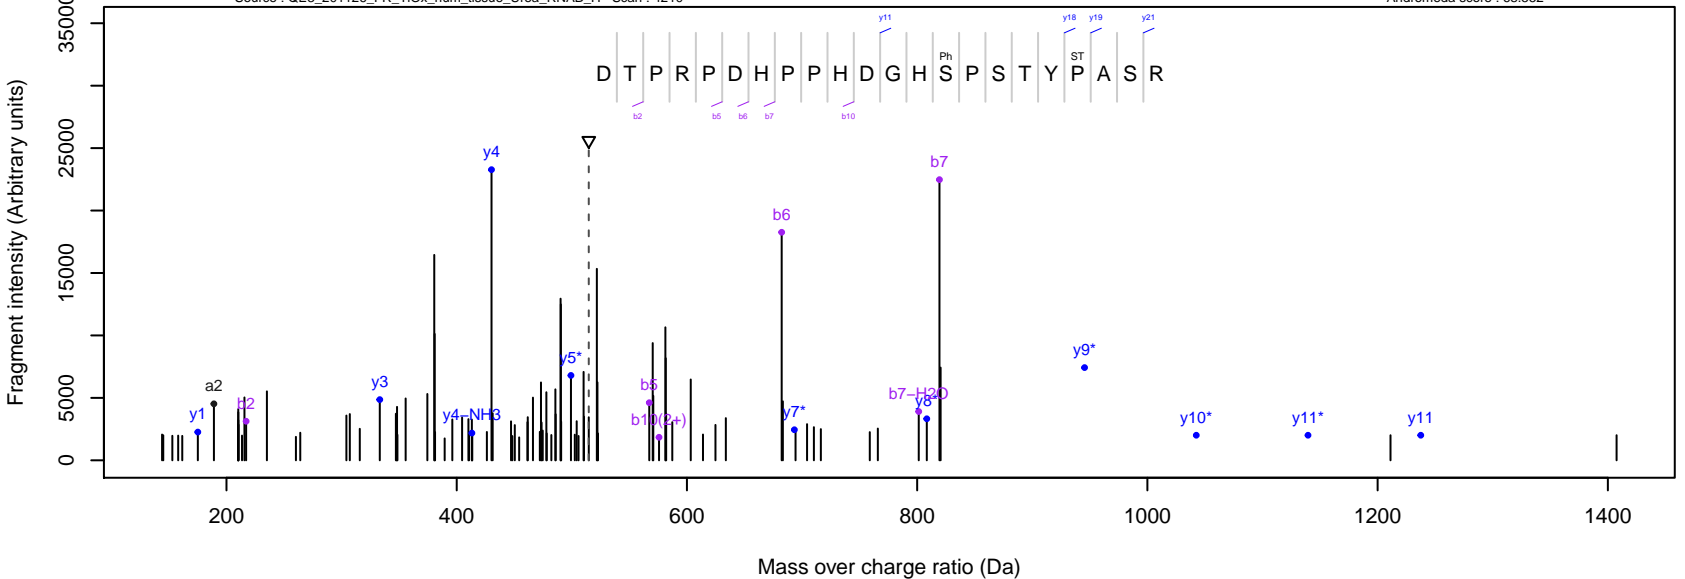

S(Phospho (STY))VVGTPAYLAPEVLLNQGYNR-3+

Source : QE3\_201126\_FR\_TiOx\_hum\_tissue\_Urea\_RNAB\_N Scan : 58238

Andromeda score : 68.552

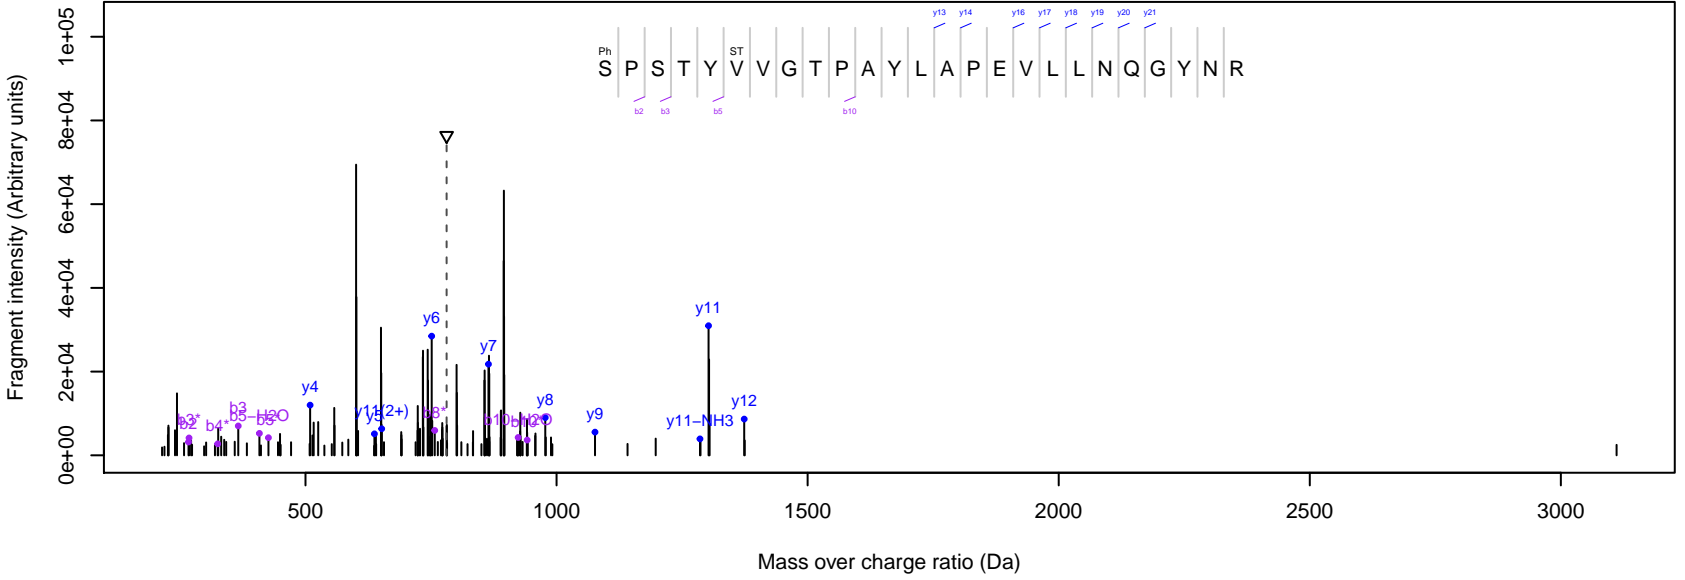

ALS(Phospho (STY))PVIPLIPR-2+

Source : QE3\_201126\_FR\_TiOx\_hum\_tissue\_Urea\_RNAB\_N Scan : 54659

Andromeda score : 68.536

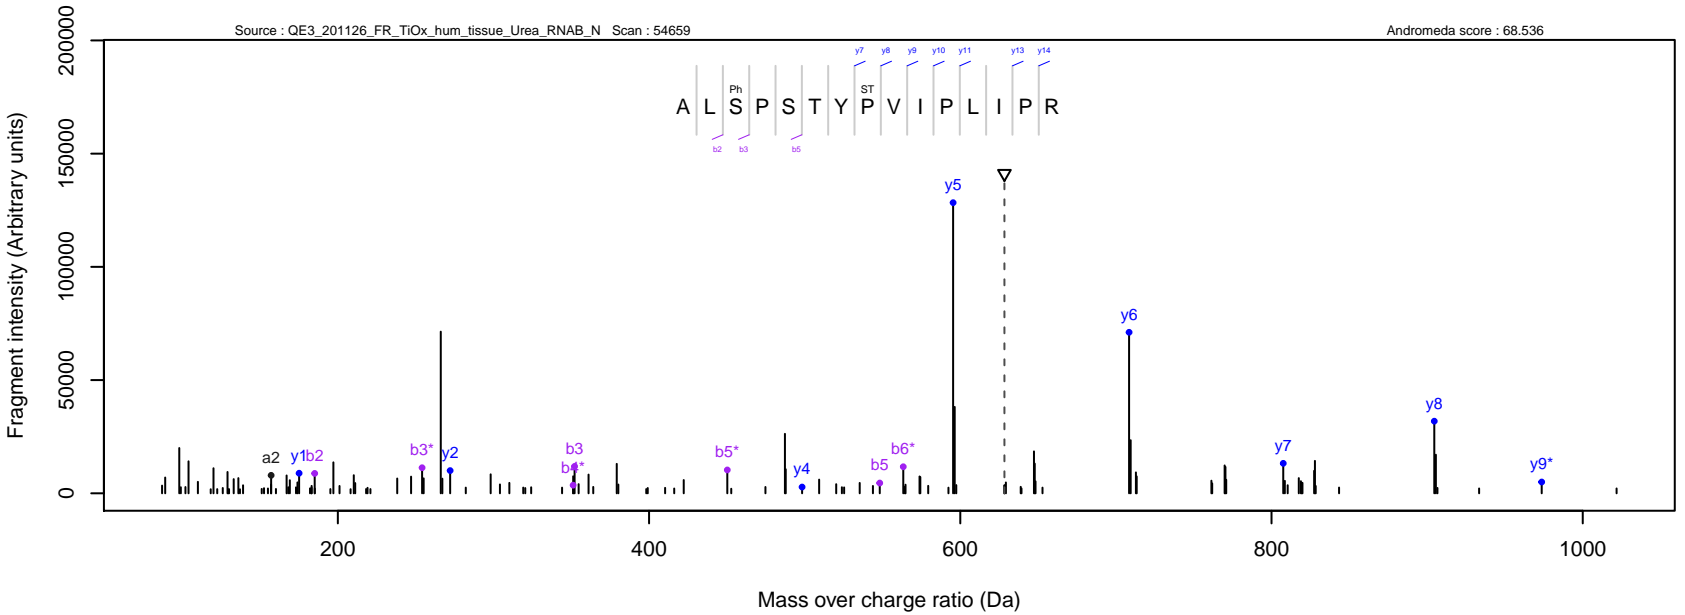

LHS(Phospho (STY))SNPNLSTLDFGEEKNYSDGSETSEFSK-4+

Source : QE3\_201126\_FR\_TiOx\_hum\_tissue\_Urea\_RNAB\_B Scan : 32728

Andromeda score : 68.516

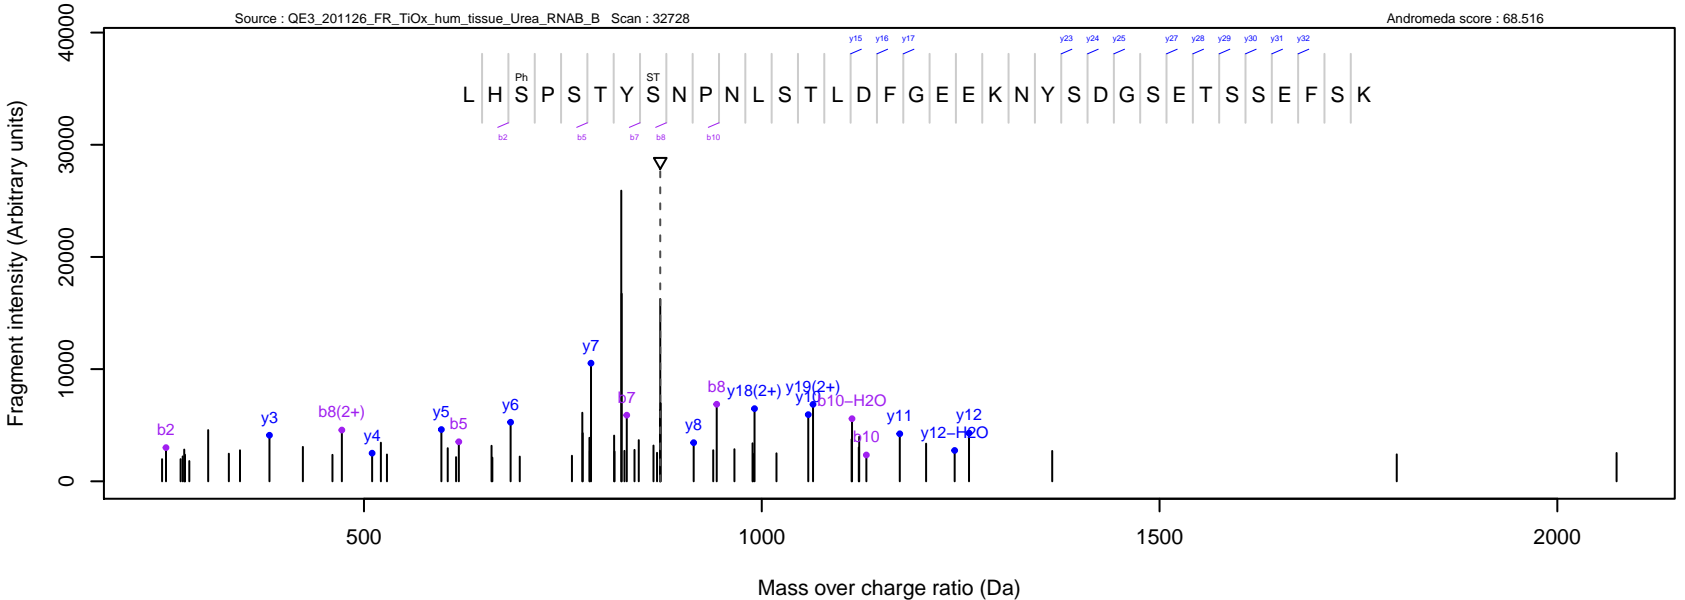

VREPGEVEFDIEEDYT(Phospho (STY))T(Phospho (STY))DEDMVEGVEGK-3+

Source : QE3\_201126\_FR\_TiOx\_hum\_tissue\_Urea\_RNAB\_B Scan : 55413

Andromeda score : 68.516

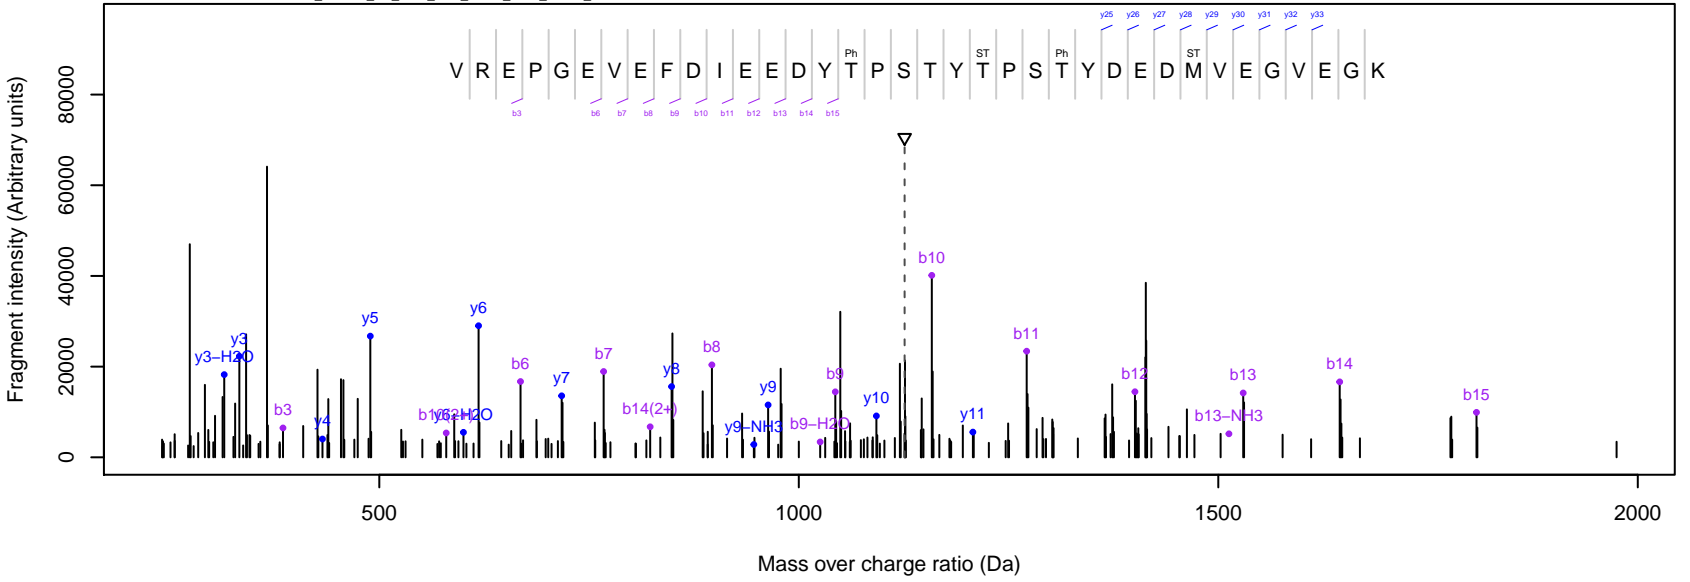

RLS(Phospho (STY))THSPFR-3+

Source : QE3\_201126\_FR\_TiOx\_hum\_tissue\_Urea\_RNAB\_H Scan : 9923

Andromeda score : 68.515

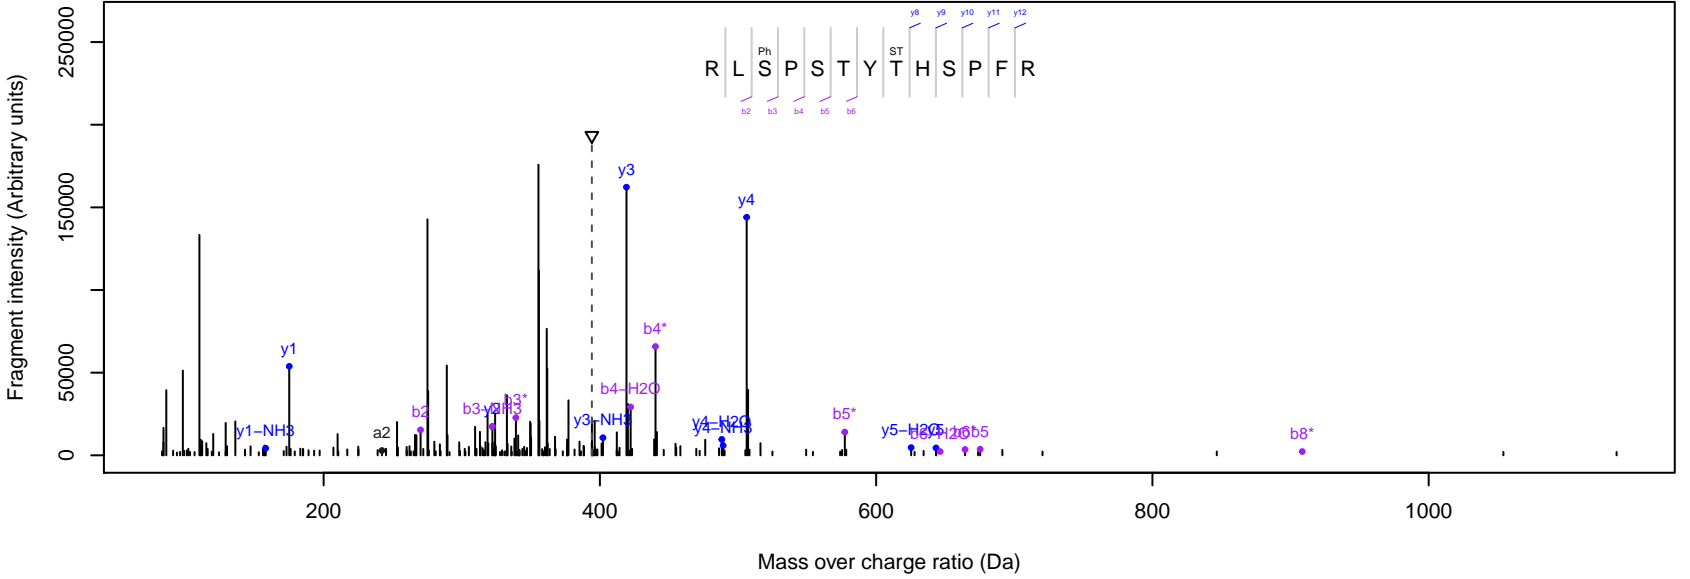

TVSSPIPYTPS(Phospho (STY))PSSSRPISPLSYASHTVGFPTPTSLTR-4+

Source : QE3\_201126\_FR\_TiOx\_hum\_tissue\_Urea\_RNAB\_H Scan : 47090

Andromeda score : 68.515

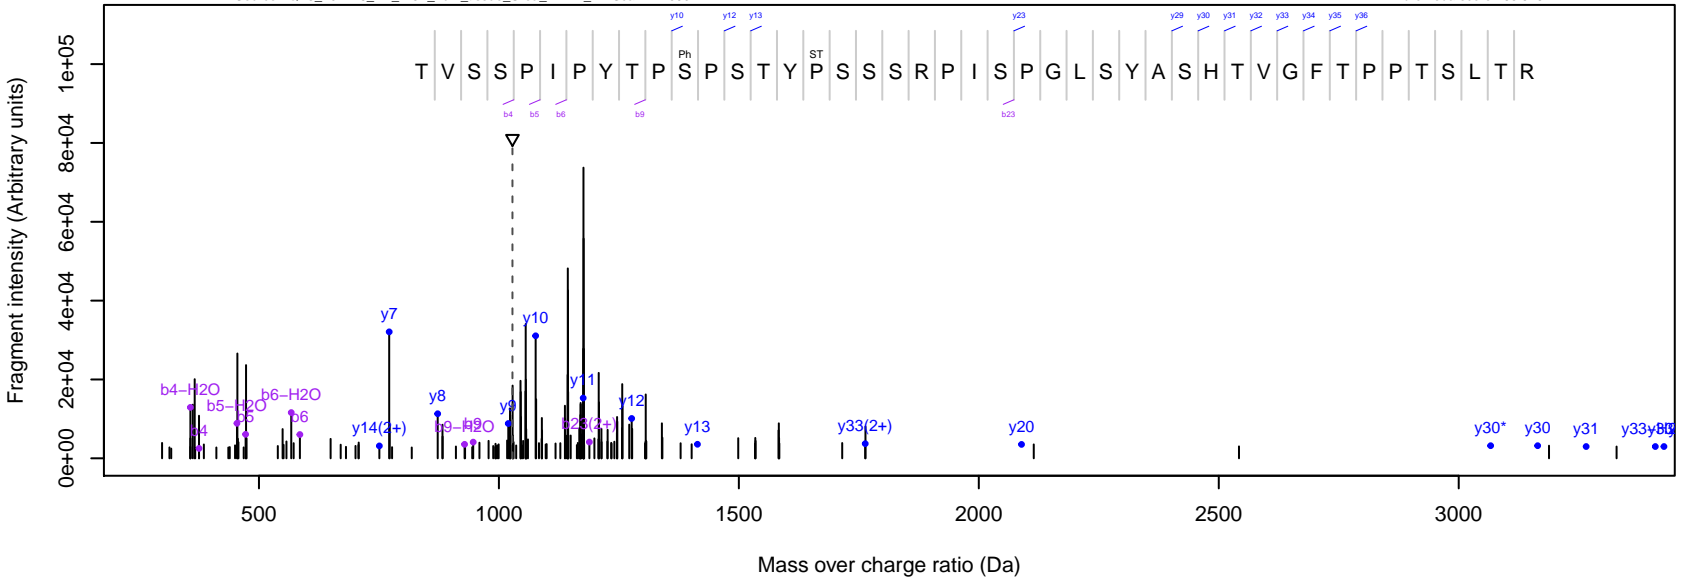





SKHEEEWT(Phospho (STY))DDDLVESL-3+

Source : QE3\_201126\_FR\_TiOx\_hum\_tissue\_Urea\_RNAB\_N Scan : 43721

Andromeda score : 68.49

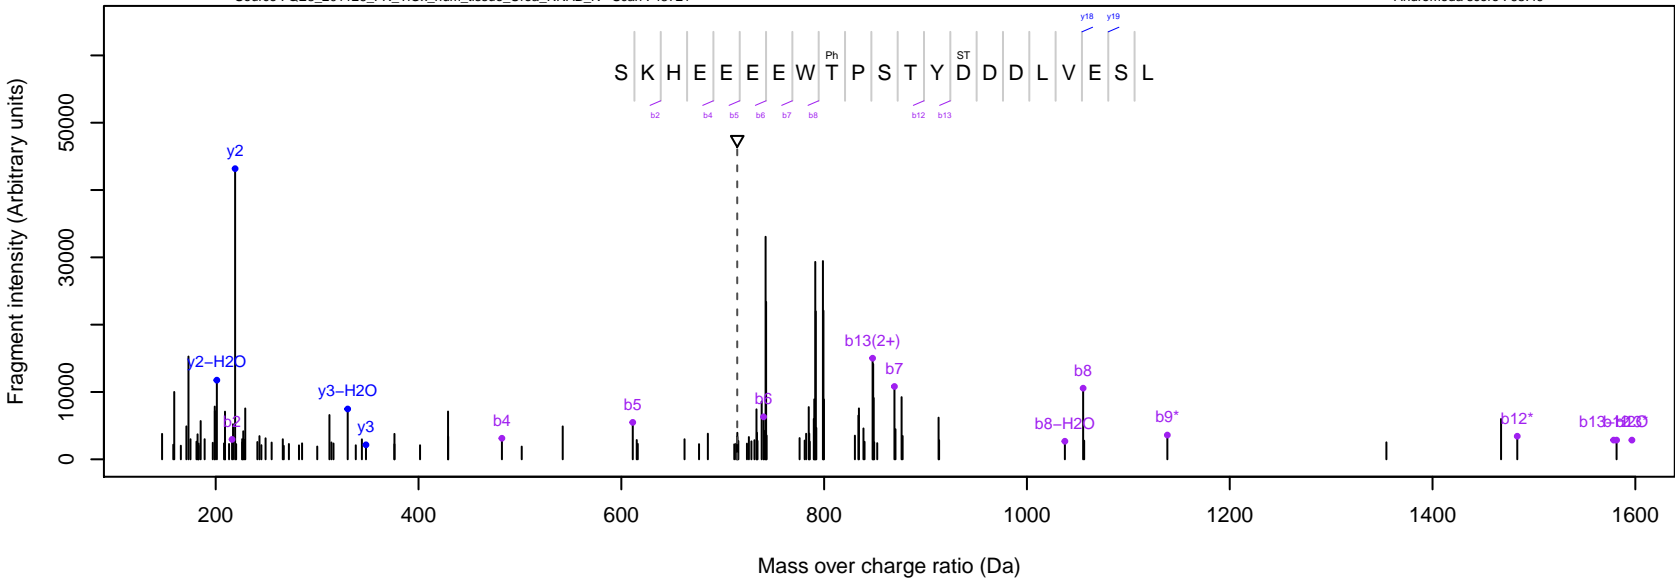

KES(Phospho (STY))LQNLHSSR-3+

Source : QE3\_201126\_FR\_TiOx\_hum\_tissue\_Urea\_RNAB\_H Scan : 17971

Andromeda score : 68.481

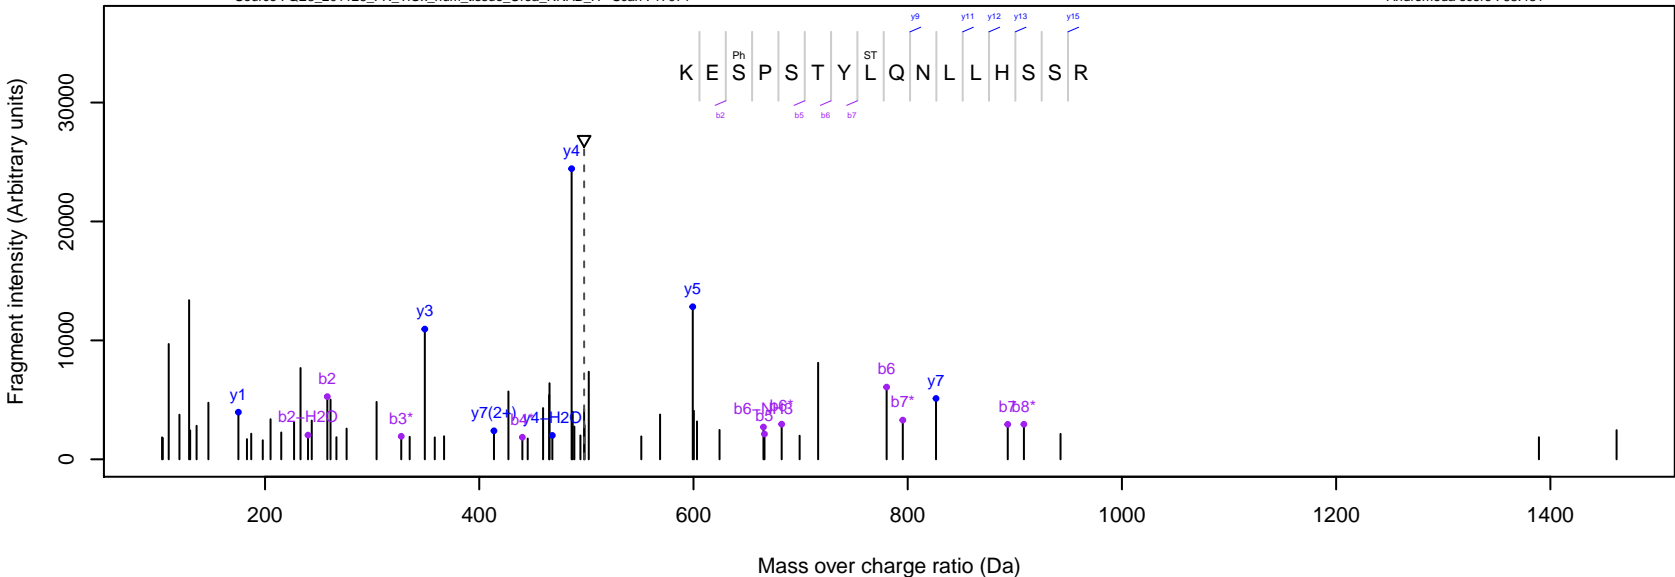

NASGVVNS(Phospho (STY))SPR-2+

Source : QE3\_201126\_FR\_TiOx\_hum\_tissue\_Urea\_RNAB\_H Scan : 6930

Andromeda score : 68.463

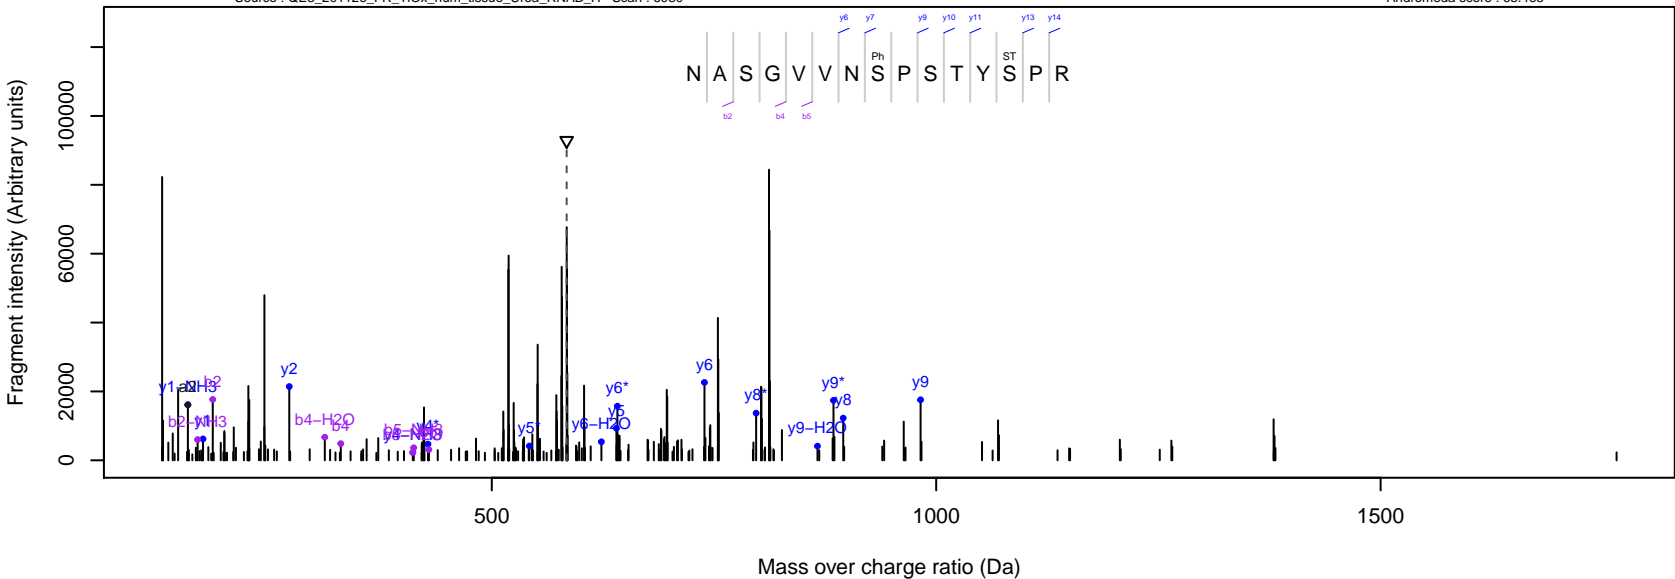

**(Acetyl (Protein N-term))AAPRPSPAISVS(SPhospho (STY))APAFYAPQKK-3+**

Source : QE3\_201126\_FR\_TIOx\_hum\_tissue\_Urea\_RNAB\_B Scan : 40014

Andromeda score : 68.444

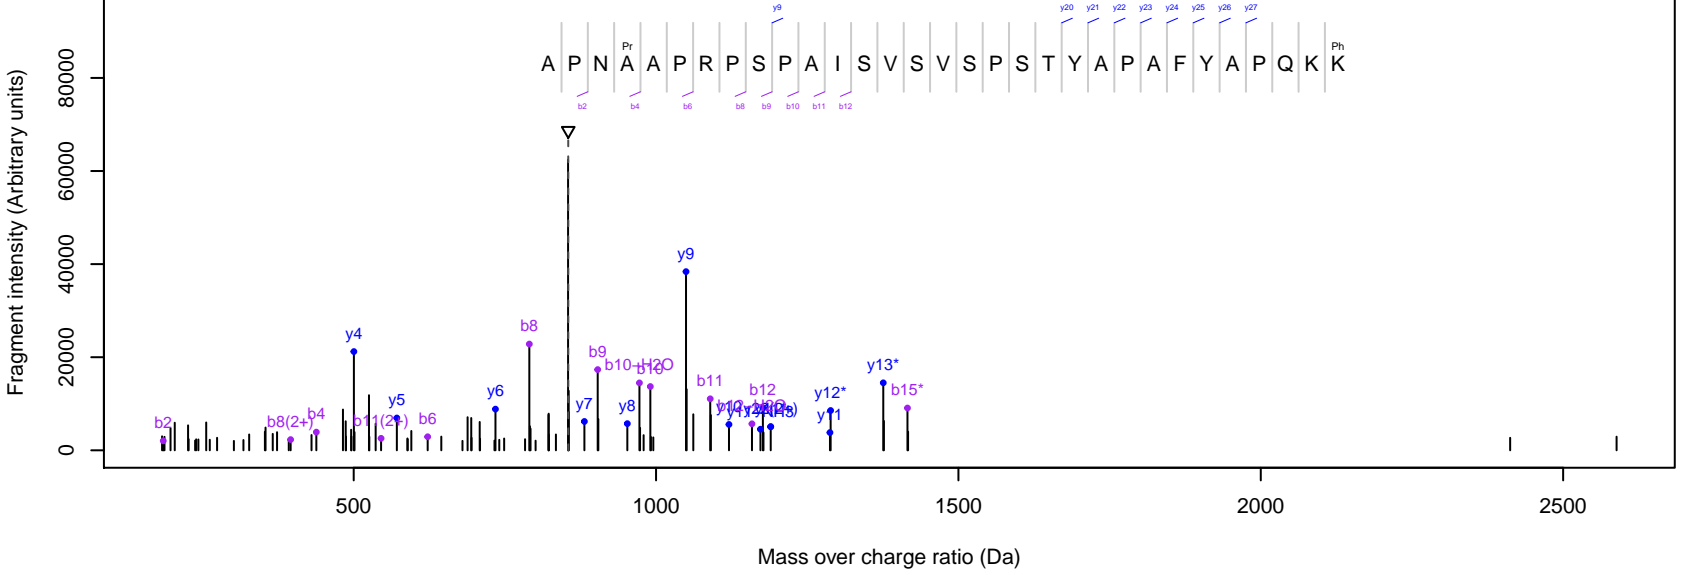

**MES(Phospho (STY))EGGADDS(Phospho (STY))AEEGDLDDDDNEDRGDDQLELIKDDEK-4+**

Source : QE3\_201126\_FR\_TIOx\_hum\_tissue\_Urea\_RNAB\_N Scan : 44904

Andromeda score : 68.414

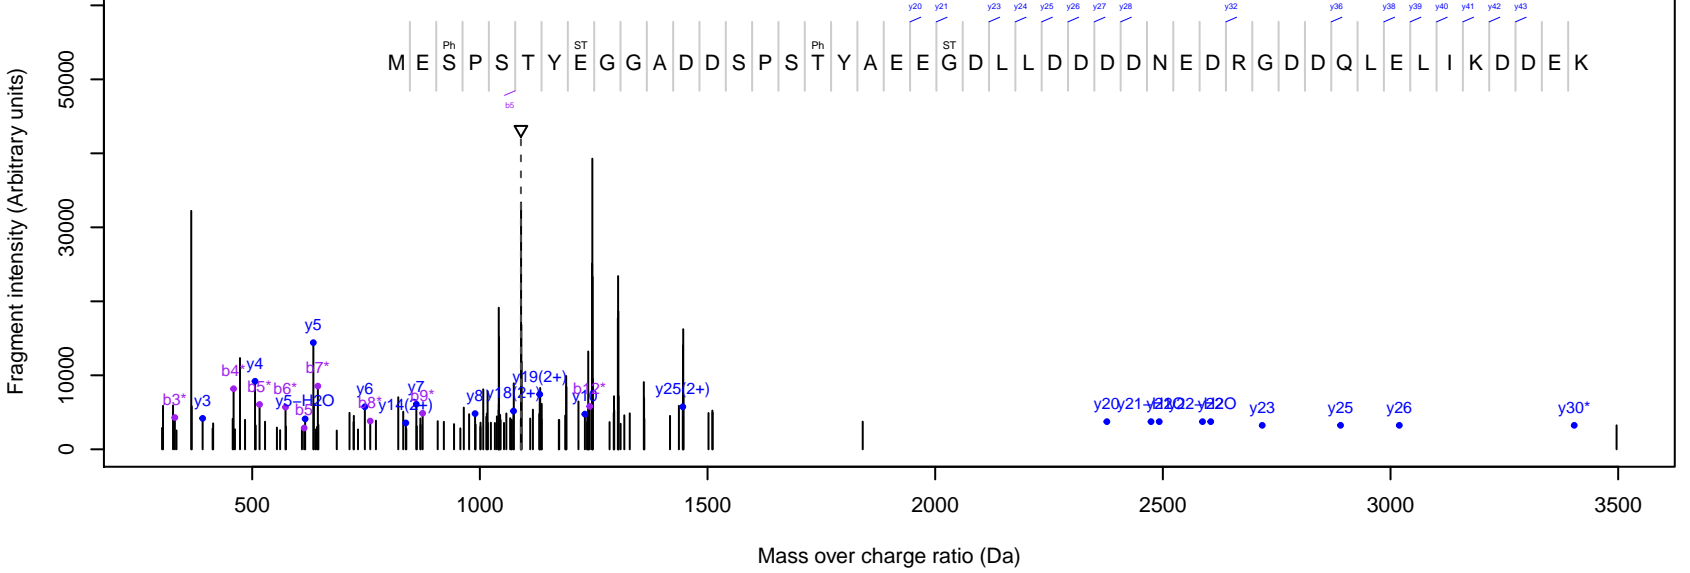

**YGS(Phospho (STY))LKYS-2+**

Source : QE3\_201126\_FR\_TIOx\_hum\_tissue\_Urea\_RNAB\_H Scan : 9896

Andromeda score : 68.371

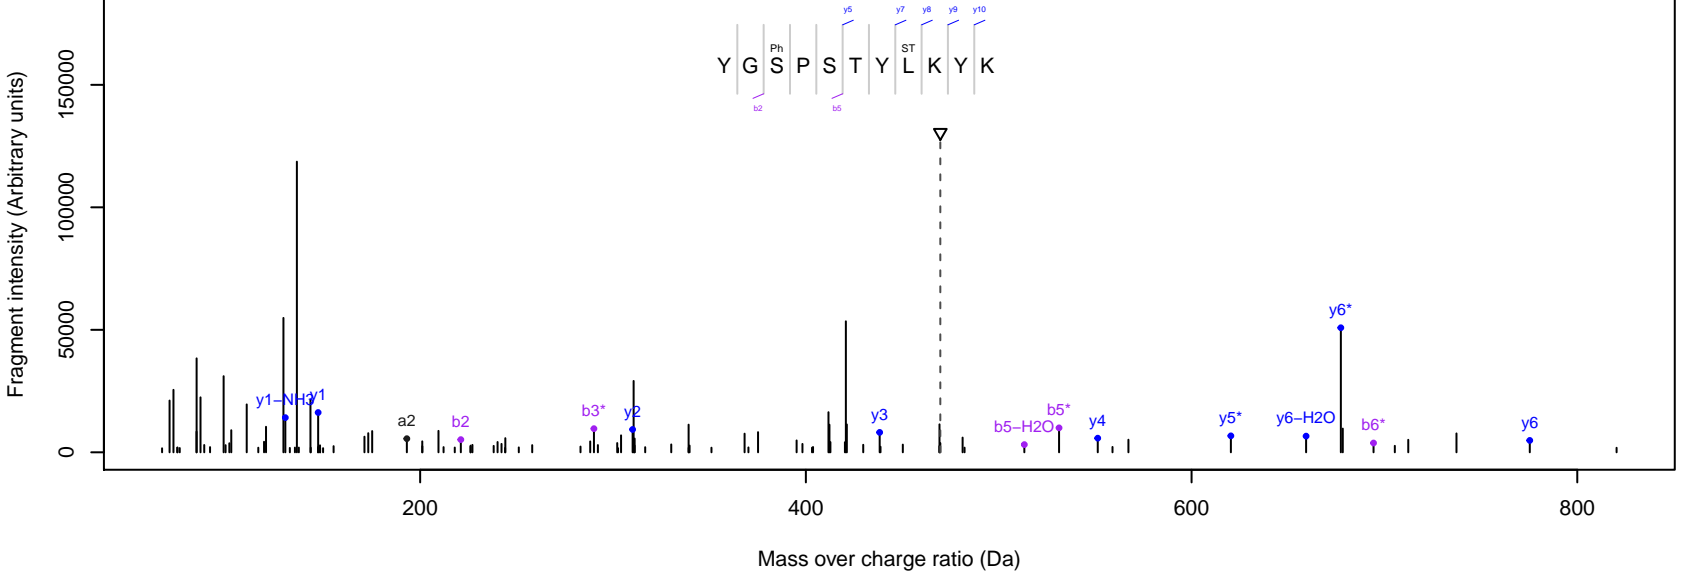

TPQGPVSATVEVS(Phospho (STY))SPTGFAQSQVLEDVLSQAAR-3+

Source : QE3\_201126\_FR\_TiOx\_hum\_tissue\_Urea\_RNAB\_H Scan : 55571

Andromeda score : 68.368

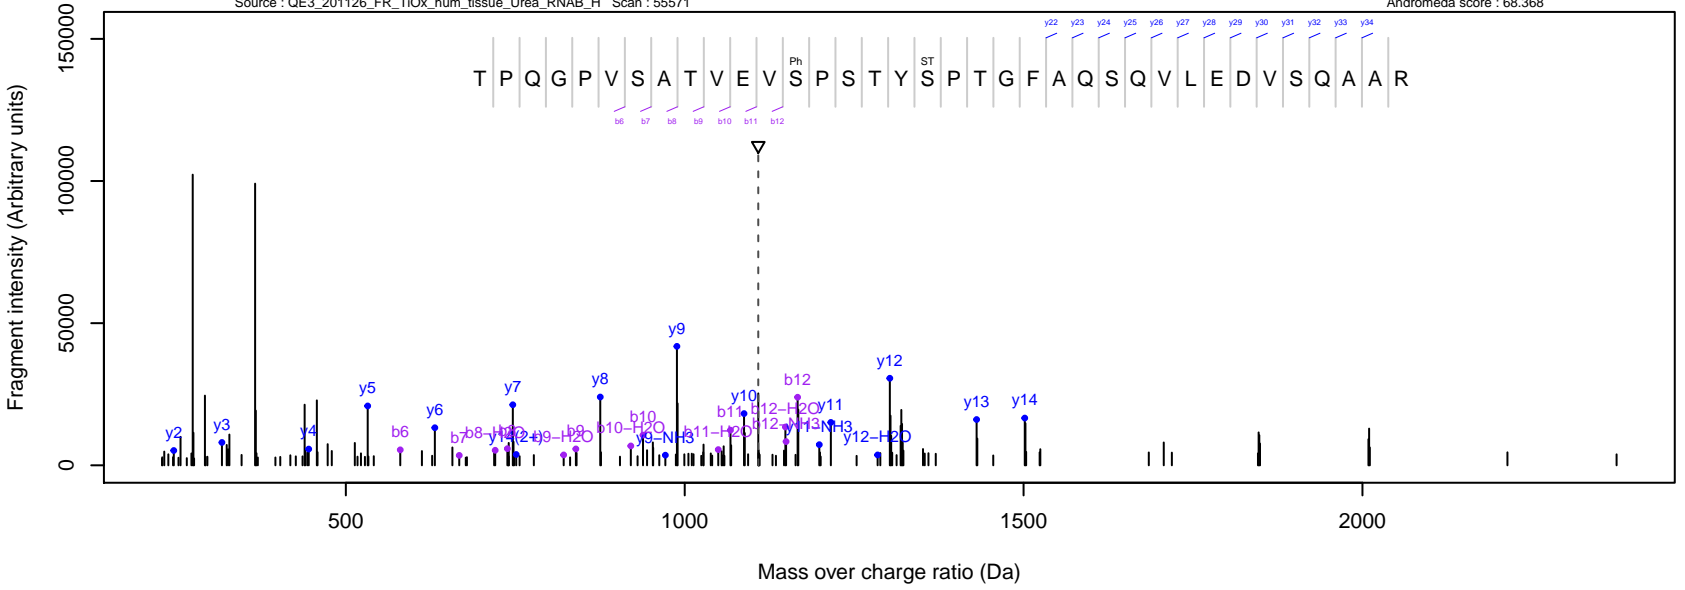

AQS(Phospho (STY))PTPS(Phospho (STY))LPAS(Phospho (STY))WKYSSNVR-3+

Source : QE3\_201126\_FR\_TiOx\_hum\_tissue\_Urea\_RNAB\_H Scan : 41668

Andromeda score : 68.361

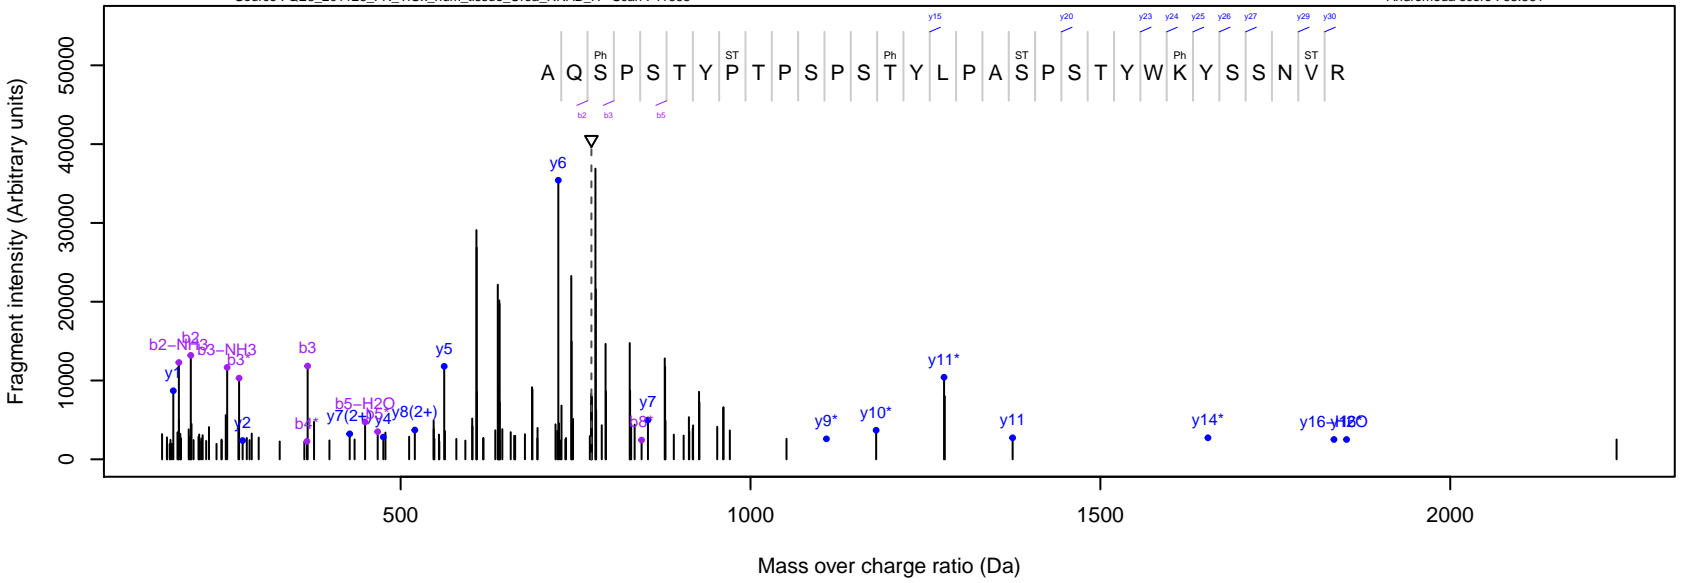

DVLDIQFS(Phospho (STY))T(Phospho (STY))VKGVLNLDHTDDDFYSK-3+

Source : QE3\_201126\_FR\_TiOx\_hum\_tissue\_Urea\_RNAB\_H Scan : 52864

Andromeda score : 68.326

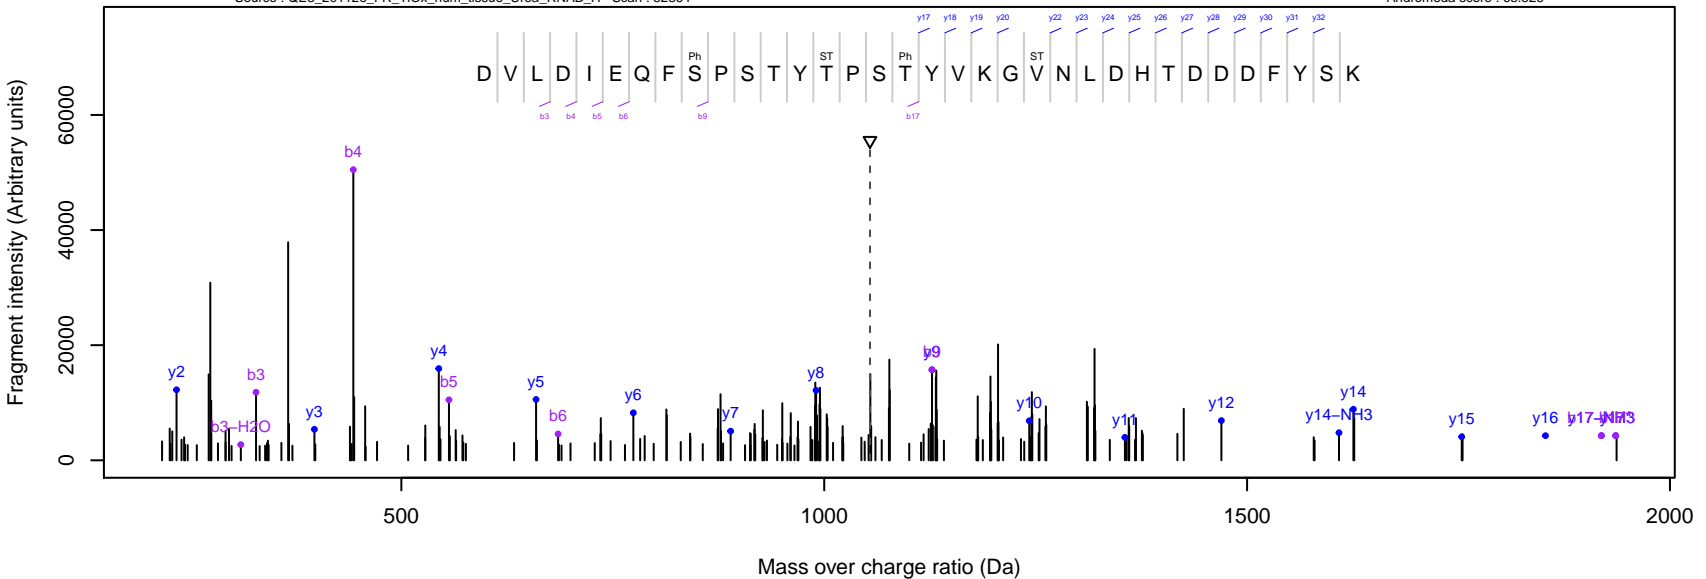

RT(Phospho (STY))PSDDEEDNLFAPPKLTDEDFSPFGSGGLFSGGK-4+

Source : QE3\_201126\_FR\_TiOx\_hum\_tissue\_Urea\_RNAB\_B Scan : 57131

Andromeda score : 68.326

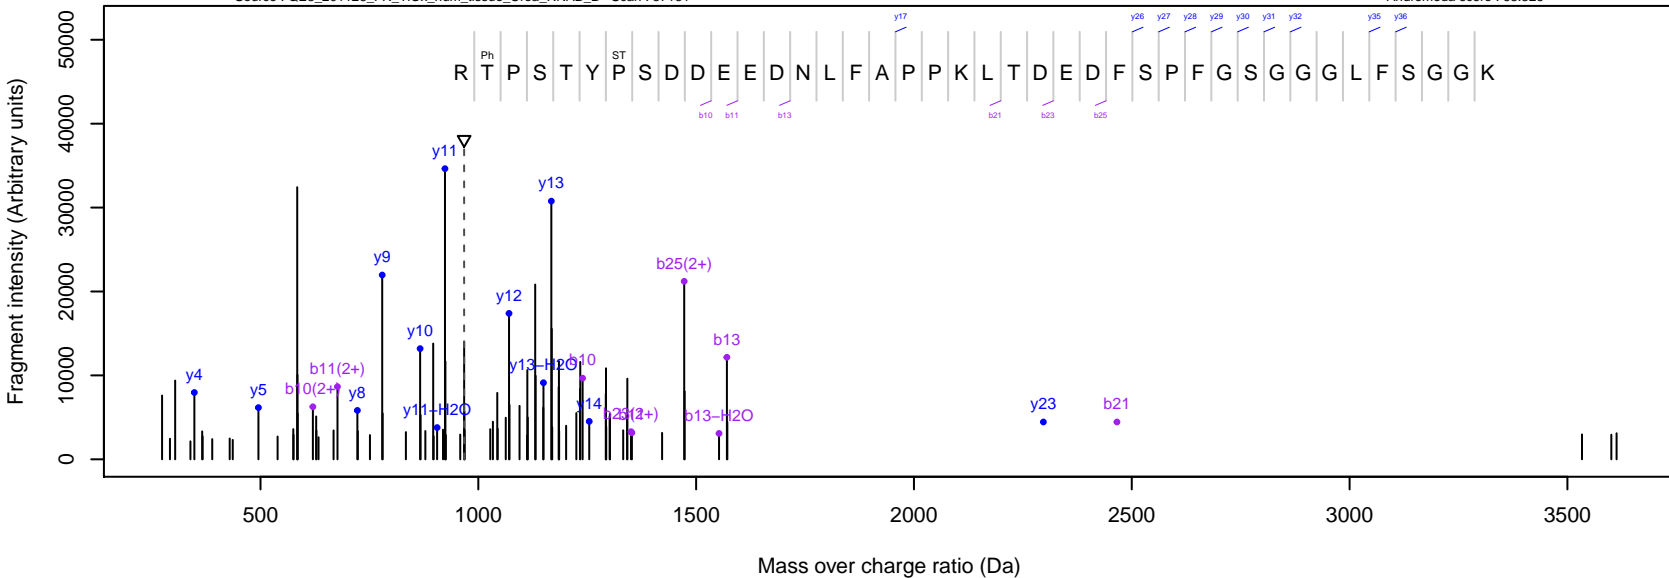

INSDS(Phospho (STY))NLYLTASK-2+

Source : QE3\_201126\_FR\_TiOx\_hum\_tissue\_Urea\_RNAB\_N Scan : 26459

Andromeda score : 68.283

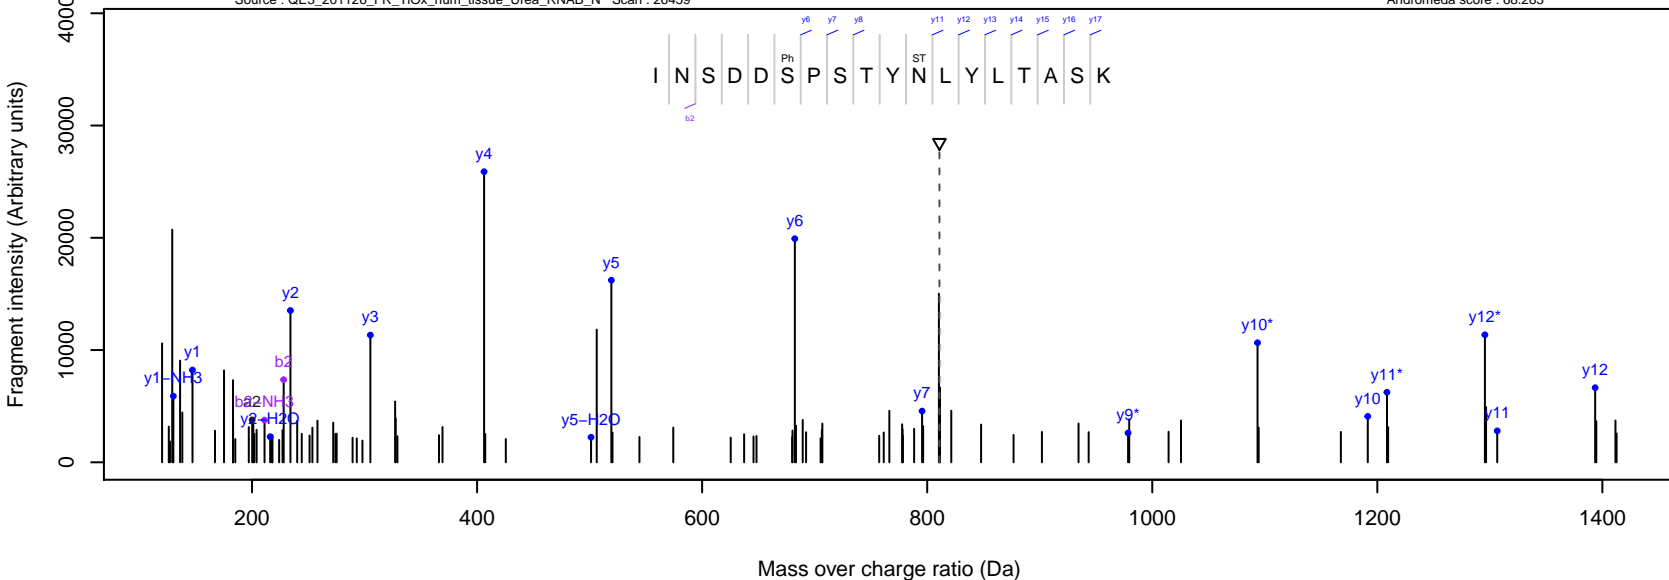

QRS(Phospho (STY))LGPSLATDKS-2+

Source : QE3\_201126\_FR\_TiOx\_hum\_tissue\_Urea\_RNAB\_H Scan : 13059

Andromeda score : 68.283

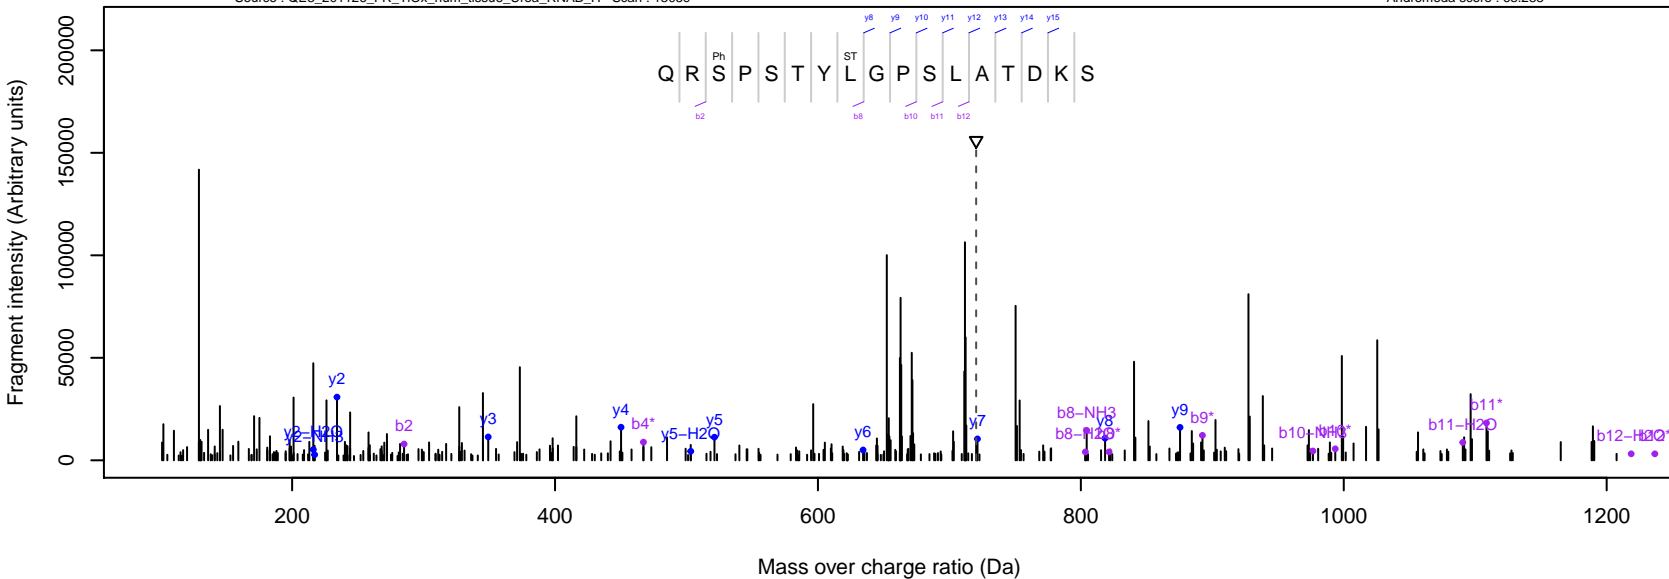

RKVM(Oxidation (M))DS(Phospho (STY))DEDDY-2+

Source : QE3\_201126\_FR\_TiOx\_hum\_tissue\_Urea\_RNAB\_N Scan : 6752

Andromeda score : 68.277

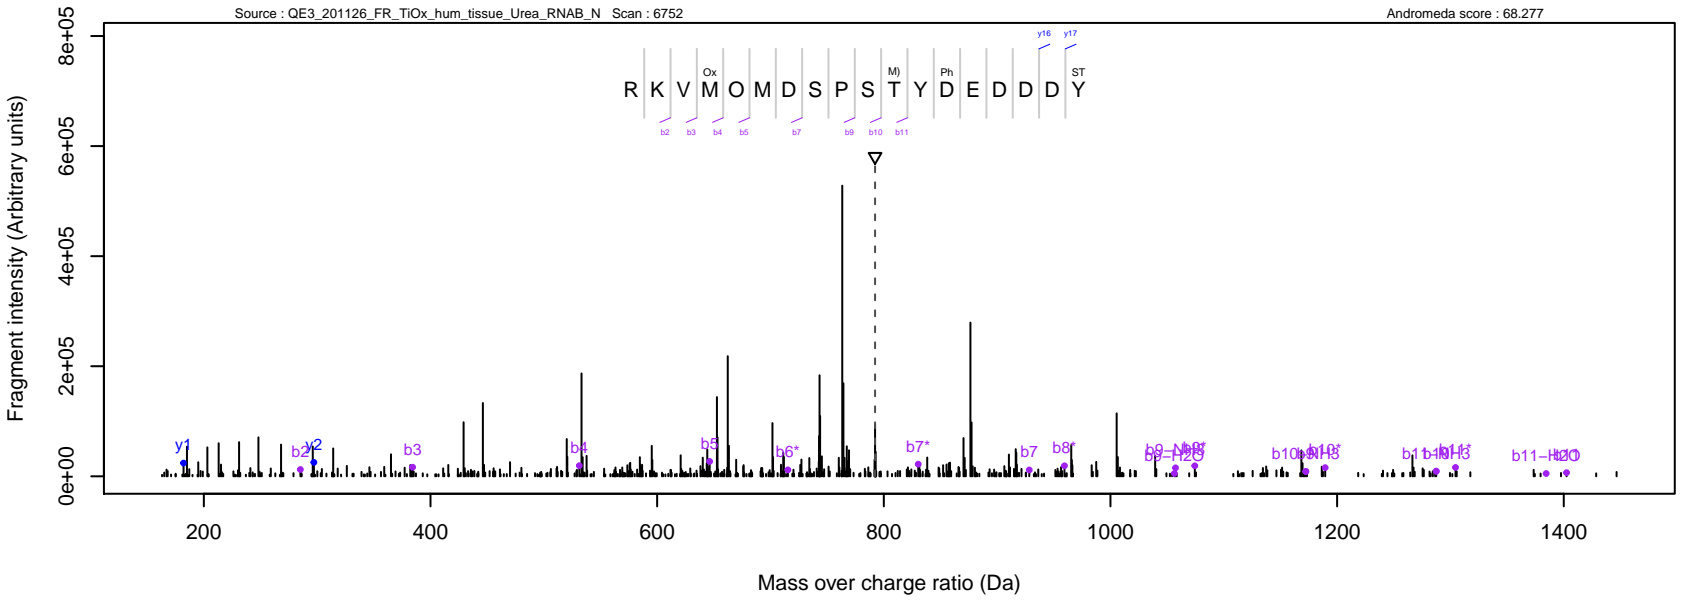

(Acetyl (Protein N-term))SSEPPPPQPPTHQASVGLLDTPRS(Phospho (STY))R-3+

Source : QE3\_201126\_FR\_TiOx\_hum\_tissue\_Urea\_RNAB\_H Scan : 30684

Andromeda score : 68.269

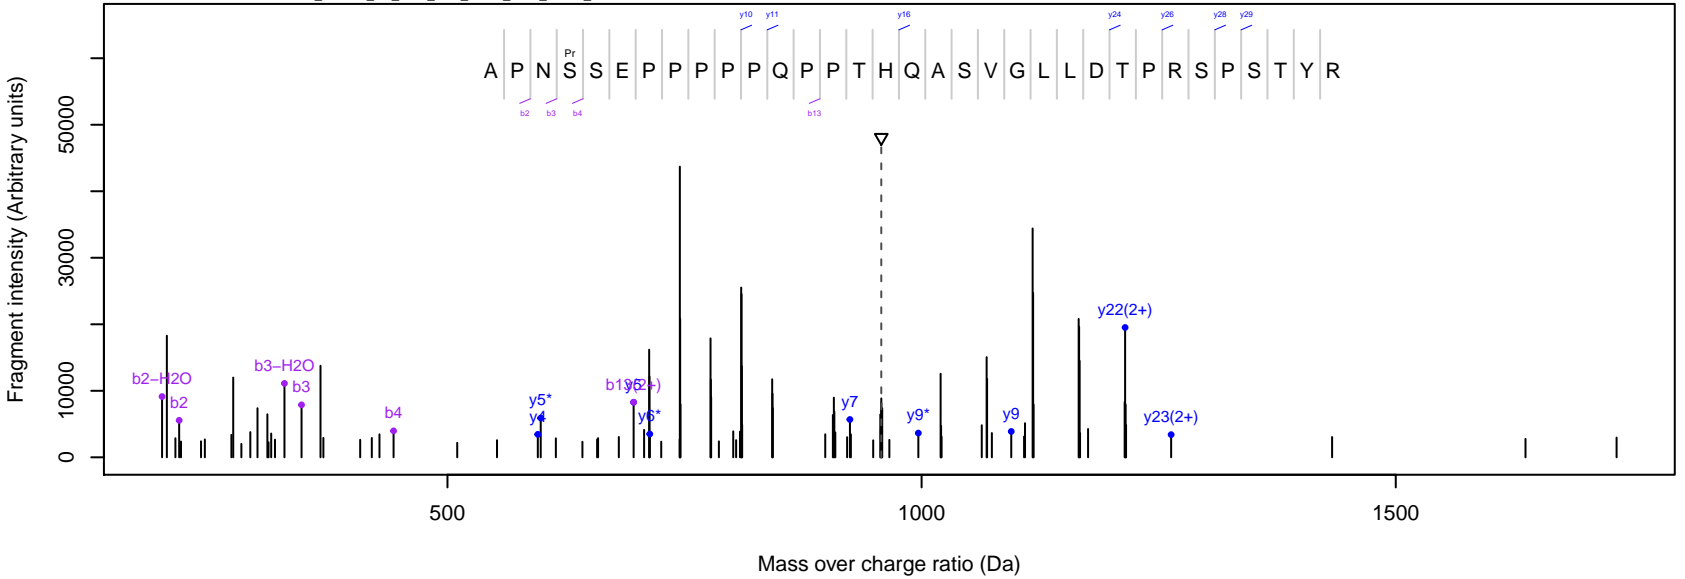

KSSSLES(Phospho (STY))LQTAVAEVR-3+

Source : QE3\_201126\_FR\_TiOx\_hum\_tissue\_Urea\_RNAB\_H Scan : 31923

Andromeda score : 68.173

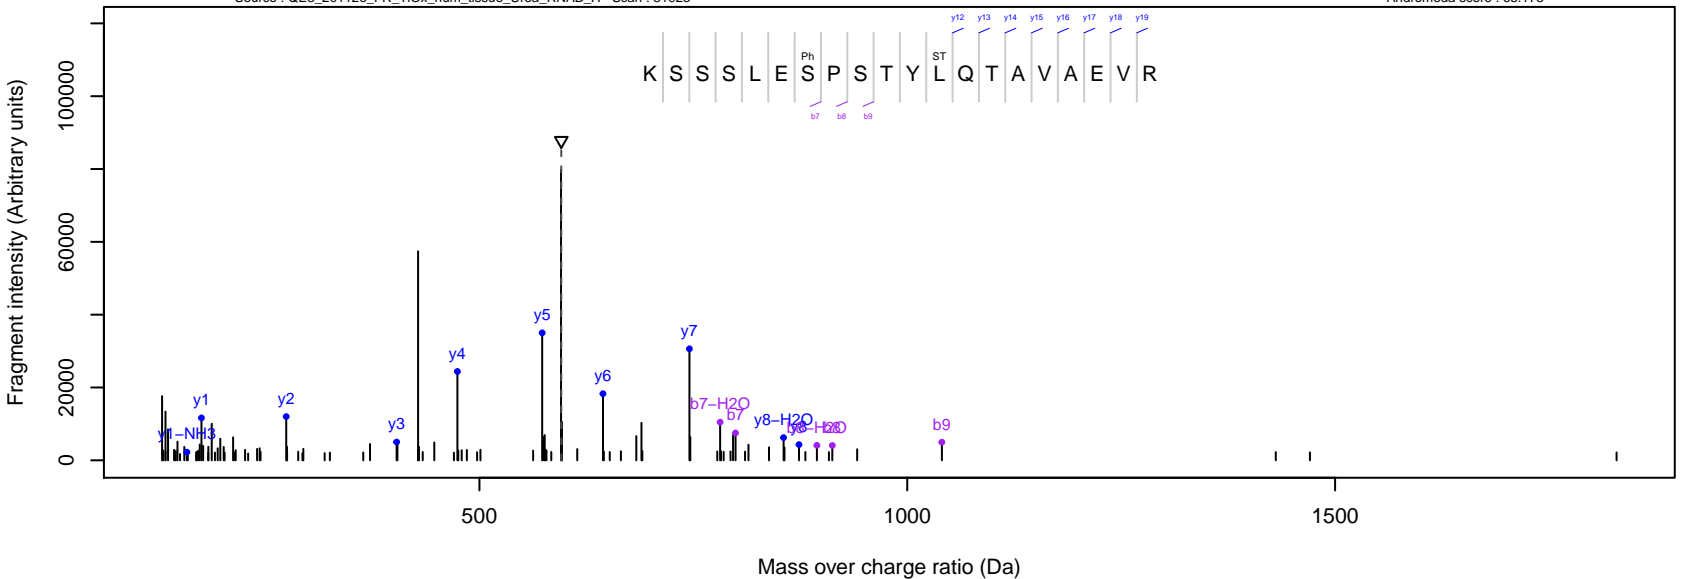

KIPEPS(Phospho (STY))PVTR-3+

Source : QE3\_201126\_FR\_TiOx\_hum\_tissue\_Urea\_RNAB\_N Scan : 11672

Andromeda score : 68.171

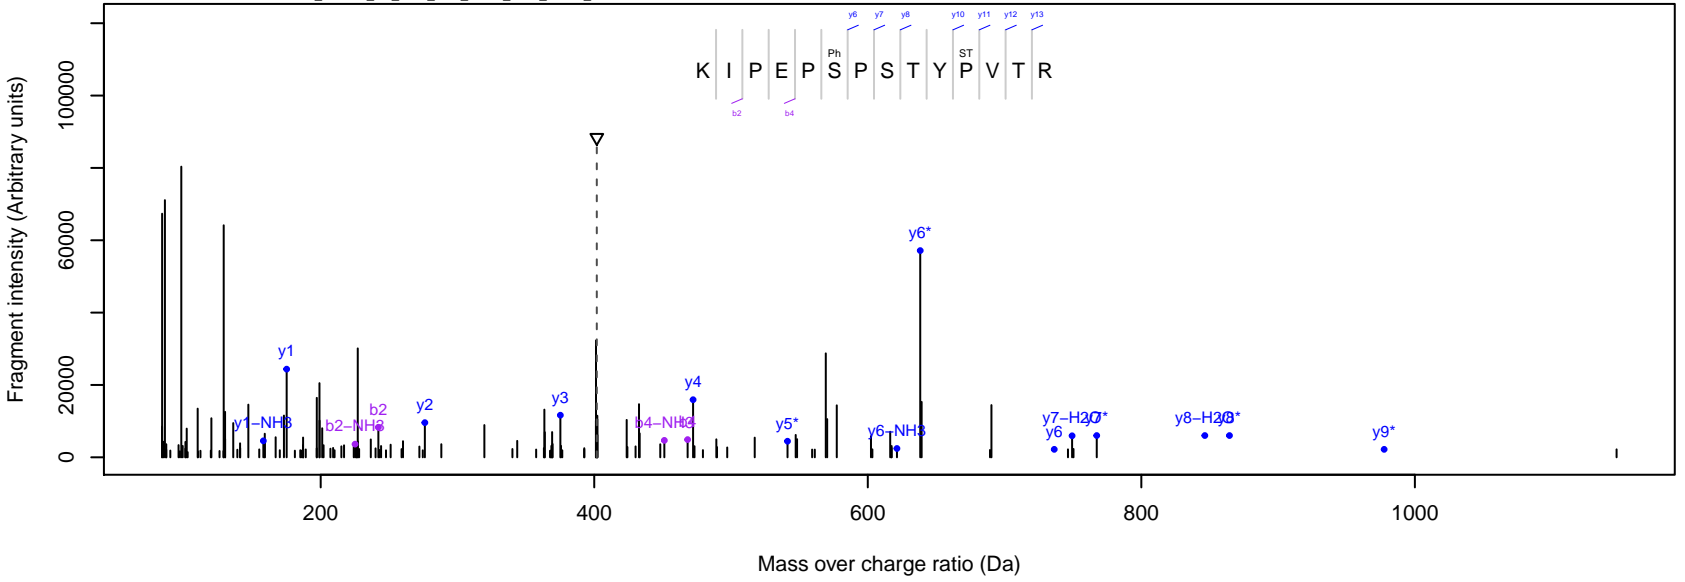

DLQSEFGITGDPQPSSFSPPSWCQGASQDYGLGGAS(Phospho (STY))PR-3+

Source : QE3\_201126\_FR\_TiOx\_hum\_tissue\_Urea\_RNAB\_H Scan : 60046

Andromeda score : 68.168

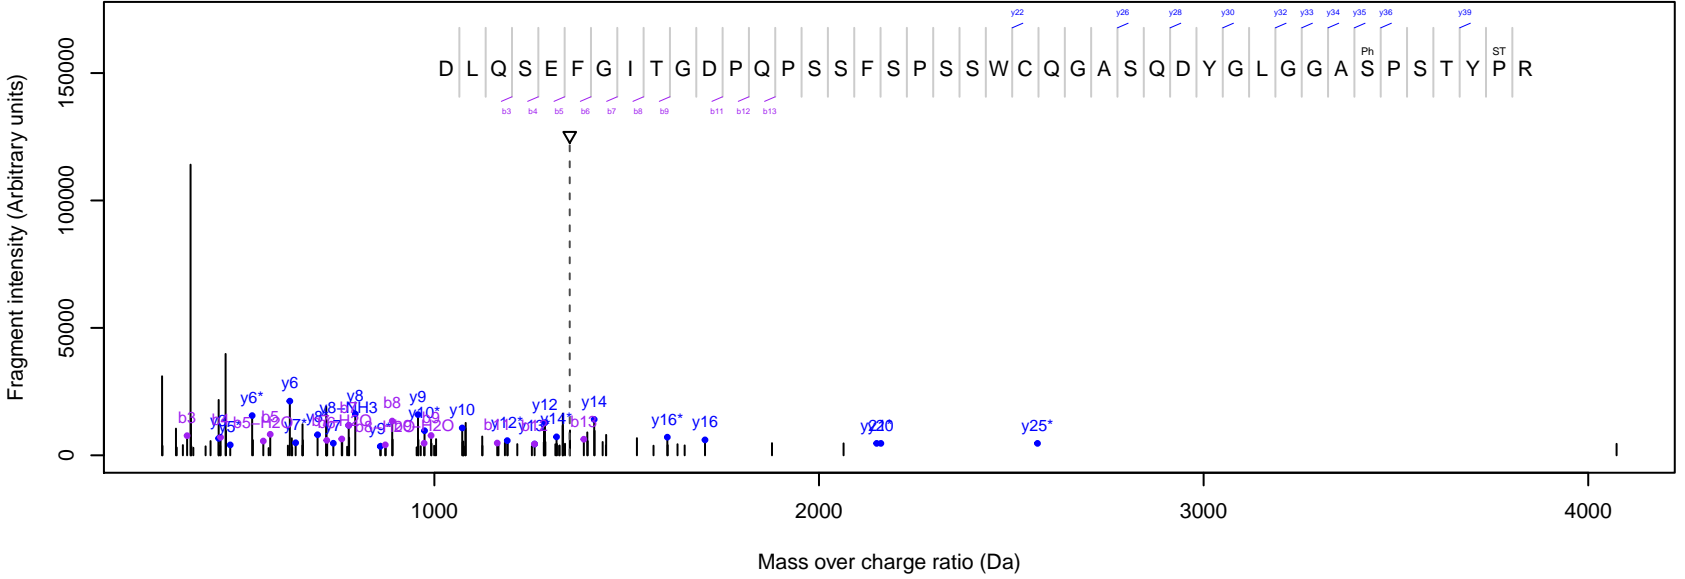

RHS(Phospho (STY))SLIDIDSVPYK-3+

Source : QE3\_201126\_FR\_TiOx\_hum\_tissue\_Urea\_RNAB\_N Scan : 28867

Andromeda score : 68.168

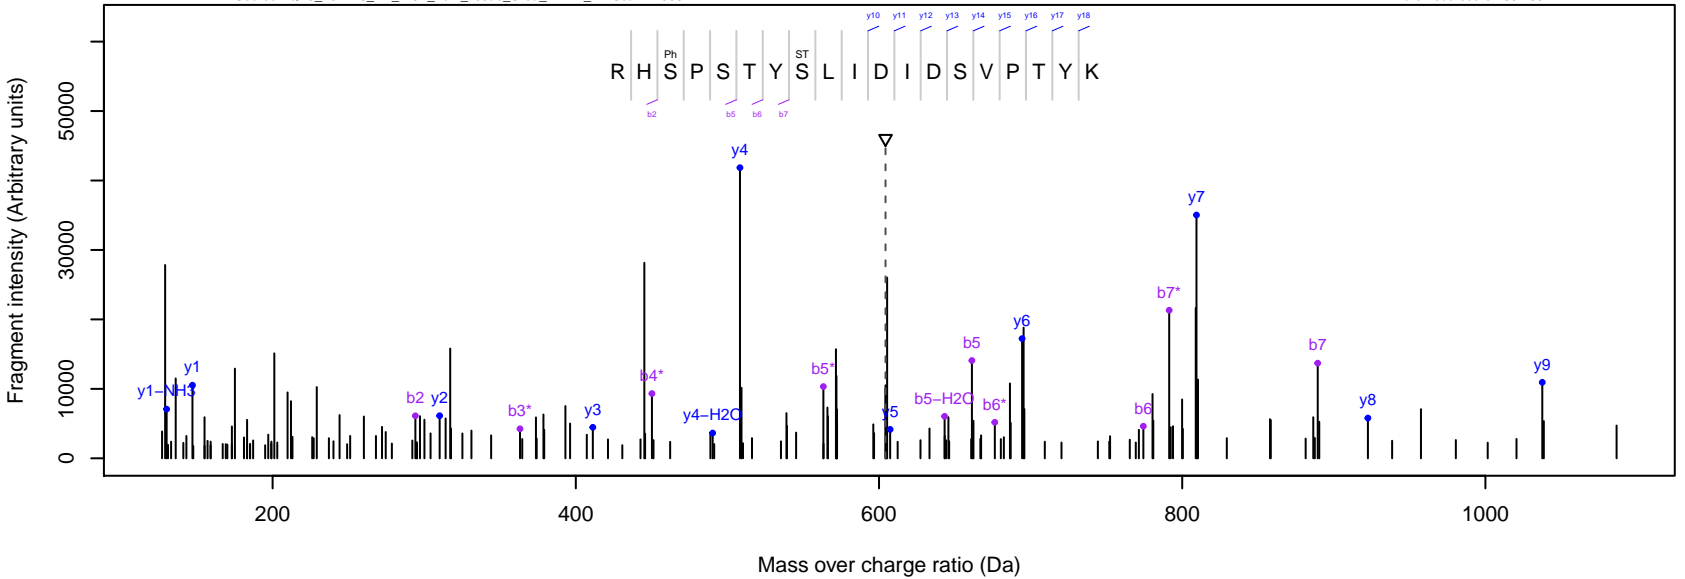

S(Phospho (STY))TPAPKEEEKVNEEQWSLR-3+

Source : QE3\_201126\_FR\_TiOx\_hum\_tissue\_Urea\_RNAB\_H Scan : 20596

Andromeda score : 68.168

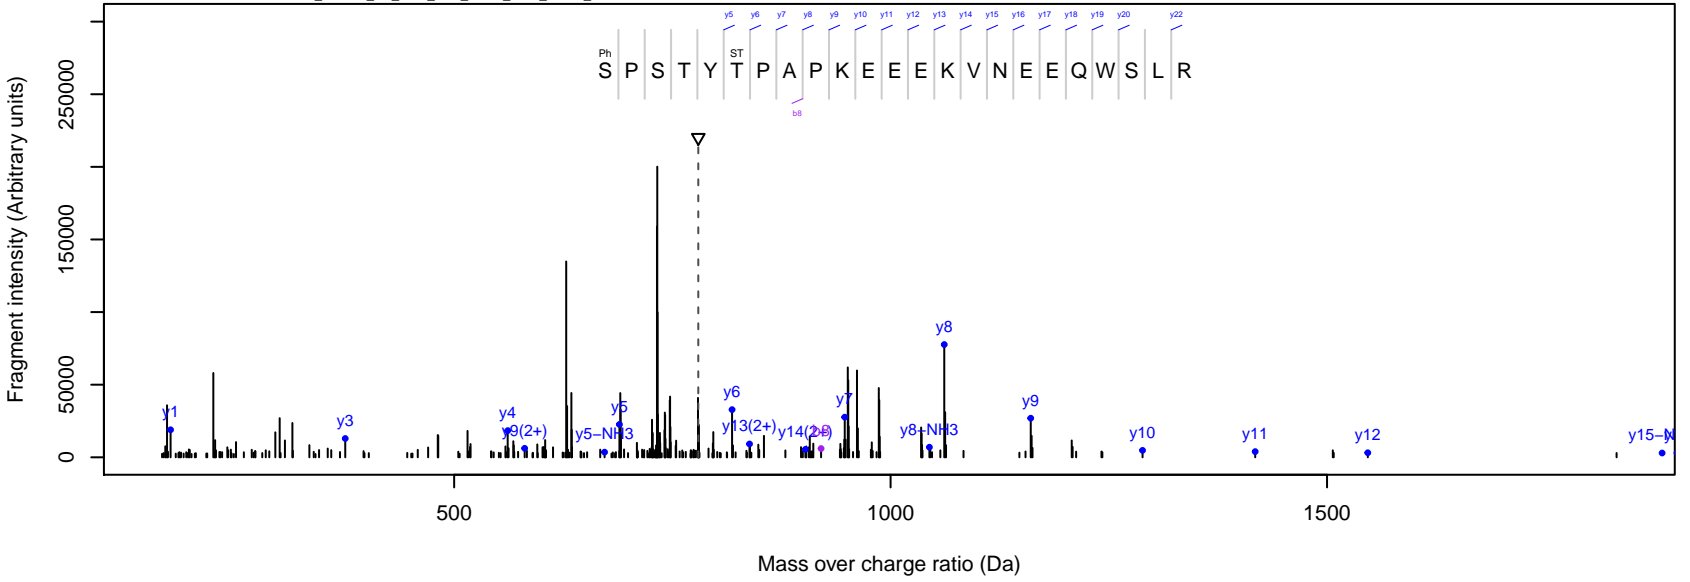

HTSISES(Phospho (STY))SRQSLPSLK-3+

Source : QE3\_201126\_FR\_TiOx\_hum\_tissue\_Urea\_RNAB\_N Scan : 14976

Andromeda score : 68.134

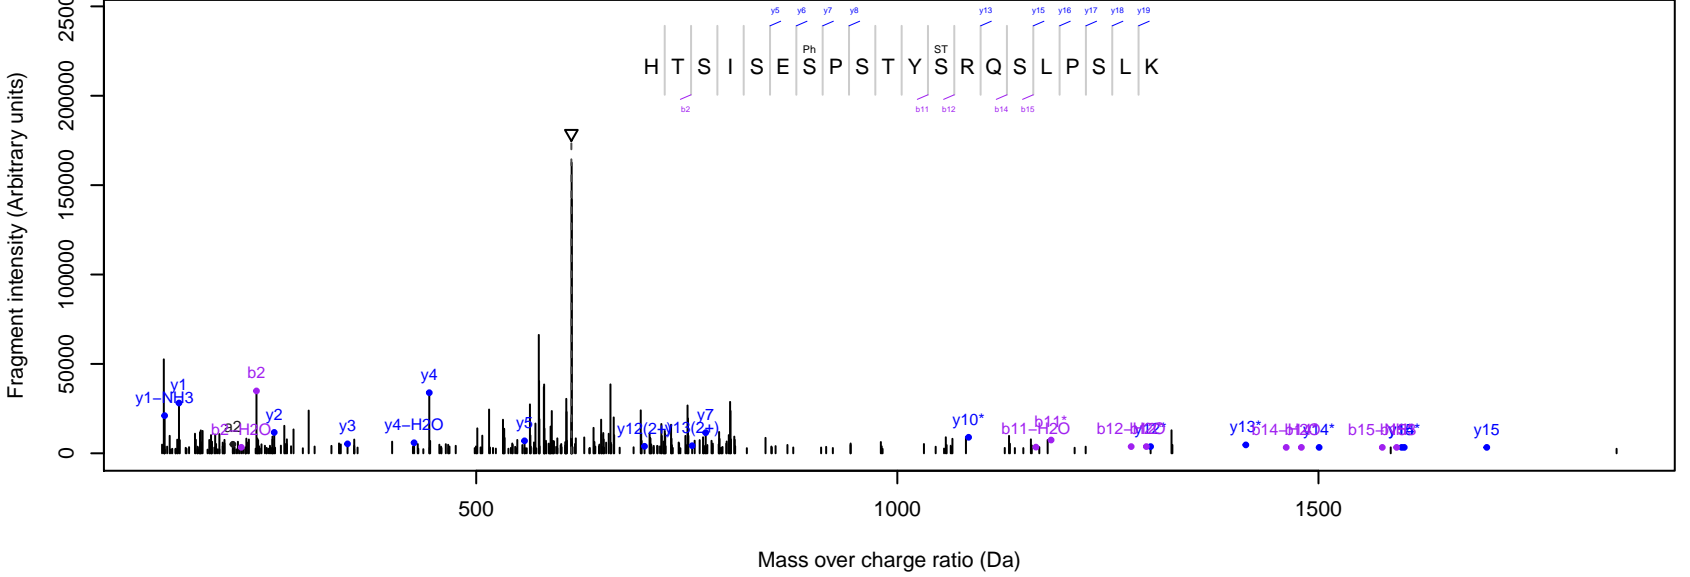

NYT(Phospho (STY))M(Oxidation (M))SFLPR-2+

Source : QE3\_201126\_FR\_TiOx\_hum\_tissue\_Urea\_RNAB\_B Scan : 32920

Andromeda score : 68.069

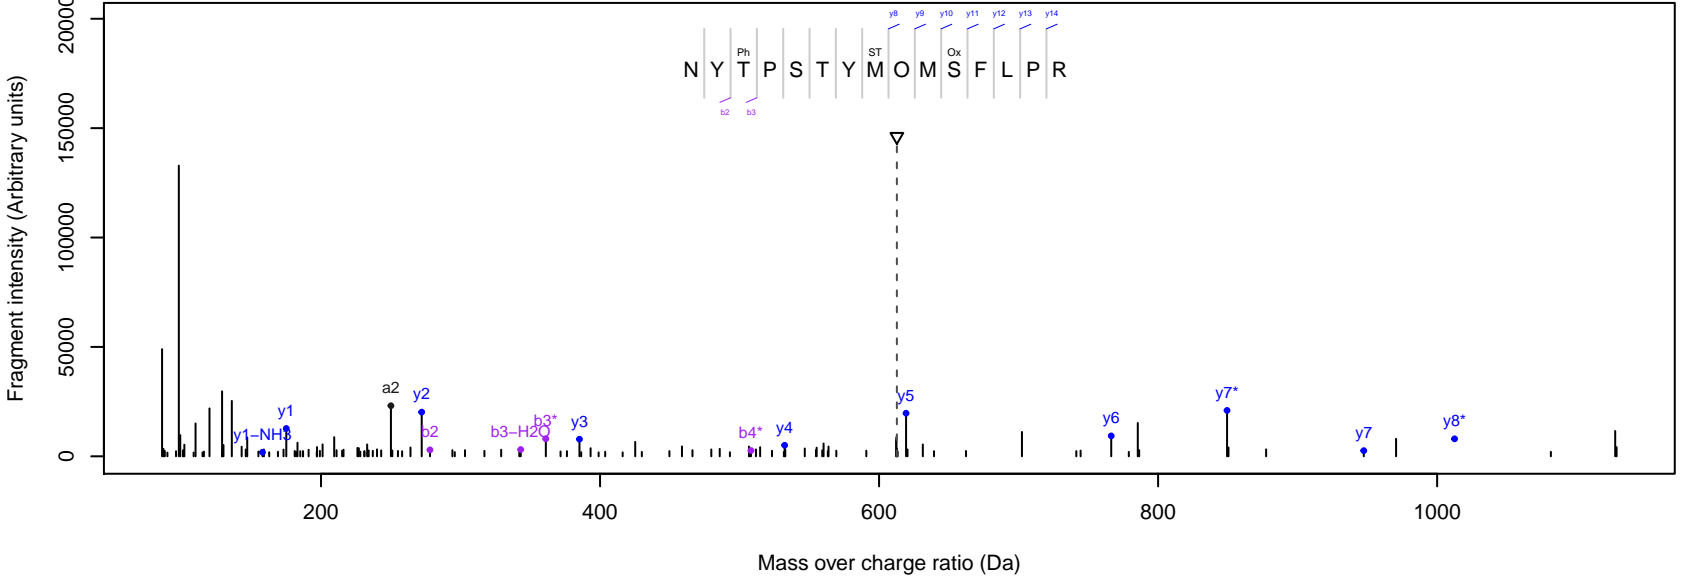

**FKS(Phospho (STY))LDDVIKR-3+**

Source : QE3\_201126\_FR\_TiOx\_hum\_tissue\_Urea\_RNAB\_H Scan : 20080

Andromeda score : 68.034

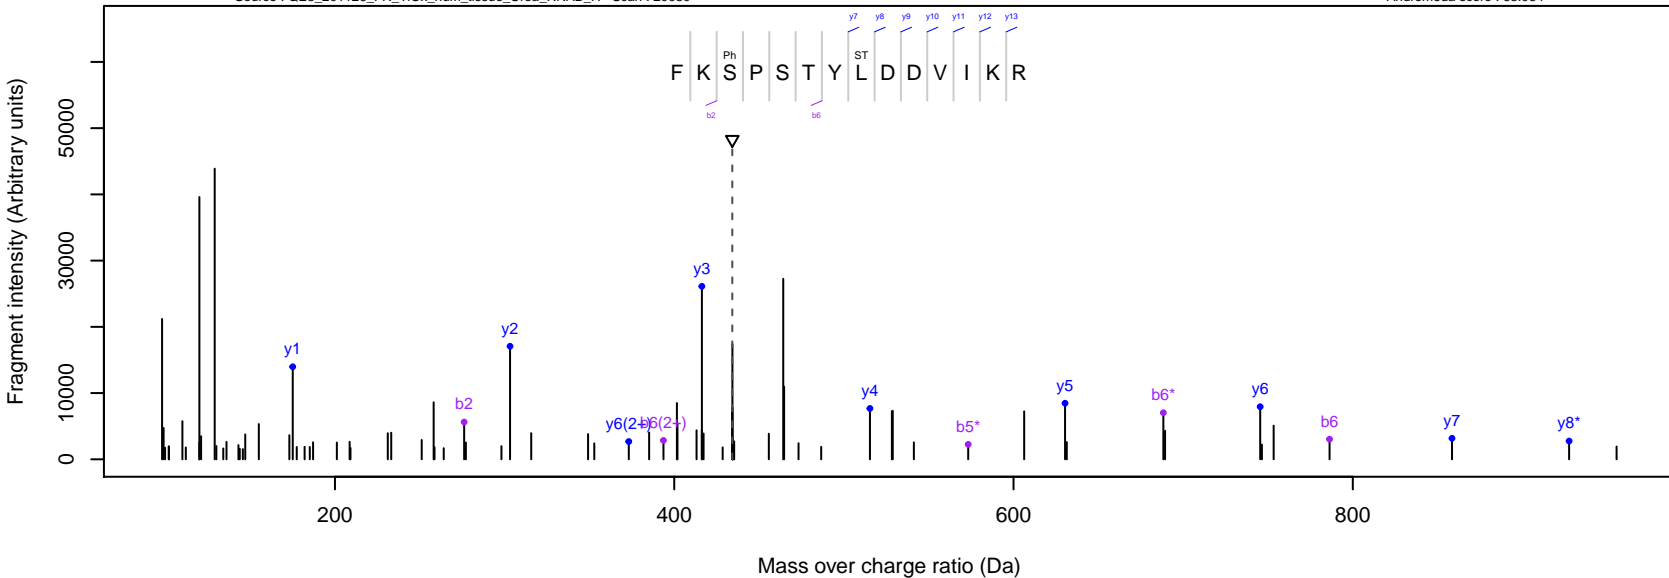

**SLS(Phospho (STY))PVAAPLREPR-3+**

Source : QE3\_201126\_FR\_TiOx\_hum\_tissue\_Urea\_RNAB\_N Scan : 23898

Andromeda score : 68.034

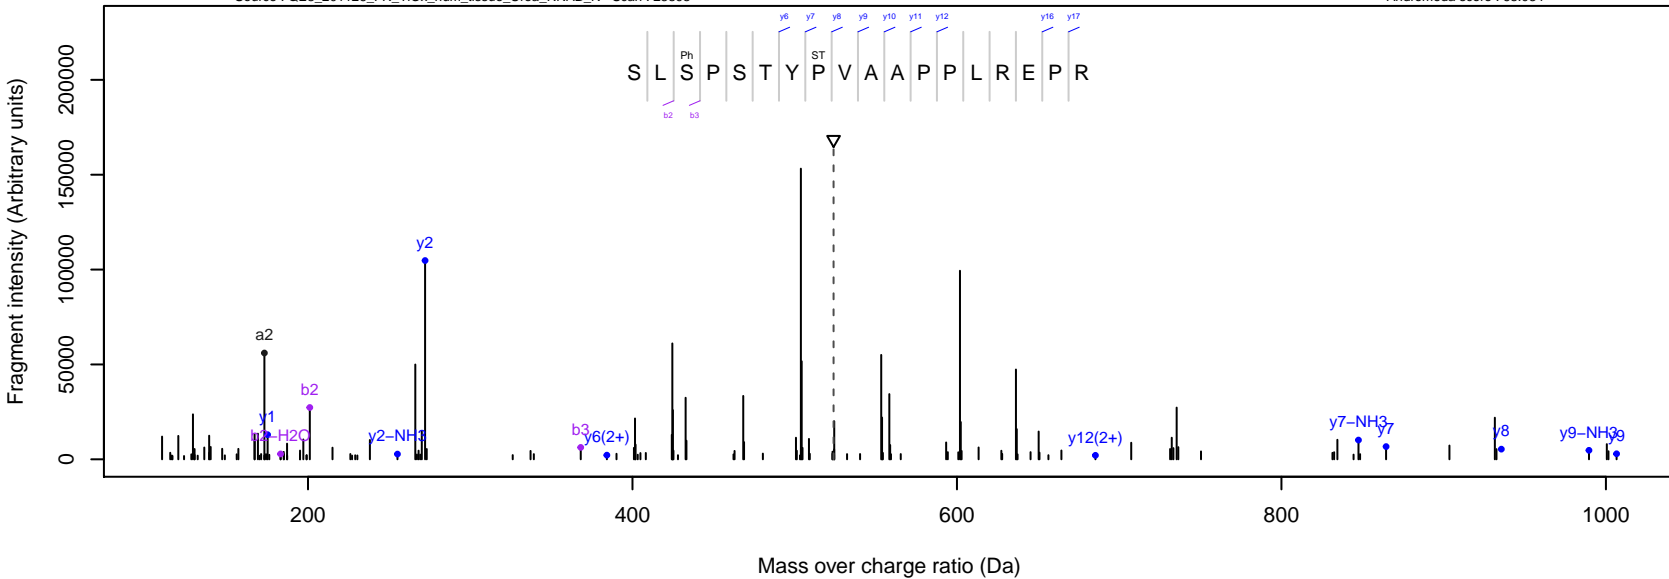

**GRECS(Phospho (STY))PTSSLER-2+**

Source : QE3\_201126\_FR\_TiOx\_hum\_tissue\_Urea\_RNAB\_H Scan : 8448

Andromeda score : 68.033

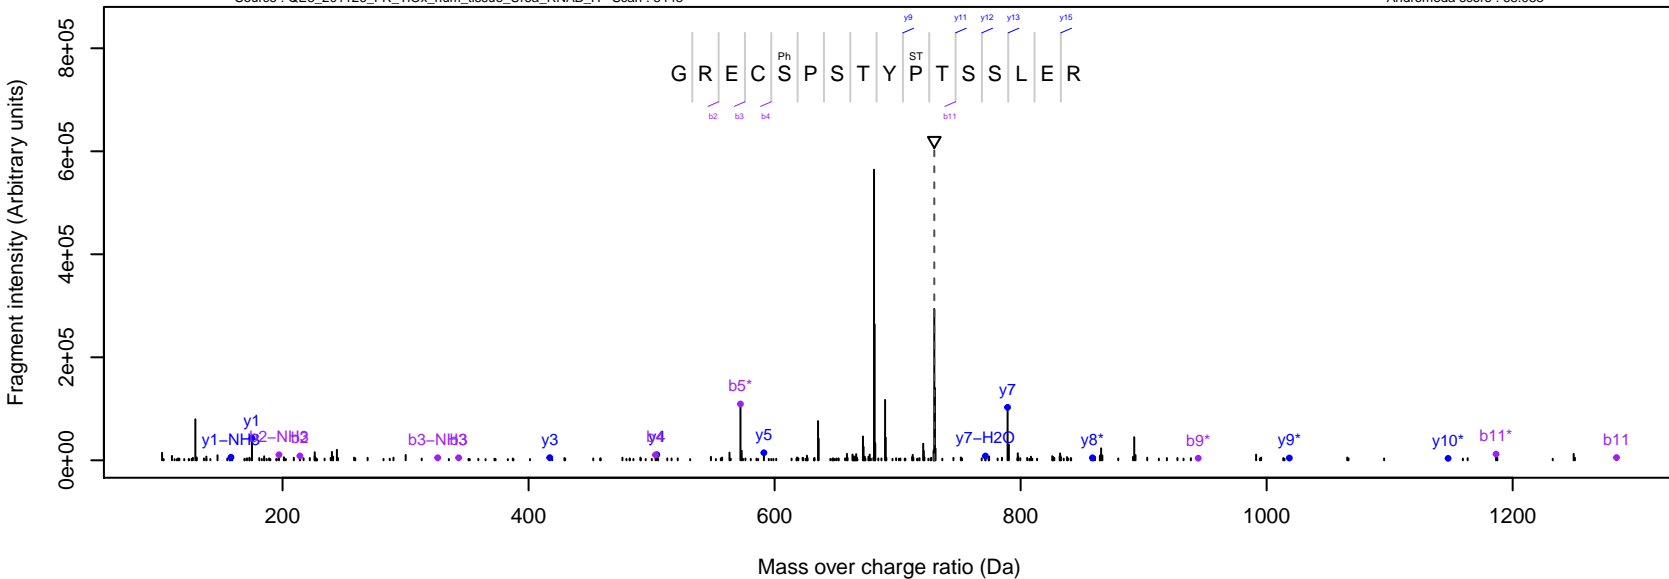



(Acetyl (Protein N-term))DKNVIS(Phospho (STY))VK-2+

Source : QE3\_201126\_FR\_TiOx\_hum\_tissue\_Urea\_RNAB\_N Scan : 15147

Andromeda score : 68.016

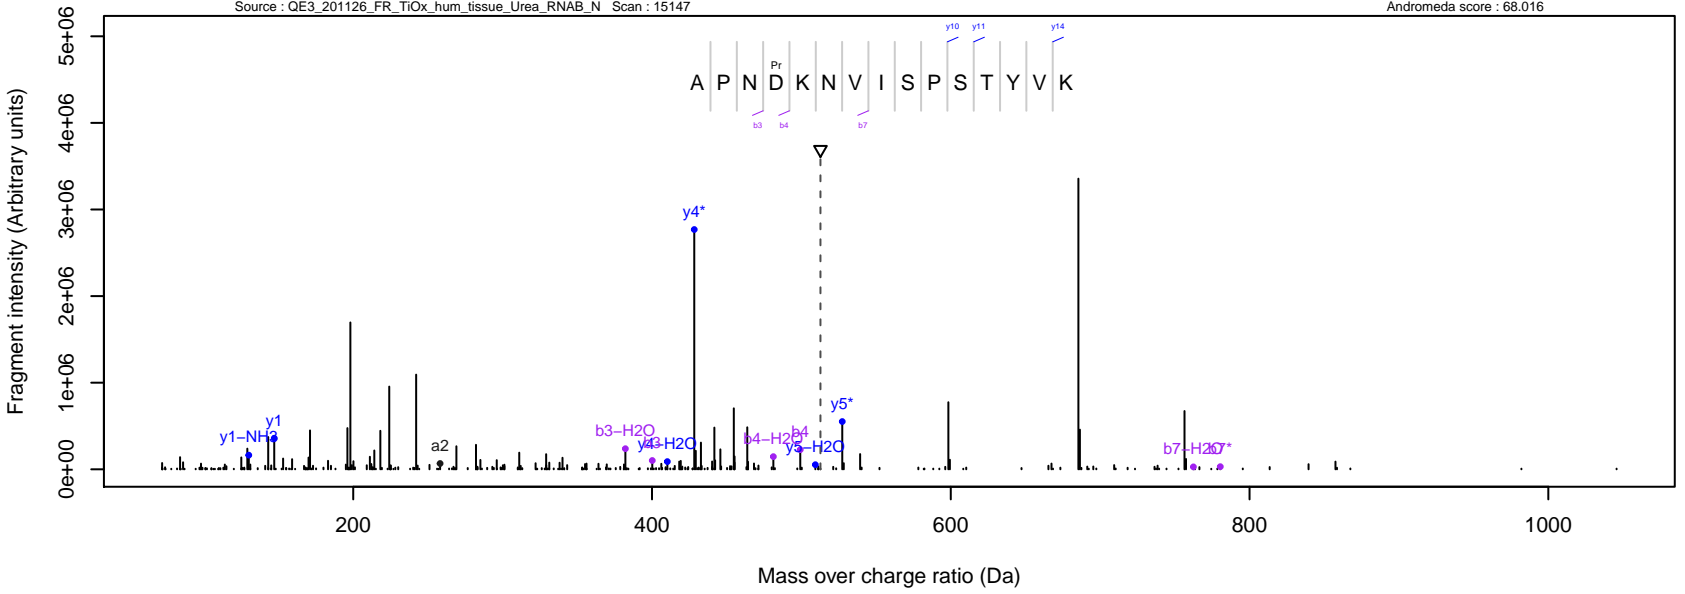

AGLRVS(Phospho (STY))APEVSVGHK-3+

Source : QE3\_201126\_FR\_TiOx\_hum\_tissue\_Urea\_RNAB\_B Scan : 17347

Andromeda score : 67.995

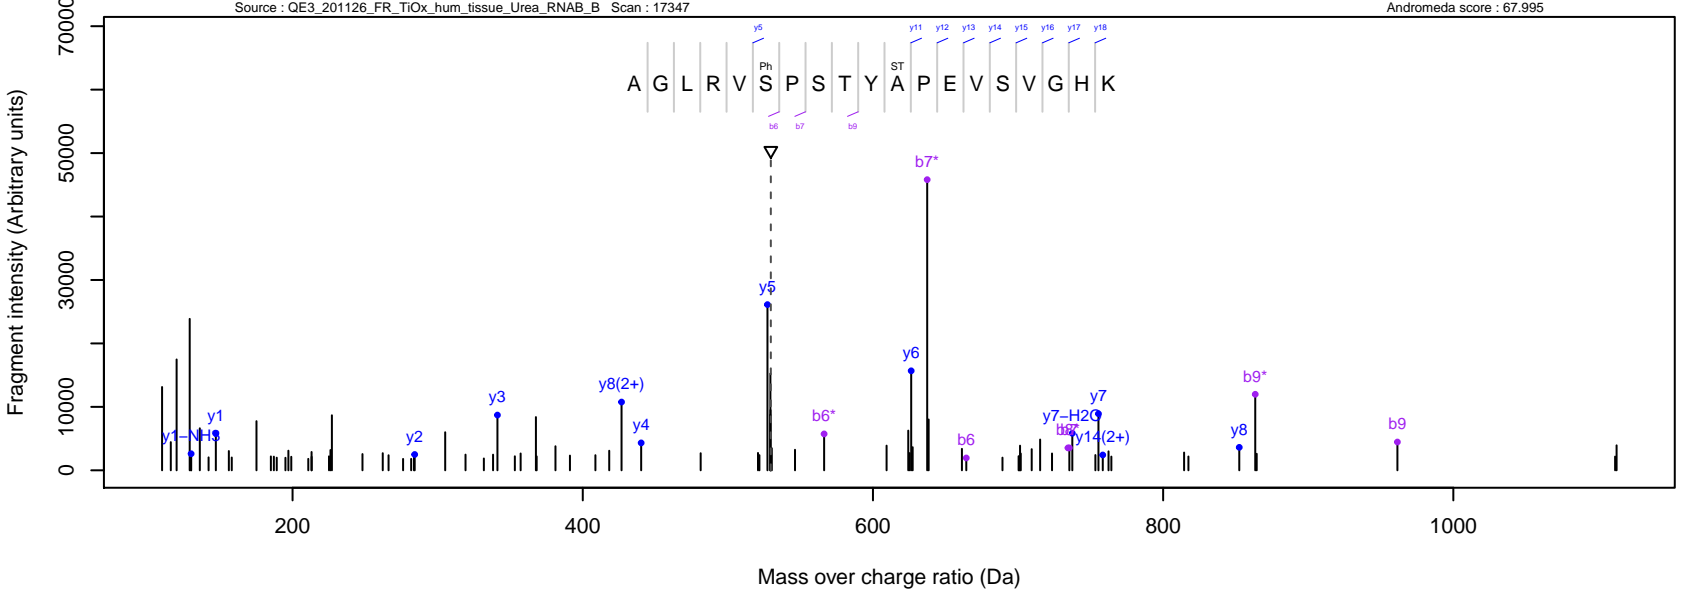

FRPFTFSQS(Phospho (STY))TPIGLDR-3+

Source : QE3\_201126\_FR\_TiOx\_hum\_tissue\_Urea\_RNAB\_H Scan : 47038

Andromeda score : 67.995

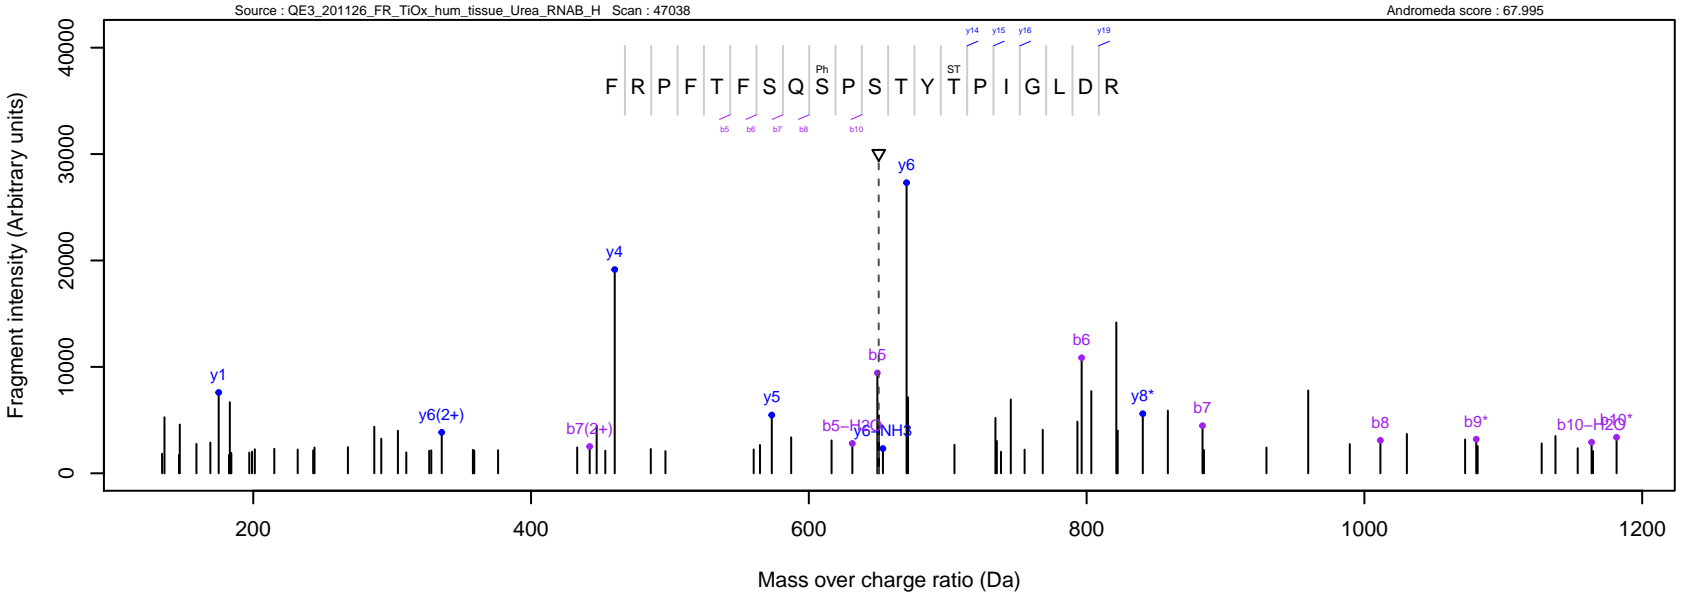

SAS(Phospho (STY))APSAHLFDSSQLV SAR-3+

Source : QE3\_201126\_FR\_TiOx\_hum\_tissue\_Urea\_RNAB\_N Scan : 34529

Andromeda score : 67.979

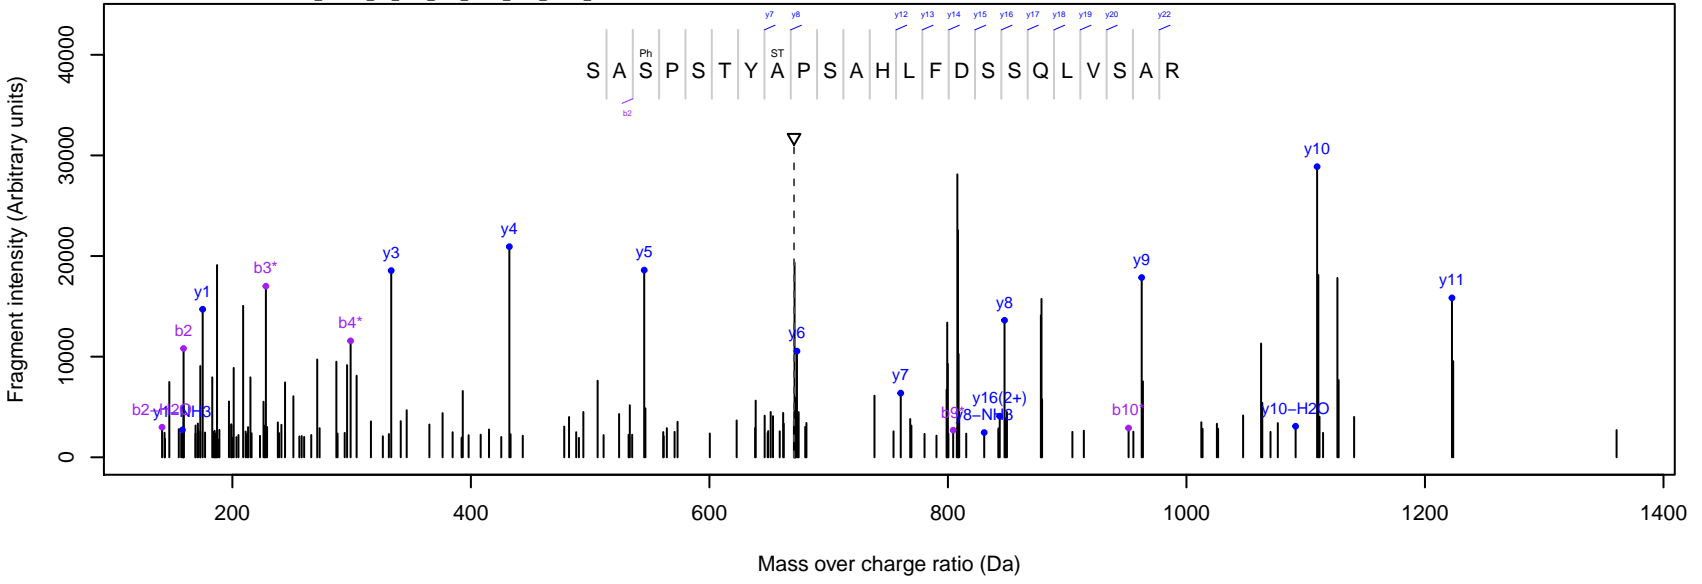

AAS(Phospho (STY))PVLLSSNSQK-2+

Source : QE3\_201126\_FR\_TiOx\_hum\_tissue\_Urea\_RNAB\_N Scan : 18142

Andromeda score : 67.964

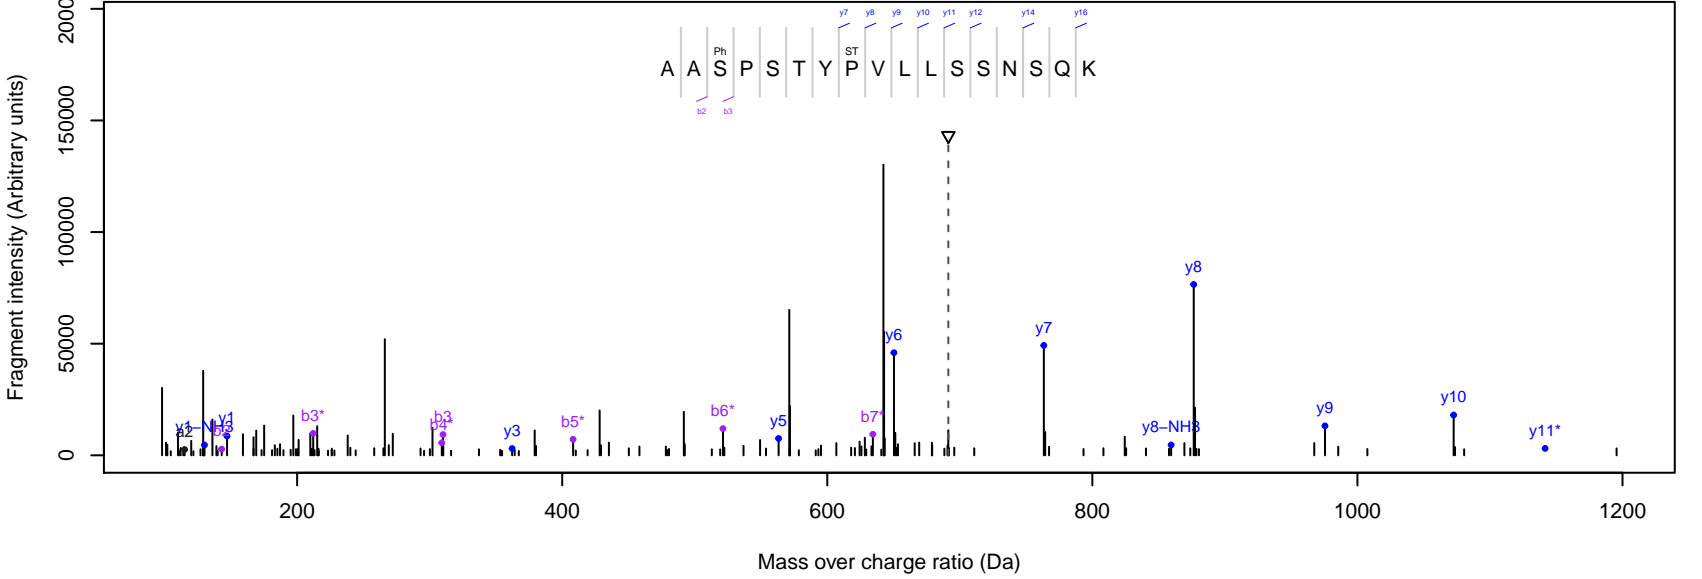

RVIGQDHDFS(Phospho (STY))ES(Phospho (STY))S(Phospho (STY))EEEEPAEASSGALR-3+

Source : QE3\_201126\_FR\_TiOx\_hum\_tissue\_Urea\_RNAB\_H Scan : 30722

Andromeda score : 67.947

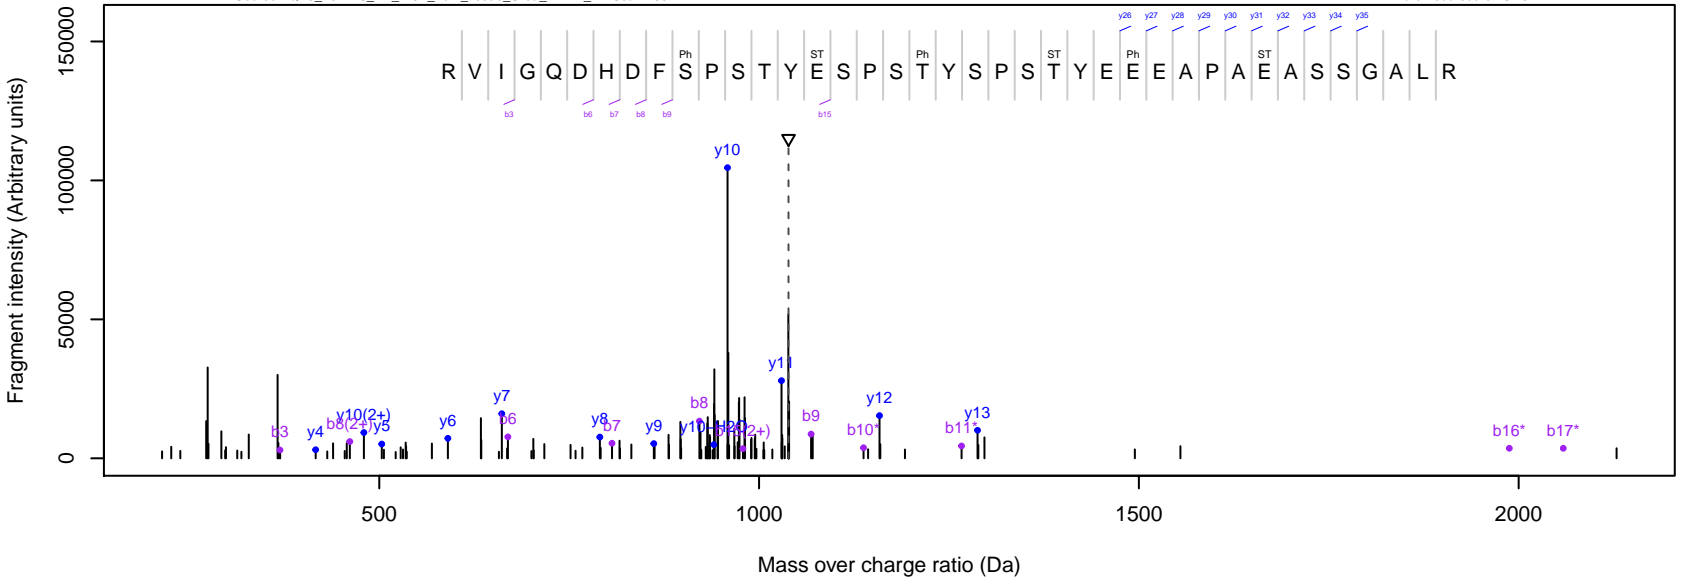

RQES(Phospho (STY))SSSLEMPGVALEEGAHVLR-3+

Source : QE3\_201126\_FR\_TiOx\_hum\_tissue\_Urea\_RNAB\_N Scan : 36648

Andromeda score : 67.88

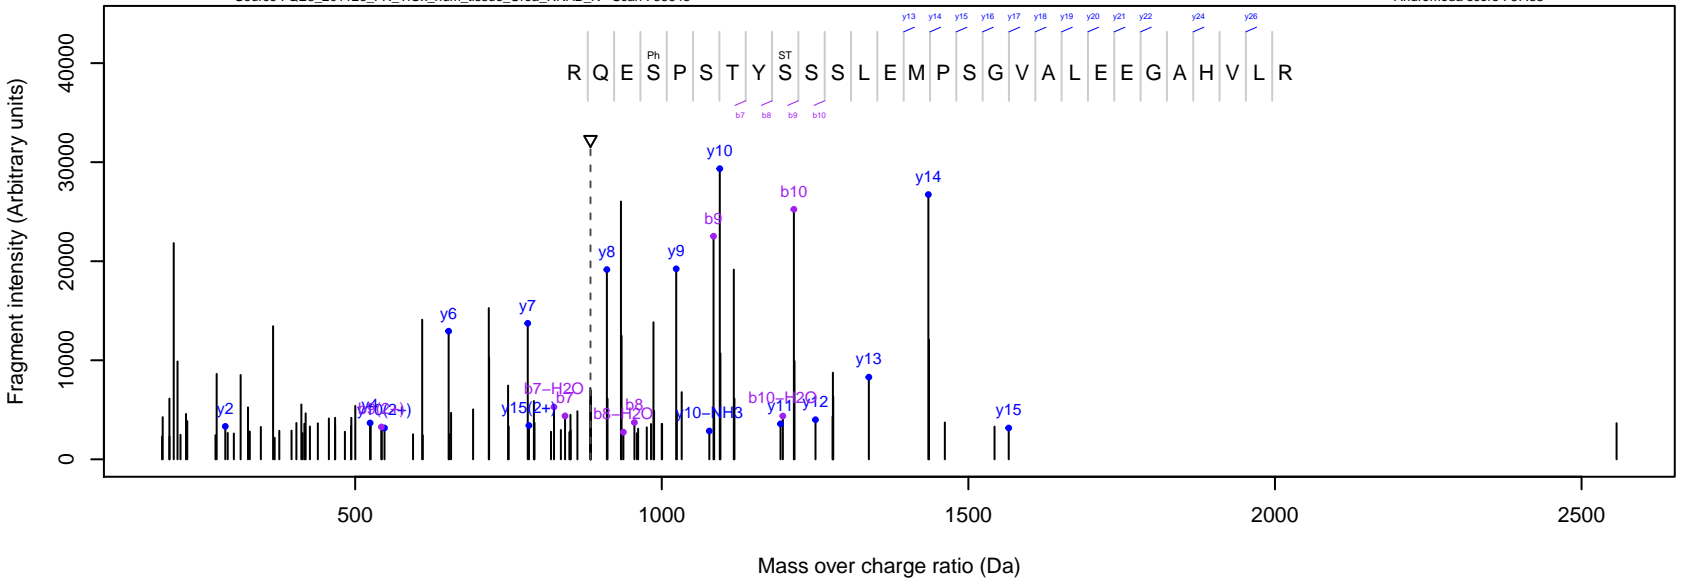

RS(Phospho (STY))SPAADVQGENFCAAVK-3+

Source : QE3\_201126\_FR\_TiOx\_hum\_tissue\_Urea\_RNAB\_B Scan : 20334

Andromeda score : 67.877

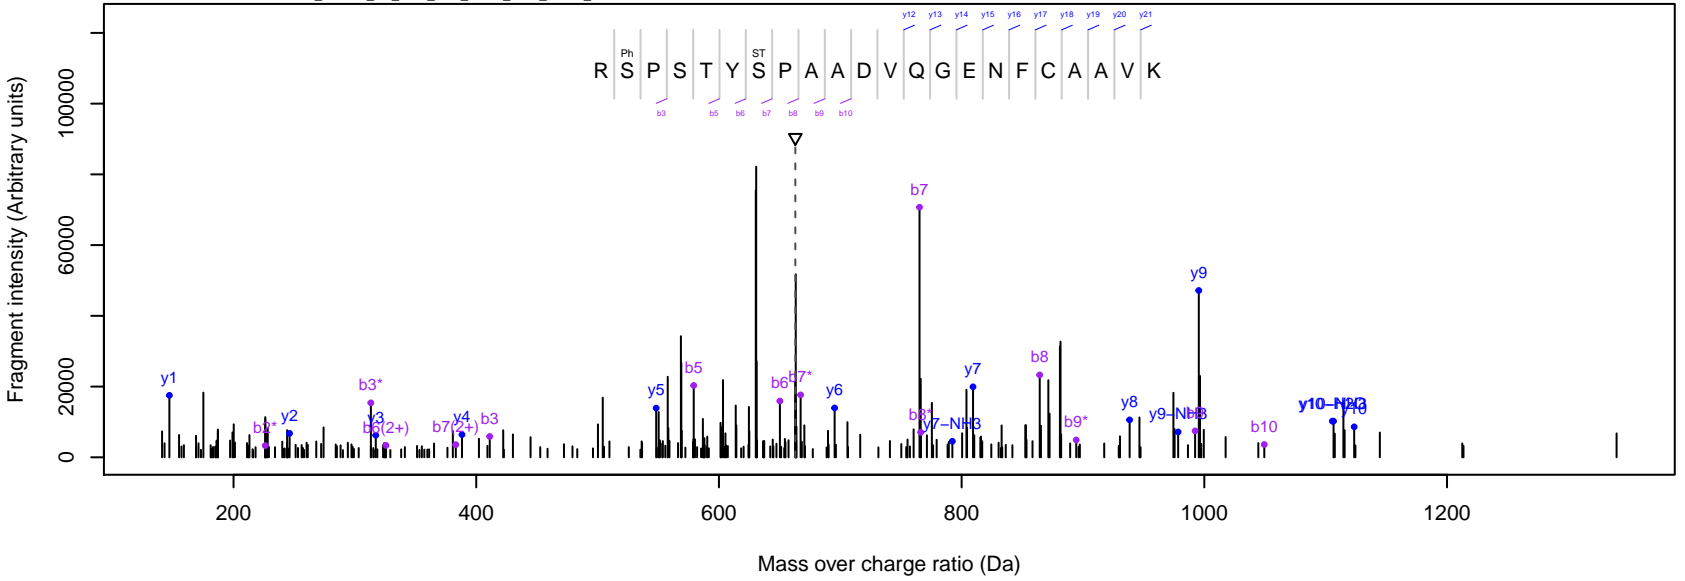

S(Phospho (STY))PDPGIVPQEA P V G N S L S E L S E E N F D G K-3+

Source : QE3\_201126\_FR\_TiOx\_hum\_tissue\_Urea\_RNAB\_N Scan : 53751

Andromeda score : 67.871

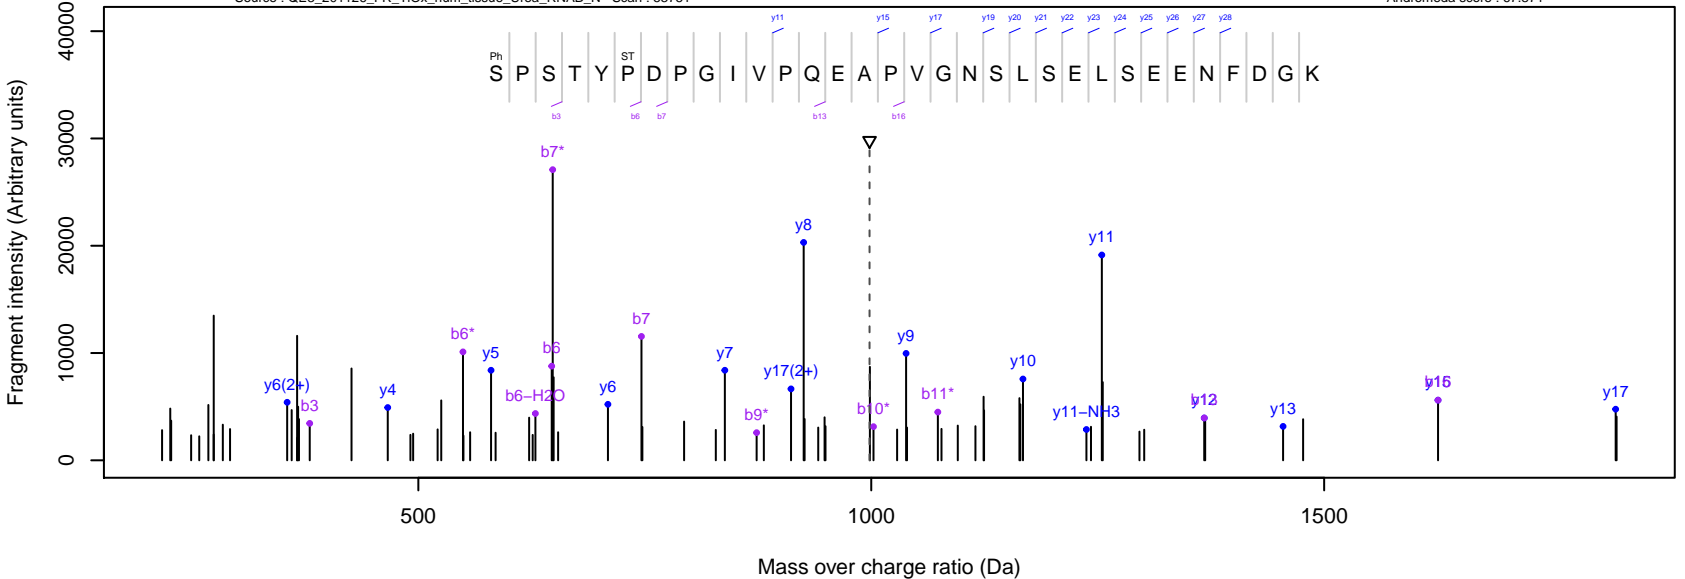

TPGESSAISMGIVSVS(Phospho (STY))SPDVSSVELTNK-3+

Source : QE3\_201126\_FR\_TIOx\_hum\_tissue\_Urea\_RNAB\_H Scan : 53151

Andromeda score : 67.871

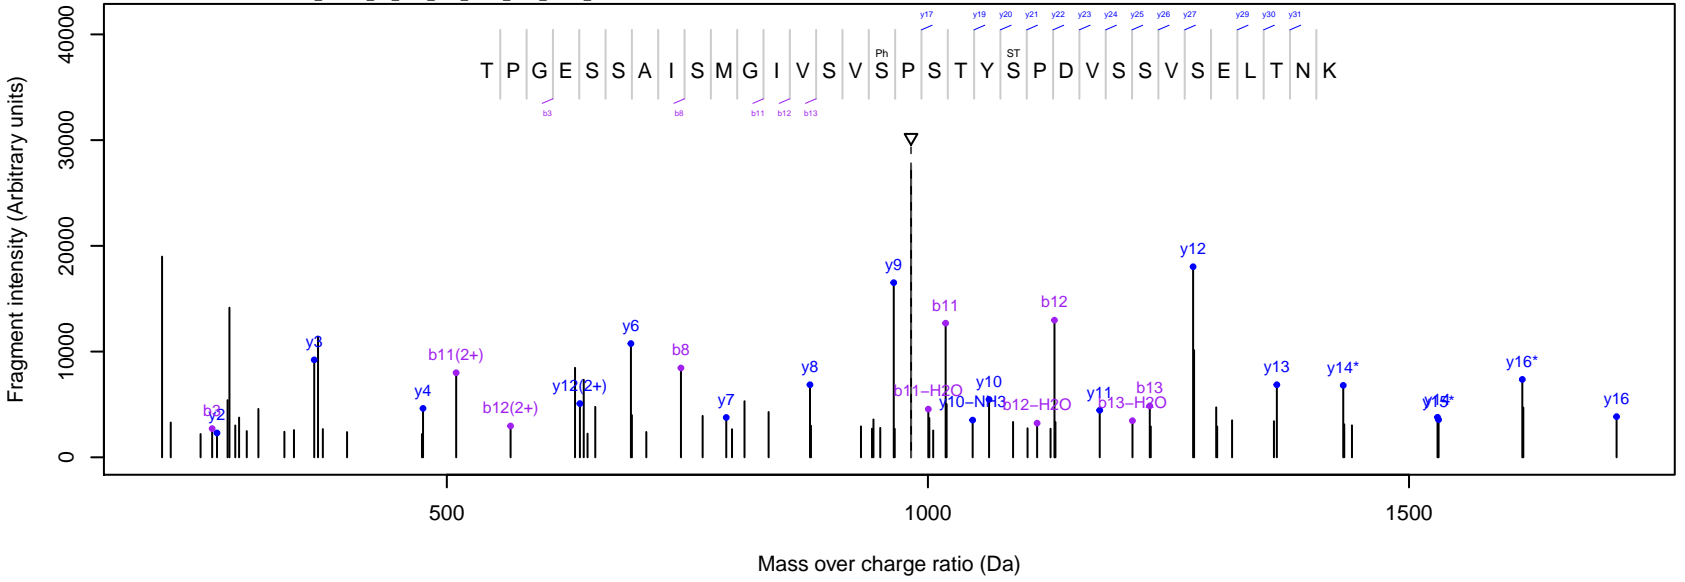

RRGS(Phospho (STY))LEENLFHEMETCLK-4+

Source : QE3\_201126\_FR\_TIOx\_hum\_tissue\_Urea\_RNAB\_N Scan : 44695

Andromeda score : 67.864

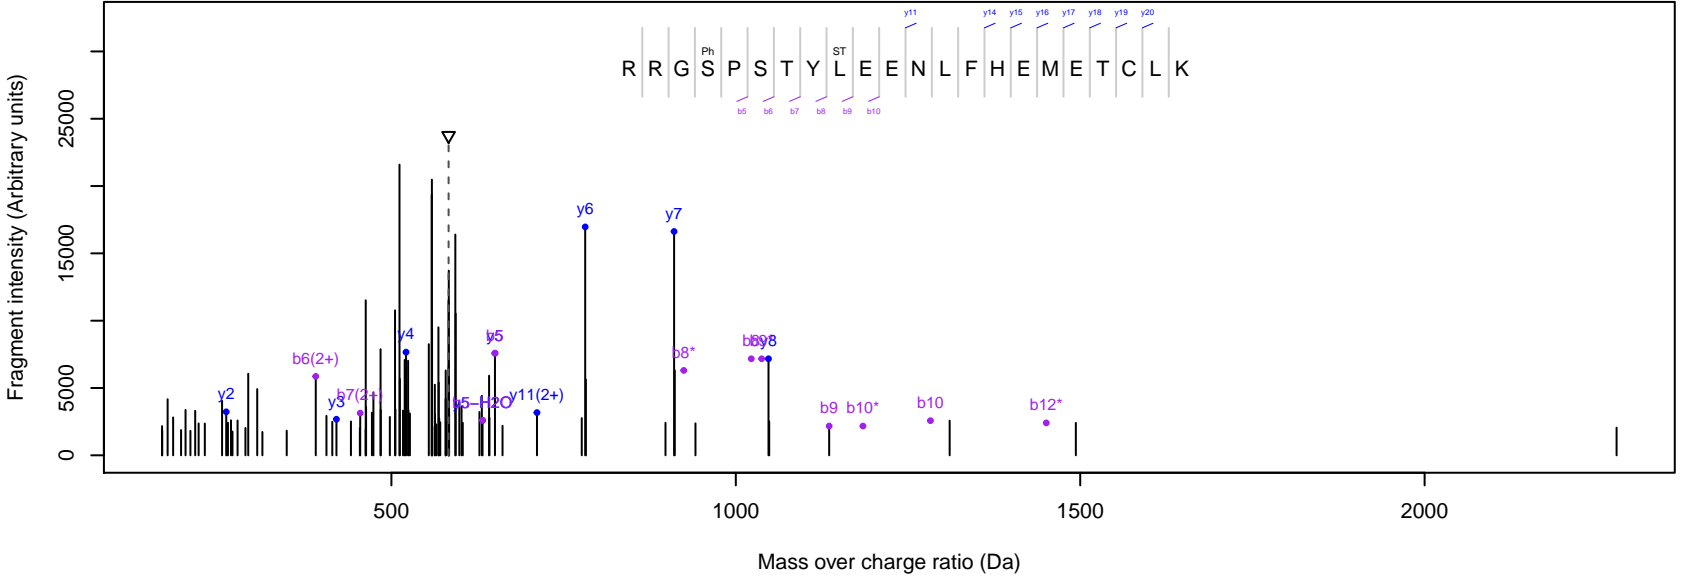

GSIS(Phospho (STY))LKELNARPLEVFMCSVLK-3+

Source : QE3\_201126\_FR\_TIOx\_hum\_tissue\_Urea\_RNAB\_H Scan : 58282

Andromeda score : 67.832

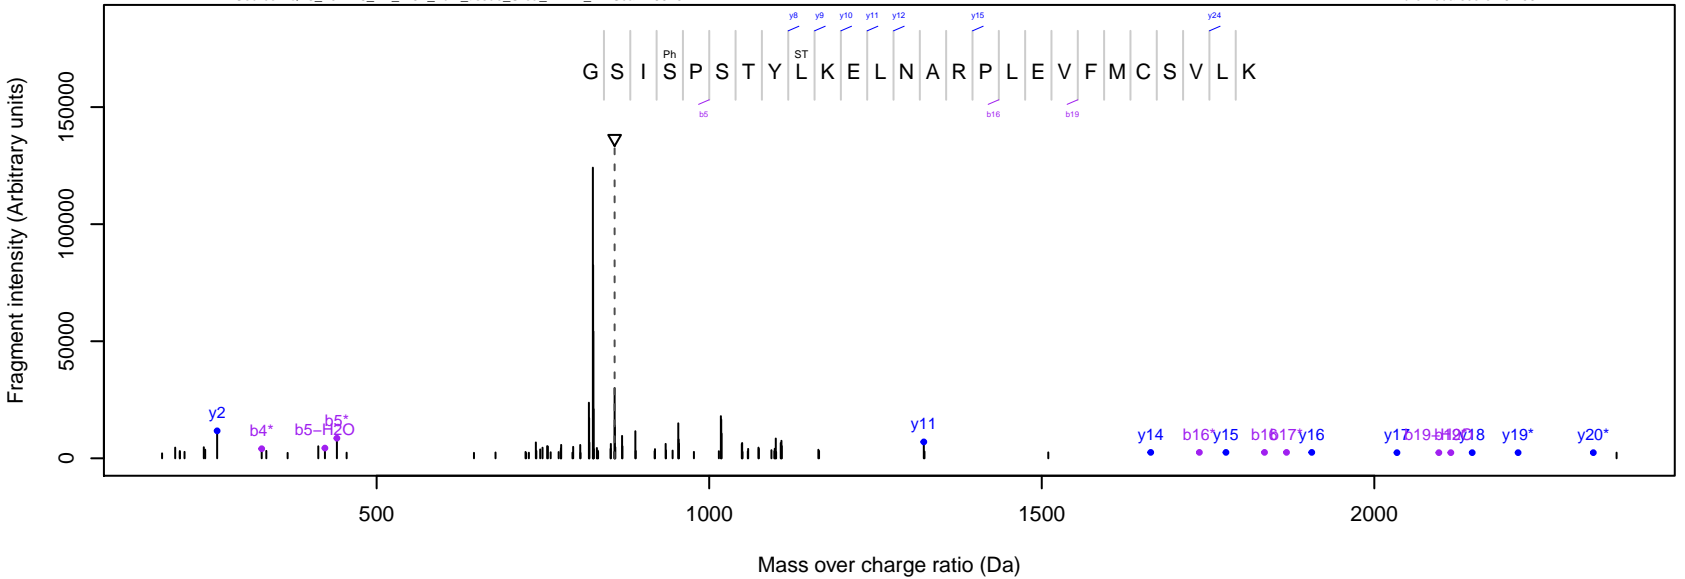

DLGHVVEEEDLES(Phospho (STY))GDQEDEDDDES(Phospho (STY))EDPGKDLDDHI-3+

Source : QE3\_201126\_FR\_TIOx\_hum\_tissue\_Urea\_RNAB\_B Scan : 43221

Andromeda score : 67.828

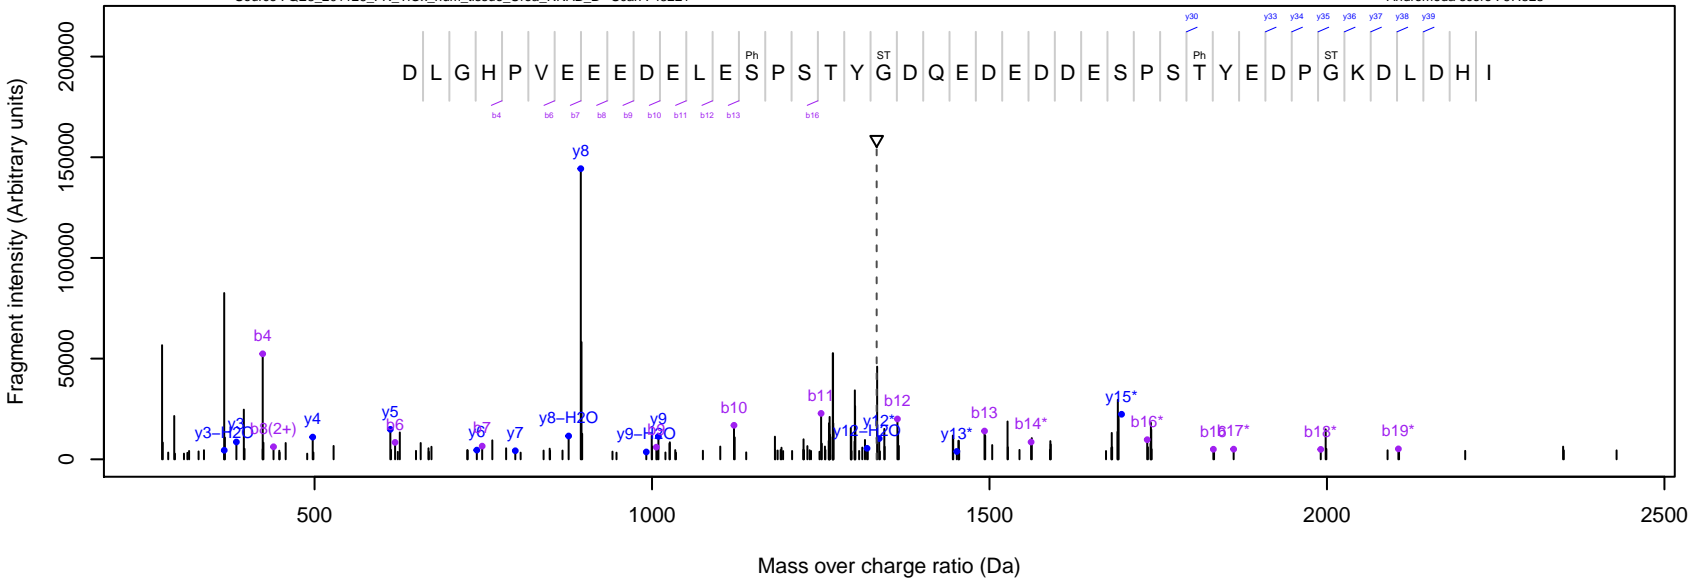

KVVEAVNS(Phospho (STY))DS(Phospho (STY))DSEFGIPKK-3+

Source : QE3\_201126\_FR\_TIOx\_hum\_tissue\_Urea\_RNAB\_N Scan : 23982

Andromeda score : 67.827

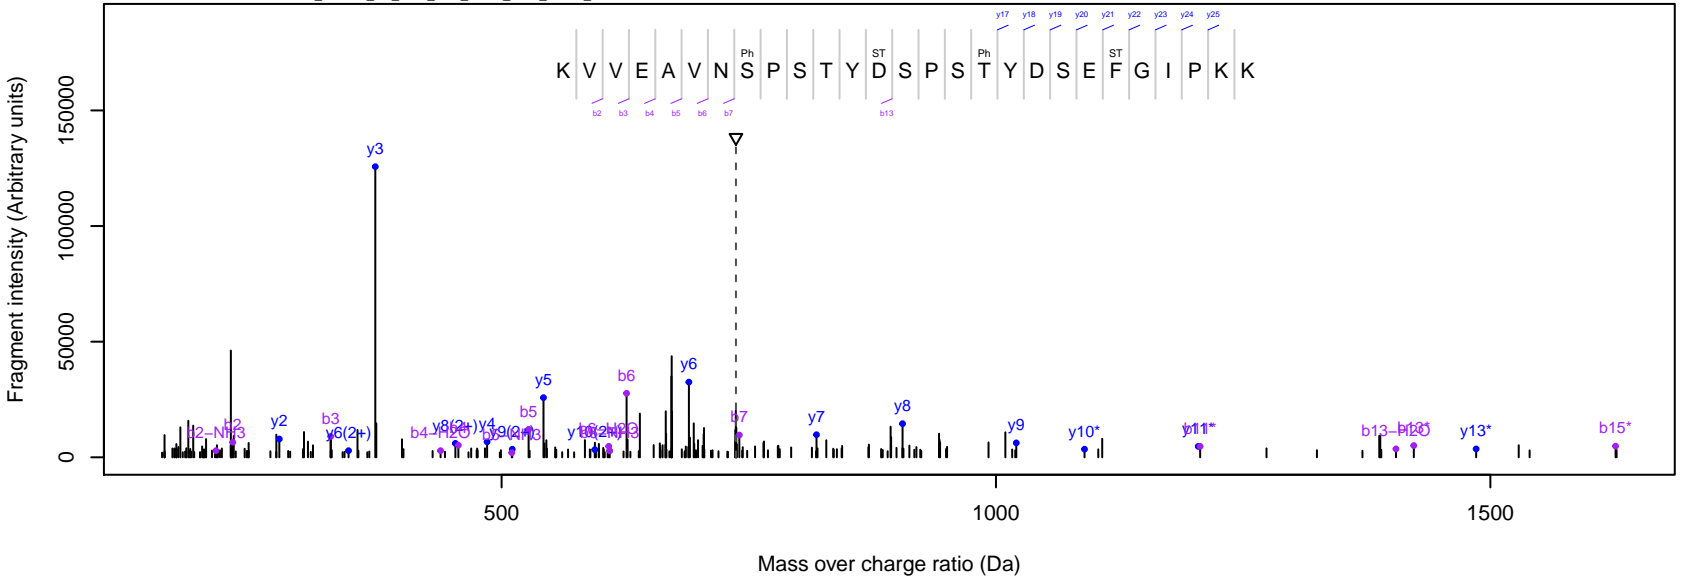

AEAPAGPALGLPS(Phospho (STY))PEAESGVD RGEPEPEPMEVEEGELEIVPVR-4+

Source : QE3\_201126\_FR\_TIOx\_hum\_tissue\_Urea\_RNAB\_N Scan : 51134

Andromeda score : 67.804

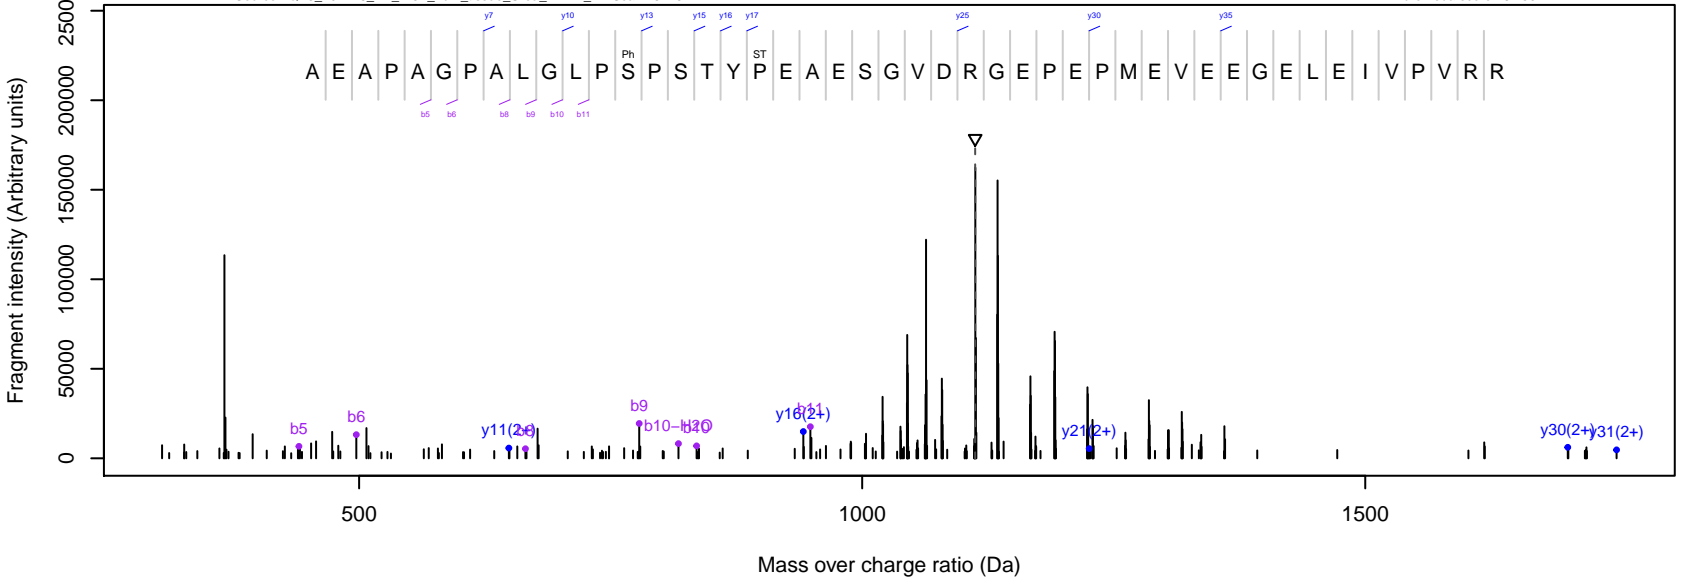

TASRPDDIPDS(Phospho (STY))PS(Phospho (STY))SPKVALLPPVLK-3+

Source : QE3\_201126\_FR\_TIOx\_hum\_tissue\_Urea\_RNAB\_N Scan : 46216

Andromeda score : 67.78

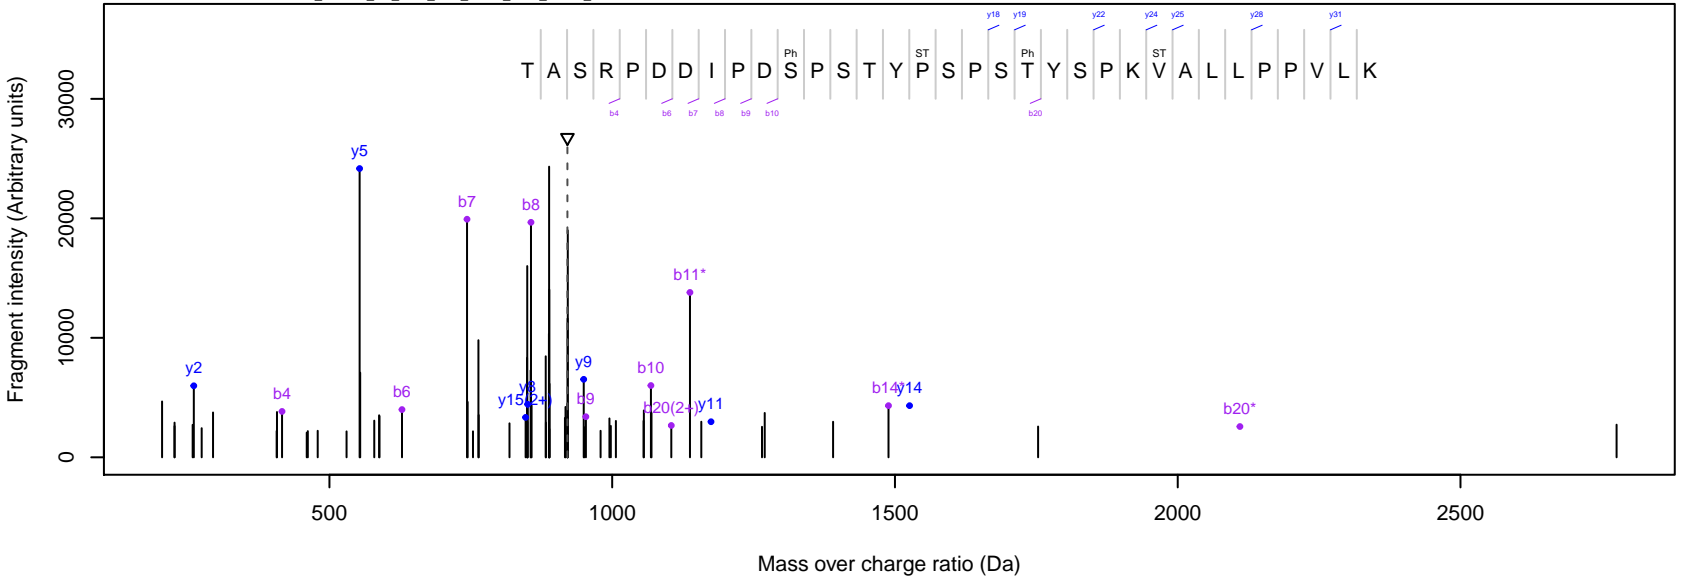

LLDLS(Phospho (STY))DSTSVASFPSAETDGNLPESR-3+

Source : QE3\_201126\_FR\_TIOx\_hum\_tissue\_Urea\_RNAB\_N Scan : 52169

Andromeda score : 67.778

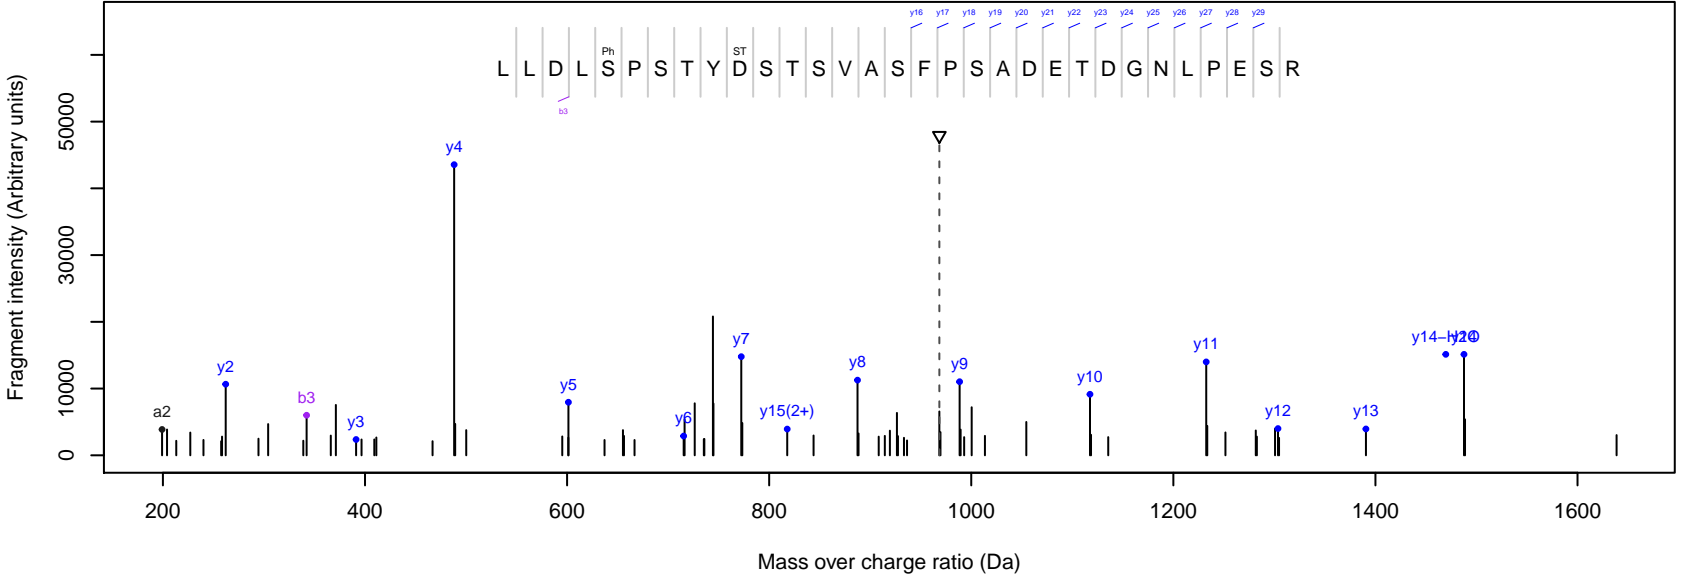

S(Phospho (STY))PQPARGSAAVPGAFAPIPR-3+

Source : QE3\_201126\_FR\_TIOx\_hum\_tissue\_Urea\_RNAB\_H Scan : 33031

Andromeda score : 67.778

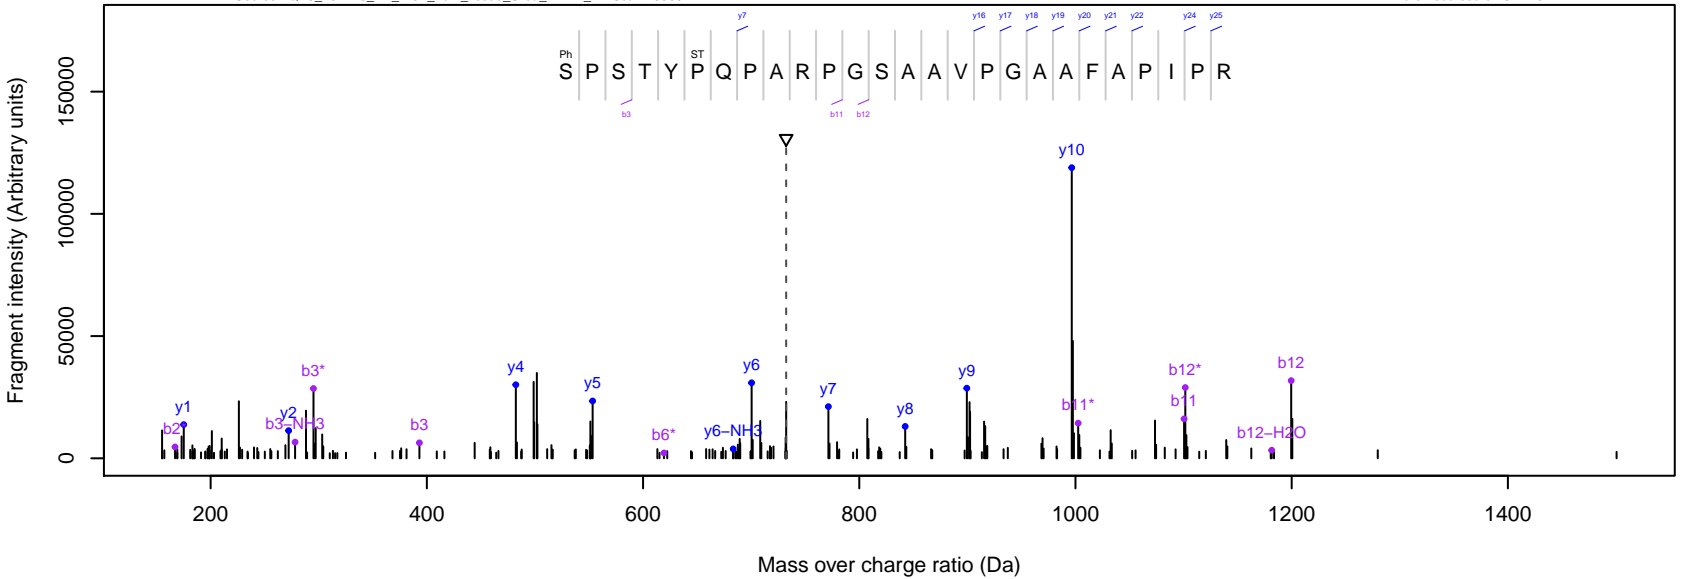

KDDS(Phospho (STY))DDGGGWITPSNIK-3+

Source : QE3\_201126\_FR\_TiOx\_hum\_tissue\_Urea\_RNAB\_N Scan : 29456

Andromeda score : 67.76

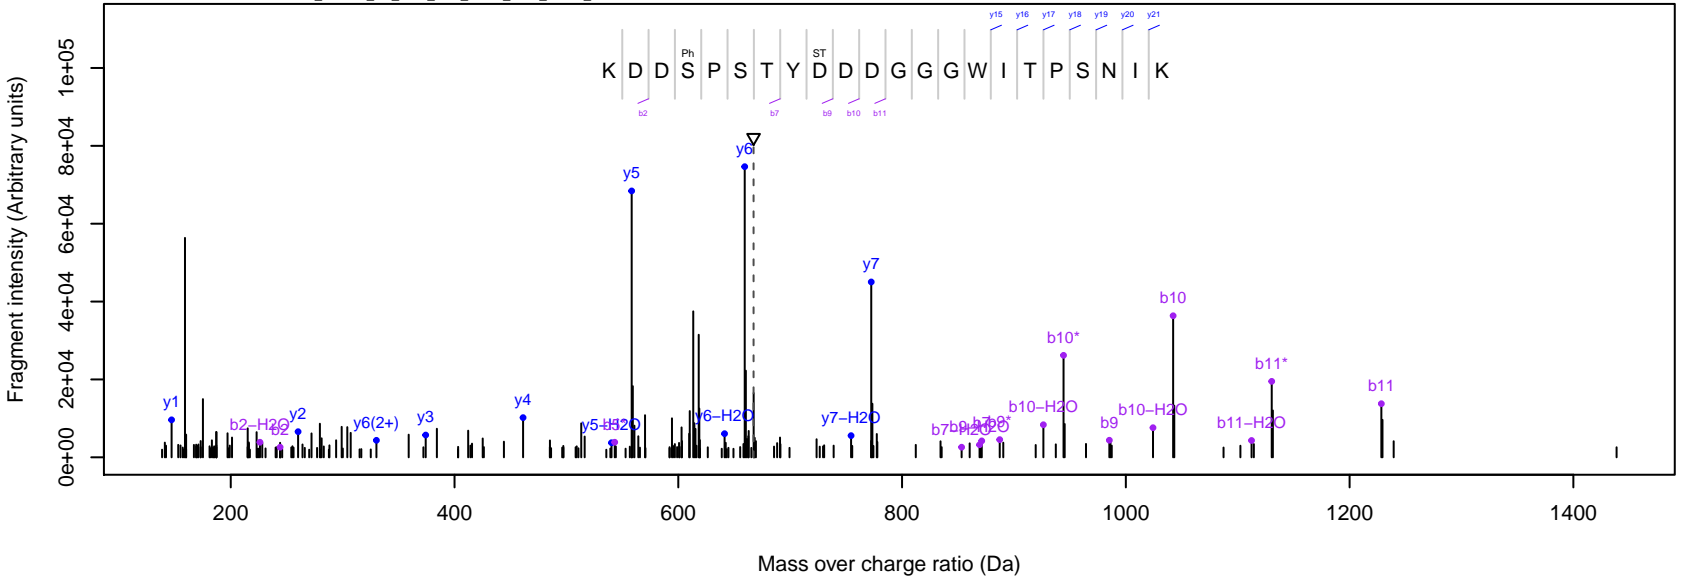

NLKAS(Phospho (STY))LENS(Phospho (STY))LREVEAR-3+

Source : QE3\_201126\_FR\_TiOx\_hum\_tissue\_Urea\_RNAB\_H Scan : 24563

Andromeda score : 67.76

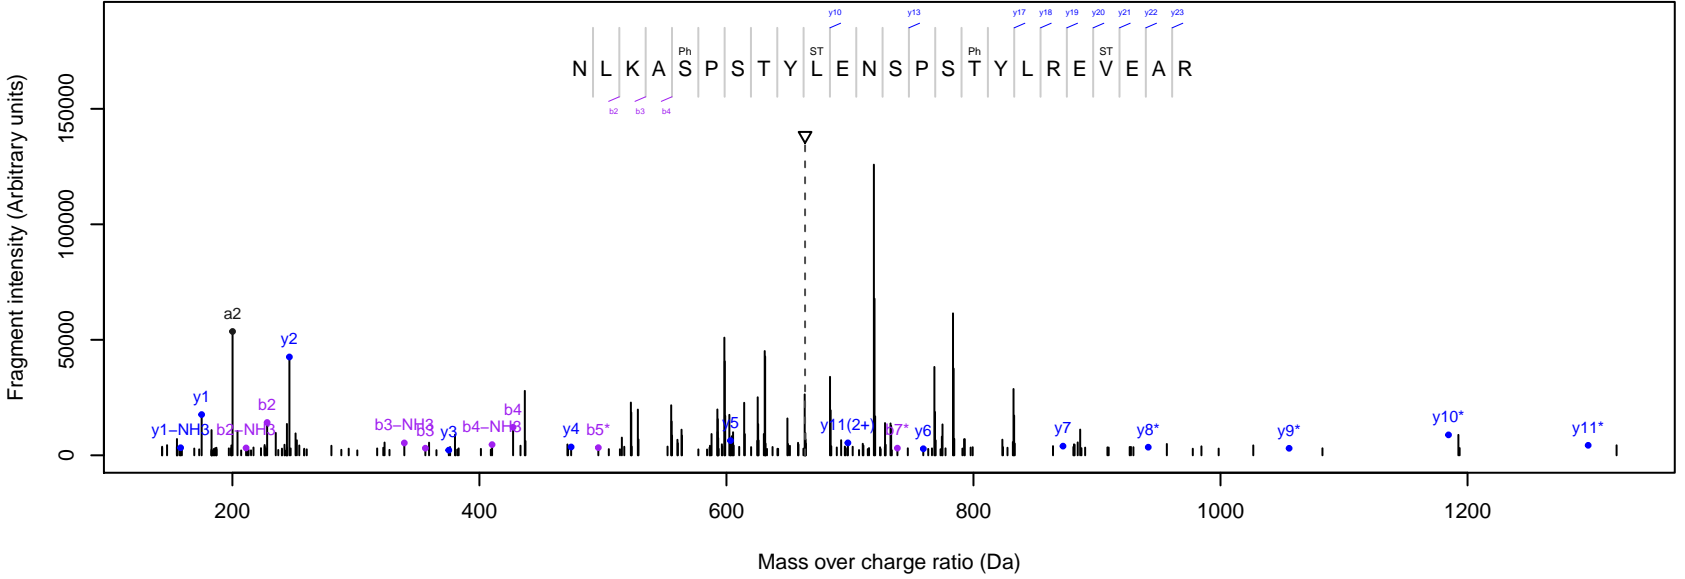

KVFS(Phospho (STY))PVIR-2+

Source : QE3\_201126\_FR\_TiOx\_hum\_tissue\_Urea\_RNAB\_H Scan : 20381

Andromeda score : 67.726

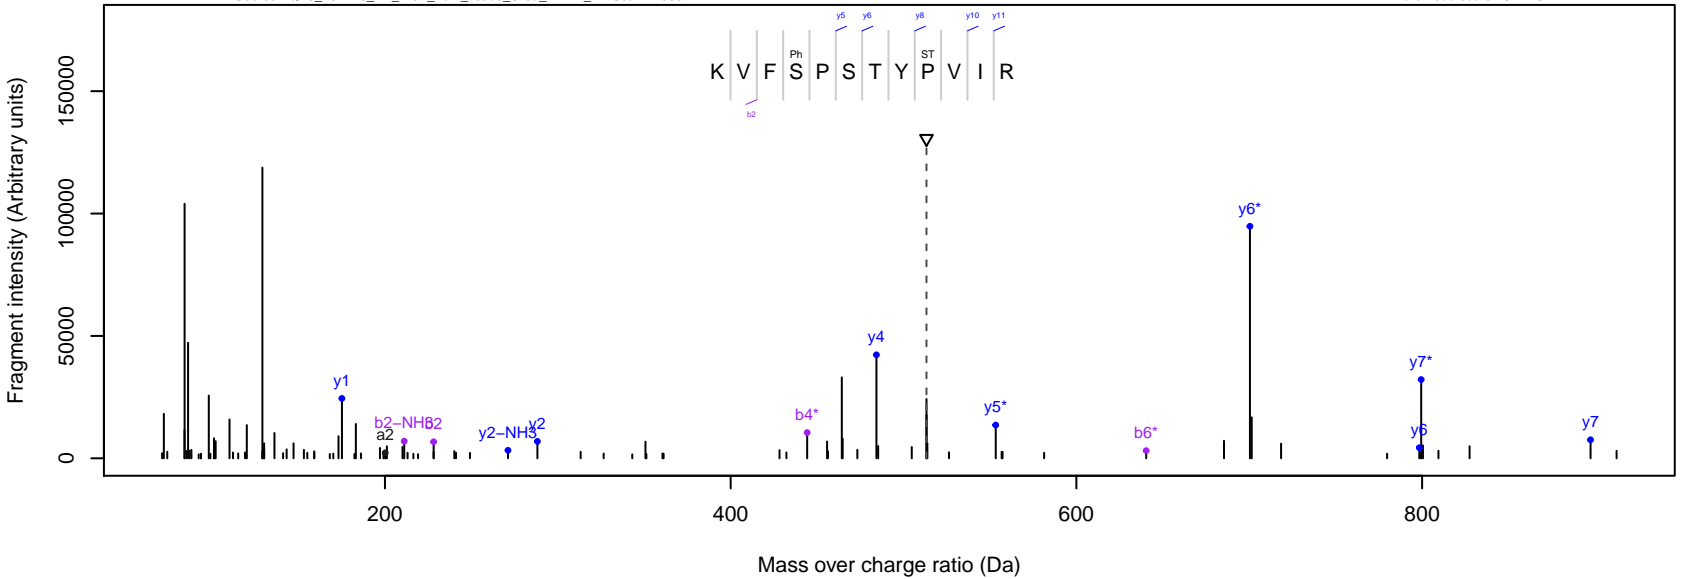

NYT(Phospho (STY))MSFLPR-2+

Source : QE3\_201126\_FR\_TiOx\_hum\_tissue\_Urea\_RNAB\_B Scan : 45522

Andromeda score : 67.726

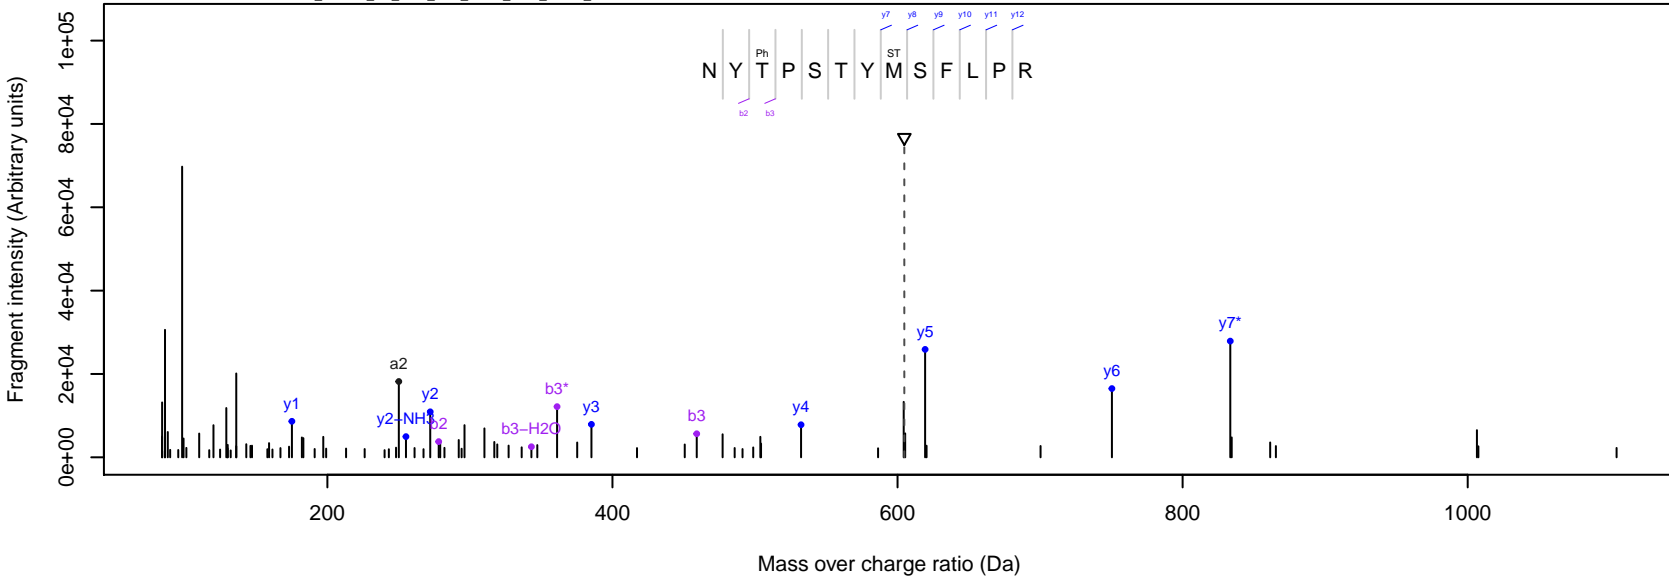

S(Phospho (STY))FSIS(Phospho (STY))PVR-2+

Source : QE3\_201126\_FR\_TiOx\_hum\_tissue\_Urea\_RNAB\_N Scan : 37324

Andromeda score : 67.726

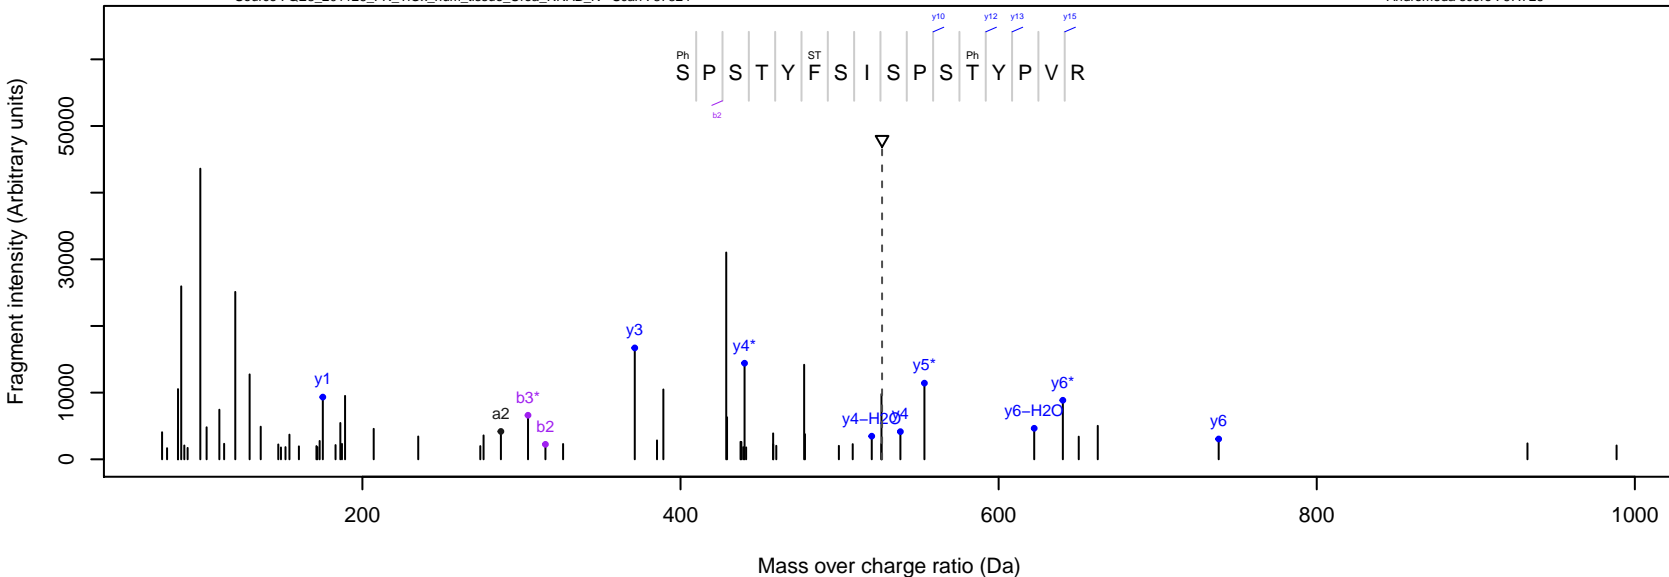

S(Phospho (STY))LEKMDVEQK-2+

Source : QE3\_201126\_FR\_TiOx\_hum\_tissue\_Urea\_RNAB\_H Scan : 54057

Andromeda score : 67.726

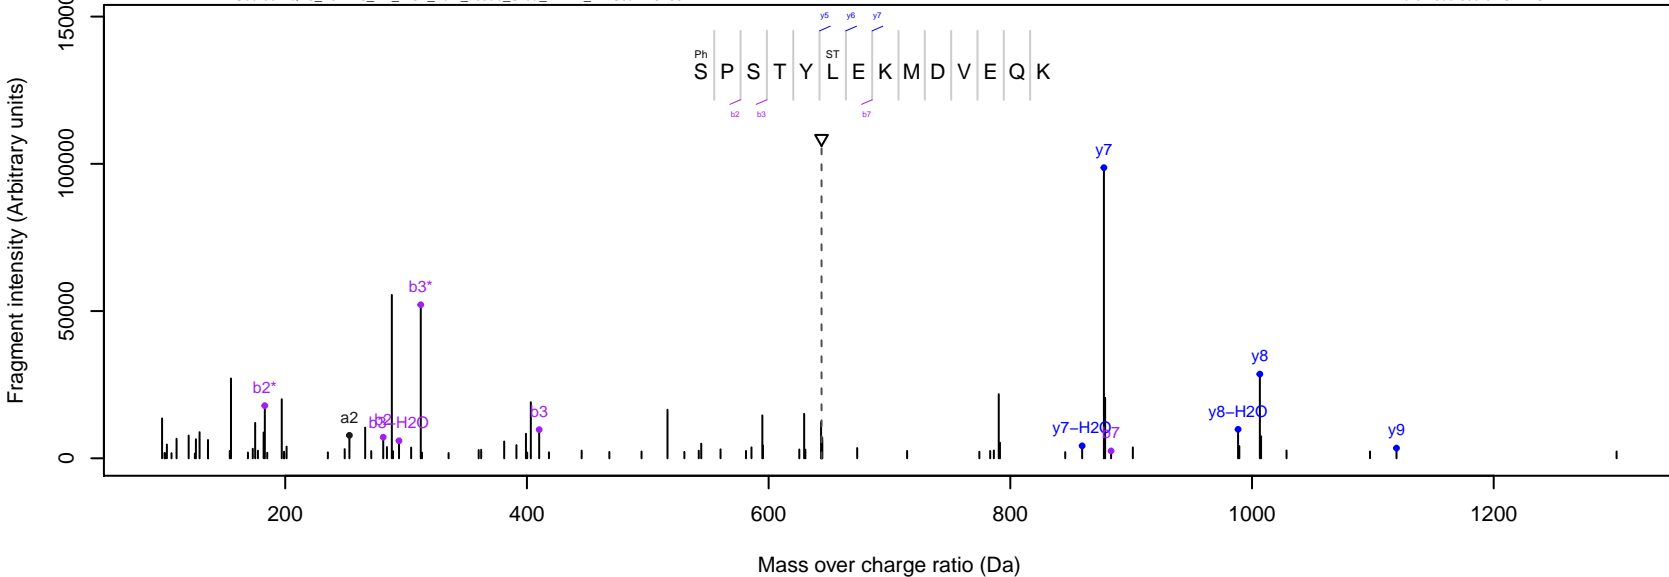



S(Phospho (STY))SPNPFVGSPPK-2+

Source : QE3\_201126\_FR\_TiOx\_hum\_tissue\_Urea\_RNAB\_H Scan : 22927

Andromeda score : 67.726

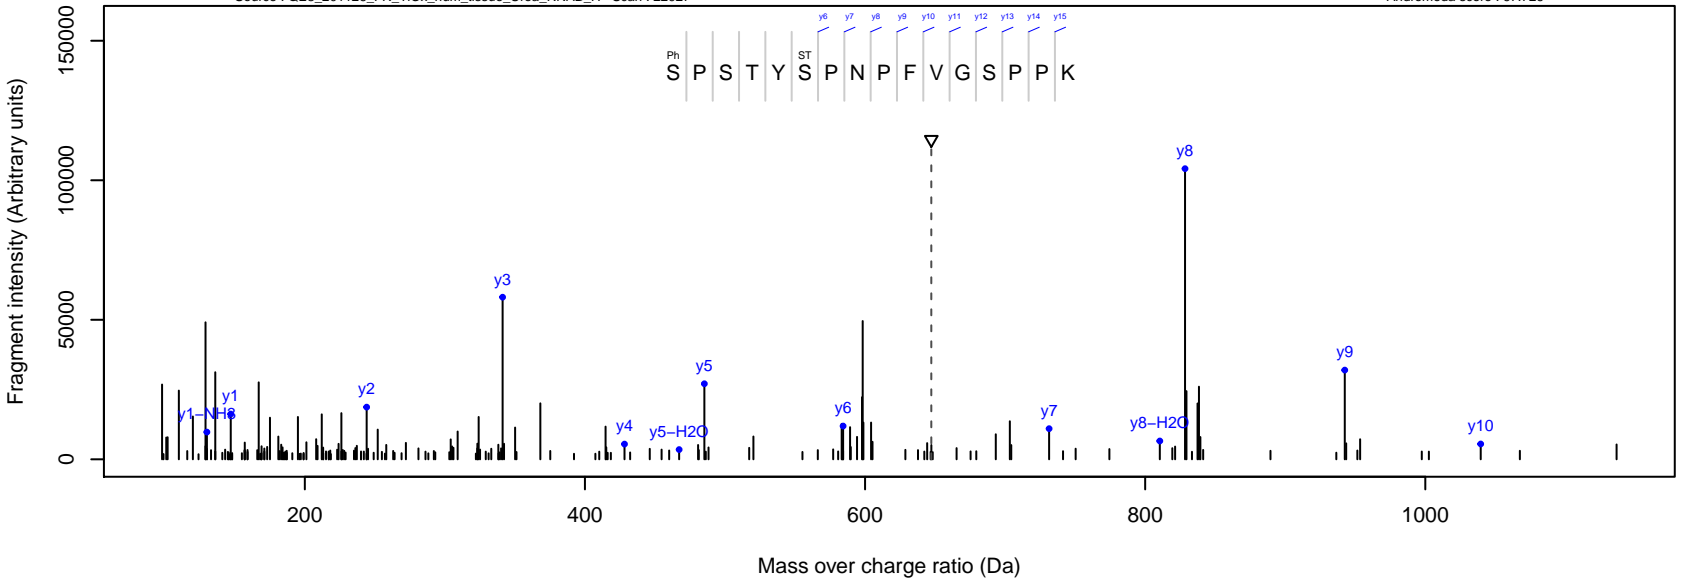

GVPNVIS(Phospho (STY))EDTLKGDLSLSTDTGQSR-3+

Source : QE3\_201126\_FR\_TiOx\_hum\_tissue\_Urea\_RNAB\_N Scan : 32963

Andromeda score : 67.69

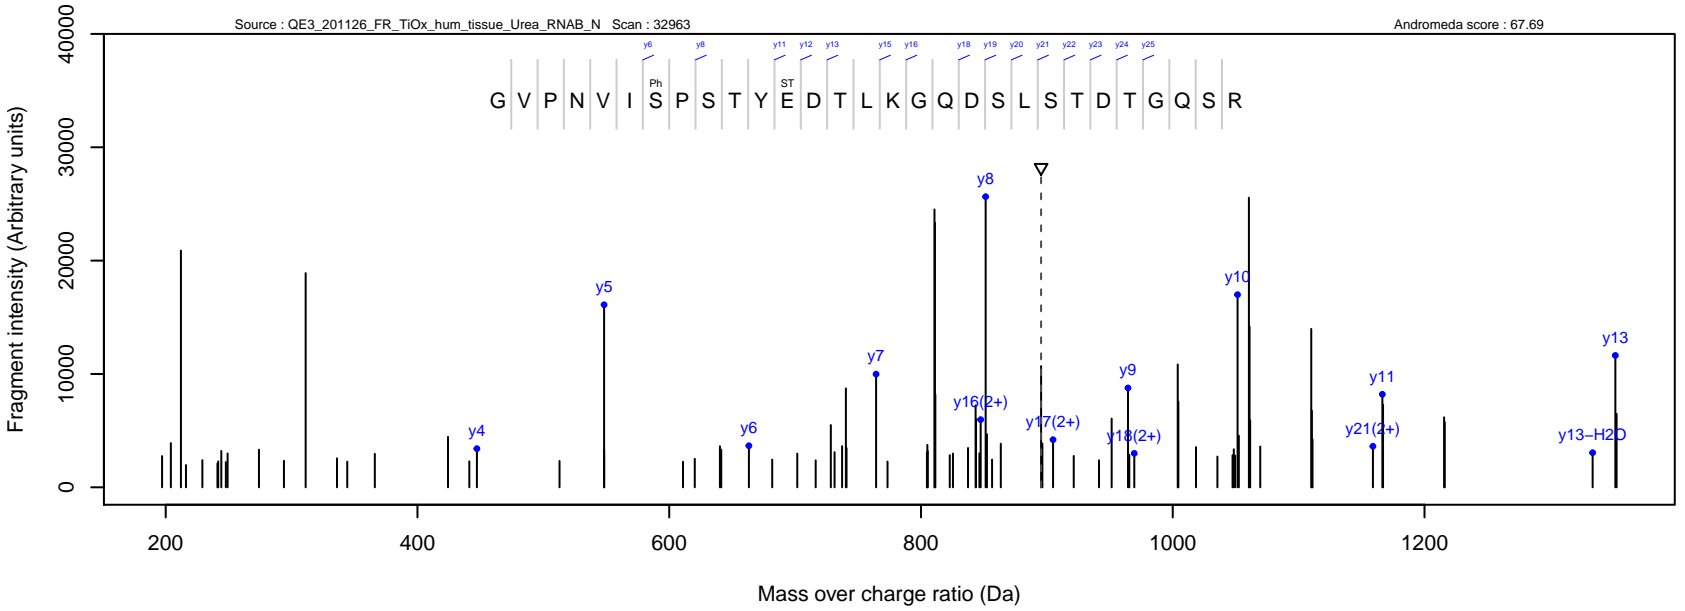

KNS(Phospho (STY))LSDHSLGISR-3+

Source : QE3\_201126\_FR\_TiOx\_hum\_tissue\_Urea\_RNAB\_N Scan : 12377

Andromeda score : 67.685

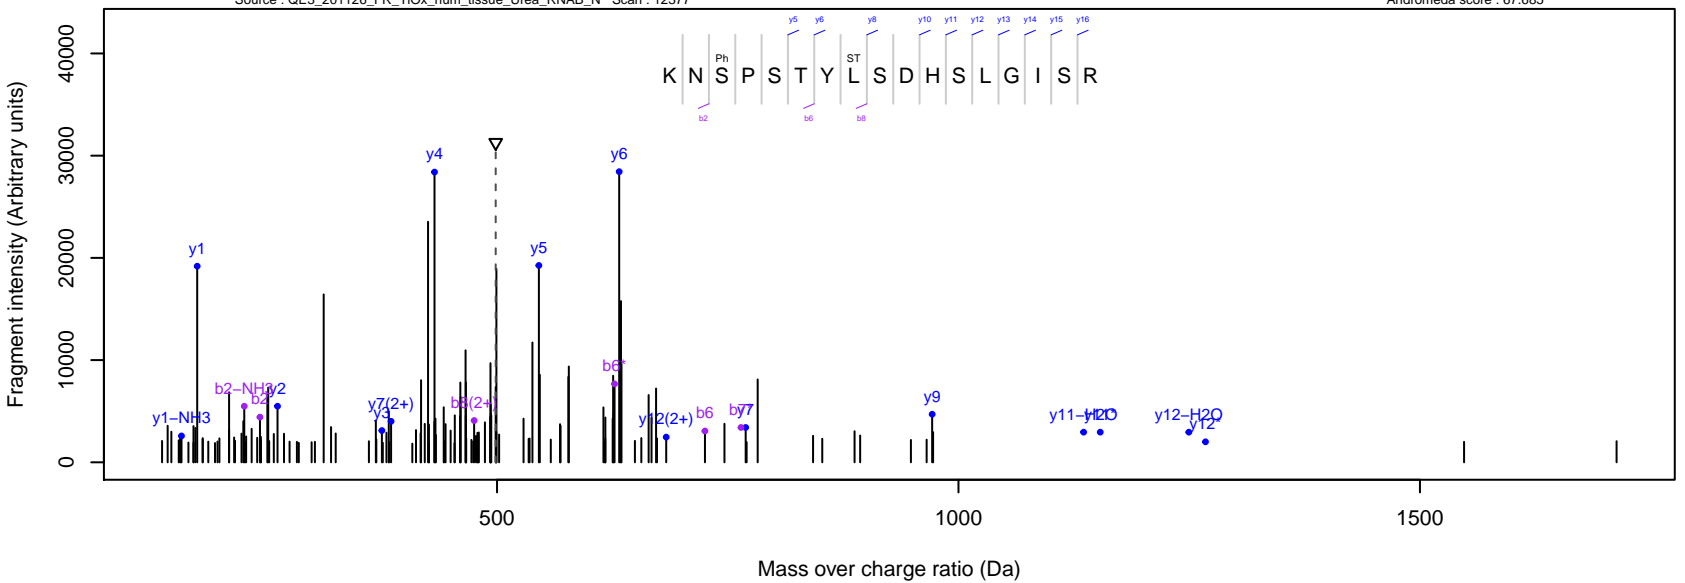

YEM(Oxidation (M))ACAIADAFNLPSSHLRPITDS(Phospho (STY))PVLGAQRPR-4+

Source : QE3\_201126\_FR\_TIOx\_hum\_tissue\_Urea\_RNAB\_N Scan : 45217

Andromeda score : 67.684

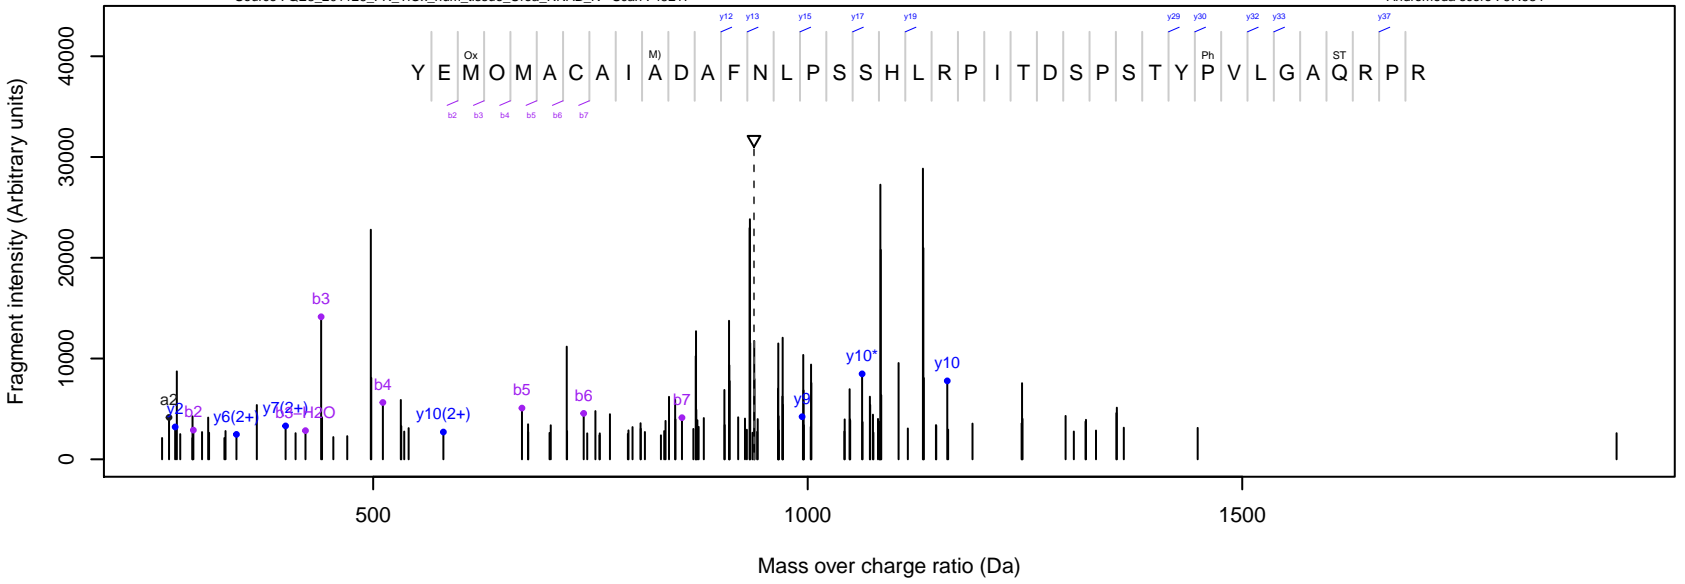

DNGPVTNSSTLS(Phospho (STY))LKD-2+

Source : QE3\_201126\_FR\_TIOx\_hum\_tissue\_Urea\_RNAB\_N Scan : 25660

Andromeda score : 67.646

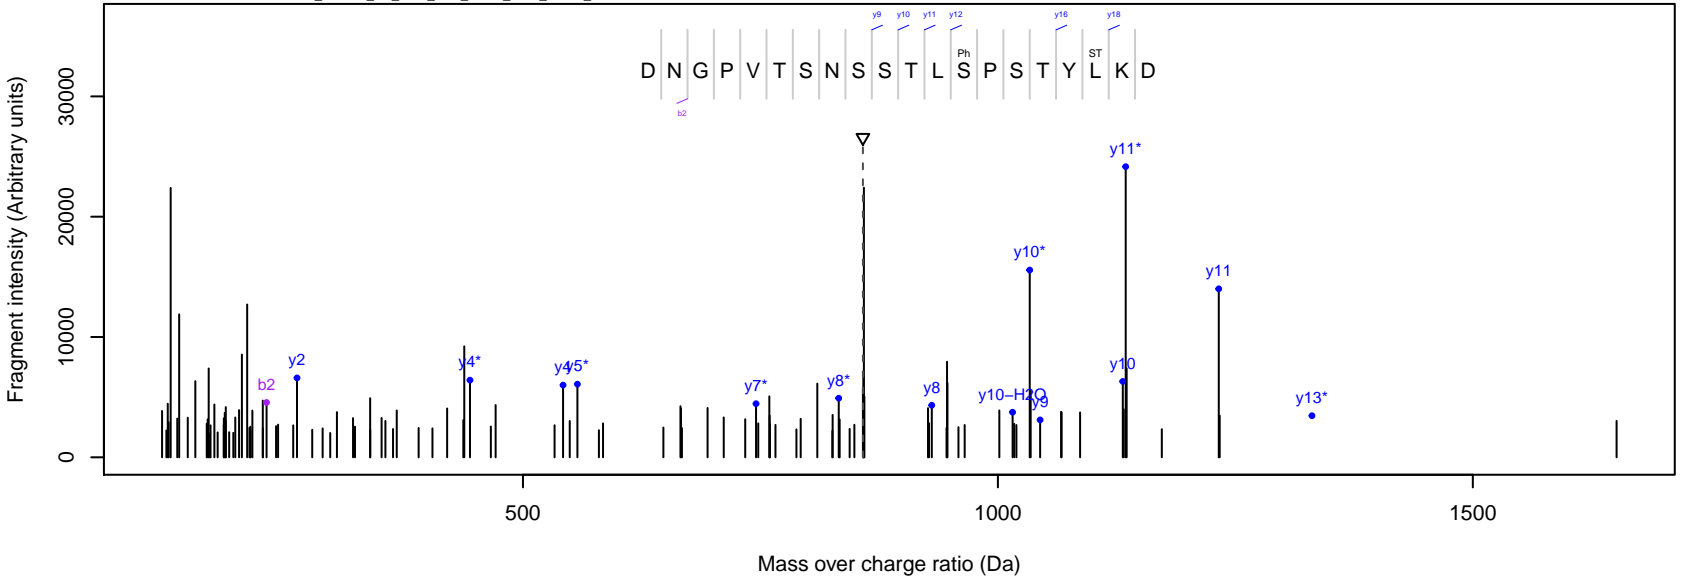

RQIS(Phospho (STY))EETESVDNR-3+

Source : QE3\_201126\_FR\_TIOx\_hum\_tissue\_Urea\_RNAB\_N Scan : 9149

Andromeda score : 67.646

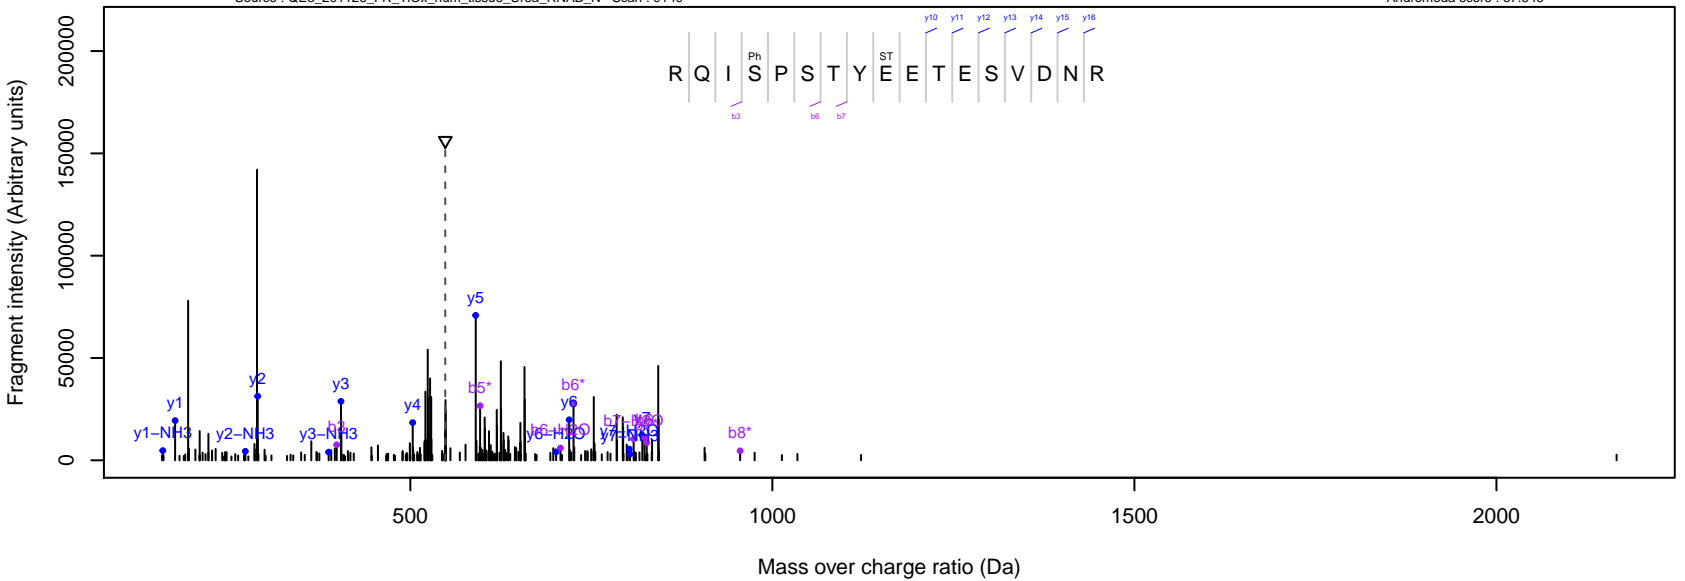



QSHSES(Phospho (STY))PSLQSK-2+

Source : QE3\_201126\_FR\_TiOx\_hum\_tissue\_Urea\_RNAB\_H Scan : 4354

Andromeda score : 67.519

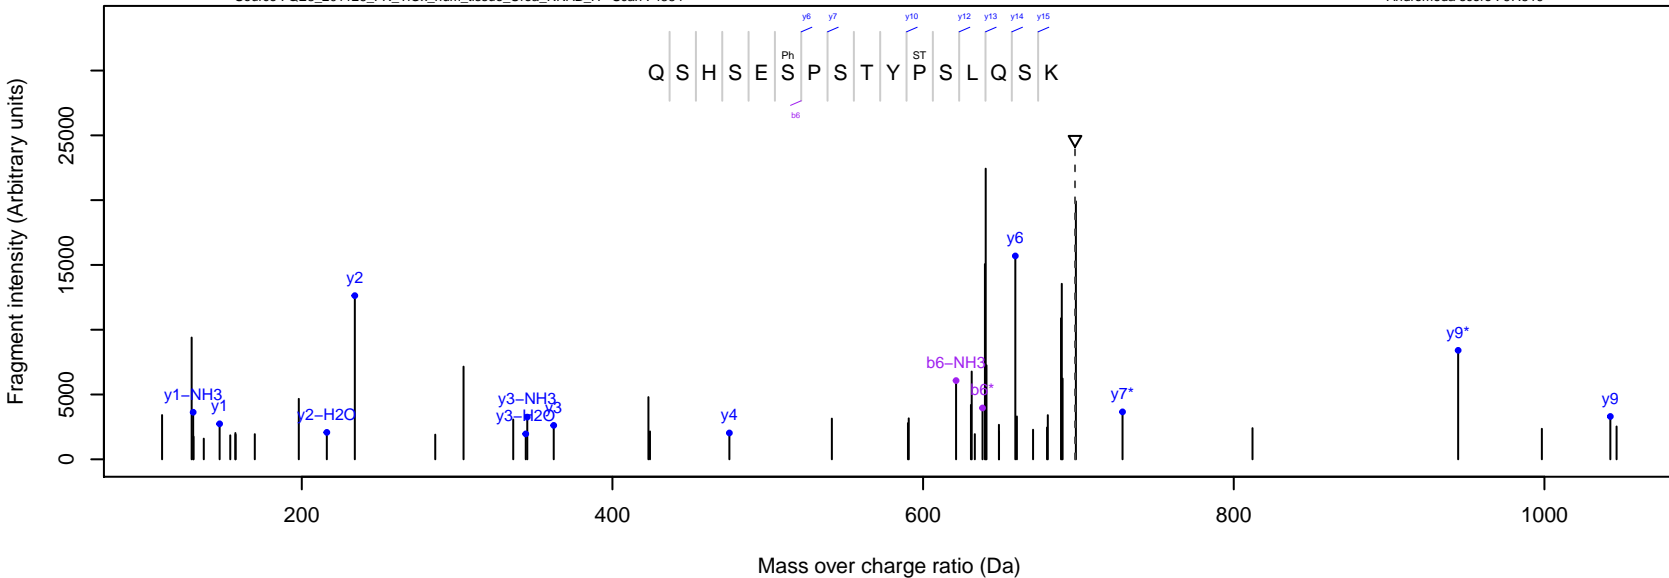

HDS(Phospho (STY))PDPS(Phospho (STY))PPRRPQHNS(Phospho (STY))SGASPR-4+

Source : QE3\_201126\_FR\_TiOx\_hum\_tissue\_Urea\_RNAB\_B Scan : 5597

Andromeda score : 67.496

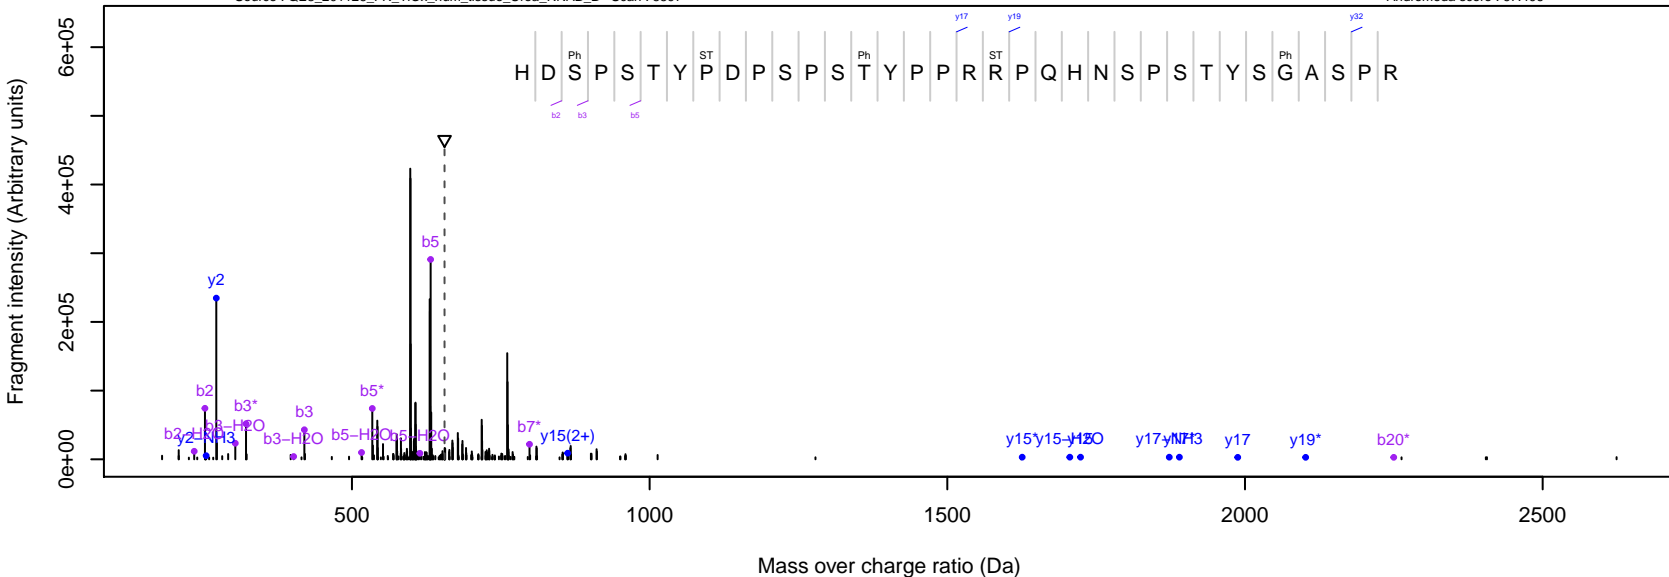

LSVHDMKPLDS(Phospho (STY))PGR-3+

Source : QE3\_201126\_FR\_TiOx\_hum\_tissue\_Urea\_RNAB\_N Scan : 18526

Andromeda score : 67.449

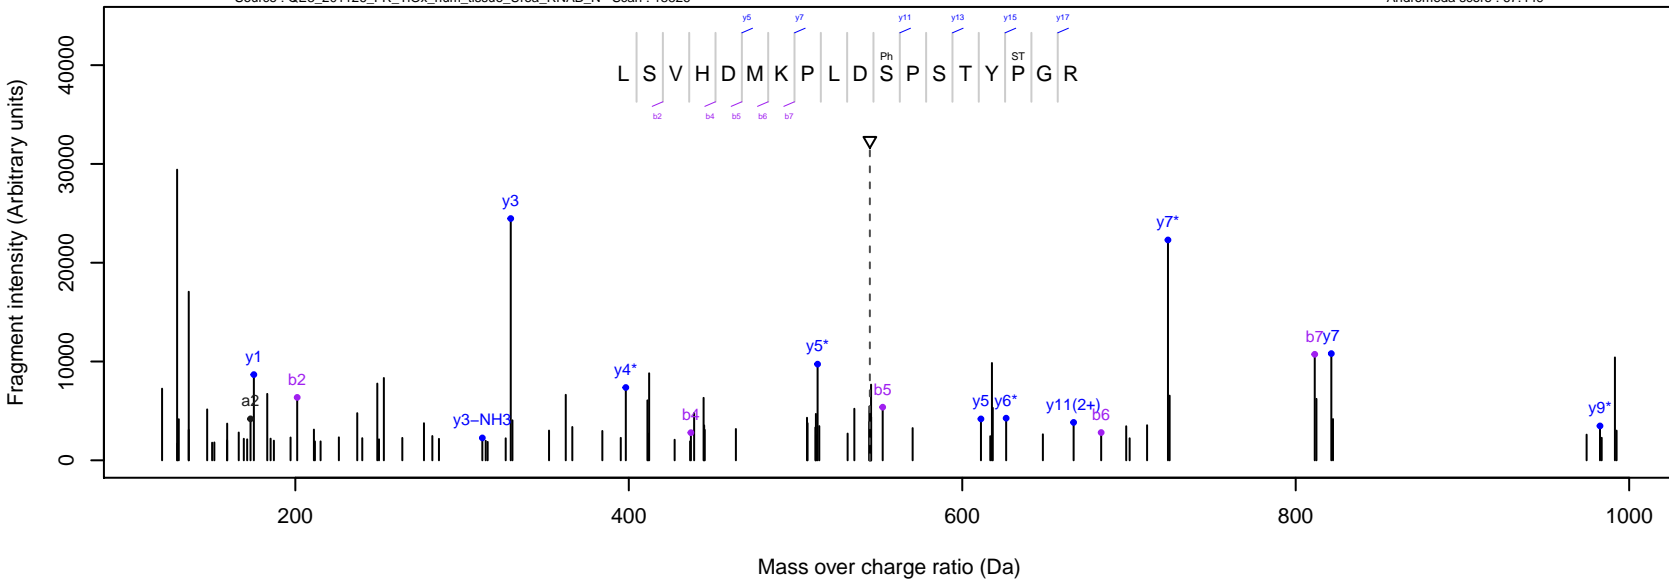



VNKTAS(Phospho (STY))GRELL-2+

Source : QE3\_201126\_FR\_TiOx\_hum\_tissue\_Urea\_RNAB\_H Scan : 10728

Andromeda score : 67.385

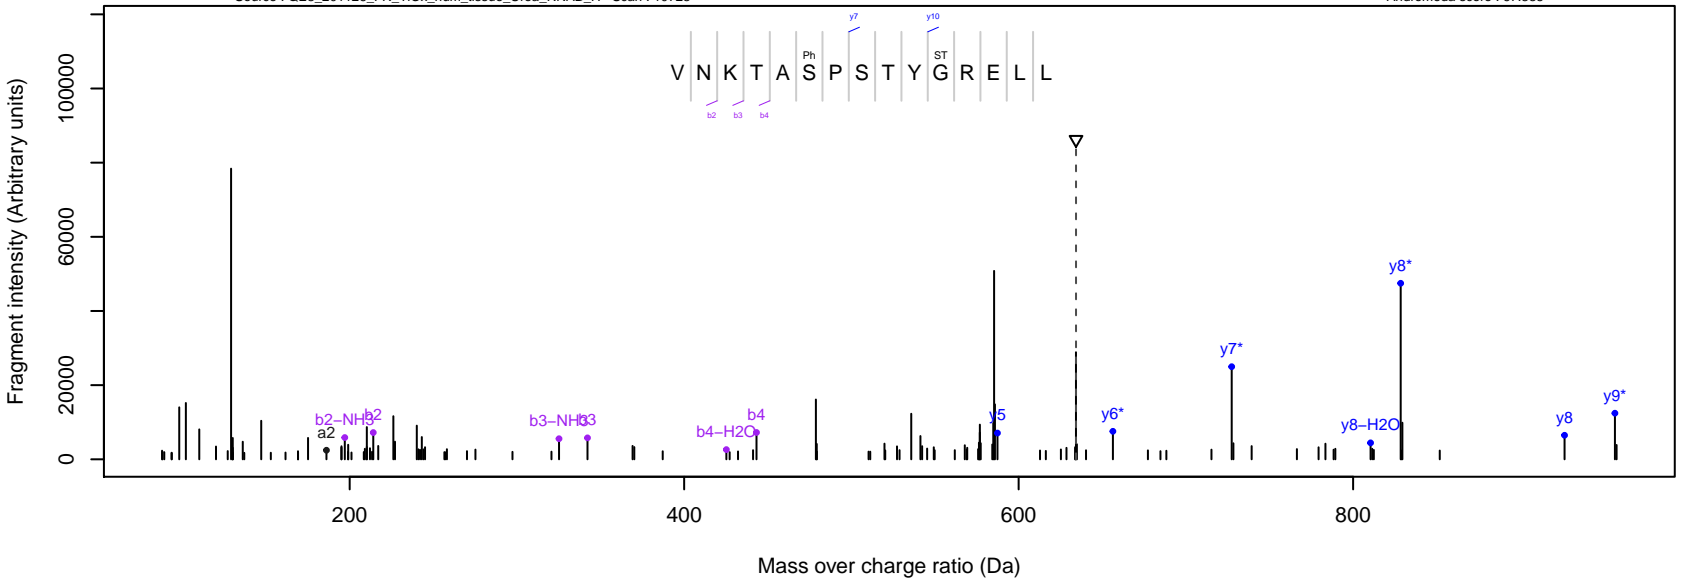

DS(Phospho (STY))STSPGDYVLSVSENSR-2+

Source : QE3\_201126\_FR\_TiOx\_hum\_tissue\_Urea\_RNAB\_B Scan : 40859

Andromeda score : 67.358

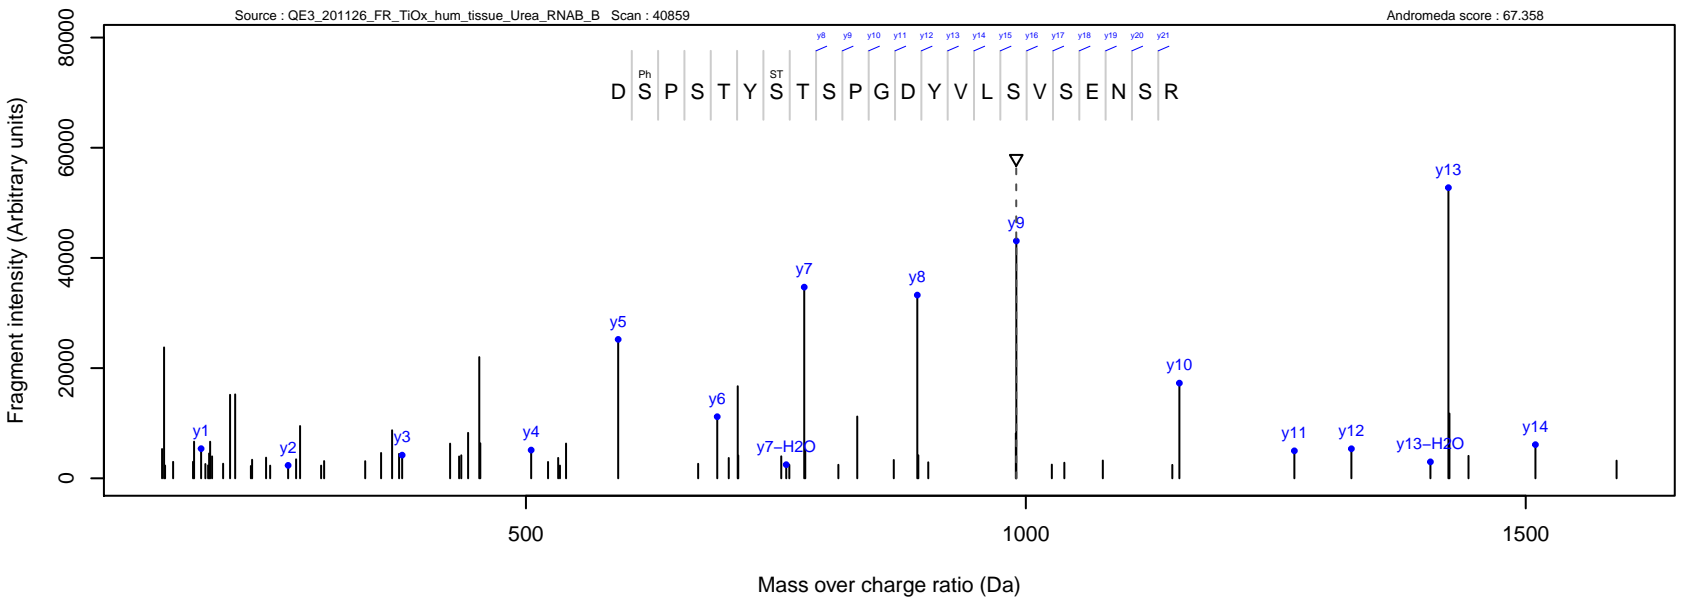

S(Phospho (STY))LPAPQNDNFLSR-2+

Source : QE3\_201126\_FR\_TiOx\_hum\_tissue\_Urea\_RNAB\_H Scan : 37014

Andromeda score : 67.358

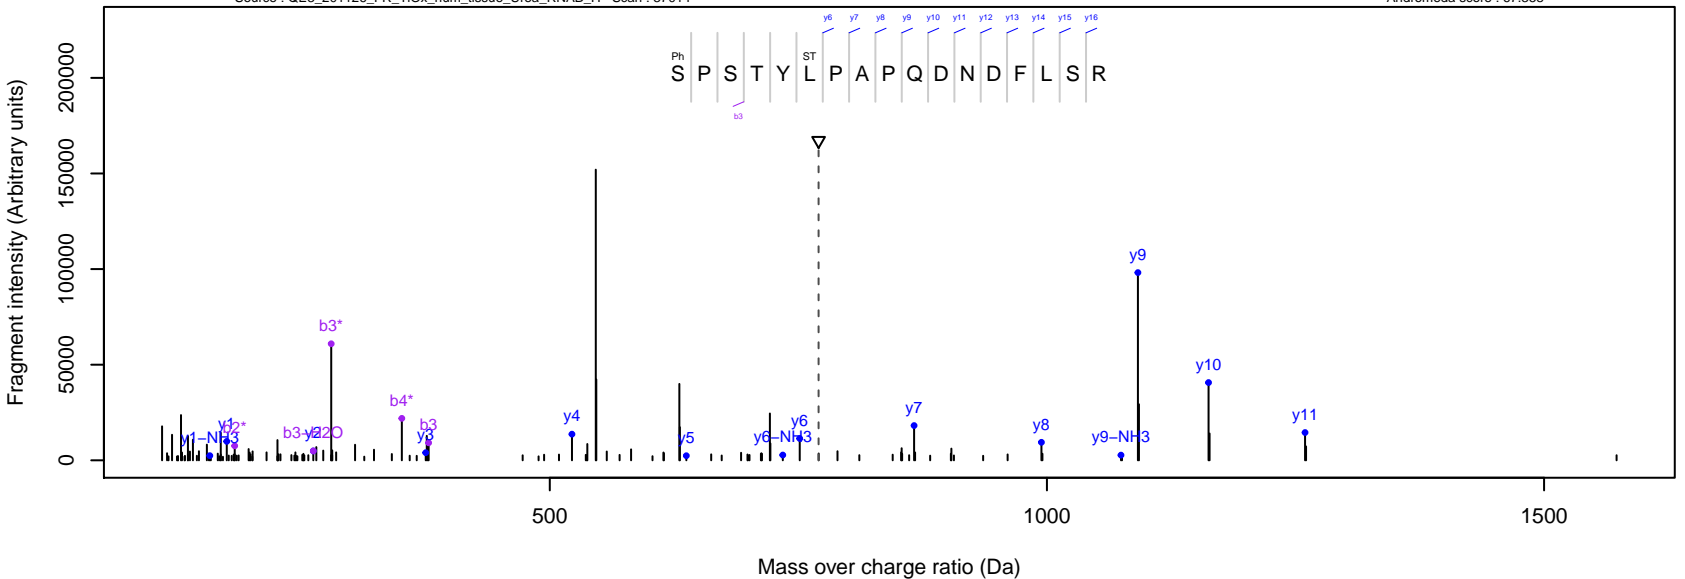

S(Phospho (STY))SSM(Oxidation (M))SSLTGAYTSGIPSSR-2+

Source : QE3\_201126\_FR\_TiOx\_hum\_tissue\_Urea\_RNAB\_N Scan : 29002

Andromeda score : 67.358

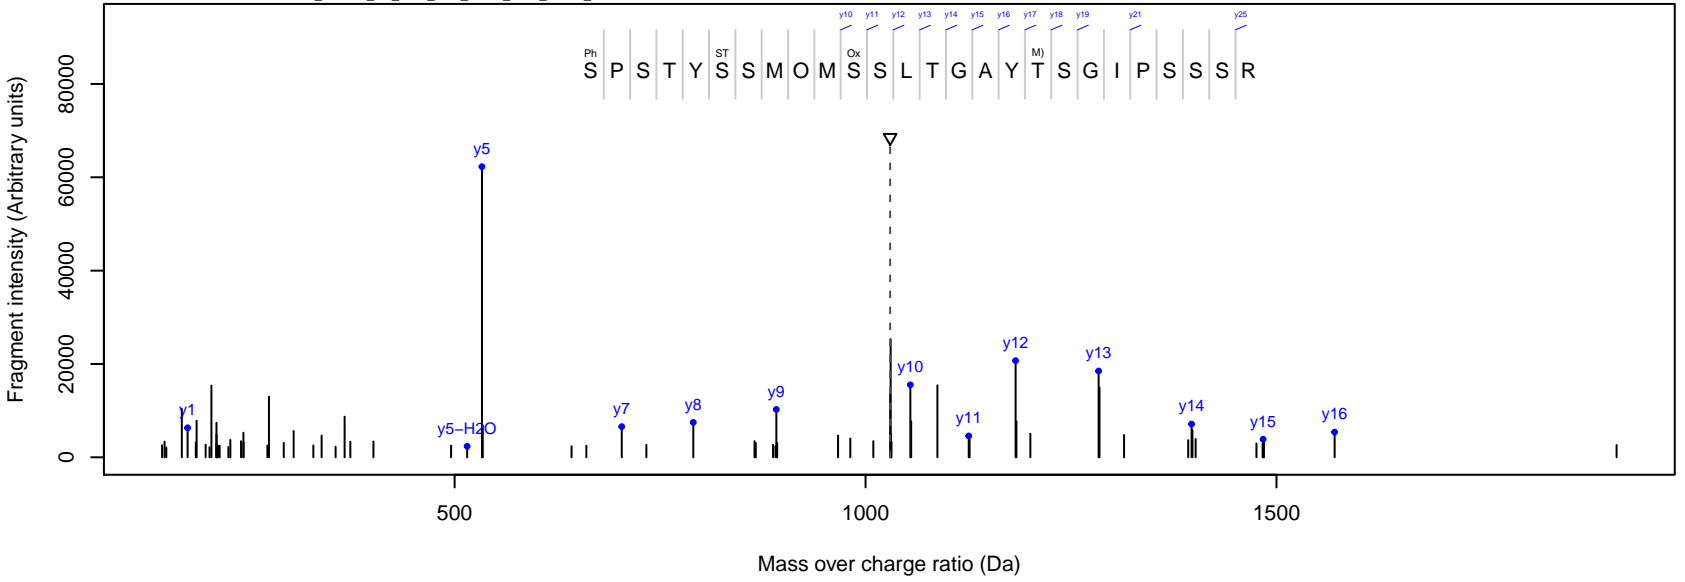

DIRS(Phospho (STY))DVEES(Phospho (STY))DSSEEAAAQEPLQLK-3+

Source : QE3\_201126\_FR\_TiOx\_hum\_tissue\_Urea\_RNAB\_H Scan : 44222

Andromeda score : 67.353

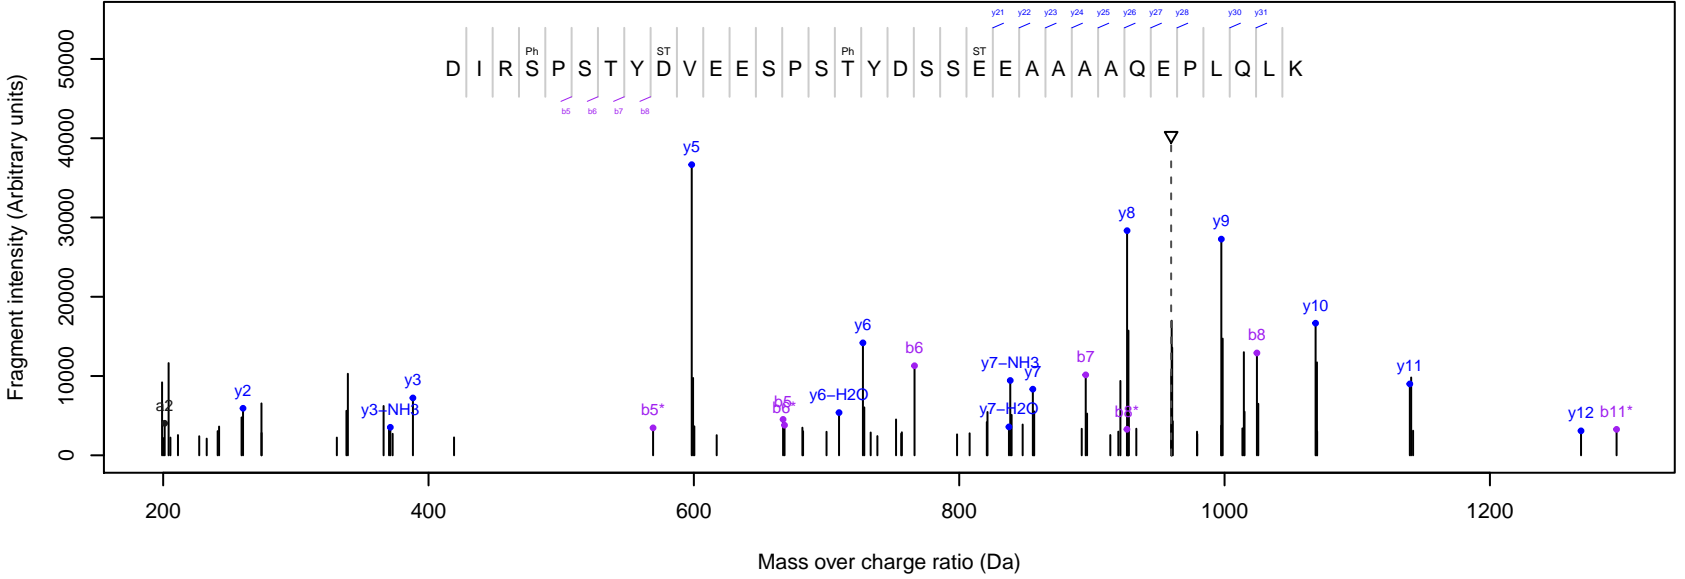

PKWT(Phospho (STY))QLSGR-2+

Source : QE3\_201126\_FR\_TiOx\_hum\_tissue\_Urea\_RNAB\_H Scan : 21213

Andromeda score : 67.334

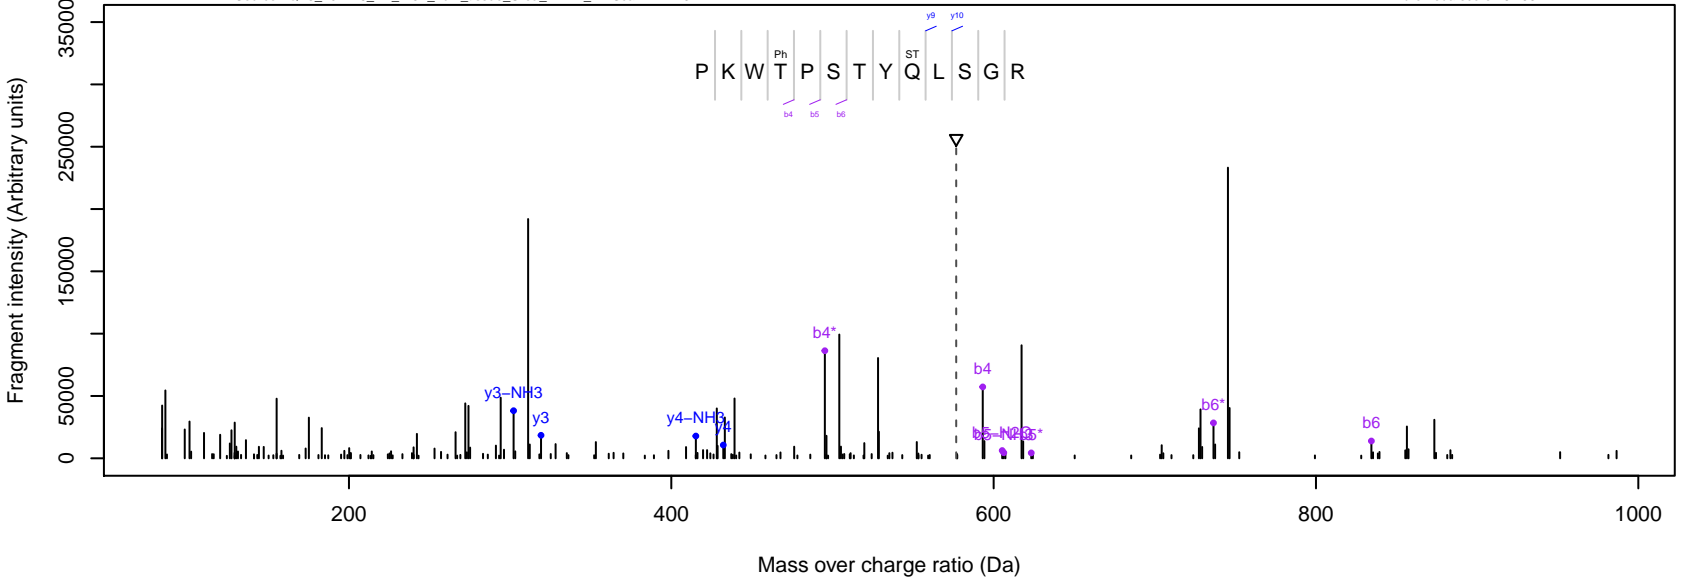

EADGSET(Phospho (STY))PEPFAAEAK-2+

Source : QE3\_201126\_FR\_TiOx\_hum\_tissue\_Urea\_RNAB\_N Scan : 23798

Andromeda score : 67.326

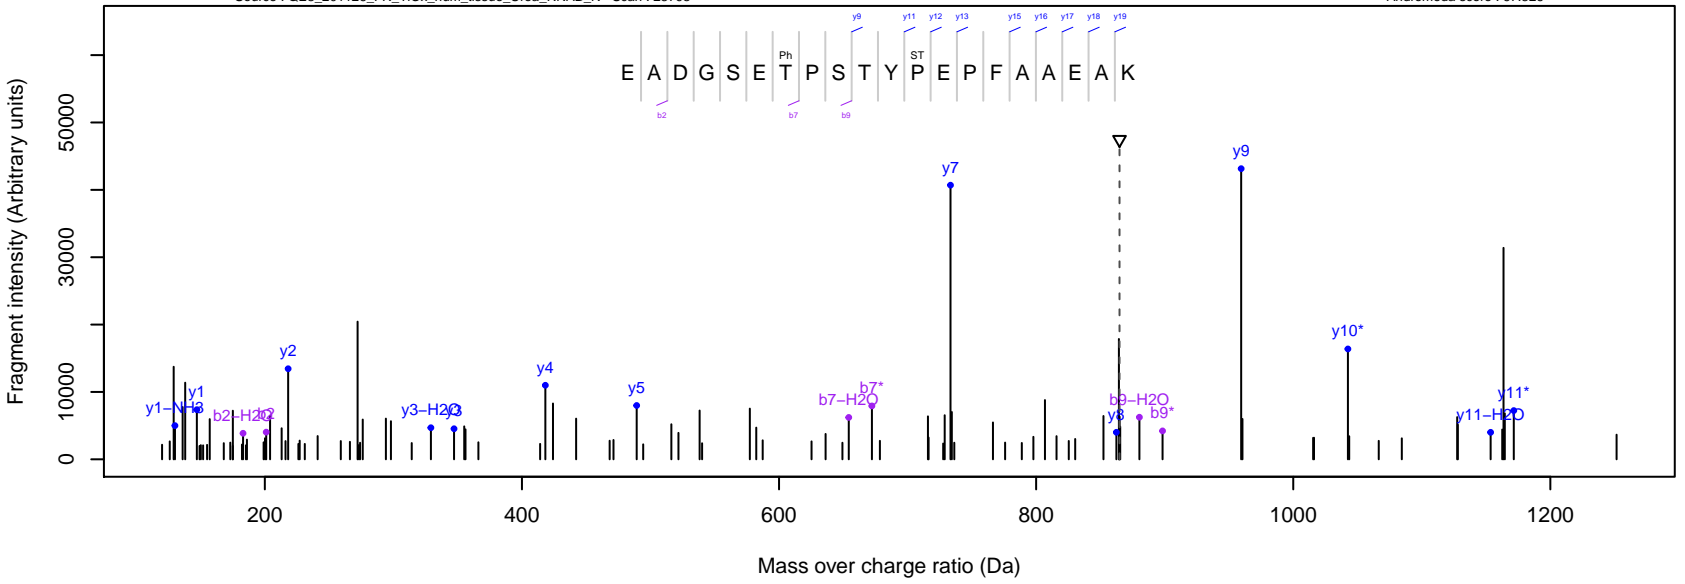

GVDFES(Phospho (STY))S(Phospho (STY))EDDDDDPFM(Oxidation (M))NTSSLR-2+

Source : QE3\_201126\_FR\_TiOx\_hum\_tissue\_Urea\_RNAB\_N Scan : 54375

Andromeda score : 67.326

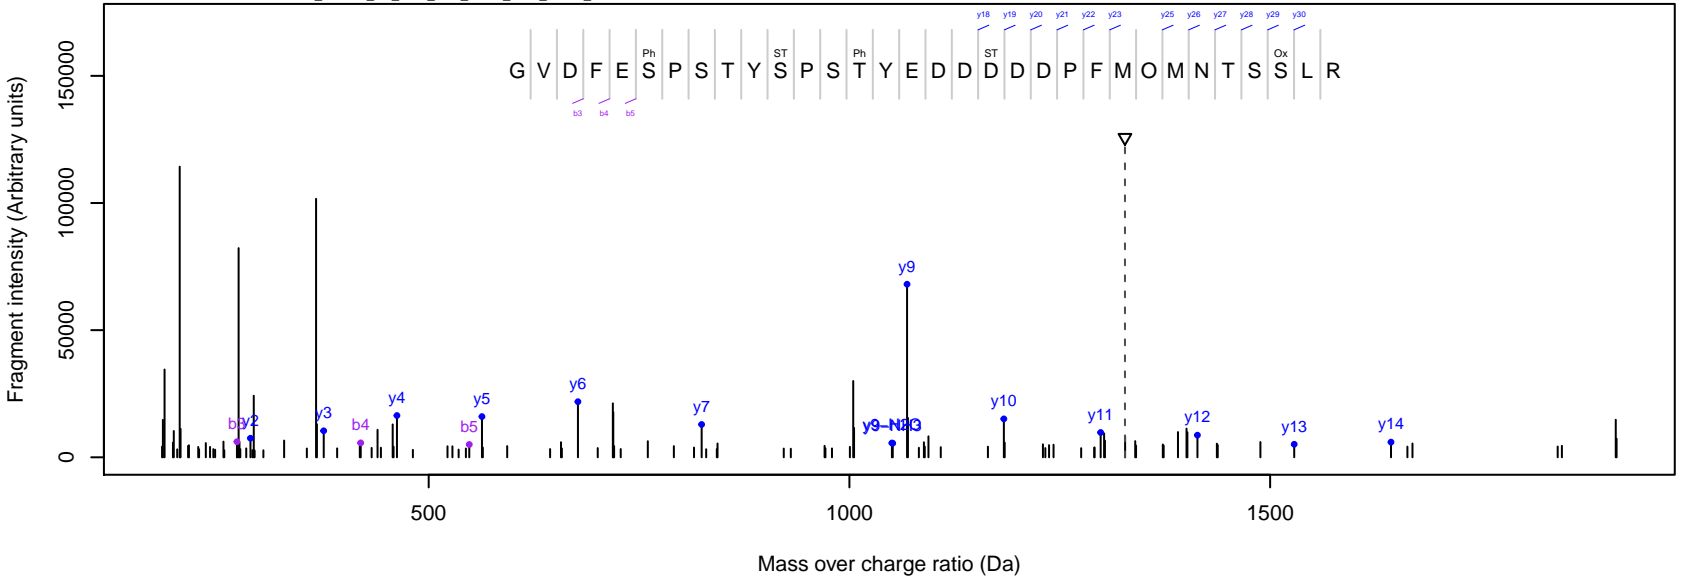

QQDLHLESPQR(QPEYS)PESPR-3+

Source : QE3\_201126\_FR\_TiOx\_hum\_tissue\_Urea\_RNAB\_H Scan : 18425

Andromeda score : 67.31

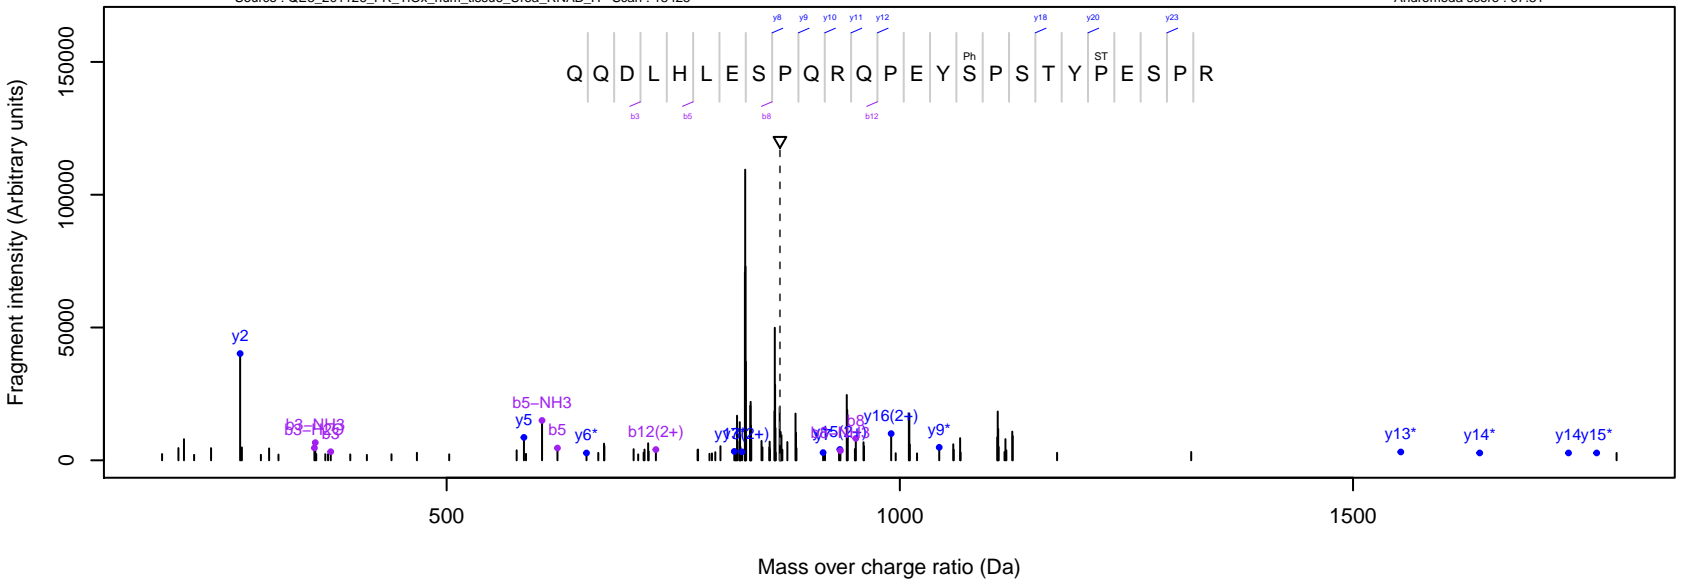



RFS(Phospho (STY))TPDAAAPVSTEPAWLALAK-3+

Source : QE3\_201126\_FR\_TiOx\_hum\_tissue\_Urea\_RNAB\_N Scan : 50125

Andromeda score : 67.31

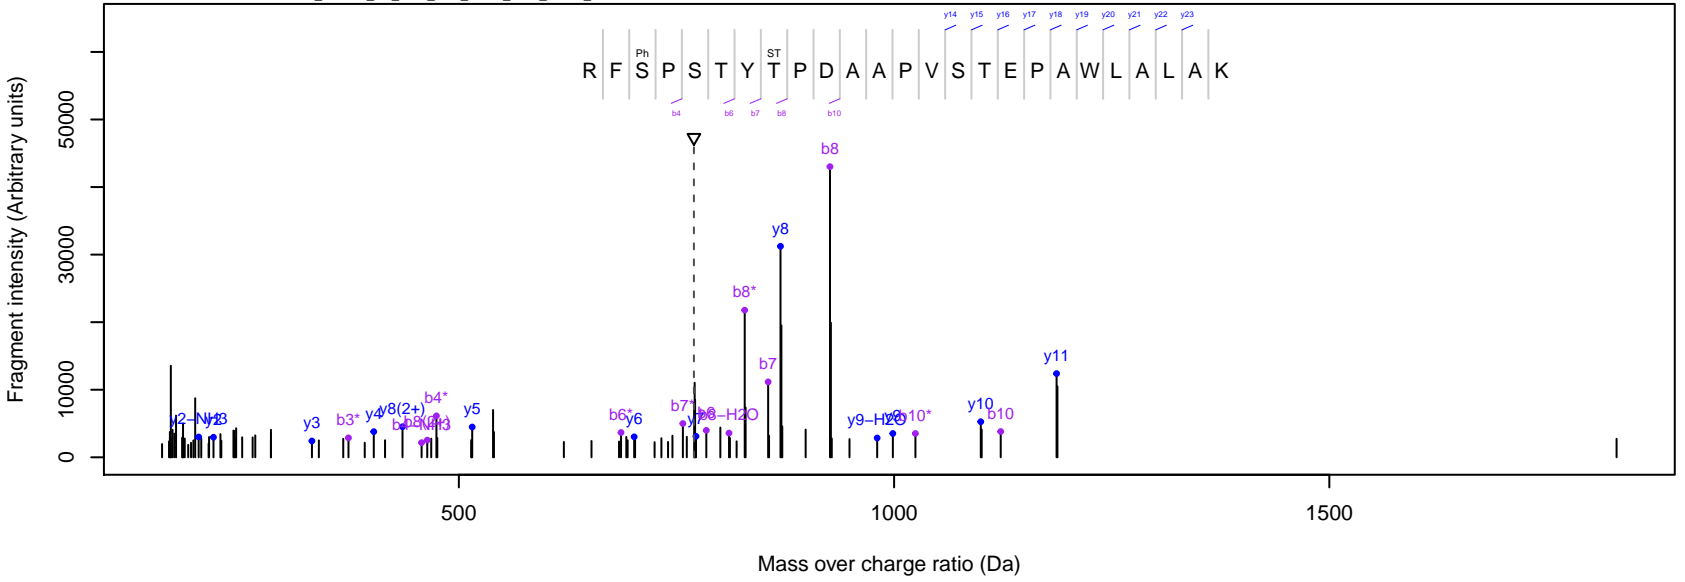

EAAAESDRELNEDDS(Phospho (STY))TDCDDVQRER-4+

Source : QE3\_201126\_FR\_TiOx\_hum\_tissue\_Urea\_RNAB\_H Scan : 12103

Andromeda score : 67.283

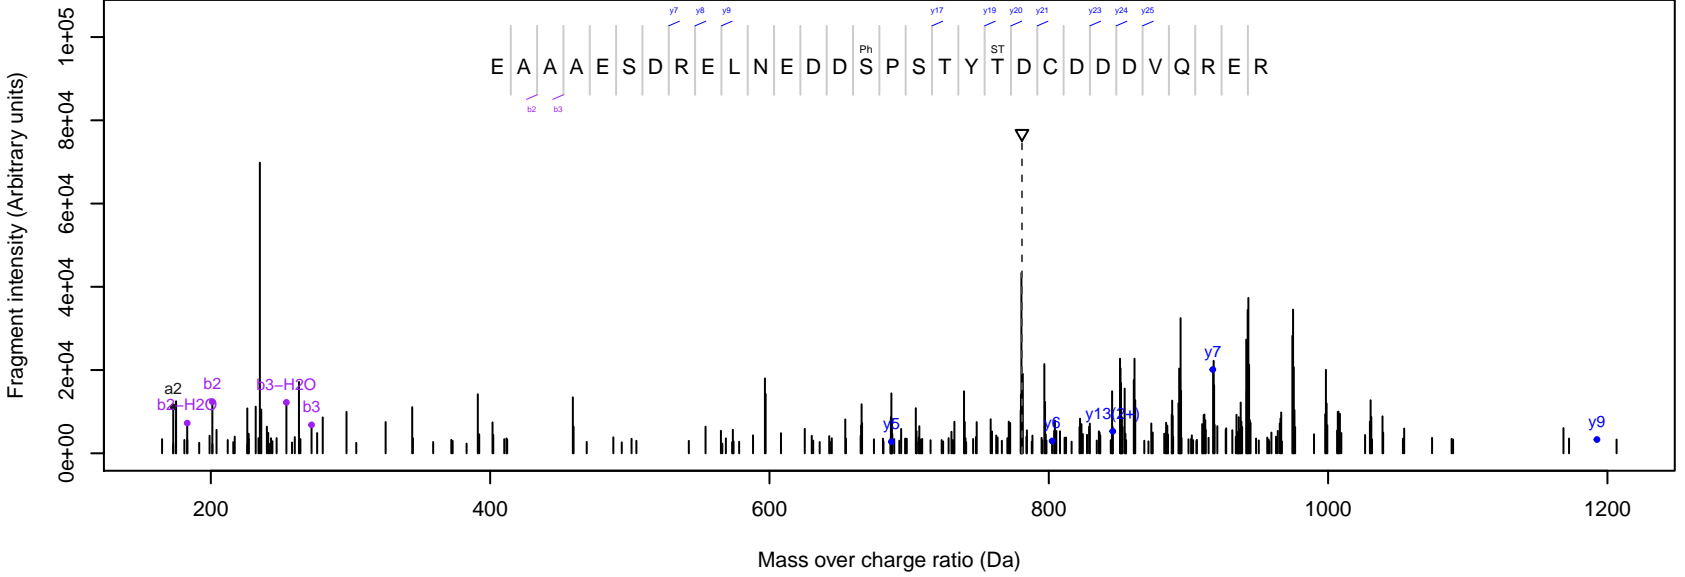

VLESLDRS(Phospho (STY))KDK-3+

Source : QE3\_201126\_FR\_TiOx\_hum\_tissue\_Urea\_RNAB\_N Scan : 7220

Andromeda score : 67.275

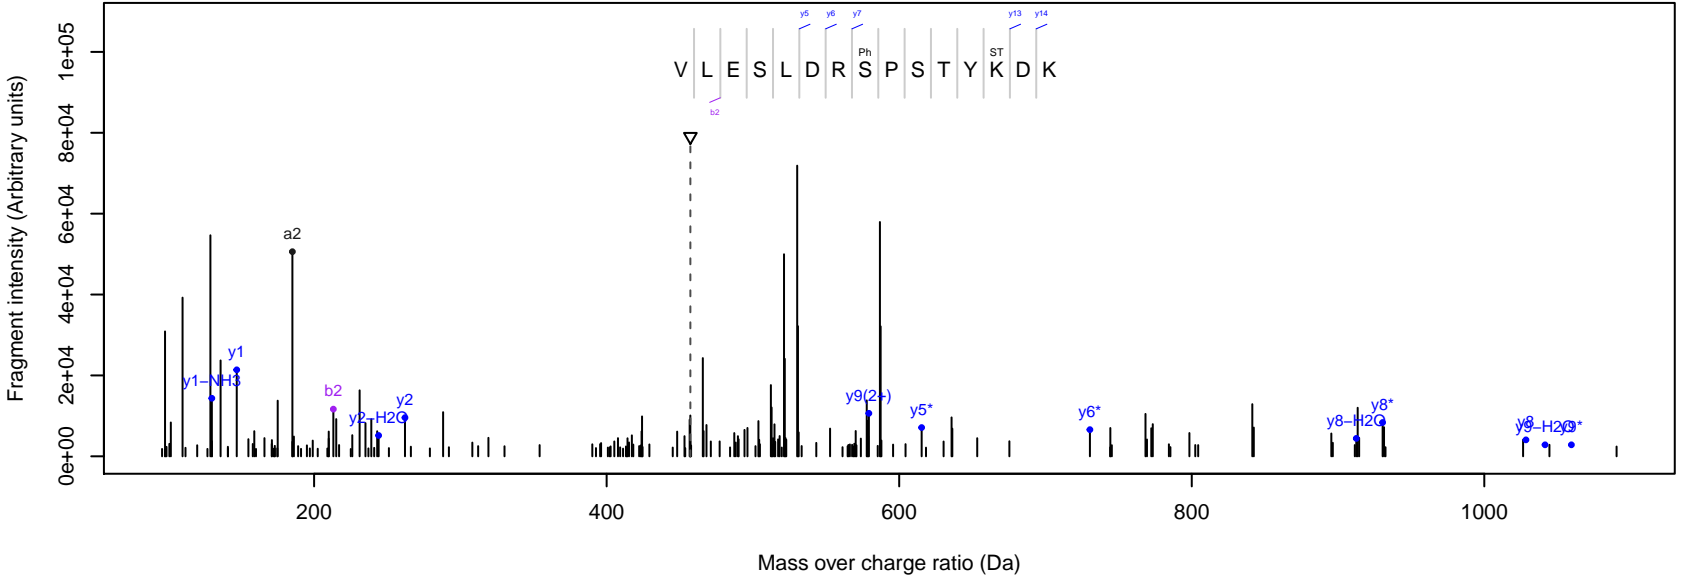

QEEEDRDS(Phospho (STY))PGPQVPDPK-3+

Source : QE3\_201126\_FR\_TiOx\_hum\_tissue\_Urea\_RNAB\_H Scan : 12102

Andromeda score : 67.251

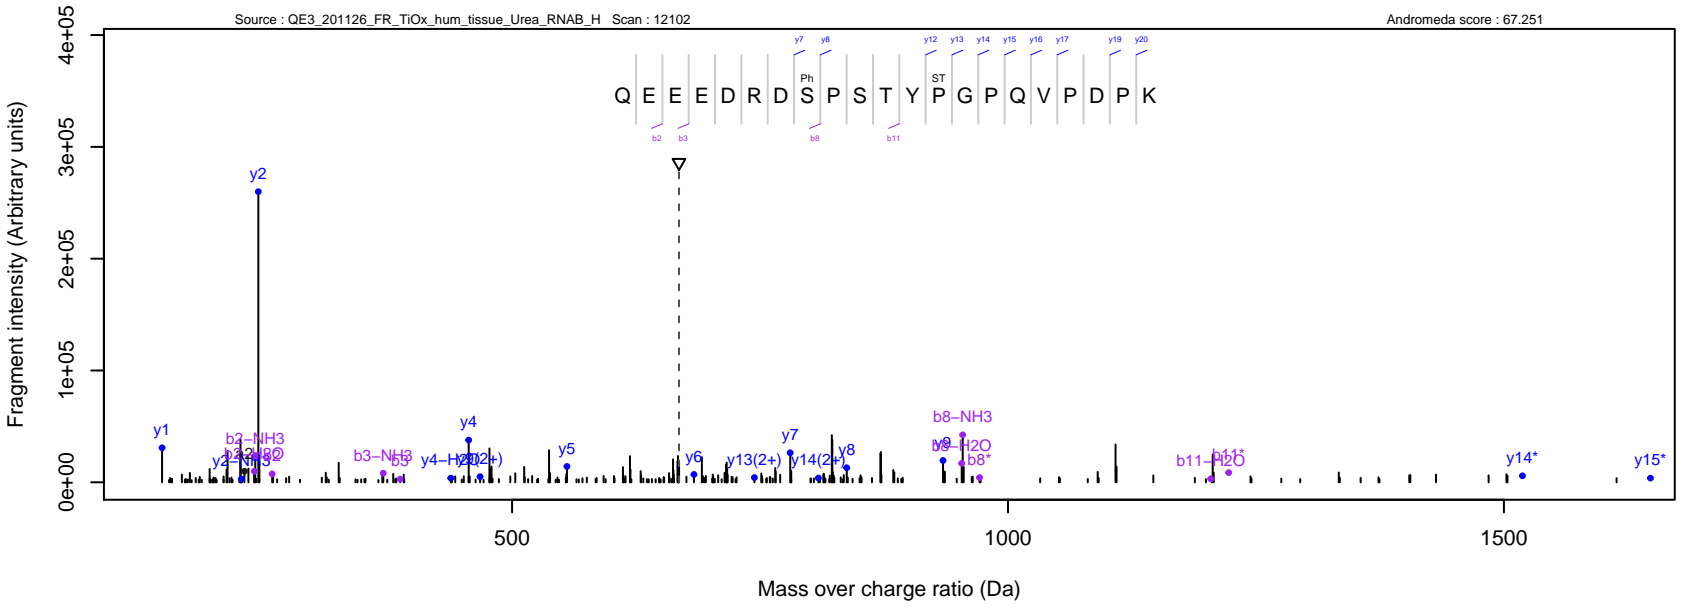

RQGLAETAS(Phospho (STY))PVAVSLR-3+

Source : QE3\_201126\_FR\_TiOx\_hum\_tissue\_Urea\_RNAB\_H Scan : 23461

Andromeda score : 67.251

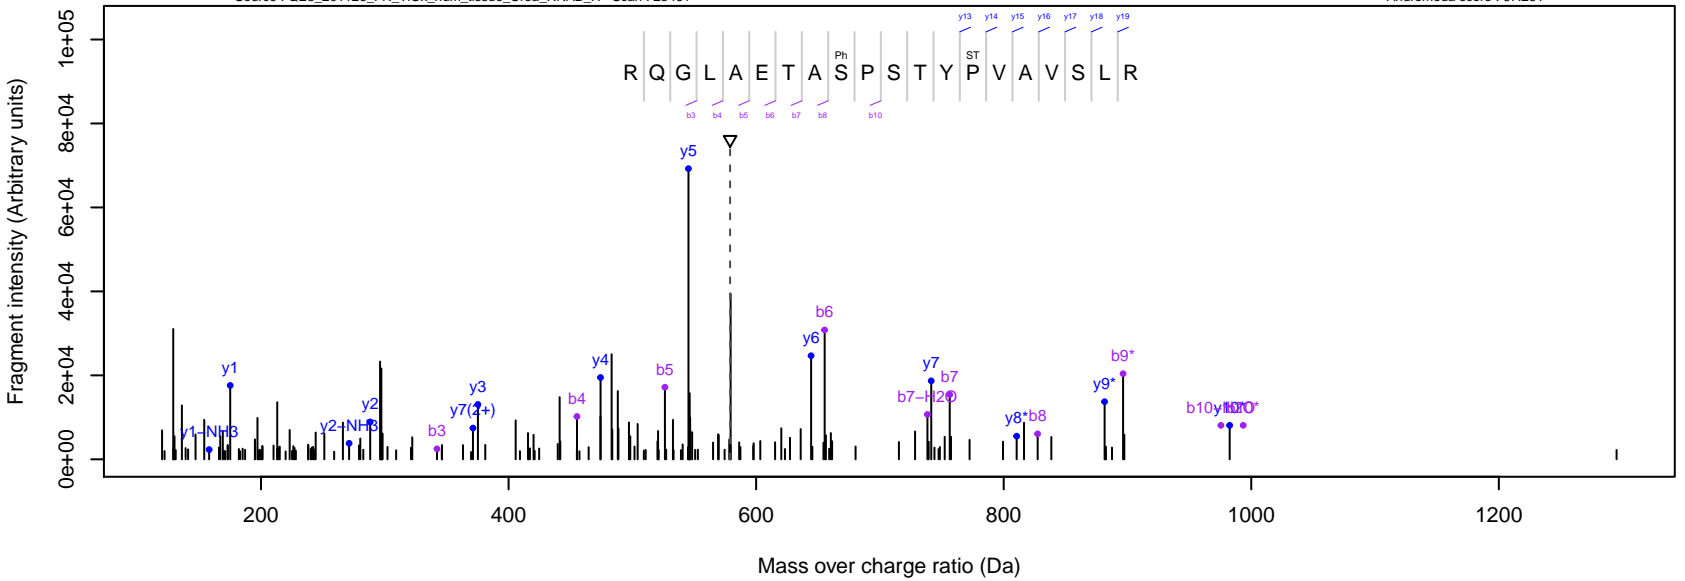

S(Phospho (STY))LS(Phospho (STY))PSSNSAFSR-2+

Source : QE3\_201126\_FR\_TiOx\_hum\_tissue\_Urea\_RNAB\_N Scan : 25756

Andromeda score : 67.234

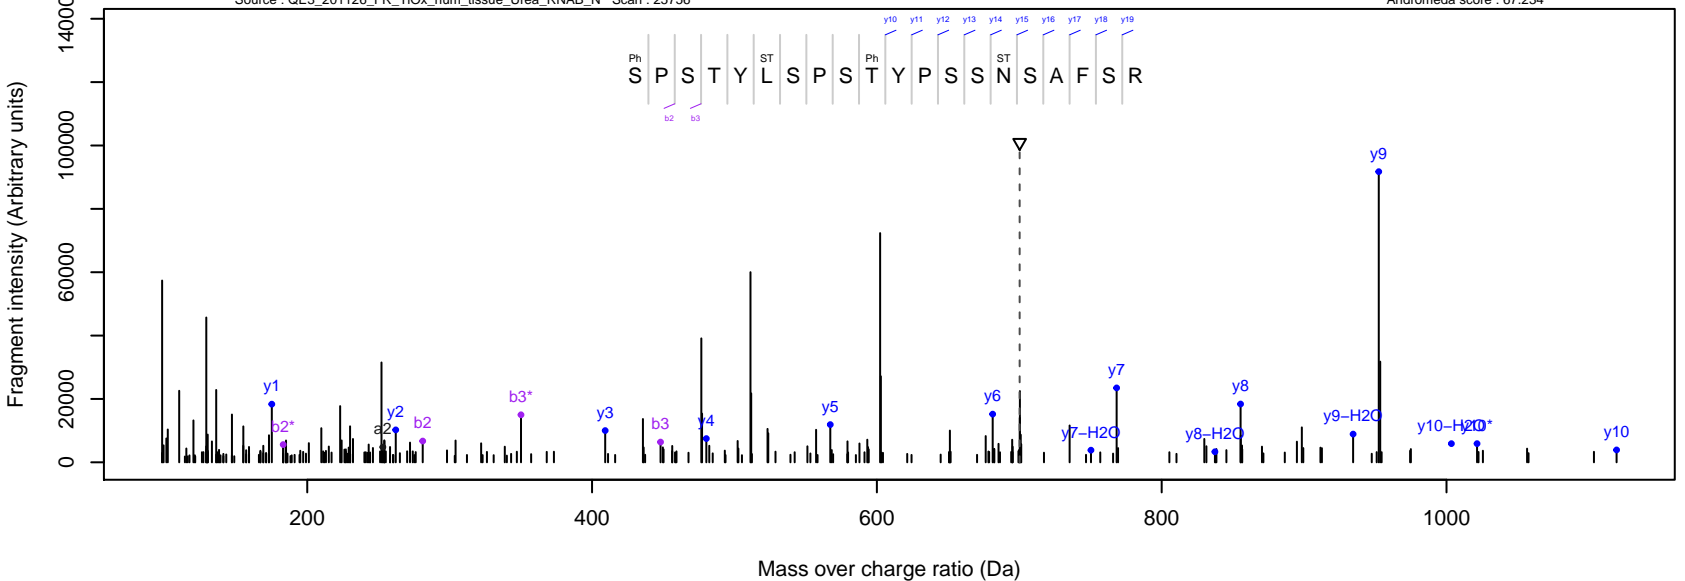

GSS(Phospho (STY))PGPRPVEGTPASR-3+

Source : QE3\_201126\_FR\_TiOx\_hum\_tissue\_Urea\_RNAB\_N Scan : 8462

Andromeda score : 67.227

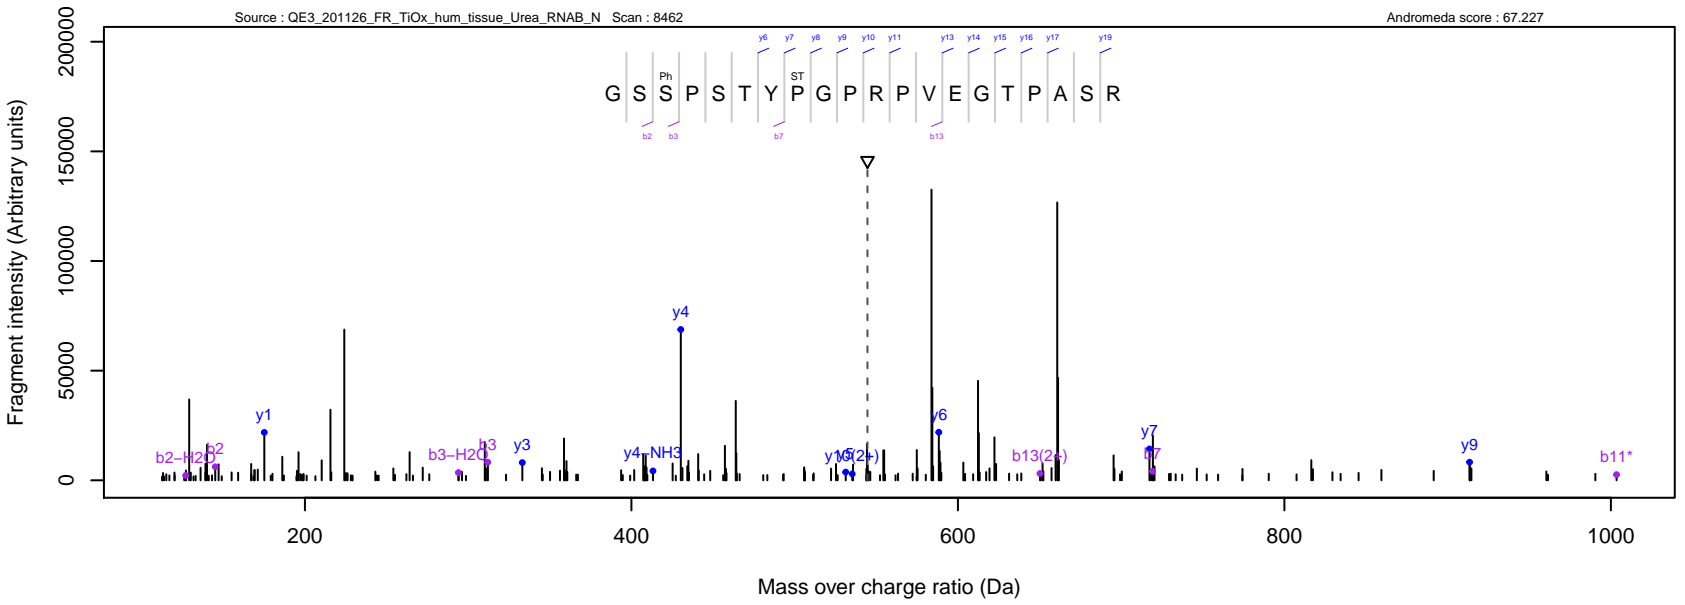

KSLS(Phospho (STY))PGVSR-2+

Source : QE3\_201126\_FR\_TiOx\_hum\_tissue\_Urea\_RNAB\_H Scan : 6133

Andromeda score : 67.214

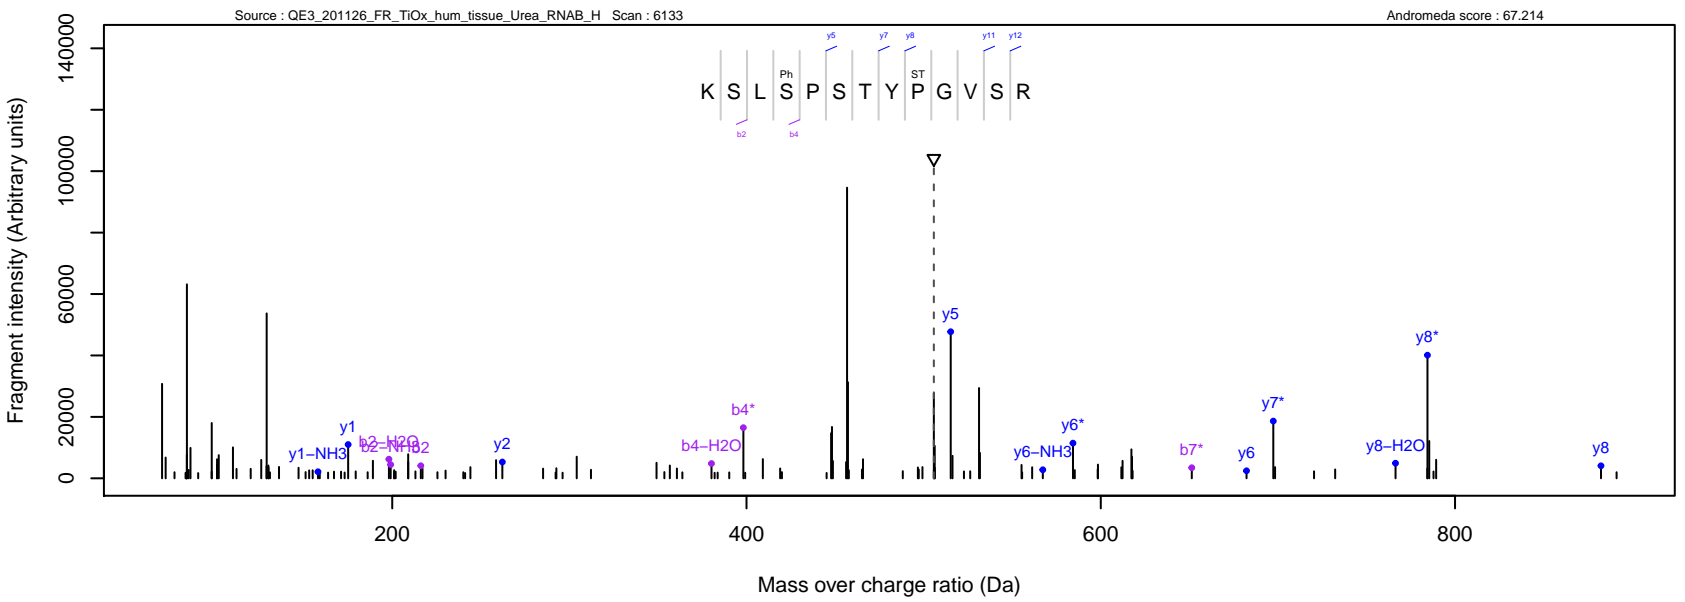

HEDEQALLDQNS(Phospho (STY))QTPPPS(Phospho (STY))PFSVQAFNK-3+

Source : QE3\_201126\_FR\_TiOx\_hum\_tissue\_Urea\_RNAB\_B Scan : 49064

Andromeda score : 67.198

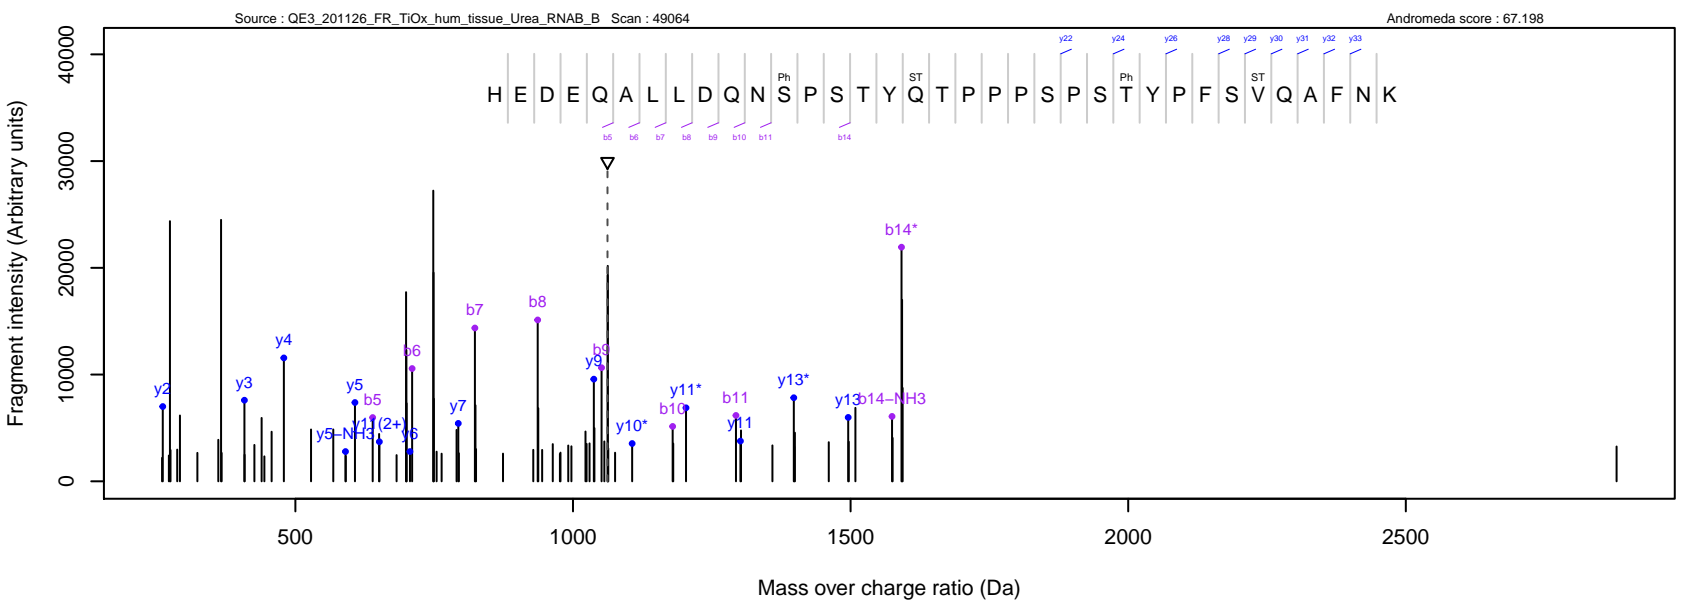

EVHNRS(Phospho (STY))PVSFR-3+

Source : QE3\_201126\_FR\_TIOx\_hum\_tissue\_Urea\_RNAB\_N Scan : 7988

Andromeda score : 67.136

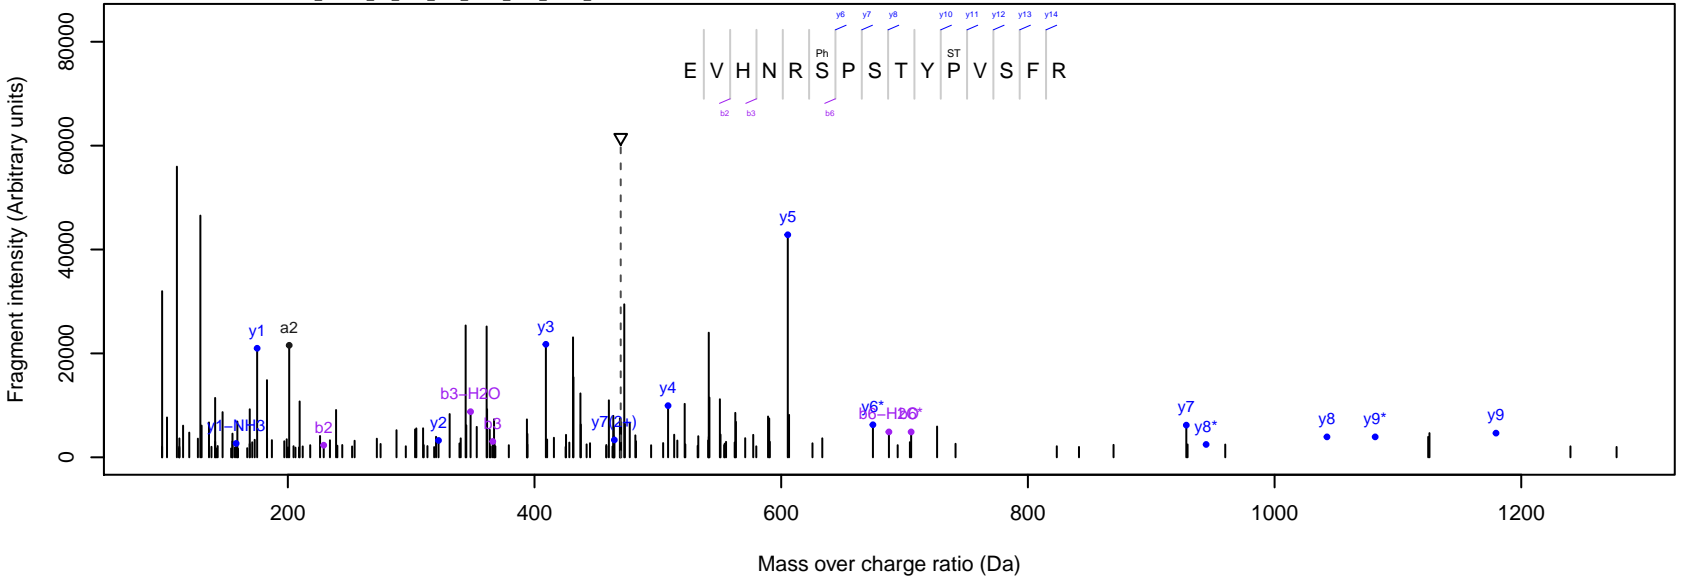

SVGS(Phospho (STY))VGDSPREPR-3+

Source : QE3\_201126\_FR\_TIOx\_hum\_tissue\_Urea\_RNAB\_N Scan : 8715

Andromeda score : 67.136

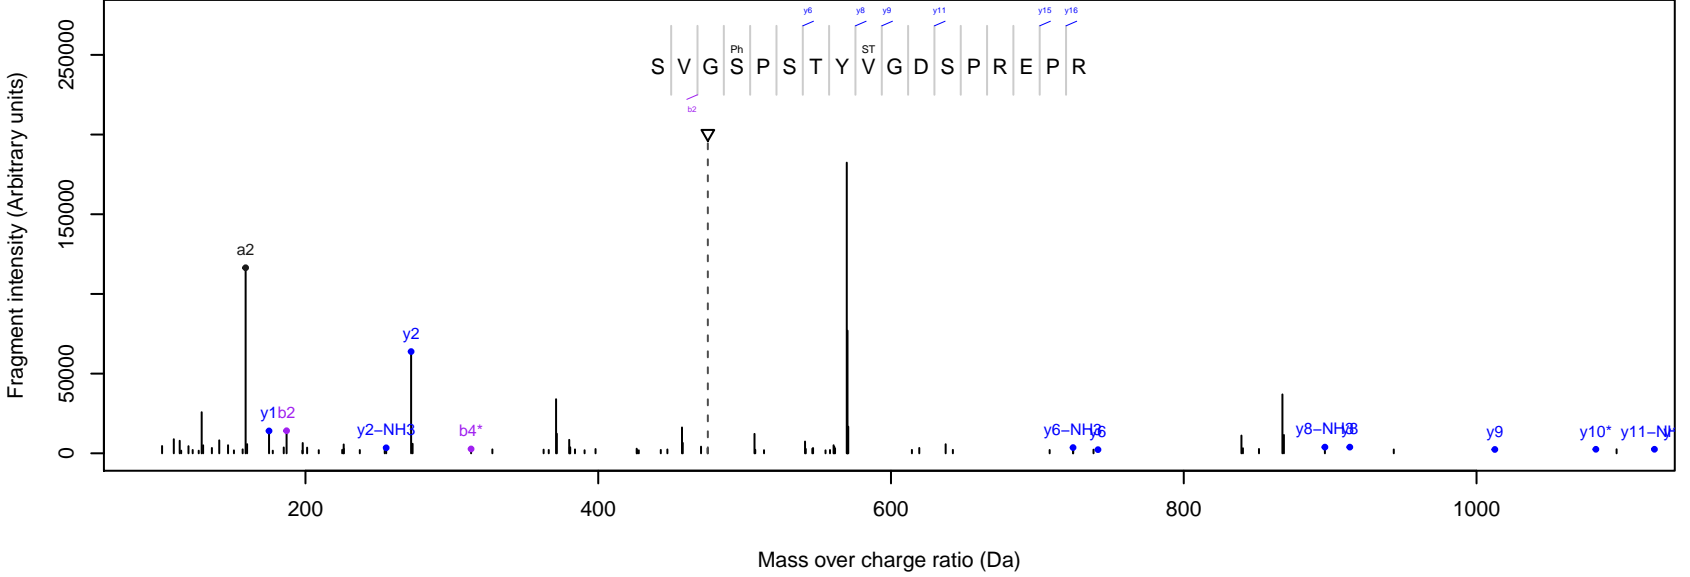

TALINS(Phospho (STY))TGEEVAMOMR-2+

Source : QE3\_201126\_FR\_TIOx\_hum\_tissue\_Urea\_RNAB\_H Scan : 23019

Andromeda score : 67.136

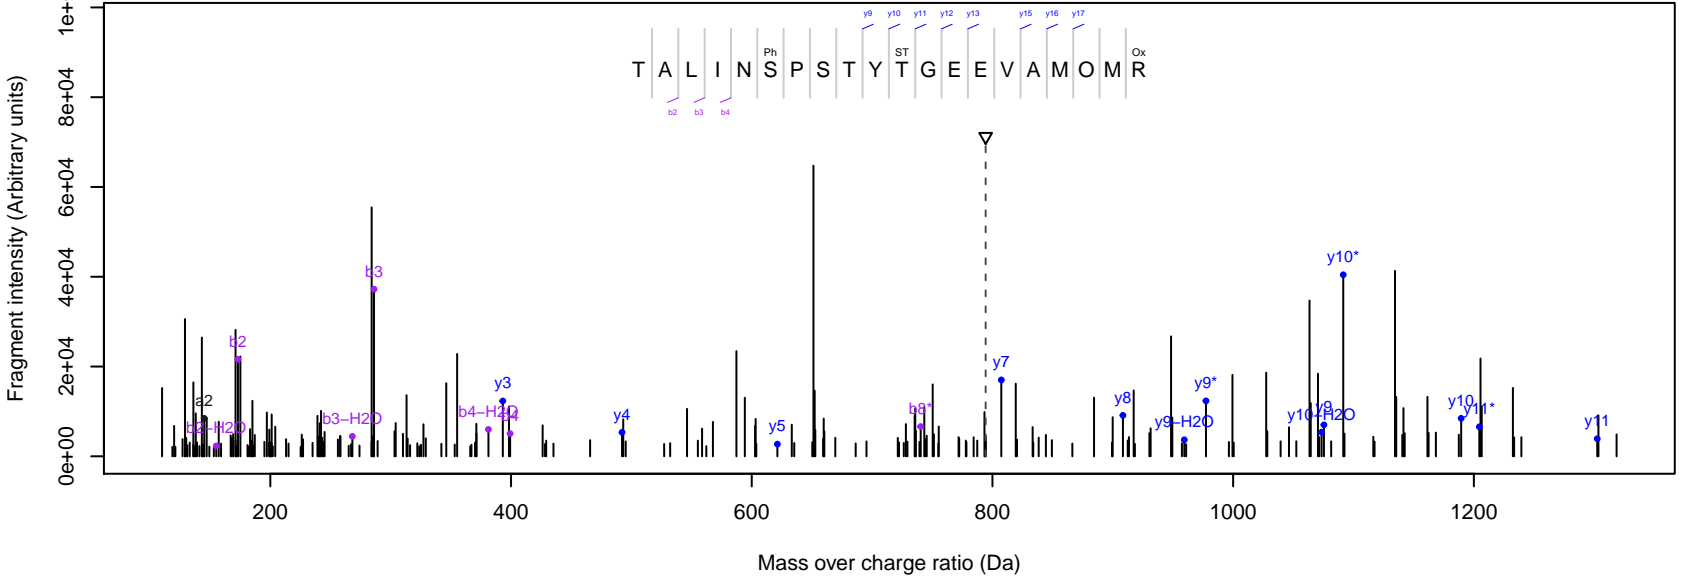

QDS(Phospho (STY))LSSEVDTLK-2+

Source : QE3\_201126\_FR\_TiOx\_hum\_tissue\_Urea\_RNAB\_B Scan : 29577

Andromeda score : 67.102

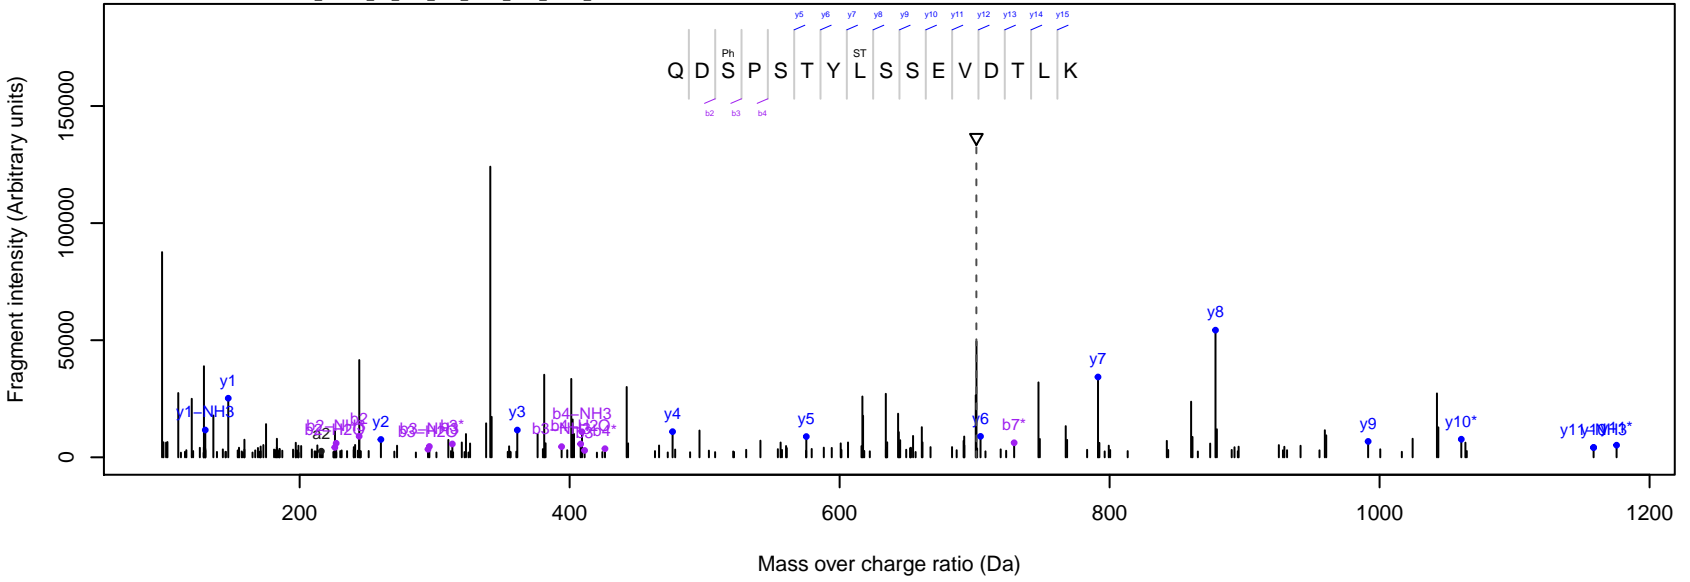

DRPHAS(Phospho (STY))GT(Phospho (STY))DGDES(Phospho (STY))EEDPPEHKPSK-3+

Source : QE3\_201126\_FR\_TiOx\_hum\_tissue\_Urea\_RNAB\_N Scan : 5260

Andromeda score : 67.072

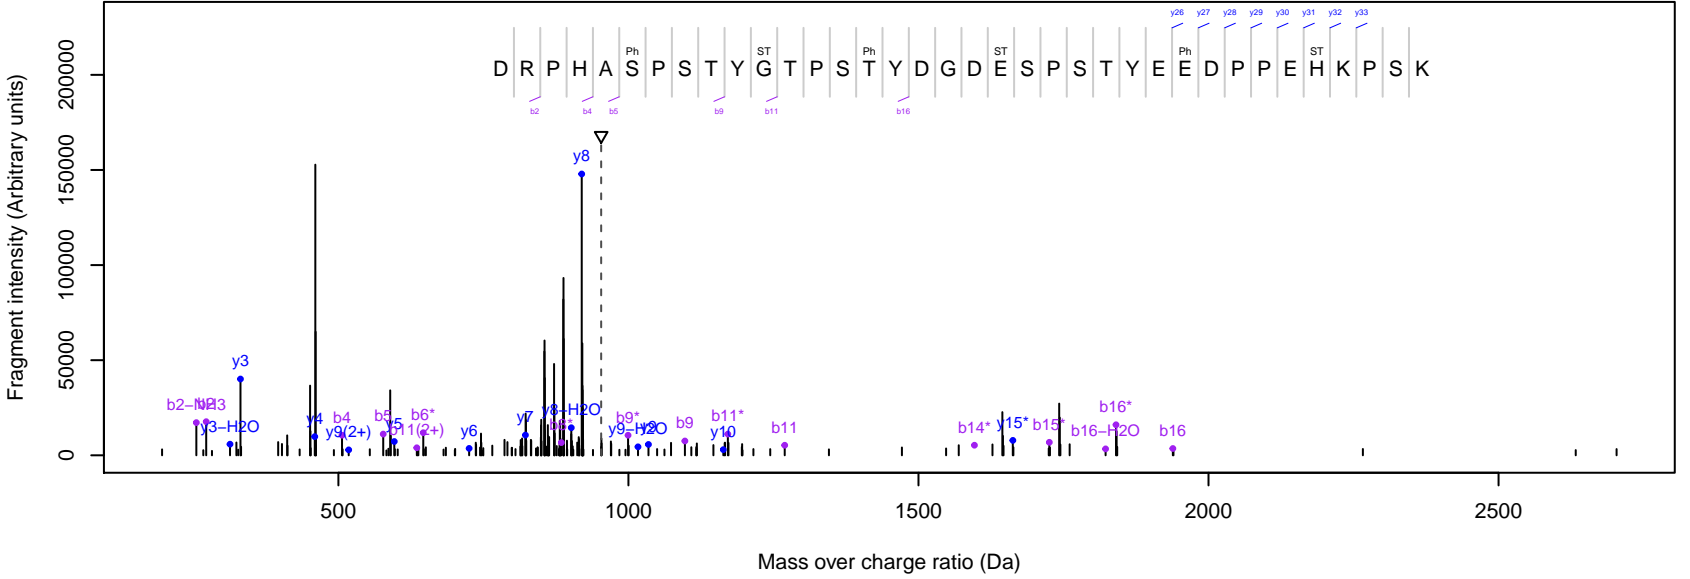

LGGSVLGQIPFLQNCED(Phospho (STY))DEDELDVQHK-3+

Source : QE3\_201126\_FR\_TiOx\_hum\_tissue\_Urea\_RNAB\_H Scan : 56597

Andromeda score : 67.062

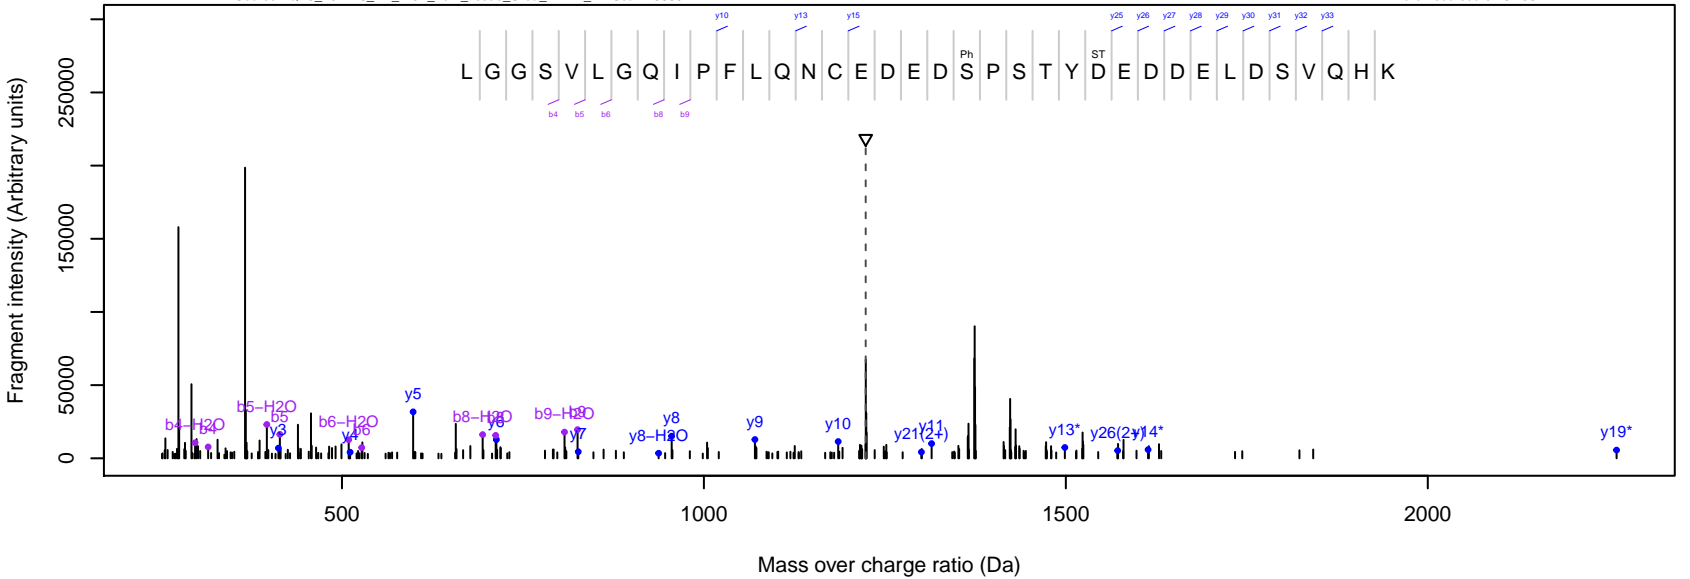



EDGHR(T(Phospho (STY))STSAVPLNFVPLNTNPK-3+

Source : QE3\_201126\_FR\_TiOx\_hum\_tissue\_Urea\_RNAB\_H Scan : 36955

Andromeda score : 66.98

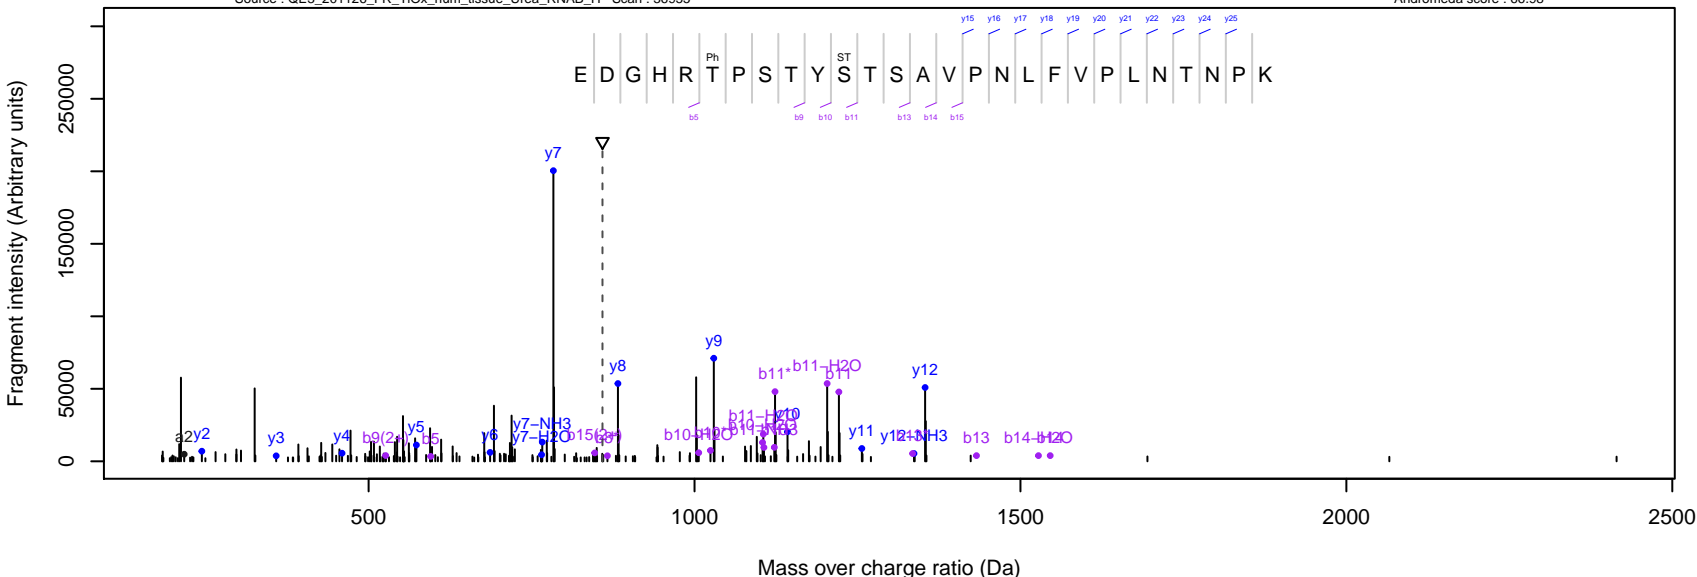

S(Phospho (STY))LVGTPYWM(Oxidation (M))APELISR-2+

Source : QE3\_201126\_FR\_TiOx\_hum\_tissue\_Urea\_RNAB\_N Scan : 56085

Andromeda score : 66.965

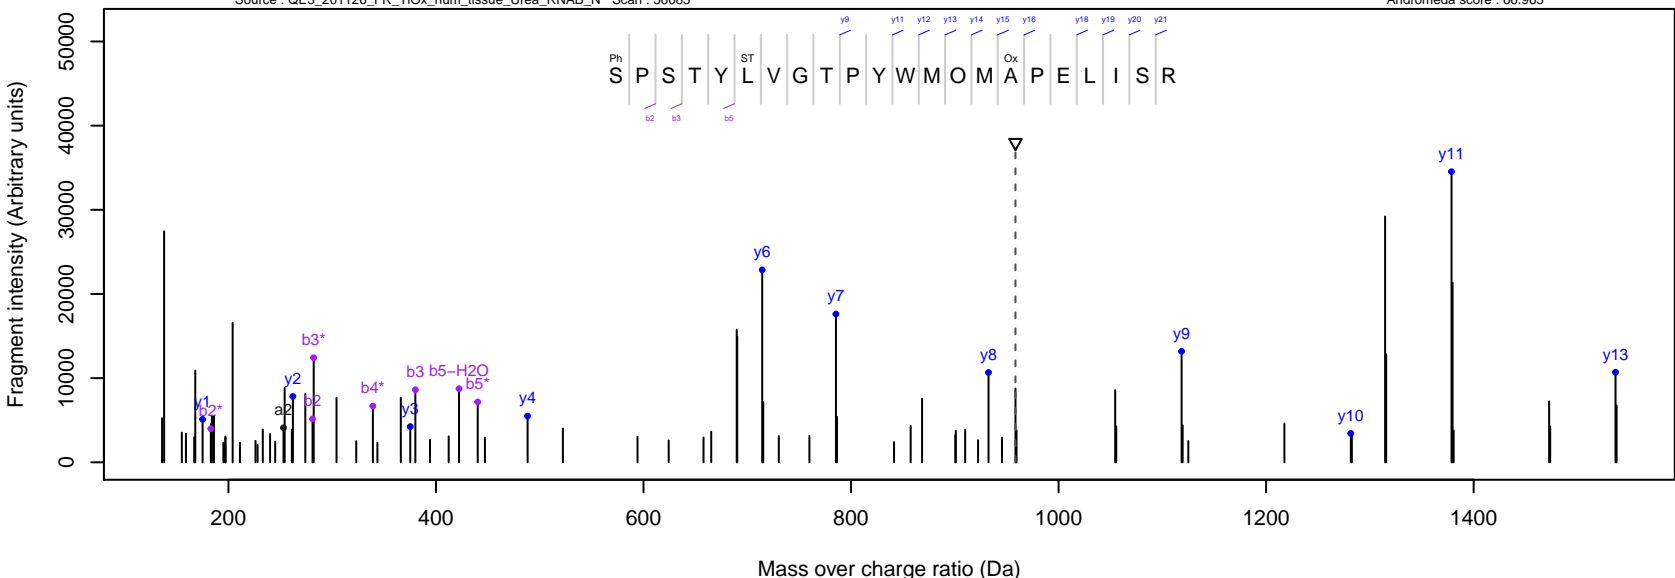

TINNQHSVESQDNDQPDYDS(Phospho (STY))VAS(Phospho (STY))DED(T(Phospho (STY))DLETTASK-3+

Source : QE3\_201126\_FR\_TiOx\_hum\_tissue\_Urea\_RNAB\_N Scan : 31793

Andromeda score : 66.916

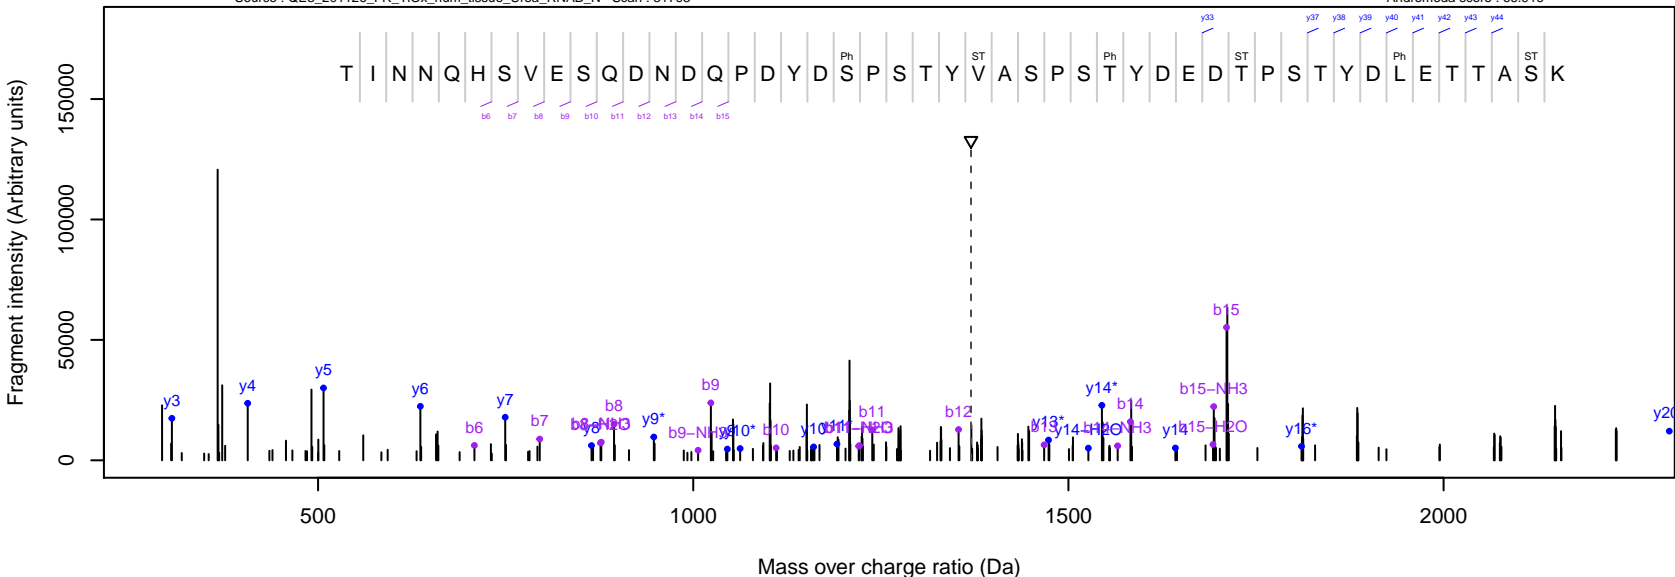

RPS(Phospho (STY))TSQTVSTPAPVPVPIESTEAEIAEK-3+

Source : QE3\_201126\_FR\_TiOx\_hum\_tissue\_Urea\_RNAB\_N Scan : 37761

Andromeda score : 66.902

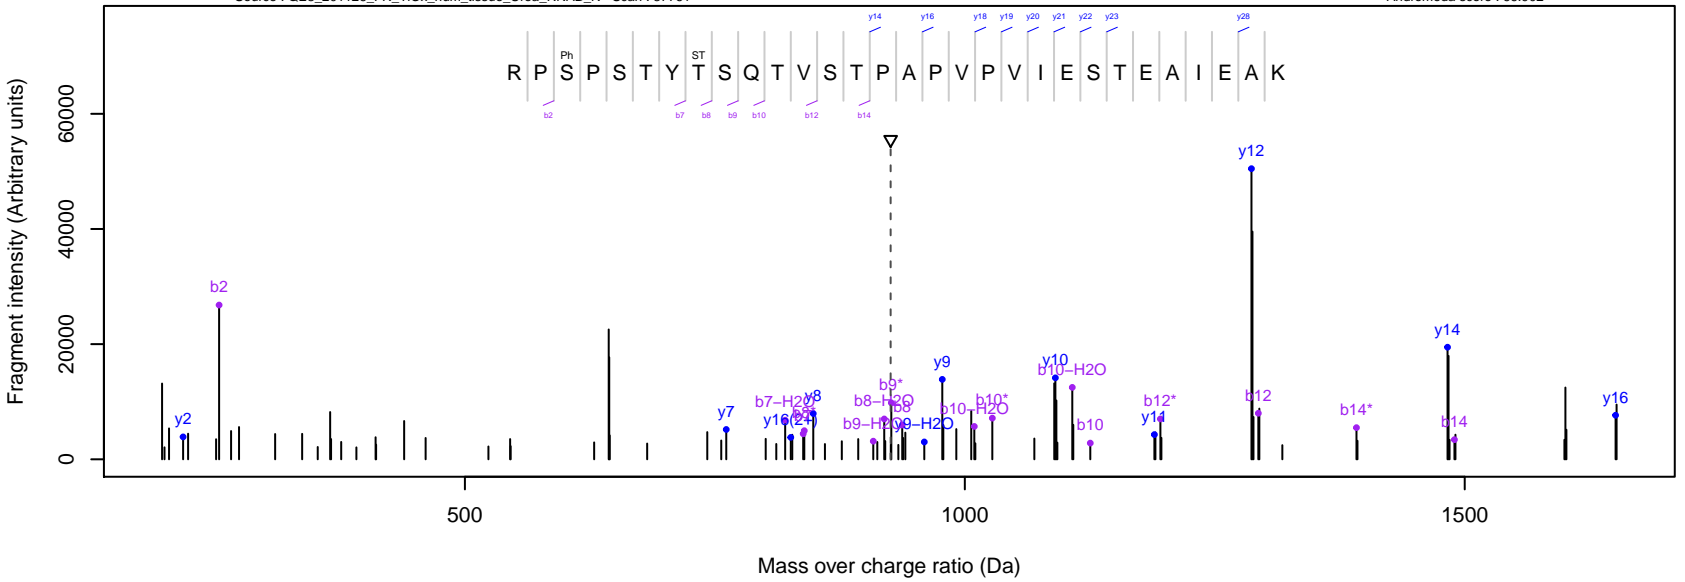

VQS(Phospho (STY))GLDLFSM(Oxidation (M))LLEQNDLEPGHTELLR-3+

Source : QE3\_201126\_FR\_TiOx\_hum\_tissue\_Urea\_RNAB\_B Scan : 61733

Andromeda score : 66.902

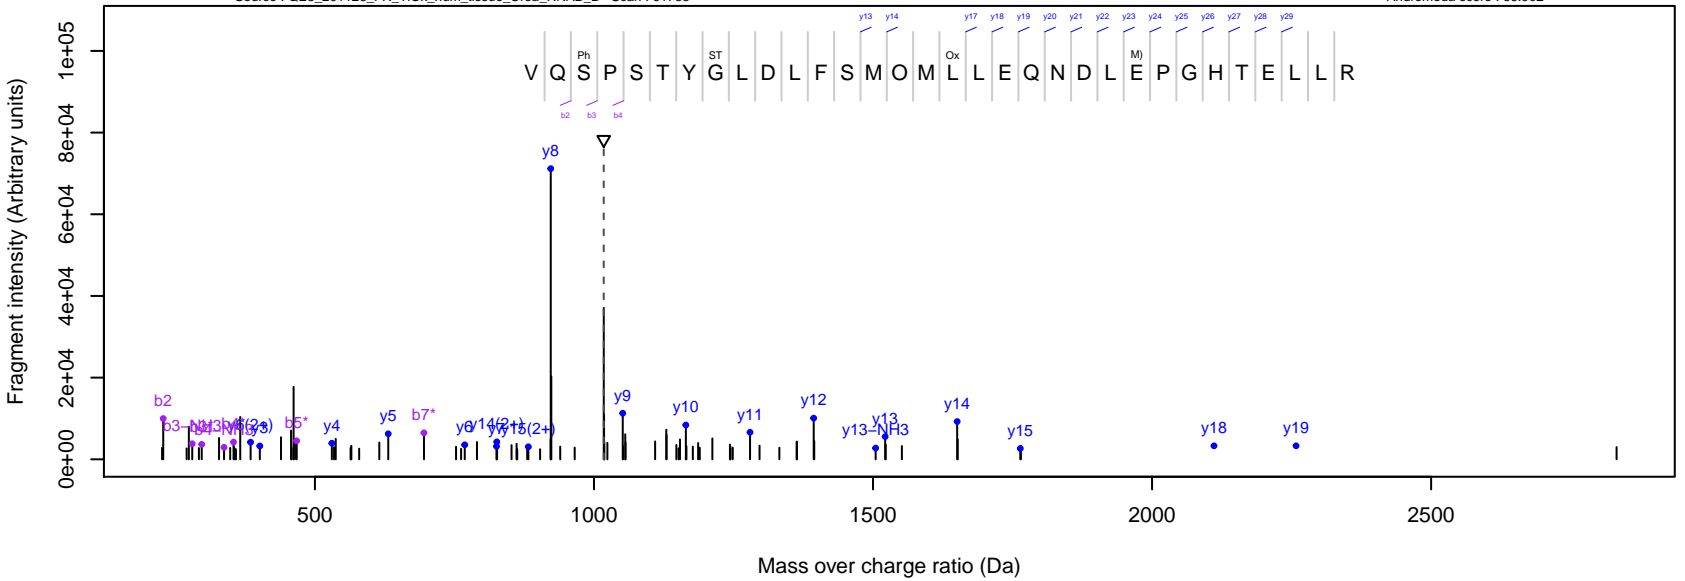

AGPTLTDENGDDLGLPSPSTYPGDTSYQDQVDDFHEAR-3+

Source : QE3\_201126\_FR\_TiOx\_hum\_tissue\_Urea\_RNAB\_H Scan : 48377

Andromeda score : 66.898

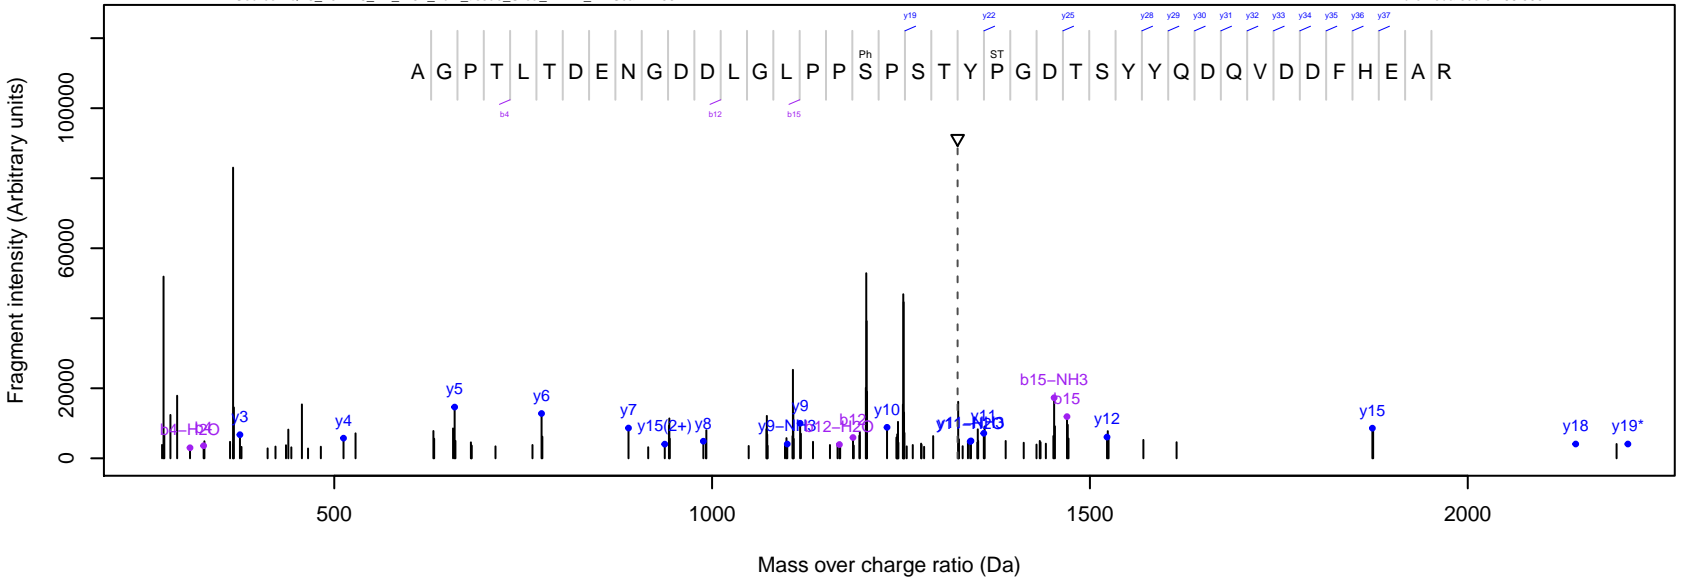



**SYS(Phospho (STY))PDGKES(Phospho (STY))PSDKK-3+**

Source : QE3\_201126\_FR\_TiOx\_hum\_tissue\_Urea\_RNAB\_H Scan : 4289

Andromeda score : 66.893

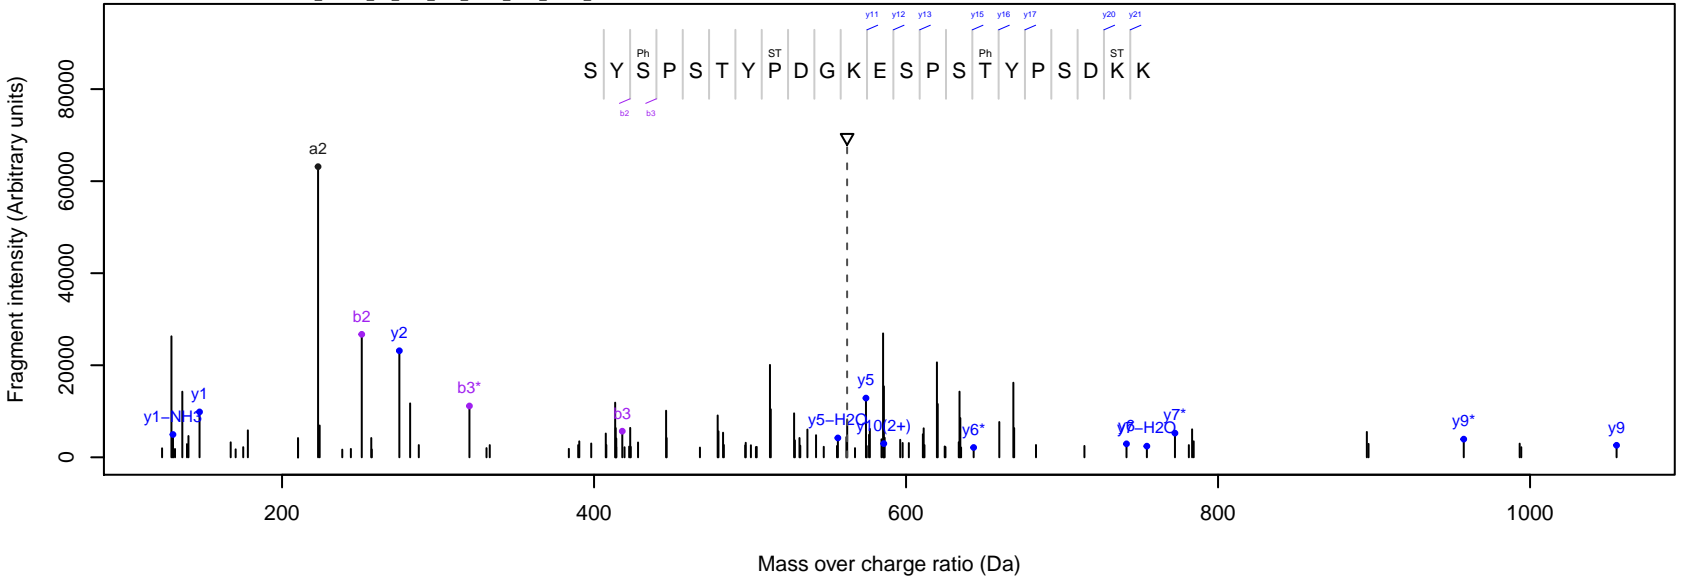

**VALS(Phospho (STY))DDETKETENM(Oxidation (M))RK-3+**

Source : QE3\_201126\_FR\_TiOx\_hum\_tissue\_Urea\_RNAB\_N Scan : 7814

Andromeda score : 66.893

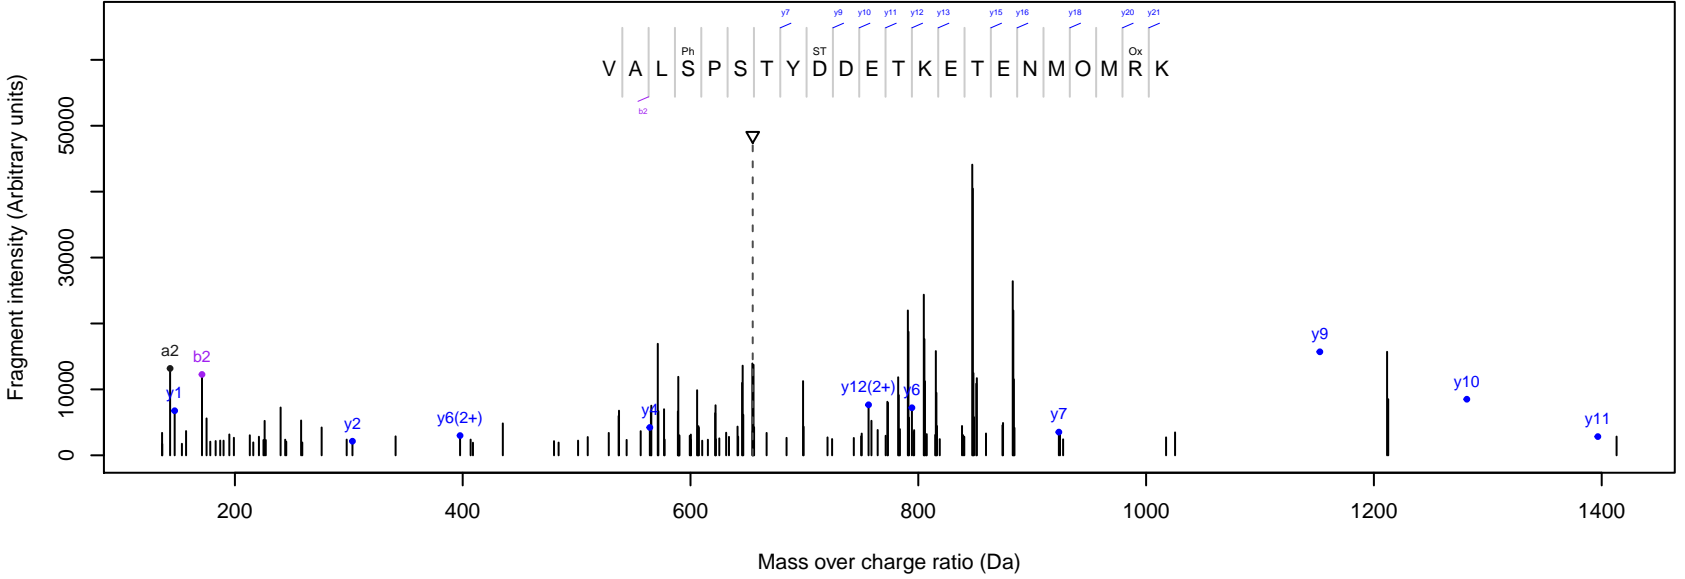

**YSPSQNS(Phospho (STY))PIHHIPSR-3+**

Source : QE3\_201126\_FR\_TiOx\_hum\_tissue\_Urea\_RNAB\_B Scan : 11543

Andromeda score : 66.893

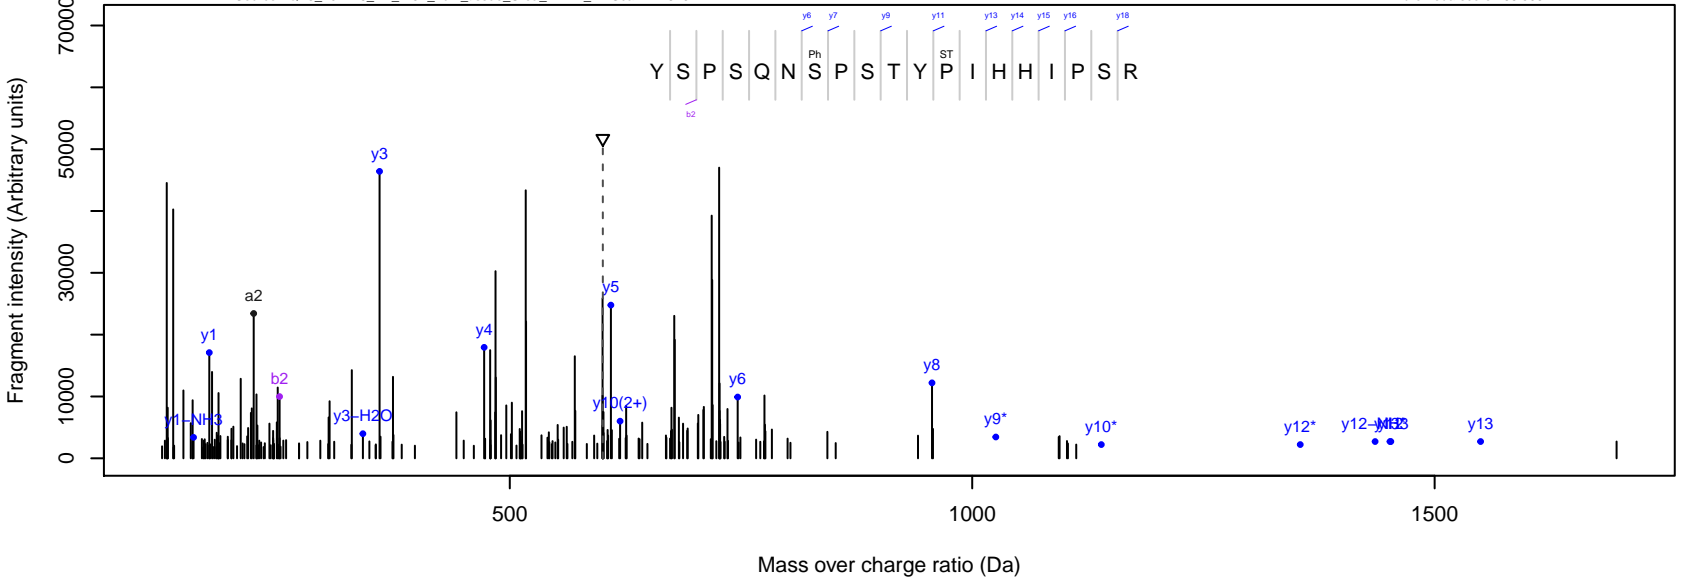

DLKHS(Phospho (STY))LPS(Phospho (STY))GLGLSETQITSHGFDNTK-4+

Source : QE3\_201126\_FR\_TiOx\_hum\_tissue\_Urea\_RNAB\_B Scan : 40011

Andromeda score : 66.886

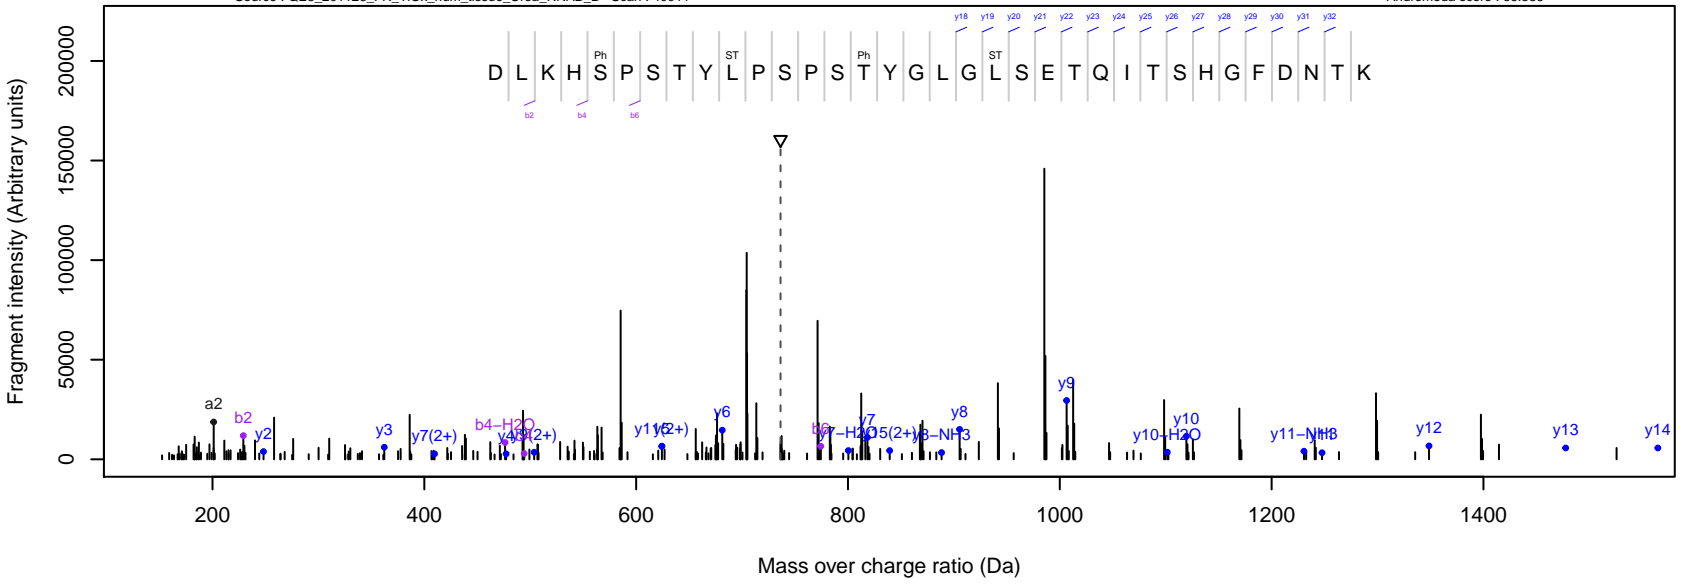

ENS(Phospho (STY))PAVS(Phospho (STY))PTTNSTAPFGLKPR-3+

Source : QE3\_201126\_FR\_TiOx\_hum\_tissue\_Urea\_RNAB\_N Scan : 34041

Andromeda score : 66.886

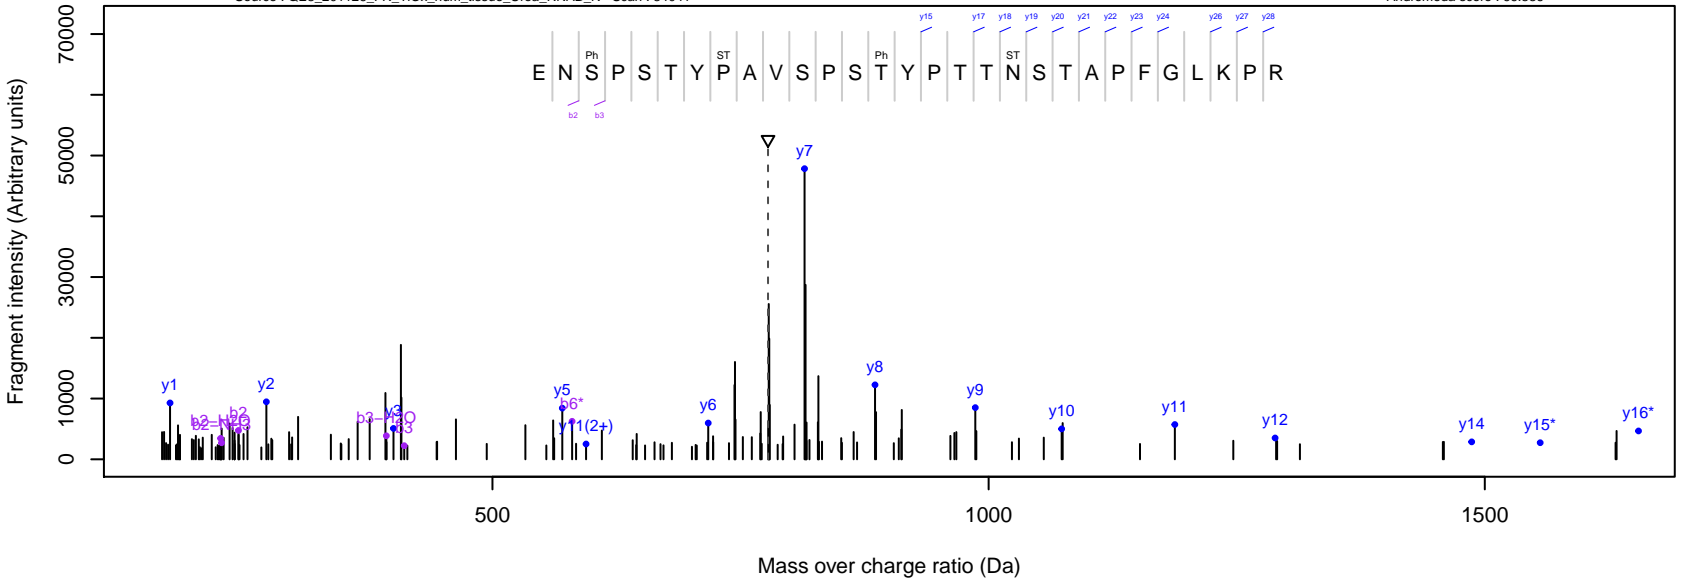

AGS(Phospho (STY))RRGS(Phospho (STY))FDATGSGFSM(Oxidation (M))TFSSSSYSSSGYGR-3+

Source : QE3\_201126\_FR\_TiOx\_hum\_tissue\_Urea\_RNAB\_H Scan : 33141

Andromeda score : 66.879

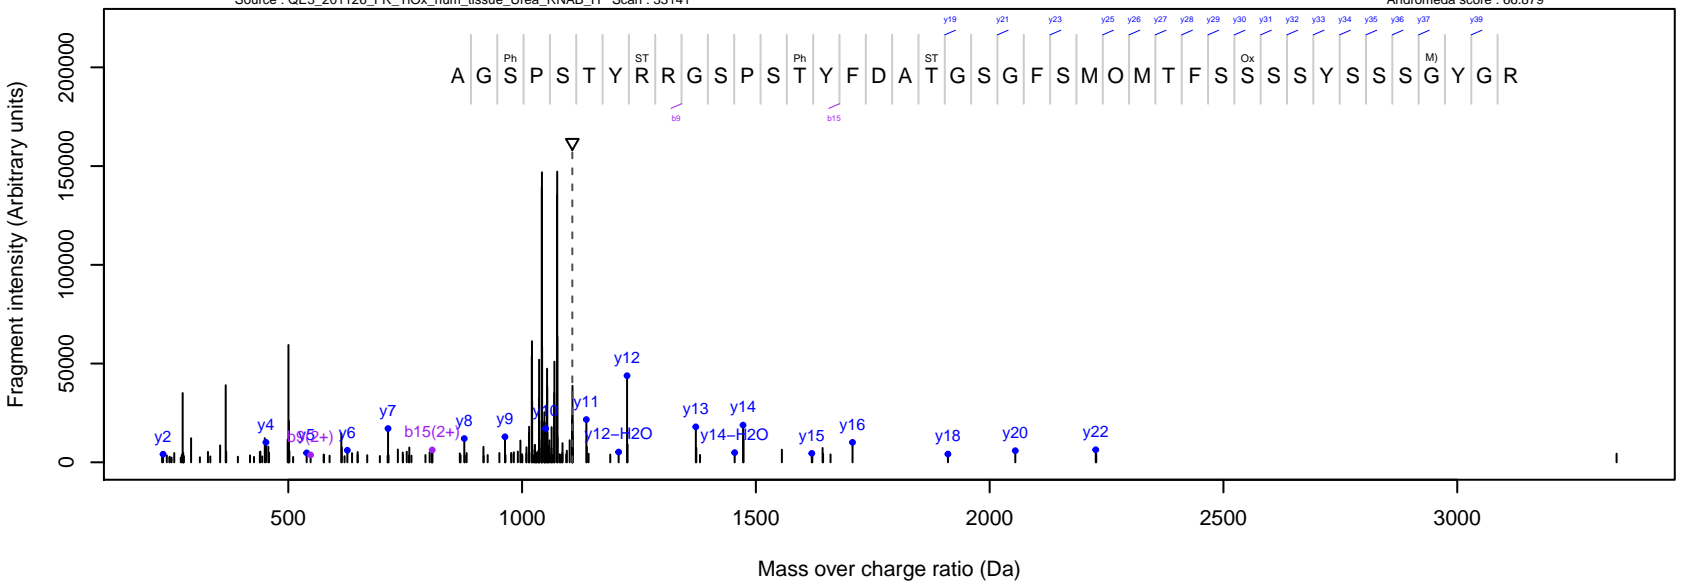

RCS(Phospho (STY))VTSM(Oxidation (M))ESTVSSGTQTTVQDDPEQFEVIK-3+

Source : QE3\_201126\_FR\_TiOx\_hum\_tissue\_Urea\_RNAB\_B Scan : 32630

Andromeda score : 66.878

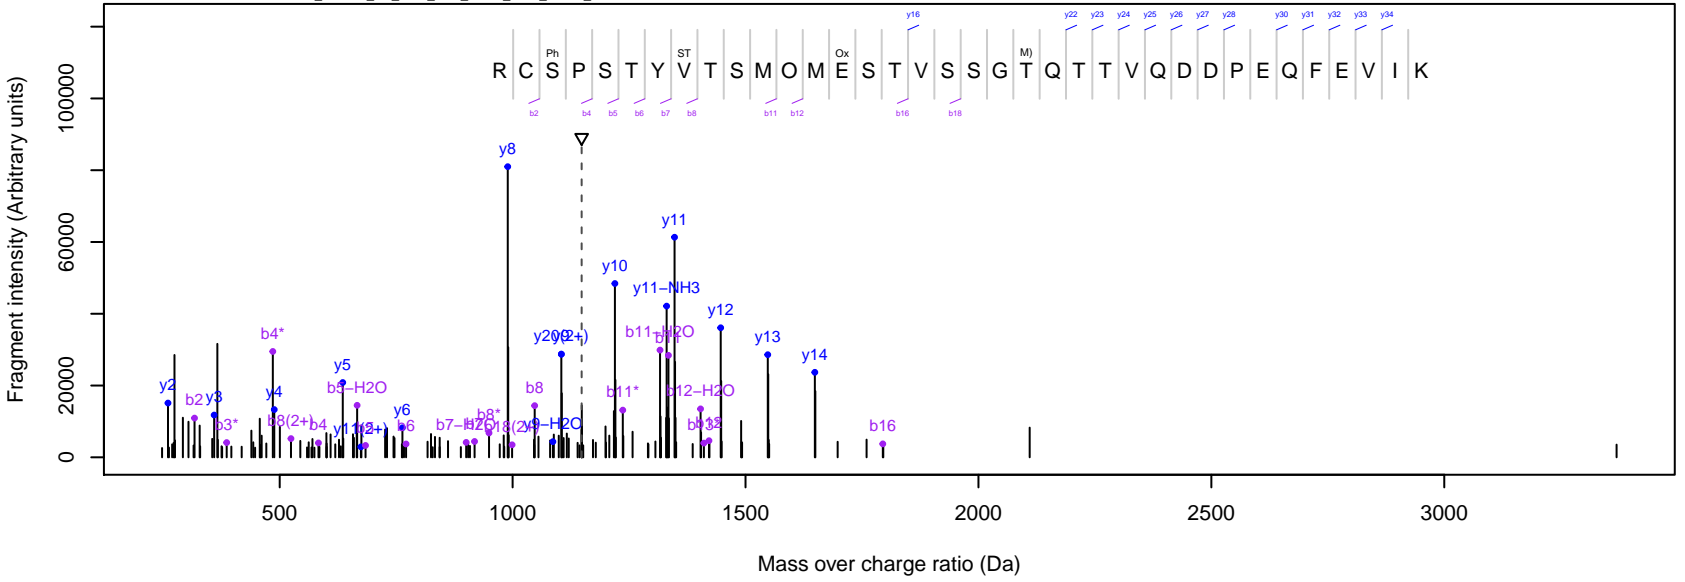

ERPDLEAPAGS(Phospho (STY))PFR-3+

Source : QE3\_201126\_FR\_TiOx\_hum\_tissue\_Urea\_RNAB\_N Scan : 26496

Andromeda score : 66.874

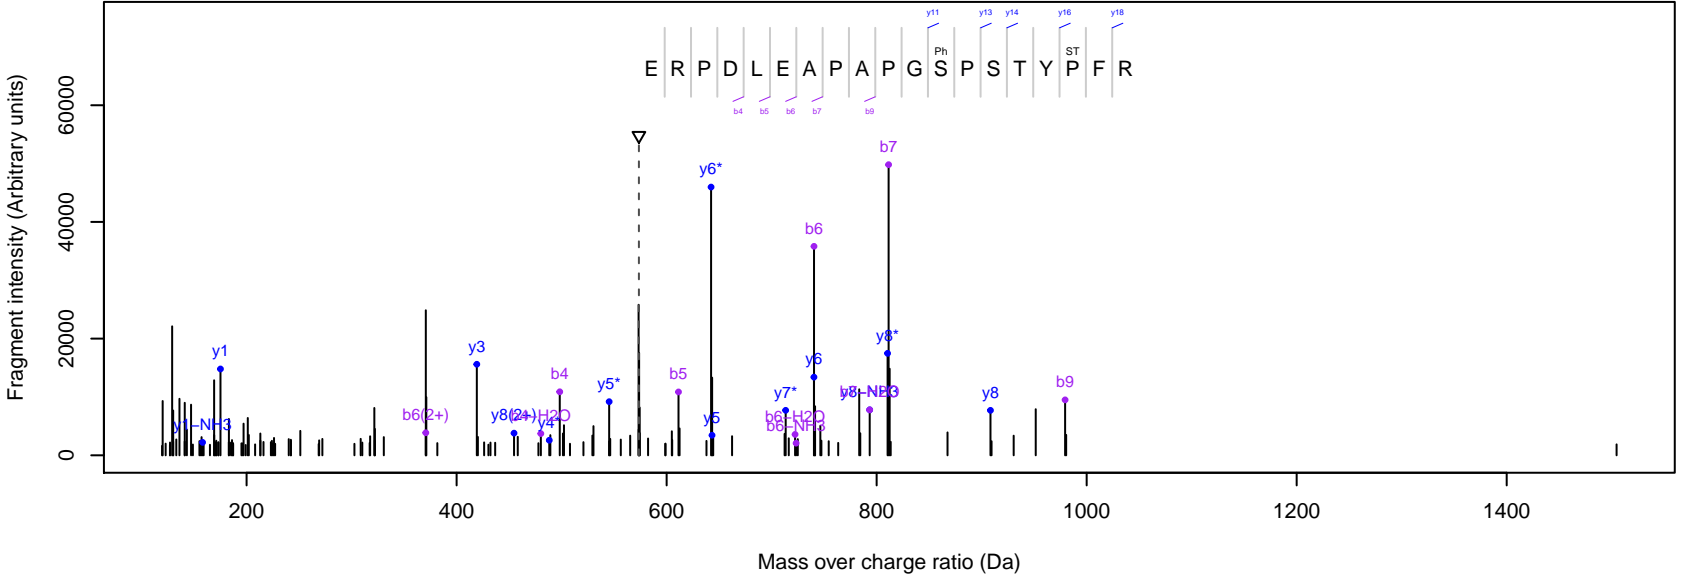

LLHEDLDES(Phospho (STY))DDDM(Oxidation (M))DEK-3+

Source : QE3\_201126\_FR\_TiOx\_hum\_tissue\_Urea\_RNAB\_H Scan : 16673

Andromeda score : 66.874

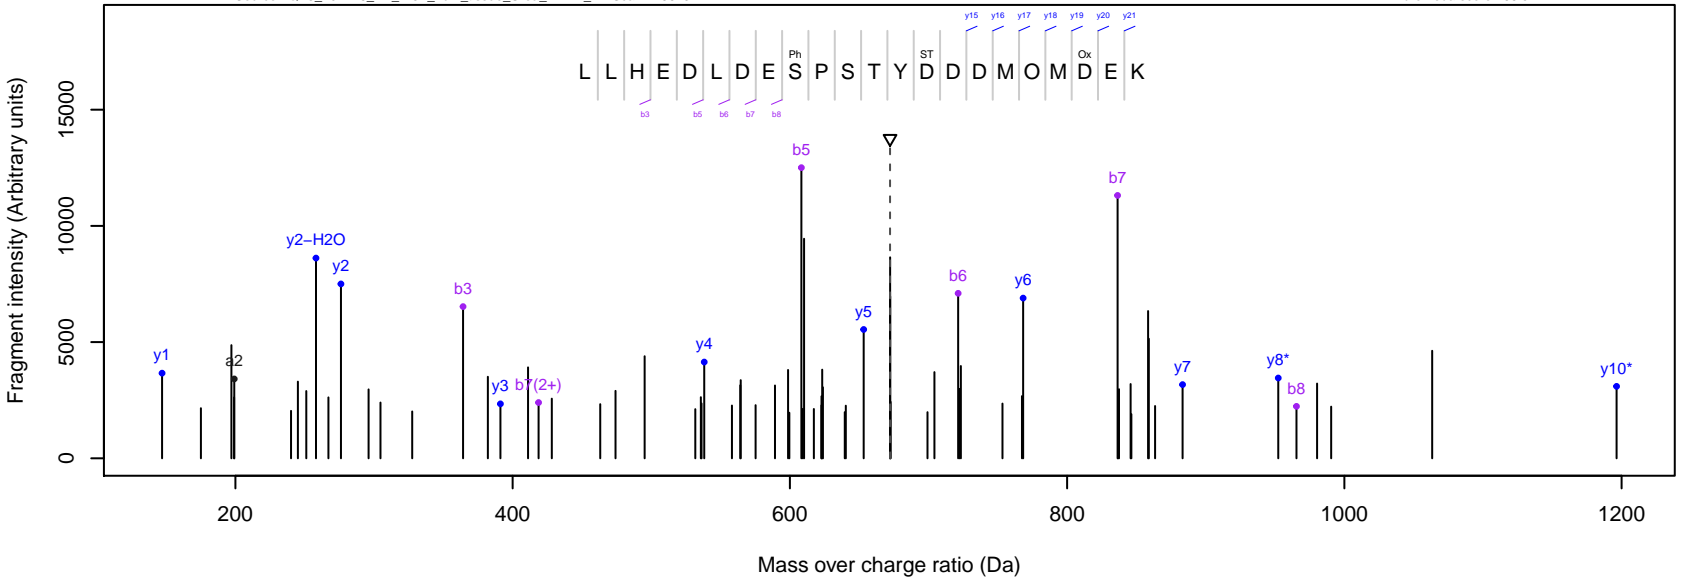

HAAERPGGT(Phospho (STY))PTPVIAYSK-3+

Source : QE3\_201126\_FR\_TiOx\_hum\_tissue\_Urea\_RNAB\_H Scan : 13684

Andromeda score : 66.871

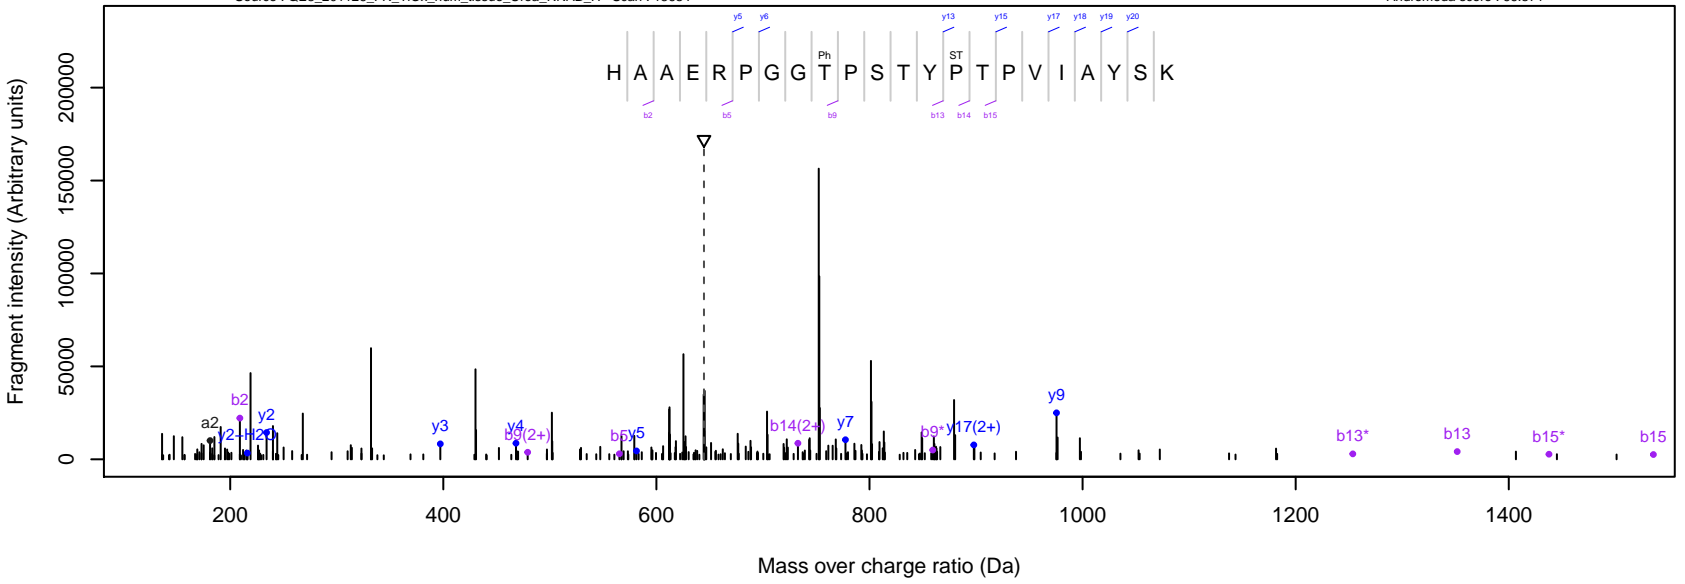

GPSRAS(Phospho (STY))S(Phospho (STY))VTFTGEPNTPCR-3+

Source : QE3\_201126\_FR\_TiOx\_hum\_tissue\_Urea\_RNAB\_B Scan : 24222

Andromeda score : 66.827

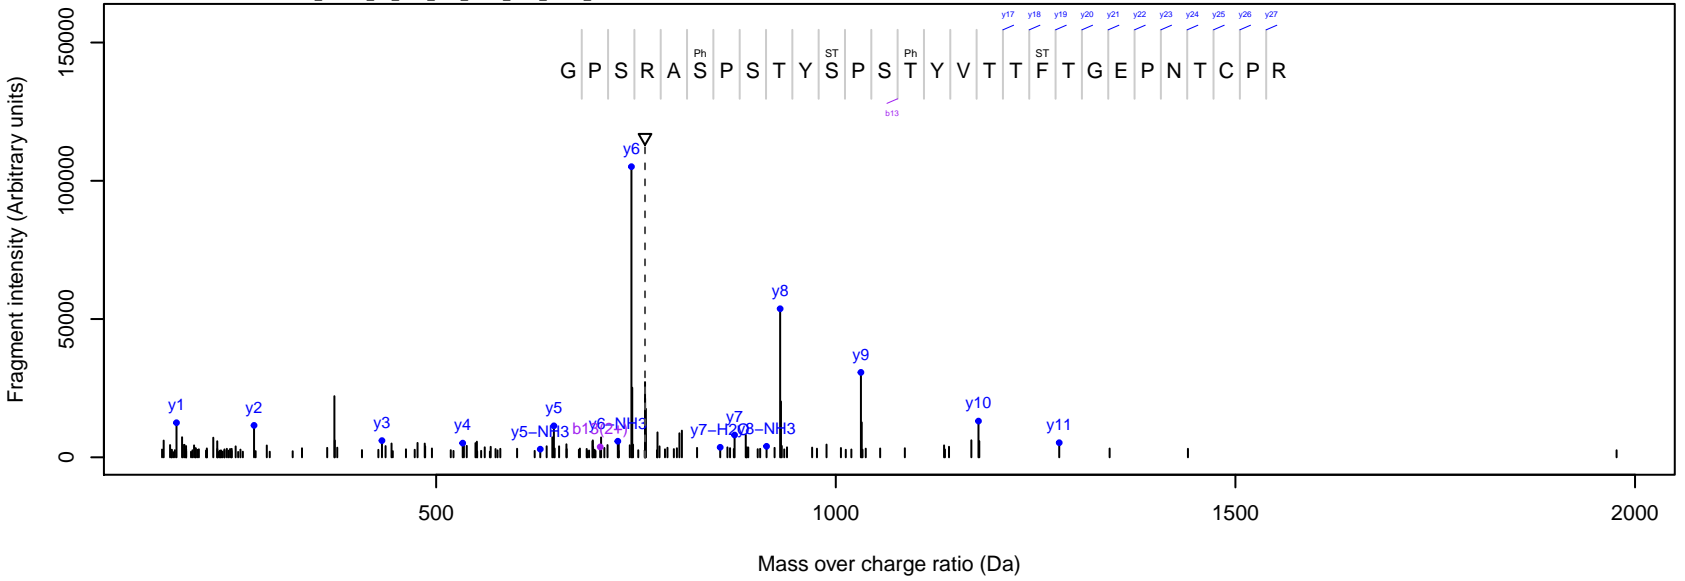

ALS(Phospho (STY))RQLS(Phospho (STY))SGVSEIR-2+

Source : QE3\_201126\_FR\_TiOx\_hum\_tissue\_Urea\_RNAB\_N Scan : 27005

Andromeda score : 66.809

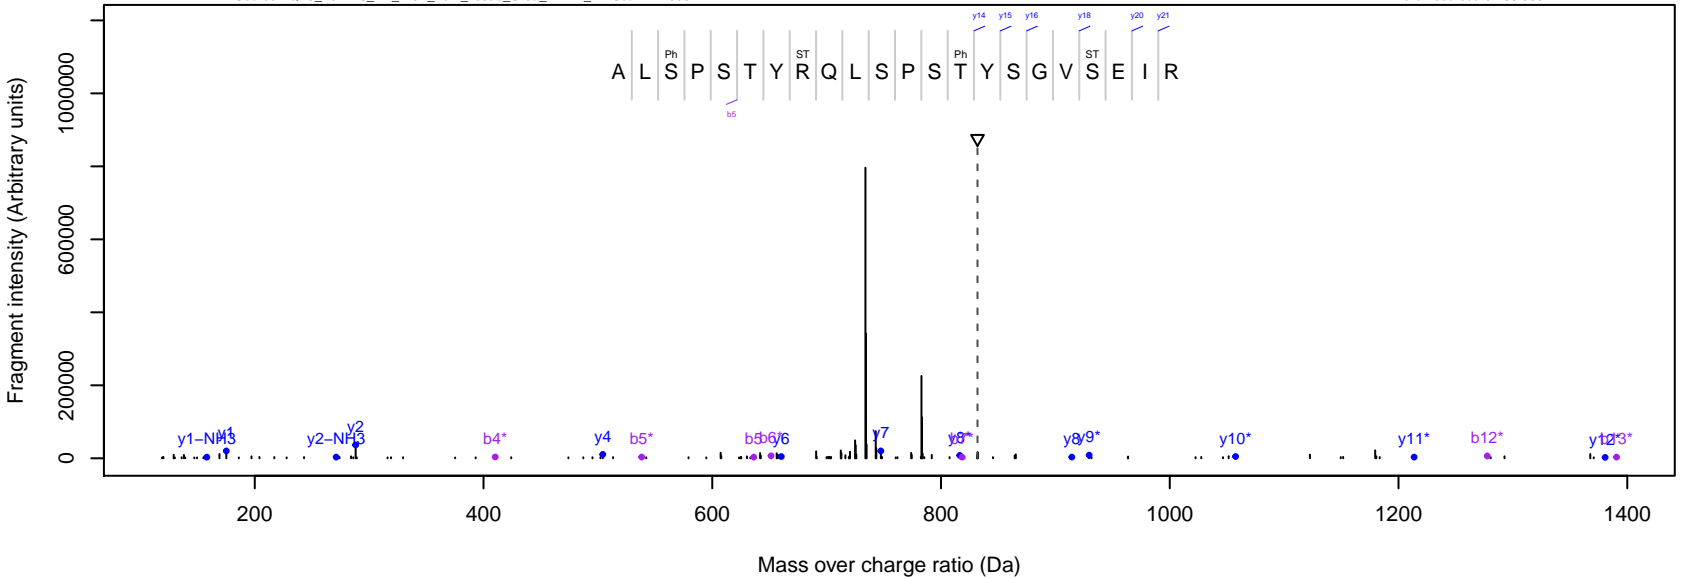

NES(Phospho (STY))LESPM(Oxidation (M))GEWGFQK-2+

Source : QE3\_201126\_FR\_TiOx\_hum\_tissue\_Urea\_RNAB\_B Scan : 37569

Andromeda score : 66.797

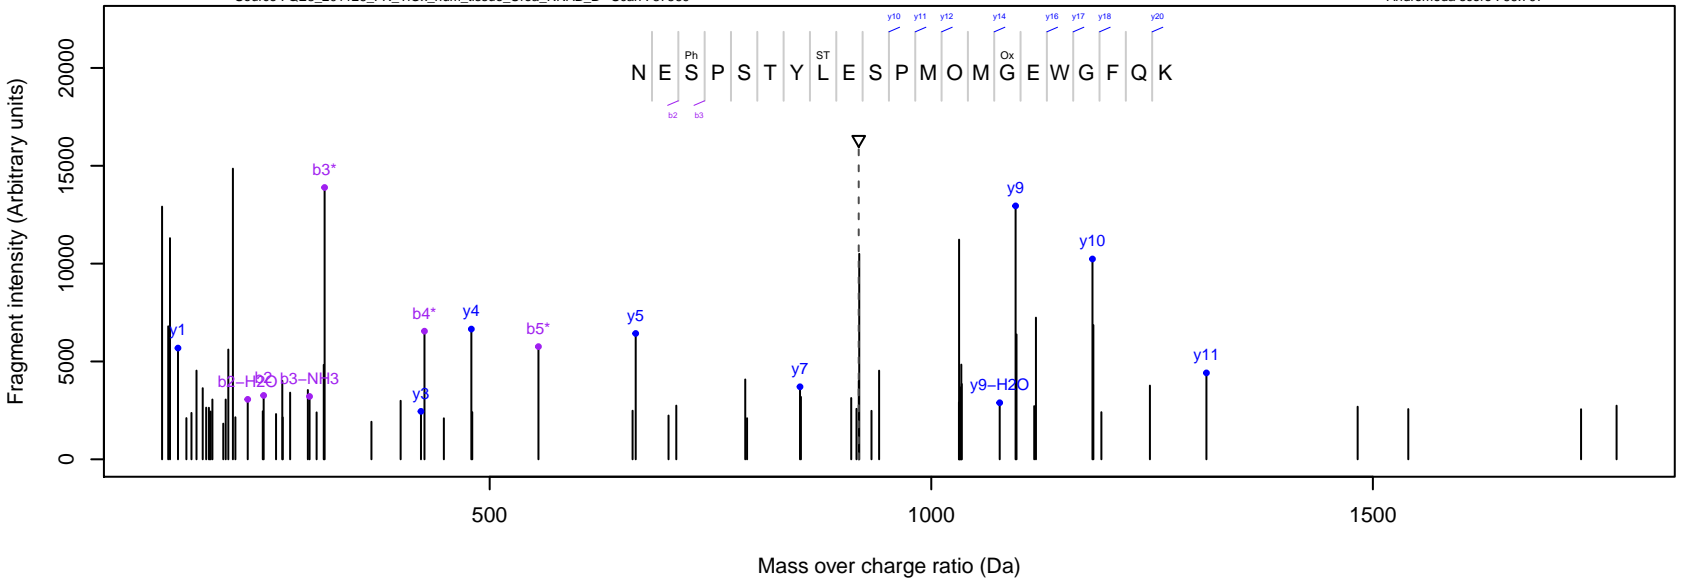

KRS(Phospho (STY))FGNPFEGSR-3+

Source : QE3\_201126\_FR\_TiOx\_hum\_tissue\_Urea\_RNAB\_H Scan : 15270

Andromeda score : 66.795

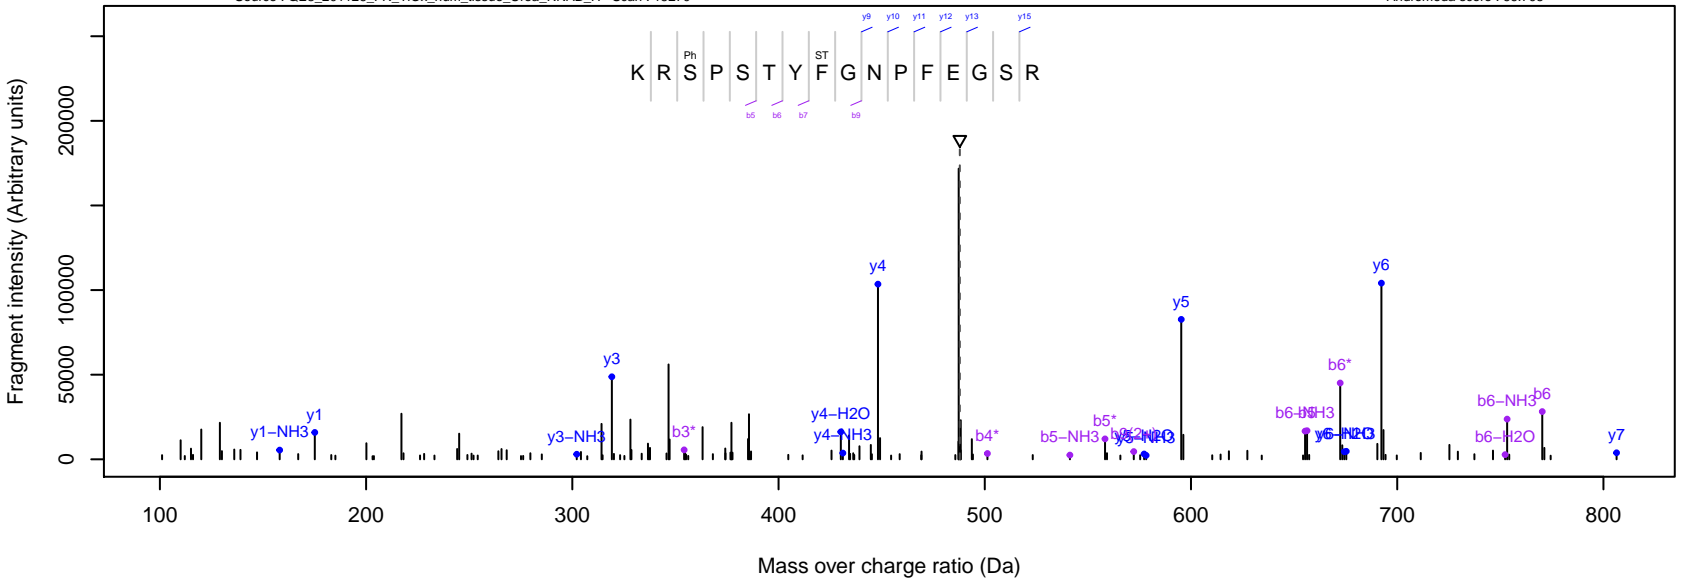

TNS(Phospho (STY))SDSERS(Phospho (STY))PDLGHSTQIPR-3+

Source : QE3\_201126\_FR\_TiOx\_hum\_tissue\_Urea\_RNAB\_H Scan : 15912

Andromeda score : 66.793

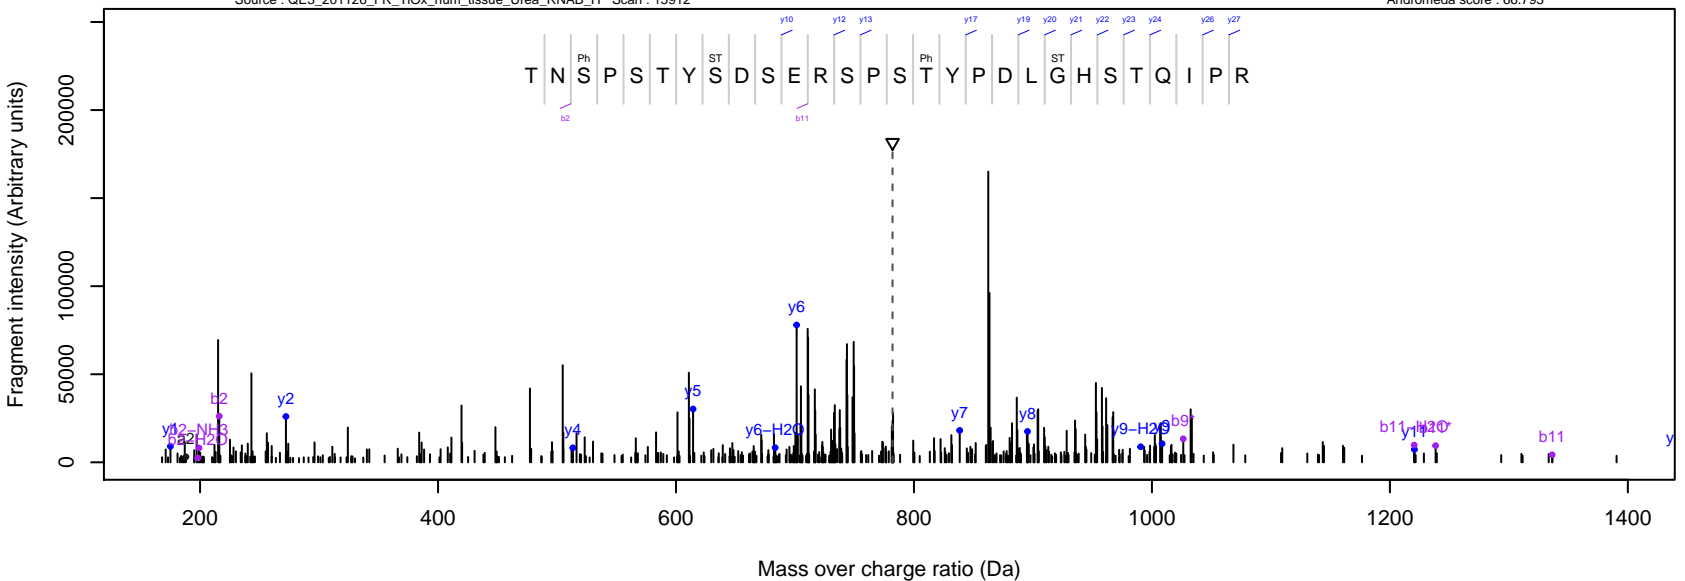

### SSS(Phospho (STY))FGNFDR-2+

Source : QE3\_201126\_FR\_TiOx\_hum\_tissue\_Urea\_RNAB\_B Scan : 21830

Andromeda score : 66.758

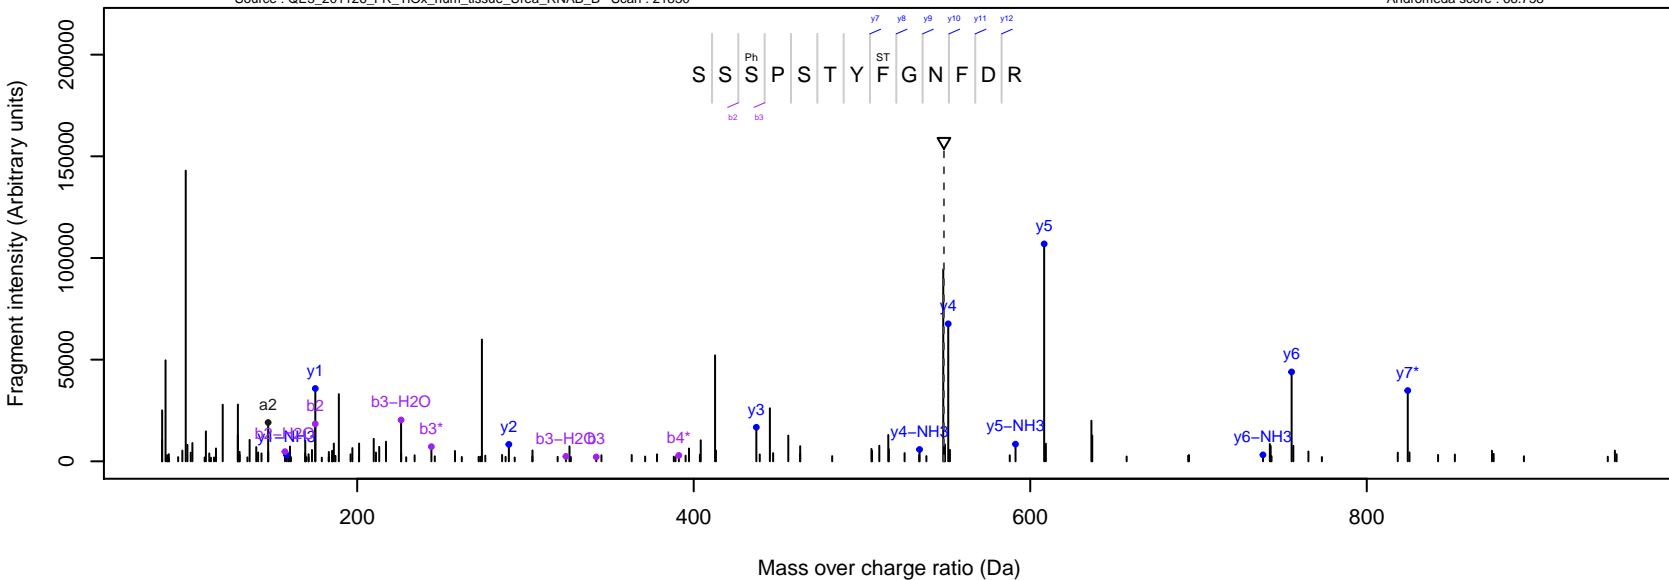

### GPVGT(Phospho (STY))VS(Phospho (STY))EAQLAR-2+

Source : QE3\_201126\_FR\_TiOx\_hum\_tissue\_Urea\_RNAB\_B Scan : 29498

Andromeda score : 66.708

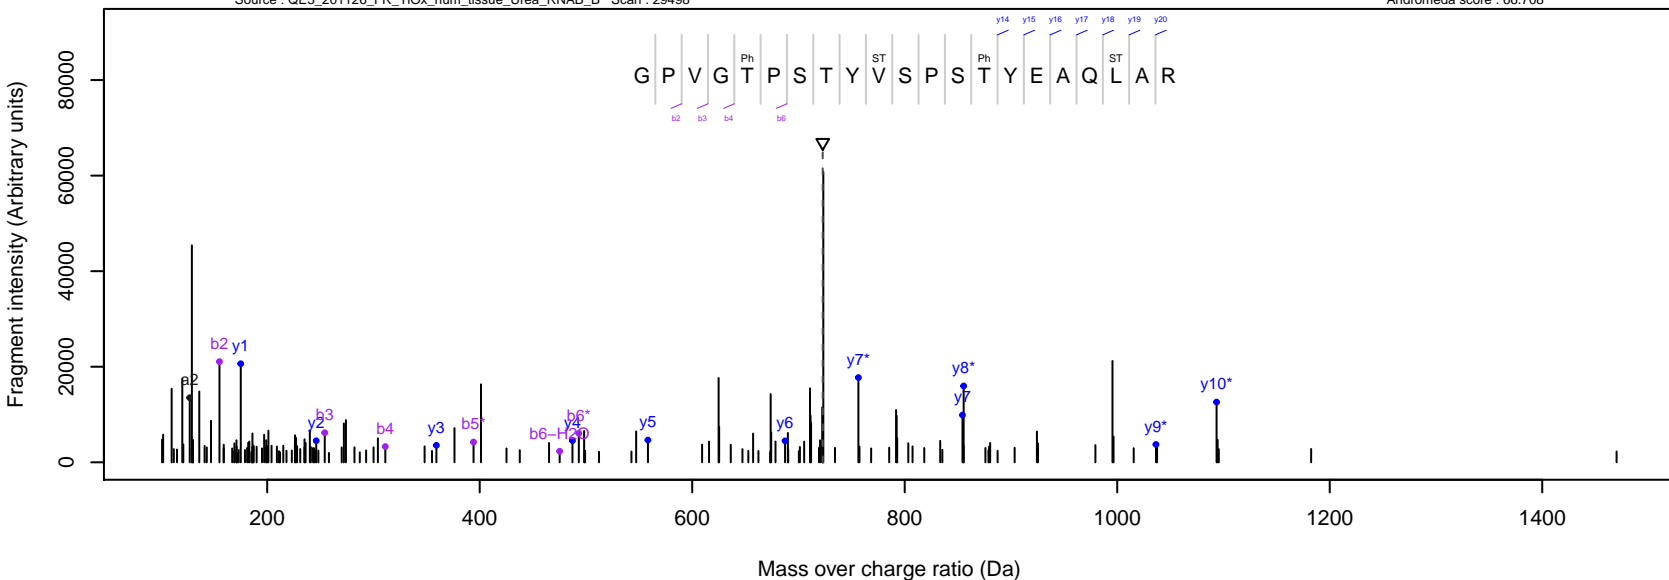

### LGGAEEERPGT(Phospho (STY))PELAPAPMQSAVAEPLPS(Phospho (STY))PR-3+

Source : QE3\_201126\_FR\_TiOx\_hum\_tissue\_Urea\_RNAB\_N Scan : 44965

Andromeda score : 66.683

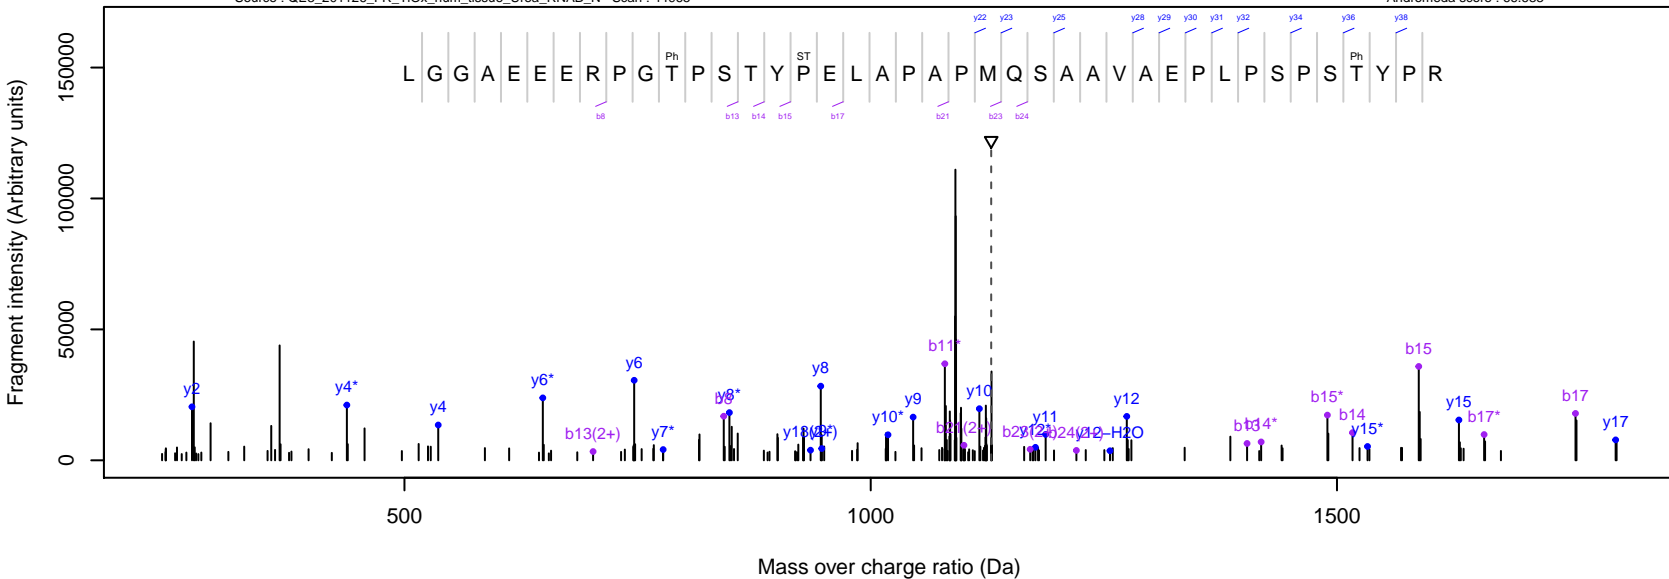

TVSS(Phospho (STY))PIPYTPS(Phospho (STY))PSSSRPISPLSYASHTVGFPTPTSLTR-4+

Source : QE3\_201126\_FR\_TiOx\_hum\_tissue\_Urea\_RNAB\_H Scan : 51530

Andromeda score : 66.683

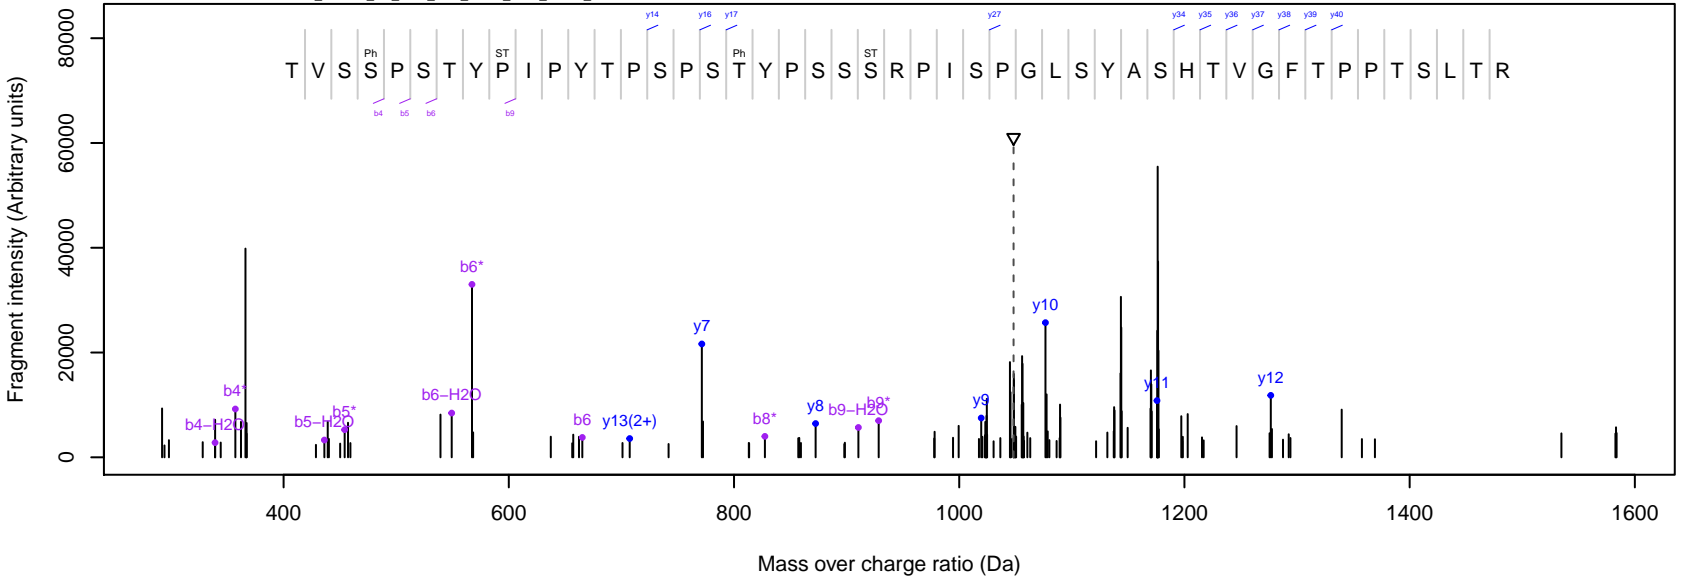

ERDHS(Phospho (STY))PT(Phospho (STY))PSVFNSEER-3+

Source : QE3\_201126\_FR\_TiOx\_hum\_tissue\_Urea\_RNAB\_N Scan : 16500

Andromeda score : 66.644

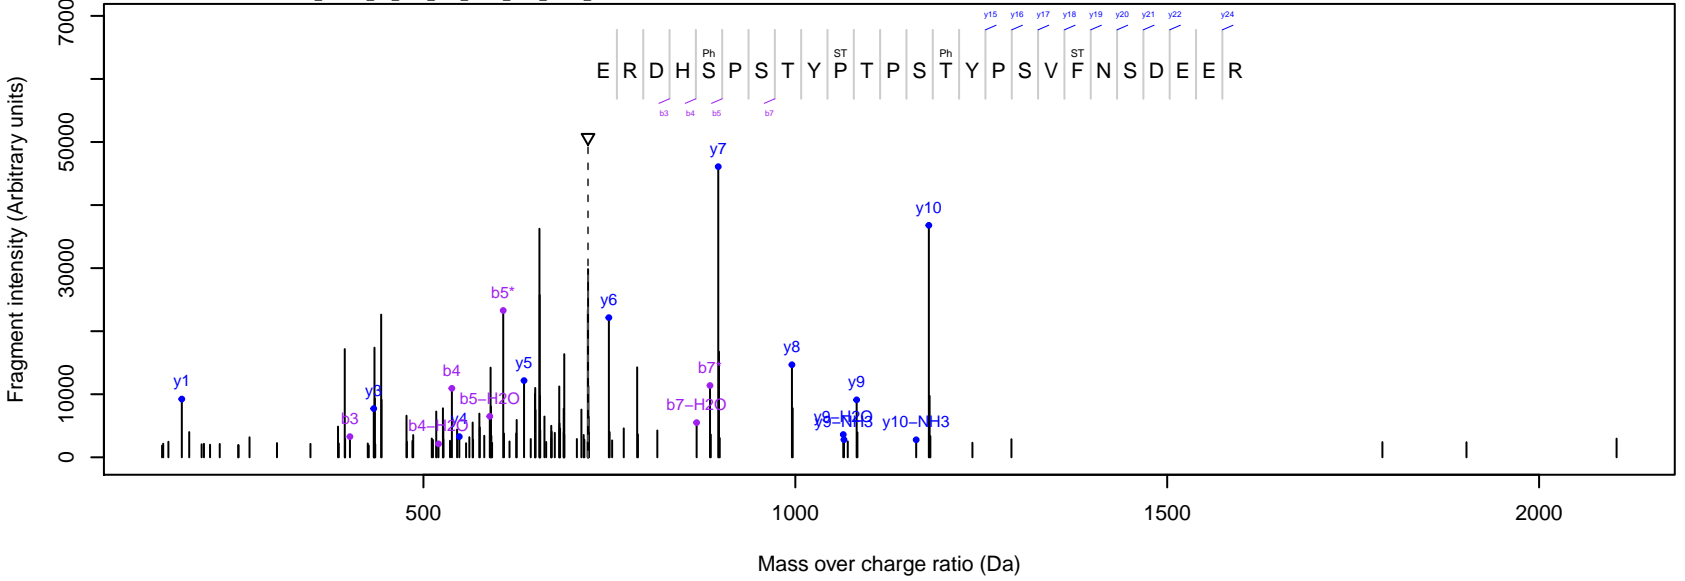

MSCFSRPS(Phospho (STY))MSPTPLDR-3+

Source : QE3\_201126\_FR\_TiOx\_hum\_tissue\_Urea\_RNAB\_H Scan : 27045

Andromeda score : 66.644

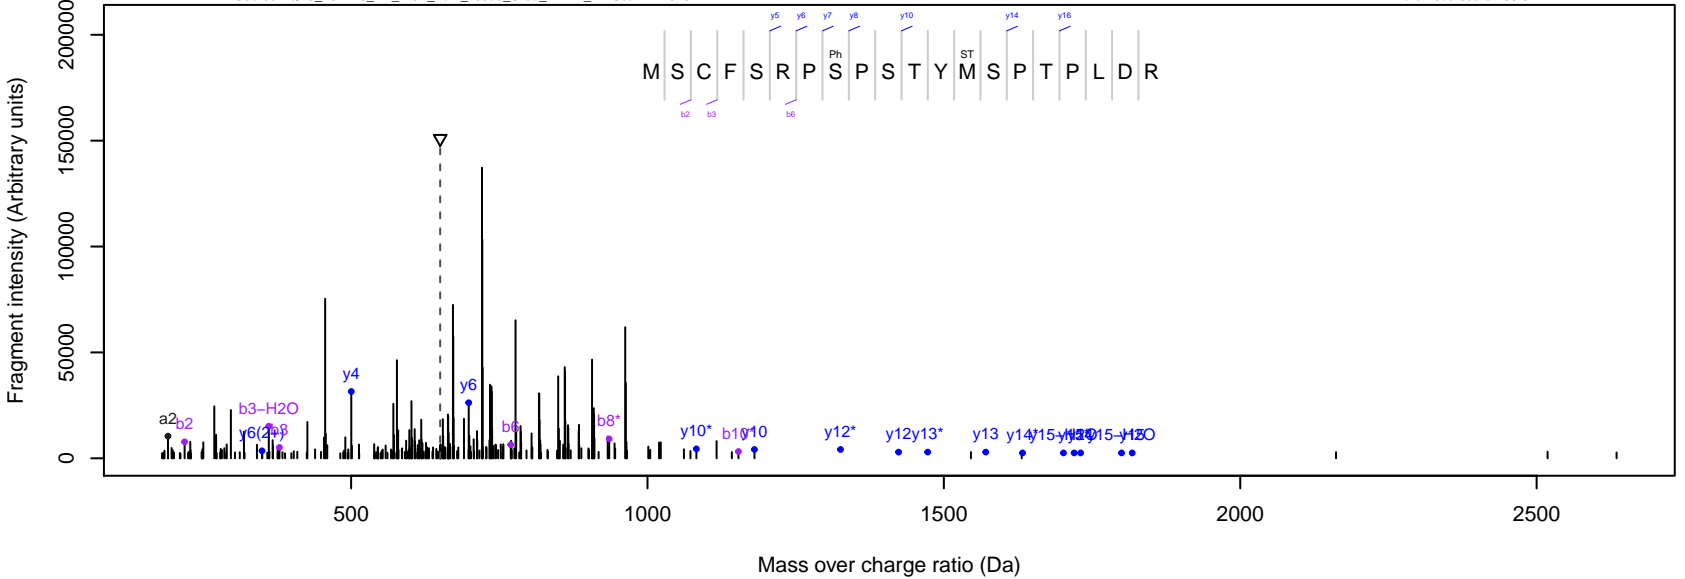

HAIM(Oxidation (M))RS(Phospho (STY))PQM(Oxidation (M))VSAIVR-3+

Source : QE3\_201126\_FR\_TIOx\_hum\_tissue\_Urea\_RNAB\_N Scan : 12925

Andromeda score : 66.606

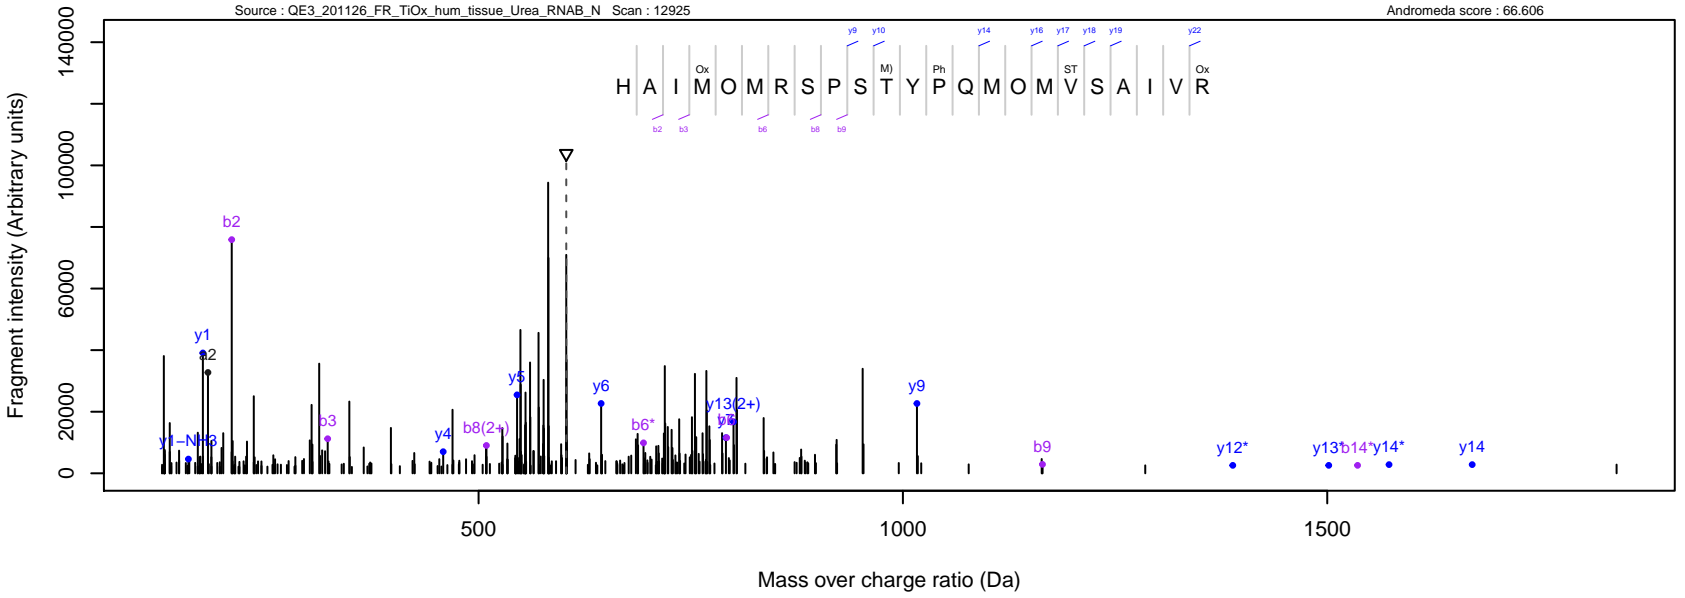

ETM(Oxidation (M))QS(Phospho (STY))LNDR-2+

Source : QE3\_201126\_FR\_TIOx\_hum\_tissue\_Urea\_RNAB\_H Scan : 5937

Andromeda score : 66.595

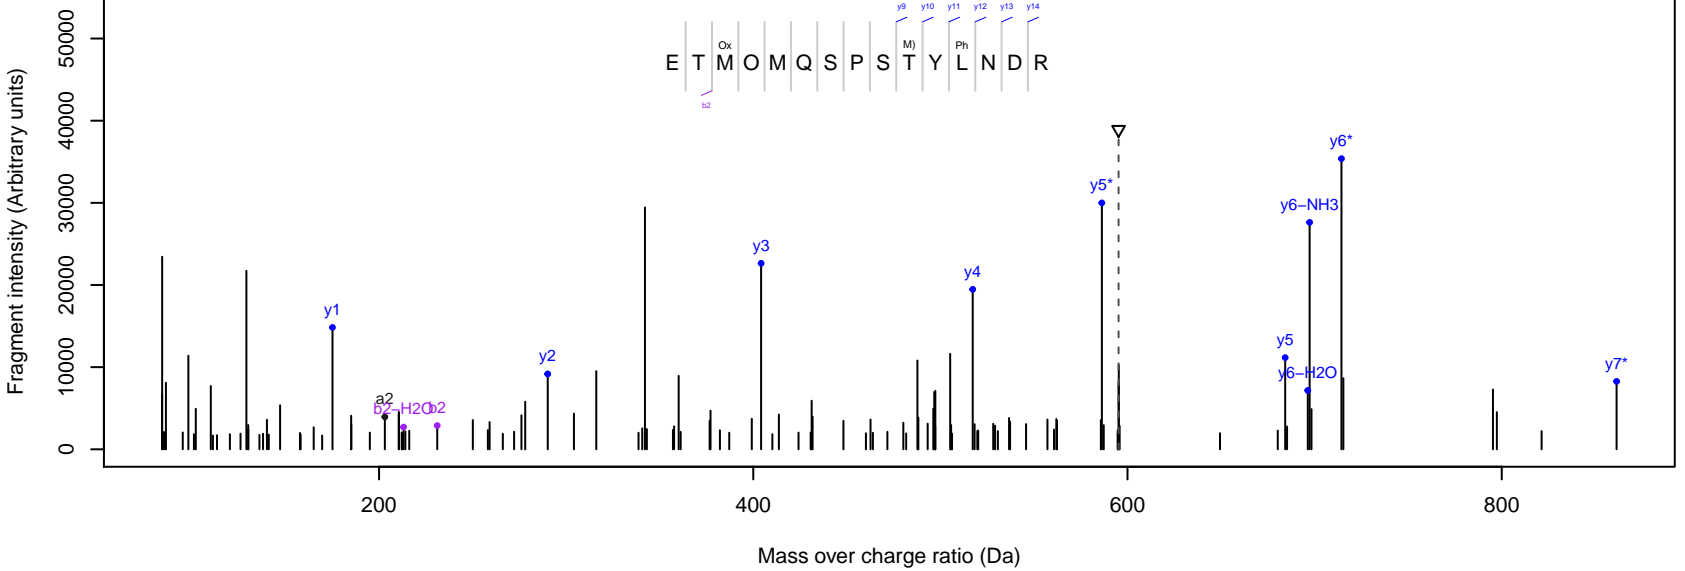

KSAEPSANTLLVS(Phospho (STY))ETEEEGSVPAFGAAK-3+

Source : QE3\_201126\_FR\_TIOx\_hum\_tissue\_Urea\_RNAB\_H Scan : 34851

Andromeda score : 66.593

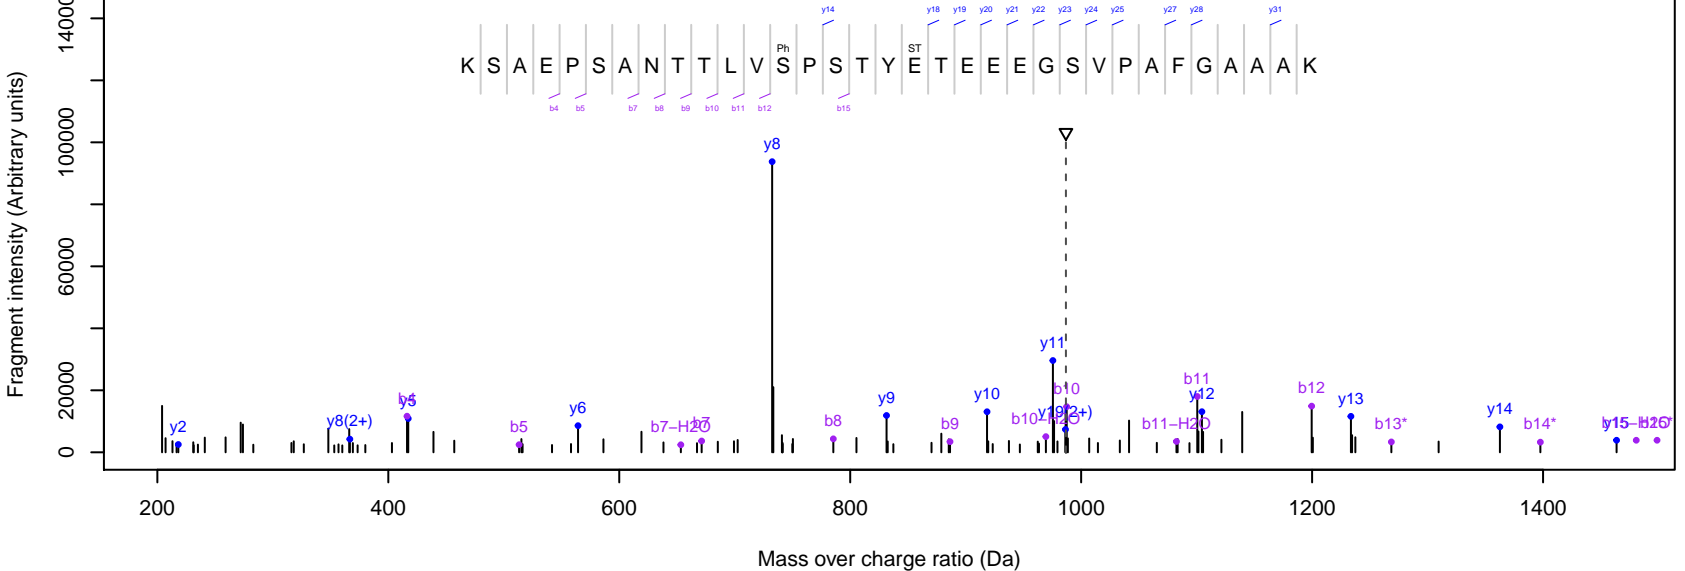



EDMAALEKDY(Phospho (STY))EEVGVDSVEGEGEEGEEY-3+

Source : QE3\_201126\_FR\_TiOx\_hum\_tissue\_Urea\_RNAB\_B Scan : 48014

Andromeda score : 66.545

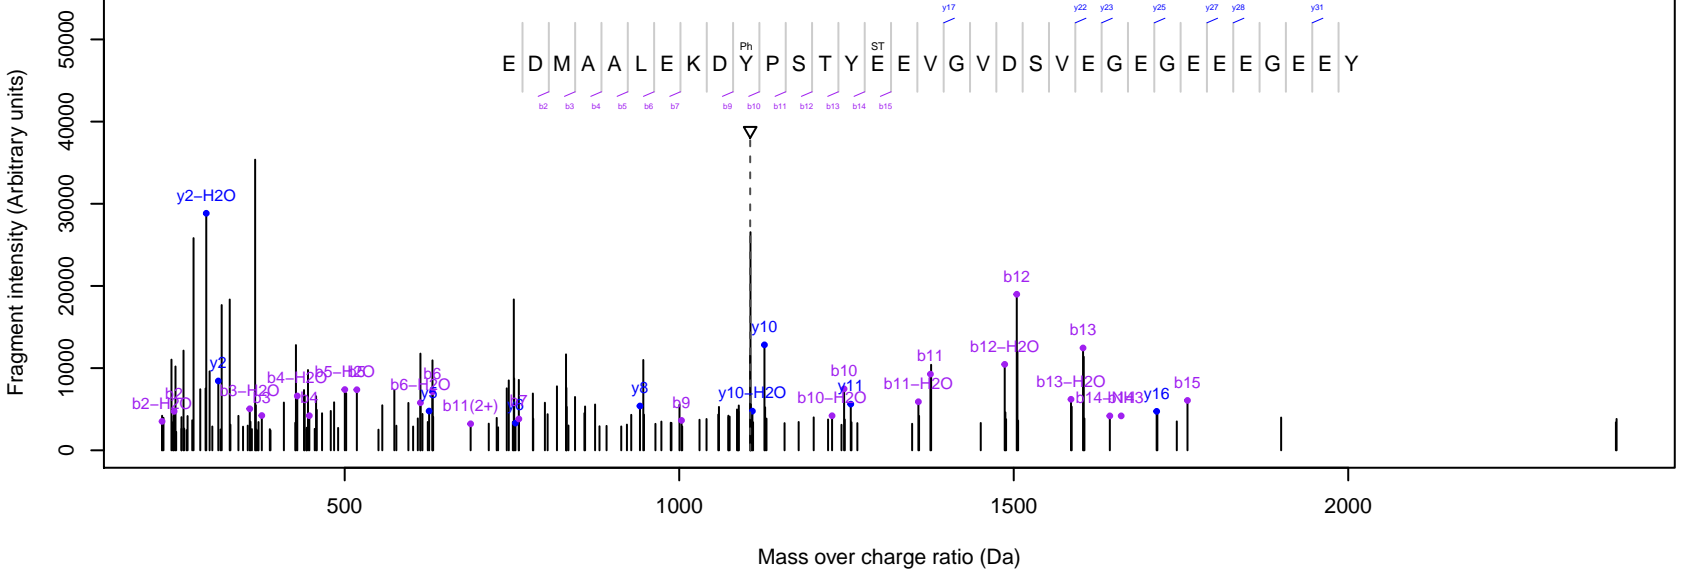

YS(Phospho (STY))SCSTIFLDDSTVSPNLK-2+

Source : QE3\_201126\_FR\_TiOx\_hum\_tissue\_Urea\_RNAB\_B Scan : 45117

Andromeda score : 66.533

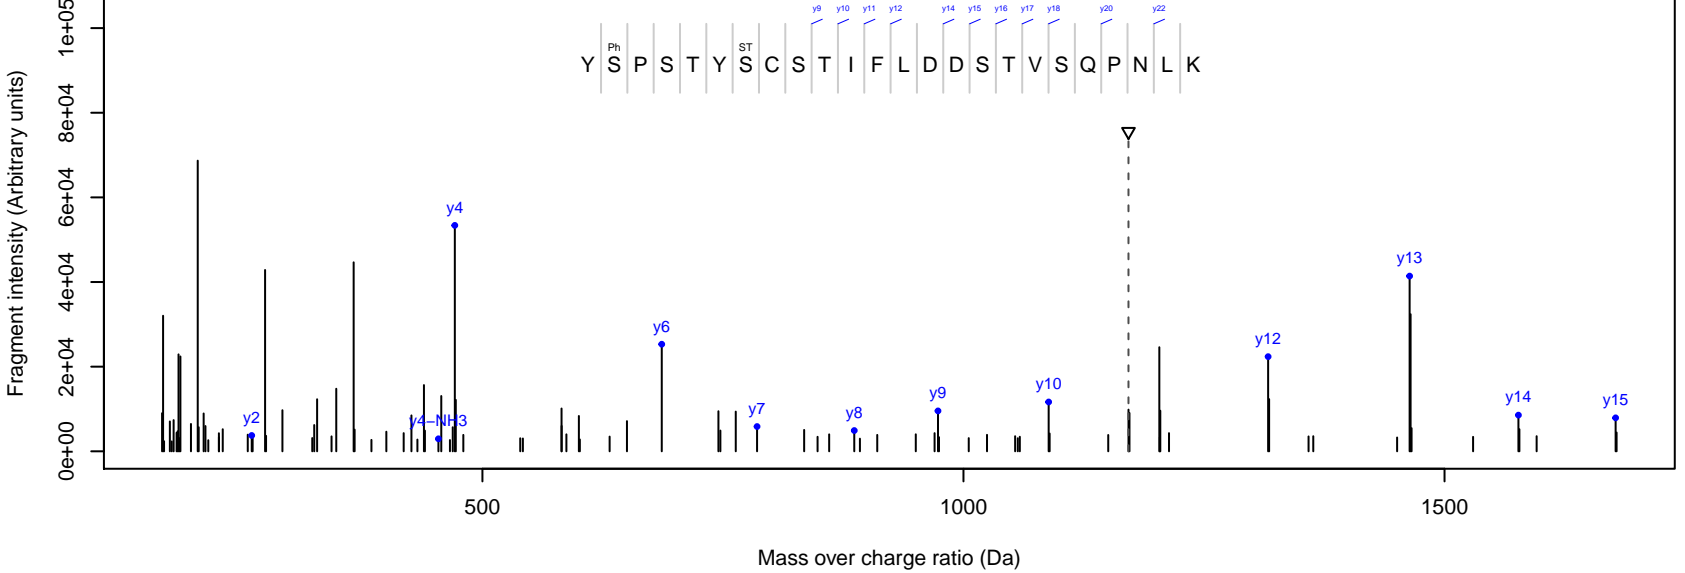

SVAS(Phospho (STY))NQS(Phospho (STY))EM(Oxidation (M))EFSSLQDM(Oxidation (M))PK-3+

Source : QE3\_201126\_FR\_TiOx\_hum\_tissue\_Urea\_RNAB\_N Scan : 34132

Andromeda score : 66.52

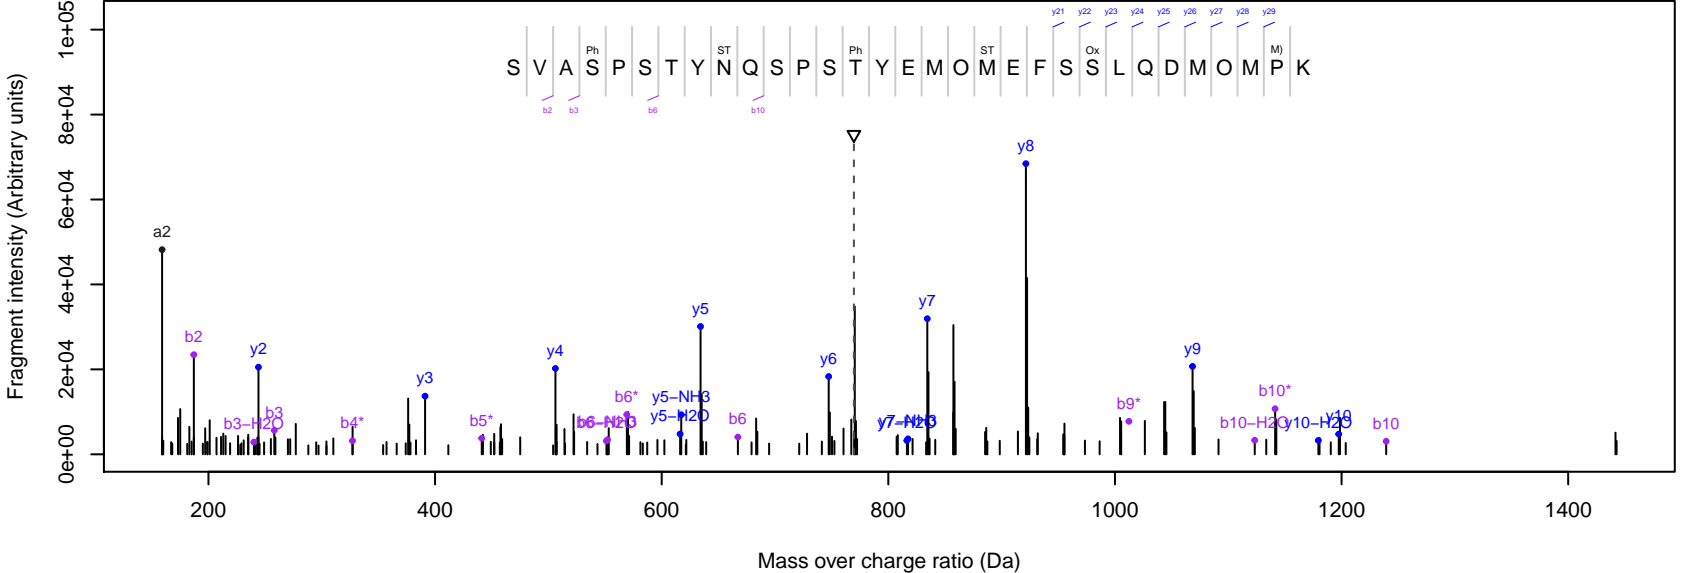

SYEDMIGEEVPSDQYY(Phospho (STY))WAPLAQHERGSLAS(Phospho (STY))LDLRLK-4+

Source : QE3\_201126\_FR\_TiOx\_hum\_tissue\_Urea\_RNAB\_N Scan : 53743

Andromeda score : 66.519

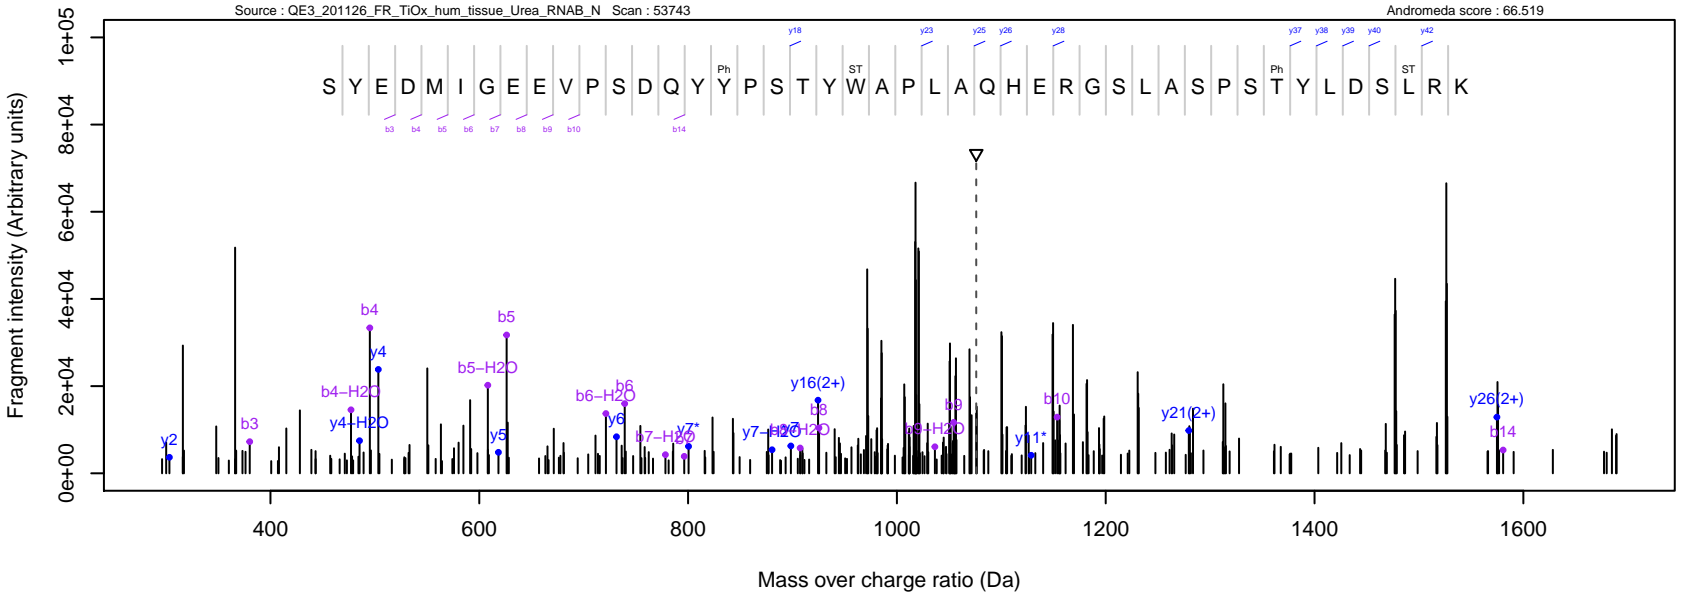

T(Phospho (STY))ASAPNLAETEKETAHLDLAGASSR-3+

Source : QE3\_201126\_FR\_TiOx\_hum\_tissue\_Urea\_RNAB\_H Scan : 36238

Andromeda score : 66.511

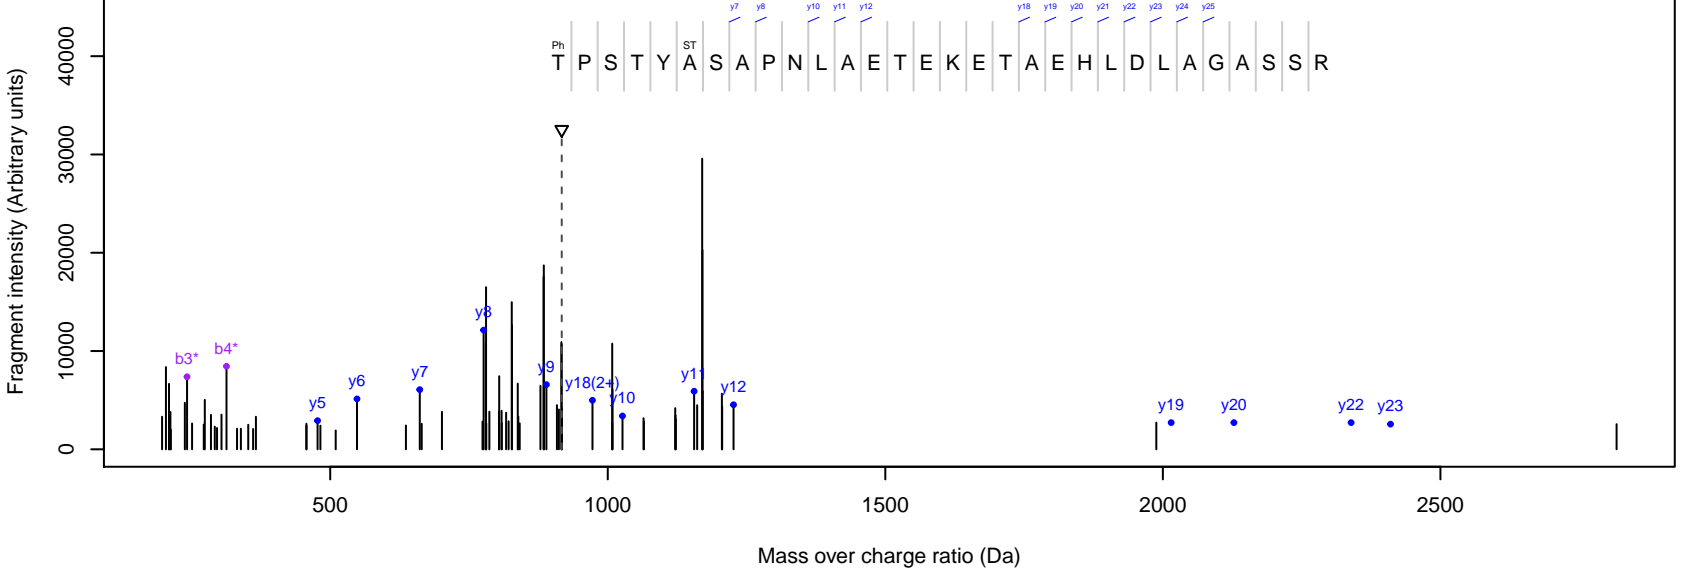

SSQGSS(Phospho (STY))LKDLGLK-2+

Source : QE3\_201126\_FR\_TiOx\_hum\_tissue\_Urea\_RNAB\_H Scan : 18725

Andromeda score : 66.509

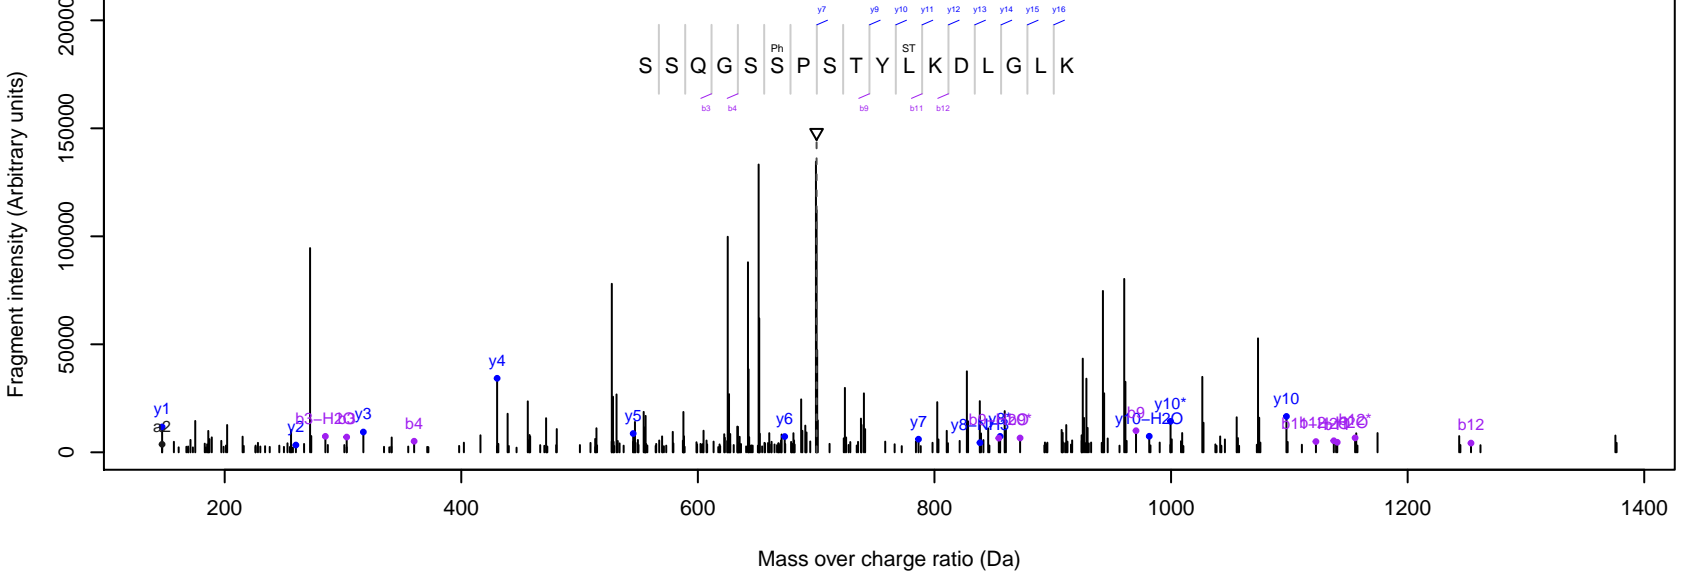

KKPEDS(Phospho (STY))PSDDDLVILYELPTAEQK-3+

Source : QE3\_201126\_FR\_TIOx\_hum\_tissue\_Urea\_RNAB\_N Scan : 43451

Andromeda score : 66.501

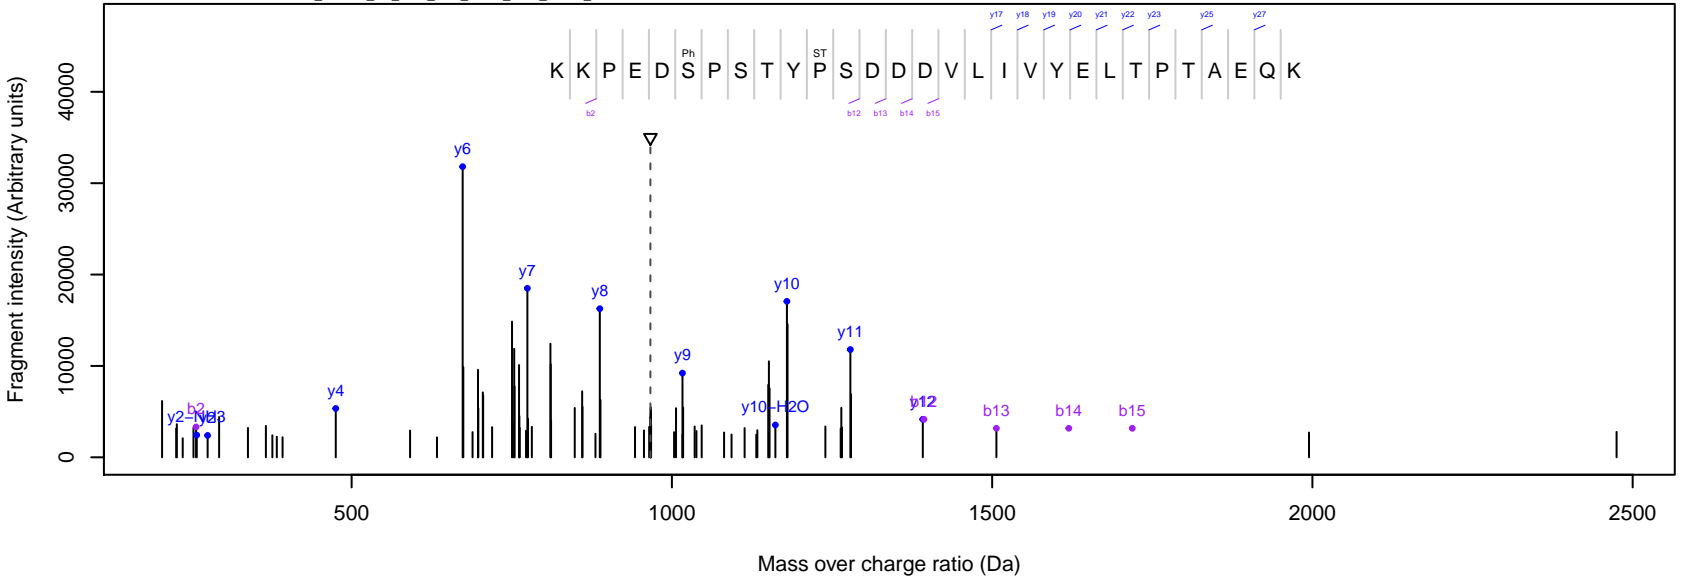

T(Phospho (STY))TGTPDSSLVYELHSRPEQDKFSQAAK-4+

Source : QE3\_201126\_FR\_TIOx\_hum\_tissue\_Urea\_RNAB\_N Scan : 27941

Andromeda score : 66.461

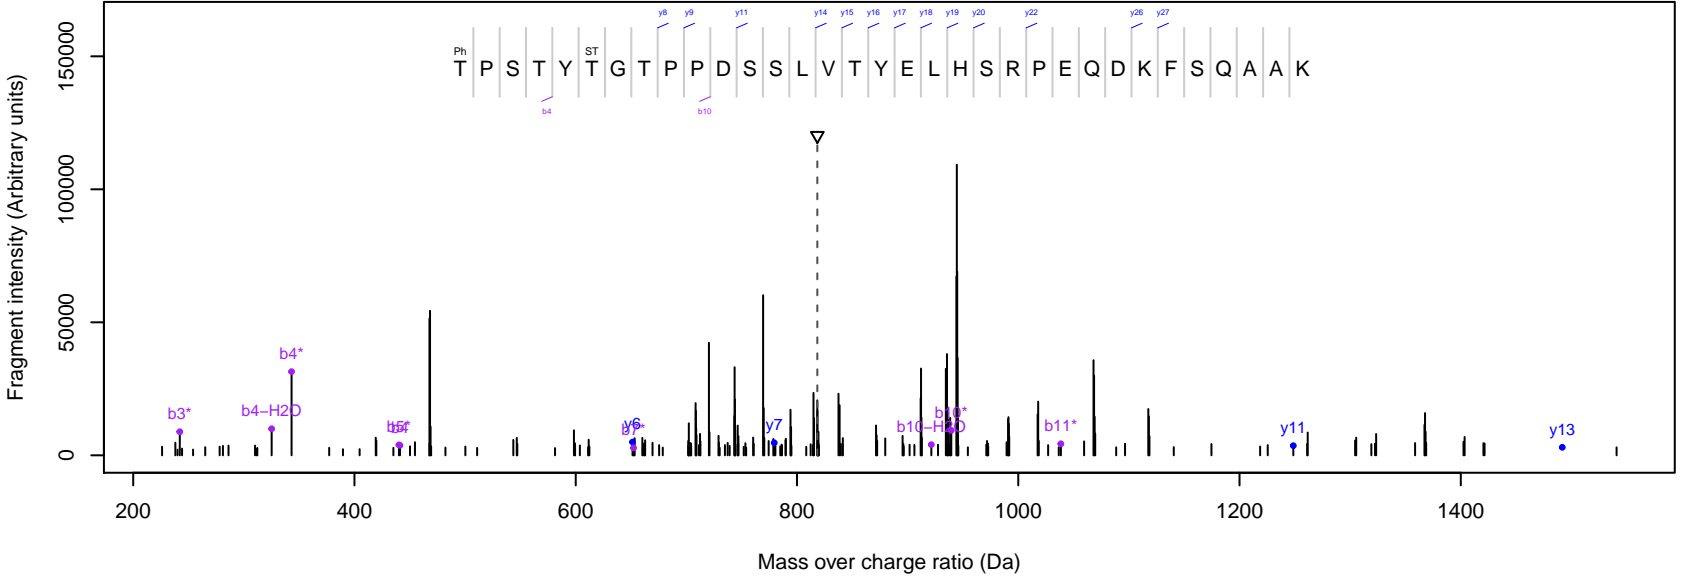

(Acetyl (Protein N-term))M(Oxidation (M))DGFAGSLDDSI(AA)STPSTYSDVQDR-3+

Source : QE3\_201126\_FR\_TIOx\_hum\_tissue\_Urea\_RNAB\_B Scan : 52710

Andromeda score : 66.447

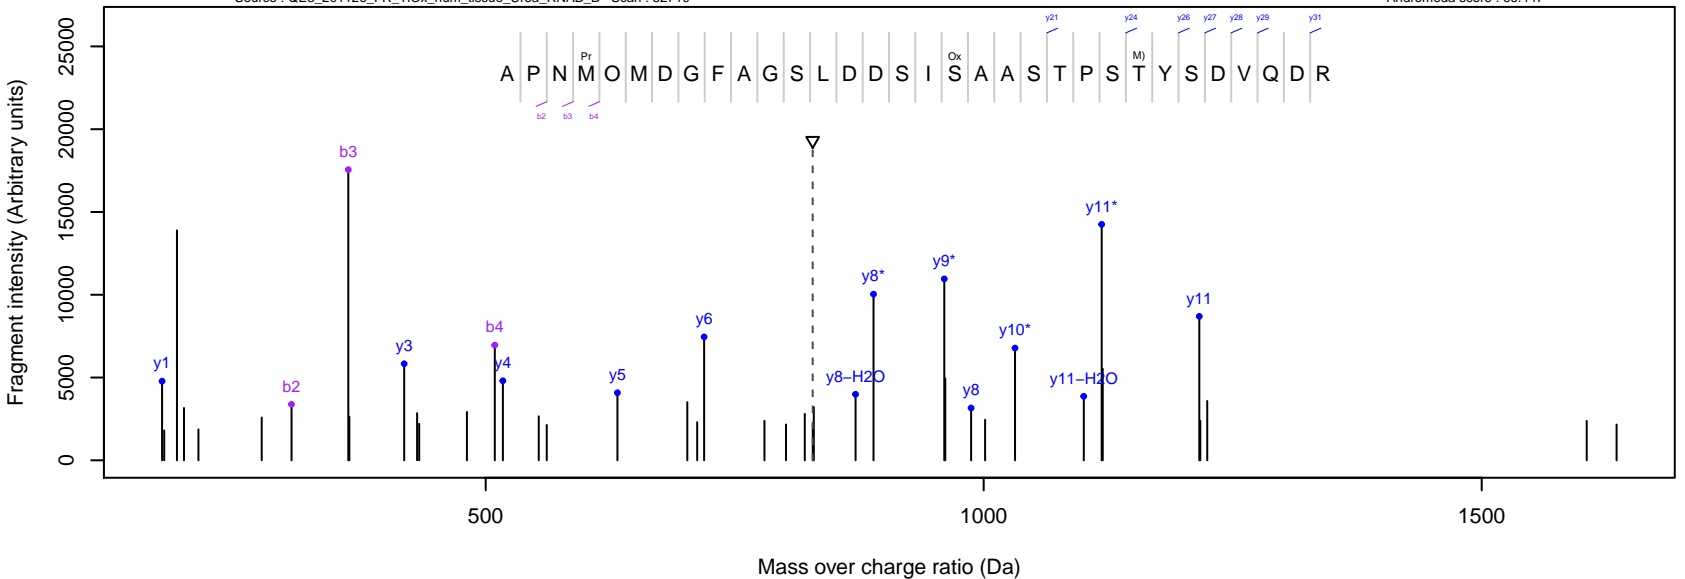

S(Phospho (STY))SSAPLIHGLSDLSQVFPYTLR-3+

Source : QE3\_201126\_FR\_TiOx\_hum\_tissue\_Urea\_RNAB\_H Scan : 60812

Andromeda score : 66.447

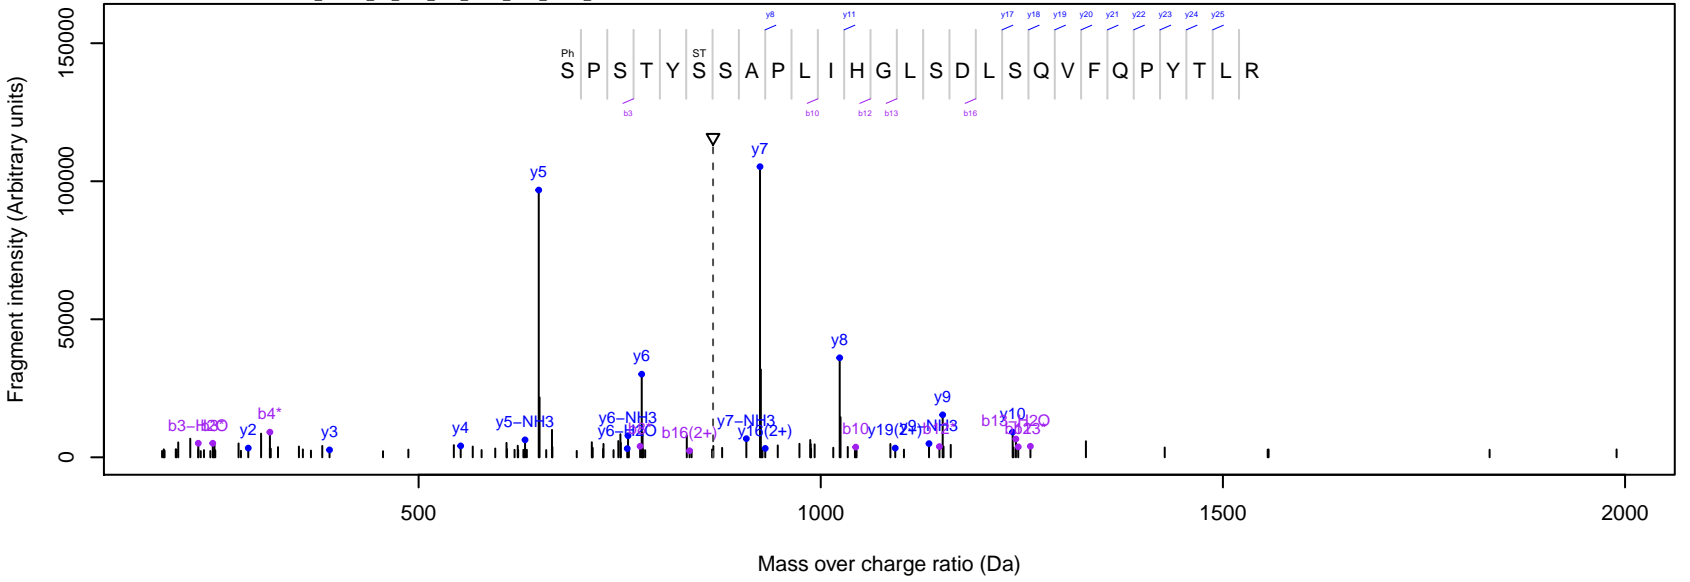

RGIAIAYEDEGS(Phospho (STY))G-2+

Source : QE3\_201126\_FR\_TiOx\_hum\_tissue\_Urea\_RNAB\_B Scan : 26240

Andromeda score : 66.393

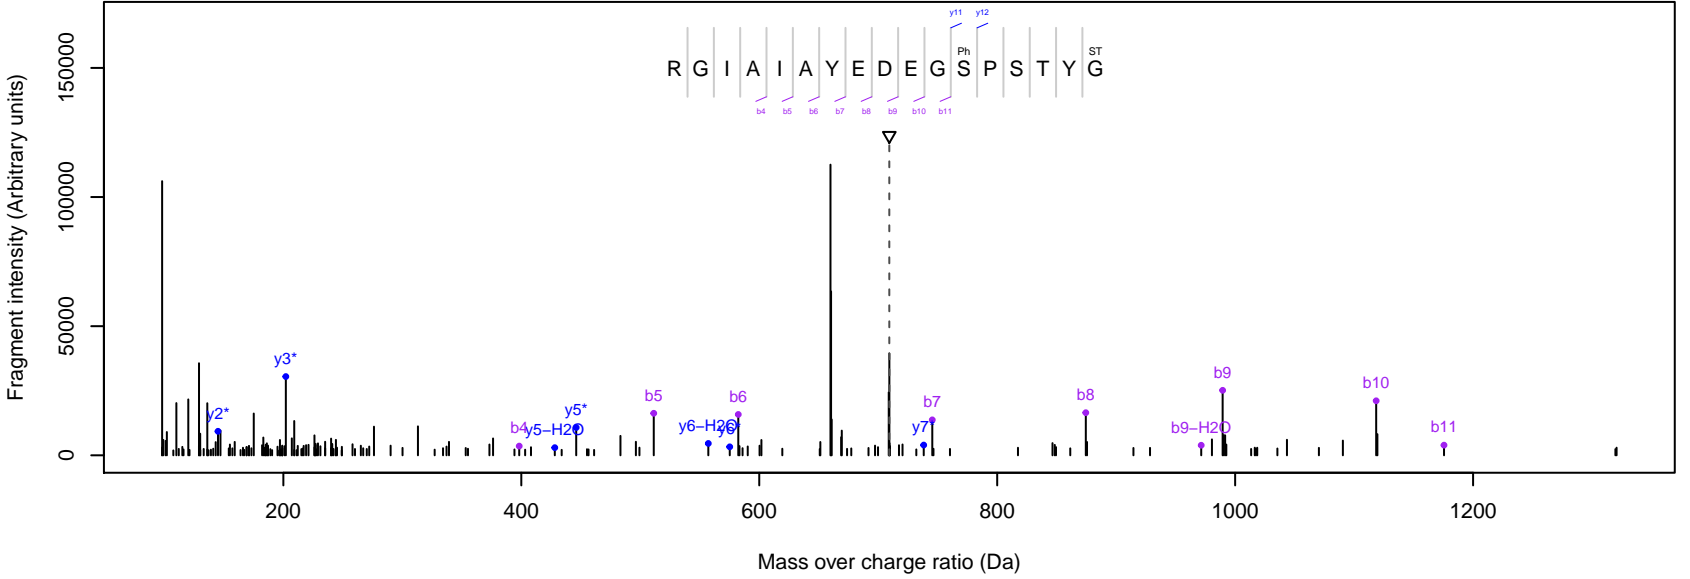

SRNS(Phospho (STY))PLLER-3+

Source : QE3\_201126\_FR\_TiOx\_hum\_tissue\_Urea\_RNAB\_B Scan : 8571

Andromeda score : 66.393

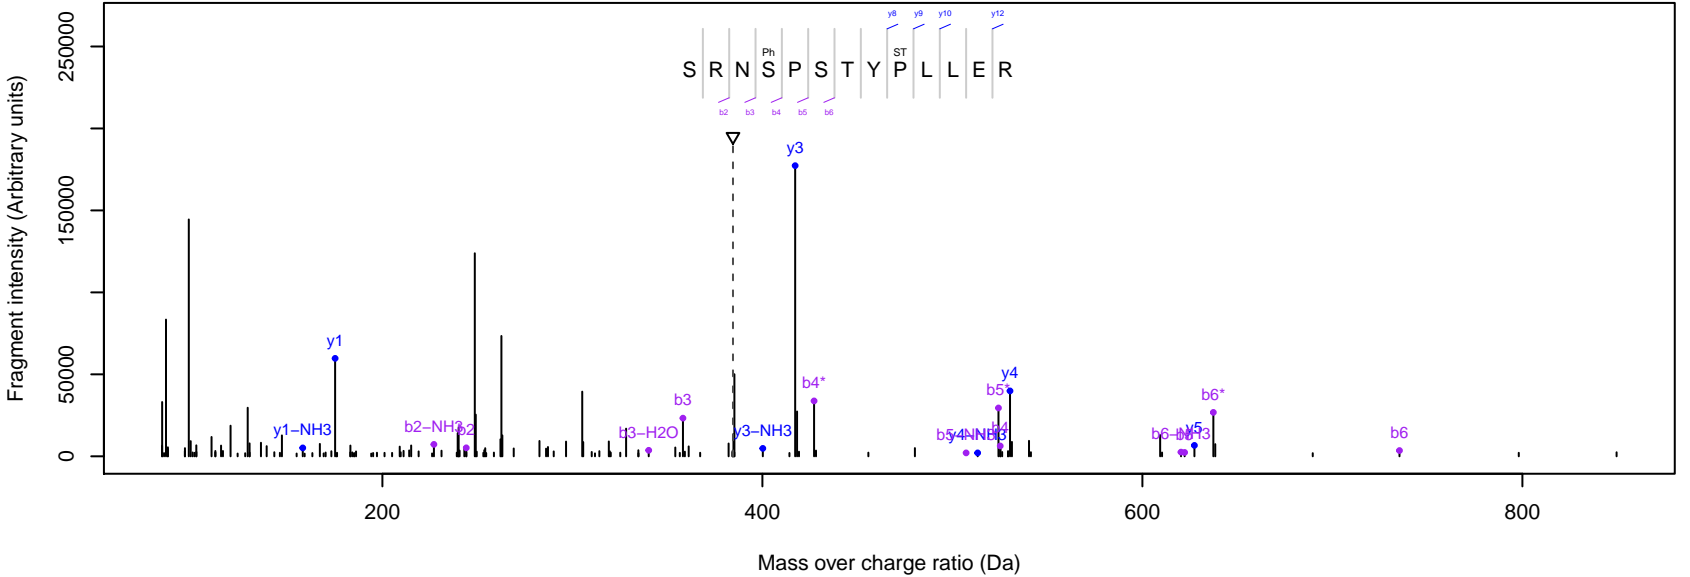

LATKS(Phospho (STY))SPVKVGEK-3+

Source : QE3\_201126\_FR\_TiOx\_hum\_tissue\_Urea\_RNAB\_H Scan : 5736

Andromeda score : 66.387

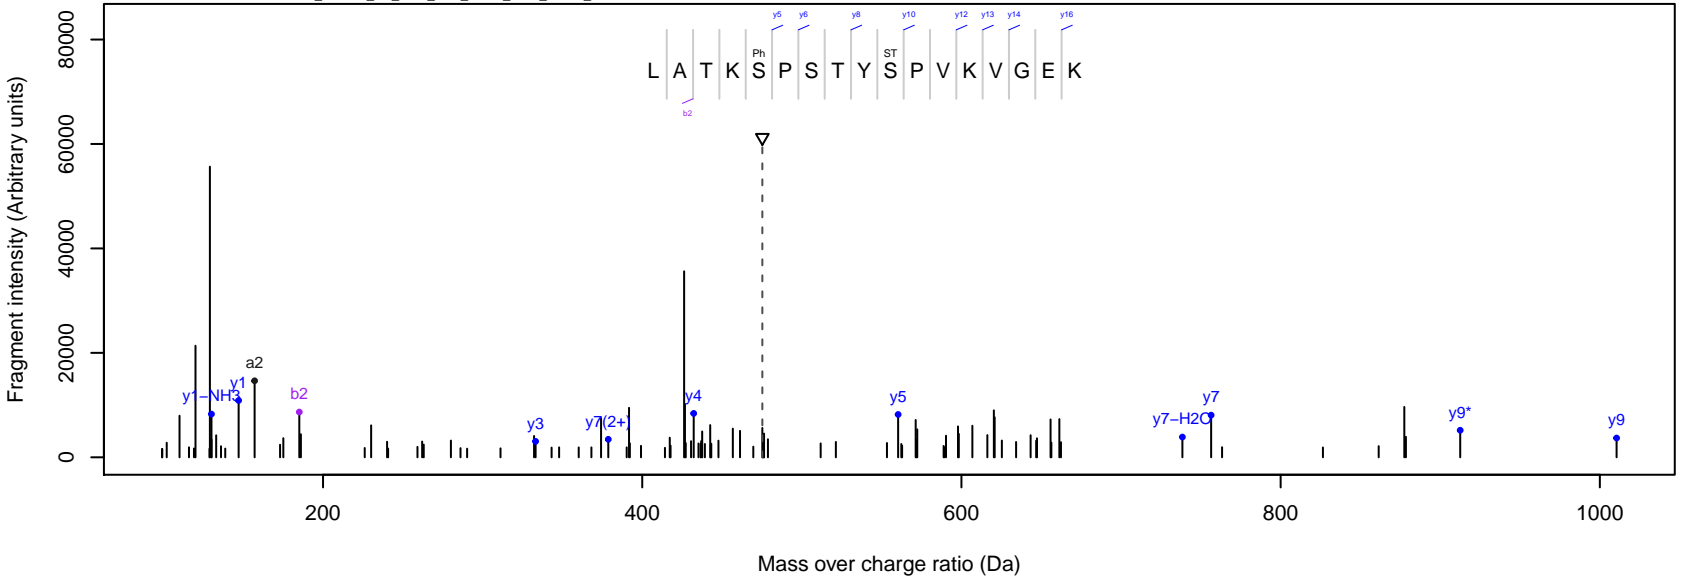

AFWMAIGDRDEIEGLS(Phospho (STY))SDEEH-3+

Source : QE3\_201126\_FR\_TiOx\_hum\_tissue\_Urea\_RNAB\_H Scan : 52098

Andromeda score : 66.383

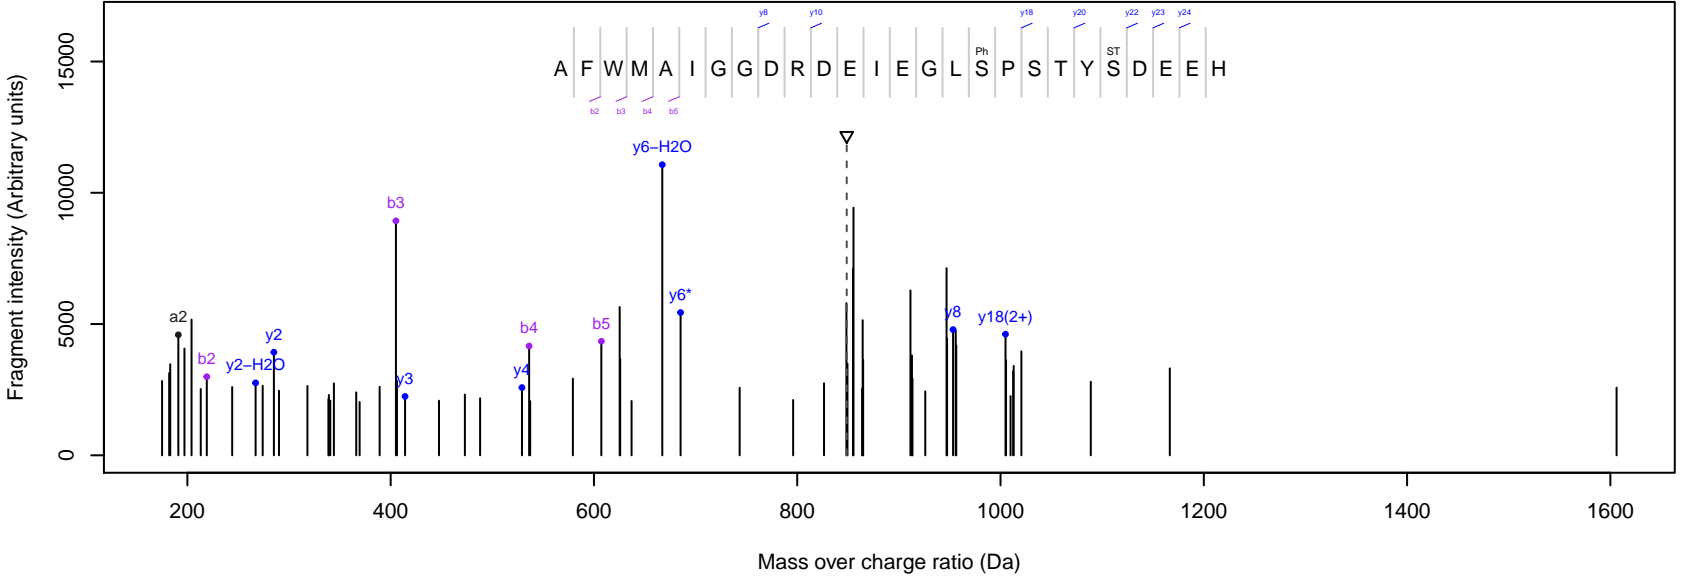

NLS(Phospho (STY))SDDANLVVHALLLPDQPPYHLK-3+

Source : QE3\_201126\_FR\_TiOx\_hum\_tissue\_Urea\_RNAB\_H Scan : 57403

Andromeda score : 66.378

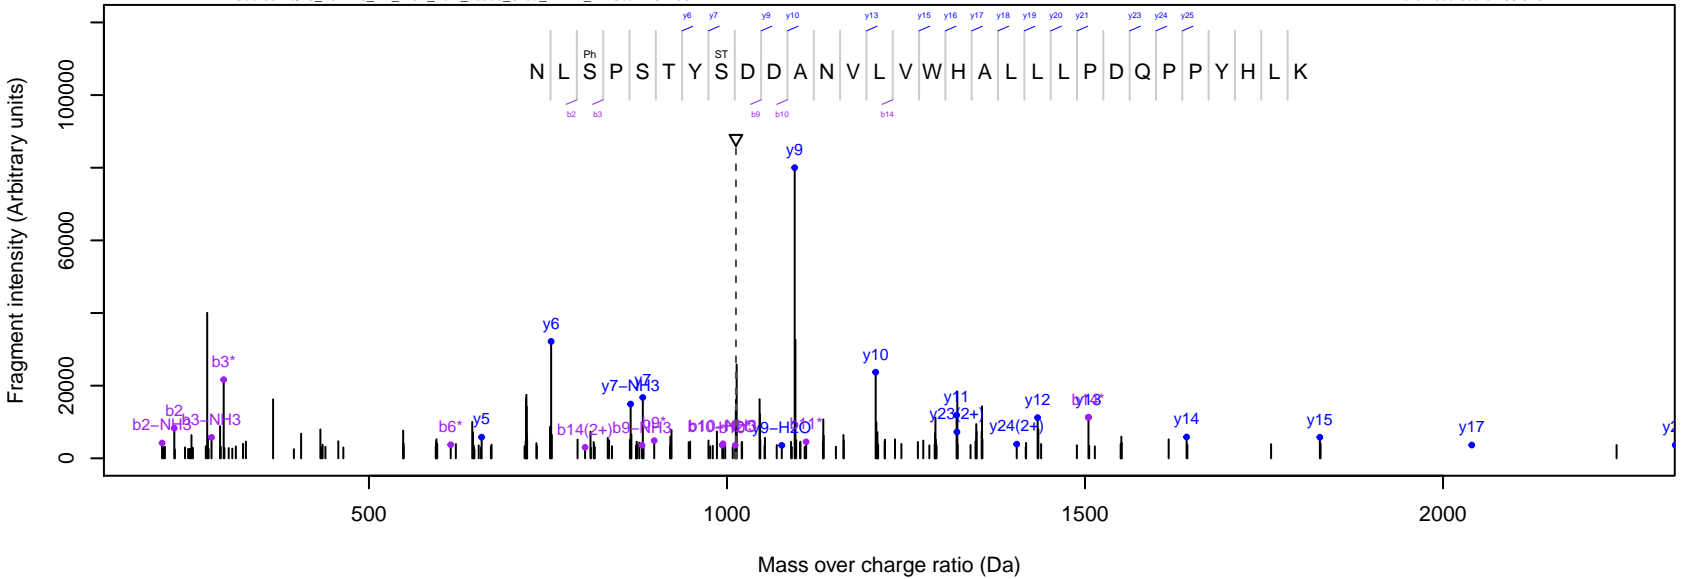

GSNPLDGRDS(Phospho (STY))PSAGGPVGQLEPIPIPA(Phospho (STY))PGTRPTLK-4+

Source : QE3\_201126\_FR\_TIOx\_hum\_tissue\_Urea\_RNAB\_H Scan : 49051

Andromeda score : 66.34

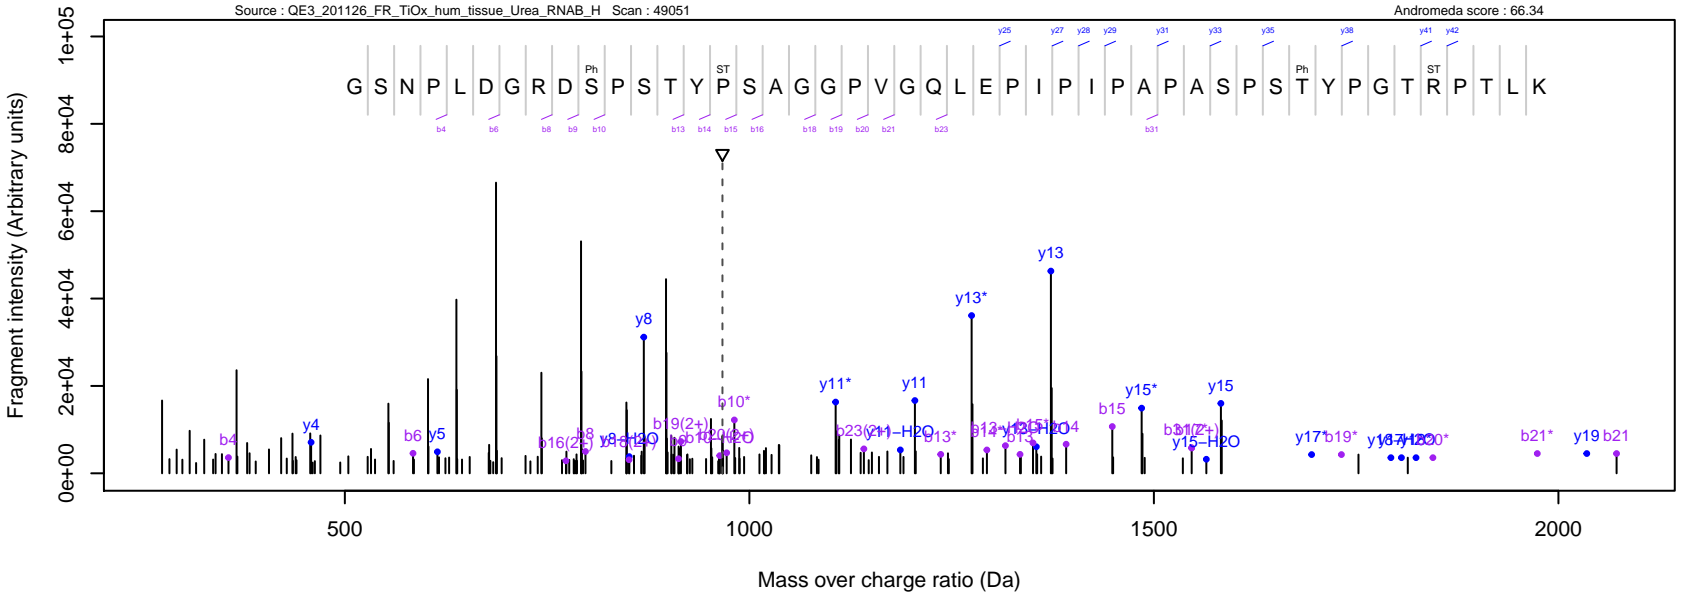

S(Phospho (STY))RSDVDM(Oxidation (M))DAAAEATR-3+

Source : QE3\_201126\_FR\_TIOx\_hum\_tissue\_Urea\_RNAB\_N Scan : 9369

Andromeda score : 66.335

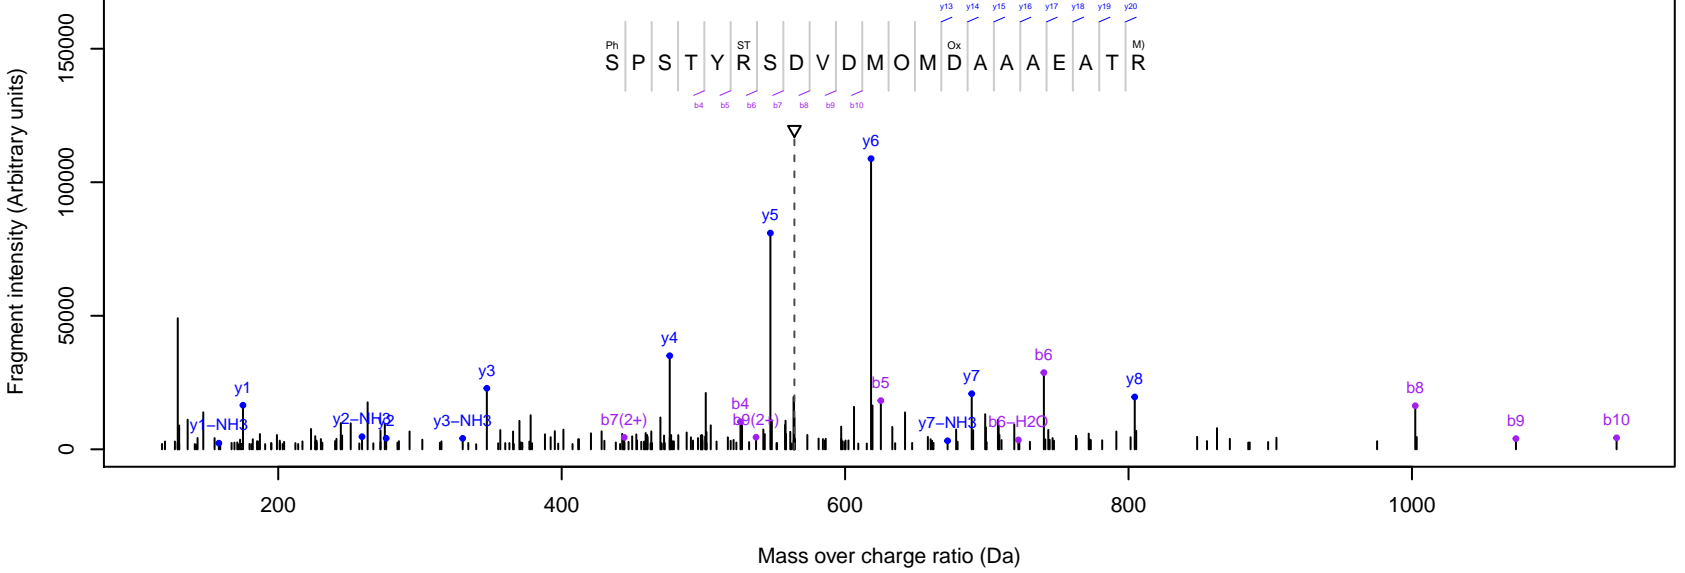

VIS(Phospho (STY))KHDLGHFMLR-3+

Source : QE3\_201126\_FR\_TIOx\_hum\_tissue\_Urea\_RNAB\_H Scan : 23261

Andromeda score : 66.335

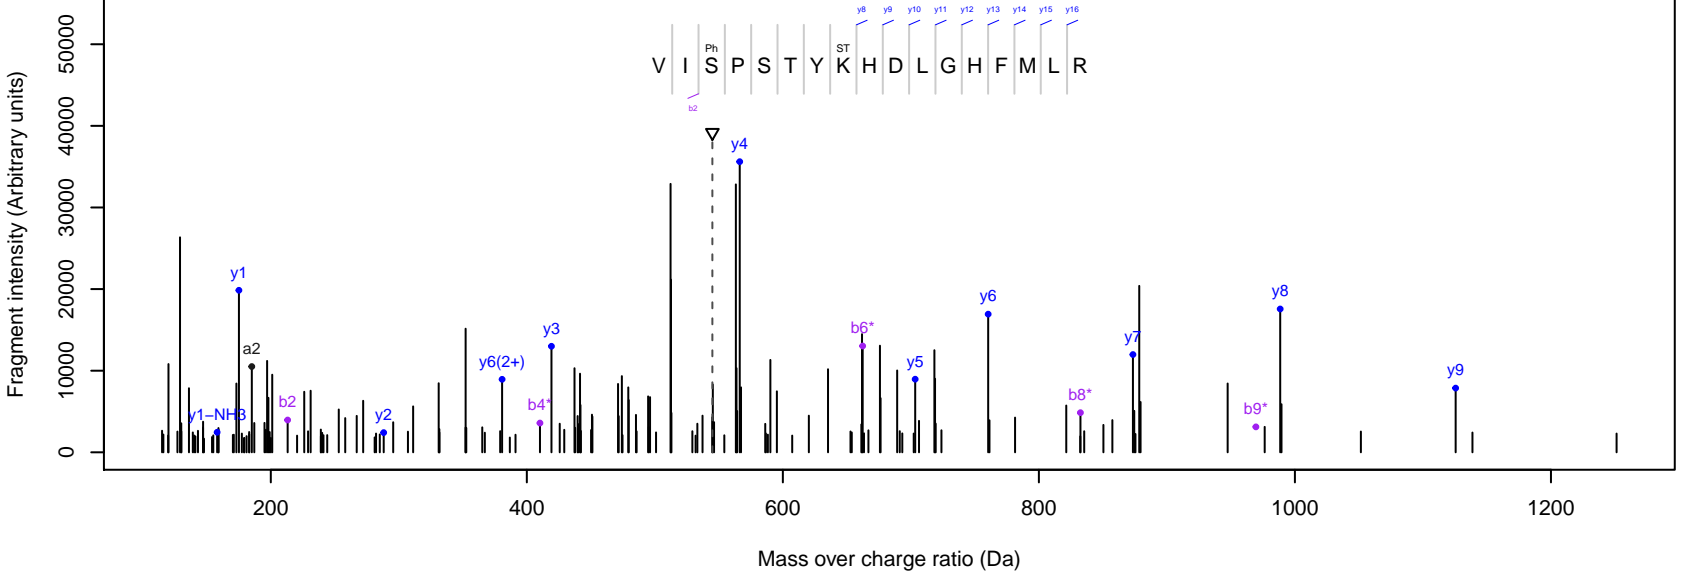

(Acetyl (Protein N-term))AM(Oxidation (M))SS(Phospho (STY))GGSGGGVPEQEDSVLFR-3+

Source : QE3\_201126\_FR\_TiOx\_hum\_tissue\_Urea\_RNAB\_N Scan : 51238

Andromeda score : 66.3

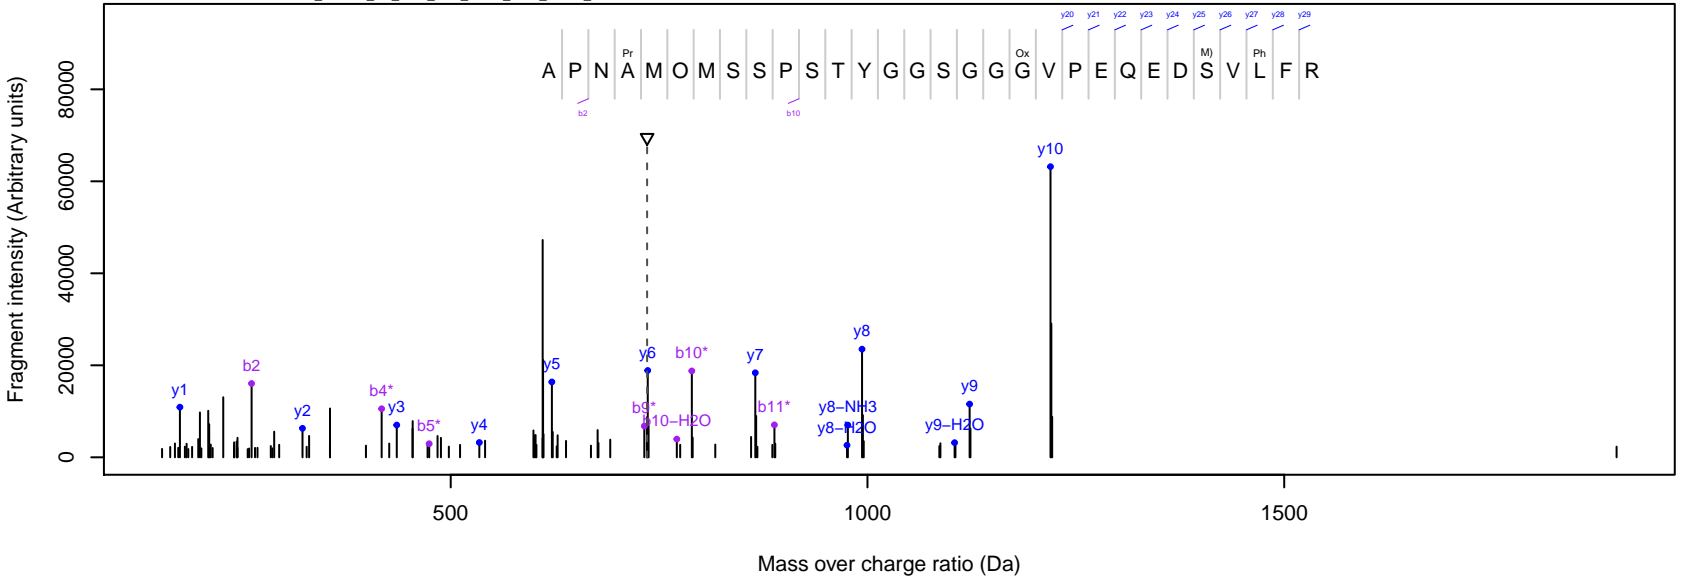

GPIAQWADGAIS(Phospho (STY))PNGHRPQLR-3+

Source : QE3\_201126\_FR\_TiOx\_hum\_tissue\_Urea\_RNAB\_N Scan : 30576

Andromeda score : 66.3

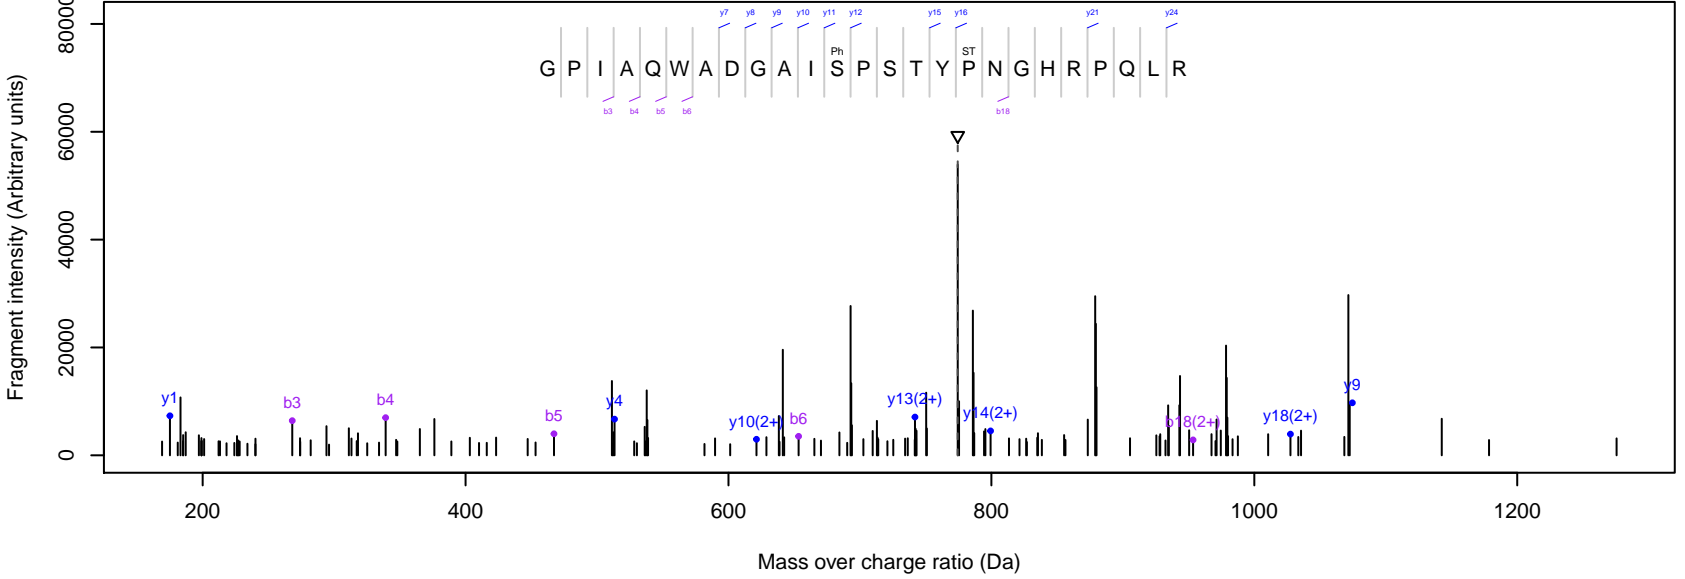

GS(Phospho (STY))LAS(Phospho (STY))LDS(Phospho (STY))LRKGGPPPNWR-3+

Source : QE3\_201126\_FR\_TiOx\_hum\_tissue\_Urea\_RNAB\_N Scan : 41336

Andromeda score : 66.3

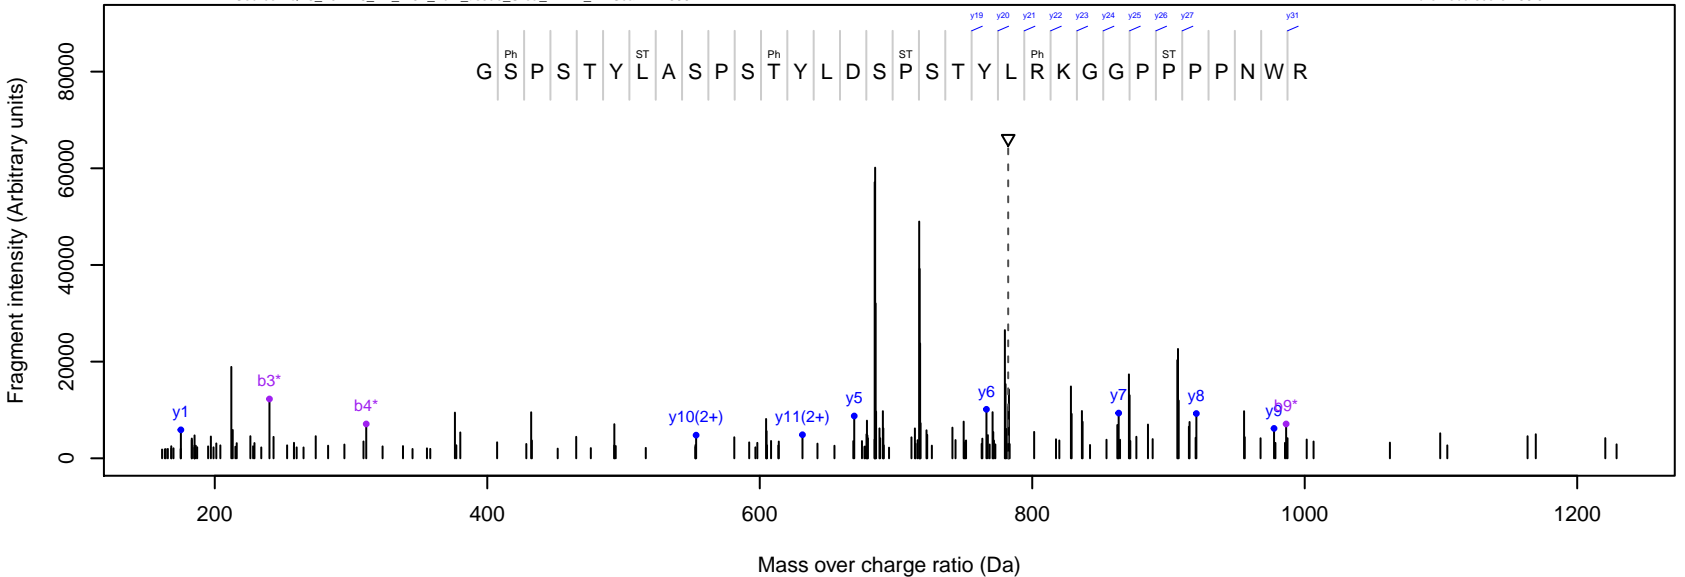

NGGLEHVSSS(Phospho (STY))S(Phospho (STY))IHNGDMEK-3+

Source : QE3\_201126\_FR\_TiOx\_hum\_tissue\_Urea\_RNAB\_N Scan : 17686

Andromeda score : 66.3

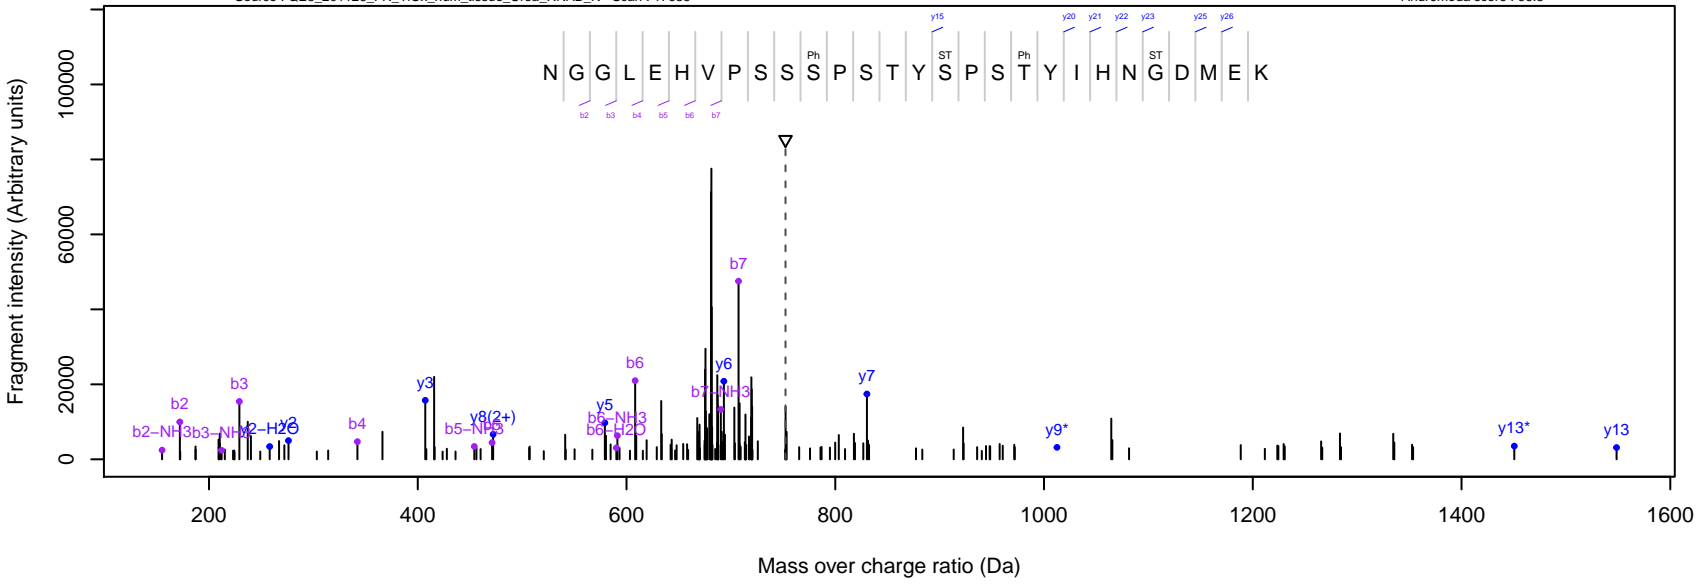

S(Phospho (STY))ASLSSLLITFPSPNSLTR-3+

Source : QE3\_201126\_FR\_TiOx\_hum\_tissue\_Urea\_RNAB\_H Scan : 60520

Andromeda score : 66.3

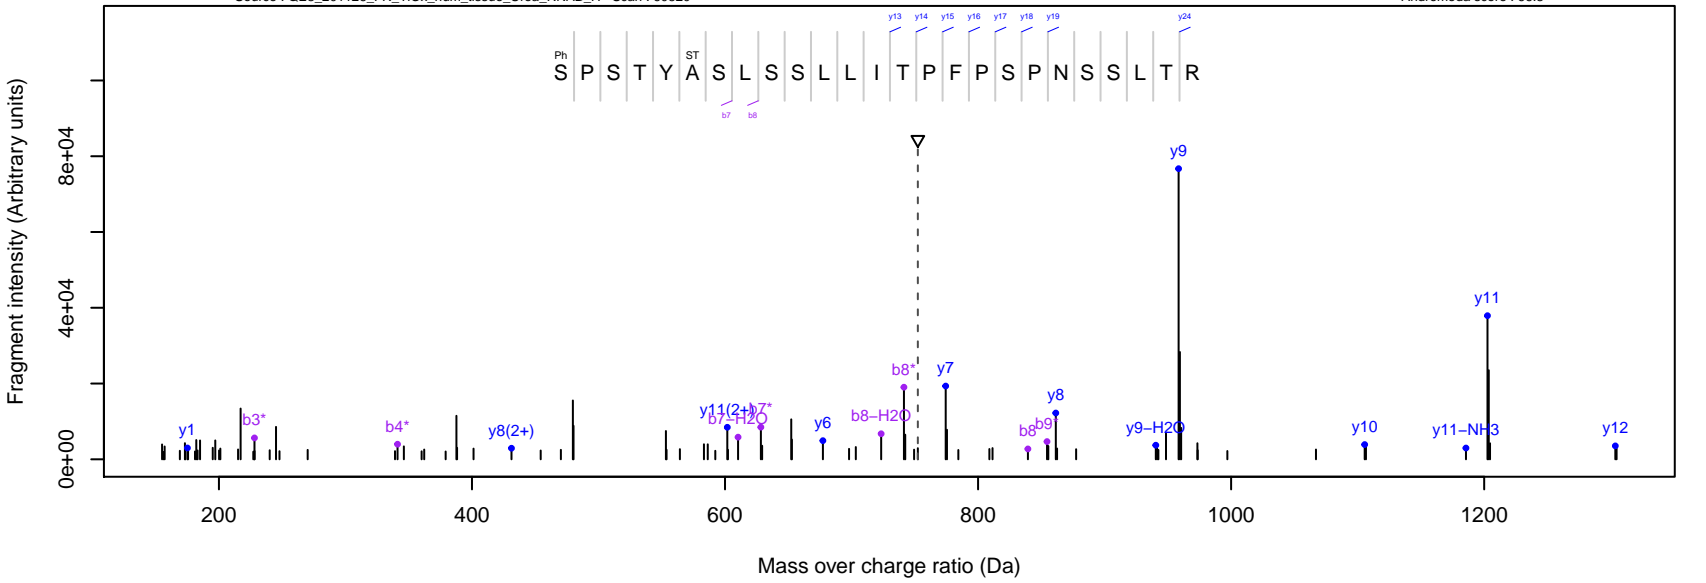

SLS(Phospho (STY))LGDKEISR-3+

Source : QE3\_201126\_FR\_TiOx\_hum\_tissue\_Urea\_RNAB\_B Scan : 18206

Andromeda score : 66.285

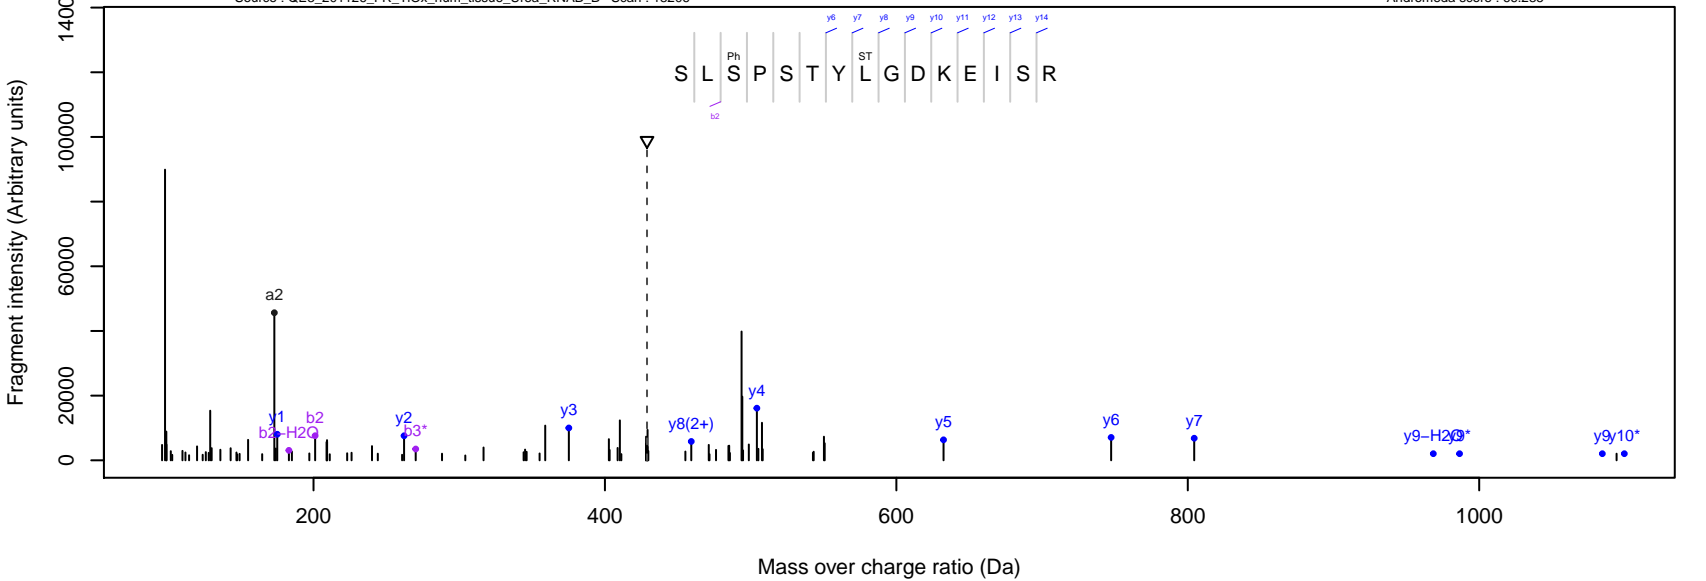



GQVIIS(Phospho (STY))DS(Phospho (STY))DDDDDERILSLEK-3+

Source : QE3\_201126\_FR\_TiOx\_hum\_tissue\_Urea\_RNAB\_N Scan : 51423

Andromeda score : 66.282

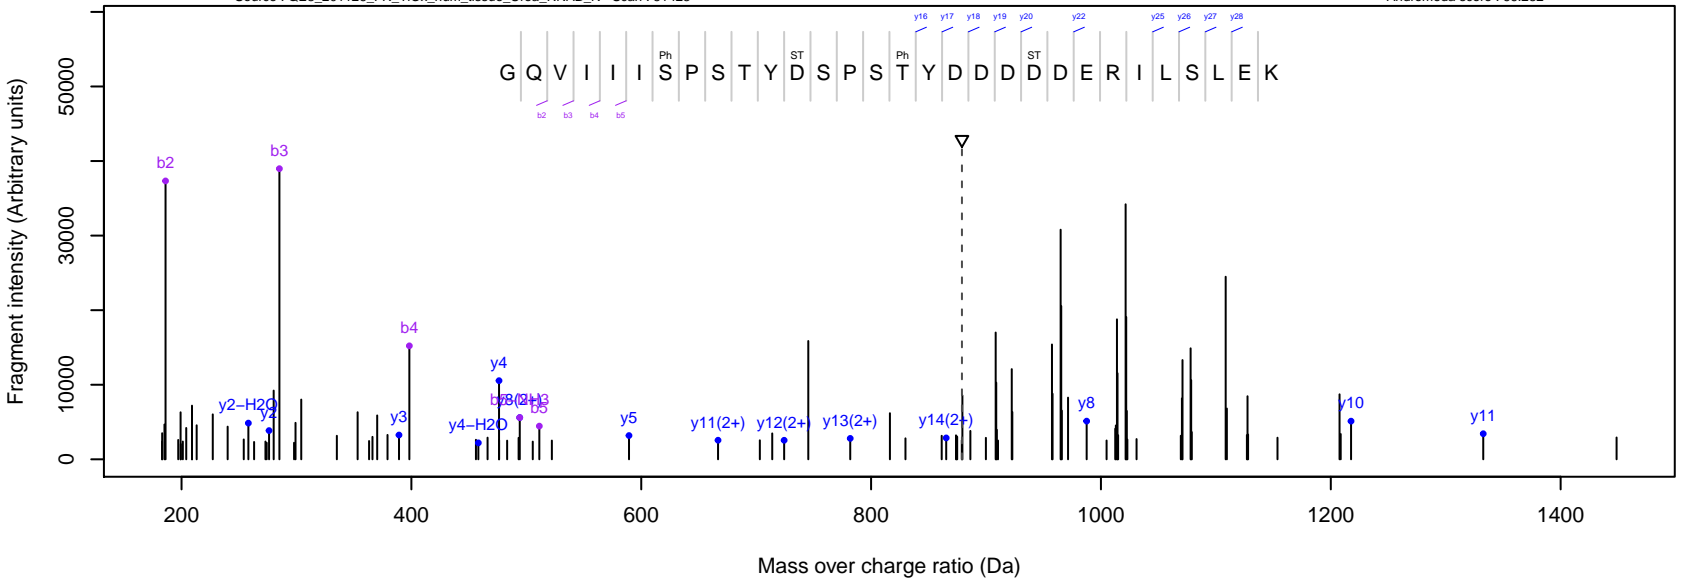

HTS(Phospho (STY))CSSAGNDSKPVQEAPSVAR-3+

Source : QE3\_201126\_FR\_TiOx\_hum\_tissue\_Urea\_RNAB\_B Scan : 8236

Andromeda score : 66.282

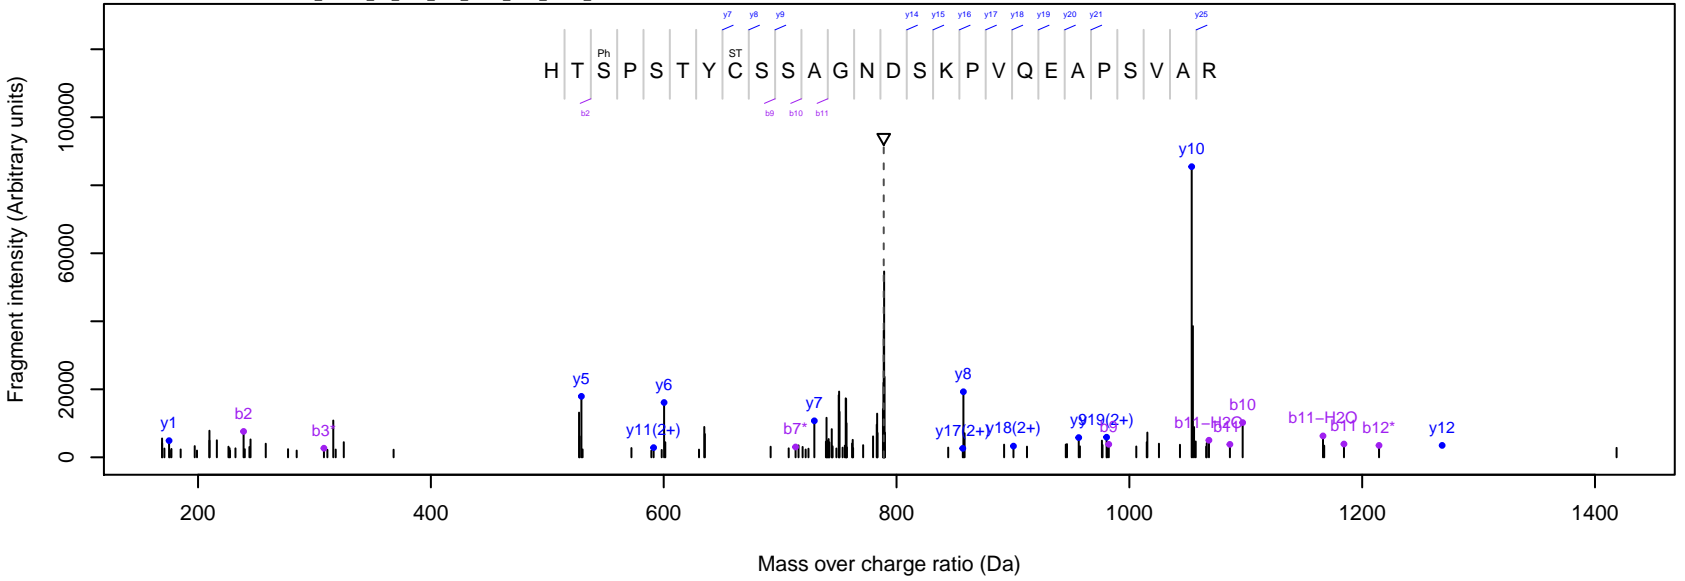

S(Phospho (STY))SRSQLDLFDDVGTFA SGP PK-3+

Source : QE3\_201126\_FR\_TiOx\_hum\_tissue\_Urea\_RNAB\_B Scan : 49299

Andromeda score : 66.282

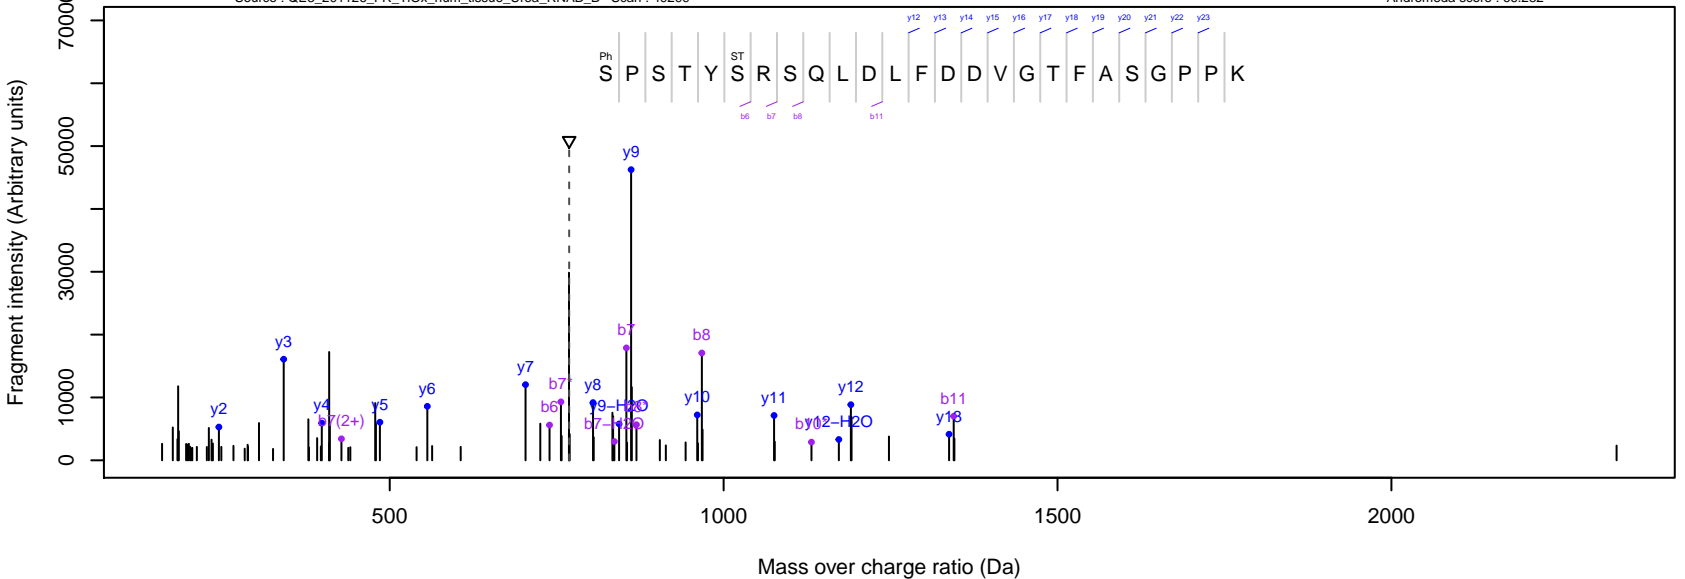

S(Phospho (STY))SKKDLLEIDR-3+

Source : QE3\_201126\_FR\_TIOx\_hum\_tissue\_Urea\_RNAB\_B Scan : 14405

Andromeda score : 66.262

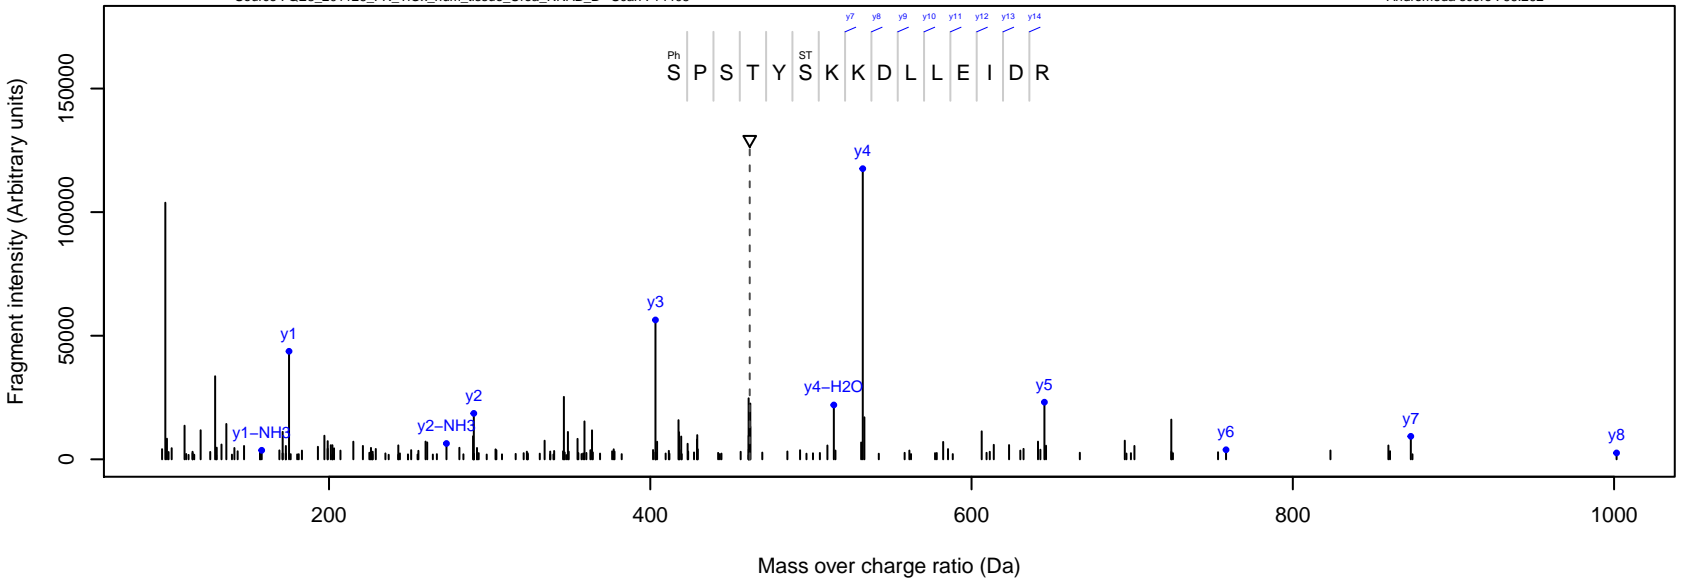

S(Phospho (STY))VDFDSLTVR-2+

Source : QE3\_201126\_FR\_TIOx\_hum\_tissue\_Urea\_RNAB\_H Scan : 39753

Andromeda score : 66.262

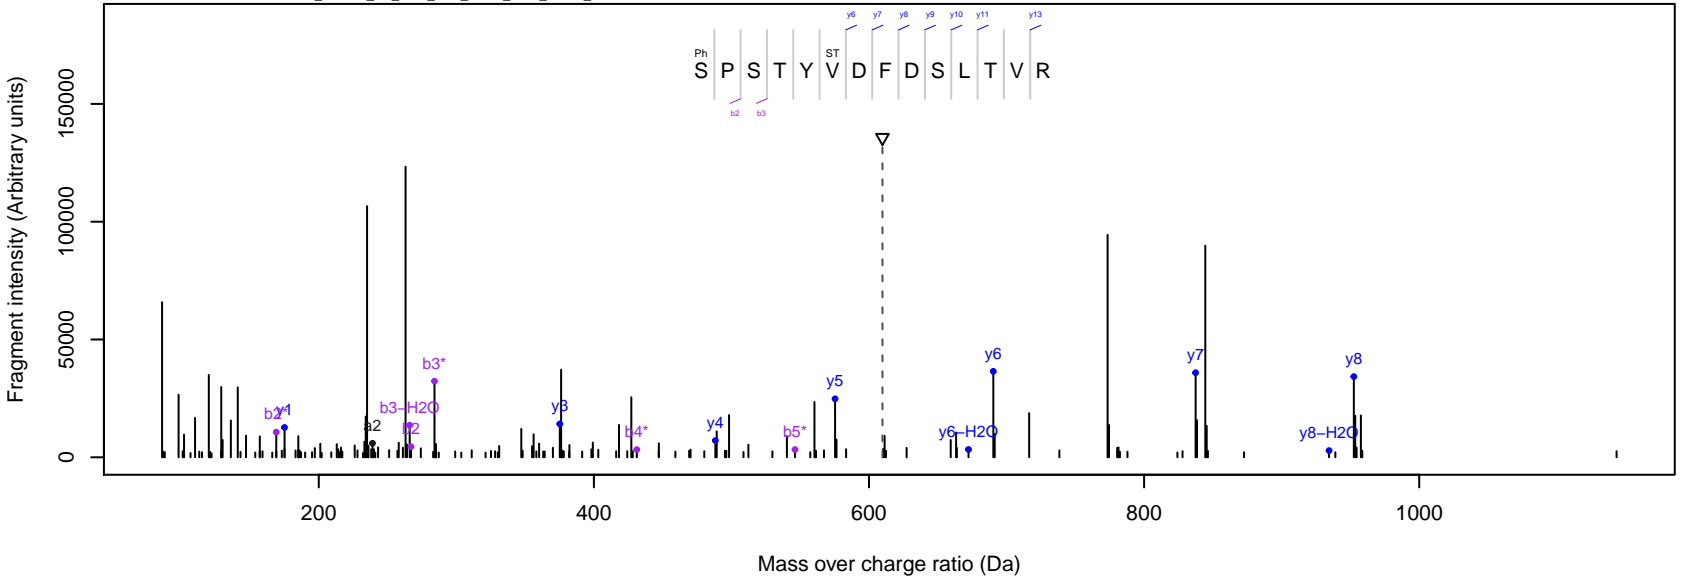

KKLGVS(Phospho (STY))PSR-3+

Source : QE3\_201126\_FR\_TIOx\_hum\_tissue\_Urea\_RNAB\_H Scan : 7335

Andromeda score : 66.246

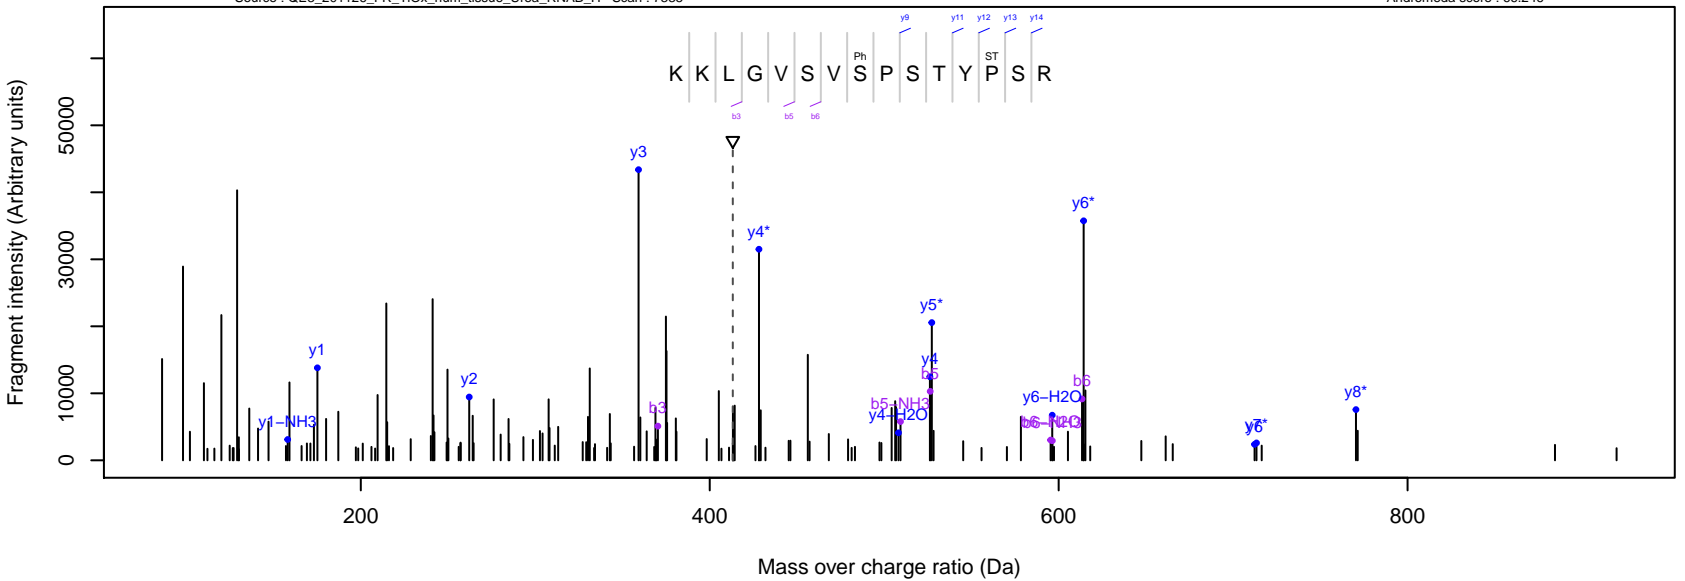

SRS(Phospho (STY))VS(Phospho (STY))PCSNVESR-2+

Source : QE3\_201126\_FR\_TiOx\_hum\_tissue\_Urea\_RNAB\_N Scan : 9112

Andromeda score : 66.246

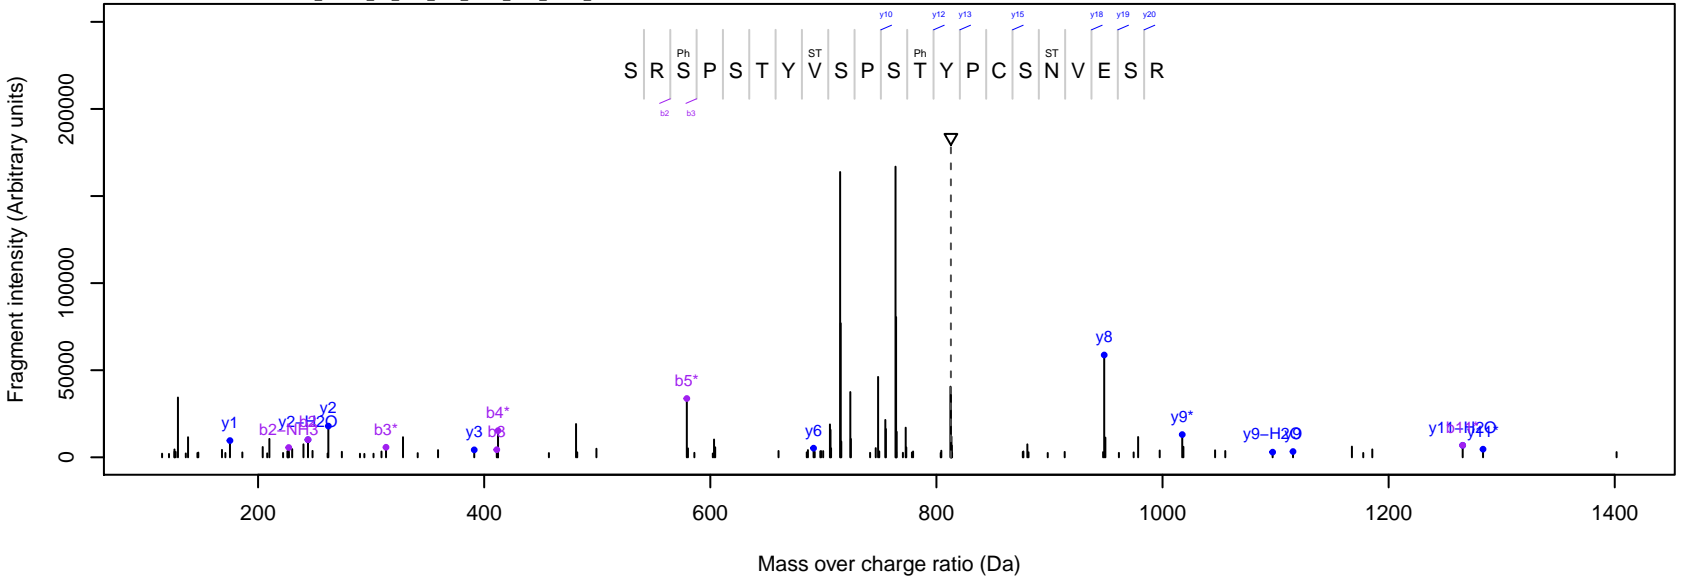

TITLEVEPS(Phospho (STY))DTIENVK-2+

Source : QE3\_201126\_FR\_TiOx\_hum\_tissue\_Urea\_RNAB\_N Scan : 41798

Andromeda score : 66.246

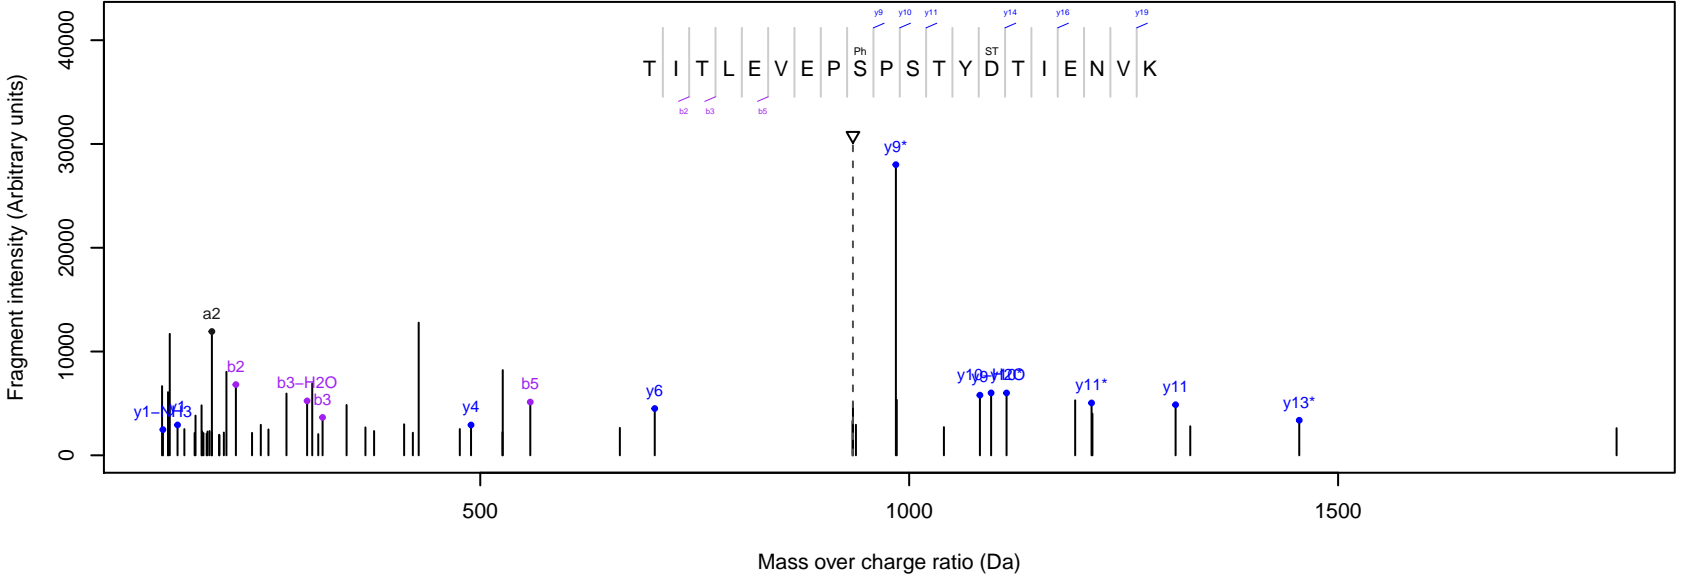

T(Phospho (STY))S(Phospho (STY))SIGPLSPAYTGQVPYNYNQLEGR-3+

Source : QE3\_201126\_FR\_TiOx\_hum\_tissue\_Urea\_RNAB\_B Scan : 54992

Andromeda score : 66.138

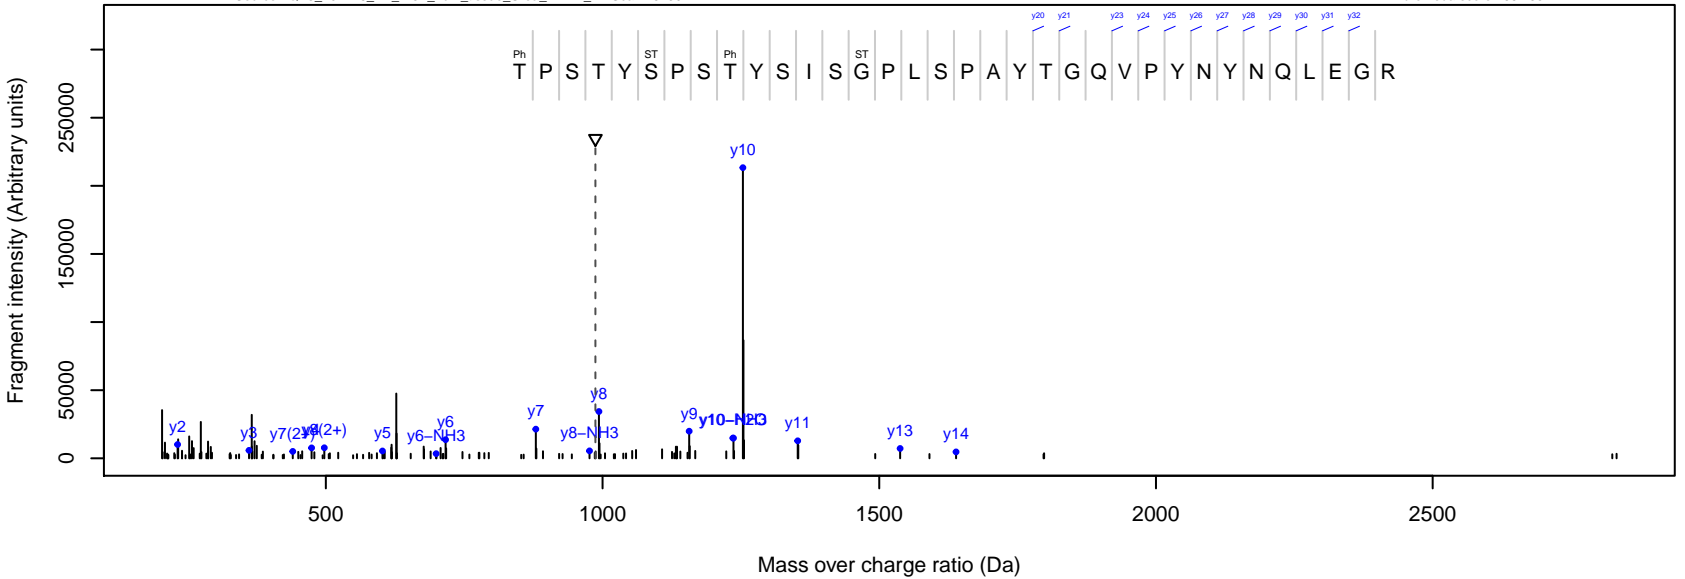

HFRS(Phospho (STY))SENVLDEEGR-3+

Source : QE3\_201126\_FR\_TiOx\_hum\_tissue\_Urea\_RNAB\_H Scan : 14516

Andromeda score : 66.12

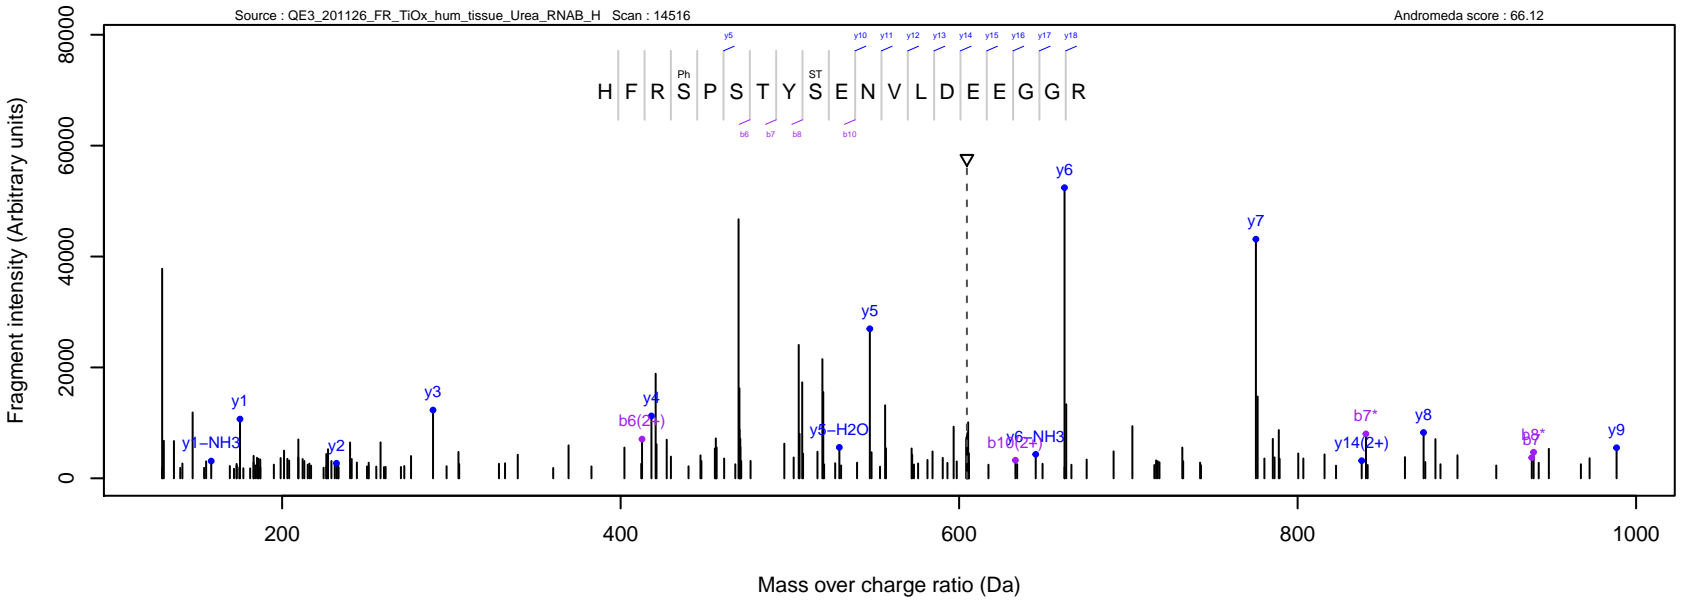

KRS(Phospho (STY))ESPPAELPSLR-3+

Source : QE3\_201126\_FR\_TiOx\_hum\_tissue\_Urea\_RNAB\_N Scan : 17503

Andromeda score : 66.12

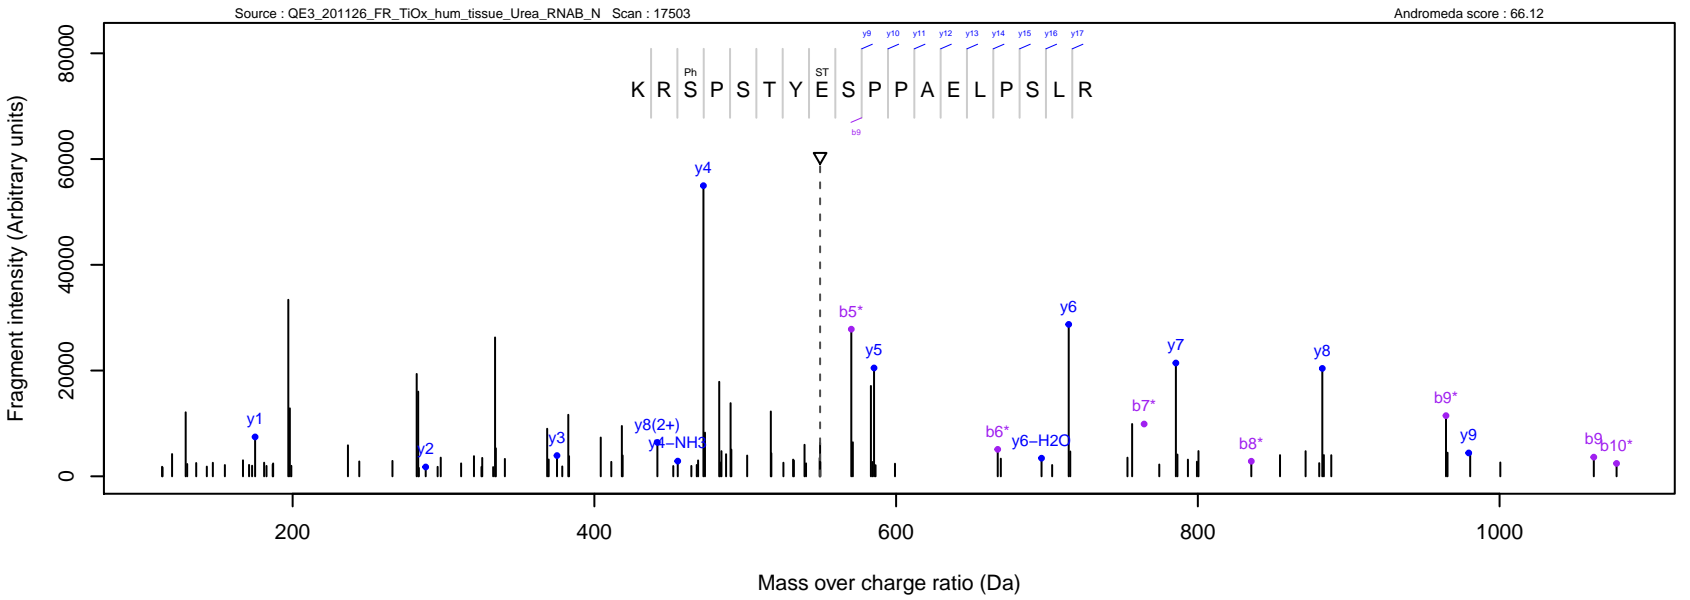

STLQDSDEYS(Phospho (STY))NPAPLPLDQHSR-3+

Source : QE3\_201126\_FR\_TiOx\_hum\_tissue\_Urea\_RNAB\_N Scan : 30817

Andromeda score : 66.045

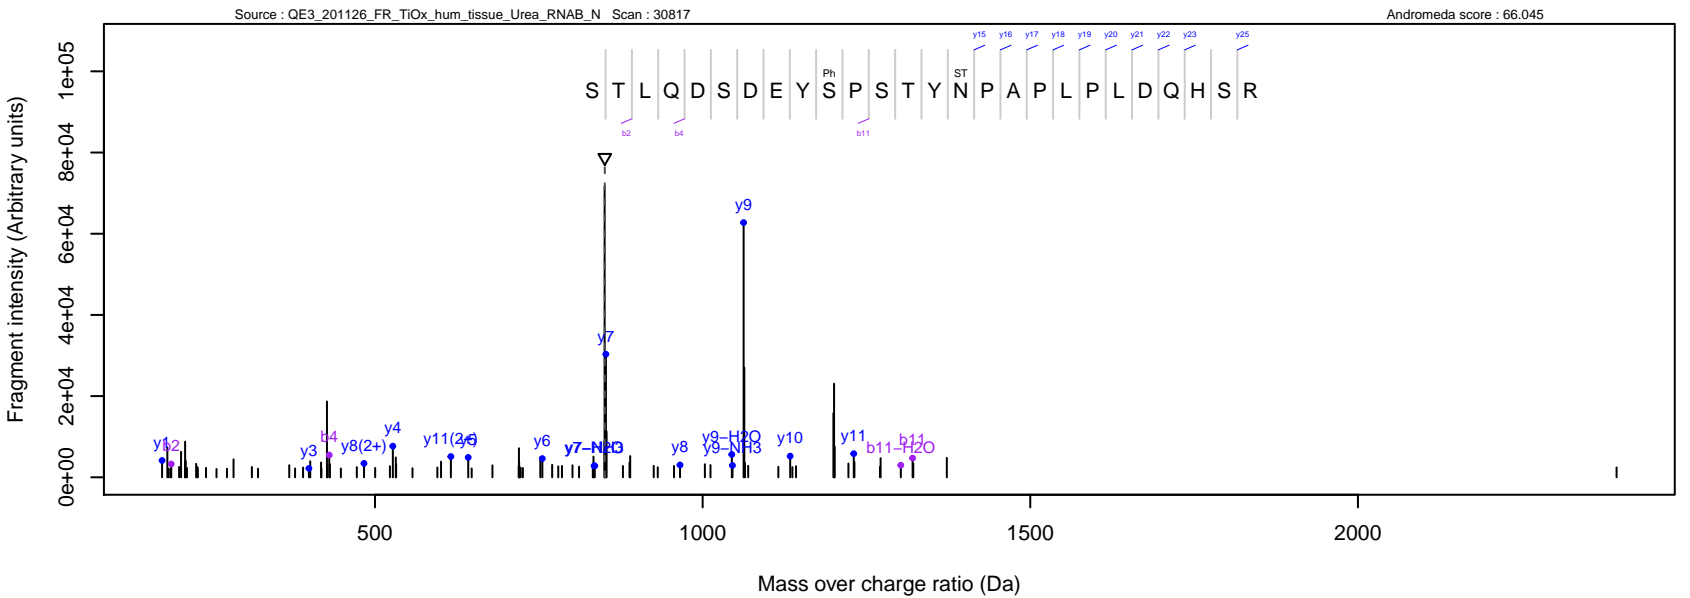

LDYVPS(Phospho (STY))S(Phospho (STY))ASR-2+

Source : QE3\_201126\_FR\_TiOx\_hum\_tissue\_Urea\_RNAB\_H Scan : 26608

Andromeda score : 66.023

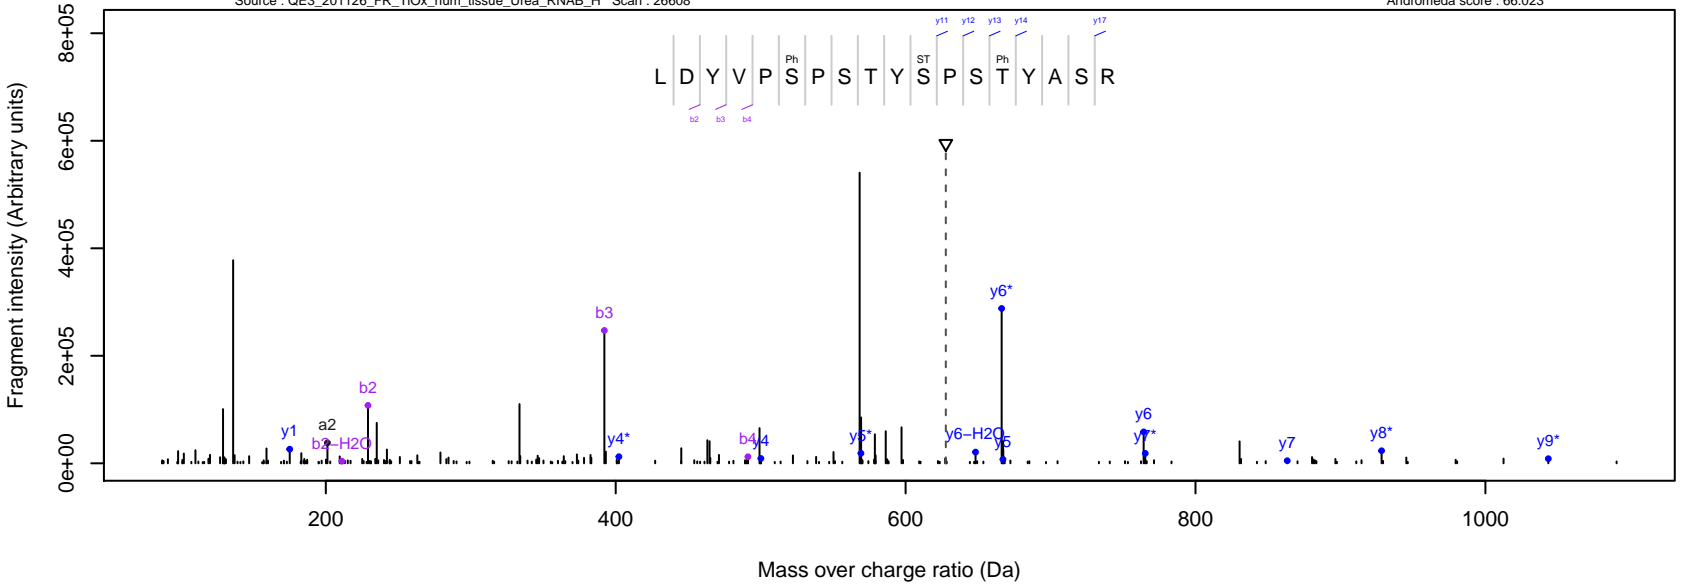

RAQS(Phospho (STY))EAEKLAK-2+

Source : QE3\_201126\_FR\_TiOx\_hum\_tissue\_Urea\_RNAB\_B Scan : 6508

Andromeda score : 66.023

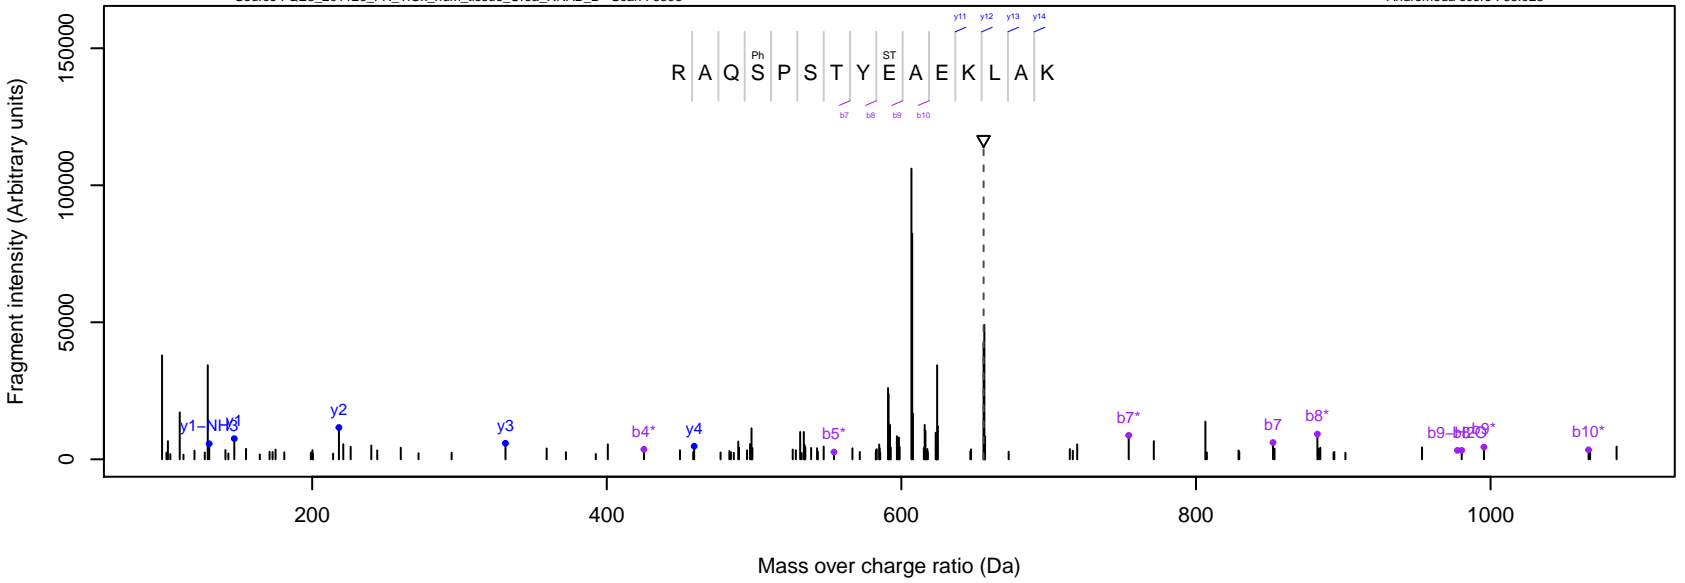

LLAEALNQVT(Phospho (STY))QRASR-3+

Source : QE3\_201126\_FR\_TiOx\_hum\_tissue\_Urea\_RNAB\_H Scan : 29475

Andromeda score : 66.022

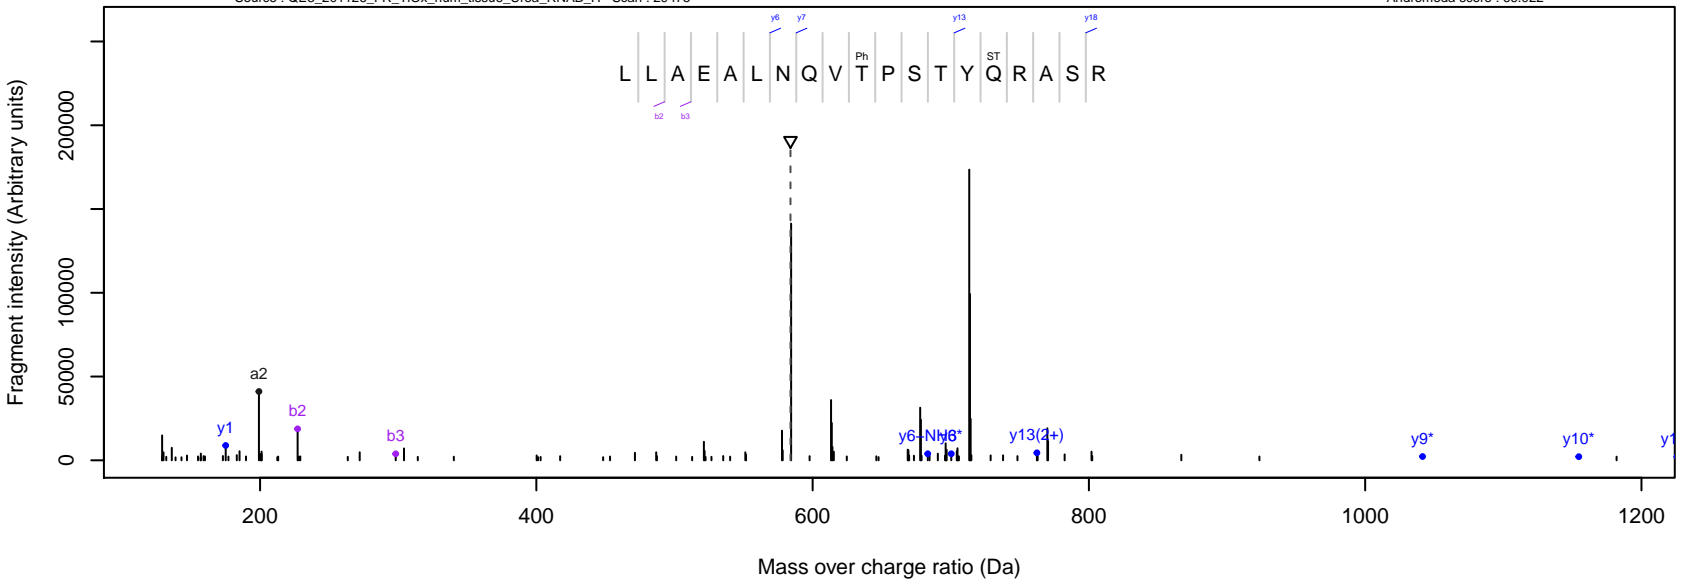

RHS(Phospho (STY))IEKETPTNVR-3+

Source : QE3\_201126\_FR\_TiOx\_hum\_tissue\_Urea\_RNAB\_H Scan : 5955

Andromeda score : 66.022

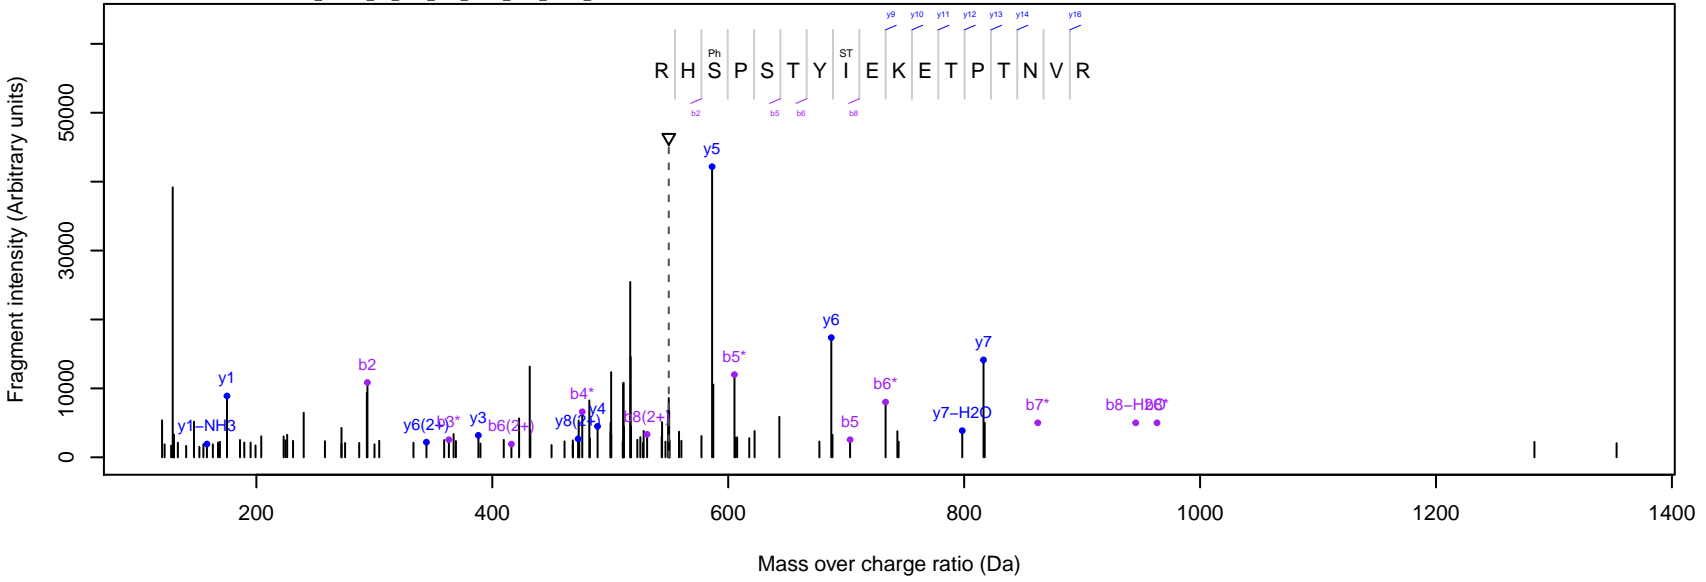

VKPET(Phospho (STY))PPRQS(Phospho (STY))HSGSIS(Phospho (STY))PYPK-3+

Source : QE3\_201126\_FR\_TiOx\_hum\_tissue\_Urea\_RNAB\_N Scan : 13290

Andromeda score : 66.017

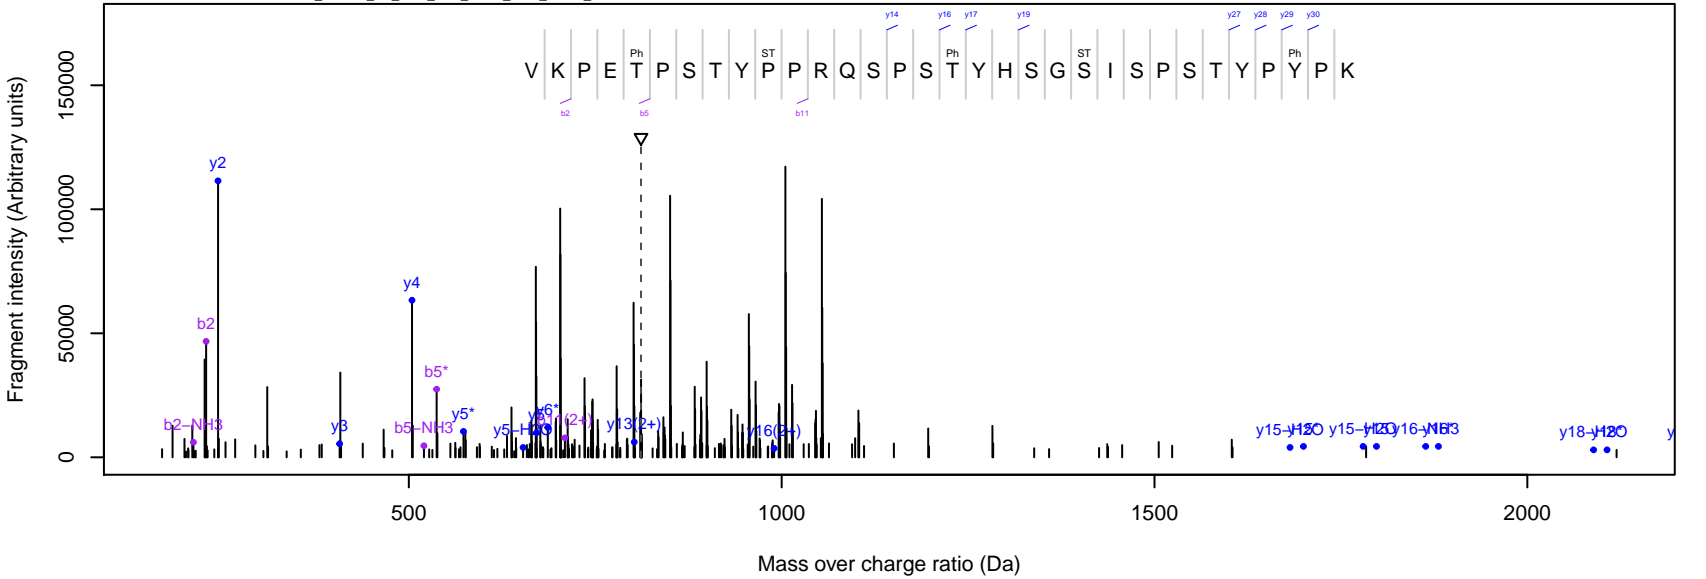

GPRT(Phospho (STY))PS(Phospho (STY))PPPIPIEDIALGKK-3+

Source : QE3\_201126\_FR\_TiOx\_hum\_tissue\_Urea\_RNAB\_H Scan : 31870

Andromeda score : 66.012

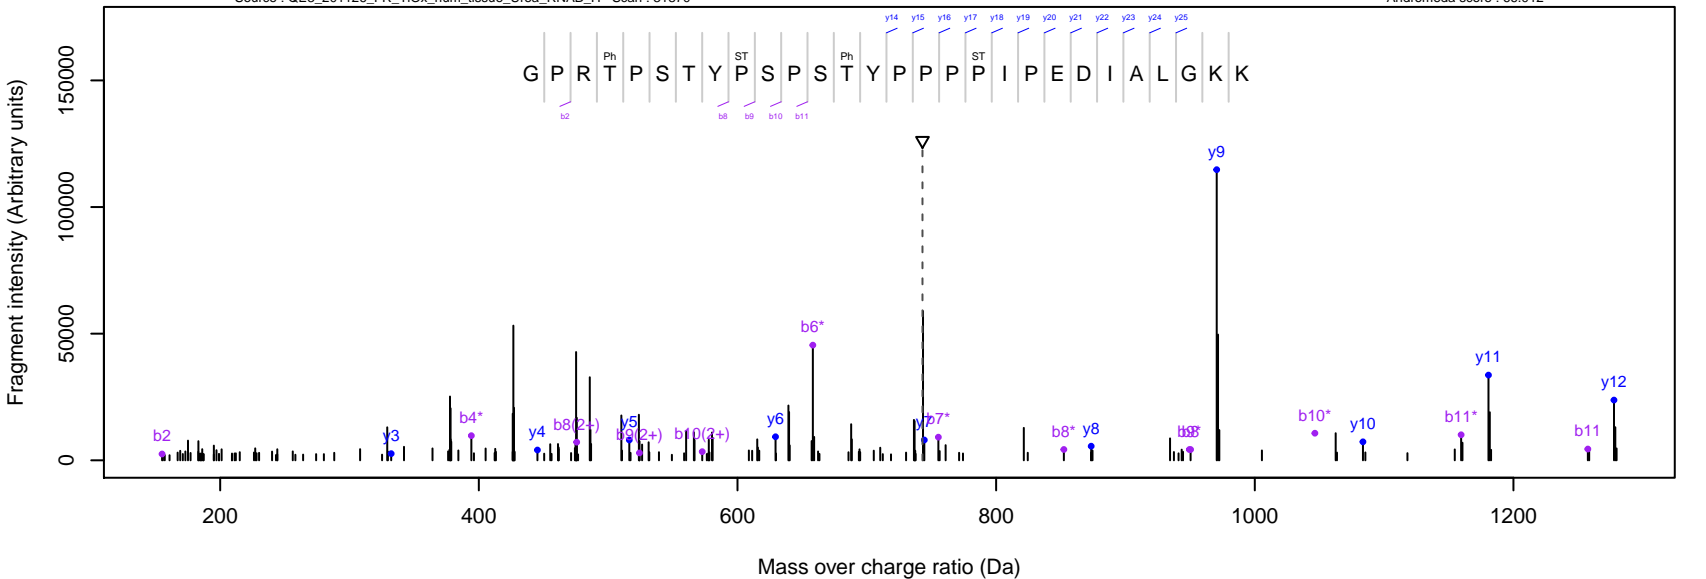

RPEGPGAQAPS(Phospho (STY))SPRVTEAPCYPGAPSTEASGQTGPQEPTSAR-4+

Source : QE3\_201126\_FR\_TiOx\_hum\_tissue\_Urea\_RNAB\_H Scan : 21863

Andromeda score : 65.938

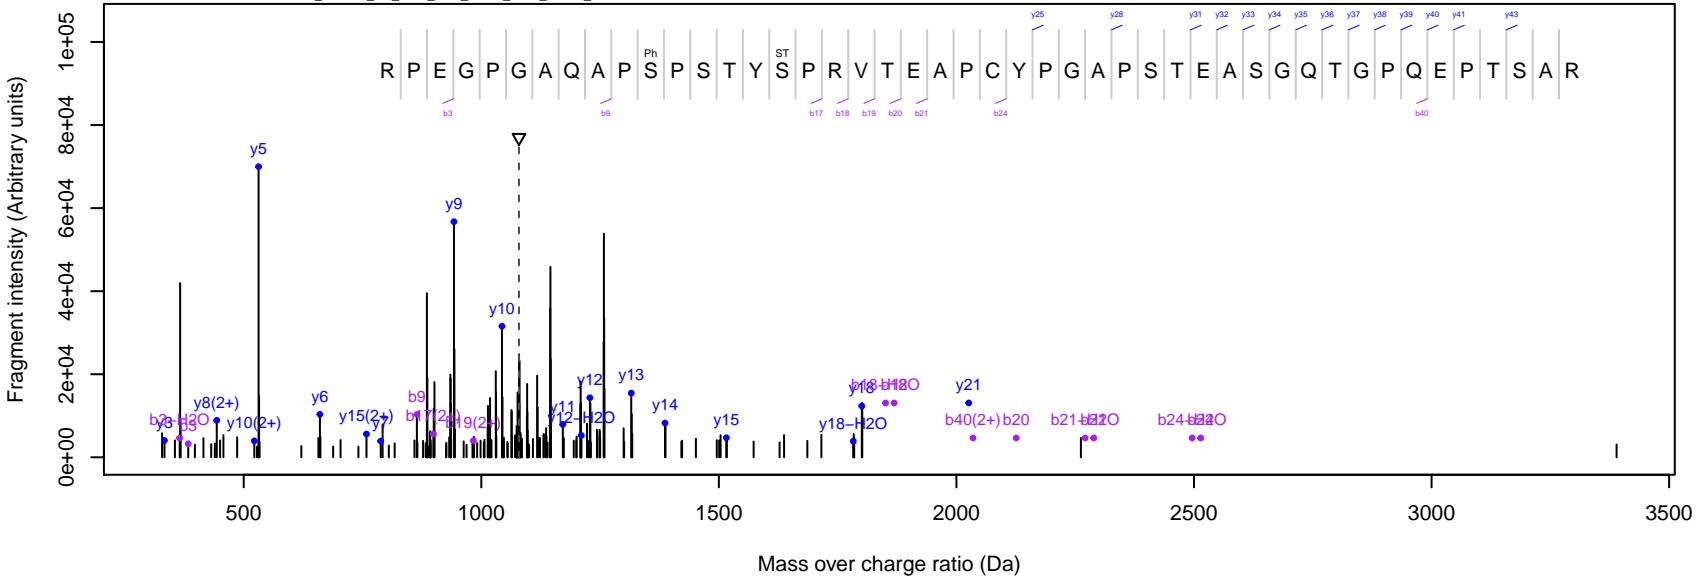

FKVAS(Phospho (STY))FRK-3+

Source : QE3\_201126\_FR\_TiOx\_hum\_tissue\_Urea\_RNAB\_H Scan : 11430

Andromeda score : 65.933

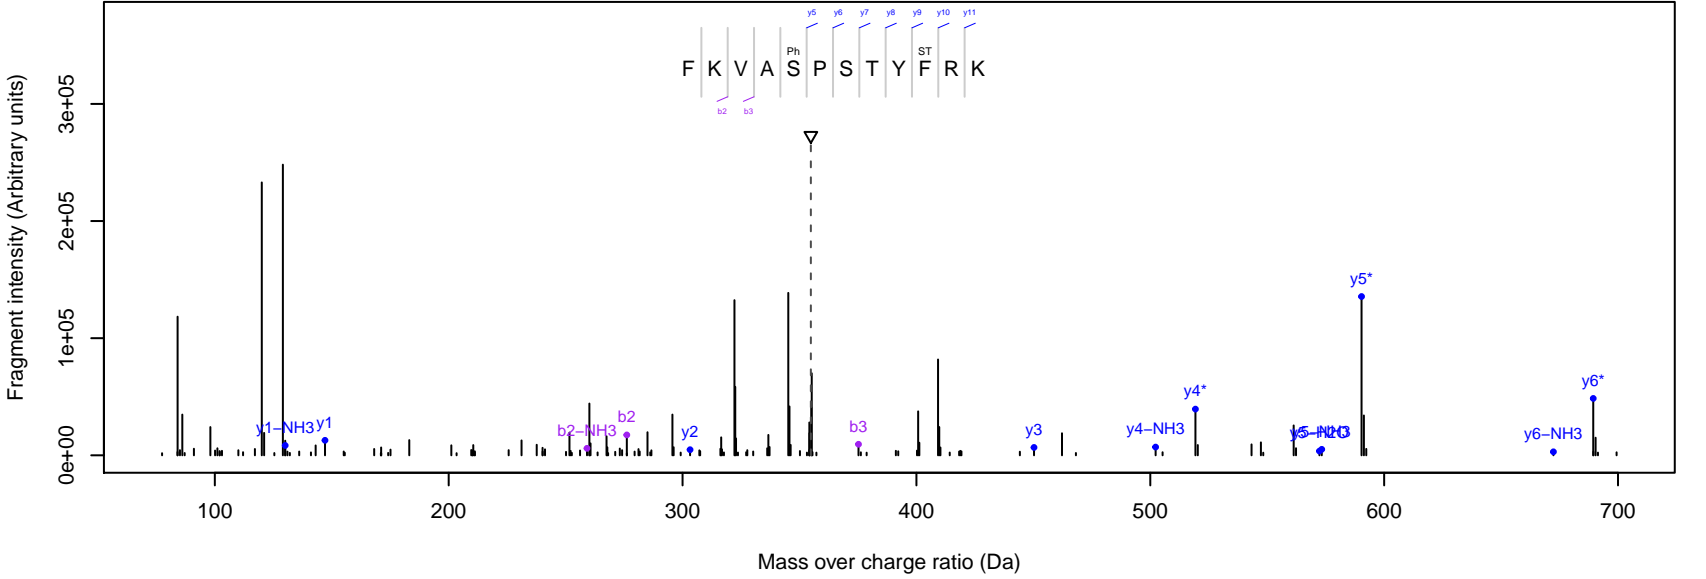

S(Phospho (STY))PS(Phospho (STY))SDLDTDAEGDDFELLDQSELSQLDPASSR-3+

Source : QE3\_201126\_FR\_TiOx\_hum\_tissue\_Urea\_RNAB\_B Scan : 63197

Andromeda score : 65.893

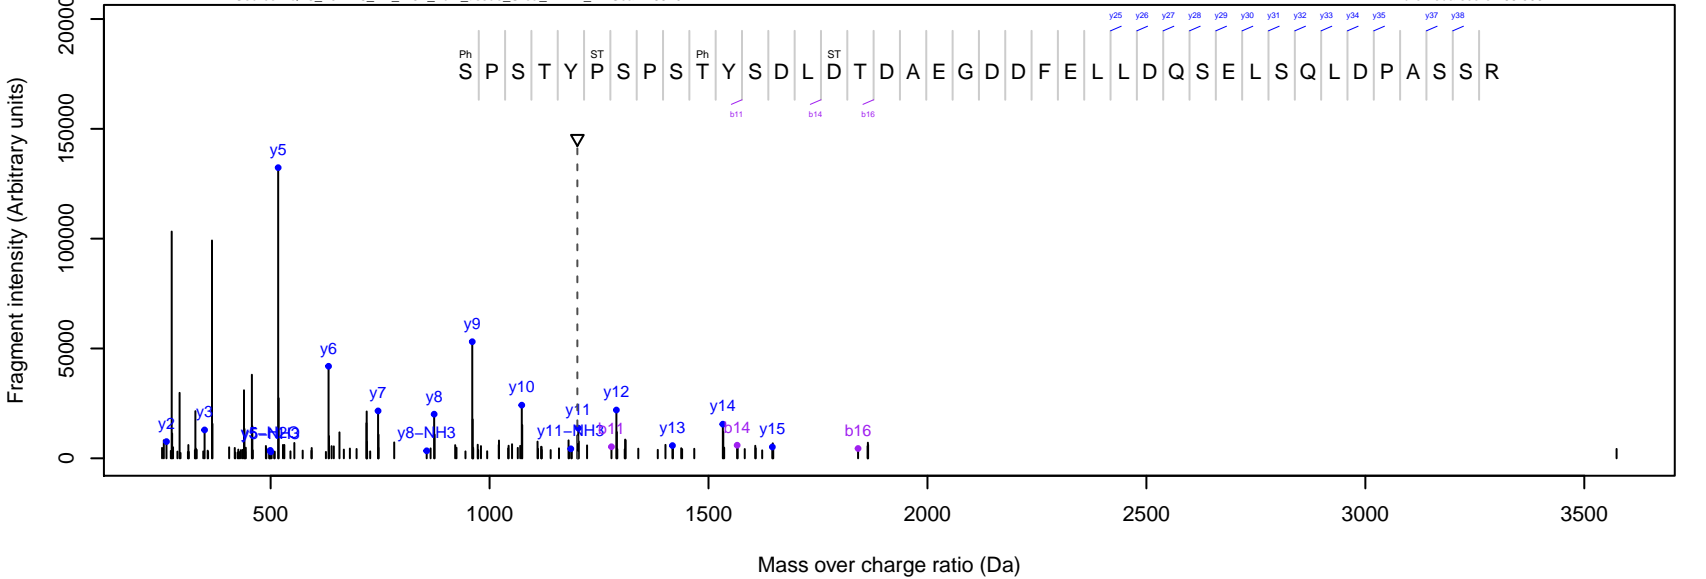

KSVAAEGALLPQTPPS(Phospho (STY))PR-3+

Source : QE3\_201126\_FR\_TiOx\_hum\_tissue\_Urea\_RNAB\_H Scan : 24142

Andromeda score : 65.833

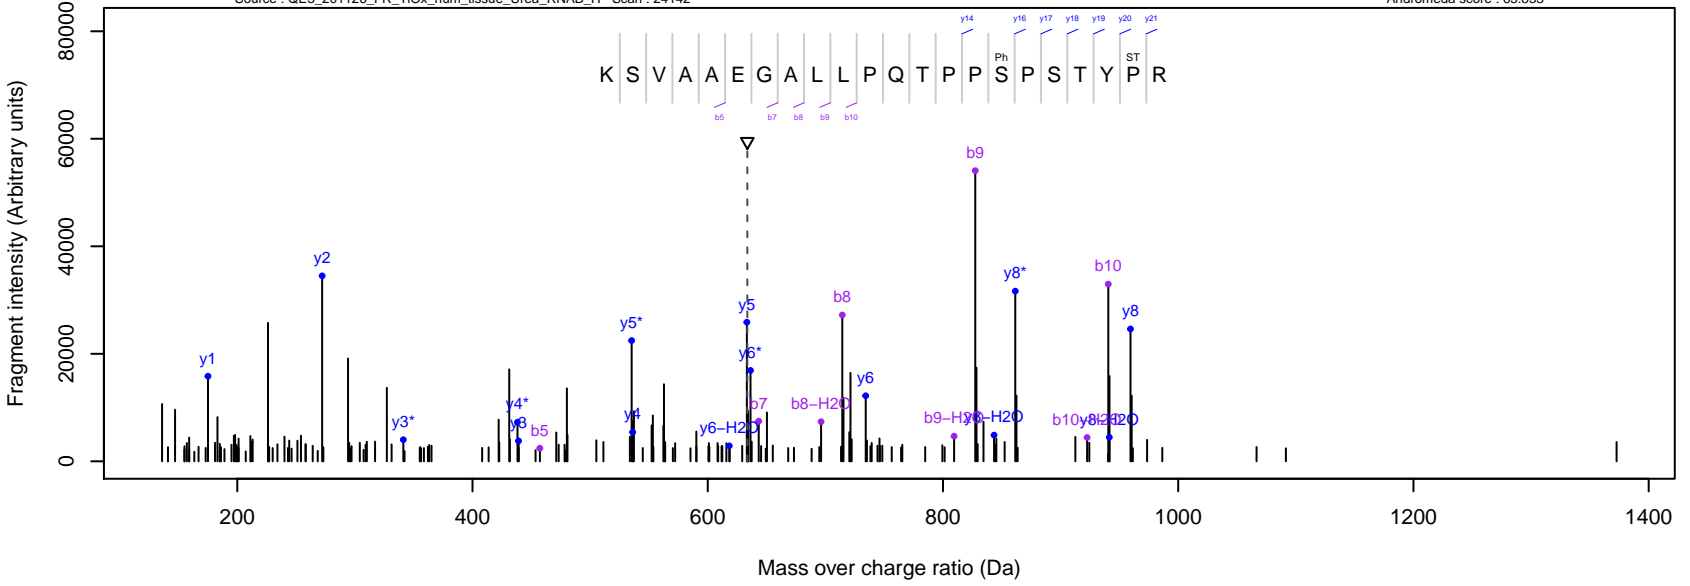

RPTETNPVTS(Phospho (STY))NS(Phospho (STY))DEECNETVKEK-3+

Source : QE3\_201126\_FR\_TiOx\_hum\_tissue\_Urea\_RNAB\_B Scan : 11643

Andromeda score : 65.833

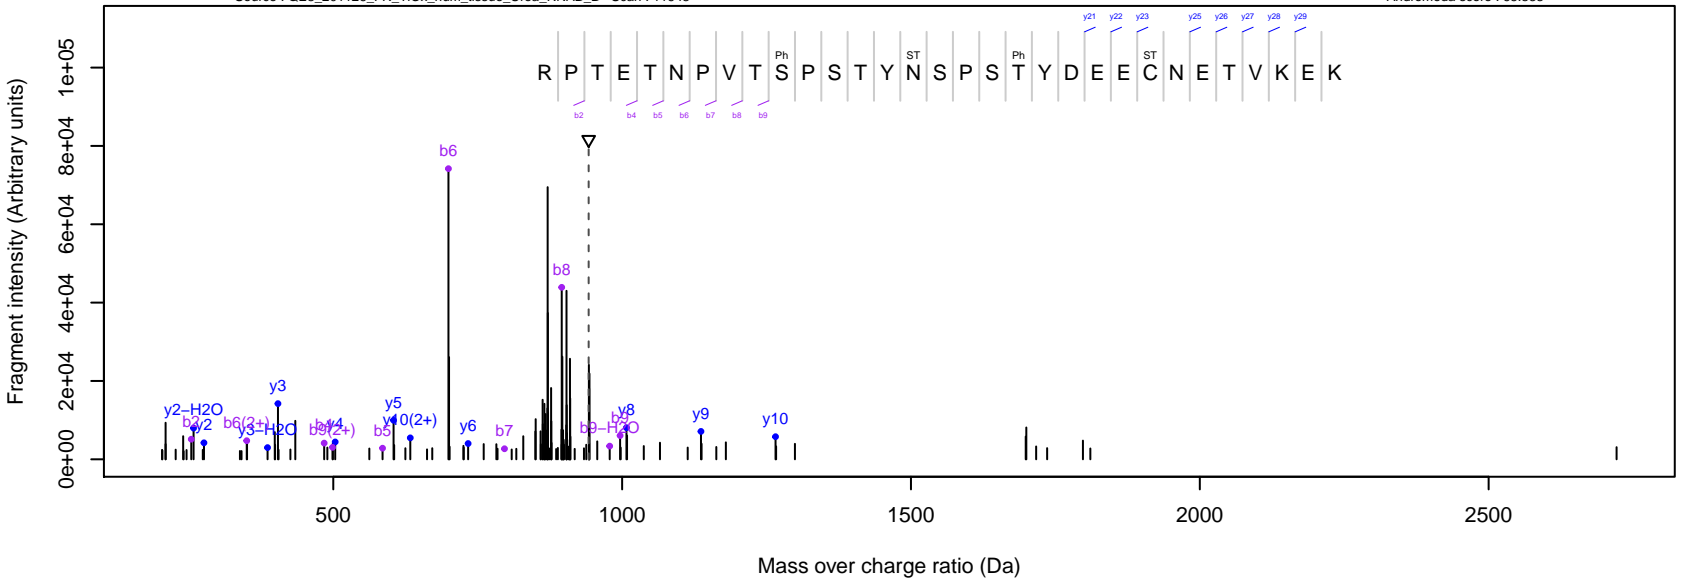



AIPVAQLNAPSDWDS(Phospho (STY))R-2+

Source : QE3\_201126\_FR\_TiOx\_hum\_tissue\_Urea\_RNAB\_H Scan : 41183

Andromeda score : 65.808

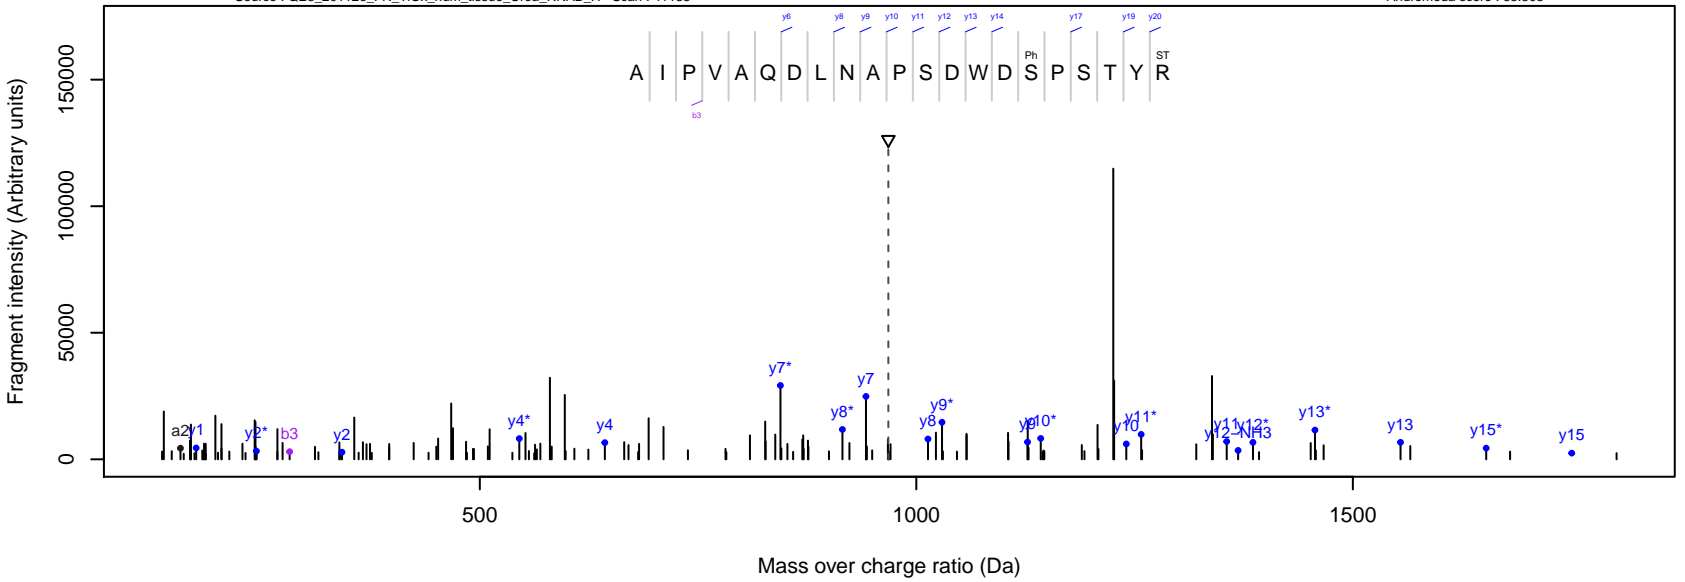

SRINS(Phospho (STY))SGES(Phospho (STY))GDES(Phospho (STY))DEFLQSR-3+

Source : QE3\_201126\_FR\_TiOx\_hum\_tissue\_Urea\_RNAB\_N Scan : 32293

Andromeda score : 65.801

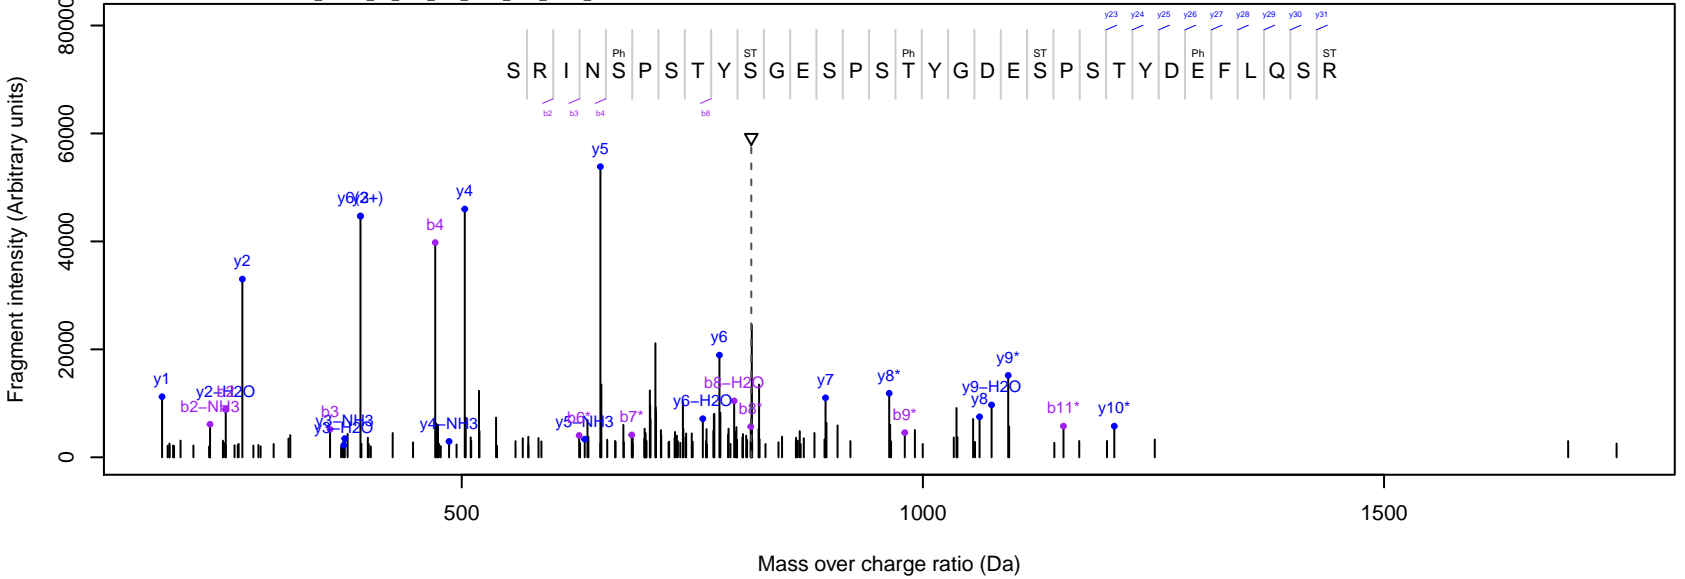

GVDFES(Phospho (STY))S(Phospho (STY))EDDDDDPFM(Oxidation (M))NTSSLRR-3+

Source : QE3\_201126\_FR\_TiOx\_hum\_tissue\_Urea\_RNAB\_N Scan : 42618

Andromeda score : 65.784

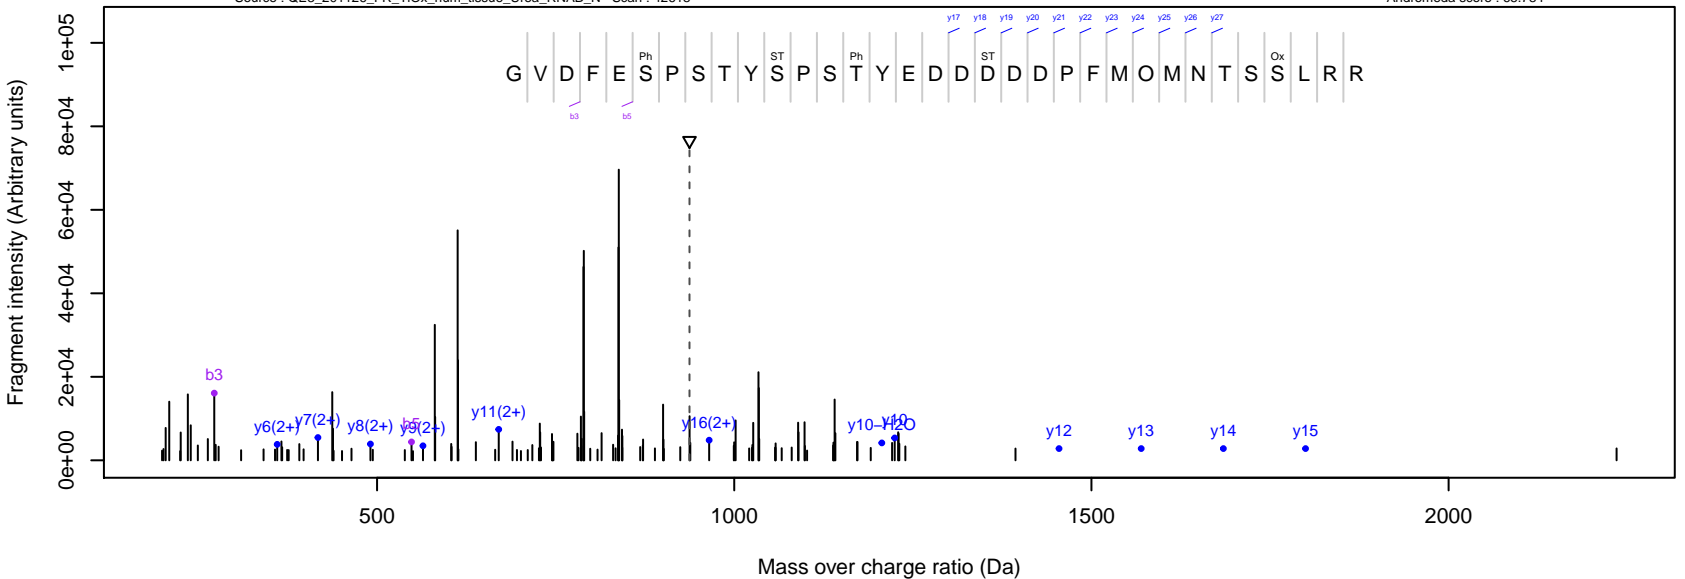

HVINFDLPS(Phospho (STY))DIEEYVHR-3+

Source : QE3\_201126\_FR\_TiOx\_hum\_tissue\_Urea\_RNAB\_N Scan : 51722

Andromeda score : 65.784

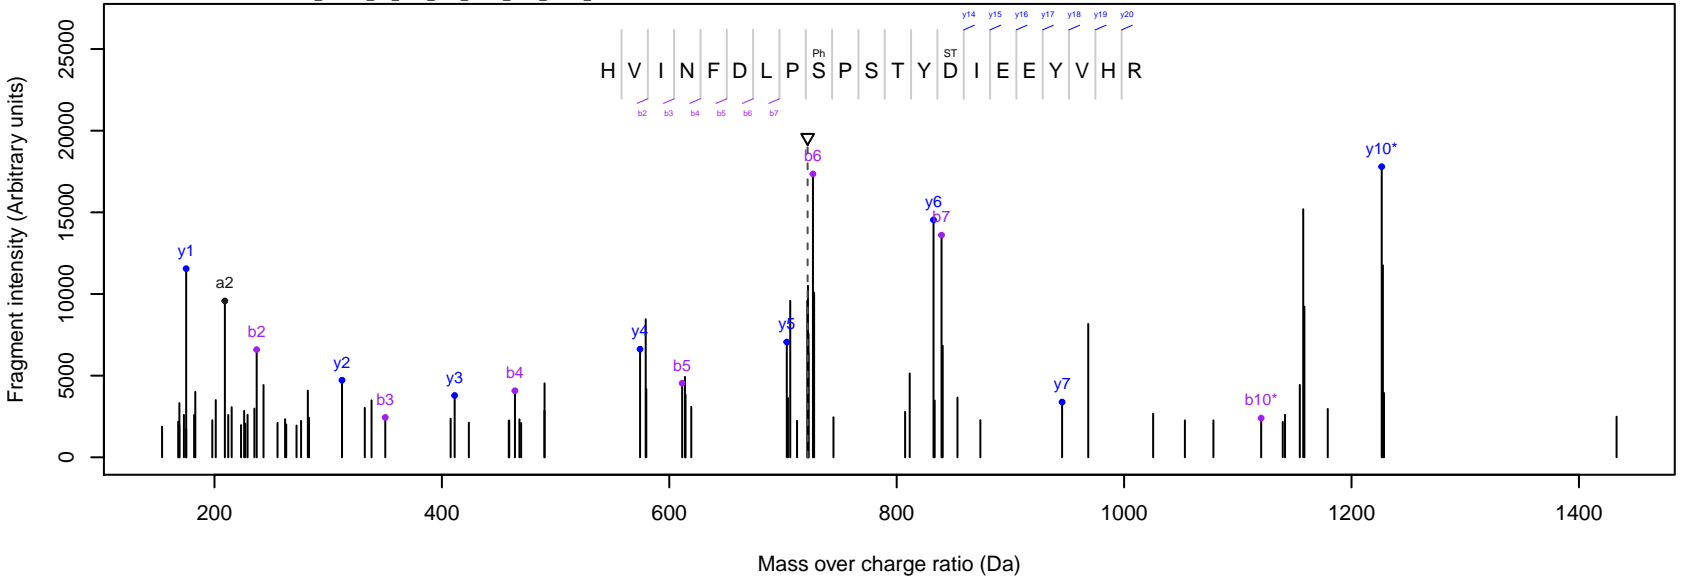

VNNS(Phospho (STY))SLIGLGYTLKPGIK-3+

Source : QE3\_201126\_FR\_TiOx\_hum\_tissue\_Urea\_RNAB\_H Scan : 39509

Andromeda score : 65.779

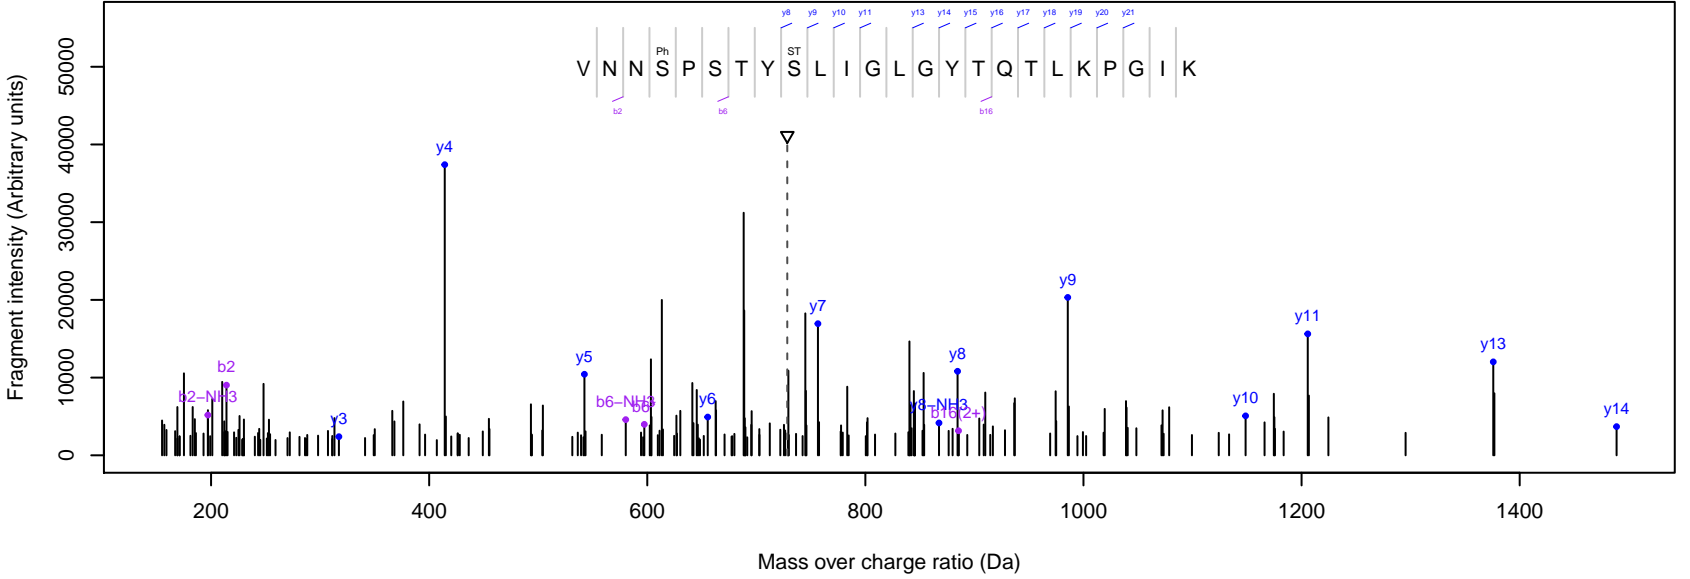

AGSATVLSGS(Phospho (STY))IAGLEGGSQLALRR-3+

Source : QE3\_201126\_FR\_TiOx\_hum\_tissue\_Urea\_RNAB\_H Scan : 40984

Andromeda score : 65.775

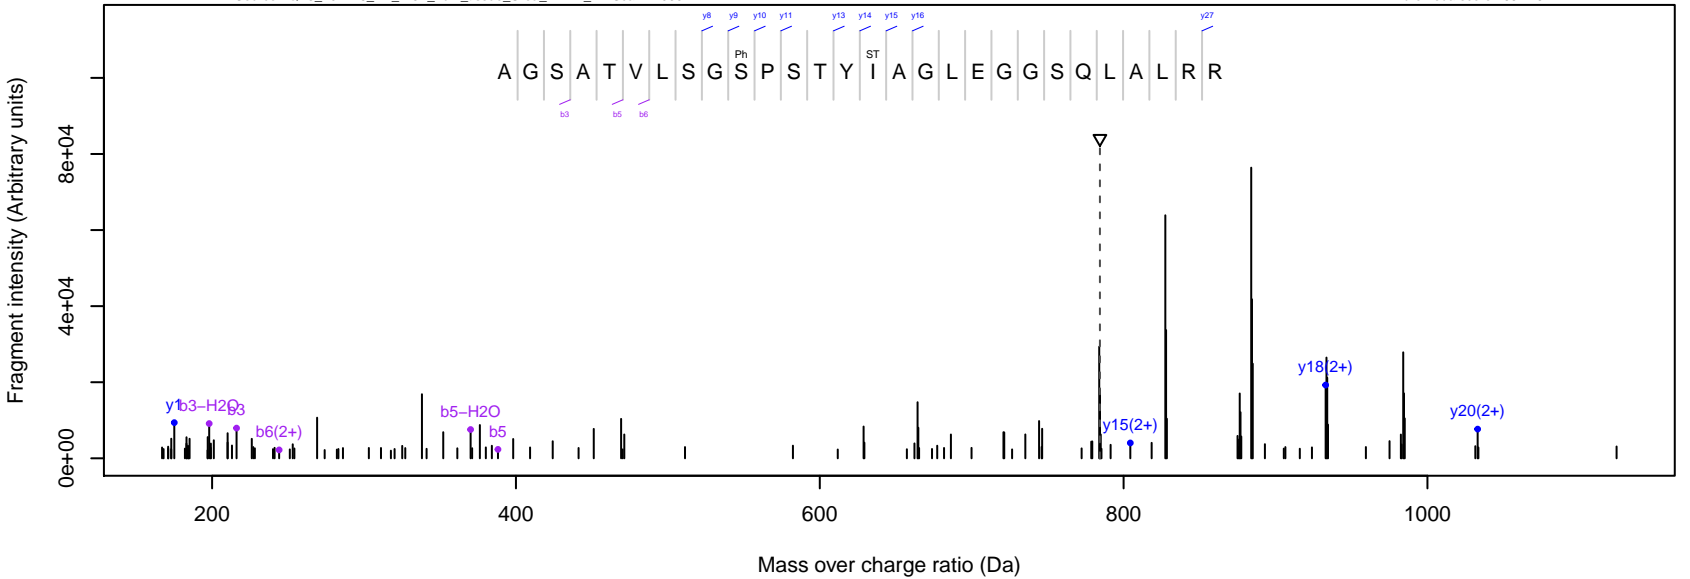

**SHSHQDEDEEVV(Phospho (STY))SEHHHILR-5+**

Source : QE3\_201126\_FR\_TiOx\_hum\_tissue\_Urea\_RNAB\_H Scan : 9617

Andromeda score : 65.775

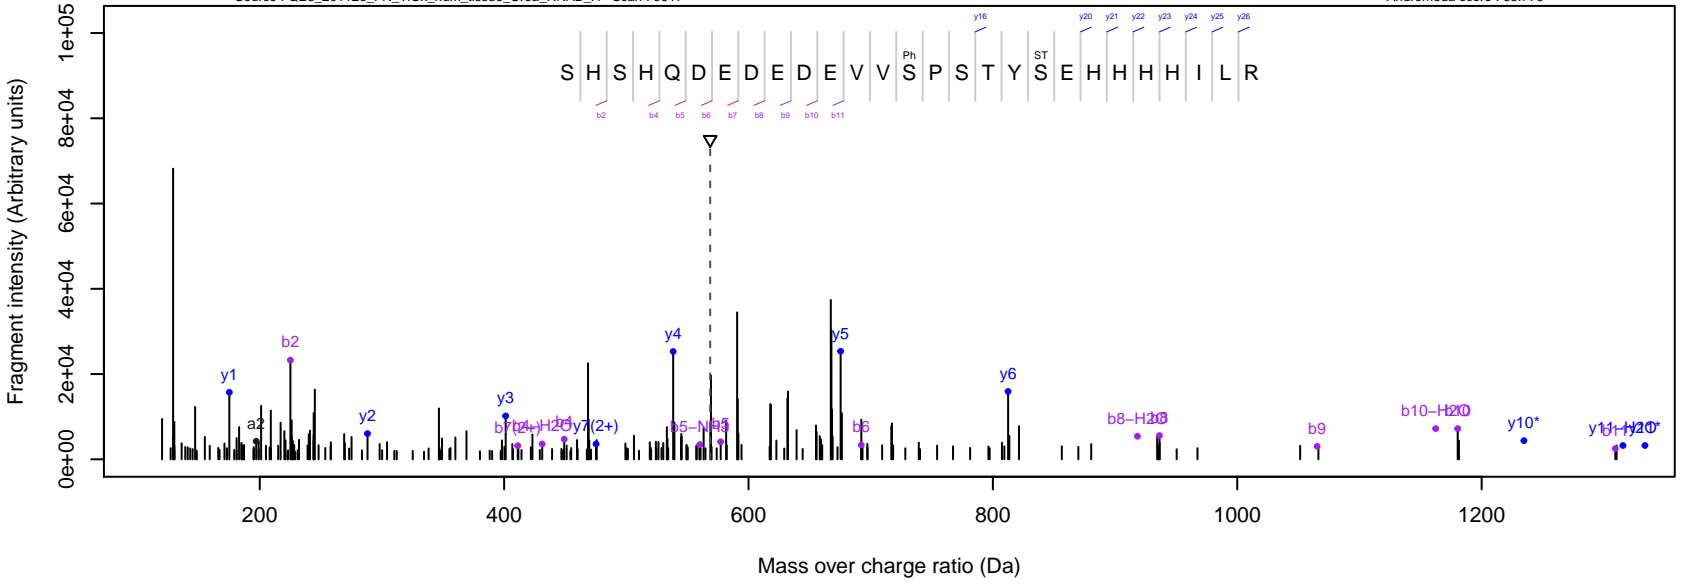

**TSS(Phospho (STY))IATLNTSGAGSRPAQAVR-3+**

Source : QE3\_201126\_FR\_TiOx\_hum\_tissue\_Urea\_RNAB\_N Scan : 21045

Andromeda score : 65.775

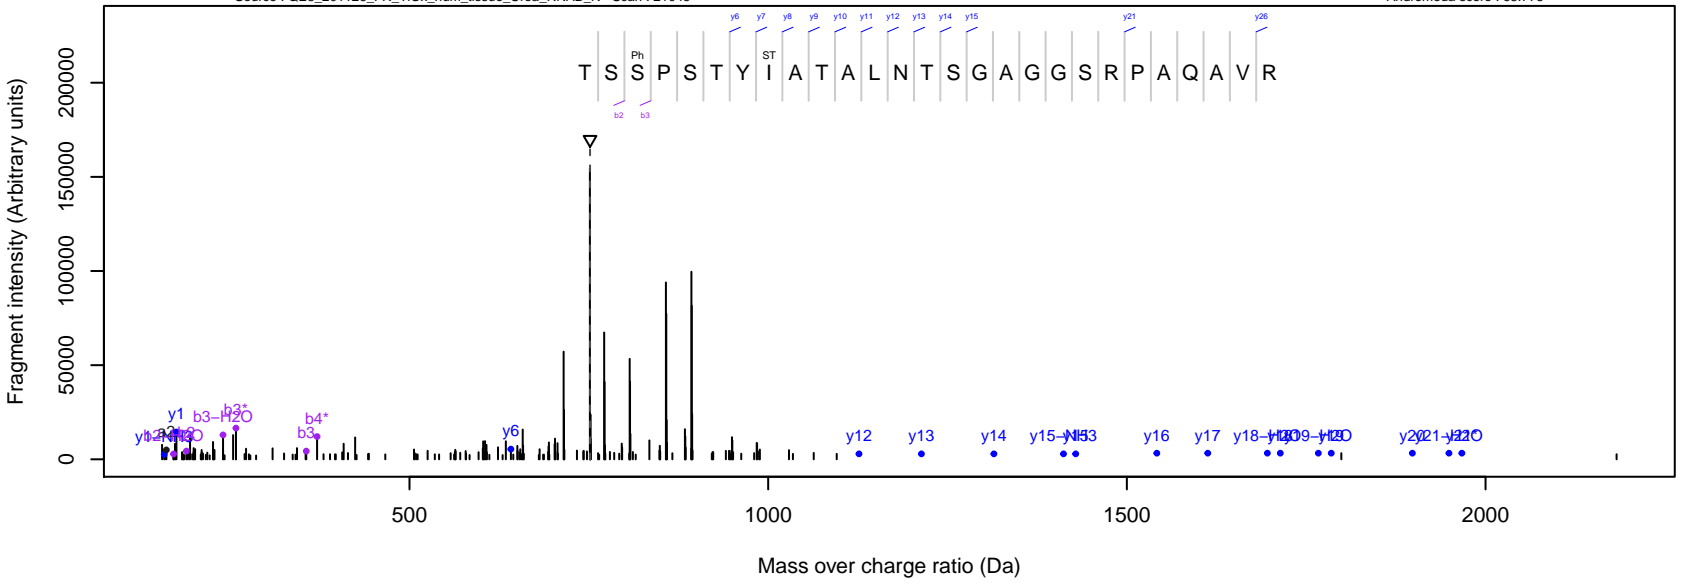

**LCAGIM(Oxidation (M))ITAS(Phospho (STY))HNPQDNGYK-3+**

Source : QE3\_201126\_FR\_TiOx\_hum\_tissue\_Urea\_RNAB\_H Scan : 16526

Andromeda score : 65.753

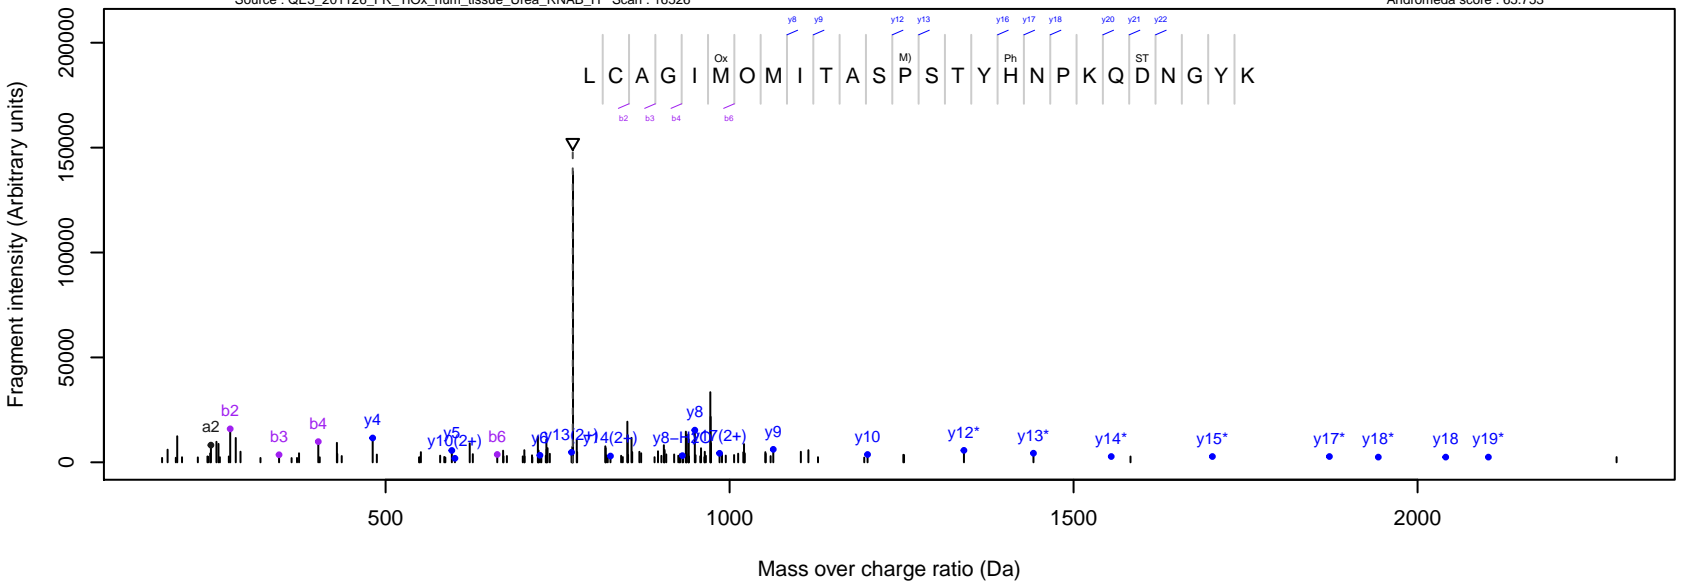

DSFAQLHQEAERQPGAAS(Phospho (STY))LTAQLLDTLGR-4+

Source : QE3\_201126\_FR\_TiOx\_hum\_tissue\_Urea\_RNAB\_N Scan : 54634

Andromeda score : 65.736

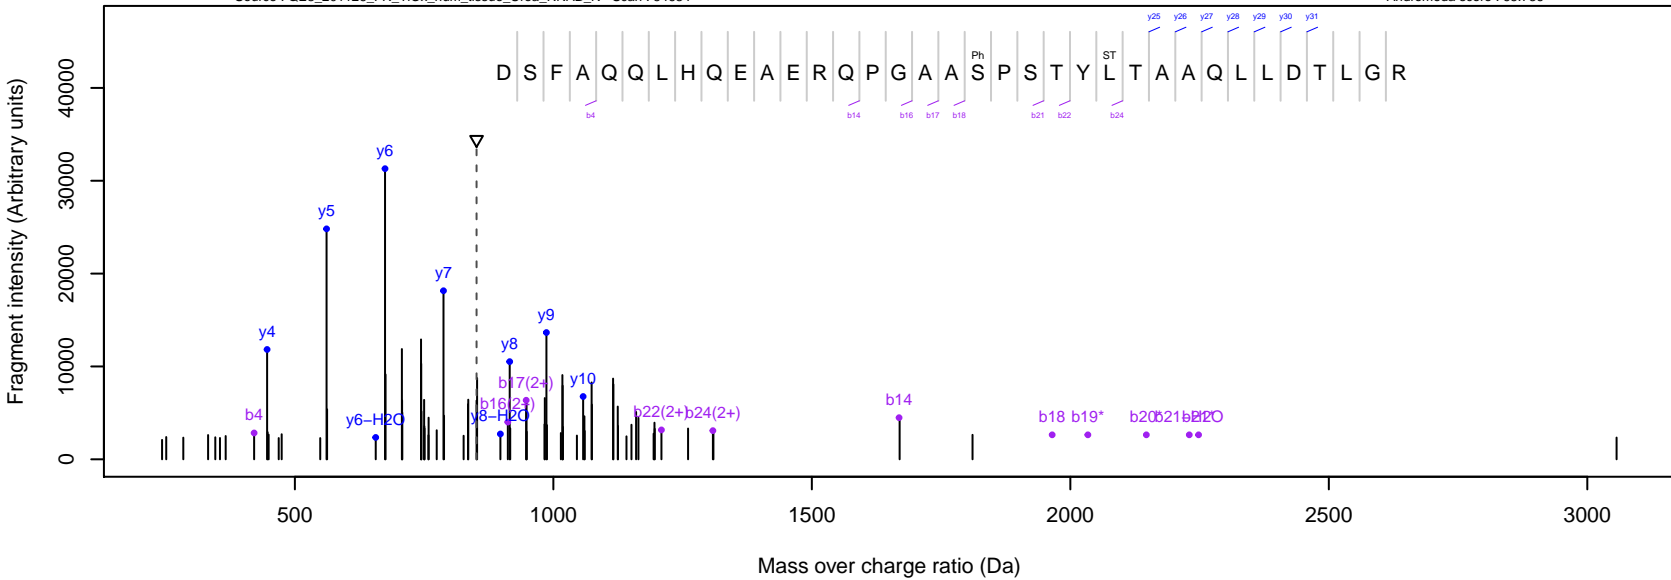

DSFDDRGP SLNPVLDYDHGS(Phospho (STY))RSQESGYDR-4+

Source : QE3\_201126\_FR\_TiOx\_hum\_tissue\_Urea\_RNAB\_H Scan : 34175

Andromeda score : 65.736

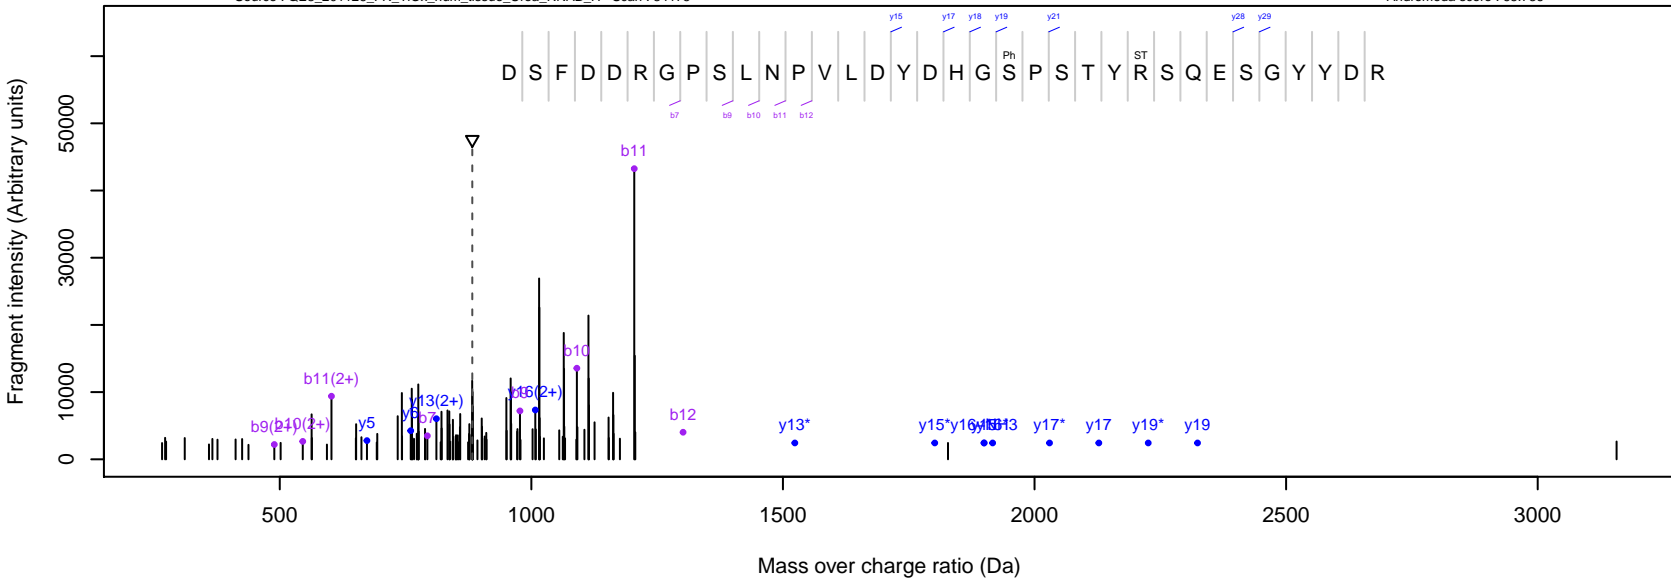

RQS(Phospho (STY))PLPPQK-2+

Source : QE3\_201126\_FR\_TiOx\_hum\_tissue\_Urea\_RNAB\_H Scan : 4467

Andromeda score : 65.719

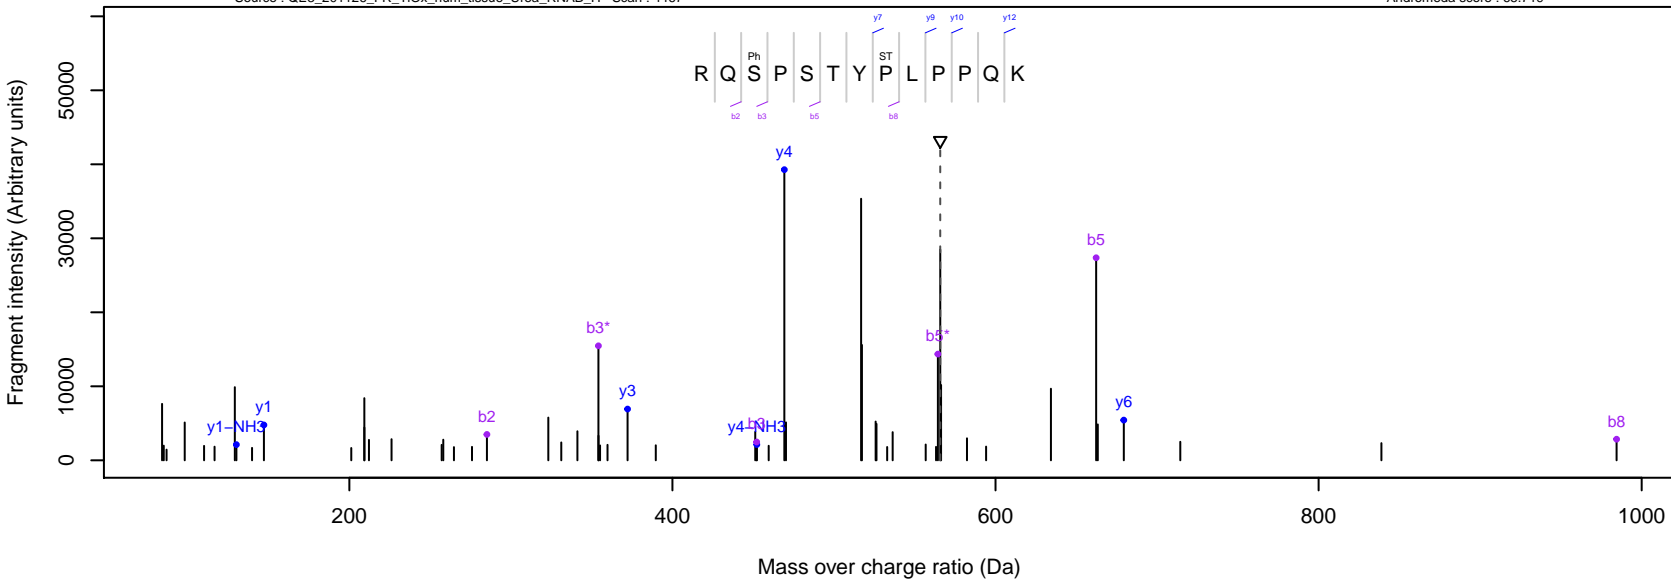

AKS(Phospho (STY))FTCSEKPM(Oxidation (M))AR-3+

Source : QE3\_201126\_FR\_TIOx\_hum\_tissue\_Urea\_RNAB\_H Scan : 5310

Andromeda score : 65.716

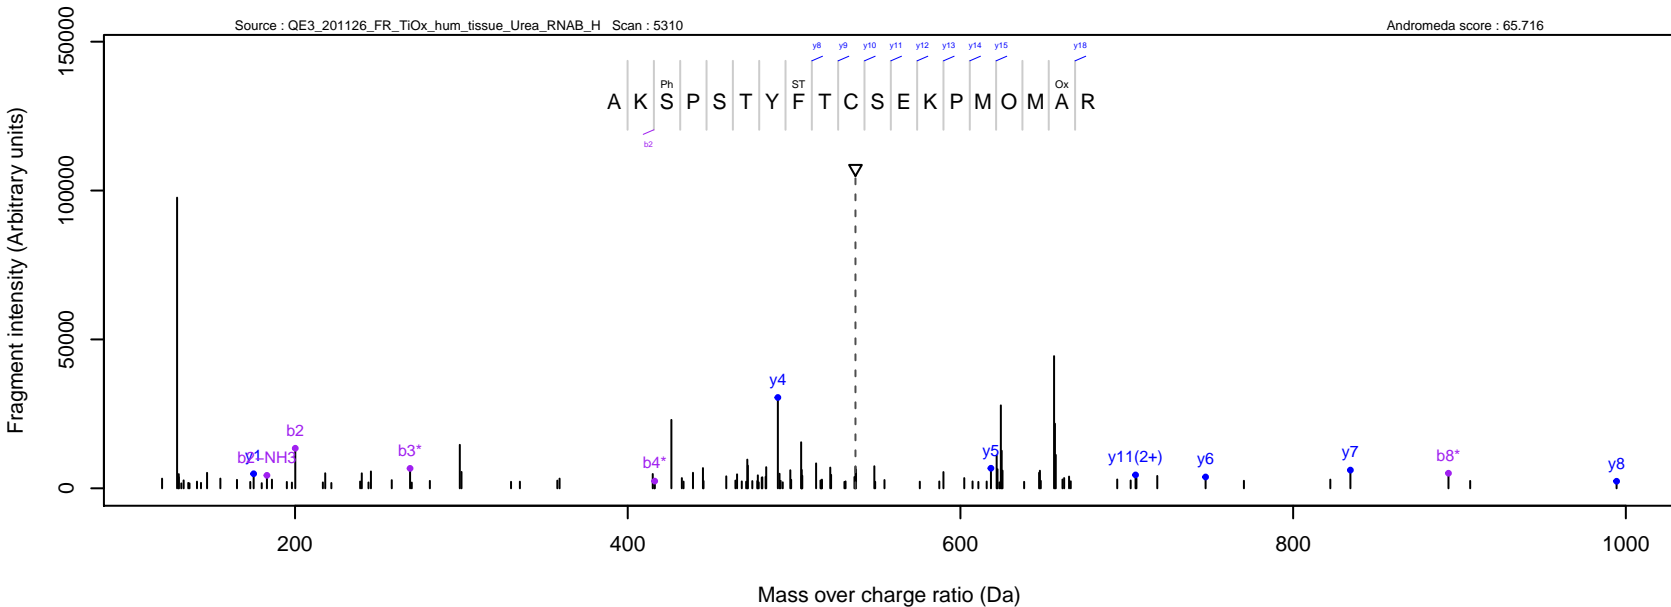

SLEPSPS(Phospho (STY))PGPQEEDGEVALLLGRPSGAVGPEDVALCSSR-4+

Source : QE3\_201126\_FR\_TIOx\_hum\_tissue\_Urea\_RNAB\_H Scan : 56679

Andromeda score : 65.71

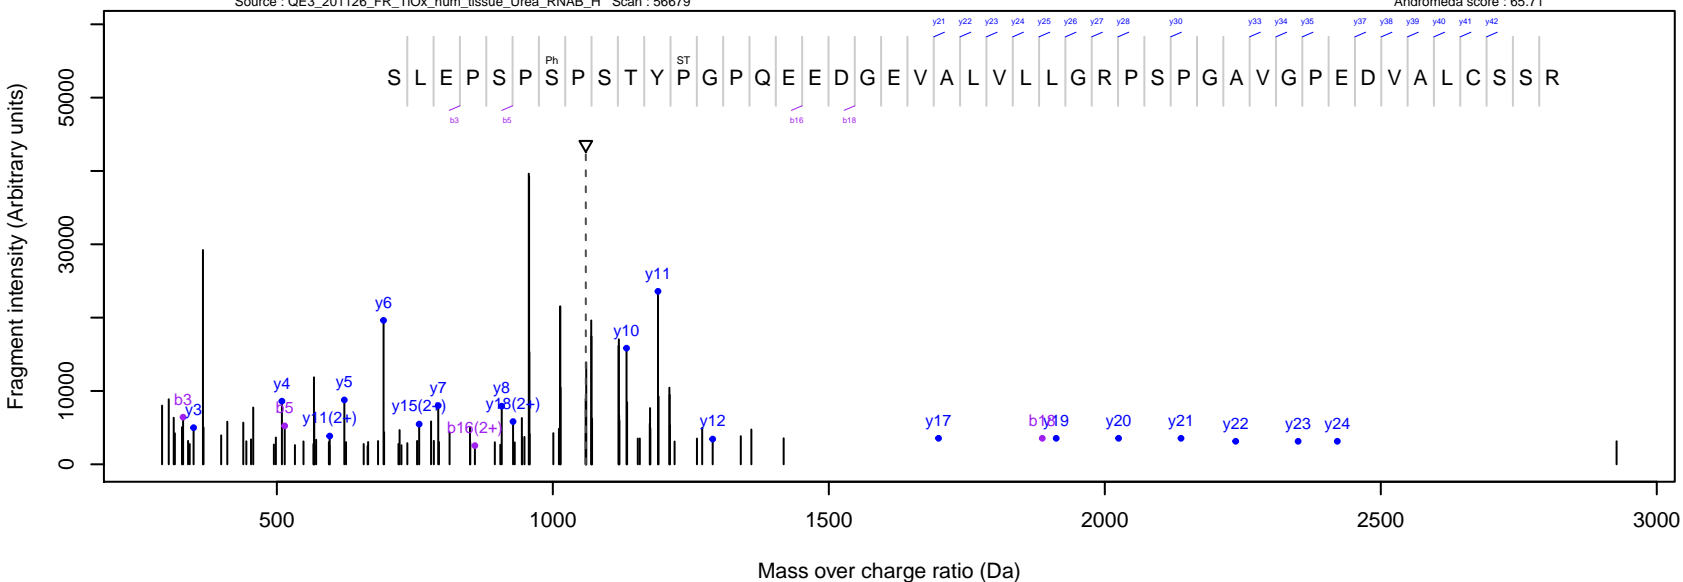

LHSAEQDADDEAADDT(Phospho (STY))DDTSSVTSSASSTSSQSGSGTSR-4+

Source : QE3\_201126\_FR\_TIOx\_hum\_tissue\_Urea\_RNAB\_N Scan : 15829

Andromeda score : 65.69

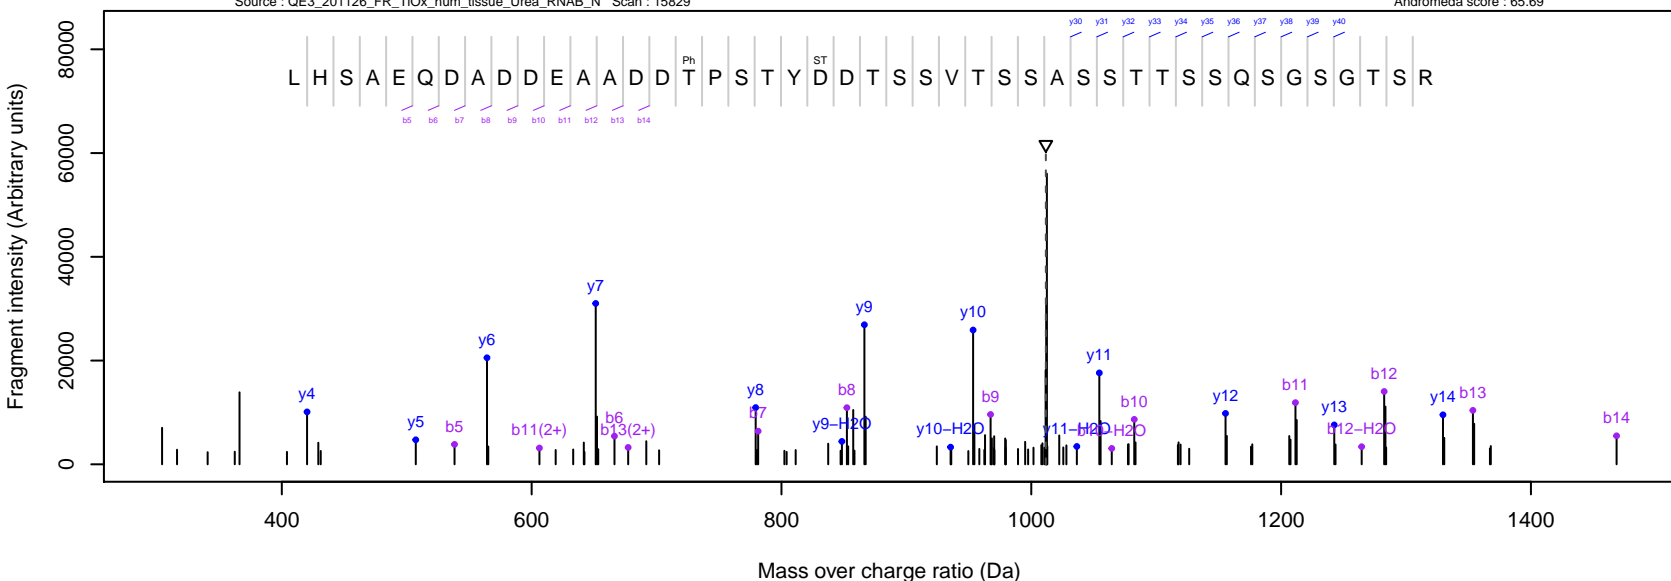

PET(Phospho (STY))PPRQSHSGSISPY(Phospho (STY))PKVK-4+

Source : QE3\_201126\_FR\_TiOx\_hum\_tissue\_Urea\_RNAB\_B Scan : 10703

Andromeda score : 65.62

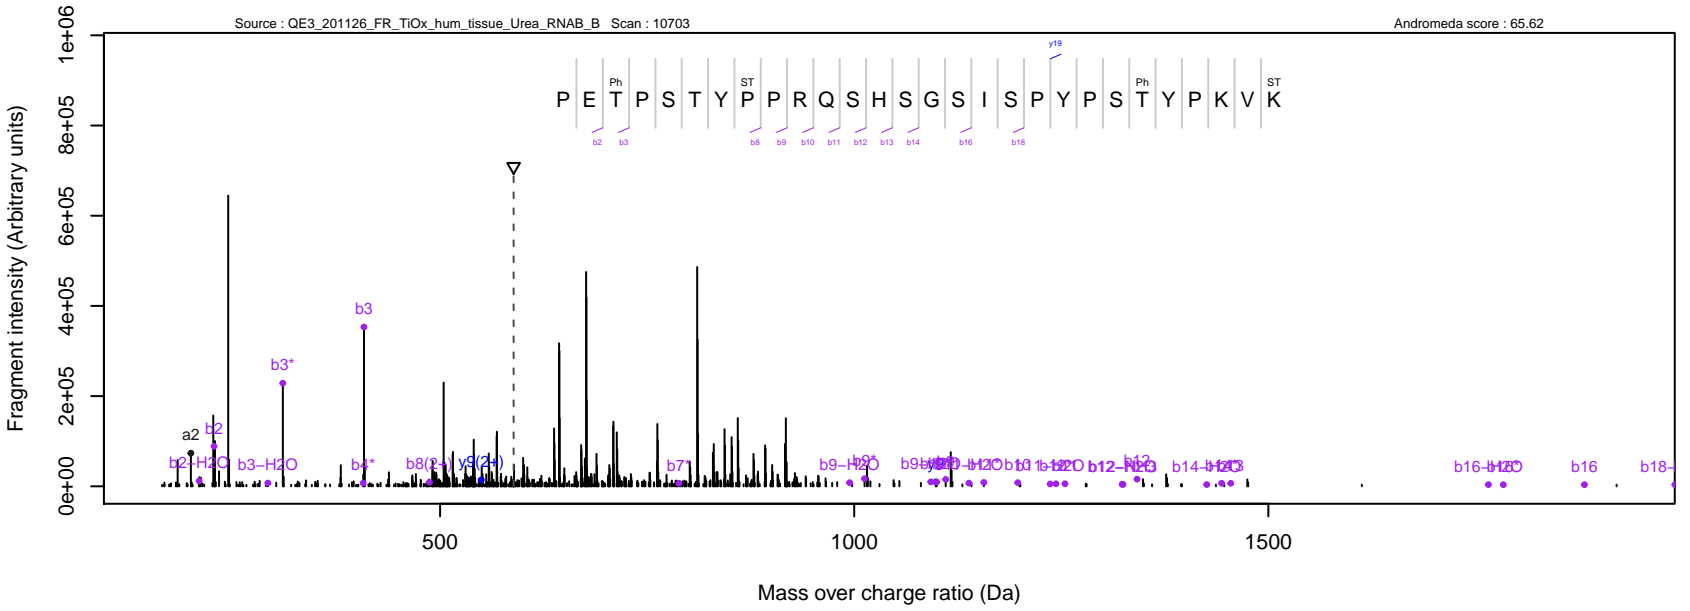

EIIDAS(Phospho (STY))DKEGMS(Phospho (STY))PAKR-3+

Source : QE3\_201126\_FR\_TiOx\_hum\_tissue\_Urea\_RNAB\_N Scan : 14786

Andromeda score : 65.598

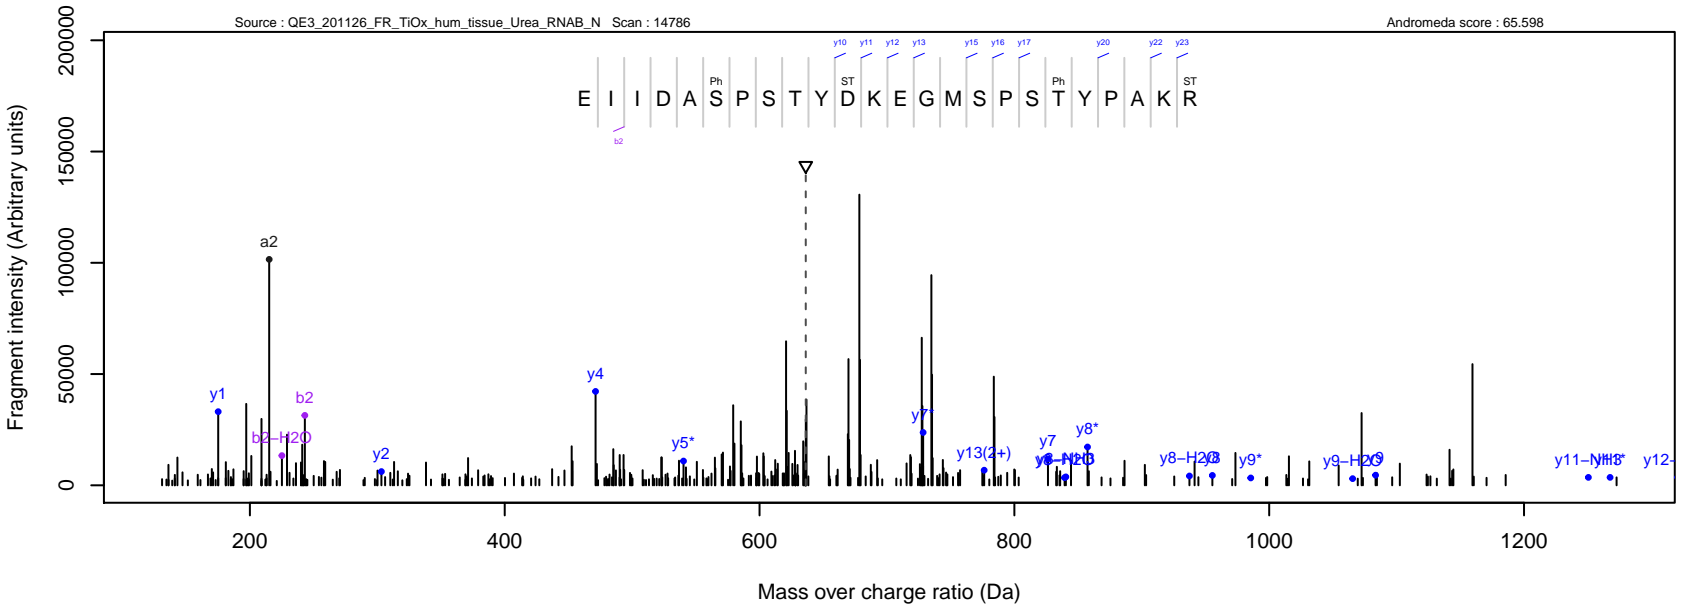

RVIHVSGETM(Oxidation (M))EEYS(Phospho (STY))T(Phospho (STY))DEDEV DGLEK-3+

Source : QE3\_201126\_FR\_TiOx\_hum\_tissue\_Urea\_RNAB\_H Scan : 34718

Andromeda score : 65.581

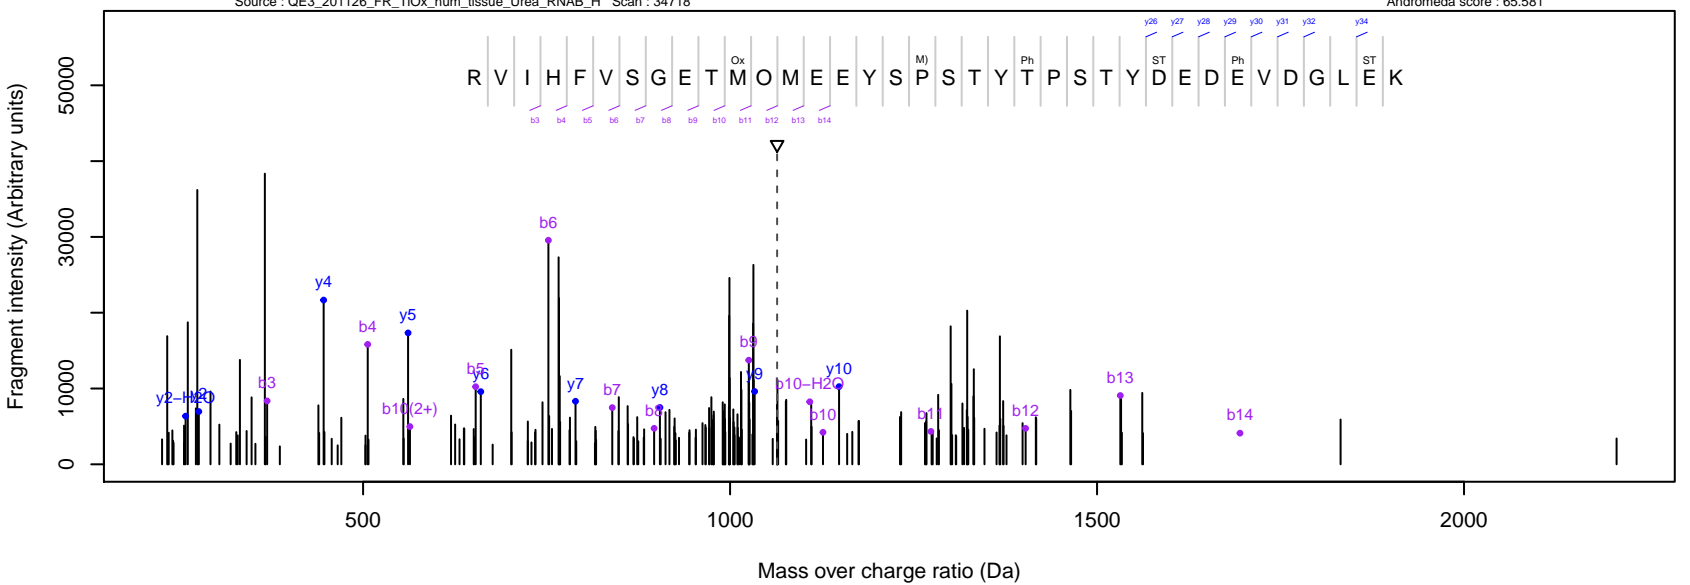

SPTPVHS(Phospho (STY))PDADRPGLFVDVQAR-3+

Source : QE3\_201126\_FR\_TiOx\_hum\_tissue\_Urea\_RNAB\_H Scan : 28986

Andromeda score : 65.581

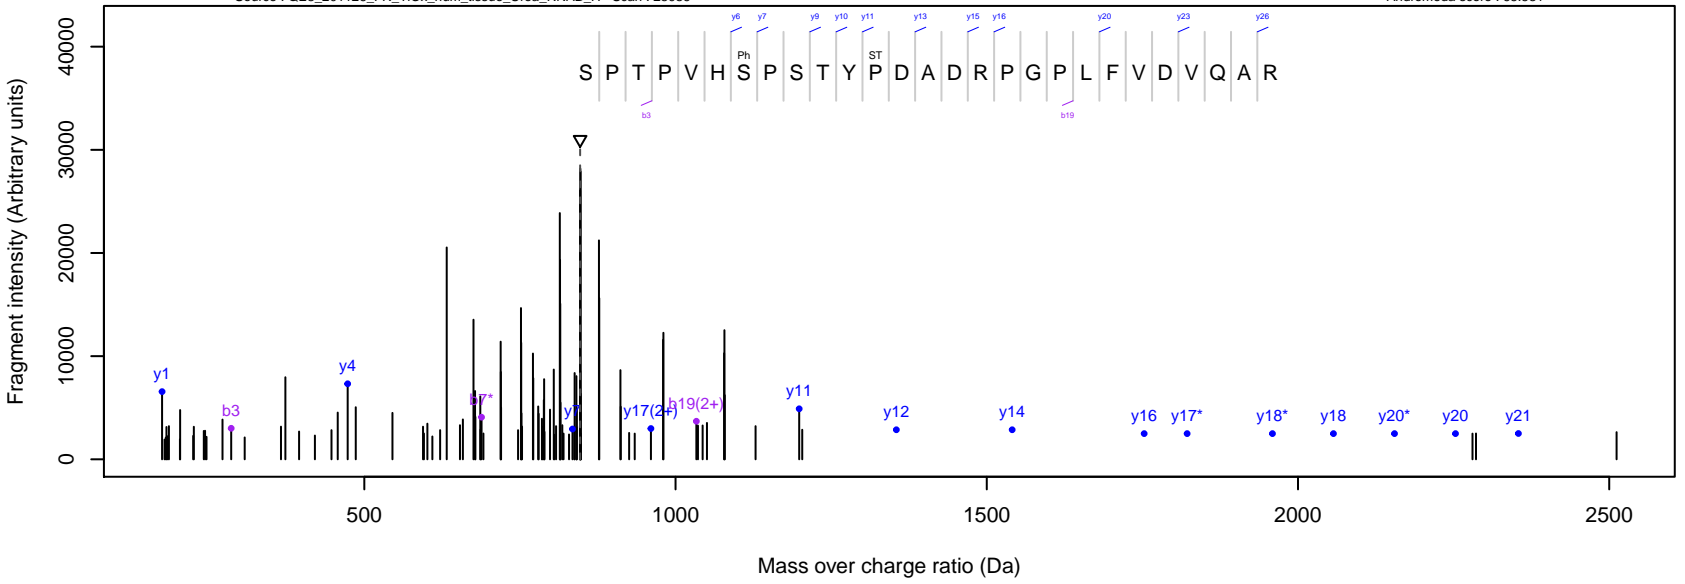

SGT(Phospho (STY))PPRQGS(Phospho (STY))ITS(Phospho (STY))PQANEQSVT(Phospho (STY))PQRR-3+

Source : QE3\_201126\_FR\_TiOx\_hum\_tissue\_Urea\_RNAB\_N Scan : 18470

Andromeda score : 65.57

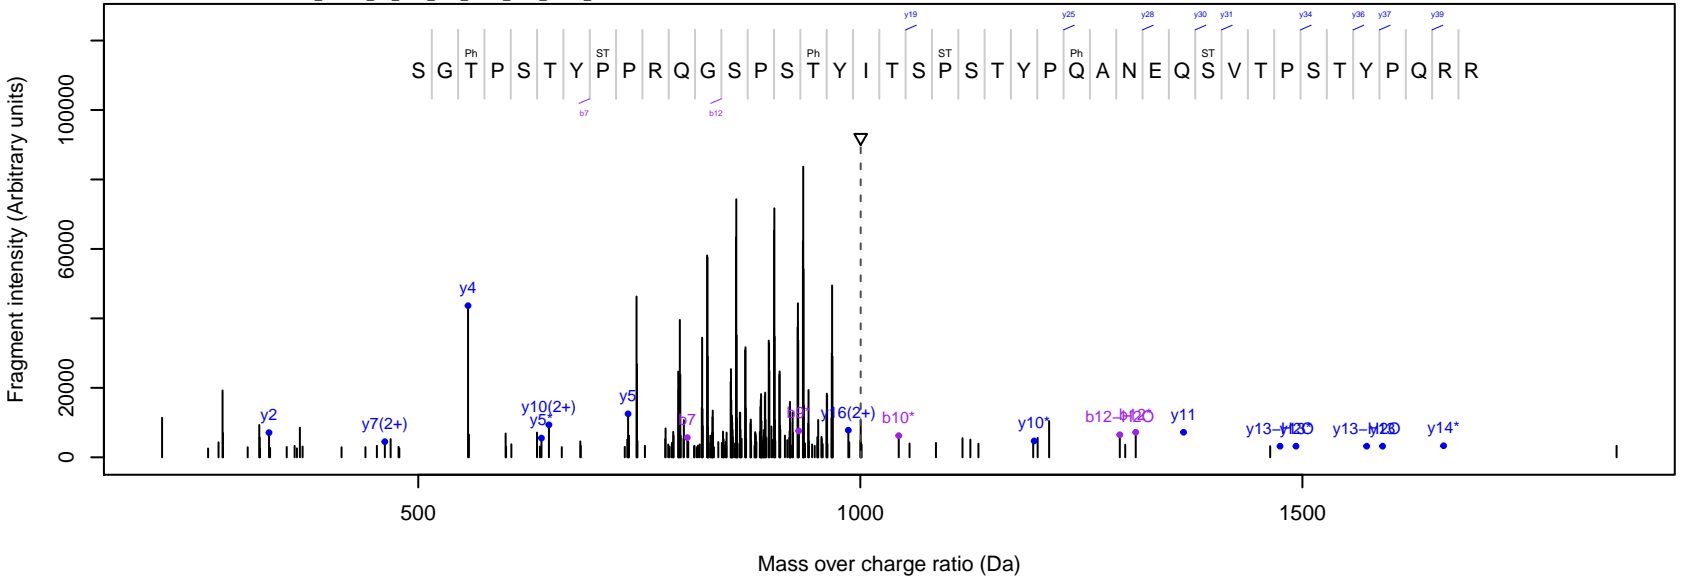

GNVVPS(Phospho (STY))PLPTRR-2+

Source : QE3\_201126\_FR\_TiOx\_hum\_tissue\_Urea\_RNAB\_N Scan : 17865

Andromeda score : 65.563

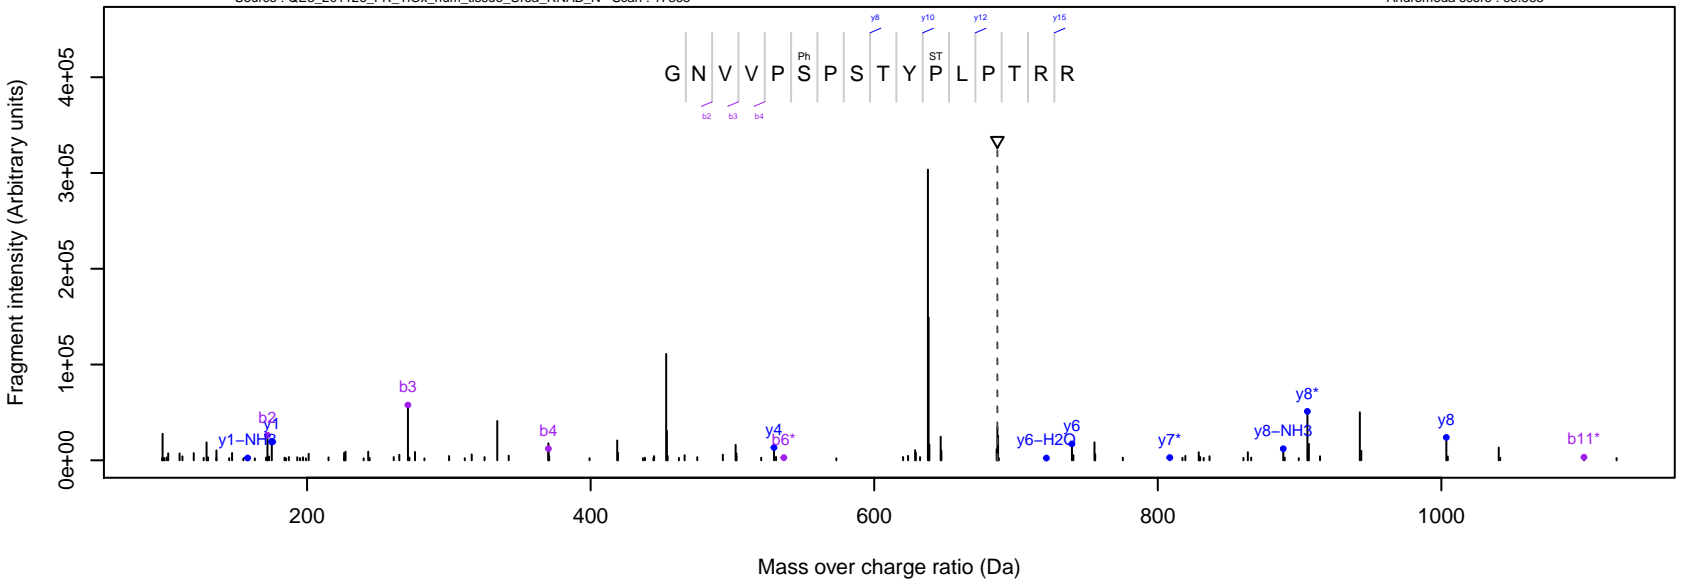

S(Phospho (STY))PQMVSAIVR-2+

Source : QE3\_201126\_FR\_TIOx\_hum\_tissue\_Urea\_RNAB\_N Scan : 28049

Andromeda score : 65.563

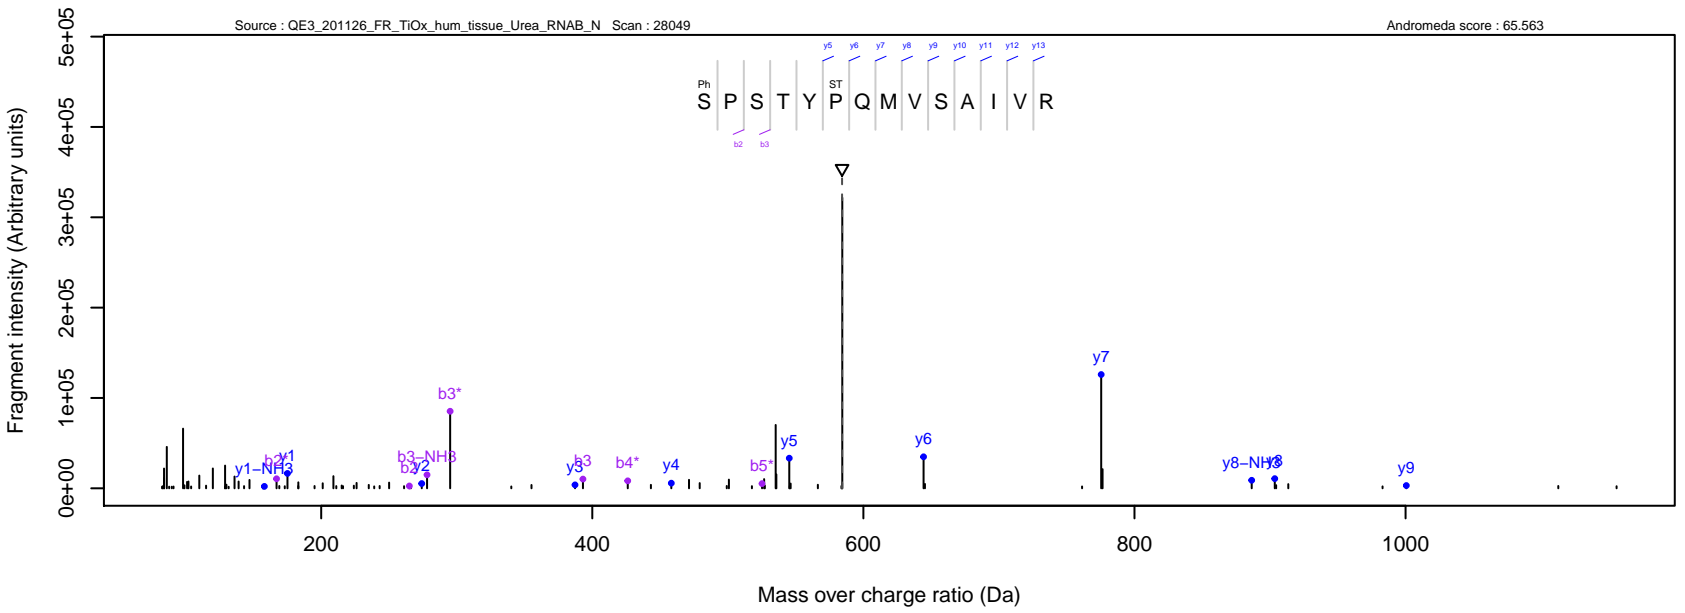

ALPQT(Phospho (STY))PRPR-3+

Source : QE3\_201126\_FR\_TIOx\_hum\_tissue\_Urea\_RNAB\_H Scan : 8003

Andromeda score : 65.5

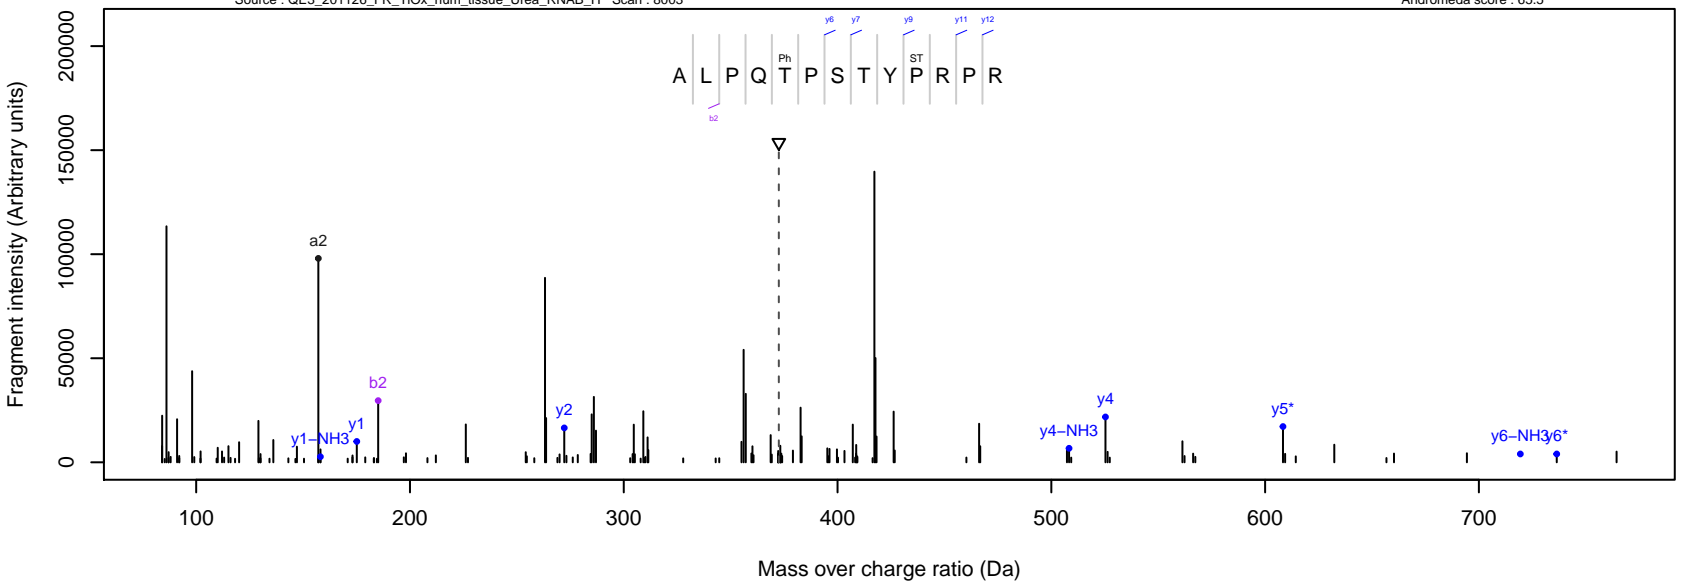

RLS(Phospho (STY))LPADIR-2+

Source : QE3\_201126\_FR\_TIOx\_hum\_tissue\_Urea\_RNAB\_N Scan : 25306

Andromeda score : 65.5

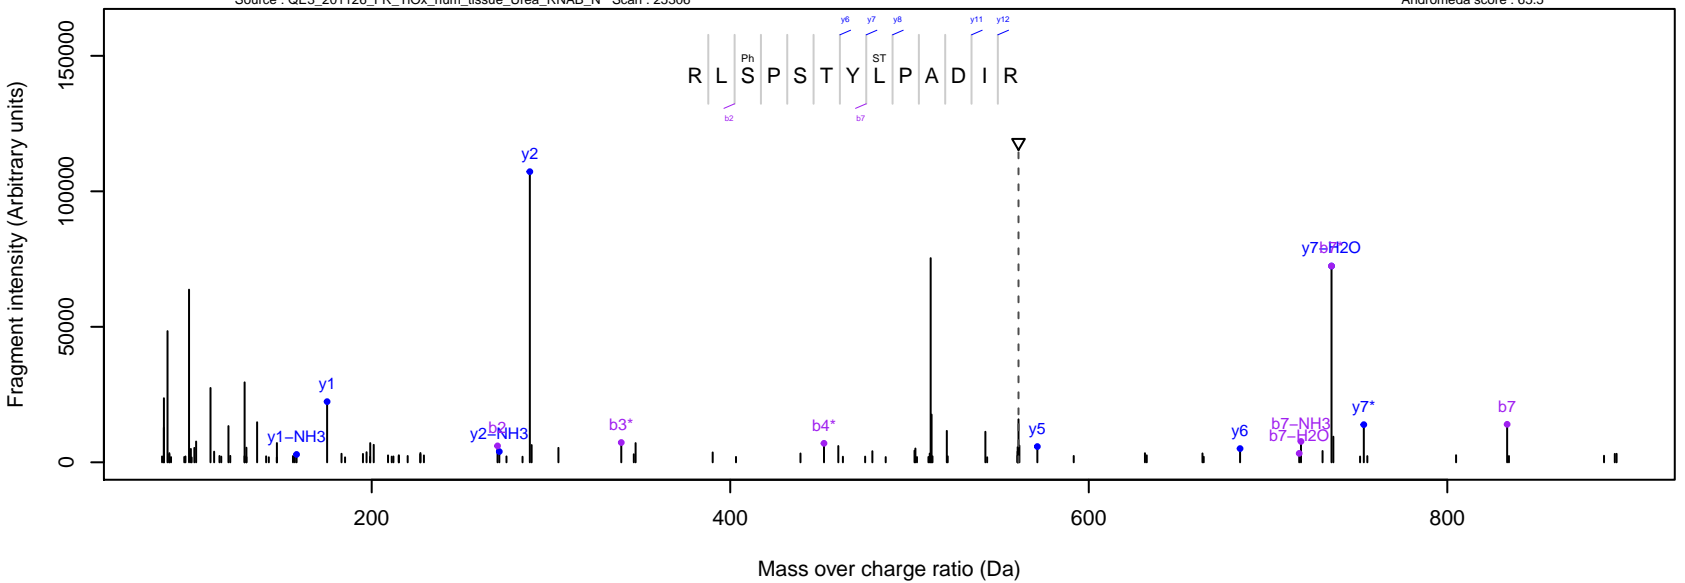



RGS(Phospho (STY))S(Phospho (STY))PGSLEIPK-2+

Source : QE3\_201126\_FR\_TiOx\_hum\_tissue\_Urea\_RNAB\_H Scan : 22176

Andromeda score : 65.495

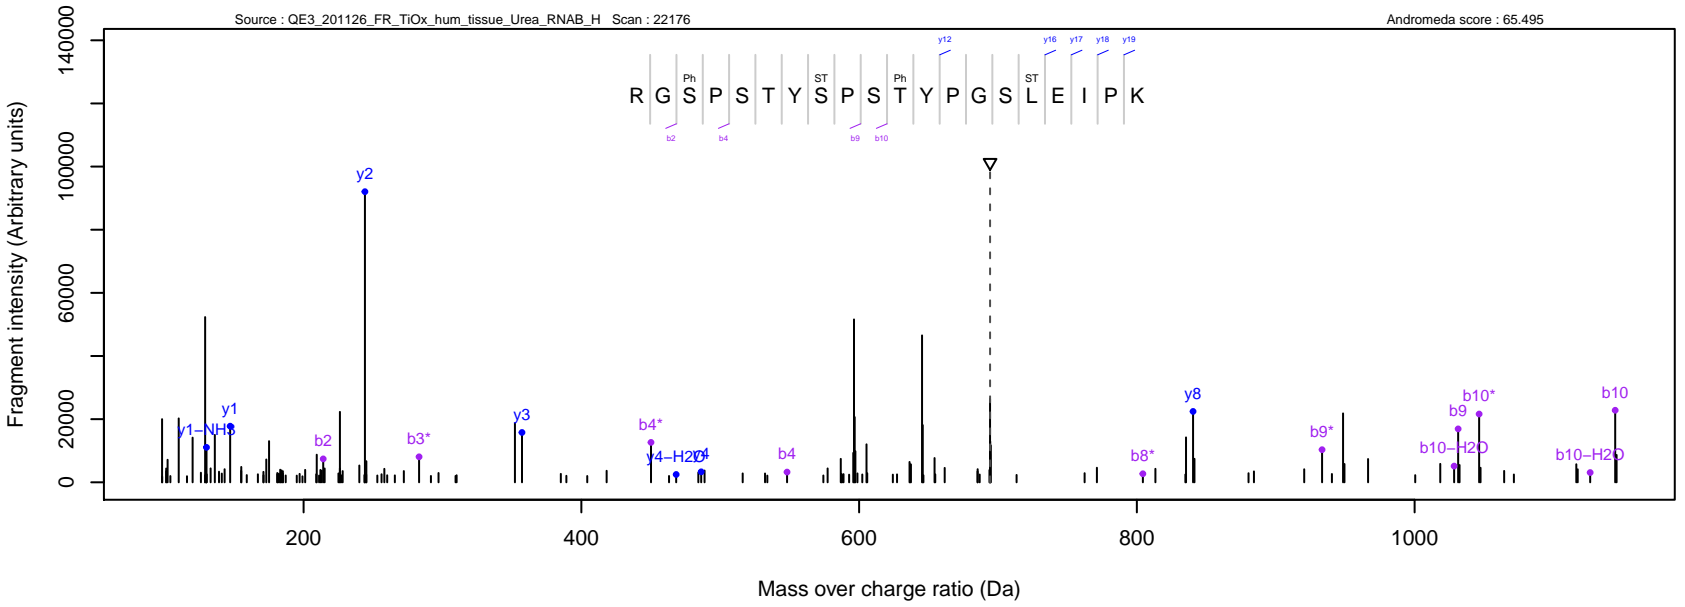

IQGQLNHS(Phospho (STY))DSSQYIR-2+

Source : QE3\_201126\_FR\_TiOx\_hum\_tissue\_Urea\_RNAB\_B Scan : 14289

Andromeda score : 65.472

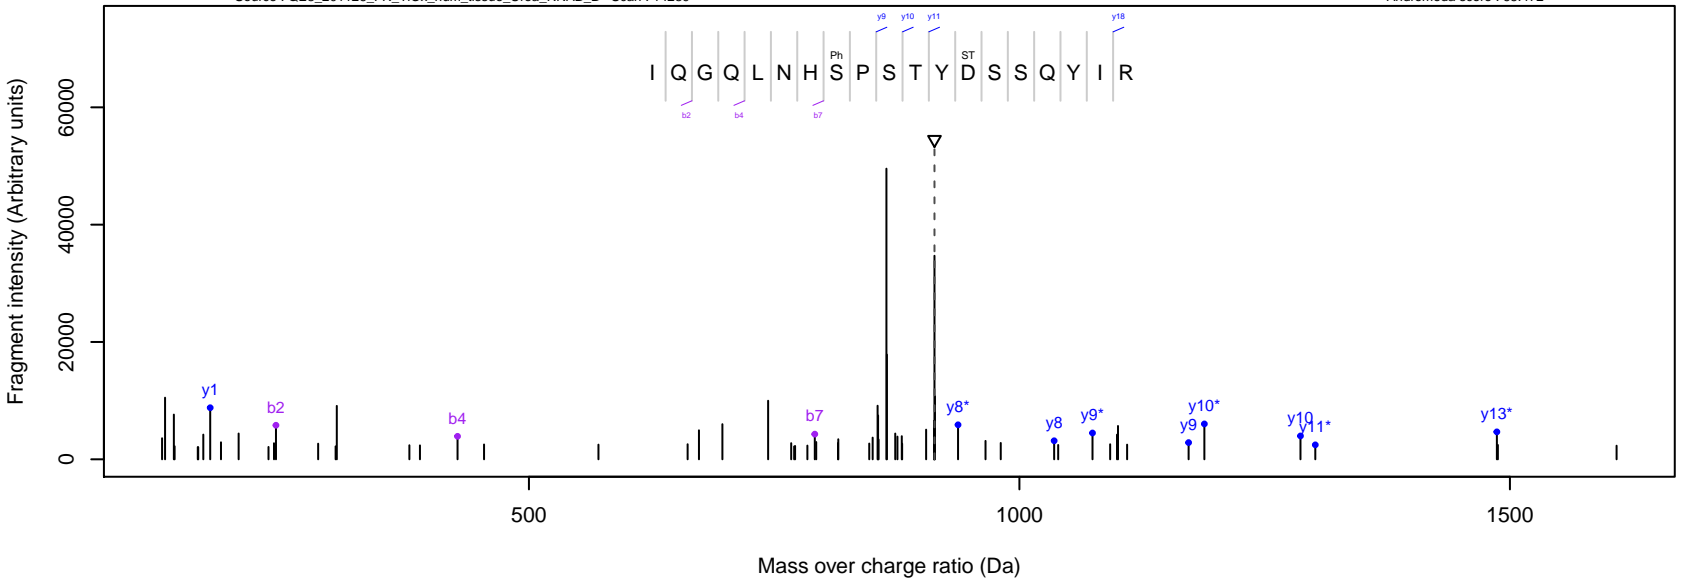

LFPEFDDS(Phospho (STY))DYDEVPEEGPGAPAR-2+

Source : QE3\_201126\_FR\_TiOx\_hum\_tissue\_Urea\_RNAB\_N Scan : 53418

Andromeda score : 65.472

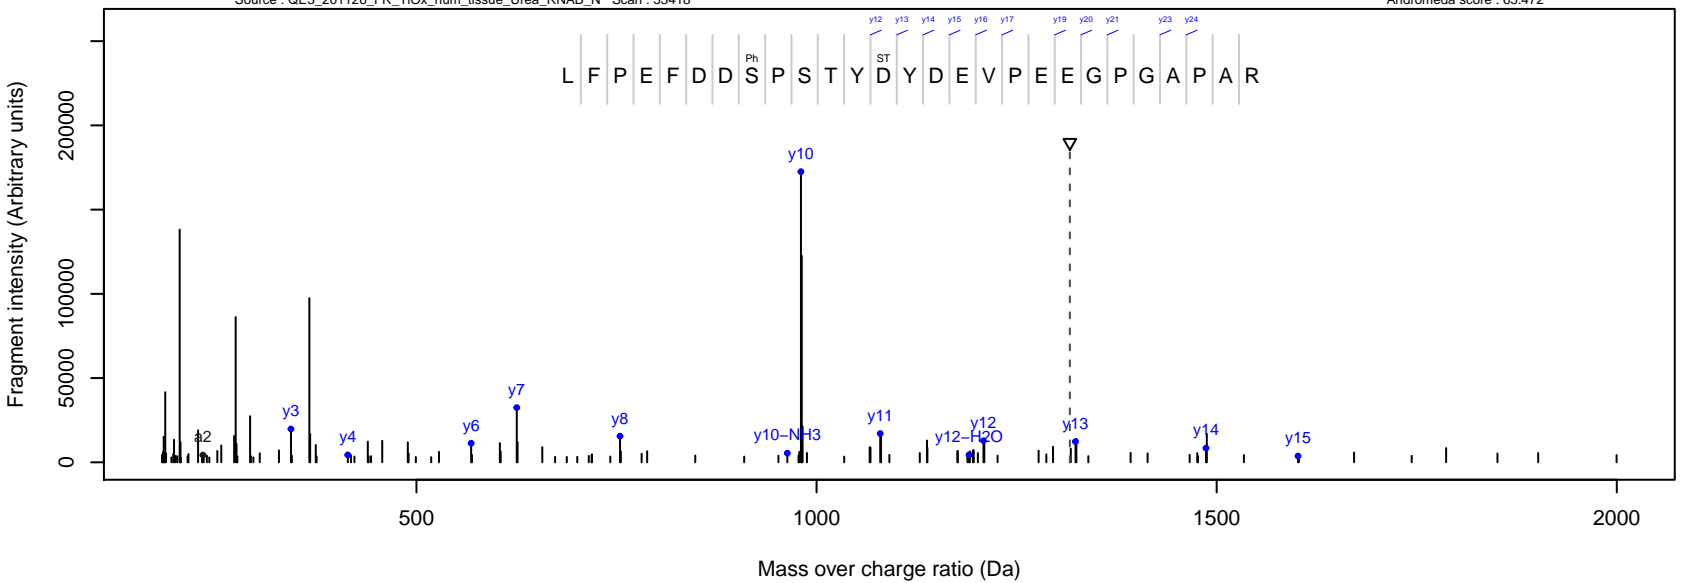

NGPSSS(Phospho (STY))PFSSPASSR-2+

Source : QE3\_201126\_FR\_TiOx\_hum\_tissue\_Urea\_RNAB\_H Scan : 16938

Andromeda score : 65.472

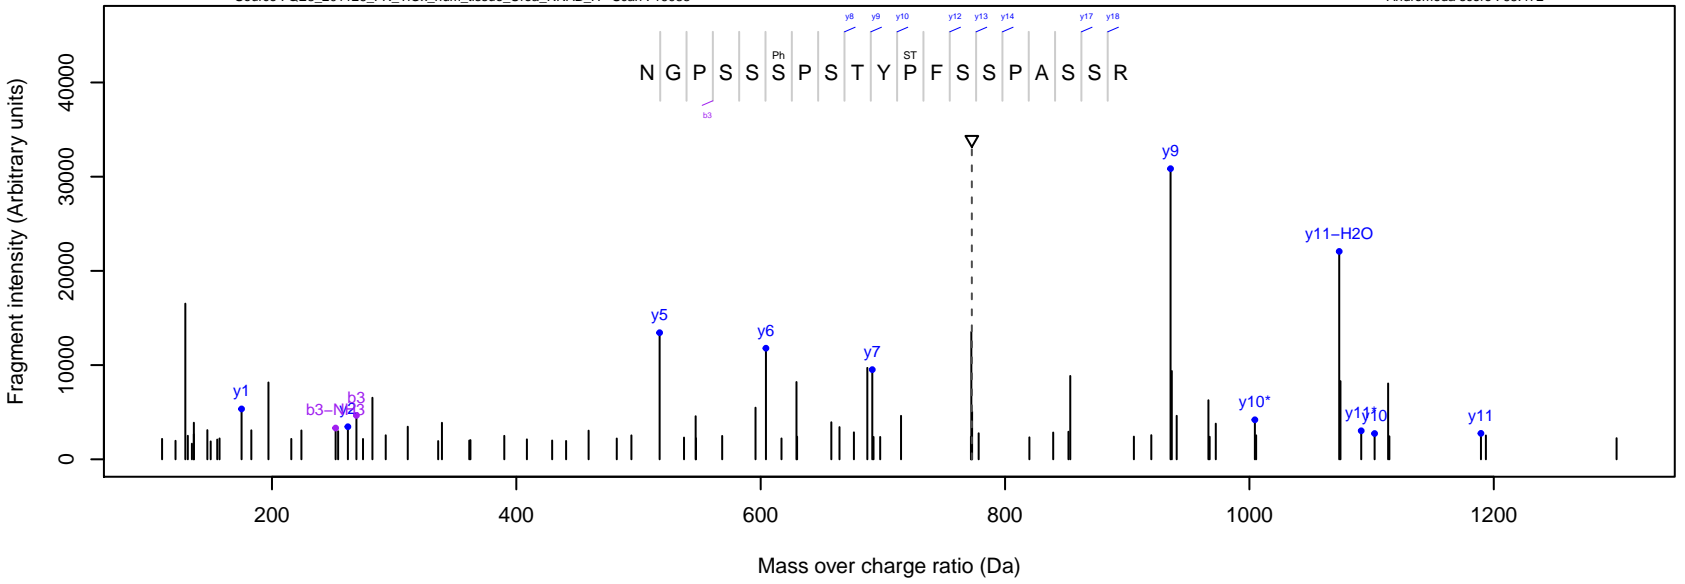

RVS(Phospho (STY))LVGADDLR-2+

Source : QE3\_201126\_FR\_TiOx\_hum\_tissue\_Urea\_RNAB\_B Scan : 21787

Andromeda score : 65.472

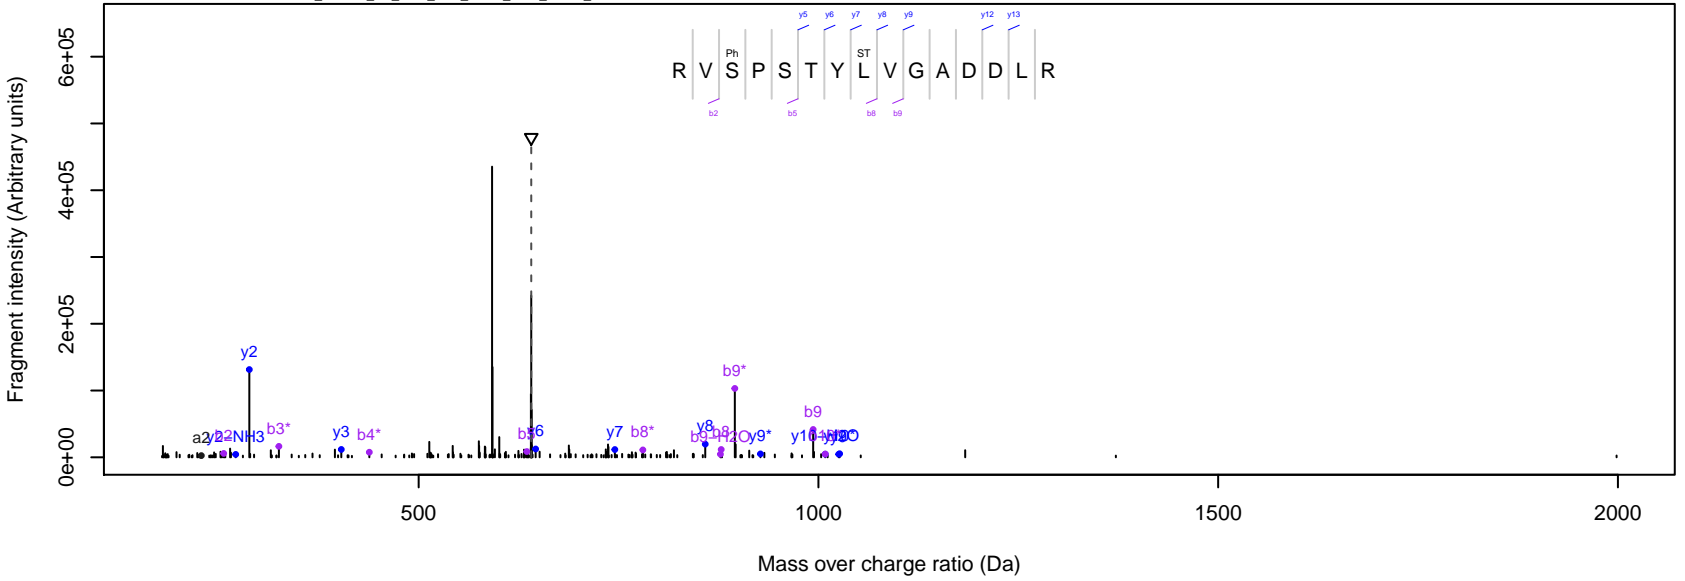

QLT(Phospho (STY))QPETHFGREPAAISRPR-4+

Source : QE3\_201126\_FR\_TiOx\_hum\_tissue\_Urea\_RNAB\_N Scan : 18240

Andromeda score : 65.428

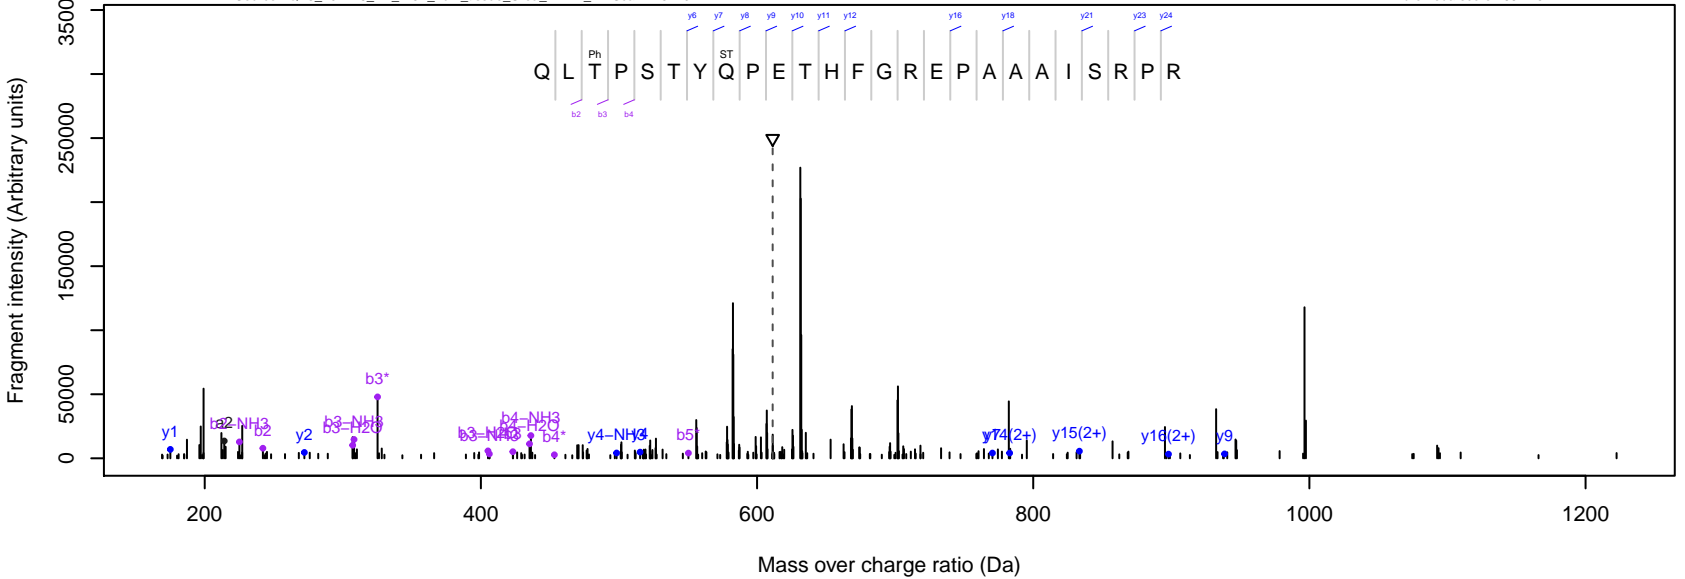

SES(Phospho (STY))VVYADIR-2+

Source : QE3\_201126\_FR\_TiOx\_hum\_tissue\_Urea\_RNAB\_H Scan : 26161

Andromeda score : 65.395

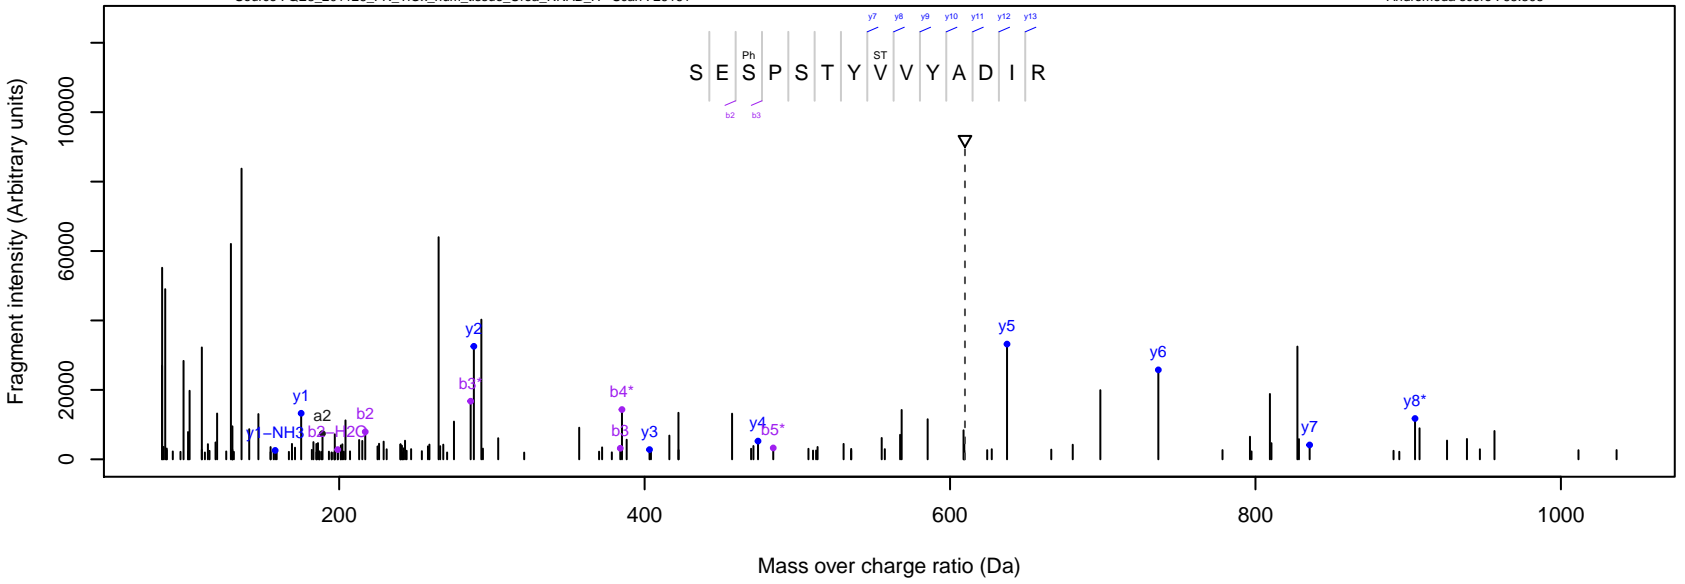

S(Phospho (STY))LS(Phospho (STY))YS(Phospho (STY))PVER-2+

Source : QE3\_201126\_FR\_TiOx\_hum\_tissue\_Urea\_RNAB\_H Scan : 35521

Andromeda score : 65.395

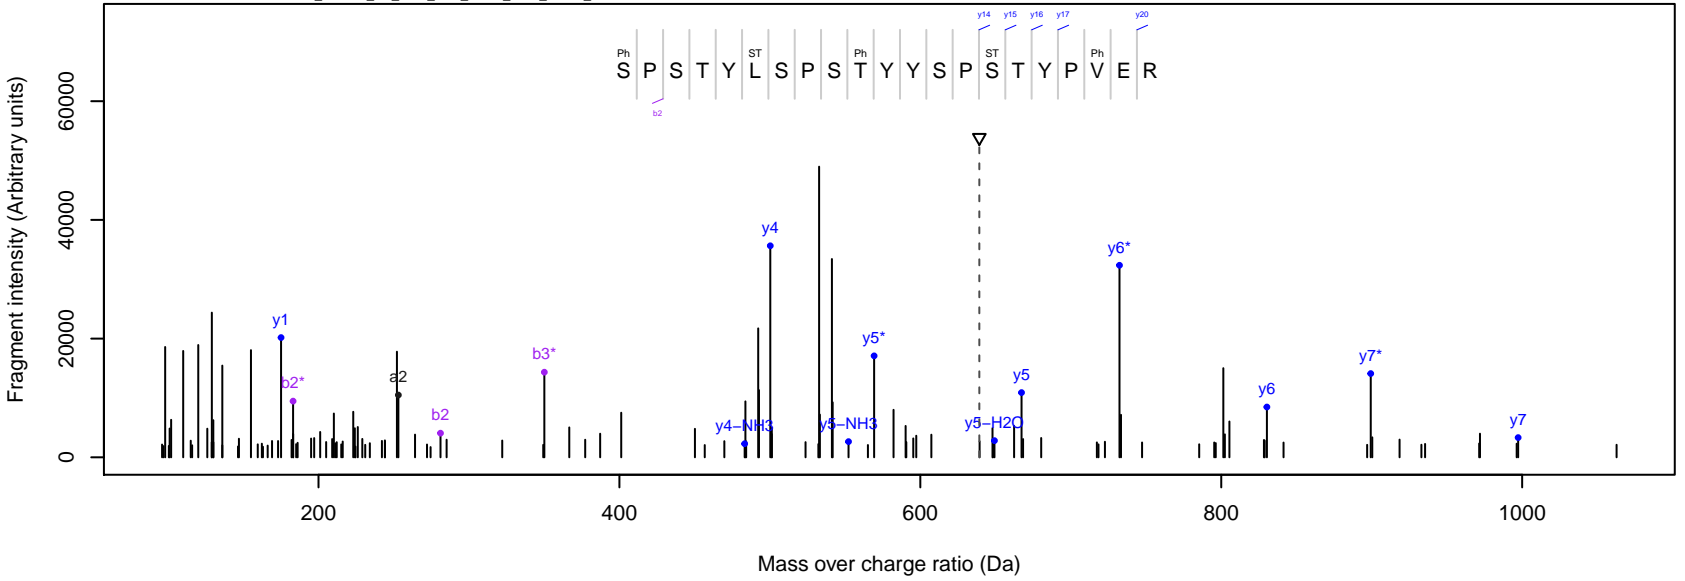

(Acetyl (Protein N-term))AAMAPGGSGGGVNPFLS(Phospho (STY))DSEDDDEVAATEER-3+

Source : QE3\_201126\_FR\_TiOx\_hum\_tissue\_Urea\_RNAB\_H Scan : 58178

Andromeda score : 65.378

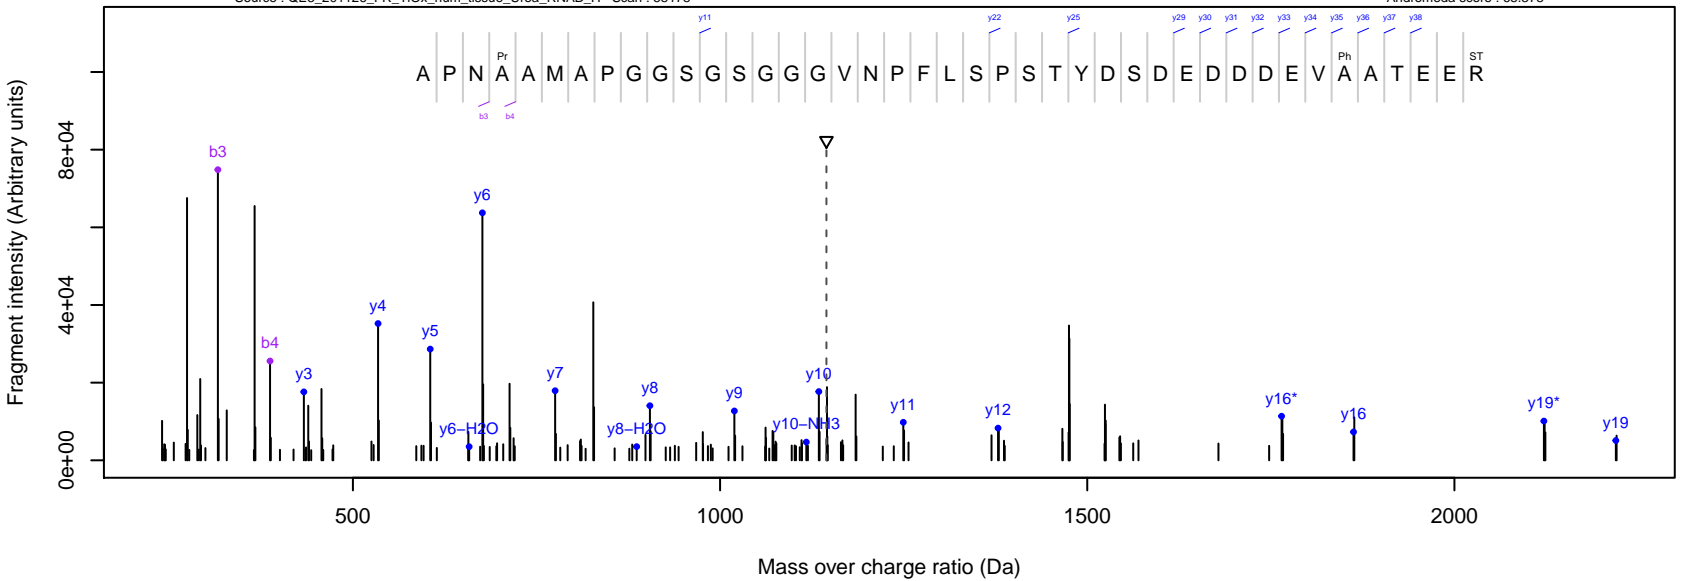

ASPSSPGRQDS(Phospho (STY))DEDDGPRVVEVDQGR-4+

Source : QE3\_201126\_FR\_TiOx\_hum\_tissue\_Urea\_RNAB\_N Scan : 14215

Andromeda score : 65.378

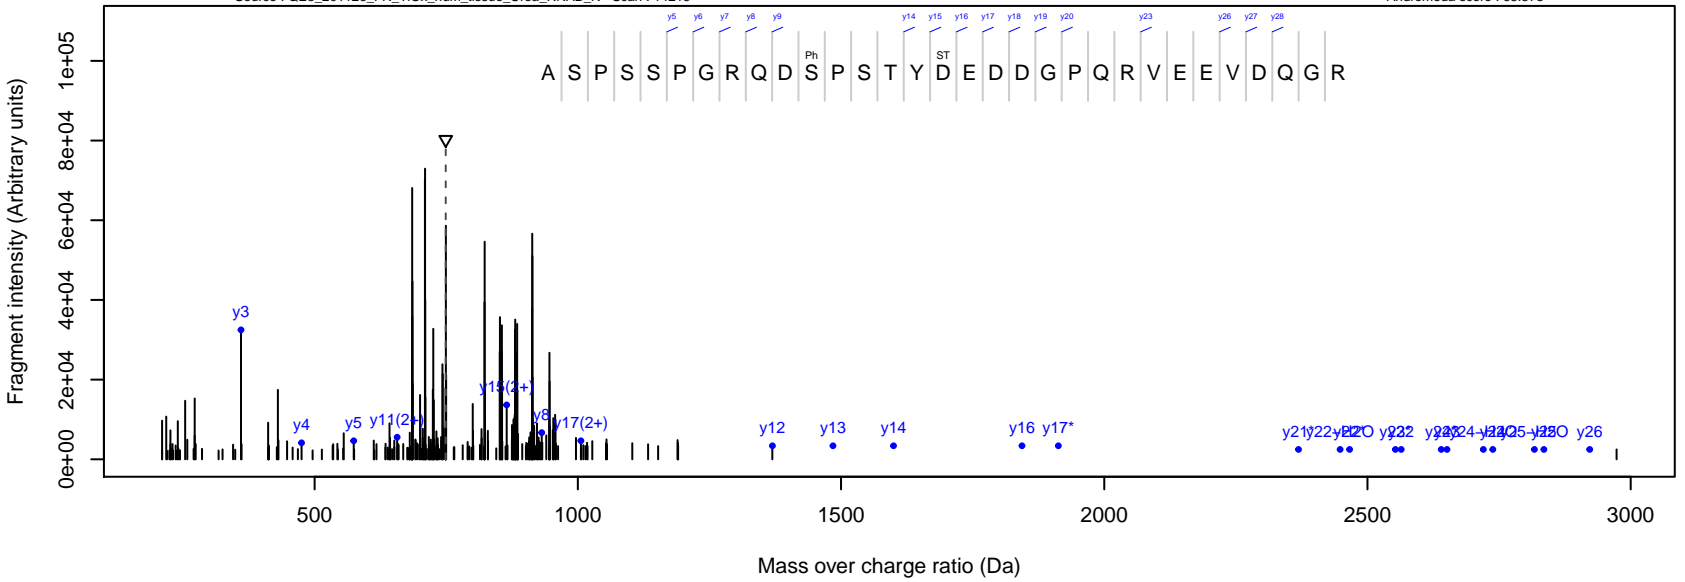

TNS(Phospho (STY))AEVT(Phospho (STY))PPVLSVMGEAT(Phospho (STY))PVSIEPR-3+

Source : QE3\_201126\_FR\_TiOx\_hum\_tissue\_Urea\_RNAB\_N Scan : 64596

Andromeda score : 65.377

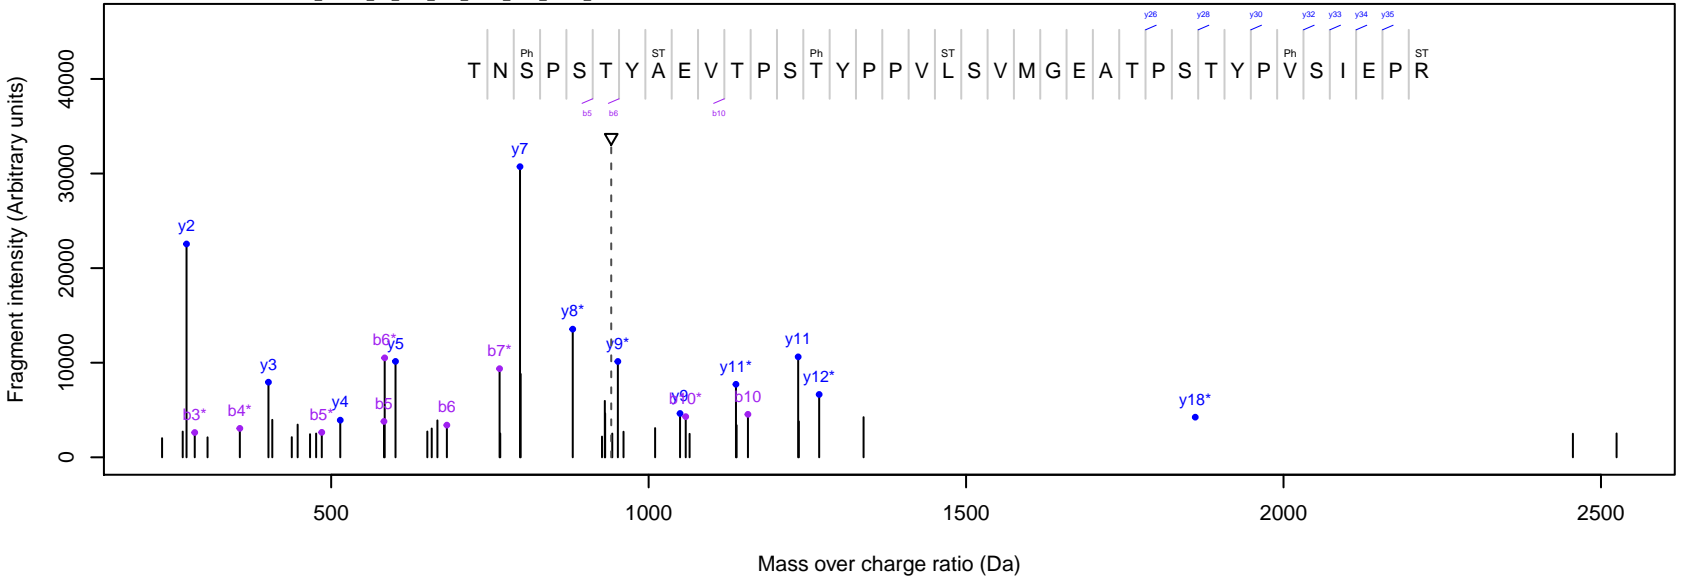

SGGLQT(Phospho (STY))PECLS(Phospho (STY))REGS(Phospho (STY))PIPHDPEFGSK-3+

Source : QE3\_201126\_FR\_TiOx\_hum\_tissue\_Urea\_RNAB\_N Scan : 36347

Andromeda score : 65.375

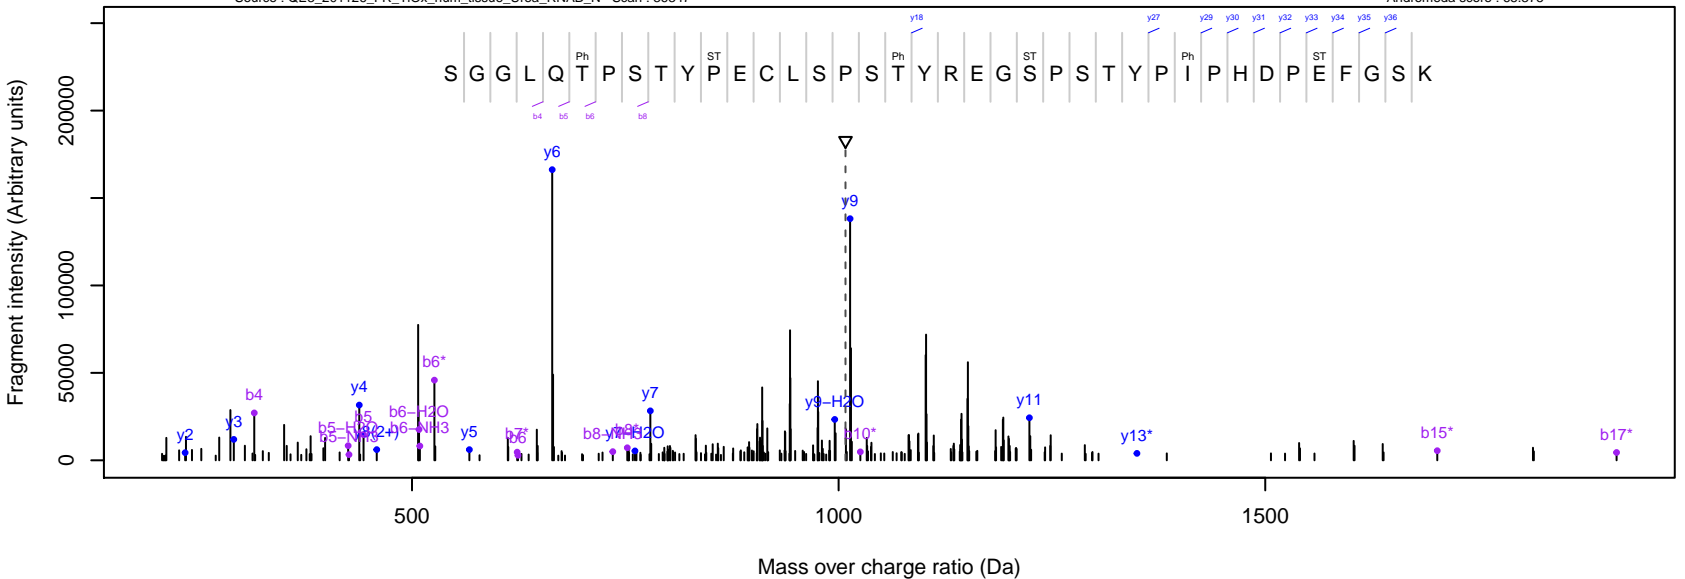

M(Oxidation (M))ALPPQDATAS(Phospho (STY))PPR-2+

Source : QE3\_201126\_FR\_TIOx\_hum\_tissue\_Urea\_RNAB\_B Scan : 18475

Andromeda score : 65.374

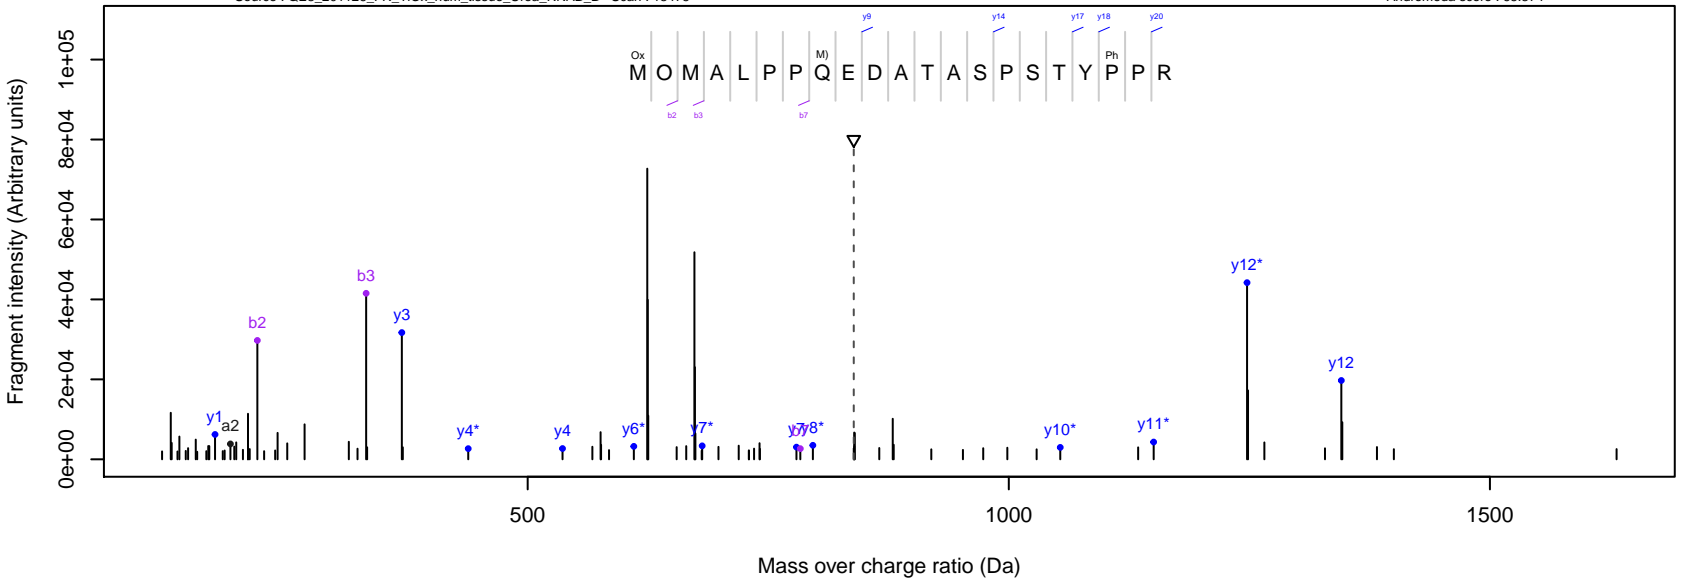

SKT(Phospho (STY))PPKSYSTAR-3+

Source : QE3\_201126\_FR\_TIOx\_hum\_tissue\_Urea\_RNAB\_H Scan : 3832

Andromeda score : 65.374

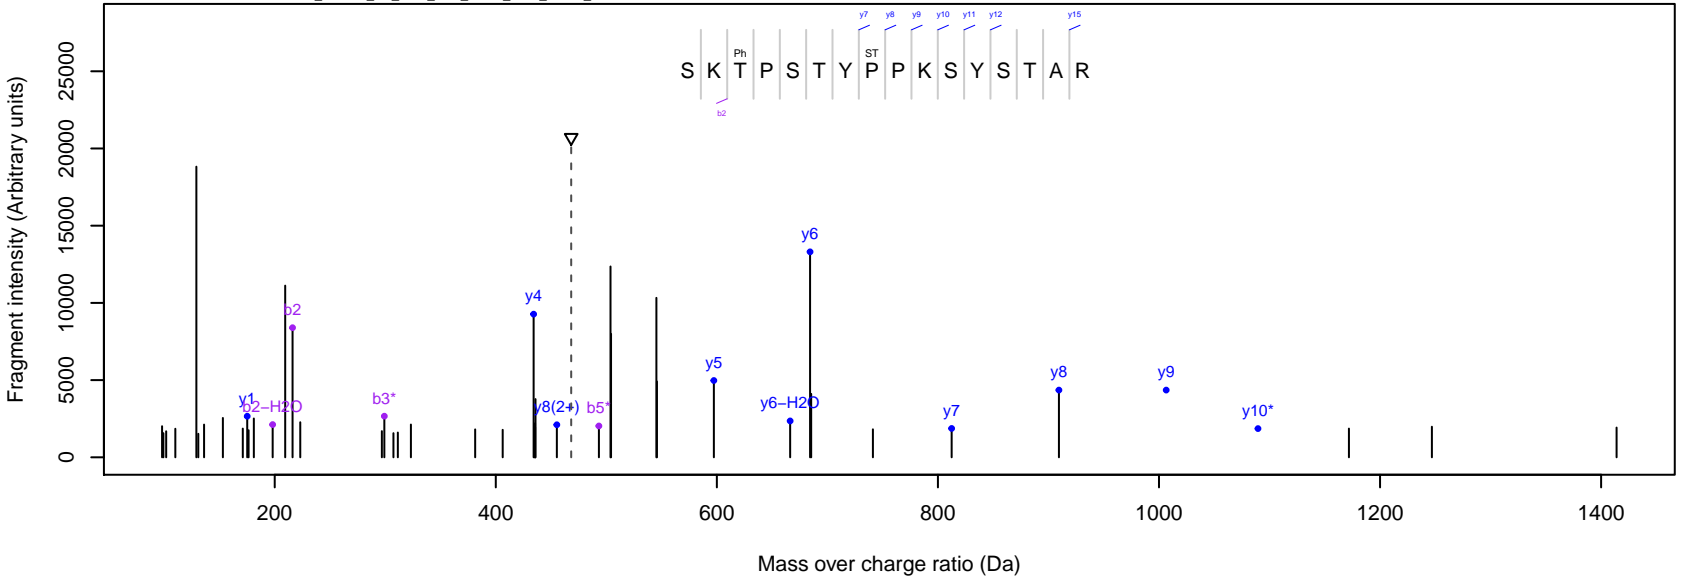

GNPEPPVS(Phospho (STY))GEMDDNSLSPEACEYCK-3+

Source : QE3\_201126\_FR\_TIOx\_hum\_tissue\_Urea\_RNAB\_N Scan : 34431

Andromeda score : 65.301

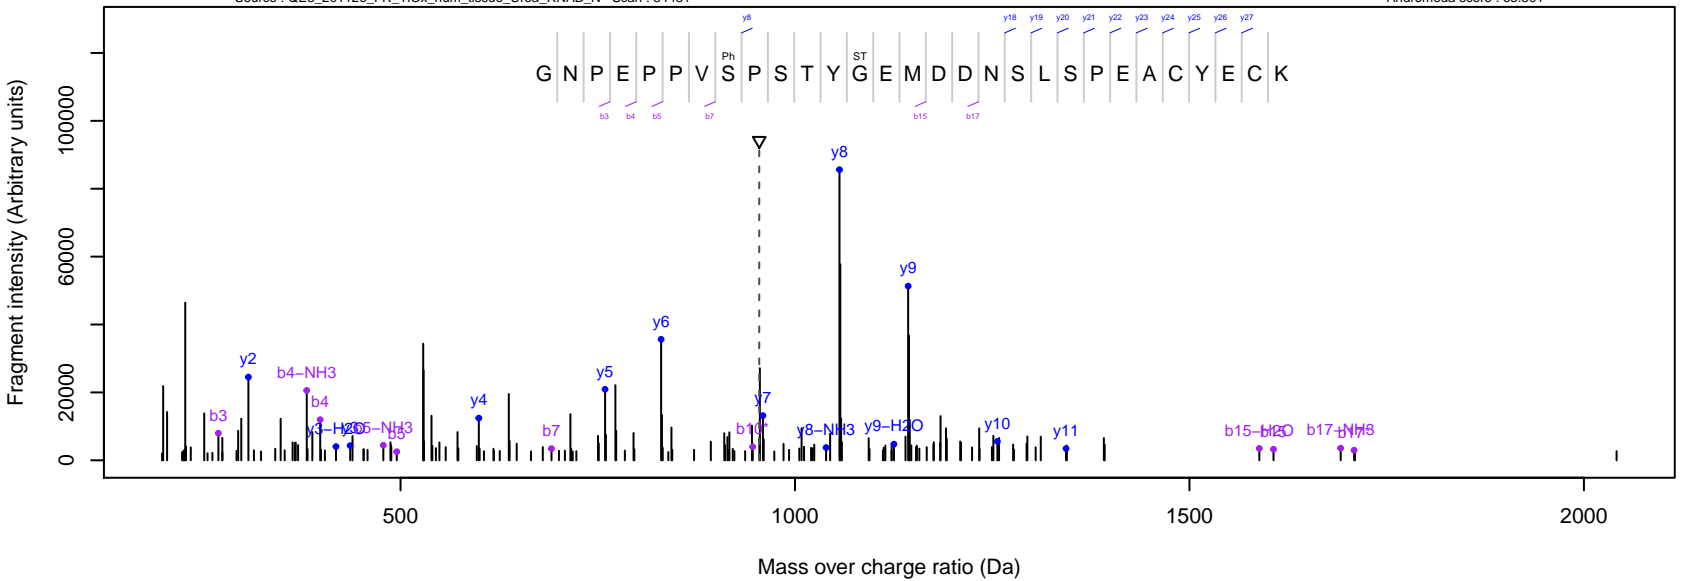

**ESS(Phospho (STY))PSHGLLK-2+**

Source : QE3\_201126\_FR\_TiOx\_hum\_tissue\_Urea\_RNAB\_H Scan : 10363

Andromeda score : 65.278

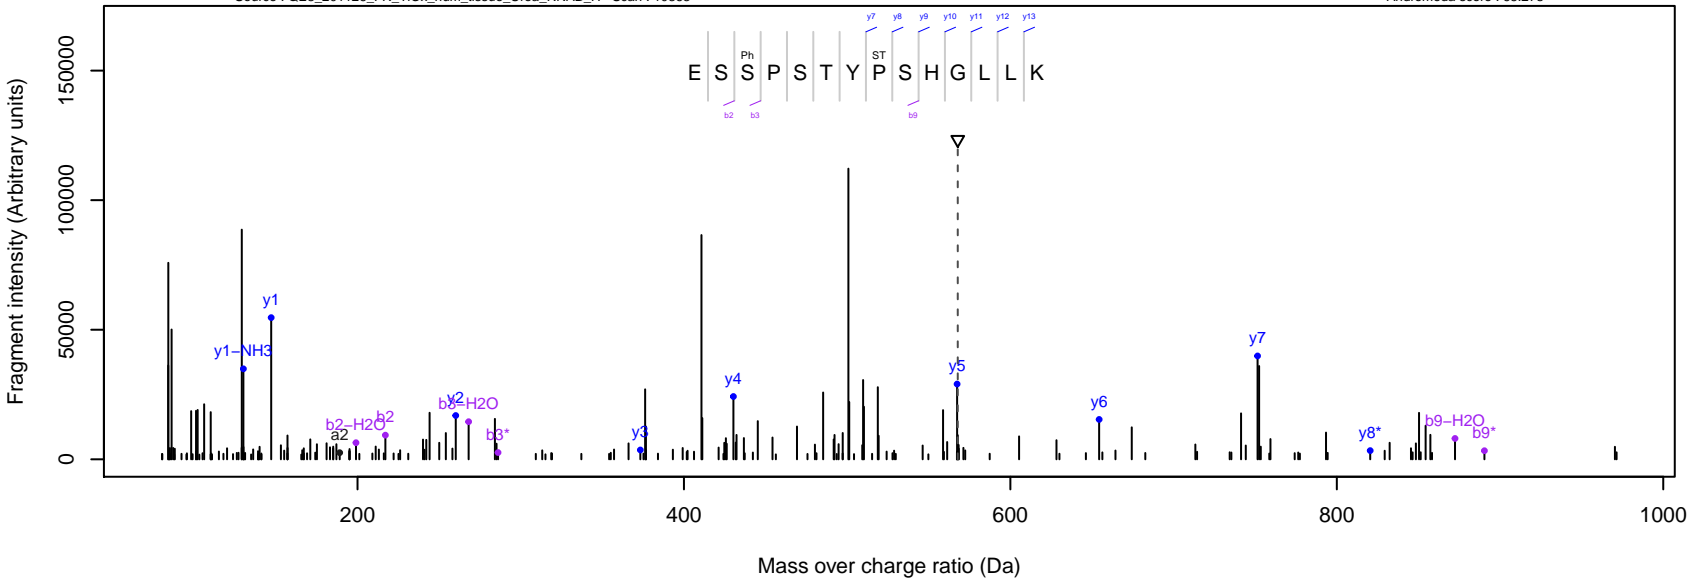

**NRHS(Phospho (STY))PDHPGM(Oxidation (M))GSSQASSSSSLR-4+**

Source : QE3\_201126\_FR\_TiOx\_hum\_tissue\_Urea\_RNAB\_B Scan : 3949

Andromeda score : 65.275

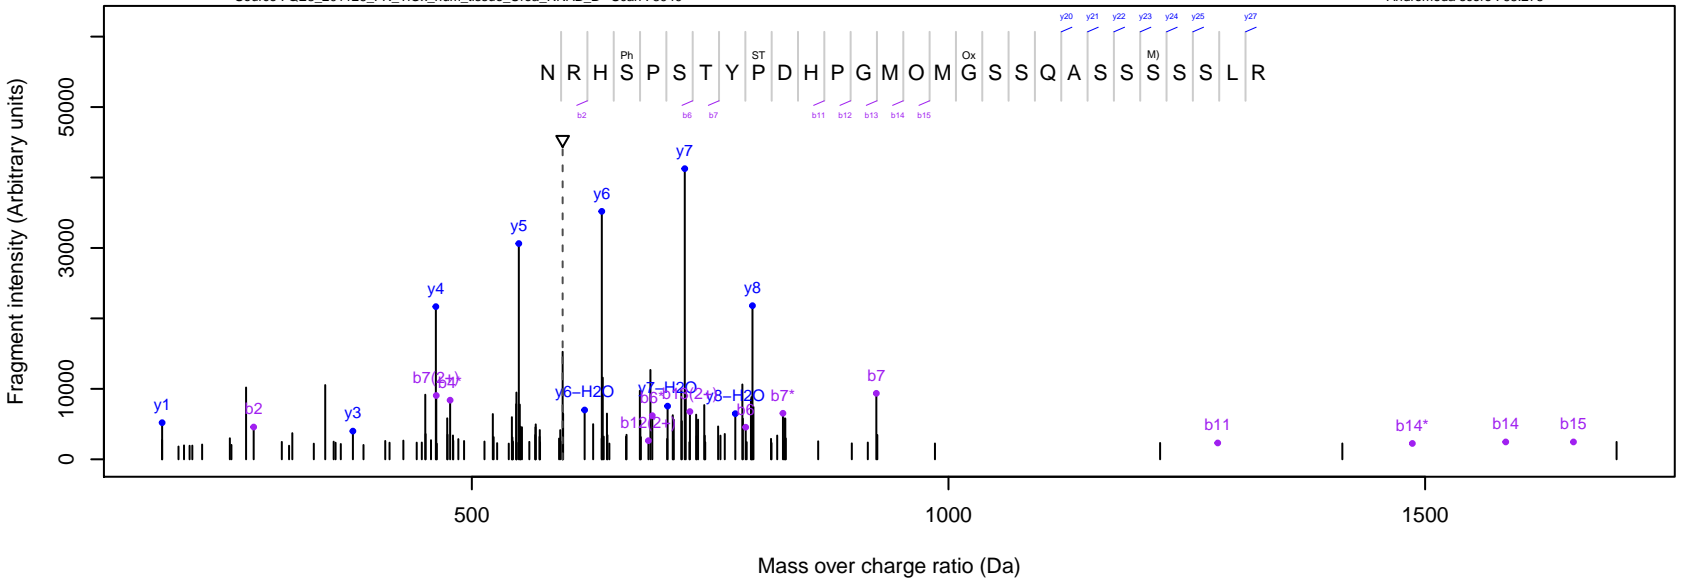

**NVNIEPDES(Phospho (STY))SSGESAPDSYIGIGNSEK-3+**

Source : QE3\_201126\_FR\_TiOx\_hum\_tissue\_Urea\_RNAB\_N Scan : 39603

Andromeda score : 65.275

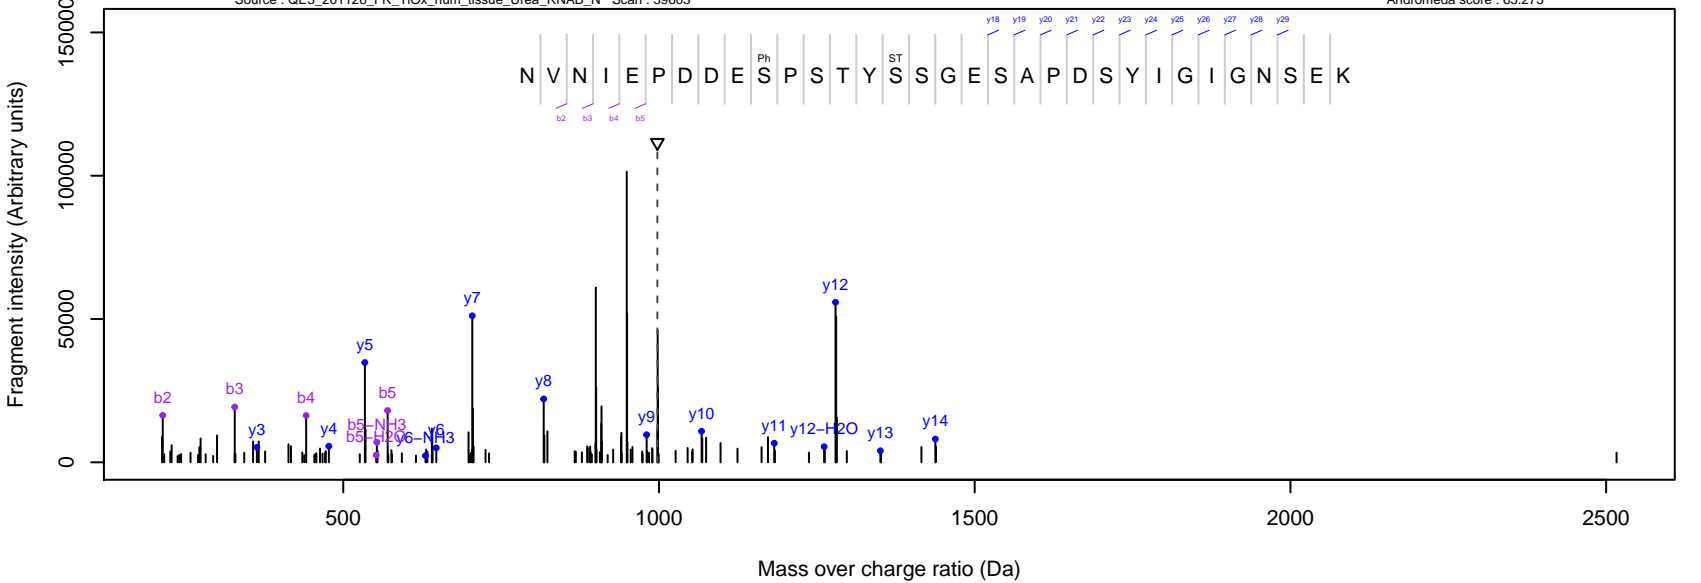

RRDGSS(Phospho (STY))QLQGYIPSNYVAEDR-3+

Source : QE3\_201126\_FR\_TiOx\_hum\_tissue\_Urea\_RNAB\_B Scan : 26515

Andromeda score : 65.275

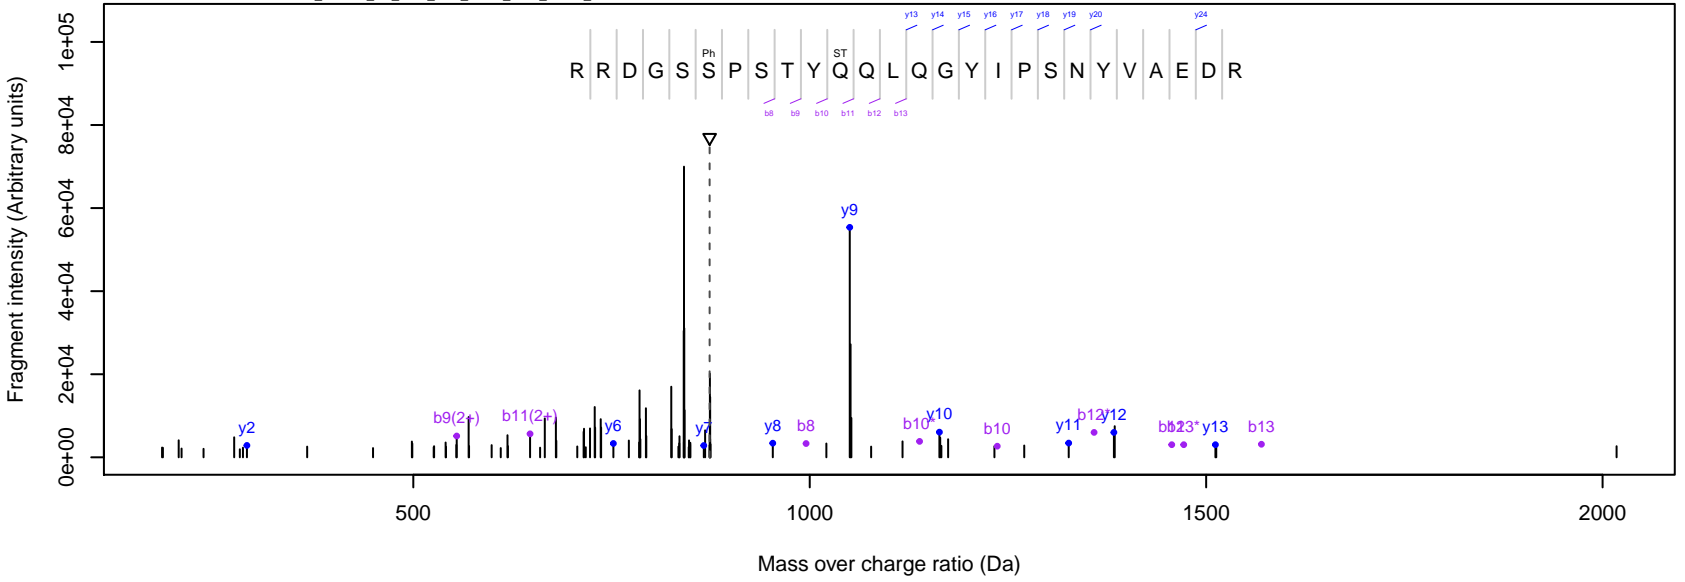

S(Phospho (STY))SESSPNHSLHNEVADDSQLEK-3+

Source : QE3\_201126\_FR\_TiOx\_hum\_tissue\_Urea\_RNAB\_N Scan : 14071

Andromeda score : 65.275

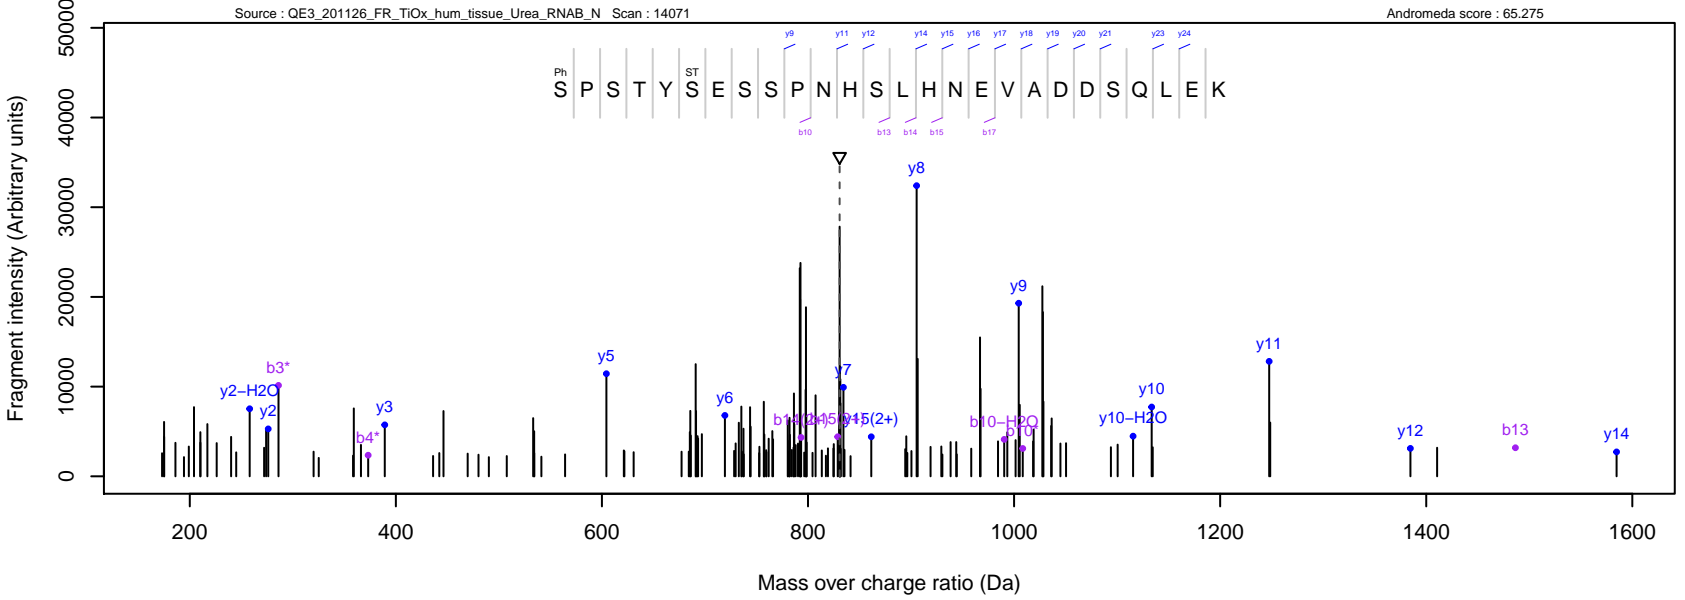

ERKNS(Phospho (STY))ITEIS(Phospho (STY))DNEDDLLEYHR-4+

Source : QE3\_201126\_FR\_TiOx\_hum\_tissue\_Urea\_RNAB\_N Scan : 29141

Andromeda score : 65.248

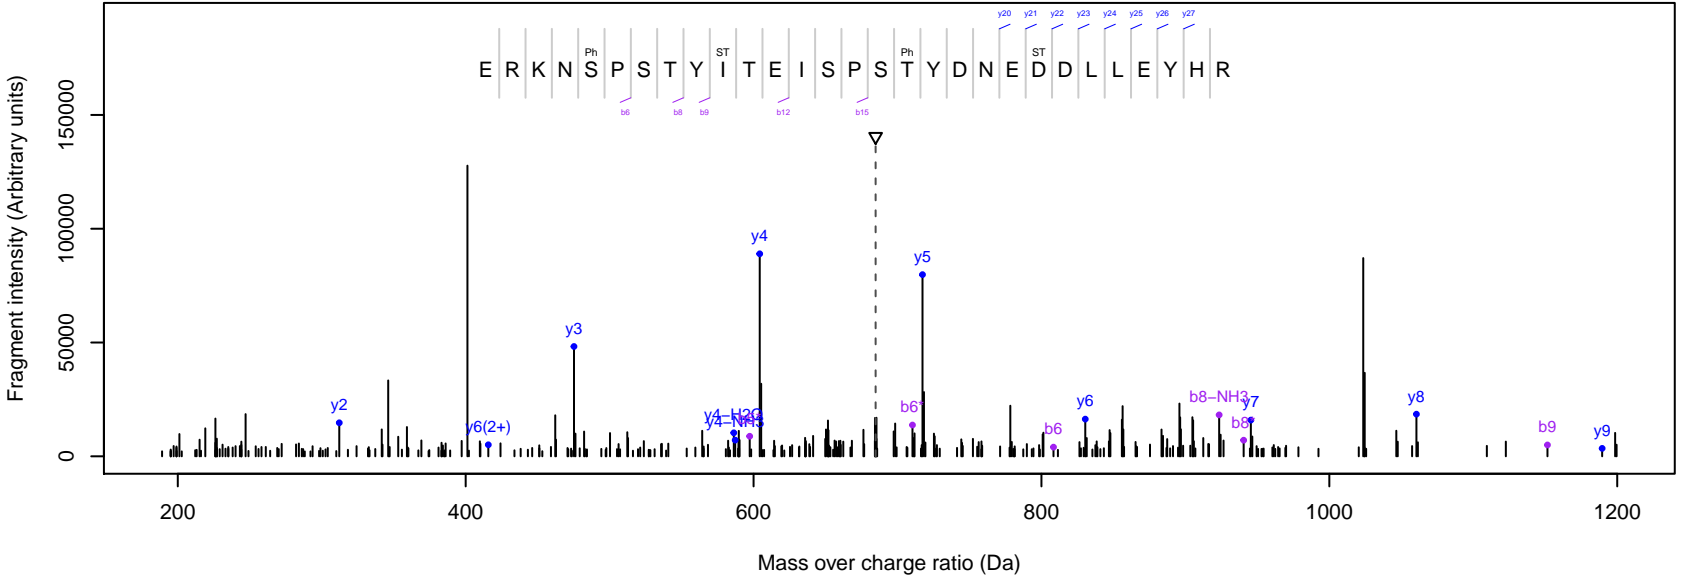

KVTSPSSSSSS(Phospho (STY))S(Phospho (STY))DSESDEADVSEVTPR-3+

Source : QE3\_201126\_FR\_TiOx\_hum\_tissue\_Urea\_RNAB\_H Scan : 21686

Andromeda score : 65.244

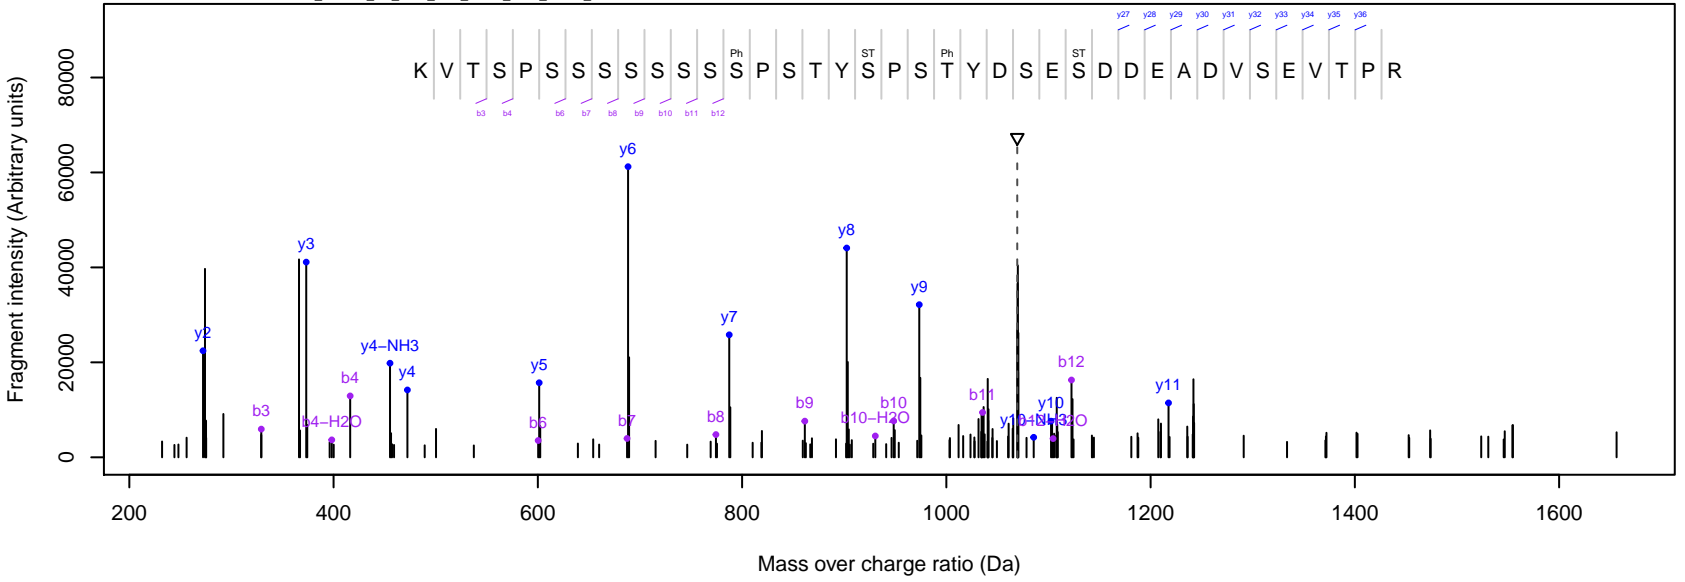

NLS(Phospho (STY))SEEVARPR-2+

Source : QE3\_201126\_FR\_TiOx\_hum\_tissue\_Urea\_RNAB\_N Scan : 10774

Andromeda score : 65.234

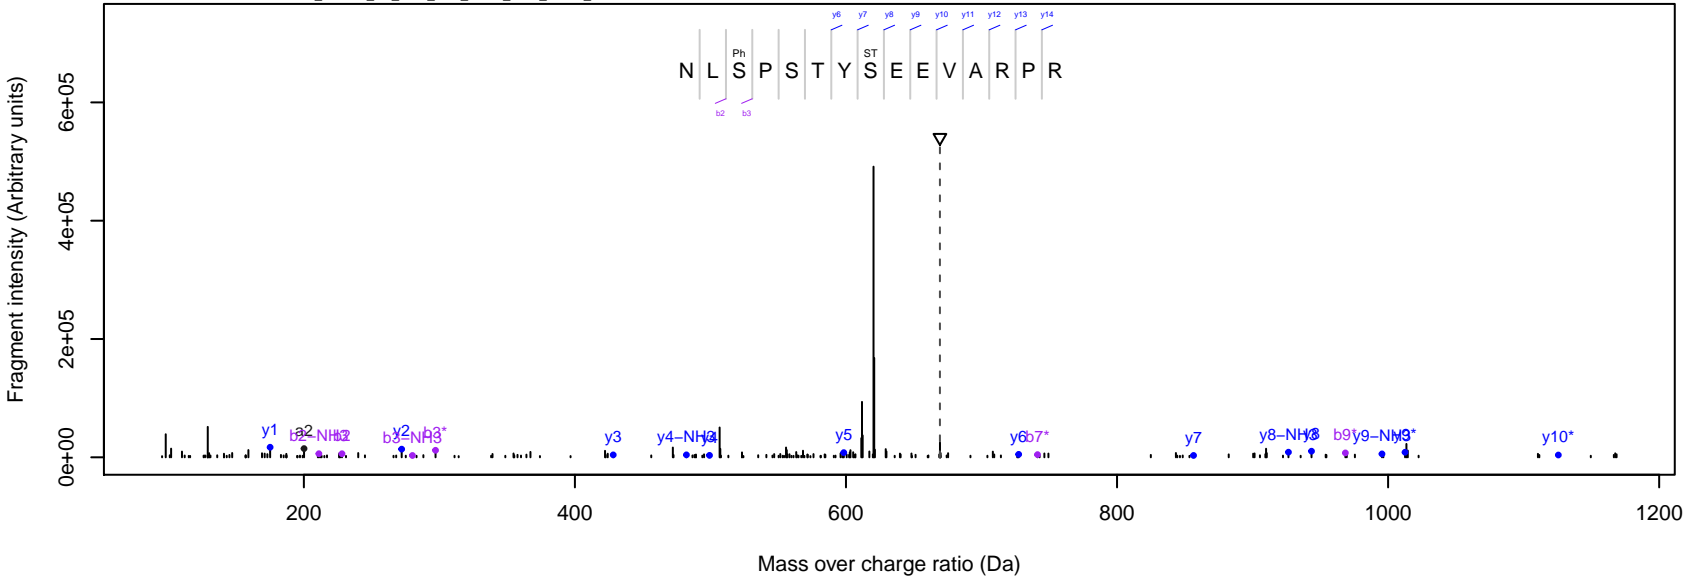

S(Phospho (STY))IDDFHQGTK-2+

Source : QE3\_201126\_FR\_TiOx\_hum\_tissue\_Urea\_RNAB\_N Scan : 10448

Andromeda score : 65.234

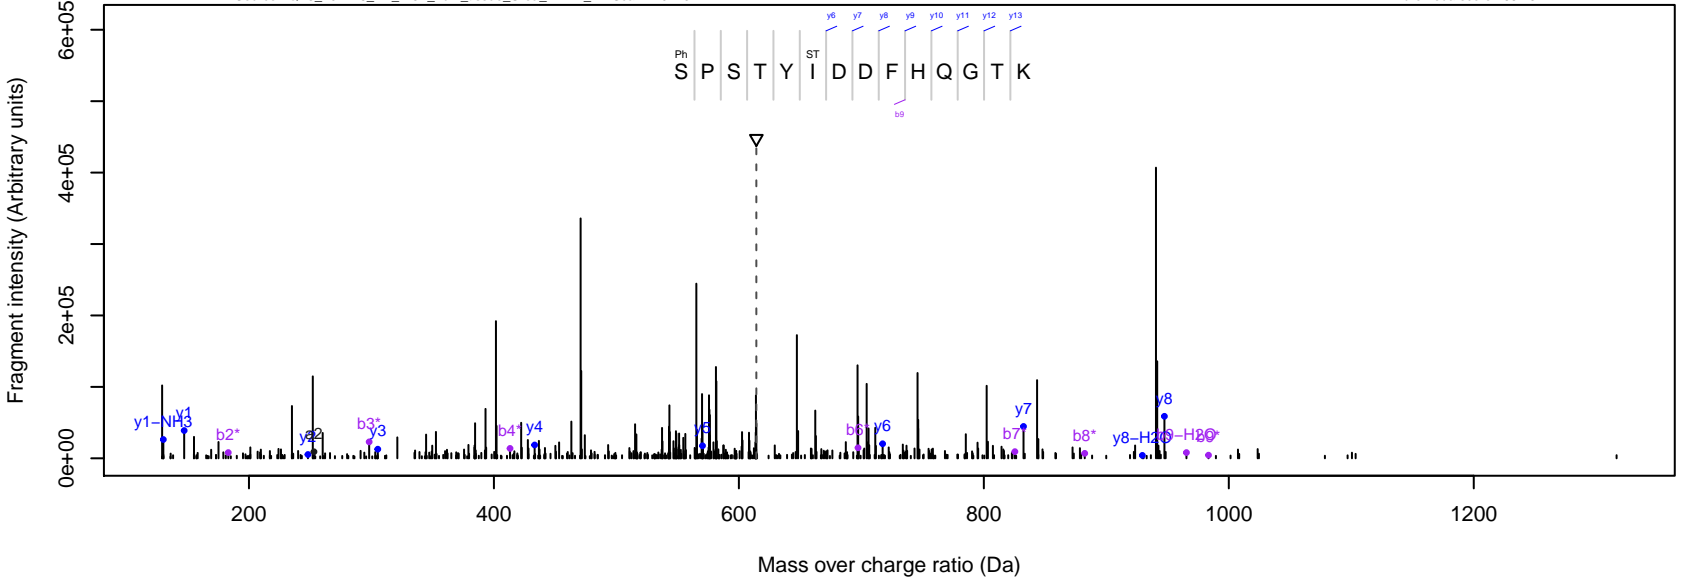



SRS(Phospho (STY))WPASPR-2+

Source : QE3\_201126\_FR\_TiOx\_hum\_tissue\_Urea\_RNAB\_H Scan : 10382

Andromeda score : 65.232

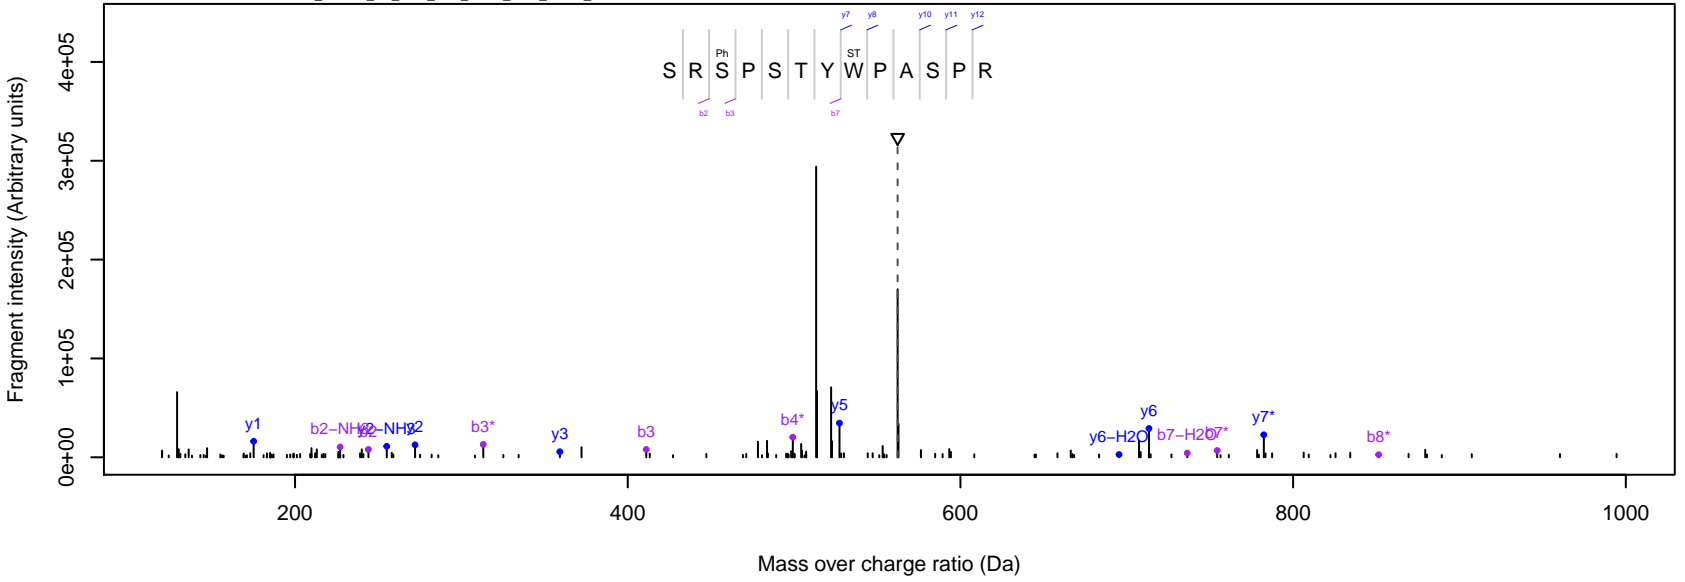

RHDS(Phospho (STY))LHDPAAAPSR-3+

Source : QE3\_201126\_FR\_TiOx\_hum\_tissue\_Urea\_RNAB\_H Scan : 5765

Andromeda score : 65.231

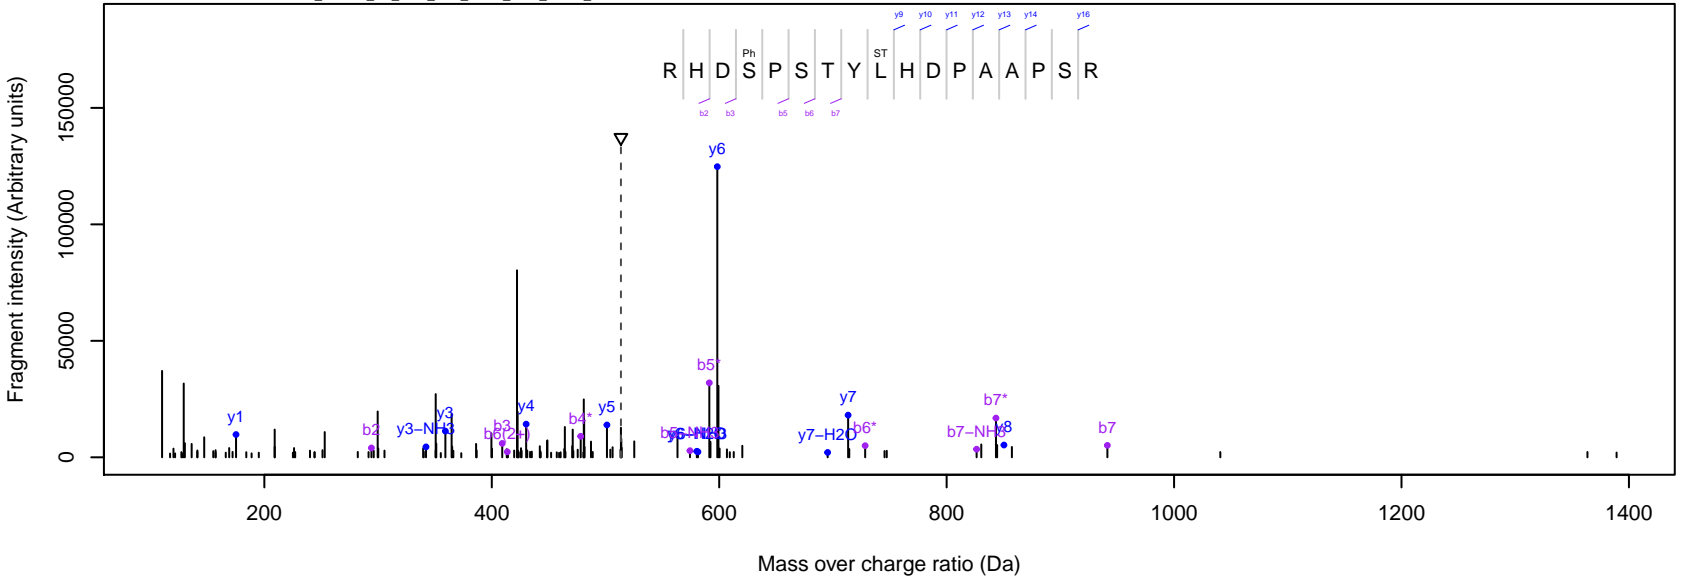

NLLNGSWG(Phospho (STY))EEKK-2+

Source : QE3\_201126\_FR\_TiOx\_hum\_tissue\_Urea\_RNAB\_H Scan : 23057

Andromeda score : 65.219

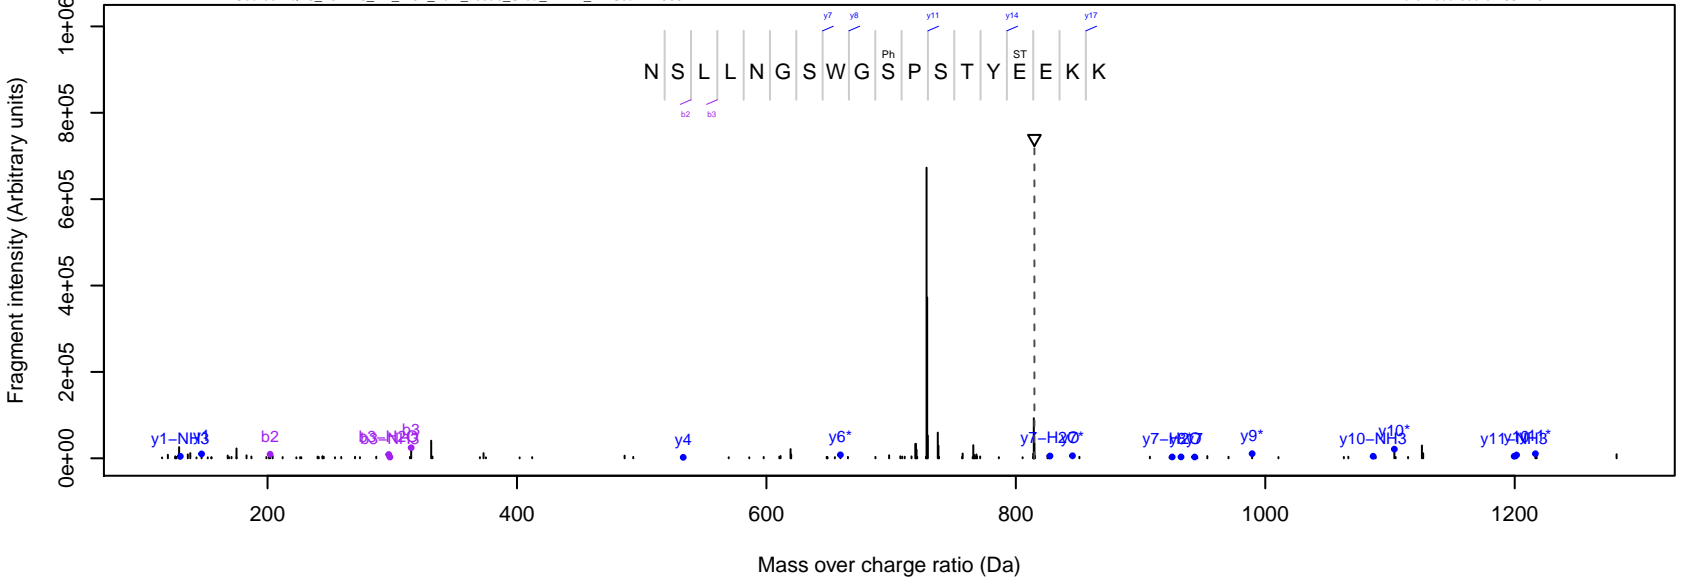

TTS(Phospho (STY))PSS(Phospho (STY))DTDLLDR-2+

Source : QE3\_201126\_FR\_TiOx\_hum\_tissue\_Urea\_RNAB\_H Scan : 32838

Andromeda score : 65.219

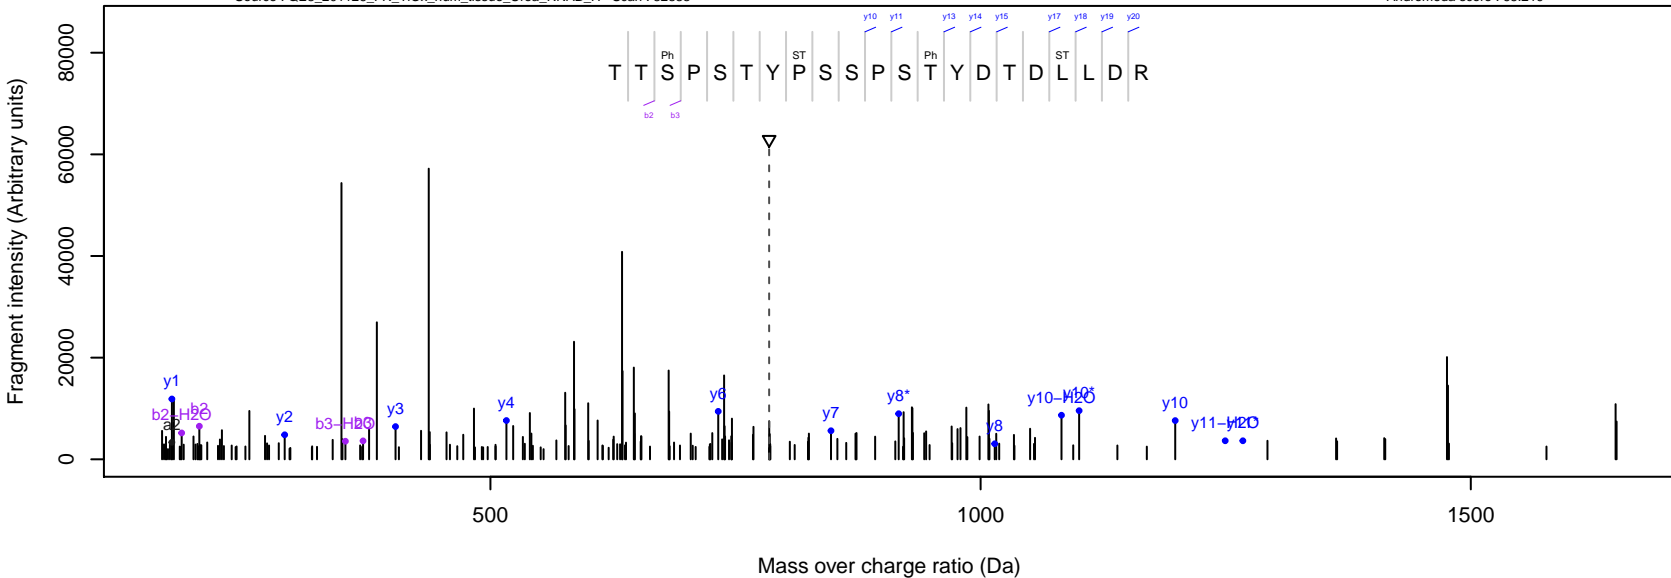

S(Phospho (STY))QS(Phospho (STY))S(Phospho (STY))SQGDNPLAPGYLPPHYK-3+

Source : QE3\_201126\_FR\_TiOx\_hum\_tissue\_Urea\_RNAB\_H Scan : 49830

Andromeda score : 65.213

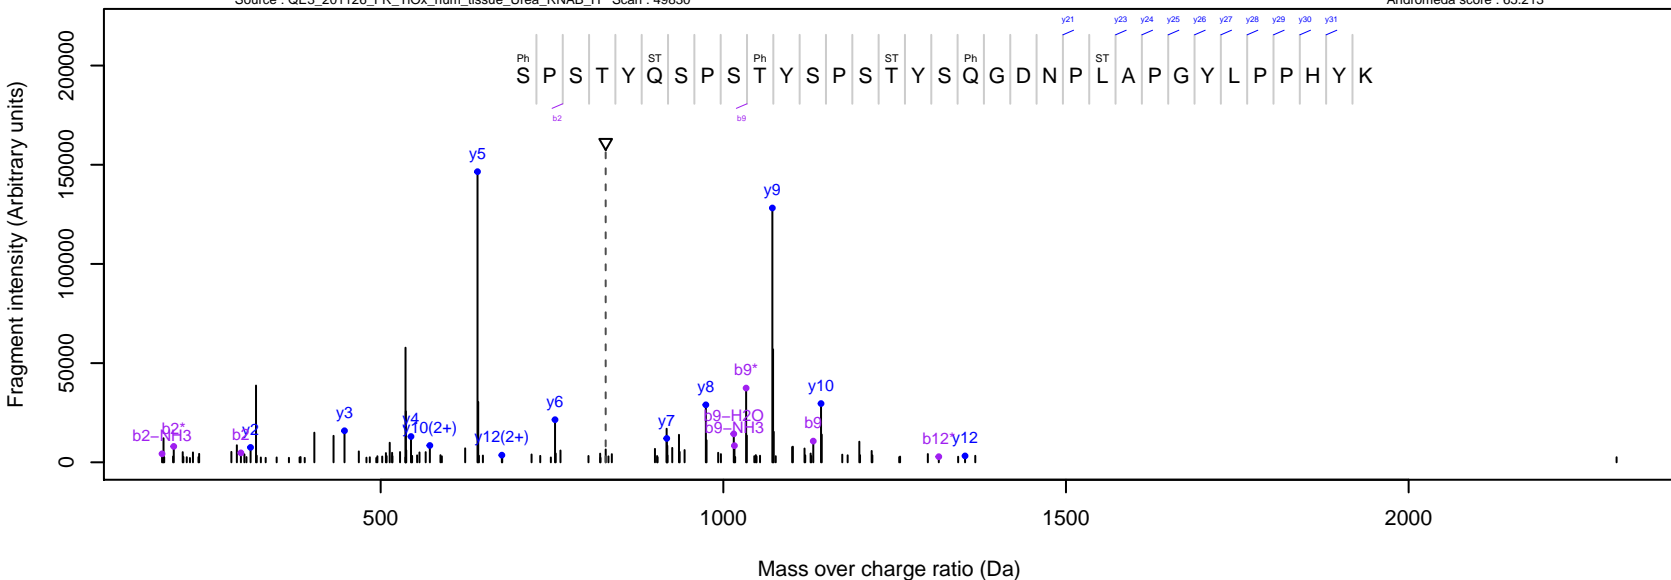

LLM(Oxidation (M))SNGNKEGASGRPGS(Phospho (STY))PK-3+

Source : QE3\_201126\_FR\_TiOx\_hum\_tissue\_Urea\_RNAB\_B Scan : 5174

Andromeda score : 65.207

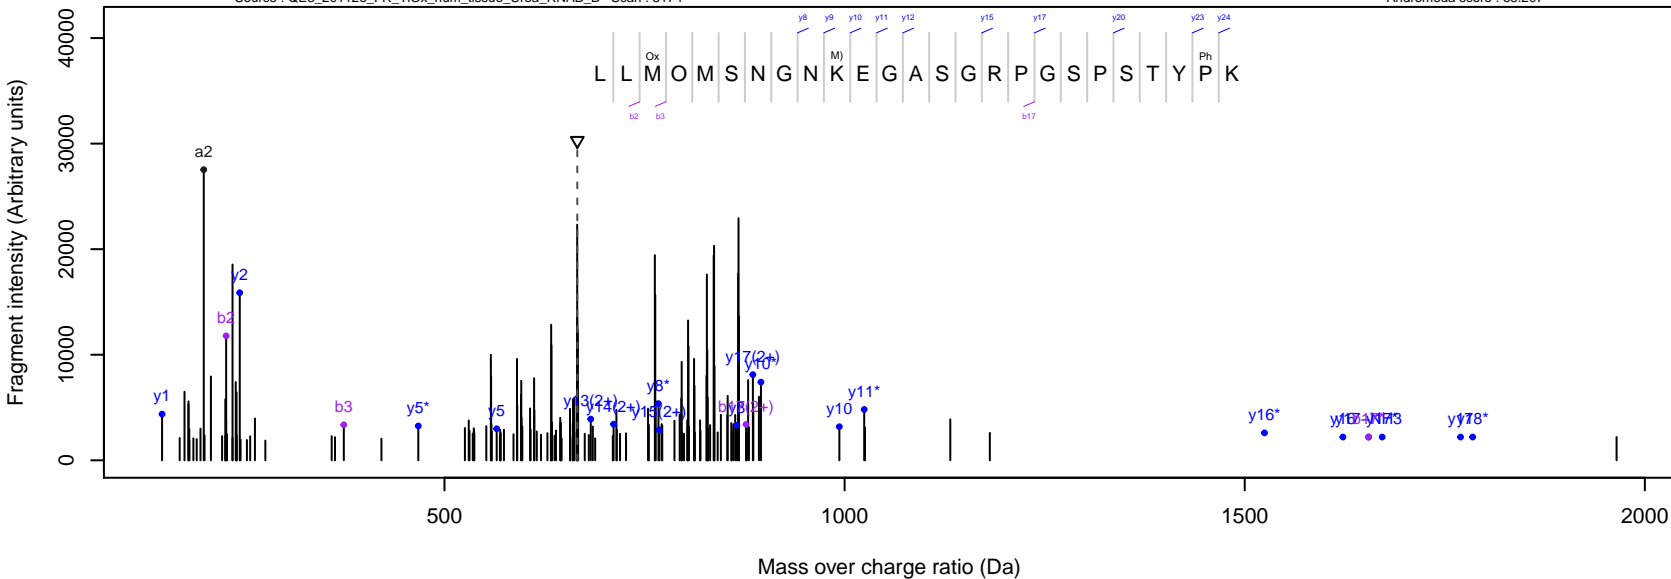

EIIDASDKEGMSPSTYPAKR-3+

Source : QE3\_201126\_FR\_TiOx\_hum\_tissue\_Urea\_RNAB\_H Scan : 11749

Andromeda score : 65.184

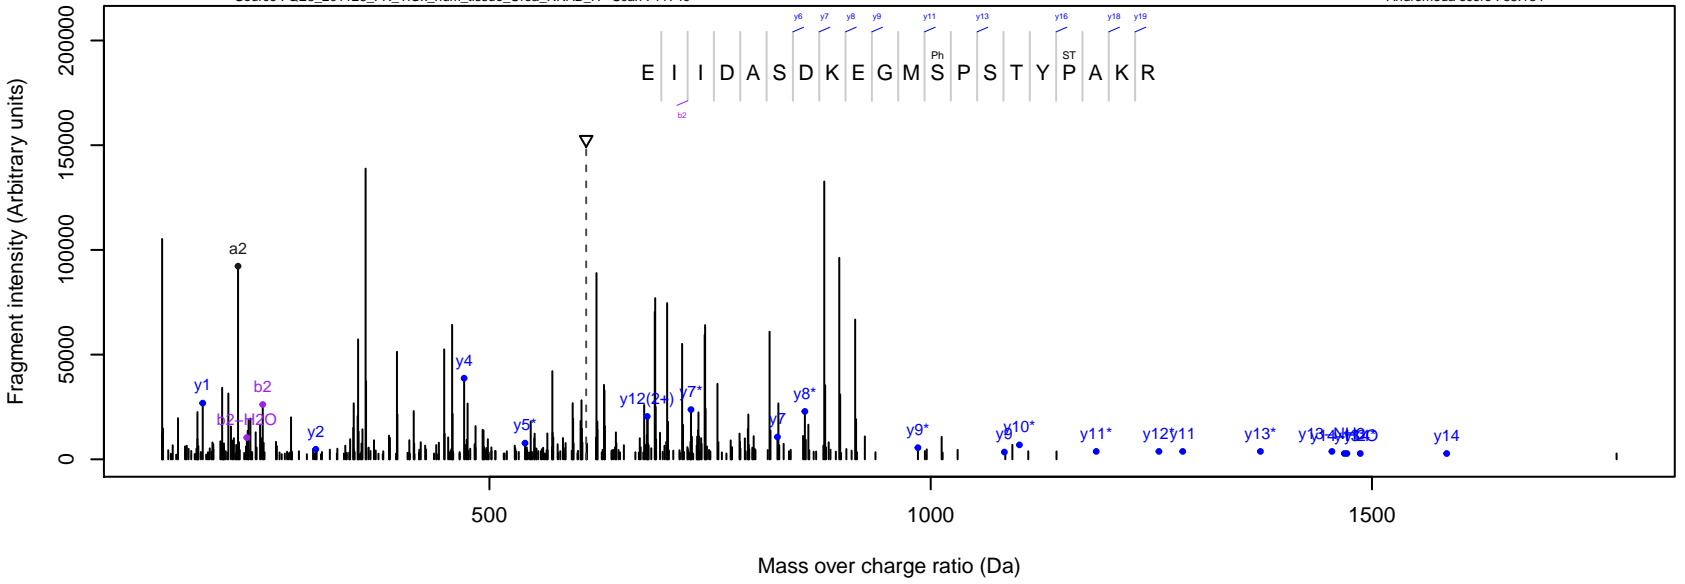

GRGPPS(Phospho (STY))SS(Phospho (STY))DS(Phospho (STY))EPEALER-2+

Source : QE3\_201126\_FR\_TiOx\_hum\_tissue\_Urea\_RNAB\_H Scan : 25348

Andromeda score : 65.175

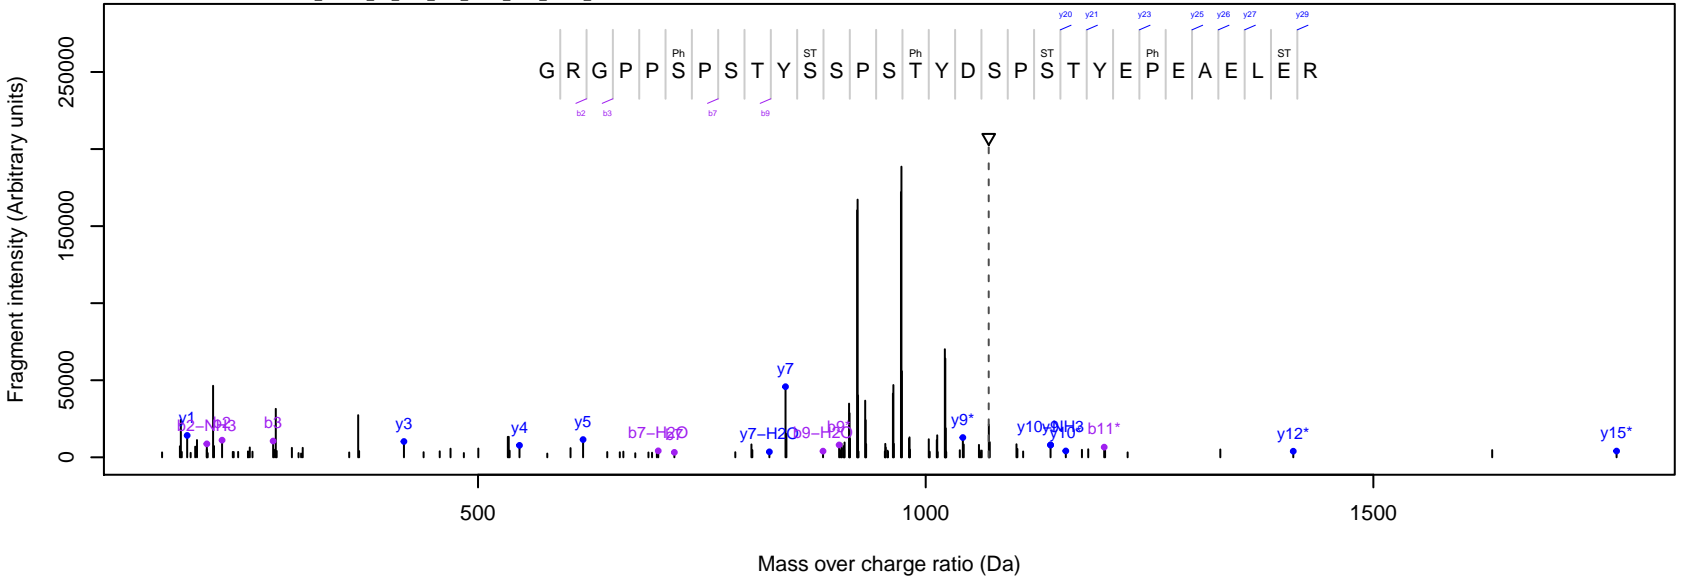

RPS(Phospho (STY))VDSLVS K-2+

Source : QE3\_201126\_FR\_TiOx\_hum\_tissue\_Urea\_RNAB\_H Scan : 14534

Andromeda score : 65.173

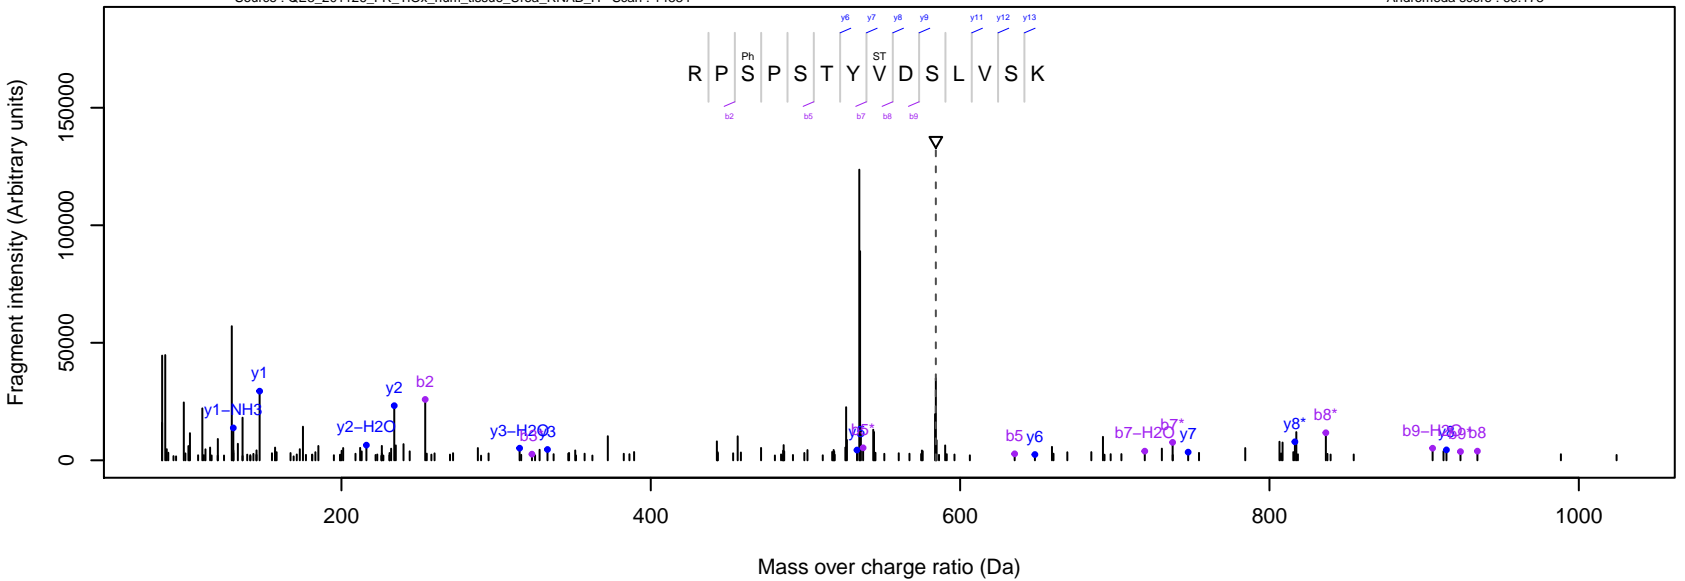

AGS(Phospho (STY))ISTLDSLDFARYS(Phospho (STY))DDGNRETDEK-3+

Source : QE3\_201126\_FR\_TiOx\_hum\_tissue\_Urea\_RNAB\_H Scan : 41395

Andromeda score : 65.134

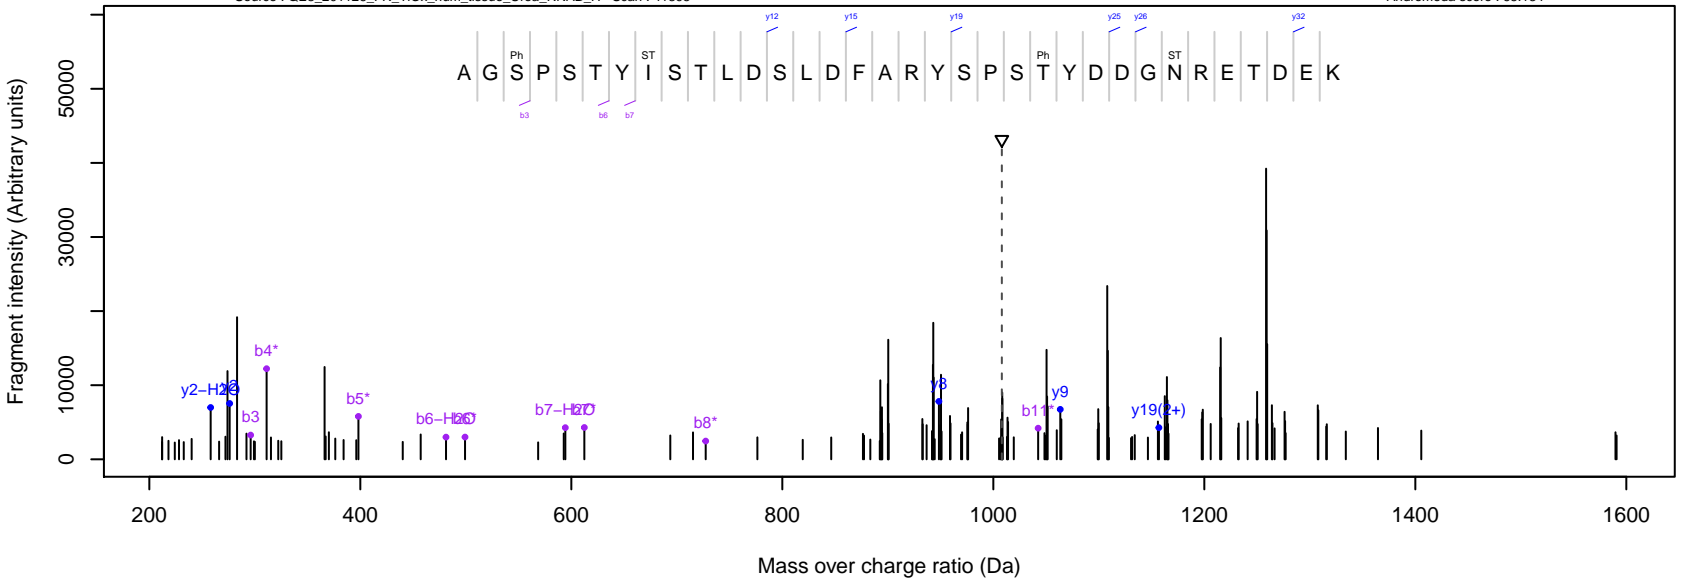

SKS(Phospho (STY))IEEEEEYQR-3+

Source : QE3\_201126\_FR\_TiOx\_hum\_tissue\_Urea\_RNAB\_N Scan : 7961

Andromeda score : 65.107

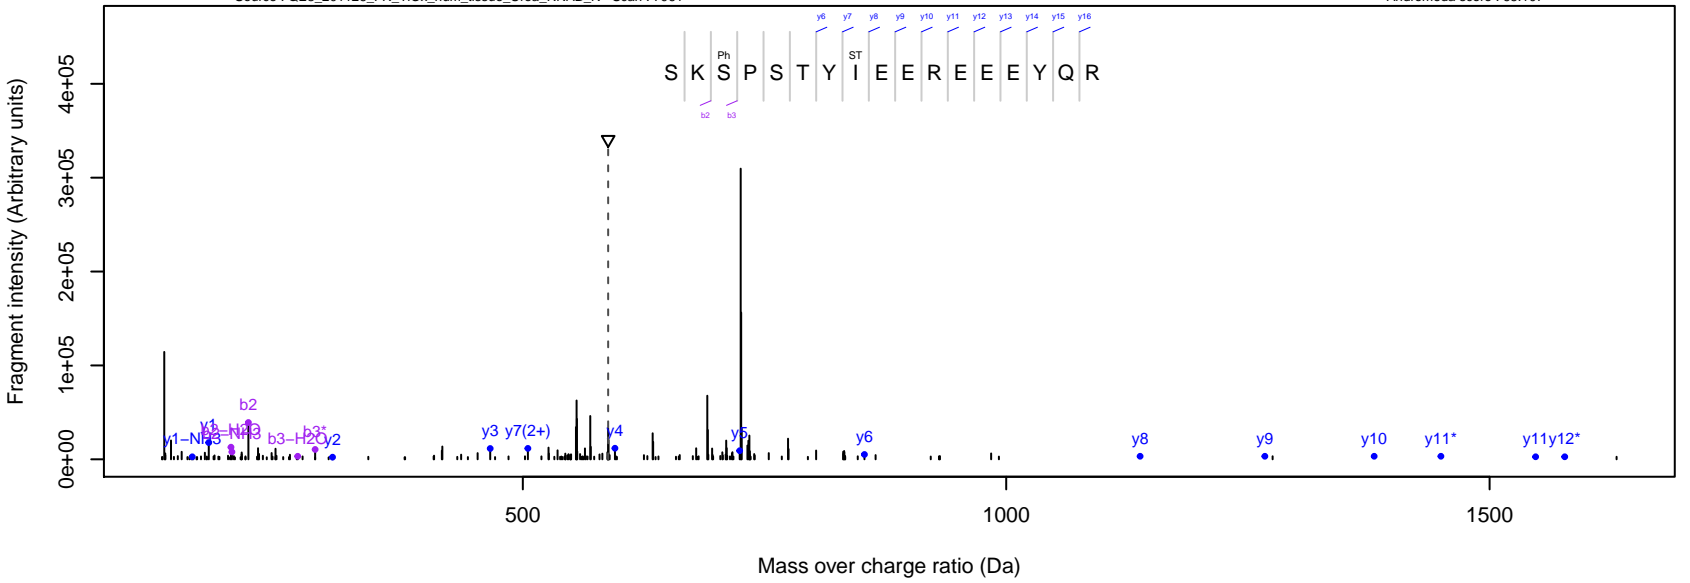

S(Phospho (STY))TSEGAWPQLPSGLSMM(Oxidation (M))R-2+

Source : QE3\_201126\_FR\_TiOx\_hum\_tissue\_Urea\_RNAB\_B Scan : 52103

Andromeda score : 65.107

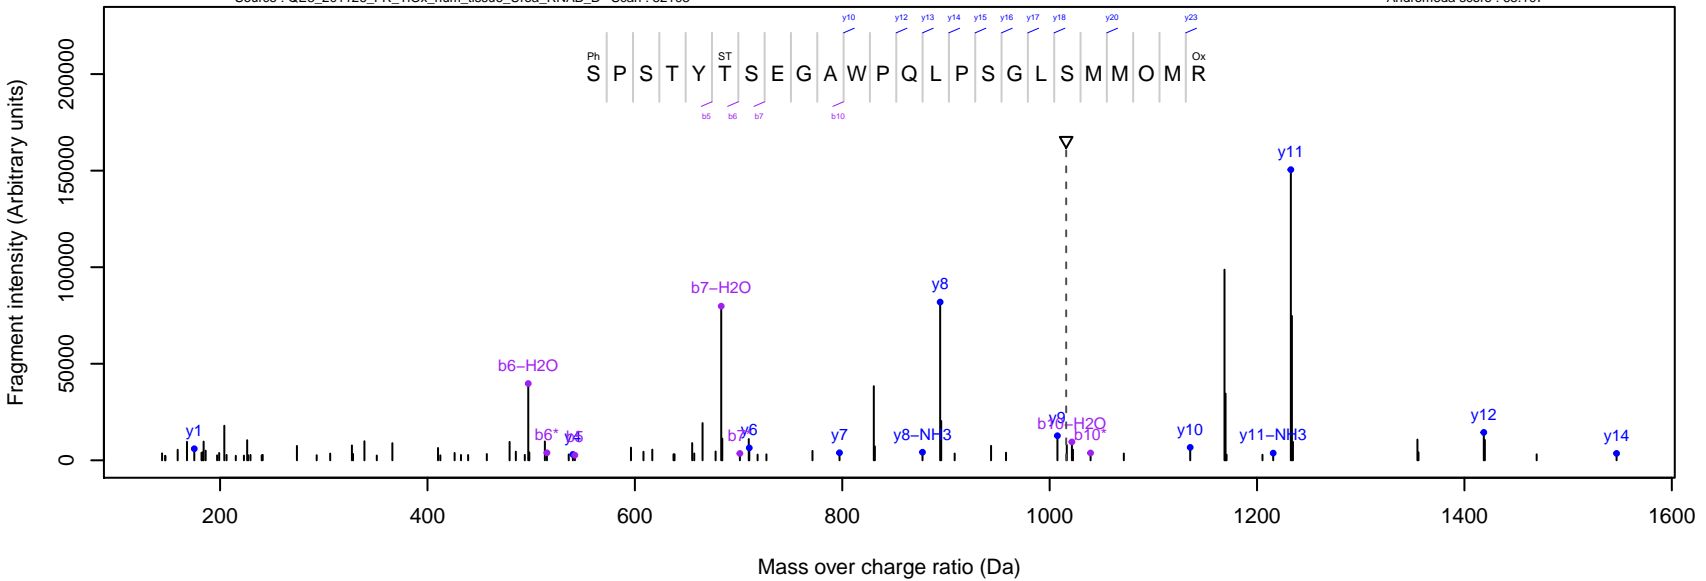

EKNQWQLS(Phospho (STY))ADLLK-3+

Source : QE3\_201126\_FR\_TiOx\_hum\_tissue\_Urea\_RNAB\_N Scan : 19973

Andromeda score : 65.105

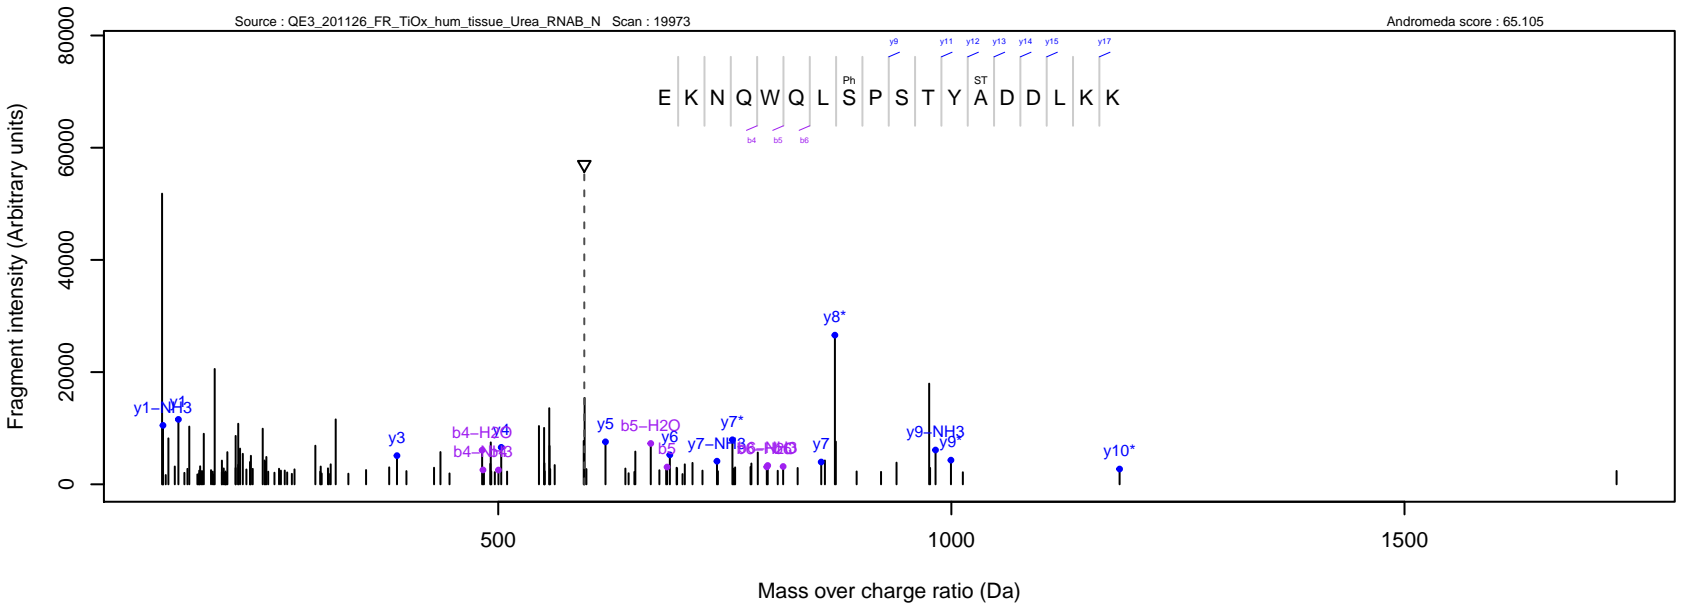

RLAAAEETAVS(Phospho (STY))PR-3+

Source : QE3\_201126\_FR\_TiOx\_hum\_tissue\_Urea\_RNAB\_N Scan : 11241

Andromeda score : 65.105

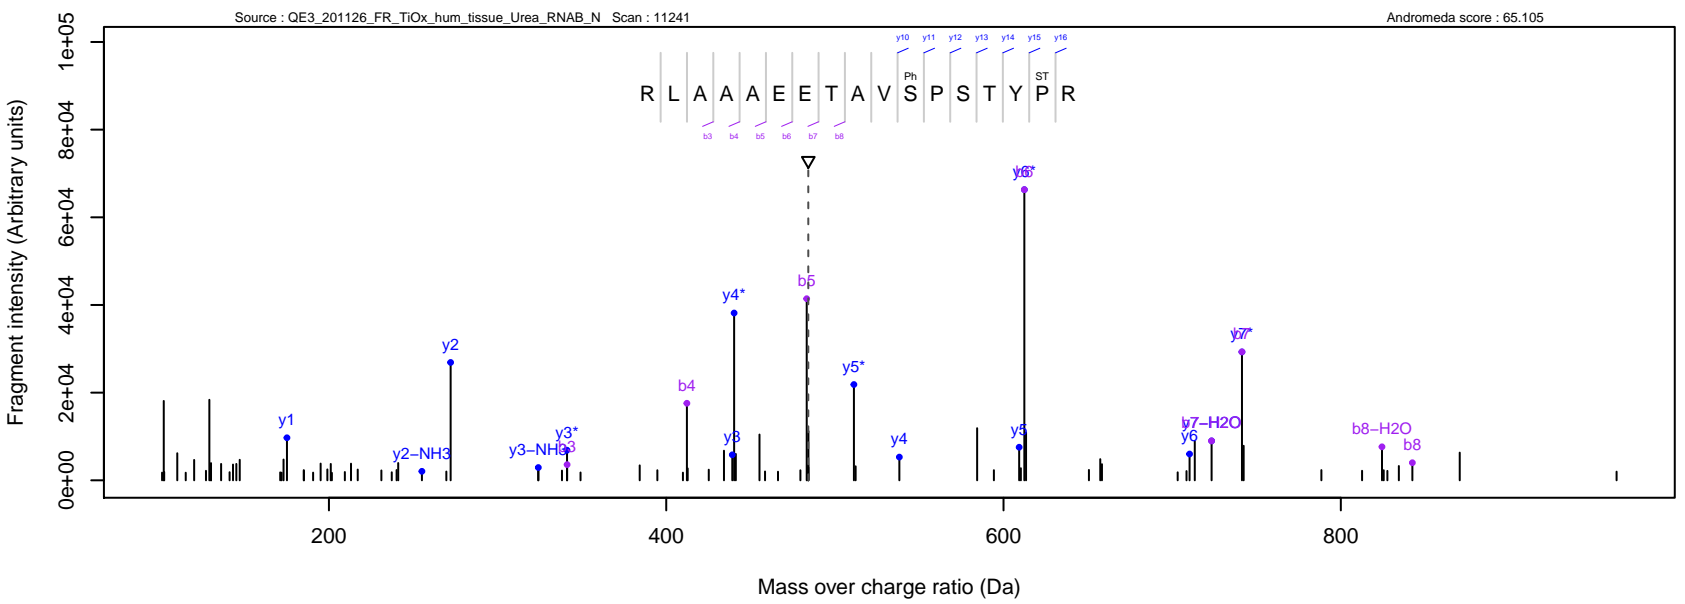

S(Phospho (STY))SSPELVTHLKWDDPYDIAR-3+

Source : QE3\_201126\_FR\_TiOx\_hum\_tissue\_Urea\_RNAB\_B Scan : 45014

Andromeda score : 65.097

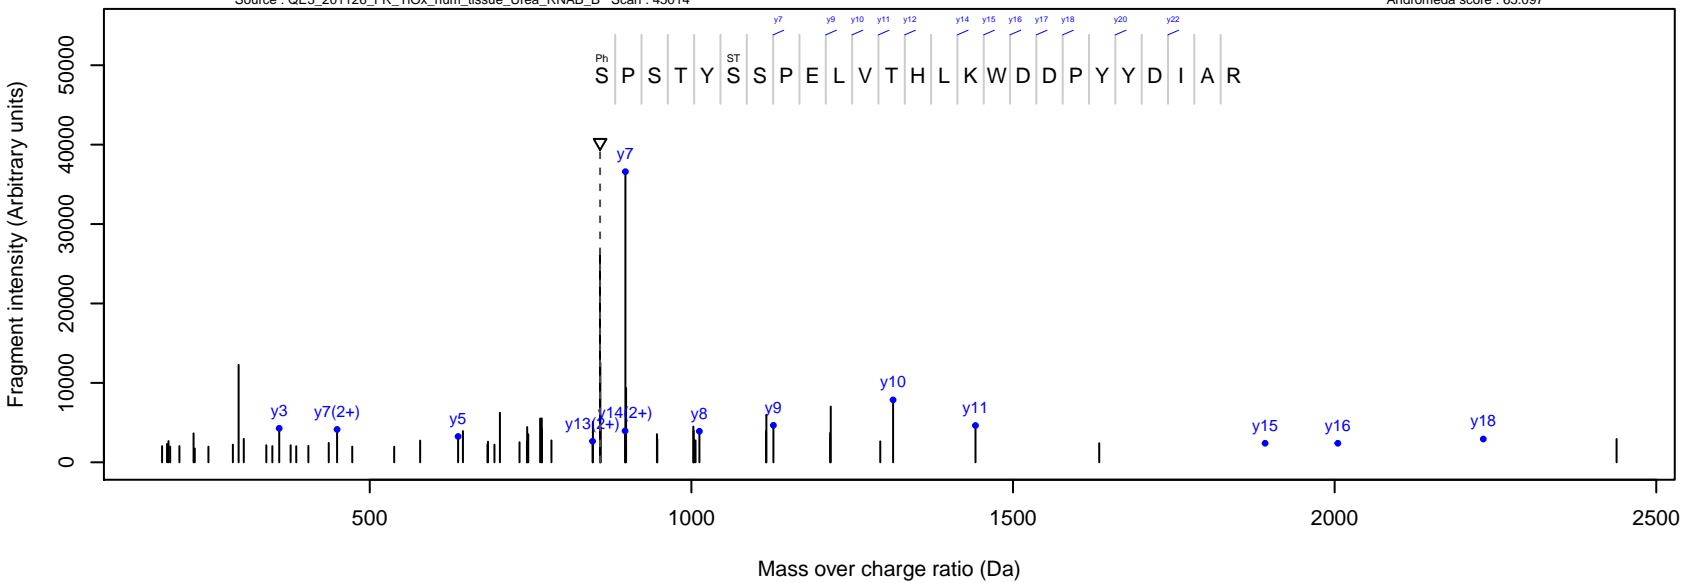

GS(Phospho (STY))SPGIQDTLEAEDGAFETDEAPEDR-3+

Source : QE3\_201126\_FR\_TiOx\_hum\_tissue\_Urea\_RNAB\_B Scan : 46042

Andromeda score : 65.093

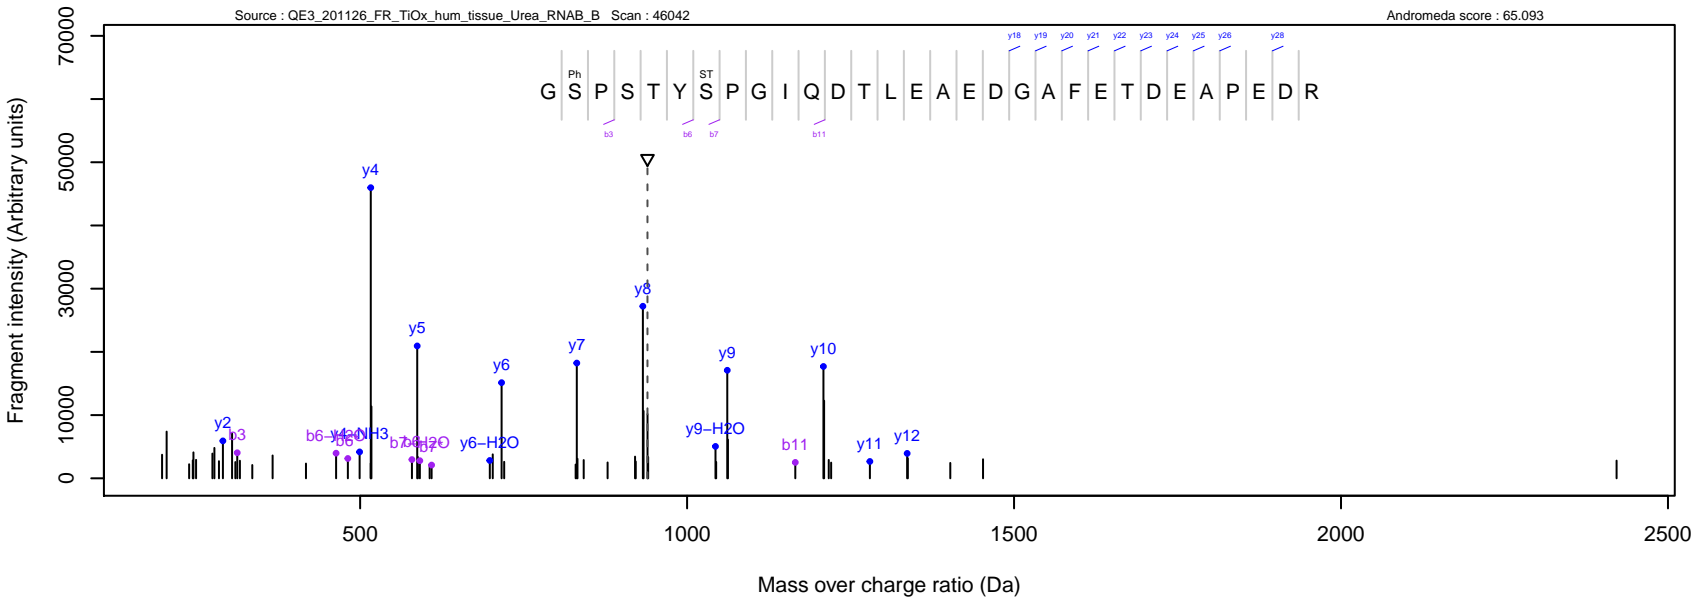

S(Phospho (STY))PM(Oxidation (M))MPENAENGDALLQFTAEFSSR-3+

Source : QE3\_201126\_FR\_TiOx\_hum\_tissue\_Urea\_RNAB\_N Scan : 61853

Andromeda score : 65.093

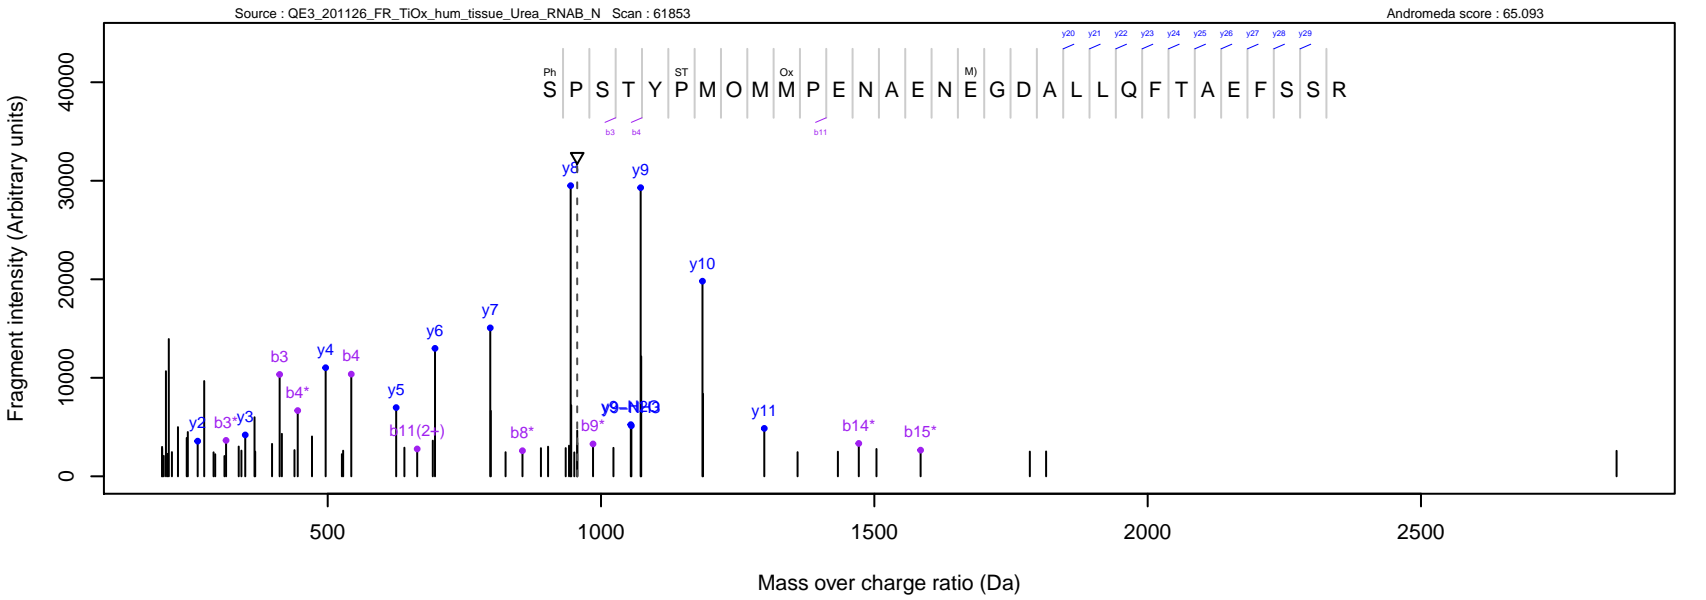

CVS(Phospho (STY))M(Oxidation (M))PGDISGLQGGPR-2+

Source : QE3\_201126\_FR\_TiOx\_hum\_tissue\_Urea\_RNAB\_N Scan : 25789

Andromeda score : 65.092

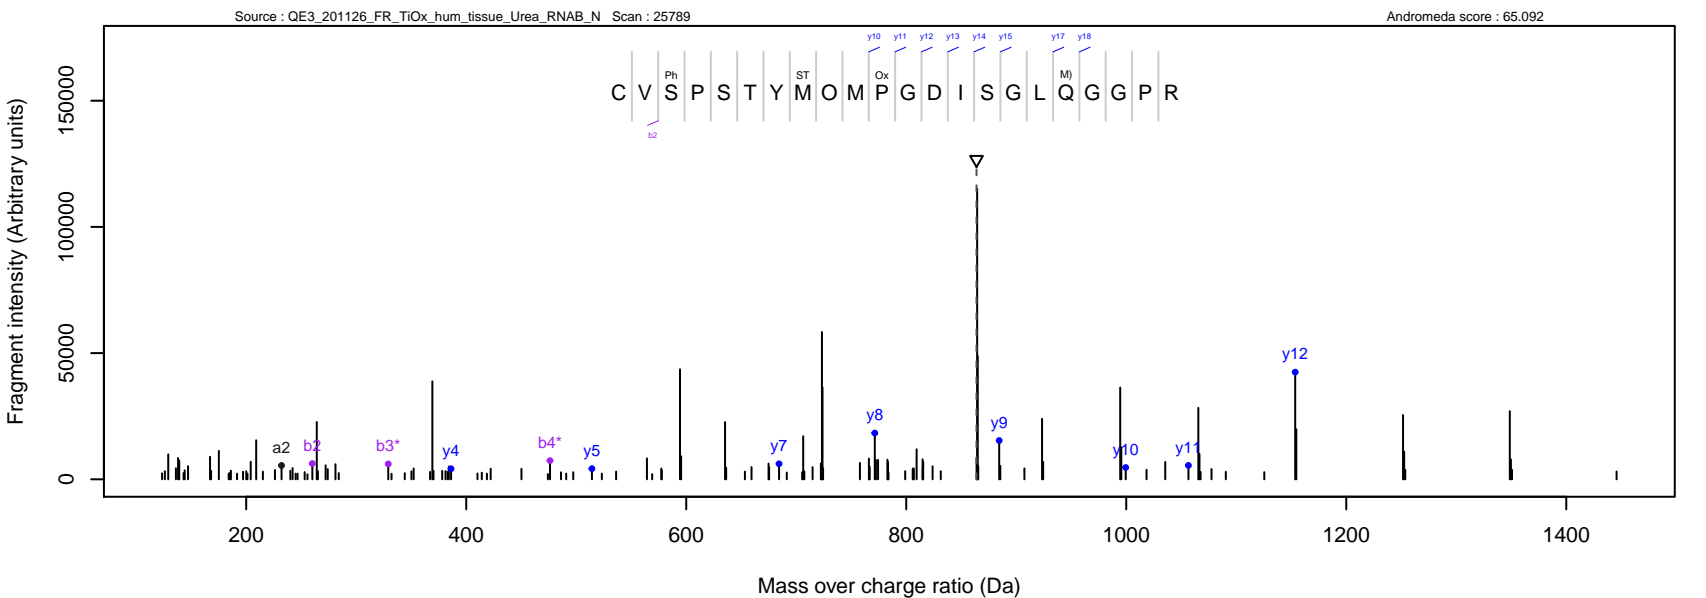

KPS(Phospho (STY))SSWFWKPR-3+

Source : QE3\_201126\_FR\_TiOx\_hum\_tissue\_Urea\_RNAB\_N Scan : 26601

Andromeda score : 65.043

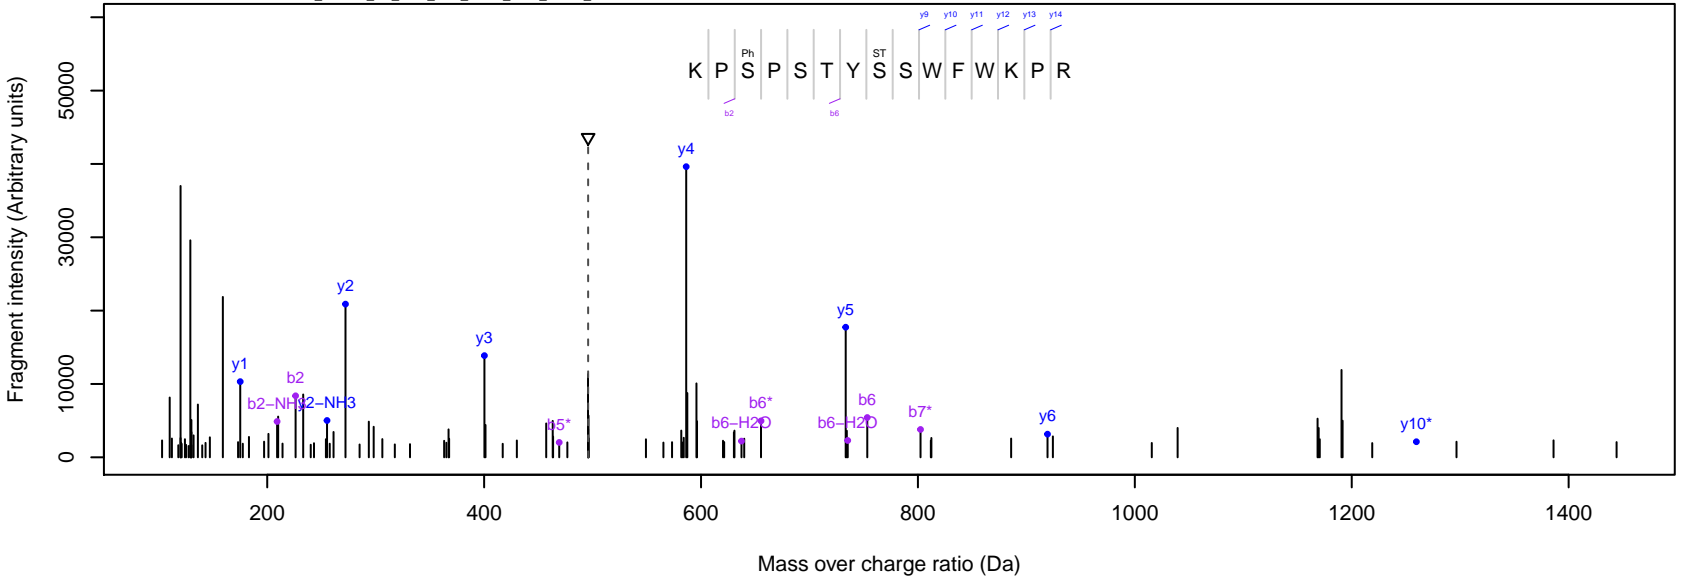

S(Phospho (STY))PGASNFSTLPK-2+

Source : QE3\_201126\_FR\_TiOx\_hum\_tissue\_Urea\_RNAB\_N Scan : 23889

Andromeda score : 65.043

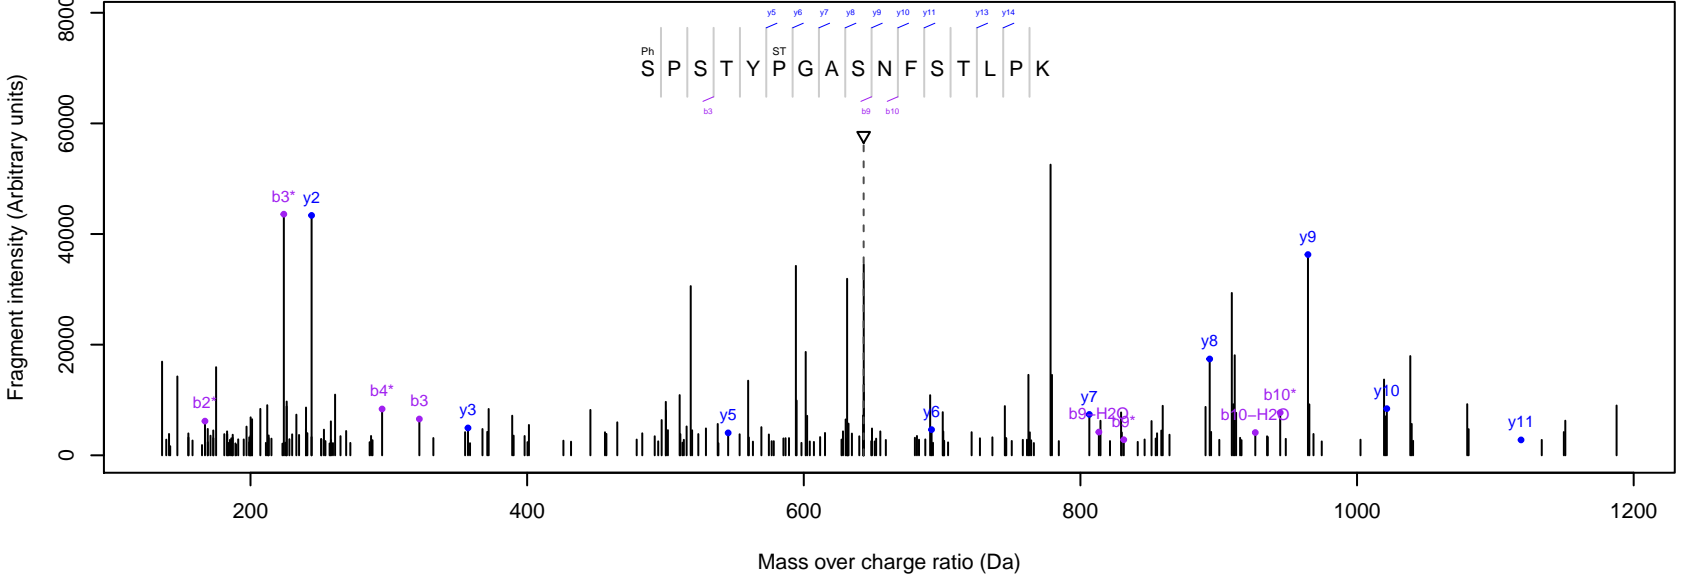

DGGSGNS(Phospho (STY))TIIVSR-2+

Source : QE3\_201126\_FR\_TiOx\_hum\_tissue\_Urea\_RNAB\_N Scan : 18796

Andromeda score : 65.038

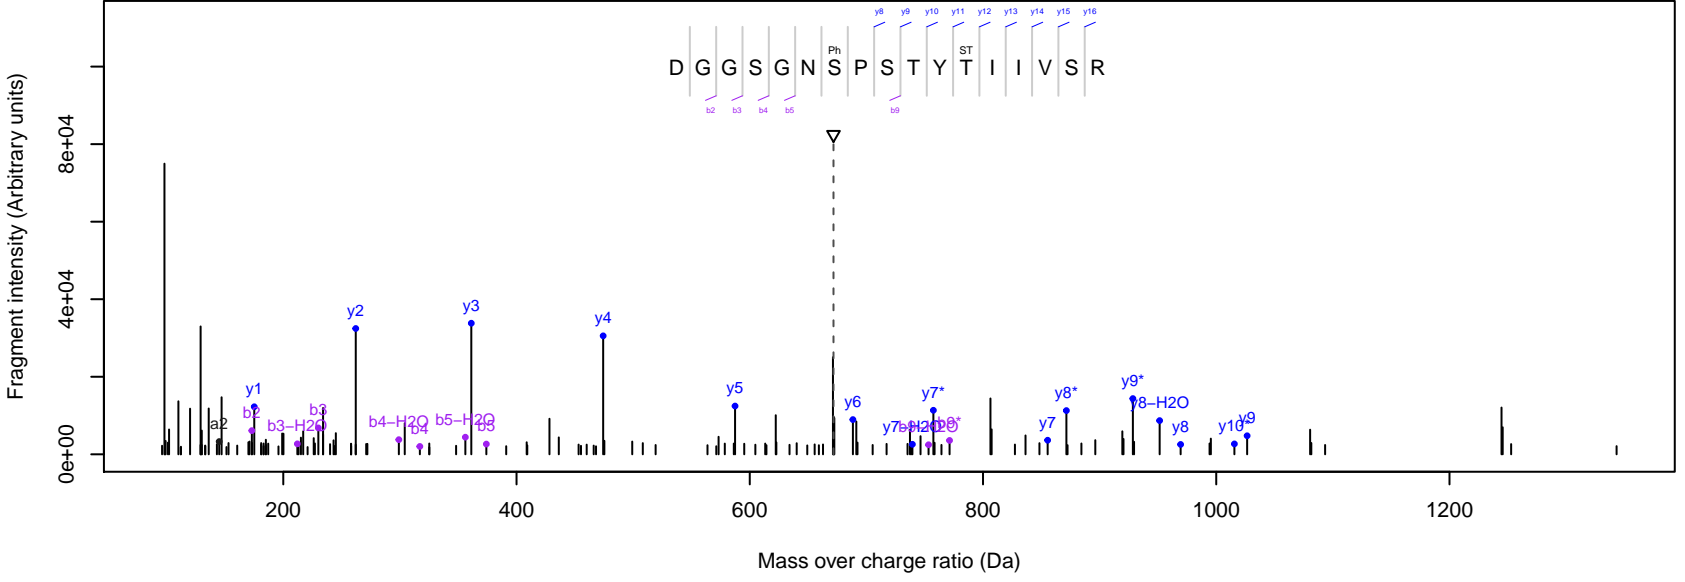

NAKKEDS(Phospho (STY))DEEEDDDSEEEDEDEDEDEDEIEPAAMK-4+

Source : QE3\_201126\_FR\_TiOx\_hum\_tissue\_Urea\_RNAB\_H Scan : 22278

Andromeda score : 65.021

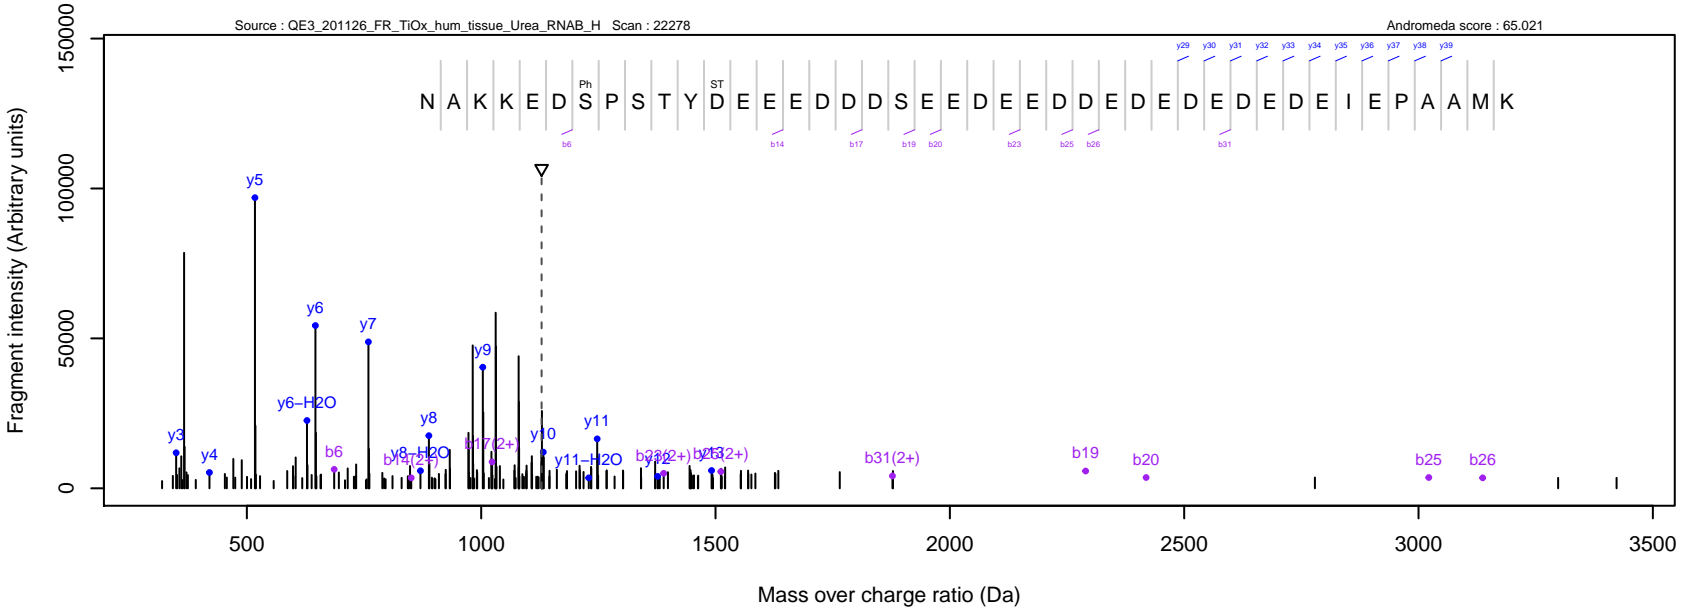

QRVPQPSSAS(Phospho (STY))LDEYTLM(Oxidation (M))R-3+

Source : QE3\_201126\_FR\_TiOx\_hum\_tissue\_Urea\_RNAB\_B Scan : 27581

Andromeda score : 64.962

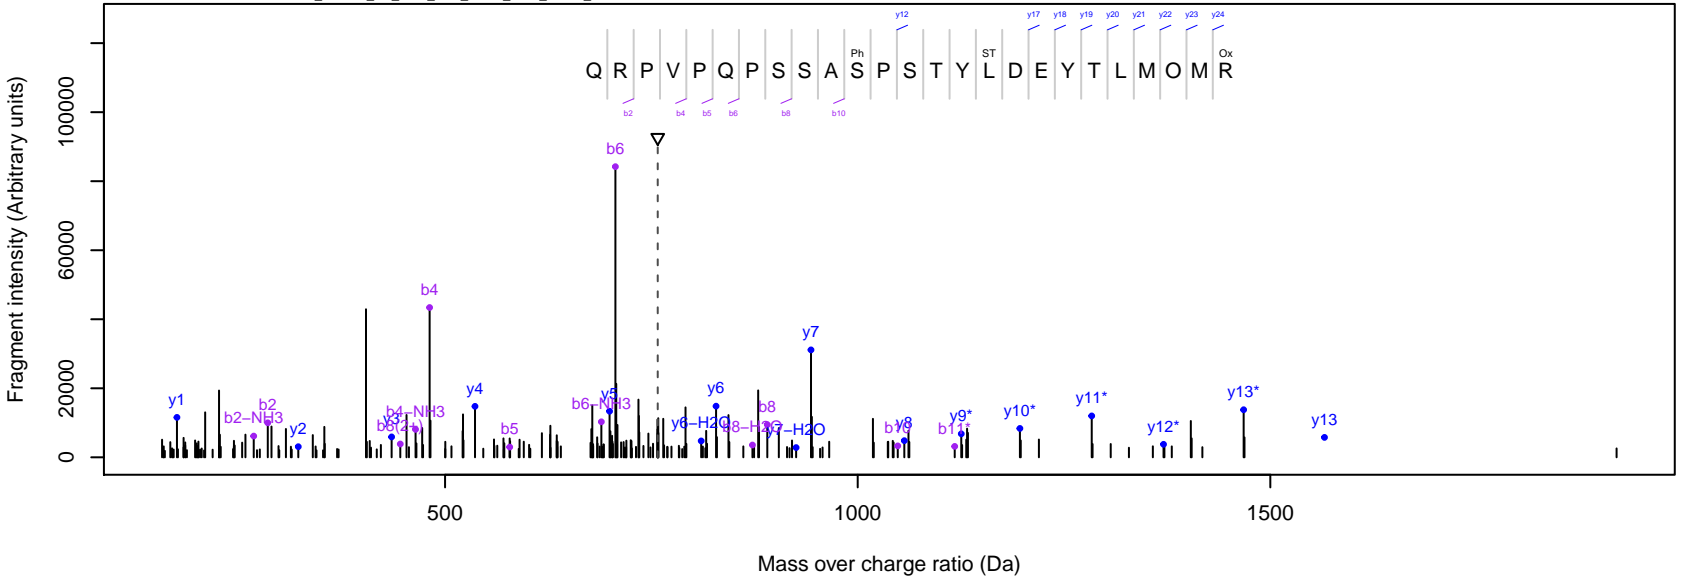

DVDDGS(Phospho (STY))GS(Phospho (STY))PHS(Phospho (STY))PHQLSSK-3+

Source : QE3\_201126\_FR\_TiOx\_hum\_tissue\_Urea\_RNAB\_B Scan : 11287

Andromeda score : 64.954

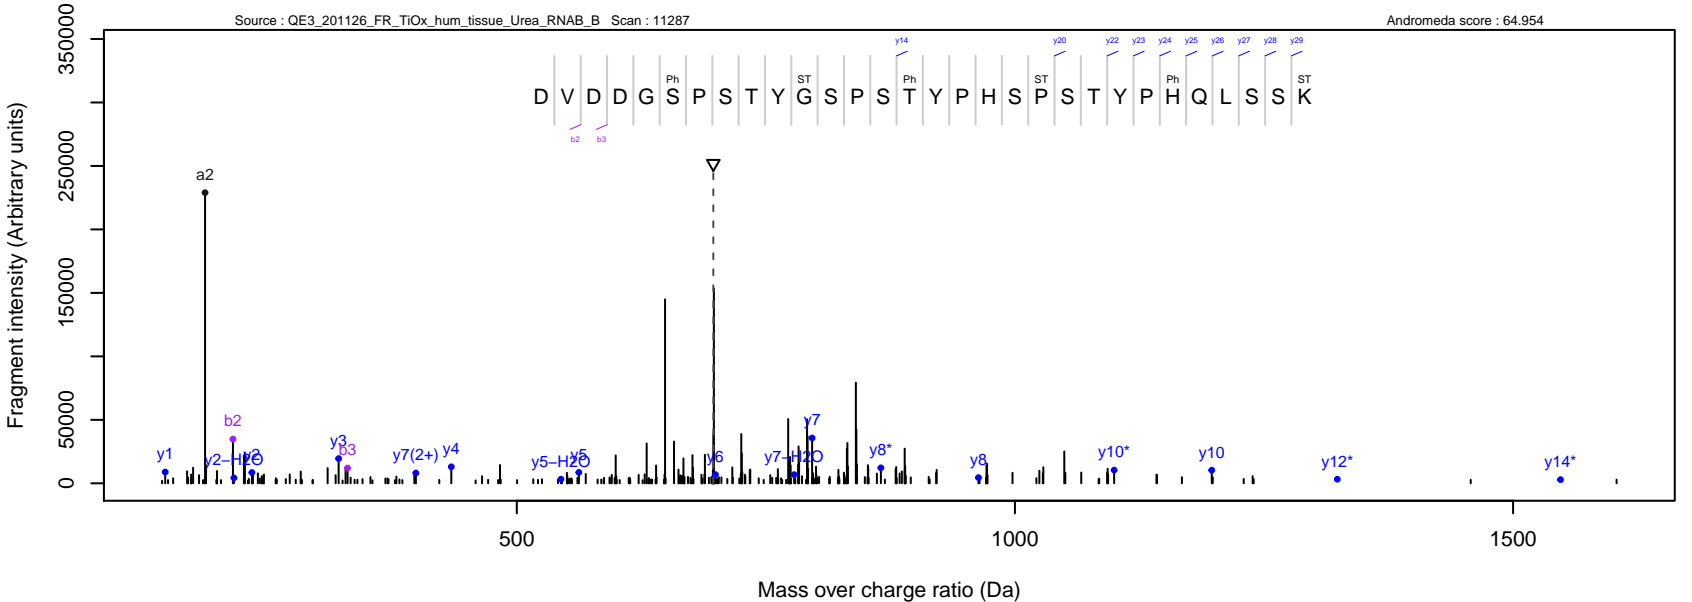



GQSQT(Phospho (STY))SPDHRS(Phospho (STY))DTSSPEVR-3+

Source : QE3\_201126\_FR\_TiOx\_hum\_tissue\_Urea\_RNAB\_B Scan : 5359

Andromeda score : 64.954

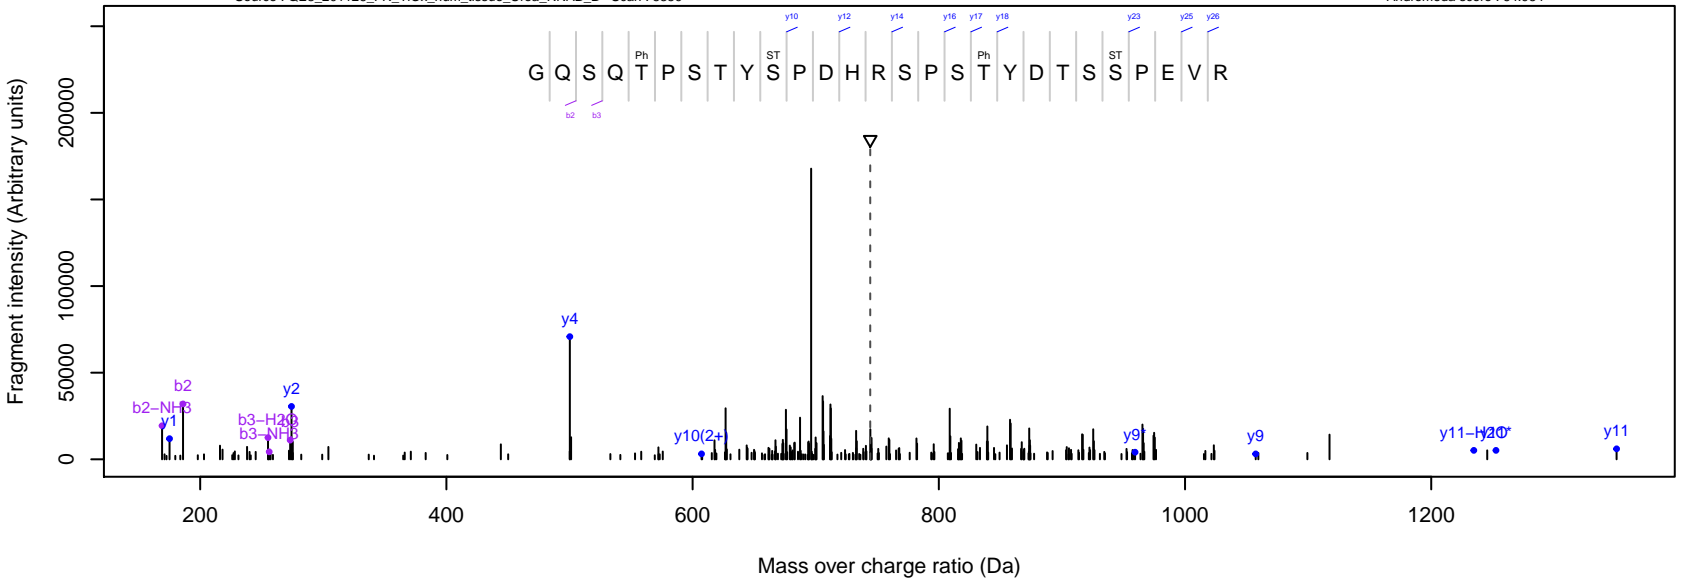

ASPAT(Phospho (STY))QPPPLLPPSATGPDATVGGPAPTLLPPSATASVK-3+

Source : QE3\_201126\_FR\_TiOx\_hum\_tissue\_Urea\_RNAB\_H Scan : 55825

Andromeda score : 64.911

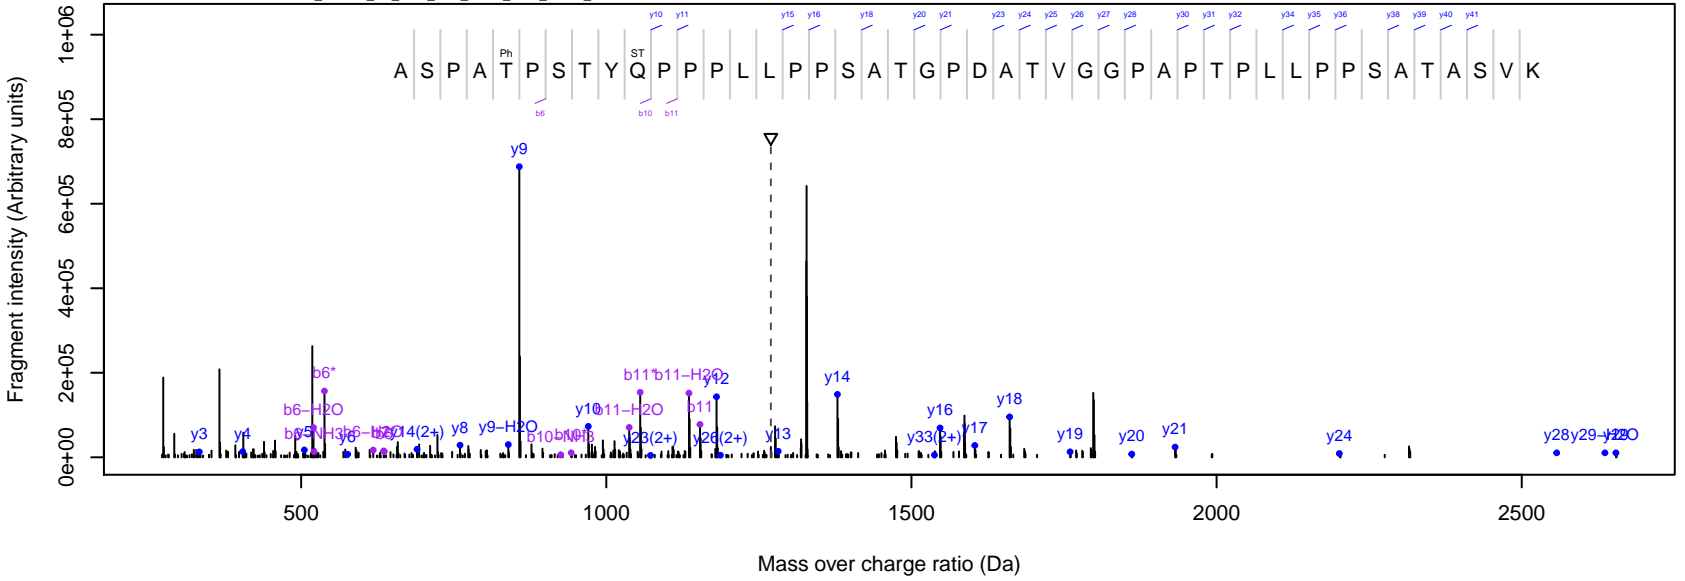

QRGSET(Phospho (STY))GS(Phospho (STY))ETHESDLAPSDKEAPTPK-4+

Source : QE3\_201126\_FR\_TiOx\_hum\_tissue\_Urea\_RNAB\_N Scan : 10956

Andromeda score : 64.885

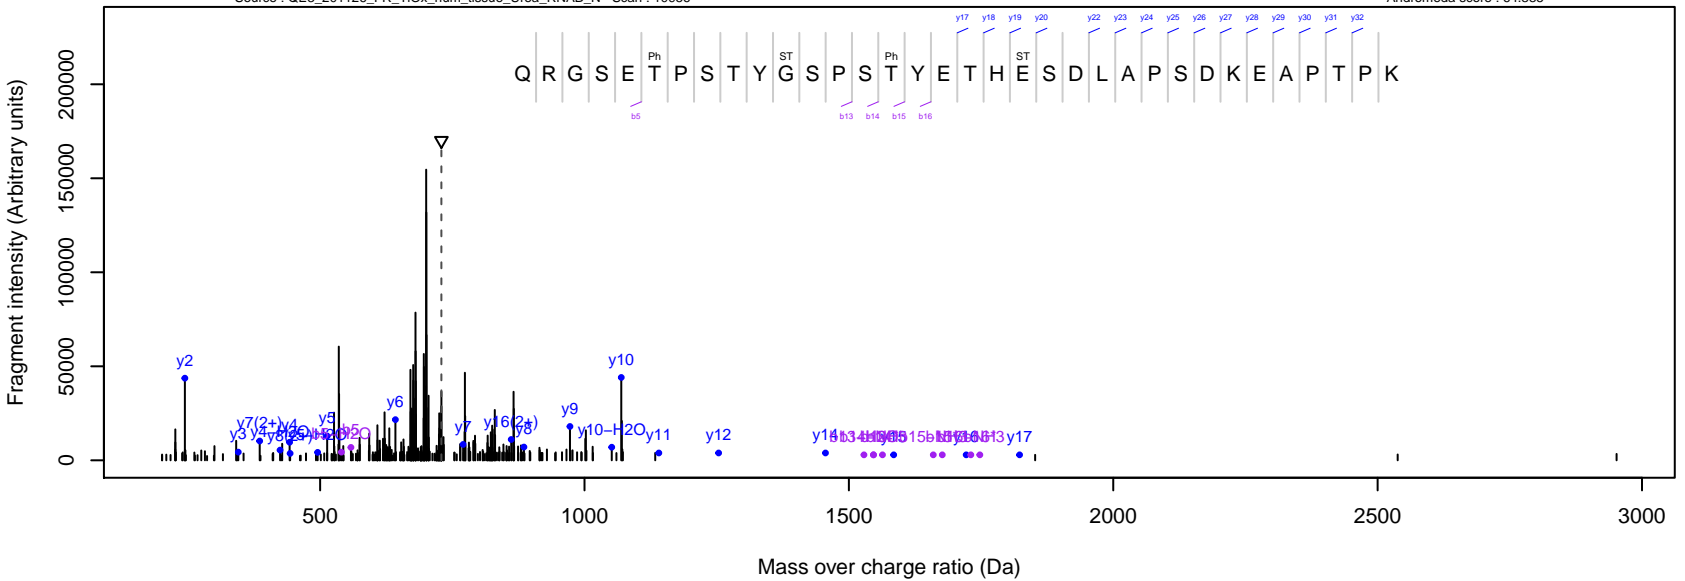

VEPPHS(Phospho (STY))S(Phospho (STY))HEDLTDGLSTR-3+

Source : QE3\_201126\_FR\_TiOx\_hum\_tissue\_Urea\_RNAB\_N Scan : 19932

Andromeda score : 64.87

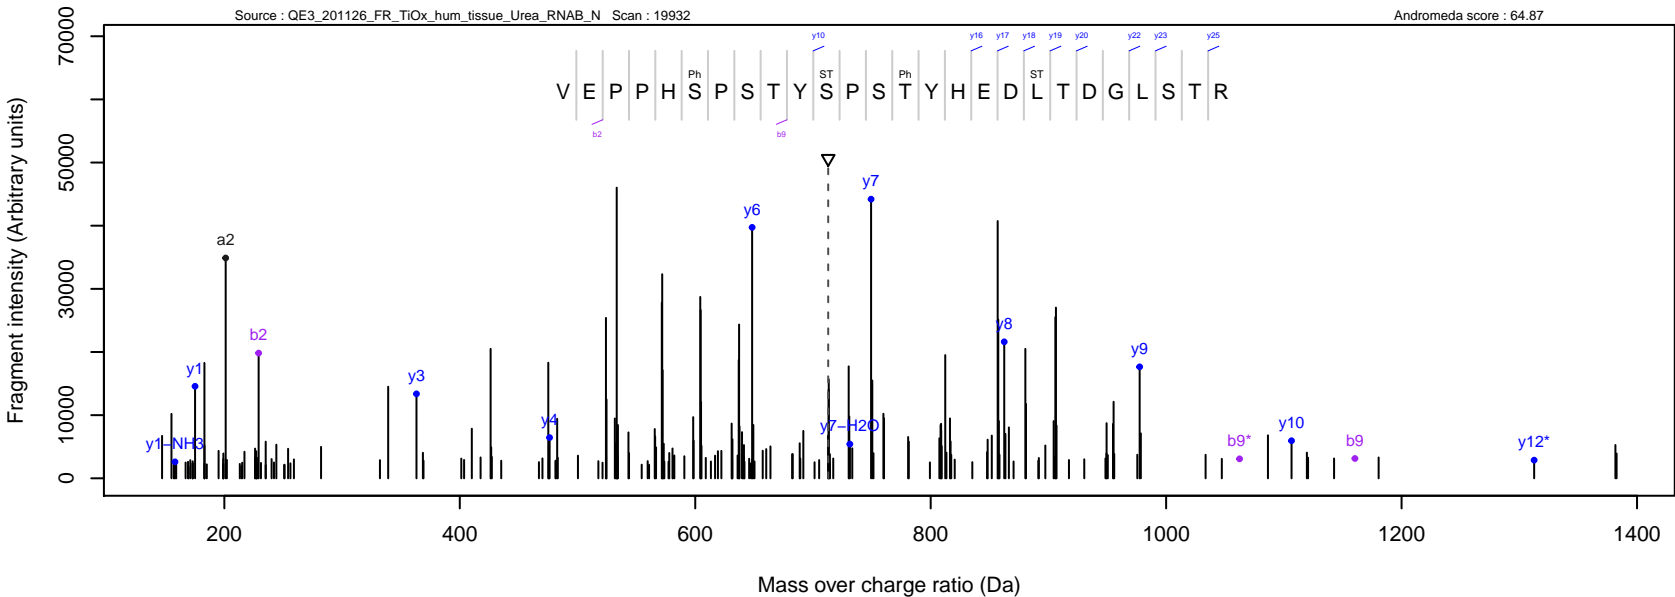

S(Phospho (STY))GSEDEMKEDESTGSGDGPVK-3+

Source : QE3\_201126\_FR\_TiOx\_hum\_tissue\_Urea\_RNAB\_N Scan : 16610

Andromeda score : 64.845

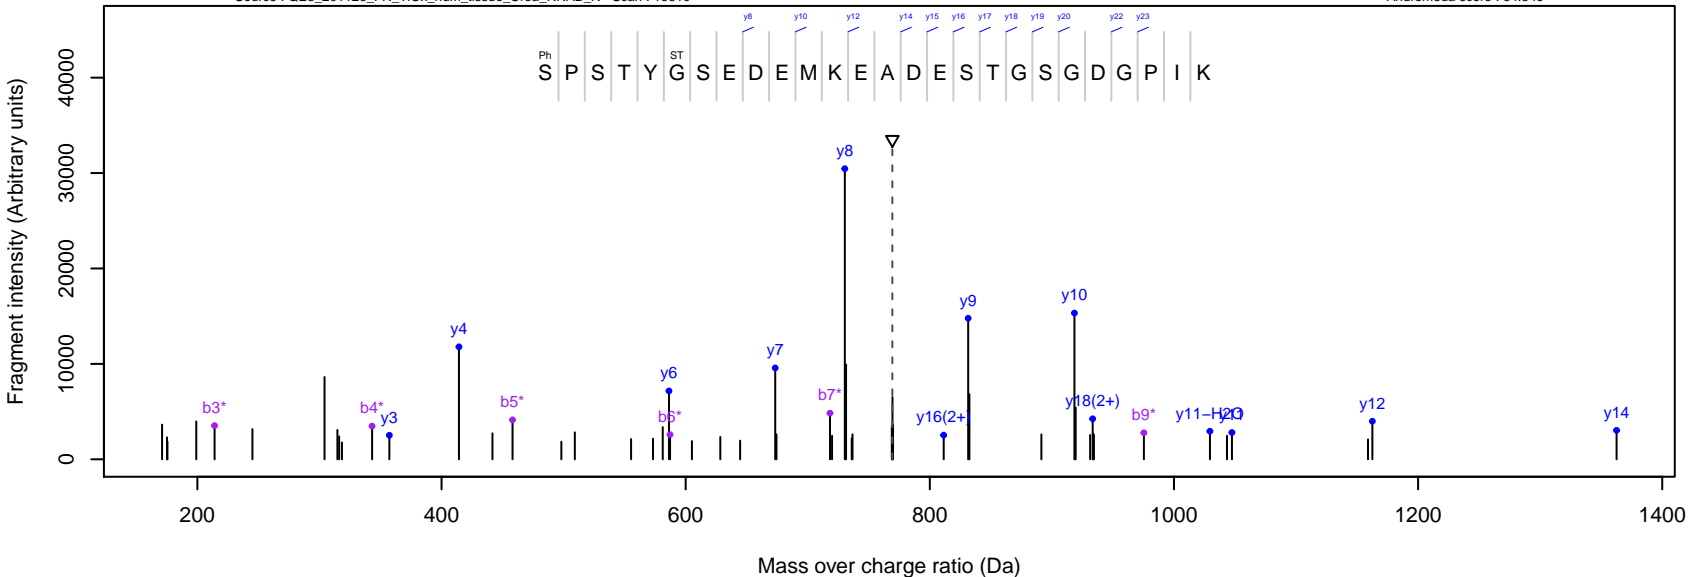

RLS(Phospho (STY))ALHPPEK-3+

Source : QE3\_201126\_FR\_TiOx\_hum\_tissue\_Urea\_RNAB\_B Scan : 10346

Andromeda score : 64.798

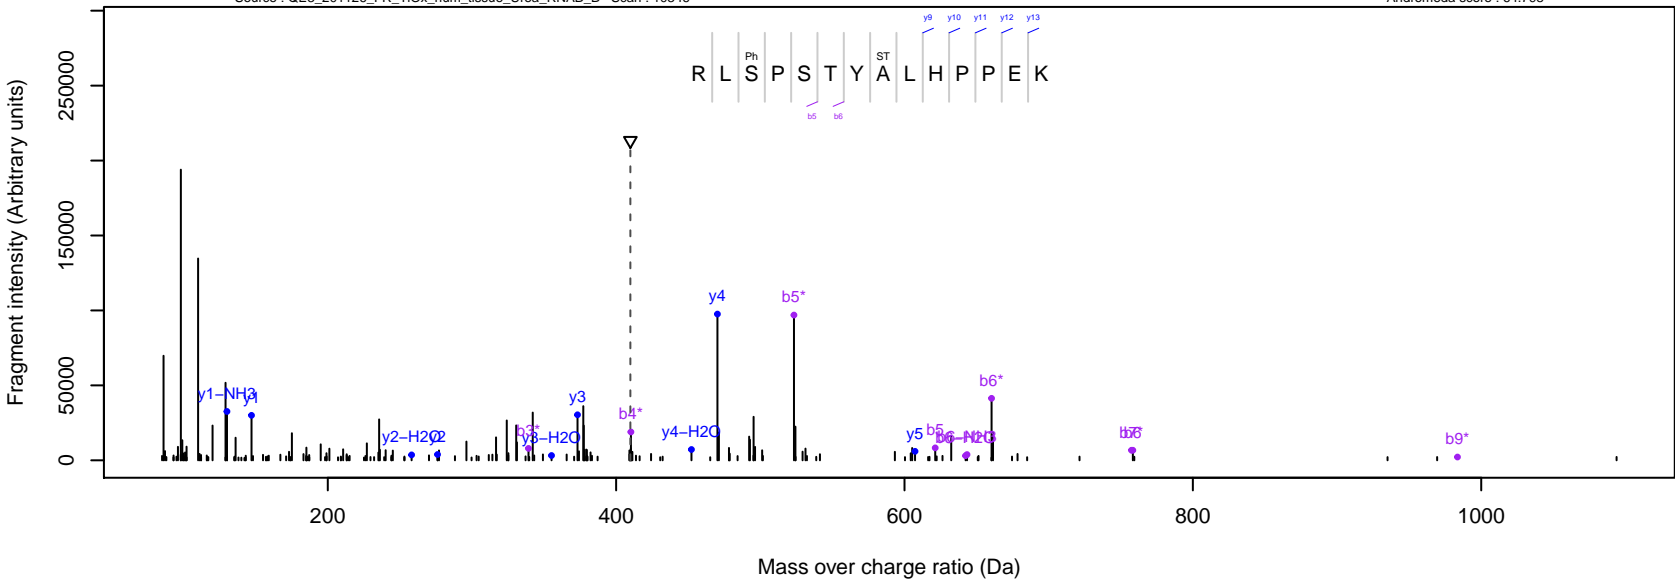

**IKGS(Phospho (STY))SPGIQDTLEADGAFETDEAPEDR-3+**

Source : QE3\_201126\_FR\_TiOx\_hum\_tissue\_Urea\_RNAB\_H Scan : 38226

Andromeda score : 64.733

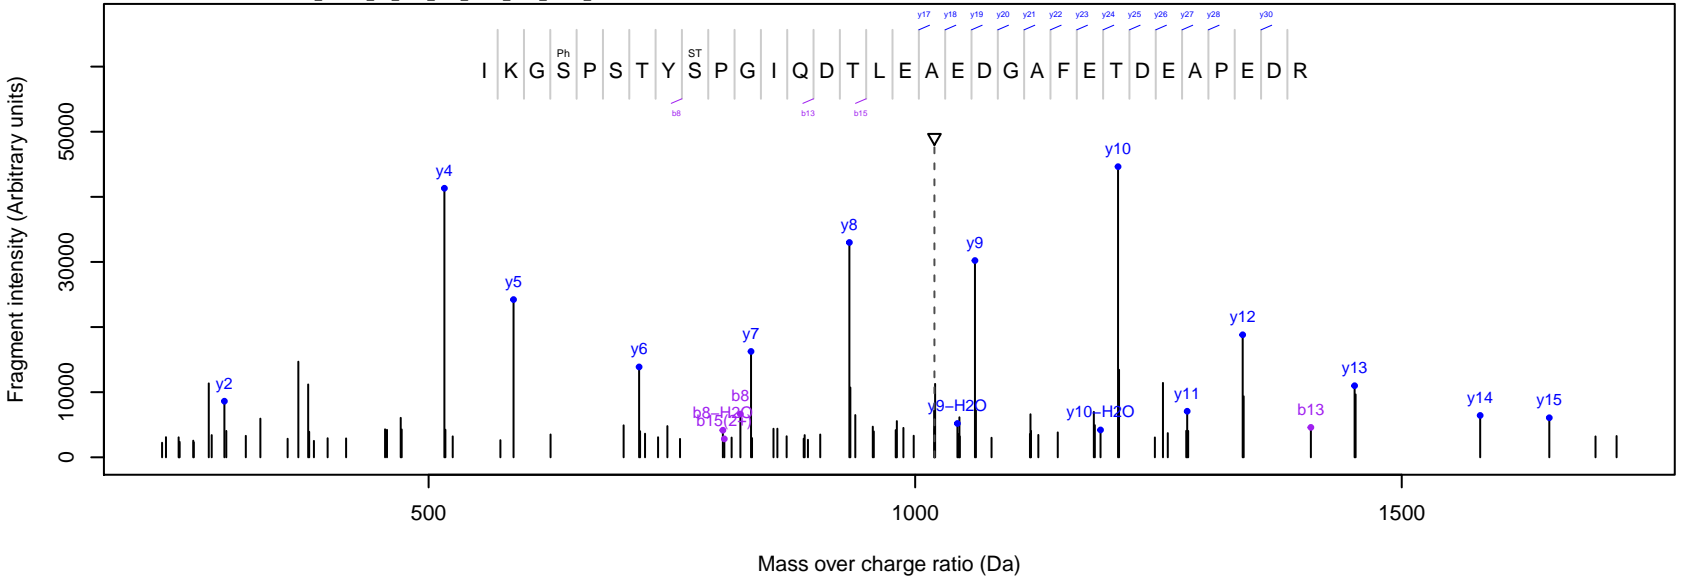

**VKS(Phospho (STY))TAYLSPQELEDVFYQYDVK-3+**

Source : QE3\_201126\_FR\_TiOx\_hum\_tissue\_Urea\_RNAB\_B Scan : 57558

Andromeda score : 64.733

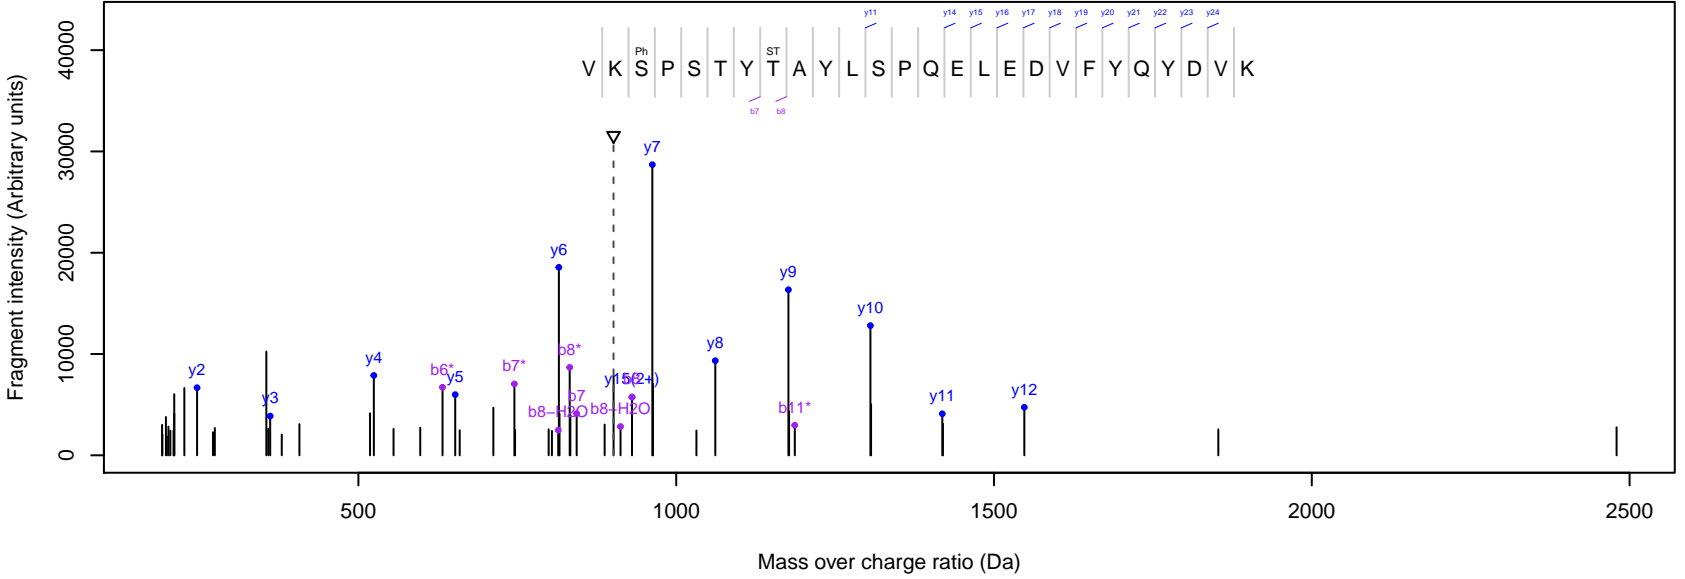

**KGS(Phospho (STY))RAS(Phospho (STY))LGALSLEYLTTGEAETR-3+**

Source : QE3\_201126\_FR\_TiOx\_hum\_tissue\_Urea\_RNAB\_N Scan : 51578

Andromeda score : 64.726

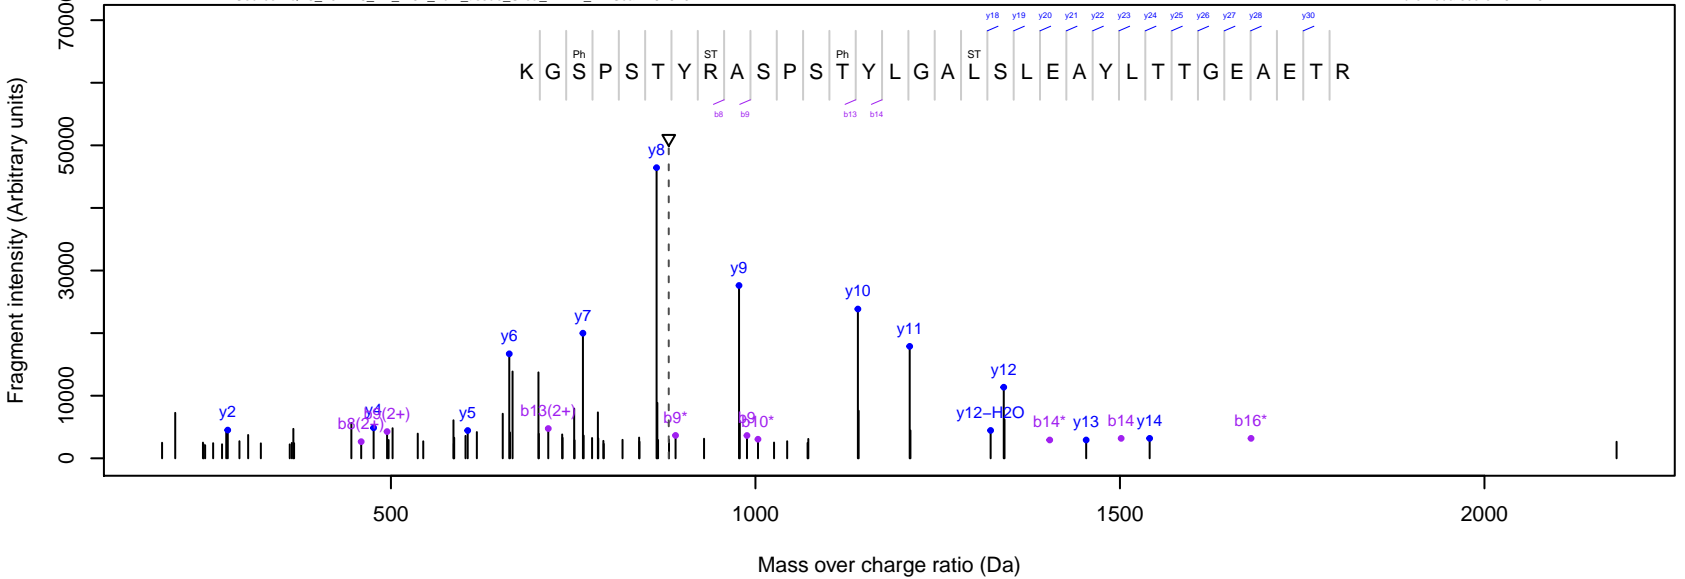

ASVS(Phospho (STY))PMDEPVPDS(Phospho (STY))ESPIEK-2+

Source : QE3\_201126\_FR\_TiOx\_hum\_tissue\_Urea\_RNAB\_N Scan : 36232

Andromeda score : 64.723

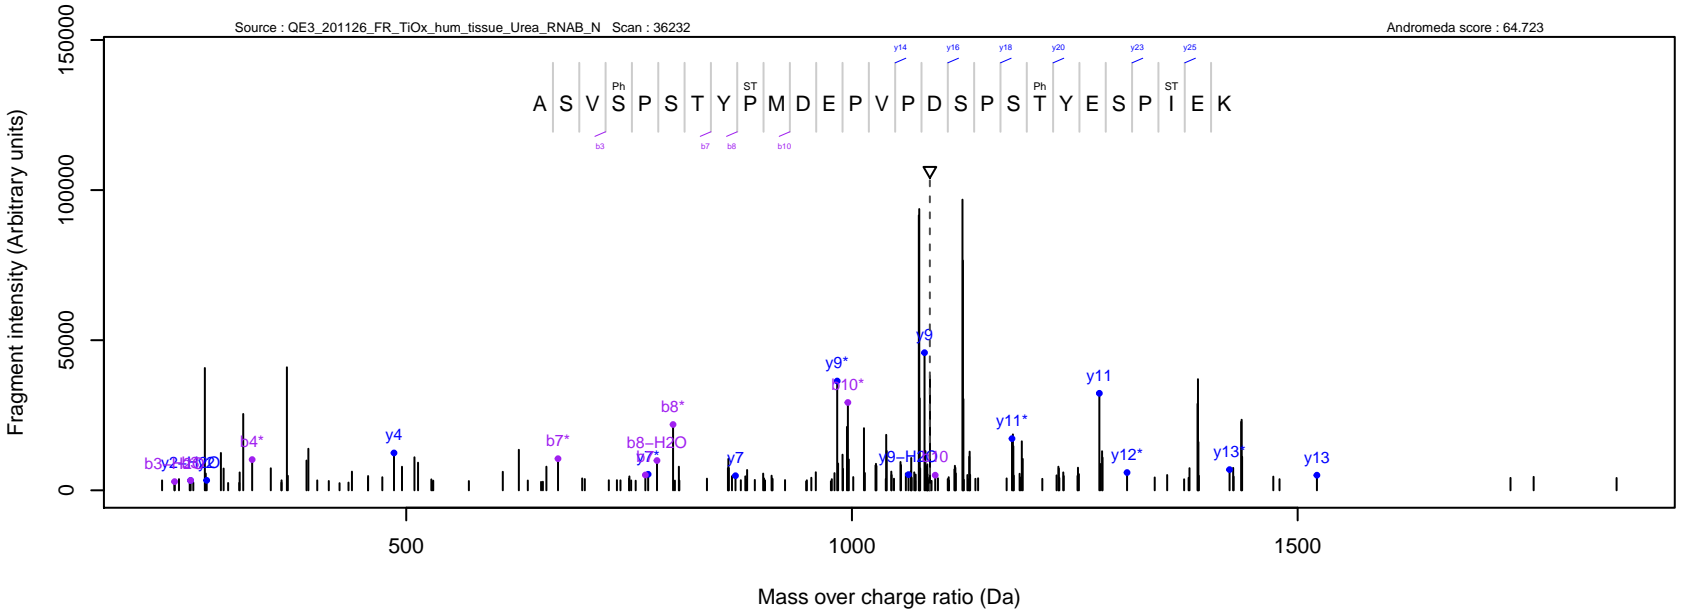

SVQGDHEMIHSAS(Phospho (STY))TK-3+

Source : QE3\_201126\_FR\_TiOx\_hum\_tissue\_Urea\_RNAB\_N Scan : 6486

Andromeda score : 64.723

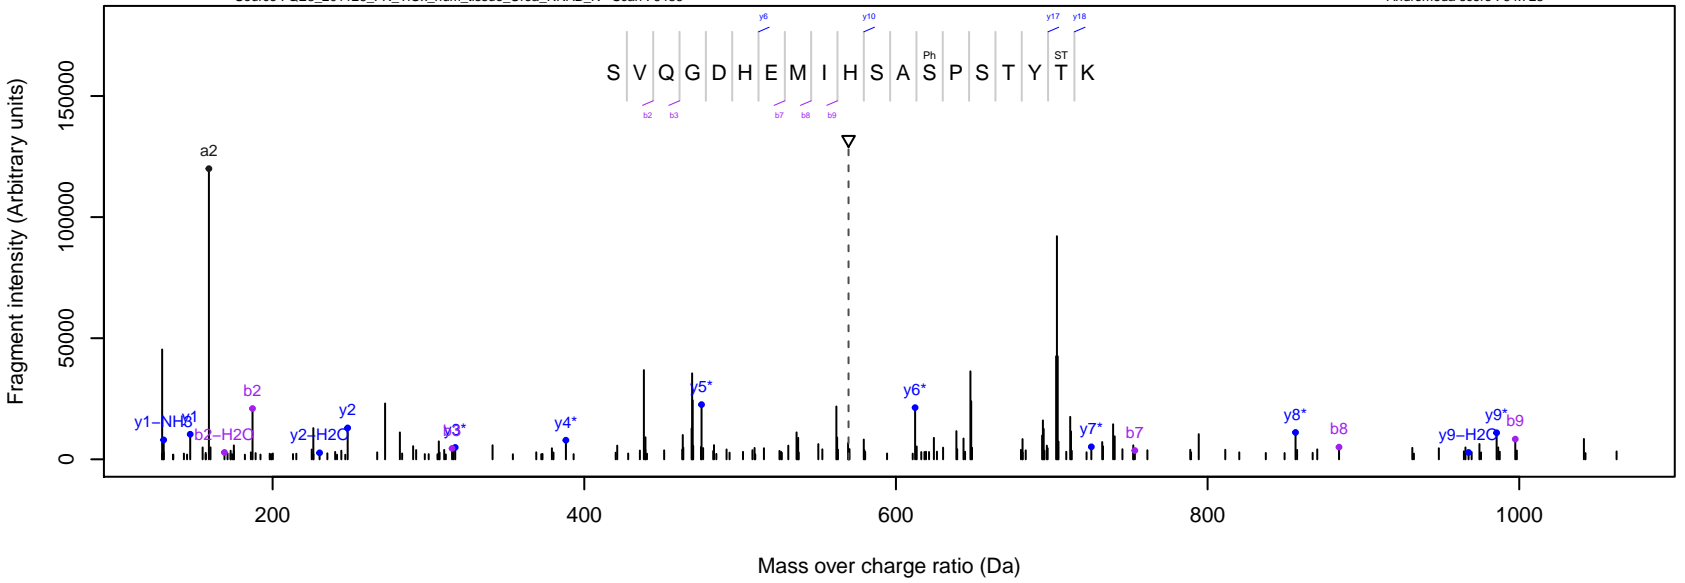

YFDTNS(Phospho (STY))VEVEES(Phospho (STY))EEDEDYIPSEDWKK-3+

Source : QE3\_201126\_FR\_TiOx\_hum\_tissue\_Urea\_RNAB\_H Scan : 46169

Andromeda score : 64.718

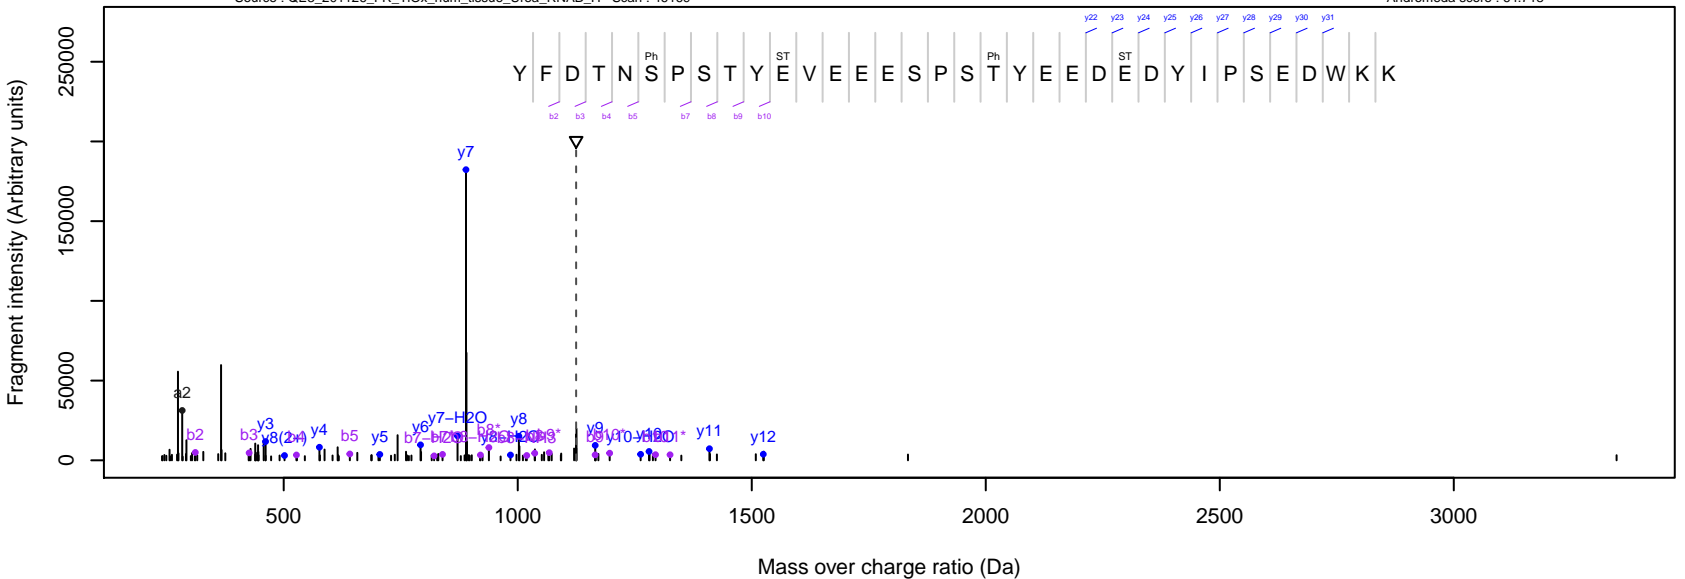

IHG V N S G S S E G A Q P N T E N G V P E I T D A A T D Q G P A E S P S T Y P P T S P S S A S R

Source : QE3\_201126\_FR\_TiOx\_hum\_tissue\_Urea\_RNAB\_N Scan : 29235

Andromeda score : 64.705

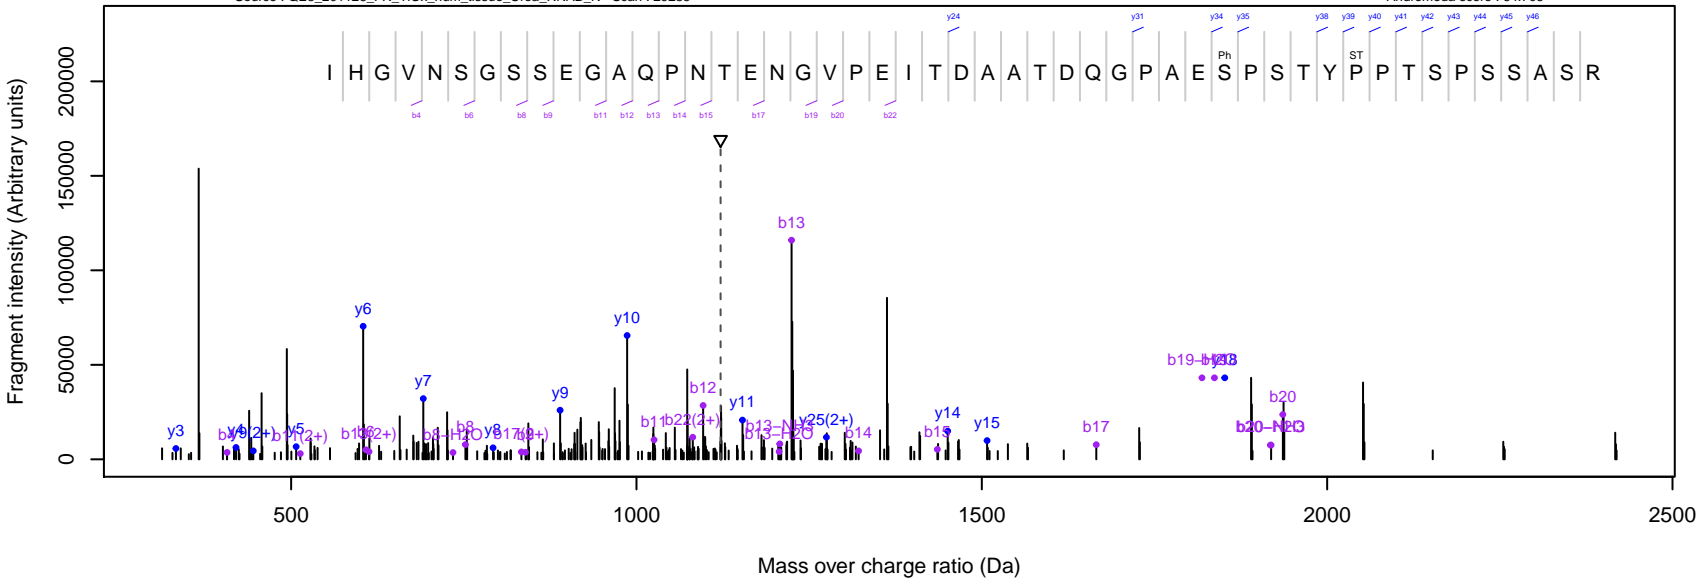

RLS(Phospho (STY))SASTGKPLPSVEDDFEK

Source : QE3\_201126\_FR\_TiOx\_hum\_tissue\_Urea\_RNAB\_H Scan : 23825

Andromeda score : 64.701

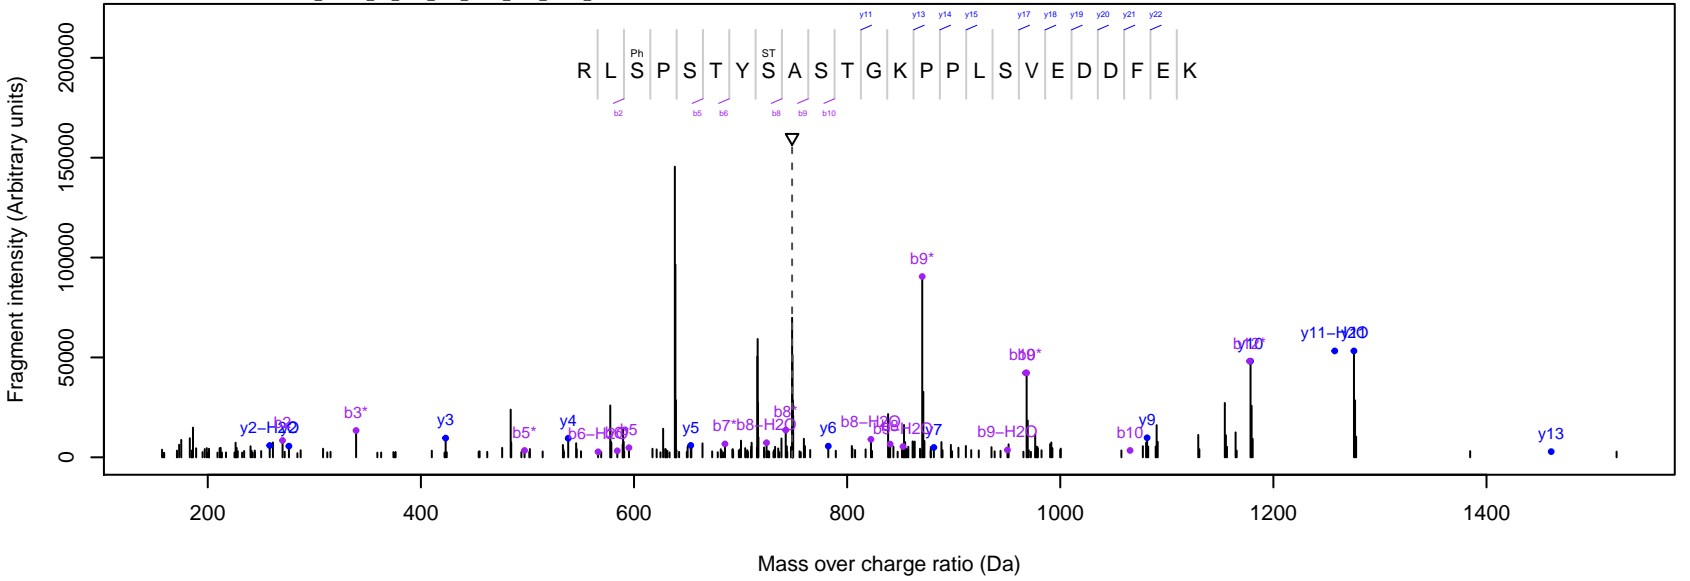

RPPGGT(Phospho (STY))SPPNGGLPGPLATSAAPPGPAAASPCLGPVAAAGSGLR

Source : QE3\_201126\_FR\_TiOx\_hum\_tissue\_Urea\_RNAB\_B Scan : 47791

Andromeda score : 64.687

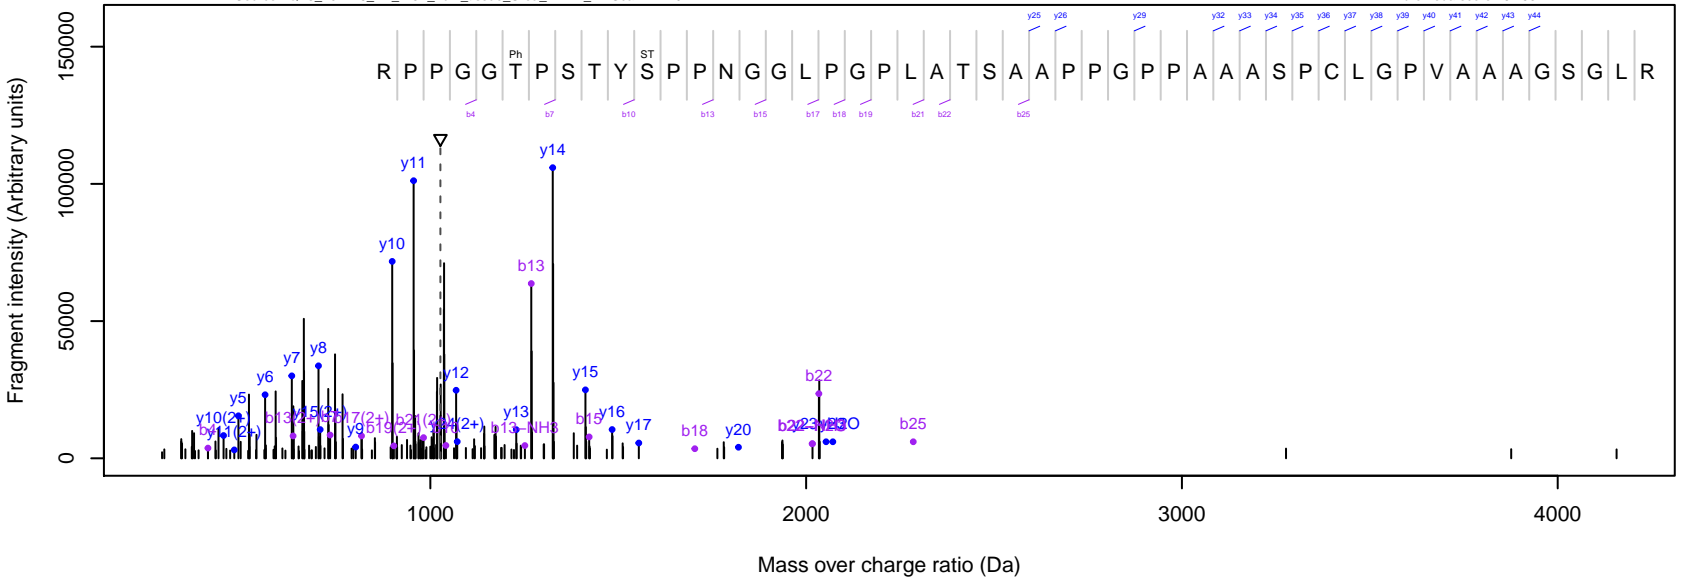

EILAGKPAQKSPS(Phospho (STY))DLLDASAVSATSR-3+

Source : QE3\_201126\_FR\_TiOx\_hum\_tissue\_Urea\_RNAB\_H Scan : 30226

Andromeda score : 64.686

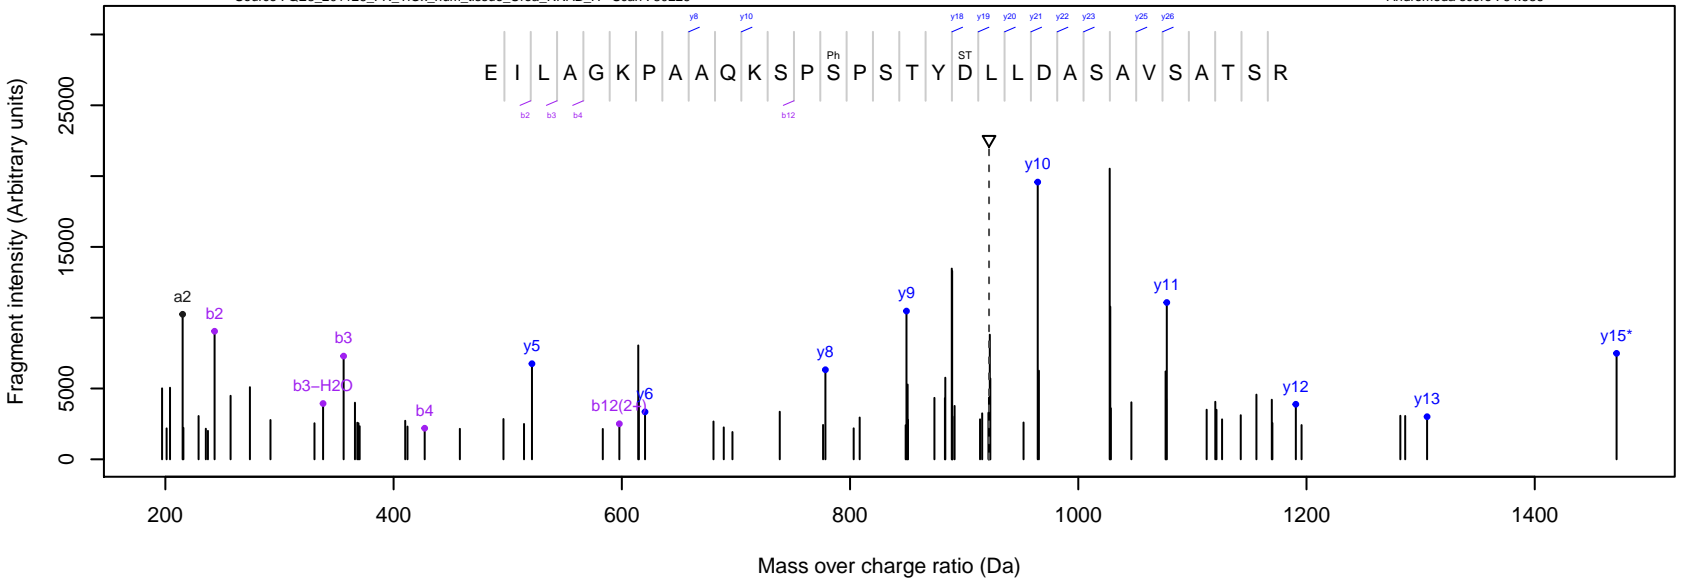

SVS(Phospho (STY))M(Oxidation (M))PAETAHIS(Phospho (STY))SPHHELRL-3+

Source : QE3\_201126\_FR\_TiOx\_hum\_tissue\_Urea\_RNAB\_N Scan : 13430

Andromeda score : 64.68

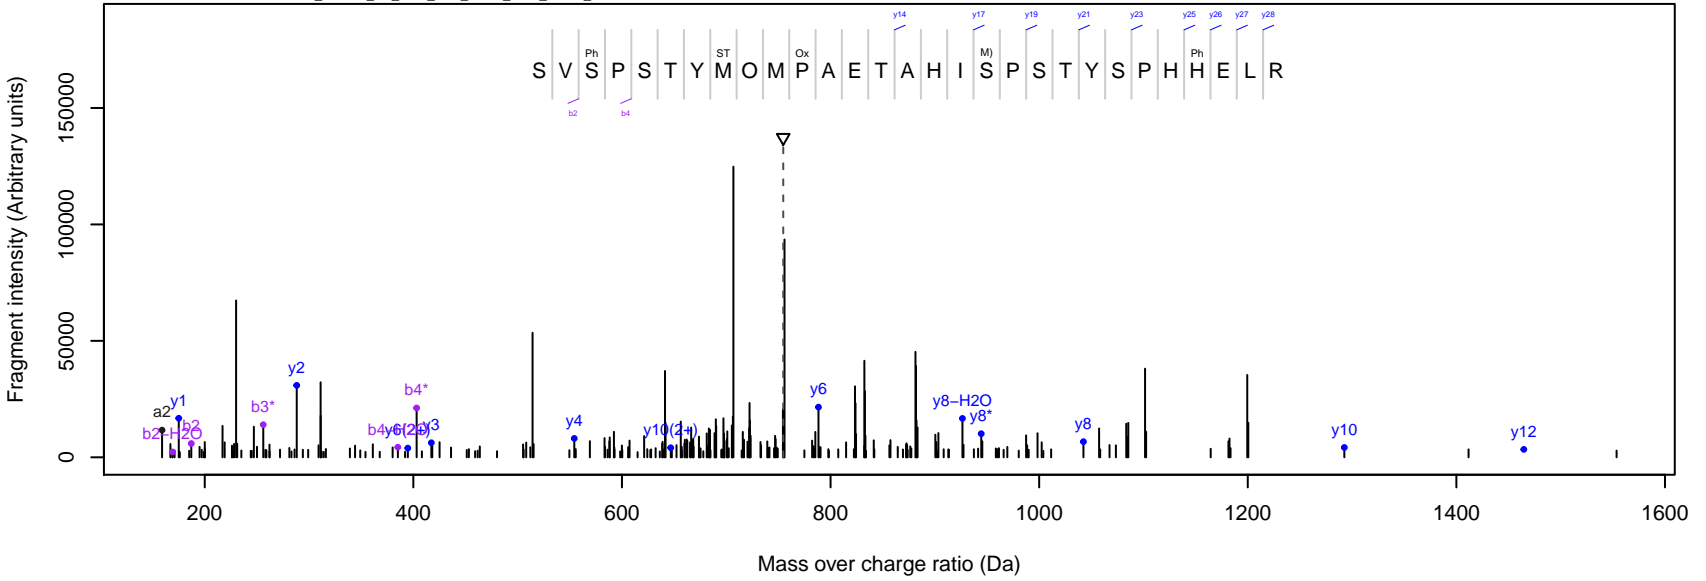

KDS(Phospho (STY))ISEDEM(Oxidation (M))VLR-3+

Source : QE3\_201126\_FR\_TiOx\_hum\_tissue\_Urea\_RNAB\_N Scan : 17903

Andromeda score : 64.675

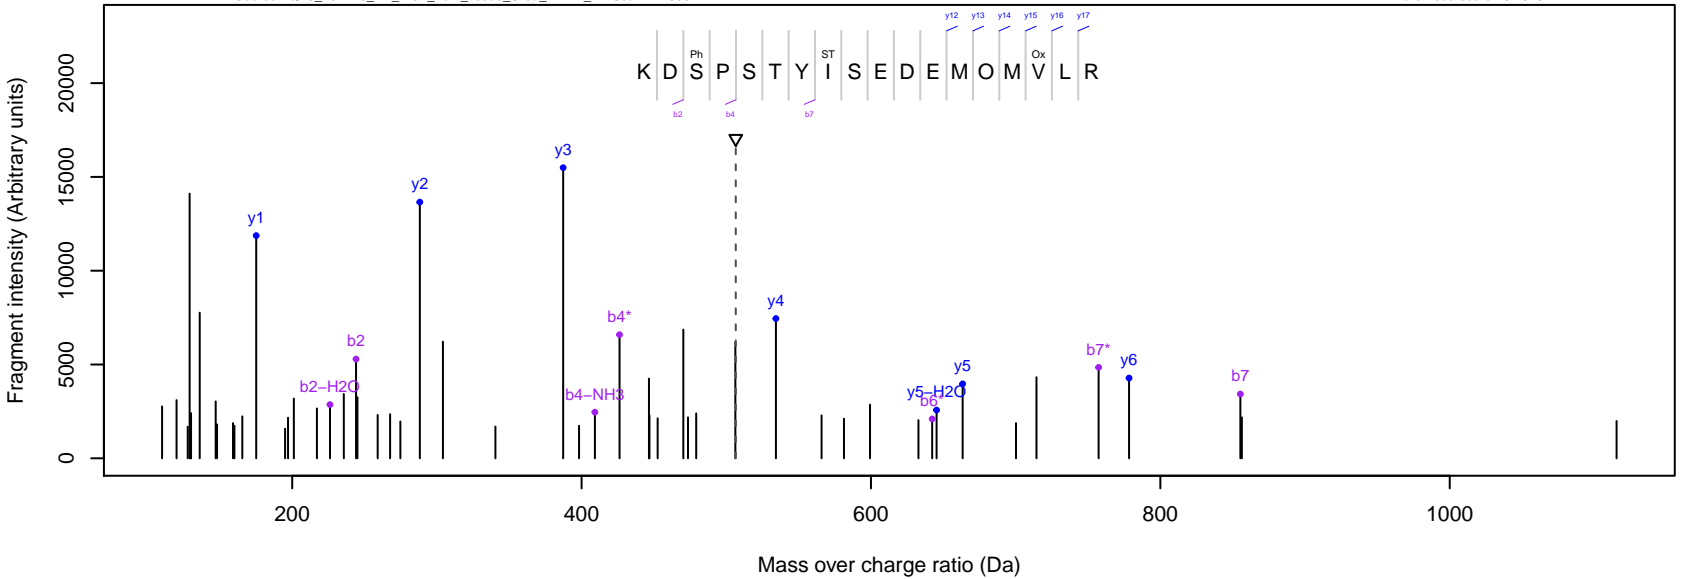

NNS(Phospho (STY))LQTATENTQAR-2+

Source : QE3\_201126\_FR\_TIOx\_hum\_tissue\_Urea\_RNAB\_H Scan : 11439

Andromeda score : 64.675

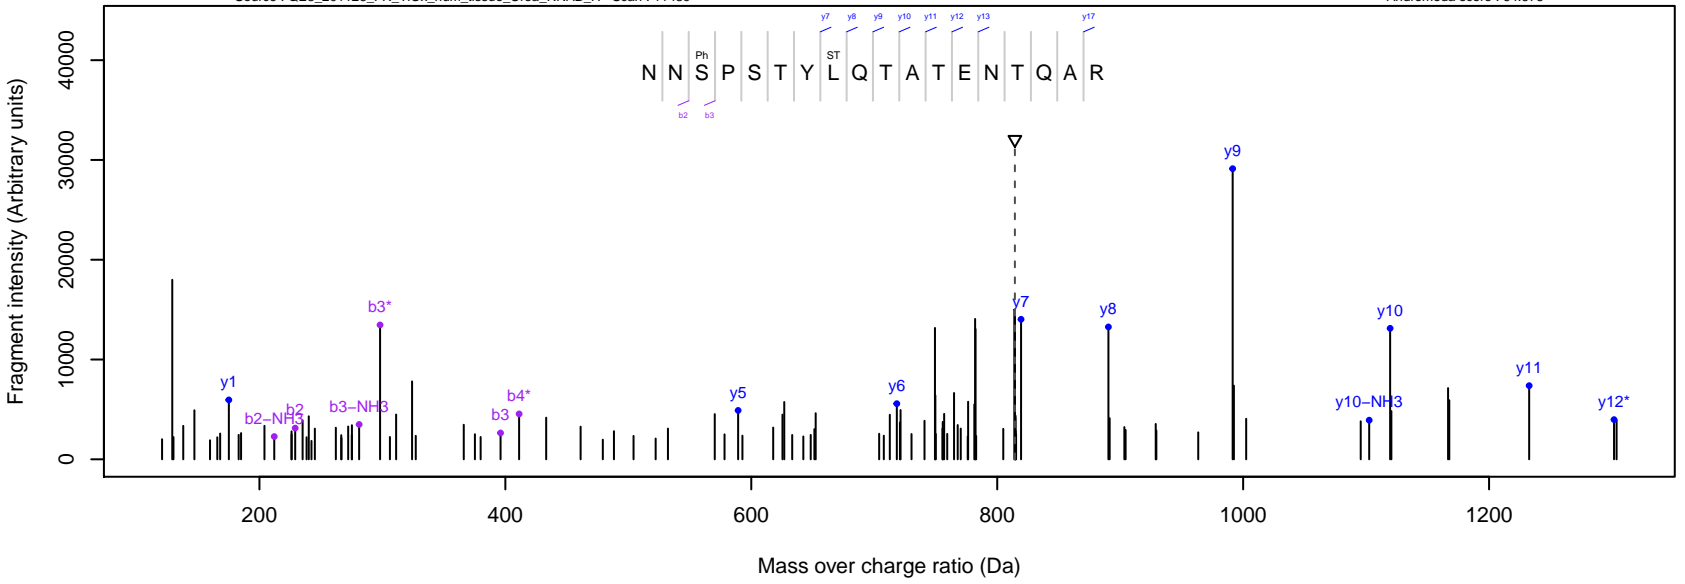

IQQFDDEEEEEDEEEA QGS(Phospho (STY))GES(Phospho (STY))DGEDGAWQGSQ LAR-3+

Source : QE3\_201126\_FR\_TIOx\_hum\_tissue\_Urea\_RNAB\_H Scan : 47918

Andromeda score : 64.668

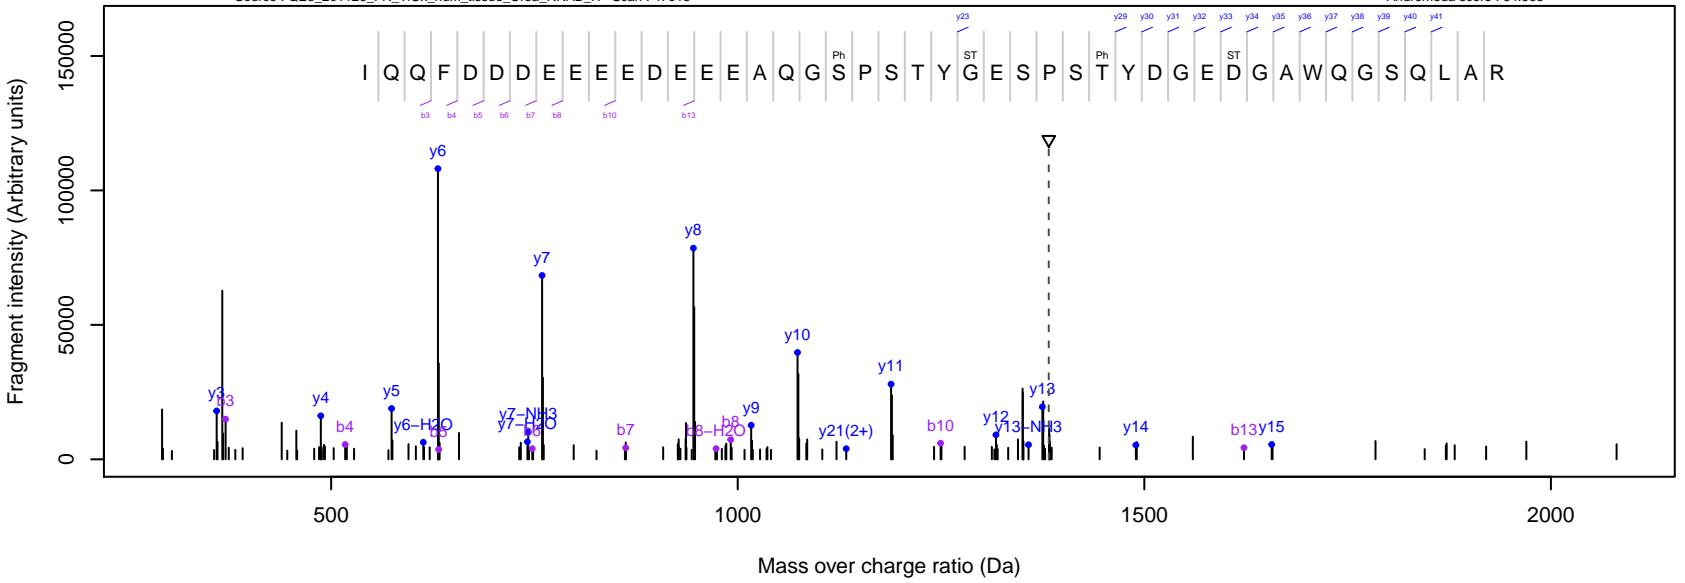

RLS(Phospho (STY))VEIWDWDR-2+

Source : QE3\_201126\_FR\_TIOx\_hum\_tissue\_Urea\_RNAB\_N Scan : 50058

Andromeda score : 64.65

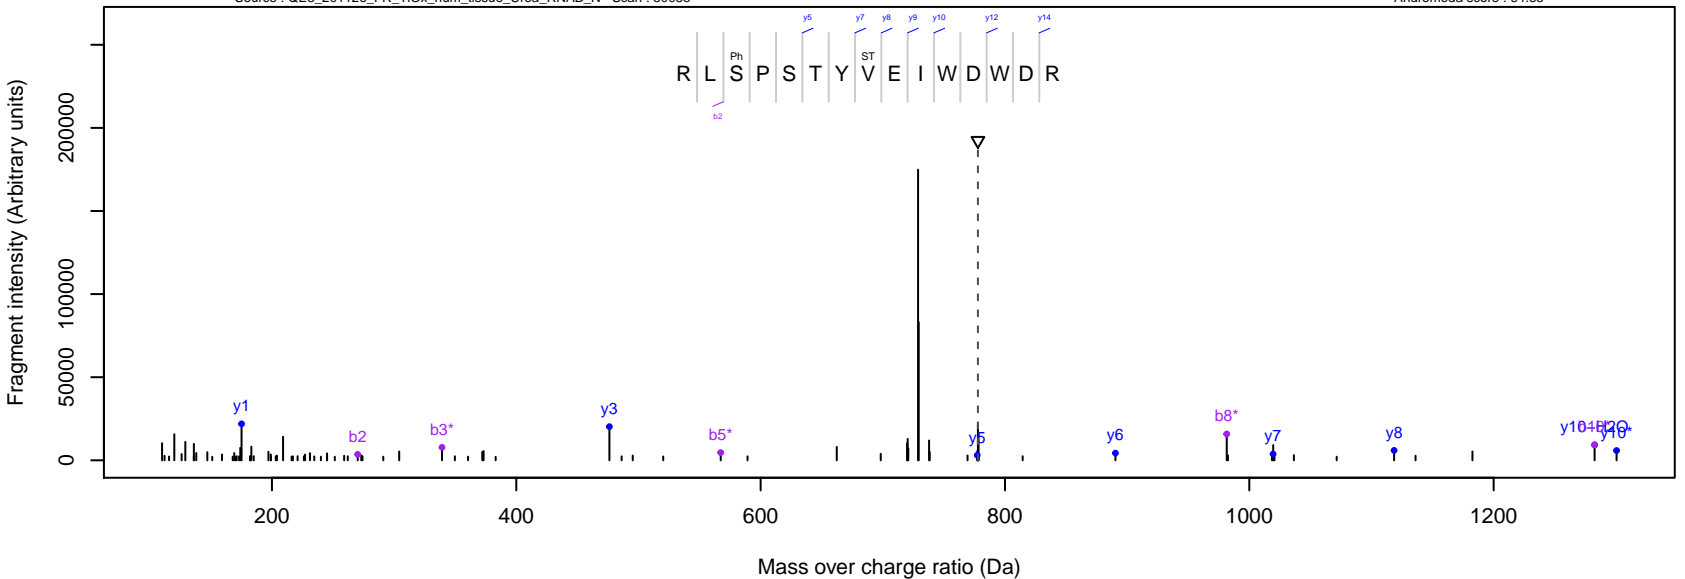

RES(Phospho (STY))LFSAR-2+

Source : QE3\_201126\_FR\_TiOx\_hum\_tissue\_Urea\_RNAB\_N Scan : 14174

Andromeda score : 64.64

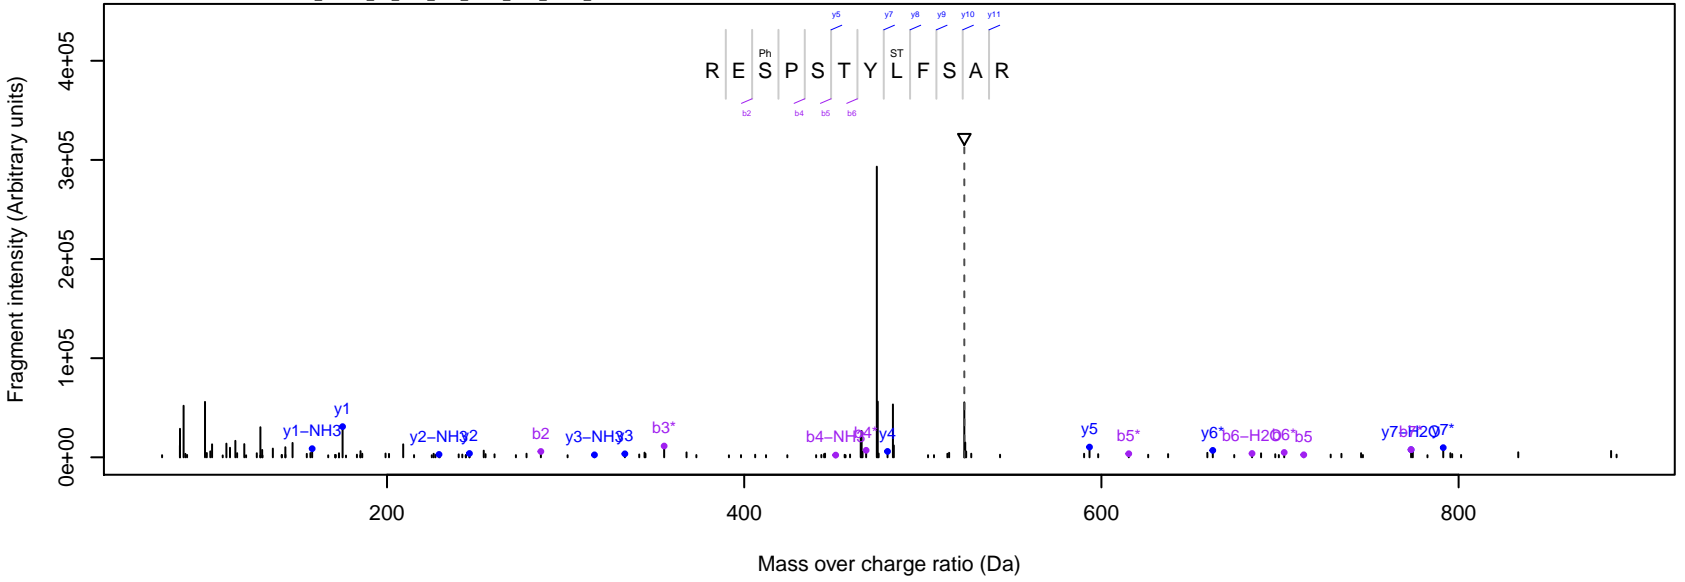

LREQGTERSS(Phospho (STY))T(Phospho (STY))PLPTISSAENTR-4+

Source : QE3\_201126\_FR\_TiOx\_hum\_tissue\_Urea\_RNAB\_H Scan : 18452

Andromeda score : 64.633

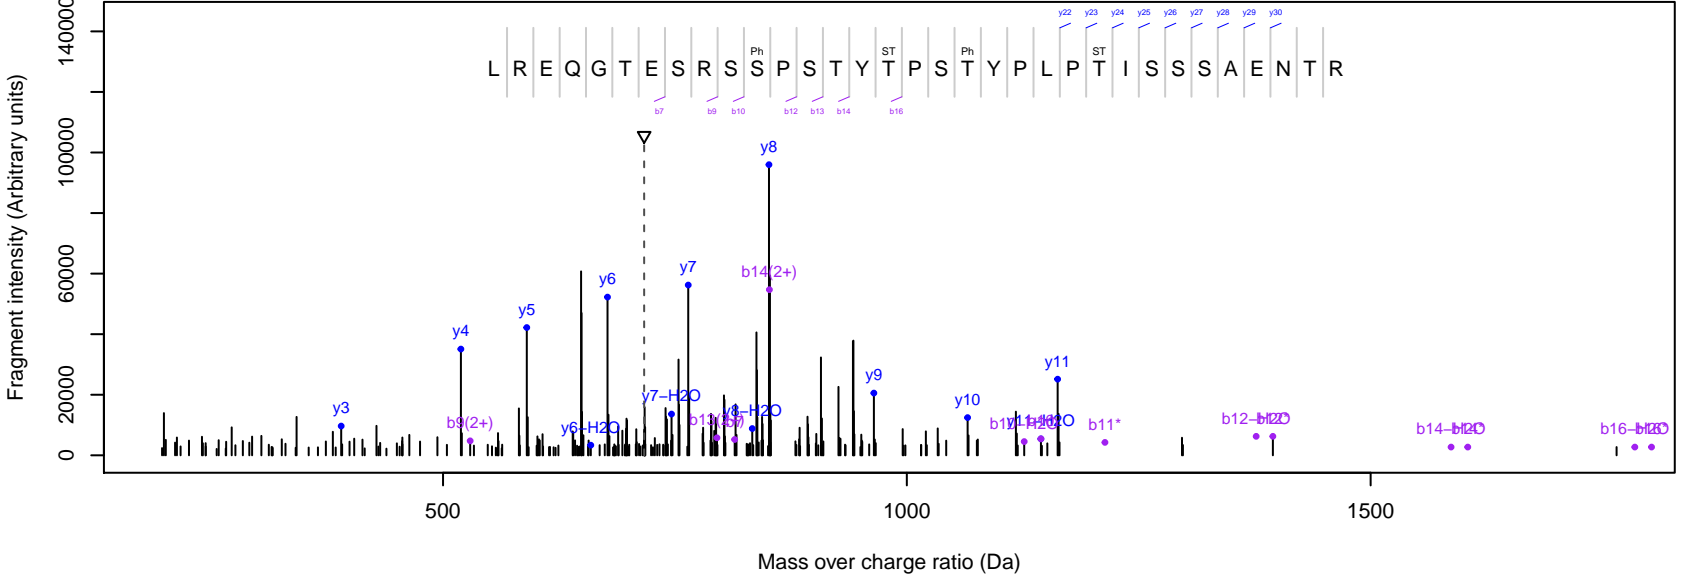

SRLS(Phospho (STY))PAGEMKPM(Oxidation (M))PLSE GK-3+

Source : QE3\_201126\_FR\_TiOx\_hum\_tissue\_Urea\_RNAB\_H Scan : 15963

Andromeda score : 64.547

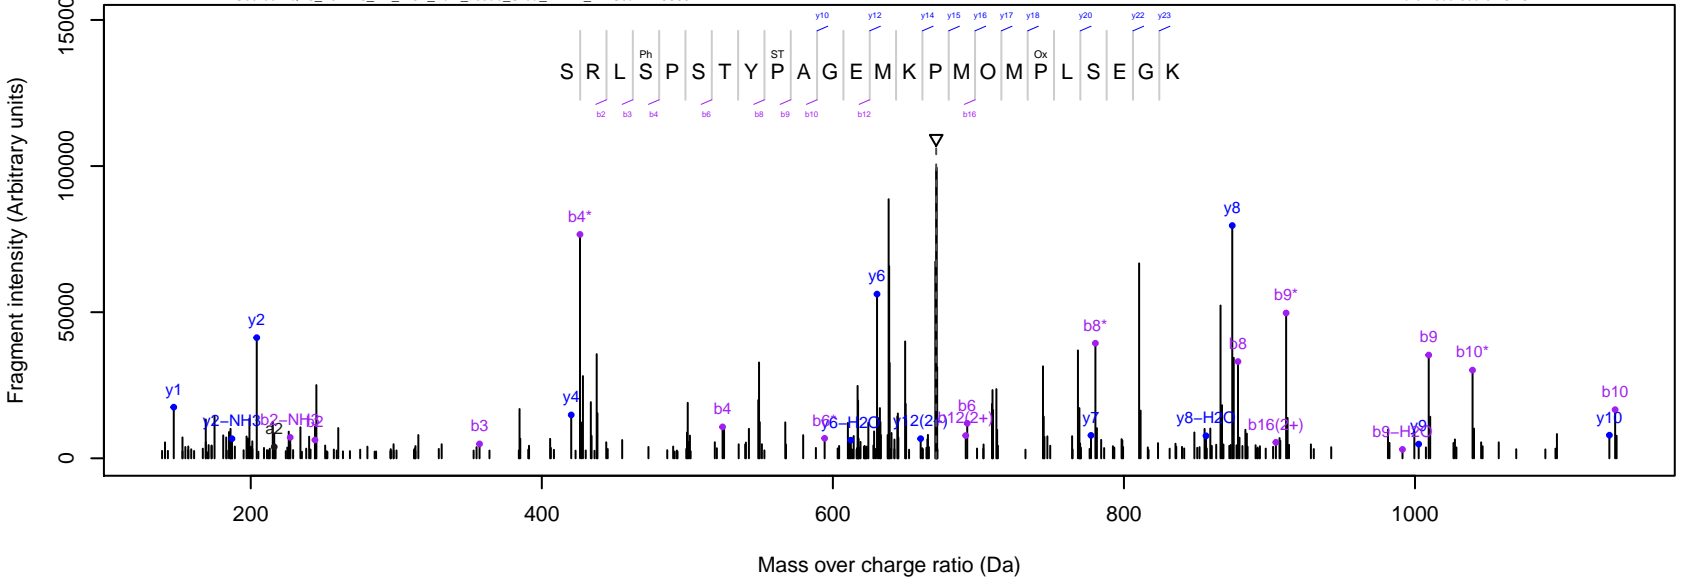



GHHVTDS ENDEPLN LNASD SPSTY ES PSTY EELHR-4+

Source : QE3\_201126\_FR\_TiOx\_hum\_tissue\_Urea\_RNAB\_B Scan : 22187

Andromeda score : 64.532

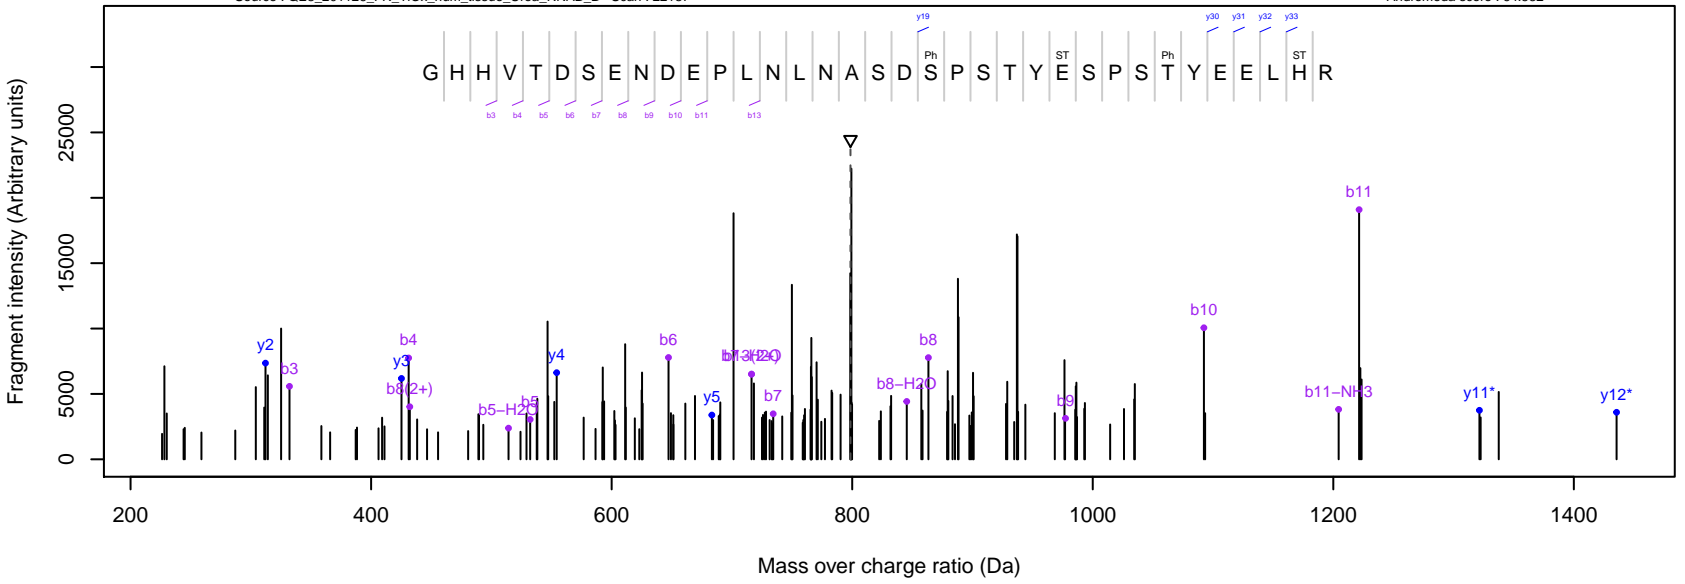

RFS(Phospho (STY))YSEAERESNR-3+

Source : QE3\_201126\_FR\_TiOx\_hum\_tissue\_Urea\_RNAB\_N Scan : 10826

Andromeda score : 64.52

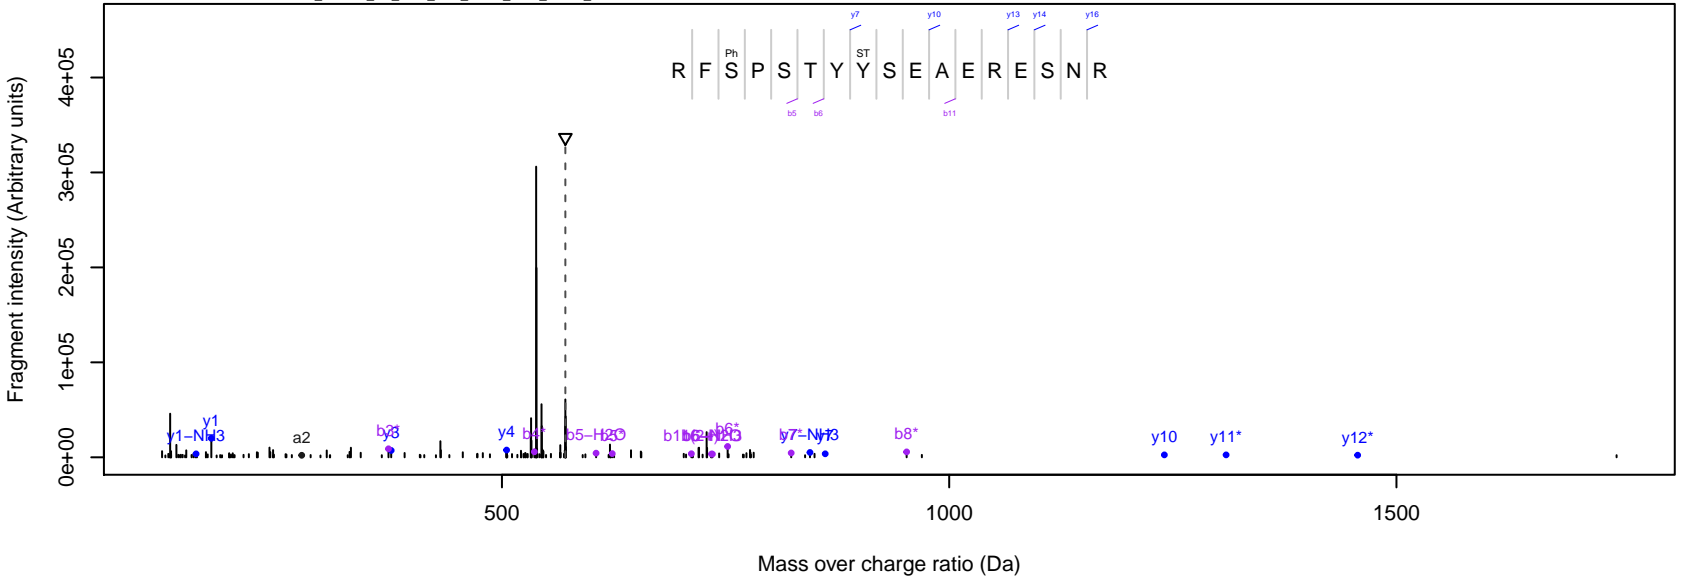

TSVATQCDPEEIIIVLS DSPSTYD-2+

Source : QE3\_201126\_FR\_TiOx\_hum\_tissue\_Urea\_RNAB\_B Scan : 55686

Andromeda score : 64.52

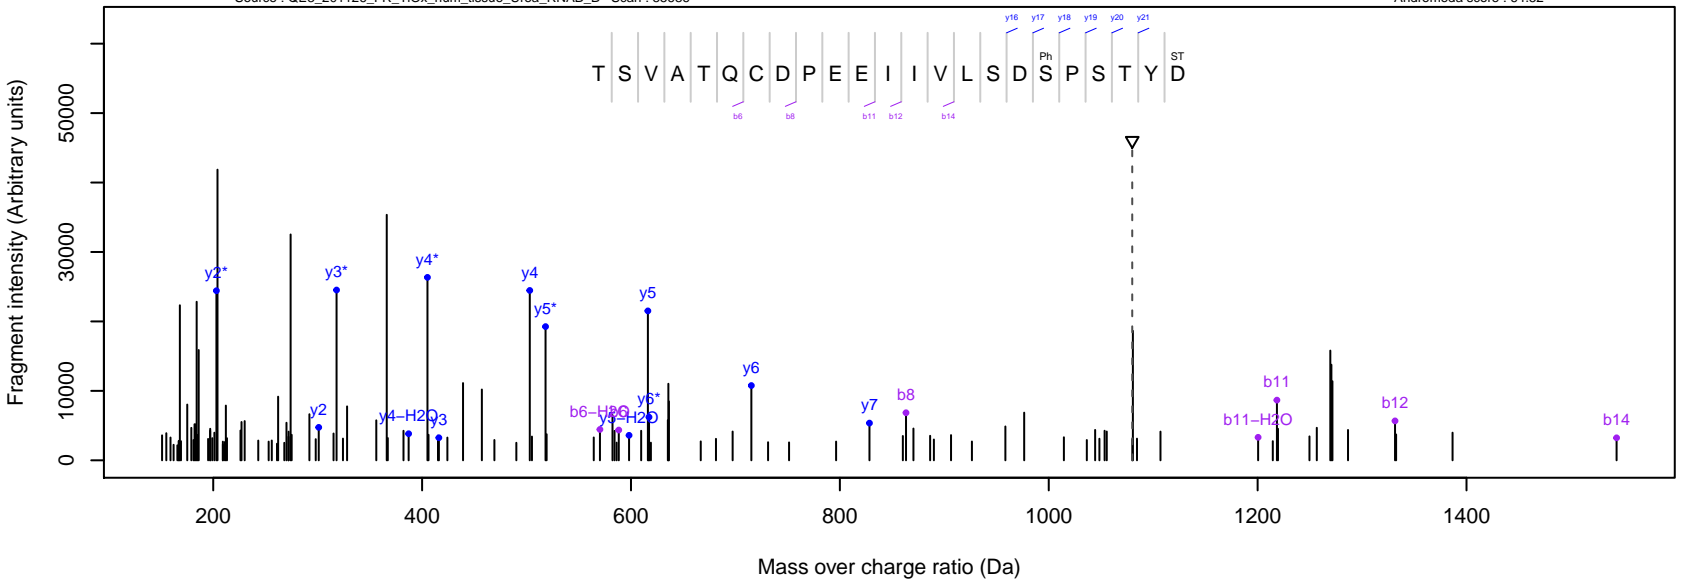

KLS(Phospho (STY))LRPTVAELQAR-3+

Source : QE3\_201126\_FR\_TiOx\_hum\_tissue\_Urea\_RNAB\_B Scan : 23636

Andromeda score : 64.507

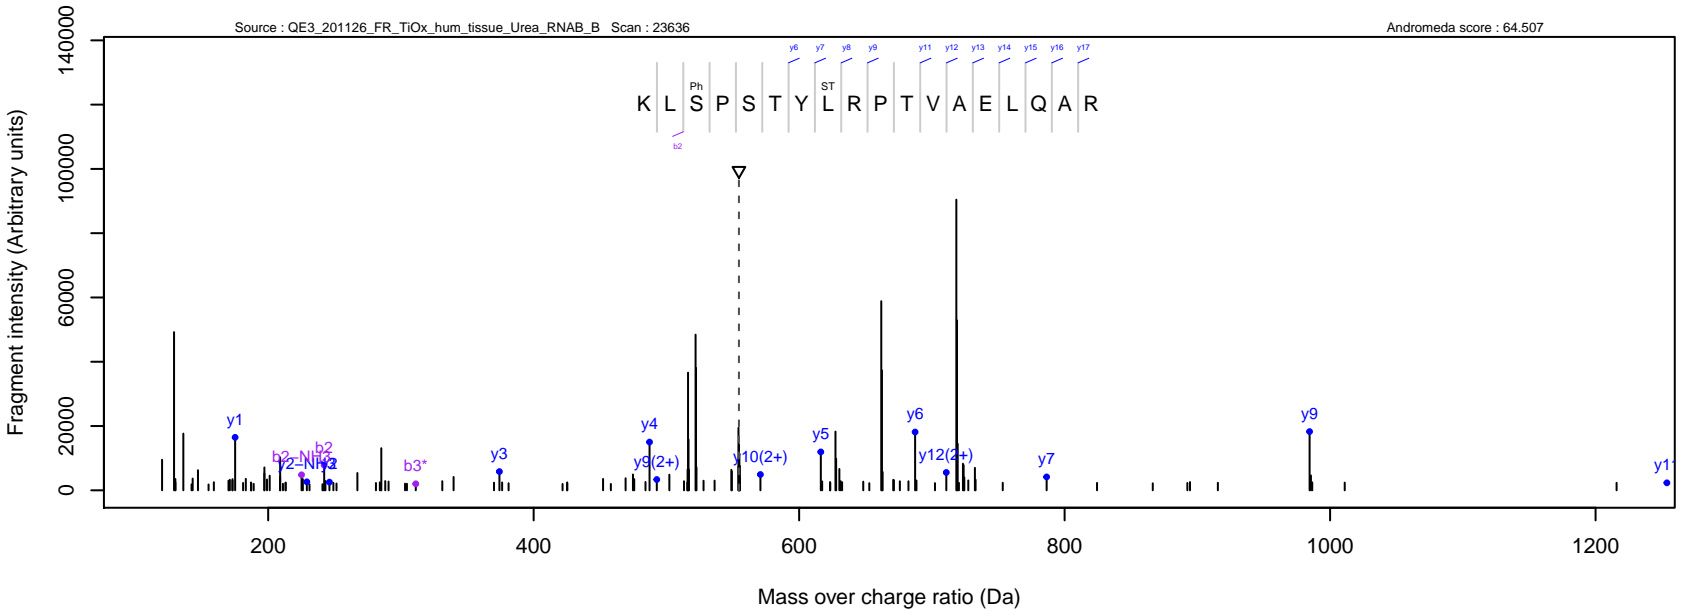

NLETLPS(Phospho (STY))FS(Phospho (STY))SDEEDSVAK-2+

Source : QE3\_201126\_FR\_TiOx\_hum\_tissue\_Urea\_RNAB\_H Scan : 51883

Andromeda score : 64.507

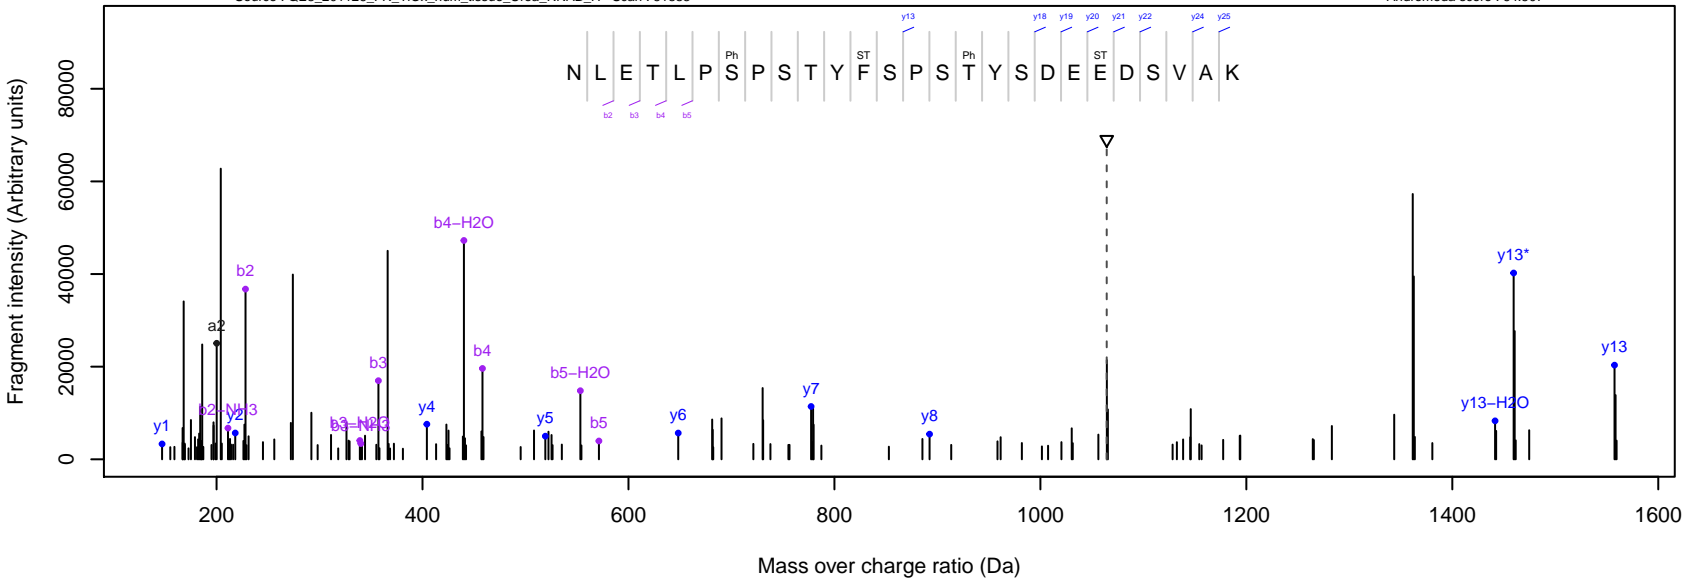

RKQSS(Phospho (STY))SEISLAVER-3+

Source : QE3\_201126\_FR\_TiOx\_hum\_tissue\_Urea\_RNAB\_N Scan : 13037

Andromeda score : 64.507

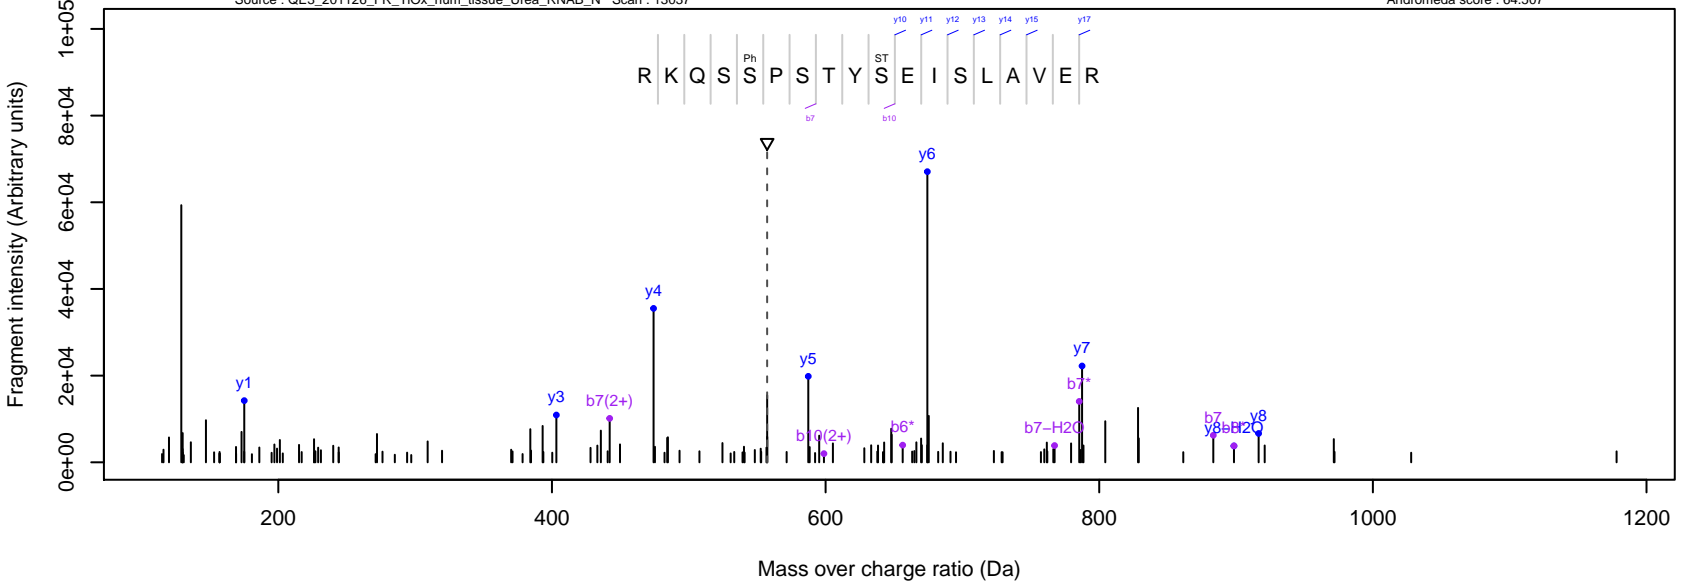

IHDLEDDLEMS(Phospho (STY))S(Phospho (STY))DAS(Phospho (STY))DASGEEGRVPK-3+

Source : QE3\_201126\_FR\_TiOx\_hum\_tissue\_Urea\_RNAB\_N Scan : 38711

Andromeda score : 64.488

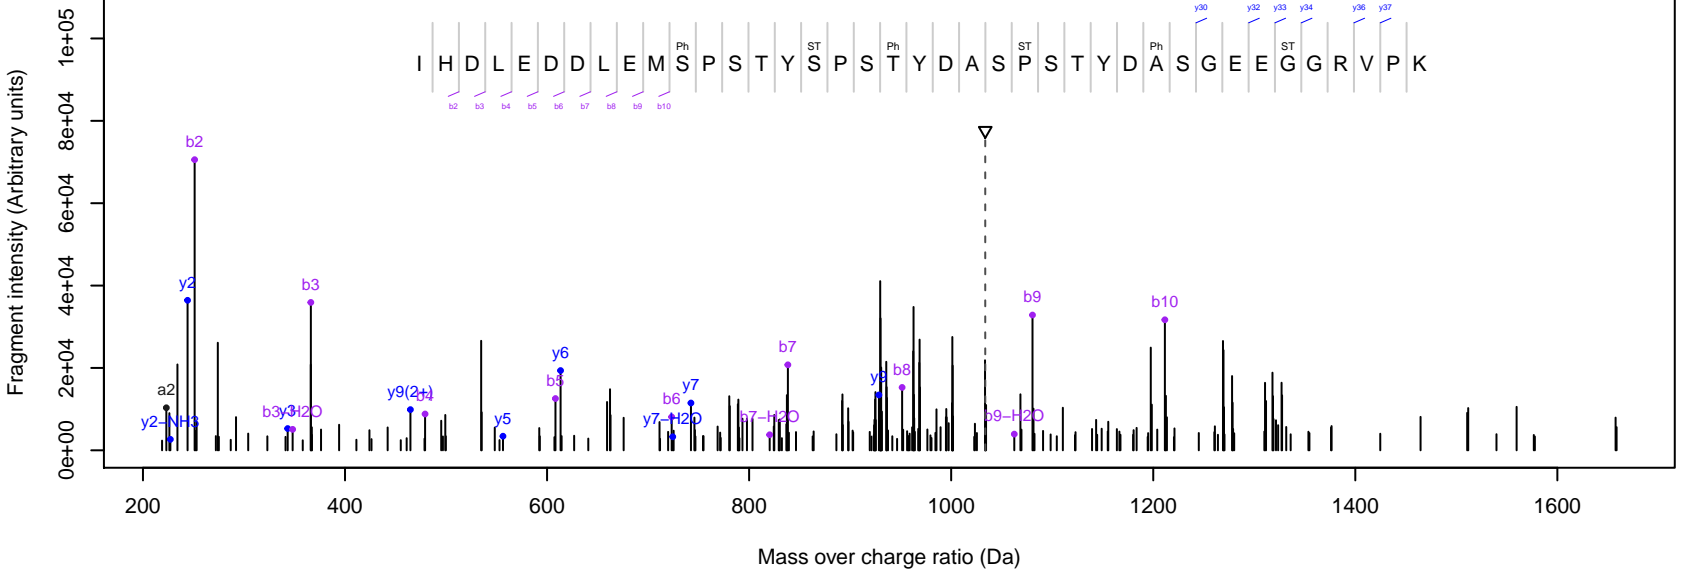

NSTPS(Phospho (STY))EPGS(Phospho (STY))GRGPPQEEEEEEEEEEATKEDAEAPGIR-4+

Source : QE3\_201126\_FR\_TiOx\_hum\_tissue\_Urea\_RNAB\_N Scan : 27072

Andromeda score : 64.474

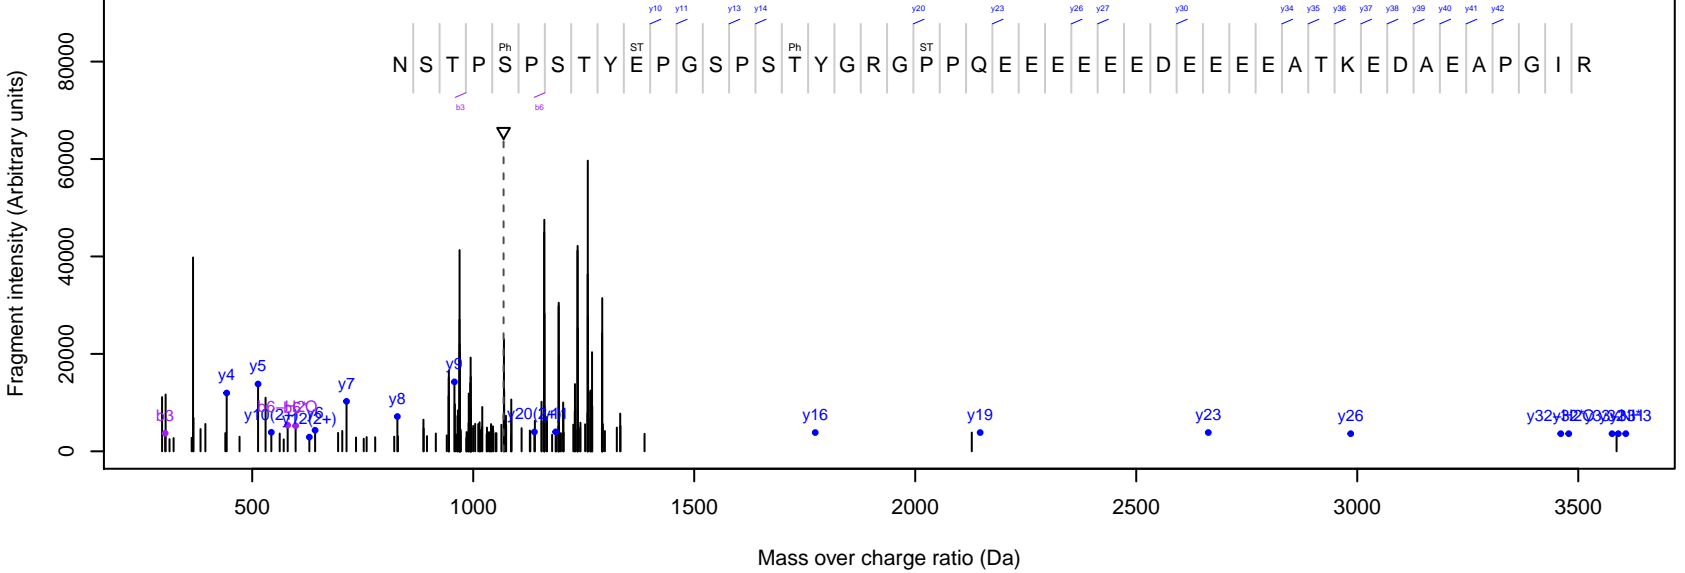

TM(Oxidation (M))LLLS(Phospho (STY))RSPEAQPK-3+

Source : QE3\_201126\_FR\_TiOx\_hum\_tissue\_Urea\_RNAB\_B Scan : 18744

Andromeda score : 64.454

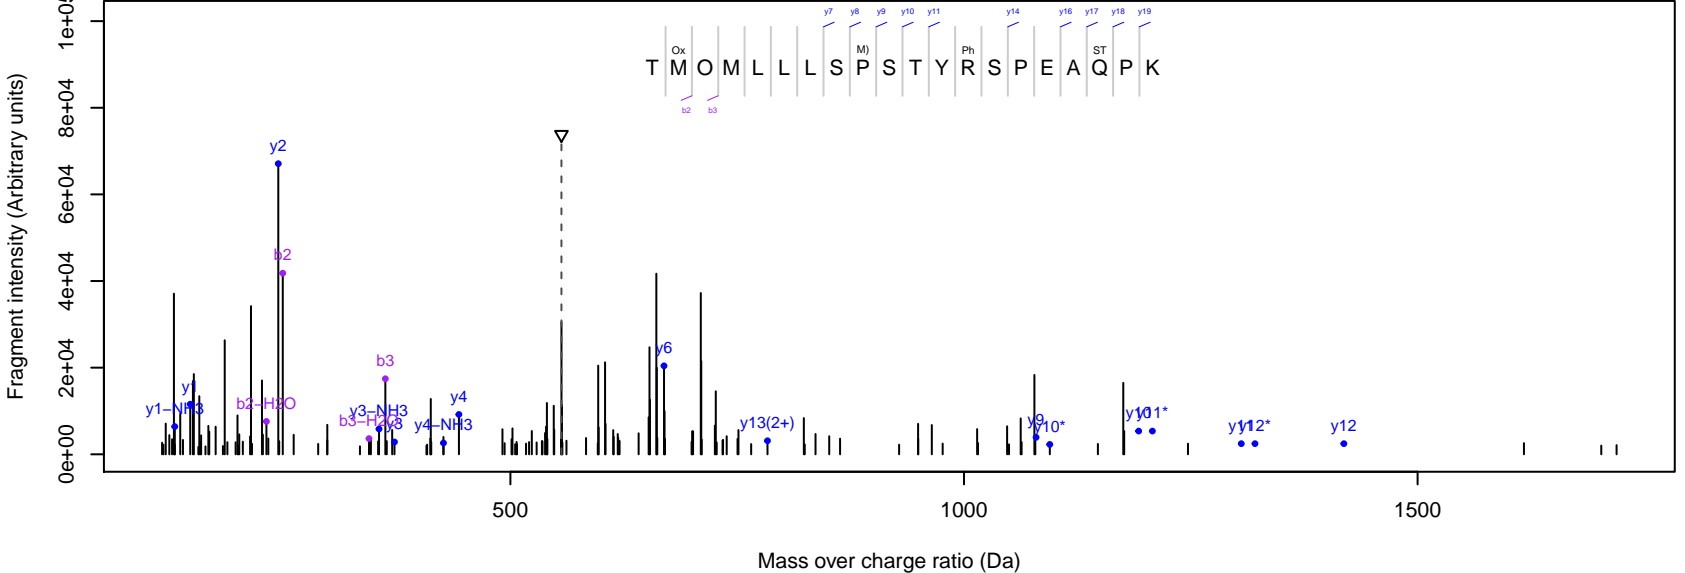

(Acetyl (Protein N-term))MDDPDCDS(Phospho (STY))TWEEDDEEDAEDAEDCEDGEEAAGAR-3+

Source : QE3\_201126\_FR\_TiOx\_hum\_tissue\_Urea\_RNAB\_H Scan : 54594

Andromeda score : 64.39

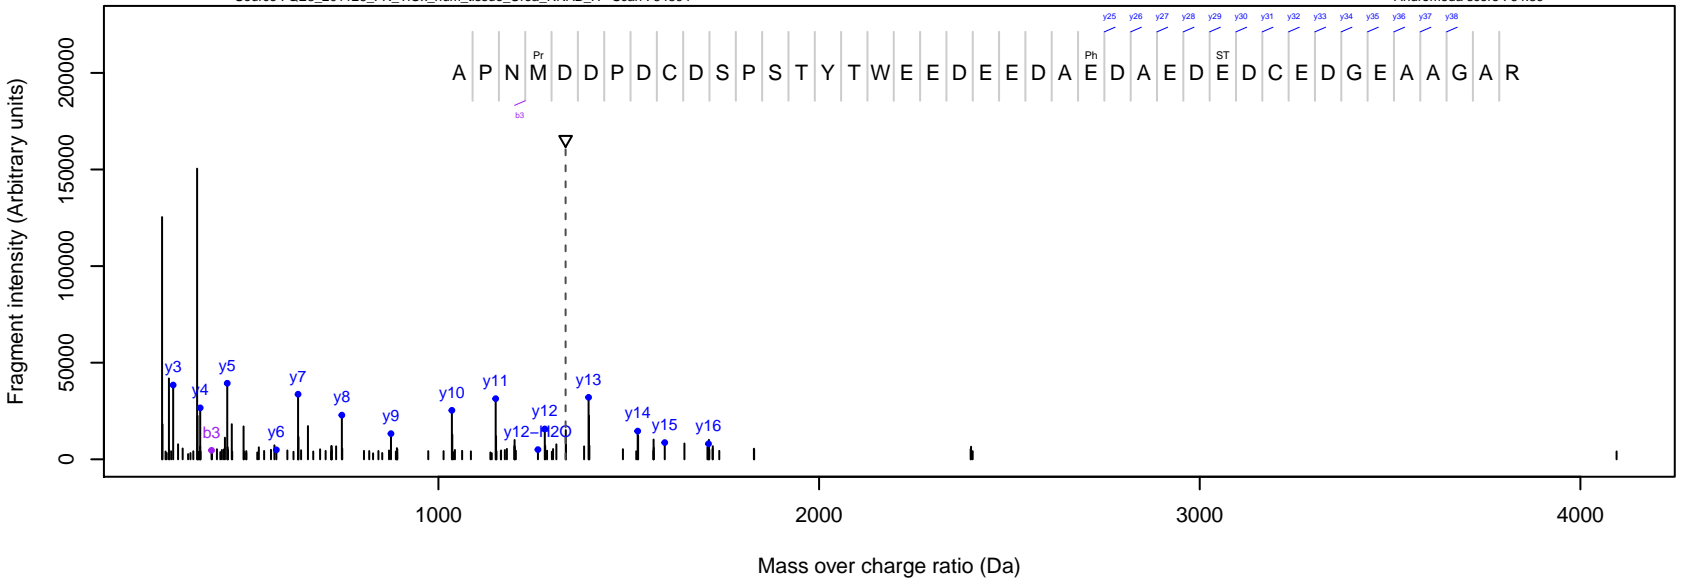

SSSSLLASPGHISVKEPTPS(Phospho (STY))IAS(Phospho (STY))DIS(Phospho (STY))LPIATQELR-3+

Source : QE3\_201126\_FR\_TiOx\_hum\_tissue\_Urea\_RNAB\_H Scan : 56533

Andromeda score : 64.384

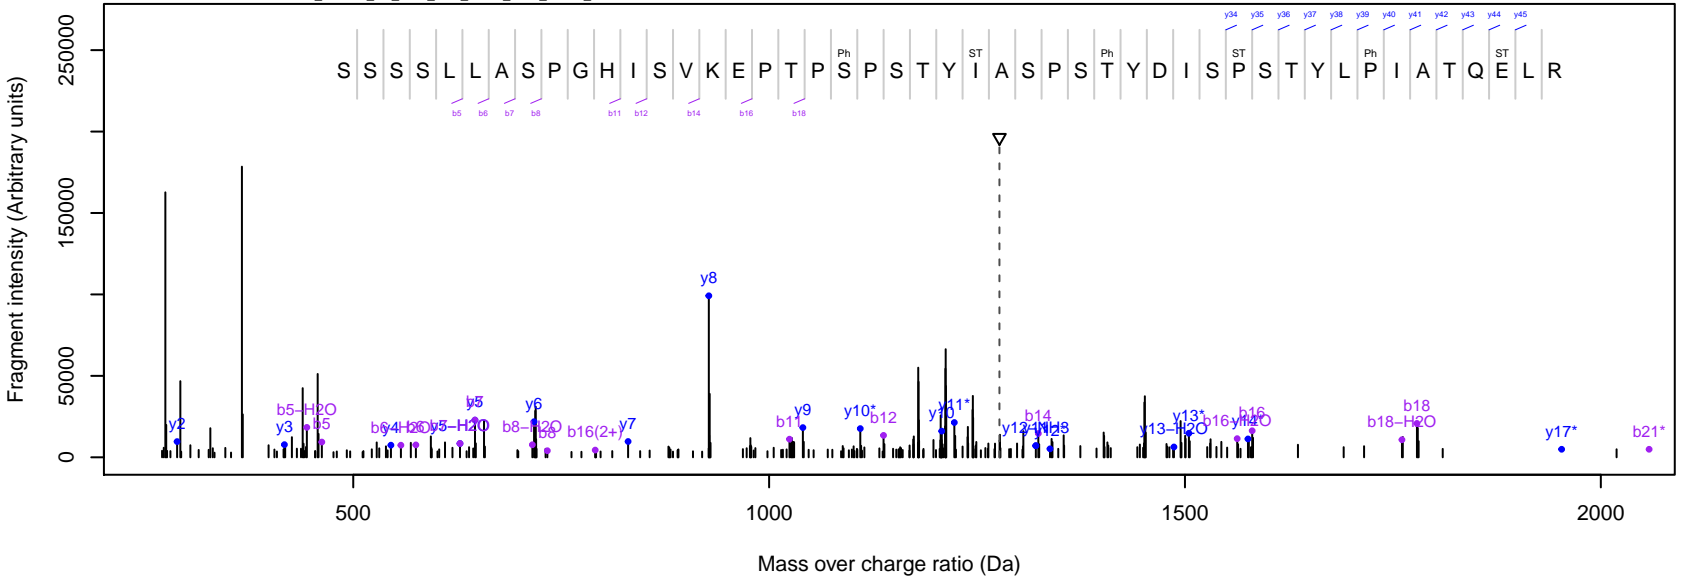

LTRIPS(Phospho (STY))AK-2+

Source : QE3\_201126\_FR\_TiOx\_hum\_tissue\_Urea\_RNAB\_B Scan : 8050

Andromeda score : 64.374

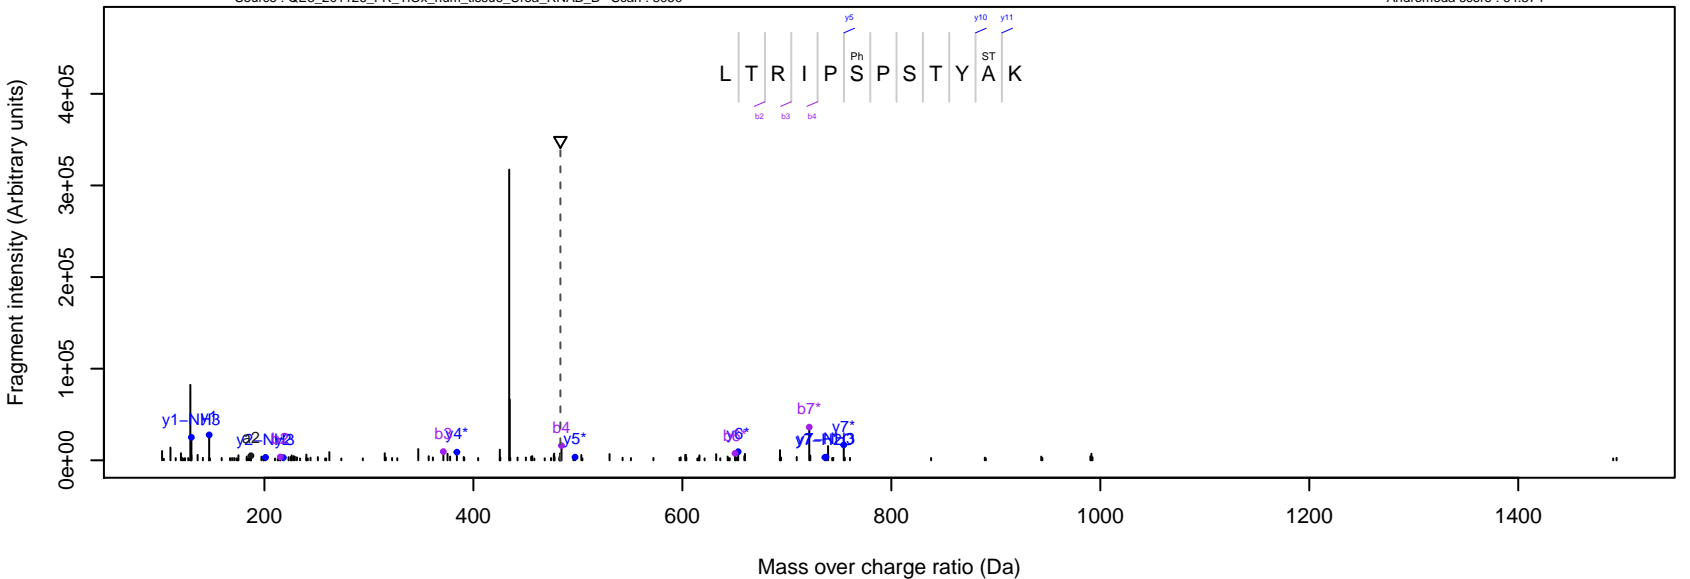

S(Phospho (STY))GGDLTLGLEPSEEEAPR-2+

Source : QE3\_201126\_FR\_TiOx\_hum\_tissue\_Urea\_RNAB\_H Scan : 39630

Andromeda score : 64.327

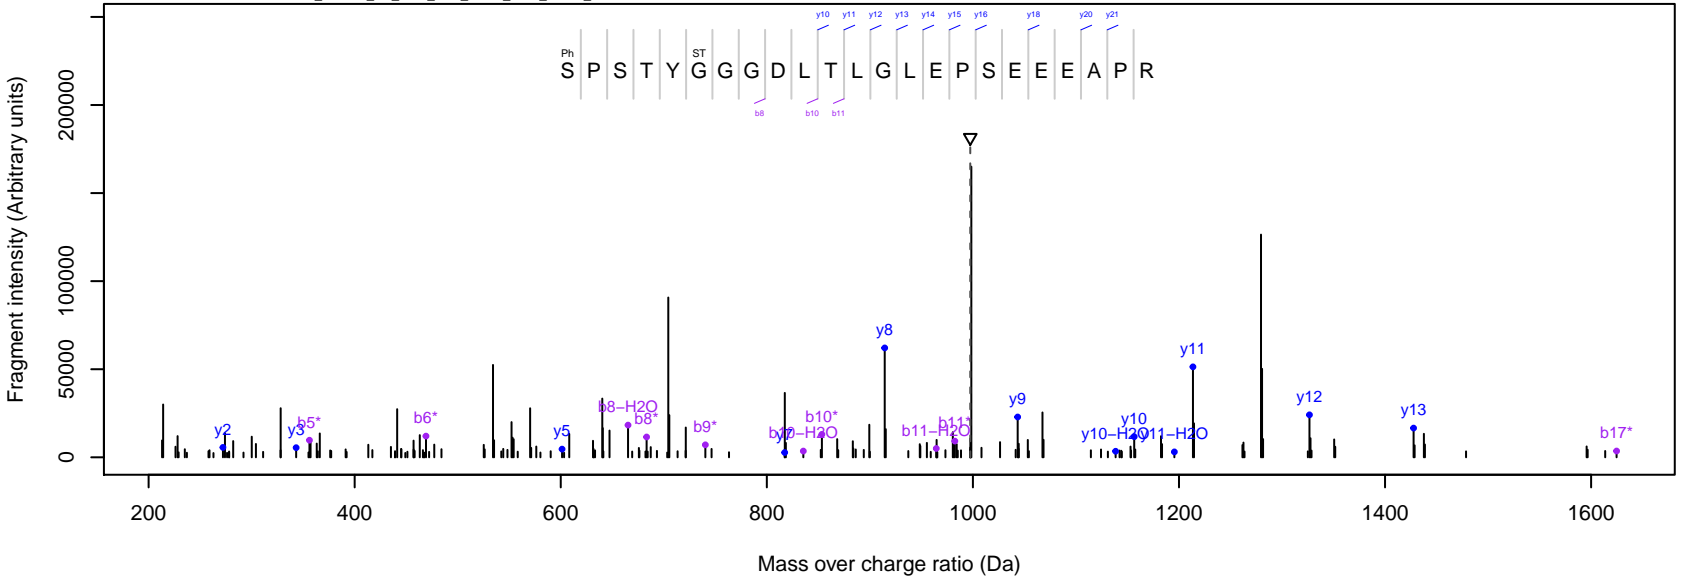

STSAPQMS(Phospho (STY))PGSSDNQSSSPQAQQK-3+

Source : QE3\_201126\_FR\_TiOx\_hum\_tissue\_Urea\_RNAB\_B Scan : 13019

Andromeda score : 64.318

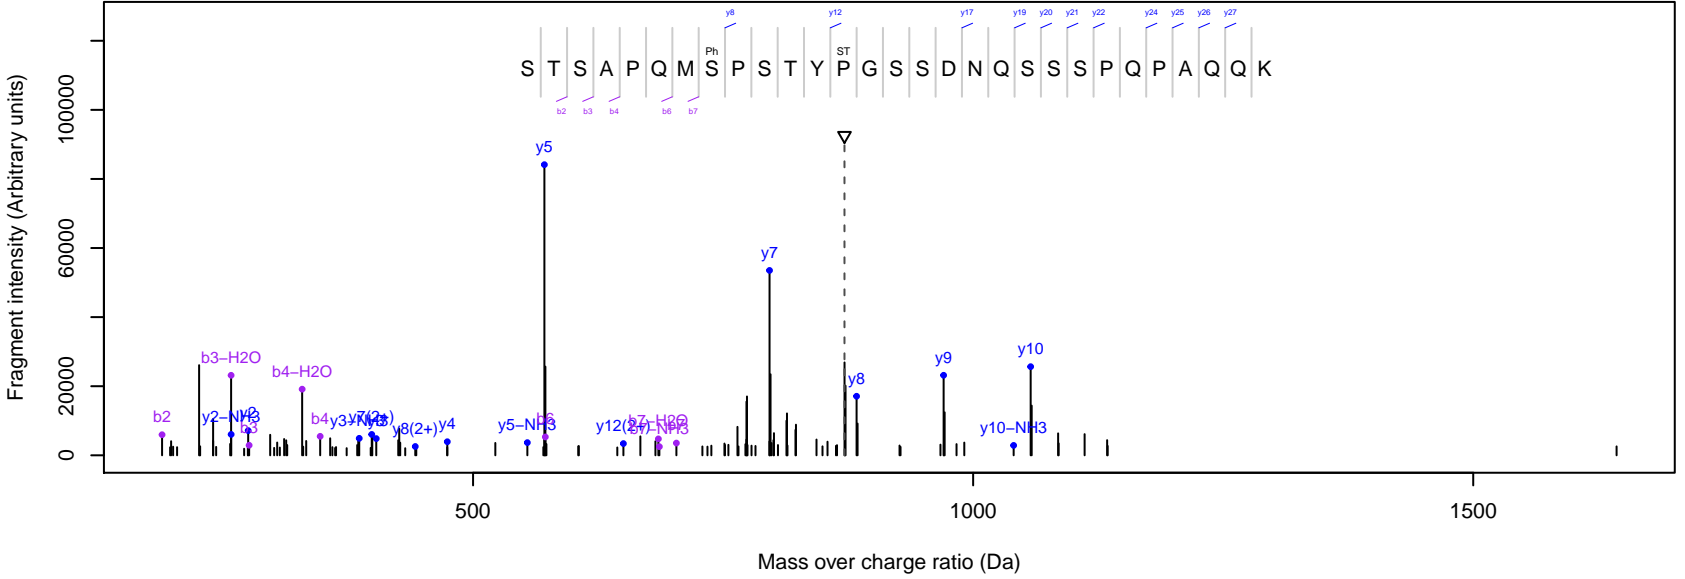

LAPVPS(Phospho (STY))PEPQKPAVPS(Phospho (STY))PESVK-3+

Source : QE3\_201126\_FR\_TiOx\_hum\_tissue\_Urea\_RNAB\_H Scan : 27671

Andromeda score : 64.315

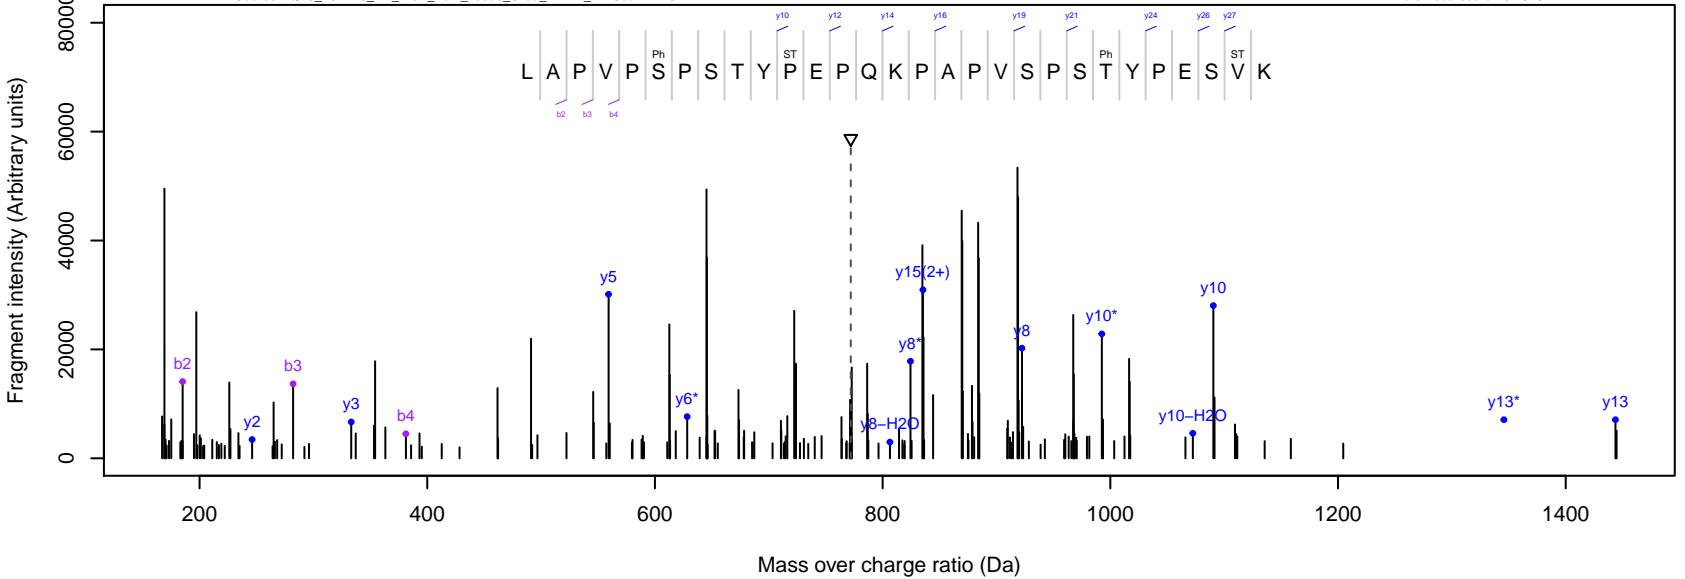

PEEMDKPLISLHLVDS(Phospho (STY))DS(Phospho (STY))SLAKVPDEAPK-3+

Source : QE3\_201126\_FR\_TIOx\_hum\_tissue\_Urea\_RNAB\_N Scan : 47086

Andromeda score : 64.315

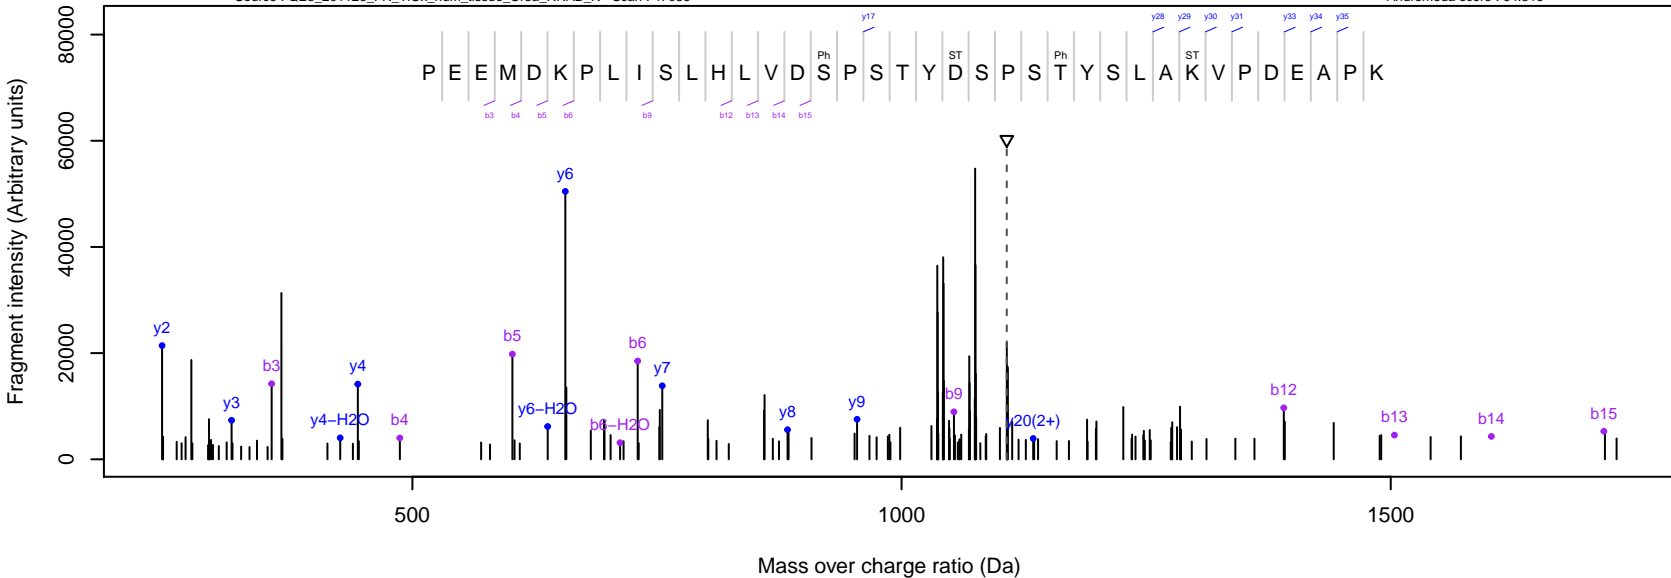

DM(Oxidation (M))S(Phospho (STY))PLSETEMALGKDV(Phospho (STY))PPPETEVLIK-3+

Source : QE3\_201126\_FR\_TIOx\_hum\_tissue\_Urea\_RNAB\_N Scan : 58916

Andromeda score : 64.279

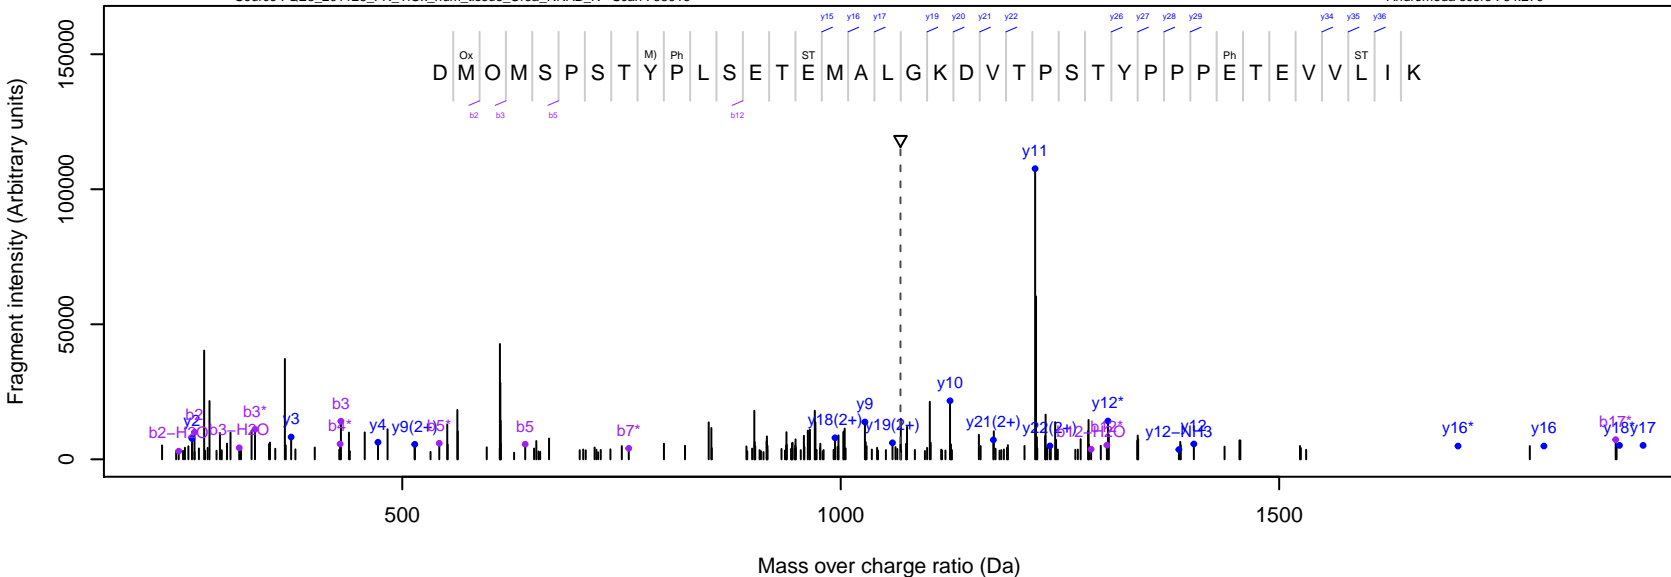

SQS(Phospho (STY))TTFNPDDM(Oxidation (M))SEPEFK-2+

Source : QE3\_201126\_FR\_TIOx\_hum\_tissue\_Urea\_RNAB\_N Scan : 29630

Andromeda score : 64.275

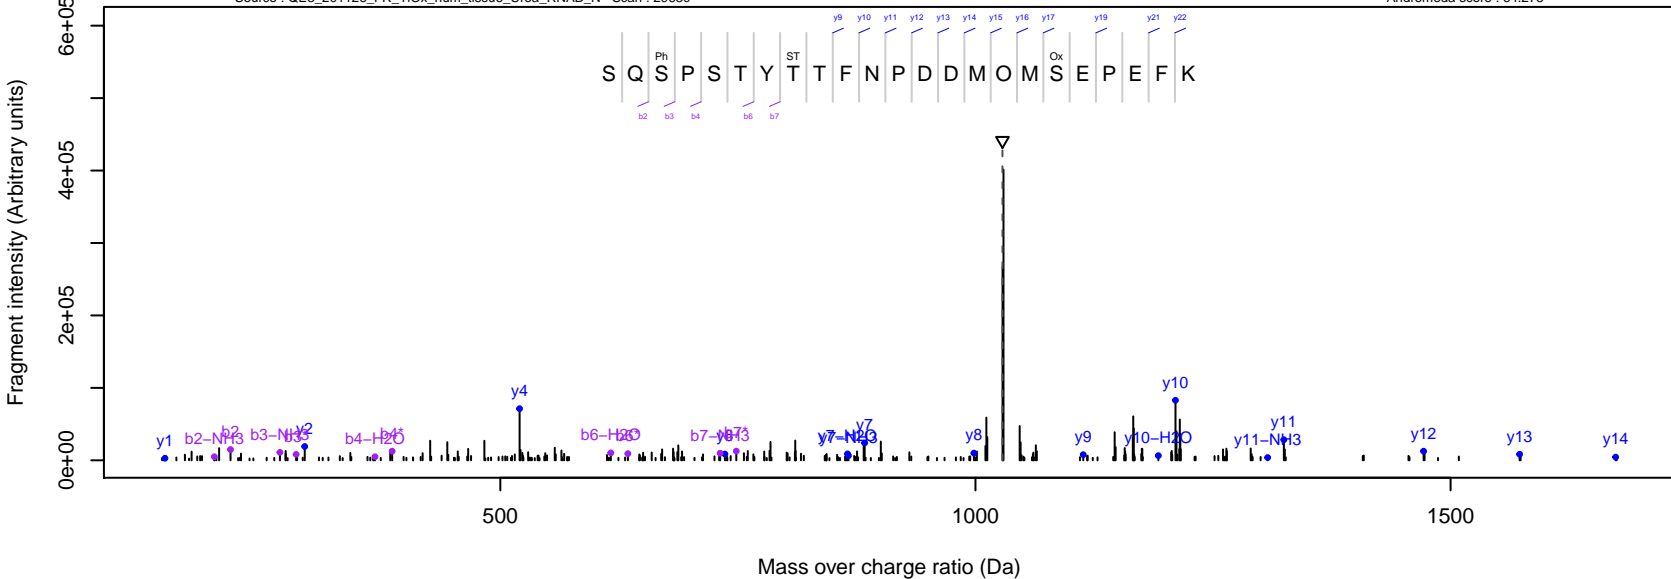

TLEEVMAEEEDGTRPGS(Phospho (STY))PA-3+

Source : QE3\_201126\_FR\_TiOx\_hum\_tissue\_Urea\_RNAB\_H Scan : 44523

Andromeda score : 64.27

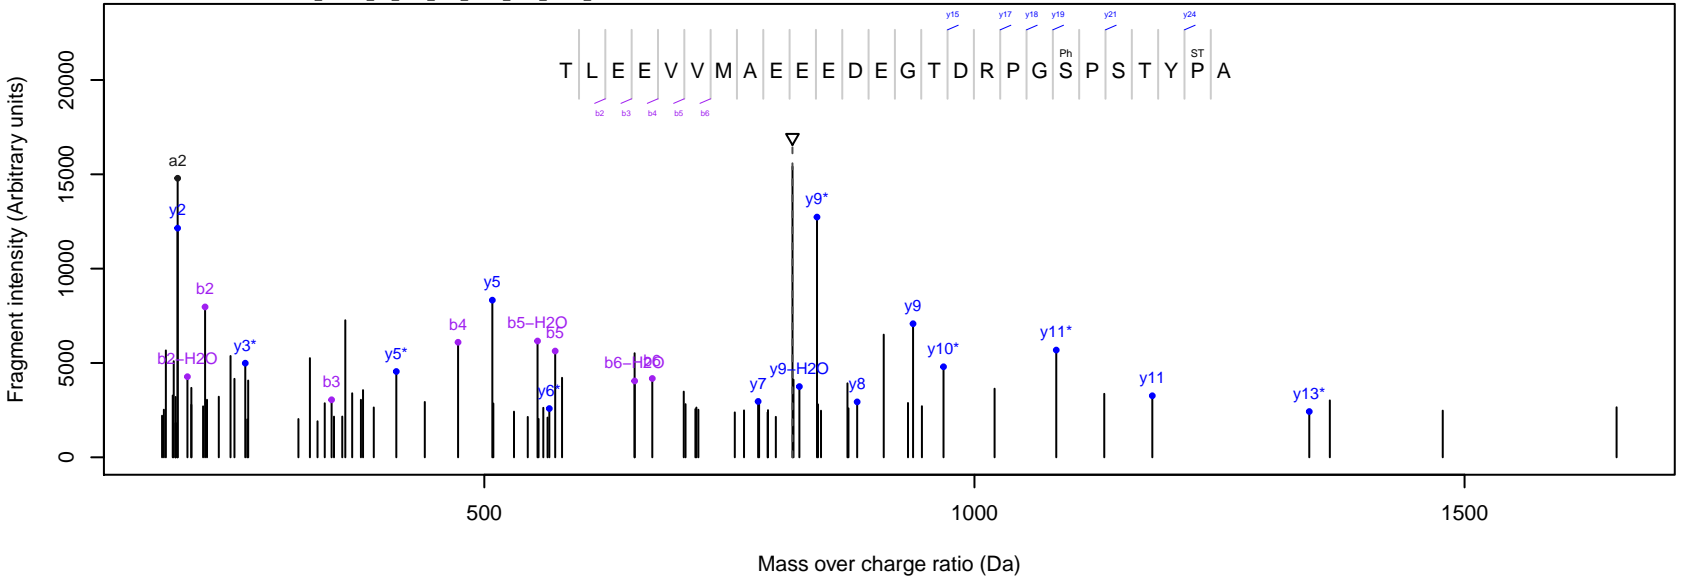

IPNYQLS(Phospho (STY))PTKLPSINK-3+

Source : QE3\_201126\_FR\_TiOx\_hum\_tissue\_Urea\_RNAB\_B Scan : 34489

Andromeda score : 64.249

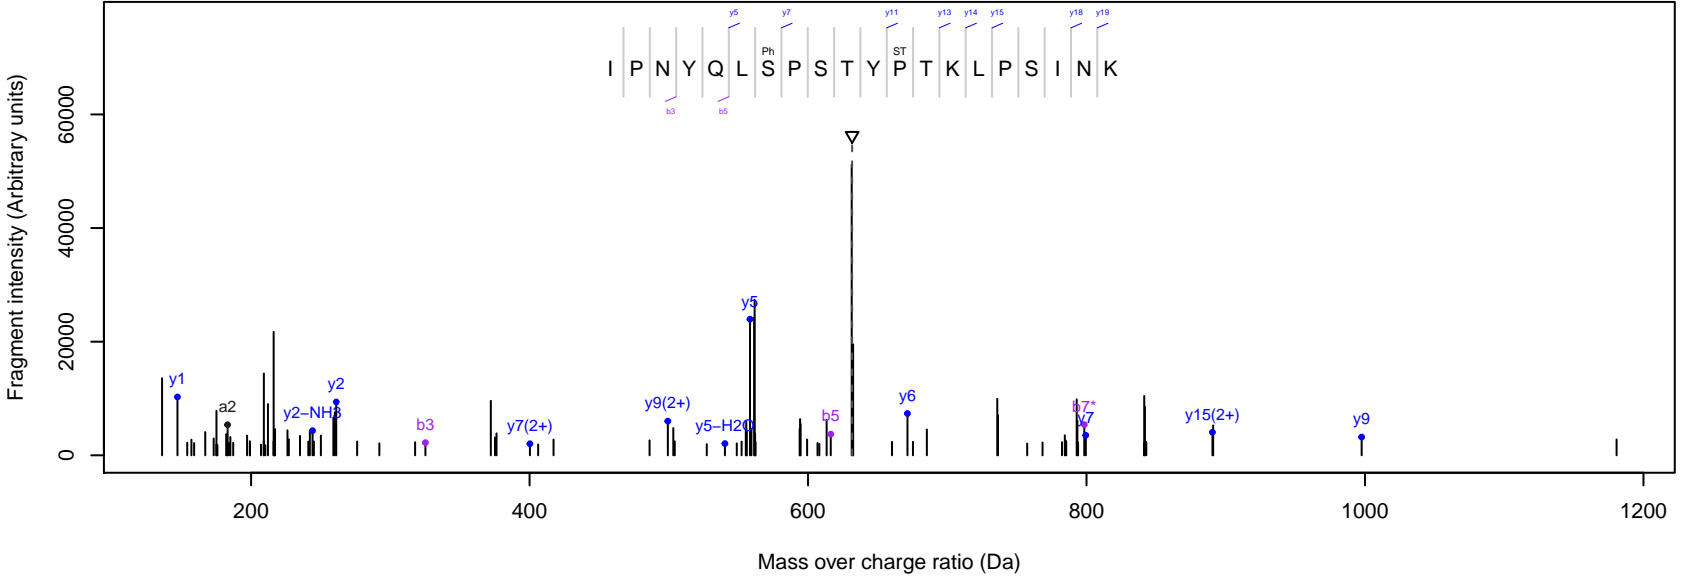

KQHLYLS(Phospho (STY))S(Phospho (STY))EPEDDNPDLVLSR-3+

Source : QE3\_201126\_FR\_TiOx\_hum\_tissue\_Urea\_RNAB\_B Scan : 26079

Andromeda score : 64.203

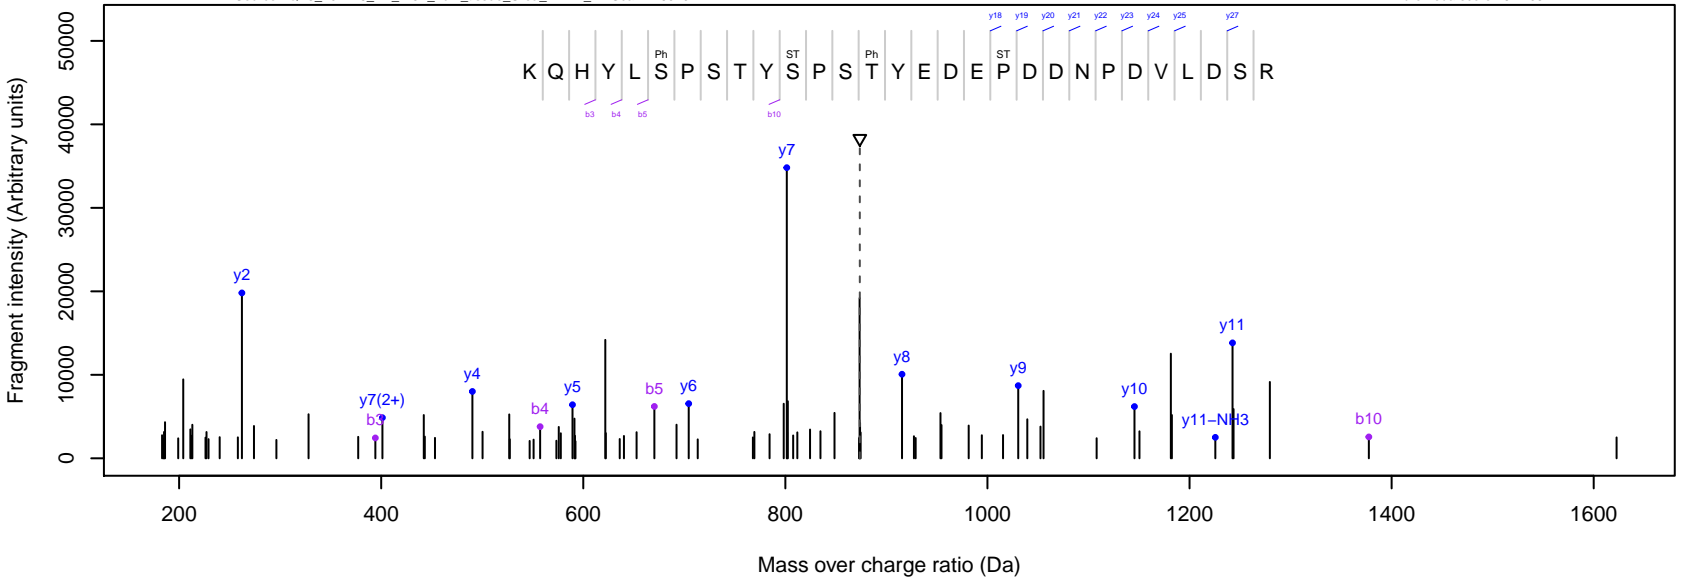

DGDSYDPYDFS(Phospho (STY))DTEEEM(Oxidation (M))PQVHT(Phospho (STY))PK-3+

Source : QE3\_201126\_FR\_TIOx\_hum\_tissue\_Urea\_RNAB\_N Scan : 40504

Andromeda score : 64.152

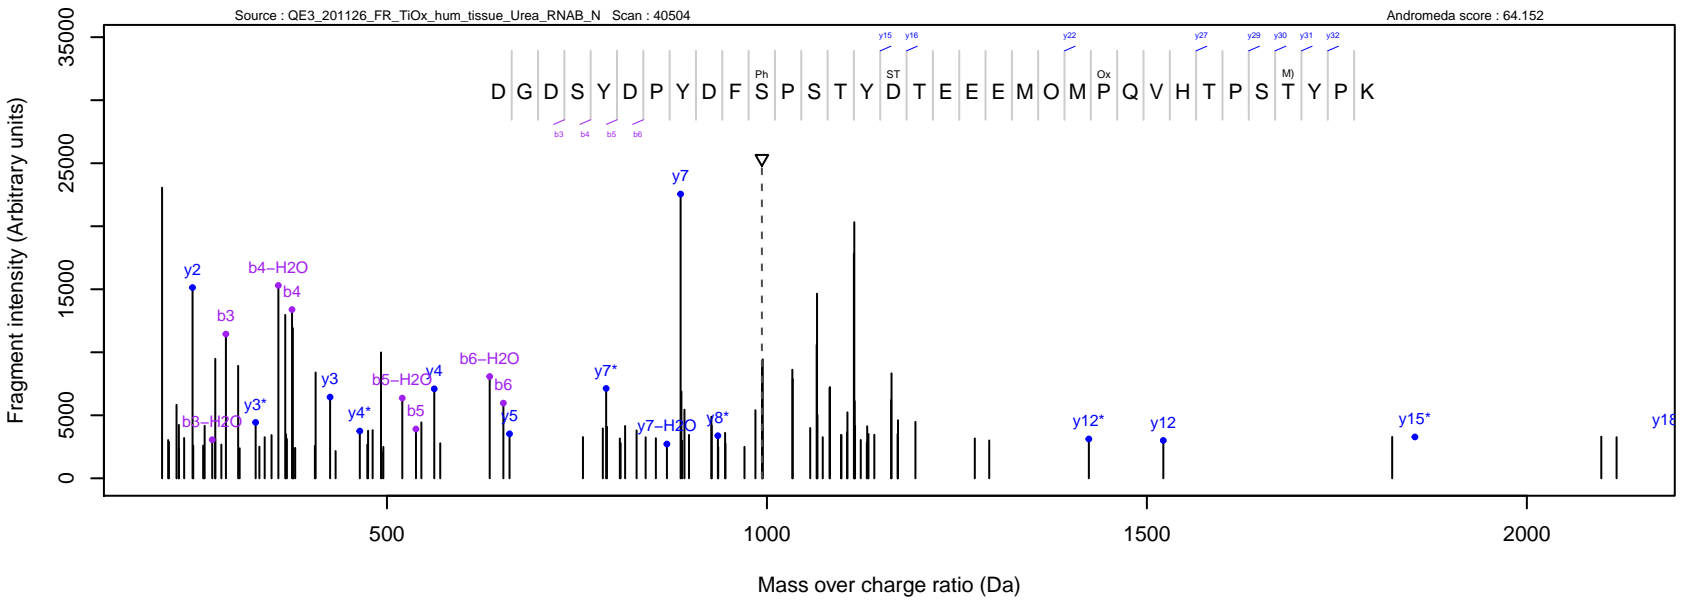

WPFSGKTS(Phospho (STY))PPCS(Phospho (STY))PANLSR-3+

Source : QE3\_201126\_FR\_TIOx\_hum\_tissue\_Urea\_RNAB\_N Scan : 39259

Andromeda score : 64.152

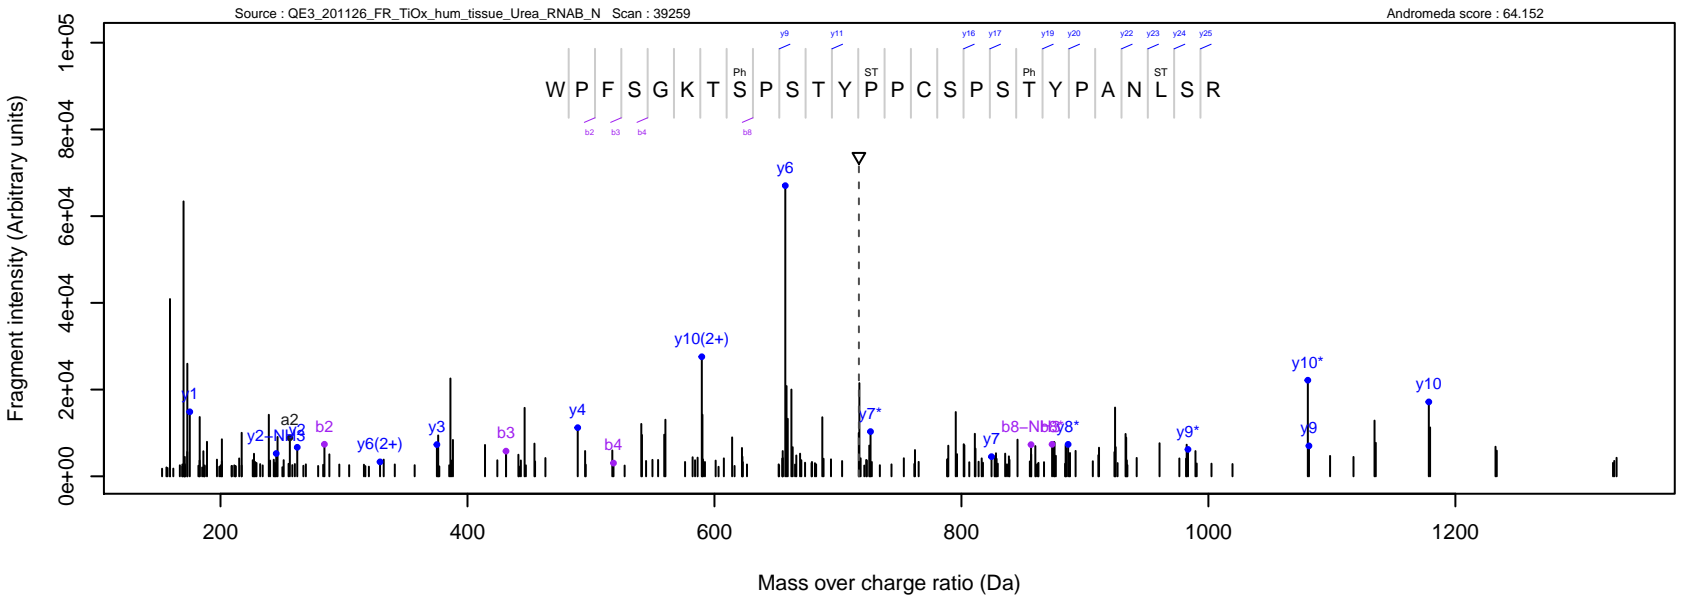

S(Phospho (STY))SLYYTGK-2+

Source : QE3\_201126\_FR\_TIOx\_hum\_tissue\_Urea\_RNAB\_N Scan : 31790

Andromeda score : 64.121

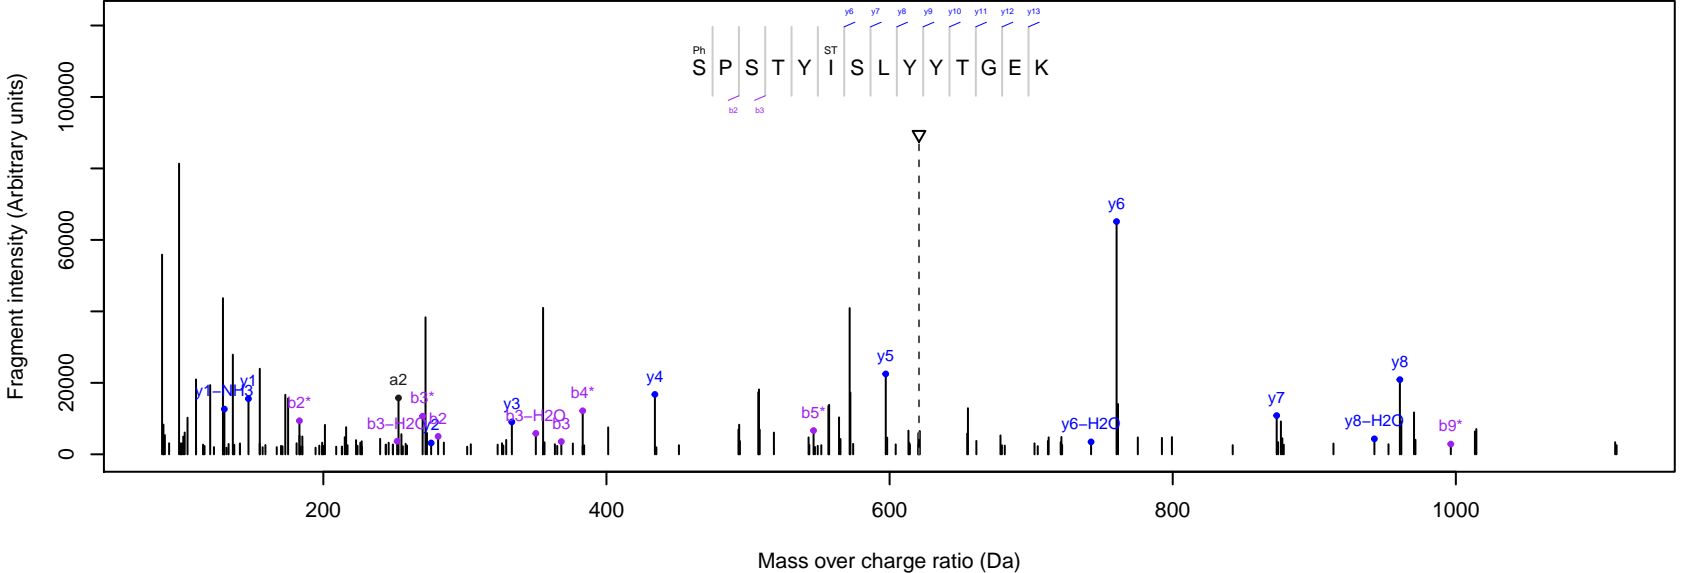



KEPEERPTFEYLQAFLEDYFTSTEPQY(Phospho (STY))QPGENL-4+

Source : QE3\_201126\_FR\_TiOx\_hum\_tissue\_Urea\_RNAB\_N Scan : 62809

Andromeda score : 64.096

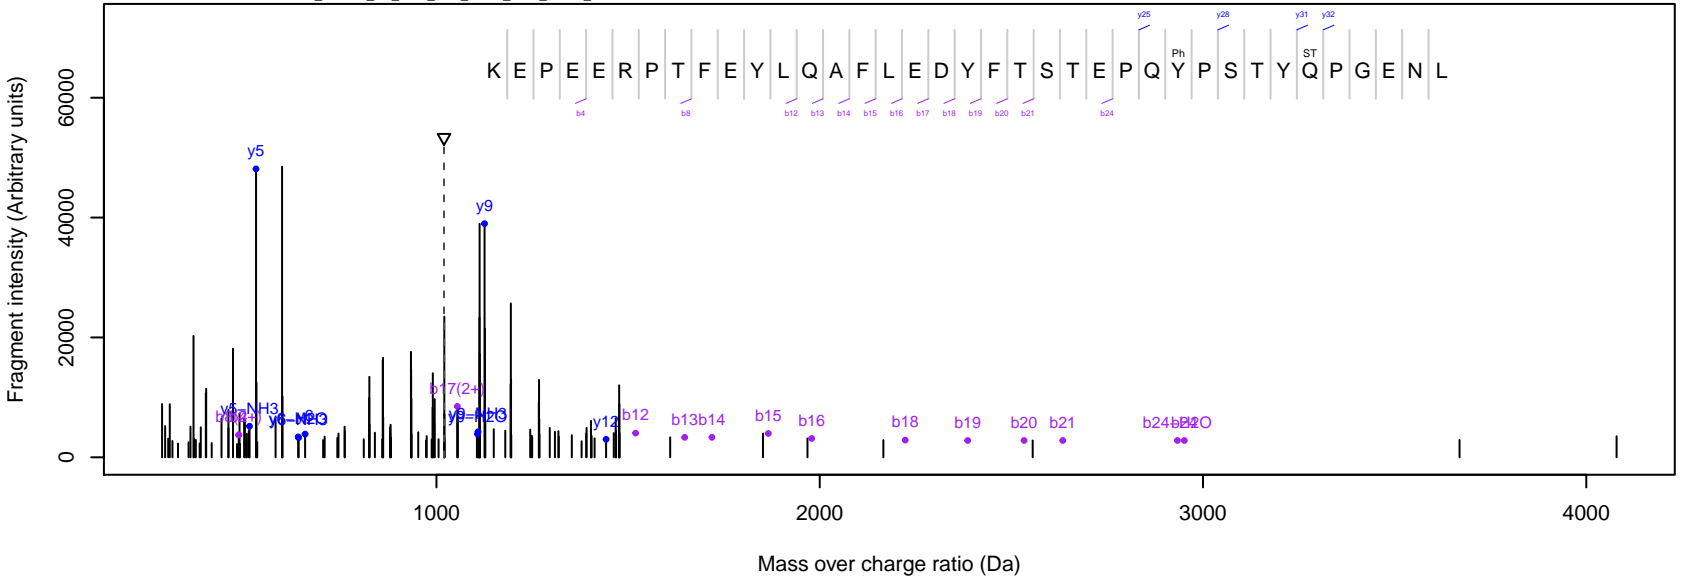

IGEGTY(Phospho (STY))GVVYK-2+

Source : QE3\_201126\_FR\_TiOx\_hum\_tissue\_Urea\_RNAB\_H Scan : 21473

Andromeda score : 64.04

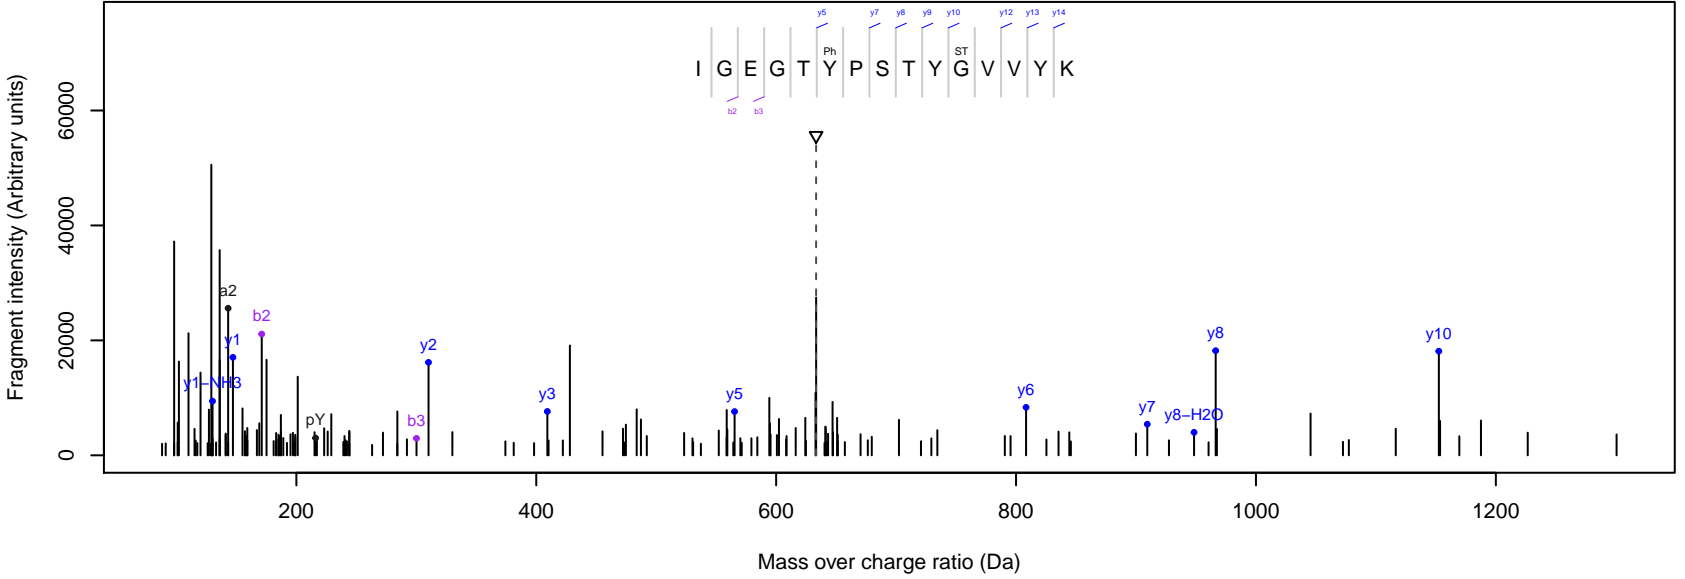

AVT(Phospho (STY))KRSPEAPQPVIAMEEPAVPAPLPK-4+

Source : QE3\_201126\_FR\_TiOx\_hum\_tissue\_Urea\_RNAB\_N Scan : 35367

Andromeda score : 64.035

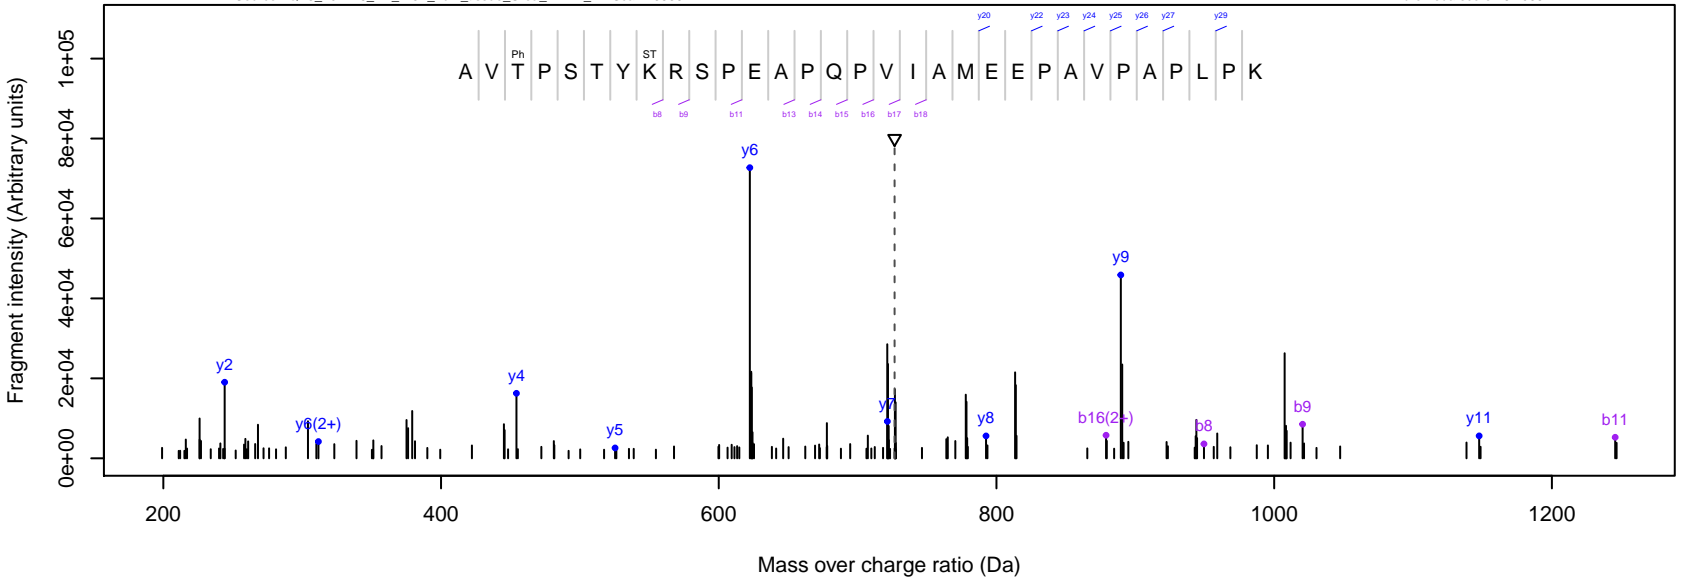

S(Phospho (STY))QSVPASTGLGWGSGLVAPLQEGSIDSTLAGTQDTR-3+

Source : QE3\_201126\_FR\_TiOx\_hum\_tissue\_Urea\_RNAB\_H Scan : 59733

Andromeda score : 64.017

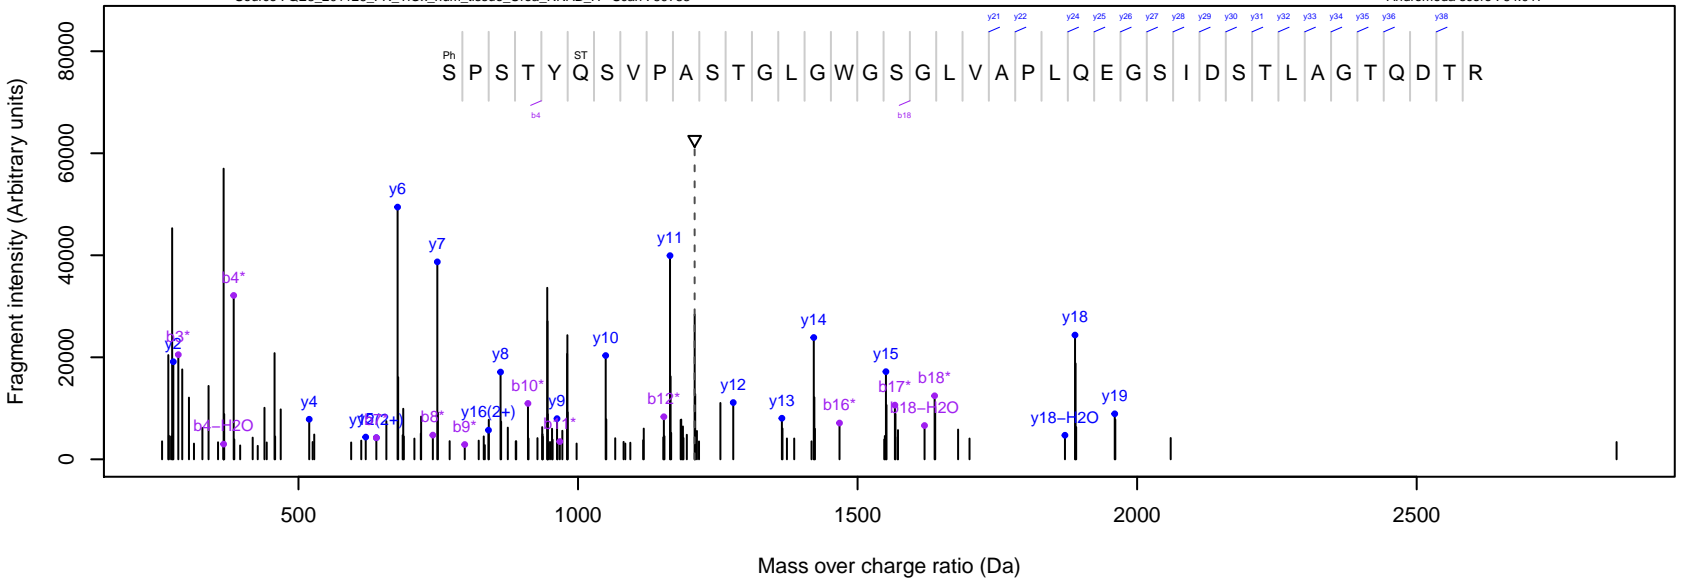

KVQIPVSRPDEPVS(Phospho (STY))DNEEDSYDEEIHDP-4+

Source : QE3\_201126\_FR\_TiOx\_hum\_tissue\_Urea\_RNAB\_N Scan : 25636

Andromeda score : 63.97

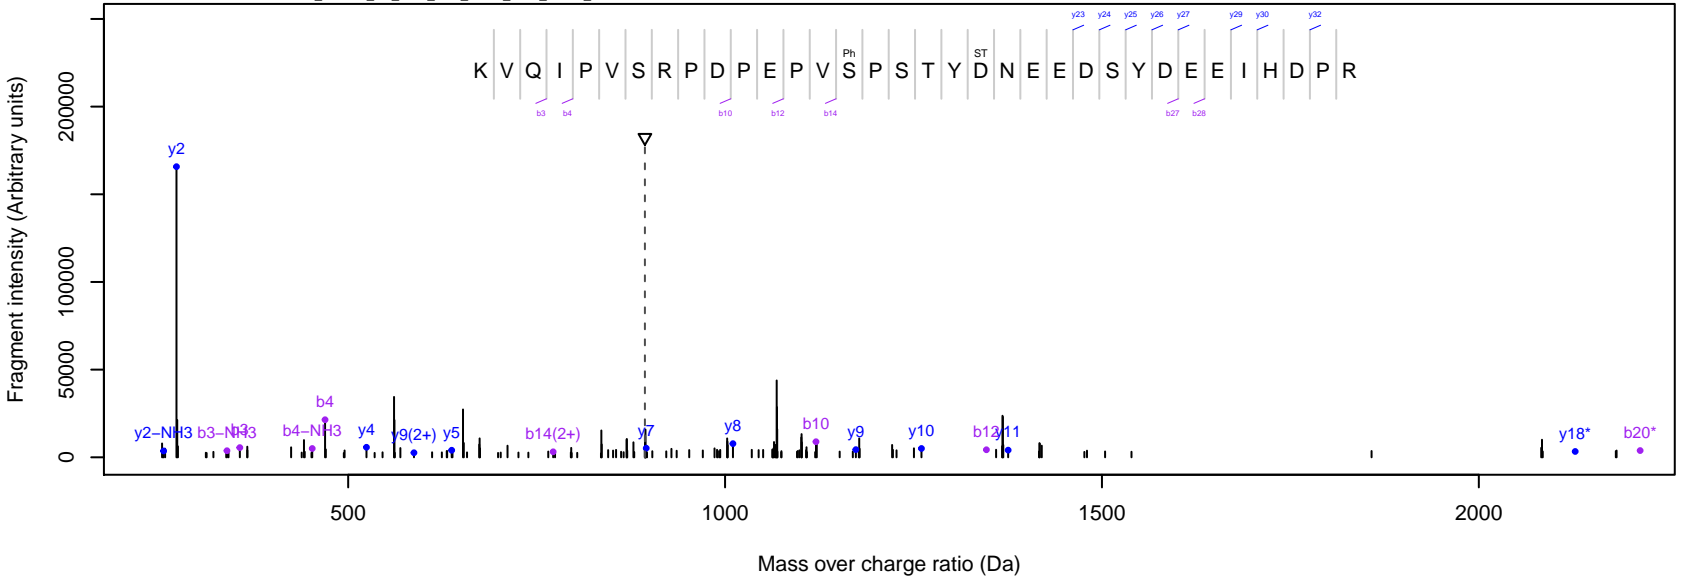

NFS(Phospho (STY))AAKS(Phospho (STY))LLK-2+

Source : QE3\_201126\_FR\_TiOx\_hum\_tissue\_Urea\_RNAB\_N Scan : 33503

Andromeda score : 63.966

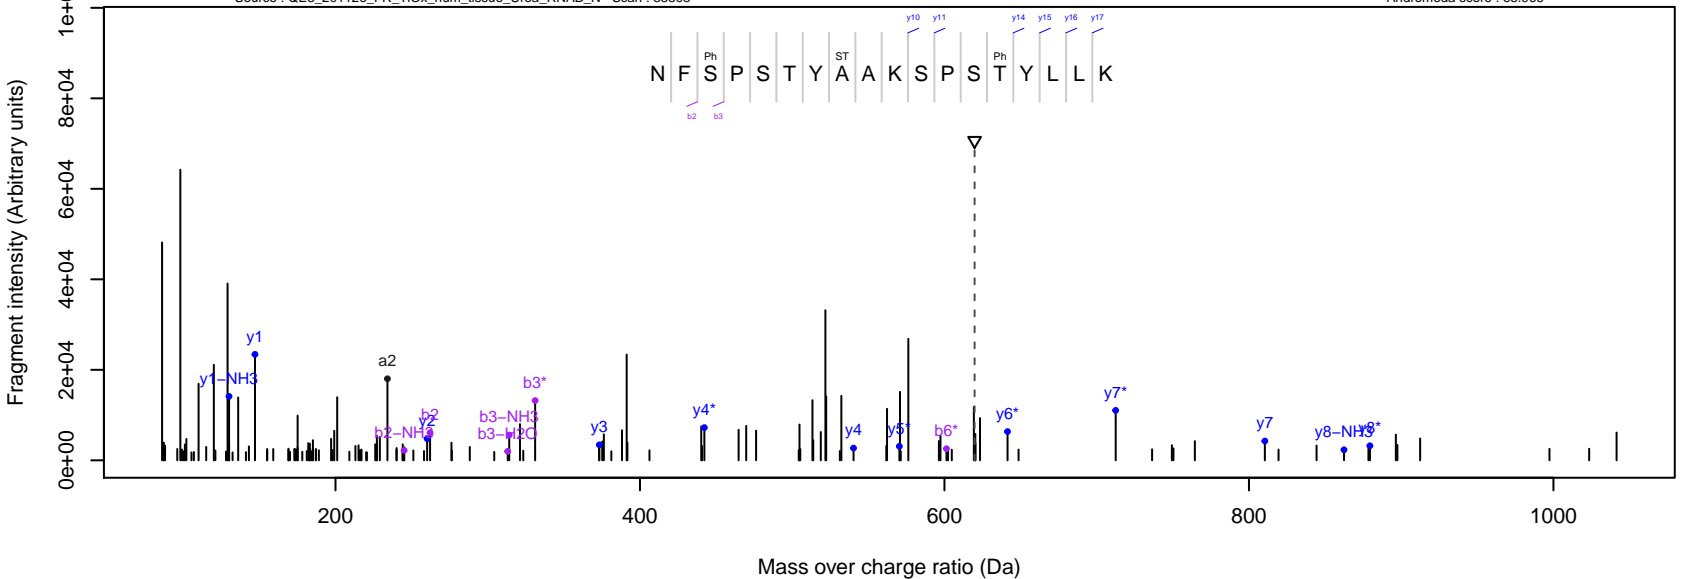

RPS(Phospho (STY))STALHQHHF-3+

Source : QE3\_201126\_FR\_TiOx\_hum\_tissue\_Urea\_RNAB\_H Scan : 7350

Andromeda score : 63.894

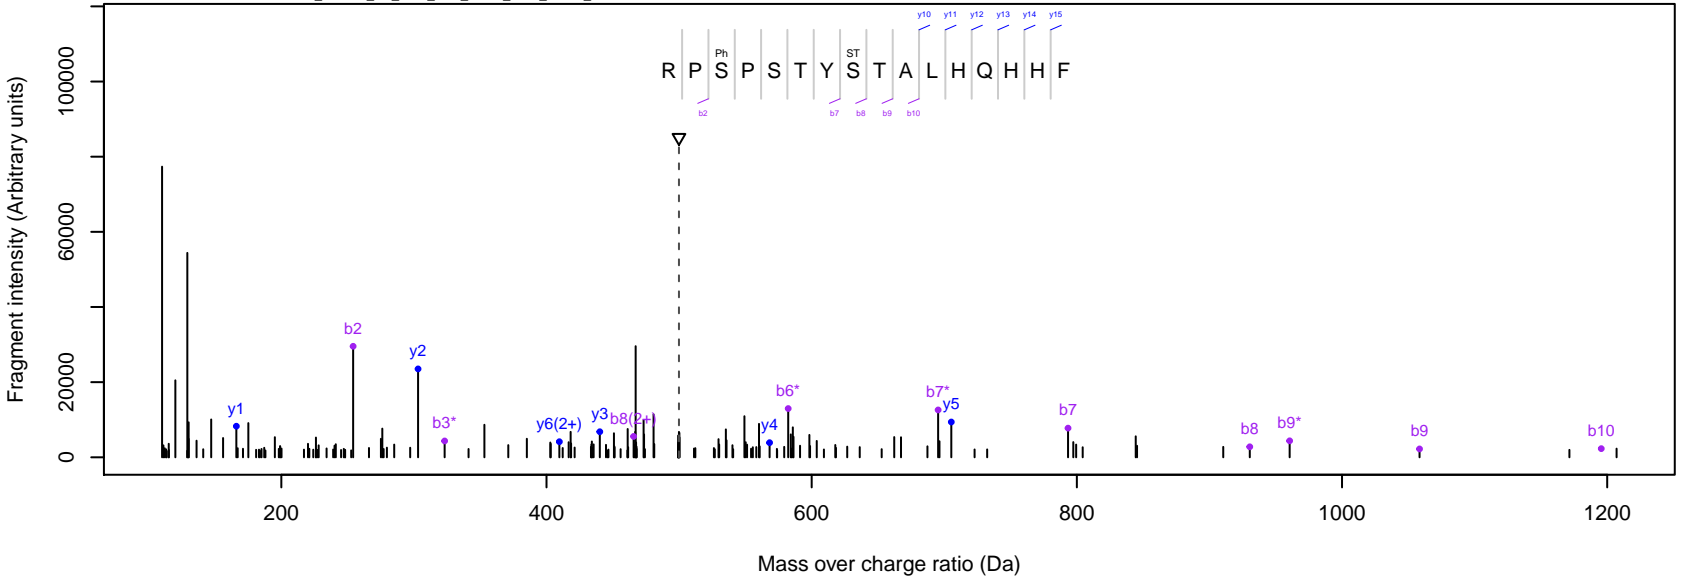

VEM(Oxidation (M))YSGS(Phospho (STY))DDDDDFNKLPKK-3+

Source : QE3\_201126\_FR\_TiOx\_hum\_tissue\_Urea\_RNAB\_H Scan : 17213

Andromeda score : 63.899

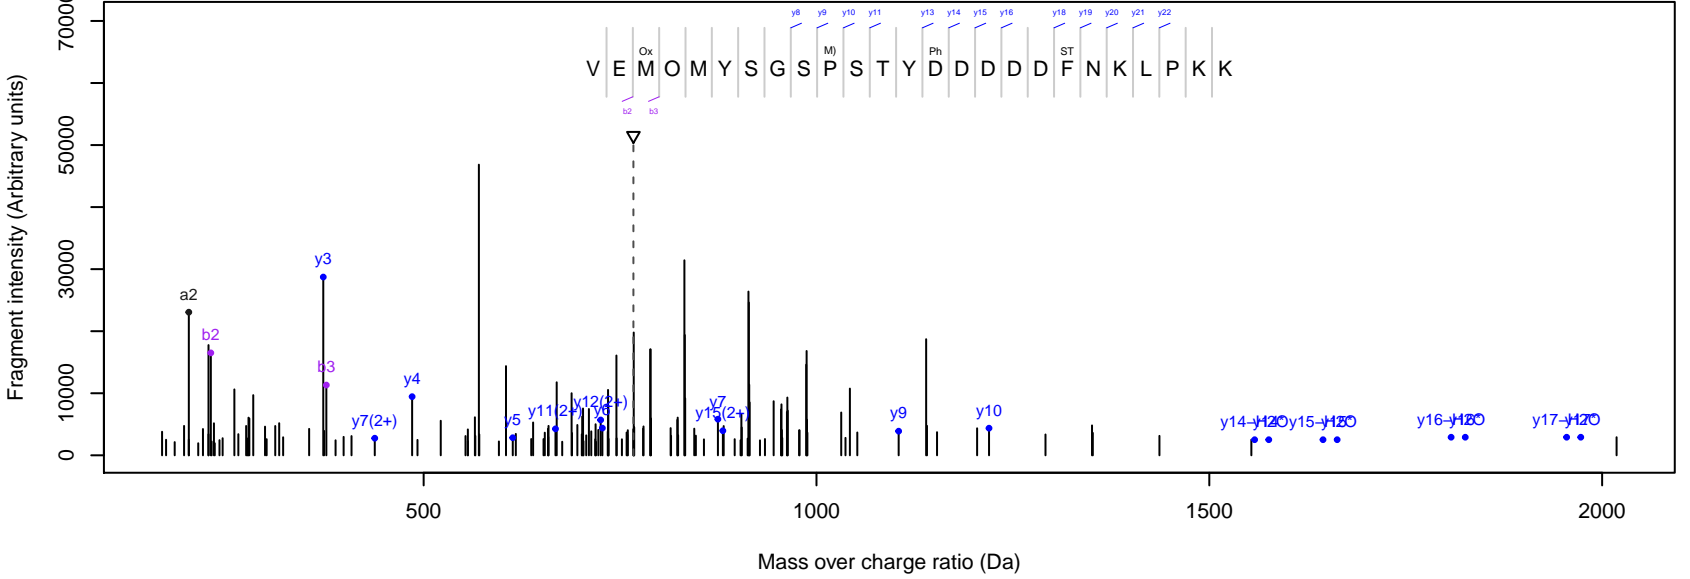

SSSDDEEQLT(Phospho (STY))ELDEEMENEICR-3+

Source : QE3\_201126\_FR\_TiOx\_hum\_tissue\_Urea\_RNAB\_N Scan : 56737

Andromeda score : 63.857

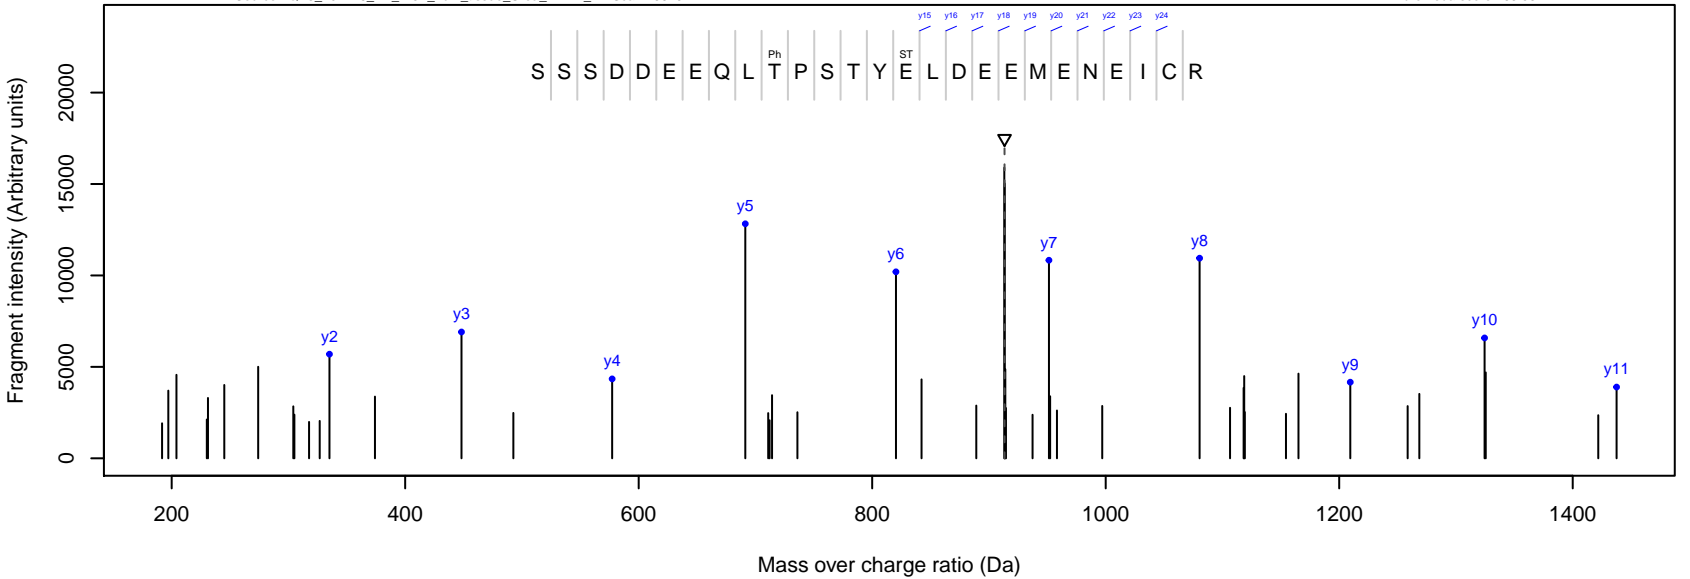

YDERPGPS(Phospho (STY))PLPHRDR-4+

Source : QE3\_201126\_FR\_TiOx\_hum\_tissue\_Urea\_RNAB\_N Scan : 8906

Andromeda score : 63.827

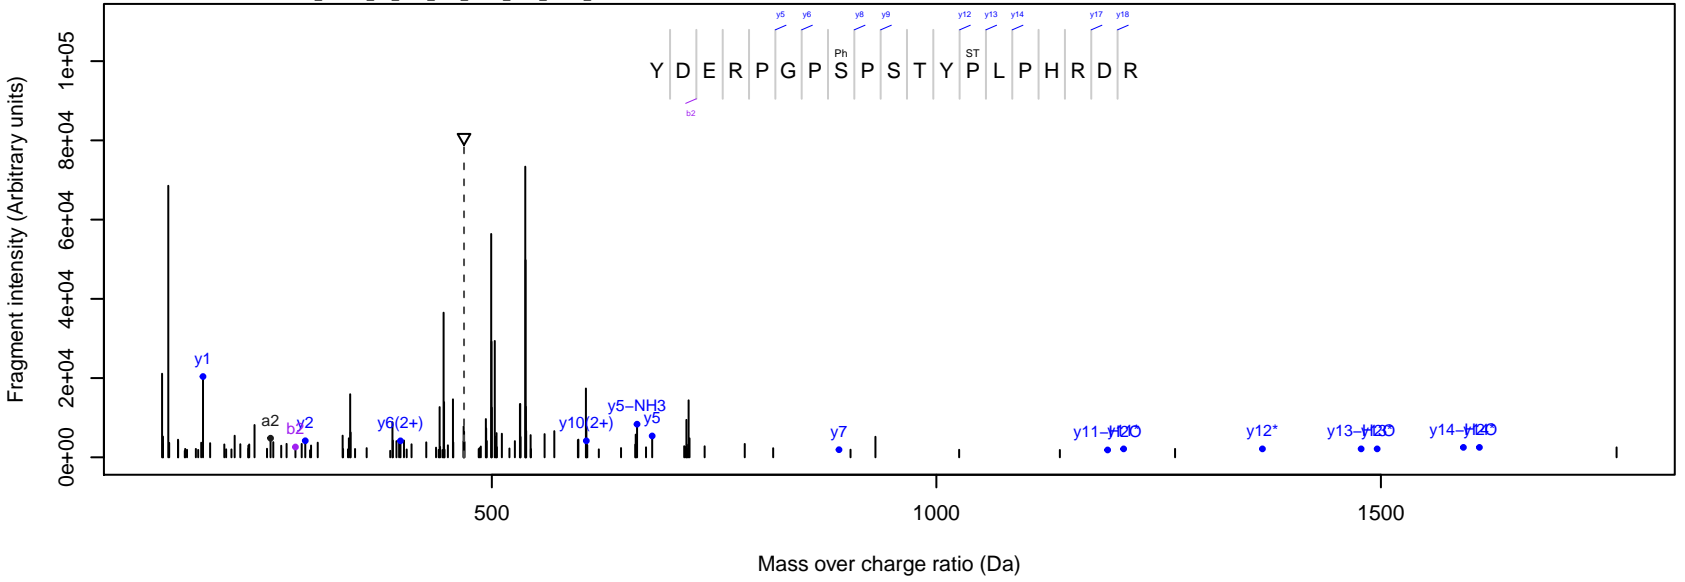

HSS(Phospho (STY))YPAGTEDDEGMGEEPSFR-3+

Source : QE3\_201126\_FR\_TiOx\_hum\_tissue\_Urea\_RNAB\_B Scan : 27449

Andromeda score : 63.823

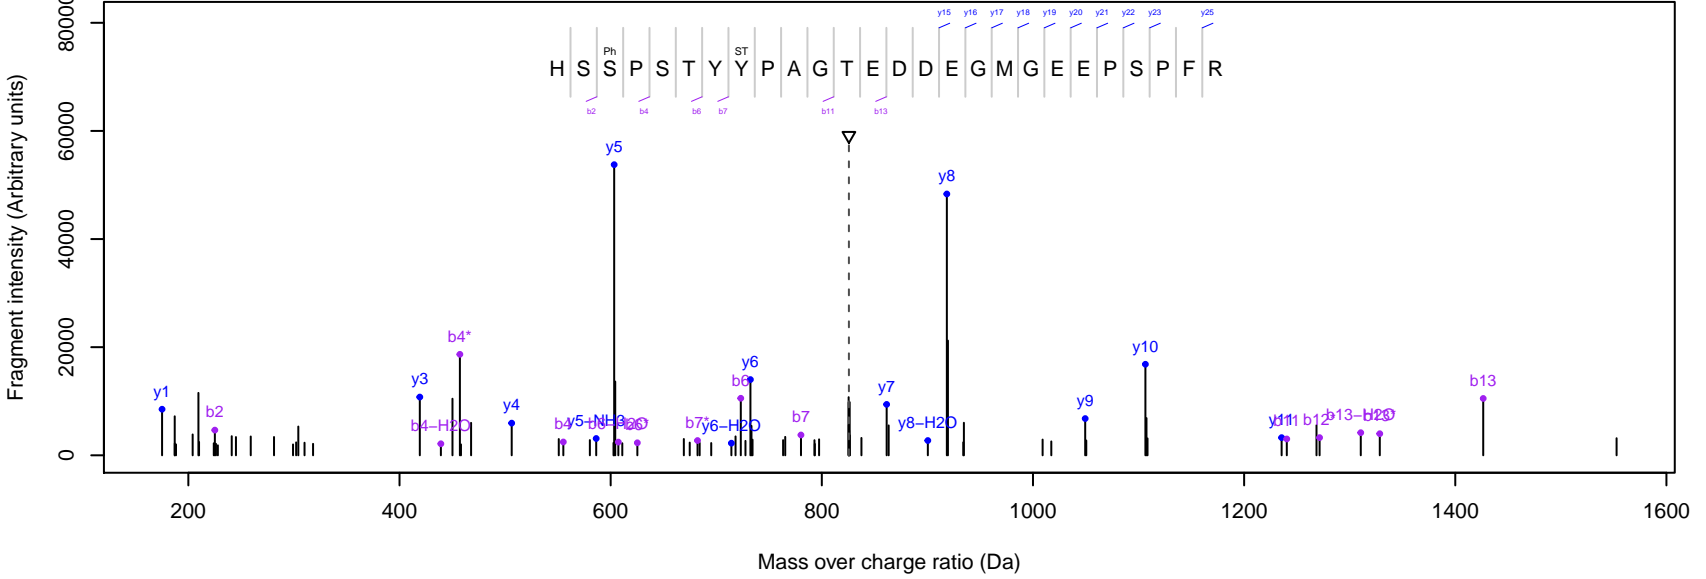

KAPSTSHSGFPPVANGPRS(Phospho (STY))PPSLR-4+

Source : QE3\_201126\_FR\_TiOx\_hum\_tissue\_Urea\_RNAB\_B Scan : 17157

Andromeda score : 63.803

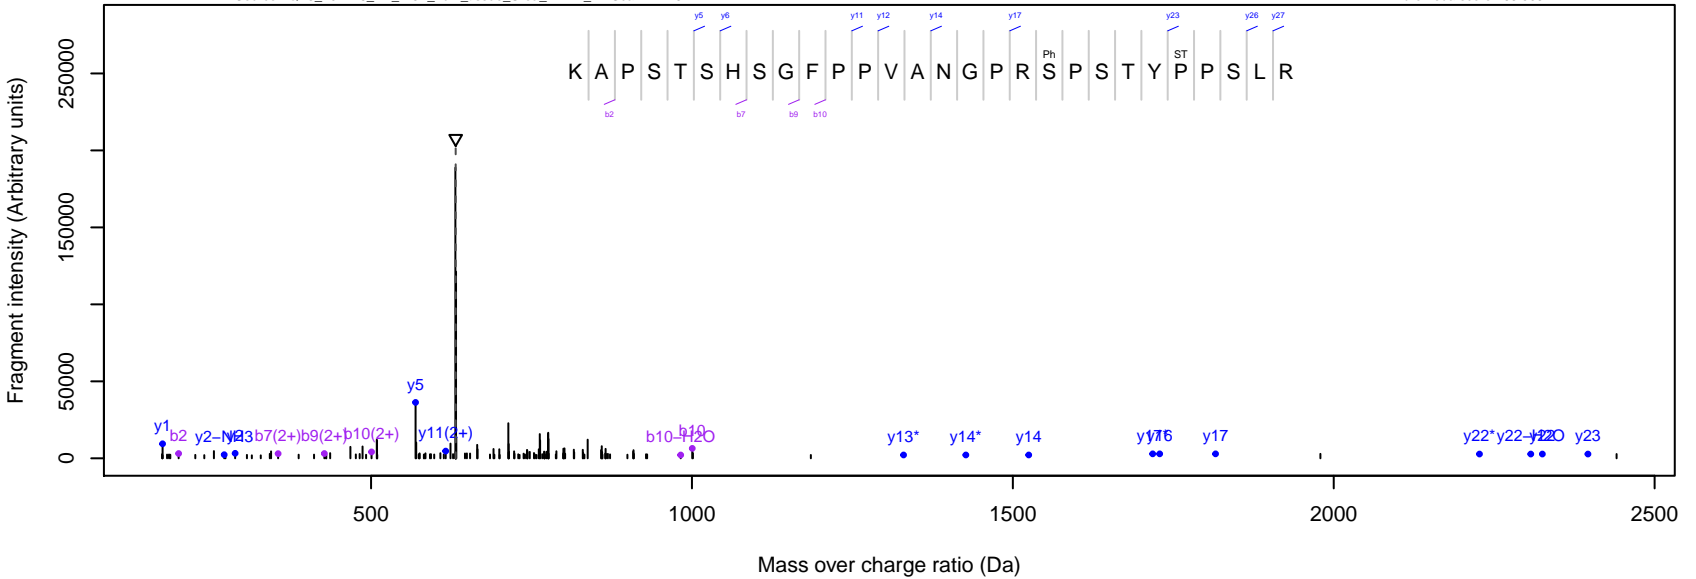

LPISSS(Phospho (STY))TSNLHVDREQDVITCYEK-3+

Source : QE3\_201126\_FR\_TiOx\_hum\_tissue\_Urea\_RNAB\_H Scan : 30978

Andromeda score : 63.803

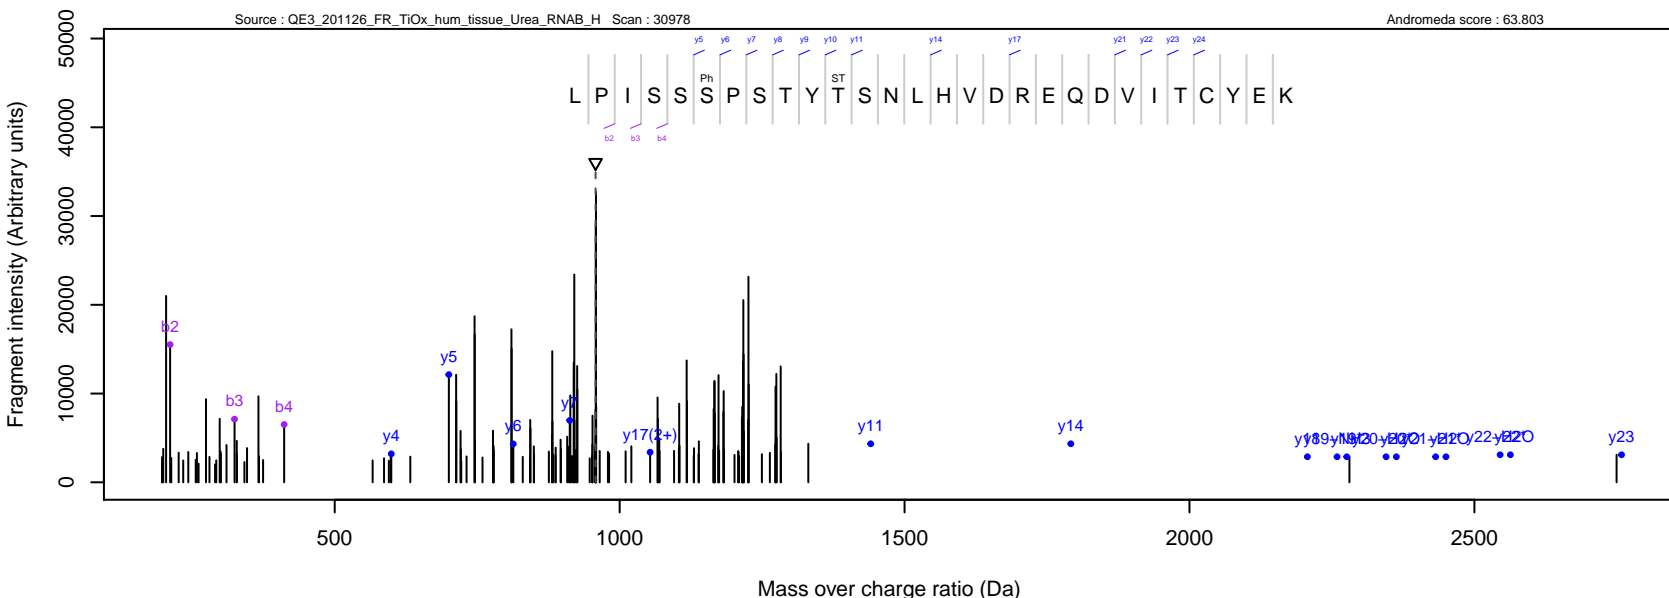

ASS(Phospho (STY))PHQAGLGLSLTPSPES(Phospho (STY))PPLPDVSAFSR-3+

Source : QE3\_201126\_FR\_TiOx\_hum\_tissue\_Urea\_RNAB\_H Scan : 56779

Andromeda score : 63.799

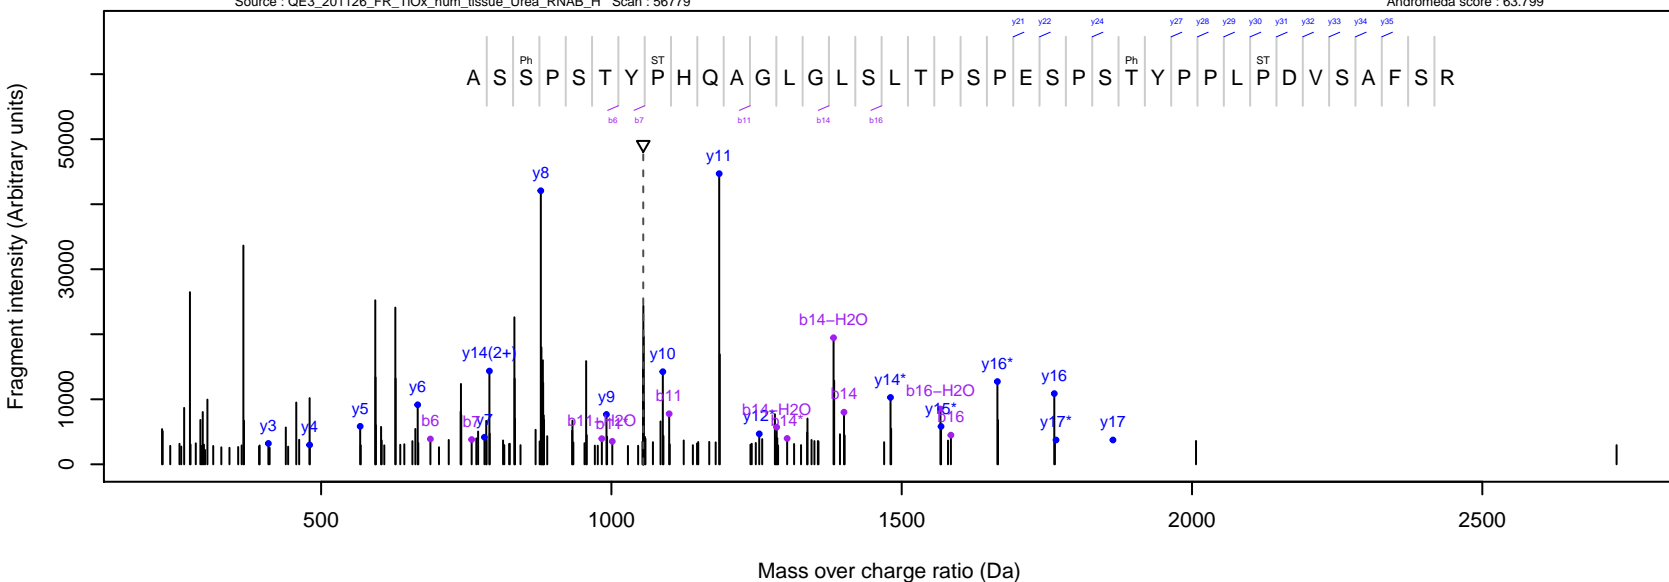

NSS(Phospho (STY))ISGPFGR-2+

Source : QE3\_201126\_FR\_TiOx\_hum\_tissue\_Urea\_RNAB\_B Scan : 22424

Andromeda score : 63.76

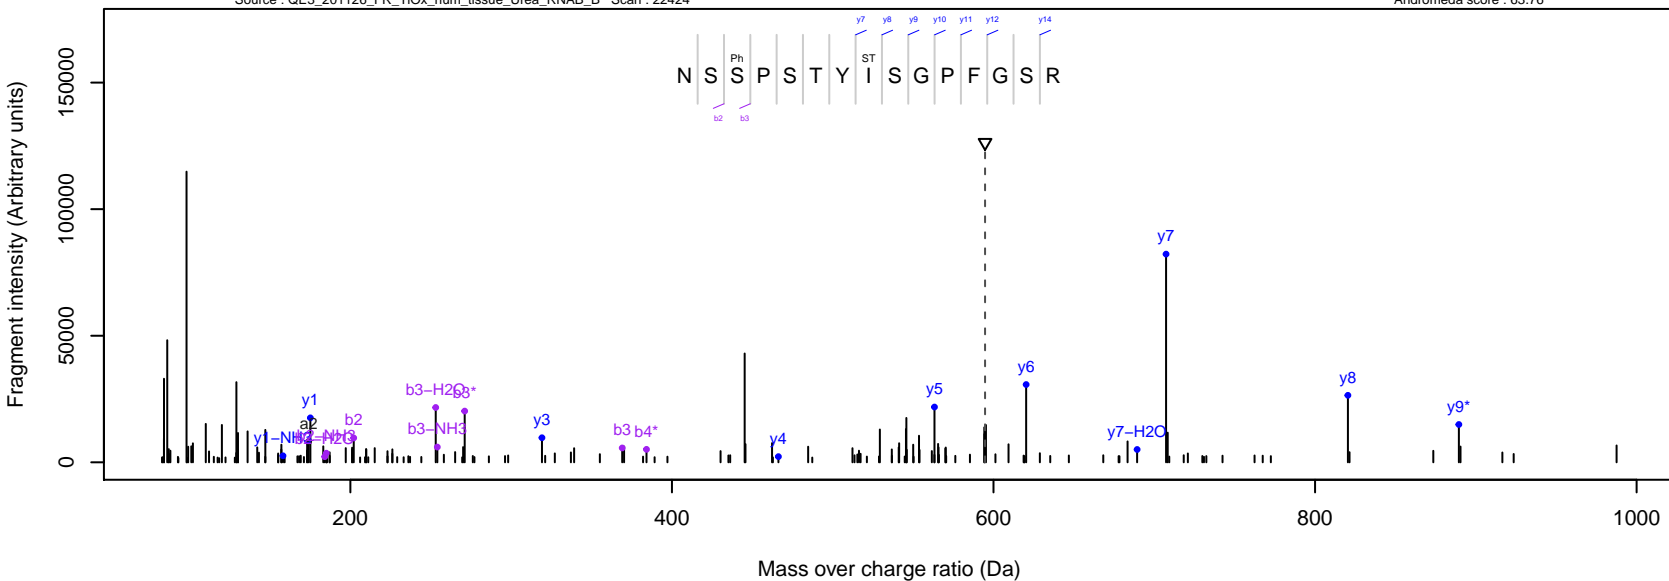

RS(Phospho (STY))PERPTGDLR-3+

Source : QE3\_201126\_FR\_TiOx\_hum\_tissue\_Urea\_RNAB\_H Scan : 5838

Andromeda score : 63.754

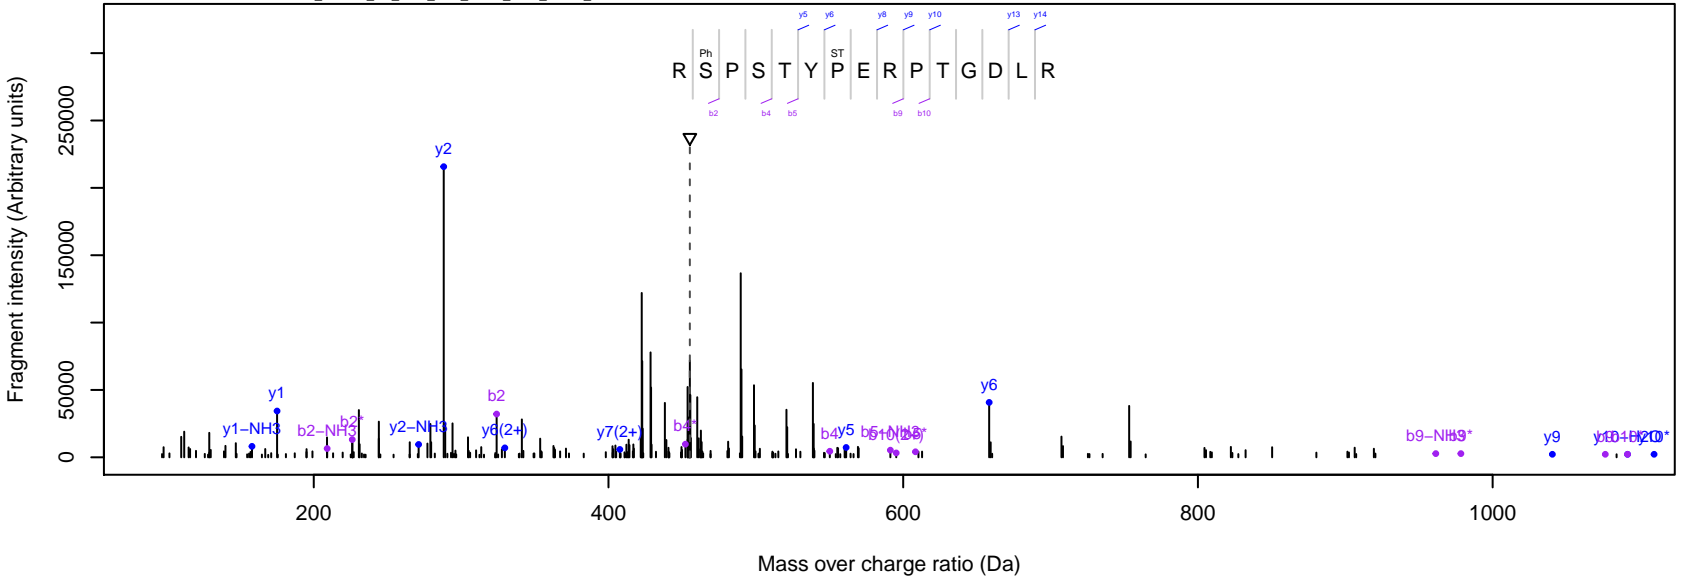

STS(Phospho (STY))LSALVR-2+

Source : QE3\_201126\_FR\_TiOx\_hum\_tissue\_Urea\_RNAB\_N Scan : 29358

Andromeda score : 63.734

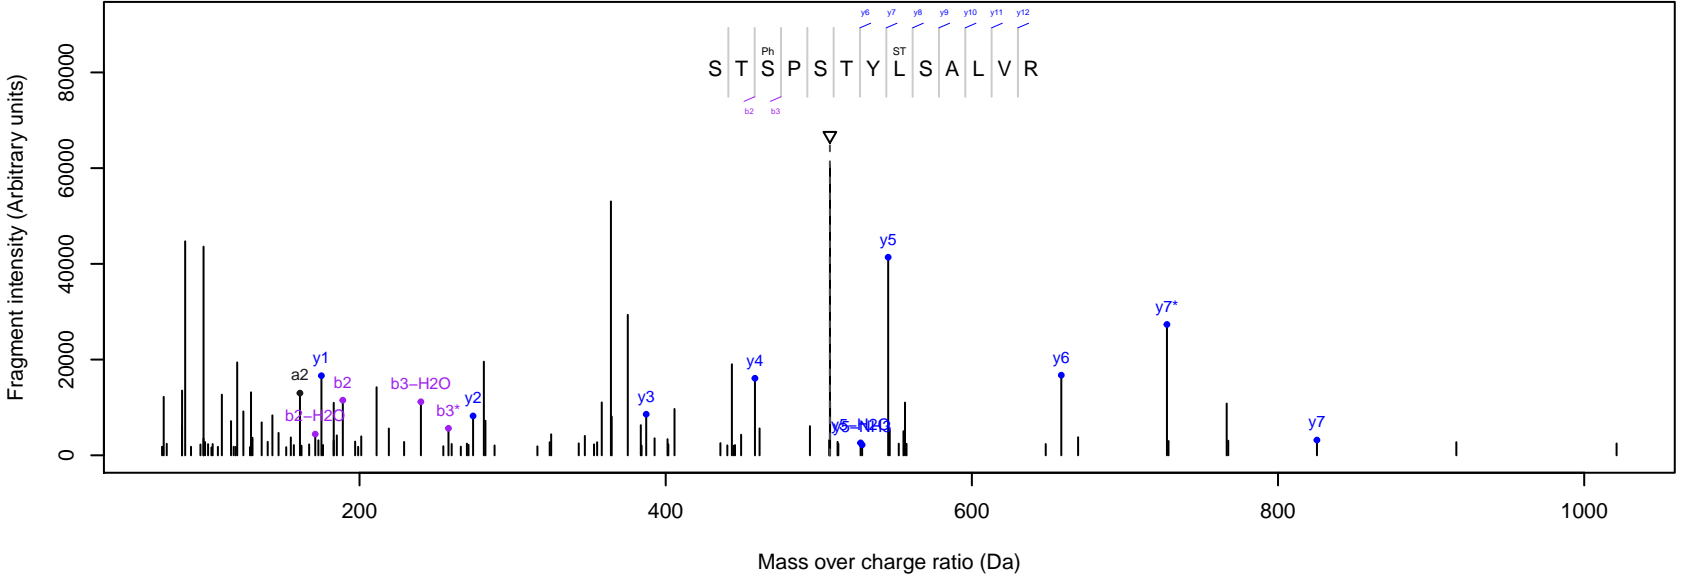

AADTEEMDIEM(Oxidation (M))DS(Phospho (STY))GDEA-2+

Source : QE3\_201126\_FR\_TiOx\_hum\_tissue\_Urea\_RNAB\_H Scan : 31204

Andromeda score : 63.727

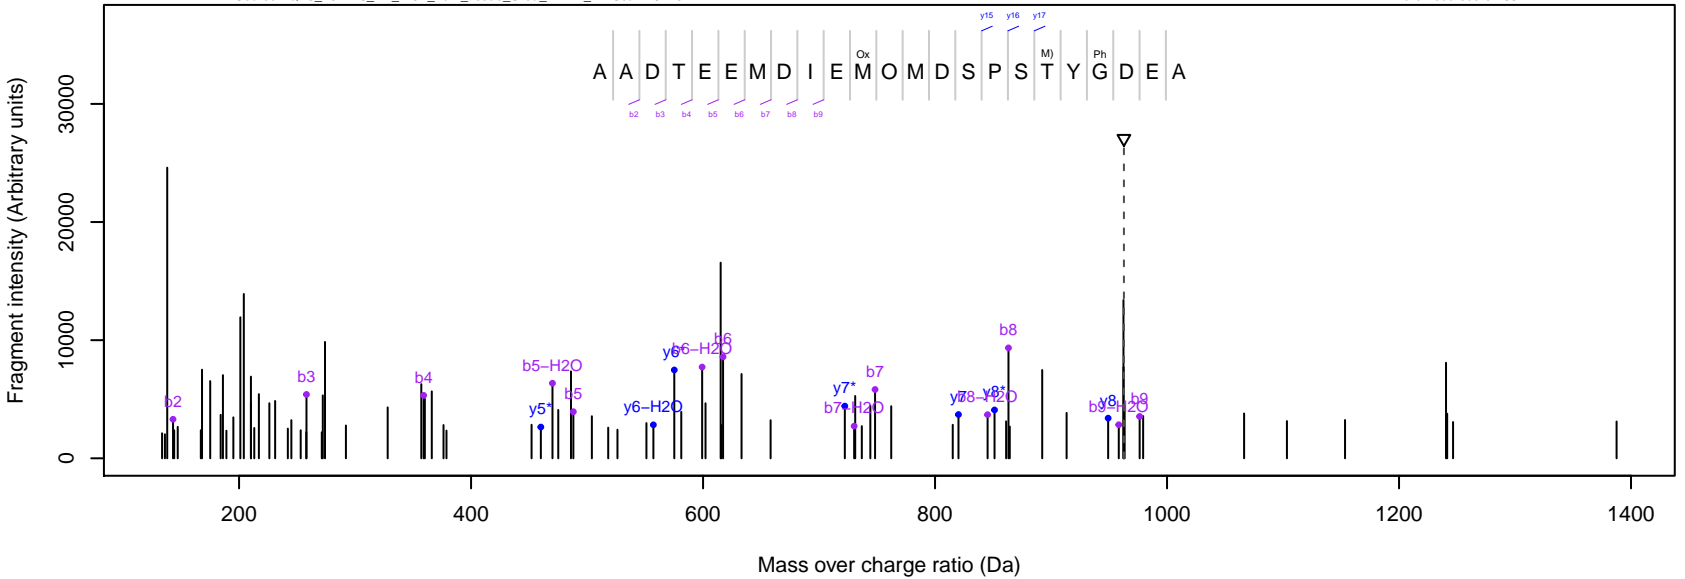

ET(Phospho (STY))SPESLIQDEIAVK-2+

Source : QE3\_201126\_FR\_TiOx\_hum\_tissue\_Urea\_RNAB\_H Scan : 41532

Andromeda score : 63.727

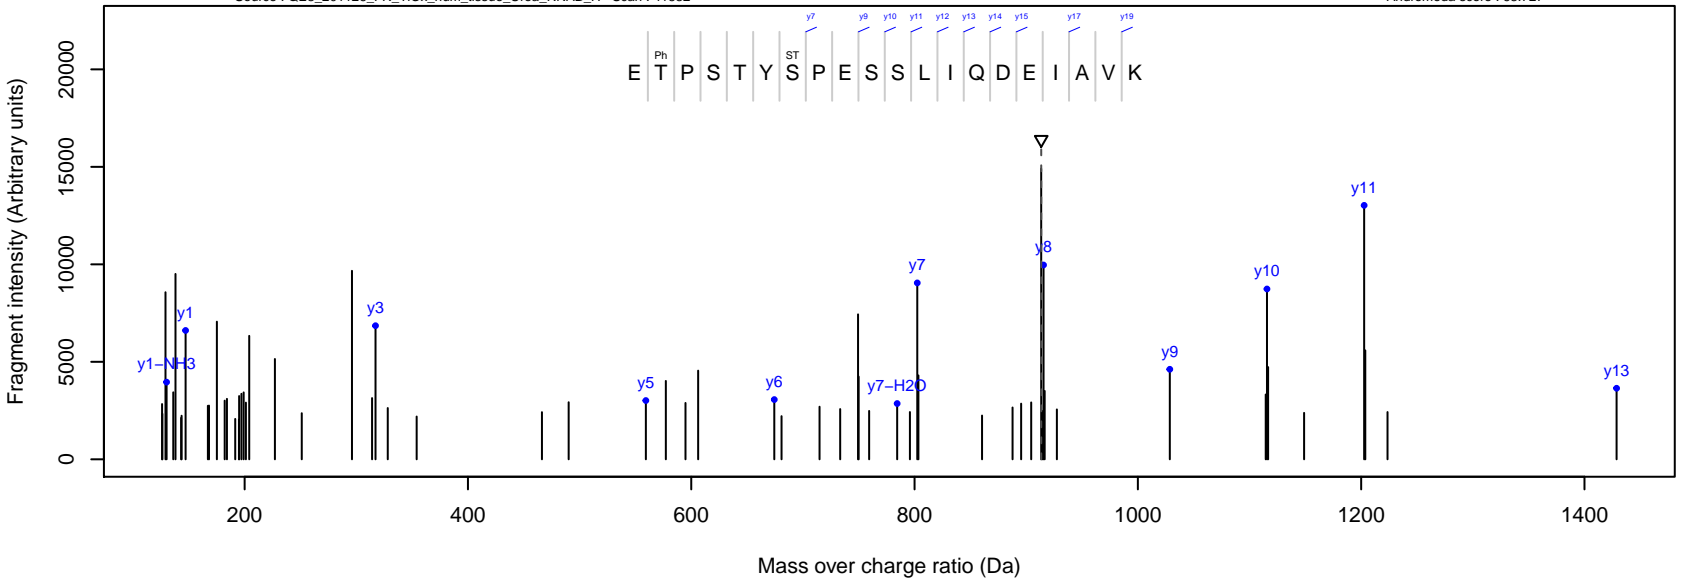

PVPDS(Phospho (STY))PVSVTRL-2+

Source : QE3\_201126\_FR\_TiOx\_hum\_tissue\_Urea\_RNAB\_H Scan : 34823

Andromeda score : 63.727

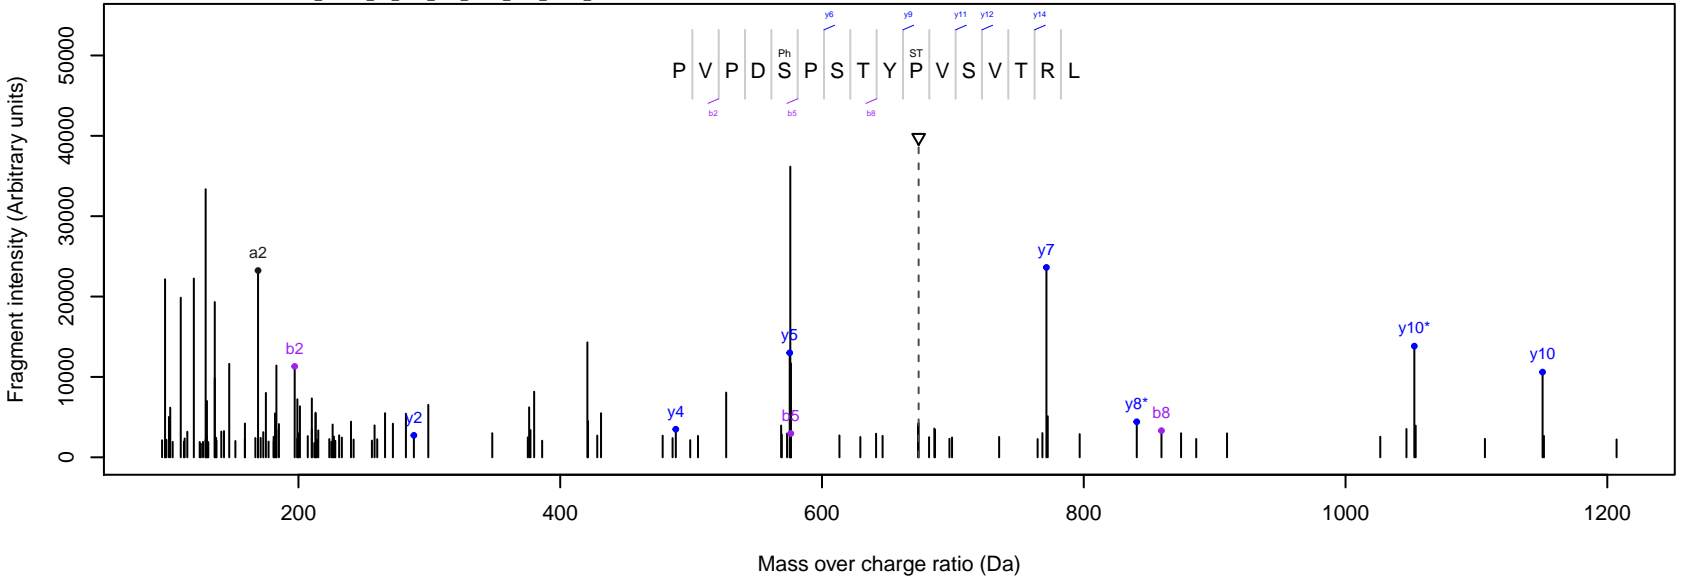

QS(Phospho (STY))FCAQEAPTASQGLLK-2+

Source : QE3\_201126\_FR\_TiOx\_hum\_tissue\_Urea\_RNAB\_N Scan : 32680

Andromeda score : 63.727

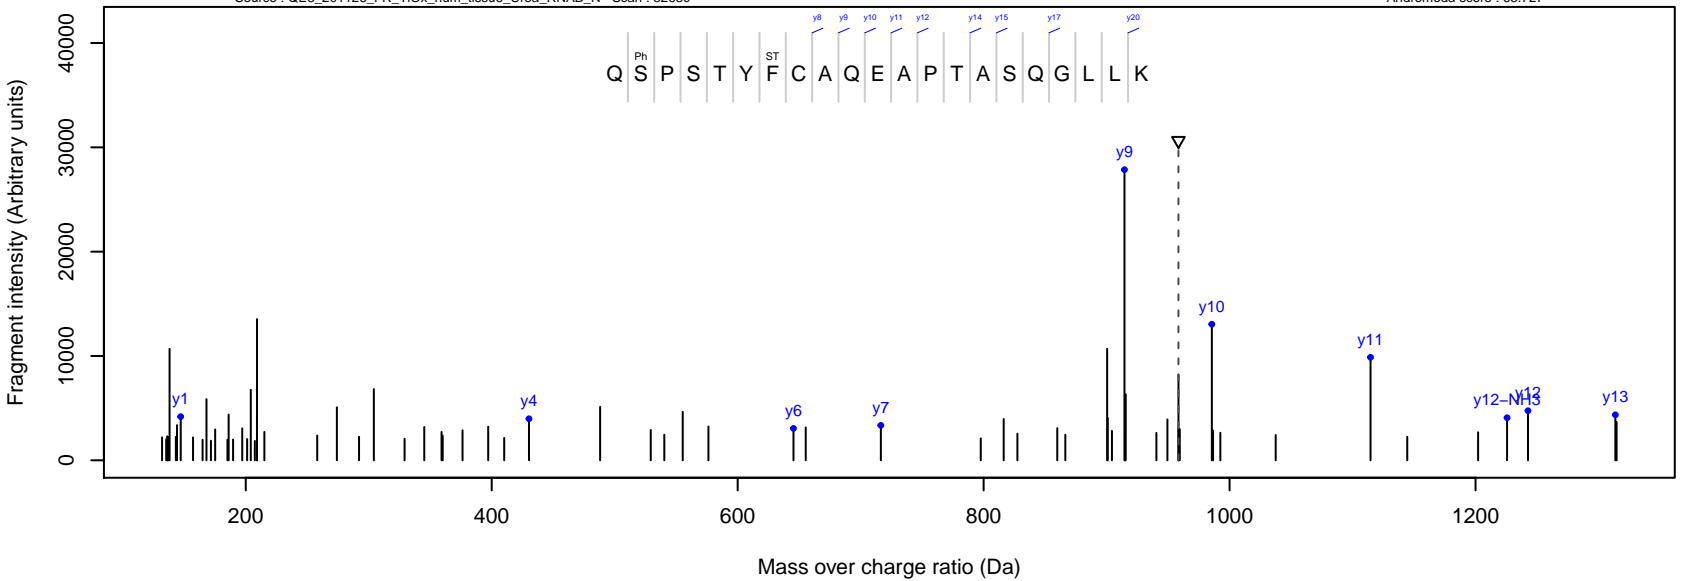

RIS(Phospho (STY))EMEEELK-2+

Source : QE3\_201126\_FR\_TiOx\_hum\_tissue\_Urea\_RNAB\_B Scan : 21323

Andromeda score : 63.727

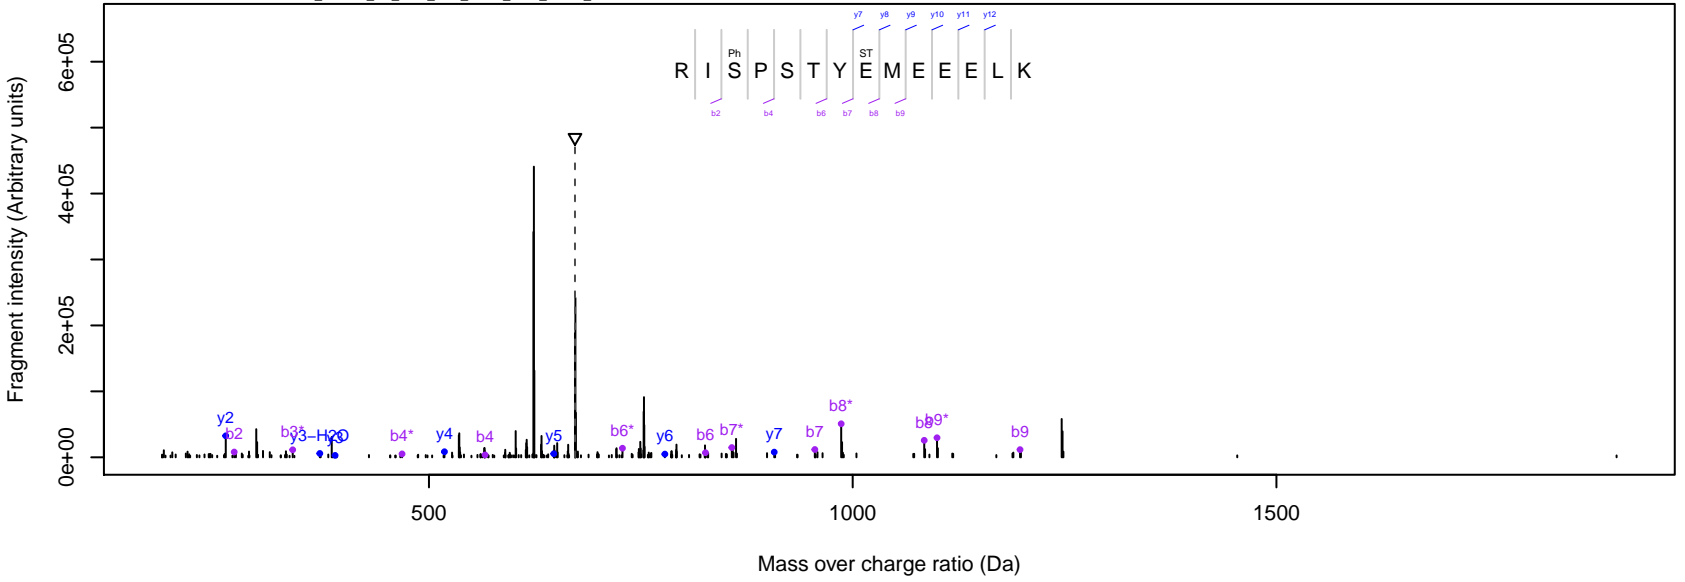

S(Phospho (STY))LSCLSDLDGGVALEPR-2+

Source : QE3\_201126\_FR\_TiOx\_hum\_tissue\_Urea\_RNAB\_B Scan : 53000

Andromeda score : 63.727

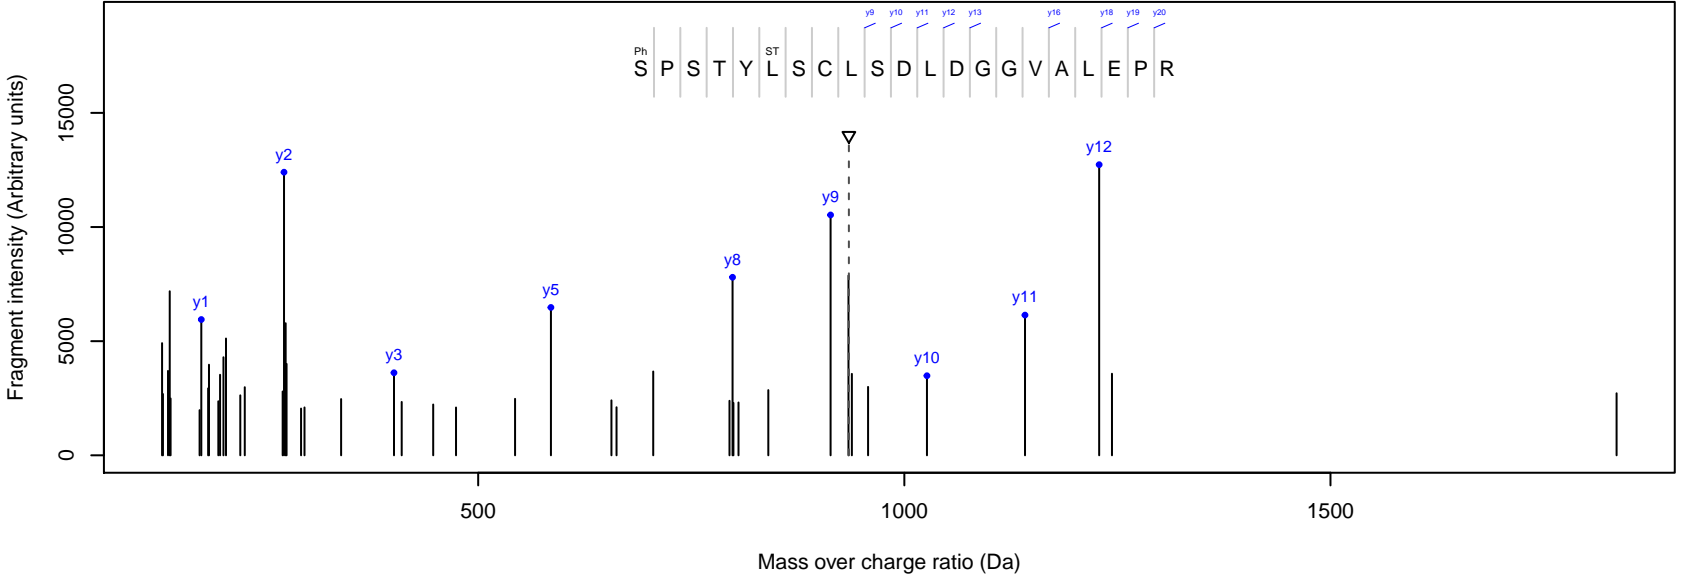

LAS(Phospho (STY))YLDVRVRS(Phospho (STY))LETENR-3+

Source : QE3\_201126\_FR\_TiOx\_hum\_tissue\_Urea\_RNAB\_H Scan : 39291

Andromeda score : 63.726

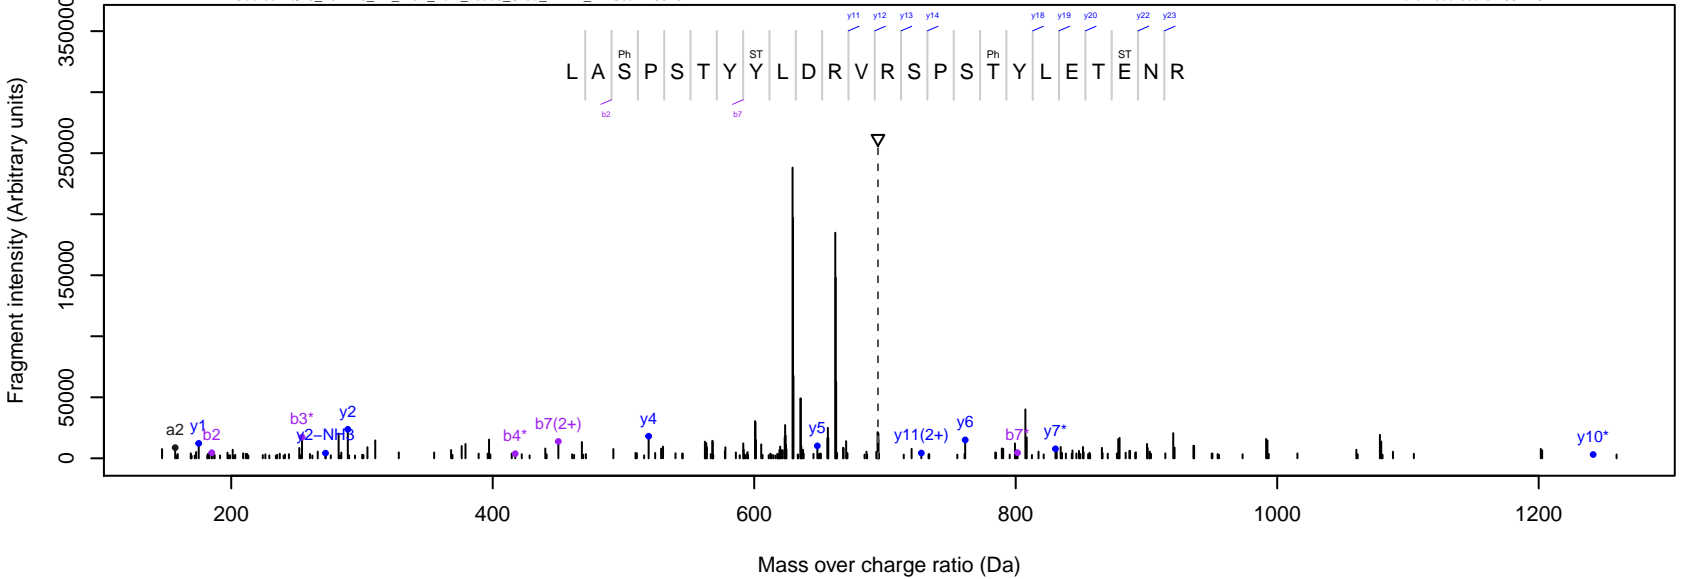



GLGPPSPAPPRGPAGEAGAS(Phospho (STY))PPVRR-3+

Source : QE3\_201126\_FR\_TiOx\_hum\_tissue\_Urea\_RNAB\_H Scan : 21233

Andromeda score : 63.706

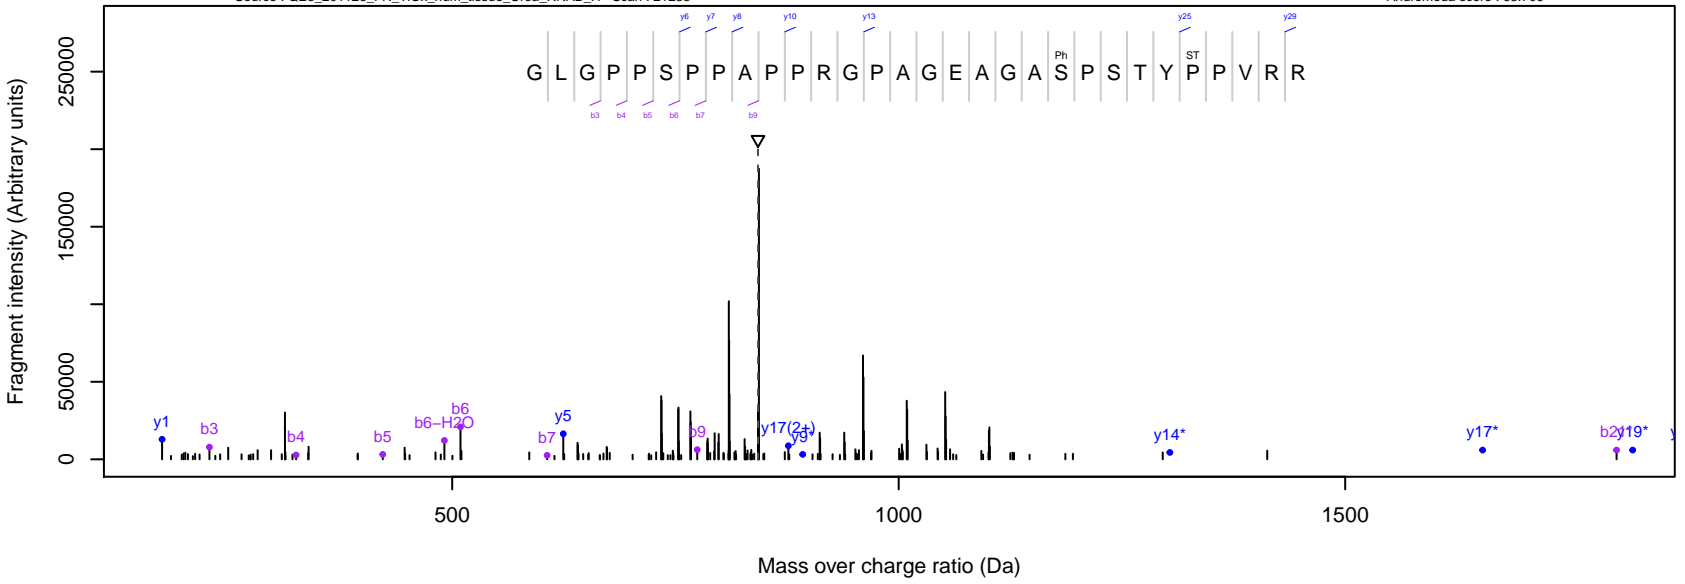

NTADHDES(Phospho (STY))PPRT(Phospho (STY))PTGNAPSSSESDIDISSPNVSHDESIK-4+

Source : QE3\_201126\_FR\_TiOx\_hum\_tissue\_Urea\_RNAB\_N Scan : 23583

Andromeda score : 63.702

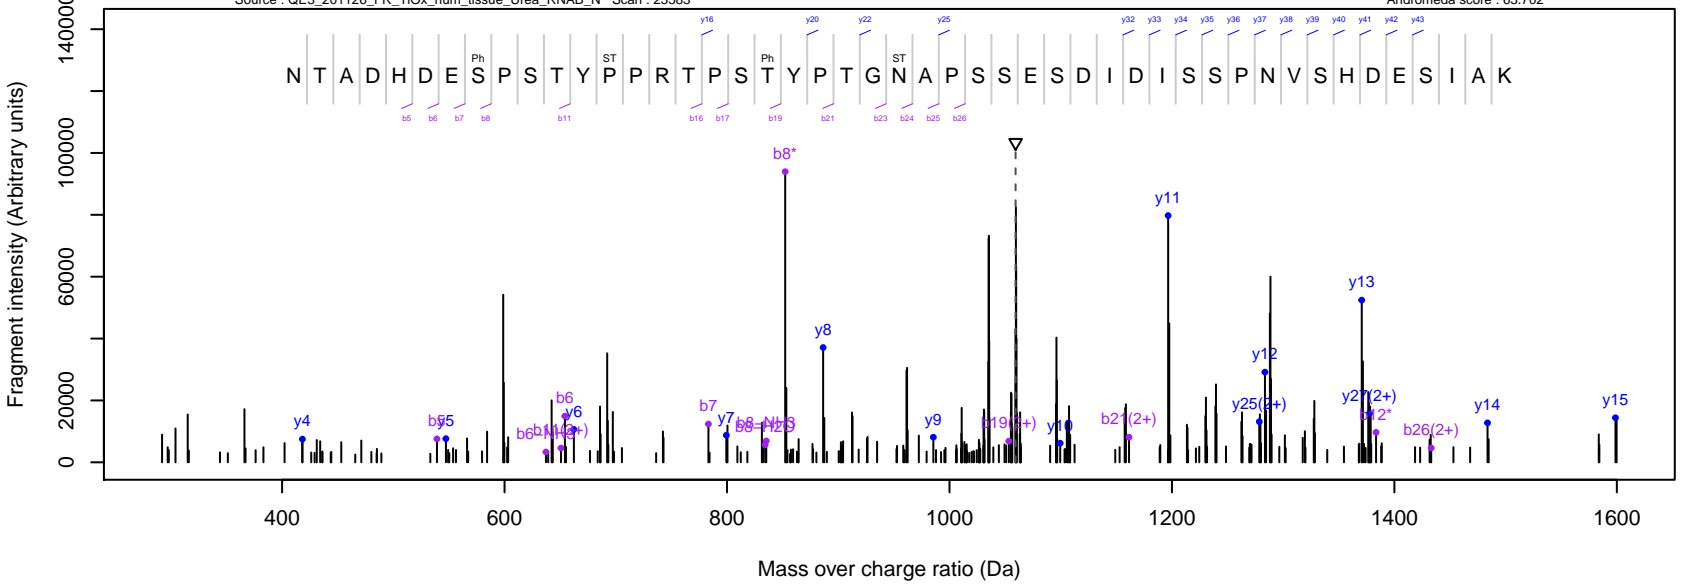

QLPALDGS(Phospho (STY))LM(Oxidation (M))GPESPPAQEEEPVSPHK-3+

Source : QE3\_201126\_FR\_TiOx\_hum\_tissue\_Urea\_RNAB\_B Scan : 35305

Andromeda score : 63.697

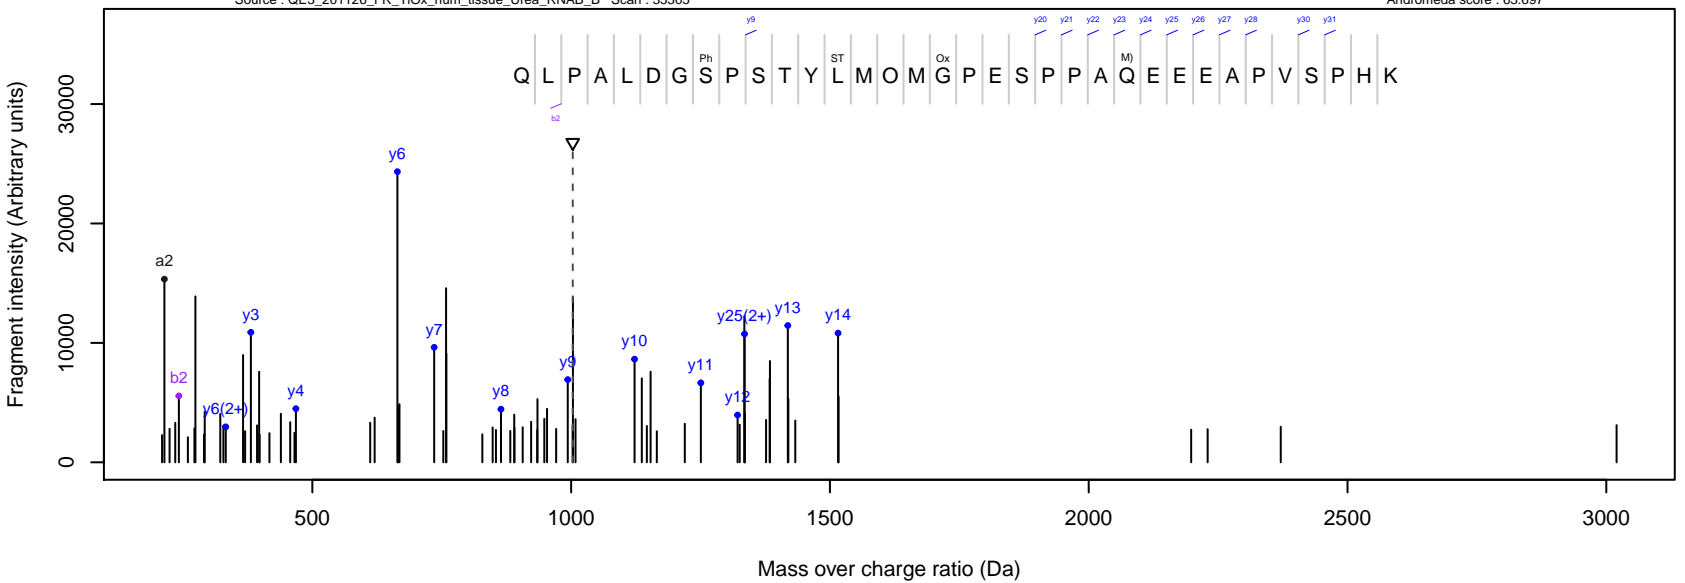

VS(Phospho (STY))SSSELDLPSGDHCEAGLLQLDVPLLR-3+

Source : QE3\_201126\_FR\_TiOx\_hum\_tissue\_Urea\_RNAB\_H Scan : 58138

Andromeda score : 63.697

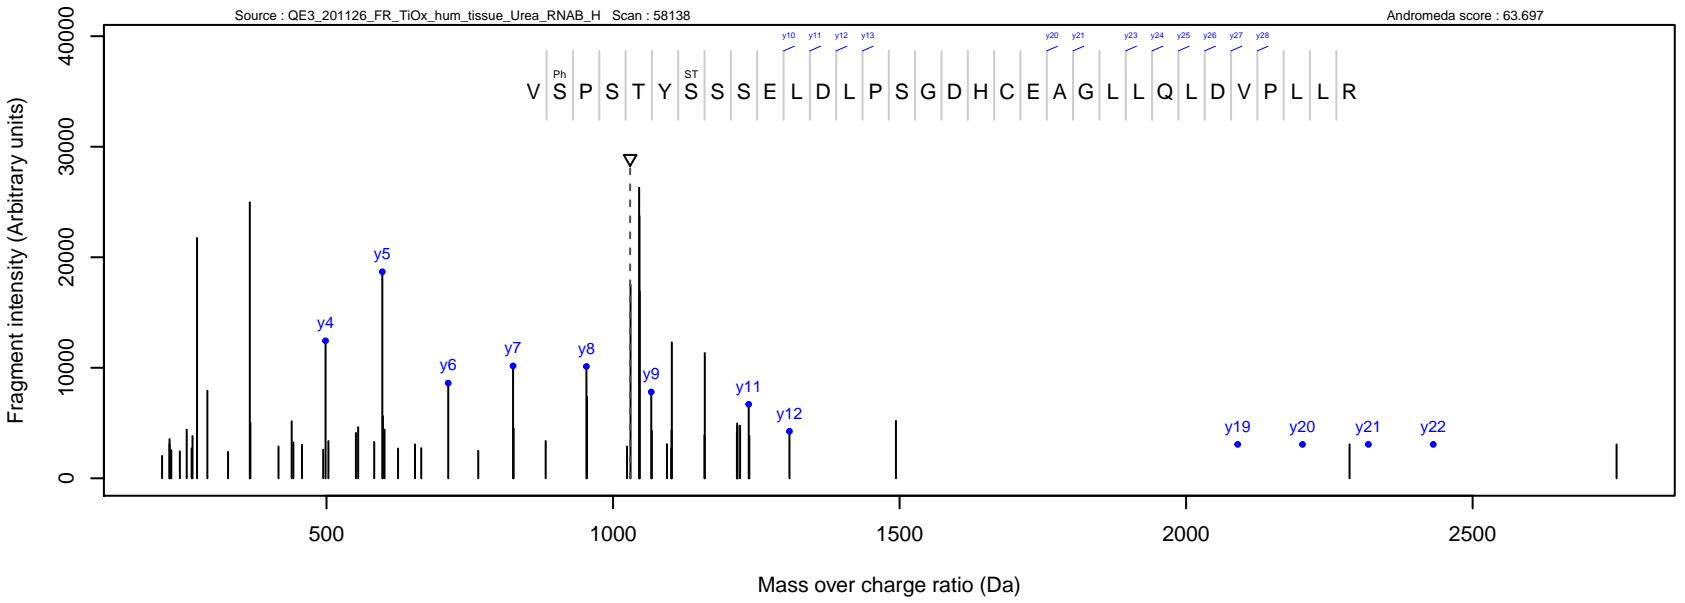

RKQS(Phospho (STY))DSDLIPER-3+

Source : QE3\_201126\_FR\_TiOx\_hum\_tissue\_Urea\_RNAB\_B Scan : 9956

Andromeda score : 63.682

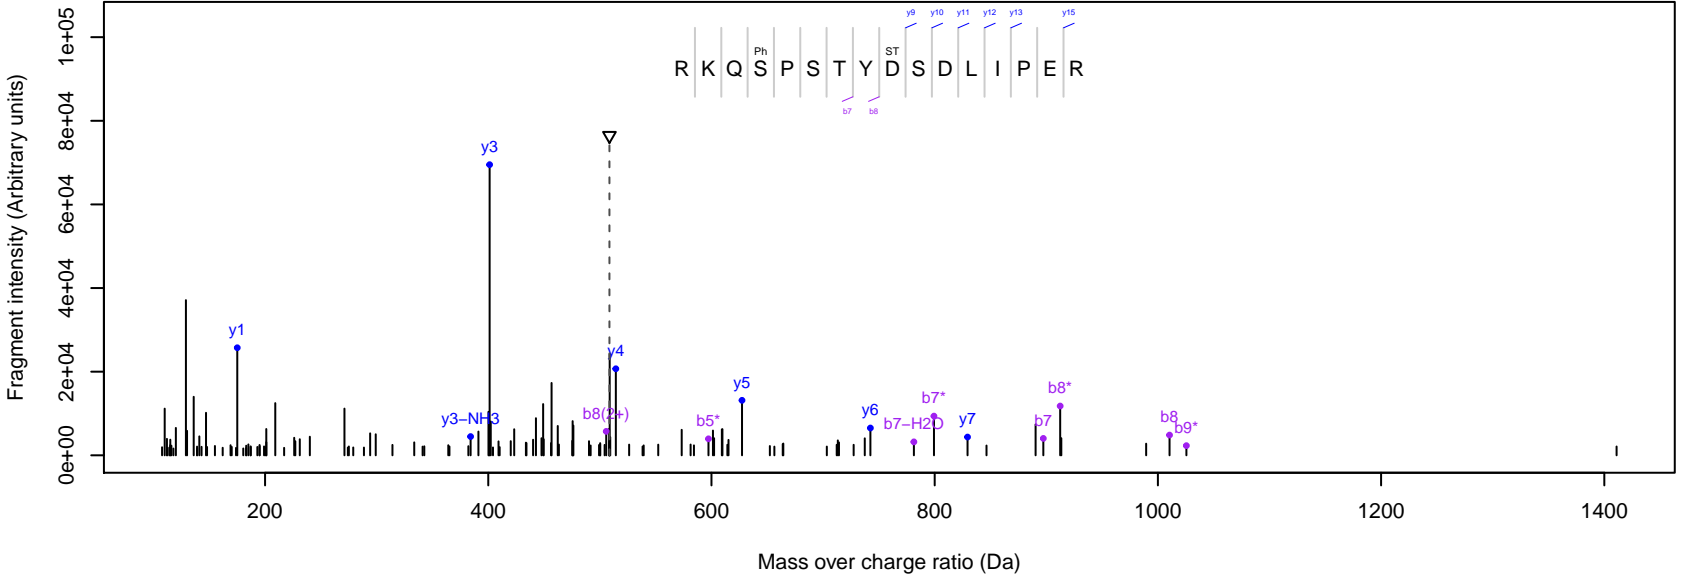

S(Phospho (STY))LGS(Phospho (STY))VQAPS(Phospho (STY))YGAR-2+

Source : QE3\_201126\_FR\_TiOx\_hum\_tissue\_Urea\_RNAB\_N Scan : 39346

Andromeda score : 63.682

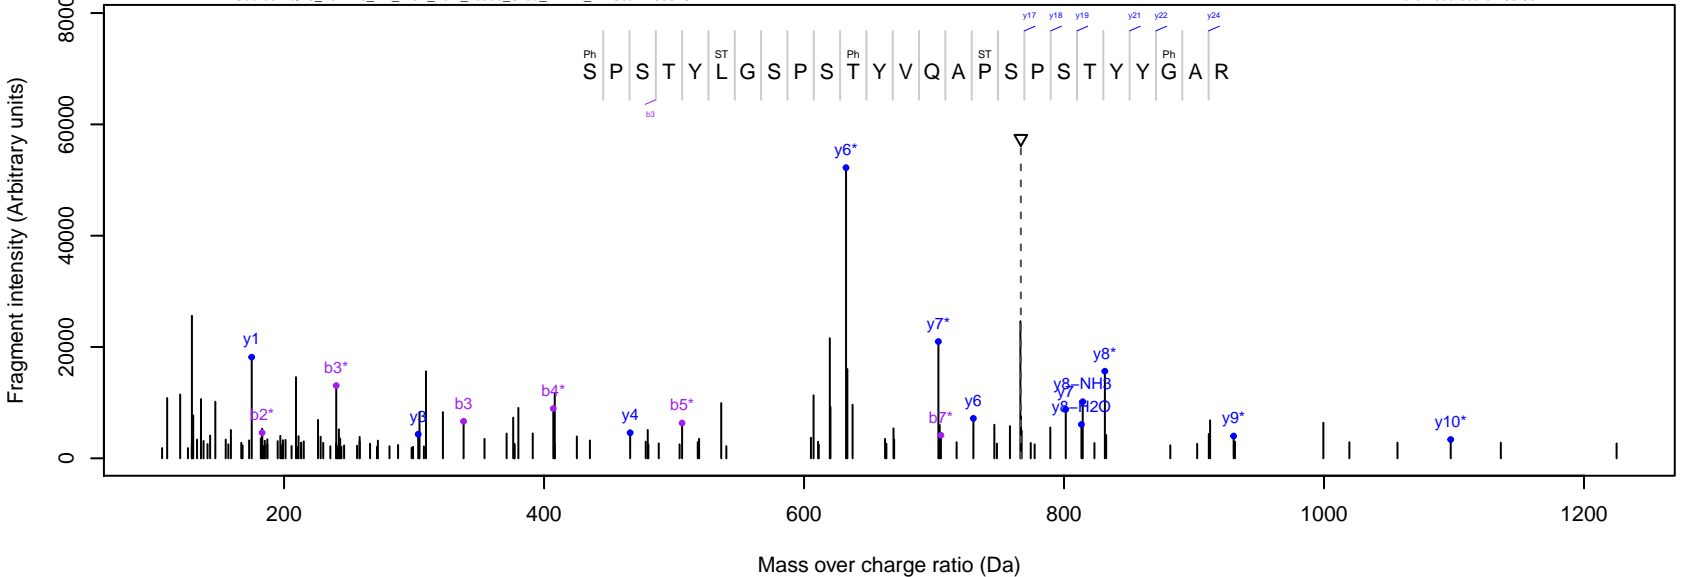

S(Phospho (STY))M(Oxidation (M))SHQAAIASQR-3+

Source : QE3\_201126\_FR\_TiOx\_hum\_tissue\_Urea\_RNAB\_H Scan : 5037

Andromeda score : 63.682

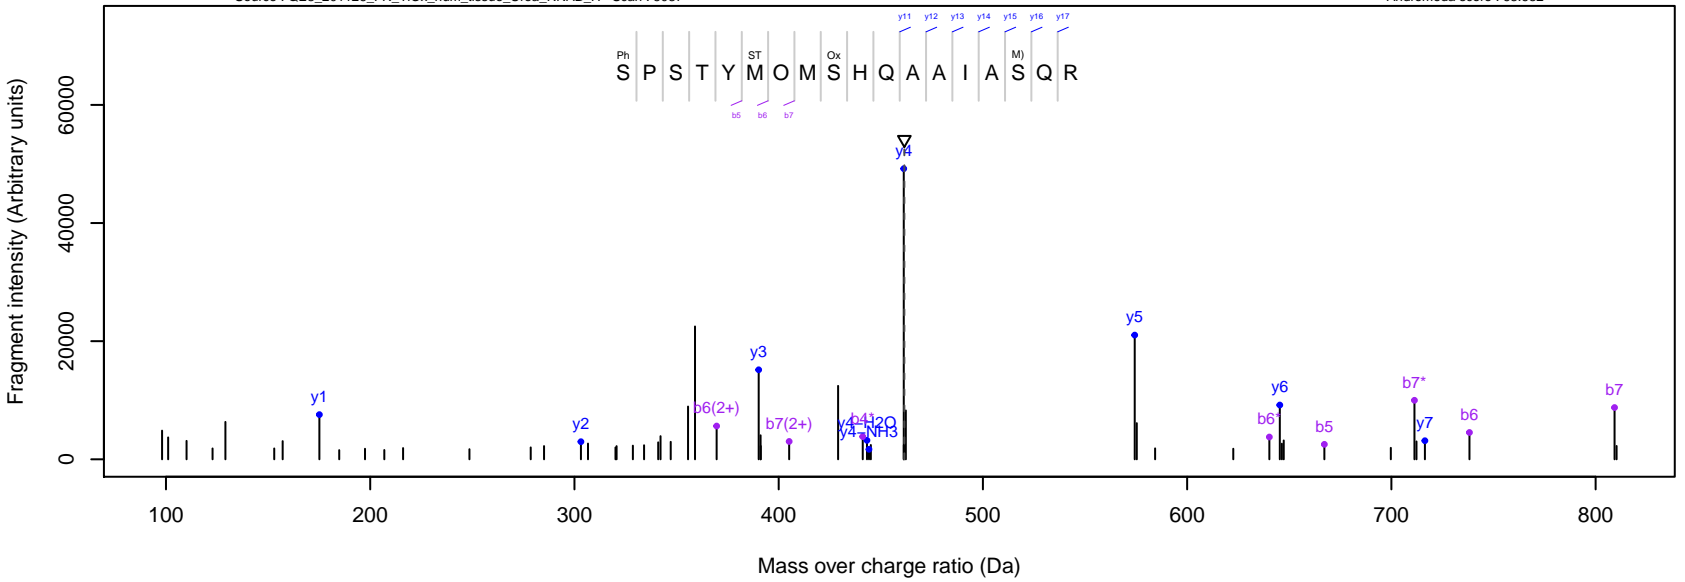

NLS(Phospho (STY))SPFIFHEK-2+

Source : QE3\_201126\_FR\_TiOx\_hum\_tissue\_Urea\_RNAB\_H Scan : 35578

Andromeda score : 63.662

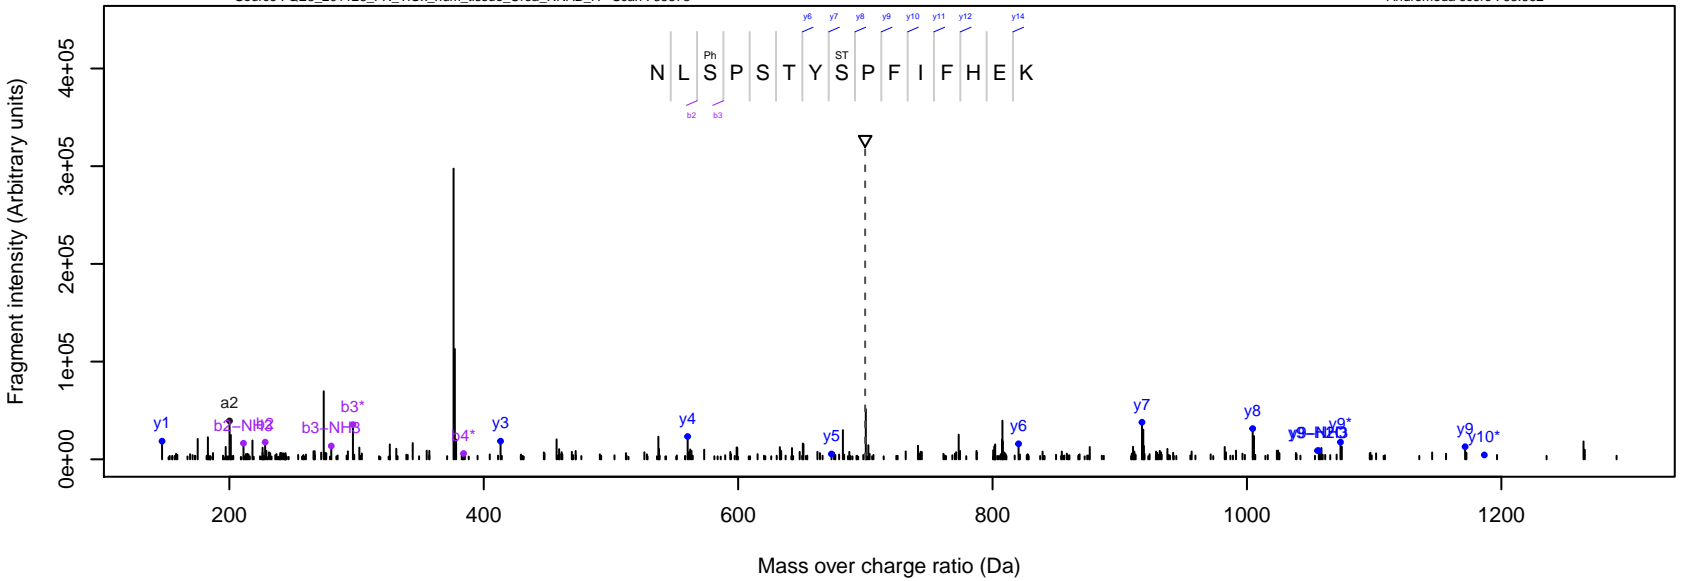

ADPGTPENGNDQPQSDKES(Phospho (STY))VK-3+

Source : QE3\_201126\_FR\_TiOx\_hum\_tissue\_Urea\_RNAB\_B Scan : 7729

Andromeda score : 63.63

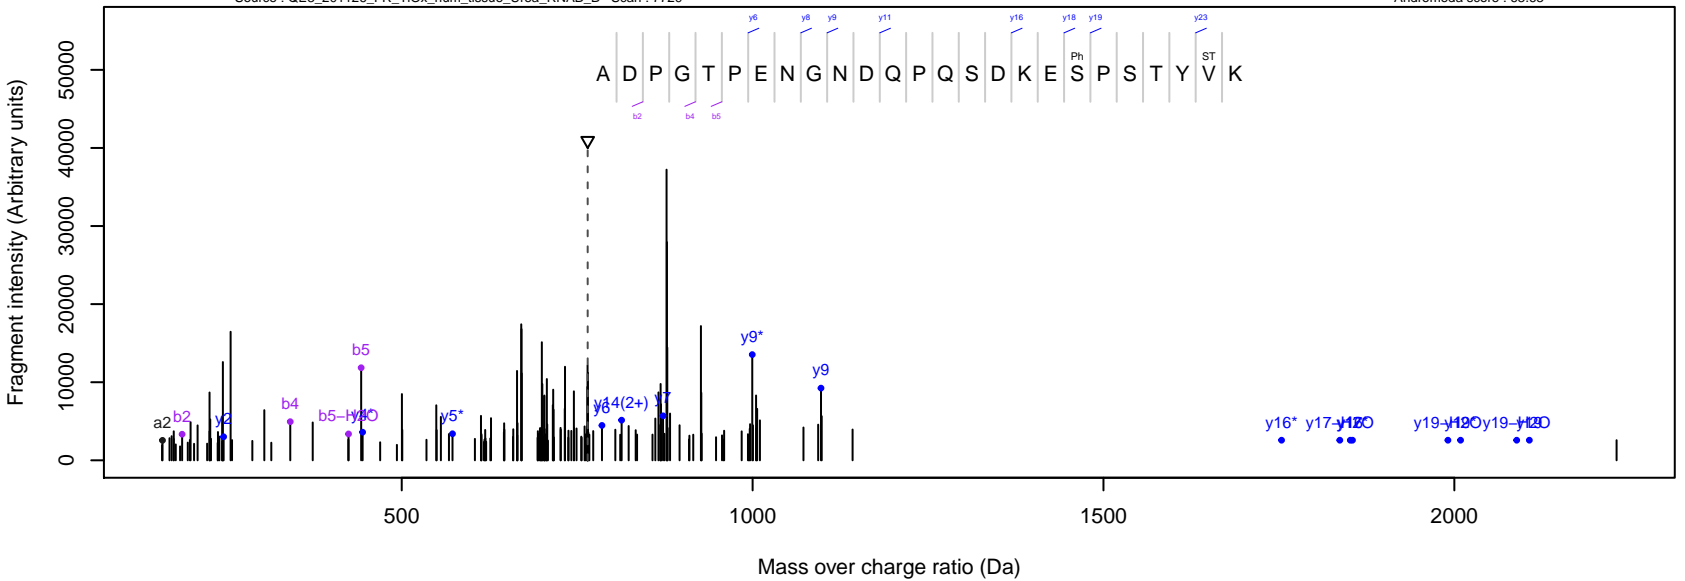

IEVQDTSGGTTALRPSASTQALSSSVSS(Phospho (STY))SK-3+

Source : QE3\_201126\_FR\_TIOx\_hum\_tissue\_Urea\_RNAB\_B Scan : 25832

Andromeda score : 63.625

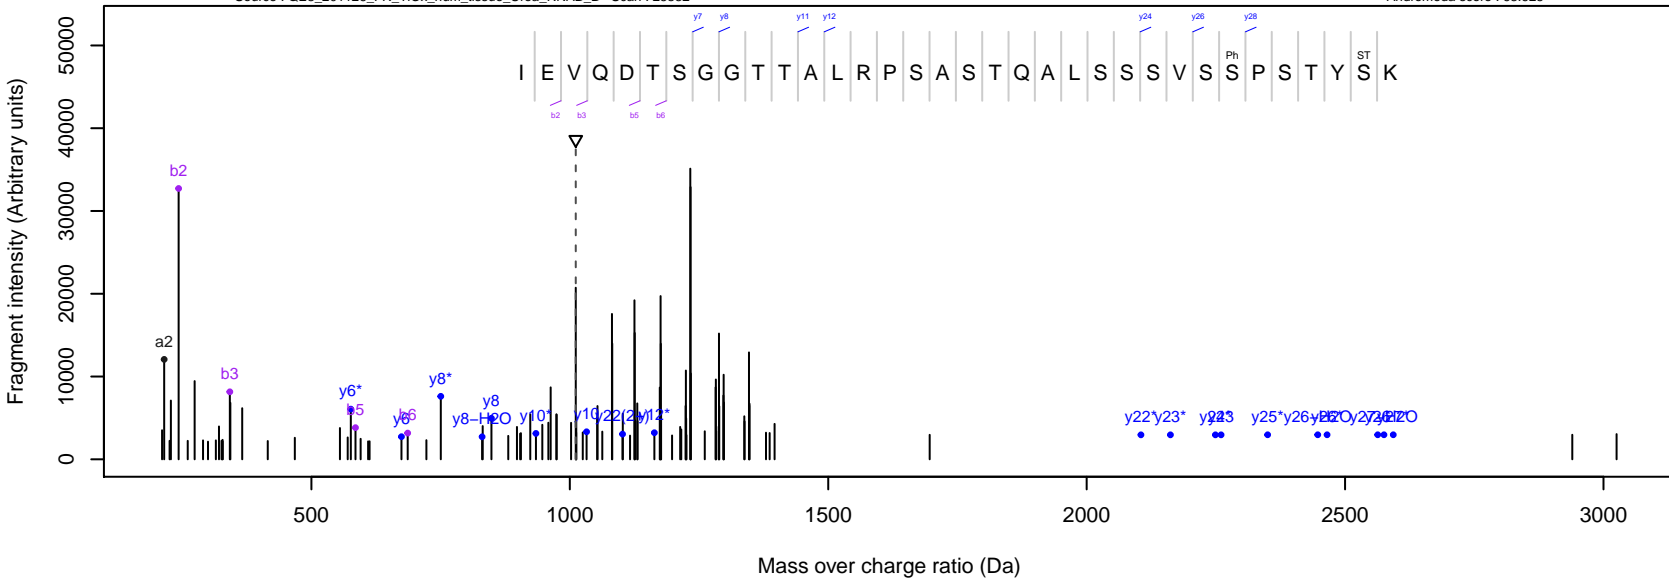

QSQQPMKPISTYVPKDPVSPSTYPASQK-3+

Source : QE3\_201126\_FR\_TIOx\_hum\_tissue\_Urea\_RNAB\_H Scan : 19945

Andromeda score : 63.625

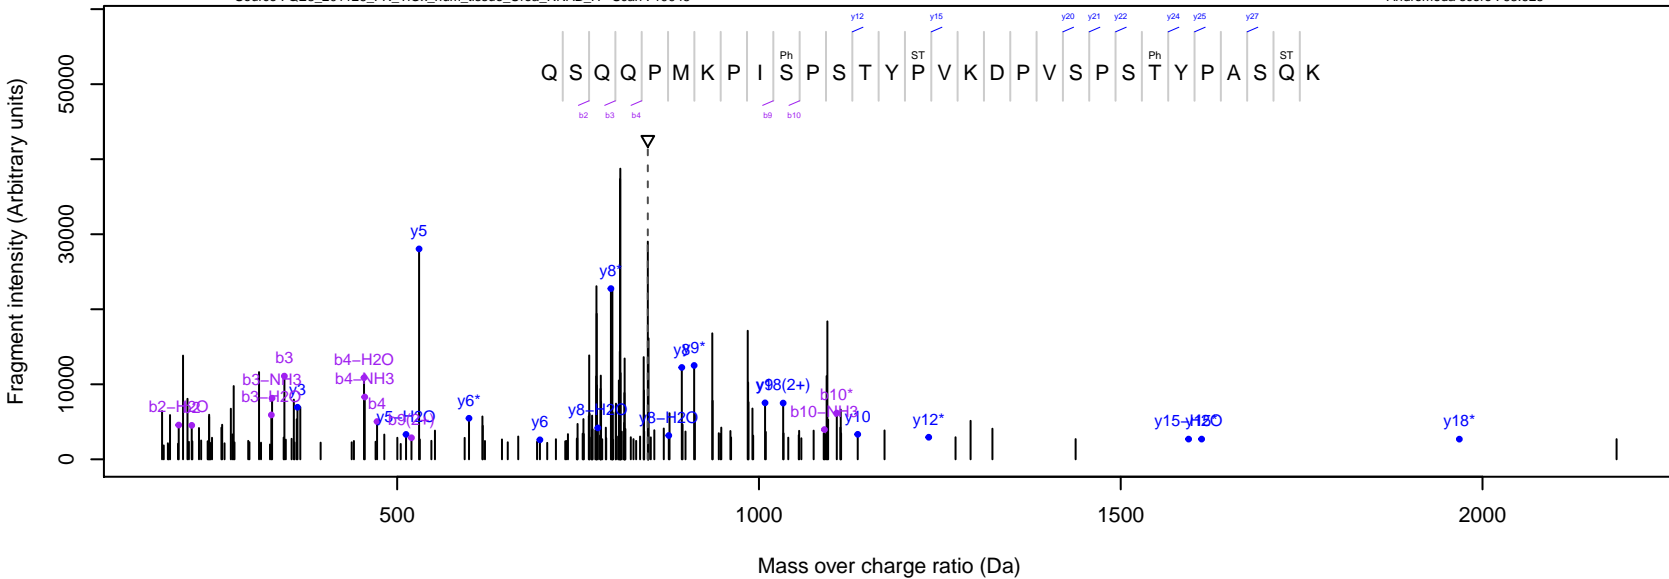

ALPAAEDGS(Phospho (STY))PVFEGPPSLK-2+

Source : QE3\_201126\_FR\_TIOx\_hum\_tissue\_Urea\_RNAB\_B Scan : 43174

Andromeda score : 63.578

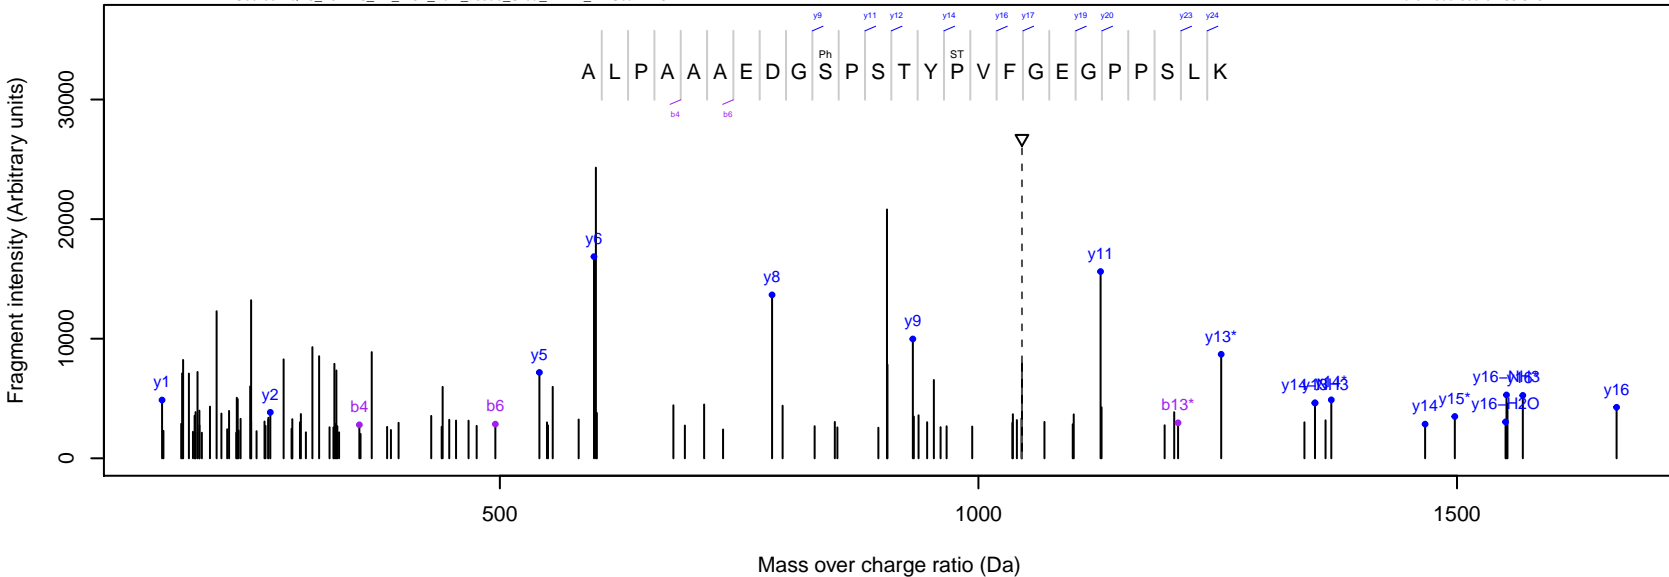

LEEPTAPSTYS(Phospho (STY))PQADSLR-3+

Source : QE3\_201126\_FR\_TiOx\_hum\_tissue\_Urea\_RNAB\_H Scan : 29960

Andromeda score : 63.573

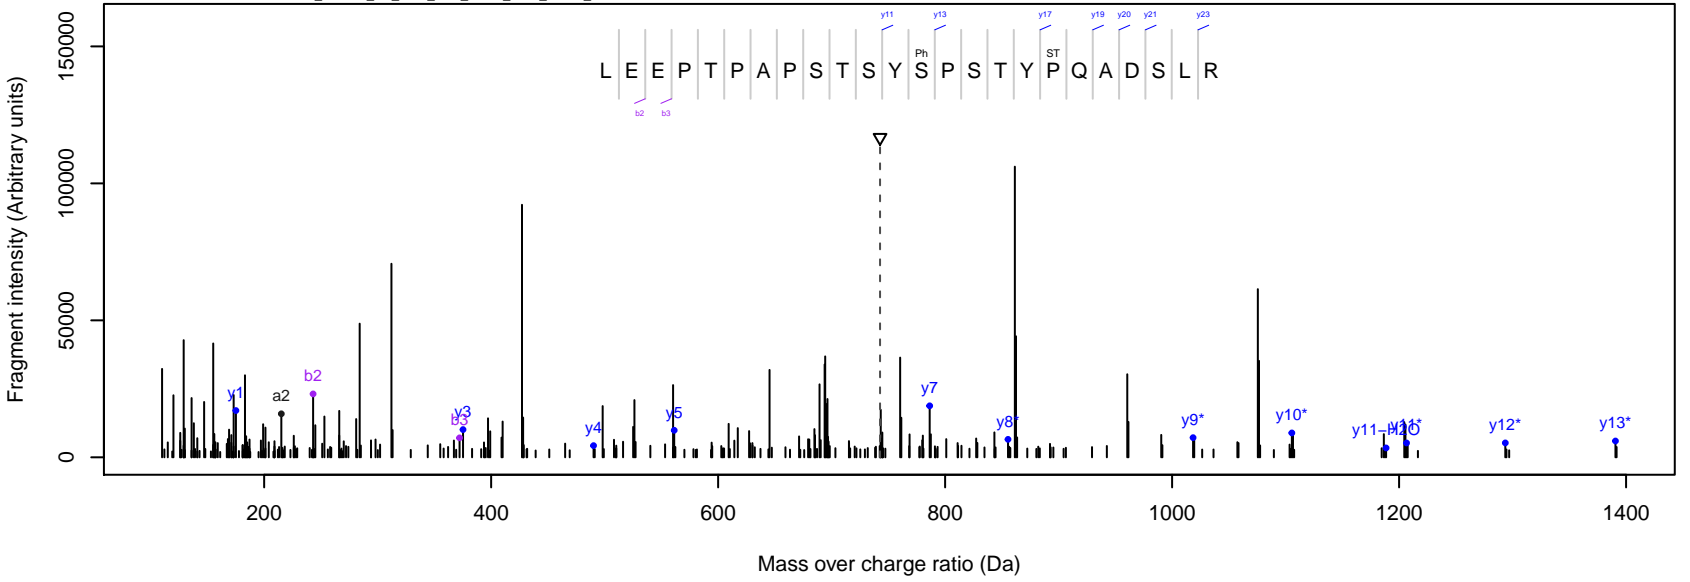

M(Oxidation (M))GSKS(Phospho (STY))PGNTSQPPAFFSK-3+

Source : QE3\_201126\_FR\_TiOx\_hum\_tissue\_Urea\_RNAB\_B Scan : 20309

Andromeda score : 63.536

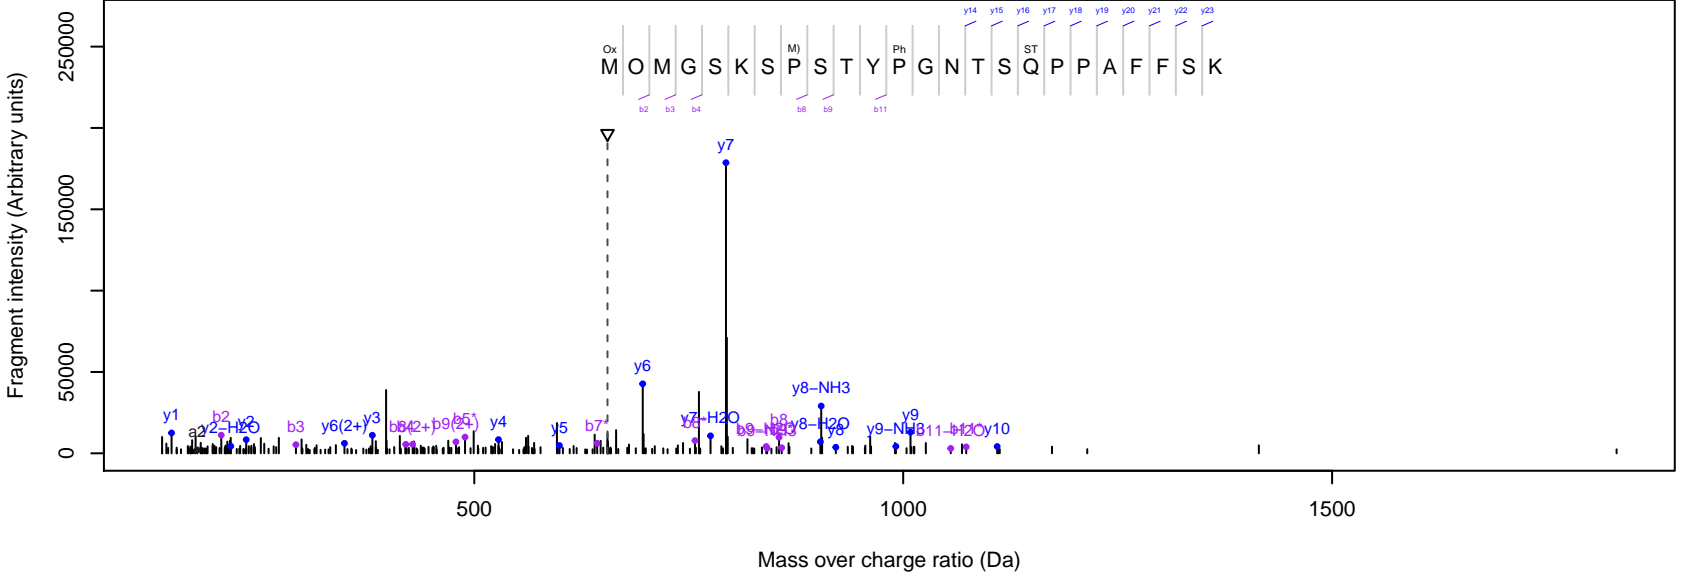

GQAATPETPQP(Phospho (STY))PPGSGSEPYK-3+

Source : QE3\_201126\_FR\_TiOx\_hum\_tissue\_Urea\_RNAB\_H Scan : 20487

Andromeda score : 63.491

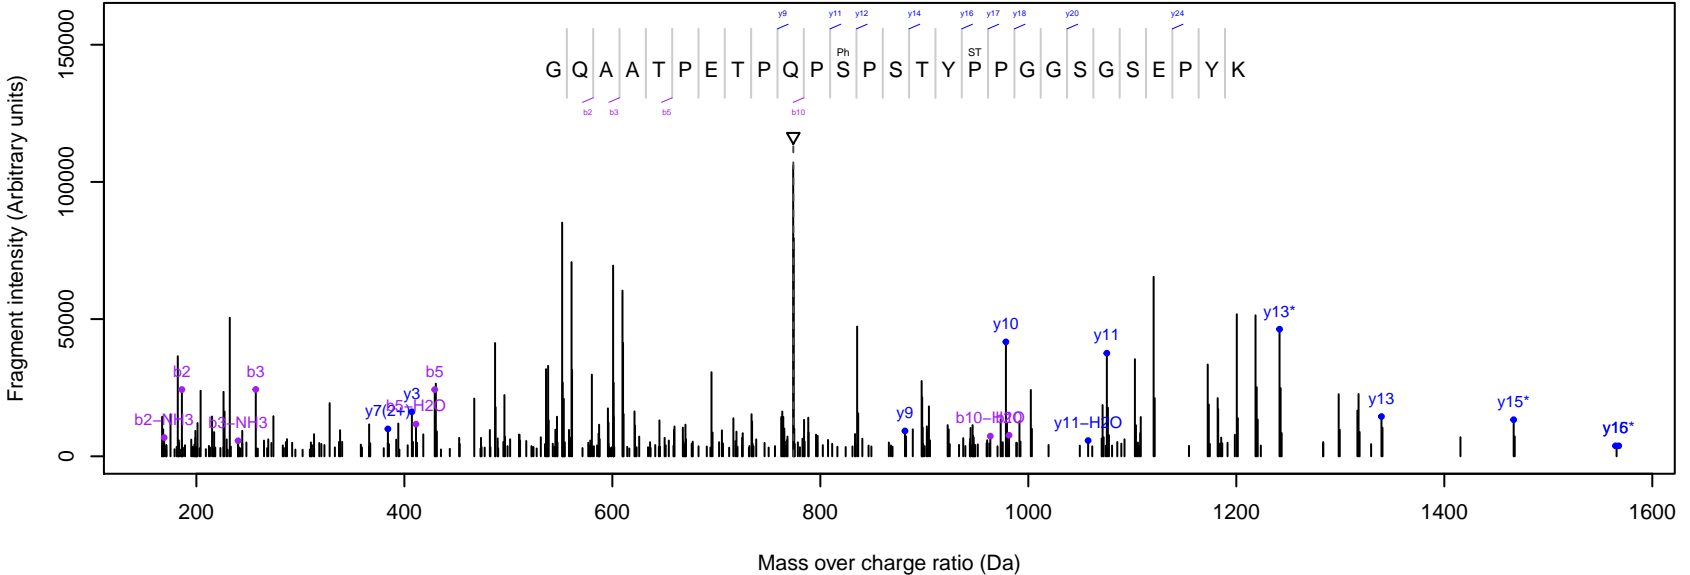

RDS(Phospho (STY))FIGTPYWM(Oxidation (M))APEVVMCETSK-3+

Source : QE3\_201126\_FR\_TiOx\_hum\_tissue\_Urea\_RNAB\_N Scan : 52493

Andromeda score : 63.491

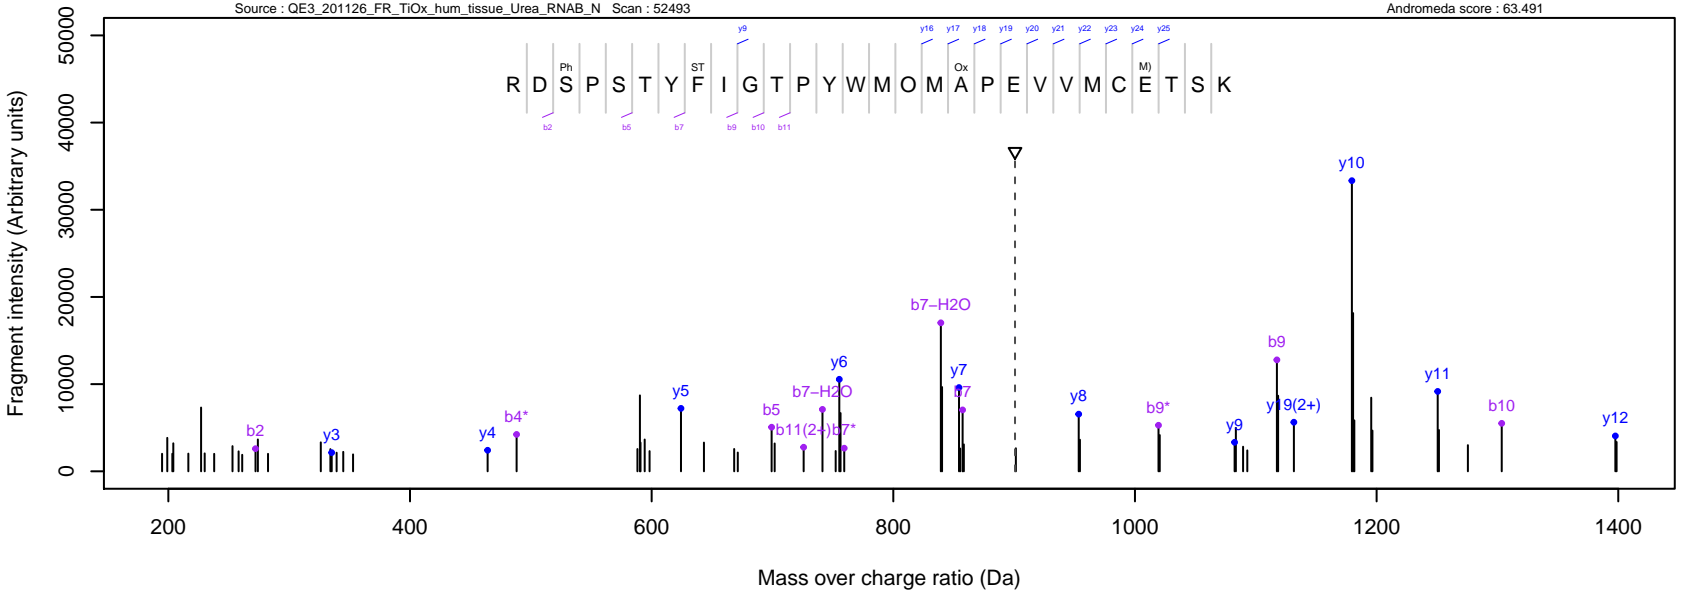

TLSVAAFNEDEDS(Phospho (STY))EPEEMPPEAK-3+

Source : QE3\_201126\_FR\_TiOx\_hum\_tissue\_Urea\_RNAB\_B Scan : 45040

Andromeda score : 63.491

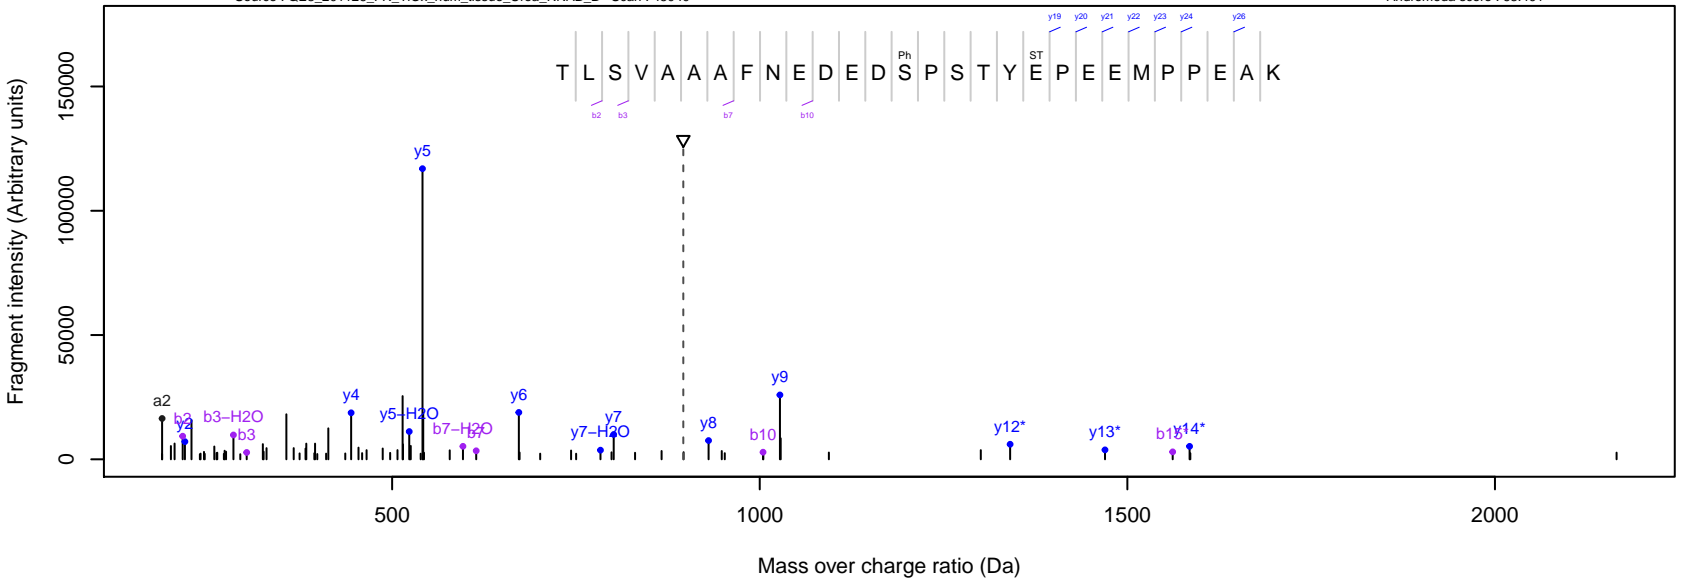

QS(Phospho (STY))PGPALAR-2+

Source : QE3\_201126\_FR\_TiOx\_hum\_tissue\_Urea\_RNAB\_H Scan : 10870

Andromeda score : 63.48

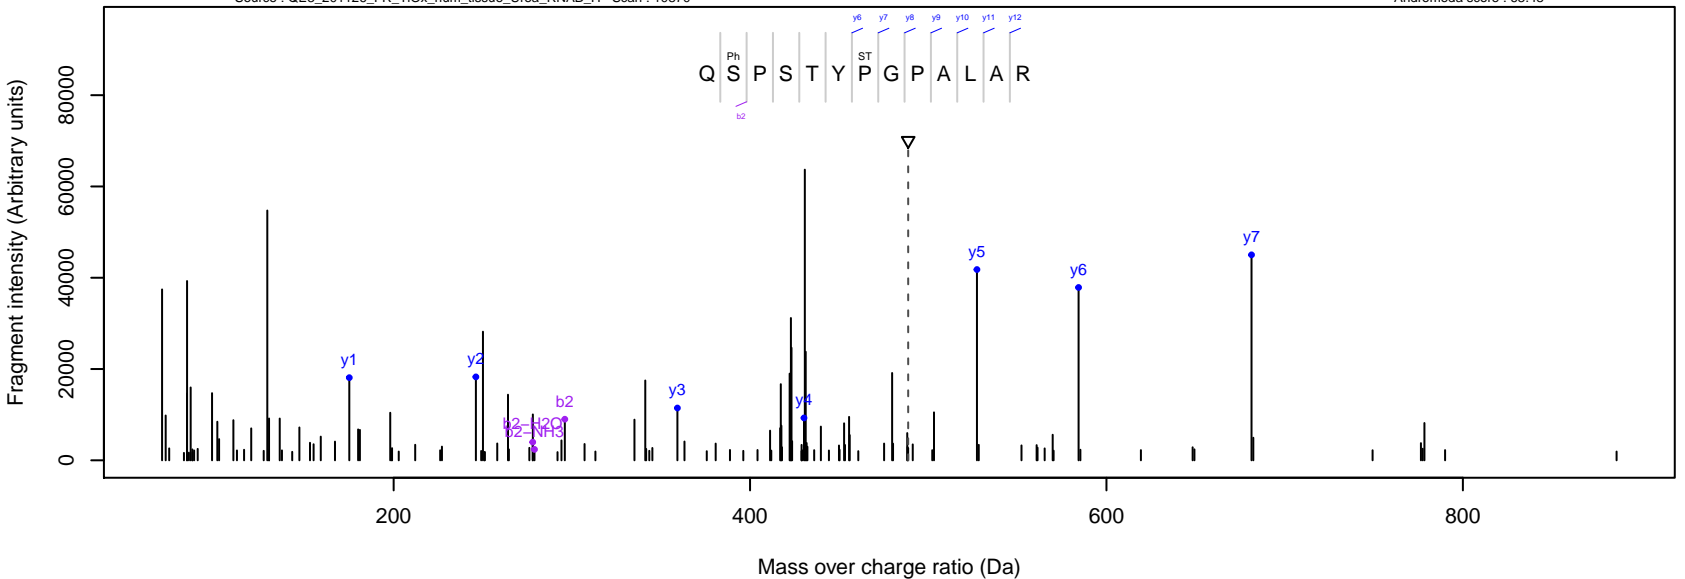

VVT(Phospho (STY))EKSPTDVALFTYEGNSNDIR-3+

Source : QE3\_201126\_FR\_TiOx\_hum\_tissue\_Urea\_RNAB\_H Scan : 46852

Andromeda score : 63.454

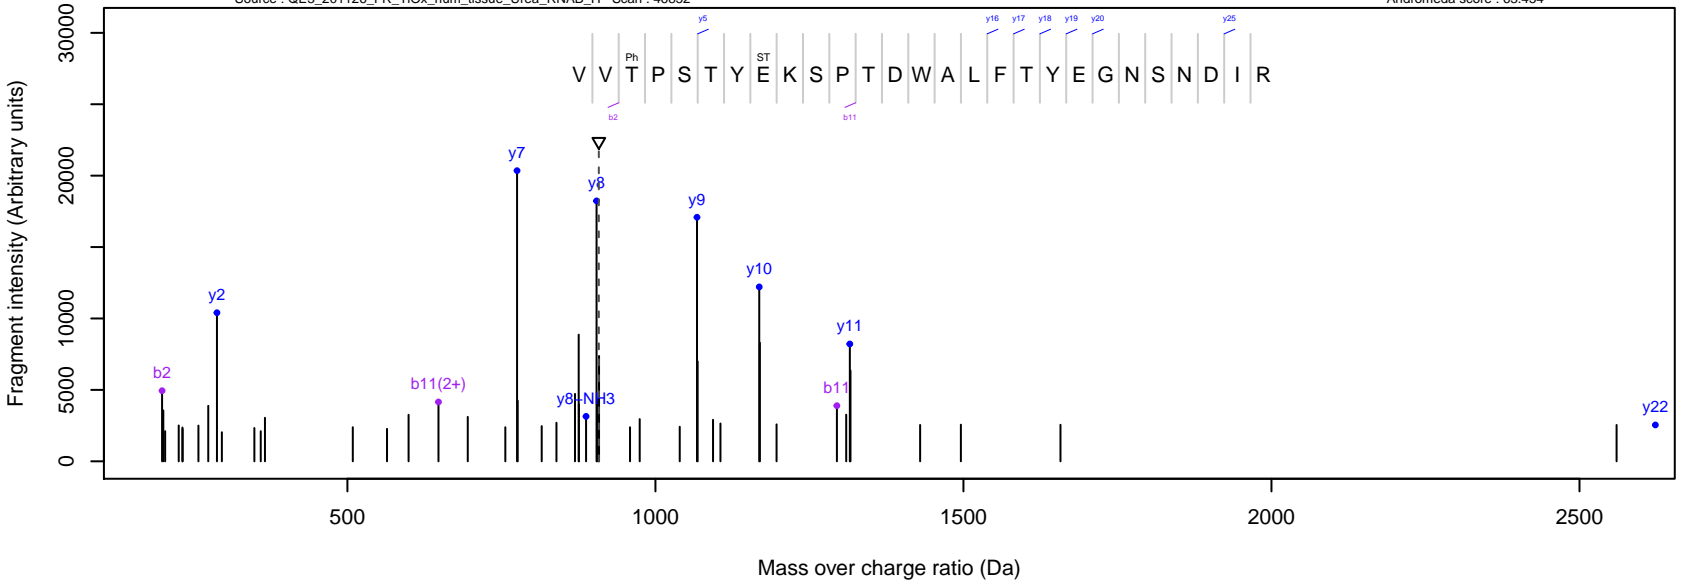

RQDS(Phospho (STY))DLVQCQGVTSPPSSAEATGK-3+

Source : QE3\_201126\_FR\_TiOx\_hum\_tissue\_Urea\_RNAB\_H Scan : 18217

Andromeda score : 63.427

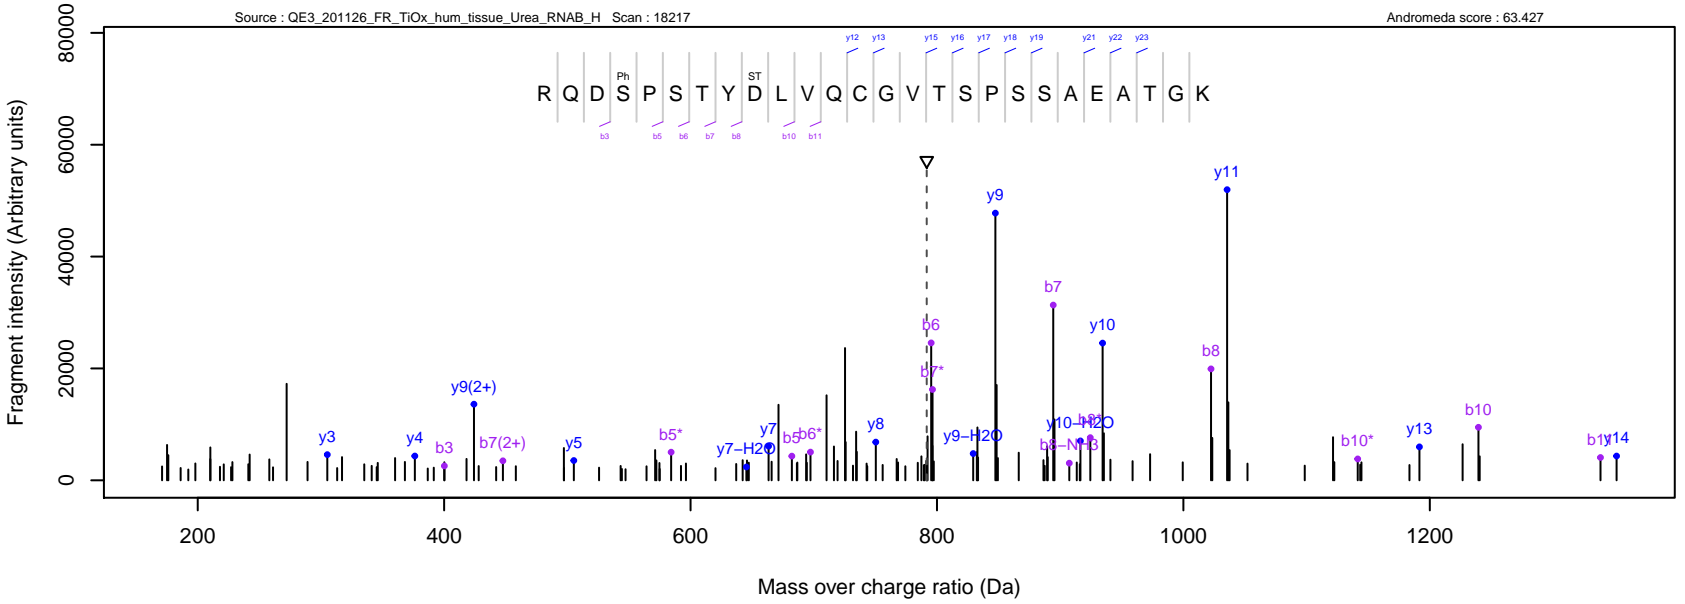

SLLSHEFQDET(Phospho (STY))DT(Phospho (STY))EEETLYSSKH-3+

Source : QE3\_201126\_FR\_TiOx\_hum\_tissue\_Urea\_RNAB\_B Scan : 36523

Andromeda score : 63.427

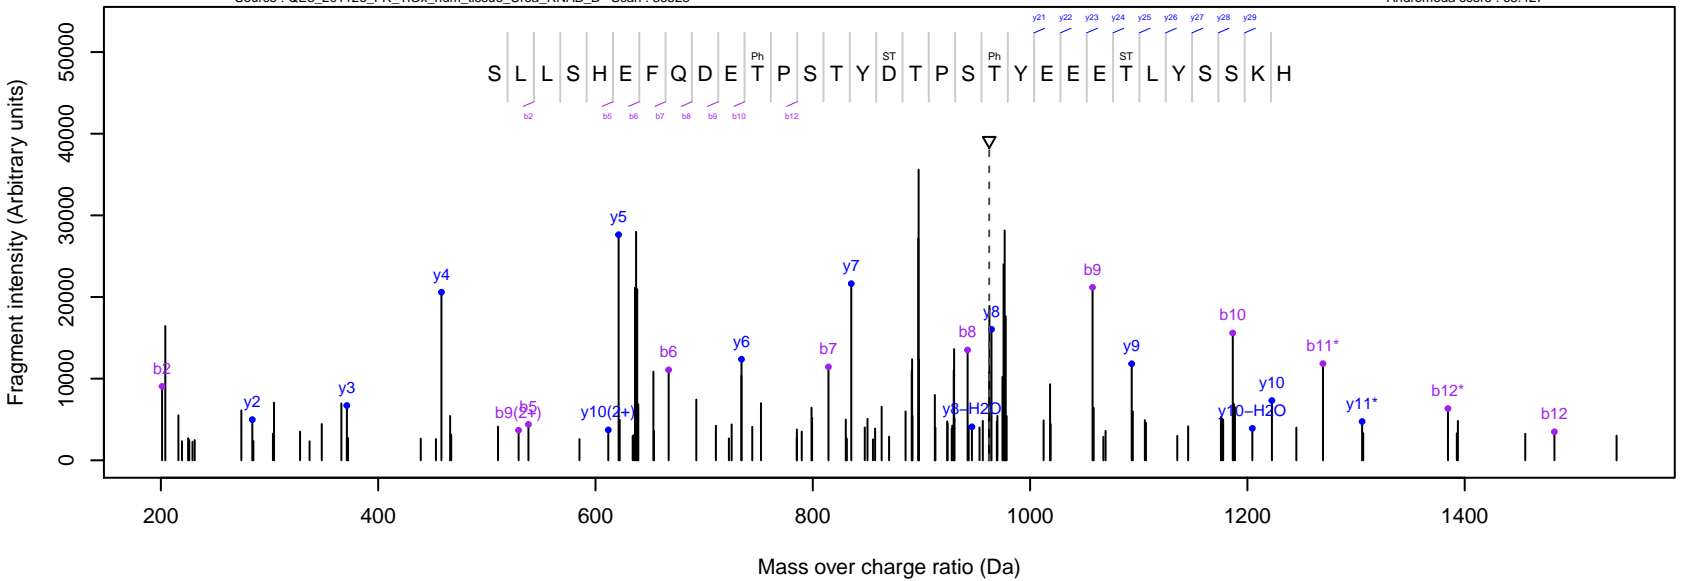

DCLCQLCAQPM(Oxidation (M))S(Phospho (STY))SSPKETTFSSNCAGCGR-3+

Source : QE3\_201126\_FR\_TiOx\_hum\_tissue\_Urea\_RNAB\_N Scan : 27144

Andromeda score : 63.426

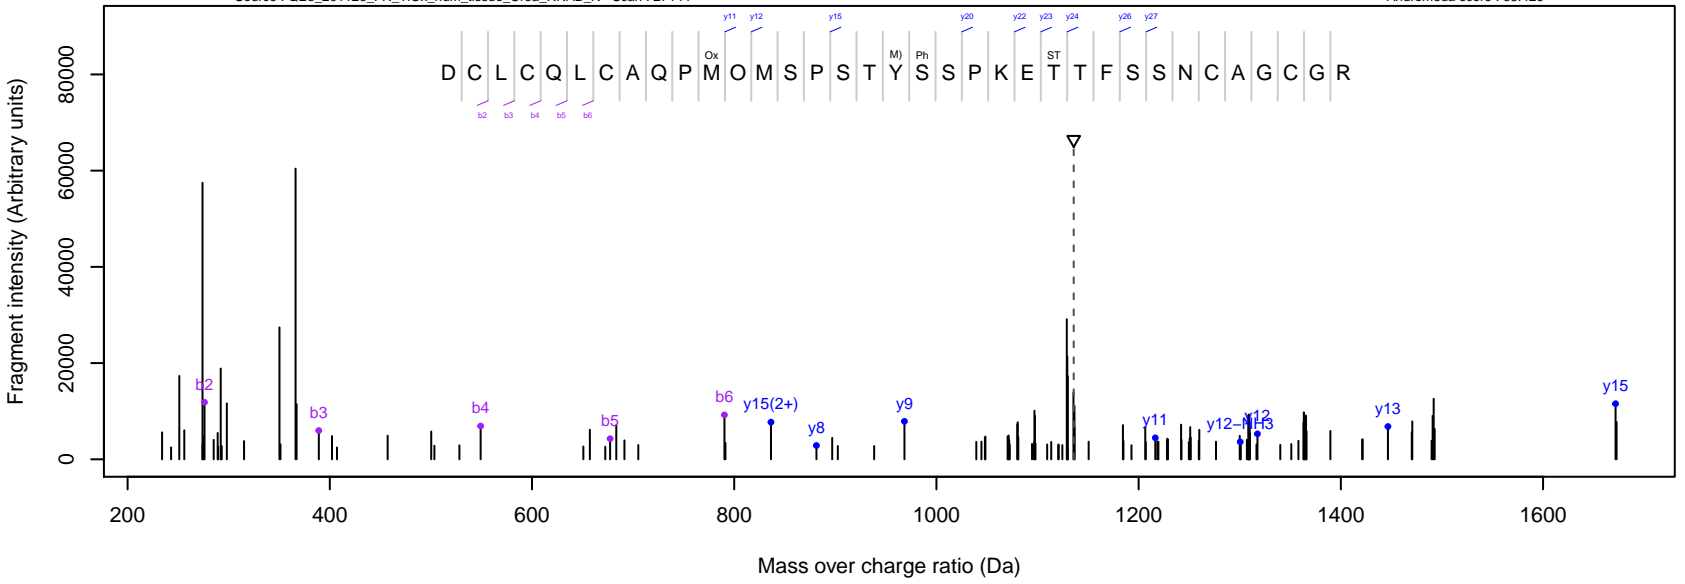

RIDS(Phospho (STY))FVKR-3+

Source : QE3\_201126\_FR\_TiOx\_hum\_tissue\_Urea\_RNAB\_B Scan : 11175

Andromeda score : 63.408

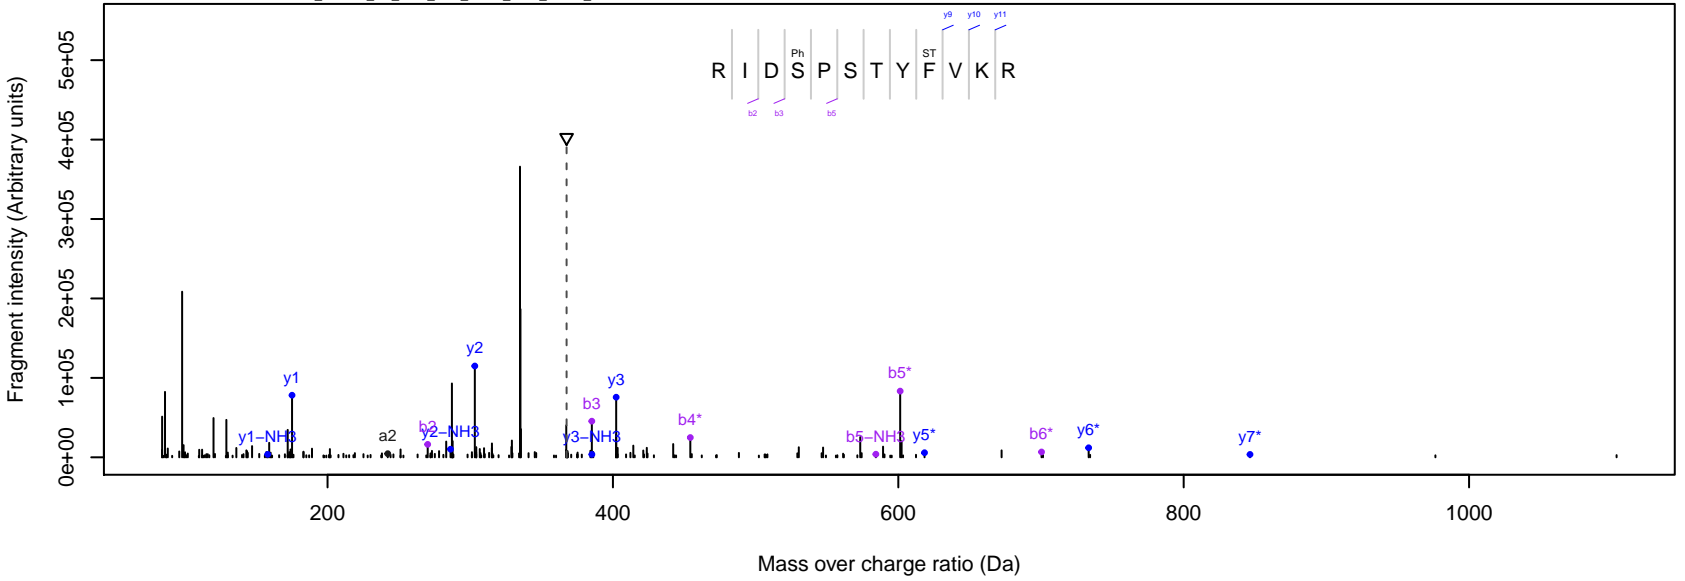

SRS(Phospho (STY))PLAIR-2+

Source : QE3\_201126\_FR\_TiOx\_hum\_tissue\_Urea\_RNAB\_N Scan : 10151

Andromeda score : 63.408

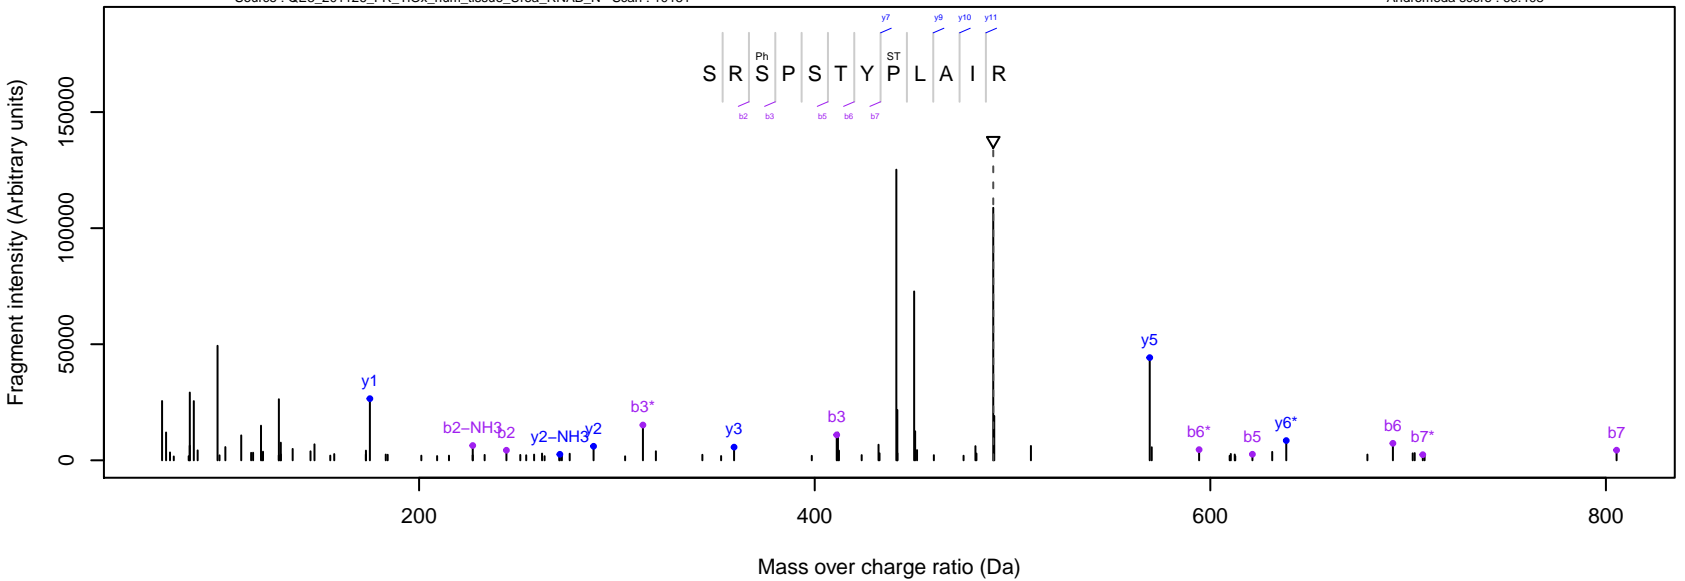



TCS(Phospho (STY))LPDLSK-2+

Source : QE3\_201126\_FR\_TiOx\_hum\_tissue\_Urea\_RNAB\_N Scan : 22504

Andromeda score : 63.408

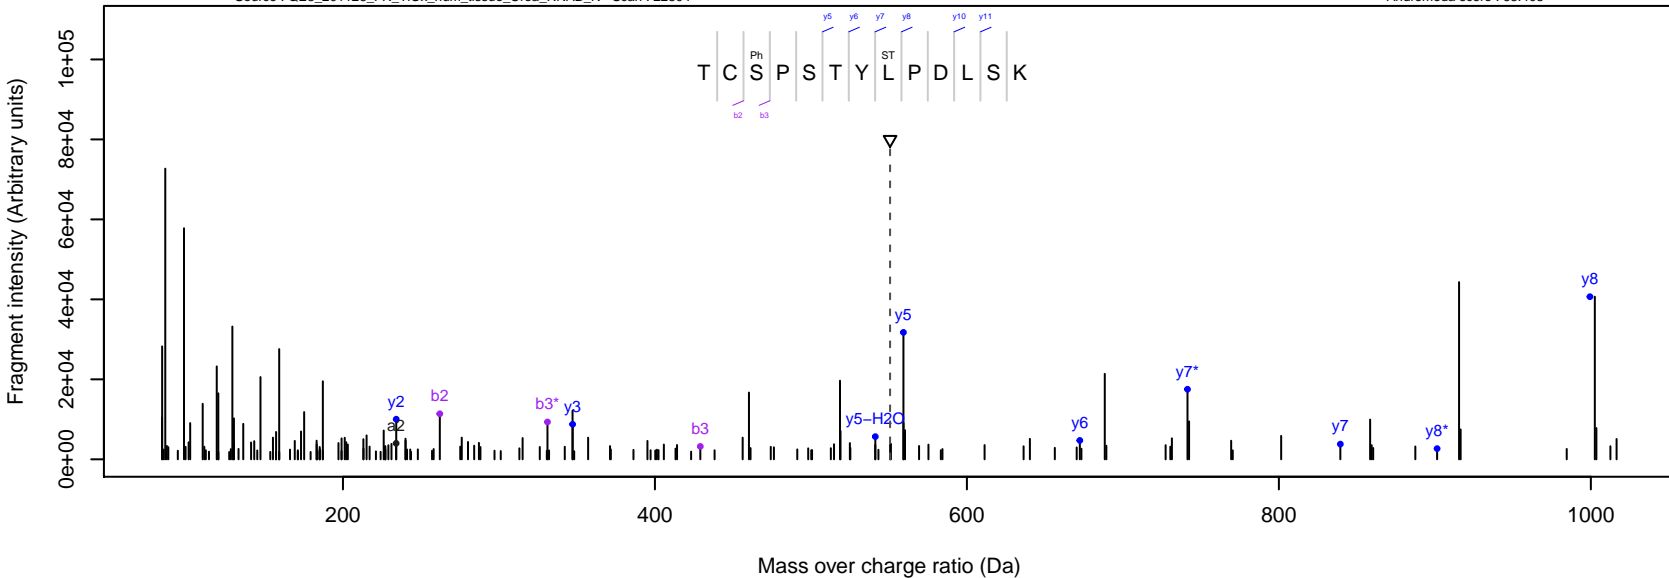

S(Phospho (STY))SPSARPPDVPGQQPQAAK-3+

Source : QE3\_201126\_FR\_TiOx\_hum\_tissue\_Urea\_RNAB\_N Scan : 12571

Andromeda score : 63.398

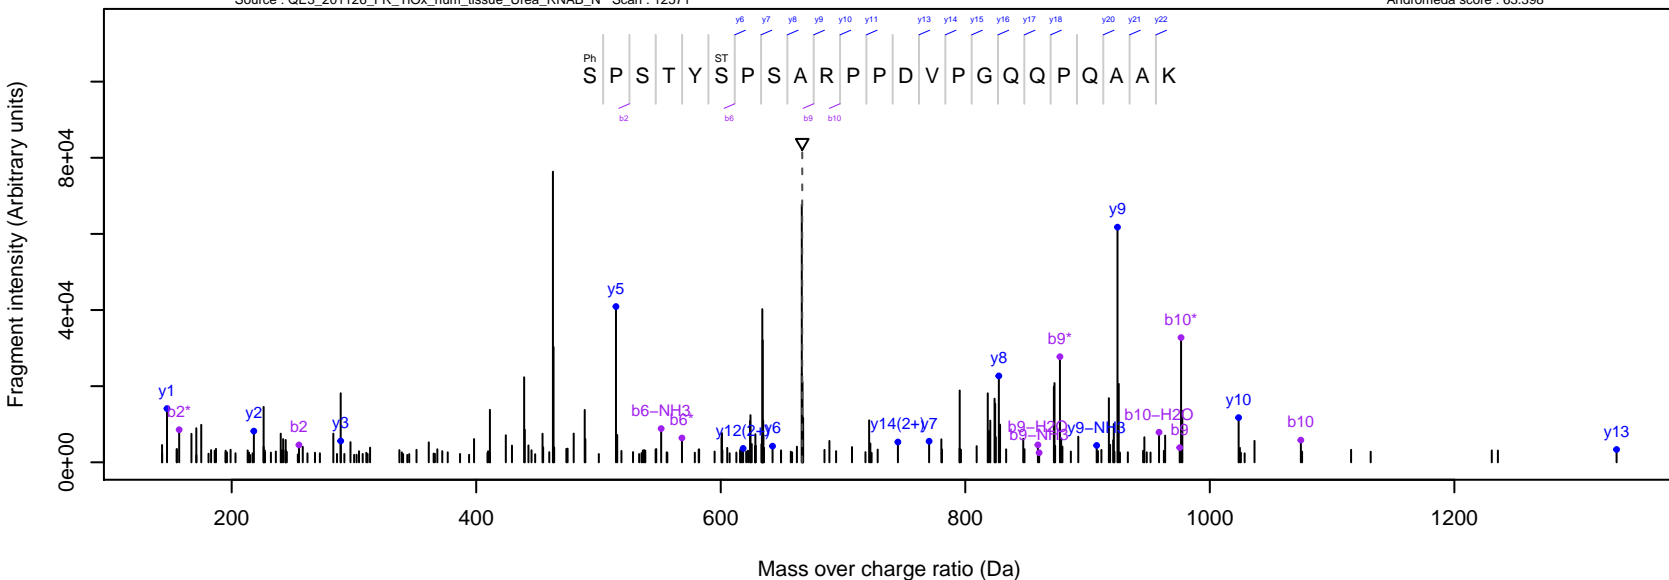

VQNHLPASGPTQPVPVSSSTNEGS(Phospho (STY))PS(Phospho (STY))PPEPTGK-3+

Source : QE3\_201126\_FR\_TiOx\_hum\_tissue\_Urea\_RNAB\_H Scan : 27438

Andromeda score : 63.394

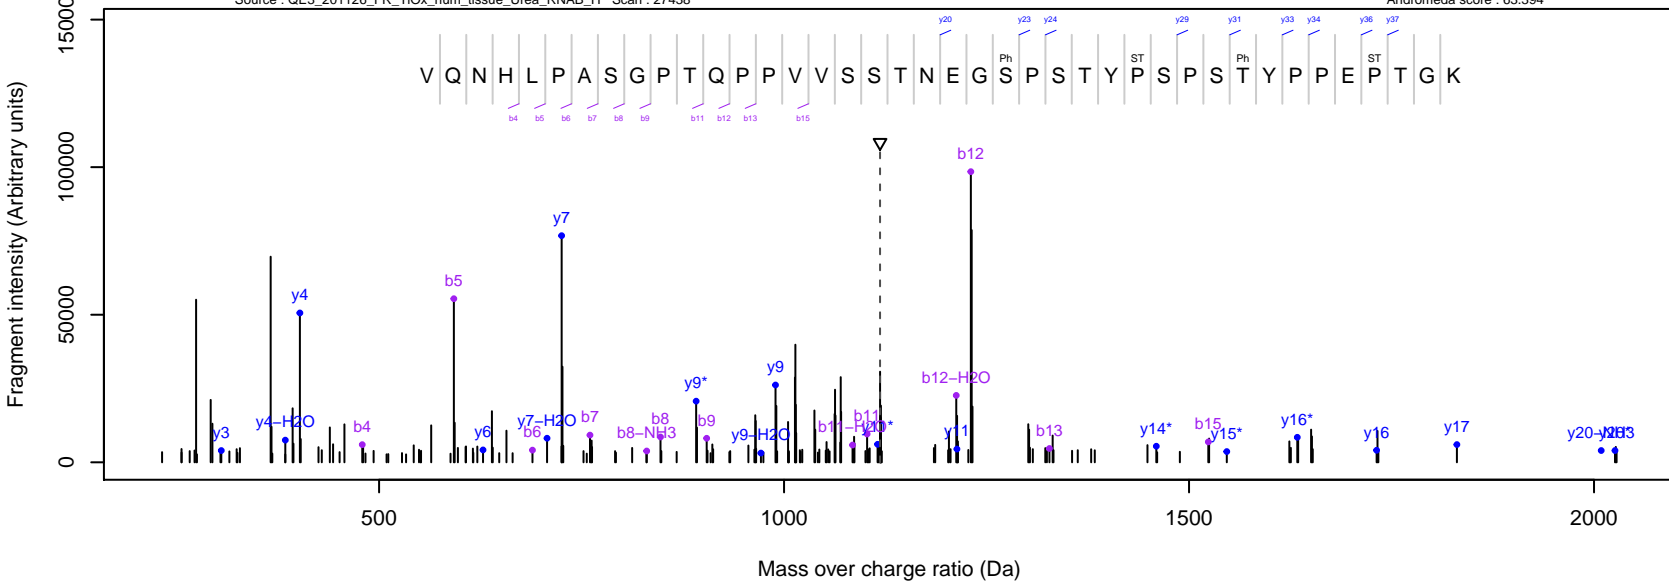

SNSQSDSHDEEV(Phospho (STY))PTPPNPVVK-3+

Source : QE3\_201126\_FR\_TiOx\_hum\_tissue\_Urea\_RNAB\_N Scan : 17555

Andromeda score : 63.361

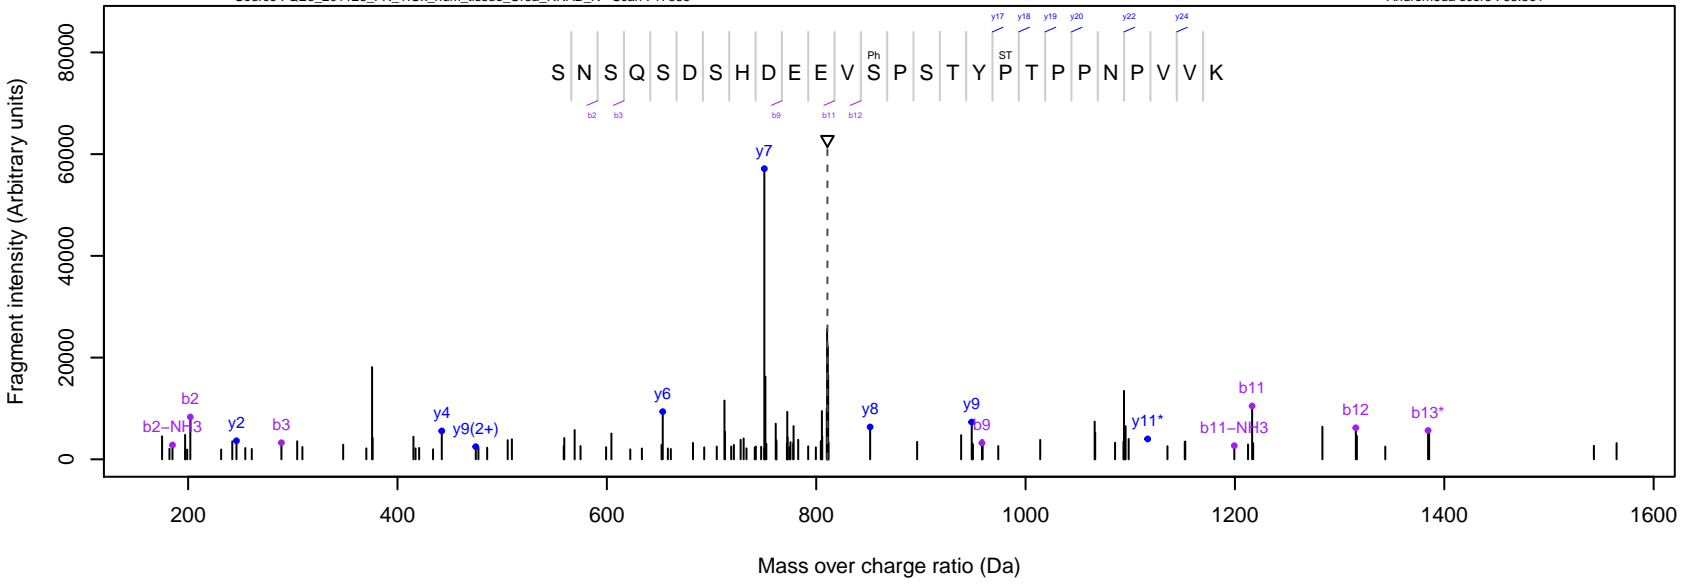

TASIKPEVALLDTQDM(Oxidation (M))ENMS(Phospho (STY))DDDGWEFVNLGDQQSFGIK-4+

Source : QE3\_201126\_FR\_TiOx\_hum\_tissue\_Urea\_RNAB\_N Scan : 59465

Andromeda score : 63.331

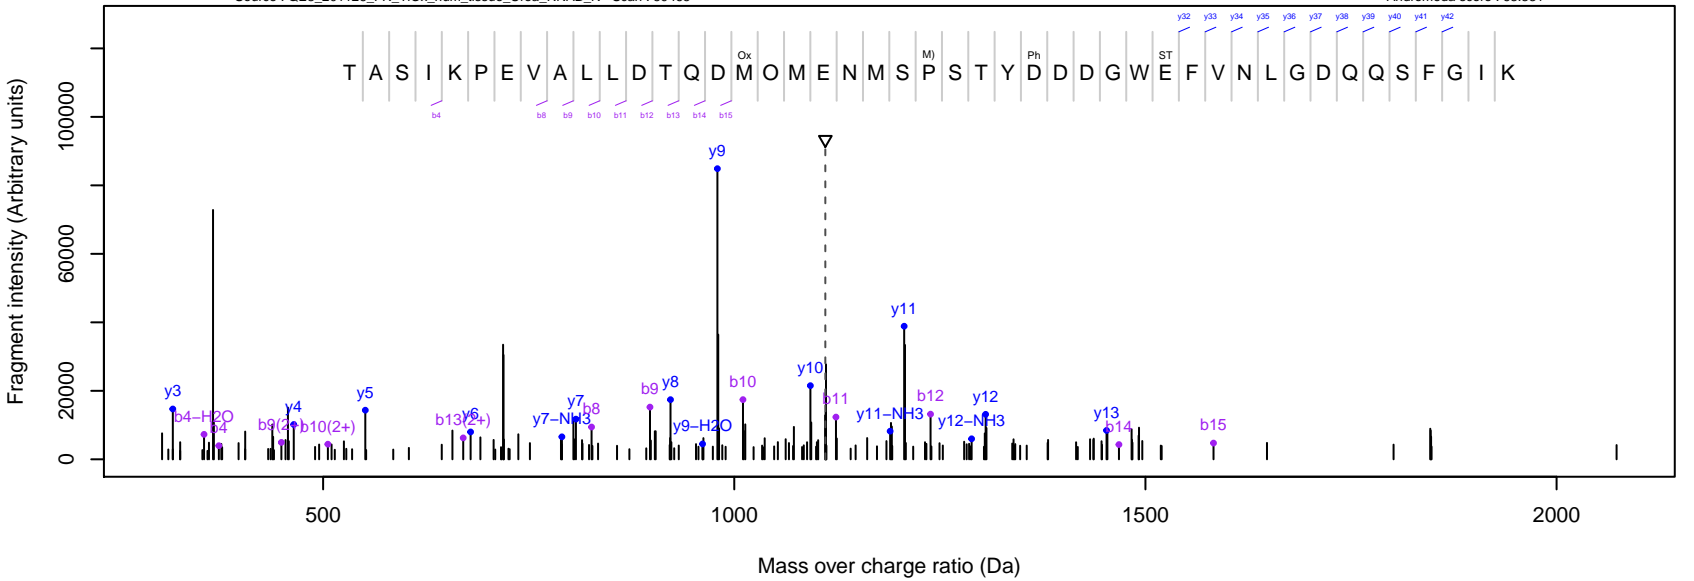

RANS(Phospho (STY))YEDAMMOMPFPGATIIISQLLK-3+

Source : QE3\_201126\_FR\_TiOx\_hum\_tissue\_Urea\_RNAB\_H Scan : 61604

Andromeda score : 63.323

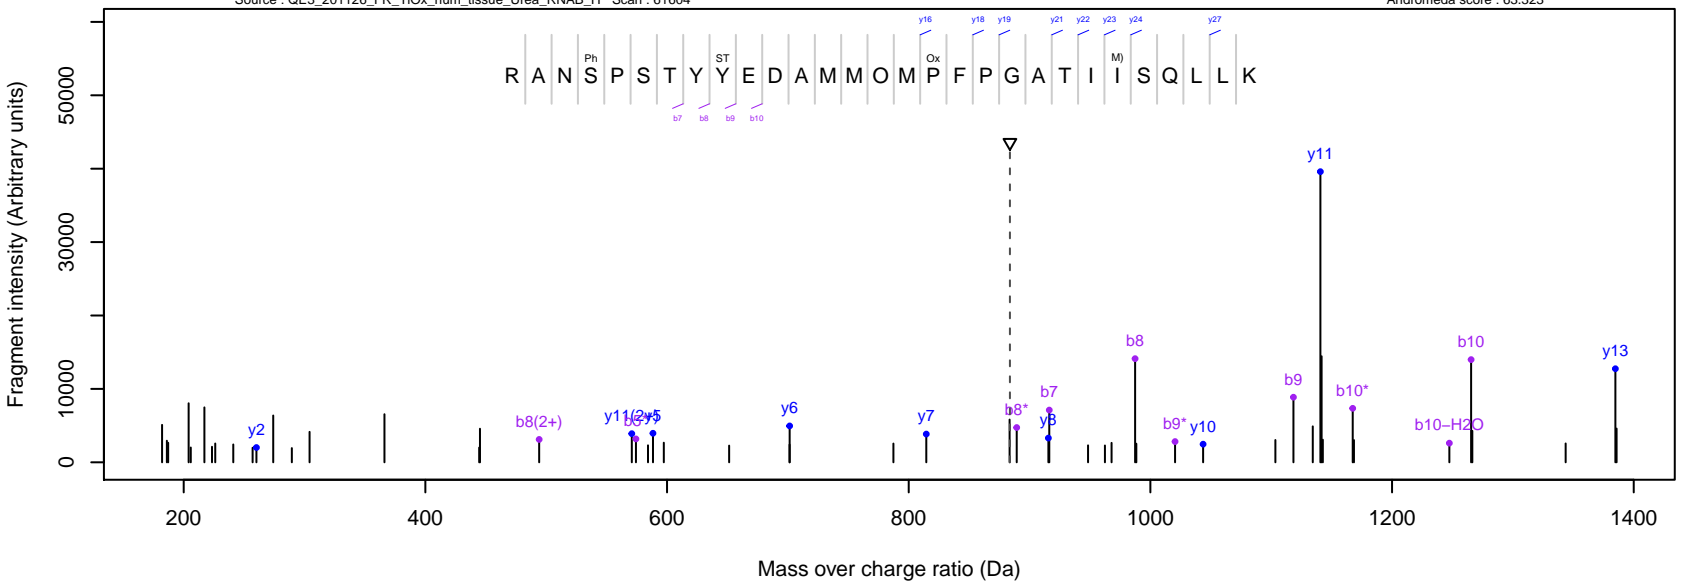

NPFRGS(Phospho (STY))PK-2+

Source : QE3\_201126\_FR\_TiOx\_hum\_tissue\_Urea\_RNAB\_H Scan : 6398

Andromeda score : 63.32

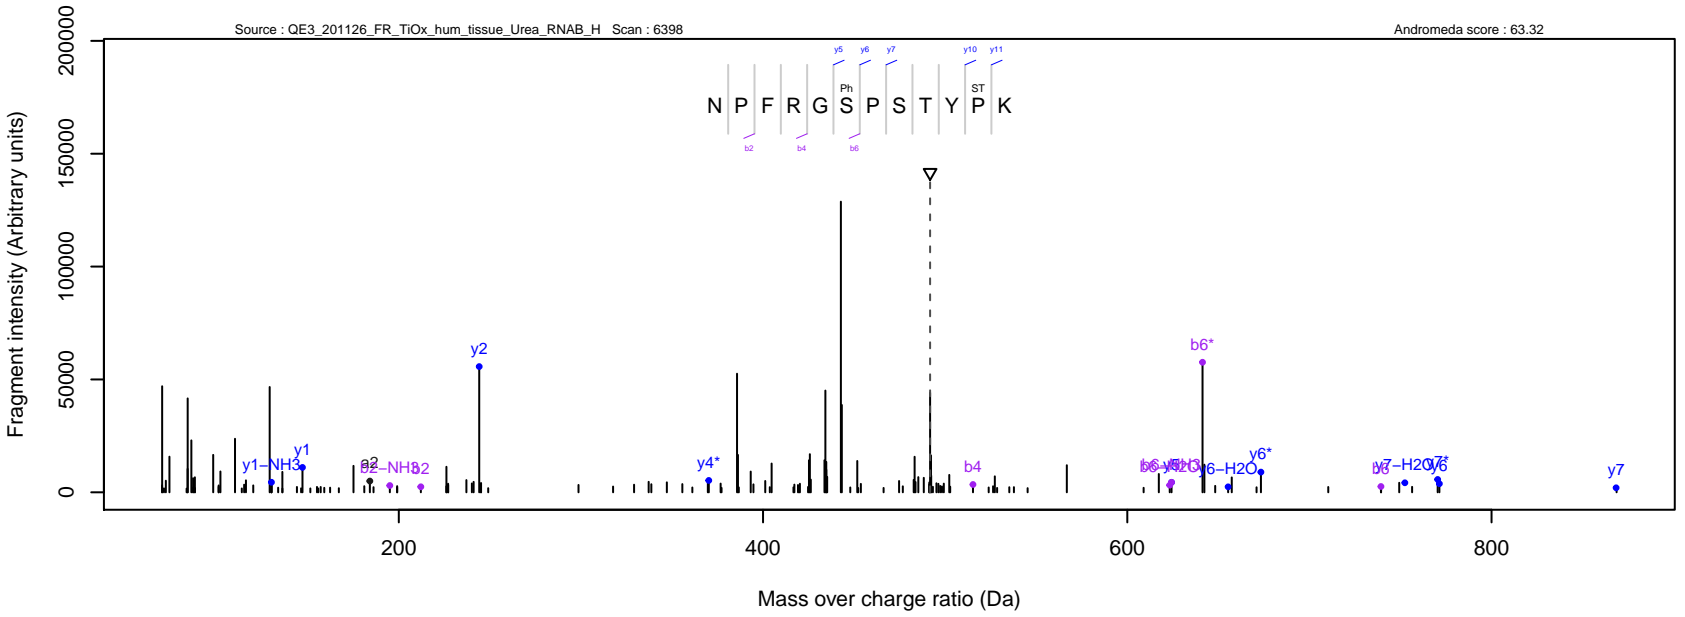

TAQASPNT(Phospho (STY))ELDFGGAAGSDVDQEEIVDER-3+

Source : QE3\_201126\_FR\_TiOx\_hum\_tissue\_Urea\_RNAB\_N Scan : 44404

Andromeda score : 63.282

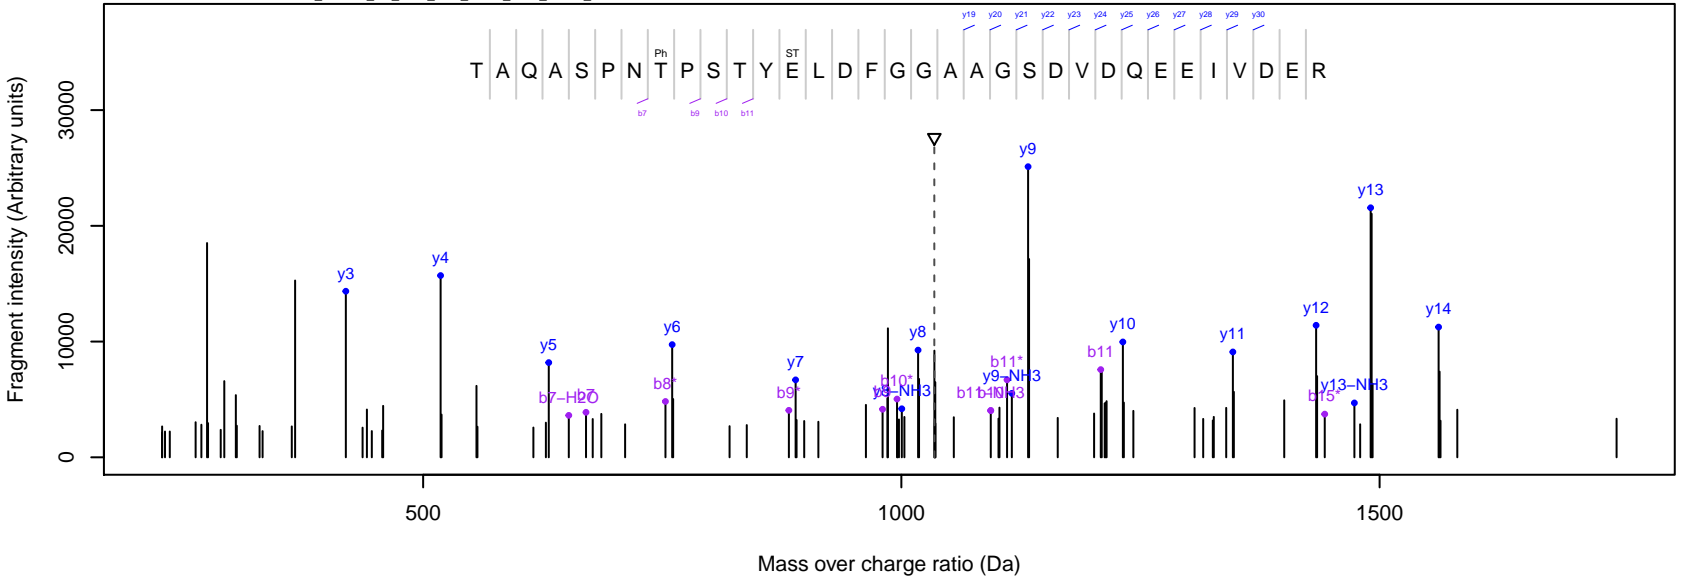

LS(Phospho (STY))IMTSENHLNNSDKEVDEVDAAALSDLEITLEGGK-4+

Source : QE3\_201126\_FR\_TiOx\_hum\_tissue\_Urea\_RNAB\_H Scan : 61164

Andromeda score : 63.23

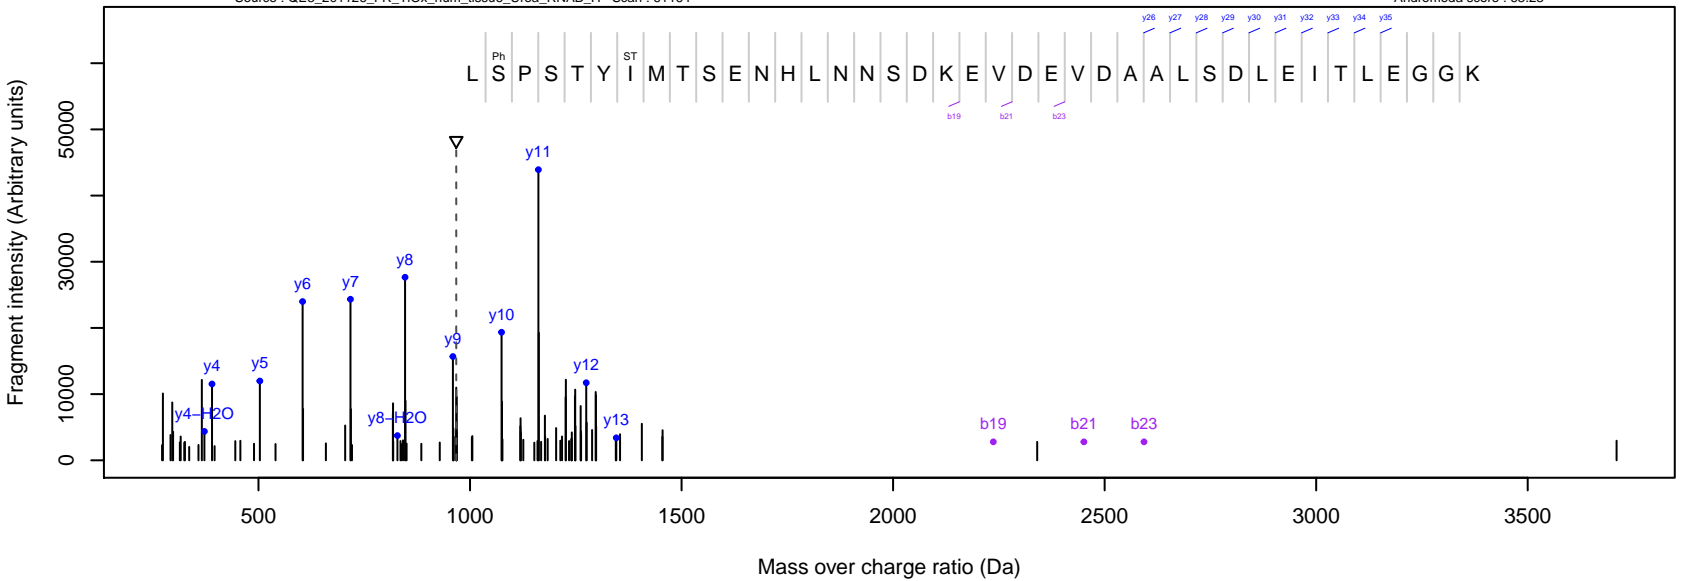

S(Phospho (STY))KGSLEITESQSADAEP PPPKPLDSR-3+

Source : QE3\_201126\_FR\_TIOx\_hum\_tissue\_Urea\_RNAB\_H Scan : 23886

Andromeda score : 63.23

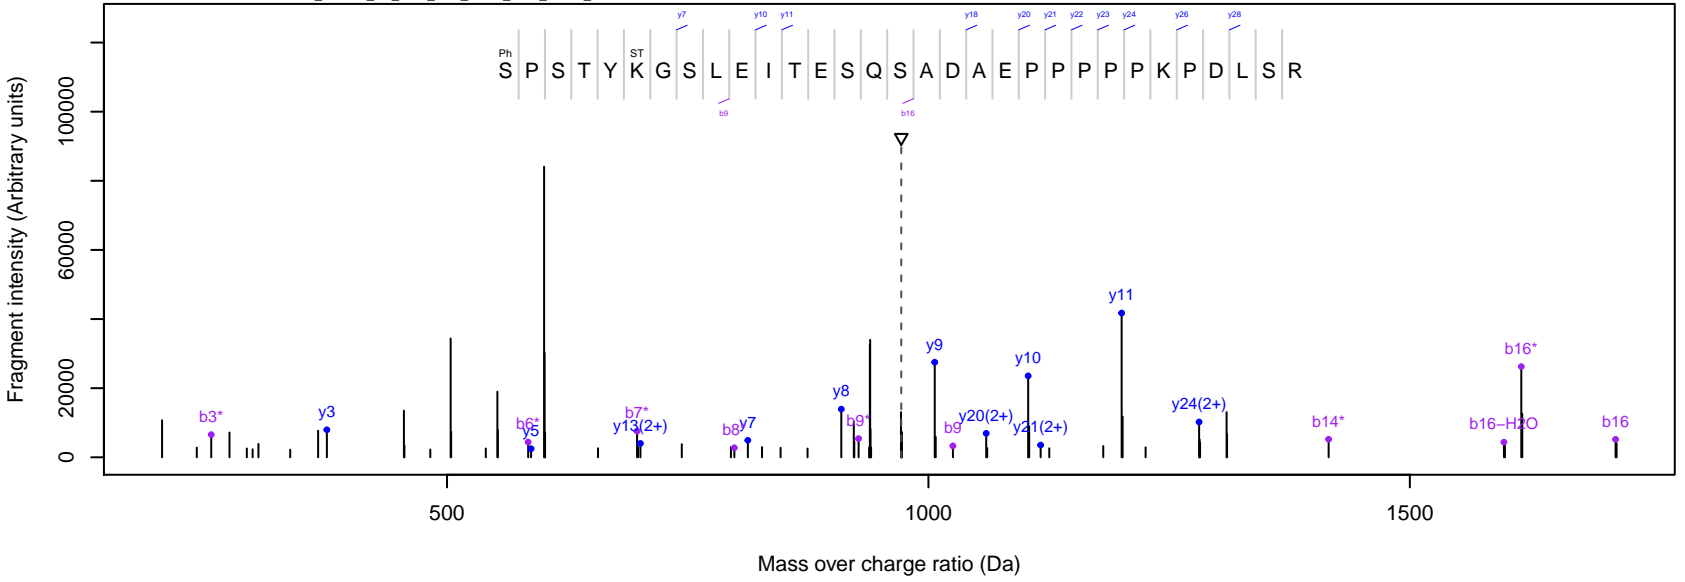

(Acetyl (Protein N-term))SAAGLLAPAPAQAGAPPAPEYYPEEDEELES(Phospho (STY))AEDDER-4+

Source : QE3\_201126\_FR\_TIOx\_hum\_tissue\_Urea\_RNAB\_N Scan : 61103

Andromeda score : 63.189

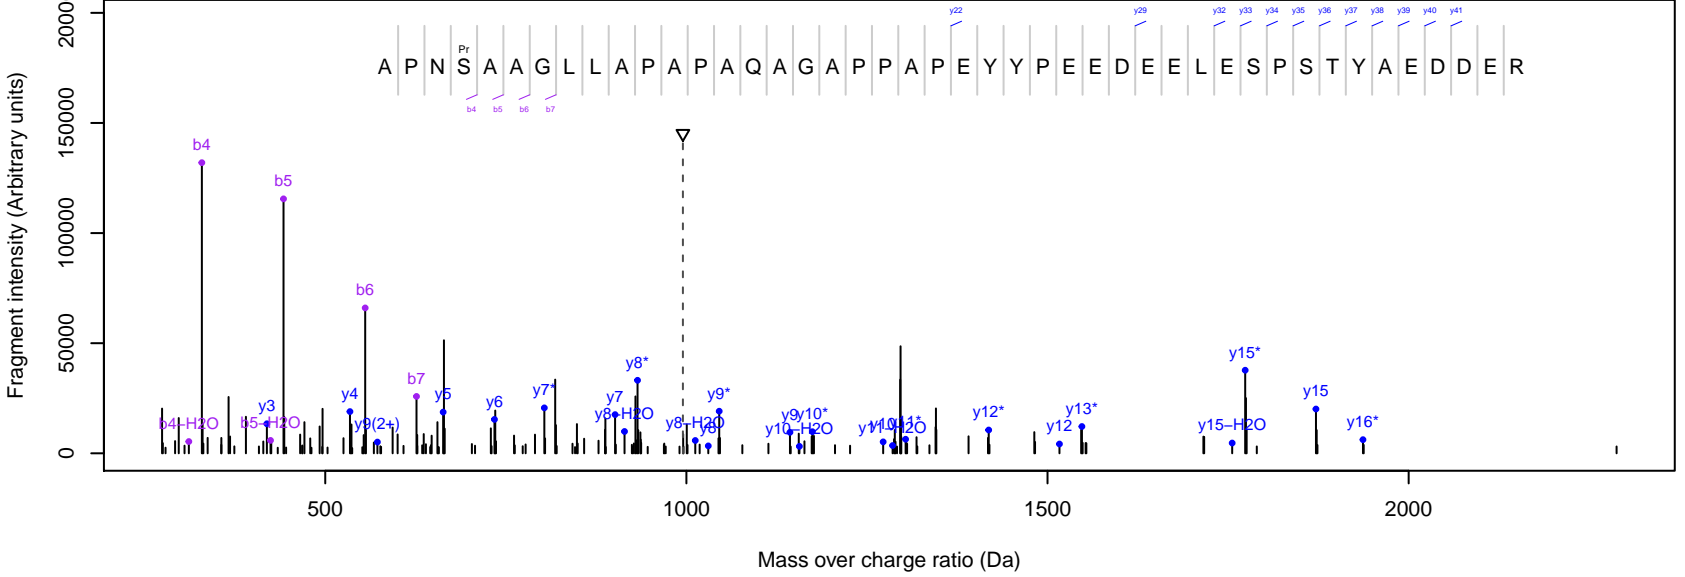

S(Phospho (STY))SPVPPVPERR-3+

Source : QE3\_201126\_FR\_TIOx\_hum\_tissue\_Urea\_RNAB\_H Scan : 10898

Andromeda score : 63.185

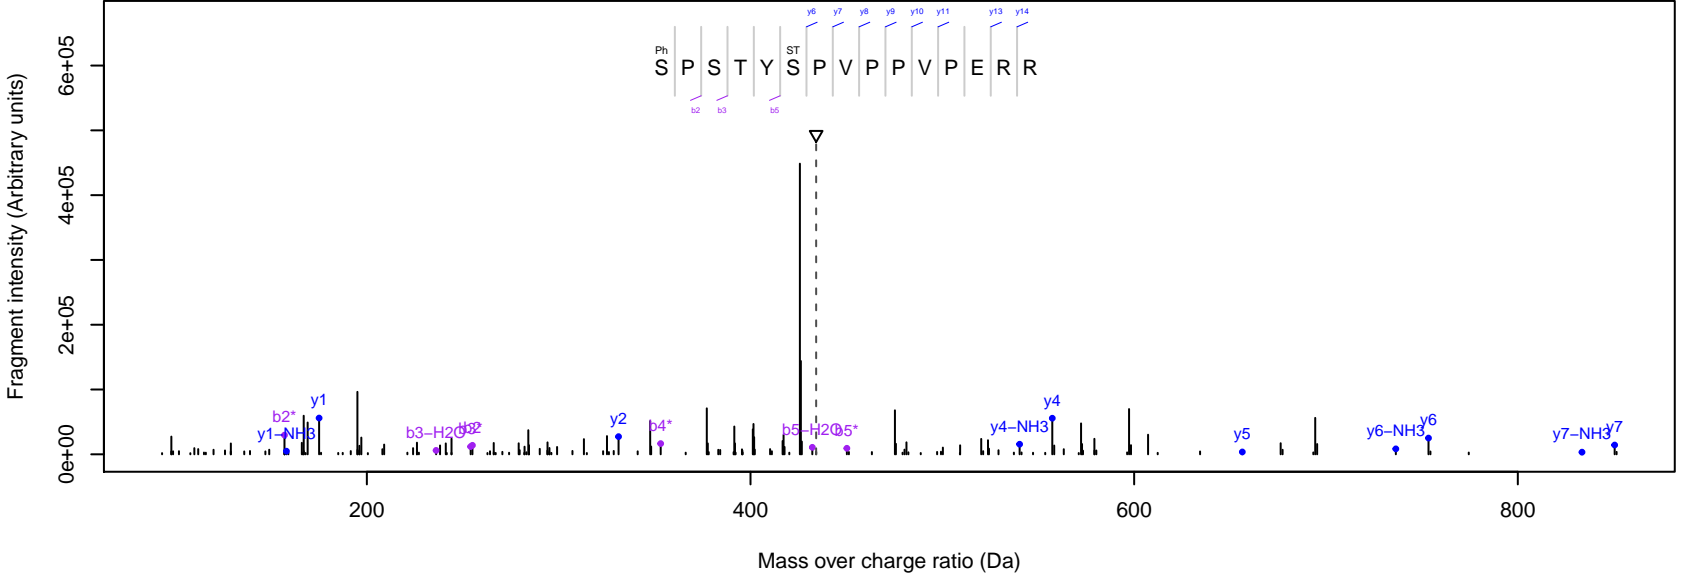

LGFSSPYEGLNKS(Phospho (STY))PK-3+

Source : QE3\_201126\_FR\_TiOx\_hum\_tissue\_Urea\_RNAB\_B Scan : 32697

Andromeda score : 63.184

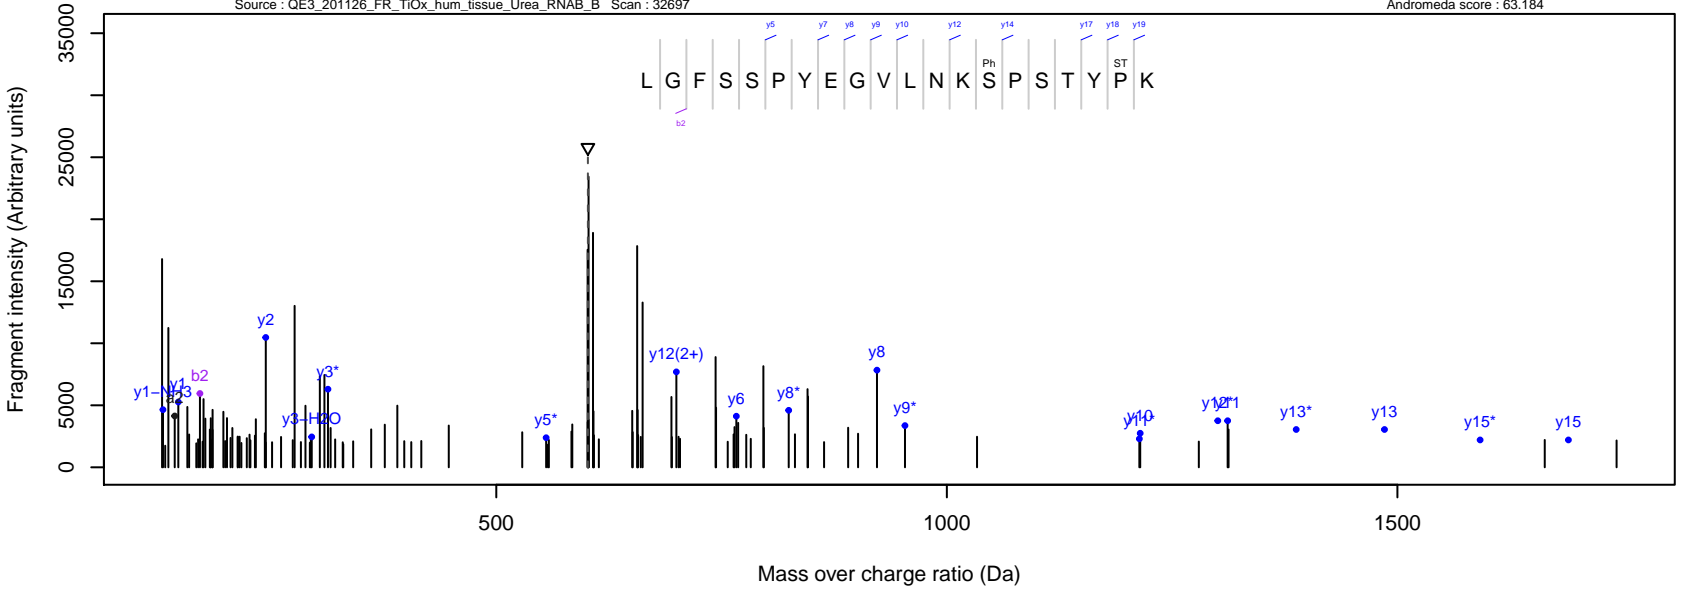

LPS(Phospho (STY))PAPAR-2+

Source : QE3\_201126\_FR\_TiOx\_hum\_tissue\_Urea\_RNAB\_B Scan : 10945

Andromeda score : 63.184

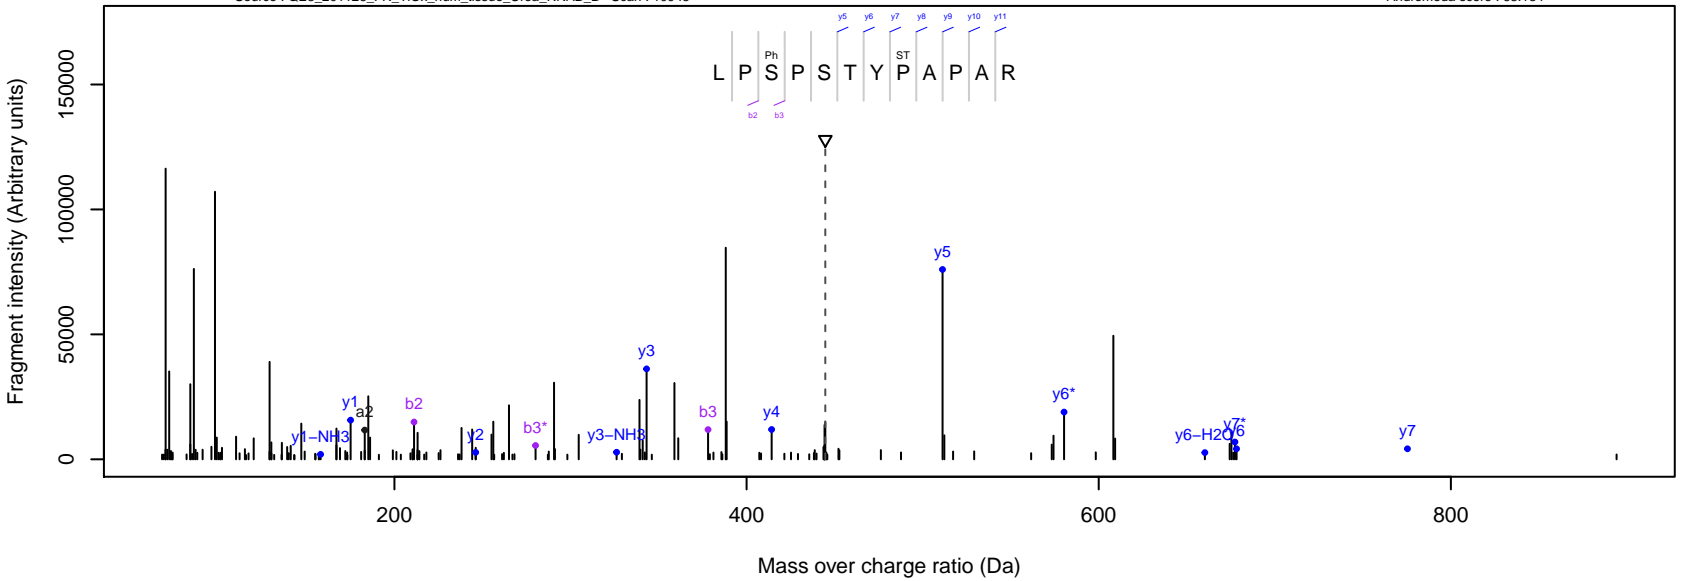

NIQES(Phospho (STY))LPQR-2+

Source : QE3\_201126\_FR\_TiOx\_hum\_tissue\_Urea\_RNAB\_B Scan : 7943

Andromeda score : 63.184

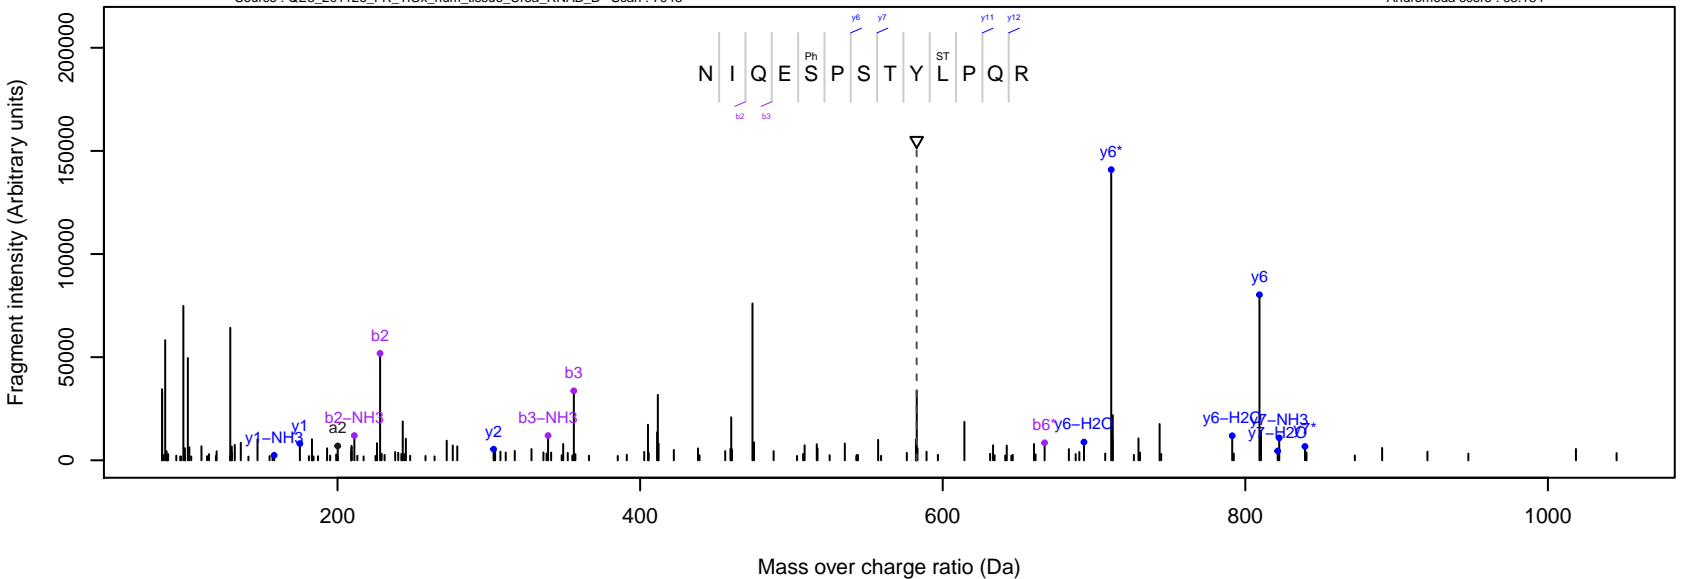

RIDFIPVSPAPS(Phospho (STY))PTR-3+

Source : QE3\_201126\_FR\_TiOx\_hum\_tissue\_Urea\_RNAB\_H Scan : 35716

Andromeda score : 63.184

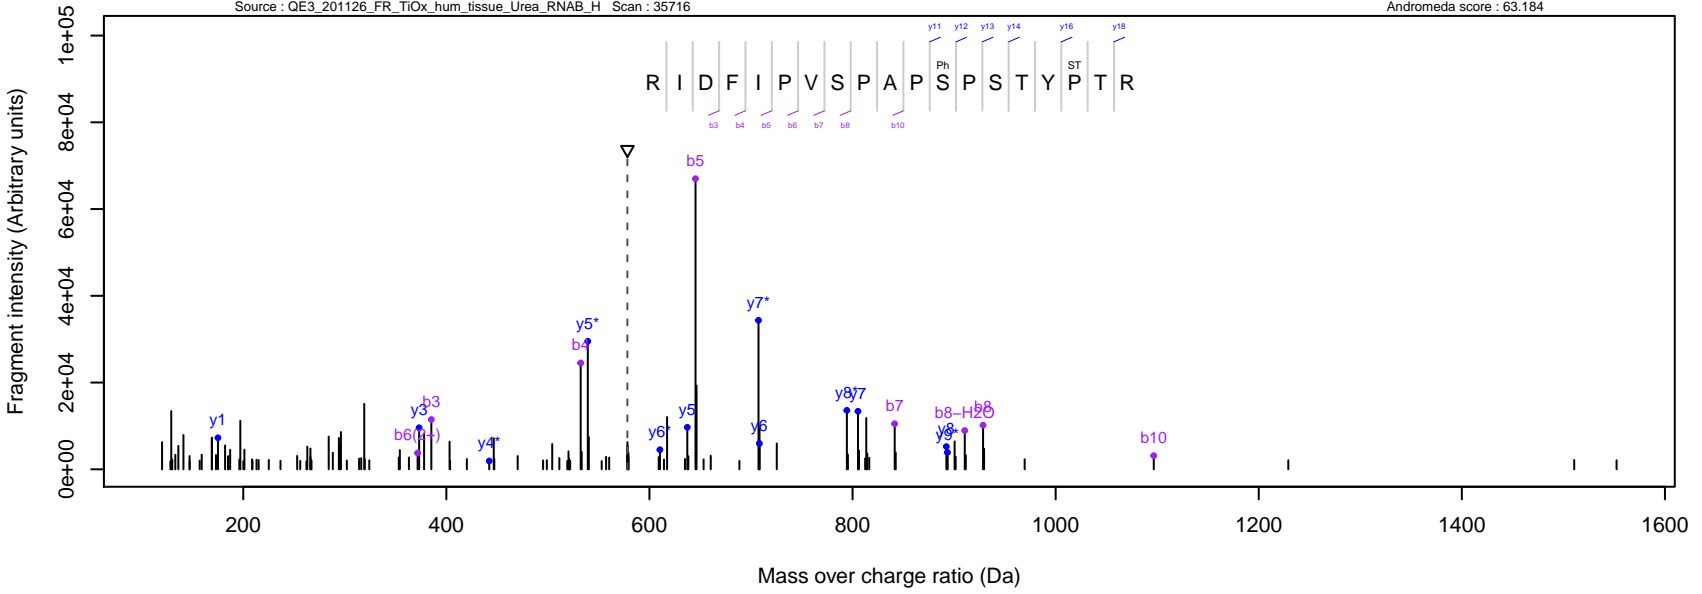

RPES(Phospho (STY))PSEISPIKGSVR-3+

Source : QE3\_201126\_FR\_TiOx\_hum\_tissue\_Urea\_RNAB\_B Scan : 14562

Andromeda score : 63.184

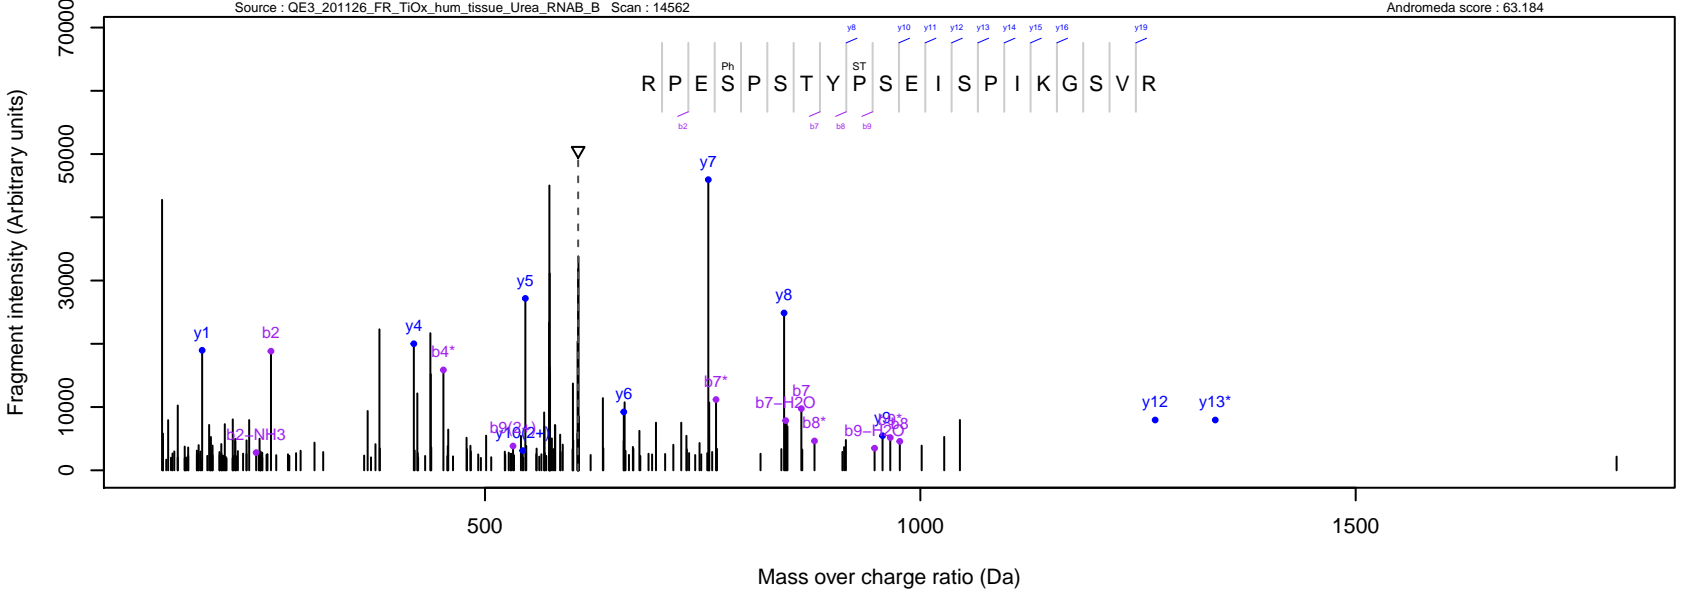

EAQTLDSQIQETSPSTYI-2+

Source : QE3\_201126\_FR\_TiOx\_hum\_tissue\_Urea\_RNAB\_H Scan : 38859

Andromeda score : 63.181

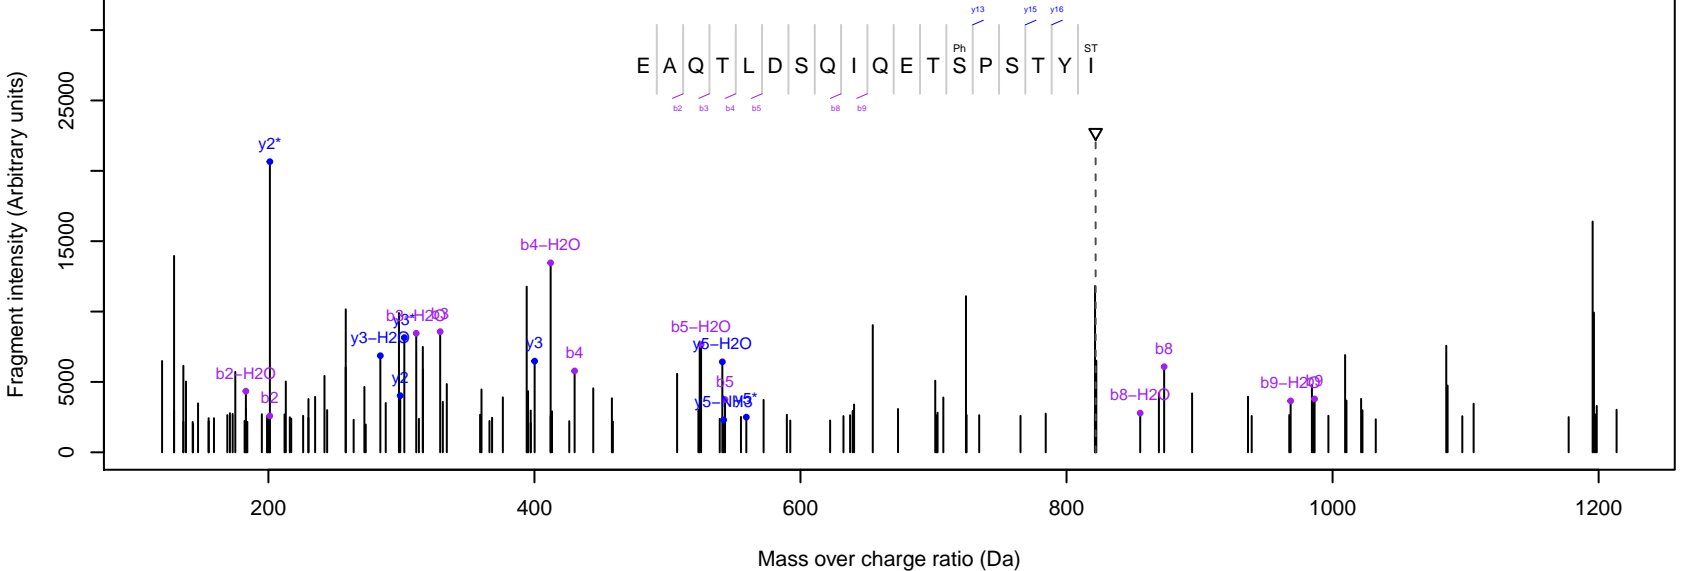

LPS(Phospho (STY))PKS(Phospho (STY))SPAPR-2+

Source : QE3\_201126\_FR\_TiOx\_hum\_tissue\_Urea\_RNAB\_H Scan : 9955

Andromeda score : 63.181

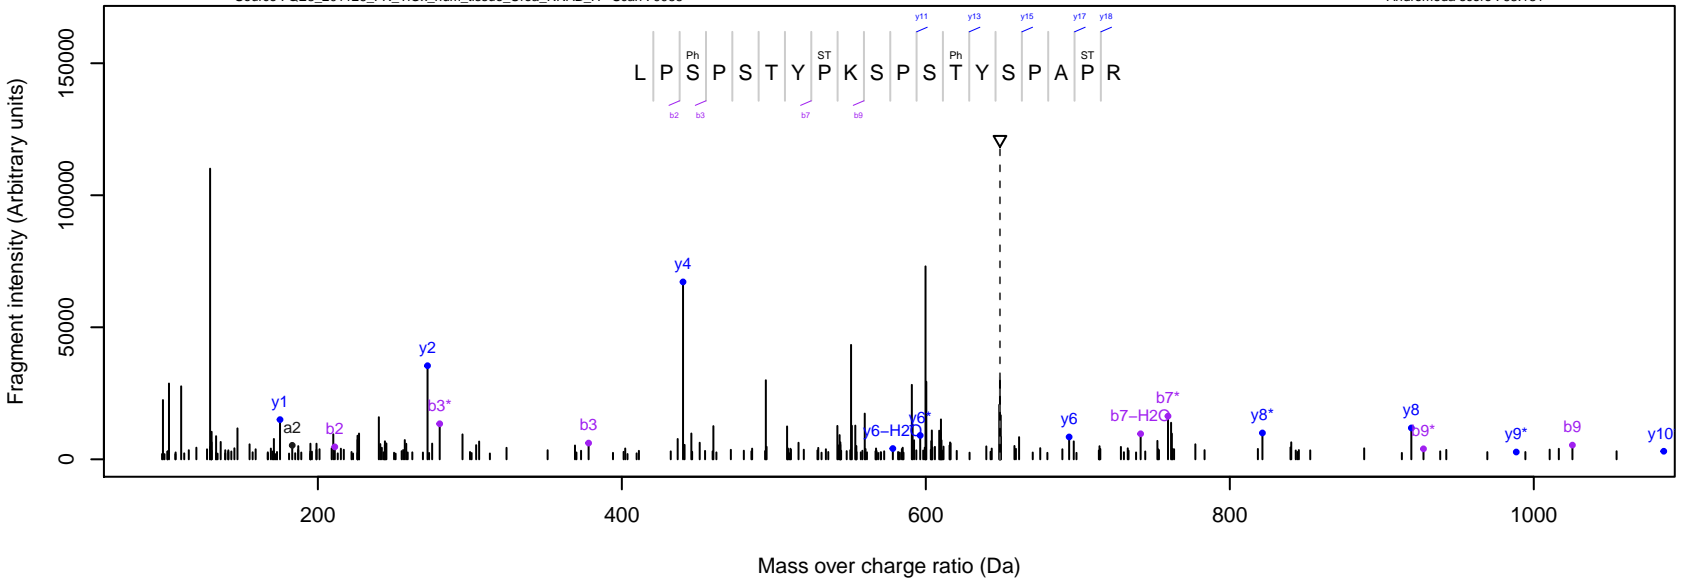

M(Oxidation (M))APPPKEVEEDSEDEEMSEDEEDS(Phospho (STY))SGEEVIPQKK-4+

Source : QE3\_201126\_FR\_TiOx\_hum\_tissue\_Urea\_RNAB\_H Scan : 23329

Andromeda score : 63.148

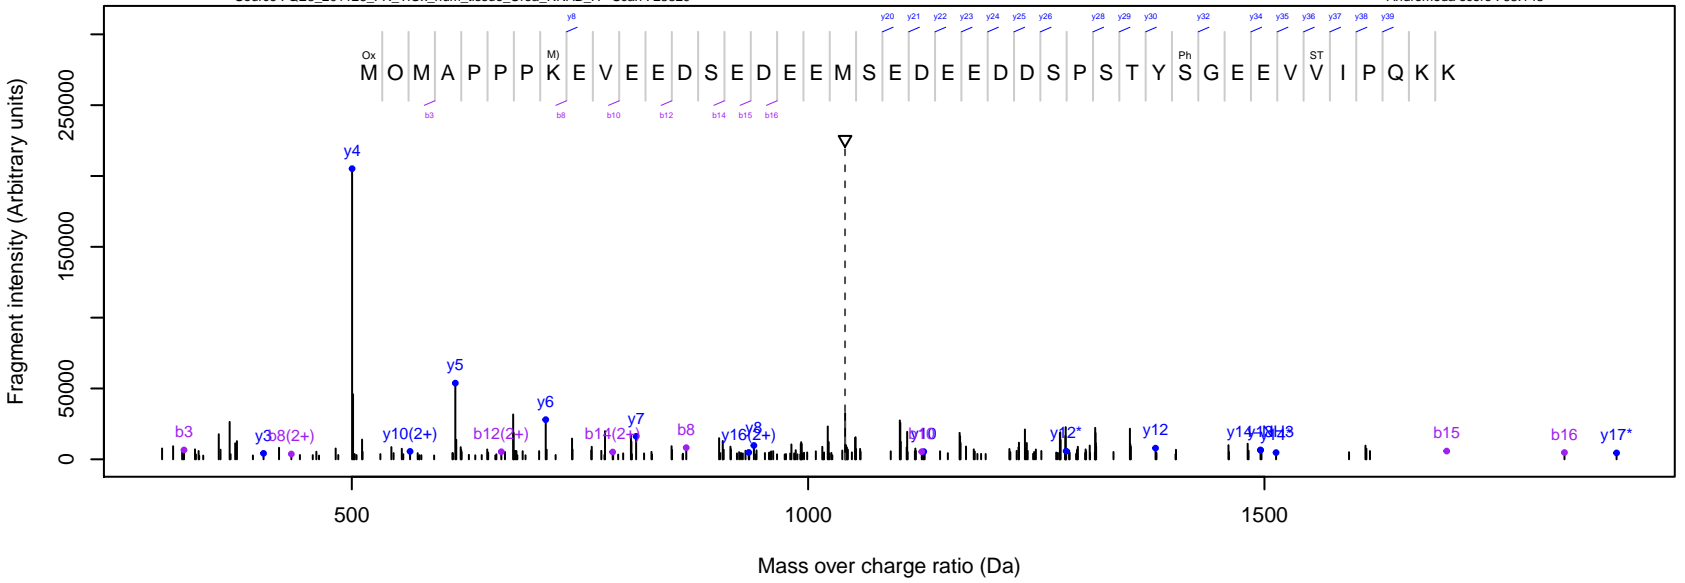

QGSFT(Phospho (STY))IEKPSNPIELIPHINK-4+

Source : QE3\_201126\_FR\_TiOx\_hum\_tissue\_Urea\_RNAB\_N Scan : 48979

Andromeda score : 63.138

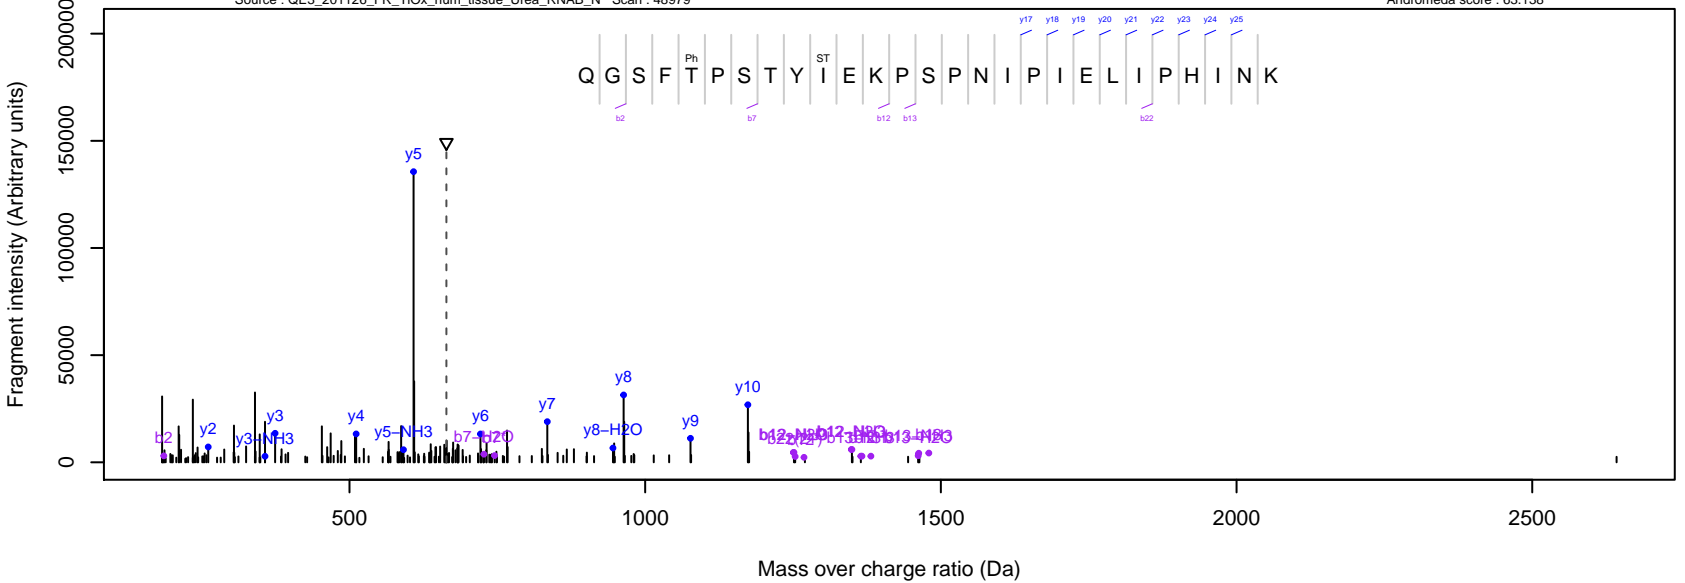

VHRPRS(Phospho (STY))PILEEK-3+

Source : QE3\_201126\_FR\_TiOx\_hum\_tissue\_Urea\_RNAB\_B Scan : 7067

Andromeda score : 63.128

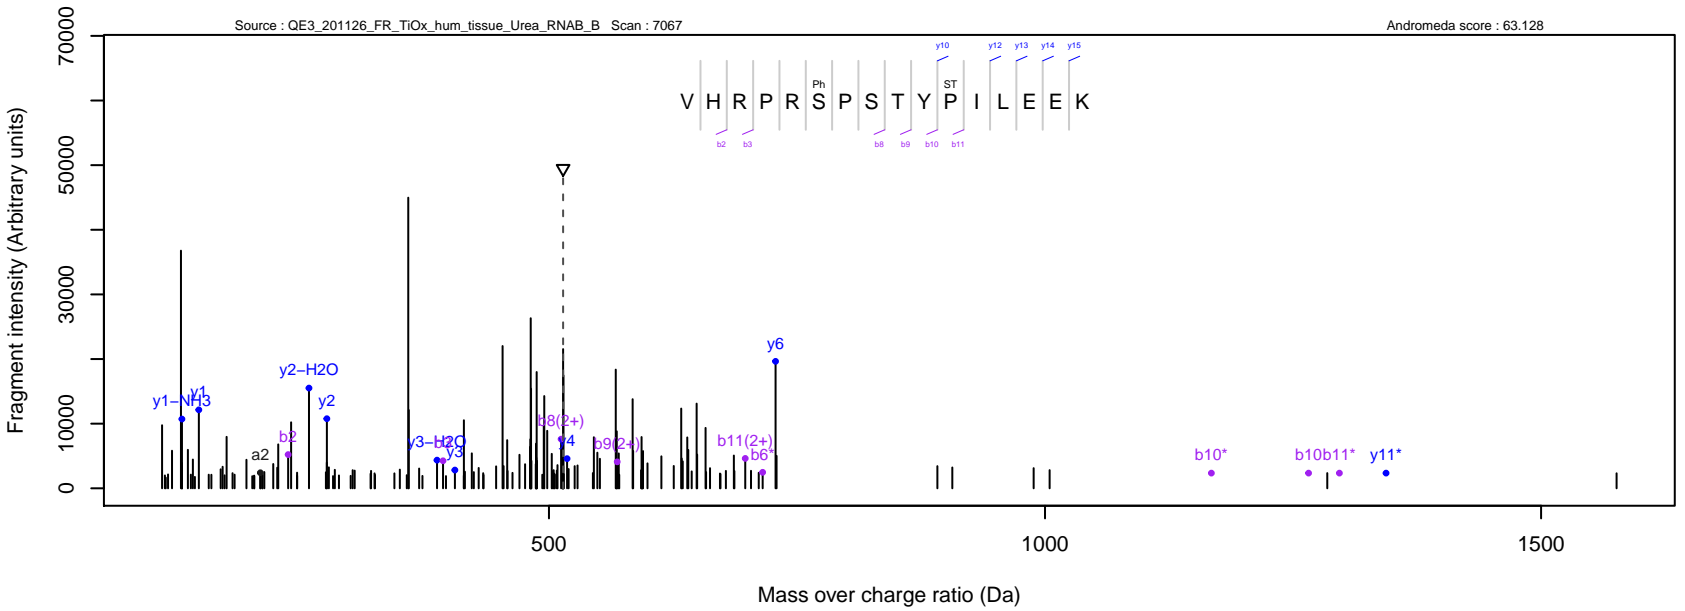

HKSSLNSS(Phospho (STY))PWSGLM(Oxidation (M))ALGNSR-3+

Source : QE3\_201126\_FR\_TiOx\_hum\_tissue\_Urea\_RNAB\_N Scan : 32665

Andromeda score : 63.115

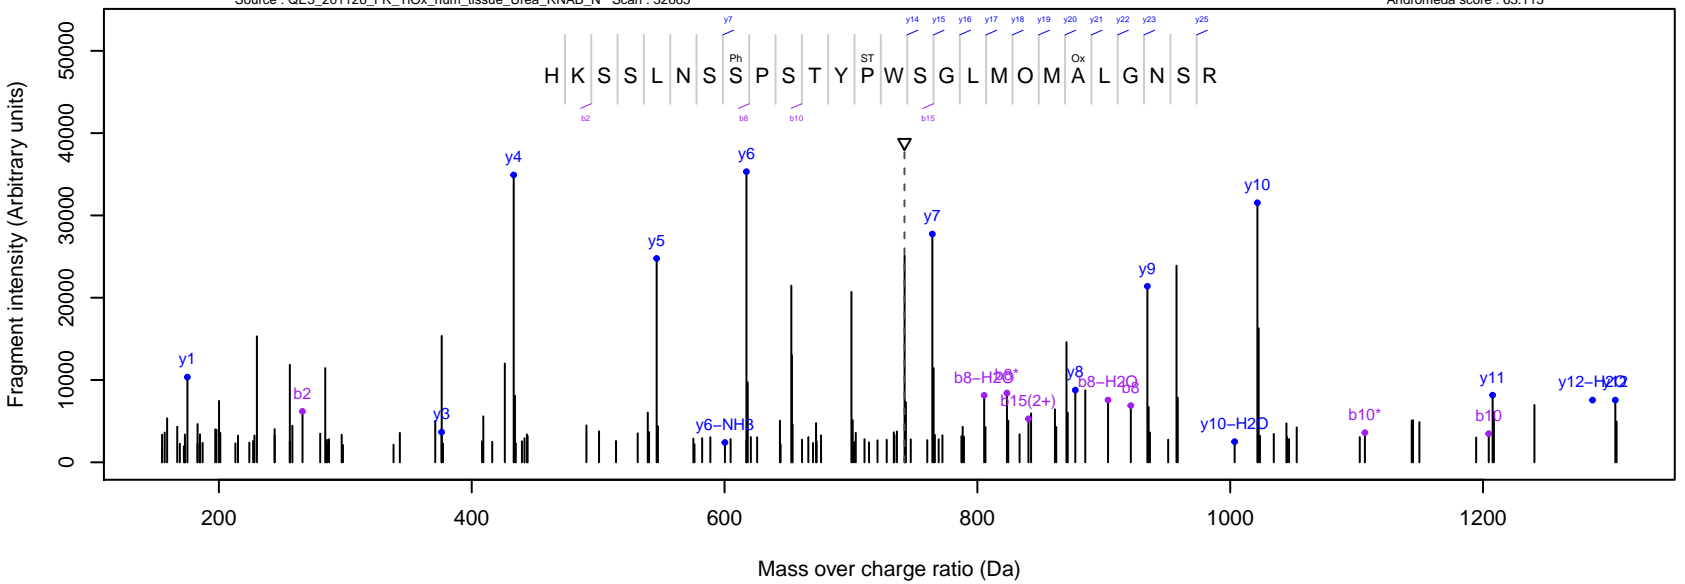

RQS(Phospho (STY))HLLQSSIPDQQLK-3+

Source : QE3\_201126\_FR\_TiOx\_hum\_tissue\_Urea\_RNAB\_N Scan : 33968

Andromeda score : 63.115

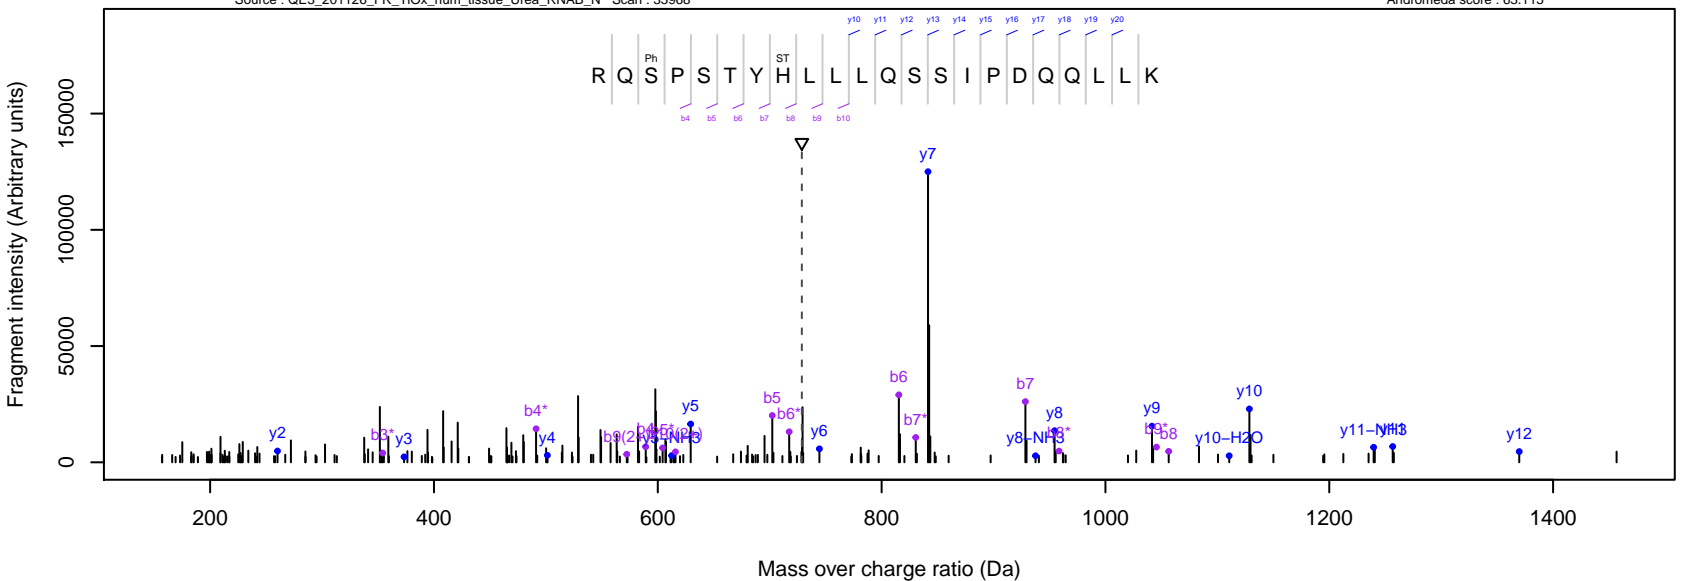



RRSS(Phospho (STY))S(Phospho (STY))PFLSK-2+

Source : QE3\_201126\_FR\_TiOx\_hum\_tissue\_Urea\_RNAB\_B Scan : 8641

Andromeda score : 63.091

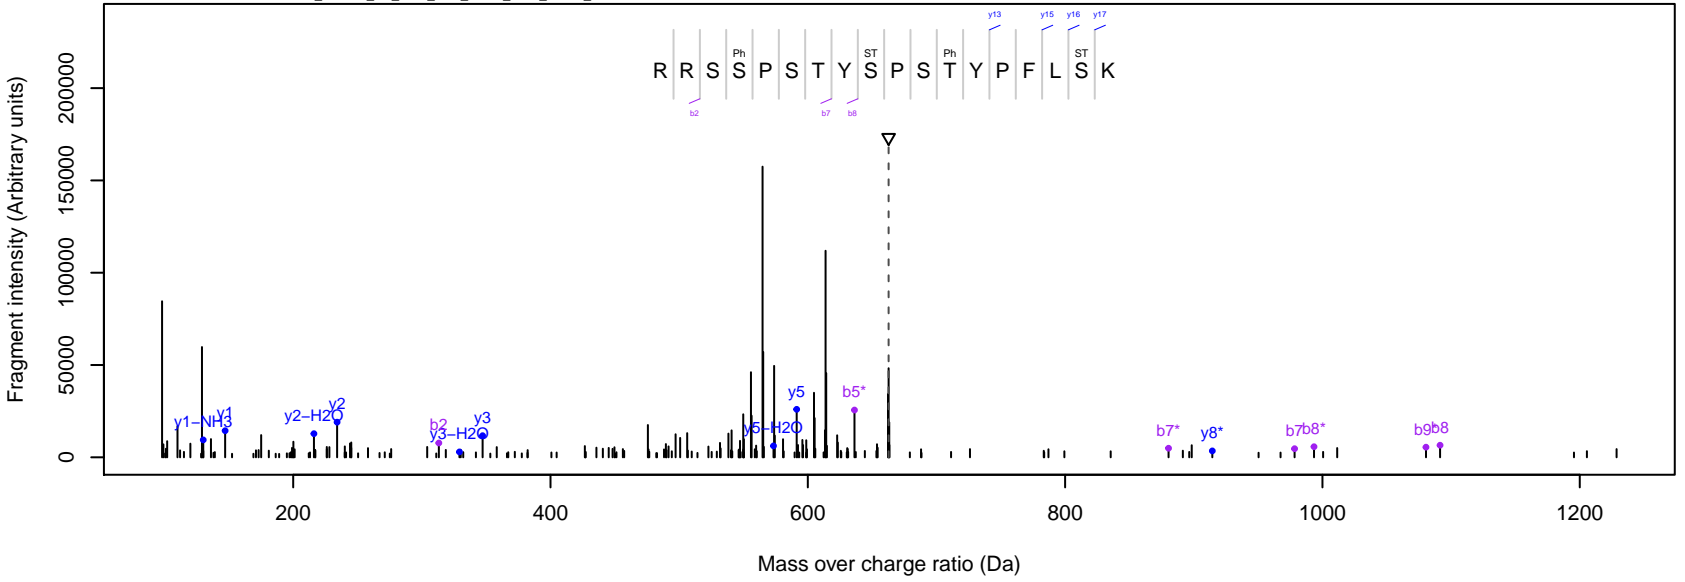

FHPEPY(Phospho (STY))GLEDDQRSMGYDDL DYGM(Oxidation (M))M(Oxidation (M))SDYGTAR-4+

Source : QE3\_201126\_FR\_TiOx\_hum\_tissue\_Urea\_RNAB\_H Scan : 38810

Andromeda score : 63.085

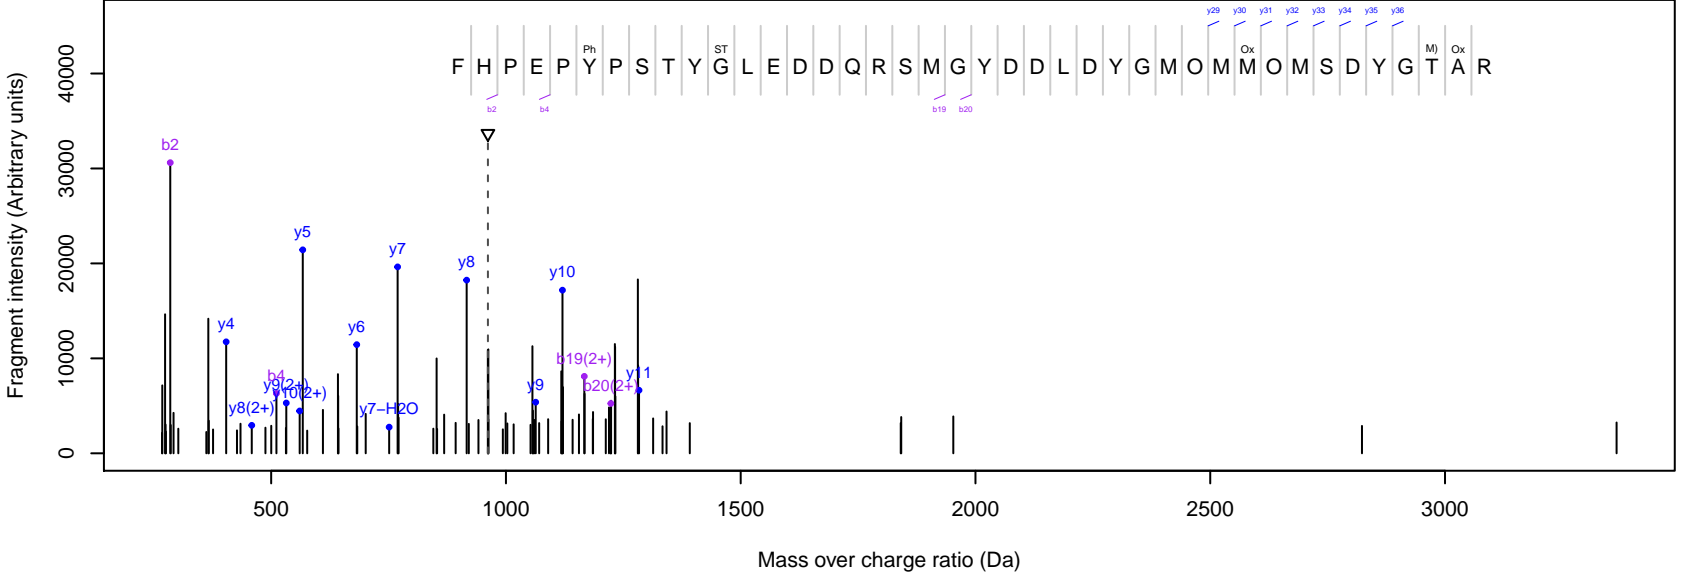

SKKGGFDEFVNDT(Phospho (STY))DDDLPISK-3+

Source : QE3\_201126\_FR\_TiOx\_hum\_tissue\_Urea\_RNAB\_N Scan : 34822

Andromeda score : 63.085

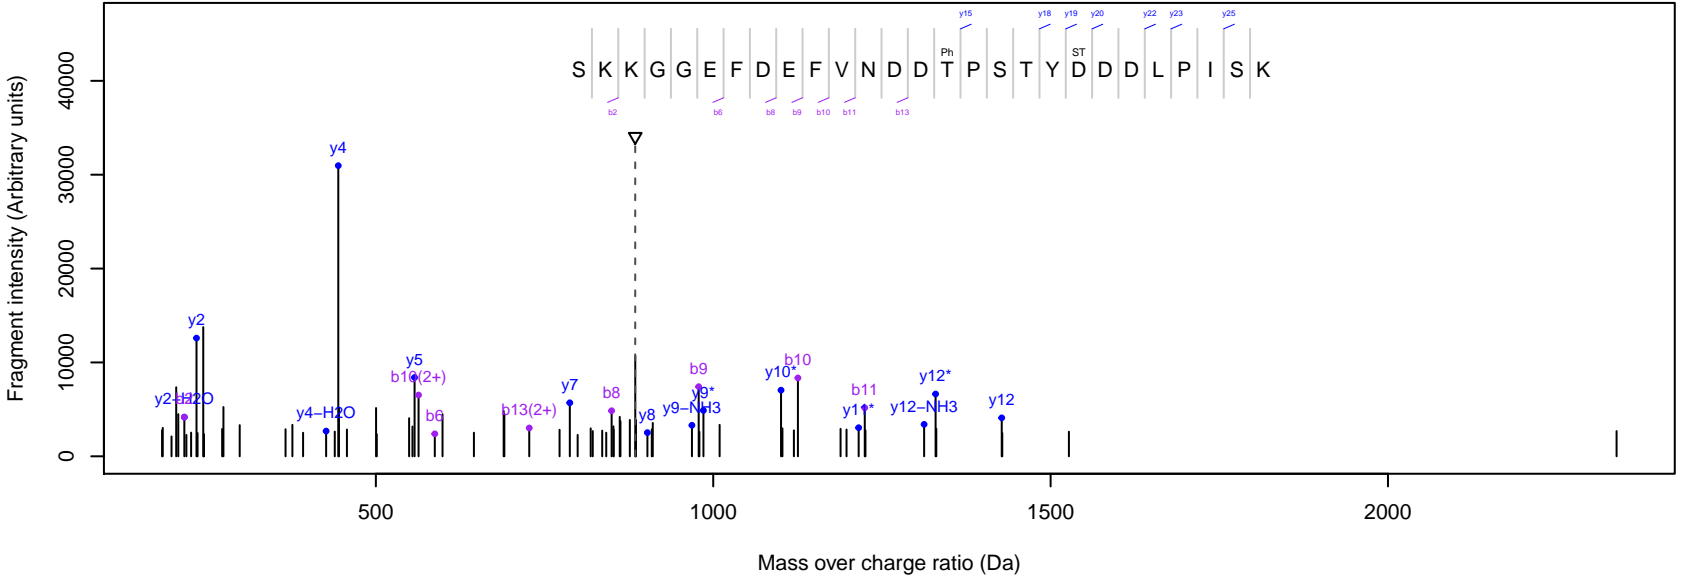

KTSS(Phospho (STY))VS(Phospho (STY))SISQVSPER-2+

Source : QE3\_201126\_FR\_TIOx\_hum\_tissue\_Urea\_RNAB\_H Scan : 17294

Andromeda score : 63.037

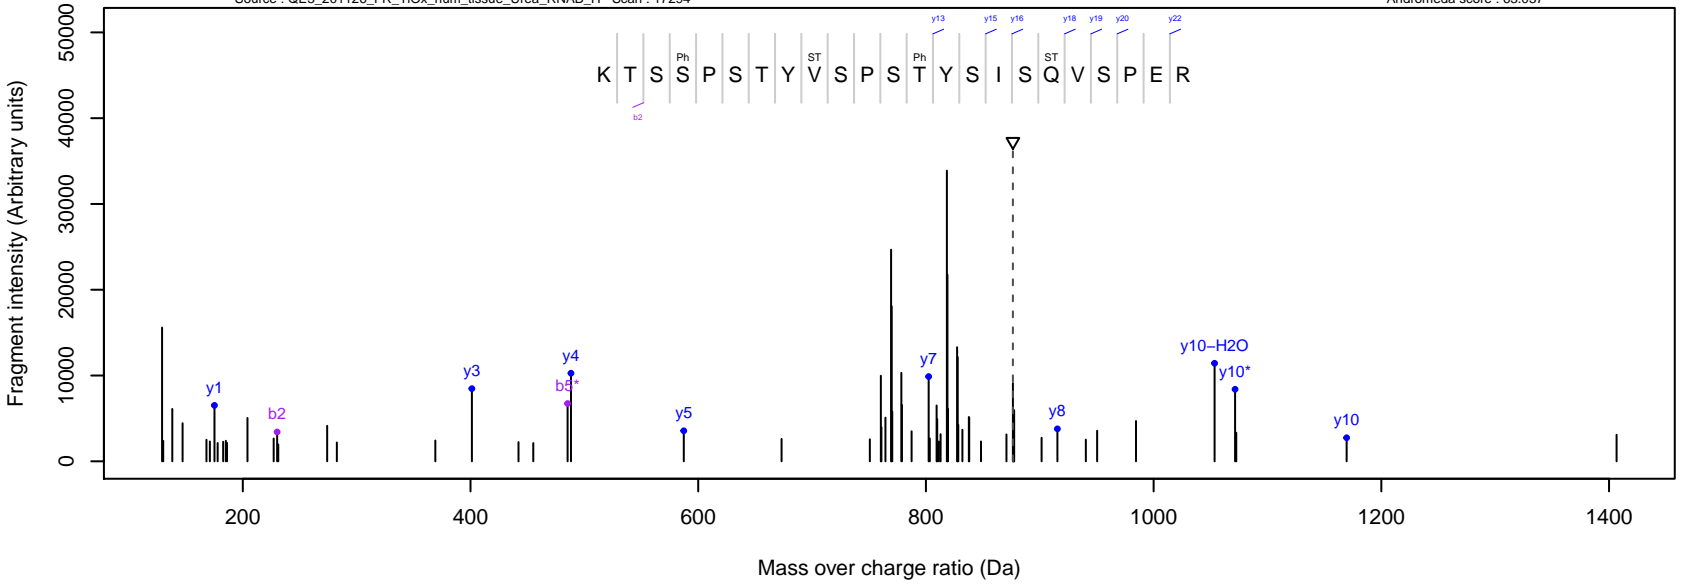

GAPPPGEPGLS(Phospho (STY))HSGSEQPEQTGLLMGGASGGAR-3+

Source : QE3\_201126\_FR\_TIOx\_hum\_tissue\_Urea\_RNAB\_H Scan : 30148

Andromeda score : 63.007

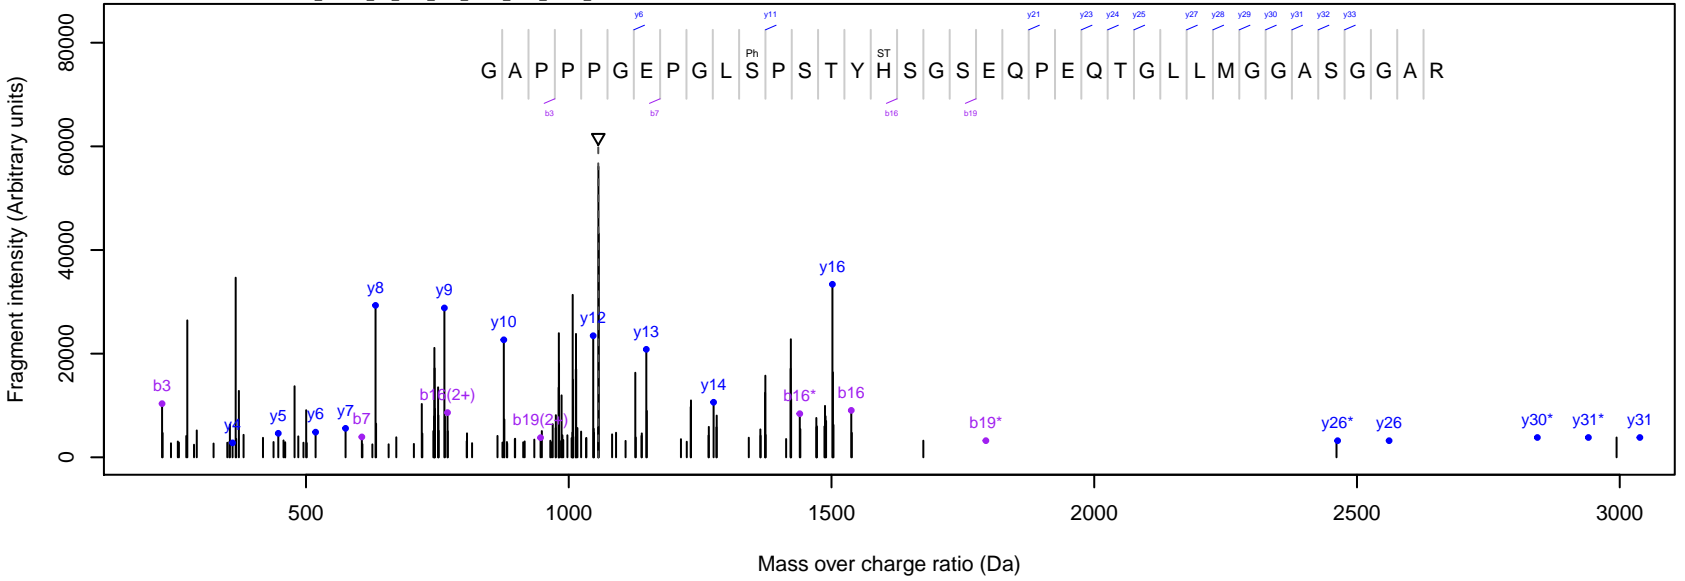

SEVQQPVHPKPLSPDRASSLS(Phospho (STY))ES(Phospho (STY))S(Phospho (STY))PPK-3+

Source : QE3\_201126\_FR\_TIOx\_hum\_tissue\_Urea\_RNAB\_N Scan : 20165

Andromeda score : 62.945

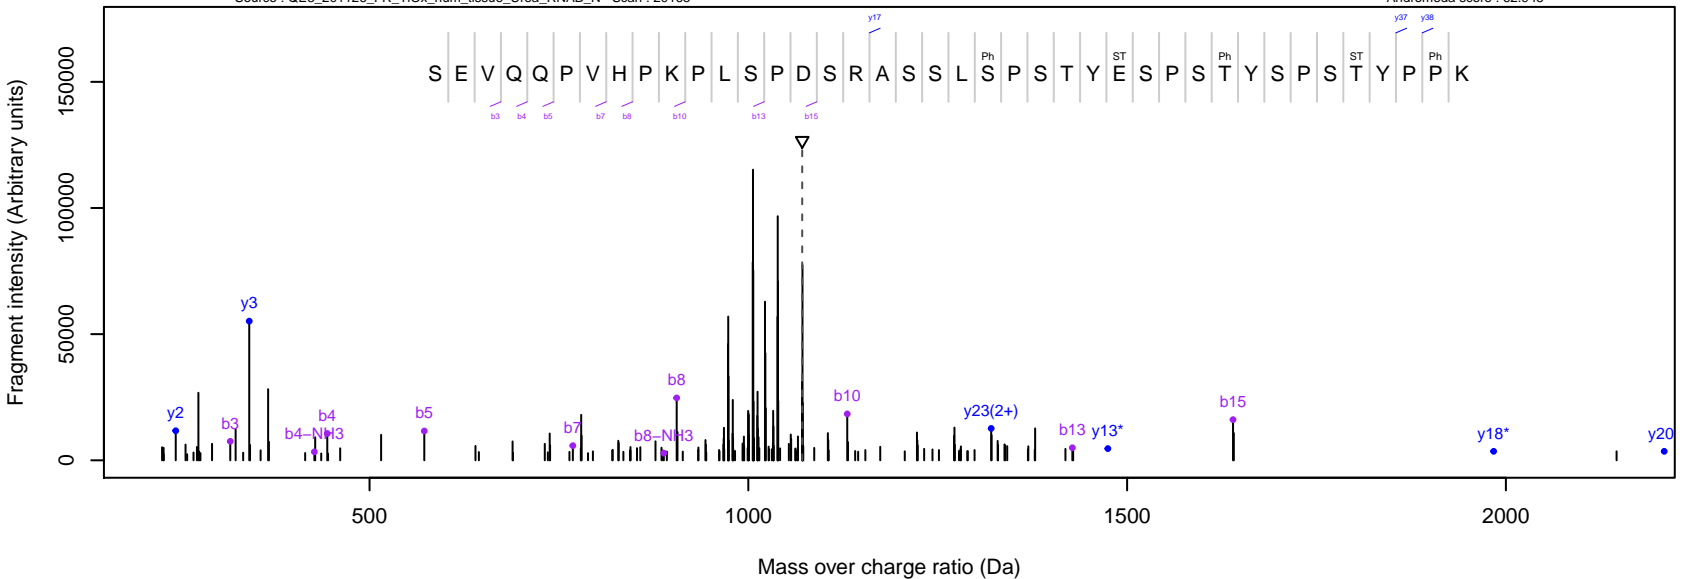

EREDS(Phospho (STY))GDAEAHAFK-3+

Source : QE3\_201126\_FR\_TiOx\_hum\_tissue\_Urea\_RNAB\_N Scan : 7081

Andromeda score : 62.94

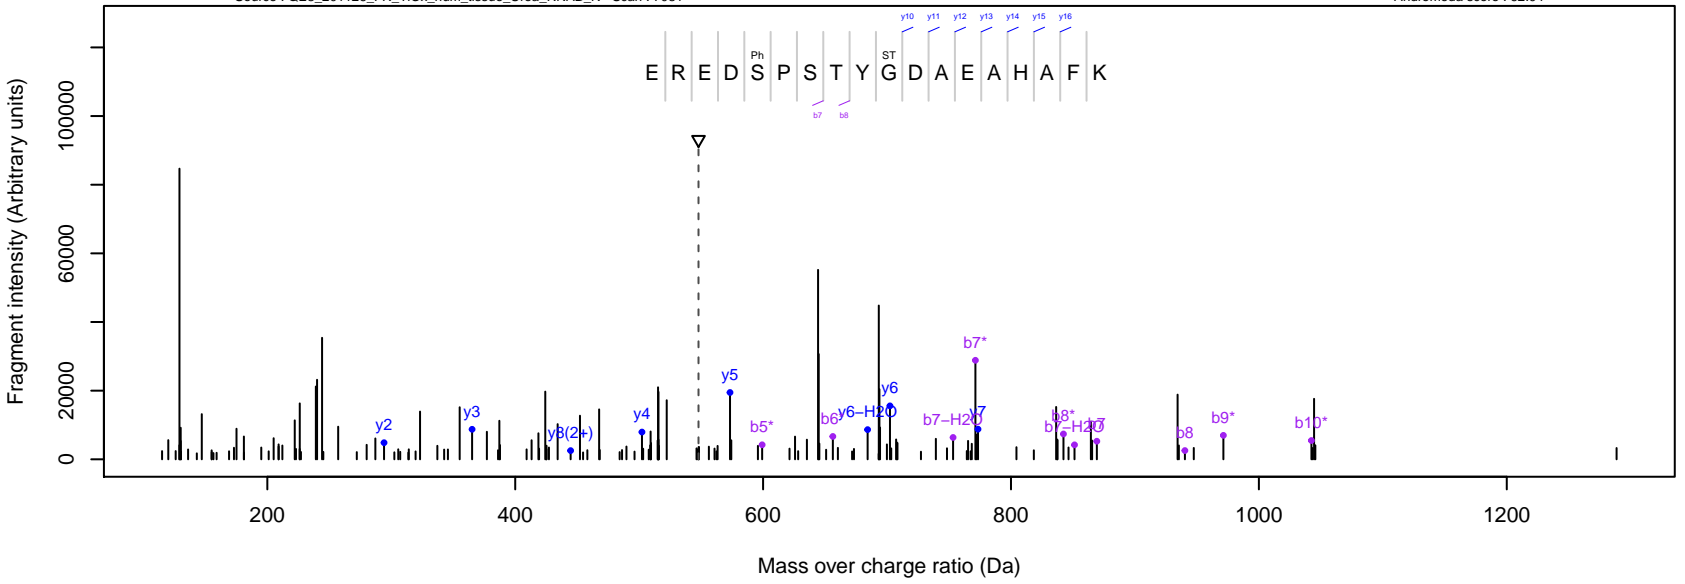

RKDPLHTSNS(Phospho (STY))LPR-4+

Source : QE3\_201126\_FR\_TiOx\_hum\_tissue\_Urea\_RNAB\_N Scan : 9416

Andromeda score : 62.94

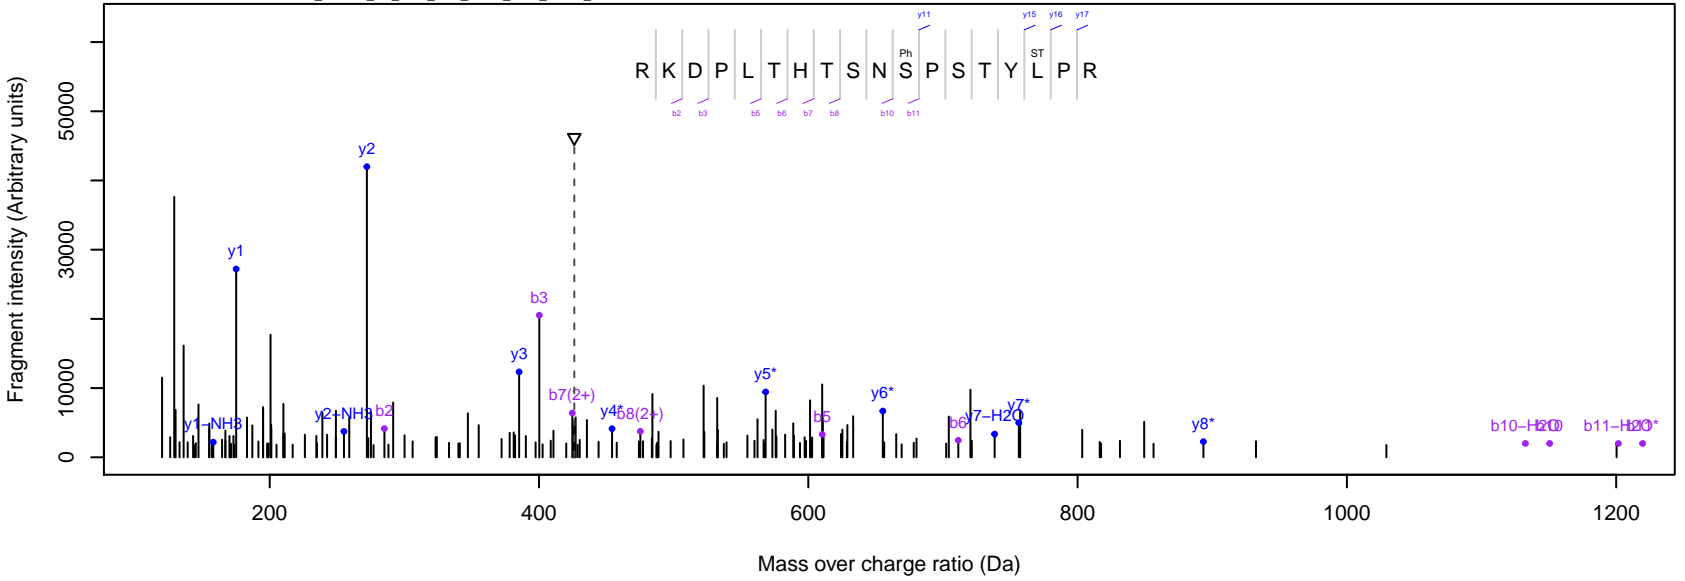

KKEFEELIDSNHGDGIVTAEEL(Phospho (STY))YMDPMNEYNALNEAK-4+

Source : QE3\_201126\_FR\_TiOx\_hum\_tissue\_Urea\_RNAB\_N Scan : 58783

Andromeda score : 62.938

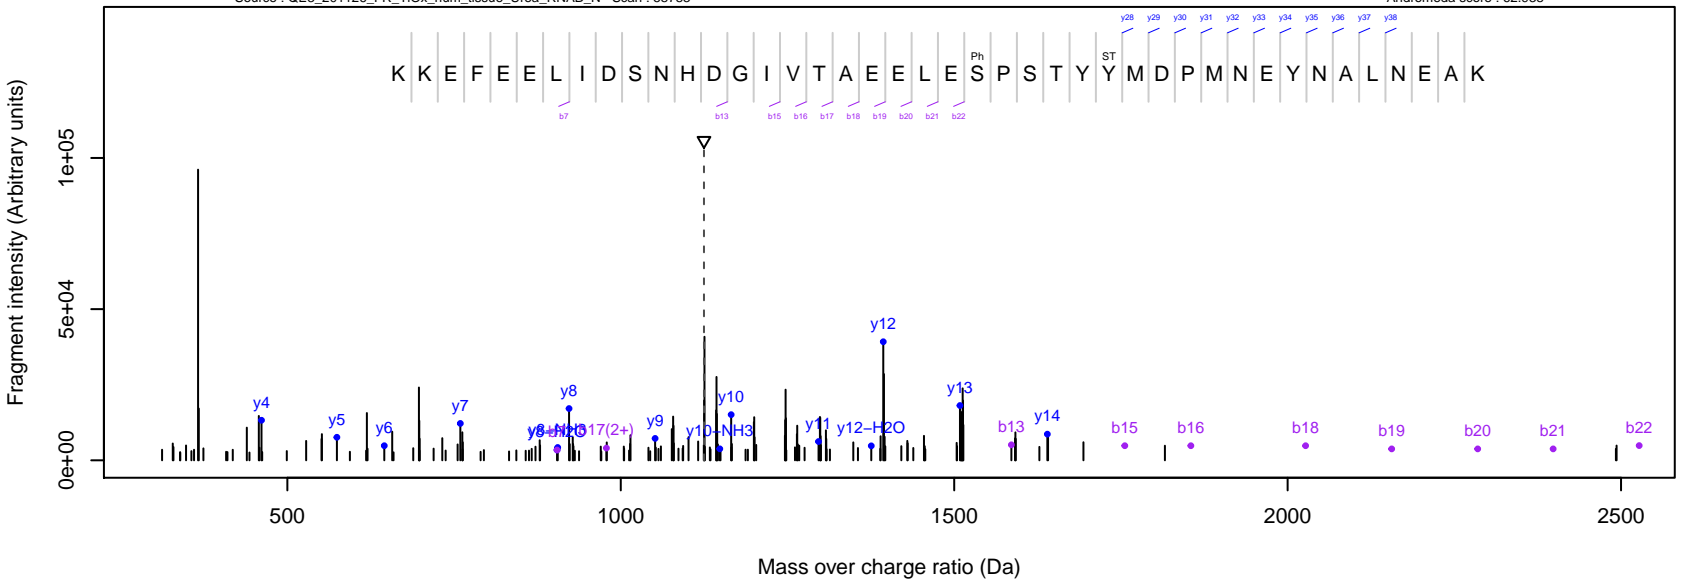

SFSEDAVTDSSGS(Phospho (STY))GTLPR-2+

Source : QE3\_201126\_FR\_TiOx\_hum\_tissue\_Urea\_RNAB\_H Scan : 27813

Andromeda score : 62.916

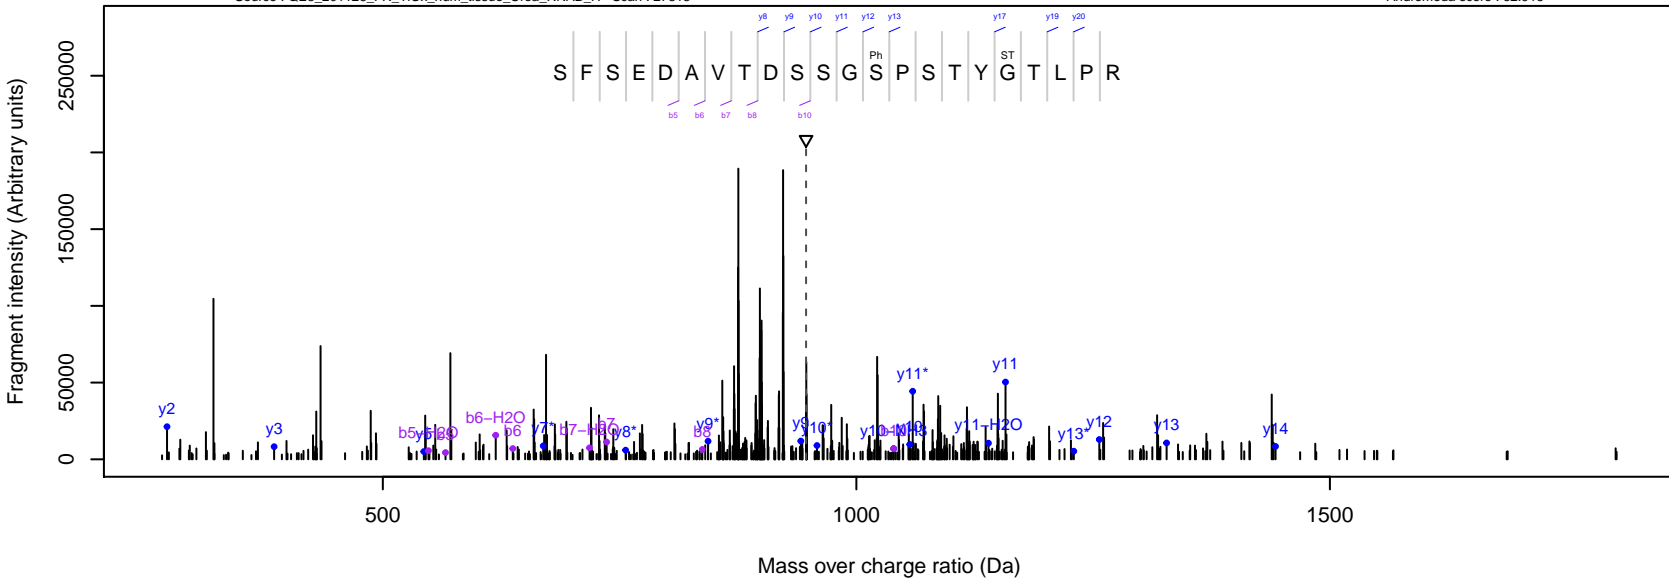

AS(Phospho (STY))APLPGLSAPGR-2+

Source : QE3\_201126\_FR\_TiOx\_hum\_tissue\_Urea\_RNAB\_B Scan : 30009

Andromeda score : 62.891

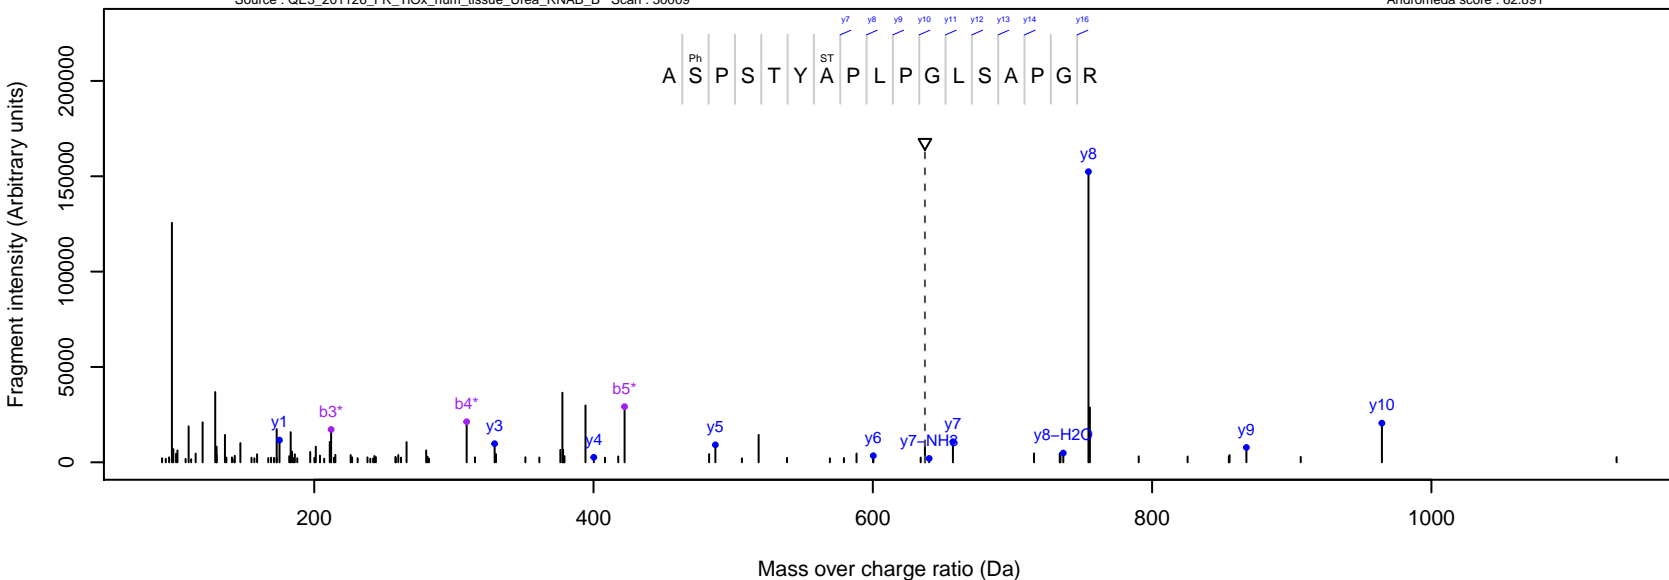

(Acetyl (Protein N-term))S(Phospho (STY))AFNLLHLVTK-2+

Source : QE3\_201126\_FR\_TiOx\_hum\_tissue\_Urea\_RNAB\_H Scan : 61218

Andromeda score : 62.891

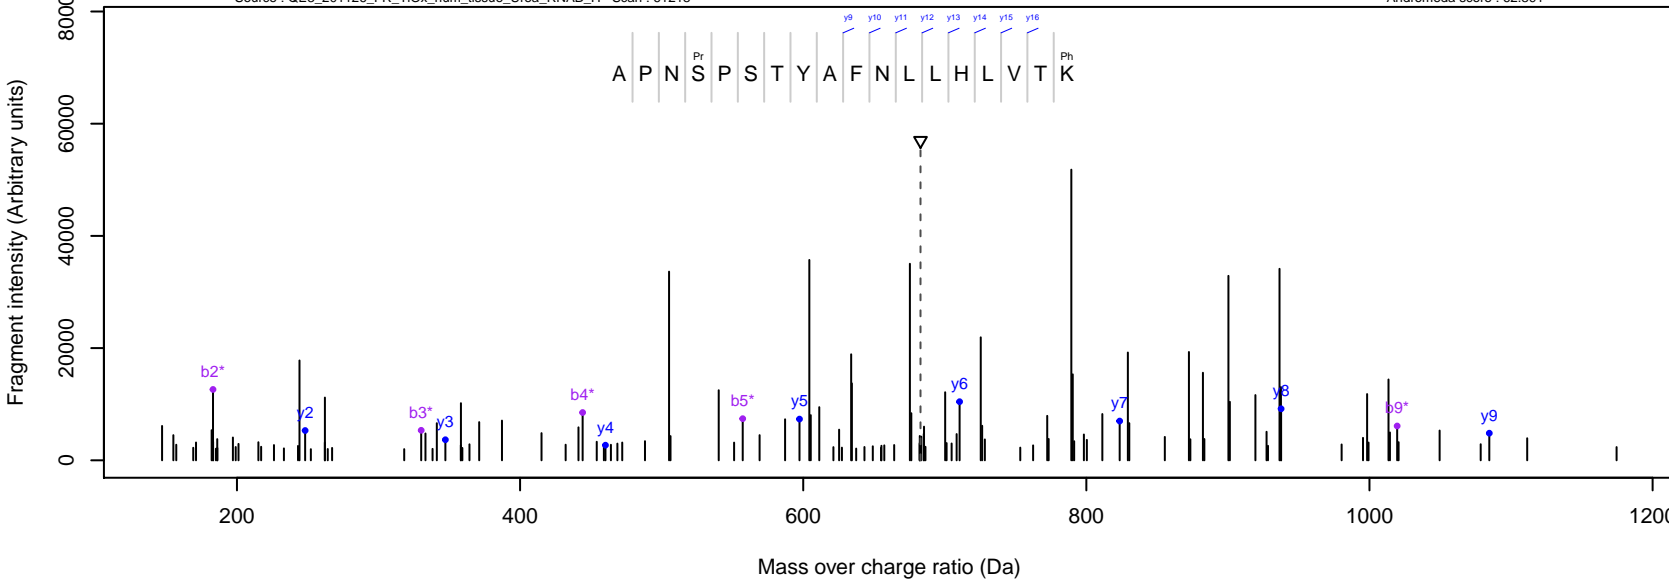

SES(Phospho (STY))VEGFLSPSR-2+

Source : QE3\_201126\_FR\_TiOx\_hum\_tissue\_Urea\_RNAB\_B Scan : 36591

Andromeda score : 62.891

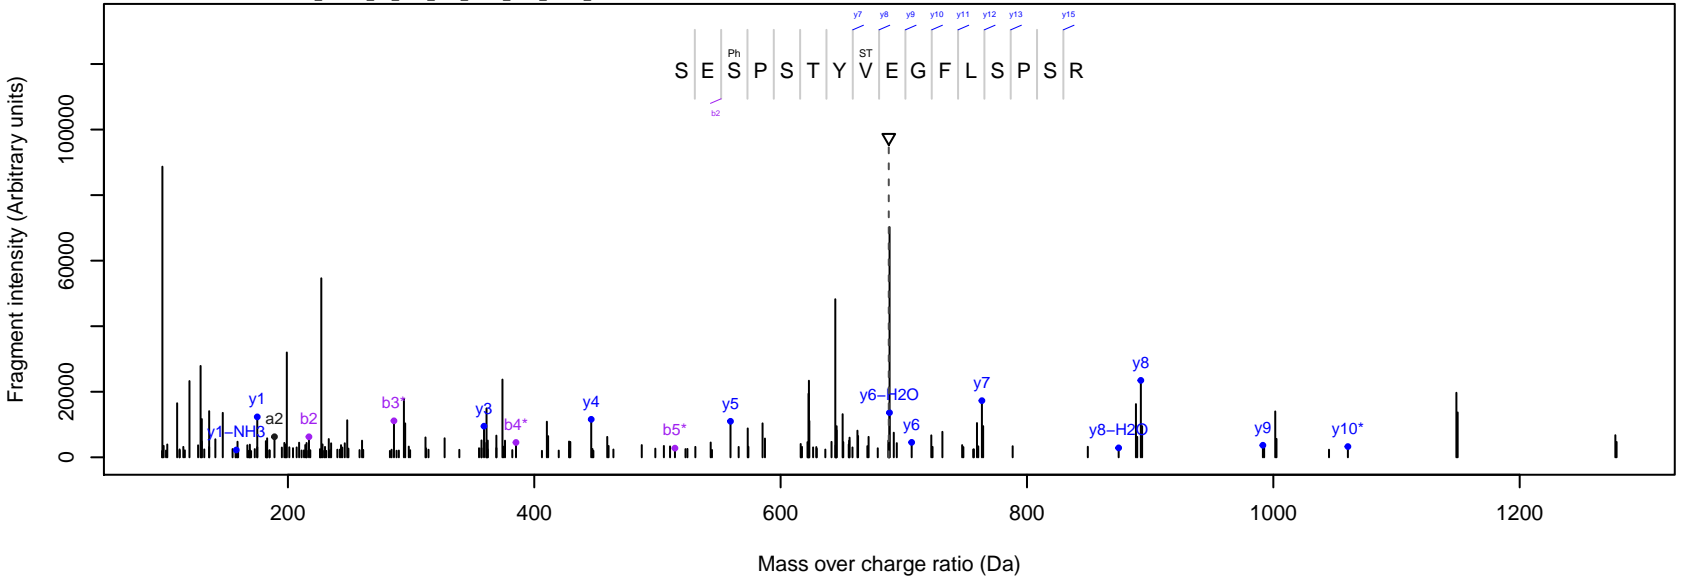

AALLAQYADVT(Phospho (STY))DEEDEADEKDDSGATTMOMNIGSDK-3+

Source : QE3\_201126\_FR\_TiOx\_hum\_tissue\_Urea\_RNAB\_H Scan : 36513

Andromeda score : 62.862

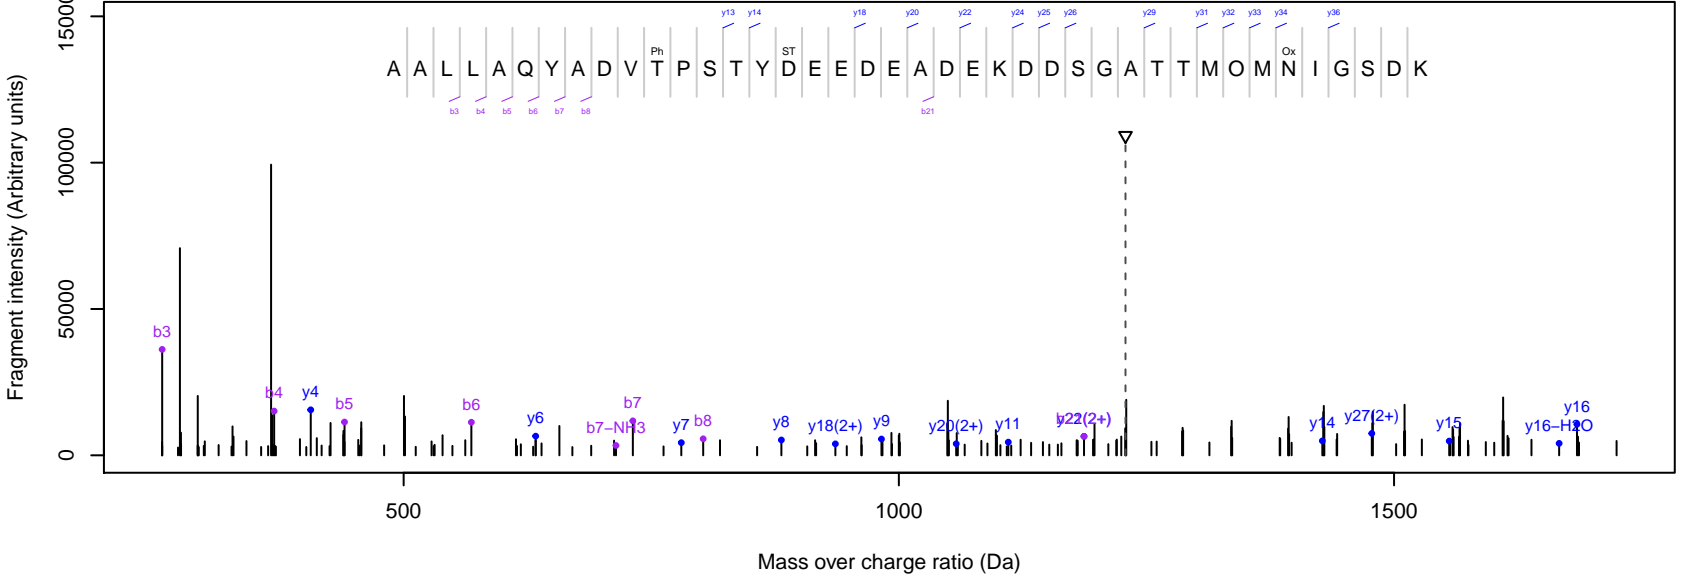

KNS(Phospho (STY))AIPSELNEK-3+

Source : QE3\_201126\_FR\_TiOx\_hum\_tissue\_Urea\_RNAB\_H Scan : 12601

Andromeda score : 62.861

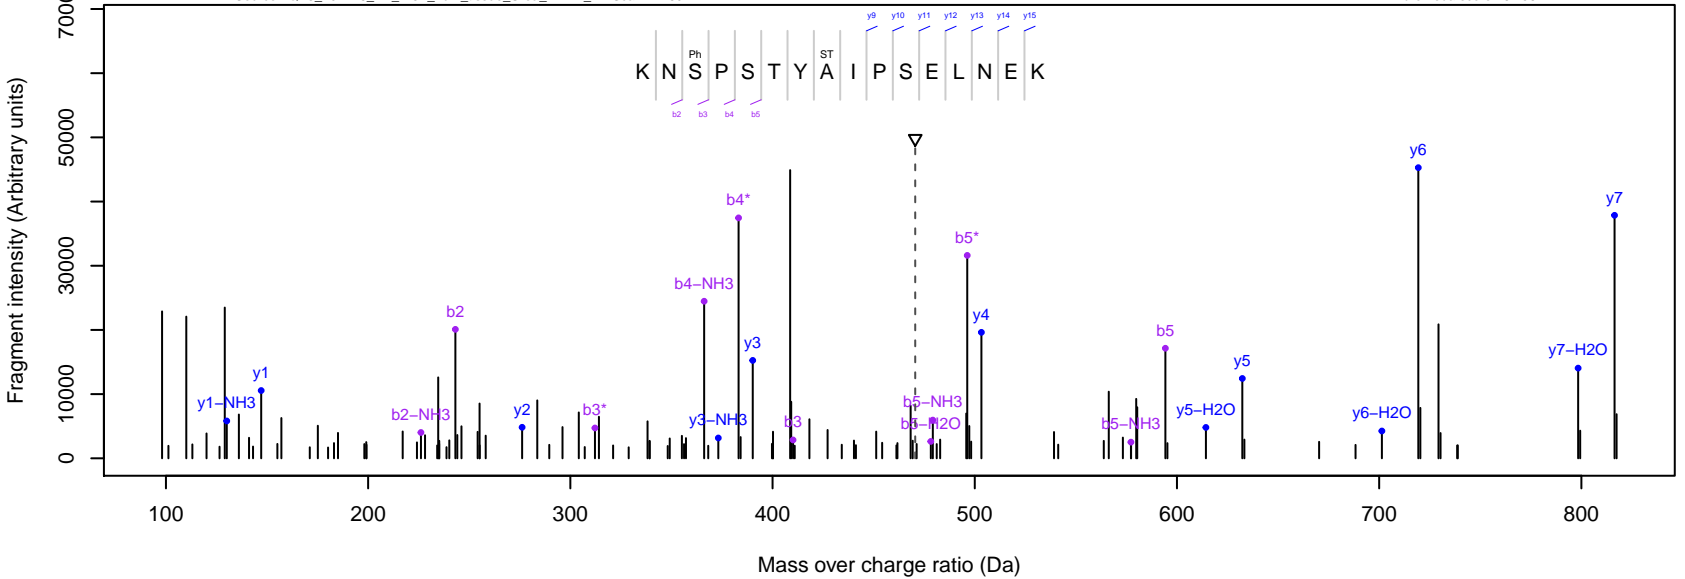

EGPLGWSSDGLSGVLLDSPS(Phospho (STY))SPR-3+

Source : QE3\_201126\_FR\_TiOx\_hum\_tissue\_Urea\_RNAB\_H Scan : 58509

Andromeda score : 62.848

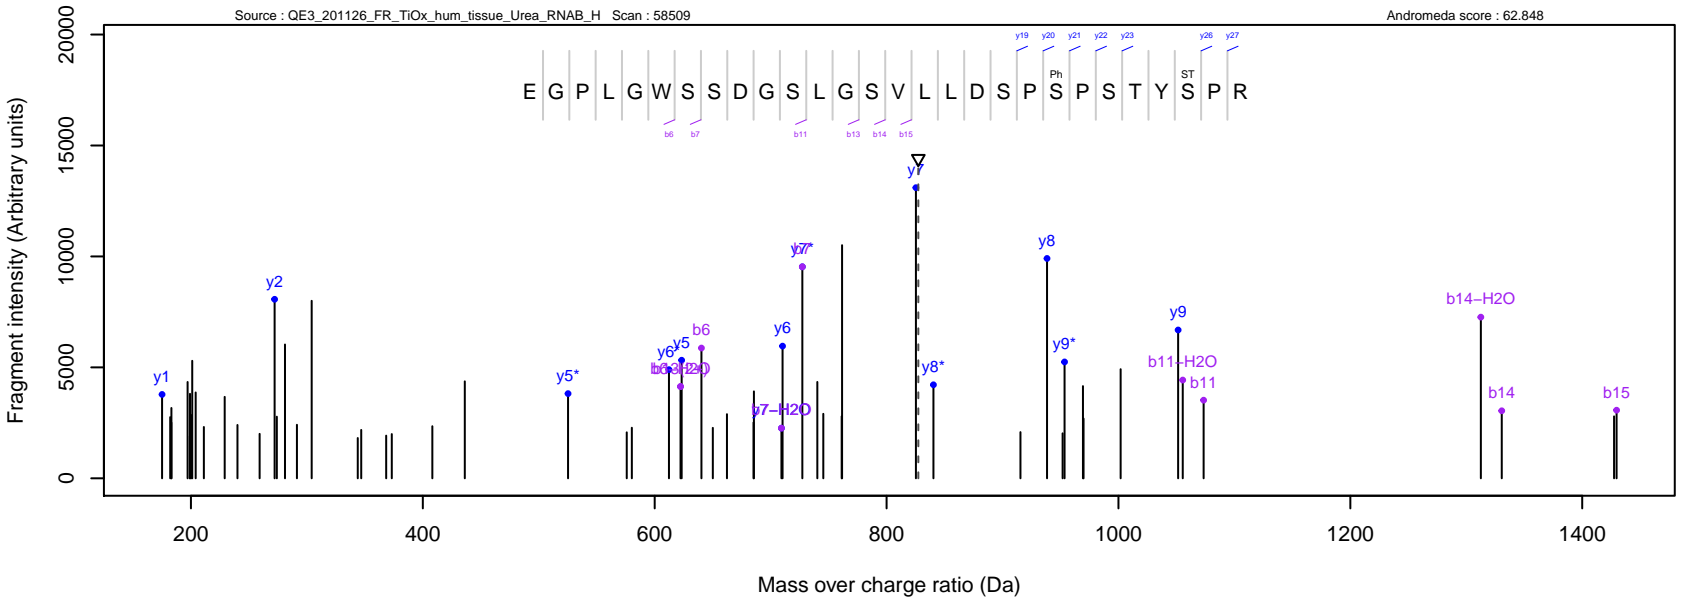

QGS(Phospho (STY))SLNLFEDVQITEPEAEPEK-3+

Source : QE3\_201126\_FR\_TiOx\_hum\_tissue\_Urea\_RNAB\_H Scan : 55841

Andromeda score : 62.848

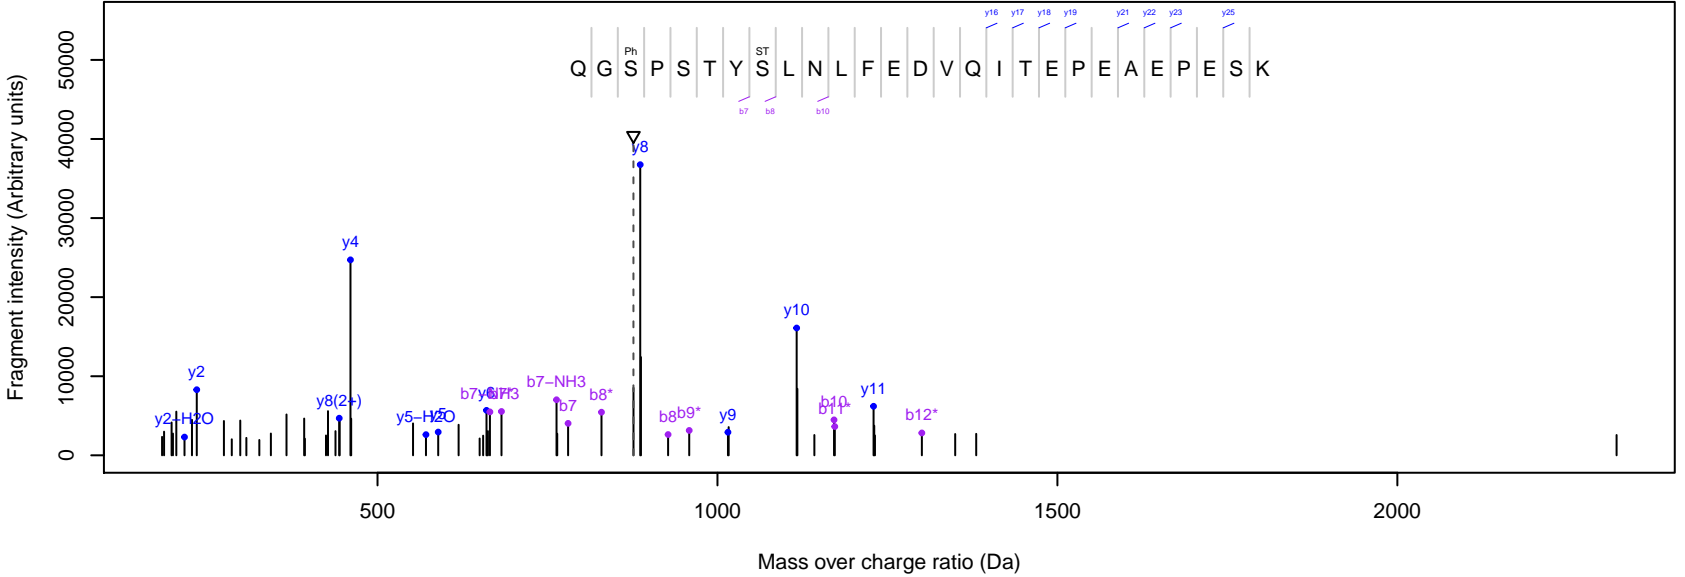

RGS(Phospho (STY))DASDFDISEIQSVCSDEVETVPQTHRPTPR-4+

Source : QE3\_201126\_FR\_TiOx\_hum\_tissue\_Urea\_RNAB\_B Scan : 37358

Andromeda score : 62.833

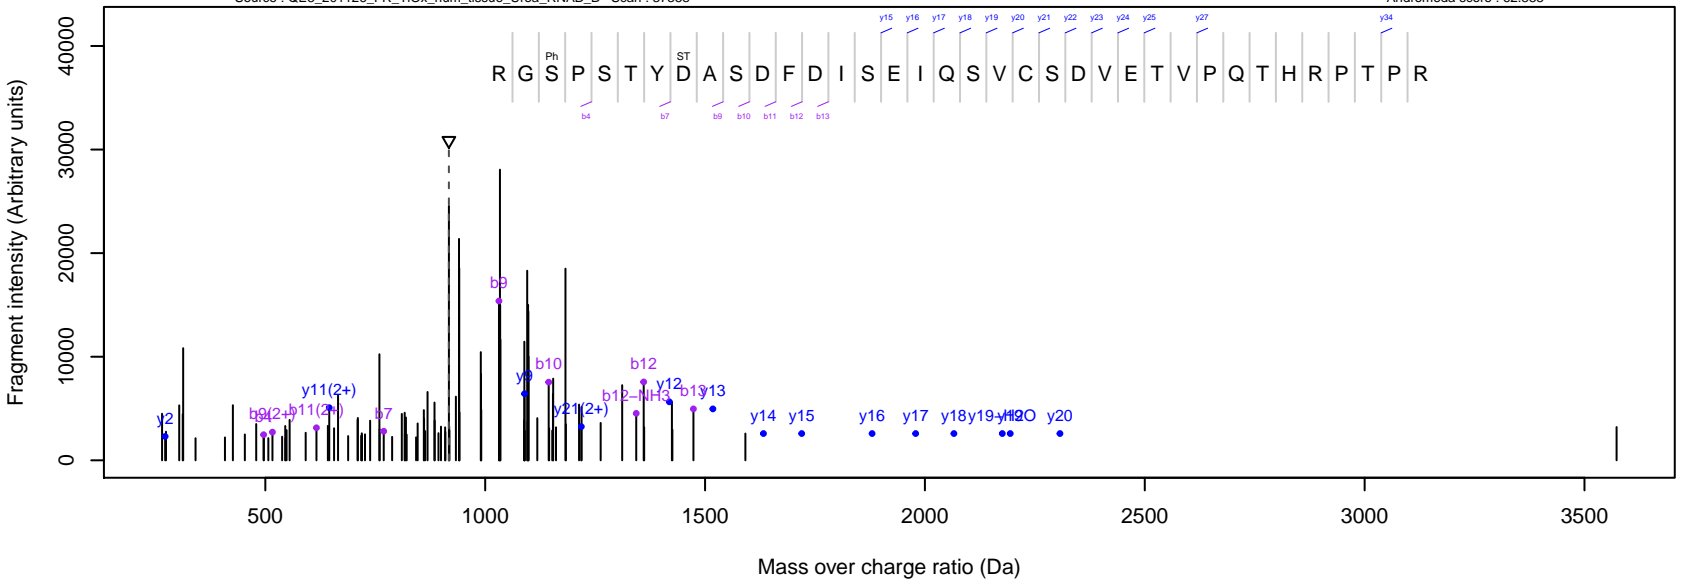

ALS(Phospho (STY))PLPTR-2+

Source : QE3\_201126\_FR\_TiOx\_hum\_tissue\_Urea\_RNAB\_H Scan : 19748

Andromeda score : 62.823

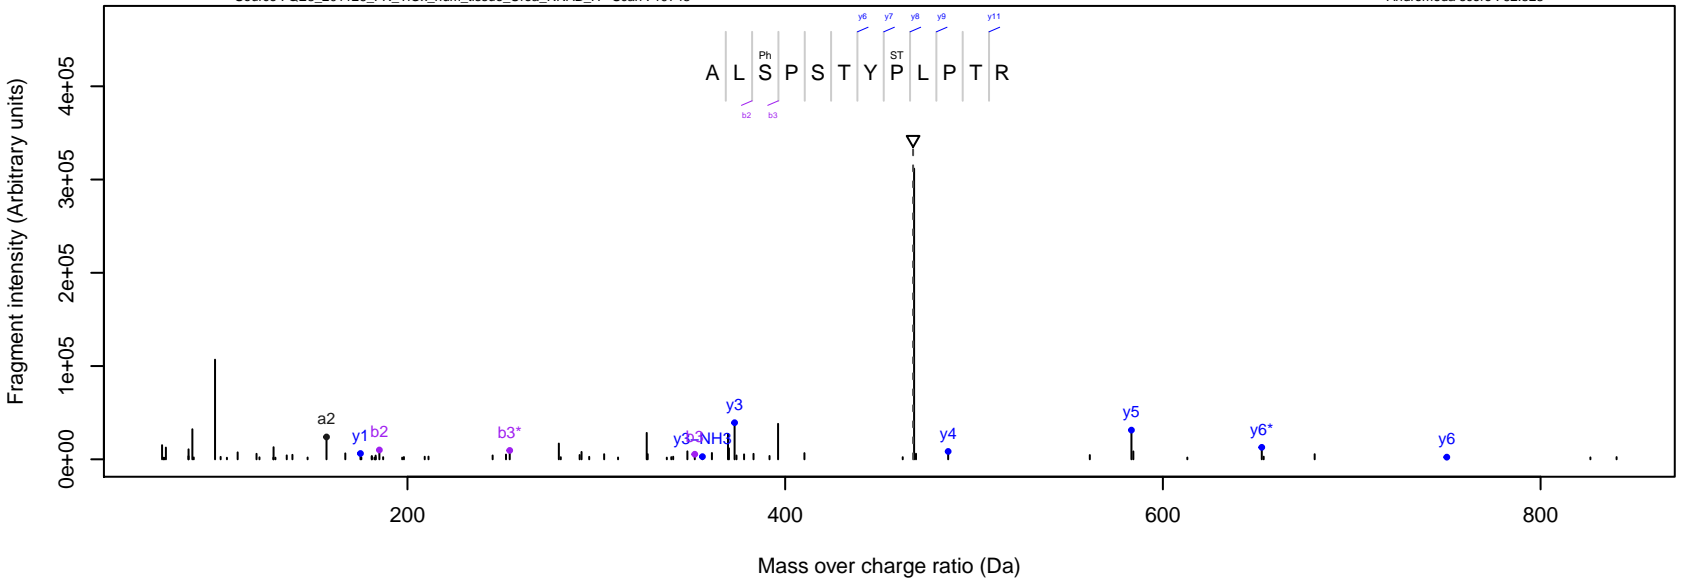

VIEDNEY(Phospho (STY))TAR-2+

Source : QE3\_201126\_FR\_TiOx\_hum\_tissue\_Urea\_RNAB\_H Scan : 9315

Andromeda score : 62.823

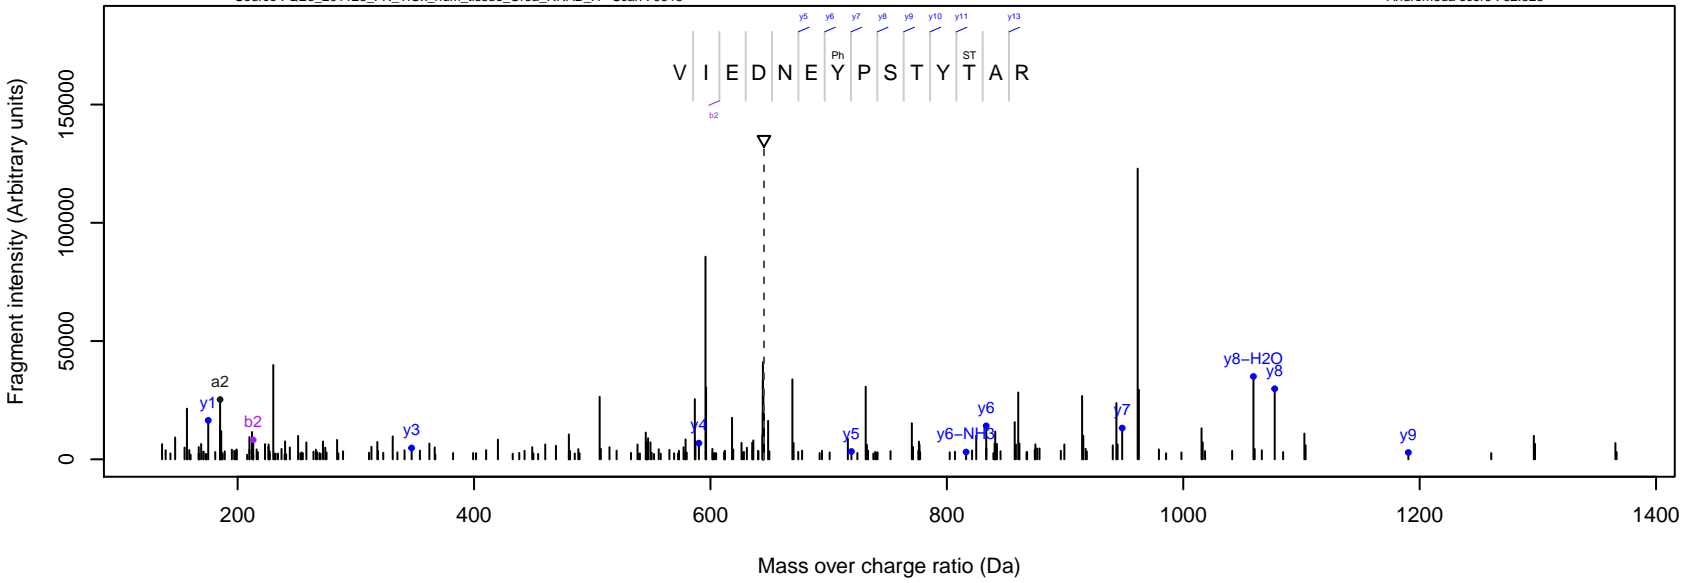

LEASDCDHQNS(Phospho (STY))PTLERPGR-3+

Source : QE3\_201126\_FR\_TiOx\_hum\_tissue\_Urea\_RNAB\_H Scan : 10320

Andromeda score : 62.781

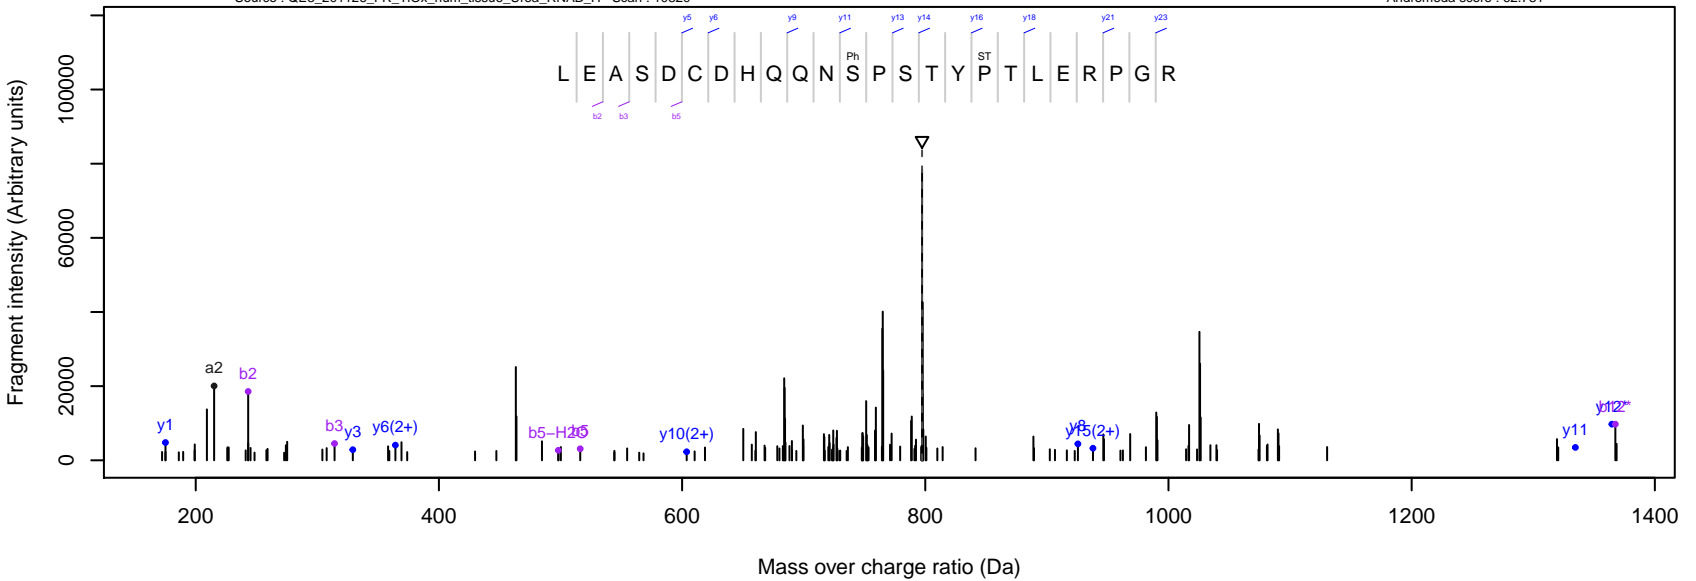

NSGTQS(Phospho (STY))DGEEKQPLVM(Oxidation (M))ER-3+

Source : QE3\_201126\_FR\_TiOx\_hum\_tissue\_Urea\_RNAB\_N Scan : 11209

Andromeda score : 62.781

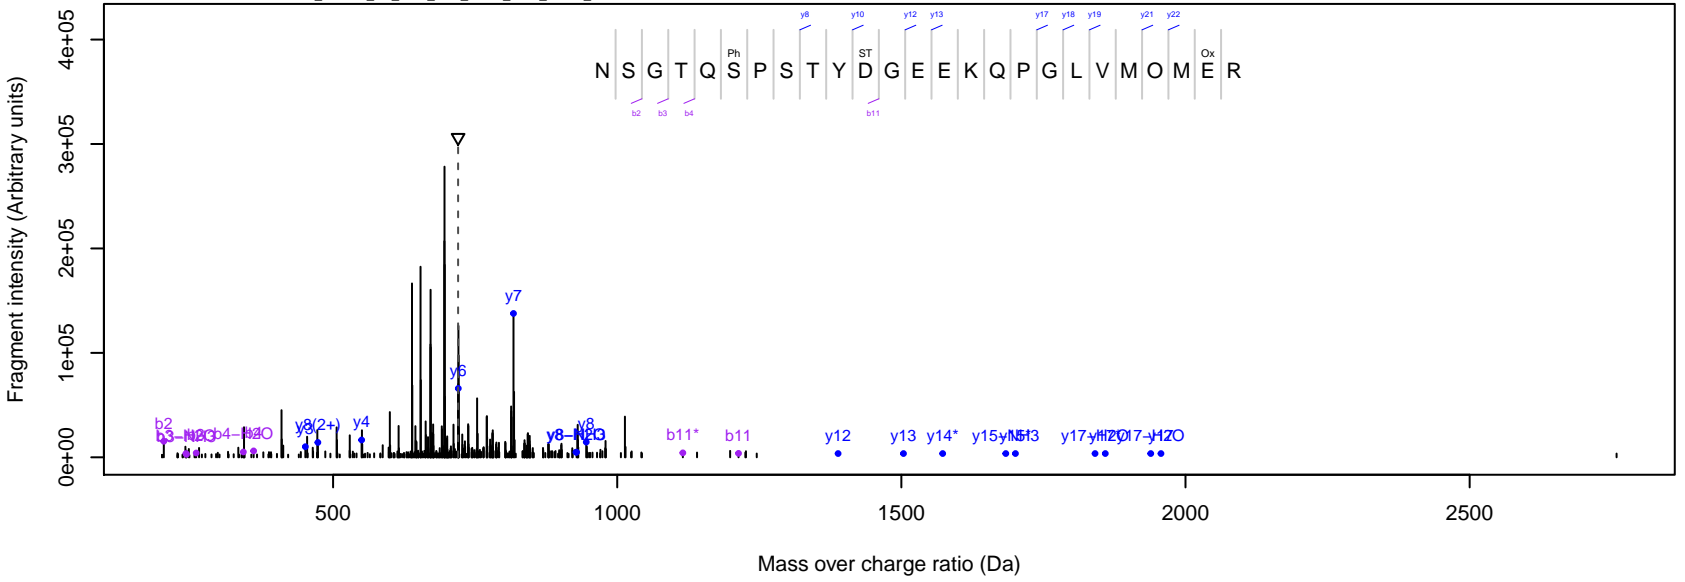

HS(Phospho (STY))SIFDQLDVVSYYEEVVR-3+

Source : QE3\_201126\_FR\_TiOx\_hum\_tissue\_Urea\_RNAB\_N Scan : 53131

Andromeda score : 62.765

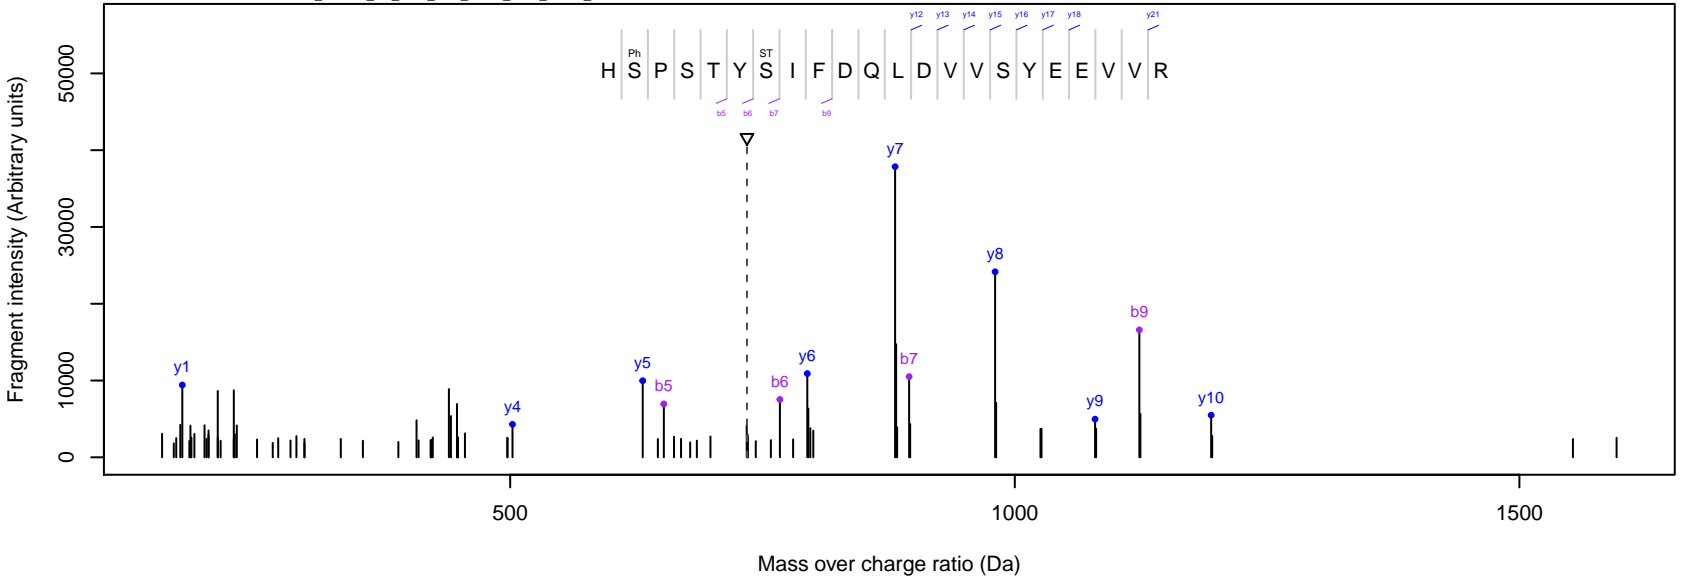

DNLGEVPLT(Phospho (STY))PTEEASLPLAVTK-3+

Source : QE3\_201126\_FR\_TiOx\_hum\_tissue\_Urea\_RNAB\_N Scan : 56171

Andromeda score : 62.7

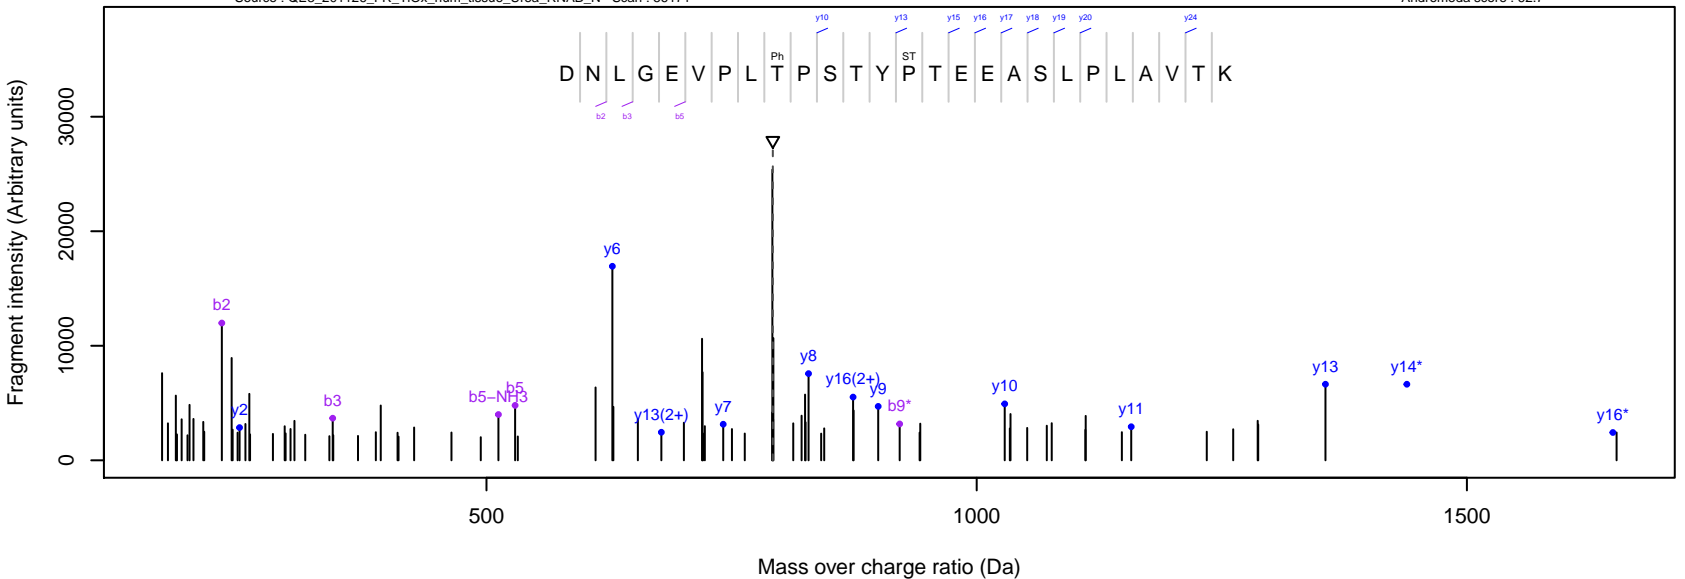



VNGLPS(Phospho (STY))PTHSPSTYR

Source : QE3\_201126\_FR\_TiOx\_hum\_tissue\_Urea\_RNAB\_N Scan : 23294

Andromeda score : 62.684

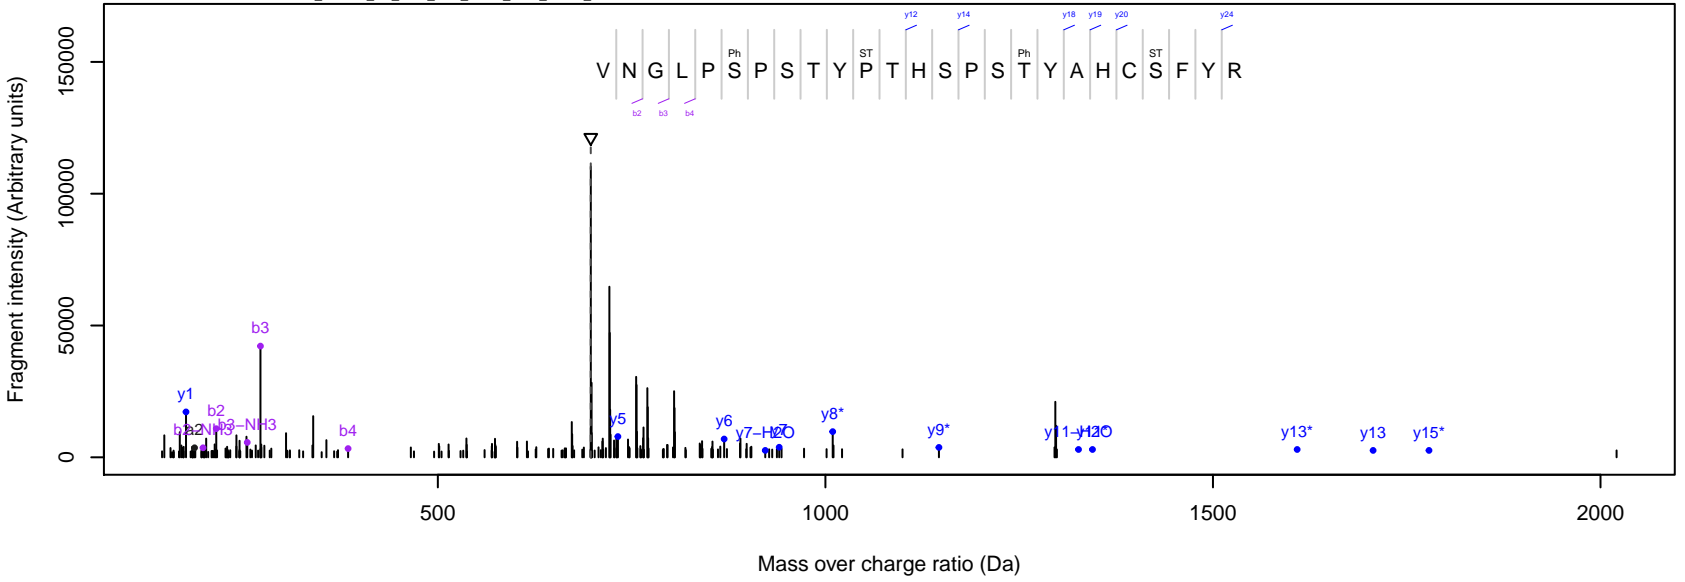

KPPLPS(Phospho (STY))SASESSLPAAVAGFSSR

Source : QE3\_201126\_FR\_TiOx\_hum\_tissue\_Urea\_RNAB\_H Scan : 39883

Andromeda score : 62.683

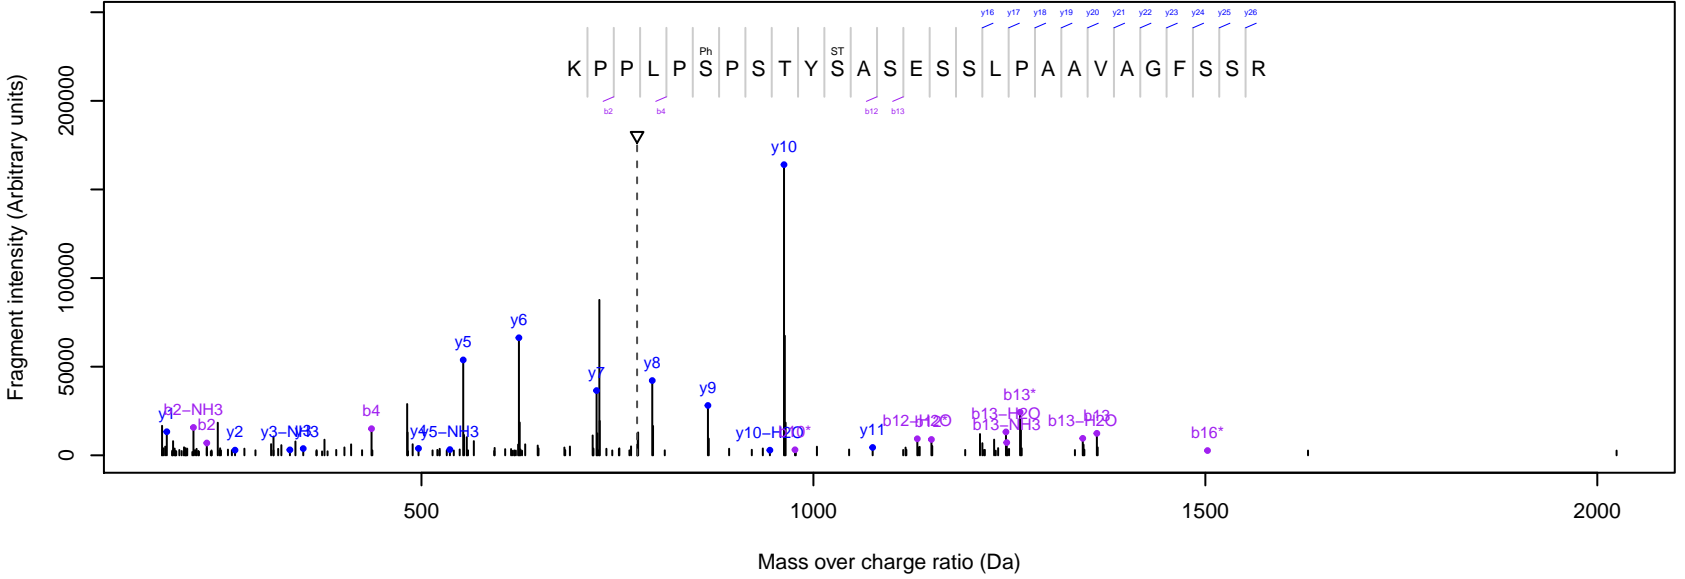

GVQVETIS(Phospho (STY))PGDGR

Source : QE3\_201126\_FR\_TiOx\_hum\_tissue\_Urea\_RNAB\_N Scan : 19767

Andromeda score : 62.68

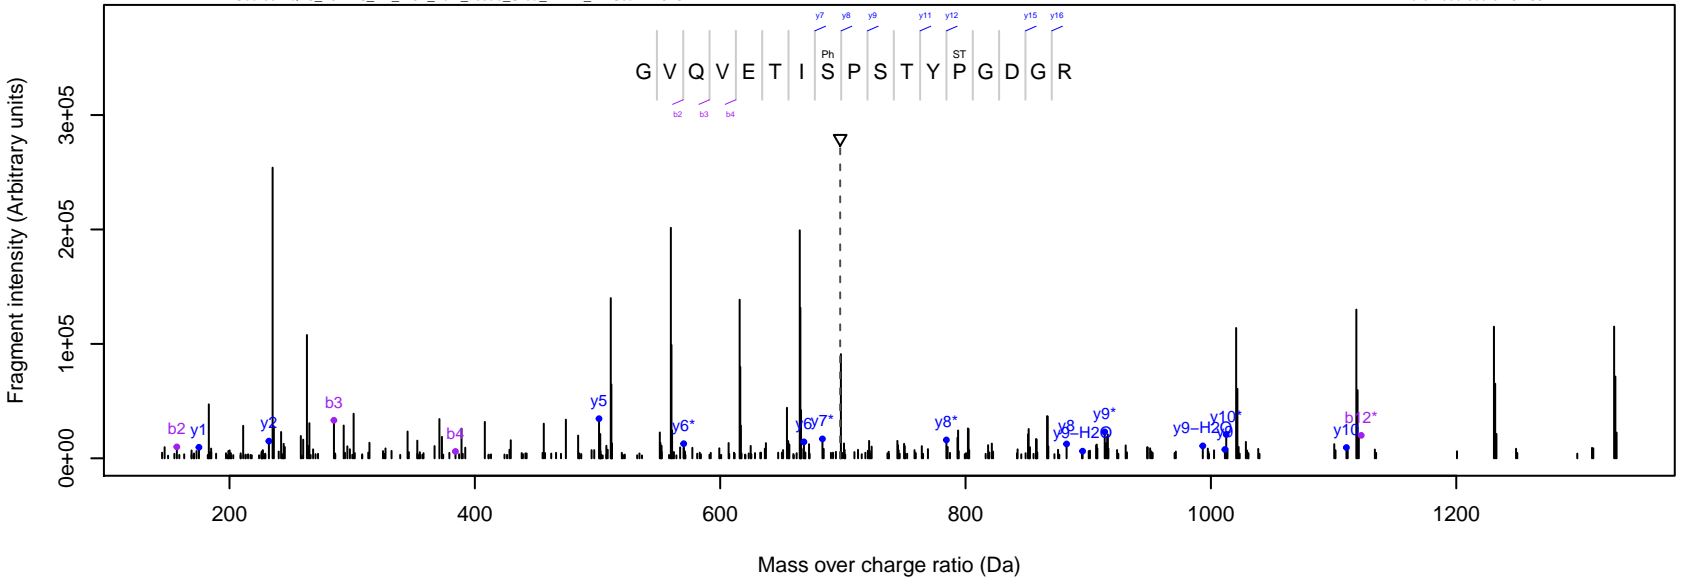

EAEALLQSM(Oxidation (M))GLTPESPIVPPPMOMSPS(Phospho (STY))SK-3+

Source : QE3\_201126\_FR\_TiOx\_hum\_tissue\_Urea\_RNAB\_N Scan : 48185

Andromeda score : 62.666

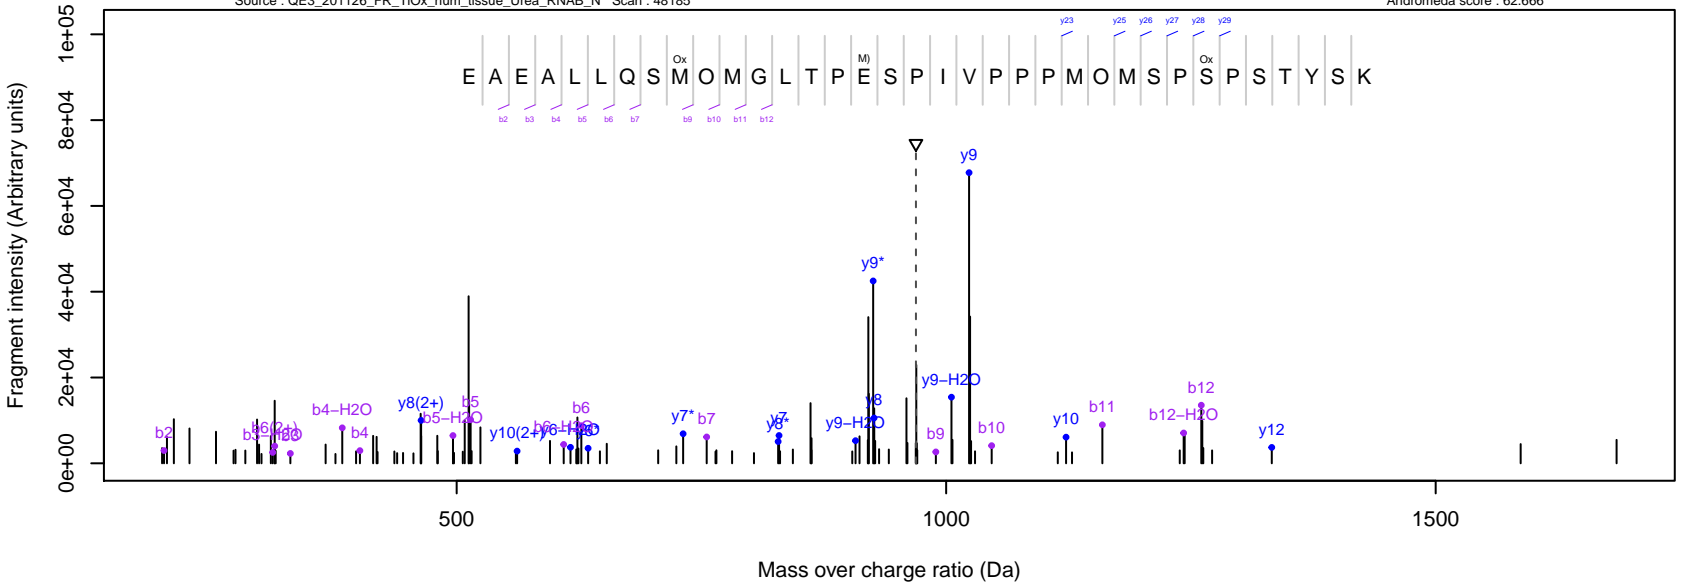

TPS(Phospho (STY))IQPSLLPHAAPFAK-3+

Source : QE3\_201126\_FR\_TiOx\_hum\_tissue\_Urea\_RNAB\_H Scan : 39765

Andromeda score : 62.648

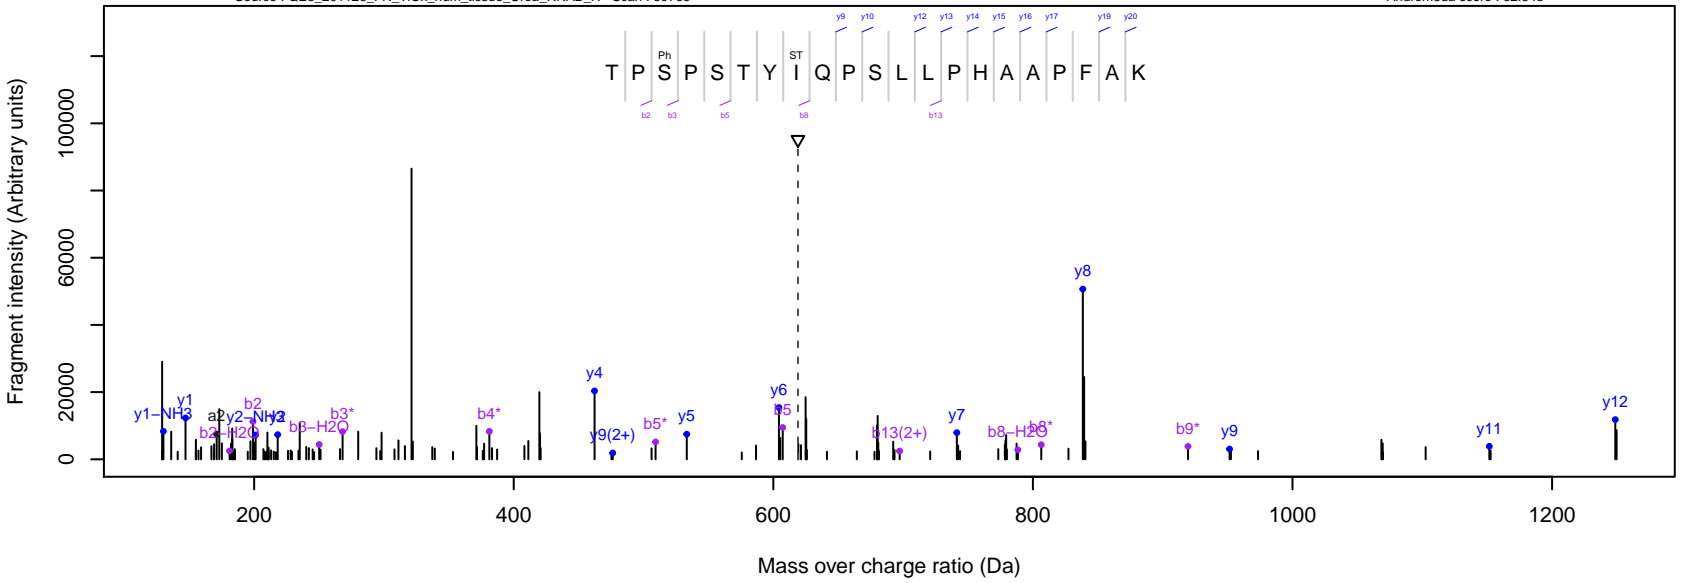

S(Phospho (STY))SLGSLQTPPEAVTTRK-3+

Source : QE3\_201126\_FR\_TiOx\_hum\_tissue\_Urea\_RNAB\_H Scan : 21141

Andromeda score : 62.646

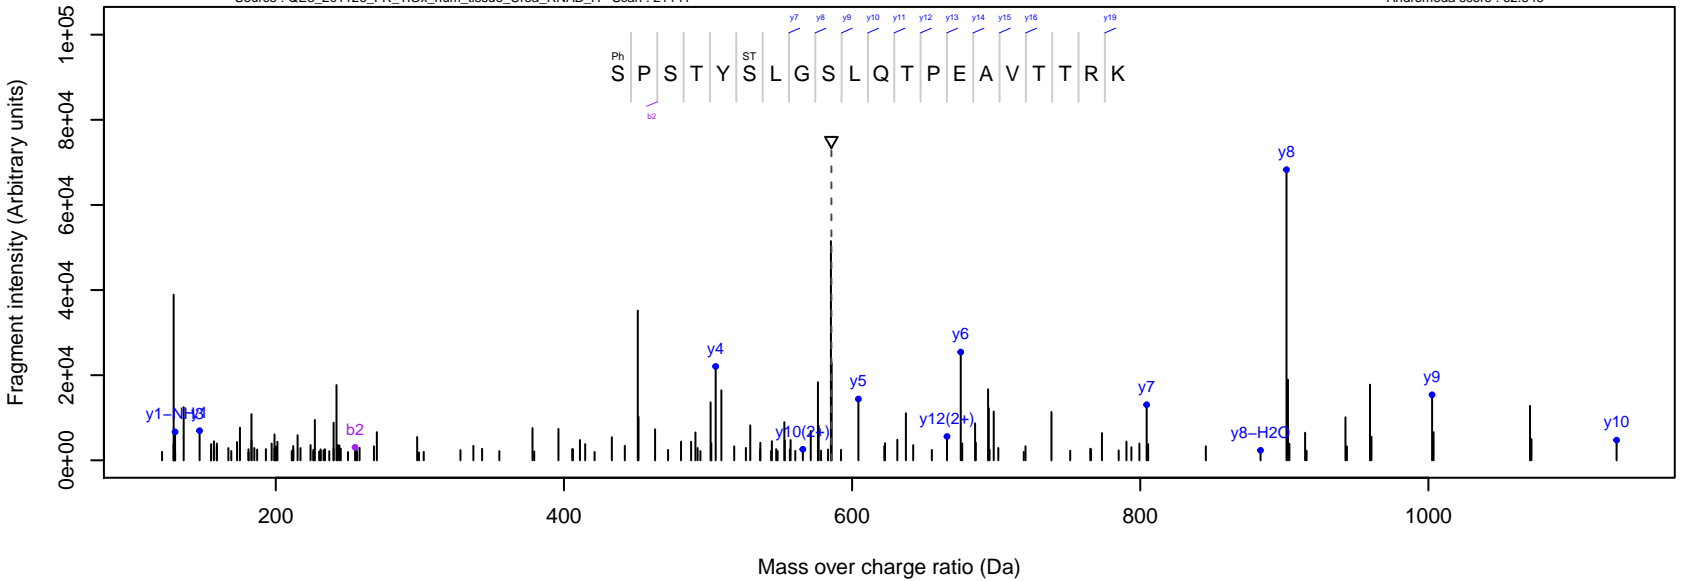

IIGVHQEDELLECLS(Phospho (STY))PATSR-3+

Source : QE3\_201126\_FR\_TiOx\_hum\_tissue\_Urea\_RNAB\_H Scan : 41319

Andromeda score : 62.605

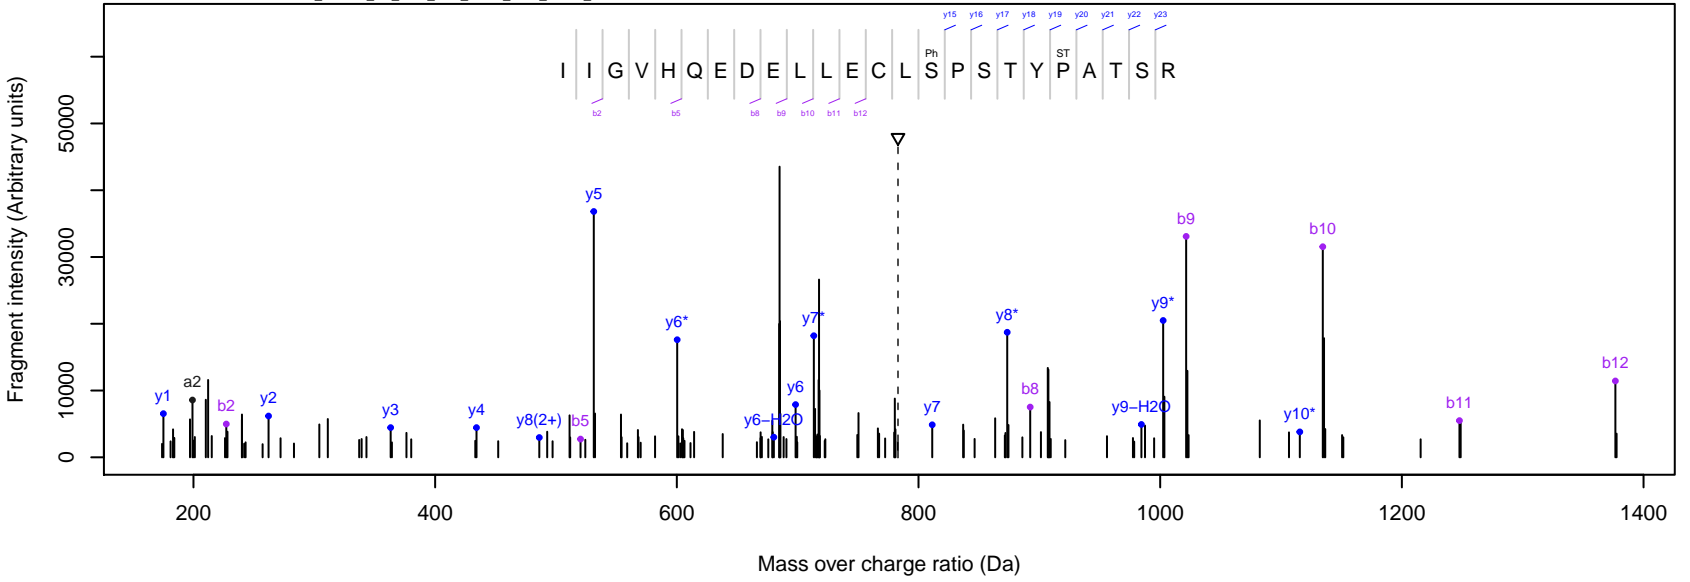

S(Phospho (STY))SFNVSDVARPEAAGSPPEEGCTEGTPAKDHR-4+

Source : QE3\_201126\_FR\_TiOx\_hum\_tissue\_Urea\_RNAB\_N Scan : 20772

Andromeda score : 62.605

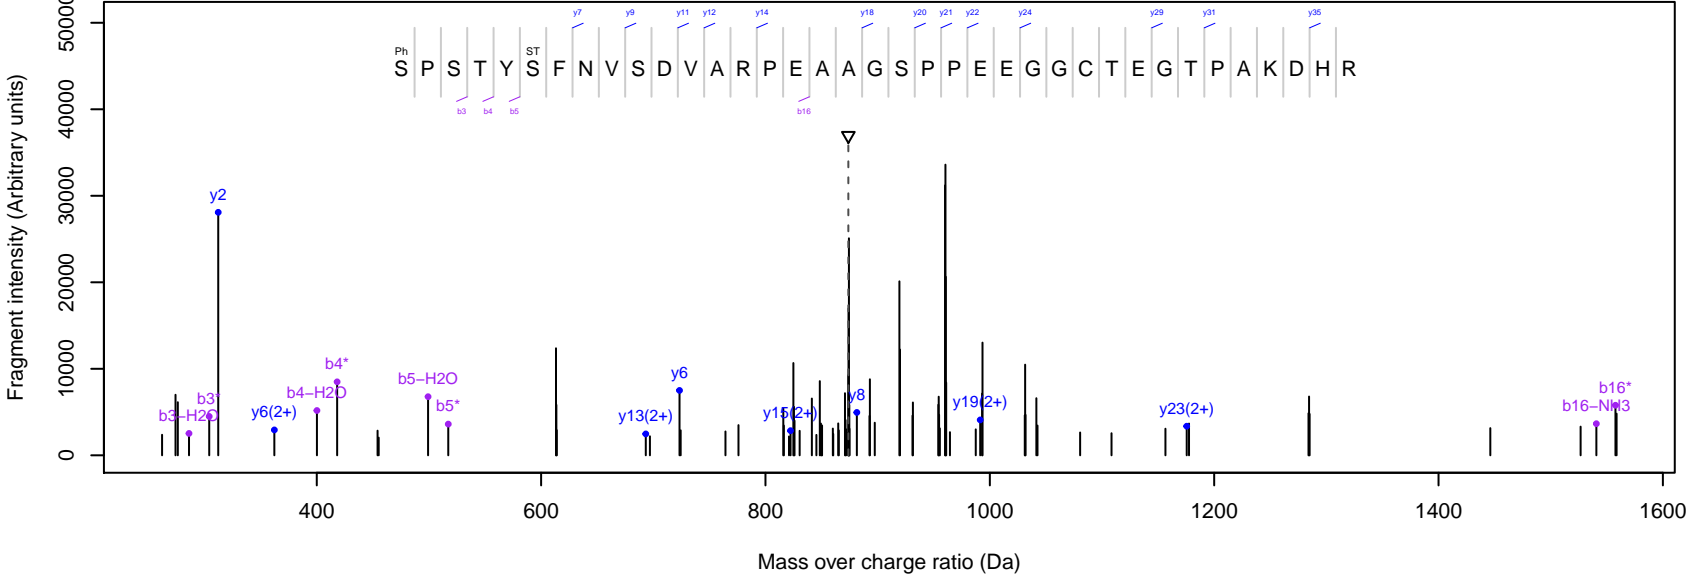

VYTY(Phospho (STY))IQSR-2+

Source : QE3\_201126\_FR\_TiOx\_hum\_tissue\_Urea\_RNAB\_H Scan : 13860

Andromeda score : 62.546

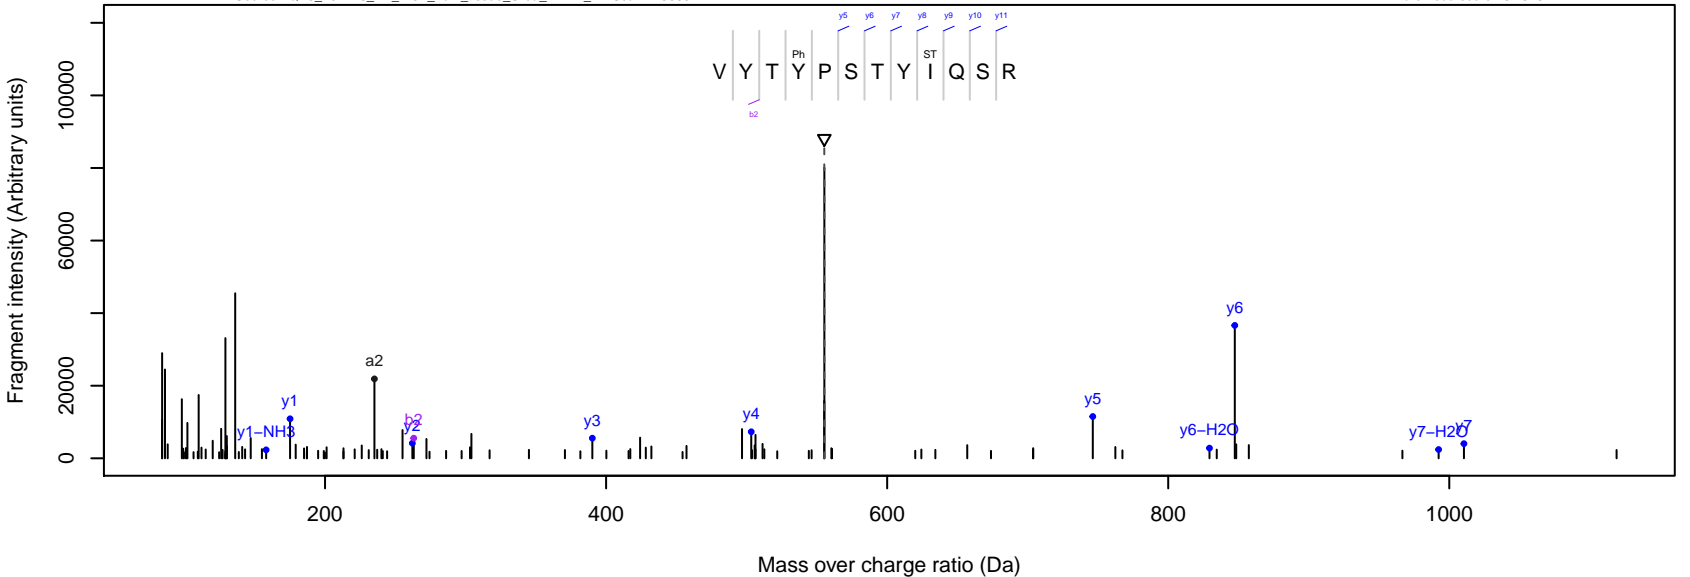

NLS(Phospho (STY))ALENYFELVDGVK-2+

Source : QE3\_201126\_FR\_TiOx\_hum\_tissue\_Urea\_RNAB\_N Scan : 58154

Andromeda score : 62.475

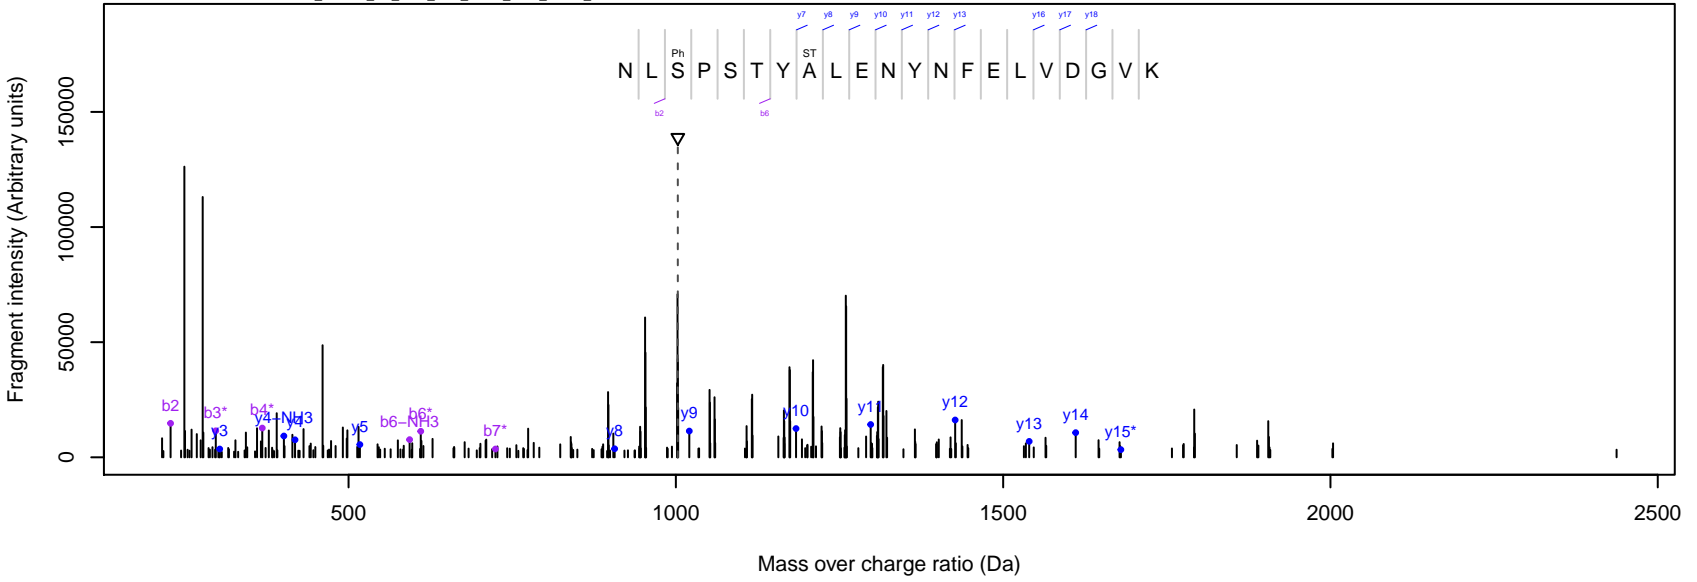

GSIRPS(Phospho (STY))ISNPR-2+

Source : QE3\_201126\_FR\_TiOx\_hum\_tissue\_Urea\_RNAB\_N Scan : 11221

Andromeda score : 62.408

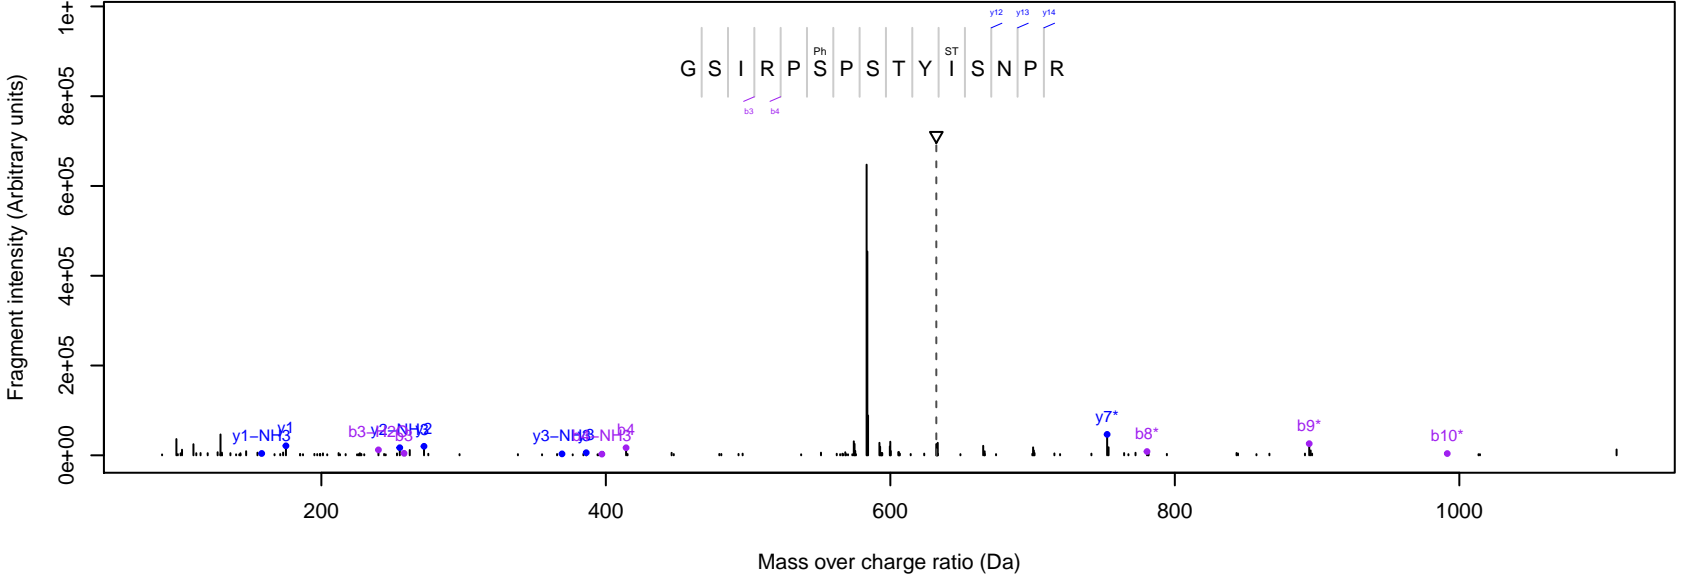

LGS(Phospho (STY))VDSFER-2+

Source : QE3\_201126\_FR\_TiOx\_hum\_tissue\_Urea\_RNAB\_H Scan : 24351

Andromeda score : 62.408

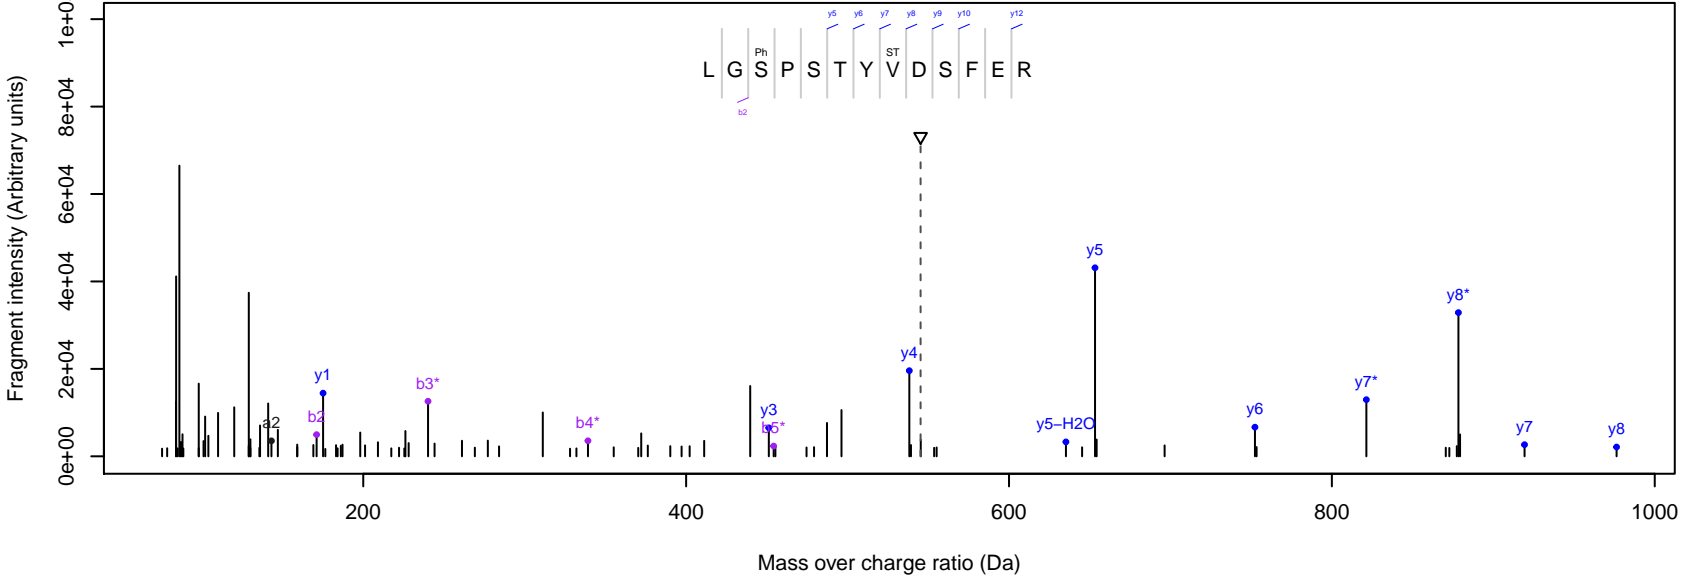

S(Phospho (STY))FGNPFEGSR-2+

Source : QE3\_201126\_FR\_TiOx\_hum\_tissue\_Urea\_RNAB\_B Scan : 33757

Andromeda score : 62.408

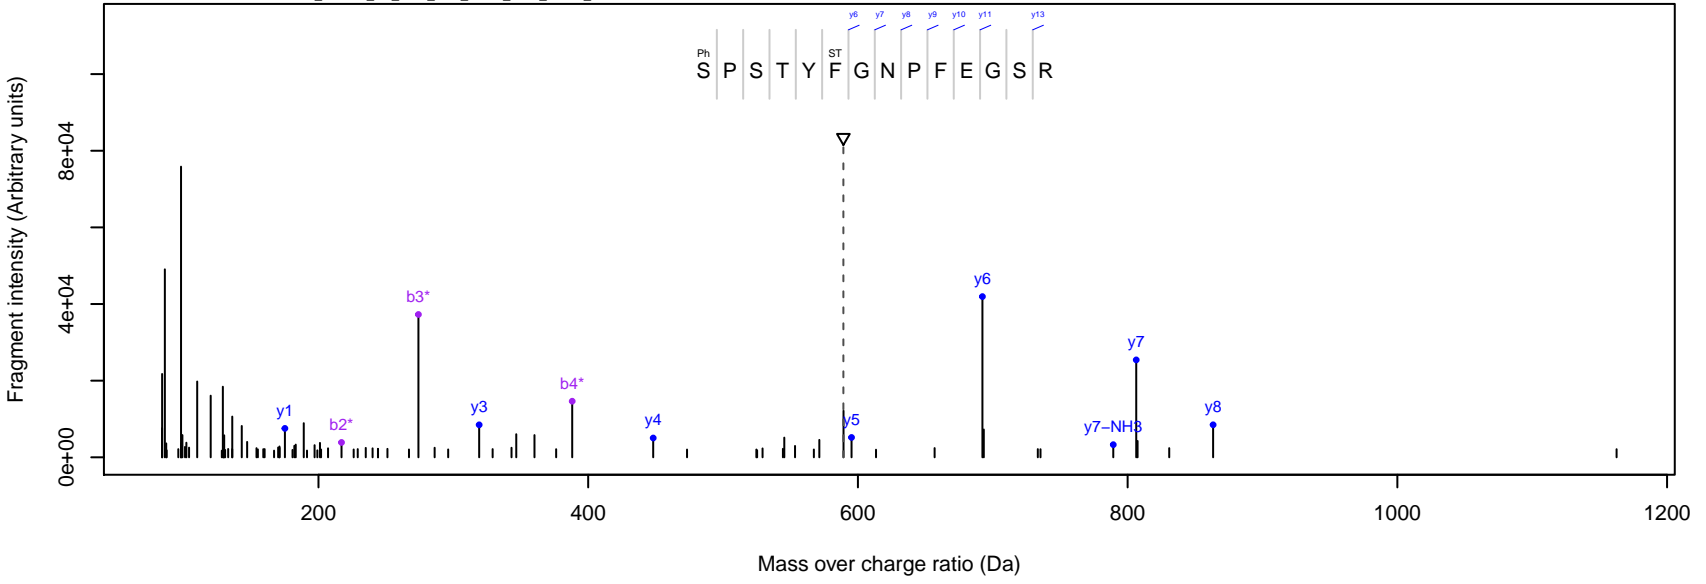

PS(Phospho (STY))SLGAAMPASTSAALQEALENAGR-3+

Source : QE3\_201126\_FR\_TiOx\_hum\_tissue\_Urea\_RNAB\_N Scan : 60511

Andromeda score : 62.393

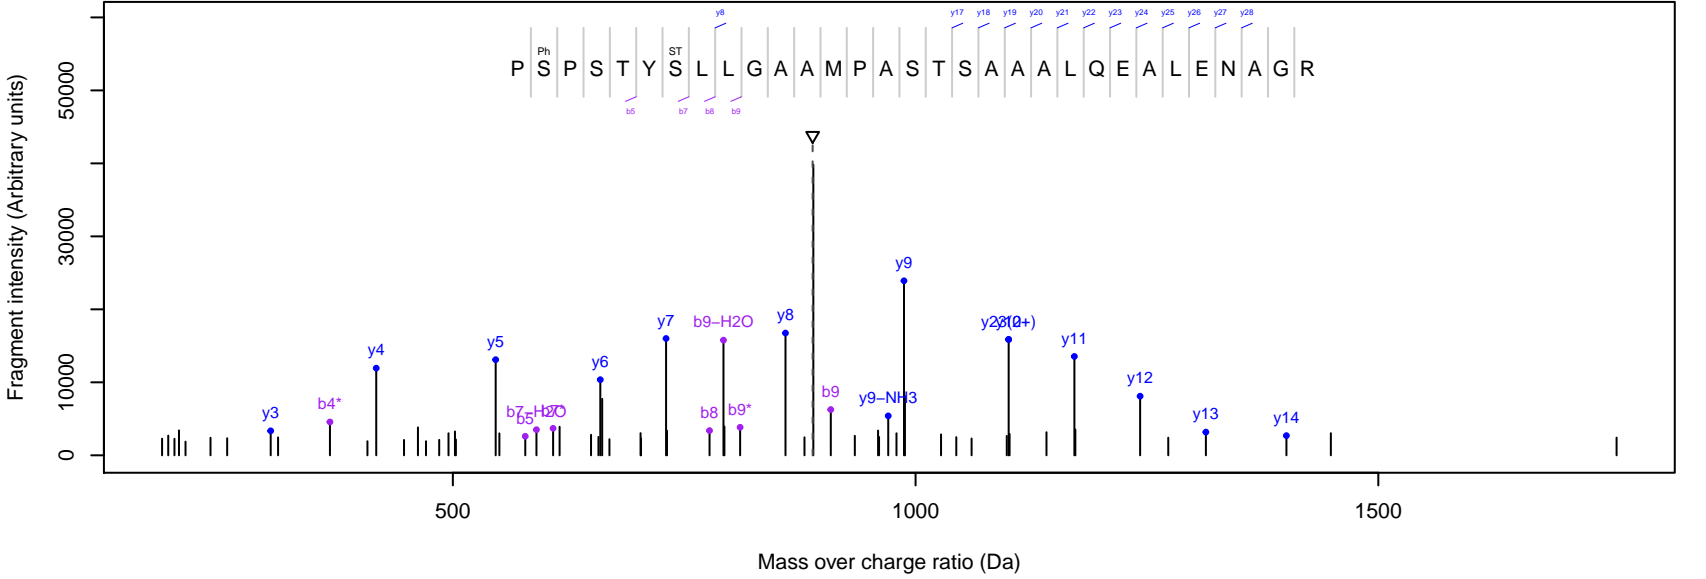

AAIPPPVYEEQDRPRSPT(Phospho (STY))GPSNSFLANMGGTVAHK-4+

Source : QE3\_201126\_FR\_TiOx\_hum\_tissue\_Urea\_RNAB\_B Scan : 34063

Andromeda score : 62.383

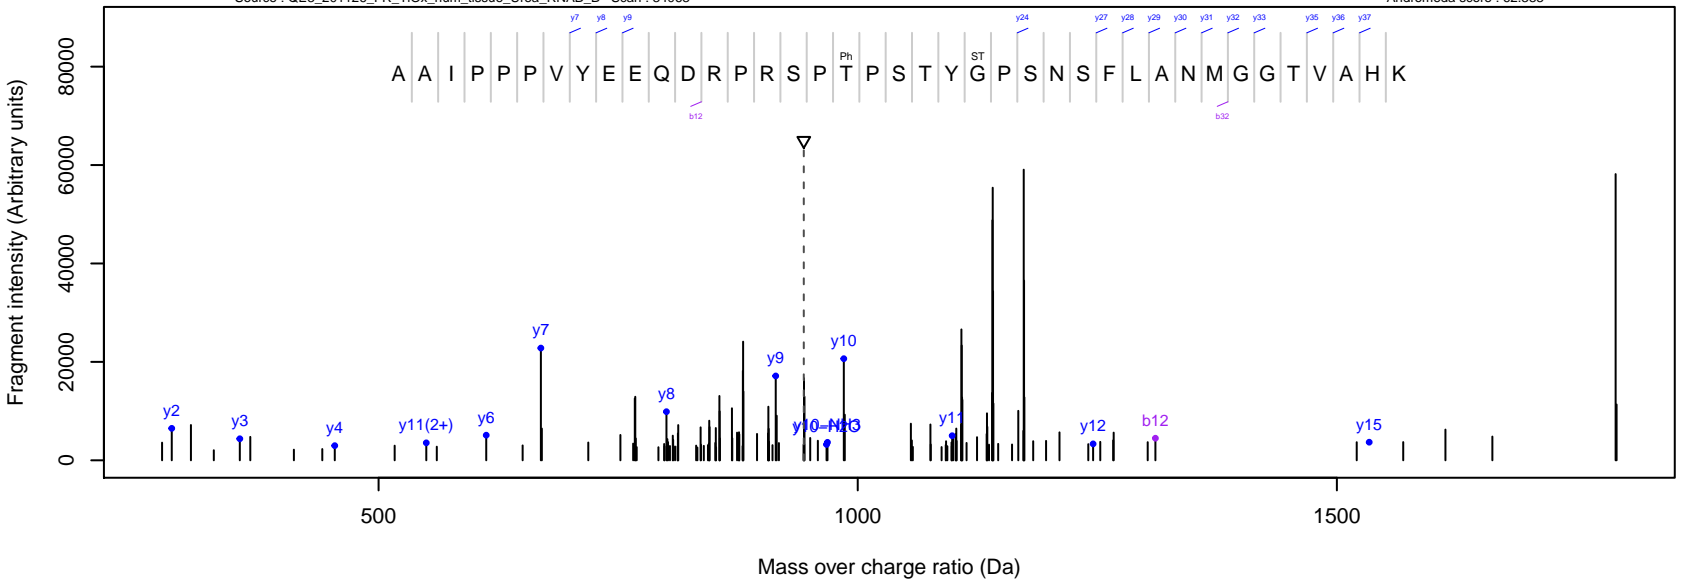

RLS(Phospho (STY))AQQQAISVVGSLSSM(Oxidation (M))SPLEEEAPQAK-3+

Source : QE3\_201126\_FR\_TiOx\_hum\_tissue\_Urea\_RNAB\_H Scan : 44602

Andromeda score : 62.377

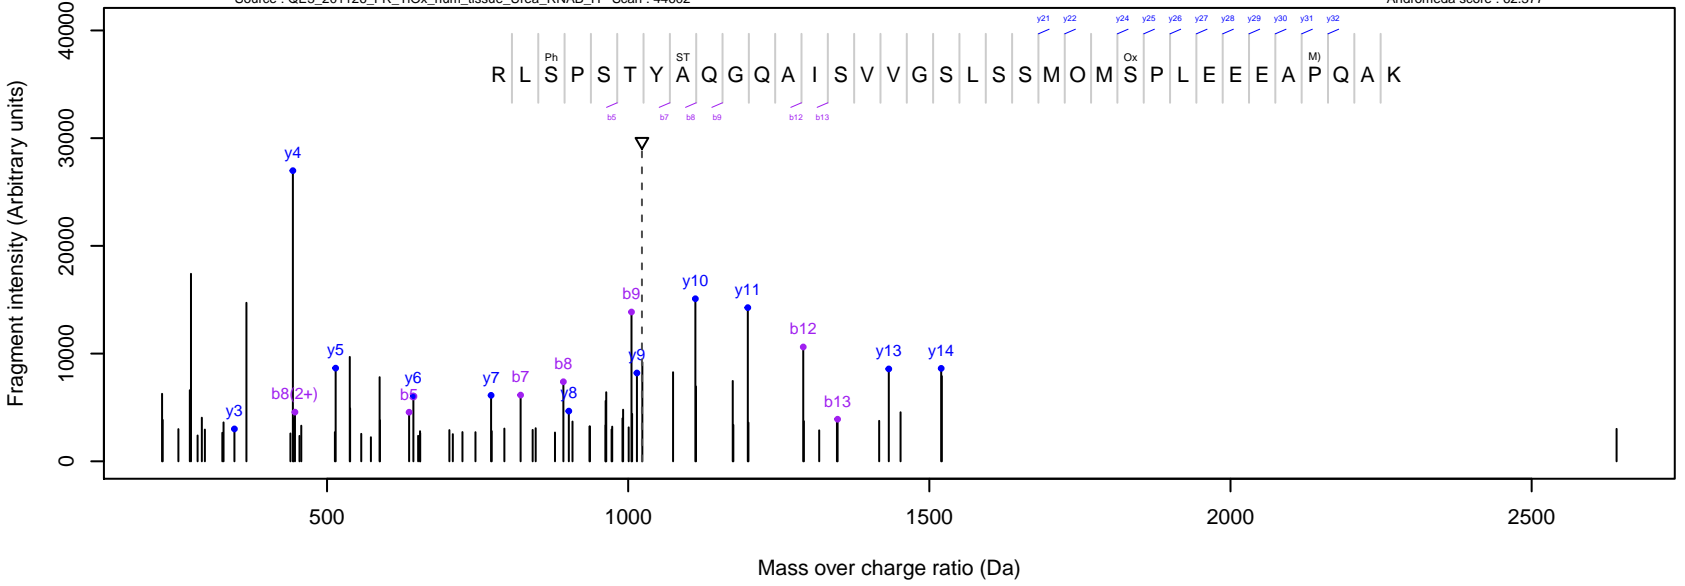

ALS(Phospho (STY))HQEPM(Oxidation (M))VSTQPAPR-3+

Source : QE3\_201126\_FR\_TiOx\_hum\_tissue\_Urea\_RNAB\_H Scan : 12907

Andromeda score : 62.362

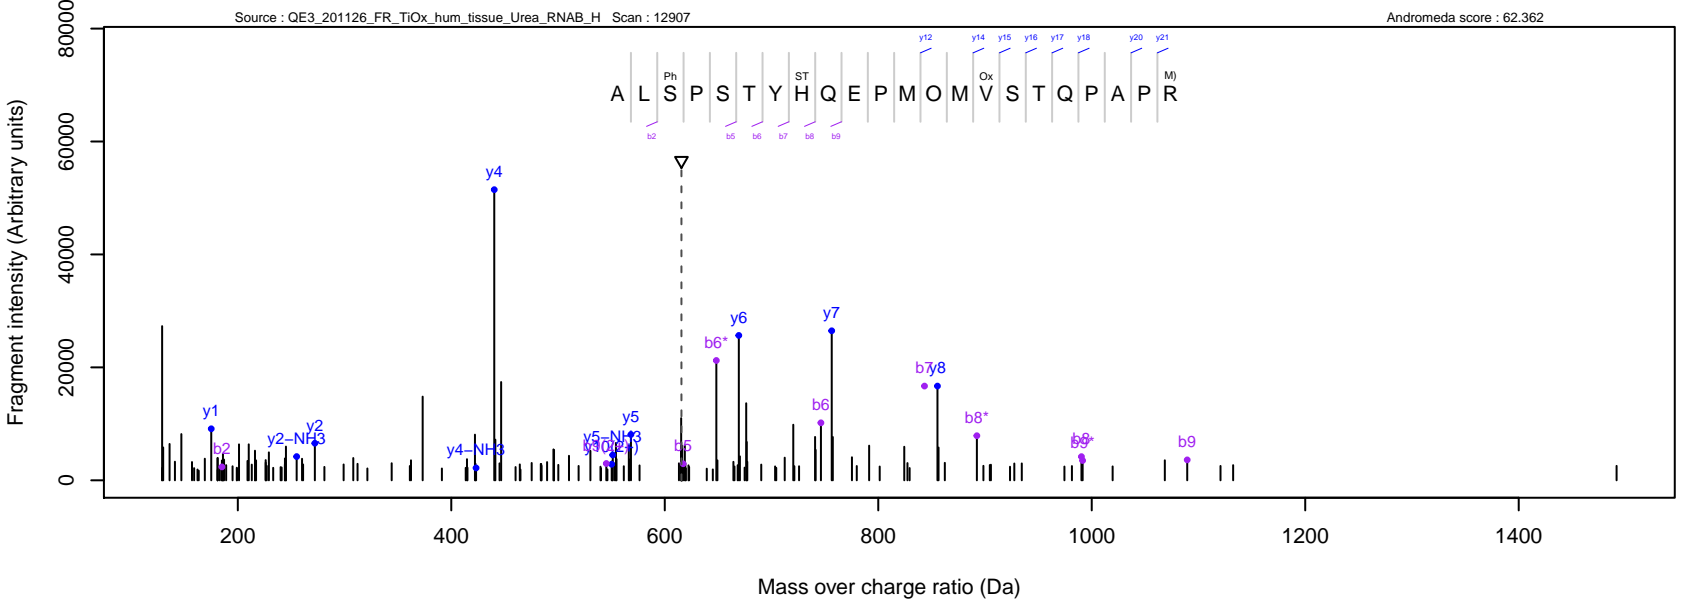

VS(Phospho (STY))KDDRS(Phospho (STY))DVES(Phospho (STY))S(Phospho (STY))SEEDVTCTK-3+

Source : QE3\_201126\_FR\_TiOx\_hum\_tissue\_Urea\_RNAB\_N Scan : 17762

Andromeda score : 62.274

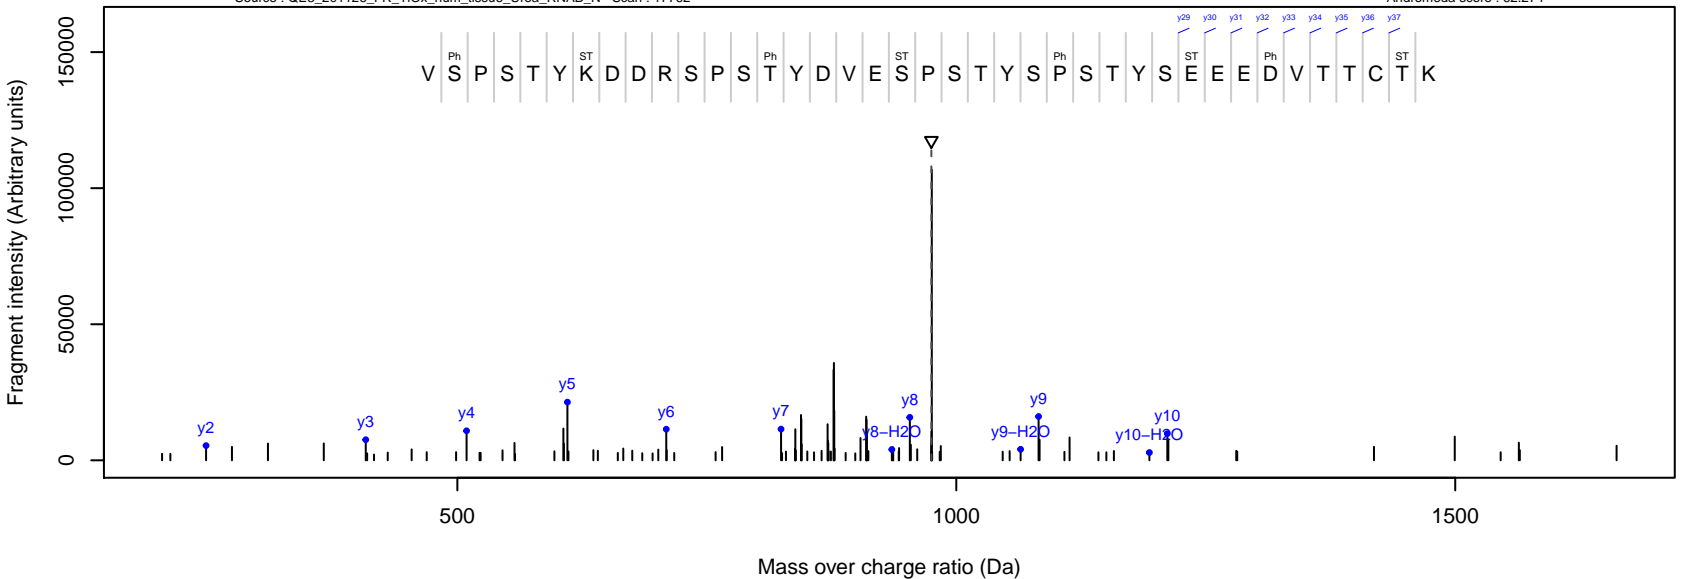

KPSKYPLCSADAAVSTT(Phospho (STY))PPGS(Phospho (STY))PPPPPLPEPPVLK-4+

Source : QE3\_201126\_FR\_TIOx\_hum\_tissue\_Urea\_RNAB\_N Scan : 46984

Andromeda score : 62.268

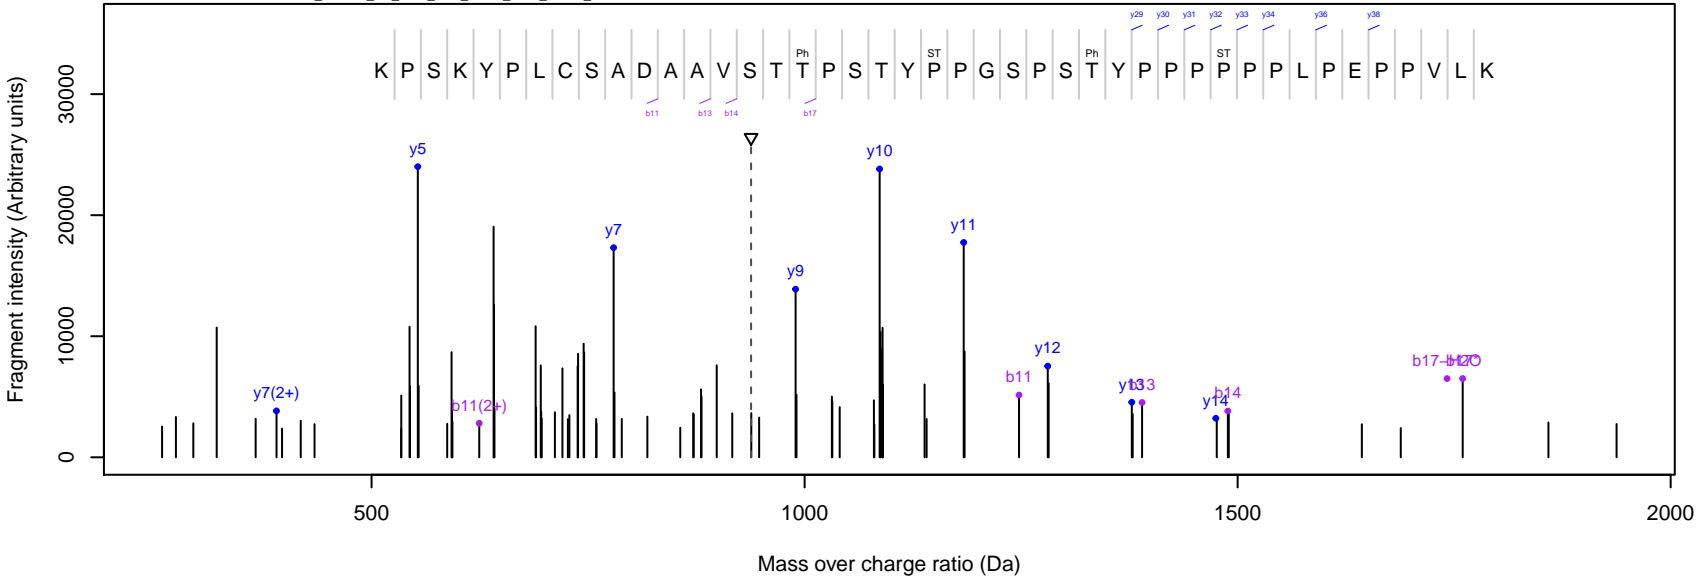

SSKAS(Phospho (STY))LGS(Phospho (STY))LEGEAEAEASS(Phospho (STY))PKGK-3+

Source : QE3\_201126\_FR\_TIOx\_hum\_tissue\_Urea\_RNAB\_N Scan : 32213

Andromeda score : 62.254

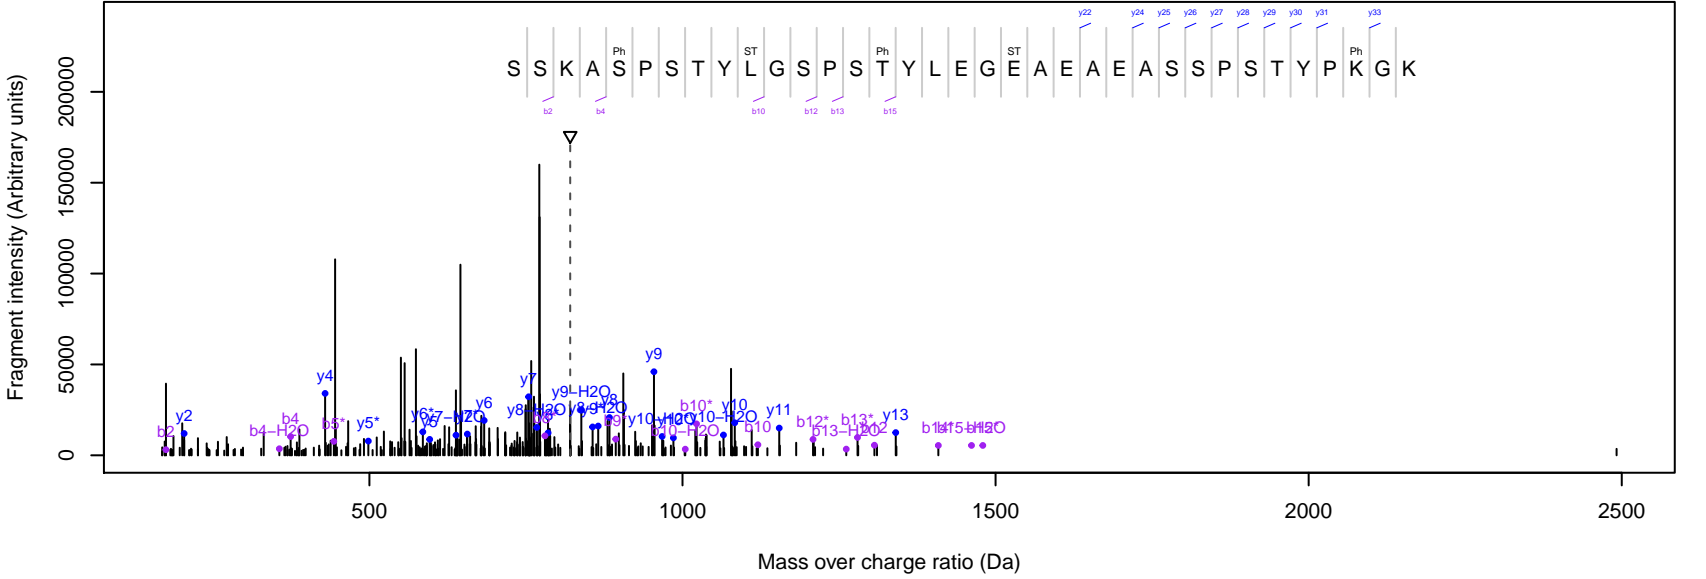

GTVTDFPGFDERADAET(Phospho (STY))LRK-3+

Source : QE3\_201126\_FR\_TIOx\_hum\_tissue\_Urea\_RNAB\_H Scan : 28708

Andromeda score : 62.237

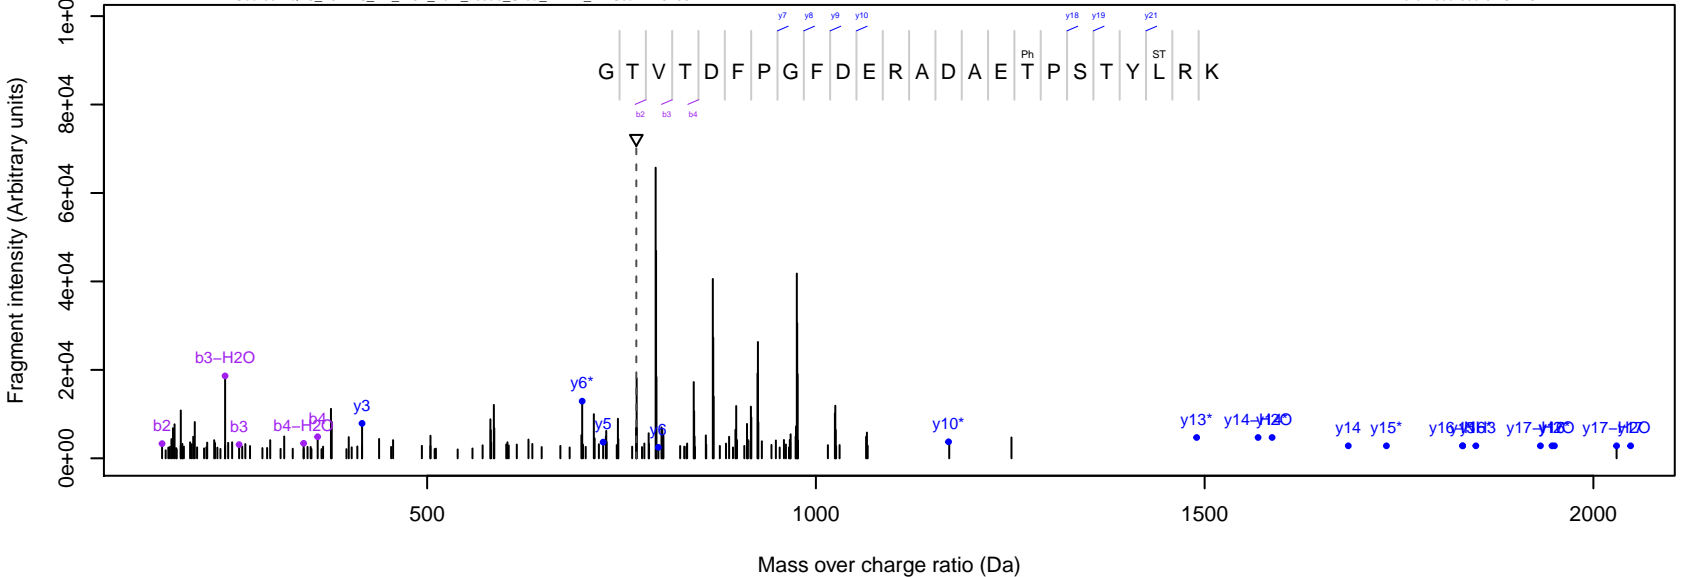

S(Phospho (STY))M(Oxidation (M))AHSPGPVVSQASPGTSSAVLFLSK-3+

Source : QE3\_201126\_FR\_TIOx\_hum\_tissue\_Urea\_RNAB\_H Scan : 35279

Andromeda score : 62.237

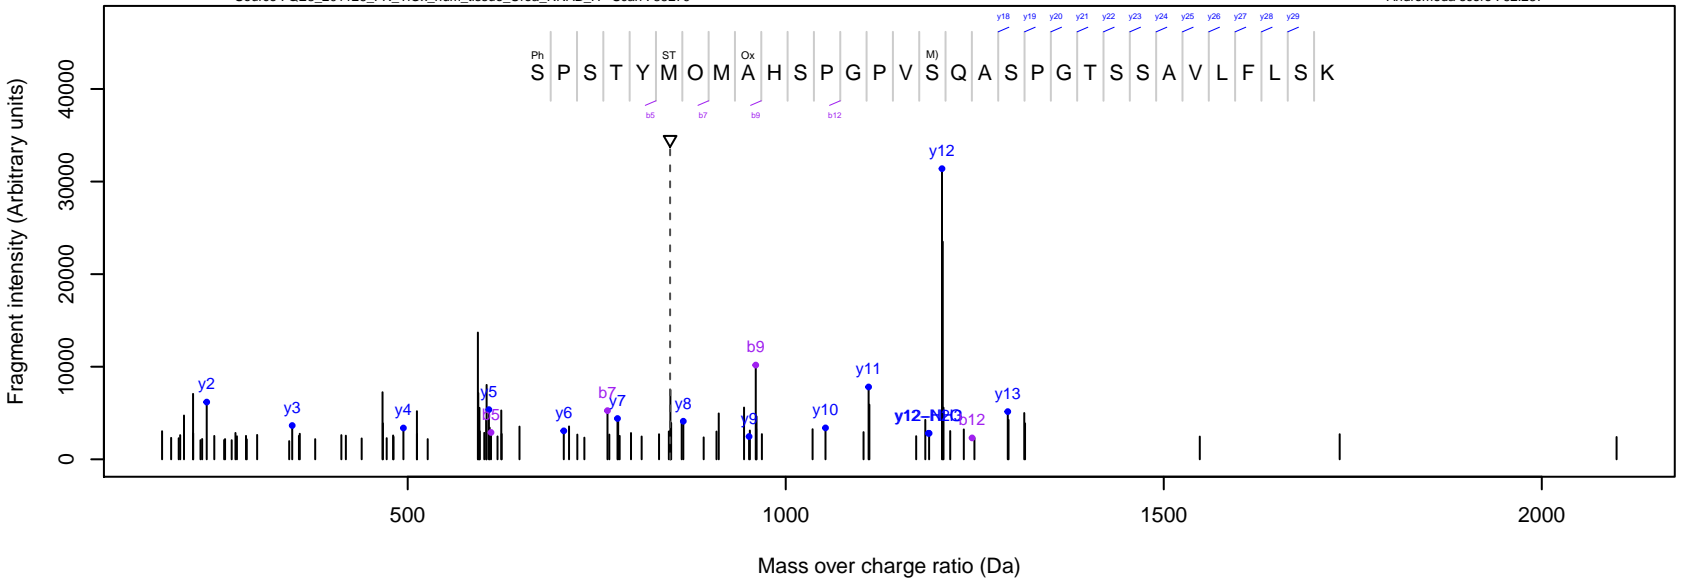

KRQS(Phospho (STY))PEPSPVTLGR-3+

Source : QE3\_201126\_FR\_TIOx\_hum\_tissue\_Urea\_RNAB\_N Scan : 10601

Andromeda score : 62.203

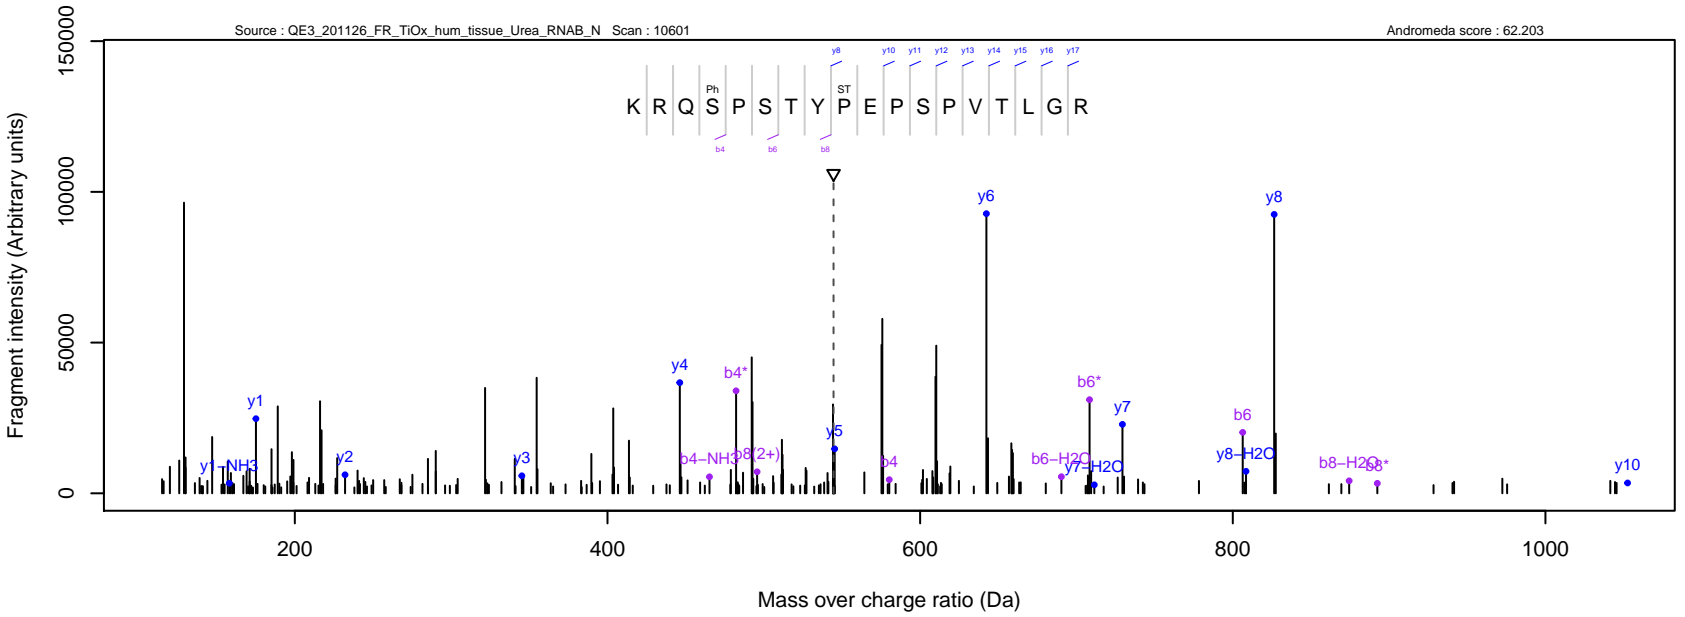

TPRPAS(Phospho (STY))PGPSLPAR-3+

Source : QE3\_201126\_FR\_TIOx\_hum\_tissue\_Urea\_RNAB\_B Scan : 12790

Andromeda score : 62.203

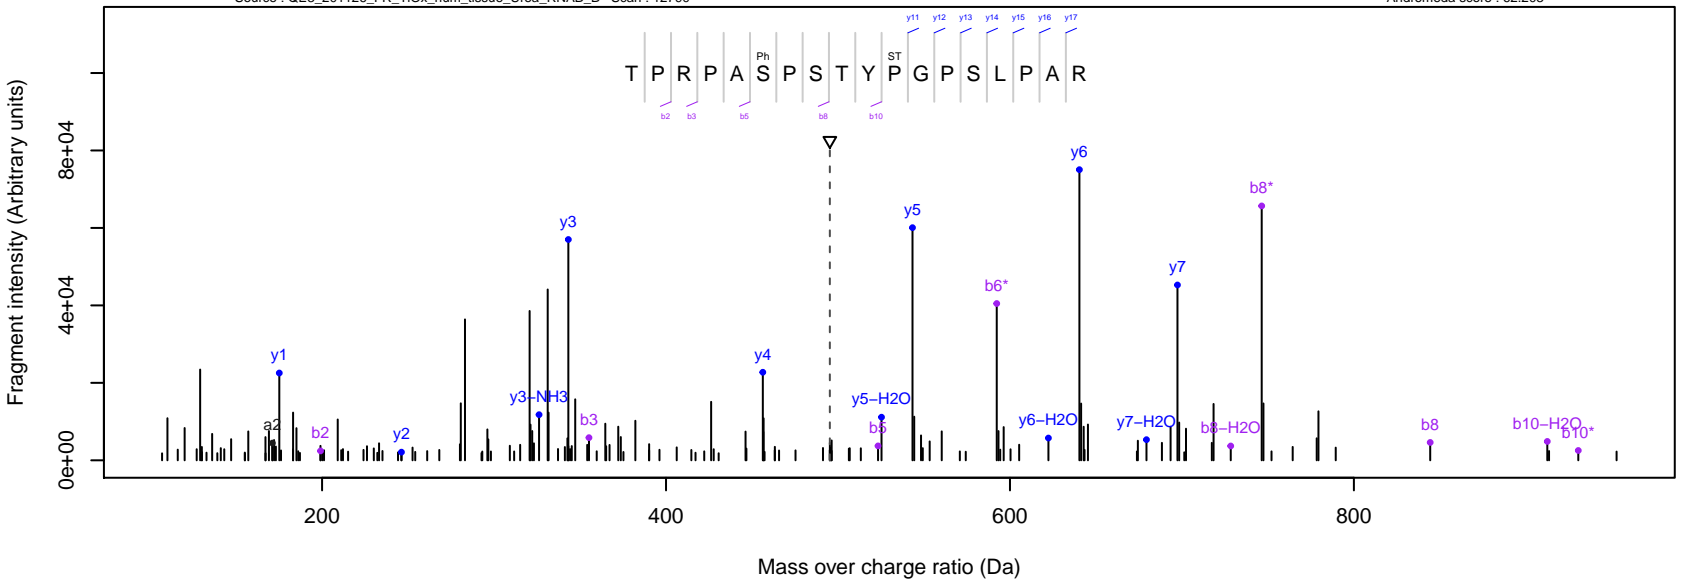



ESEEGNPVRGSEEDSPSTYPKK-3+

Source : QE3\_201126\_FR\_TiOx\_hum\_tissue\_Urea\_RNAB\_B Scan : 4565

Andromeda score : 62.19

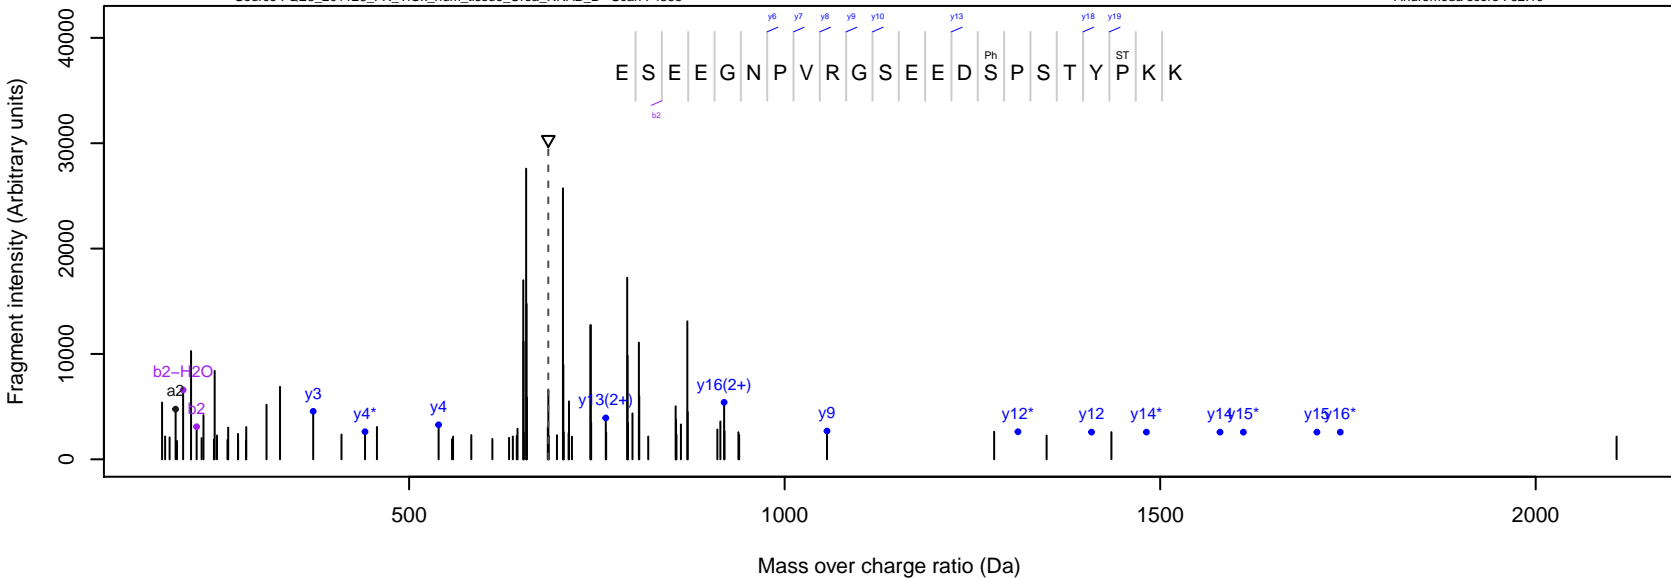

IPLIKS(Phospho (STY))HNDFVAILDLPGEHGYK-3+

Source : QE3\_201126\_FR\_TiOx\_hum\_tissue\_Urea\_RNAB\_B Scan : 45683

Andromeda score : 62.19

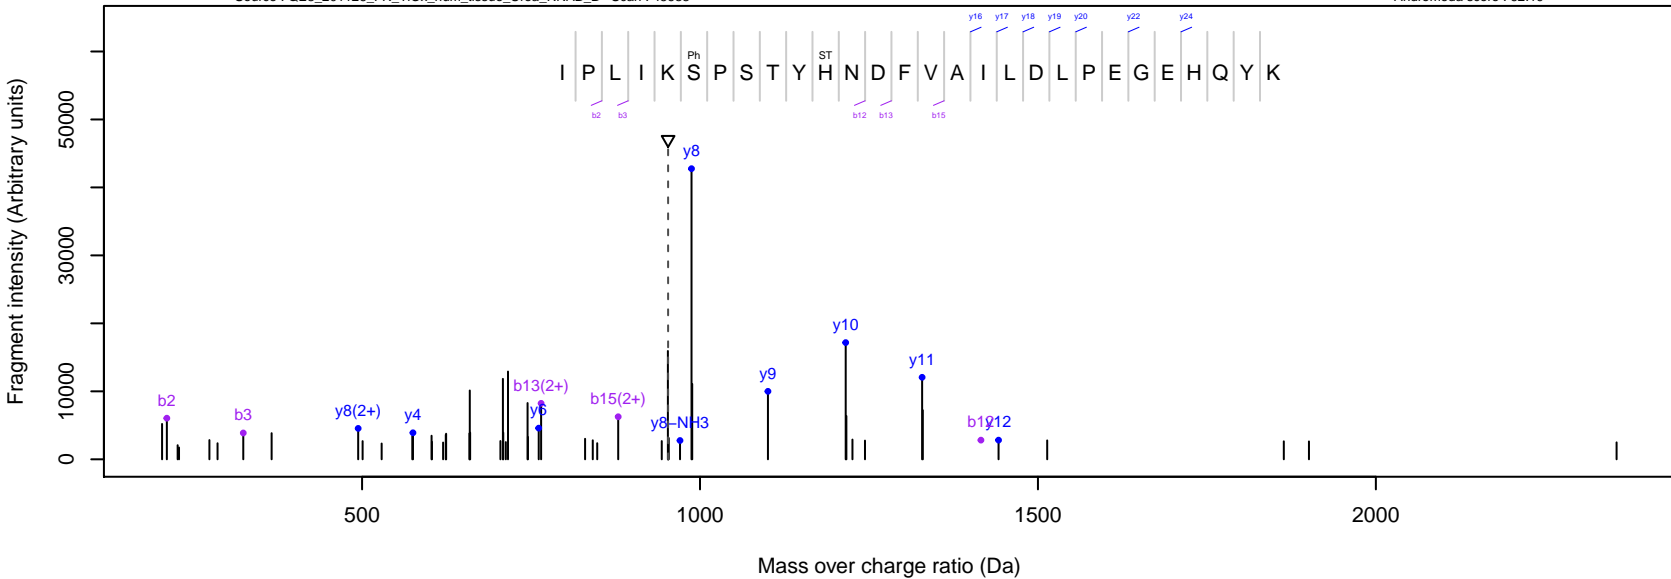

SLQDDTEPENGSPSTYDIISSAENEQTEADQATAAETLSK-3+

Source : QE3\_201126\_FR\_TiOx\_hum\_tissue\_Urea\_RNAB\_H Scan : 36797

Andromeda score : 62.183

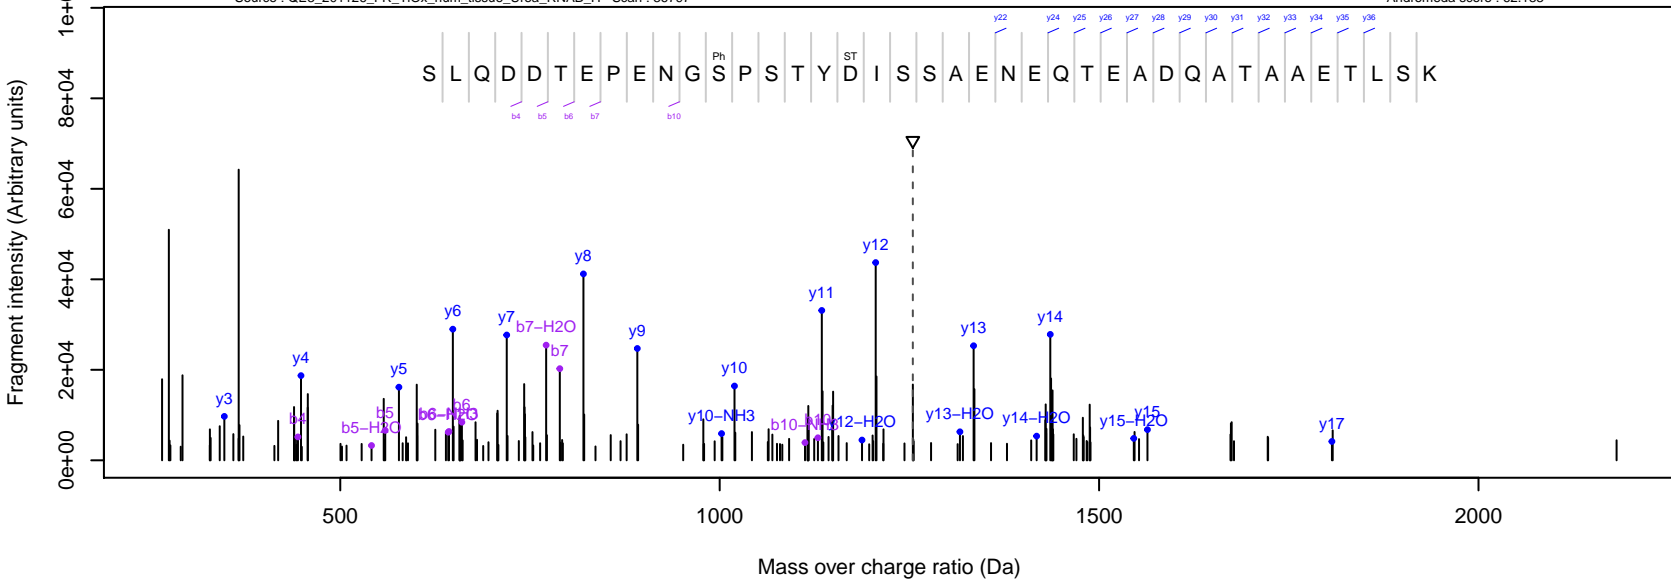

(Acetyl (Protein N-term))M(Oxidation (M))NS(Phospho (STY))S(Phospho (STY))DEEKQLQLITSLK-3+

Source : QE3\_201126\_FR\_TiOx\_hum\_tissue\_Urea\_RNAB\_N Scan : 58982

Andromeda score : 62.165

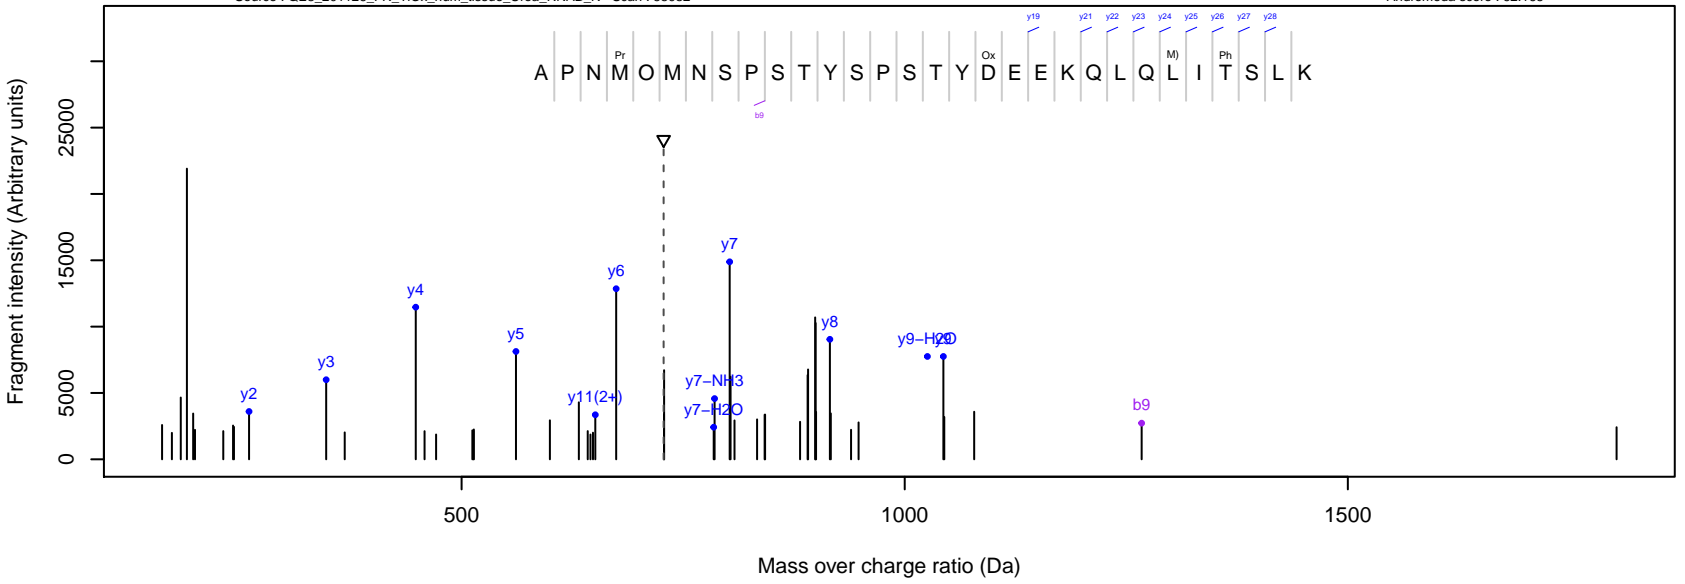

KQKS(Phospho (STY))YTLVAK-3+

Source : QE3\_201126\_FR\_TiOx\_hum\_tissue\_Urea\_RNAB\_N Scan : 9854

Andromeda score : 62.162

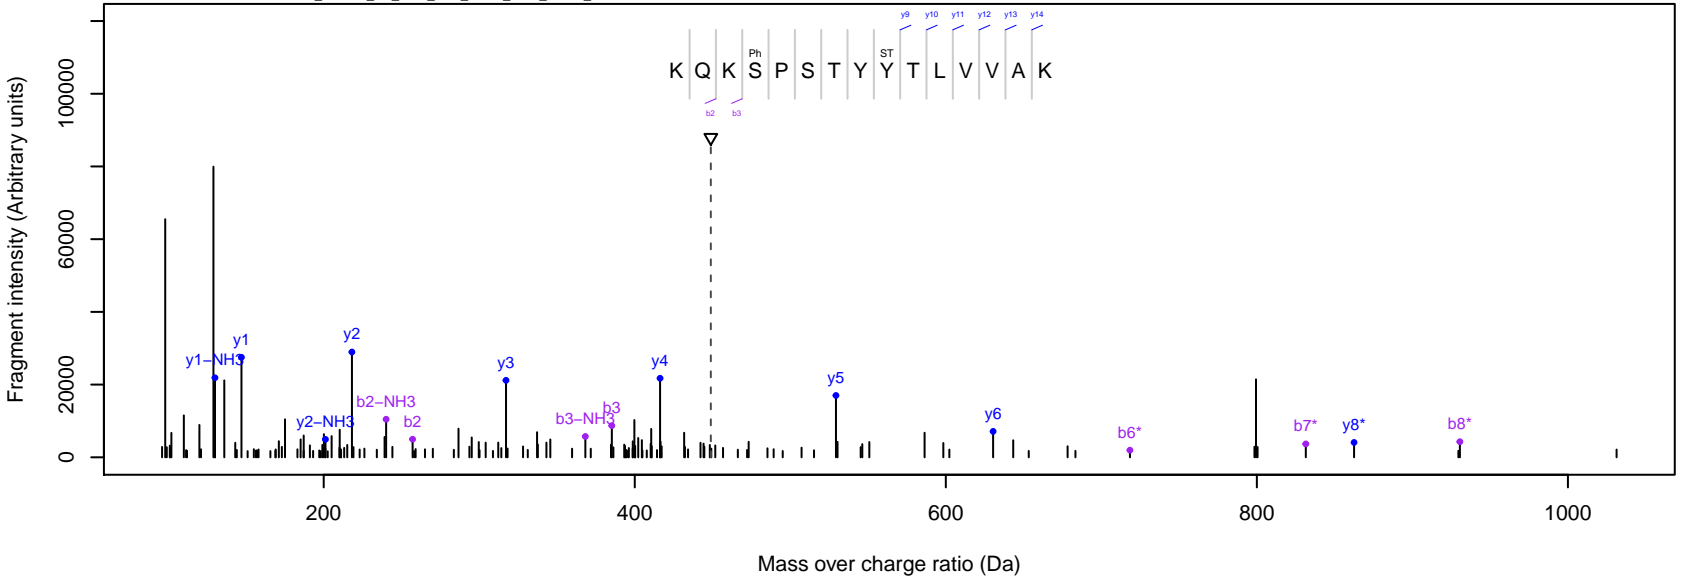

T(Phospho (STY))AMSTPHVAEPAENEQDEQDENGAEASADLR-3+

Source : QE3\_201126\_FR\_TiOx\_hum\_tissue\_Urea\_RNAB\_B Scan : 25246

Andromeda score : 62.16

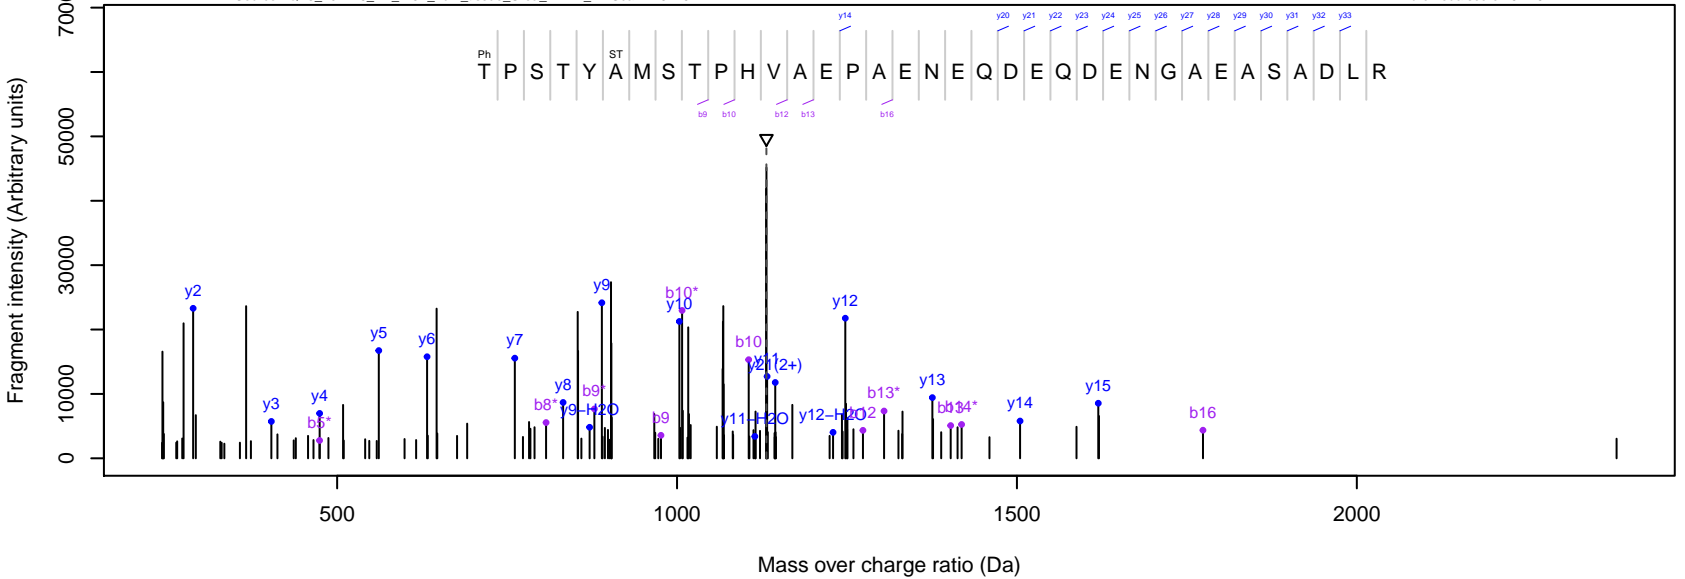

RGS(Phospho (STY))LQAYTFEEQPTLPVLLPTSSGLPPGWEEKQDER-4+

Source : QE3\_201126\_FR\_TiOx\_hum\_tissue\_Urea\_RNAB\_N Scan : 55218

Andromeda score : 62.105

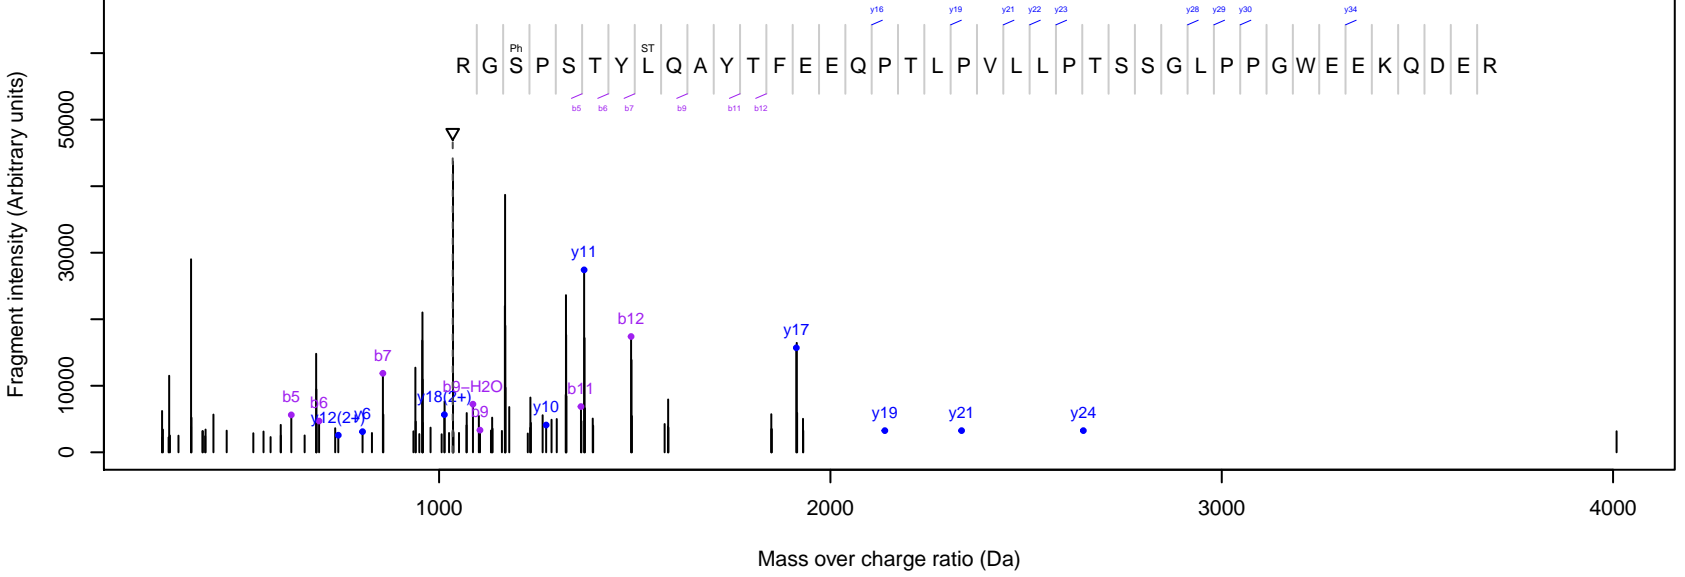

AS(Phospho (STY))PNLIGATGANS LGK-2+

Source : QE3\_201126\_FR\_TiOx\_hum\_tissue\_Urea\_RNAB\_B Scan : 29812

Andromeda score : 62.104

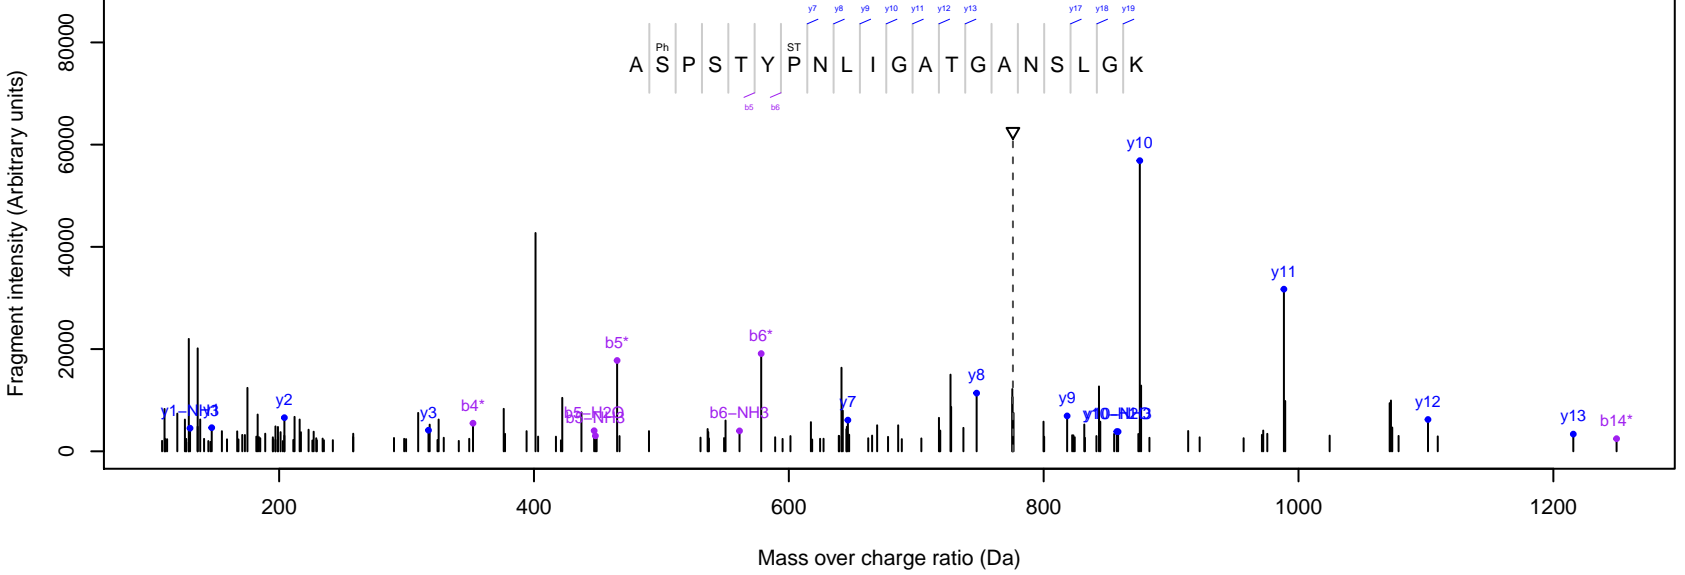

SVS(Phospho (STY))LVKDEPGLLPEGG S ALPK-3+

Source : QE3\_201126\_FR\_TiOx\_hum\_tissue\_Urea\_RNAB\_H Scan : 39614

Andromeda score : 62.1

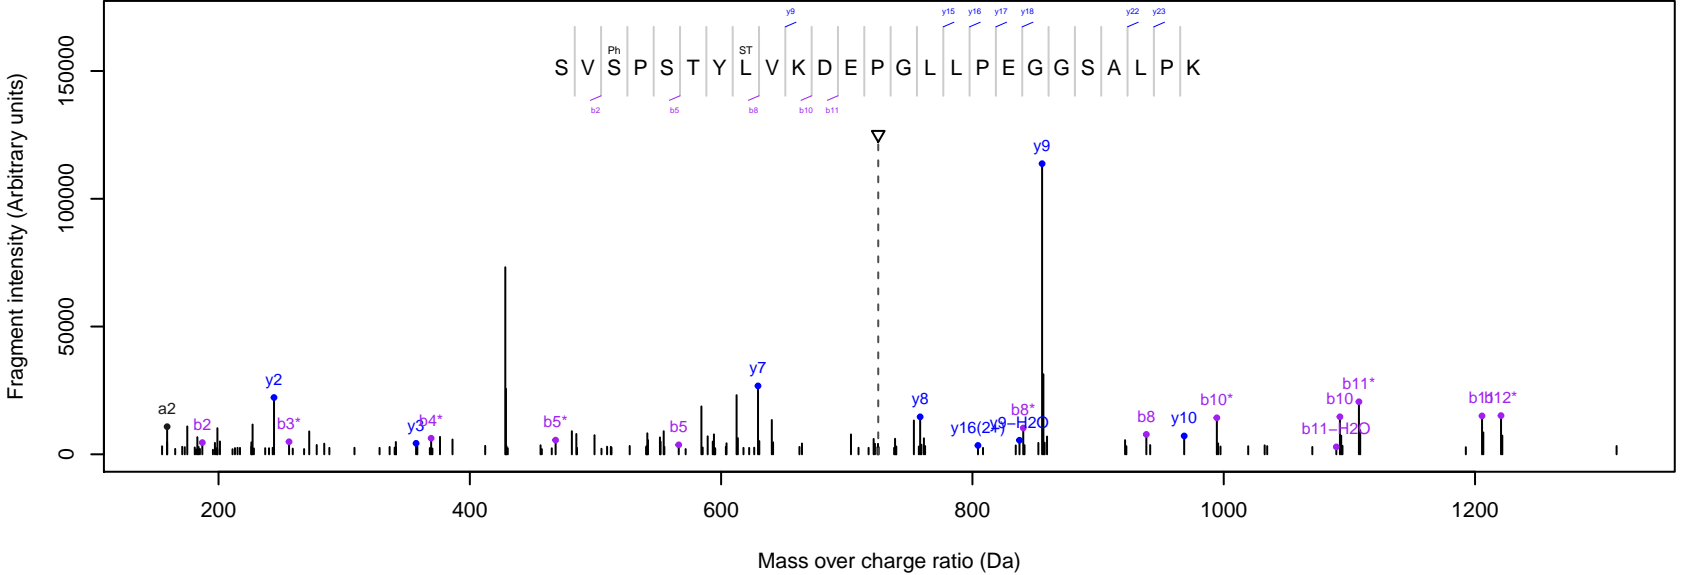

AGLGSPERPPKT(Phospho (STY))SPGSPR-3+

Source : QE3\_201126\_FR\_TiOx\_hum\_tissue\_Urea\_RNAB\_N Scan : 9116

Andromeda score : 62.099

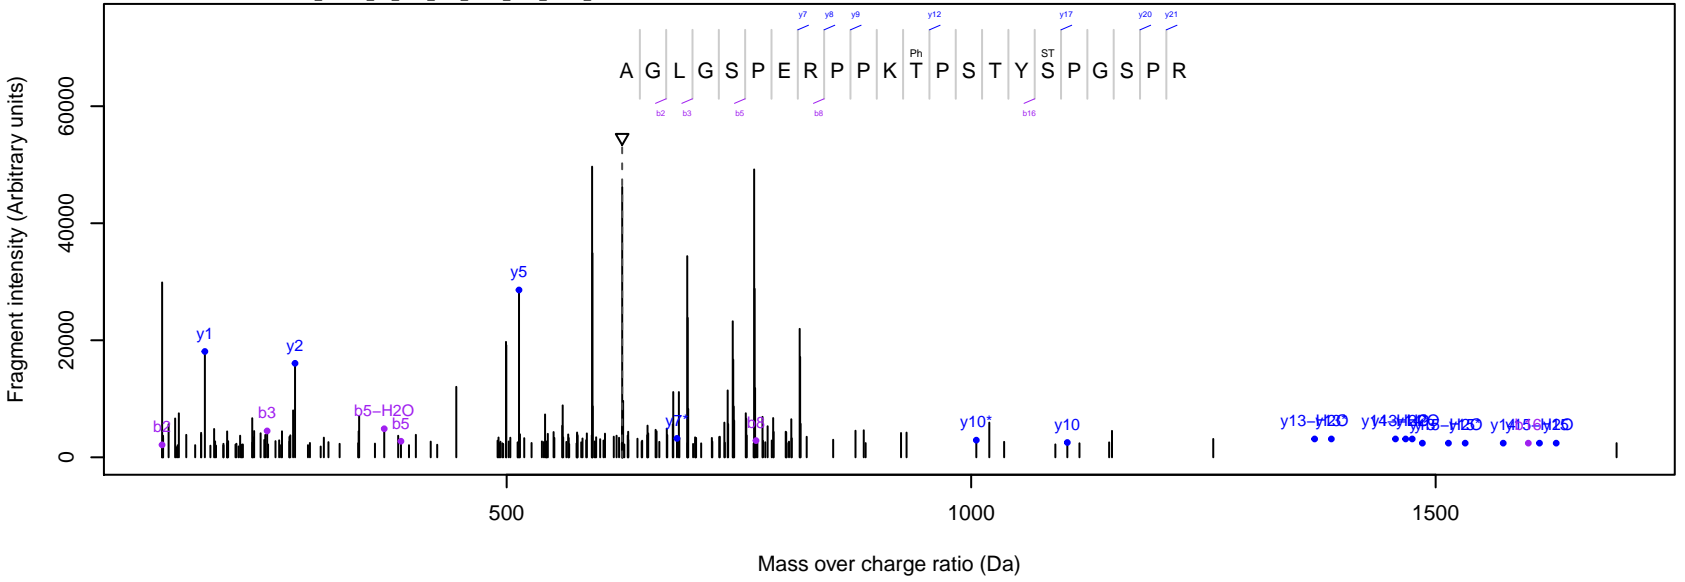

SNS(Phospho (STY))MLELAPK-2+

Source : QE3\_201126\_FR\_TiOx\_hum\_tissue\_Urea\_RNAB\_N Scan : 29793

Andromeda score : 62.088

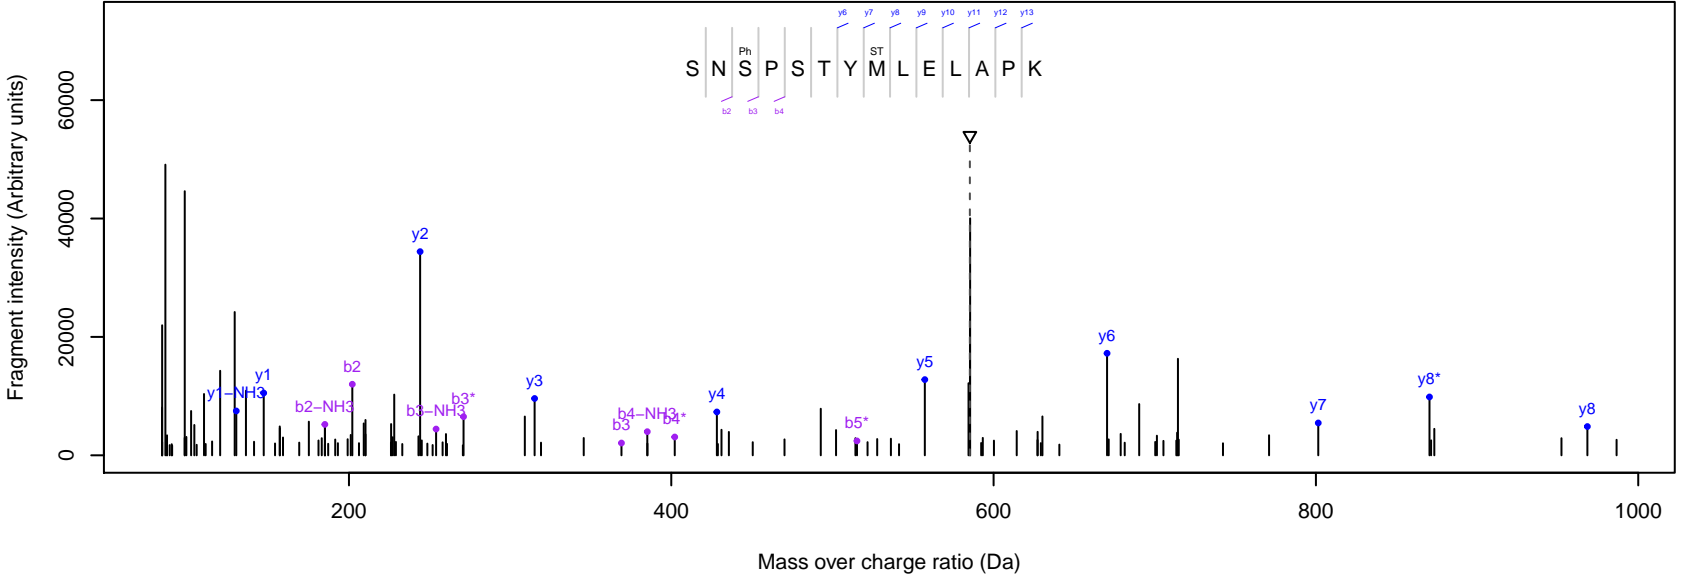

DTSATS(Phospho (STY))QSVNGSPQAEQPSLESTSK-3+

Source : QE3\_201126\_FR\_TiOx\_hum\_tissue\_Urea\_RNAB\_B Scan : 20139

Andromeda score : 62.082

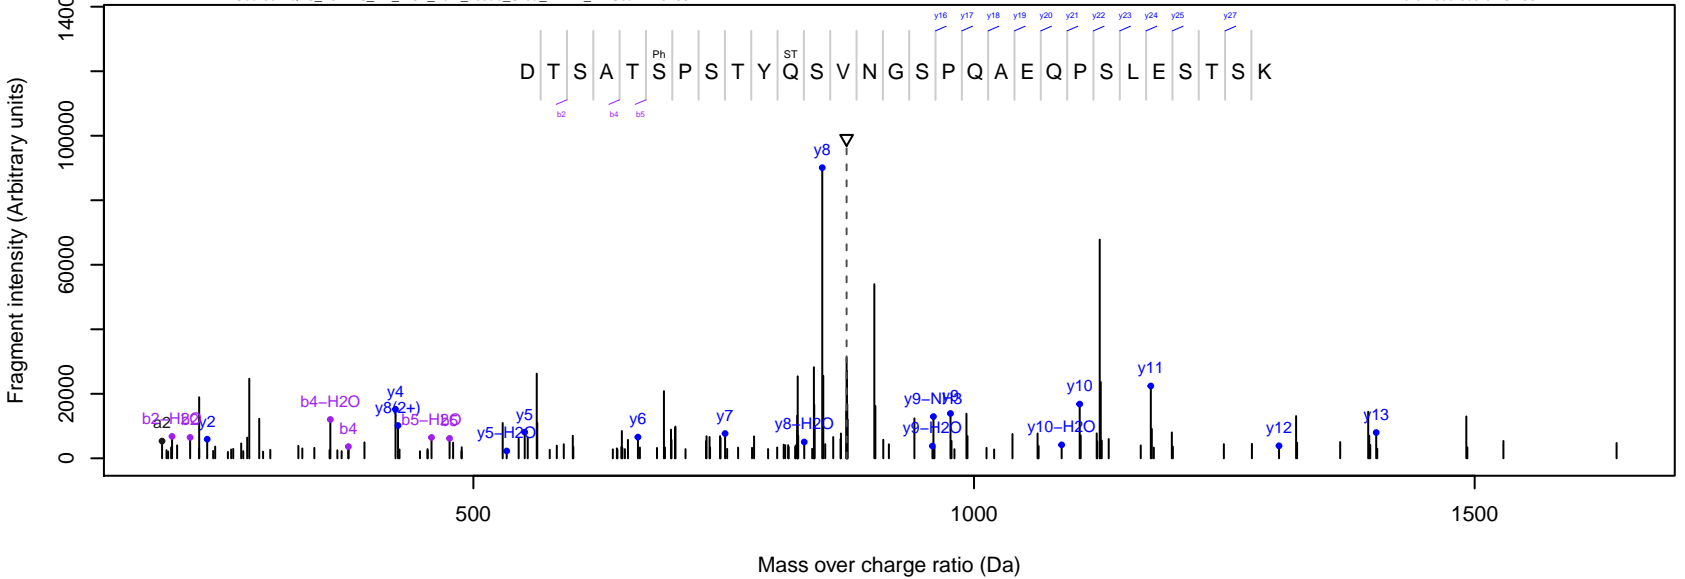

QHLYS(Phospho (STY))SEDEPDNDPDLDSR-3+

Source : QE3\_201126\_FR\_TiOx\_hum\_tissue\_Urea\_RNAB\_N Scan : 27524

Andromeda score : 62.082

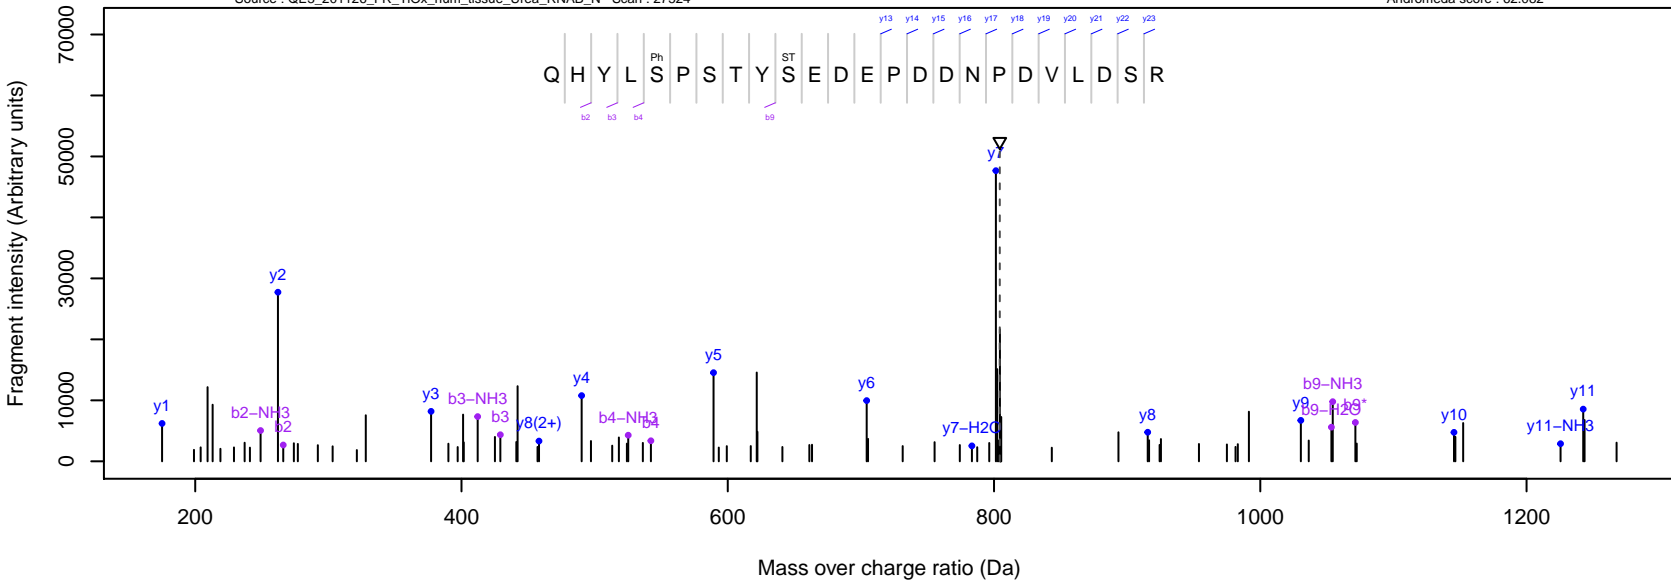

M(Oxidation (M))AEES(Phospho (STY))SSSSSSSPTAATSQQQLK-3+

Source : QE3\_201126\_FR\_TiOx\_hum\_tissue\_Urea\_RNAB\_H Scan : 11252

Andromeda score : 62.064

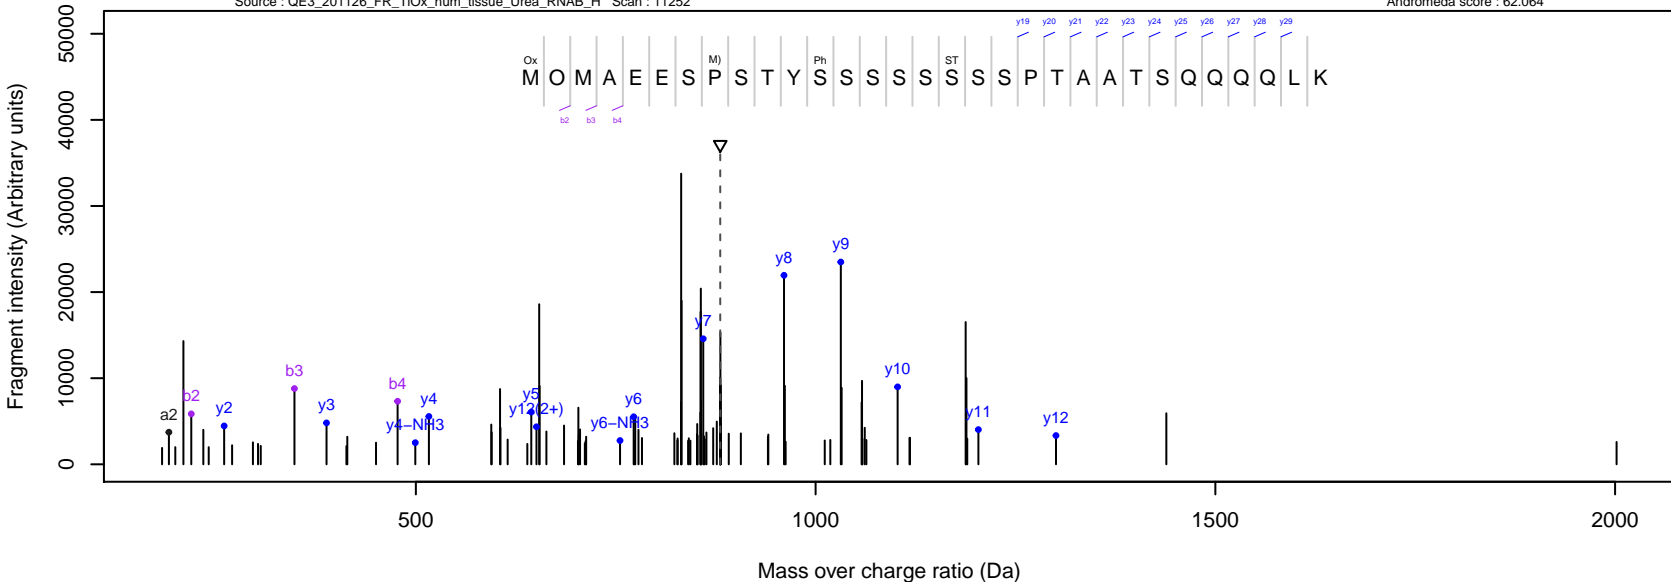

ALEYSNGIFDCQS(Phospho (STY))PTSPFMGSLR-3+

Source : QE3\_201126\_FR\_TiOx\_hum\_tissue\_Urea\_RNAB\_H Scan : 57470

Andromeda score : 62.051

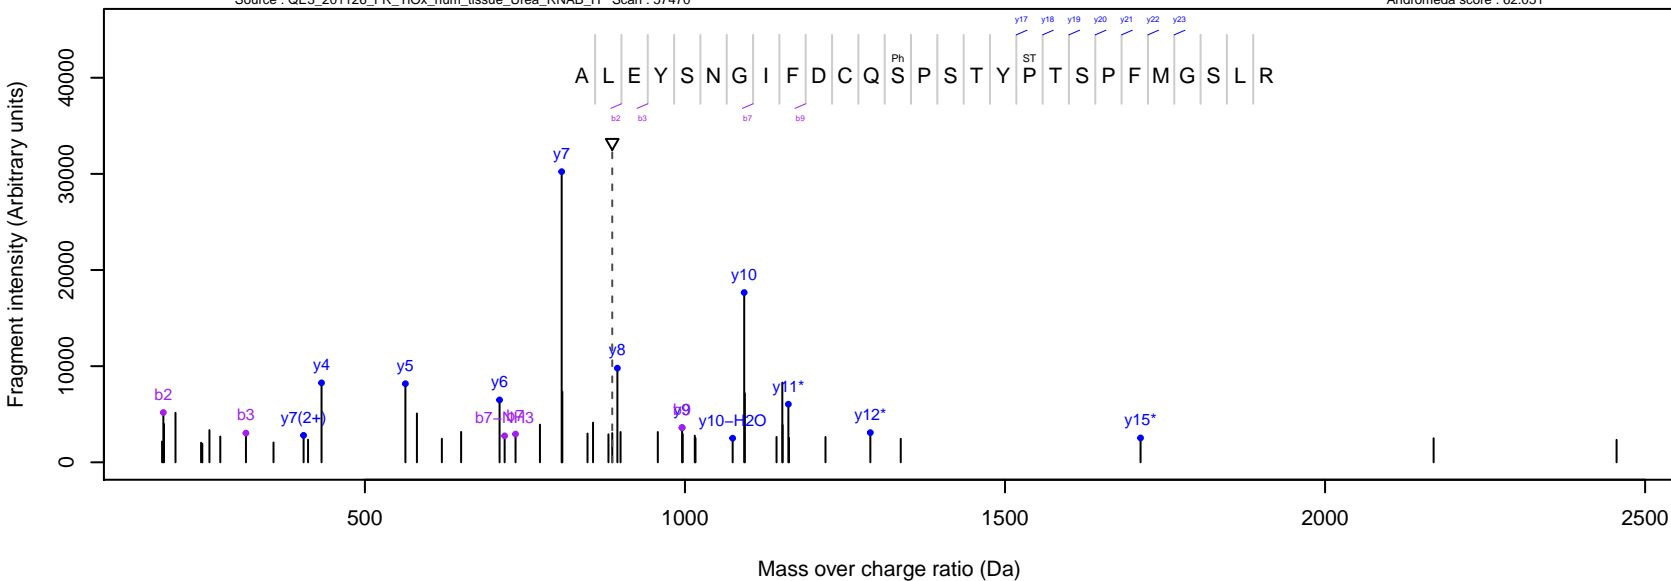

LITSFLELHCLSP(Phospho (STY))ELSQS(Phospho (STY))S(Phospho (STY))DSEAGDPASQ-3+

Source : QE3\_201126\_FR\_TIOx\_hum\_tissue\_Urea\_RNAB\_N Scan : 64497

Andromeda score : 62.049

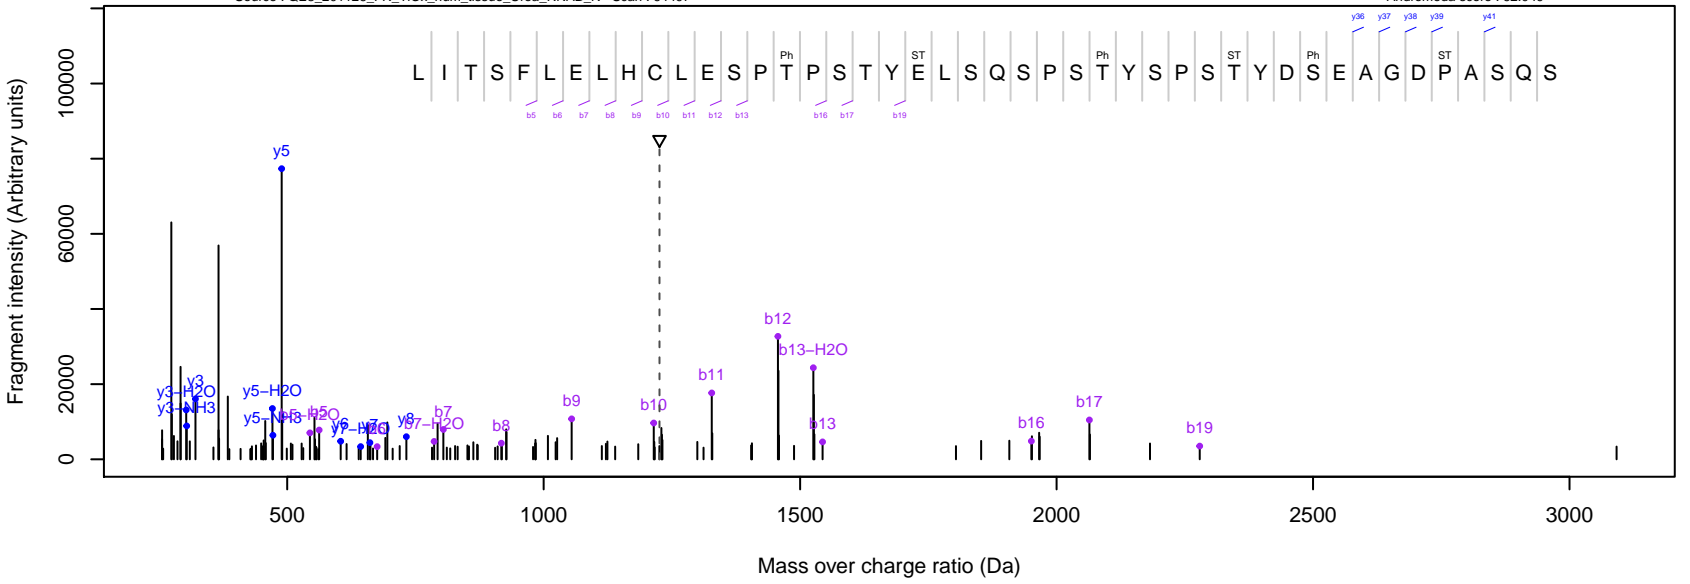

IS(Phospho (STY))M(Oxidation (M))PDFLHLKGP-3+

Source : QE3\_201126\_FR\_TIOx\_hum\_tissue\_Urea\_RNAB\_B Scan : 26928

Andromeda score : 62.042

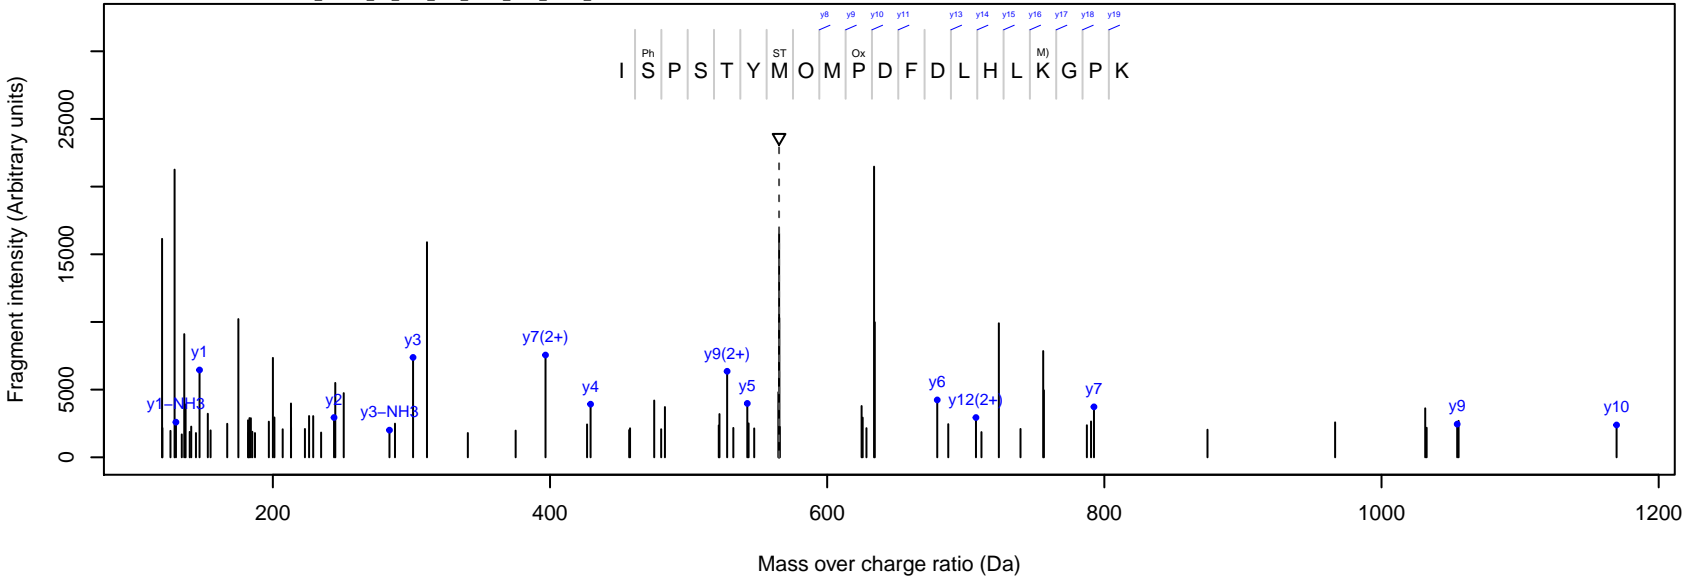

PKIES(Phospho (STY))PKLER-3+

Source : QE3\_201126\_FR\_TIOx\_hum\_tissue\_Urea\_RNAB\_N Scan : 8918

Andromeda score : 62.042

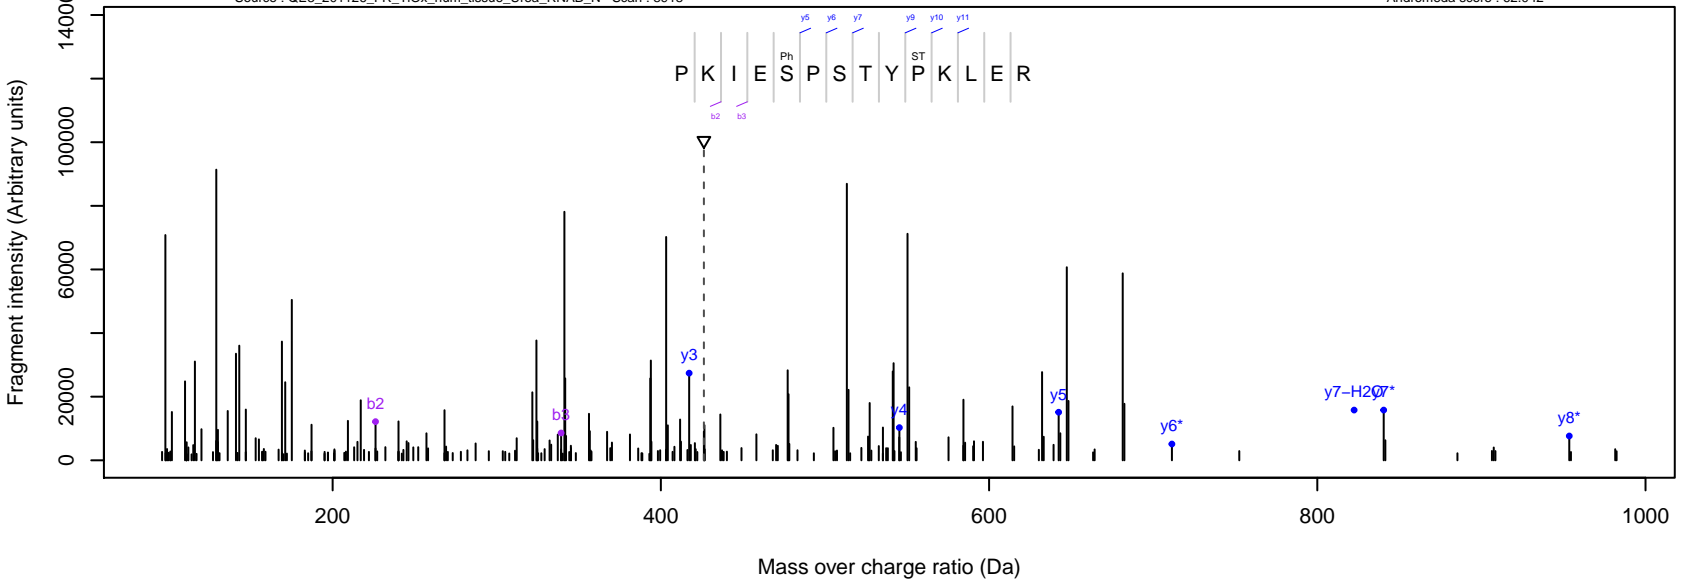

NGGLEHVPS(Phospho (STY))SSS(Phospho (STY))IHNGDM(Oxidation (M))EK-3+

Source : QE3\_201126\_FR\_TiOx\_hum\_tissue\_Urea\_RNAB\_B Scan : 14310

Andromeda score : 62.032

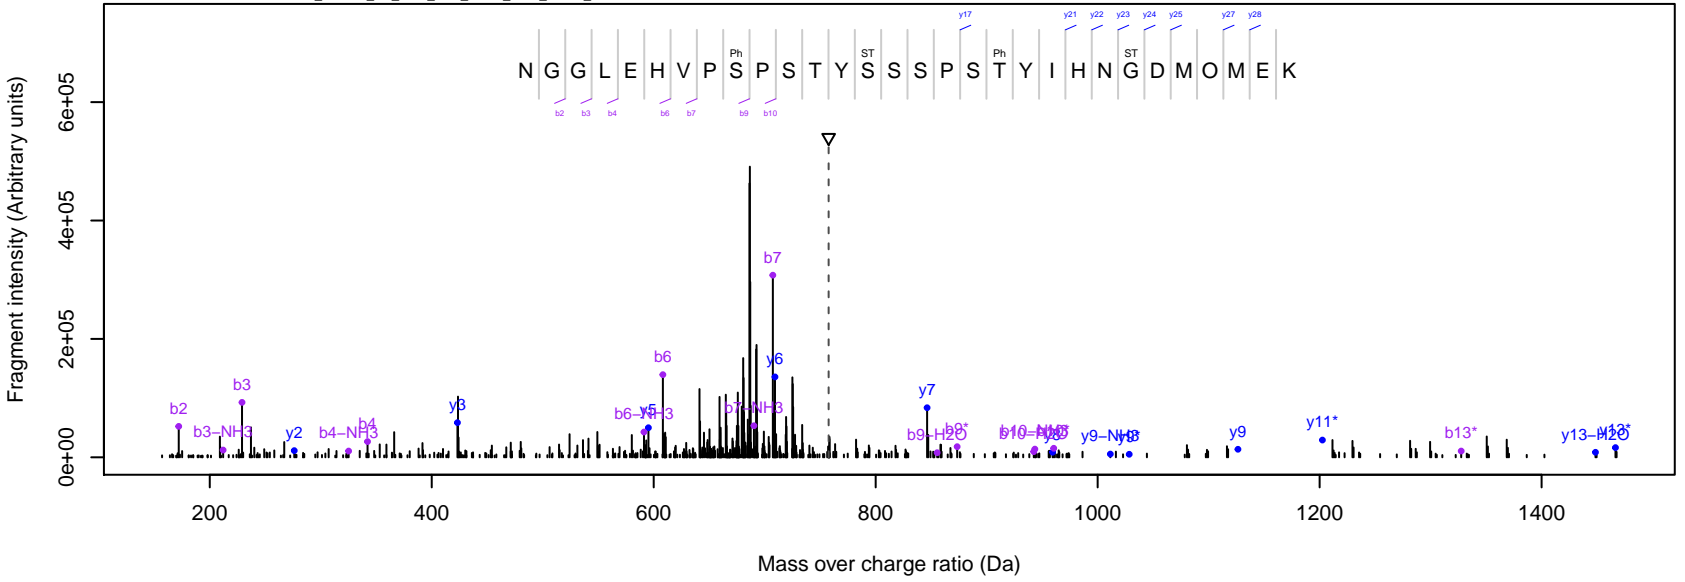

QAS(Phospho (STY))RNDNSAIM(Oxidation (M))SM(Oxidation (M))ETR-3+

Source : QE3\_201126\_FR\_TiOx\_hum\_tissue\_Urea\_RNAB\_H Scan : 6617

Andromeda score : 61.957

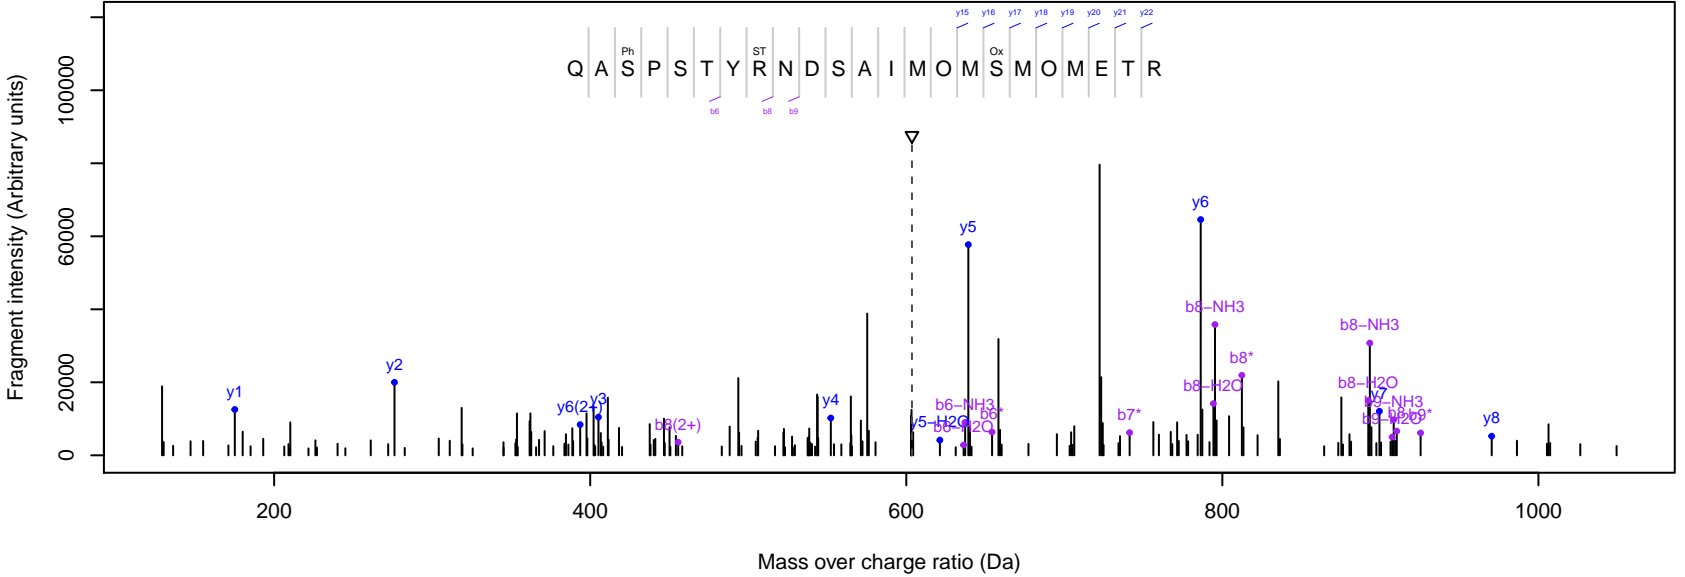

GASAAATGIPLES(Phospho (STY))DEDS(Phospho (STY))NDNDNIENENCM(Oxidation (M))HTN-3+

Source : QE3\_201126\_FR\_TiOx\_hum\_tissue\_Urea\_RNAB\_H Scan : 38319

Andromeda score : 61.938

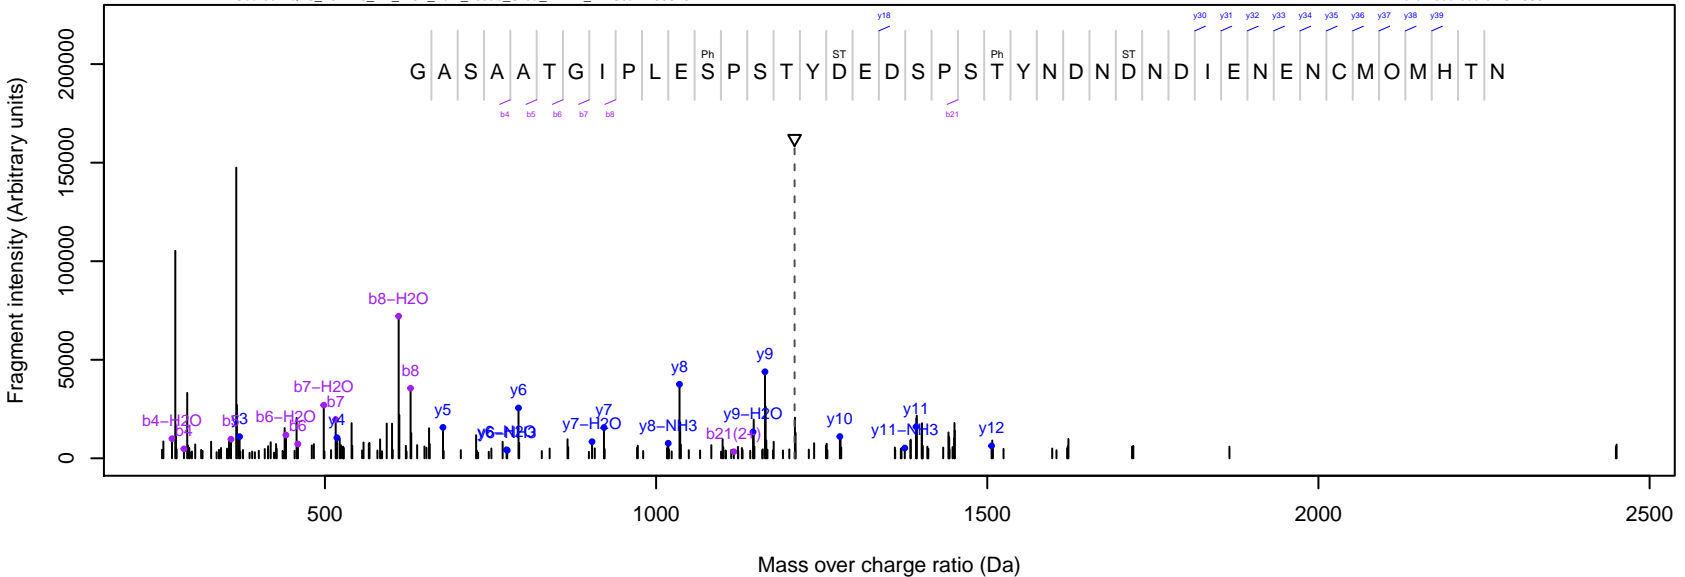

DSAAPS(Phospho (STY))PIPGADNLSADPVPVSPPTSIPFK-3+

Source : QE3\_201126\_FR\_TiOx\_hum\_tissue\_Urea\_RNAB\_H Scan : 56619

Andromeda score : 61.911

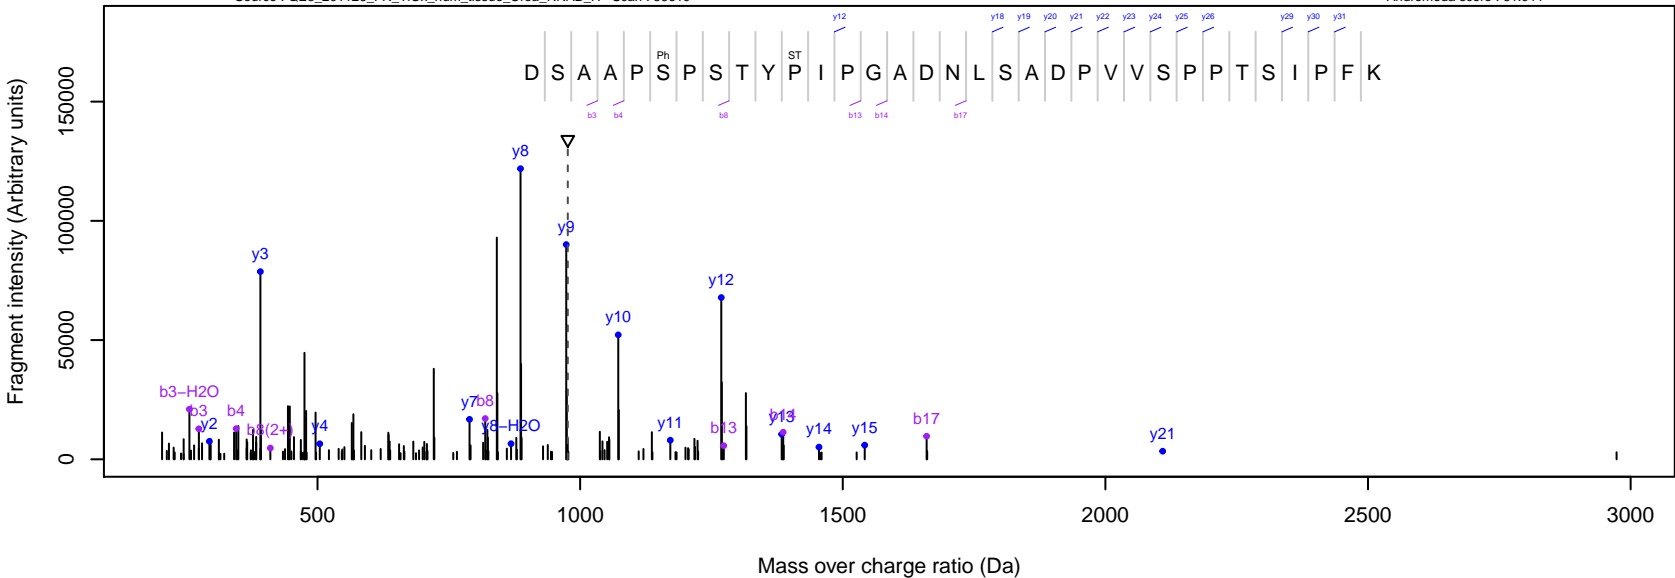

GNFGGS(Phospho (STY))FAGSFGGAGGHAPGVAR-3+

Source : QE3\_201126\_FR\_TiOx\_hum\_tissue\_Urea\_RNAB\_N Scan : 32465

Andromeda score : 61.911

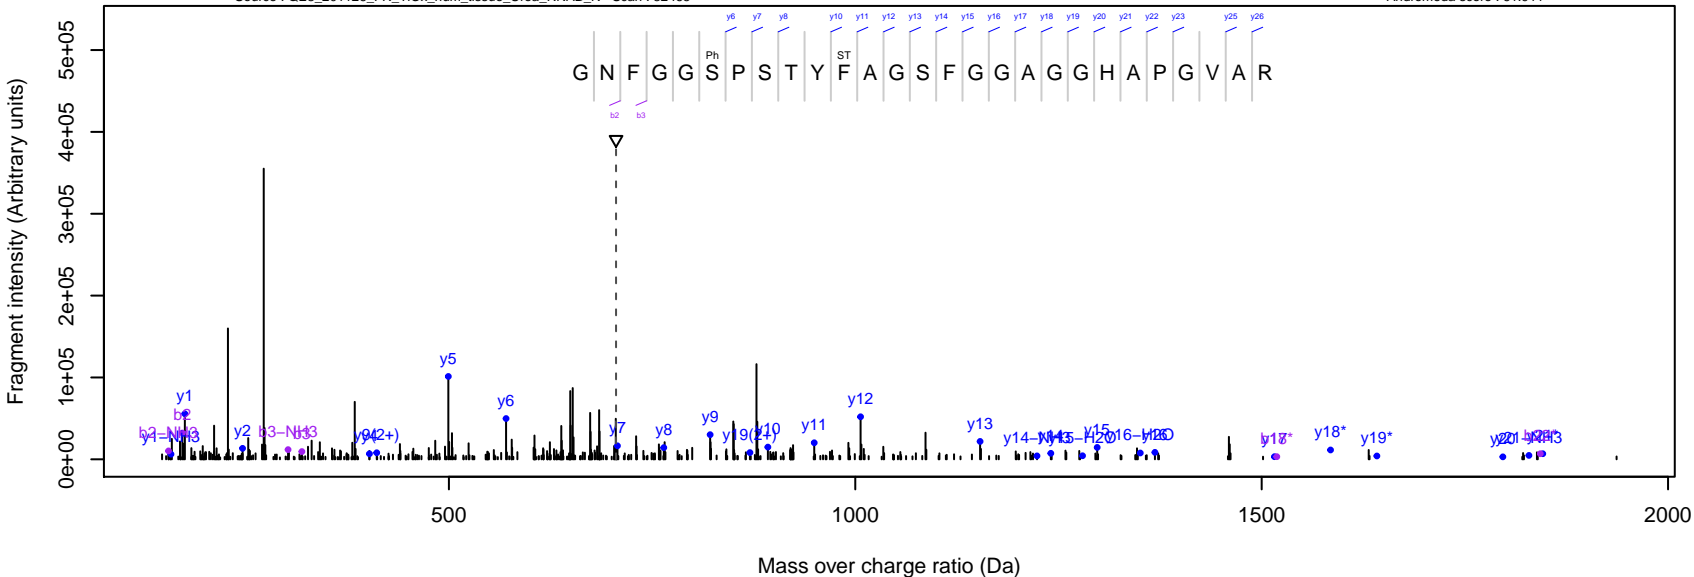

KVEEDLKADEPSS(Phospho (STY))EES(Phospho (STY))DLEIDK-3+

Source : QE3\_201126\_FR\_TiOx\_hum\_tissue\_Urea\_RNAB\_N Scan : 24881

Andromeda score : 61.89

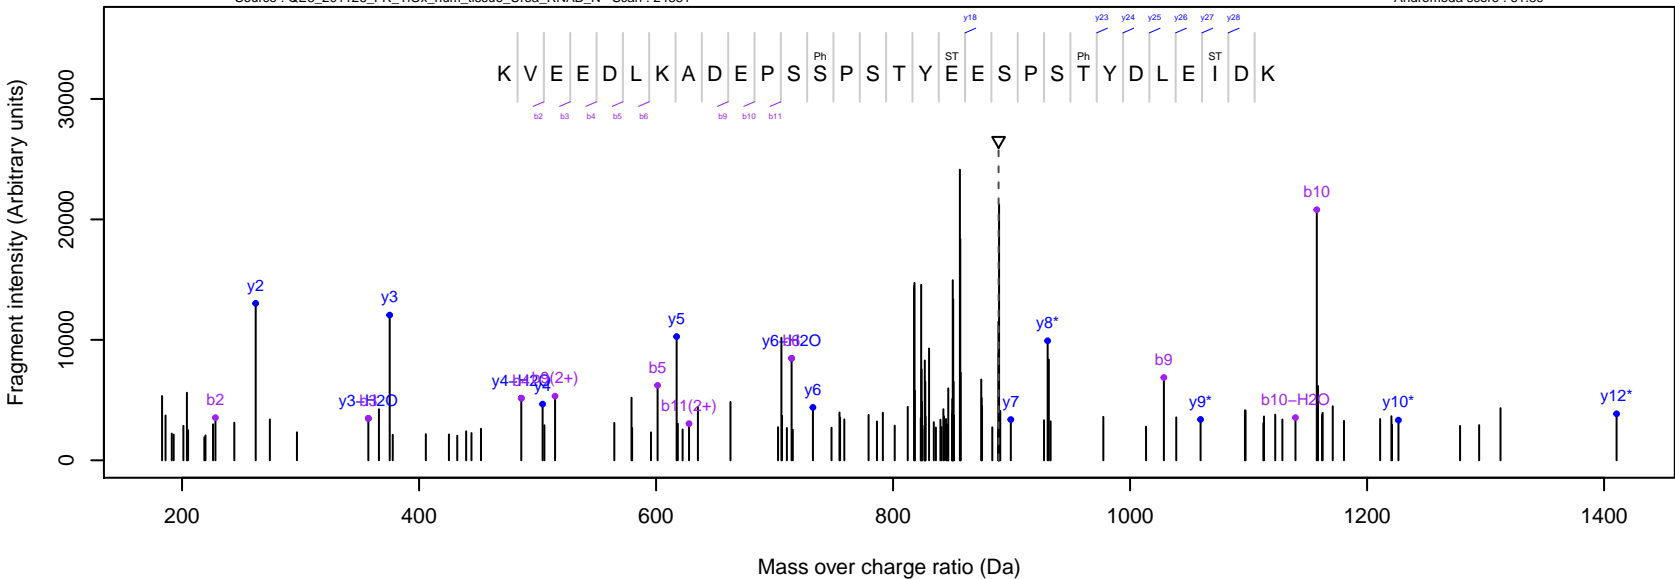



S(Phospho (STY))RHS(Phospho (STY))SISPVRLPLNSSLGAELSR-4+

Source : QE3\_201126\_FR\_TiOx\_hum\_tissue\_Urea\_RNAB\_H Scan : 36385

Andromeda score : 61.89

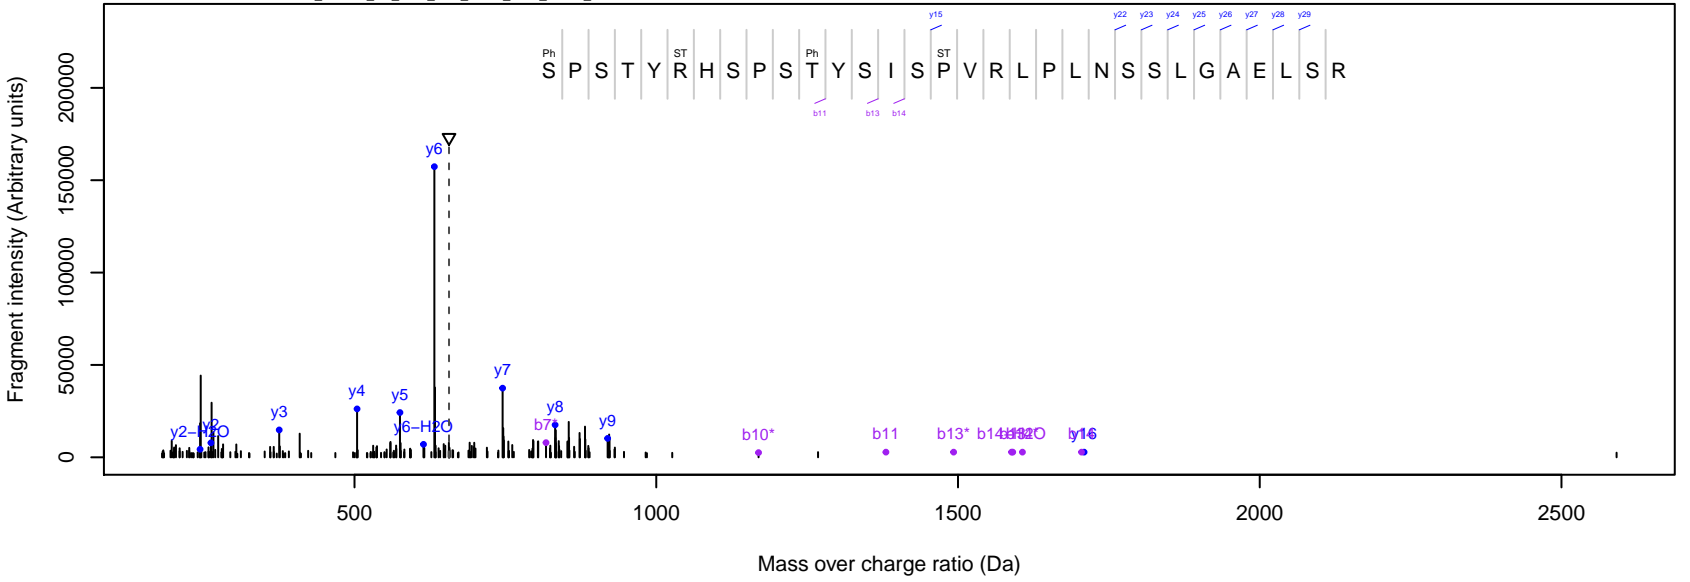

VKGGDDHDDT(Phospho (STY))S(Phospho (STY))DS(Phospho (STY))DSDGLTLK-3+

Source : QE3\_201126\_FR\_TiOx\_hum\_tissue\_Urea\_RNAB\_H Scan : 21230

Andromeda score : 61.89

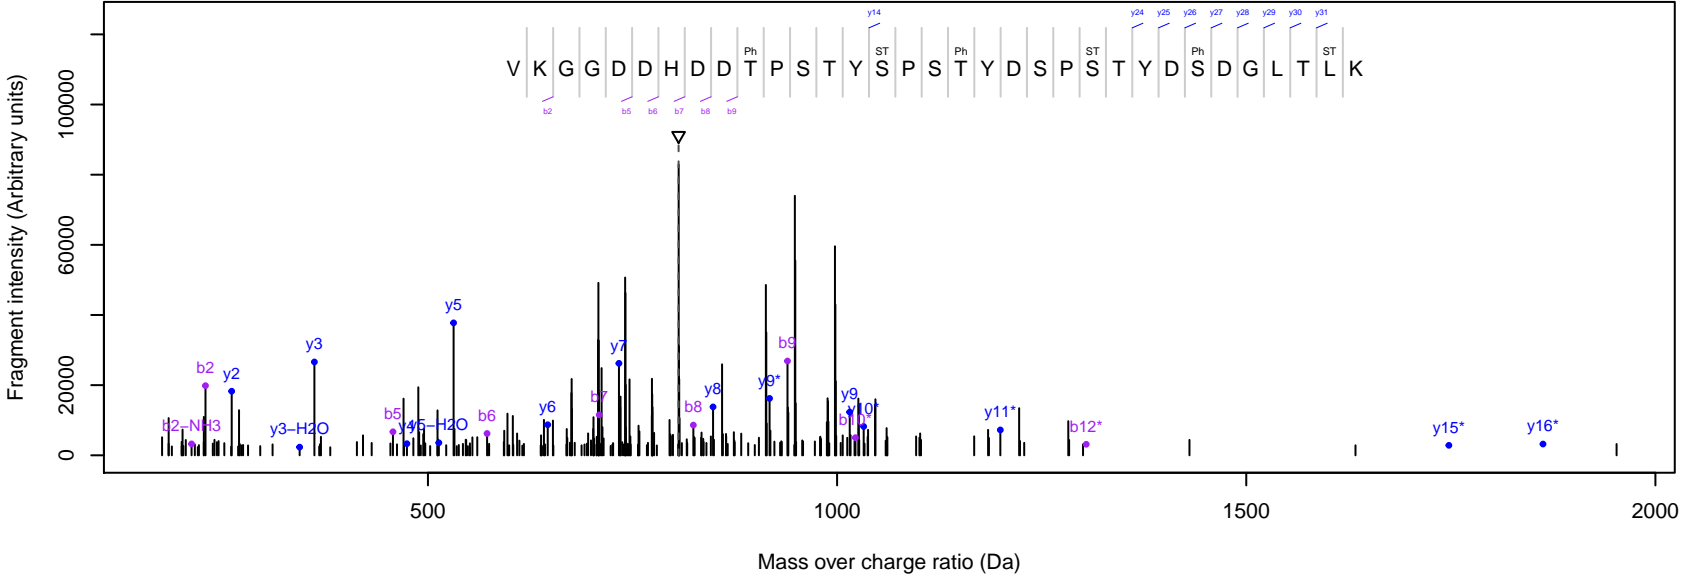

RQLS(Phospho (STY))LDINKLPGEK-3+

Source : QE3\_201126\_FR\_TiOx\_hum\_tissue\_Urea\_RNAB\_H Scan : 26194

Andromeda score : 61.87

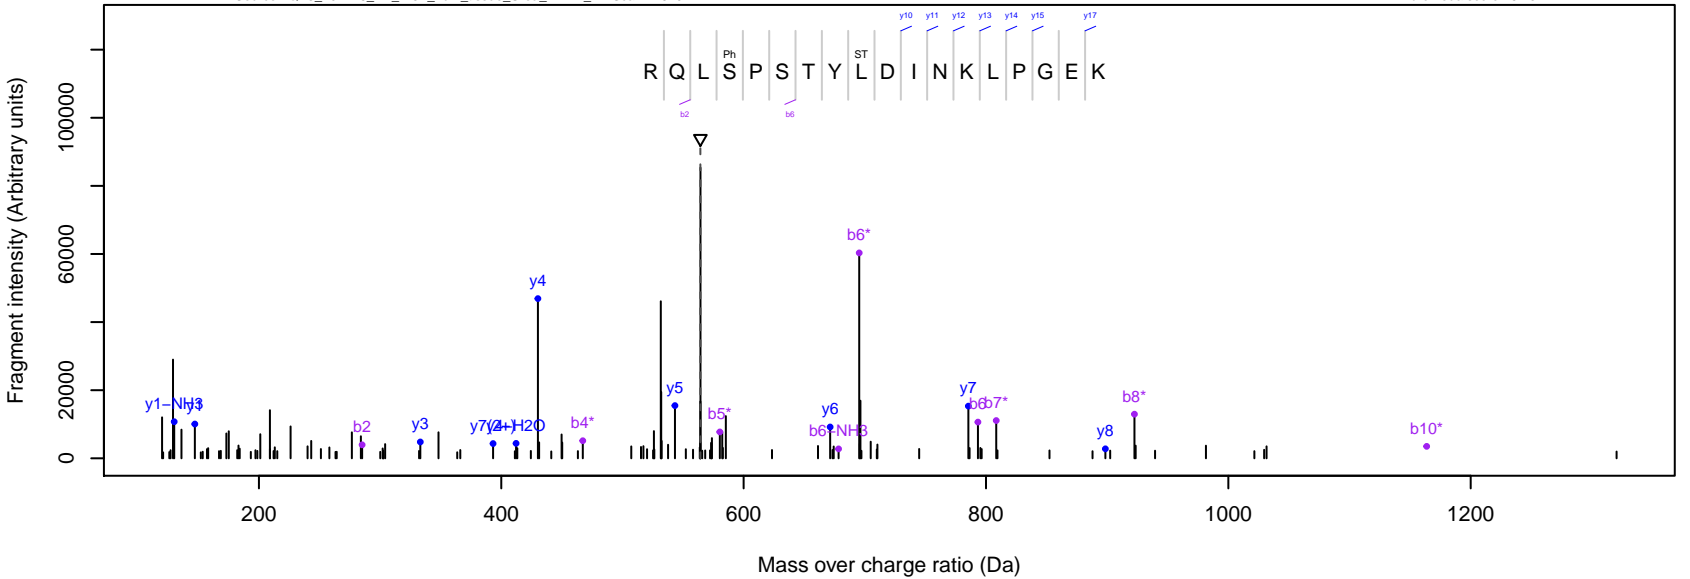

VPTM(Oxidation (M))RPS(Phospho (STY))M(Oxidation (M))SGLHLVK-3+

Source : QE3\_201126\_FR\_TiOx\_hum\_tissue\_Urea\_RNAB\_H Scan : 14564

Andromeda score : 61.87

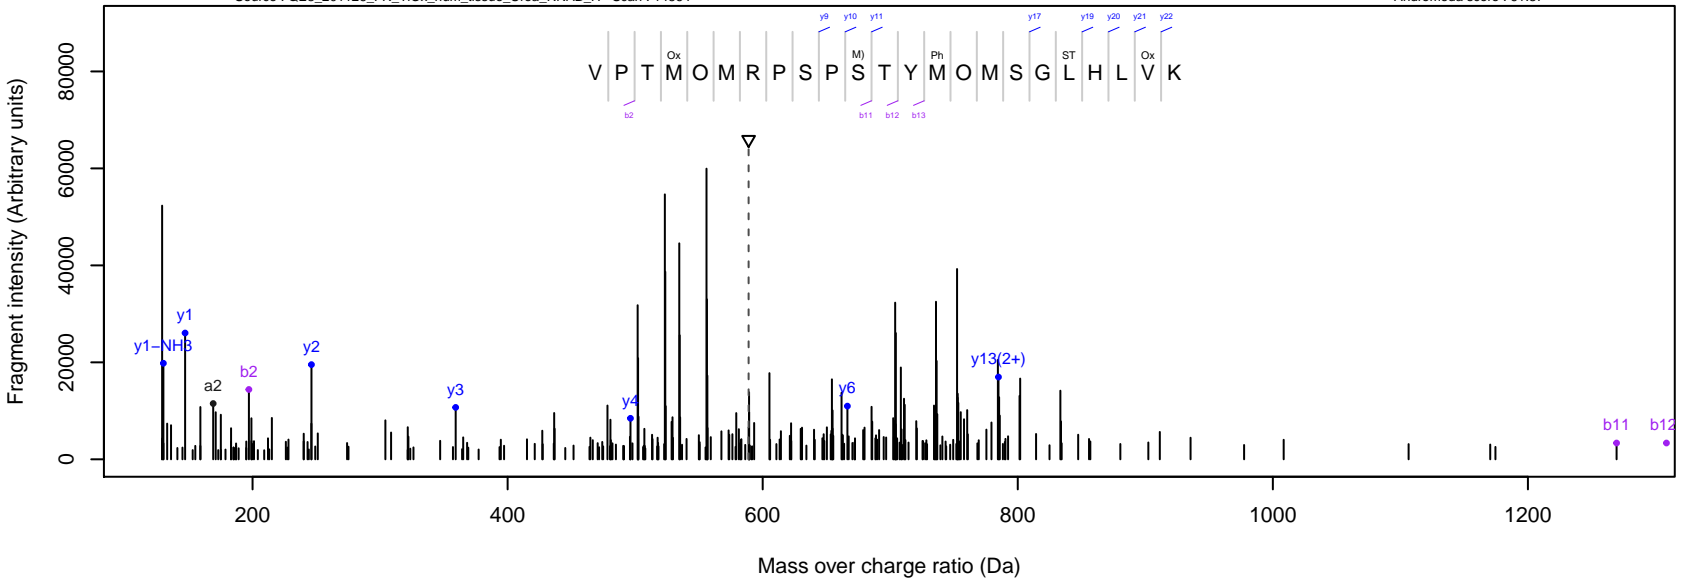

ETES(Phospho (STY))APGS(Phospho (STY))PRAVT(Phospho (STY))PVPTKTEEVSNLK-3+

Source : QE3\_201126\_FR\_TiOx\_hum\_tissue\_Urea\_RNAB\_N Scan : 25343

Andromeda score : 61.829

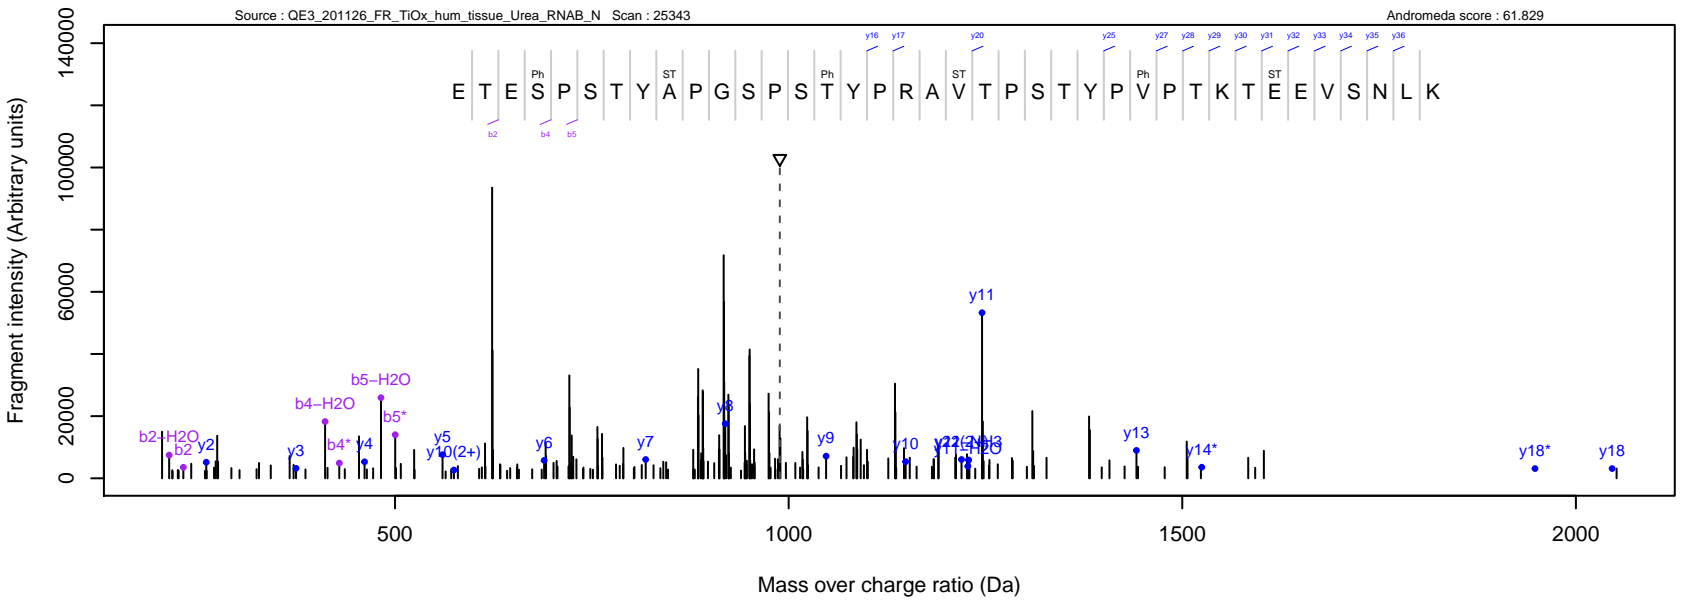

GVS(Phospho (STY))PSKAHGLGSLNLTVEVR-3+

Source : QE3\_201126\_FR\_TiOx\_hum\_tissue\_Urea\_RNAB\_H Scan : 20645

Andromeda score : 61.801

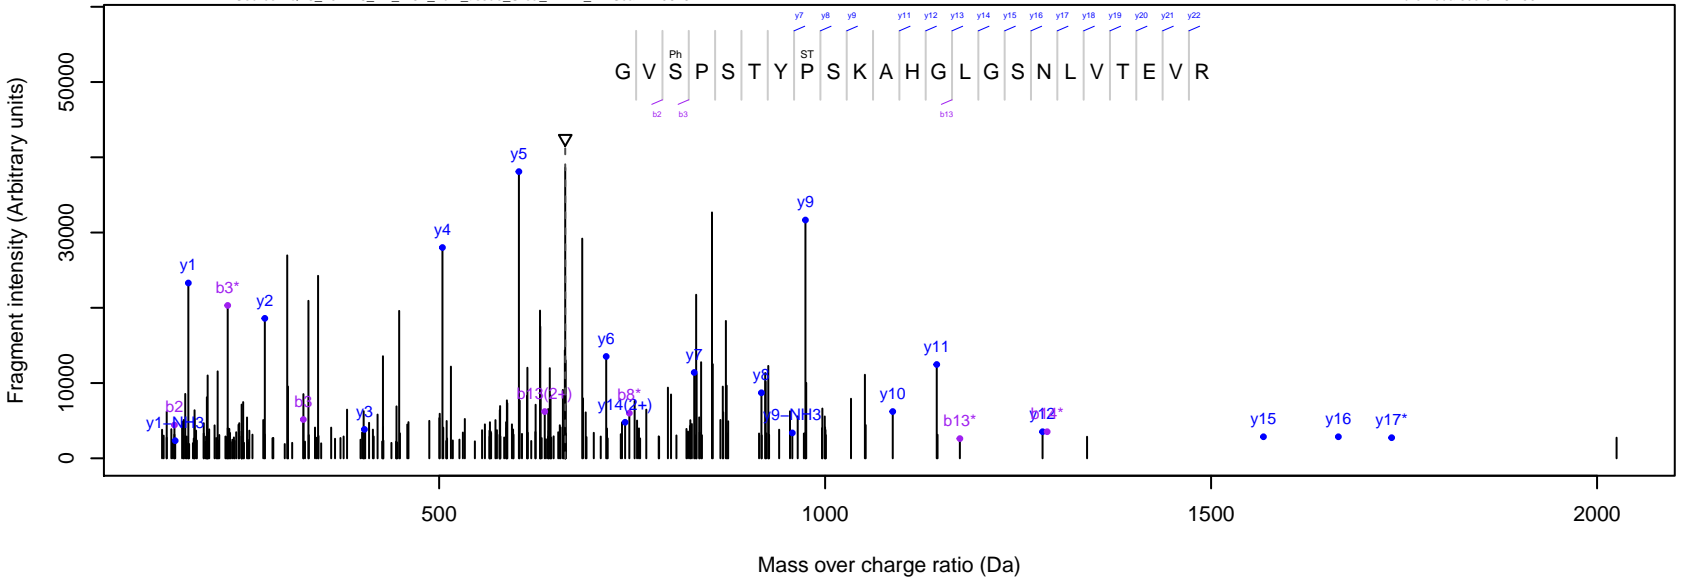

VDSGTEKPLVAPES(Phospho (STY))PVRK-3+

Source : QE3\_201126\_FR\_TiOx\_hum\_tissue\_Urea\_RNAB\_H Scan : 12872

Andromeda score : 61.801

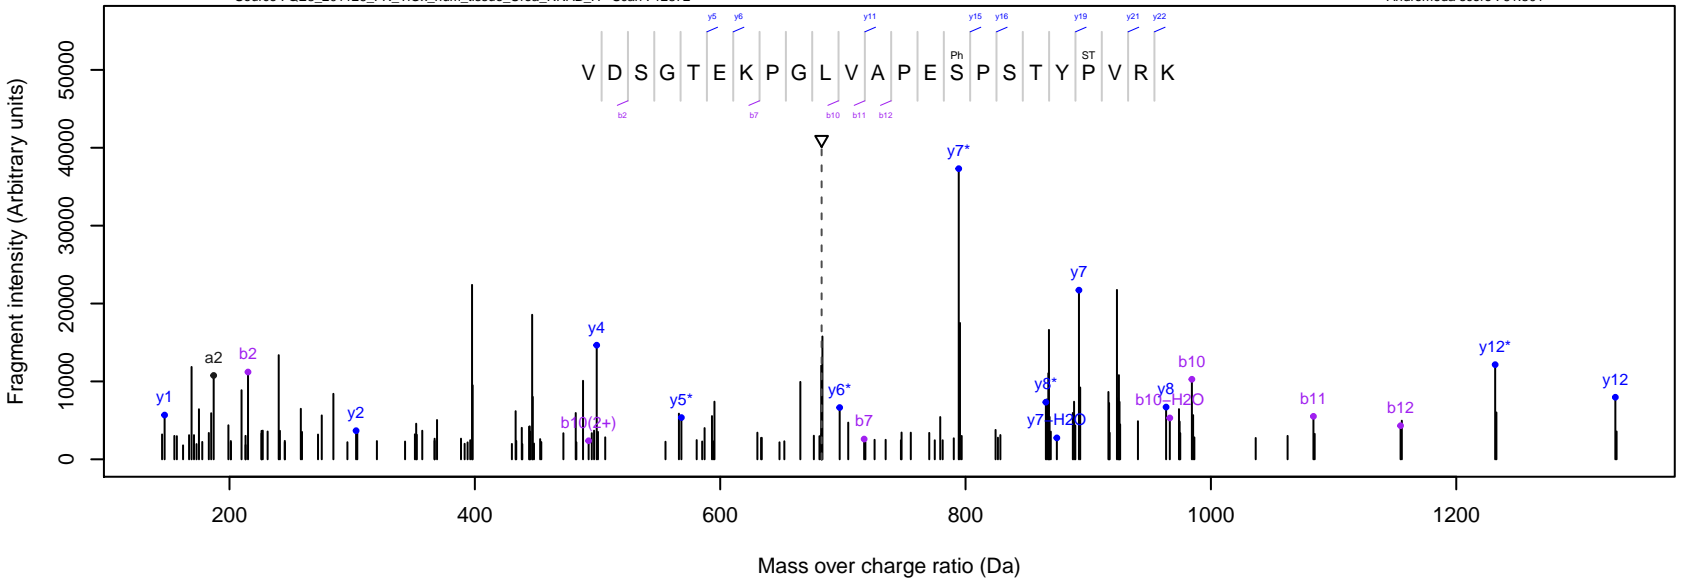

EVEEEDSEEM(Oxidation (M))SEEEEDS(Phospho (STY))S(Phospho (STY))GEEVIPQKK-3+

Source : QE3\_201126\_FR\_TiOx\_hum\_tissue\_Urea\_RNAB\_B Scan : 25973

Andromeda score : 61.776

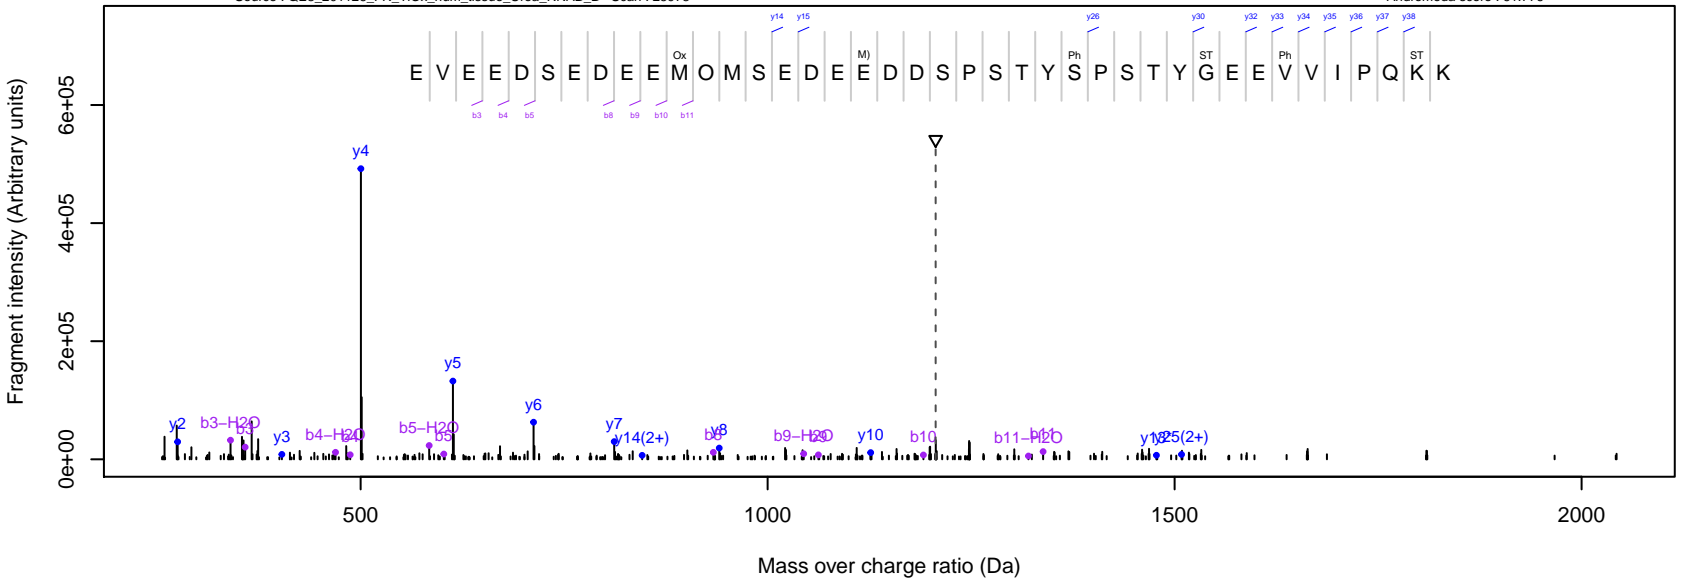

EALHTAGYEM(Oxidation (M))SLNGS(Phospho (STY))PR-3+

Source : QE3\_201126\_FR\_TiOx\_hum\_tissue\_Urea\_RNAB\_H Scan : 17109

Andromeda score : 61.767

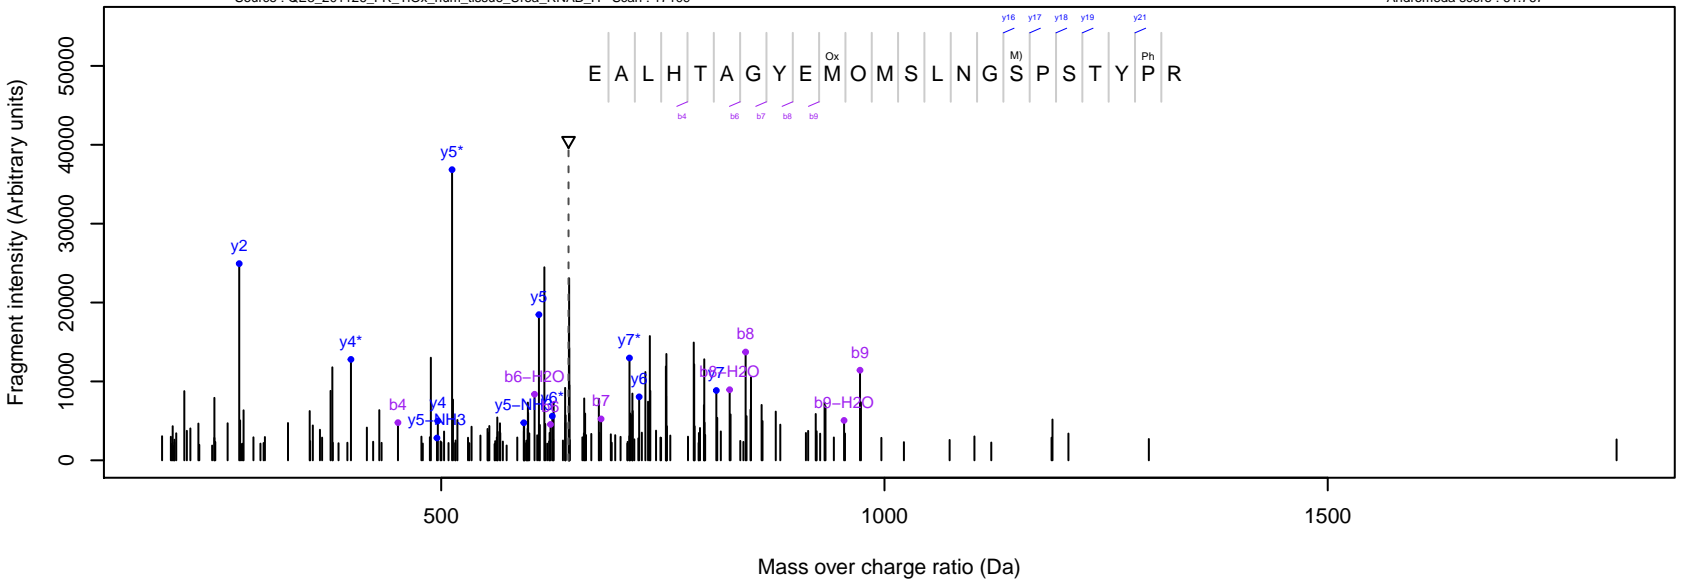



**FSKEEPVS(Phospho (STY))S(Phospho (STY))GPEEAVGK-3+**

Source : QE3\_201126\_FR\_TiOx\_hum\_tissue\_Urea\_RNAB\_N Scan : 19855

Andromeda score : 61.703

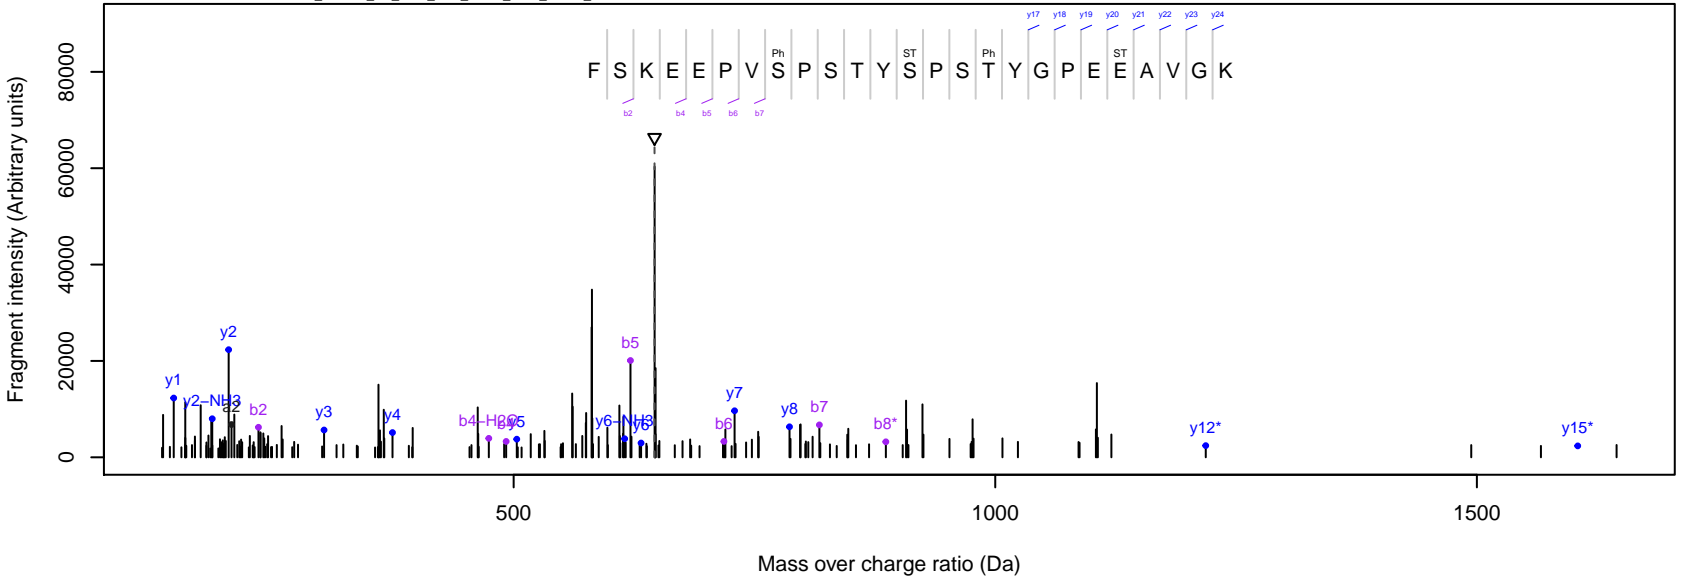

**HTPNT(Phospho (STY))S(Phospho (STY))DNEGSDTEVCGPNPSKR-3+**

Source : QE3\_201126\_FR\_TiOx\_hum\_tissue\_Urea\_RNAB\_B Scan : 8960

Andromeda score : 61.703

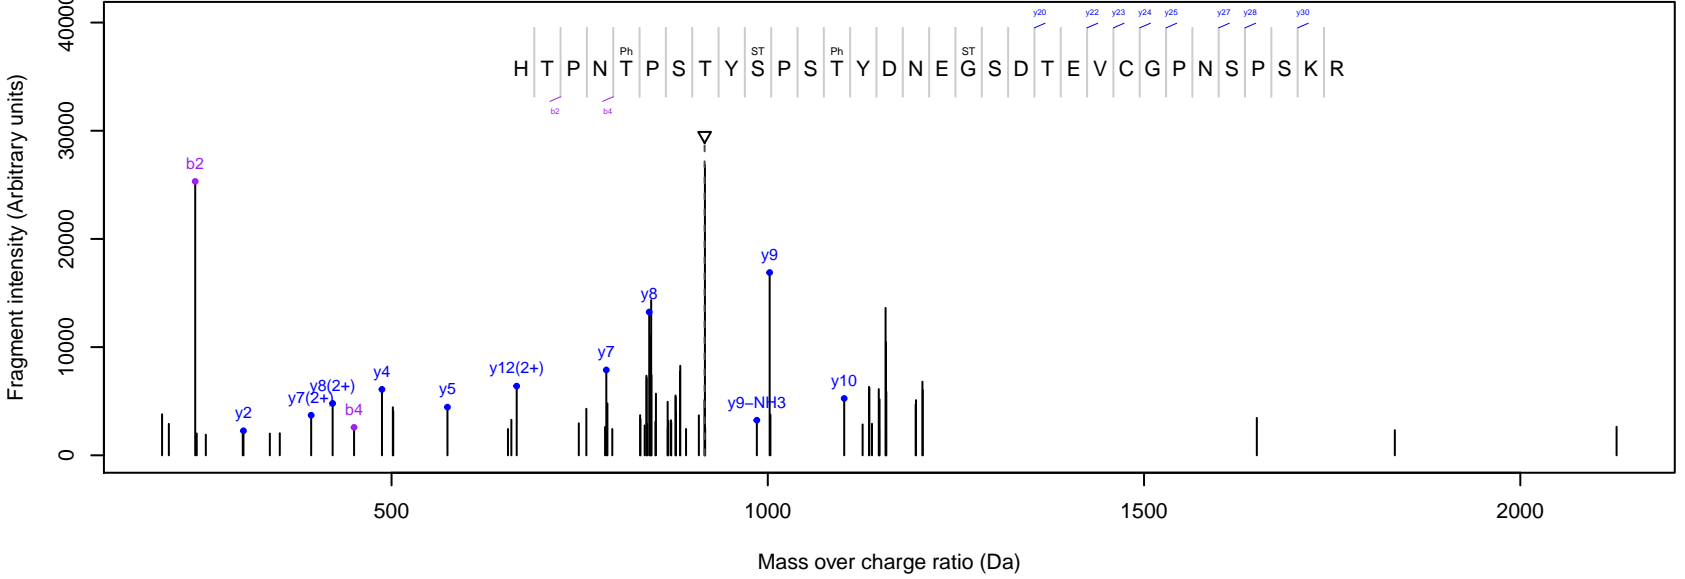

**KTPSKPPAQLS(Phospho (STY))PSVPK-3+**

Source : QE3\_201126\_FR\_TiOx\_hum\_tissue\_Urea\_RNAB\_H Scan : 11367

Andromeda score : 61.703

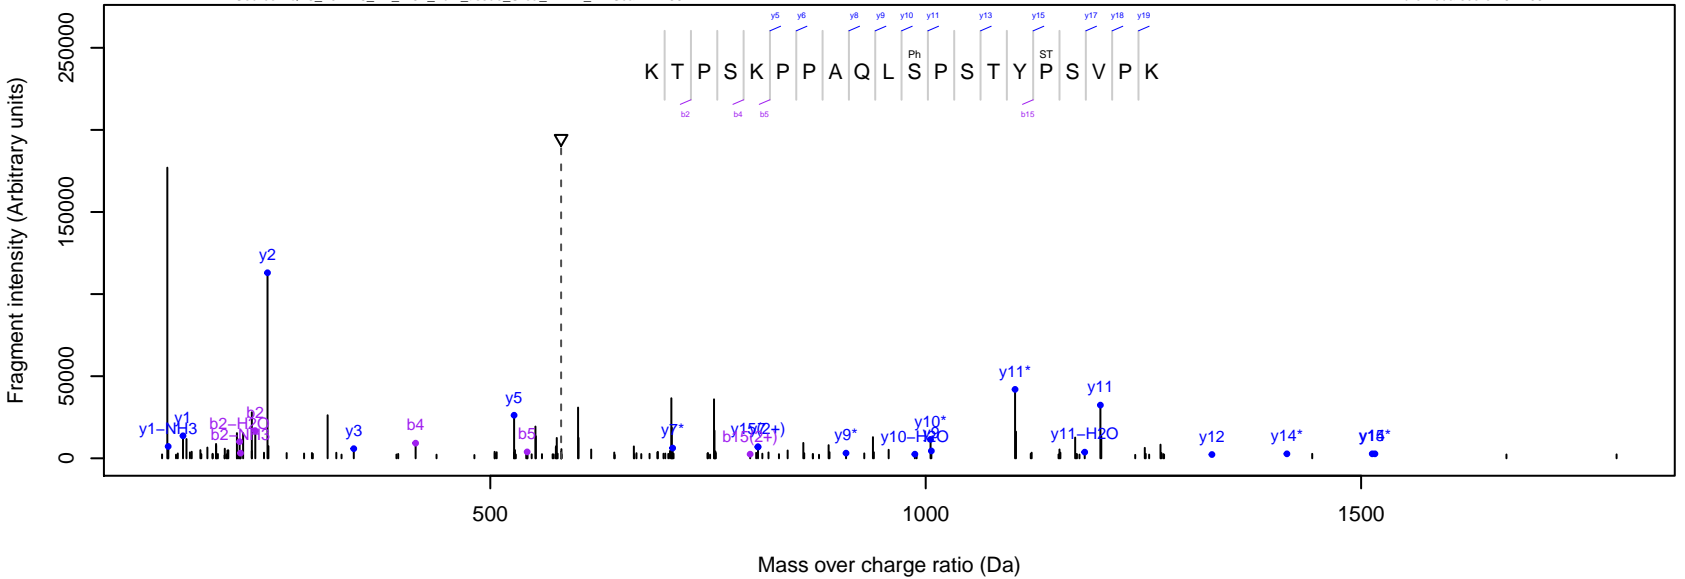

QPDISCILGTGGKS(Phospho (STY))PR-3+

Source : QE3\_201126\_FR\_TiOx\_hum\_tissue\_Urea\_RNAB\_N Scan : 30145

Andromeda score : 61.684

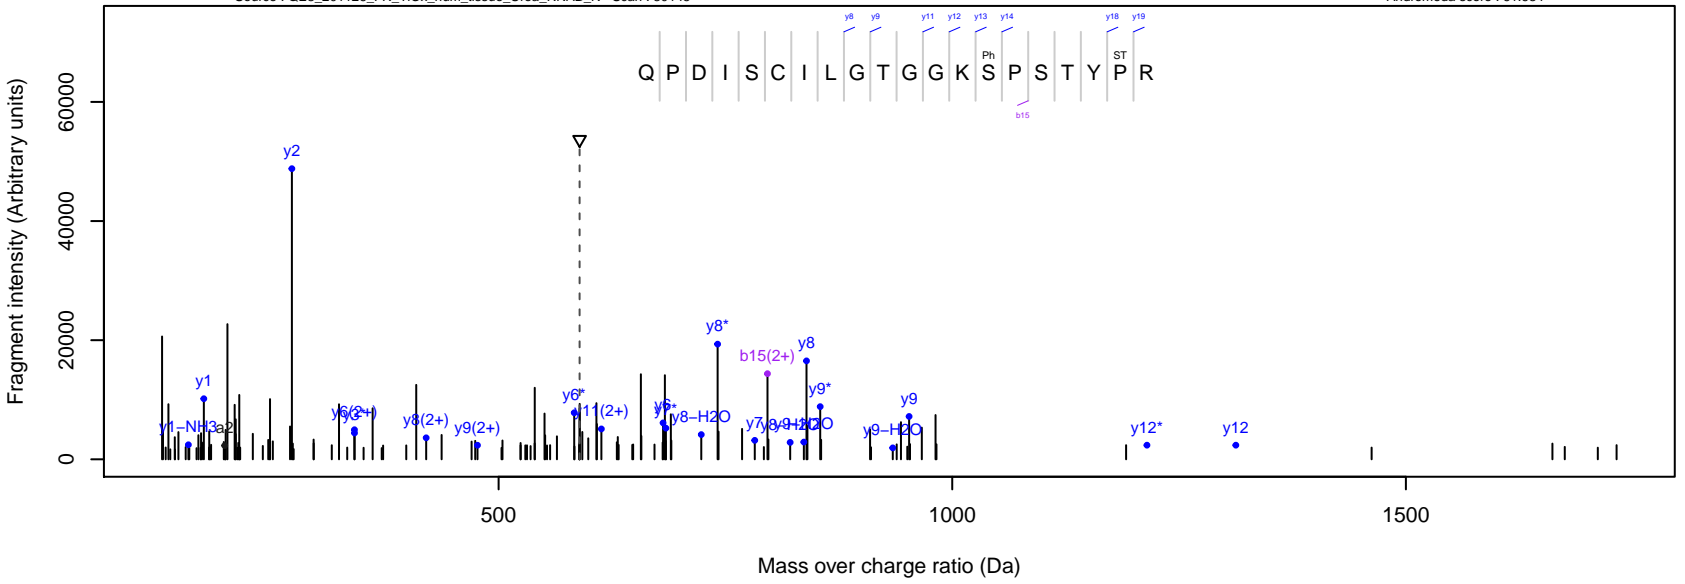

SQS(Phospho (STY))LNIR-2+

Source : QE3\_201126\_FR\_TiOx\_hum\_tissue\_Urea\_RNAB\_B Scan : 13423

Andromeda score : 61.679

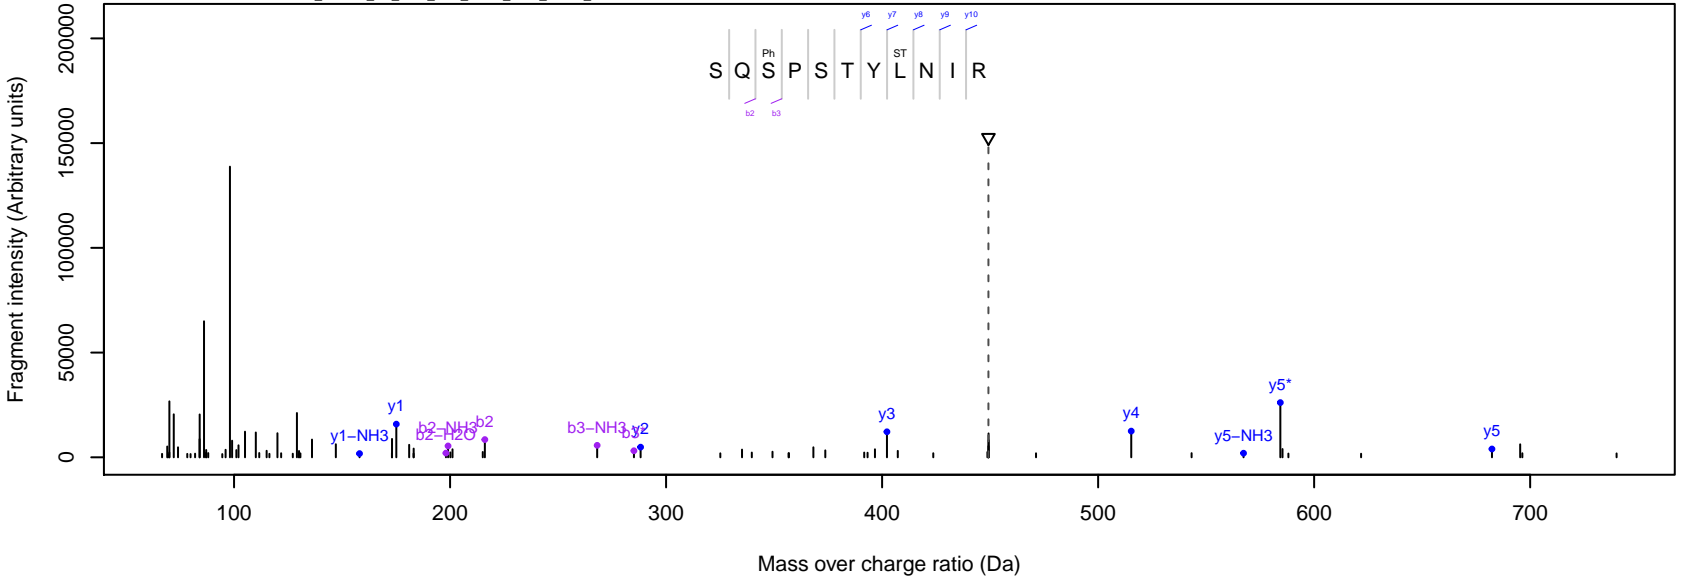

SVS(Phospho (STY))M(Oxidation (M))PAETAHISPHHELRL-4+

Source : QE3\_201126\_FR\_TiOx\_hum\_tissue\_Urea\_RNAB\_B Scan : 11005

Andromeda score : 61.648

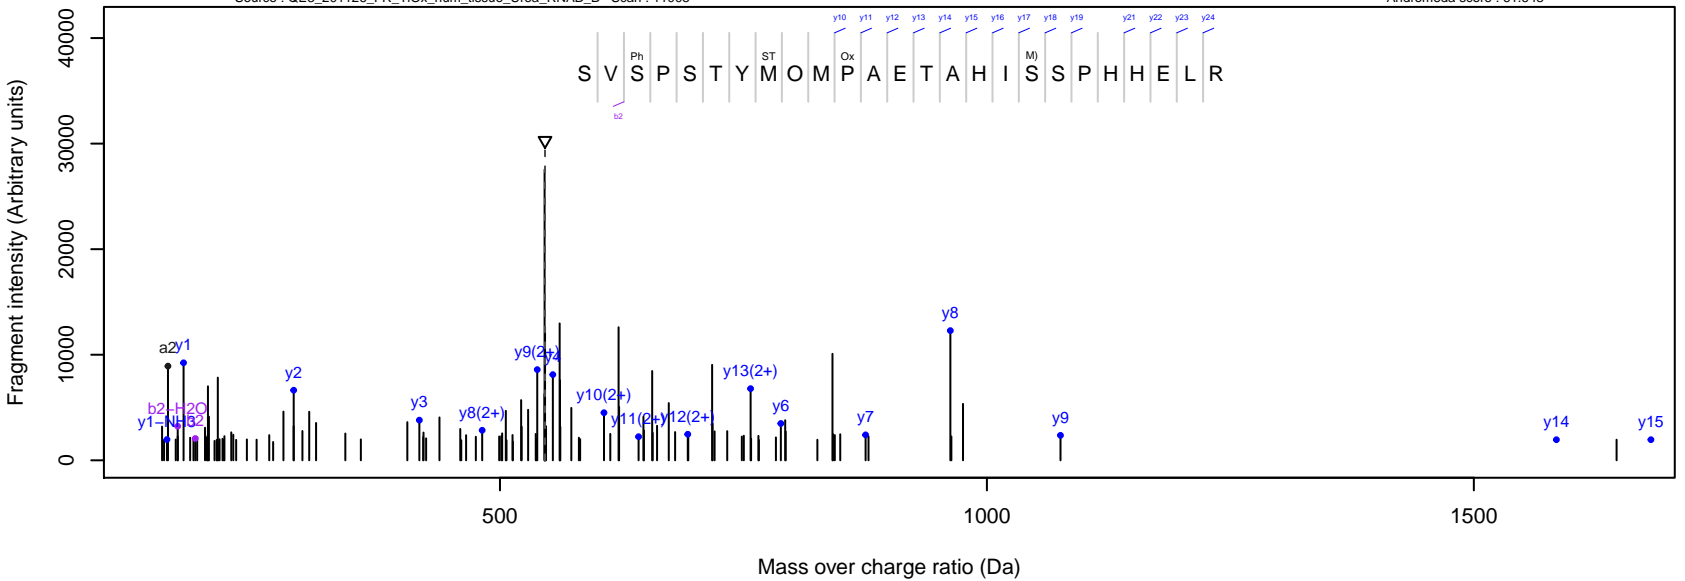

RQLAELETEDGM(Oxidation (M))QES(Phospho (STY))P-2+

Source : QE3\_201126\_FR\_TiOx\_hum\_tissue\_Urea\_RNAB\_B Scan : 24072

Andromeda score : 61.641

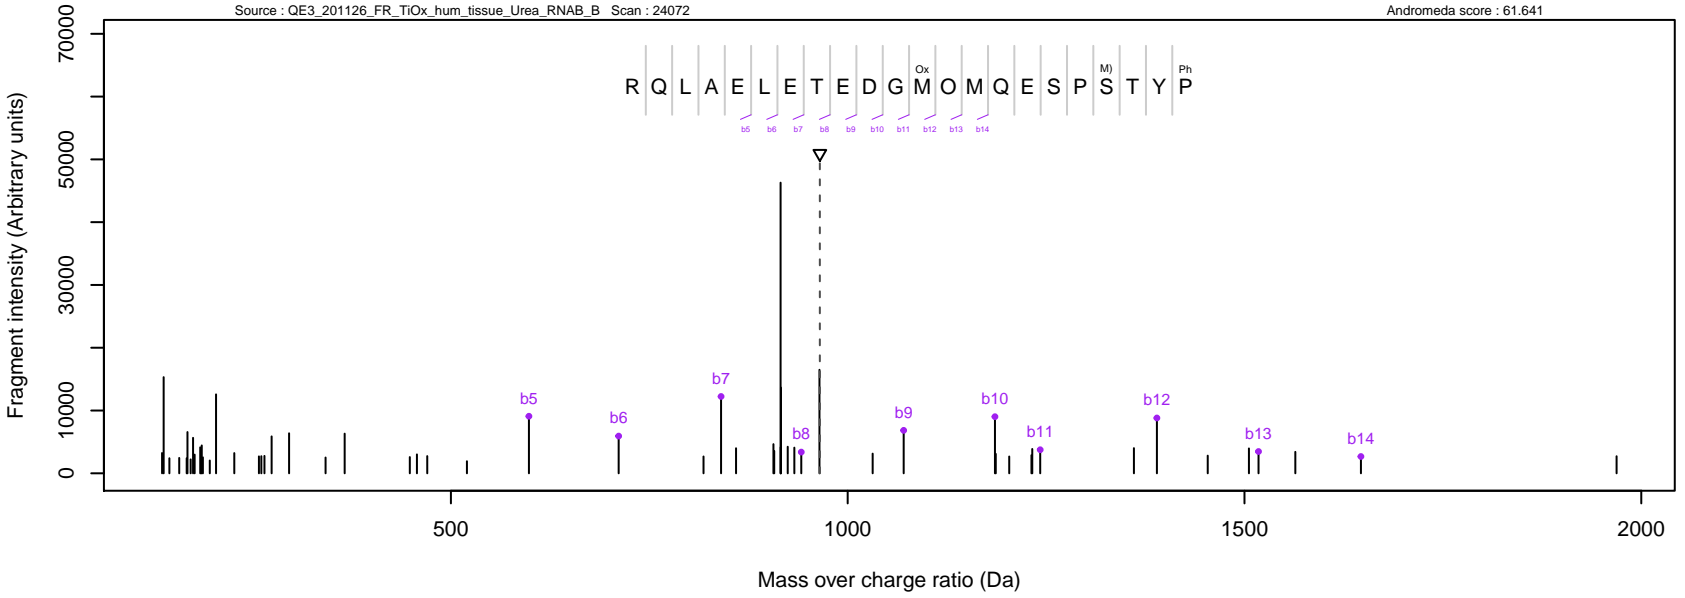

RRES(Phospho (STY))QTALVANQR-3+

Source : QE3\_201126\_FR\_TiOx\_hum\_tissue\_Urea\_RNAB\_N Scan : 6039

Andromeda score : 61.641

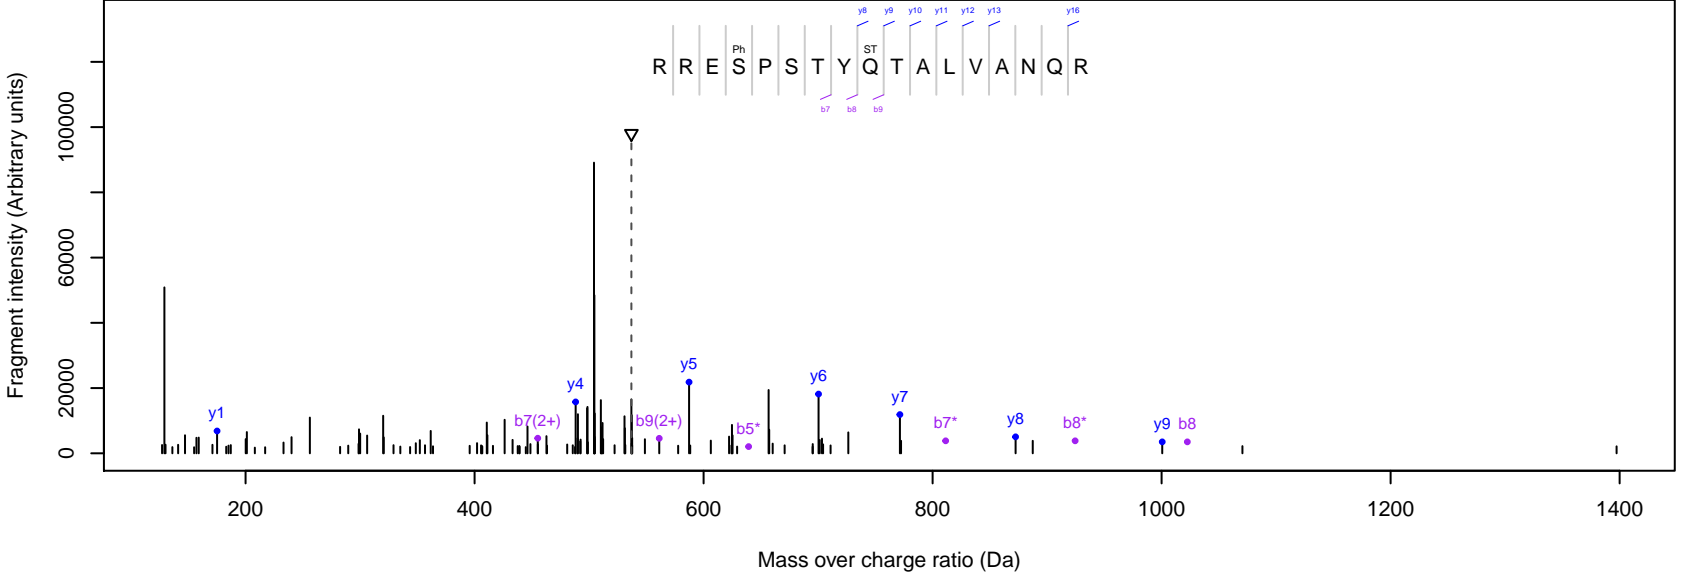

LNT(Phospho (STY))SDFQK-2+

Source : QE3\_201126\_FR\_TiOx\_hum\_tissue\_Urea\_RNAB\_H Scan : 12352

Andromeda score : 61.593

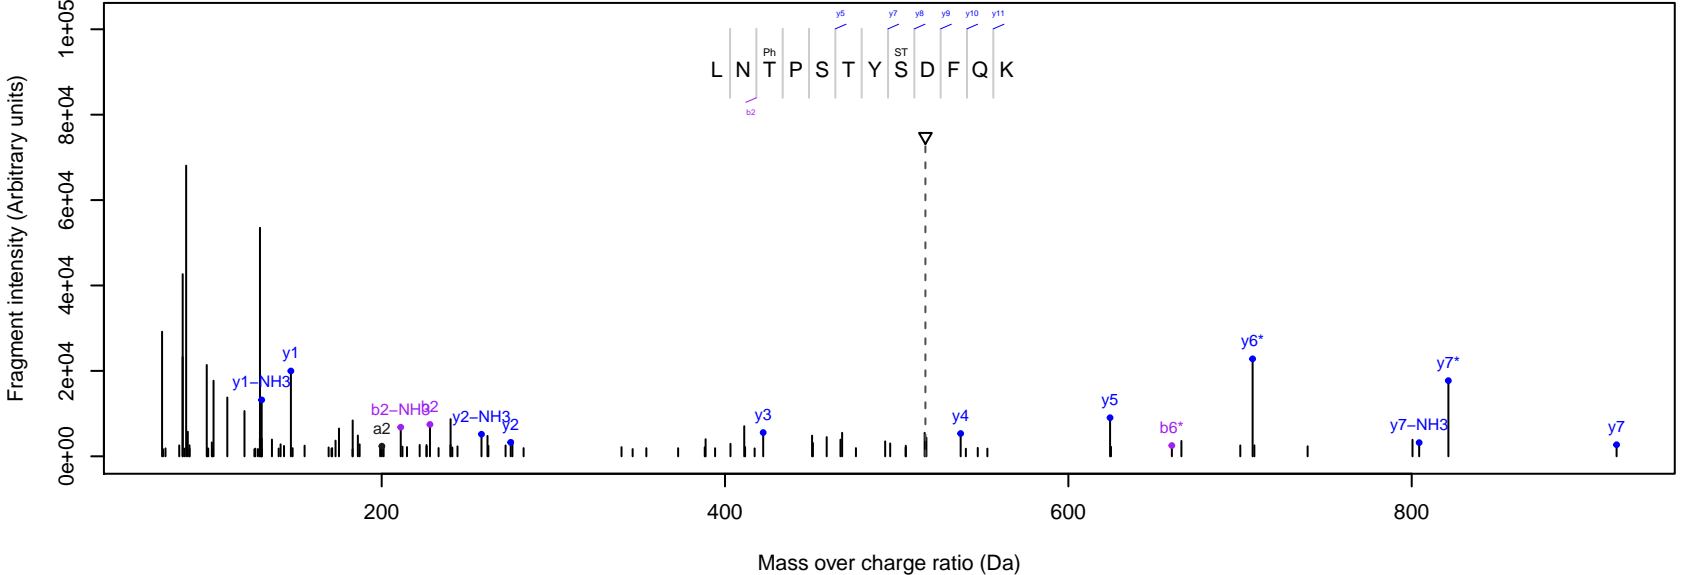

NIS(Phospho (STY))FNDKK-2+

Source : QE3\_201126\_FR\_TiOx\_hum\_tissue\_Urea\_RNAB\_H Scan : 9184

Andromeda score : 61.56

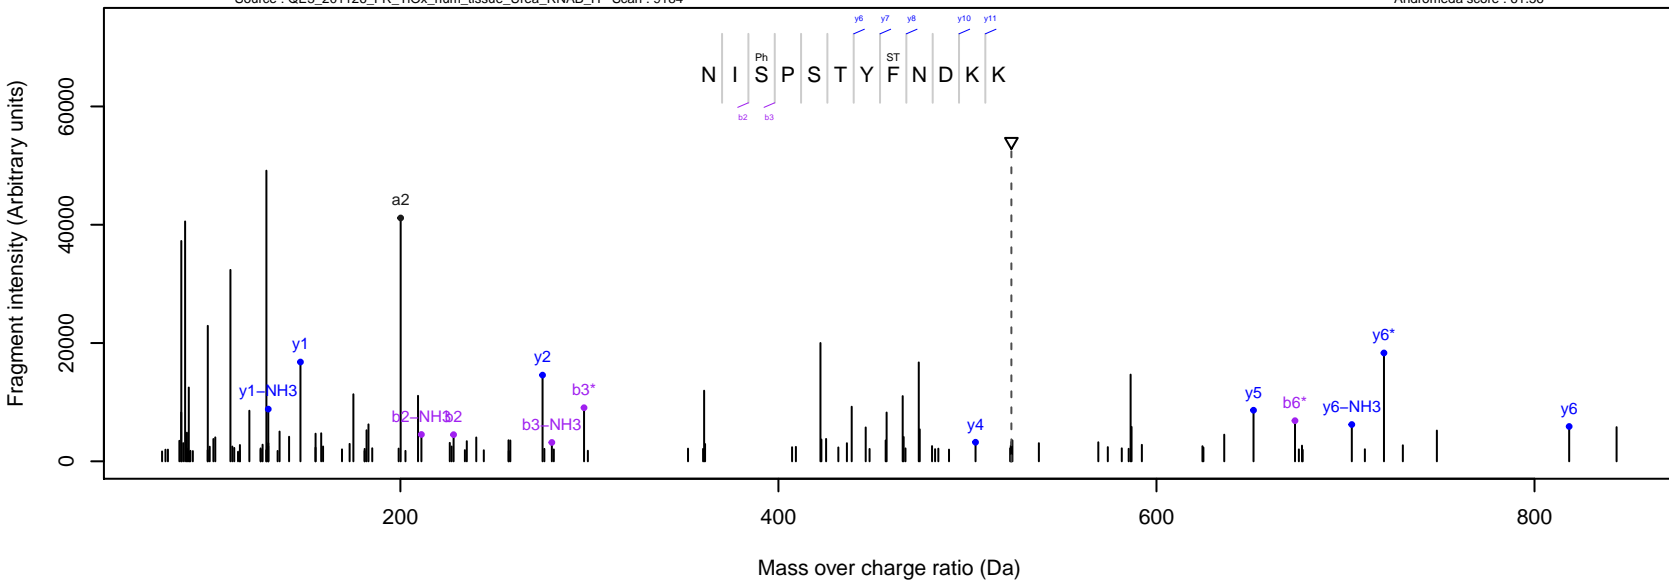

LDRPAGGPS(Phospho (STY))AESPRPSSAYNGDLNGLLVPDPLCSGDSTSANK-4+

Source : QE3\_201126\_FR\_TiOx\_hum\_tissue\_Urea\_RNAB\_N Scan : 44611

Andromeda score : 61.534

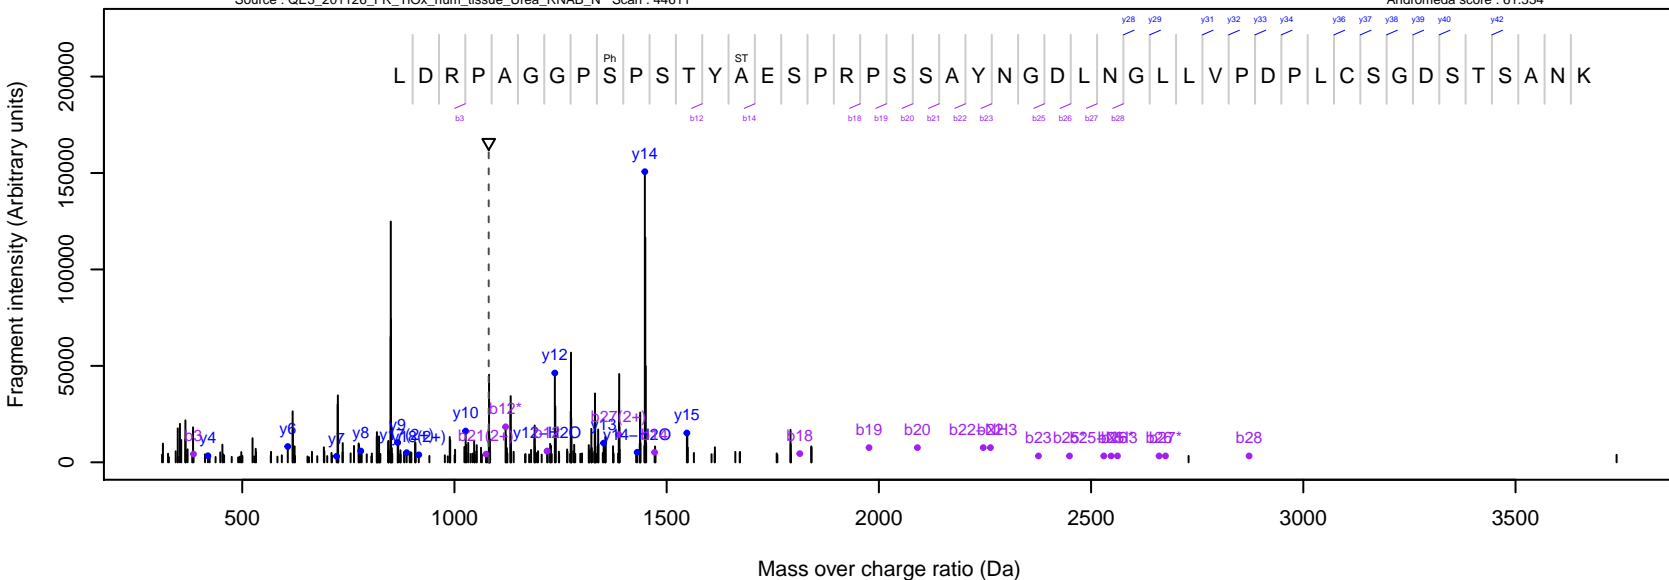

KRS(Phospho (STY))ASADNLTLP-3+

Source : QE3\_201126\_FR\_TiOx\_hum\_tissue\_Urea\_RNAB\_N Scan : 12012

Andromeda score : 61.532

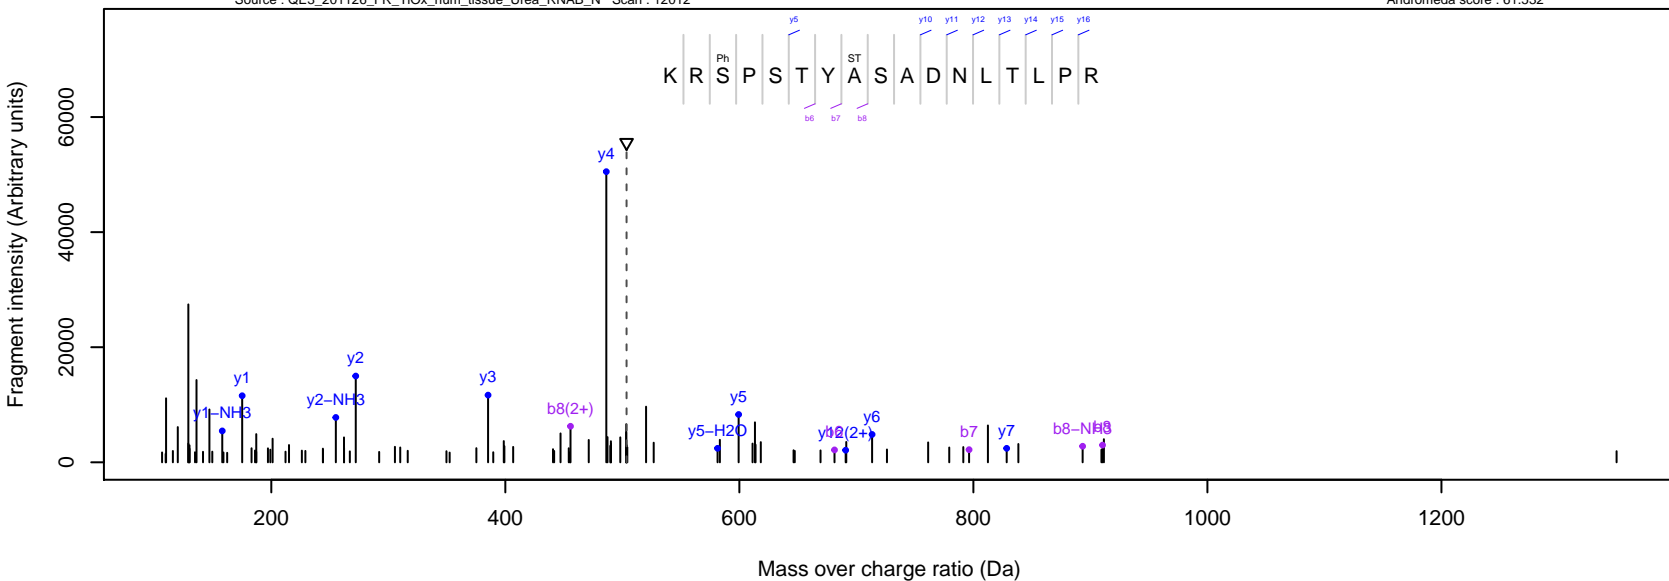



S(Phospho (STY))GSGPSLKGEEELVASEDGAVDAPAPDEPEGGDGAAP-3+

Source : QE3\_201126\_FR\_TIOx\_hum\_tissue\_Urea\_RNAB\_N Scan : 41652

Andromeda score : 61.531

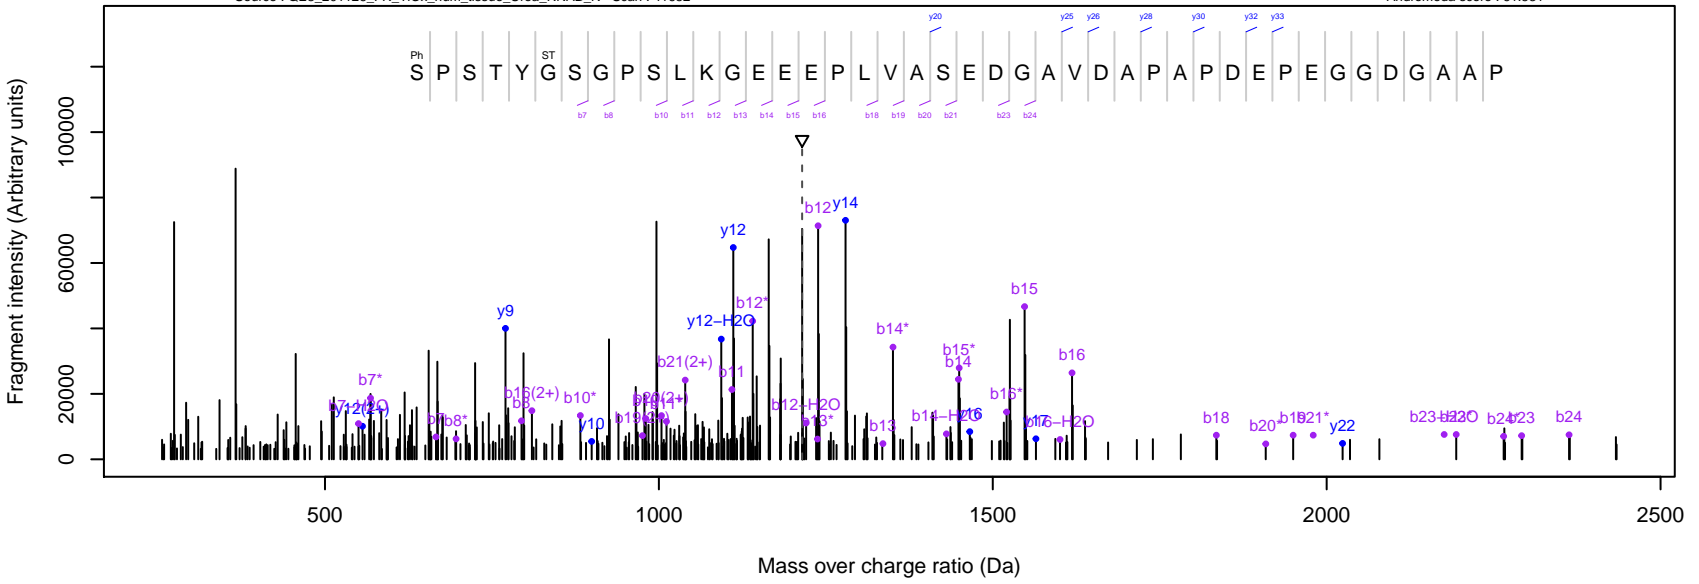

RADNCS(Phospho (STY))PVAEEETTGS AESTLPK-3+

Source : QE3\_201126\_FR\_TIOx\_hum\_tissue\_Urea\_RNAB\_B Scan : 19028

Andromeda score : 61.524

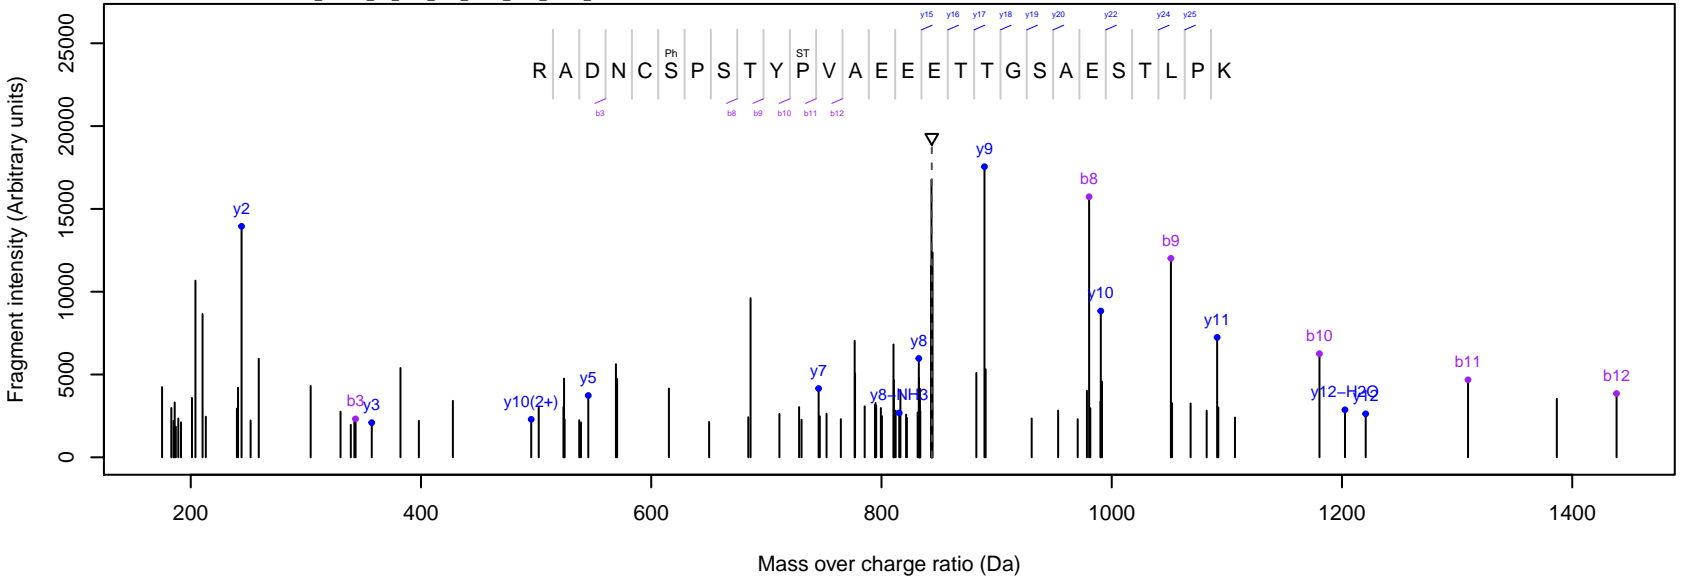

SMGTGDTGPLEVPSS(Phospho (STY))PLRK-3+

Source : QE3\_201126\_FR\_TIOx\_hum\_tissue\_Urea\_RNAB\_B Scan : 27825

Andromeda score : 61.524

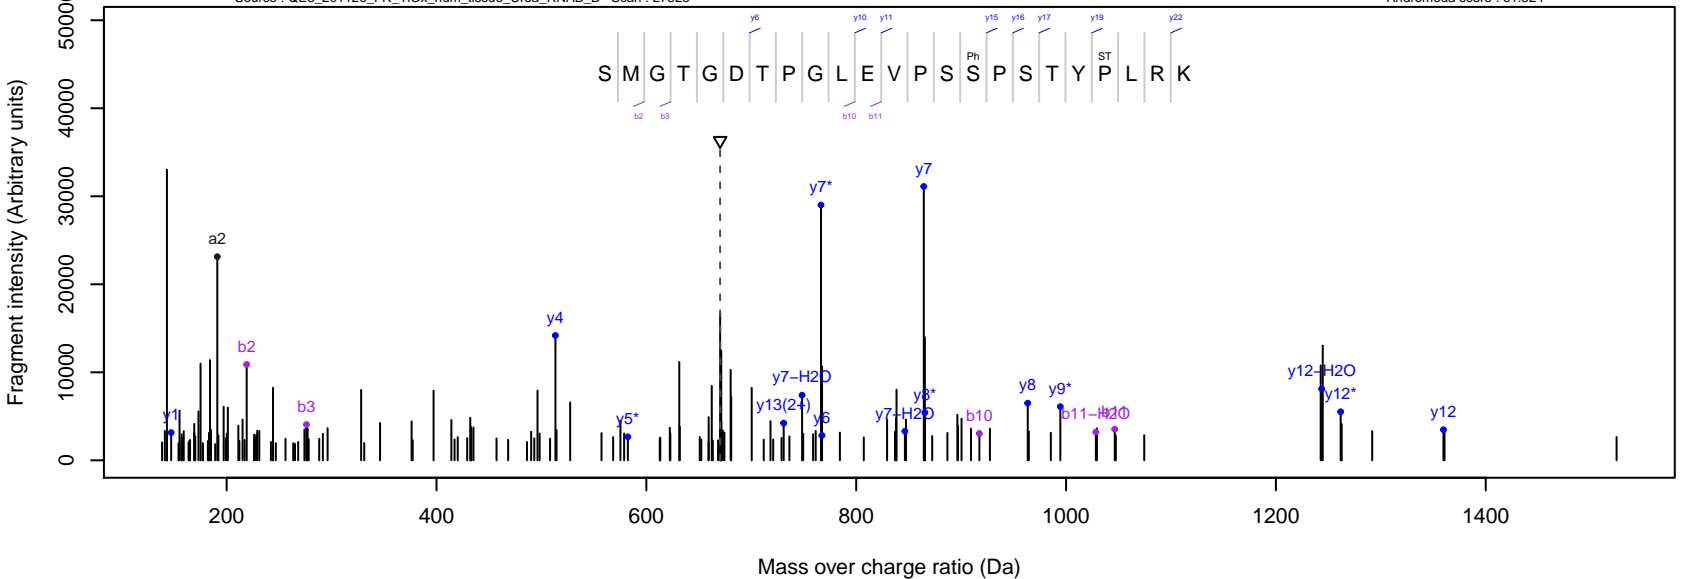

TSS(Phospho (STY))EEEDSRREEPSLLLVLK-3+

Source : QE3\_201126\_FR\_TiOx\_hum\_tissue\_Urea\_RNAB\_B Scan : 36811

Andromeda score : 61.524

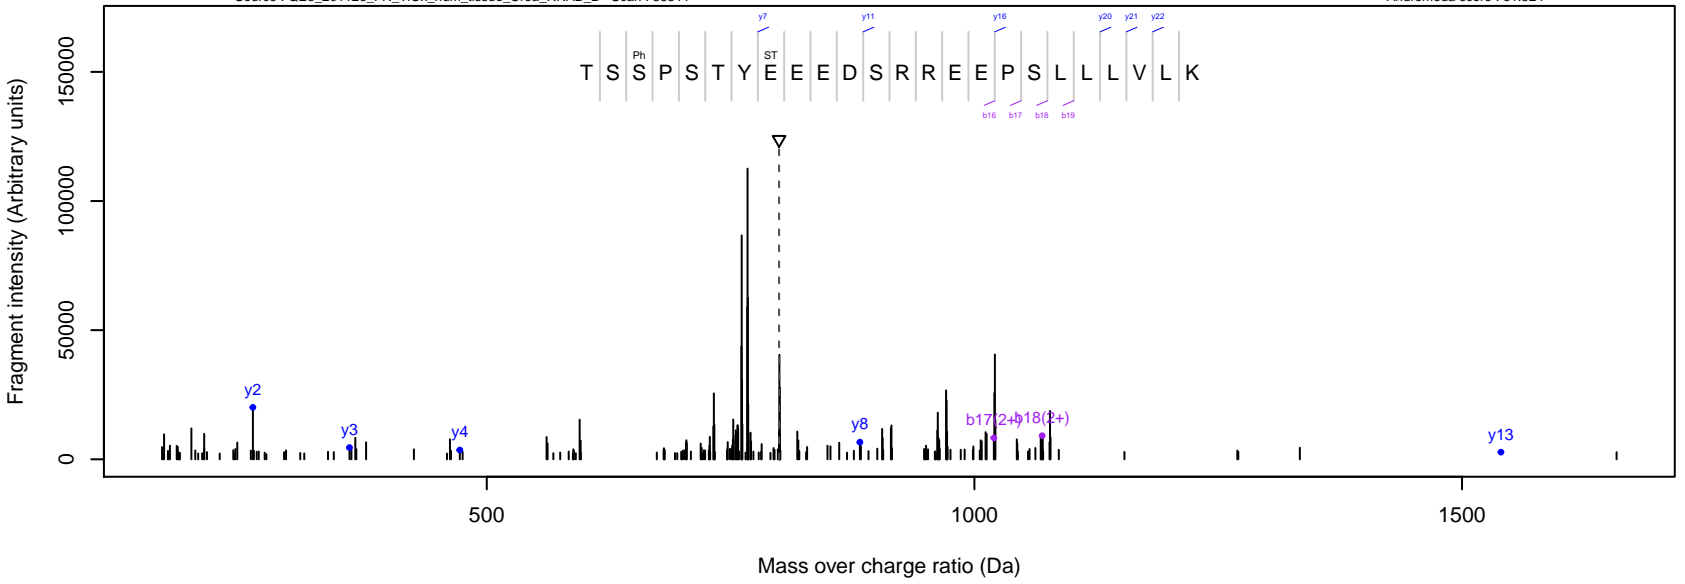

VEMMSEALNGGDDLNNYDS(Phospho (STY))DDQEKQSK-3+

Source : QE3\_201126\_FR\_TiOx\_hum\_tissue\_Urea\_RNAB\_N Scan : 30827

Andromeda score : 61.519

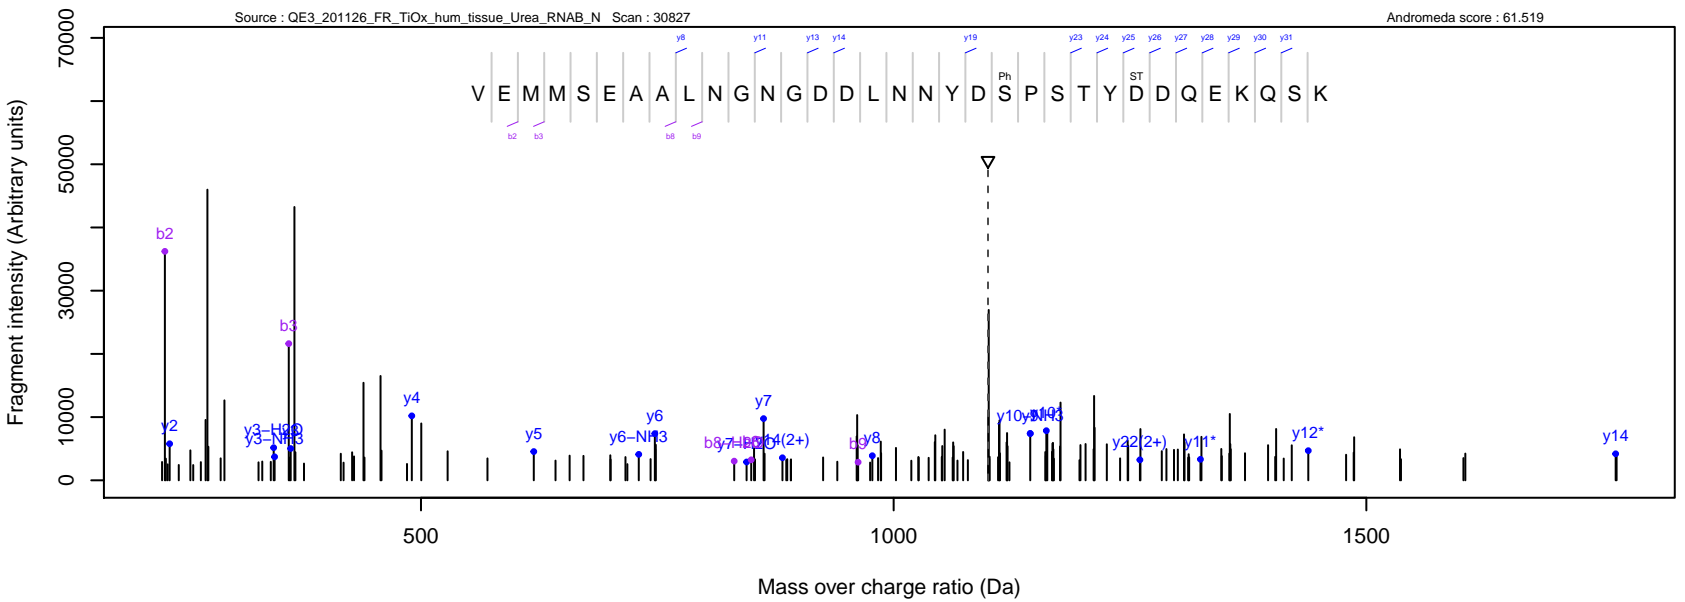

AS(Phospho (STY))ESSSEESSDDDEEDQKKQPVK-3+

Source : QE3\_201126\_FR\_TiOx\_hum\_tissue\_Urea\_RNAB\_B Scan : 4533

Andromeda score : 61.499

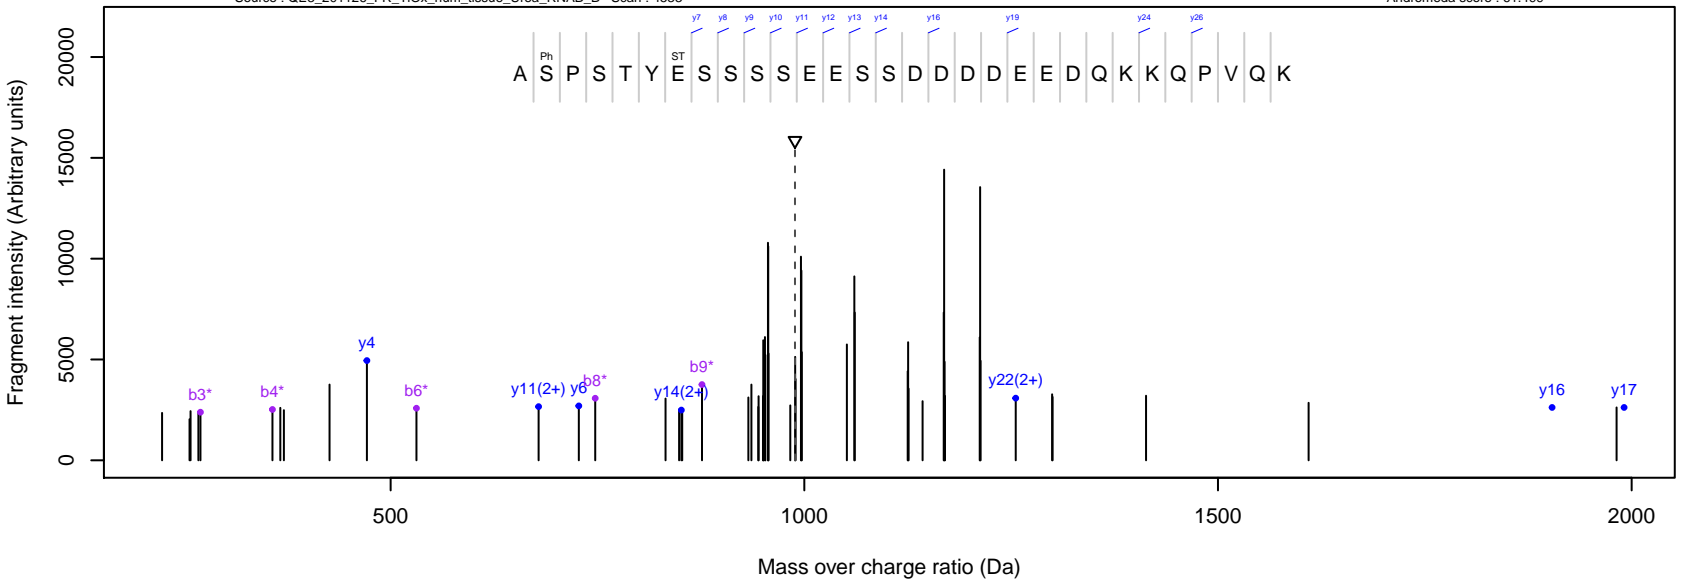

SKS(Phospho (STY))LKEGLTVQER-3+

Source : QE3\_201126\_FR\_TiOx\_hum\_tissue\_Urea\_RNAB\_H Scan : 9712

Andromeda score : 61.477

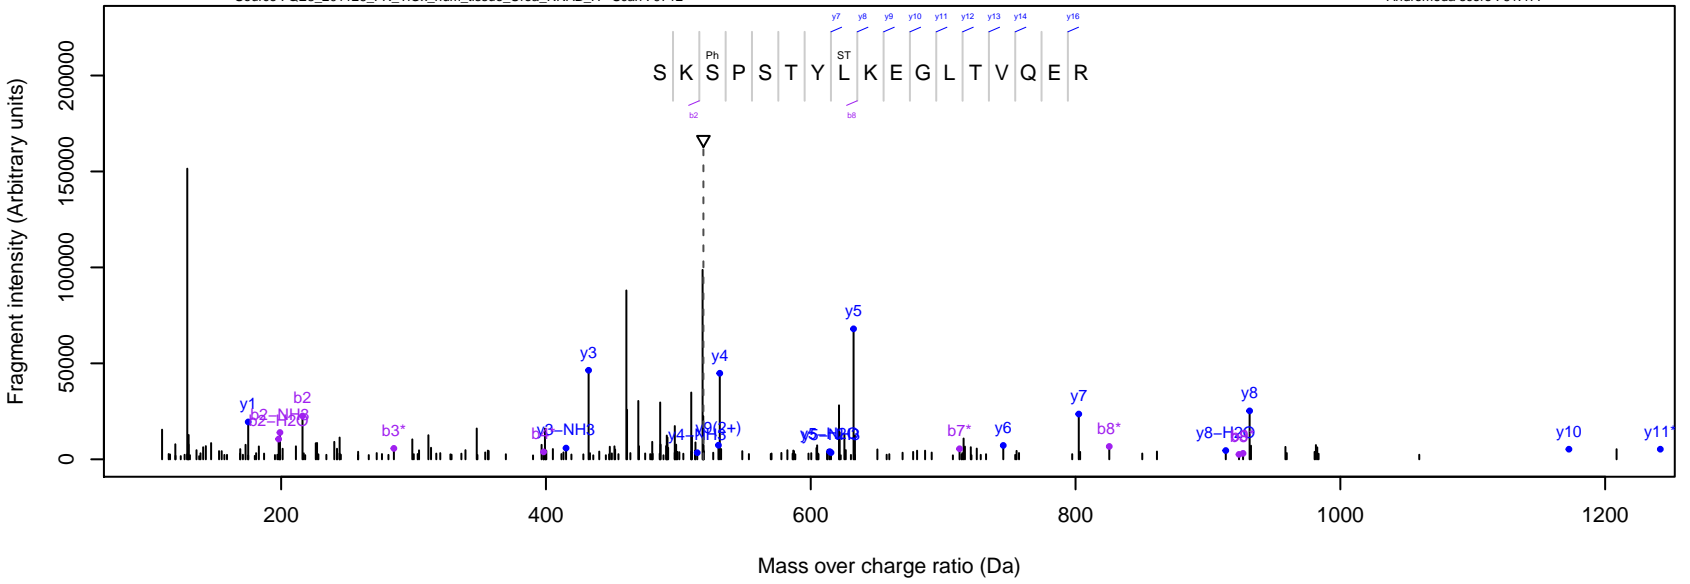

GKEIDLESIFSLNPDLPDEEIEPSPET(Phospho (STY))PPPPASSAK-3+

Source : QE3\_201126\_FR\_TiOx\_hum\_tissue\_Urea\_RNAB\_N Scan : 60712

Andromeda score : 61.452

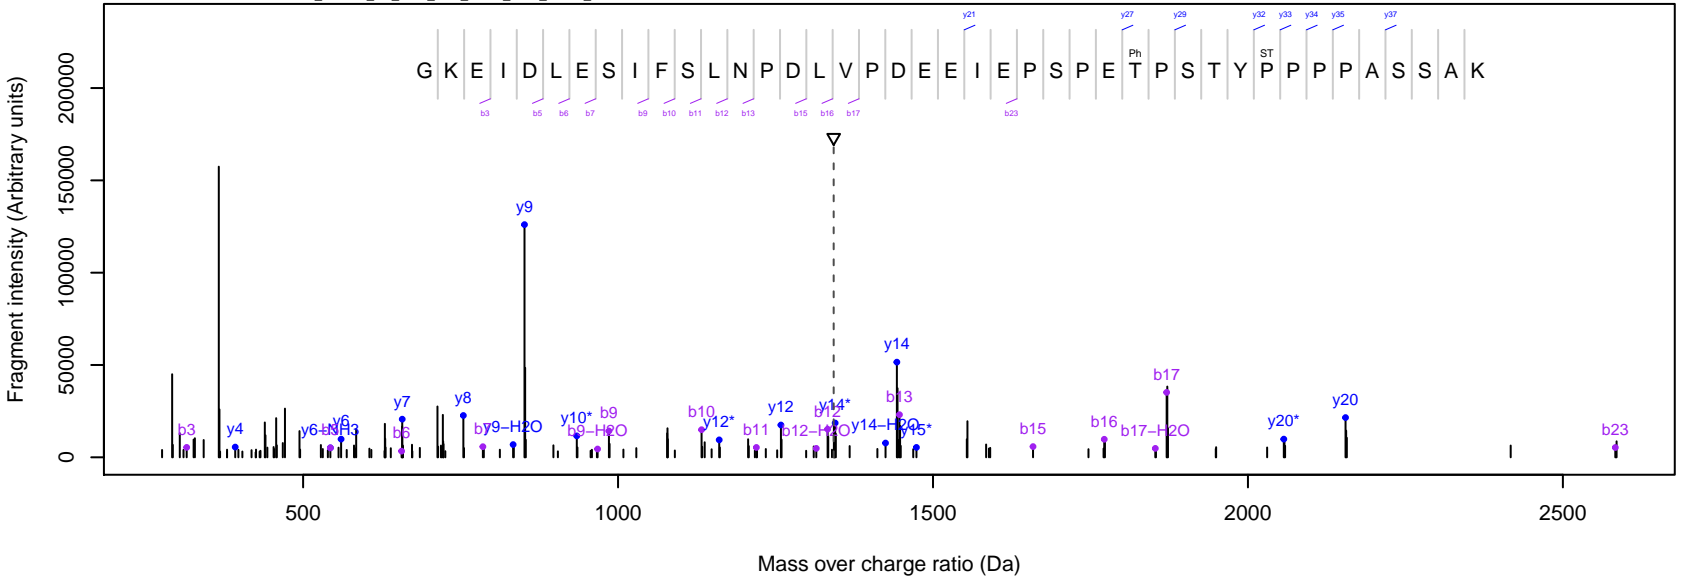

DIKFDDSPSTYDTEQIAEEGDDNLANSASPSK-3+

Source : QE3\_201126\_FR\_TiOx\_hum\_tissue\_Urea\_RNAB\_H Scan : 39294

Andromeda score : 61.45

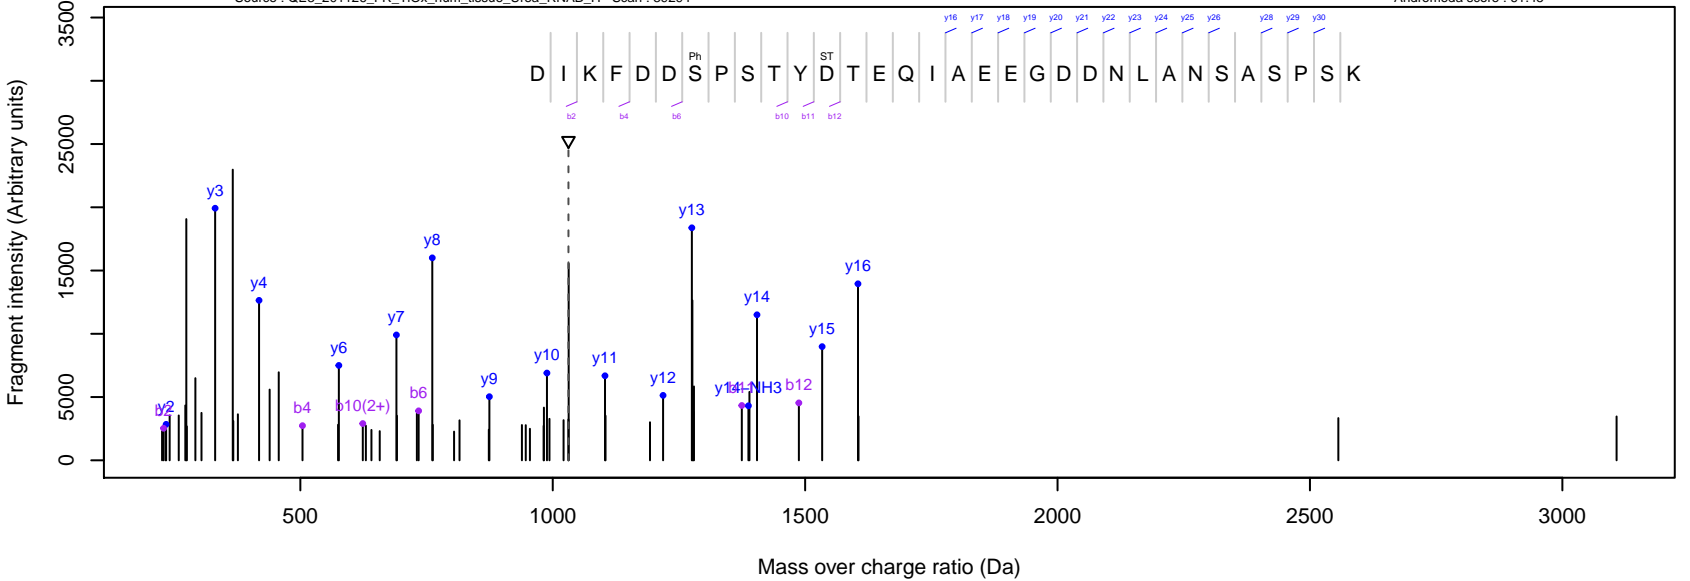

NNRPAFFSPS(Phospho (STY))LKR-3+

Source : QE3\_201126\_FR\_TiOx\_hum\_tissue\_Urea\_RNAB\_N Scan : 19788

Andromeda score : 61.444

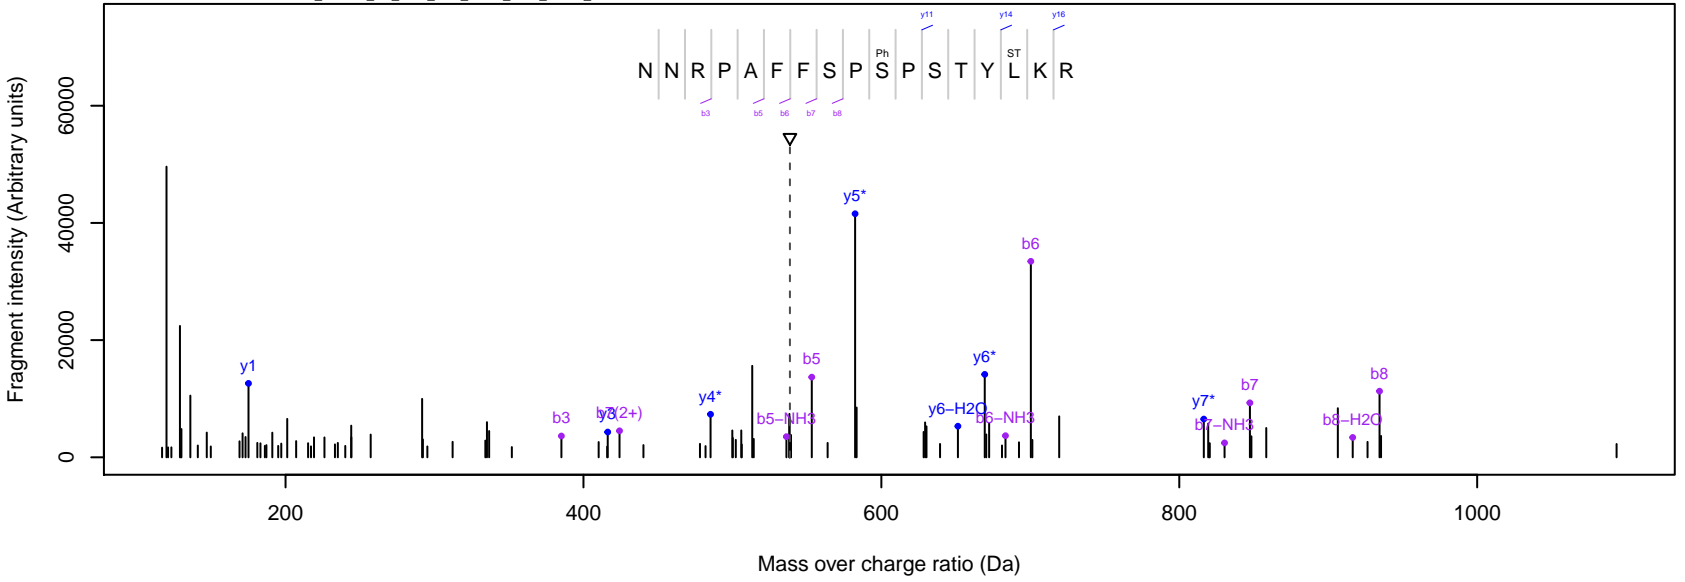

RADLNQGIGEPQS(Phospho (STY))PSRR-3+

Source : QE3\_201126\_FR\_TiOx\_hum\_tissue\_Urea\_RNAB\_B Scan : 9902

Andromeda score : 61.437

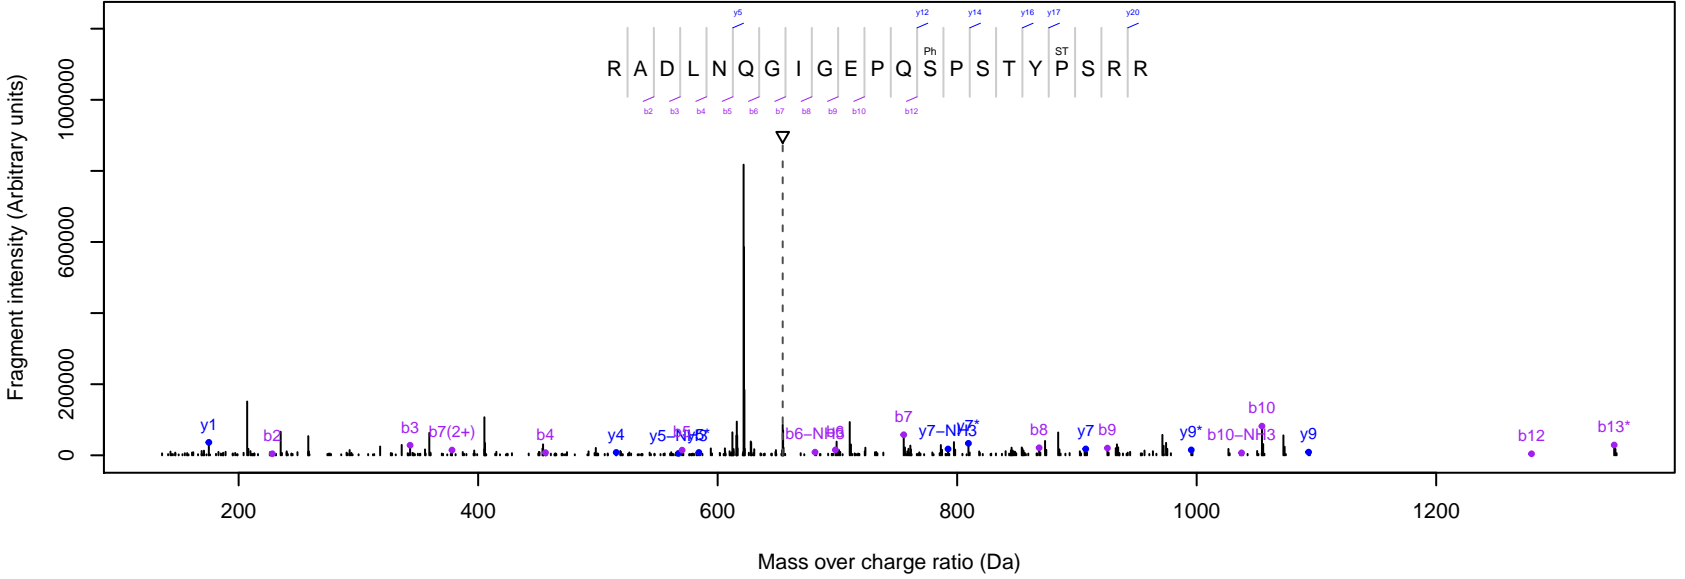

RPILQLS(Phospho (STY))PPGPR-3+

Source : QE3\_201126\_FR\_TiOx\_hum\_tissue\_Urea\_RNAB\_H Scan : 28556

Andromeda score : 61.409

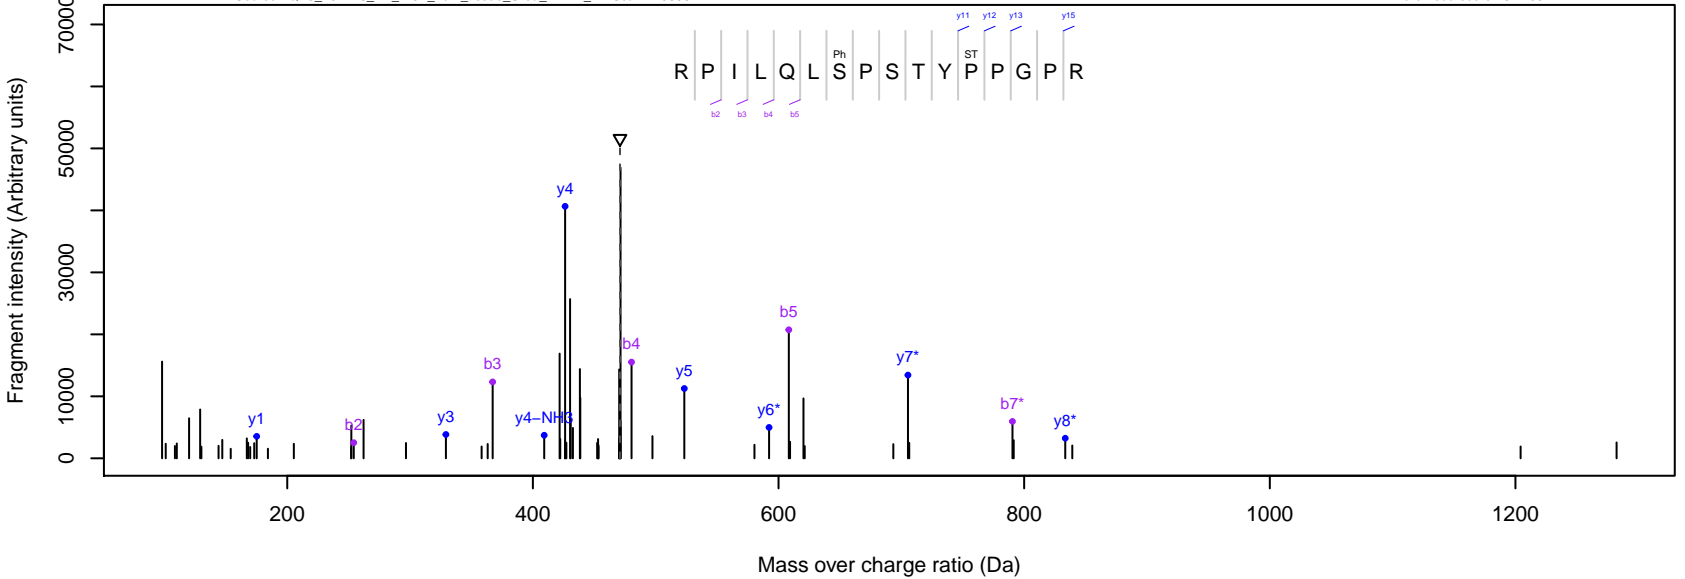

RSVS(Phospho (STY))ELS(Phospho (STY))LQGR-2+

Source : QE3\_201126\_FR\_TIOx\_hum\_tissue\_Urea\_RNAB\_H Scan : 19240

Andromeda score : 61.409

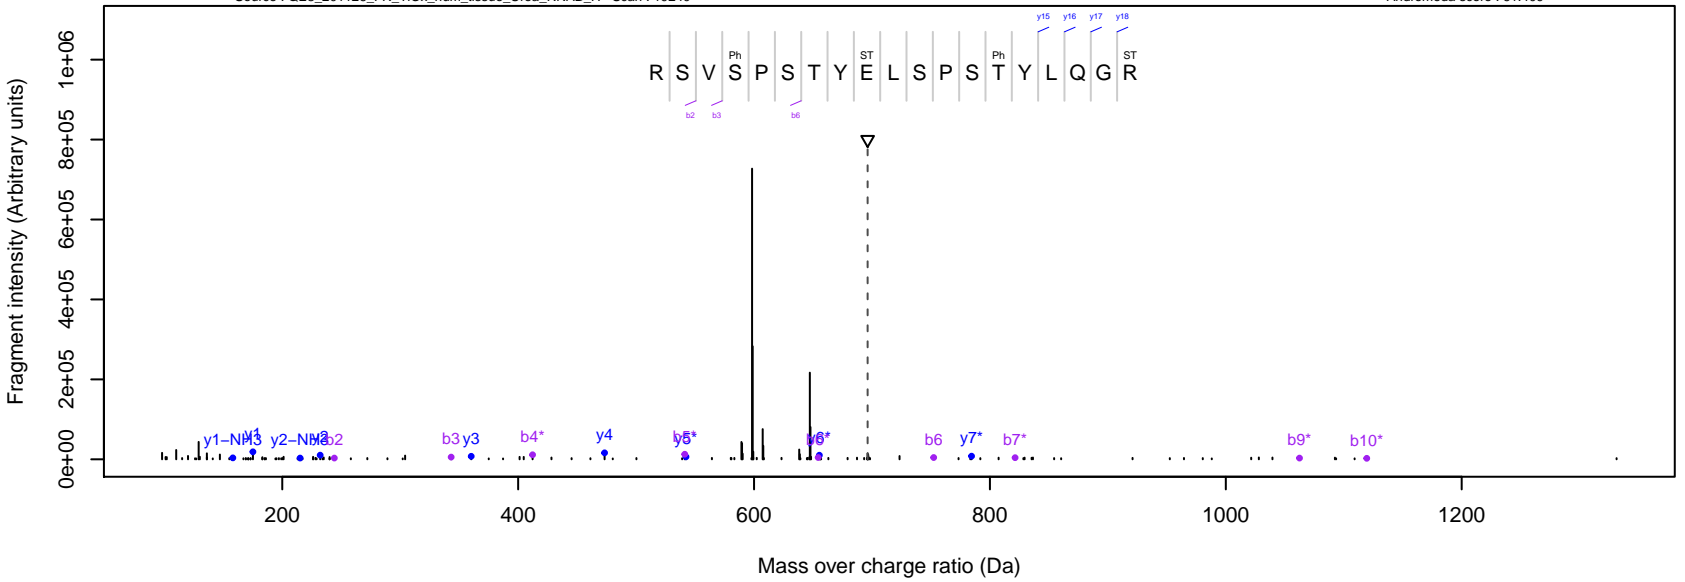

SRGPT(Phospho (STY))PPAM(Oxidation (M))GPR-3+

Source : QE3\_201126\_FR\_TIOx\_hum\_tissue\_Urea\_RNAB\_H Scan : 6725

Andromeda score : 61.409

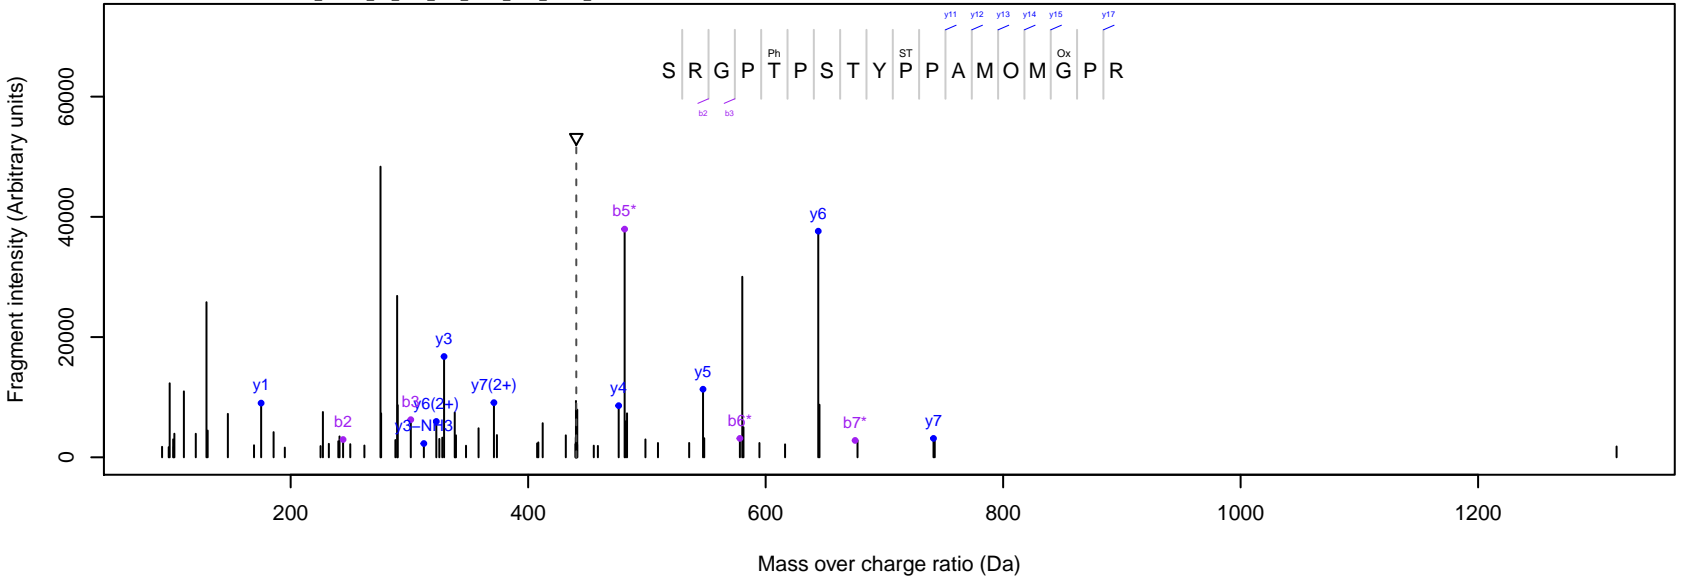

(Acetyl (Protein N-term))S(Phospho (STY))TAVLENPGLGRK-2+

Source : QE3\_201126\_FR\_TIOx\_hum\_tissue\_Urea\_RNAB\_N Scan : 27888

Andromeda score : 61.375

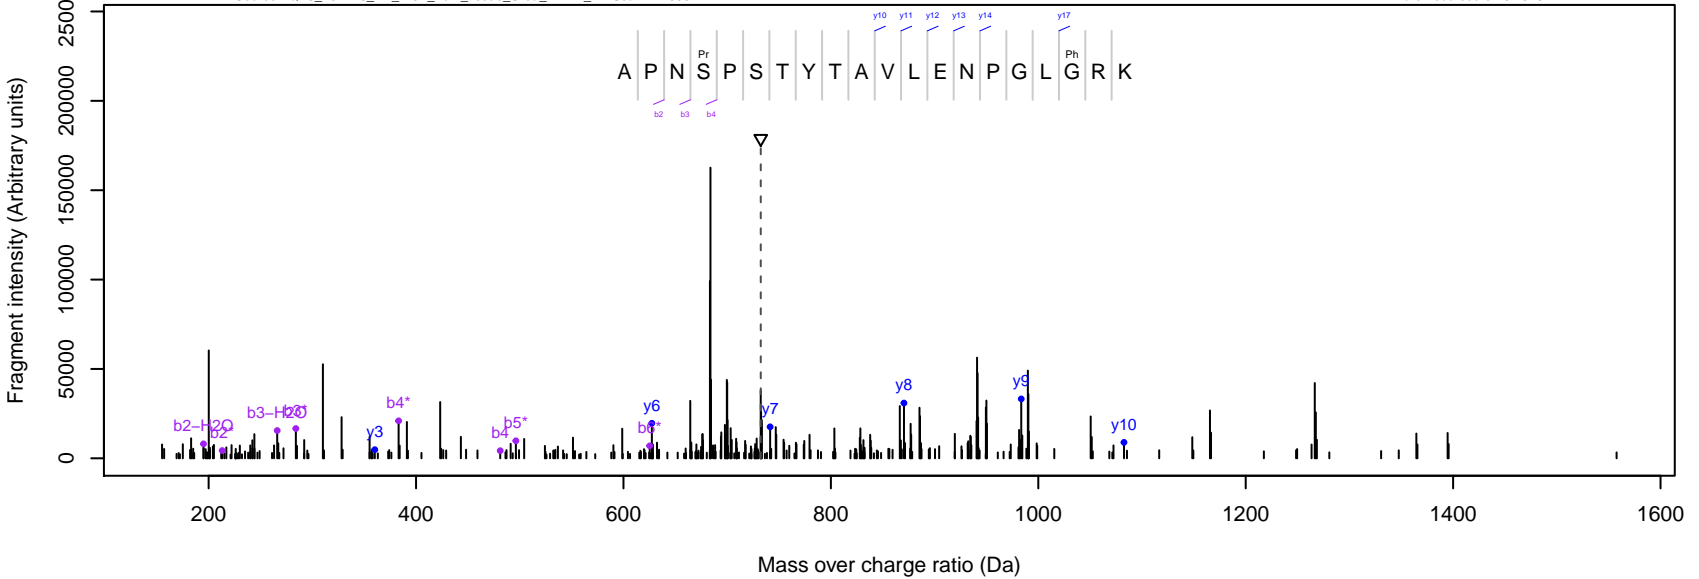

WSDSSKQDDS(Phospho (STY))PSGASYGQDYDLS(Phospho (STY))PSR-3+

Source : QE3\_201126\_FR\_TiOx\_hum\_tissue\_Urea\_RNAB\_B Scan : 30444

Andromeda score : 61.372

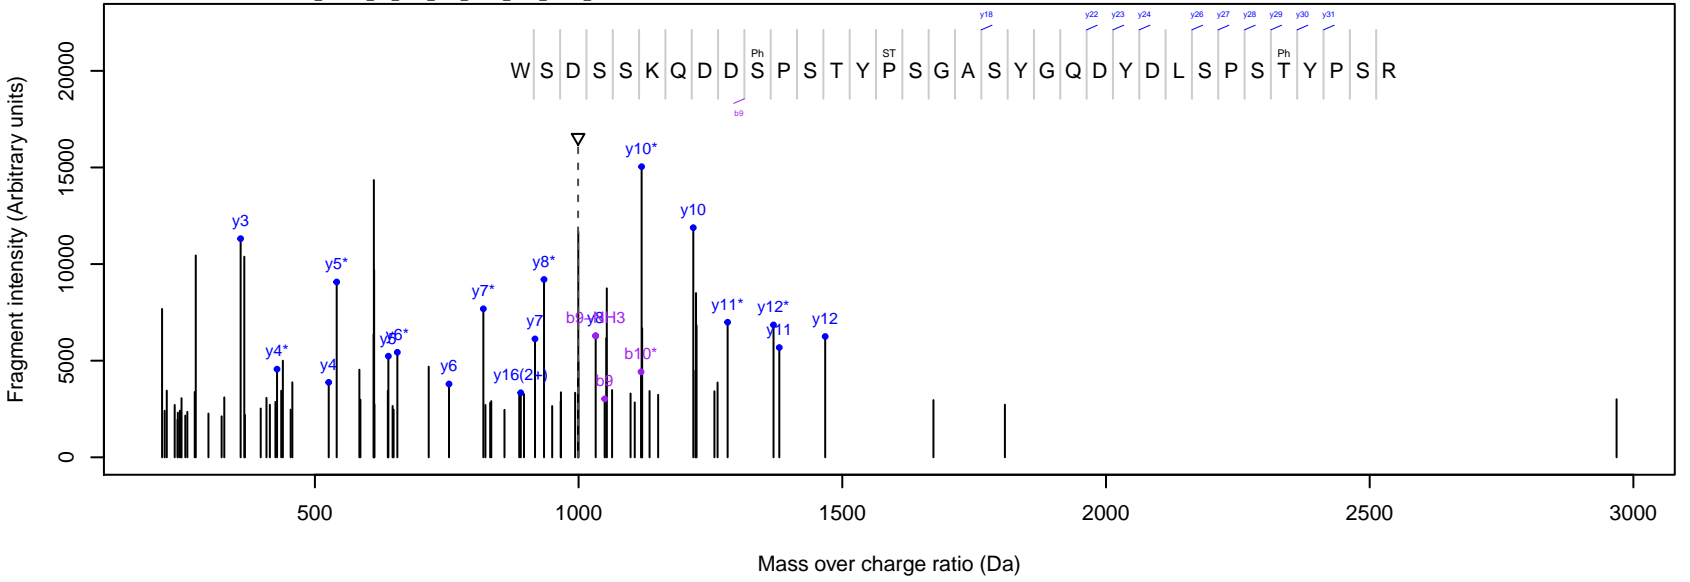

LNRDDSDLYS(Phospho (STY))PRYSFSEDTK-3+

Source : QE3\_201126\_FR\_TiOx\_hum\_tissue\_Urea\_RNAB\_B Scan : 26347

Andromeda score : 61.37

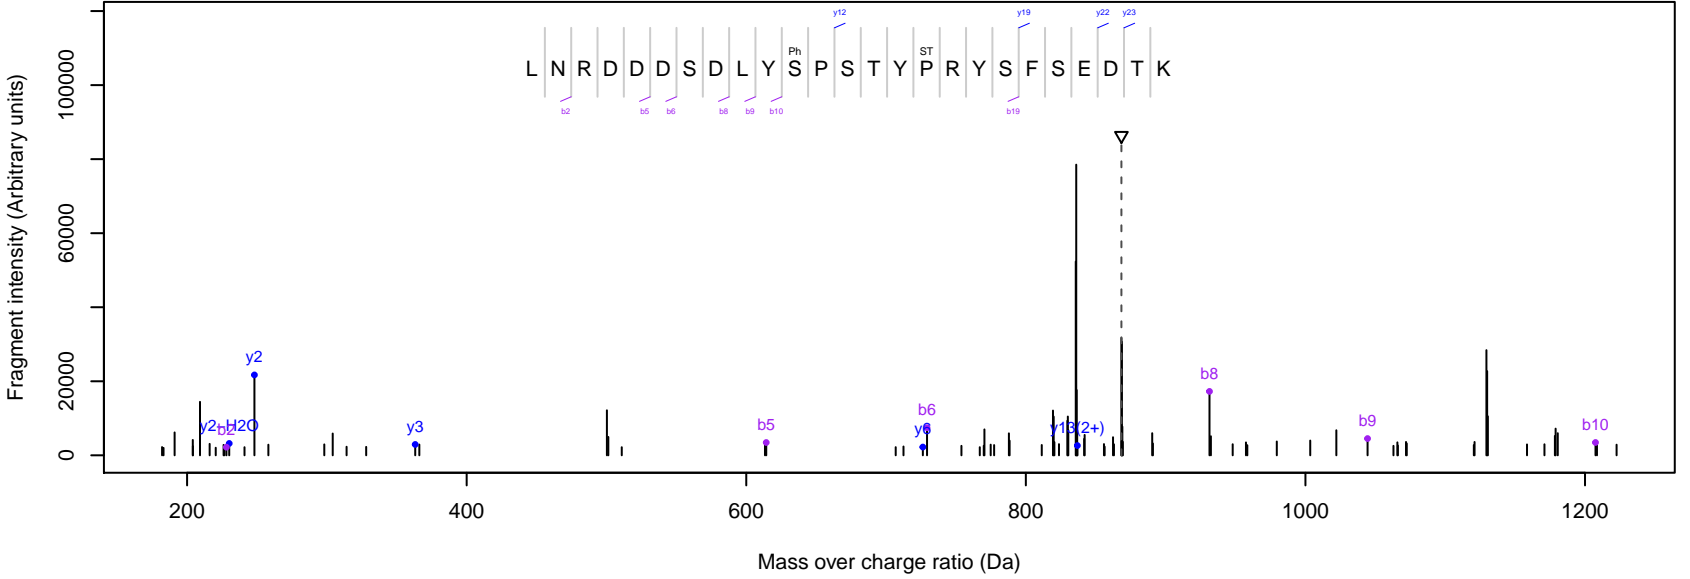

M(Oxidation (M))DRT(Phospho (STY))PPPPTLSPAAITVGR-3+

Source : QE3\_201126\_FR\_TiOx\_hum\_tissue\_Urea\_RNAB\_B Scan : 30547

Andromeda score : 61.37

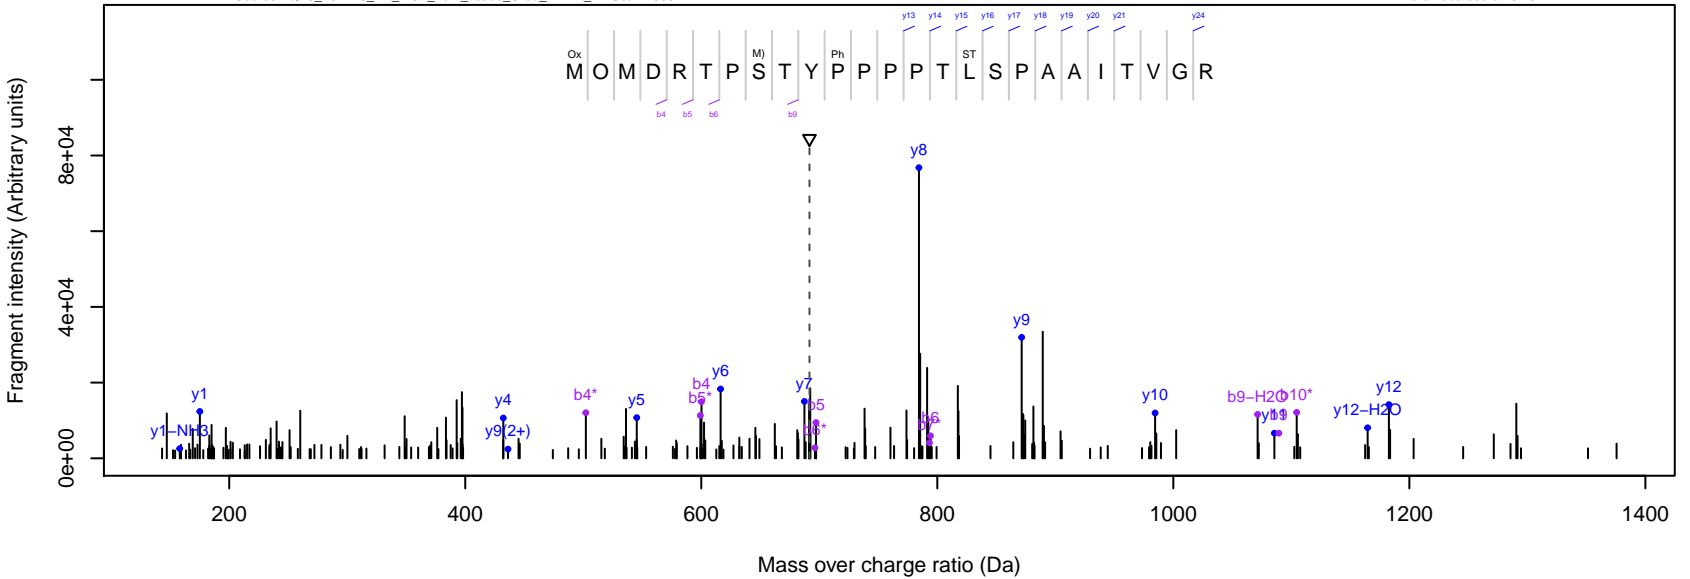

QENGAS(Phospho (STY))VILR-2+

Source : QE3\_201126\_FR\_TiOx\_hum\_tissue\_Urea\_RNAB\_B Scan : 23320

Andromeda score : 61.344

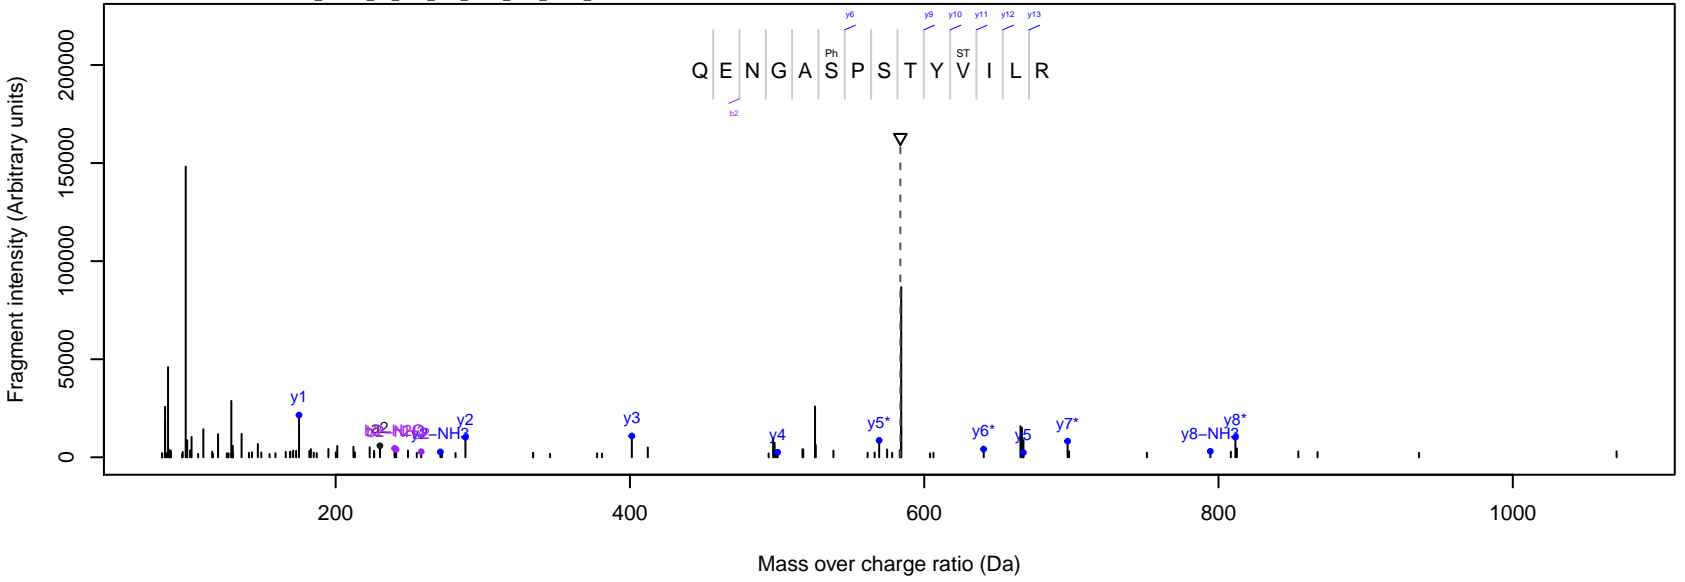

S(Phospho (STY))QEIEELER-2+

Source : QE3\_201126\_FR\_TiOx\_hum\_tissue\_Urea\_RNAB\_N Scan : 21211

Andromeda score : 61.344

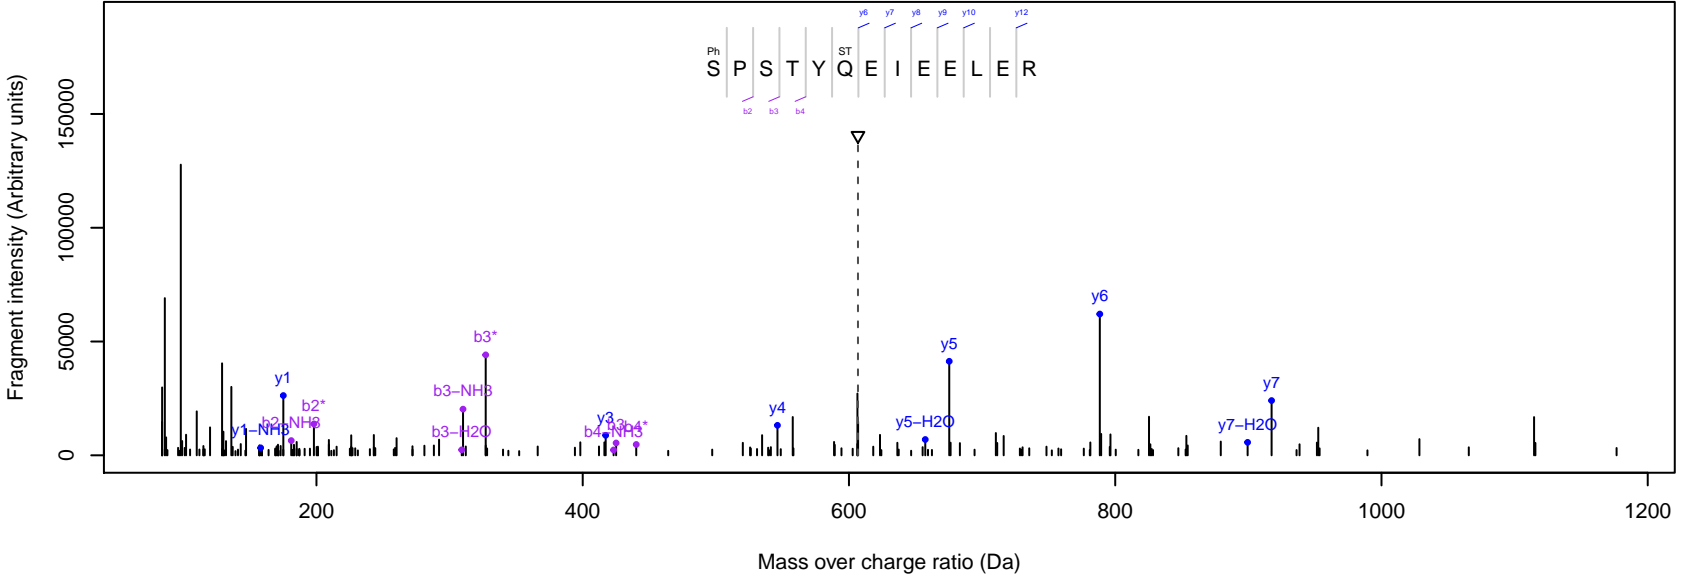

KRS(Phospho (STY))S(Phospho (STY))S(Phospho (STY))EDDDLDES(Phospho (STY))DFDDASINSYSVSDGSTR-3+

Source : QE3\_201126\_FR\_TiOx\_hum\_tissue\_Urea\_RNAB\_N Scan : 54720

Andromeda score : 61.283

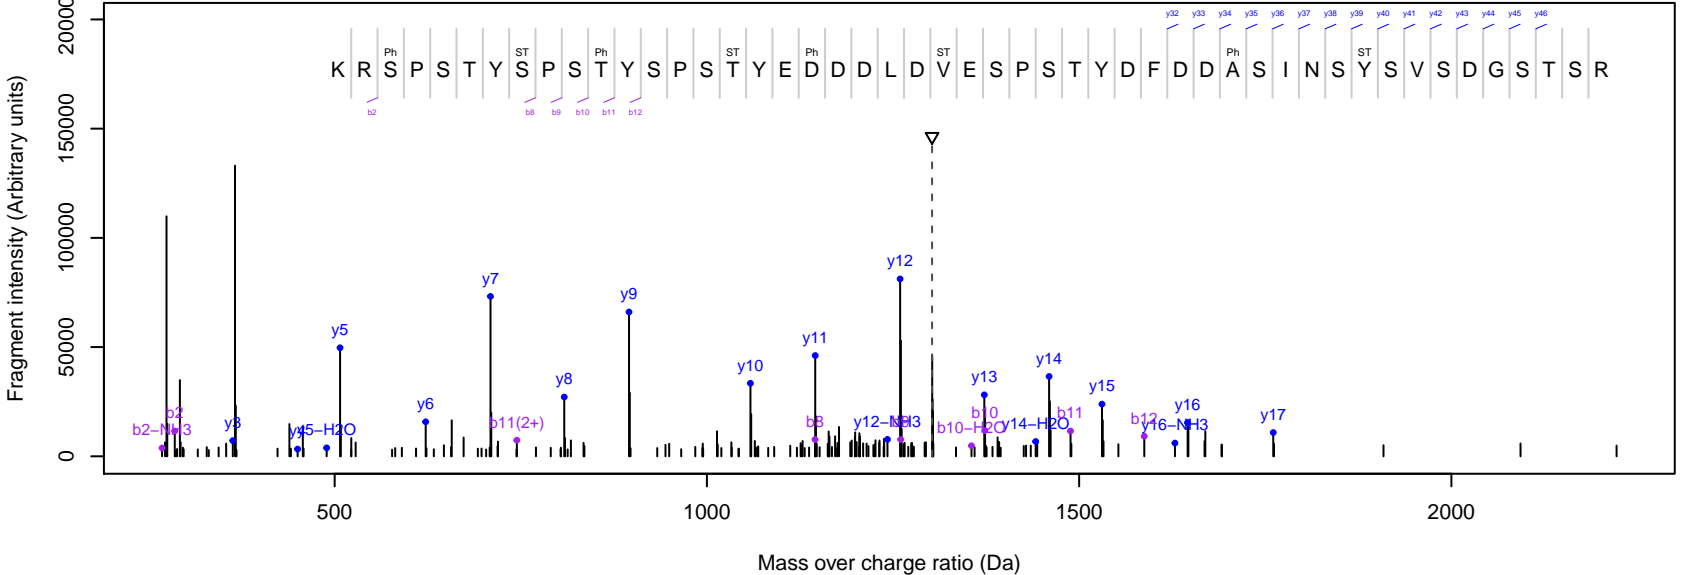

KRVS(Phospho (STY))LEPHQGPGTPEK-4+

Source : QE3\_2011126\_FR\_TiOx\_hum\_tissue\_Urea\_RNAB\_N Scan : 7175

Andromeda score : 61.276

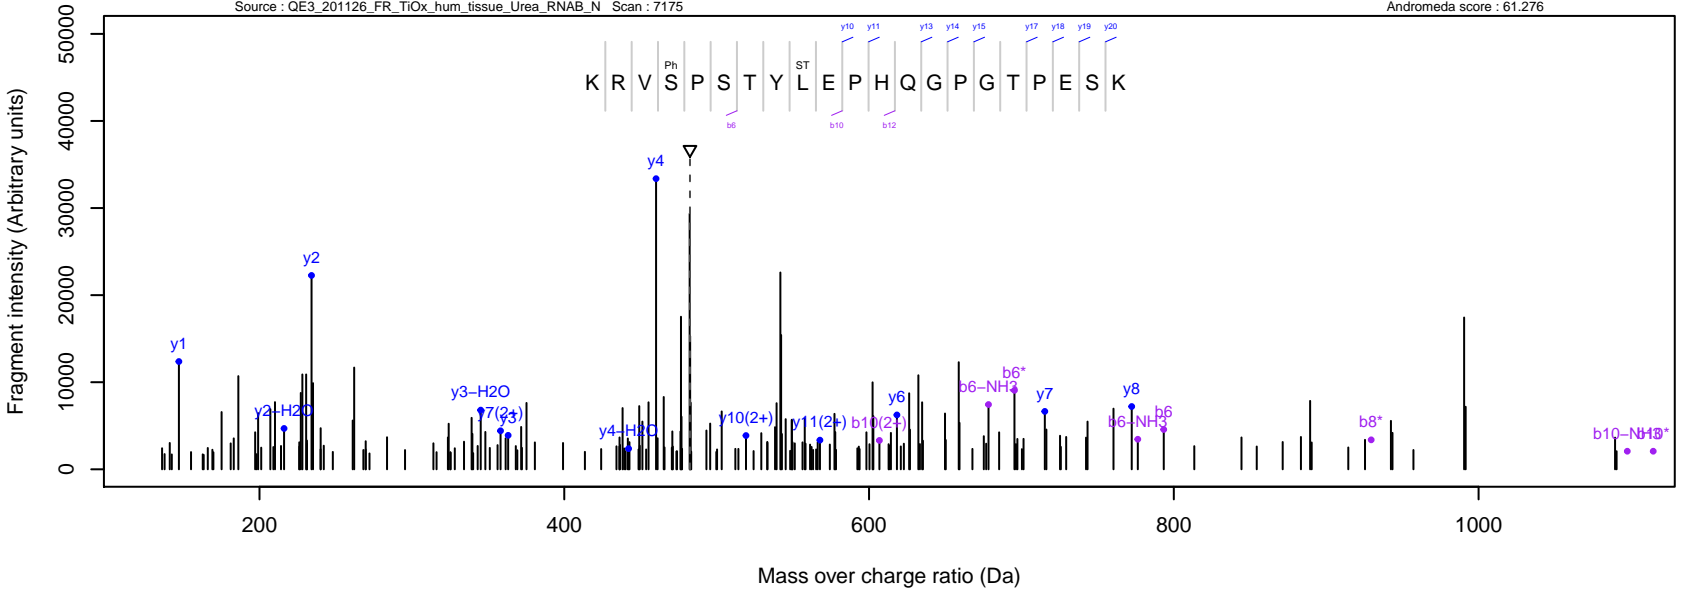

TPSPKEEDEEPES(Phospho (STY))PPEK-3+

Source : QE3\_2011126\_FR\_TiOx\_hum\_tissue\_Urea\_RNAB\_H Scan : 9151

Andromeda score : 61.276

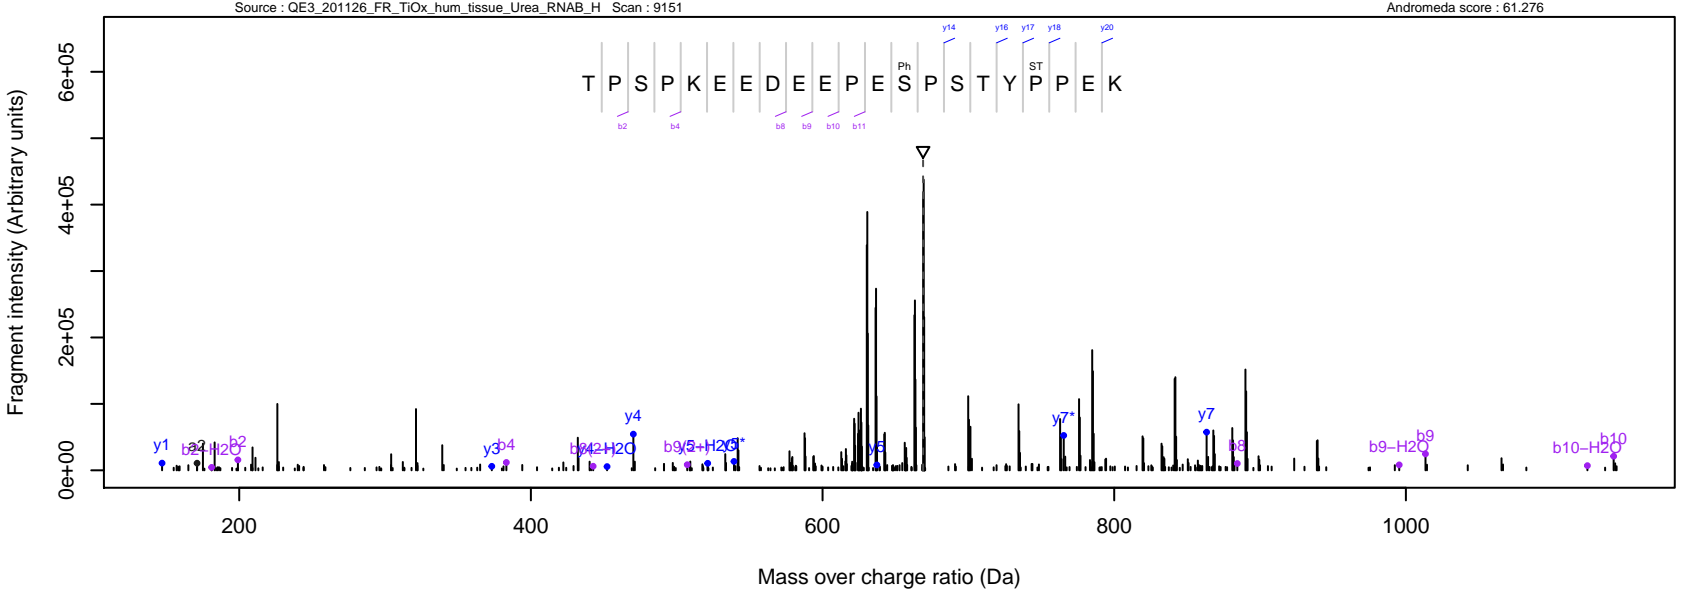

KKYS(Phospho (STY))DADIEPFLK-3+

Source : QE3\_2011126\_FR\_TiOx\_hum\_tissue\_Urea\_RNAB\_B Scan : 24313

Andromeda score : 61.265

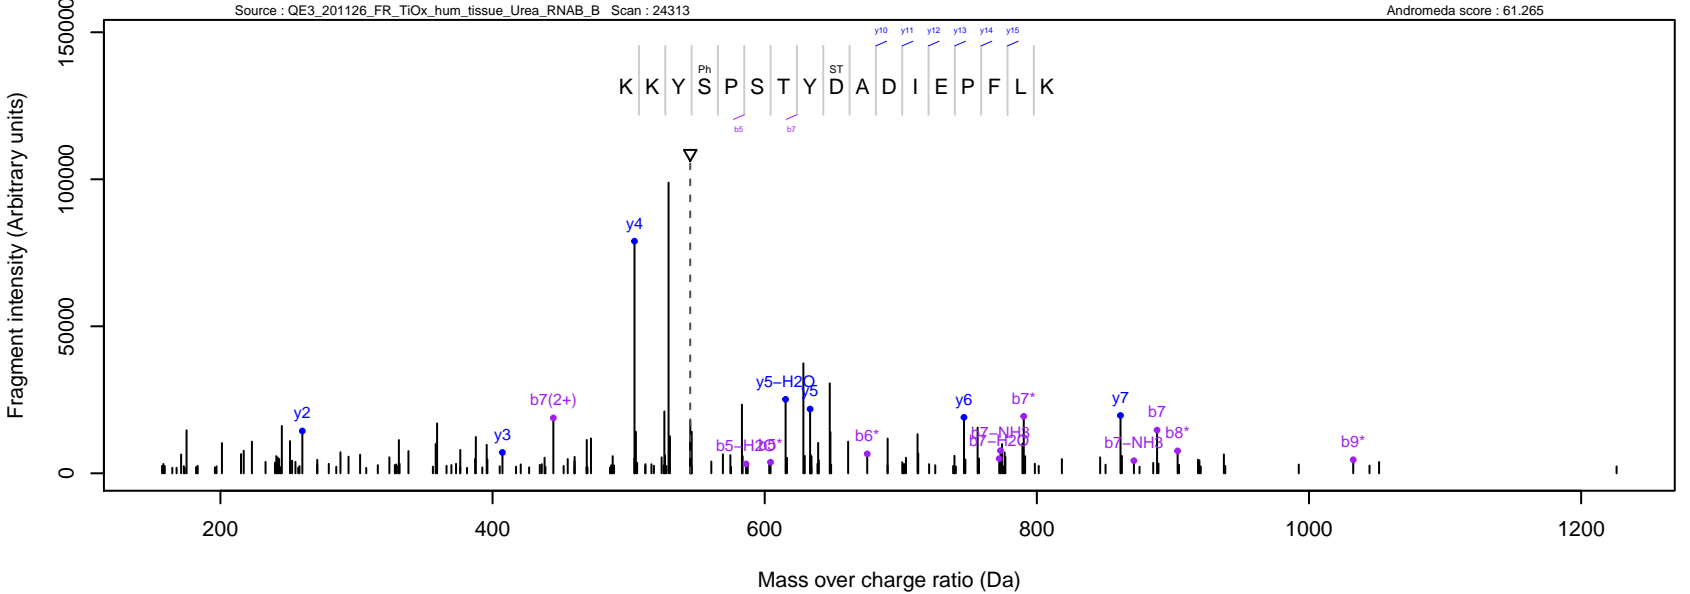



SIDGKDAVHS(Phospho (STY))FK-2+

Source : QE3\_201126\_FR\_TiOx\_hum\_tissue\_Urea\_RNAB\_N Scan : 31797

Andromeda score : 61.235

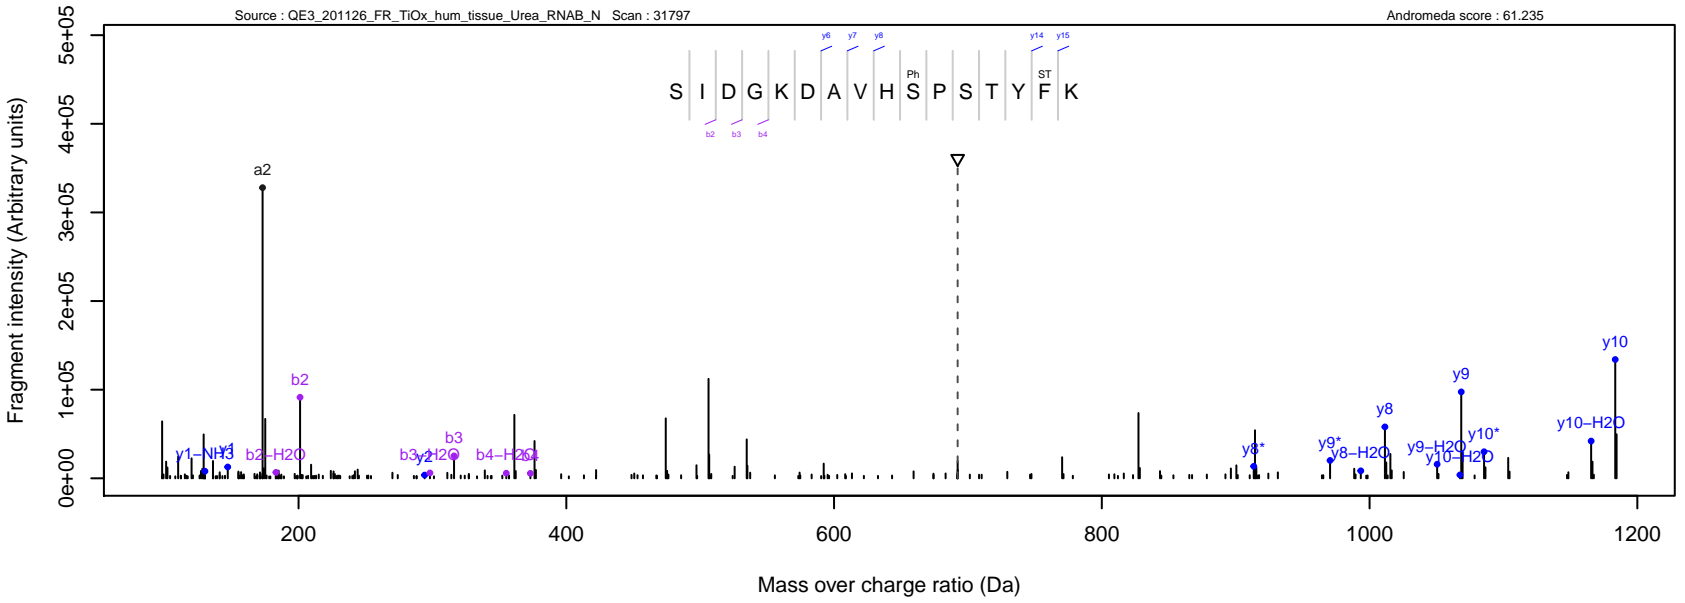

S(Phospho (STY))VGQRPVPGVGR-2+

Source : QE3\_201126\_FR\_TiOx\_hum\_tissue\_Urea\_RNAB\_N Scan : 10730

Andromeda score : 61.235

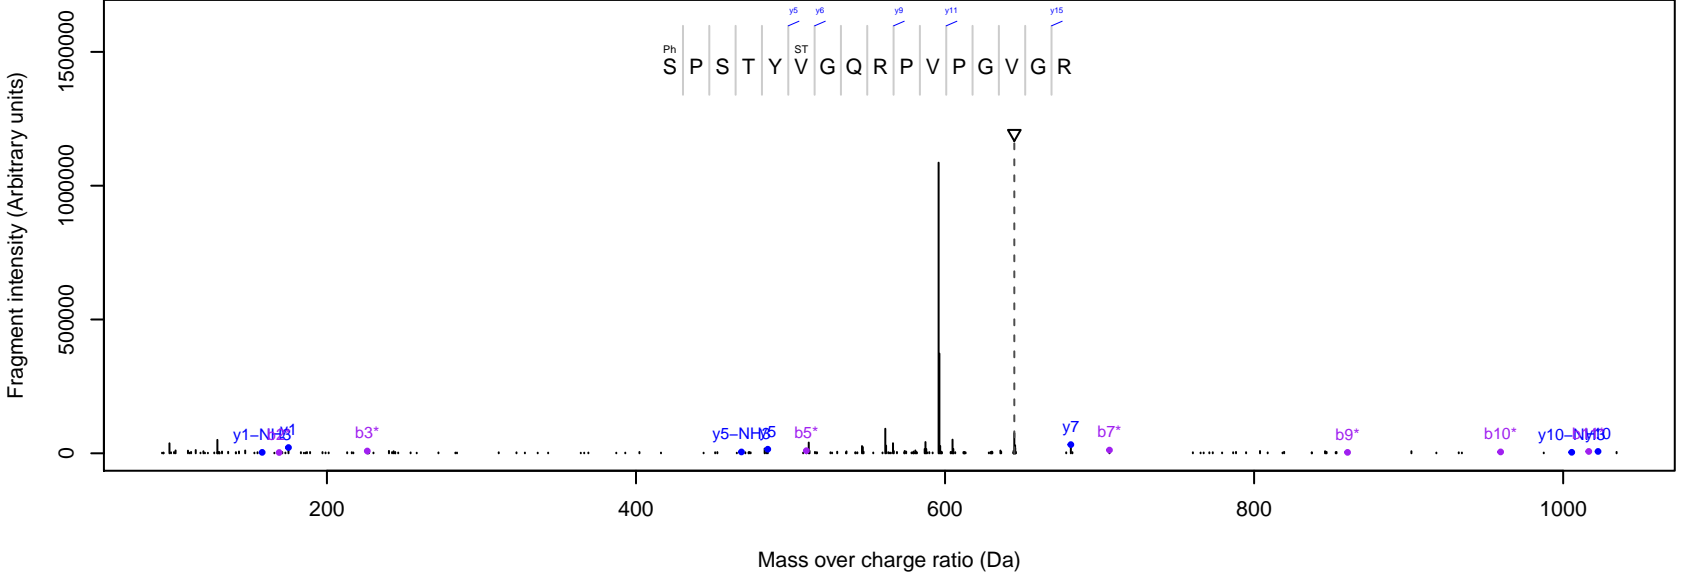

EIPEDVDMEEKES(Phospho (STY))EDS(Phospho (STY))DEENDFTEK-3+

Source : QE3\_201126\_FR\_TiOx\_hum\_tissue\_Urea\_RNAB\_N Scan : 35937

Andromeda score : 61.228

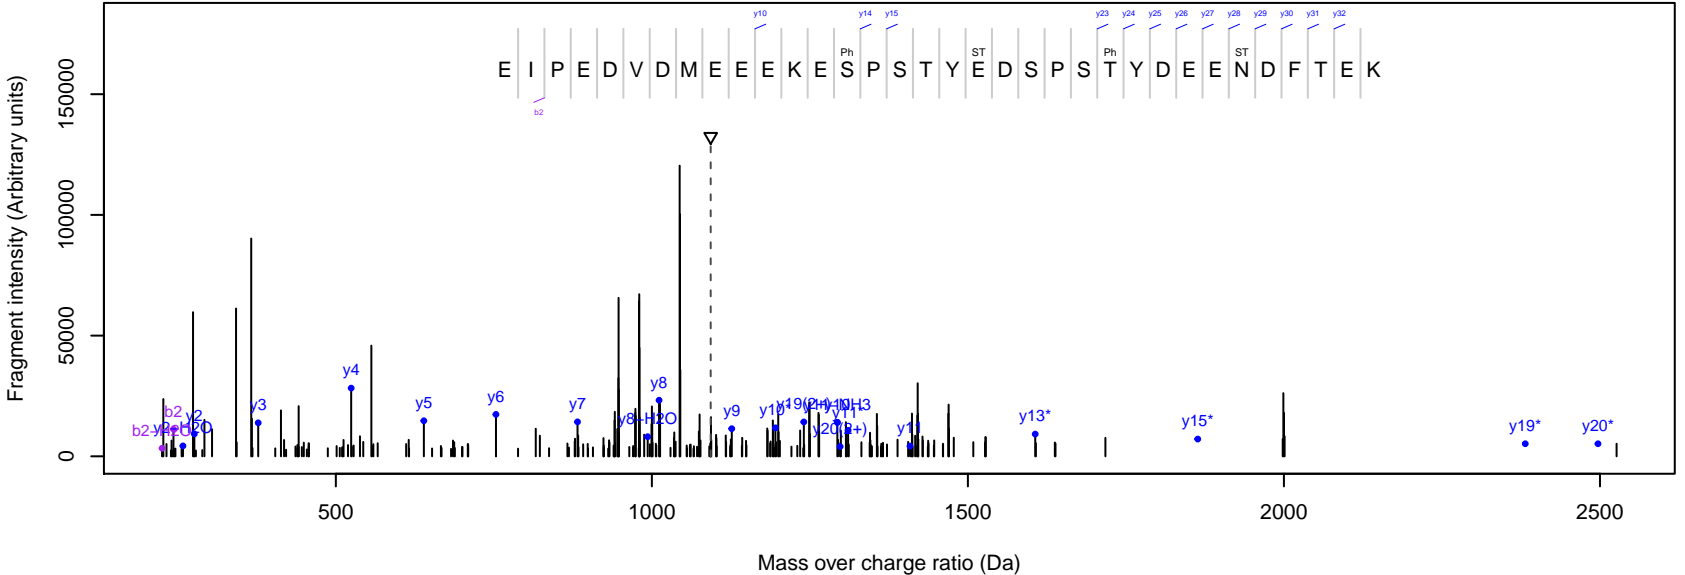

S(Phospho (STY))PSPGPNHTSNSSNASNATVVPQNSSAR-3+

Source : QE3\_201126\_FR\_TiOx\_hum\_tissue\_Urea\_RNAB\_N Scan : 10677

Andromeda score : 61.228

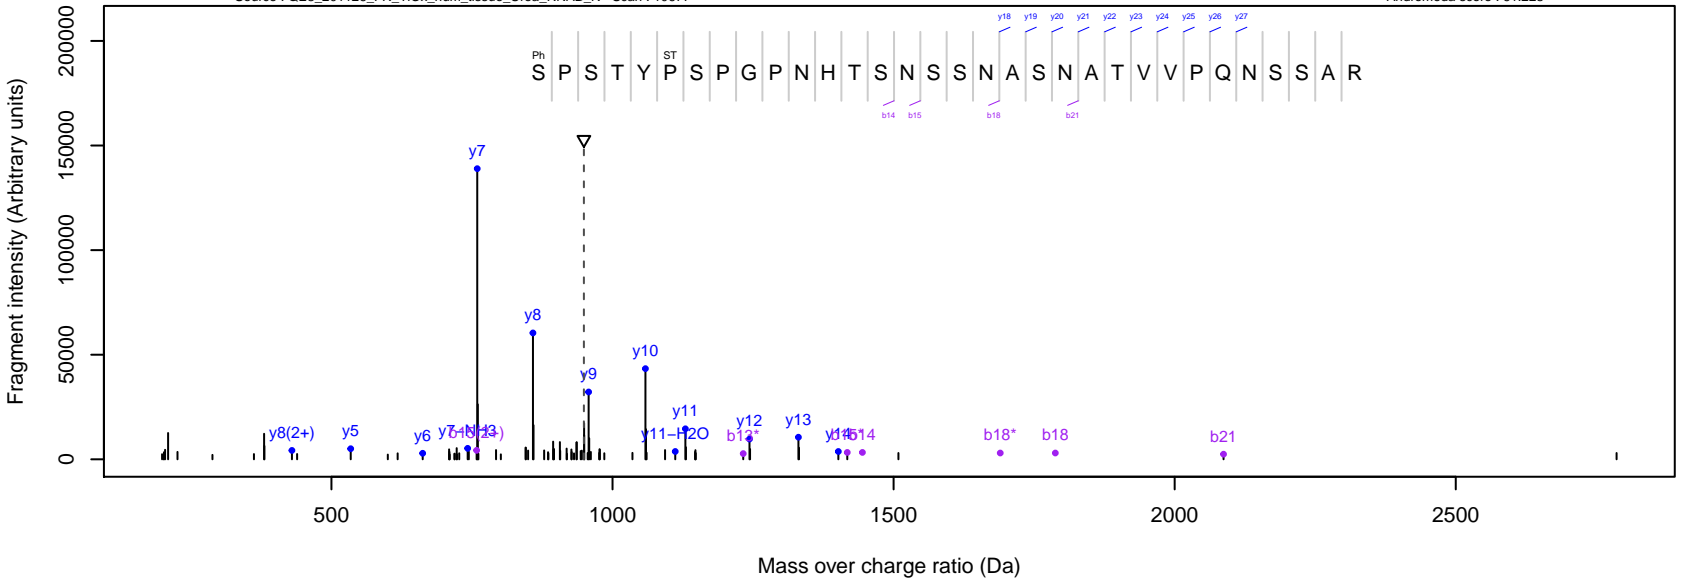

GALHT(Phospho (STY))VSHEDIRDIR-4+

Source : QE3\_201126\_FR\_TiOx\_hum\_tissue\_Urea\_RNAB\_H Scan : 14032

Andromeda score : 61.226

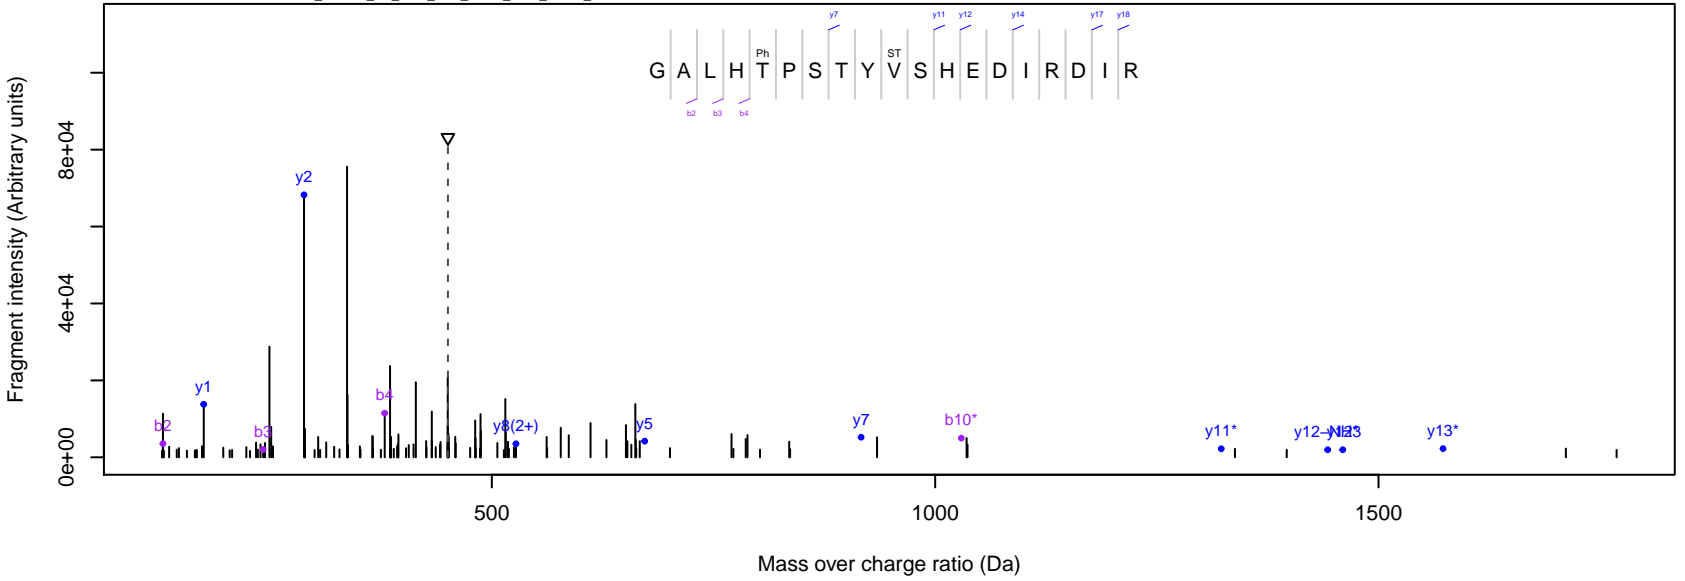

AS(Phospho (STY))PPPQGPLPGPPGALHR-3+

Source : QE3\_201126\_FR\_TiOx\_hum\_tissue\_Urea\_RNAB\_H Scan : 24416

Andromeda score : 61.222

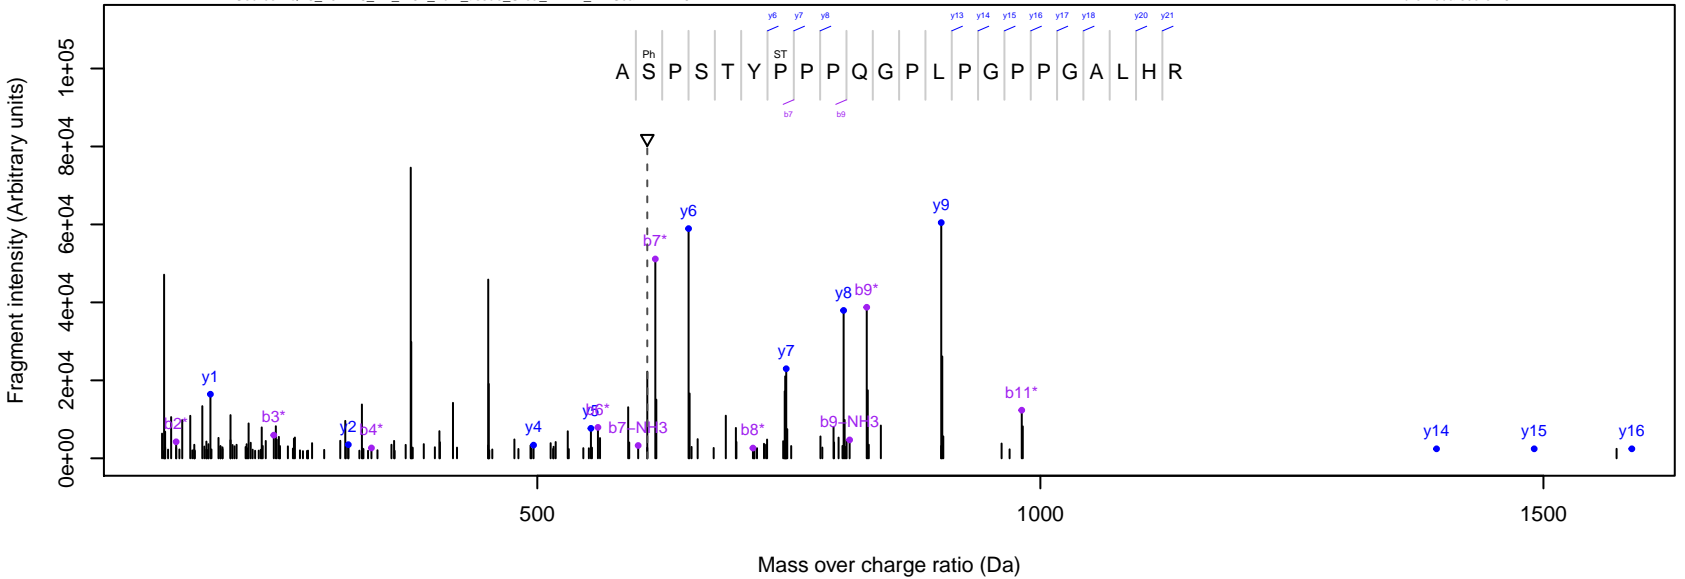

YGS(Phospho (STY))IVDDER-2+

Source : QE3\_201126\_FR\_TIOx\_hum\_tissue\_Urea\_RNAB\_N Scan : 18010

Andromeda score : 61.213

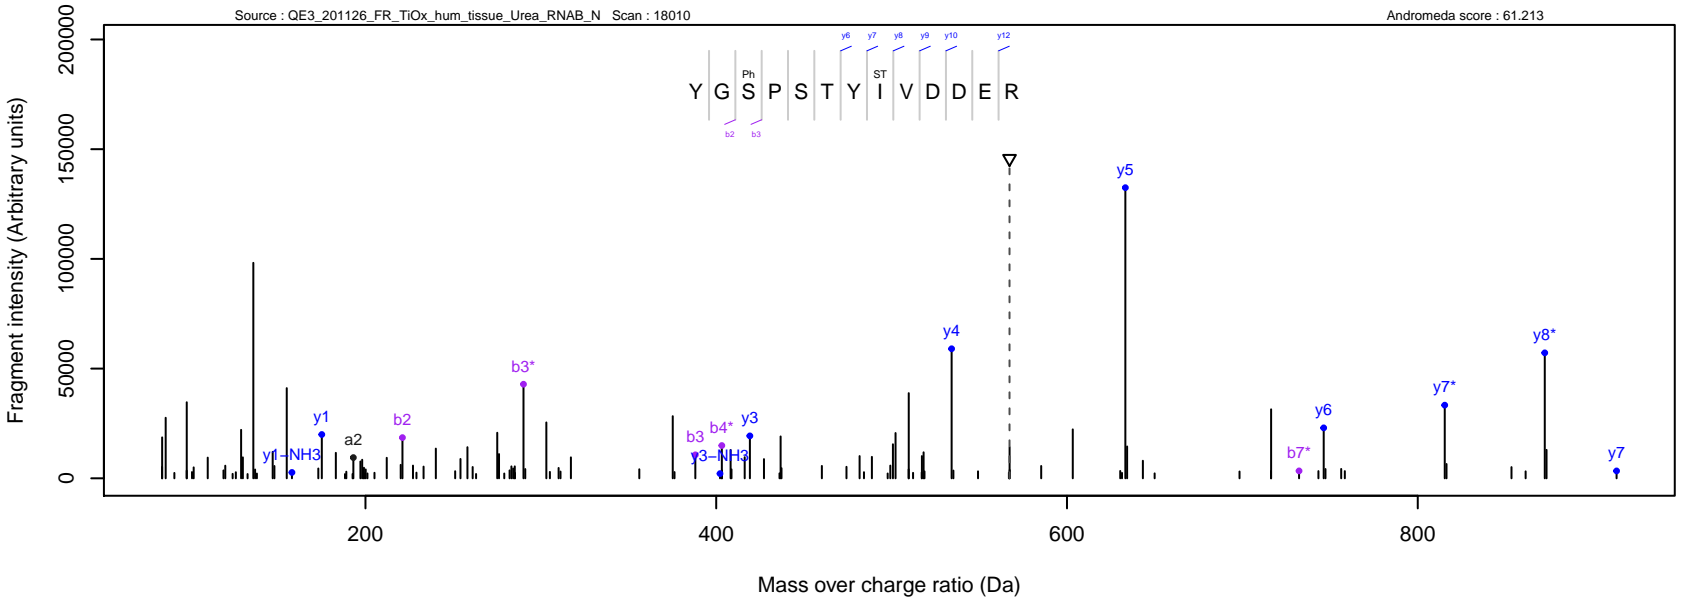

QKS(Phospho (STY))LDS(Phospho (STY))DLS(Phospho (STY))DGPVTVQEFMEVK-3+

Source : QE3\_201126\_FR\_TIOx\_hum\_tissue\_Urea\_RNAB\_N Scan : 61754

Andromeda score : 61.181

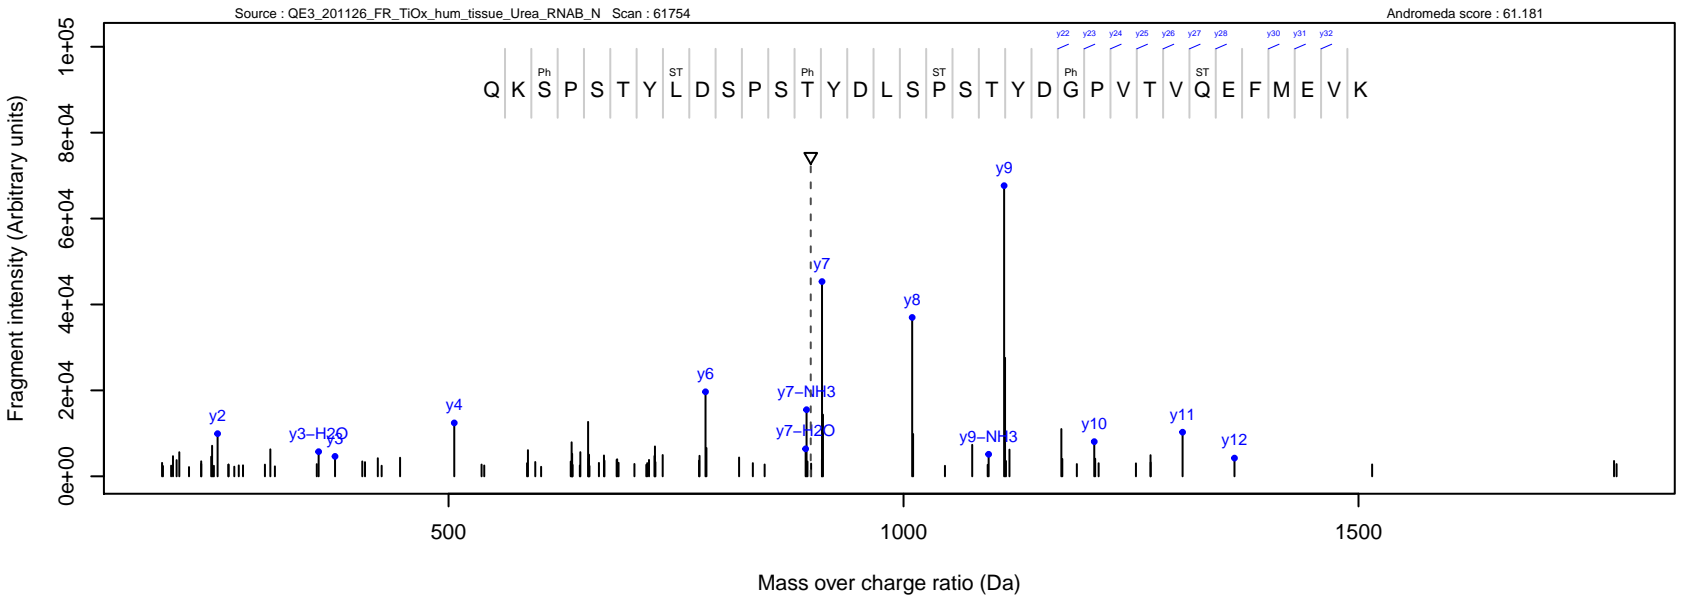

QSS(Phospho (STY))SFRLQEALEAER-3+

Source : QE3\_201126\_FR\_TIOx\_hum\_tissue\_Urea\_RNAB\_N Scan : 50134

Andromeda score : 61.181

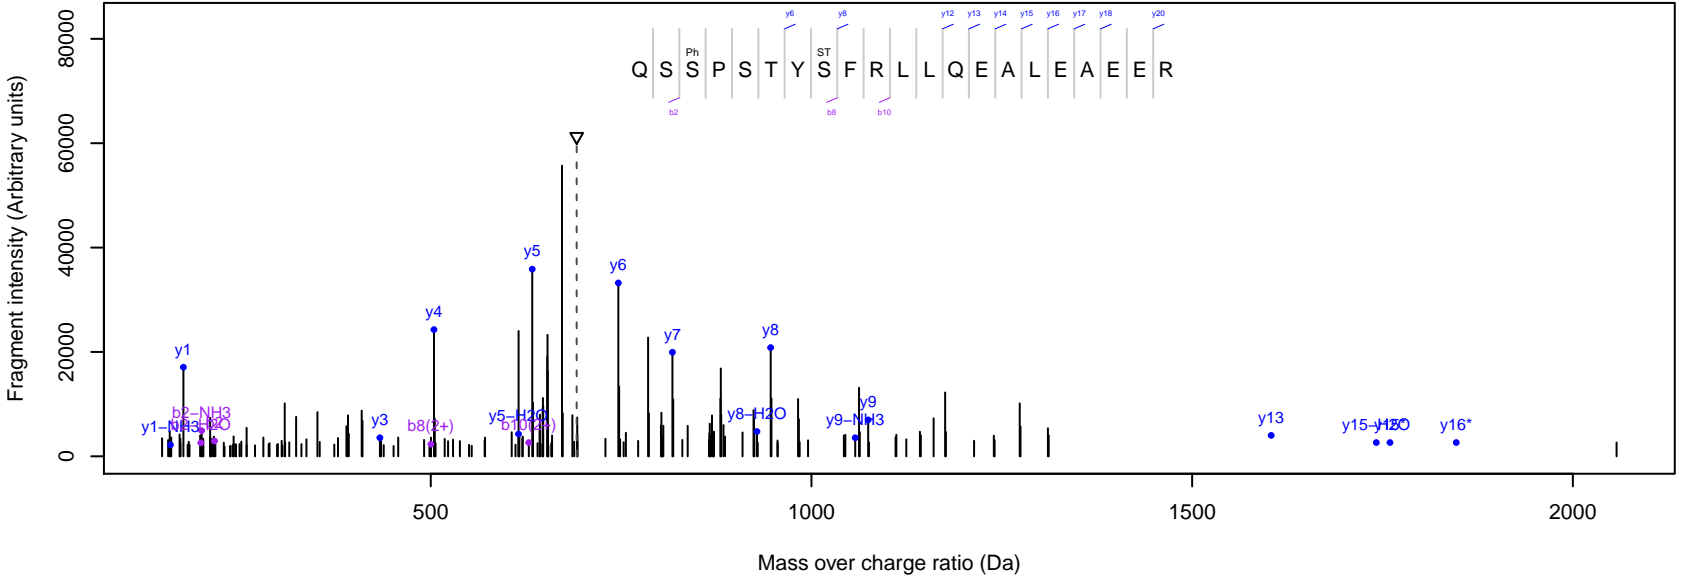

HSENET(Phospho (STY))SDREDGLPK-3+

Source : QE3\_201126\_FR\_TiOx\_hum\_tissue\_Urea\_RNAB\_H Scan : 6833

Andromeda score : 61.167

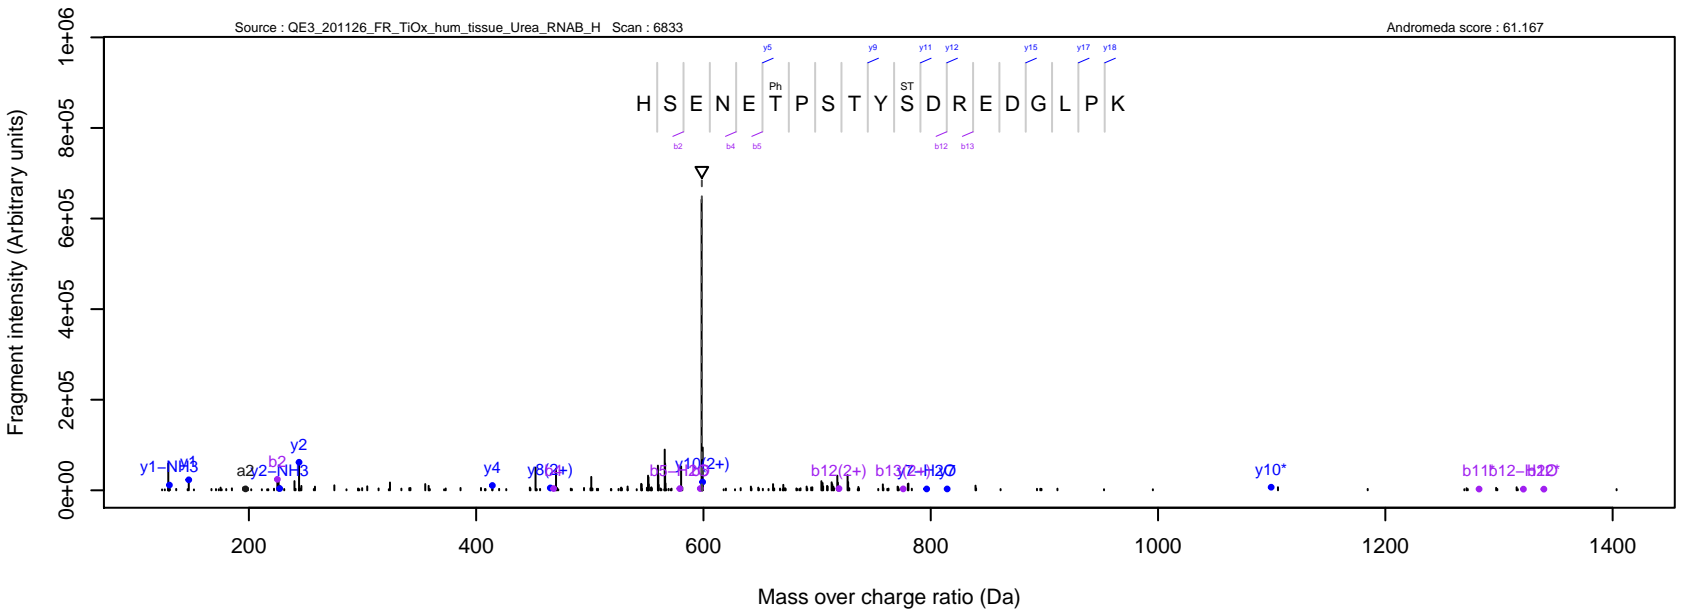

KRS(Phospho (STY))WGHE(SPhospho (STY))PEER-3+

Source : QE3\_201126\_FR\_TiOx\_hum\_tissue\_Urea\_RNAB\_H Scan : 5984

Andromeda score : 61.167

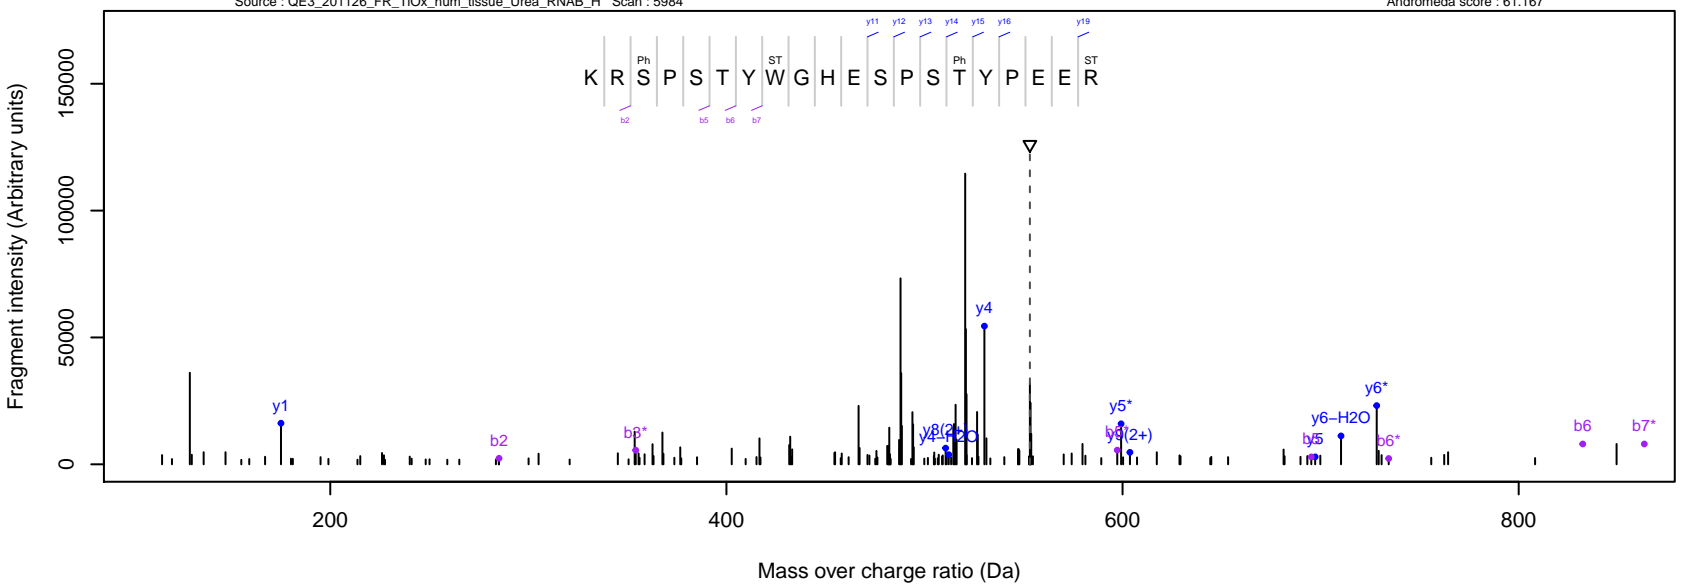

VEAPSLDVHMDS(Phospho (STY))PDINIEGPDVK-3+

Source : QE3\_201126\_FR\_TiOx\_hum\_tissue\_Urea\_RNAB\_H Scan : 43786

Andromeda score : 61.136

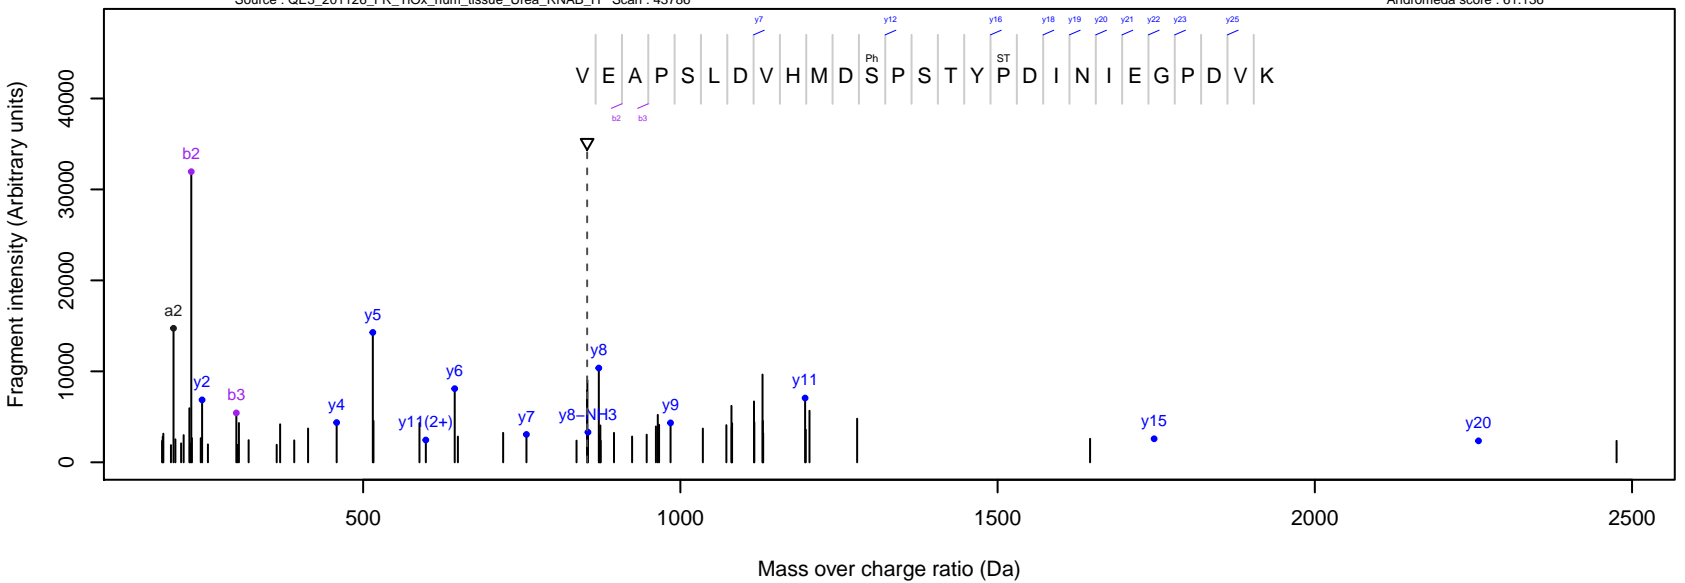

ATLSSTSGLDLMSESGEGEIS(Phospho (STY))PQR-3+

Source : QE3\_201126\_FR\_TiOx\_hum\_tissue\_Urea\_RNAB\_N Scan : 43561

Andromeda score : 61.112

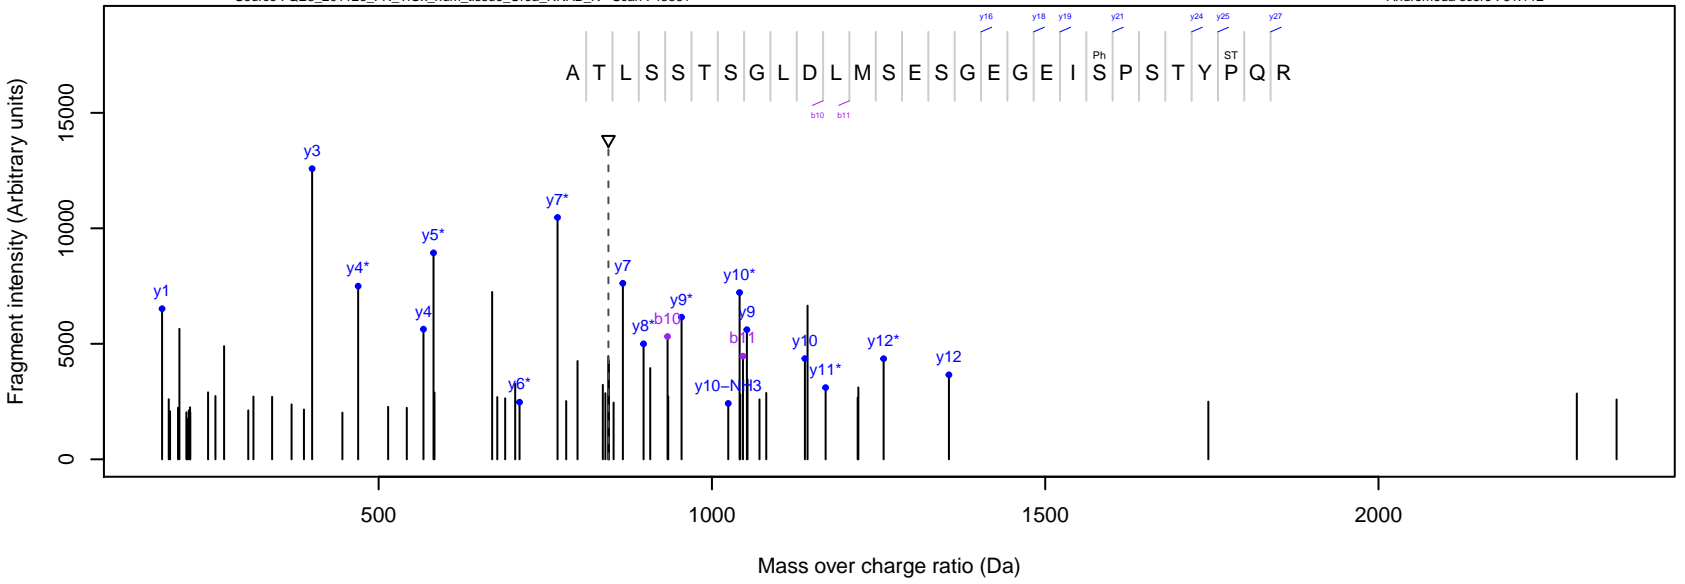

LRGEDDY(Phospho (STY))NMDENEAESETDKQAALAGNDR-3+

Source : QE3\_201126\_FR\_TiOx\_hum\_tissue\_Urea\_RNAB\_N Scan : 22542

Andromeda score : 61.112

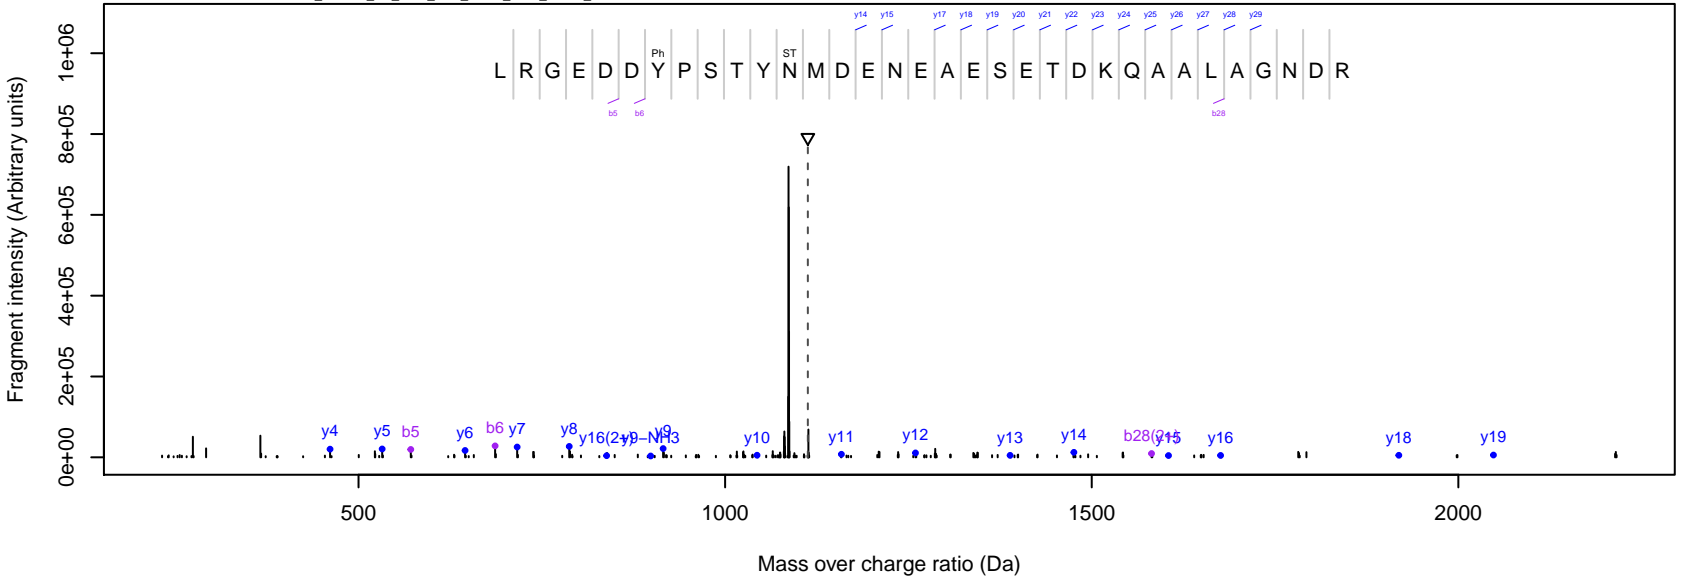

GSS(Phospho (STY))FQSGRDDTWR-2+

Source : QE3\_201126\_FR\_TiOx\_hum\_tissue\_Urea\_RNAB\_B Scan : 15200

Andromeda score : 61.111

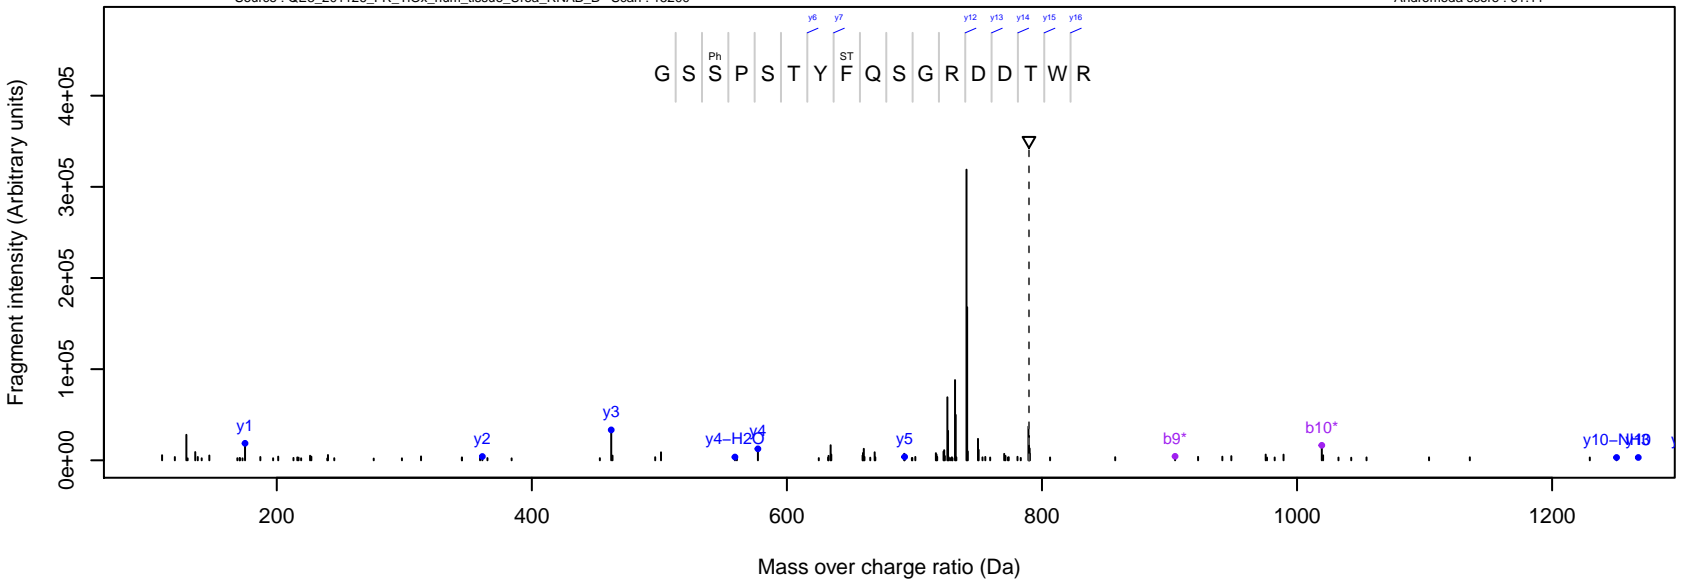

EGES(Phospho (STY))LEDLM(Oxidation (M))KLSPEELLR-3+

Source : QE3\_201126\_FR\_TiOx\_hum\_tissue\_Urea\_RNAB\_B Scan : 56675

Andromeda score : 61.102

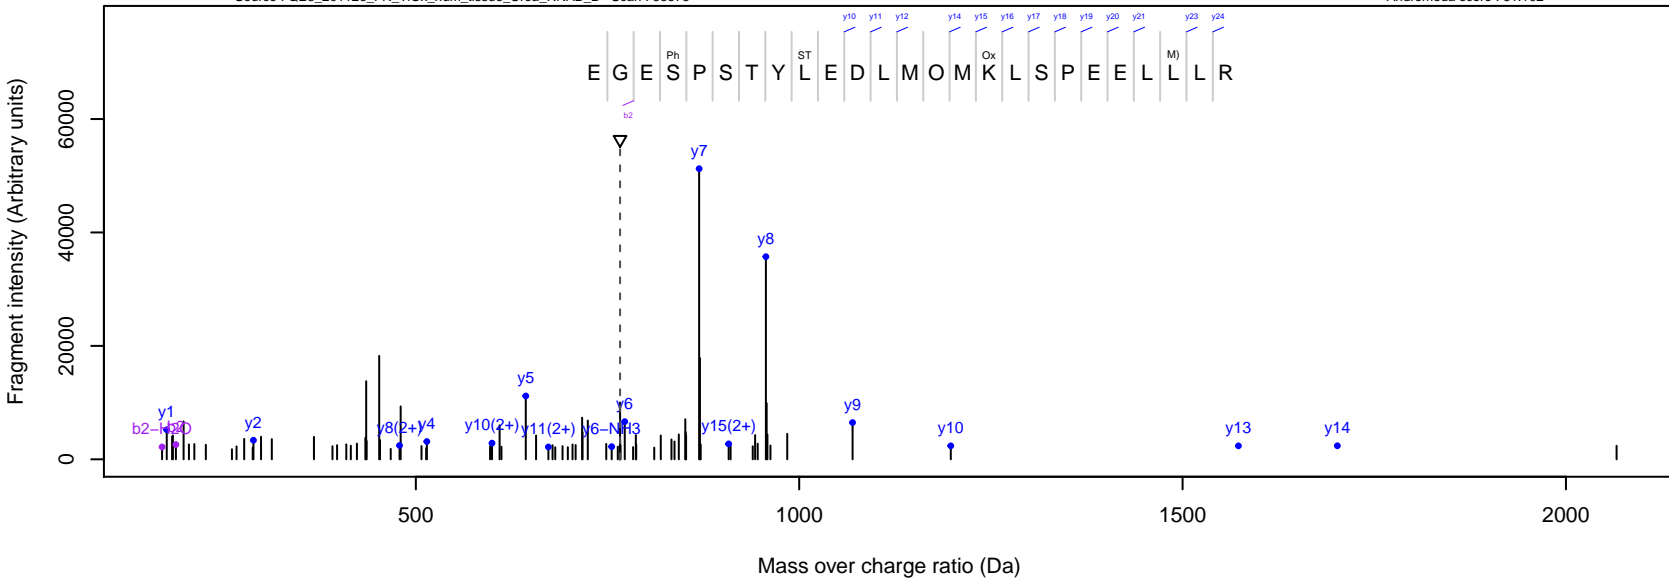

ERHPS(Phospho (STY))WRSEETQER-3+

Source : QE3\_201126\_FR\_TiOx\_hum\_tissue\_Urea\_RNAB\_H Scan : 7049

Andromeda score : 61.102

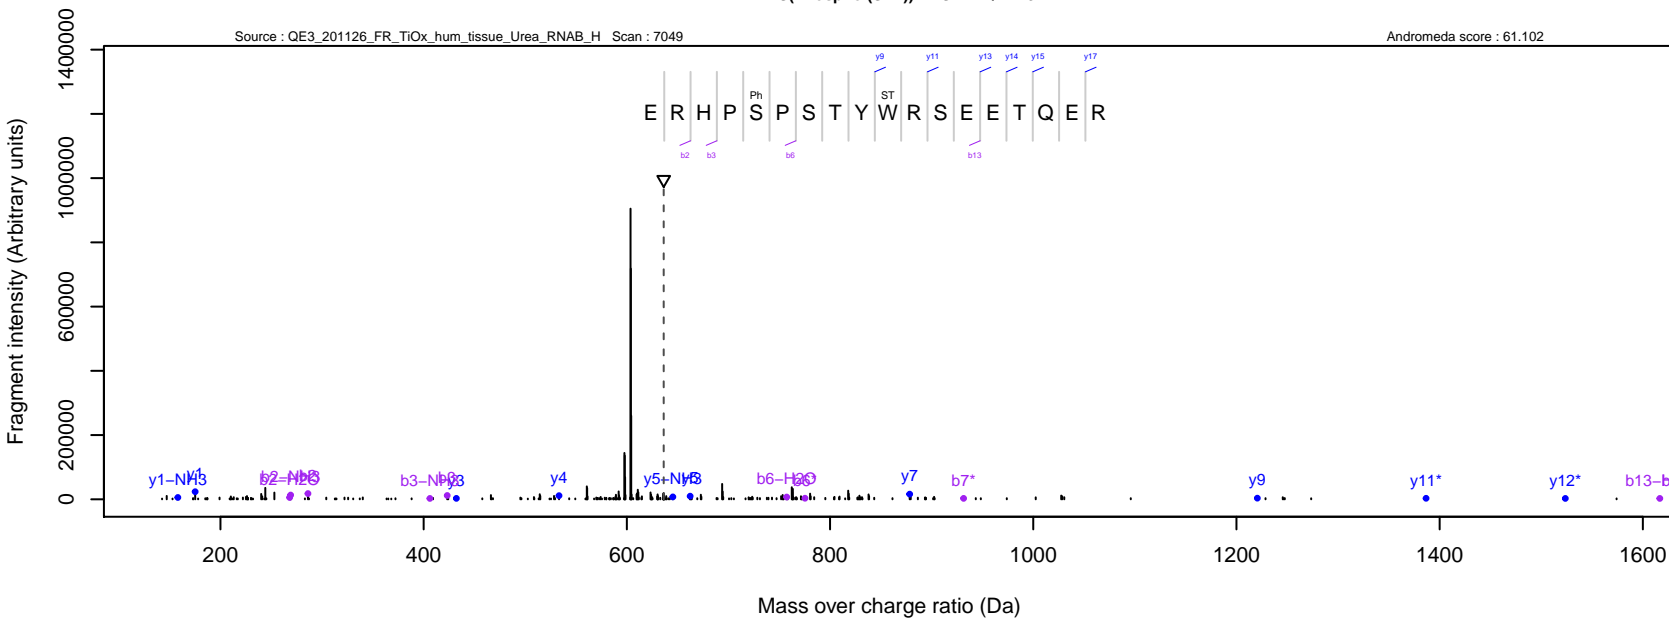

SLS(Phospho (STY))APLHPEFEEVYR-3+

Source : QE3\_201126\_FR\_TiOx\_hum\_tissue\_Urea\_RNAB\_H Scan : 39539

Andromeda score : 61.102

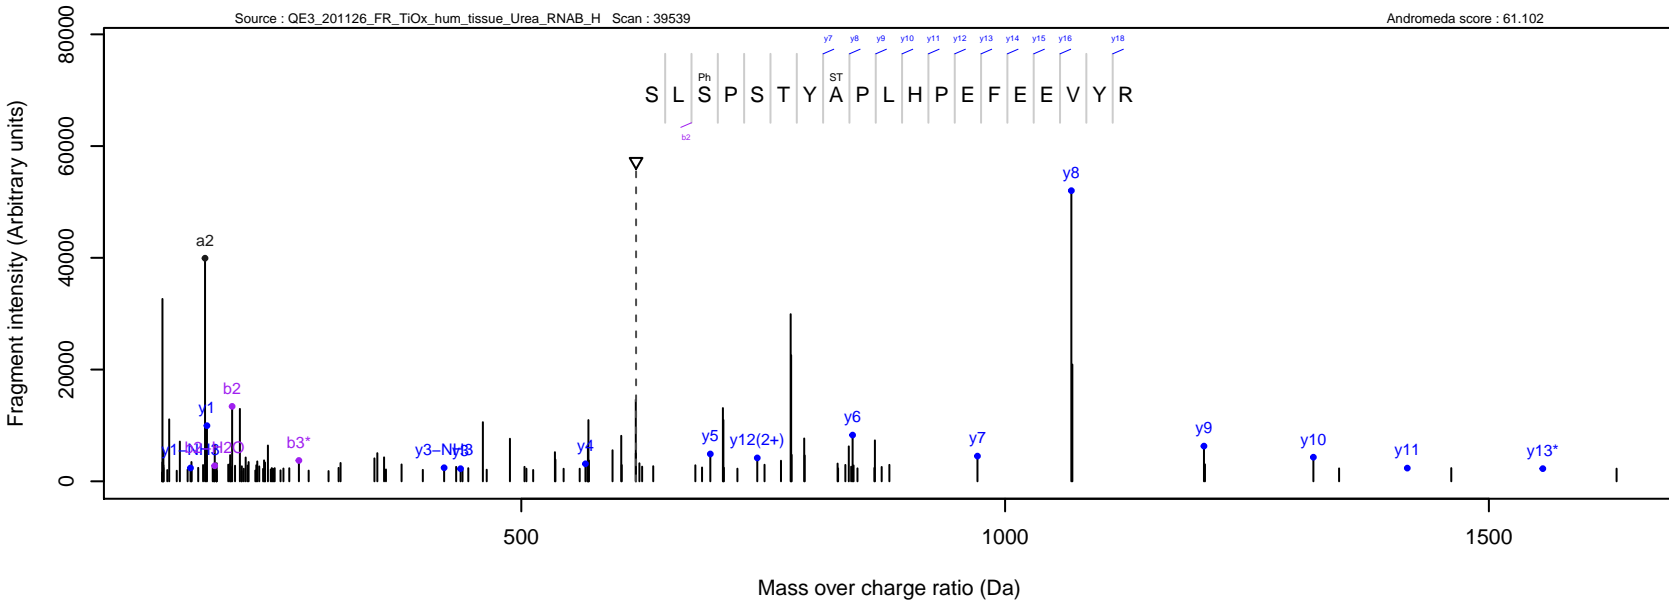

QQPPLGPS(Phospho (STY))S(Phospho (STY))SLLSLPGLK-2+

Source : QE3\_201126\_FR\_TIOx\_hum\_tissue\_Urea\_RNAB\_B Scan : 61781

Andromeda score : 61.097

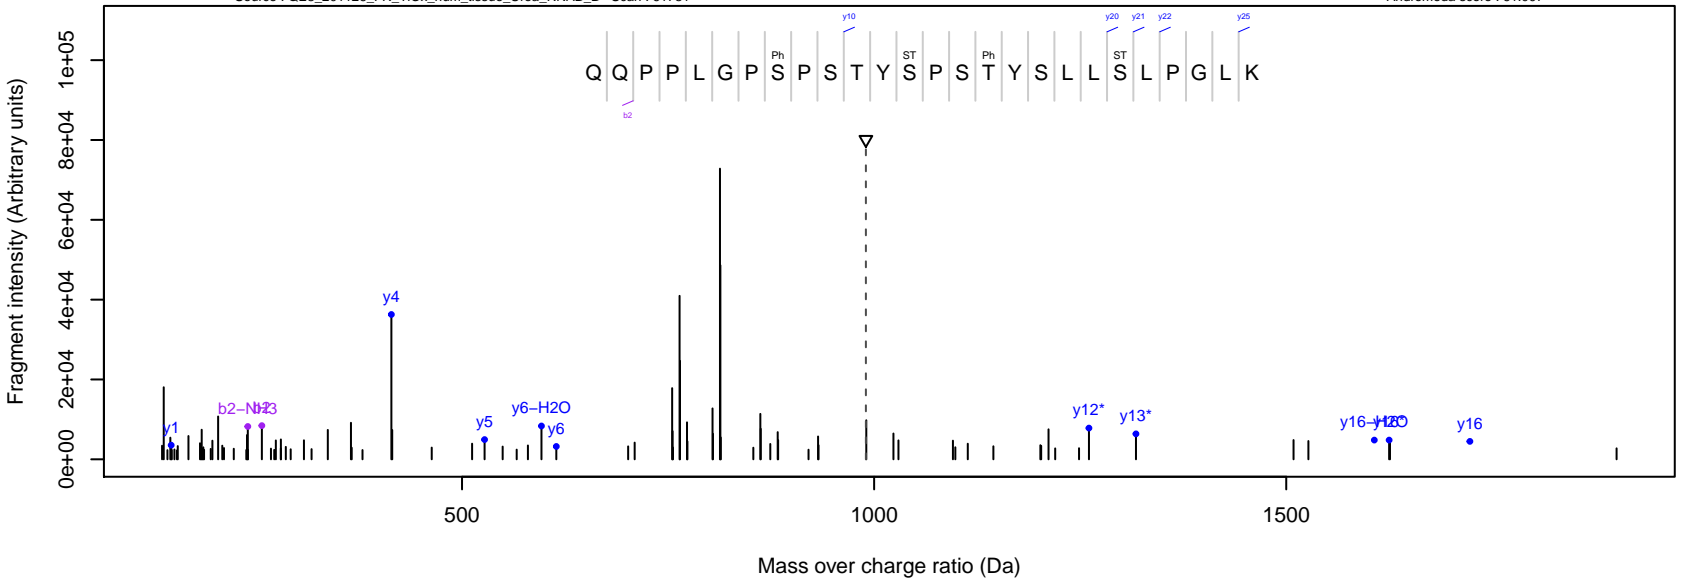

LHS(Phospho (STY))APNLSDLHVVRPK-4+

Source : QE3\_201126\_FR\_TIOx\_hum\_tissue\_Urea\_RNAB\_N Scan : 20749

Andromeda score : 61.096

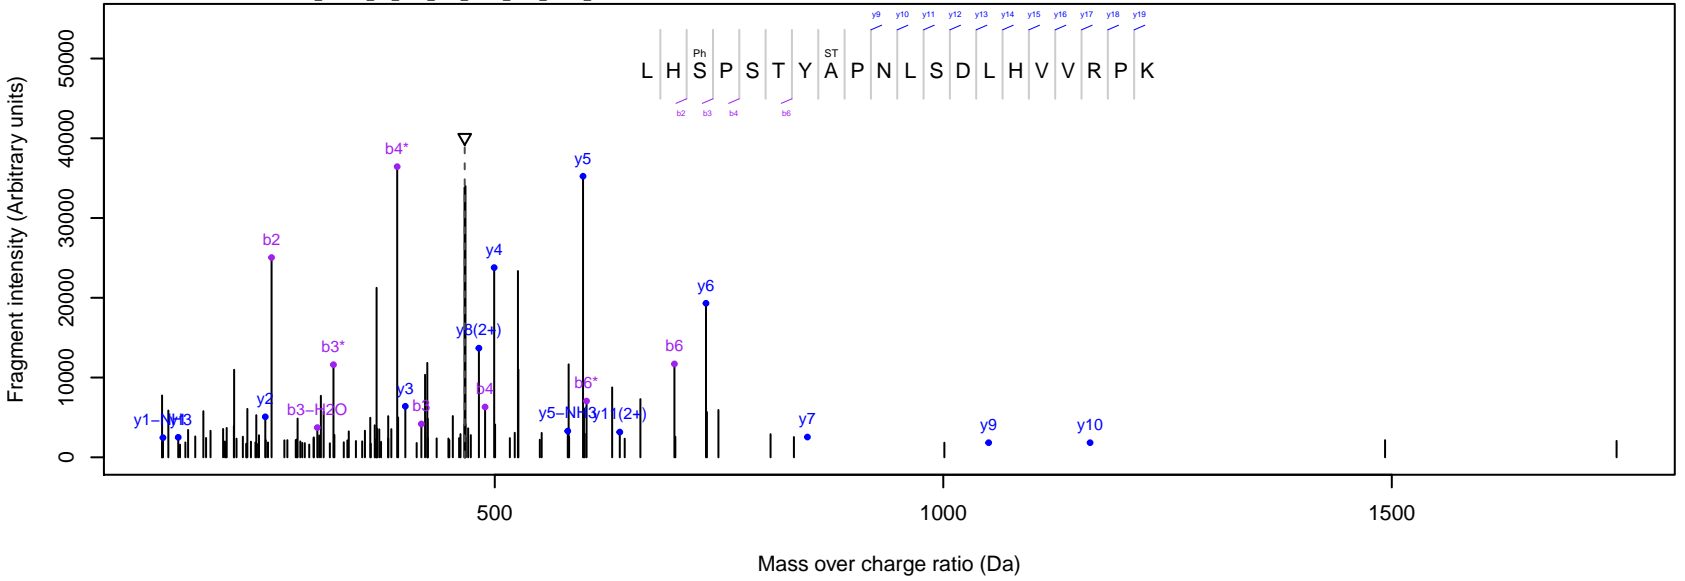

RS(Phospho (STY))PTDSDVSLDSEDSGAK-2+

Source : QE3\_201126\_FR\_TIOx\_hum\_tissue\_Urea\_RNAB\_B Scan : 12801

Andromeda score : 61.096

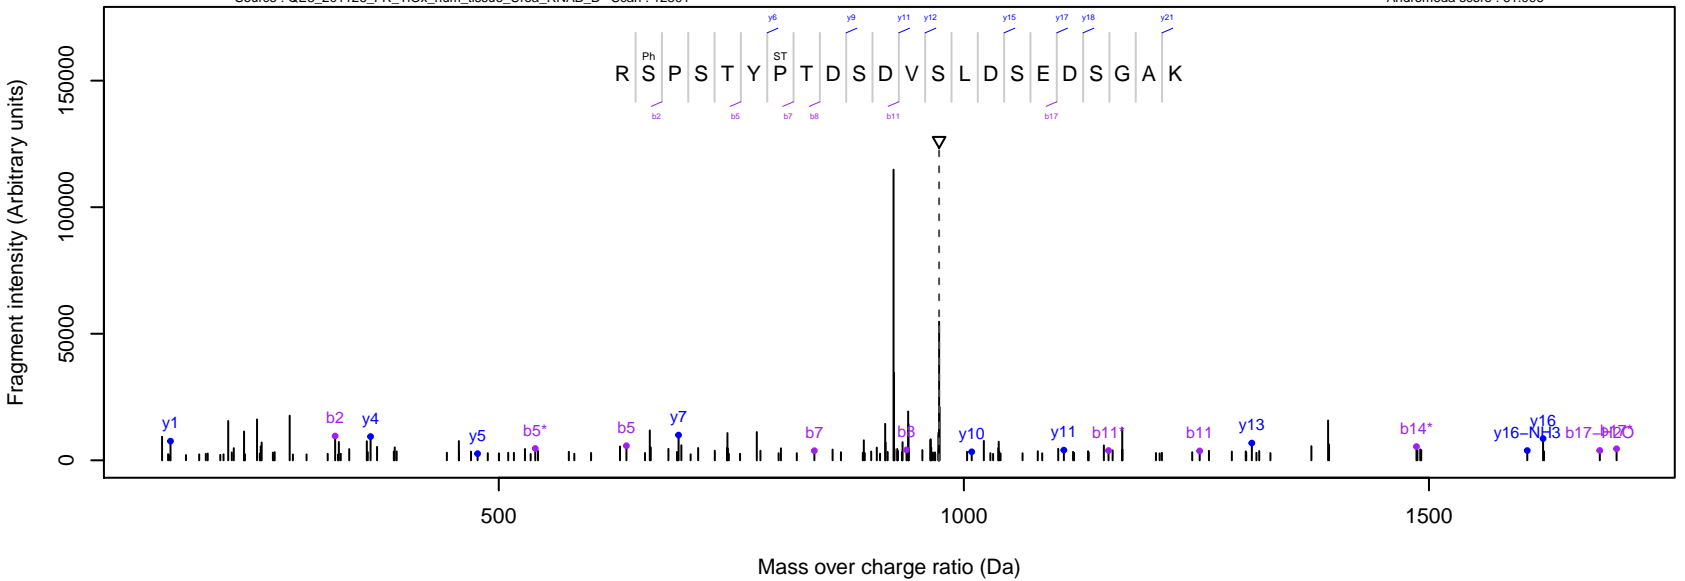

**RYASGS(Phospho (STY))SAS(Phospho (STY))LGGPESAVA-2+**

Source : QE3\_201126\_FR\_TiOx\_hum\_tissue\_Urea\_RNAB\_N Scan : 29690

Andromeda score : 61.096

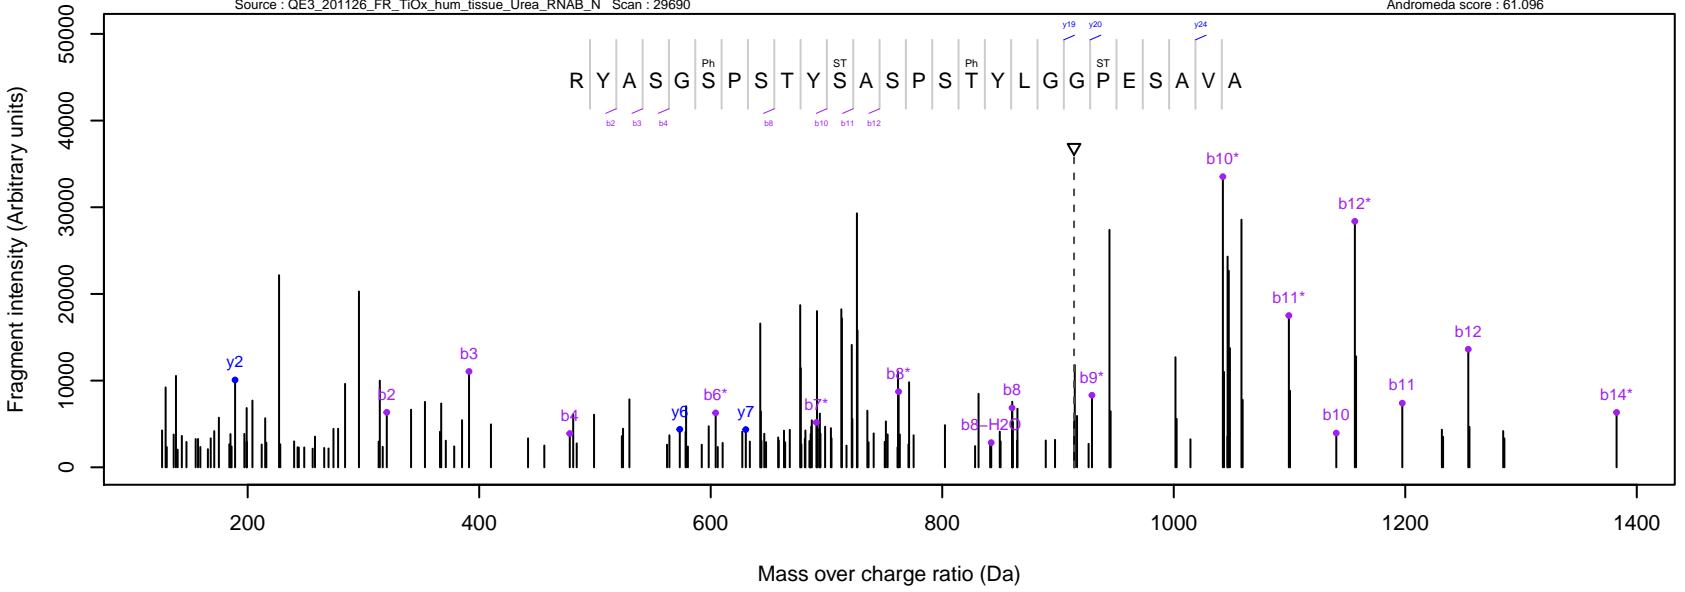

**FKIDSNIS(Phospho (STY))PK-2+**

Source : QE3\_201126\_FR\_TiOx\_hum\_tissue\_Urea\_RNAB\_H Scan : 19108

Andromeda score : 61.03

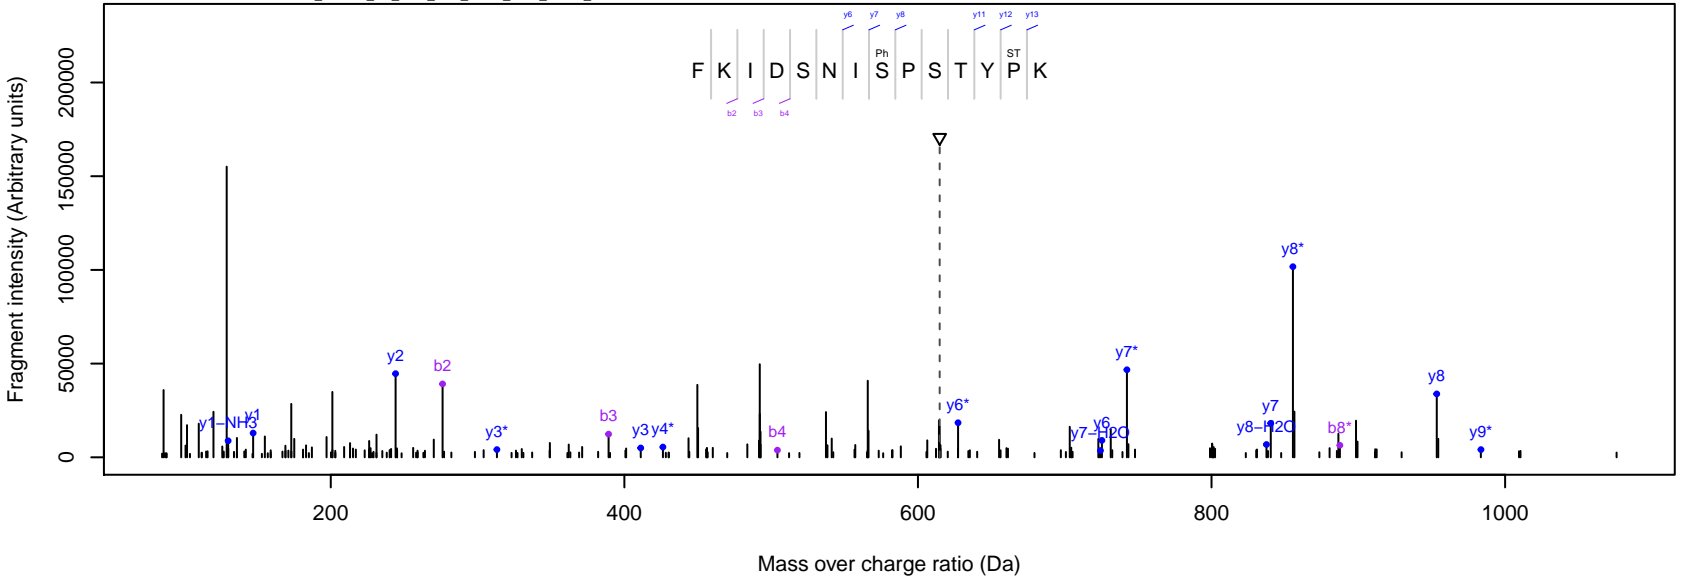

**KYPDShLPTLGSKT(Phospho (STY))PPAS(Phospho (STY))PHR-4+**

Source : QE3\_201126\_FR\_TiOx\_hum\_tissue\_Urea\_RNAB\_N Scan : 15664

Andromeda score : 61.03

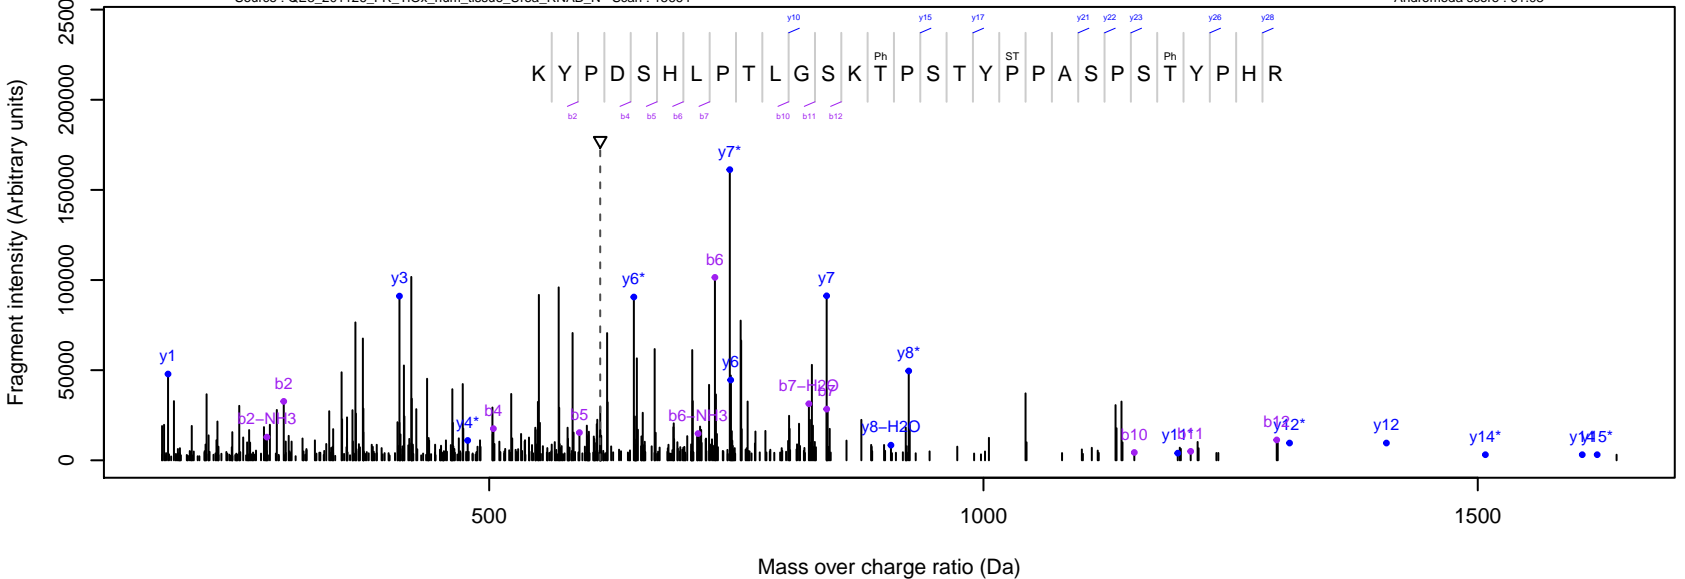







SRS(Phospho (STY))SDIVSSVR-2+

Source : QE3\_201126\_FR\_TiOx\_hum\_tissue\_Urea\_RNAB\_N Scan : 11829

Andromeda score : 60.968

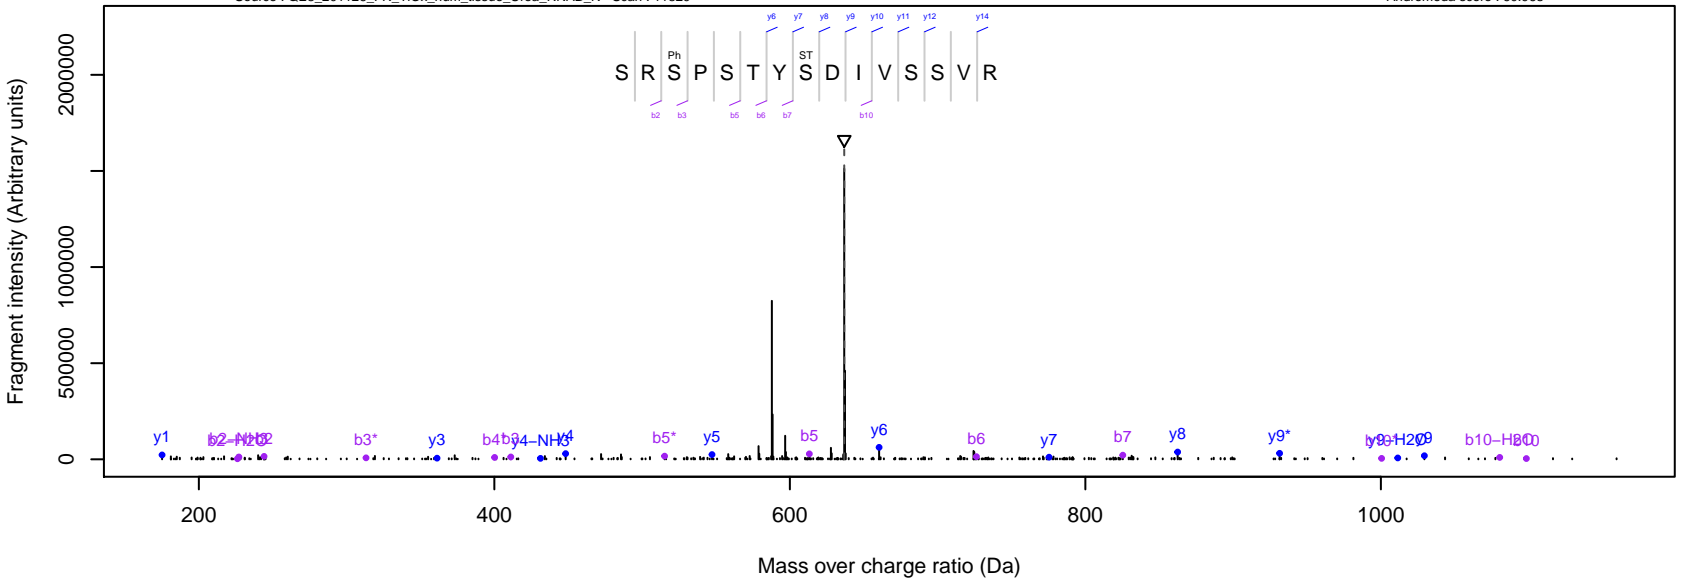

MAPPPKEVEEEDSEDEEMSEDEEDD(Phospho (STY))SGEEVIPQKK-4+

Source : QE3\_201126\_FR\_TiOx\_hum\_tissue\_Urea\_RNAB\_H Scan : 26056

Andromeda score : 60.959

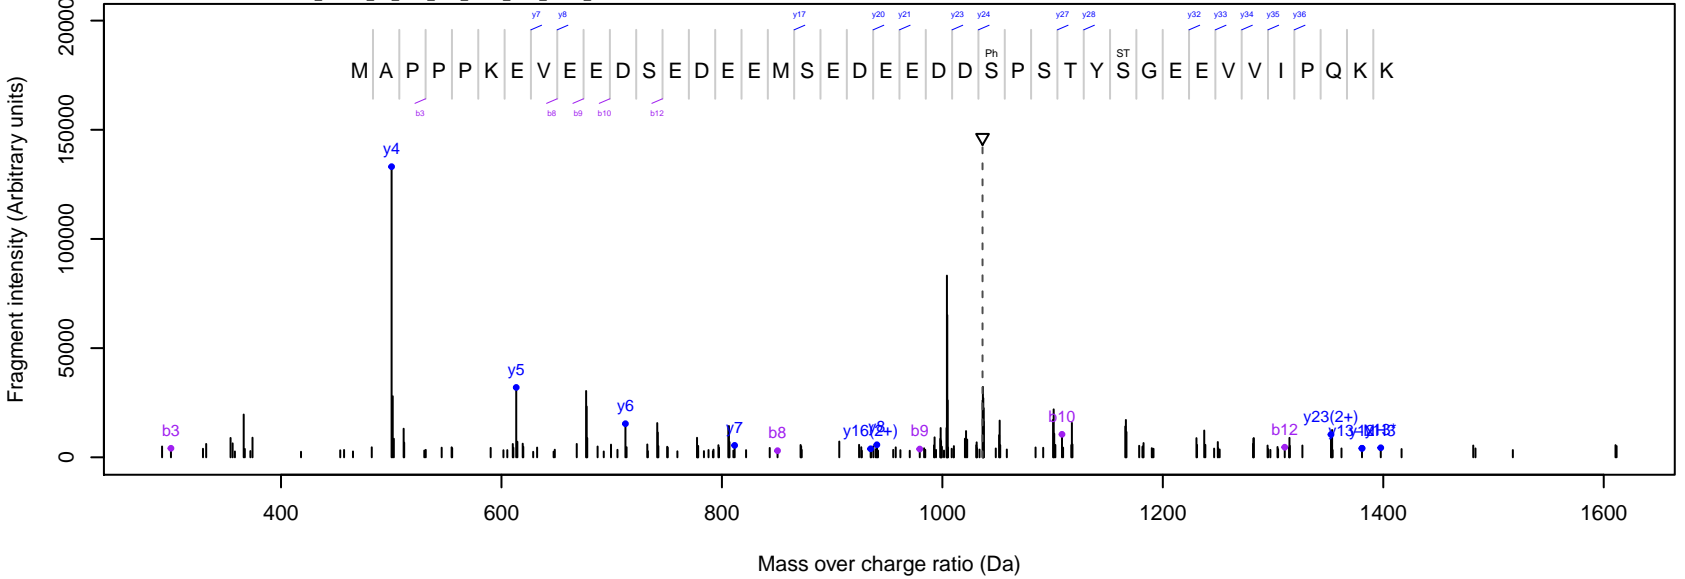

SSSS(Phospho (STY))QPVT(Phospho (STY))PVS(Phospho (STY))PVWSPGVAPTQPAPFTSNPSK-3+

Source : QE3\_201126\_FR\_TiOx\_hum\_tissue\_Urea\_RNAB\_B Scan : 62425

Andromeda score : 60.959

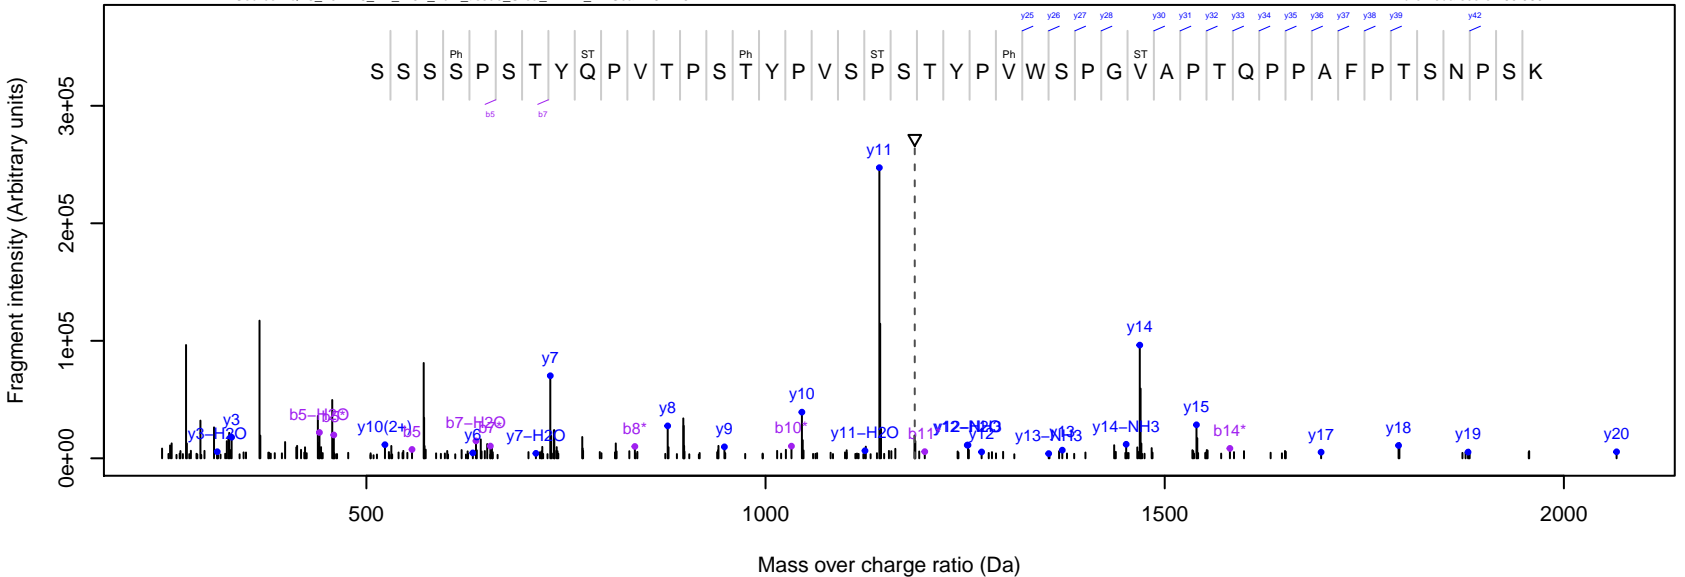



LGS(Phospho (STY))VSLDLCDGDTGEPR-2+

Source : QE3\_201126\_FR\_TiOx\_hum\_tissue\_Urea\_RNAB\_N Scan : 39747

Andromeda score : 60.918

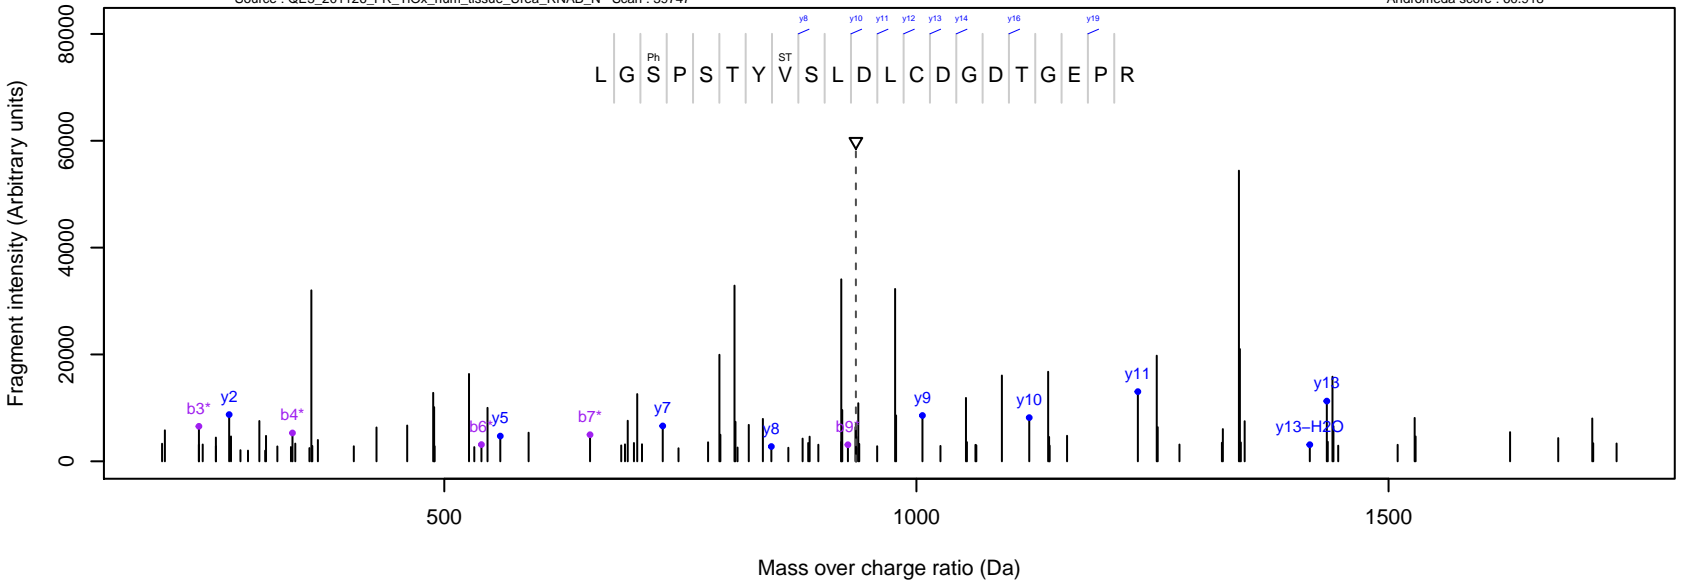

RAPS(Phospho (STY))PVKPSALER-3+

Source : QE3\_201126\_FR\_TiOx\_hum\_tissue\_Urea\_RNAB\_B Scan : 9199

Andromeda score : 60.918

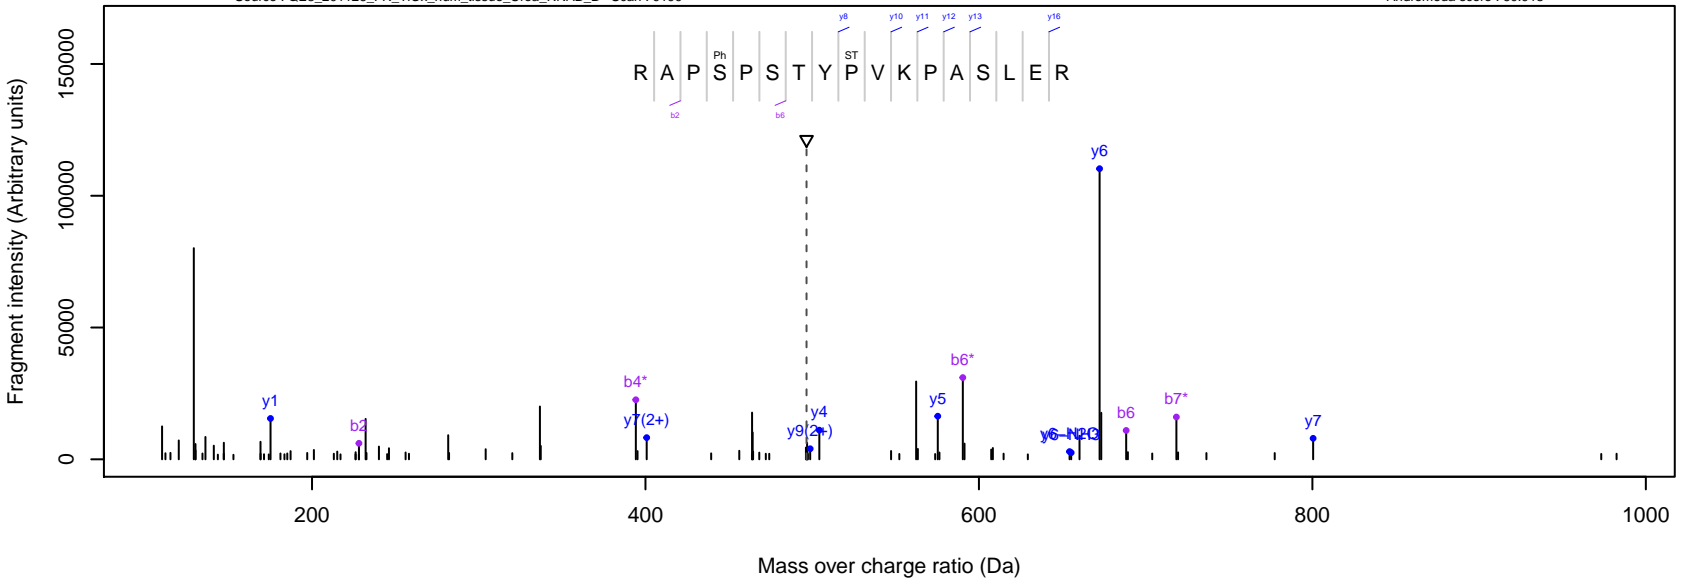

T(Phospho (STY))PPVVIK-2+

Source : QE3\_201126\_FR\_TiOx\_hum\_tissue\_Urea\_RNAB\_H Scan : 16888

Andromeda score : 60.91

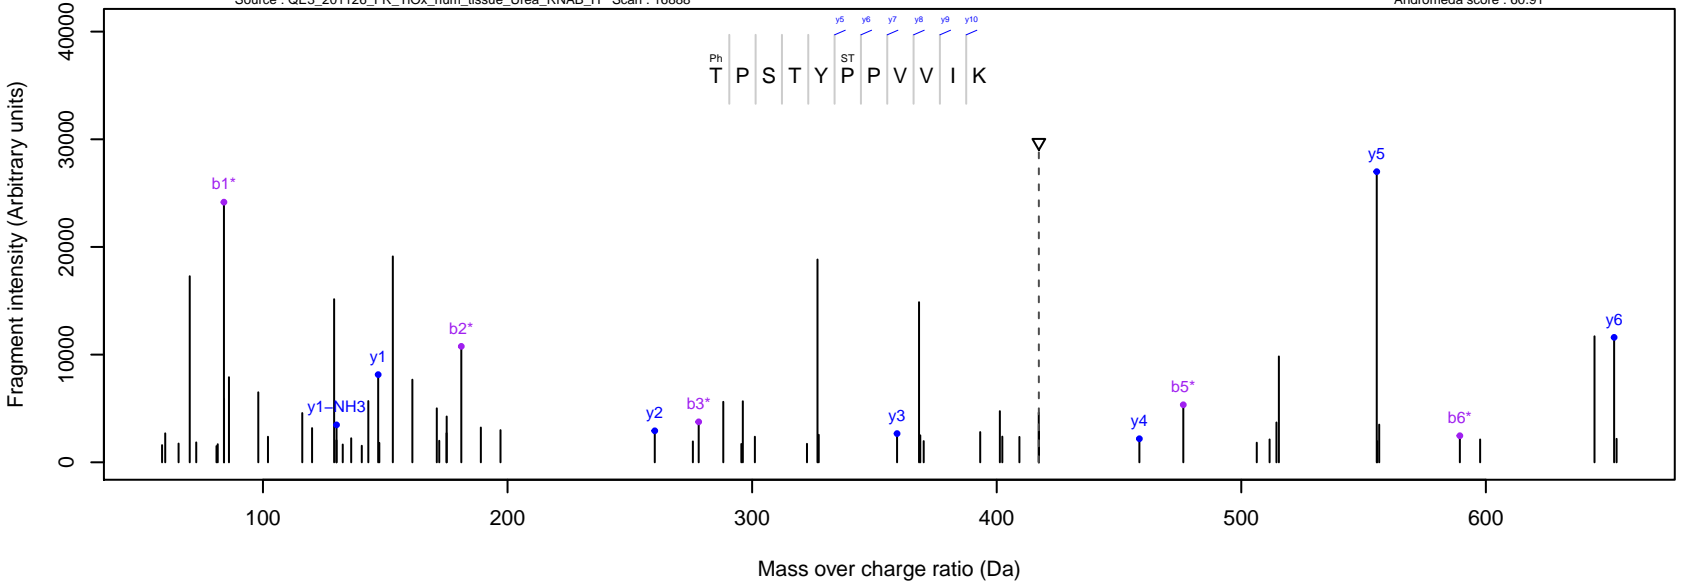

SKS(Phospho (STY))EMSYIDGK-2+

Source : QE3\_201126\_FR\_TiOx\_hum\_tissue\_Urea\_RNAB\_H Scan : 15239

Andromeda score : 60.901

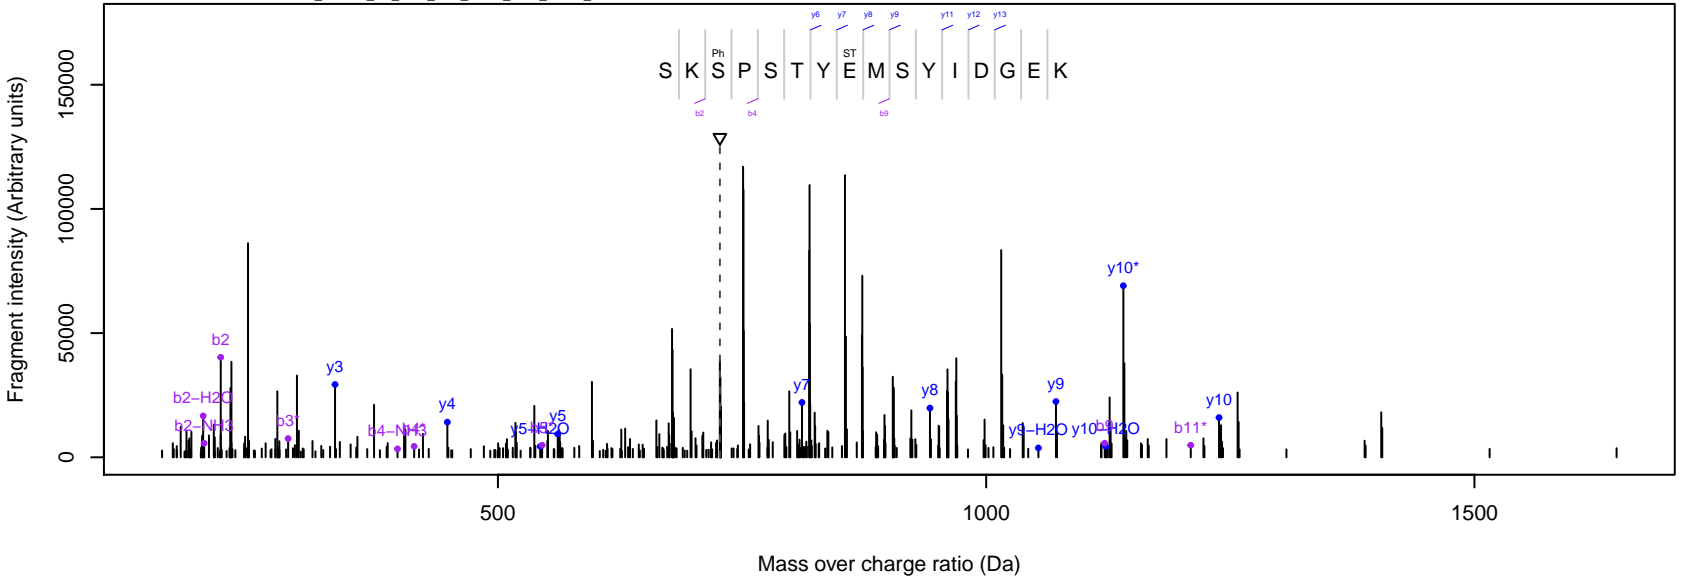

KQS(Phospho (STY))FVLK-2+

Source : QE3\_201126\_FR\_TiOx\_hum\_tissue\_Urea\_RNAB\_B Scan : 11491

Andromeda score : 60.828

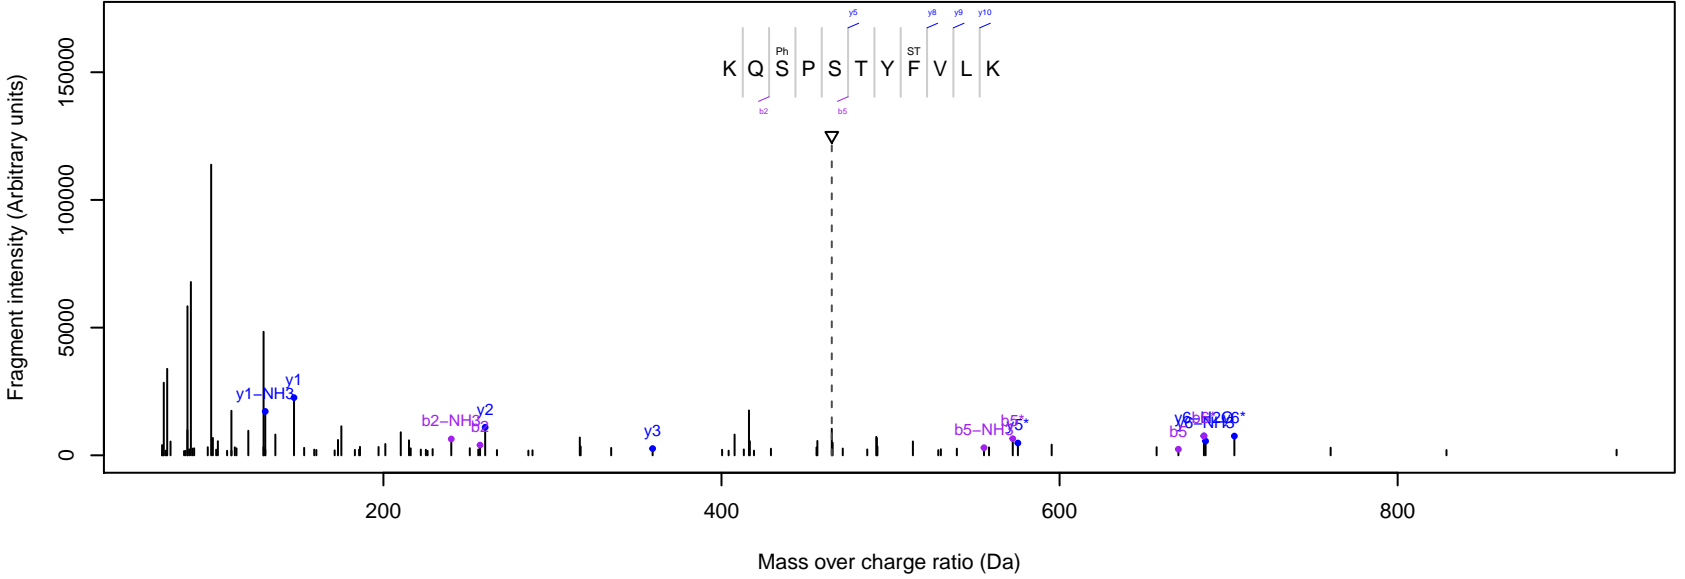

SATSSASRPHVLS(Phospho (STY))HKESLVY-3+

Source : QE3\_201126\_FR\_TiOx\_hum\_tissue\_Urea\_RNAB\_N Scan : 16232

Andromeda score : 60.814

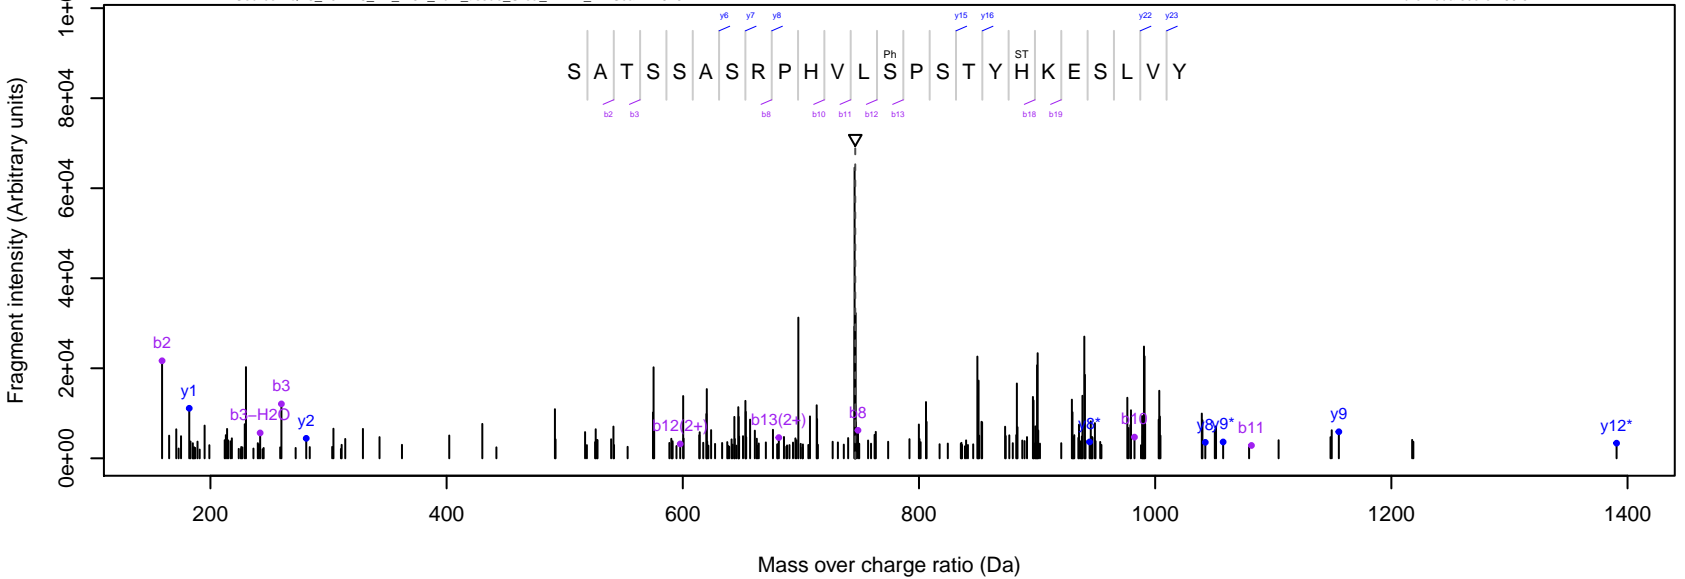

LKPFEGM(Oxidation (M))SQSSS(Phospho (STY))QTEIGSLNSK-3+

Source : QE3\_201126\_FR\_TiOx\_hum\_tissue\_Urea\_RNAB\_N Scan : 34838

Andromeda score : 60.79

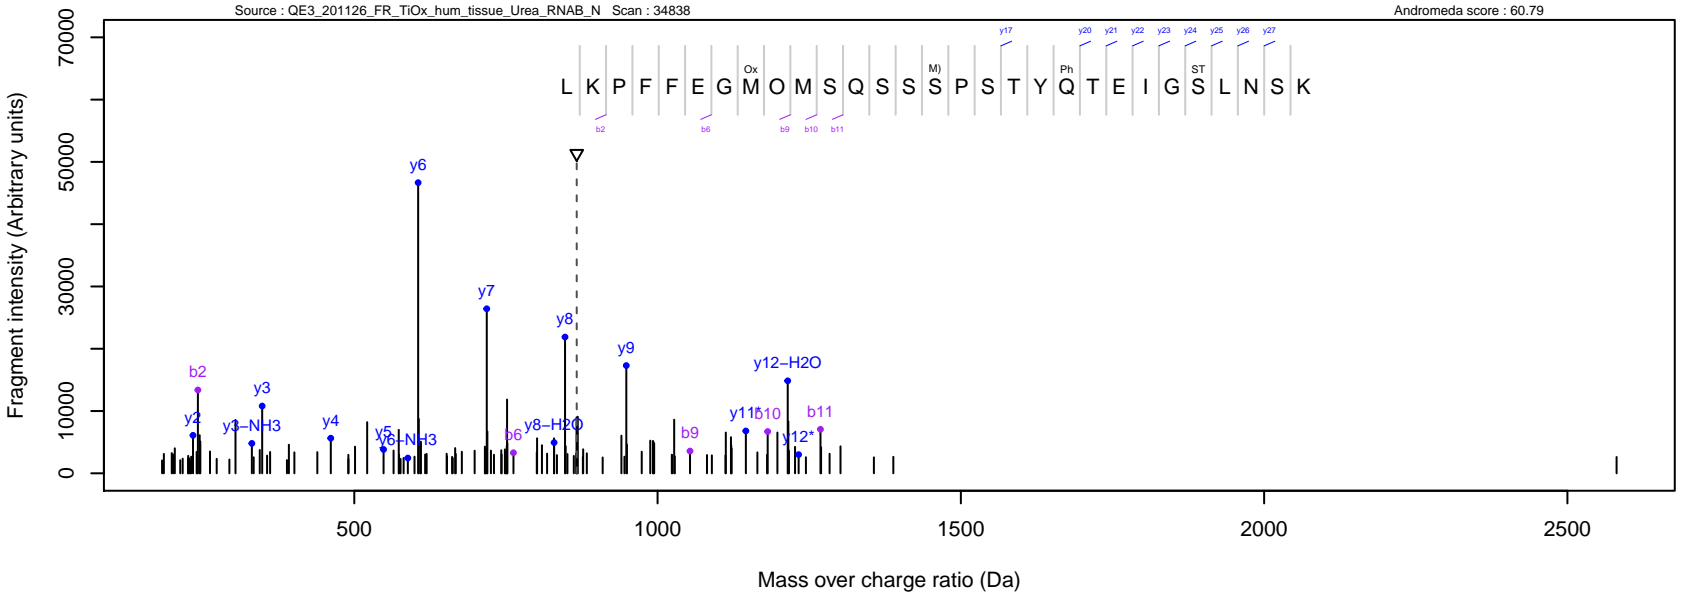

VSVPS(Phospho (STY))NLSYGEWLHGFEK-3+

Source : QE3\_201126\_FR\_TiOx\_hum\_tissue\_Urea\_RNAB\_H Scan : 52066

Andromeda score : 60.768

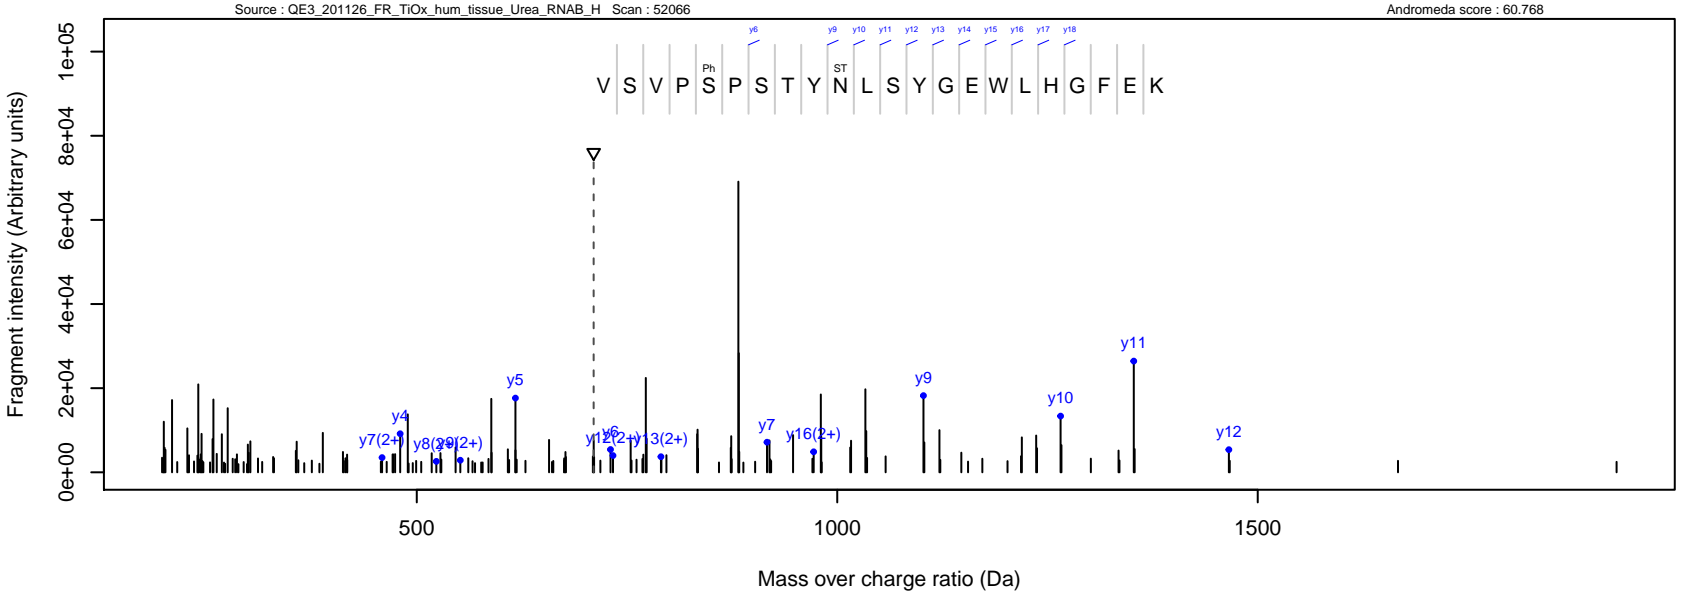

T(Phospho (STY))PASPLSAPPFLSLPSWR-3+

Source : QE3\_201126\_FR\_TiOx\_hum\_tissue\_Urea\_RNAB\_N Scan : 62092

Andromeda score : 60.747

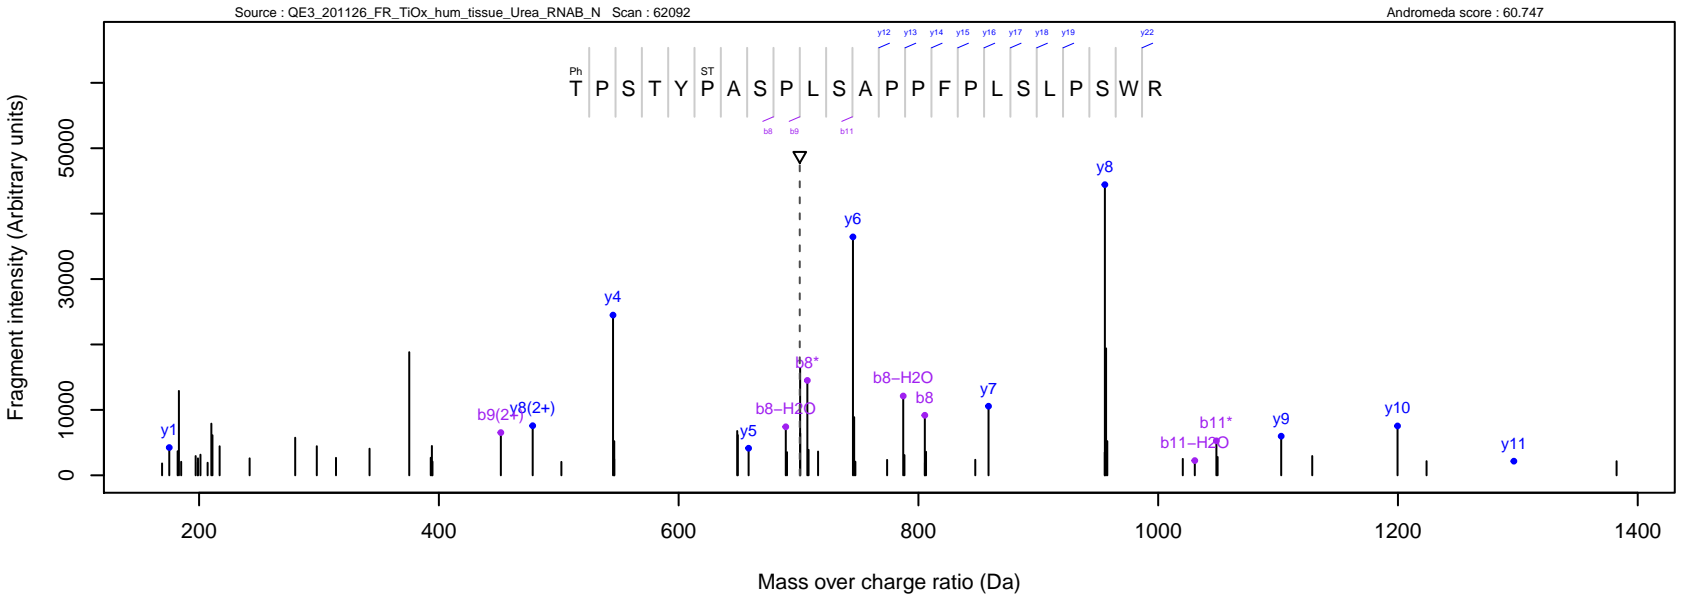

IACDEEFS(Phospho (STY))DS(Phospho (STY))EDEDGEGRR-3+

Source : QE3\_201126\_FR\_TiOx\_hum\_tissue\_Urea\_RNAB\_H Scan : 17704

Andromeda score : 60.735

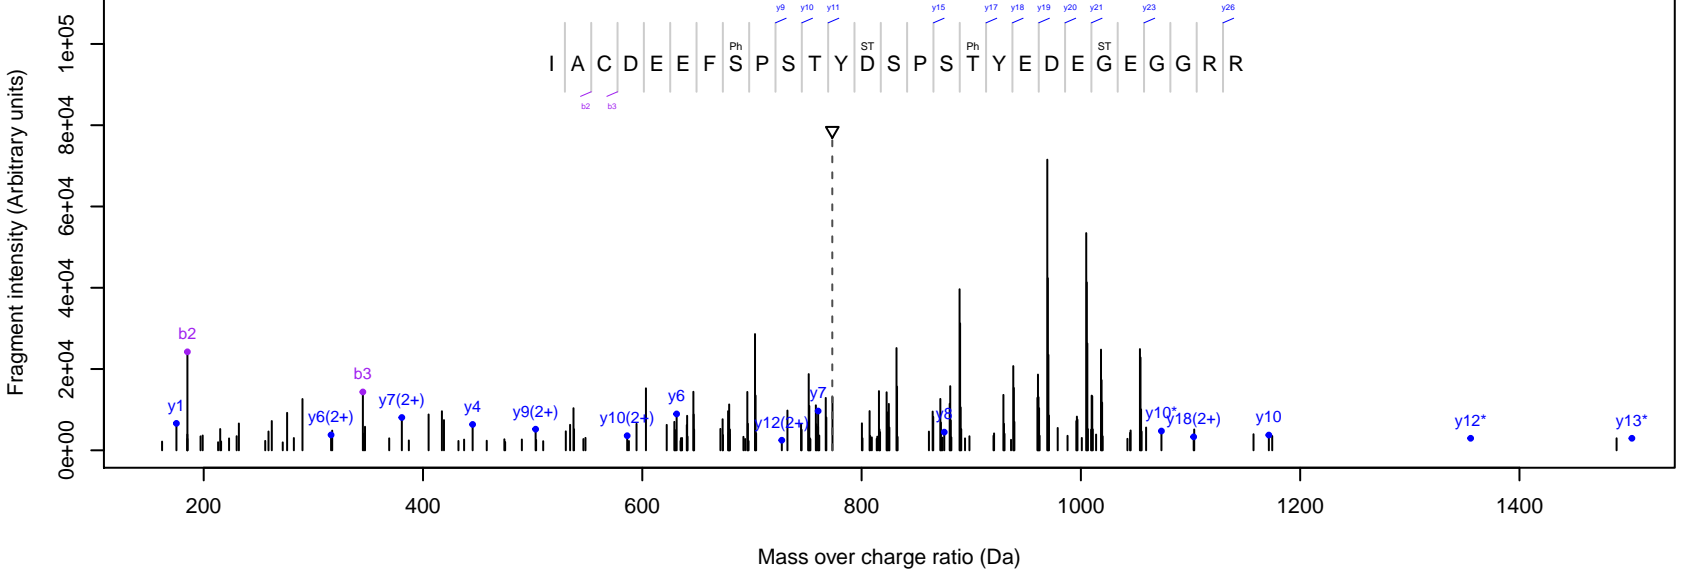

SIM(Oxidation (M))QSQSVMLDLAY(Phospho (STY))GDR-2+

Source : QE3\_201126\_FR\_TiOx\_hum\_tissue\_Urea\_RNAB\_H Scan : 21930

Andromeda score : 60.641

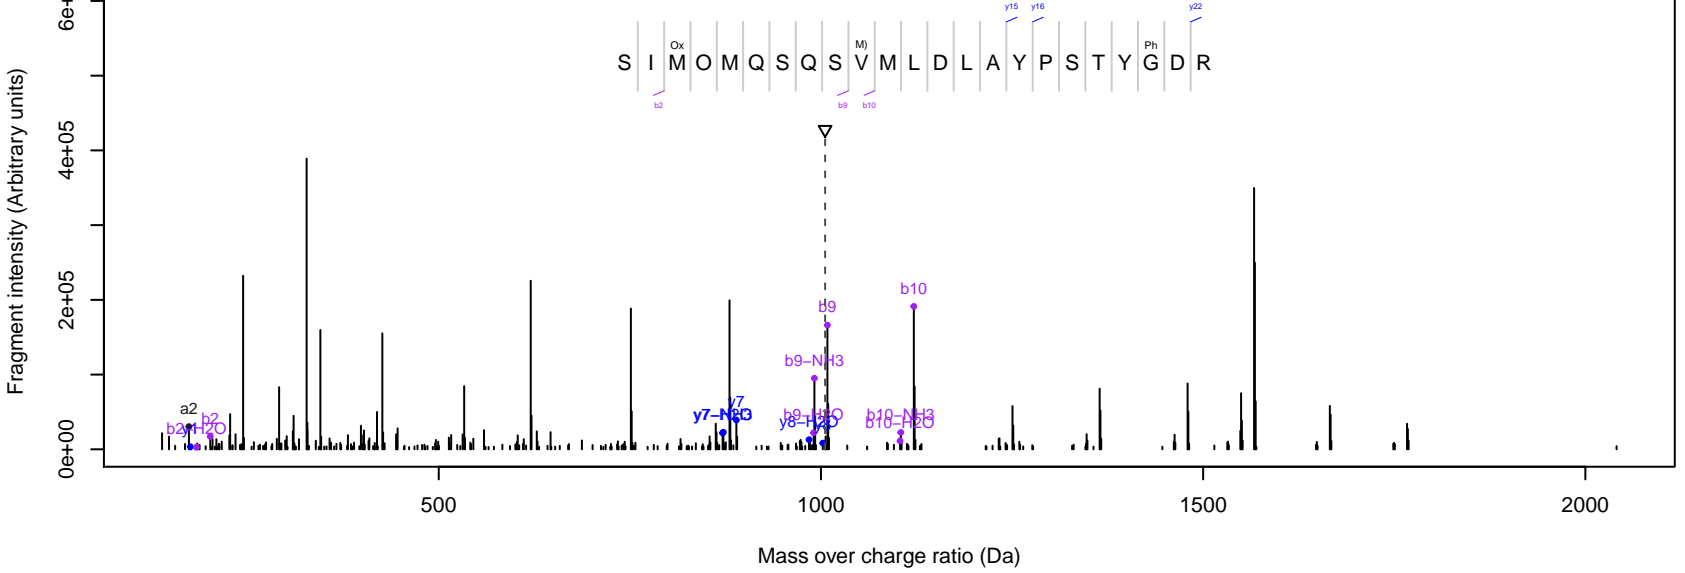

AKS(Phospho (STY))ELTLTPAPPMAHSPLHR-4+

Source : QE3\_201126\_FR\_TiOx\_hum\_tissue\_Urea\_RNAB\_B Scan : 23823

Andromeda score : 60.621

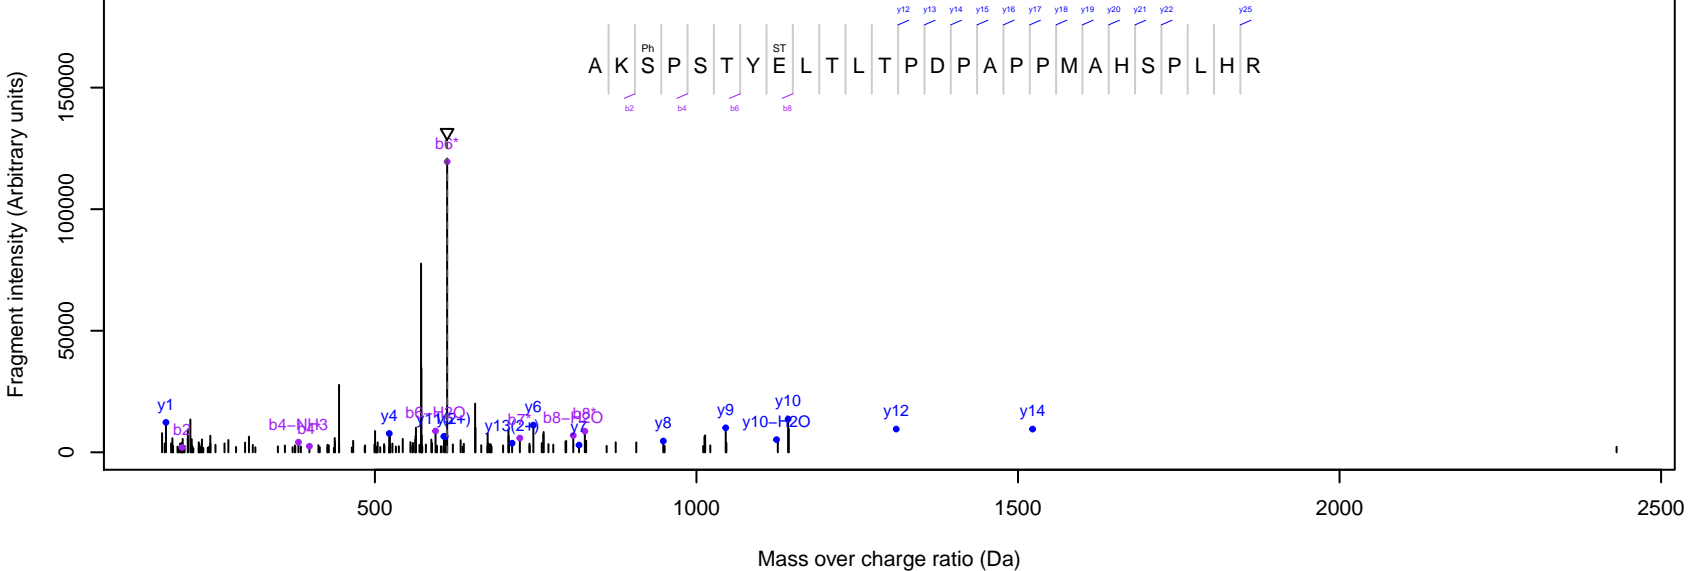



AIMTYVSS(Phospho (STY))FYHAFSGAQK-3+

Source : QE3\_201126\_FR\_TiOx\_hum\_tissue\_Urea\_RNAB\_H Scan : 53356

Andromeda score : 60.602

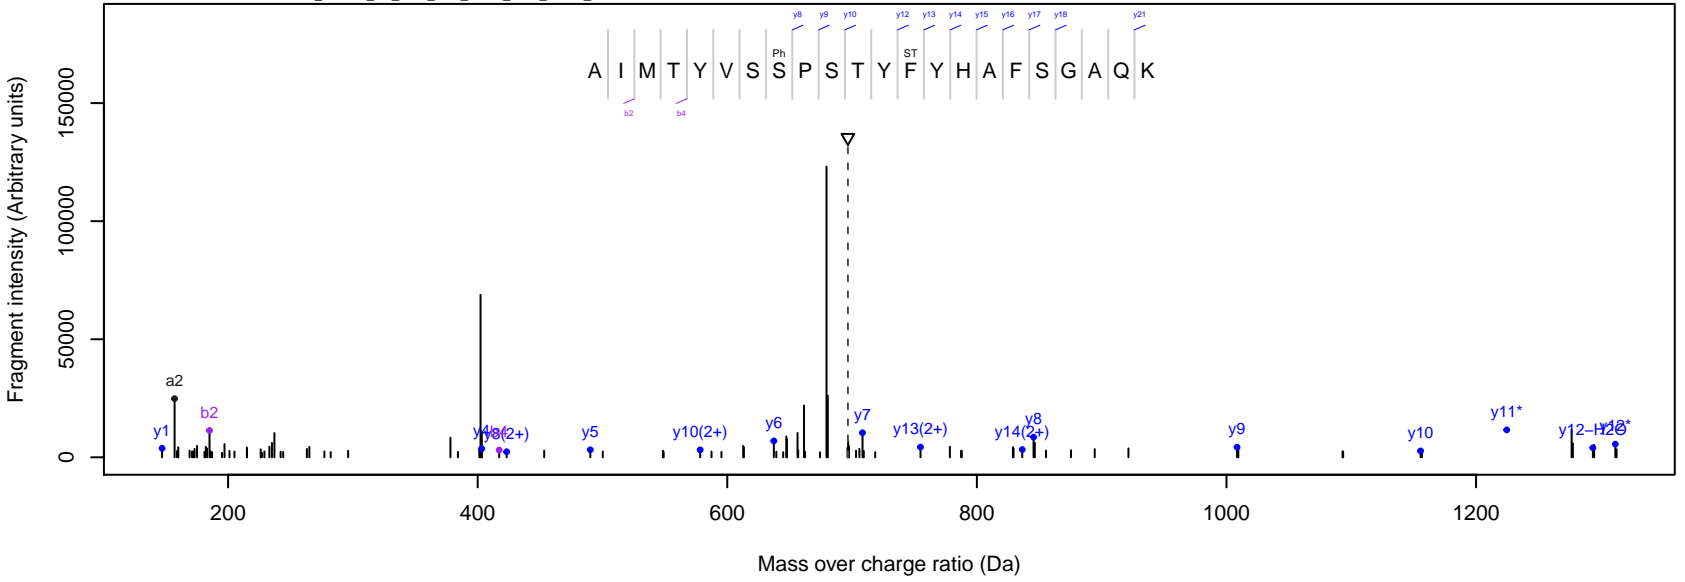

CHAEHT(Phospho (STY))PEEIDHTGAK-3+

Source : QE3\_201126\_FR\_TiOx\_hum\_tissue\_Urea\_RNAB\_H Scan : 6319

Andromeda score : 60.602

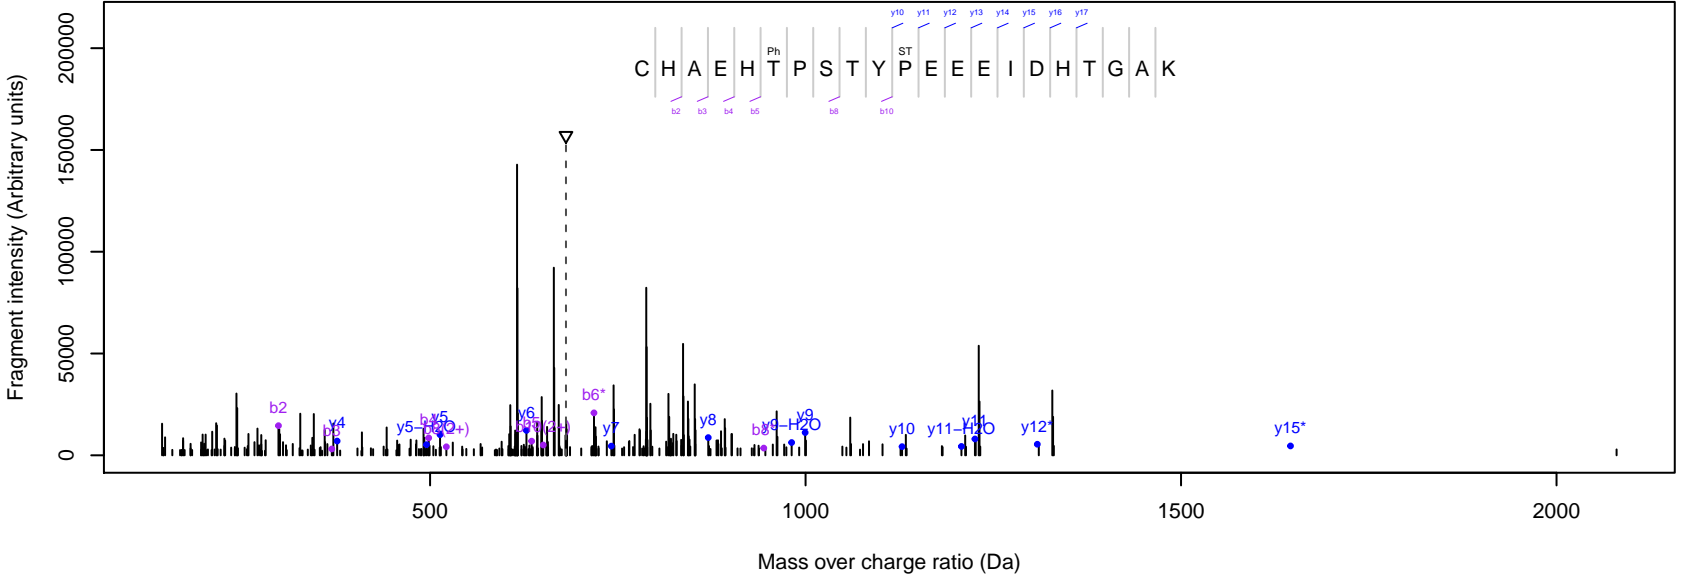

LGSVSLIPLRGS(Phospho (STY))ENEM(Oxidation (M))RR-3+

Source : QE3\_201126\_FR\_TiOx\_hum\_tissue\_Urea\_RNAB\_N Scan : 25456

Andromeda score : 60.602

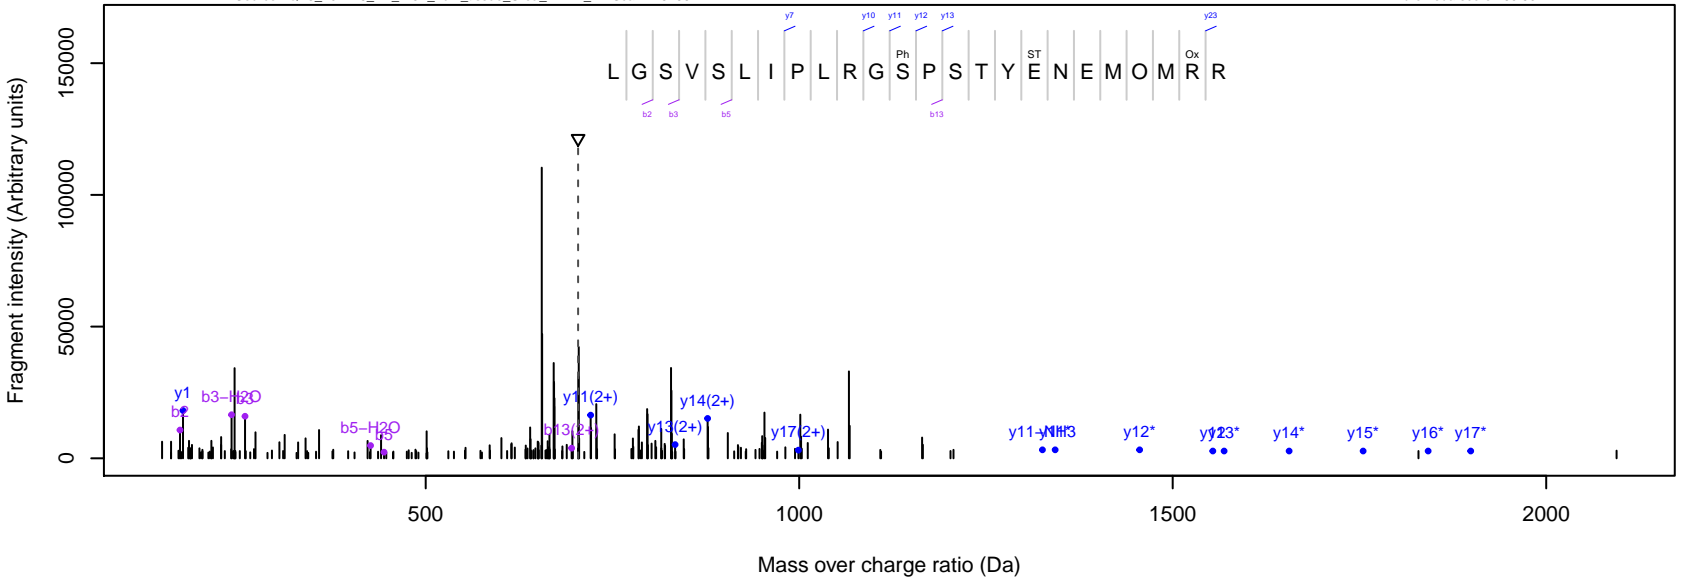

S(Phospho (STY))HSSDFPCSDTFSNFTFWR-3+

Source : QE3\_201126\_FR\_TiOx\_hum\_tissue\_Urea\_RNAB\_N Scan : 55674

Andromeda score : 60.564

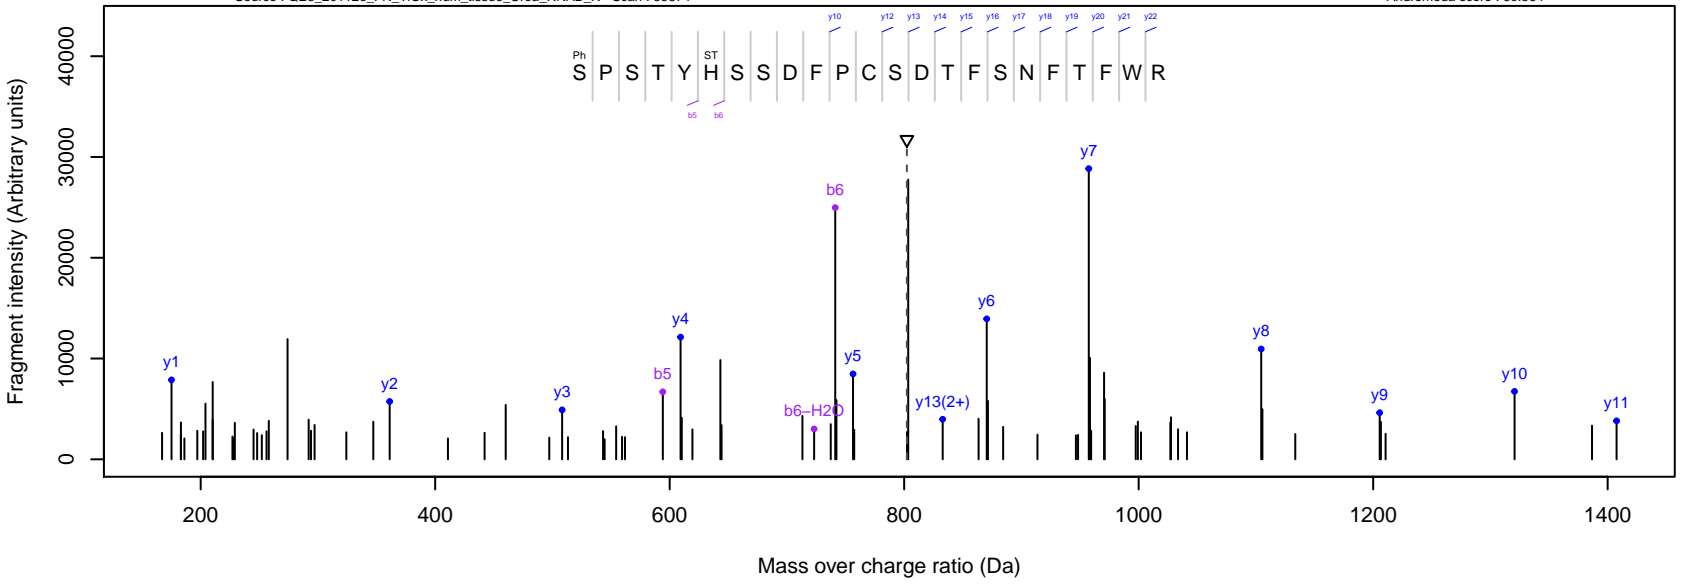

ANVSS(Phospho (STY))PHREFPPATAR-3+

Source : QE3\_201126\_FR\_TiOx\_hum\_tissue\_Urea\_RNAB\_H Scan : 9862

Andromeda score : 60.561

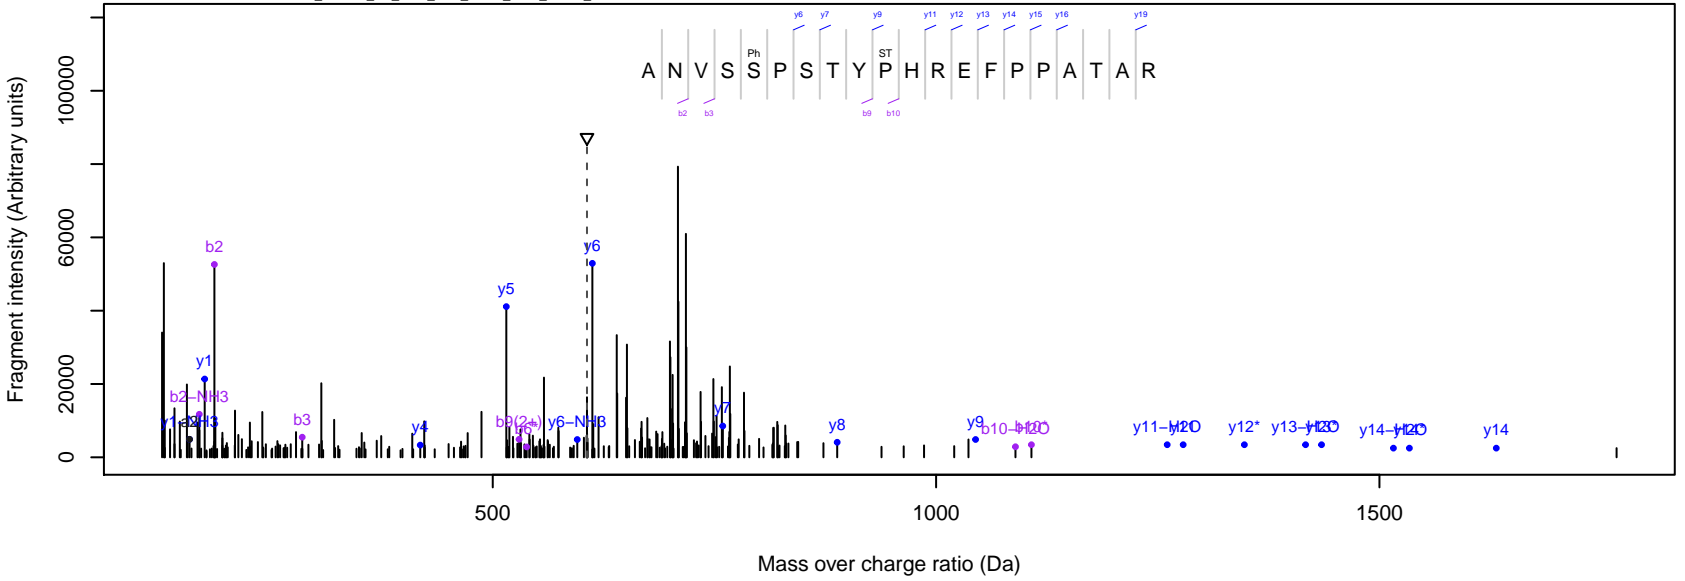

KKS(Phospho (STY))S(Phospho (STY))SDPGIPGGPQAIPATNSPDHSDHTLSVSSDSGHSTASAR-4+

Source : QE3\_201126\_FR\_TiOx\_hum\_tissue\_Urea\_RNAB\_H Scan : 18377

Andromeda score : 60.557

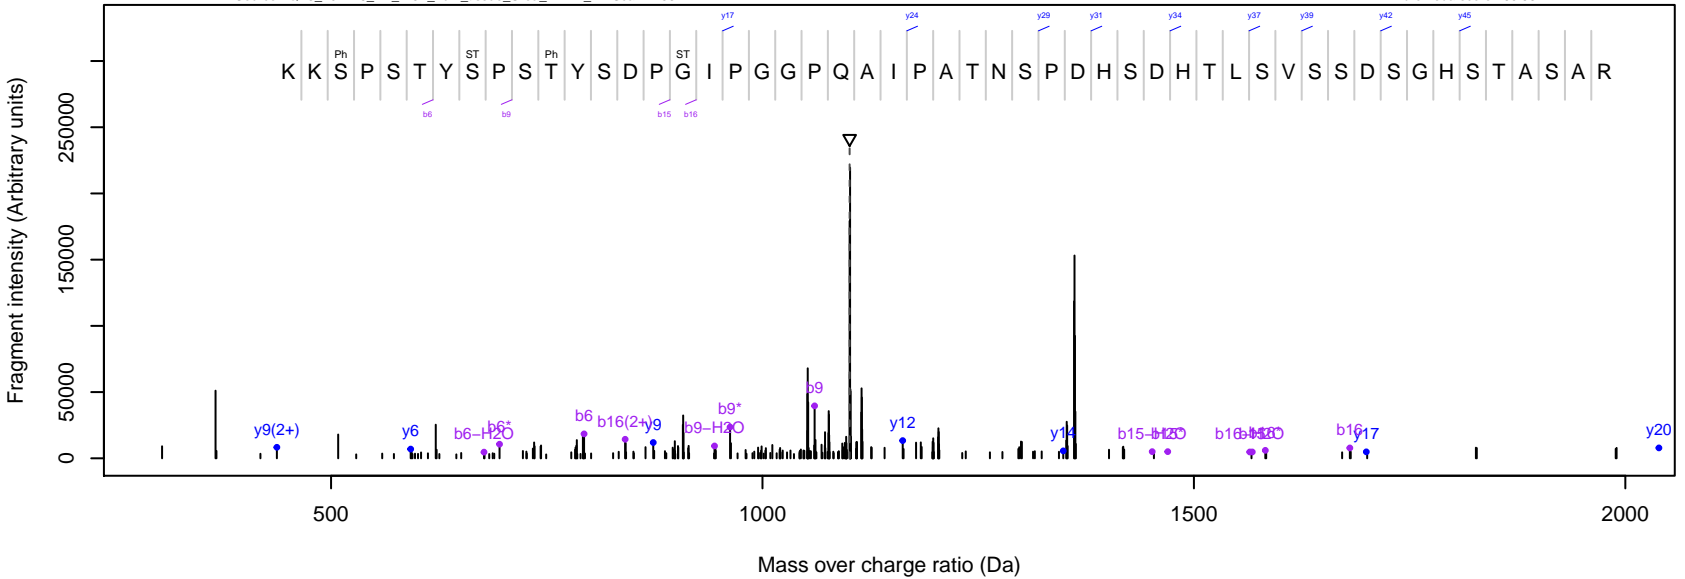

NNS(Phospho (STY))PPTVGAFGHTR-3+

Source : QE3\_201126\_FR\_TiOx\_hum\_tissue\_Urea\_RNAB\_N Scan : 17243

Andromeda score : 60.528

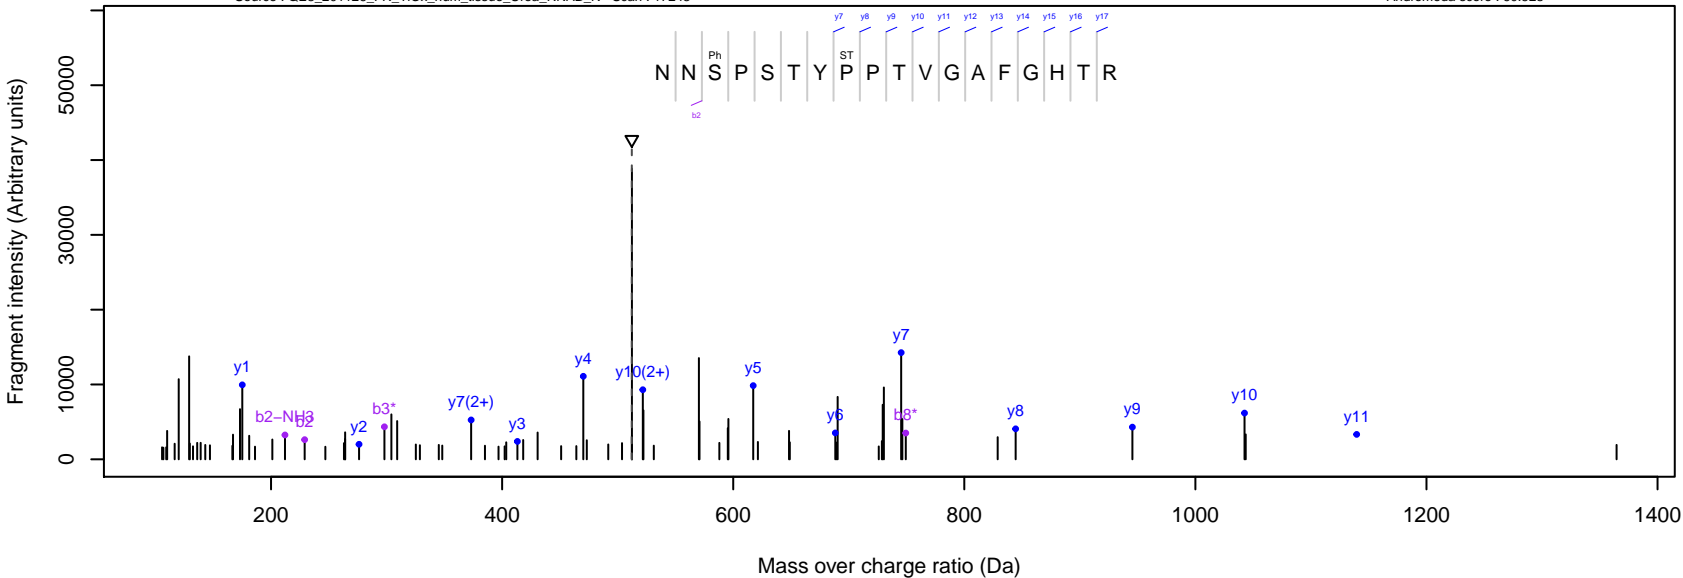

IEPSELPLPGGGRS(Phospho (STY))SSVPHPFQVTLRL-4+

Source : QE3\_201126\_FR\_TiOx\_hum\_tissue\_Urea\_RNAB\_N Scan : 48854

Andromeda score : 60.527

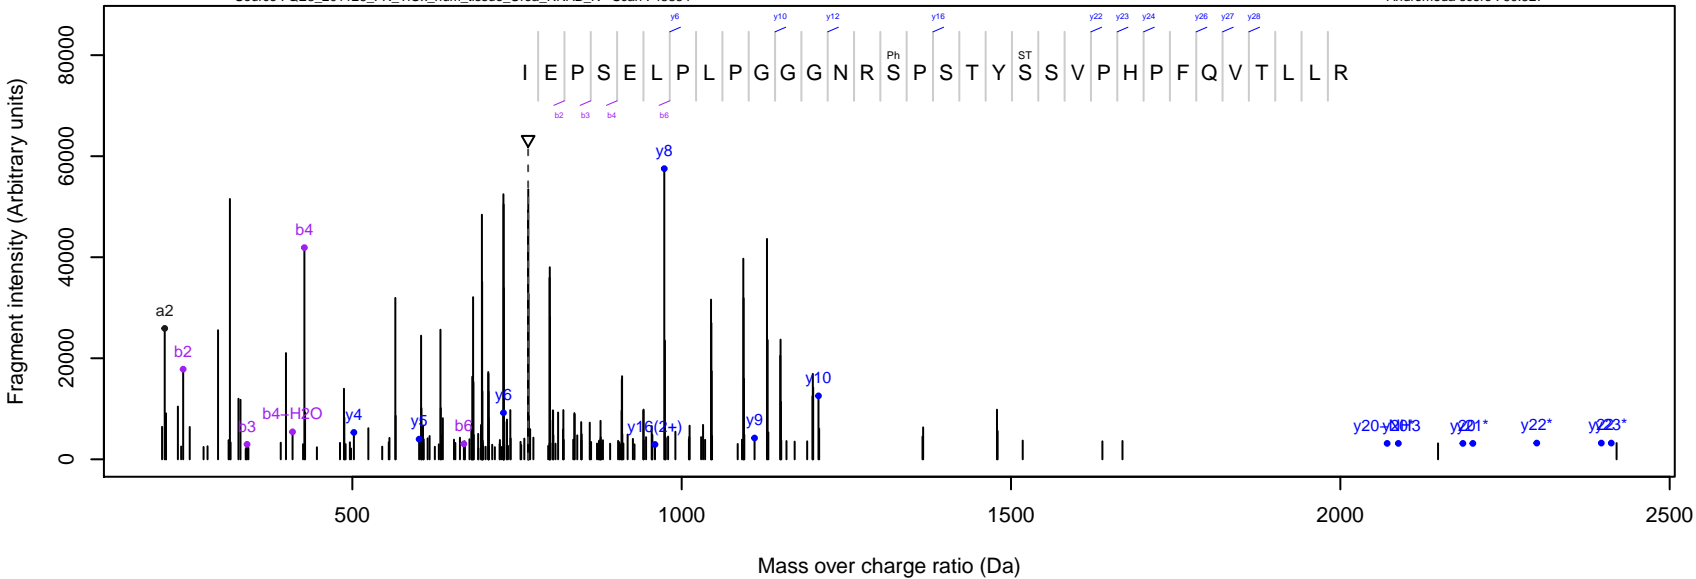

NSVAGSNPAKPLGSPGRYS(Phospho (STY))PVHGSQLR-4+

Source : QE3\_201126\_FR\_TiOx\_hum\_tissue\_Urea\_RNAB\_H Scan : 15447

Andromeda score : 60.527

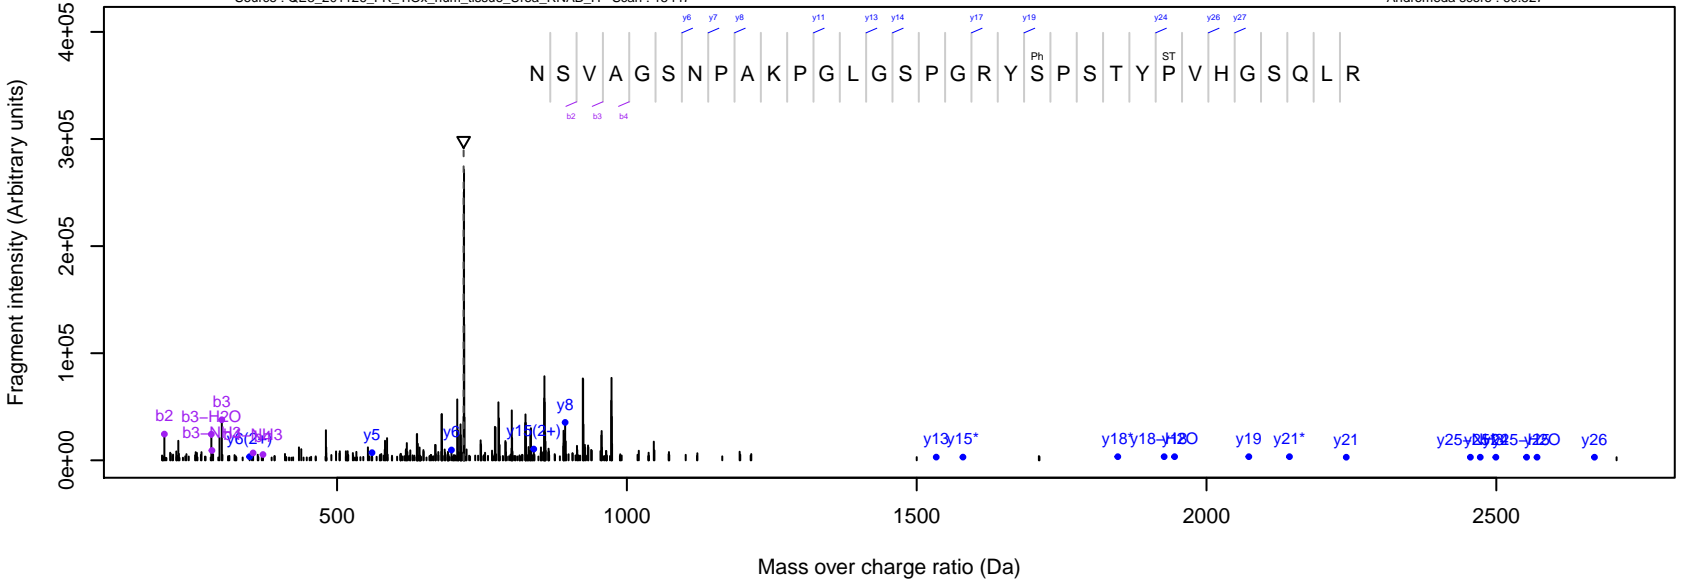

**EQQAQVEKEDFS(Phospho (STY))DMVAEHAAK-3+**

Source : QE3\_201126\_FR\_TiOx\_hum\_tissue\_Urea\_RNAB\_H Scan : 23934

Andromeda score : 60.521

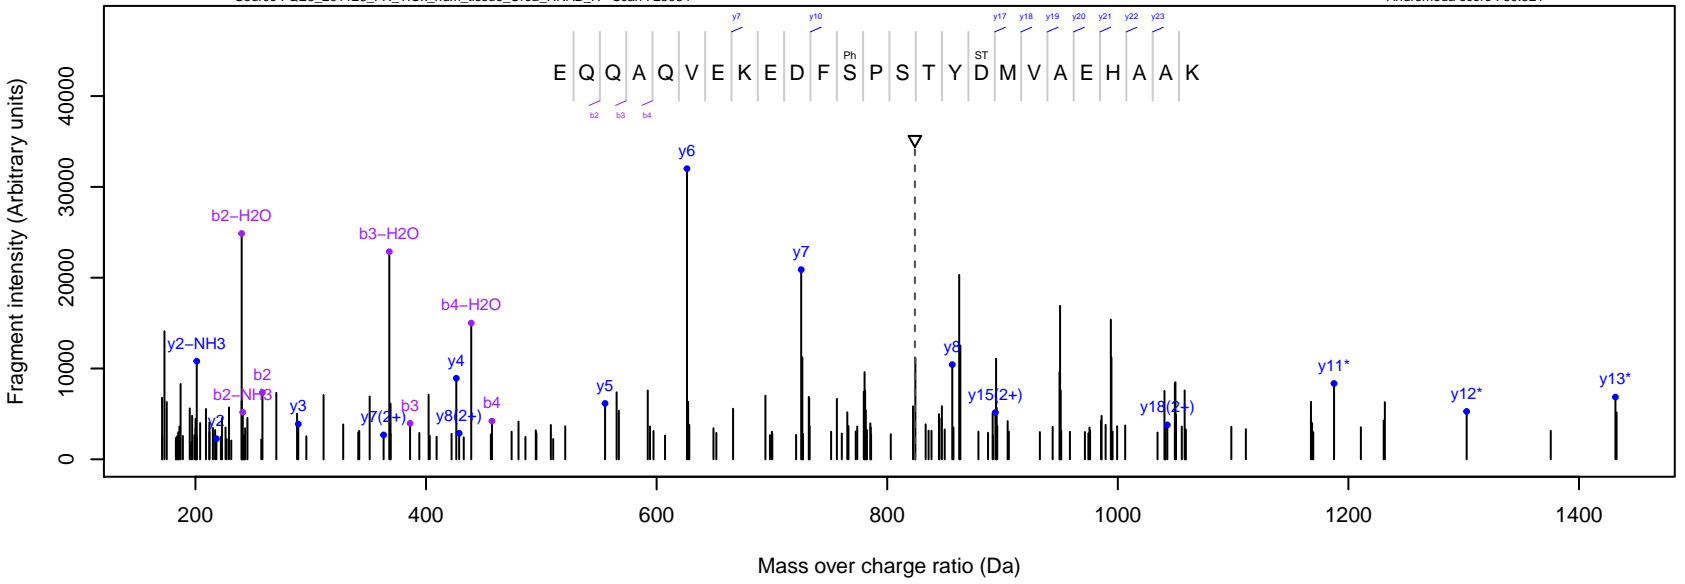

**SS(Phospho (STY))PPLRT(Phospho (STY))PDVLESSGPAVR-3+**

Source : QE3\_201126\_FR\_TiOx\_hum\_tissue\_Urea\_RNAB\_N Scan : 34416

Andromeda score : 60.521

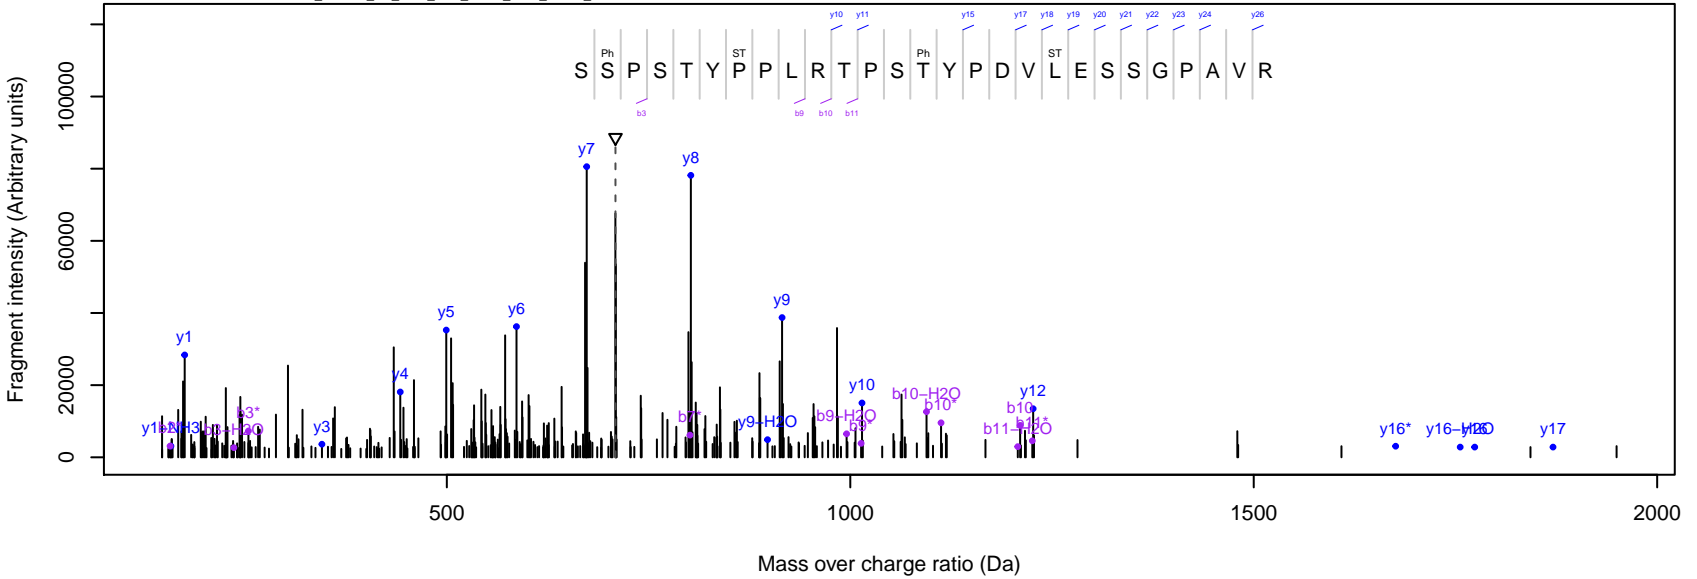

**AQIS(Phospho (STY))SPNLR-2+**

Source : QE3\_201126\_FR\_TiOx\_hum\_tissue\_Urea\_RNAB\_N Scan : 15631

Andromeda score : 60.518

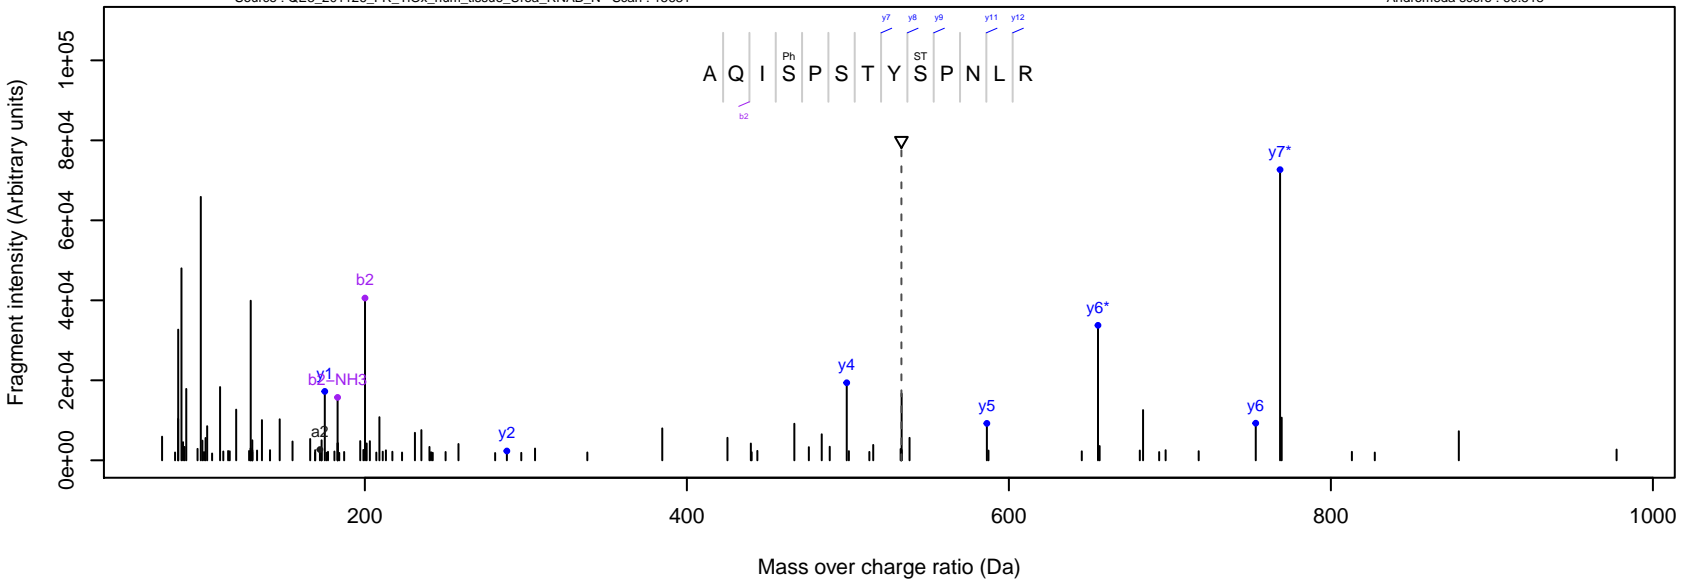

RFS(Phospho (STY))LSVPR-2+

Source : QE3\_201126\_FR\_TiOx\_hum\_tissue\_Urea\_RNAB\_H Scan : 23971

Andromeda score : 60.518

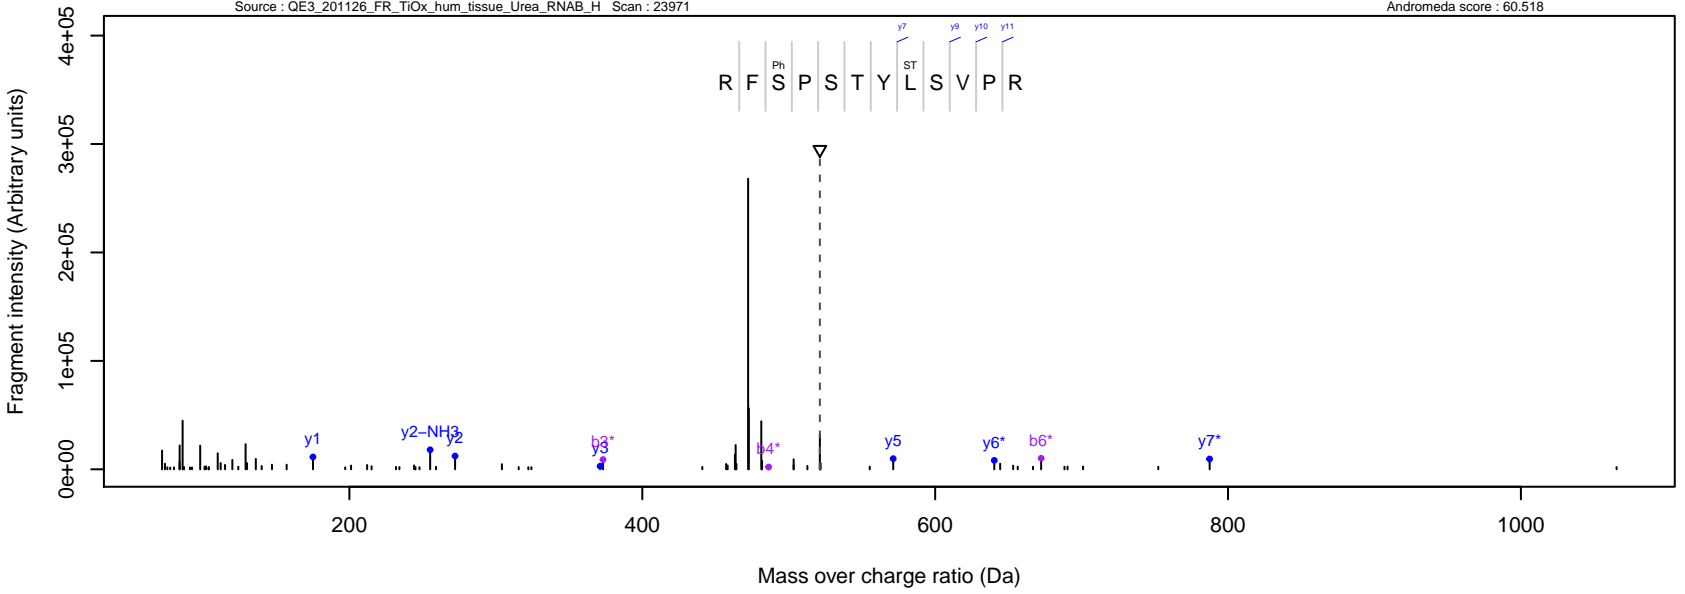

SNYS(Phospho (STY))PTIVKE-2+

Source : QE3\_201126\_FR\_TiOx\_hum\_tissue\_Urea\_RNAB\_H Scan : 19972

Andromeda score : 60.49

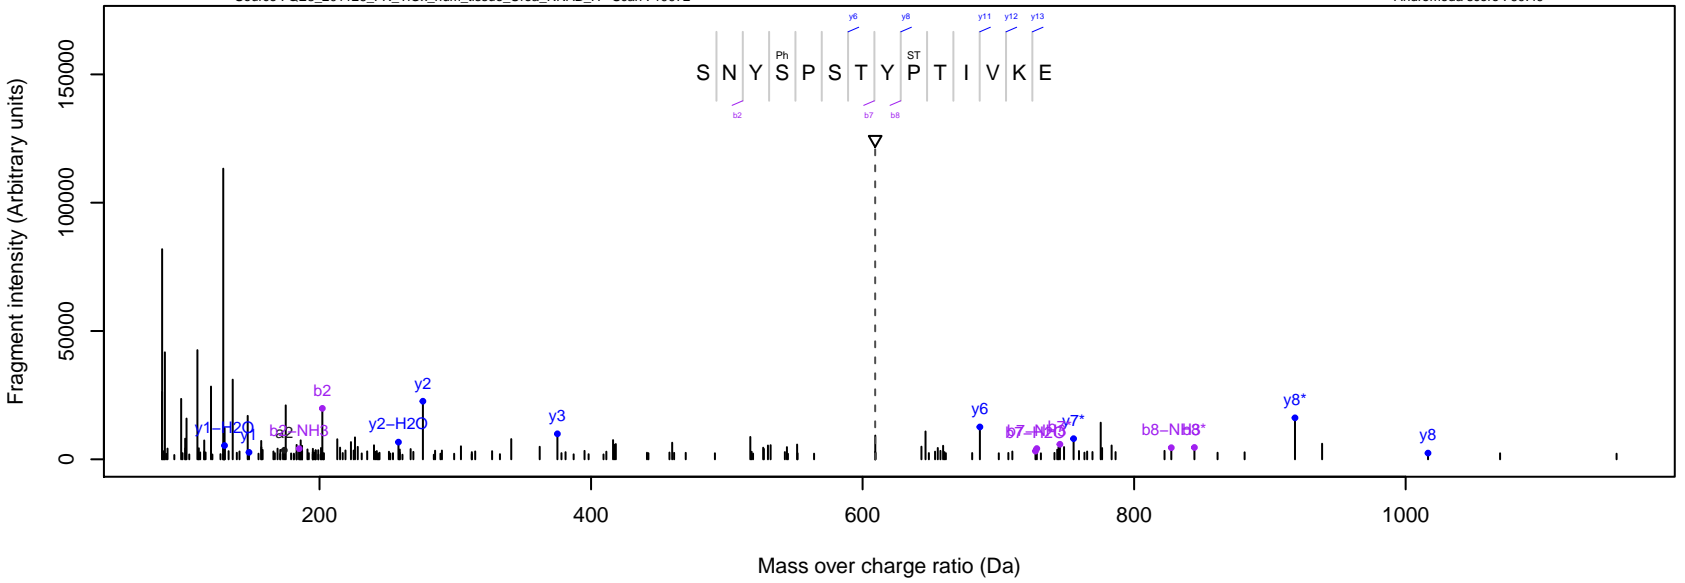

DPYGS(Phospho (STY))LDRHTQTVR-3+

Source : QE3\_201126\_FR\_TiOx\_hum\_tissue\_Urea\_RNAB\_B Scan : 14191

Andromeda score : 60.489

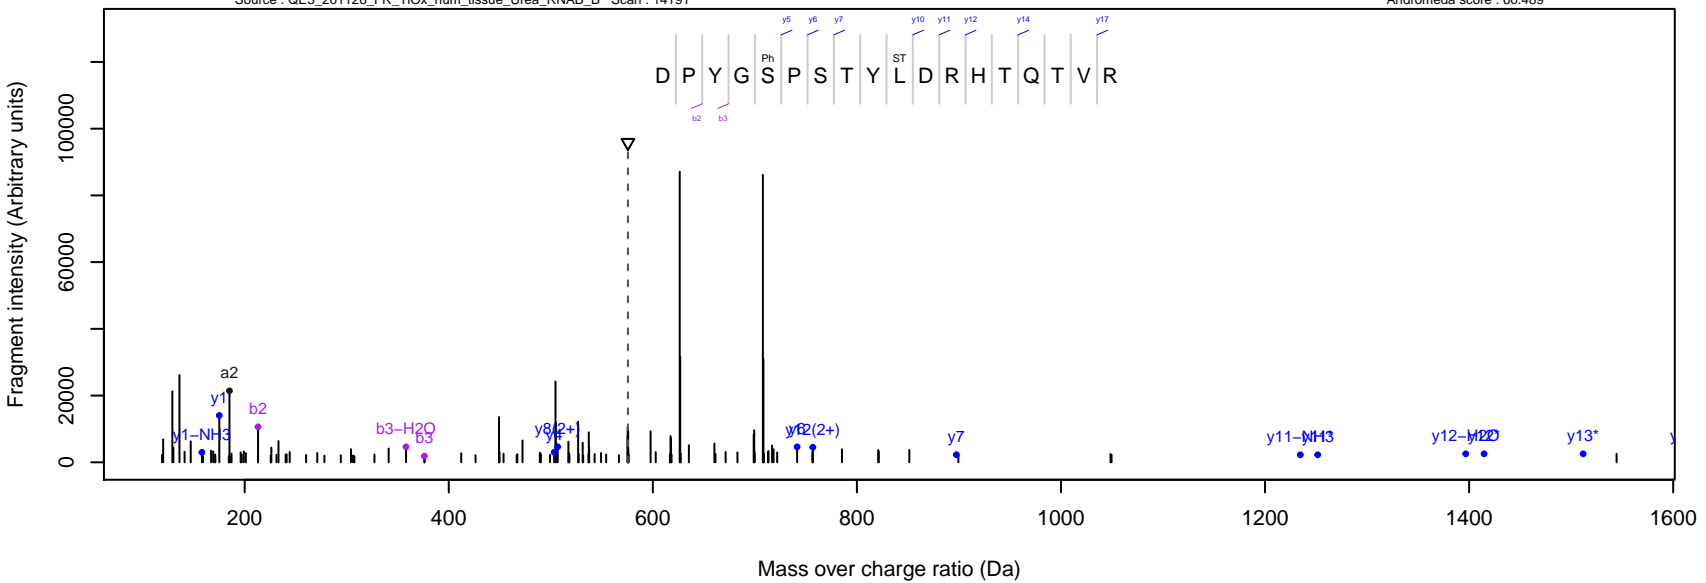

S(Phospho (STY))SPVPEMLESQELLEPEVDDVPK-3+

Source : QE3\_201126\_FR\_TiOx\_hum\_tissue\_Urea\_RNAB\_N Scan : 62456

Andromeda score : 60.481

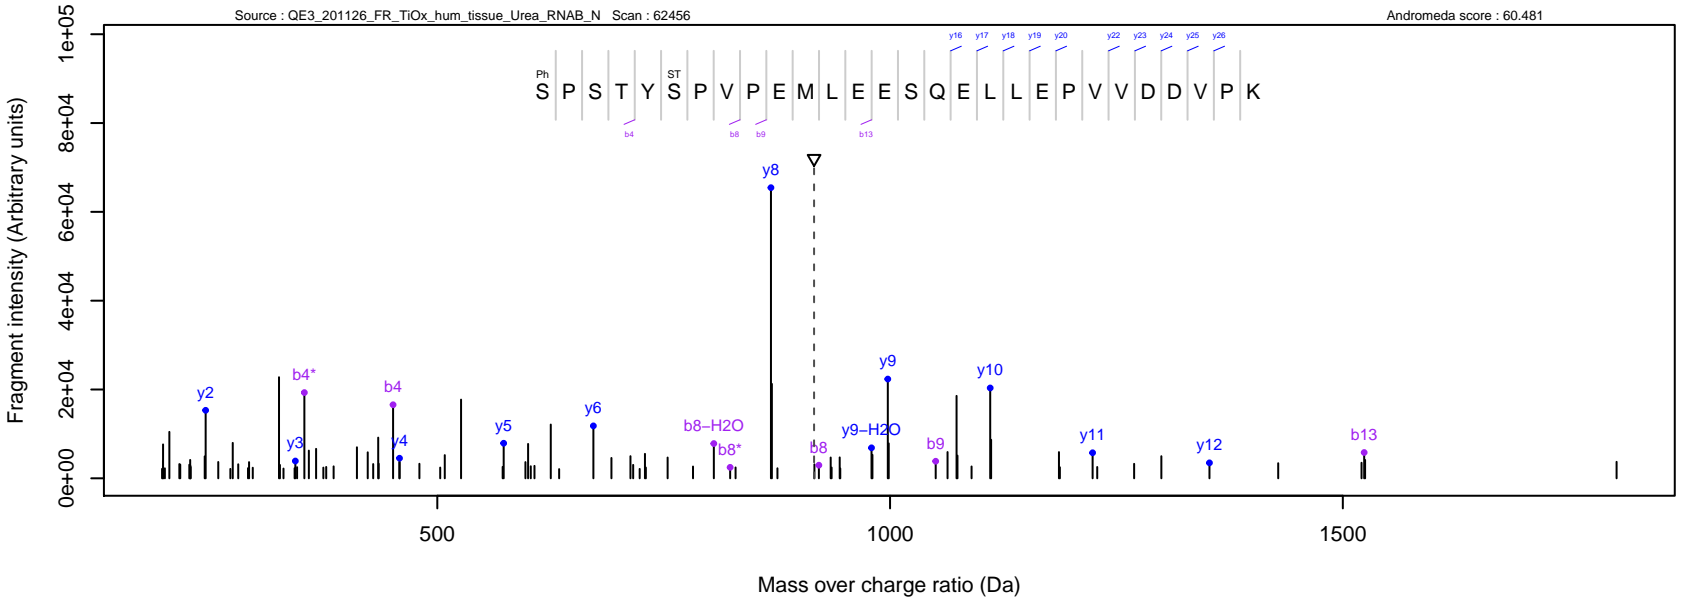

SQHVGGMNGLEQSEEVGQGM(Oxidation (M))PLVSEDRGSPFQEEEGS(Phospho (STY))ALK-4+

Source : QE3\_201126\_FR\_TiOx\_hum\_tissue\_Urea\_RNAB\_H Scan : 37533

Andromeda score : 60.475

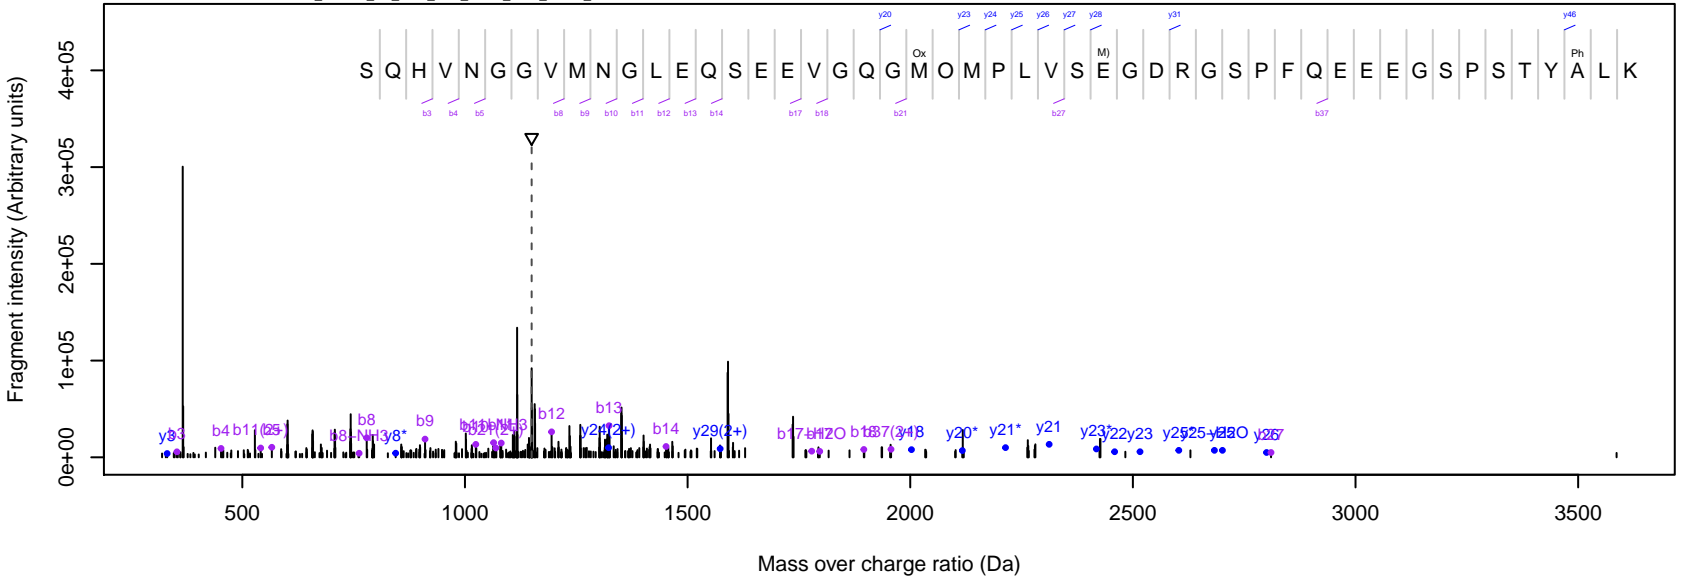

KLS(Phospho (STY))SERPS(Phospho (STY))SDGEGVVENGITTCNGK-3+

Source : QE3\_201126\_FR\_TiOx\_hum\_tissue\_Urea\_RNAB\_B Scan : 20044

Andromeda score : 60.464

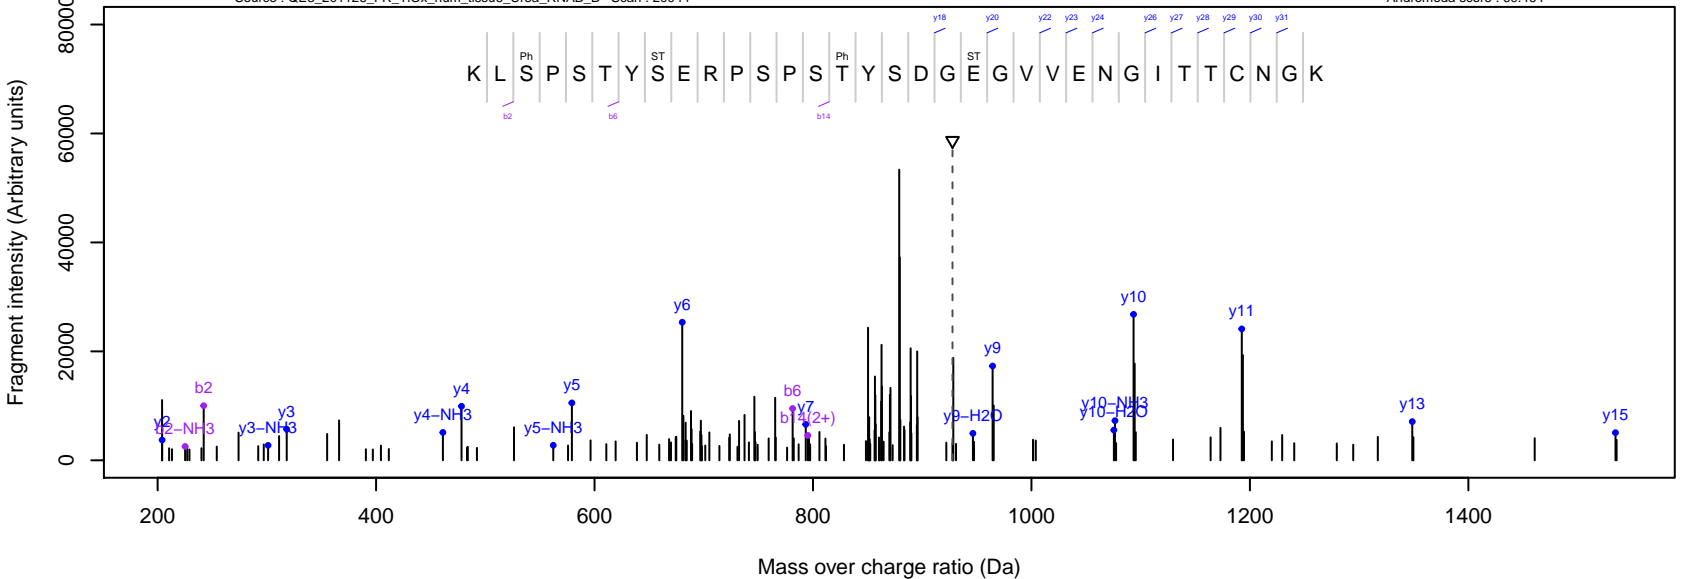

PYS(Phospho (STY))VGFR-2+

Source : QE3\_201126\_FR\_TiOx\_hum\_tissue\_Urea\_RNAB\_H Scan : 23839

Andromeda score : 60.436

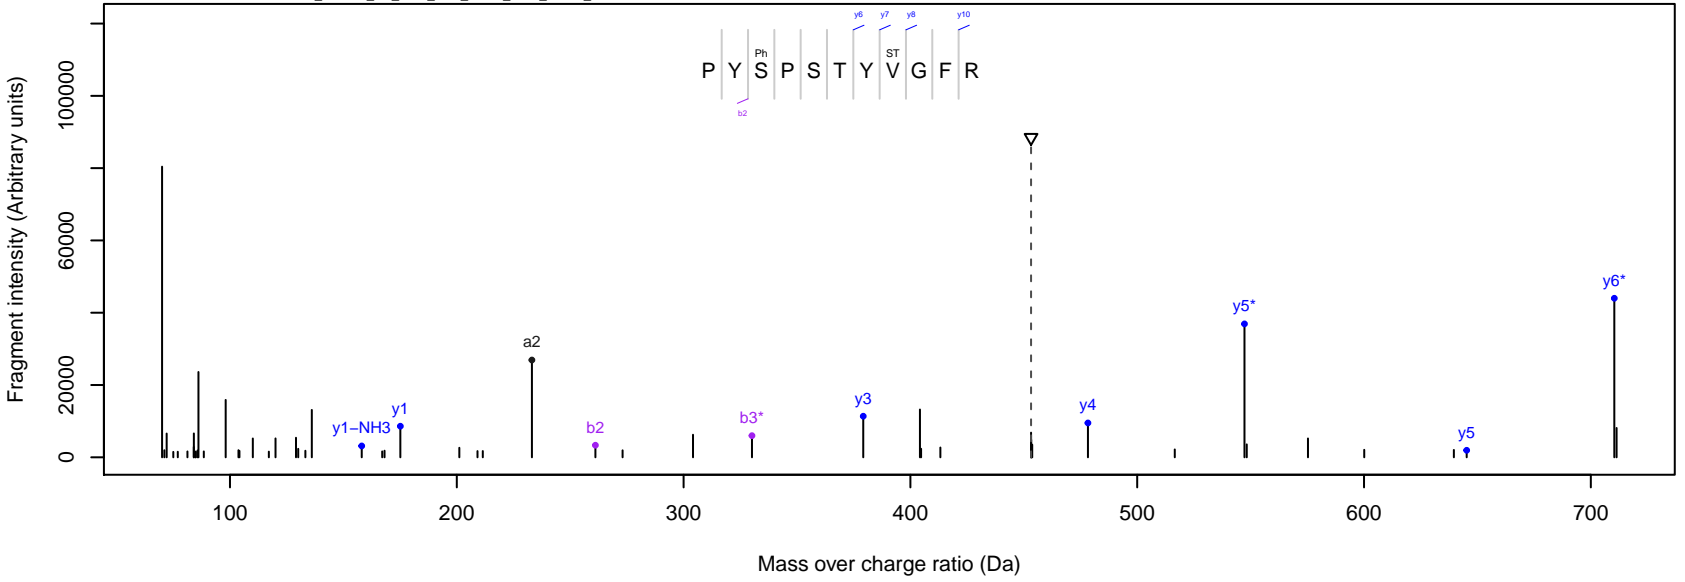

TDGS(Phospho (STY))FIGYK-2+

Source : QE3\_201126\_FR\_TiOx\_hum\_tissue\_Urea\_RNAB\_H Scan : 23634

Andromeda score : 60.398

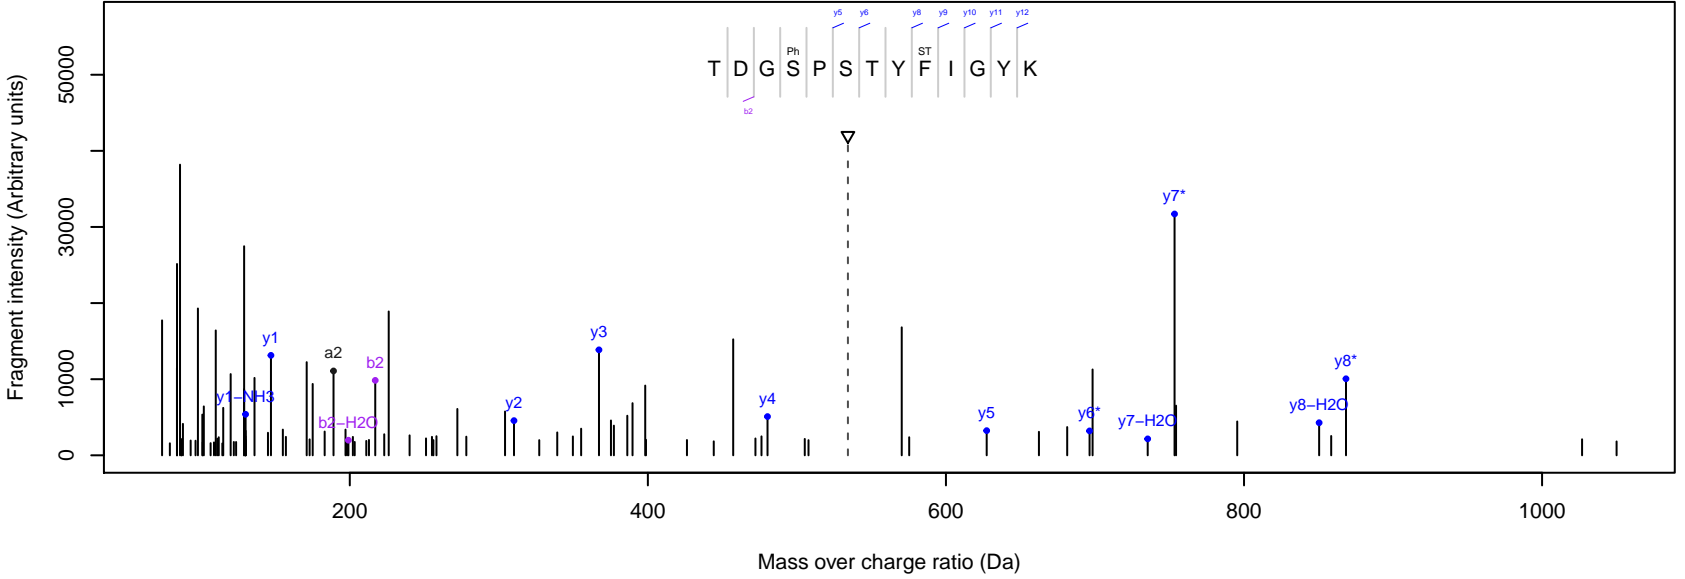

AGEQLS(Phospho (STY))EPEDMEMEAGDTPPR-3+

Source : QE3\_201126\_FR\_TiOx\_hum\_tissue\_Urea\_RNAB\_B Scan : 33831

Andromeda score : 60.348

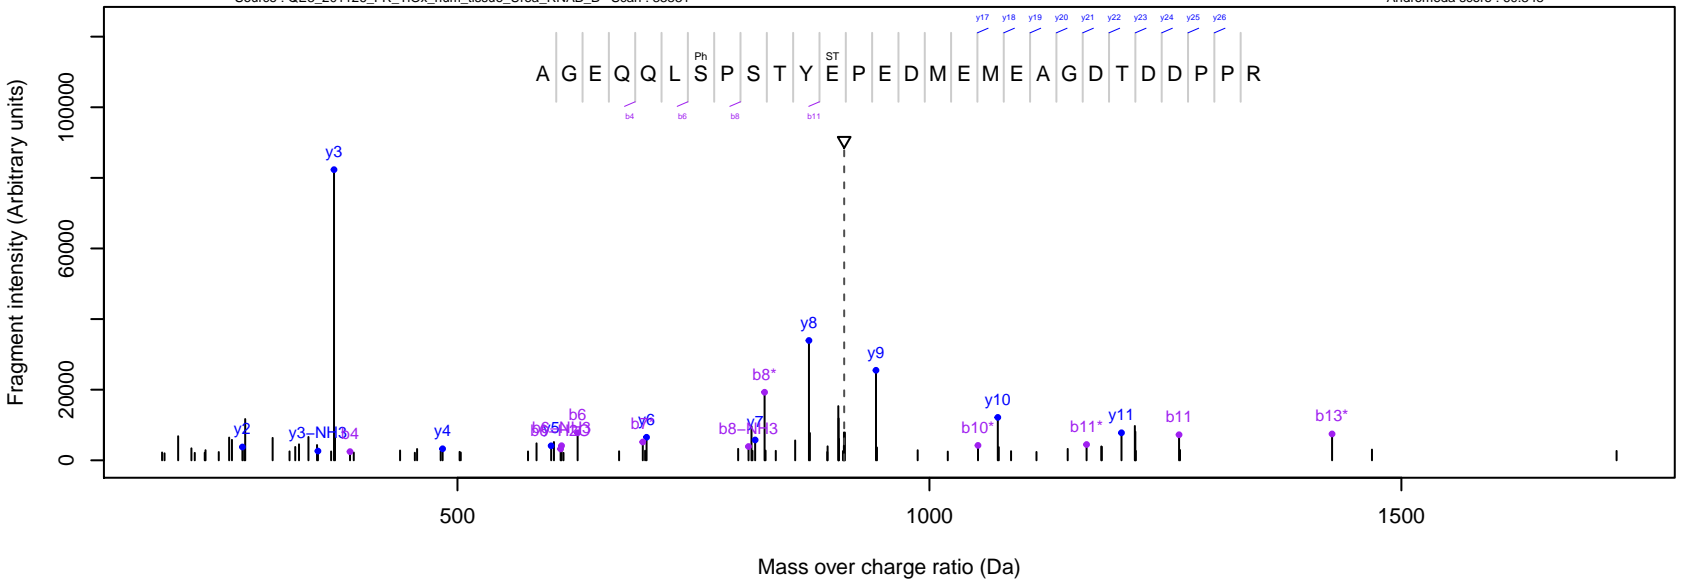

NQLS(Phospho (STY))PVNIHPSYAPSSSSSSNSGSYK-3+

Source : QE3\_201126\_FR\_TiOx\_hum\_tissue\_Urea\_RNAB\_H Scan : 25899

Andromeda score : 60.348

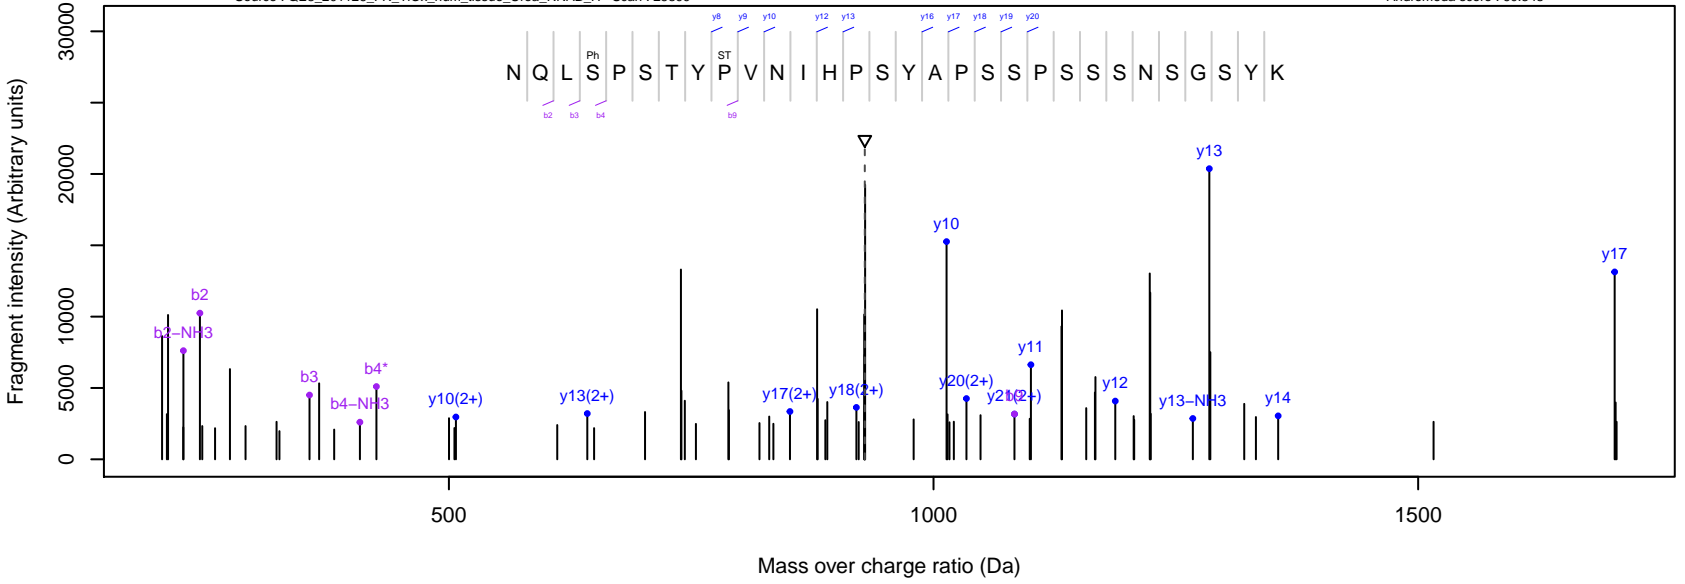

TAPPALPTGYDS(Phospho (STY))EEEEESRPM(Oxidation (M))SYDEK-3+

Source : QE3\_201126\_FR\_TiOx\_hum\_tissue\_Urea\_RNAB\_N Scan : 26729

Andromeda score : 60.348

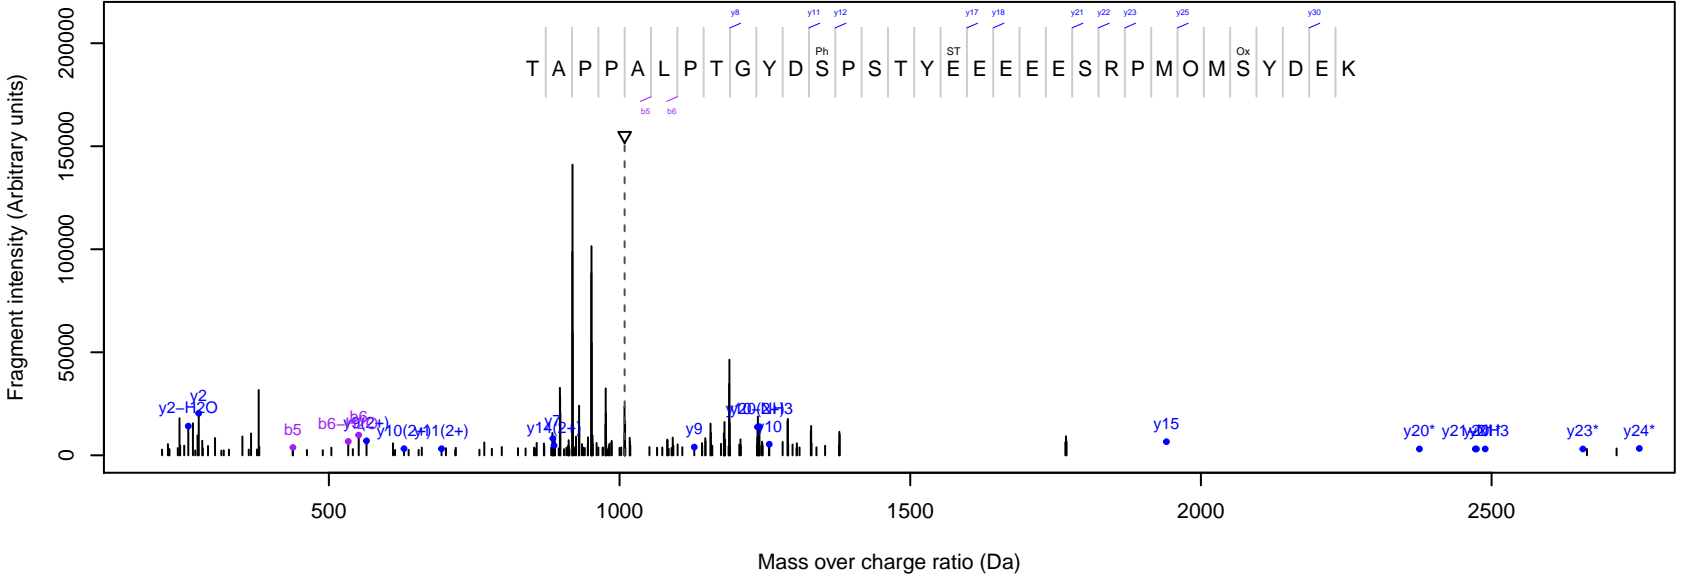

QAEDLGWSSSEFESYS(Phospho (STY))EDS(Phospho (STY))GEEAKPEVEVEPAK-3+

Source : QE3\_201126\_FR\_TiOx\_hum\_tissue\_Urea\_RNAB\_N Scan : 47586

Andromeda score : 60.34

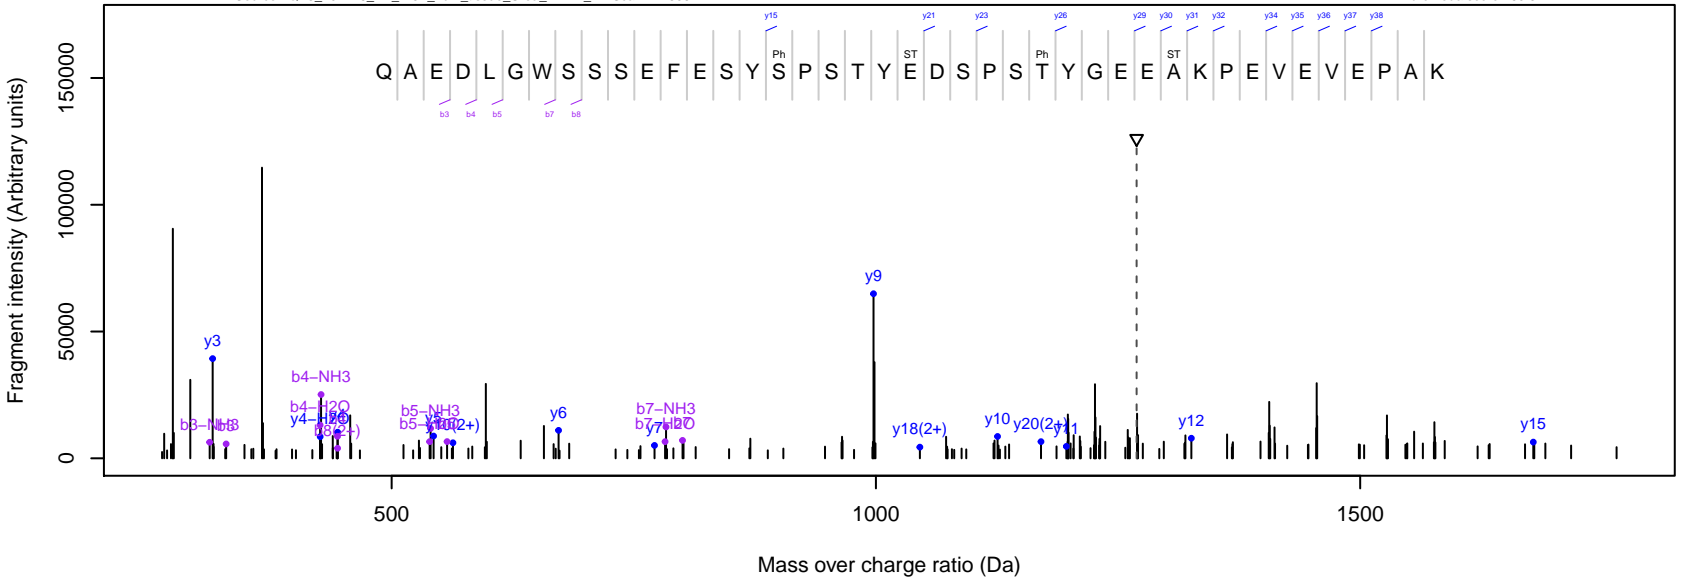



FTGYQAIQQSSSETEGEGGNTADAS(Phospho (STY))S(Phospho (STY))EEEGDRVEEDGK-4+

Source : QE3\_201126\_FR\_TIOx\_hum\_tissue\_Urea\_RNAB\_N Scan : 29191

Andromeda score : 60.328

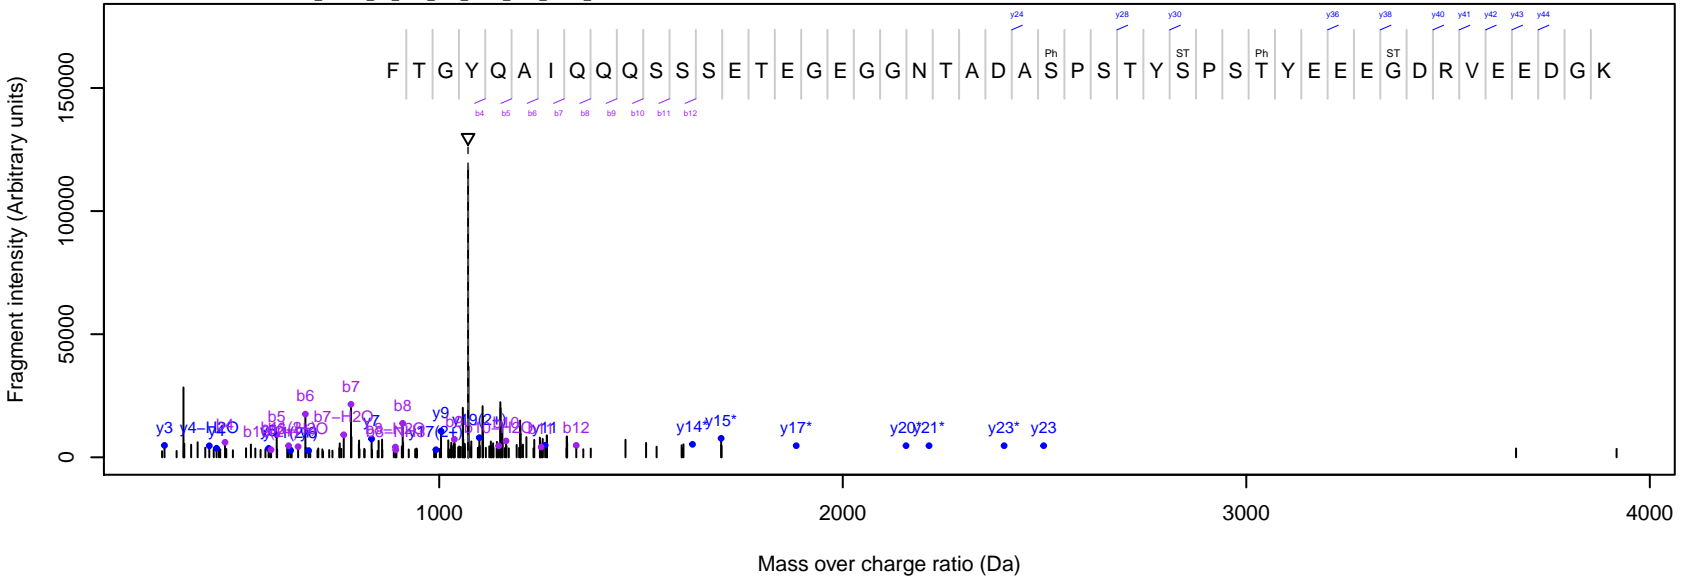

HKSSSS(Phospho (STY))FTPFDPR-3+

Source : QE3\_201126\_FR\_TIOx\_hum\_tissue\_Urea\_RNAB\_H Scan : 24540

Andromeda score : 60.307

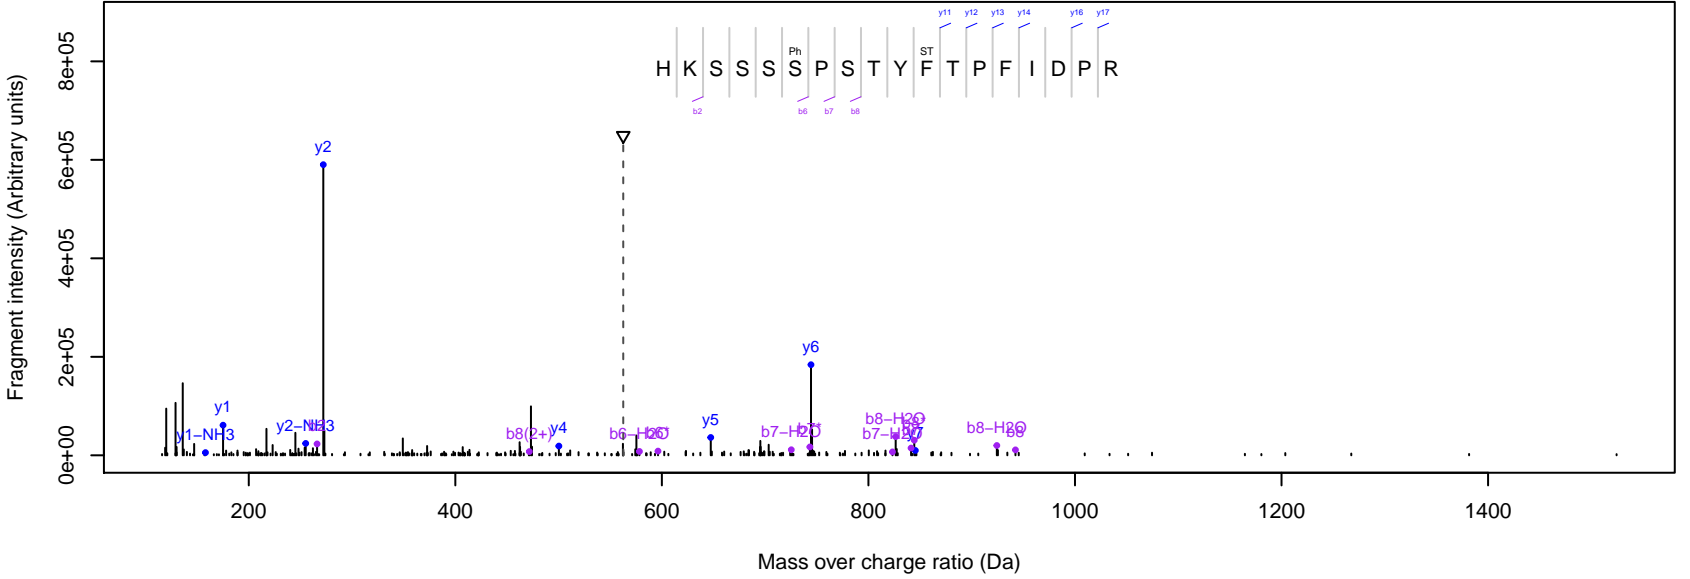

QREESETRS(Phospho (STY))ES(Phospho (STY))SDFEVVPK-3+

Source : QE3\_201126\_FR\_TIOx\_hum\_tissue\_Urea\_RNAB\_N Scan : 19582

Andromeda score : 60.278

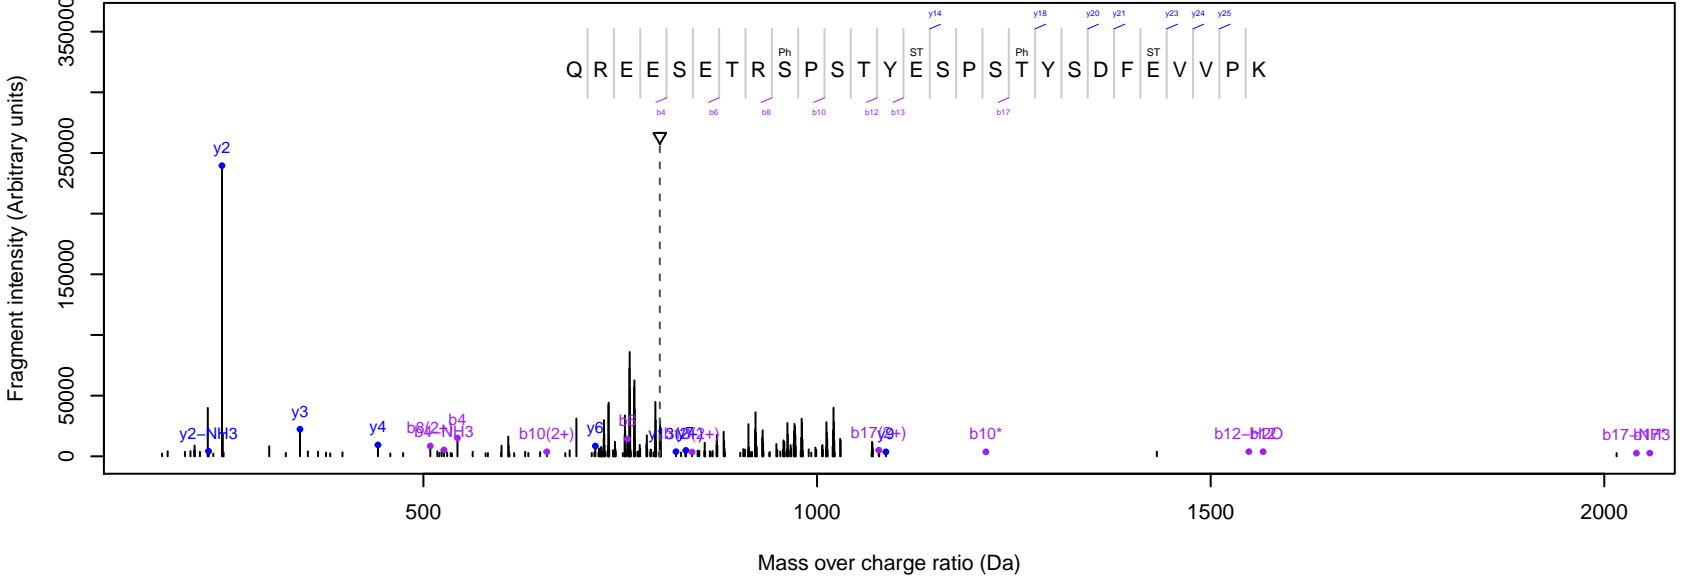

ERPES(Phospho (STY))PMVPSEQVVEEAVPLPPQALTTSDGHR-4+

Source : QE3\_201126\_FR\_TiOx\_hum\_tissue\_Urea\_RNAB\_H Scan : 45903

Andromeda score : 60.268

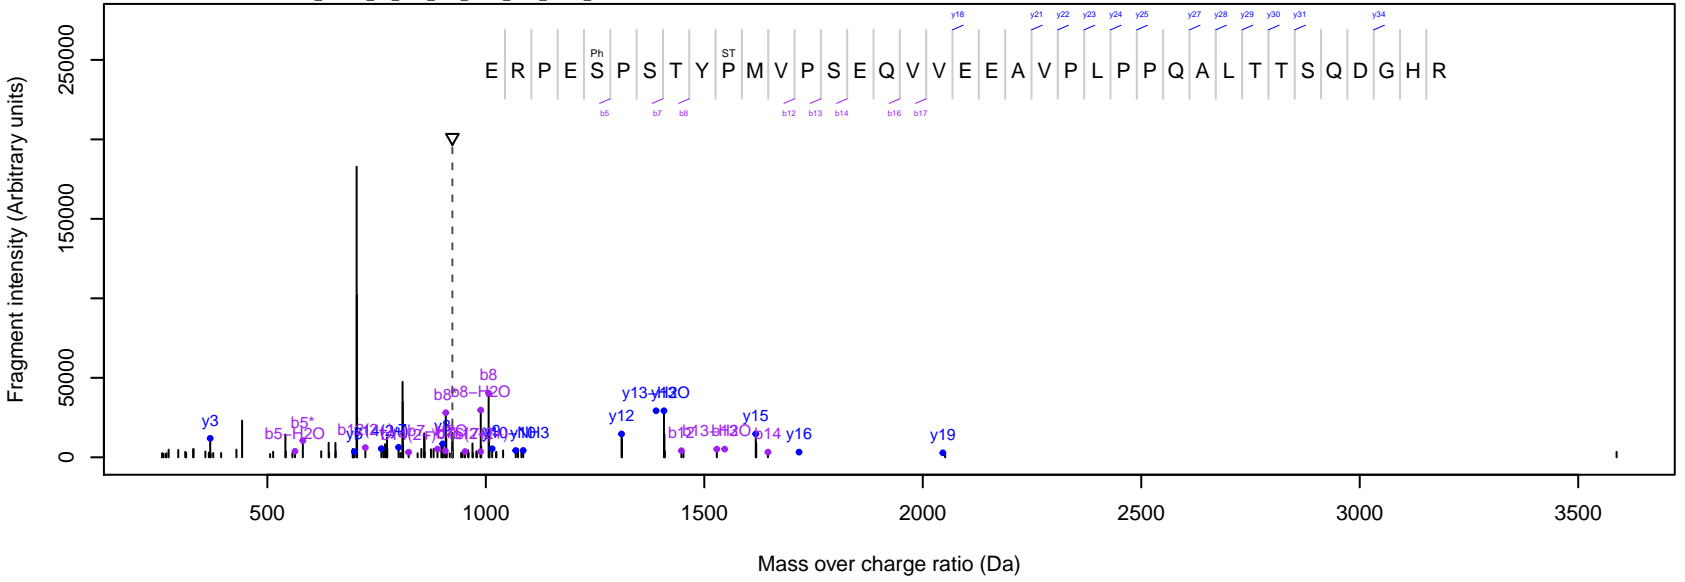

ALAT(Phospho (STY))PPKLHTCEK-3+

Source : QE3\_201126\_FR\_TiOx\_hum\_tissue\_Urea\_RNAB\_N Scan : 11575

Andromeda score : 60.246

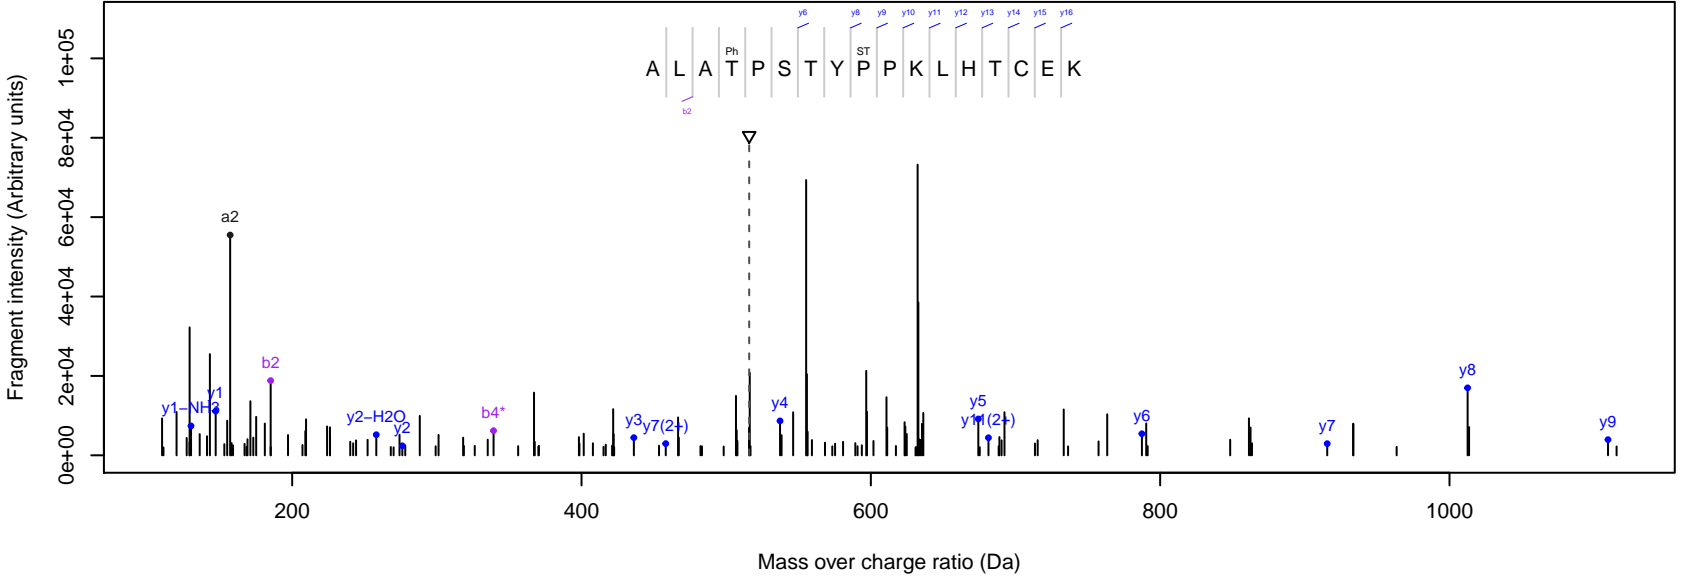

KKDEGS(Phospho (STY))YSLEEPK-3+

Source : QE3\_201126\_FR\_TiOx\_hum\_tissue\_Urea\_RNAB\_H Scan : 9091

Andromeda score : 60.246

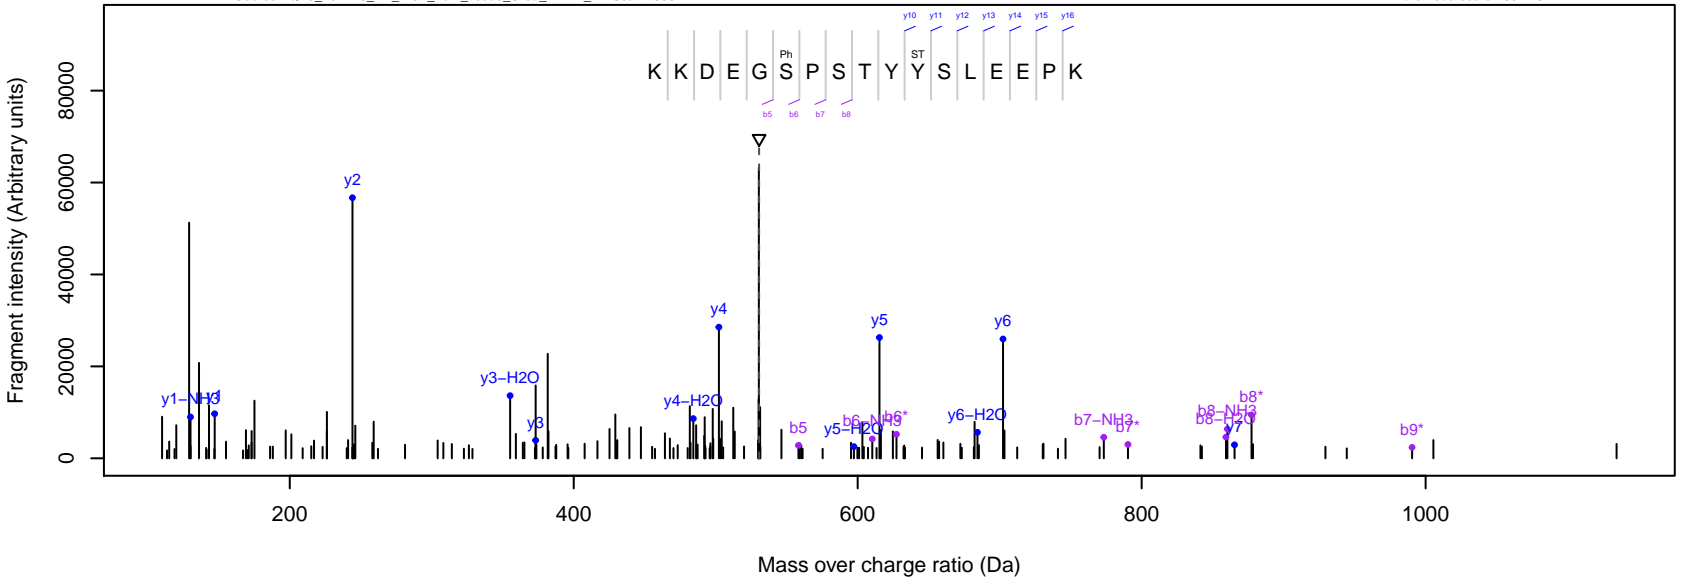

KKEQSEVSVS(Phospho (STY))PR-3+

Source : QE3\_201126\_FR\_TiOx\_hum\_tissue\_Urea\_RNAB\_H Scan : 5229

Andromeda score : 60.246

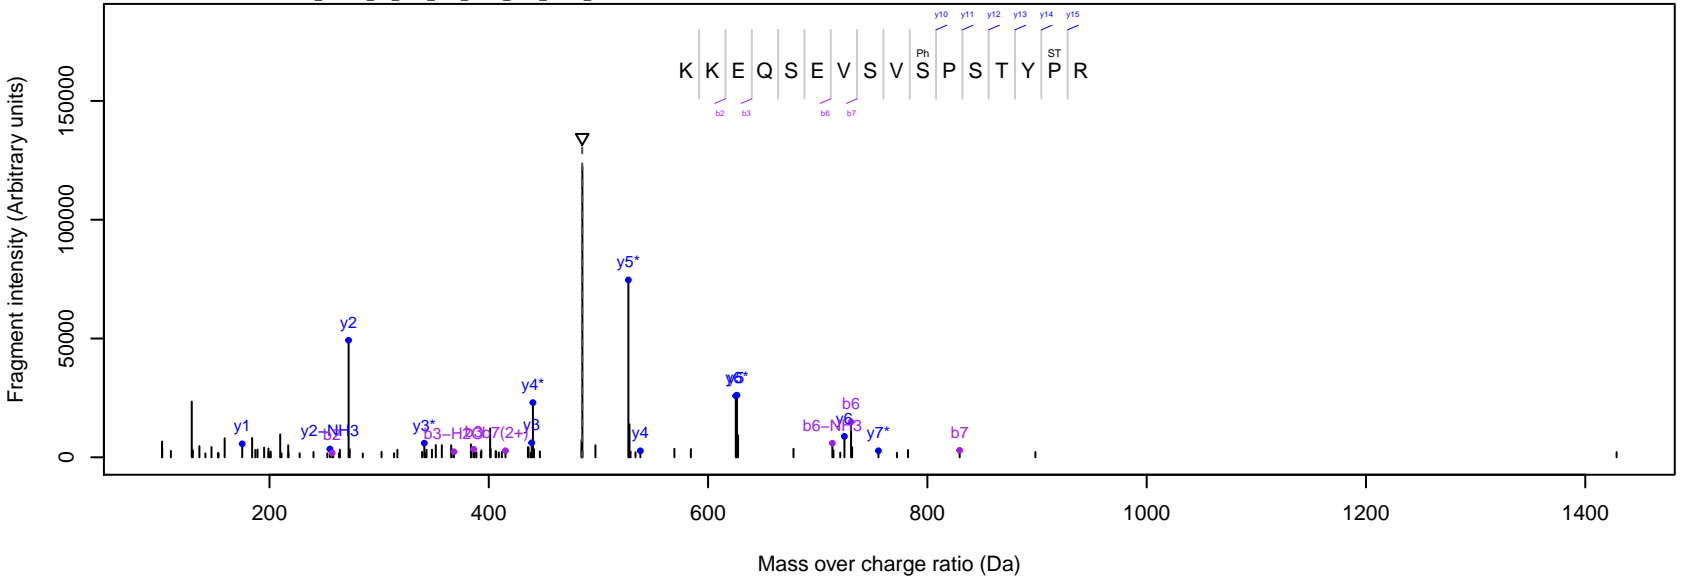

ADVQLFMDDDS(Phospho (STY))YS(Phospho (STY))HHS(Phospho (STY))GLEADPEKFADSDQDRDPHR-4+

Source : QE3\_201126\_FR\_TiOx\_hum\_tissue\_Urea\_RNAB\_B Scan : 42089

Andromeda score : 60.216

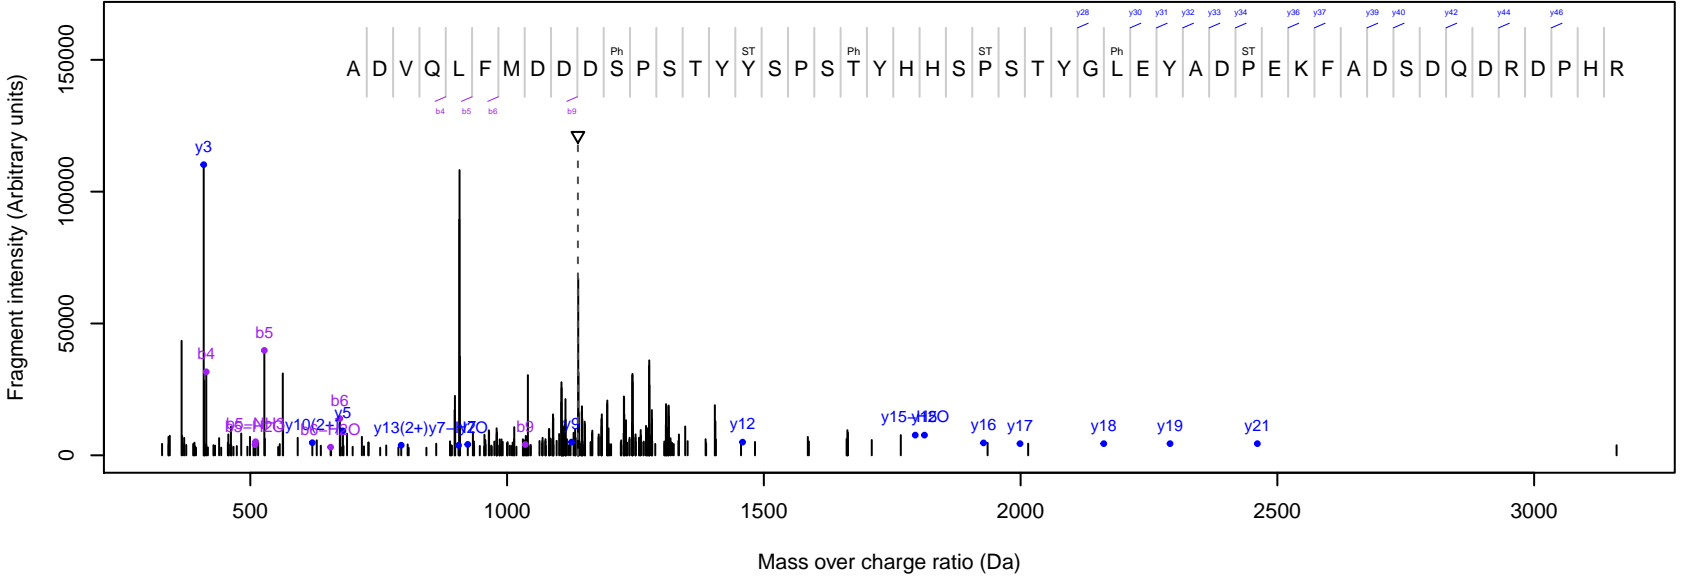

AGTLS(Phospho (STY))ITEFADMLS(Phospho (STY))GNAGGFRSRSSS(Phospho (STY))VGS(Phospho (STY))SSSYPIPAVSR-4+

Source : QE3\_201126\_FR\_TiOx\_hum\_tissue\_Urea\_RNAB\_N Scan : 63151

Andromeda score : 60.214

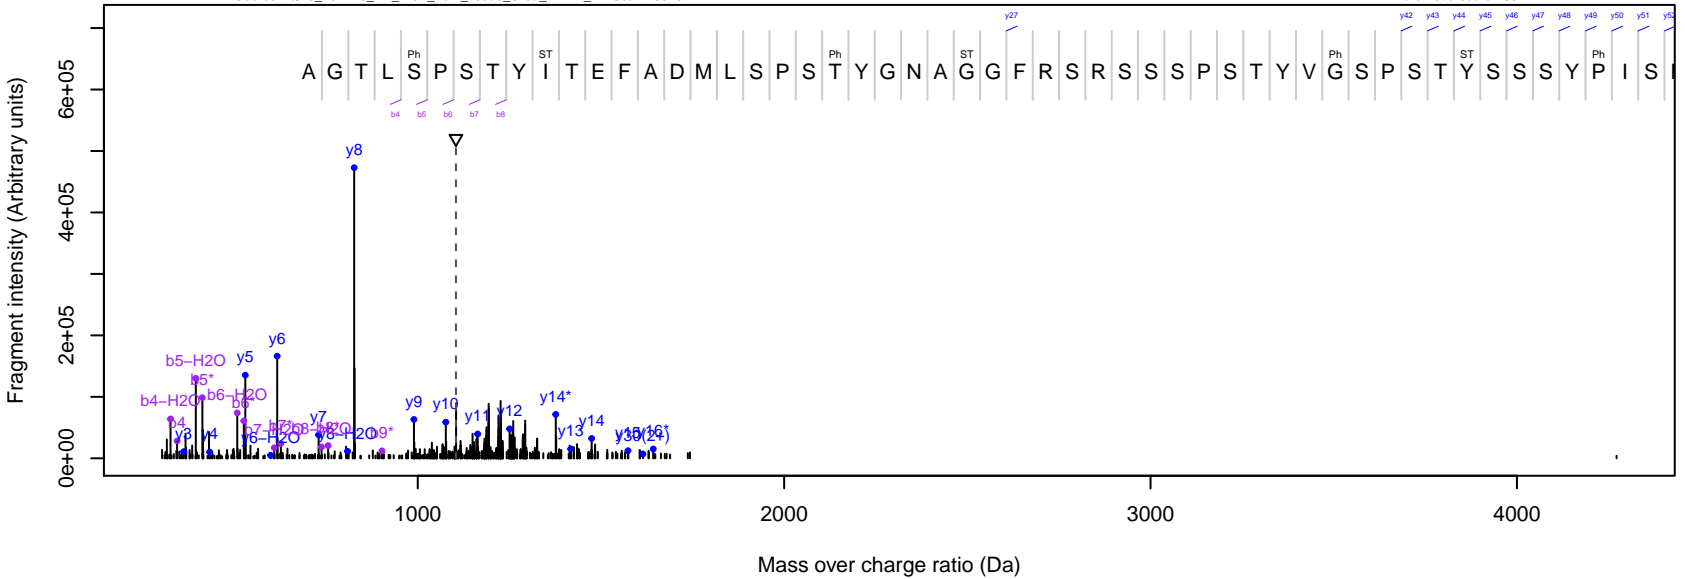

APPPSRPPRPS(Phospho (STY))V-3+

Source : QE3\_201126\_FR\_TIOx\_hum\_tissue\_Urea\_RNAB\_B Scan : 10931

Andromeda score : 60.209

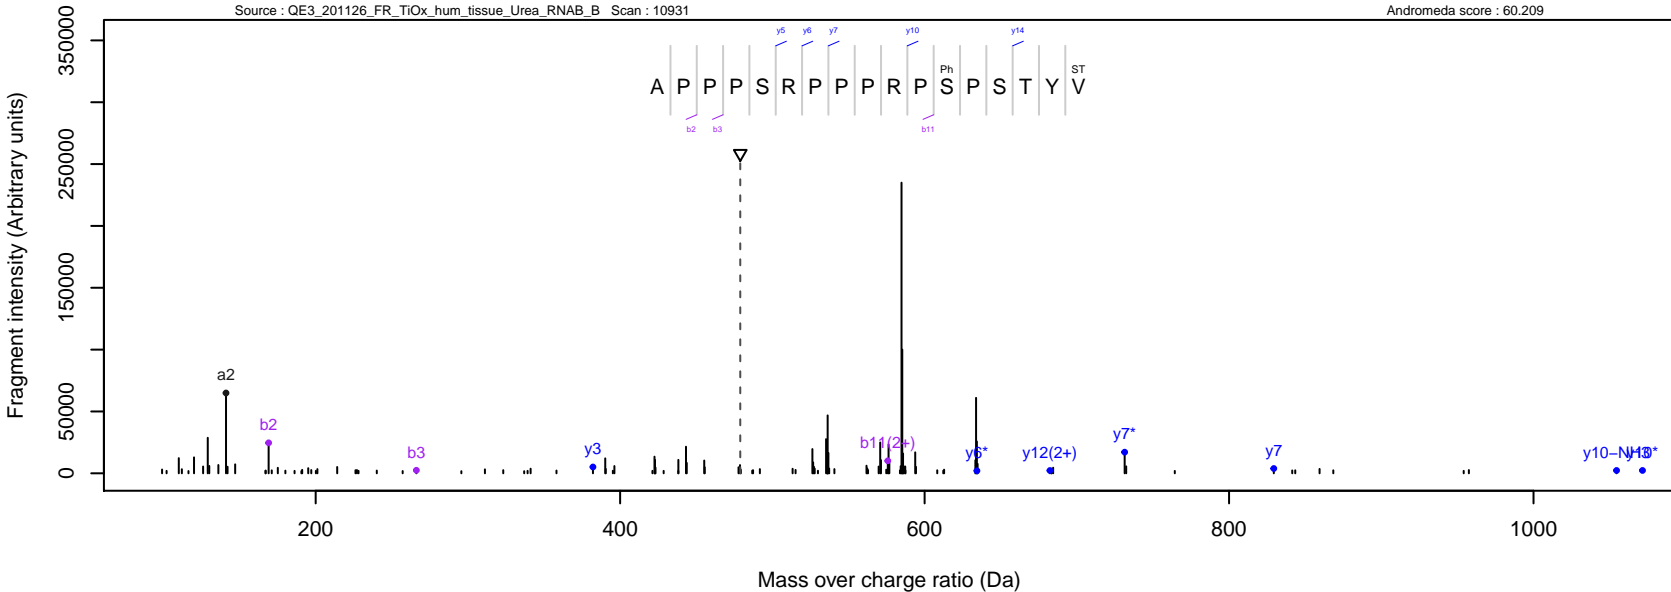

EVEEEDSEEMSEDEEDDS(Phospho (STY))S(Phospho (STY))GEEVIPQKK-3+

Source : QE3\_201126\_FR\_TIOx\_hum\_tissue\_Urea\_RNAB\_B Scan : 30454

Andromeda score : 60.18

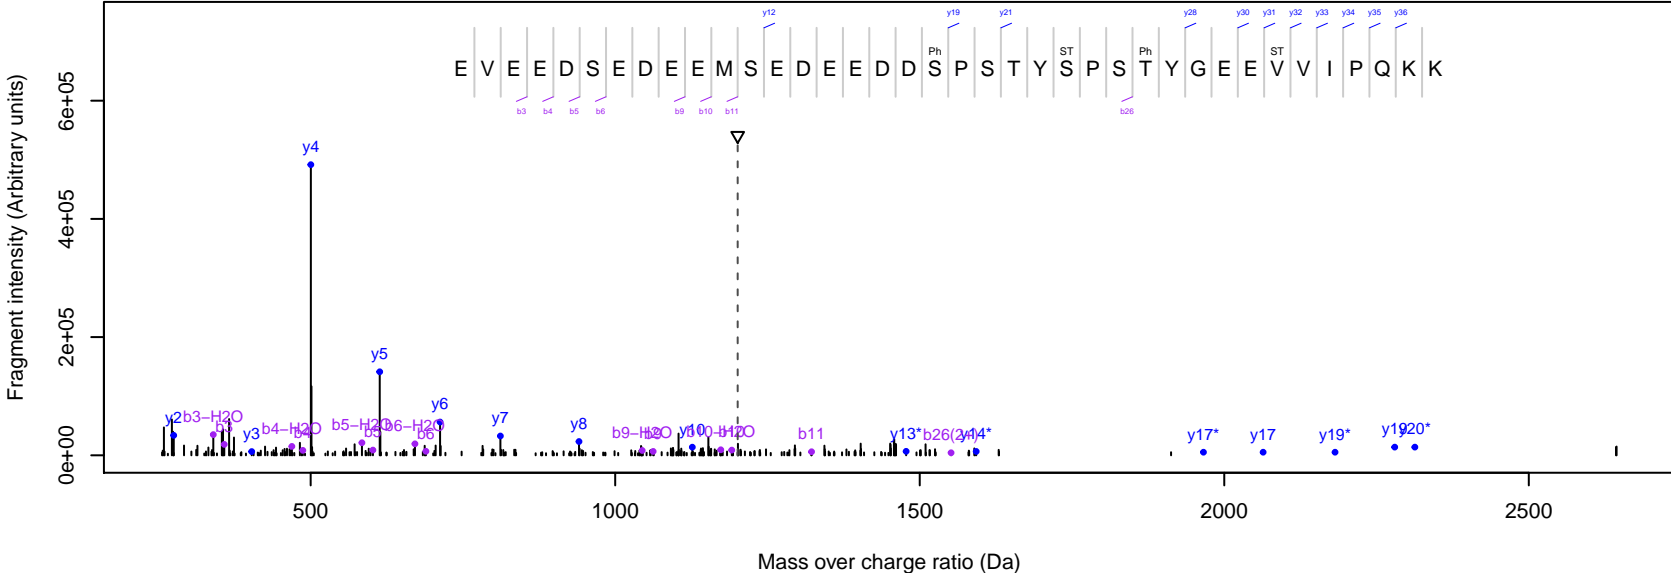

S(Phospho (STY))GSSSSIPESQSNHNSNQSDSGVSDTQPAGHVR-4+

Source : QE3\_201126\_FR\_TIOx\_hum\_tissue\_Urea\_RNAB\_H Scan : 9716

Andromeda score : 60.18

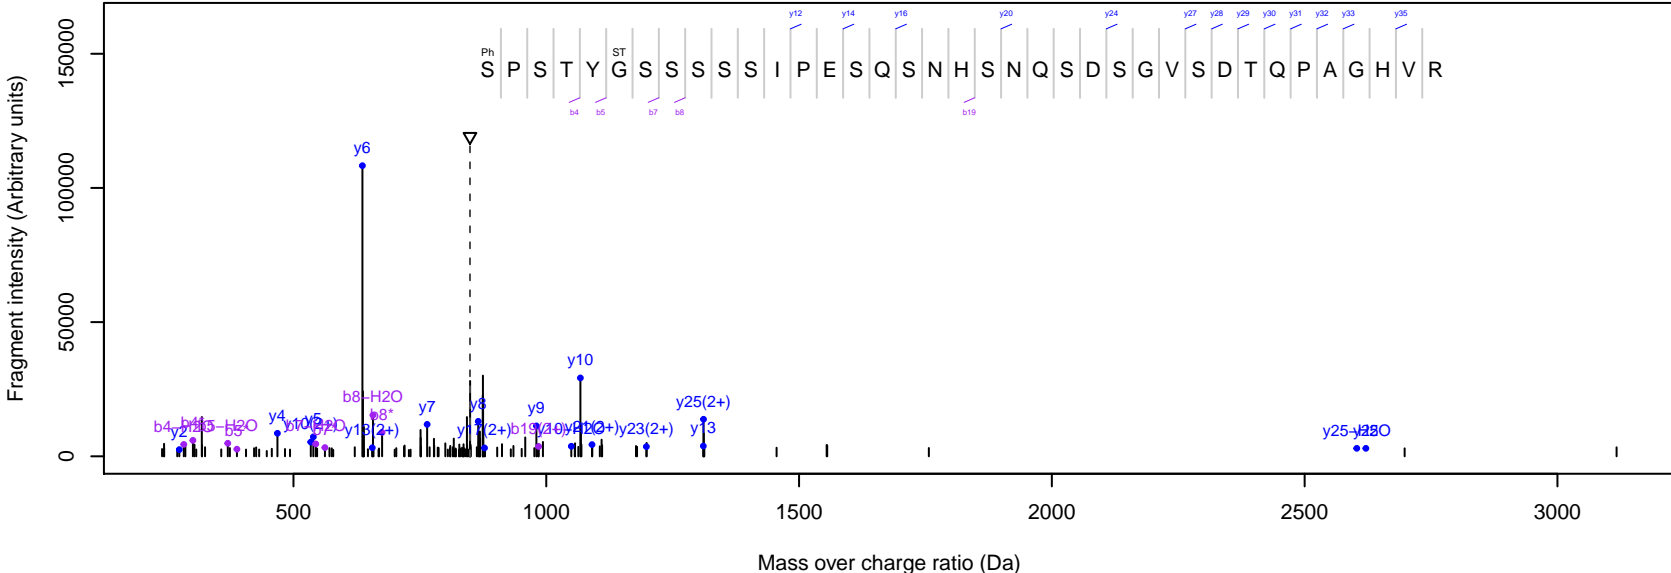

DSGS(Phospho (STY))ISLQETR-2+

Source : QE3\_201126\_FR\_TiOx\_hum\_tissue\_Urea\_RNAB\_N Scan : 18366

Andromeda score : 60.161

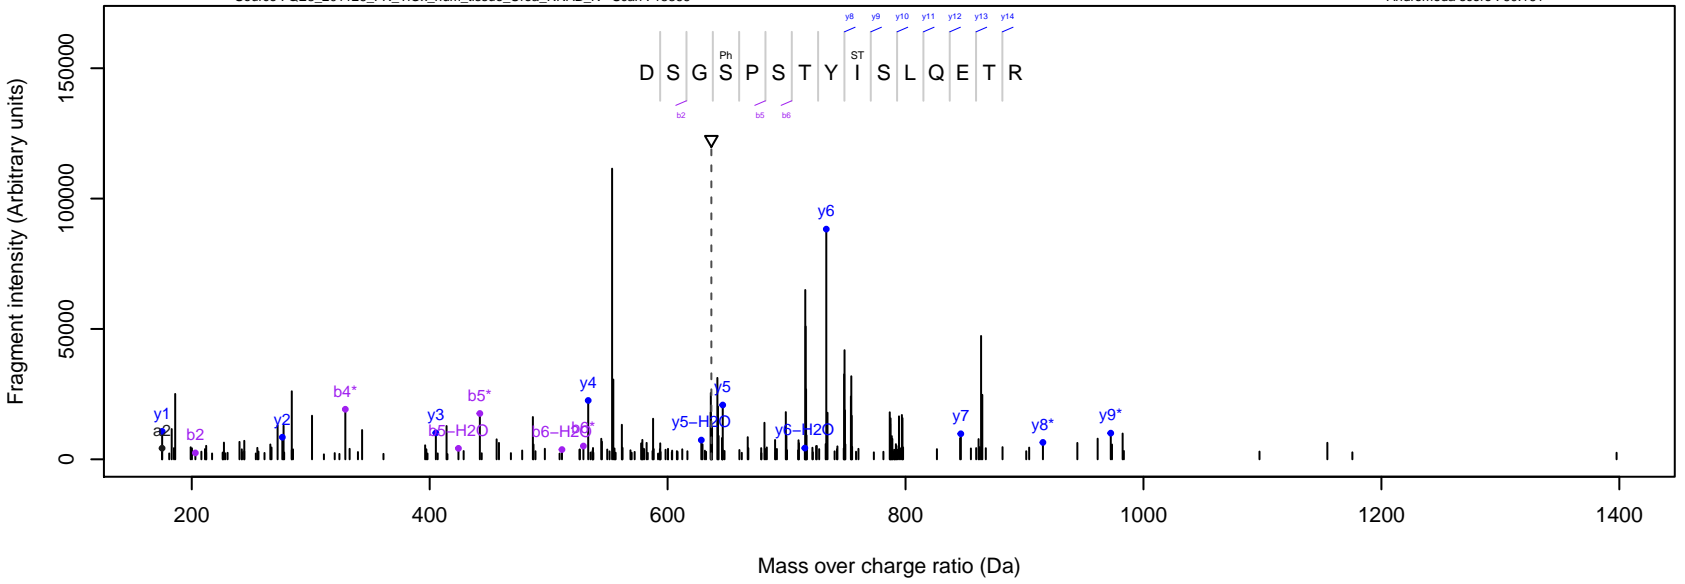

NKS(Phospho (STY))SSPEDPGAEV-2+

Source : QE3\_201126\_FR\_TiOx\_hum\_tissue\_Urea\_RNAB\_N Scan : 12022

Andromeda score : 60.161

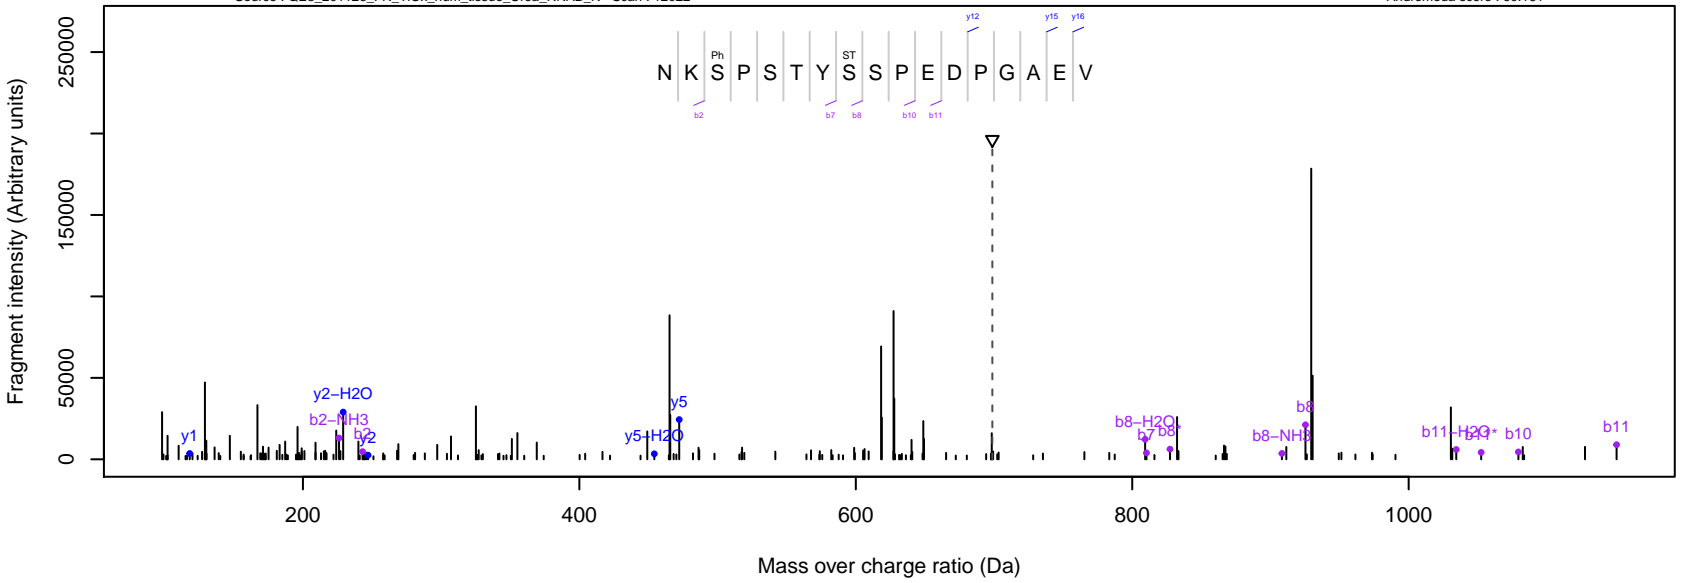

NADSEIKHST(Phospho (STY))PS(Phospho (STY))PTR-3+

Source : QE3\_201126\_FR\_TiOx\_hum\_tissue\_Urea\_RNAB\_N Scan : 5509

Andromeda score : 60.134

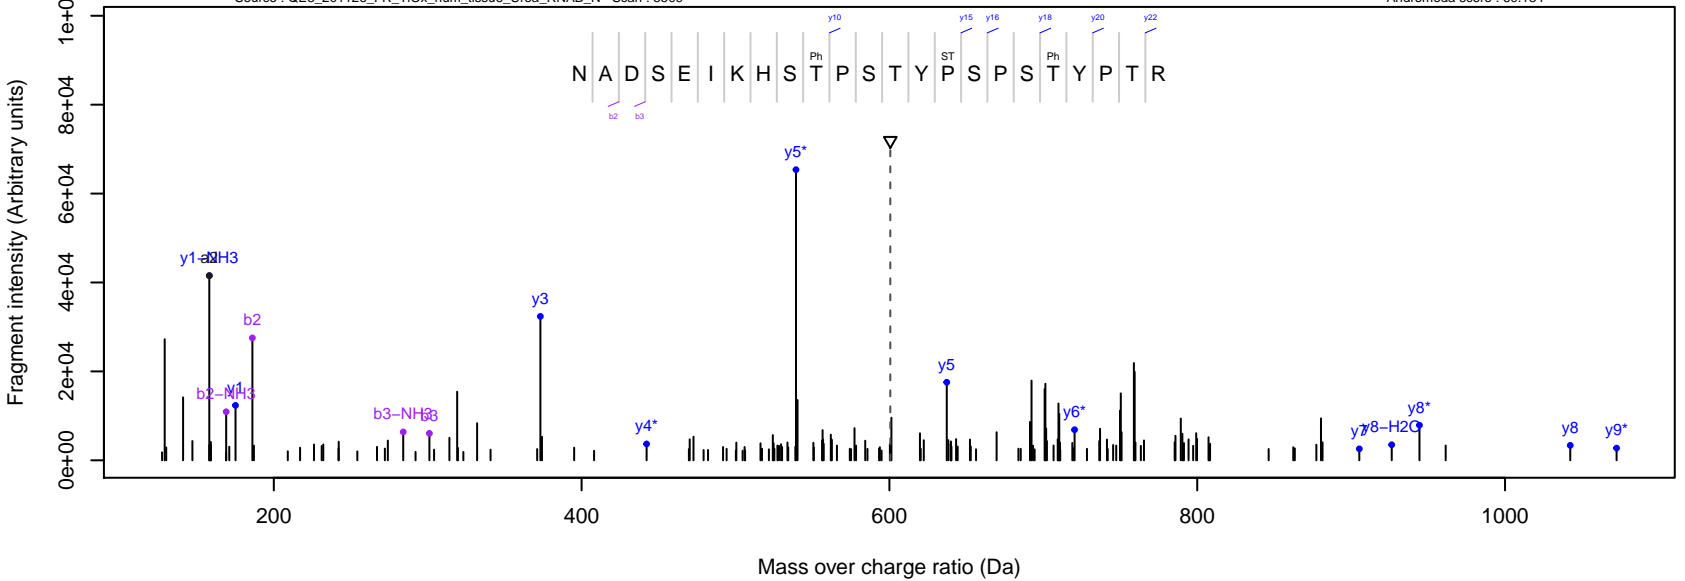

DSGSDGHSVSSRDS(Phospho (STY))AAPS(Phospho (STY))PIPGADNLSADPVVSPPTSIPFK-4+

Source : QE3\_201126\_FR\_TiOx\_hum\_tissue\_Urea\_RNAB\_N Scan : 51232

Andromeda score : 60.114

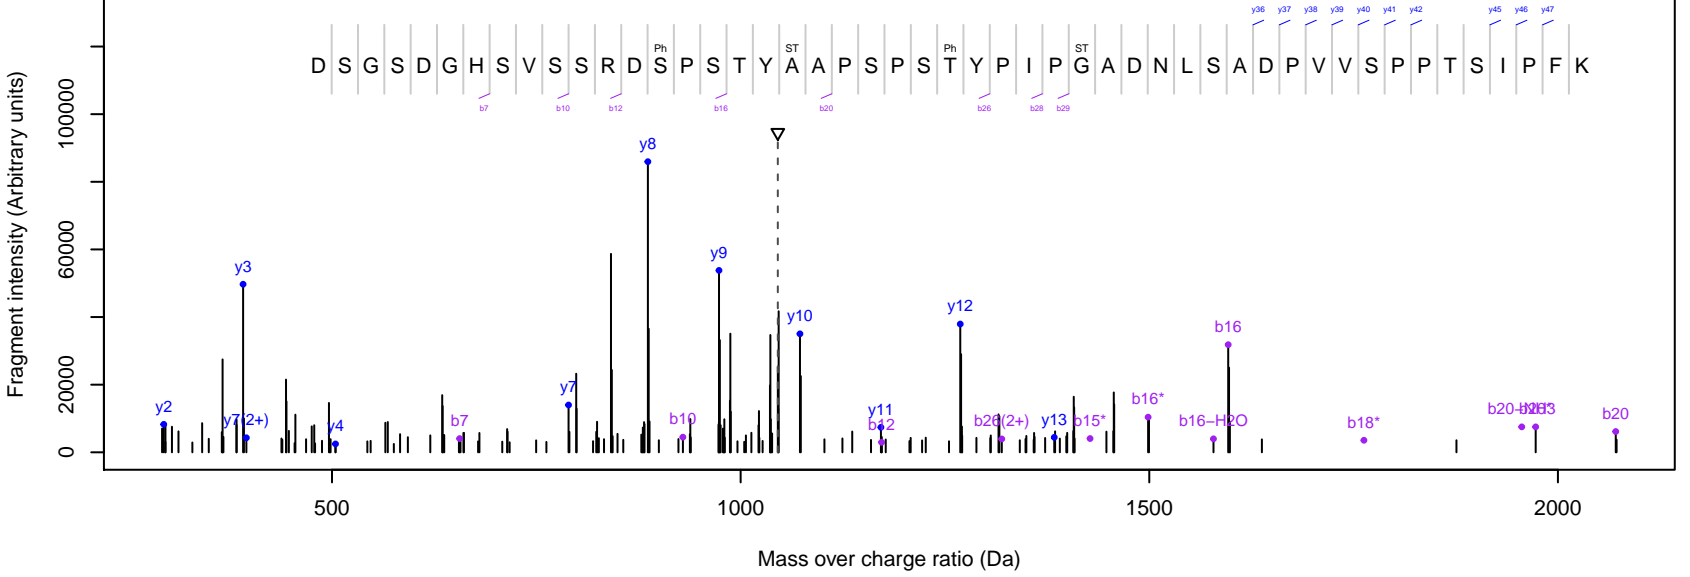

KRES(Phospho (STY))ES(Phospho (STY))ES(Phospho (STY))DET(Phospho (STY))PPAAPQLIK-3+

Source : QE3\_201126\_FR\_TiOx\_hum\_tissue\_Urea\_RNAB\_N Scan : 33085

Andromeda score : 60.104

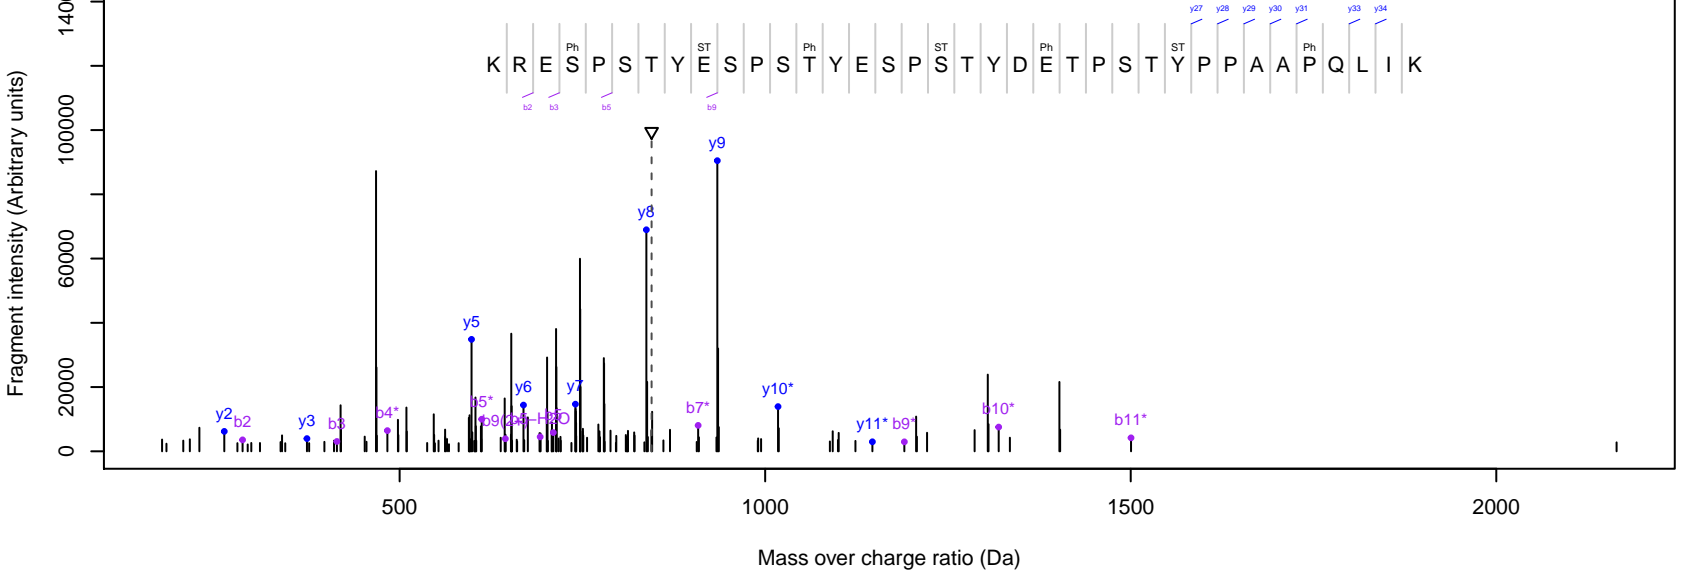

RMEDEGGFPVQENGQPES(Phospho (STY))PRR-3+

Source : QE3\_201126\_FR\_TiOx\_hum\_tissue\_Urea\_RNAB\_B Scan : 19711

Andromeda score : 60.104

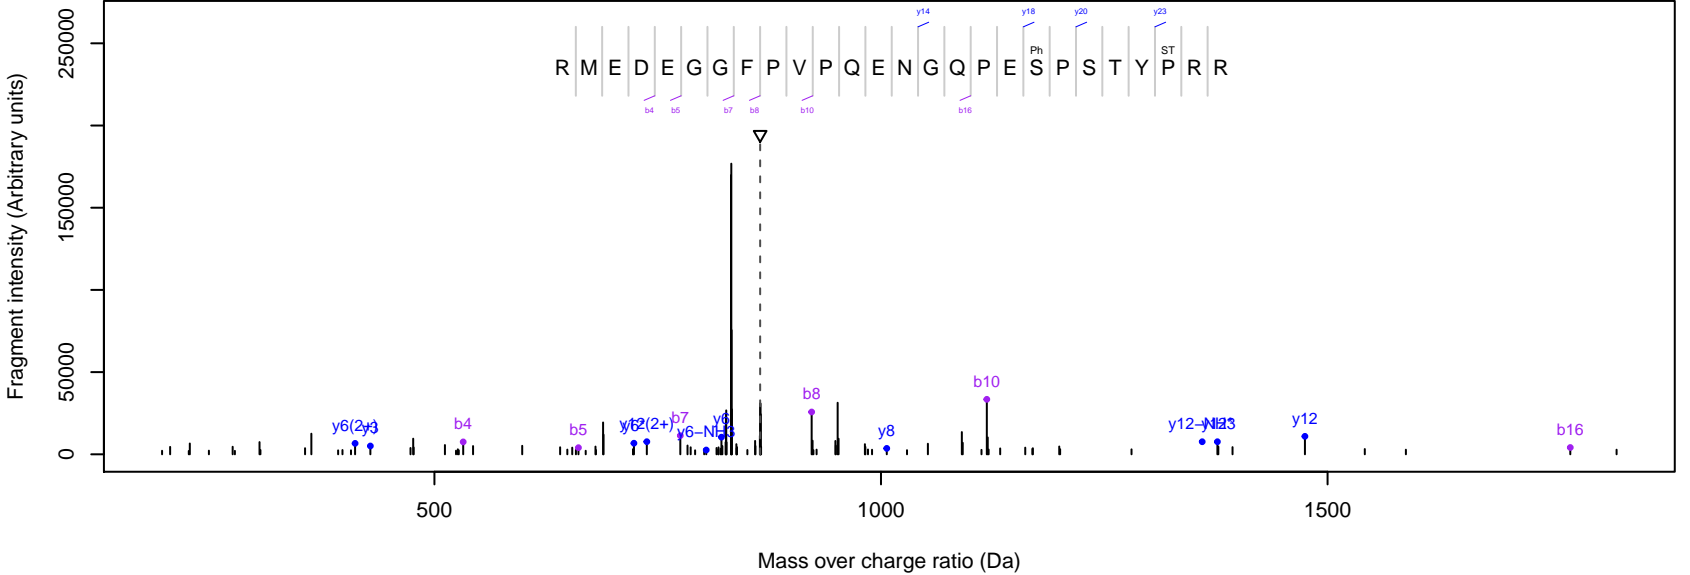

DDSDLYSPRYS(Phospho (STY))FSEDTKSPLSVPR-4+

Source : QE3\_201126\_FR\_TiOx\_hum\_tissue\_Urea\_RNAB\_B Scan : 40641

Andromeda score : 60.093

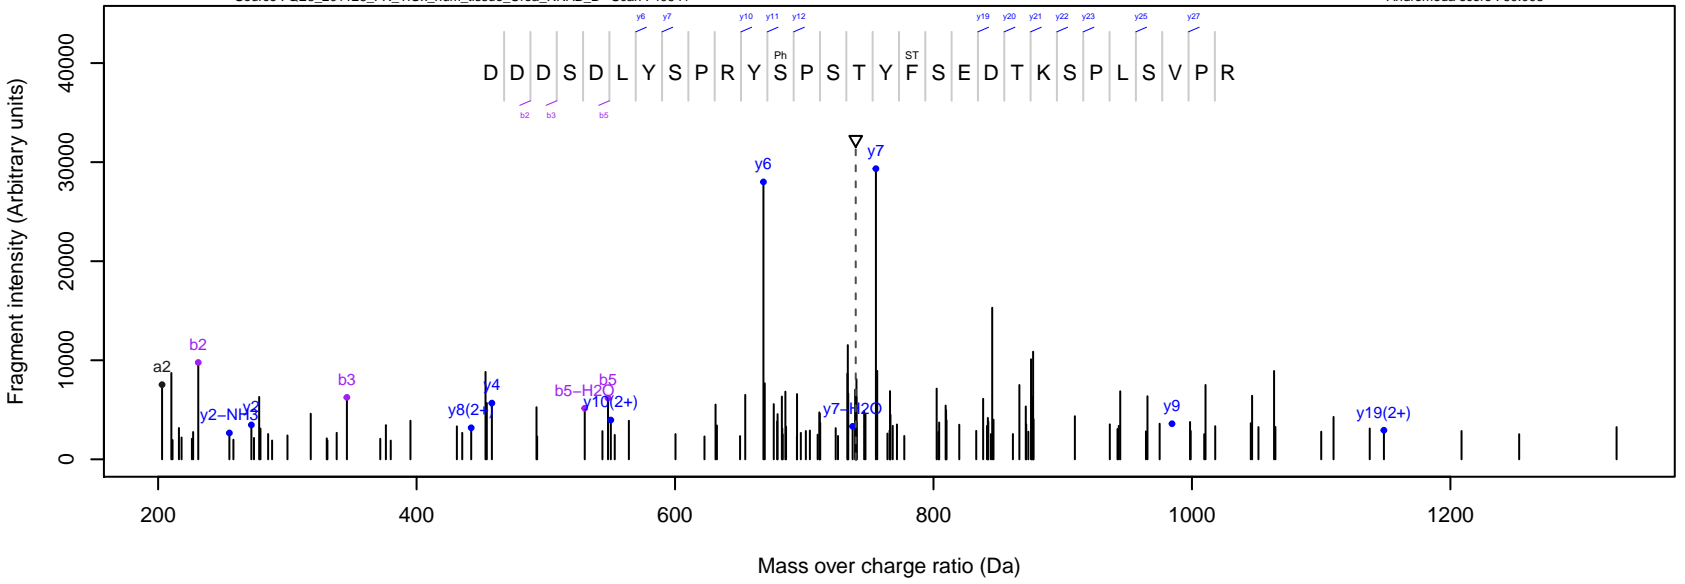

GNVVP(Phospho (STY))PLPTR-2+

Source : QE3\_201126\_FR\_TiOx\_hum\_tissue\_Urea\_RNAB\_H Scan : 25002

Andromeda score : 60.08

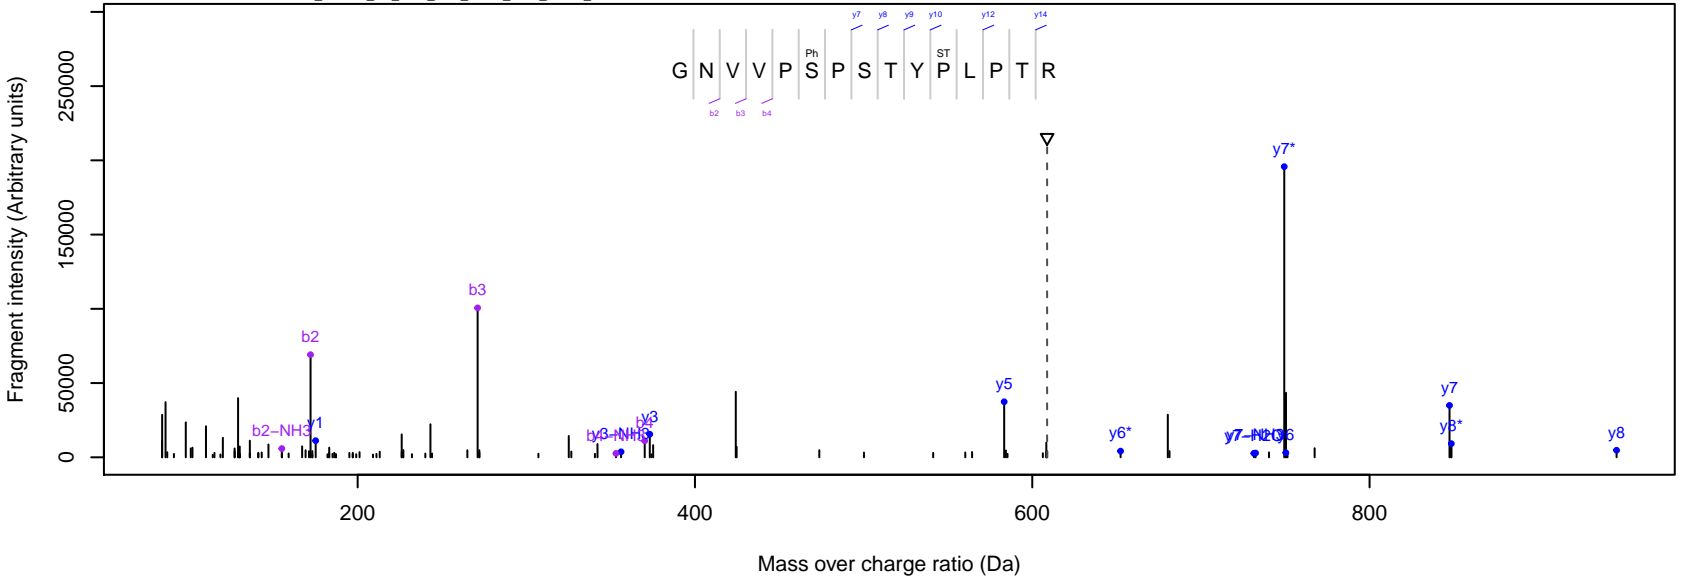

SVS(Phospho (STY))ELS(Phospho (STY))LQGR-2+

Source : QE3\_201126\_FR\_TiOx\_hum\_tissue\_Urea\_RNAB\_H Scan : 19879

Andromeda score : 60.08

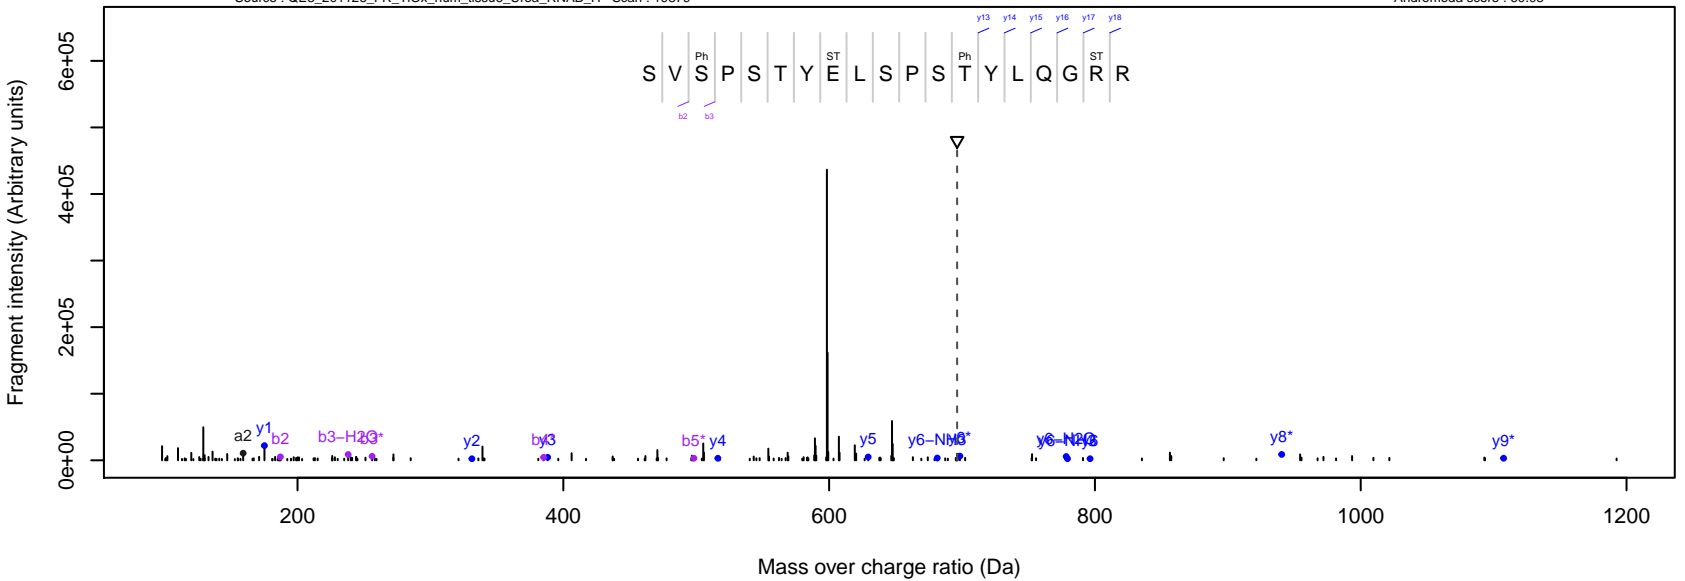

APSHM(Oxidation (M))SSSHS(Phospho (STY))FPQLAR-3+

Source : QE3\_201126\_FR\_TIOx\_hum\_tissue\_Urea\_RNAB\_N Scan : 12042

Andromeda score : 60.032

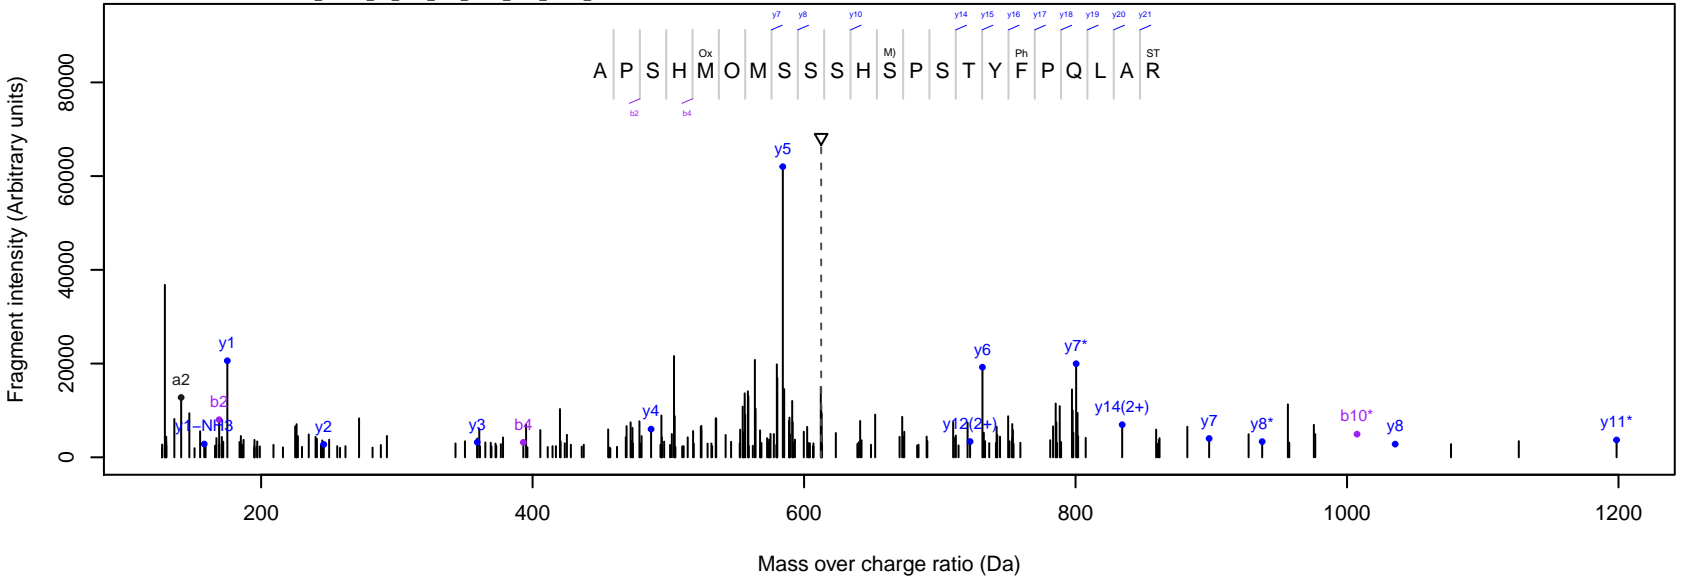

QWIGPTGM(Oxidation (M))NQN(M)S(Phospho (STY))FHR-3+

Source : QE3\_201126\_FR\_TIOx\_hum\_tissue\_Urea\_RNAB\_N Scan : 21228

Andromeda score : 59.975

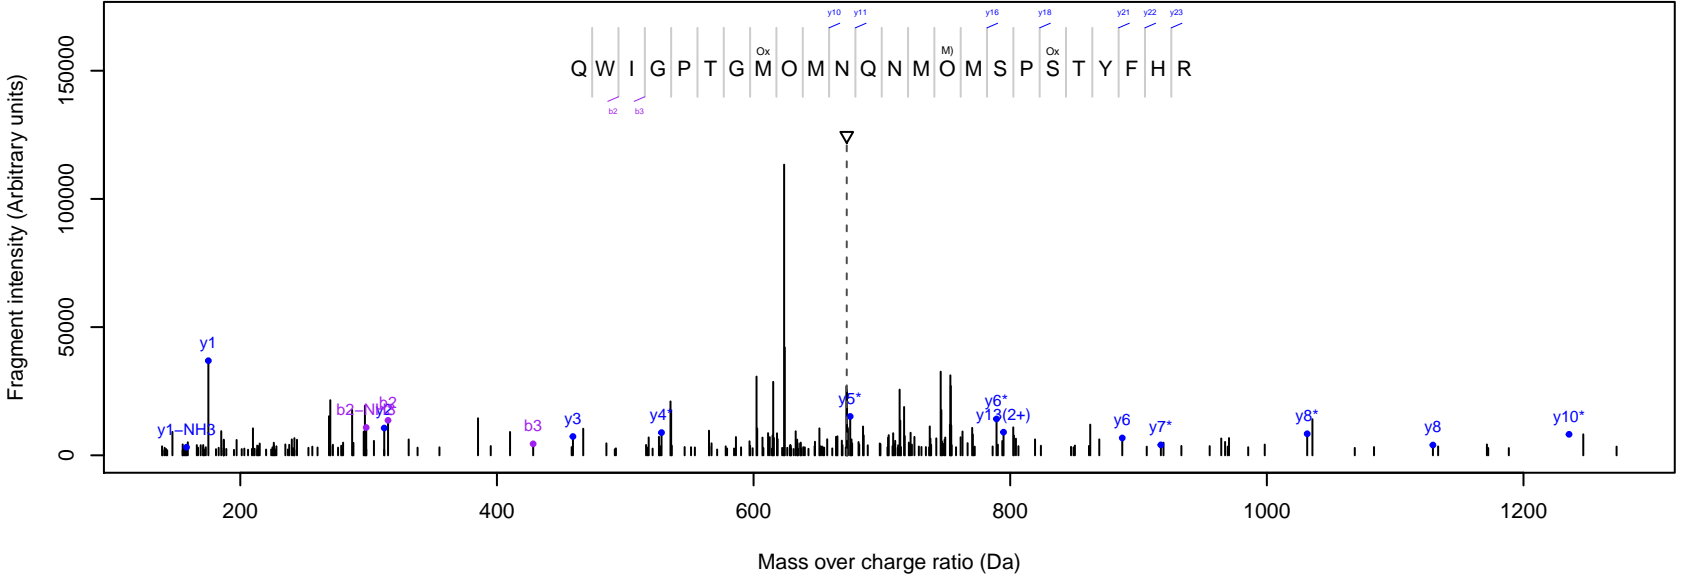

VLS(Phospho (STY))PELSCTEIPILNERHS(Phospho (STY))PK-3+

Source : QE3\_201126\_FR\_TIOx\_hum\_tissue\_Urea\_RNAB\_H Scan : 45965

Andromeda score : 59.971

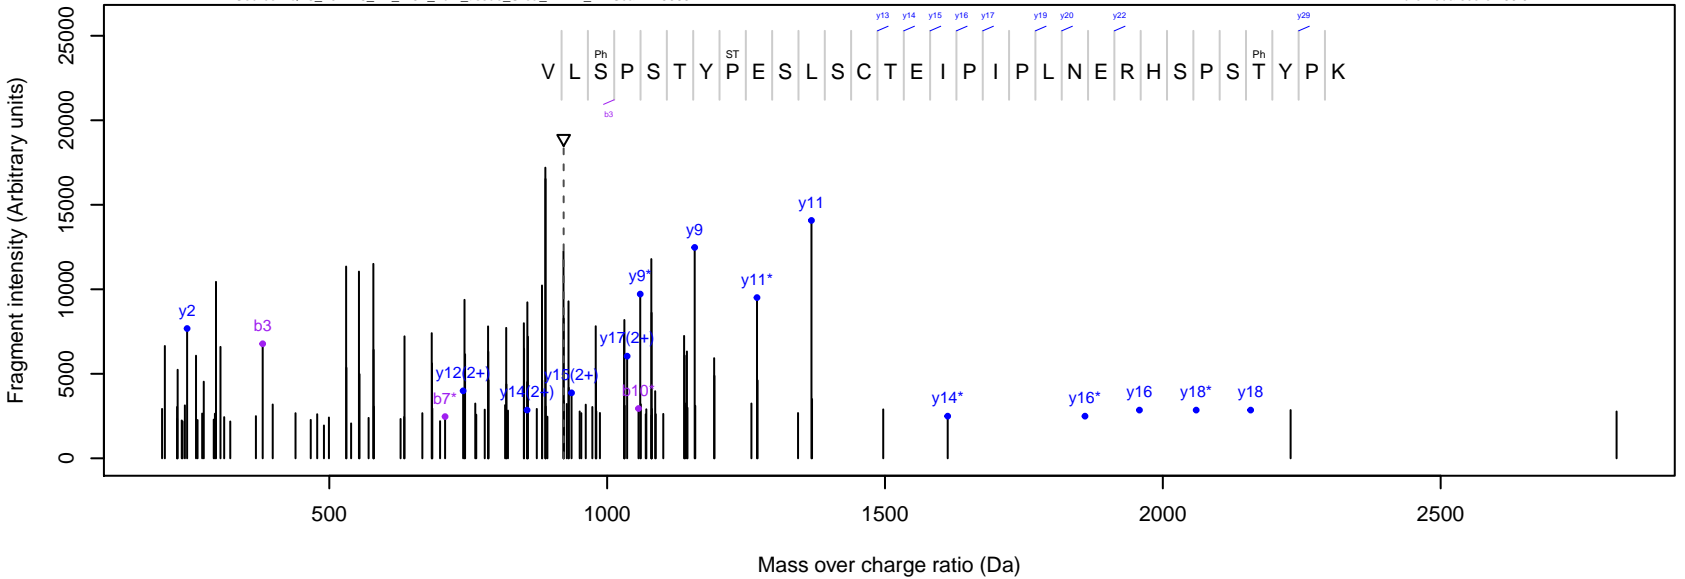



EFS(Phospho (STY))GPSTPTGTLEFEGGEVSLLEGGK-3+

Source : QE3\_201126\_FR\_TiOx\_hum\_tissue\_Urea\_RNAB\_B Scan : 49634

Andromeda score : 59.943

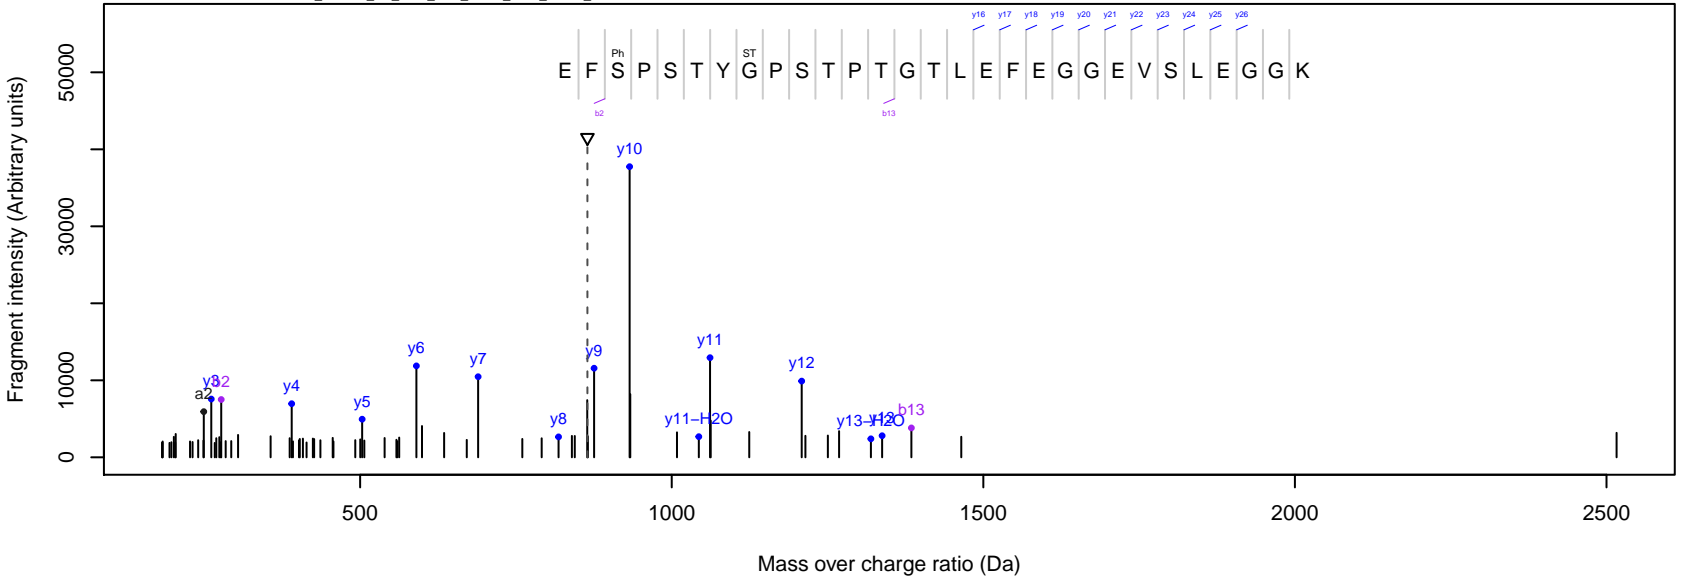

HAS(Phospho (STY))VPATFMPIVPEPPTSVGPPVAVPEPIGFPTR-4+

Source : QE3\_201126\_FR\_TiOx\_hum\_tissue\_Urea\_RNAB\_H Scan : 60927

Andromeda score : 59.898

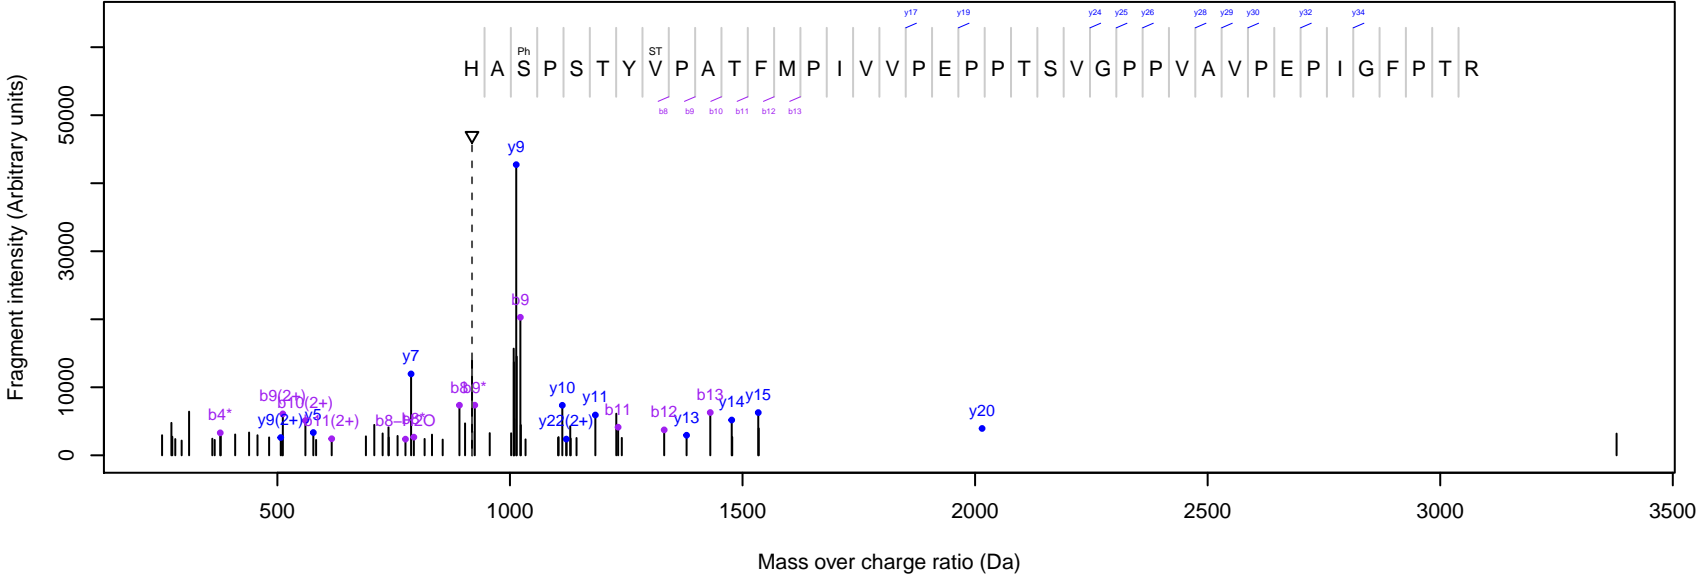

KEESHNDQSPQIRAS(Phospho (STY))PS(Phospho (STY))PQPSSQLQIHR-4+

Source : QE3\_201126\_FR\_TiOx\_hum\_tissue\_Urea\_RNAB\_N Scan : 15750

Andromeda score : 59.837

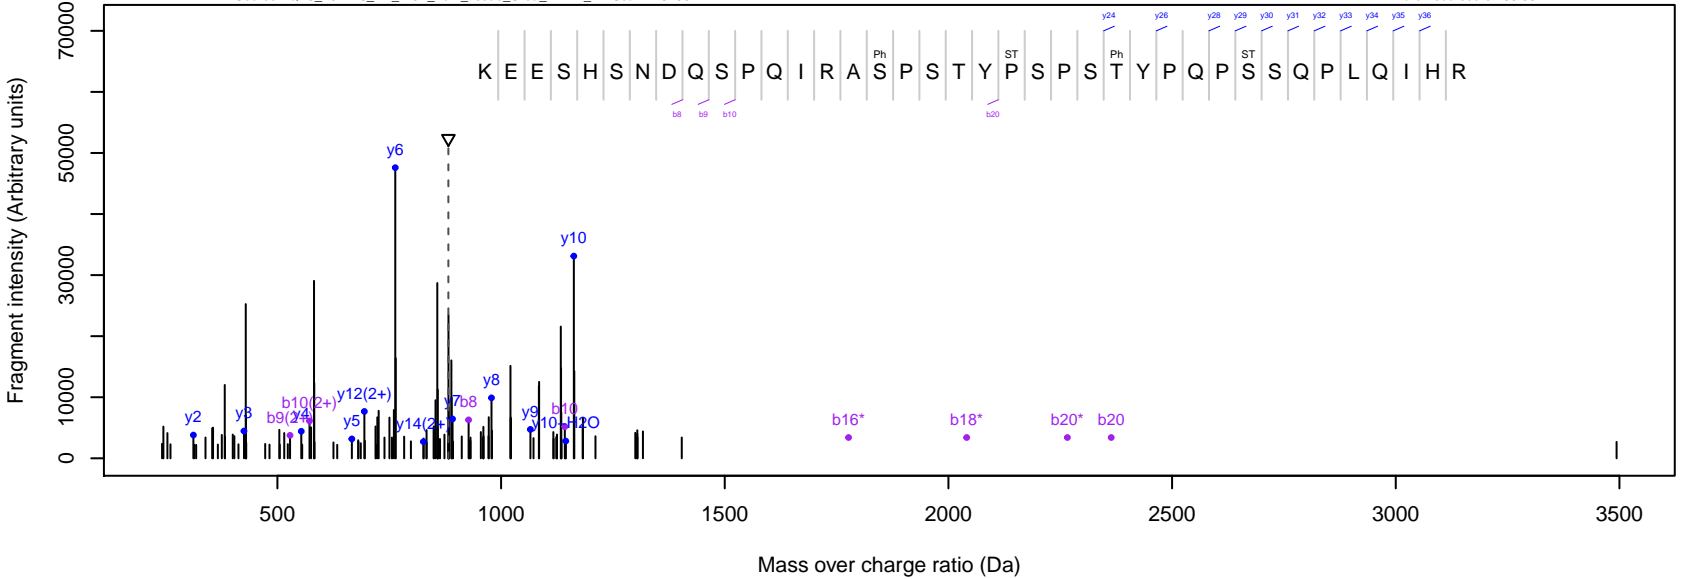

RKS(Phospho (STY))PLQDPFPEEDYSSTEGSGGR-3+

Source : QE3\_201126\_FR\_TiOx\_hum\_tissue\_Urea\_RNAB\_B Scan : 22416

Andromeda score : 59.814

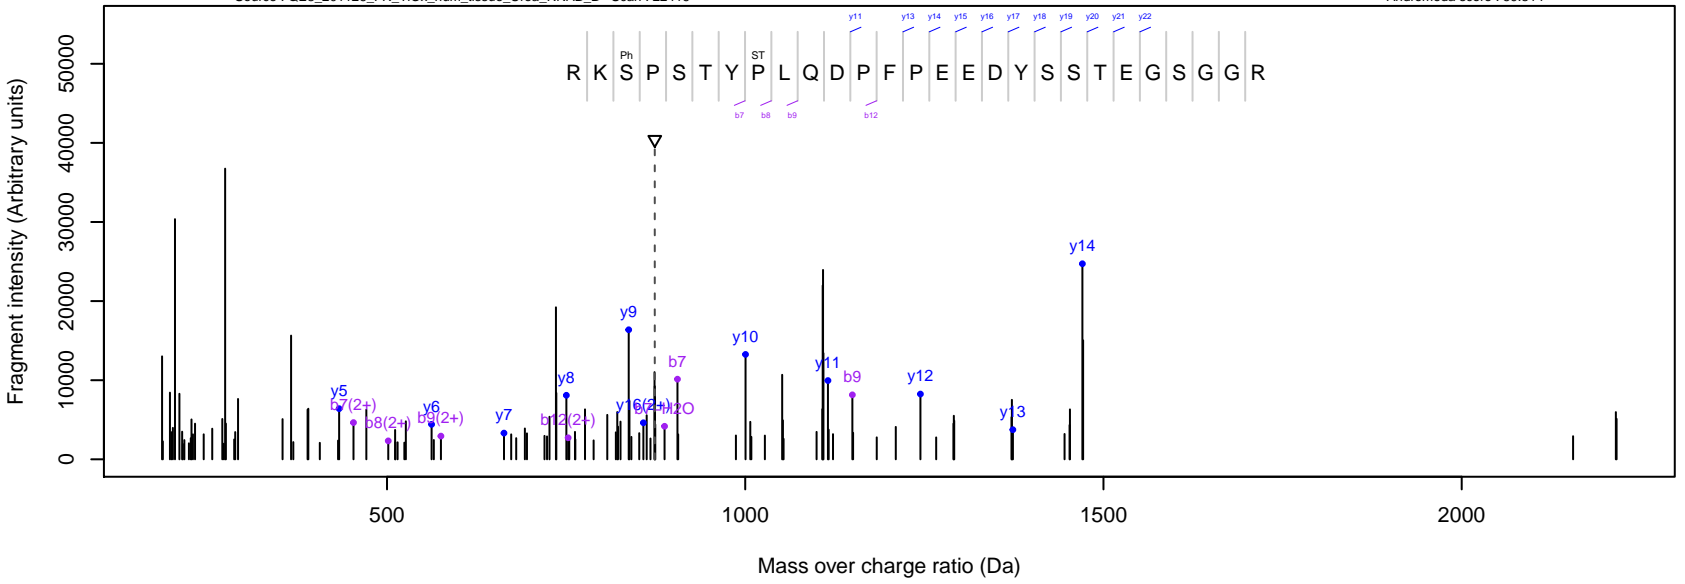

HKSGSM(Oxidation (M))EEDVDTS(Phospho (STY))PGGDYITSPSSPTSSSR-3+

Source : QE3\_201126\_FR\_TiOx\_hum\_tissue\_Urea\_RNAB\_N Scan : 16101

Andromeda score : 59.789

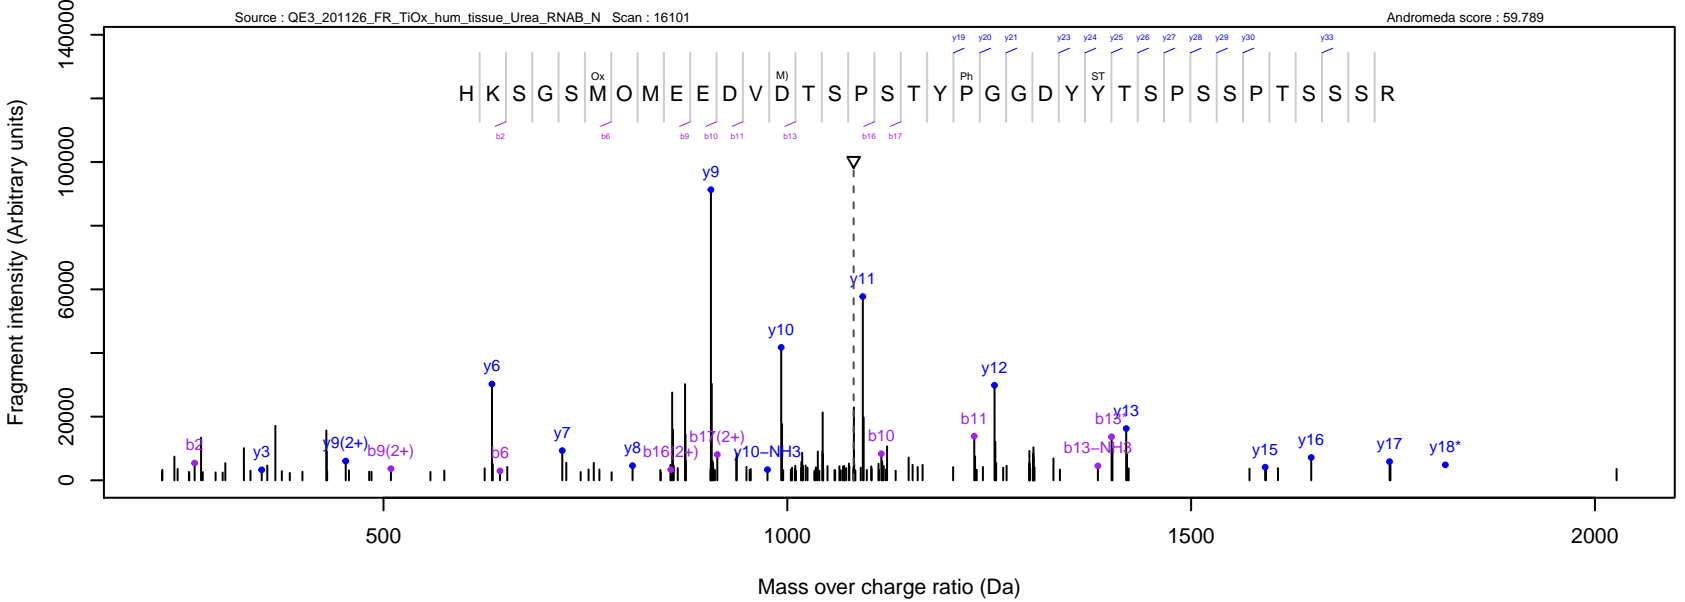

KADTTTPTAILAPGSPAS(Phospho (STY))PPGSLEPK-3+

Source : QE3\_201126\_FR\_TiOx\_hum\_tissue\_Urea\_RNAB\_H Scan : 37425

Andromeda score : 59.691

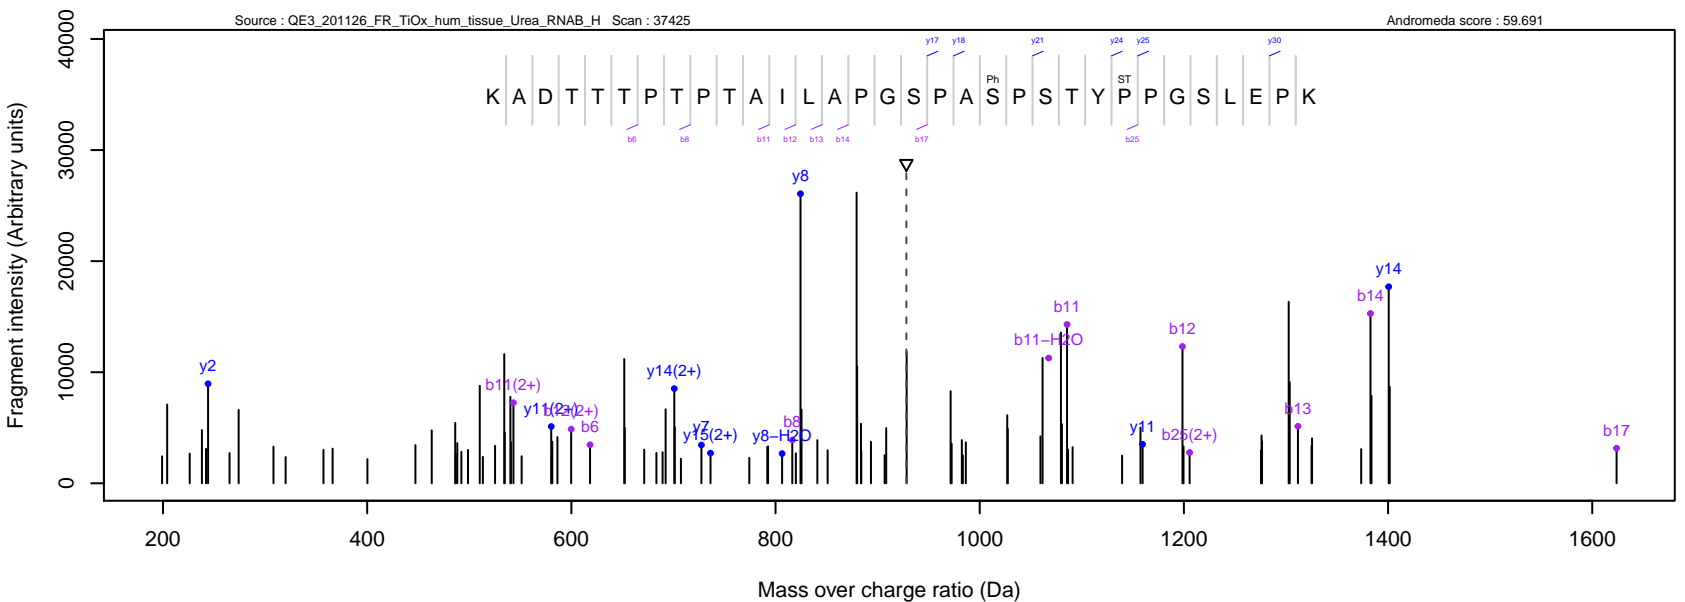

AVS(Phospho (STY))PLDPSKEVSGK-2+

Source : QE3\_201126\_FR\_TiOx\_hum\_tissue\_Urea\_RNAB\_H Scan : 18322

Andromeda score : 59.68

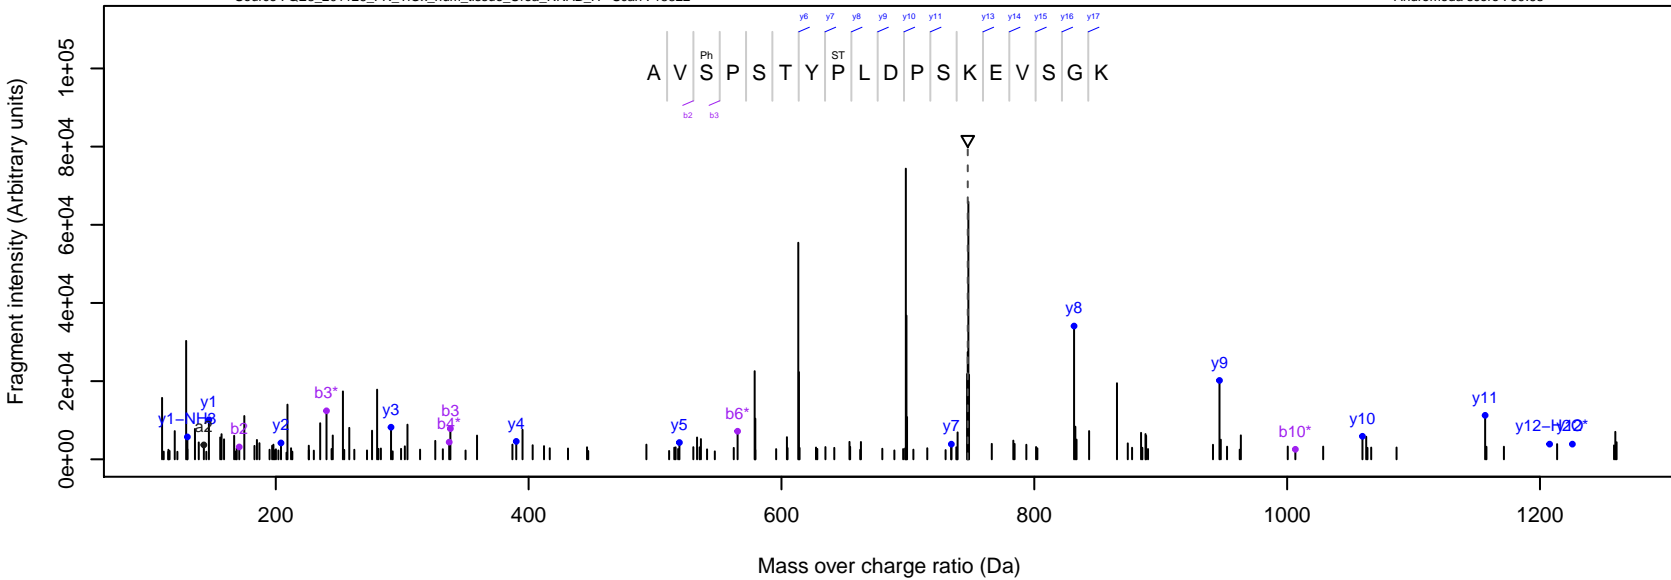

SSS(Phospho (STY))QPS(Phospho (STY))S(Phospho (STY))CCS(Phospho (STY))DPSKPGGNVEGATQSLAEQMR-3+

Source : QE3\_201126\_FR\_TiOx\_hum\_tissue\_Urea\_RNAB\_N Scan : 52599

Andromeda score : 59.678

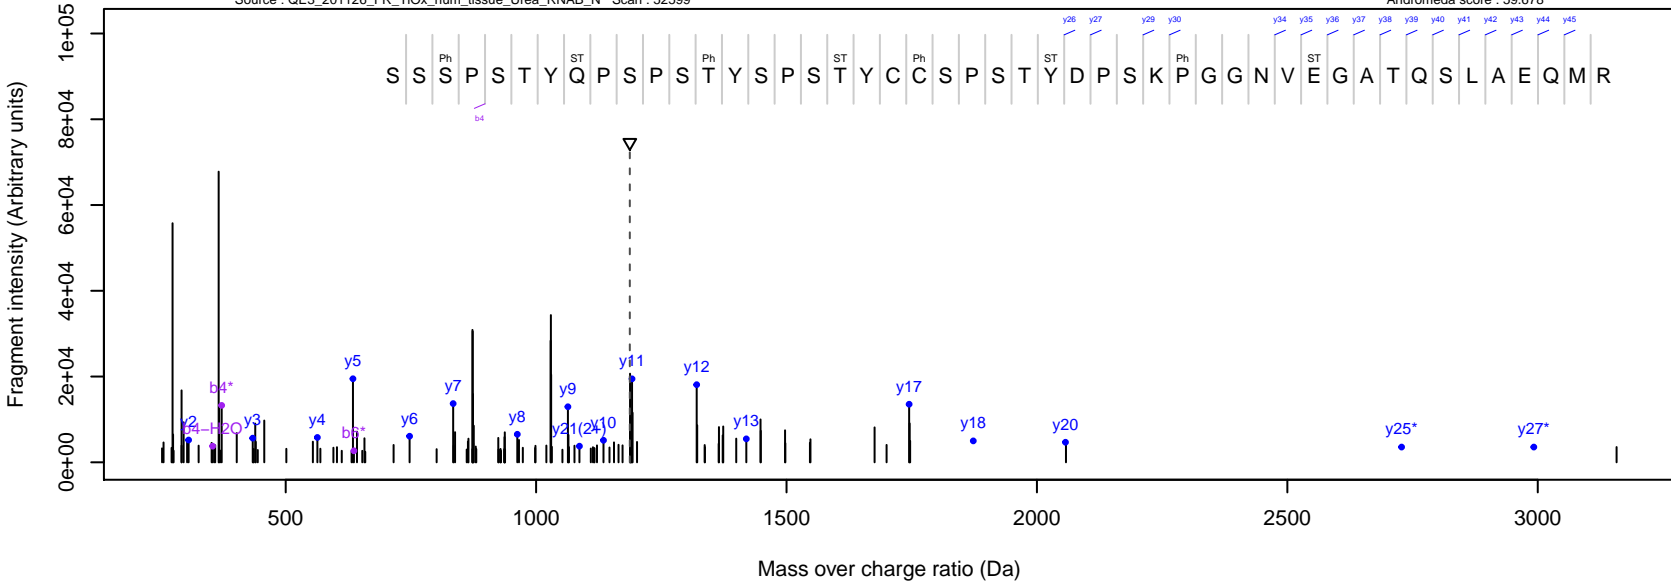

ASEAAS(Phospho (STY))PLDPSGDK-2+

Source : QE3\_201126\_FR\_TiOx\_hum\_tissue\_Urea\_RNAB\_H Scan : 14956

Andromeda score : 59.673

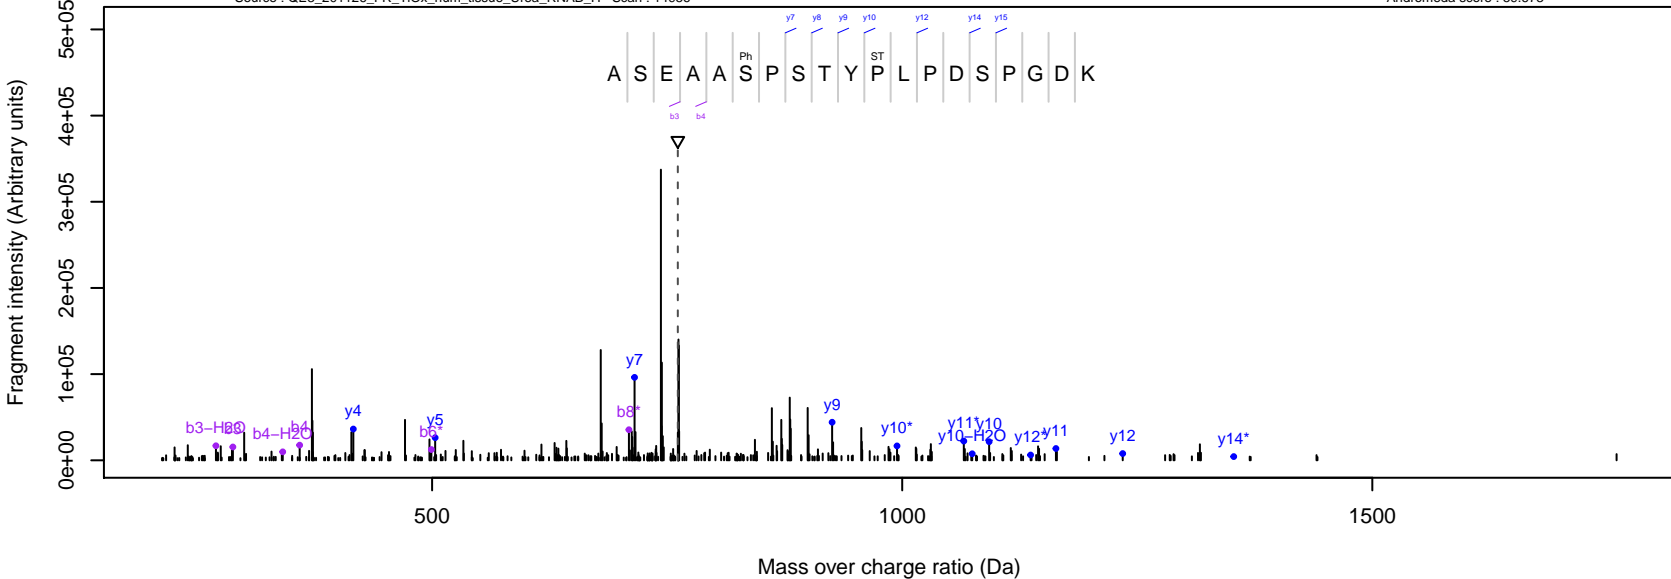

SGGGLHSVAEGVRLS(Phospho (STY))PEPGR-3+

Source : QE3\_201126\_FR\_TiOx\_hum\_tissue\_Urea\_RNAB\_H Scan : 20400

Andromeda score : 59.661

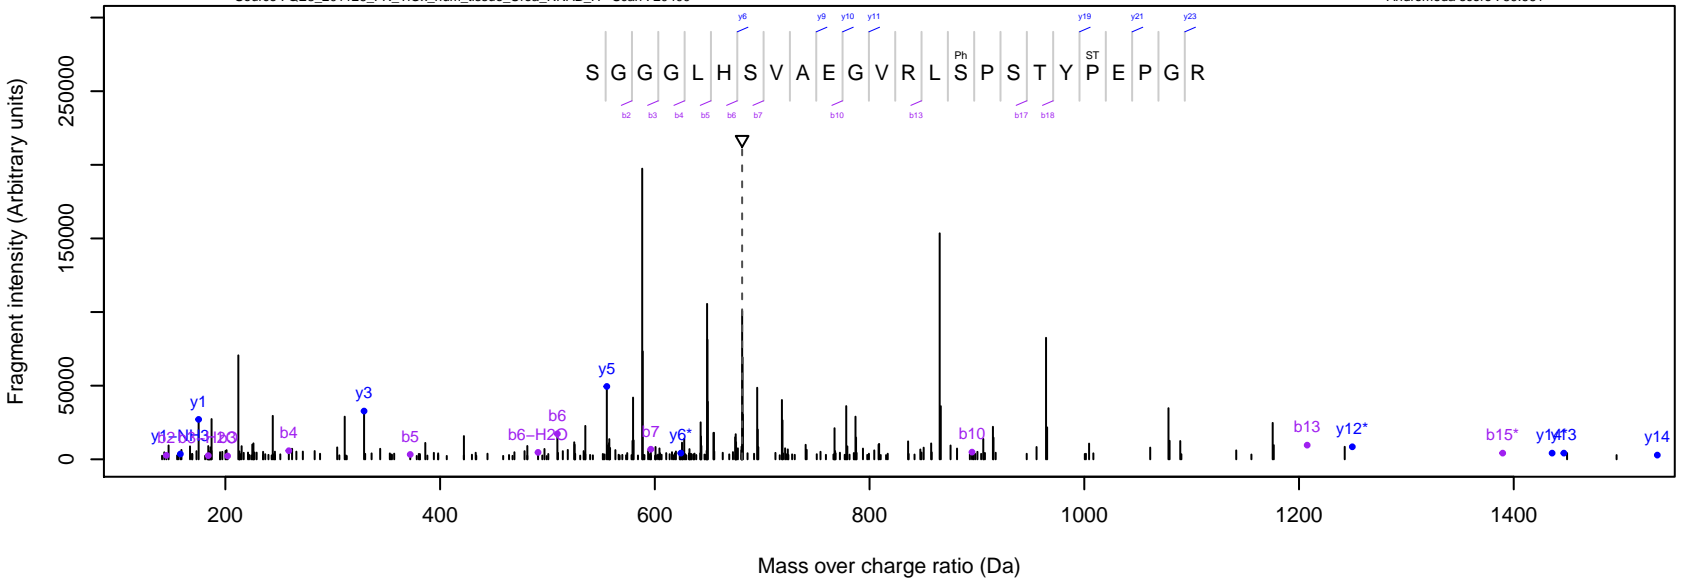

KPGPPLS(Phospho (STY))PEIR-3+

Source : QE3\_201126\_FR\_TiOx\_hum\_tissue\_Urea\_RNAB\_H Scan : 17154

Andromeda score : 59.607

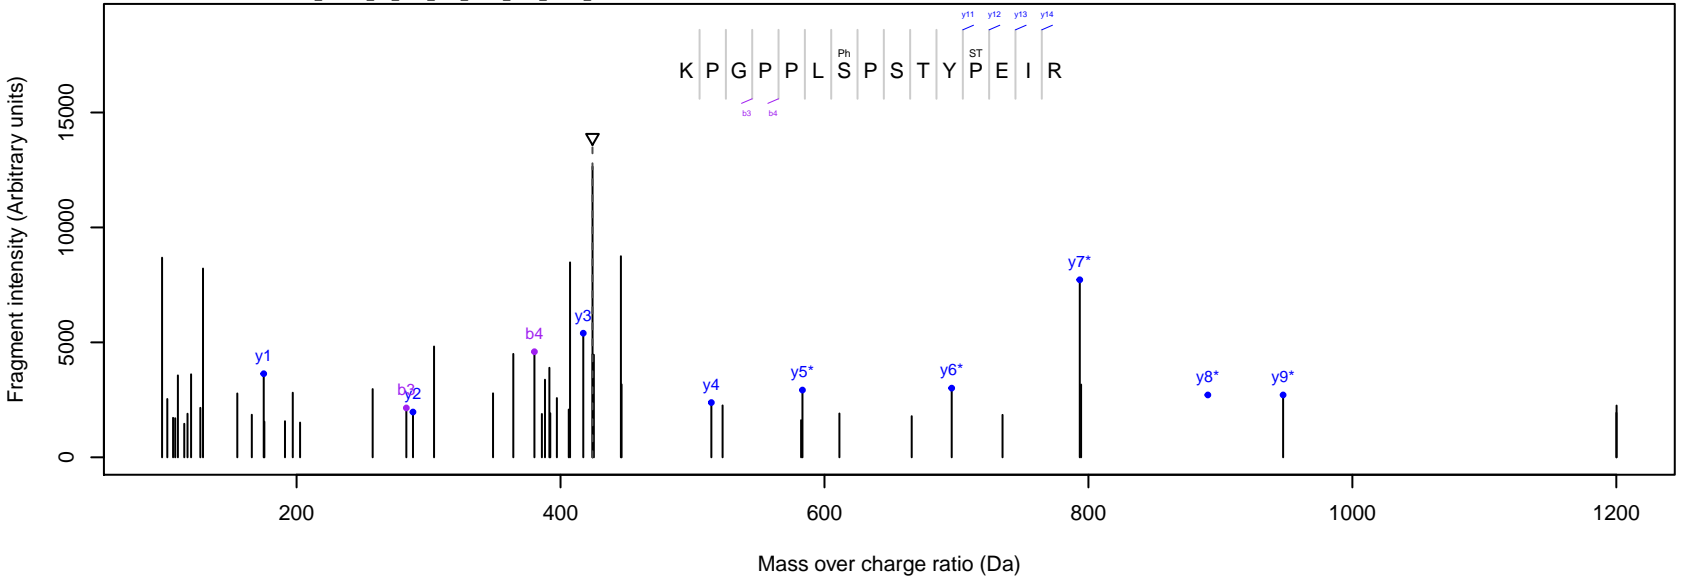

AVTIANS(Phospho (STY))PSKPSEKDSVVSLESQK-3+

Source : QE3\_201126\_FR\_TiOx\_hum\_tissue\_Urea\_RNAB\_B Scan : 18690

Andromeda score : 59.598

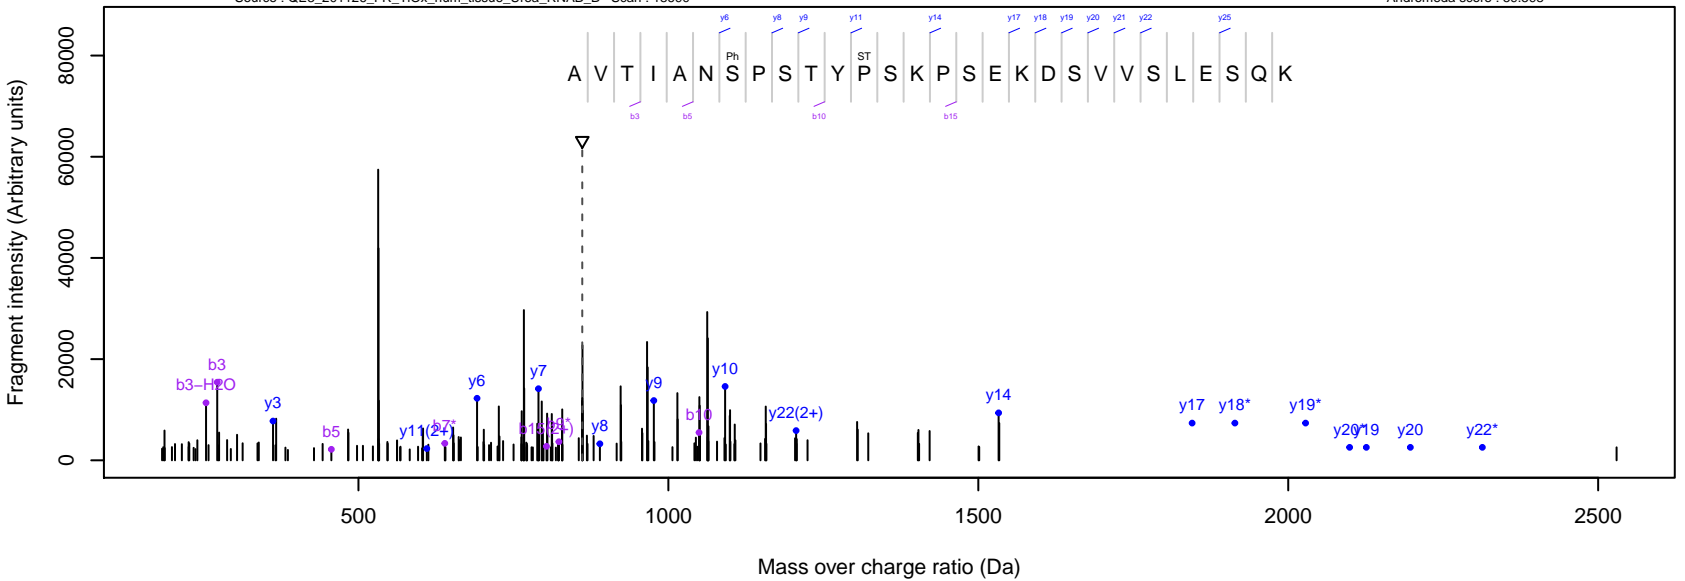

SGGLQTPCELS(Phospho (STY))REGS(Phospho (STY))PIPHDPEFGSK-3+

Source : QE3\_201126\_FR\_TIOx\_hum\_tissue\_Urea\_RNAB\_B Scan : 32387

Andromeda score : 59.598

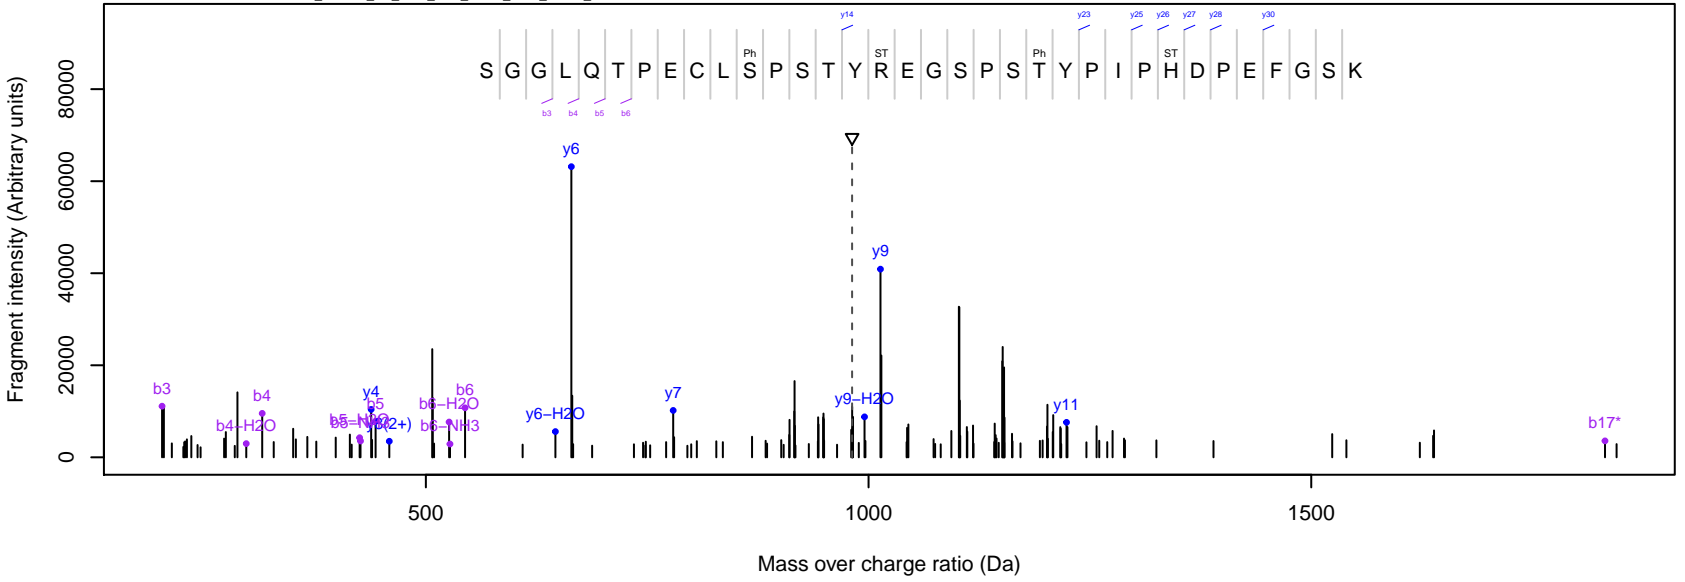

GEVQAMLGQS(Phospho (STY))TEELRVR-3+

Source : QE3\_201126\_FR\_TIOx\_hum\_tissue\_Urea\_RNAB\_N Scan : 31064

Andromeda score : 59.574

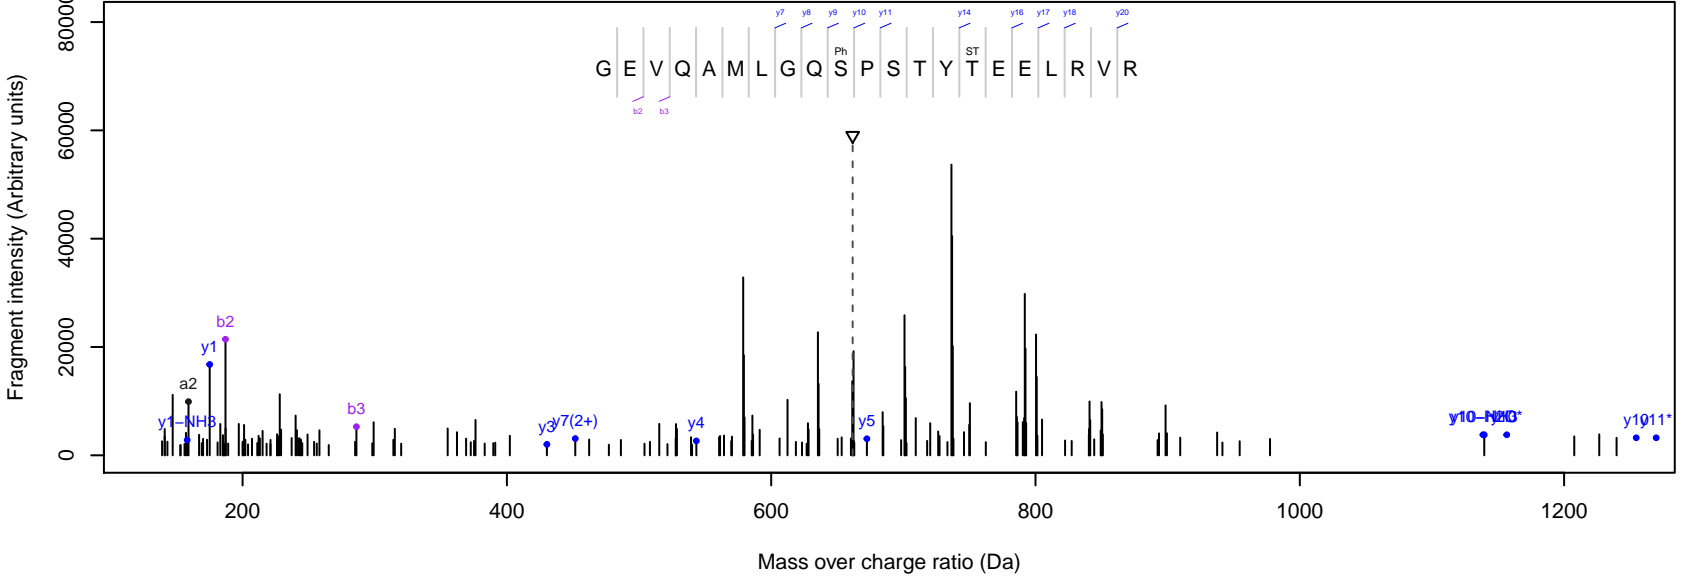

TSS(Phospho (STY))SITLQAAR-2+

Source : QE3\_201126\_FR\_TIOx\_hum\_tissue\_Urea\_RNAB\_B Scan : 17540

Andromeda score : 59.57

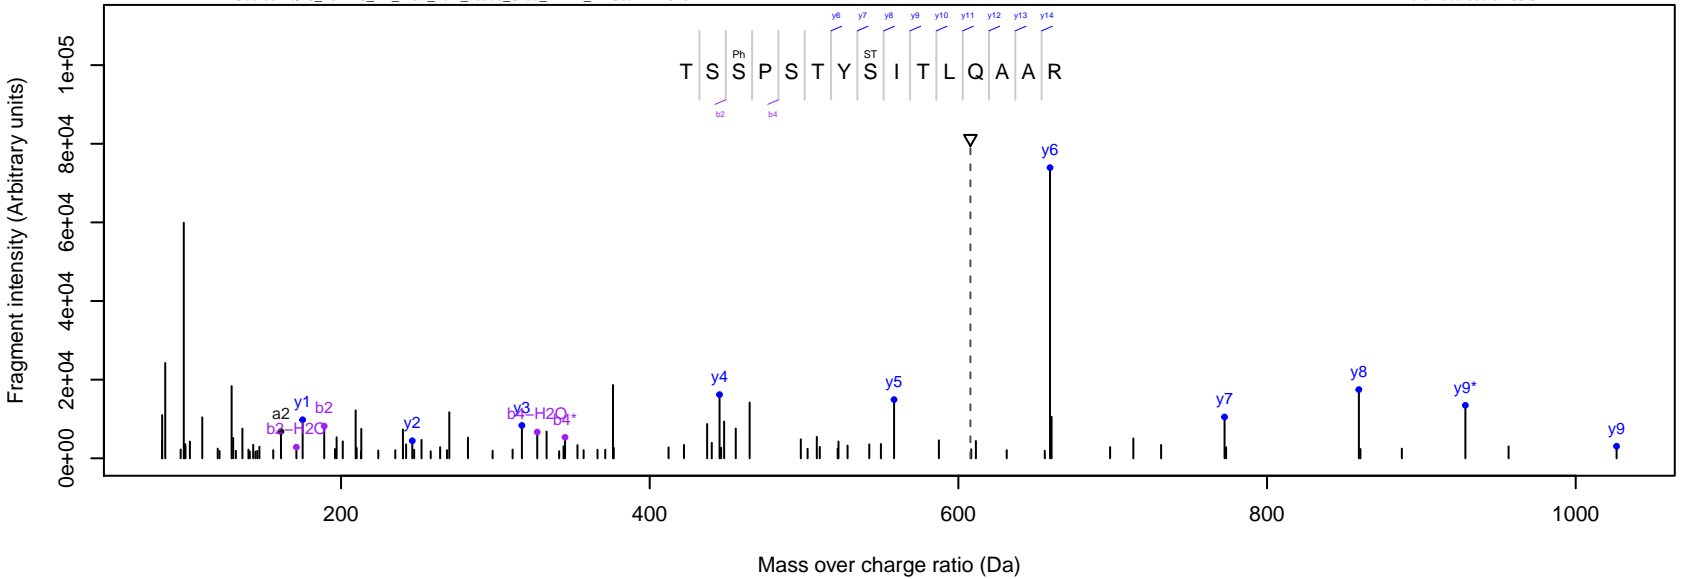

ANDES(Phospho (STY))NEHSDVIDSPSTYQELSK-3+

Source : QE3\_201126\_FR\_TiOx\_hum\_tissue\_Urea\_RNAB\_B Scan : 20680

Andromeda score : 59.555

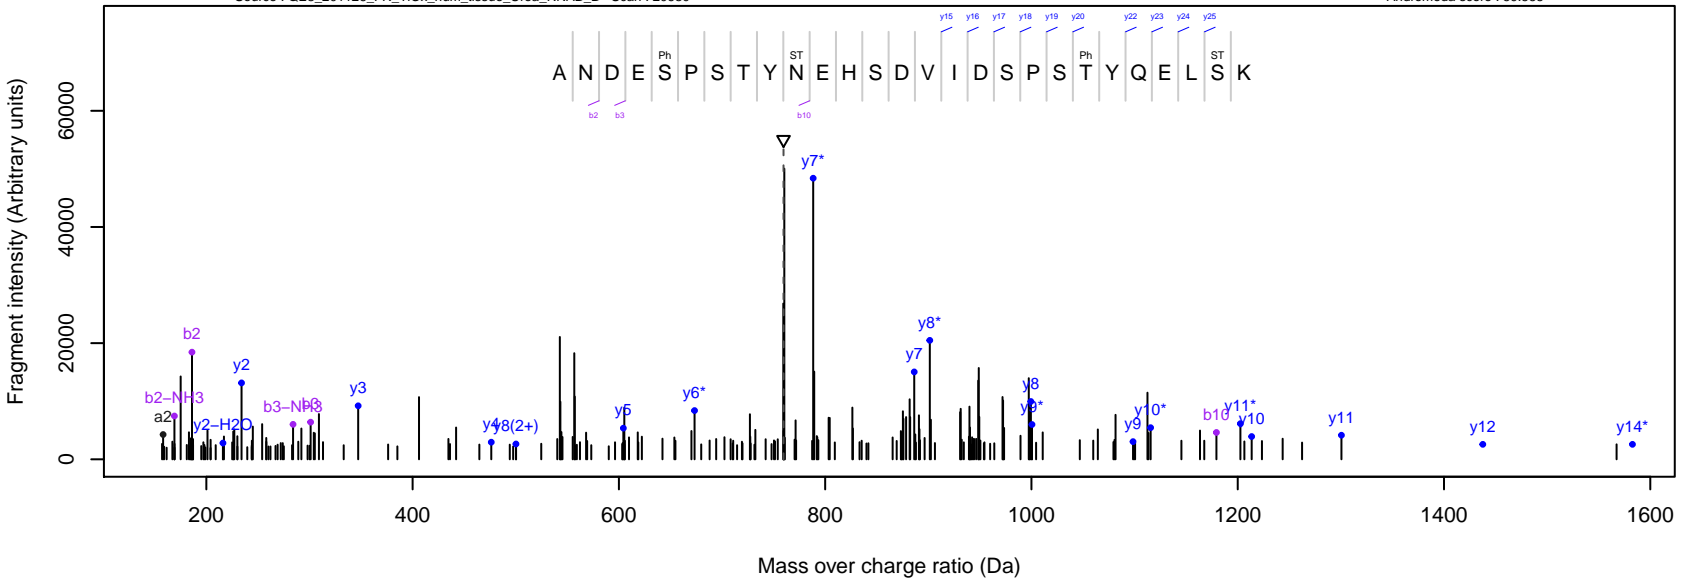

RS(Phospho (STY))SDPLGDTASNLGSAVDELMR-3+

Source : QE3\_201126\_FR\_TiOx\_hum\_tissue\_Urea\_RNAB\_N Scan : 55377

Andromeda score : 59.539

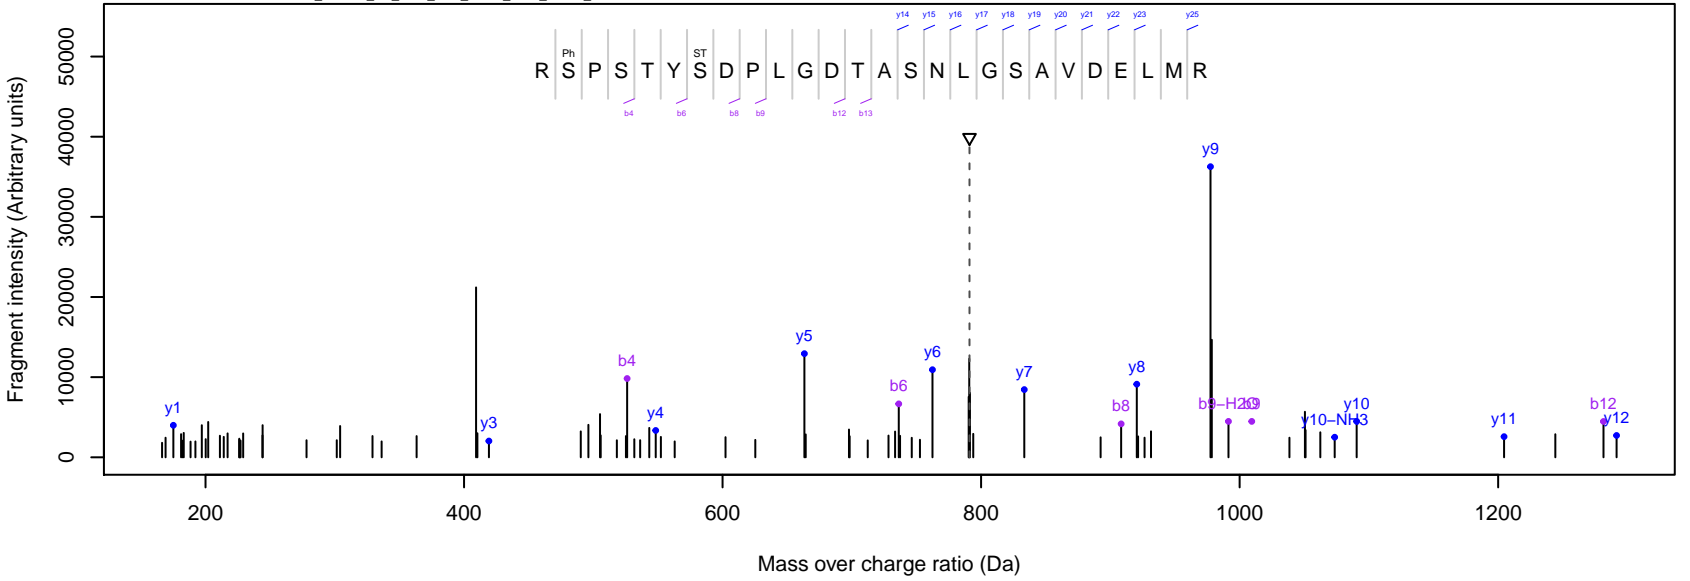

VILSNMVSISSEPFGLVDDDDIS(Phospho (STY))DQEDHRSEEK-4+

Source : QE3\_201126\_FR\_TiOx\_hum\_tissue\_Urea\_RNAB\_H Scan : 47731

Andromeda score : 59.53

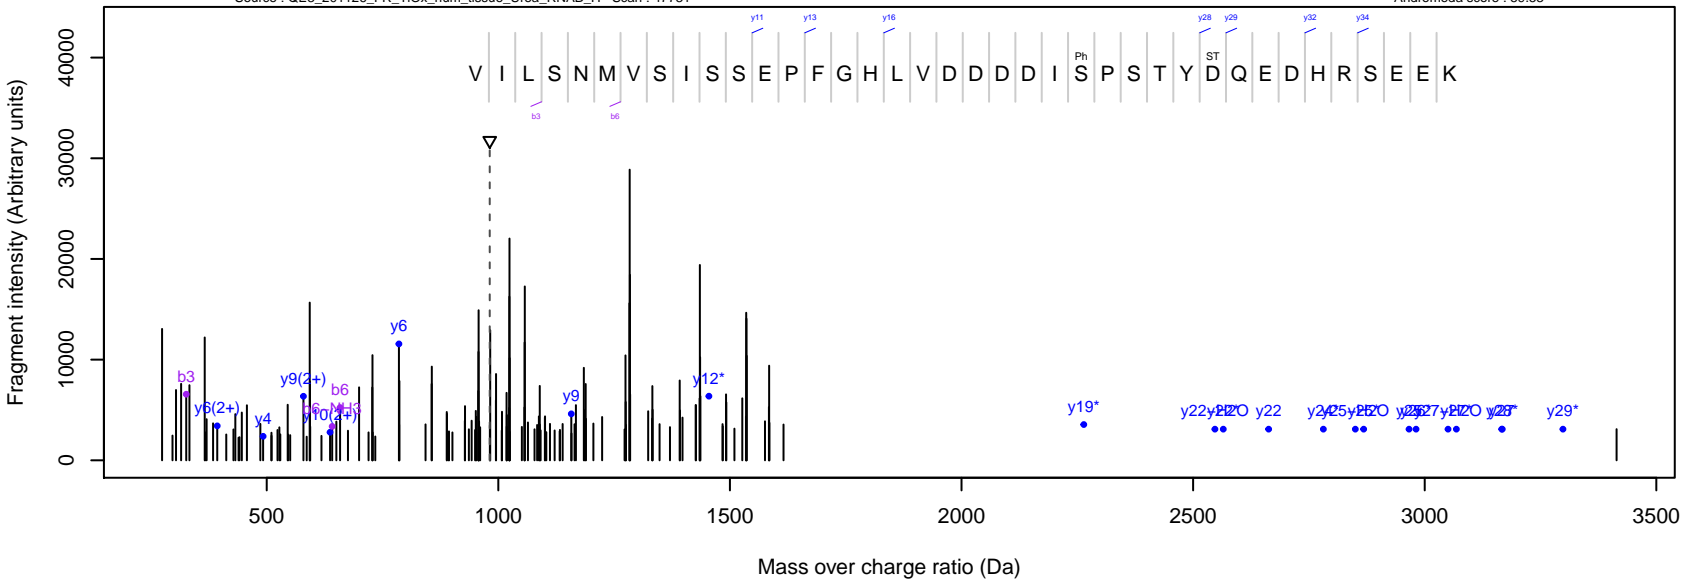

S(Phospho (STY))RSPIIHS(Phospho (STY))PK-3+

Source : QE3\_201126\_FR\_TiOx\_hum\_tissue\_Urea\_RNAB\_H Scan : 6857

Andromeda score : 59.513

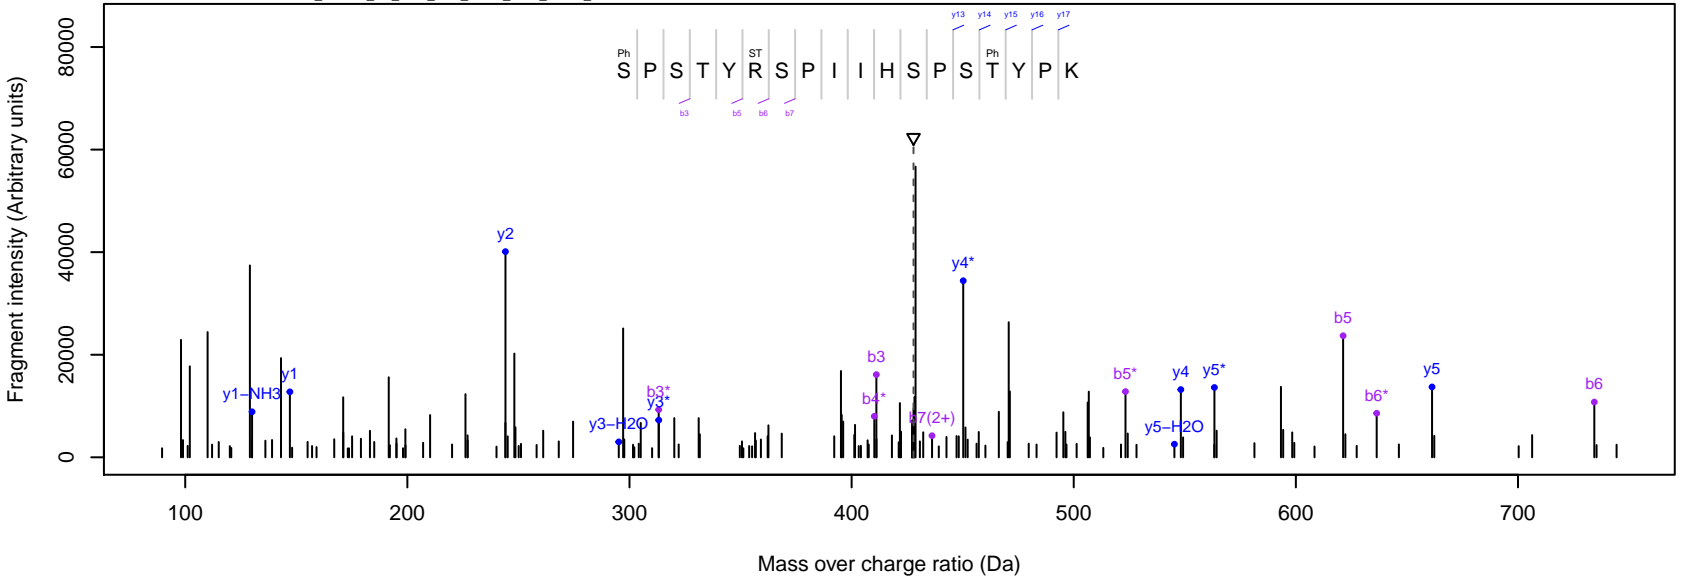

RSS(Phospho (STY))QPPADRDPAFPR-3+

Source : QE3\_201126\_FR\_TiOx\_hum\_tissue\_Urea\_RNAB\_N Scan : 10533

Andromeda score : 59.512

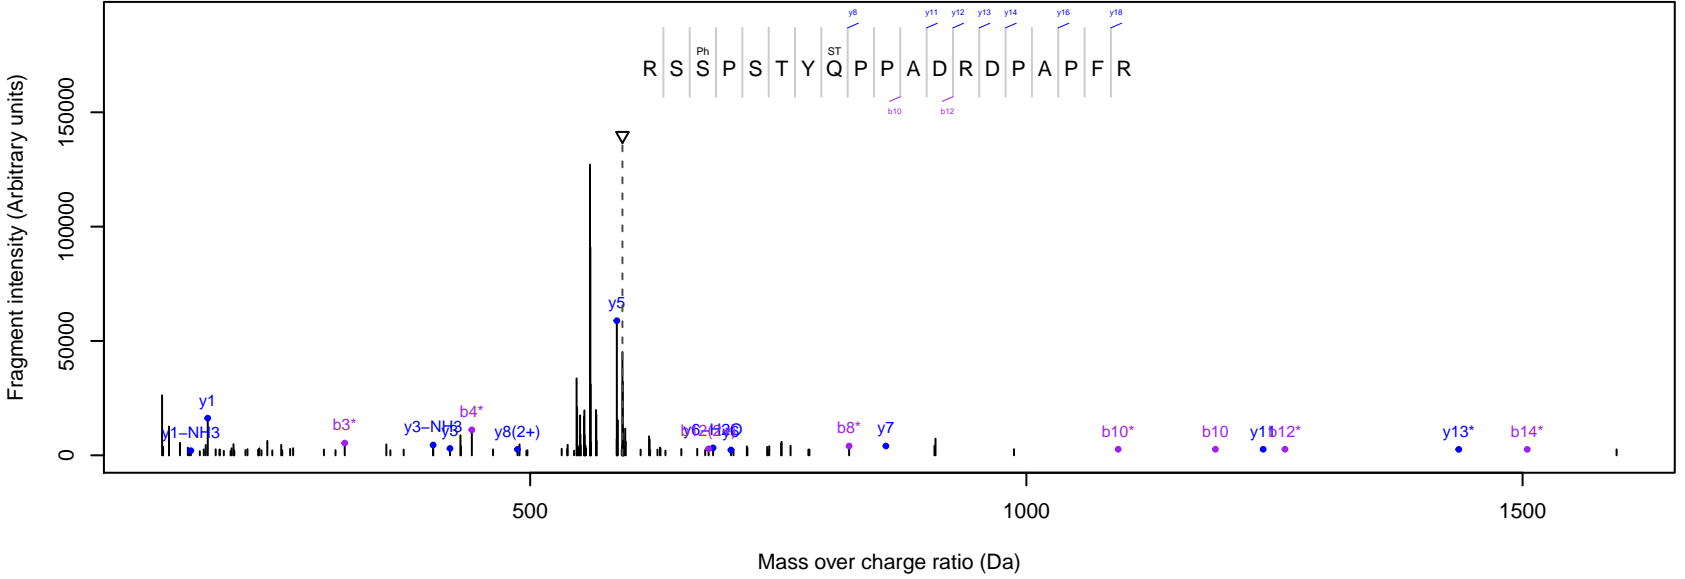

(Acetyl (Protein N-term))TECLPPT(Phospho (STY))SSPSEHRR-3+

Source : QE3\_201126\_FR\_TiOx\_hum\_tissue\_Urea\_RNAB\_H Scan : 25589

Andromeda score : 59.512

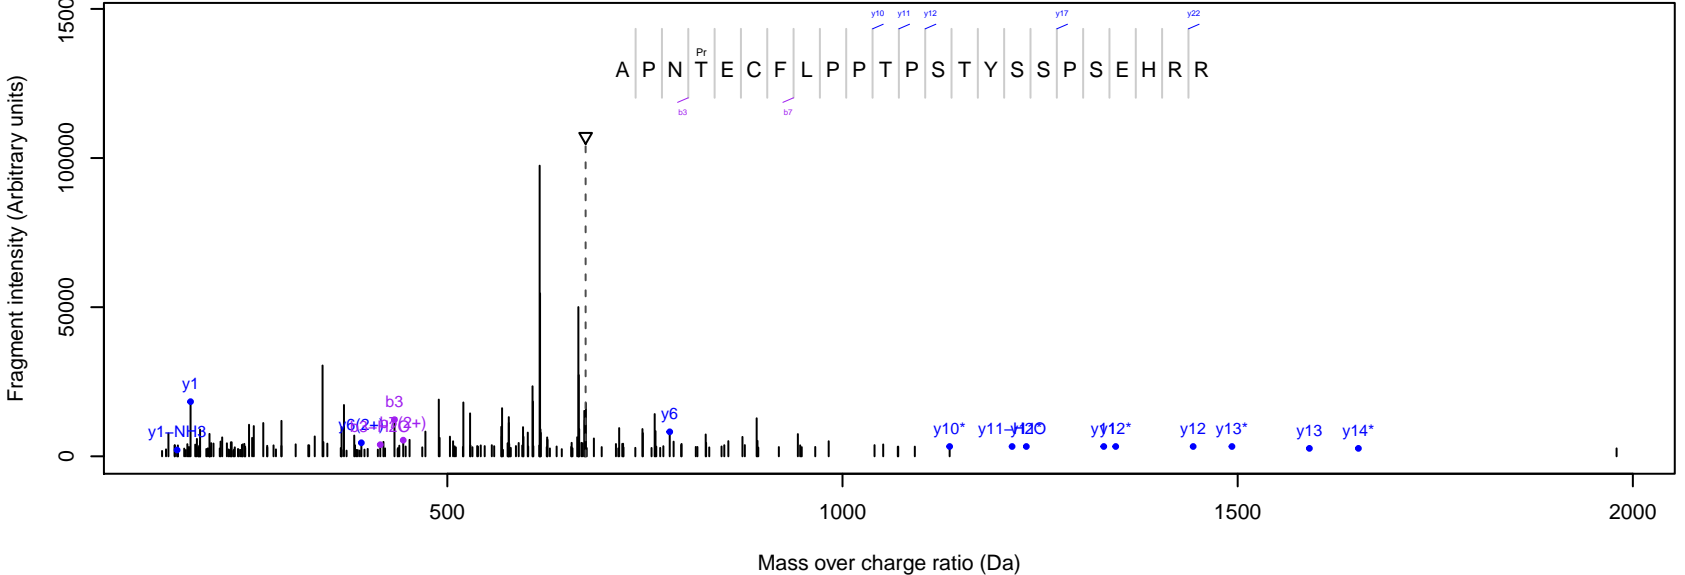

**RAS(Phospho (STY))SPGYIDSPYSR-3+**

Source : QE3\_201126\_FR\_TiOx\_hum\_tissue\_Urea\_RNAB\_B Scan : 15784

Andromeda score : 59.469

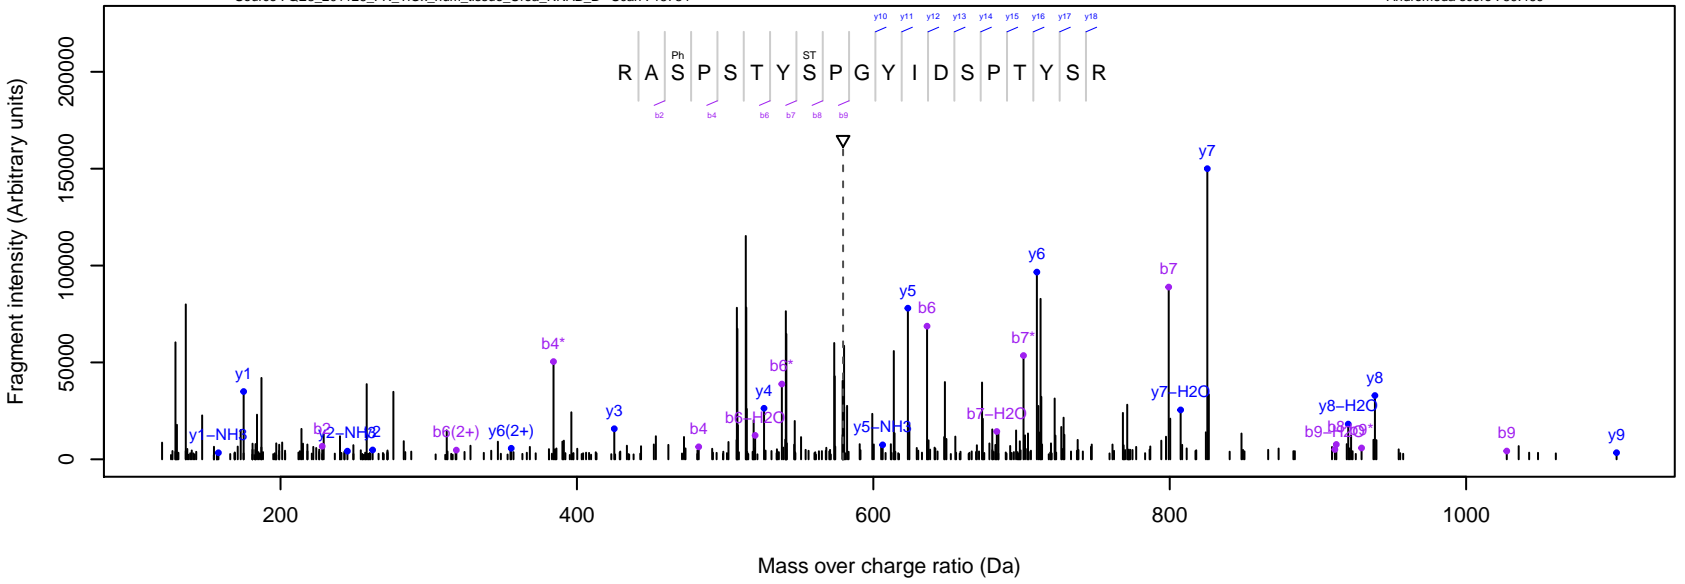

**M(Oxidation (M))ES(Phospho (STY))EGGADDS(Phospho (STY))AEEGLDDDDNDRGDDQLLELIKDEK-4+**

Source : QE3\_201126\_FR\_TiOx\_hum\_tissue\_Urea\_RNAB\_B Scan : 43828

Andromeda score : 59.436

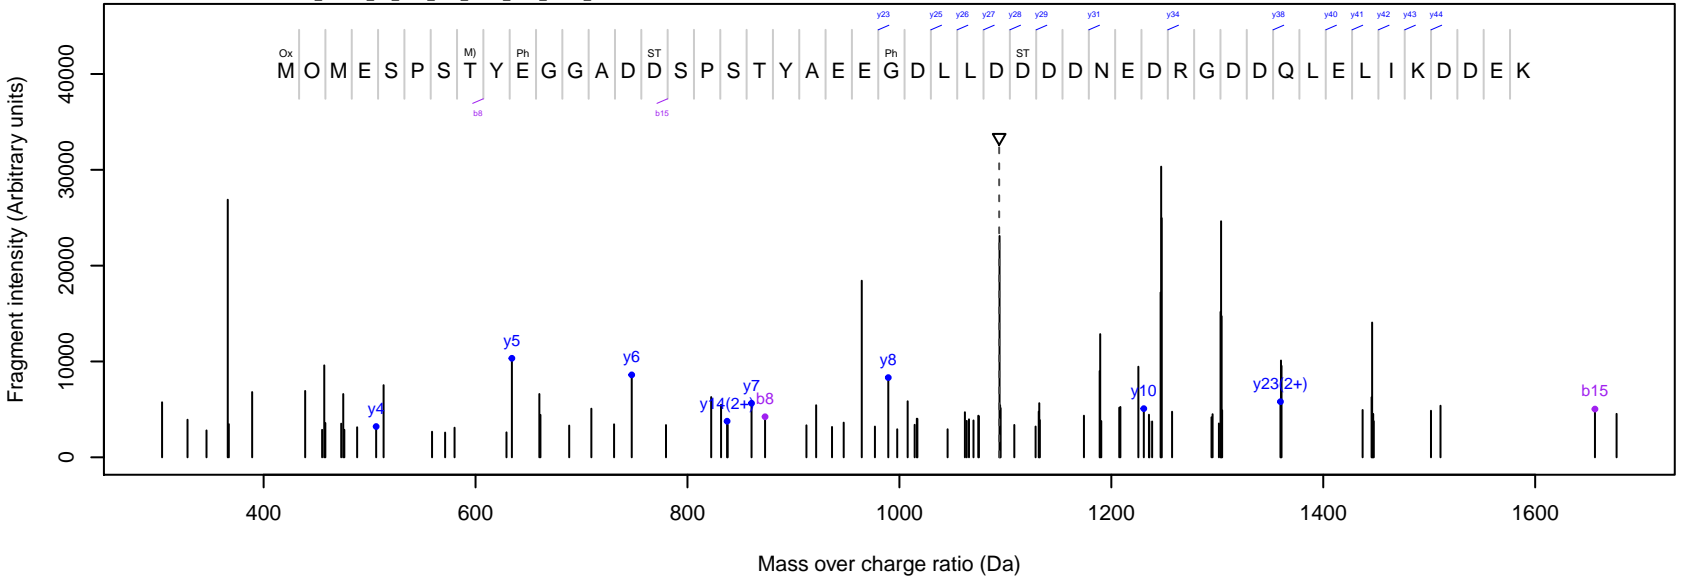

**KKEVDAT(Phospho (STY))SPAPSTSSTVK-3+**

Source : QE3\_201126\_FR\_TiOx\_hum\_tissue\_Urea\_RNAB\_H Scan : 6018

Andromeda score : 59.429

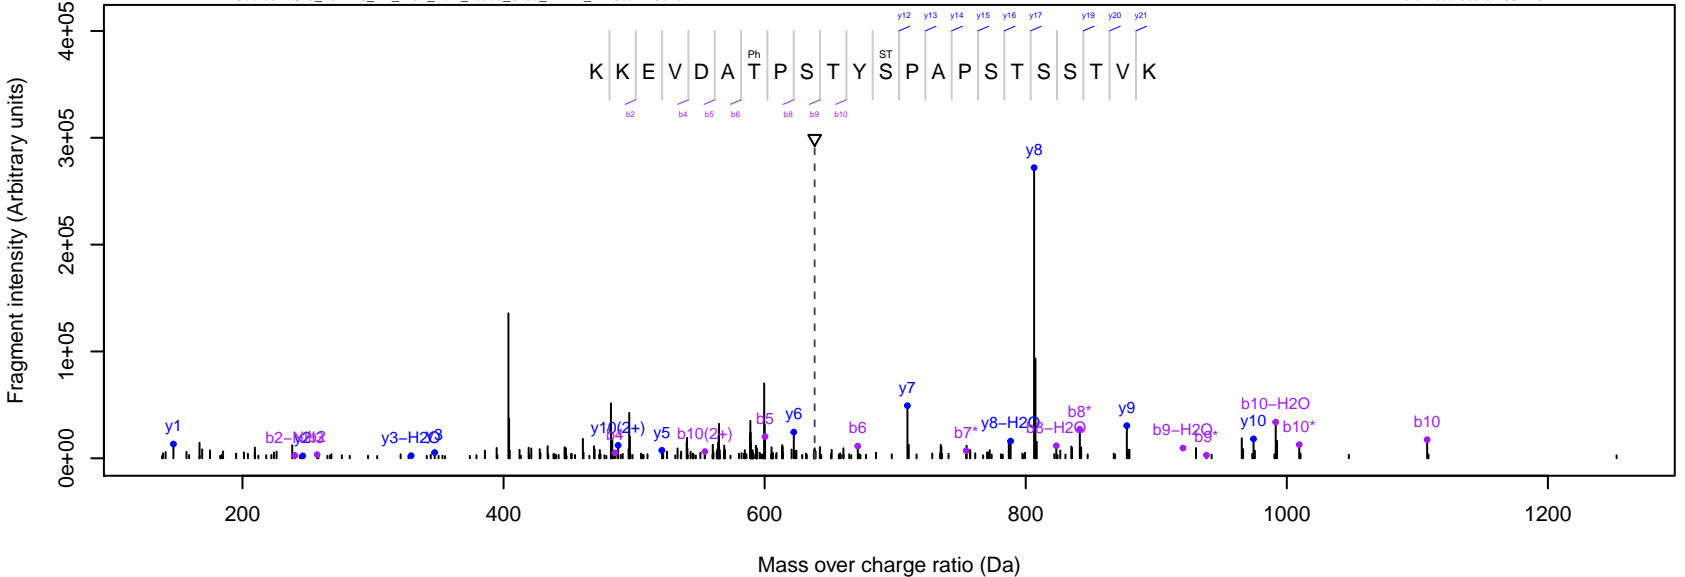



FNS(Phospho (STY))YDISR-2+

Source : QE3\_201126\_FR\_TiOx\_hum\_tissue\_Urea\_RNAB\_H Scan : 19524

Andromeda score : 59.426

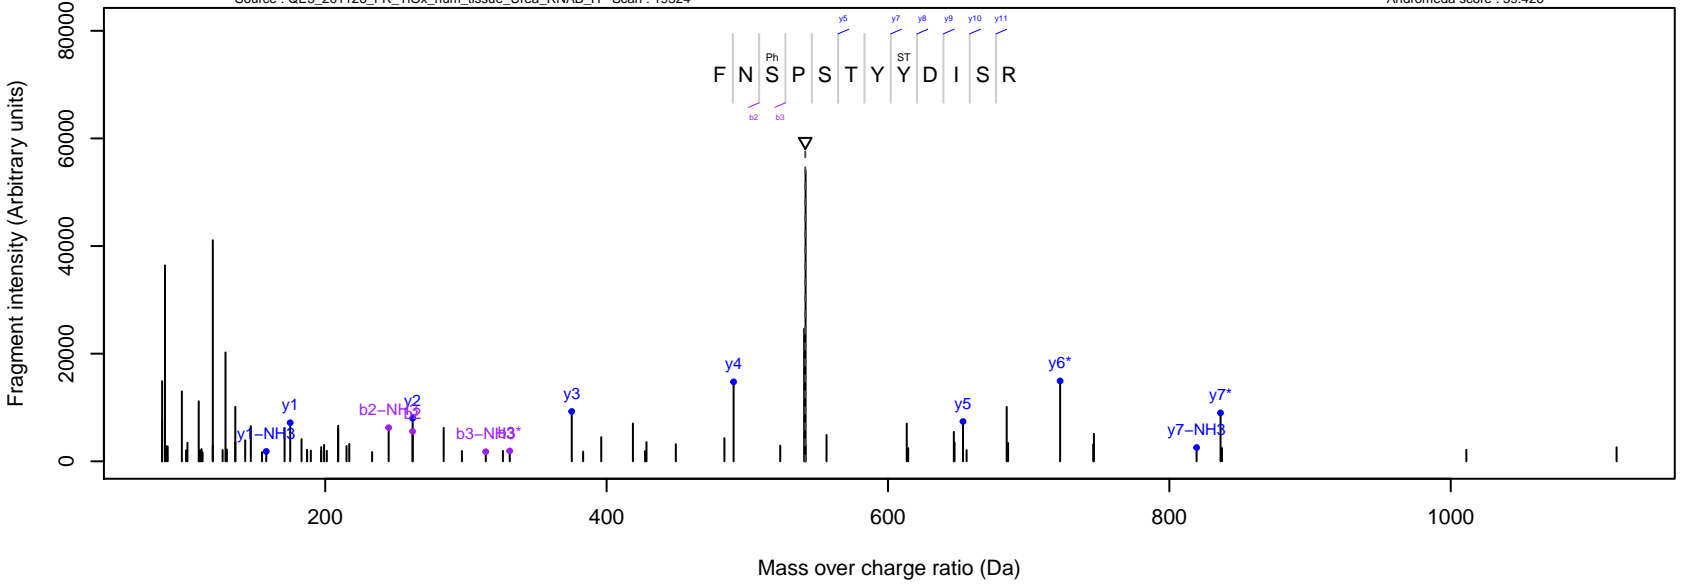

HNFLFEDNMLPS(Phospho (STY))ES(Phospho (STY))VSSLTDLKPPTGSNQASPAR-3+

Source : QE3\_201126\_FR\_TiOx\_hum\_tissue\_Urea\_RNAB\_B Scan : 51974

Andromeda score : 59.426

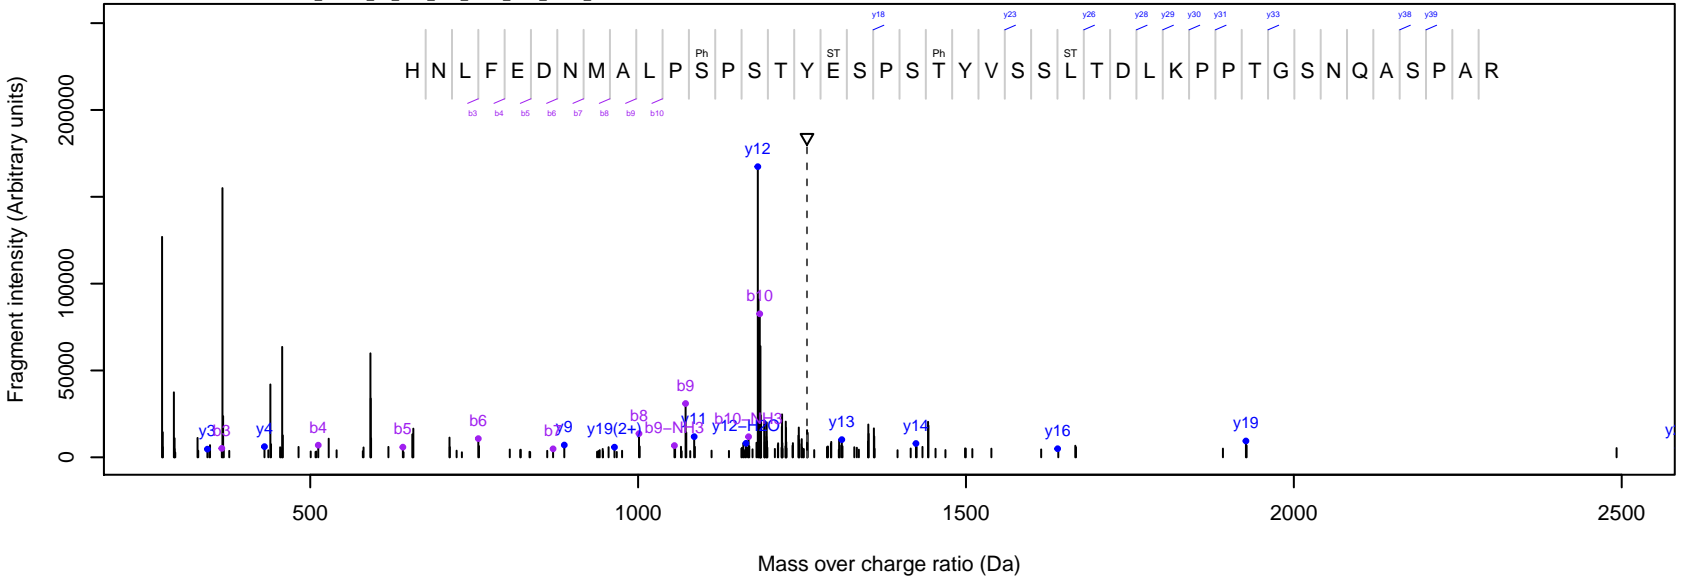

VGGS(Phospho (STY))S(Phospho (STY))VDLHR-2+

Source : QE3\_201126\_FR\_TiOx\_hum\_tissue\_Urea\_RNAB\_H Scan : 12176

Andromeda score : 59.418

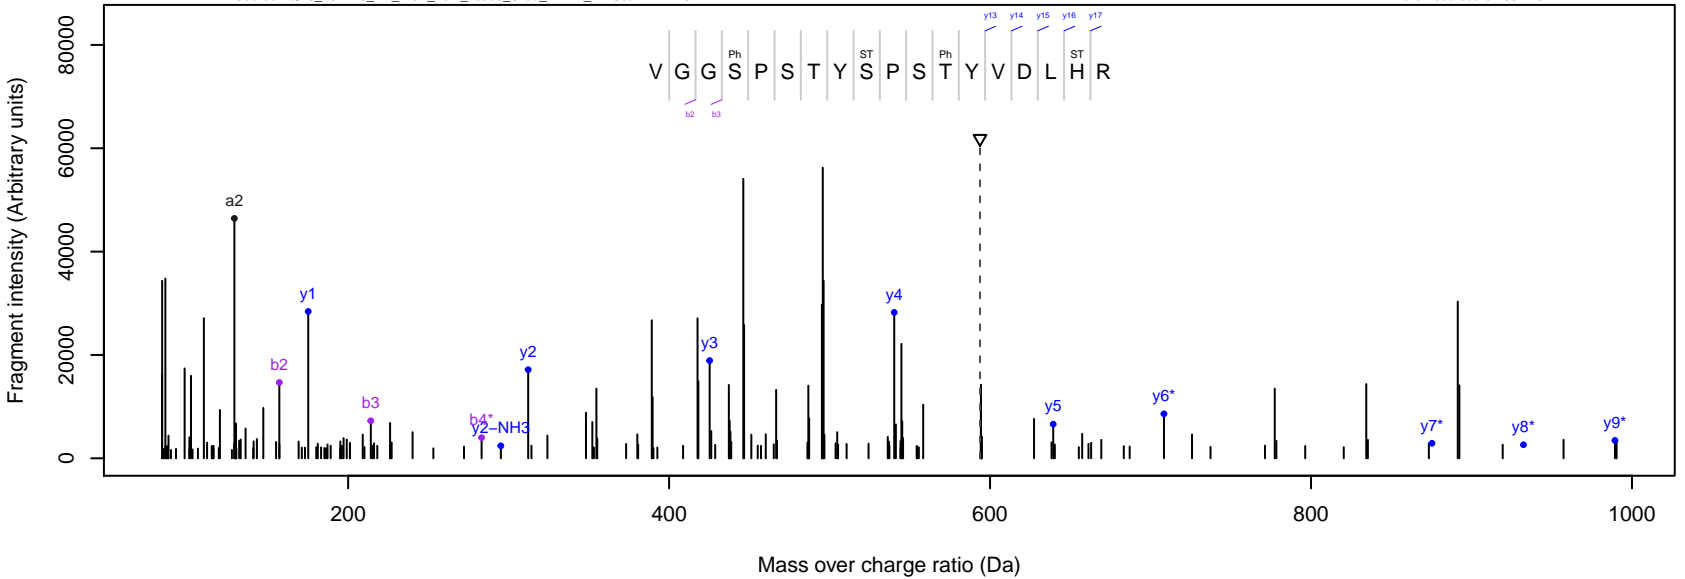

DSDS(Phospho (STY))GLEQMSIGHHIR-3+

Source : QE3\_201126\_FR\_TiOx\_hum\_tissue\_Urea\_RNAB\_N Scan : 22128

Andromeda score : 59.372

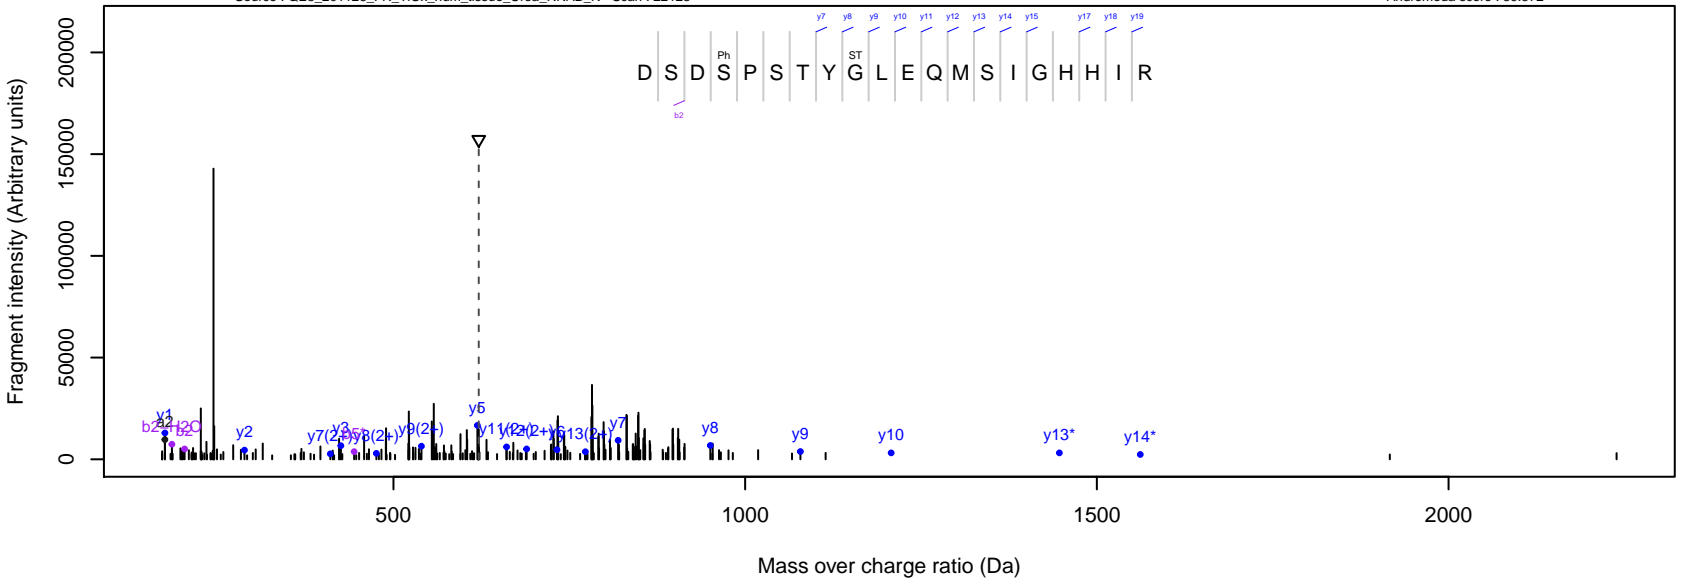

RLGSLLPVLS(Phospho (STY))PTSLPS(Phospho (STY))PLPATLETPVPAFLK-3+

Source : QE3\_201126\_FR\_TiOx\_hum\_tissue\_Urea\_RNAB\_H Scan : 62940

Andromeda score : 59.364

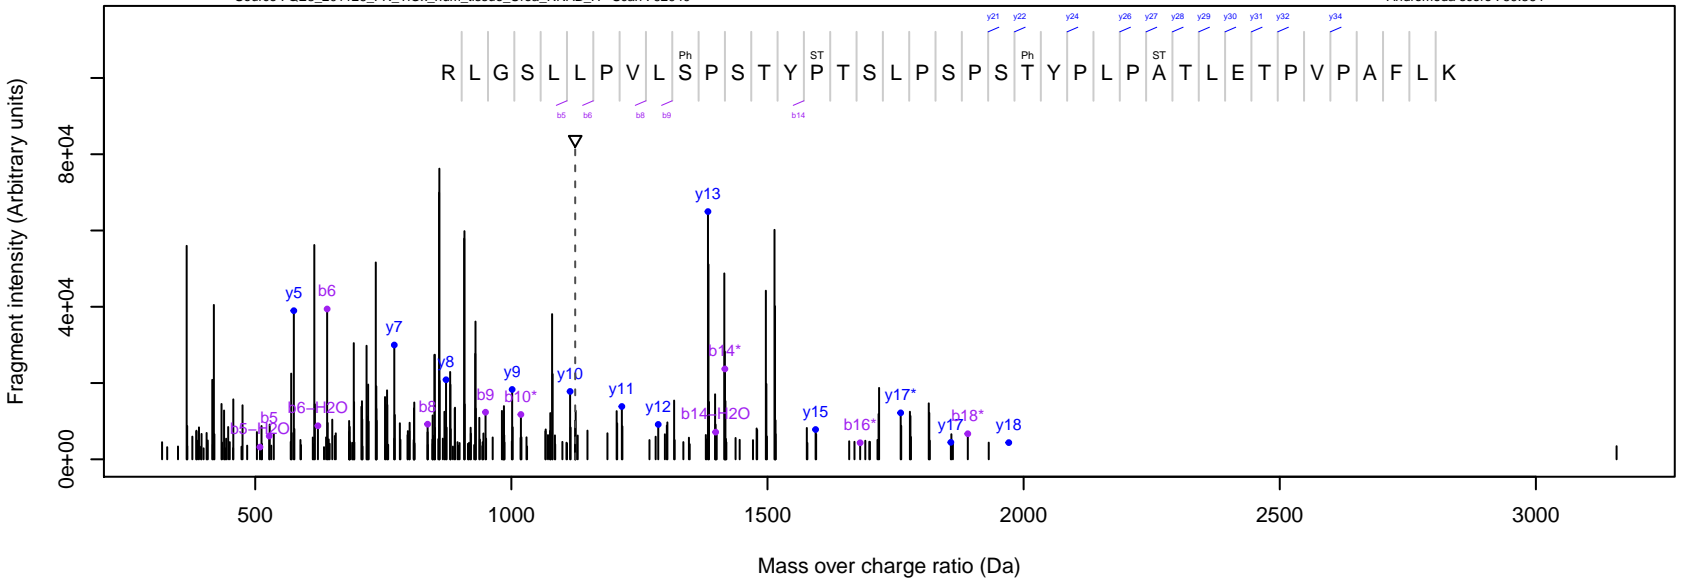

TESVSDKEDKPLAPSGGTEGPEQPPPCPS(Phospho (STY))QTGSPPVGLIK-4+

Source : QE3\_201126\_FR\_TiOx\_hum\_tissue\_Urea\_RNAB\_N Scan : 32762

Andromeda score : 59.364

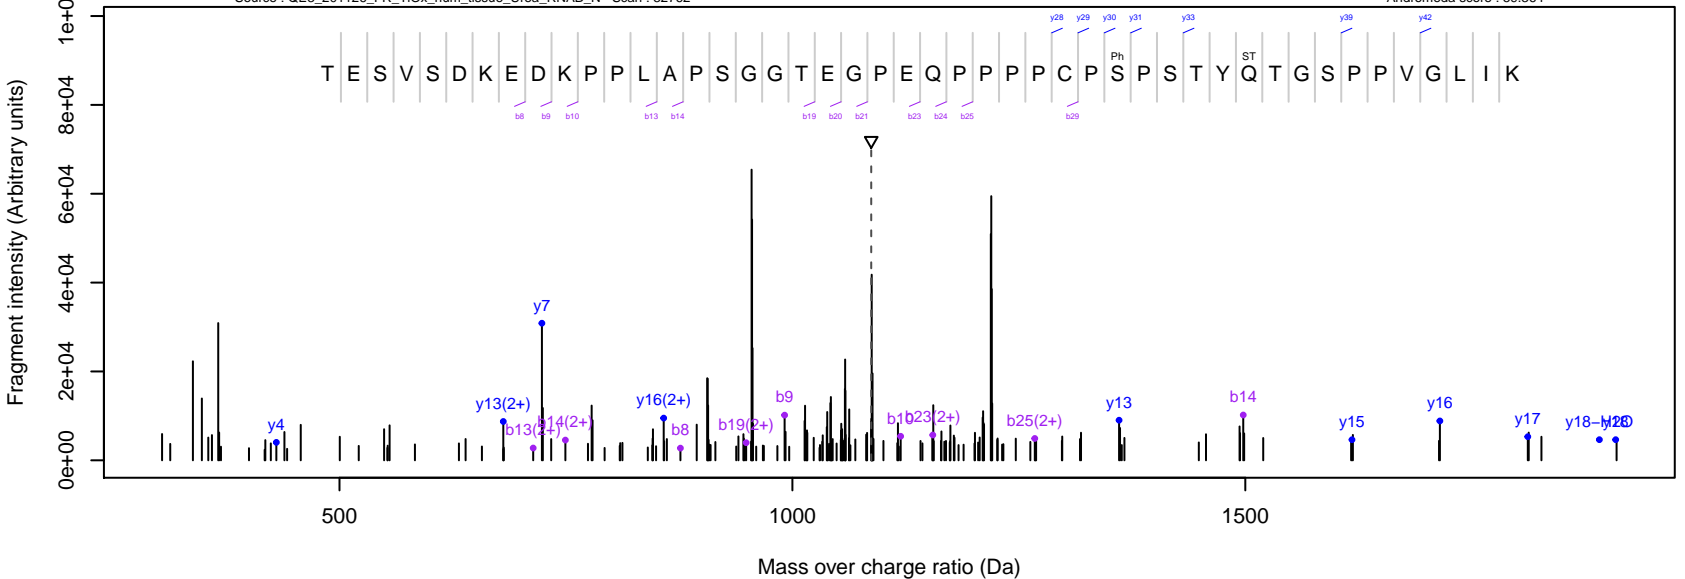

GSGGS(Phospho (STY))S(Phospho (STY))GDELREDDEPK-3+

Source : QE3\_201126\_FR\_TiOx\_hum\_tissue\_Urea\_RNAB\_H Scan : 16939

Andromeda score : 59.356

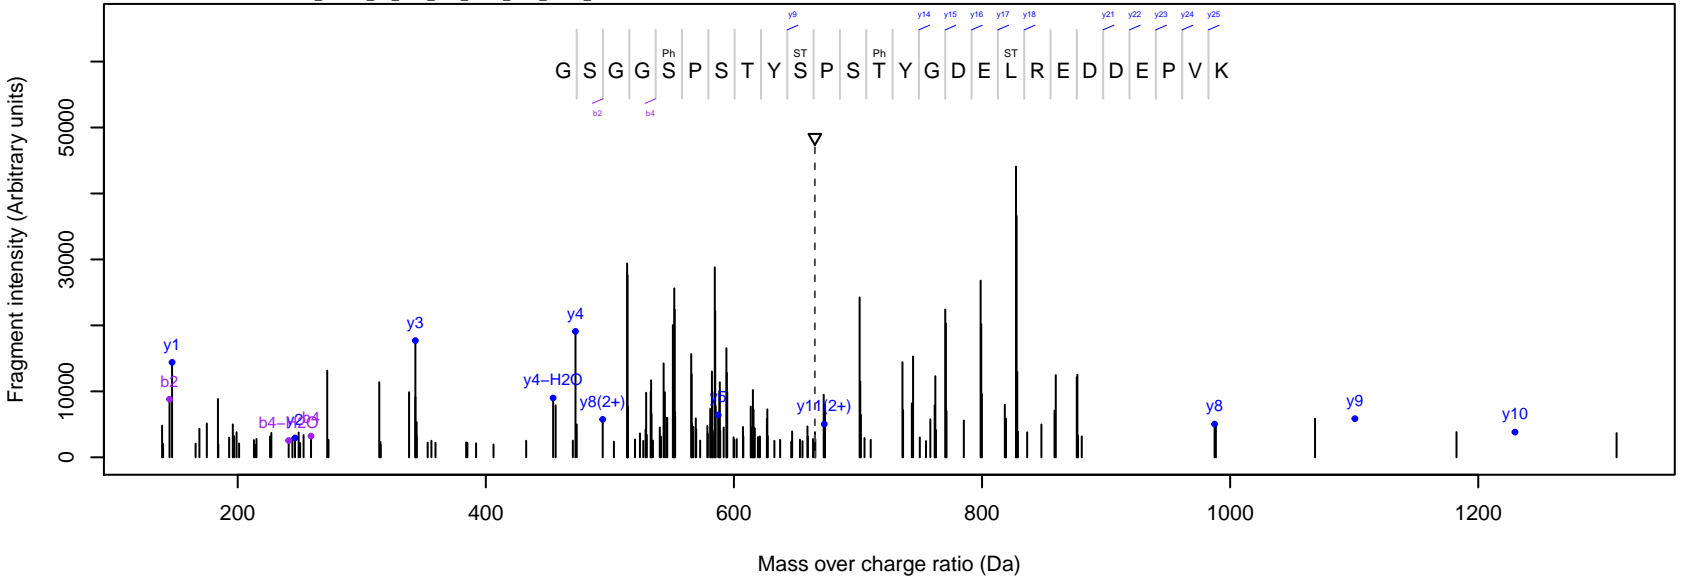

S(Phospho (STY))SELLVR-2+

Source : QE3\_201126\_FR\_TiOx\_hum\_tissue\_Urea\_RNAB\_N Scan : 19849

Andromeda score : 59.35

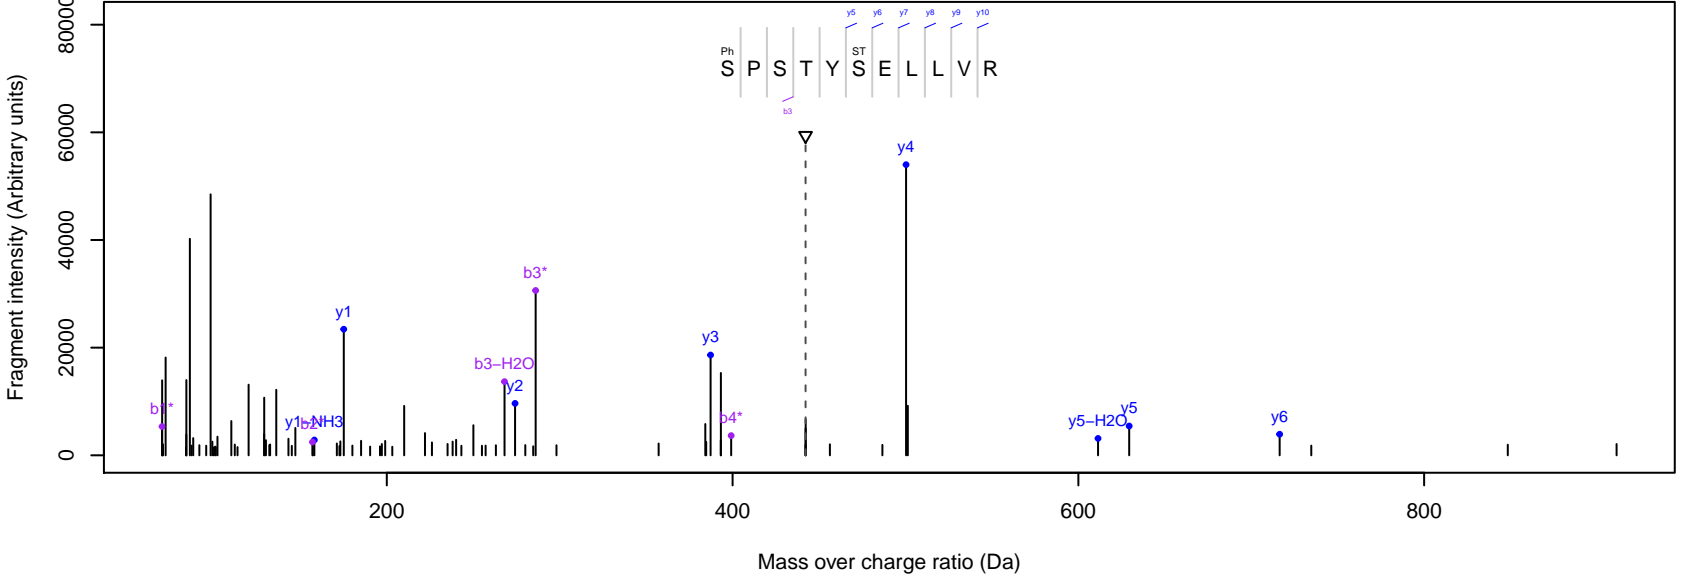

DSGCYISSGNS(Phospho (STY))DNGKEDLESENLSMDMVHK-3+

Source : QE3\_201126\_FR\_TiOx\_hum\_tissue\_Urea\_RNAB\_H Scan : 31202

Andromeda score : 59.305

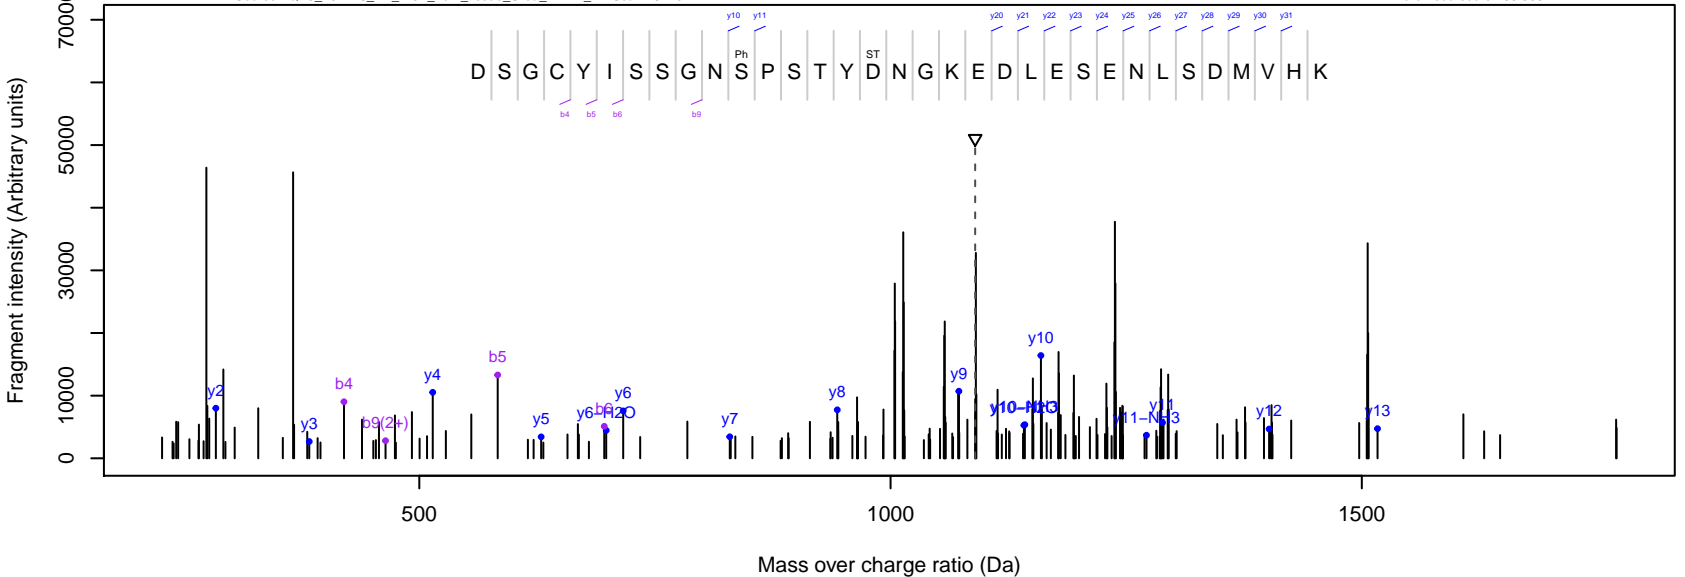

NSS(Phospho (STY))IKSSSGAEHPEPK-3+

Source : QE3\_201126\_FR\_TiOx\_hum\_tissue\_Urea\_RNAB\_H Scan : 4006

Andromeda score : 59.281

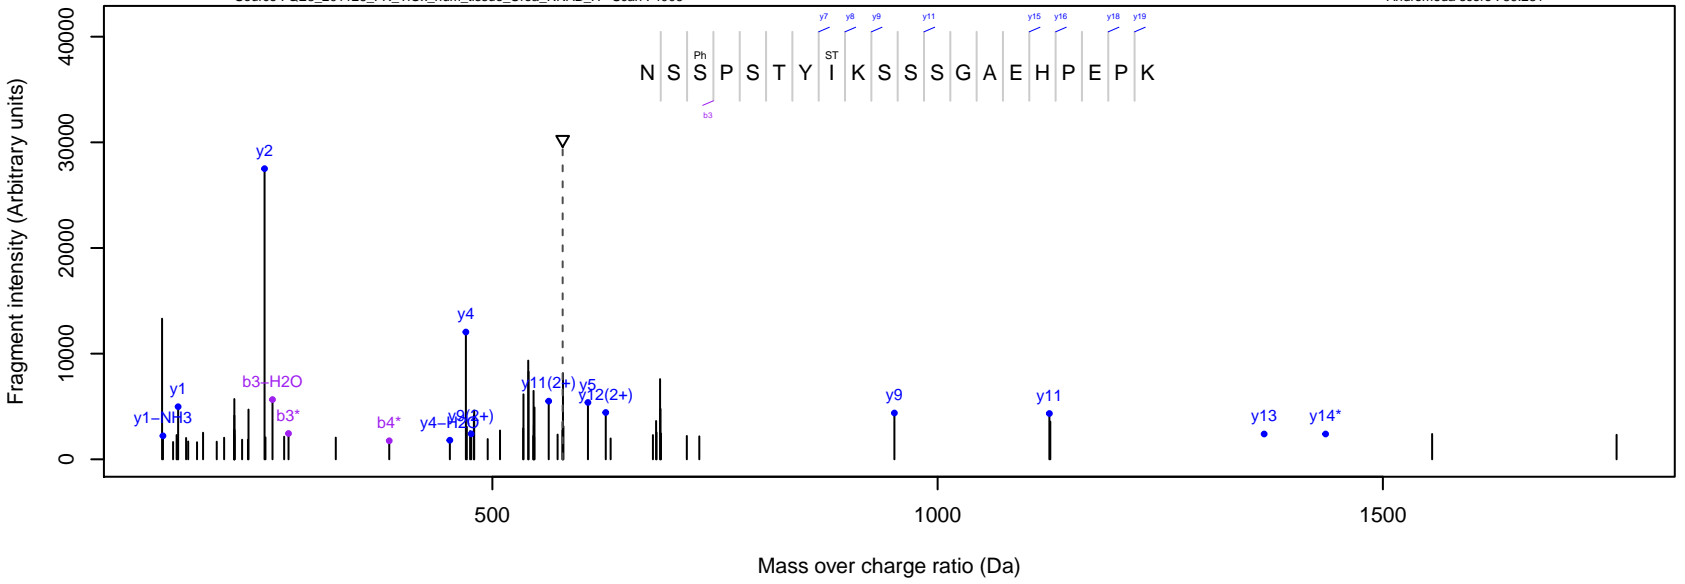

T(Phospho (STY))RS(Phospho (STY))VEDDEEGHLICQSGDVL SAR-3+

Source : QE3\_201126\_FR\_TiOx\_hum\_tissue\_Urea\_RNAB\_H Scan : 32734

Andromeda score : 59.275

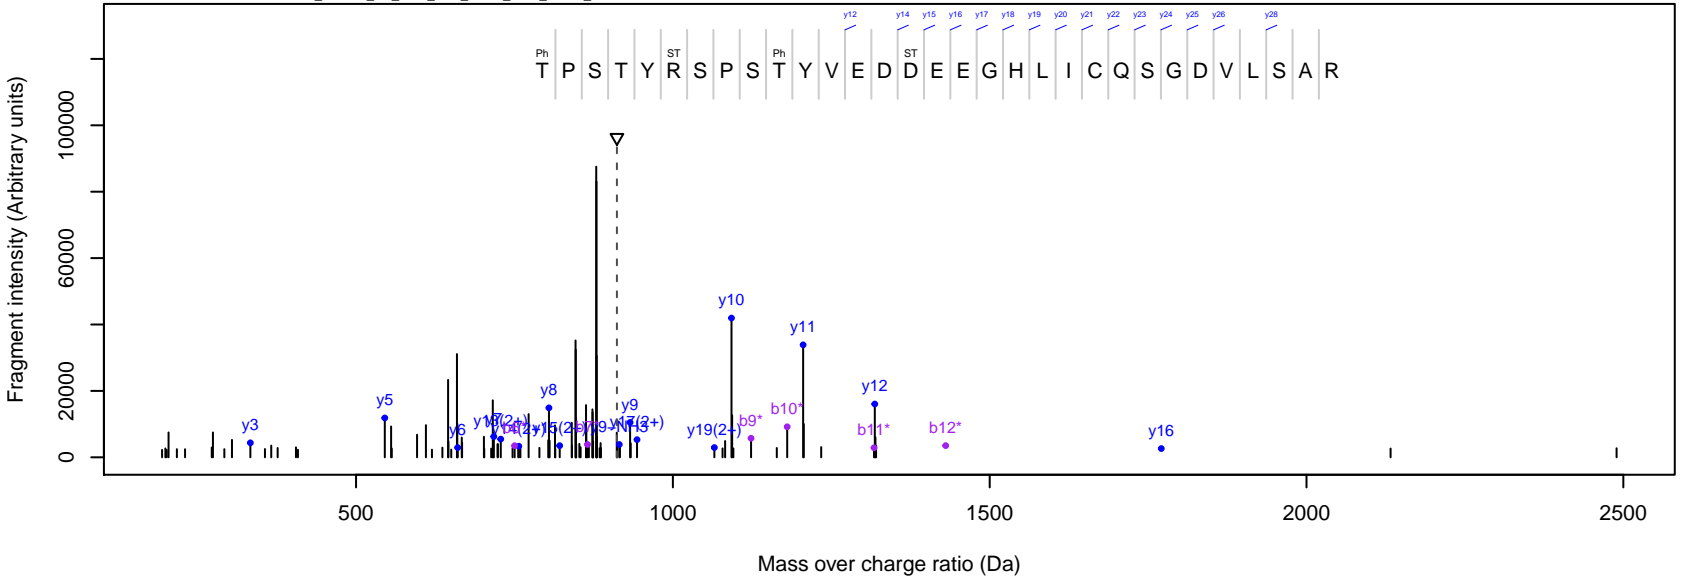

RDS(Phospho (STY))ITPDIATKPGQLFLDSISP K-3+

Source : QE3\_201126\_FR\_TiOx\_hum\_tissue\_Urea\_RNAB\_N Scan : 42936

Andromeda score : 59.263

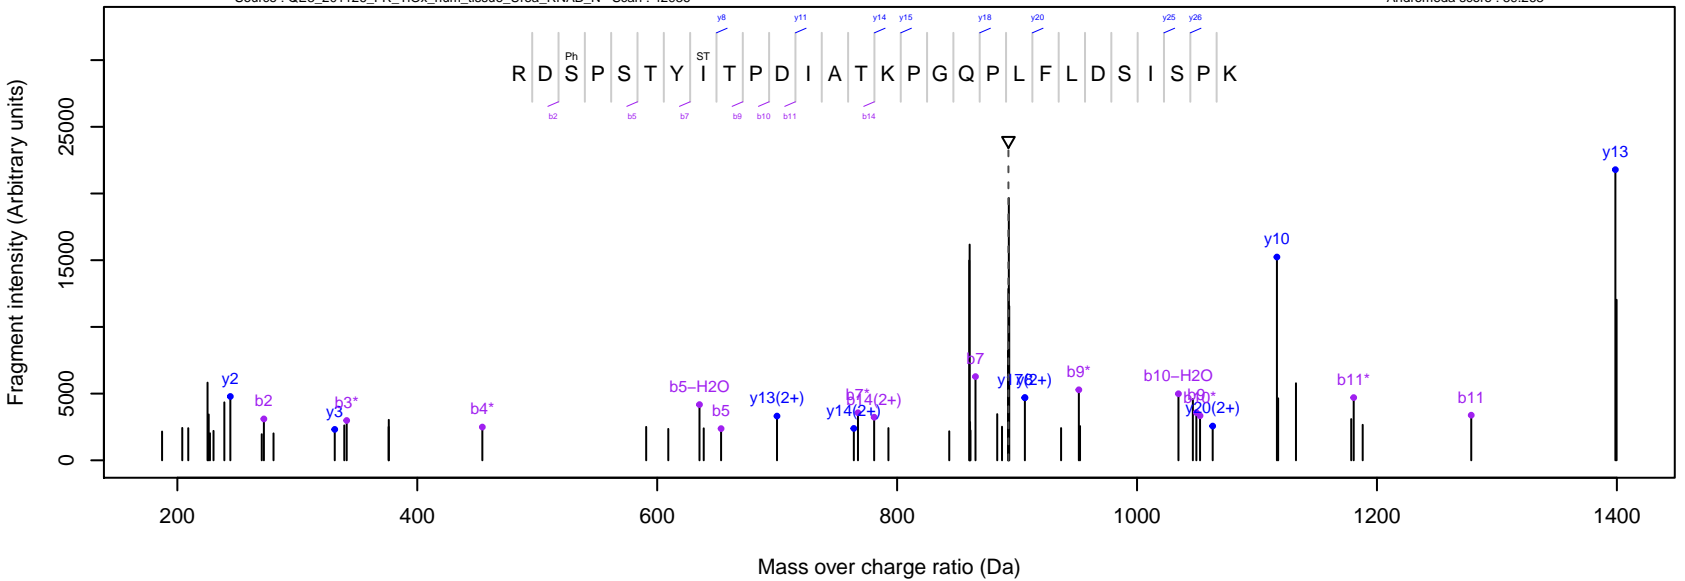

S(Phospho (STY))GSEEEAELSLSLAR-2+

Source : QE3\_201126\_FR\_TiOx\_hum\_tissue\_Urea\_RNAB\_B Scan : 40579

Andromeda score : 59.261

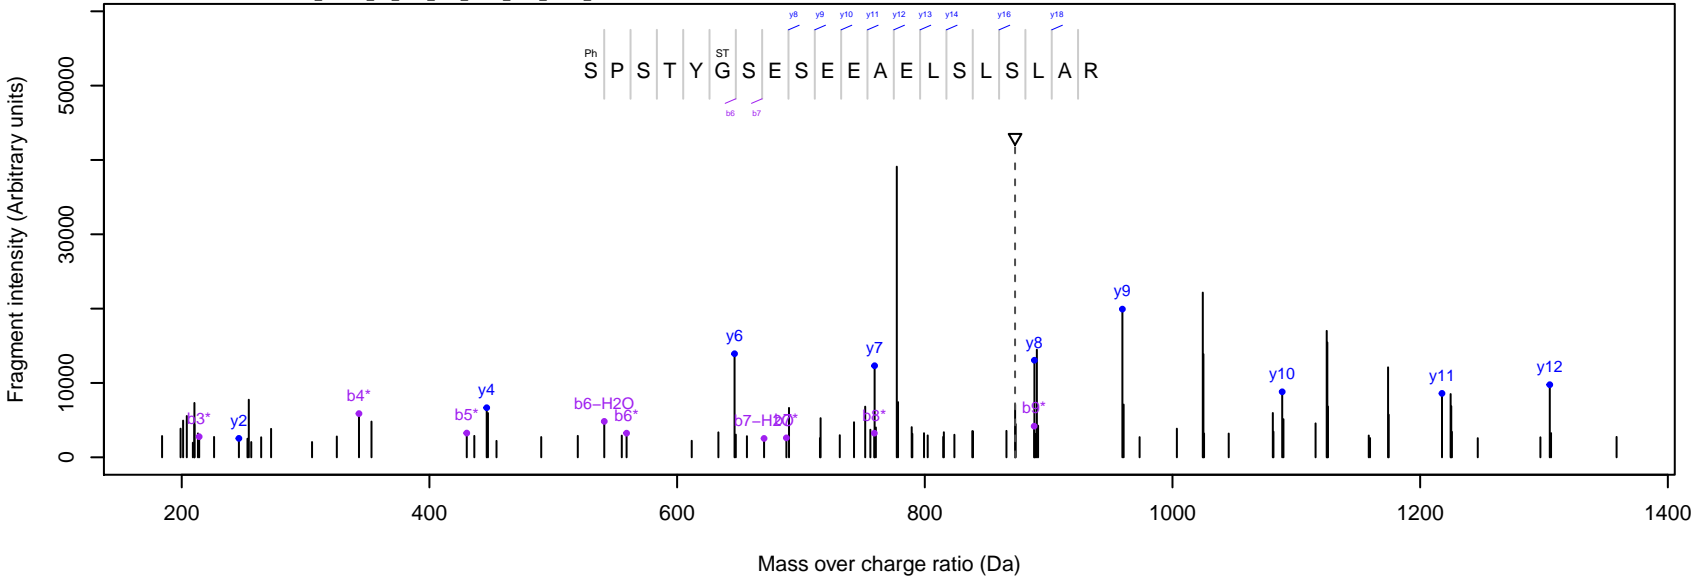

DQS(Phospho (STY))GEVDFK-2+

Source : QE3\_201126\_FR\_TiOx\_hum\_tissue\_Urea\_RNAB\_N Scan : 16655

Andromeda score : 59.245

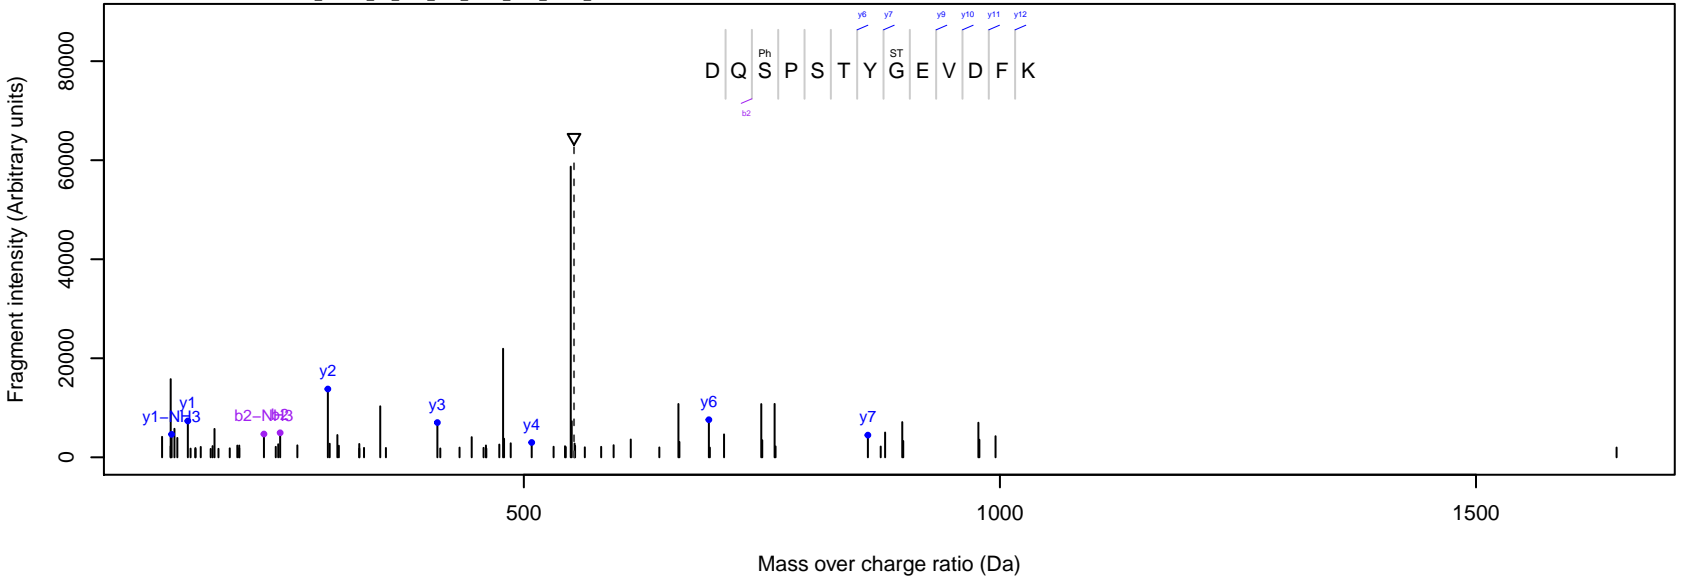

LEAIEDDSVKETDSSASAATPSTYPSK-3+

Source : QE3\_201126\_FR\_TiOx\_hum\_tissue\_Urea\_RNAB\_B Scan : 17344

Andromeda score : 59.228

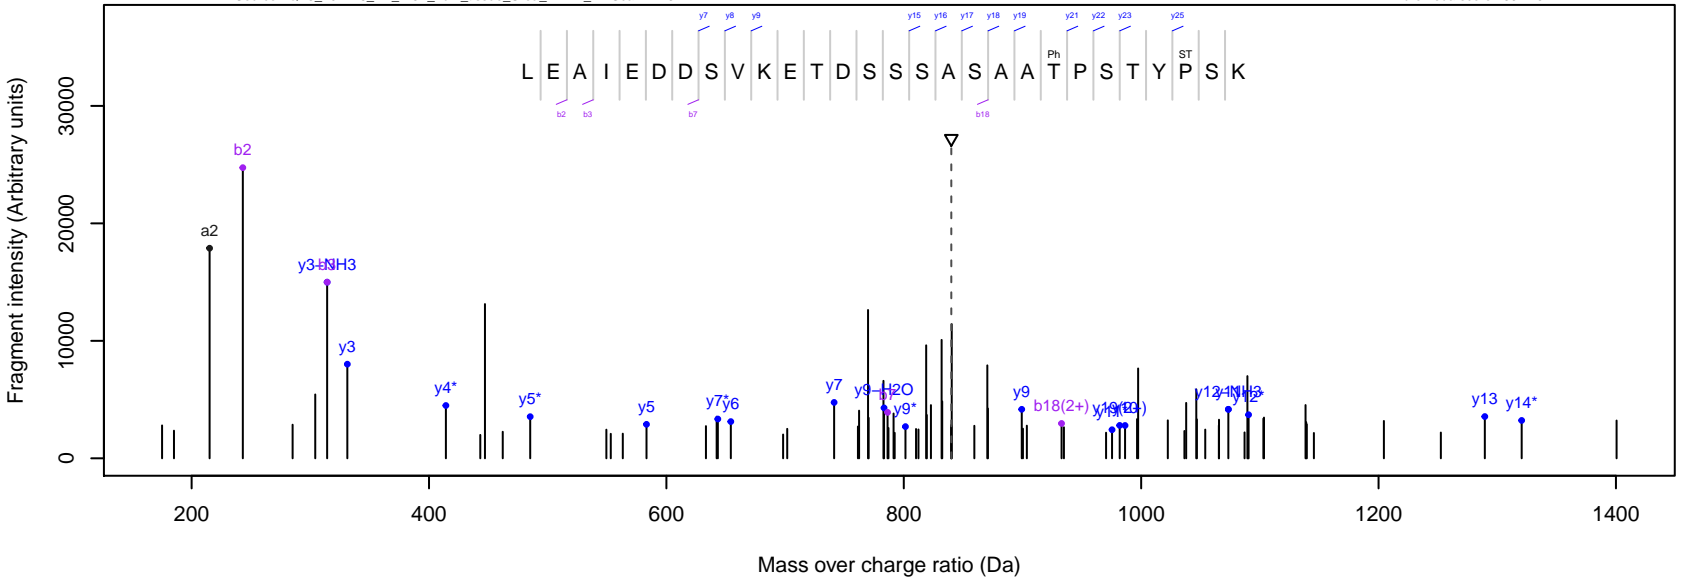

(Acetyl (Protein N-term))S(Phospho (STY))CCDLAAAGQLGK-2+

Source : QE3\_201126\_FR\_TiOx\_hum\_tissue\_Urea\_RNAB\_N Scan : 36456

Andromeda score : 59.227

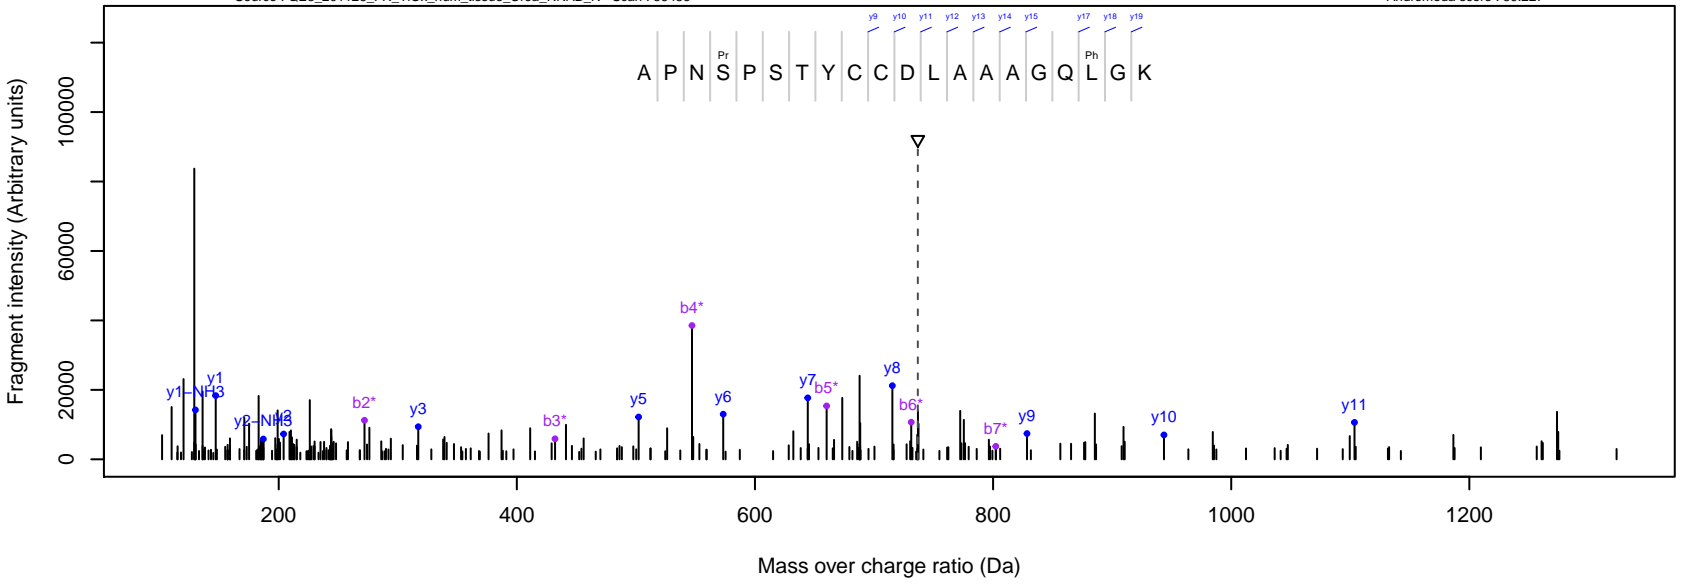

QQFS(Phospho (STY))PSM(Oxidation (M))TER-2+

Source : QE3\_201126\_FR\_TiOx\_hum\_tissue\_Urea\_RNAB\_H Scan : 11601

Andromeda score : 59.198

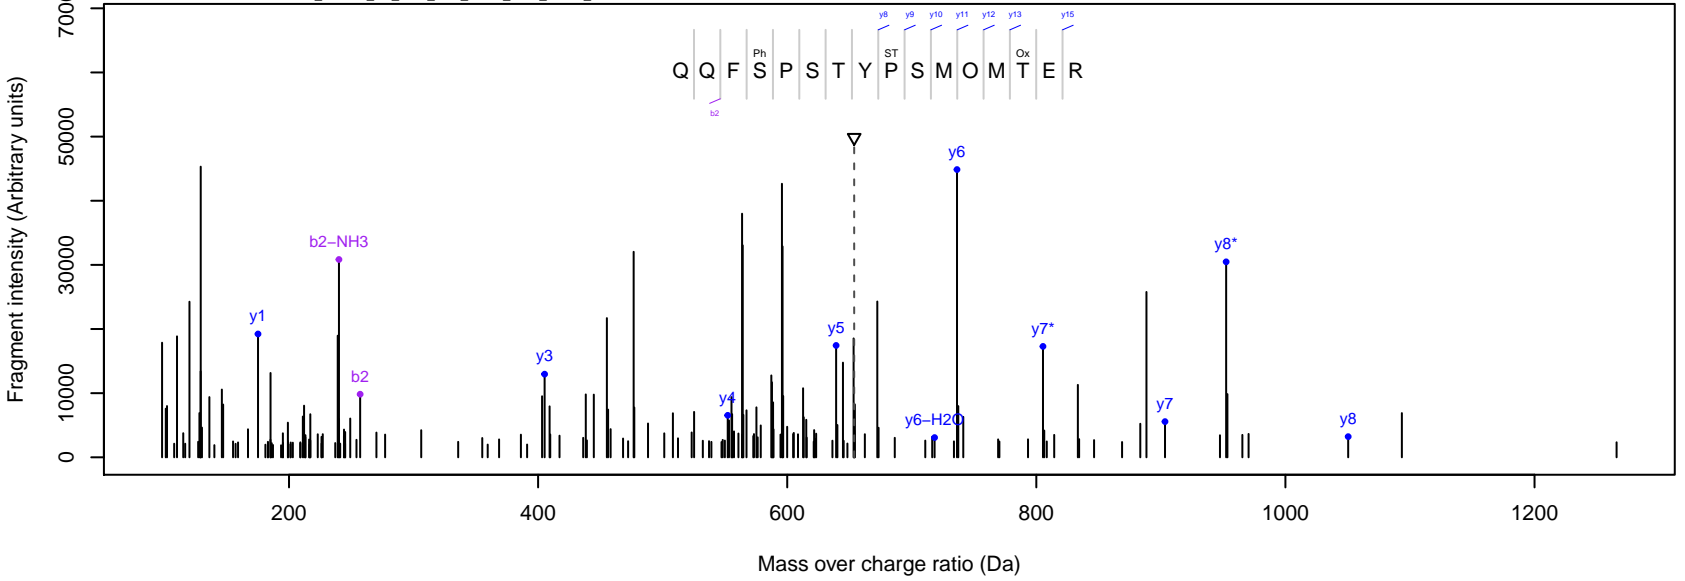

S(Phospho (STY))LPREESAGAAPGEGPEGVDGR-3+

Source : QE3\_201126\_FR\_TiOx\_hum\_tissue\_Urea\_RNAB\_H Scan : 17592

Andromeda score : 59.189

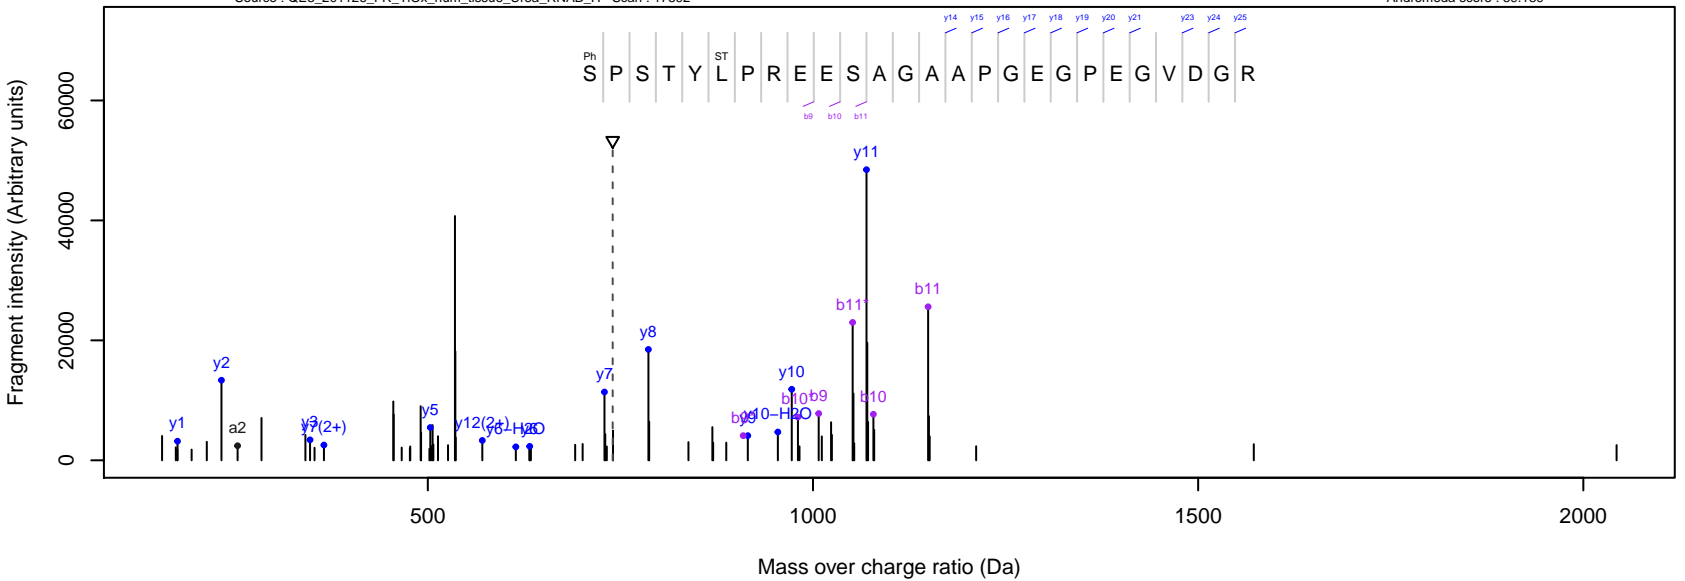

FT(Phospho (STY))DTRKDEQER-3+

Source : QE3\_201126\_FR\_TiOx\_hum\_tissue\_Urea\_RNAB\_H Scan : 3715

Andromeda score : 59.185

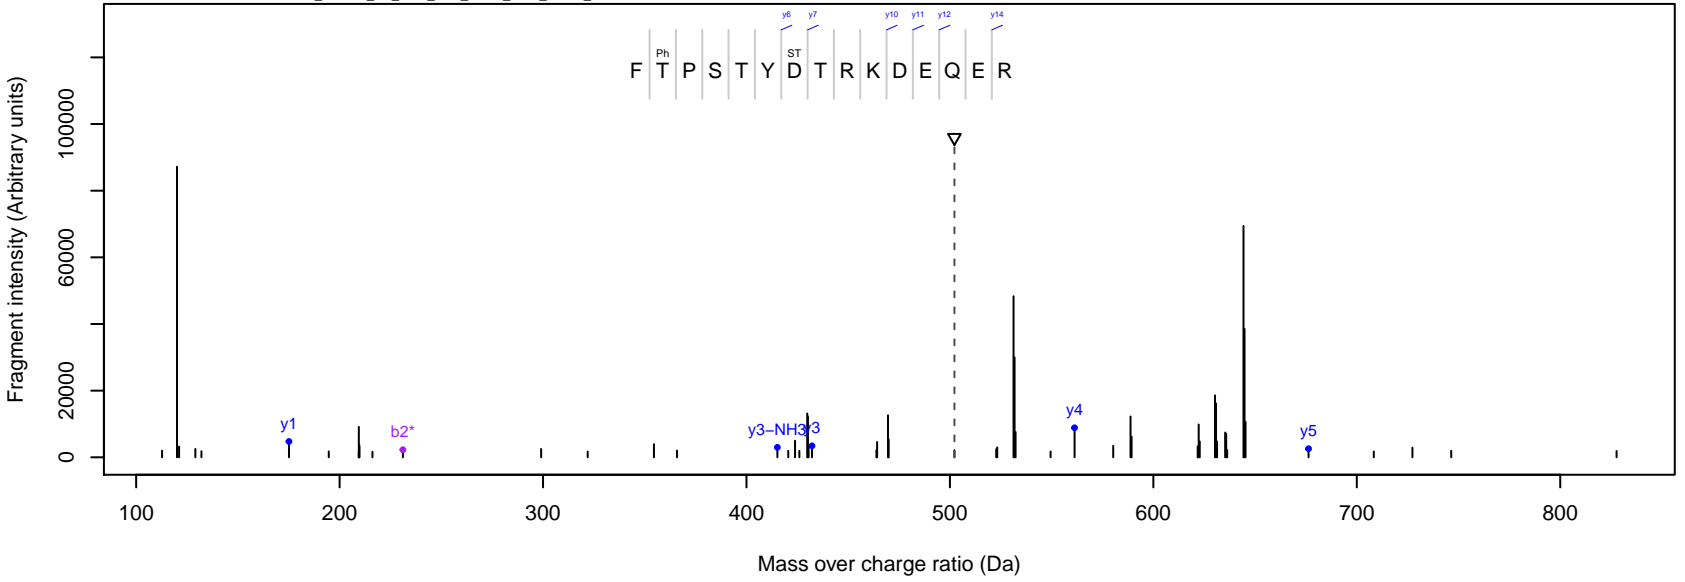

VSS(Phospho (STY))PVAS(Phospho (STY))GM(Oxidation (M))SSPSGGSTVSFSHTLPDFSK-3+

Source : QE3\_201126\_FR\_TiOx\_hum\_tissue\_Urea\_RNAB\_H Scan : 44279

Andromeda score : 59.18

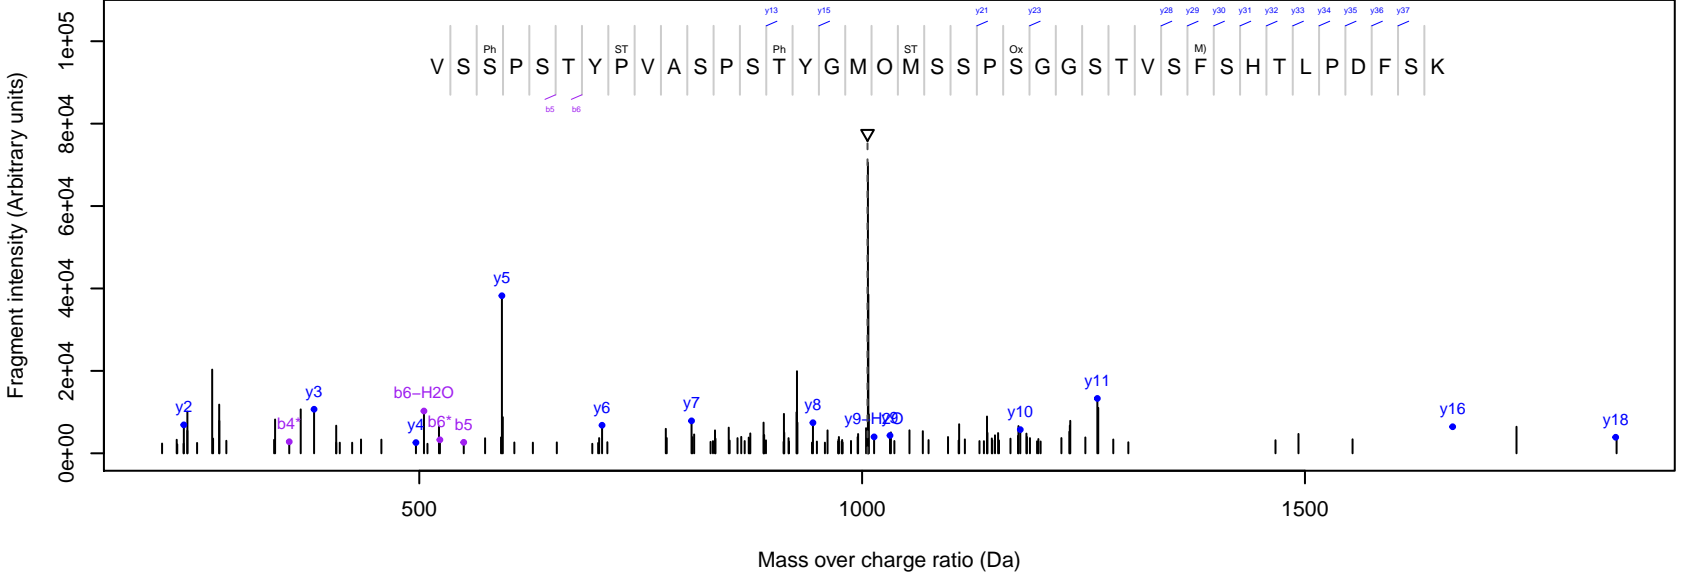

ASASRPQAPADGADPPPAEEPEARPDGEGS(Phospho (STY))PGK-4+

Source : QE3\_201126\_FR\_TiOx\_hum\_tissue\_Urea\_RNAB\_N Scan : 13351

Andromeda score : 59.166

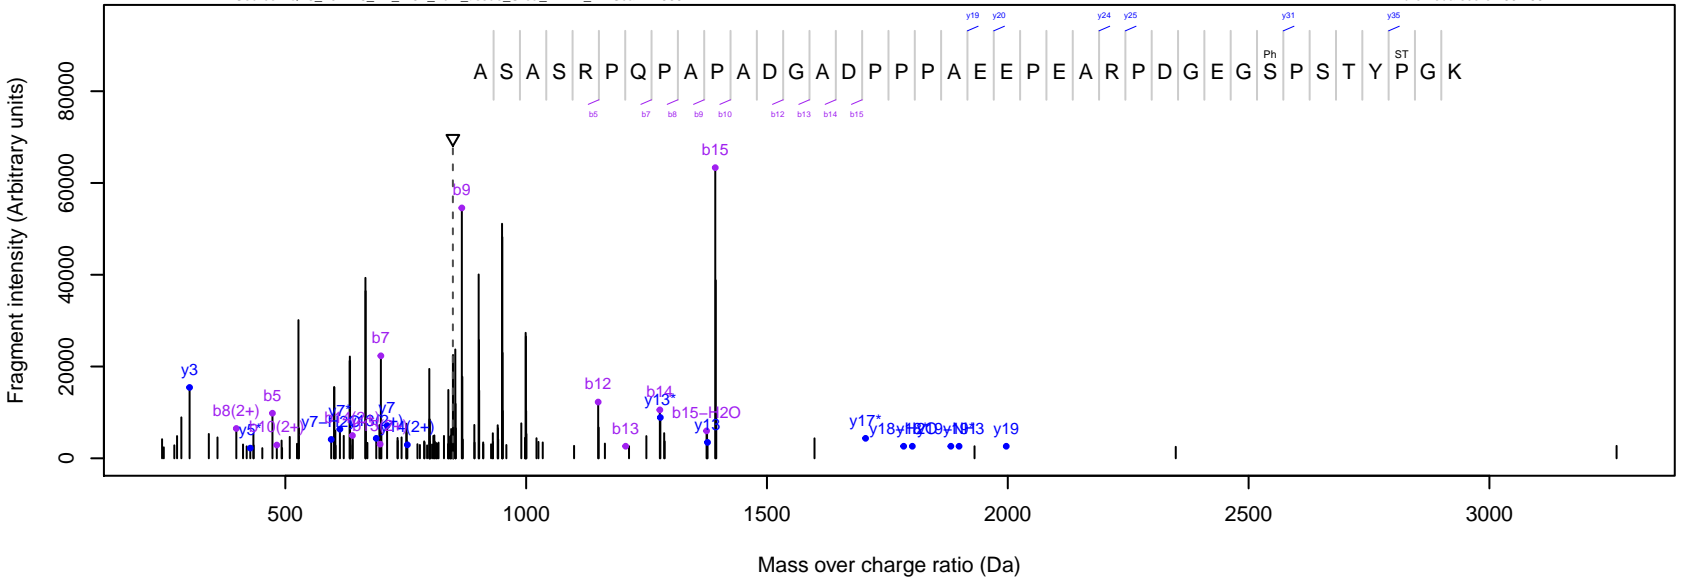

NKPRS(Phospho (STY))PVVLSK-3+

Source : QE3\_201126\_FR\_TiOx\_hum\_tissue\_Urea\_RNAB\_H Scan : 7989

Andromeda score : 59.116

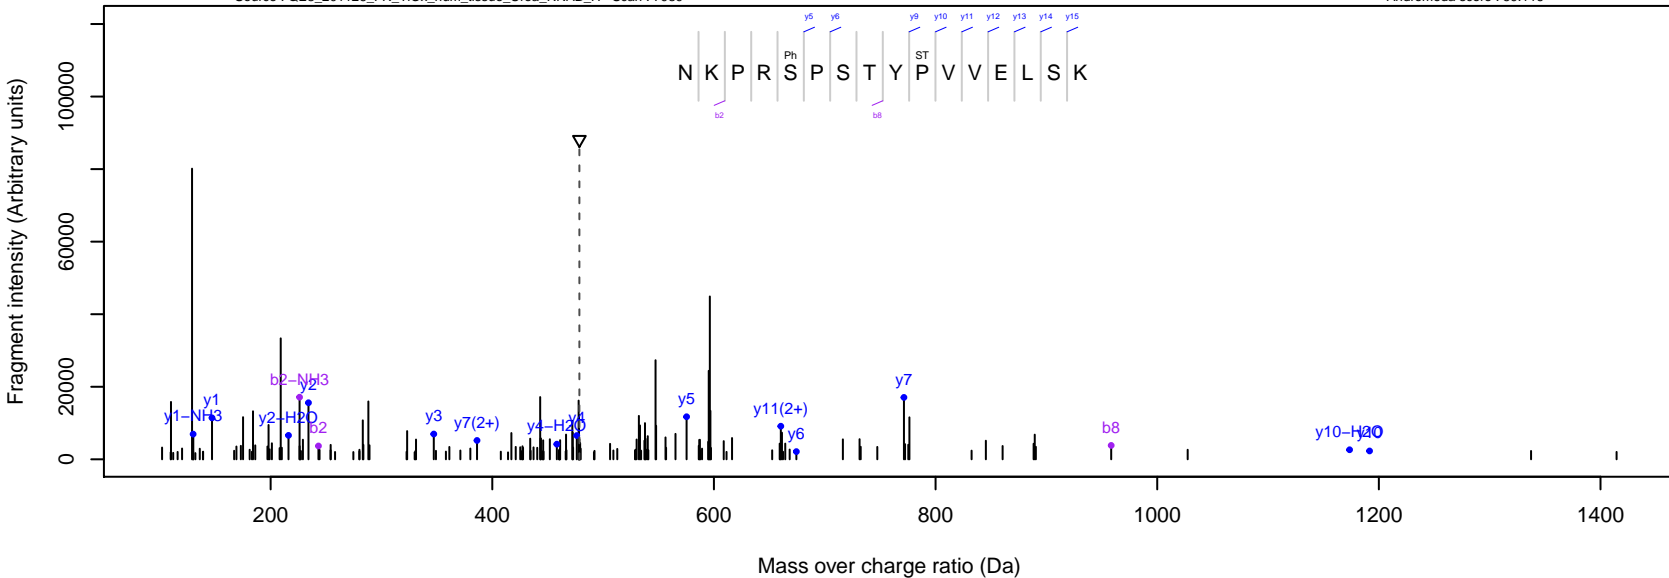

GATM(Oxidation (M))NEDS(Phospho (STY))NEEEEE(Phospho (STY))ENDWEEVEELSEPVLG DVR-3+

Source : QE3\_201126\_FR\_TiOx\_hum\_tissue\_Urea\_RNAB\_B Scan : 63212

Andromeda score : 59.089

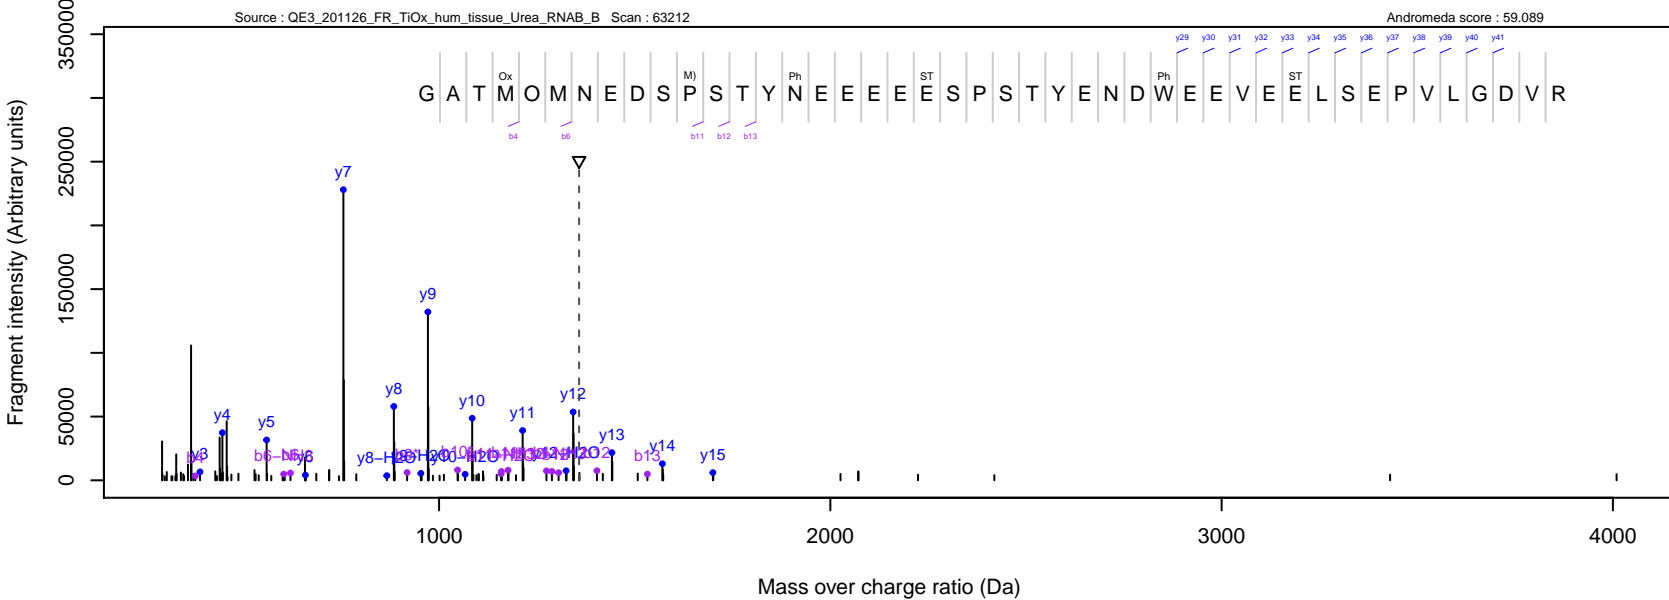

SPEYISSHNGCS(Phospho (STY))PSHS(Phospho (STY))IVDGYEDADSSYPATR-3+

Source : QE3\_201126\_FR\_TiOx\_hum\_tissue\_Urea\_RNAB\_H Scan : 34341

Andromeda score : 59.089

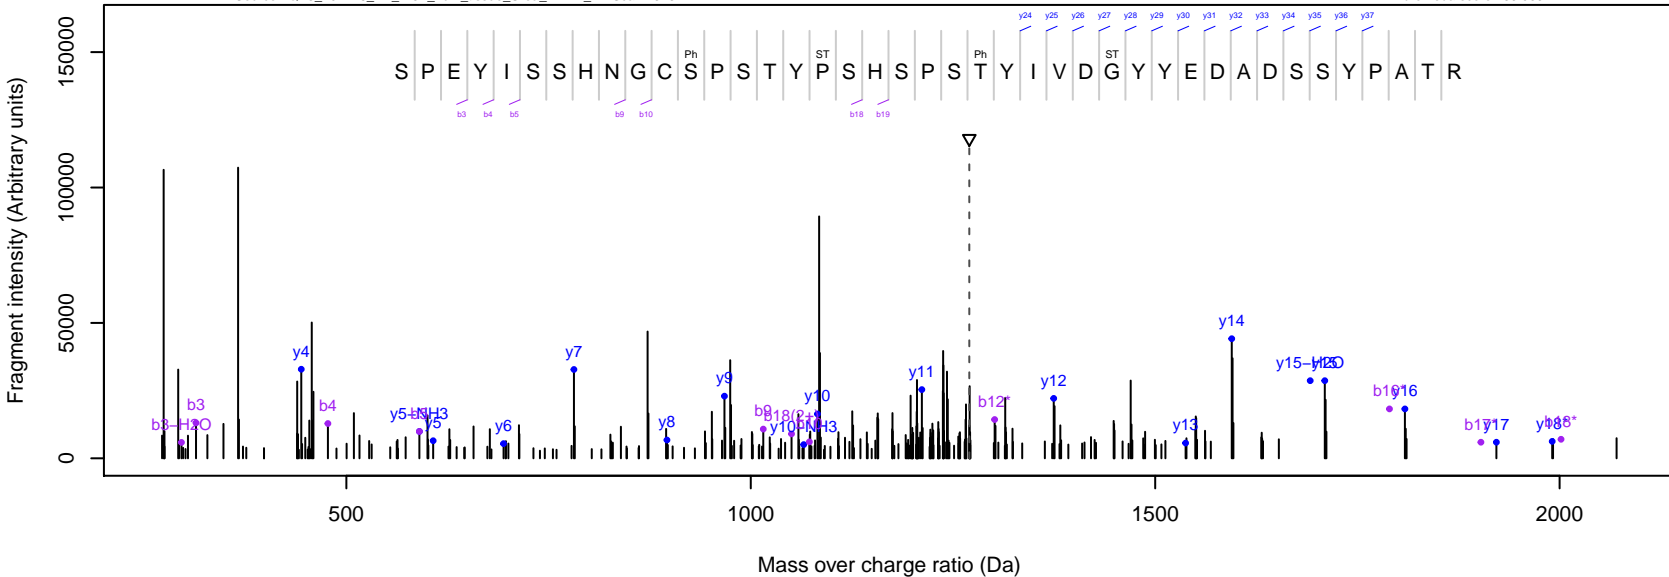



IPS(Phospho (STY))PNILK-2+

Source : QE3\_201126\_FR\_TiOx\_hum\_tissue\_Urea\_RNAB\_H Scan : 28216

Andromeda score : 59.067

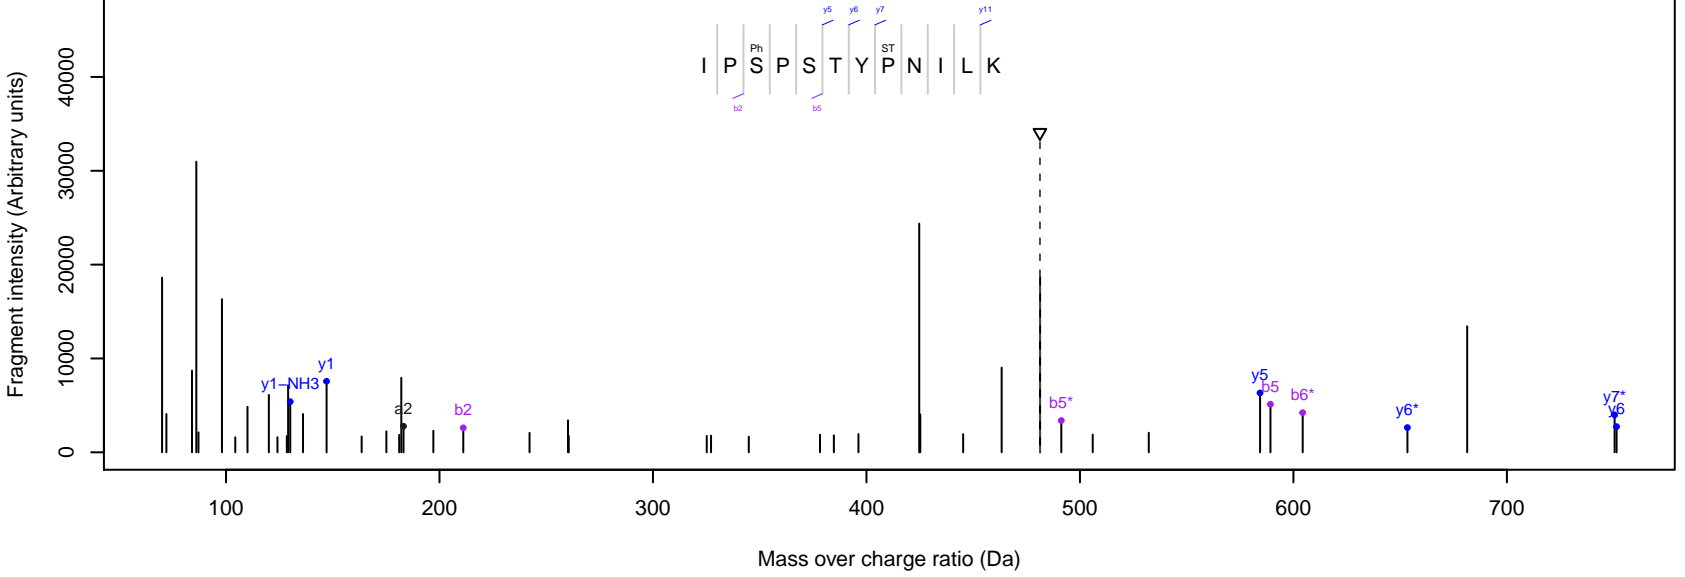

GM(Oxidation (M))PPGLQQSVSSGSSEIKS(Phospho (STY))DDEGDENLQDTK-3+

Source : QE3\_201126\_FR\_TiOx\_hum\_tissue\_Urea\_RNAB\_H Scan : 21025

Andromeda score : 59.052

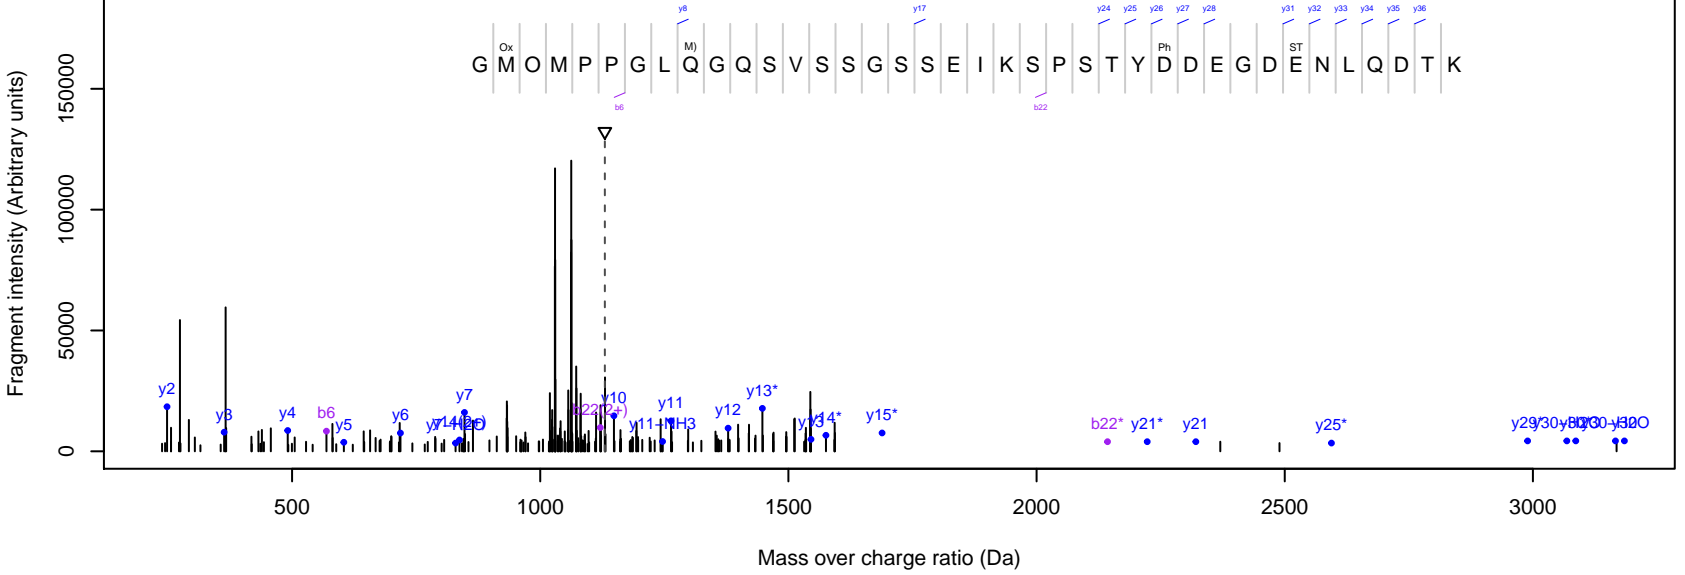

QAS(Phospho (STY))TLIDRPAPHFER-3+

Source : QE3\_201126\_FR\_TiOx\_hum\_tissue\_Urea\_RNAB\_H Scan : 19990

Andromeda score : 58.997

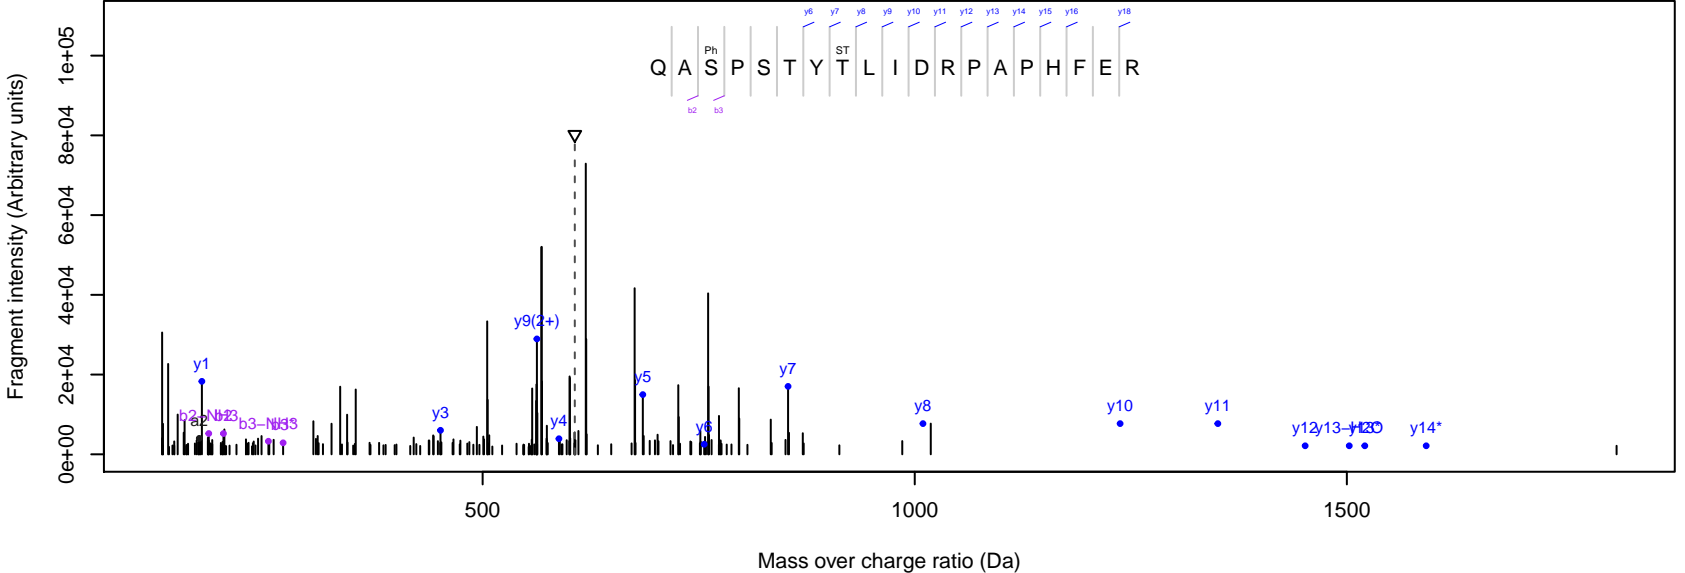

GPLLFSGALSEGQFYSPPESEFAGSDNES(Phospho(STY))DEEVAGKK-3+

Source : QE3\_201126\_FR\_TiOx\_hum\_tissue\_Urea\_RNAB\_H Scan : 55252

Andromeda score : 58.981

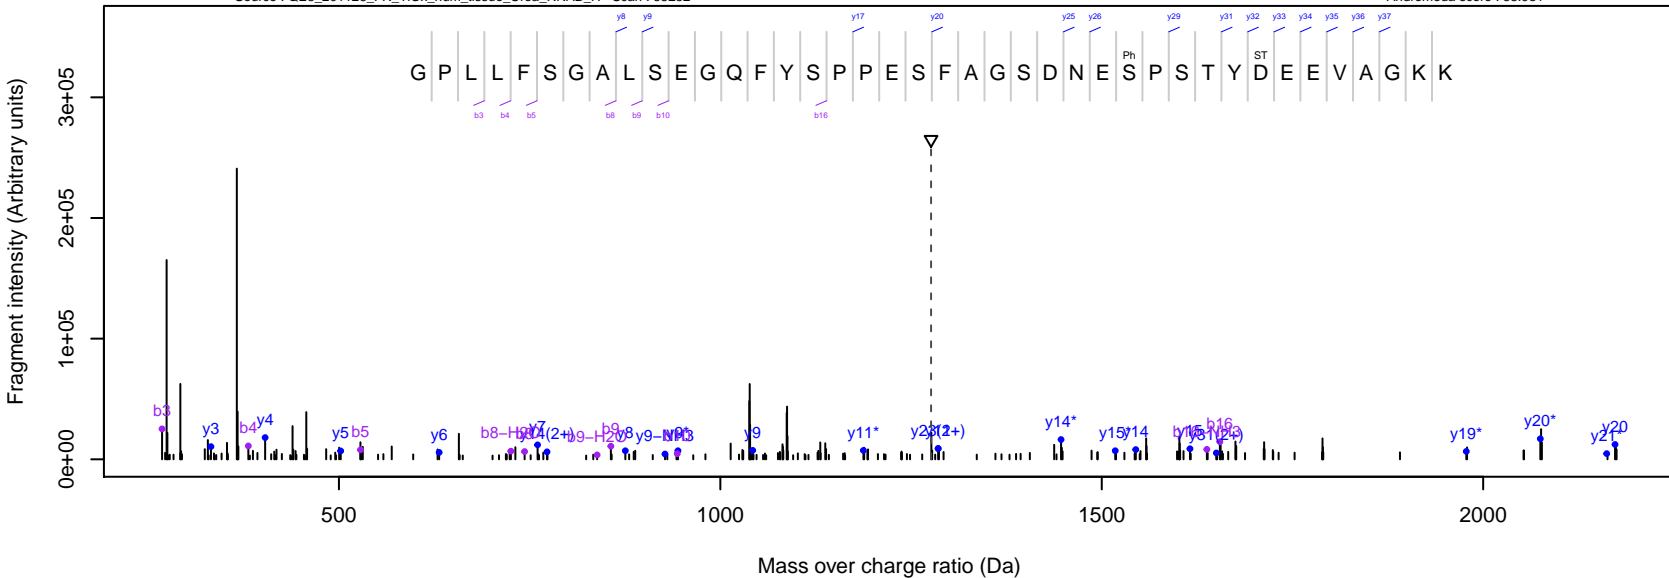

GYSS(Phospho(STY))LLKR-2+

Source : QE3\_201126\_FR\_TiOx\_hum\_tissue\_Urea\_RNAB\_H Scan : 18797

Andromeda score : 58.981

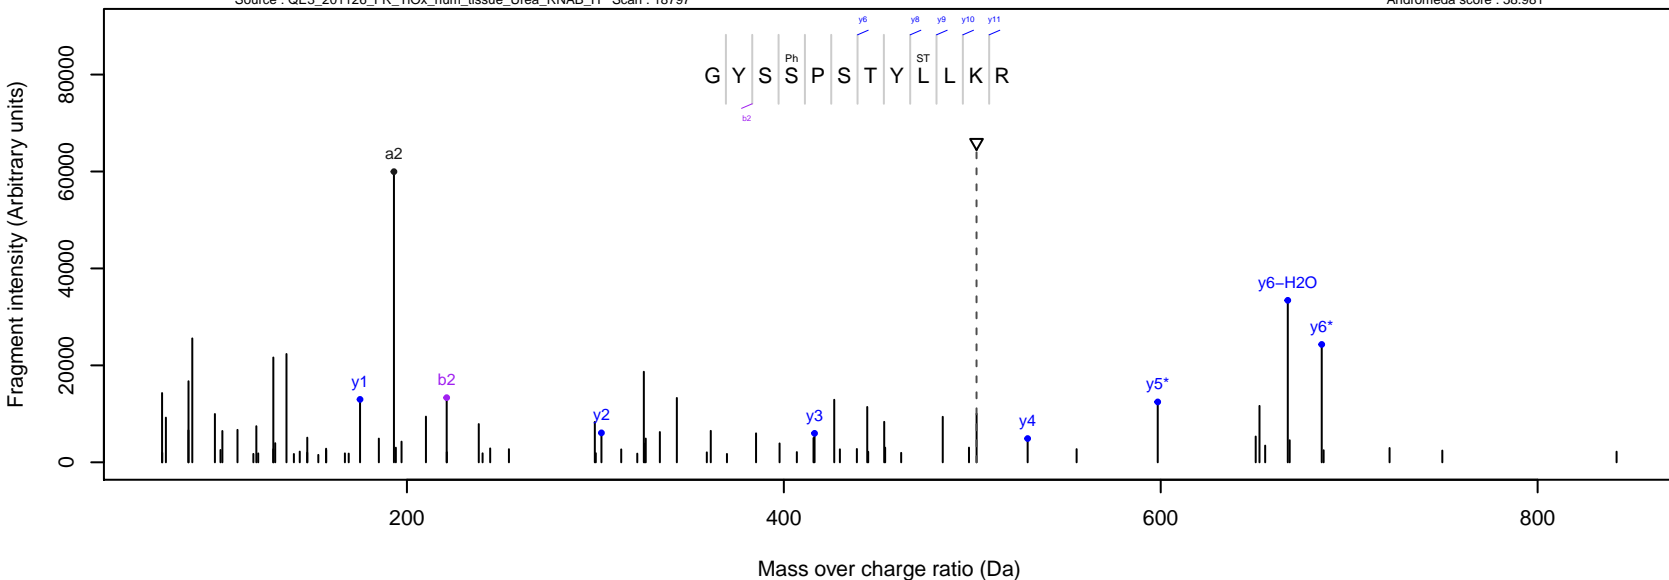

EVS(Phospho(STY))S(Phospho(STY))RPSTPGLSVVSGISATSEDPNKIEDLR-4+

Source : QE3\_201126\_FR\_TiOx\_hum\_tissue\_Urea\_RNAB\_N Scan : 51811

Andromeda score : 58.98

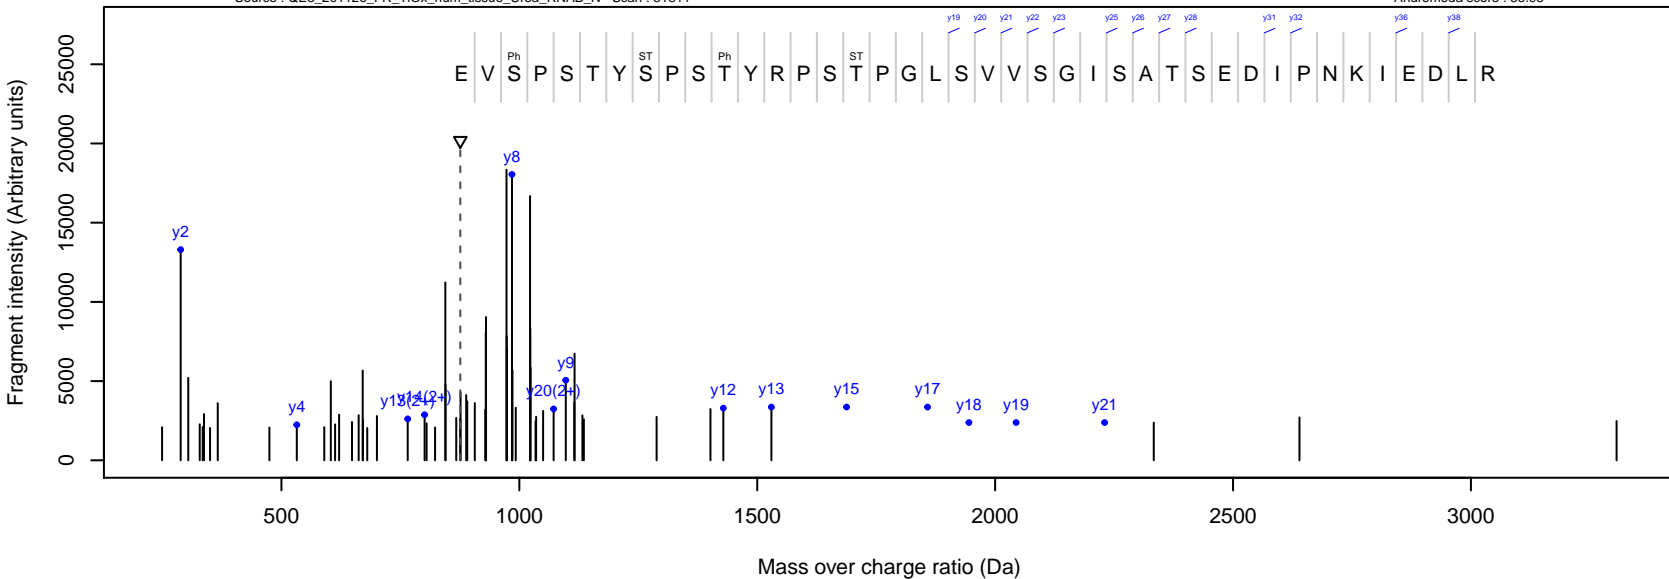

RGSQPS(Phospho (STY))T(Phospho (STY))PRLS(Phospho (STY))PTFPESIEHPLAR-4+

Source : QE3\_201126\_FR\_TIOx\_hum\_tissue\_Urea\_RNAB\_N Scan : 39738

Andromeda score : 58.98

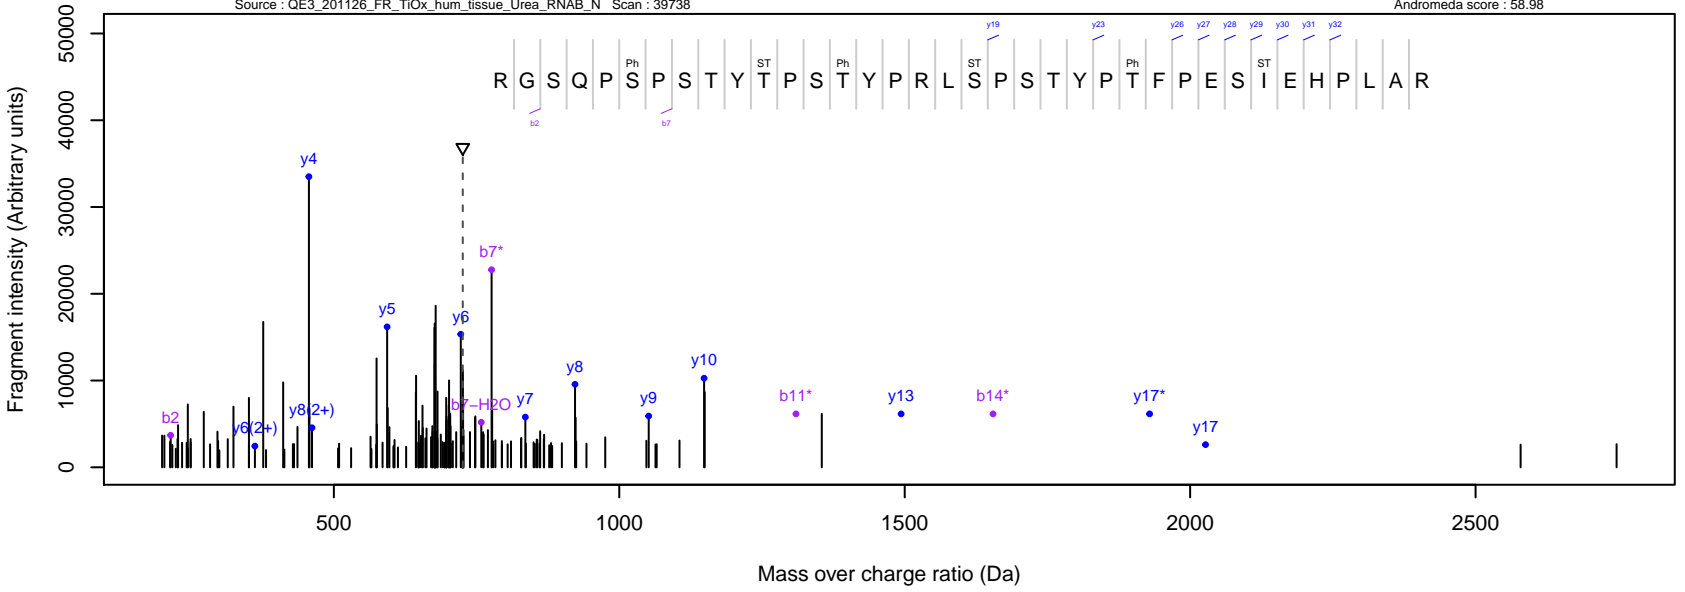

GGSP(Phospho (STY))PAPYVDFTLNAPDILPR-3+

Source : QE3\_201126\_FR\_TIOx\_hum\_tissue\_Urea\_RNAB\_B Scan : 61099

Andromeda score : 58.952

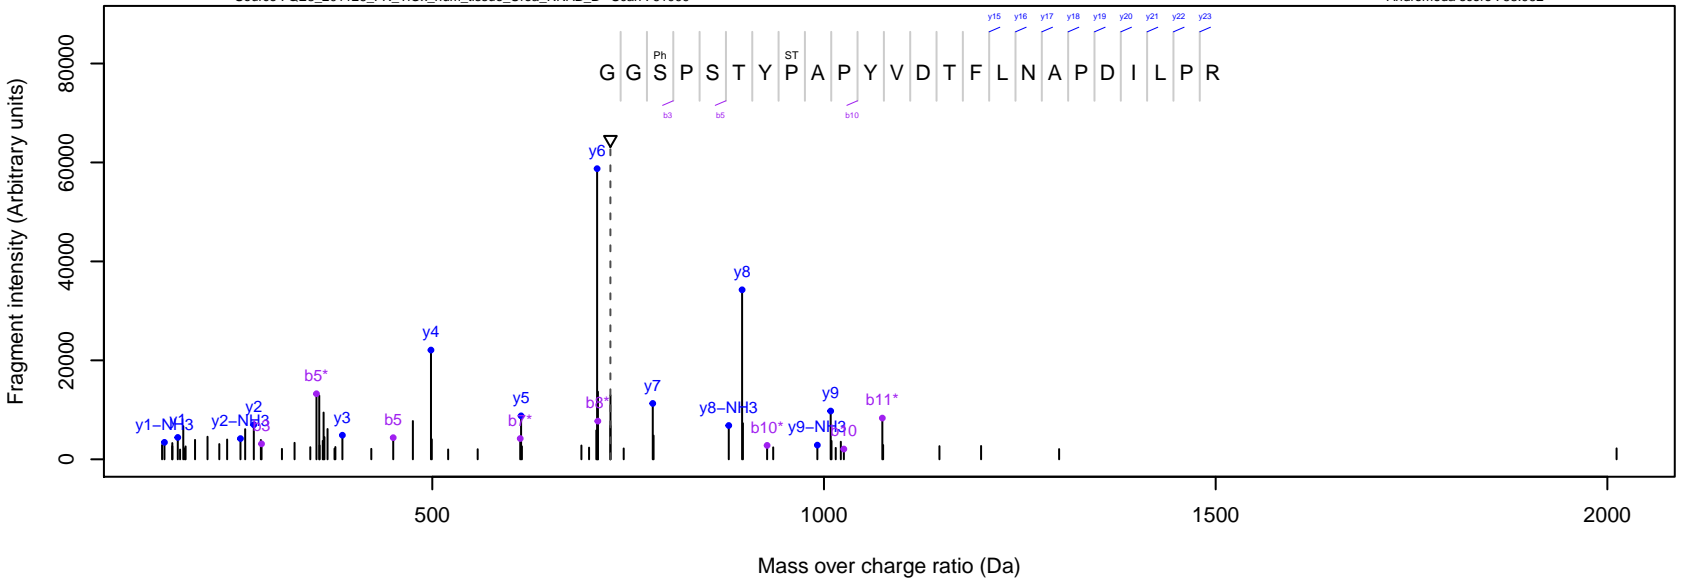

LLQPGGGPDVGT(Phospho (STY))GAPRPGCSPR-3+

Source : QE3\_201126\_FR\_TIOx\_hum\_tissue\_Urea\_RNAB\_N Scan : 20717

Andromeda score : 58.938

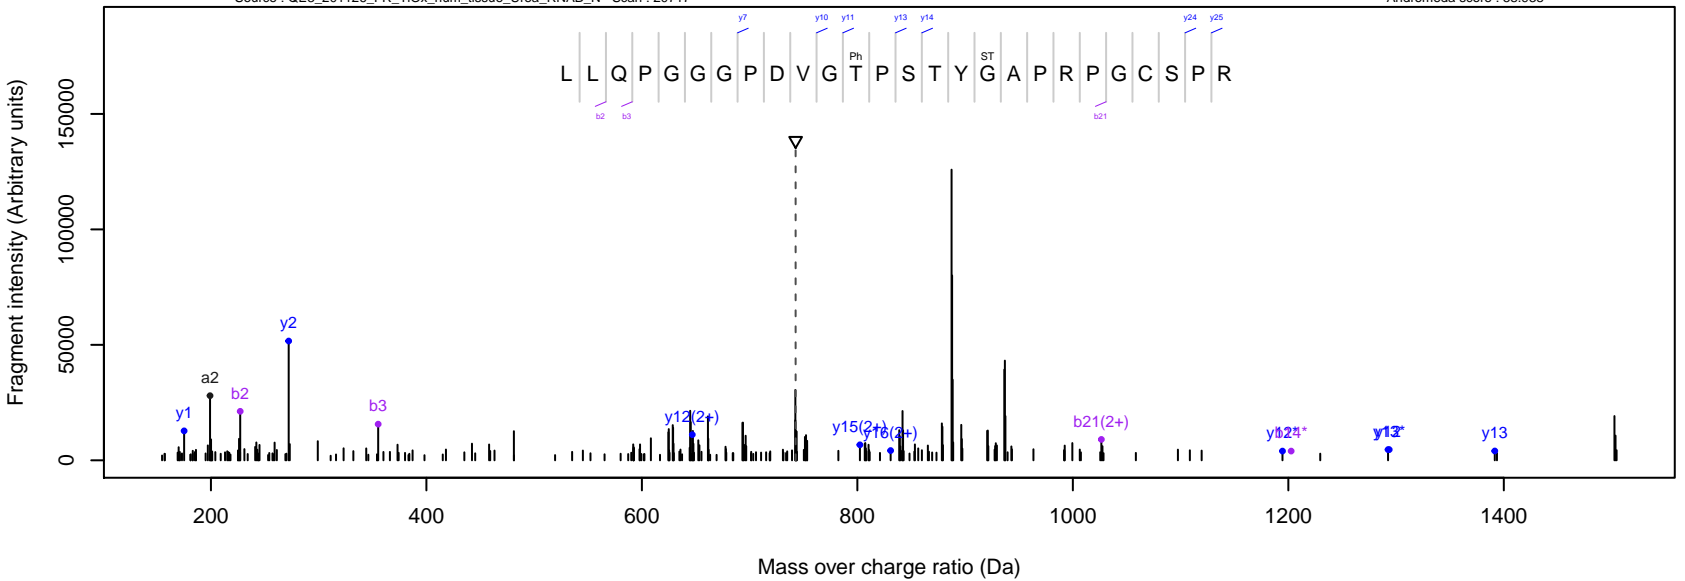

S(Phospho (STY))PVDESQVGDVPVENGM(Oxidation (M))APFFEM(Oxidation (M))K-3+

Source : QE3\_201126\_FR\_TiOx\_hum\_tissue\_Urea\_RNAB\_H Scan : 50796

Andromeda score : 58.929

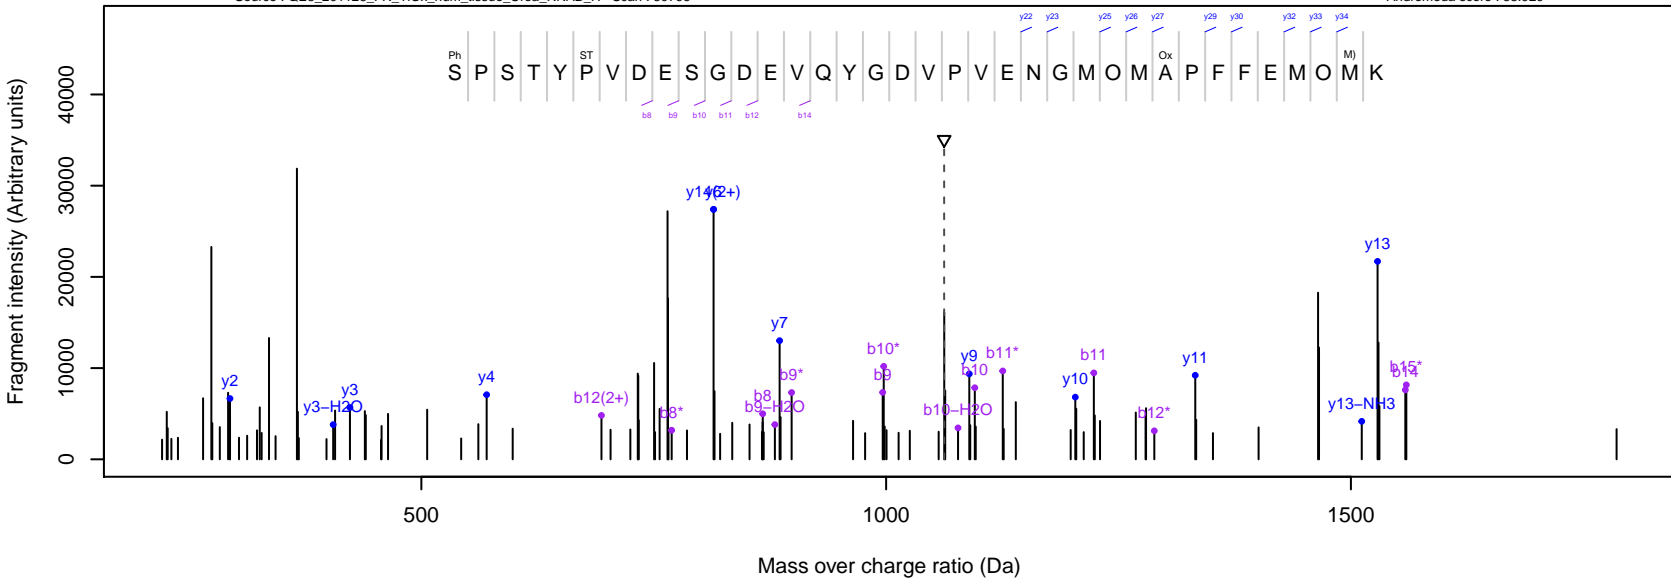

S(Phospho (STY))ASTLCLPSVGAARPQVK-3+

Source : QE3\_201126\_FR\_TiOx\_hum\_tissue\_Urea\_RNAB\_H Scan : 28872

Andromeda score : 58.914

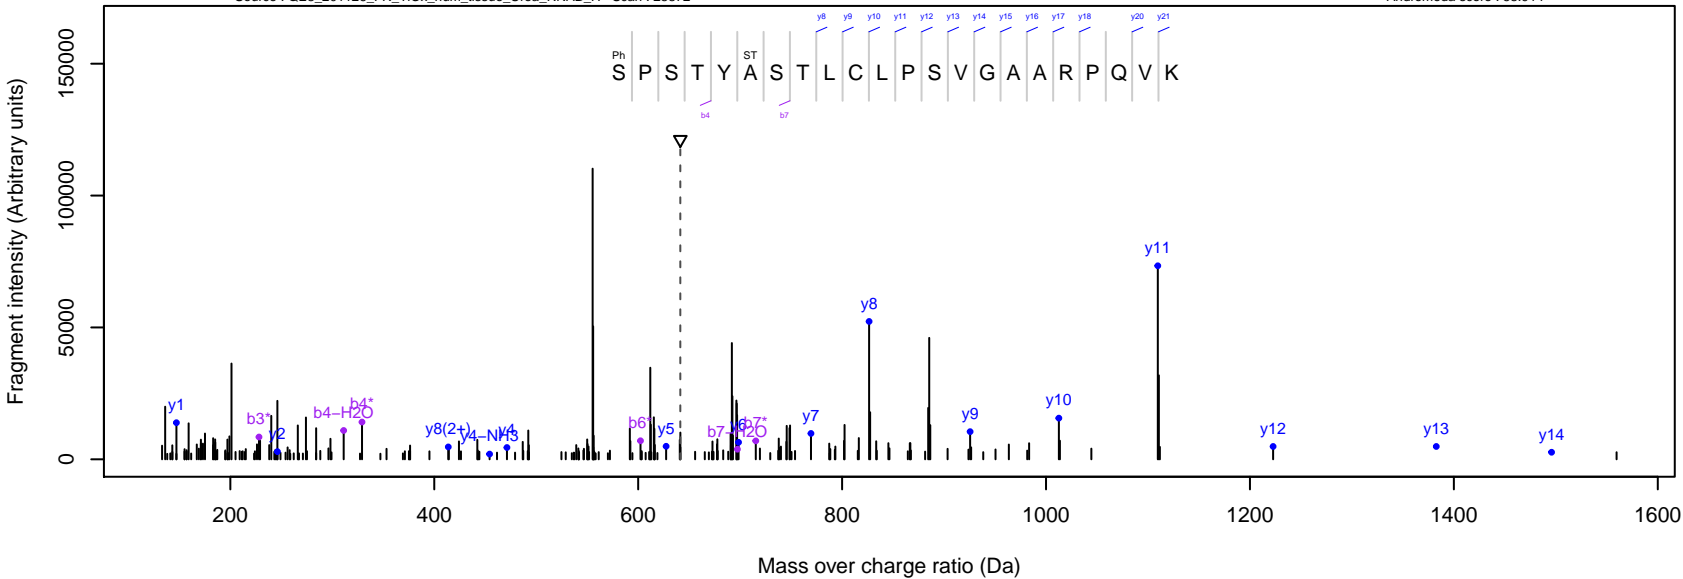

S(Phospho (STY))FADIGKKHS(Phospho (STY))DPHLLER-4+

Source : QE3\_201126\_FR\_TiOx\_hum\_tissue\_Urea\_RNAB\_N Scan : 19148

Andromeda score : 58.904

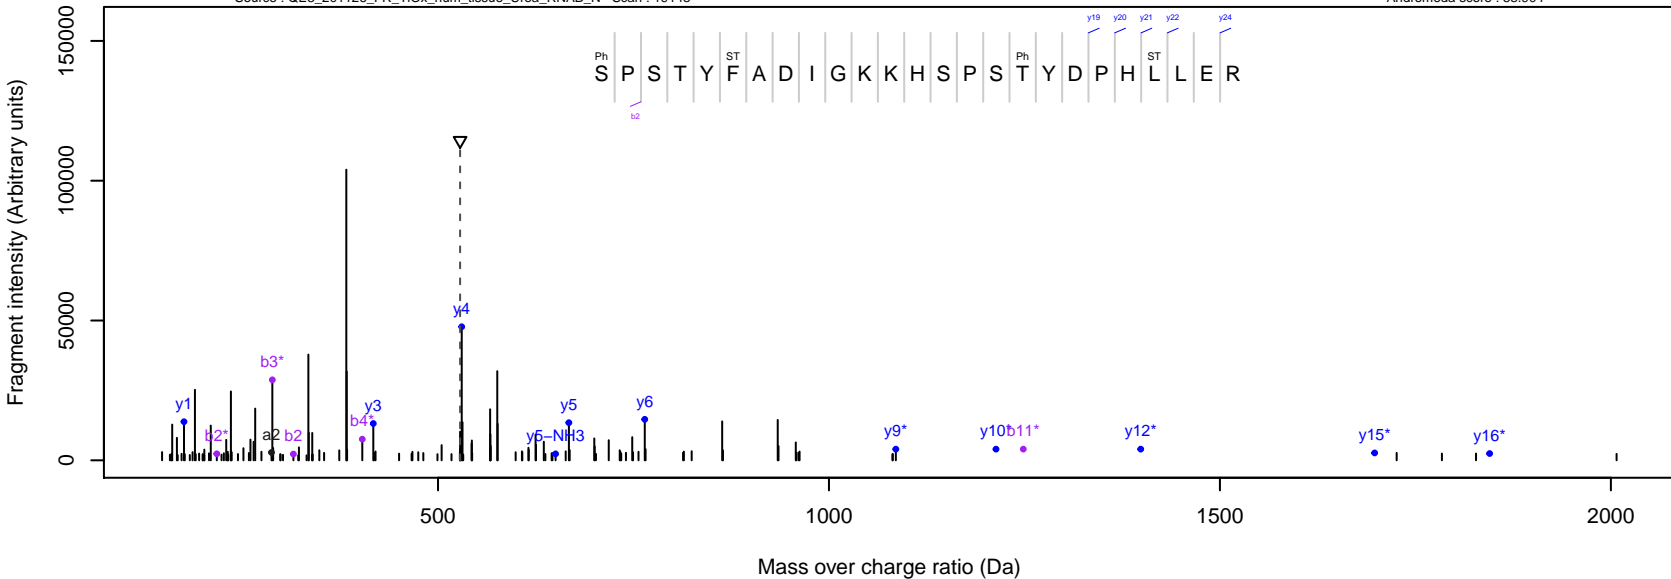

GPGQPSS(Phospho (STY))PQRLDR-3+

Source : QE3\_201126\_FR\_TiOx\_hum\_tissue\_Urea\_RNAB\_N Scan : 7624

Andromeda score : 58.885

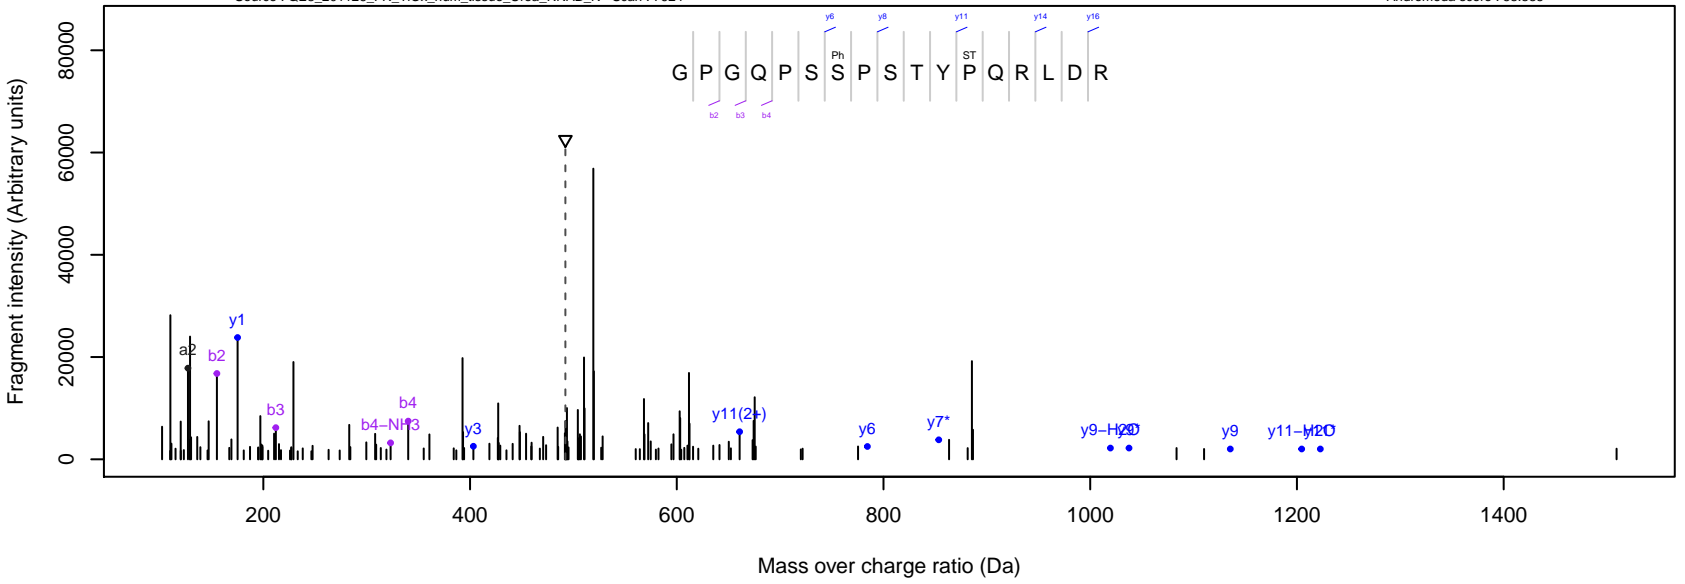

RAS(Phospho (STY))EFPGLSVTSHGRPEAPGK-4+

Source : QE3\_201126\_FR\_TiOx\_hum\_tissue\_Urea\_RNAB\_B Scan : 19773

Andromeda score : 58.861

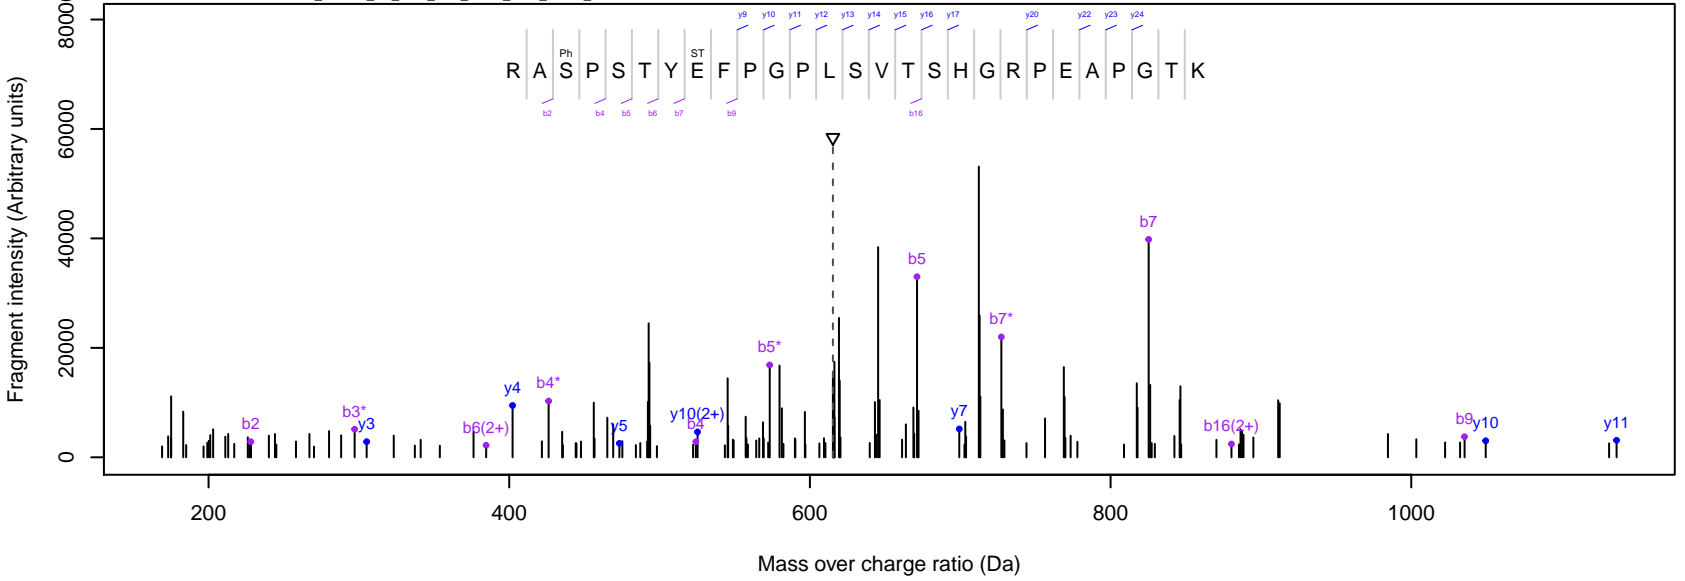

TASIS(Phospho (STY))S(Phospho (STY))SPSEGTPTVGSYGCTPQSLPK-3+

Source : QE3\_201126\_FR\_TiOx\_hum\_tissue\_Urea\_RNAB\_B Scan : 39698

Andromeda score : 58.861

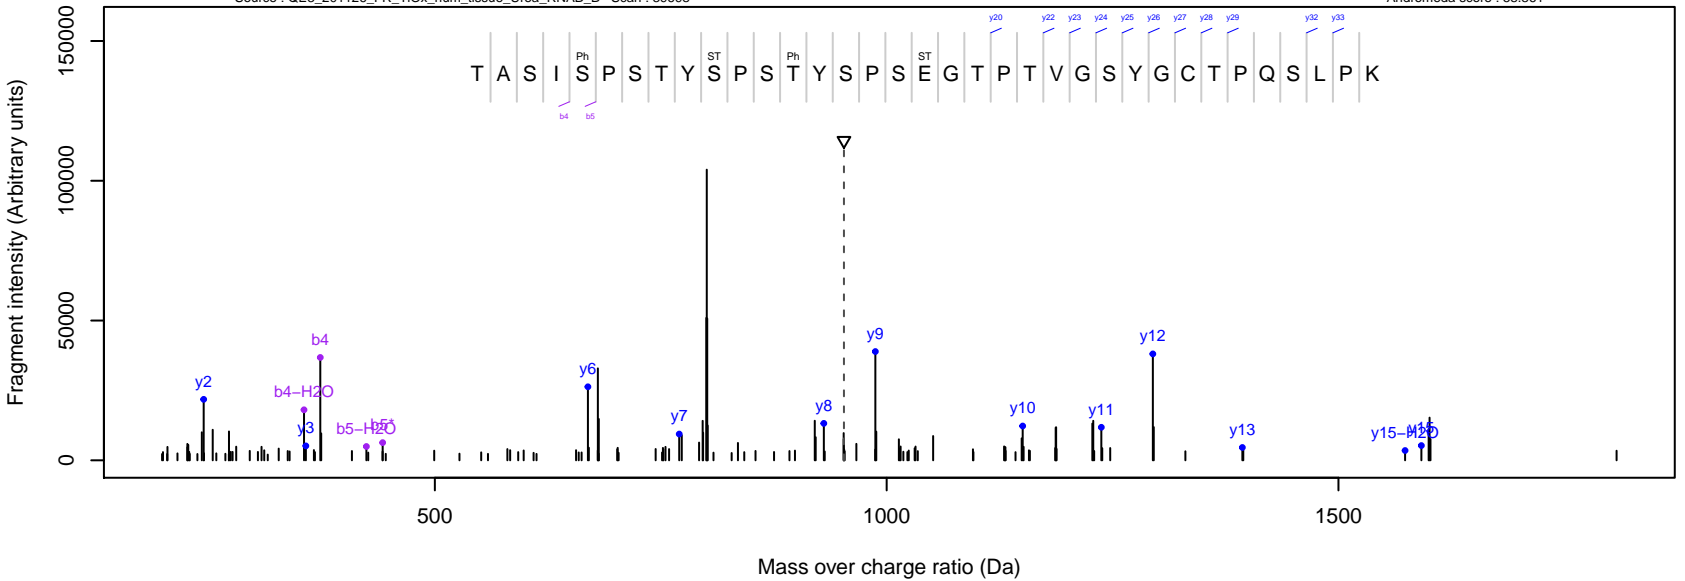

DFTNEAPPALPDAS(Phospho (STY))ASPLSPHRR-3+

Source : QE3\_201126\_FR\_TiOx\_hum\_tissue\_Urea\_RNAB\_H Scan : 32286

Andromeda score : 58.858

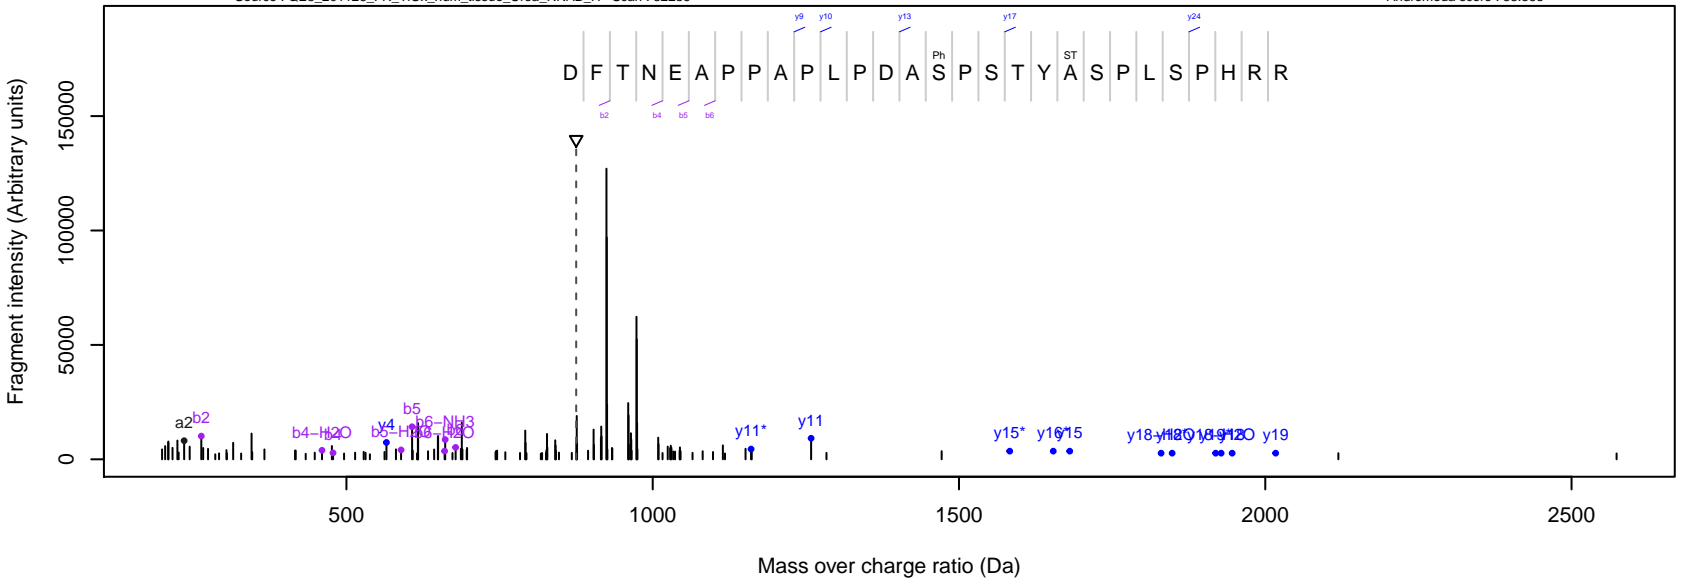

EAS(Phospho (STY))RSSPVEFECINEK-3+

Source : QE3\_201126\_FR\_TiOx\_hum\_tissue\_Urea\_RNAB\_N Scan : 20524

Andromeda score : 58.848

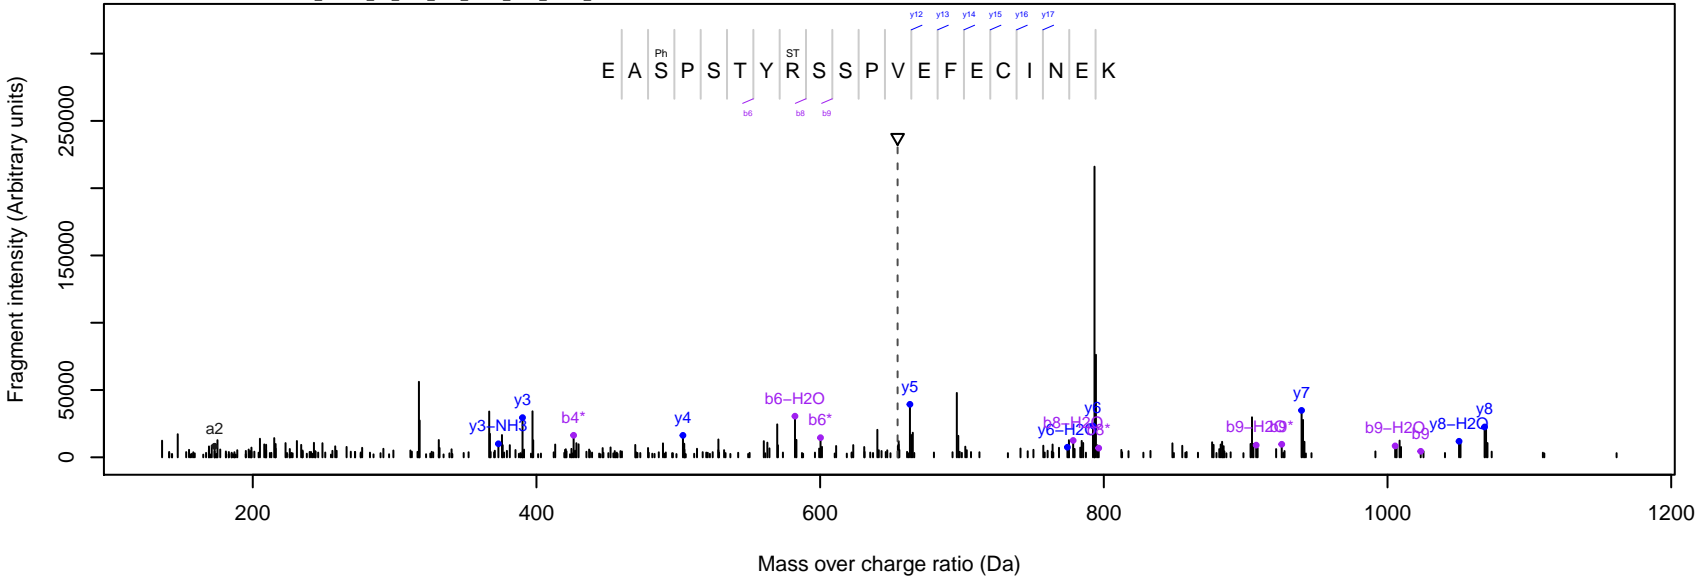

HRDS(Phospho (STY))IVETLKR-4+

Source : QE3\_201126\_FR\_TiOx\_hum\_tissue\_Urea\_RNAB\_B Scan : 9084

Andromeda score : 58.831

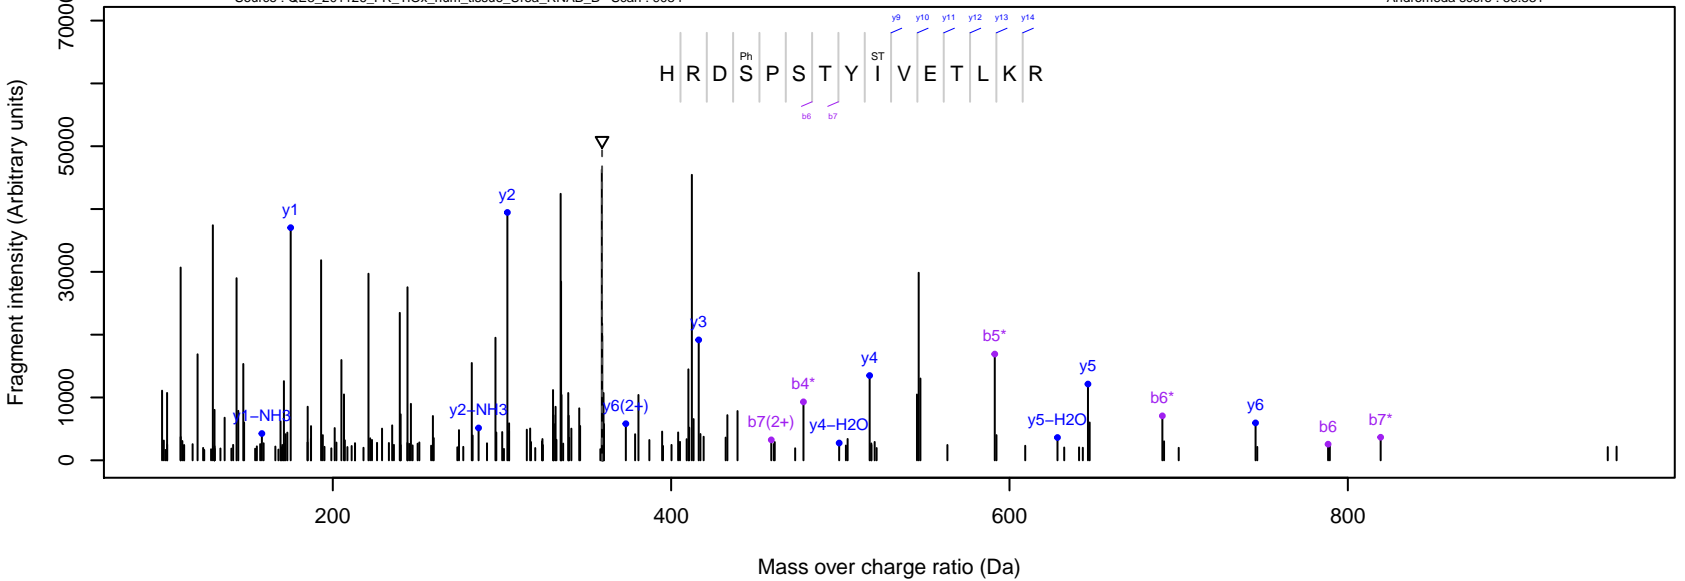

AVPS(Phospho (STY))PTTGEEGSVHSR-3+

Source : QE3\_2011126\_FR\_TiOx\_hum\_tissue\_Urea\_RNAB\_B Scan : 9746

Andromeda score : 58.83

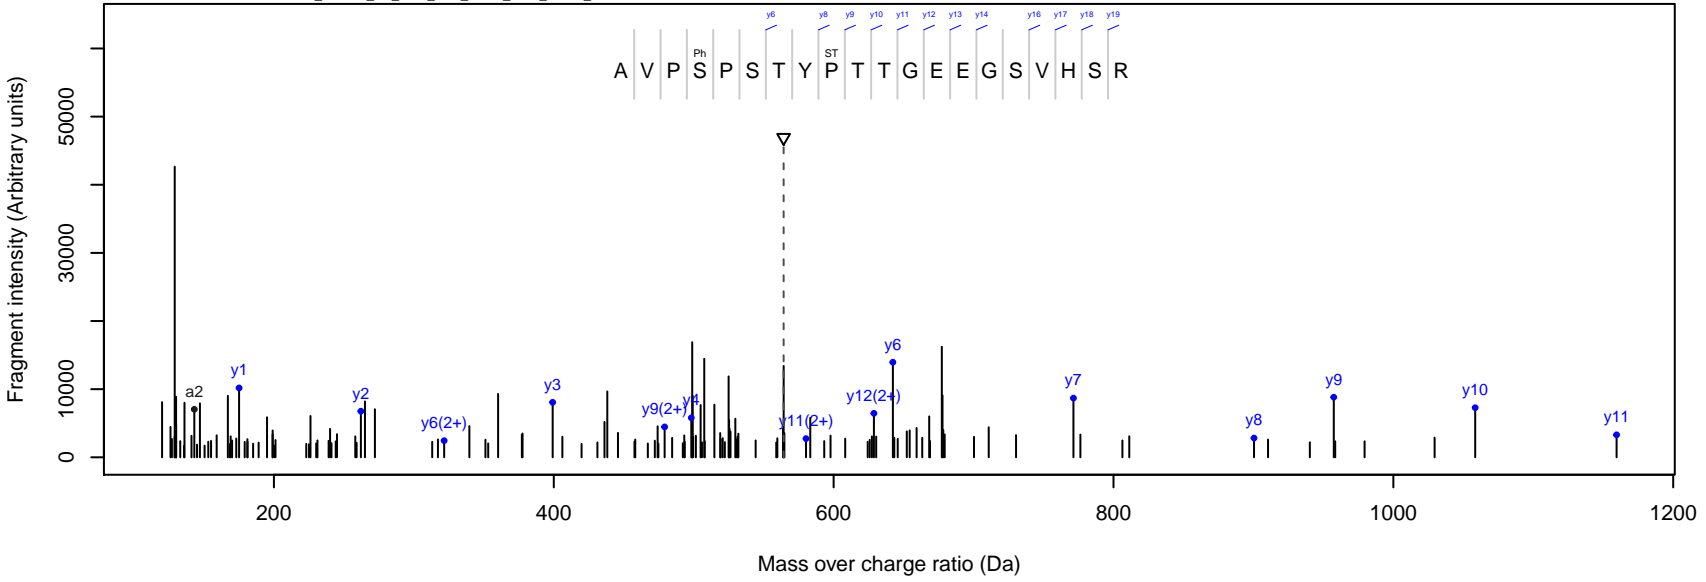

KFDGVEGPRTPSTYPK-3+

Source : QE3\_2011126\_FR\_TiOx\_hum\_tissue\_Urea\_RNAB\_N Scan : 8485

Andromeda score : 58.83

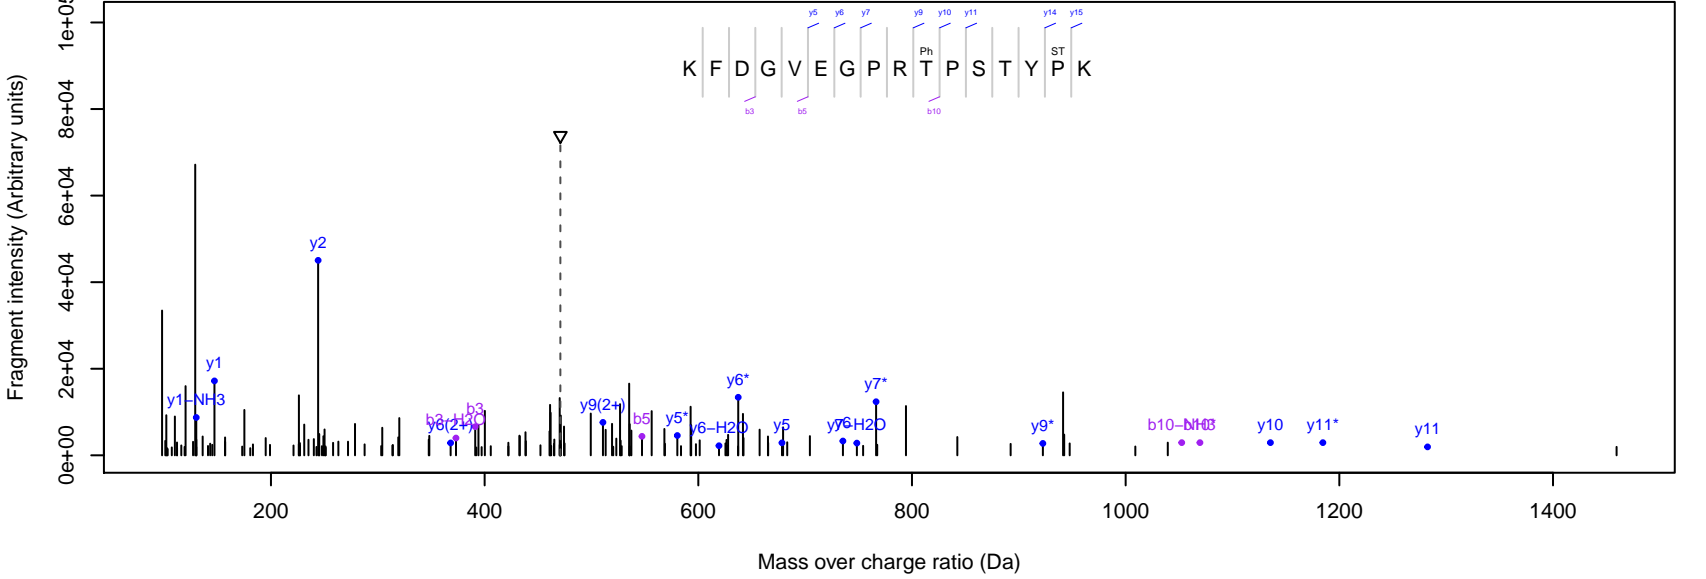

QVGETSAPGDTLDGTPSTYPR-2+

Source : QE3\_2011126\_FR\_TiOx\_hum\_tissue\_Urea\_RNAB\_N Scan : 18626

Andromeda score : 58.83

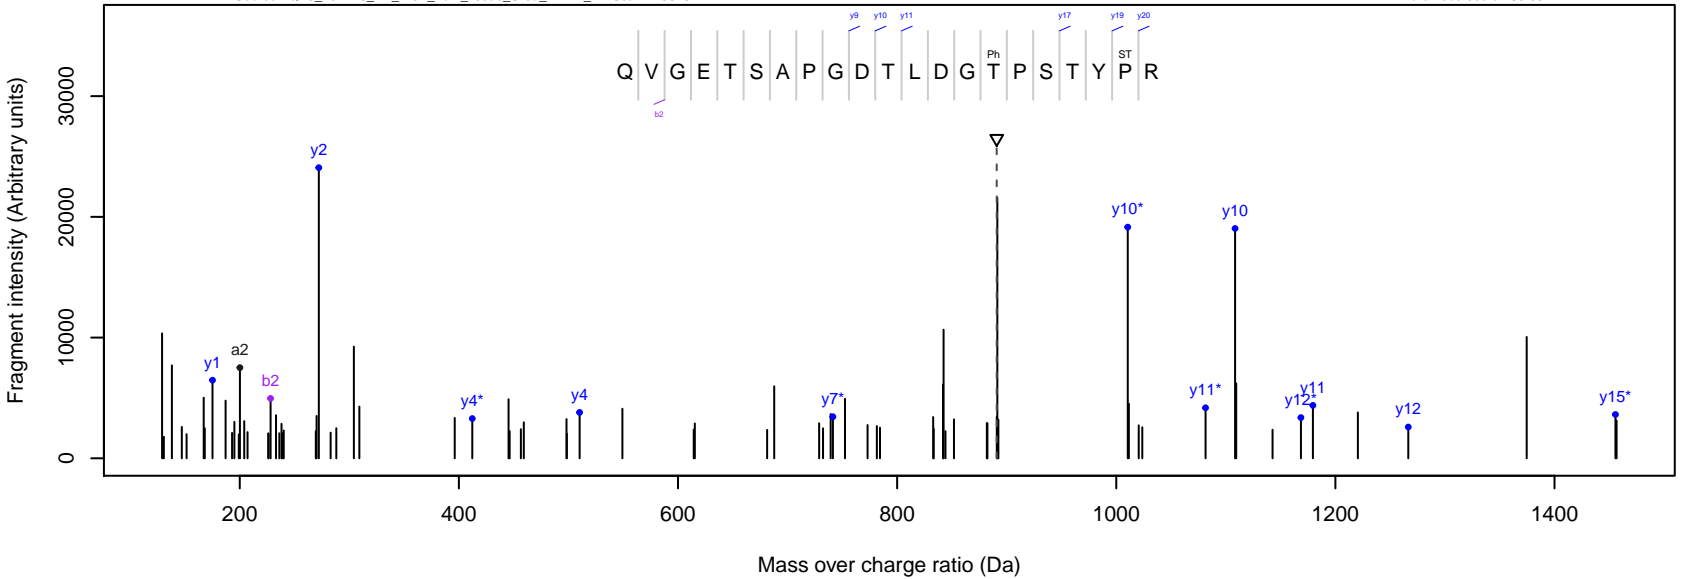

RSS(Phospho (STY))SSSTTPTSANSLYR-2+

Source : QE3\_201126\_FR\_TiOx\_hum\_tissue\_Urea\_RNAB\_H Scan : 12106

Andromeda score : 58.83

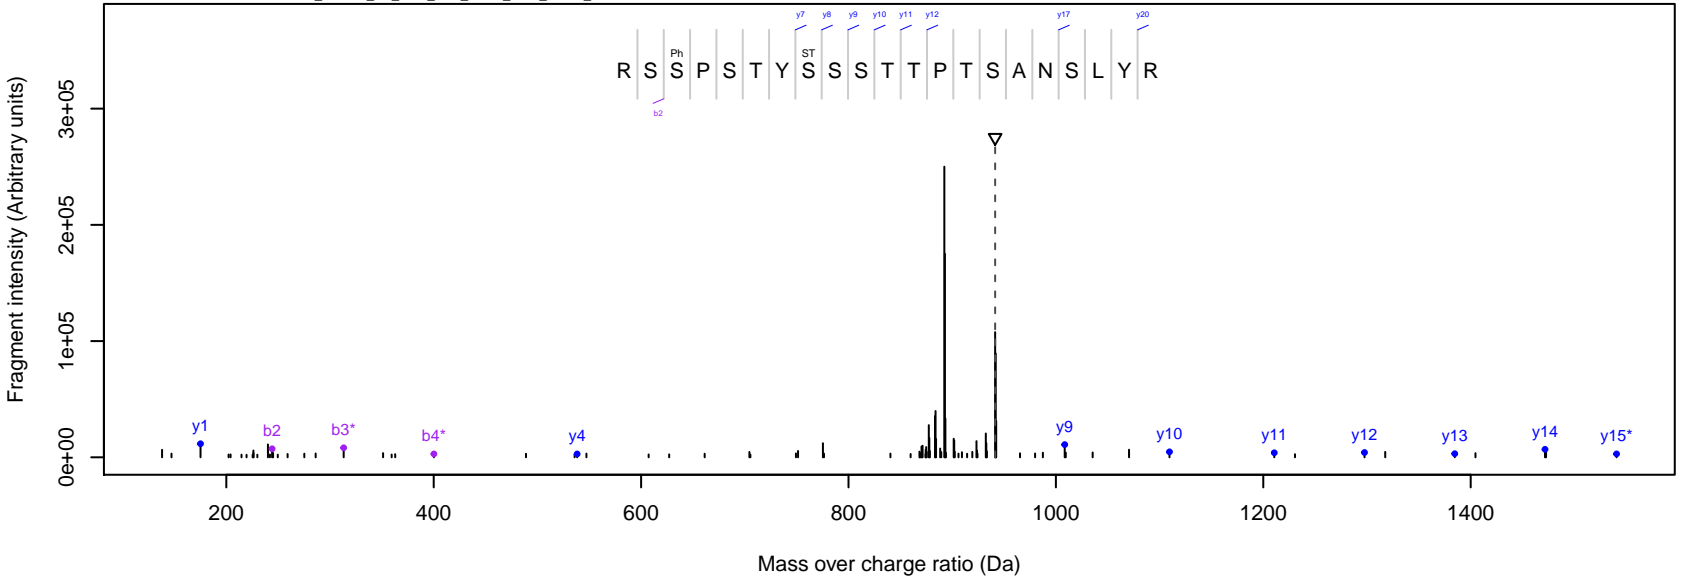

SFFDNIS(Phospho (STY))CDDNRER-3+

Source : QE3\_201126\_FR\_TiOx\_hum\_tissue\_Urea\_RNAB\_H Scan : 26750

Andromeda score : 58.83

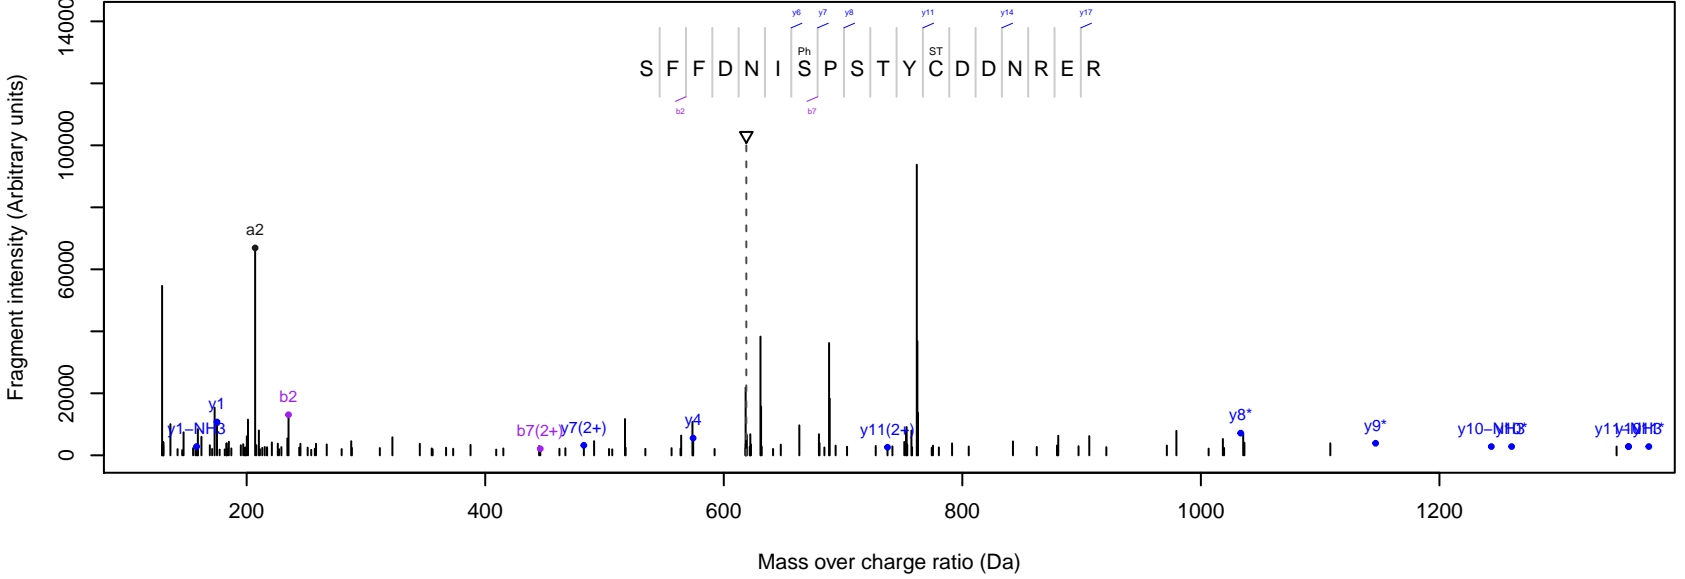

RLS(Phospho (STY))KGSFPTSR-3+

Source : QE3\_201126\_FR\_TiOx\_hum\_tissue\_Urea\_RNAB\_N Scan : 9097

Andromeda score : 58.817

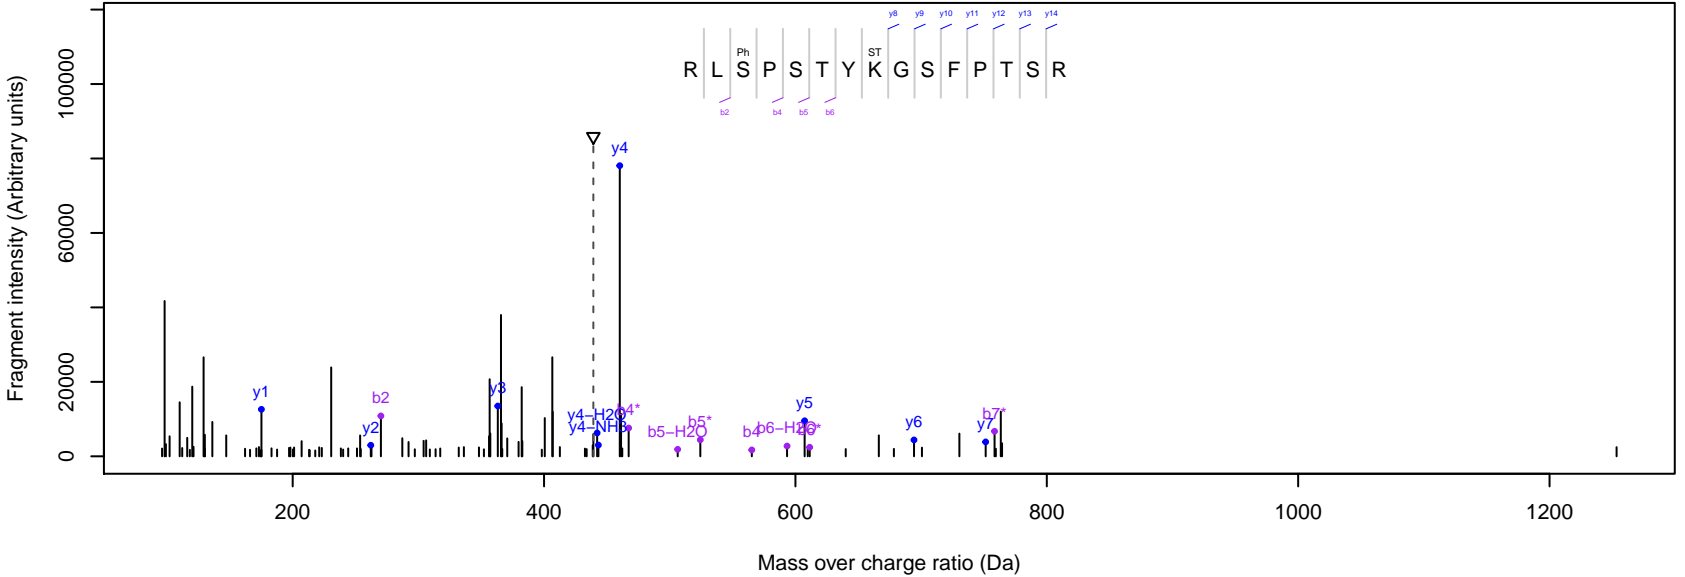



LADMYGGVDS(Phospho (STY))DKDS-2+

Source : QE3\_201126\_FR\_TIOx\_hum\_tissue\_Urea\_RNAB\_H Scan : 23044

Andromeda score : 58.814

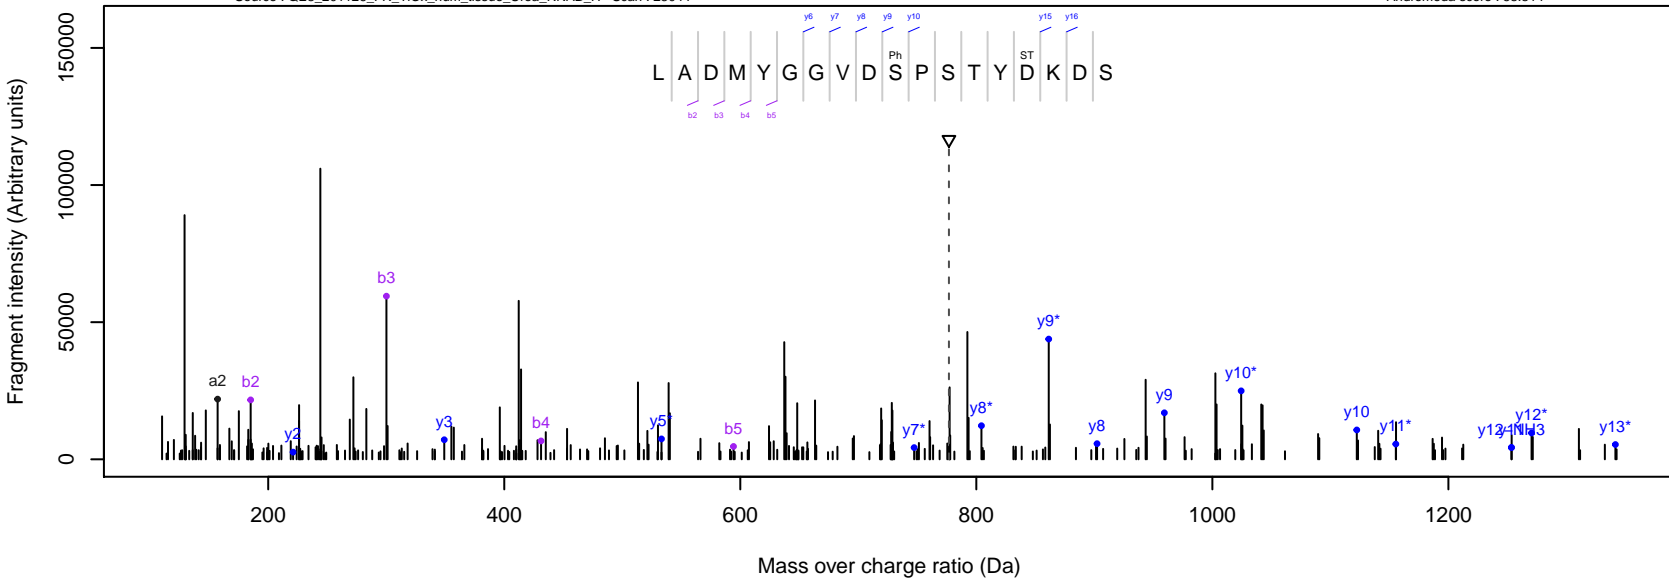

NLTANDPSQEYVAS(Phospho (STY))EGEEDPEVEFLK-3+

Source : QE3\_201126\_FR\_TIOx\_hum\_tissue\_Urea\_RNAB\_B Scan : 50364

Andromeda score : 58.812

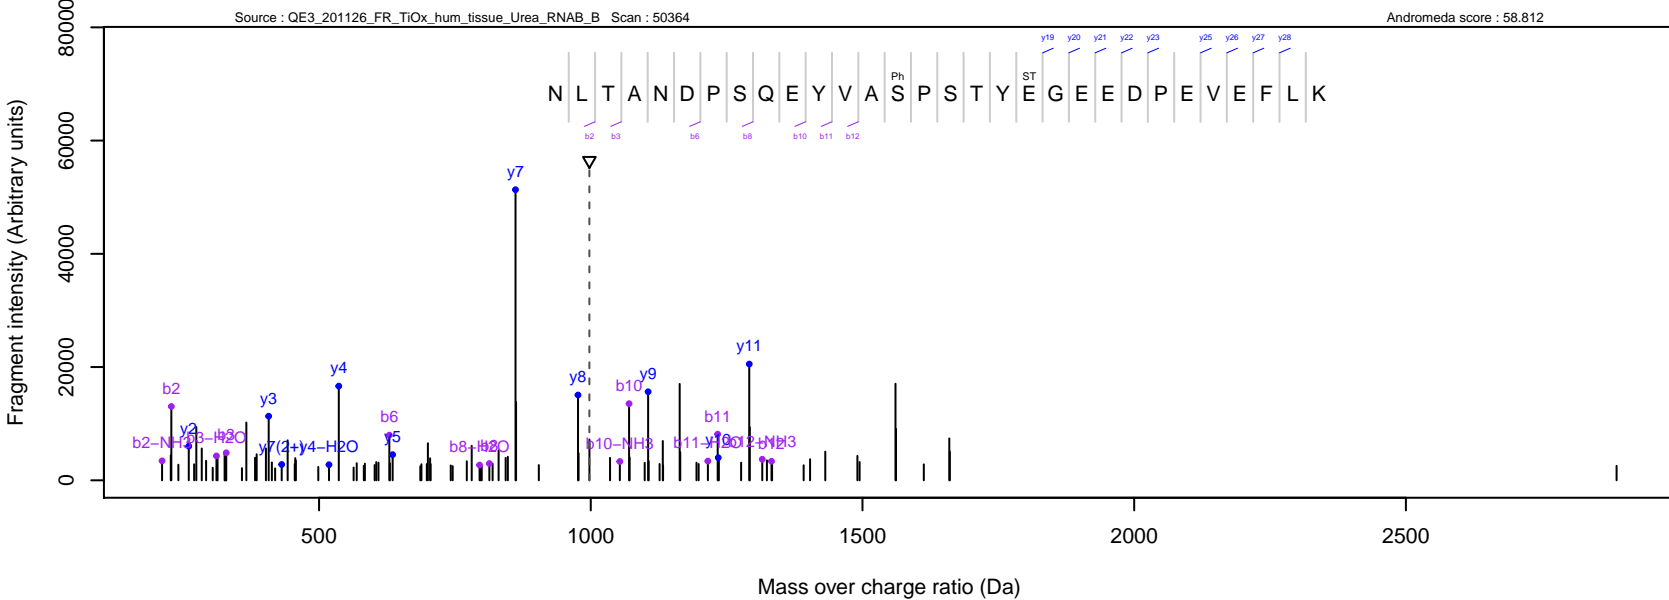

SESGTDLREHS(Phospho (STY))PS(Phospho (STY))ESEKEVVGADPR-4+

Source : QE3\_201126\_FR\_TIOx\_hum\_tissue\_Urea\_RNAB\_H Scan : 15195

Andromeda score : 58.776

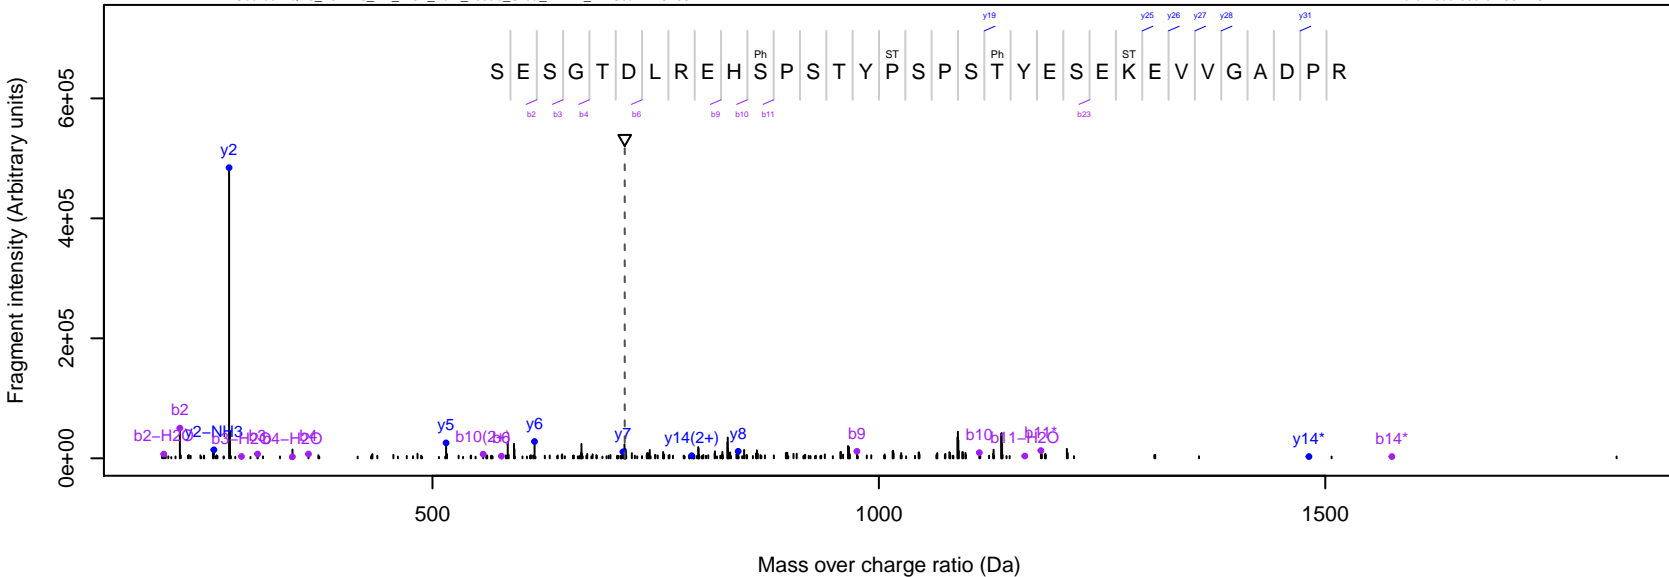

SGRDT(Phospho (STY))PAS(Phospho (STY))VDS(Phospho (STY))IPLEWDHVDLSR-3+

Source : QE3\_201126\_FR\_TiOx\_hum\_tissue\_Urea\_RNAB\_N Scan : 53886

Andromeda score : 58.776

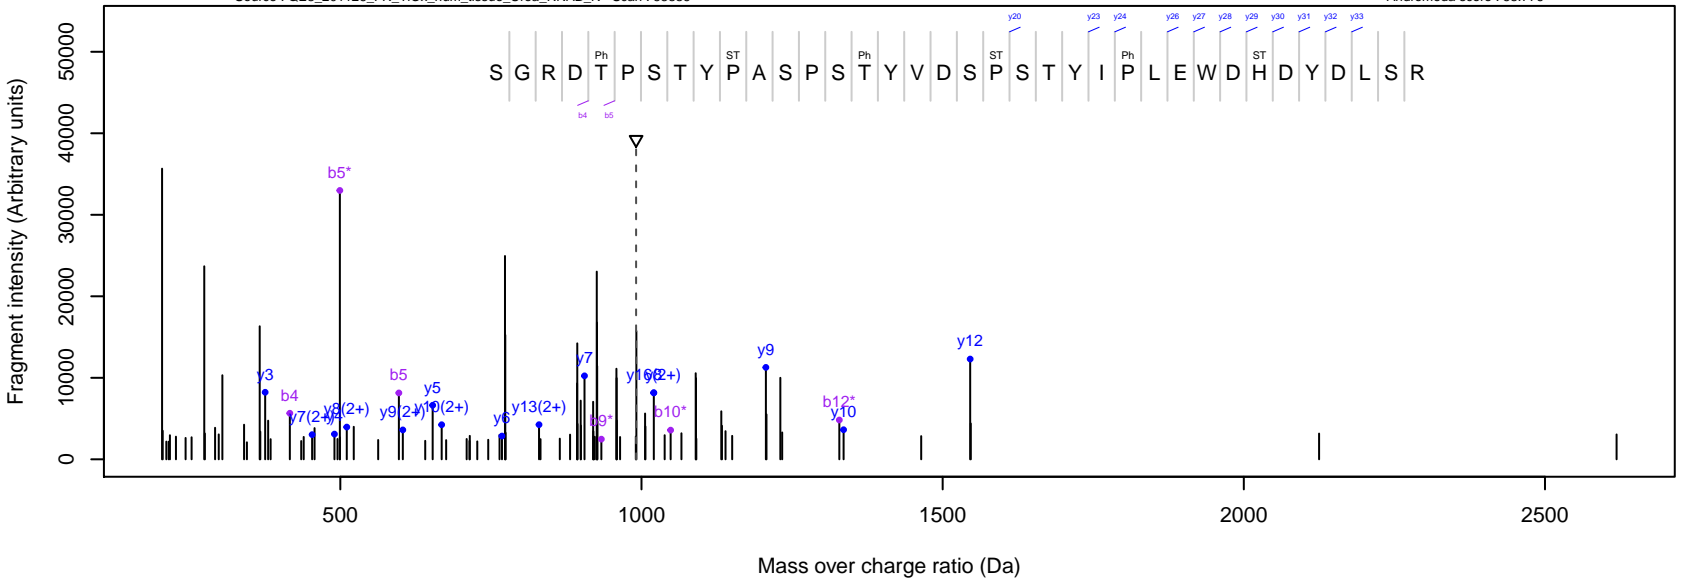

QLSSSS(Phospho (STY))YSGDISR-2+

Source : QE3\_201126\_FR\_TiOx\_hum\_tissue\_Urea\_RNAB\_H Scan : 16956

Andromeda score : 58.723

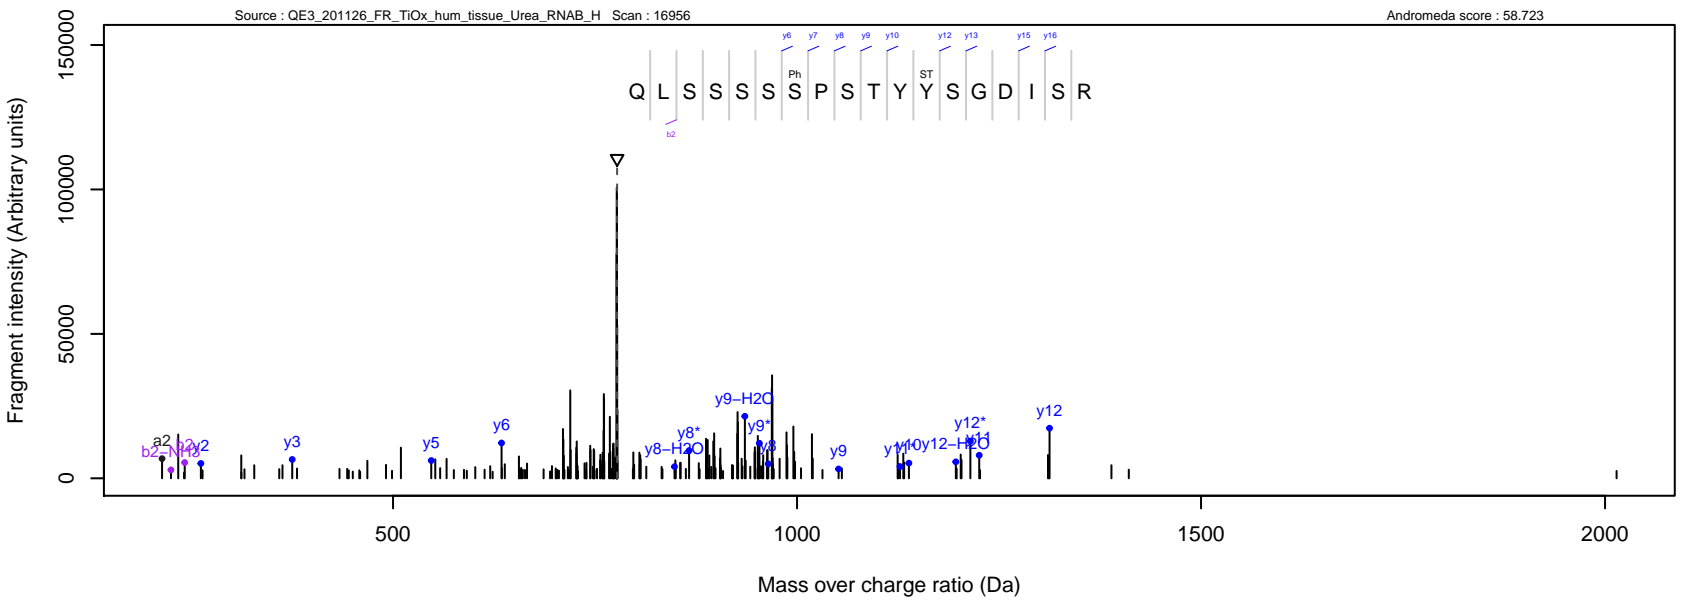

RPDYAPM(Oxidation (M))ES(Phospho (STY))S(Phospho (STY))DEEDEFQFIK-3+

Source : QE3\_201126\_FR\_TiOx\_hum\_tissue\_Urea\_RNAB\_H Scan : 47382

Andromeda score : 58.712

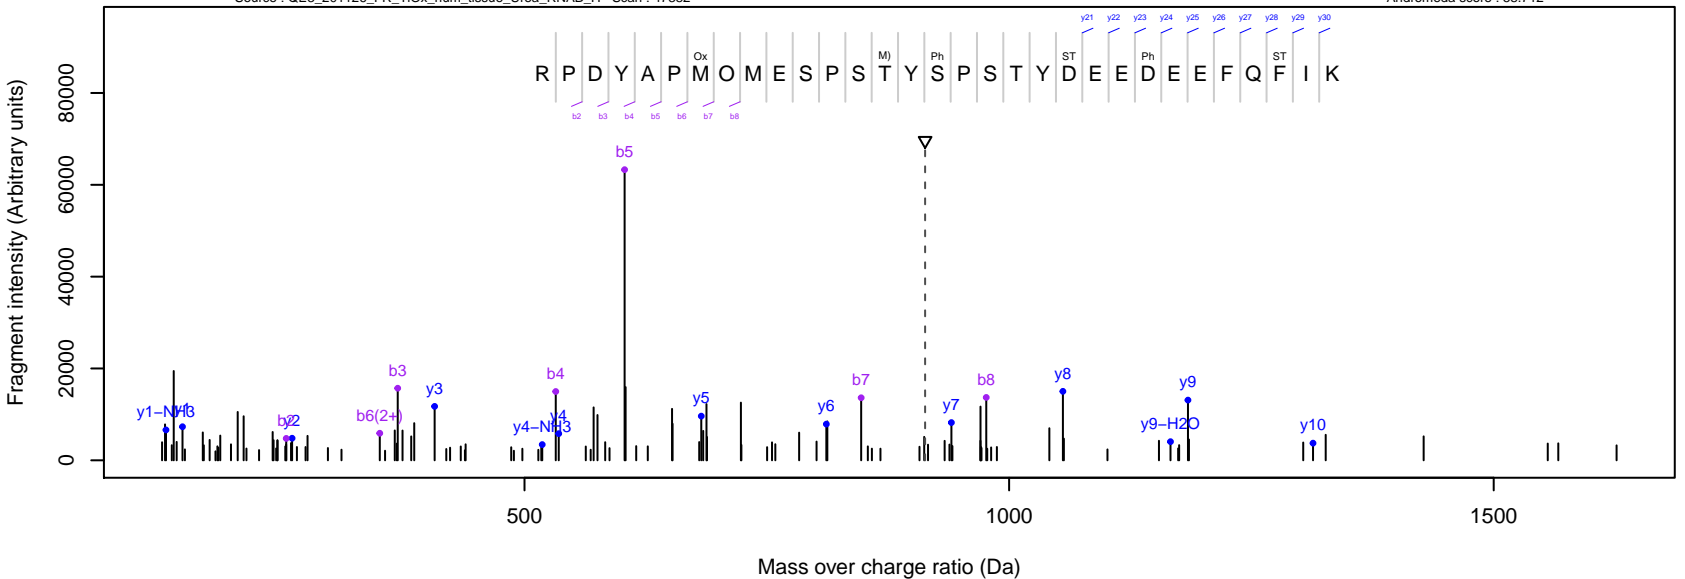

S(Phospho (STY))ILDDSFK-2+

Source : QE3\_201126\_FR\_TiOx\_hum\_tissue\_Urea\_RNAB\_B Scan : 30546

Andromeda score : 58.693

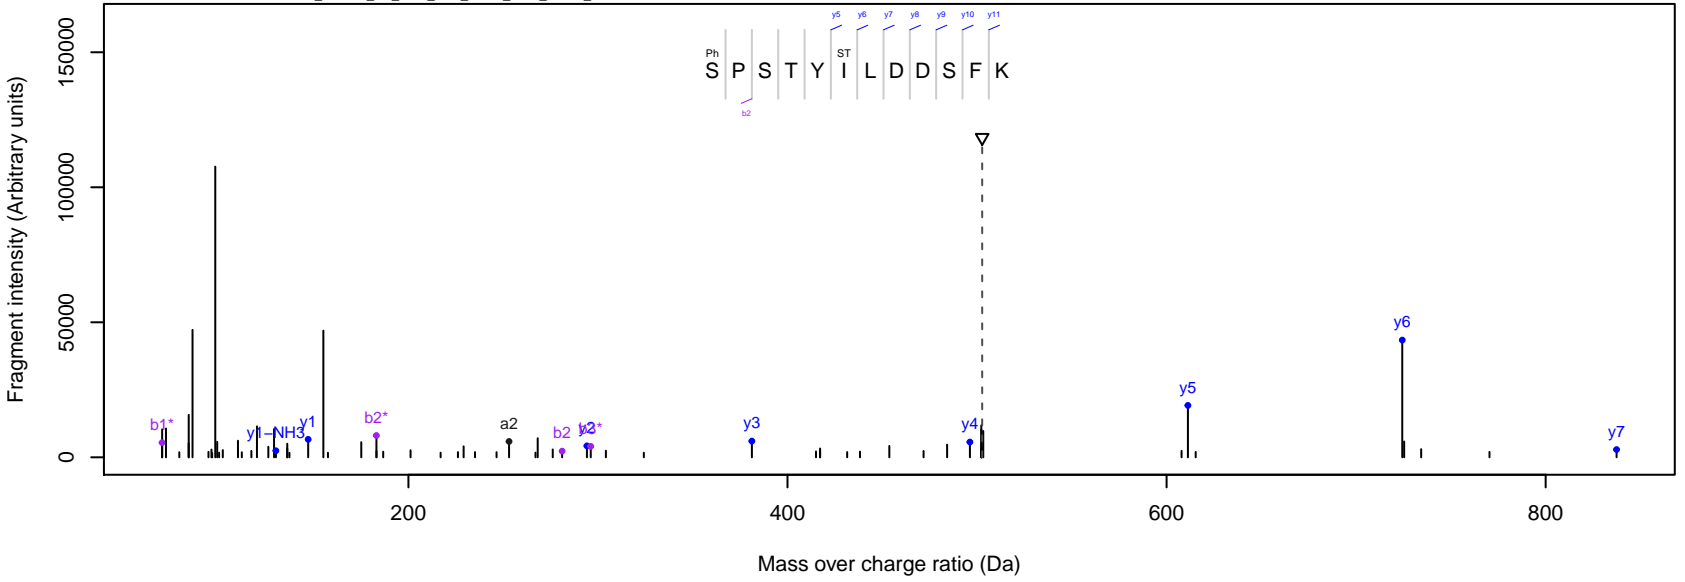

KLERPPET(Phospho (STY))PTVDPTVK-3+

Source : QE3\_201126\_FR\_TiOx\_hum\_tissue\_Urea\_RNAB\_H Scan : 14598

Andromeda score : 58.693

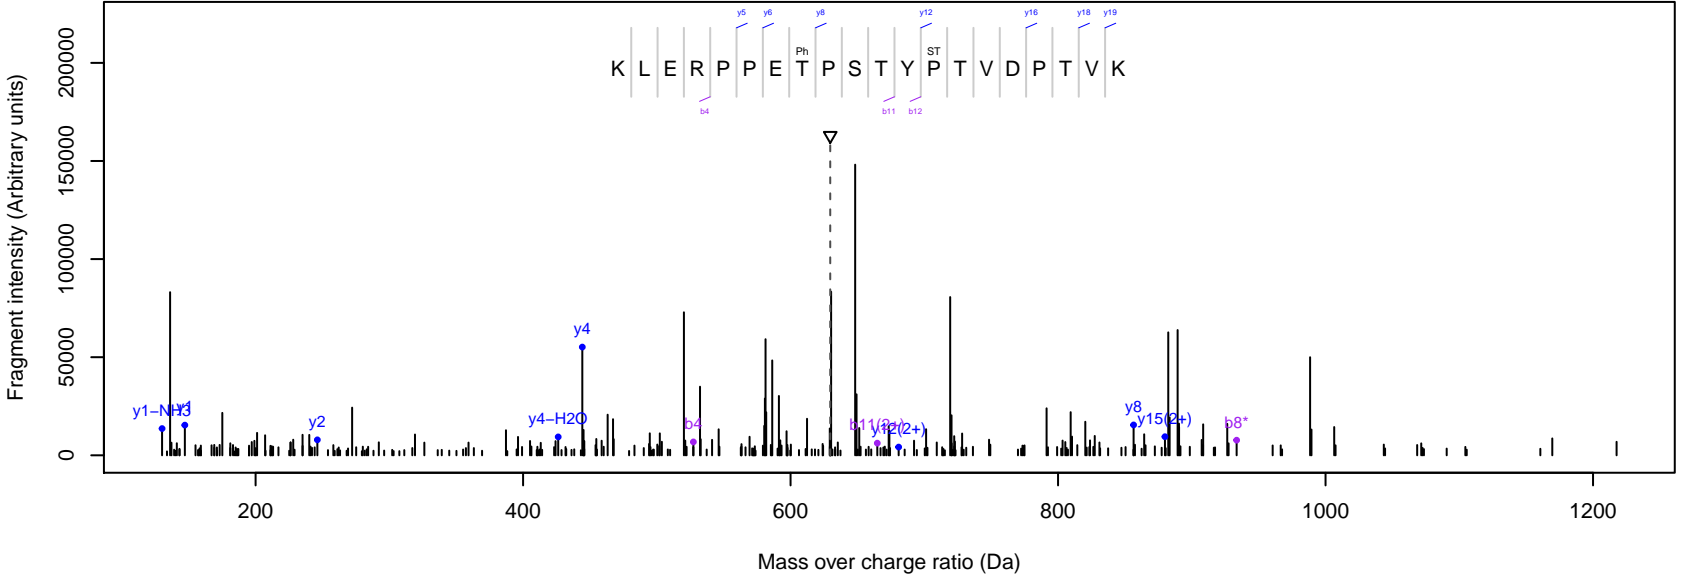

M(Oxidation (M))YFPDVEFDIKS(Phospho (STY))PK-3+

Source : QE3\_201126\_FR\_TiOx\_hum\_tissue\_Urea\_RNAB\_N Scan : 42942

Andromeda score : 58.693

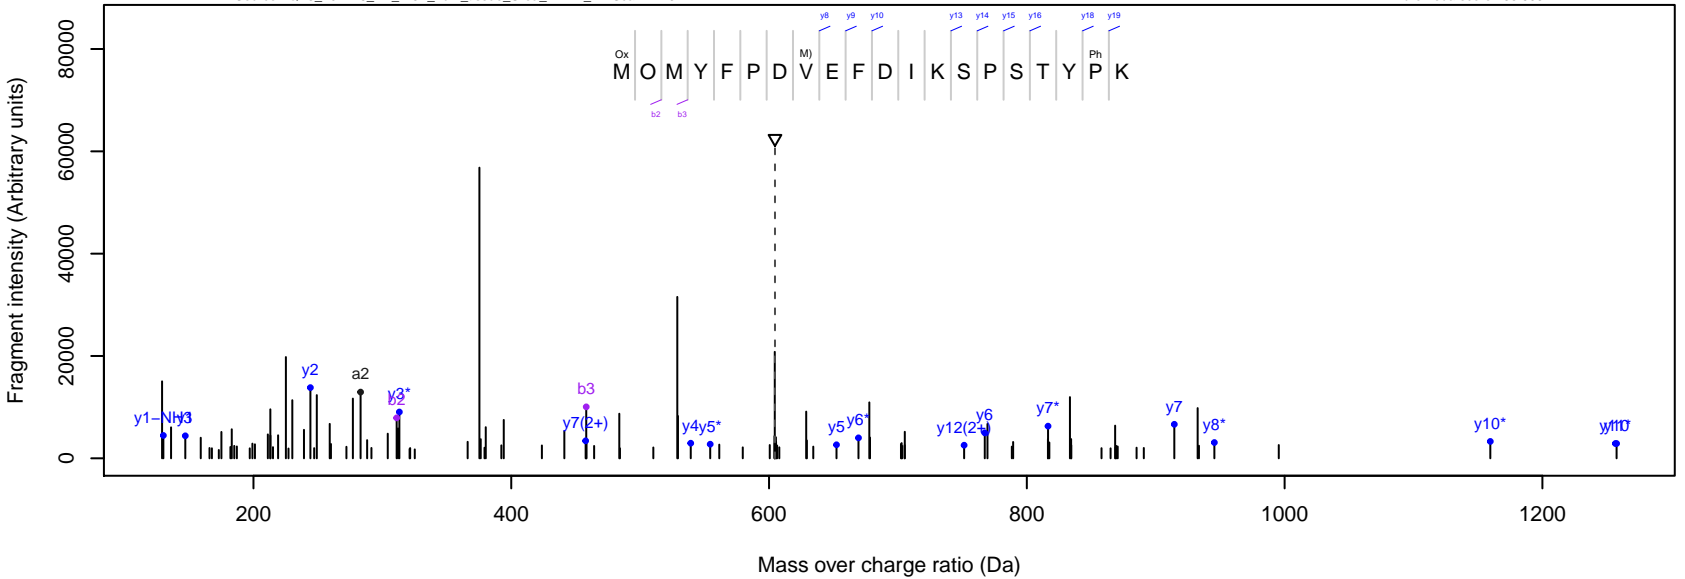

LSEAVWQPEEHYS(Phospho (STY))SSPEK-3+

Source : QE3\_201126\_FR\_TiOx\_hum\_tissue\_Urea\_RNAB\_H Scan : 26309

Andromeda score : 58.688

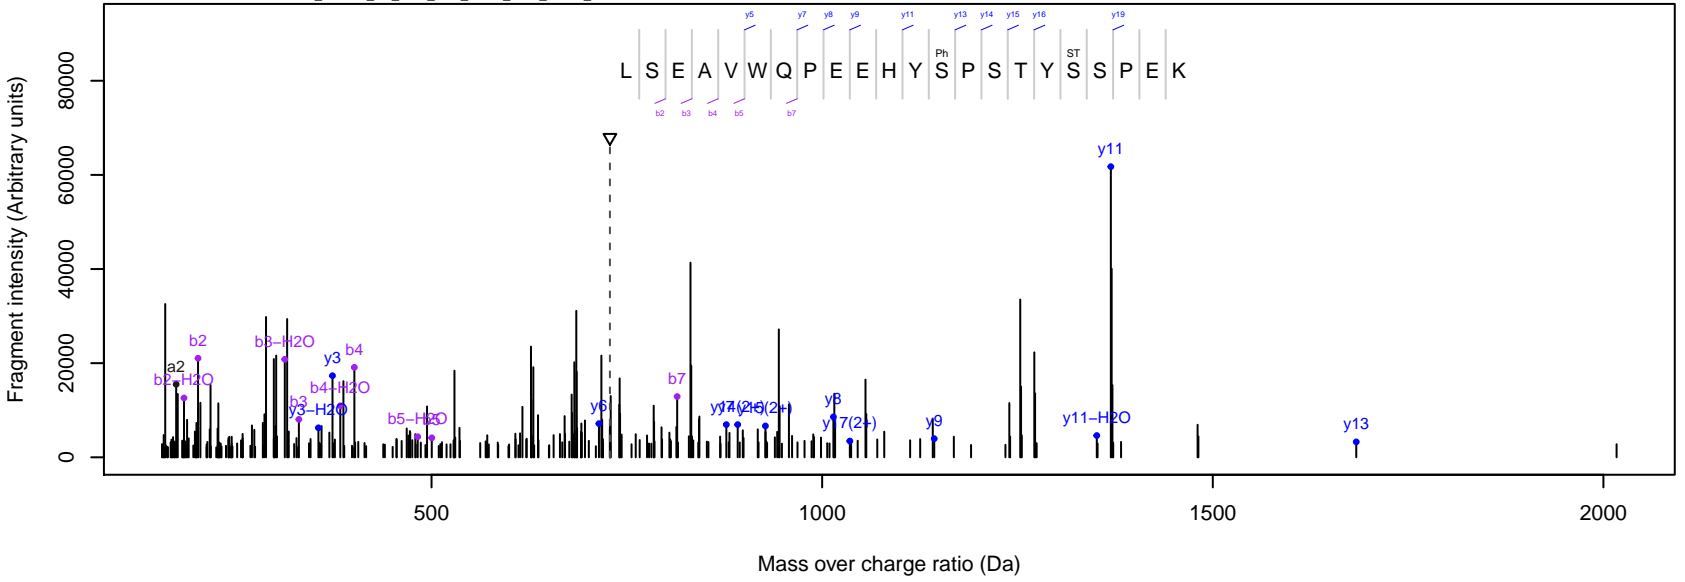

S(Phospho (STY))GSLDSELSVSPK-2+

Source : QE3\_201126\_FR\_TiOx\_hum\_tissue\_Urea\_RNAB\_N Scan : 26862

Andromeda score : 58.676

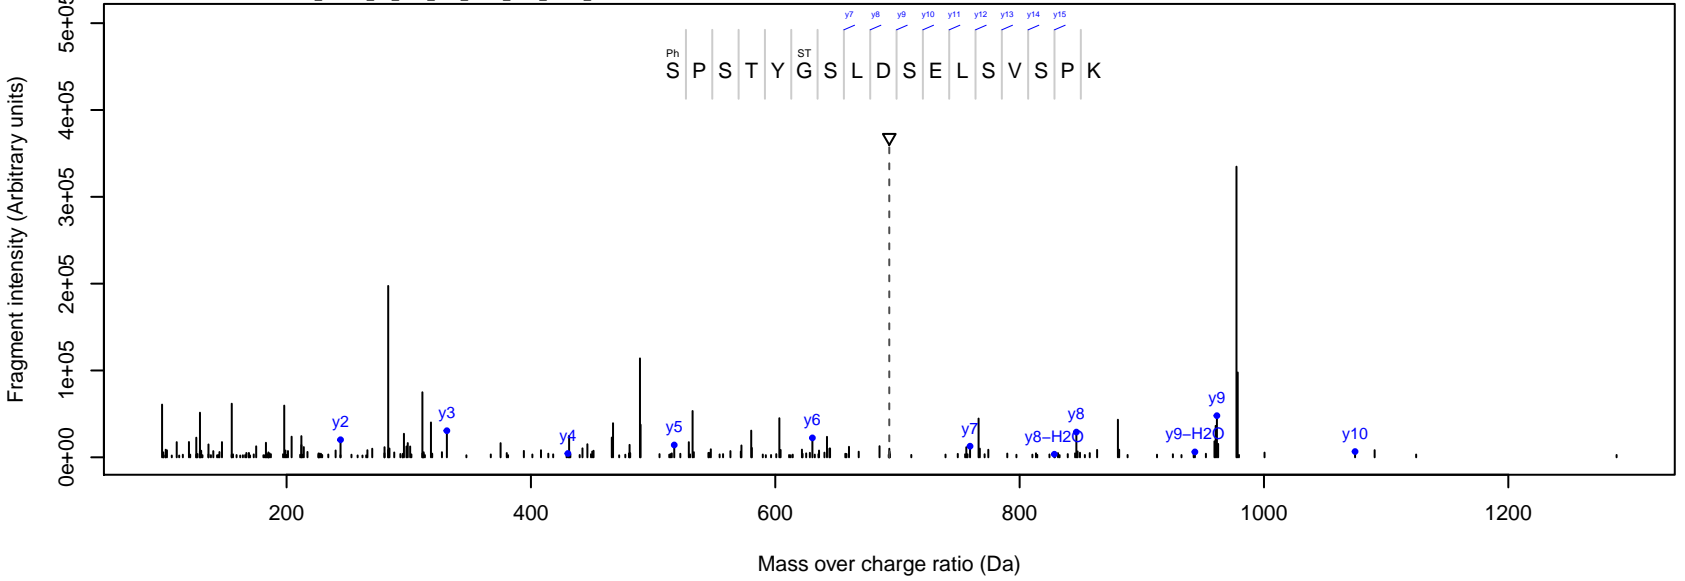

ILQEYITQEGHKLETGAPPPATV(Phospho (STY))NAVSWR-4+

Source : QE3\_201126\_FR\_TiOx\_hum\_tissue\_Urea\_RNAB\_N Scan : 41400

Andromeda score : 58.672

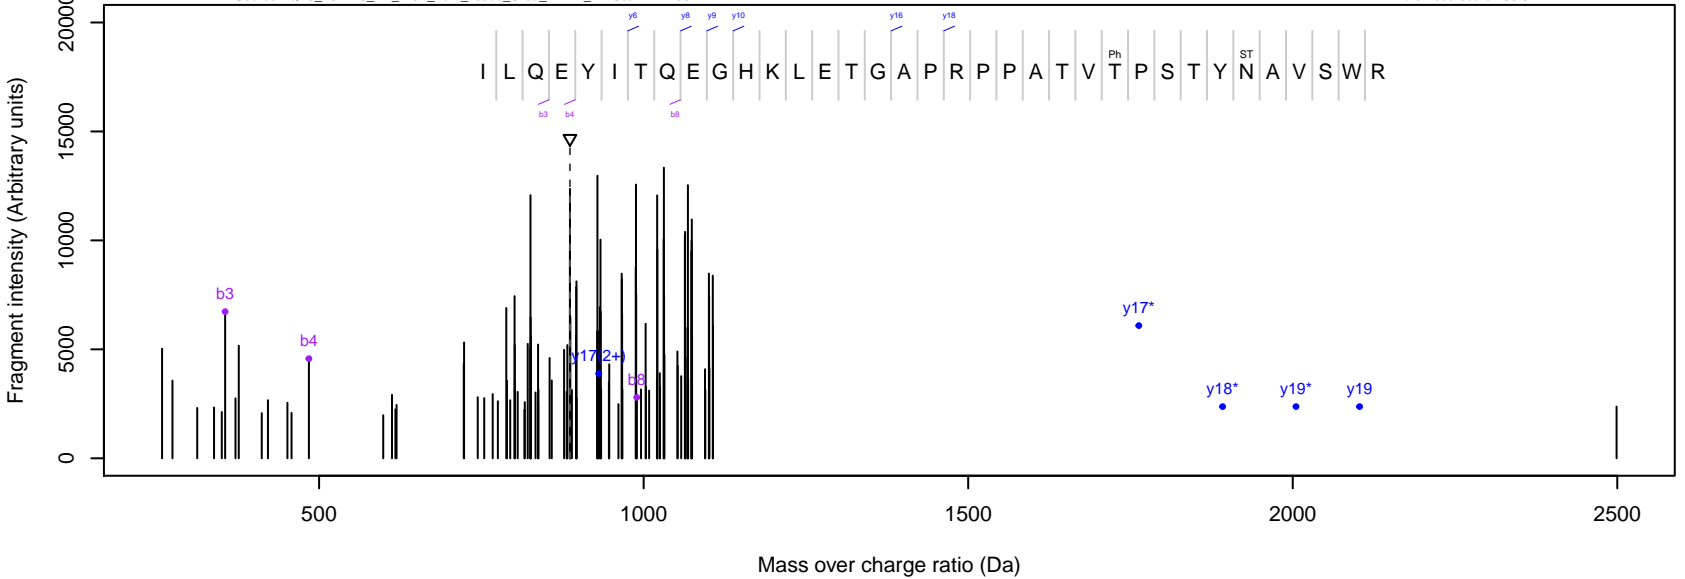

QQQM(Oxidation (M))VVAHQYS(Phospho (STY))FAPDGEAR-3+

Source : QE3\_201126\_FR\_TiOx\_hum\_tissue\_Urea\_RNAB\_N Scan : 21157

Andromeda score : 58.627

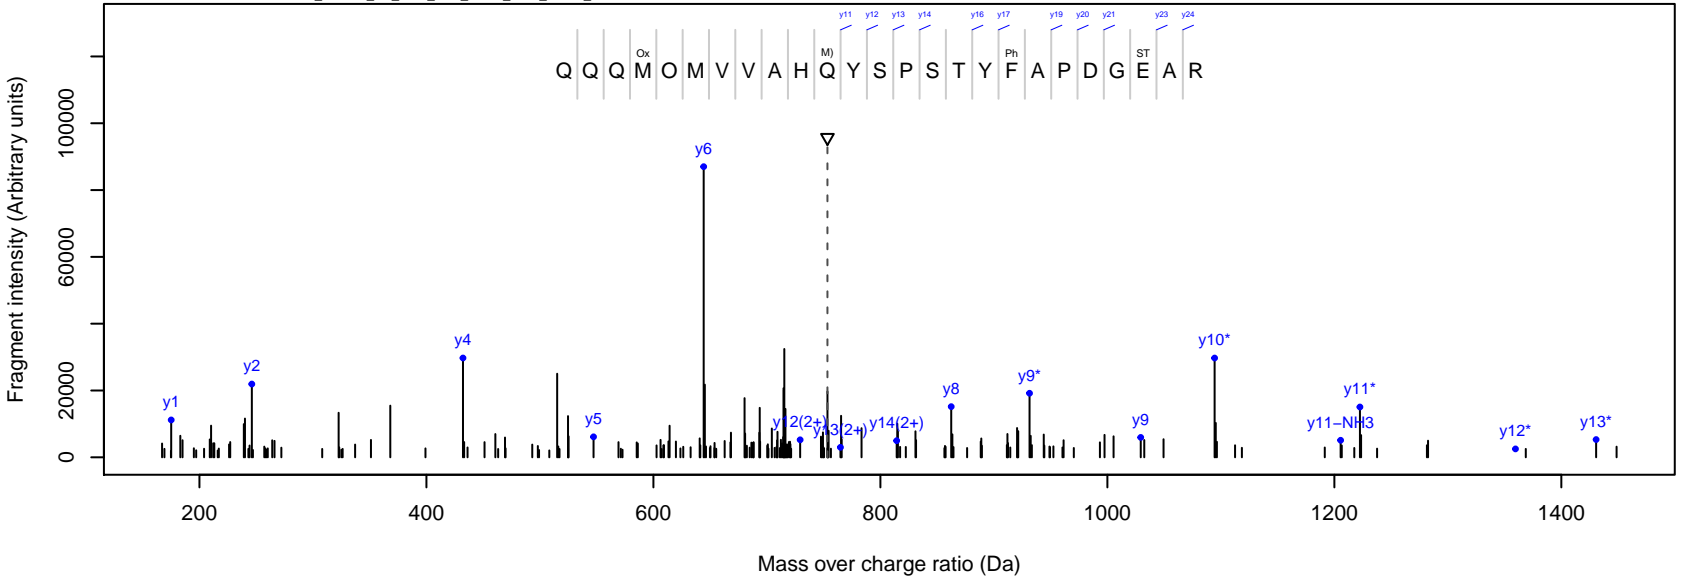

S(Phospho (STY))RS(Phospho (STY))RS(Phospho (STY))PLAIR-2+

Source : QE3\_201126\_FR\_TiOx\_hum\_tissue\_Urea\_RNAB\_N Scan : 15774

Andromeda score : 58.626

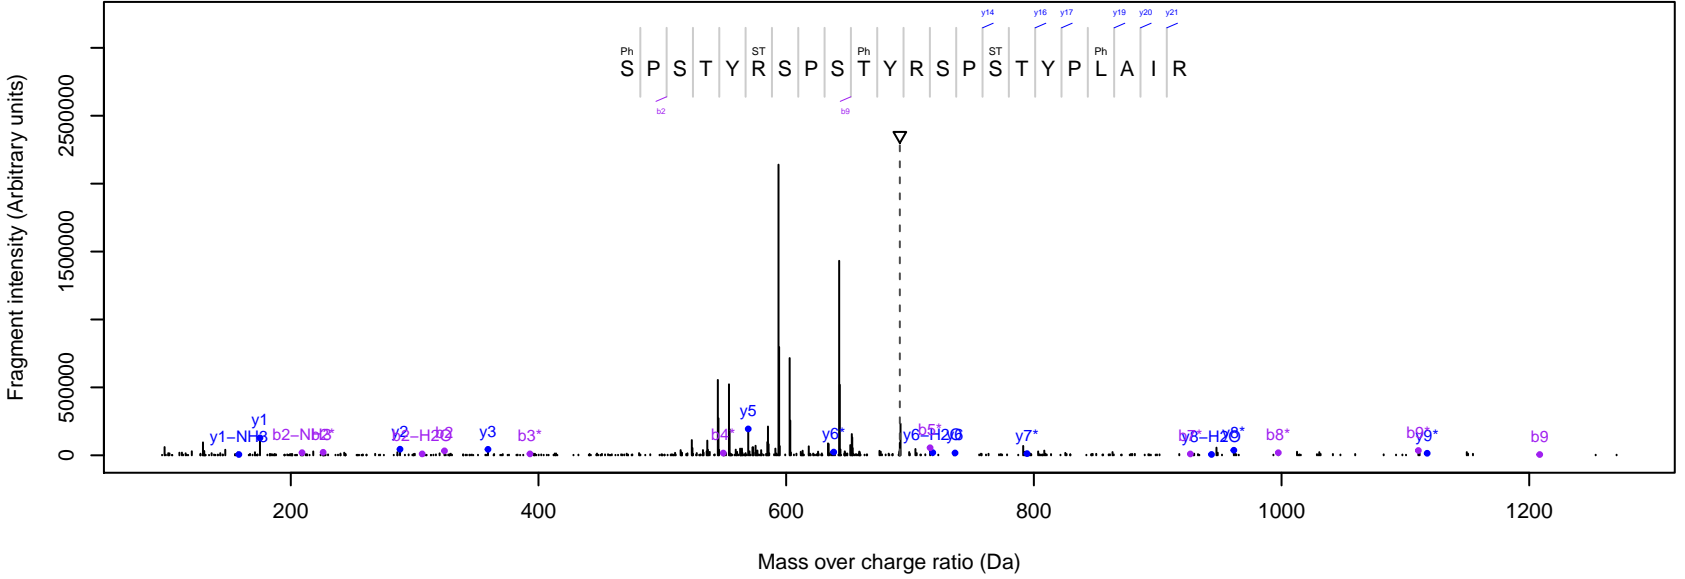

ADVQLF(Oxidation (M))DDDSY(Phospho (STY))S(Phospho (STY))HHS(Phospho (STY))GLEADPEKFA DSDQDRDPH-4+

Source : QE3\_201126\_FR\_TiOx\_hum\_tissue\_Urea\_RNAB\_H Scan : 38335

Andromeda score : 58.612

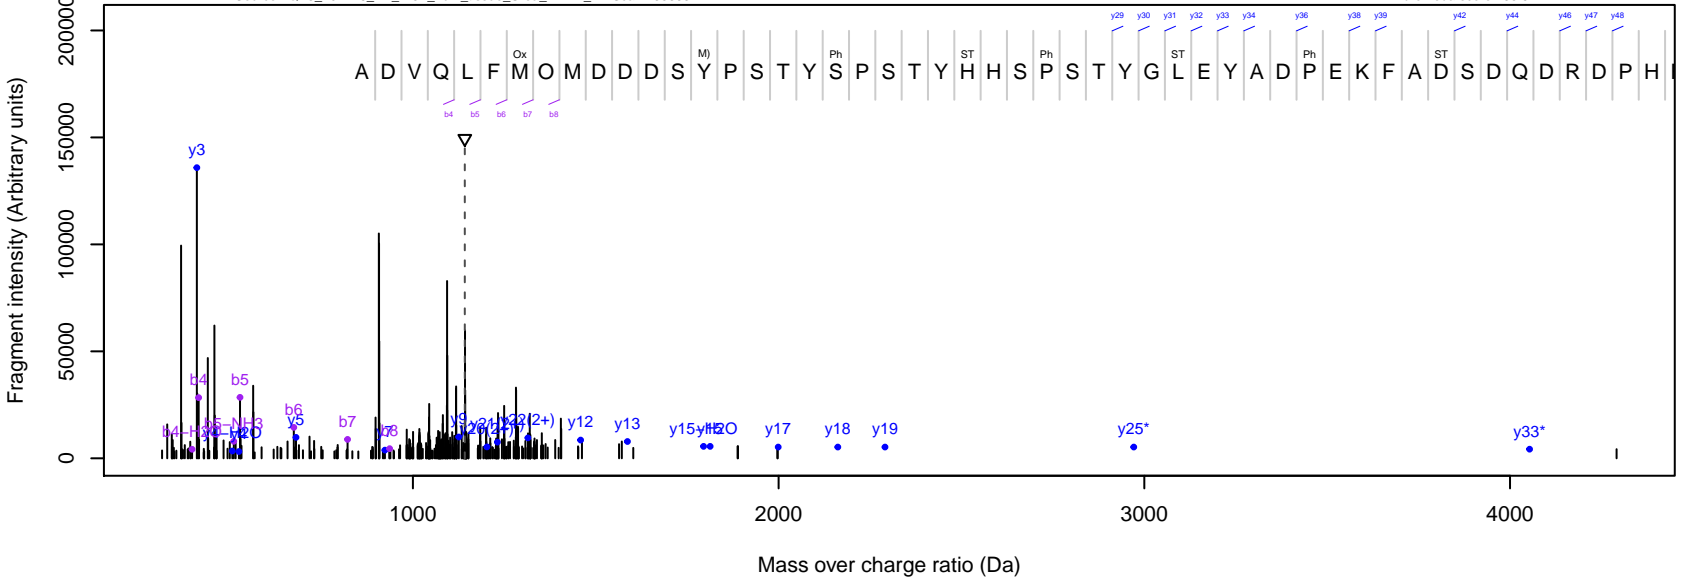

SPLPAGPS(Phospho (STY))SCTSPRSPLAPRRPFLYR-4+

Source : QE3\_201126\_FR\_TiOx\_hum\_tissue\_Urea\_RNAB\_H Scan : 36441

Andromeda score : 58.565

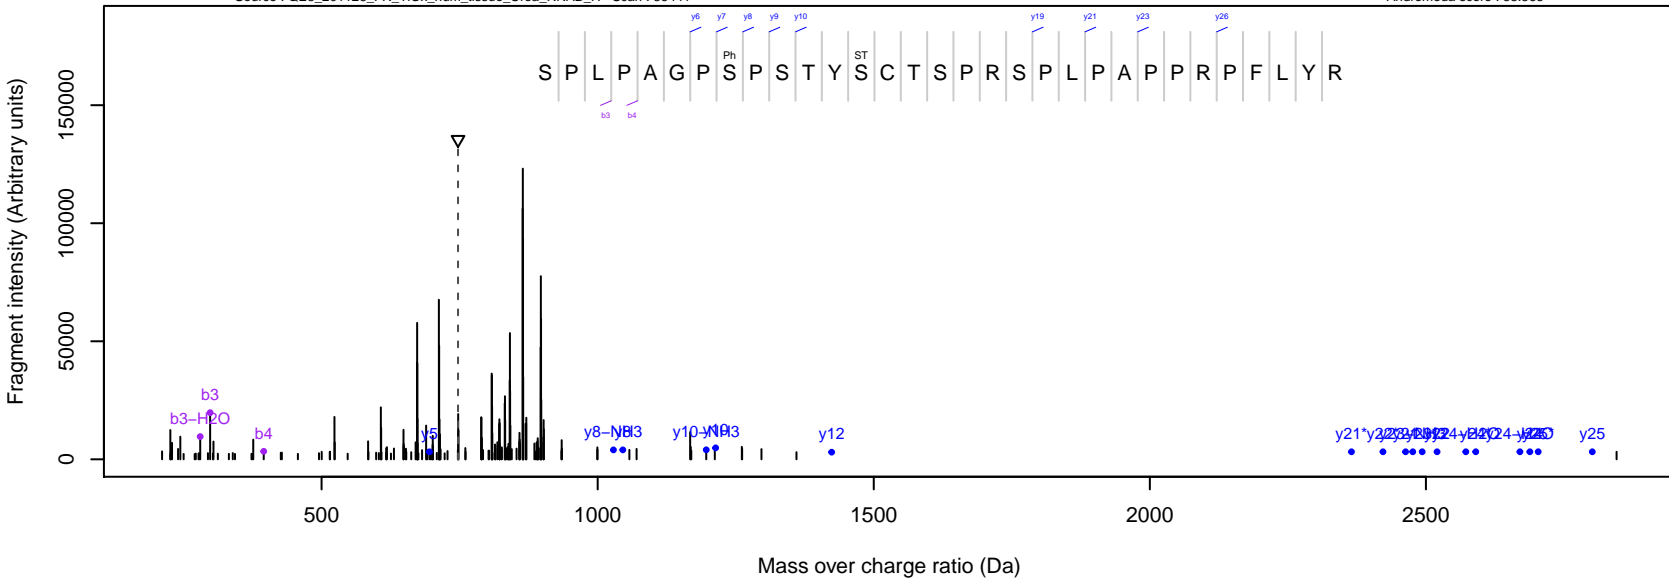

QEEESLGQVTDQVEVNAQNS(Phospho (STY))VPDEEAK-3+

Source : QE3\_201126\_FR\_TiOx\_hum\_tissue\_Urea\_RNAB\_N Scan : 35242

Andromeda score : 58.522

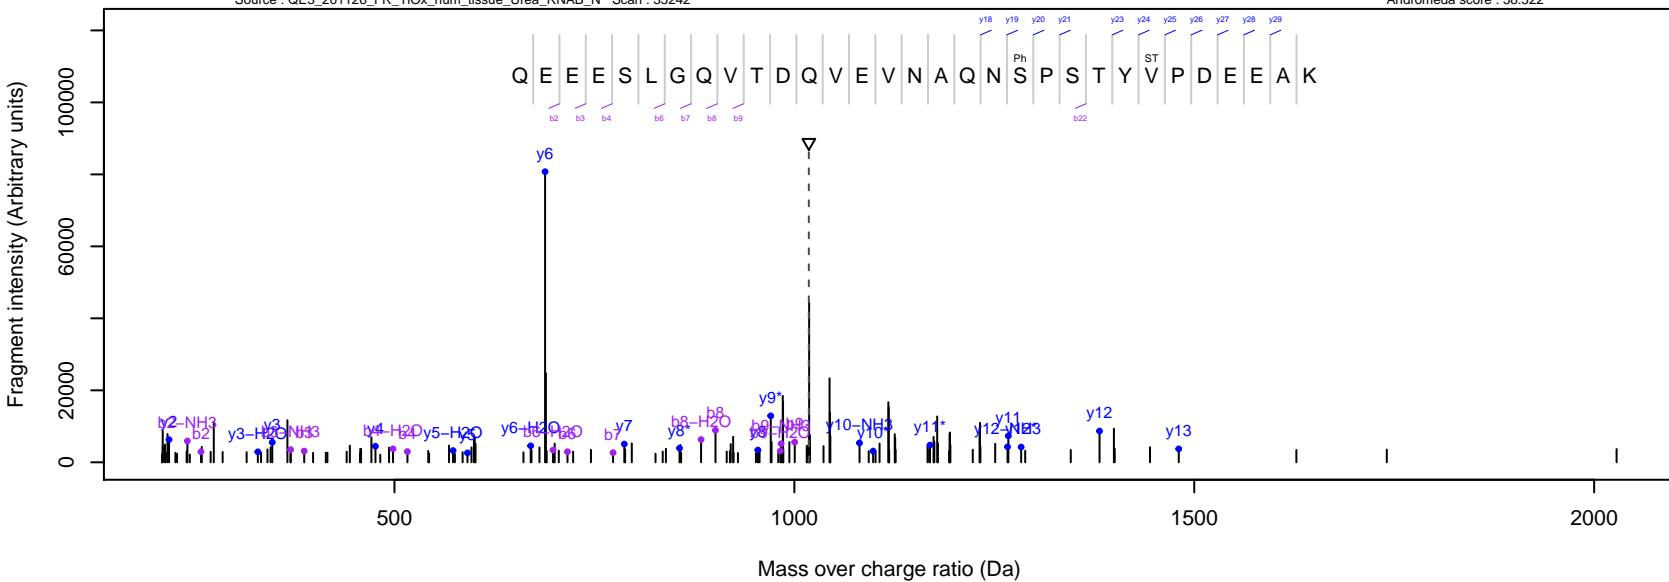

GPS(Phospho (STY))PAPAS(Phospho (STY))SPKREVLVDSEGLSGEER-3+

Source : QE3\_201126\_FR\_TiOx\_hum\_tissue\_Urea\_RNAB\_B Scan : 26643

Andromeda score : 58.498

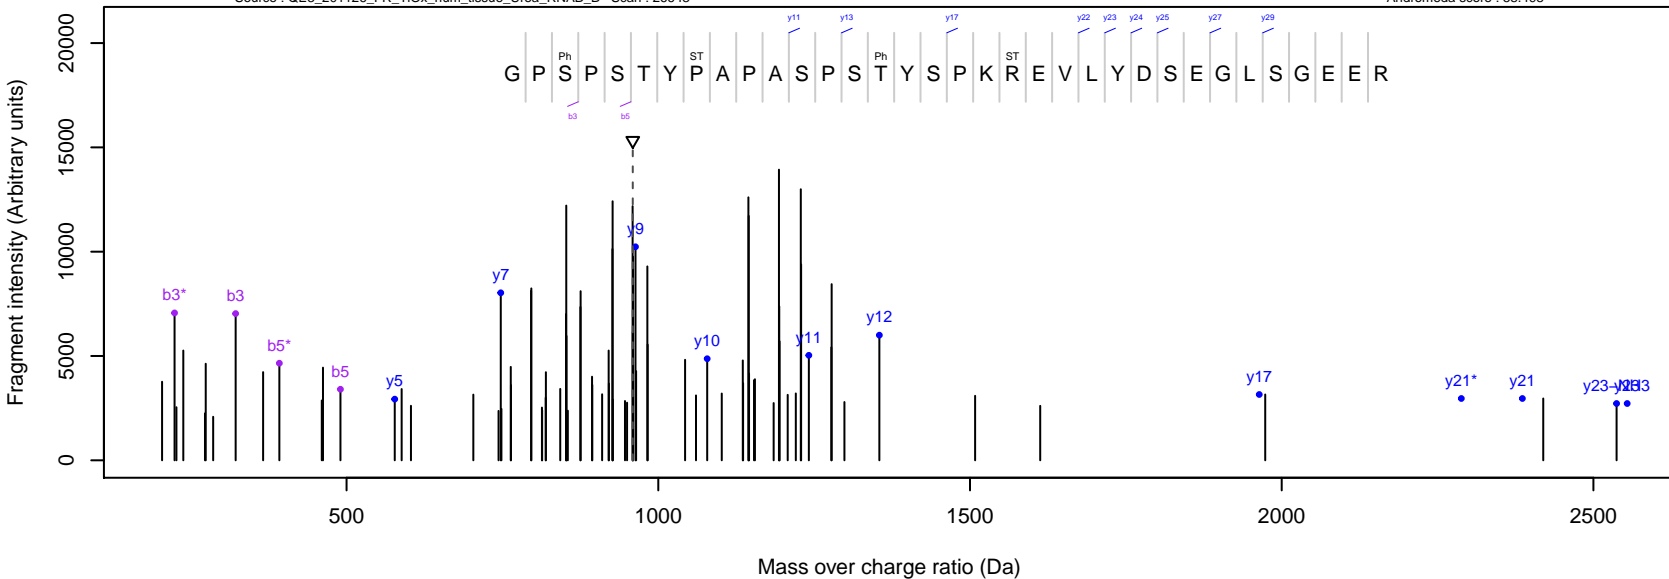

**IKDQYKVS(Phospho (STY))VR-3+**

Source : QE3\_201126\_FR\_TiOx\_hum\_tissue\_Urea\_RNAB\_B Scan : 9099

Andromeda score : 58.487

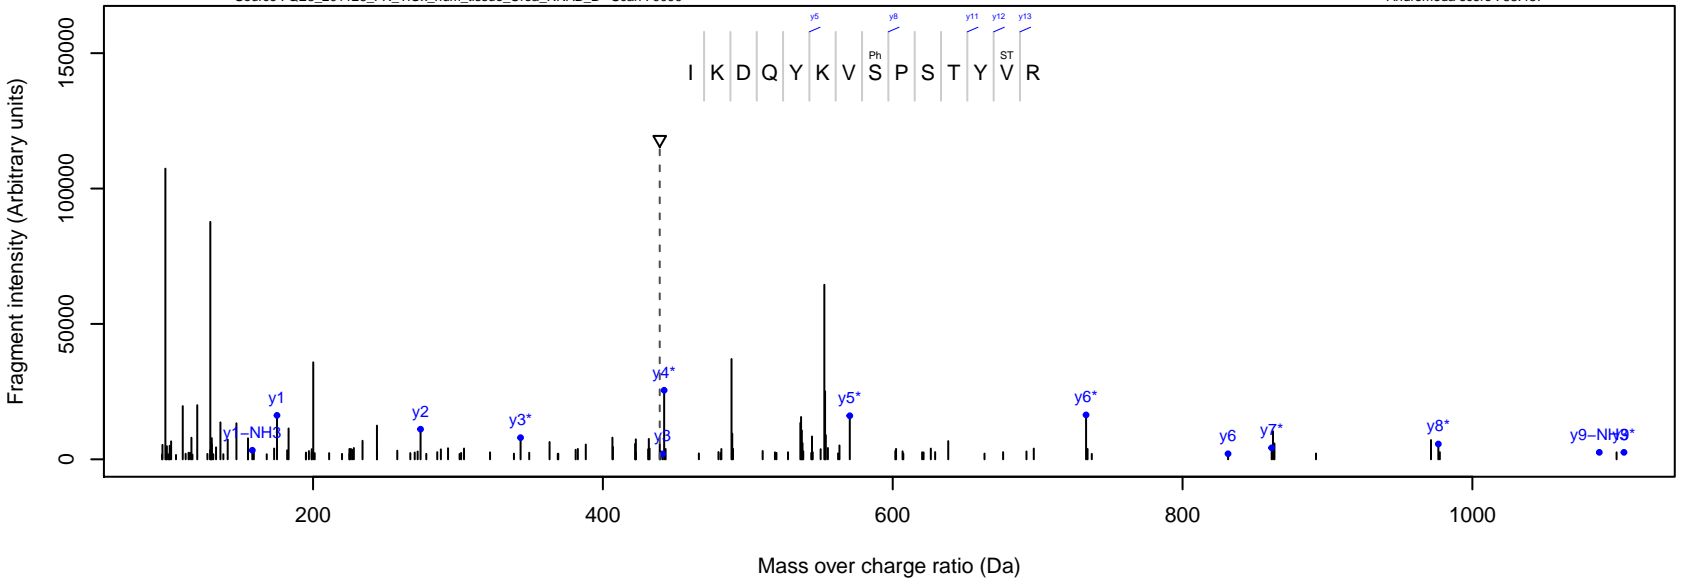

**ELT(Phospho (STY))NRHSLPFLSPQMEPRPDVPR-4+**

Source : QE3\_201126\_FR\_TiOx\_hum\_tissue\_Urea\_RNAB\_B Scan : 35384

Andromeda score : 58.477

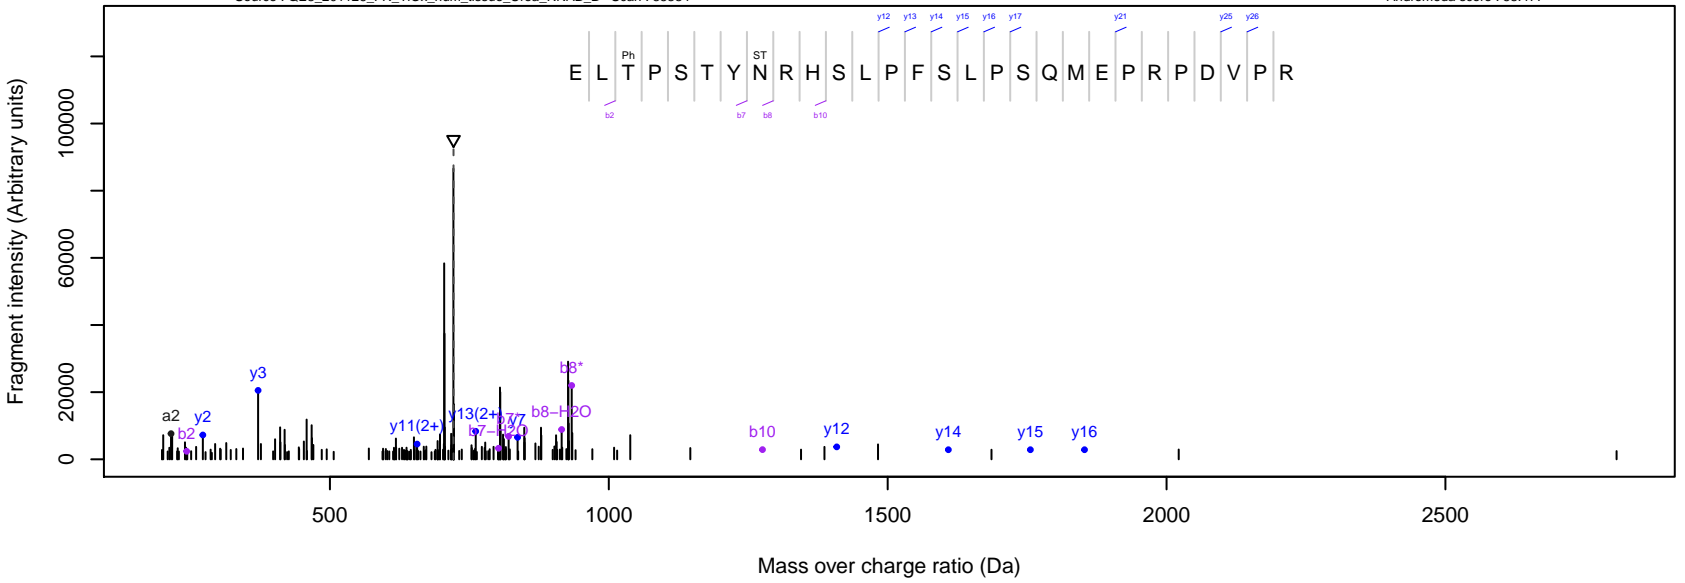

**S(Phospho (STY))M(Oxidation (M))GGAAIAPPTSLVEKDKELPR-3+**

Source : QE3\_201126\_FR\_TiOx\_hum\_tissue\_Urea\_RNAB\_B Scan : 26606

Andromeda score : 58.477

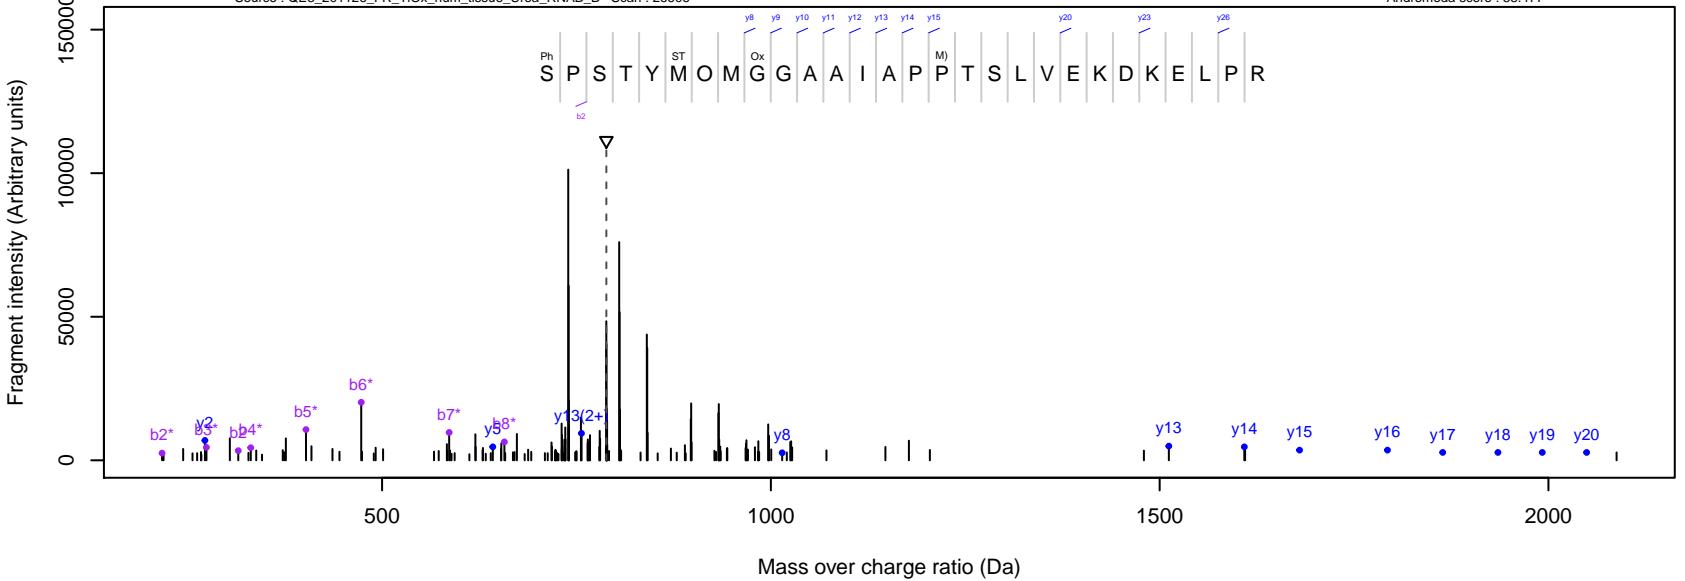

IPYAPS(Phospho (STY))GEIPKFSLQDPPNK-3+

Source : QE3\_201126\_FR\_TiOx\_hum\_tissue\_Urea\_RNAB\_H Scan : 42536

Andromeda score : 58.457

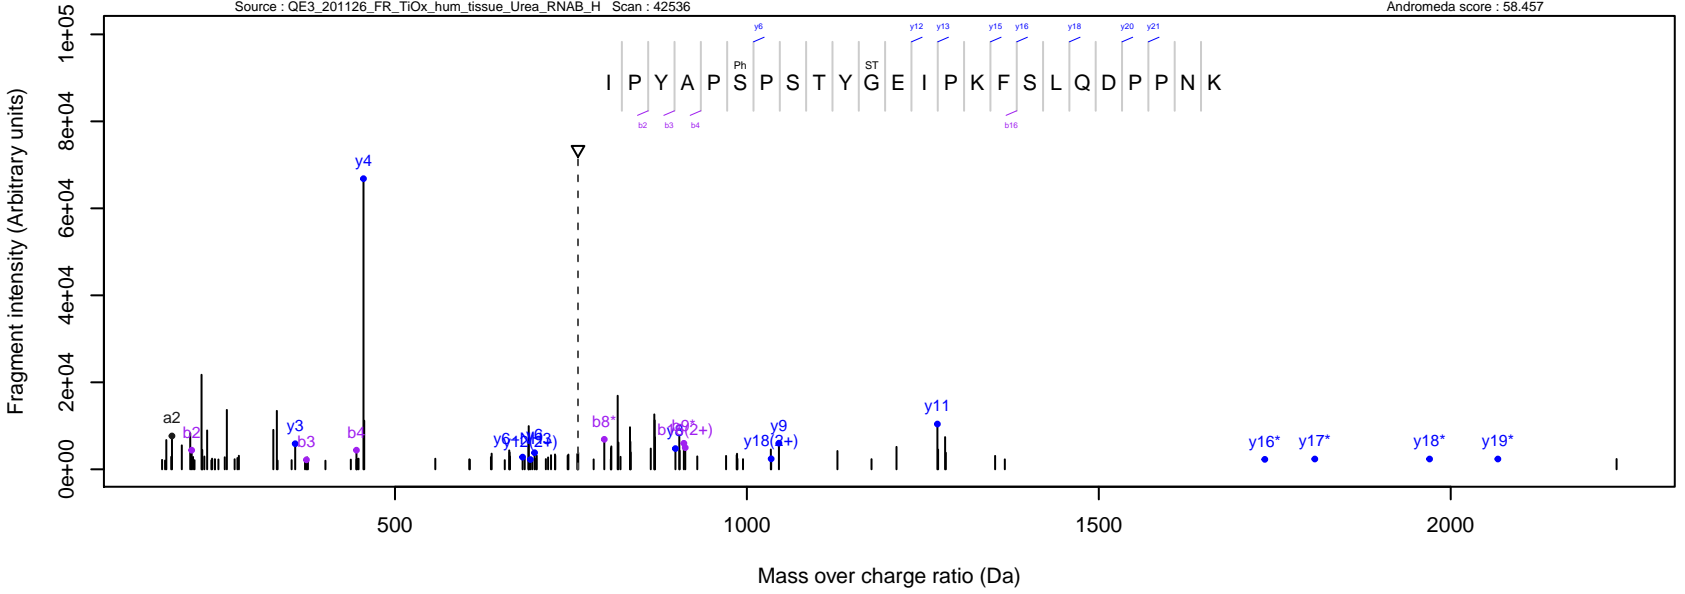

S(Phospho (STY))SSPATEQSWMENDFDELREEGFRR-4+

Source : QE3\_201126\_FR\_TiOx\_hum\_tissue\_Urea\_RNAB\_N Scan : 48634

Andromeda score : 58.457

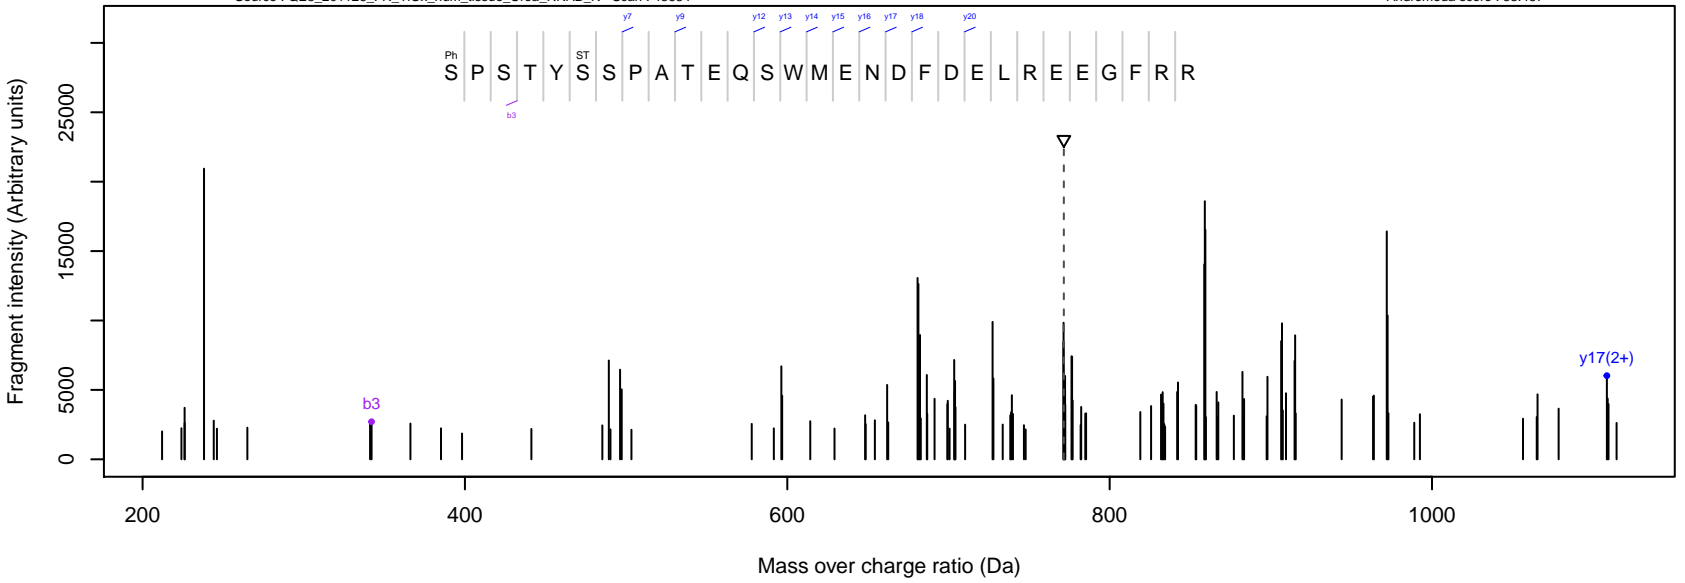

S(Phospho (STY))VM(Oxidation (M))TEEYKVPDGM(Oxidation (M))VGFIIGR-3+

Source : QE3\_201126\_FR\_TiOx\_hum\_tissue\_Urea\_RNAB\_B Scan : 43297

Andromeda score : 58.457

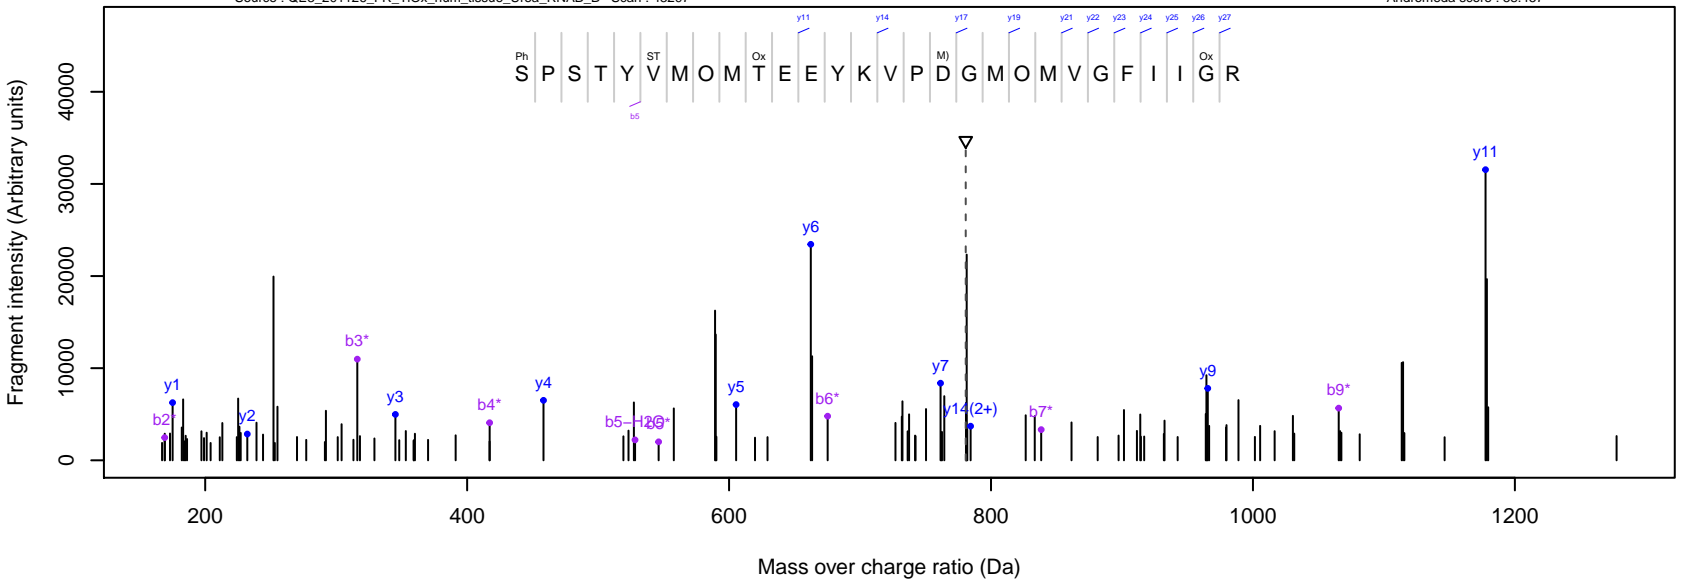





LTQAEISEQPTM(Oxidation (M))ATVVPQVPT(Phospho (STY))SPK-3+

Source : QE3\_201126\_FR\_TIOx\_hum\_tissue\_Urea\_RNAB\_N Scan : 36547

Andromeda score : 58.324

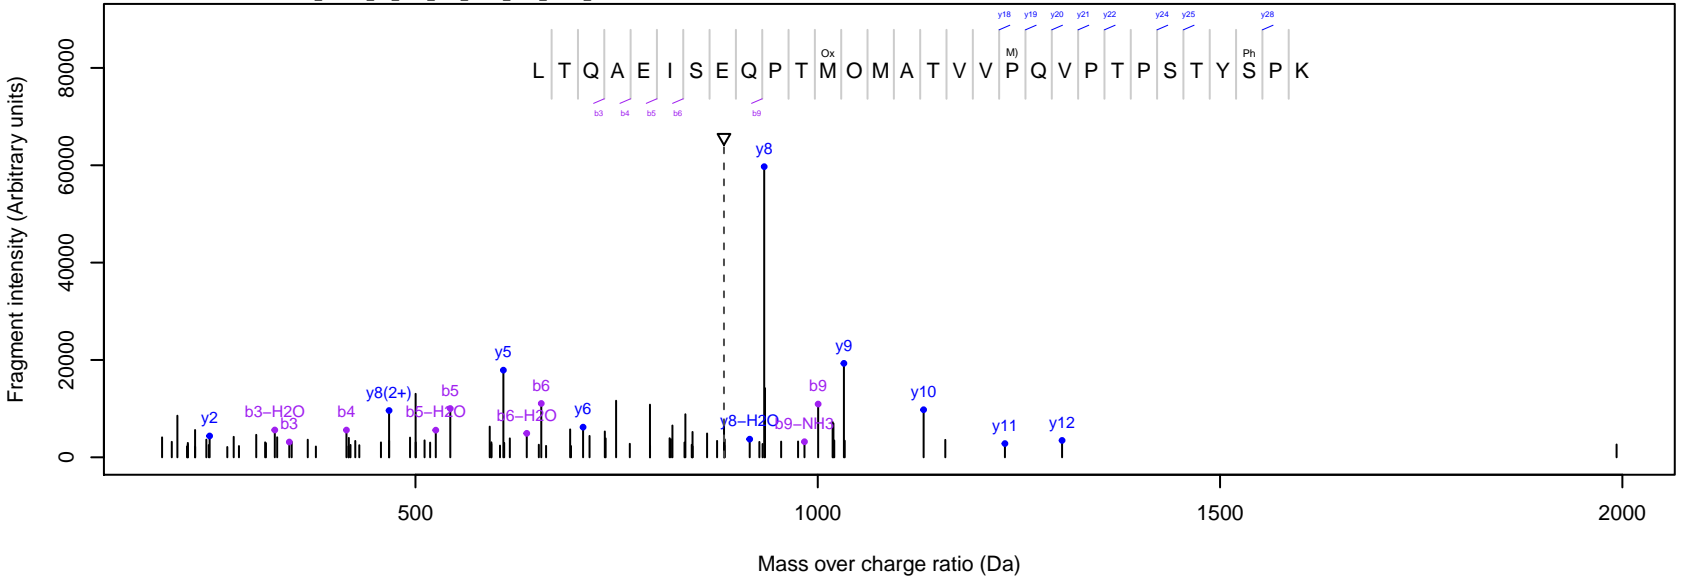

LGS(Phospho (STY))YSGPSTVSR-2+

Source : QE3\_201126\_FR\_TIOx\_hum\_tissue\_Urea\_RNAB\_N Scan : 19058

Andromeda score : 58.32

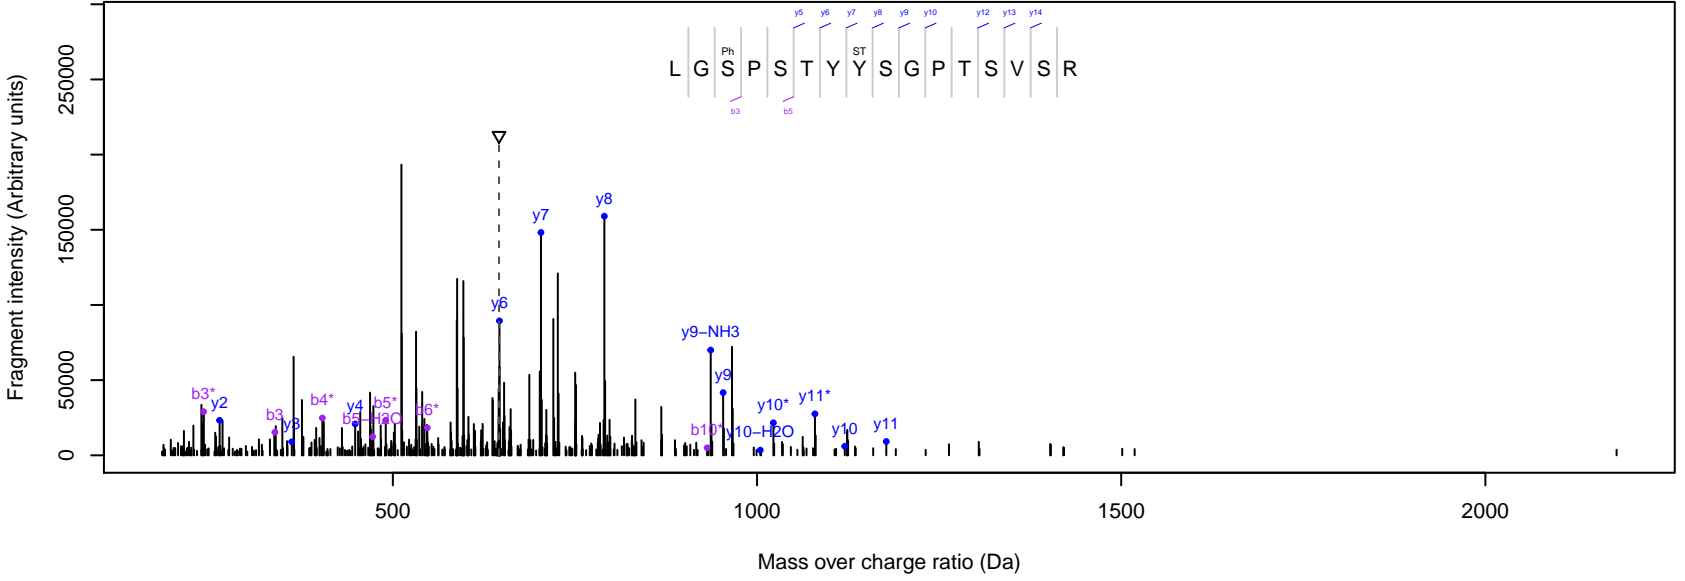

SHQLIHAAS(Phospho (STY))LK-3+

Source : QE3\_201126\_FR\_TIOx\_hum\_tissue\_Urea\_RNAB\_B Scan : 10610

Andromeda score : 58.32

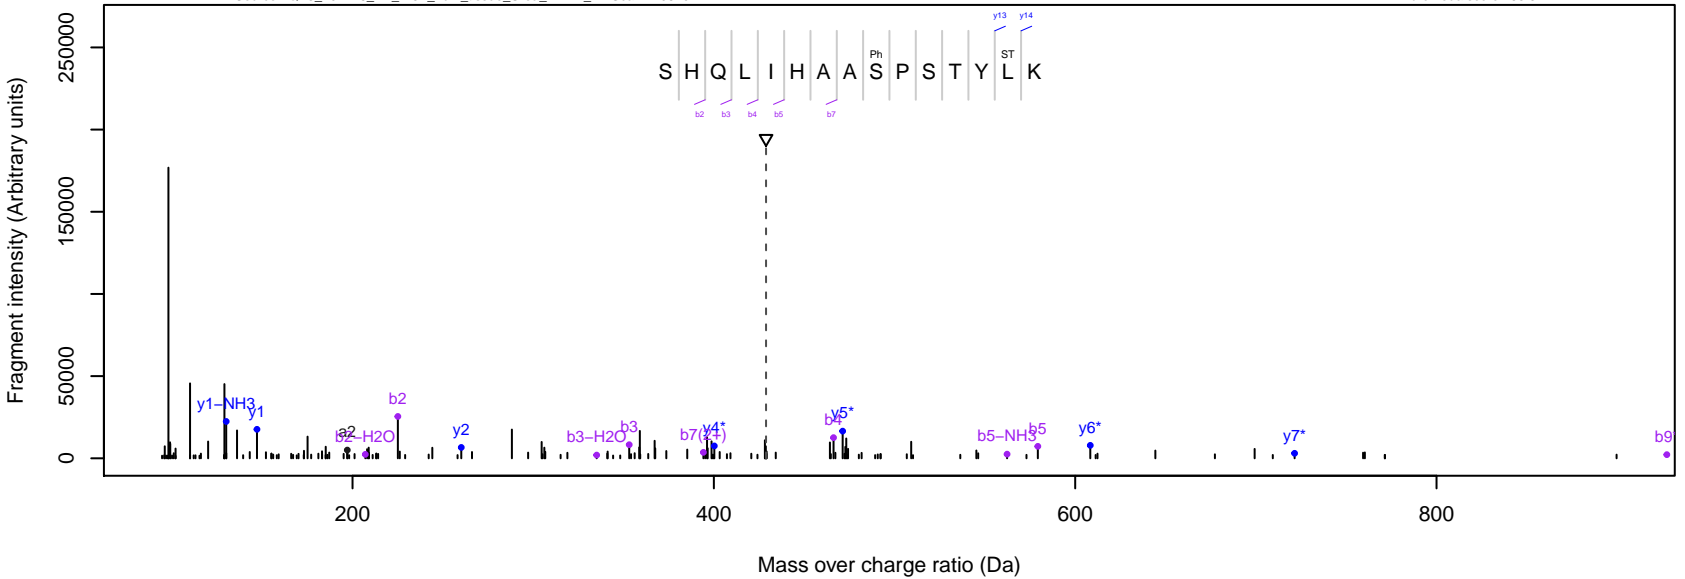

FNEEHIPDSPFVVPVAVAS(Phospho (STY))PSGDAR-3+

Source : QE3\_201126\_FR\_TiOx\_hum\_tissue\_Urea\_RNAB\_N Scan : 47642

Andromeda score : 58.284

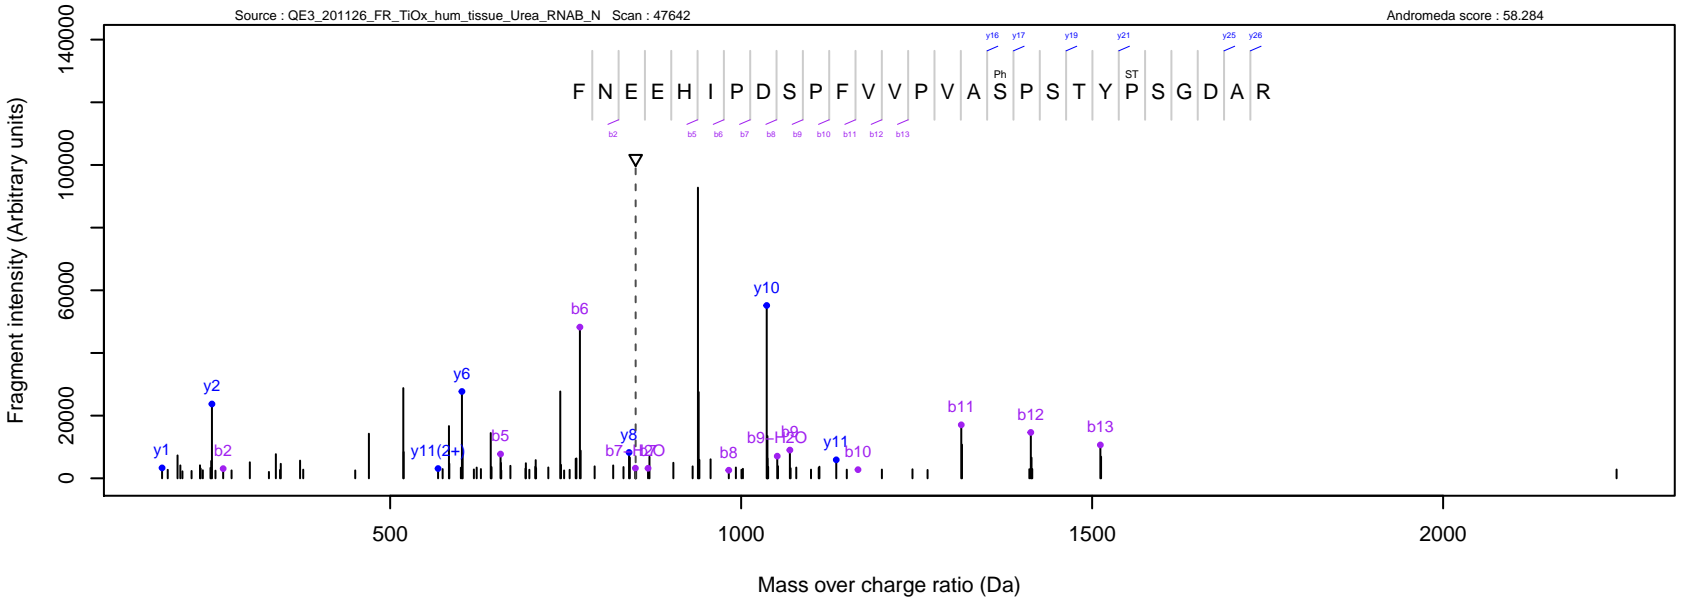

AS(Phospho (STY))LEDAPVDDLTR-2+

Source : QE3\_201126\_FR\_TiOx\_hum\_tissue\_Urea\_RNAB\_B Scan : 33574

Andromeda score : 58.268

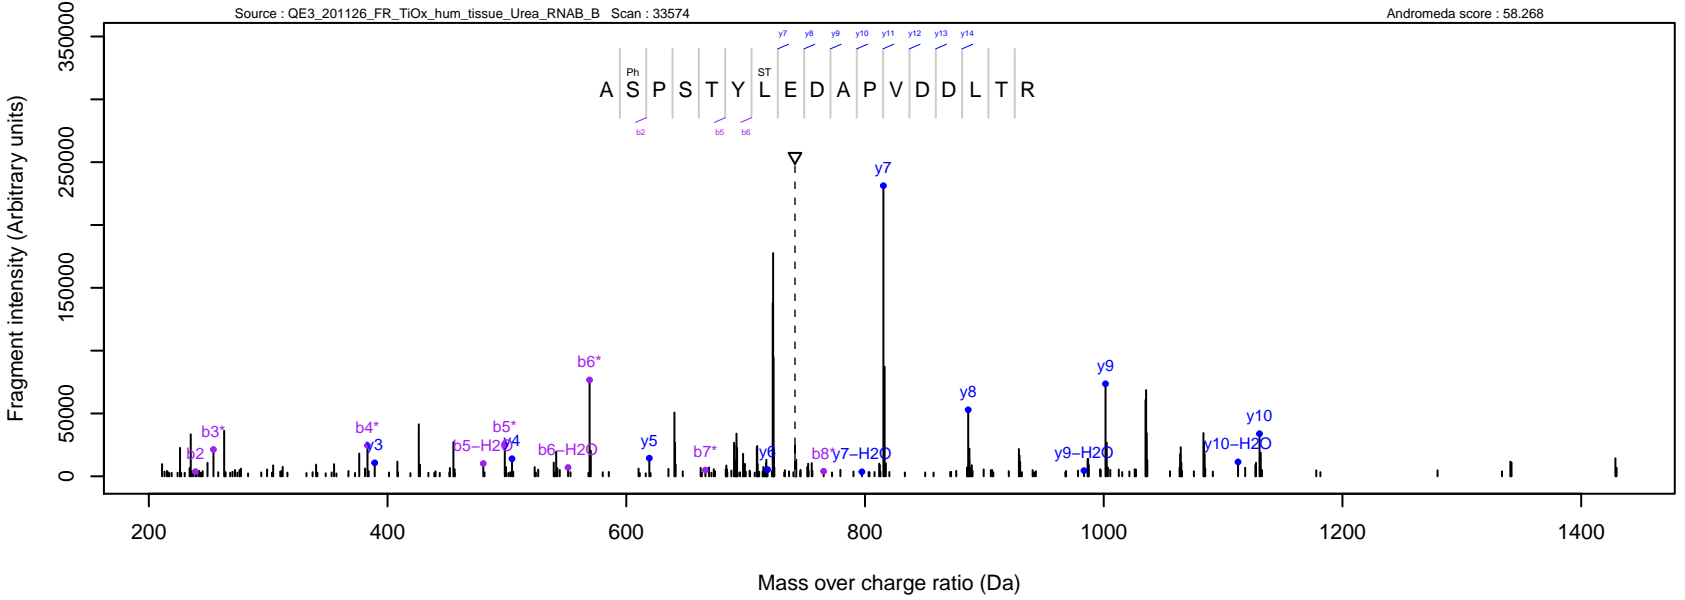

DFS(Phospho (STY))VQIK-2+

Source : QE3\_201126\_FR\_TiOx\_hum\_tissue\_Urea\_RNAB\_H Scan : 28598

Andromeda score : 58.246

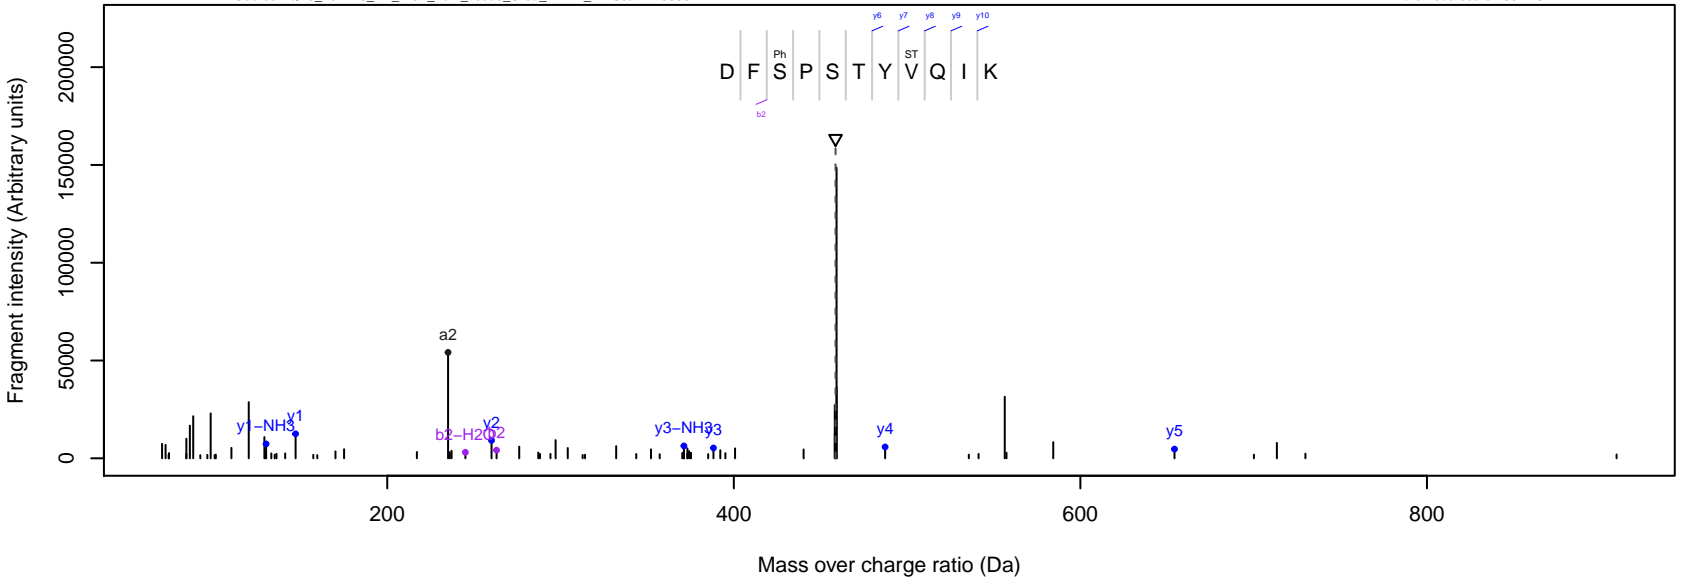

ELLHSVHPES(Phospho (STY))PNLK-3+

Source : QE3\_201126\_FR\_TIOx\_hum\_tissue\_Urea\_RNAB\_N Scan : 16928

Andromeda score : 58.246

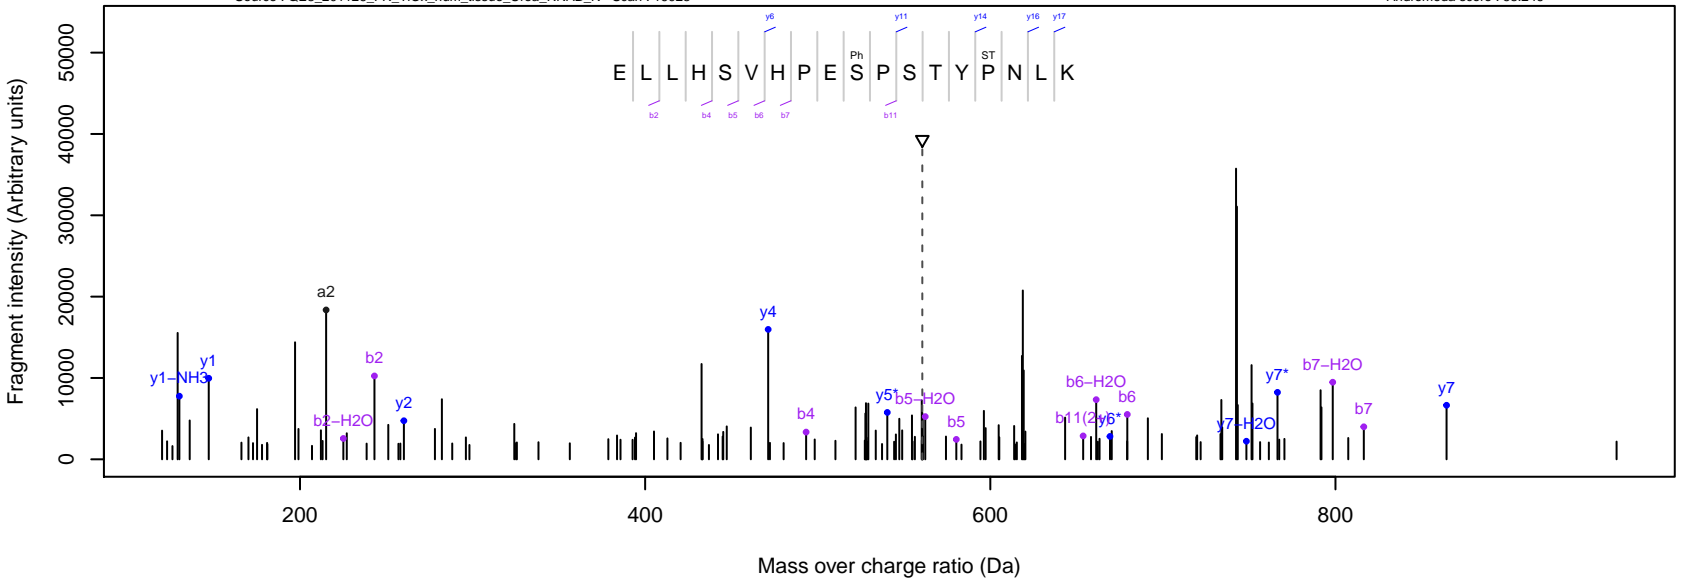

GLGPPS(Phospho (STY))PPAPPRGPAEAGAS(Phospho (STY))PPVRR-3+

Source : QE3\_201126\_FR\_TIOx\_hum\_tissue\_Urea\_RNAB\_H Scan : 25503

Andromeda score : 58.21

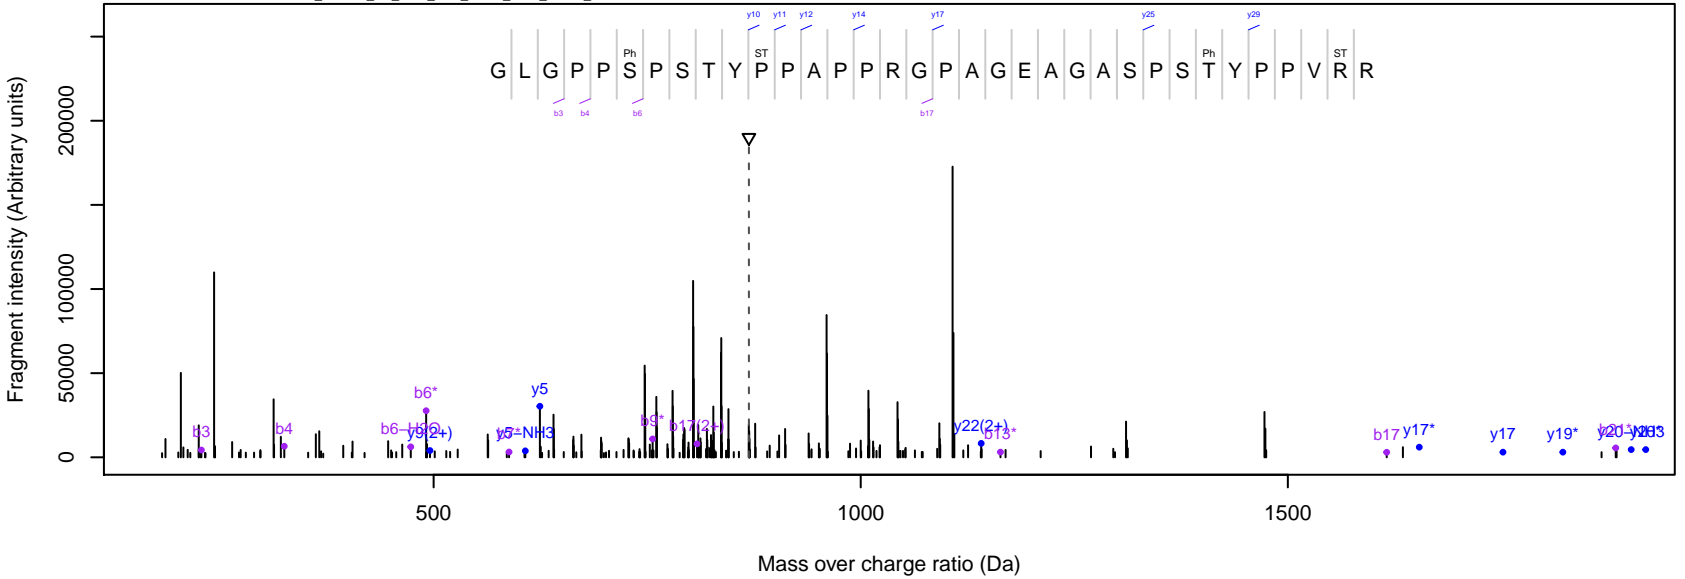

RLFDEAS(Phospho (STY))VDEPR-2+

Source : QE3\_201126\_FR\_TIOx\_hum\_tissue\_Urea\_RNAB\_B Scan : 22455

Andromeda score : 58.21

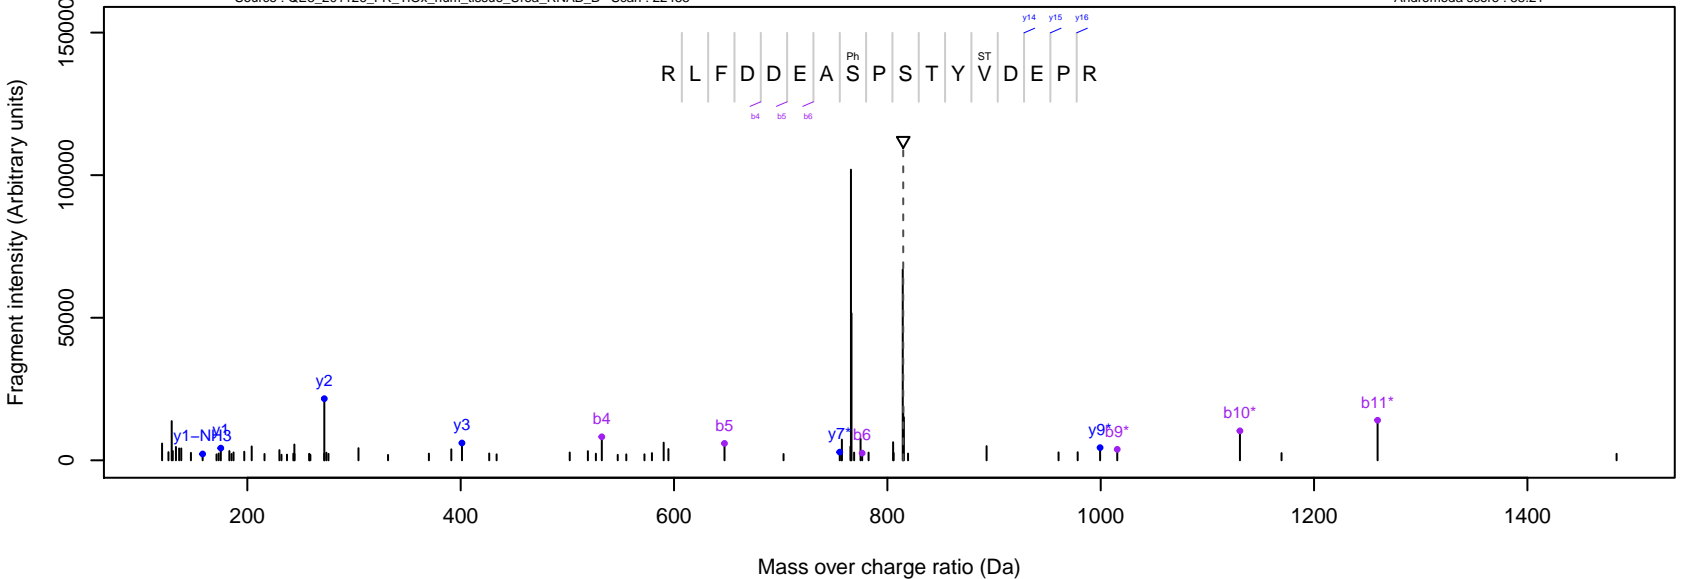

T(Phospho (STY))PELPEPSVK-2+

Source : QE3\_201126\_FR\_TiOx\_hum\_tissue\_Urea\_RNAB\_N Scan : 23481

Andromeda score : 58.172

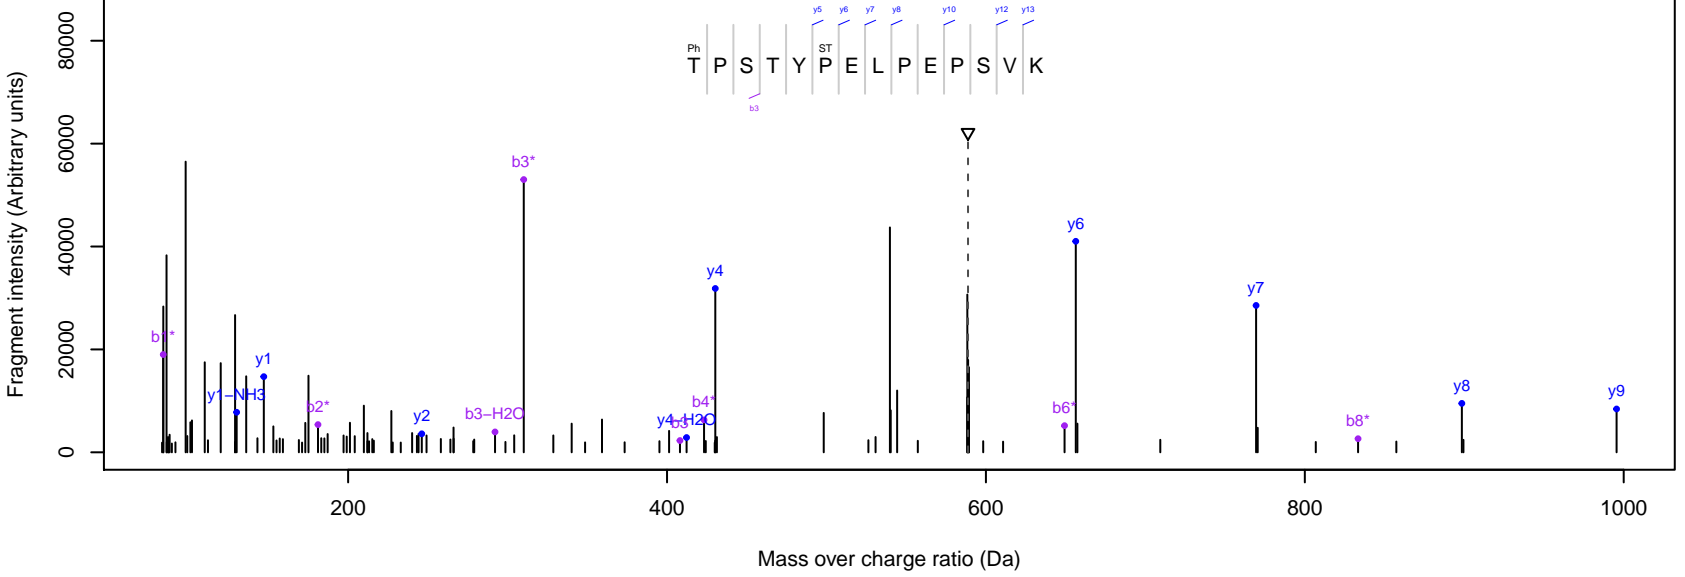

NTAPLVICSELHKS(Phospho (STY))EESIVRPEGK-4+

Source : QE3\_201126\_FR\_TiOx\_hum\_tissue\_Urea\_RNAB\_H Scan : 27997

Andromeda score : 58.137

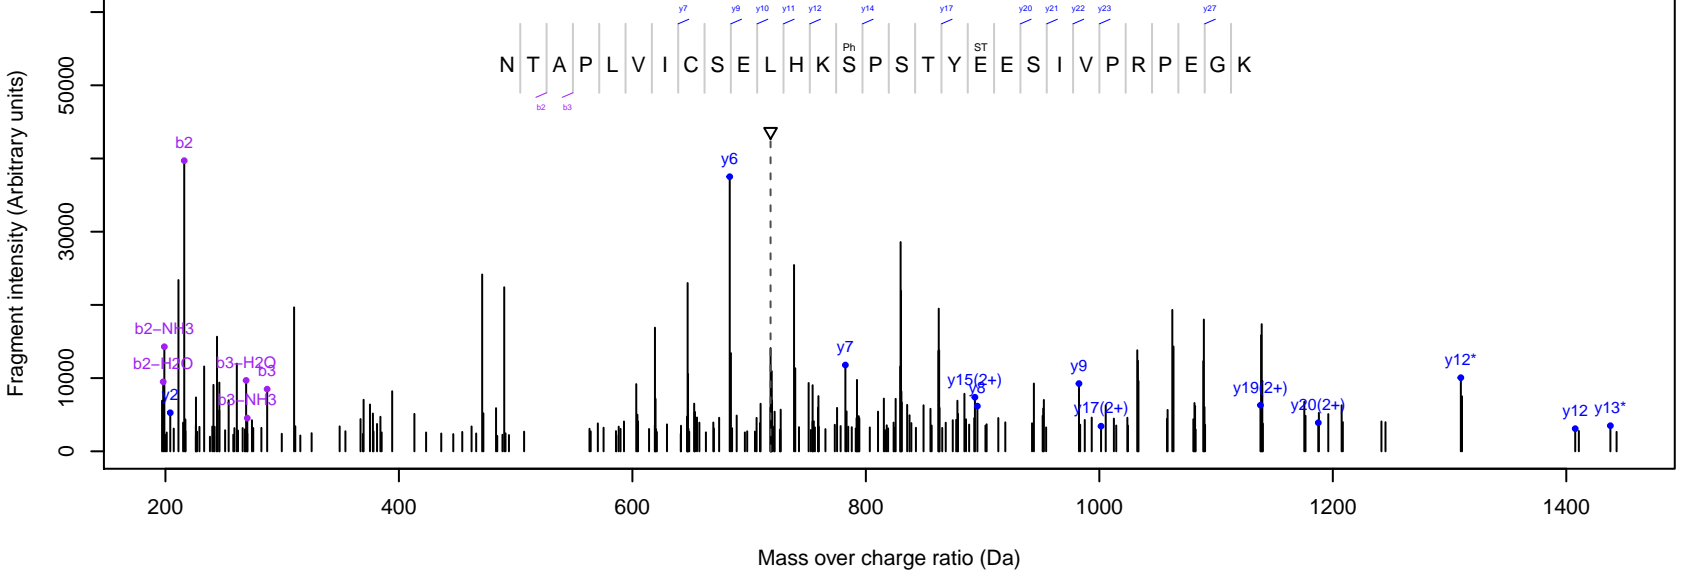

FS(Phospho (STY))FKKS(Phospho (STY))FK-2+

Source : QE3\_201126\_FR\_TiOx\_hum\_tissue\_Urea\_RNAB\_H Scan : 19949

Andromeda score : 58.132

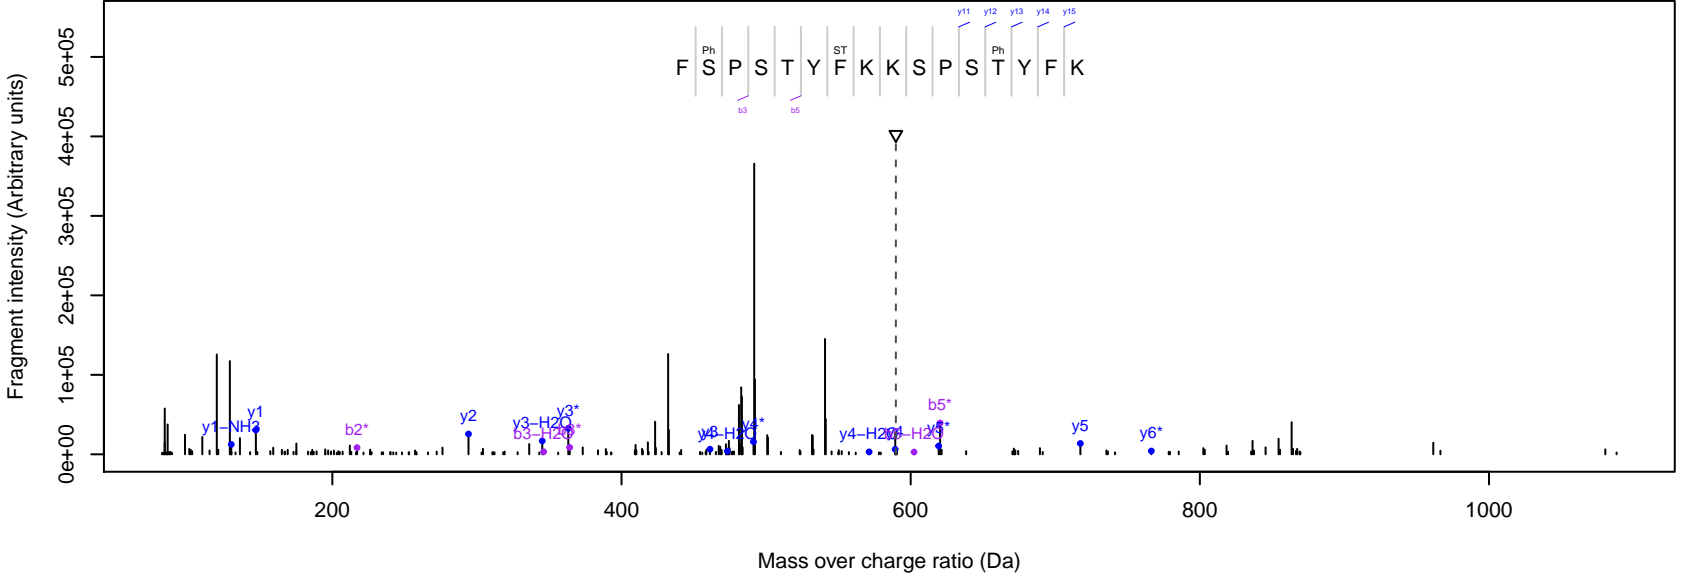

IYY(Phospho (STY))EETSSDQGNEDDEEPEKVVSSSTELHSNEK-4+

Source : QE3\_201126\_FR\_TiOx\_hum\_tissue\_Urea\_RNAB\_H Scan : 19288

Andromeda score : 58.11

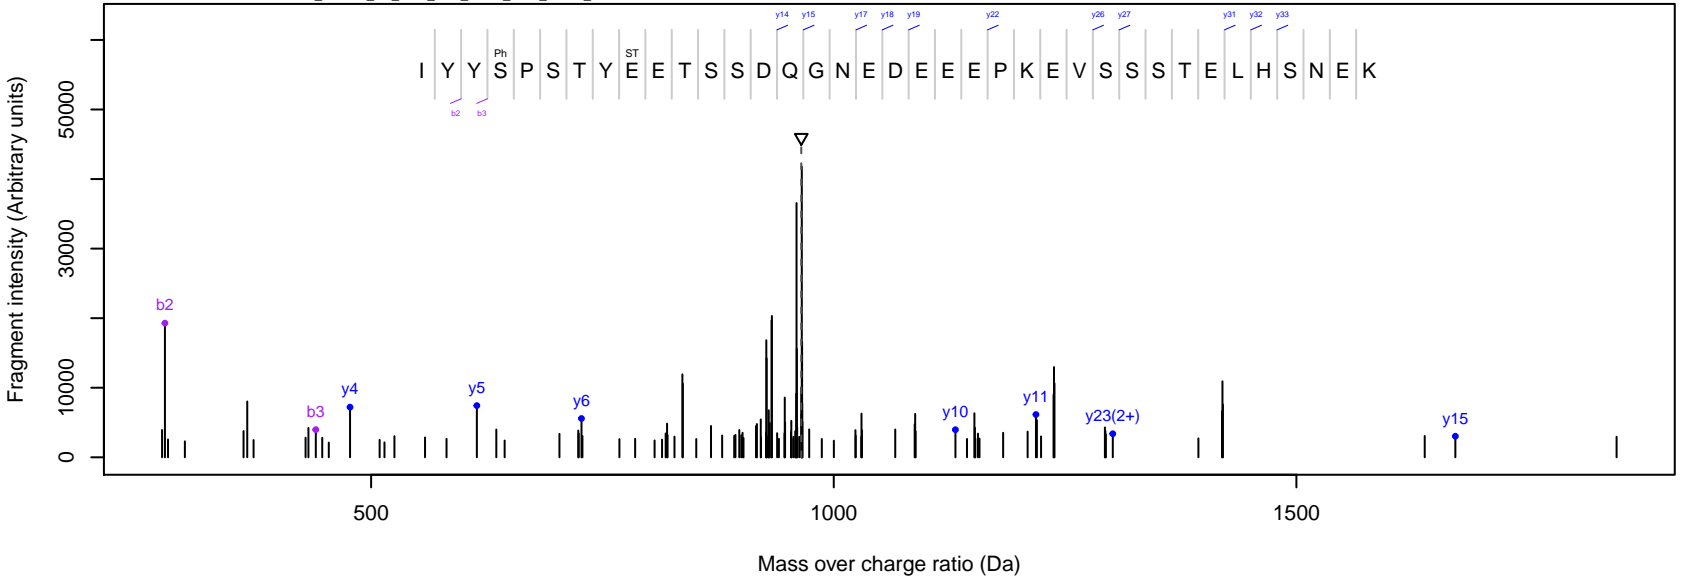

LHS(Phospho (STY))SNPNLSTLDFGEEK-3+

Source : QE3\_201126\_FR\_TiOx\_hum\_tissue\_Urea\_RNAB\_N Scan : 30534

Andromeda score : 58.093

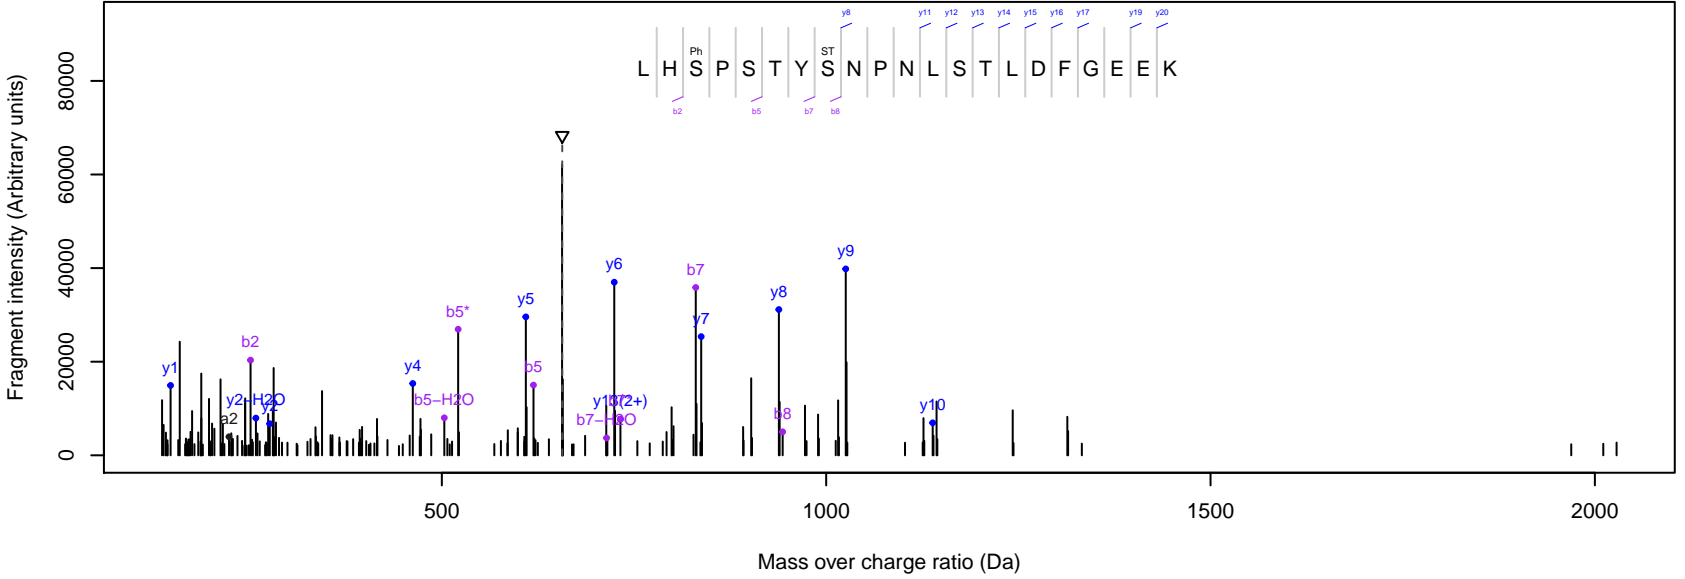

IS(Phospho (STY))IPDVLDLKGPK-3+

Source : QE3\_201126\_FR\_TiOx\_hum\_tissue\_Urea\_RNAB\_N Scan : 43929

Andromeda score : 58.09

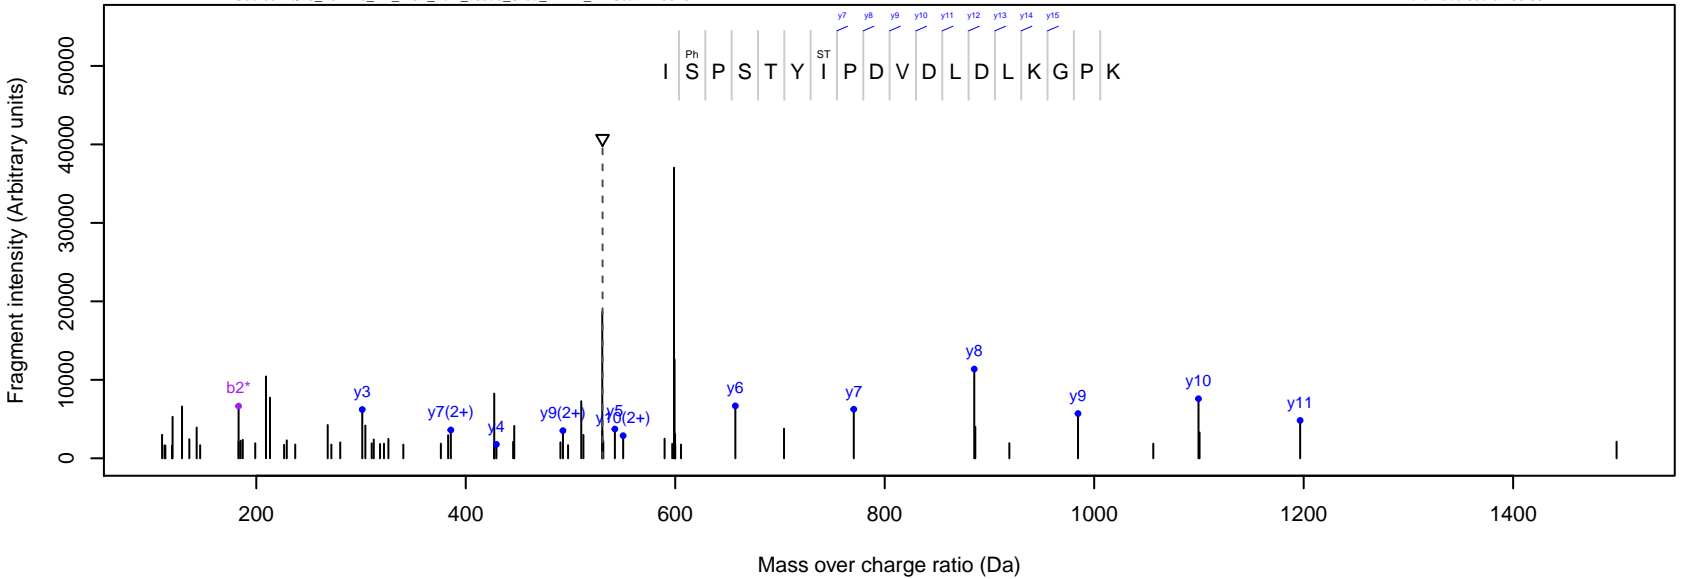

LSVPT(Phospho (STY))S(Phospho (STY))DEEDEVPAKPR-2+

Source : QE3\_201126\_FR\_TiOx\_hum\_tissue\_Urea\_RNAB\_N Scan : 28089

Andromeda score : 58.089

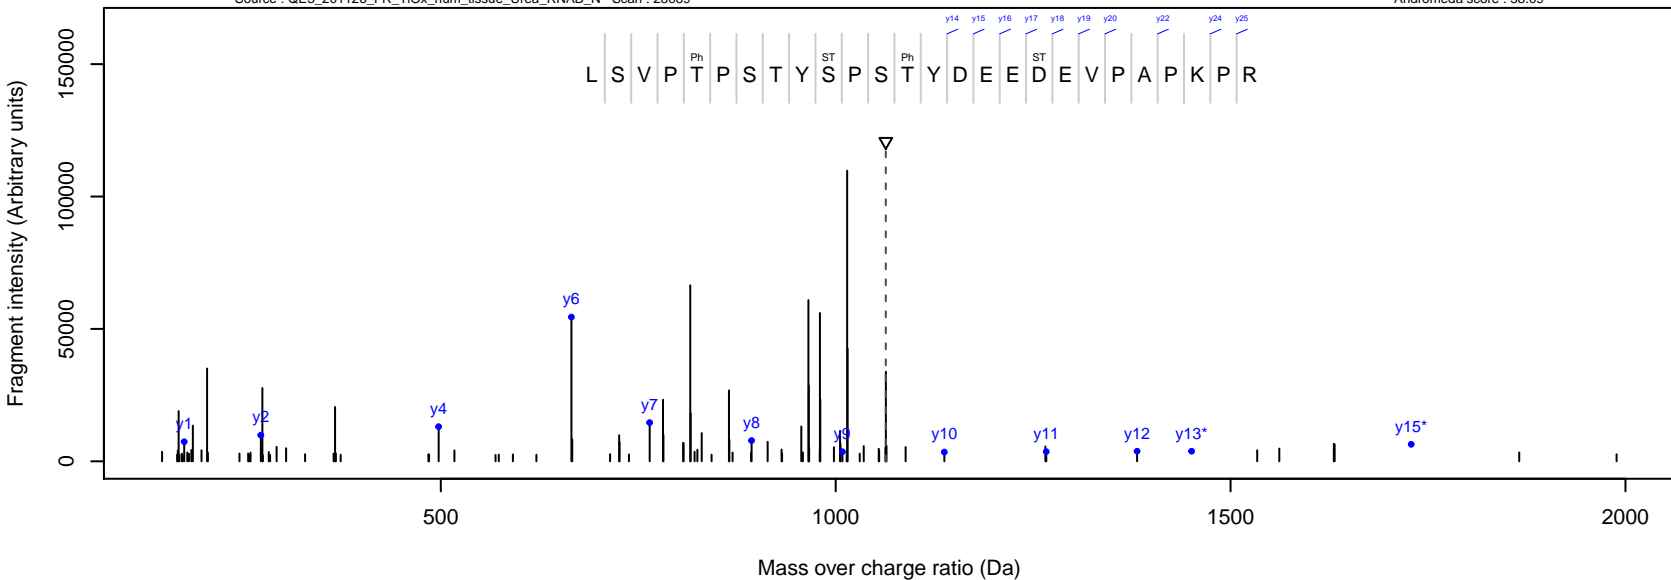

GSS(Phospho (STY))LSGTDGGAQEVVKDILEDVVTSAIKEAAEK-3+

Source : QE3\_201126\_FR\_TiOx\_hum\_tissue\_Urea\_RNAB\_N Scan : 62897

Andromeda score : 58.089

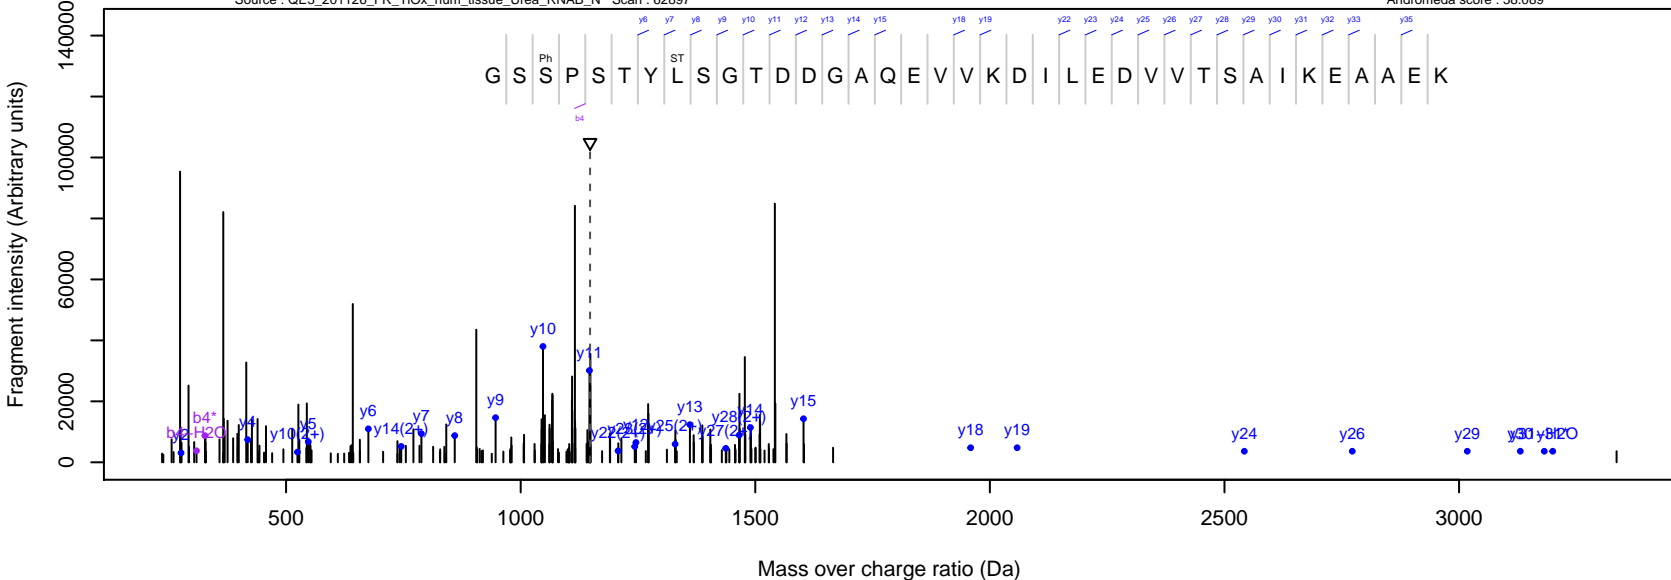

S(Phospho (STY))DSPVPTAPTSGGPKPSTASAVPELATDPELEK-3+

Source : QE3\_201126\_FR\_TiOx\_hum\_tissue\_Urea\_RNAB\_B Scan : 35785

Andromeda score : 58.089

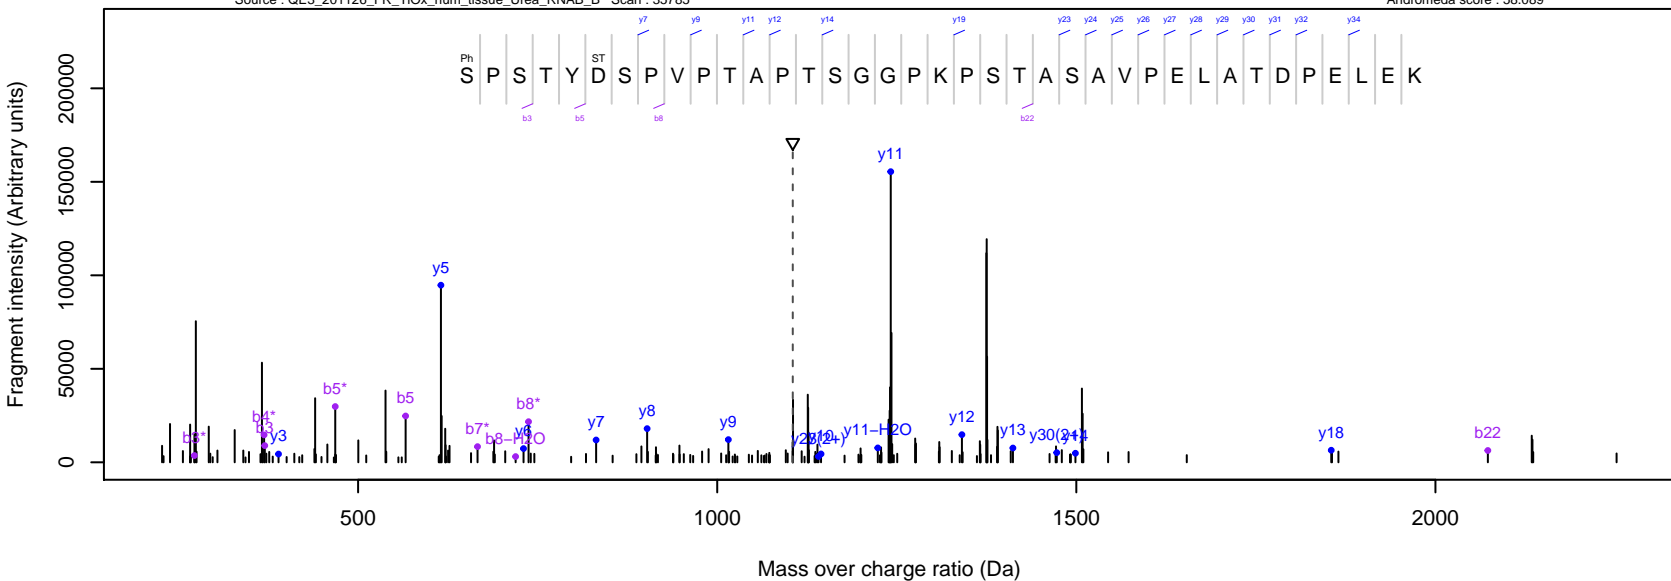

ILDELKDDSTHESLS(Phospho (STY))QES(Phospho (STY))ESEEDGIHVDSQK-4+

Source : QE3\_201126\_FR\_TiOx\_hum\_tissue\_Urea\_RNAB\_N Scan : 28373

Andromeda score : 58.087

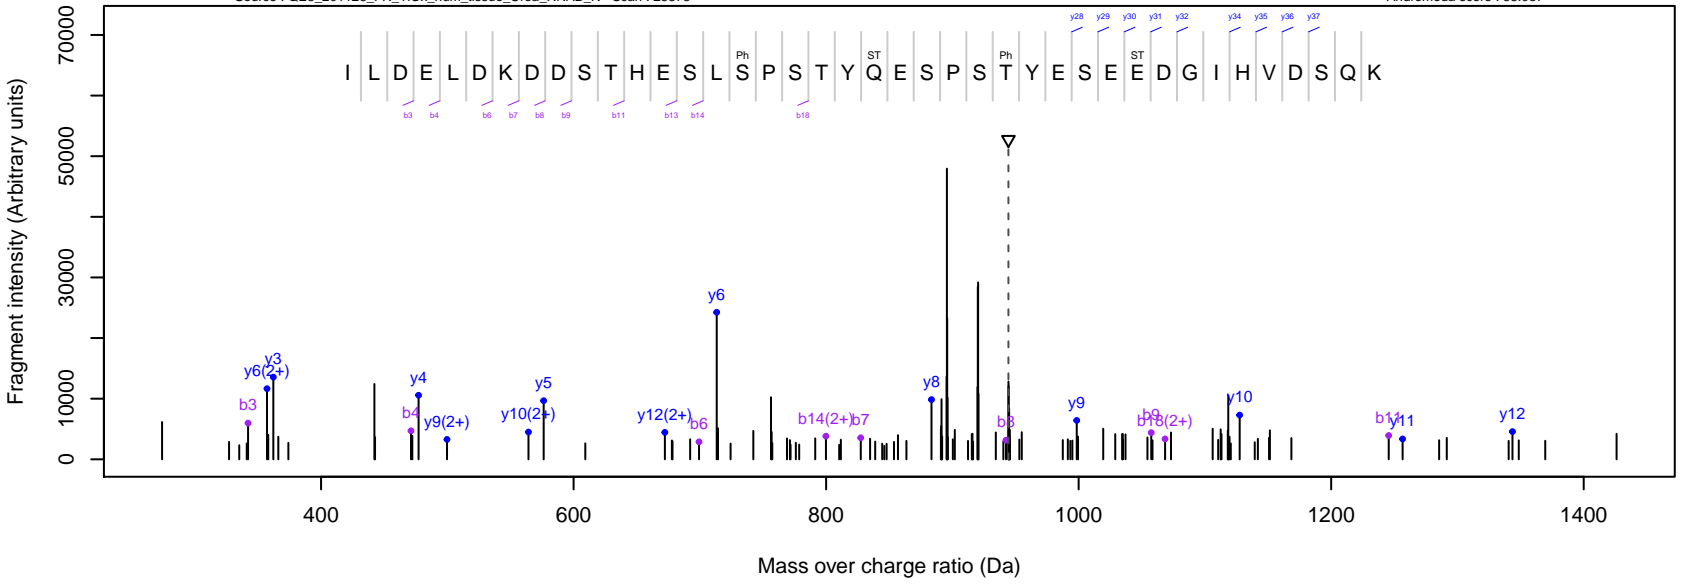

LEGPLAAHS(Phospho (STY))PGPCTVLYEGPVR-3+

Source : QE3\_201126\_FR\_TiOx\_hum\_tissue\_Urea\_RNAB\_B Scan : 40575

Andromeda score : 58.08

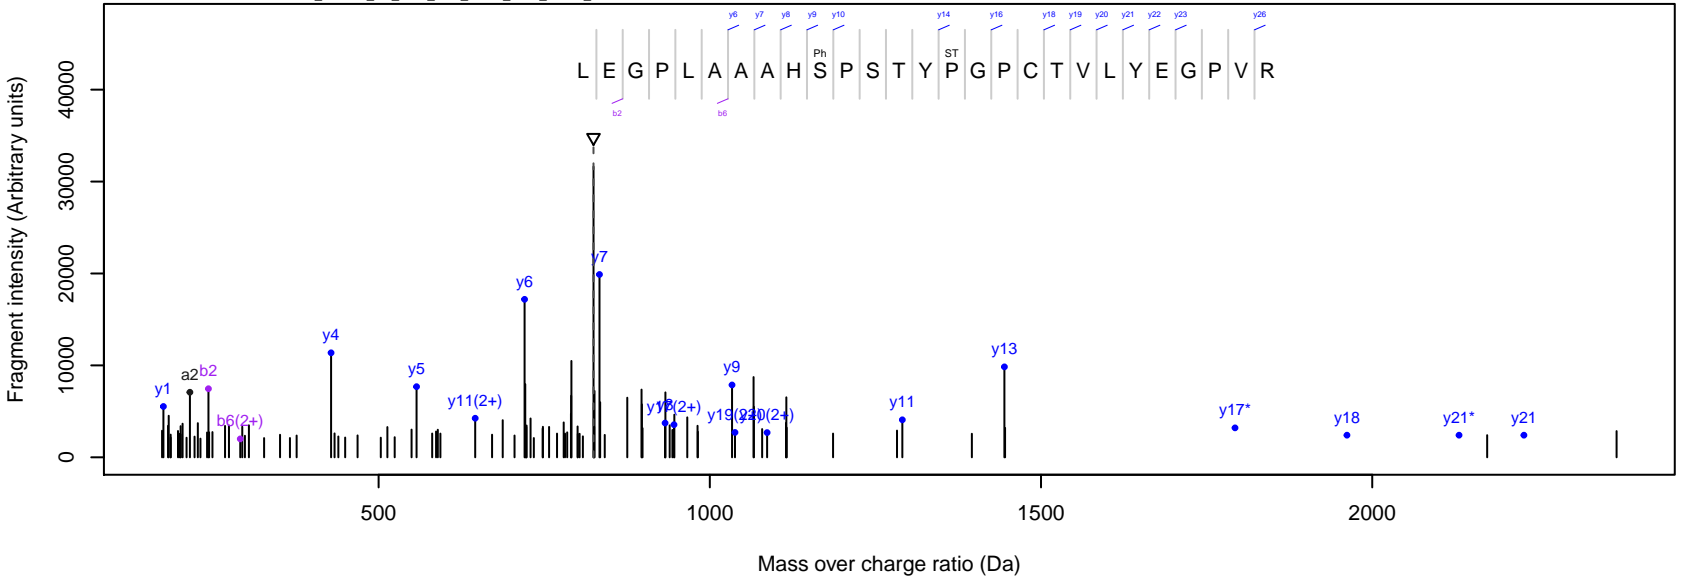

S(Phospho (STY))QS(Phospho (STY))LPTLLSPVR-2+

Source : QE3\_201126\_FR\_TiOx\_hum\_tissue\_Urea\_RNAB\_N Scan : 56395

Andromeda score : 58.079

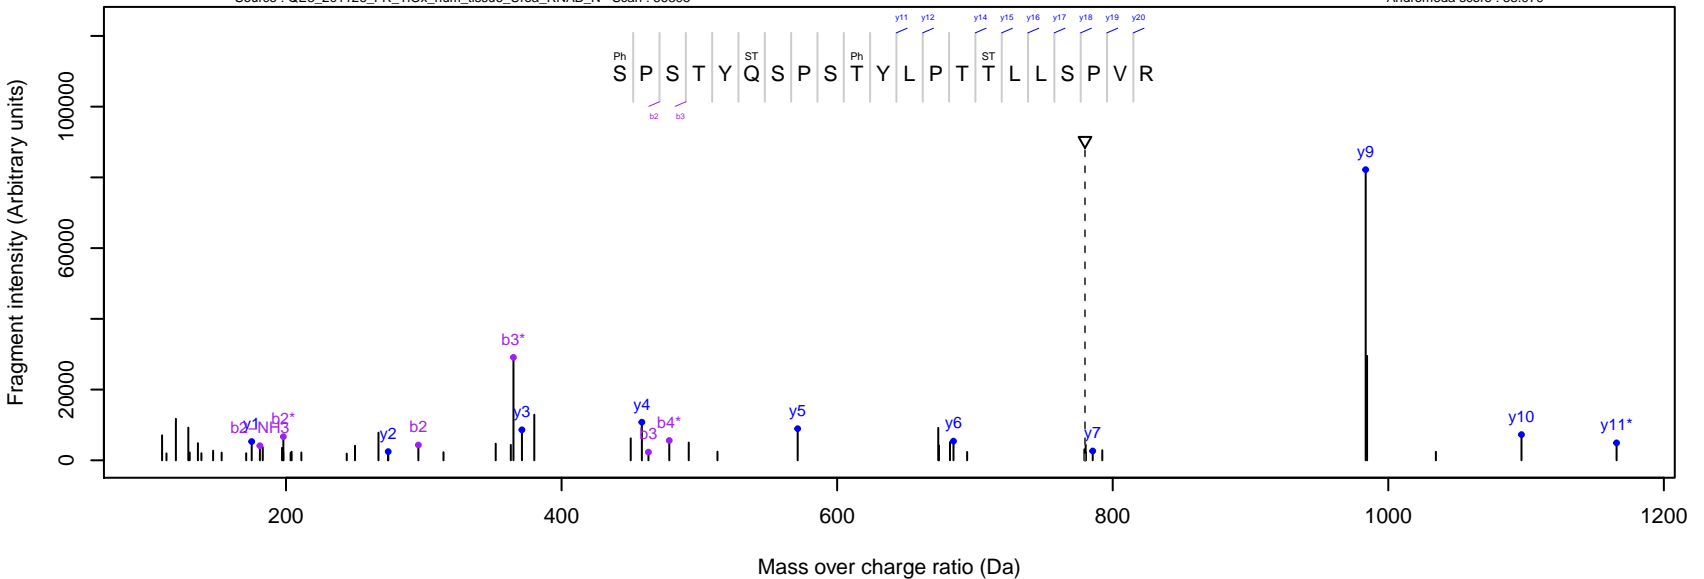



LLKEGEEPTVYS(Phospho (STY))DEEPEK-3+

Source : QE3\_201126\_FR\_TiOx\_hum\_tissue\_Urea\_RNAB\_B Scan : 20328

Andromeda score : 58.015

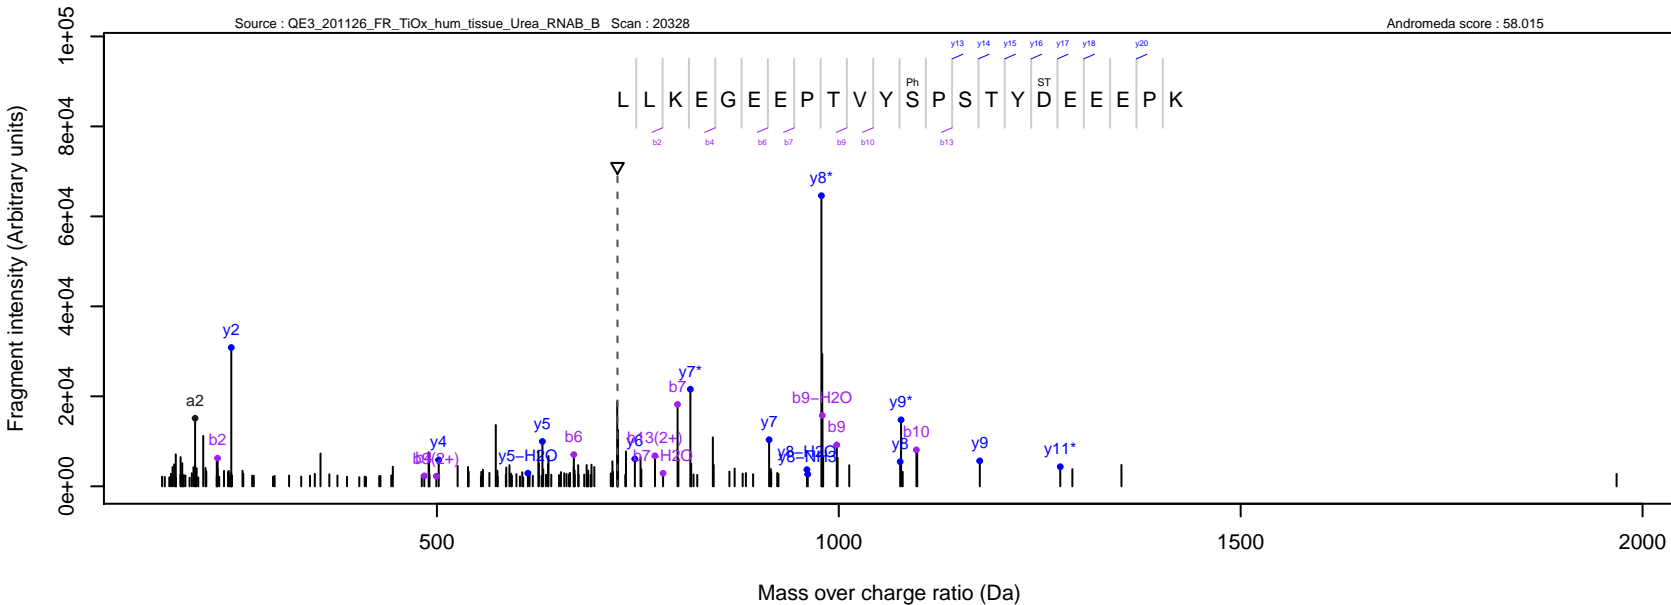

TEIKEEEDQPSTSATQS(Phospho (STY))SPAPGQSK-3+

Source : QE3\_201126\_FR\_TiOx\_hum\_tissue\_Urea\_RNAB\_H Scan : 10443

Andromeda score : 58.015

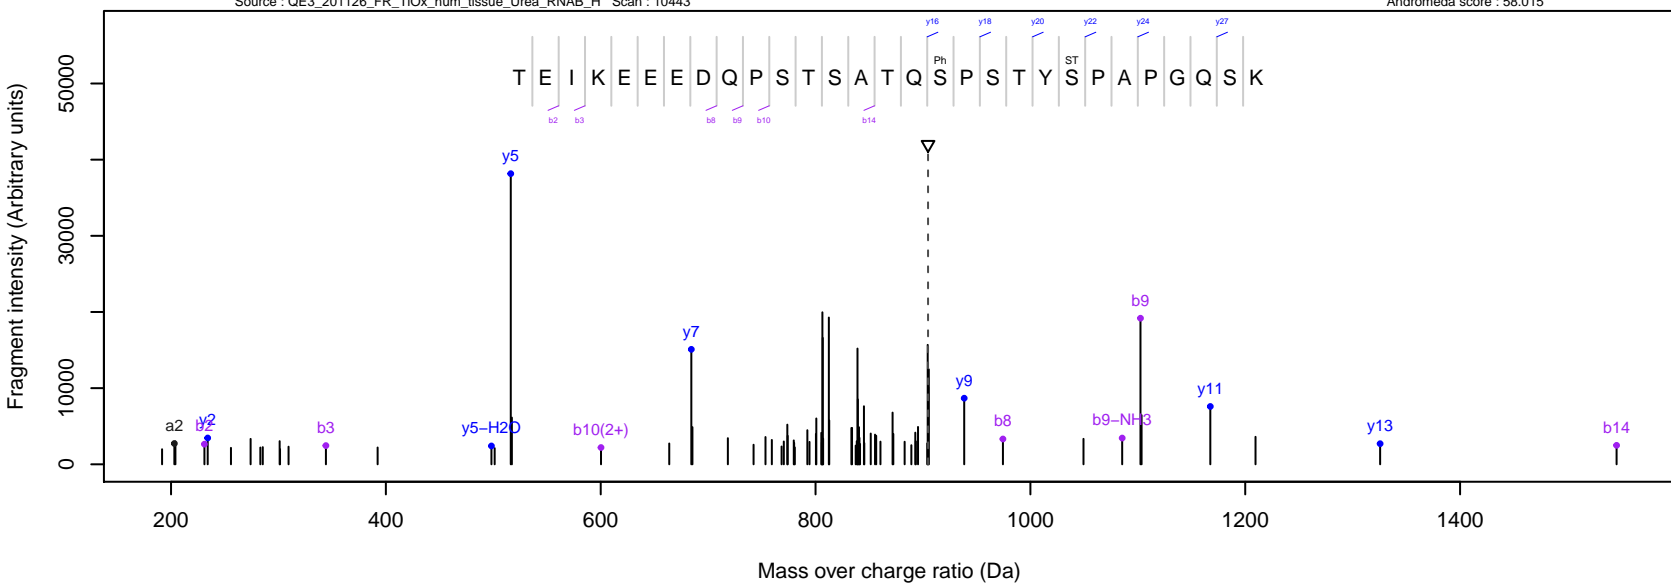

DCLCQLCAQPMSSS(Phospho (STY))PKETTFSNCAGCGR-3+

Source : QE3\_201126\_FR\_TiOx\_hum\_tissue\_Urea\_RNAB\_N Scan : 31696

Andromeda score : 58.001

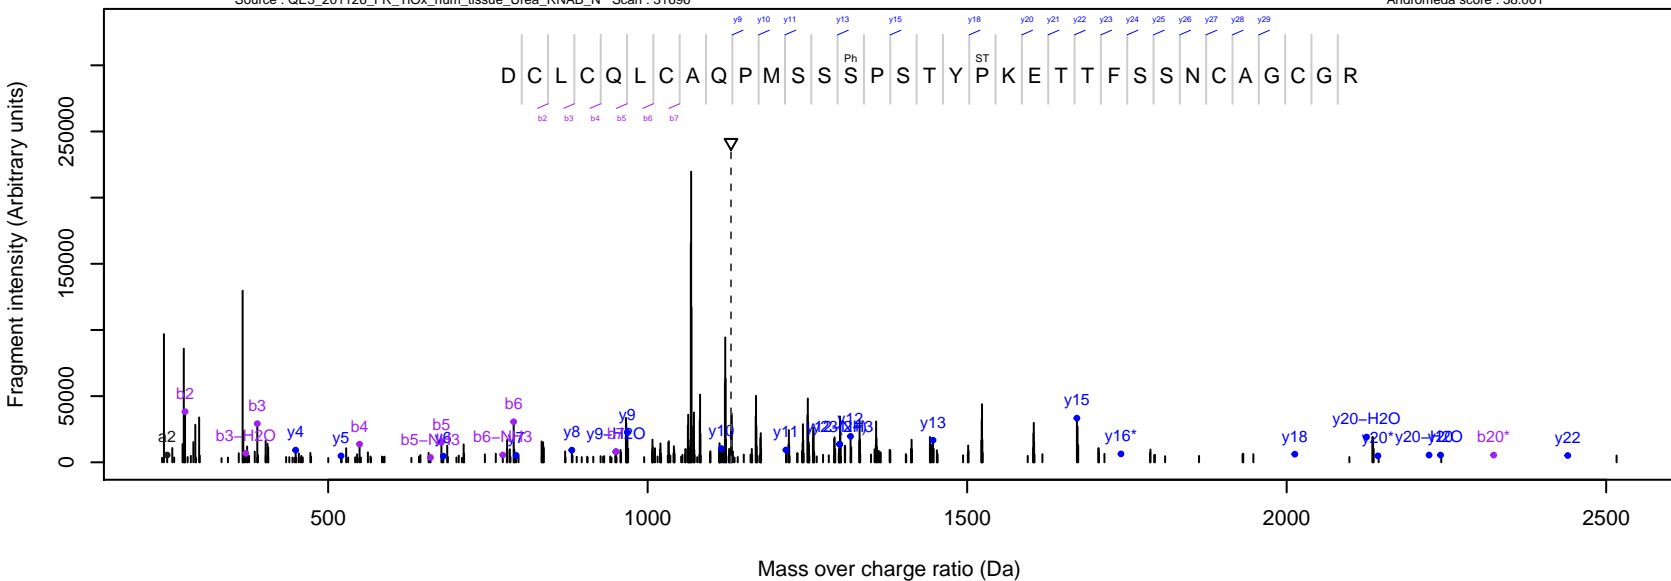

ALQAPHS(Phospho (STY))PSKTDGK-3+

Source : QE3\_201126\_FR\_TiOx\_hum\_tissue\_Urea\_RNAB\_H Scan : 4907

Andromeda score : 57.973

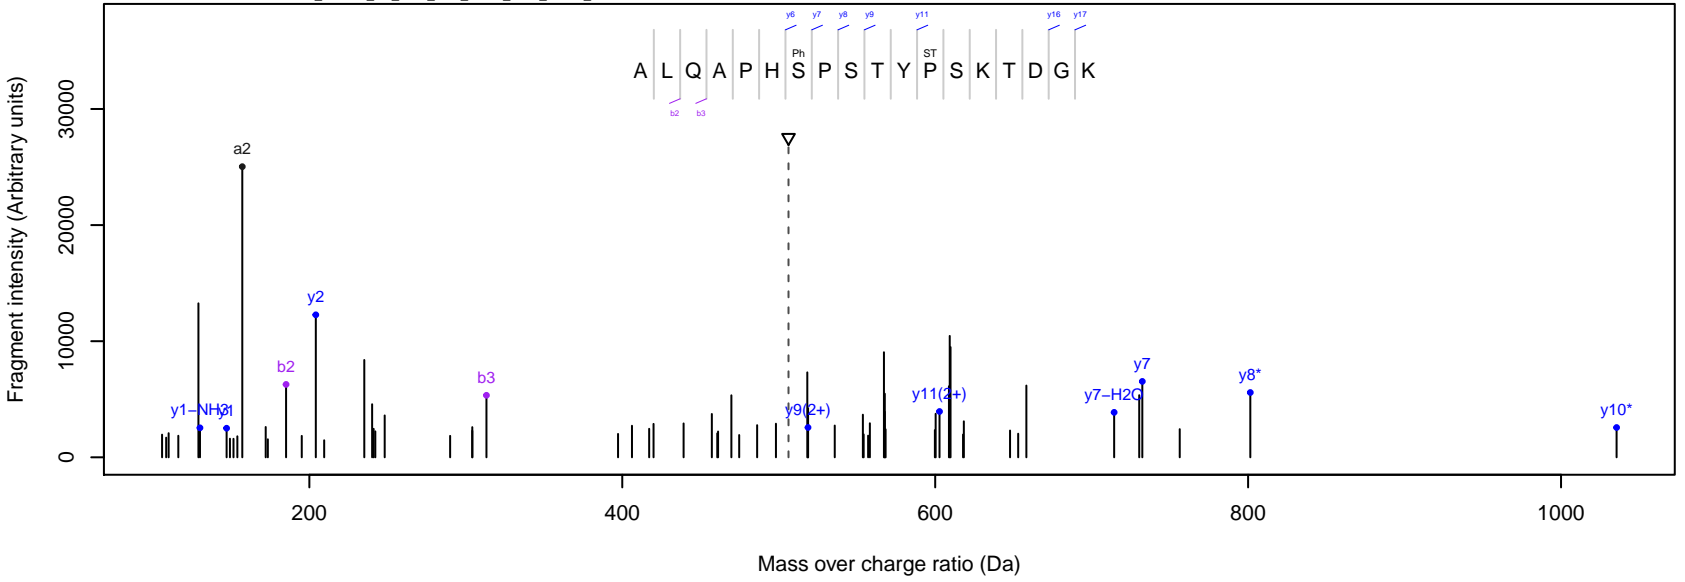

RVS(Phospho (STY))PLNLSSVT(Phospho (STY))P-2+

Source : QE3\_201126\_FR\_TiOx\_hum\_tissue\_Urea\_RNAB\_N Scan : 44834

Andromeda score : 57.973

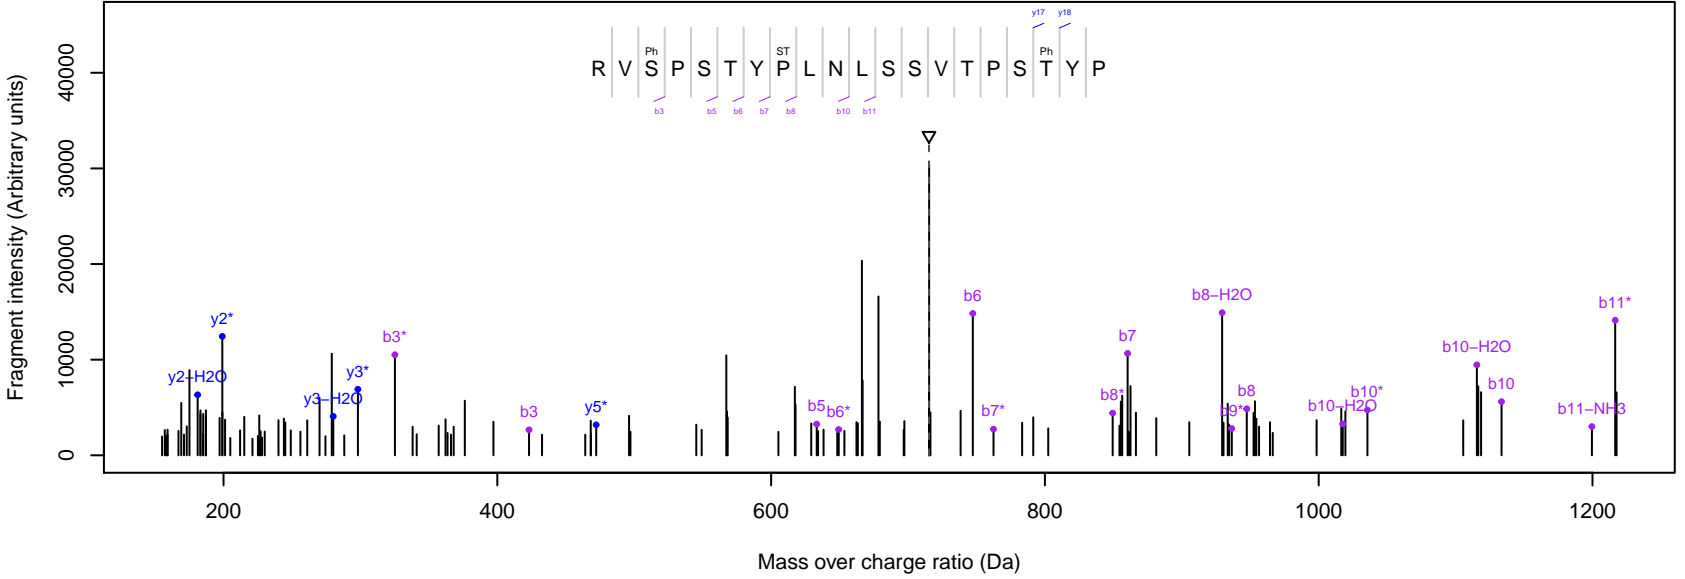

ERDHS(Phospho (STY))PT(Phospho (STY))PSVFNS(Phospho (STY))DEERYR-3+

Source : QE3\_201126\_FR\_TiOx\_hum\_tissue\_Urea\_RNAB\_N Scan : 21493

Andromeda score : 57.922

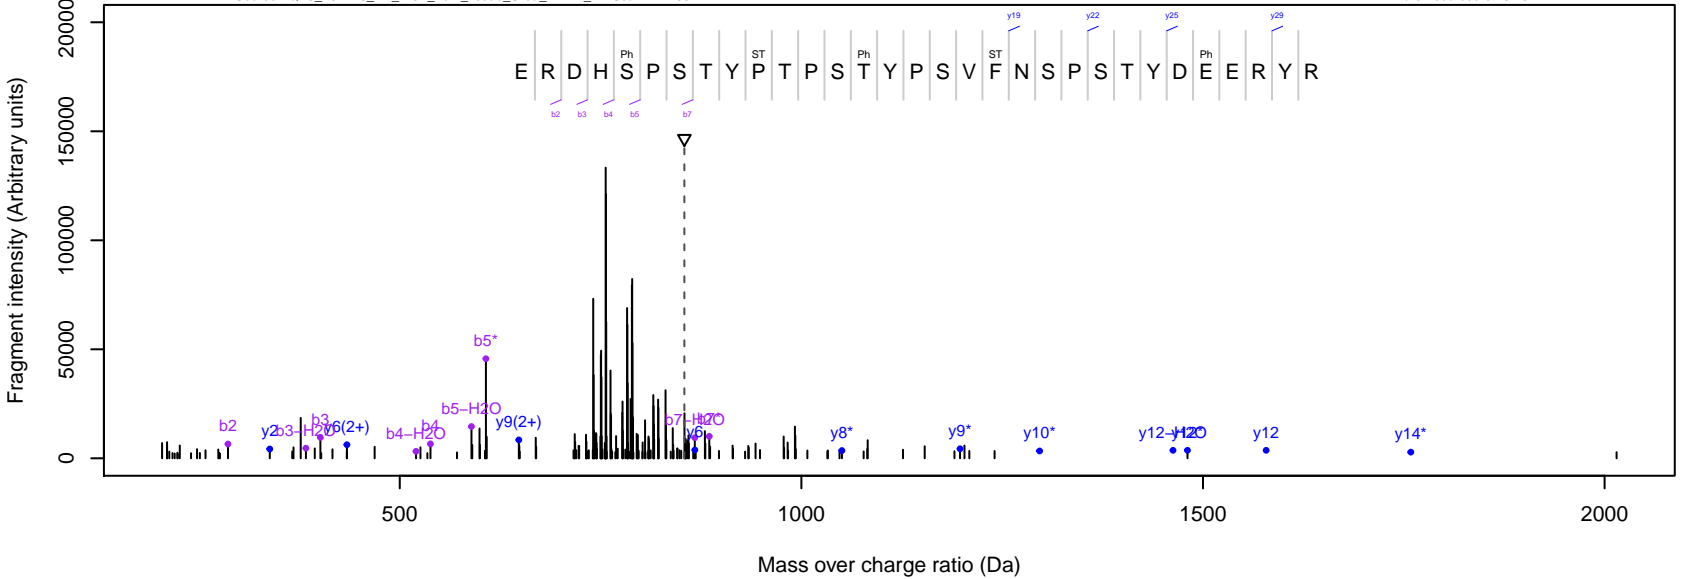

LVPTGPT(Phospho (STY))HREPSVRYDNLRSR-4+

Source : QE3\_201126\_FR\_TiOx\_hum\_tissue\_Urea\_RNAB\_B Scan : 15902

Andromeda score : 57.922

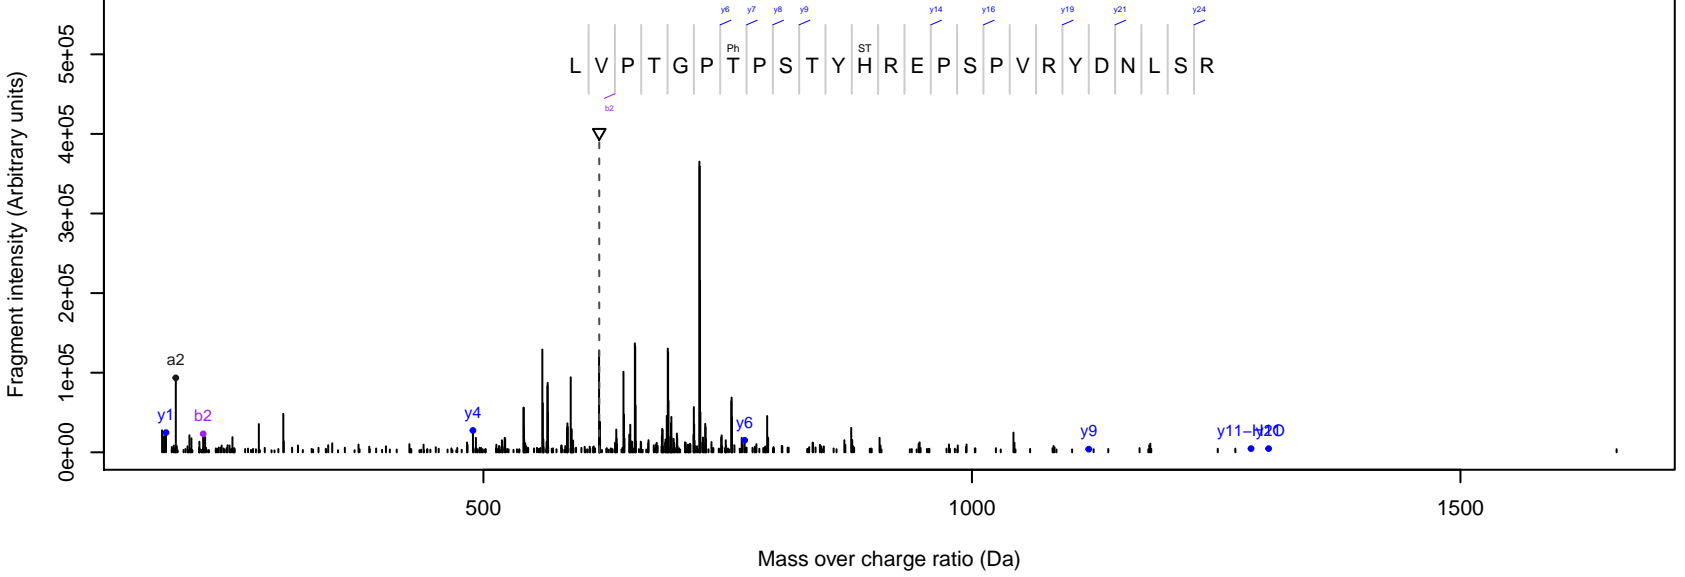

LS(Phospho (STY))QETEALGR-2+

Source : QE3\_201126\_FR\_TiOx\_hum\_tissue\_Urea\_RNAB\_N Scan : 15606

Andromeda score : 57.859

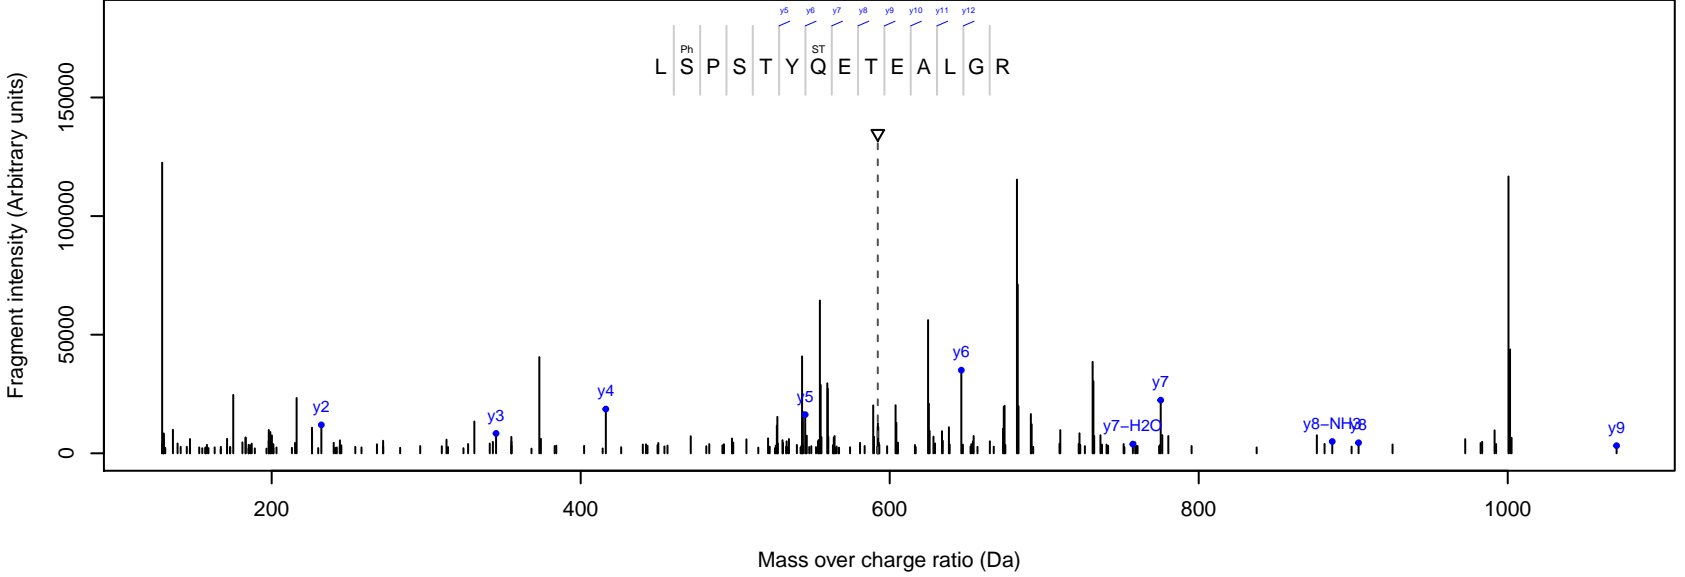

S(Phospho (STY))VEDLVR-2+

Source : QE3\_201126\_FR\_TiOx\_hum\_tissue\_Urea\_RNAB\_N Scan : 21489

Andromeda score : 57.859

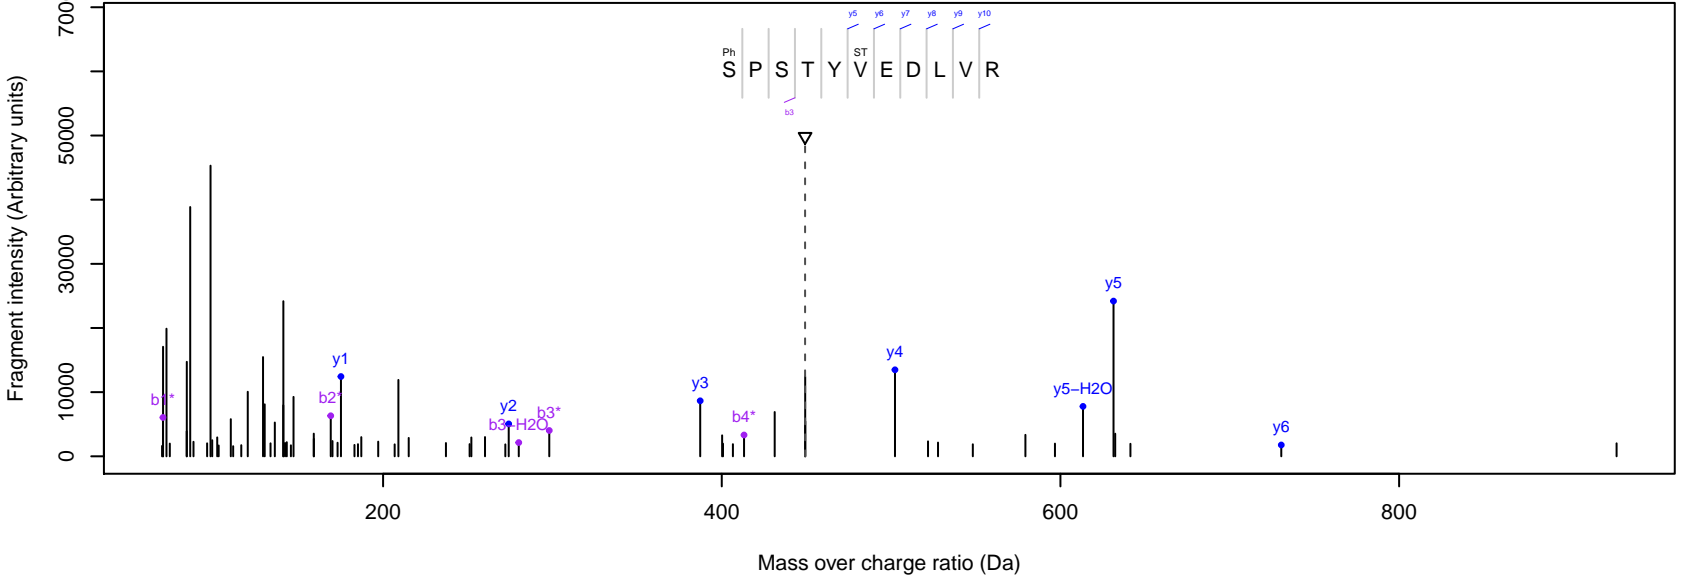

GYYPYSVSGSGS(Phospho (STY))T(Phospho (STY))AGSRTGS(Phospho (STY))R-3+

Source : QE3\_201126\_FR\_TiOx\_hum\_tissue\_Urea\_RNAB\_N Scan : 31364

Andromeda score : 57.838

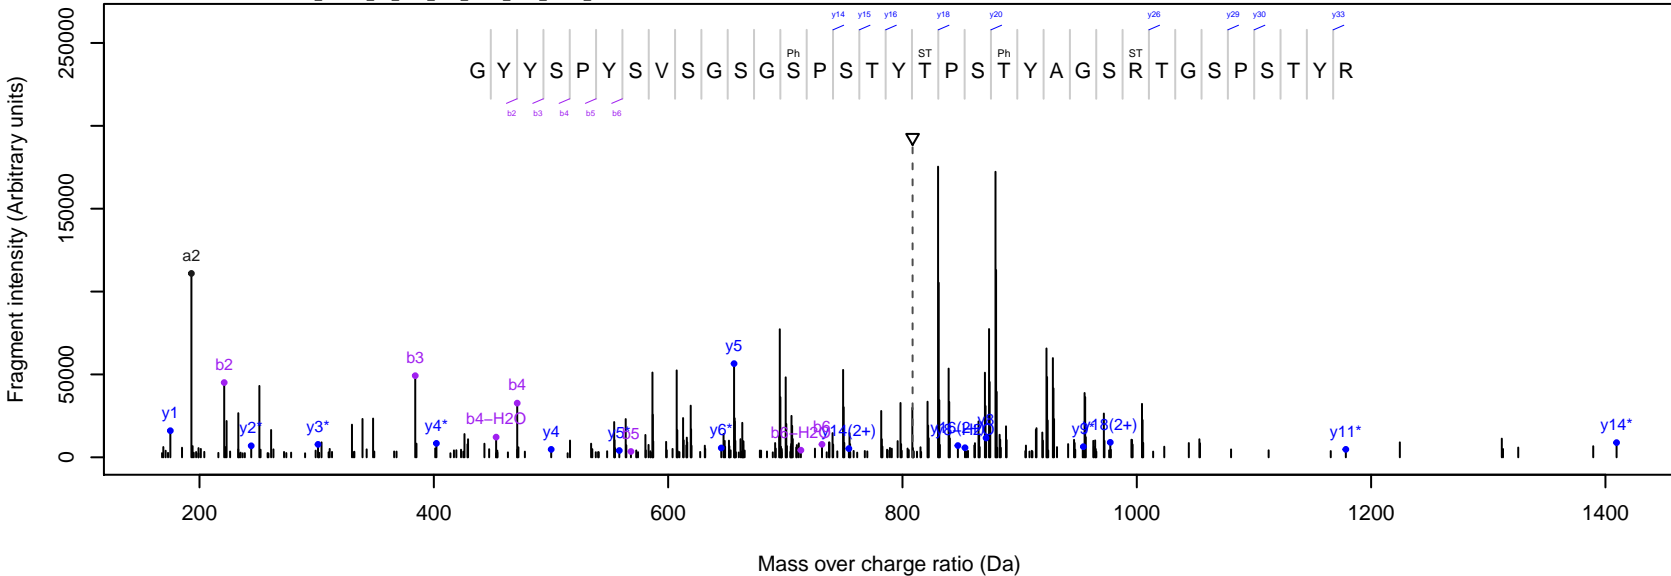

ARLS(Phospho (STY))YSDKNLIDMSDFAGFSVNPK-3+

Source : QE3\_201126\_FR\_TiOx\_hum\_tissue\_Urea\_RNAB\_H Scan : 55630

Andromeda score : 57.811

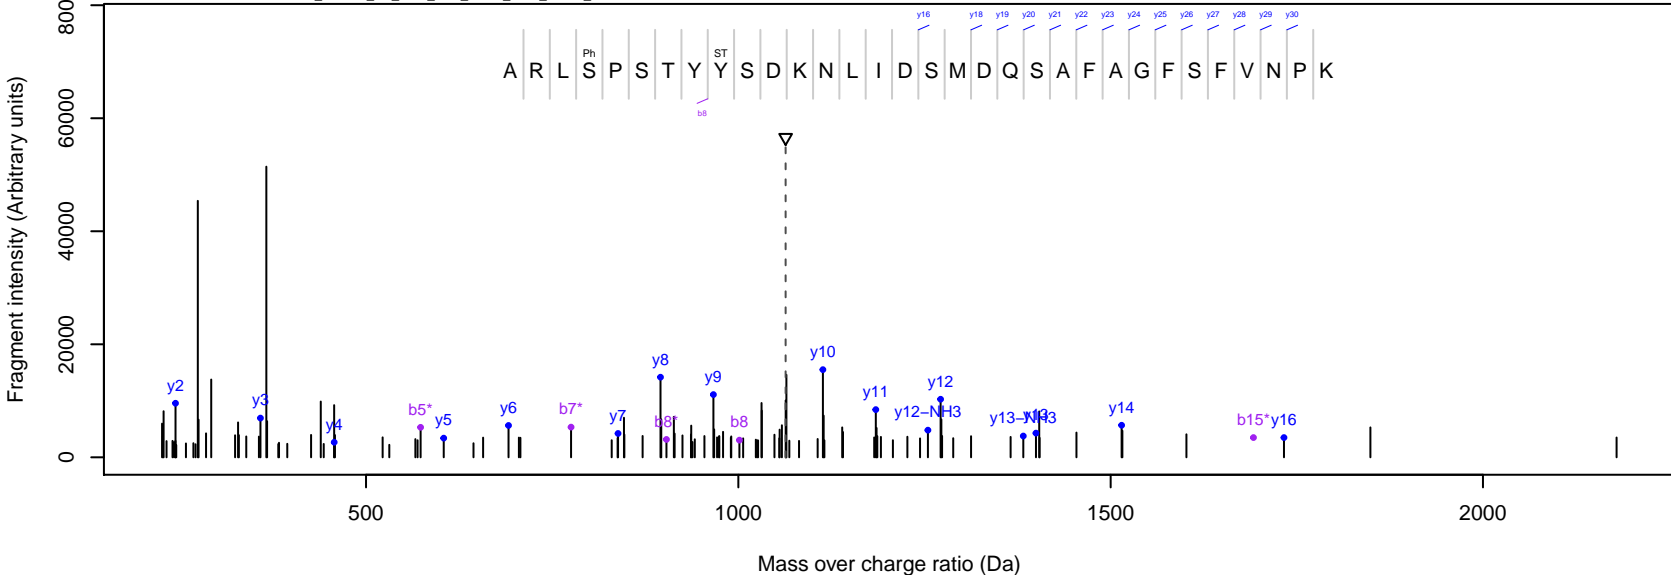

SATRPS(Phospho (STY))PS(Phospho (STY))PER-2+

Source : QE3\_201126\_FR\_TiOx\_hum\_tissue\_Urea\_RNAB\_H Scan : 5358

Andromeda score : 57.804

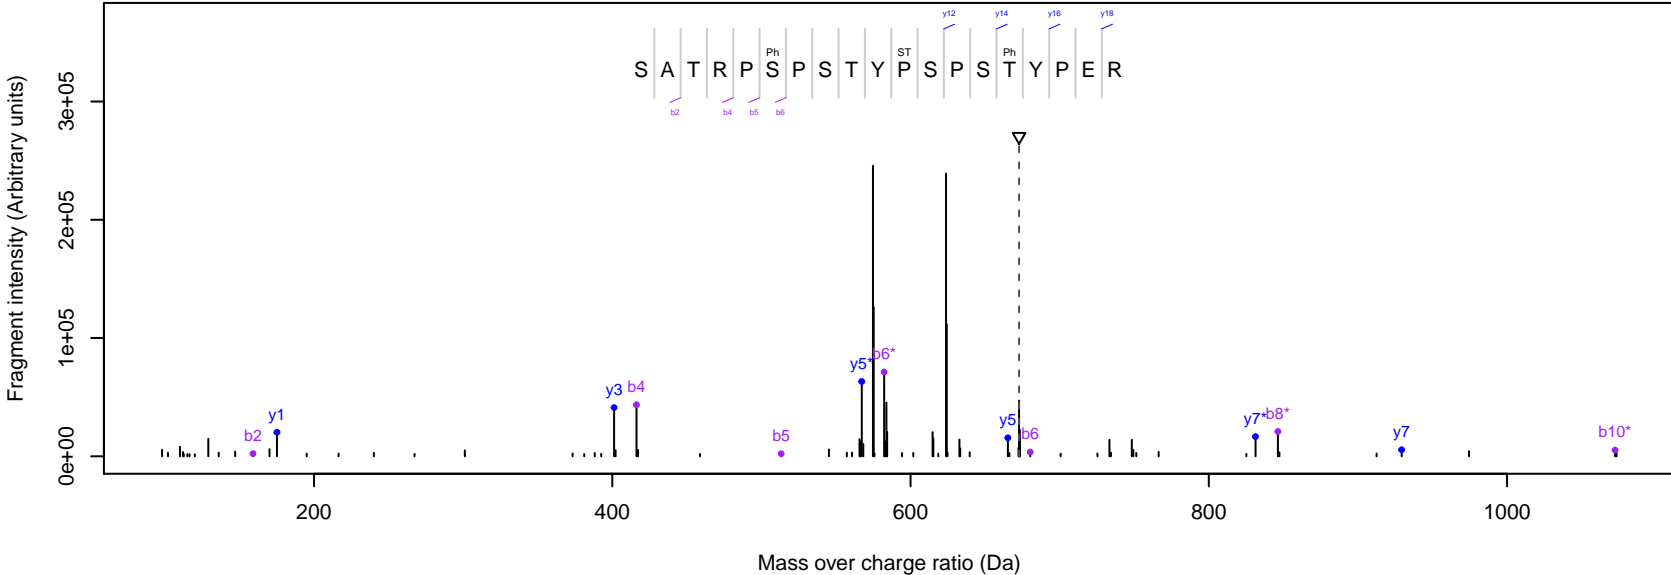

TDS(Phospho (STY))REDEIS(Phospho (STY))PPPPNPVVK-3+

Source : QE3\_201126\_FR\_TiOx\_hum\_tissue\_Urea\_RNAB\_N Scan : 26134

Andromeda score : 57.802

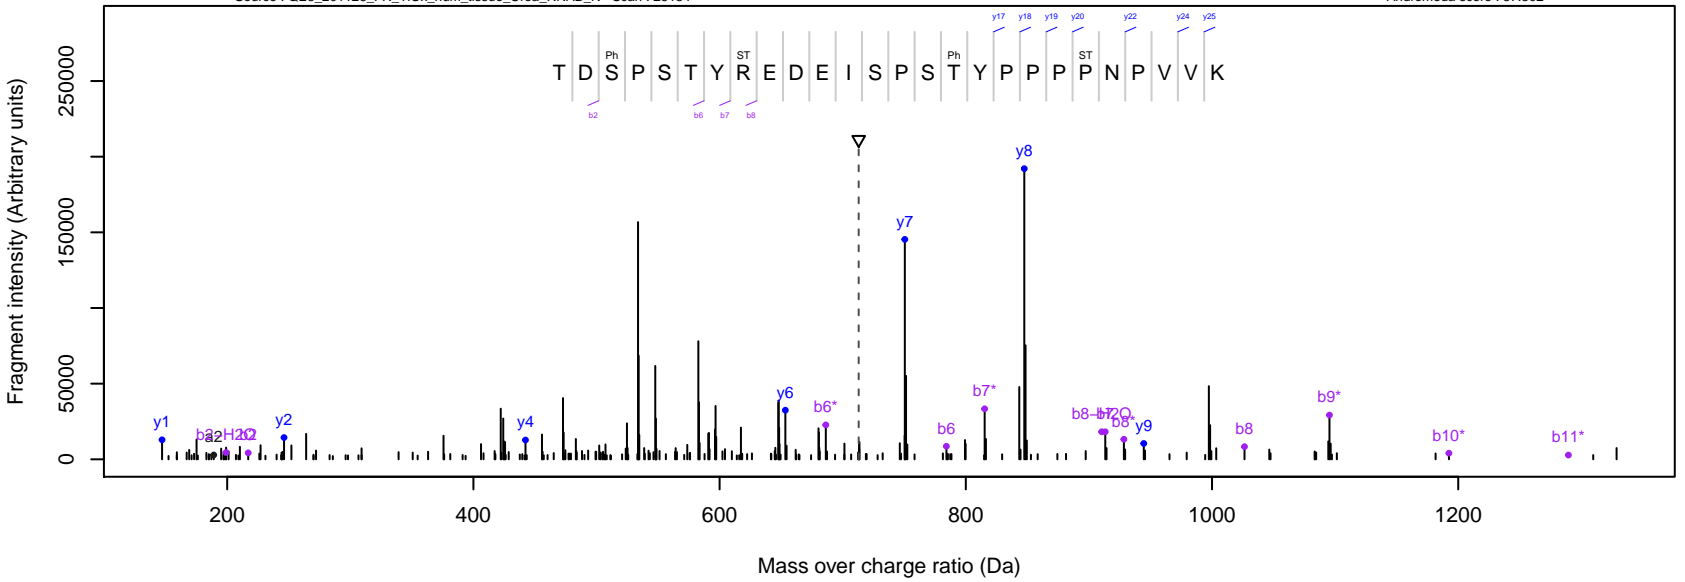

TGSS(Phospho (STY))PTQGIVNK-2+

Source : QE3\_201126\_FR\_TiOx\_hum\_tissue\_Urea\_RNAB\_N Scan : 11639

Andromeda score : 57.802

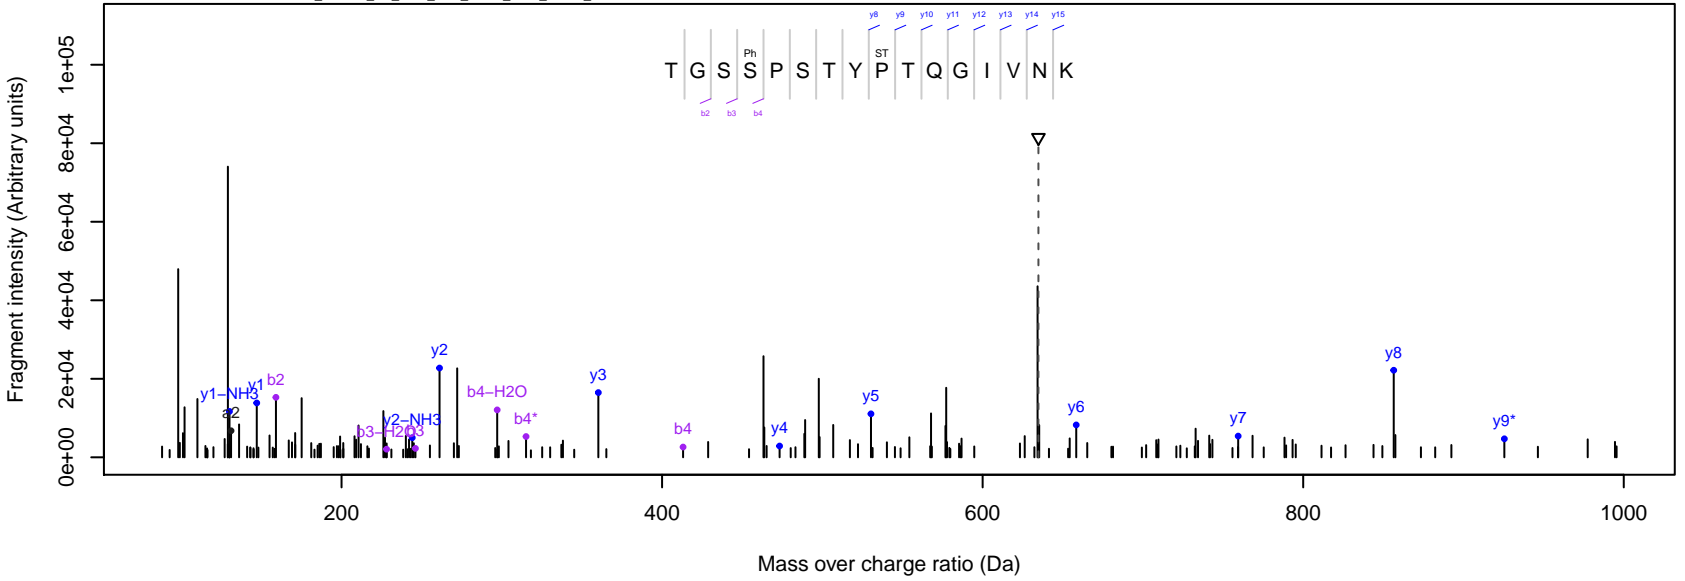

S(Phospho (STY))PQM(Oxidation (M))VSAIVR-2+

Source : QE3\_201126\_FR\_TiOx\_hum\_tissue\_Urea\_RNAB\_N Scan : 18787

Andromeda score : 57.792

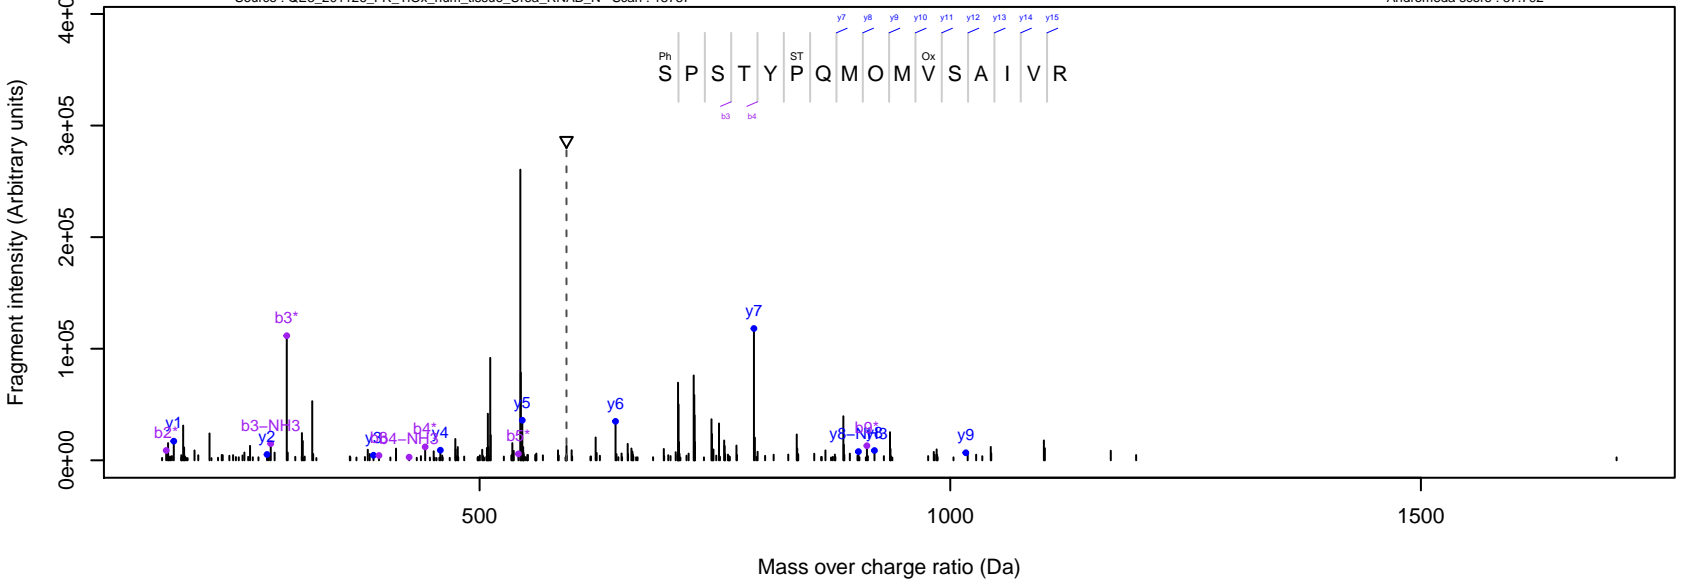

**QSS(Phospho (STY))LTFQSSDPEQMR-2+**

Source : QE3\_201126\_FR\_TiOx\_hum\_tissue\_Urea\_RNAB\_N Scan : 27746

Andromeda score : 57.788

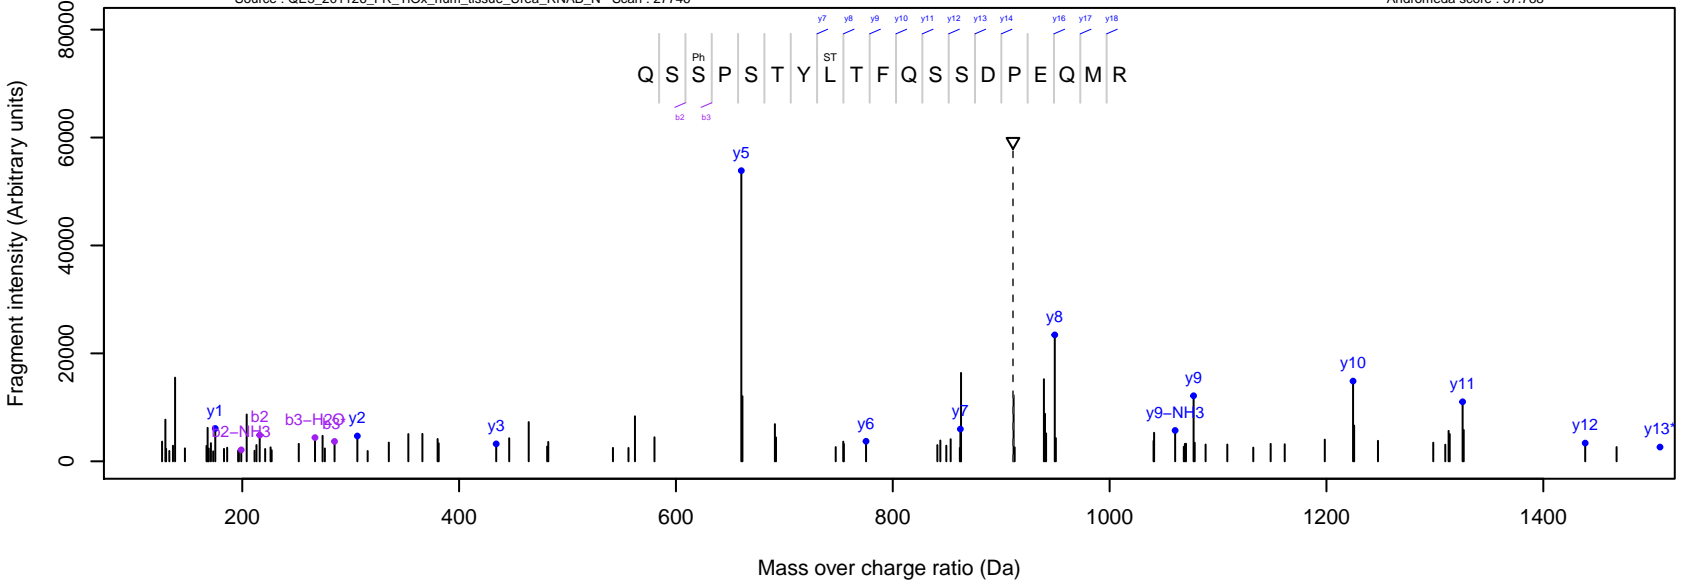

**APS(Phospho (STY))VANVGSCHCDLSLKIP EISIQDMT AQT VSPSGK-4+**

Source : QE3\_201126\_FR\_TiOx\_hum\_tissue\_Urea\_RNAB\_B Scan : 52763

Andromeda score : 57.78

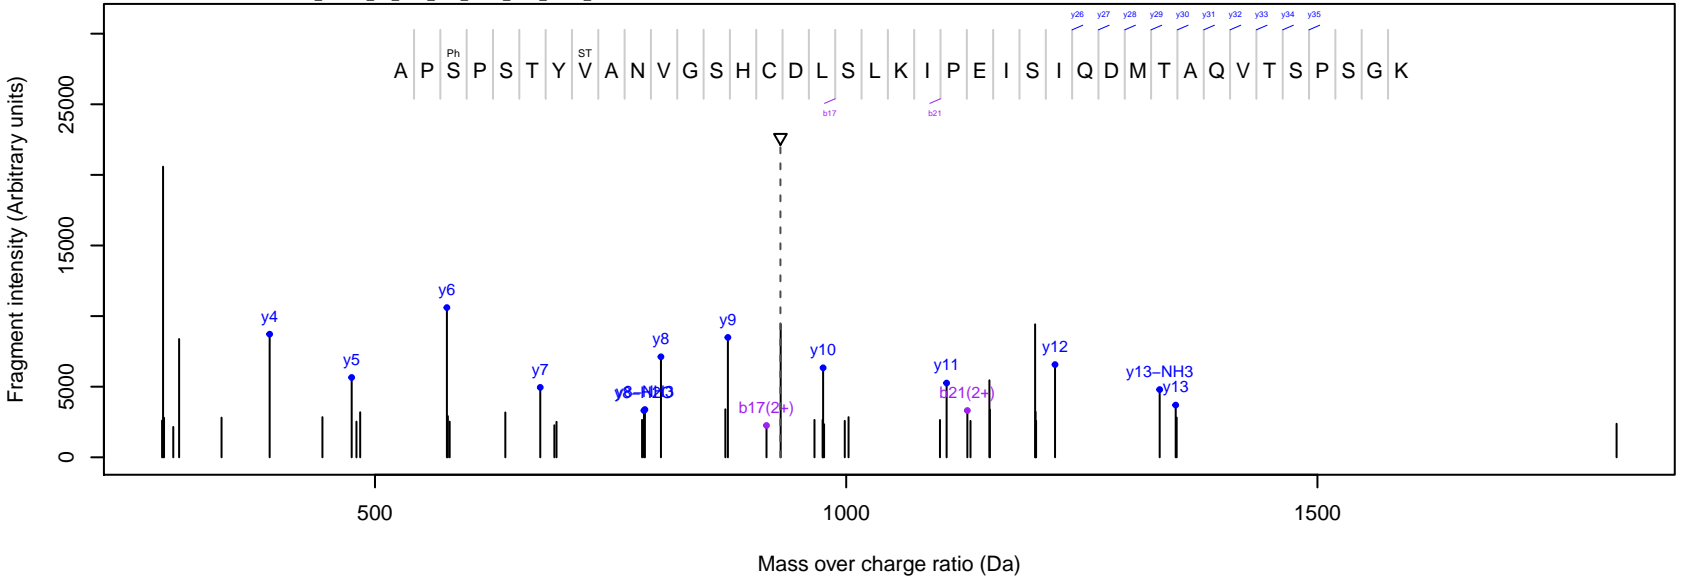

**NIS(Phospho (STY))AGSLGSL LGH H G Q G A E S D P H V T E P L M G G V P E T R-4+**

Source : QE3\_201126\_FR\_TiOx\_hum\_tissue\_Urea\_RNAB\_H Scan : 39508

Andromeda score : 57.763

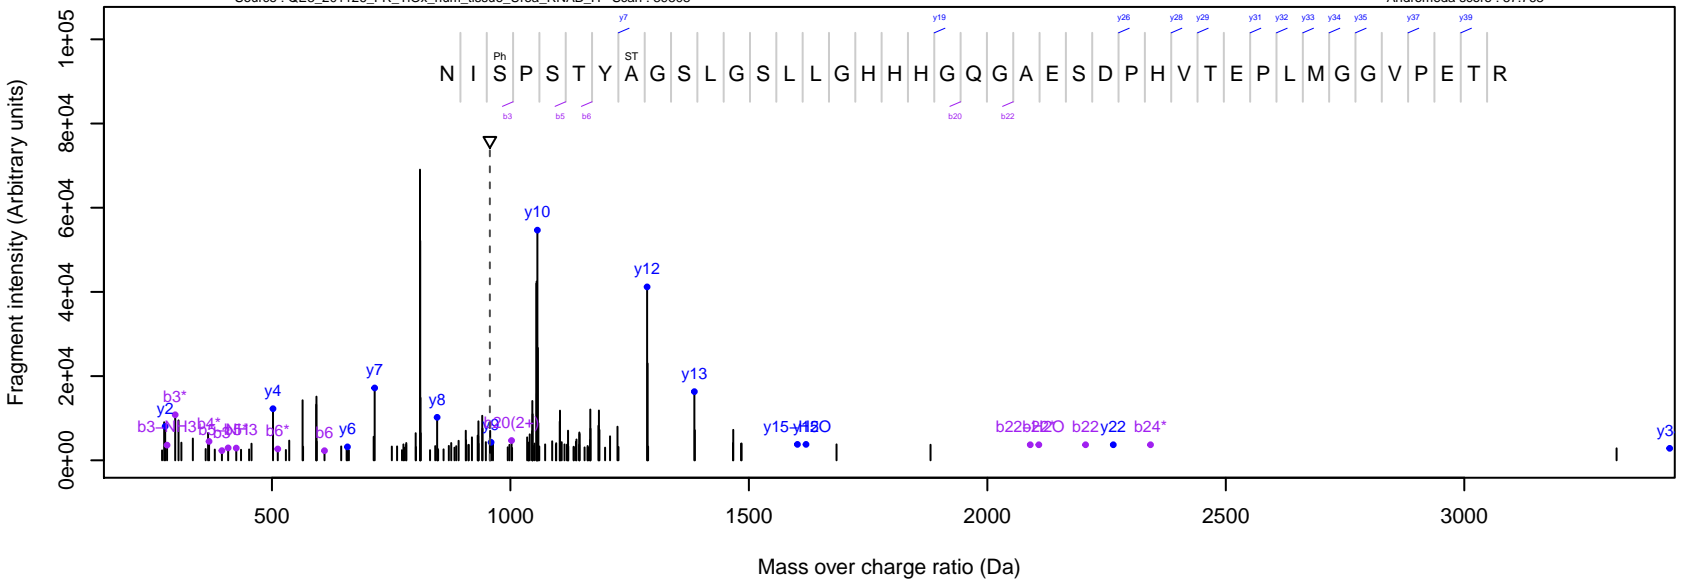

DQSTS(Phospho (STY))M(Oxidation (M))S(Phospho (STY))HINLLFSR-3+

Source : QE3\_201126\_FR\_TiOx\_hum\_tissue\_Urea\_RNAB\_H Scan : 44594

Andromeda score : 57.745

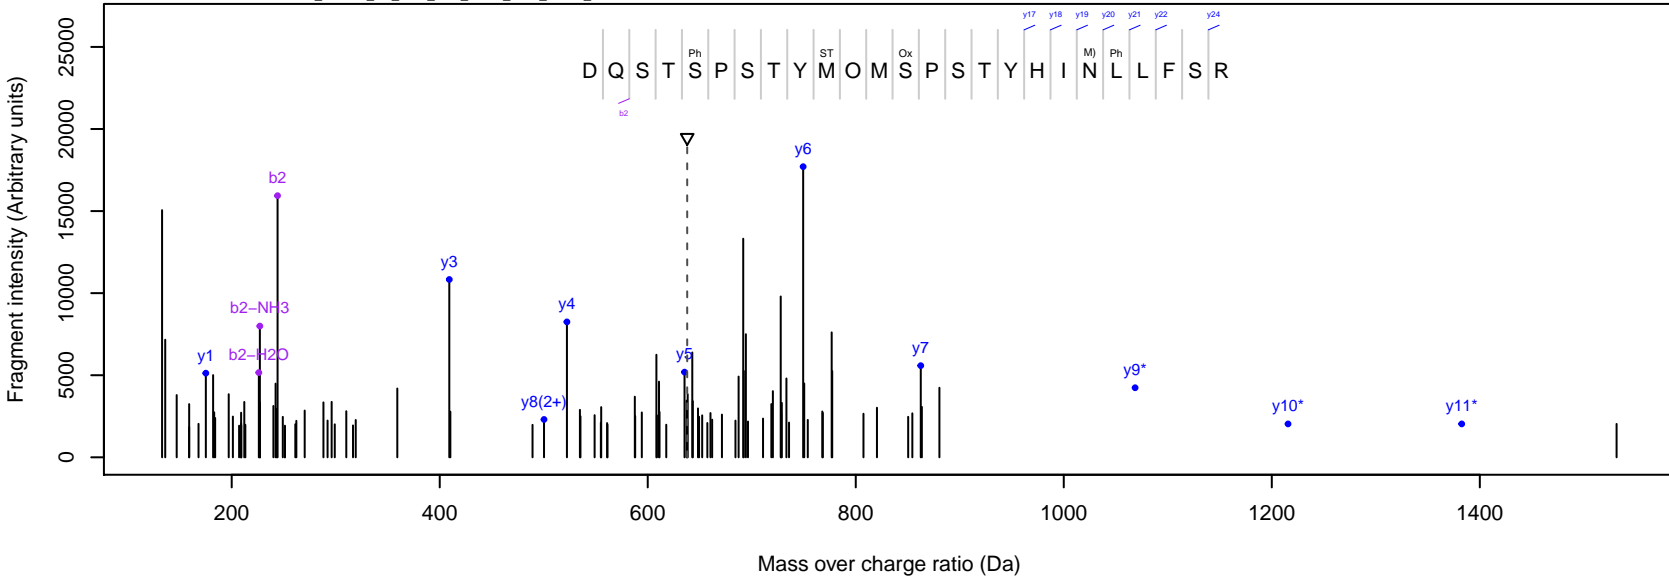

QPTVTSVCS(Phospho (STY))ETSQELAEGR-3+

Source : QE3\_201126\_FR\_TiOx\_hum\_tissue\_Urea\_RNAB\_H Scan : 29054

Andromeda score : 57.745

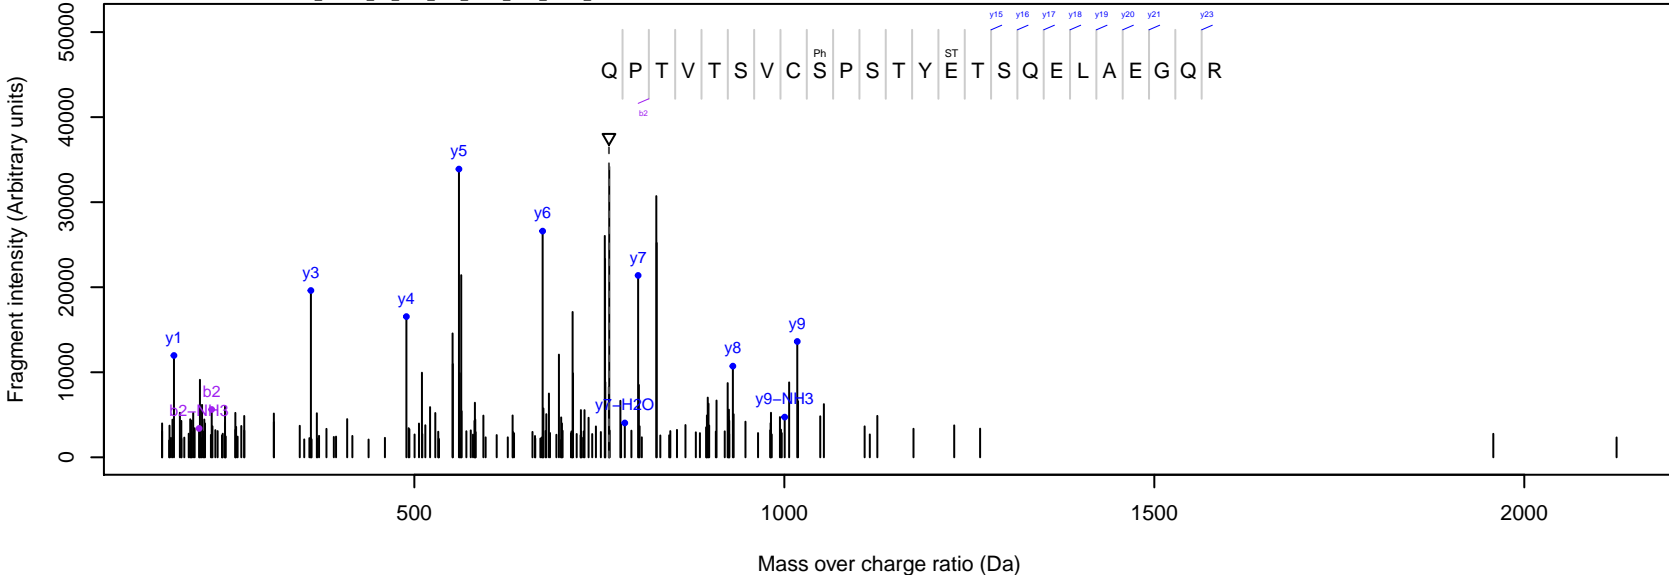

RLPIFSRLS(Phospho (STY))IS(Phospho (STY))DD-2+

Source : QE3\_201126\_FR\_TiOx\_hum\_tissue\_Urea\_RNAB\_H Scan : 52893

Andromeda score : 57.679

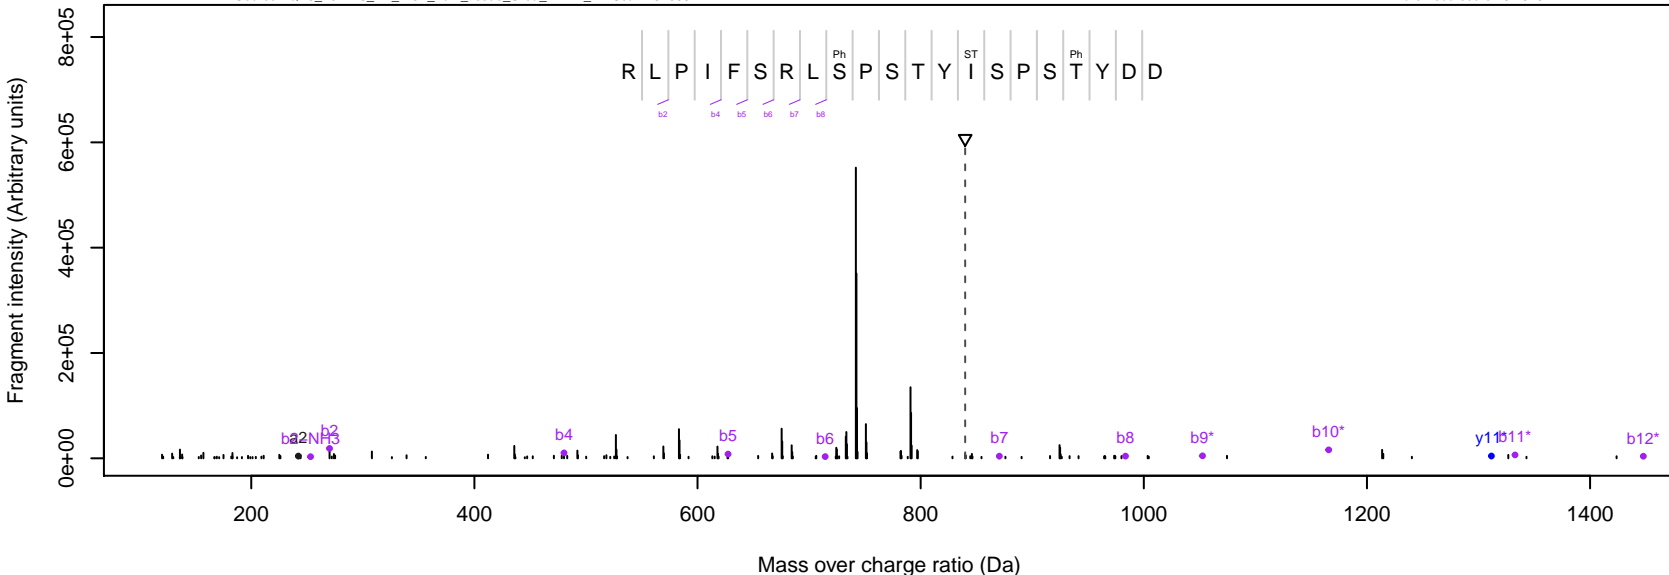

LKS(Phospho (STY))VEDEMSPGEEPFFYTGQGR-3+

Source : QE3\_201126\_FR\_TiOx\_hum\_tissue\_Urea\_RNAB\_H Scan : 32830

Andromeda score : 57.629

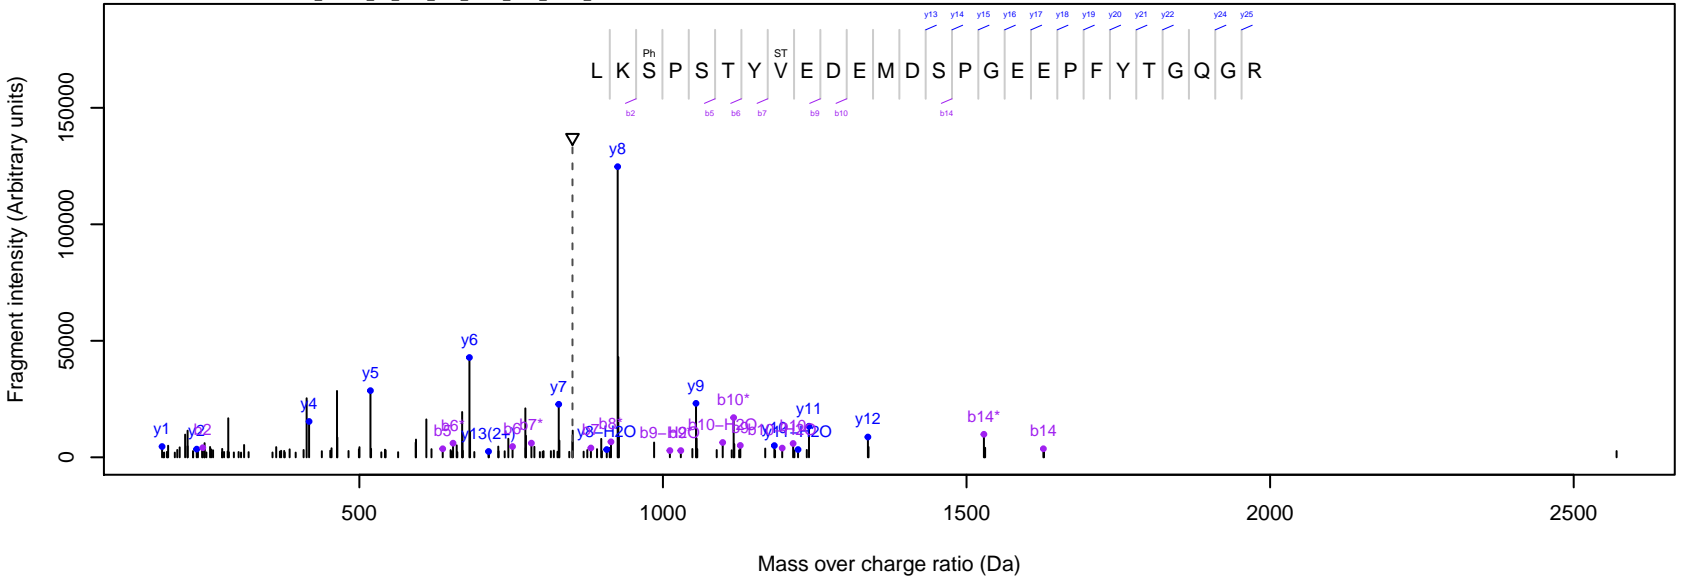

FS(Phospho (STY))GGFGAR-2+

Source : QE3\_201126\_FR\_TiOx\_hum\_tissue\_Urea\_RNAB\_N Scan : 18650

Andromeda score : 57.59

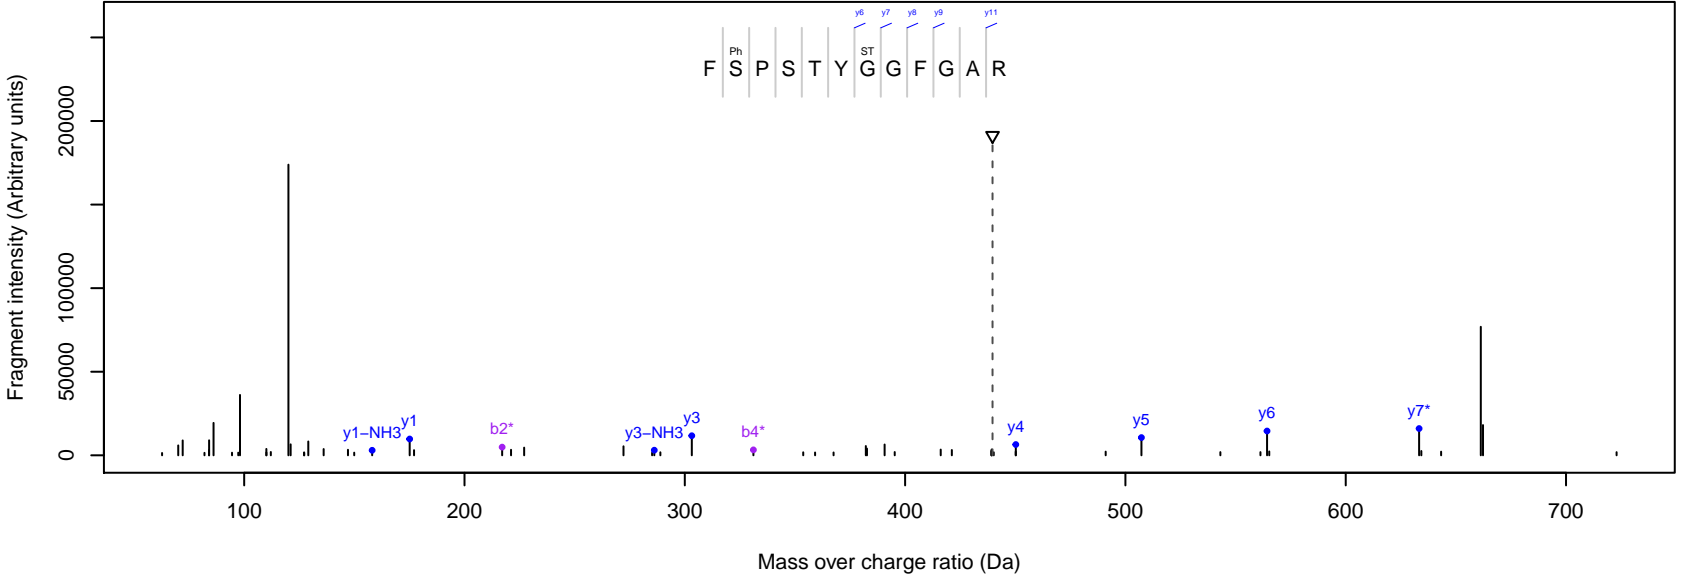

NNS(Phospho (STY))LWDR-2+

Source : QE3\_201126\_FR\_TiOx\_hum\_tissue\_Urea\_RNAB\_H Scan : 20483

Andromeda score : 57.59

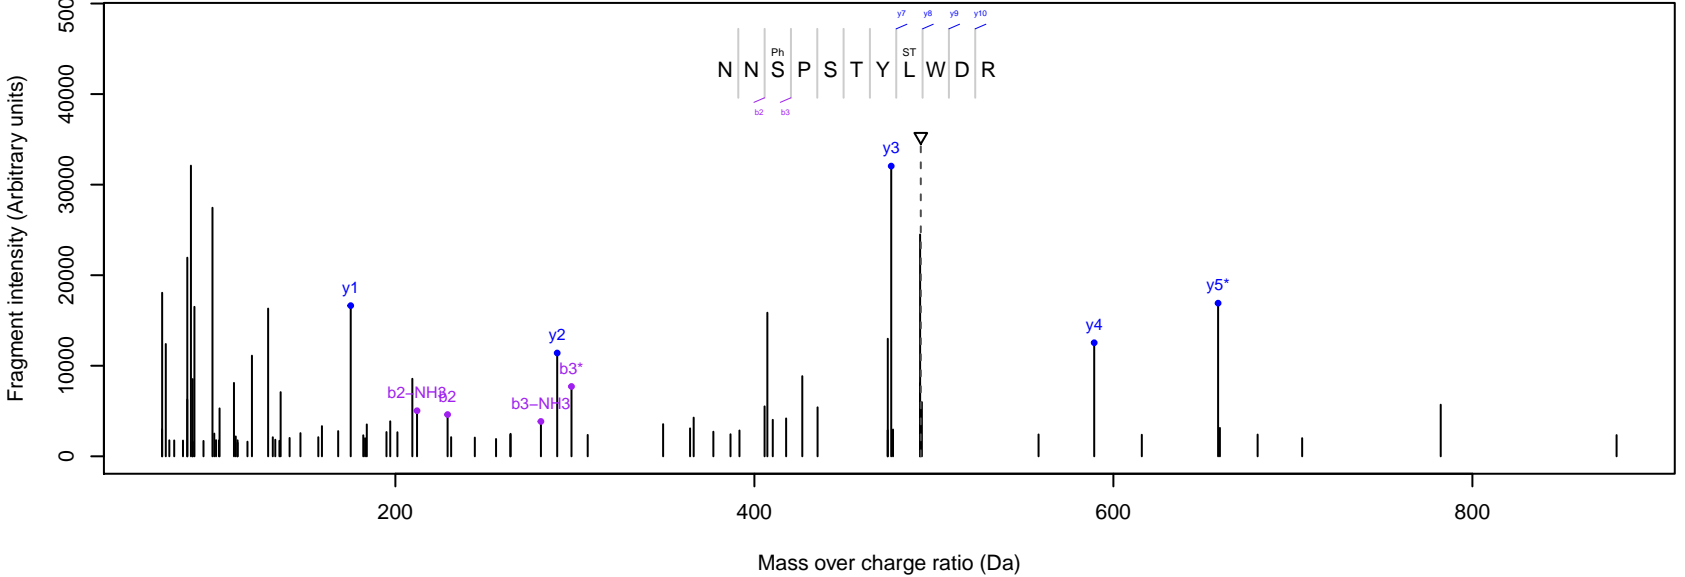



PAS(Phospho (STY))PARRDLR-2+

Source : QE3\_201126\_FR\_TiOx\_hum\_tissue\_Urea\_RNAB\_B Scan : 29925

Andromeda score : 57.579

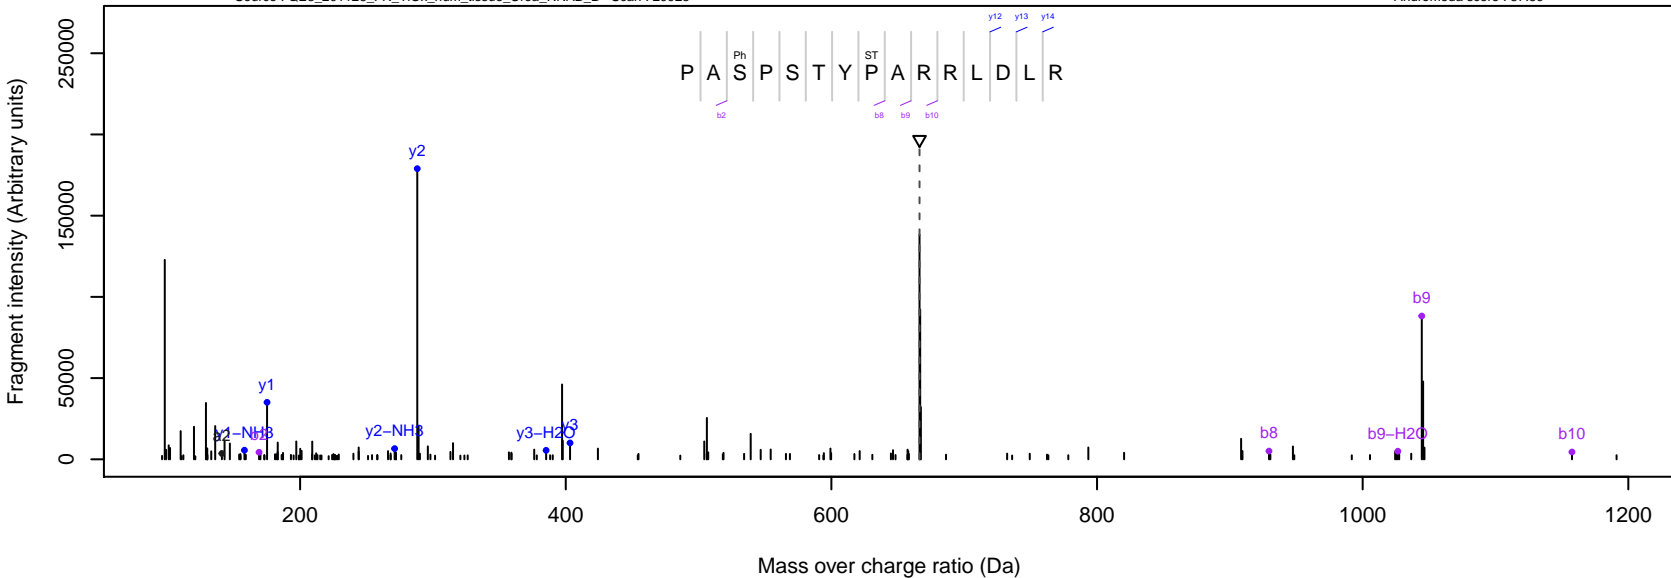

LKPFEGMSQSS(Phospho (STY))SQTEIGSLNSK-3+

Source : QE3\_201126\_FR\_TiOx\_hum\_tissue\_Urea\_RNAB\_H Scan : 41119

Andromeda score : 57.578

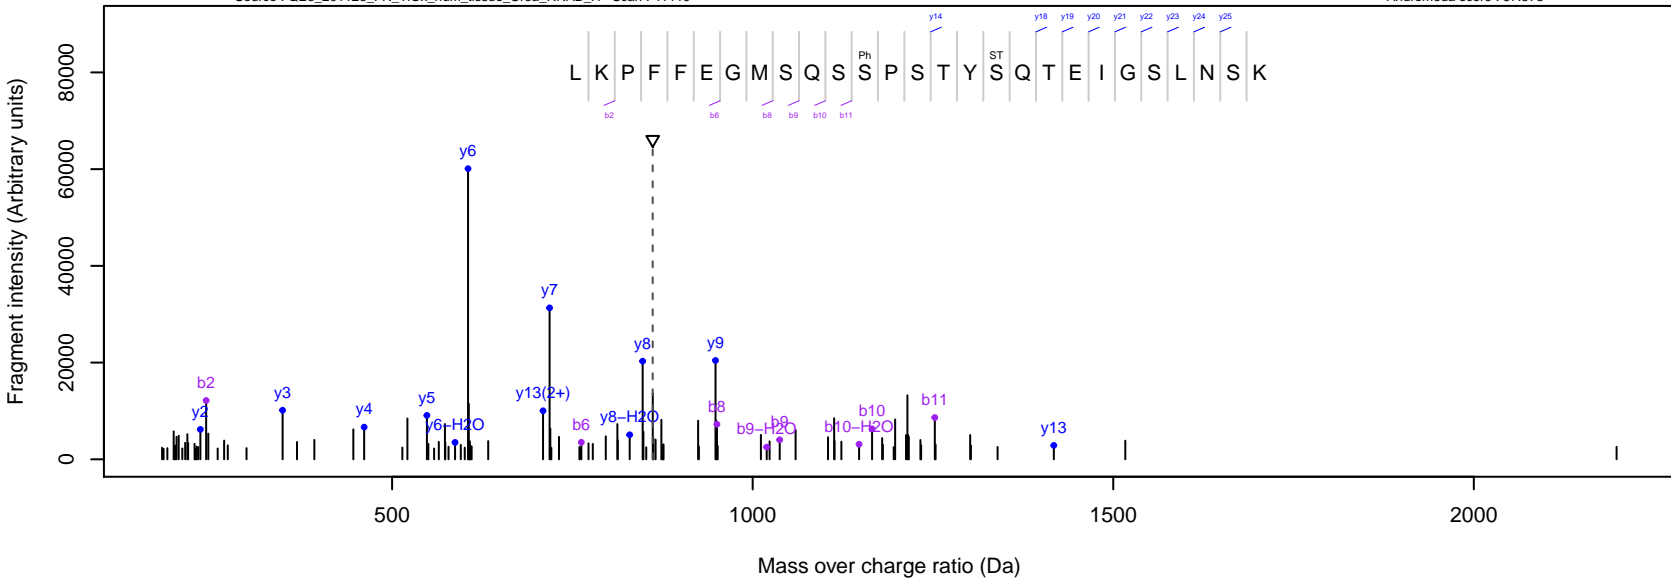

LSSERPS(Phospho (STY))SDGEGVVENGITTCNGK-3+

Source : QE3\_201126\_FR\_TiOx\_hum\_tissue\_Urea\_RNAB\_H Scan : 19815

Andromeda score : 57.578

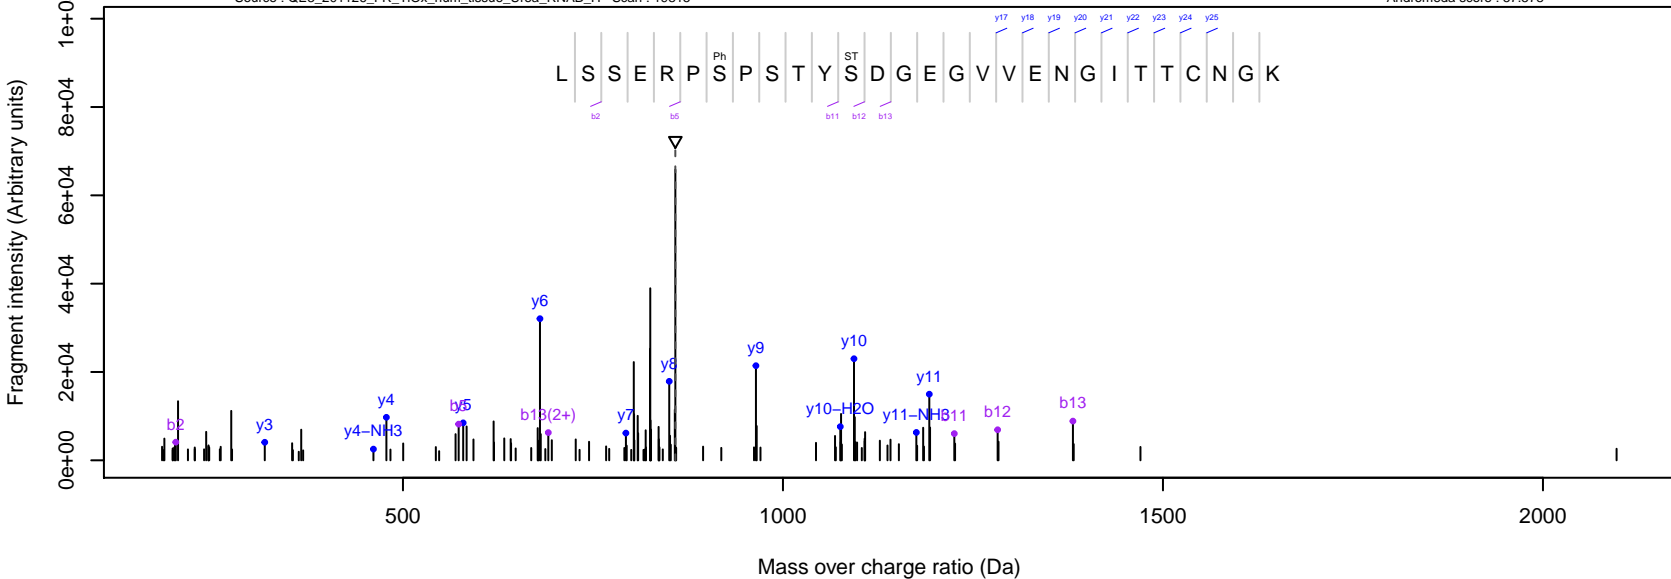

SES(Phospho (STY))LNSCSIGKK-2+

Source : QE3\_201126\_FR\_TiOx\_hum\_tissue\_Urea\_RNAB\_H Scan : 8349

Andromeda score : 57.567

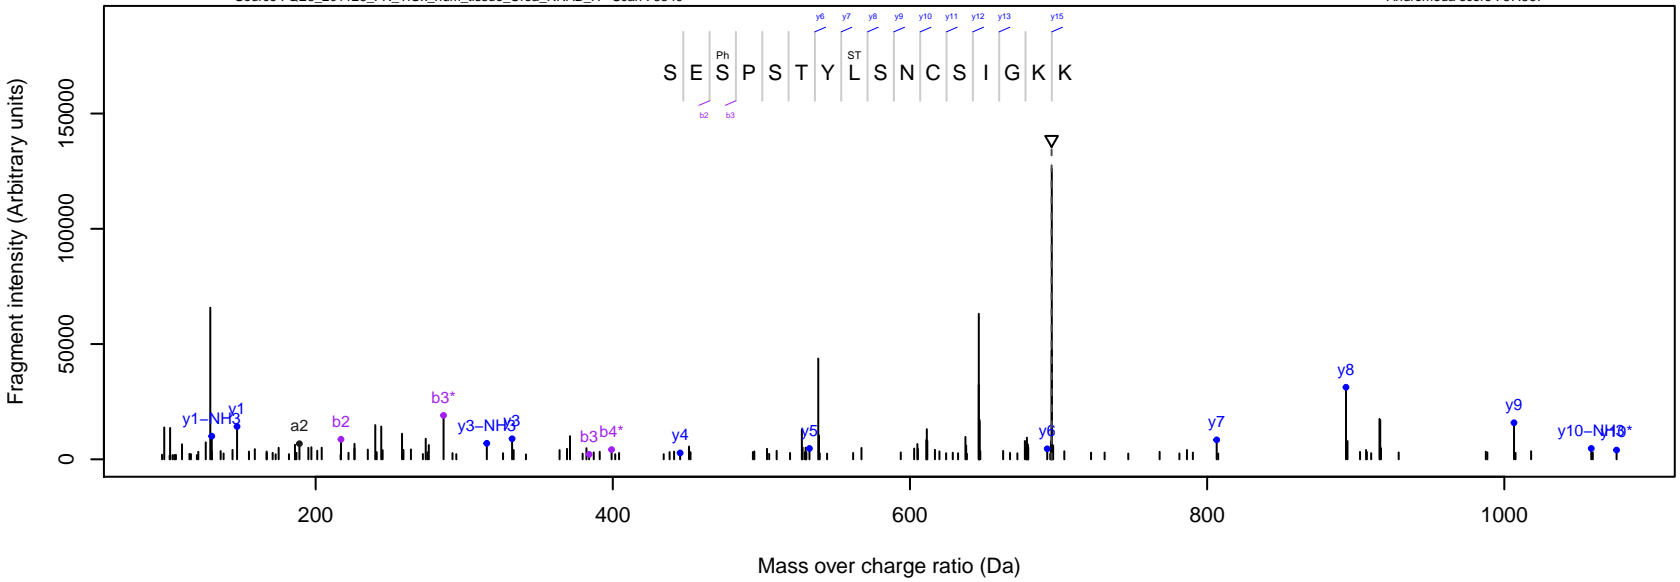

GRS(Phospho (STY))PSQYHDFAEK-3+

Source : QE3\_201126\_FR\_TiOx\_hum\_tissue\_Urea\_RNAB\_B Scan : 8768

Andromeda score : 57.525

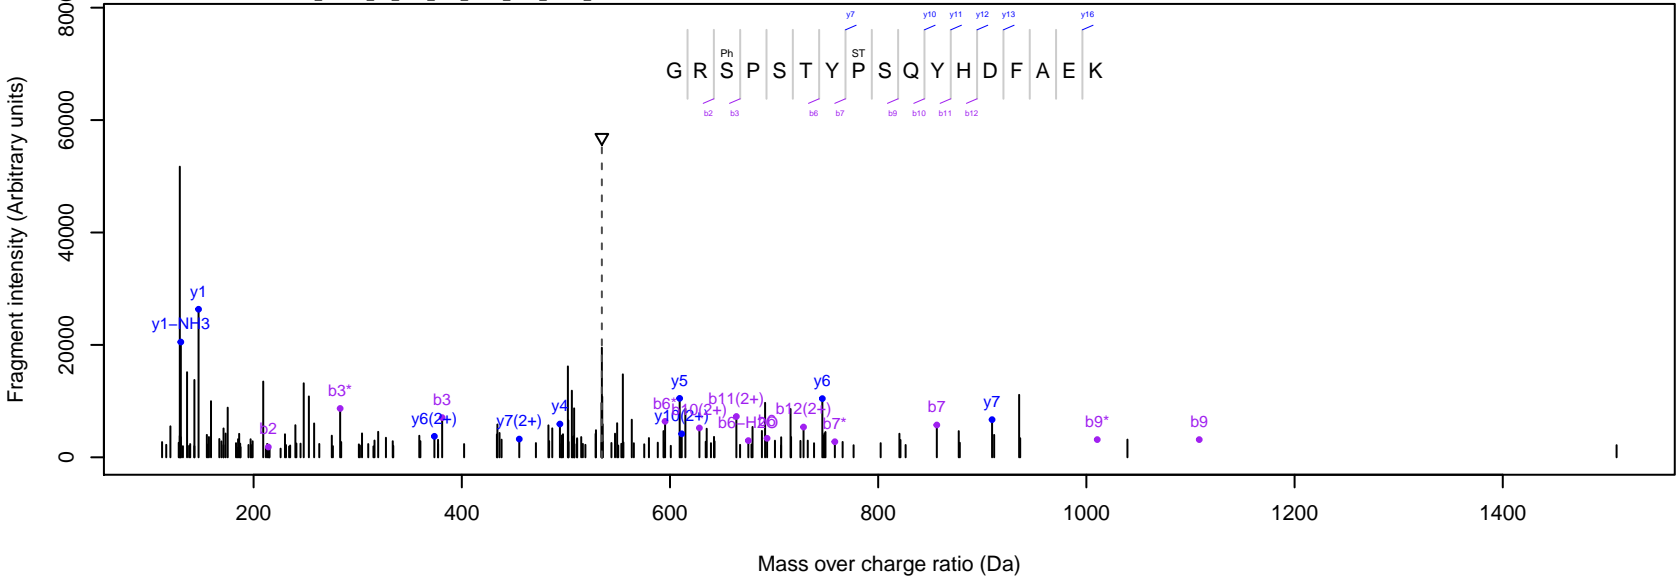

NREEEWDPEYT(Phospho (STY))PK-3+

Source : QE3\_201126\_FR\_TiOx\_hum\_tissue\_Urea\_RNAB\_B Scan : 20990

Andromeda score : 57.525

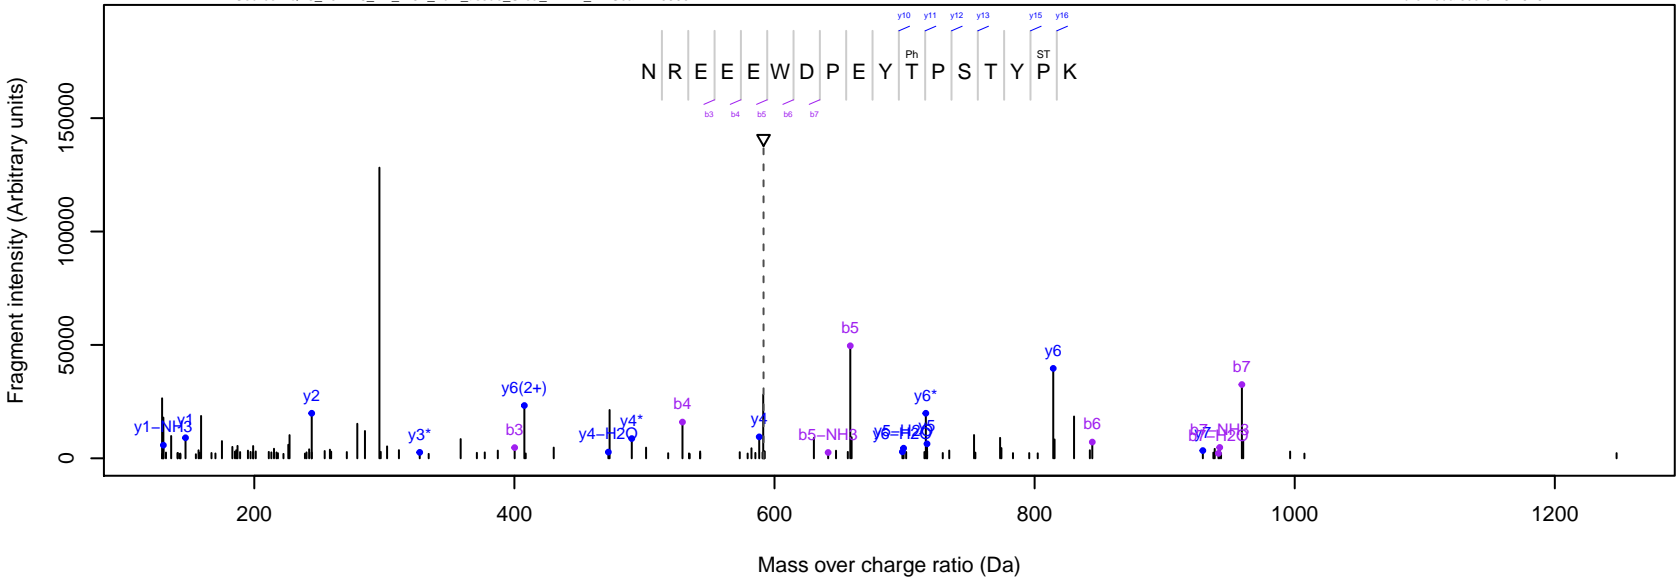

(Acetyl (Protein N-term))ADFDDRVS(Phospho (STY))DEEKVR-3+

Source : QE3\_201126\_FR\_TiOx\_hum\_tissue\_Urea\_RNAB\_H Scan : 22007

Andromeda score : 57.52

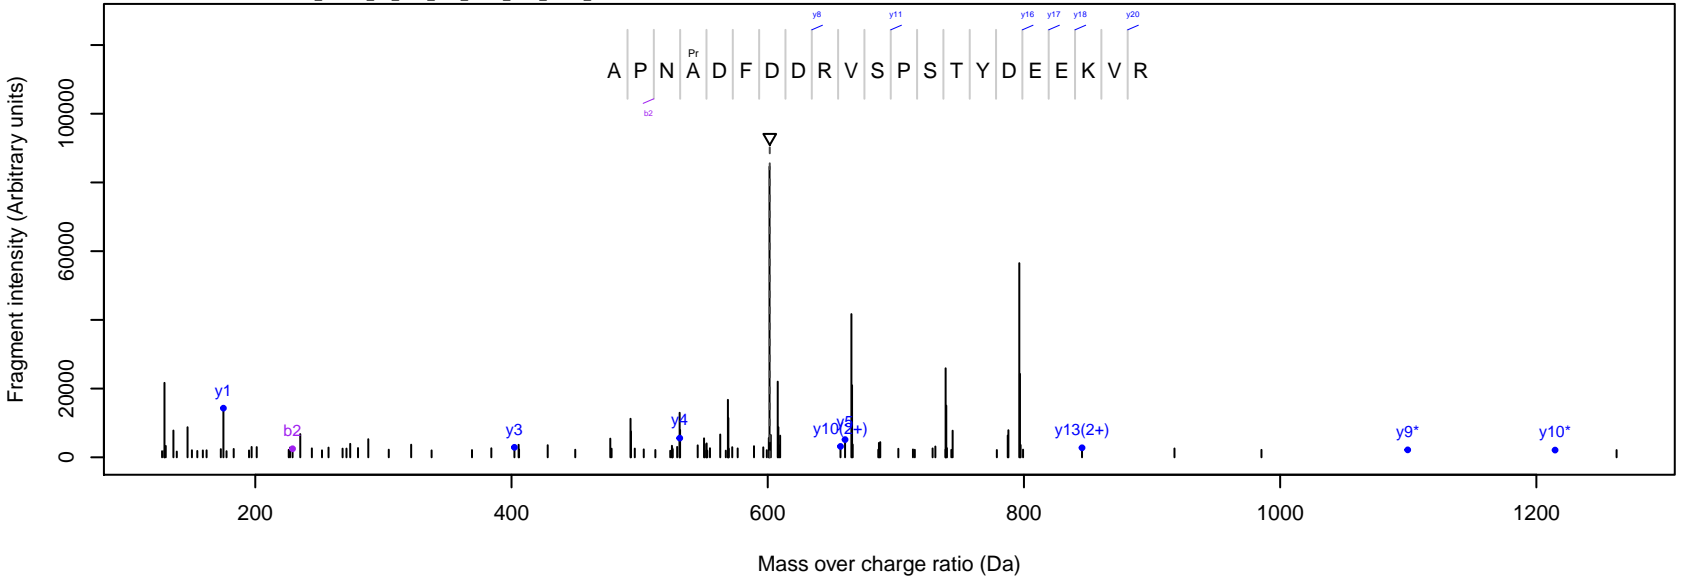

ALSSGGSIT(Phospho (STY))SPPLSPALPK-2+

Source : QE3\_201126\_FR\_TiOx\_hum\_tissue\_Urea\_RNAB\_N Scan : 40930

Andromeda score : 57.52

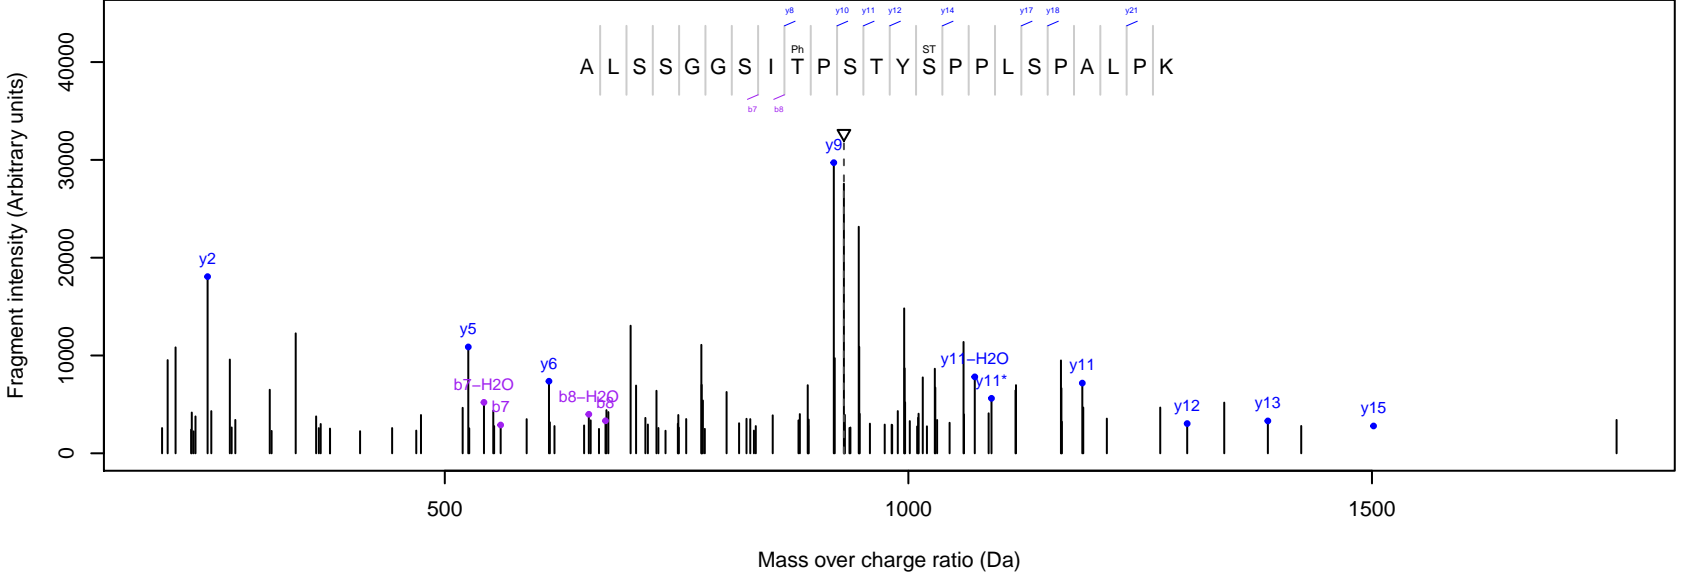

S(Phospho (STY))SAQEDFQEPEELPLTAIFPNGDCDDLGR-3+

Source : QE3\_201126\_FR\_TiOx\_hum\_tissue\_Urea\_RNAB\_H Scan : 61661

Andromeda score : 57.509

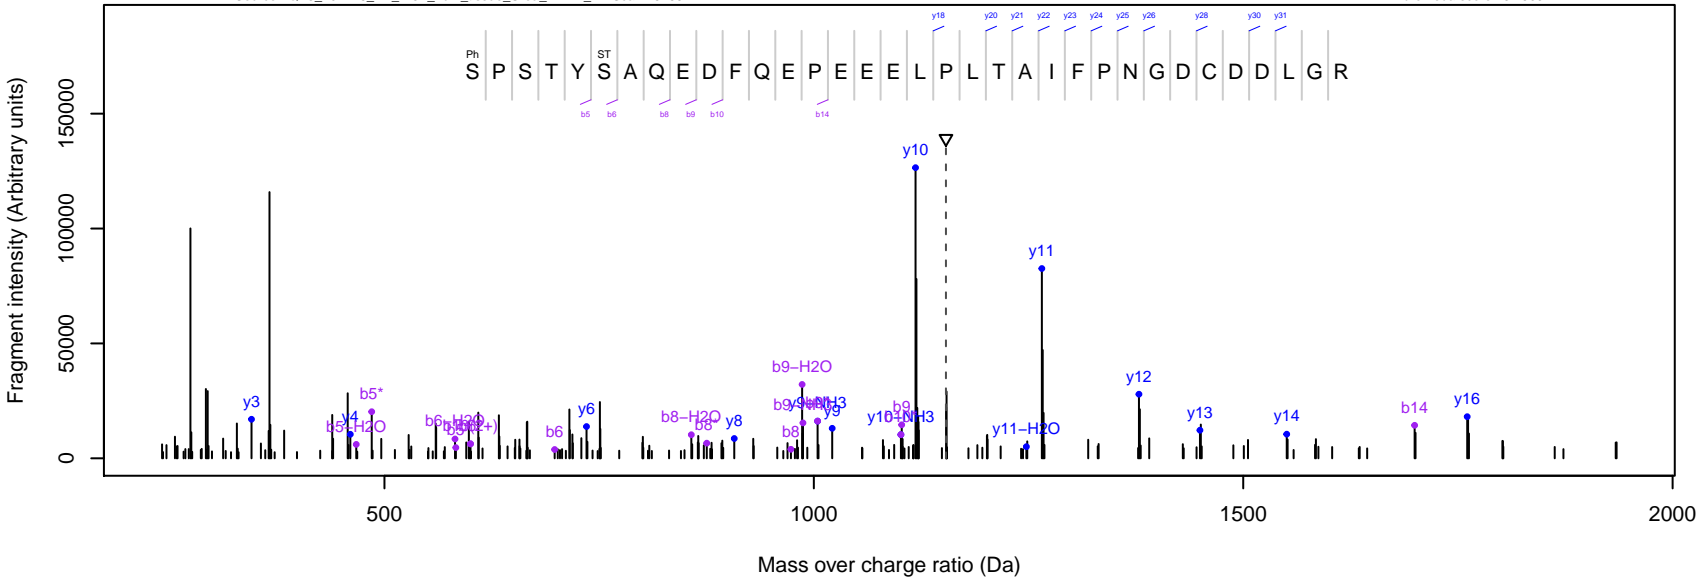

TGYGGGFNERENVEYIEREES(Phospho (STY))DGEYDEFGR-3+

Source : QE3\_201126\_FR\_TIOx\_hum\_tissue\_Urea\_RNAB\_N Scan : 38059

Andromeda score : 57.507

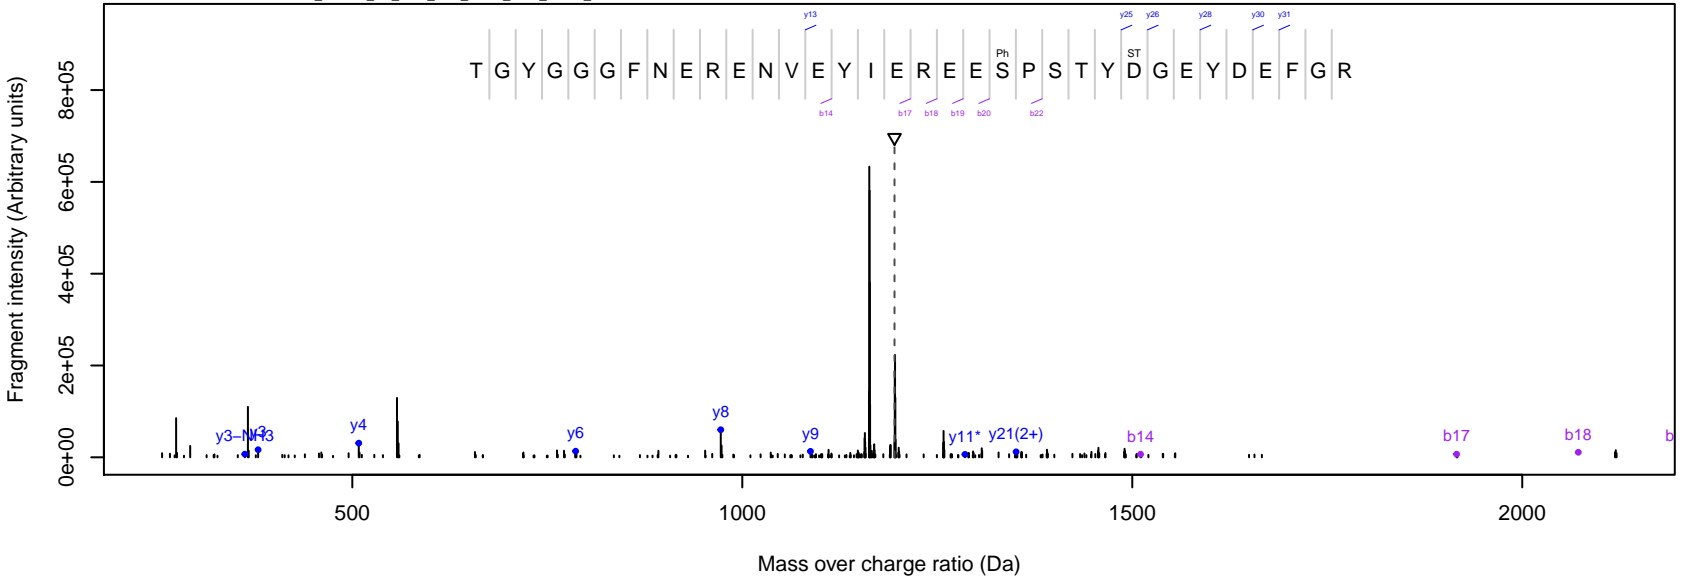

NKRDS(Phospho (STY))TEITSILLK-3+

Source : QE3\_201126\_FR\_TIOx\_hum\_tissue\_Urea\_RNAB\_H Scan : 27402

Andromeda score : 57.499

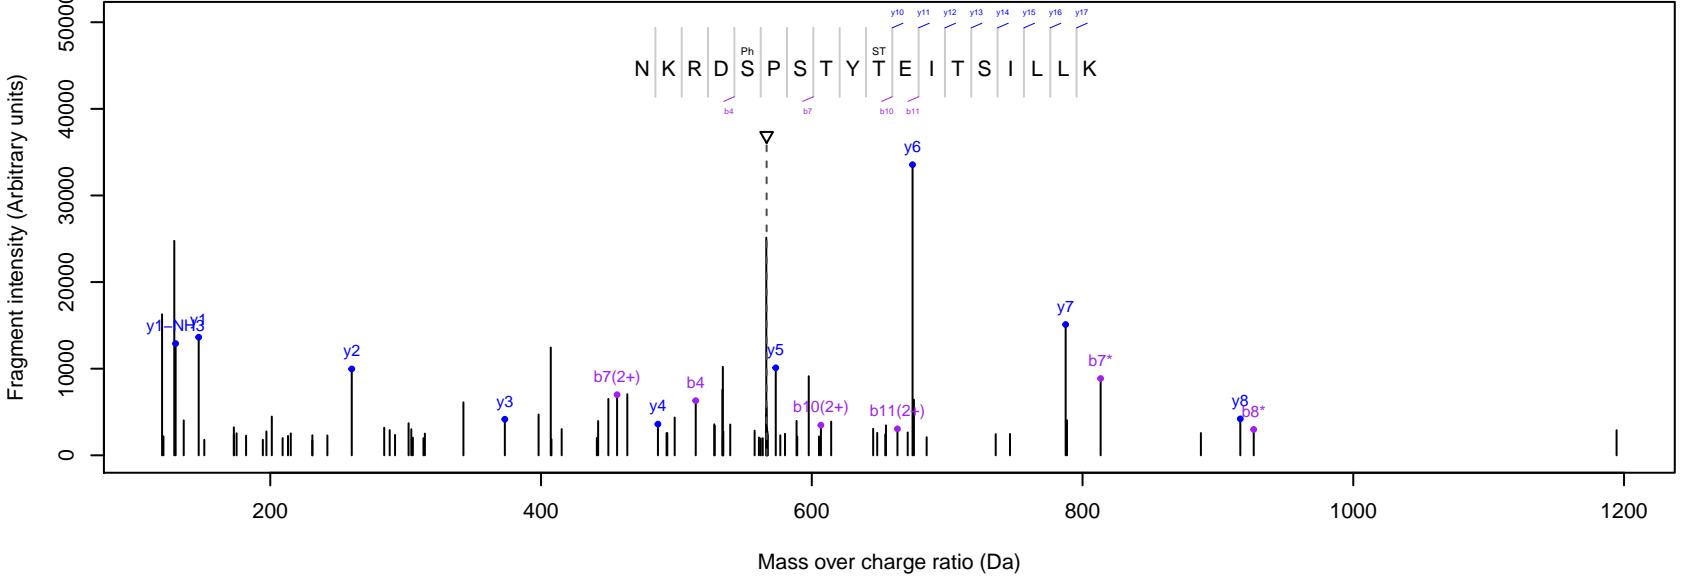

LRGAVAEAGAS(Phospho (STY))DTEREEPTESQGLAAR-4+

Source : QE3\_201126\_FR\_TIOx\_hum\_tissue\_Urea\_RNAB\_H Scan : 16182

Andromeda score : 57.484

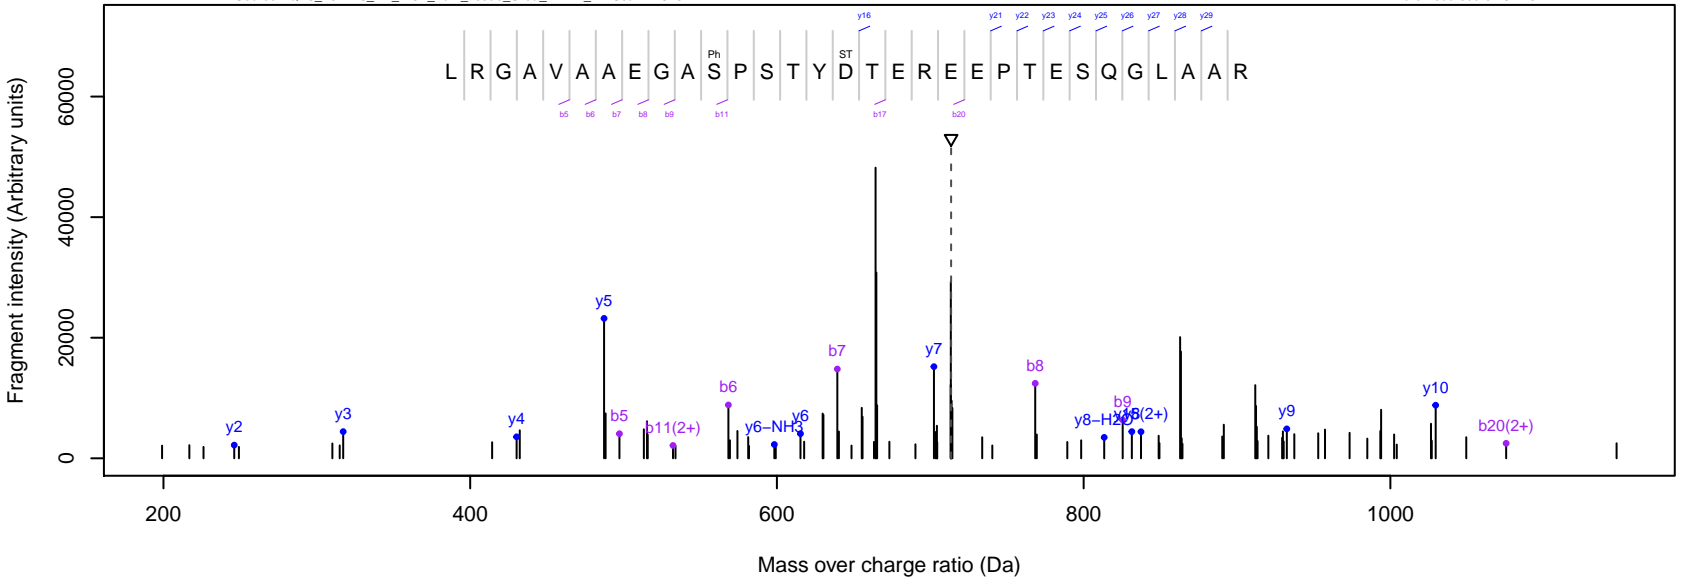

SAS(Phospho (STY))RDSLKGGGALK-3+

Source : QE3\_201126\_FR\_TiOx\_hum\_tissue\_Urea\_RNAB\_H Scan : 6336

Andromeda score : 57.482

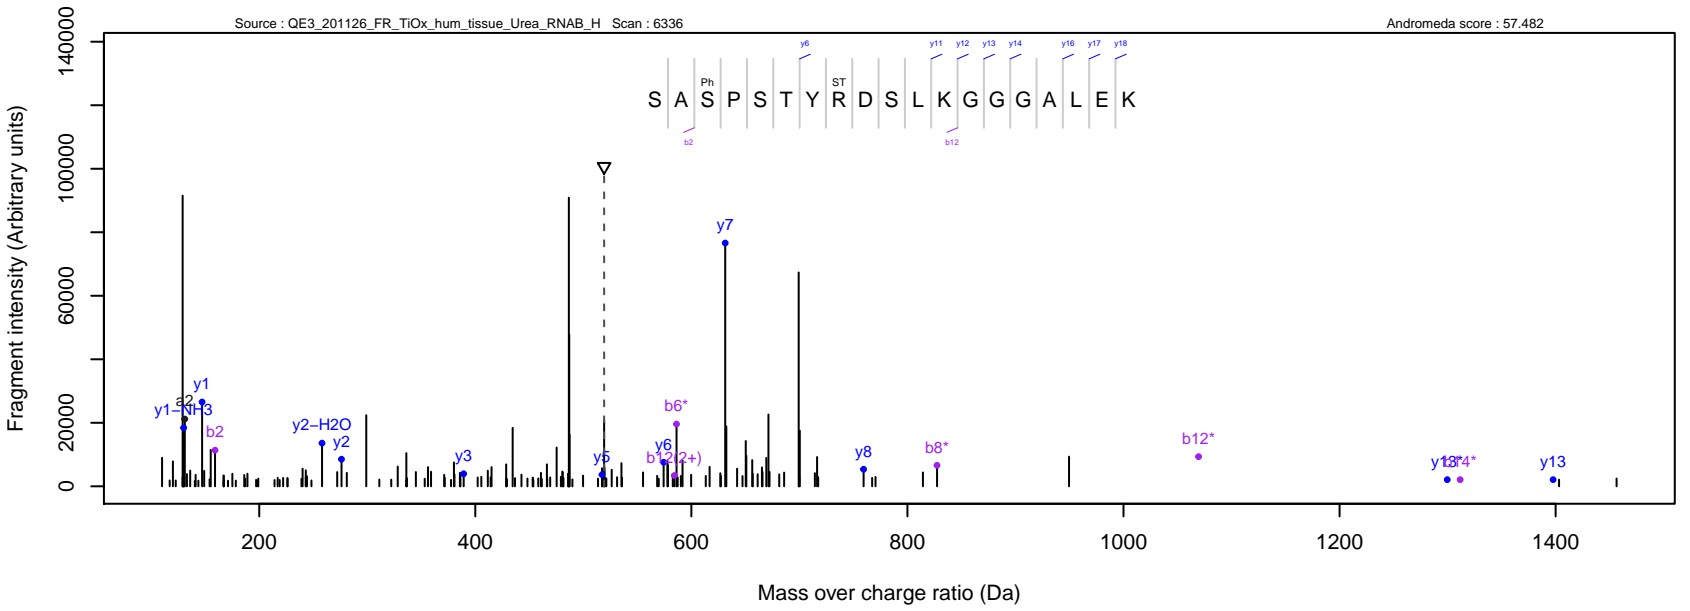

YKDNPFSLGES(Phospho (STY))FGSR-3+

Source : QE3\_201126\_FR\_TiOx\_hum\_tissue\_Urea\_RNAB\_H Scan : 37593

Andromeda score : 57.482

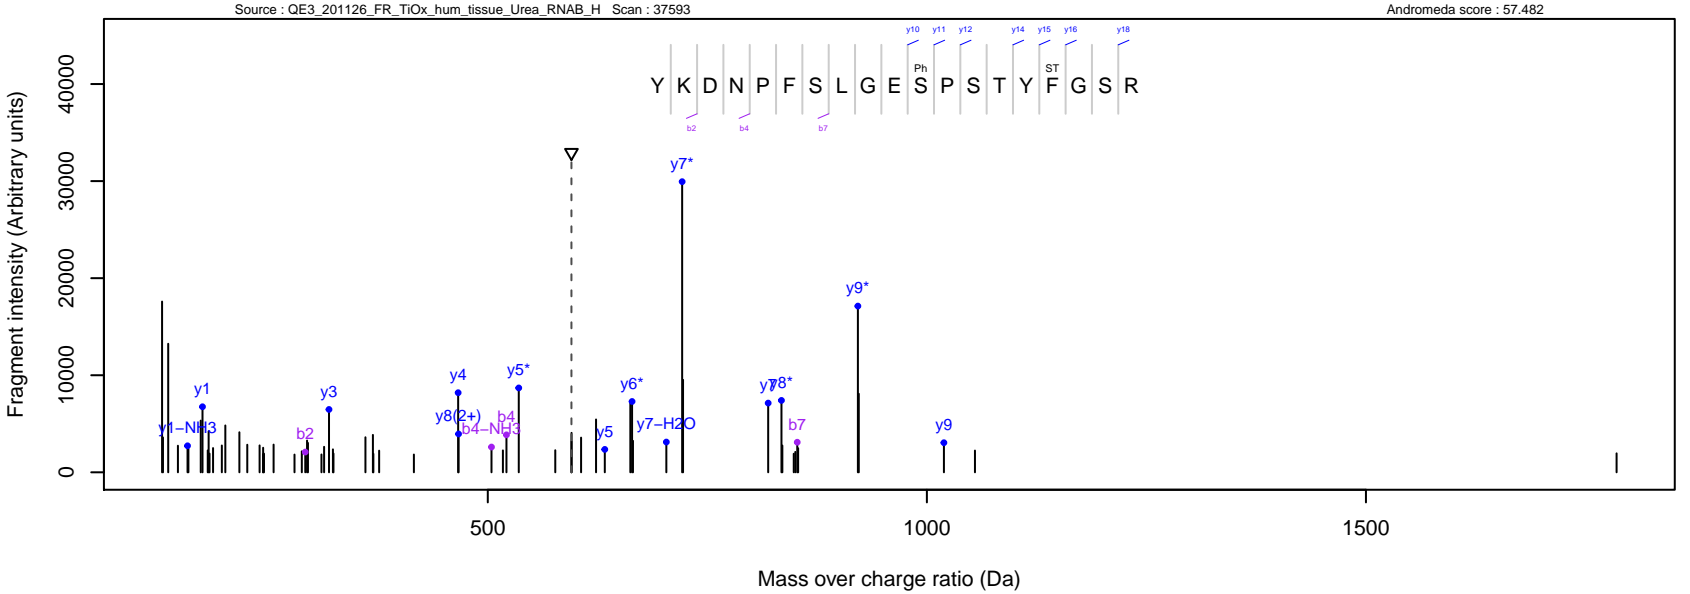

GGGNFGPGGS(Phospho (STY))NFR-2+

Source : QE3\_201126\_FR\_TiOx\_hum\_tissue\_Urea\_RNAB\_N Scan : 23117

Andromeda score : 57.475

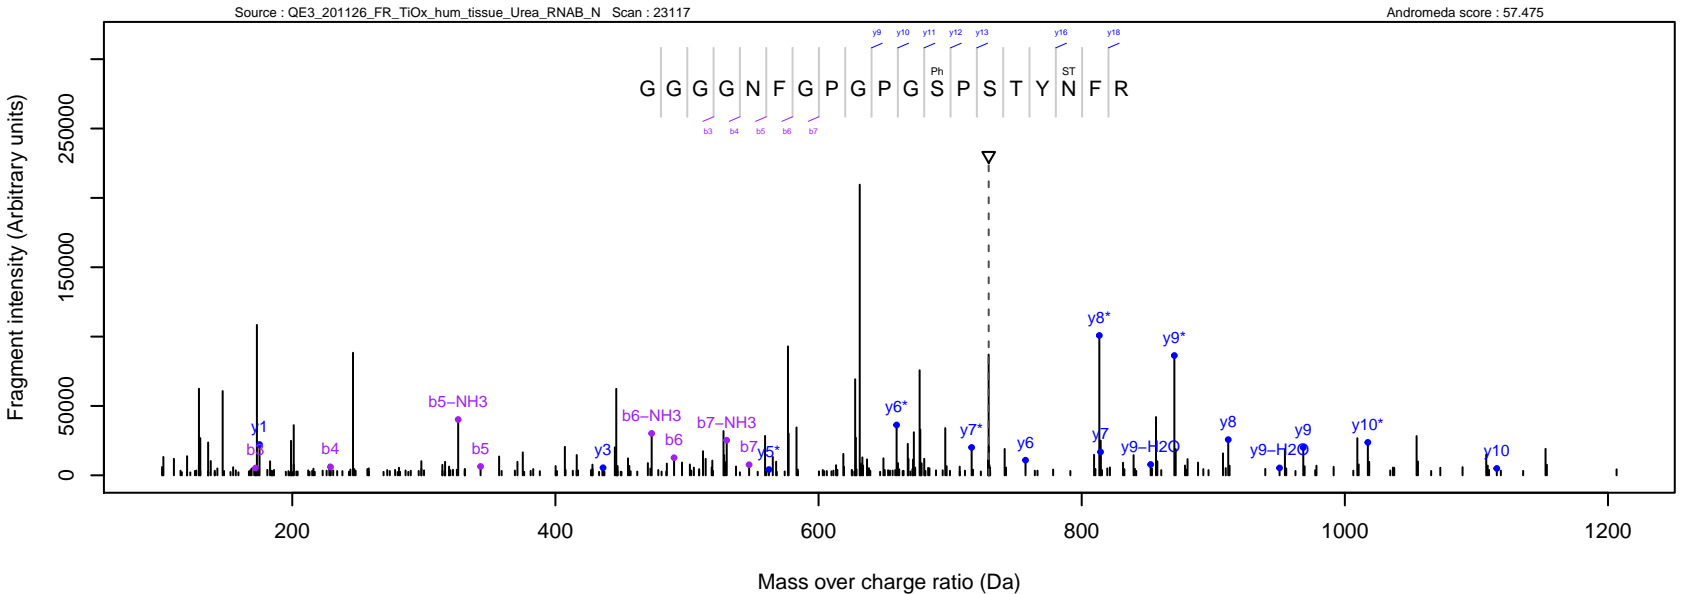

RGT(Phospho (STY))GQS(Phospho (STY))DDS(Phospho (STY))DIWDDTALIK-3+

Source : QE3\_201126\_FR\_TiOx\_hum\_tissue\_Urea\_RNAB\_N Scan : 58209

Andromeda score : 57.432

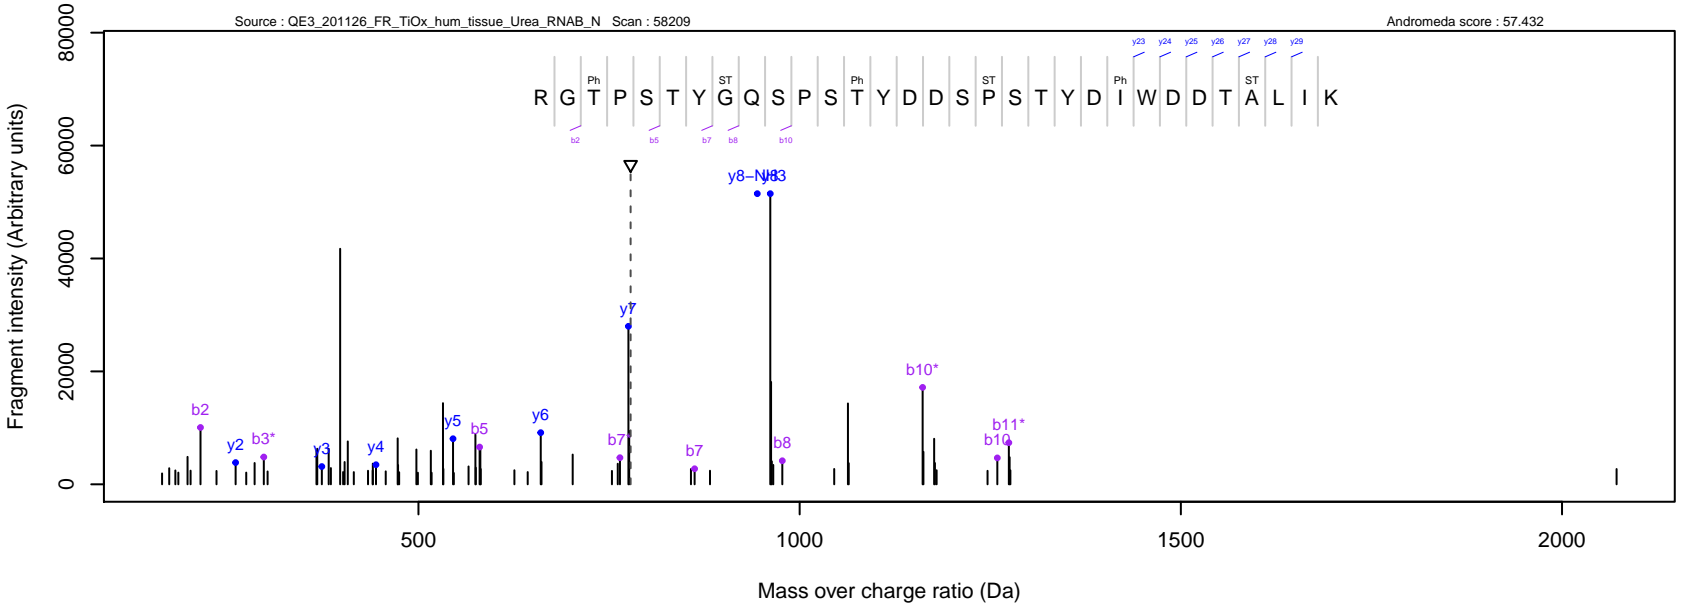

EAAAESDRELNEDDS(Phospho (STY))T(Phospho (STY))DCDDVQRER-3+

Source : QE3\_201126\_FR\_TiOx\_hum\_tissue\_Urea\_RNAB\_B Scan : 14496

Andromeda score : 57.427

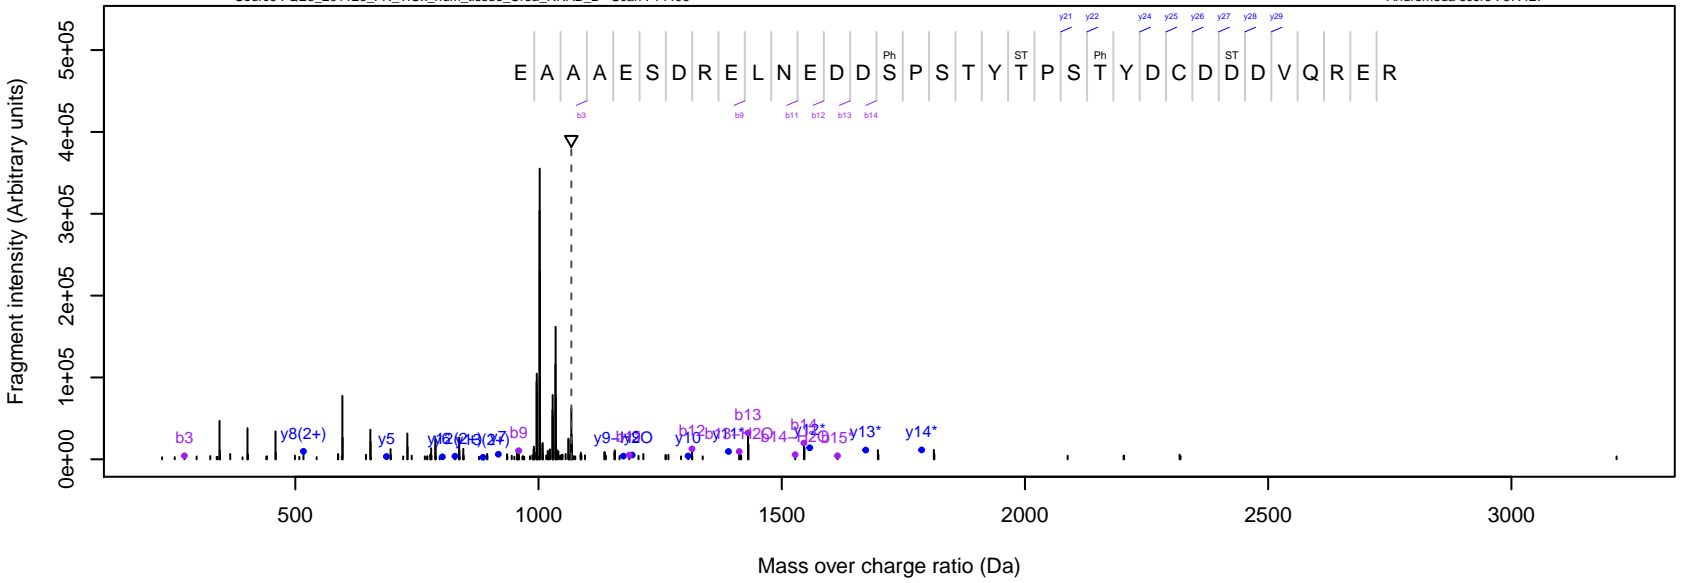

SPSPSPT(Phospho (STY))SPGSLRK-2+

Source : QE3\_201126\_FR\_TiOx\_hum\_tissue\_Urea\_RNAB\_B Scan : 10189

Andromeda score : 57.425

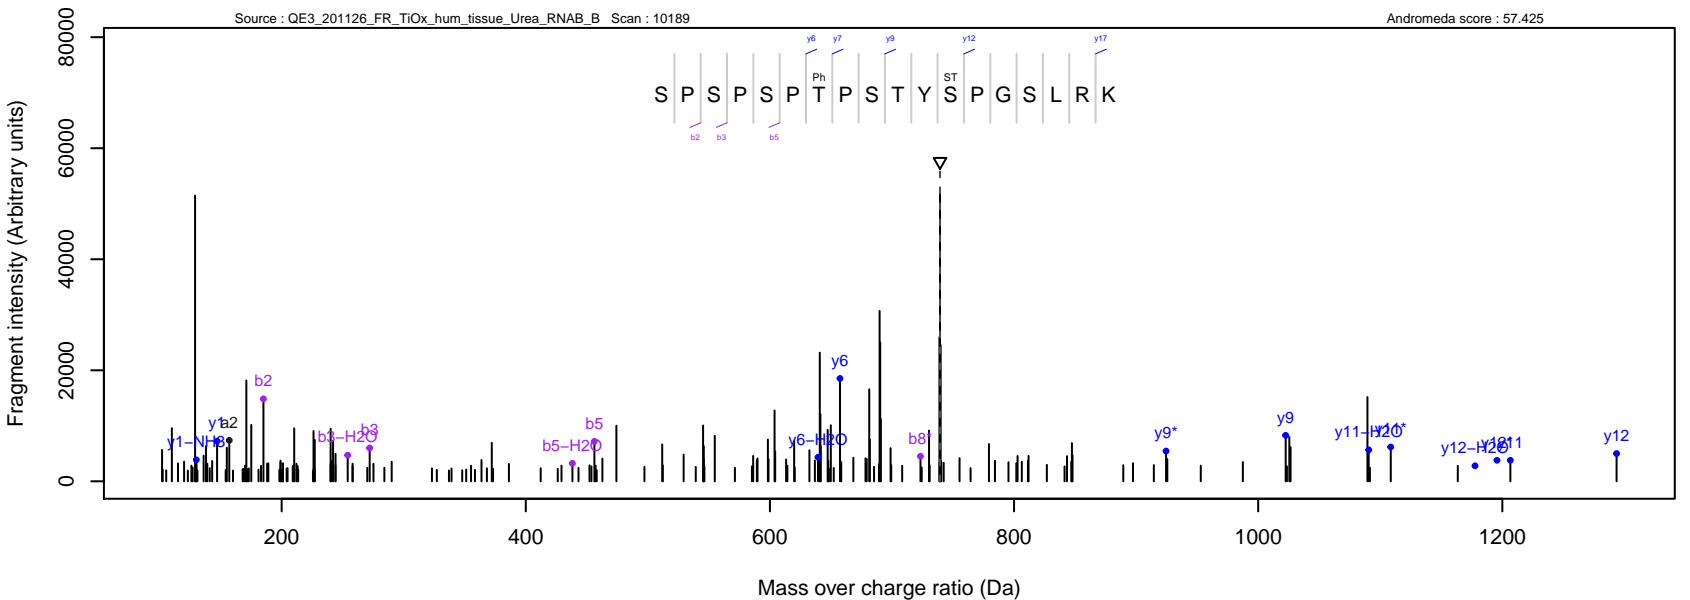

YHS(Phospho (STY))VSTETPHER-3+

Source : QE3\_201126\_FR\_TiOx\_hum\_tissue\_Urea\_RNAB\_B Scan : 4982

Andromeda score : 57.414

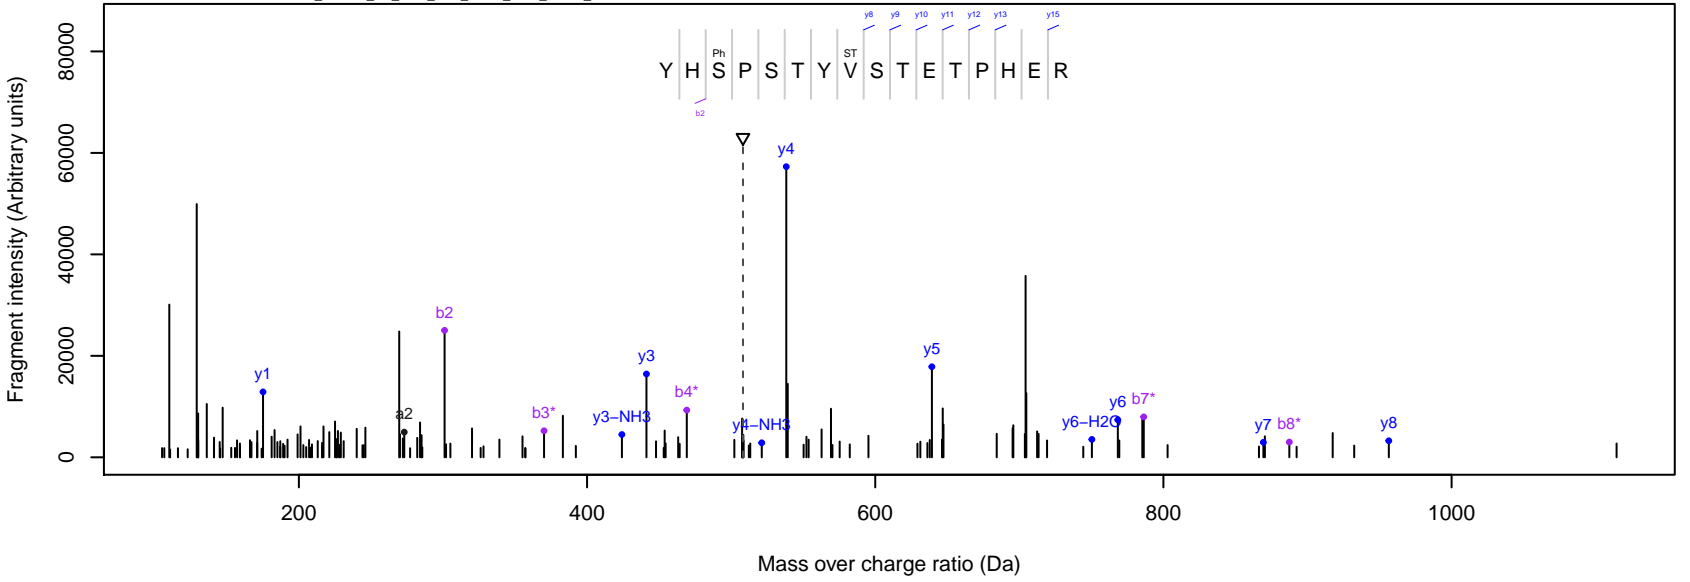

SLS(Phospho (STY))RS(Phospho (STY))PLPSR-2+

Source : QE3\_201126\_FR\_TiOx\_hum\_tissue\_Urea\_RNAB\_H Scan : 14876

Andromeda score : 57.401

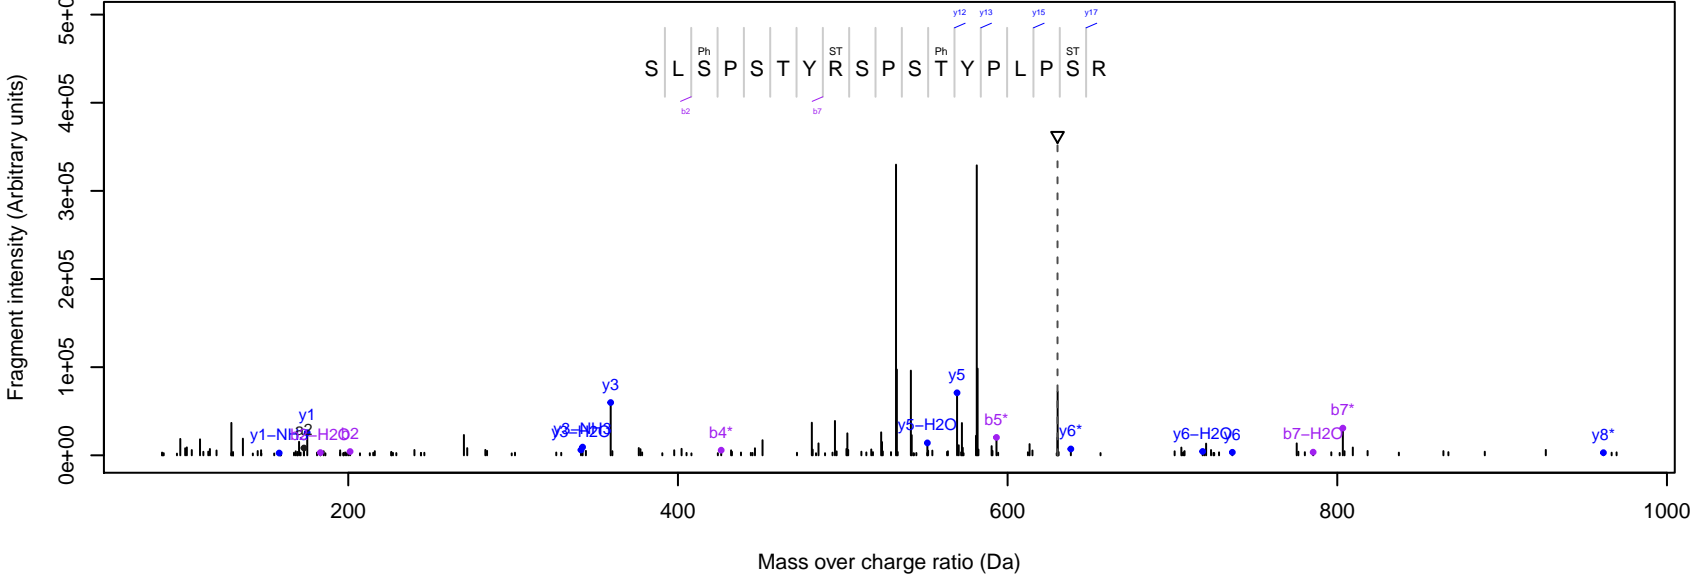

KSEAPAEVTHFS(Phospho (STY))PK-3+

Source : QE3\_201126\_FR\_TiOx\_hum\_tissue\_Urea\_RNAB\_B Scan : 11355

Andromeda score : 57.366

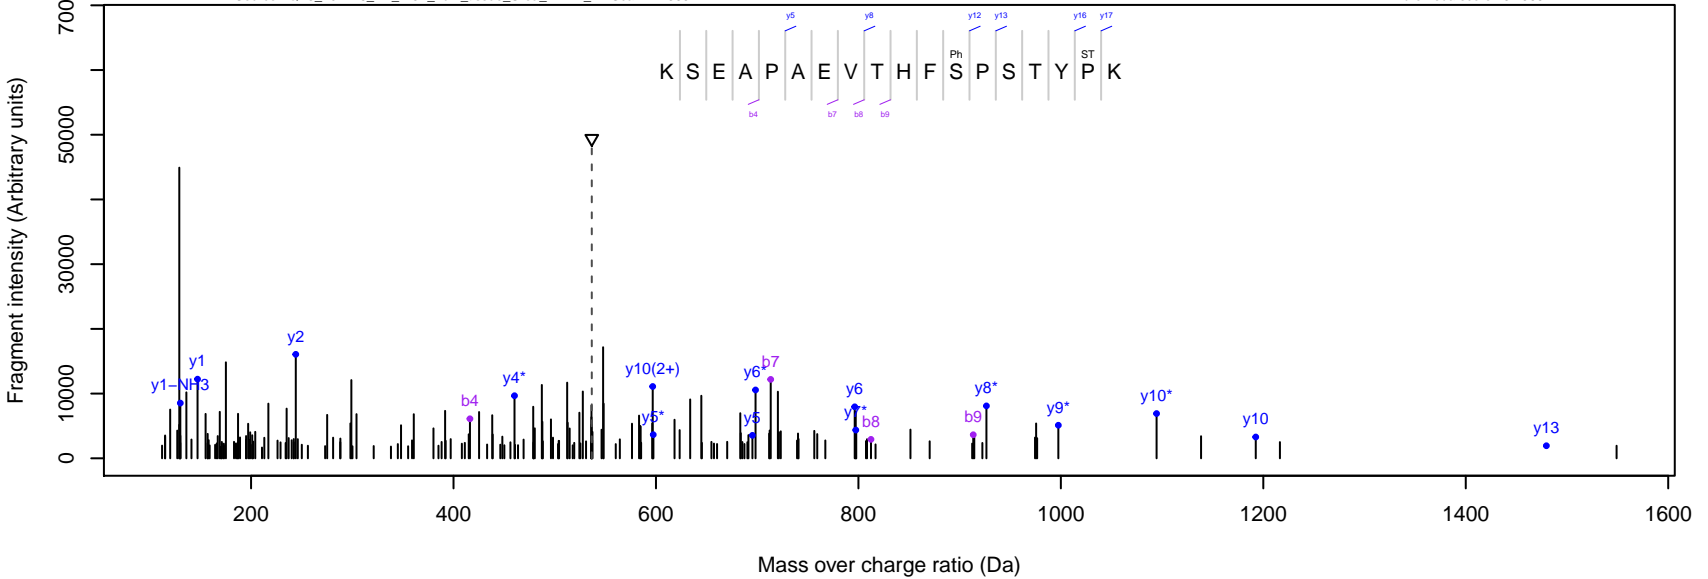

SSGHSSS(Phospho (STY))ELS(Phospho (STY))PDAVEK-3+

Source : QE3\_201126\_FR\_TiOx\_hum\_tissue\_Urea\_RNAB\_B Scan : 15557

Andromeda score : 57.366

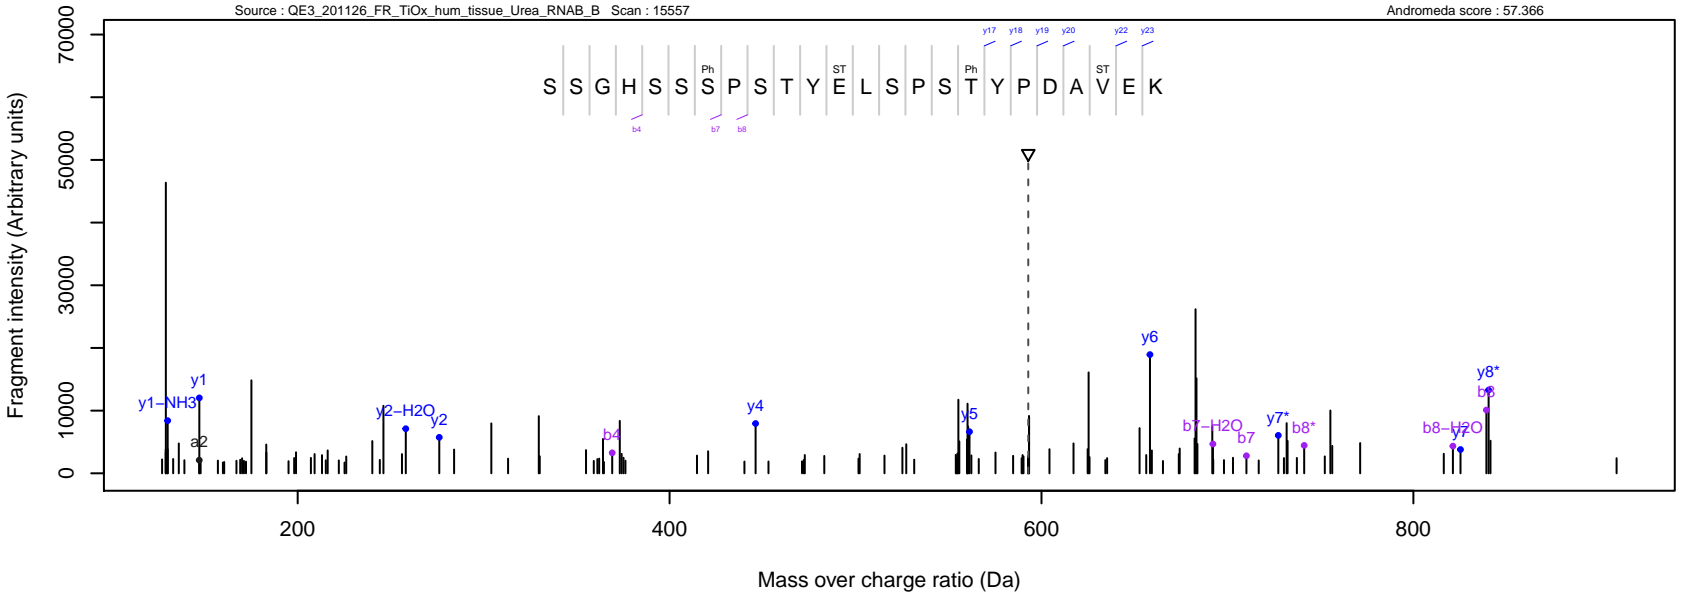

CVACQNPKPS(Phospho (STY))PSTSVPAAPASFK-3+

Source : QE3\_201126\_FR\_TiOx\_hum\_tissue\_Urea\_RNAB\_H Scan : 22614

Andromeda score : 57.351

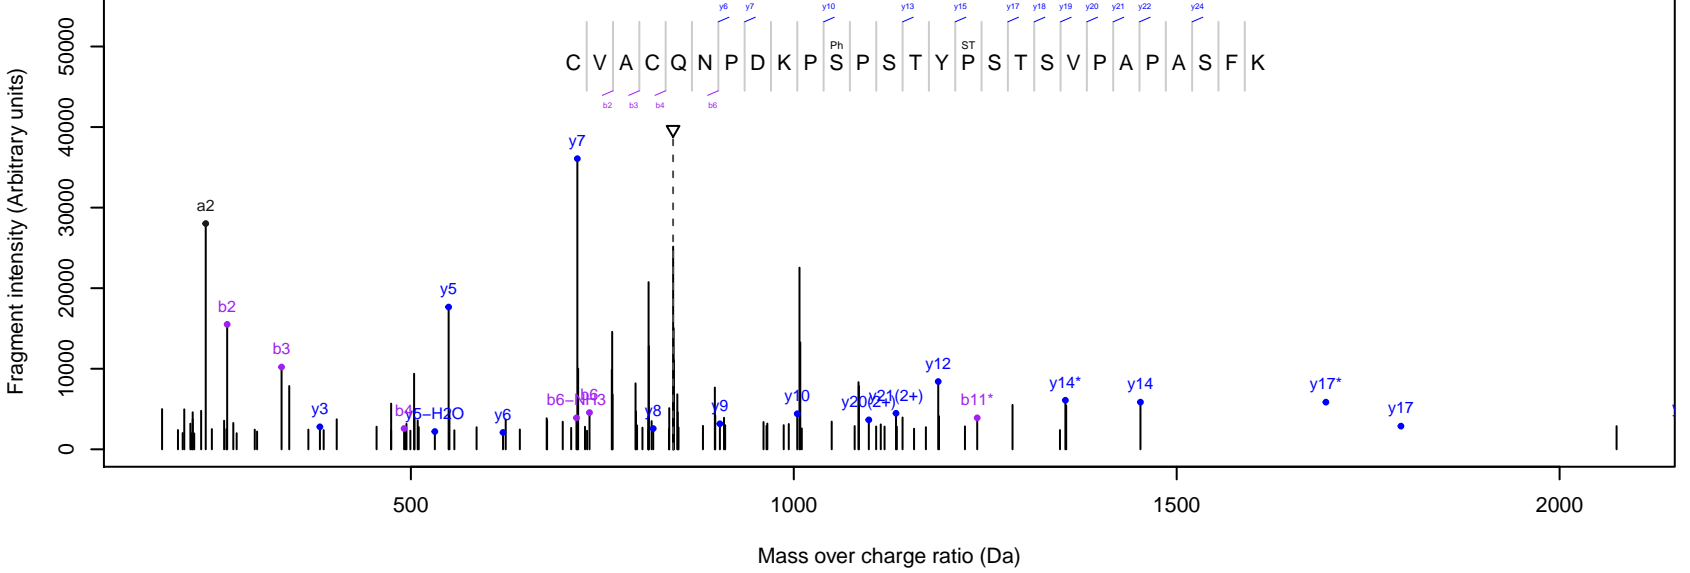

YLS(Phospho (STY))FTPPEKDGFPSPSTYGTPALNAK-3+

Source : QE3\_201126\_FR\_TiOx\_hum\_tissue\_Urea\_RNAB\_H Scan : 50176

Andromeda score : 57.351

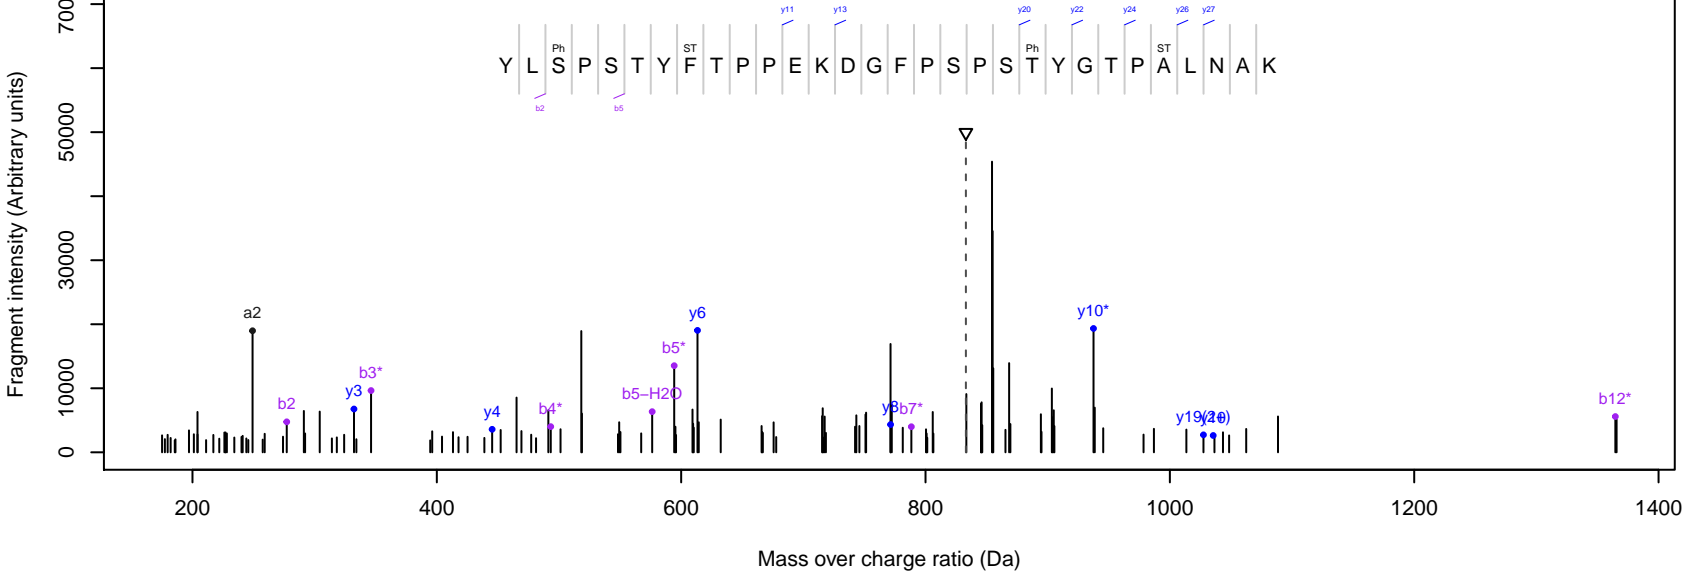



SIQPQVS(Phospho (STY))PR-2+

Source : QE3\_201126\_FR\_TiOx\_hum\_tissue\_Urea\_RNAB\_N Scan : 12257

Andromeda score : 57.348

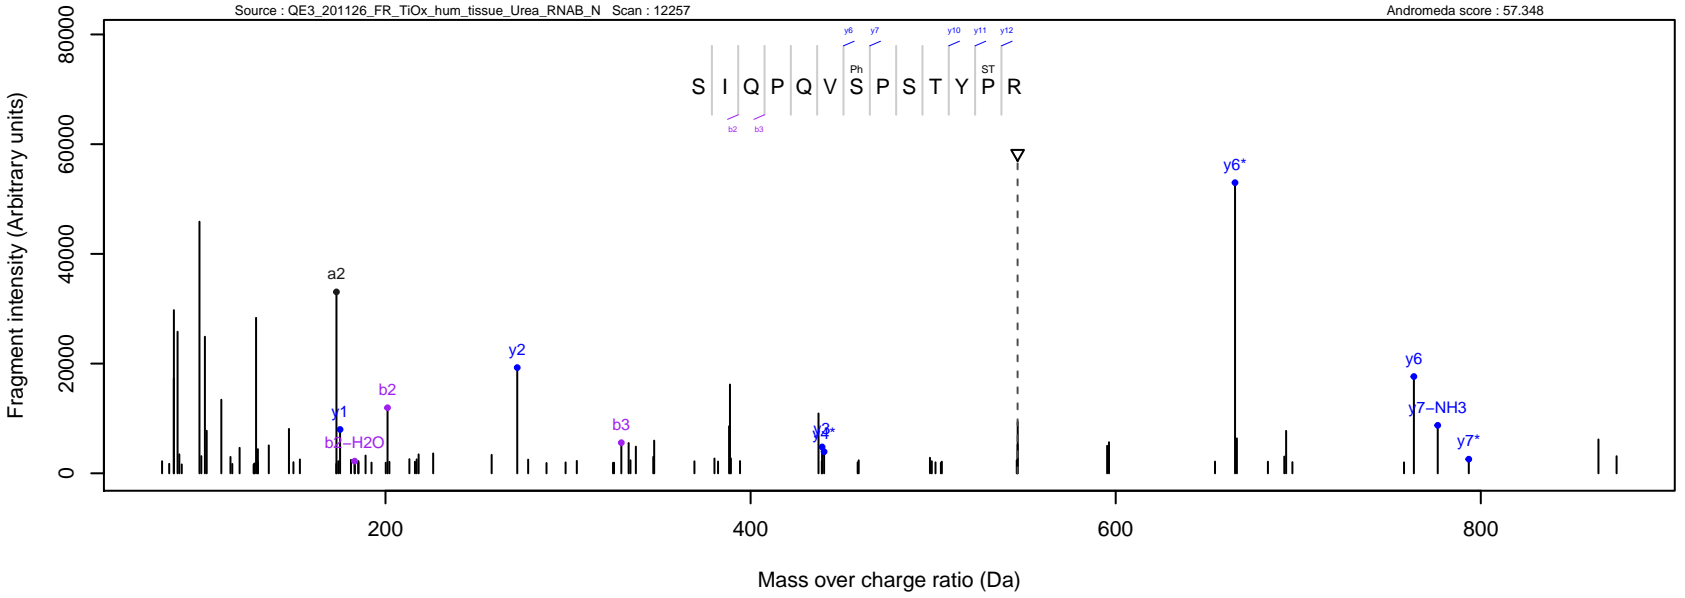

SLS(Phospho (STY))YSEILR-2+

Source : QE3\_201126\_FR\_TiOx\_hum\_tissue\_Urea\_RNAB\_N Scan : 39155

Andromeda score : 57.348

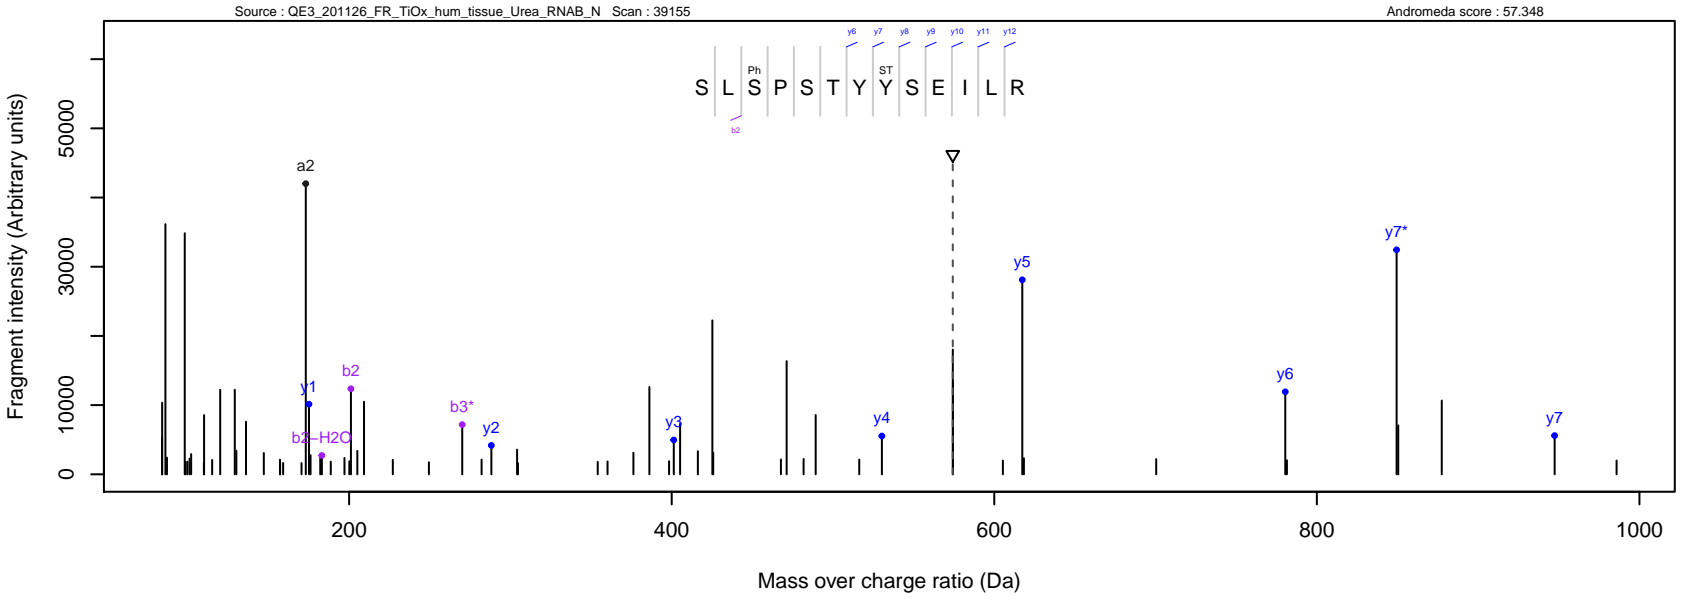

RPS(Phospho (STY))LPALHFIK-3+

Source : QE3\_201126\_FR\_TiOx\_hum\_tissue\_Urea\_RNAB\_H Scan : 32291

Andromeda score : 57.328

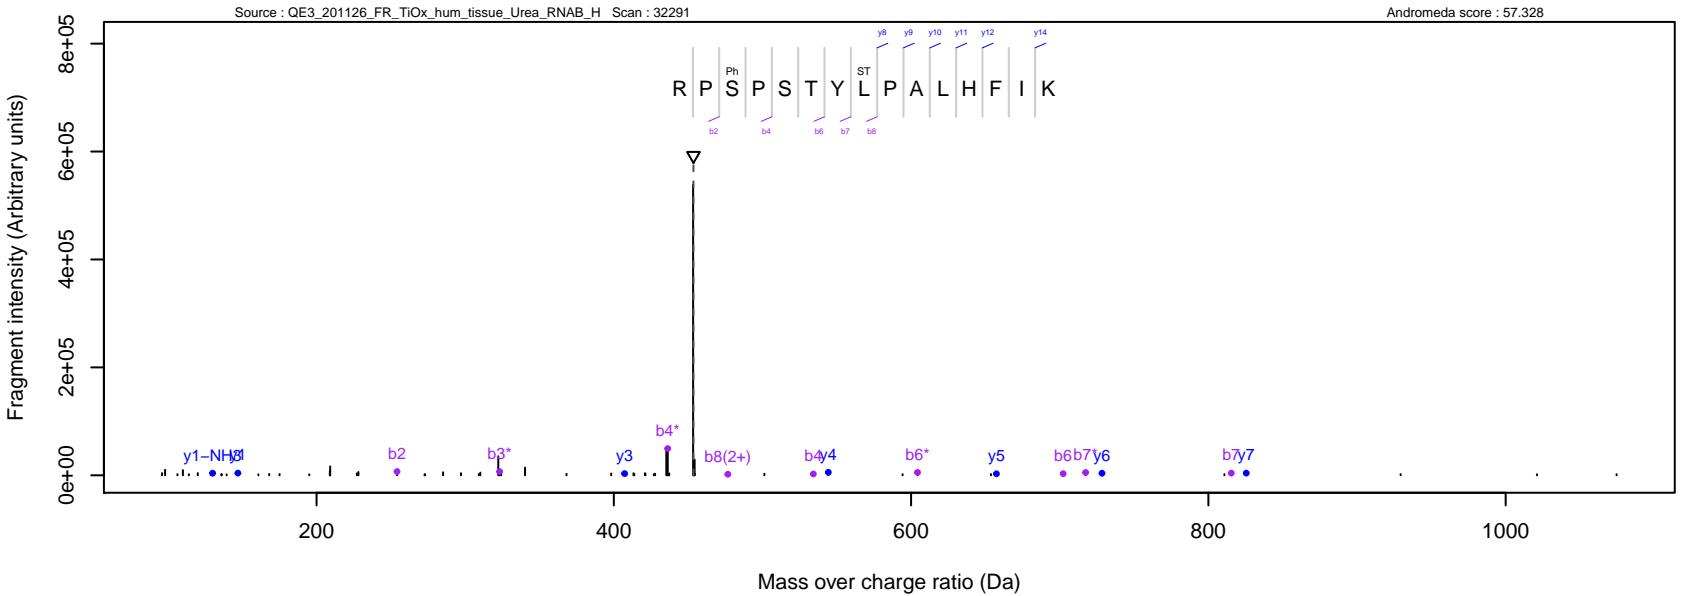

EAYNDS(Phospho (STY))S(Phospho (STY))DEESSHHGPGVQCAHQ-3+

Source : QE3\_201126\_FR\_TIOx\_hum\_tissue\_Urea\_RNAB\_N Scan : 9998

Andromeda score : 57.299

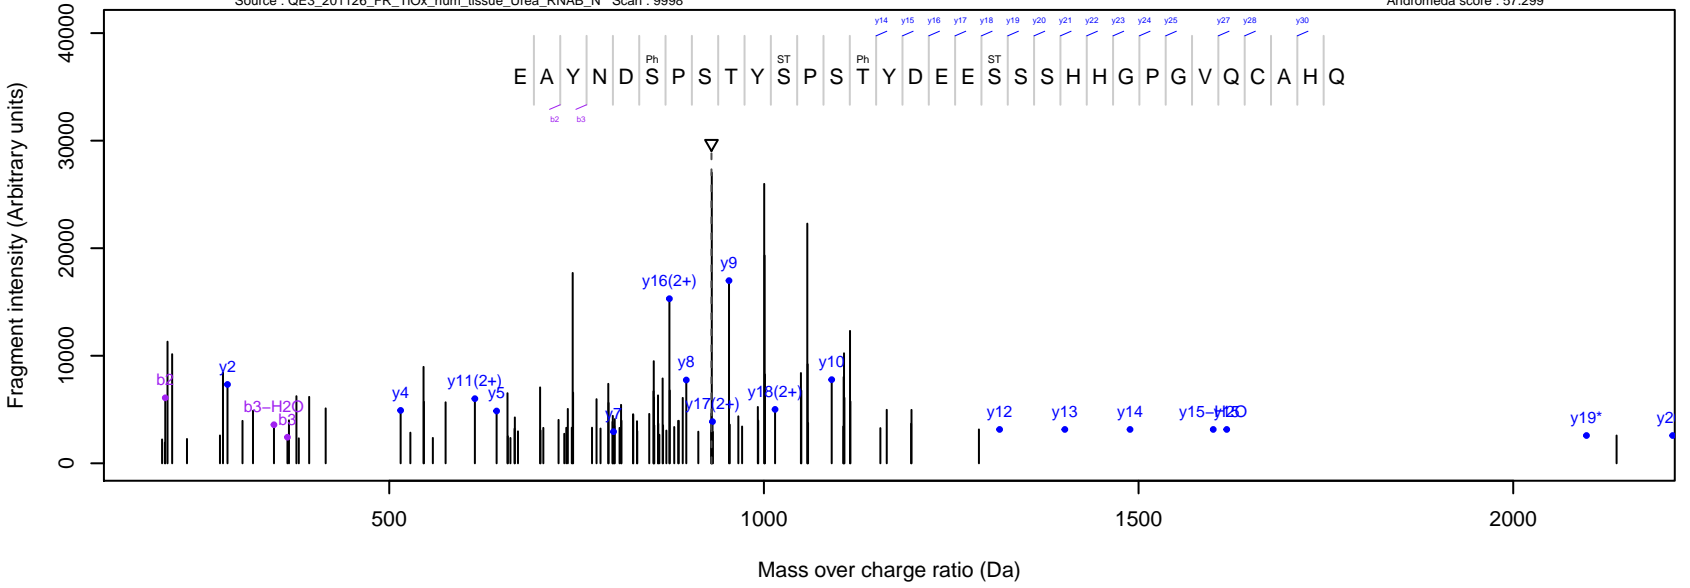

IYQNIQDGS(Phospho (STY))LDLNAAESGVQHKPSAPQGGR-4+

Source : QE3\_201126\_FR\_TIOx\_hum\_tissue\_Urea\_RNAB\_H Scan : 26908

Andromeda score : 57.299

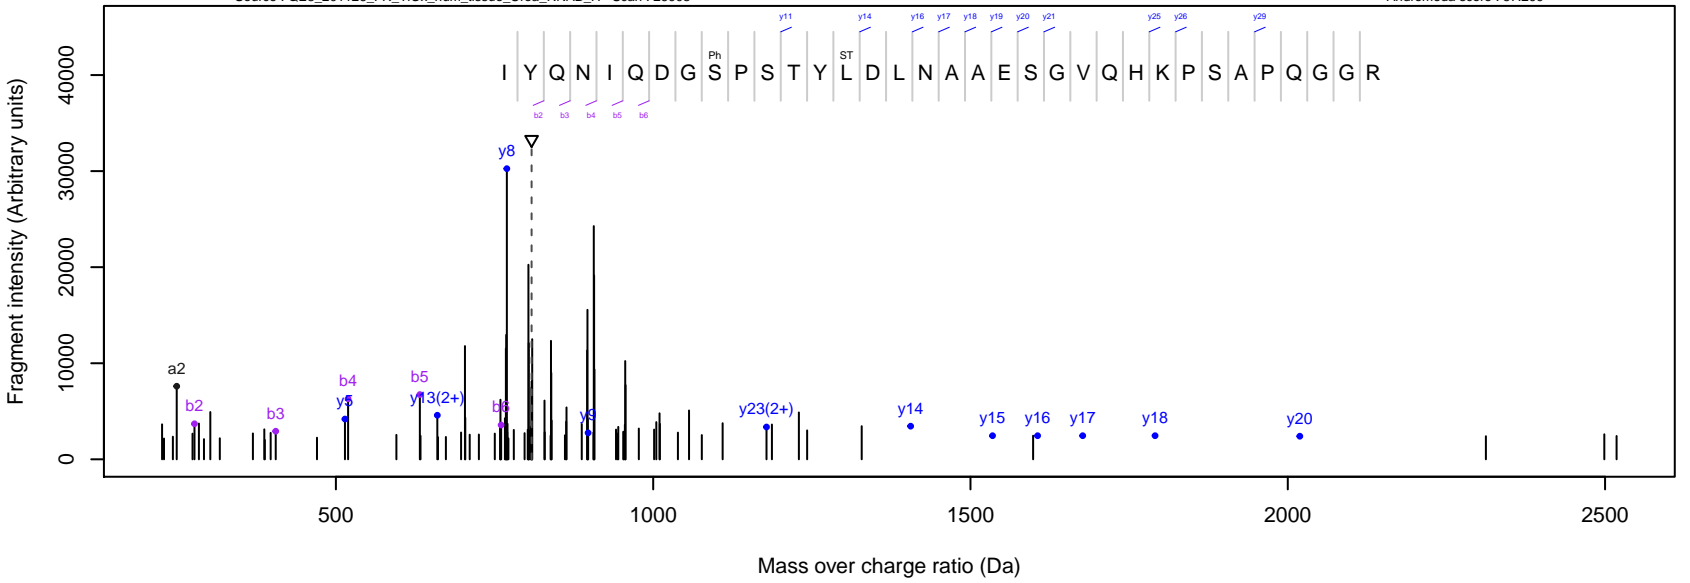

QSQQPM(Oxidation (M))KPIS(Phospho (STY))PVKDPVSPASQK-3+

Source : QE3\_201126\_FR\_TIOx\_hum\_tissue\_Urea\_RNAB\_H Scan : 12439

Andromeda score : 57.299

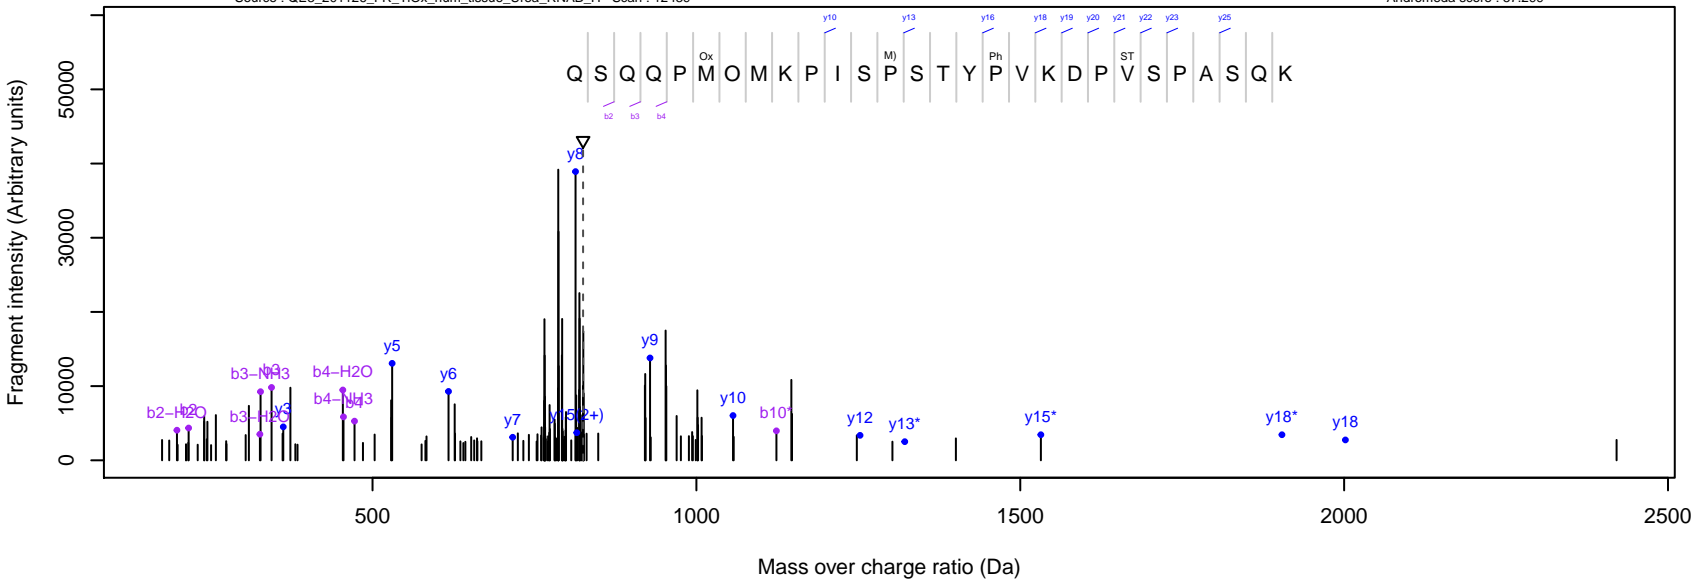

SVS(Phospho (STY))DQFYR-2+

Source : QE3\_201126\_FR\_TiOx\_hum\_tissue\_Urea\_RNAB\_N Scan : 21236

Andromeda score : 57.281

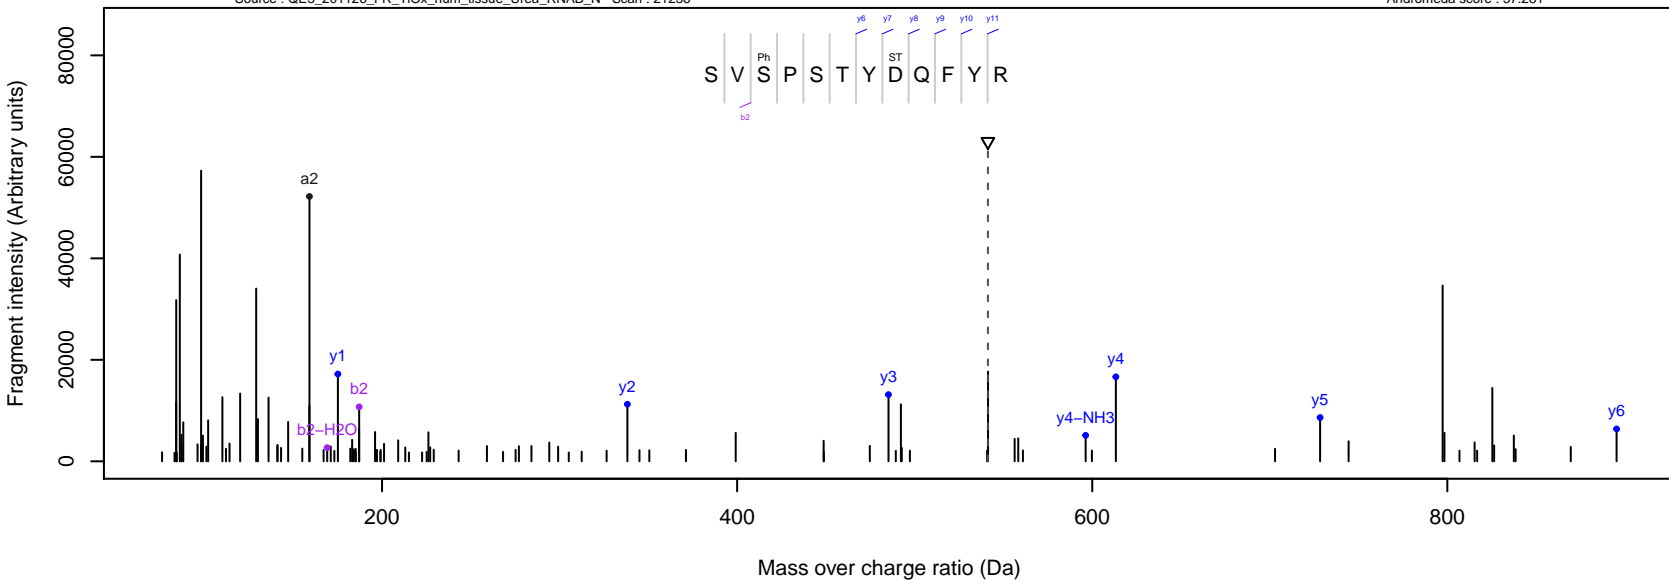

MRS(Phospho (STY))PQPARPGS(Phospho (STY))AAVPGAFAPIPR-3+

Source : QE3\_201126\_FR\_TiOx\_hum\_tissue\_Urea\_RNAB\_N Scan : 33926

Andromeda score : 57.262

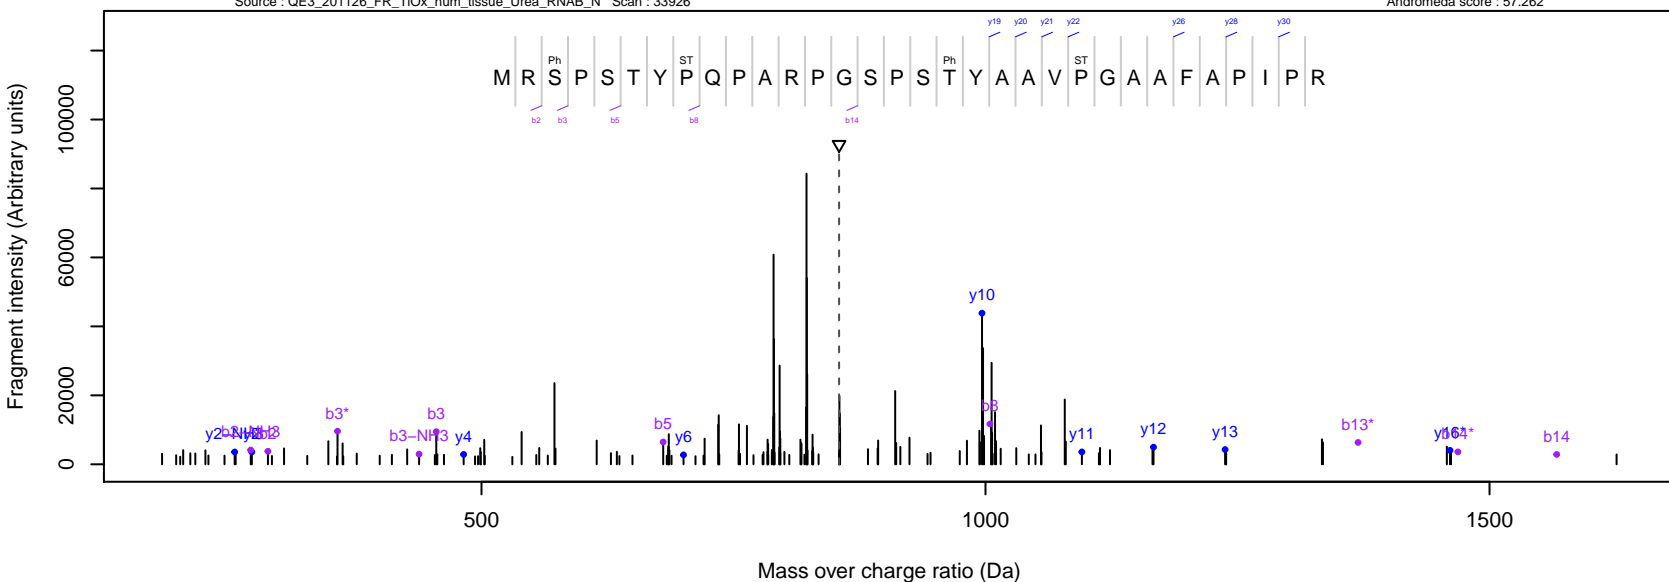

RSDVQEESEGS(Phospho (STY))DT(Phospho (STY))DDNKDSAAFEDNEVQDEFLEK-4+

Source : QE3\_201126\_FR\_TiOx\_hum\_tissue\_Urea\_RNAB\_H Scan : 38331

Andromeda score : 57.229

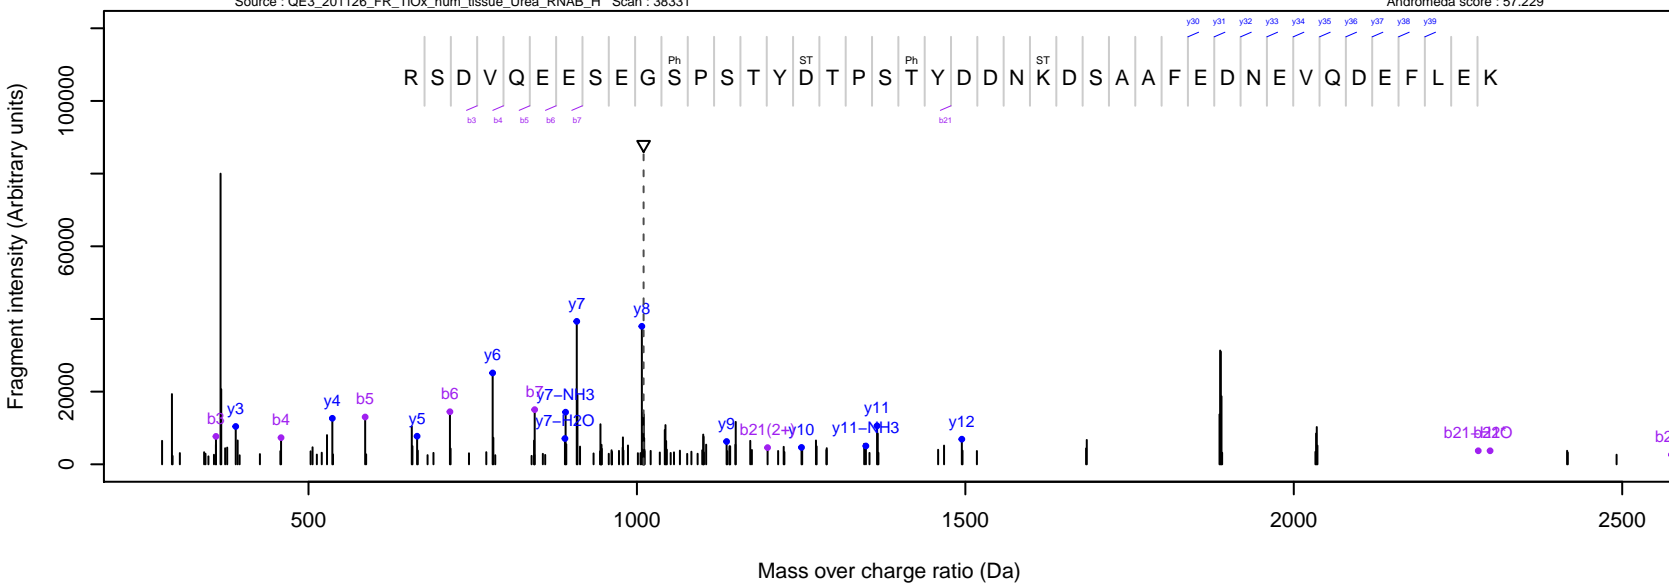

GGPGKLS(Phospho (STY))PR-2+

Source : QE3\_201126\_FR\_TIOx\_hum\_tissue\_Urea\_RNAB\_H Scan : 5389

Andromeda score : 57.225

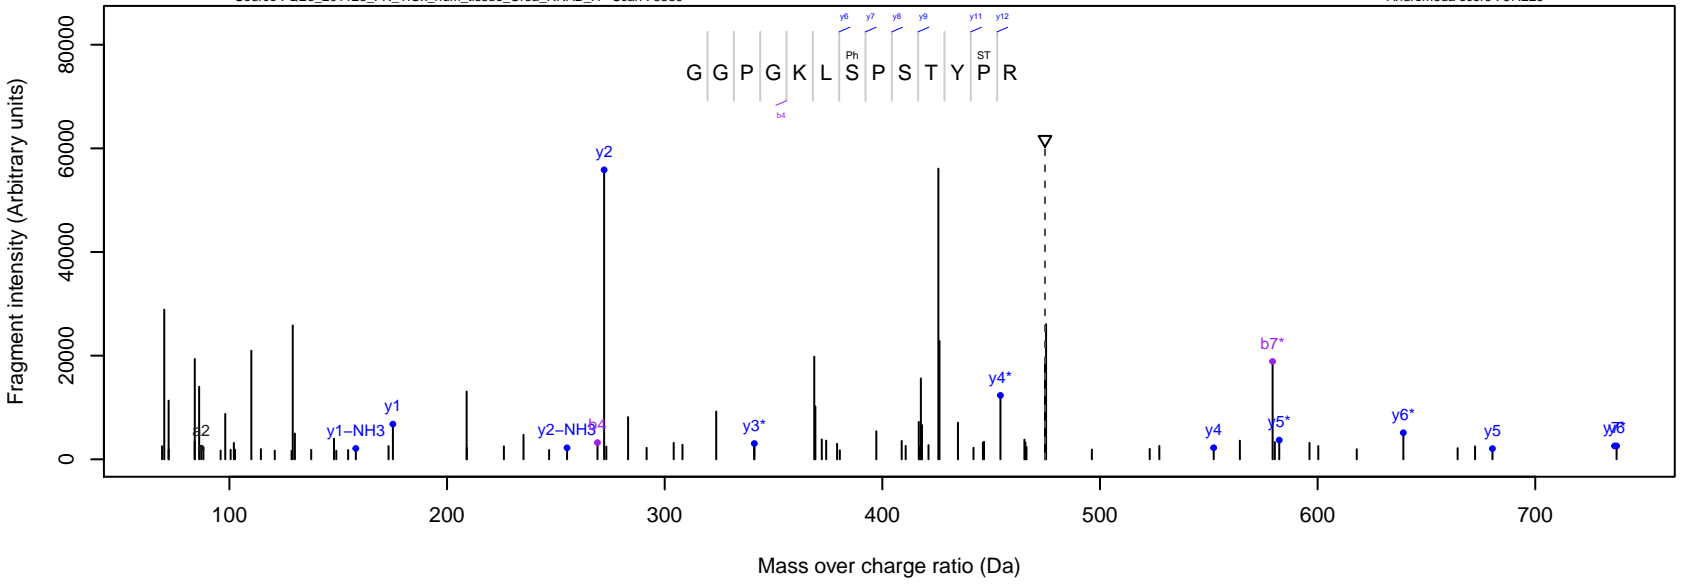

GASAAATGIPLES(Phospho (STY))DEDSNDNDNDIENENCM(Oxidation (M))HTN-3+

Source : QE3\_201126\_FR\_TIOx\_hum\_tissue\_Urea\_RNAB\_H Scan : 31423

Andromeda score : 57.184

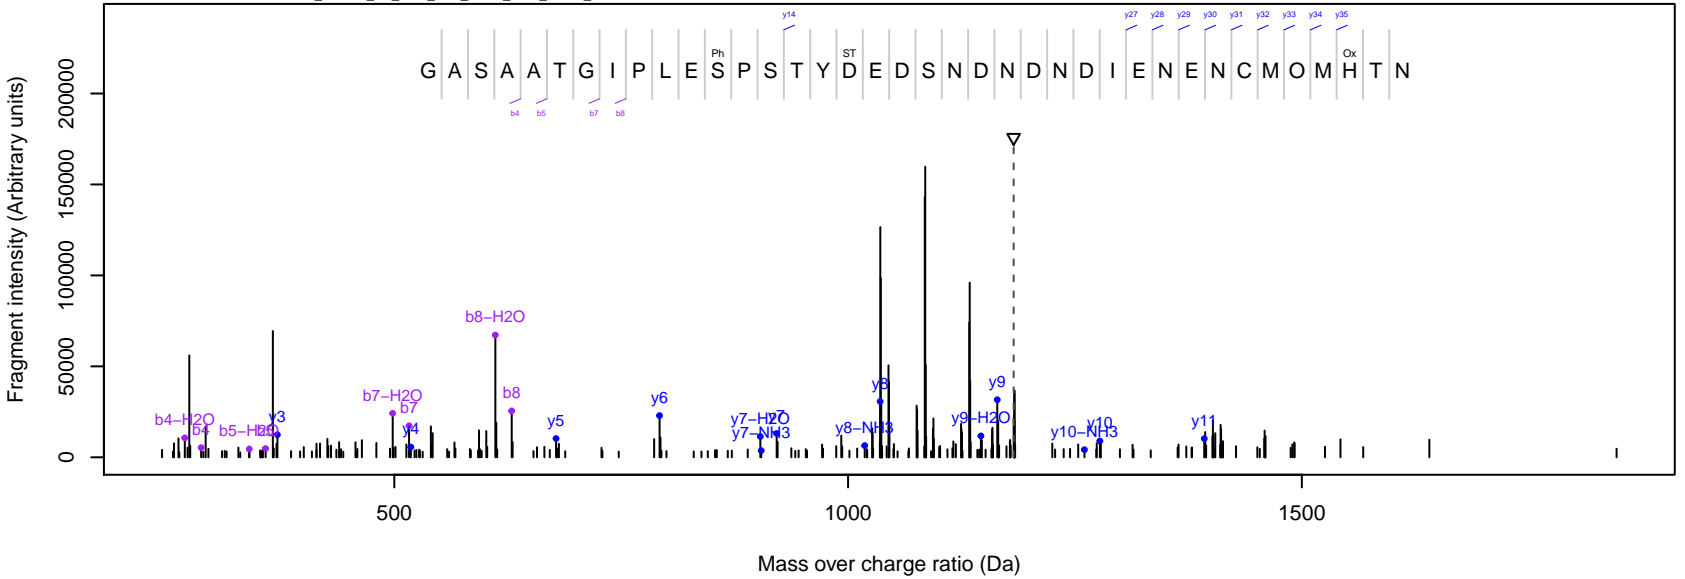

HKS(Phospho (STY))SFVI-2+

Source : QE3\_201126\_FR\_TIOx\_hum\_tissue\_Urea\_RNAB\_H Scan : 15016

Andromeda score : 57.177

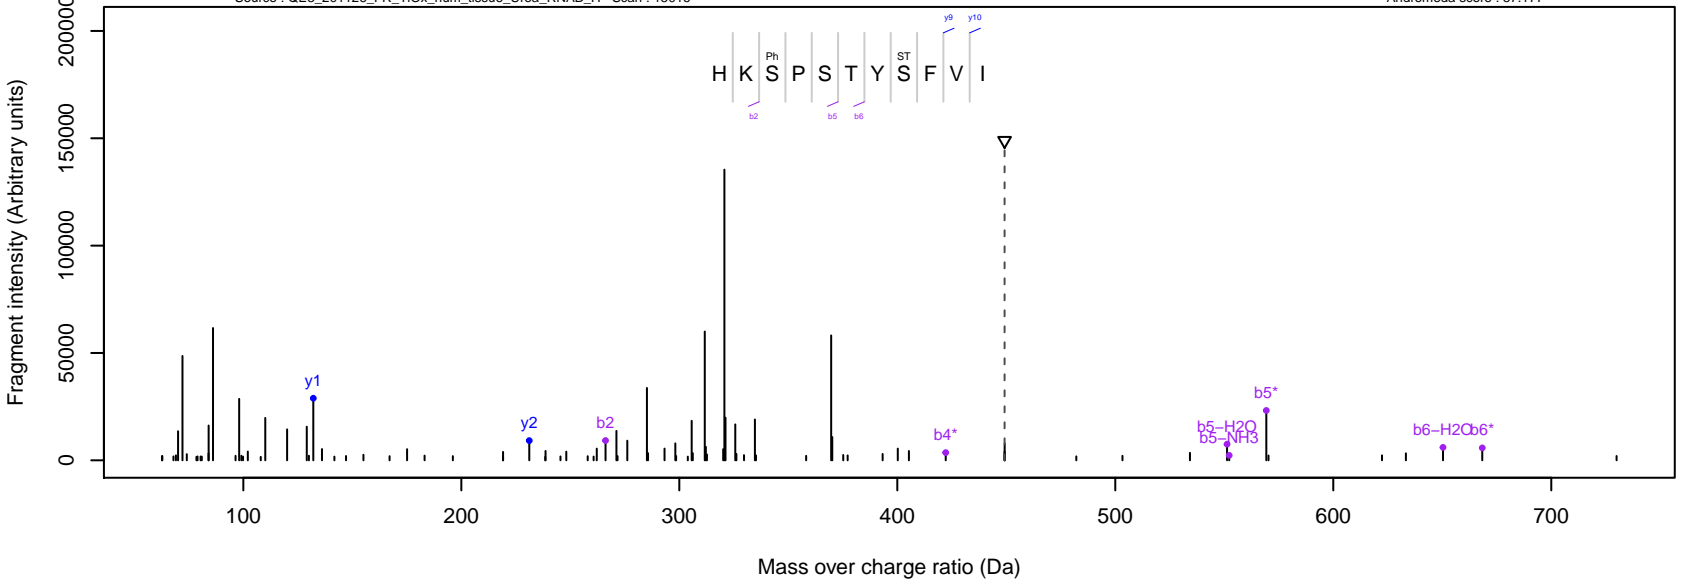

VLPGV DALS(Phospho (STY))NI-2+

Source : QE3\_201126\_FR\_TIOx\_hum\_tissue\_Urea\_RNAB\_H Scan : 58033

Andromeda score : 57.174

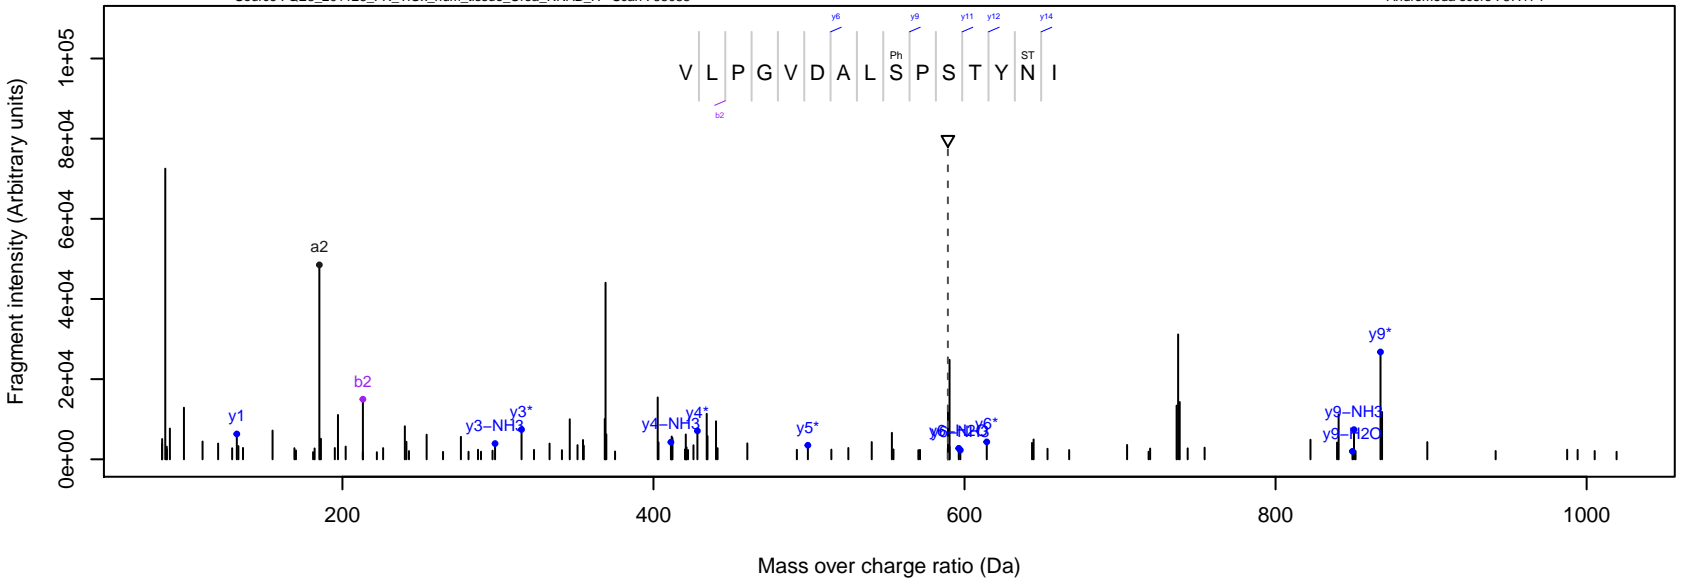

LDYVPS(Phospho (STY))S(Phospho (STY))ASREVR-3+

Source : QE3\_201126\_FR\_TIOx\_hum\_tissue\_Urea\_RNAB\_B Scan : 24838

Andromeda score : 57.148

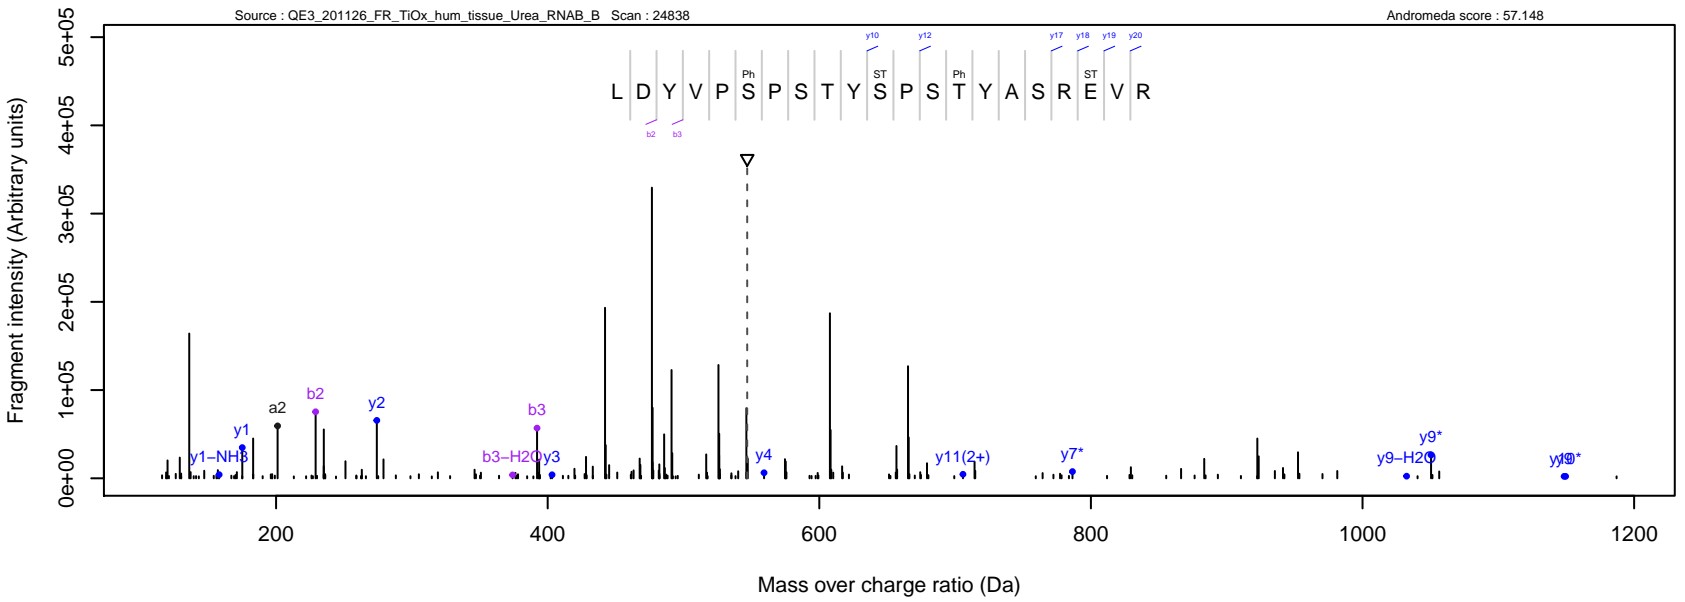

YFEADPPGQVAAS(Phospho (STY))PDPTT-2+

Source : QE3\_201126\_FR\_TIOx\_hum\_tissue\_Urea\_RNAB\_N Scan : 38732

Andromeda score : 57.148

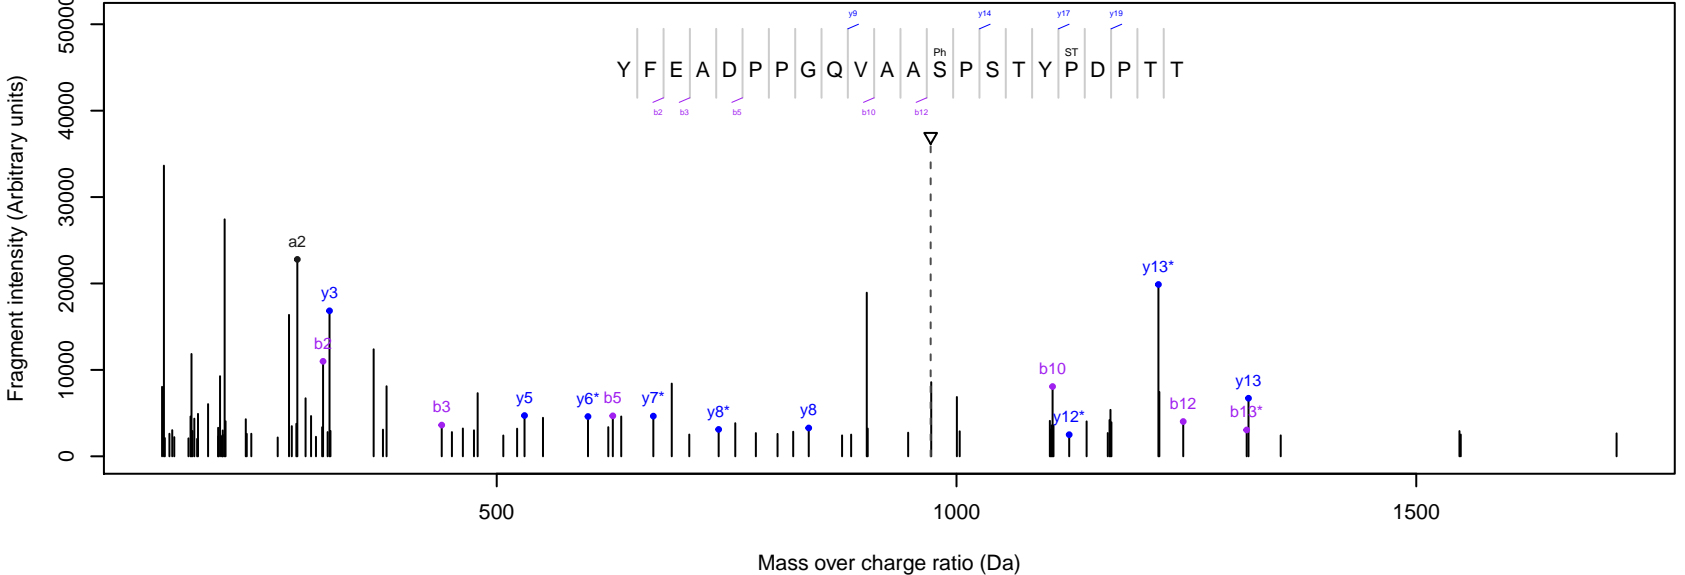

TSVATSTEGKDKVTLSPSTYPK-3+

Source : QE3\_201126\_FR\_TiOx\_hum\_tissue\_Urea\_RNAB\_B Scan : 13135

Andromeda score : 57.145

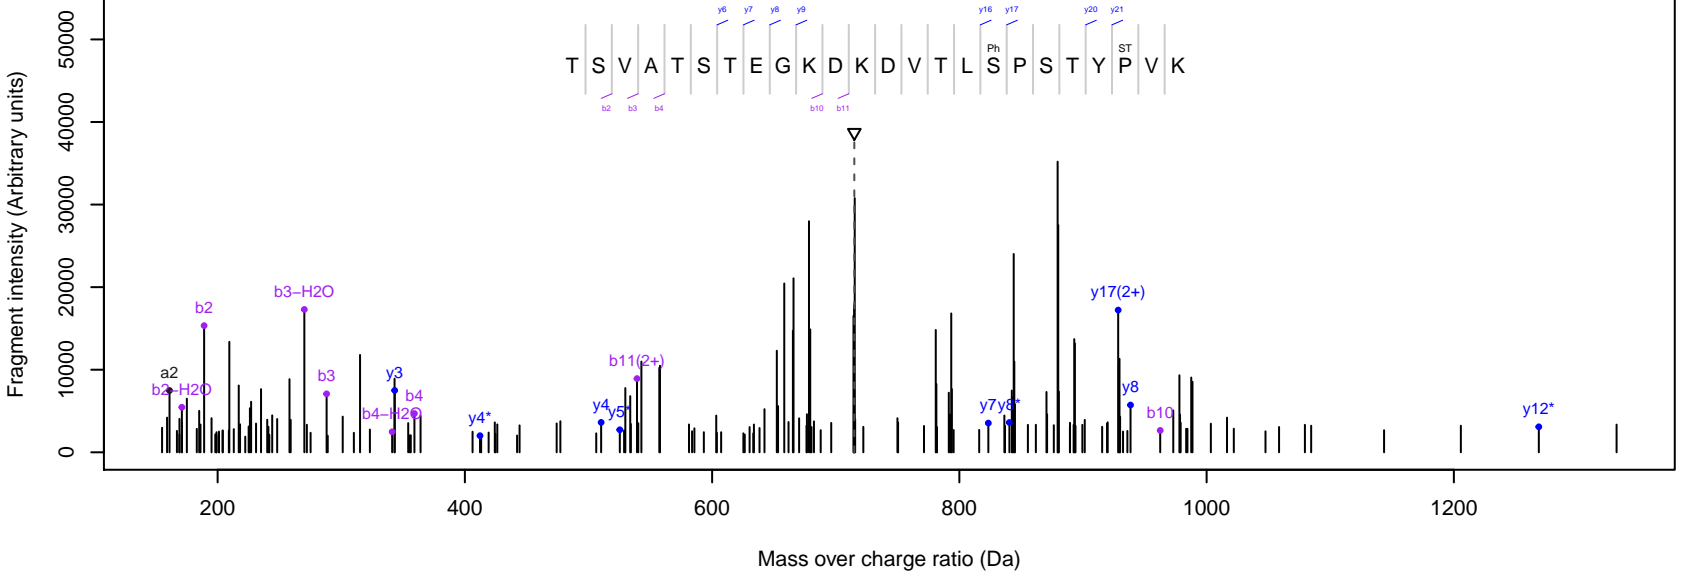

DTAKSPSTYLPAPR-2+

Source : QE3\_201126\_FR\_TiOx\_hum\_tissue\_Urea\_RNAB\_N Scan : 17004

Andromeda score : 57.106

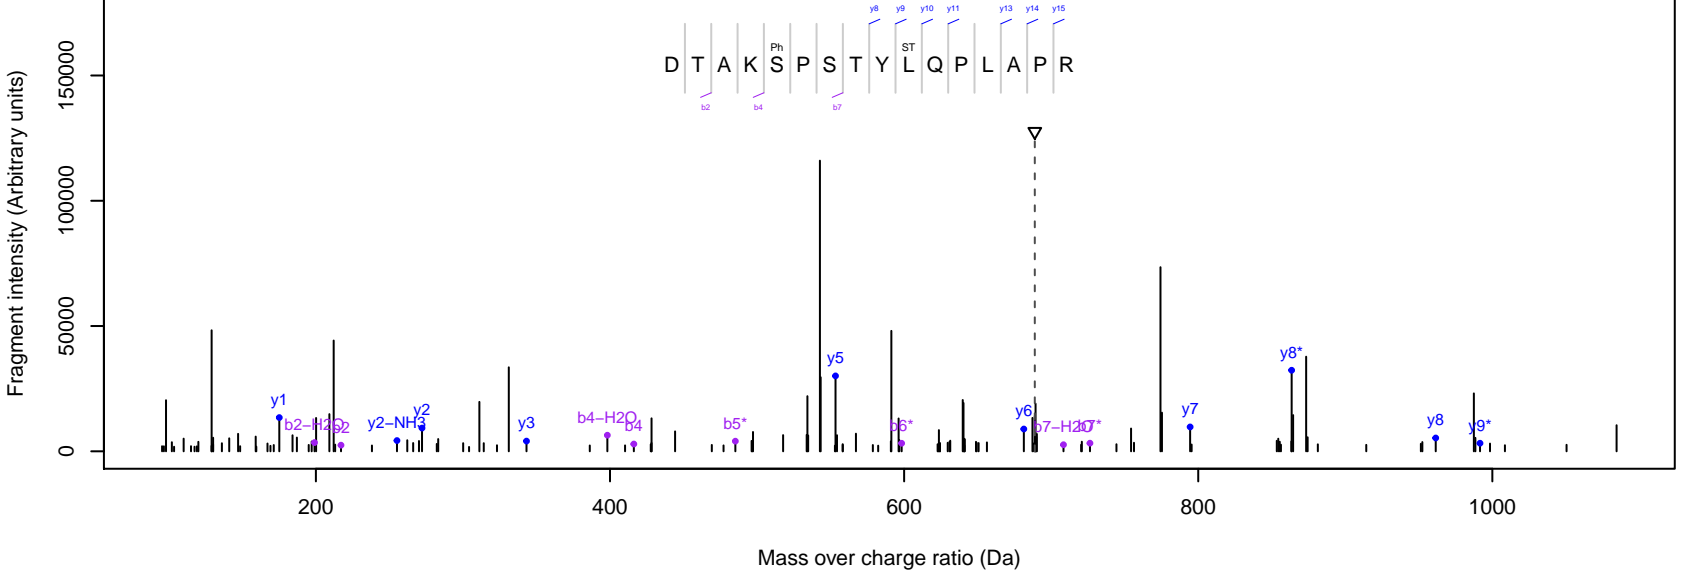

SVIRPATQQAQKQSPSTYASTLQGEPR-3+

Source : QE3\_201126\_FR\_TiOx\_hum\_tissue\_Urea\_RNAB\_N Scan : 11917

Andromeda score : 57.097

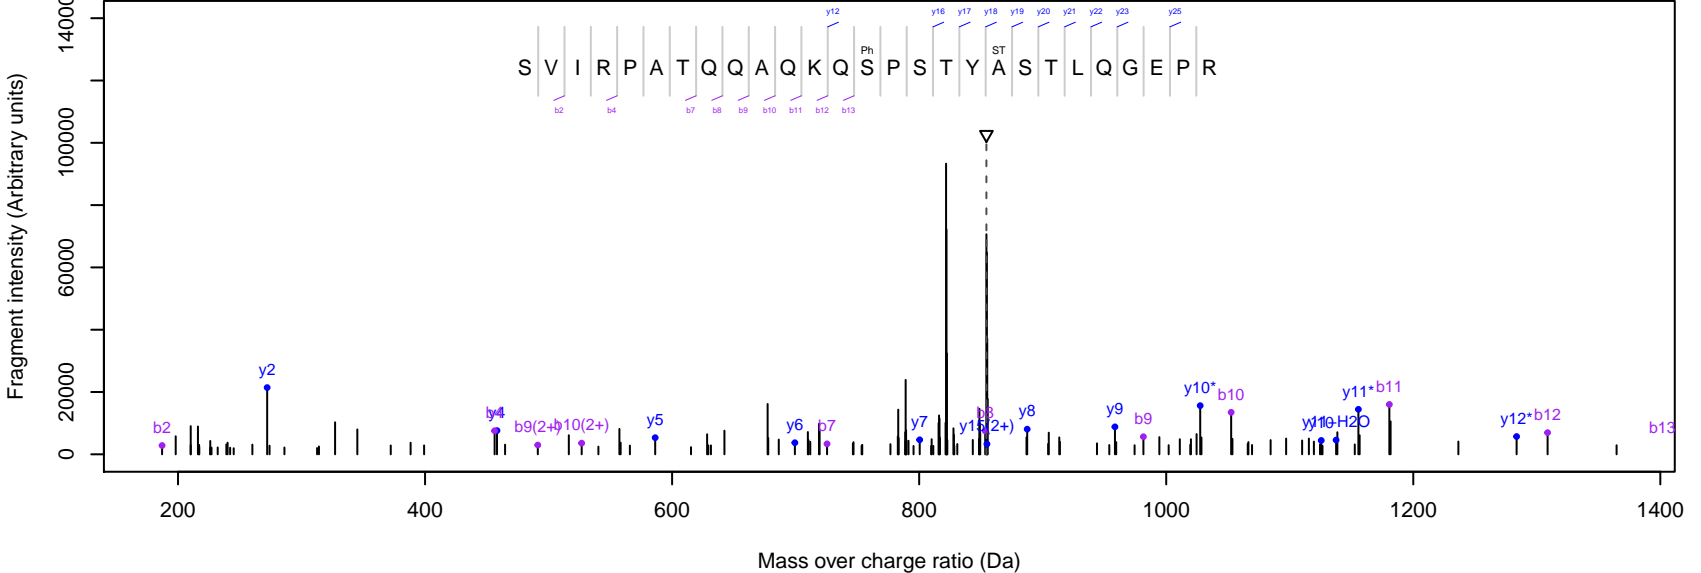

GPQVALKGS(Phospho (STY))RVDIETPNLEGLTGPR-3+

Source : QE3\_201126\_FR\_TiOx\_hum\_tissue\_Urea\_RNAB\_H Scan : 36303

Andromeda score : 57.078

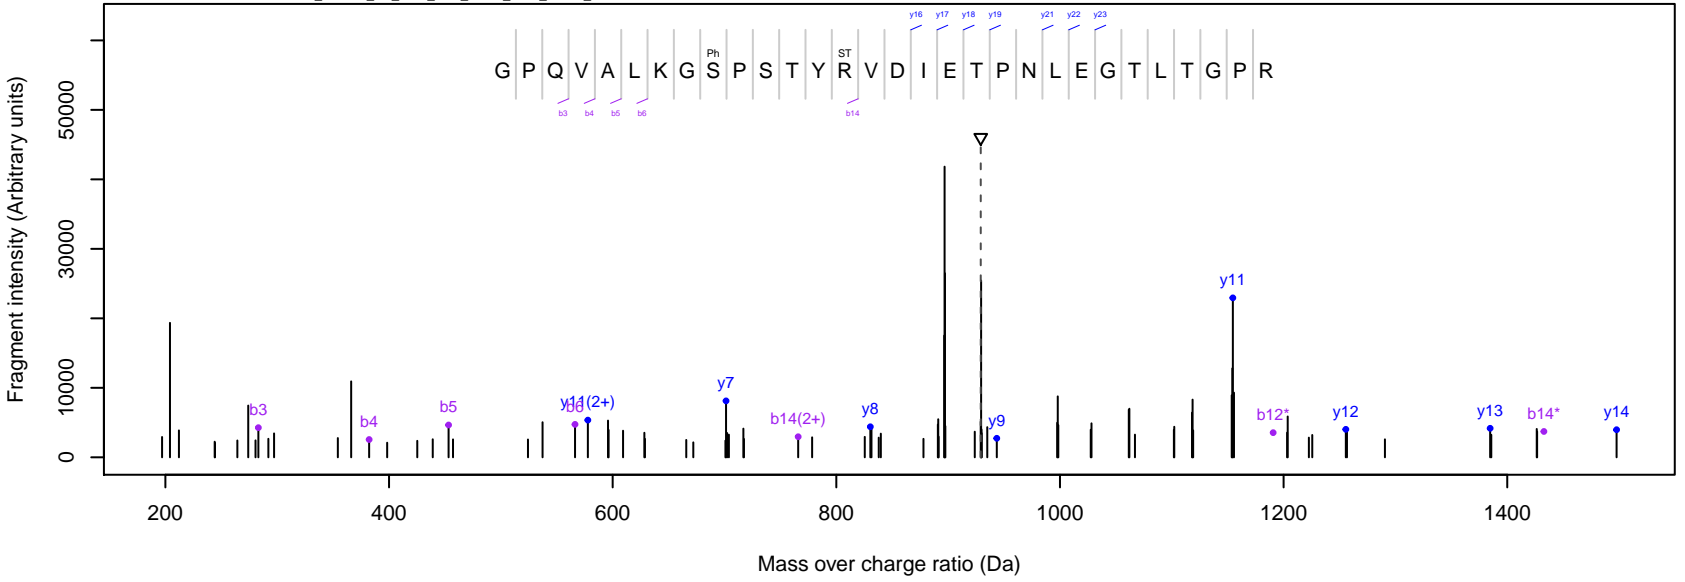

AT(Phospho (STY))PPPS(Phospho (STY))PLSELLKK-3+

Source : QE3\_201126\_FR\_TiOx\_hum\_tissue\_Urea\_RNAB\_N Scan : 53153

Andromeda score : 57.009

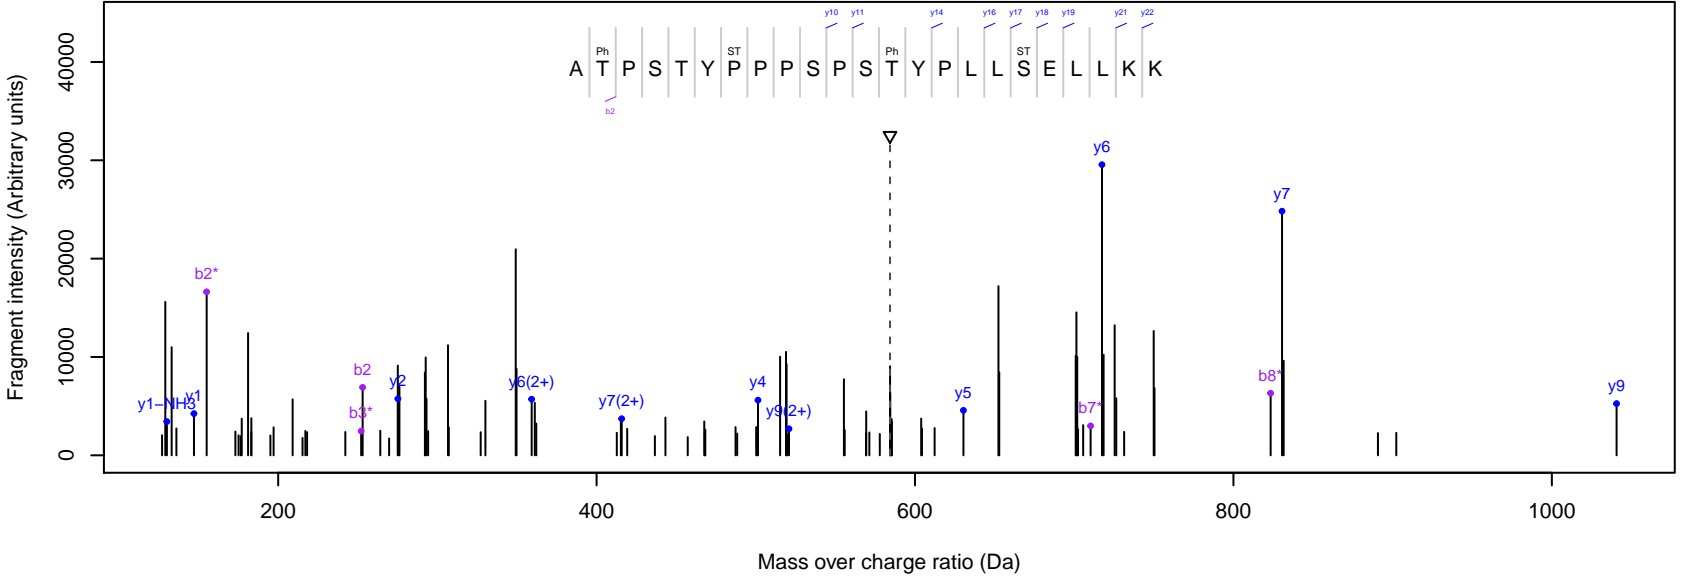

NAHS(Phospho (STY))RLESYRPDTDLR-4+

Source : QE3\_201126\_FR\_TiOx\_hum\_tissue\_Urea\_RNAB\_B Scan : 14039

Andromeda score : 57.009

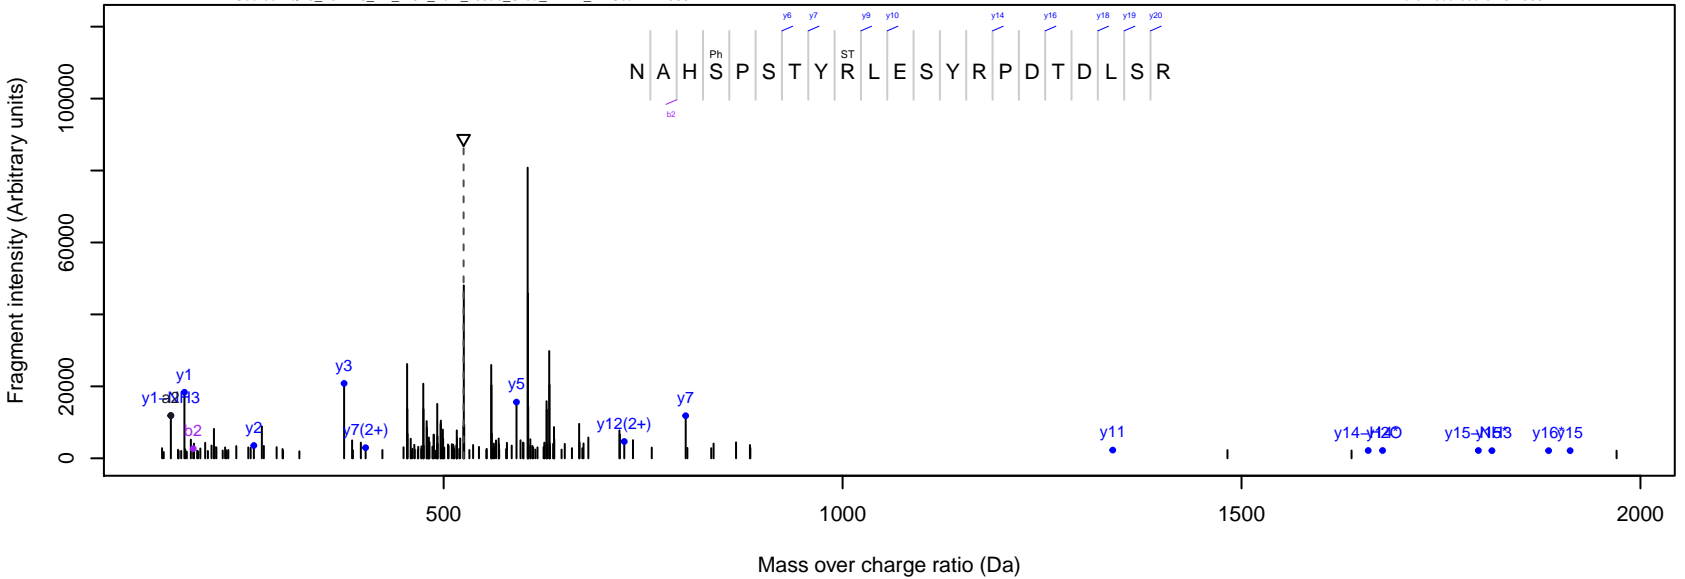

RLSNLPT(Phospho (STY))VDPIAVCHELYNTIR-3+

Source : QE3\_201126\_FR\_TiOx\_hum\_tissue\_Urea\_RNAB\_N Scan : 52270

Andromeda score : 57.009

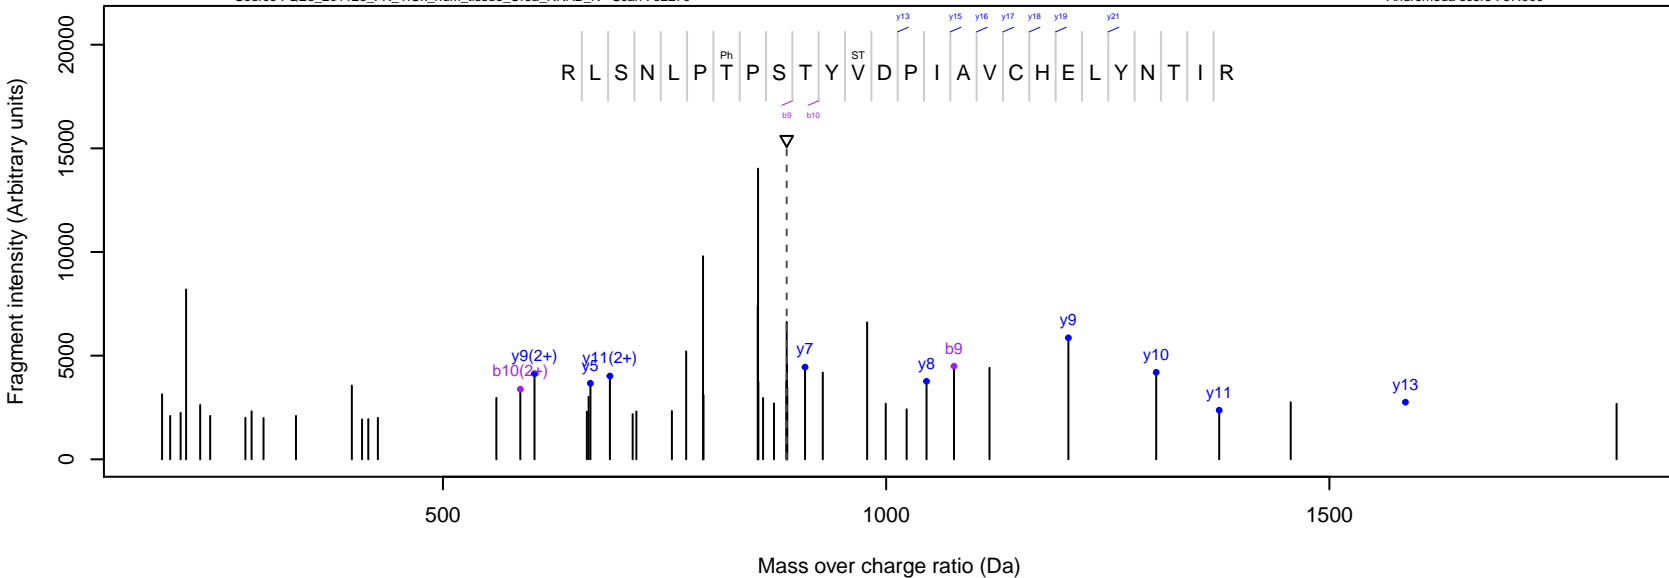

T(Phospho (STY))RTAEALNLDAALFELIK-4+

Source : QE3\_201126\_FR\_TiOx\_hum\_tissue\_Urea\_RNAB\_B Scan : 19970

Andromeda score : 57.009

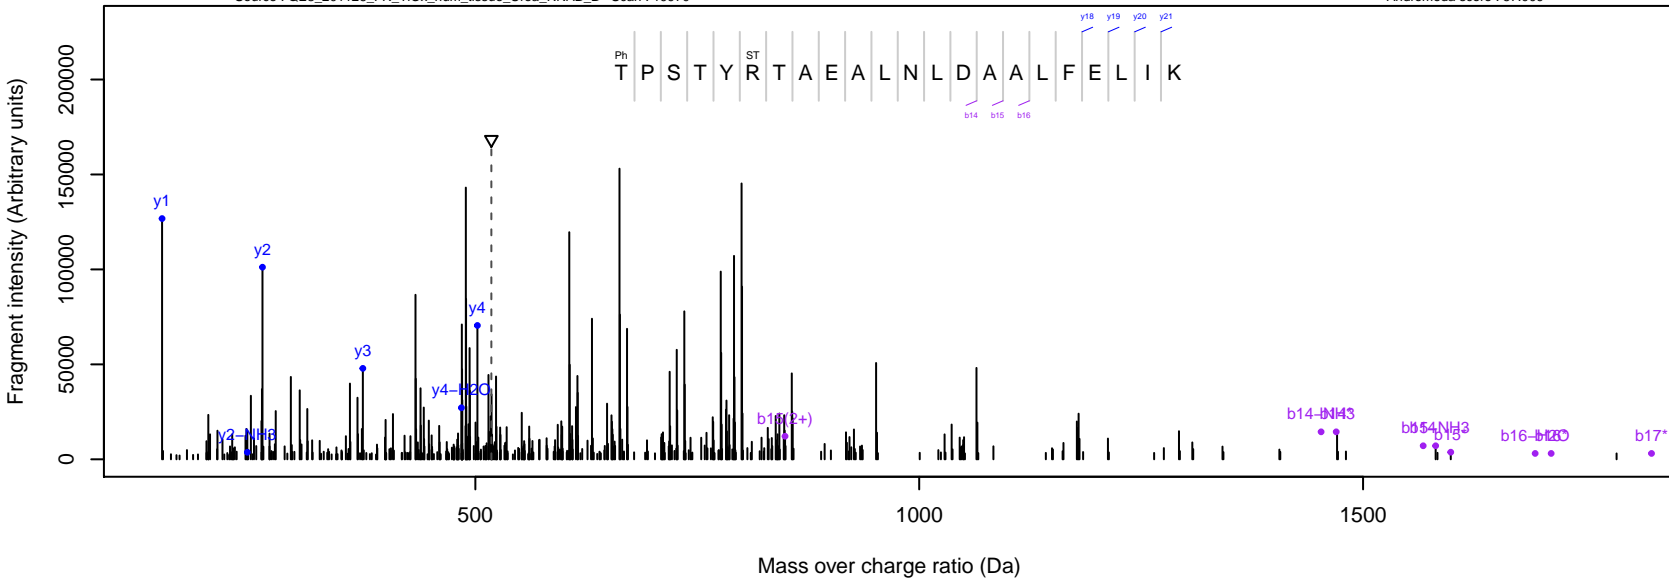

HHNS(Phospho (STY))TAE LQKAEAK-3+

Source : QE3\_201126\_FR\_TiOx\_hum\_tissue\_Urea\_RNAB\_H Scan : 4551

Andromeda score : 56.959

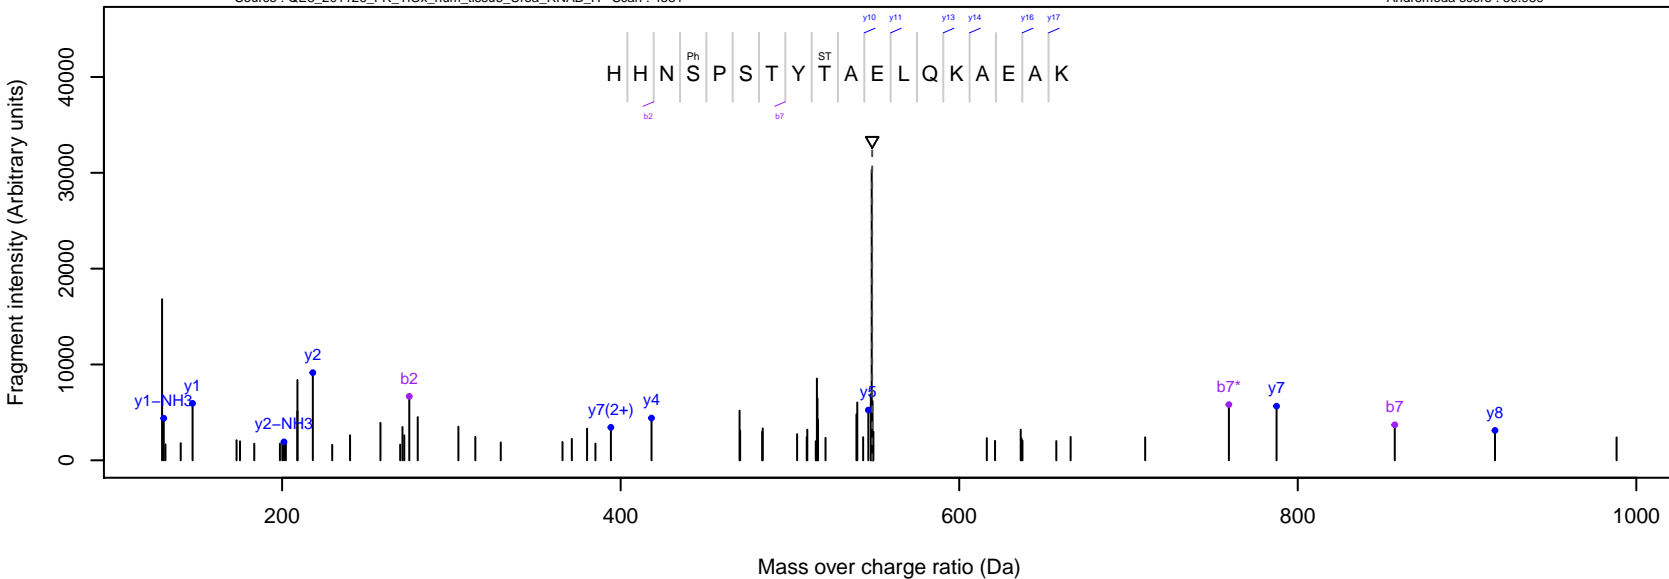



IILDLISES(Phospho (STY))PIKGR-3+

Source : QE3\_201126\_FR\_TiOx\_hum\_tissue\_Urea\_RNAB\_H Scan : 43491

Andromeda score : 56.959

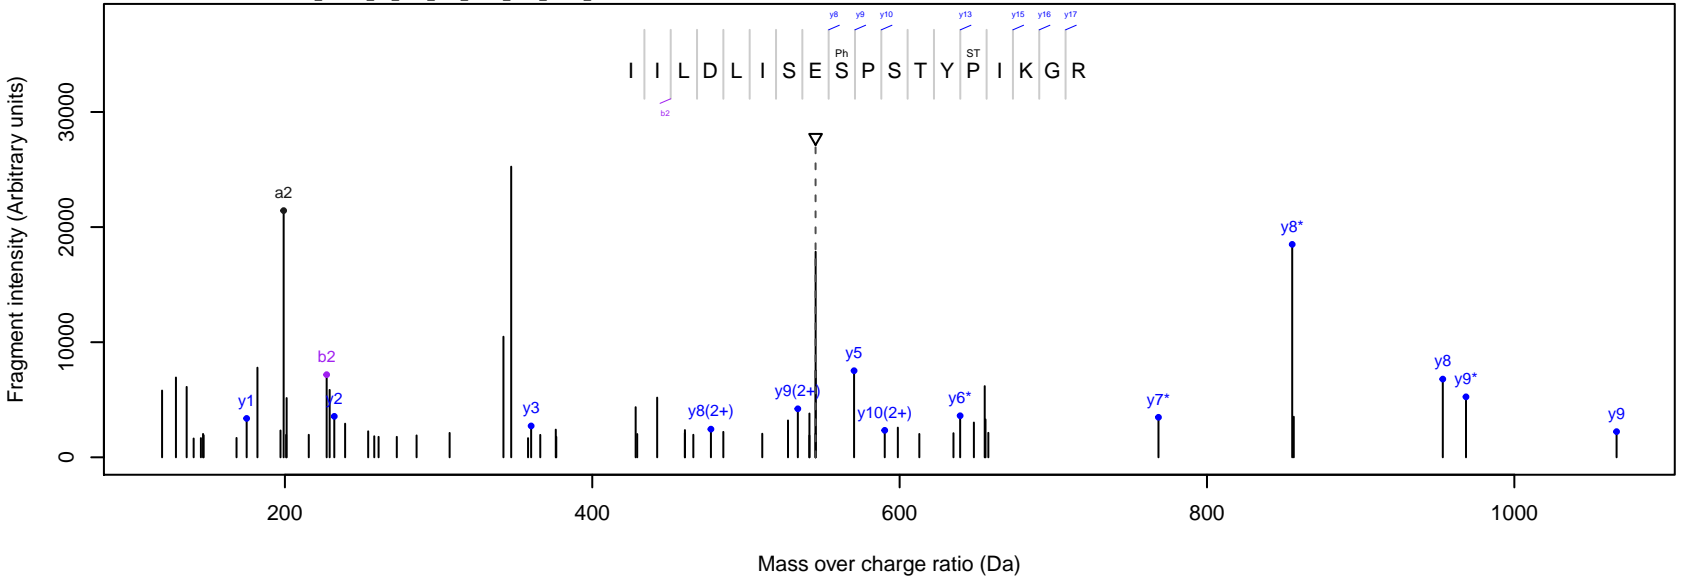

NVALLS(Phospho (STY))QLYHSPARR-3+

Source : QE3\_201126\_FR\_TiOx\_hum\_tissue\_Urea\_RNAB\_N Scan : 28594

Andromeda score : 56.959

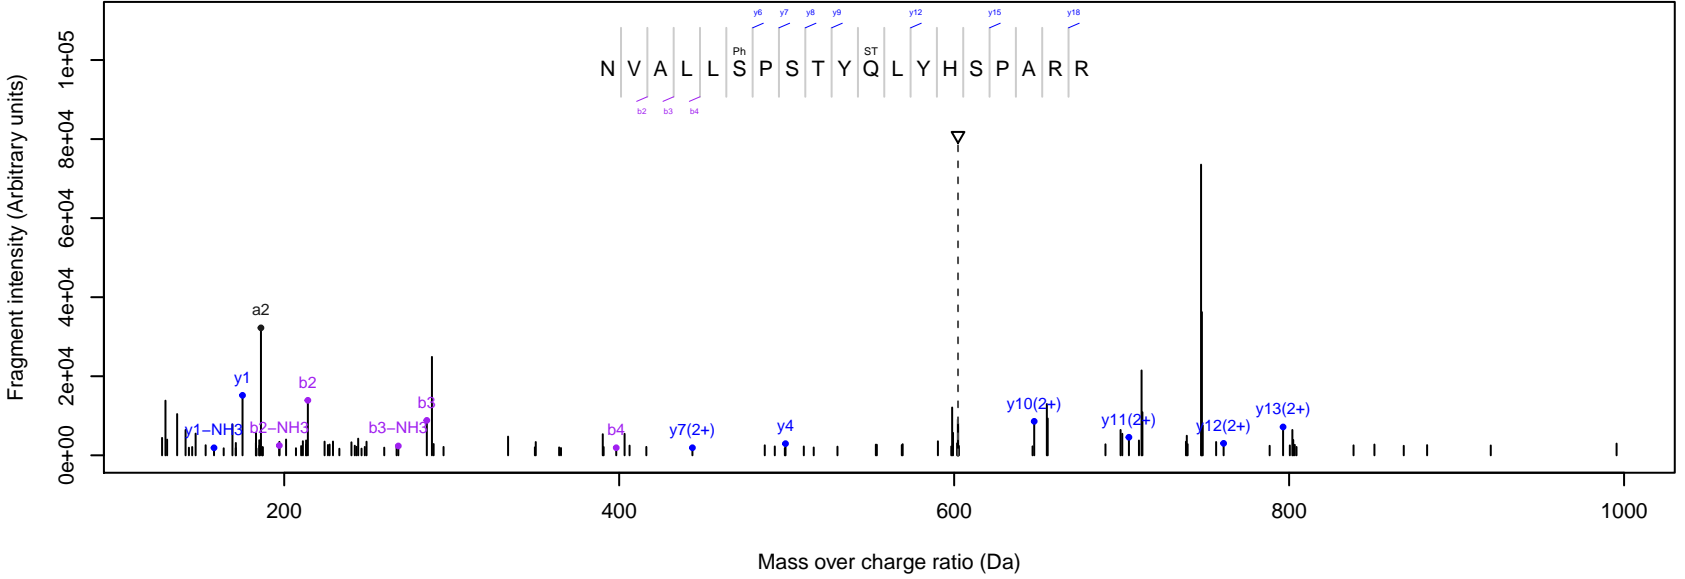

ELQFS(Phospho (STY))VEDINR-2+

Source : QE3\_201126\_FR\_TiOx\_hum\_tissue\_Urea\_RNAB\_B Scan : 39357

Andromeda score : 56.951

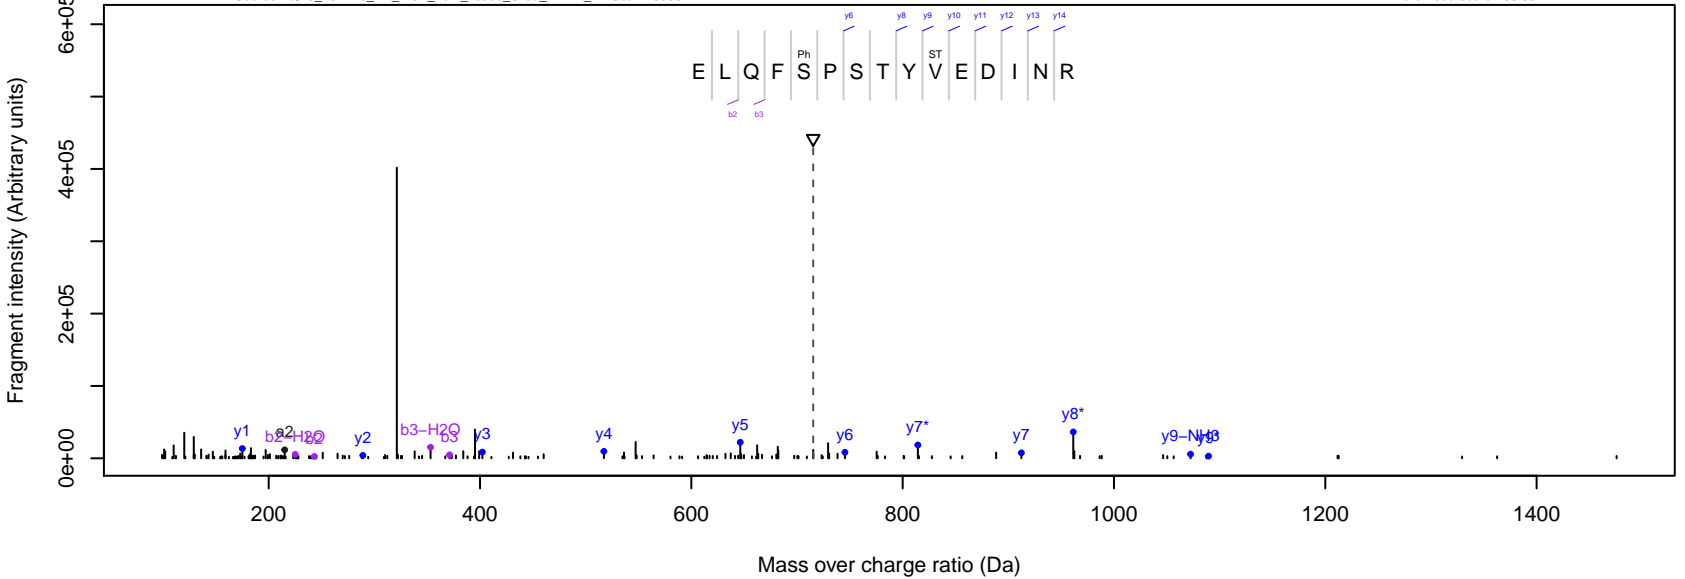

VVKPKS(Phospho (STY))PEPEATLTFPFLDK-3+

Source : QE3\_201126\_FR\_TiOx\_hum\_tissue\_Urea\_RNAB\_B Scan : 41385

Andromeda score : 56.95

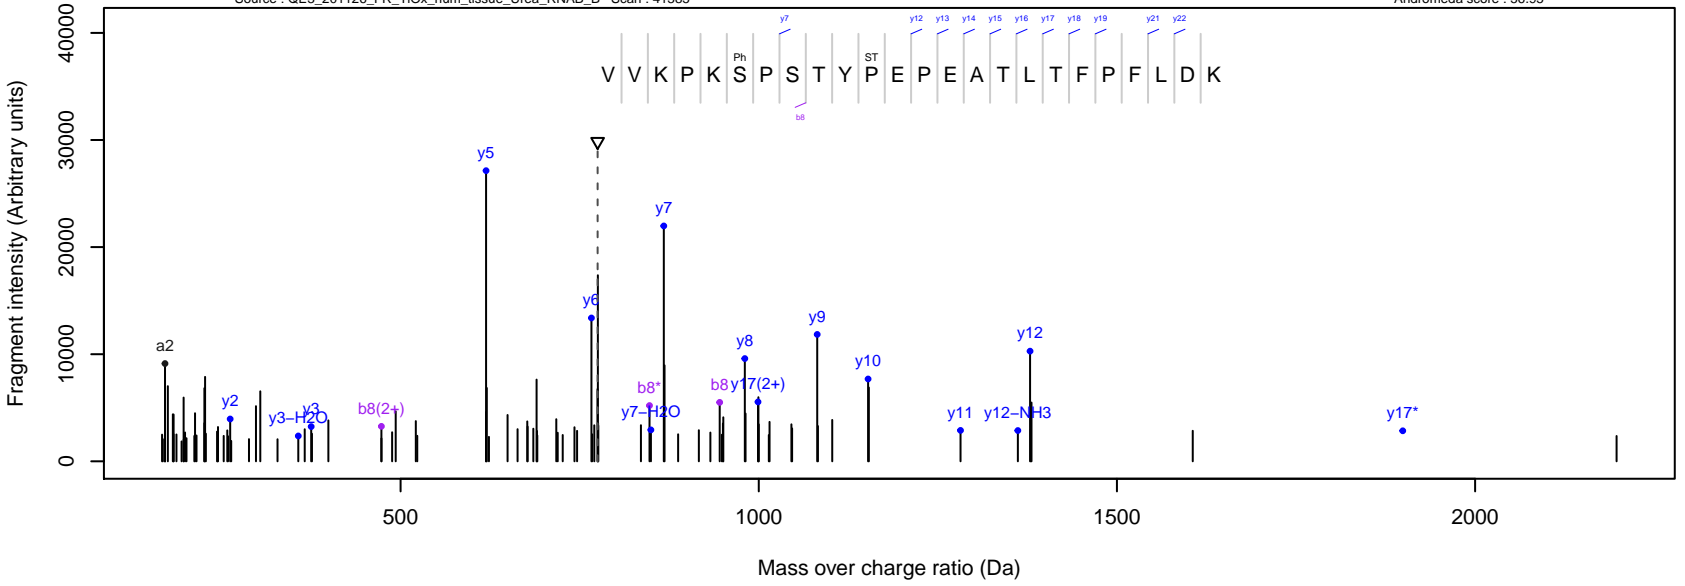

GDLS(Phospho (STY))DVEEEEEEM(Oxidation (M))DVDEATGAVK-3+

Source : QE3\_201126\_FR\_TiOx\_hum\_tissue\_Urea\_RNAB\_H Scan : 43557

Andromeda score : 56.914

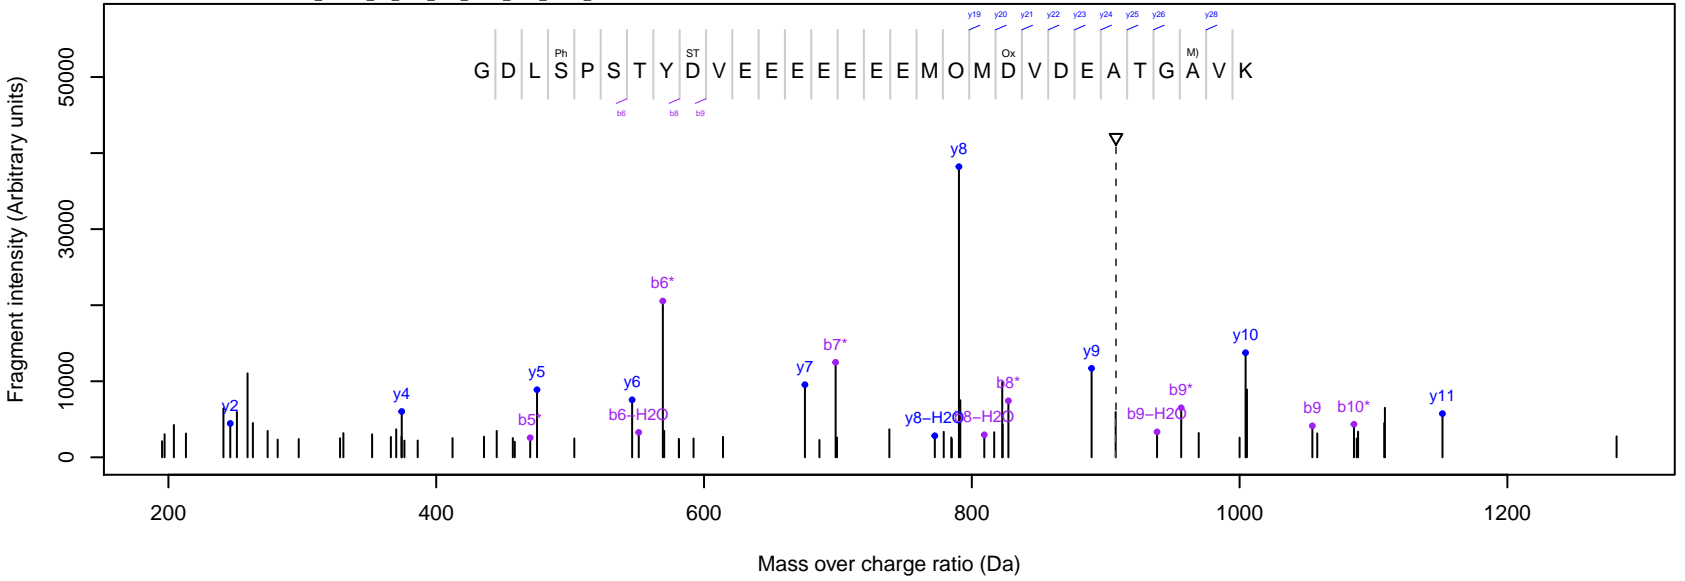

NRHS(Phospho (STY))PDHPGMGSSQASSSSSLR-3+

Source : QE3\_201126\_FR\_TiOx\_hum\_tissue\_Urea\_RNAB\_H Scan : 6720

Andromeda score : 56.903

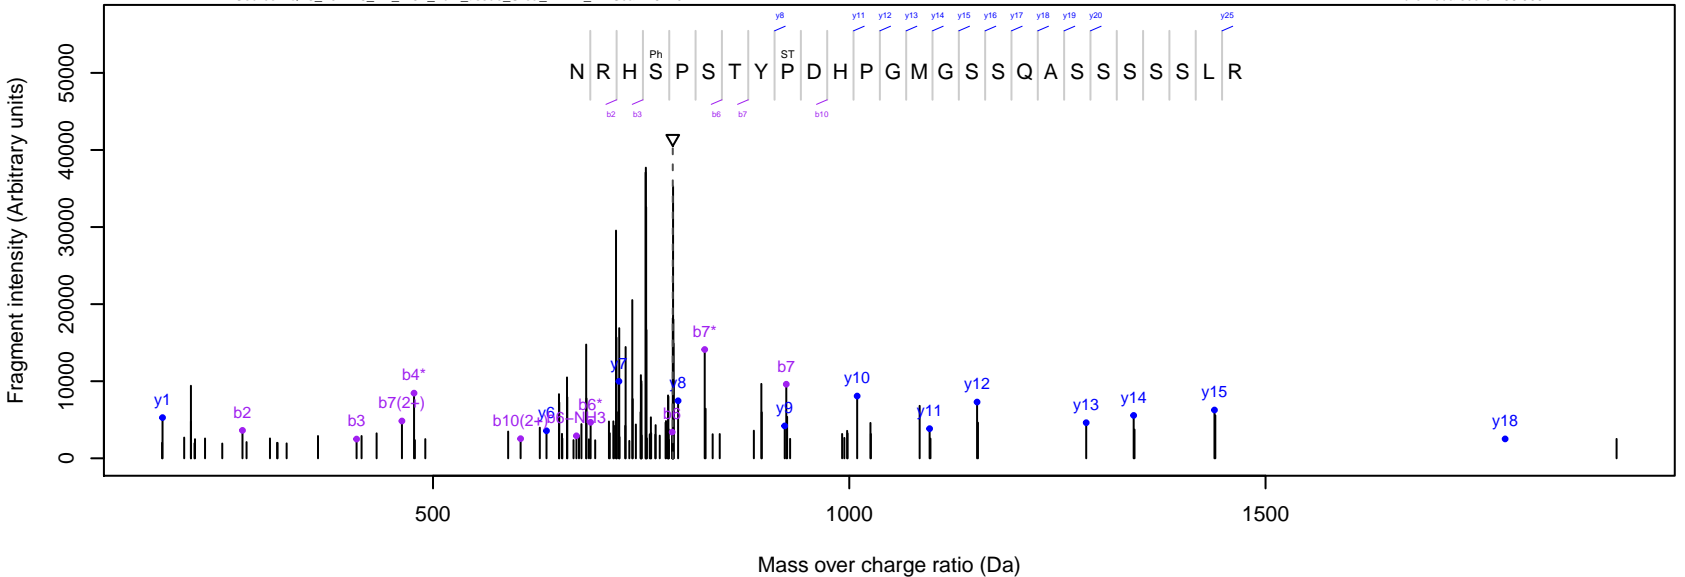

RGPS(Phospho (STY))PACSDSSTLALIHSALHK-4+

Source : QE3\_201126\_FR\_TiOx\_hum\_tissue\_Urea\_RNAB\_B Scan : 29707

Andromeda score : 56.903

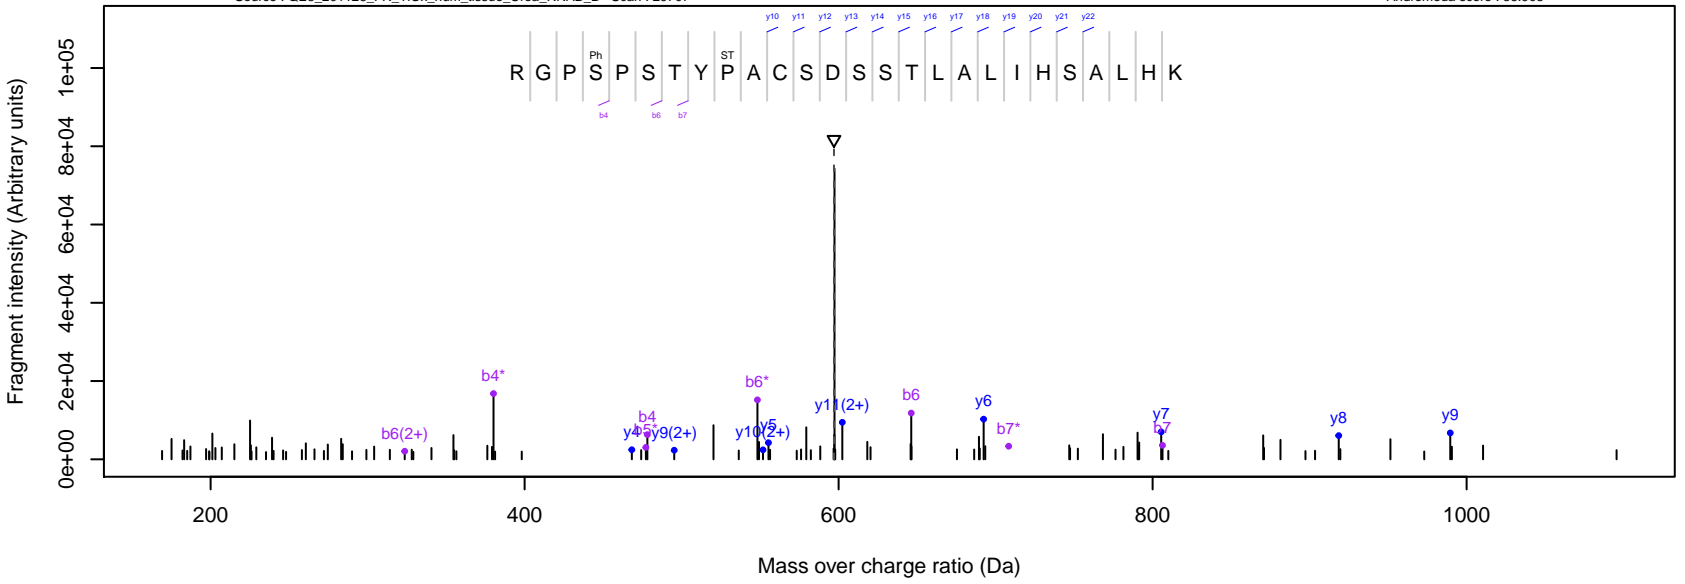

DLSTSPKPS(Phospho (STY))PIPS(Phospho (STY))PVLGR-3+

Source : QE3\_201126\_FR\_TiOx\_hum\_tissue\_Urea\_RNAB\_N Scan : 41251

Andromeda score : 56.882

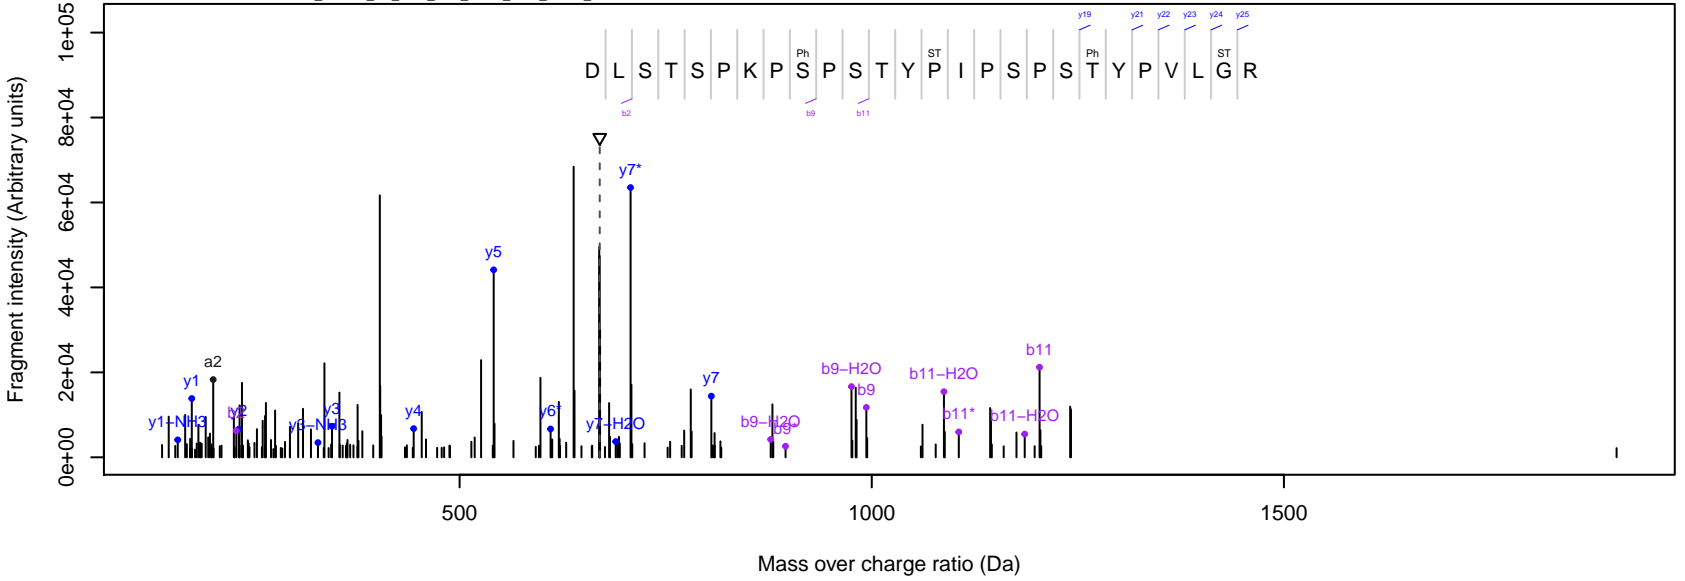

KKS(Phospho (STY))TIIISGISK-3+

Source : QE3\_201126\_FR\_TiOx\_hum\_tissue\_Urea\_RNAB\_N Scan : 13364

Andromeda score : 56.872

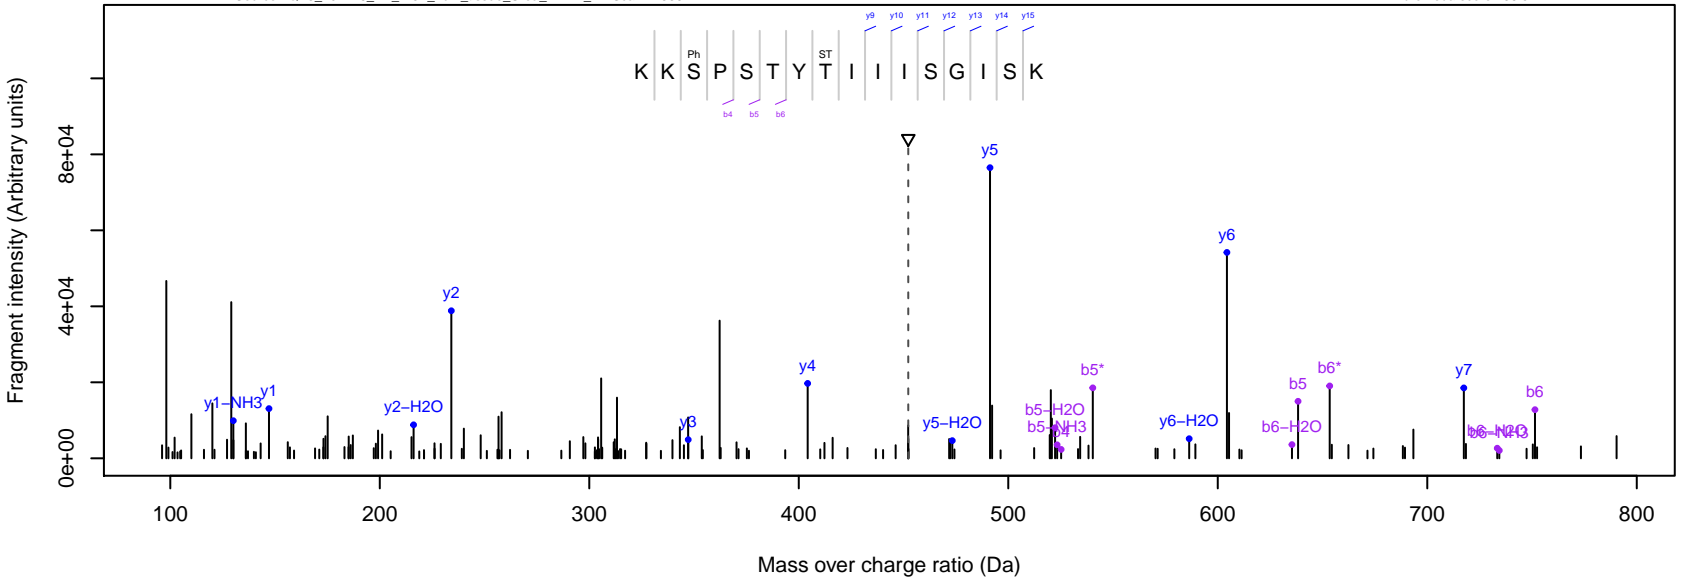

SPEAKS(Phospho (STY))PLQSQPHSR-3+

Source : QE3\_201126\_FR\_TiOx\_hum\_tissue\_Urea\_RNAB\_B Scan : 4467

Andromeda score : 56.872

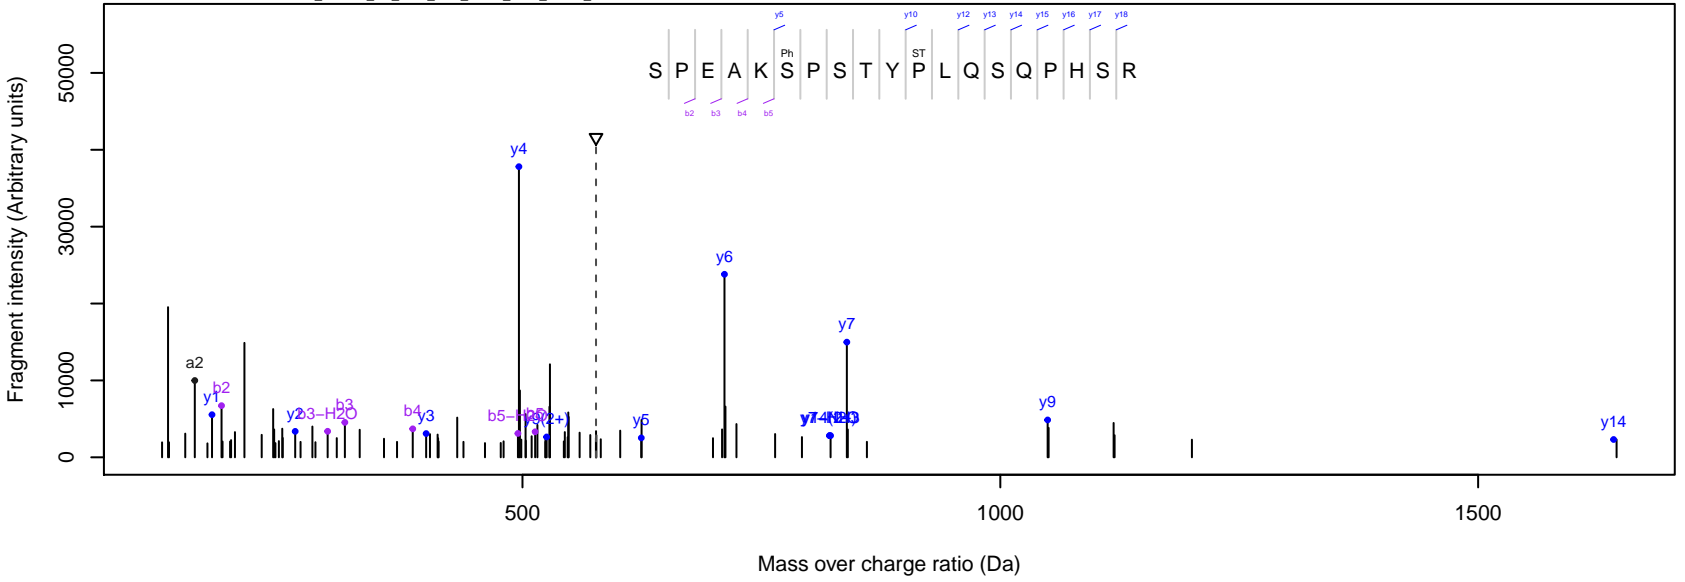

M(Oxidation (M))AEGEAEGS(Phospho (STY))VKEIK-3+

Source : QE3\_201126\_FR\_TiOx\_hum\_tissue\_Urea\_RNAB\_B Scan : 8282

Andromeda score : 56.851

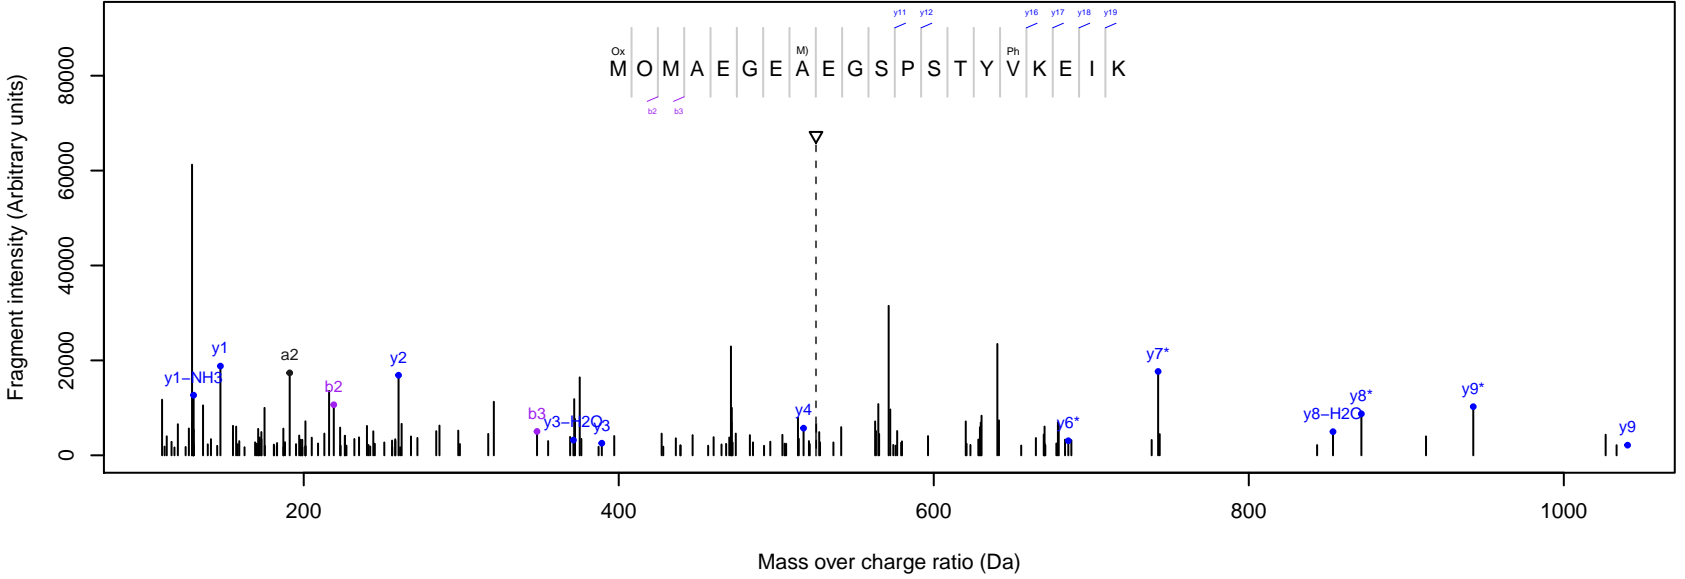

YRS(Phospho (STY))DVHTEAVQAALAK-3+

Source : QE3\_201126\_FR\_TiOx\_hum\_tissue\_Urea\_RNAB\_B Scan : 16657

Andromeda score : 56.851

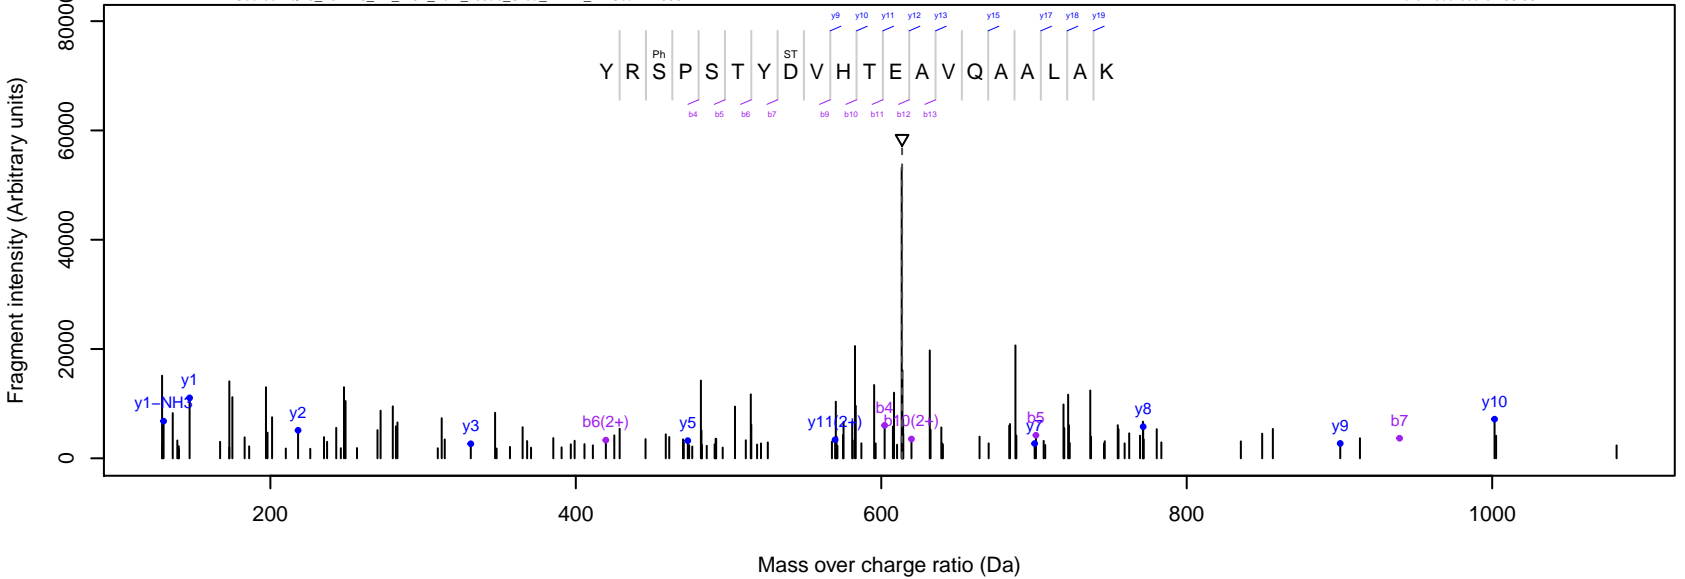

DRLGS(Phospho (STY))YSGPSTVSR-3+

Source : QE3\_201126\_FR\_TiOx\_hum\_tissue\_Urea\_RNAB\_N Scan : 17409

Andromeda score : 56.819

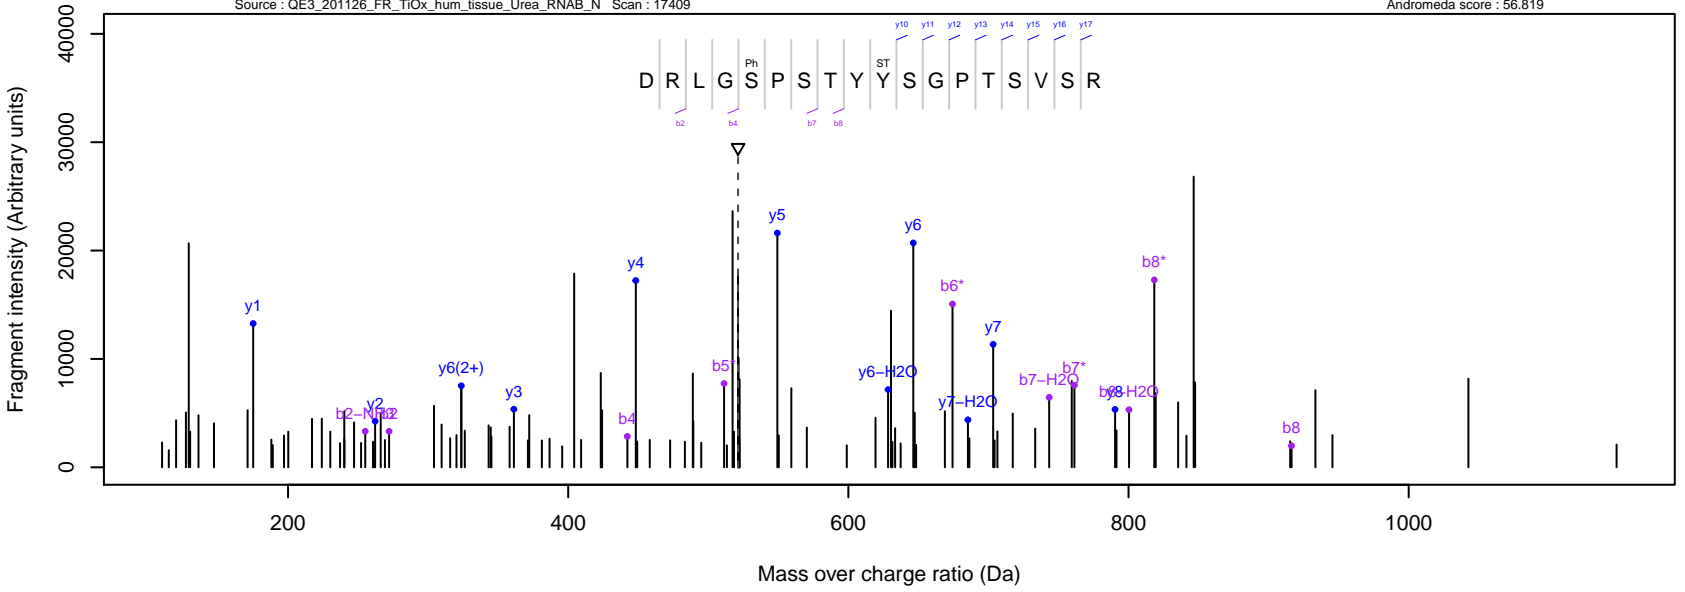

QQTEKPES(Phospho (STY))EDEWER-3+

Source : QE3\_201126\_FR\_TiOx\_hum\_tissue\_Urea\_RNAB\_H Scan : 12028

Andromeda score : 56.819

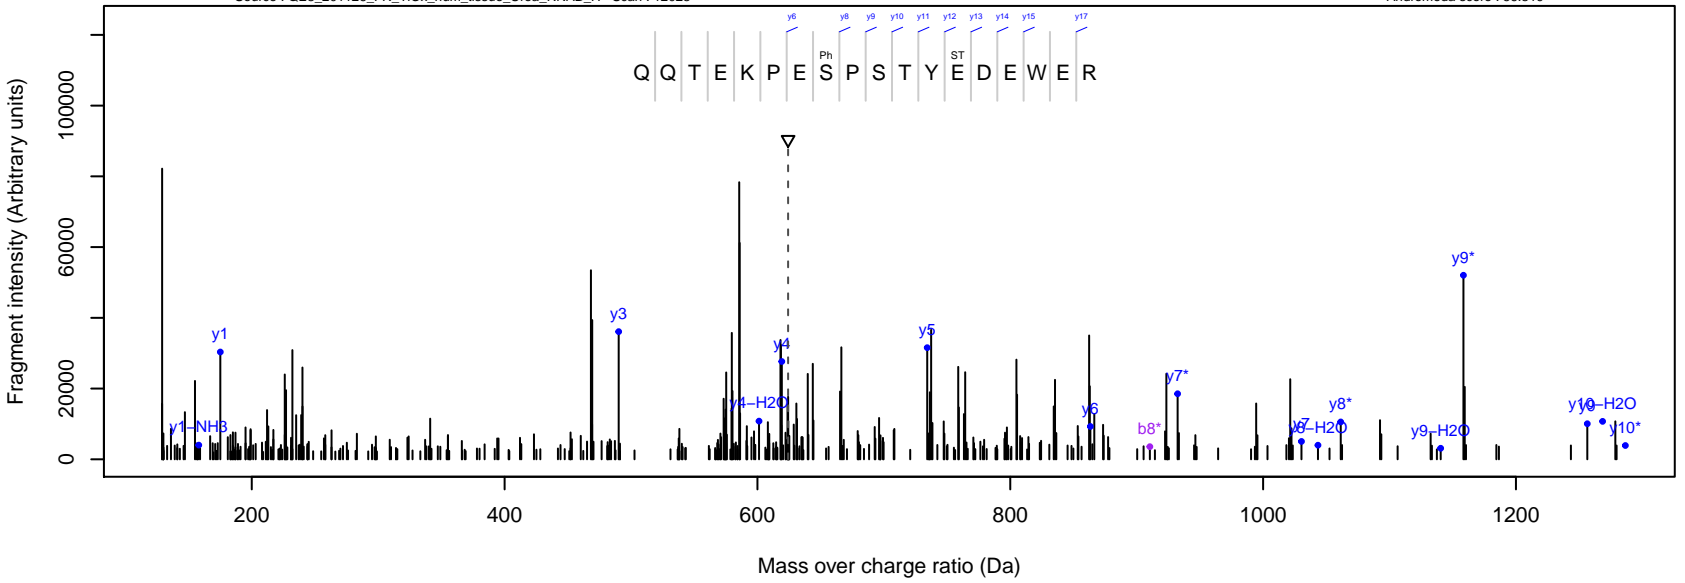

AFS(Phospho (STY))IQTPEQYFCYK-2+

Source : QE3\_201126\_FR\_TiOx\_hum\_tissue\_Urea\_RNAB\_H Scan : 54546

Andromeda score : 56.783

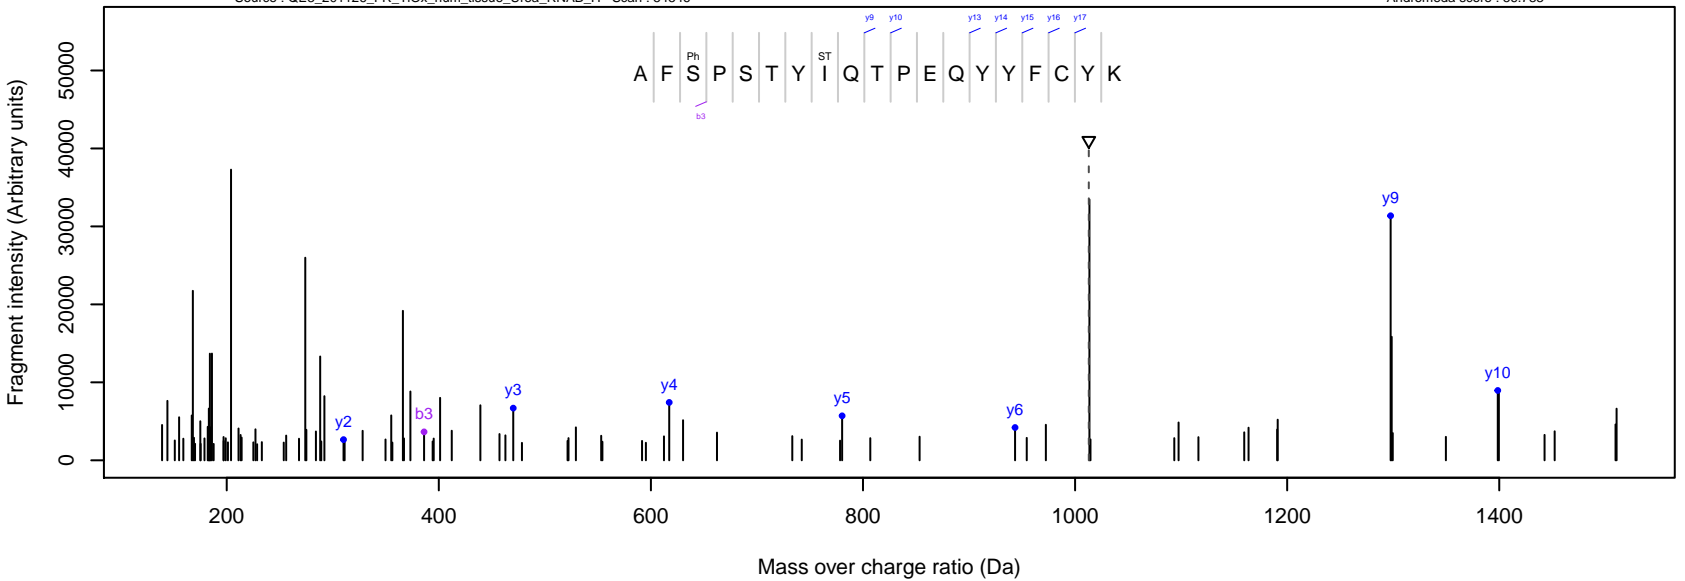

VTM(Oxidation (M))ILQSPS(Phospho (STY))FR-2+

Source : QE3\_201126\_FR\_TiOx\_hum\_tissue\_Urea\_RNAB\_N Scan : 20190

Andromeda score : 56.729

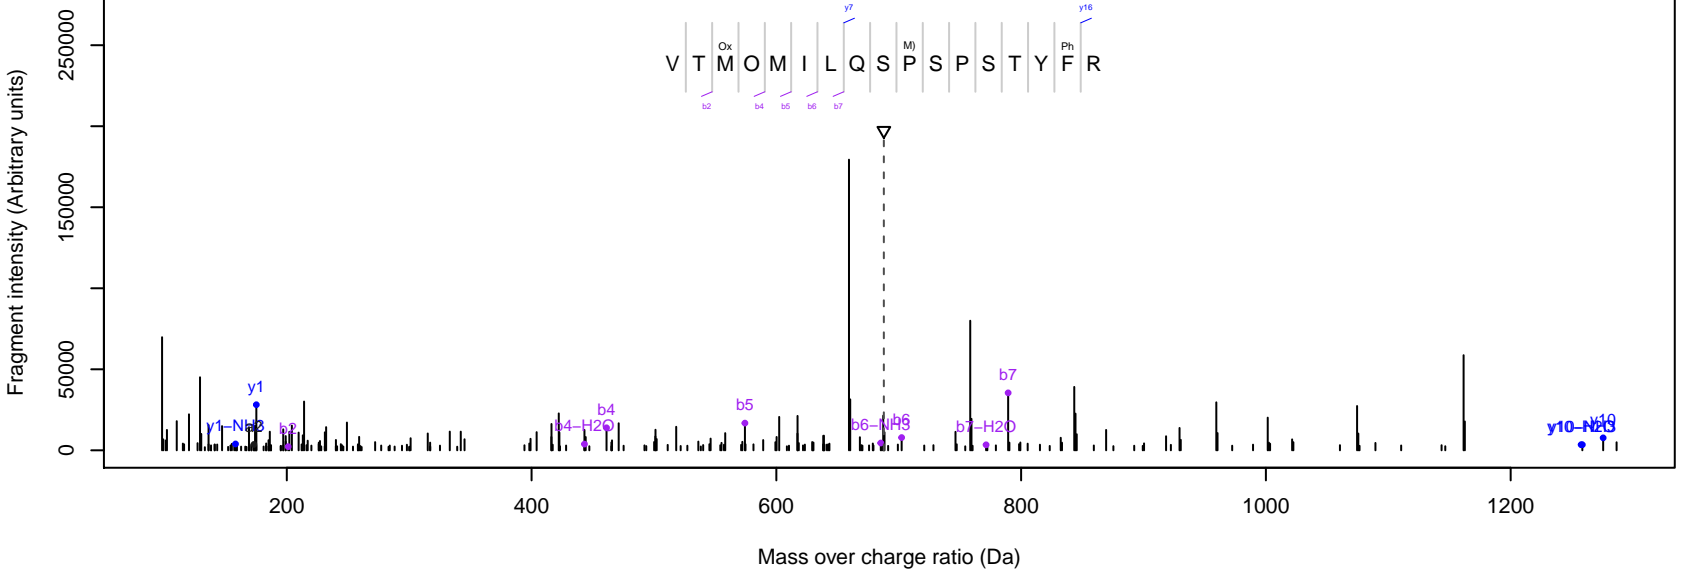

GESAPTLSTSPSPSPSPTSPS(Phospho (STY))PTLGR-3+

Source : QE3\_201126\_FR\_TiOx\_hum\_tissue\_Urea\_RNAB\_H Scan : 29532

Andromeda score : 56.728

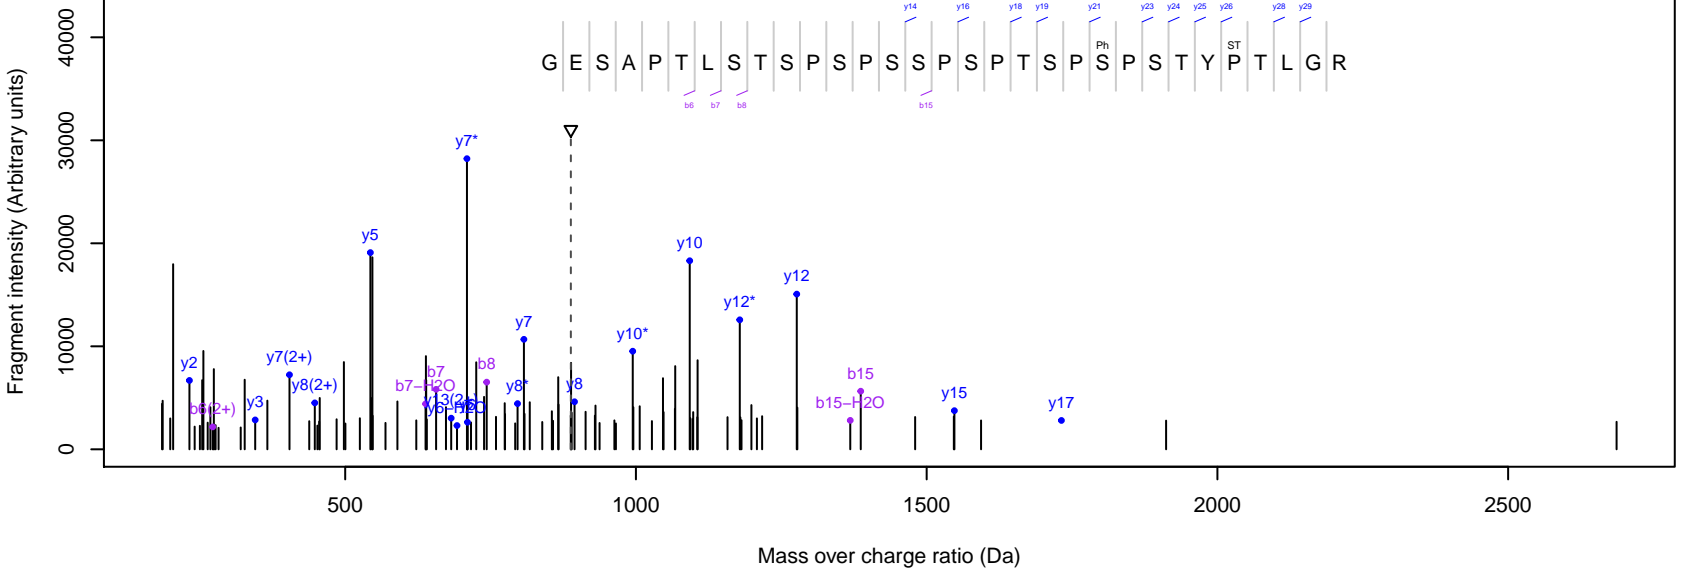

ESS(Phospho (STY))PIPS(Phospho (STY))PTSDR-2+

Source : QE3\_201126\_FR\_TiOx\_hum\_tissue\_Urea\_RNAB\_N Scan : 18682

Andromeda score : 56.725

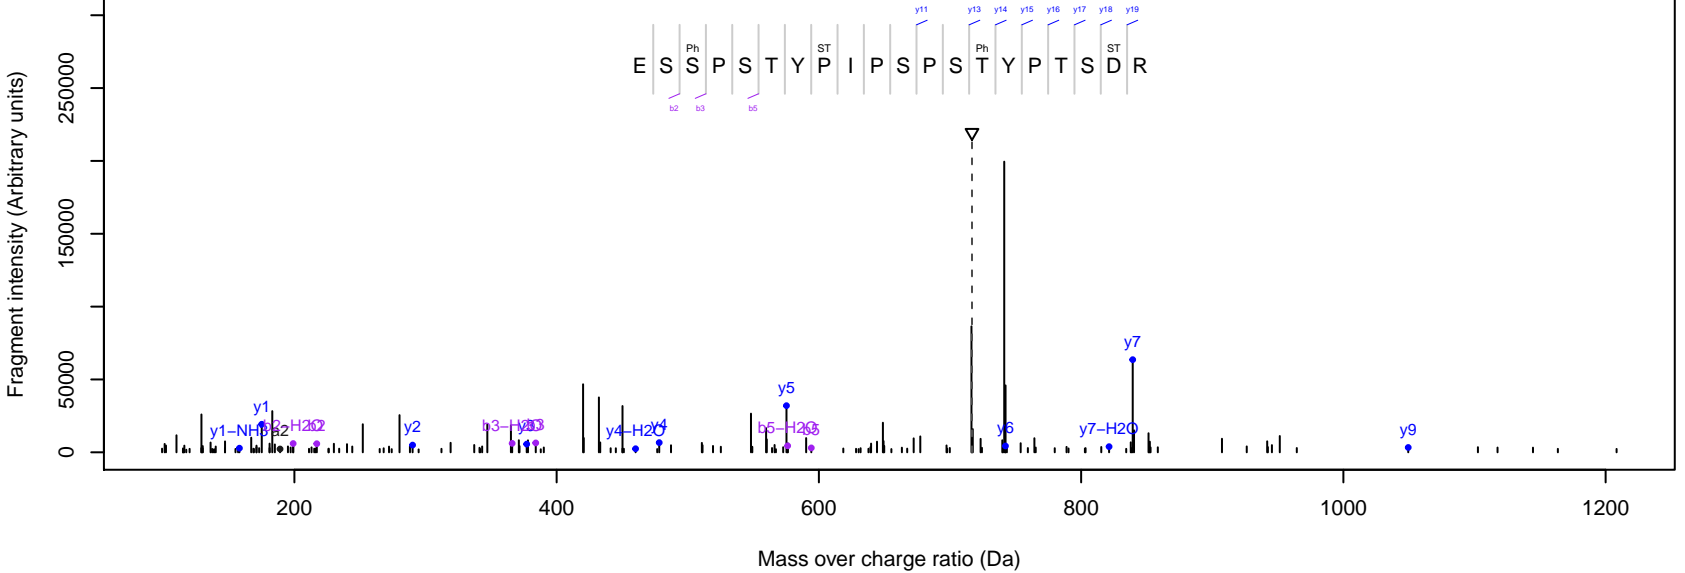

LTGS(Phospho (STY))TSS(Phospho (STY))LNKLSVQSSGNRR-3+

Source : QE3\_201126\_FR\_TiOx\_hum\_tissue\_Urea\_RNAB\_B Scan : 17588

Andromeda score : 56.72

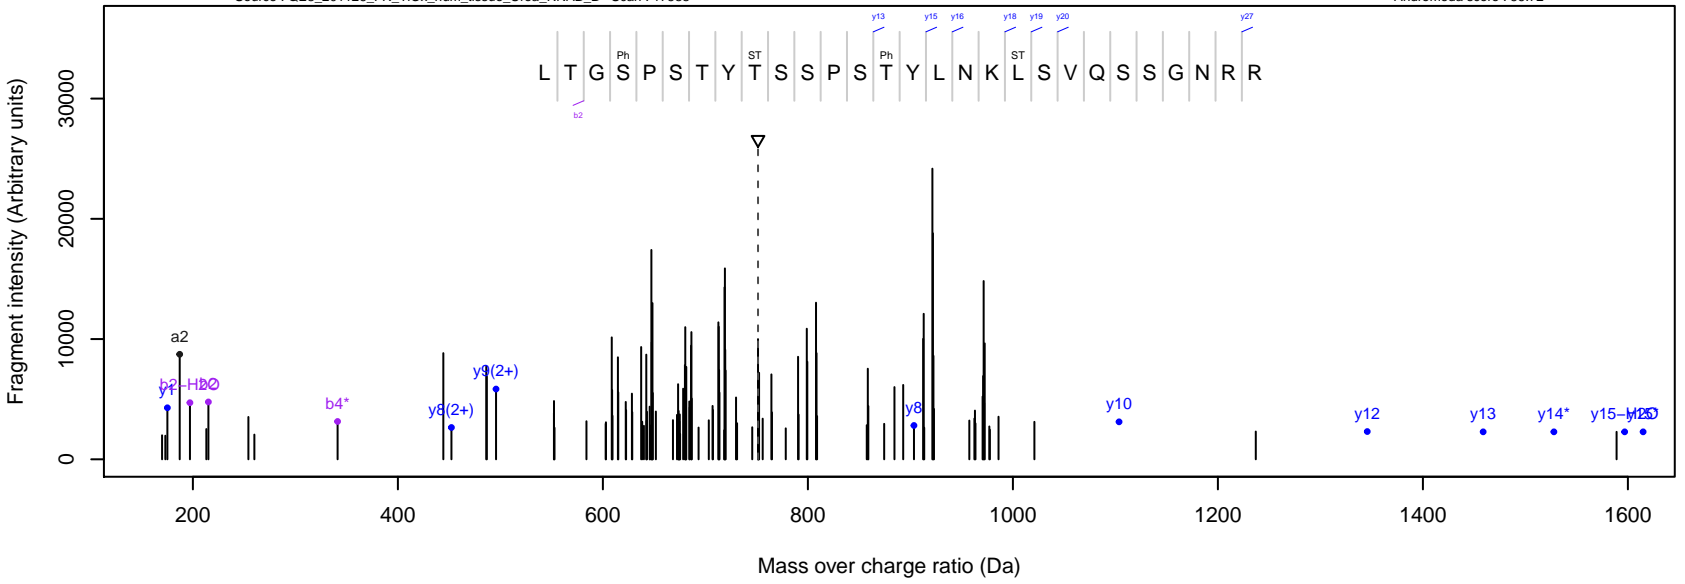

KRPS(Phospho (STY))LPSS(Phospho (STY))PS(Phospho (STY))PGLPK-3+

Source : QE3\_201126\_FR\_TiOx\_hum\_tissue\_Urea\_RNAB\_N Scan : 21632

Andromeda score : 56.719

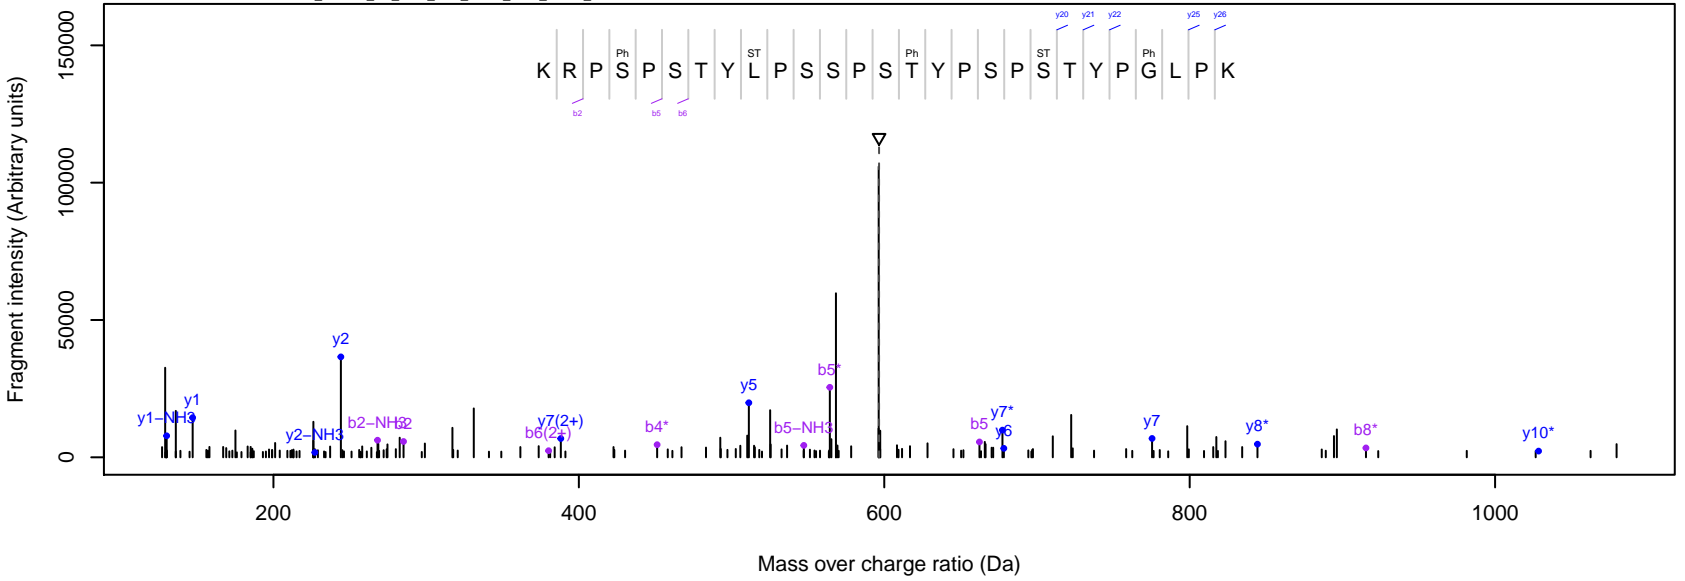

KYS(Phospho (STY))SSLSHM(Oxidation (M))GAYSR-3+

Source : QE3\_201126\_FR\_TiOx\_hum\_tissue\_Urea\_RNAB\_N Scan : 8839

Andromeda score : 56.708

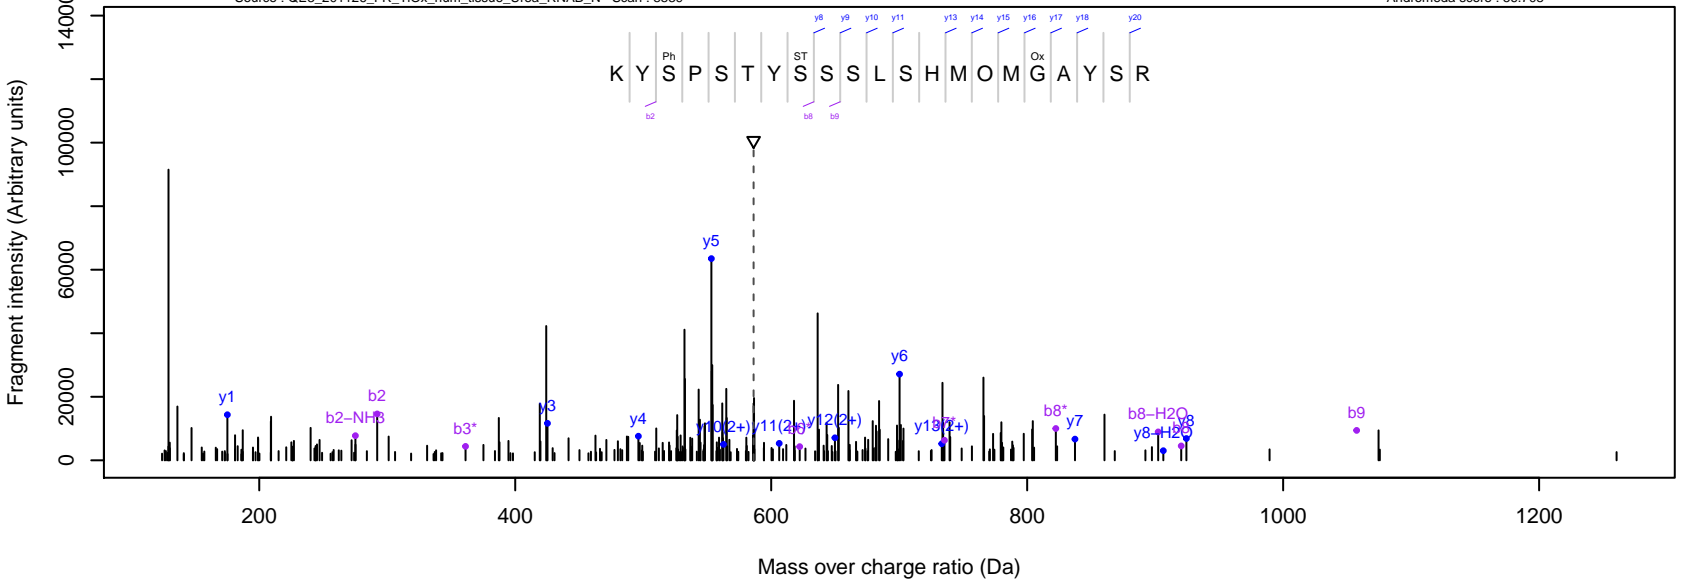

RSS(Phospho (STY))SDEQGLSYSSLK-3+

Source : QE3\_201126\_FR\_TiOx\_hum\_tissue\_Urea\_RNAB\_N Scan : 17166

Andromeda score : 56.708

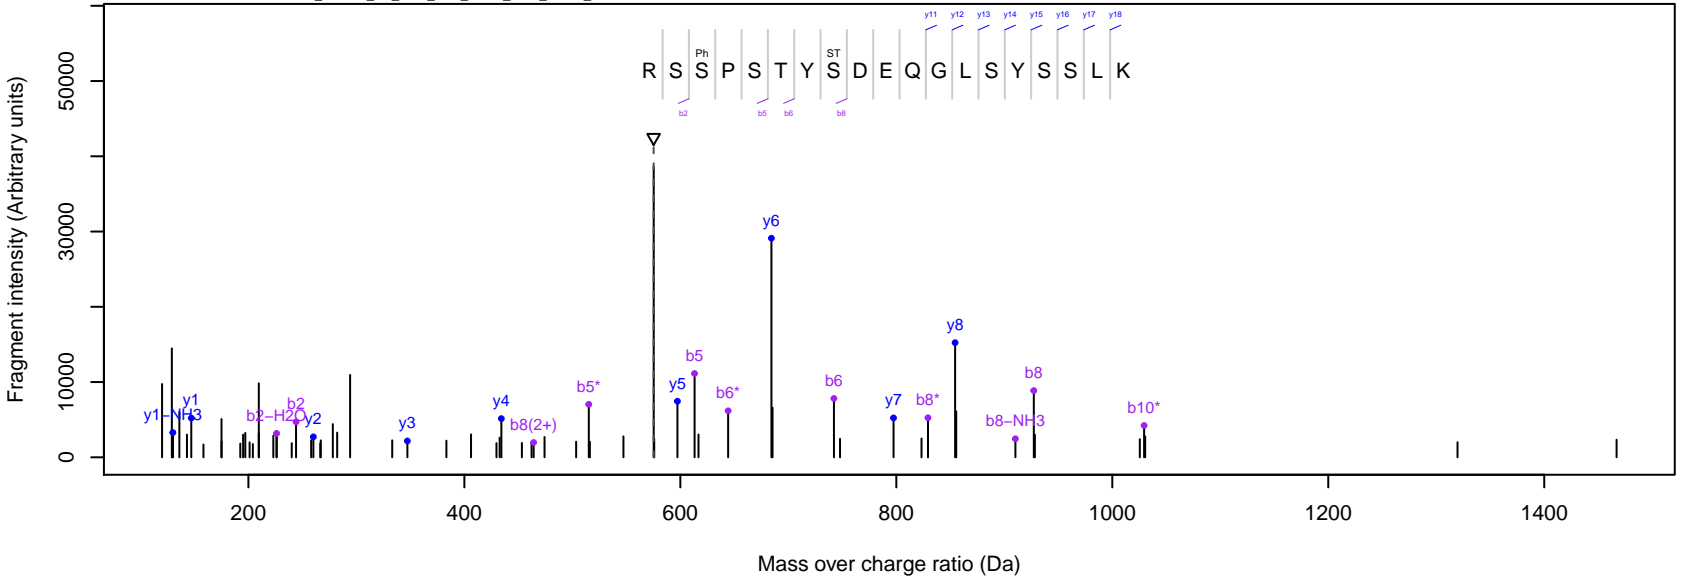

APVPLLPPLPPPPPEPESSEDP(Phospho (STY))PPEPQDLSSVCKEEK-4+

Source : QE3\_201126\_FR\_TiOx\_hum\_tissue\_Urea\_RNAB\_N Scan : 53584

Andromeda score : 56.655

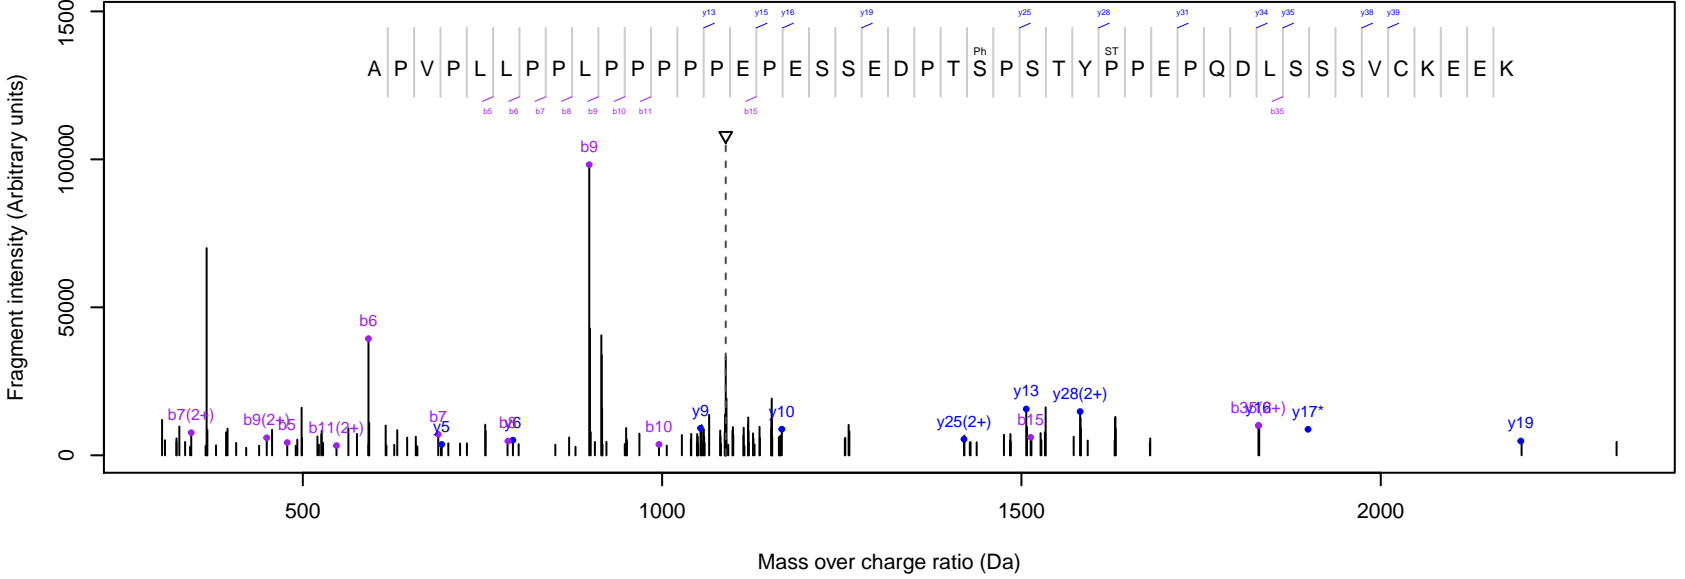

TSQPPVPQGEAEEDS(Phospho (STY))QGKEGPGSGDLSASSR-3+

Source : QE3\_201126\_FR\_TiOx\_hum\_tissue\_Urea\_RNAB\_H Scan : 17077

Andromeda score : 56.638

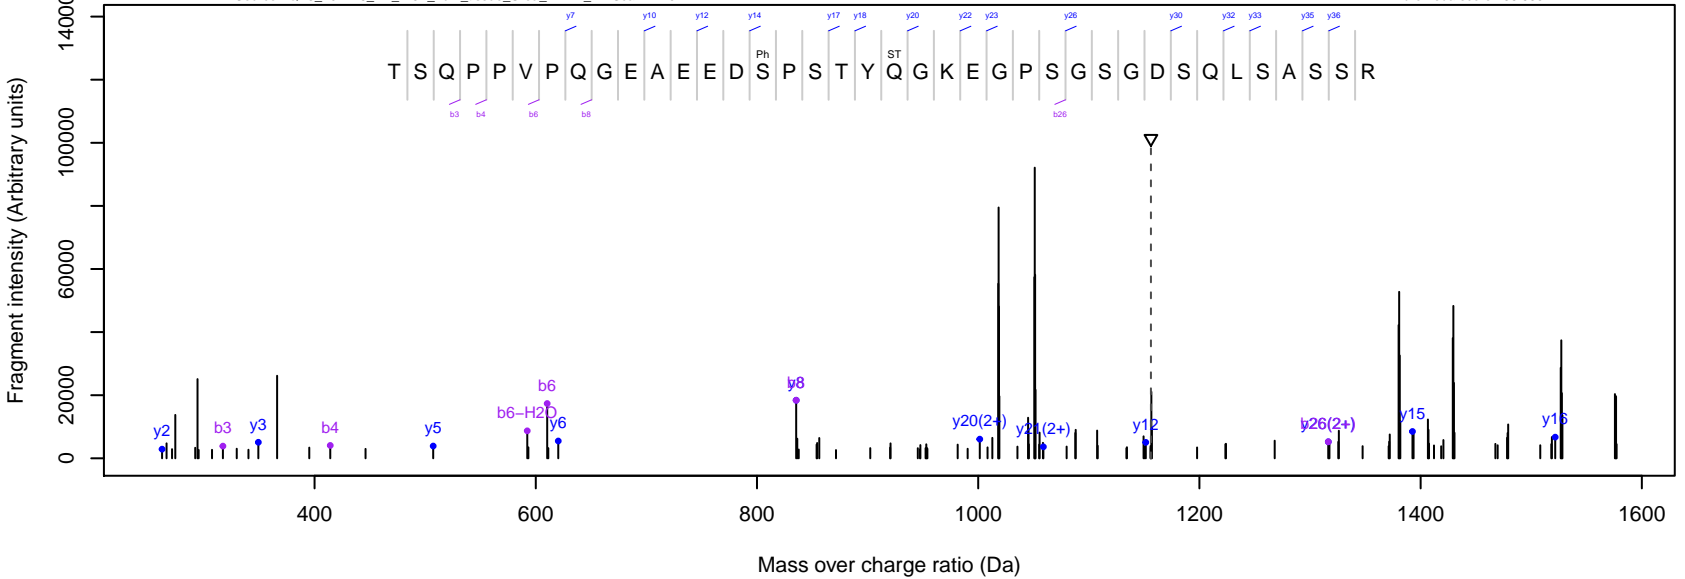



VAPSPDS(Phospho (STY))DS(Phospho (STY))DTDSEDP SLRR-3+

Source : QE3\_201126\_FR\_TiOx\_hum\_tissue\_Urea\_RNAB\_N Scan : 17244

Andromeda score : 56.625

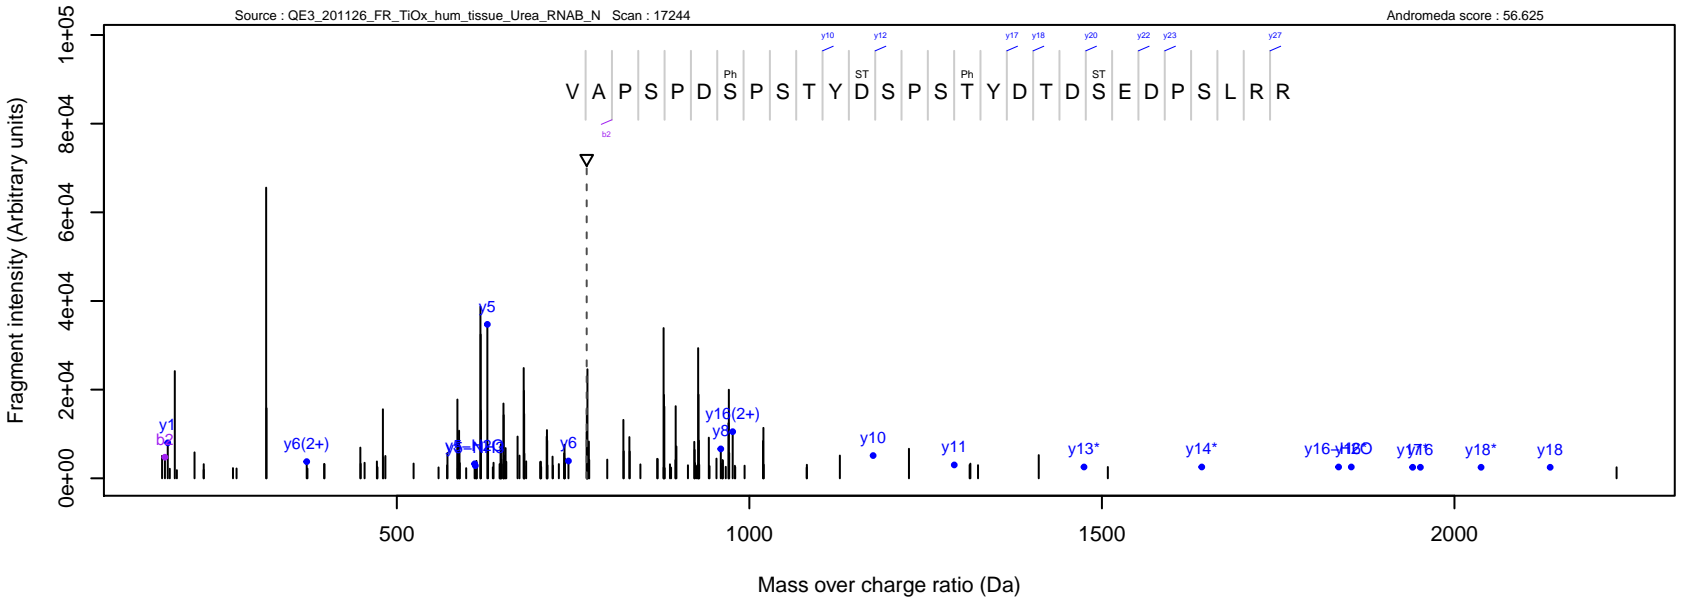

AT(Phospho (STY))PPPS(Phospho (STY))PLLSELLK-2+

Source : QE3\_201126\_FR\_TiOx\_hum\_tissue\_Urea\_RNAB\_B Scan : 62775

Andromeda score : 56.599

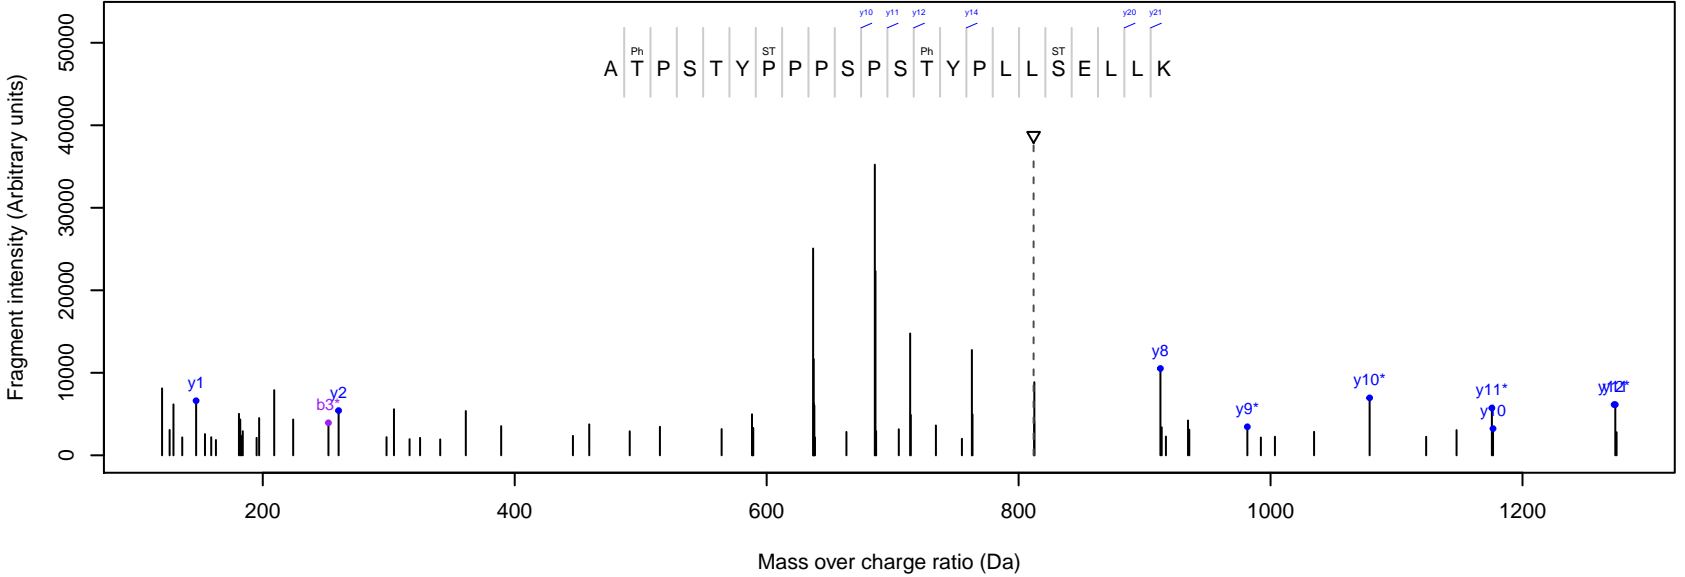

(Acetyl (Protein N-term))GPSGAGKS(Phospho (STY))TFM(Oxidation (M))NILAGYR-2+

Source : QE3\_201126\_FR\_TiOx\_hum\_tissue\_Urea\_RNAB\_H Scan : 48699

Andromeda score : 56.599

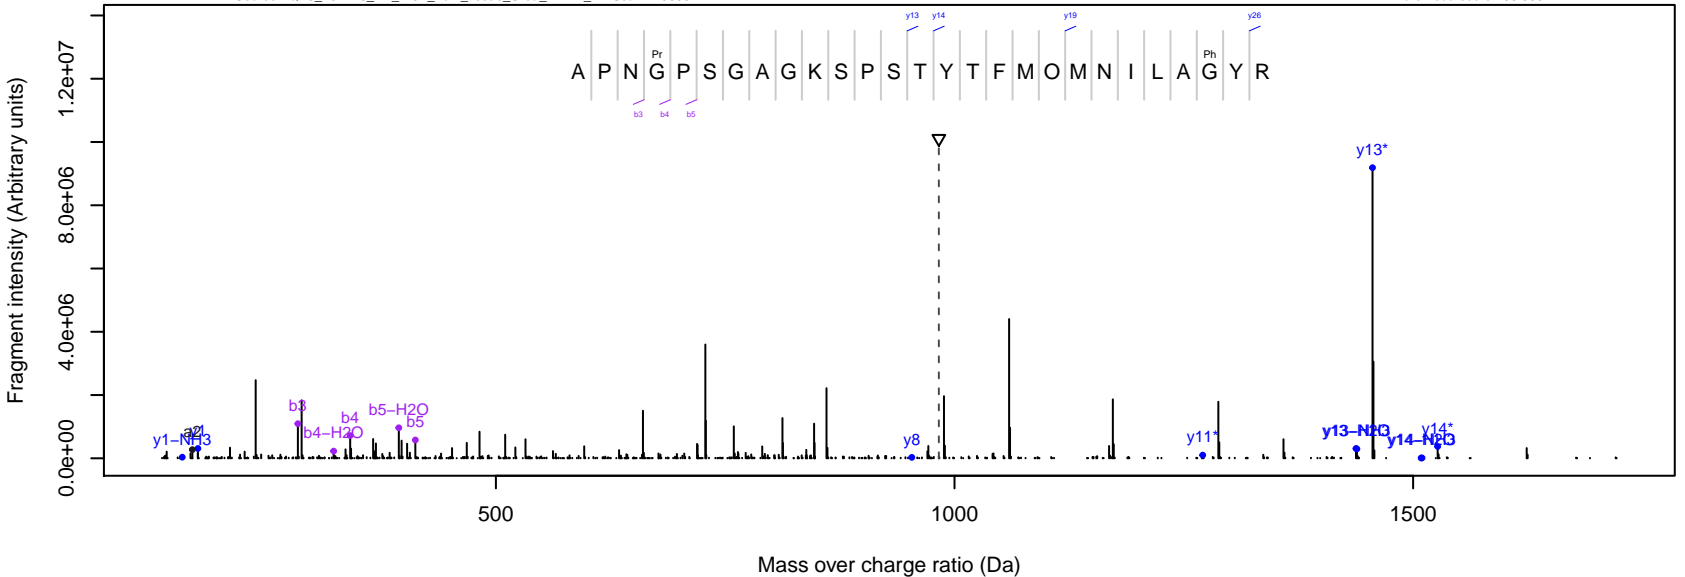

NFATS(Phospho (STY))LYSMIK-2+

Source : QE3\_201126\_FR\_TiOx\_hum\_tissue\_Urea\_RNAB\_H Scan : 53960

Andromeda score : 56.563

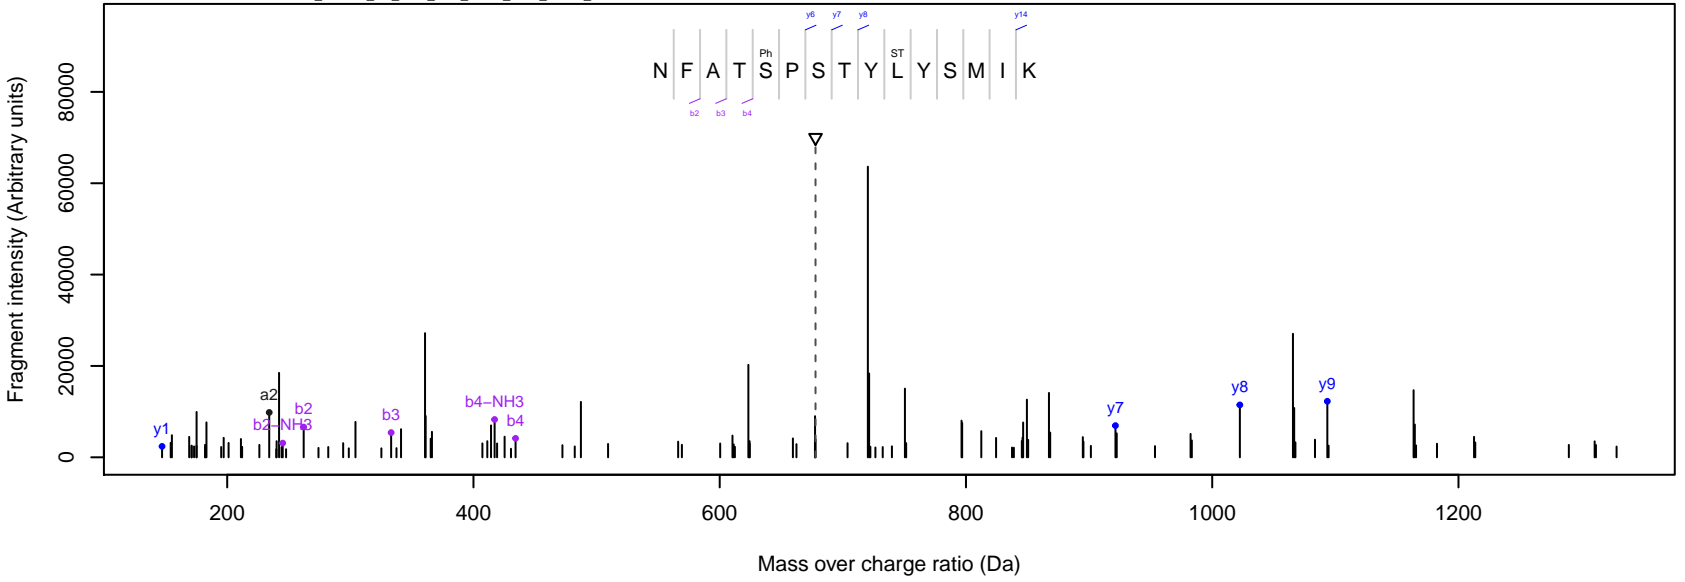

EPGS(Phospho (STY))GT(Phospho (STY))ESDTPDFHNQENEPSQEDPEDLDGVSQGVKPK-4+

Source : QE3\_201126\_FR\_TiOx\_hum\_tissue\_Urea\_RNAB\_N Scan : 28678

Andromeda score : 56.547

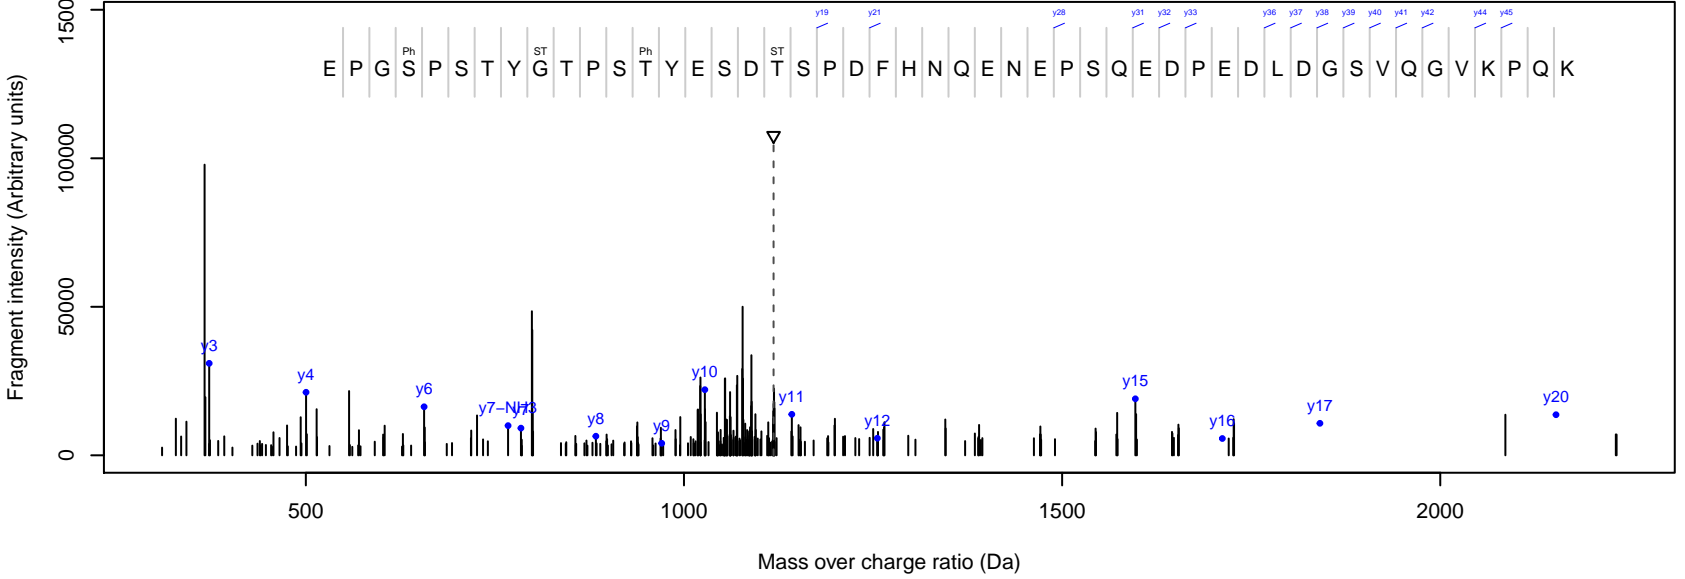

TQS(Phospho (STY))TFDPFEKPANQVK-3+

Source : QE3\_201126\_FR\_TiOx\_hum\_tissue\_Urea\_RNAB\_H Scan : 27948

Andromeda score : 56.54

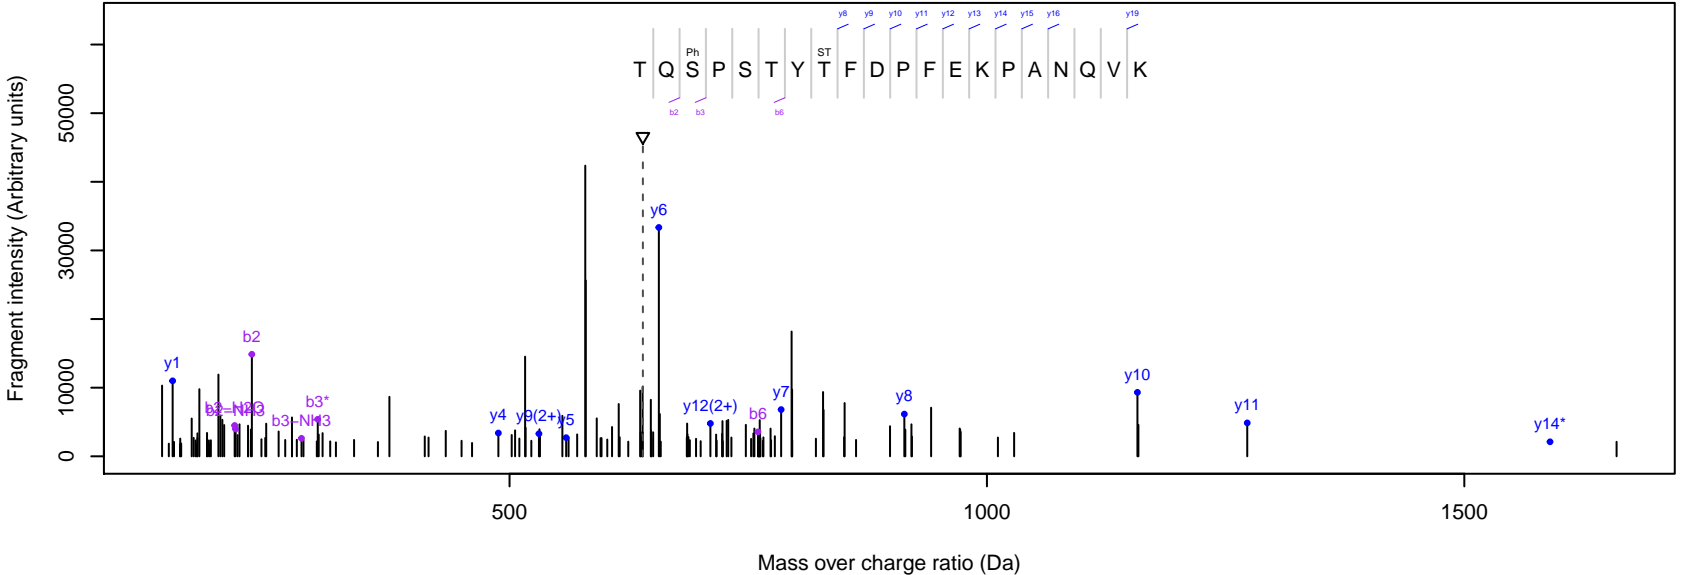

MALPPQEDATAS(Phospho (STY))PPRQK-3+

Source : QE3\_201126\_FR\_TiOx\_hum\_tissue\_Urea\_RNAB\_N Scan : 17614

Andromeda score : 56.529

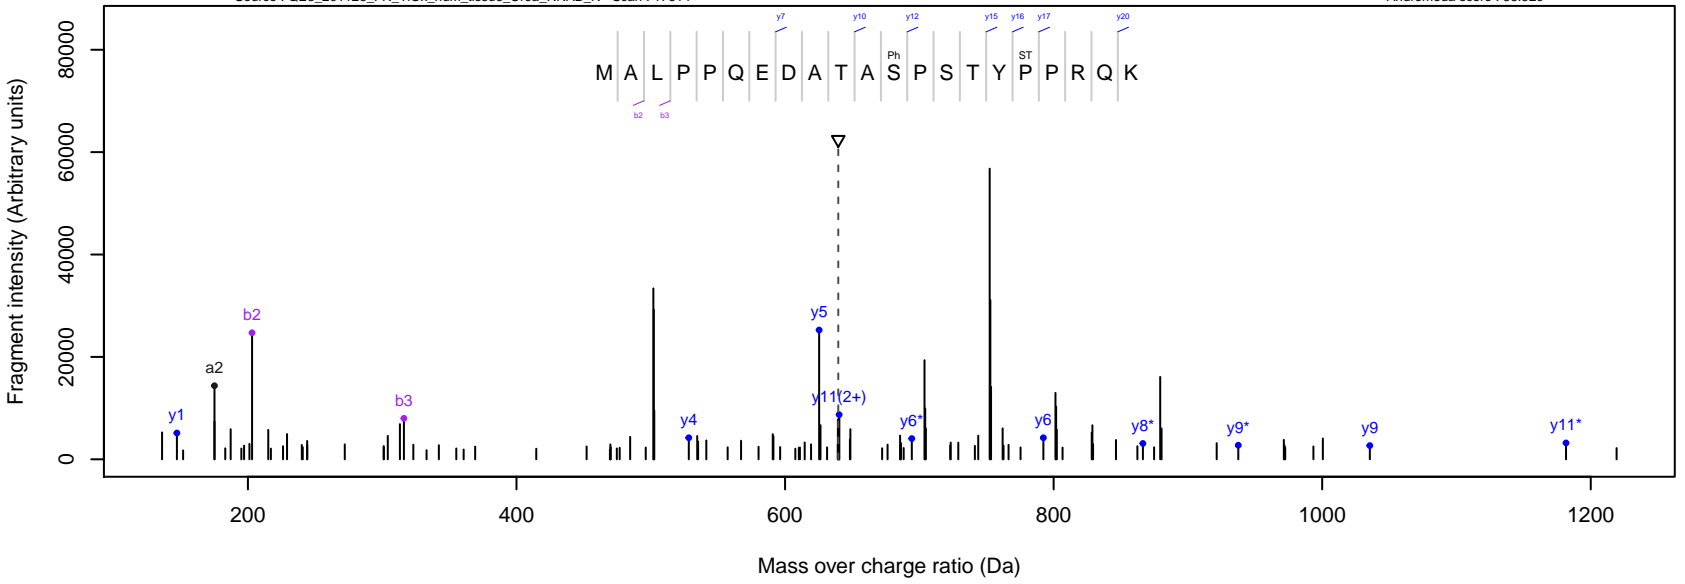

GGHERPPS(Phospho (STY))PGLR-3+

Source : QE3\_201126\_FR\_TiOx\_hum\_tissue\_Urea\_RNAB\_B Scan : 6307

Andromeda score : 56.514

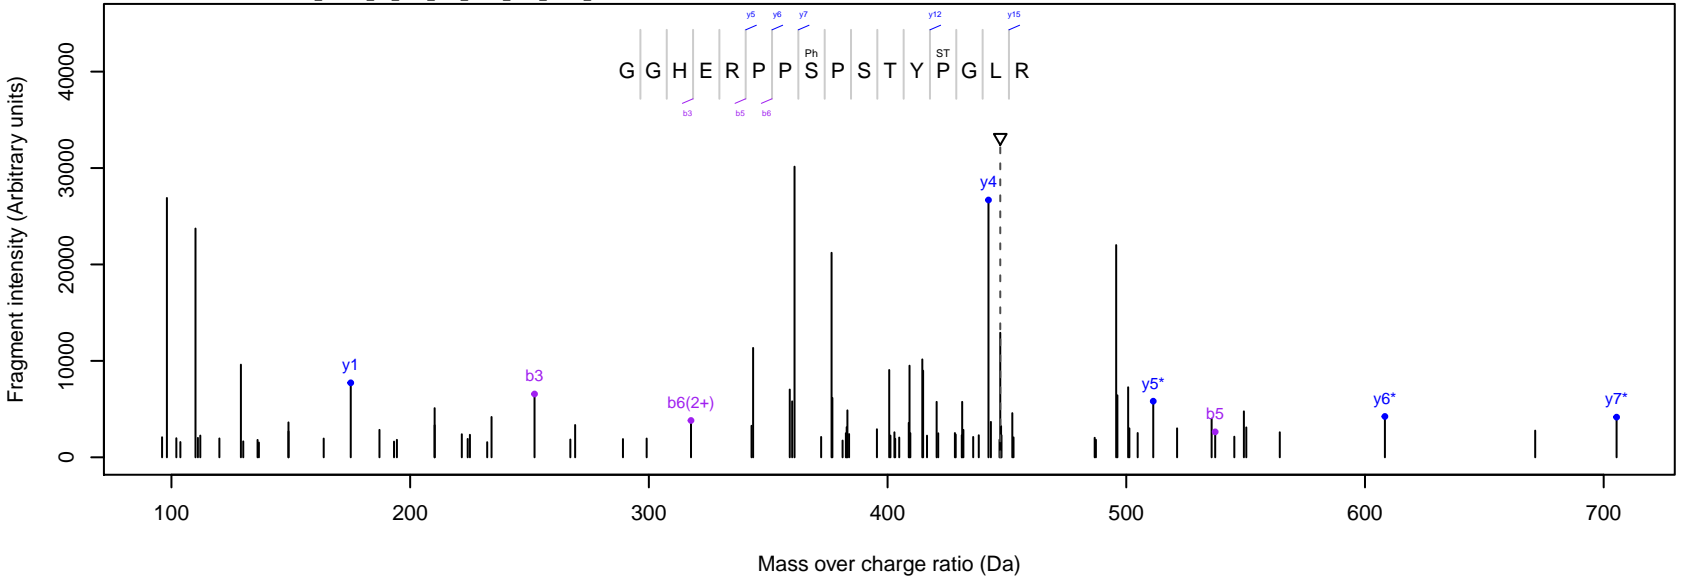

GILRT(Phospho (STY))PDTIRR-3+

Source : QE3\_201126\_FR\_TiOx\_hum\_tissue\_Urea\_RNAB\_H Scan : 13489

Andromeda score : 56.482

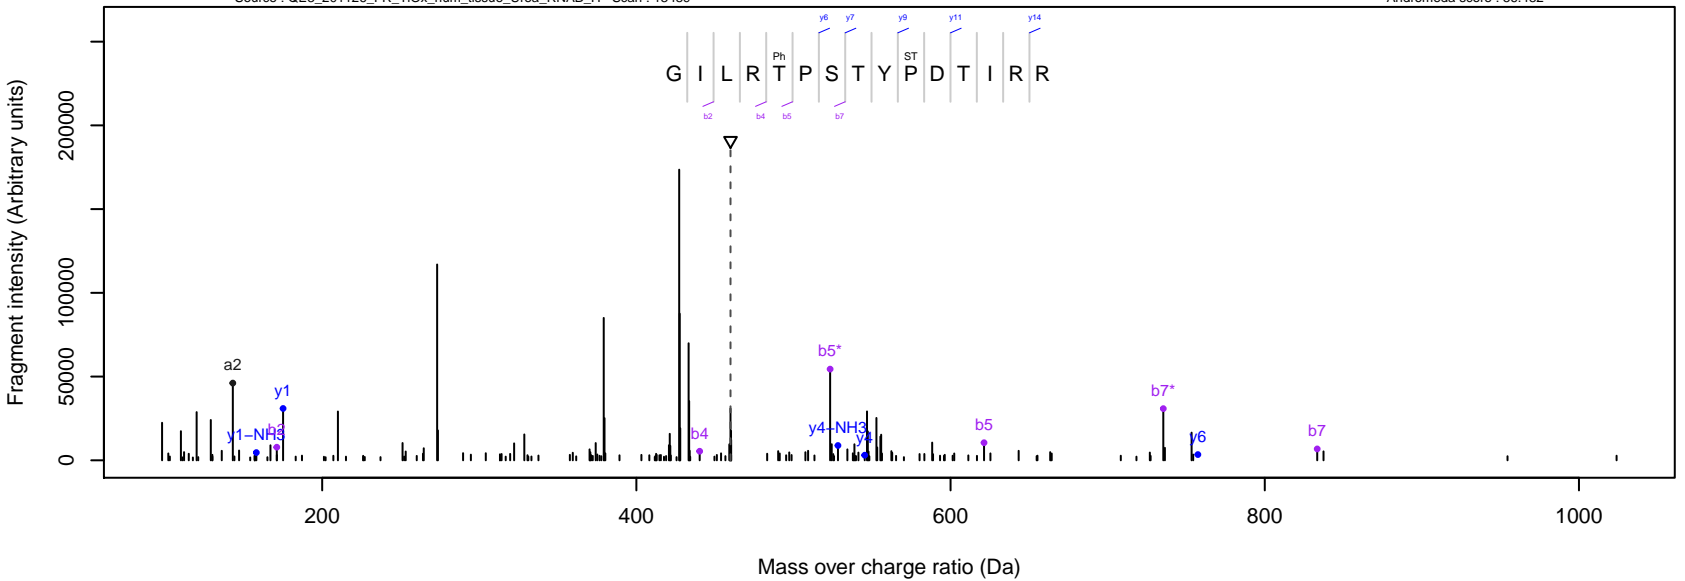

IRYEEQRPS(Phospho (STY))LK-3+

Source : QE3\_201126\_FR\_TiOx\_hum\_tissue\_Urea\_RNAB\_N Scan : 10422

Andromeda score : 56.482

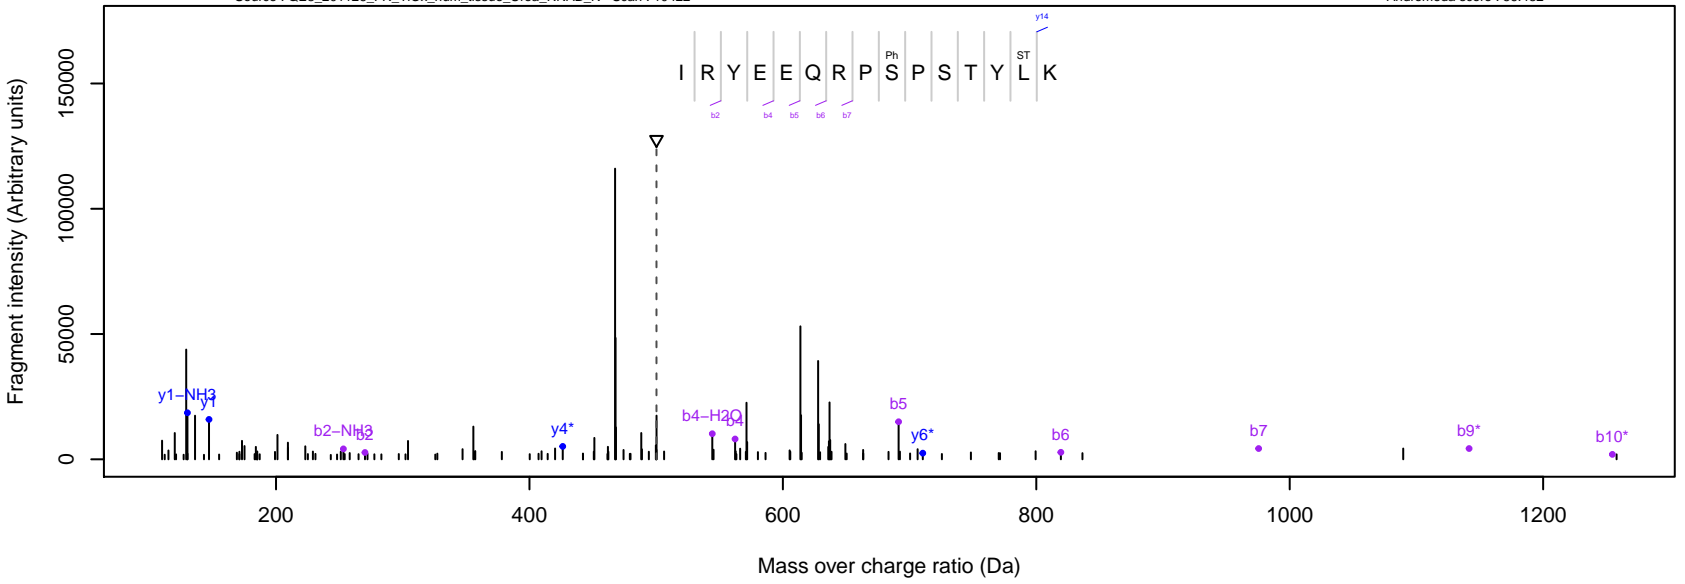

KPTGSLPS(Phospho (STY))PSGVR-2+

Source : QE3\_201126\_FR\_TiOx\_hum\_tissue\_Urea\_RNAB\_H Scan : 12713

Andromeda score : 56.482

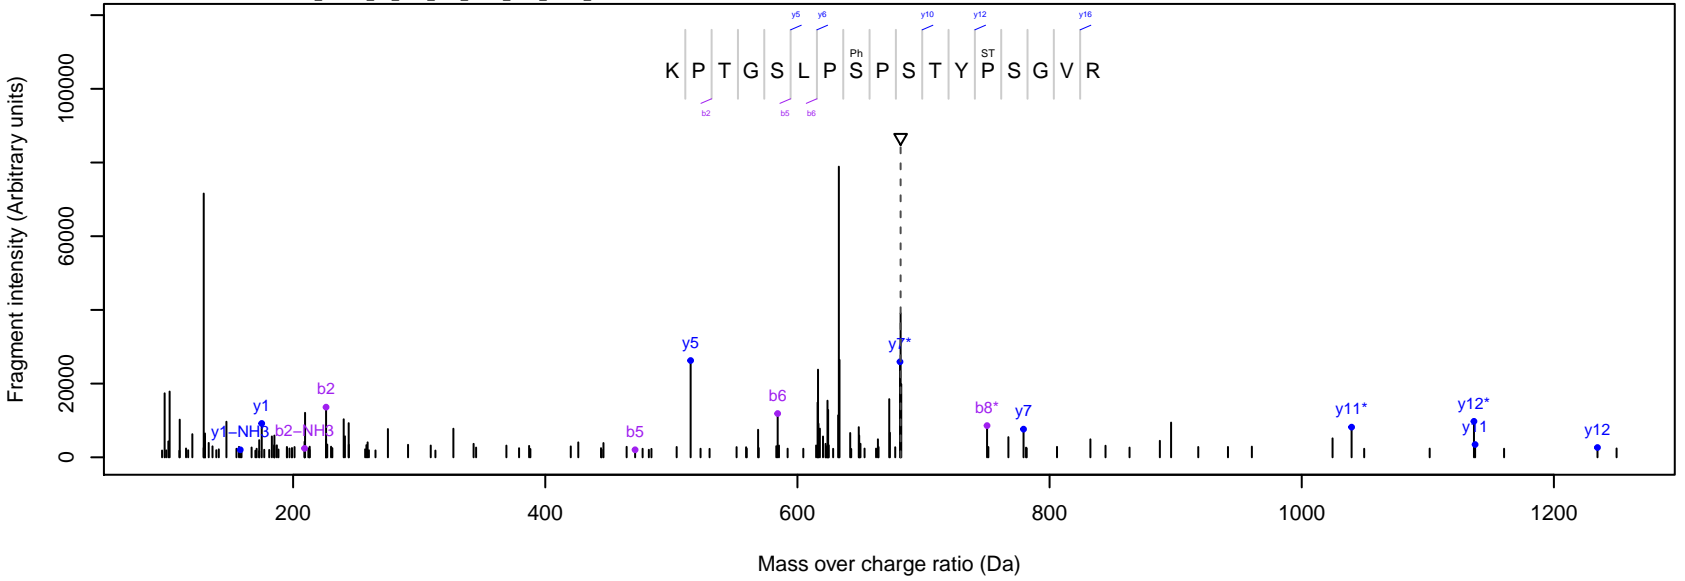

IAS(Phospho (STY))DEEIQTKDAVIQDLERK-3+

Source : QE3\_201126\_FR\_TiOx\_hum\_tissue\_Urea\_RNAB\_B Scan : 37059

Andromeda score : 56.468

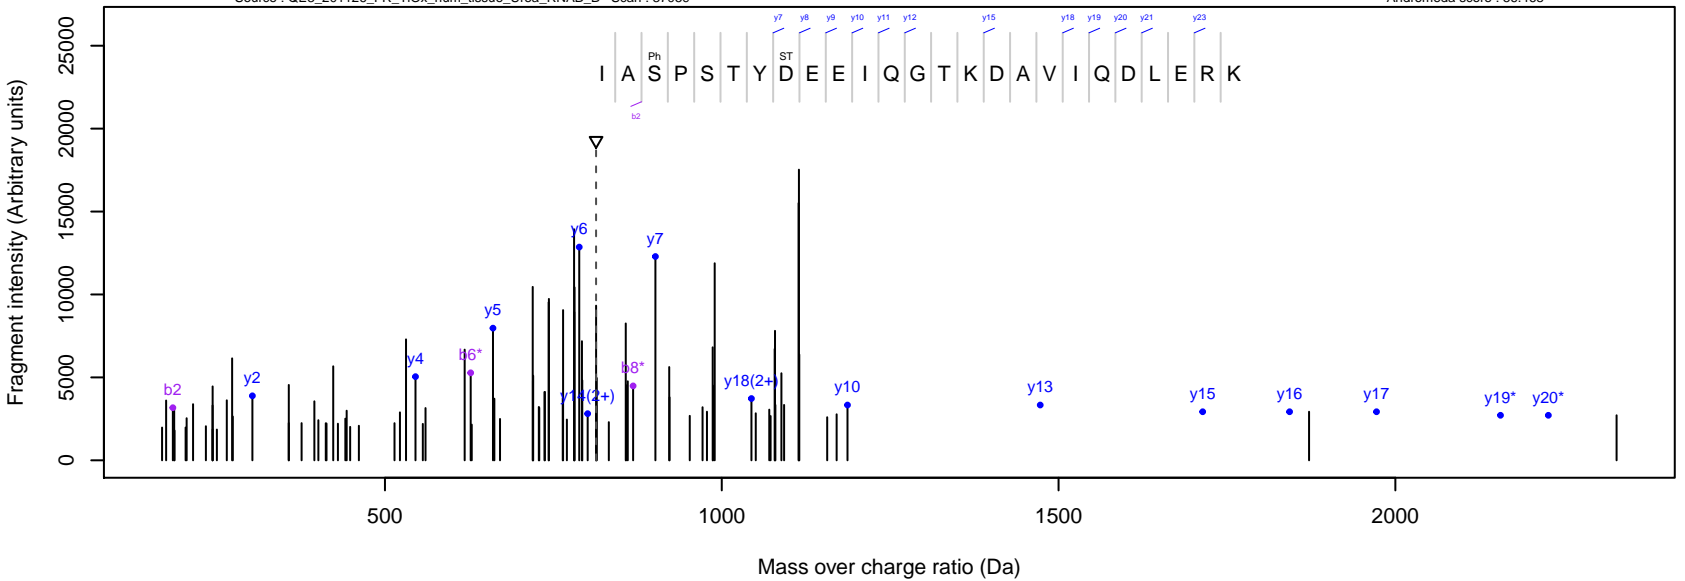

SMS(Phospho (STY))FQGIR-2+

Source : QE3\_201126\_FR\_TiOx\_hum\_tissue\_Urea\_RNAB\_N Scan : 26520

Andromeda score : 56.432

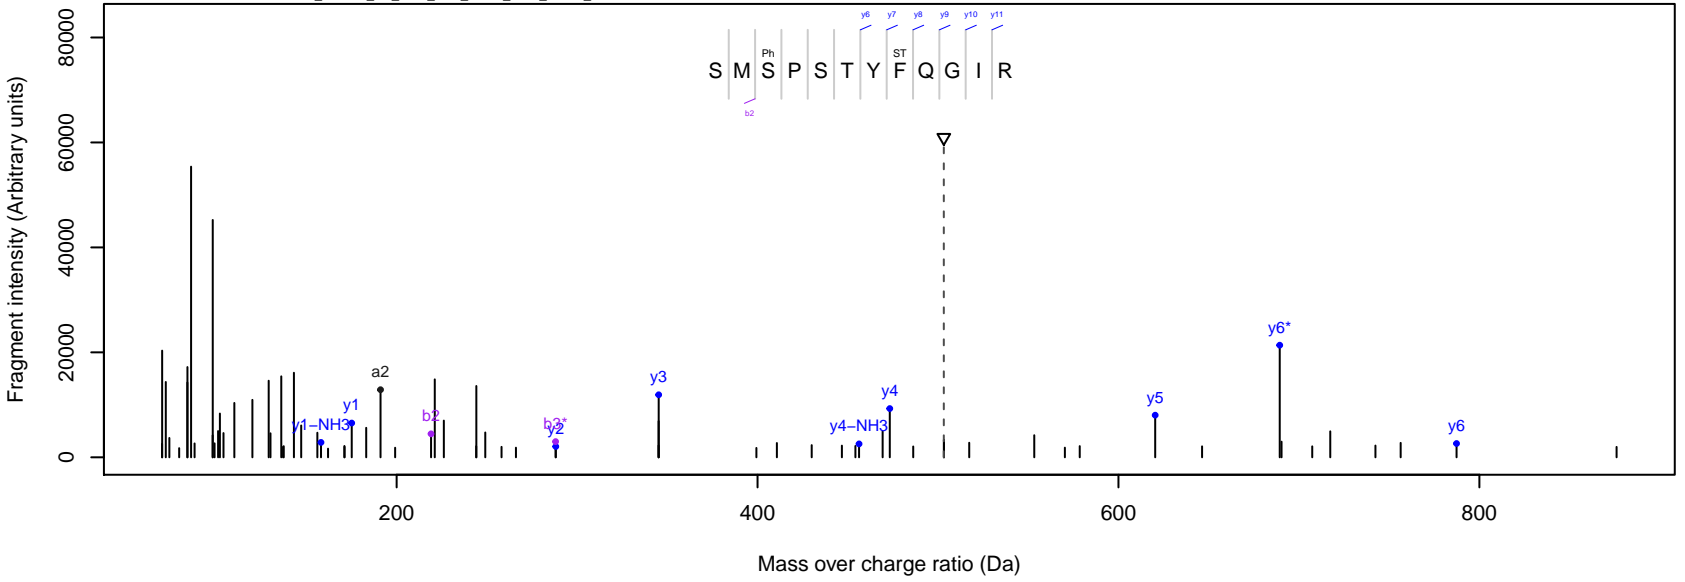

IACEEFS(Phospho (STY))DSEEEGEGGR-2+

Source : QE3\_201126\_FR\_TiOx\_hum\_tissue\_Urea\_RNAB\_B Scan : 20795

Andromeda score : 56.424

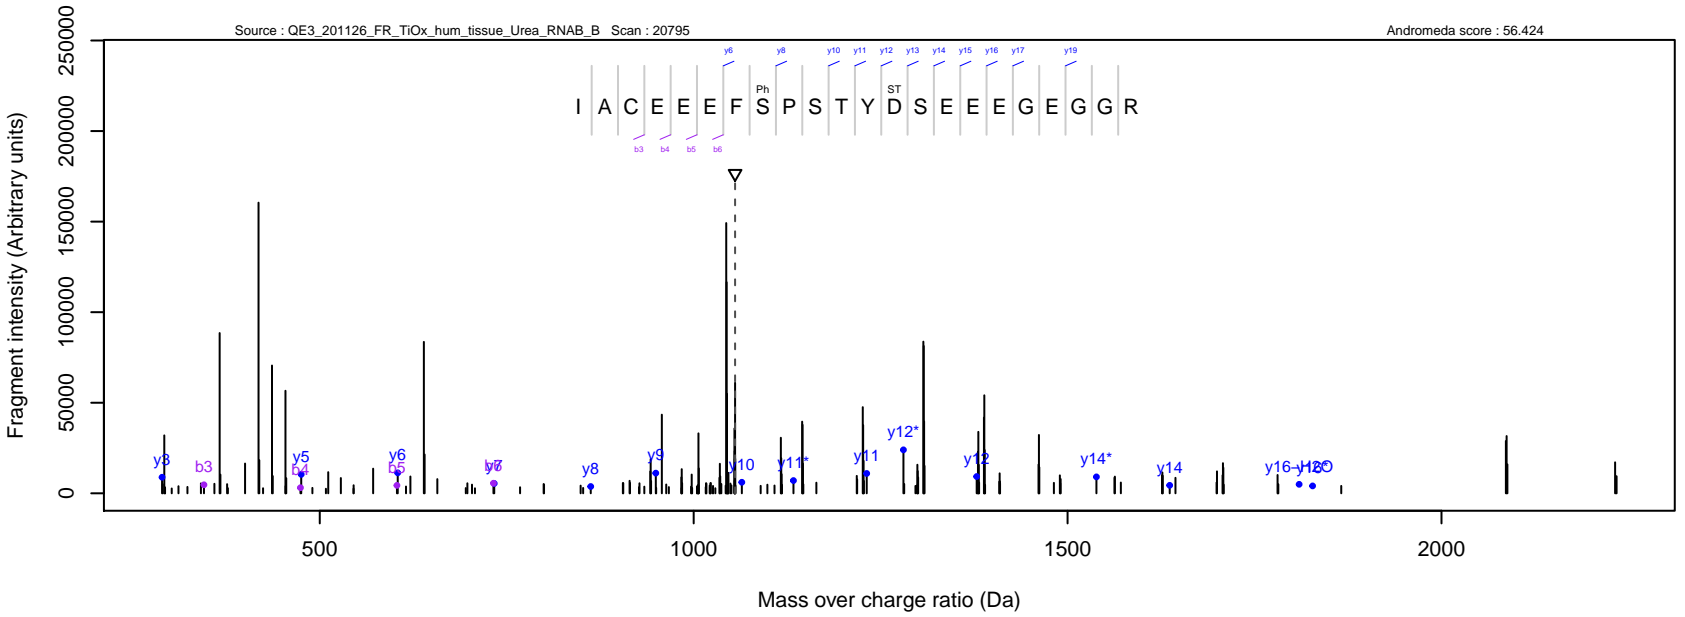

SGSYSGRS(Phospho (STY))PS(Phospho (STY))PYGR-3+

Source : QE3\_201126\_FR\_TiOx\_hum\_tissue\_Urea\_RNAB\_N Scan : 9783

Andromeda score : 56.424

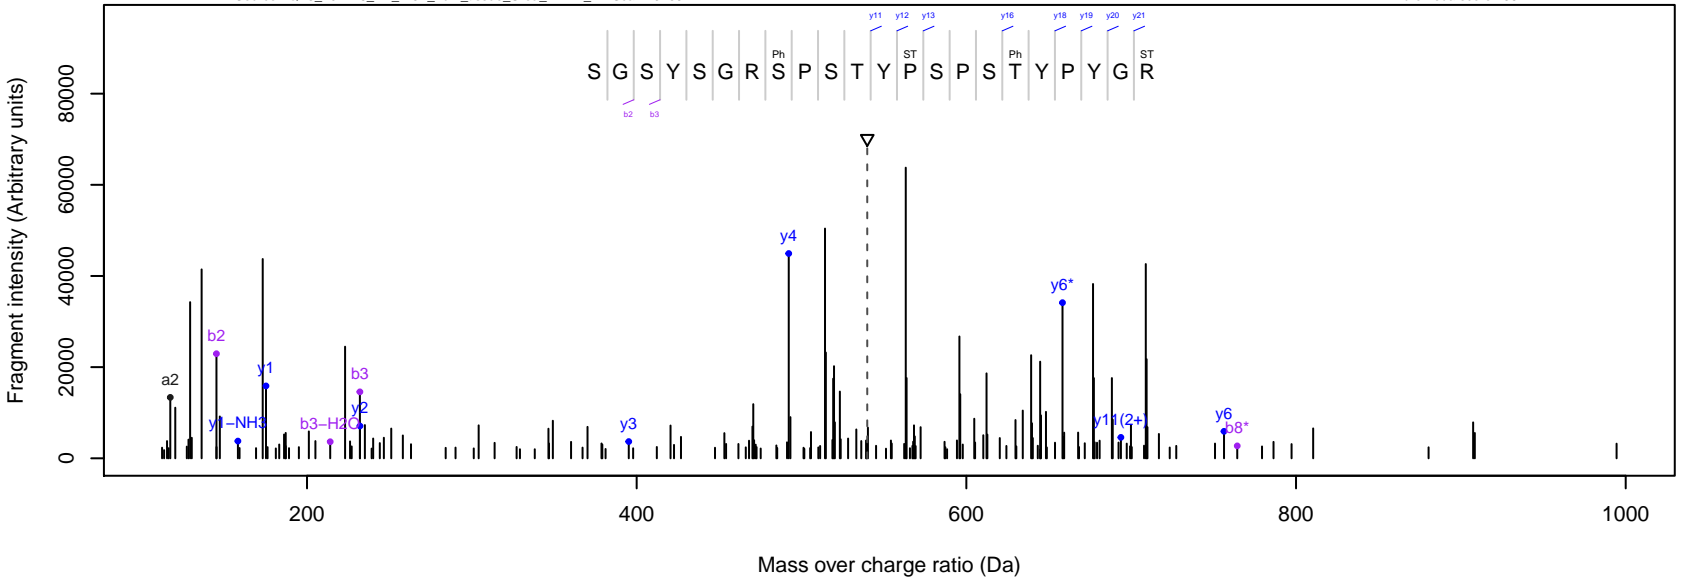

GS(Phospho (STY))SGSVDETLFALPAASEPVIR-3+

Source : QE3\_201126\_FR\_TiOx\_hum\_tissue\_Urea\_RNAB\_H Scan : 57419

Andromeda score : 56.416

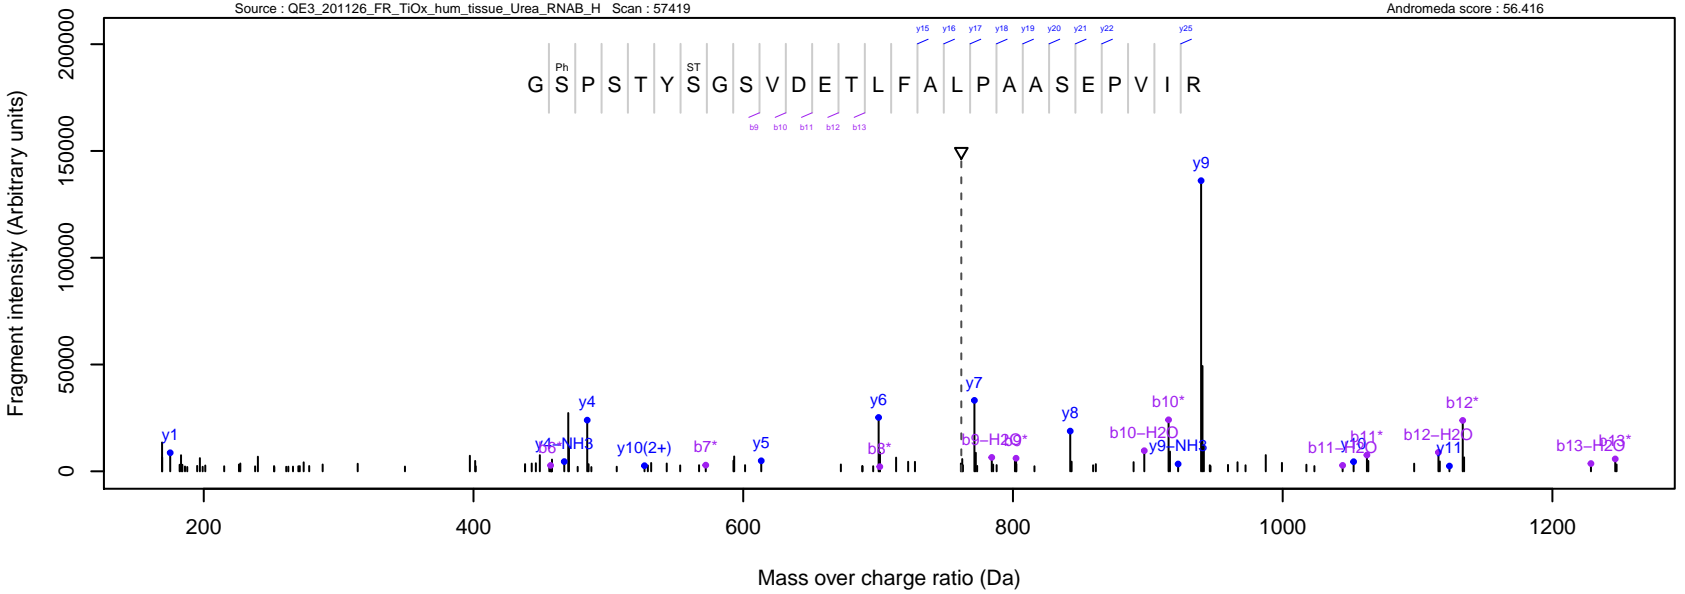

KGS(Phospho (STY))ITEYTAEEK-3+

Source : QE3\_201126\_FR\_TiOx\_hum\_tissue\_Urea\_RNAB\_H Scan : 12377

Andromeda score : 56.407

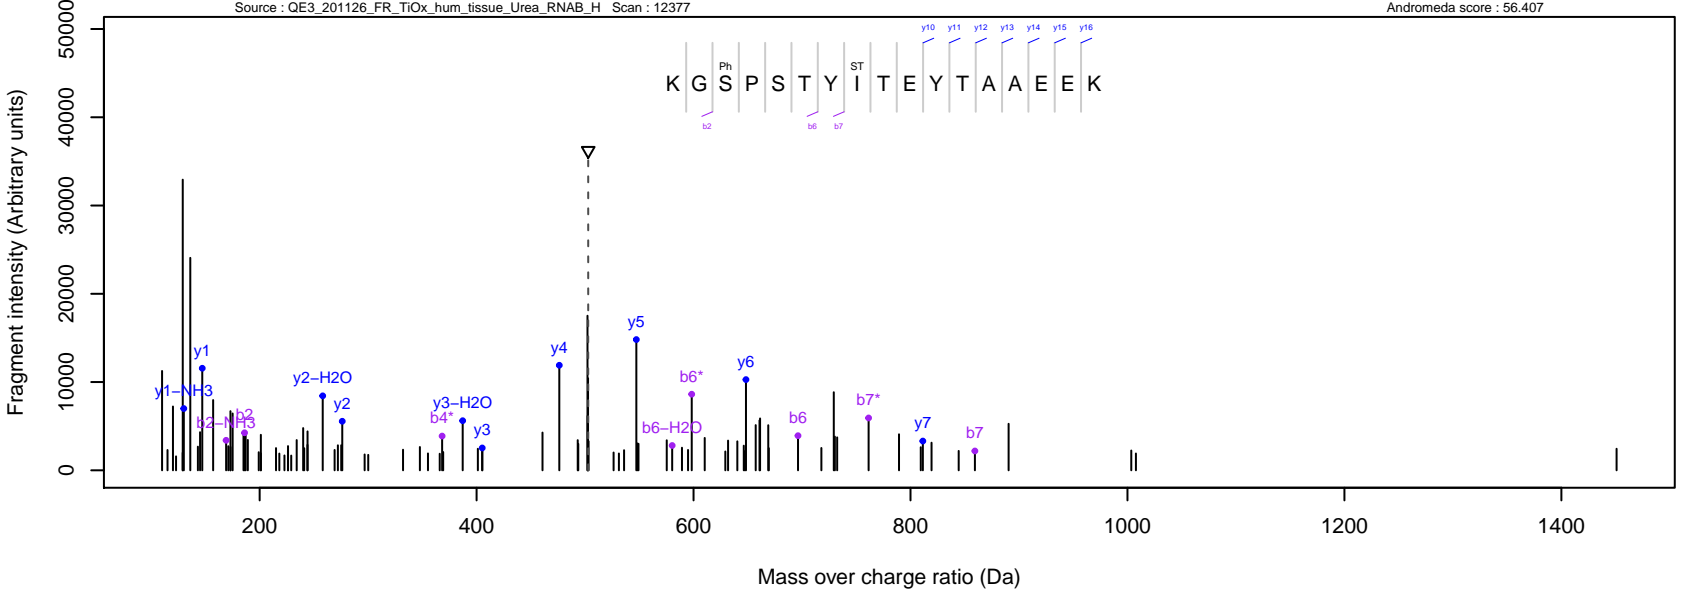

EPS(Phospho (STY))PALGPLNDGSGLLPRPIFYCSFPTR-3+

Source : QE3\_201126\_FR\_TiOx\_hum\_tissue\_Urea\_RNAB\_N Scan : 58778

Andromeda score : 56.383

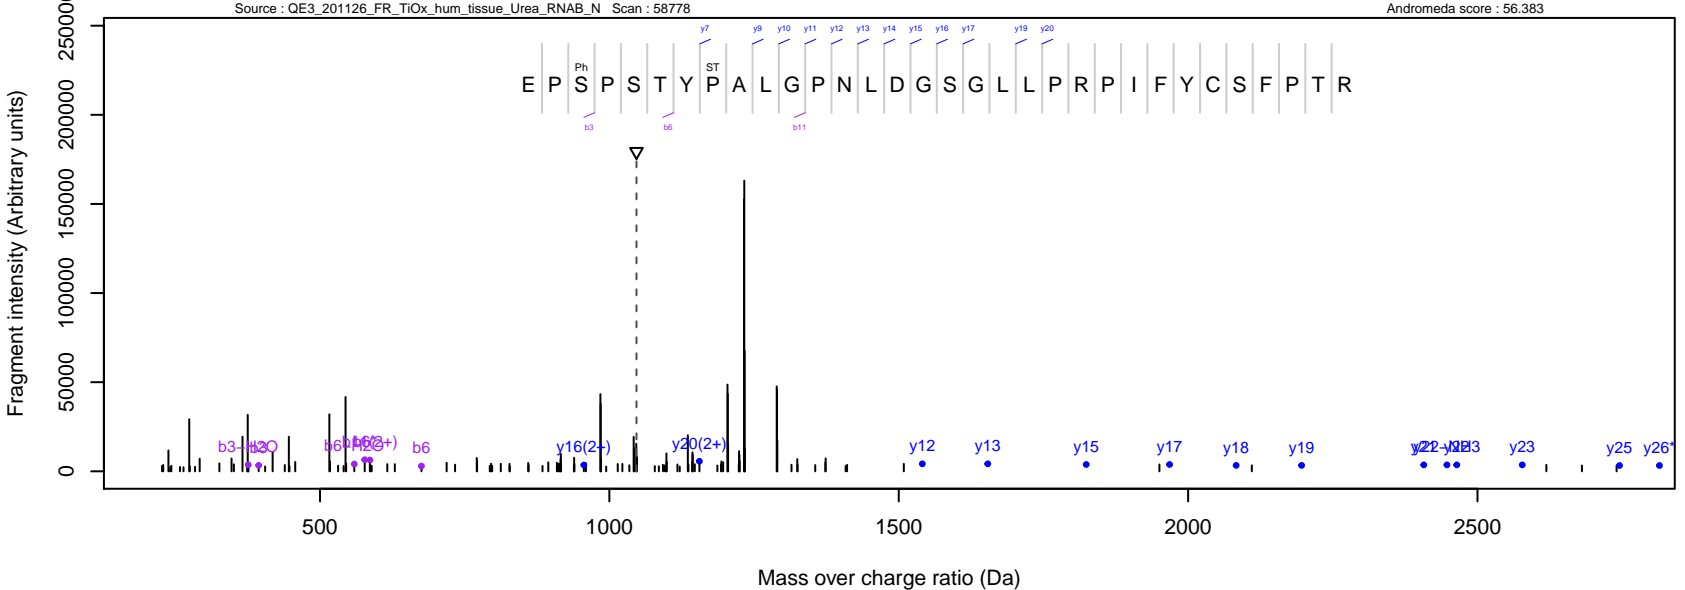

HRS(Phospho (STY))HEEDNDDDDVS(Phospho (STY))TEYGHQAHR-4+

Source : QE3\_201126\_FR\_TIOx\_hum\_tissue\_Urea\_RNAB\_N Scan : 6230

Andromeda score : 56.383

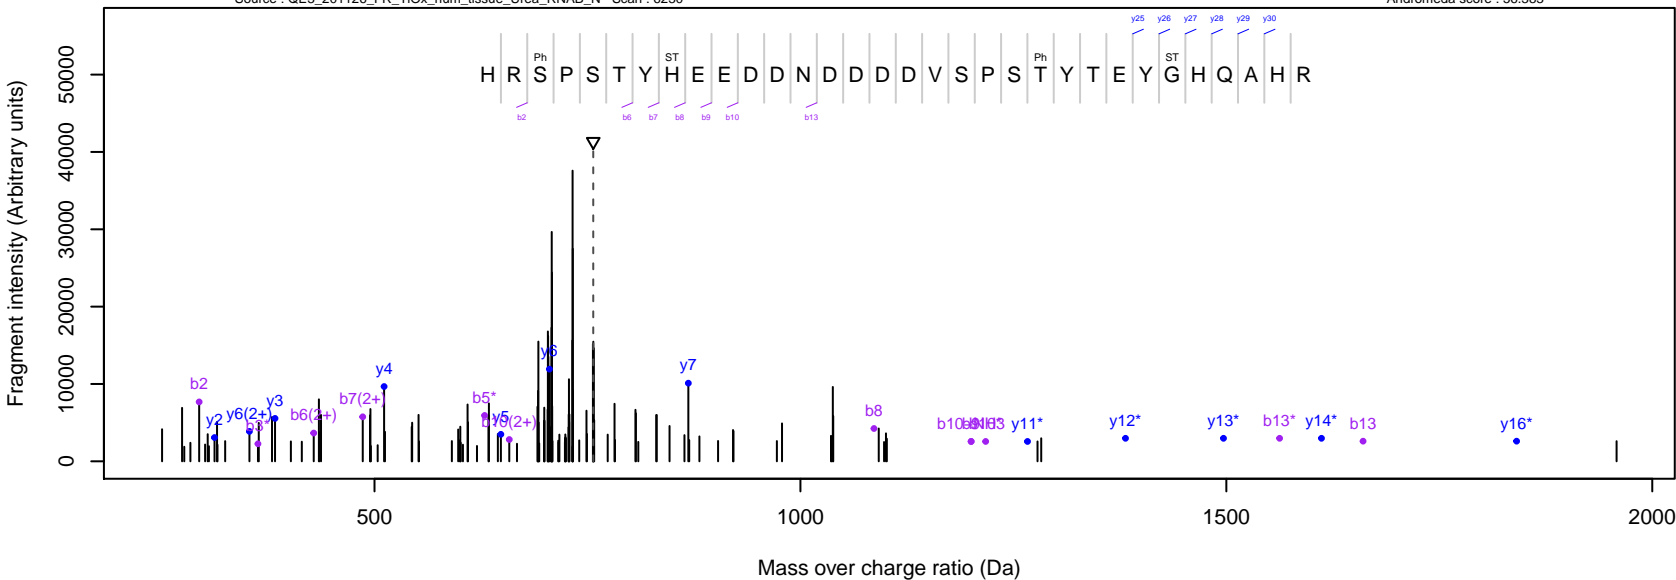

SLQKVDEEDSDEES(Phospho (STY))HHDEM(Oxidation (M))SEQEELEDDPTVVK-4+

Source : QE3\_201126\_FR\_TIOx\_hum\_tissue\_Urea\_RNAB\_H Scan : 20644

Andromeda score : 56.383

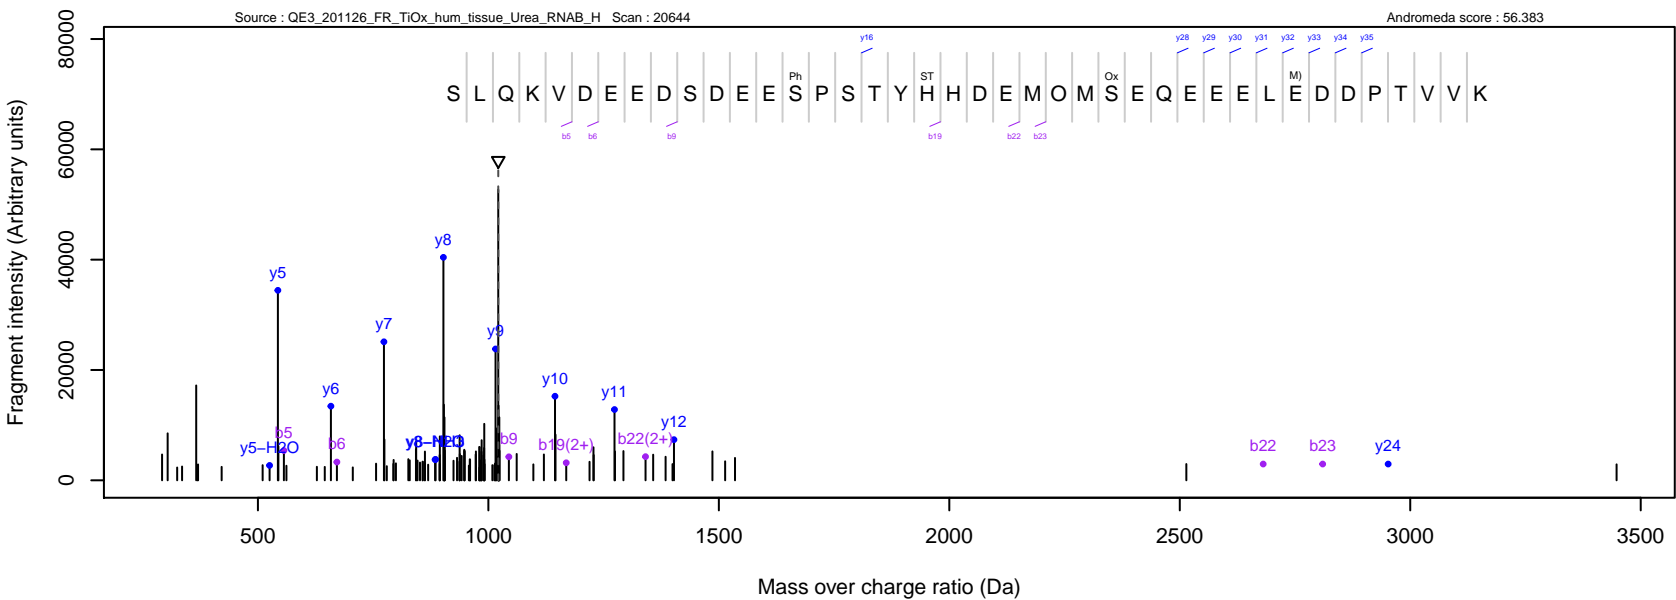

ASTT(Phospho (STY))SLSGSDS(Phospho (STY))ETEGKQHSSDFDDAFKADSLVEGTSSR-4+

Source : QE3\_201126\_FR\_TIOx\_hum\_tissue\_Urea\_RNAB\_N Scan : 35810

Andromeda score : 56.382

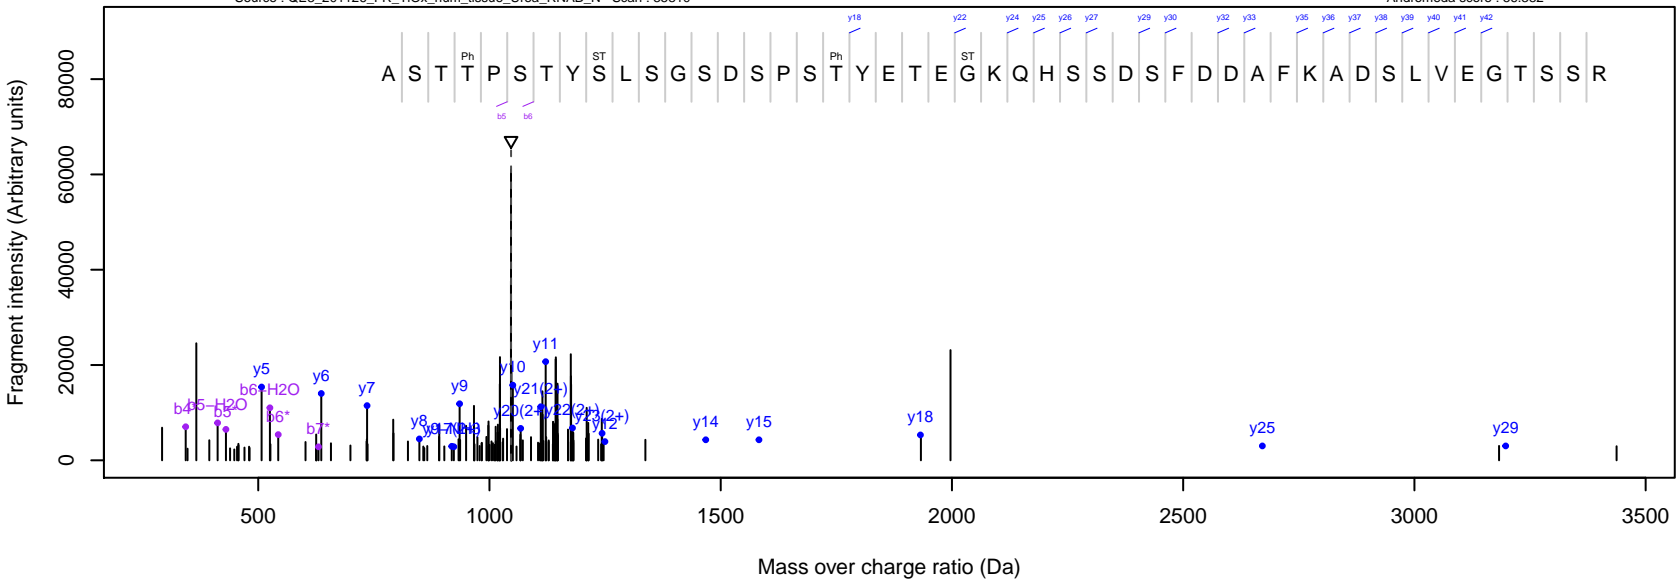

S(Phospho (STY))SVVFADEK-2+

Source : QE3\_201126\_FR\_TiOx\_hum\_tissue\_Urea\_RNAB\_B Scan : 17283

Andromeda score : 56.359

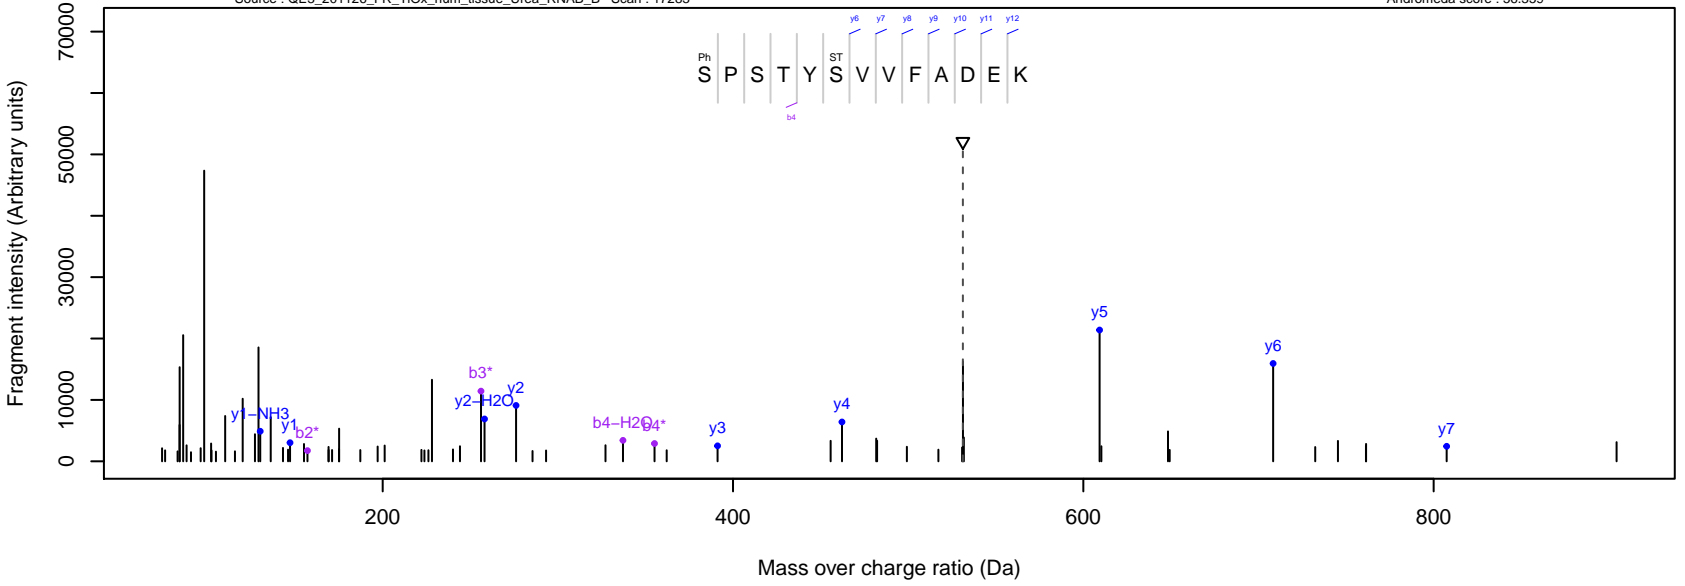

AQSLIDLGS(Phospho (STY))SSSTSSTASLSGNSPK-3+

Source : QE3\_201126\_FR\_TiOx\_hum\_tissue\_Urea\_RNAB\_B Scan : 34975

Andromeda score : 56.298

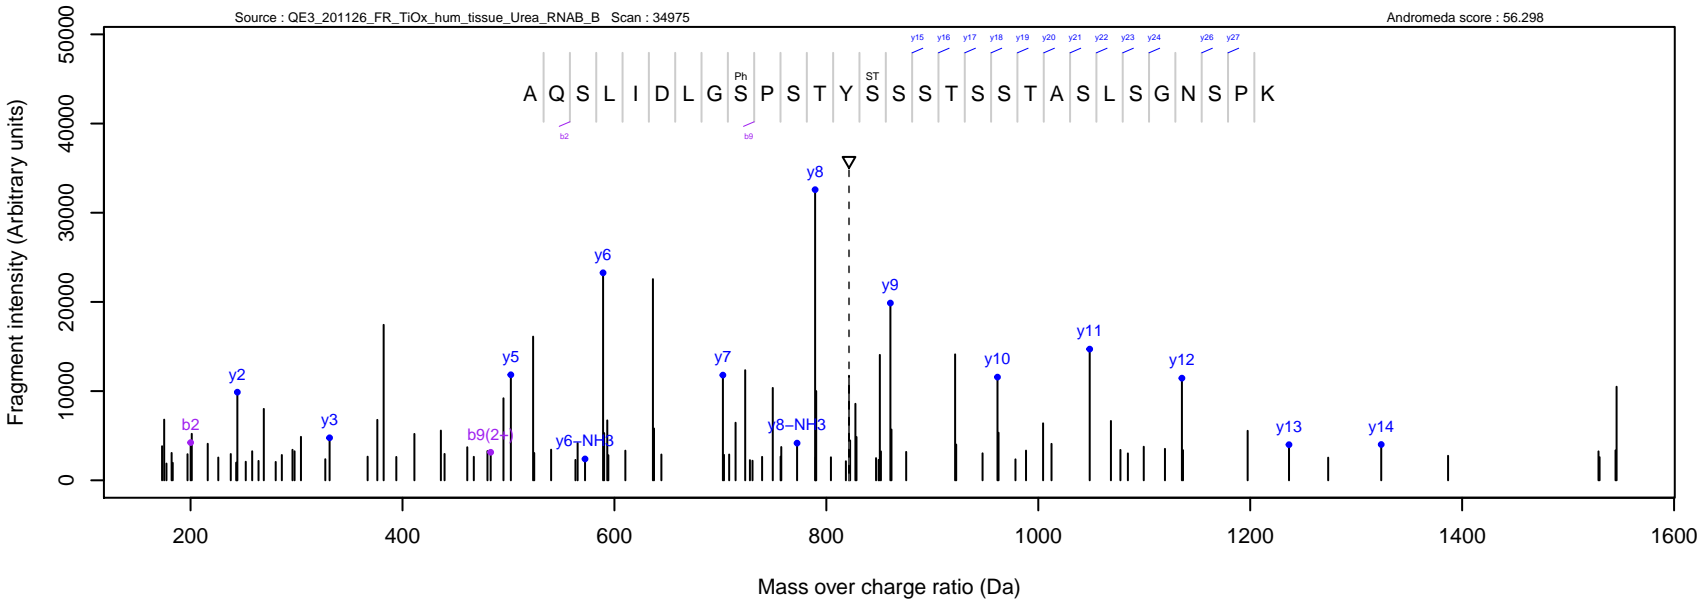

LLEDGFNLGDALDS(Phospho (STY))S(Phospho (STY))NS(Phospho (STY))M(Oxidation (M))QTIQK-3+

Source : QE3\_201126\_FR\_TiOx\_hum\_tissue\_Urea\_RNAB\_H Scan : 63957

Andromeda score : 56.247

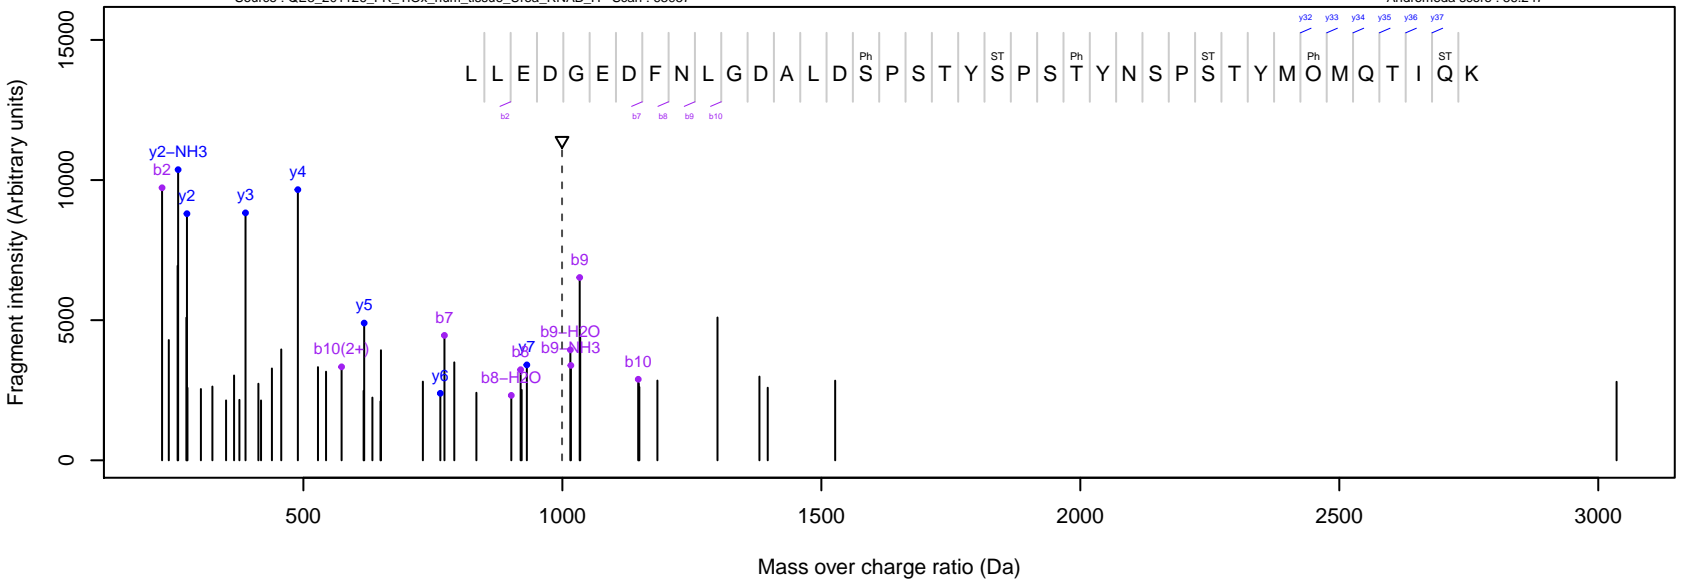



QRS(Phospho (STY))PS(Phospho (STY))PAPAPAPAAAAGPPTRK-3+

Source : QE3\_201126\_FR\_TiOx\_hum\_tissue\_Urea\_RNAB\_N Scan : 11210

Andromeda score : 56.234

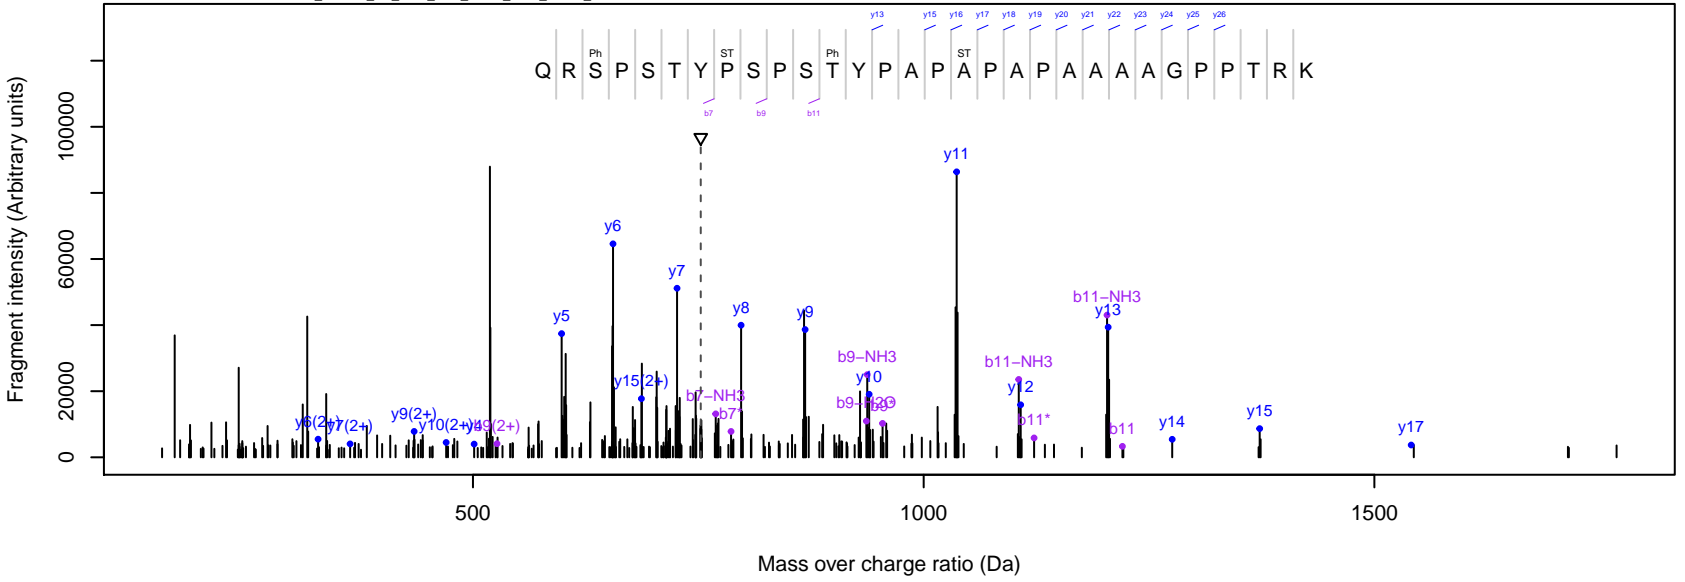

DQPAFTPSGILTPHALGS(Phospho (STY))RNSPGSQVASNPR-4+

Source : QE3\_201126\_FR\_TiOx\_hum\_tissue\_Urea\_RNAB\_N Scan : 36033

Andromeda score : 56.231

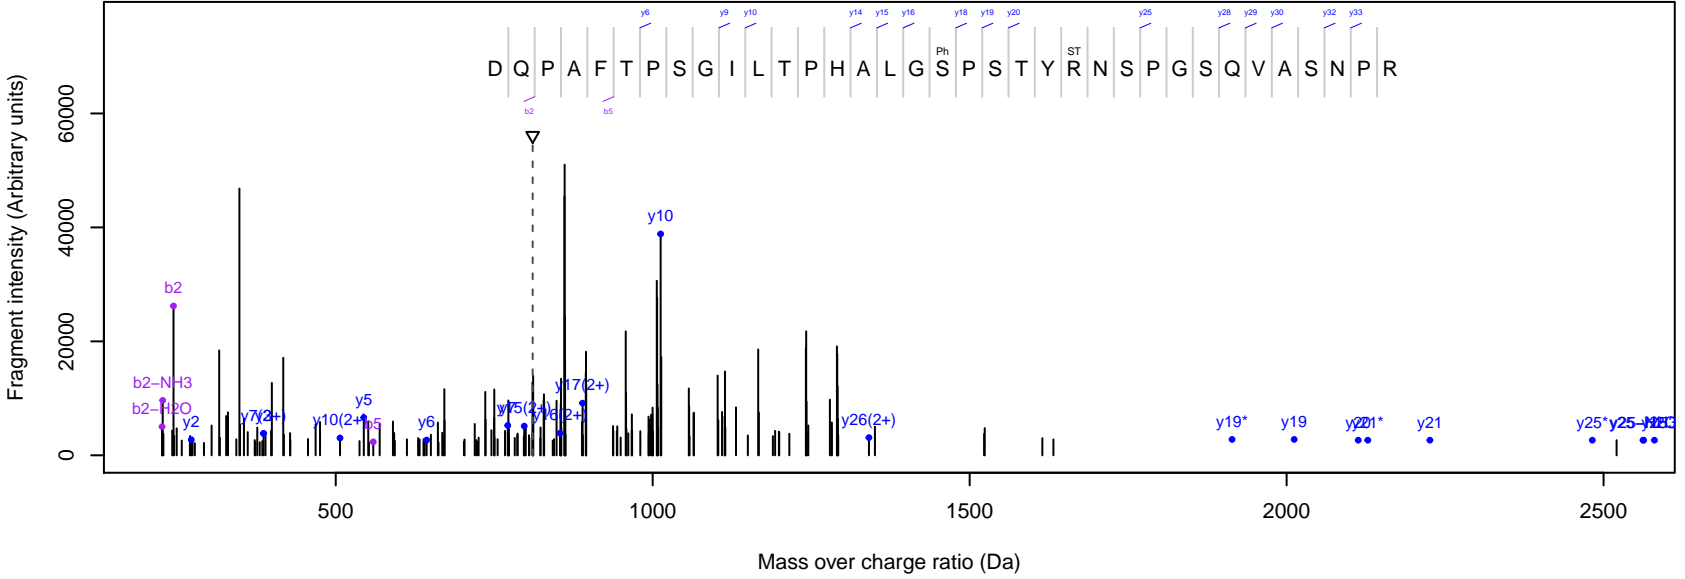

(Acetyl (Protein N-term))GDS(Phospho (STY))DDEYDRR-2+

Source : QE3\_201126\_FR\_TiOx\_hum\_tissue\_Urea\_RNAB\_B Scan : 10571

Andromeda score : 56.225

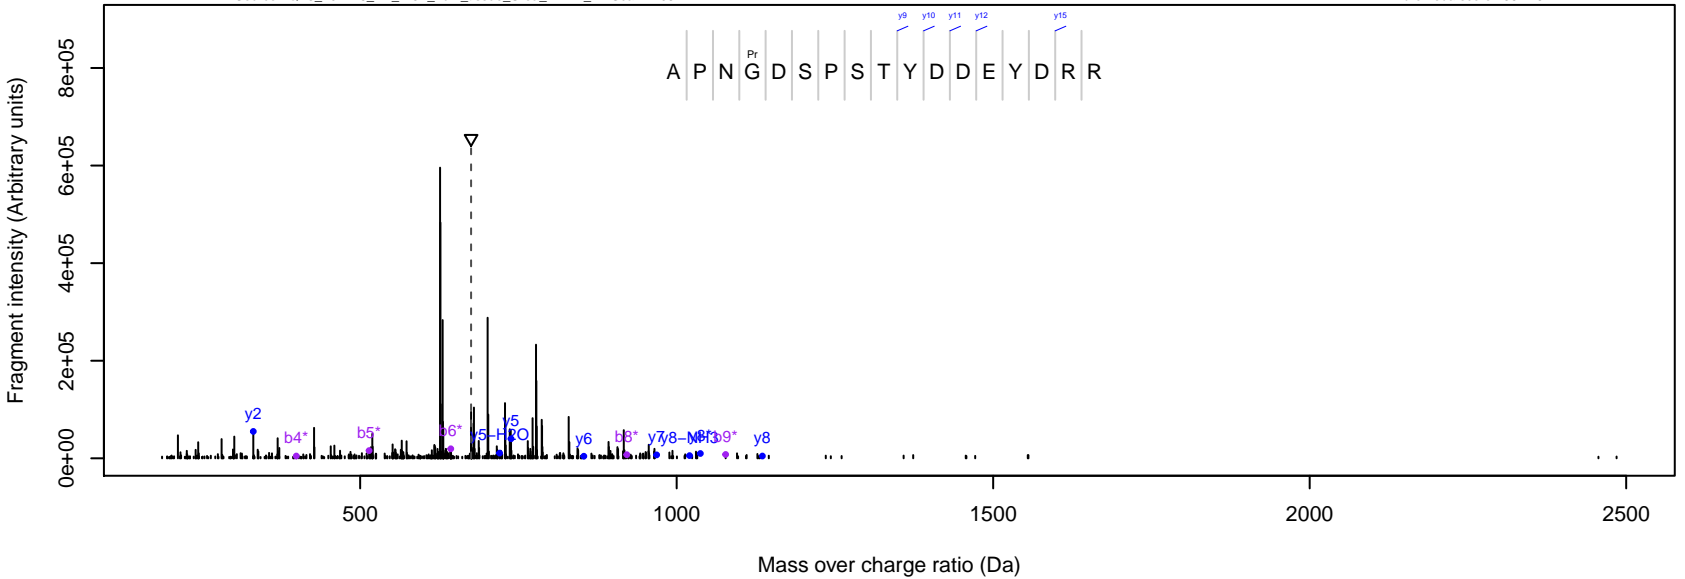

GNS(Phospho (STY))LQEILER-2+

Source : QE3\_201126\_FR\_TiOx\_hum\_tissue\_Urea\_RNAB\_N Scan : 37317

Andromeda score : 56.225

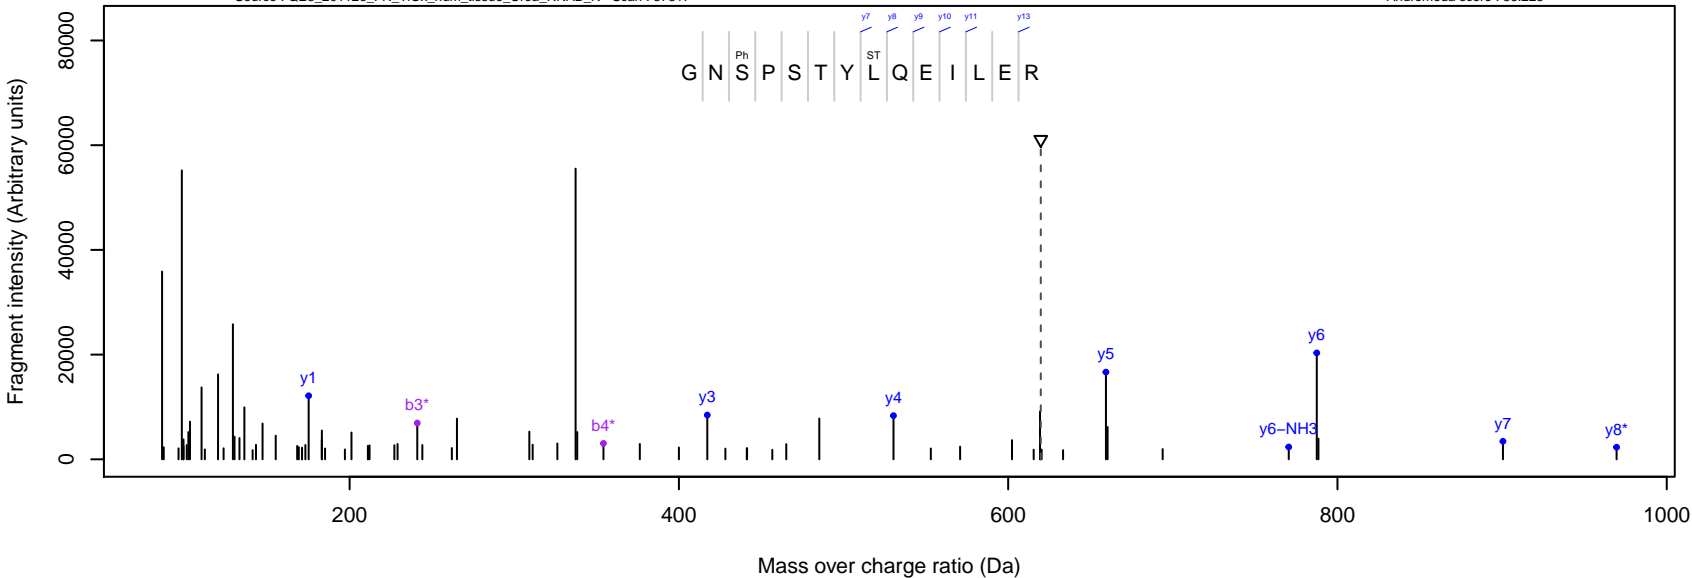

RAADEDWDS(Phospho (STY))ELEDDLGEDLLSGKK-3+

Source : QE3\_201126\_FR\_TiOx\_hum\_tissue\_Urea\_RNAB\_B Scan : 55480

Andromeda score : 56.22

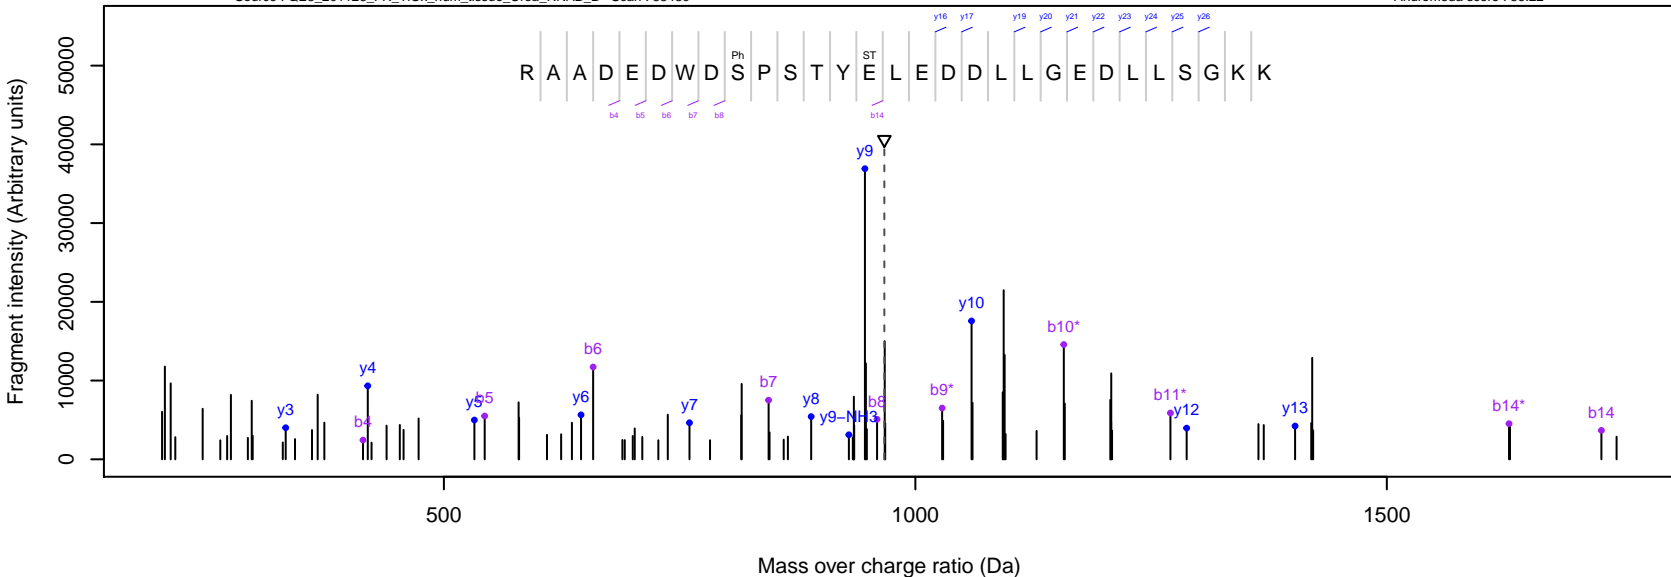

KESEEDS(Phospho (STY))S(Phospho (STY))DDEPLIKK-3+

Source : QE3\_201126\_FR\_TiOx\_hum\_tissue\_Urea\_RNAB\_N Scan : 12290

Andromeda score : 56.215

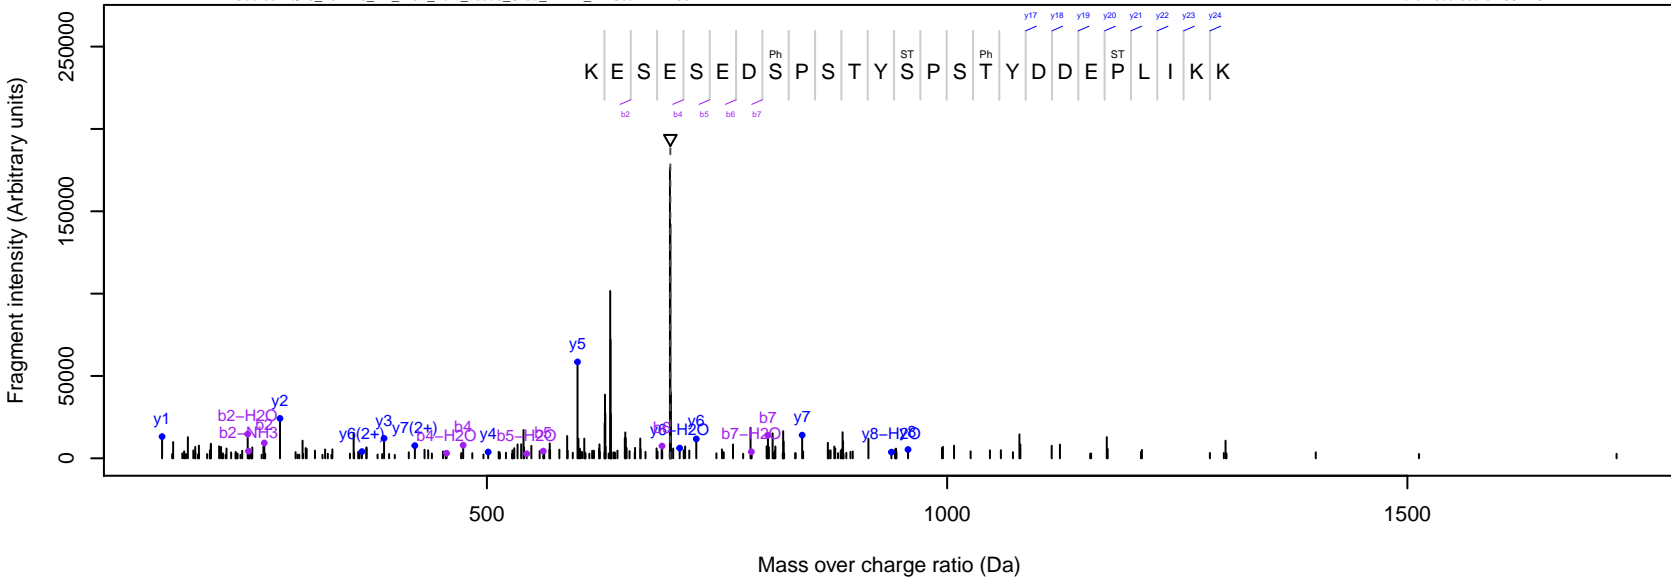

SVDYNMPRS(Phospho (STY))PVEMDEDVIFDYPYAPK-3+

Source : QE3\_201126\_FR\_TiOx\_hum\_tissue\_Urea\_RNAB\_B Scan : 59251

Andromeda score : 56.172

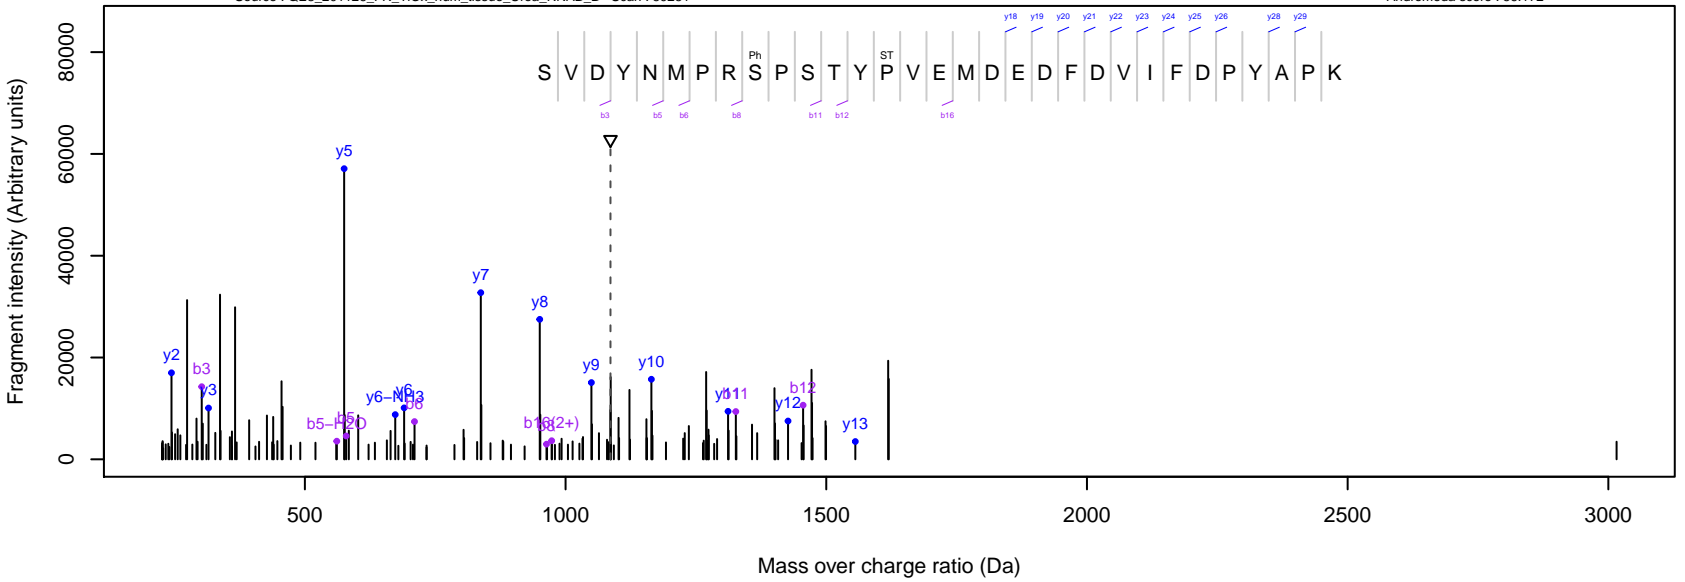

DELNEELIQEES(Phospho (STY))S(Phospho (STY))EDEGEYEEVRK-3+

Source : QE3\_201126\_FR\_TiOx\_hum\_tissue\_Urea\_RNAB\_H Scan : 39759

Andromeda score : 56.156

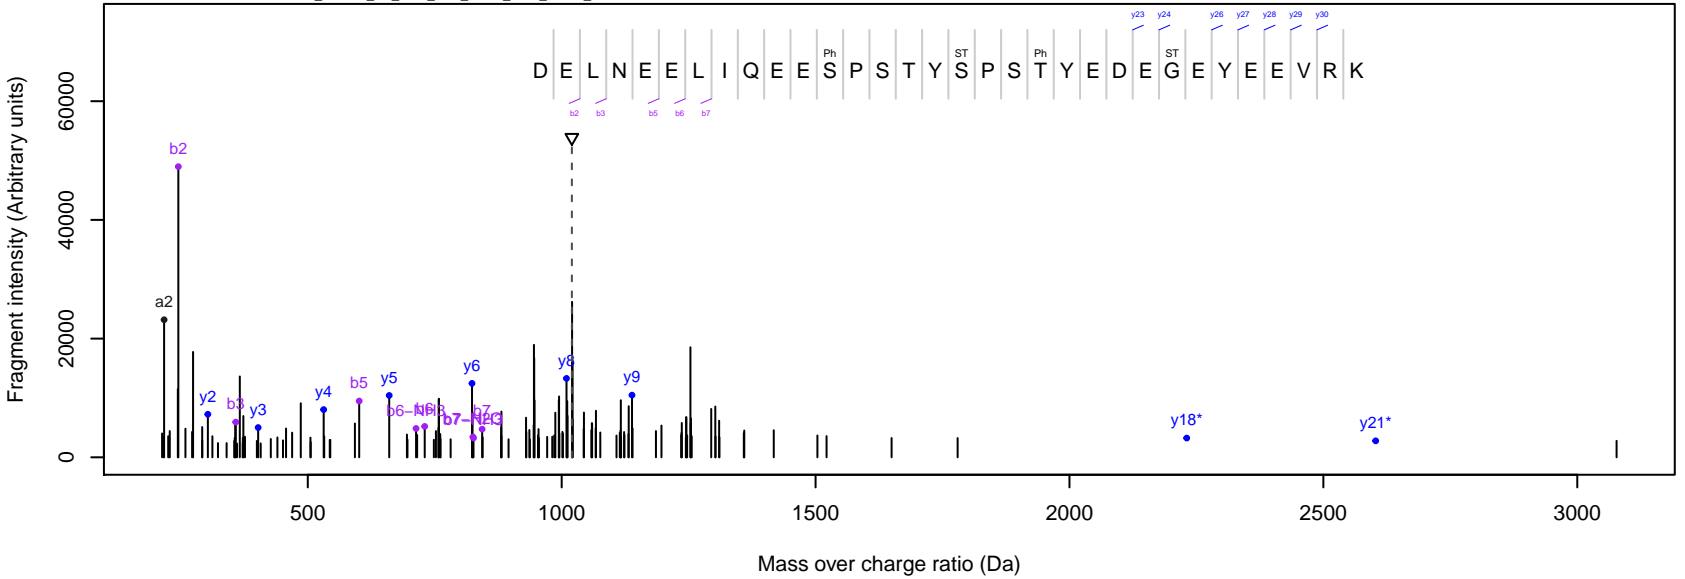

AS(Phospho (STY))WES(Phospho (STY))LDEEWR-2+

Source : QE3\_201126\_FR\_TiOx\_hum\_tissue\_Urea\_RNAB\_N Scan : 57495

Andromeda score : 56.122

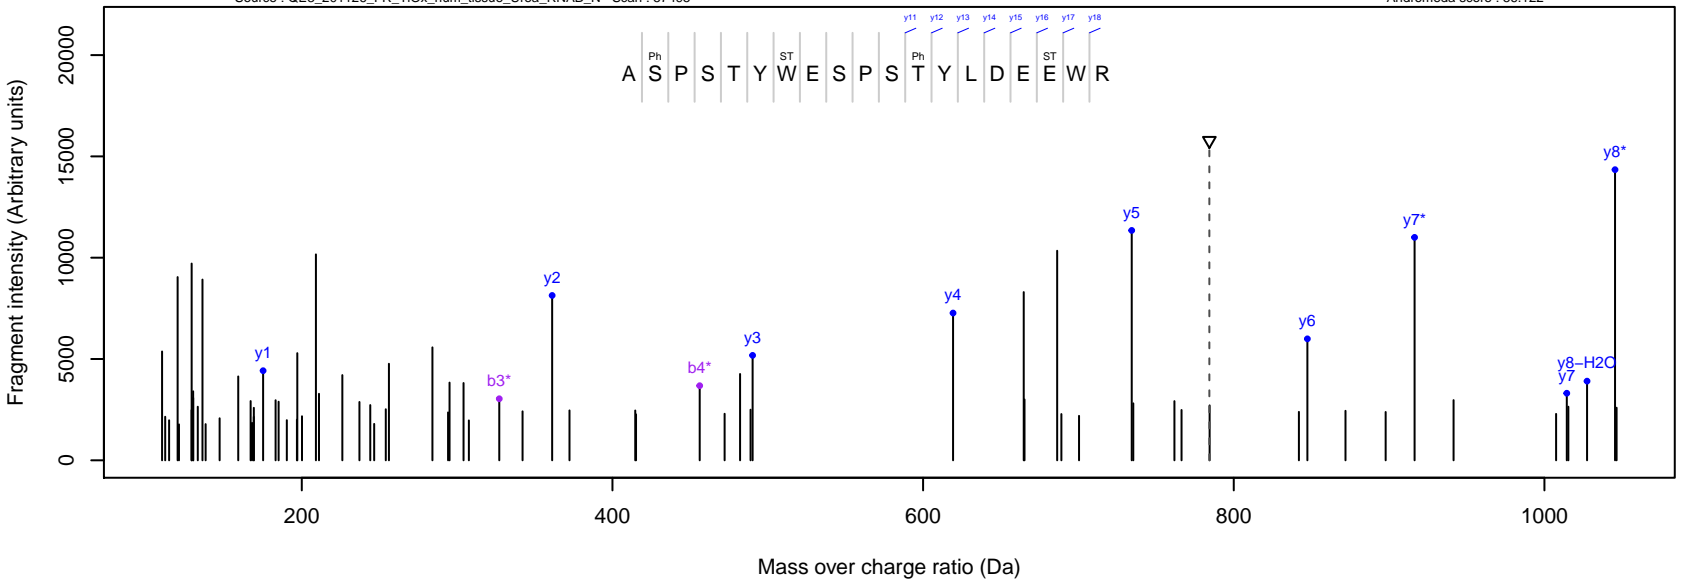

**GPLM(Oxidation (M))LSPS(Phospho (STY))SLFSAFHR-3+**

Source : QE3\_201126\_FR\_TiOx\_hum\_tissue\_Urea\_RNAB\_H Scan : 57578

Andromeda score : 56.121

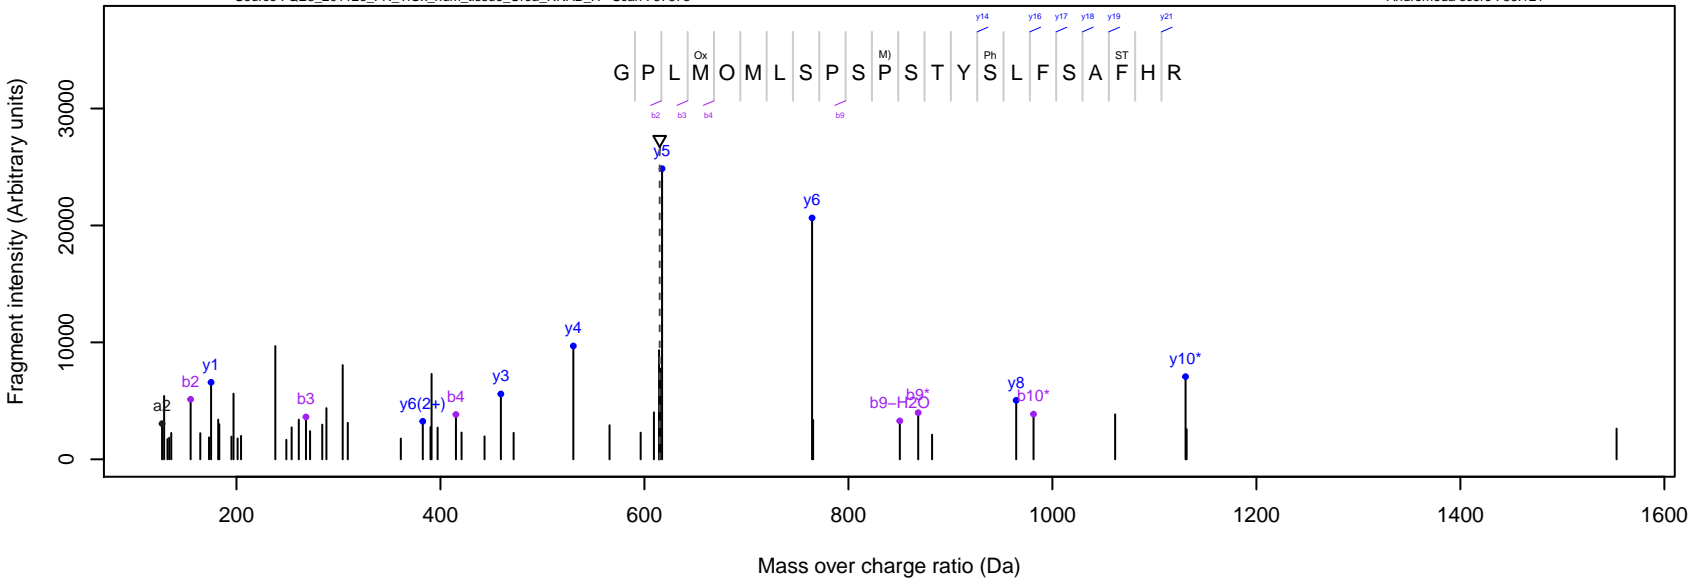

**DQSTS(Phospho (STY))MS(Phospho (STY))HINLLFSR-3+**

Source : QE3\_201126\_FR\_TiOx\_hum\_tissue\_Urea\_RNAB\_N Scan : 53135

Andromeda score : 56.081

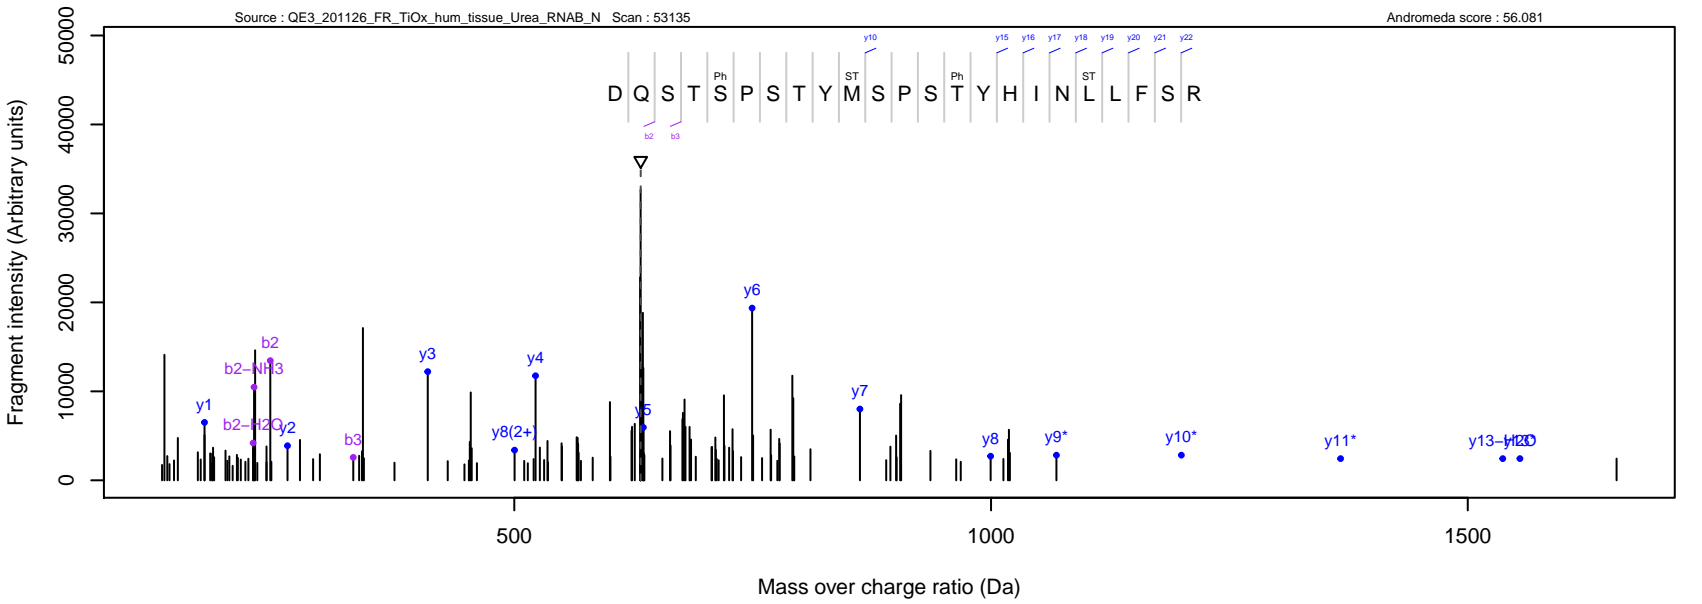

**IGS(Phospho (STY))PLS(Phospho (STY))PKKNSETSLQAM(Oxidation (M))SR-3+**

Source : QE3\_201126\_FR\_TiOx\_hum\_tissue\_Urea\_RNAB\_B Scan : 25404

Andromeda score : 56.055

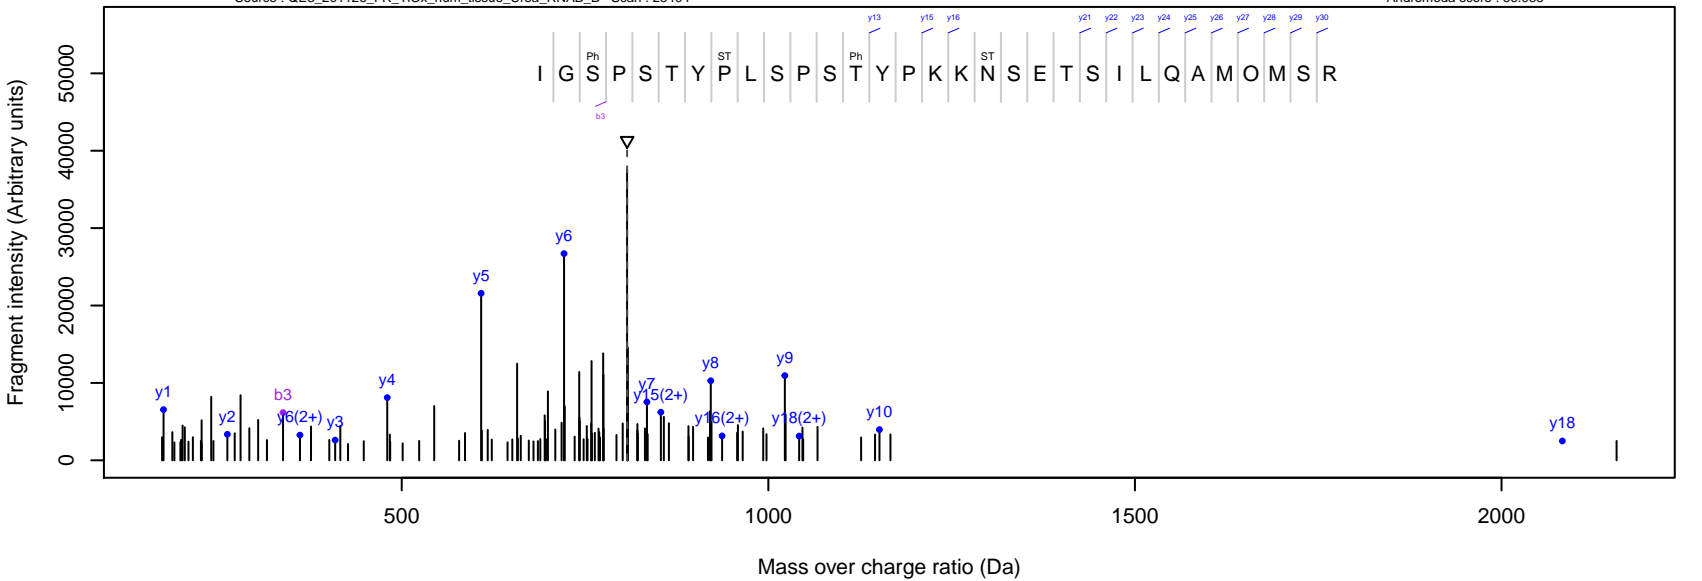

NTFT(Phospho (STY))DWS(Phospho (STY))DNDSYIEDDQLNK-3+

Source : QE3\_201126\_FR\_TiOx\_hum\_tissue\_Urea\_RNAB\_N Scan : 55028

Andromeda score : 56.055

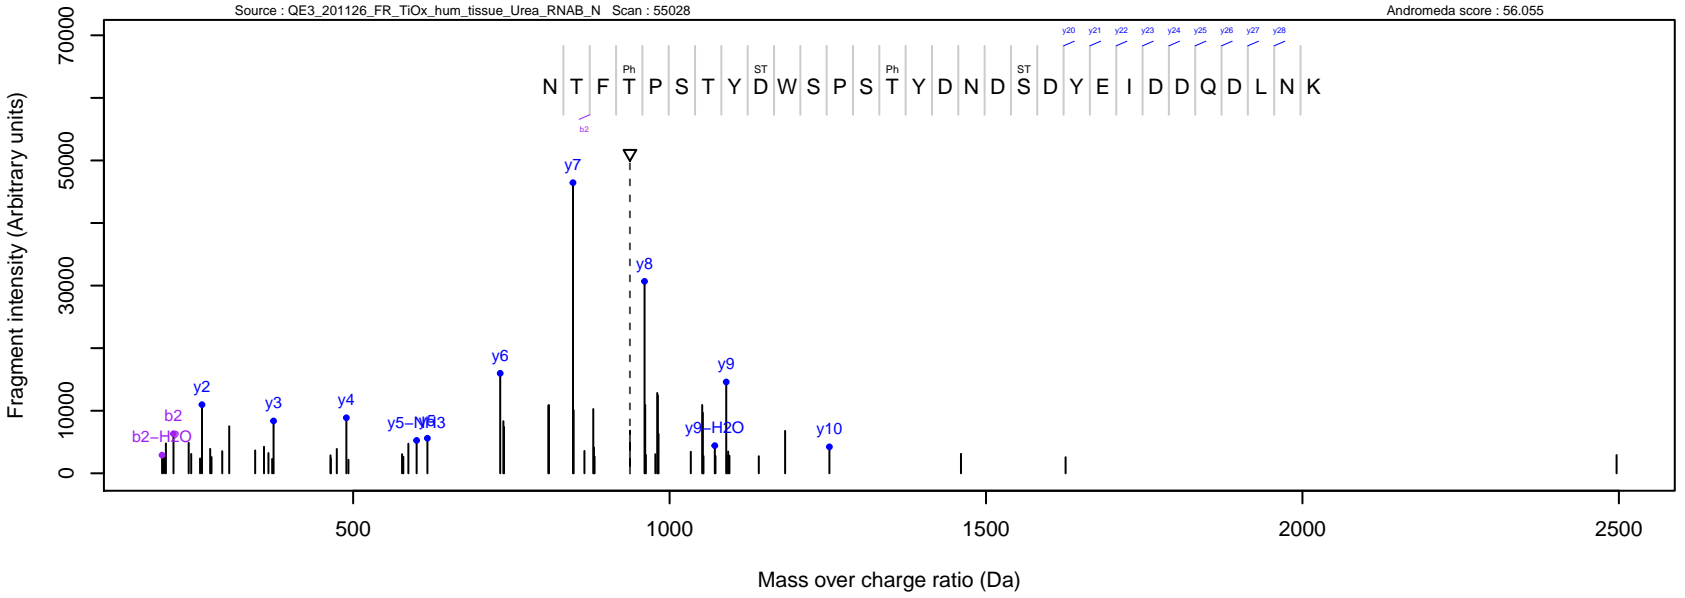

IFDEVM(Oxidation (M))GCFS(Phospho (STY))DSPPQSPTFPEAGHTSLYDEDKVPR-4+

Source : QE3\_201126\_FR\_TiOx\_hum\_tissue\_Urea\_RNAB\_H Scan : 44769

Andromeda score : 56.041

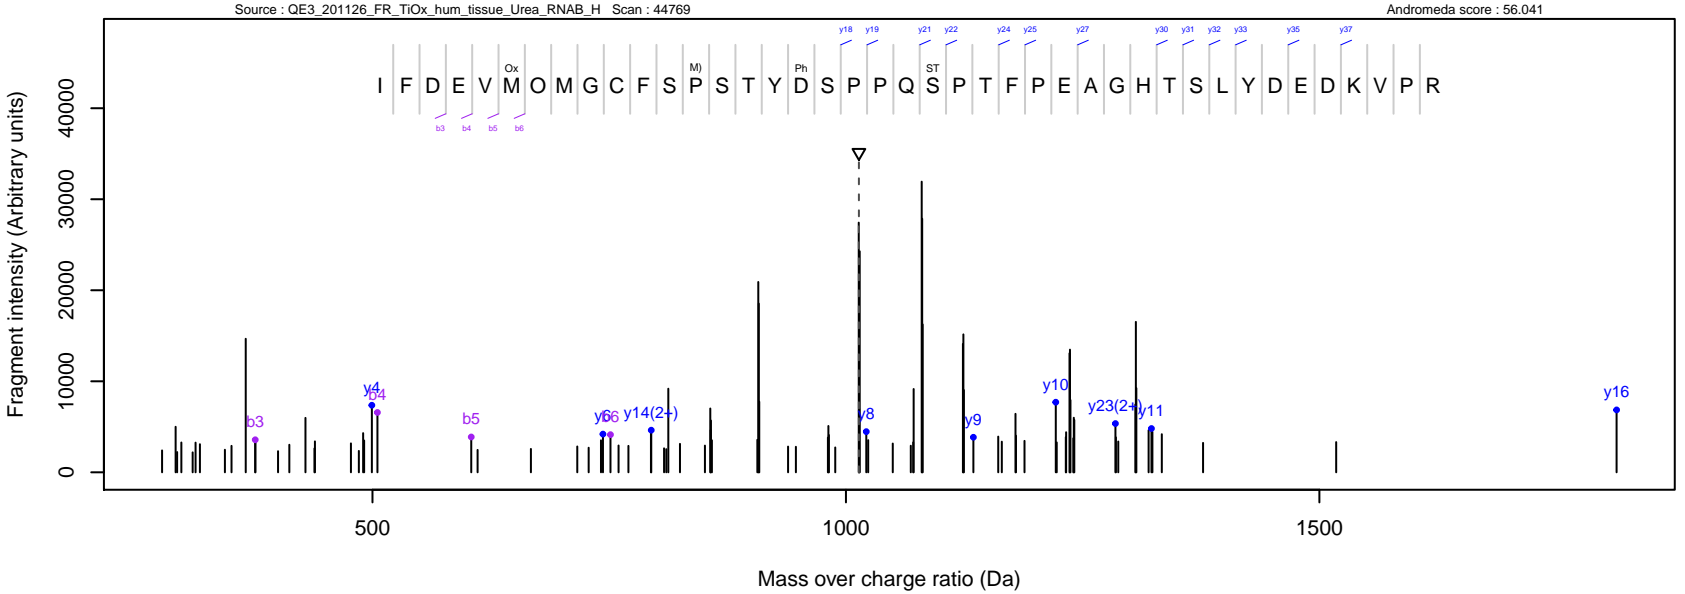

QPPGT(Phospho (STY))QQSHSSPGEITSSPQGLDNPALLR-3+

Source : QE3\_201126\_FR\_TiOx\_hum\_tissue\_Urea\_RNAB\_H Scan : 32438

Andromeda score : 56.041

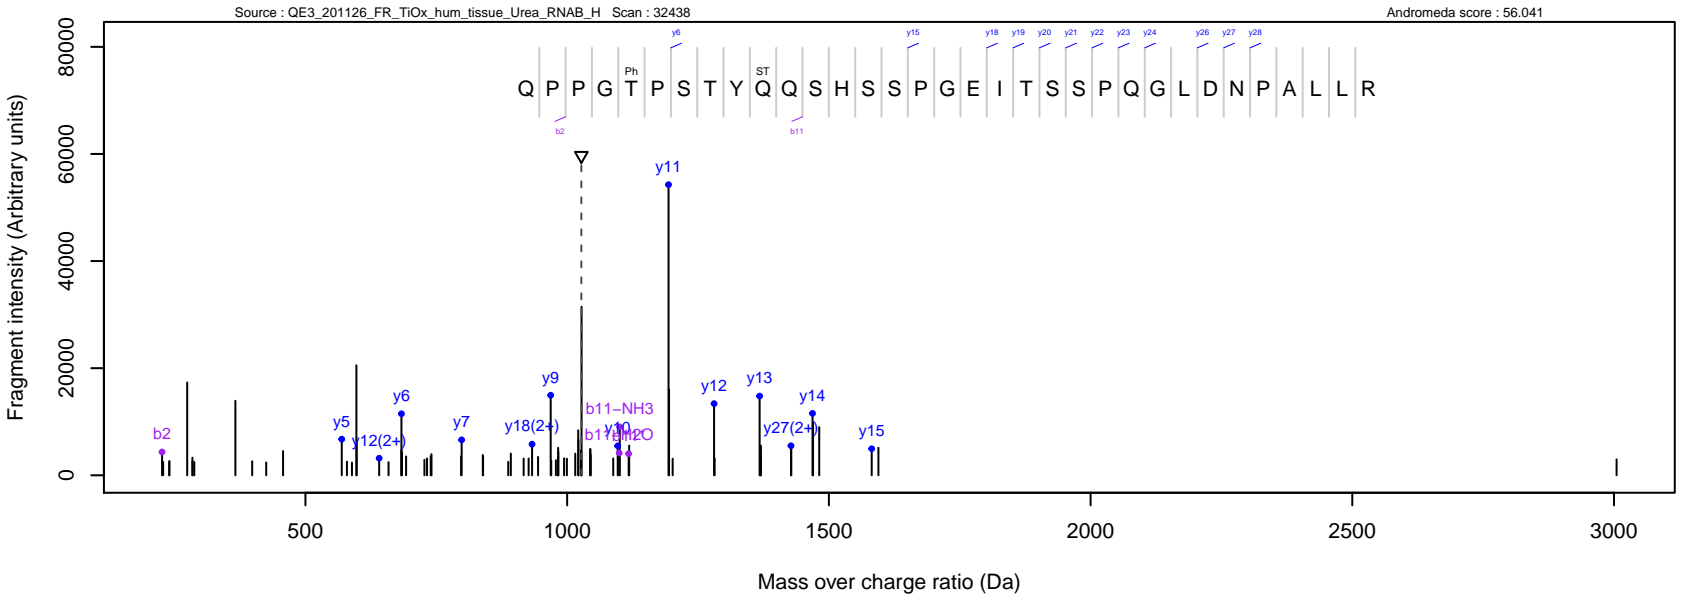

S(Phospho (STY))ASYTVSTIS(Phospho (STY))DGPGYSHDCPSEHLNGK-3+

Source : QE3\_201126\_FR\_TIOx\_hum\_tissue\_Urea\_RNAB\_B Scan : 24478

Andromeda score : 56.041

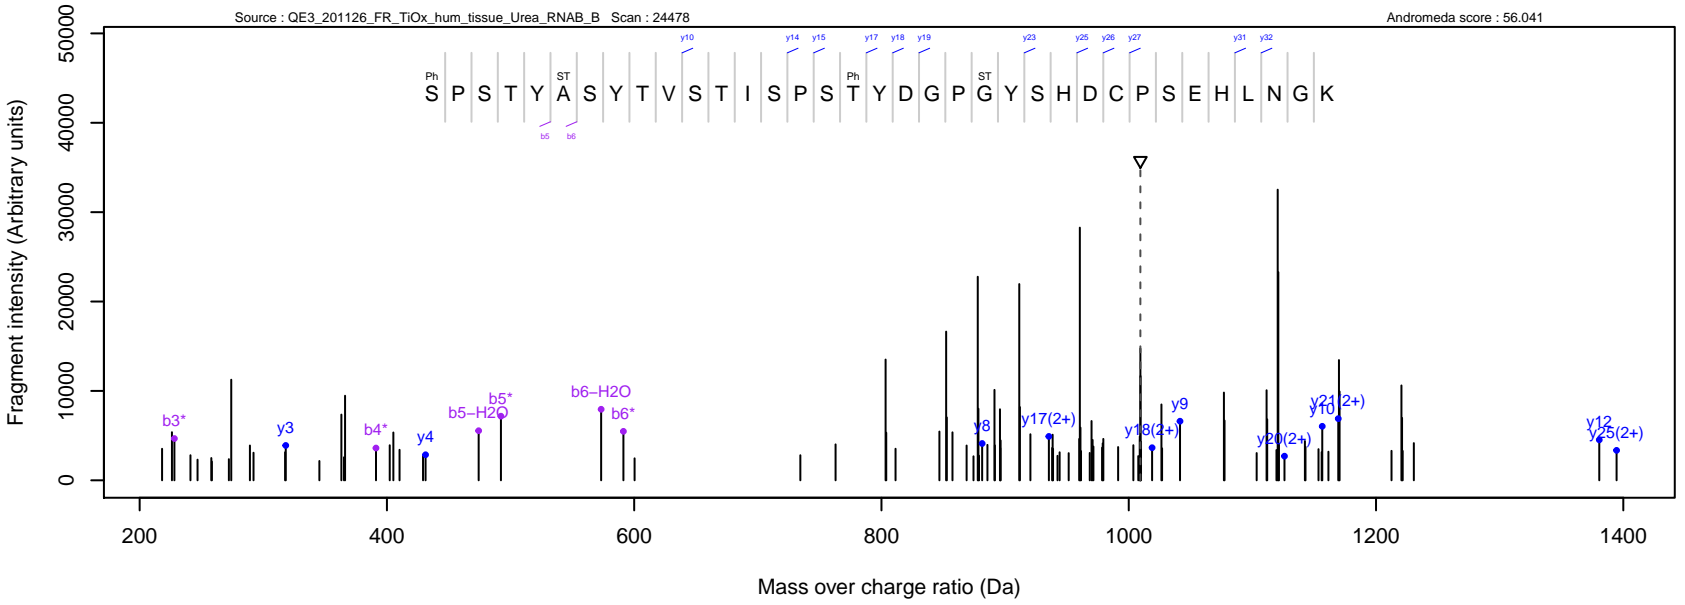

QENCGAQQVPAGPGTSPSTYTPPSPSTYSPV-3+

Source : QE3\_201126\_FR\_TIOx\_hum\_tissue\_Urea\_RNAB\_N Scan : 22928

Andromeda score : 56.021

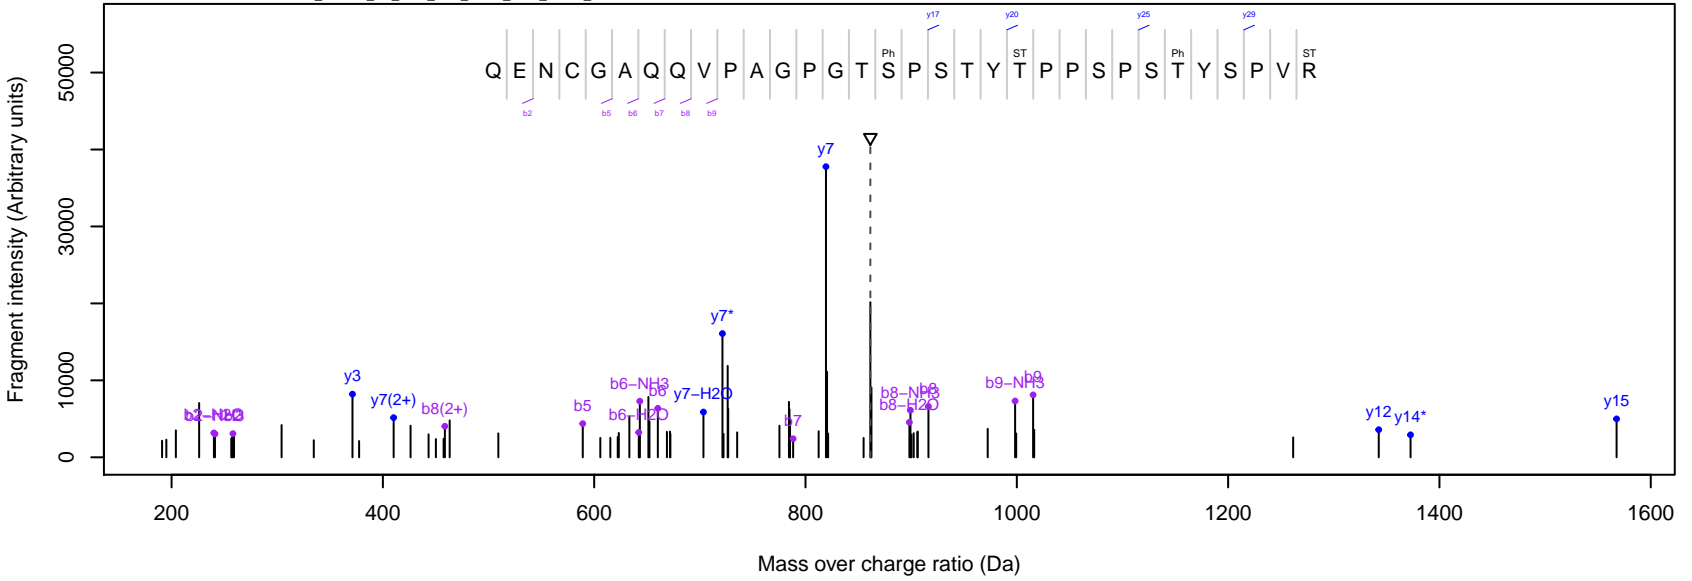

RLLEDGFNLGDALDS(Phospho (STY))S(Phospho (STY))NSM(Oxidation (M))QT(Phospho (STY))IQK-3+

Source : QE3\_201126\_FR\_TIOx\_hum\_tissue\_Urea\_RNAB\_B Scan : 58595

Andromeda score : 55.985

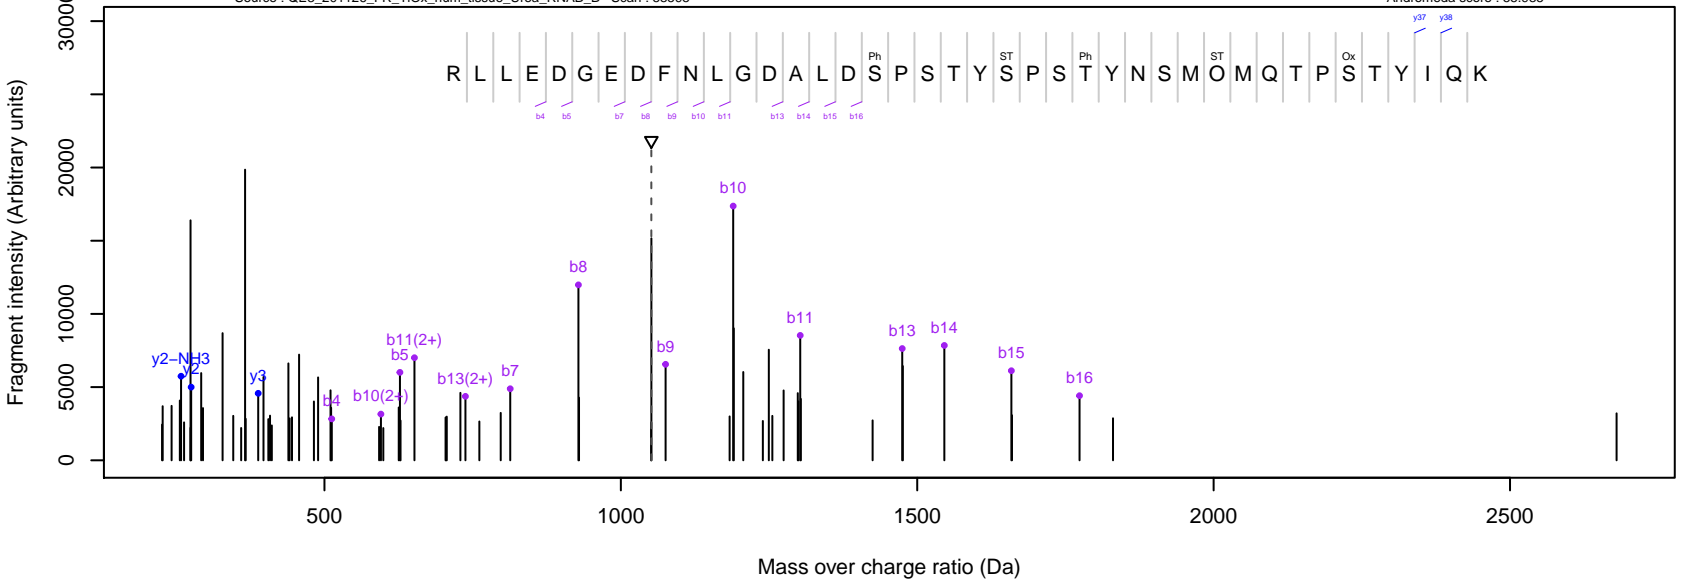

SGDET(Phospho (STY))PGS(Phospho (STY))EVPGDKAAEEQGDDQDSEK-3+

Source : QE3\_201126\_FR\_TiOx\_hum\_tissue\_Urea\_RNAB\_H Scan : 17410

Andromeda score : 55.895

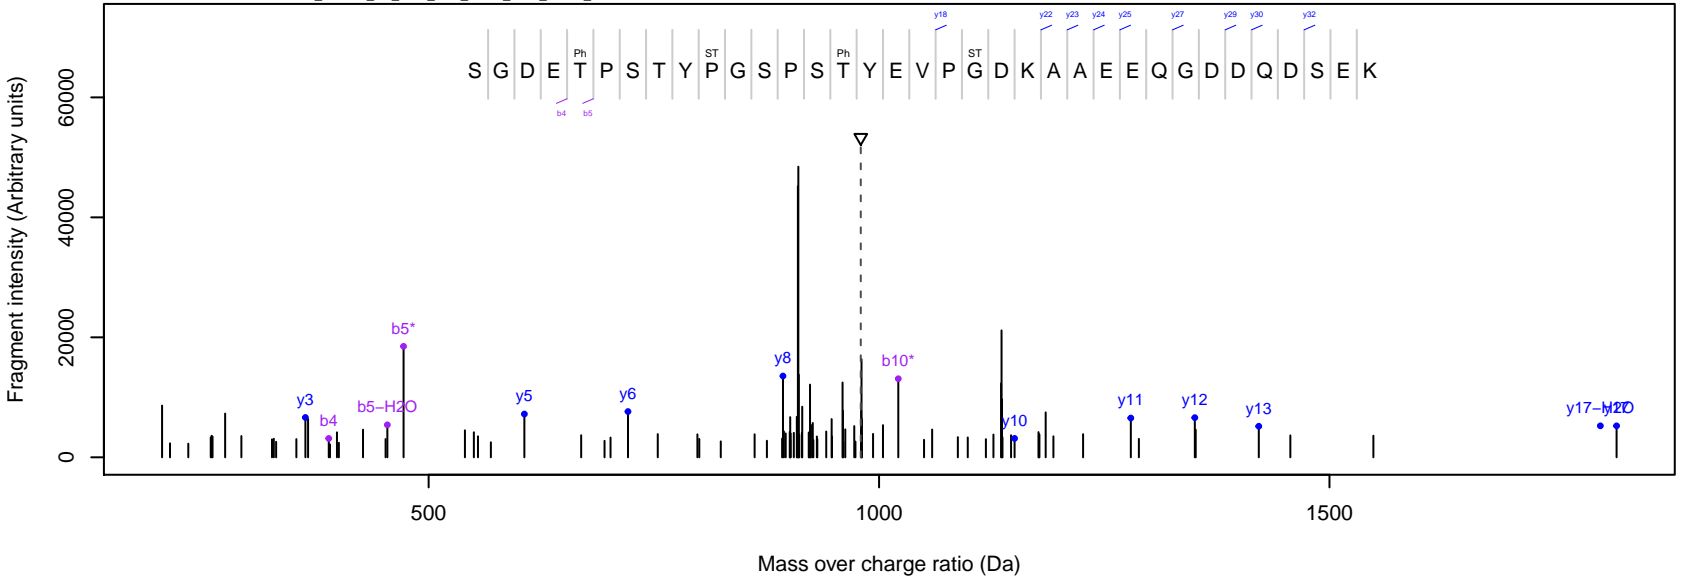

Y(Phospho (STY))WAS(Phospho (STY))VEEYIPKWEQFL LGR-2+

Source : QE3\_201126\_FR\_TiOx\_hum\_tissue\_Urea\_RNAB\_N Scan : 61464

Andromeda score : 55.885

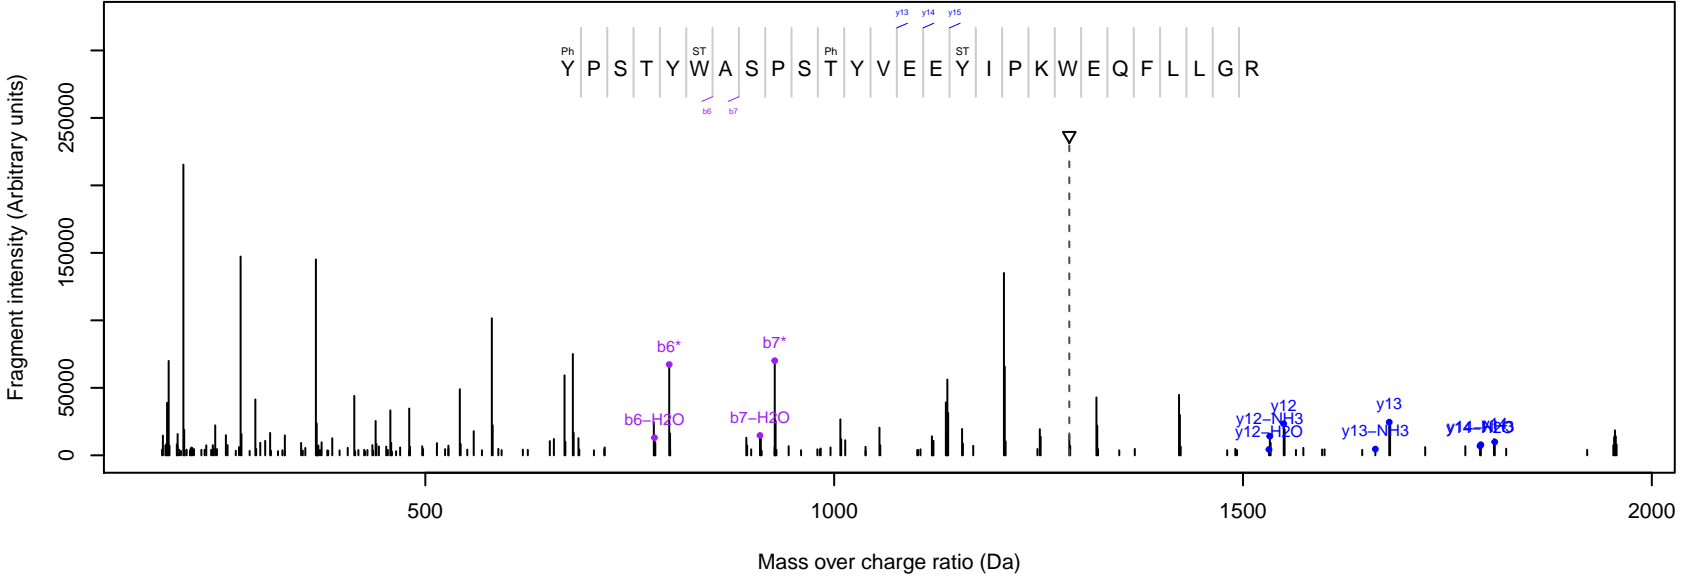

M(Oxidation (M))S(Phospho (STY))PKPELT EEQKQEIR-3+

Source : QE3\_201126\_FR\_TiOx\_hum\_tissue\_Urea\_RNAB\_H Scan : 10858

Andromeda score : 55.864

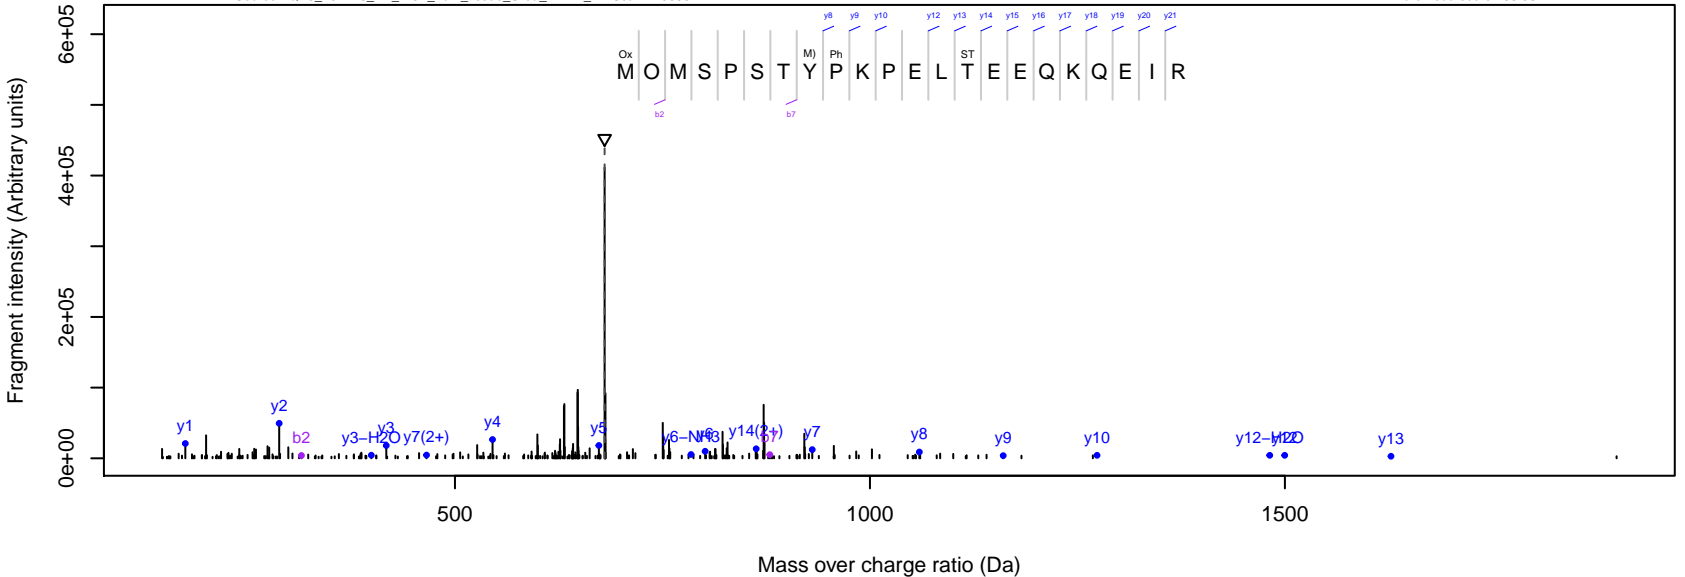

(Acetyl (Protein N-term))SQSGAVSCCPGATNGS(Phospho (STY))LGR-2+

Source : QE3\_201126\_FR\_TIOx\_hum\_tissue\_Urea\_RNAB\_N Scan : 23002

Andromeda score : 55.864

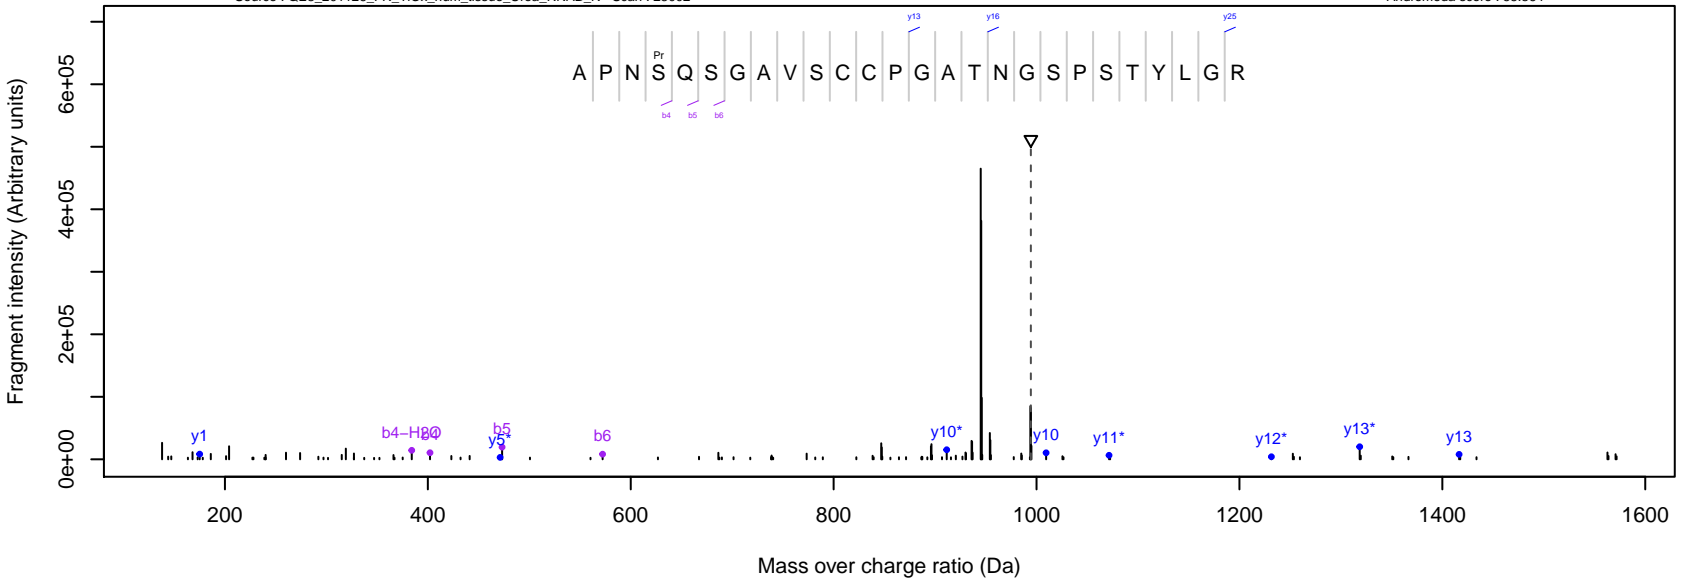

RLS(Phospho (STY))S(Phospho (STY))TSLASGHSVR-3+

Source : QE3\_201126\_FR\_TIOx\_hum\_tissue\_Urea\_RNAB\_N Scan : 12502

Andromeda score : 55.841

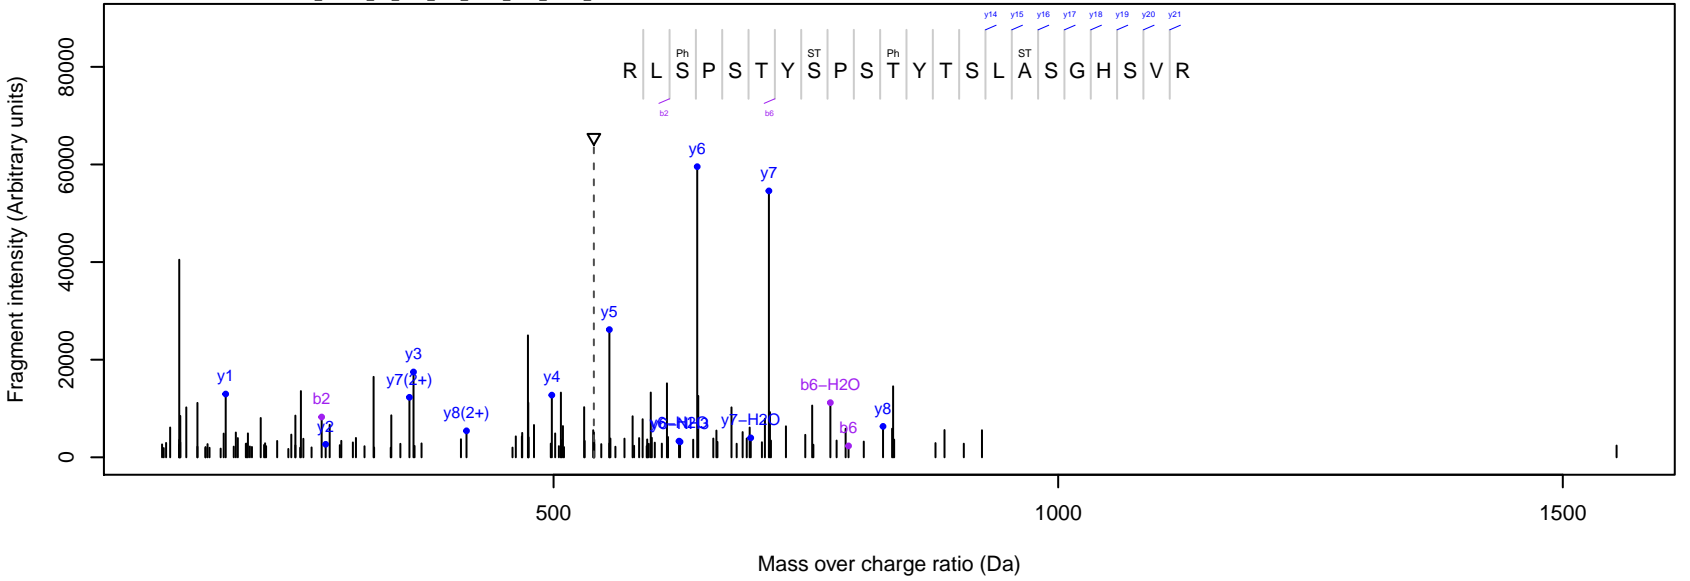

S(Phospho (STY))VASNQSEMEFSSLQDMOMP(Oxidation (M))PK-2+

Source : QE3\_201126\_FR\_TIOx\_hum\_tissue\_Urea\_RNAB\_N Scan : 34453

Andromeda score : 55.841

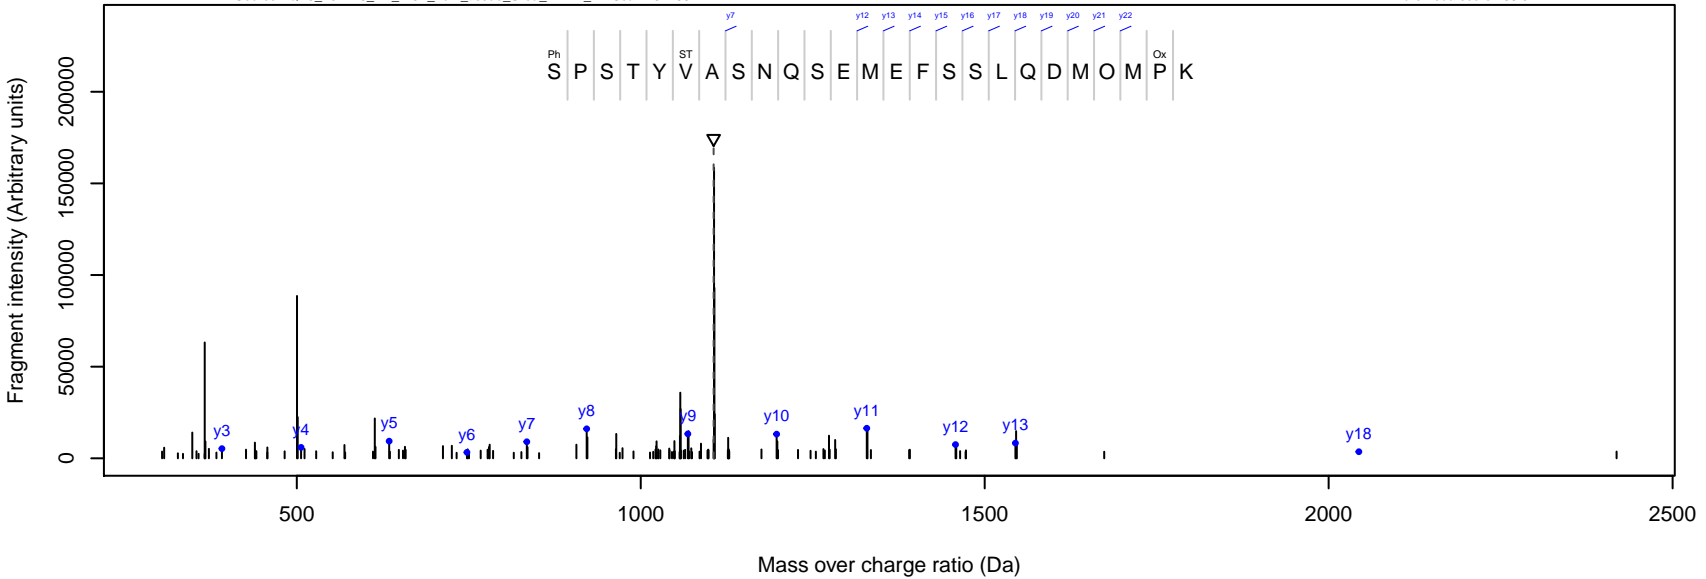



AAS(Phospho (STY))SDQLRDNS(Phospho (STY))PPPAFKPEPPK-3+

Source : QE3\_201126\_FR\_TiOx\_hum\_tissue\_Urea\_RNAB\_N Scan : 22401

Andromeda score : 55.783

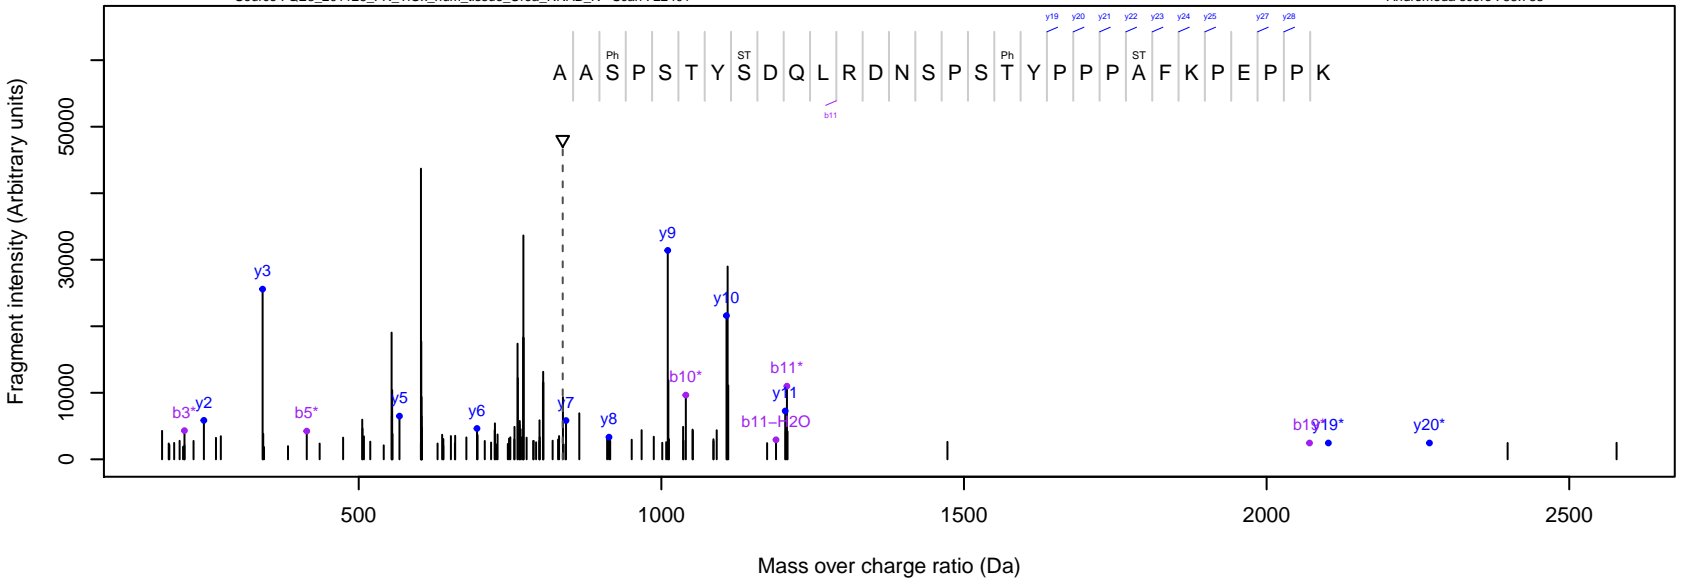

AGM(Oxidation (M))SSNQSIS(Phospho (STY))PVLDAVPRT(Phospho (STY))PSR-3+

Source : QE3\_201126\_FR\_TiOx\_hum\_tissue\_Urea\_RNAB\_B Scan : 31970

Andromeda score : 55.783

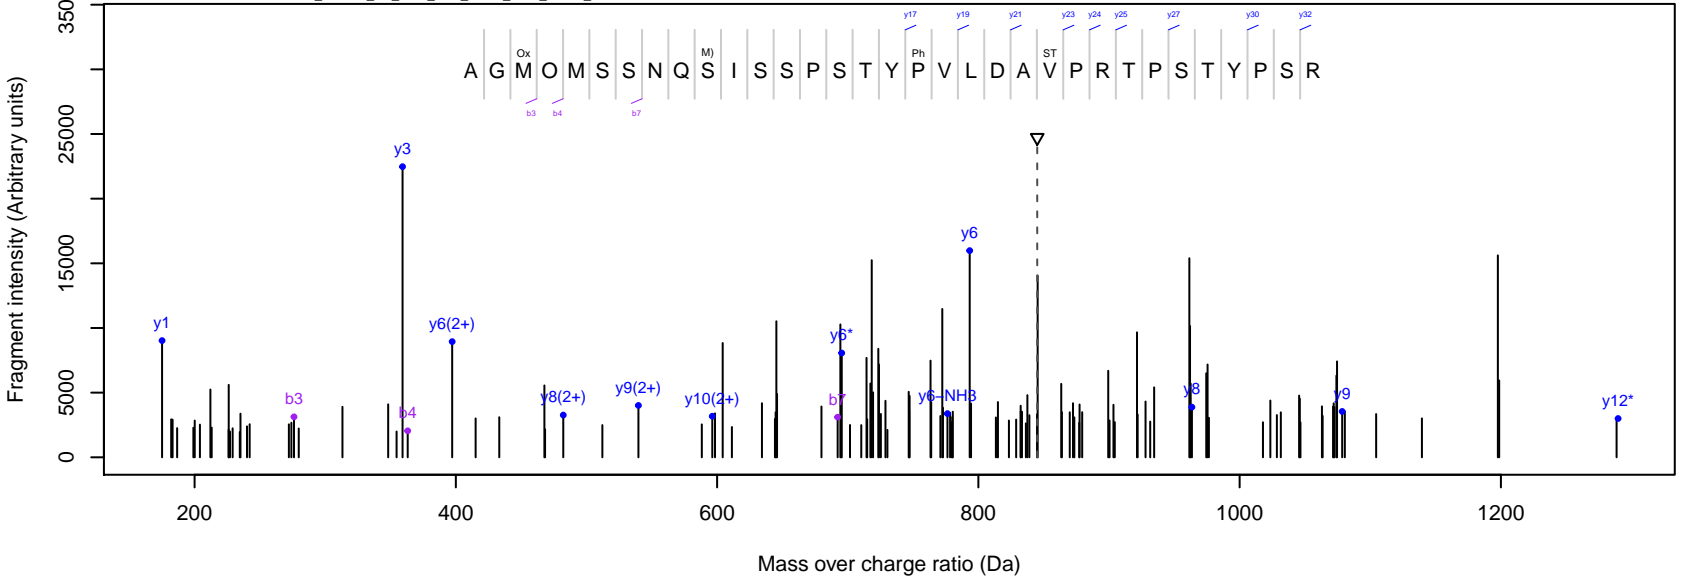

S(Phospho (STY))GSEAVTDPGEREAGASLYQGLMR-3+

Source : QE3\_201126\_FR\_TiOx\_hum\_tissue\_Urea\_RNAB\_H Scan : 38973

Andromeda score : 55.783

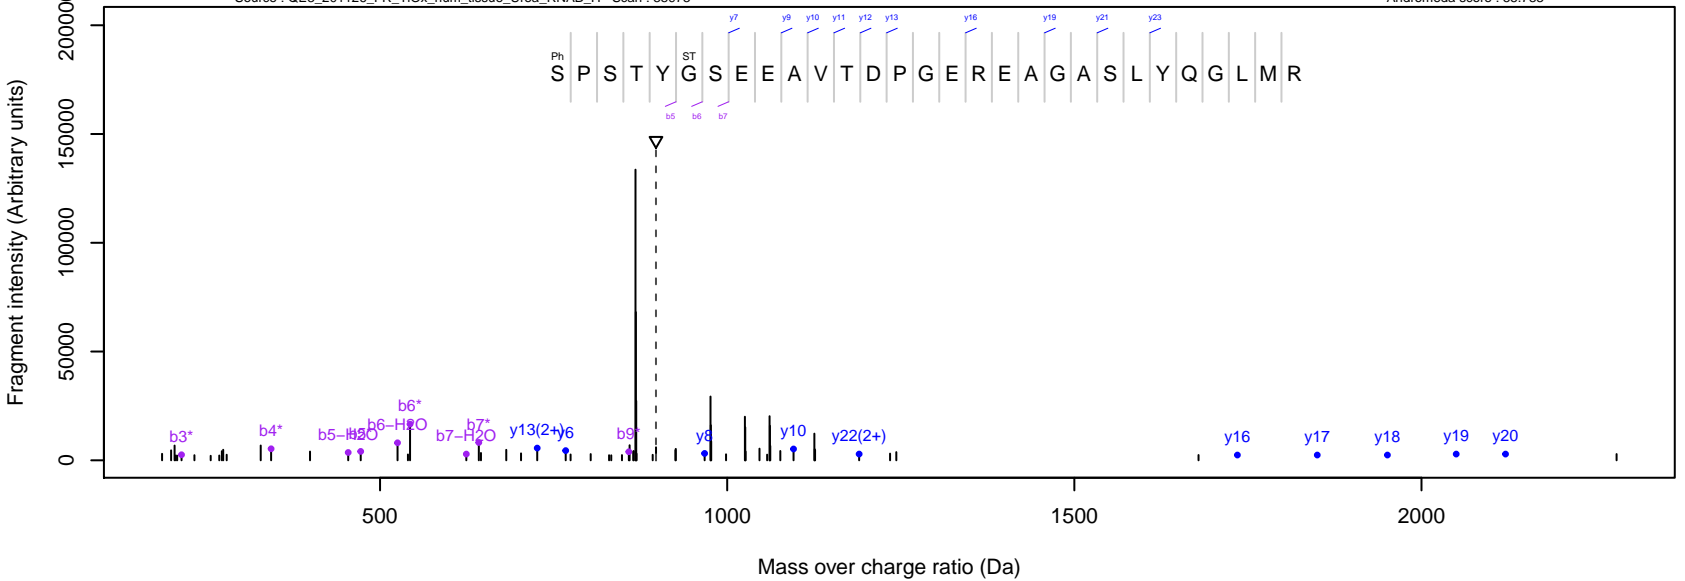

S(Phospho (STY))SLQPITTLGK-2+

Source : QE3\_201126\_FR\_TiOx\_hum\_tissue\_Urea\_RNAB\_H Scan : 28530

Andromeda score : 55.776

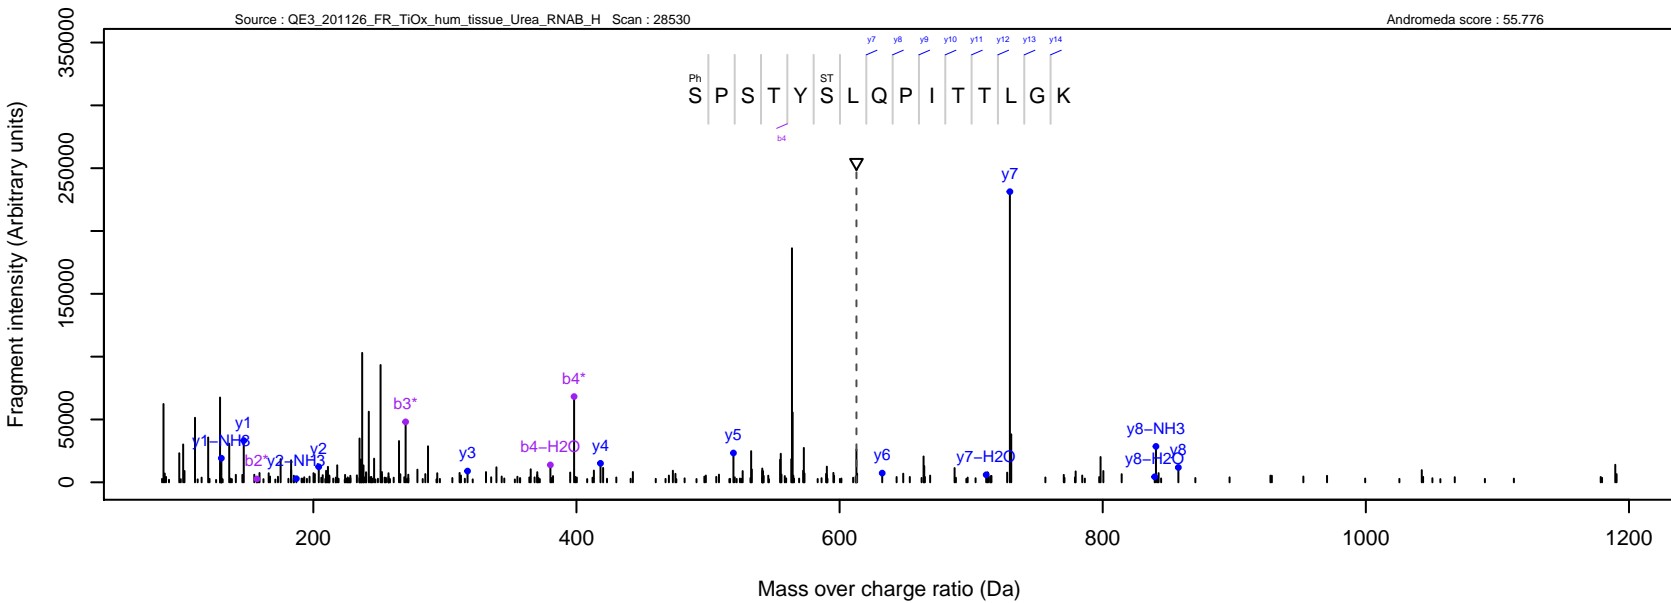

LQLS(Phospho (STY))DEESVFEEALMSPDTR-3+

Source : QE3\_201126\_FR\_TiOx\_hum\_tissue\_Urea\_RNAB\_H Scan : 61048

Andromeda score : 55.763

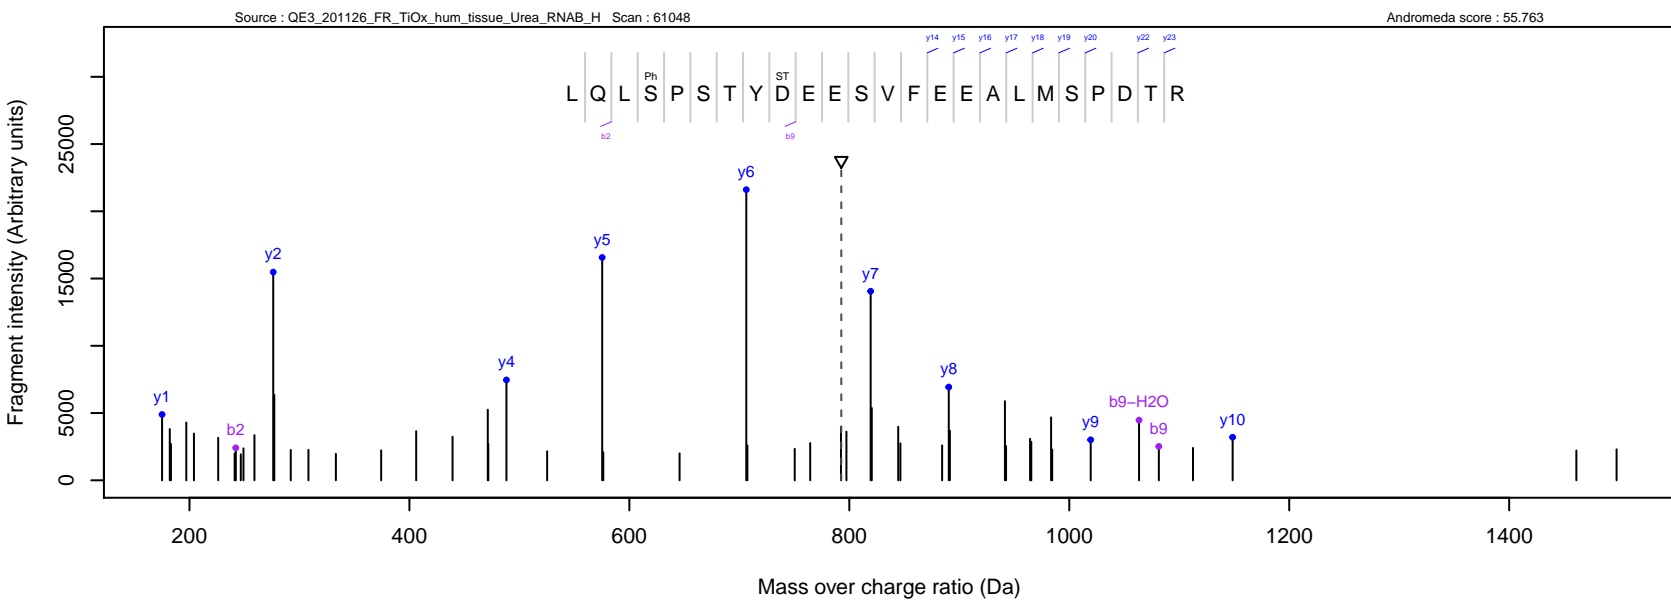

SKELVS(Phospho (STY))S(Phospho (STY))S(Phospho (STY))SSGSDDSEVDK-3+

Source : QE3\_201126\_FR\_TiOx\_hum\_tissue\_Urea\_RNAB\_N Scan : 11804

Andromeda score : 55.763

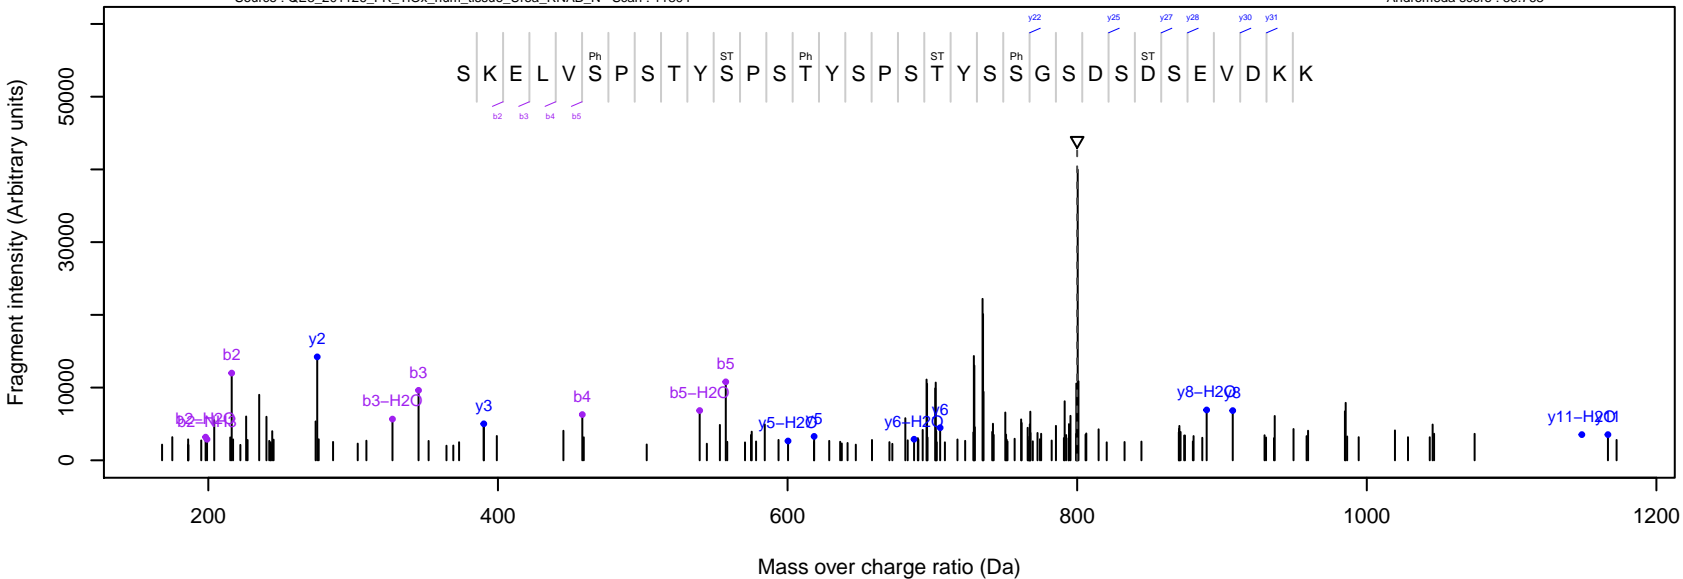

FNDS(Phospho (STY))EGDDTEETEDYRQFRK-3+

Source : QE3\_201126\_FR\_TiOx\_hum\_tissue\_Urea\_RNAB\_H Scan : 18356

Andromeda score : 55.734

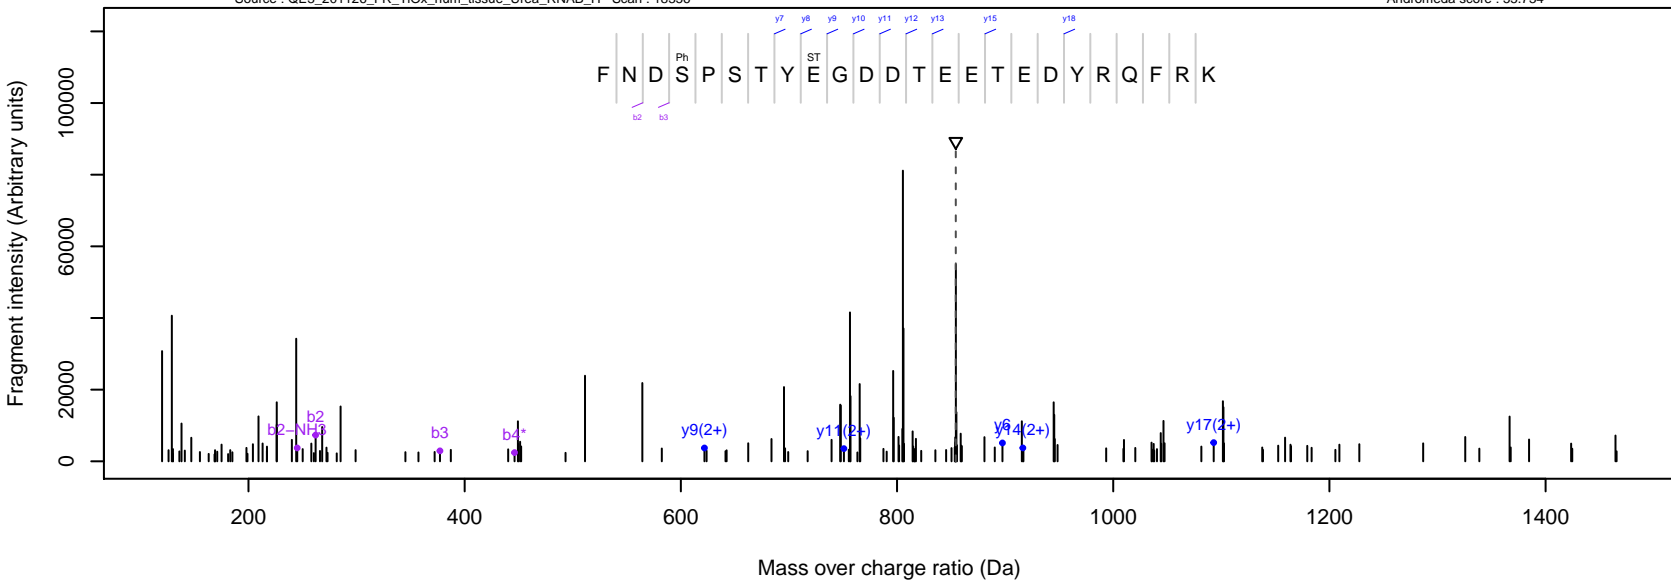

EREPEAASSRGS(Phospho (STY))PVR-3+

Source : QE3\_201126\_FR\_TiOx\_hum\_tissue\_Urea\_RNAB\_H Scan : 4647

Andromeda score : 55.688

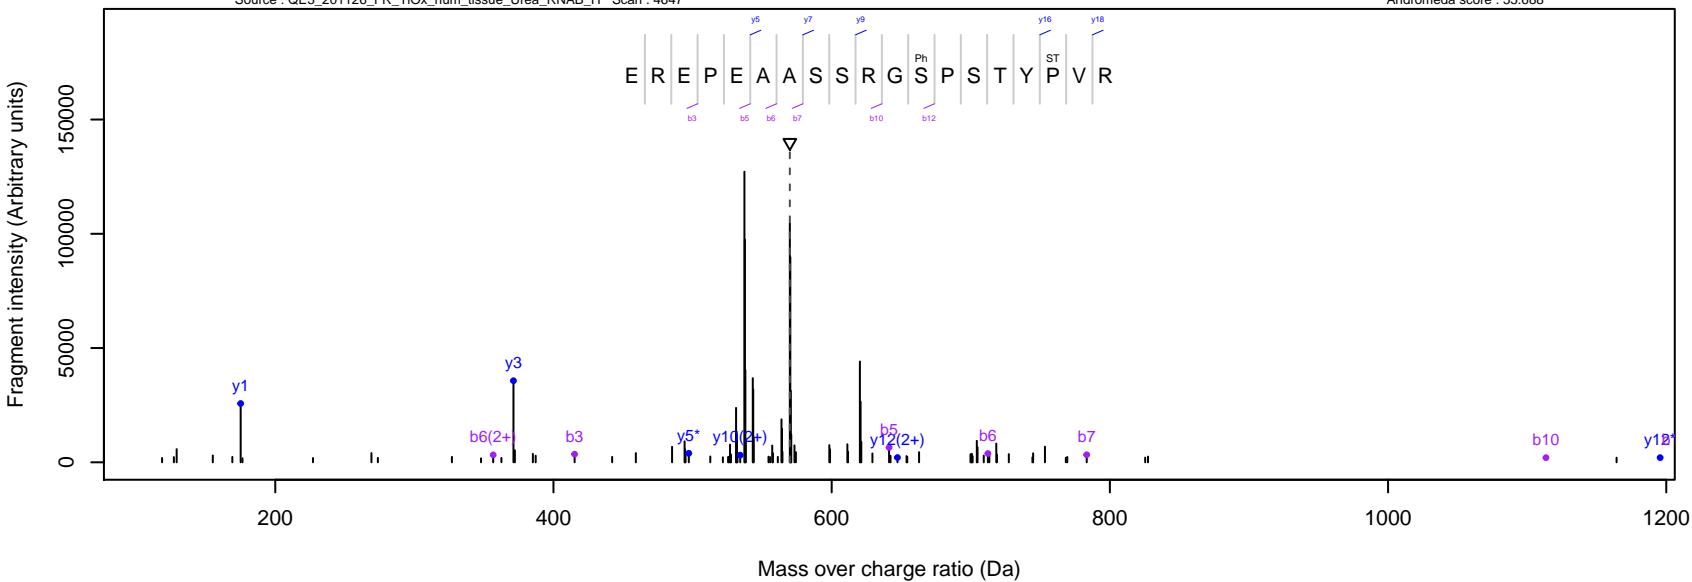

TGSDHT(Phospho (STY))NPTSPLLVKPSDLLLEENKINSVK-4+

Source : QE3\_201126\_FR\_TiOx\_hum\_tissue\_Urea\_RNAB\_H Scan : 36796

Andromeda score : 55.608

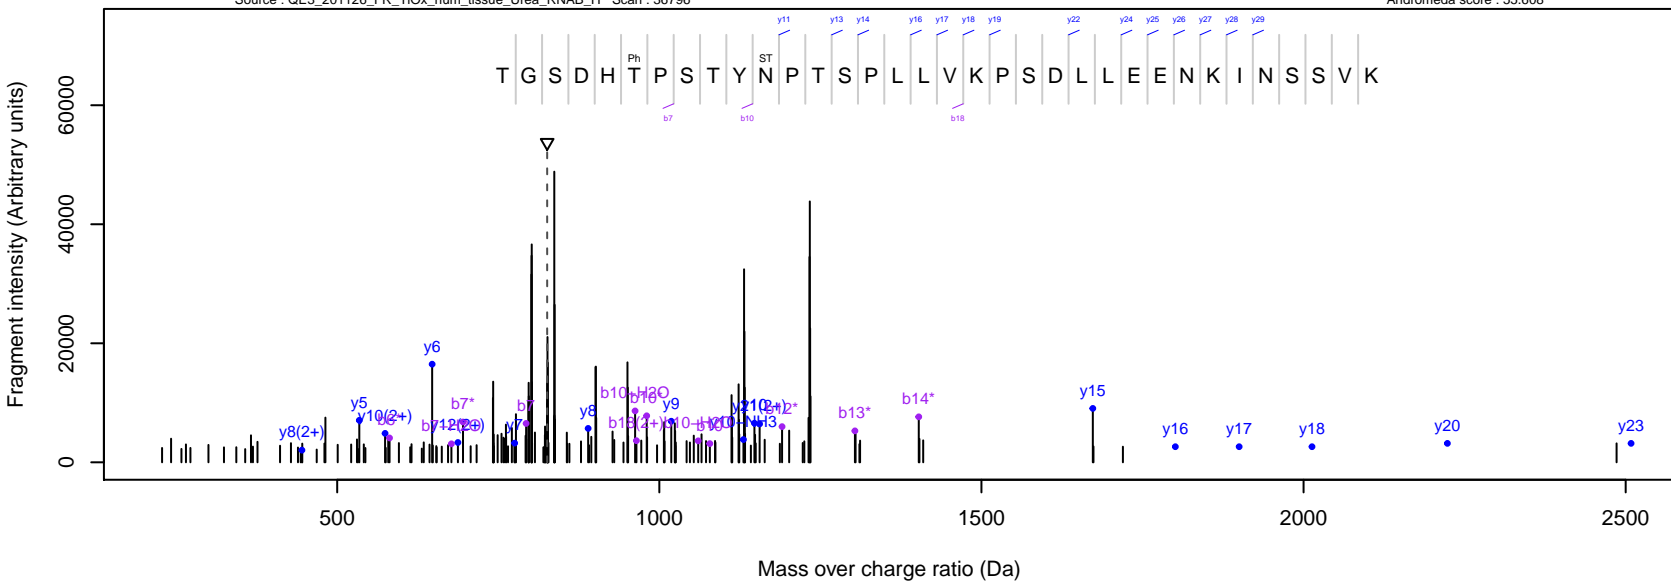

GPPS(Phospho (STY))PPAPVM(Oxidation (M))HS(Phospho (STY))PSR-3+

Source : QE3\_201126\_FR\_TiOx\_hum\_tissue\_Urea\_RNAB\_H Scan : 14298

Andromeda score : 55.588

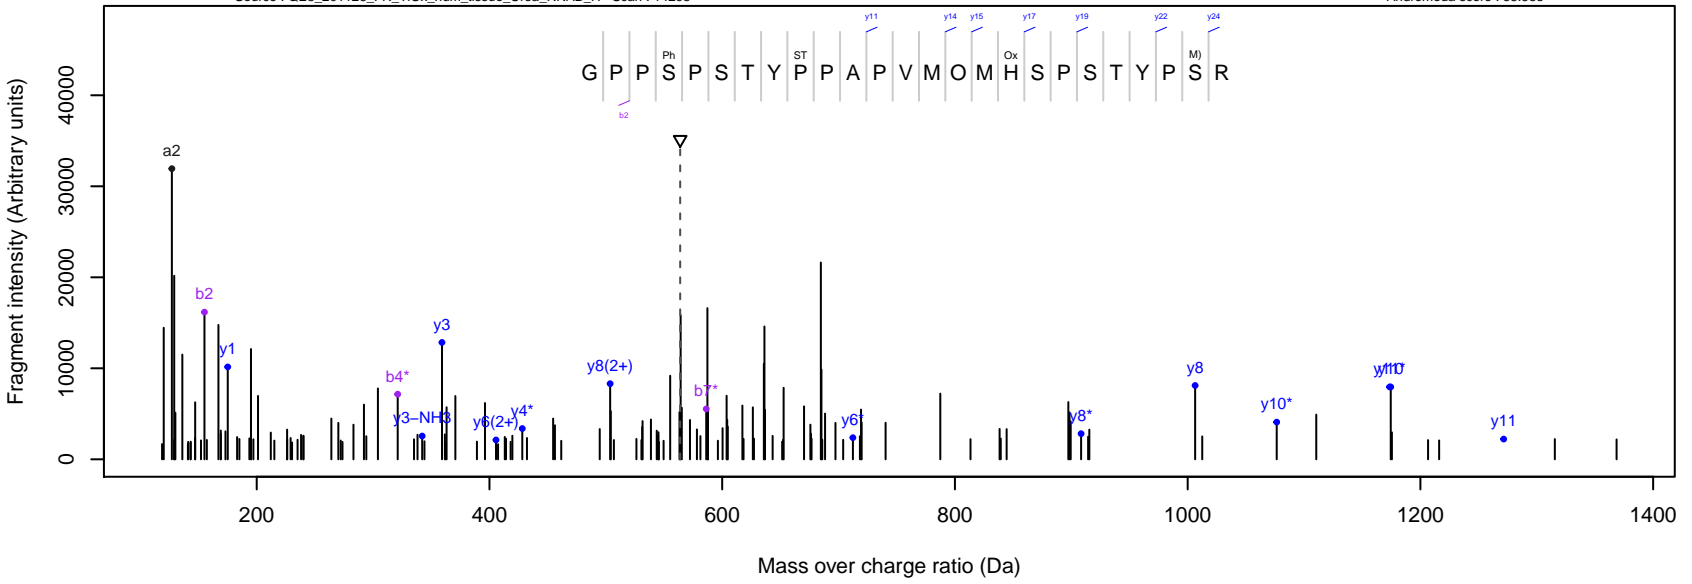

WGPGS(Phospho (STY))S(Phospho (STY))VGLQLALSSSQR-3+

Source : QE3\_201126\_FR\_TiOx\_hum\_tissue\_Urea\_RNAB\_N Scan : 49311

Andromeda score : 55.588

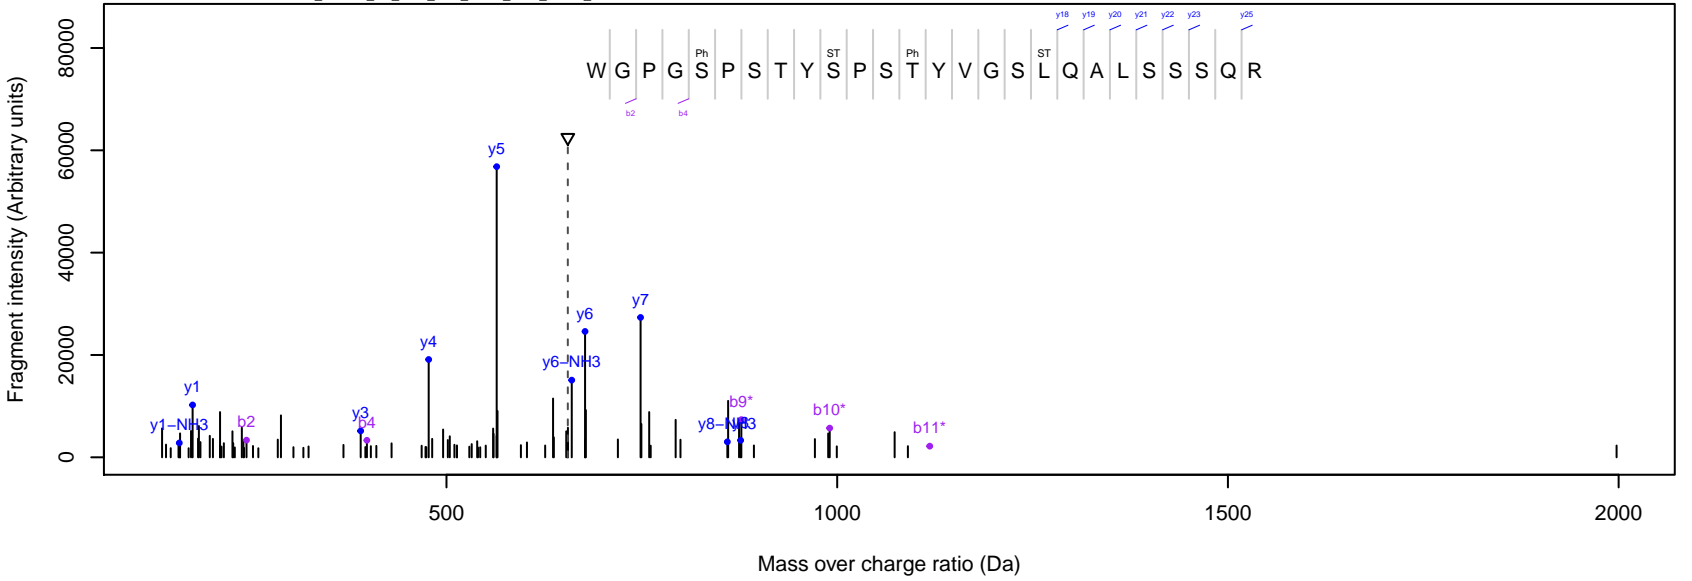

DDEKEAEEGEDDRDS(Phospho (STY))ANGEDDS-3+

Source : QE3\_201126\_FR\_TiOx\_hum\_tissue\_Urea\_RNAB\_H Scan : 7887

Andromeda score : 55.526

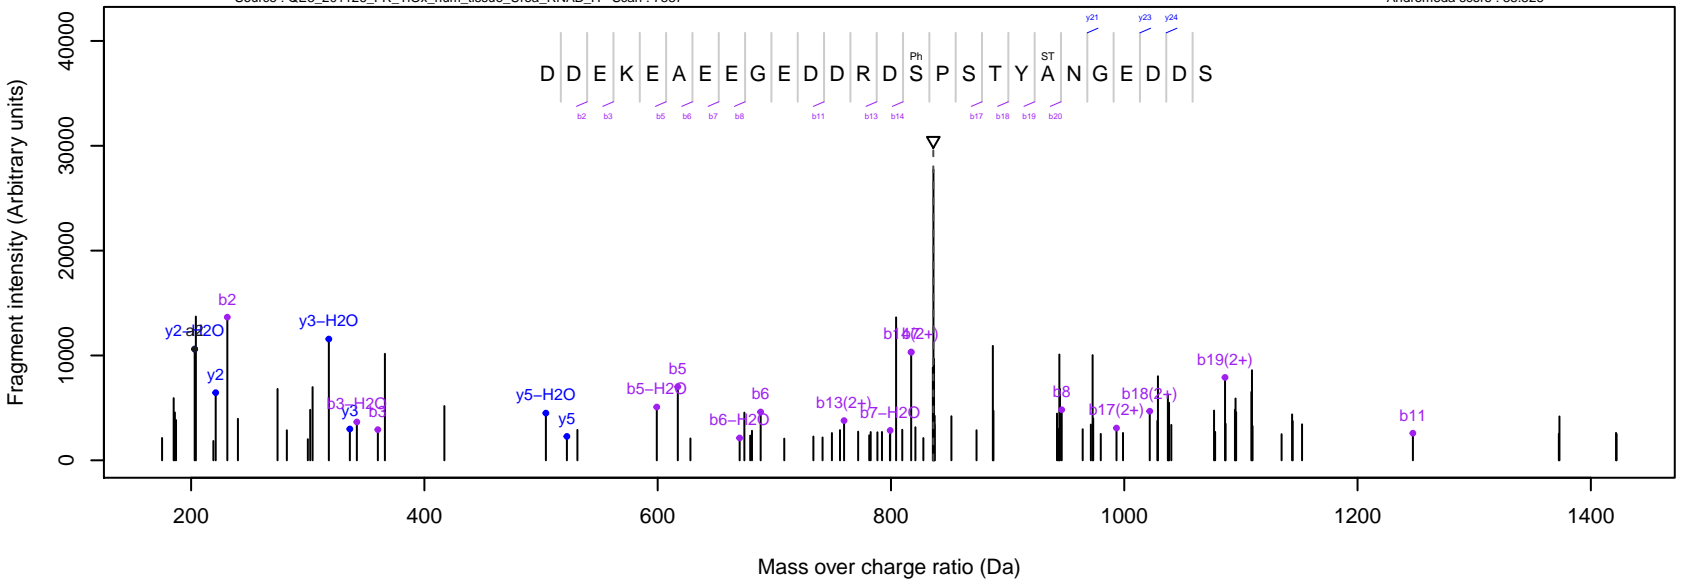

(Acetyl (Protein N-term))M(Oxidation (M))ETDAPQPLAS(Phospho (STY))PDSHPDPCCK-3+

Source : QE3\_201126\_FR\_TIOx\_hum\_tissue\_Urea\_RNAB\_B Scan : 23071

Andromeda score : 55.526

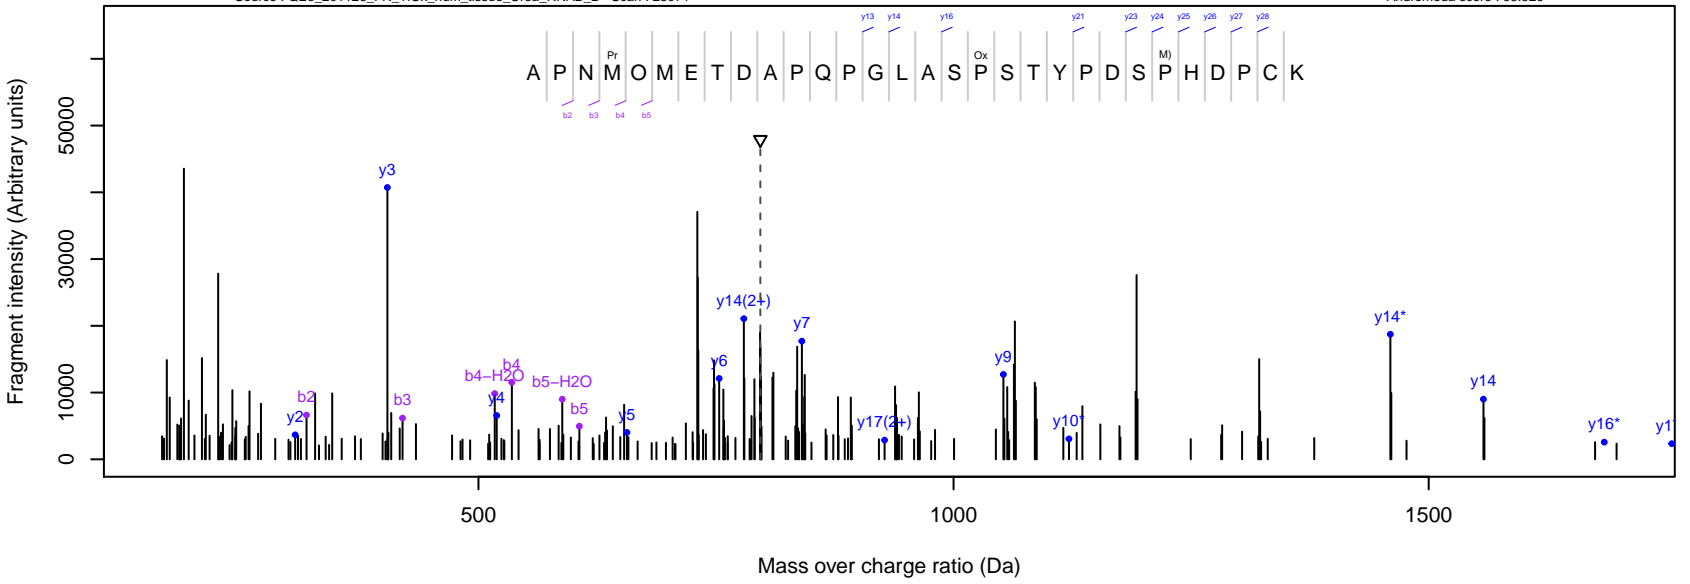

(Acetyl (Protein N-term))S(Phospho (STY))AGGASVPPPPNPAVSFPFPPR-3+

Source : QE3\_201126\_FR\_TIOx\_hum\_tissue\_Urea\_RNAB\_H Scan : 51488

Andromeda score : 55.469

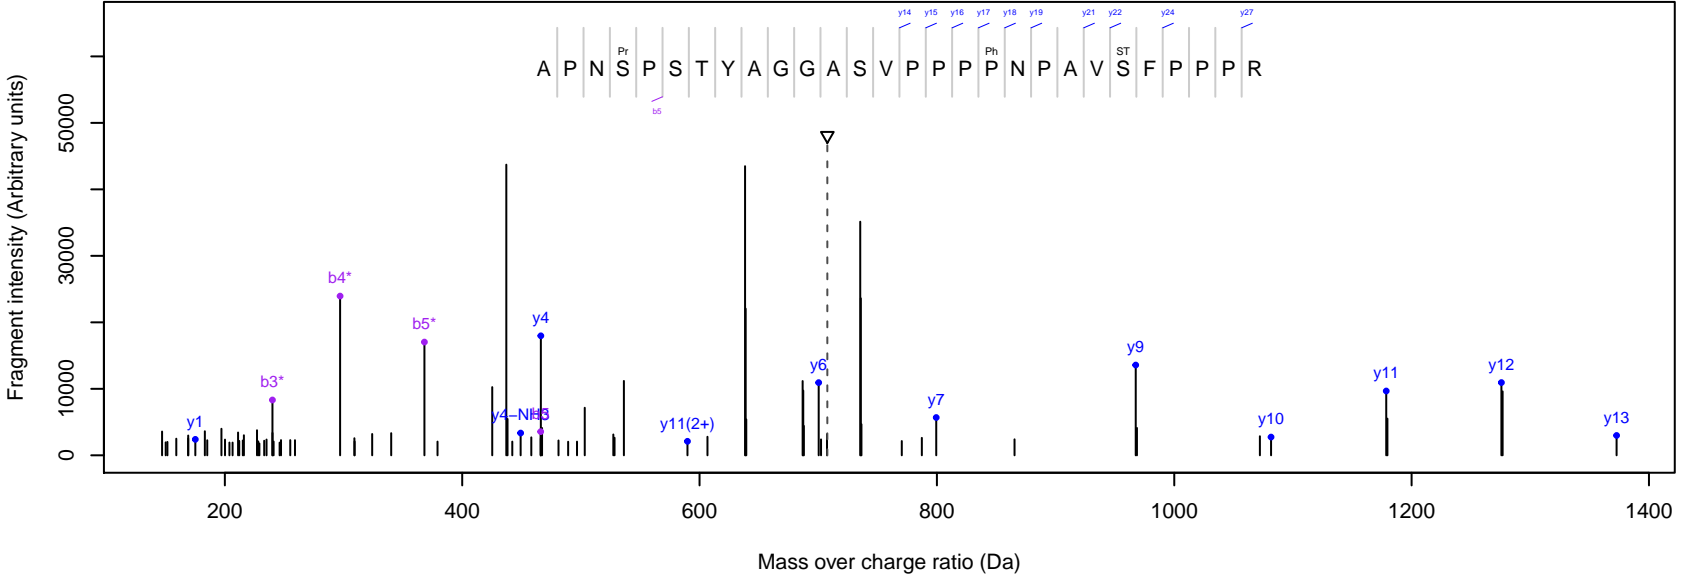

S(Phospho (STY))SGPTSLFAVTVAPPGAR-2+

Source : QE3\_201126\_FR\_TIOx\_hum\_tissue\_Urea\_RNAB\_N Scan : 50034

Andromeda score : 55.452

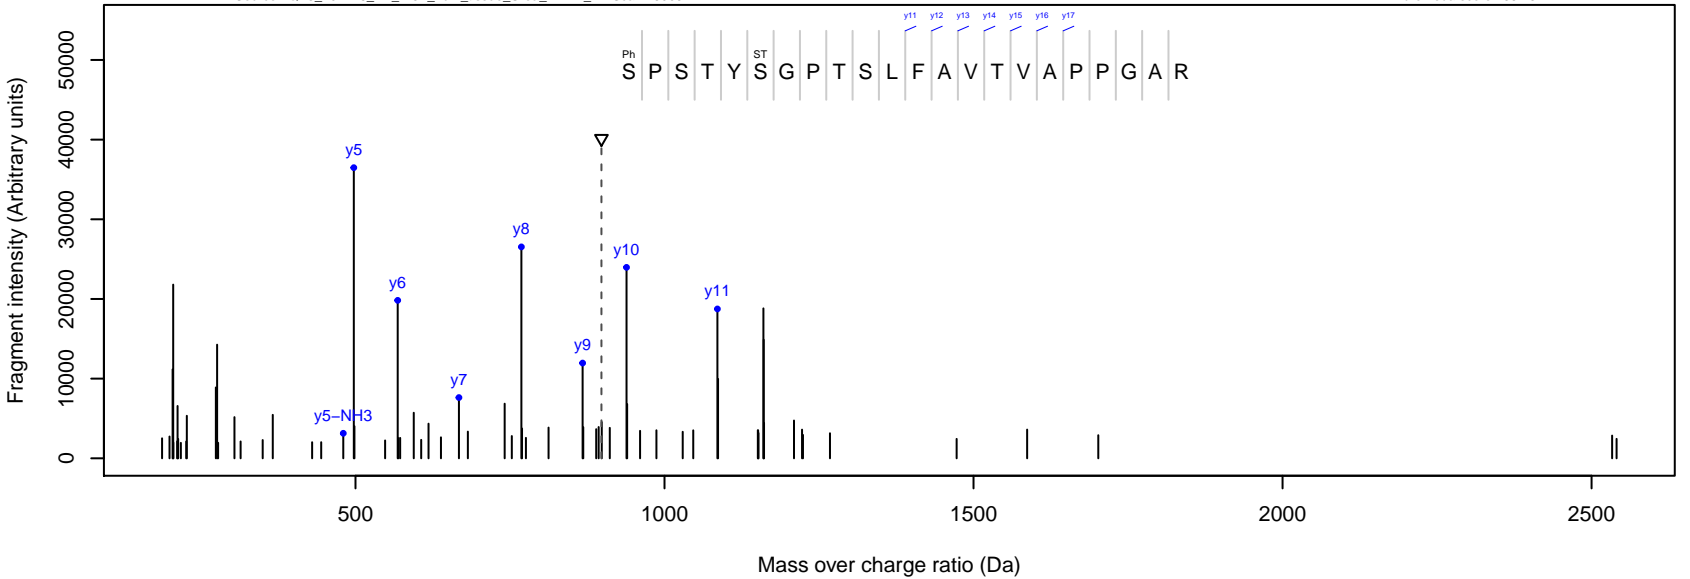

FSDHAEERAS(Pospho (STY))IYK-3+

Source : QE3\_201126\_FR\_TiOx\_hum\_tissue\_Urea\_RNAB\_N Scan : 10562

Andromeda score : 55.437

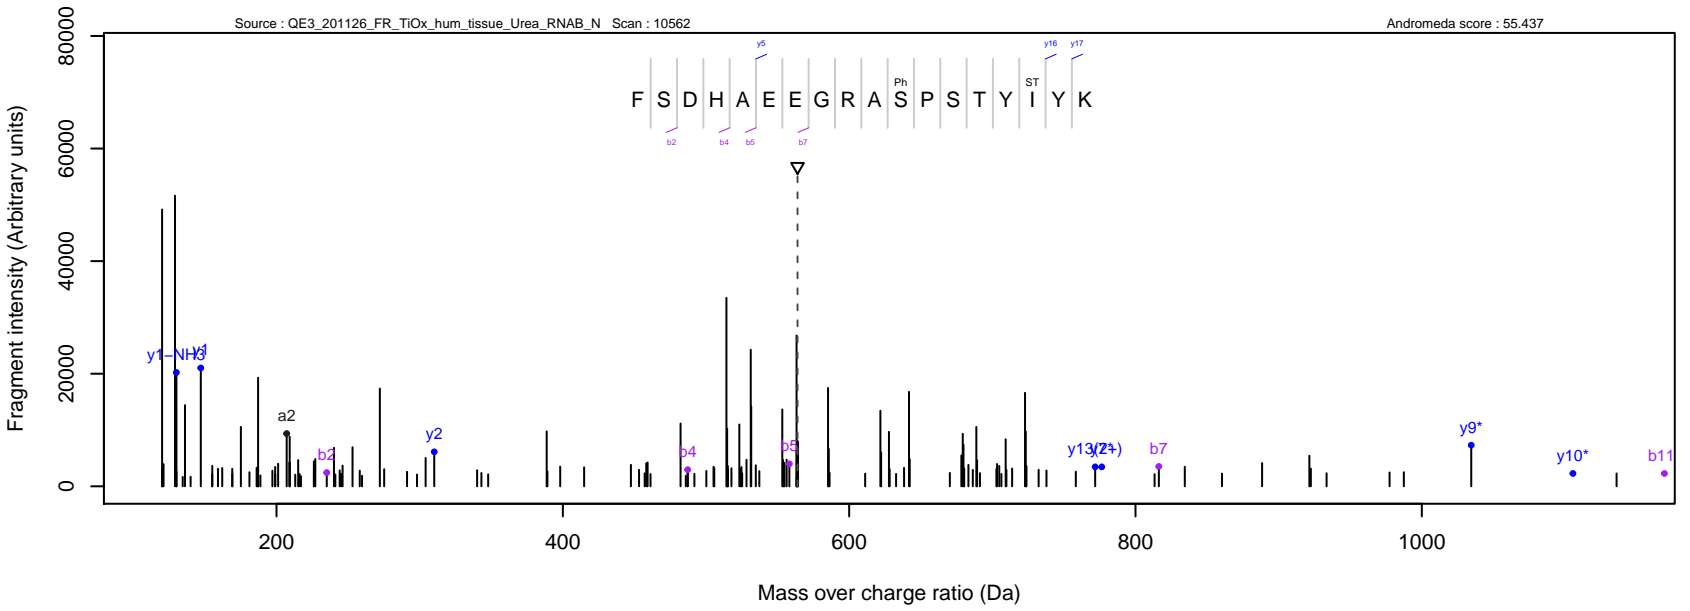

SFSKEELMS(Pospho (STY))S(Pospho (STY))DLEETAGSTSIPK-3+

Source : QE3\_201126\_FR\_TiOx\_hum\_tissue\_Urea\_RNAB\_H Scan : 41263

Andromeda score : 55.413

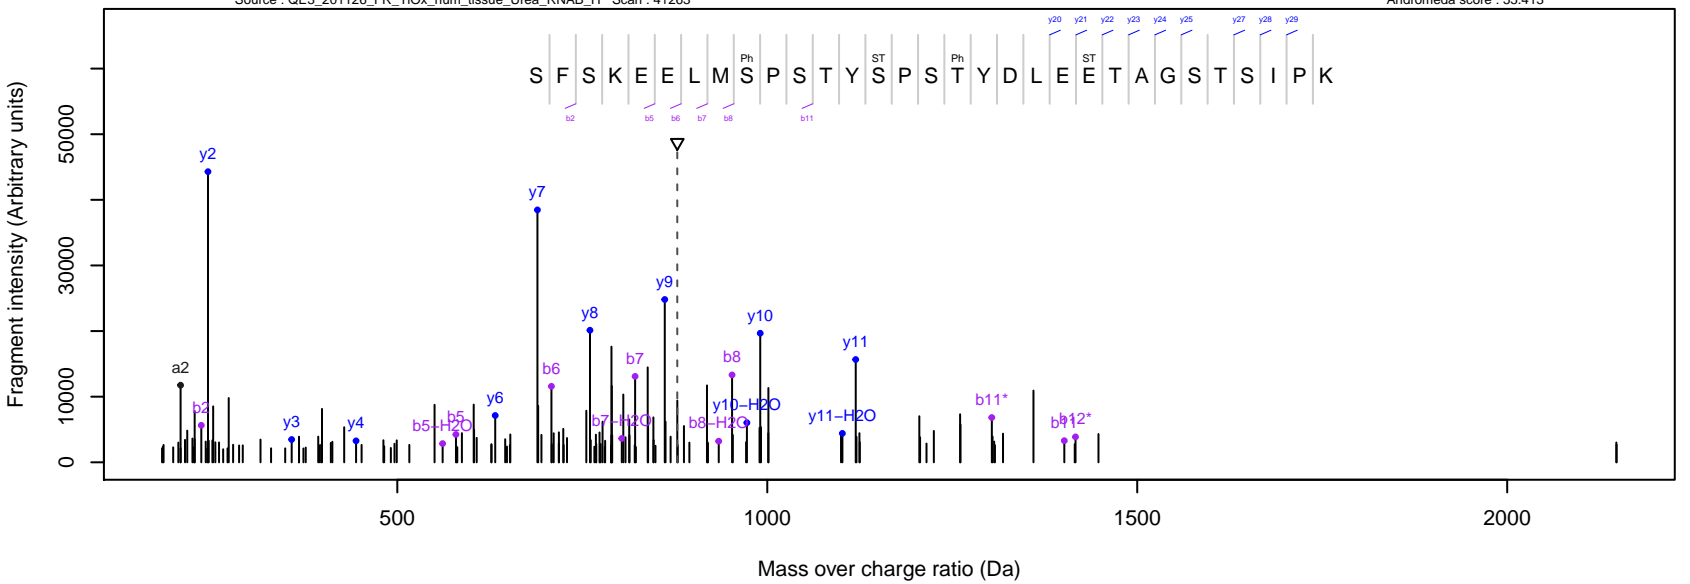

TTQSM(Oxidation (M))QDFPVVDS(Pospho (STY))EEEEEEFQK-3+

Source : QE3\_201126\_FR\_TiOx\_hum\_tissue\_Urea\_RNAB\_H Scan : 39839

Andromeda score : 55.413

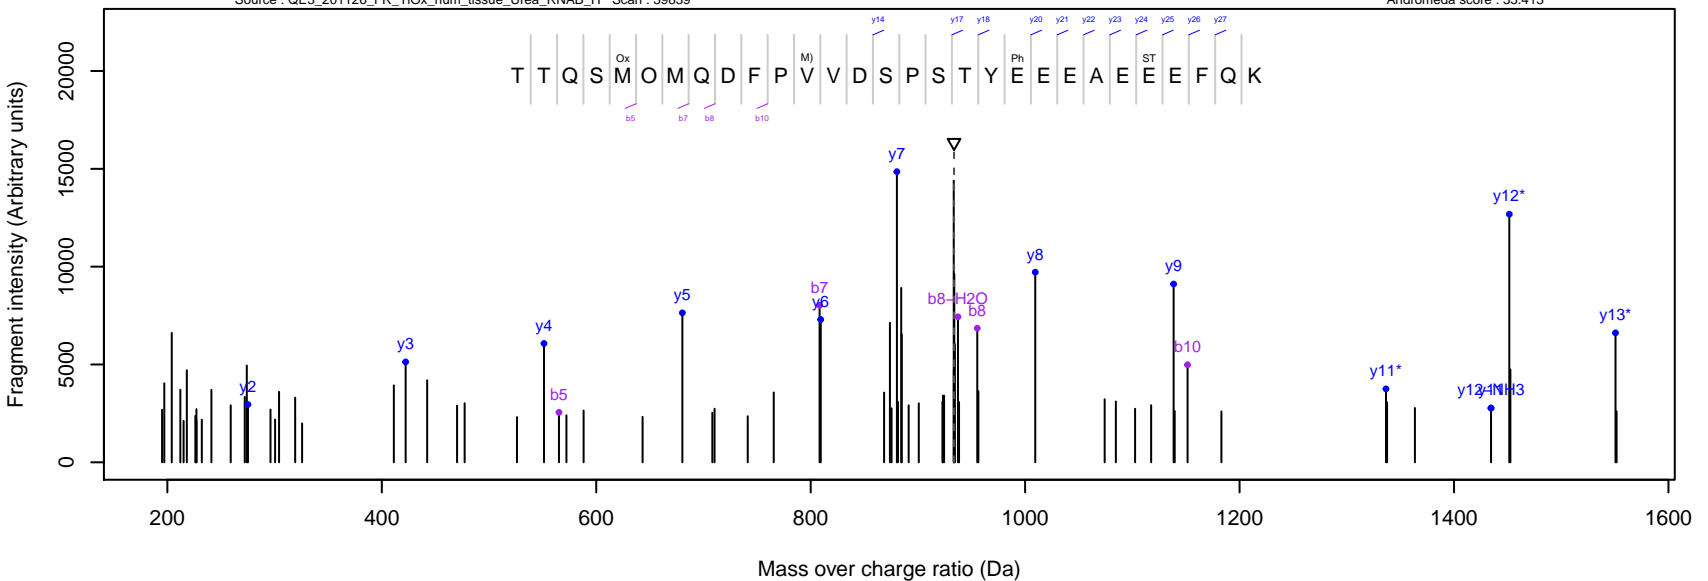

VQSLEGEKLS(Phospho (STY))PKS(Phospho (STY))DISPLT(Phospho (STY))PR-3+

Source : QE3\_201126\_FR\_TiOx\_hum\_tissue\_Urea\_RNAB\_N Scan : 34089

Andromeda score : 55.413

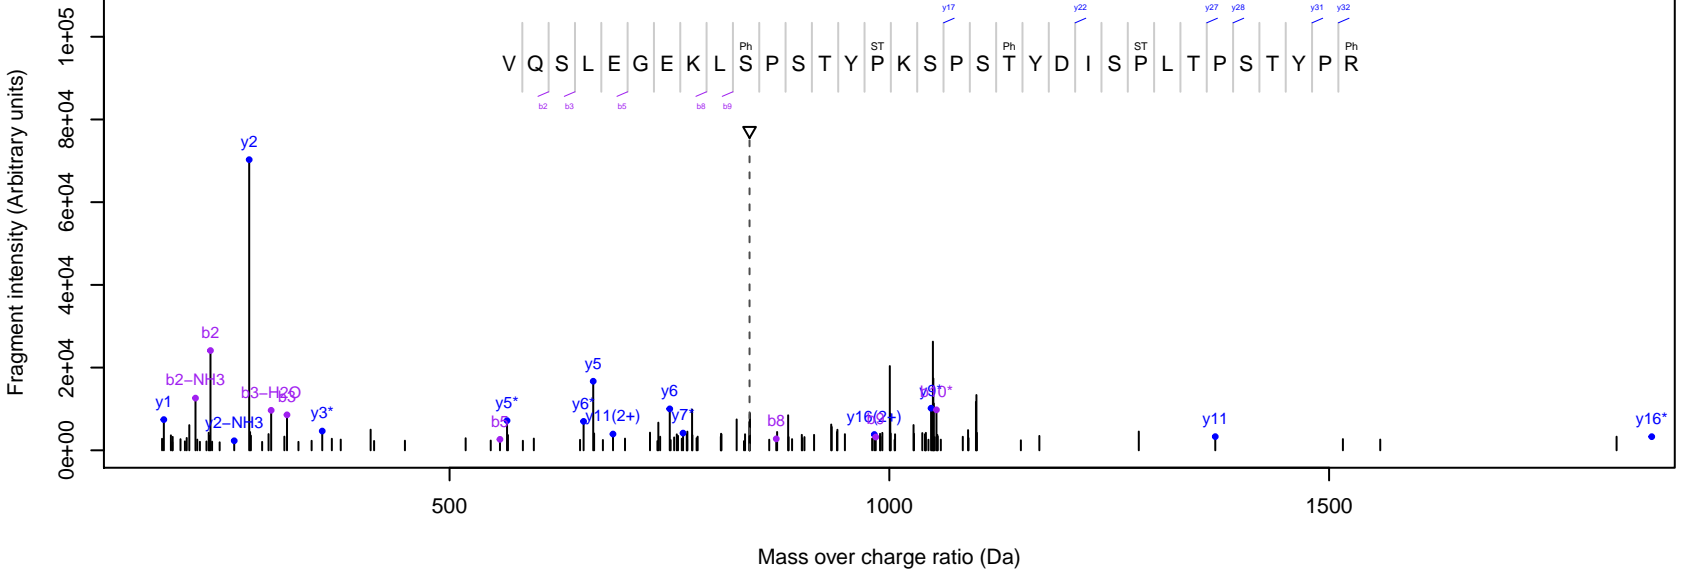

S(Phospho (STY))S(Phospho (STY))DGLSHEEDLAK-2+

Source : QE3\_201126\_FR\_TiOx\_hum\_tissue\_Urea\_RNAB\_N Scan : 17507

Andromeda score : 55.401

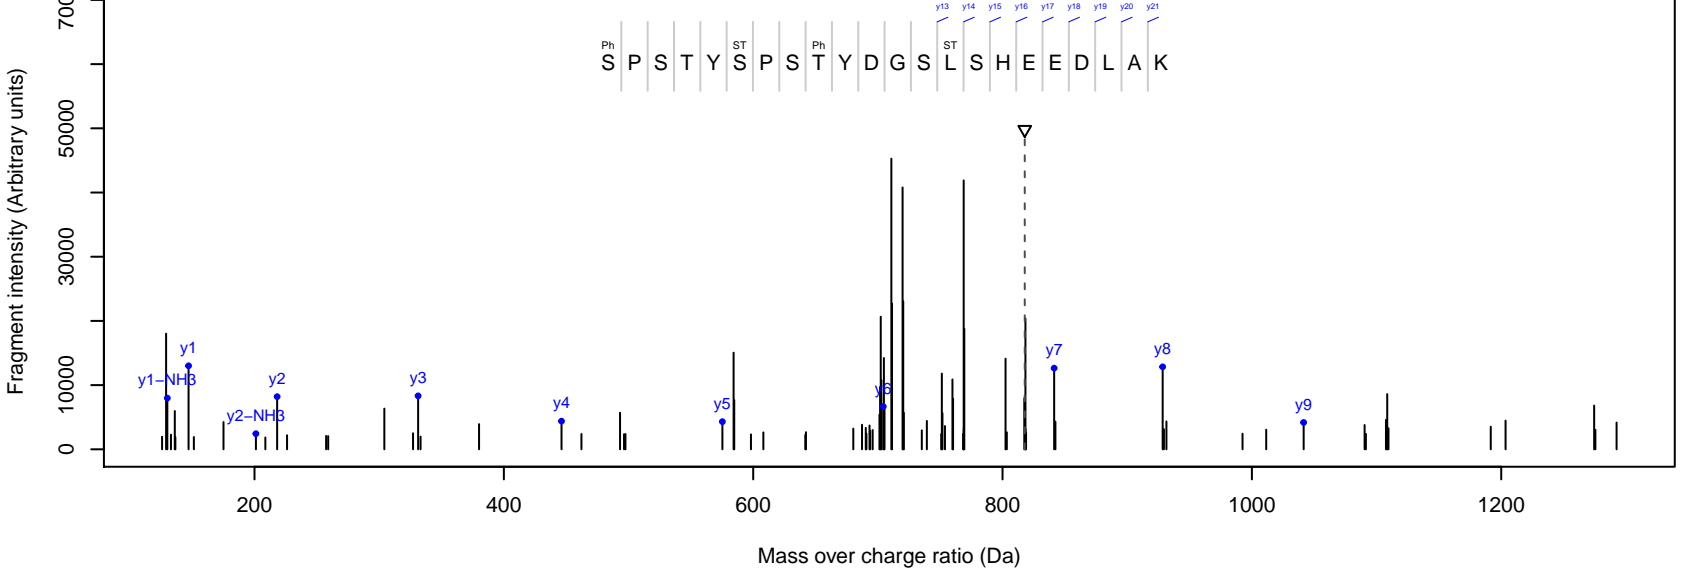

SINKLDS(Phospho (STY))PDPFKLNDPFQFPFGNDSPK-3+

Source : QE3\_201126\_FR\_TiOx\_hum\_tissue\_Urea\_RNAB\_B Scan : 49783

Andromeda score : 55.366

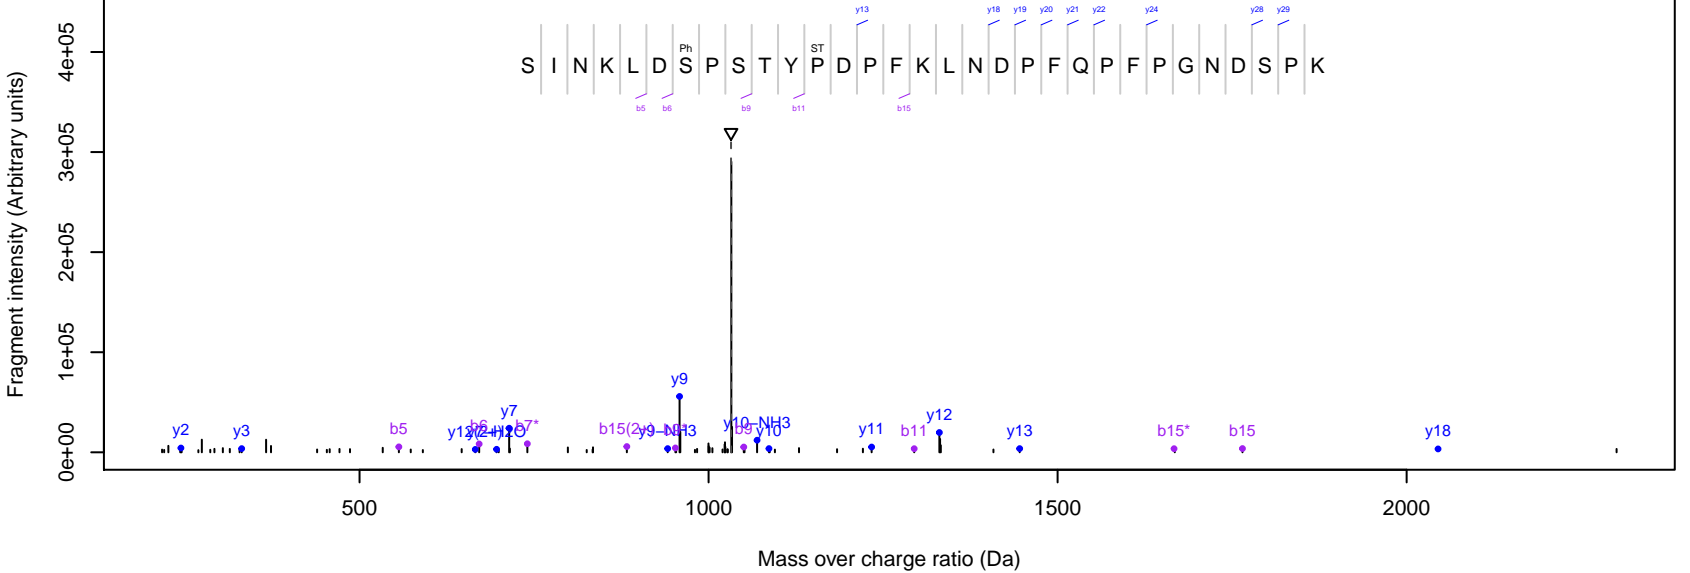

(Acetyl (Protein N-term))AAAAALSGAGTTPAGGGAGGGGAGGGGS(Phospho (STY))PPGGWAVAR-4+

Source : QE3\_201126\_FR\_TiOx\_hum\_tissue\_Urea\_RNAB\_N Scan : 55930

Andromeda score : 55.331

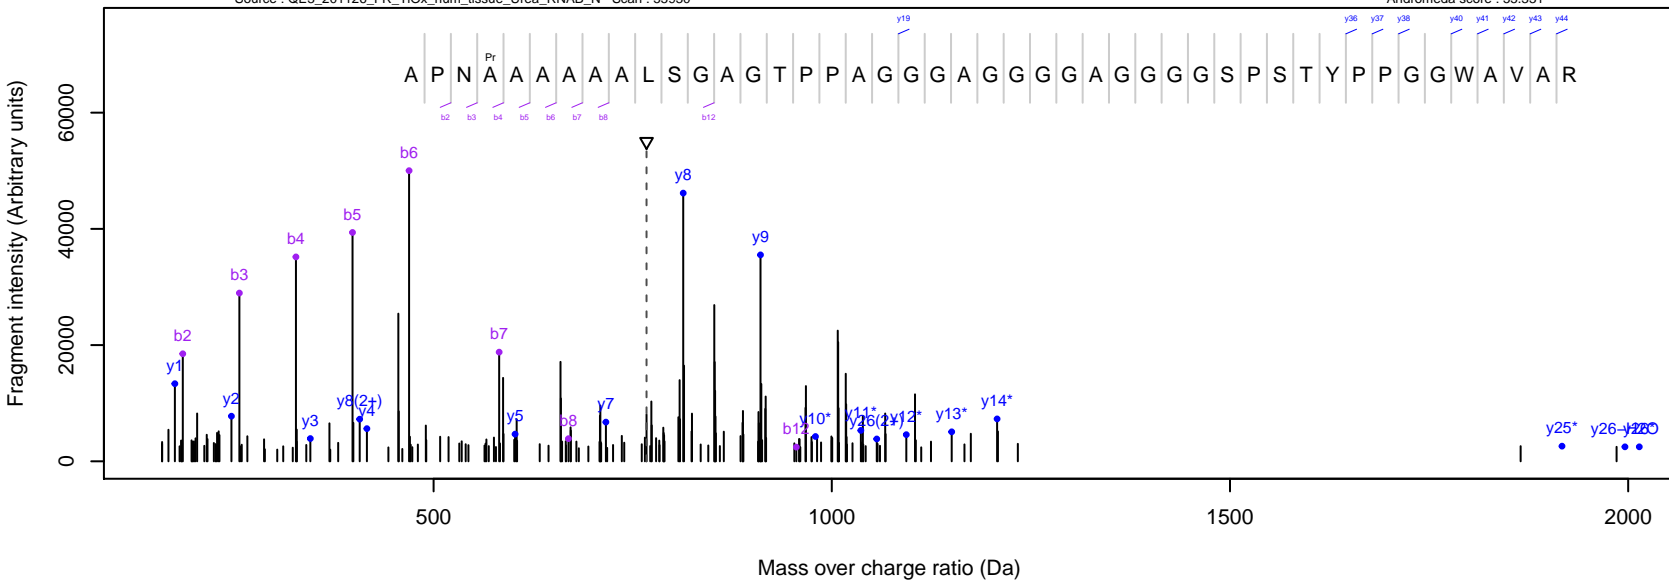

(Acetyl (Protein N-term))AAAMVPGRS(Phospho (STY))ESWER-2+

Source : QE3\_201126\_FR\_TiOx\_hum\_tissue\_Urea\_RNAB\_N Scan : 33736

Andromeda score : 55.314

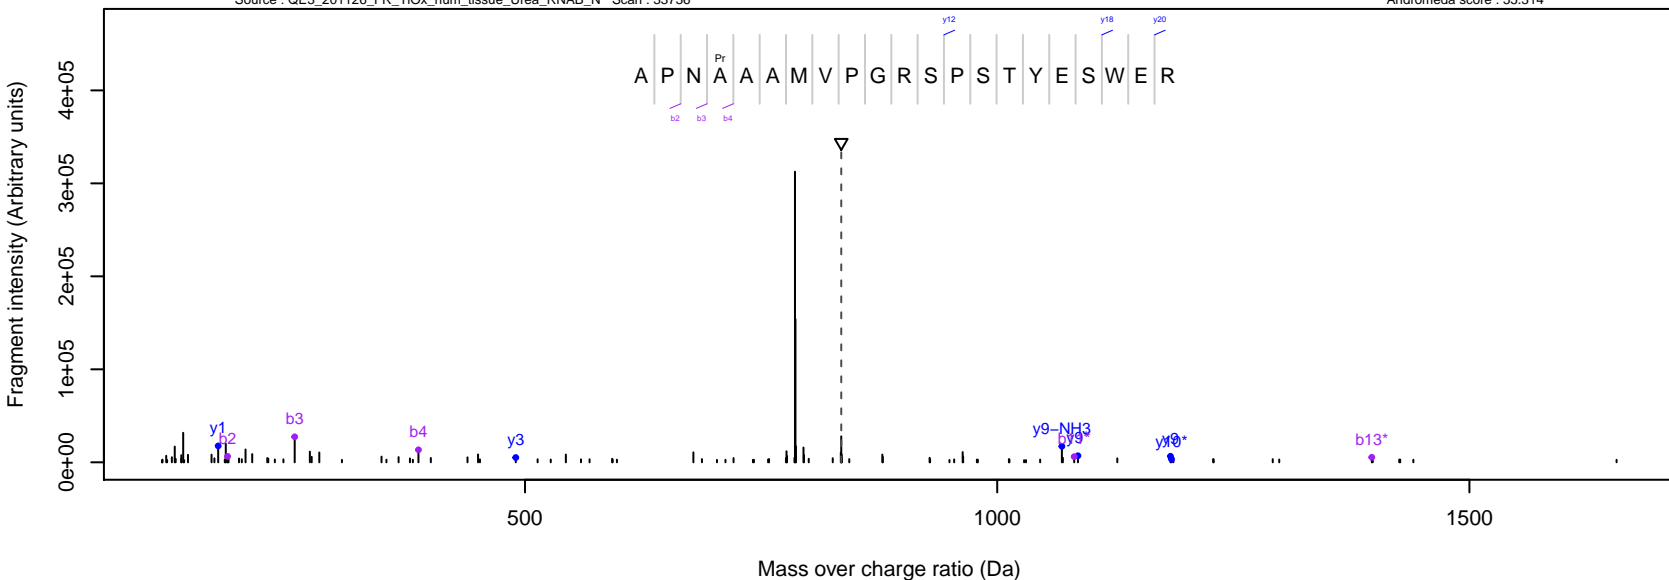

ATS(Phospho (STY))GSSLPVGINR-2+

Source : QE3\_201126\_FR\_TiOx\_hum\_tissue\_Urea\_RNAB\_B Scan : 24040

Andromeda score : 55.314

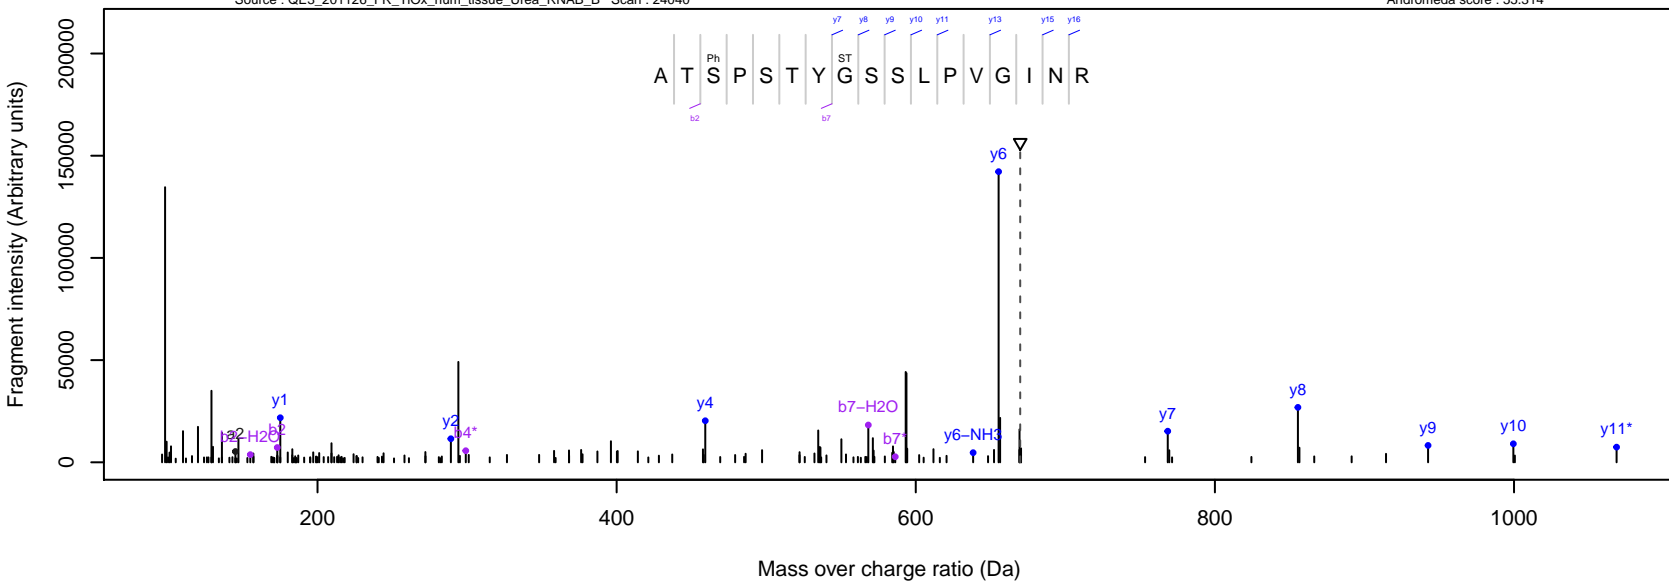



ISES(Phospho (STY))PEVTR-2+

Source : QE3\_201126\_FR\_TiOx\_hum\_tissue\_Urea\_RNAB\_H Scan : 10680

Andromeda score : 55.314

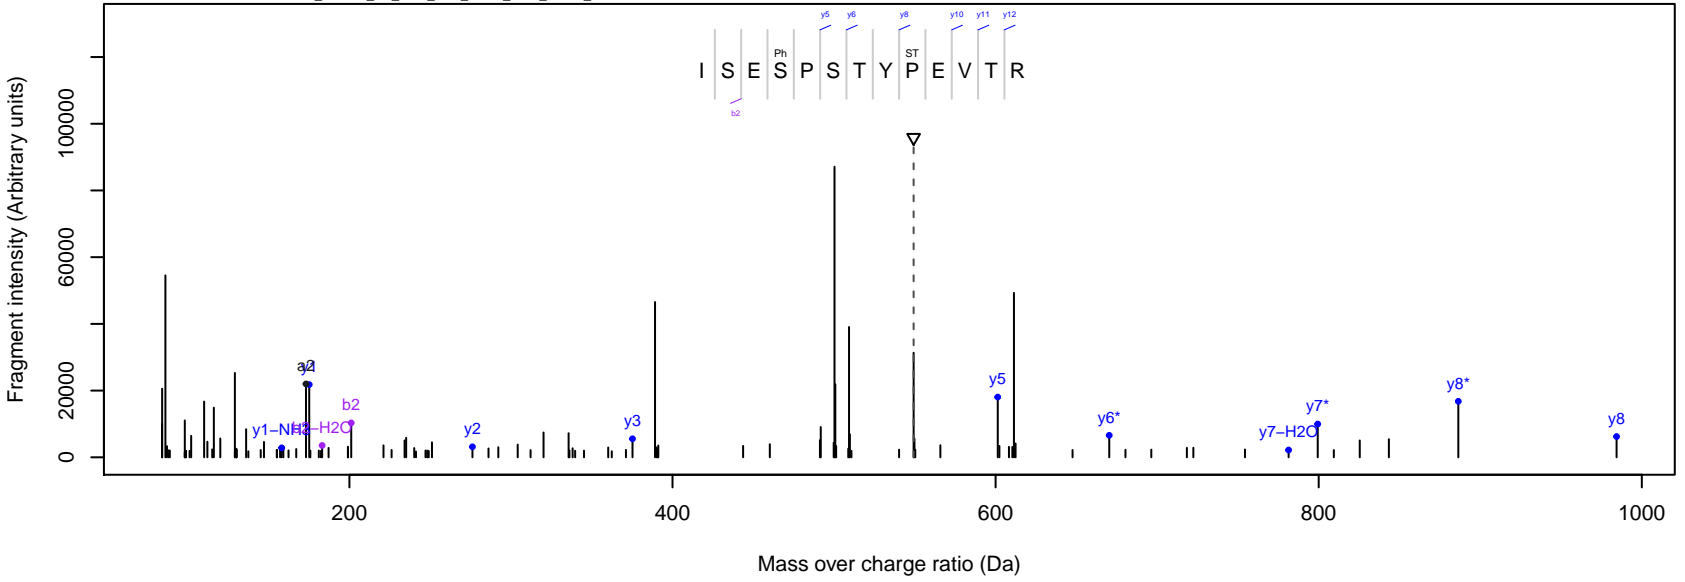

DLPTIPGVTSPPSDEPPMEAS(Phospho (STY))QSHLRNSPEDKR-4+

Source : QE3\_201126\_FR\_TiOx\_hum\_tissue\_Urea\_RNAB\_N Scan : 33340

Andromeda score : 55.3

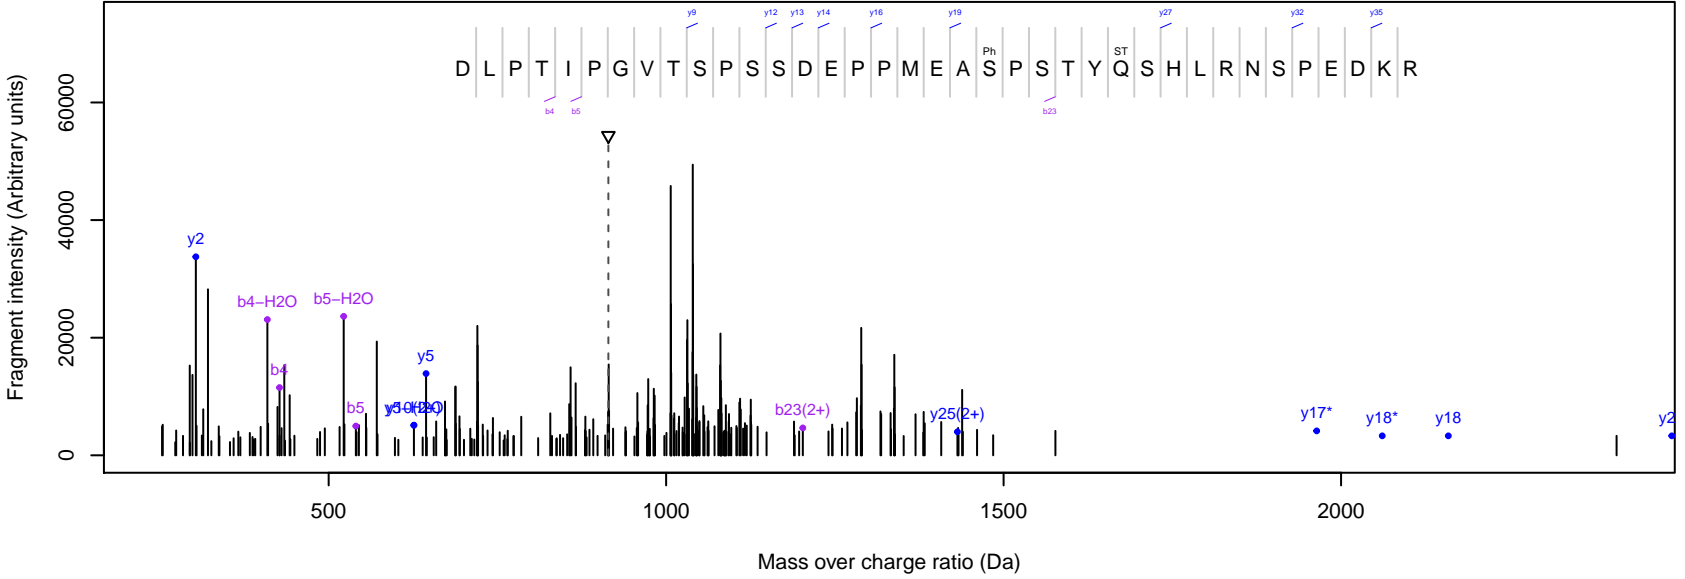

SCFES(Phospho (STY))S(Phospho (STY))PDPELK-2+

Source : QE3\_201126\_FR\_TiOx\_hum\_tissue\_Urea\_RNAB\_B Scan : 30690

Andromeda score : 55.291

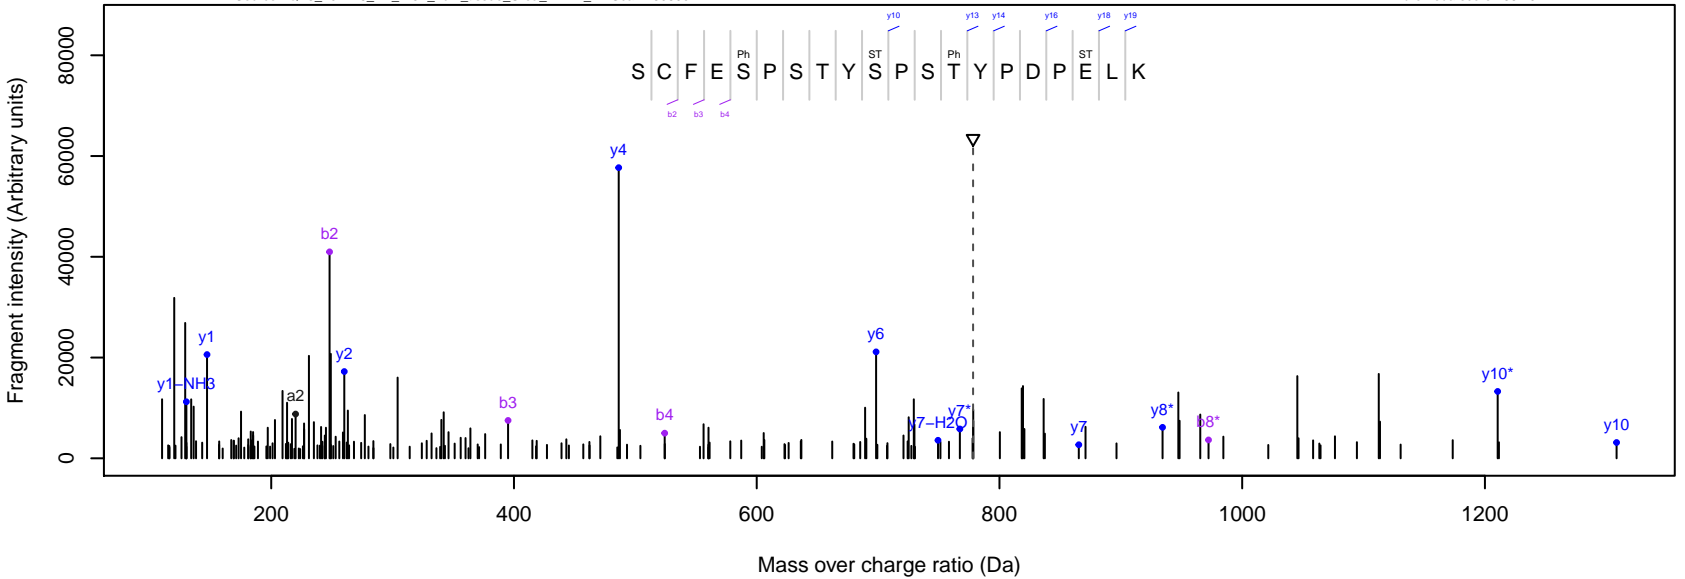

**VAS(Phospho (STY))FSIPGSSSR-2+**

Source : QE3\_201126\_FR\_TiOx\_hum\_tissue\_Urea\_RNAB\_N Scan : 30791

Andromeda score : 55.261

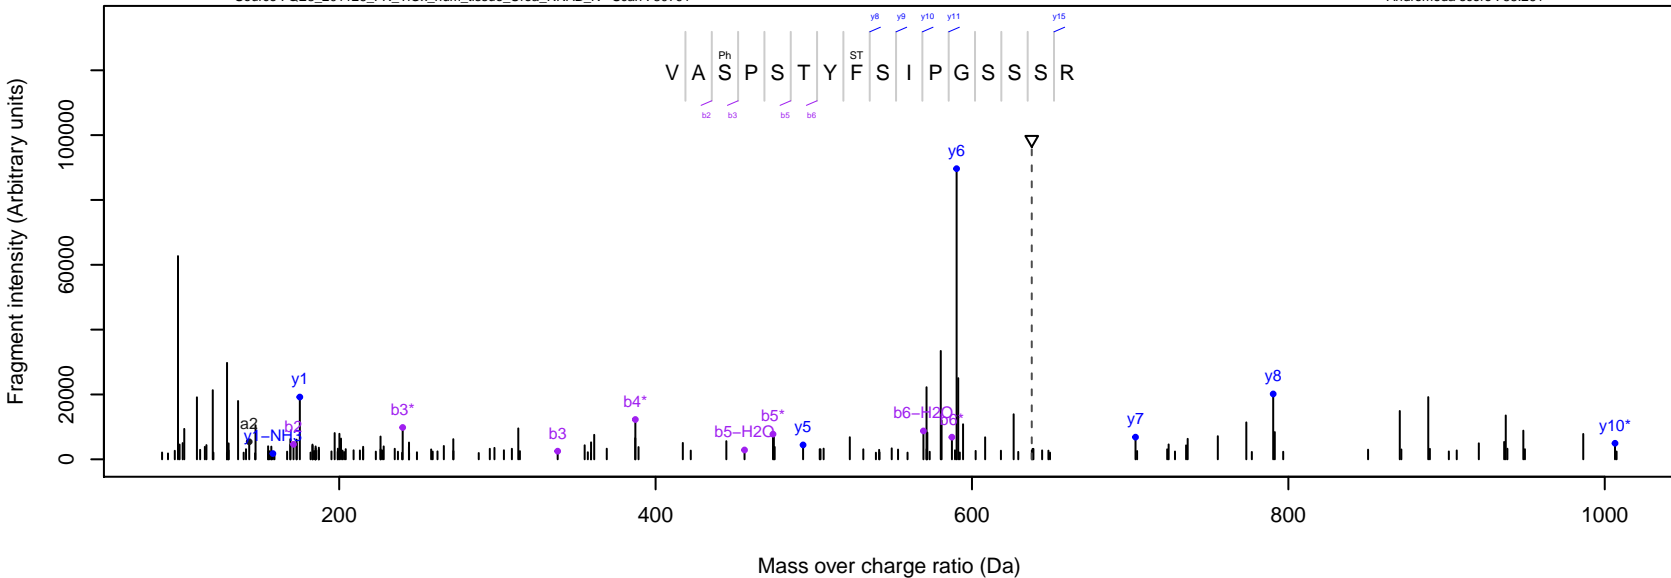

**VLSNRGDS(Phospho (STY))LSR-2+**

Source : QE3\_201126\_FR\_TiOx\_hum\_tissue\_Urea\_RNAB\_H Scan : 7780

Andromeda score : 55.261

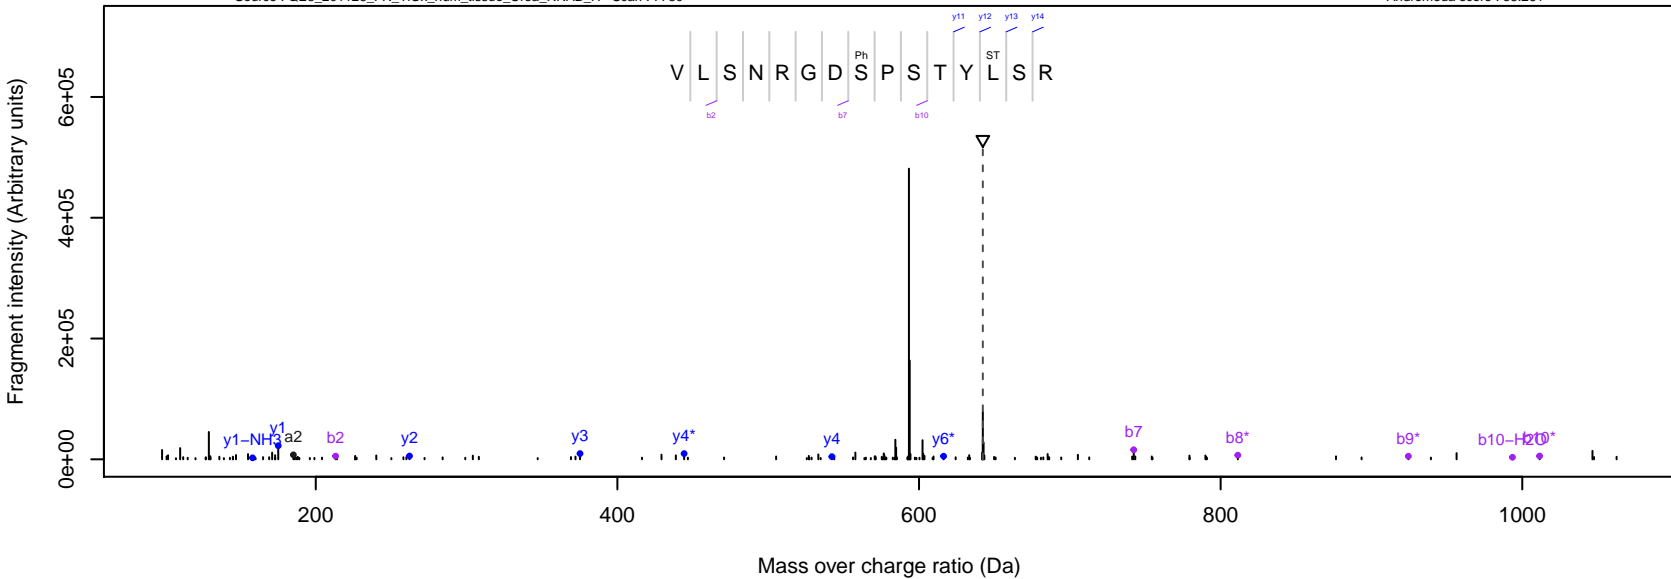

**SSQQPS(Phospho (STY))TPQQAPPGQPQQGTFVAHK-3+**

Source : QE3\_201126\_FR\_TiOx\_hum\_tissue\_Urea\_RNAB\_H Scan : 15343

Andromeda score : 55.247

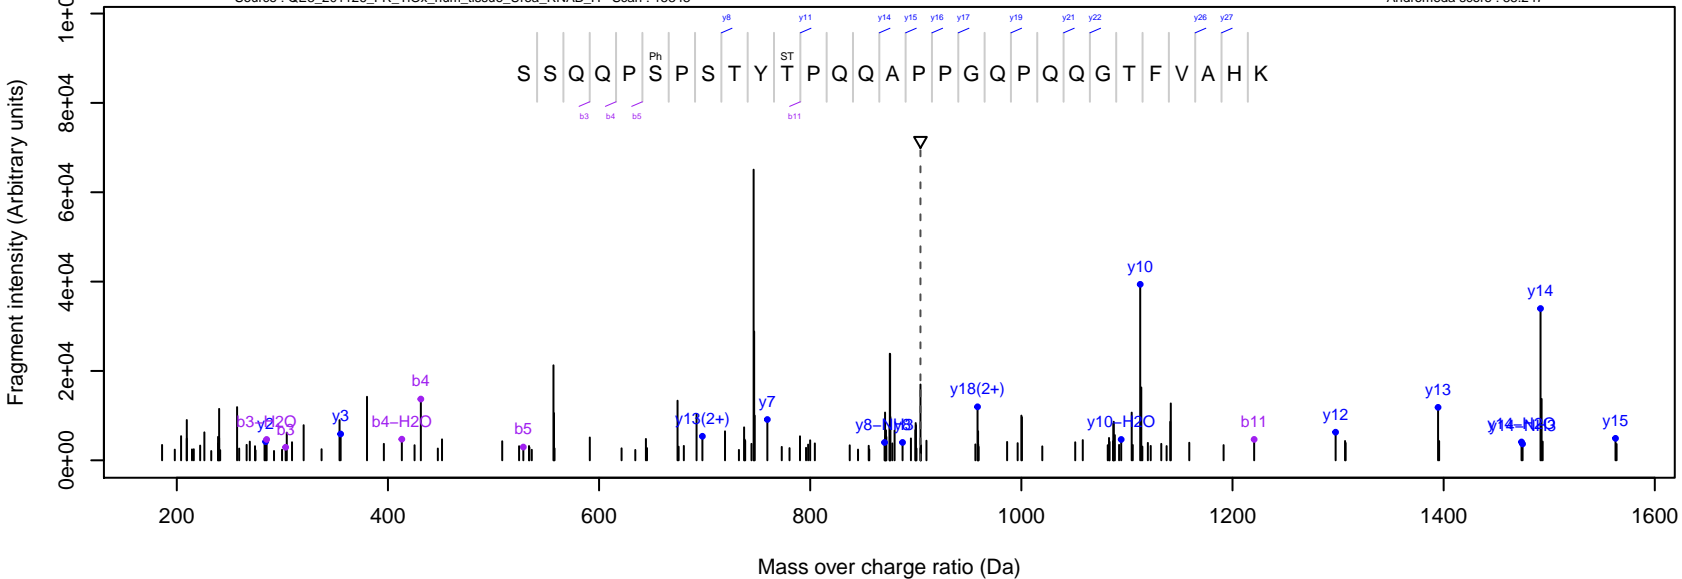

LTLEDQAT(Phospho (STY))FIKK-3+

Source : QE3\_201126\_FR\_TiOx\_hum\_tissue\_Urea\_RNAB\_H Scan : 27097

Andromeda score : 55.213

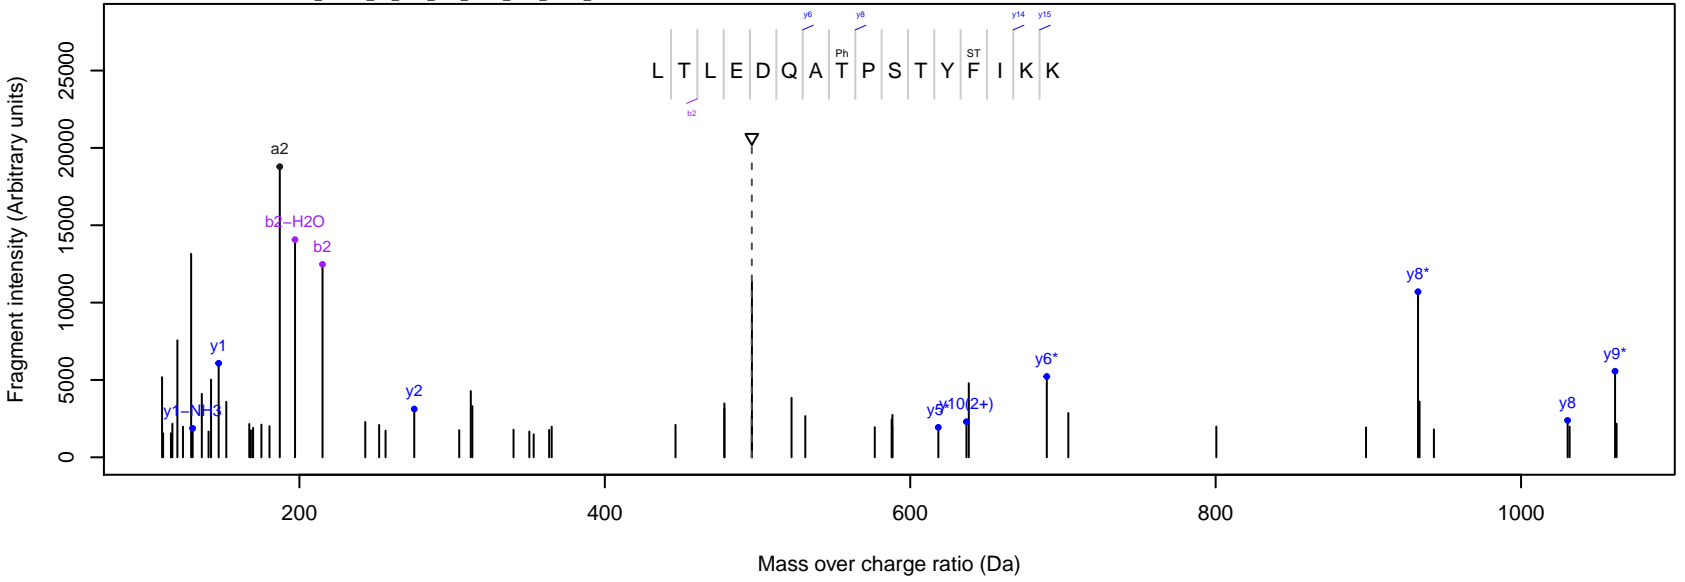

S(Phospho (STY))ILDDS(Phospho (STY))FKLLSFK-2+

Source : QE3\_201126\_FR\_TiOx\_hum\_tissue\_Urea\_RNAB\_B Scan : 58528

Andromeda score : 55.213

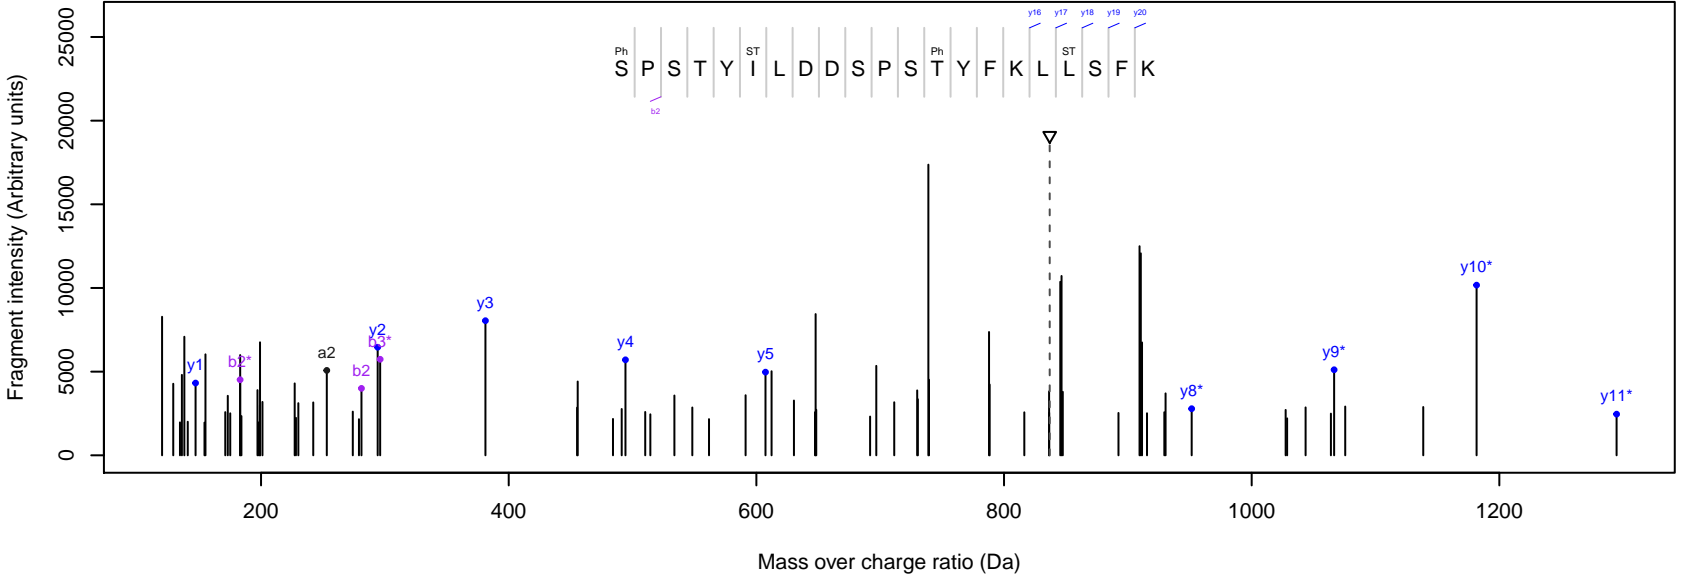

SSPGLY(Phospho (STY))TSPGQDSLQPTAVSPPYGGDIS(Phospho (STY))PVSPSR-3+

Source : QE3\_201126\_FR\_TiOx\_hum\_tissue\_Urea\_RNAB\_B Scan : 54503

Andromeda score : 55.196

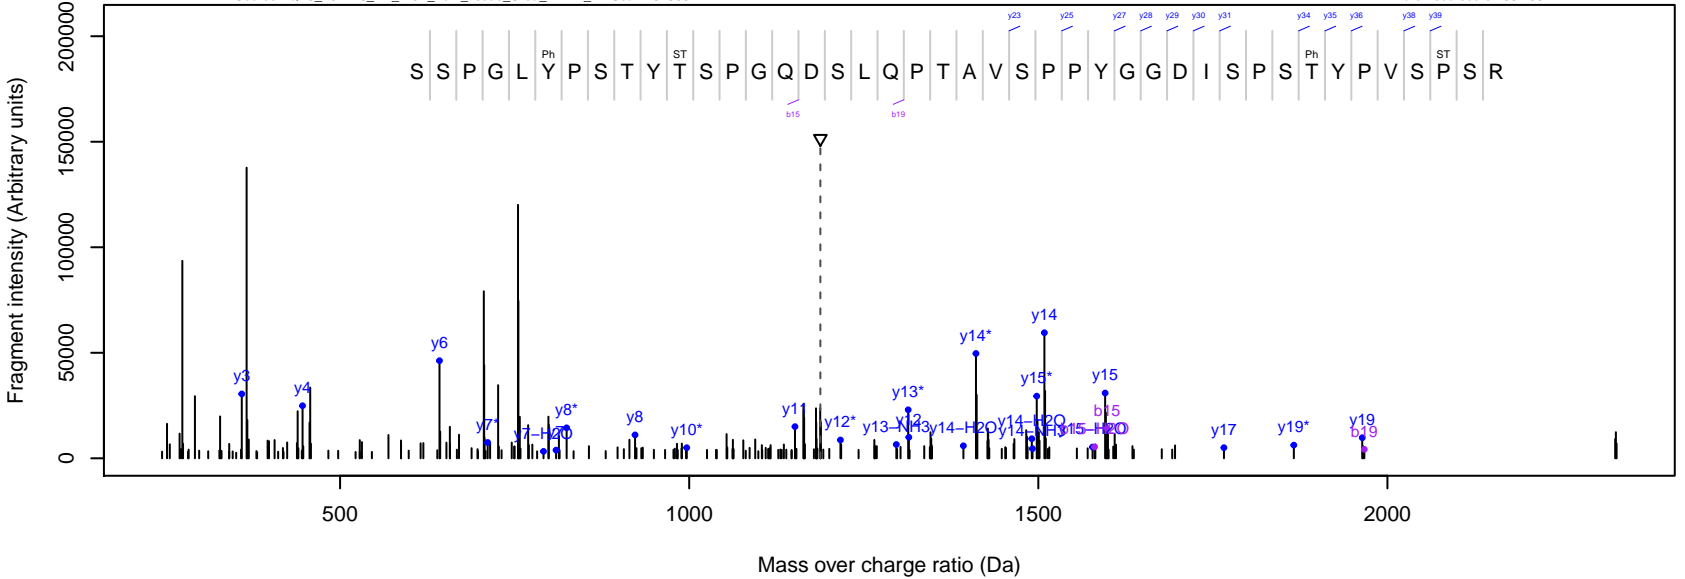

RS(Phospho (STY))SLQSPASVAPPQGGPK-3+

Source : QE3\_201126\_FR\_TiOx\_hum\_tissue\_Urea\_RNAB\_N Scan : 16132

Andromeda score : 55.171

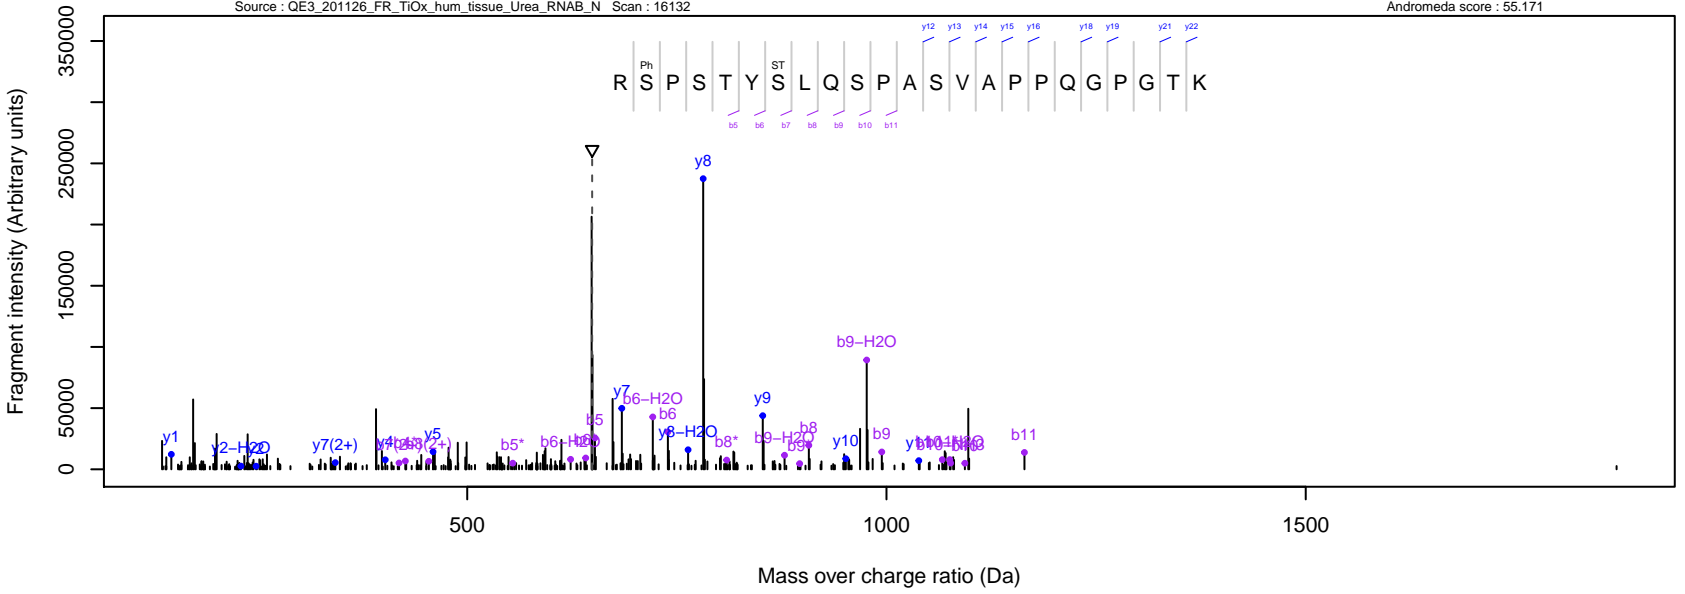

SNS(Phospho (STY))PLPSIQLQPQSPSASKK-3+

Source : QE3\_201126\_FR\_TiOx\_hum\_tissue\_Urea\_RNAB\_H Scan : 26373

Andromeda score : 55.171

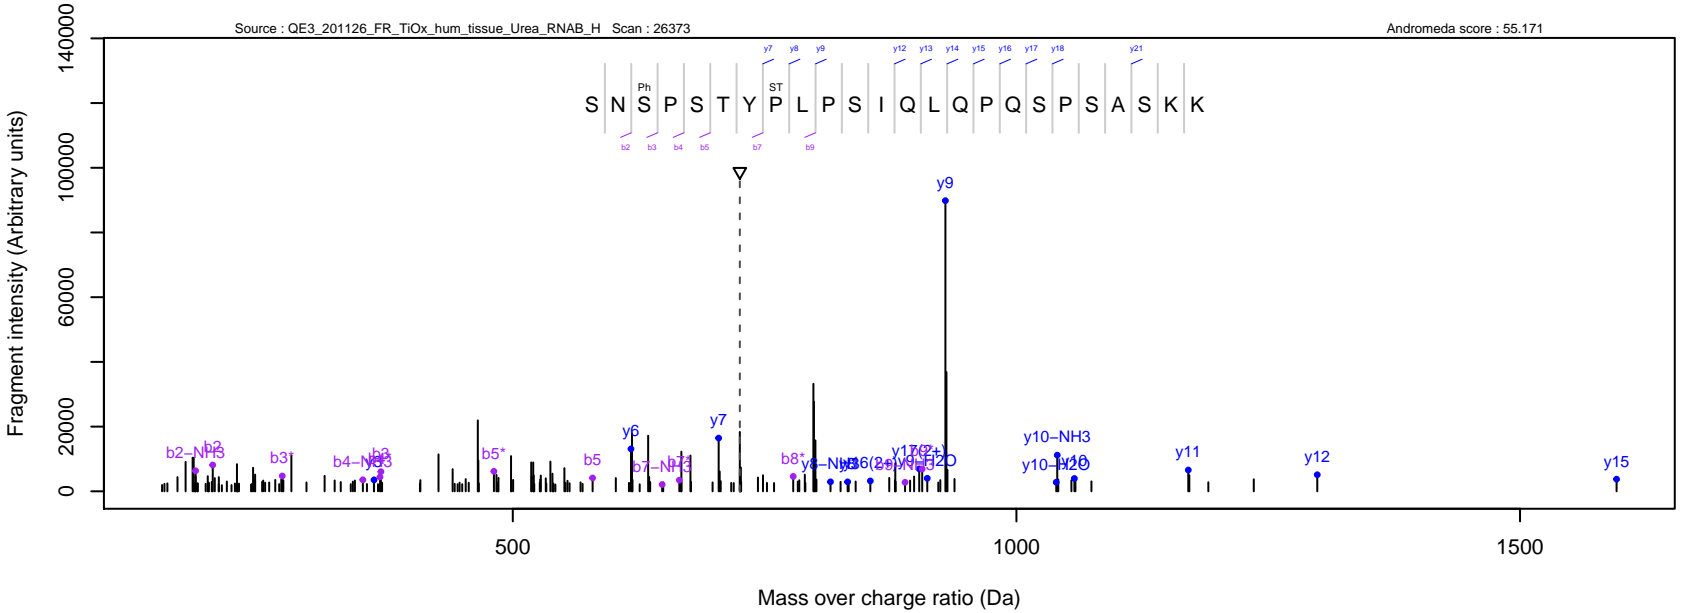

GSVSQPSTPS(Phospho (STY))PPKPTGIFQTSANSSFE PVK-3+

Source : QE3\_201126\_FR\_TiOx\_hum\_tissue\_Urea\_RNAB\_B Scan : 39290

Andromeda score : 55.158

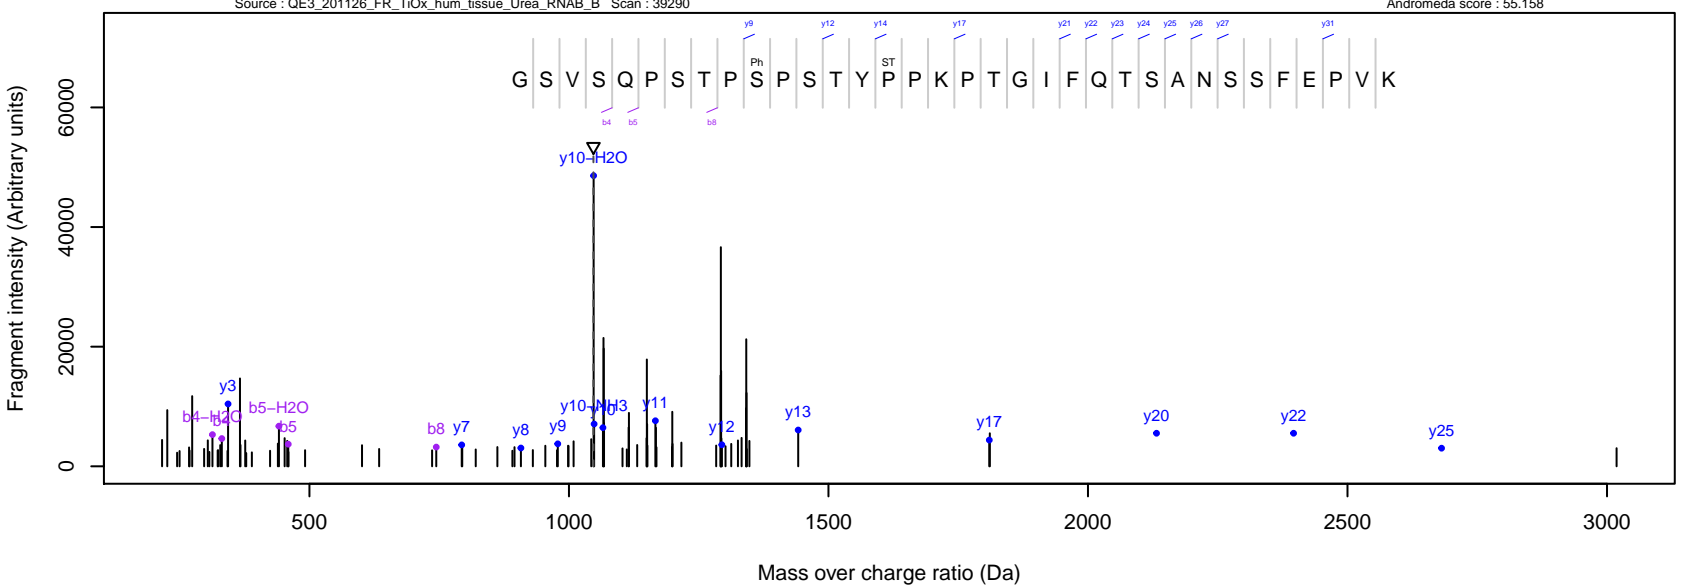

S(Phospho (STY))NTPM(Oxidation (M))GDKDDDDDDDADEKM(Oxidation (M))QSSGIPNGGHIR-4+

Source : QE3\_201126\_FR\_TiOx\_hum\_tissue\_Urea\_RNAB\_B Scan : 11164

Andromeda score : 55.158

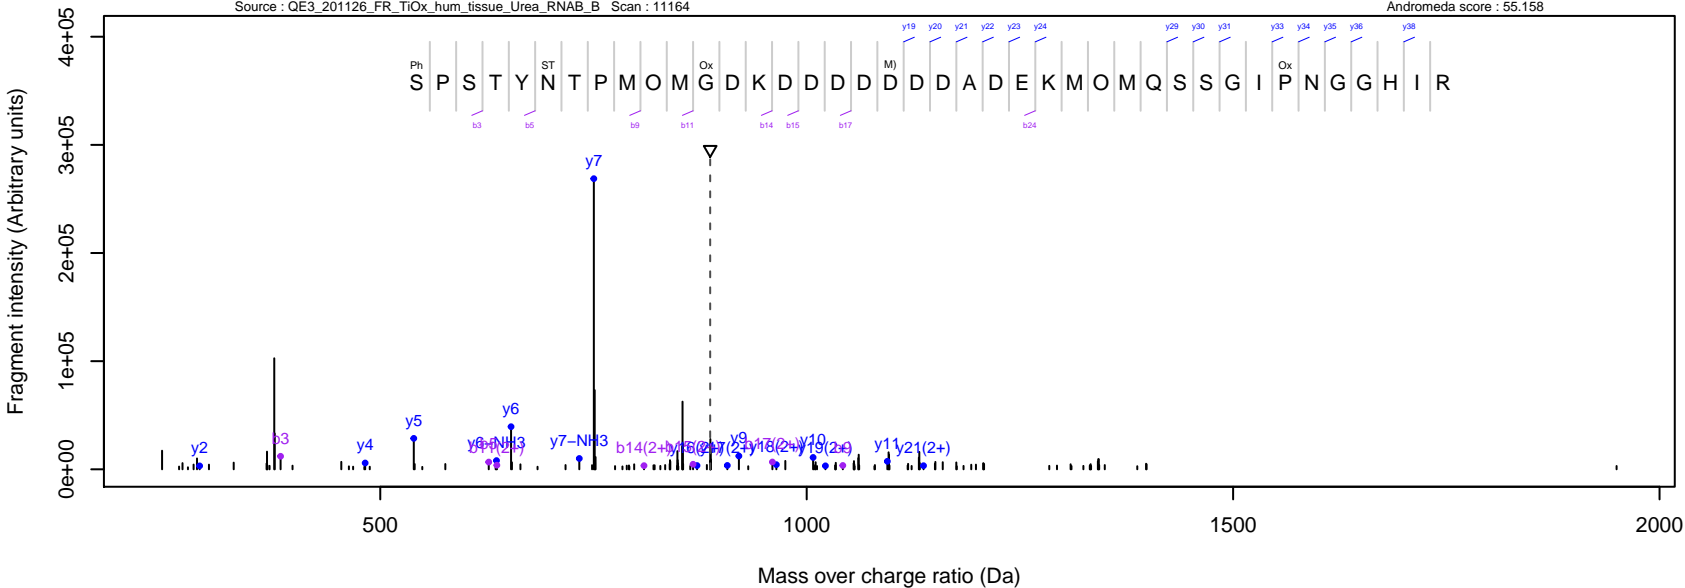

S(Phospho (STY))T(Phospho (STY))S(Phospho (STY))FRGGMSSGLATGIAGGLAGMGGIQNEK-3+

Source : QE3\_201126\_FR\_TiOx\_hum\_tissue\_Urea\_RNAB\_B Scan : 60611

Andromeda score : 55.158

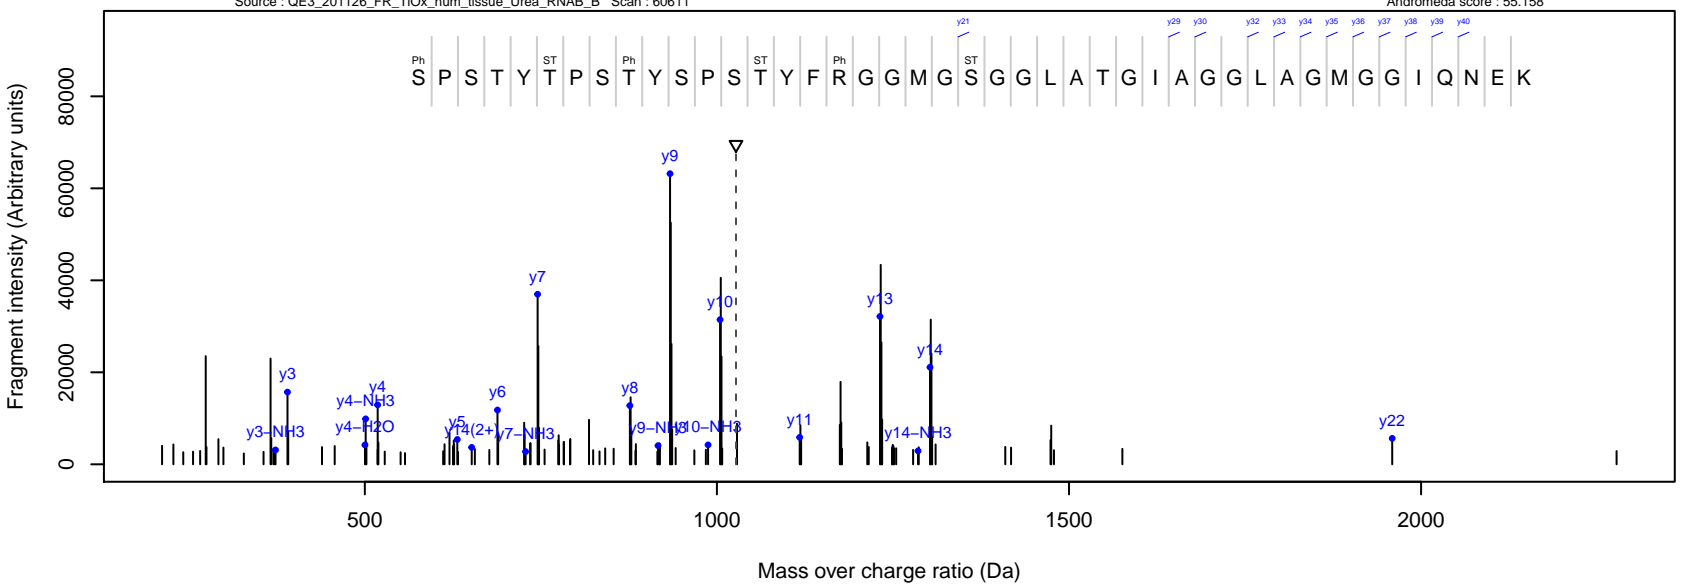

NVPHEIDEDS(Phospho (STY))DIGDYR-3+

Source : QE3\_201126\_FR\_TiOx\_hum\_tissue\_Urea\_RNAB\_B Scan : 22270

Andromeda score : 55.127

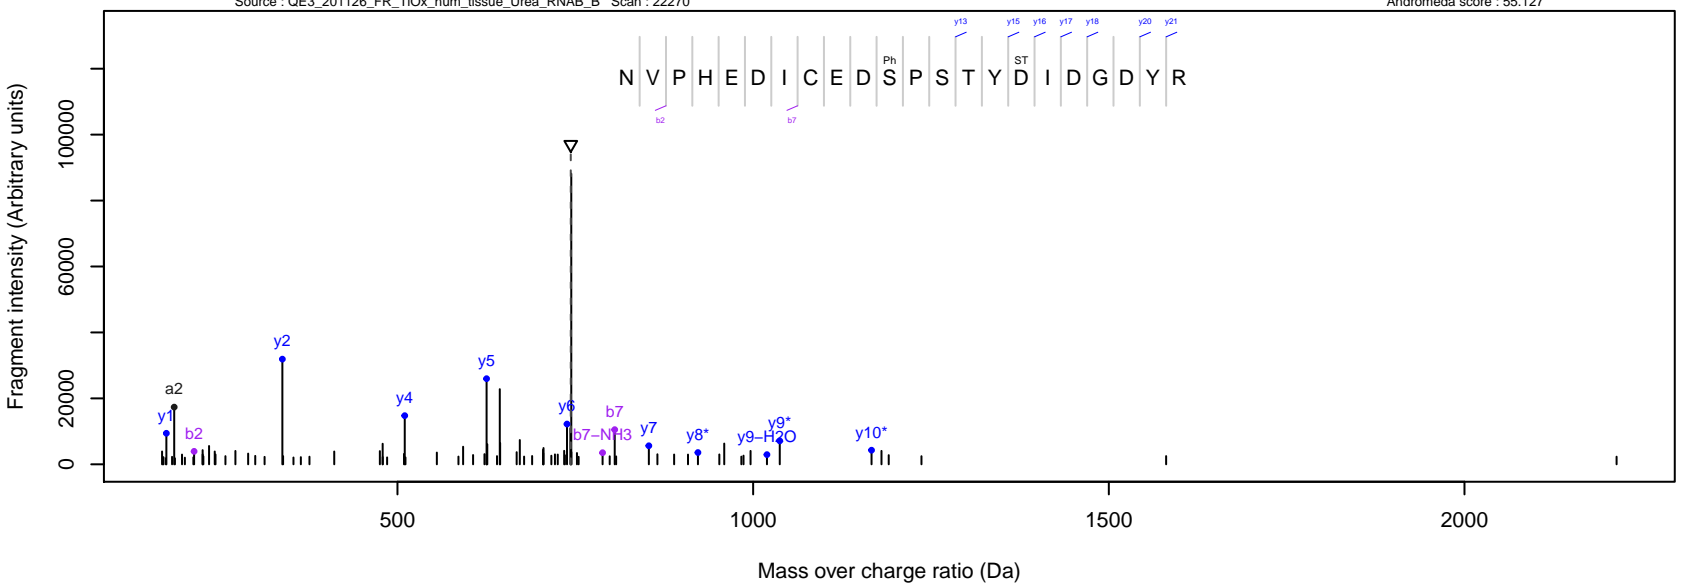

EFS(Phospho (STY))GGSYSAK-2+

Source : QE3\_2011126\_FR\_TiOx\_hum\_tissue\_Urea\_RNAB\_H Scan : 14058

Andromeda score : 55.112

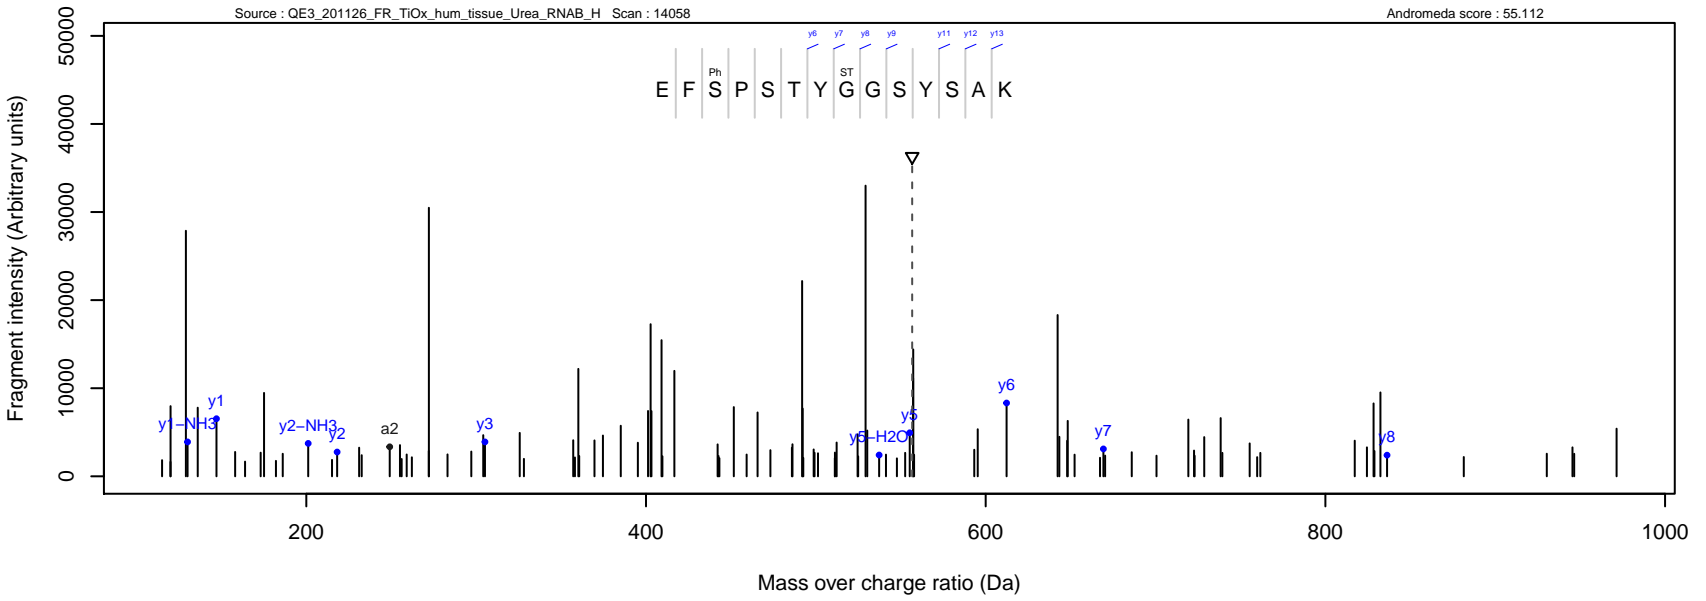

KT(Phospho (STY))SEVDLAKPLVK-3+

Source : QE3\_2011126\_FR\_TiOx\_hum\_tissue\_Urea\_RNAB\_N Scan : 15795

Andromeda score : 55.097

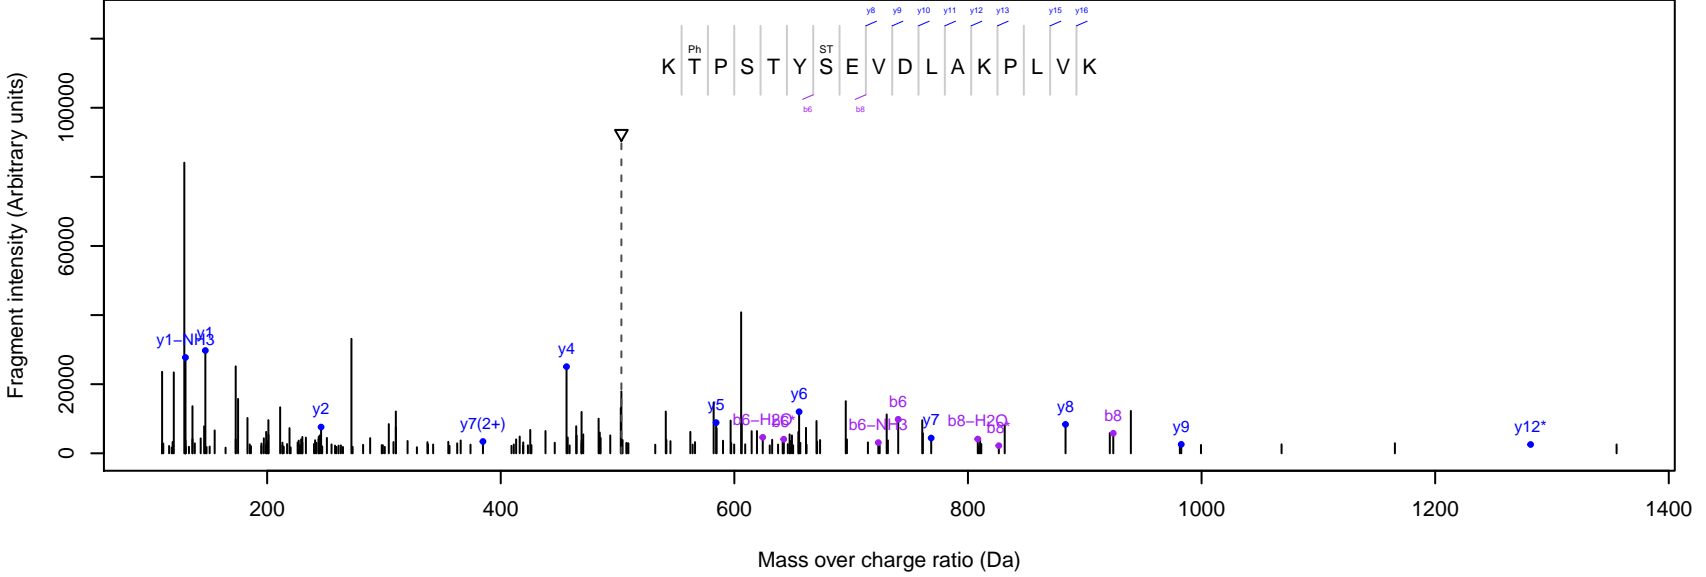

S(Phospho (STY))LPVSICR-2+

Source : QE3\_2011126\_FR\_TiOx\_hum\_tissue\_Urea\_RNAB\_H Scan : 26570

Andromeda score : 55.064

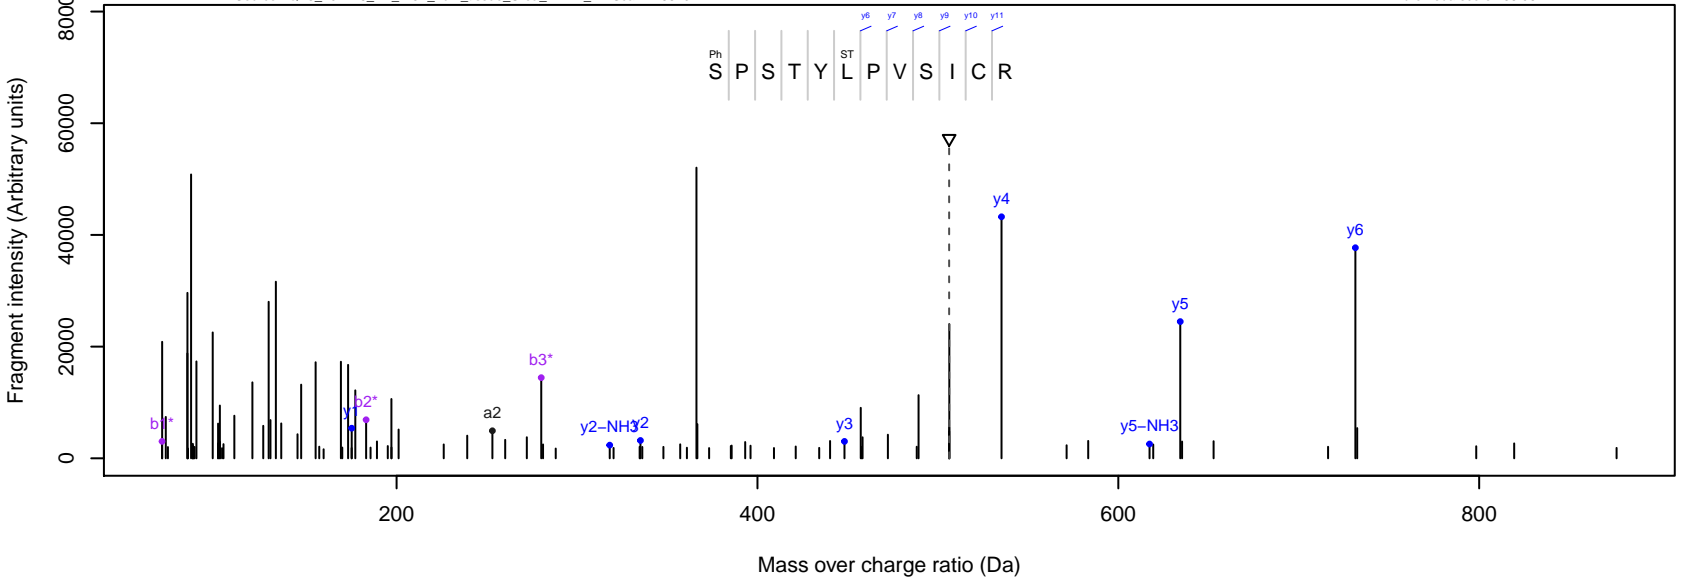

IEKLS(Phospho (STY))DDEEVDITDEVELSSQTPQK-3+

Source : QE3\_201126\_FR\_TiOx\_hum\_tissue\_Urea\_RNAB\_H Scan : 48231

Andromeda score : 55.063

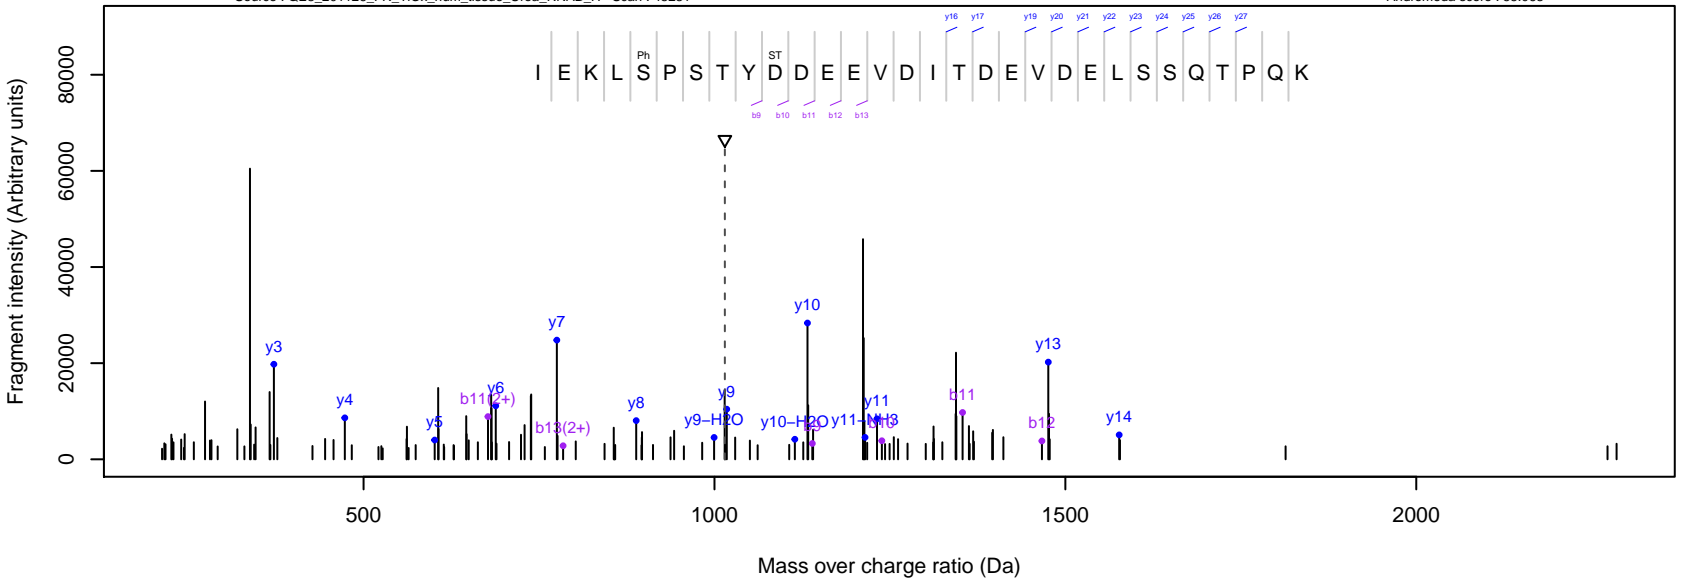

KGSPVSEIGWET(Phospho (STY))PPPEESPSTYPR-3+

Source : QE3\_201126\_FR\_TiOx\_hum\_tissue\_Urea\_RNAB\_N Scan : 35336

Andromeda score : 55.061

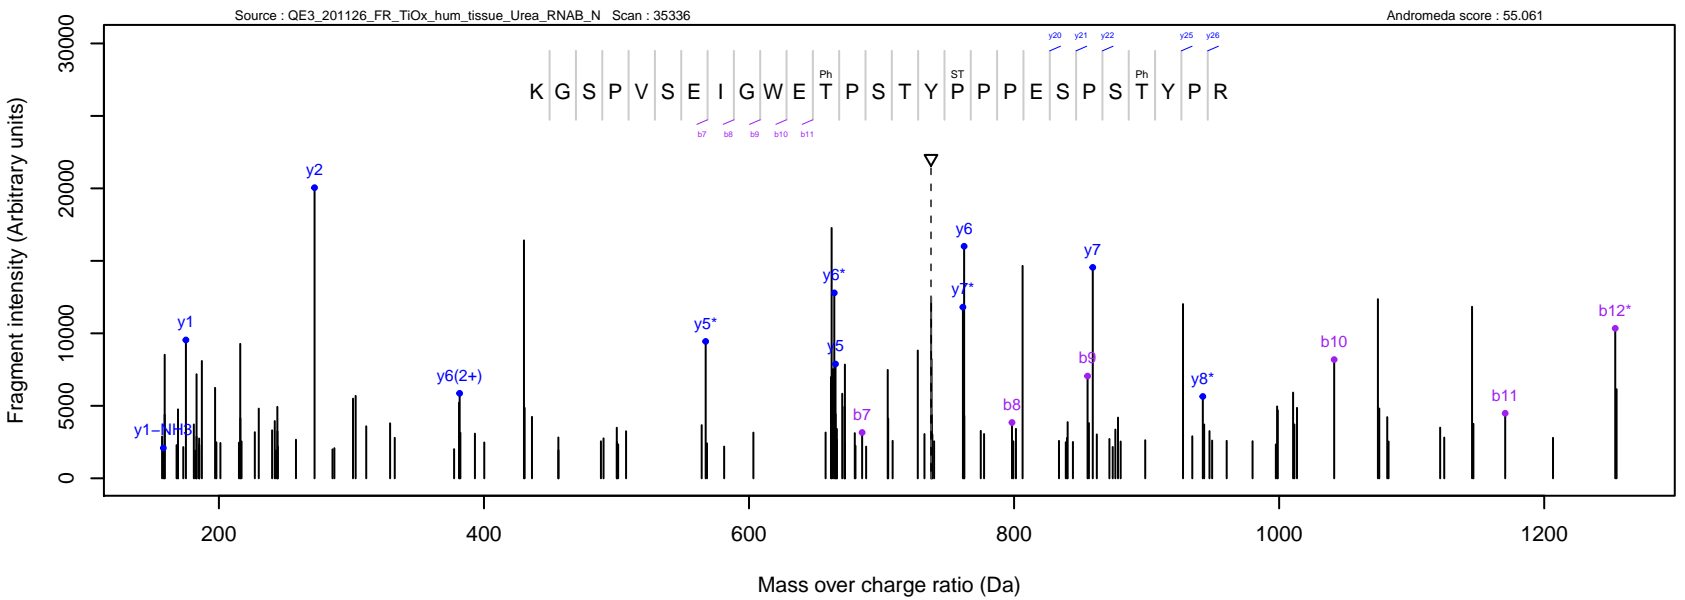

NHEEEVKGLQAQIAS(Phospho (STY))SGLT(Phospho (STY))VEVDAPK-3+

Source : QE3\_201126\_FR\_TiOx\_hum\_tissue\_Urea\_RNAB\_B Scan : 35401

Andromeda score : 55.061

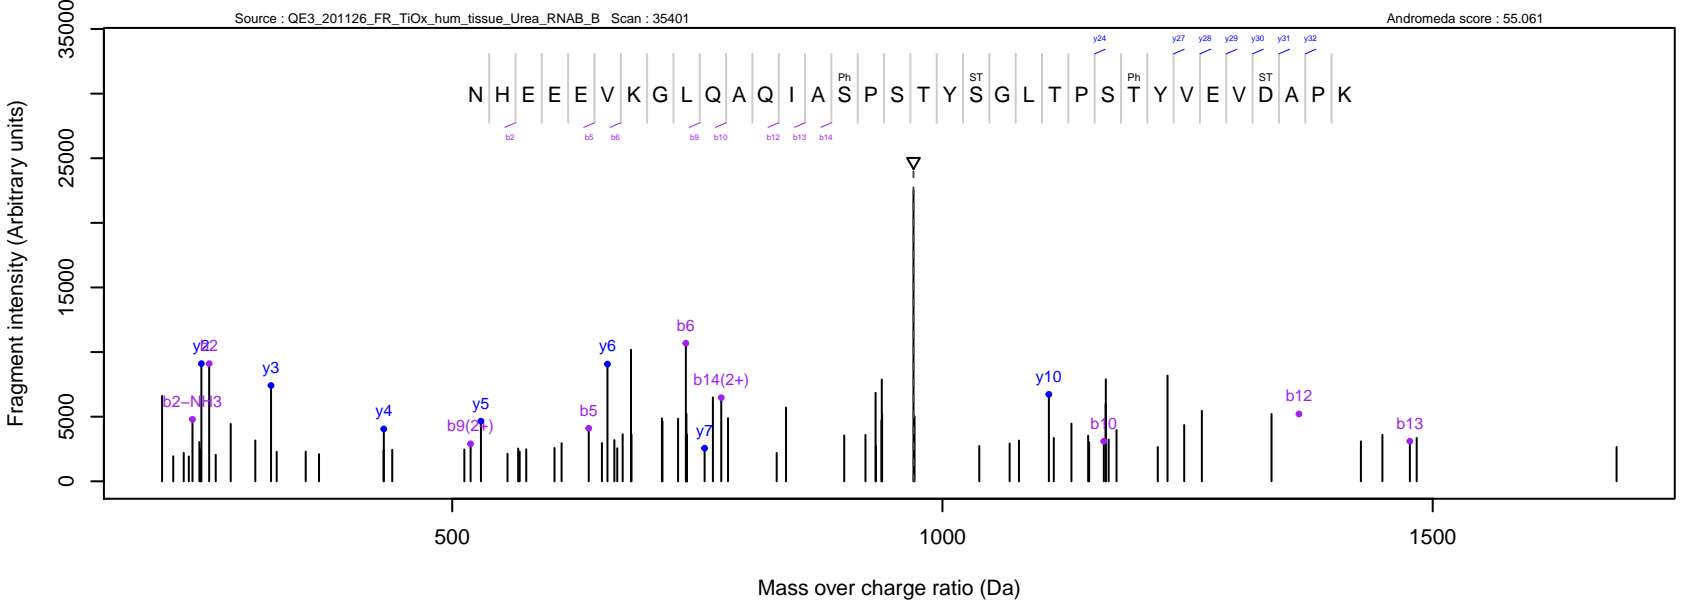

NVM(Oxidation (M))SAFGLTDDQVSGPPS(Phospho (STY))APAEDR-3+

Source : QE3\_201126\_FR\_TiOx\_hum\_tissue\_Urea\_RNAB\_B Scan : 40246

Andromeda score : 55.046

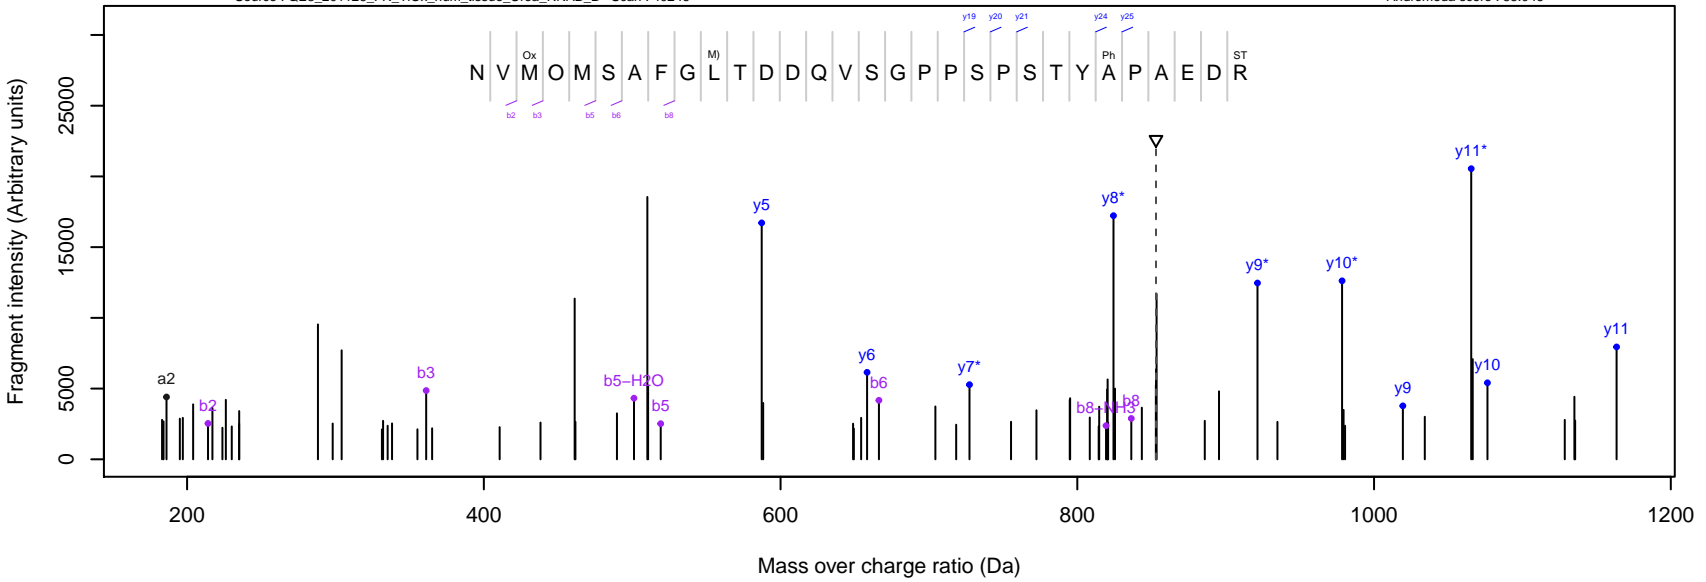

QGHRPLSQS(Phospho (STY))IVEAGSVGQTDLNK-3+

Source : QE3\_201126\_FR\_TiOx\_hum\_tissue\_Urea\_RNAB\_H Scan : 24247

Andromeda score : 55.046

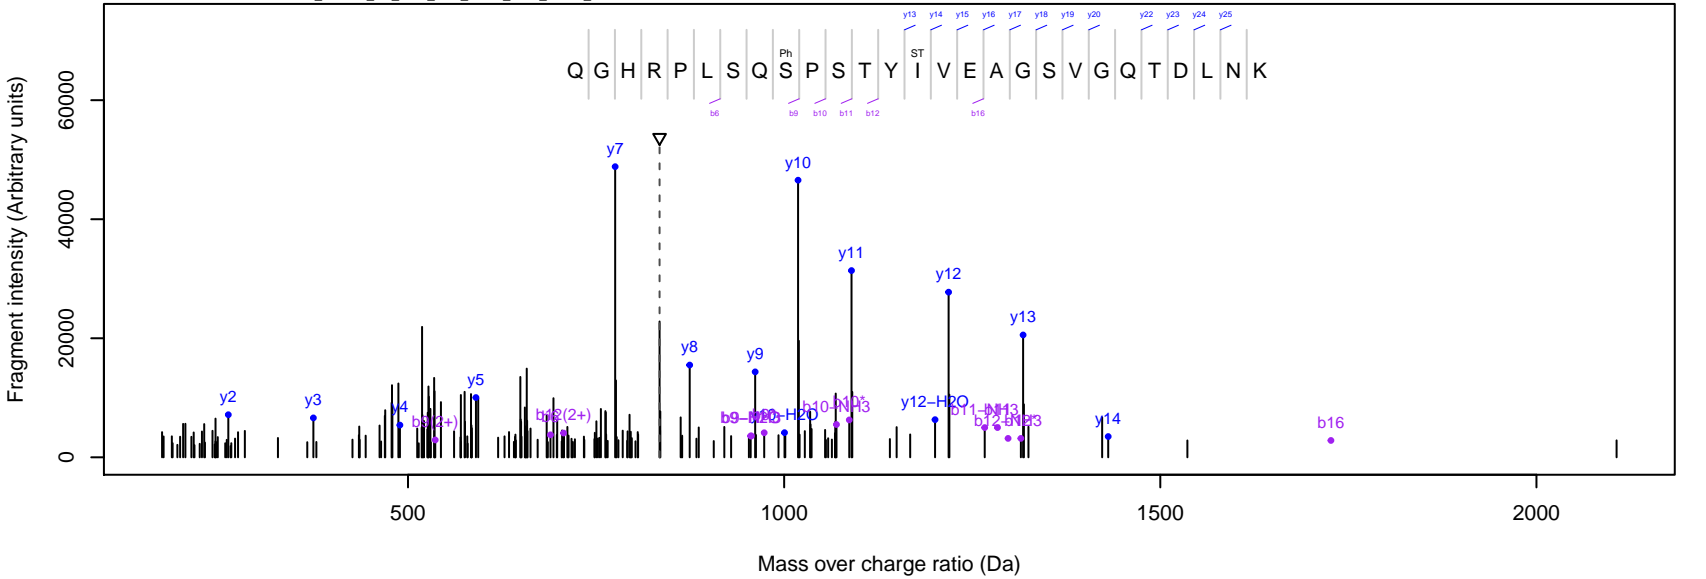

VDGIPNDS(Phospho (STY))SDSEMEDKTTANLAALK-3+

Source : QE3\_201126\_FR\_TiOx\_hum\_tissue\_Urea\_RNAB\_B Scan : 36099

Andromeda score : 55.046

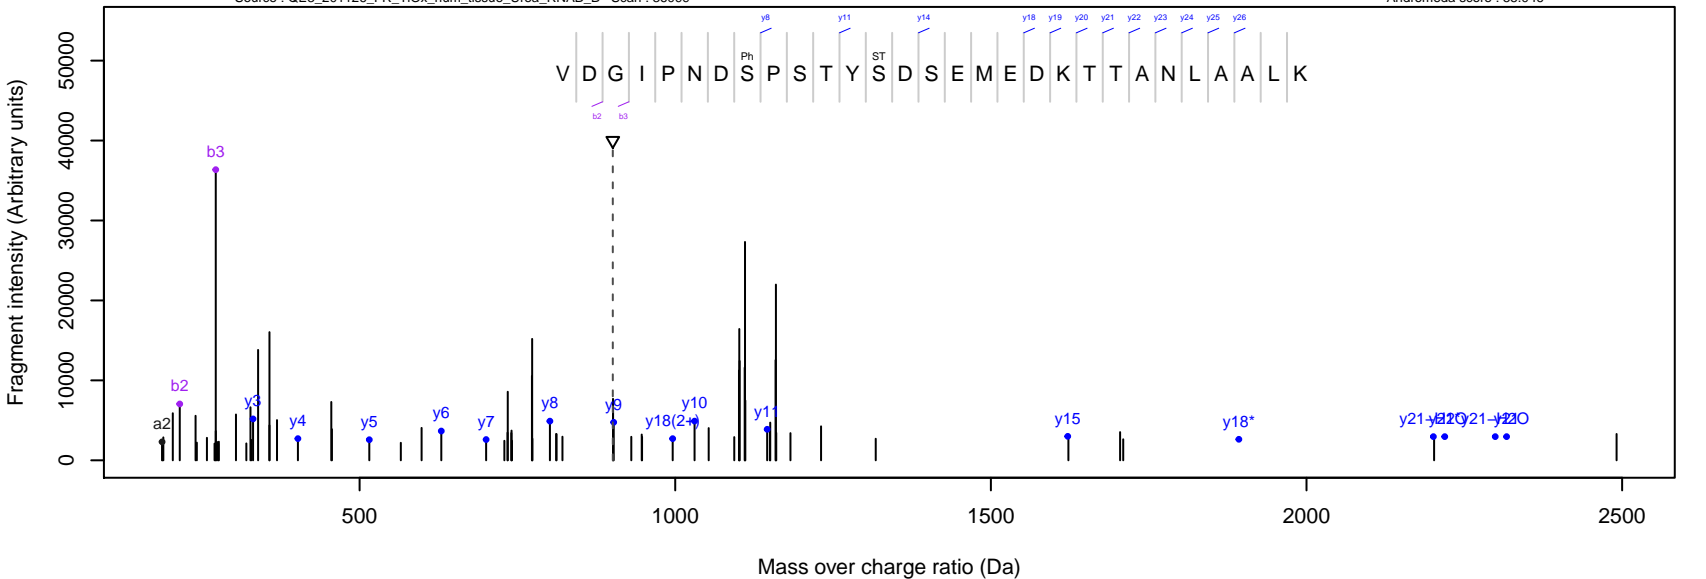



RRT(Phospho (STY))PT(Phospho (STY))PPPR-3+

Source : QE3\_201126\_FR\_TiOx\_hum\_tissue\_Urea\_RNAB\_H Scan : 4030

Andromeda score : 55.04

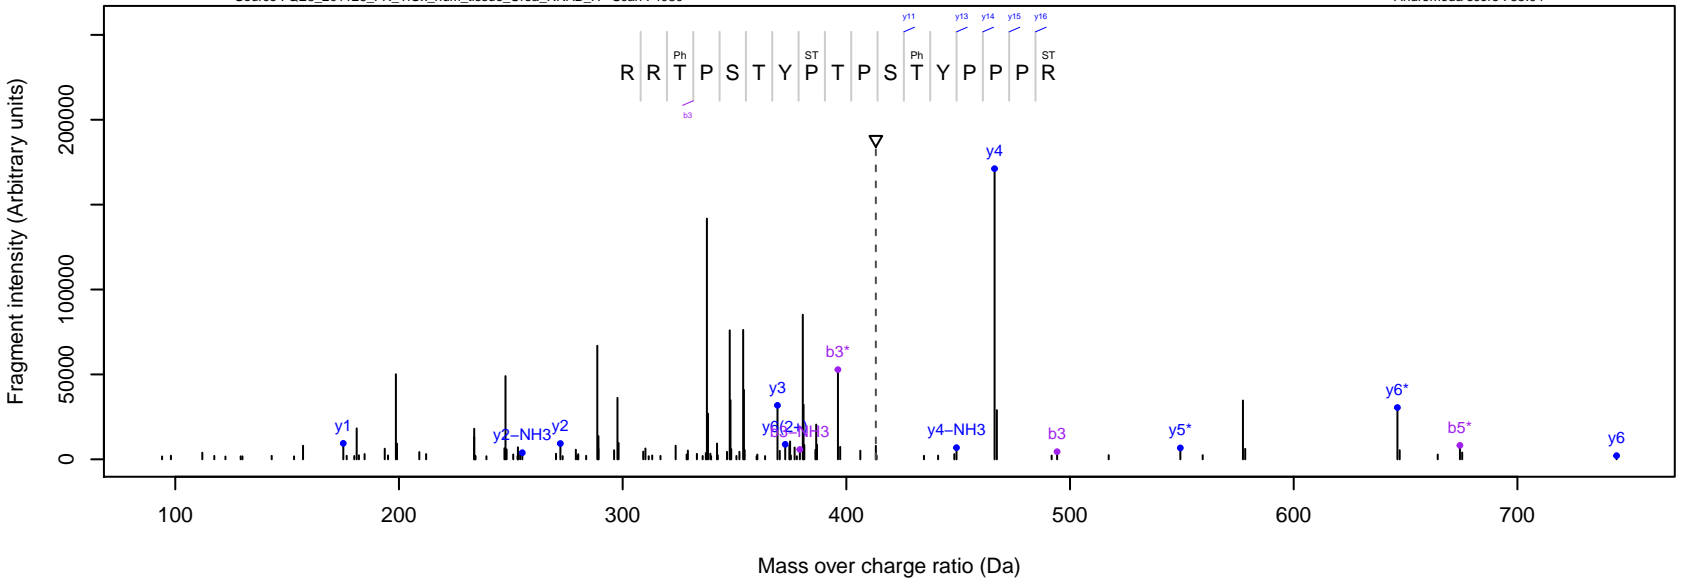

KKS(Phospho (STY))MEELTVIQCTSQELPAQTGLLSQTDVPLPAGR-4+

Source : QE3\_201126\_FR\_TiOx\_hum\_tissue\_Urea\_RNAB\_H Scan : 50247

Andromeda score : 55.033

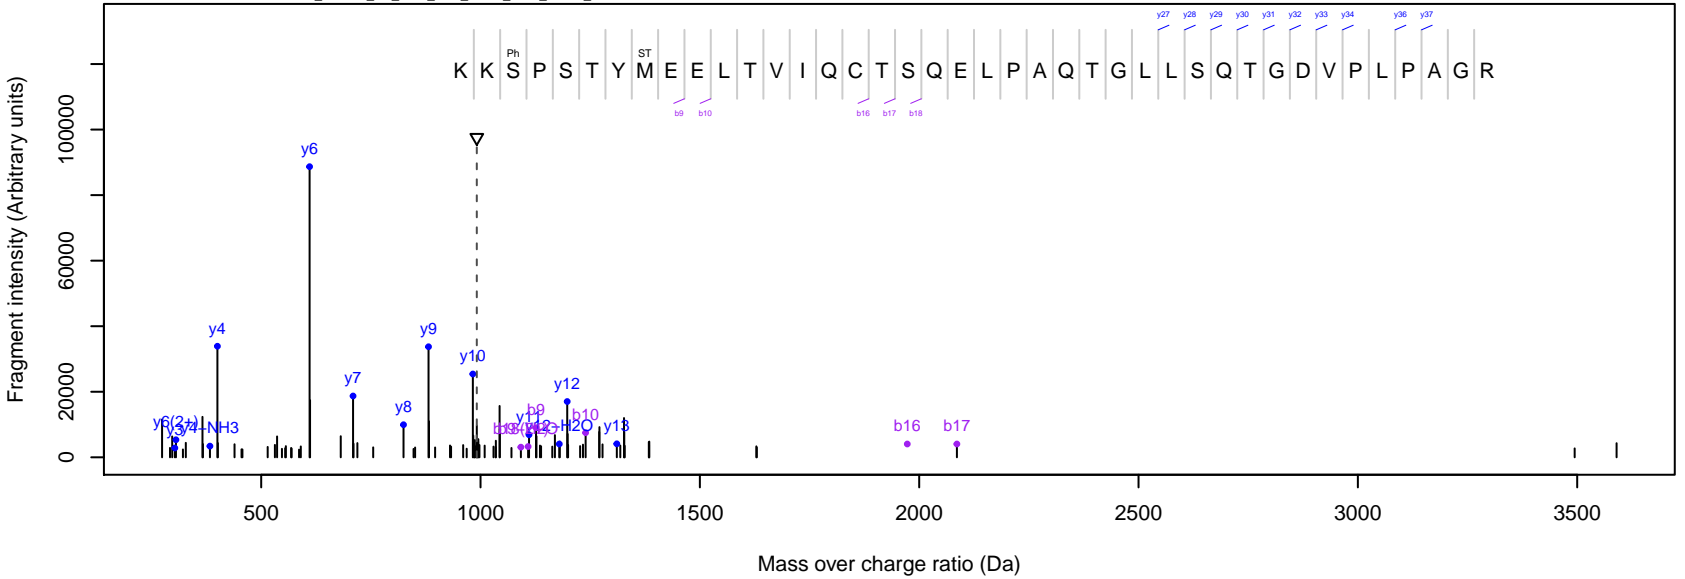

YAFM(Oxidation (M))PLIDDS(Phospho (STY))DDEIEEFM(Oxidation (M))VTSENLTGK-3+

Source : QE3\_201126\_FR\_TiOx\_hum\_tissue\_Urea\_RNAB\_B Scan : 62494

Andromeda score : 55.033

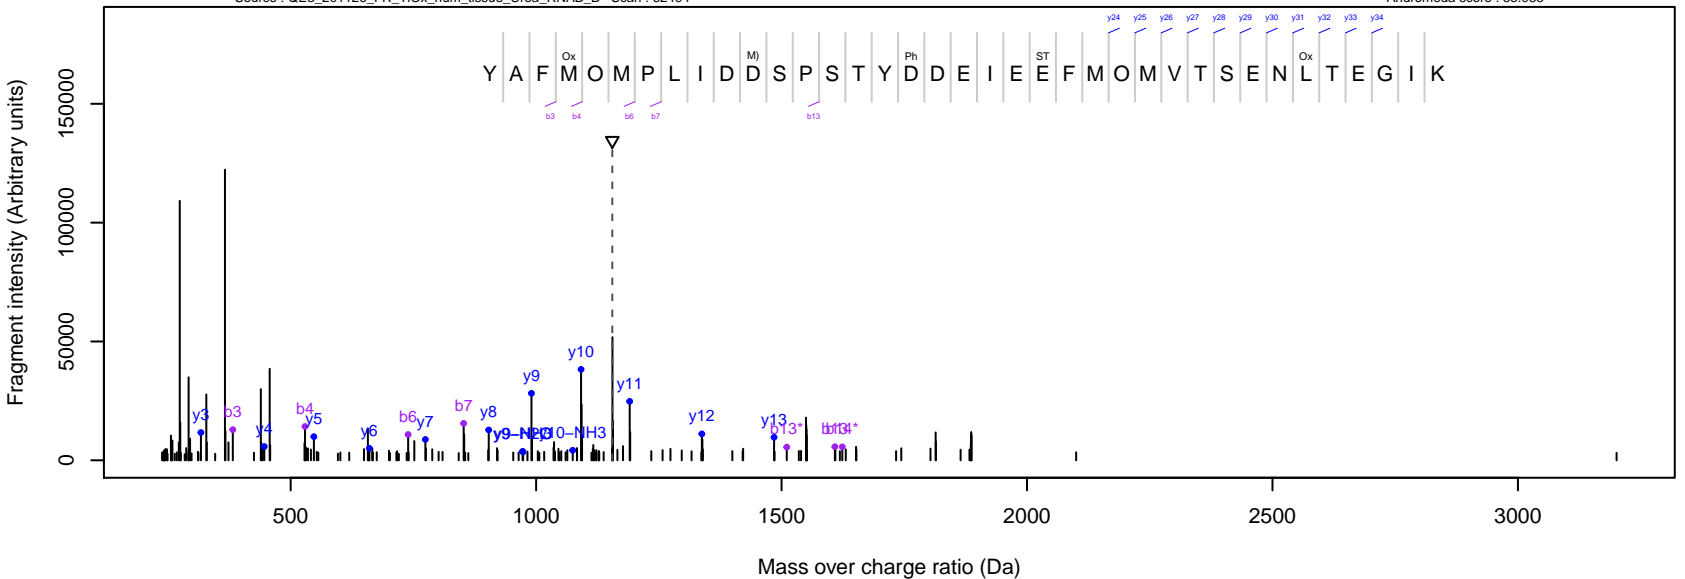

PSANRENS(Phospho (STY))PER-3+

Source : QE3\_201126\_FR\_TiOx\_hum\_tissue\_Urea\_RNAB\_H Scan : 8531

Andromeda score : 55.011

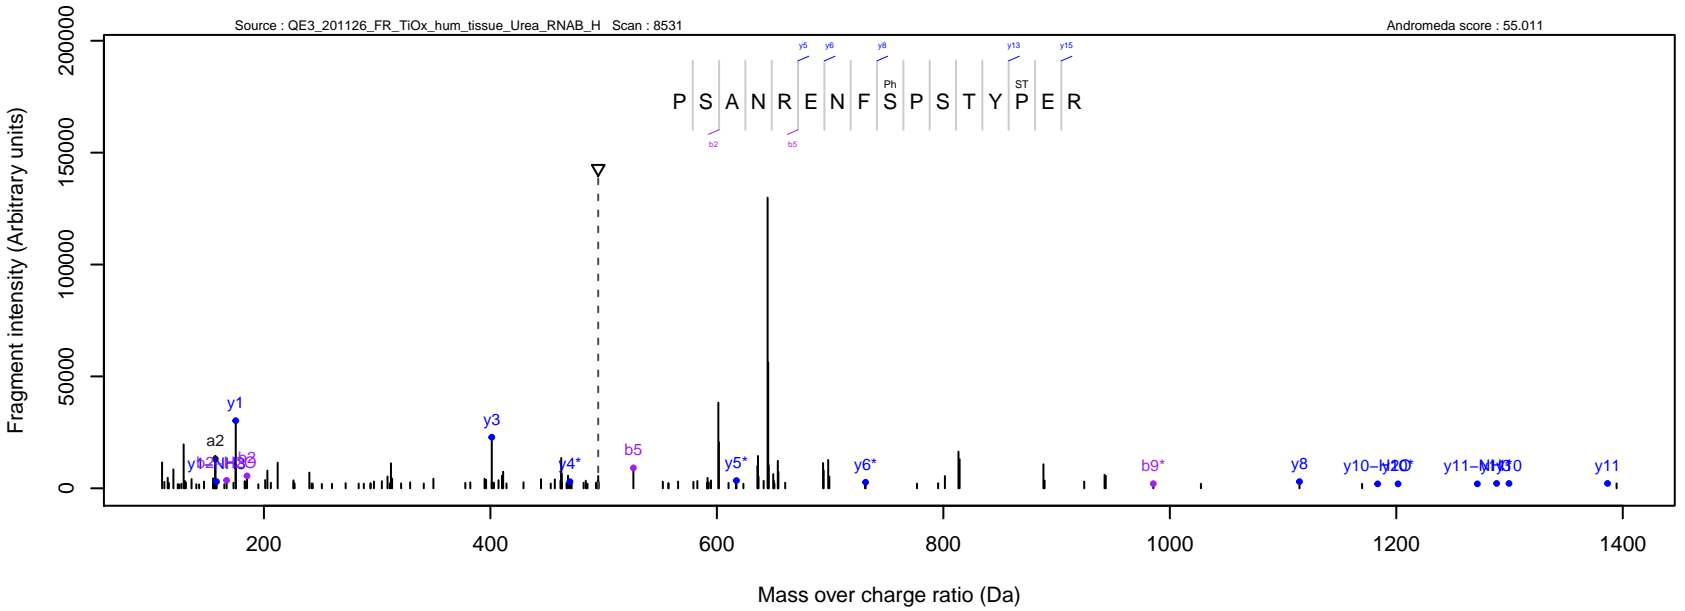

SAVRVS(Phospho (STY))IAIS(Phospho (STY))RM(Oxidation (M))K-3+

Source : QE3\_201126\_FR\_TiOx\_hum\_tissue\_Urea\_RNAB\_N Scan : 9191

Andromeda score : 55.011

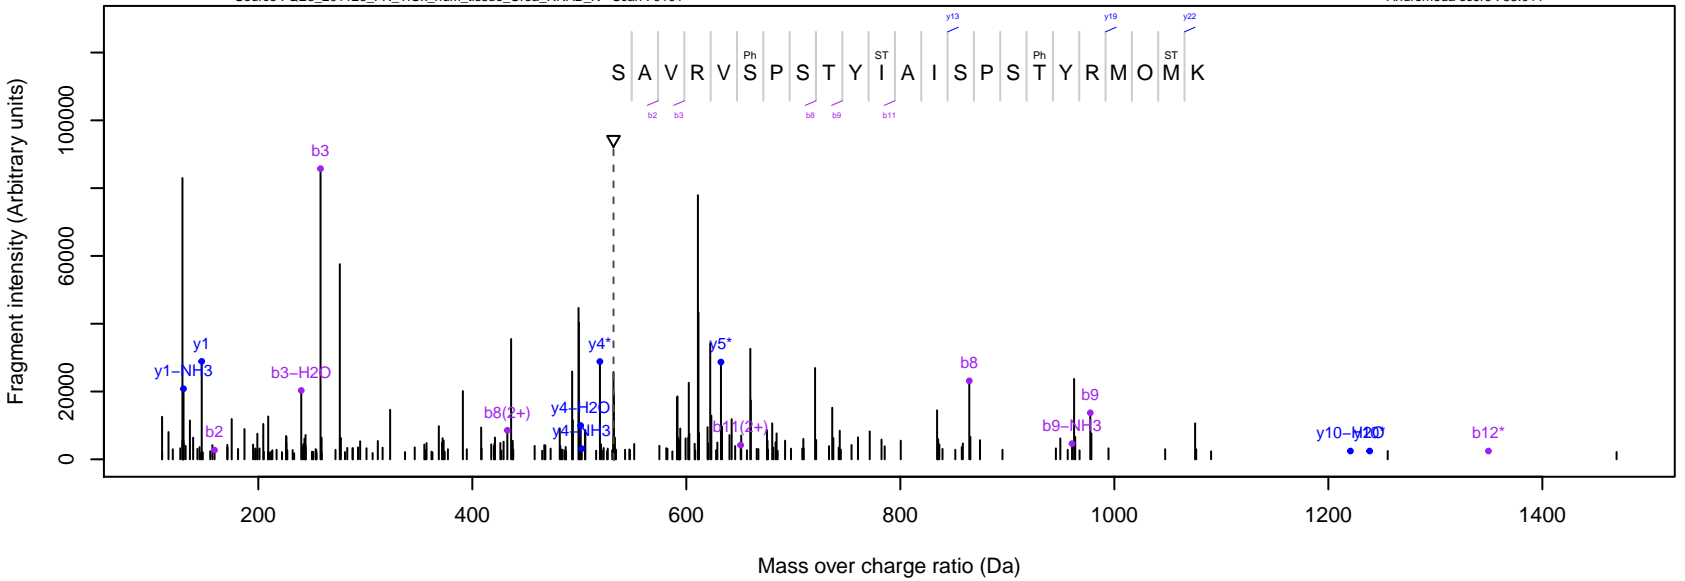

MSVQPT(Phospho (STY))VSLGGFEITPPVLR-3+

Source : QE3\_201126\_FR\_TiOx\_hum\_tissue\_Urea\_RNAB\_N Scan : 61613

Andromeda score : 55.007

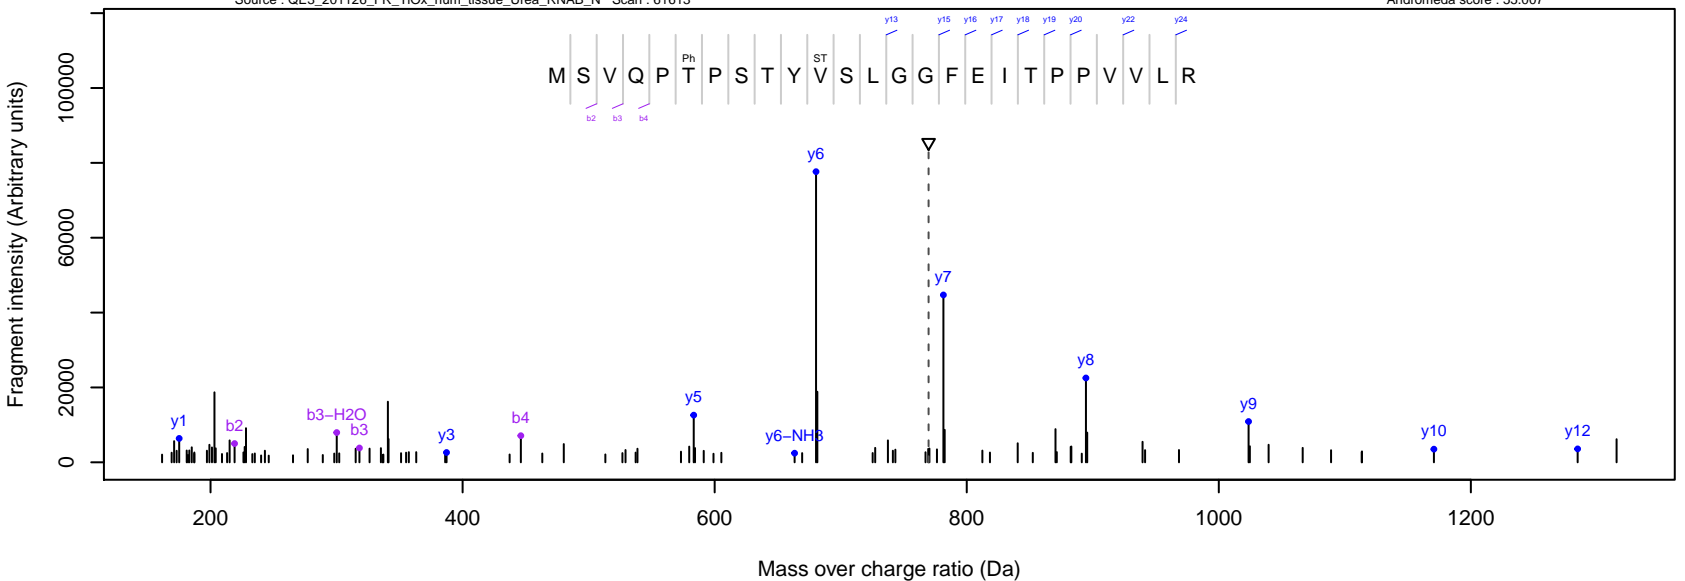

**AASEQQADT(Phospho (STY))S(Phospho (STY))GGDSPKDESKPPFSYAQLIVQAIS SAQDR-4+**

Source : QE3\_201126\_FR\_TiOx\_hum\_tissue\_Urea\_RNAB\_N Scan : 62097

Andromeda score : 54.994

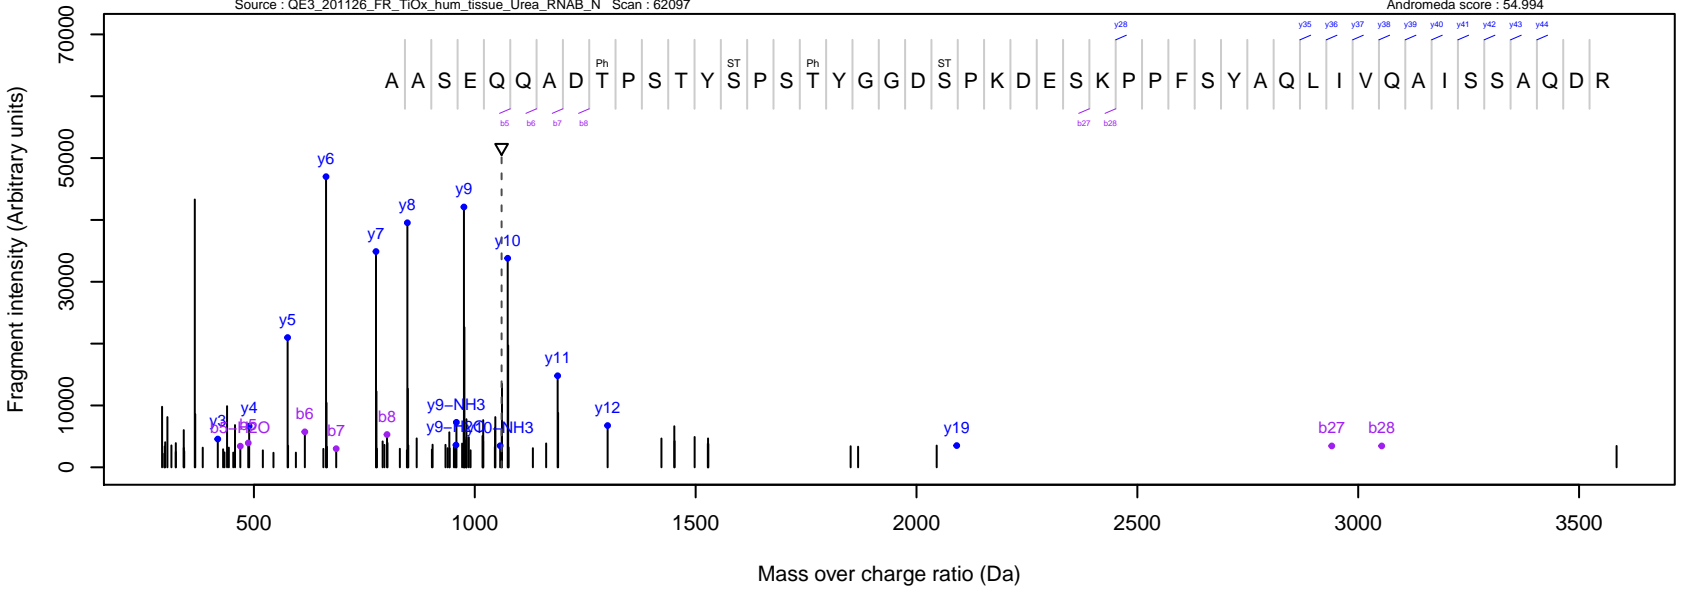

**CS(Phospho (STY))VCKEPIMPAPGQEETVR-3+**

Source : QE3\_201126\_FR\_TiOx\_hum\_tissue\_Urea\_RNAB\_H Scan : 23204

Andromeda score : 54.985

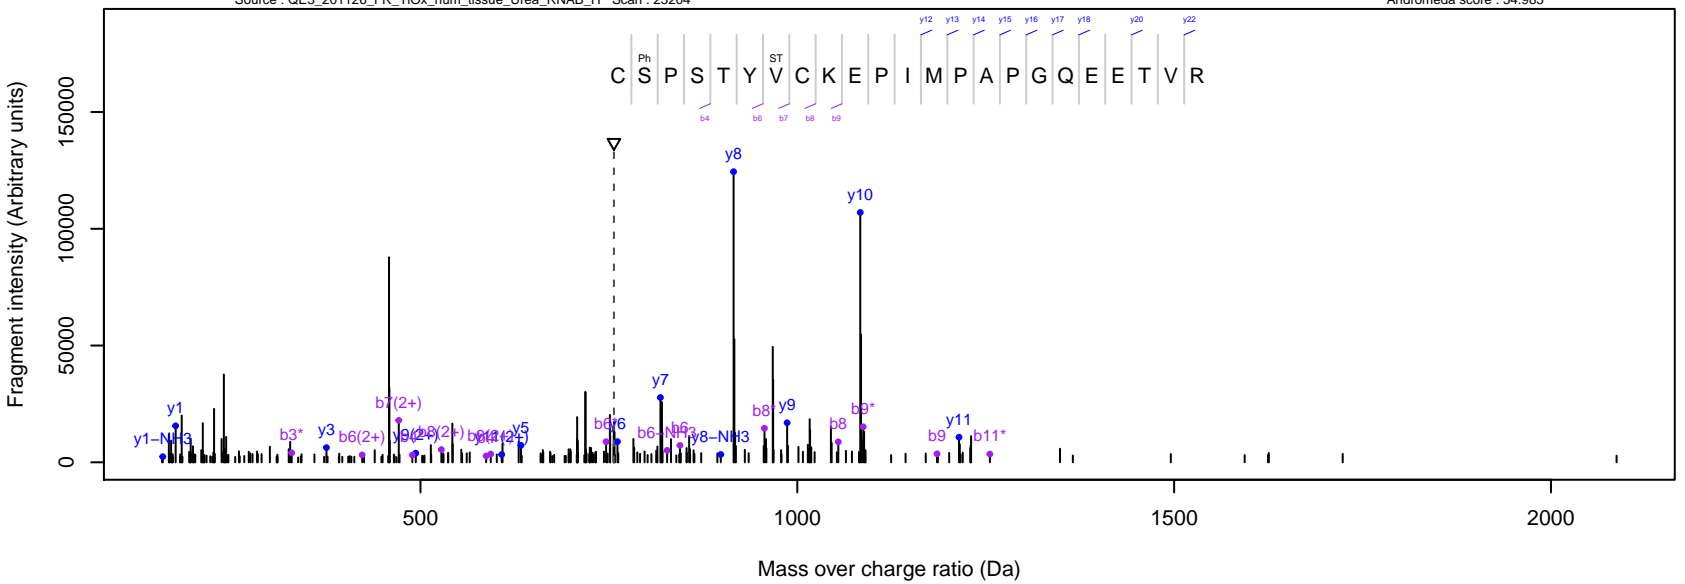

**RFS(Phospho (STY))NVGLVHTSER-3+**

Source : QE3\_201126\_FR\_TiOx\_hum\_tissue\_Urea\_RNAB\_B Scan : 15115

Andromeda score : 54.964

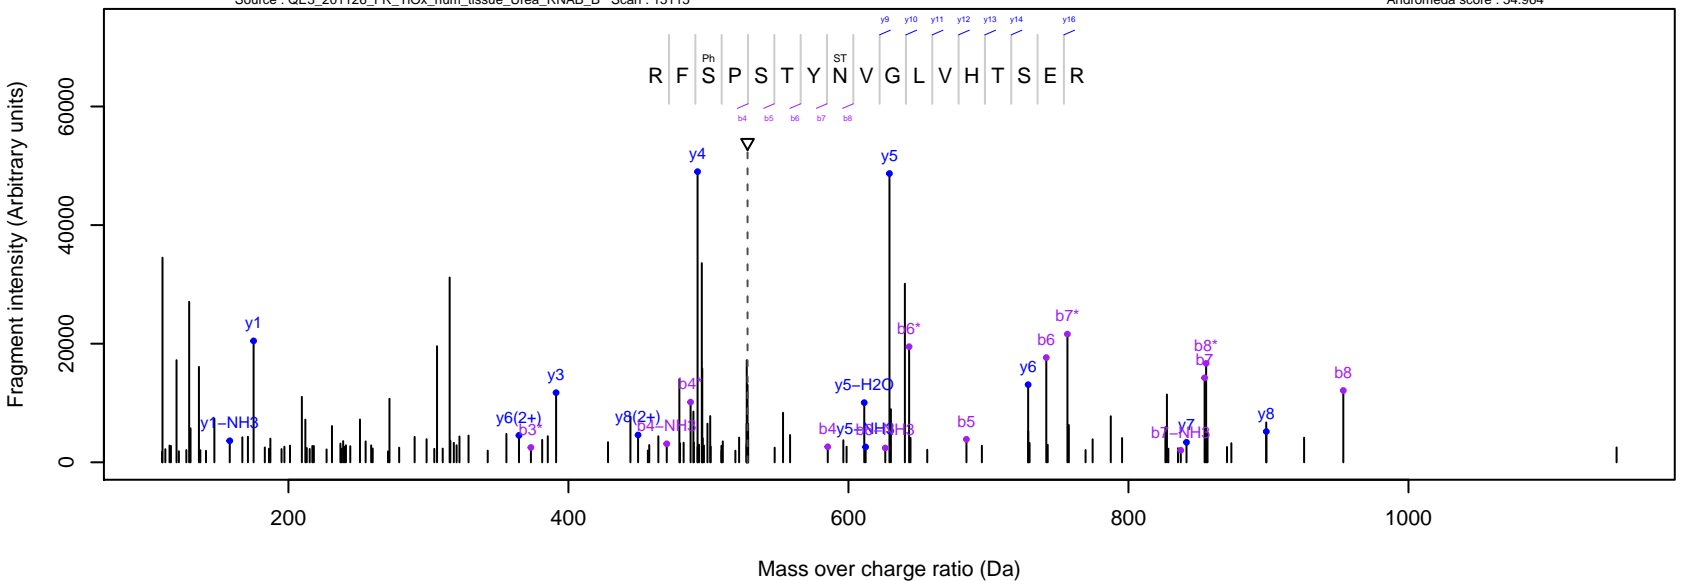

HSLSGS(Phospho (STY))SPGM(Oxidation (M))KDIPR-3+

Source : QE3\_201126\_FR\_TiOx\_hum\_tissue\_Urea\_RNAB\_N Scan : 8082

Andromeda score : 54.95

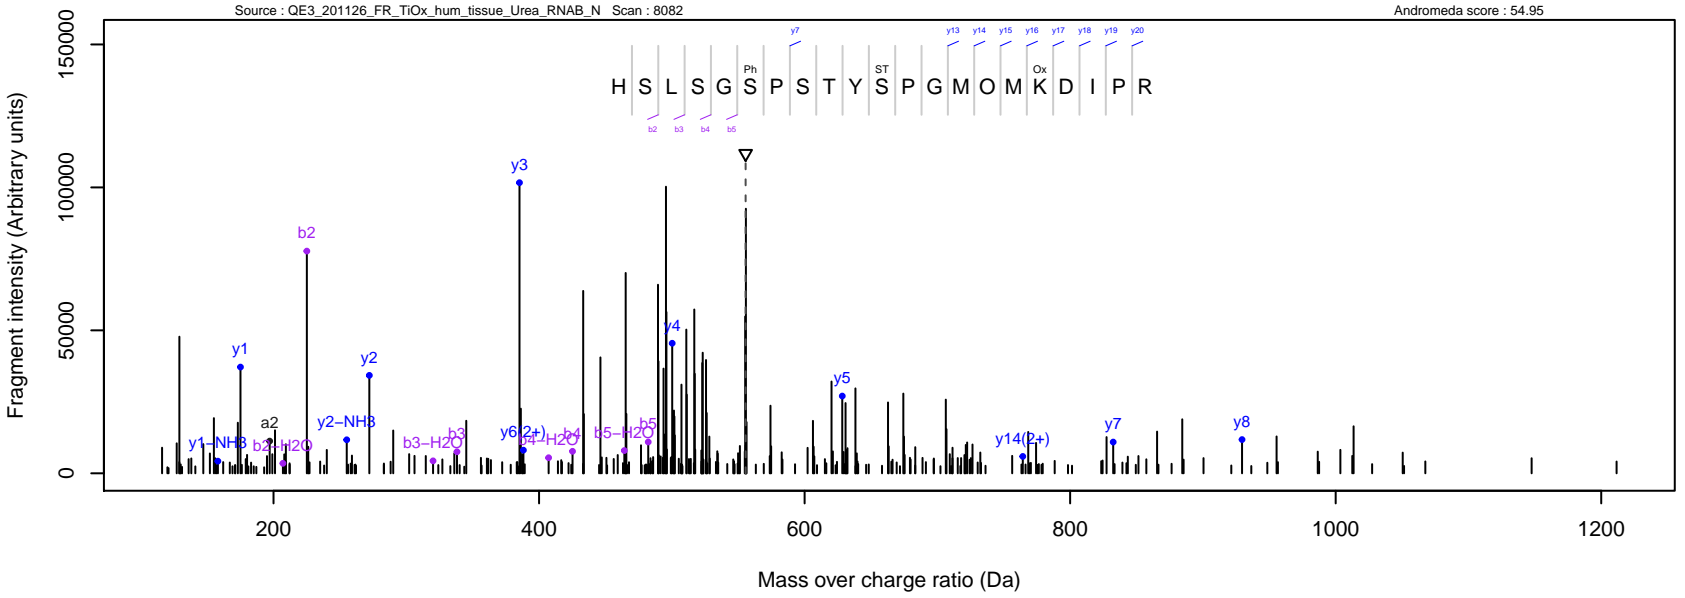

LRVQS(Phospho (STY))PEPPAPER-2+

Source : QE3\_201126\_FR\_TiOx\_hum\_tissue\_Urea\_RNAB\_H Scan : 13607

Andromeda score : 54.898

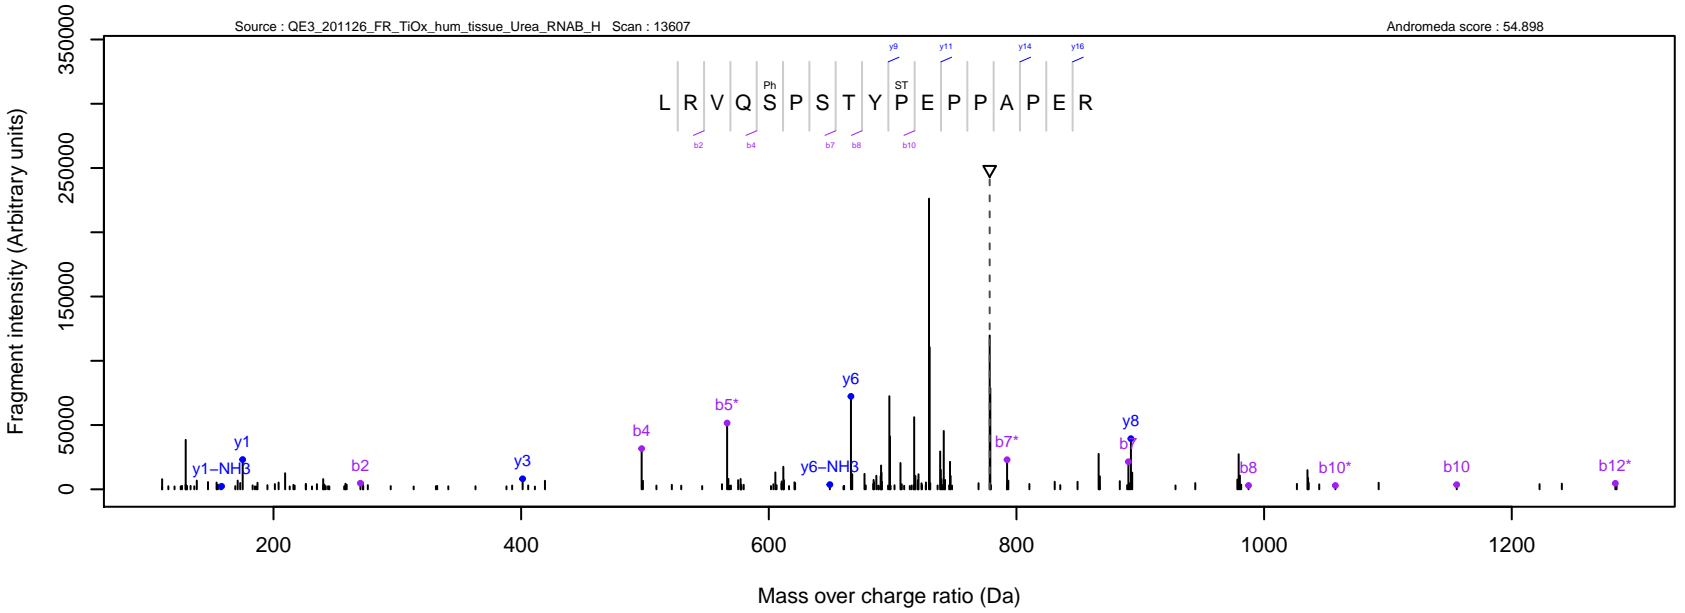

QKS(Phospho (STY))FSEDVISHK-3+

Source : QE3\_201126\_FR\_TiOx\_hum\_tissue\_Urea\_RNAB\_B Scan : 11286

Andromeda score : 54.898

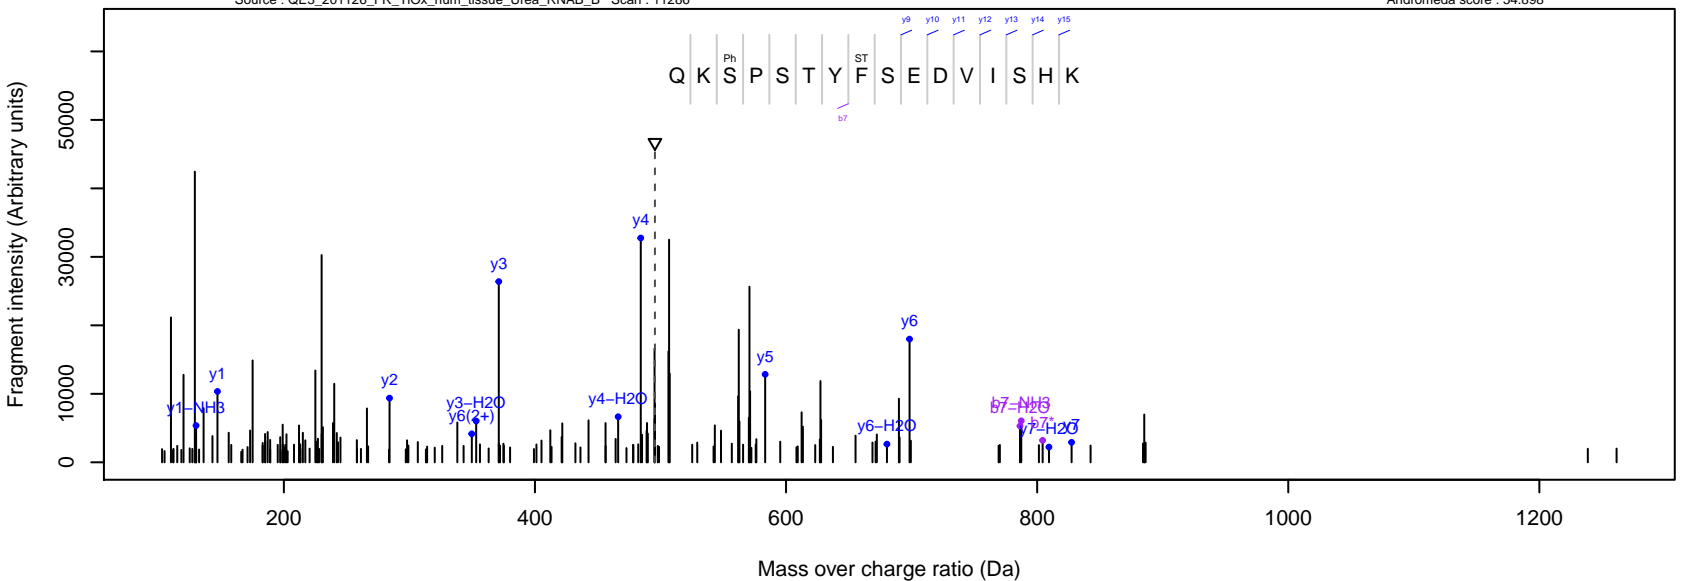

KKYDLESAS(Phospho (STY))AILPSSAIEDPDLGSLGK-3+

Source : QE3\_201126\_FR\_TiOx\_hum\_tissue\_Urea\_RNAB\_N Scan : 47033

Andromeda score : 54.867

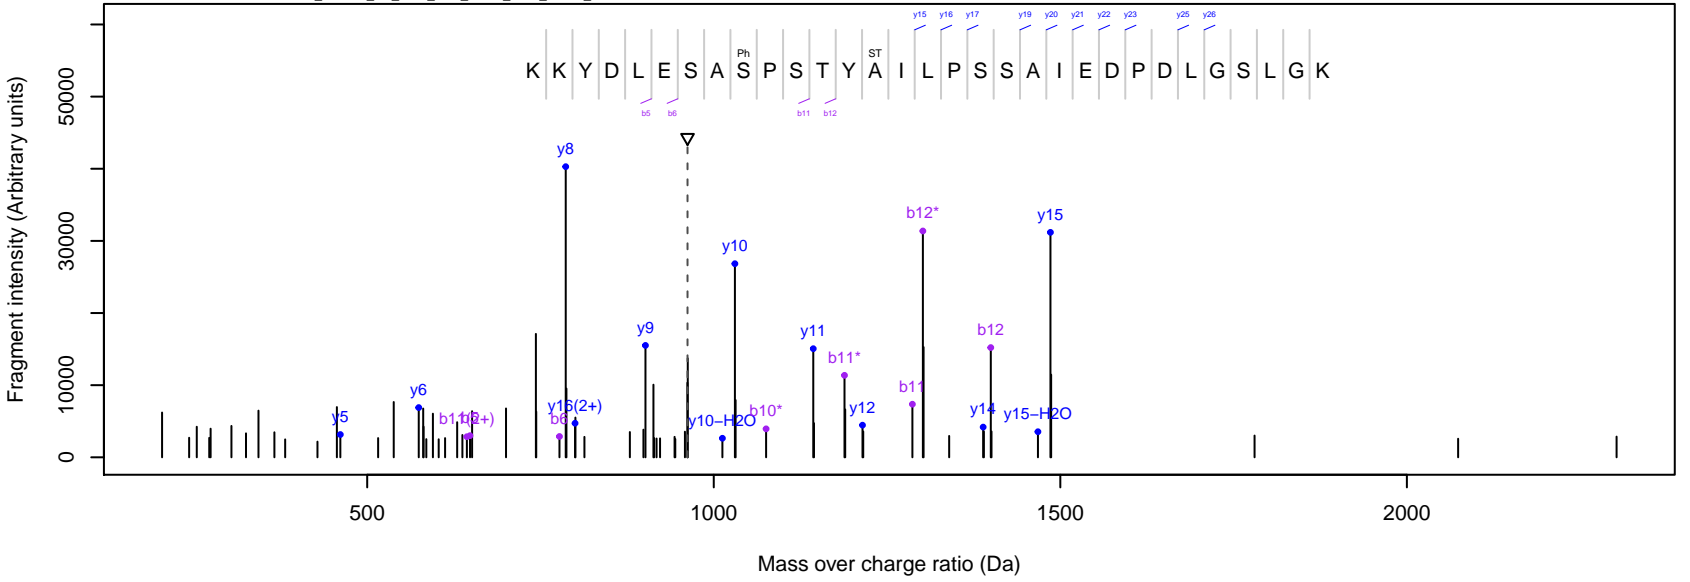

GSTYSPTSPGYSPSTSPYSLTSPAIS(Phospho (STY))PDDSDEEN-3+

Source : QE3\_201126\_FR\_TiOx\_hum\_tissue\_Urea\_RNAB\_N Scan : 53091

Andromeda score : 54.856

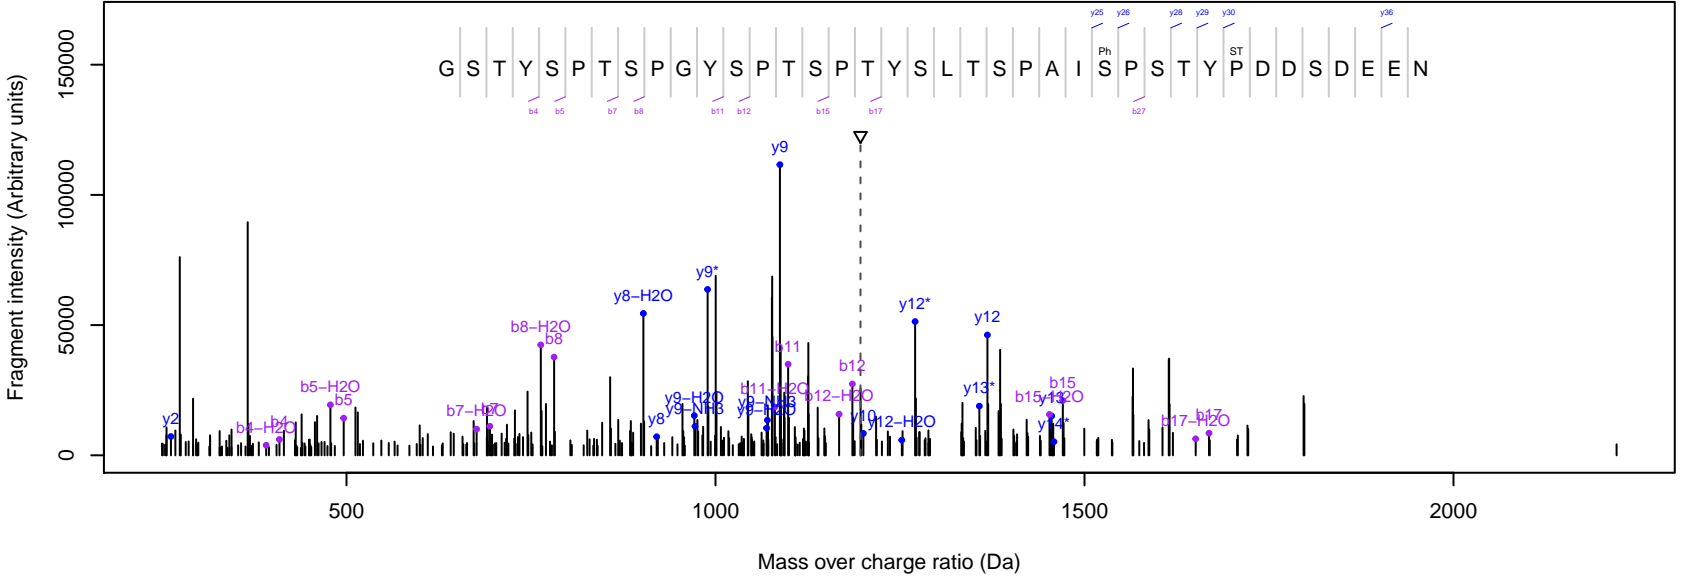

TSEEIS(Phospho (STY))LNDAGVELK-2+

Source : QE3\_201126\_FR\_TiOx\_hum\_tissue\_Urea\_RNAB\_H Scan : 37681

Andromeda score : 54.812

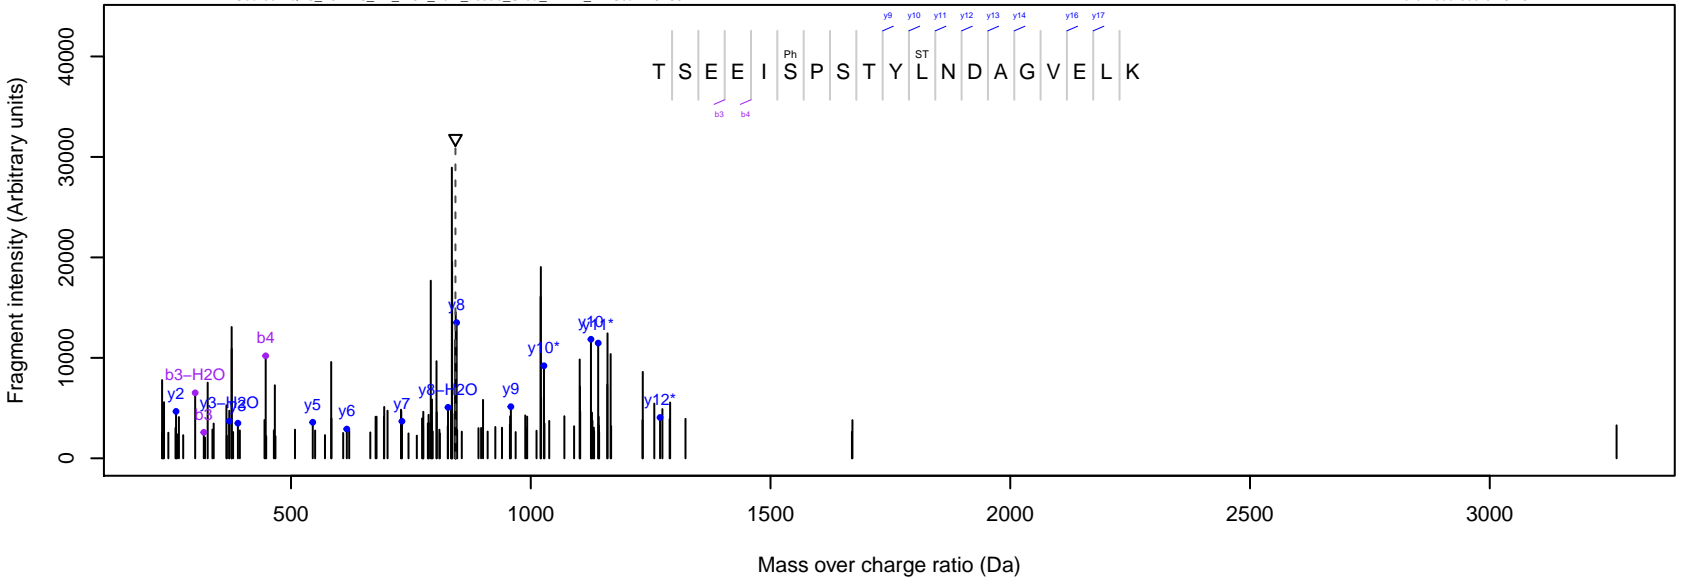

ASLLHSM(Oxidation (M))PTHS(Phospho (STY))SPR-3+

Source : QE3\_201126\_FR\_TiOx\_hum\_tissue\_Urea\_RNAB\_N Scan : 7150

Andromeda score : 54.805

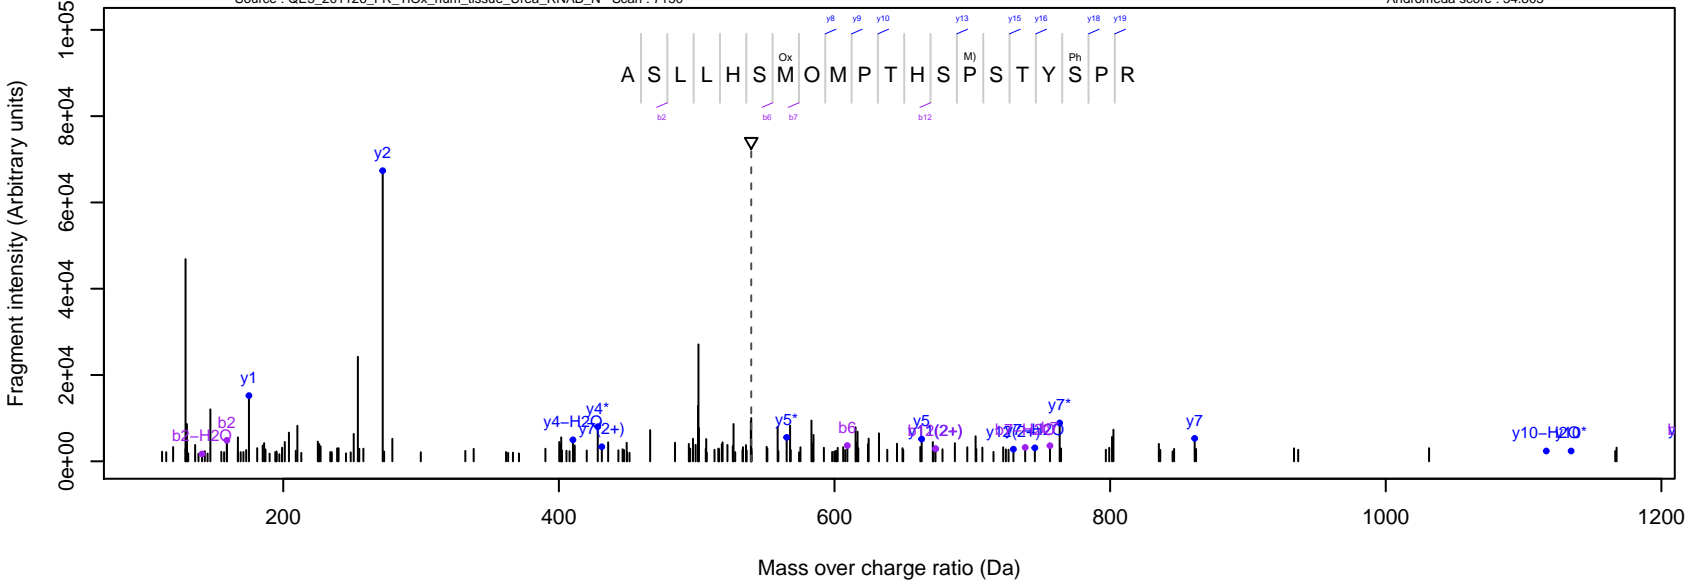

GVHGS(Phospho (STY))FLAR-2+

Source : QE3\_201126\_FR\_TiOx\_hum\_tissue\_Urea\_RNAB\_B Scan : 13159

Andromeda score : 54.784

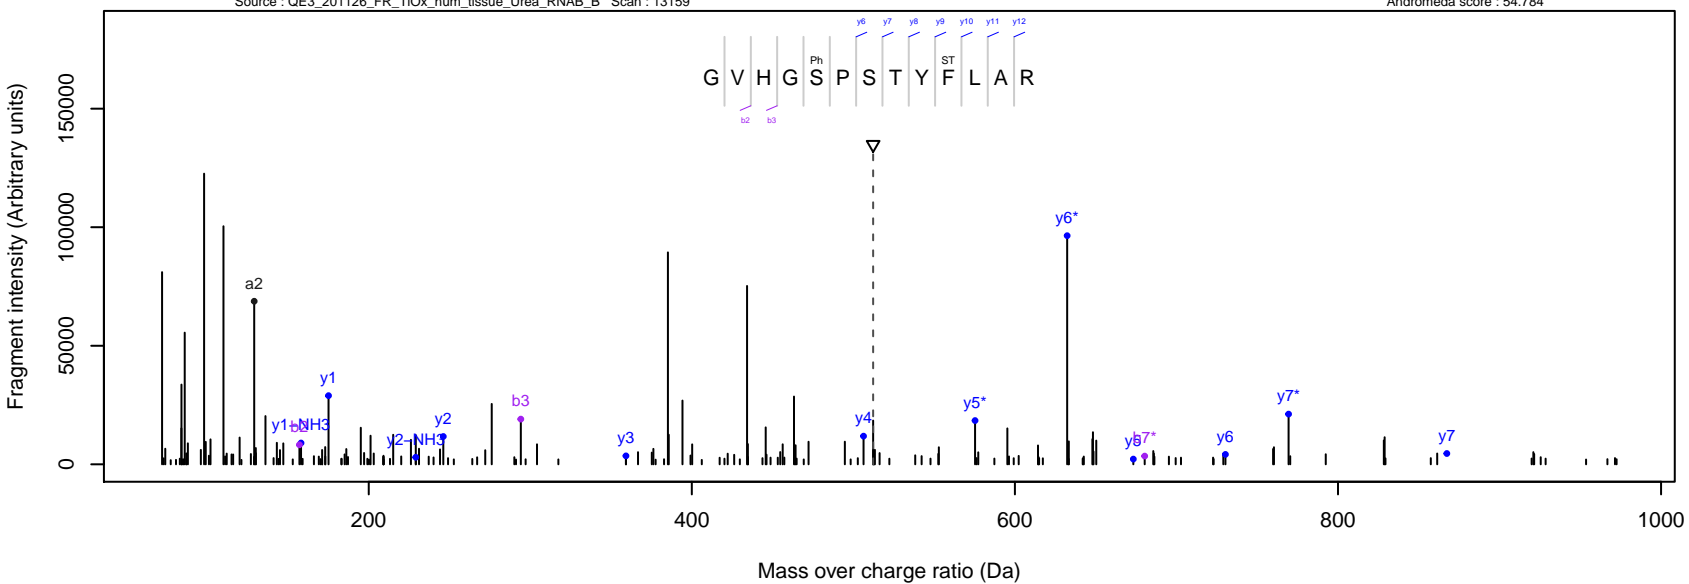

TDRVGEASEETPQTSSSSARPGT(Phospho (STY))PSDHQSQEASQFER-4+

Source : QE3\_201126\_FR\_TiOx\_hum\_tissue\_Urea\_RNAB\_N Scan : 16020

Andromeda score : 54.748

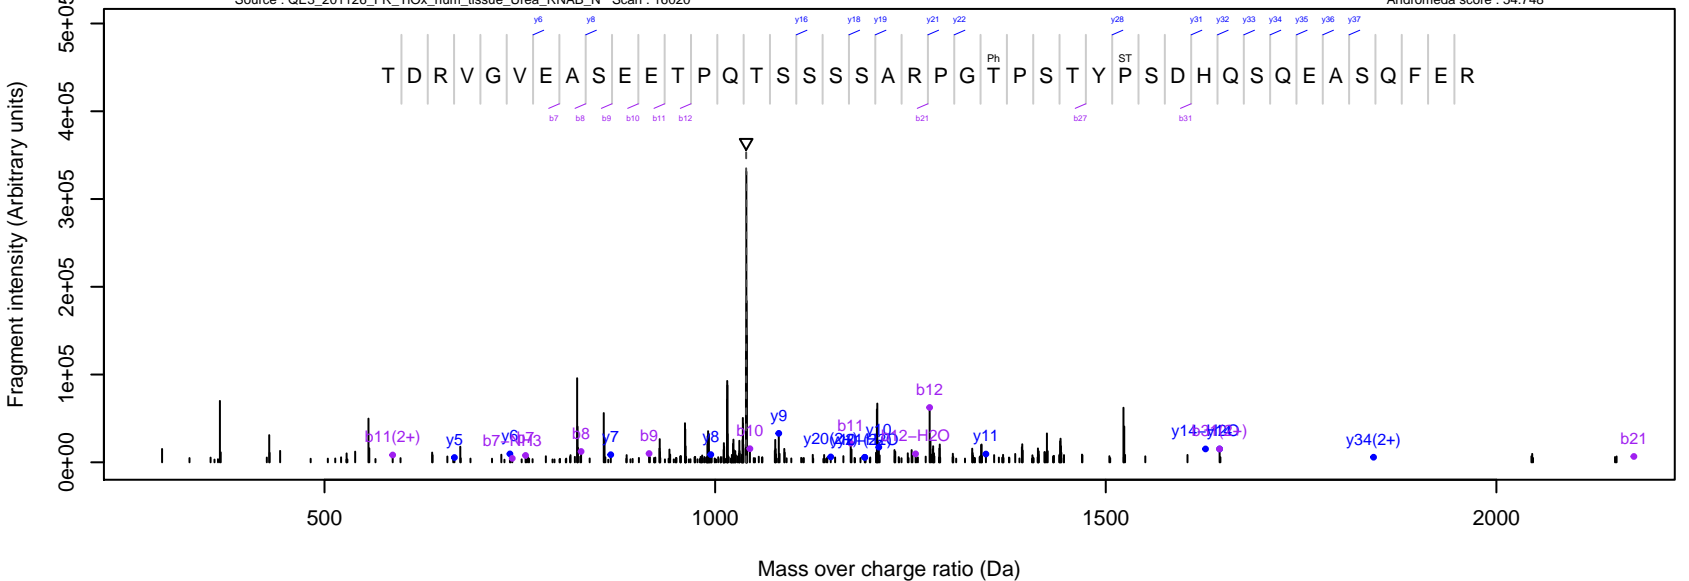

QVPVMQGTGMQGSIQGGSQPGGFS(Phospho (STY))PGQNQVTPQDHEK-4+

Source : QE3\_2011126\_FR\_TiOx\_hum\_tissue\_Urea\_RNAB\_N Scan : 32821

Andromeda score : 54.745

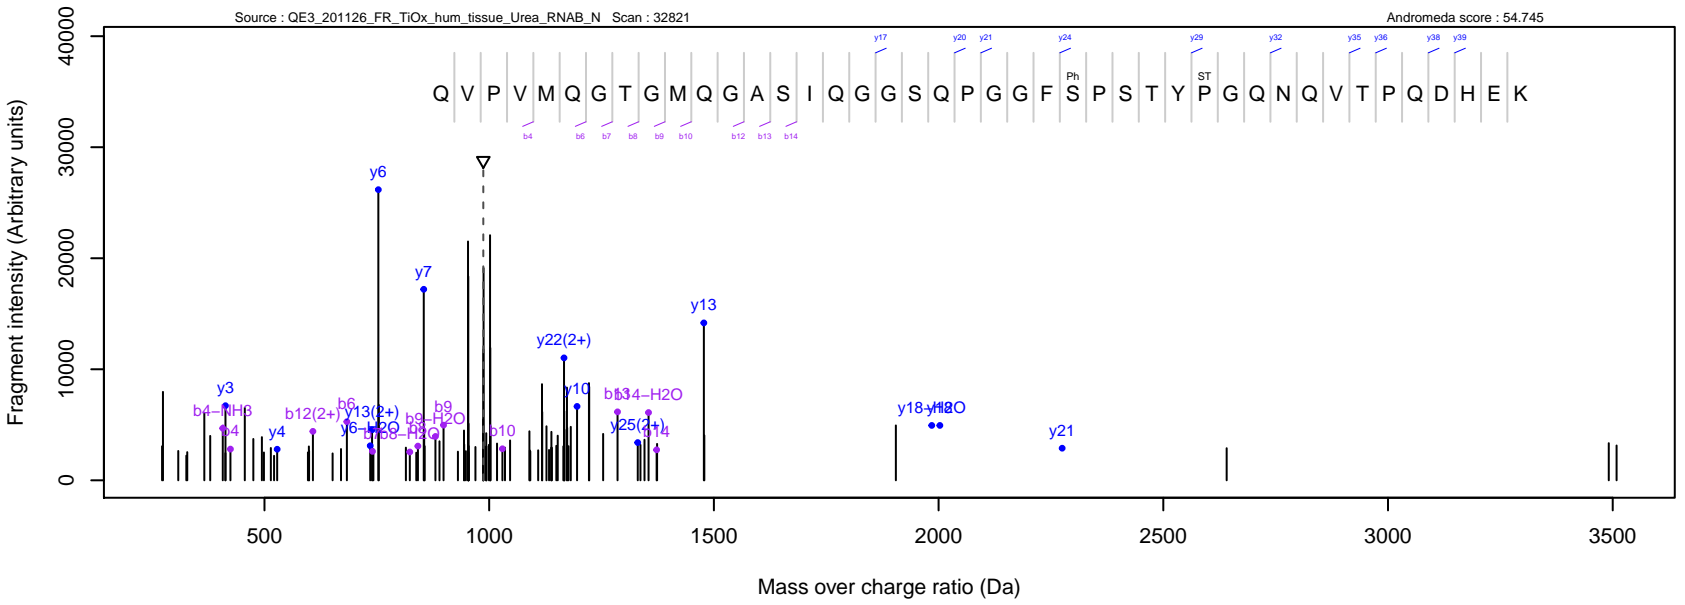

RLES(Phospho (STY))MLQPLAQELEATR-3+

Source : QE3\_2011126\_FR\_TiOx\_hum\_tissue\_Urea\_RNAB\_H Scan : 57656

Andromeda score : 54.728

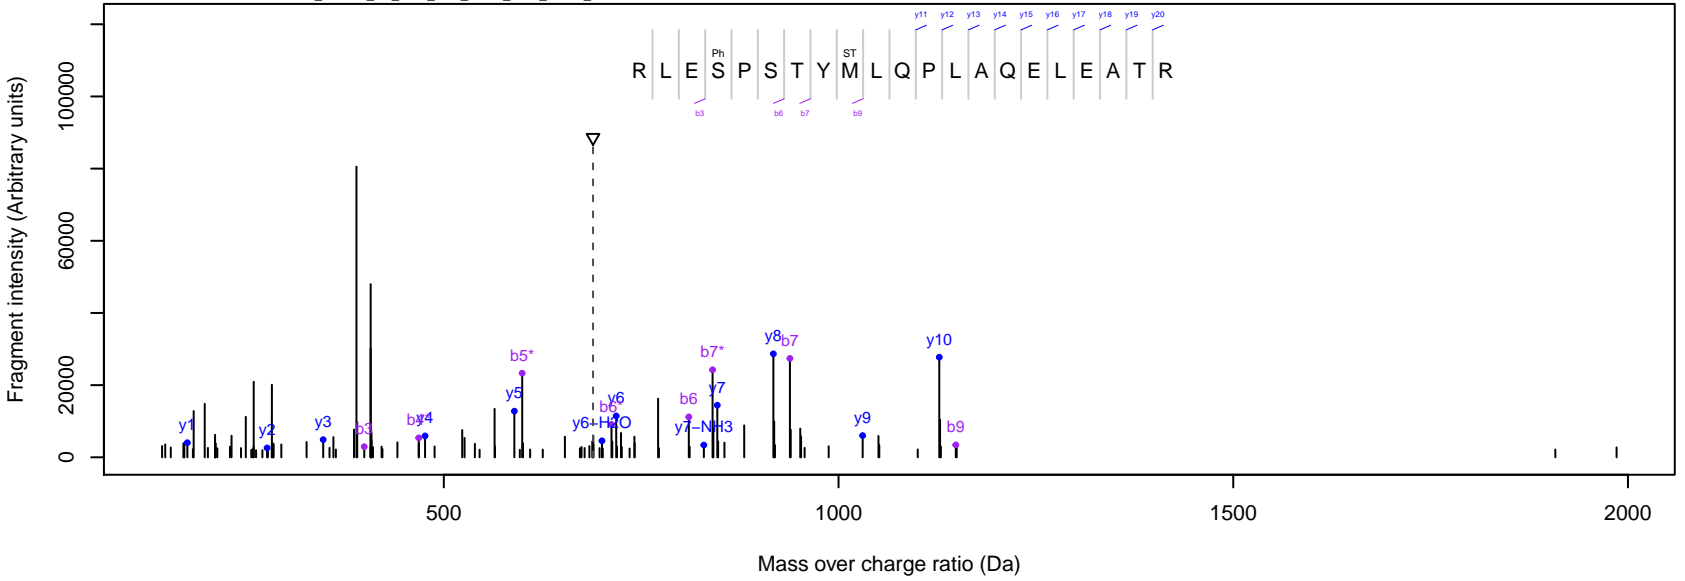

LLIVQDAS(Phospho (STY))ER-2+

Source : QE3\_2011126\_FR\_TiOx\_hum\_tissue\_Urea\_RNAB\_B Scan : 26024

Andromeda score : 54.7

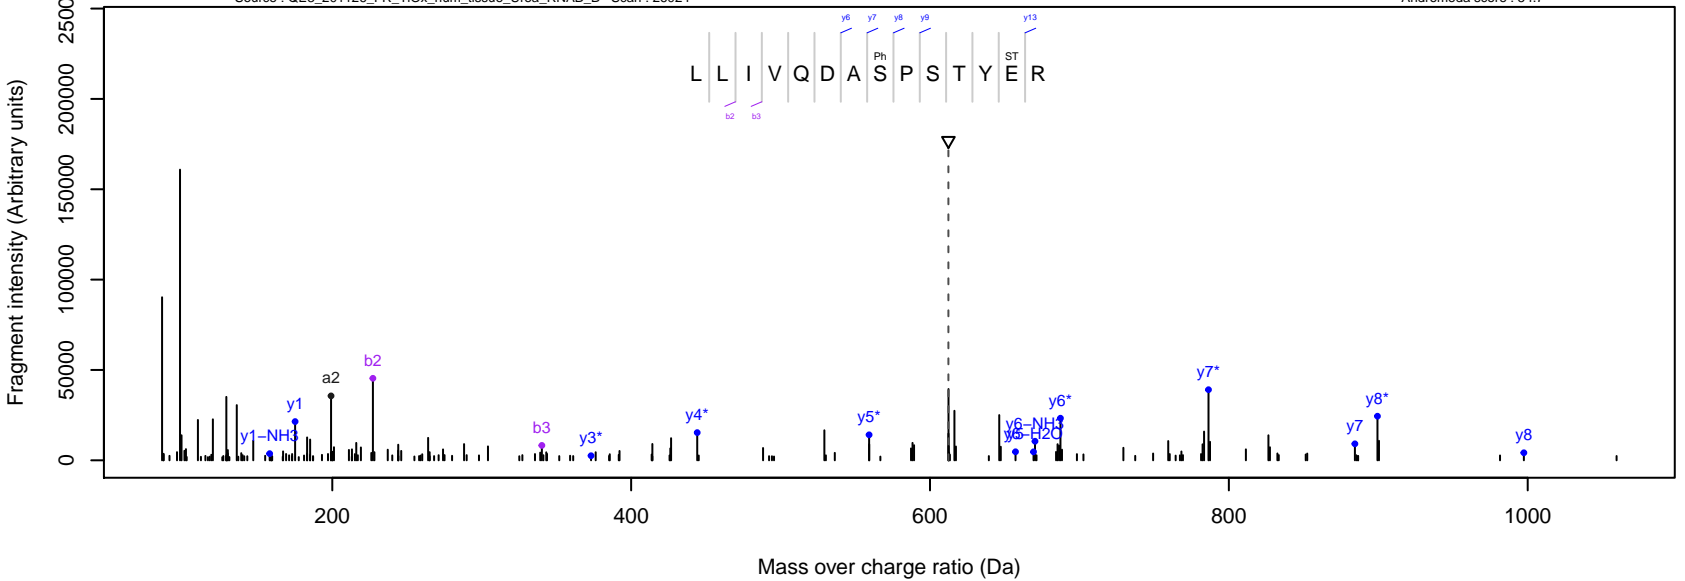

S(Phospho (STY))RS(Phospho (STY))PLLNDR-2+

Source : QE3\_201126\_FR\_TiOx\_hum\_tissue\_Urea\_RNAB\_N Scan : 12516

Andromeda score : 54.683

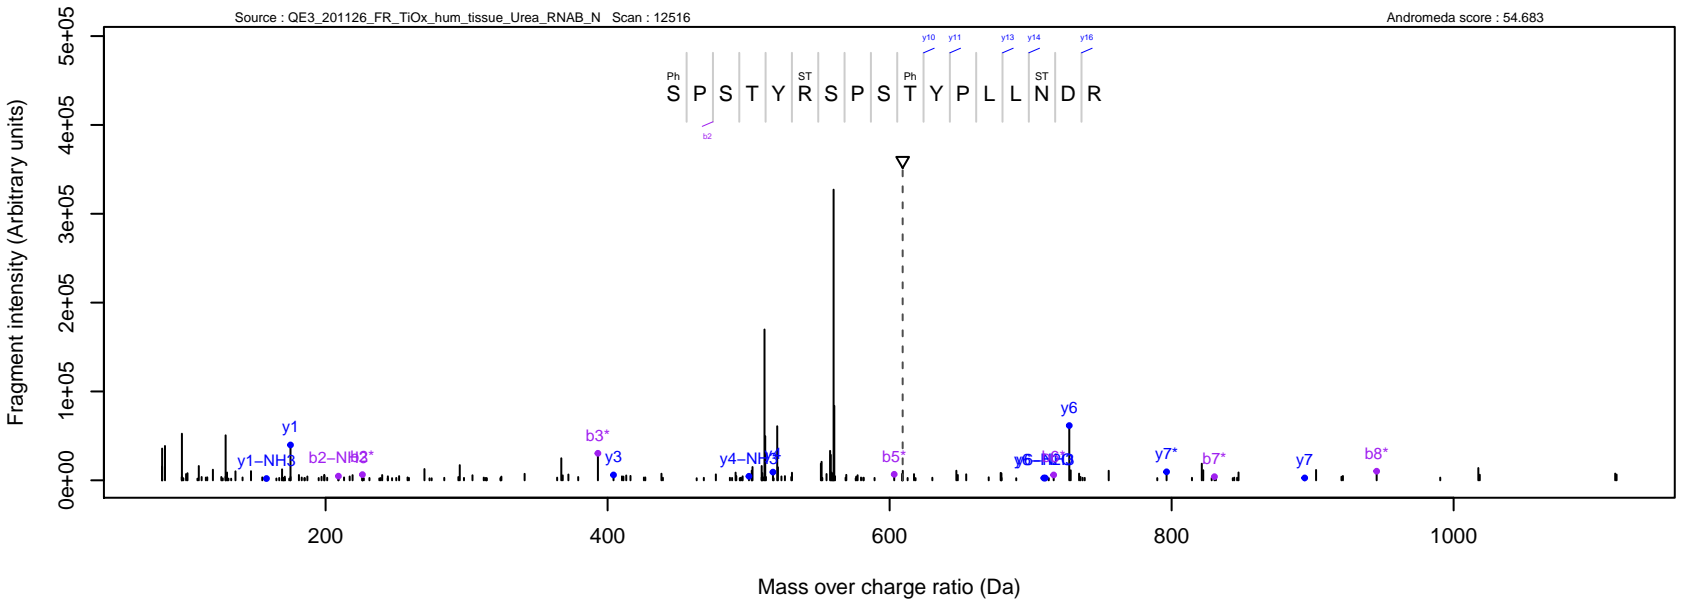

KTAEIS(Phospho (STY))STALRSSPIMR-3+

Source : QE3\_201126\_FR\_TiOx\_hum\_tissue\_Urea\_RNAB\_N Scan : 18044

Andromeda score : 54.672

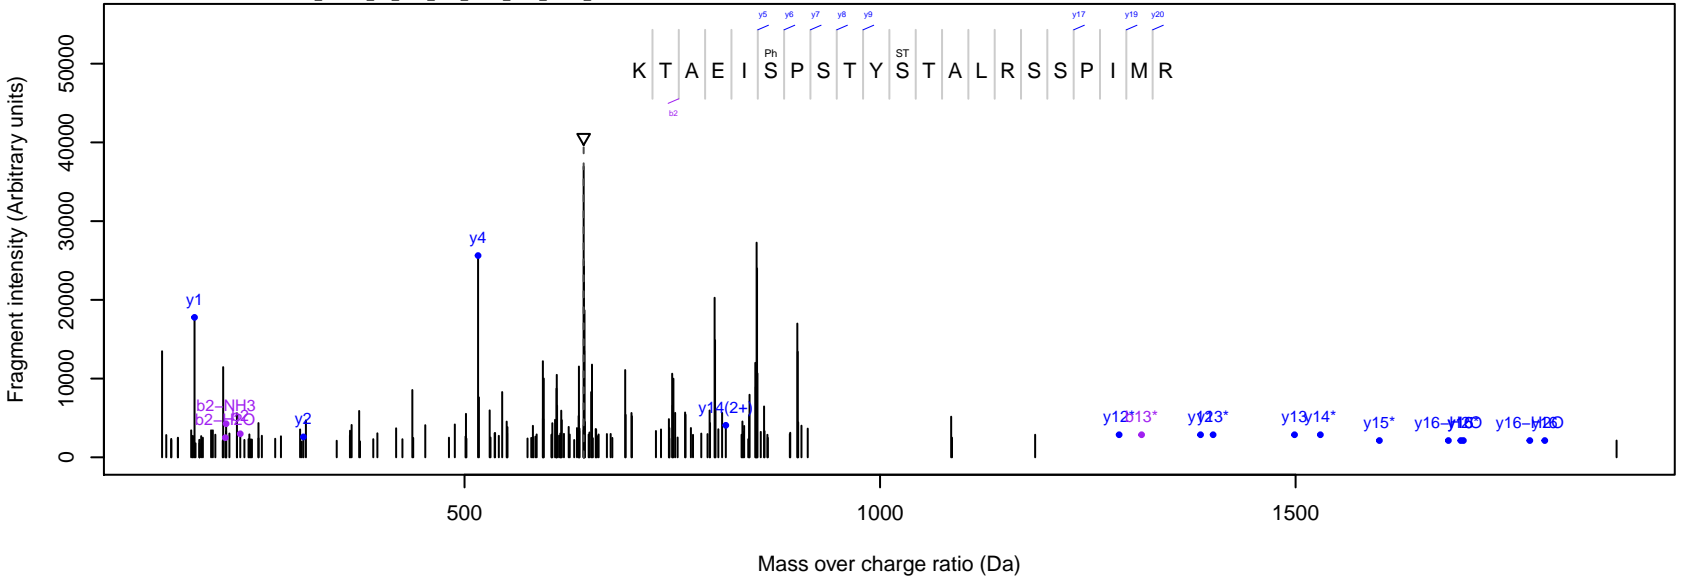

SPS(Phospho (STY))PLRGNVVP(Phospho (STY))PLPTRR-3+

Source : QE3\_201126\_FR\_TiOx\_hum\_tissue\_Urea\_RNAB\_N Scan : 26326

Andromeda score : 54.656

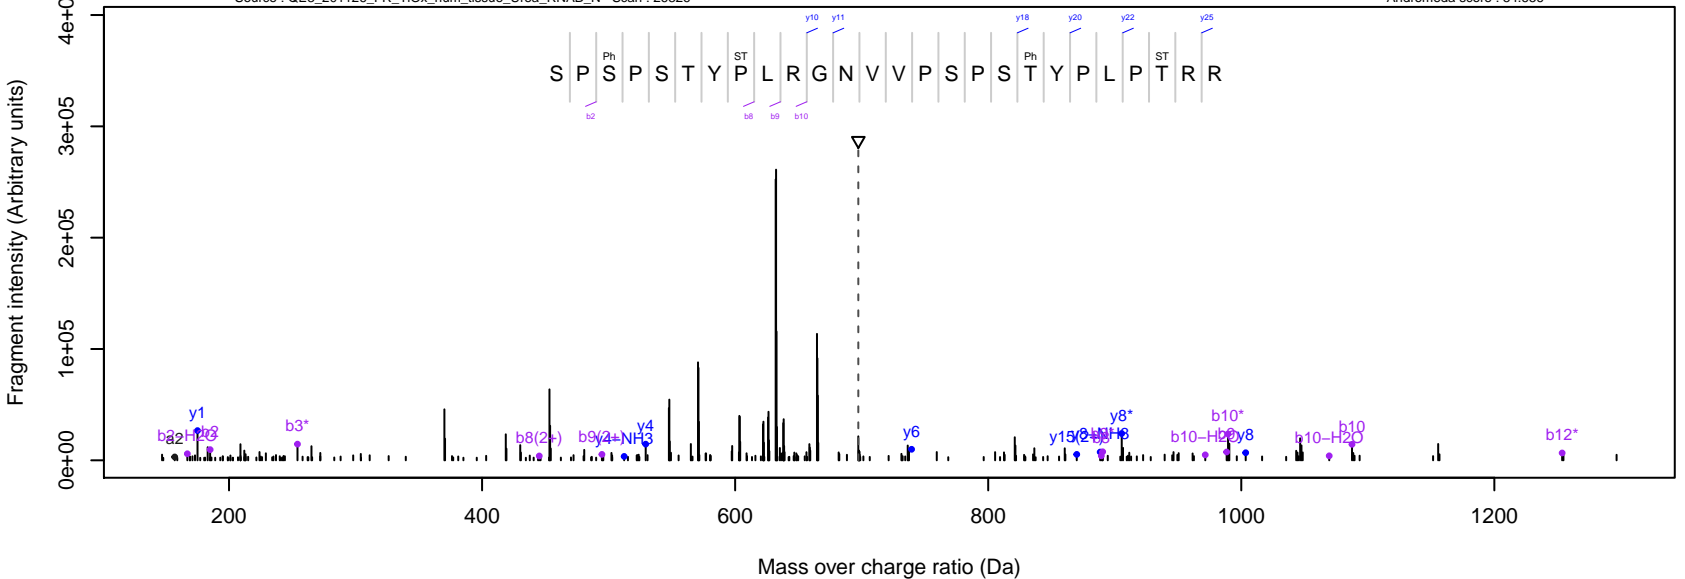



KLS(Phospho (STY))DASDERGEPDLASGSDVNGSTESFEMVIEEATIDSATK-4+

Source : QE3\_201126\_FR\_TiOx\_hum\_tissue\_Urea\_RNAB\_N Scan : 55807

Andromeda score : 54.634

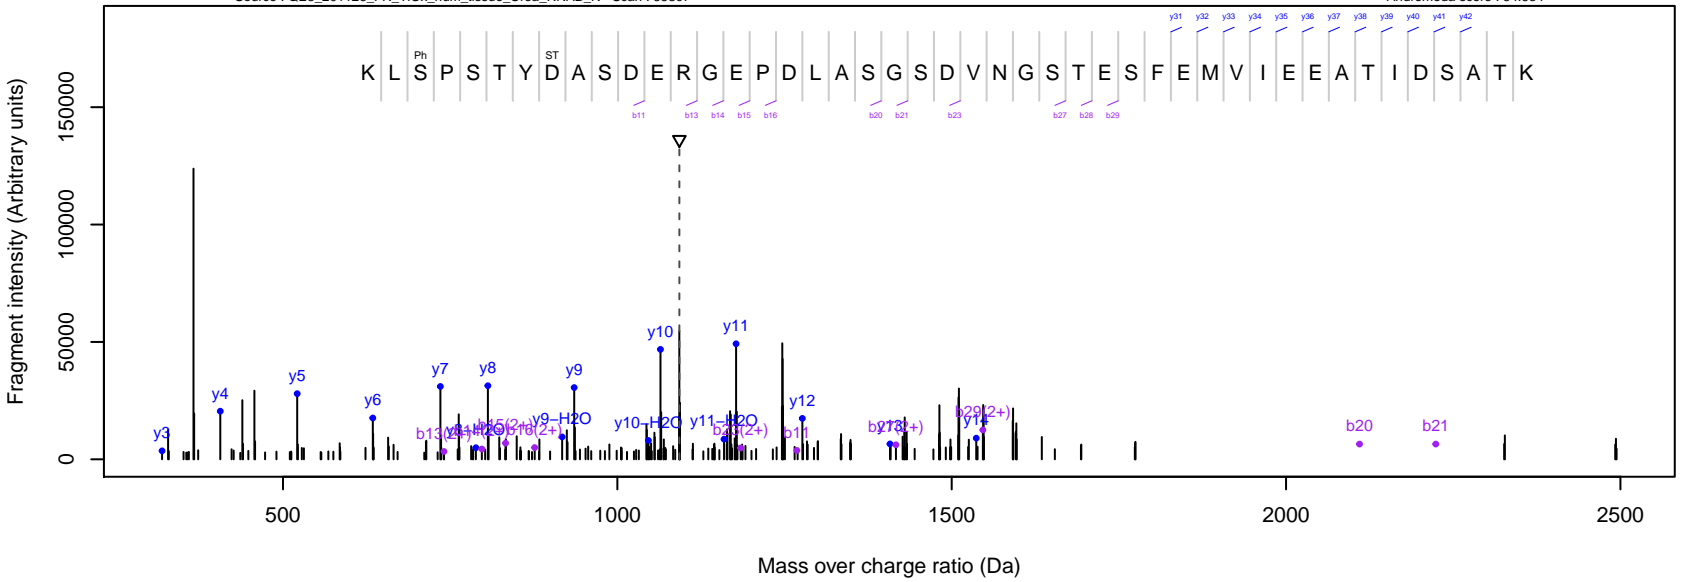

CSDAAGYPHATHDLEGPPLDAYSPSTYIQGQHTISPLDLAK-4+

Source : QE3\_201126\_FR\_TiOx\_hum\_tissue\_Urea\_RNAB\_H Scan : 42960

Andromeda score : 54.632

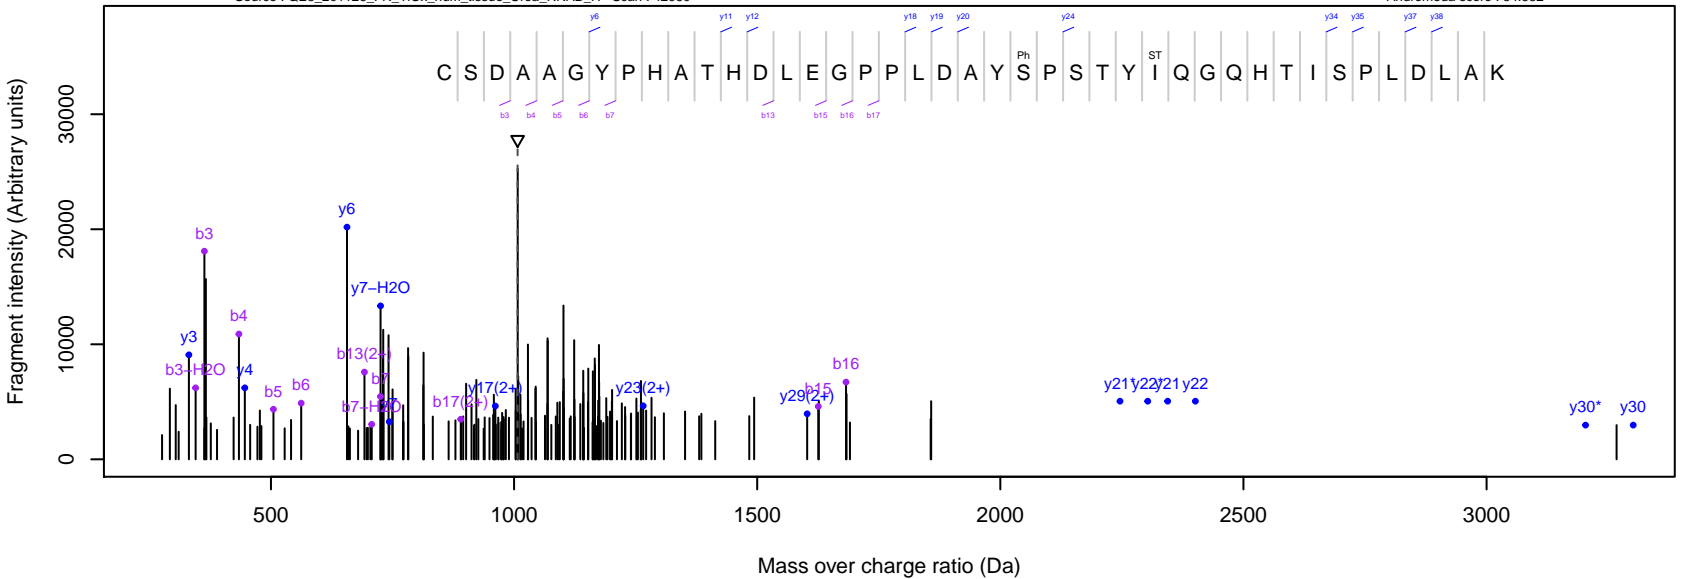

GPTSS(Phospho (STY))PCEEEGDEGEDRT(Phospho (STY))SDLRDEASSVT(Phospho (STY))R-3+

Source : QE3\_201126\_FR\_TiOx\_hum\_tissue\_Urea\_RNAB\_H Scan : 24309

Andromeda score : 54.632

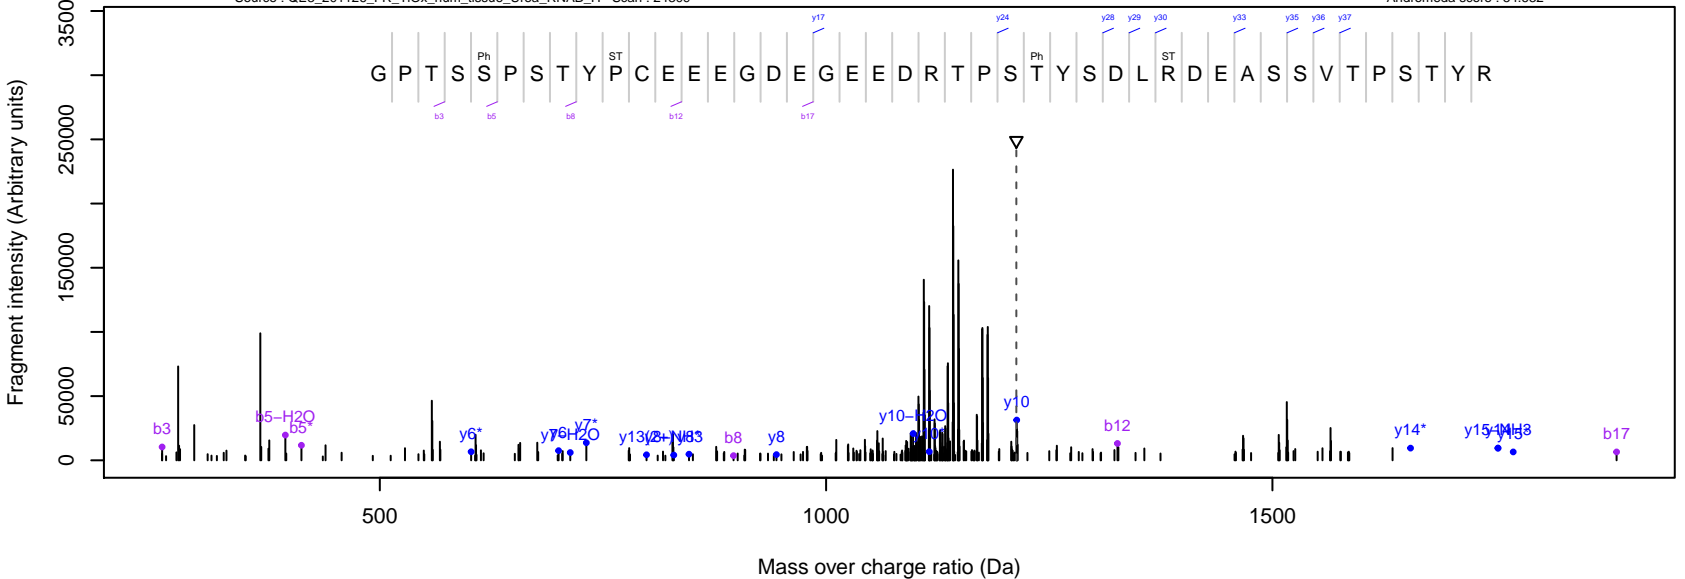

ELS(Phospho (STY))NS(Phospho (STY))PLRENSFGS(Phospho (STY))PLEFR-3+

Source : QE3\_201126\_FR\_TiOx\_hum\_tissue\_Urea\_RNAB\_H Scan : 56708

Andromeda score : 54.605

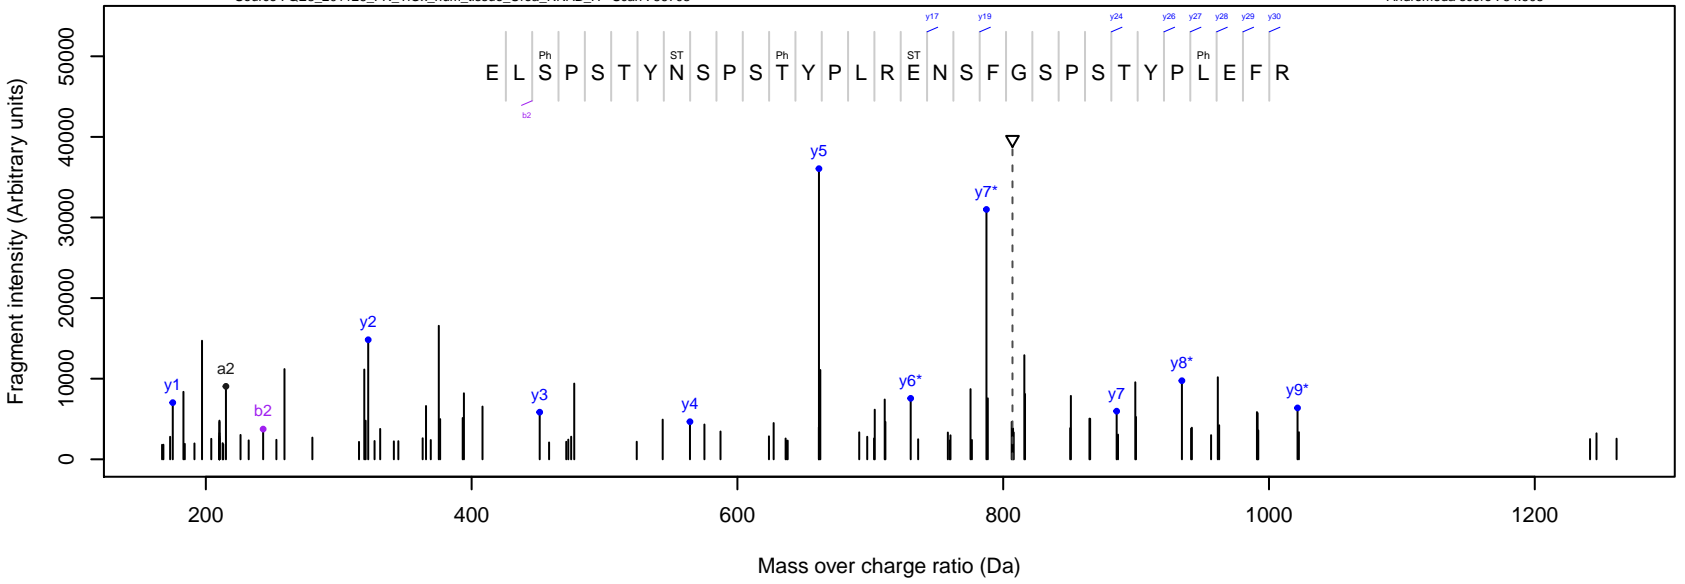

QAS(Phospho (STY))EDSNDLTPTLPETPVLP-3+

Source : QE3\_201126\_FR\_TiOx\_hum\_tissue\_Urea\_RNAB\_N Scan : 52267

Andromeda score : 54.605

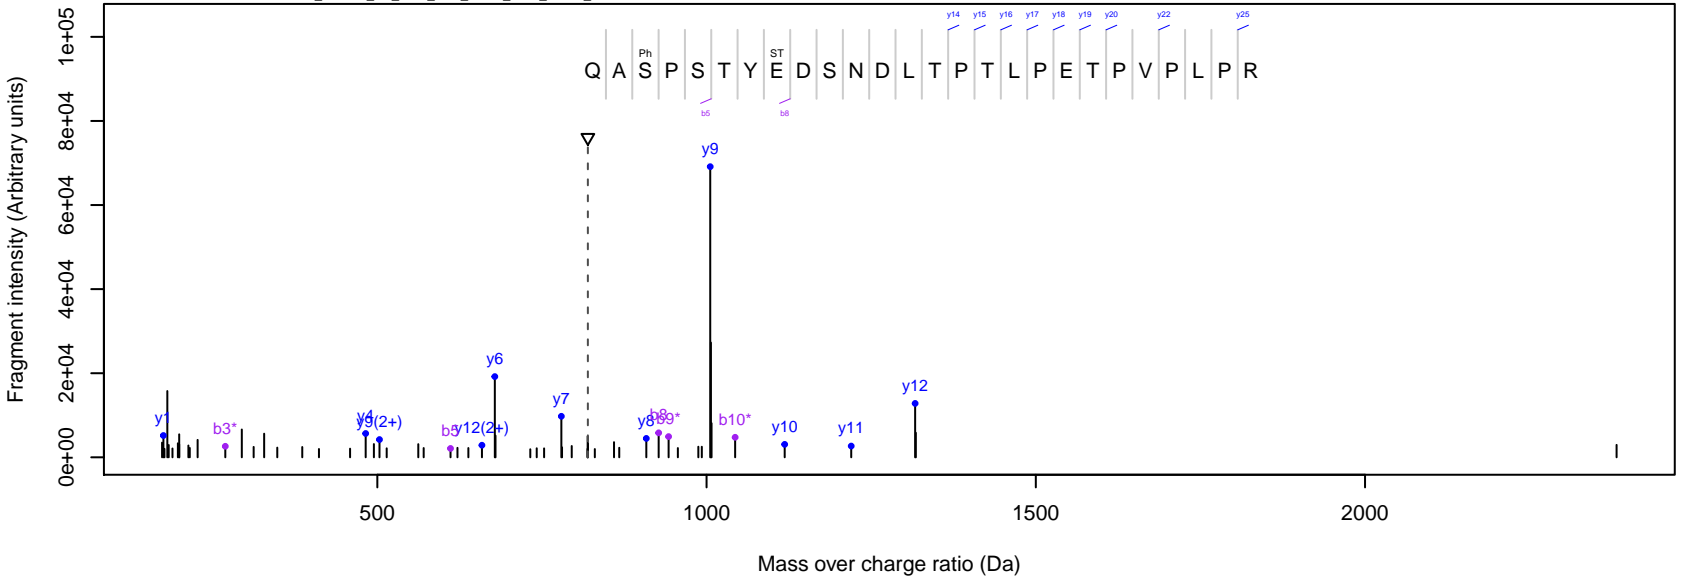

LKFGT(Phospho (STY))FGGLGSK-2+

Source : QE3\_201126\_FR\_TiOx\_hum\_tissue\_Urea\_RNAB\_H Scan : 33148

Andromeda score : 54.598

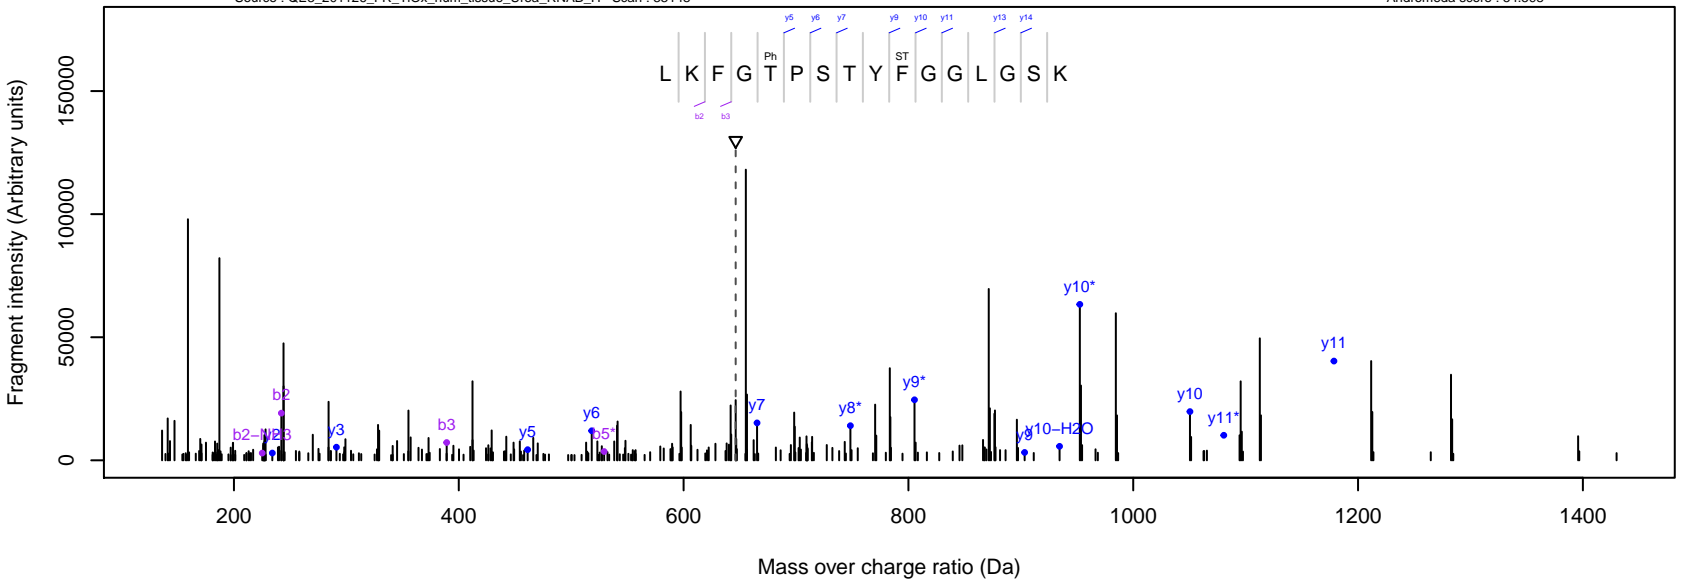

NSQEEDS(Phospho (STY))EDSKDVK-2+

Source : QE3\_201126\_FR\_TiOx\_hum\_tissue\_Urea\_RNAB\_H Scan : 4911

Andromeda score : 54.598

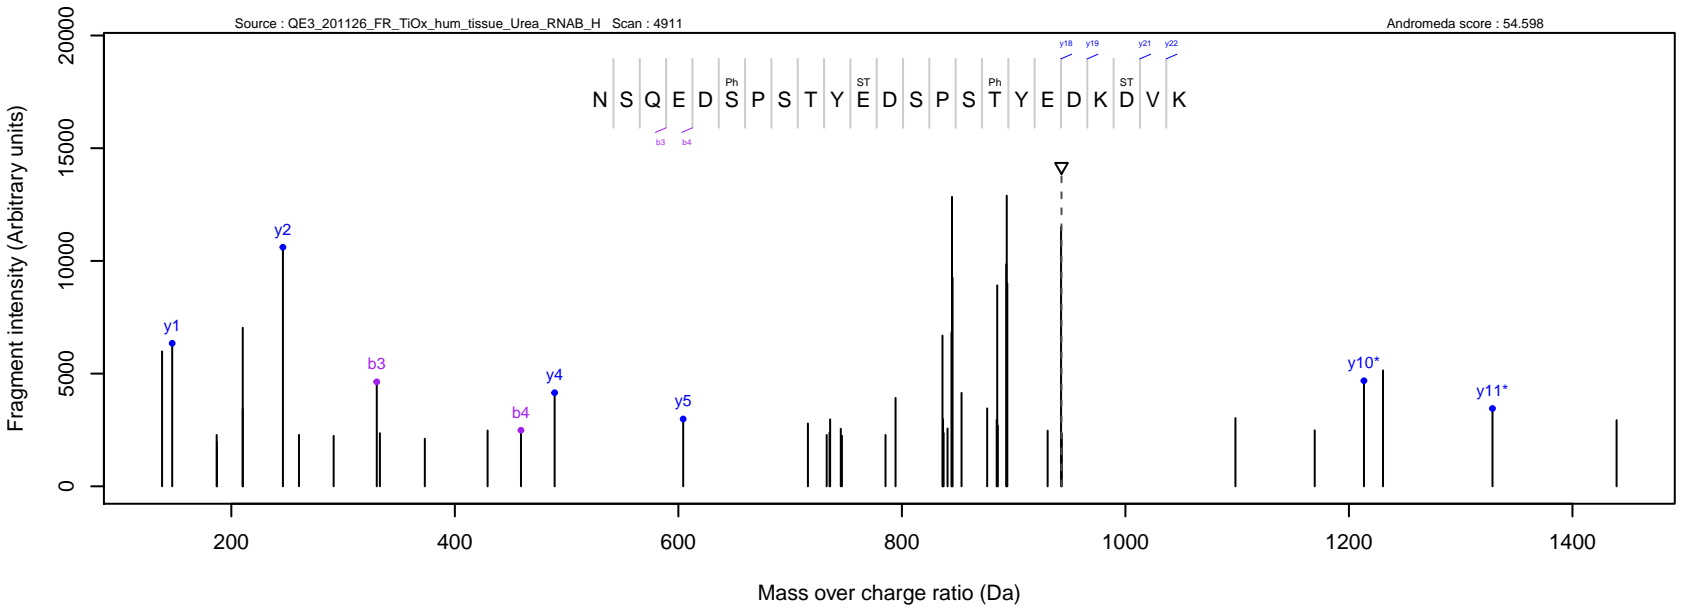

QAEPELDRS(Phospho (STY))IKEVDEAK-3+

Source : QE3\_201126\_FR\_TiOx\_hum\_tissue\_Urea\_RNAB\_H Scan : 26100

Andromeda score : 54.582

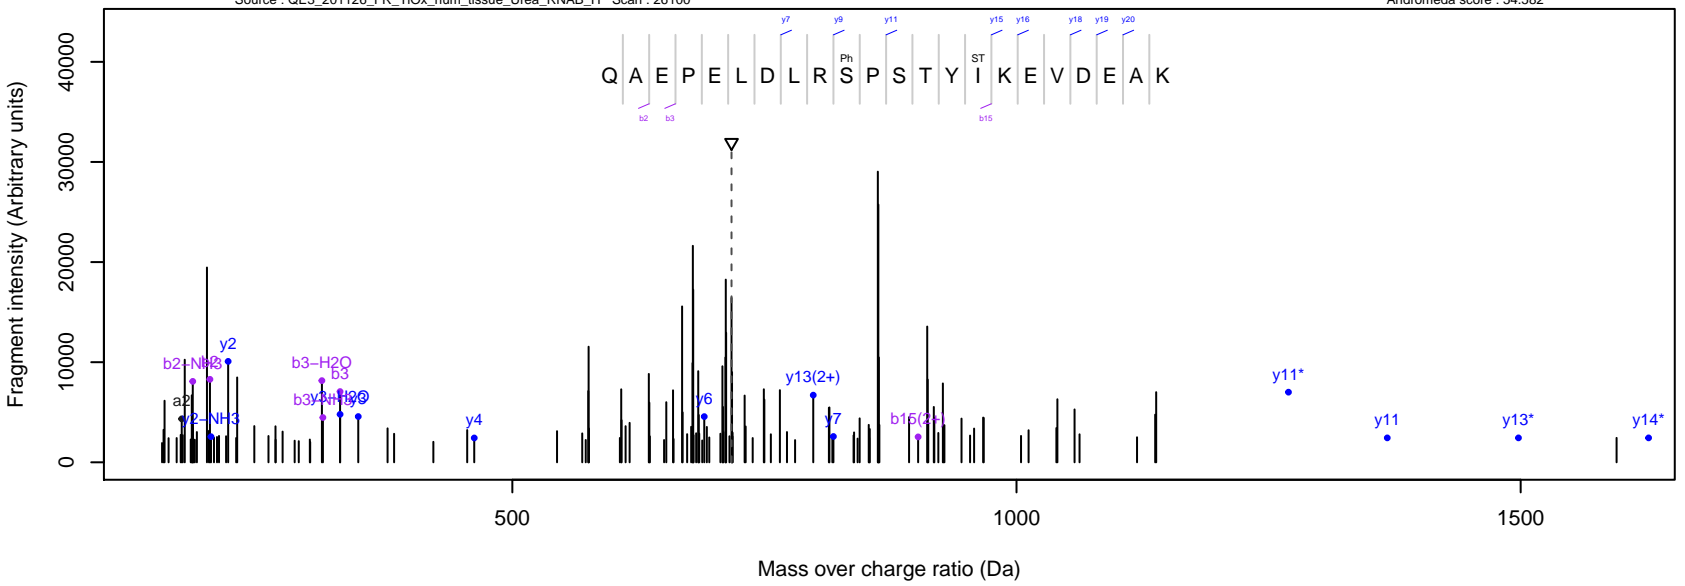

SGPPS(Phospho (STY))PPSTATSFGGPR-3+

Source : QE3\_201126\_FR\_TiOx\_hum\_tissue\_Urea\_RNAB\_B Scan : 20200

Andromeda score : 54.582

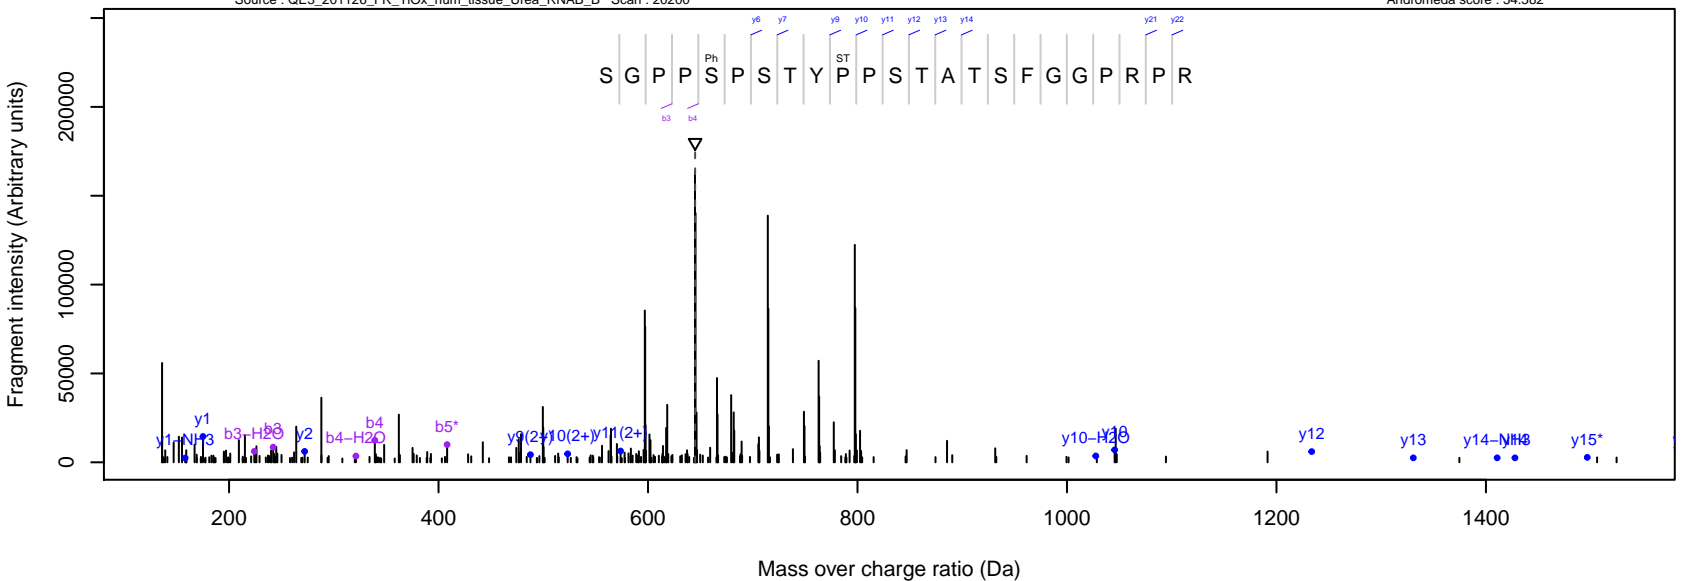

AQDS(Phospho (STY))VGRSDNEMCELDPGQFIDR-3+

Source : QE3\_201126\_FR\_TiOx\_hum\_tissue\_Urea\_RNAB\_N Scan : 42091

Andromeda score : 54.559

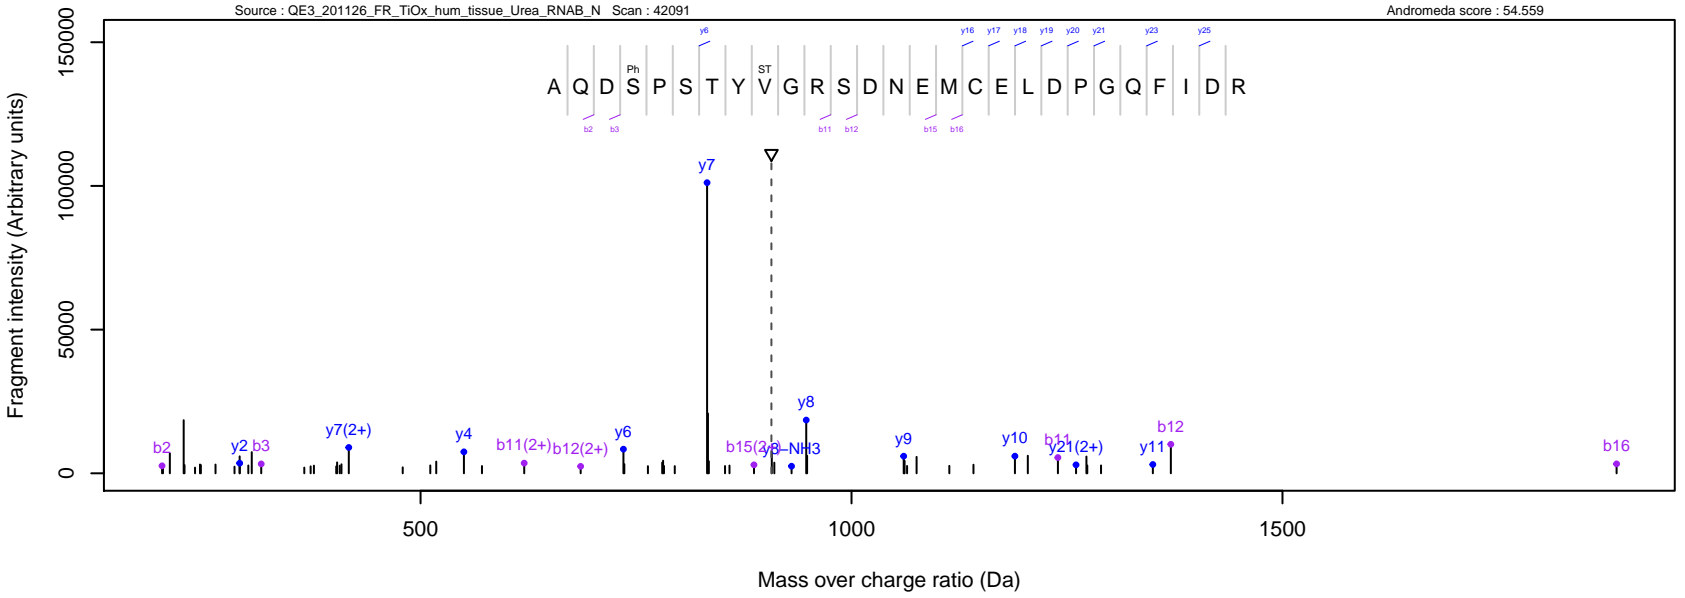

SSSPAPEFLASSPPDNKSPDEATAADQES(Phospho (STY))EDDLSASRTSLER-4+

Source : QE3\_201126\_FR\_TiOx\_hum\_tissue\_Urea\_RNAB\_H Scan : 32245

Andromeda score : 54.517

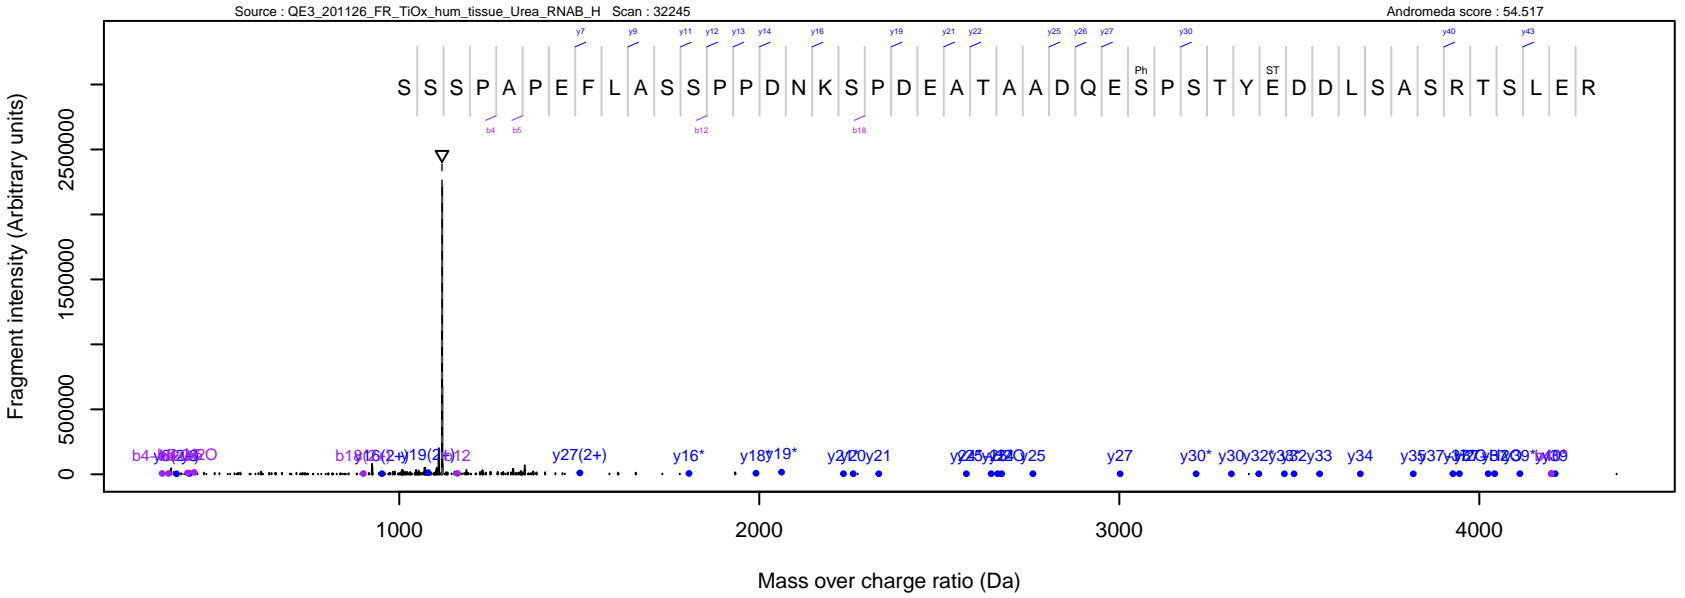

S(Phospho (STY))SPSHTISRPIPMPIR-3+

Source : QE3\_201126\_FR\_TiOx\_hum\_tissue\_Urea\_RNAB\_B Scan : 21190

Andromeda score : 54.501

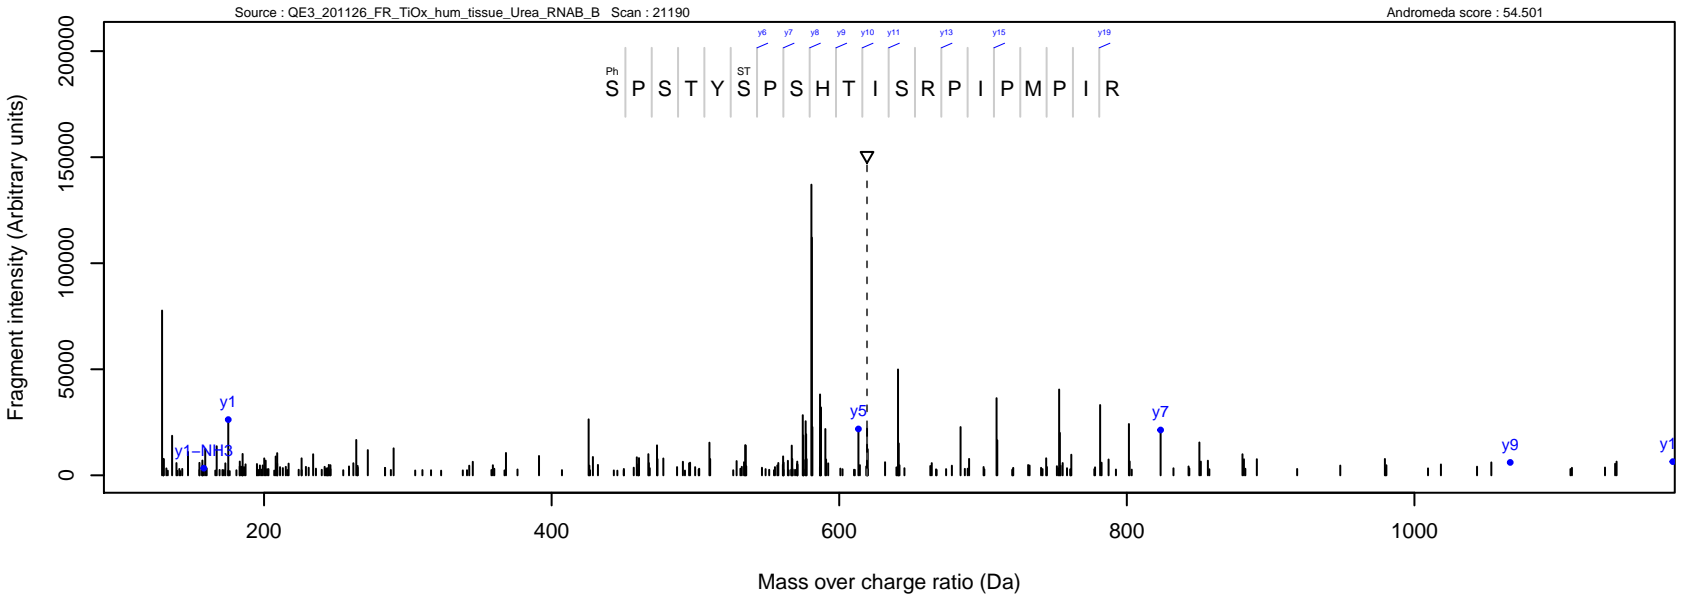

ESGS(Phospho (STY))PYSVLVDTK-2+

Source : QE3\_201126\_FR\_TiOx\_hum\_tissue\_Urea\_RNAB\_N Scan : 34262

Andromeda score : 54.471

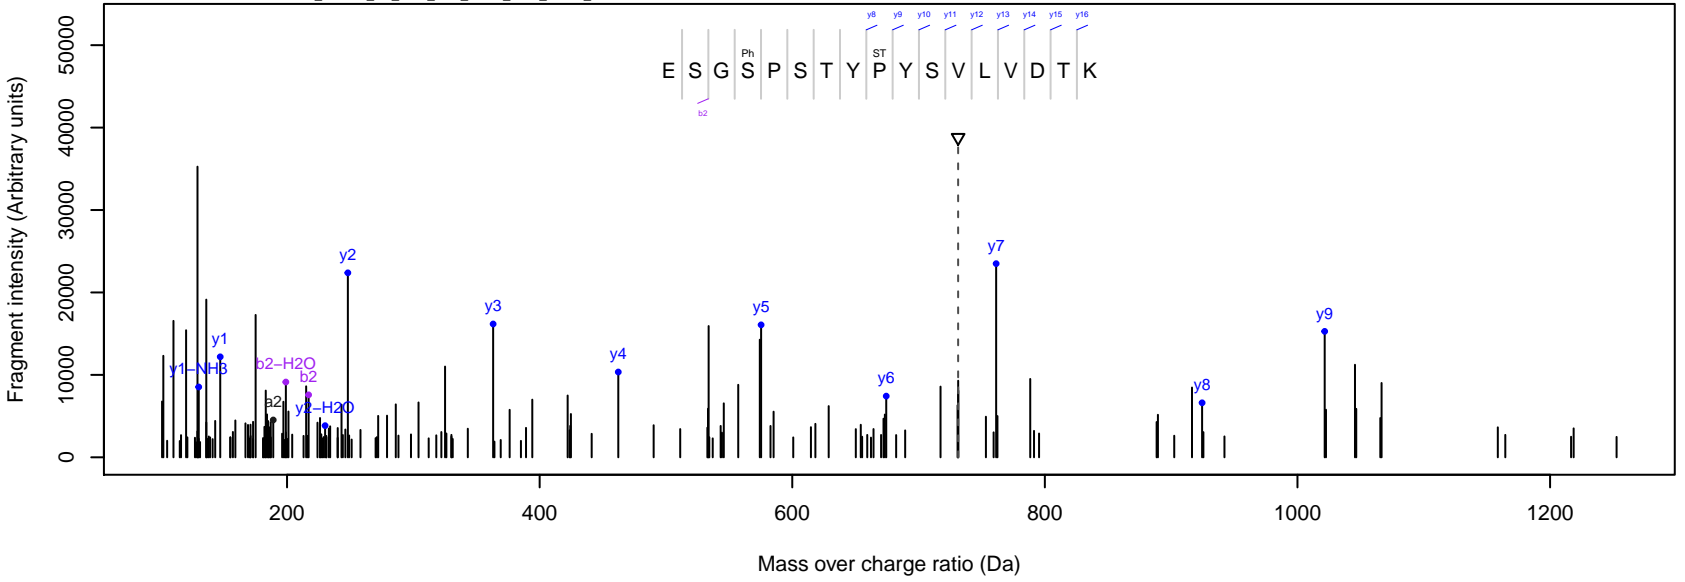

RALS(Phospho (STY))PLPTR-2+

Source : QE3\_201126\_FR\_TiOx\_hum\_tissue\_Urea\_RNAB\_B Scan : 12967

Andromeda score : 54.471

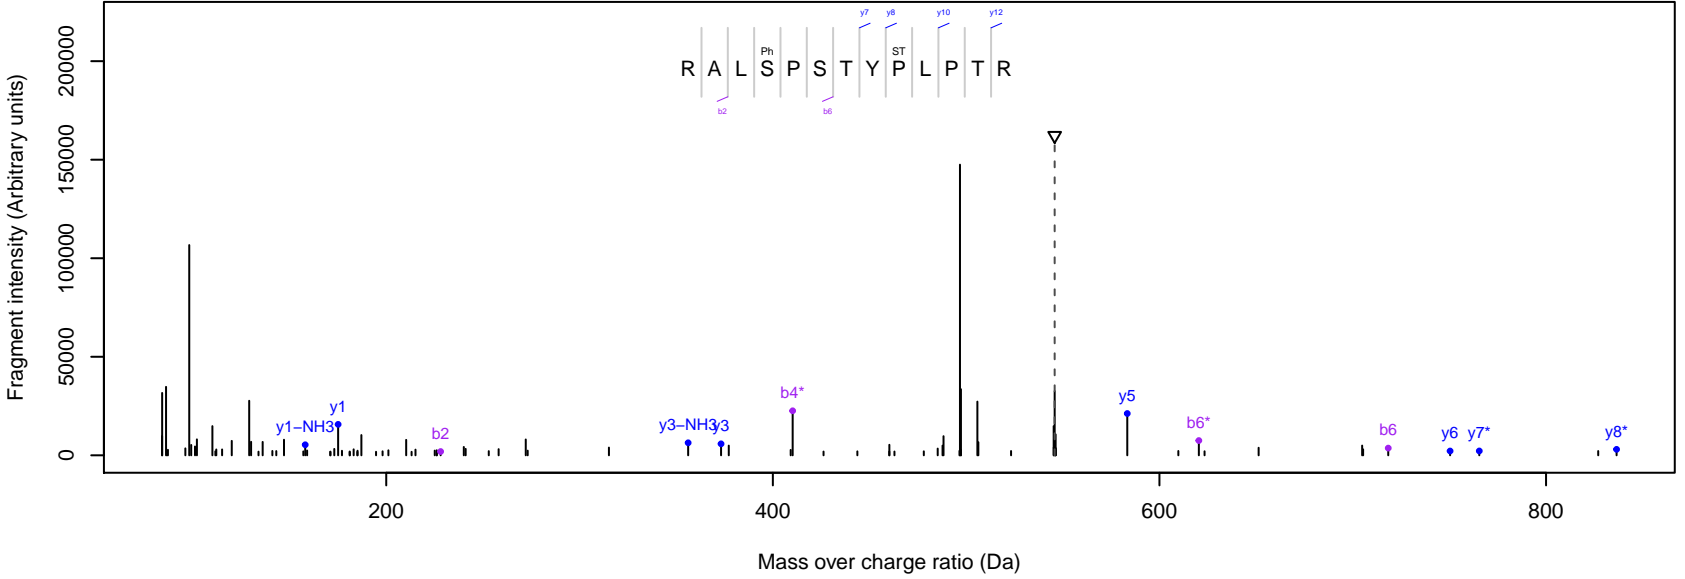

IPS(Phospho (STY))T(Phospho (STY))PKLIPK-2+

Source : QE3\_201126\_FR\_TiOx\_hum\_tissue\_Urea\_RNAB\_H Scan : 27661

Andromeda score : 54.343

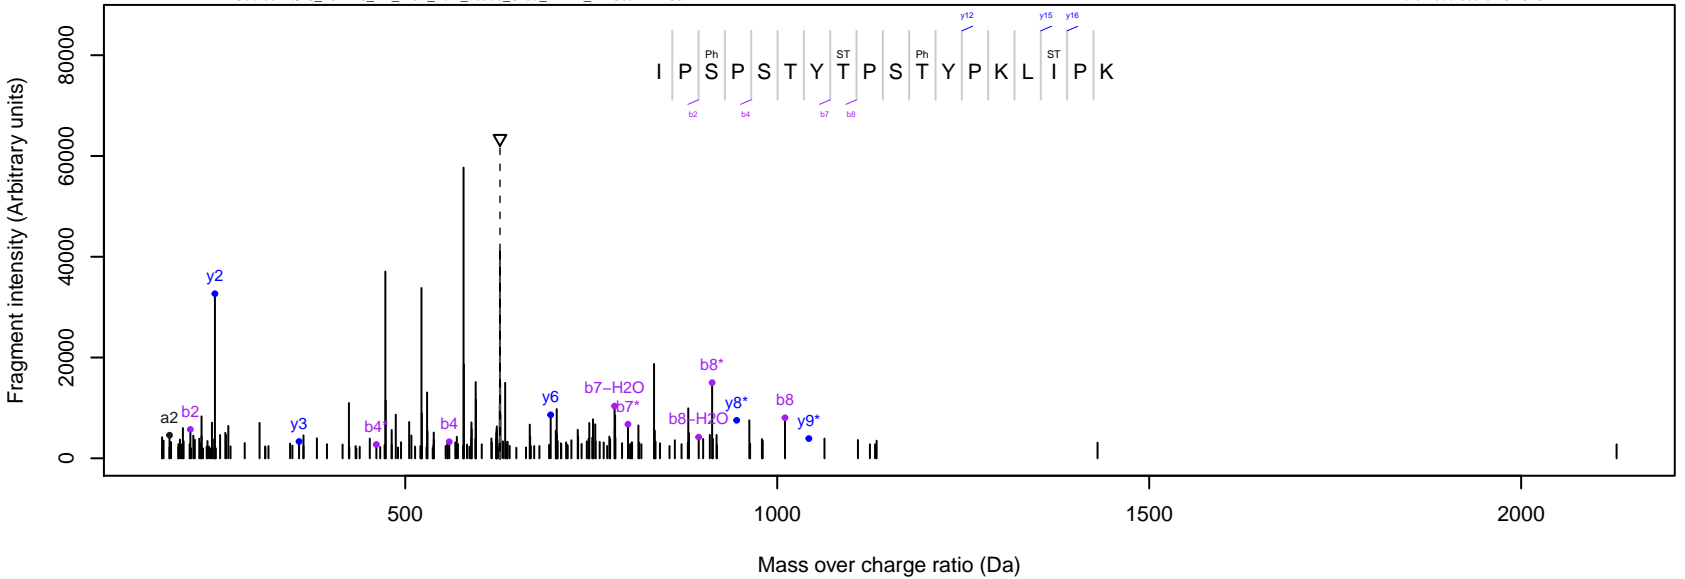

KDQES(Phospho (STY))PKMPR-3+

Source : QE3\_201126\_FR\_TiOx\_hum\_tissue\_Urea\_RNAB\_H Scan : 5124

Andromeda score : 54.343

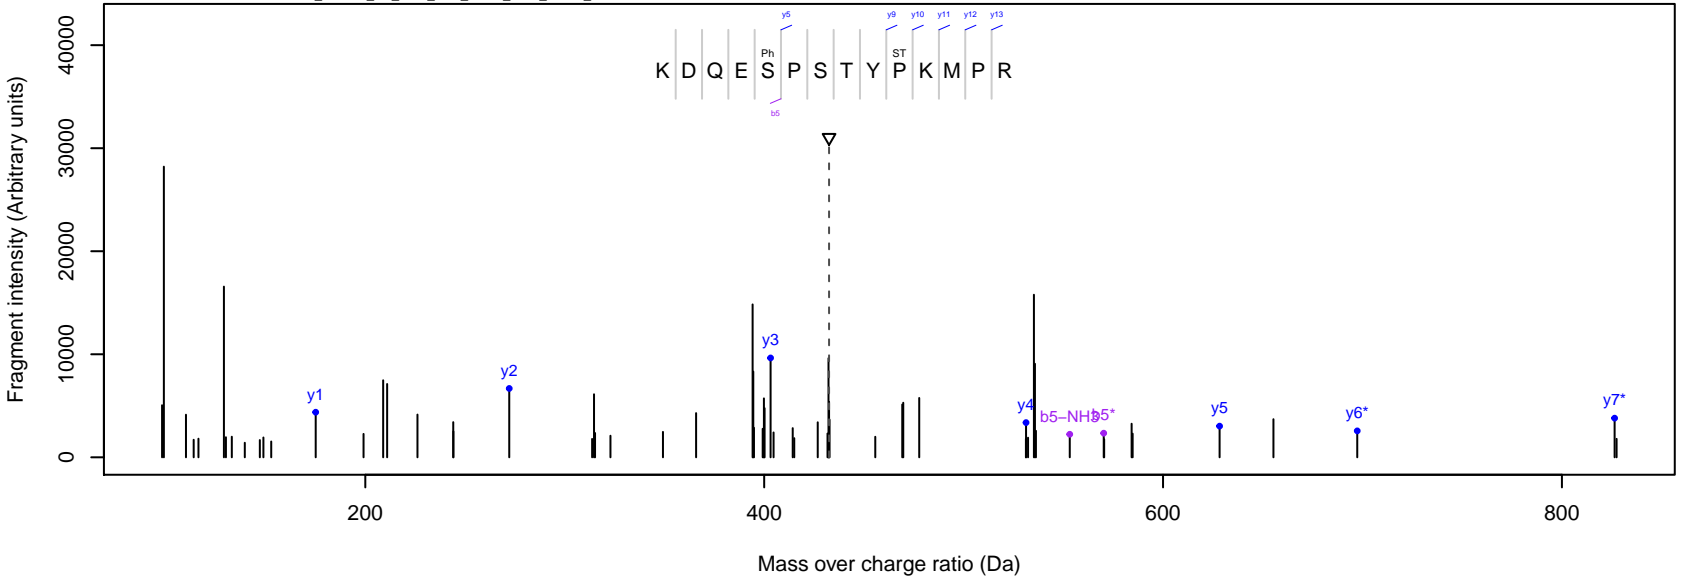

S(Phospho (STY))SSSSTTPTSANSLYR-2+

Source : QE3\_201126\_FR\_TiOx\_hum\_tissue\_Urea\_RNAB\_N Scan : 18284

Andromeda score : 54.343

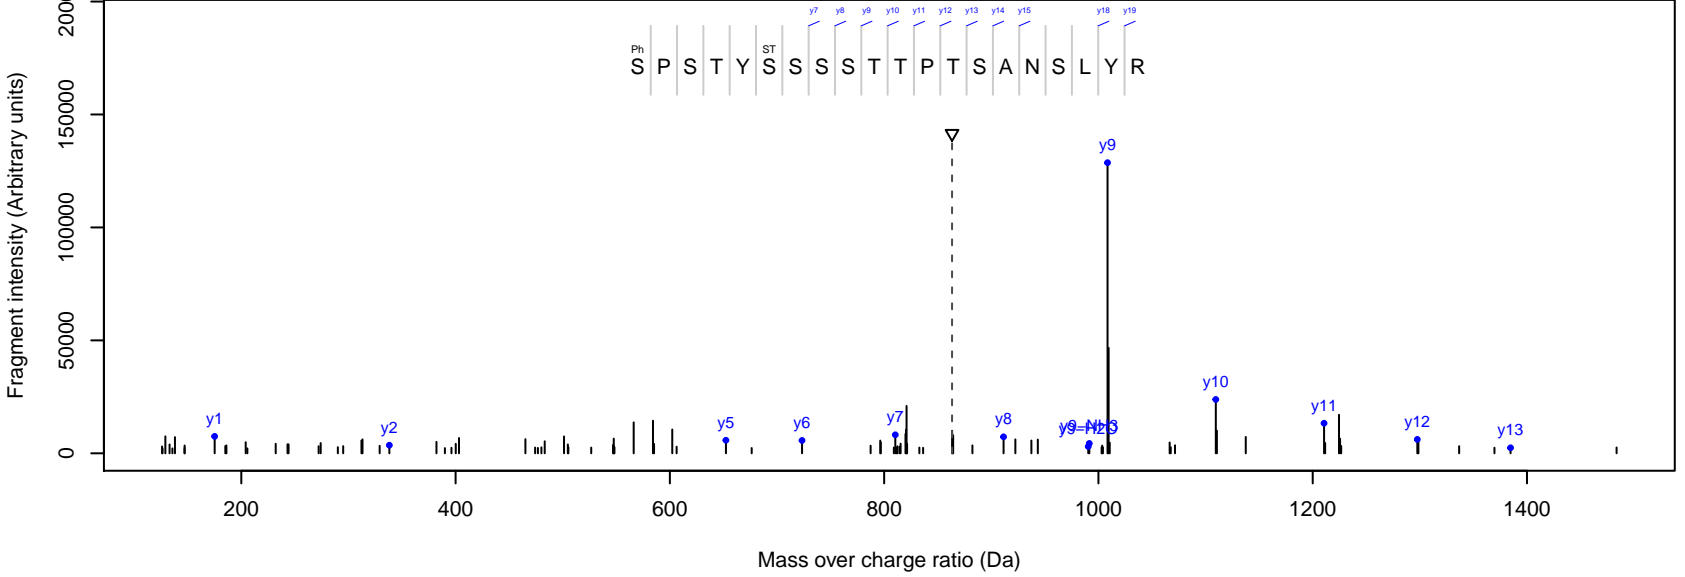

VGSLTPS(Phospho (STY))SPK-2+

Source : QE3\_201126\_FR\_TiOx\_hum\_tissue\_Urea\_RNAB\_N Scan : 15028

Andromeda score : 54.343

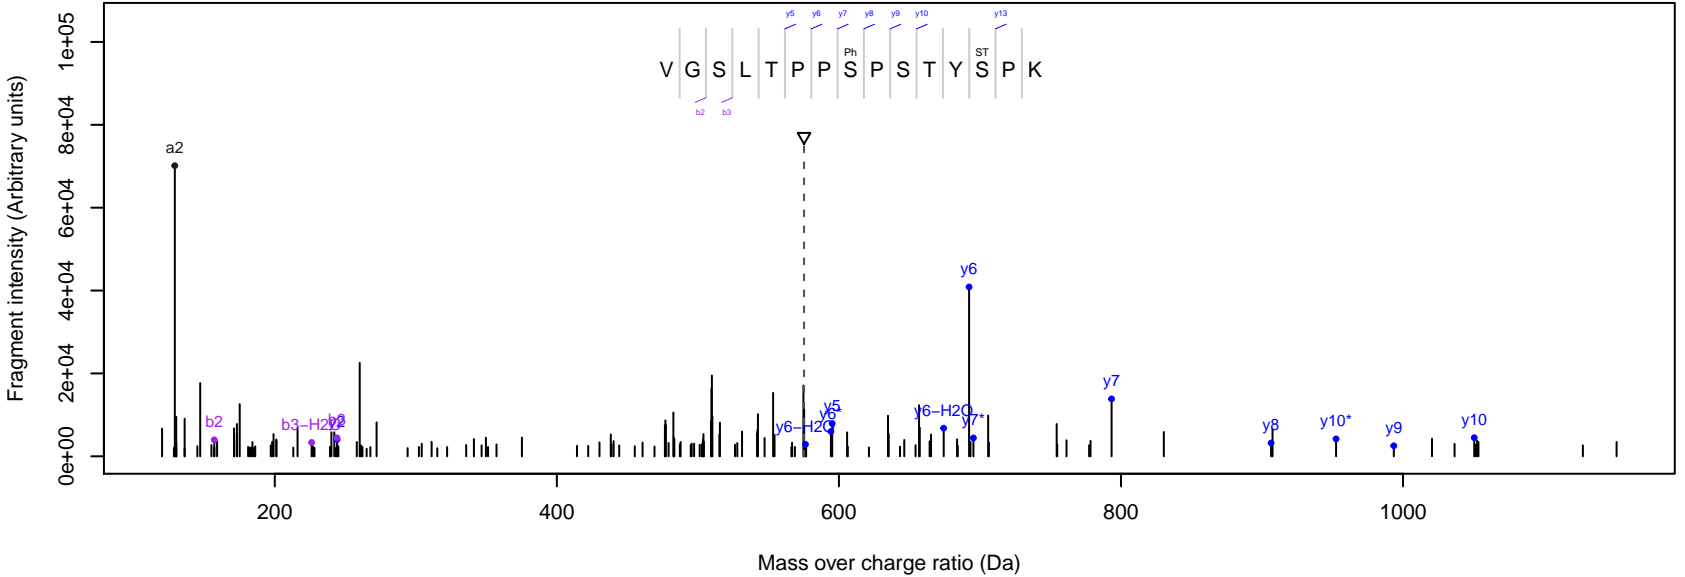

HGS(Phospho (STY))GADS(Phospho (STY))DYENTQSGDPLLGLLEGKR-3+

Source : QE3\_201126\_FR\_TiOx\_hum\_tissue\_Urea\_RNAB\_B Scan : 34099

Andromeda score : 54.324

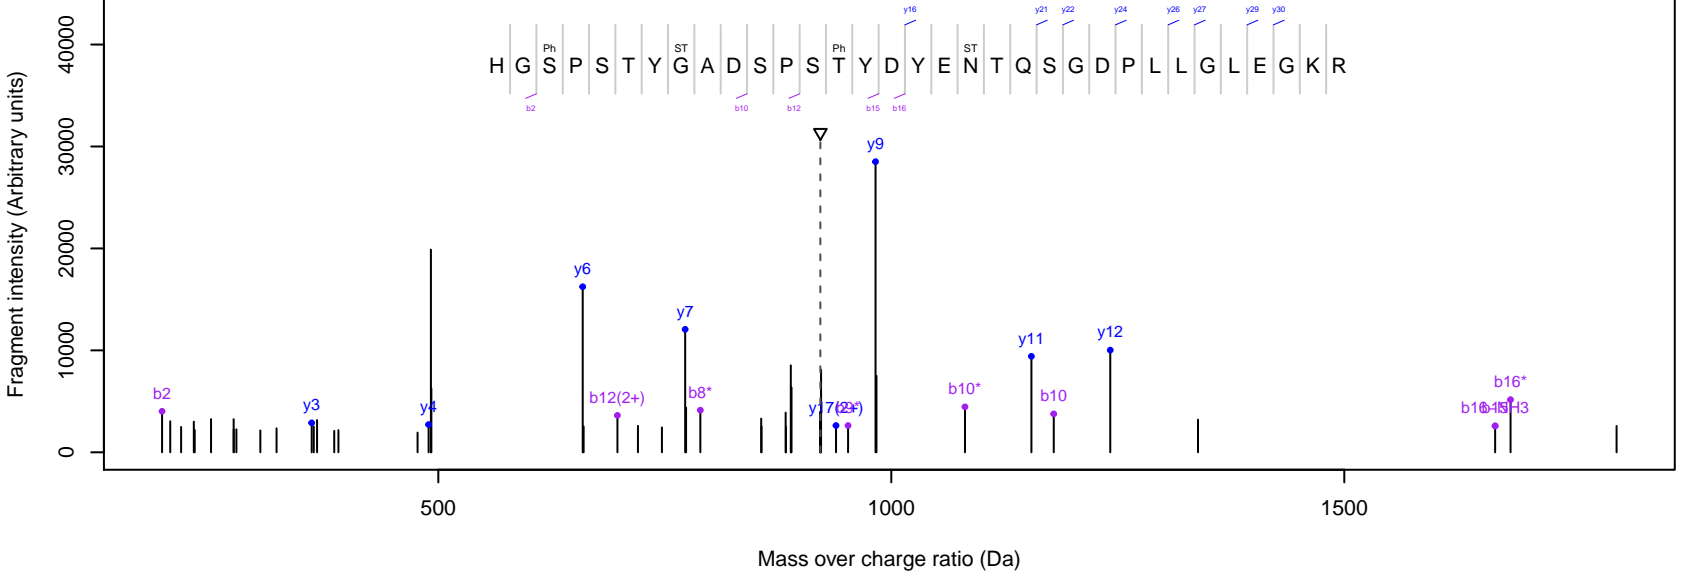

GLVAAY(Phospho (STY))SGES(Phospho (STY))DS(Phospho (STY))EEEQERGGPEREEK-3+

Source : QE3\_201126\_FR\_TiOx\_hum\_tissue\_Urea\_RNAB\_H Scan : 22318

Andromeda score : 54.311

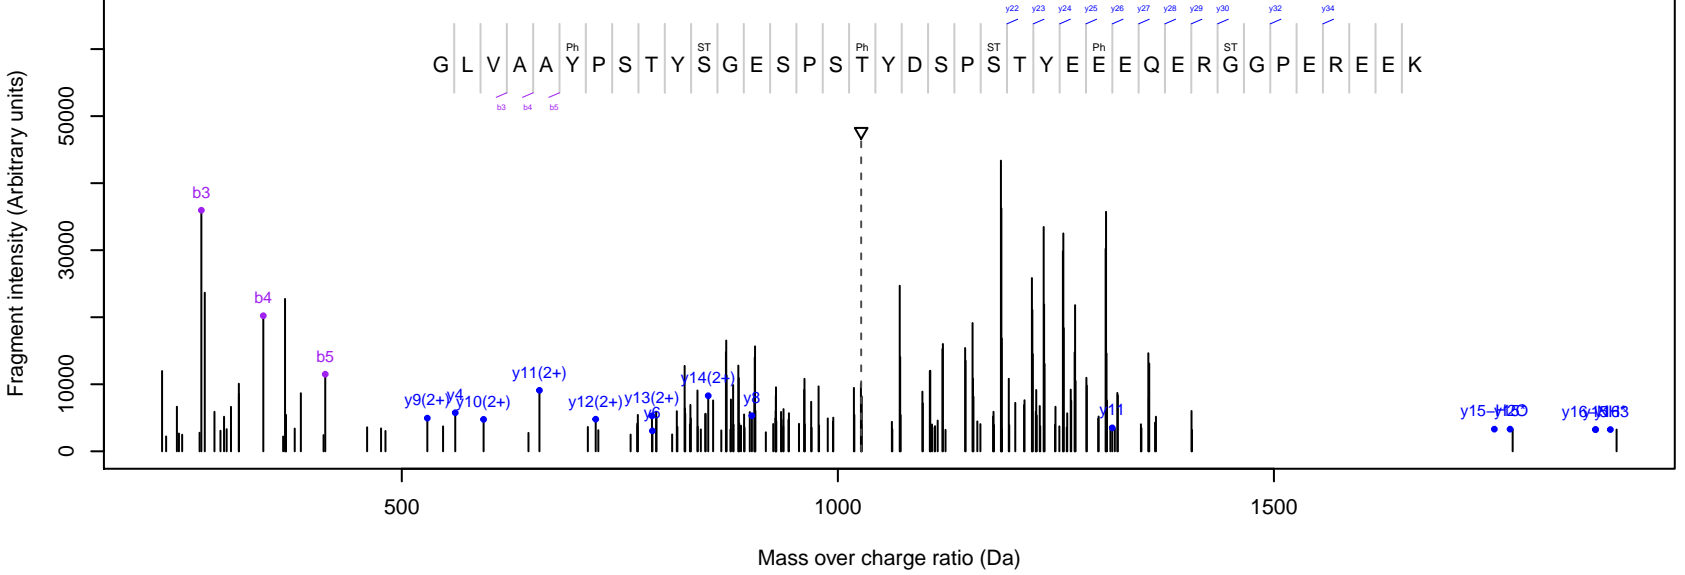

LGGSVLGQIPFLQNCEDS(Phospho (STY))DEDELDVQHKK-4+

Source : QE3\_201126\_FR\_TiOx\_hum\_tissue\_Urea\_RNAB\_H Scan : 51480

Andromeda score : 54.311

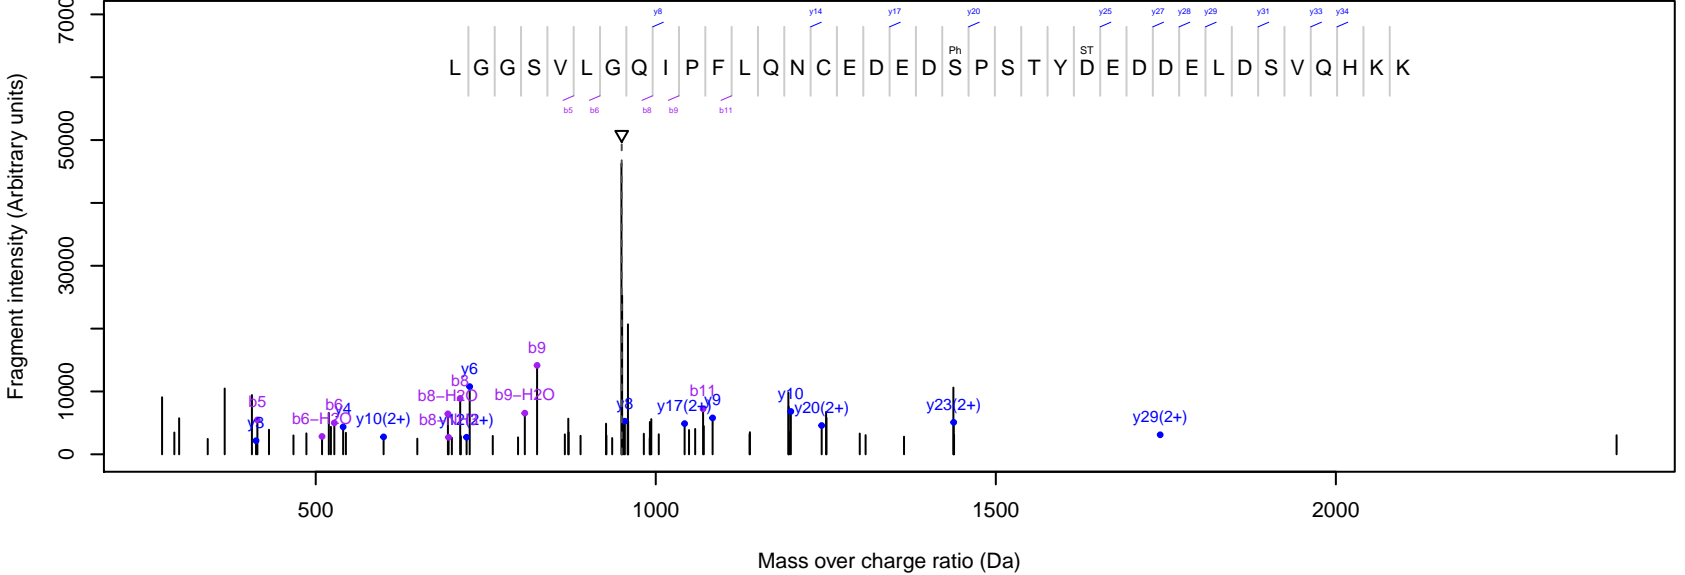

WEETRPESQPD(TPhospho (STY))PPGTPLVSQDEKR-4+

Source : QE3\_201126\_FR\_TiOx\_hum\_tissue\_Urea\_RNAB\_N Scan : 22016

Andromeda score : 54.3

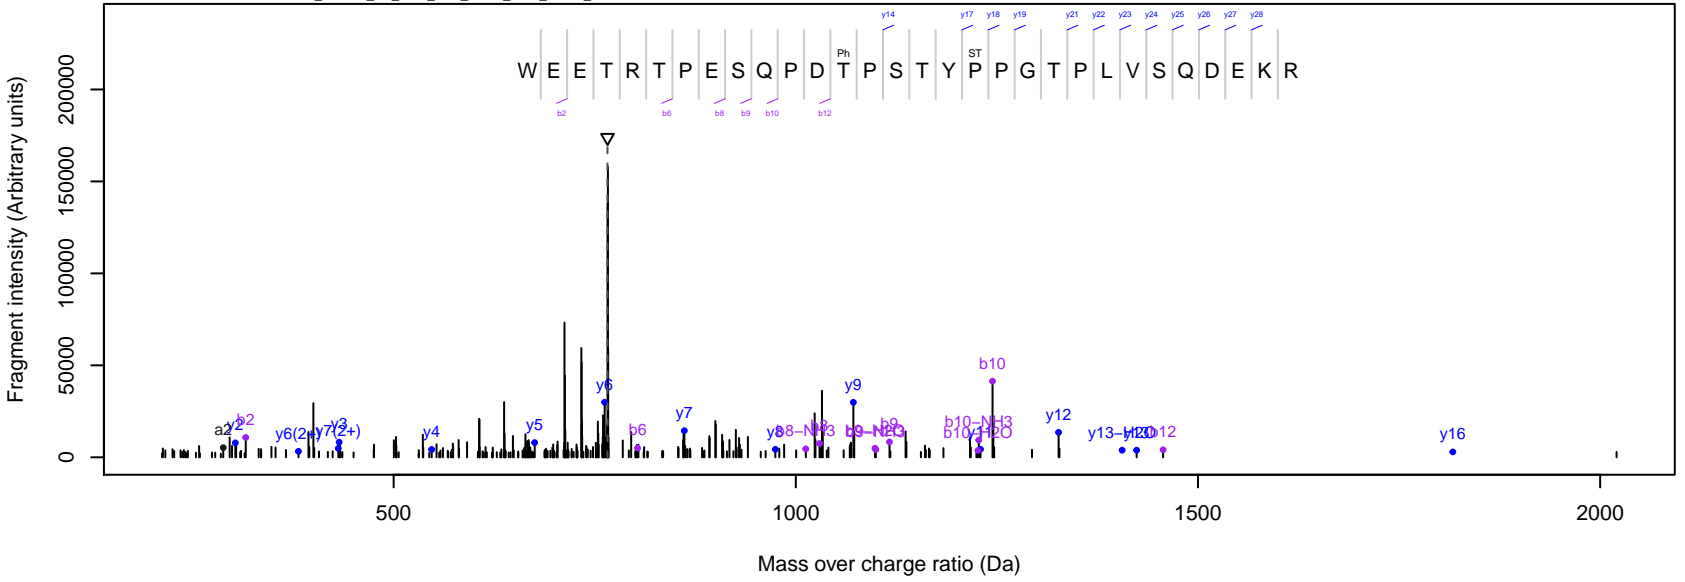

RKS(Phospho (STY))LEDVTAEYIHK-3+

Source : QE3\_201126\_FR\_TiOx\_hum\_tissue\_Urea\_RNAB\_N Scan : 17841

Andromeda score : 54.292

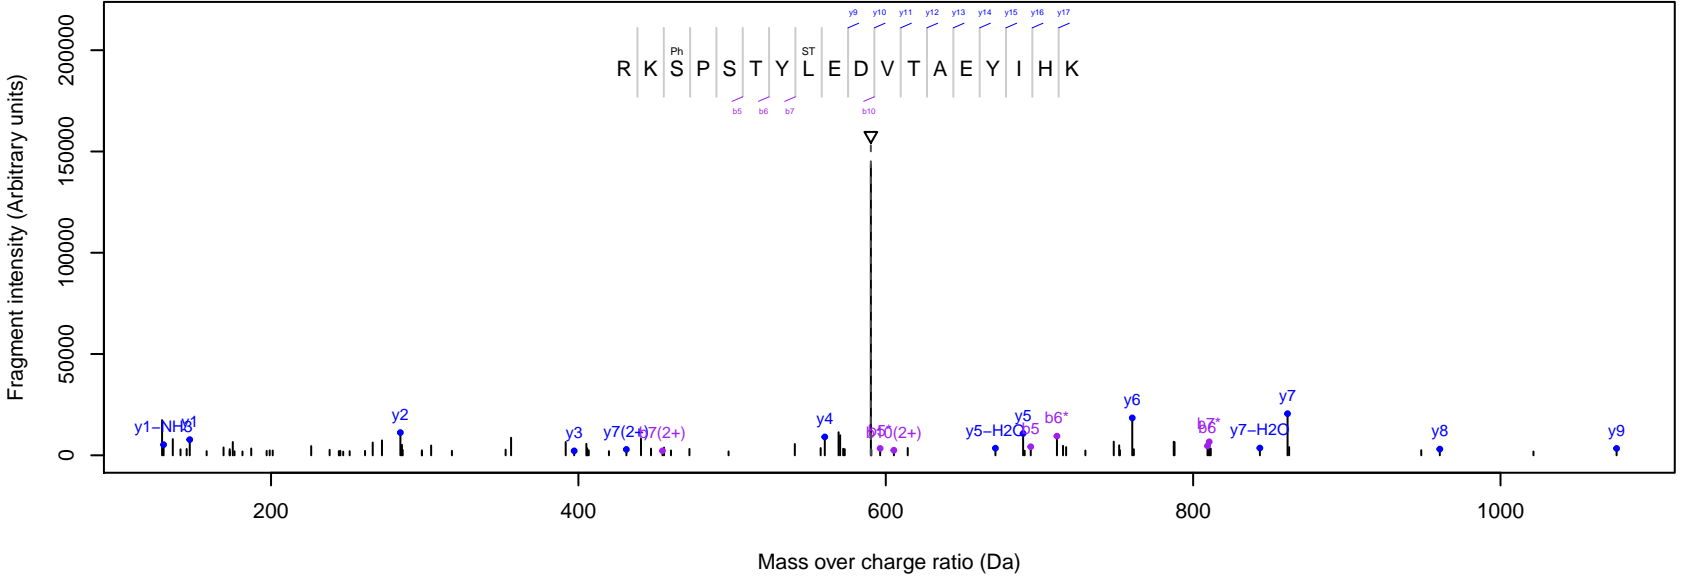

RES(Phospho (STY))DESGESAPDEGGEGAR-2+

Source : QE3\_201126\_FR\_TiOx\_hum\_tissue\_Urea\_RNAB\_H Scan : 5988

Andromeda score : 54.288

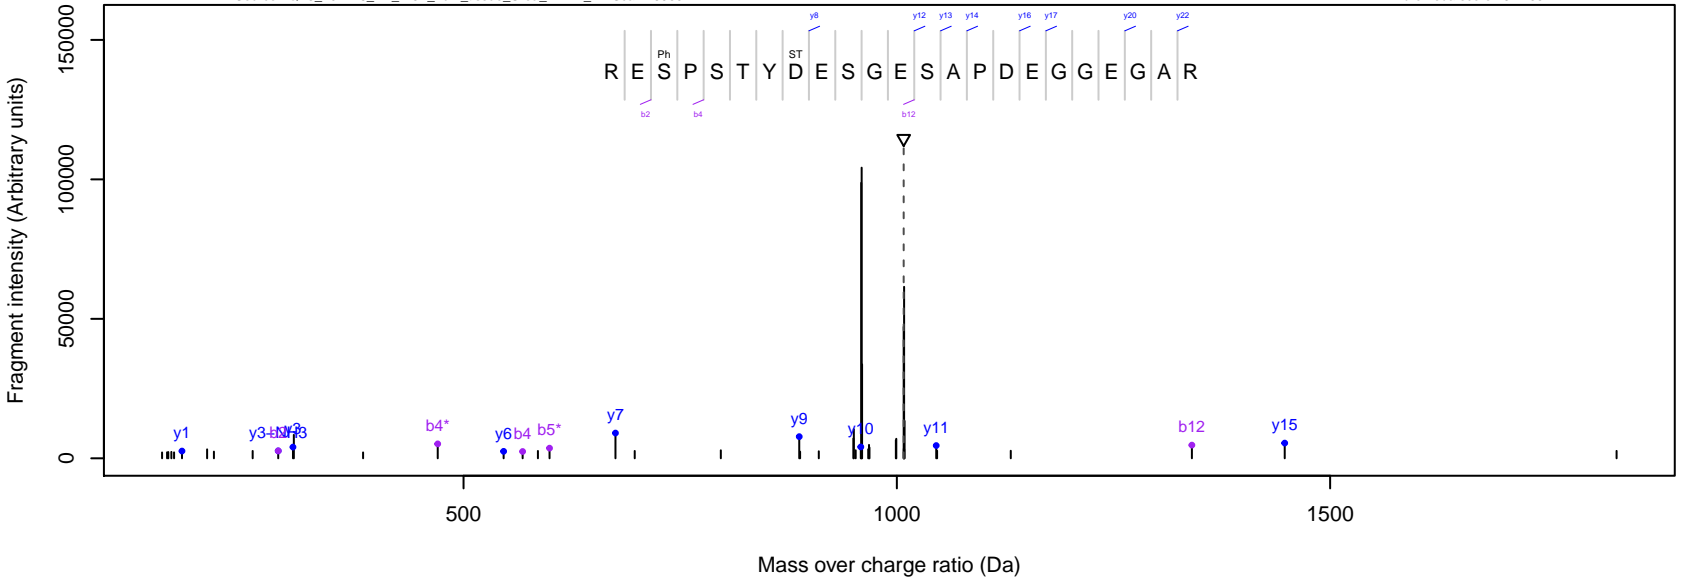



KAVLPGGTAT(Phospho (STY))SPK-2+

Source : QE3\_201126\_FR\_TiOx\_hum\_tissue\_Urea\_RNAB\_N Scan : 13446

Andromeda score : 54.286

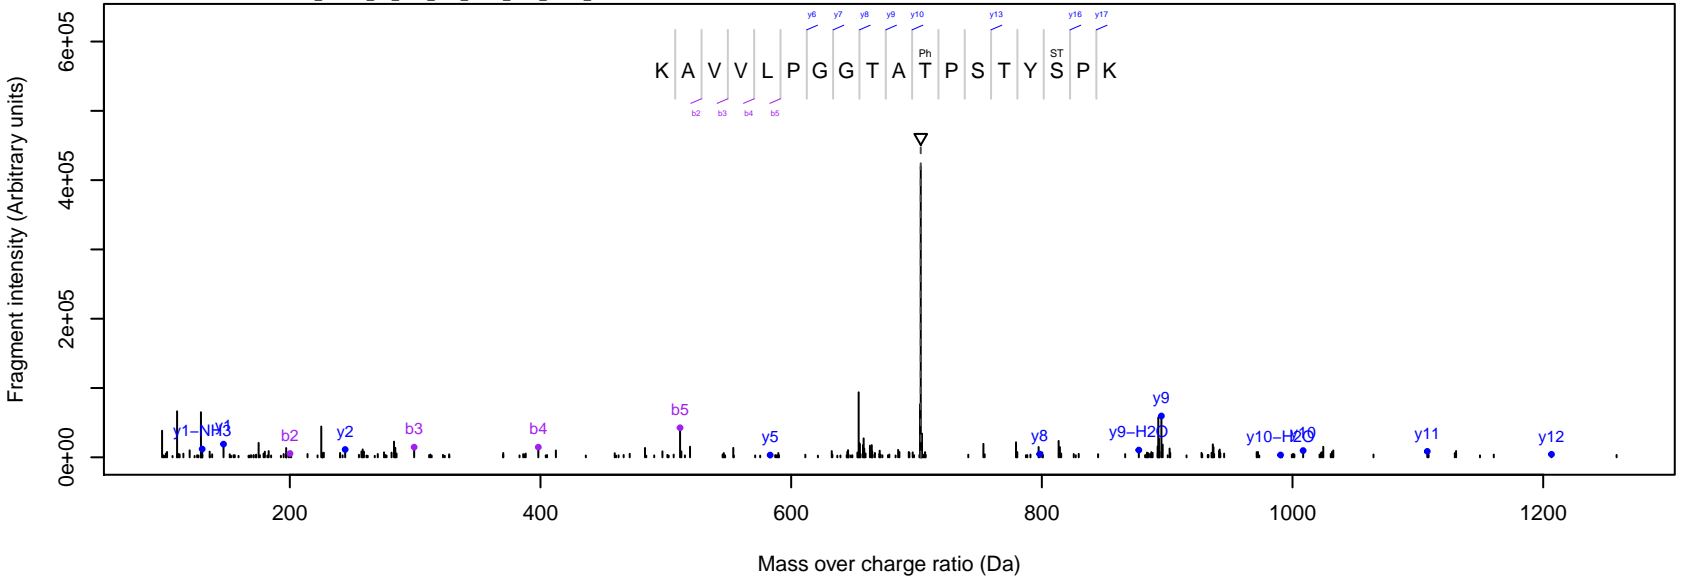

TTSRS(Phospho (STY))PVLSR-3+

Source : QE3\_201126\_FR\_TiOx\_hum\_tissue\_Urea\_RNAB\_H Scan : 6148

Andromeda score : 54.276

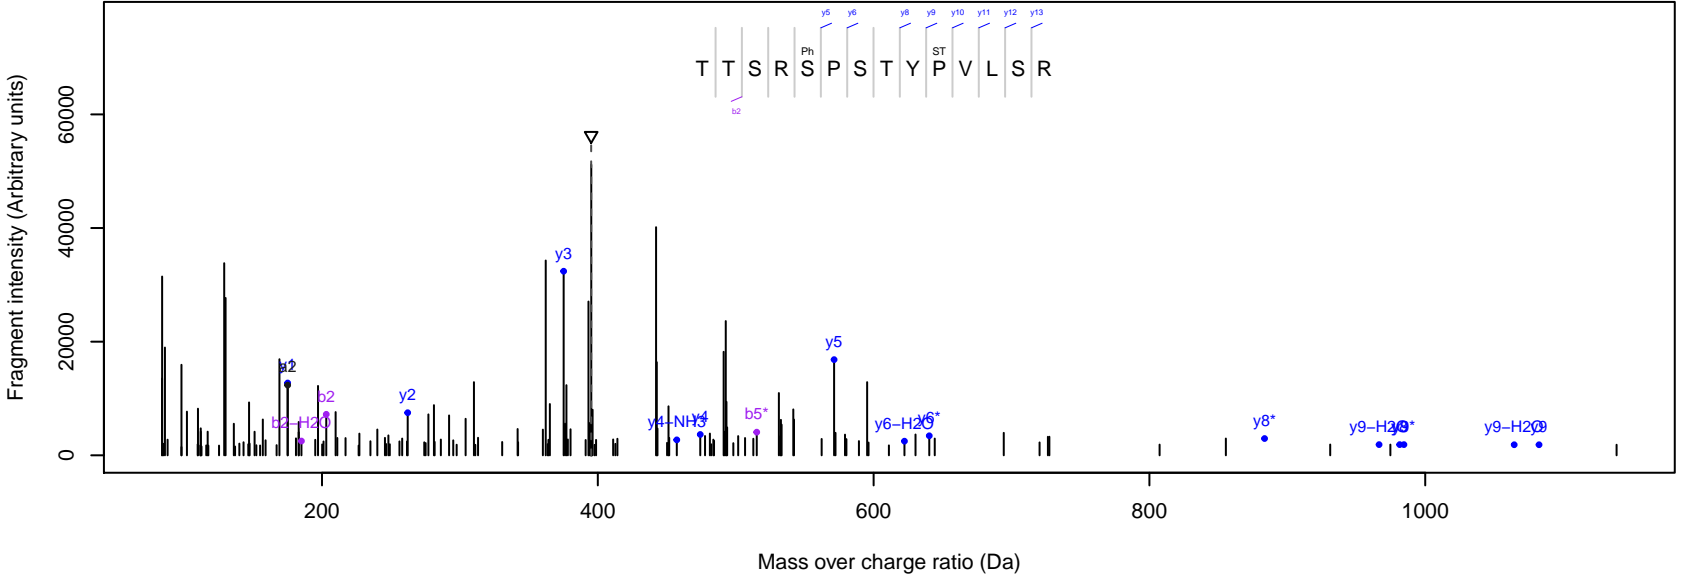

DKPRST(Phospho (STY))S(Phospho (STY))PAGQHHS(Phospho (STY))PISSR-4+

Source : QE3\_201126\_FR\_TiOx\_hum\_tissue\_Urea\_RNAB\_N Scan : 3882

Andromeda score : 54.259

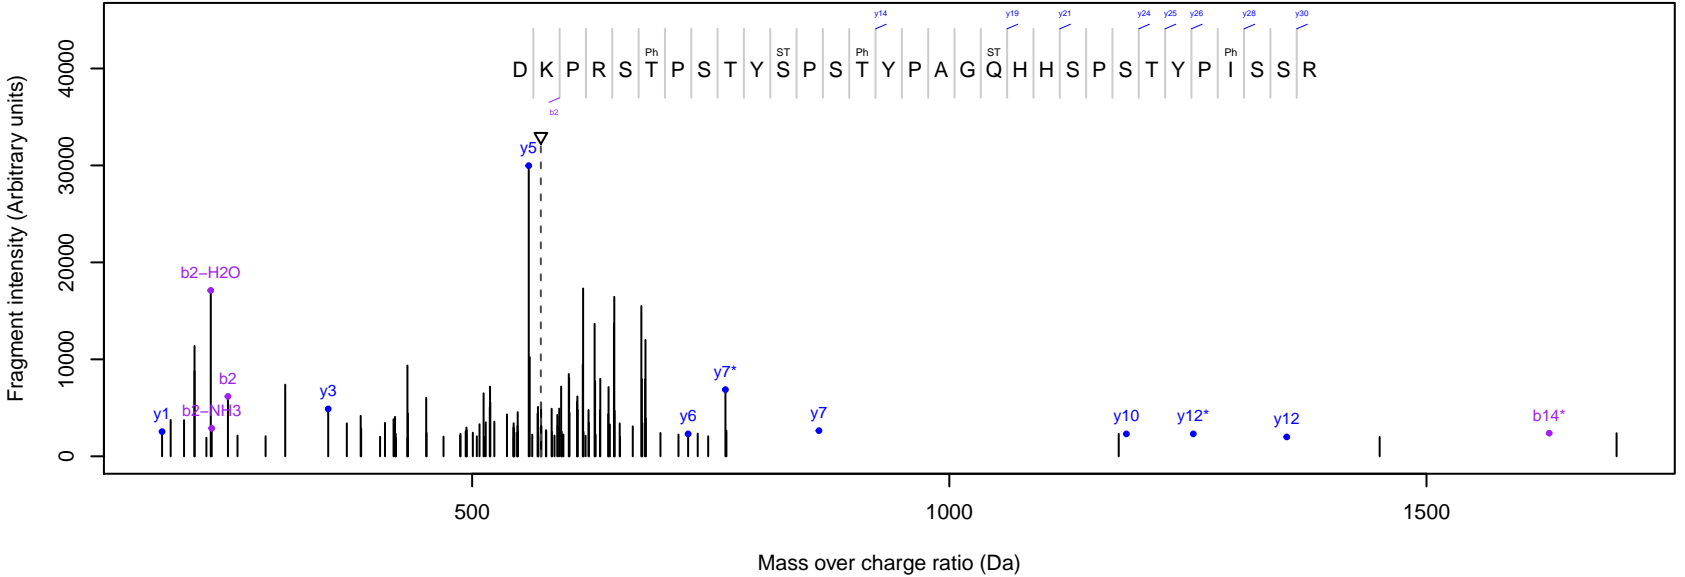

TGGPAYGPSSDVSTASETPTSTYEESEKREEPNR

Source : QE3\_201126\_FR\_TIOx\_hum\_tissue\_Urea\_RNAB\_N Scan : 13236

Andromeda score : 54.255

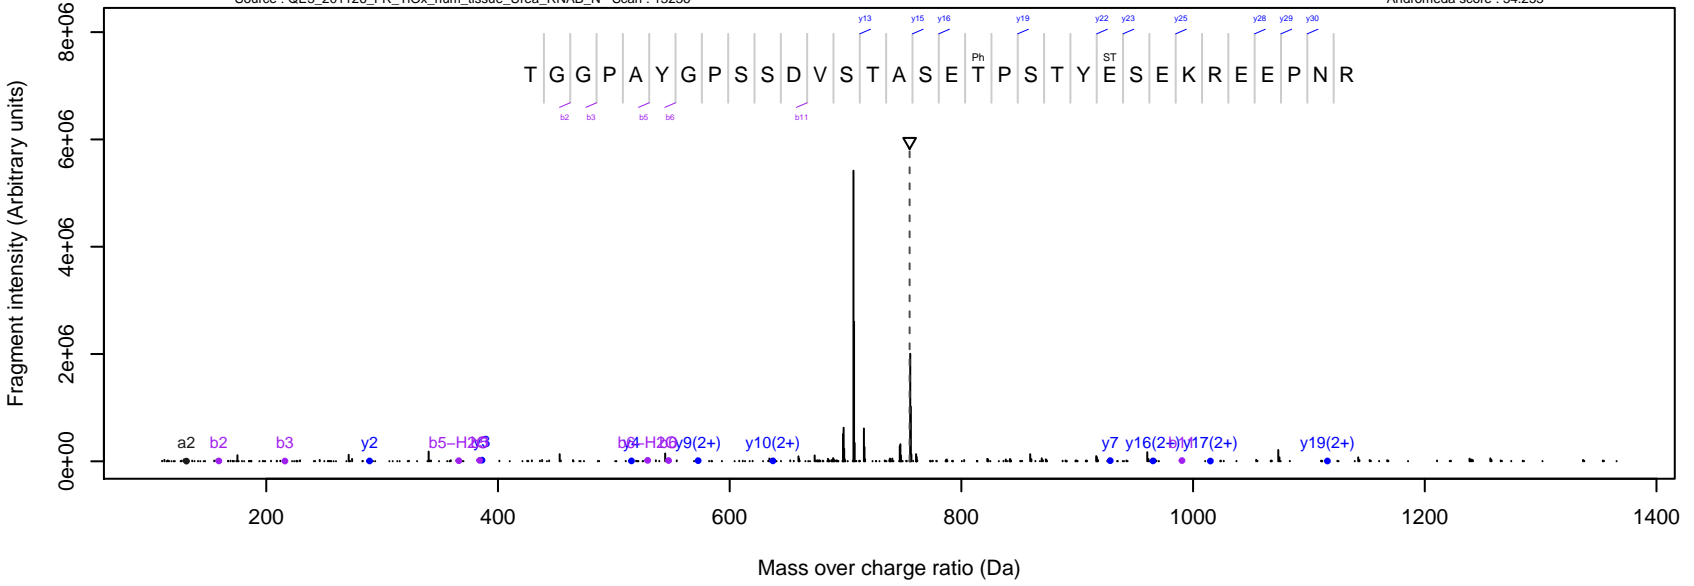

ELVSPSTYSSTSSPSTYSGSDSPSTYDSEVDK

Source : QE3\_201126\_FR\_TIOx\_hum\_tissue\_Urea\_RNAB\_B Scan : 17875

Andromeda score : 54.253

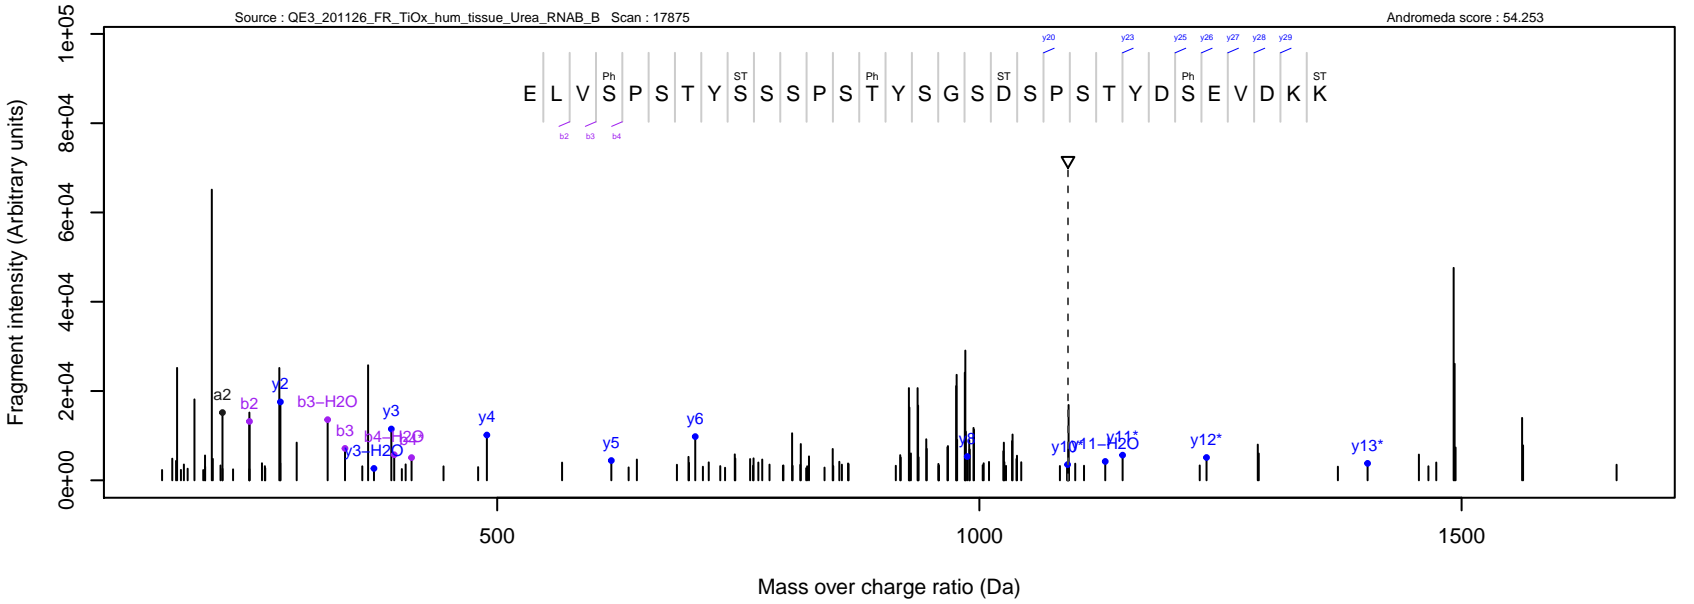

QFKDLFDLNSPSTYSEEDDTEGFSER

Source : QE3\_201126\_FR\_TIOx\_hum\_tissue\_Urea\_RNAB\_B Scan : 50249

Andromeda score : 54.223

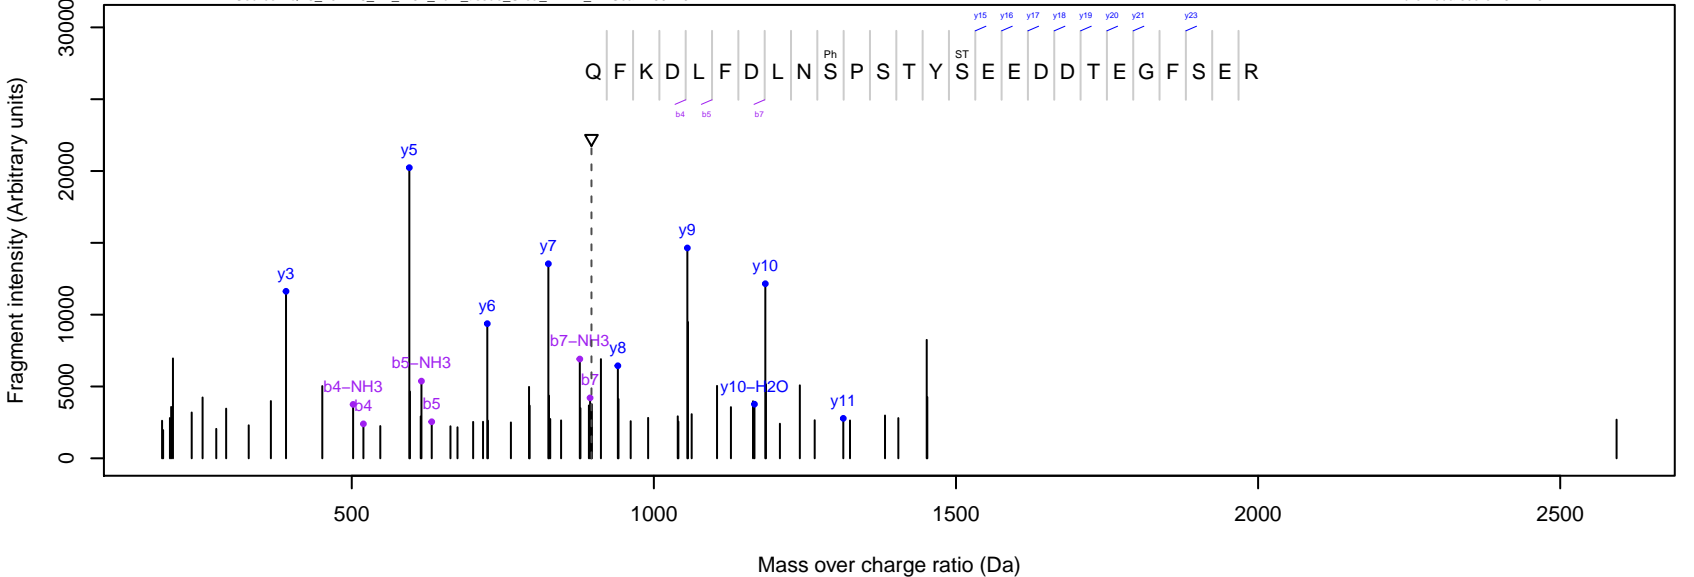

TEAPAPASST(Phospho (STY))PQEPWPGTAPS(Phospho (STY))PTSRPPWAVDPAFAER-4+

Source : QE3\_201126\_FR\_TiOx\_hum\_tissue\_Urea\_RNAB\_N Scan : 56601

Andromeda score : 54.214

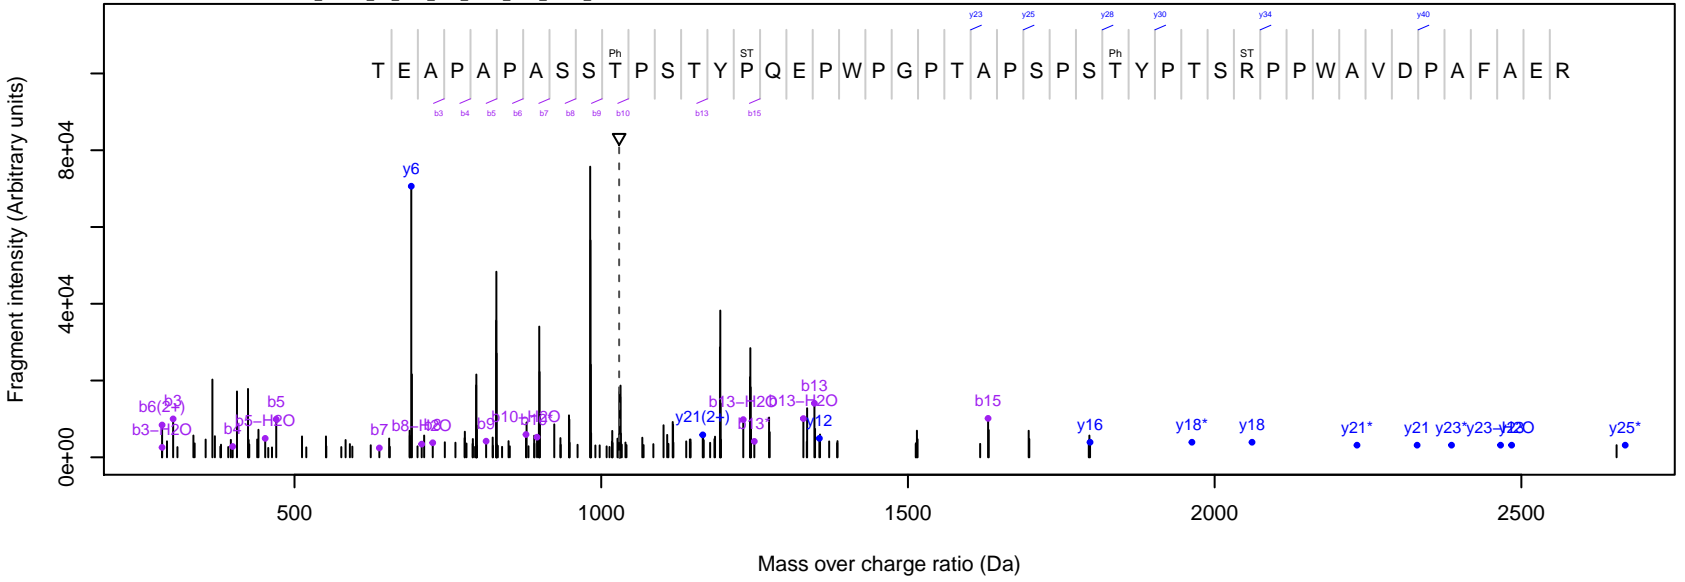

RKGS(Phospho (STY))VDQYLLR-3+

Source : QE3\_201126\_FR\_TiOx\_hum\_tissue\_Urea\_RNAB\_H Scan : 15911

Andromeda score : 54.199

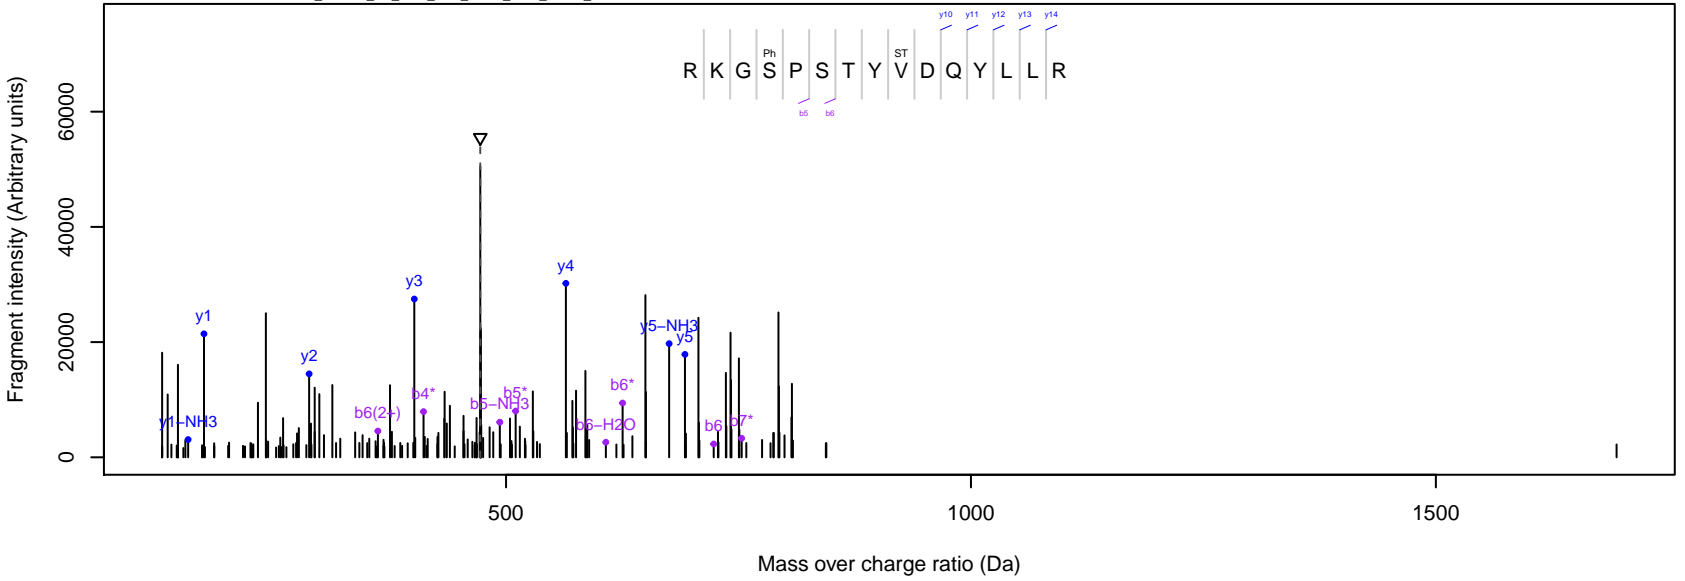

YKHPS(Phospho (STY))EEELR-3+

Source : QE3\_201126\_FR\_TiOx\_hum\_tissue\_Urea\_RNAB\_B Scan : 7129

Andromeda score : 54.199

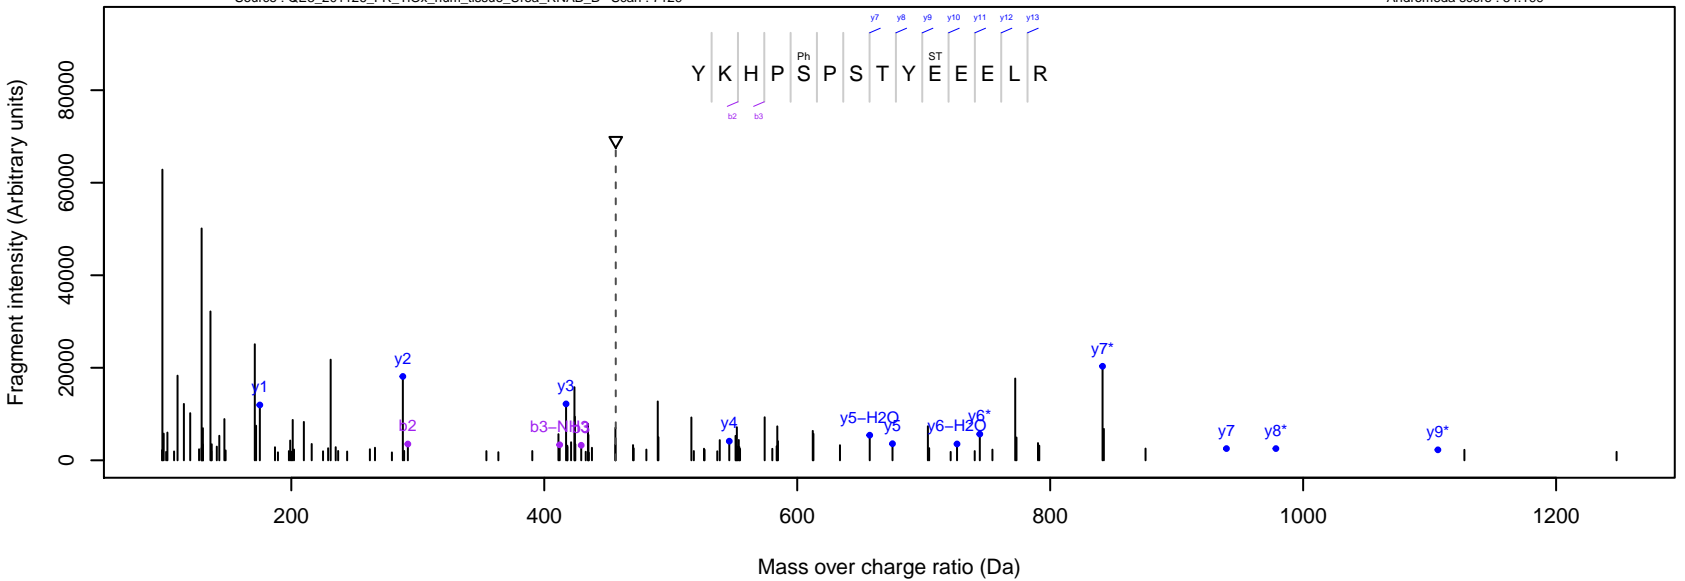

AATSEPTGFSVDSNLLGLS(Phospho (STY))PK-3+

Source : QE3\_201126\_FR\_TiOx\_hum\_tissue\_Urea\_RNAB\_N Scan : 53423

Andromeda score : 54.167

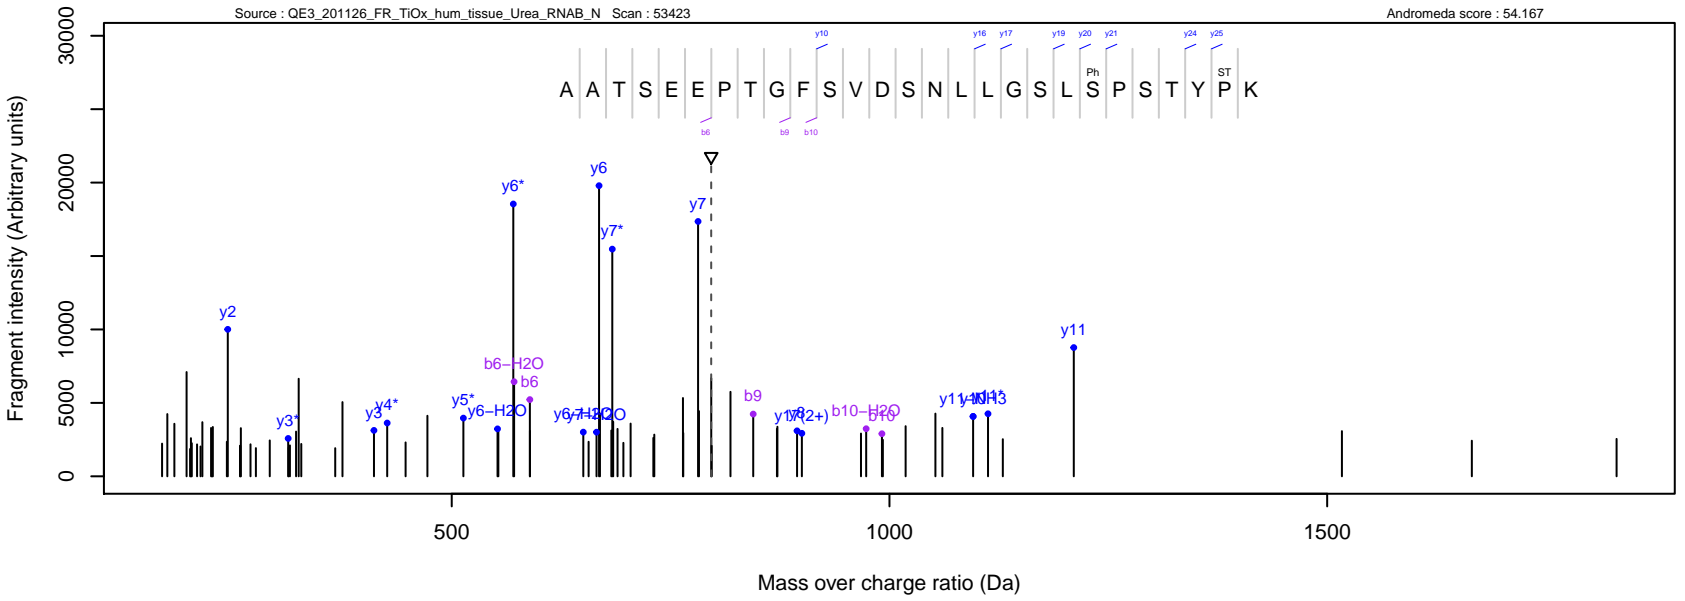

RIPYAPS(Phospho (STY))GEIPKFSLQDPPNK-3+

Source : QE3\_201126\_FR\_TiOx\_hum\_tissue\_Urea\_RNAB\_H Scan : 37806

Andromeda score : 54.152

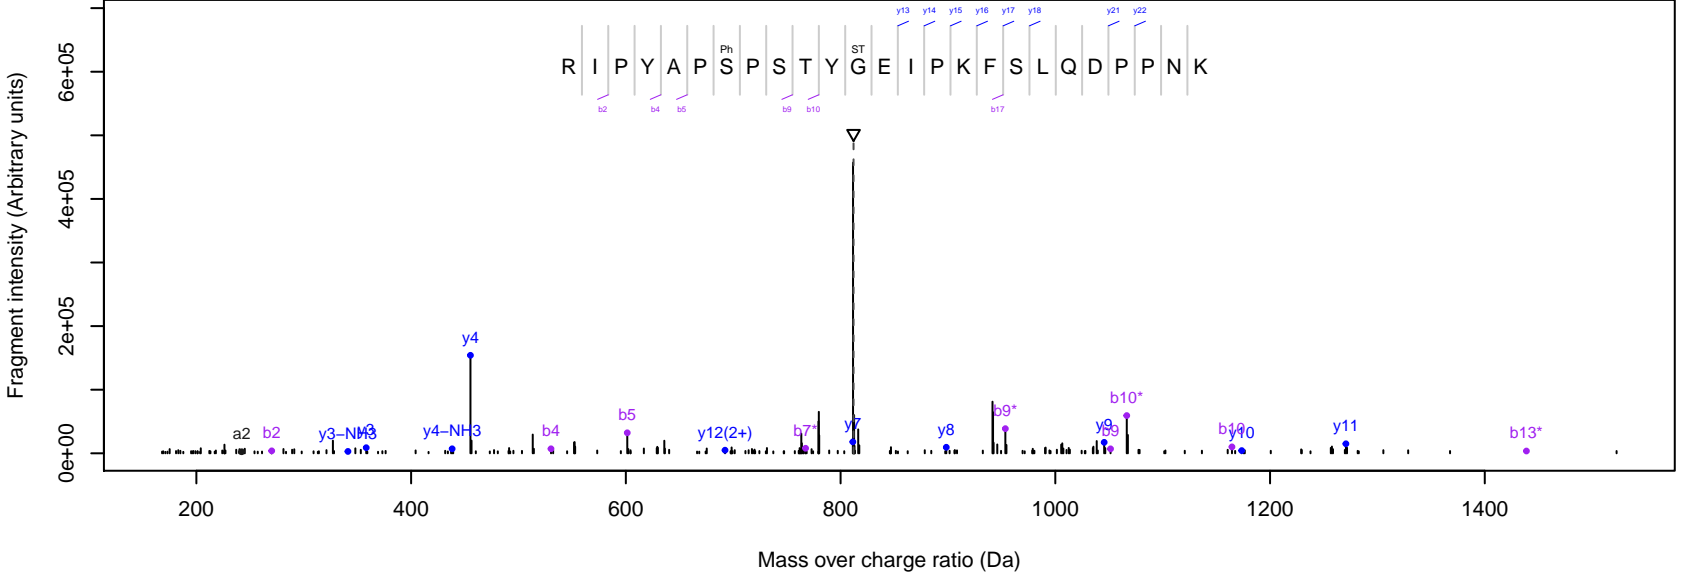

AAS(Phospho (STY))AIYSGYIFDYRDDFYDR-3+

Source : QE3\_201126\_FR\_TiOx\_hum\_tissue\_Urea\_RNAB\_N Scan : 58464

Andromeda score : 54.141

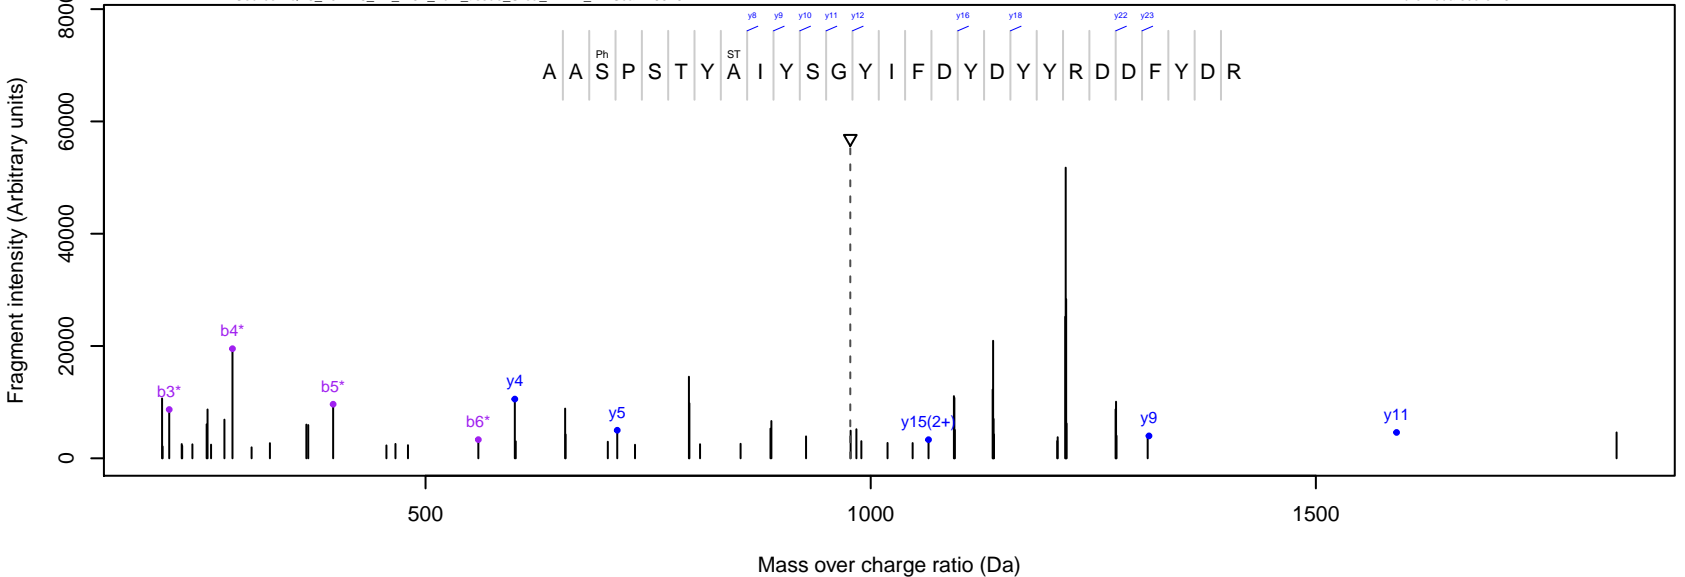

LS(Phospho (STY))S(Phospho (STY))SSSNDSGNKVGIQLPELVSTK-3+

Source : QE3\_201126\_FR\_TiOx\_hum\_tissue\_Urea\_RNAB\_N Scan : 51805

Andromeda score : 54.141

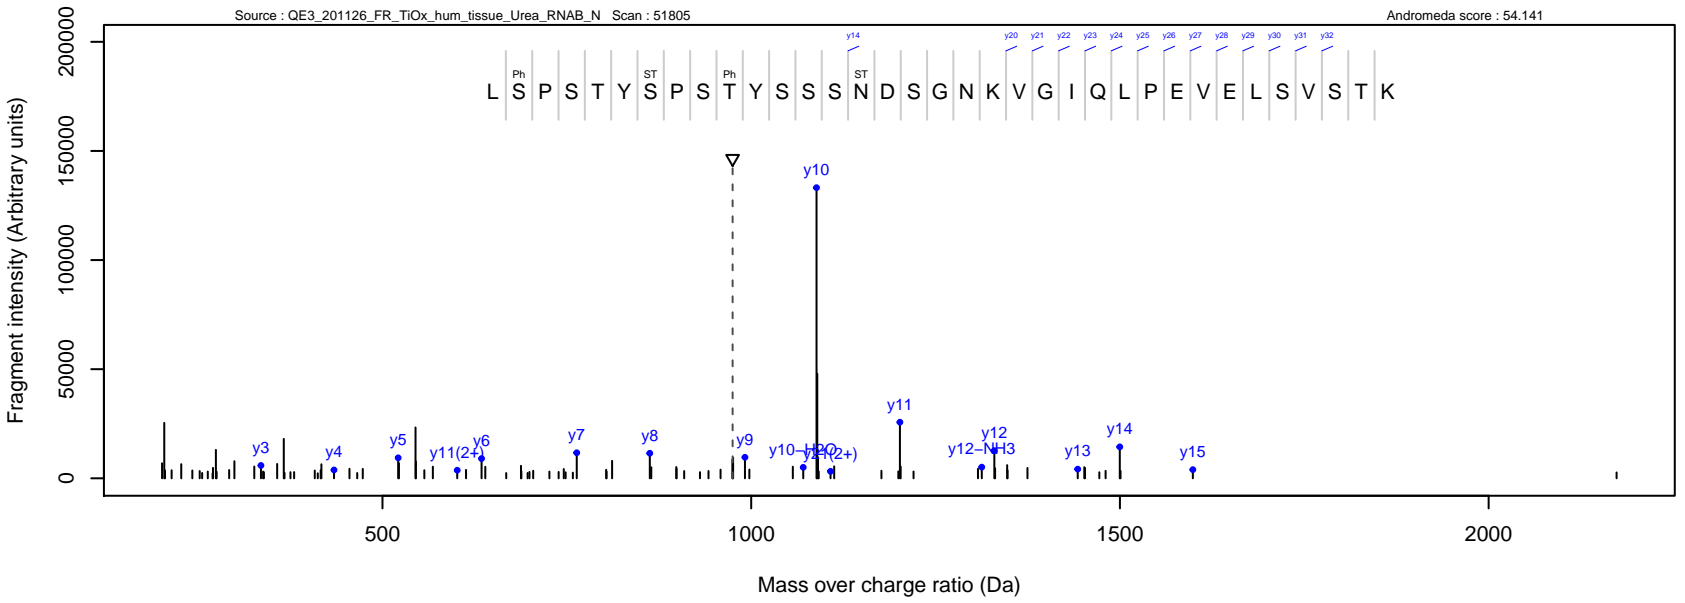

ADT(Phospho (STY))SSAENILYTVGLWEAPR-3+

Source : QE3\_201126\_FR\_TiOx\_hum\_tissue\_Urea\_RNAB\_H Scan : 61697

Andromeda score : 54.117

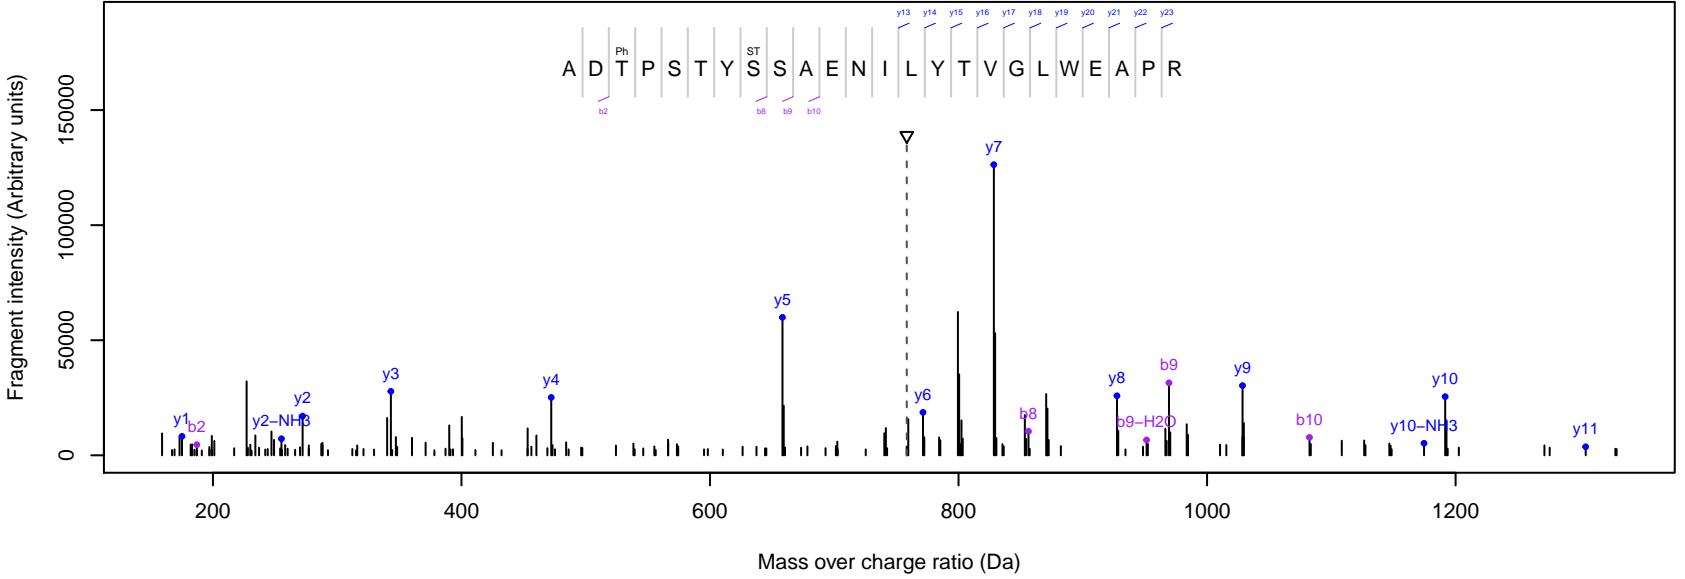

SSS(Phospho (STY))QSGSGPSSPDSVLRPR-3+

Source : QE3\_201126\_FR\_TiOx\_hum\_tissue\_Urea\_RNAB\_N Scan : 16642

Andromeda score : 54.117

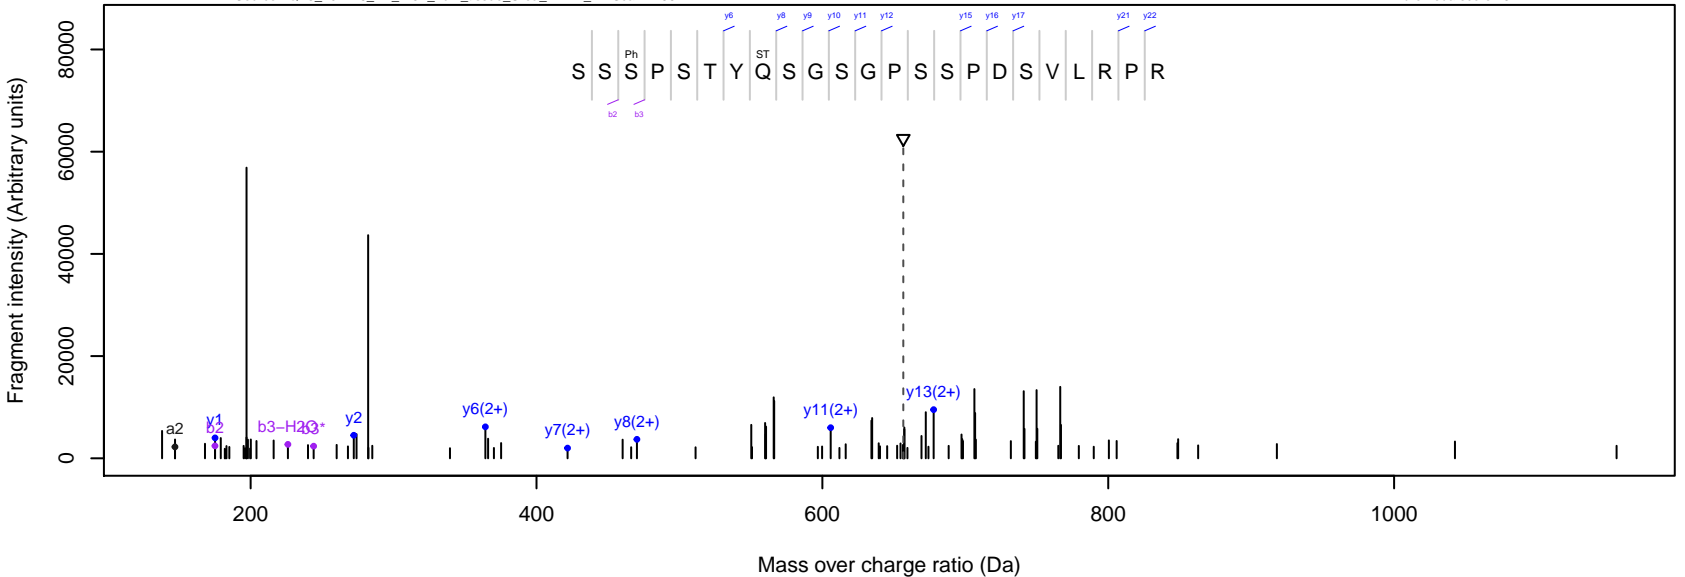

NS(Phospho (STY))LESISSIDRELSPEGP GK-3+

Source : QE3\_201126\_FR\_TIOx\_hum\_tissue\_Urea\_RNAB\_B Scan : 37810

Andromeda score : 54.072

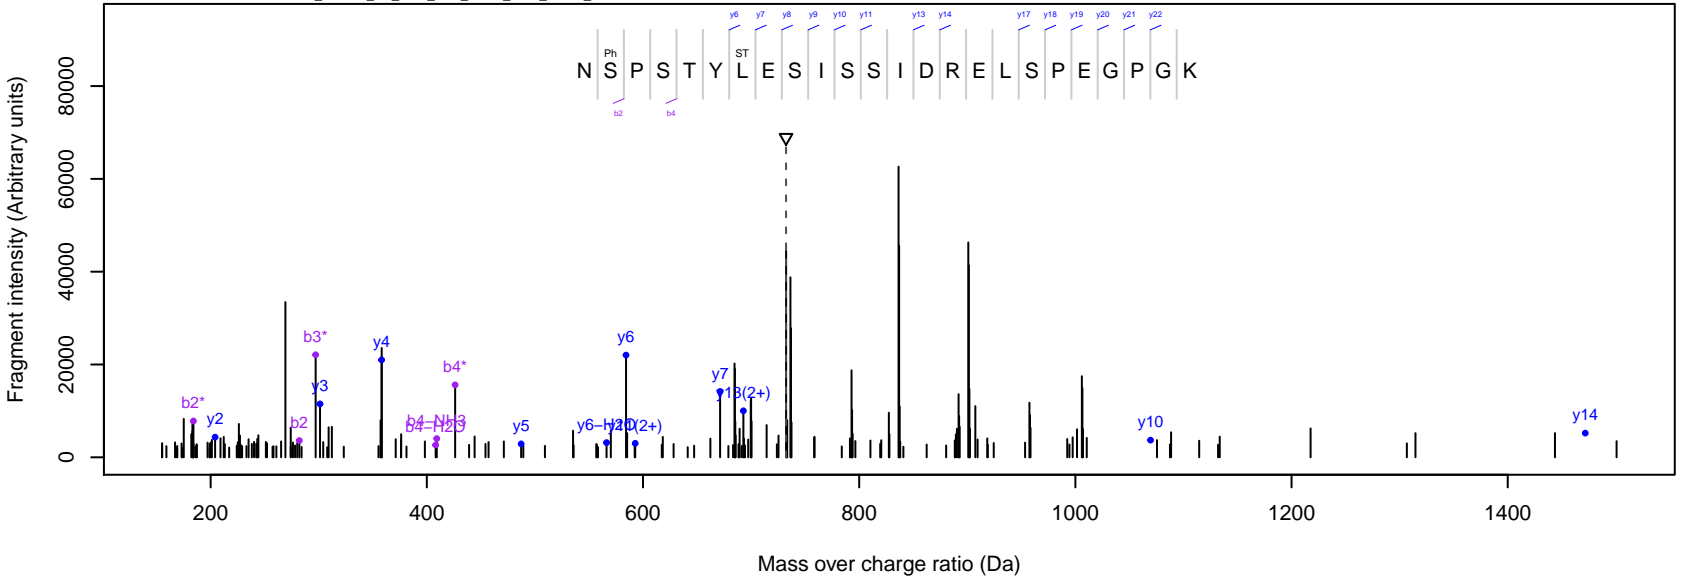

YRHLGS(Phospho (STY))EDDETNDDEESSTEIPQFSSCSHR-4+

Source : QE3\_201126\_FR\_TIOx\_hum\_tissue\_Urea\_RNAB\_H Scan : 21495

Andromeda score : 54.05

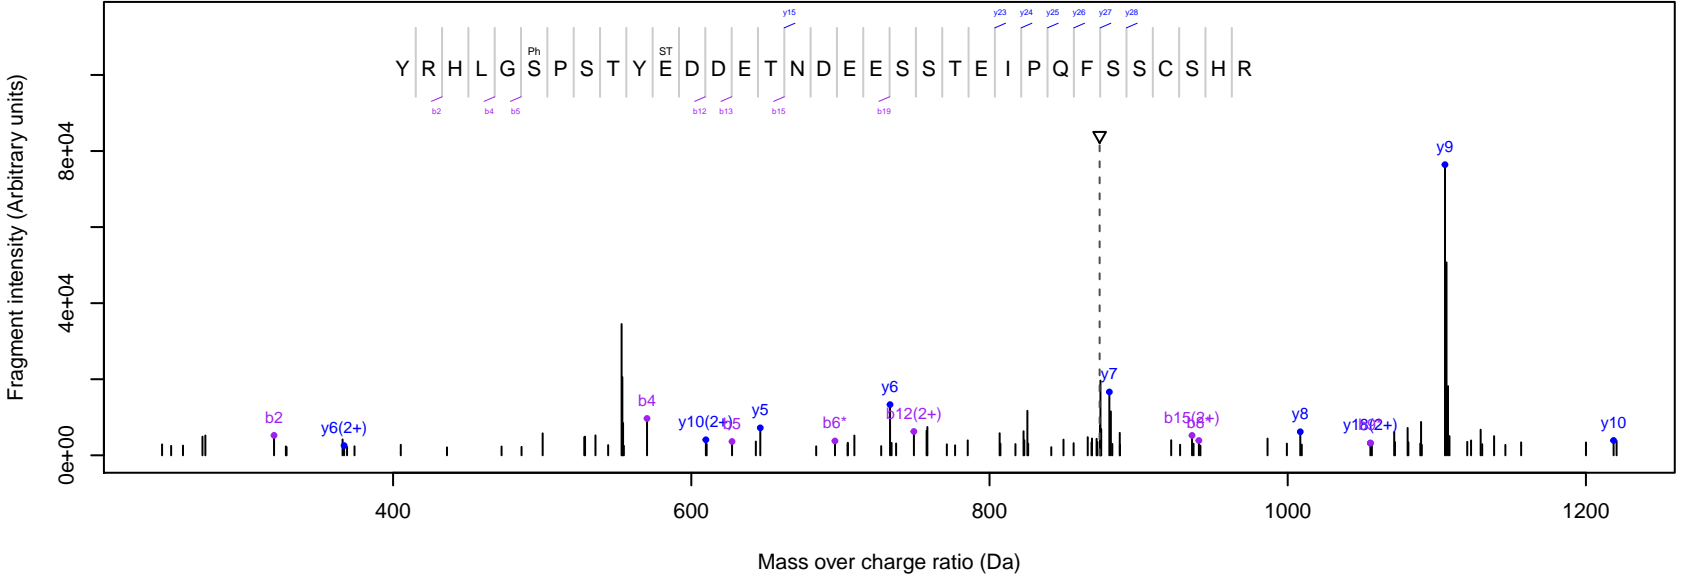

ASS(Phospho (STY))FADMM(Oxidation (M))GILK-2+

Source : QE3\_201126\_FR\_TIOx\_hum\_tissue\_Urea\_RNAB\_H Scan : 42671

Andromeda score : 54.023

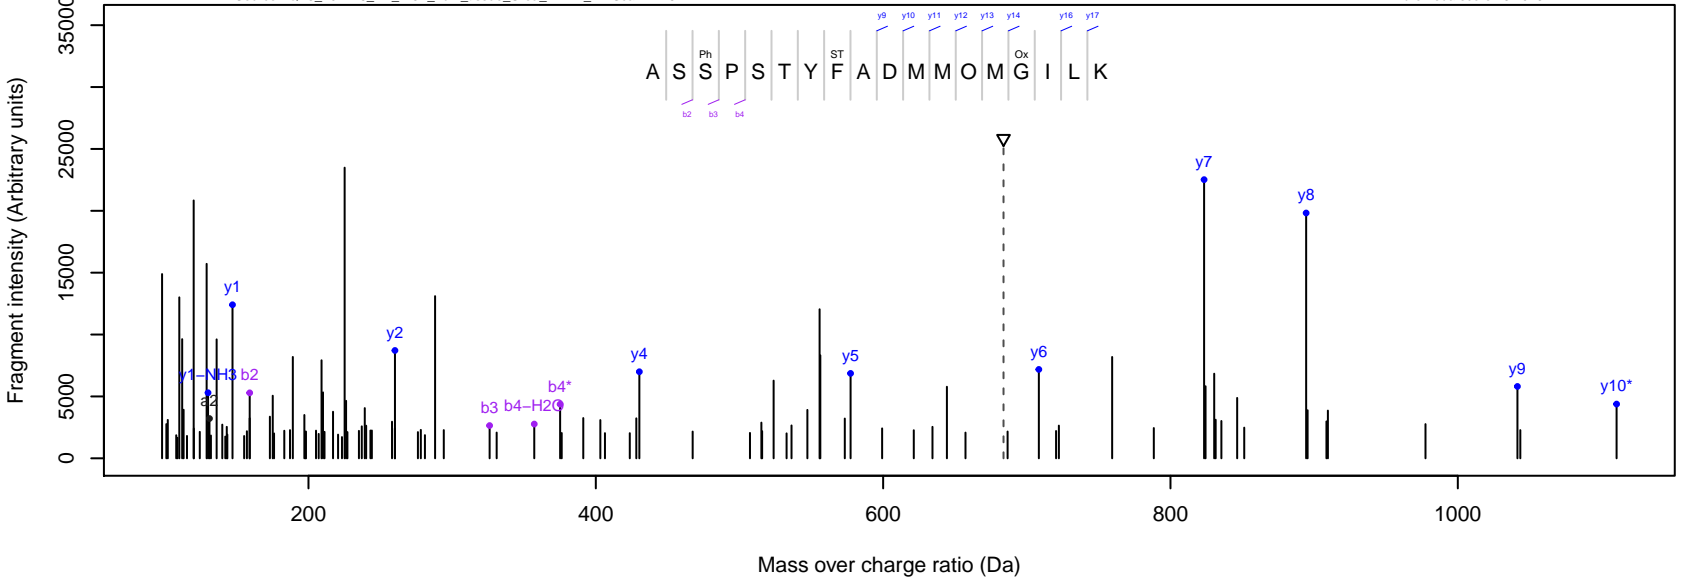



KLPELSWRS(Phospho (STY))DEEEDS(Phospho (STY))DFGEEQR-3+

Source : QE3\_201126\_FR\_TIOx\_hum\_tissue\_Urea\_RNAB\_N Scan : 39913

Andromeda score : 53.968

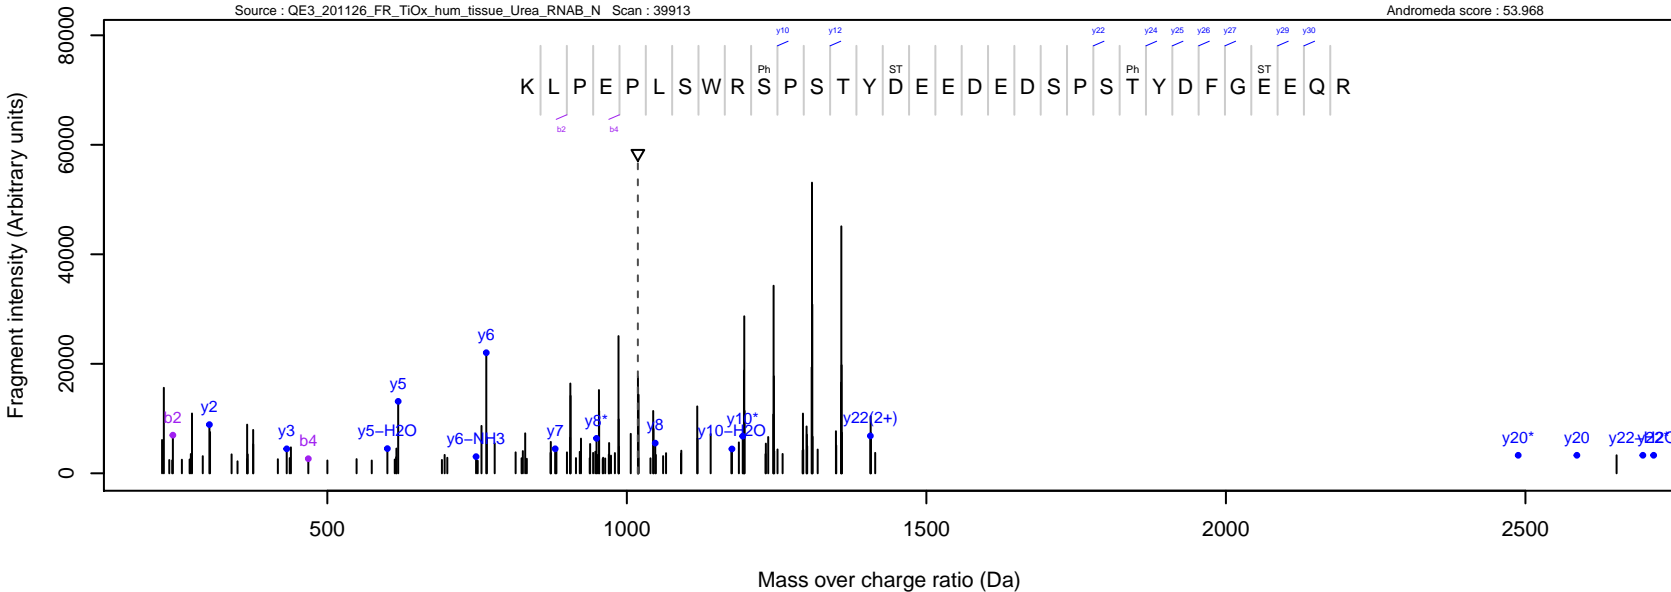

S(Phospho (STY))T(Phospho (STY))S(Phospho (STY))FRGGM(Oxidation (M))GSGGLATGIAGGLAGMGGIQNEK-3+

Source : QE3\_201126\_FR\_TIOx\_hum\_tissue\_Urea\_RNAB\_N Scan : 57642

Andromeda score : 53.968

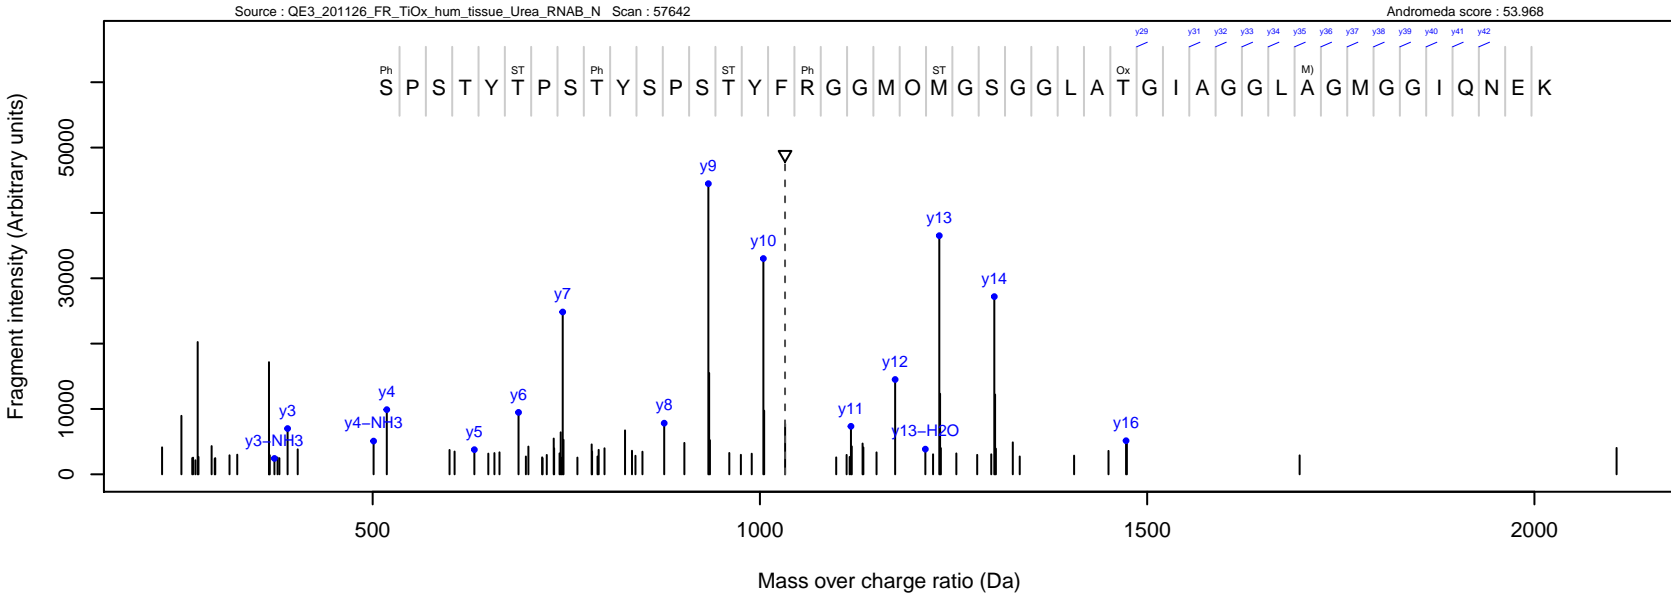

NAET(Phospho (STY))PEATTQETDLDLPEAPPPLEPAVIAR-3+

Source : QE3\_201126\_FR\_TIOx\_hum\_tissue\_Urea\_RNAB\_N Scan : 50892

Andromeda score : 53.964

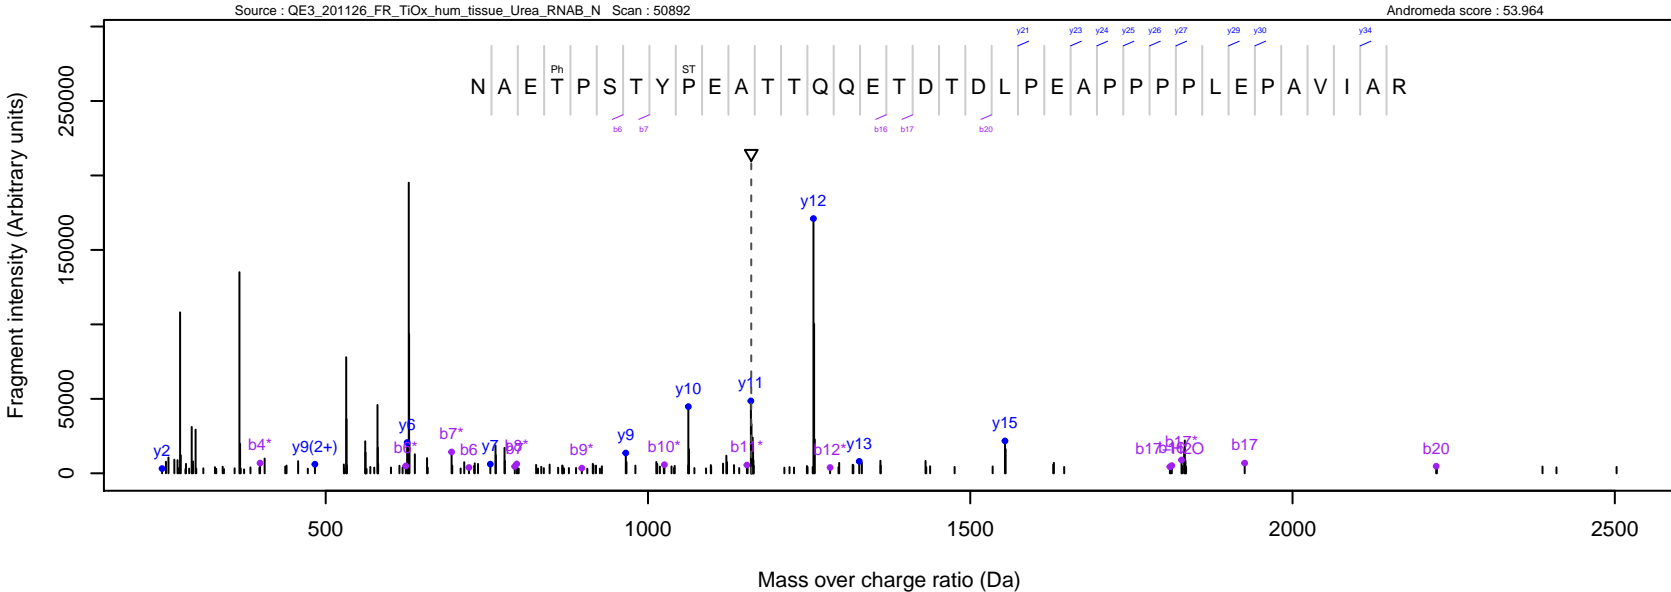



QGQDVAPPPNPVQRT(Phospho (STY))SPTGPK-3+

Source : QE3\_201126\_FR\_TiOx\_hum\_tissue\_Urea\_RNAB\_H Scan : 16794

Andromeda score : 53.957

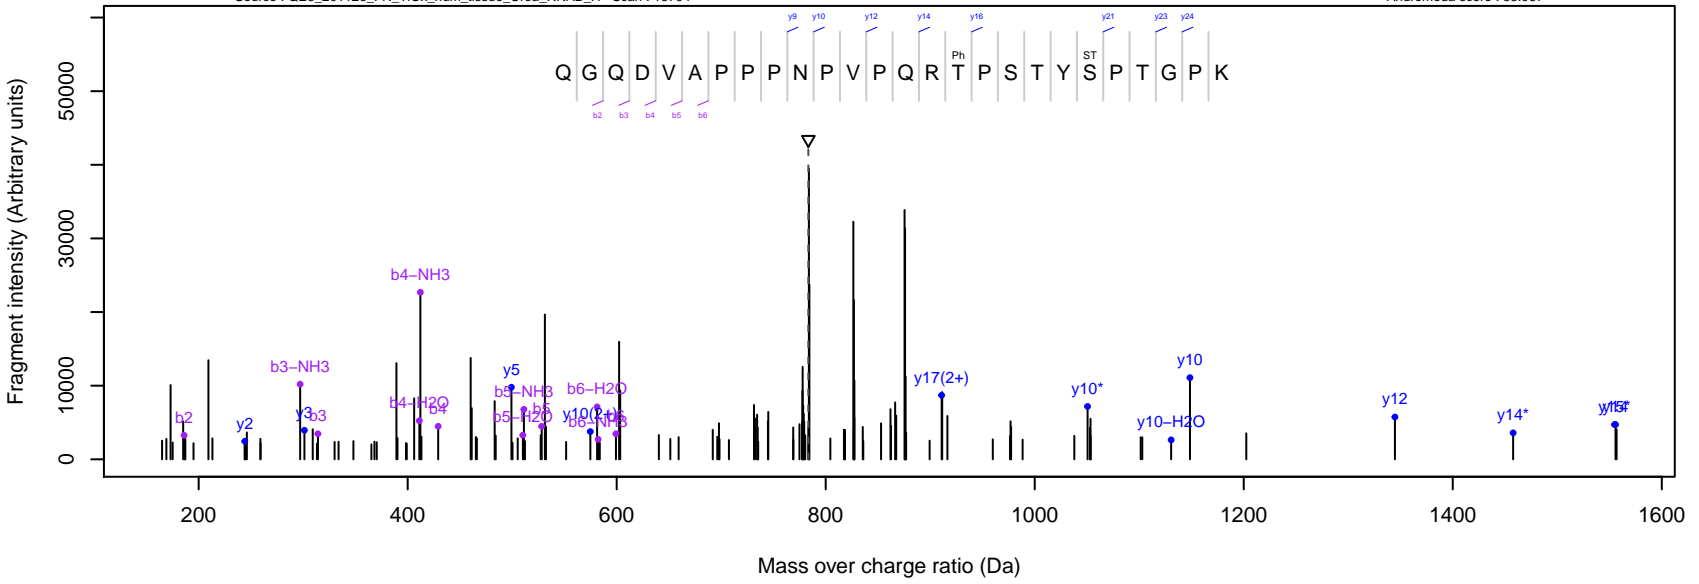

QKS(Phospho (STY))LDS(Phospho (STY))DLSDGPVTVQEFMEVK-3+

Source : QE3\_201126\_FR\_TiOx\_hum\_tissue\_Urea\_RNAB\_B Scan : 57917

Andromeda score : 53.909

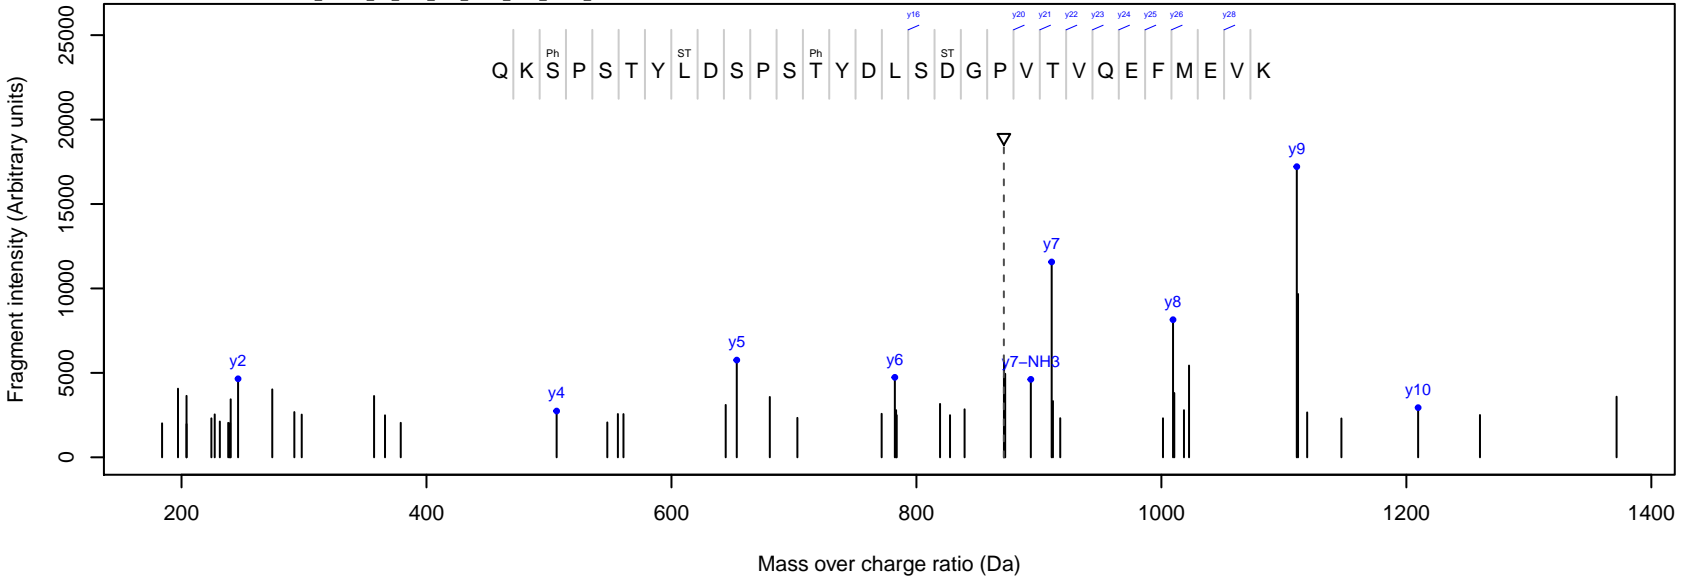

GRLGS(Phospho (STY))VDSFER-2+

Source : QE3\_201126\_FR\_TiOx\_hum\_tissue\_Urea\_RNAB\_B Scan : 18724

Andromeda score : 53.869

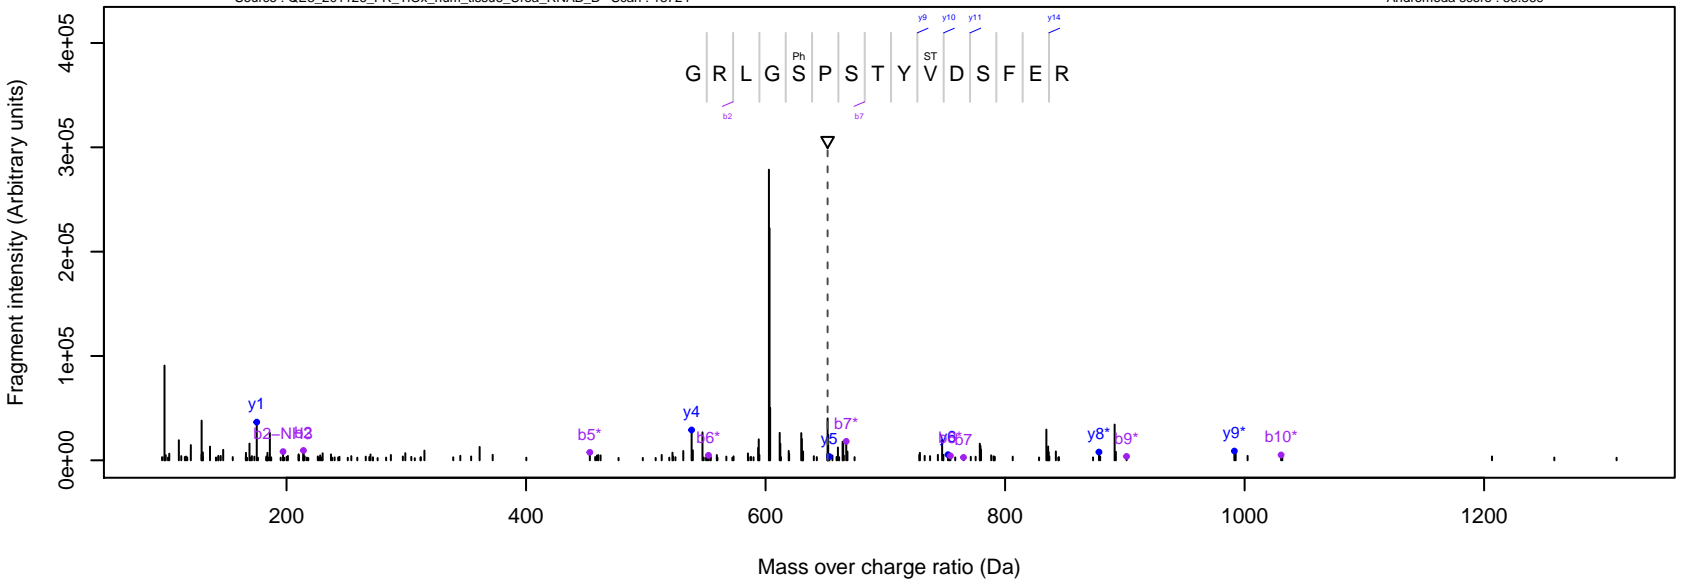

THKPDPGT(Phospho (STY))PQHTSSRPPEPQK-4+

Source : QE3\_201126\_FR\_TiOx\_hum\_tissue\_Urea\_RNAB\_N Scan : 4029

Andromeda score : 53.865

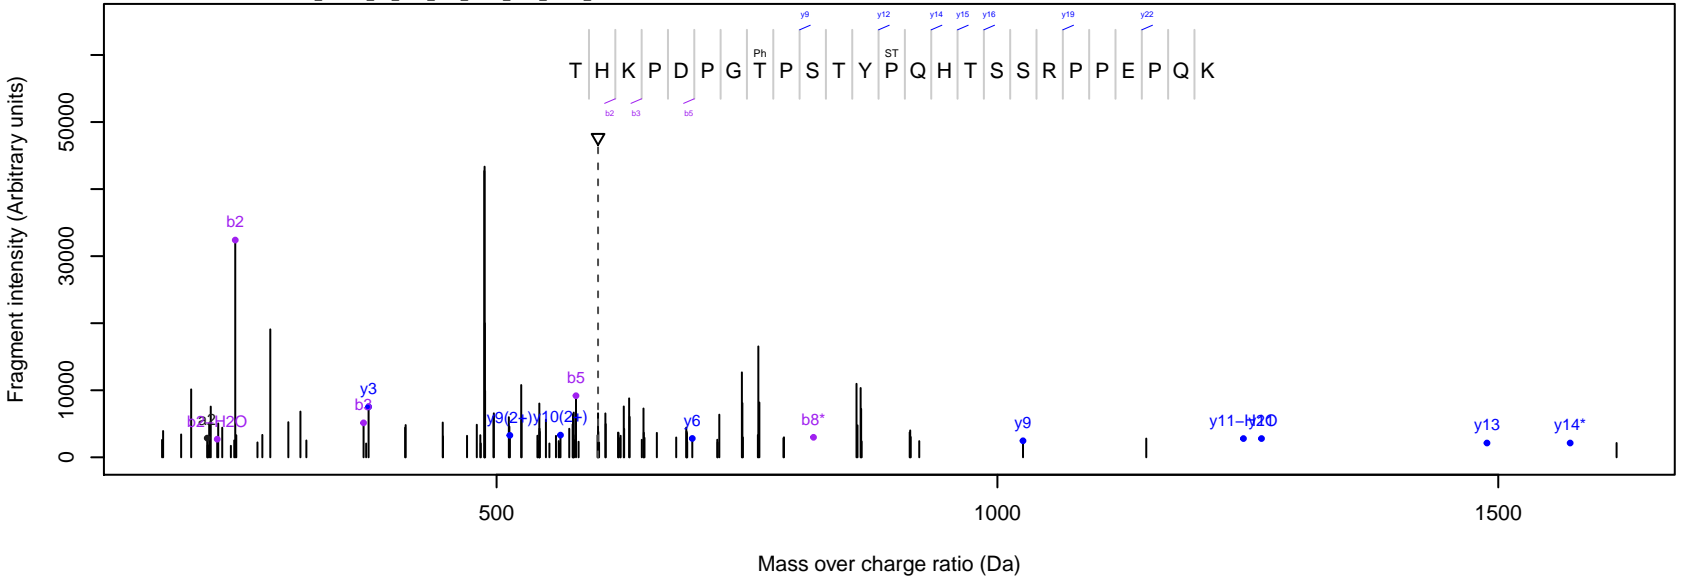

VIS(Phospho (STY))KHDLGHFM(oxidation (M))LR-3+

Source : QE3\_201126\_FR\_TiOx\_hum\_tissue\_Urea\_RNAB\_N Scan : 19222

Andromeda score : 53.828

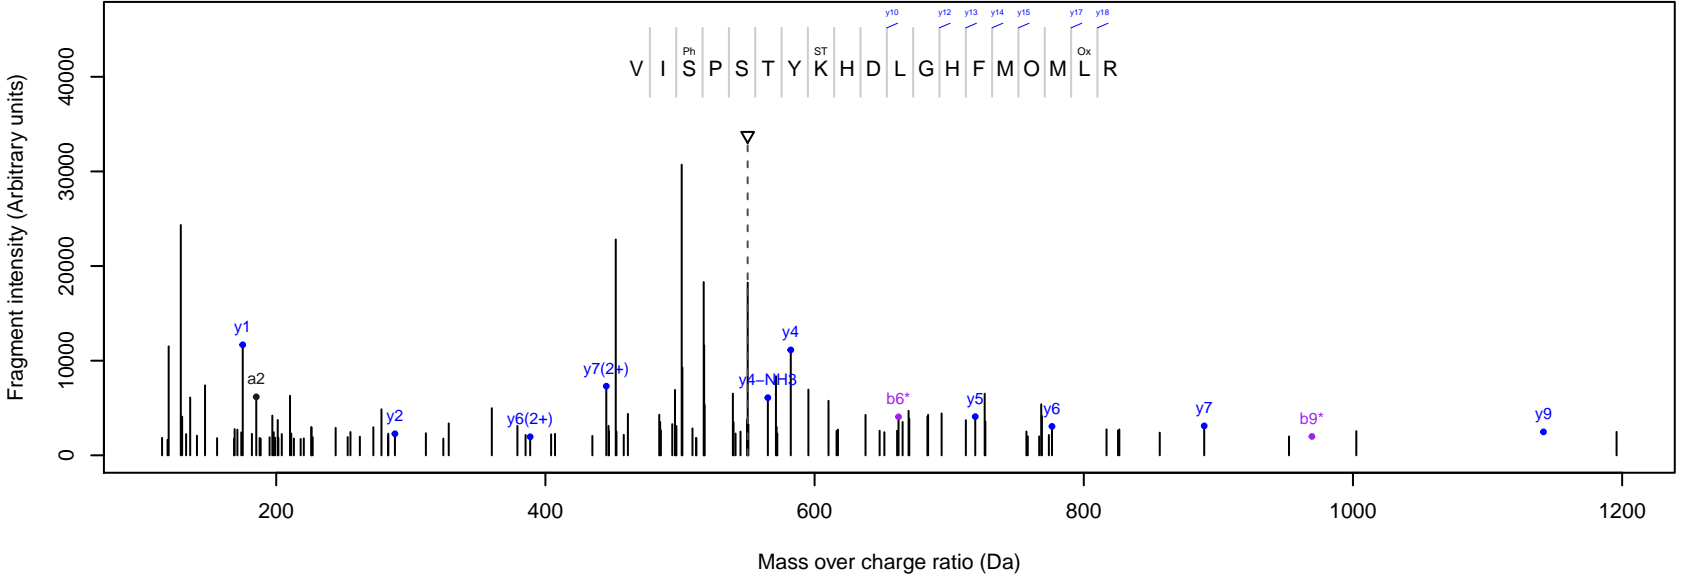

KILDPNTEGEPAPVLS(Phospho (STY))SPPPADVSTFLAFPSPEK-3+

Source : QE3\_201126\_FR\_TiOx\_hum\_tissue\_Urea\_RNAB\_H Scan : 56639

Andromeda score : 53.819

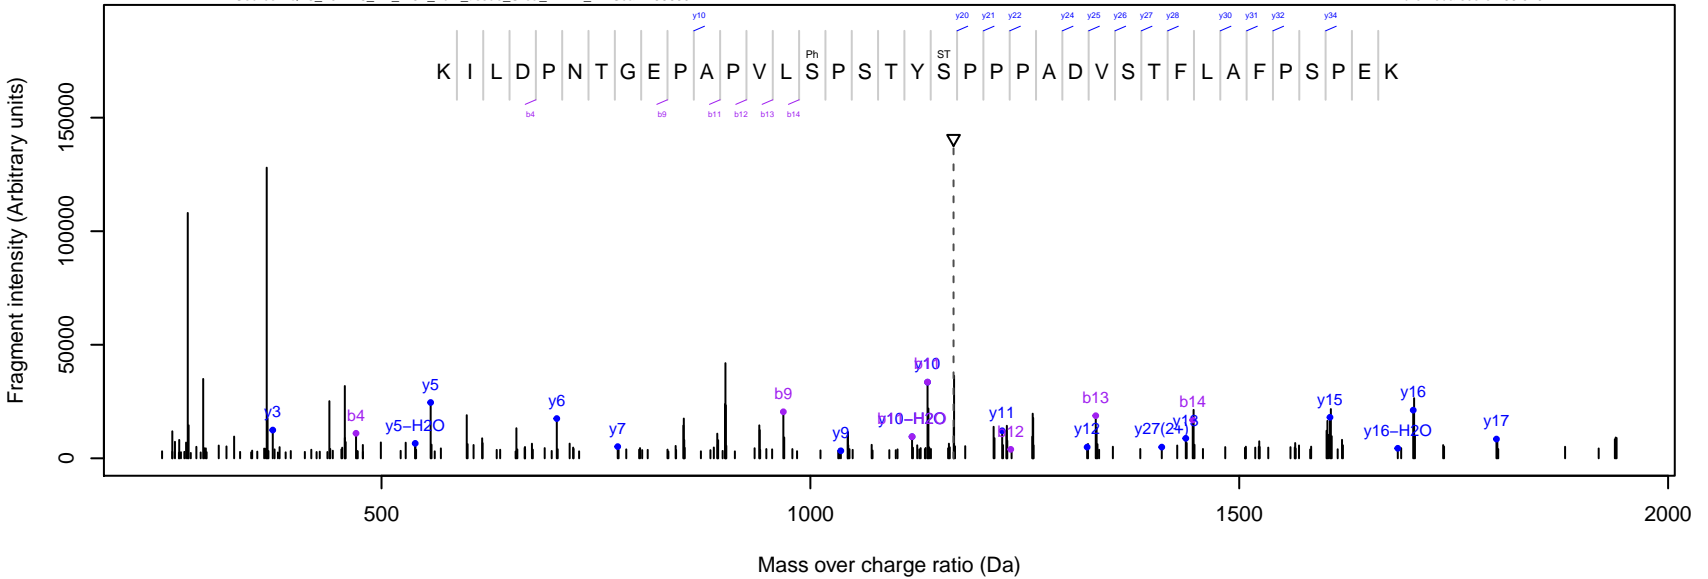

ET(Phospho (STY))M(Oxidation (M))QSLNDRLAS(Phospho (STY))YLDR-3+

Source : QE3\_201126\_FR\_TiOx\_hum\_tissue\_Urea\_RNAB\_H Scan : 44826

Andromeda score : 53.779

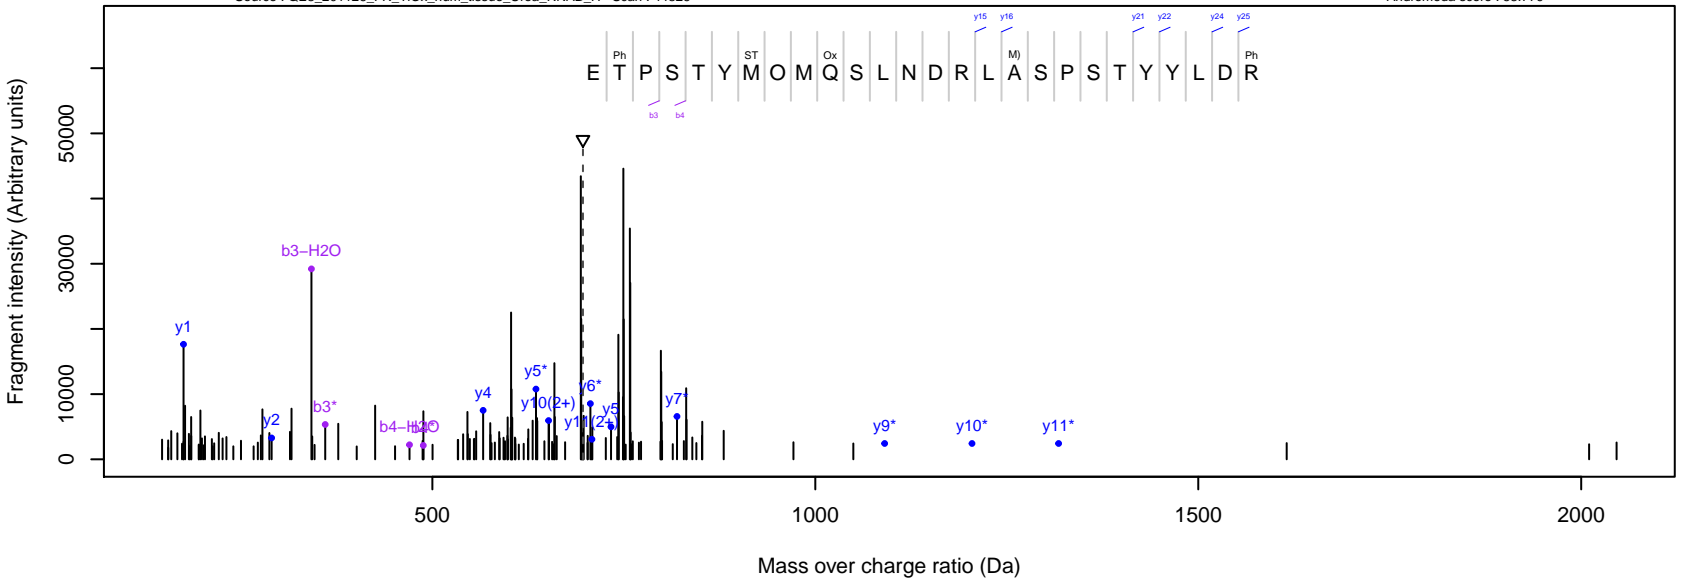

(Acetyl (Protein N-term))SCINLPTVLPGPS(Phospho (STY))KTR-2+

Source : QE3\_201126\_FR\_TiOx\_hum\_tissue\_Urea\_RNAB\_N Scan : 46707

Andromeda score : 53.777

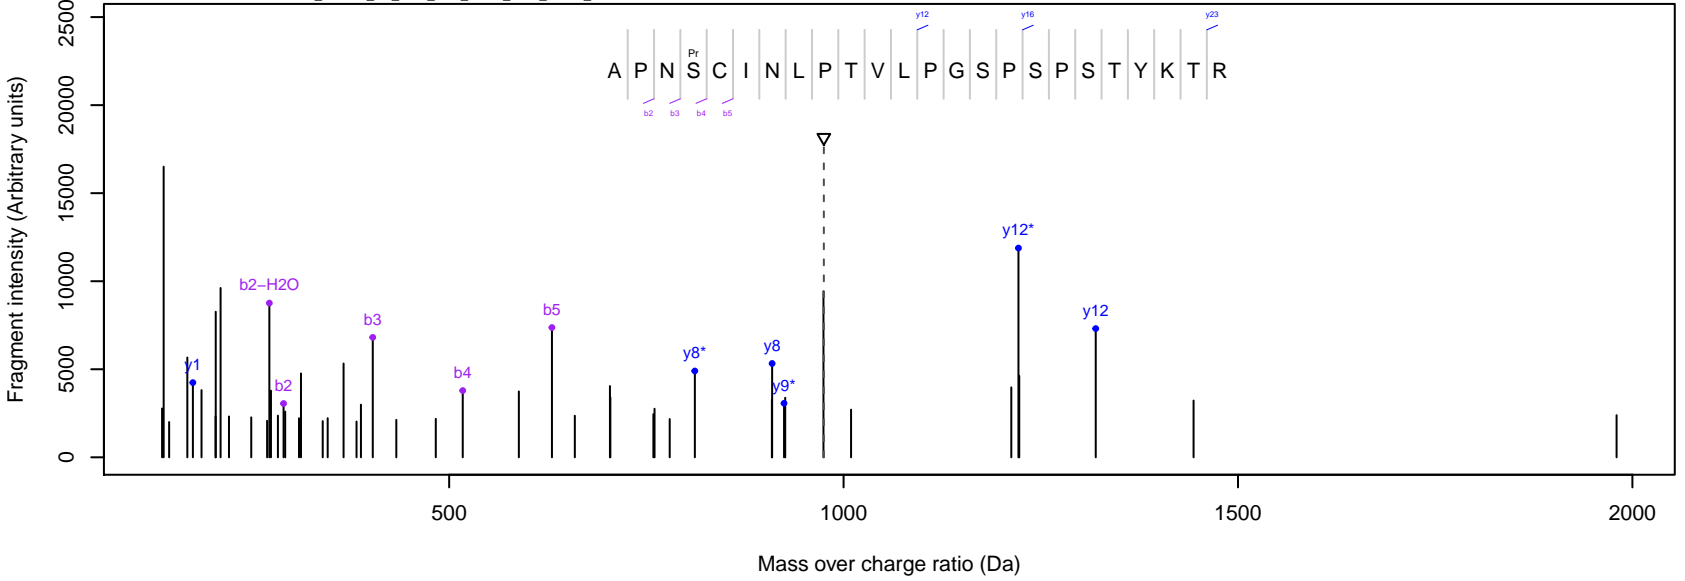

AAELFVET(Phospho (STY))IAK-2+

Source : QE3\_201126\_FR\_TiOx\_hum\_tissue\_Urea\_RNAB\_N Scan : 29658

Andromeda score : 53.775

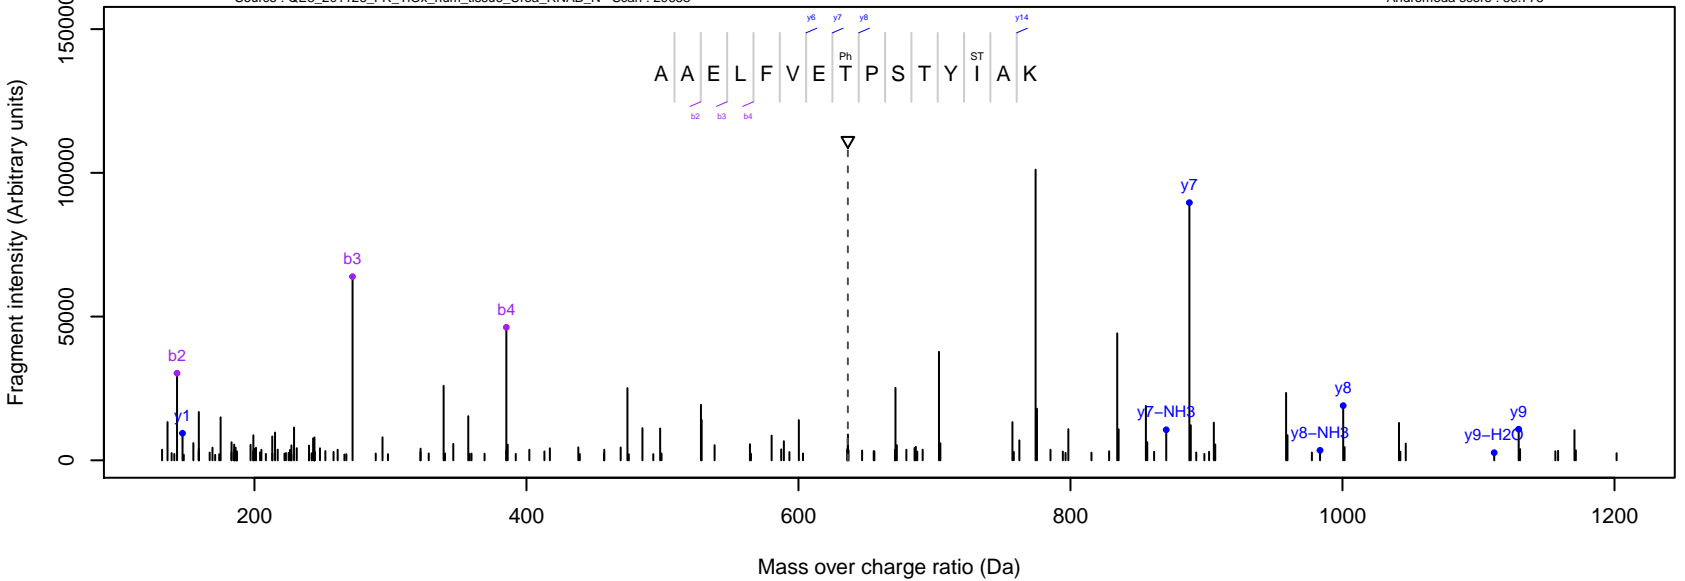

APALS(Phospho (STY))PTRPPK-2+

Source : QE3\_2011126\_FR\_TiOx\_hum\_tissue\_Urea\_RNAB\_H Scan : 10045

Andromeda score : 53.769

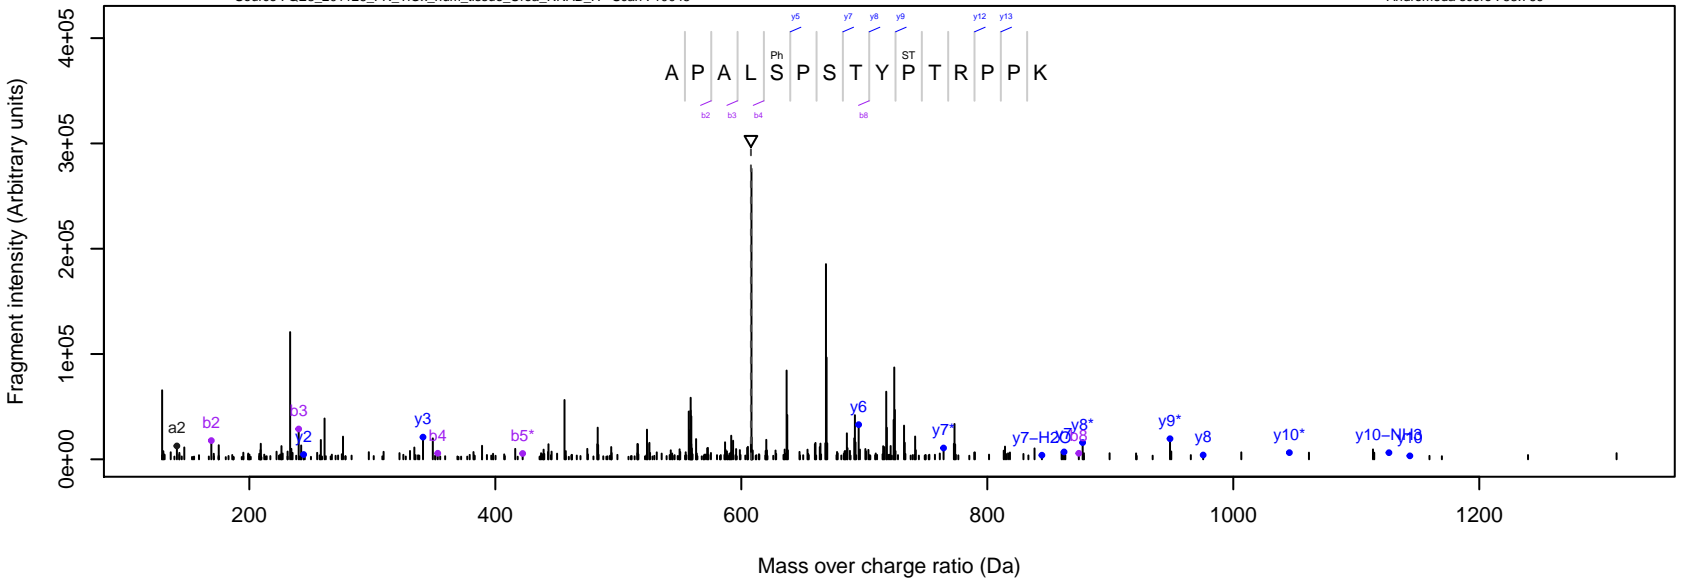

S(Phospho (STY))RTPLLPR-2+

Source : QE3\_2011126\_FR\_TiOx\_hum\_tissue\_Urea\_RNAB\_N Scan : 12292

Andromeda score : 53.756

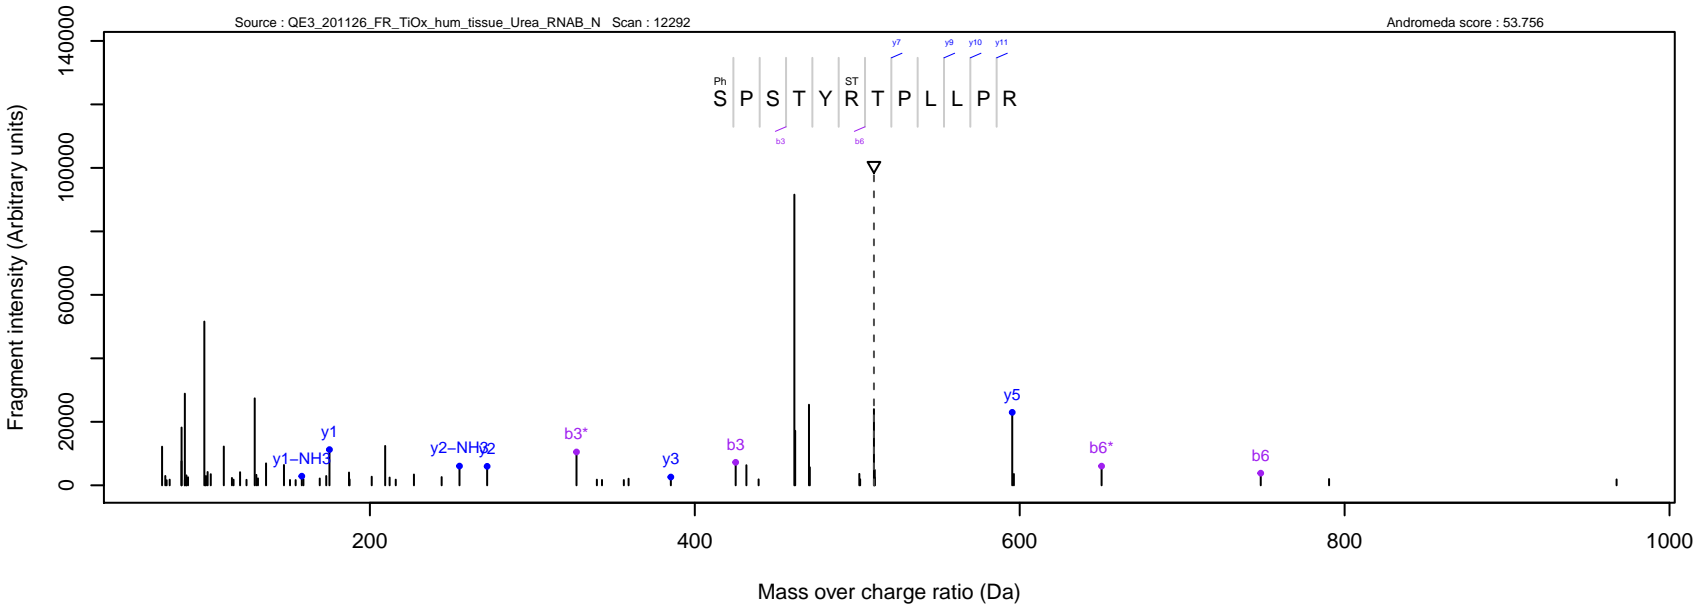

PS(Phospho (STY))SSPVIFAGGQDR-2+

Source : QE3\_2011126\_FR\_TiOx\_hum\_tissue\_Urea\_RNAB\_B Scan : 25208

Andromeda score : 53.754

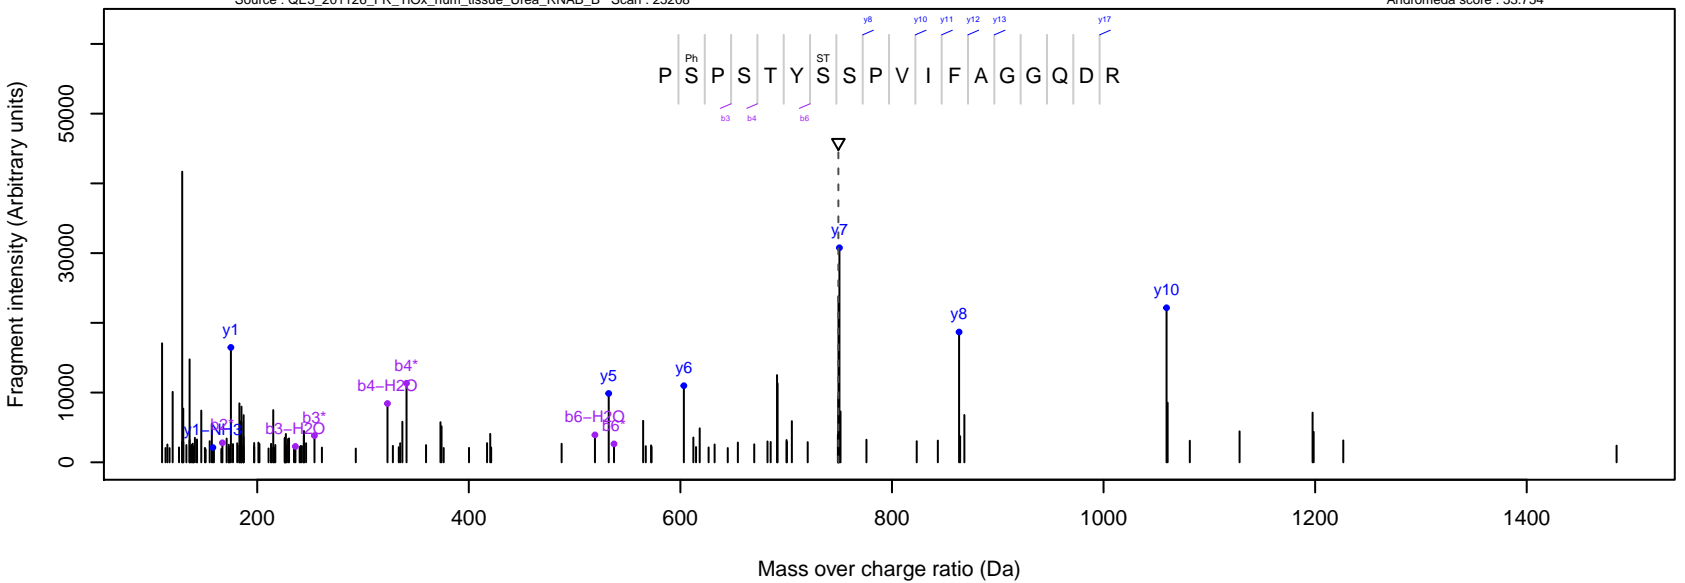

S(Phospho (STY))LS(Phospho (STY))PLGGRDDS(Phospho (STY))PVSHR-3+

Source : QE3\_201126\_FR\_TiOx\_hum\_tissue\_Urea\_RNAB\_H Scan : 21576

Andromeda score : 53.747

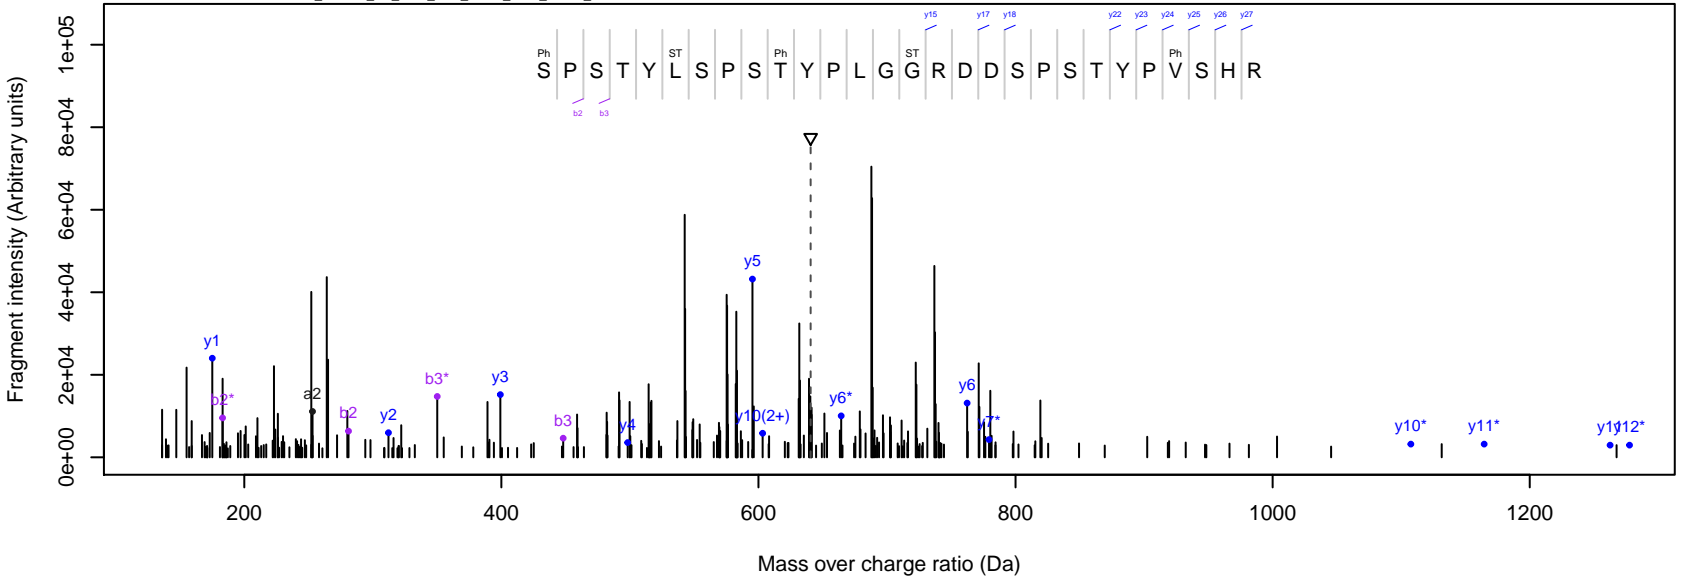

VFNSSHSFLEDLTGLTLHQTQAAEIWD(M)(Oxidation)S(Phospho (STY))DDETI-4+

Source : QE3\_201126\_FR\_TiOx\_hum\_tissue\_Urea\_RNAB\_N Scan : 62590

Andromeda score : 53.728

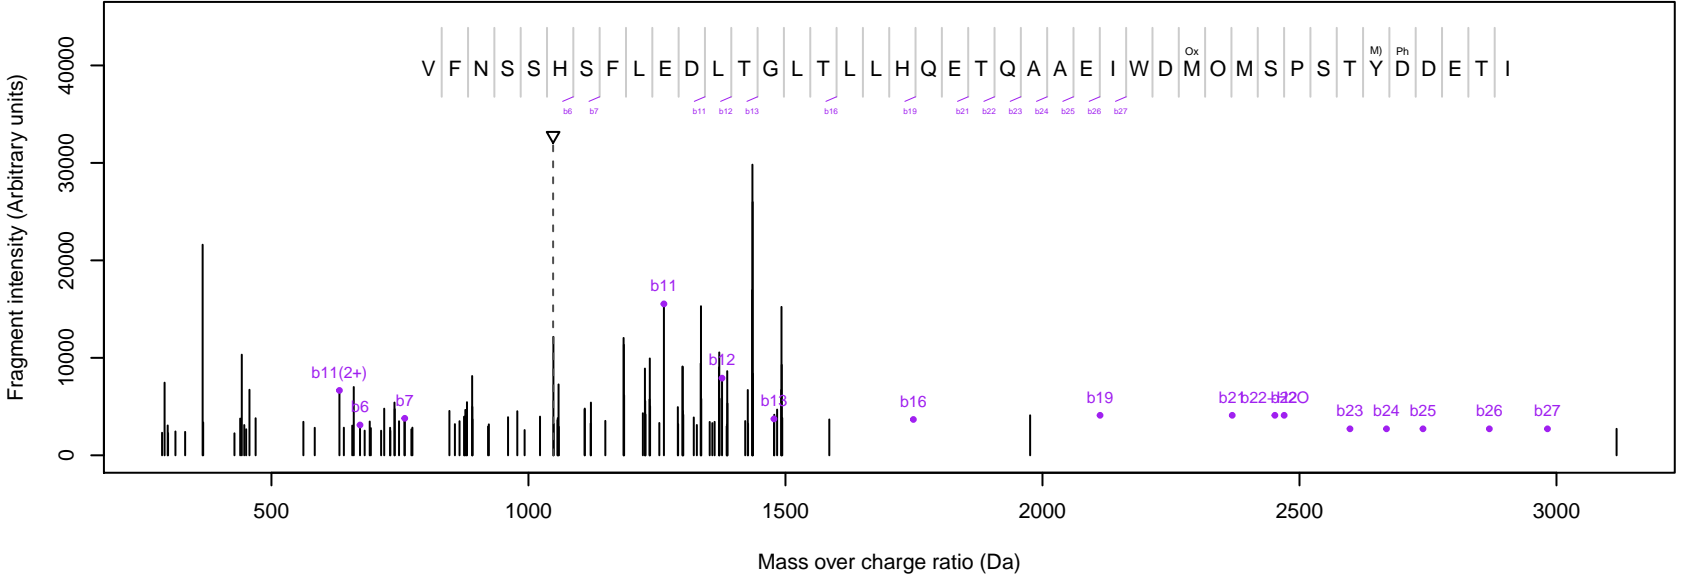

SYIEGYVPSQADVAVFEAVS(Phospho (STY))SPPPADLCHALR-3+

Source : QE3\_201126\_FR\_TiOx\_hum\_tissue\_Urea\_RNAB\_B Scan : 56870

Andromeda score : 53.648

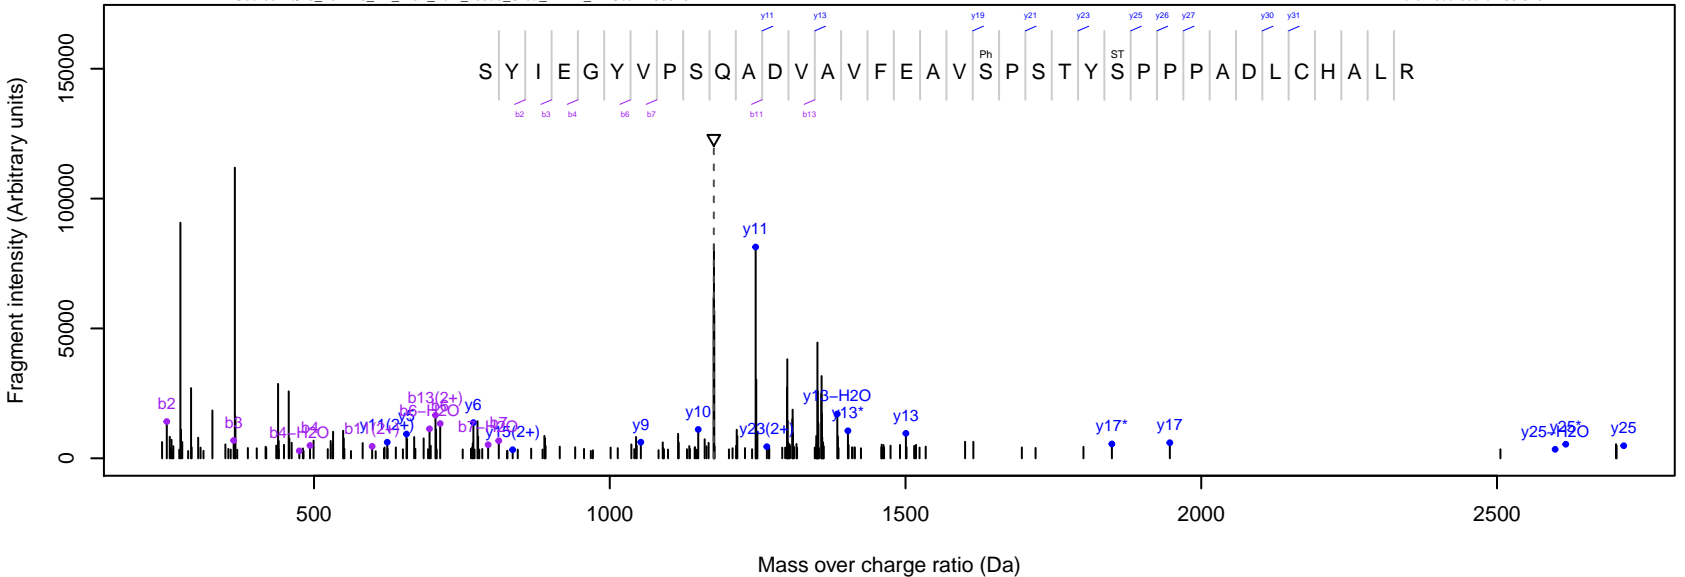

LIPITGGNARS(Phospho (STY))PEDQLGK-3+

Source : QE3\_201126\_FR\_TiOx\_hum\_tissue\_Urea\_RNAB\_N Scan : 25695

Andromeda score : 53.585

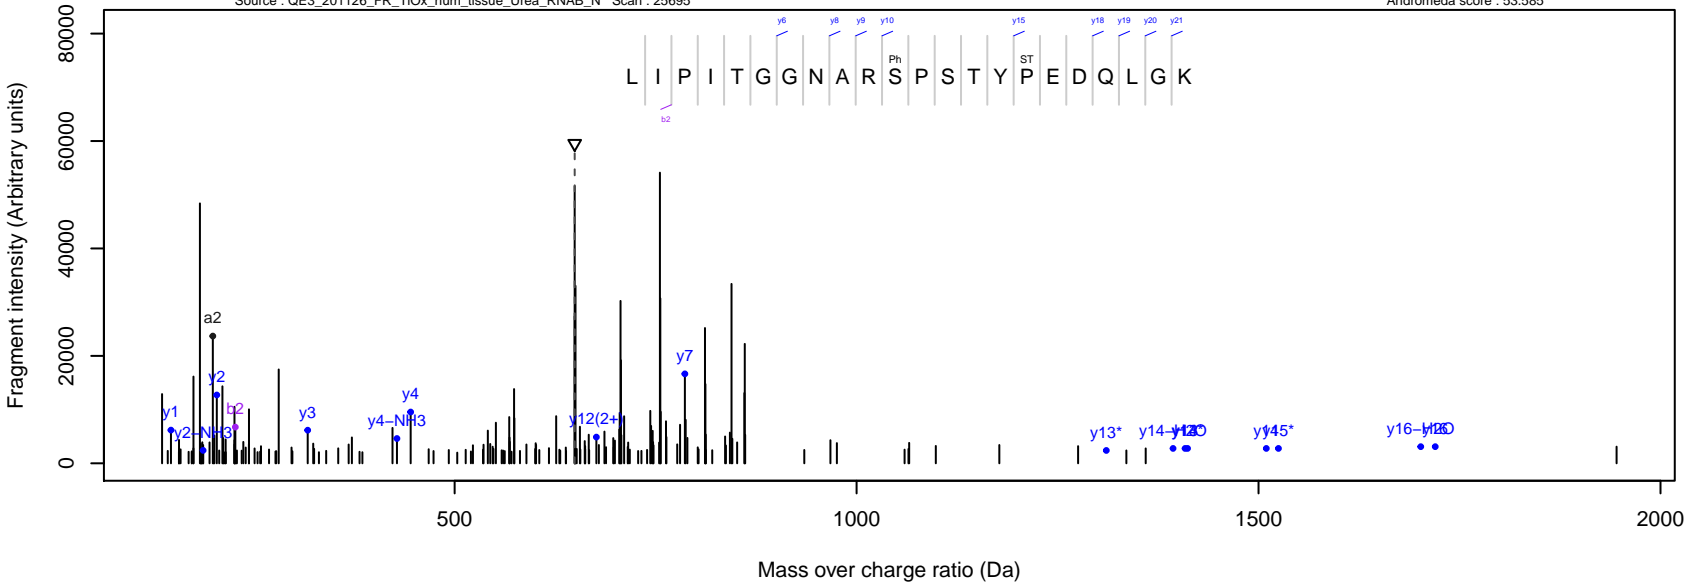

LTWHS(Phospho (STY))CPEDEAQ-2+

Source : QE3\_201126\_FR\_TiOx\_hum\_tissue\_Urea\_RNAB\_B Scan : 22398

Andromeda score : 53.569

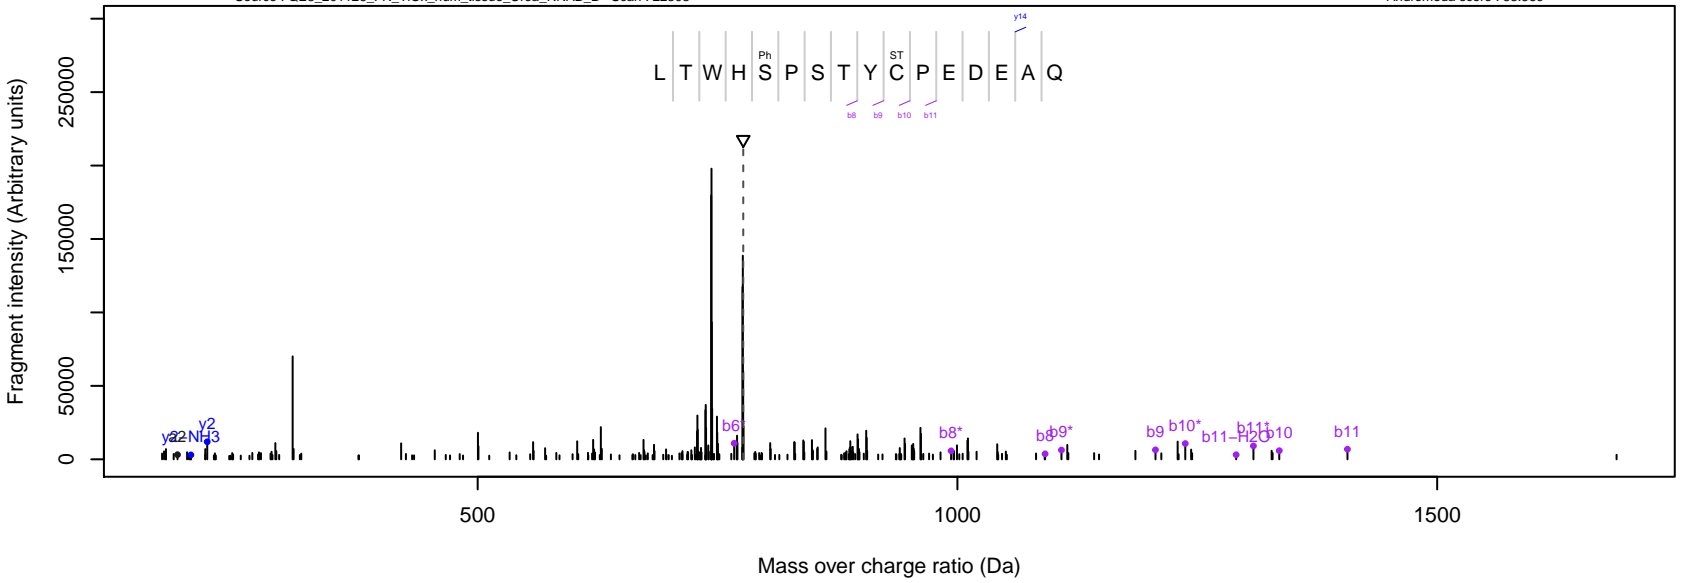

SLS(Phospho (STY))VPVDSLRS-2+

Source : QE3\_201126\_FR\_TiOx\_hum\_tissue\_Urea\_RNAB\_H Scan : 35224

Andromeda score : 53.569

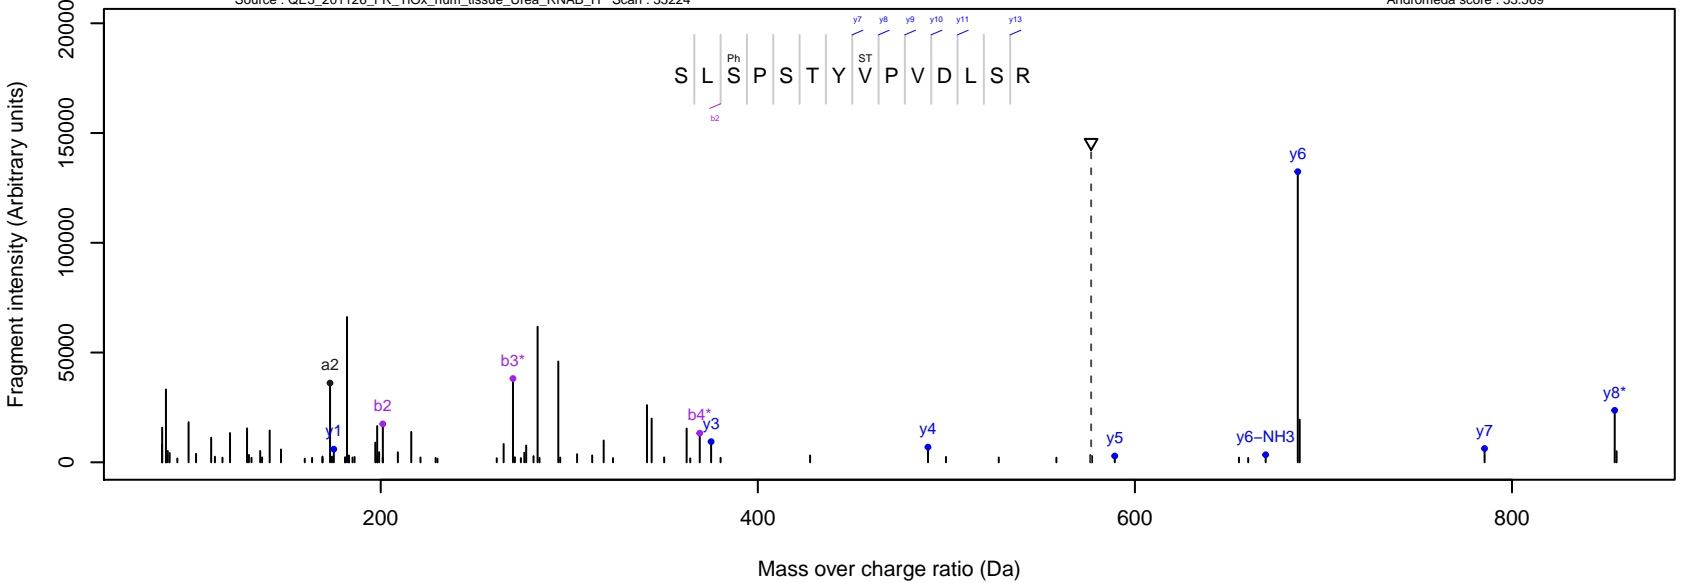

RNS(Phospho (STY))LLHG<sup>YR</sup>-3+

Source : QE3\_201126\_FR\_TiOx\_hum\_tissue\_Urea\_RNAB\_N Scan : 11020

Andromeda score : 53.567

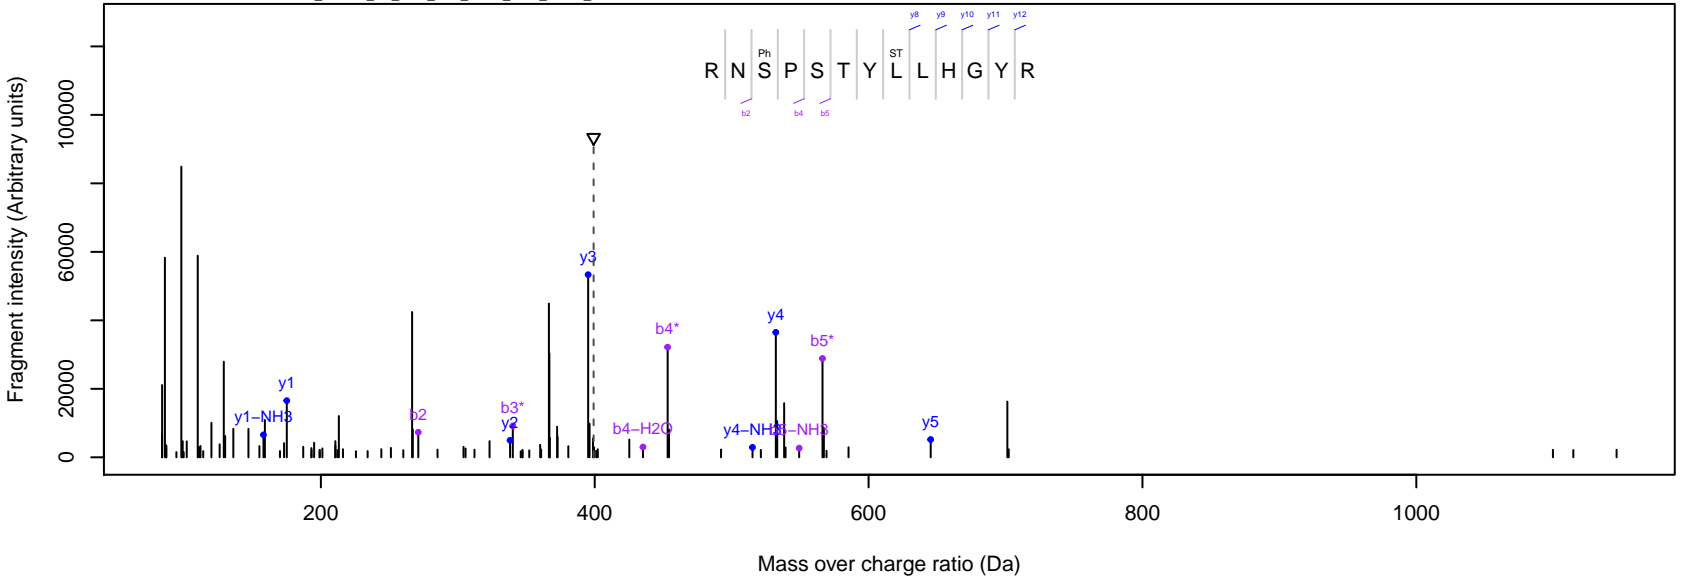

SDS(Phospho (STY))YSQSLK-2+

Source : QE3\_201126\_FR\_TiOx\_hum\_tissue\_Urea\_RNAB\_H Scan : 11253

Andromeda score : 53.567

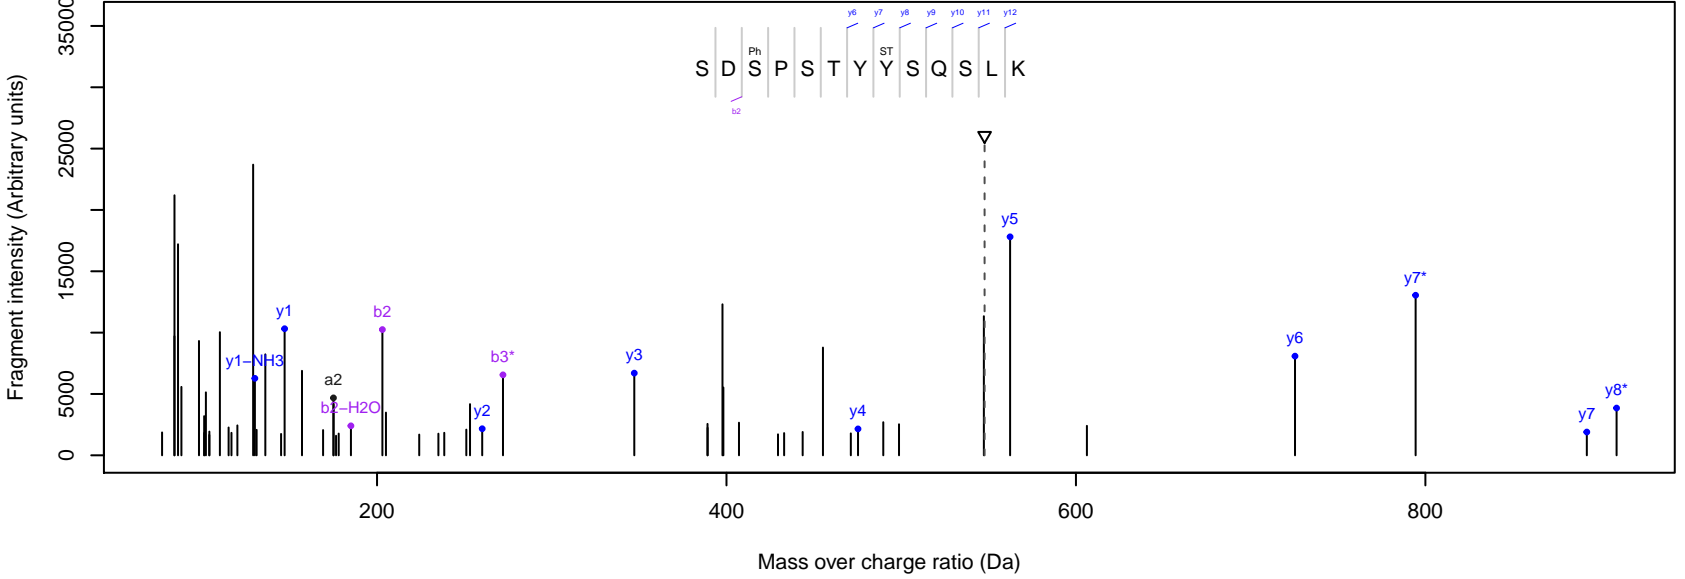

CVGAELEYDS(Phospho (STY))EHS(Phospho (STY))DWHGFD-3+

Source : QE3\_201126\_FR\_TiOx\_hum\_tissue\_Urea\_RNAB\_B Scan : 45771

Andromeda score : 53.553

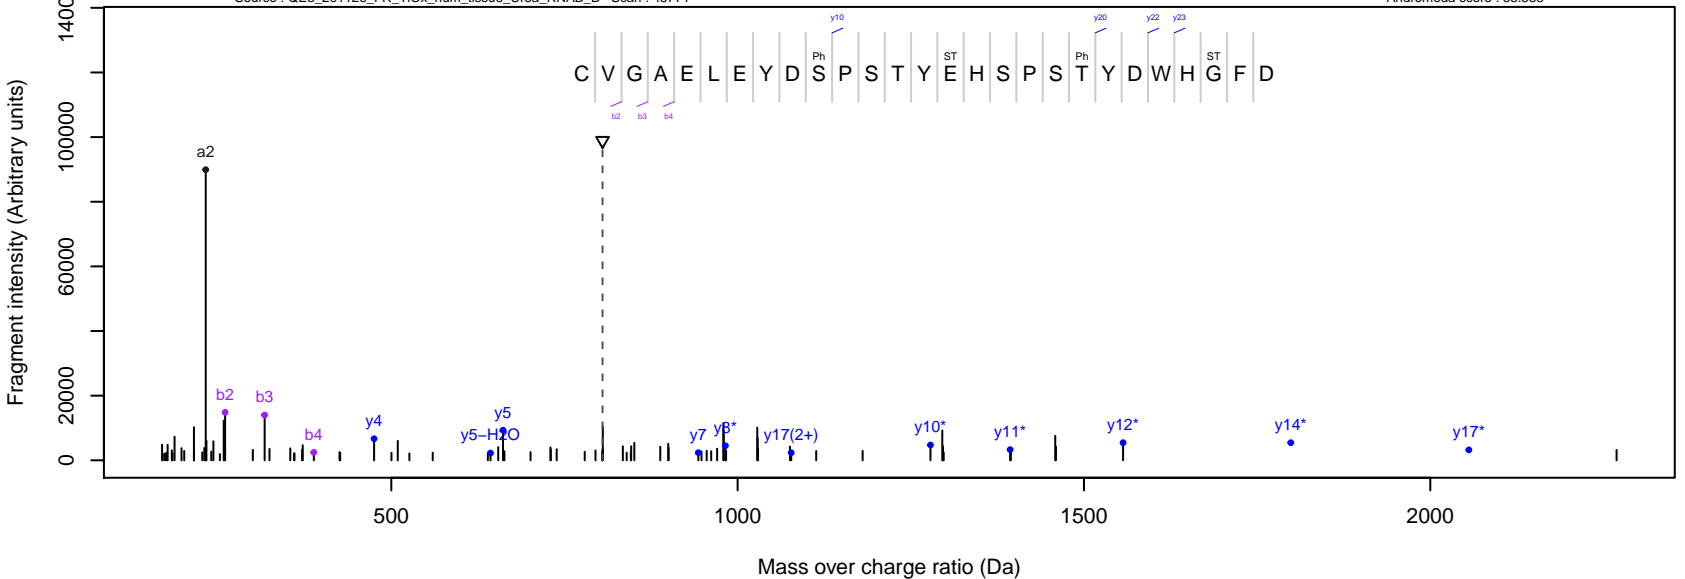

GFGGAGELGQTPQVQAALS(Phospho (STY))VS(Phospho (STY))QENPEMOMEGER-3+

Source : QE3\_201126\_FR\_TIOx\_hum\_tissue\_Urea\_RNAB\_N Scan : 49199

Andromeda score : 53.545

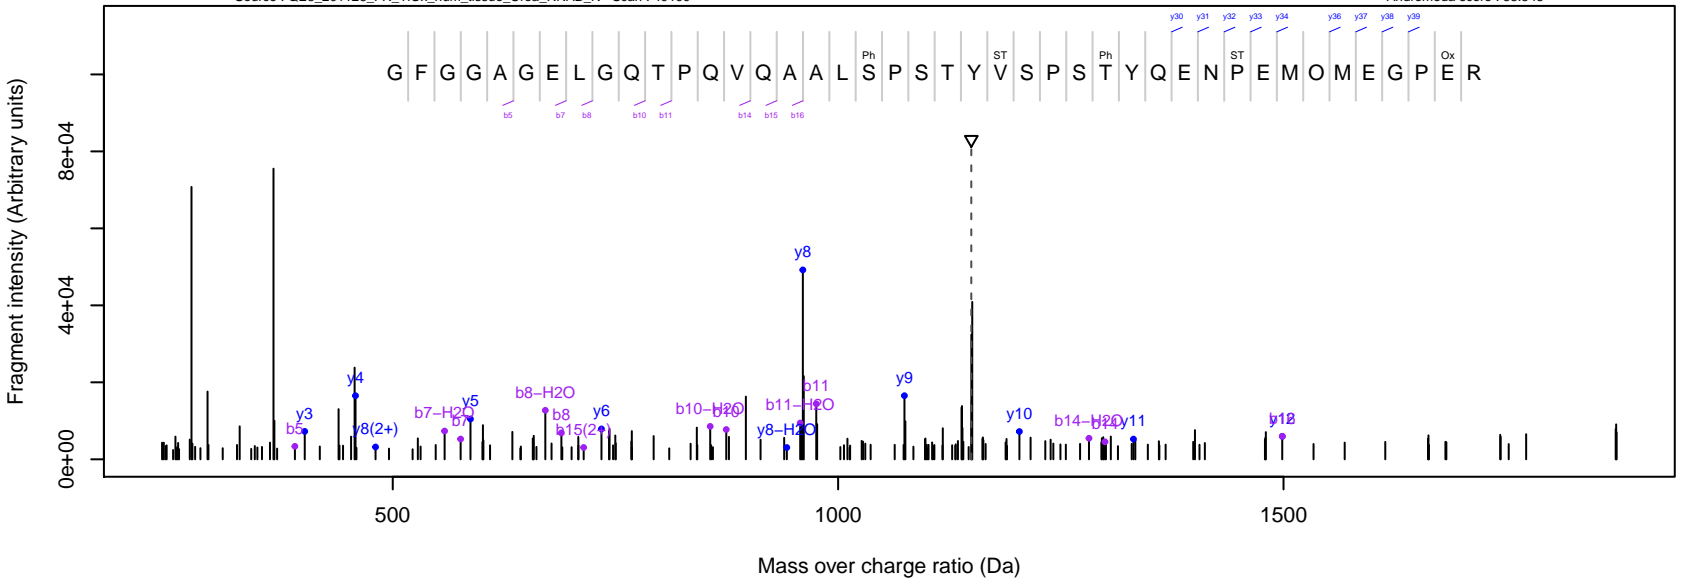

RLEISPDS(Phospho (STY))SPERAHYTHSDYQSQR-4+

Source : QE3\_201126\_FR\_TIOx\_hum\_tissue\_Urea\_RNAB\_B Scan : 15678

Andromeda score : 53.545

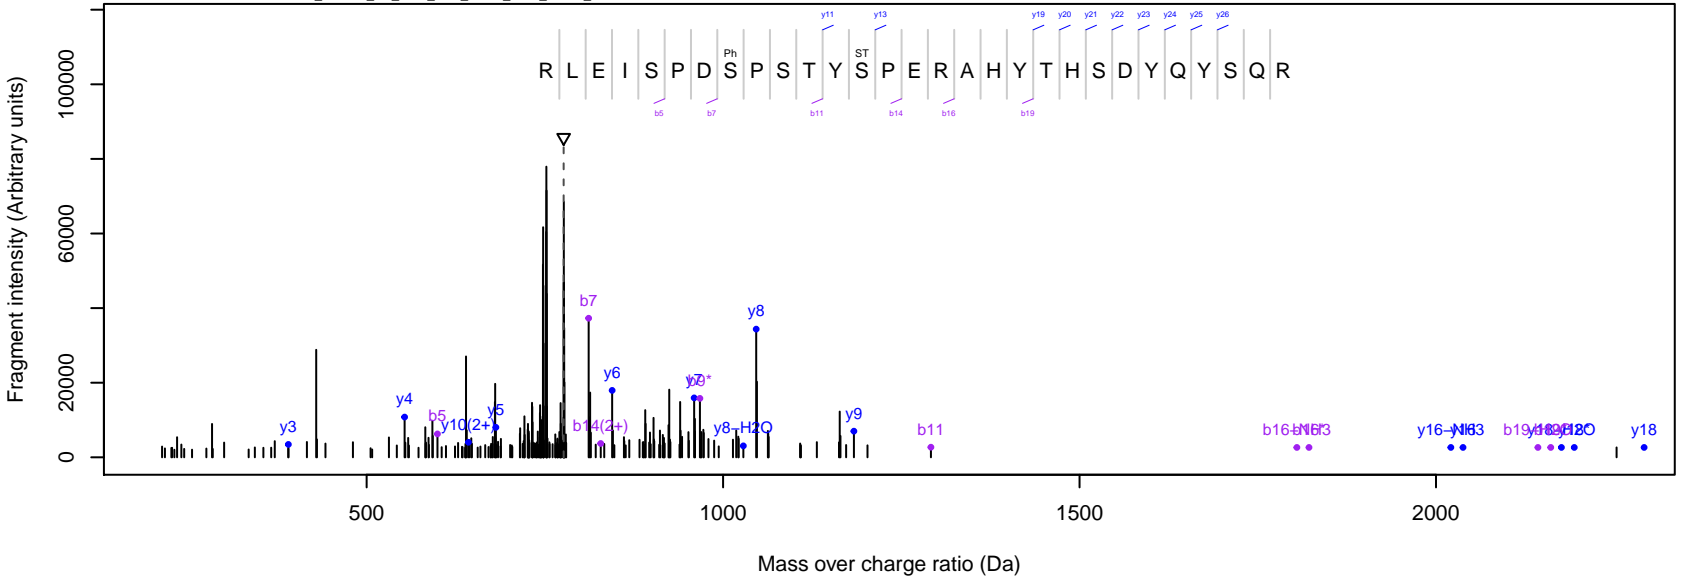

QQFYHS(Phospho (STY))VQDLGGSR-3+

Source : QE3\_201126\_FR\_TIOx\_hum\_tissue\_Urea\_RNAB\_H Scan : 20776

Andromeda score : 53.536

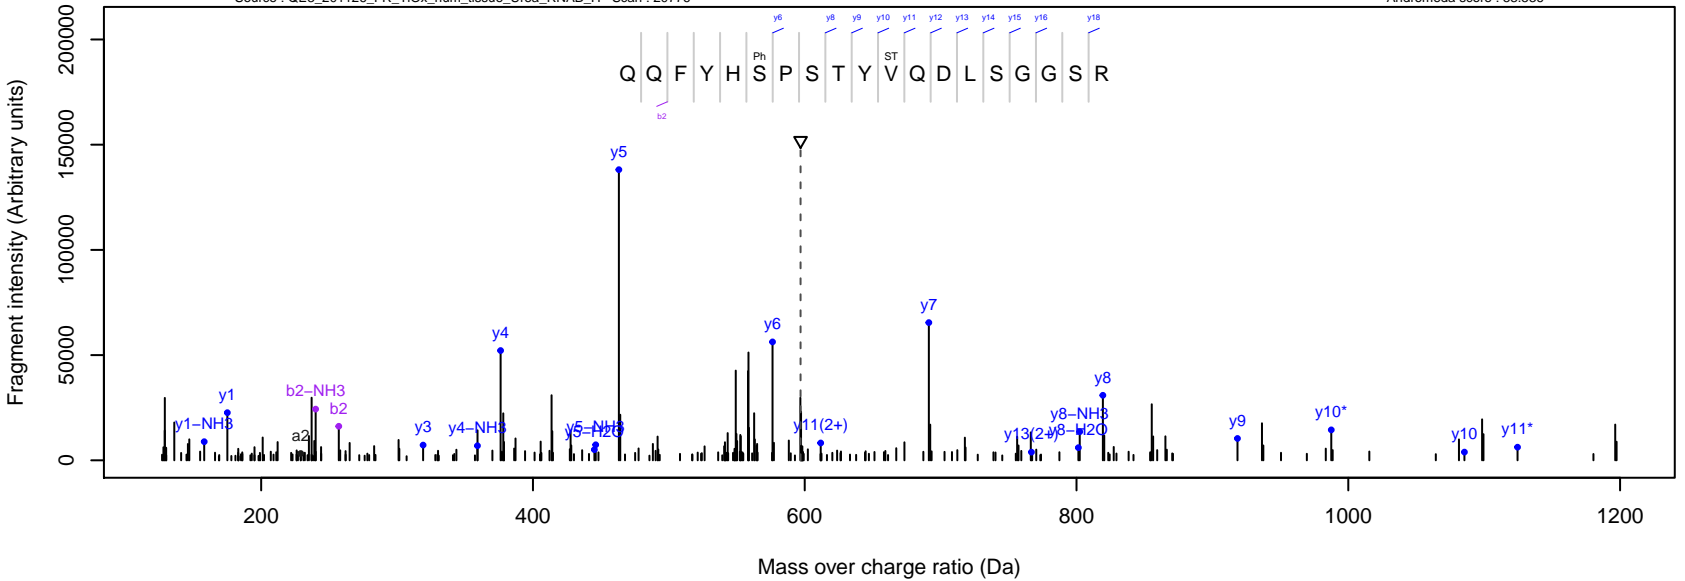



(Acetyl (Protein N-term))AAAAAAAAAGAAGGRGS(Phospho (STY))GPGR-3+

Source : QE3\_201126\_FR\_TIOx\_hum\_tissue\_Urea\_RNAB\_N Scan : 33111

Andromeda score : 53.496

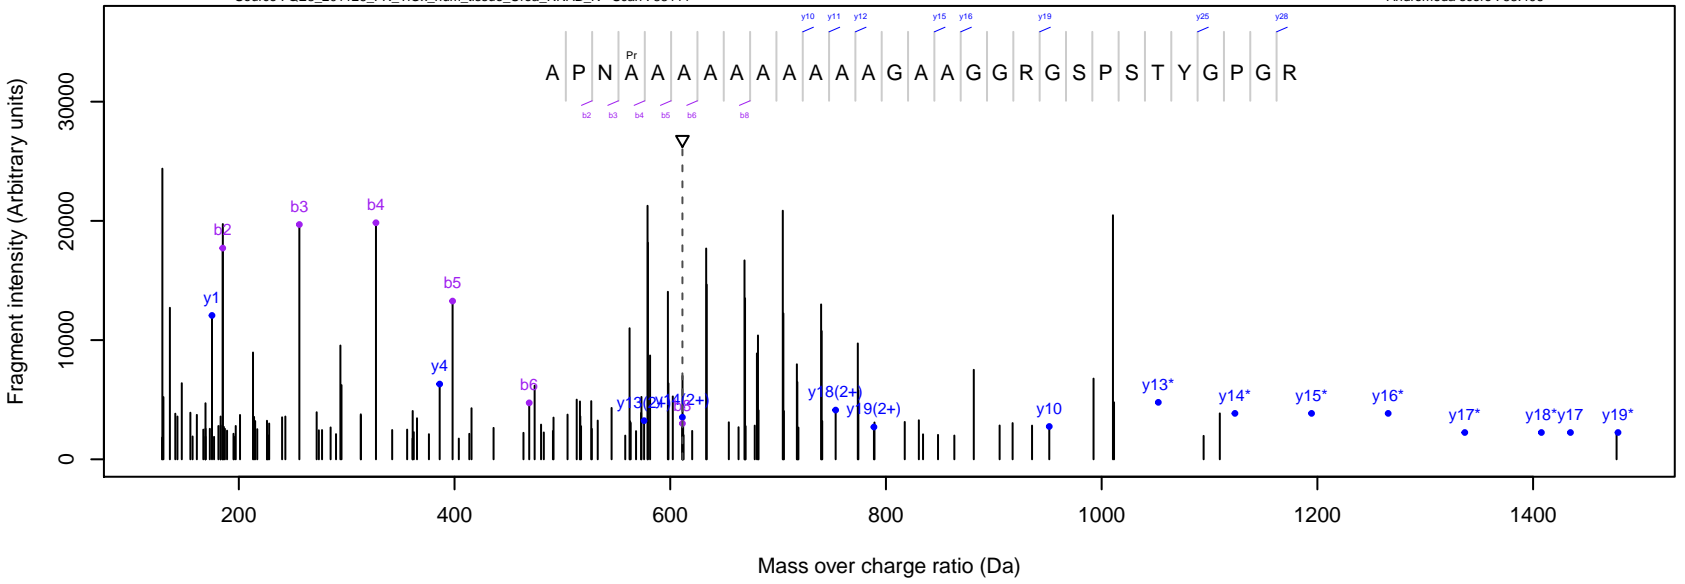

GM(Oxidation (M))LPTALQNQDEDAQGSYDDDS(Phospho (STY))TEVEAQDVR-3+

Source : QE3\_201126\_FR\_TIOx\_hum\_tissue\_Urea\_RNAB\_B Scan : 35595

Andromeda score : 53.493

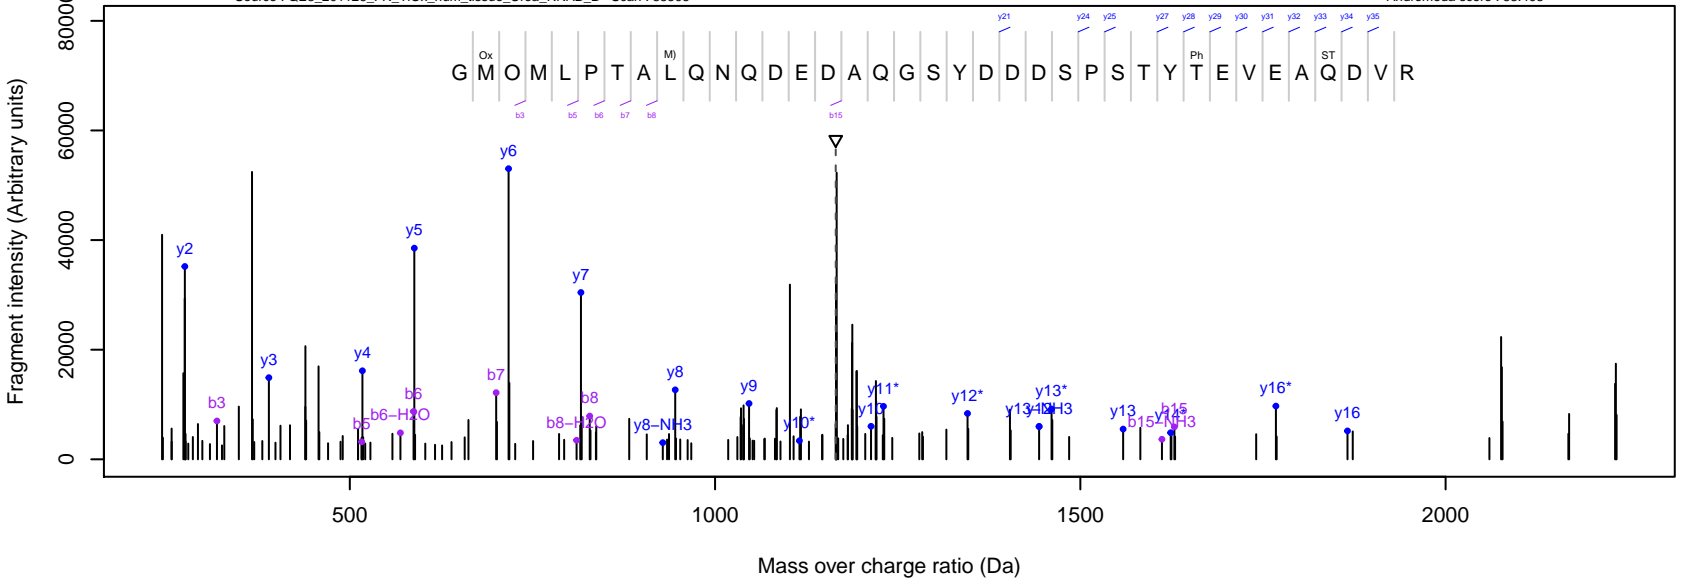

AGSISTLSDLFARYS(Phospho (STY))DDGNRETDEK-3+

Source : QE3\_201126\_FR\_TIOx\_hum\_tissue\_Urea\_RNAB\_B Scan : 34681

Andromeda score : 53.482

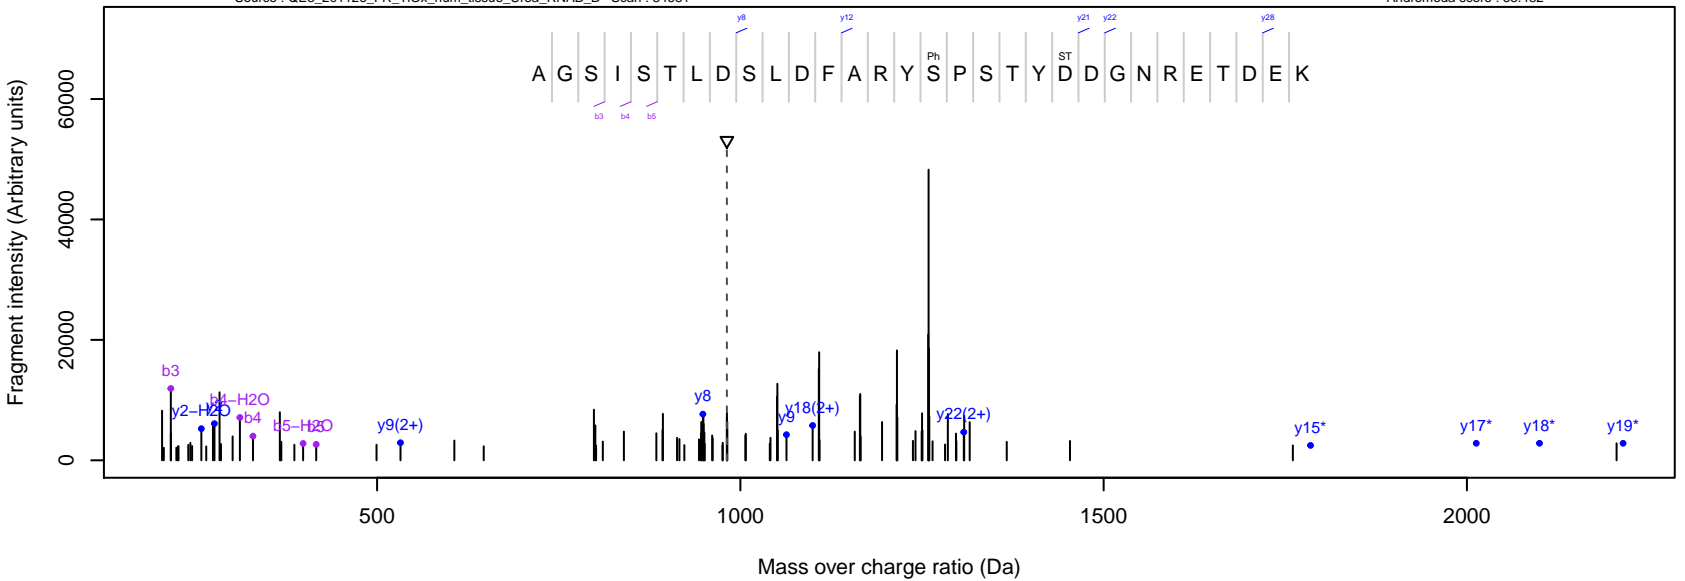

(Acetyl (Protein N-term))ADEAALQPGGS(Phospho (STY))PSAAGADR-3+

Source : QE3\_201126\_FR\_TIOx\_hum\_tissue\_Urea\_RNAB\_H Scan : 46664

Andromeda score : 53.481

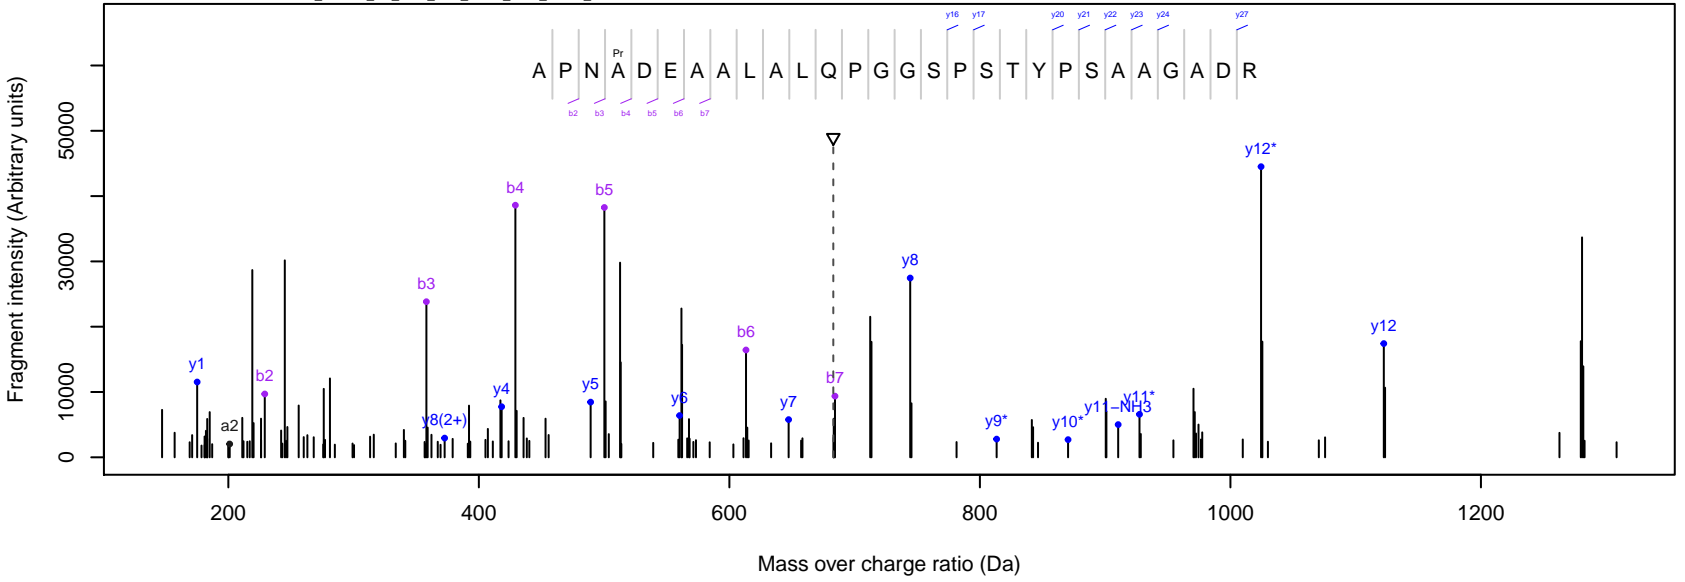

QDS(Phospho (STY))NRS(Phospho (STY))EKEATPVVHETEPESGSQPR-4+

Source : QE3\_201126\_FR\_TIOx\_hum\_tissue\_Urea\_RNAB\_N Scan : 10441

Andromeda score : 53.475

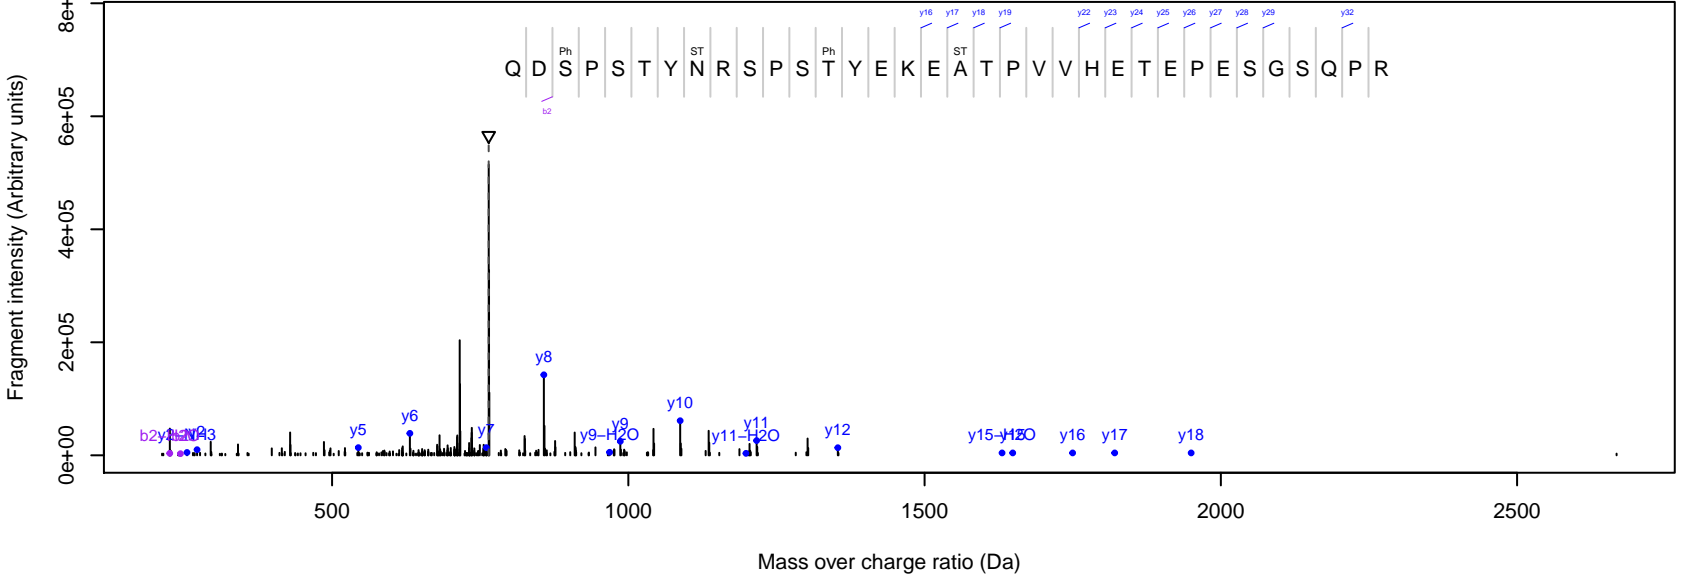

T(Phospho (STY))RNSGIWESPELDR-3+

Source : QE3\_201126\_FR\_TIOx\_hum\_tissue\_Urea\_RNAB\_N Scan : 27065

Andromeda score : 53.453

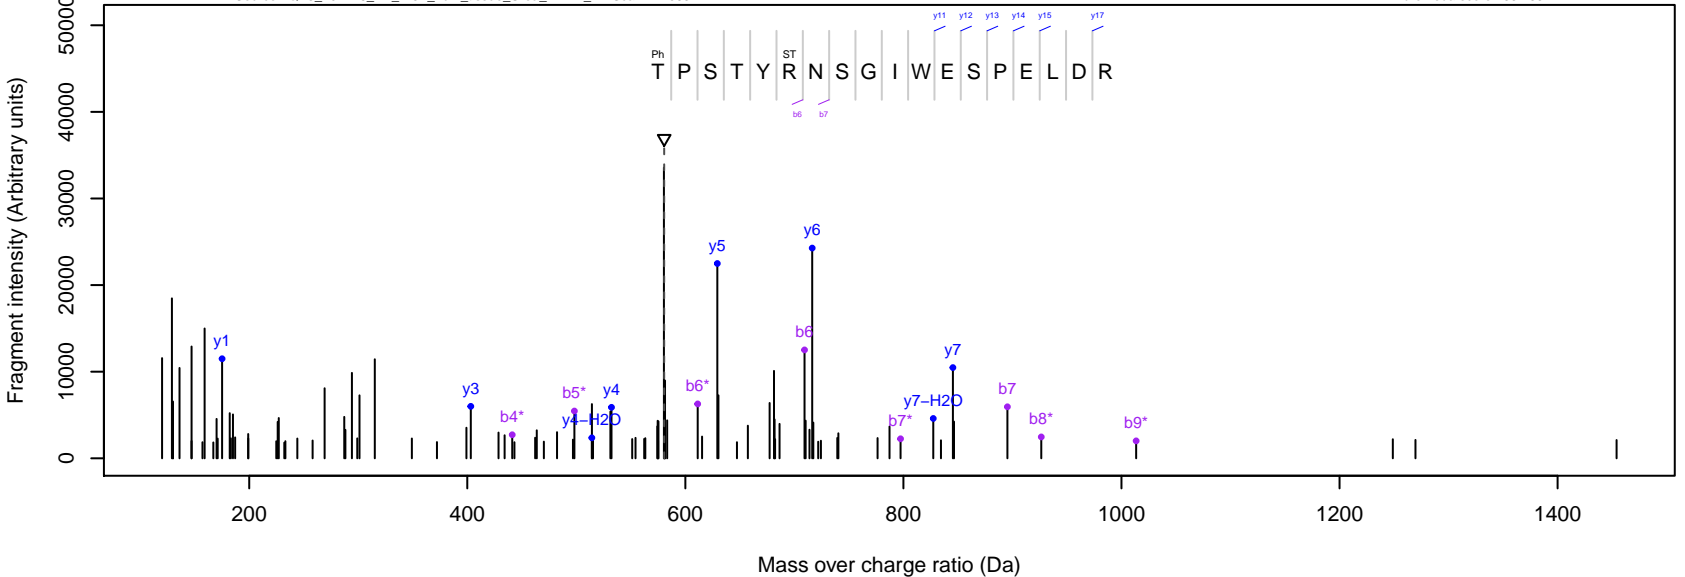

GLPDFAS(Phospho (STY))FSAK-2+

Source : QE3\_201126\_FR\_TiOx\_hum\_tissue\_Urea\_RNAB\_B Scan : 45046

Andromeda score : 53.448

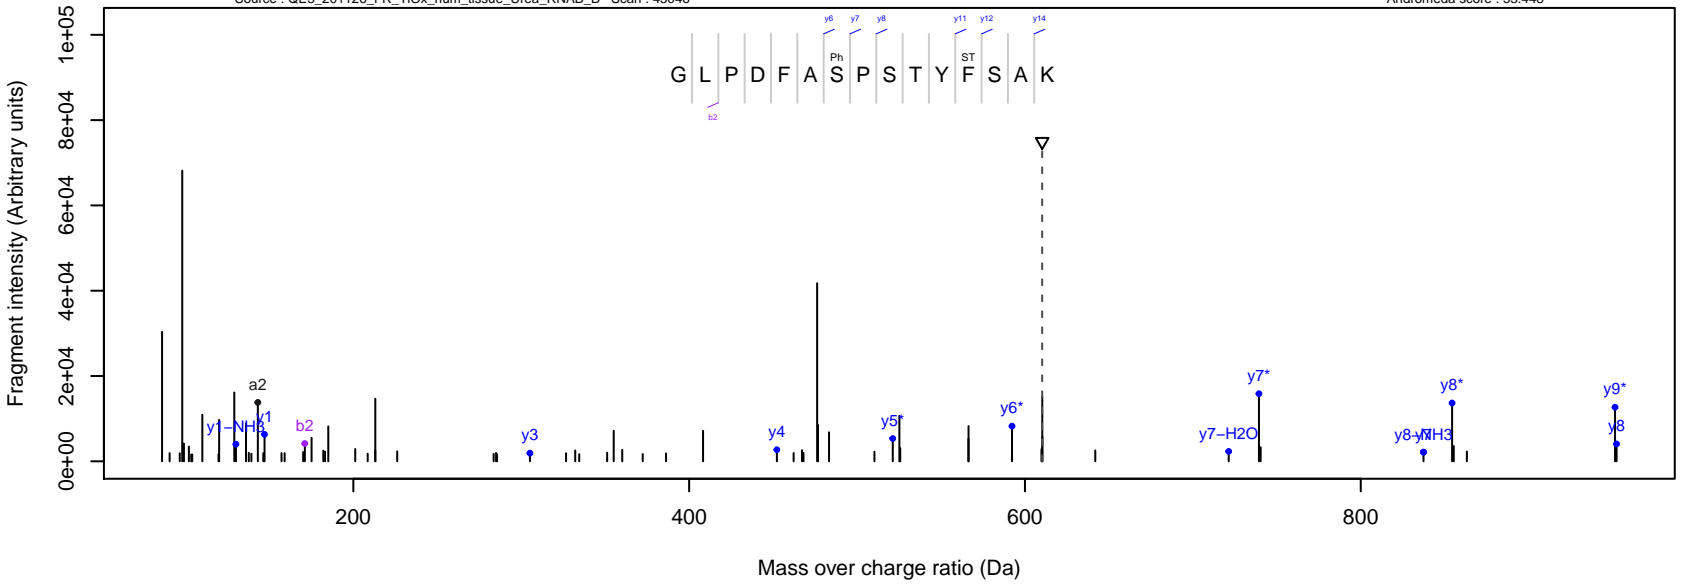

VAELALS(Phospho (STY))LSSTSDDEPPSSVSHGAK-3+

Source : QE3\_201126\_FR\_TiOx\_hum\_tissue\_Urea\_RNAB\_N Scan : 32905

Andromeda score : 53.444

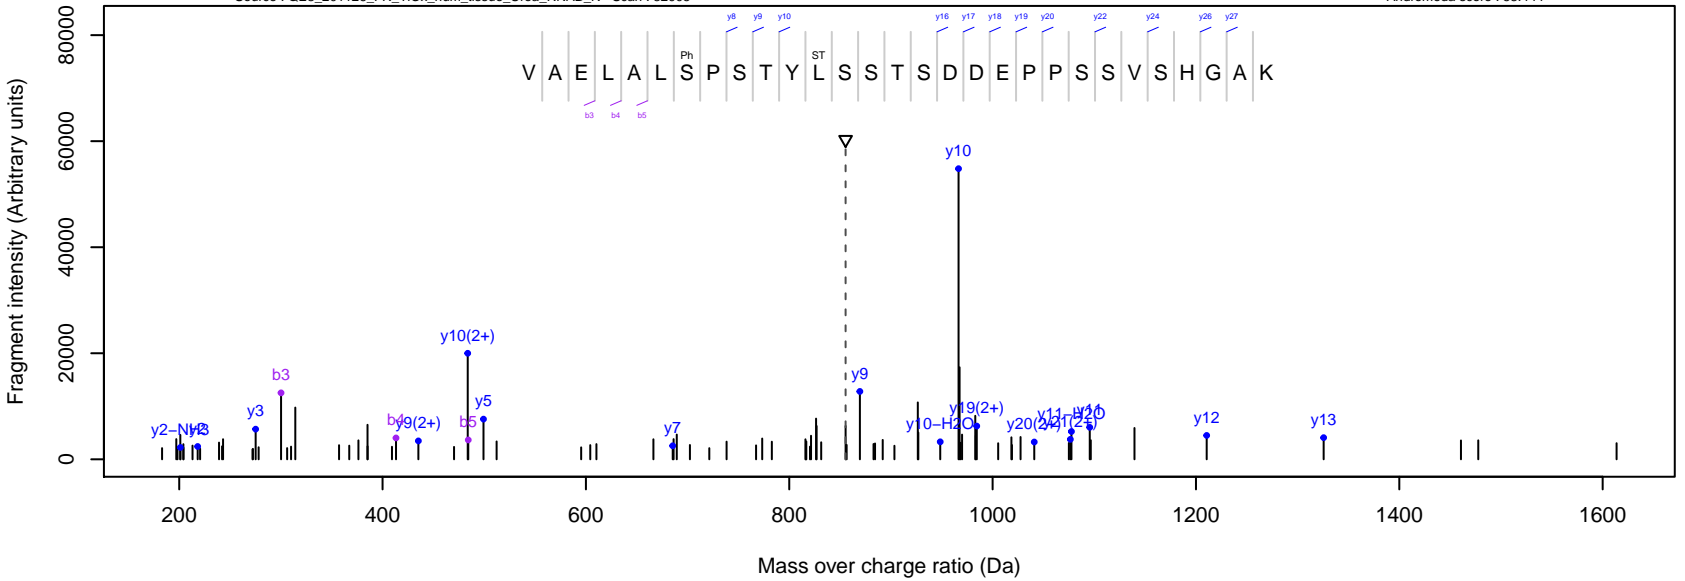

NSWIIQDTINTLRNDEDEGIPSPSTYENEEKK-4+

Source : QE3\_201126\_FR\_TiOx\_hum\_tissue\_Urea\_RNAB\_N Scan : 62154

Andromeda score : 53.408

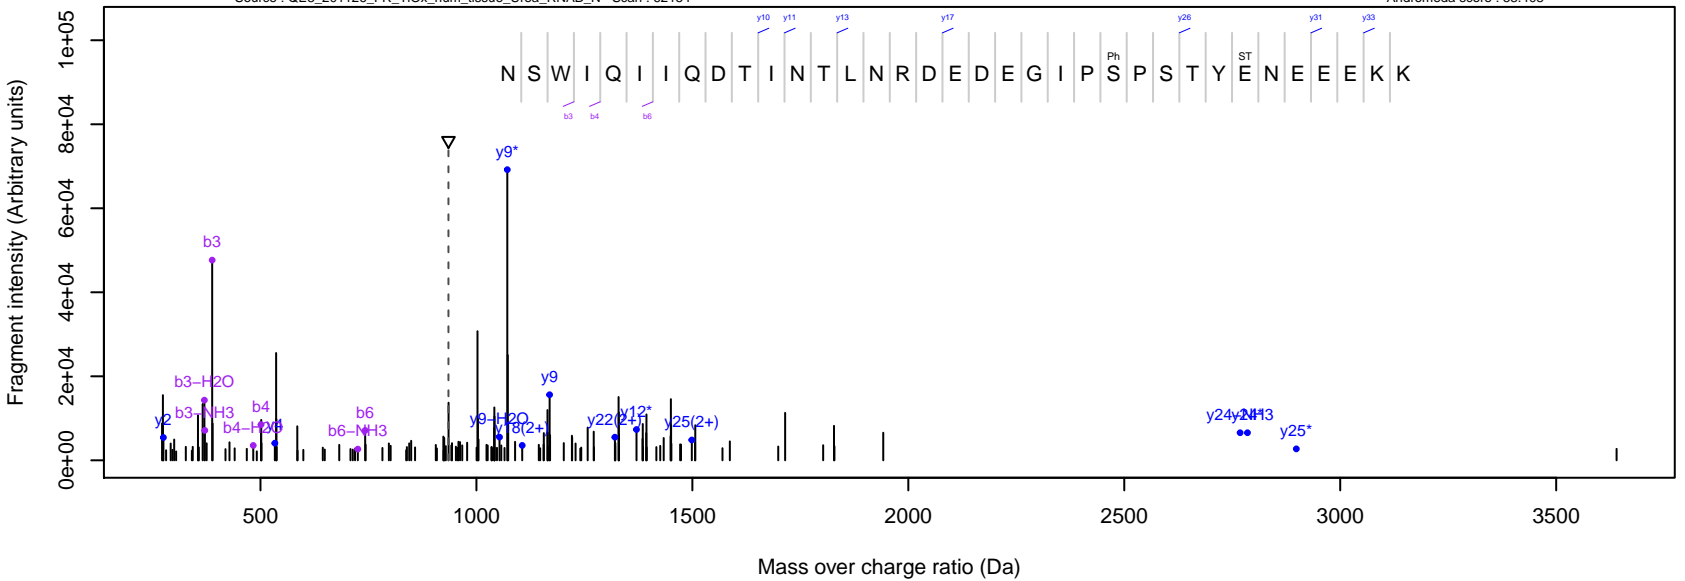

ALS(Phospho (STY))PGLLEESGLGLLAR-2+

Source : QE3\_201126\_FR\_TiOx\_hum\_tissue\_Urea\_RNAB\_B Scan : 53981

Andromeda score : 53.403

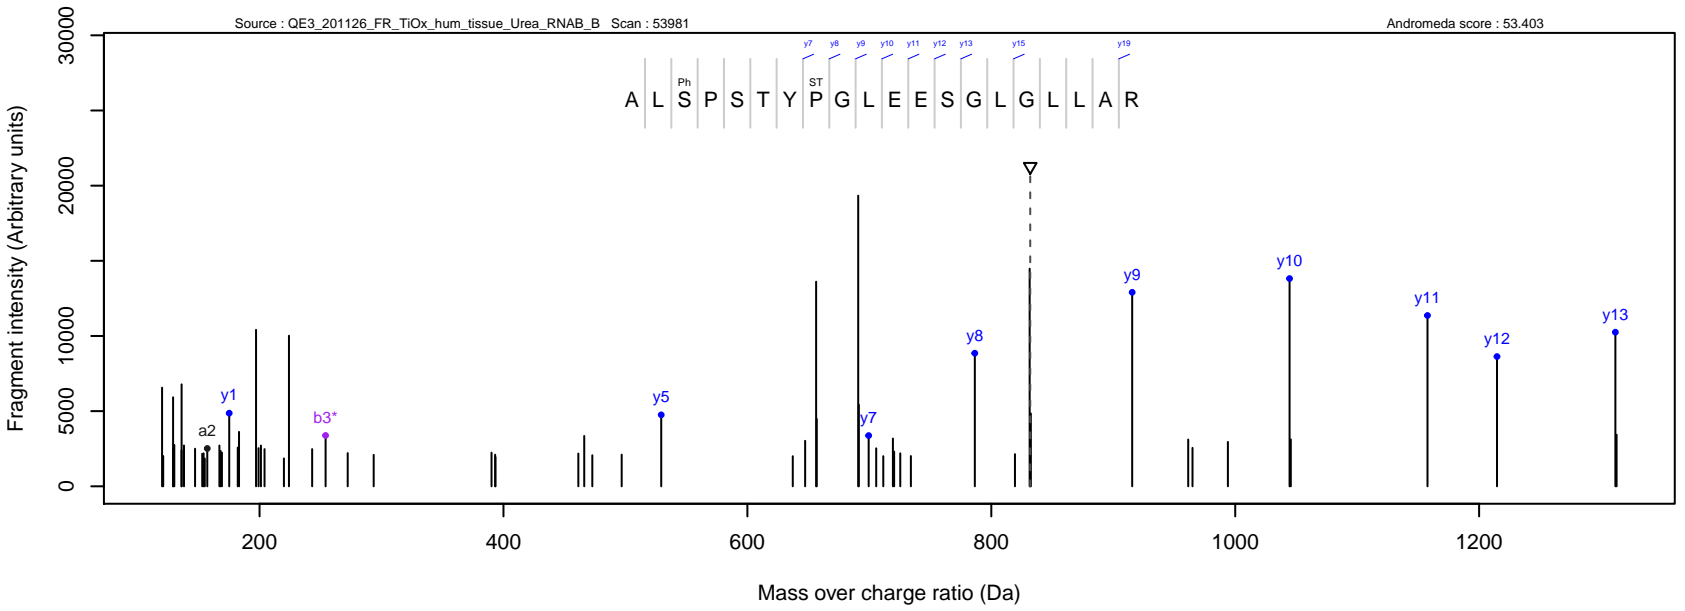

SGGDFKPTS(Phospho (STY))PSLPASK-2+

Source : QE3\_201126\_FR\_TiOx\_hum\_tissue\_Urea\_RNAB\_H Scan : 17698

Andromeda score : 53.403

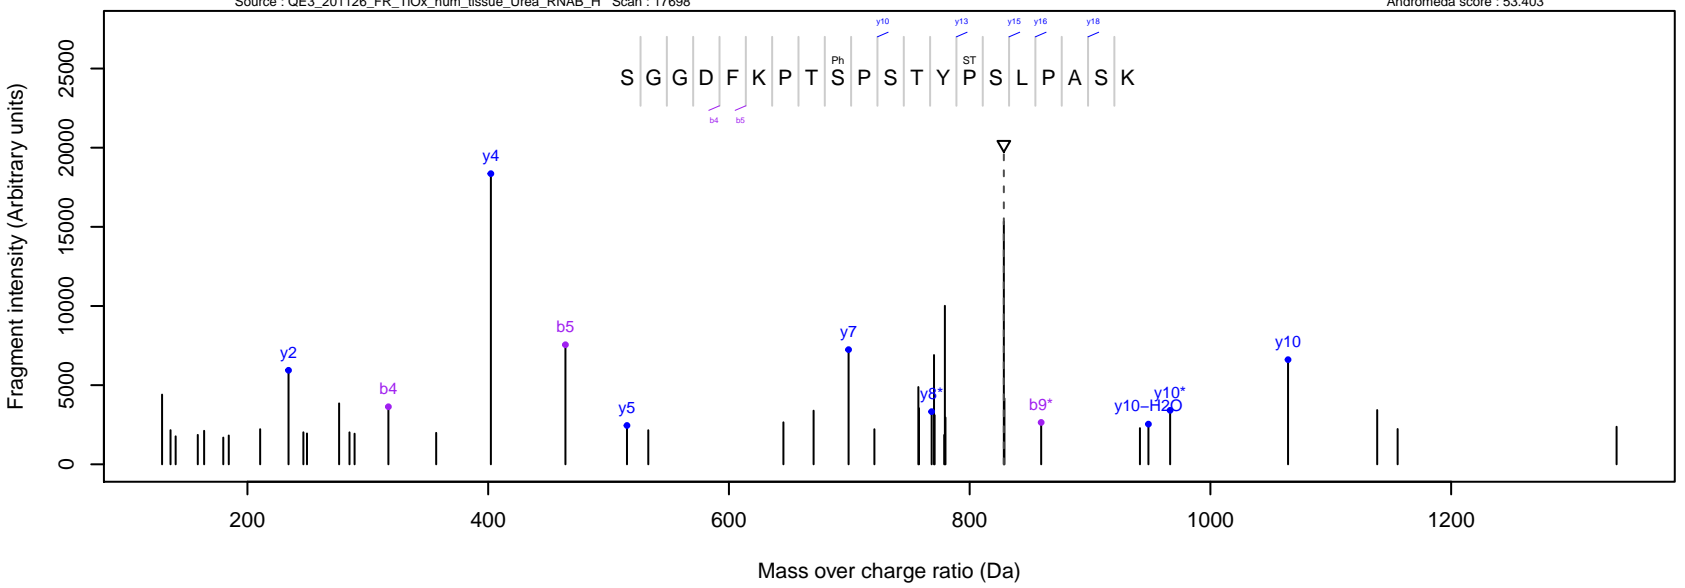

SVRPIHSSTS(Phospho (STY))S(Phospho (STY))PTISIEVGHGTGVTK-4+

Source : QE3\_201126\_FR\_TiOx\_hum\_tissue\_Urea\_RNAB\_N Scan : 16955

Andromeda score : 53.361

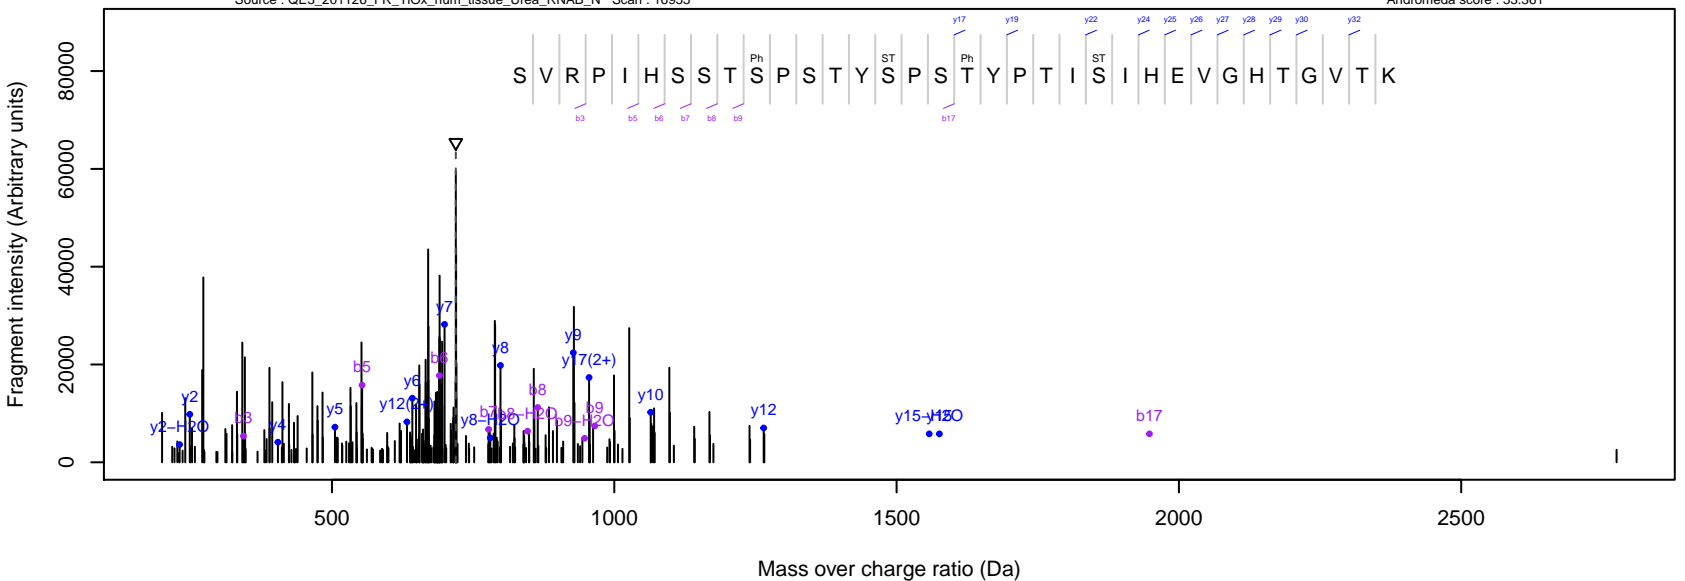

GIPLAT(Phospho (STY))GDT(Phospho (STY))SPELLPGAPLPPK-3+

Source : QE3\_201126\_FR\_TiOx\_hum\_tissue\_Urea\_RNAB\_H Scan : 60973

Andromeda score : 53.342

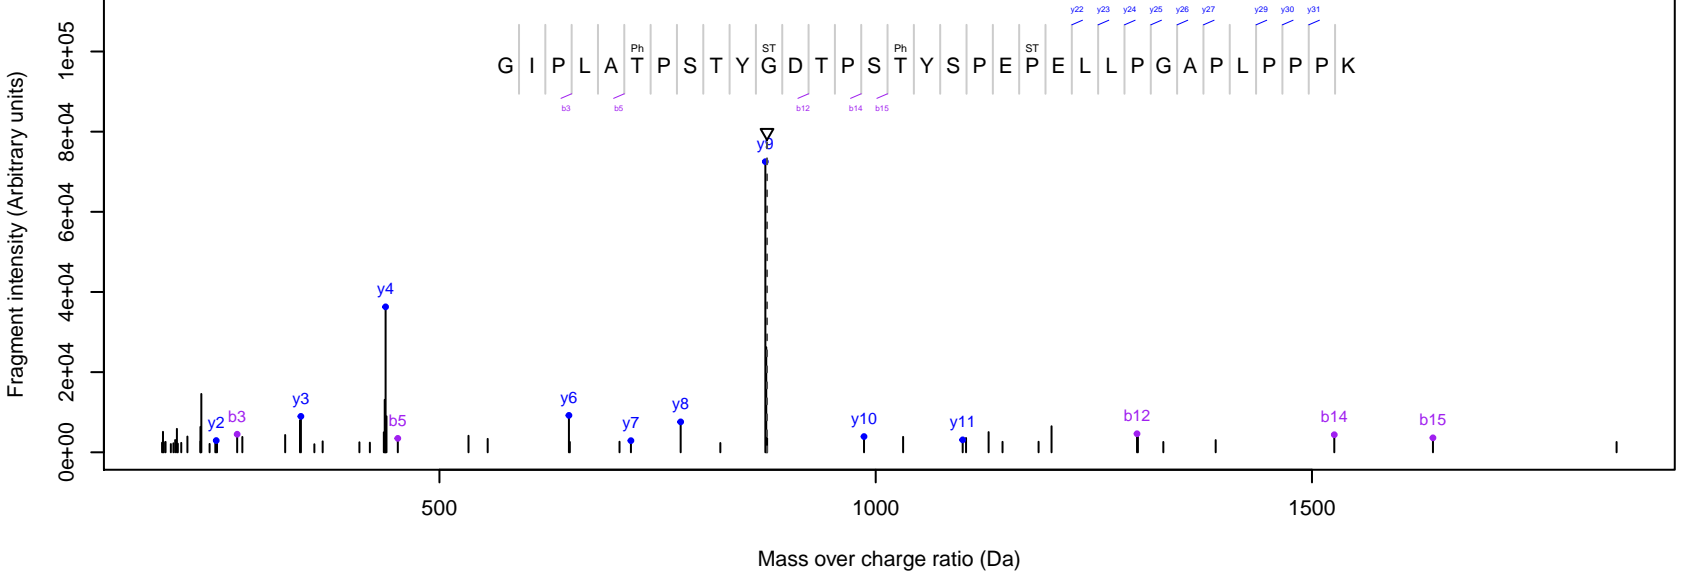

KSESPFRET(Phospho (STY))EPLVSPHQDK-4+

Source : QE3\_201126\_FR\_TiOx\_hum\_tissue\_Urea\_RNAB\_N Scan : 15186

Andromeda score : 53.342

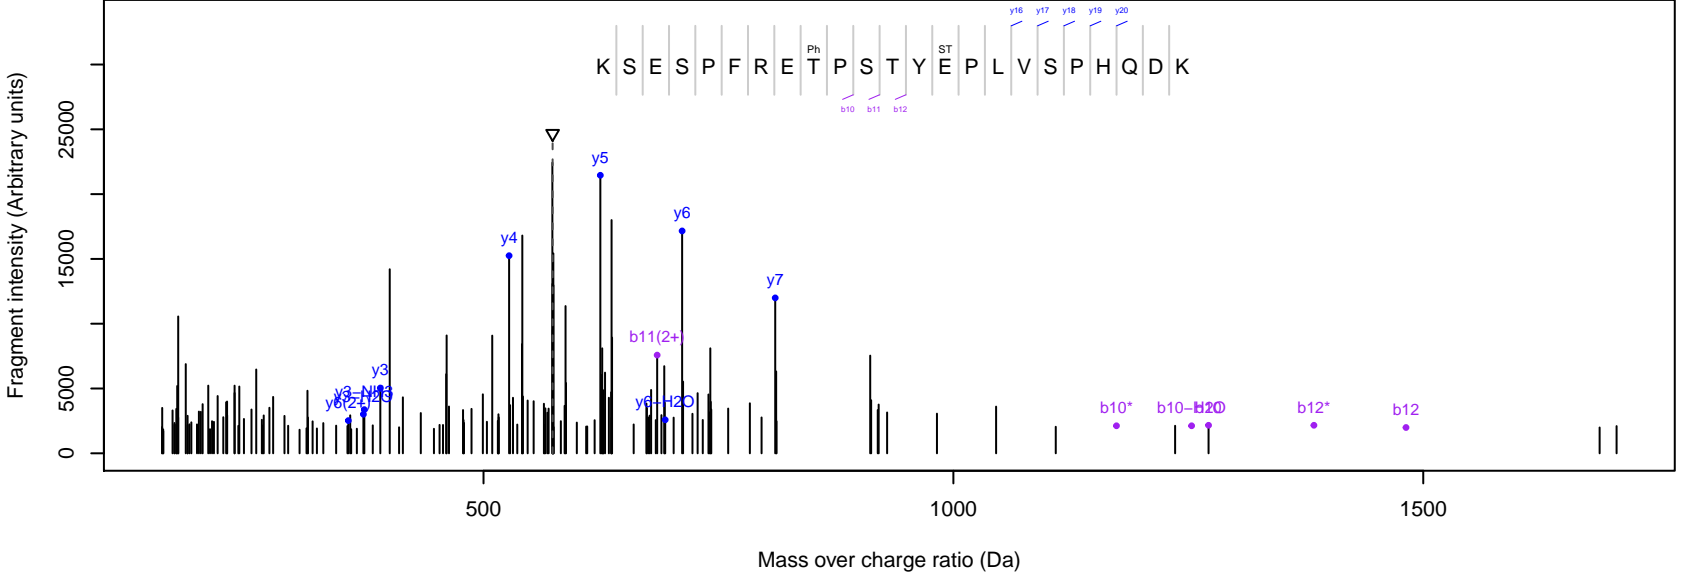

RRHSS(Phospho (STY))ETFSSTPSATR-3+

Source : QE3\_201126\_FR\_TiOx\_hum\_tissue\_Urea\_RNAB\_H Scan : 6343

Andromeda score : 53.328

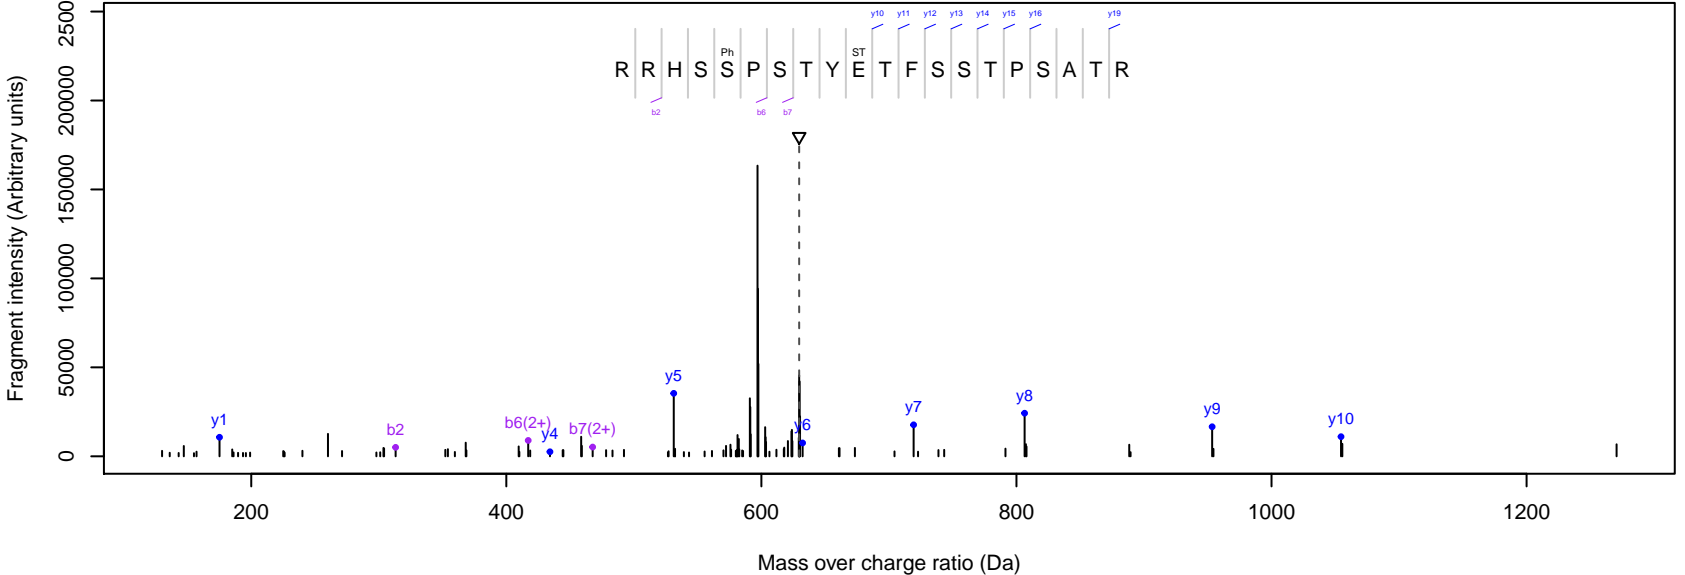

NLLS(Phospho (STY))VAYK-2+

Source : QE3\_201126\_FR\_TIOx\_hum\_tissue\_Urea\_RNAB\_N Scan : 36655

Andromeda score : 53.327

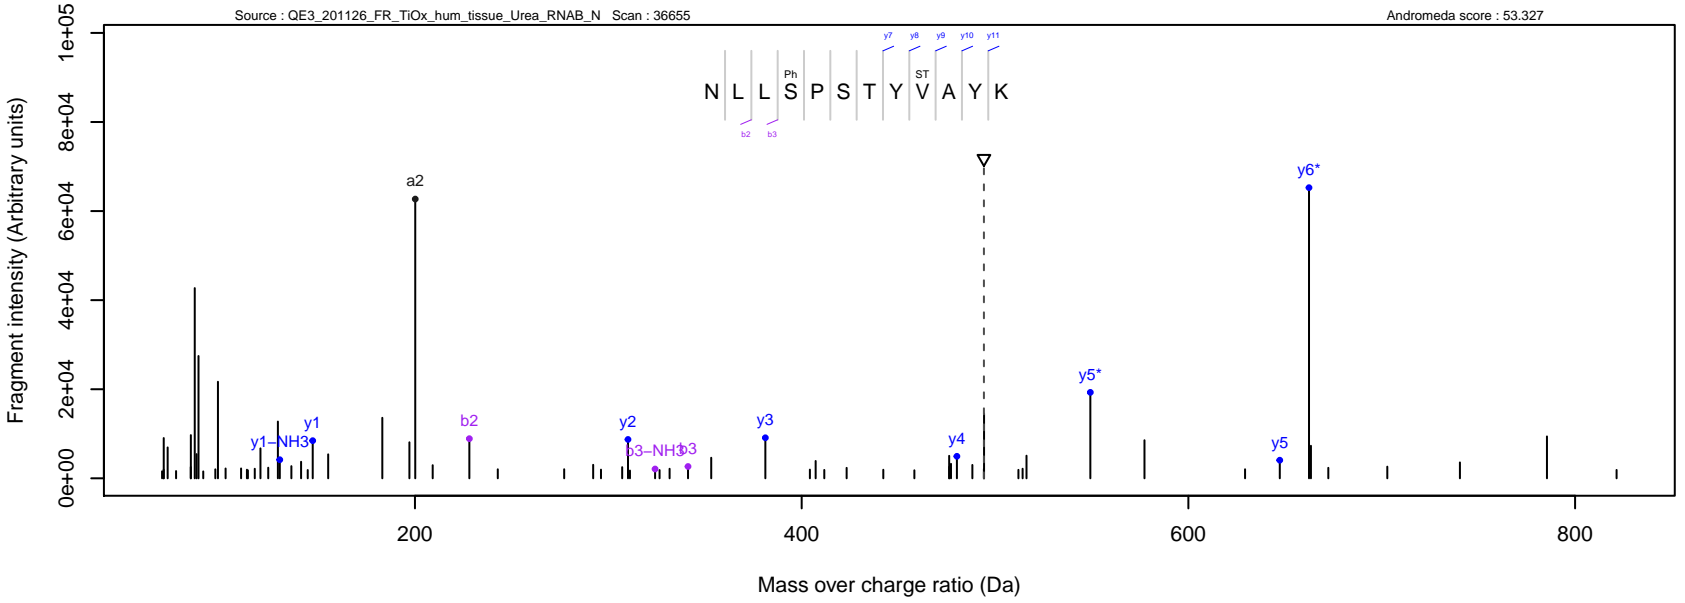

TGKEYIPGQPPLS(Phospho (STY))QSSDSSPTRNSEPAGLETPEAK-4+

Source : QE3\_201126\_FR\_TIOx\_hum\_tissue\_Urea\_RNAB\_H Scan : 26311

Andromeda score : 53.32

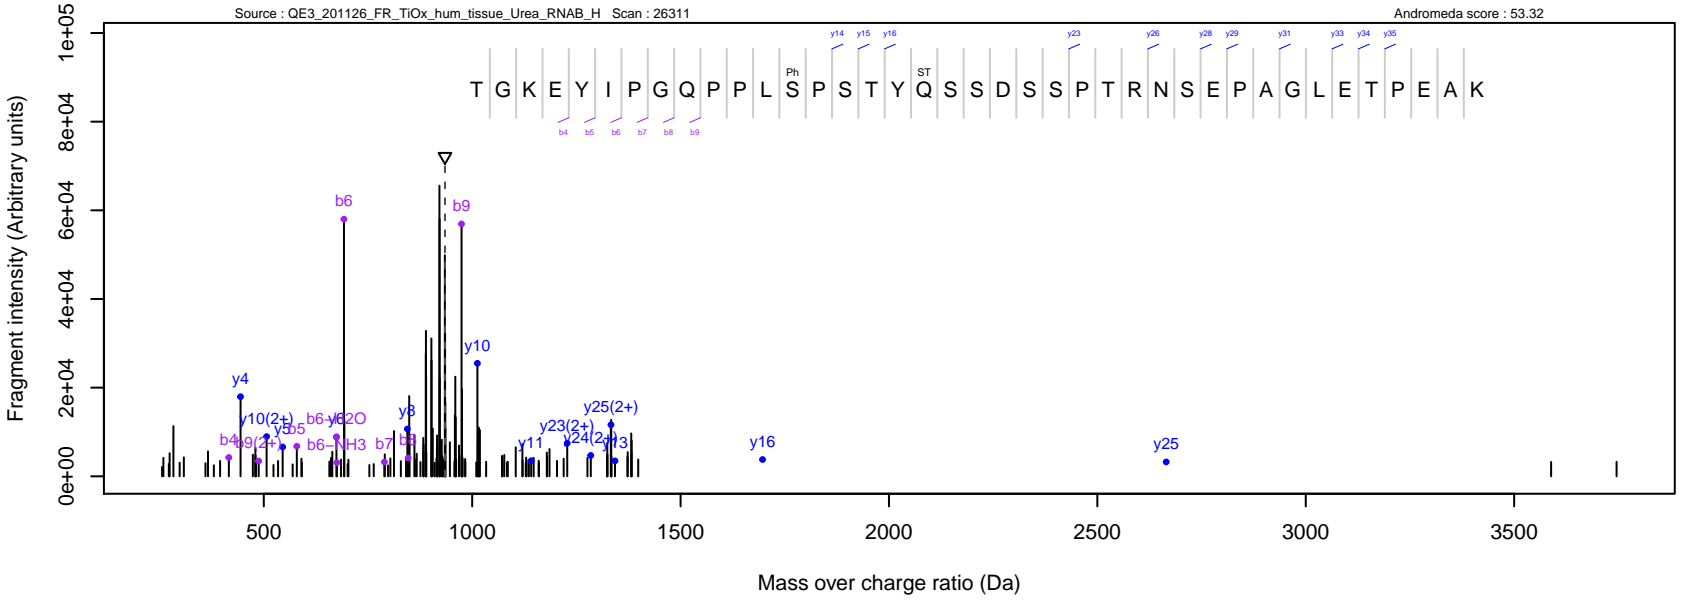

GPLDGSPLYPSTYAQVQRPPR-3+

Source : QE3\_201126\_FR\_TIOx\_hum\_tissue\_Urea\_RNAB\_B Scan : 18858

Andromeda score : 53.3

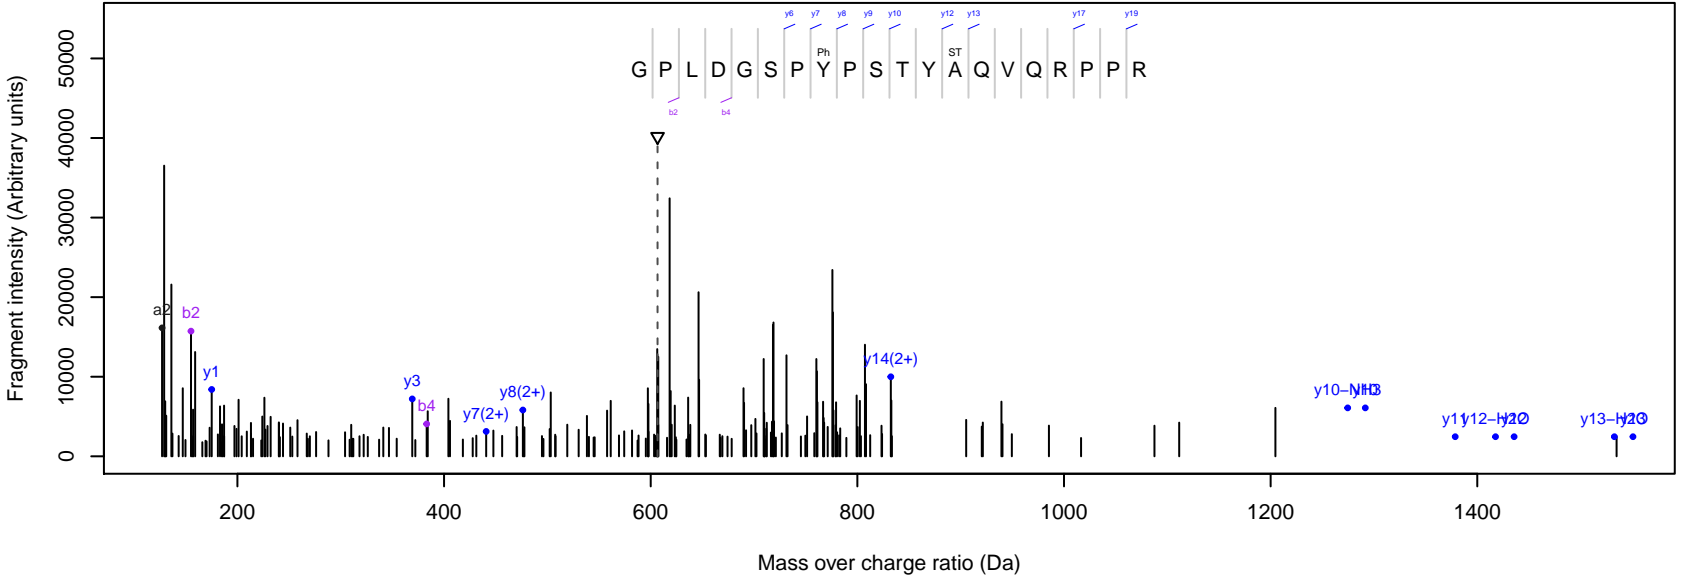

M(Oxidation (M))NGVM(Oxidation (M))FPGNS(Phospho (STY))PSYTER-2+

Source : QE3\_201126\_FR\_TIOx\_hum\_tissue\_Urea\_RNAB\_B Scan : 26483

Andromeda score : 53.3

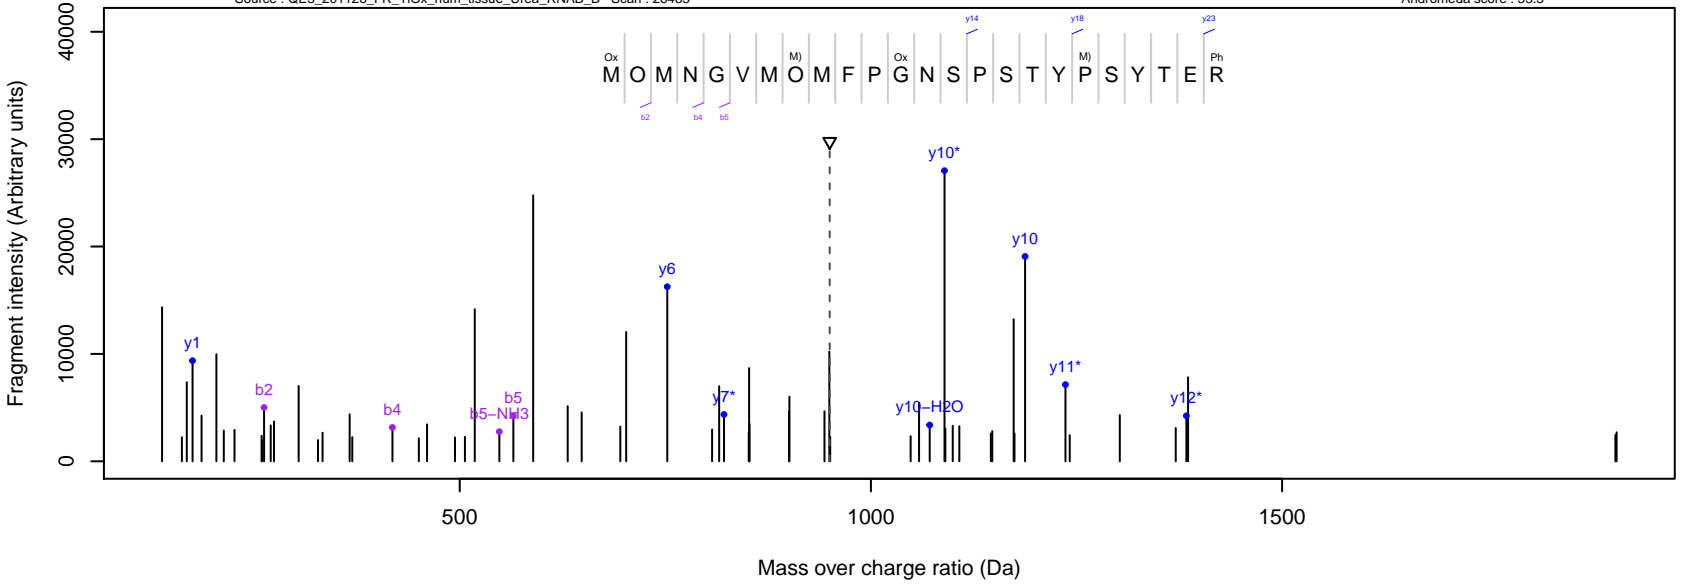

SAS(Phospho (STY))LGSQQLGLPR-2+

Source : QE3\_201126\_FR\_TIOx\_hum\_tissue\_Urea\_RNAB\_N Scan : 42931

Andromeda score : 53.3

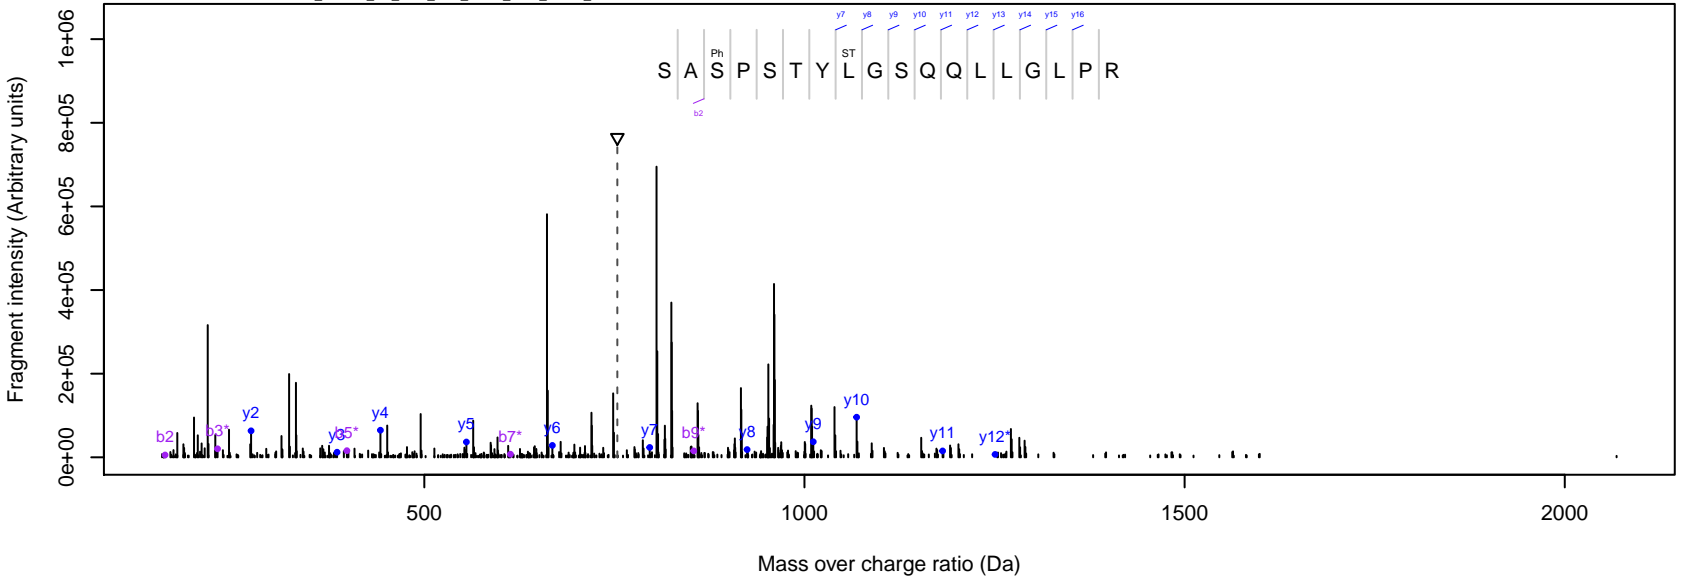

SRSSPS(Phospho (STY))TDHYKQEASVELR-4+

Source : QE3\_201126\_FR\_TIOx\_hum\_tissue\_Urea\_RNAB\_N Scan : 11544

Andromeda score : 53.278

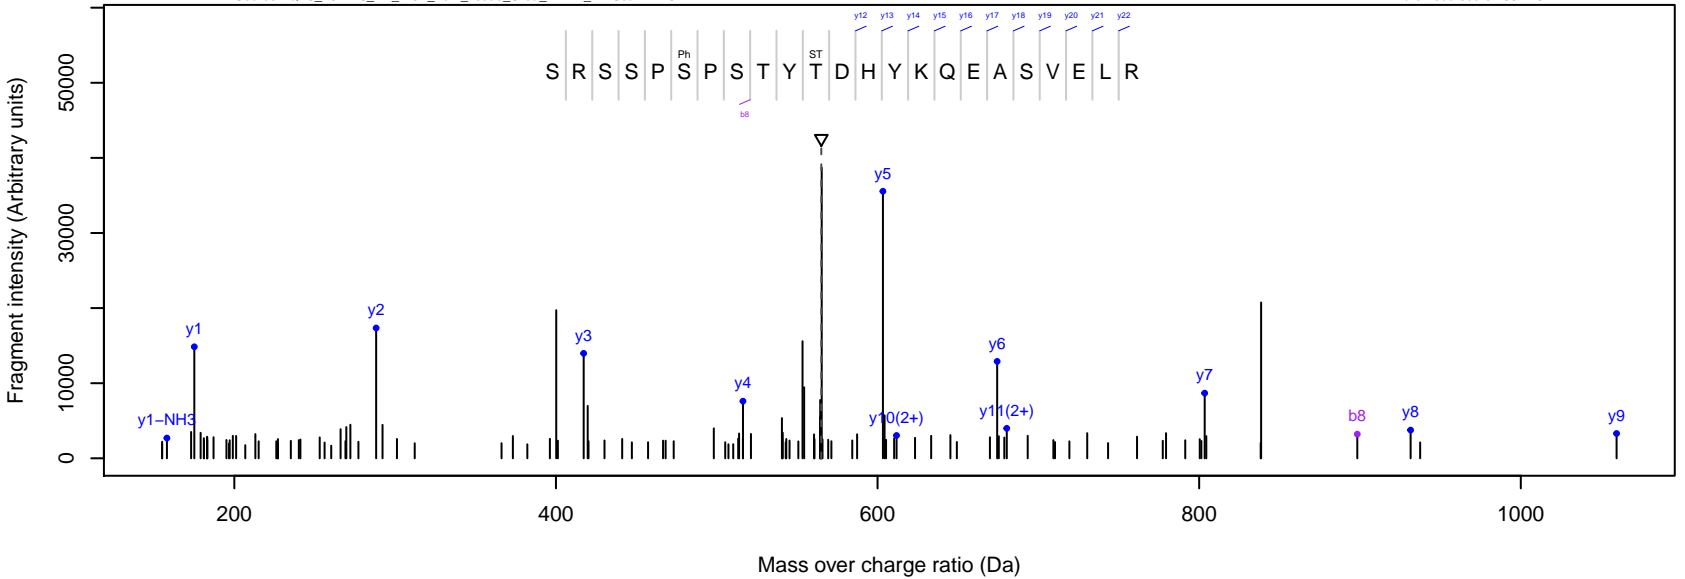

VEQALSEVAS(Phospho (STY))S(Phospho (STY))LQSSAPK-2+

Source : QE3\_201126\_FR\_TiOx\_hum\_tissue\_Urea\_RNAB\_B Scan : 37666

Andromeda score : 53.278

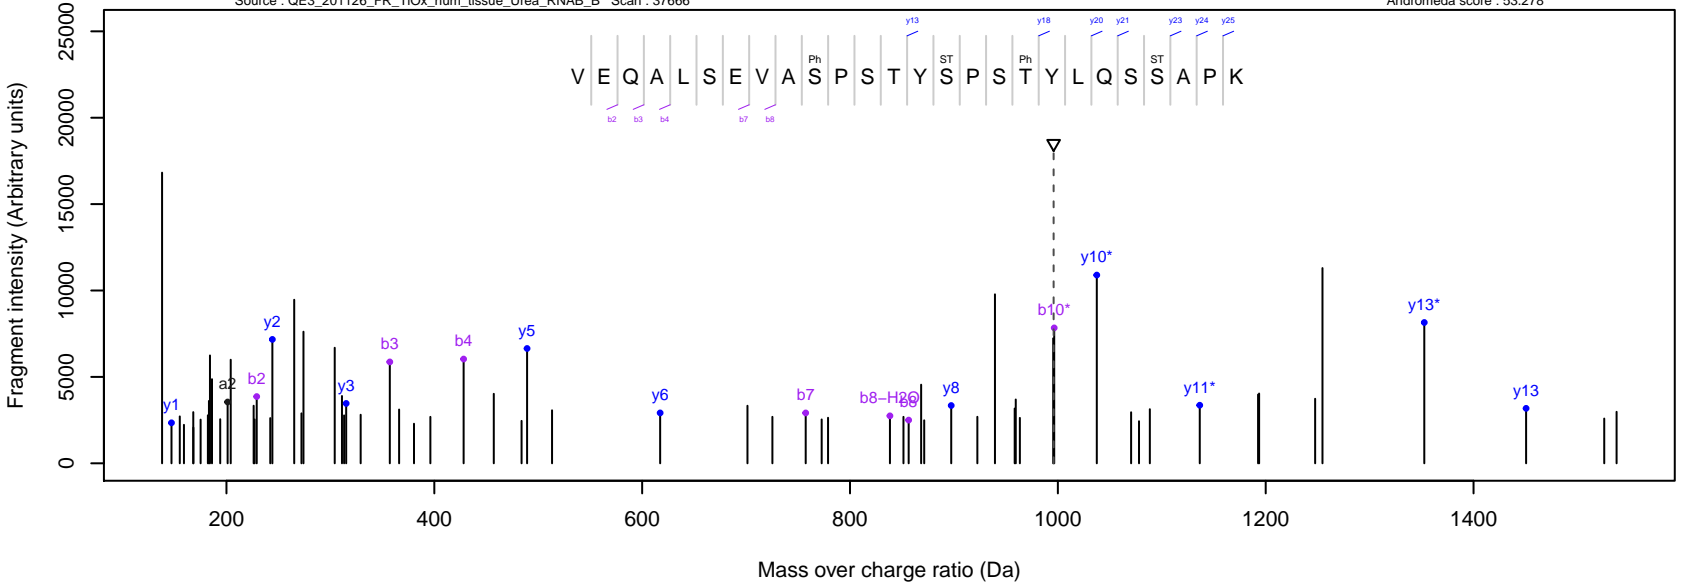

SLS(Phospho (STY))TSGESLYHVLGLDKNATSDDIK-3+

Source : QE3\_201126\_FR\_TiOx\_hum\_tissue\_Urea\_RNAB\_H Scan : 46946

Andromeda score : 53.266

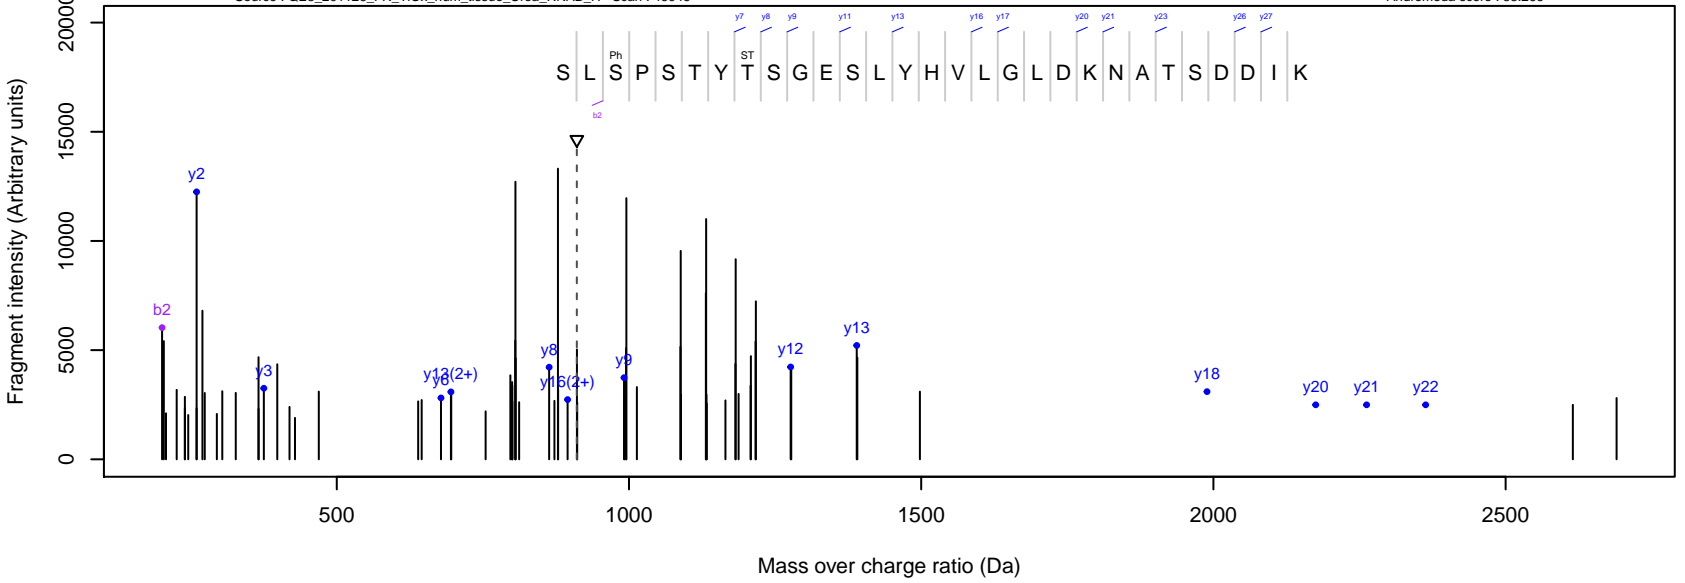

IS(Phospho (STY))PLSSPCSSPLQGTPASSLVSK-3+

Source : QE3\_201126\_FR\_TiOx\_hum\_tissue\_Urea\_RNAB\_H Scan : 45575

Andromeda score : 53.262

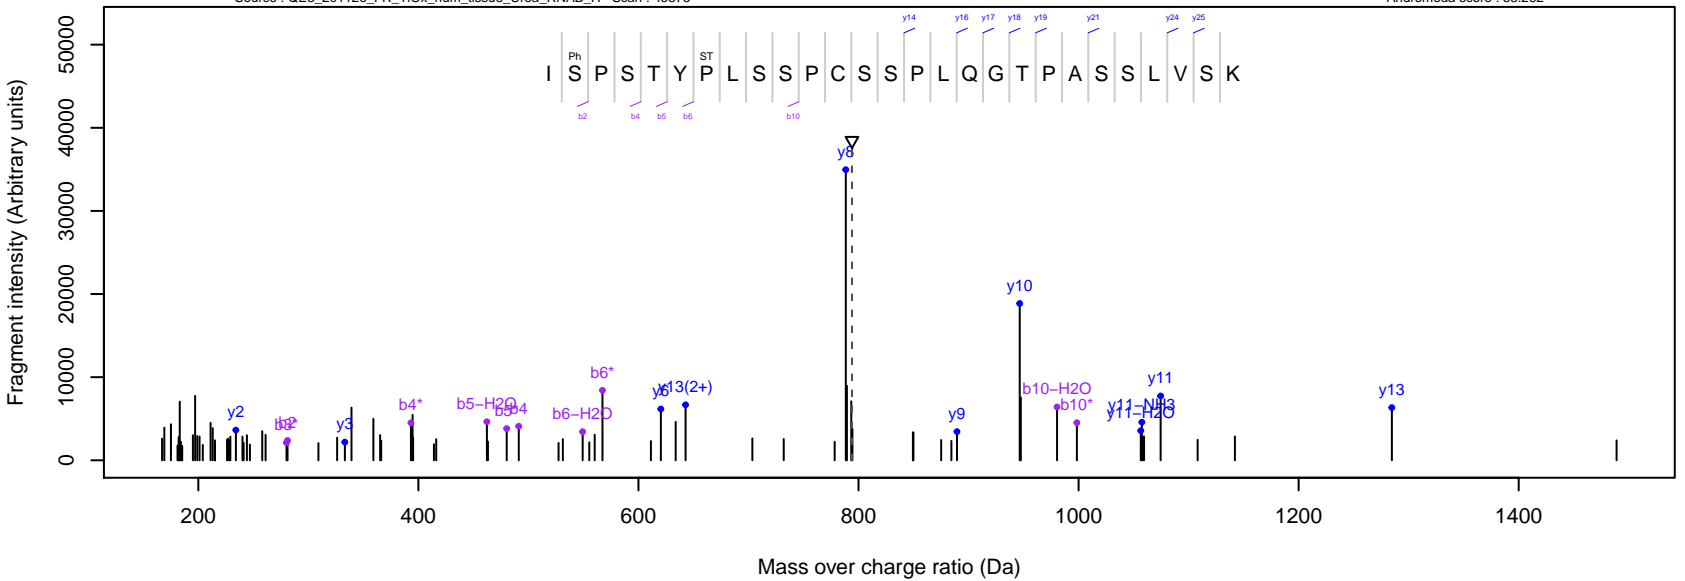



**KKPS(Phospho (STY))EEEEAAVAGPPGGPQVNPVPTDEVV-3+**

Source : QE3\_201126\_FR\_TiOx\_hum\_tissue\_Urea\_RNAB\_H Scan : 41626

Andromeda score : 53.262

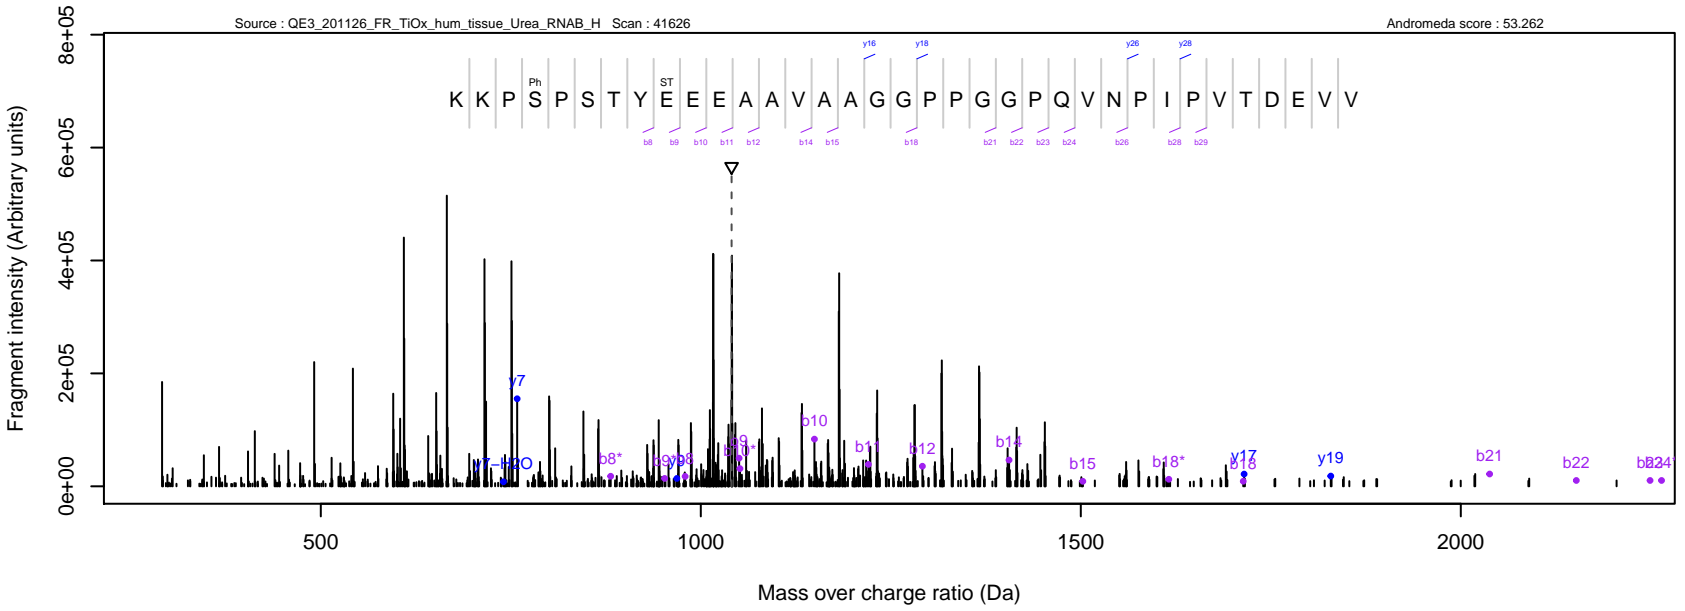

**SQASMVINS(Phospho (STY))DT(Phospho (STY))DDEEVSAALTLAHLK-3+**

Source : QE3\_201126\_FR\_TiOx\_hum\_tissue\_Urea\_RNAB\_B Scan : 59838

Andromeda score : 53.262

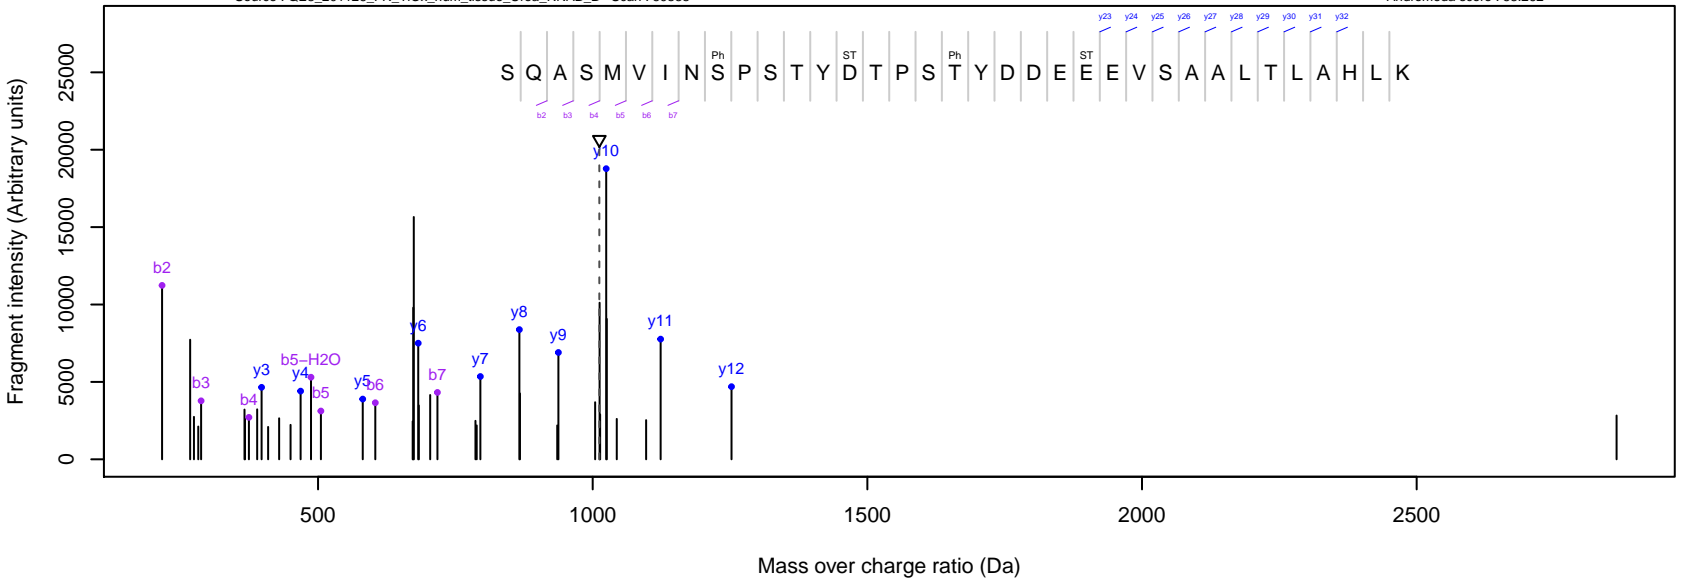

**SS(Phospho (STY))S(Phospho (STY))PVTELASR-2+**

Source : QE3\_201126\_FR\_TiOx\_hum\_tissue\_Urea\_RNAB\_H Scan : 28532

Andromeda score : 53.252

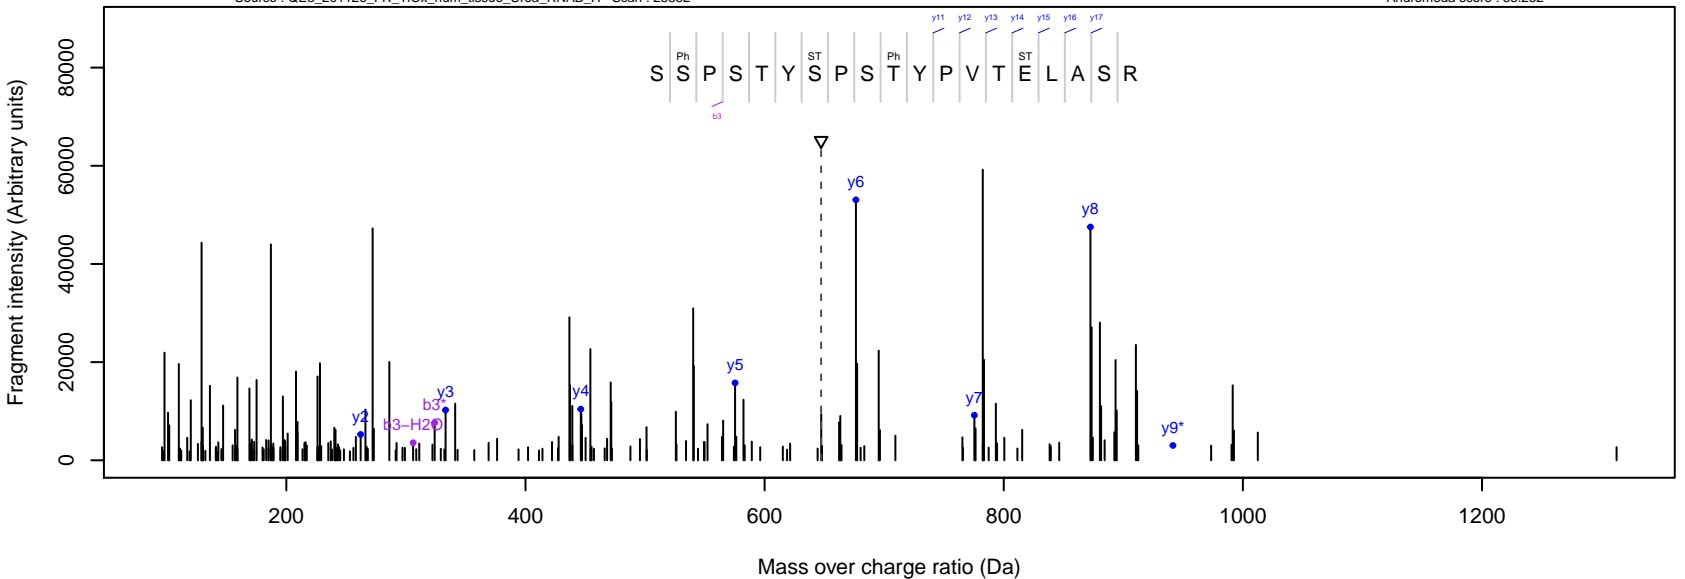

EKPSFIDLETFNAGSDVGS(Phospho (STY))DSEYESPFMGGAR-3+

Source : QE3\_201126\_FR\_TiOx\_hum\_tissue\_Urea\_RNAB\_H Scan : 56333

Andromeda score : 53.206

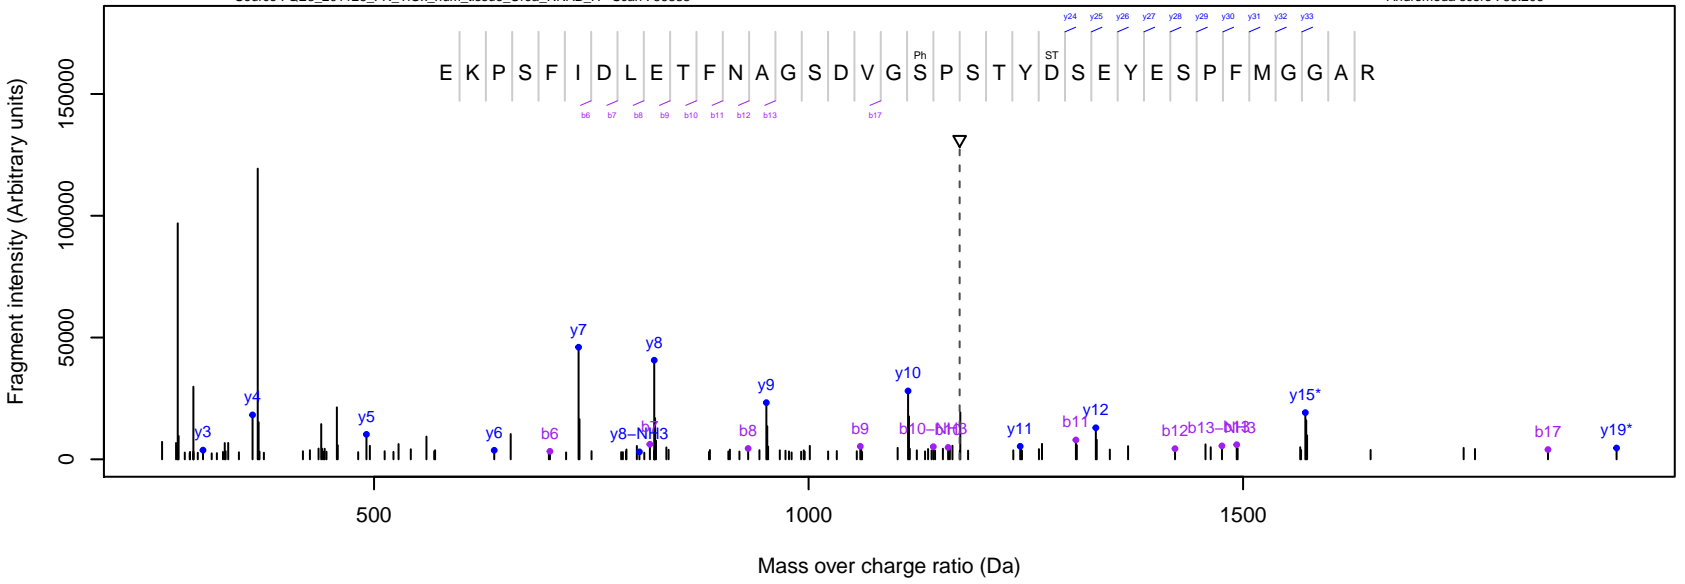

GPGLGS(Phospho (STY))TQGQTIALPAQGLIEFR-3+

Source : QE3\_201126\_FR\_TiOx\_hum\_tissue\_Urea\_RNAB\_B Scan : 57974

Andromeda score : 53.197

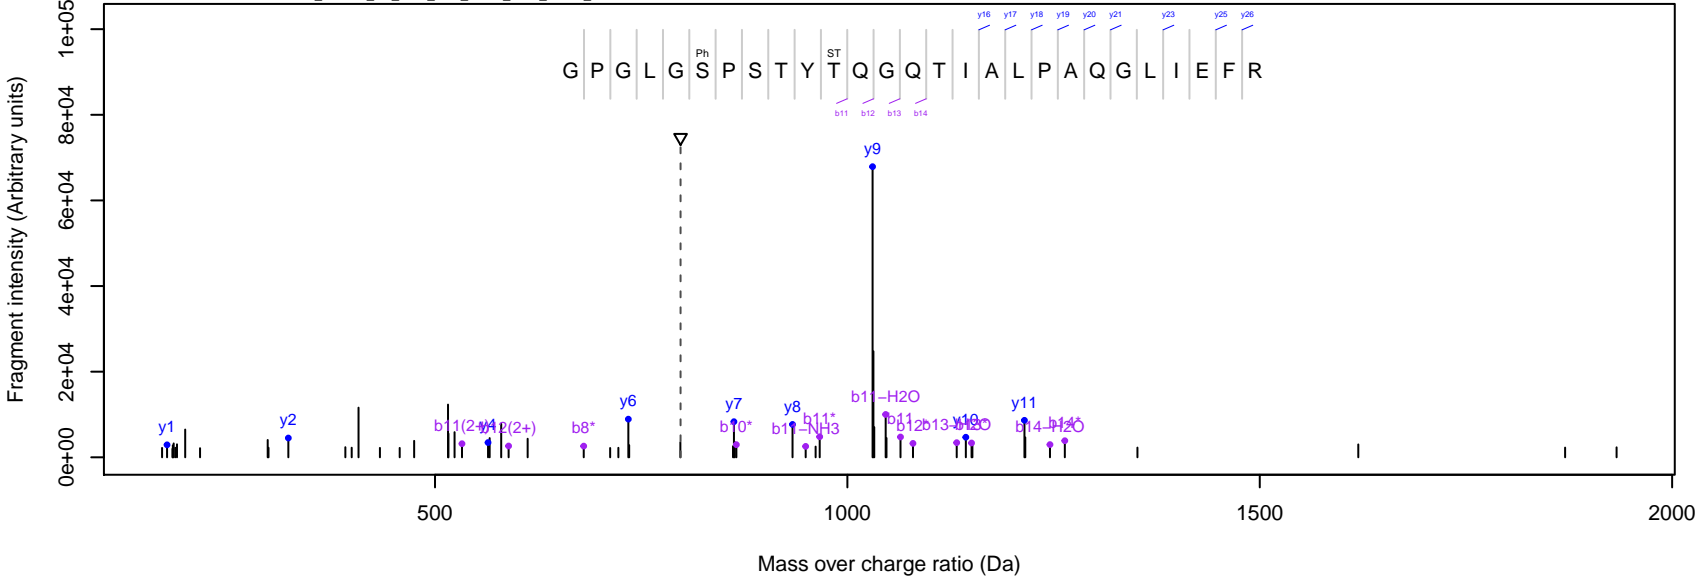

AKPTS(Phospho (STY))DKPGSPYR-3+

Source : QE3\_201126\_FR\_TiOx\_hum\_tissue\_Urea\_RNAB\_H Scan : 4364

Andromeda score : 53.169

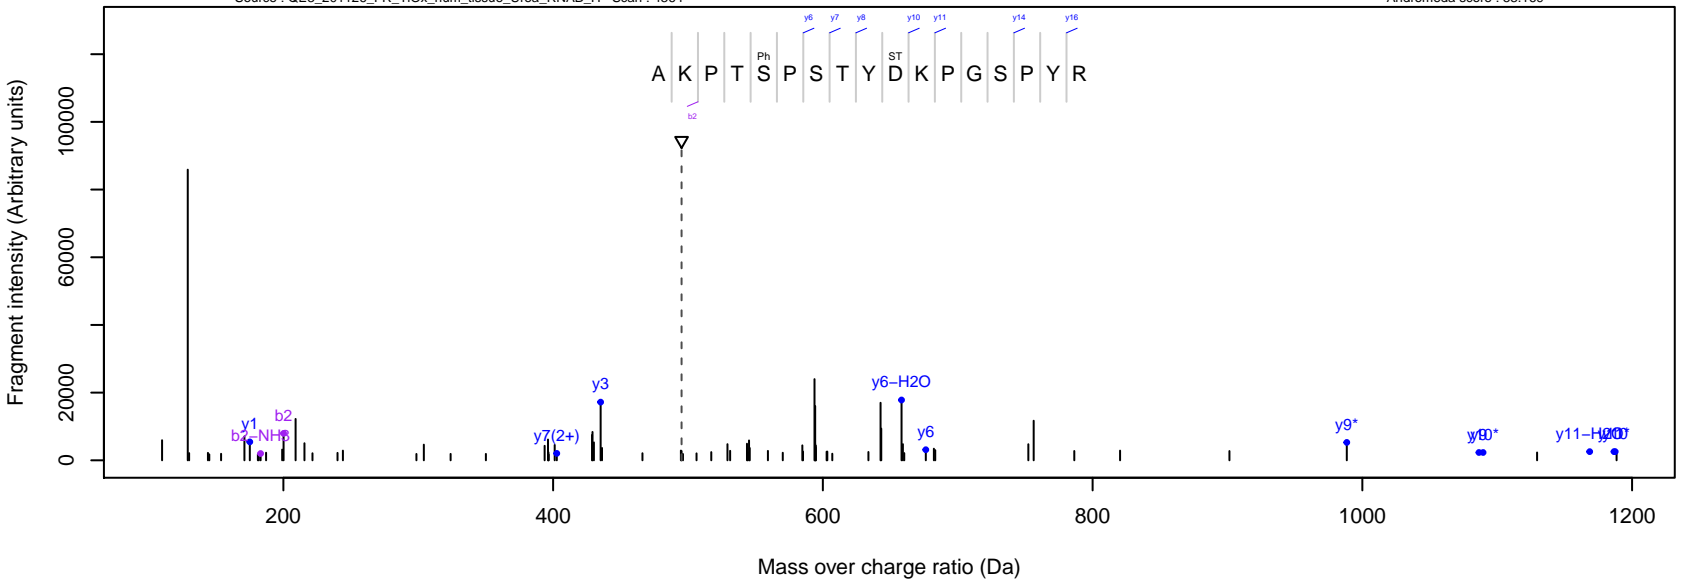

LS(Phospho (STY))GPSLKMPSLEISAPK-2+

Source : QE3\_201126\_FR\_TIOx\_hum\_tissue\_Urea\_RNAB\_H Scan : 43214

Andromeda score : 53.169

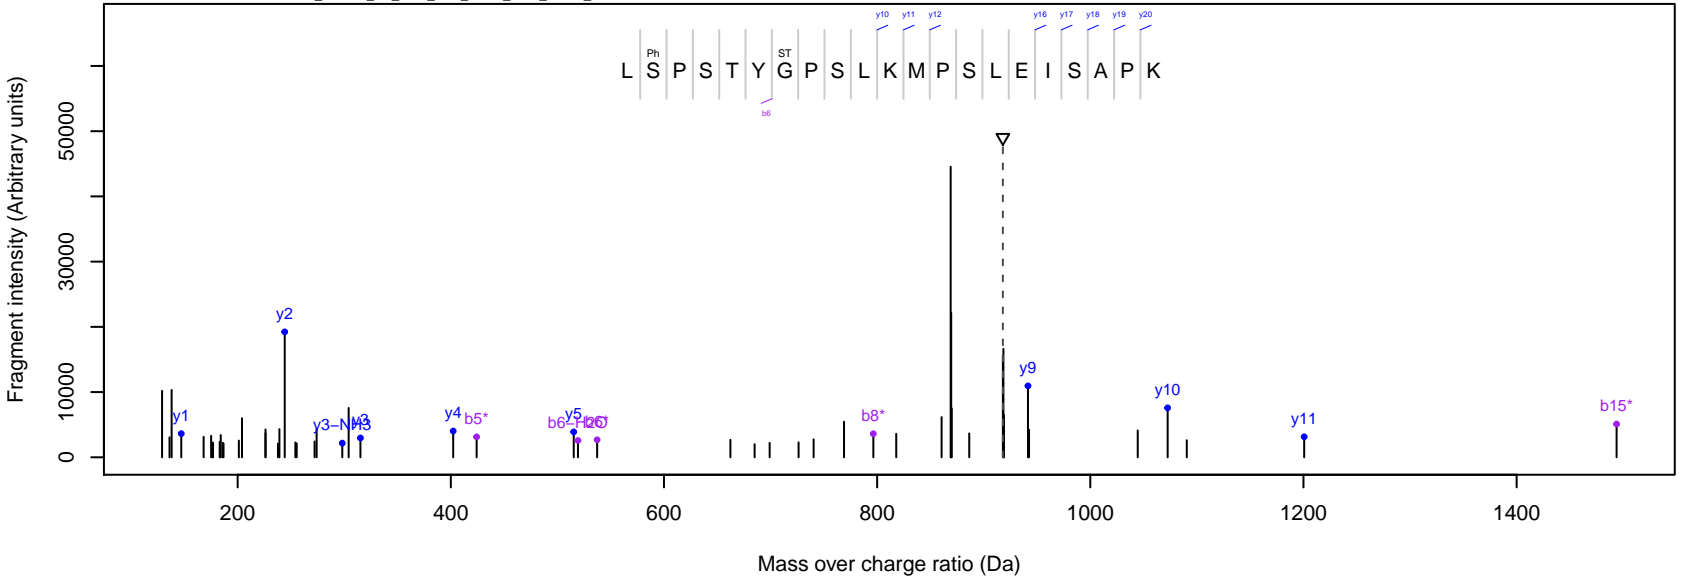

EESLVEELSPAS(Phospho (STY))EKKVPPSEK-3+

Source : QE3\_201126\_FR\_TIOx\_hum\_tissue\_Urea\_RNAB\_N Scan : 22764

Andromeda score : 53.089

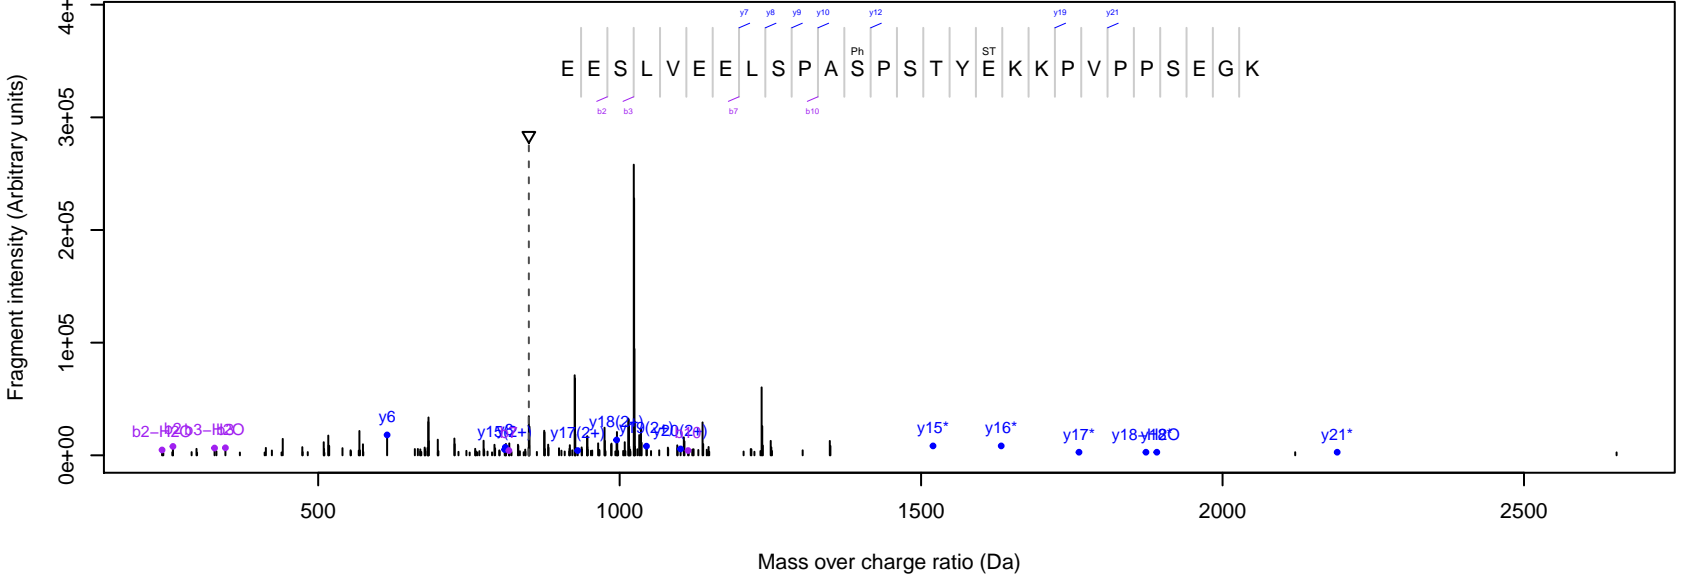

MAESPCSPSGQQPPS(Phospho (STY))PPS(Phospho (STY))PDELPAVK-3+

Source : QE3\_201126\_FR\_TIOx\_hum\_tissue\_Urea\_RNAB\_N Scan : 39207

Andromeda score : 53.074

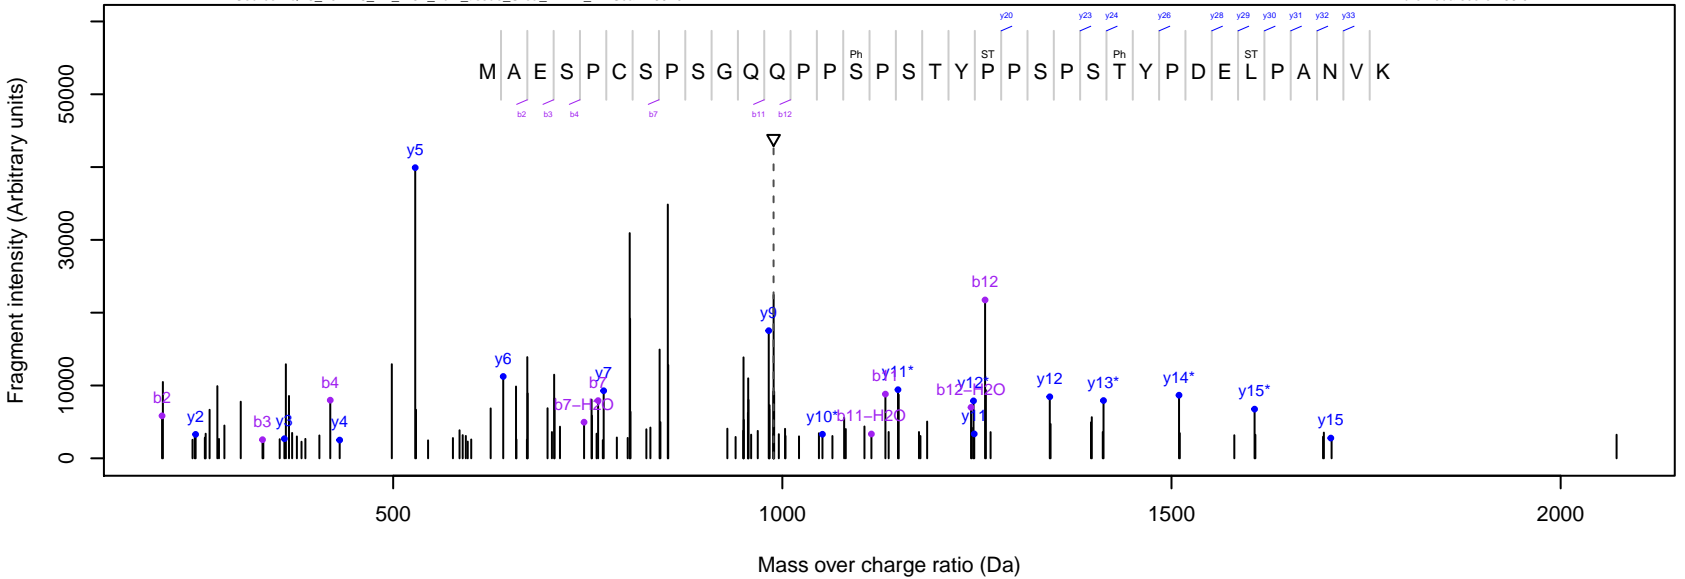

ASPEPQRENAS(Pospho (STY))PAPGTTAEEAM(Oxidation (M))SR-3+

Source : QE3\_201126\_FR\_TiOx\_hum\_tissue\_Urea\_RNAB\_H Scan : 10667

Andromeda score : 53.073

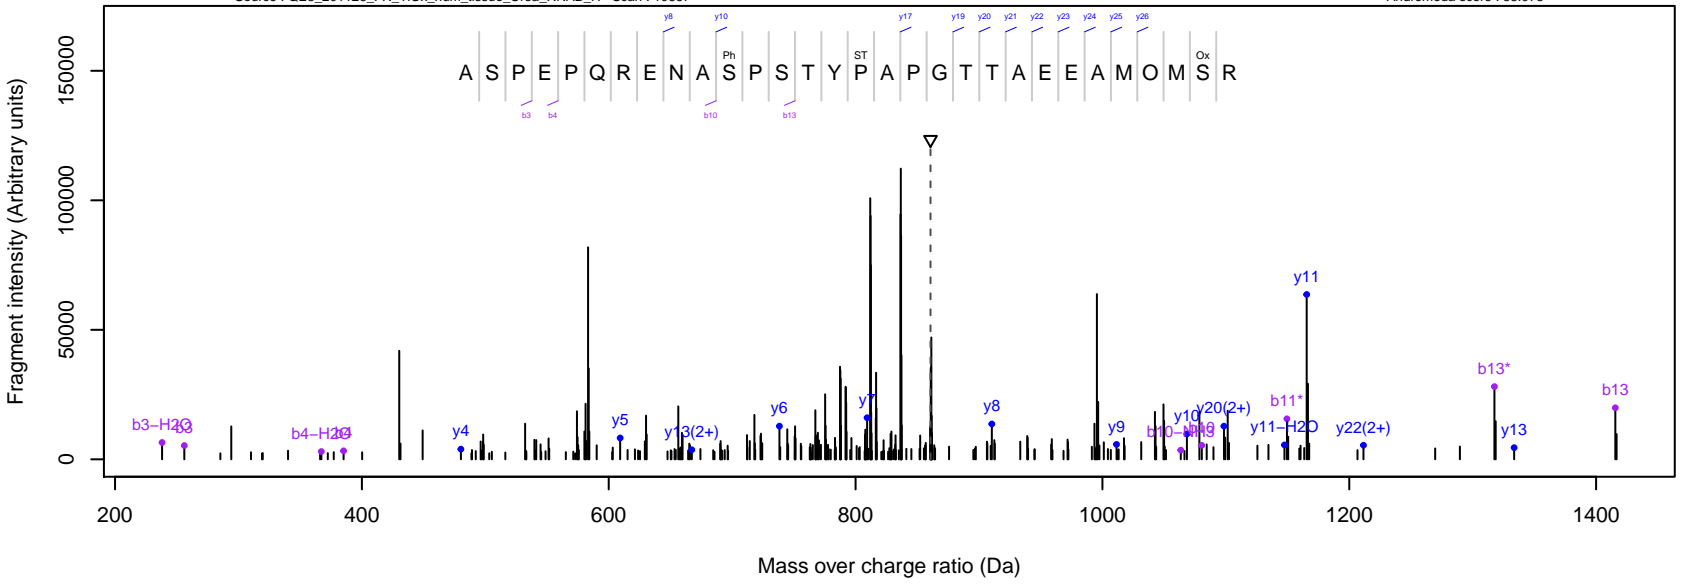

LQDSSDPDTGSEEEGSSRLS(Phospho (STY))PPHSR-3+

Source : QE3\_201126\_FR\_TiOx\_hum\_tissue\_Urea\_RNAB\_N Scan : 15109

Andromeda score : 53.073

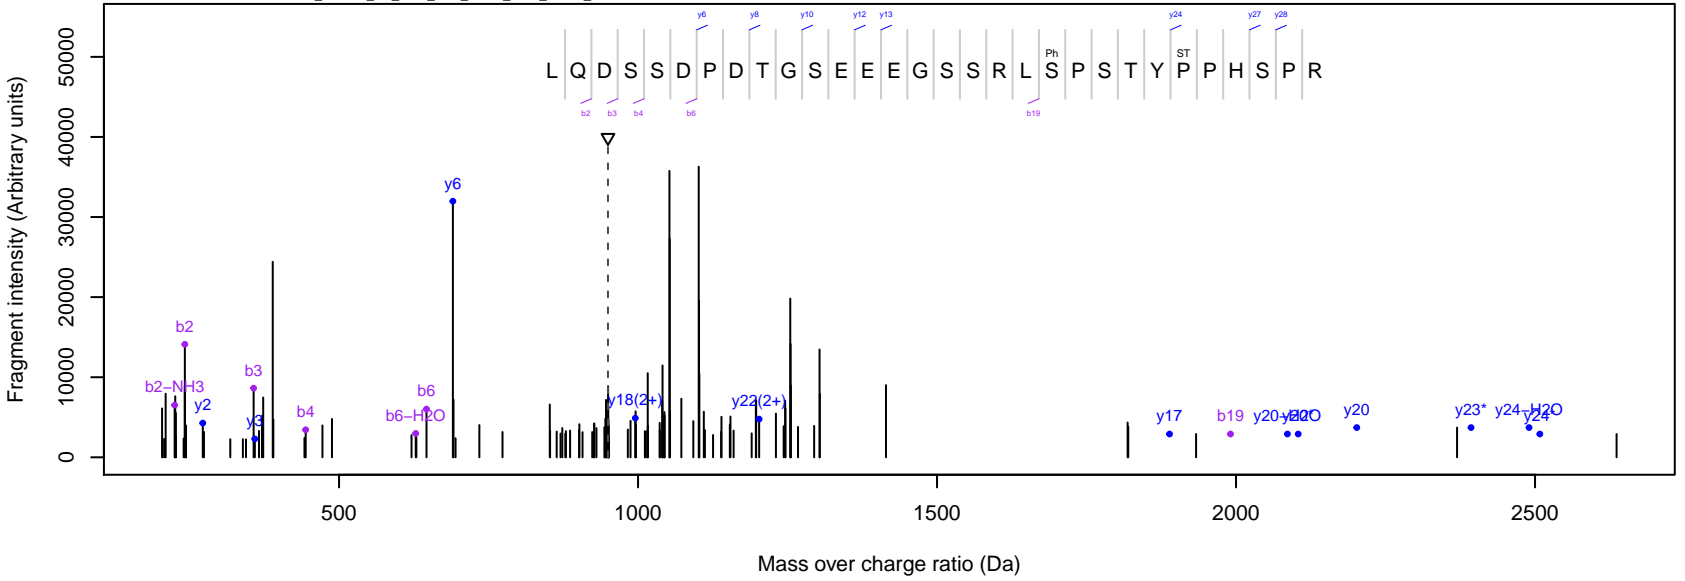

S(Phospho (STY))TGQLNLSTSPINSSSYLGYNSENAR

Source : QE3\_201126\_FR\_TiOx\_hum\_tissue\_Urea\_RNAB\_N Scan : 45836

Andromeda score : 53.073

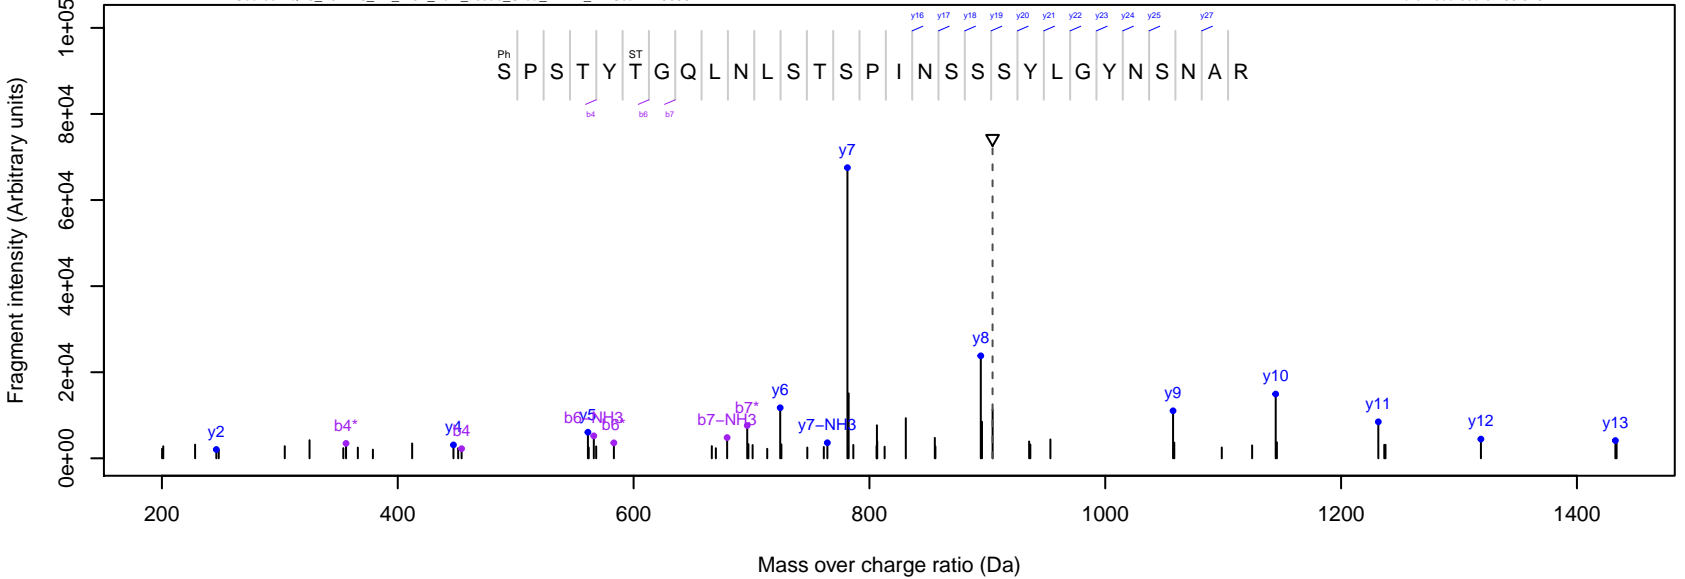

VEAEAGGS(Phospho (STY))GARTPLSR-3+

Source : QE3\_201126\_FR\_TIOx\_hum\_tissue\_Urea\_RNAB\_B Scan : 10617

Andromeda score : 53.059

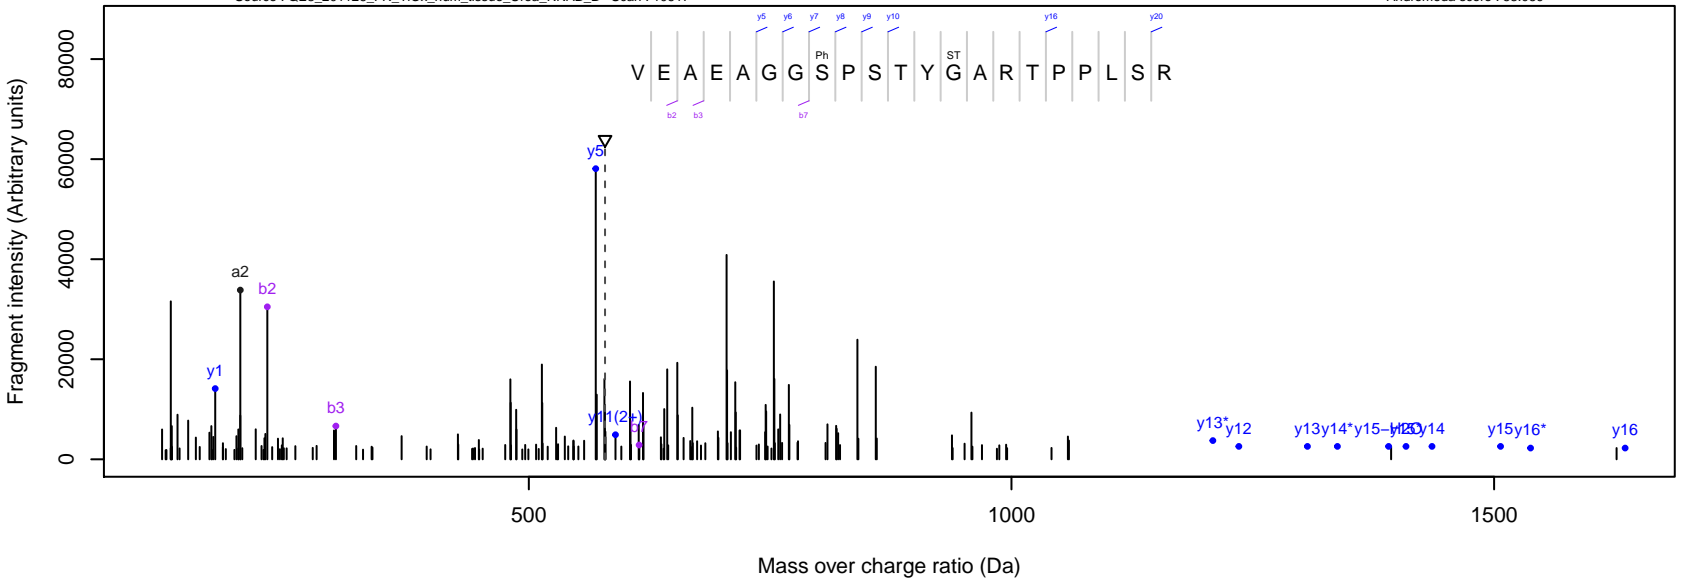

GLPDFASFS(Phospho (STY))AKL-2+

Source : QE3\_201126\_FR\_TIOx\_hum\_tissue\_Urea\_RNAB\_N Scan : 55710

Andromeda score : 53.001

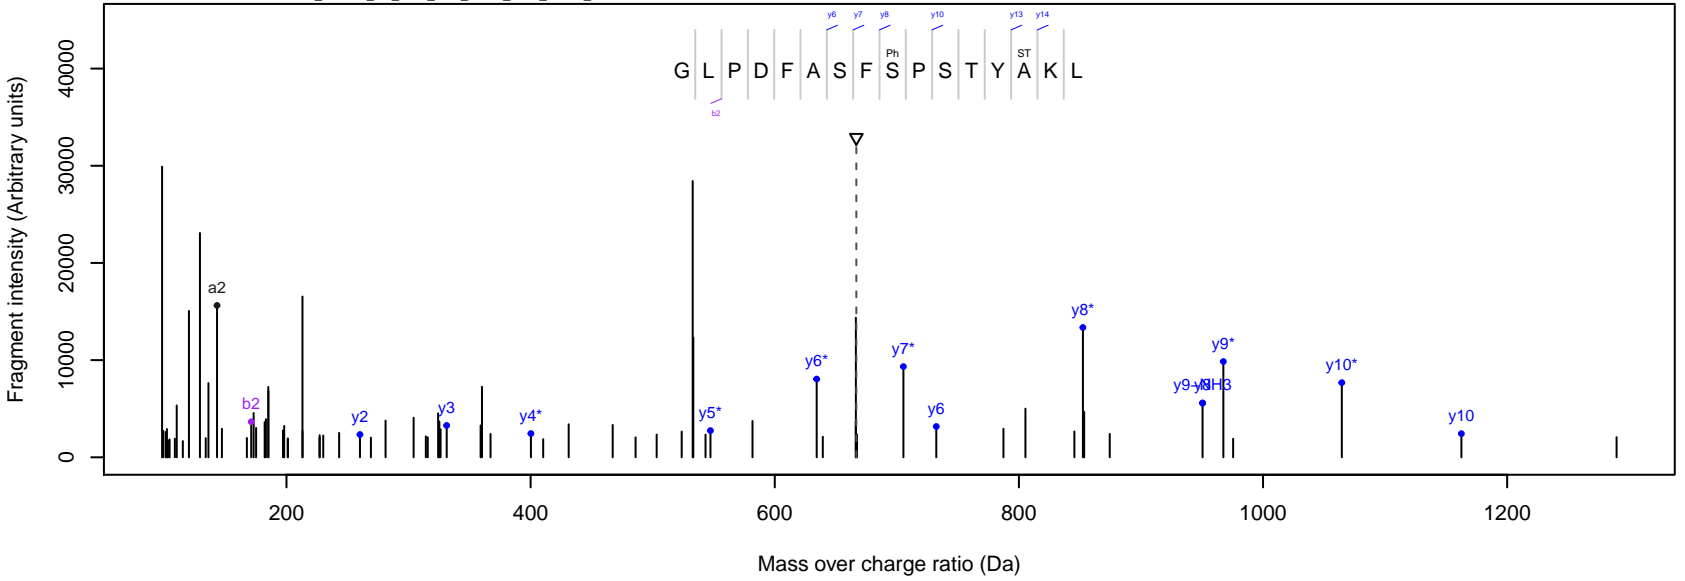

IDFDSVSSIMASS(Phospho (STY))Q-2+

Source : QE3\_201126\_FR\_TIOx\_hum\_tissue\_Urea\_RNAB\_N Scan : 59350

Andromeda score : 53.001

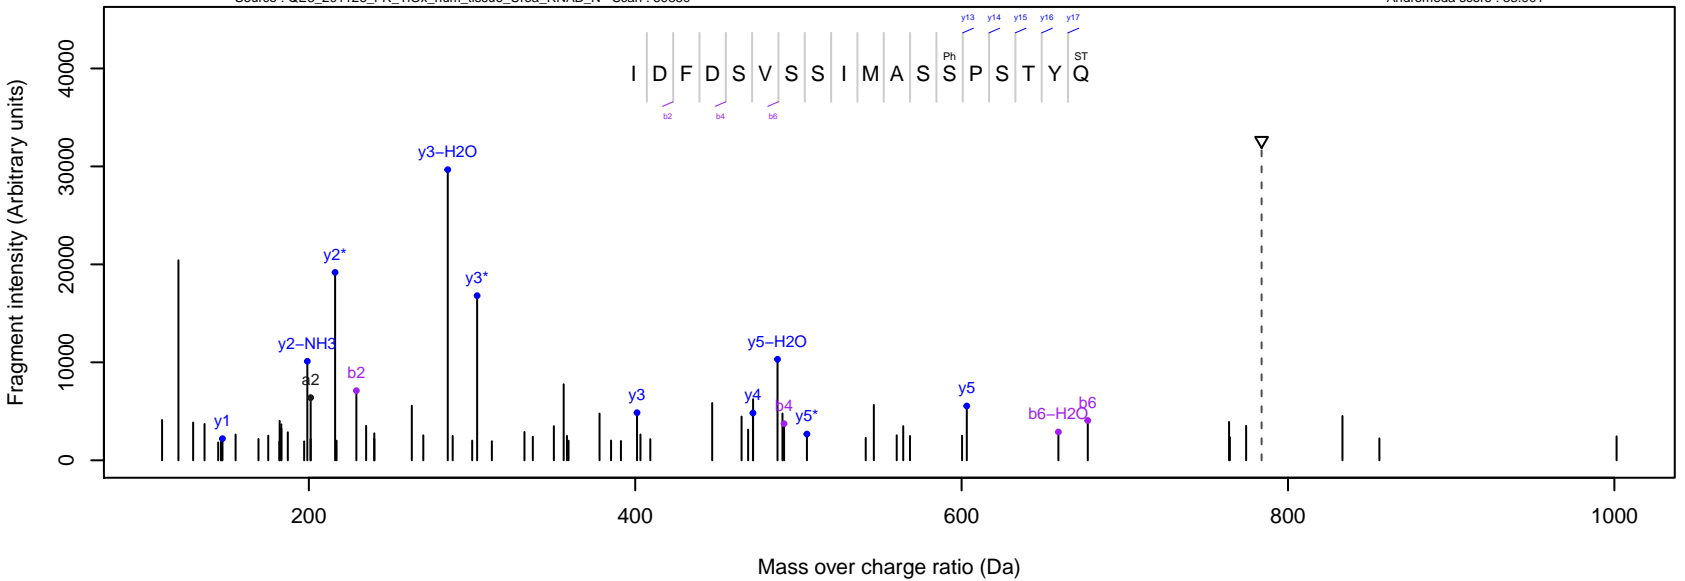

SRS(Phospho (STY))VPVSFYEIR-2+

Source : QE3\_201126\_FR\_TIOx\_hum\_tissue\_Urea\_RNAB\_B Scan : 30908

Andromeda score : 53.001

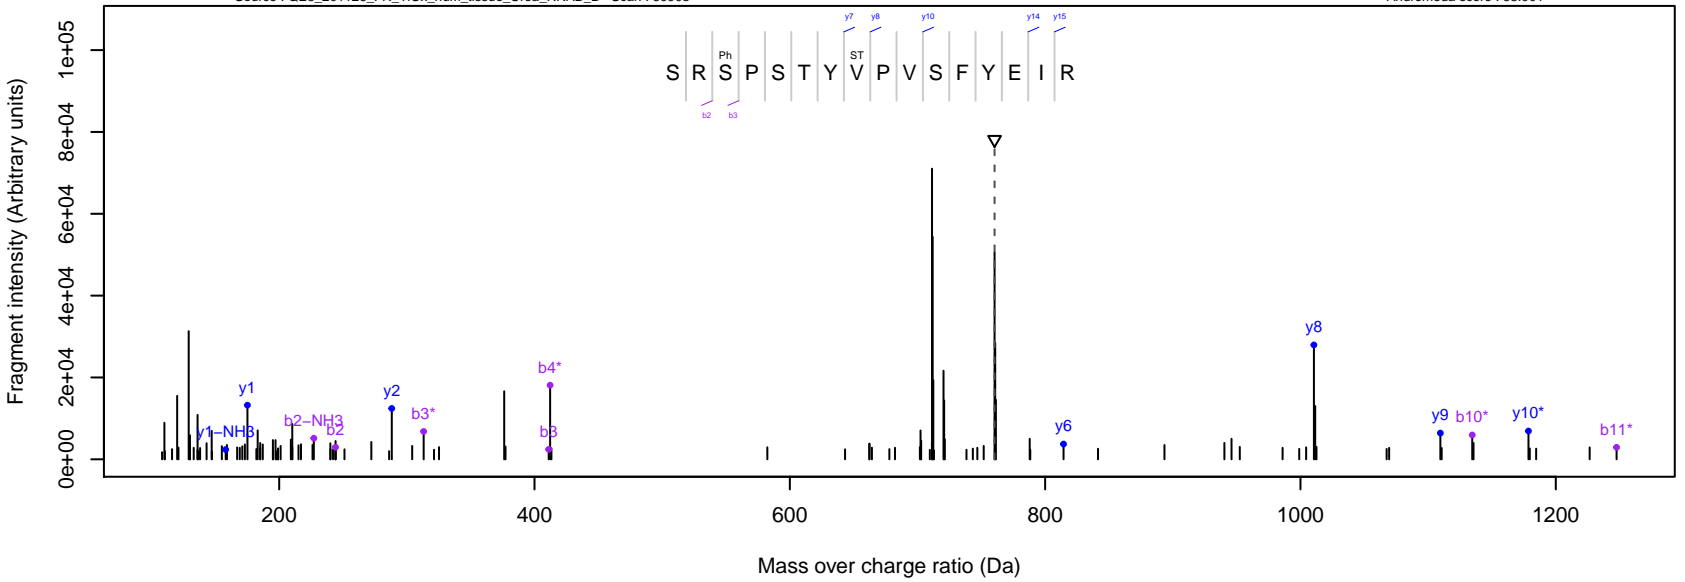

ADVQLF(M)DDDS(Phospho (STY))Y(Phospho (STY))SHHSGLYADPEKFADSDQDRDPHR-4+

Source : QE3\_201126\_FR\_TIOx\_hum\_tissue\_Urea\_RNAB\_H Scan : 34691

Andromeda score : 52.986

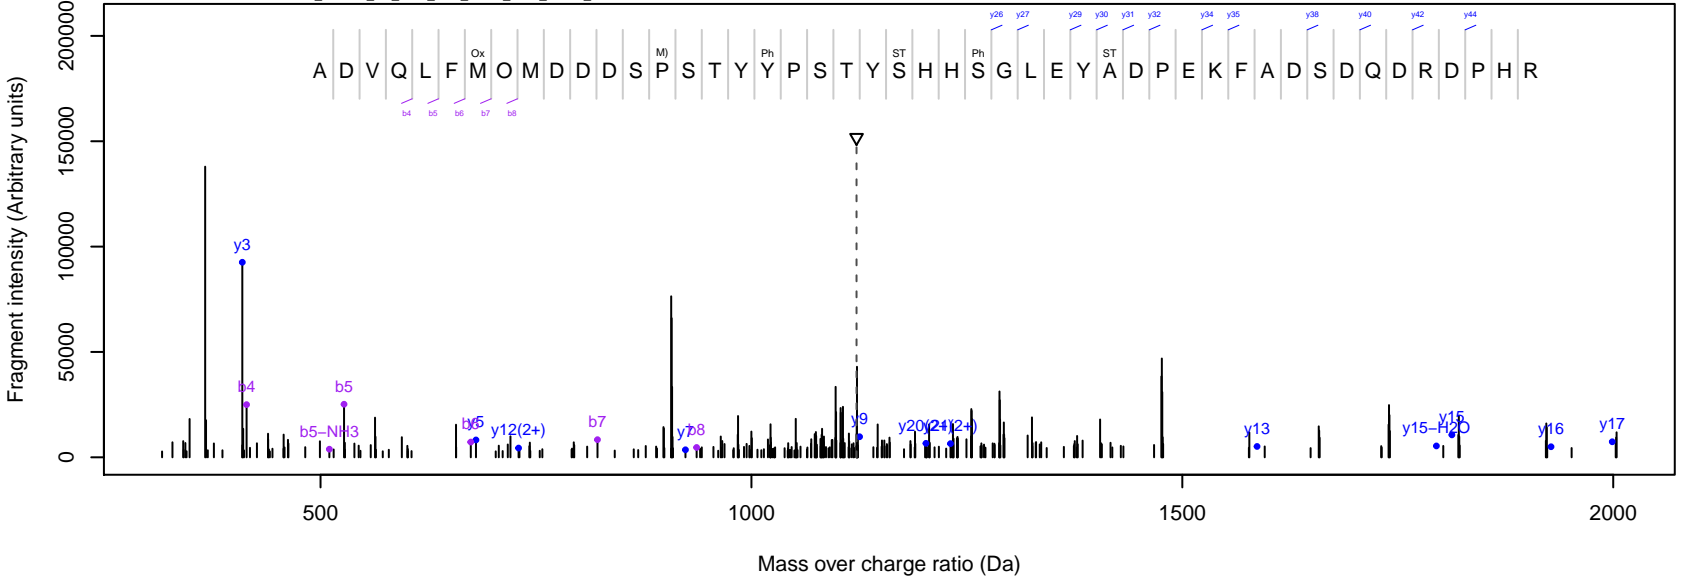

QASASYDS(Phospho (STY))EEEEGLPM(Oxidation (M))SYDEKR-3+

Source : QE3\_201126\_FR\_TIOx\_hum\_tissue\_Urea\_RNAB\_H Scan : 21607

Andromeda score : 52.971

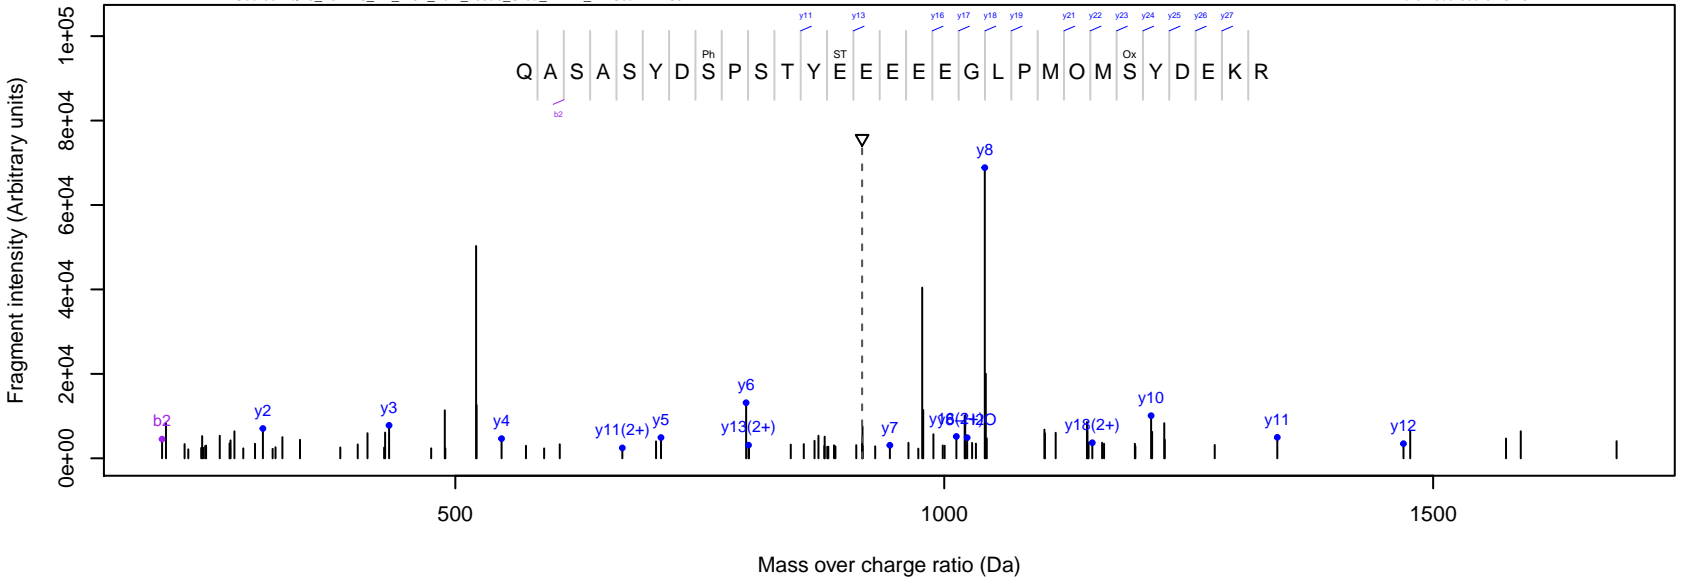

GGNFGFGDS(Phospho (STY))RGGGGNFGPGGSNFR-3+

Source : QE3\_201126\_FR\_TiOx\_hum\_tissue\_Urea\_RNAB\_H Scan : 35411

Andromeda score : 52.92

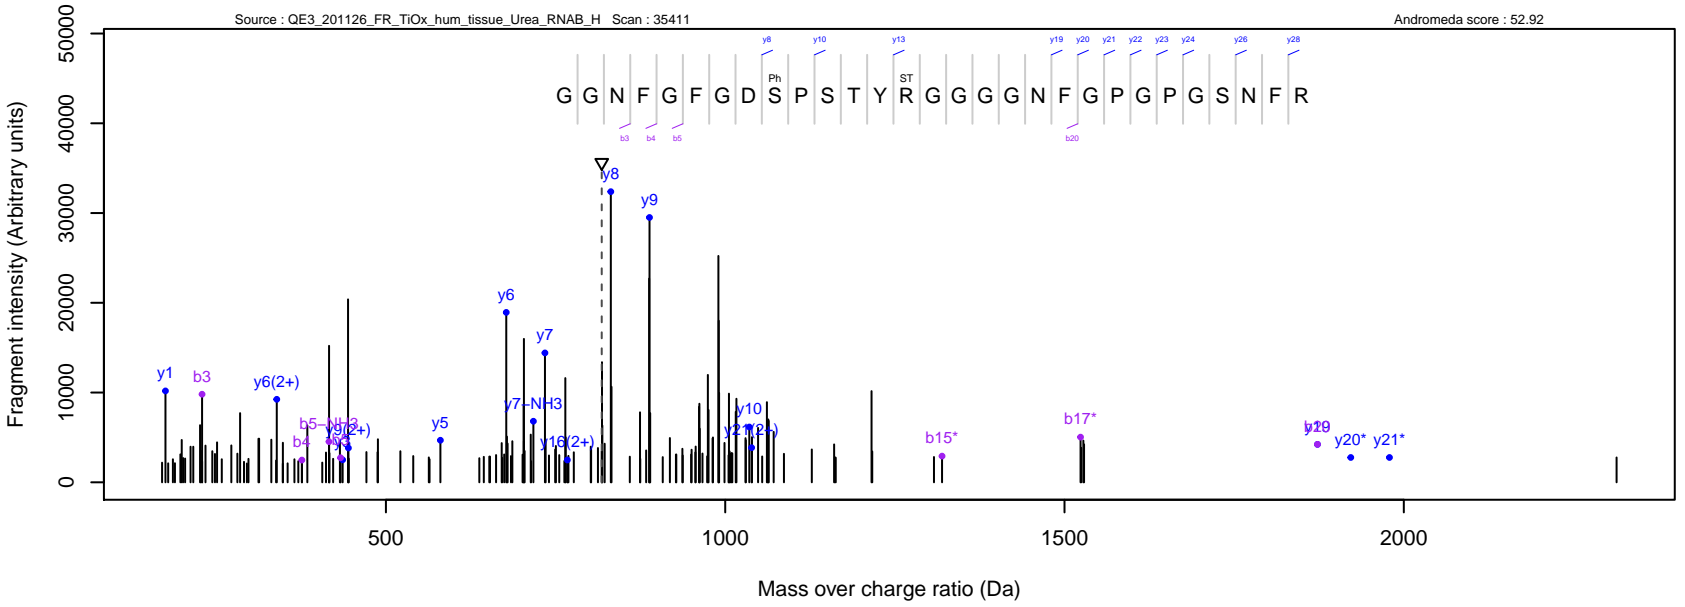

KGADSLDFLYHEGYACTPSTYSIHGDR-4+

Source : QE3\_201126\_FR\_TiOx\_hum\_tissue\_Urea\_RNAB\_B Scan : 38250

Andromeda score : 52.92

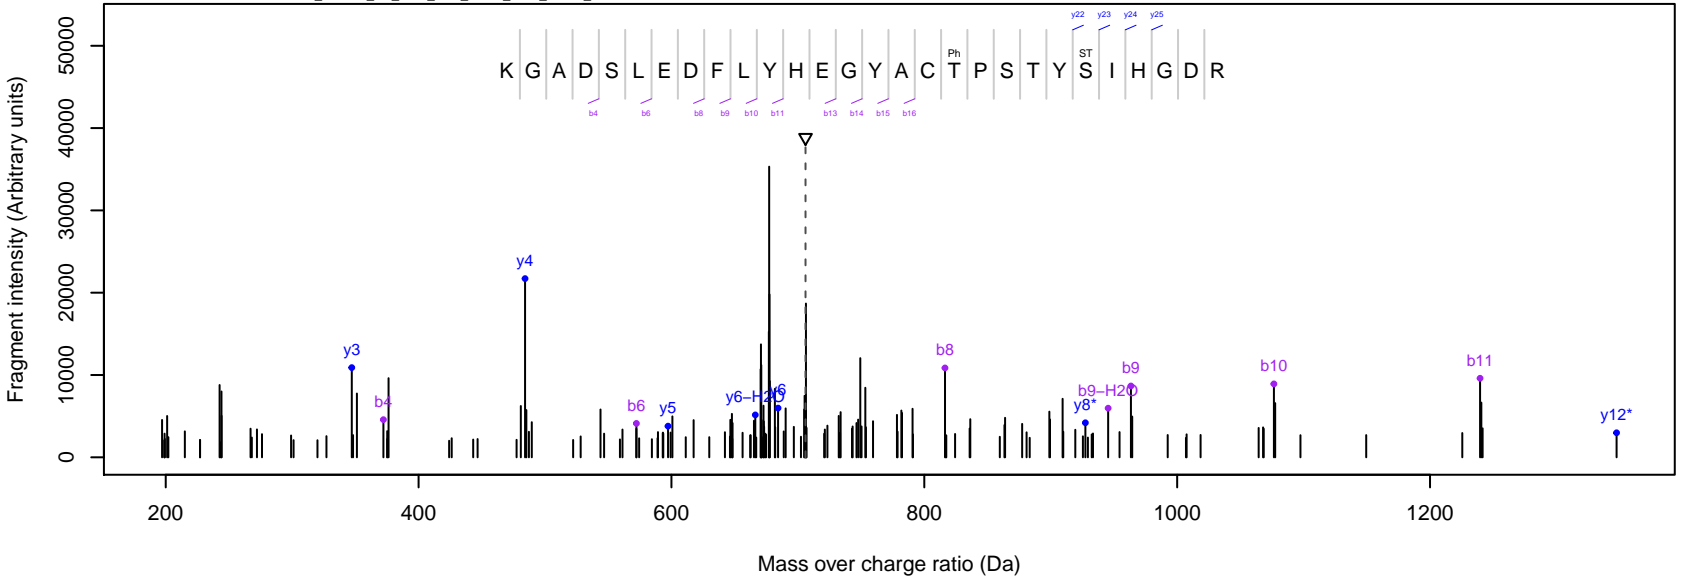

DQDS(Phospho (STY))SDDERALEDWVSSSETSALPR-3+

Source : QE3\_201126\_FR\_TiOx\_hum\_tissue\_Urea\_RNAB\_H Scan : 59264

Andromeda score : 52.909

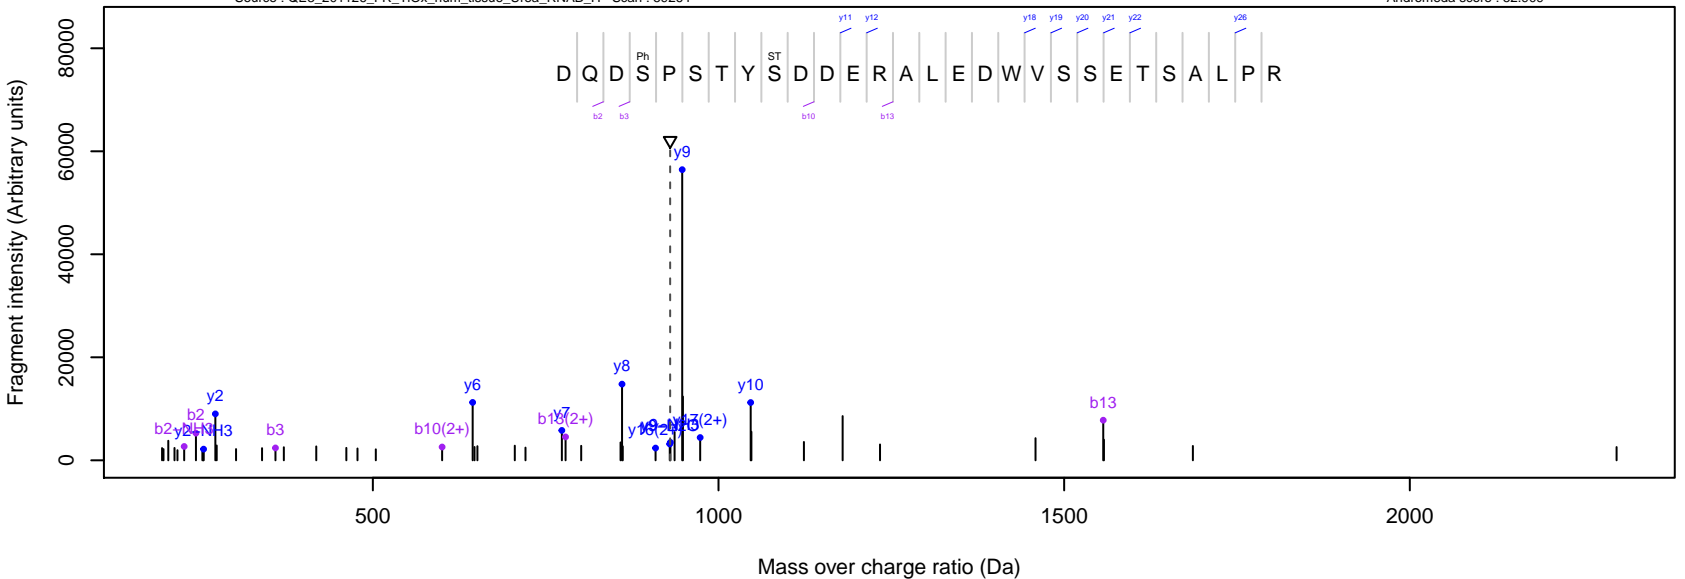

NLAMEATYINHNFSPSTYQQCLR-3+

Source : QE3\_201126\_FR\_TiOx\_hum\_tissue\_Urea\_RNAB\_B Scan : 37646

Andromeda score : 52.909

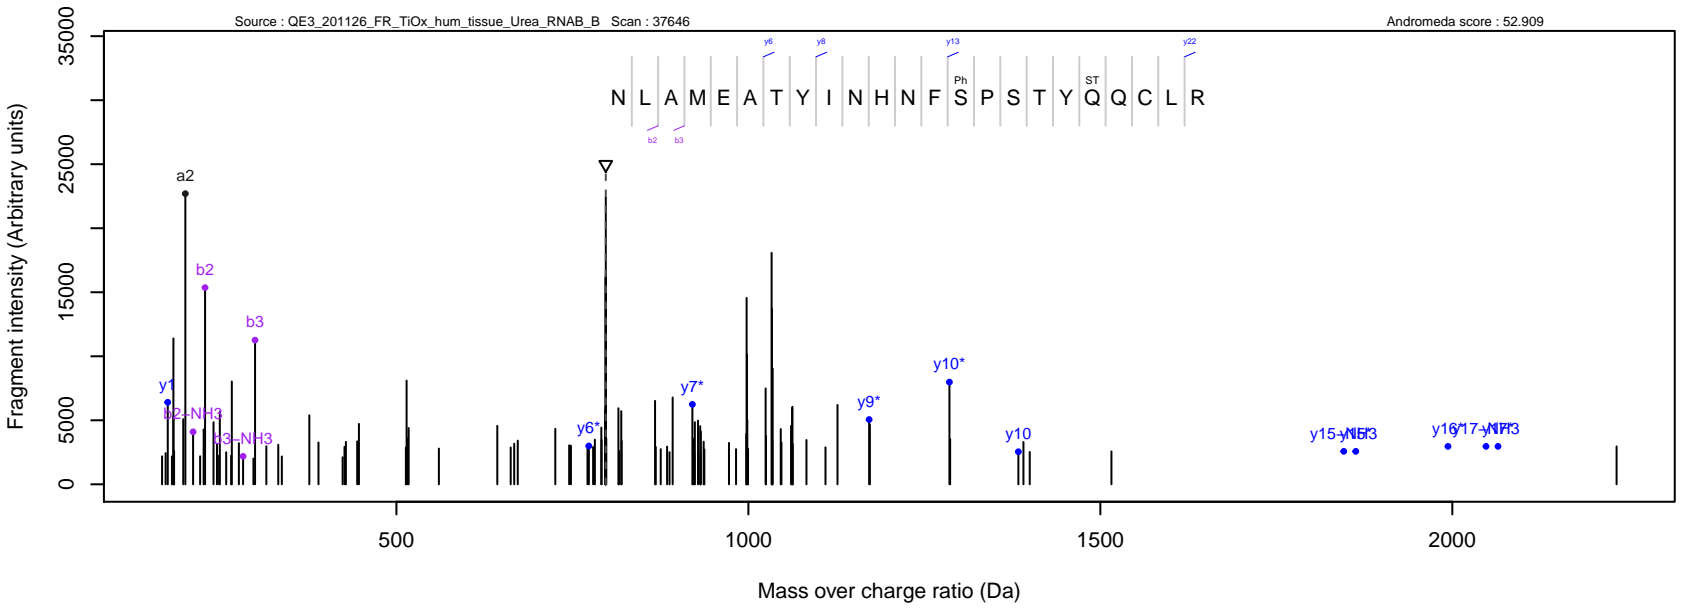

QRS(Phospho (STY))PAGSPDEEGGAEAPAAGIR-3+

Source : QE3\_201126\_FR\_TiOx\_hum\_tissue\_Urea\_RNAB\_H Scan : 15536

Andromeda score : 52.909

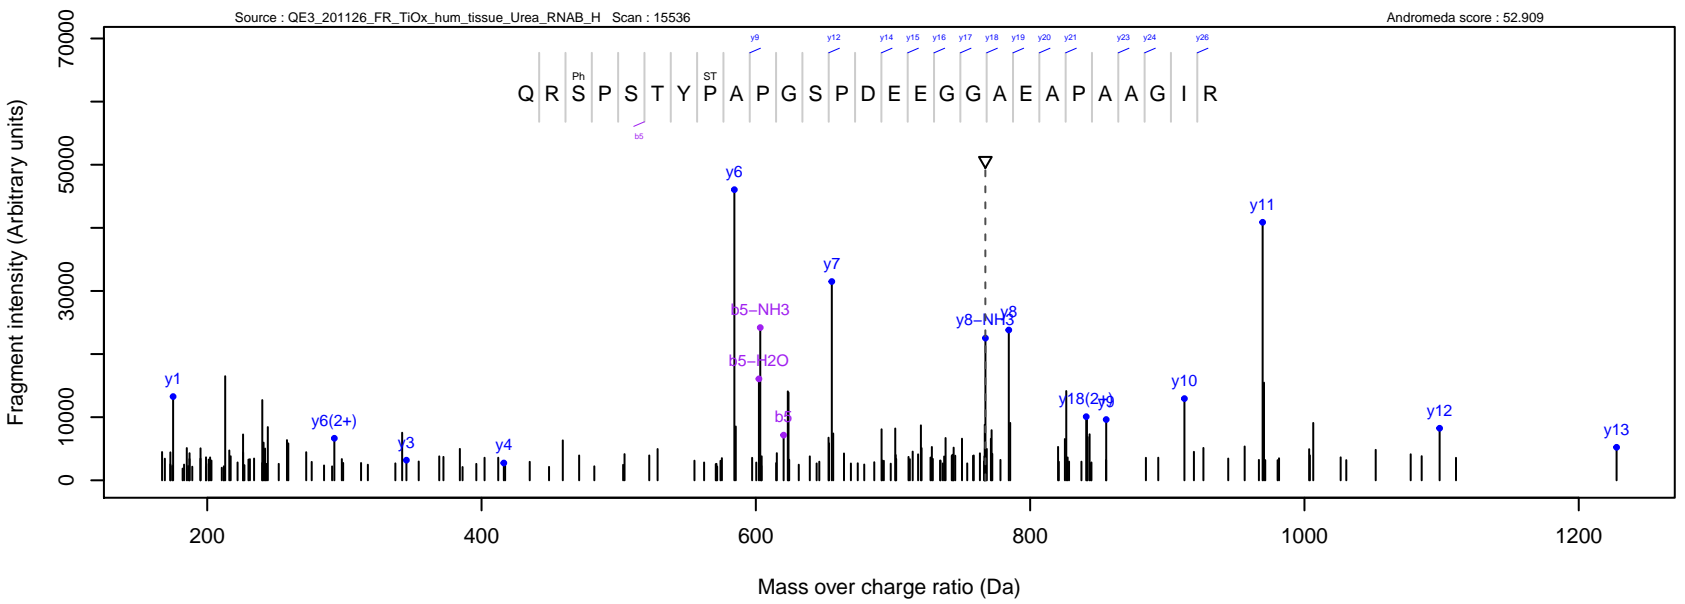

SVS(Phospho (STY))VDESRELIFR-3+

Source : QE3\_201126\_FR\_TiOx\_hum\_tissue\_Urea\_RNAB\_H Scan : 34247

Andromeda score : 52.862

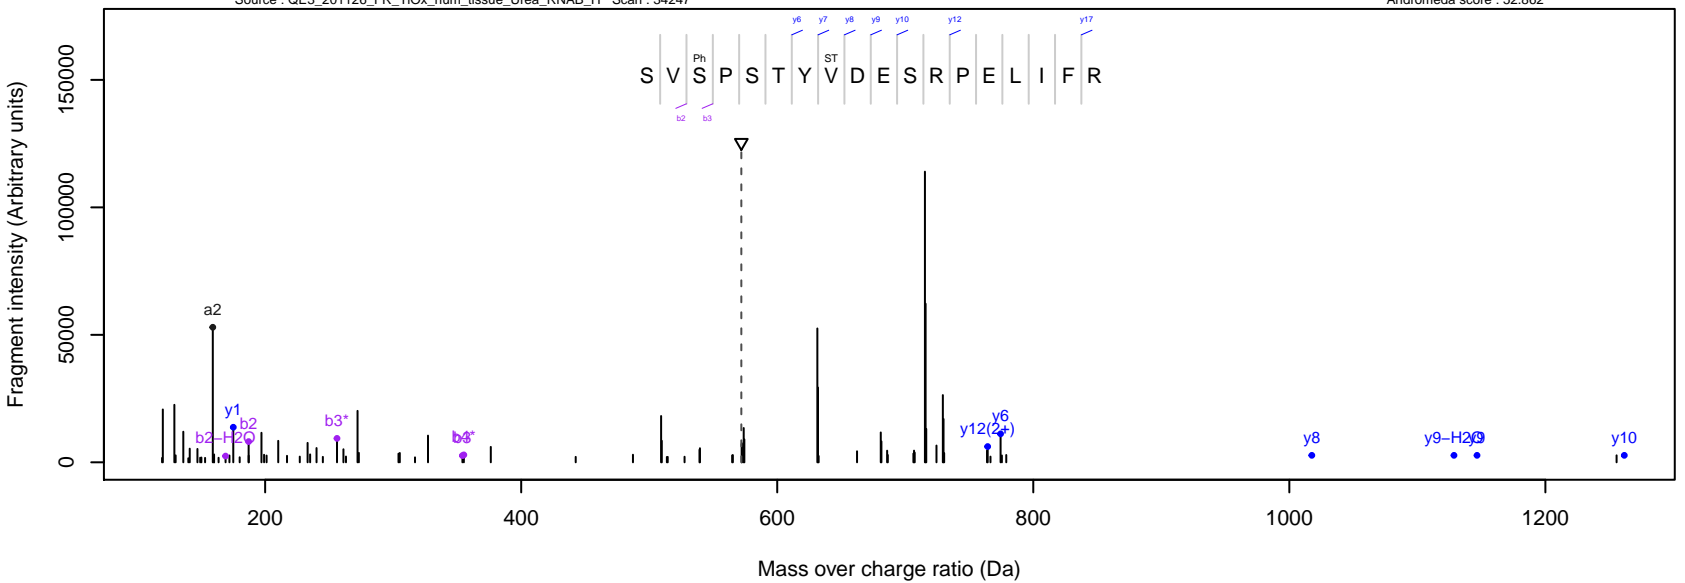



QRKS(Phospho (STY))LS(Phospho (STY))NPDIASETLTLLSFLR-3+

Source : QE3\_201126\_FR\_TiOx\_hum\_tissue\_Urea\_RNAB\_H Scan : 62127

Andromeda score : 52.853

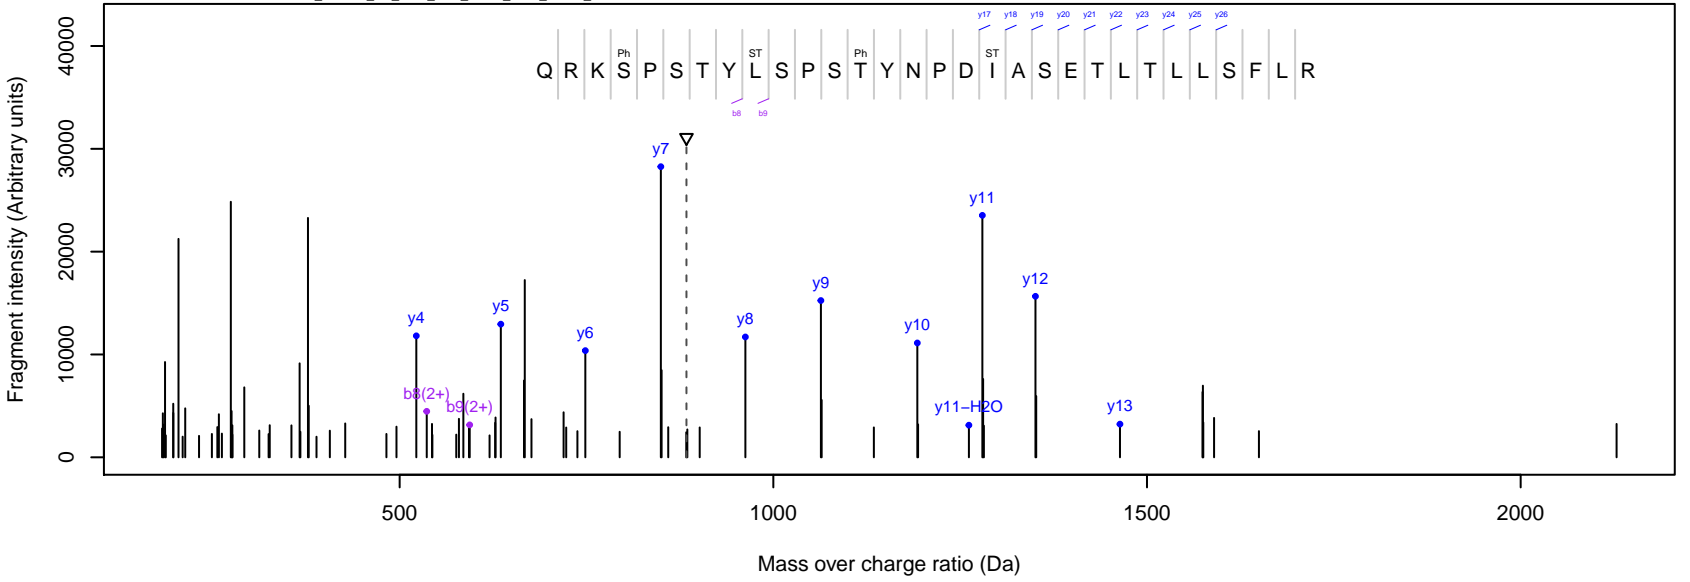

HSPTSEPTPPGDALPPVSSPH(Phospho (STY))HTPSTYHR-4+

Source : QE3\_201126\_FR\_TiOx\_hum\_tissue\_Urea\_RNAB\_B Scan : 14271

Andromeda score : 52.824

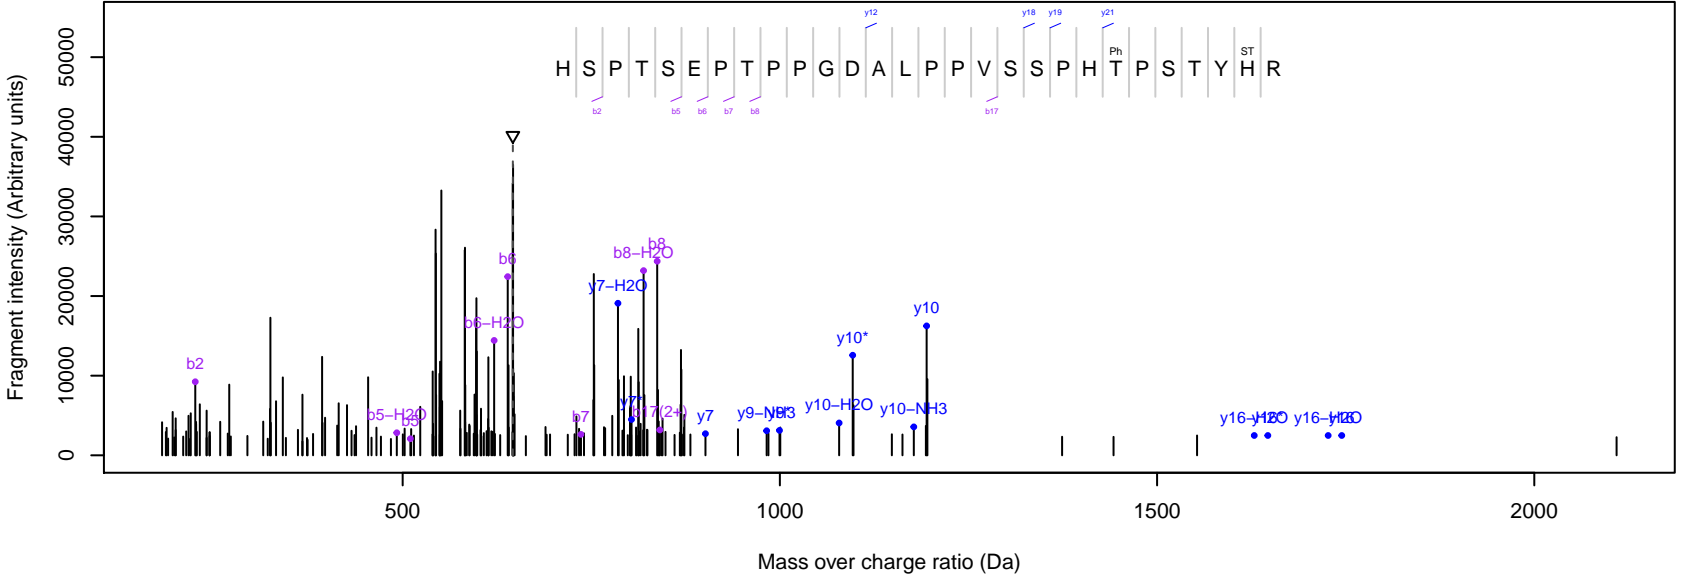

S(Phospho (STY))VVS(Phospho (STY))FDKVKKEPR-3+

Source : QE3\_201126\_FR\_TiOx\_hum\_tissue\_Urea\_RNAB\_H Scan : 21219

Andromeda score : 52.823

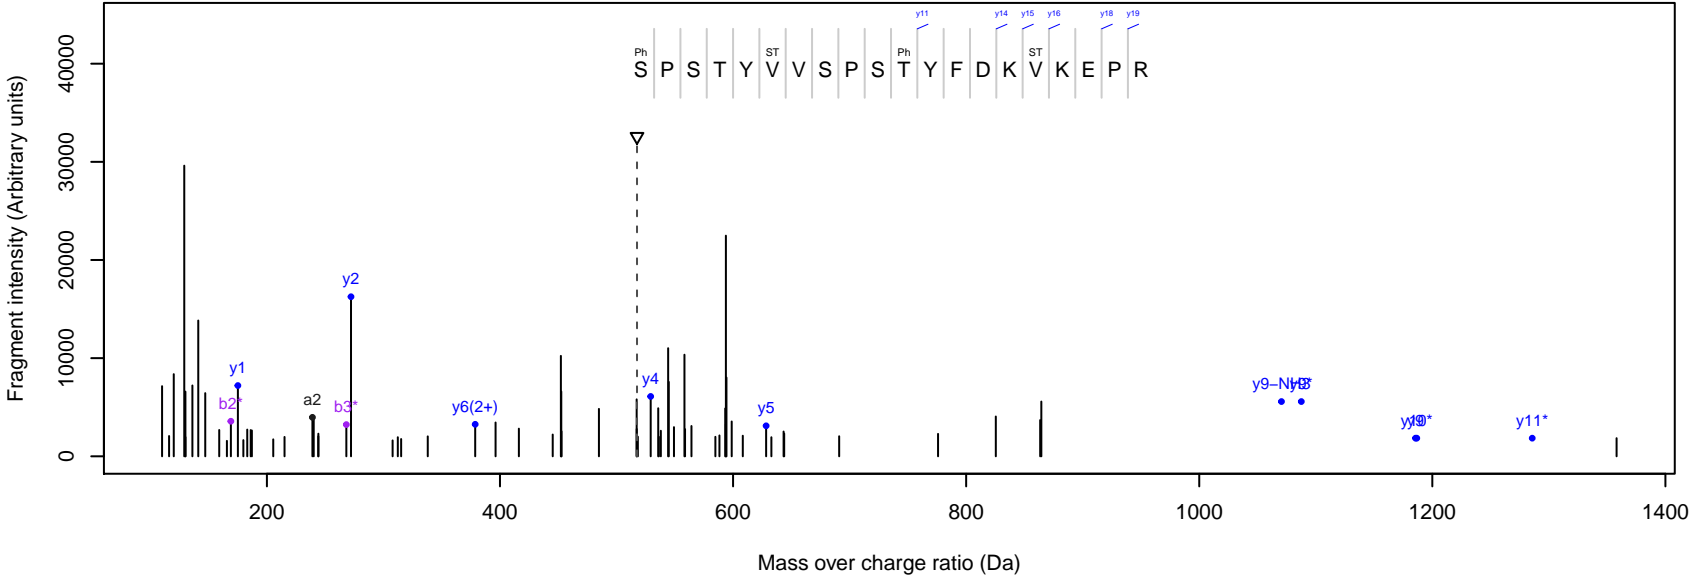

EGS(Phospho (STY))FRVTTATEQAEREEM(Oxidation (M))K-3+

Source : QE3\_201126\_FR\_TIOx\_hum\_tissue\_Urea\_RNAB\_N Scan : 22232

Andromeda score : 52.79

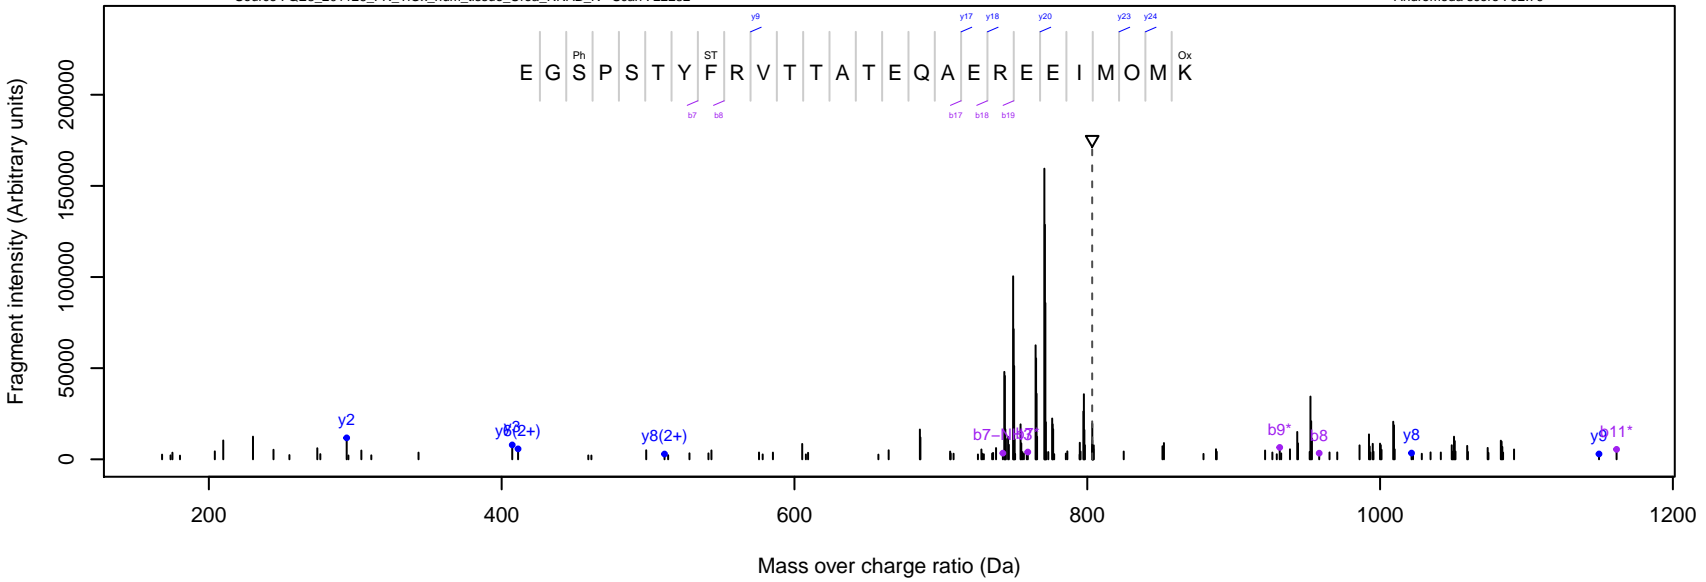

(Acetyl (Protein N-term))M(Oxidation (M))EQLS(Phospho (STY))DEIDHGAEEDS(Phospho (STY))DKEDQLDKMFGAWLGELDK-4+

Source : QE3\_201126\_FR\_TIOx\_hum\_tissue\_Urea\_RNAB\_H Scan : 62461

Andromeda score : 52.777

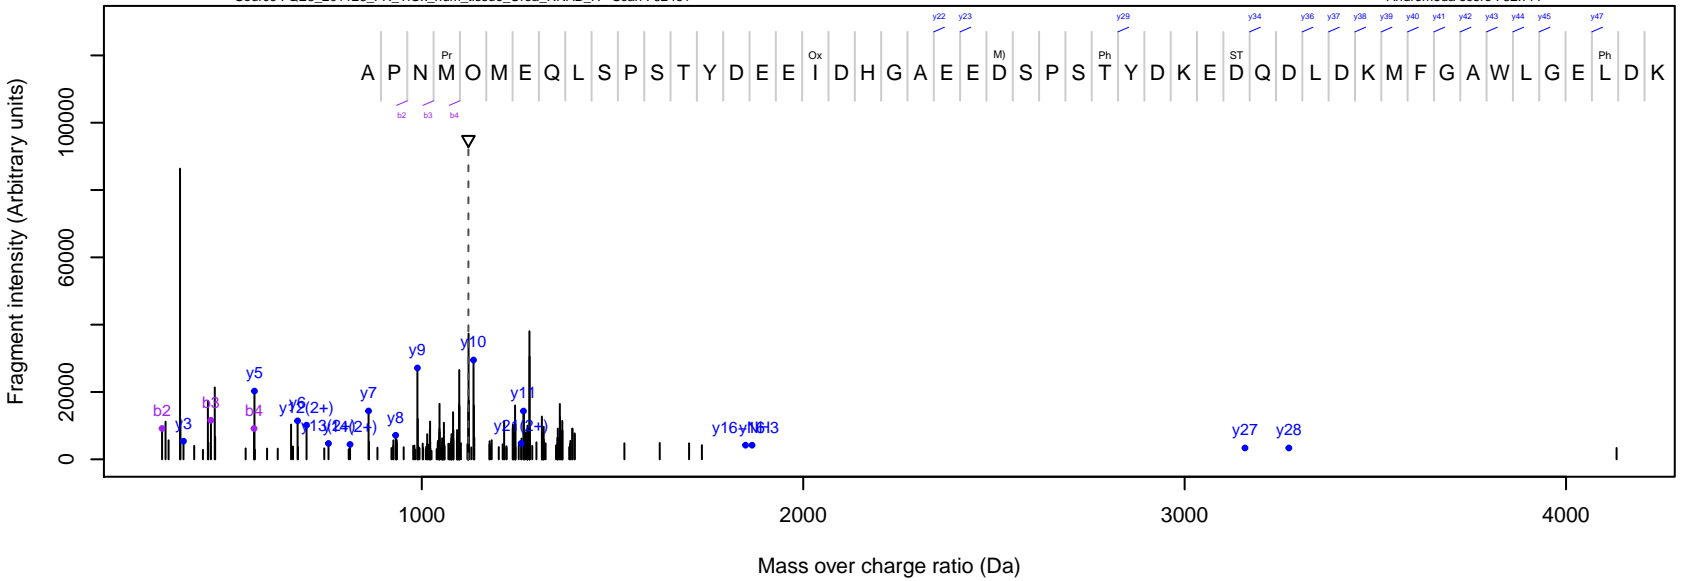

RADLNQGIGEPQS(Phospho (STY))PSR-3+

Source : QE3\_201126\_FR\_TIOx\_hum\_tissue\_Urea\_RNAB\_N Scan : 13346

Andromeda score : 52.769

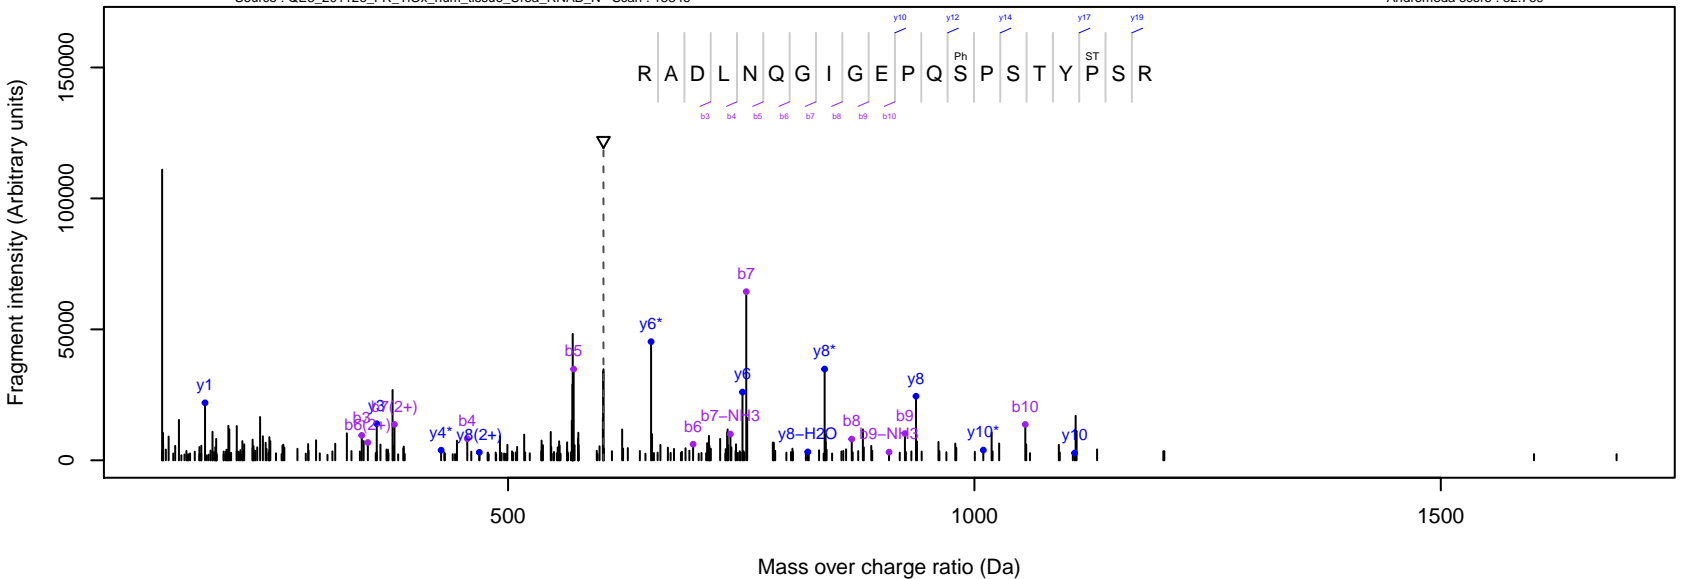

YGPADVEDTTGSGAT(Phospho (STY))DS(Phospho (STY))KDDDDIDLFGS(Phospho (STY))DDEEESEAKR-4+

Source : QE3\_201126\_FR\_TIOx\_hum\_tissue\_Urea\_RNAB\_H Scan : 48143

Andromeda score : 52.734

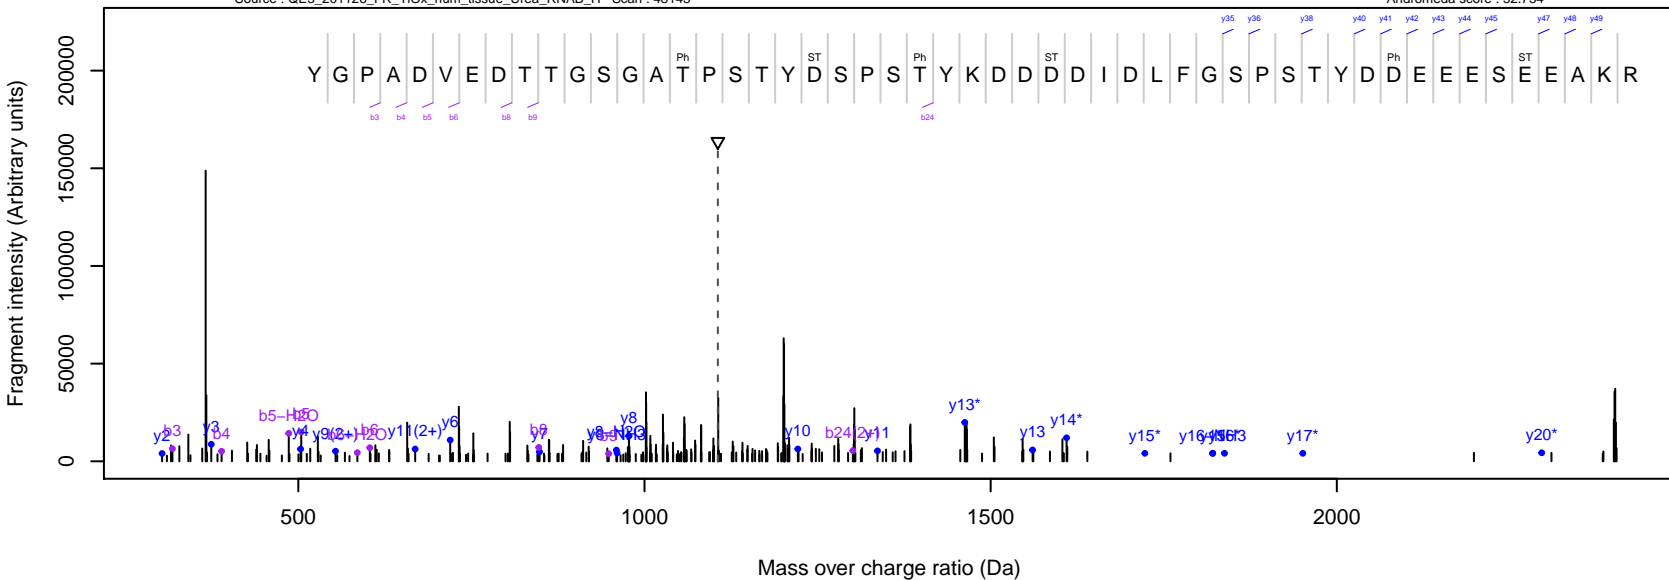

QEPVITDSYSGS(Phospho (STY))TPSITSLIK-2+

Source : QE3\_201126\_FR\_TIOx\_hum\_tissue\_Urea\_RNAB\_B Scan : 53334

Andromeda score : 52.72

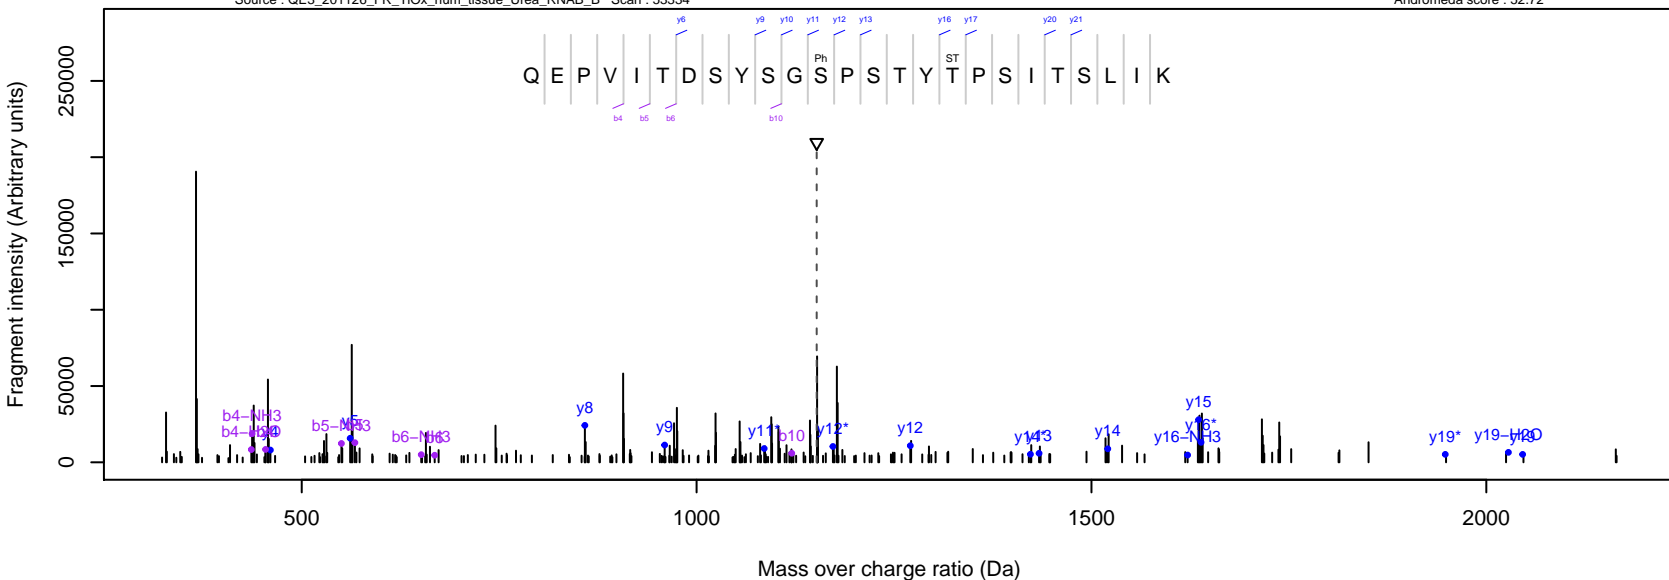

GPSLVTMTPAVPAVTPVDEES(Phospho (STY))SDGEPDQEAQR-3+

Source : QE3\_201126\_FR\_TIOx\_hum\_tissue\_Urea\_RNAB\_N Scan : 52707

Andromeda score : 52.717

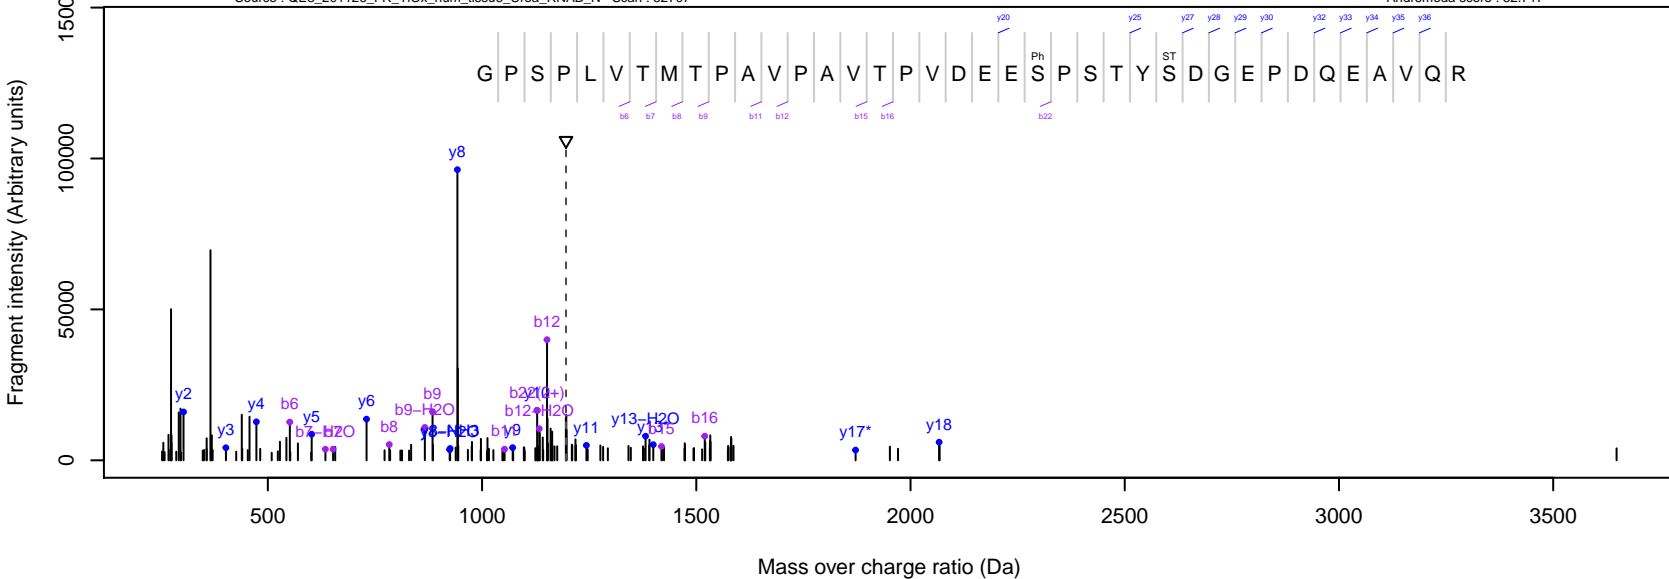

YLVDGTPNAGSEEI(S(Phospho (STY)))S(Phospho (STY))EDDELVEEK-3+

Source : QE3\_201126\_FR\_TIOx\_hum\_tissue\_Urea\_RNAB\_N Scan : 36626

Andromeda score : 52.707

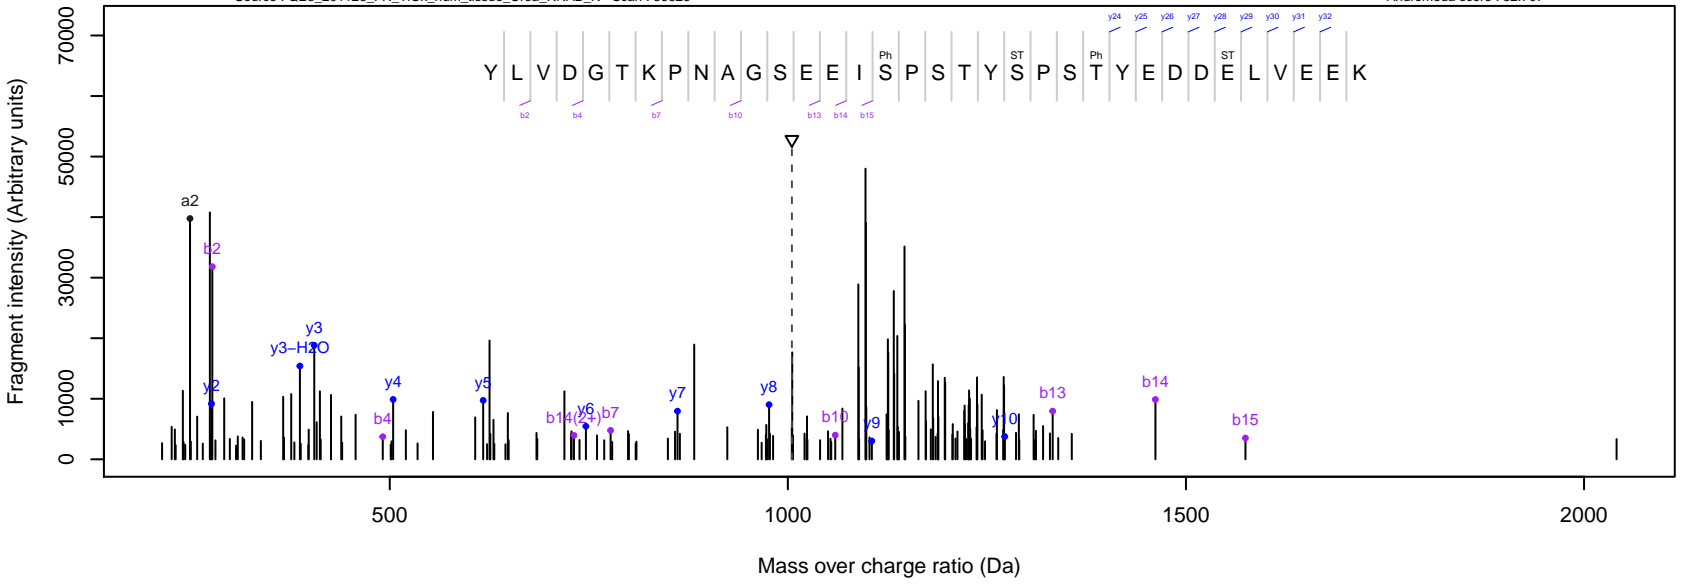

HNQGDS(Phospho (STY))DDVEETHPM(Oxidation (M))DGNDSYDPKK-4+

Source : QE3\_201126\_FR\_TIOx\_hum\_tissue\_Urea\_RNAB\_N Scan : 8871

Andromeda score : 52.697

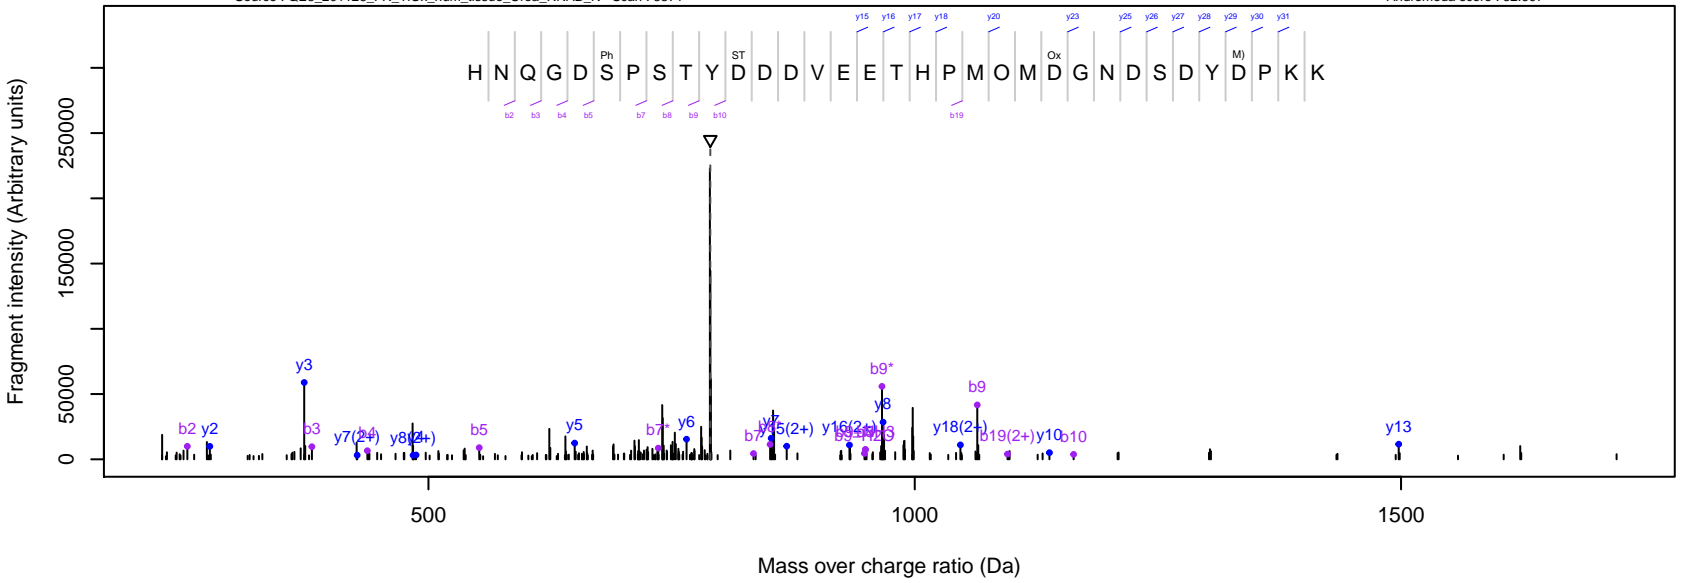

(Acetyl (Protein N-term))ACS(Phospho (STY))PDAVVSPPSAFLR-2+

Source : QE3\_201126\_FR\_TIOx\_hum\_tissue\_Urea\_RNAB\_B Scan : 56917

Andromeda score : 52.693

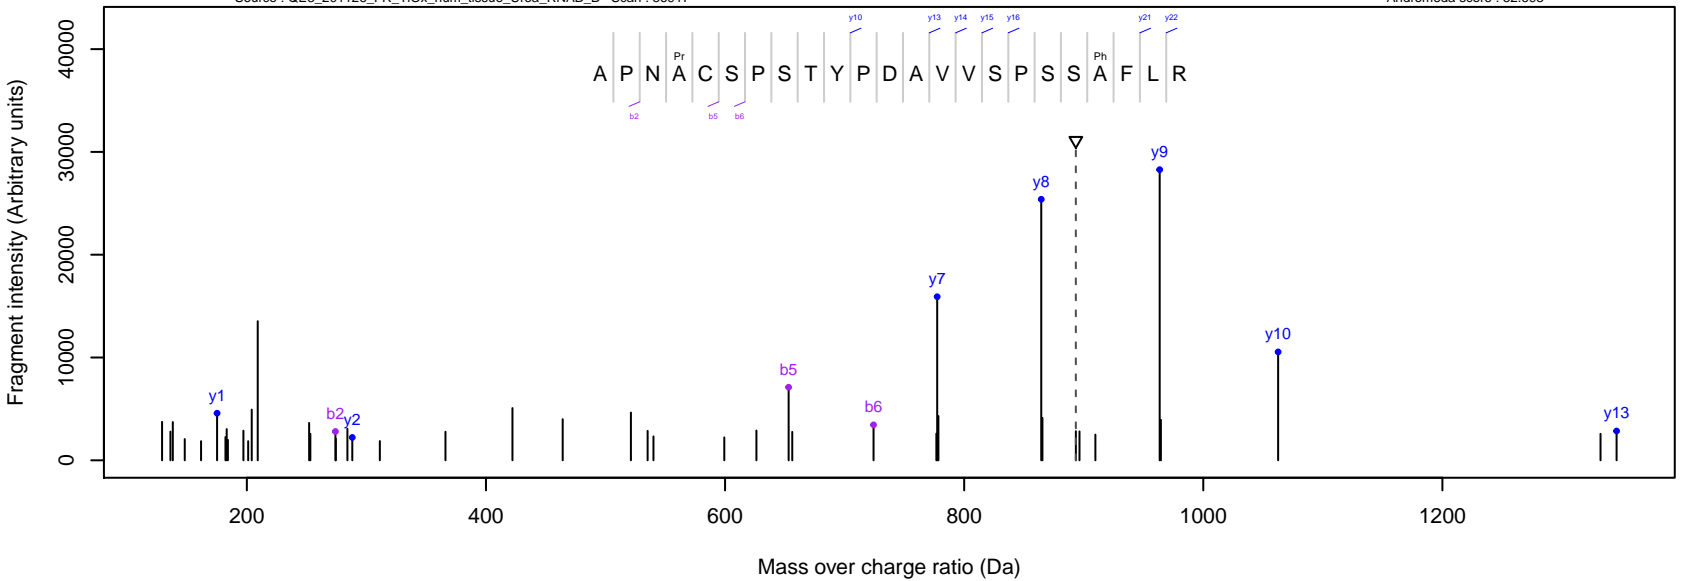

STS(Phospho (STY))LTEKDLK-2+

Source : QE3\_201126\_FR\_TiOx\_hum\_tissue\_Urea\_RNAB\_H Scan : 9734

Andromeda score : 52.693

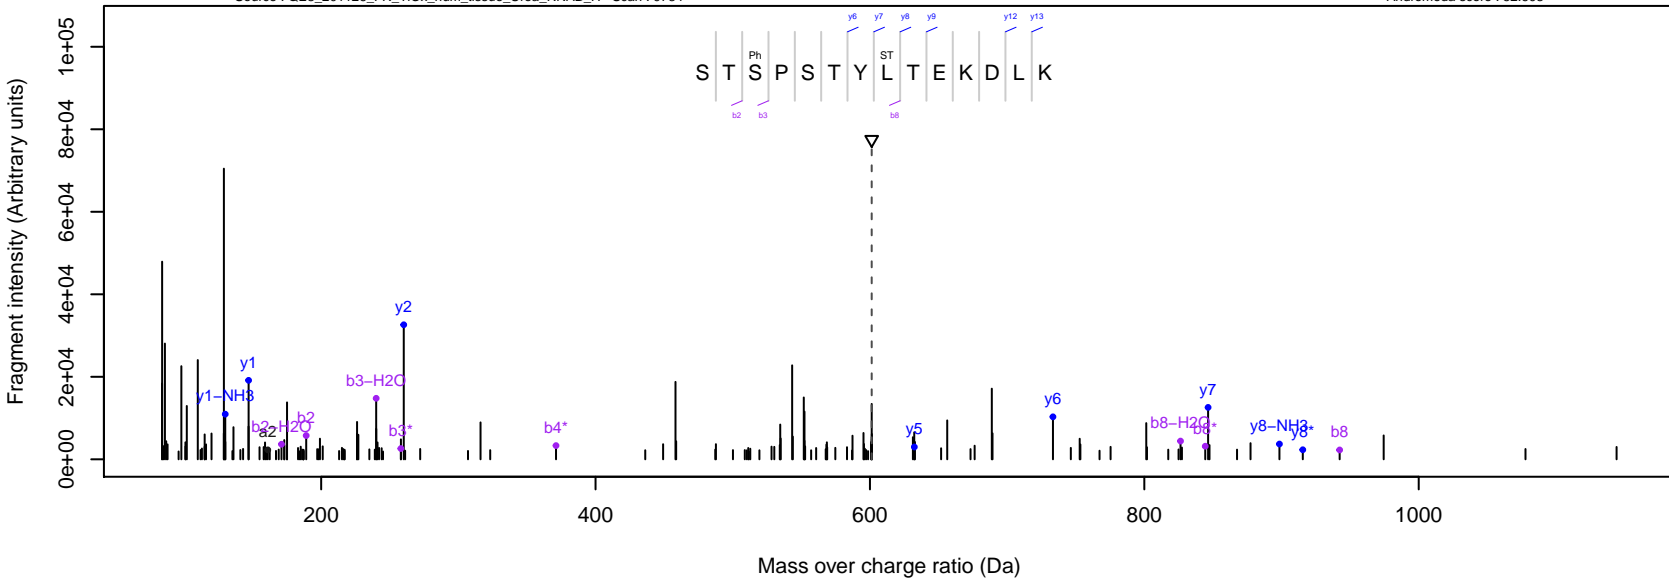

TRTFS(Phospho (STY))ATVR-2+

Source : QE3\_201126\_FR\_TiOx\_hum\_tissue\_Urea\_RNAB\_N Scan : 10472

Andromeda score : 52.693

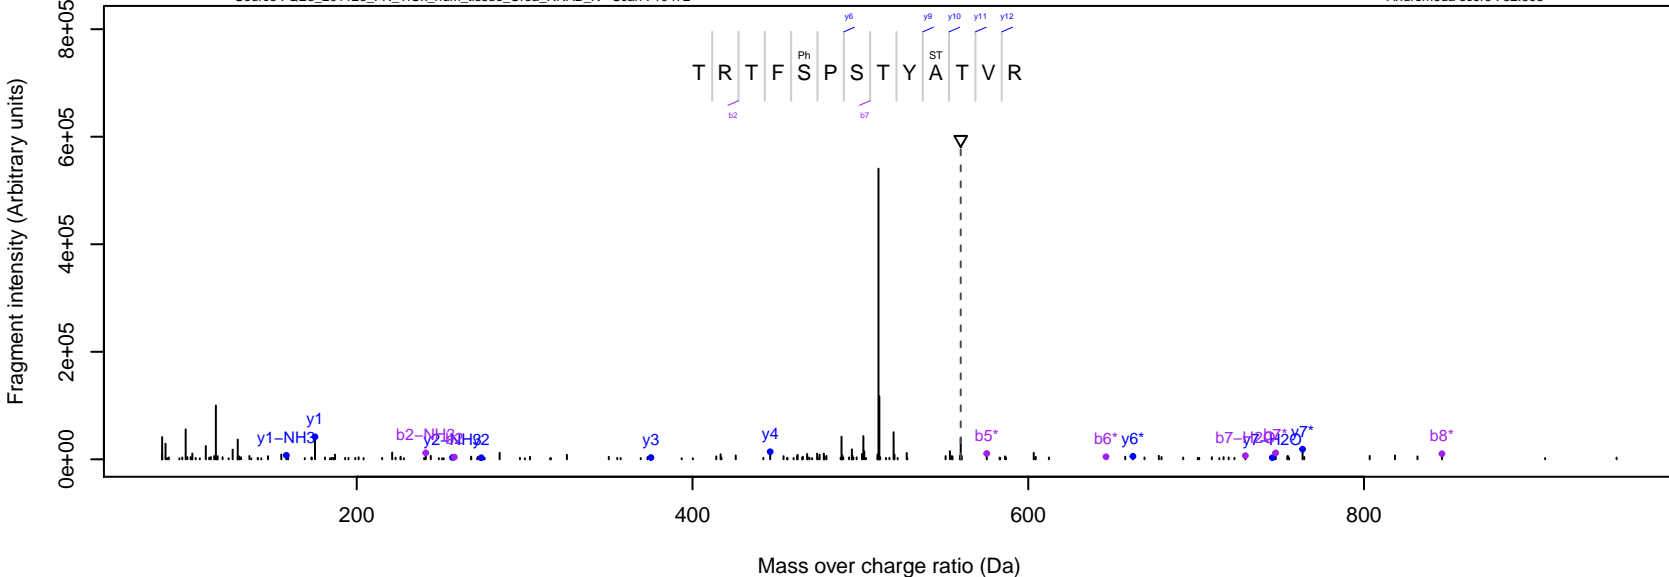

MAETVDTSEMVGATEQRTSS(Phospho (STY))KES(Phospho (STY))SPIPSPTSDR-3+

Source : QE3\_201126\_FR\_TiOx\_hum\_tissue\_Urea\_RNAB\_N Scan : 31599

Andromeda score : 52.627

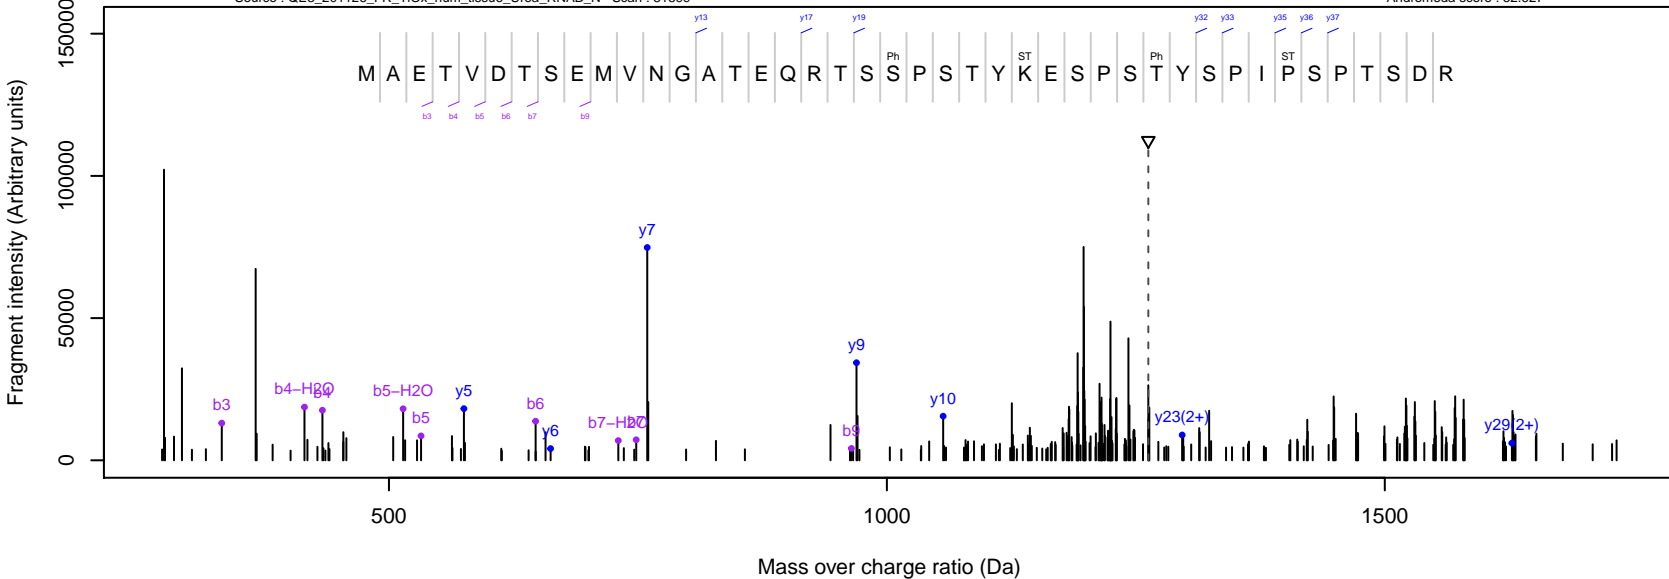

**QADS(Phospho (STY))GS(Phospho (STY))SEEKQLYLNKYPDAVATWLNPDPSQK-3+**

Source : QE3\_201126\_FR\_TIOx\_hum\_tissue\_Urea\_RNAB\_H Scan : 51785

Andromeda score : 52.577

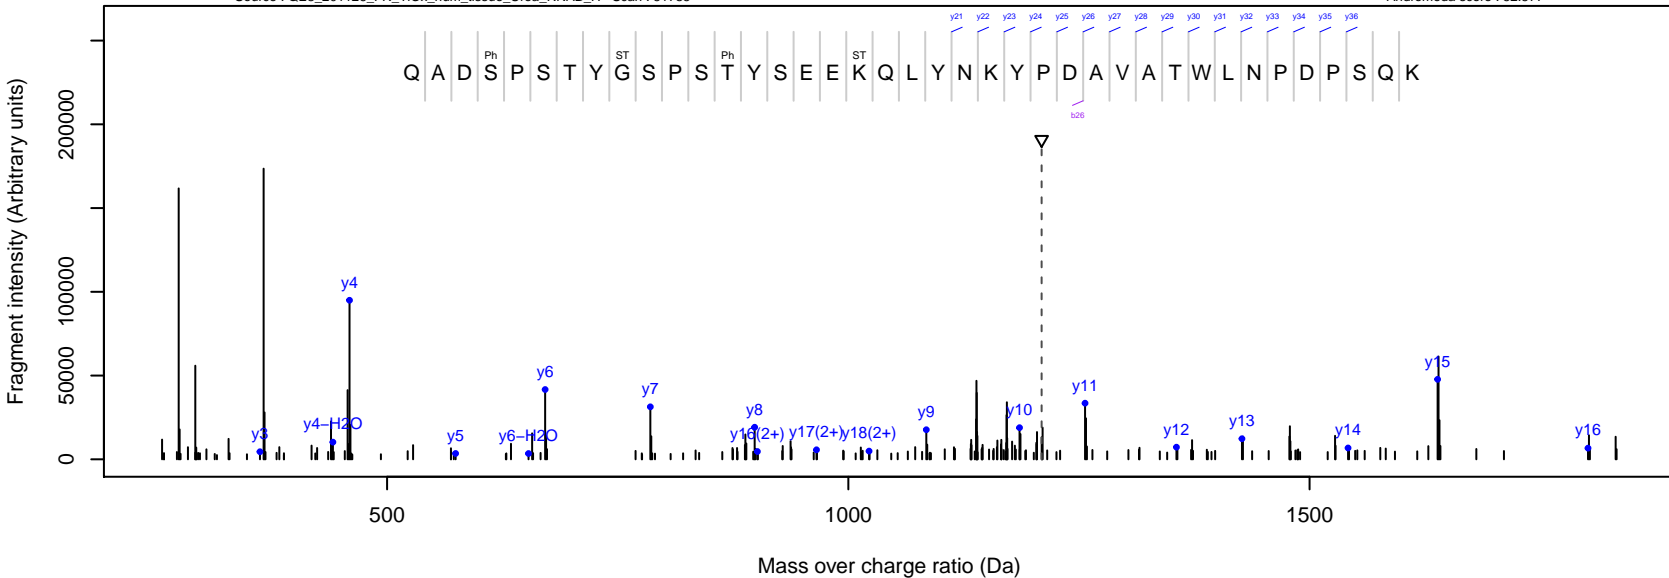

**KVMDS(Phospho (STY))DEDDDY-2+**

Source : QE3\_201126\_FR\_TIOx\_hum\_tissue\_Urea\_RNAB\_B Scan : 16521

Andromeda score : 52.555

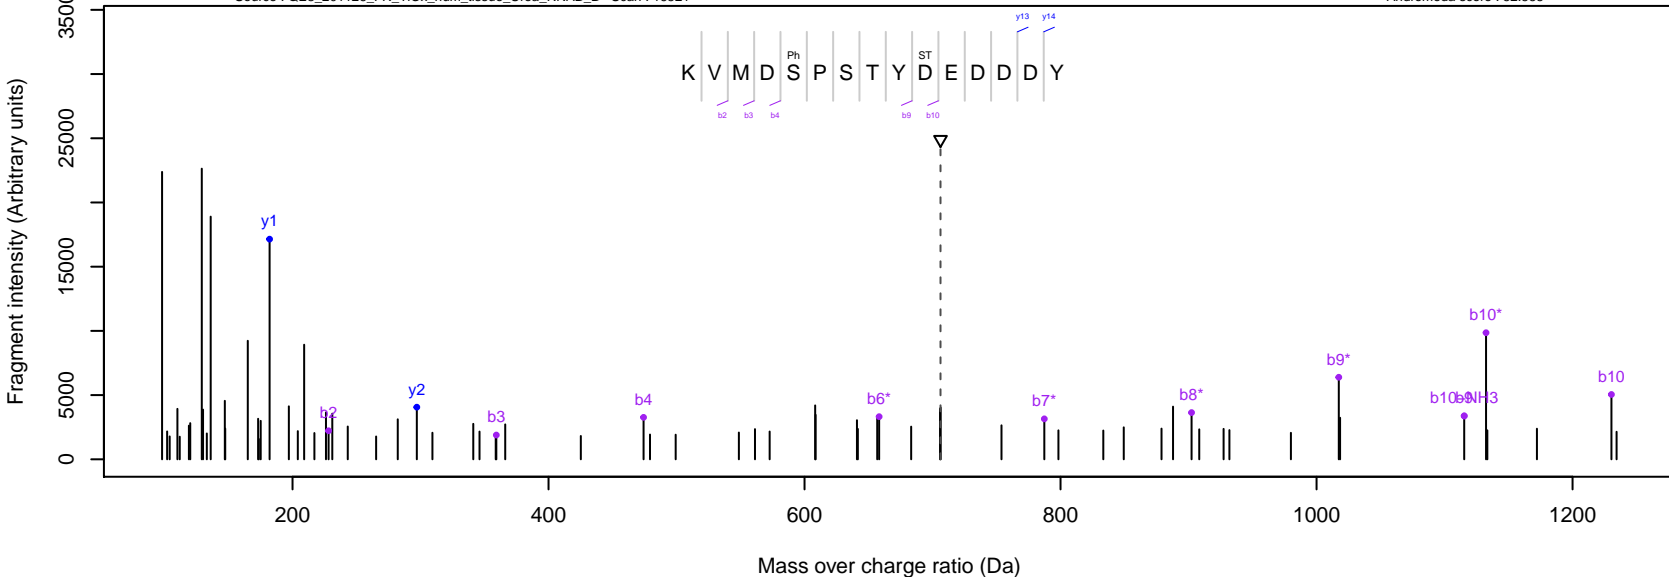

**RQS(Phospho (STY))M(Oxidation (M))AFSILNTPK-3+**

Source : QE3\_201126\_FR\_TIOx\_hum\_tissue\_Urea\_RNAB\_N Scan : 27042

Andromeda score : 52.52

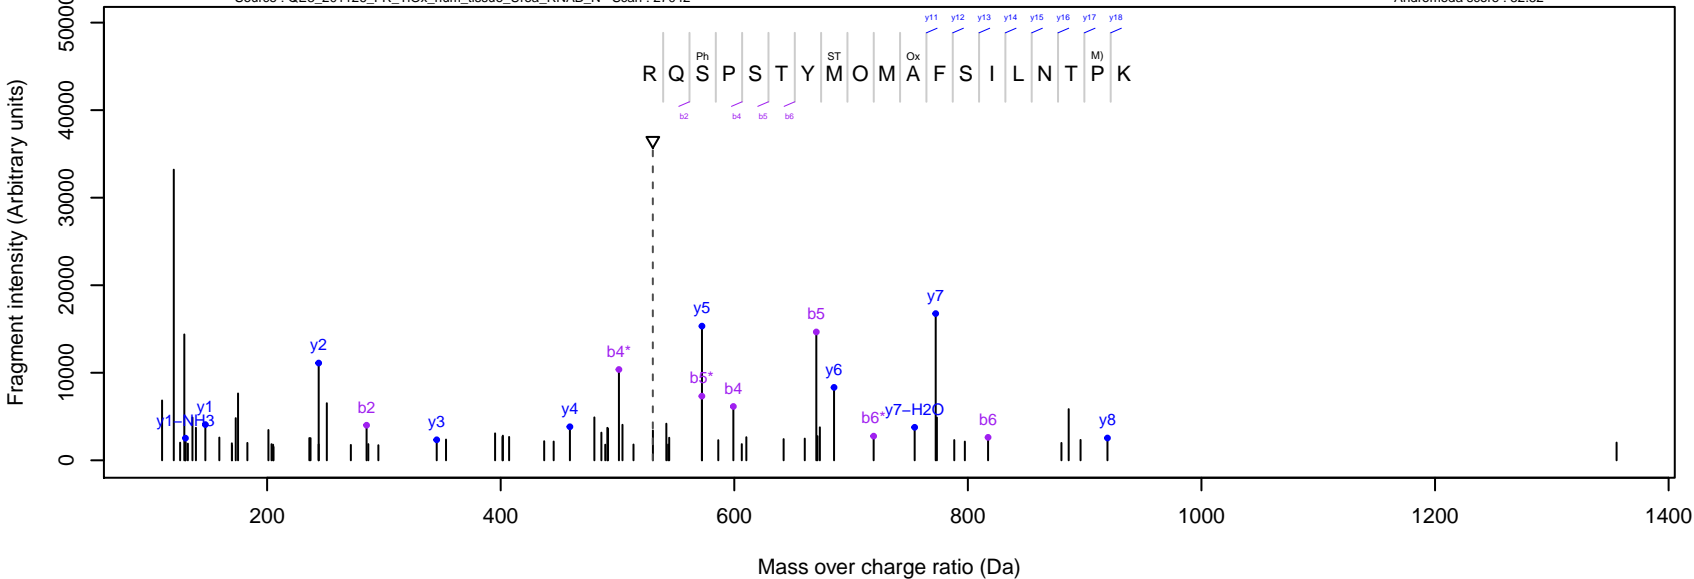

AIHS(Phospho (STY))SDEDEDEDEEDFEDDDEWED-3+

Source : QE3\_201126\_FR\_TiOx\_hum\_tissue\_Urea\_RNAB\_N Scan : 41189

Andromeda score : 52.509

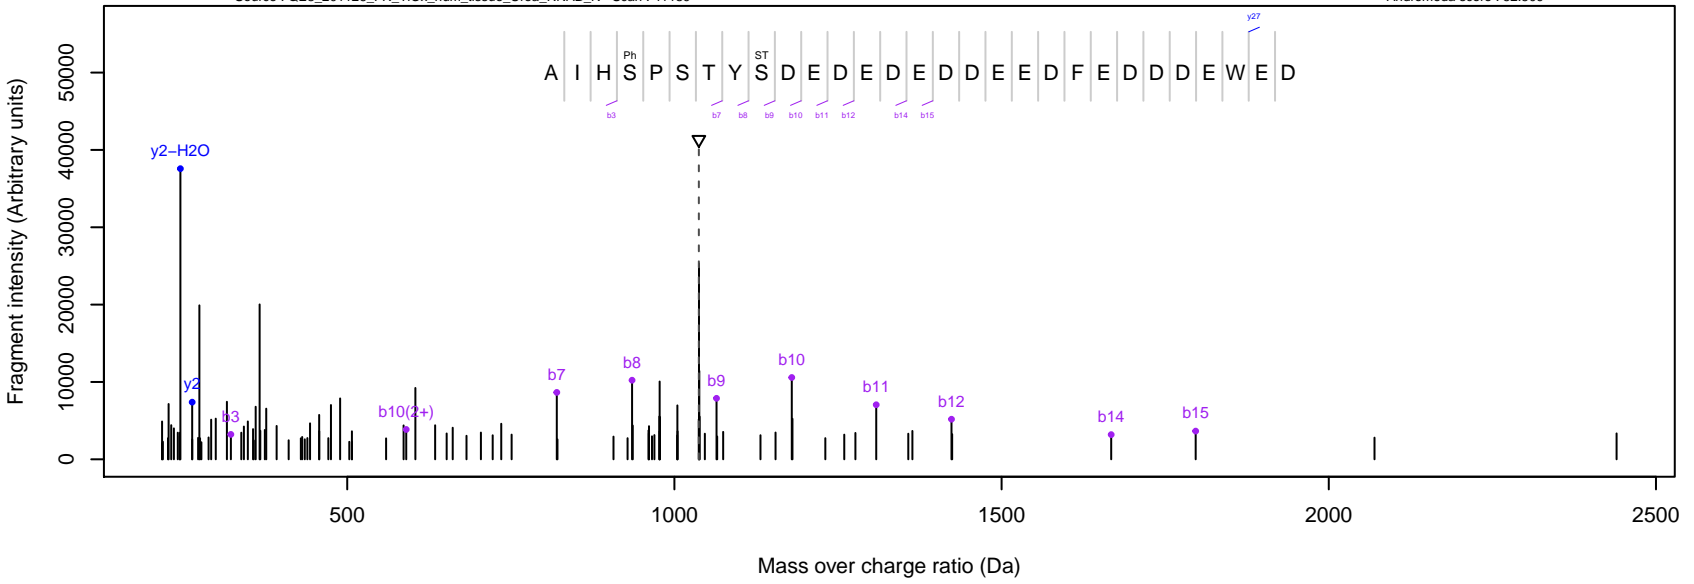

ENLQLNQET(Phospho (STY))EAIKEELLY(Phospho (STY))FK-4+

Source : QE3\_201126\_FR\_TiOx\_hum\_tissue\_Urea\_RNAB\_B Scan : 5379

Andromeda score : 52.483

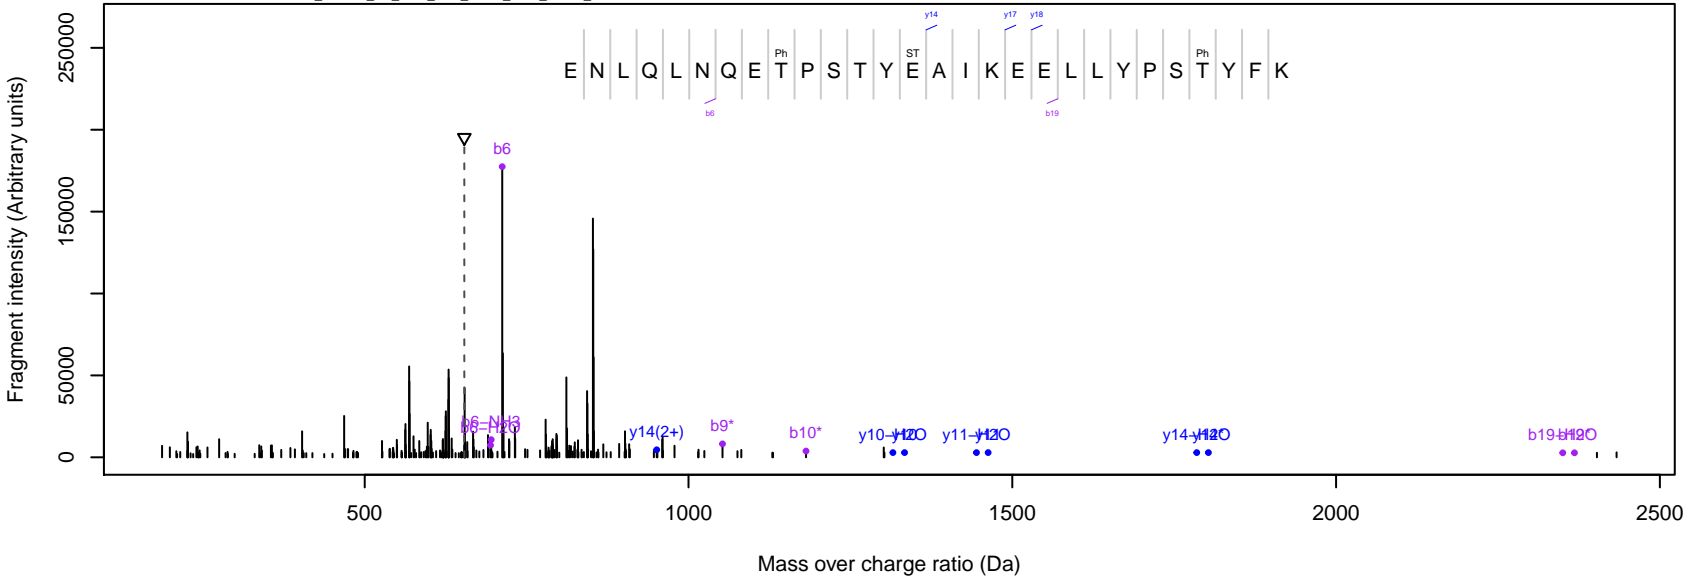

SFSKEELM(Oxidation (M))S(Phospho (STY))S(Phospho (STY))DLEETAGSTSIPK-3+

Source : QE3\_201126\_FR\_TiOx\_hum\_tissue\_Urea\_RNAB\_B Scan : 34668

Andromeda score : 52.483

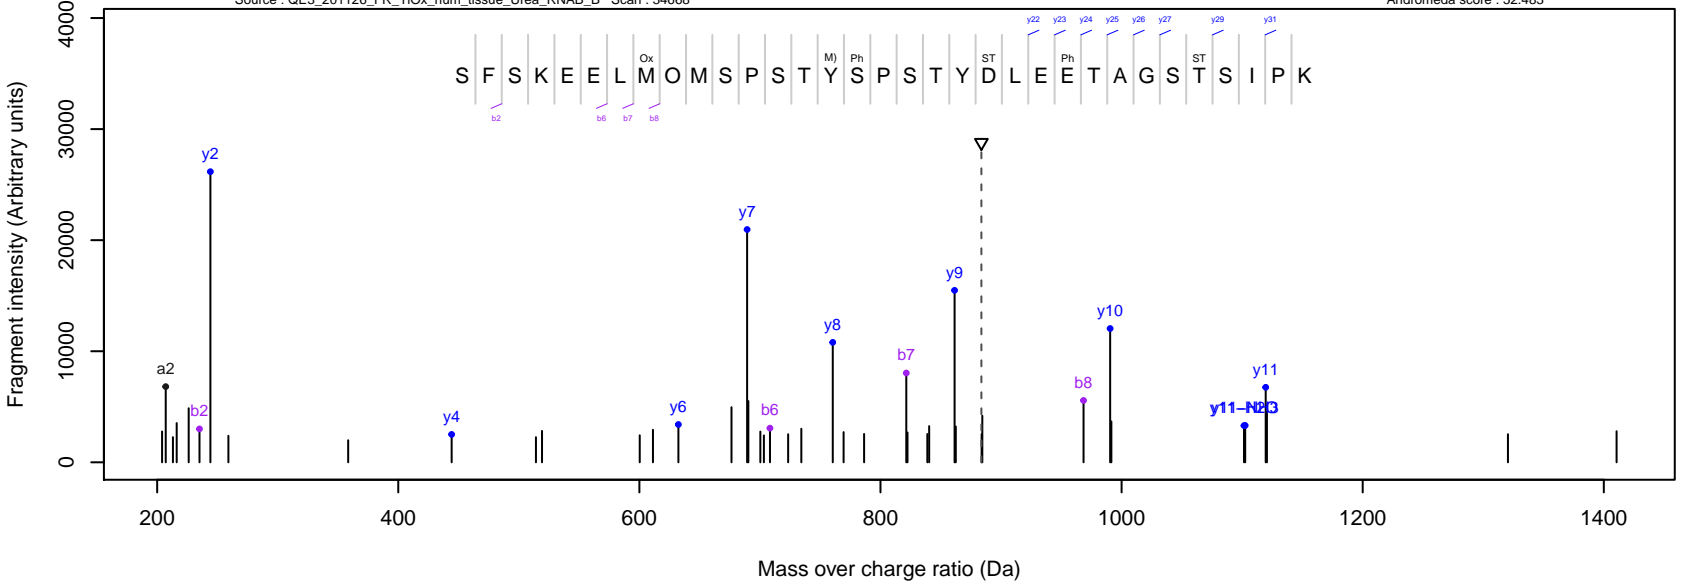

NQS(Phospho (STY))SEDILR-2+

Source : QE3\_201126\_FR\_TiOx\_hum\_tissue\_Urea\_RNAB\_H Scan : 17002

Andromeda score : 52.482

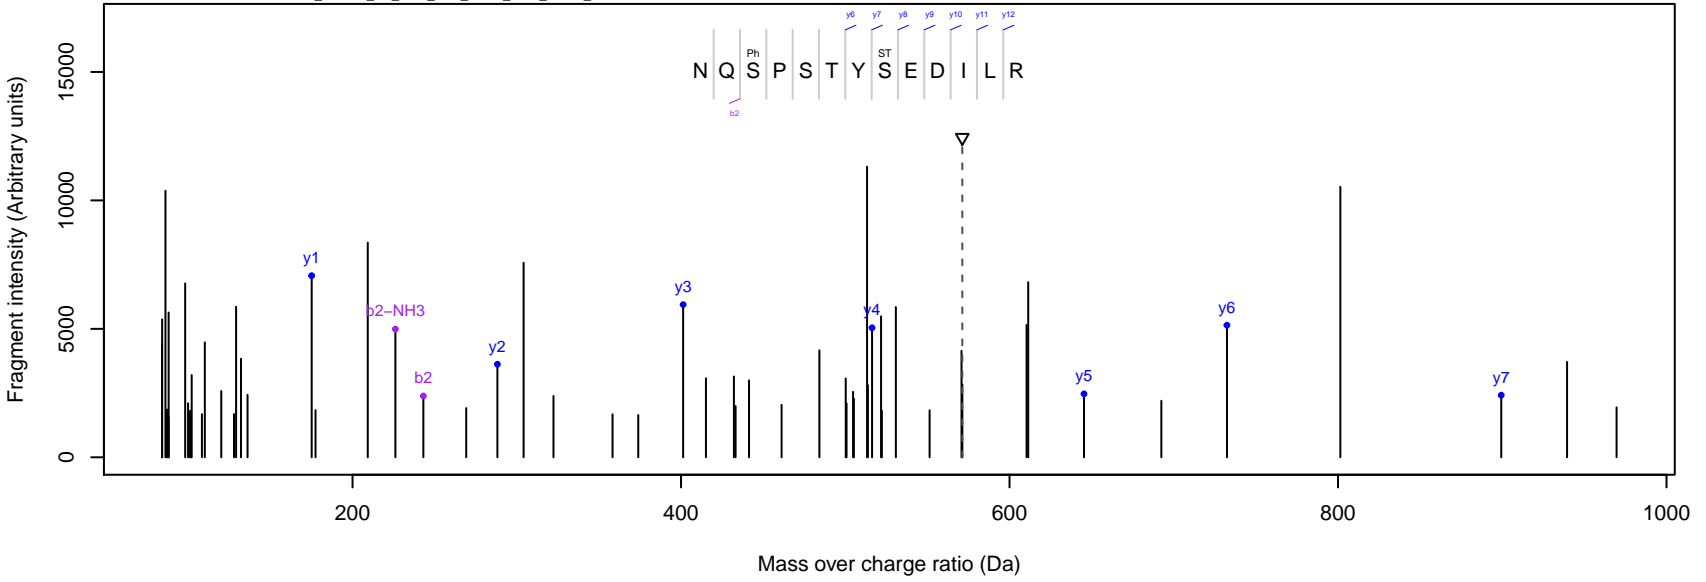

QIT(Phospho (STY))MEELVR-2+

Source : QE3\_201126\_FR\_TiOx\_hum\_tissue\_Urea\_RNAB\_H Scan : 36020

Andromeda score : 52.482

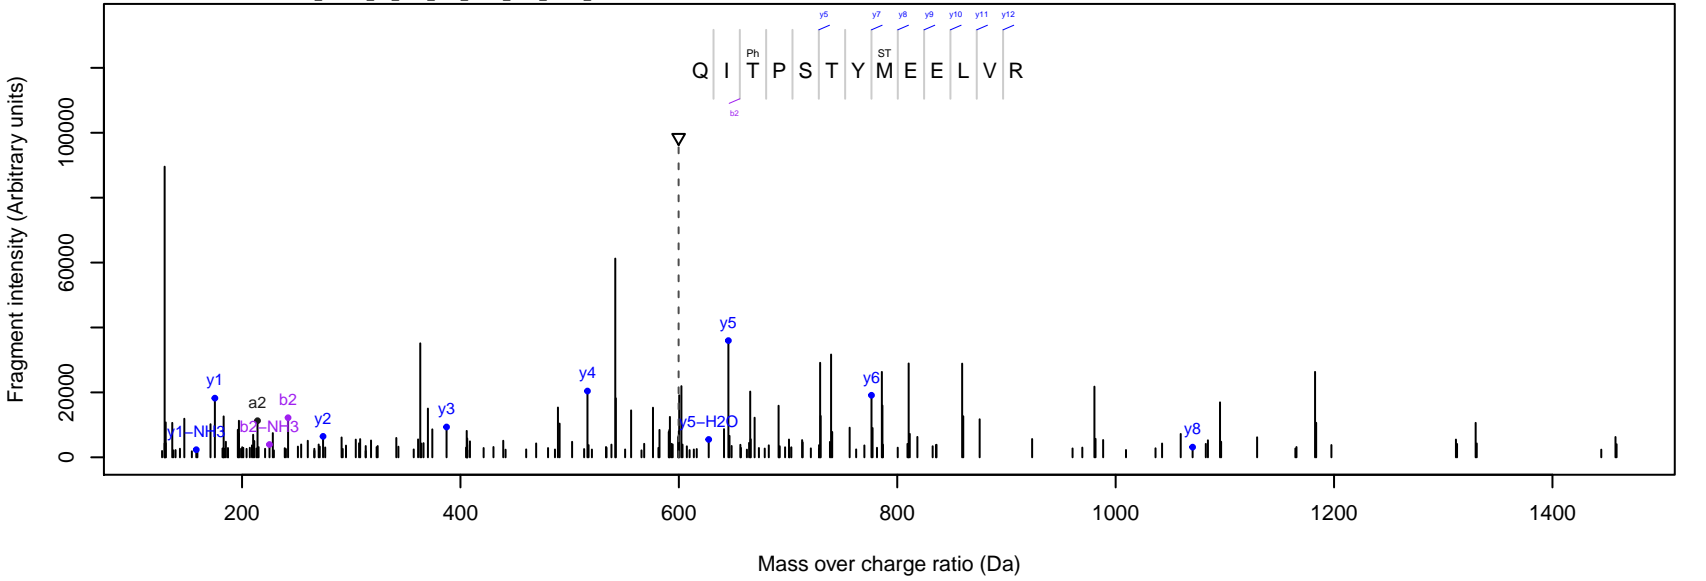

HDT(Phospho (STY))PDPS(Phospho (STY))PLRGAR-3+

Source : QE3\_201126\_FR\_TiOx\_hum\_tissue\_Urea\_RNAB\_B Scan : 11459

Andromeda score : 52.453

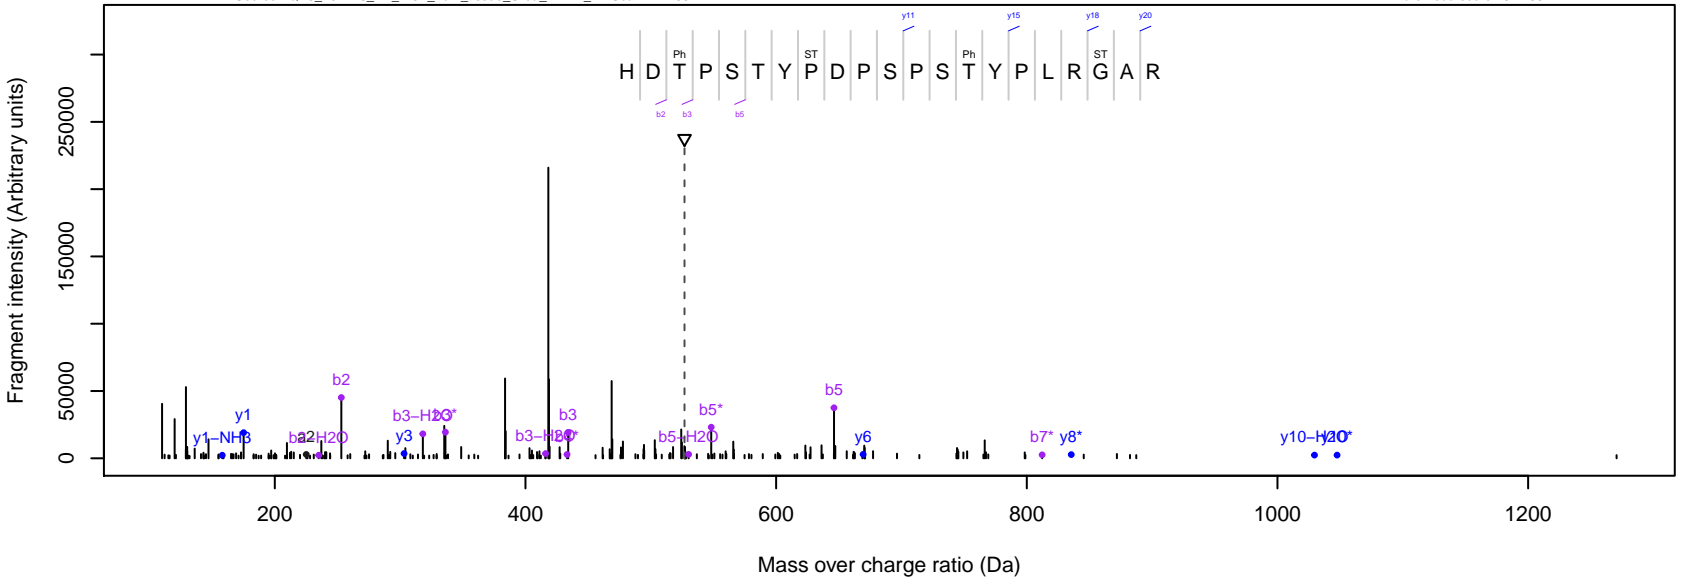



VEHPNGTGLGPHS(Phospho (STY))PPAQPTPGPPDNTLQETGTFPSS-3+

Source : QE3\_201126\_FR\_TiOx\_hum\_tissue\_Urea\_RNAB\_H Scan : 37030

Andromeda score : 52.451

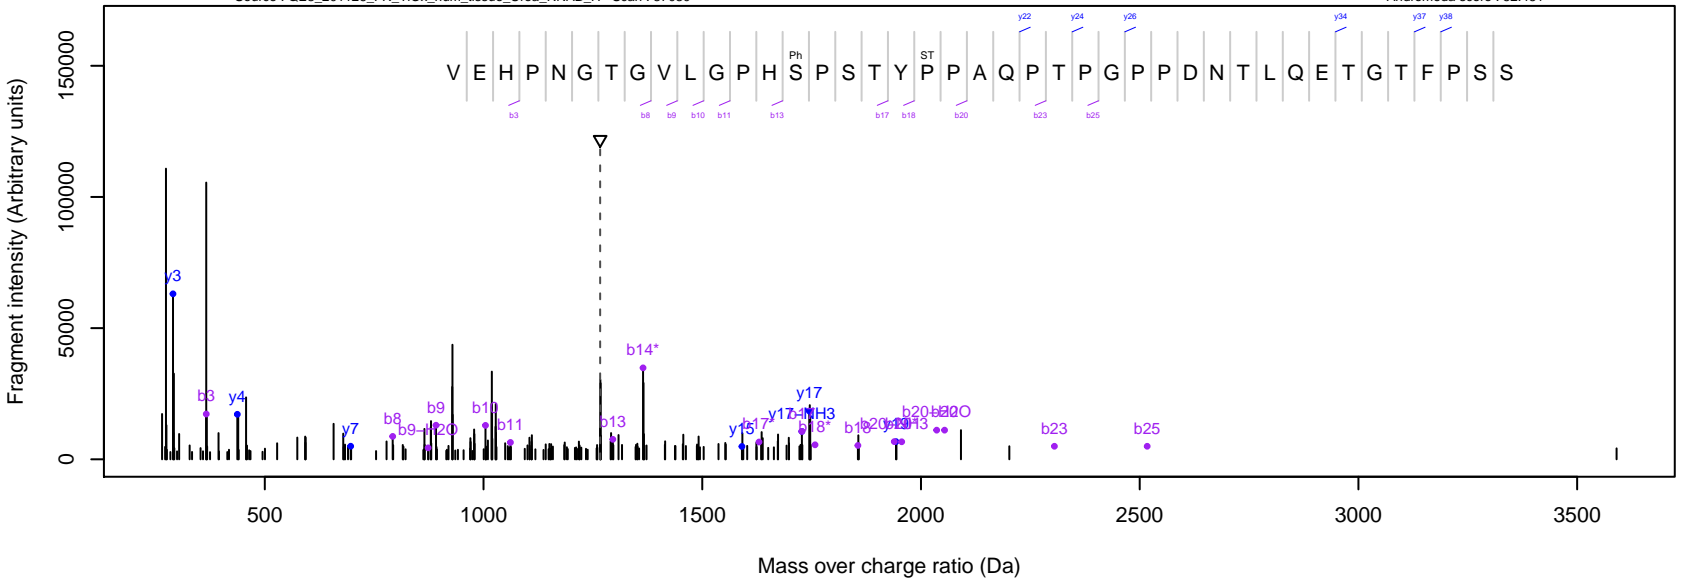

TGSGSPFAGNS(Phospho (STY))PAREGEQDAASLKDVFK-4+

Source : QE3\_201126\_FR\_TiOx\_hum\_tissue\_Urea\_RNAB\_N Scan : 37664

Andromeda score : 52.347

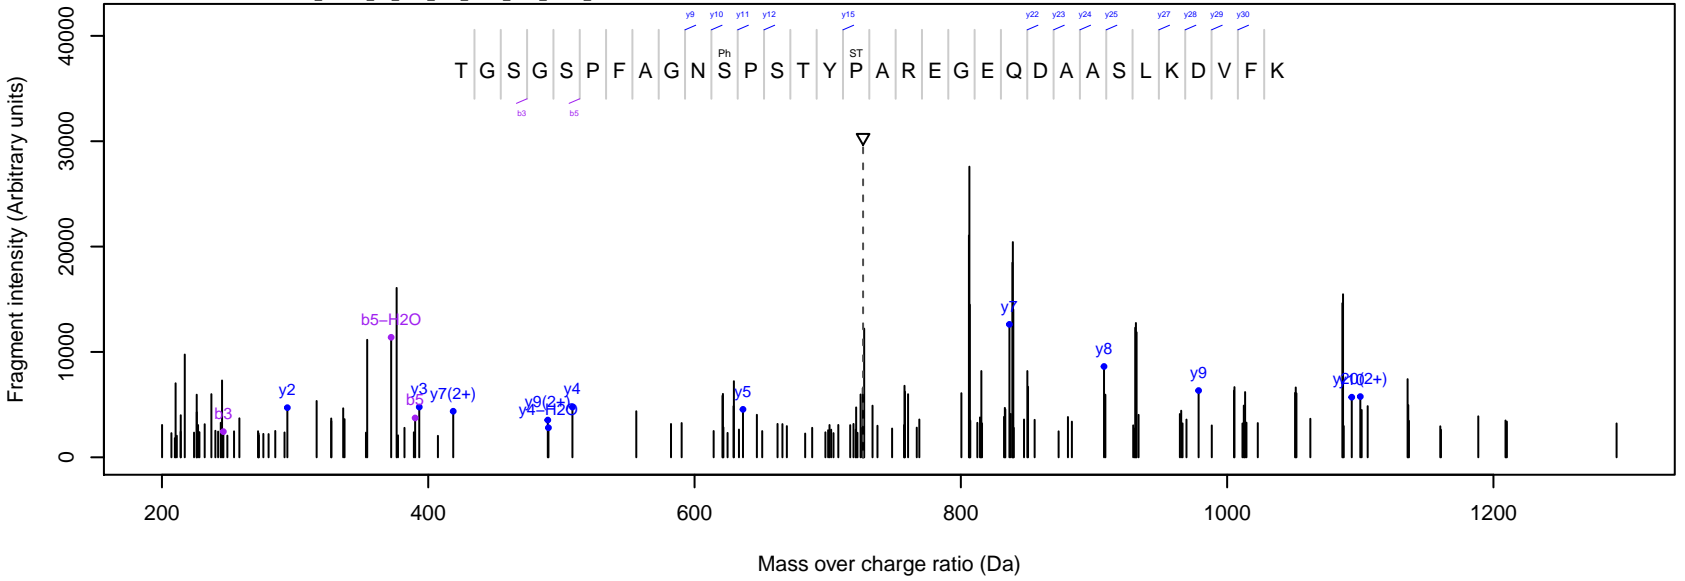

NS(Phospho (STY))QSFFSGLFGSSK-2+

Source : QE3\_201126\_FR\_TiOx\_hum\_tissue\_Urea\_RNAB\_B Scan : 56621

Andromeda score : 52.344

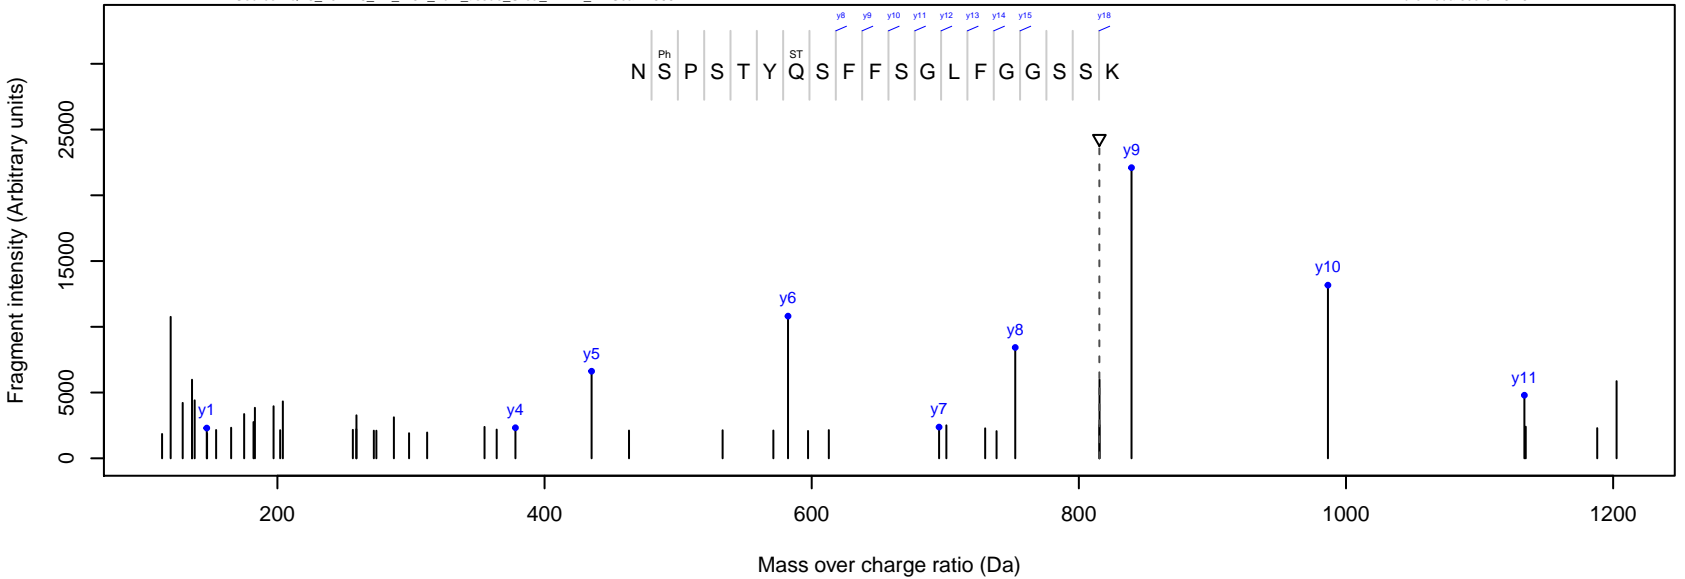

GEDS(Phospho (STY))AEETEAKPAVVAPVVEAVSTPSAAFPSDATAENVK-4+

Source : QE3\_201126\_FR\_TiOx\_hum\_tissue\_Urea\_RNAB\_N Scan : 47907

Andromeda score : 52.341

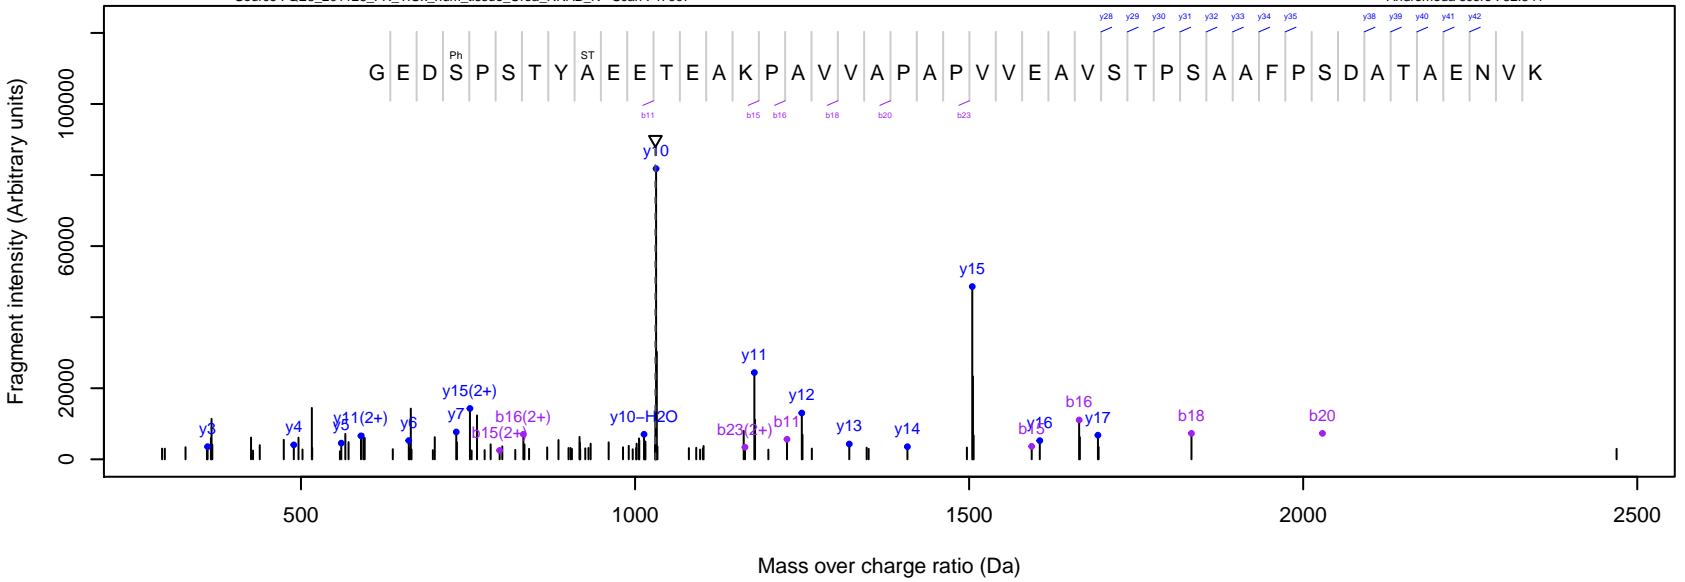

ERREEQTDS(Phospho (STY))DGESVTHHIR-3+

Source : QE3\_201126\_FR\_TiOx\_hum\_tissue\_Urea\_RNAB\_B Scan : 6685

Andromeda score : 52.321

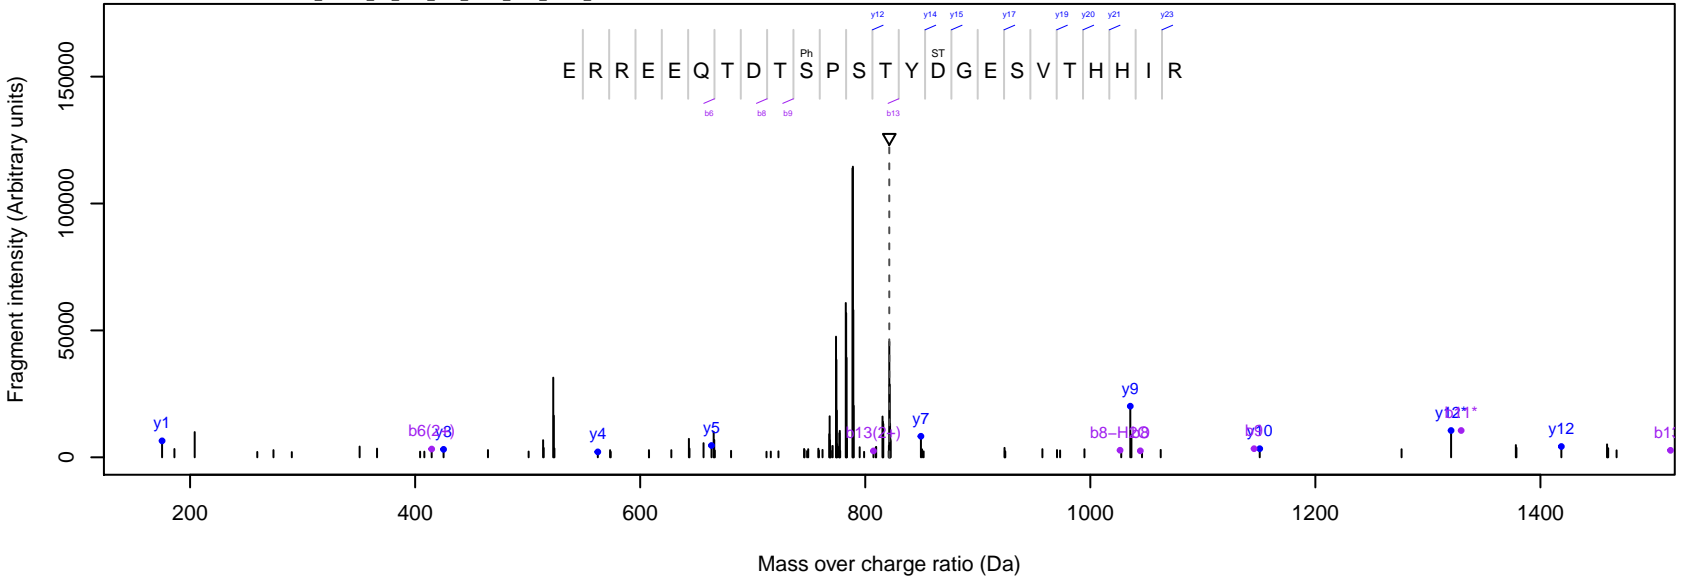

SLDS(Phospho (STY))DLS(Phospho (STY))DGPVTQEFM(Oxidation (M))EVK-3+

Source : QE3\_201126\_FR\_TiOx\_hum\_tissue\_Urea\_RNAB\_H Scan : 57433

Andromeda score : 52.321

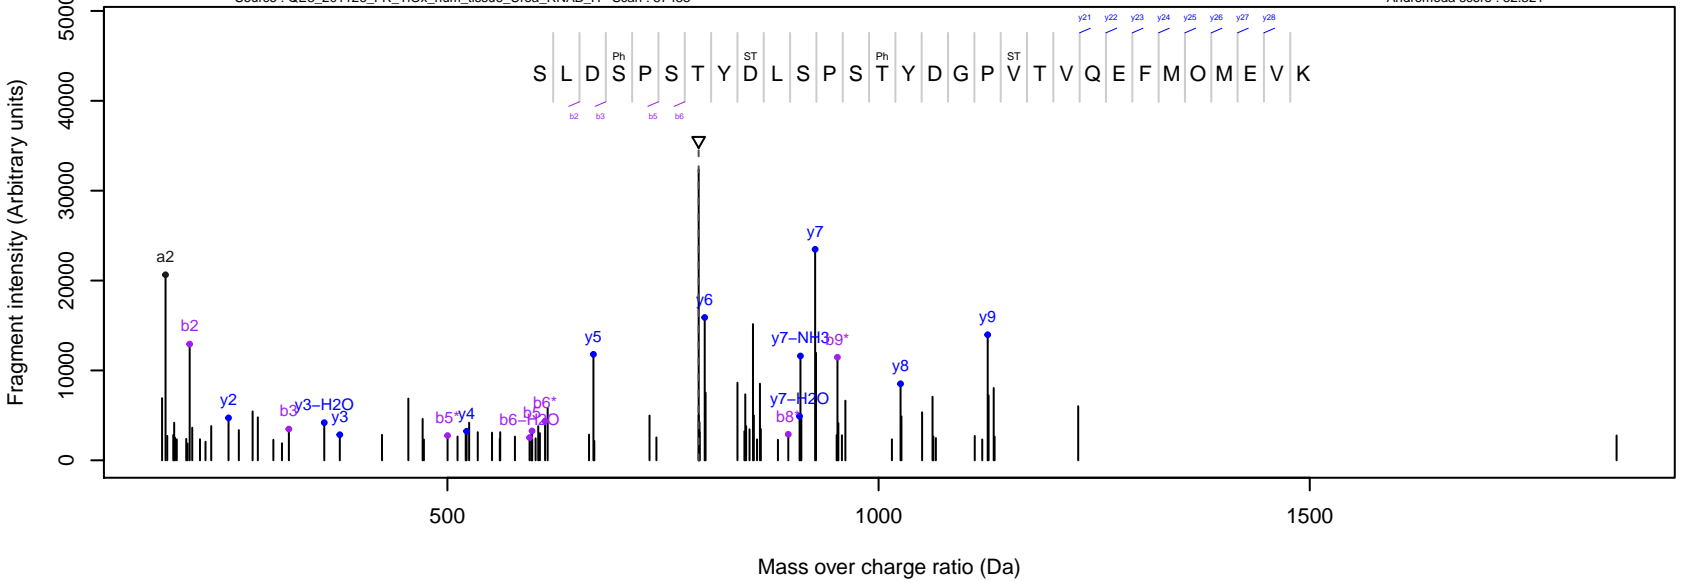

TAPPALPTYDYS(Phospho (STY))EEEEESRPM(Oxidation (M))SYDEKR-3+

Source : QE3\_201126\_FR\_TiOx\_hum\_tissue\_Urea\_RNAB\_H Scan : 22453

Andromeda score : 52.268

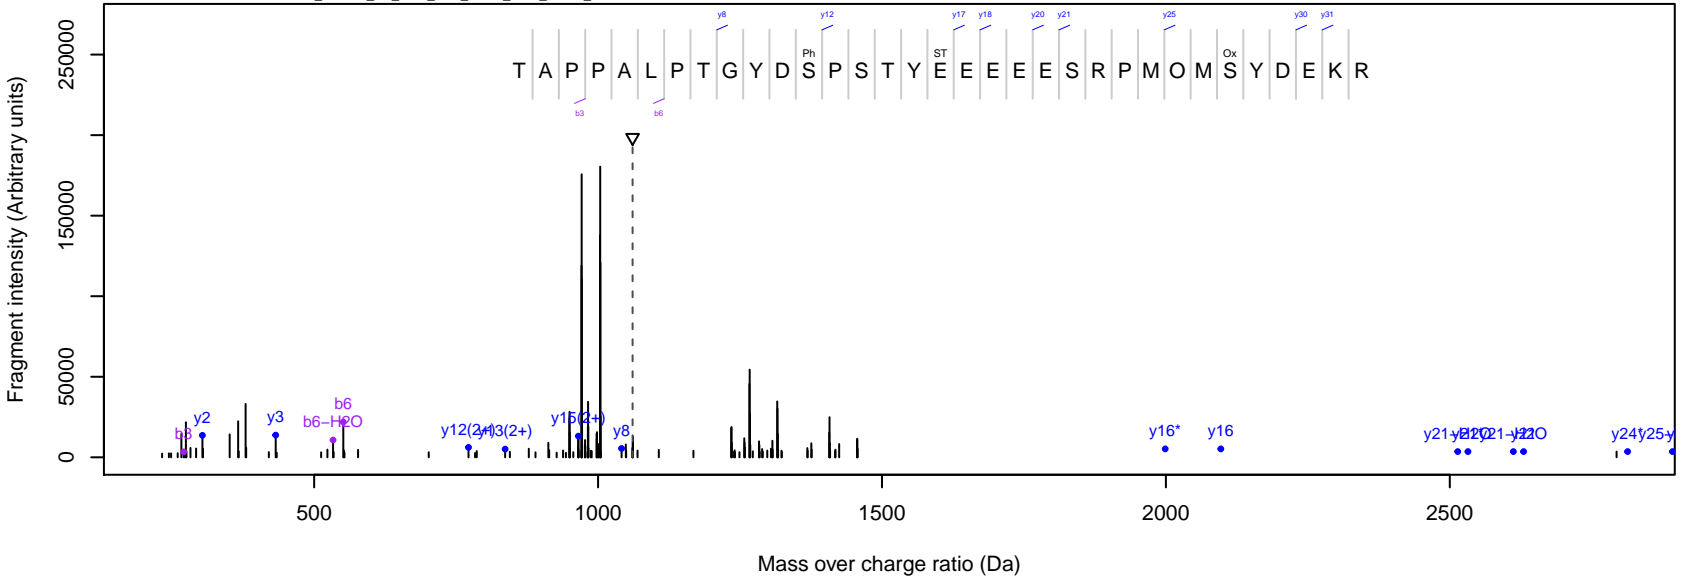

GGGT(Phospho (STY))PDANSLAPPGK-2+

Source : QE3\_201126\_FR\_TiOx\_hum\_tissue\_Urea\_RNAB\_B Scan : 17018

Andromeda score : 52.265

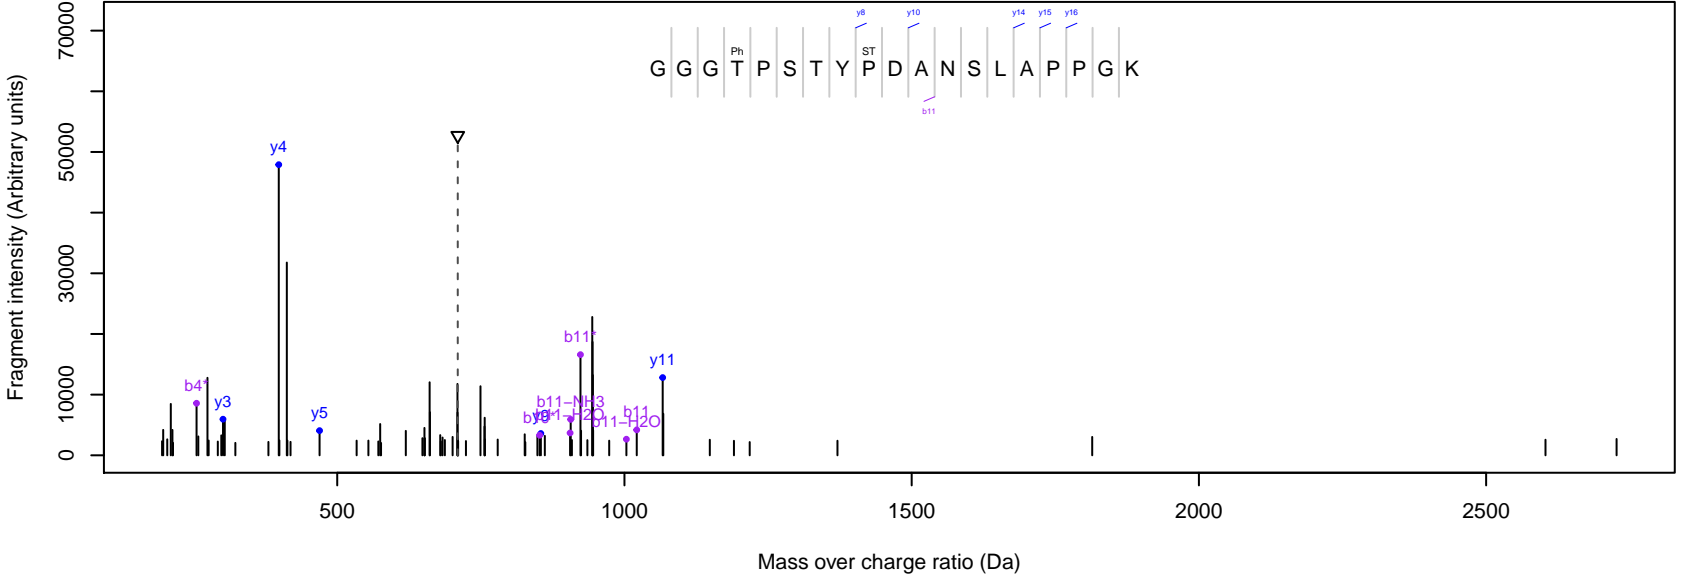

STT(Phospho (STY))PTSSPFR-2+

Source : QE3\_201126\_FR\_TiOx\_hum\_tissue\_Urea\_RNAB\_N Scan : 16426

Andromeda score : 52.255

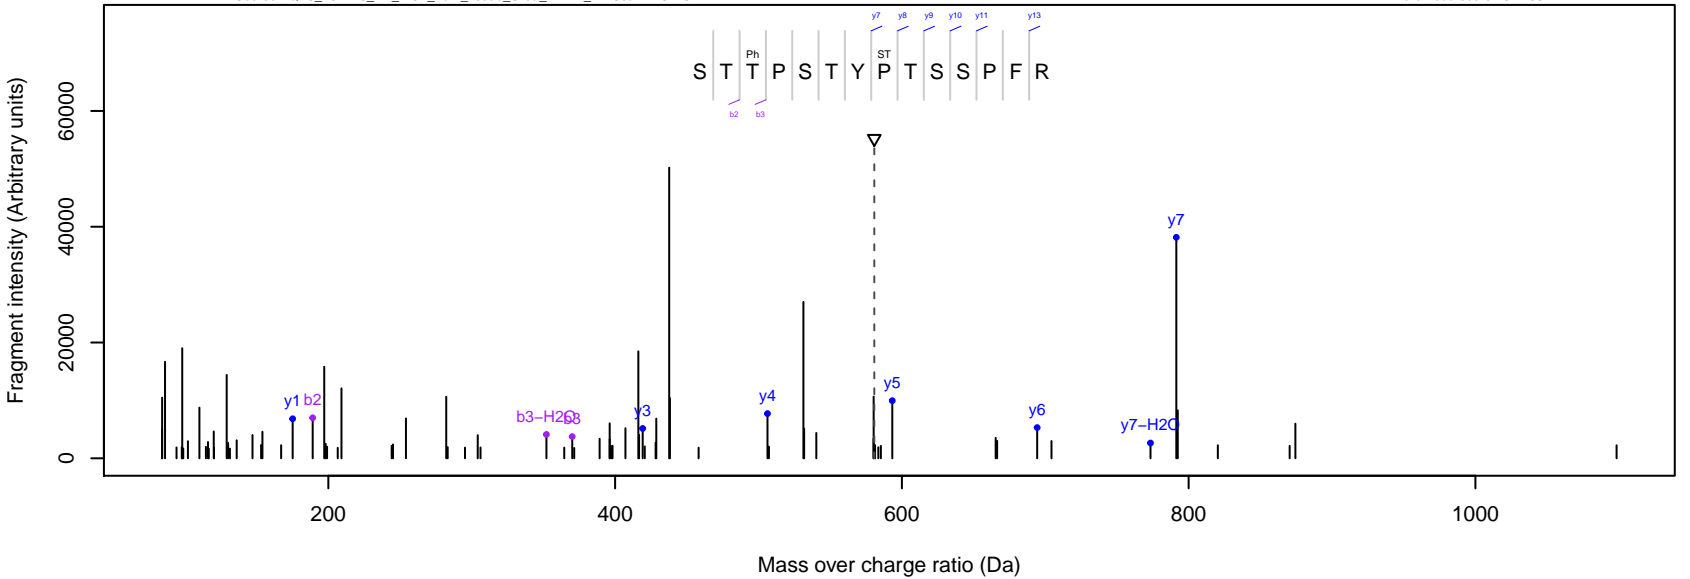

FLPLNIRNS(Phospho (STY))PFTR-3+

Source : QE3\_201126\_FR\_TiOx\_hum\_tissue\_Urea\_RNAB\_H Scan : 39348

Andromeda score : 52.254

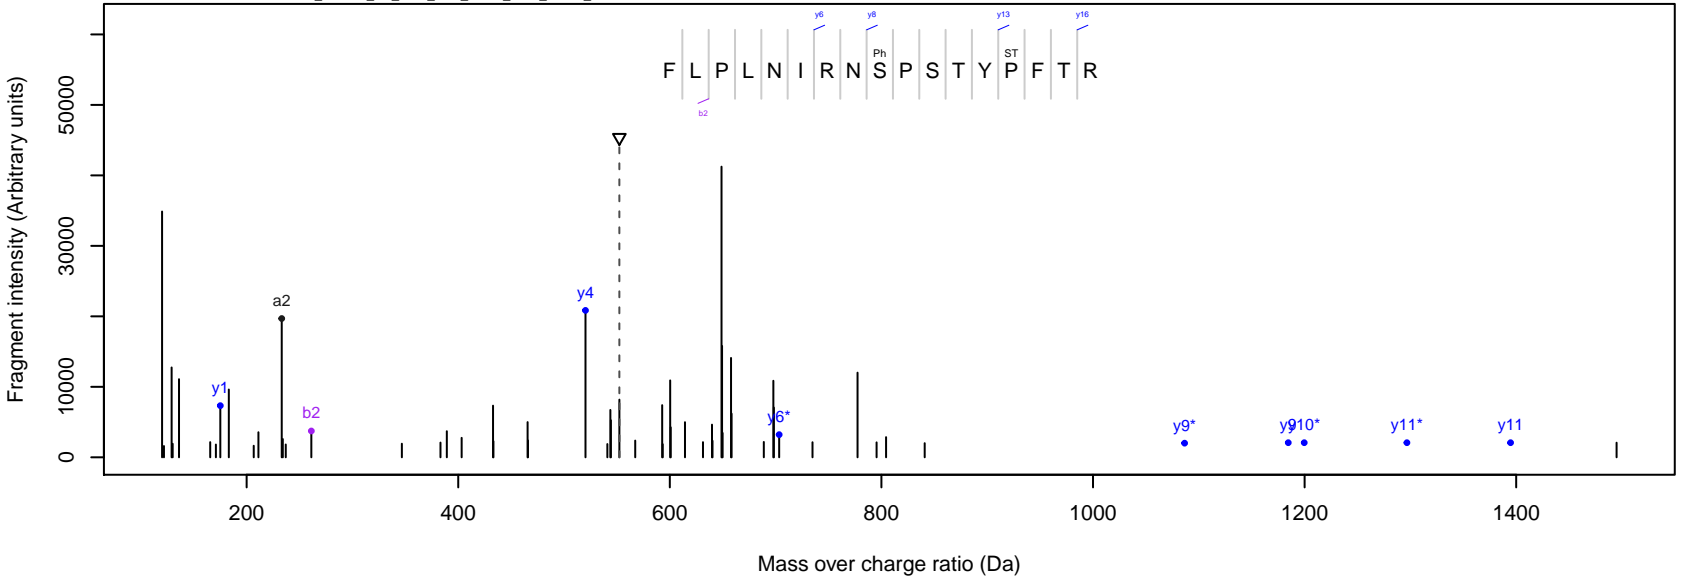

SIK M(Oxidation (M))VGFDM(Oxidation (M))S(Phospho (STY))K-2+

Source : QE3\_201126\_FR\_TiOx\_hum\_tissue\_Urea\_RNAB\_N Scan : 20636

Andromeda score : 52.247

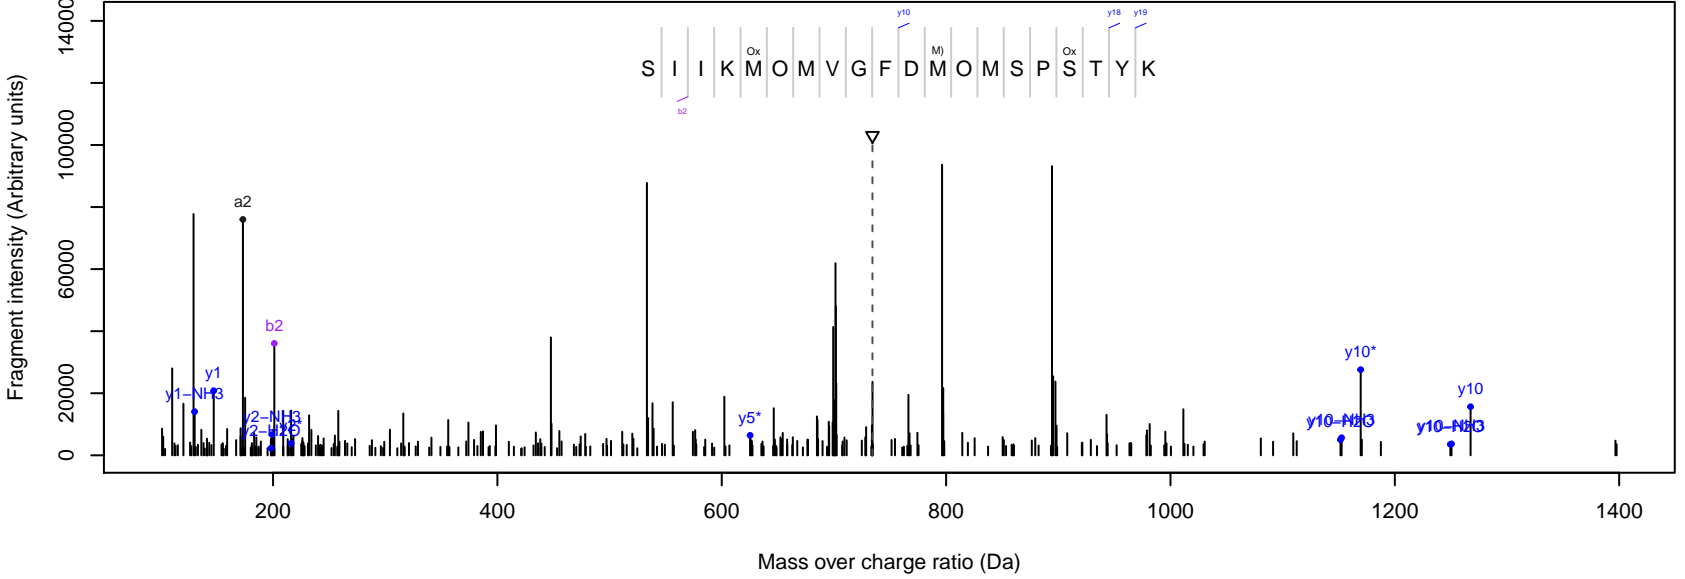

TVNSGGSEPS(Phospho (STY))PTEVDVSR-2+

Source : QE3\_201126\_FR\_TiOx\_hum\_tissue\_Urea\_RNAB\_H Scan : 17952

Andromeda score : 52.185

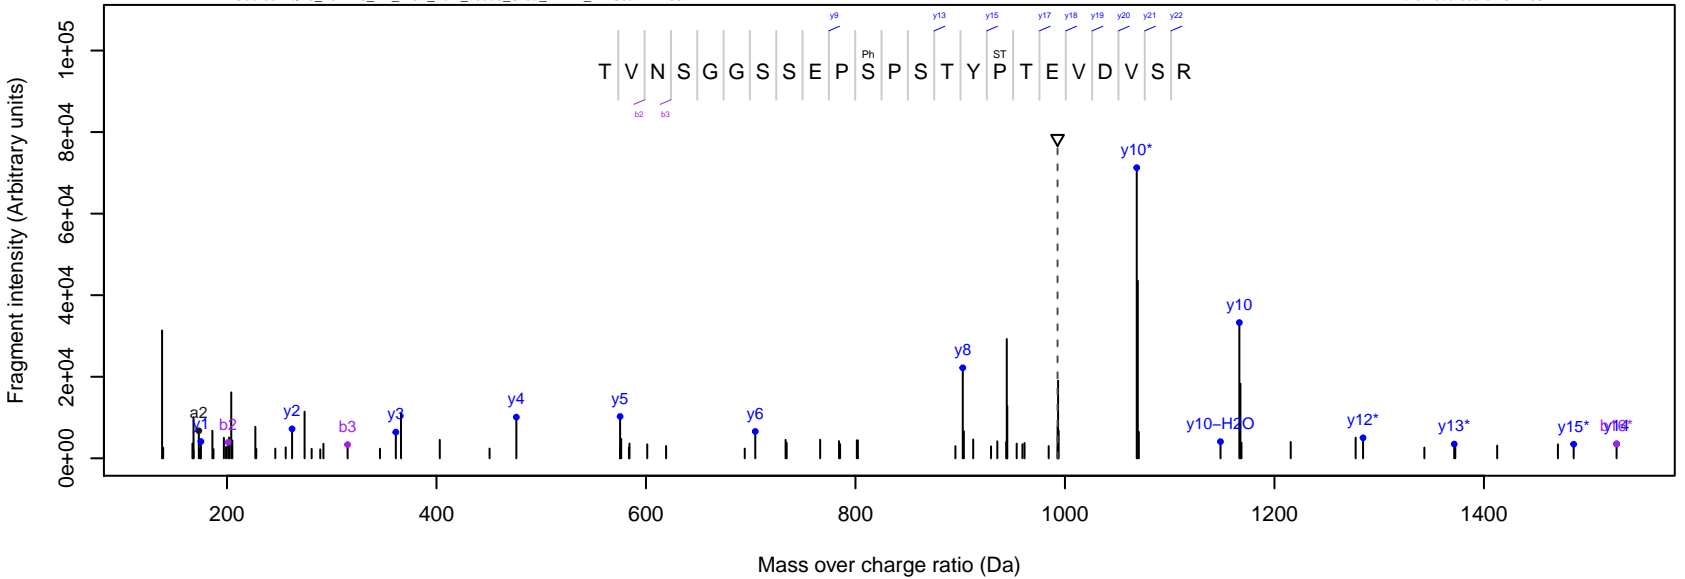

FTSSQTQSPTPPKPPS(Phospho (STY))PSFELGLSSFPLPGAAGNLK-3+

Source : QE3\_201126\_FR\_TiOx\_hum\_tissue\_Urea\_RNAB\_H Scan : 56021

Andromeda score : 52.155

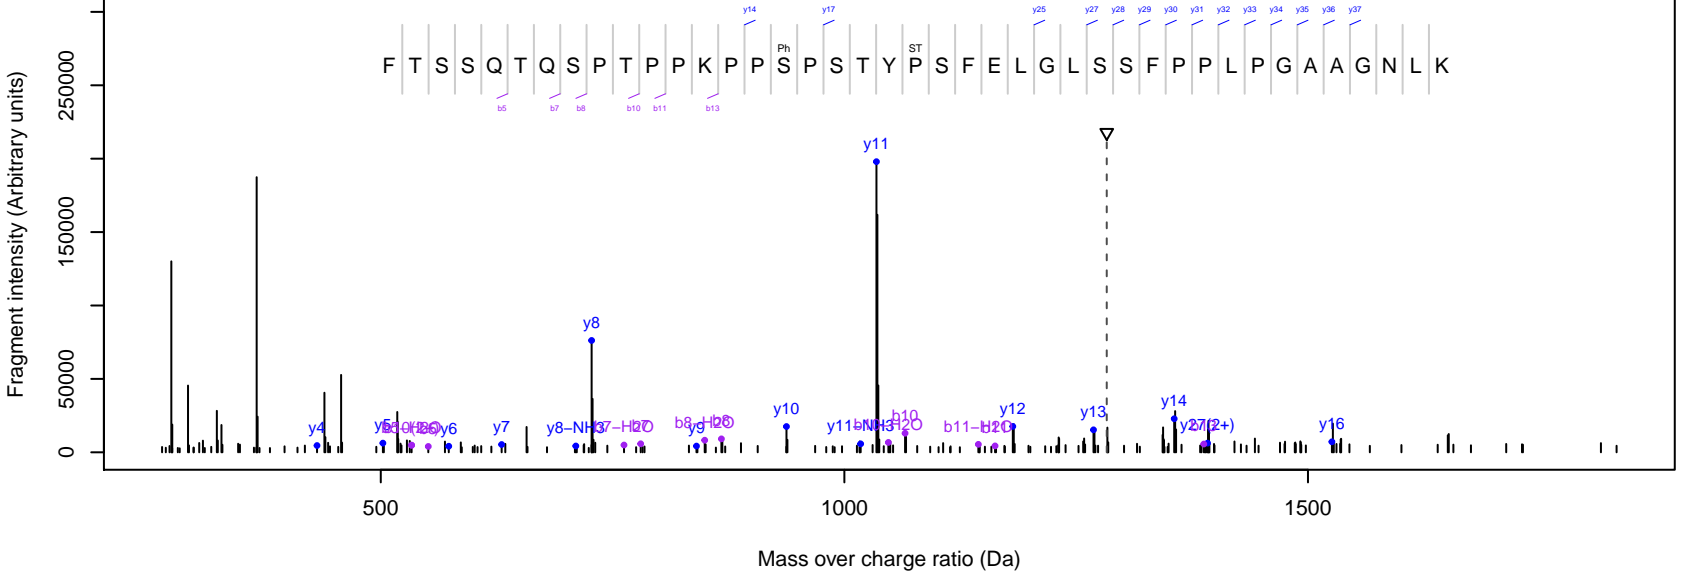

IIPLELPSVS(Phospho (STY))EDDSEEEFFDAPCSPLEEPLQFPTGVK-4+

Source : QE3\_201126\_FR\_TiOx\_hum\_tissue\_Urea\_RNAB\_H Scan : 62989

Andromeda score : 52.155

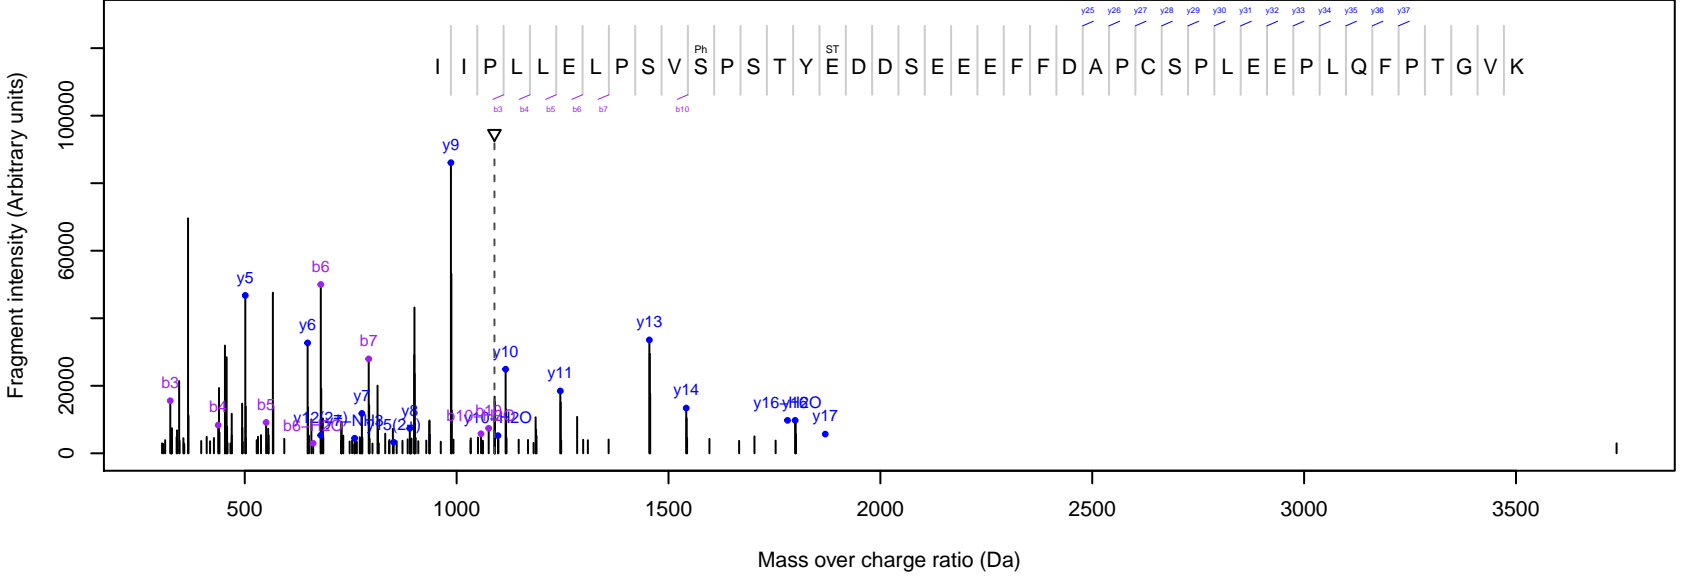

RFS(Phospho (STY))IPESGGGTEMDFRR-3+

Source : QE3\_201126\_FR\_TiOx\_hum\_tissue\_Urea\_RNAB\_H Scan : 27118

Andromeda score : 52.061

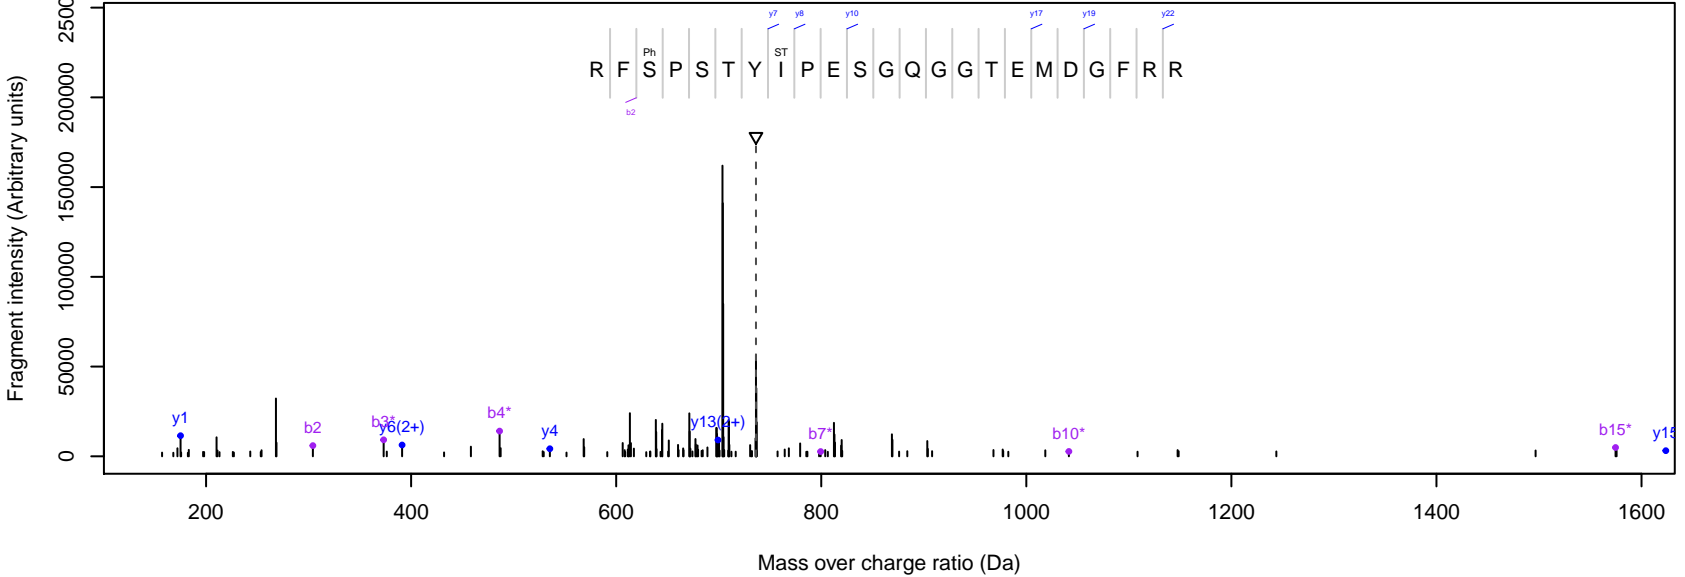

DTYSDRS(Phospho (STY))GS(Phospho (STY))S(Phospho (STY))SPDSEITELKFPSINH D-3+

Source : QE3\_201126\_FR\_TiOx\_hum\_tissue\_Urea\_RNAB\_N Scan : 55029

Andromeda score : 51.956

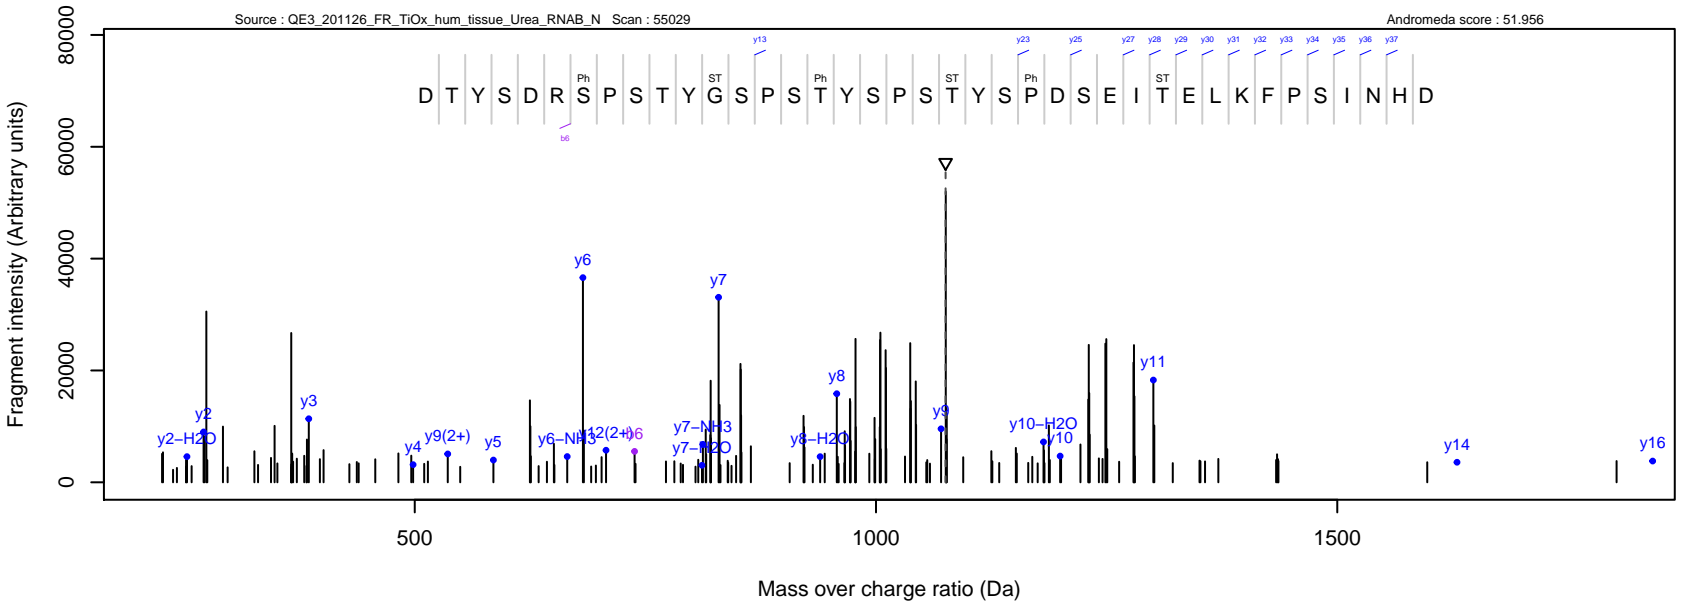

EYGS(Phospho (STY))TSSIDKQGTSGESFFDLLK-3+

Source : QE3\_201126\_FR\_TiOx\_hum\_tissue\_Urea\_RNAB\_N Scan : 53401

Andromeda score : 51.956

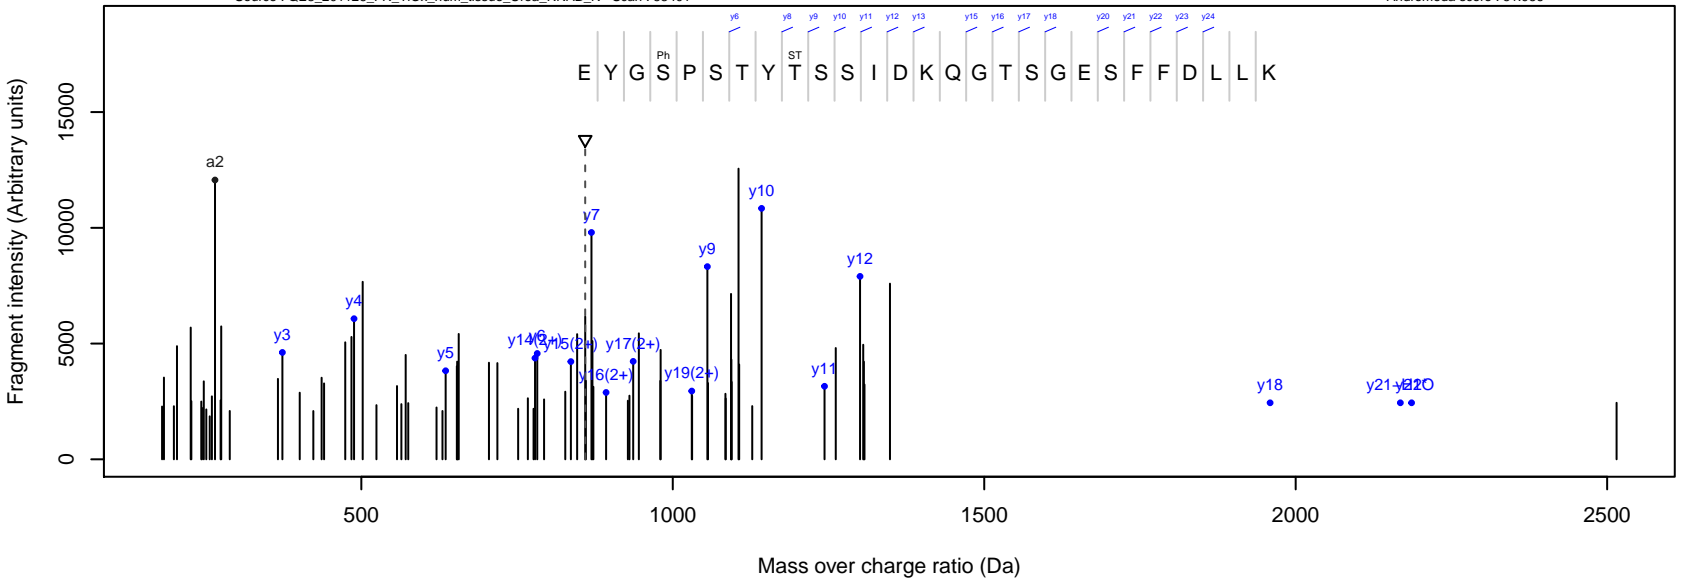

VS(Phospho (STY))PGLPS(Phospho (STY))PNLENGAPAVGPVQPR-3+

Source : QE3\_201126\_FR\_TiOx\_hum\_tissue\_Urea\_RNAB\_H Scan : 49313

Andromeda score : 51.956

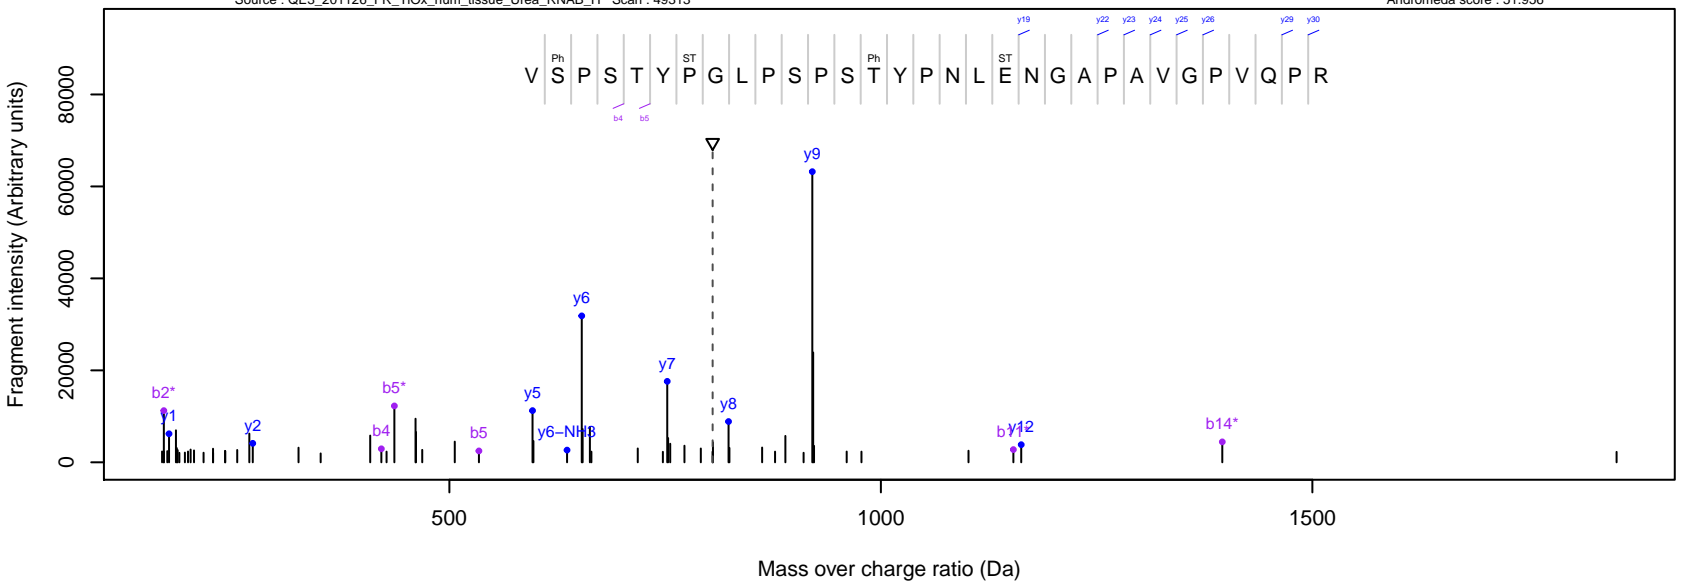

HNDIVDS(Phospho (STY))DS(Phospho (STY))DAEDRGTLSAELTAHFGGGGGLLHK-4+

Source : QE3\_201126\_FR\_TiOx\_hum\_tissue\_Urea\_RNAB\_B Scan : 40553

Andromeda score : 51.93

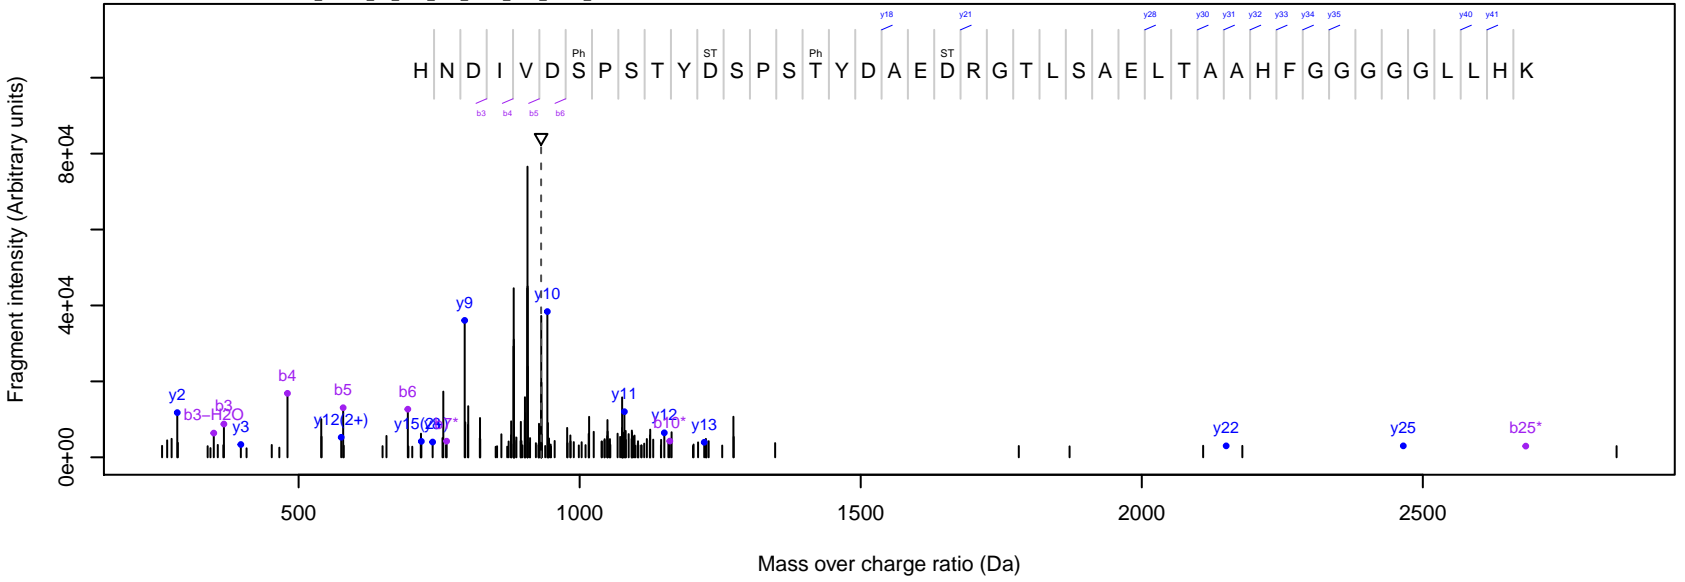

RDYDDM(Oxidation (M))S(Phospho (STY))PR-2+

Source : QE3\_201126\_FR\_TiOx\_hum\_tissue\_Urea\_RNAB\_H Scan : 4811

Andromeda score : 51.927

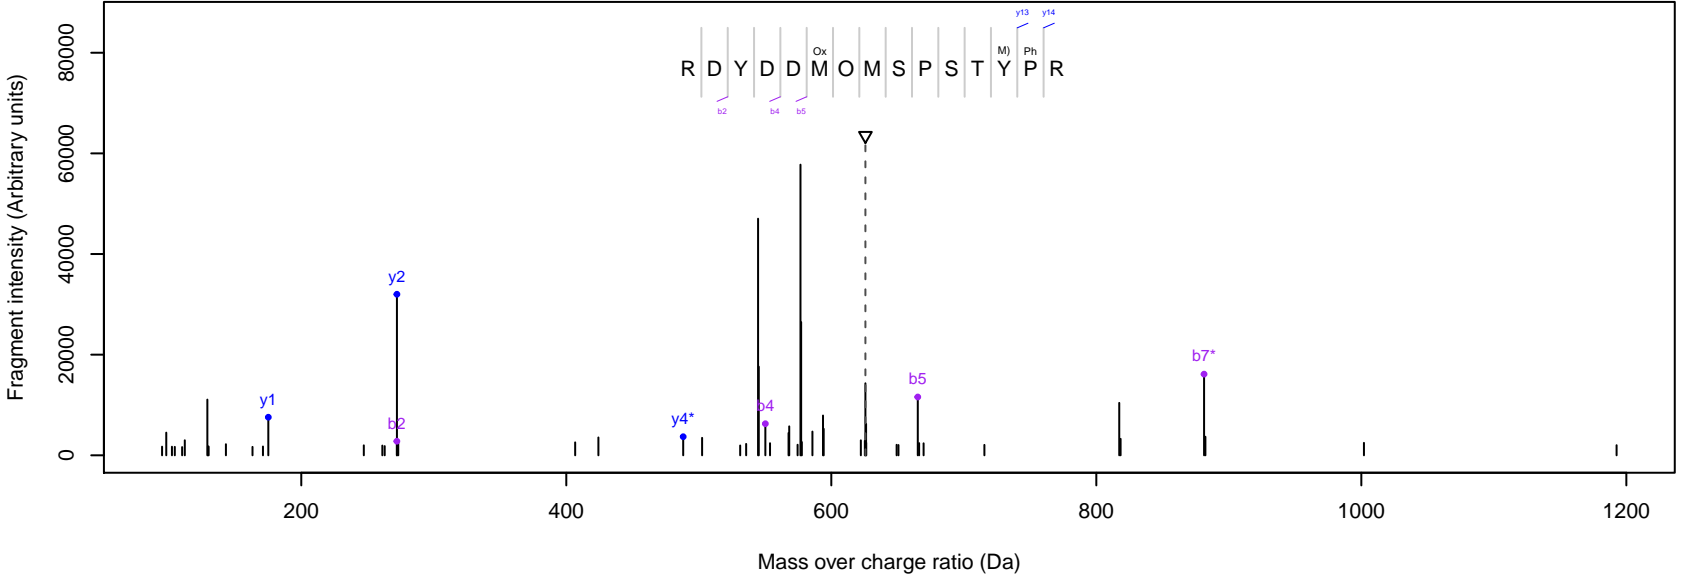

(Acetyl (Protein N-term))GDS(Phospho (STY))DDEYDRR-3+

Source : QE3\_201126\_FR\_TiOx\_hum\_tissue\_Urea\_RNAB\_H Scan : 6865

Andromeda score : 51.875

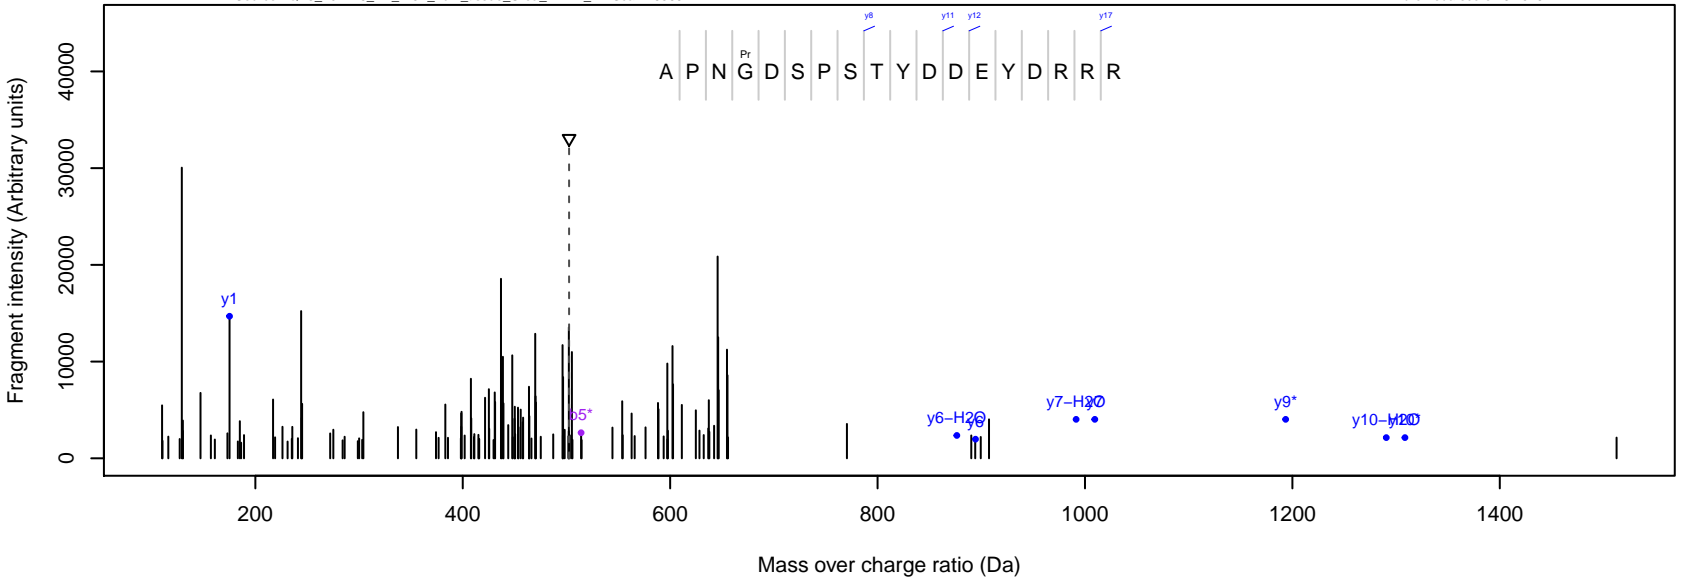

RS(Phospho (STY))QSDCGELGDFR-2+

Source : QE3\_201126\_FR\_TiOx\_hum\_tissue\_Urea\_RNAB\_B Scan : 17362

Andromeda score : 51.875

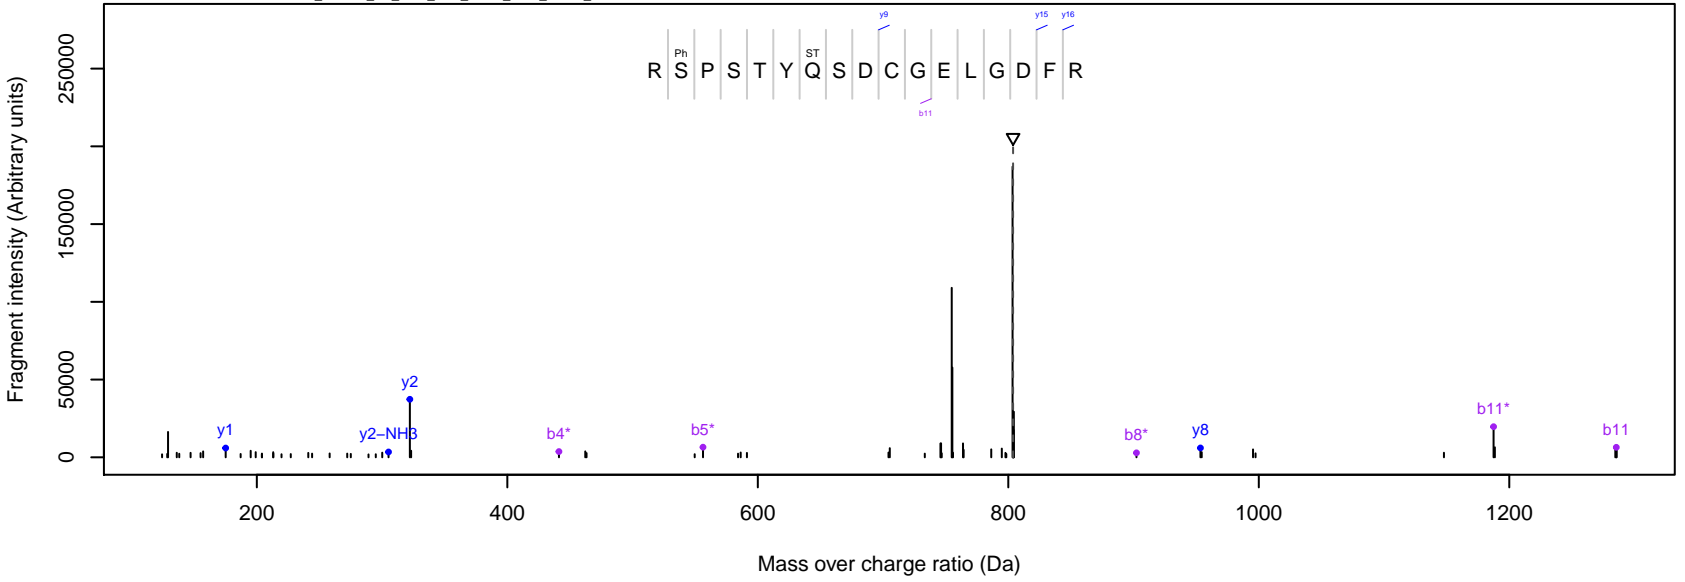

T(Phospho (STY))SVQTEDDQLIAGQSAR-2+

Source : QE3\_201126\_FR\_TiOx\_hum\_tissue\_Urea\_RNAB\_B Scan : 26483

Andromeda score : 51.875

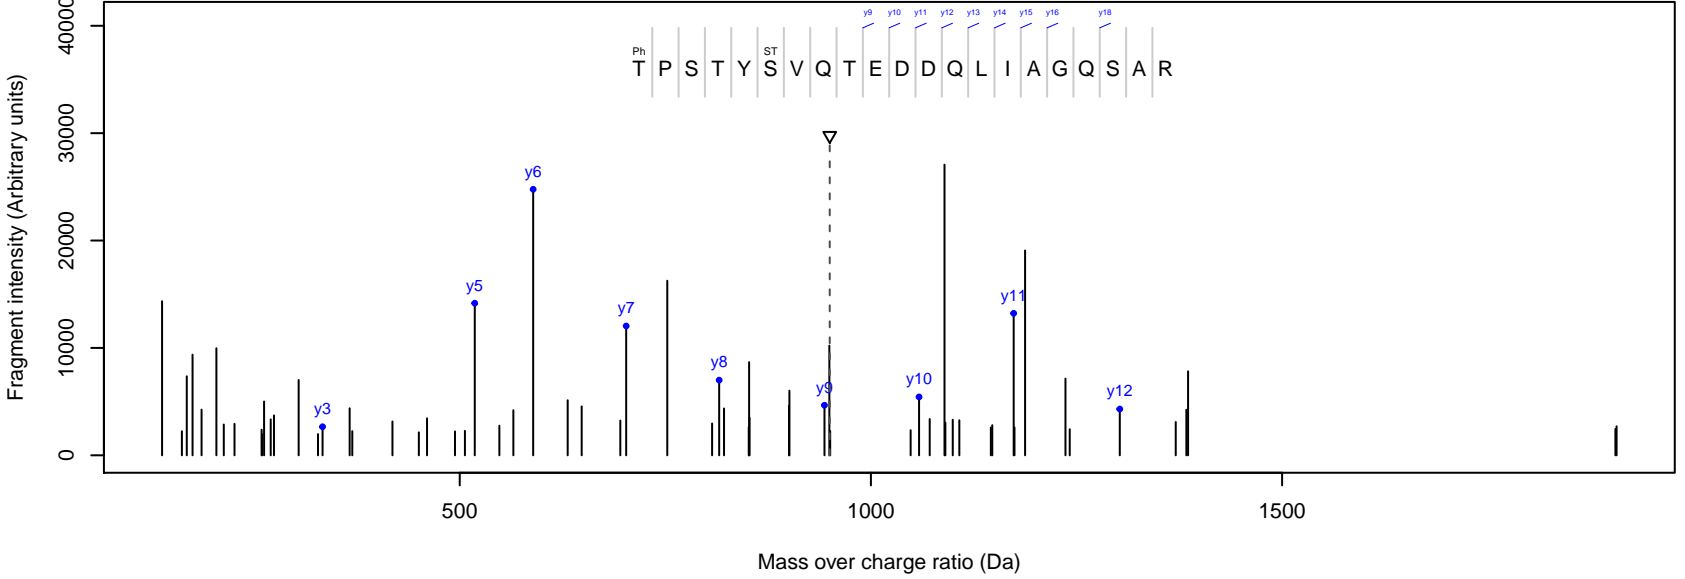

SGST(Phospho (STY))ES(Phospho (STY))LNPRPQT TISPADLHGM(Oxidation (M))WYPTVR-4+

Source : QE3\_201126\_FR\_TiOx\_hum\_tissue\_Urea\_RNAB\_N Scan : 43845

Andromeda score : 51.868

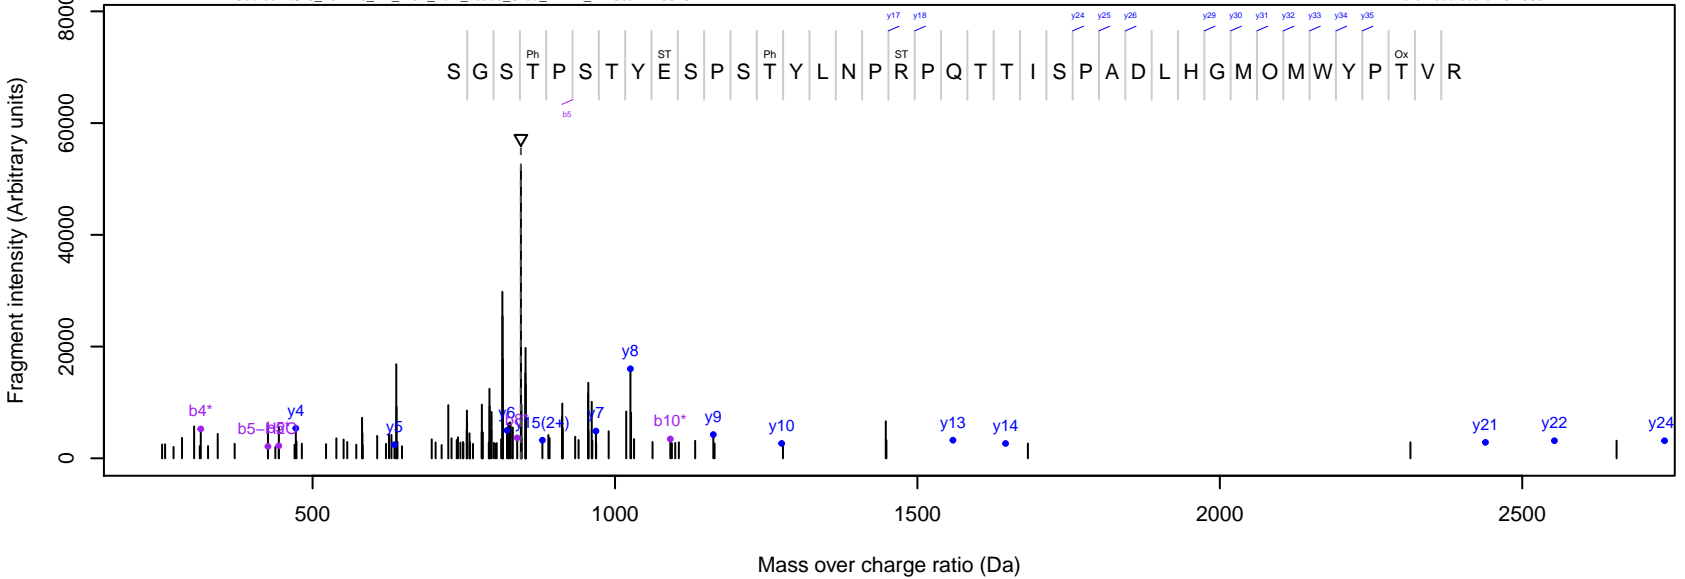



QRS(Phospho (STY))HS(Phospho (STY))GT(Phospho (STY))SPDNTAPPPPPRPQPSHSR-4+

Source : QE3\_201126\_FR\_TiOx\_hum\_tissue\_Urea\_RNAB\_N Scan : 8701

Andromeda score : 51.857

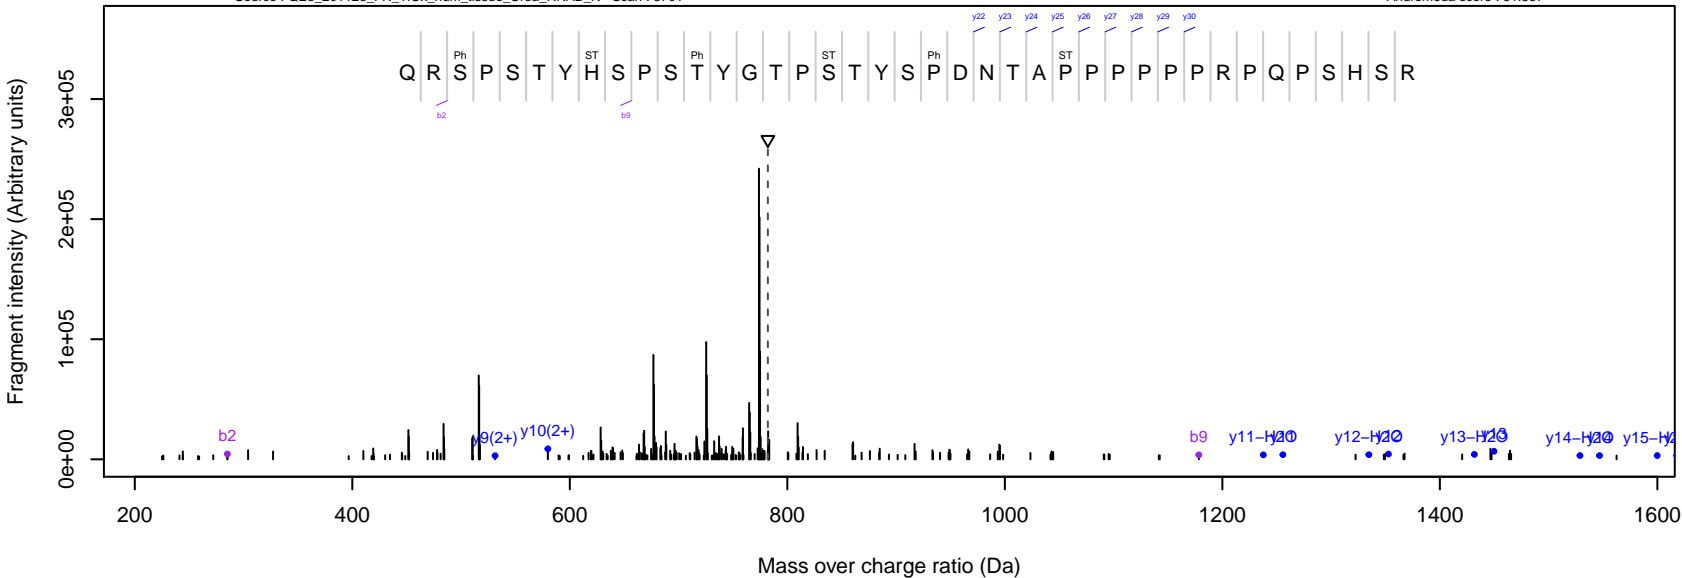

KGS(Phospho (STY))PCGEEELPSAAAAAAAAAATAR-3+

Source : QE3\_201126\_FR\_TiOx\_hum\_tissue\_Urea\_RNAB\_B Scan : 53275

Andromeda score : 51.844

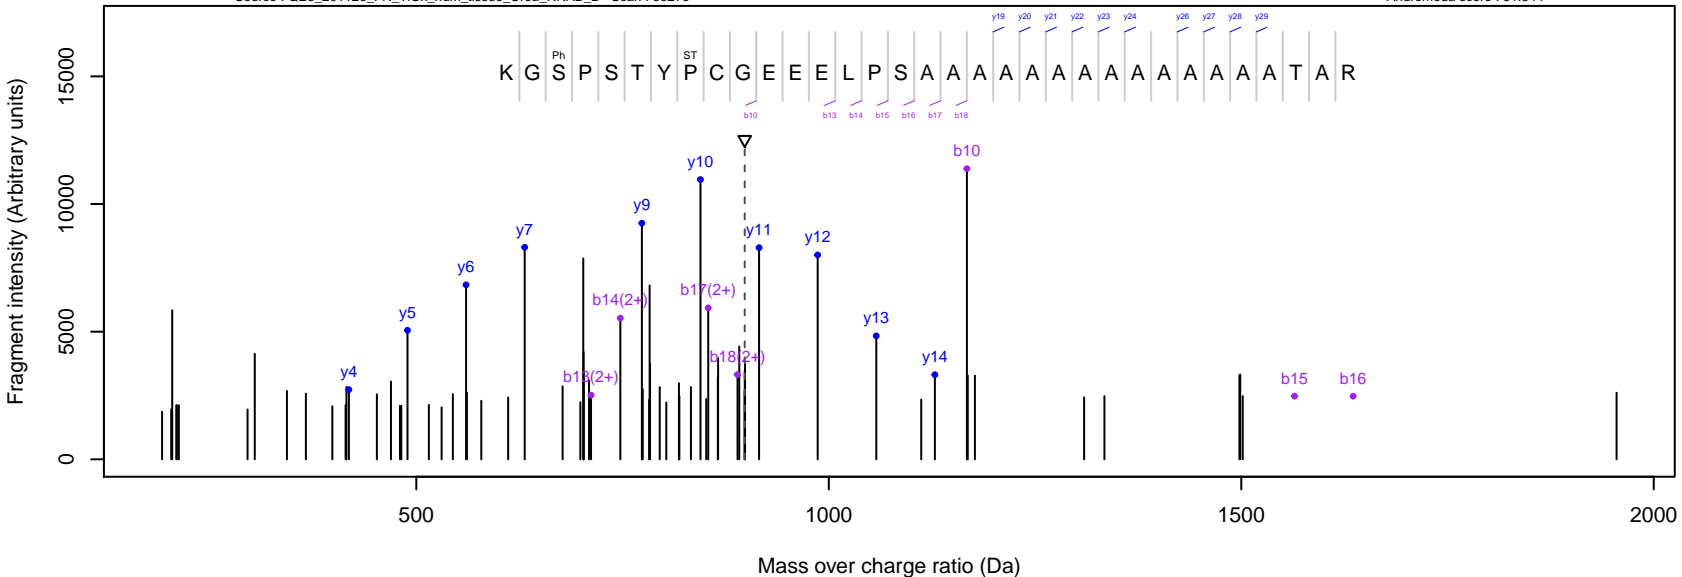

AS(Phospho (STY))AVALEVQR-2+

Source : QE3\_201126\_FR\_TiOx\_hum\_tissue\_Urea\_RNAB\_B Scan : 19786

Andromeda score : 51.841

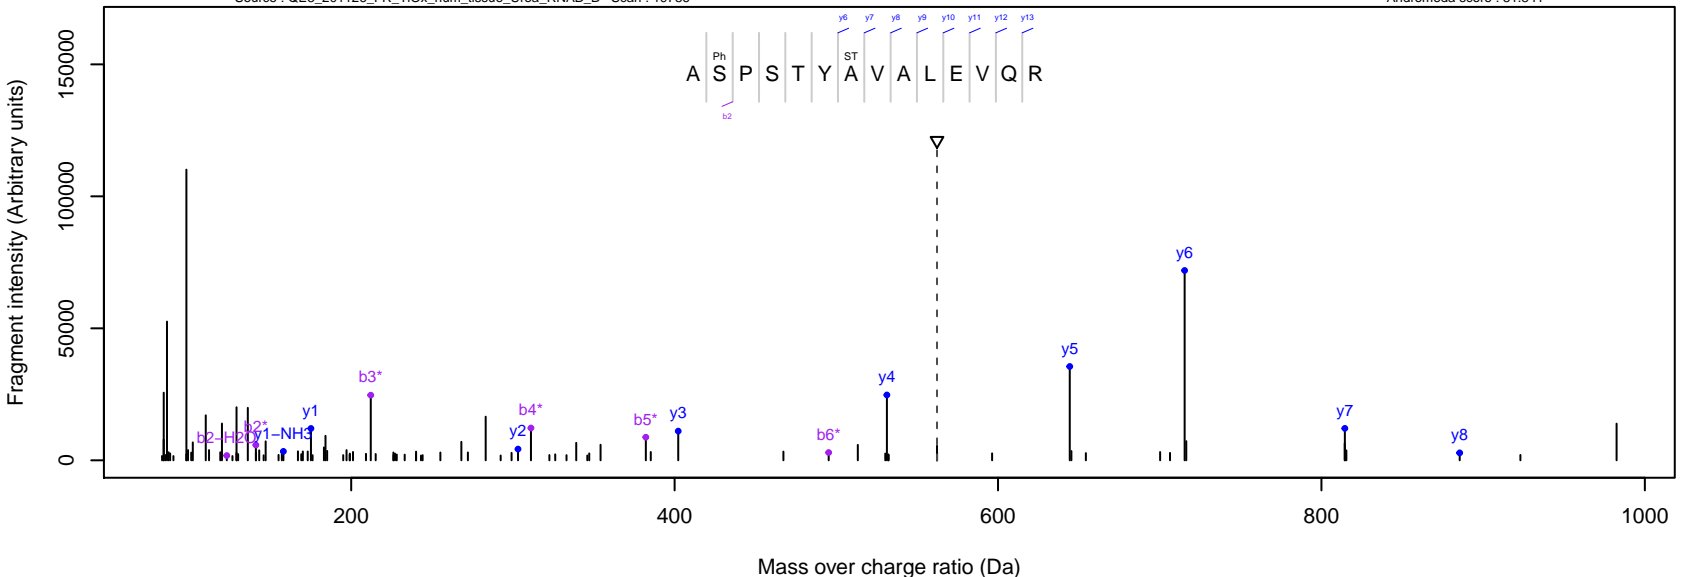

VPLVQRGS(Phospho (STY))ANGL-2+

Source : QE3\_201126\_FR\_TiOx\_hum\_tissue\_Urea\_RNAB\_H Scan : 25286

Andromeda score : 51.841

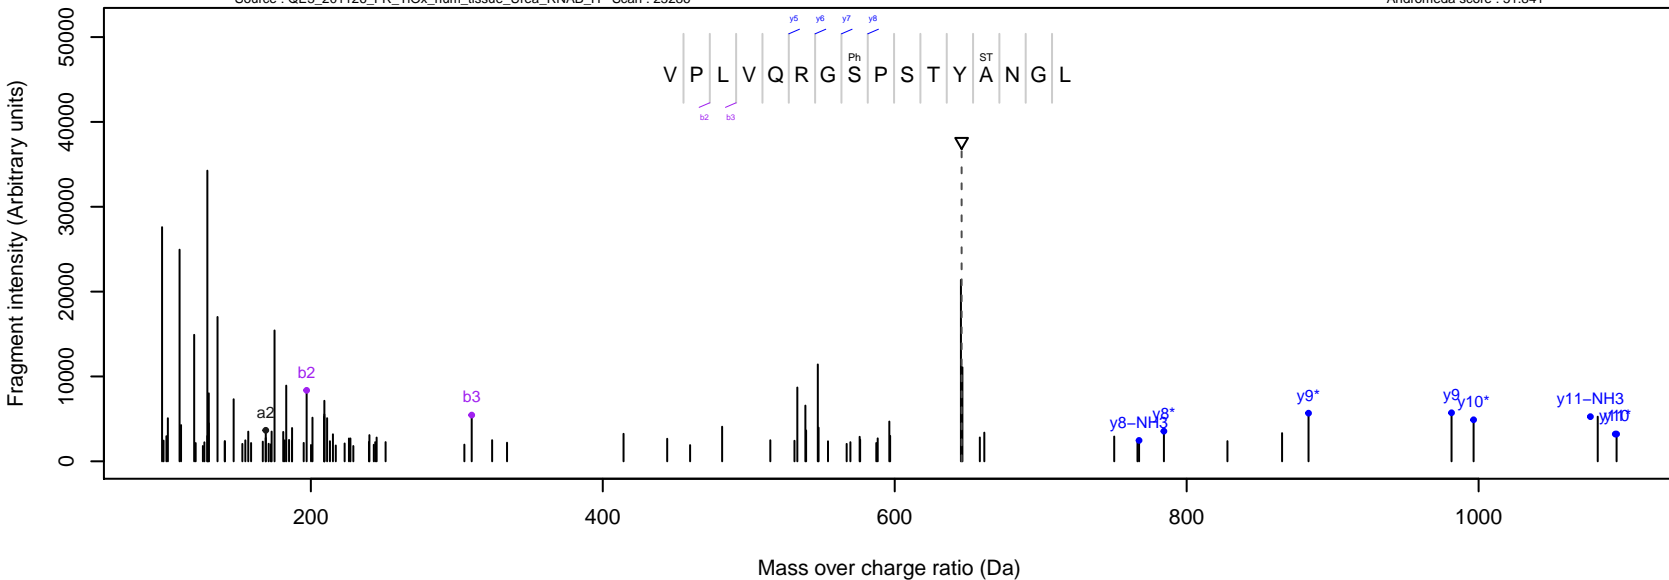

LTQAEISEQPTMATVVPQVPT(Phospho (STY))SPK-3+

Source : QE3\_201126\_FR\_TiOx\_hum\_tissue\_Urea\_RNAB\_N Scan : 44349

Andromeda score : 51.827

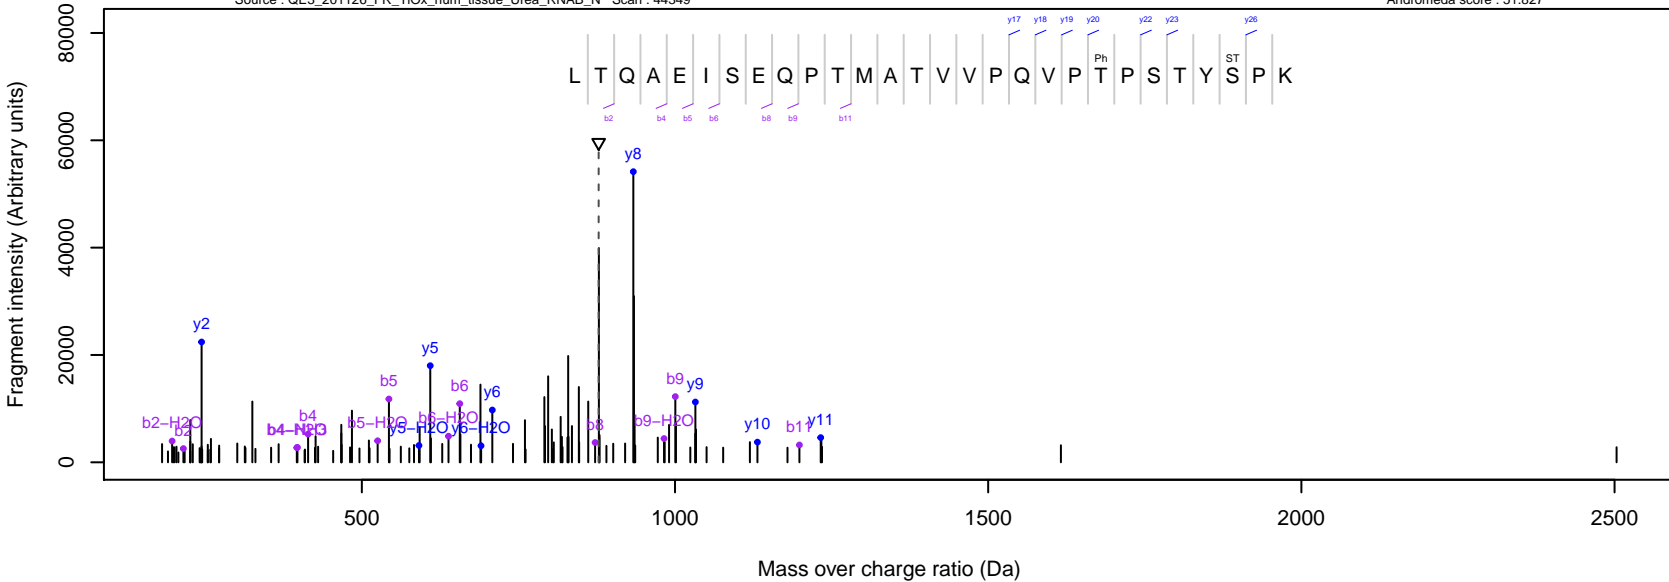

SAYQEYDS(Phospho (STY))DS(Phospho (STY))DVPEELK-3+

Source : QE3\_201126\_FR\_TiOx\_hum\_tissue\_Urea\_RNAB\_B Scan : 30742

Andromeda score : 51.827

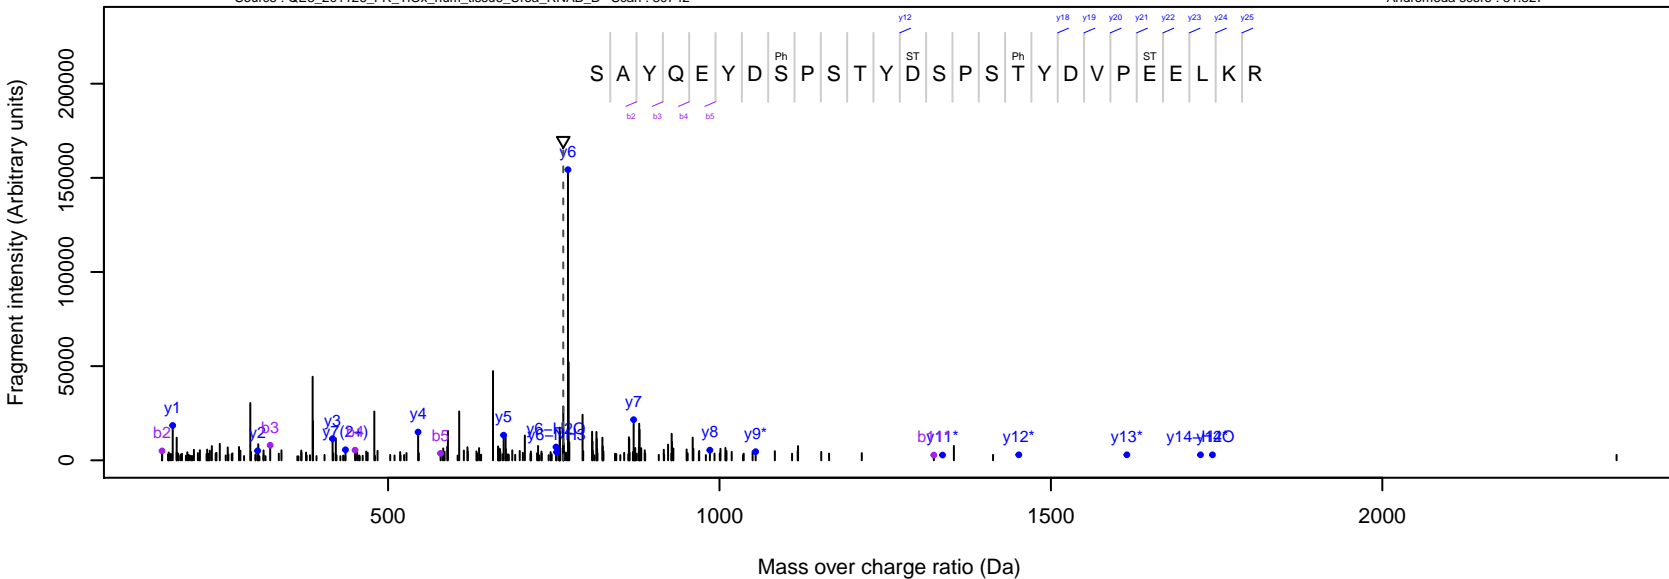

LQANLTFDPAALLPGAS(Phospho (STY))PKS(Phospho (STY))PGLK-3+

Source : QE3\_201126\_FR\_TiOx\_hum\_tissue\_Urea\_RNAB\_H Scan : 59293

Andromeda score : 51.783

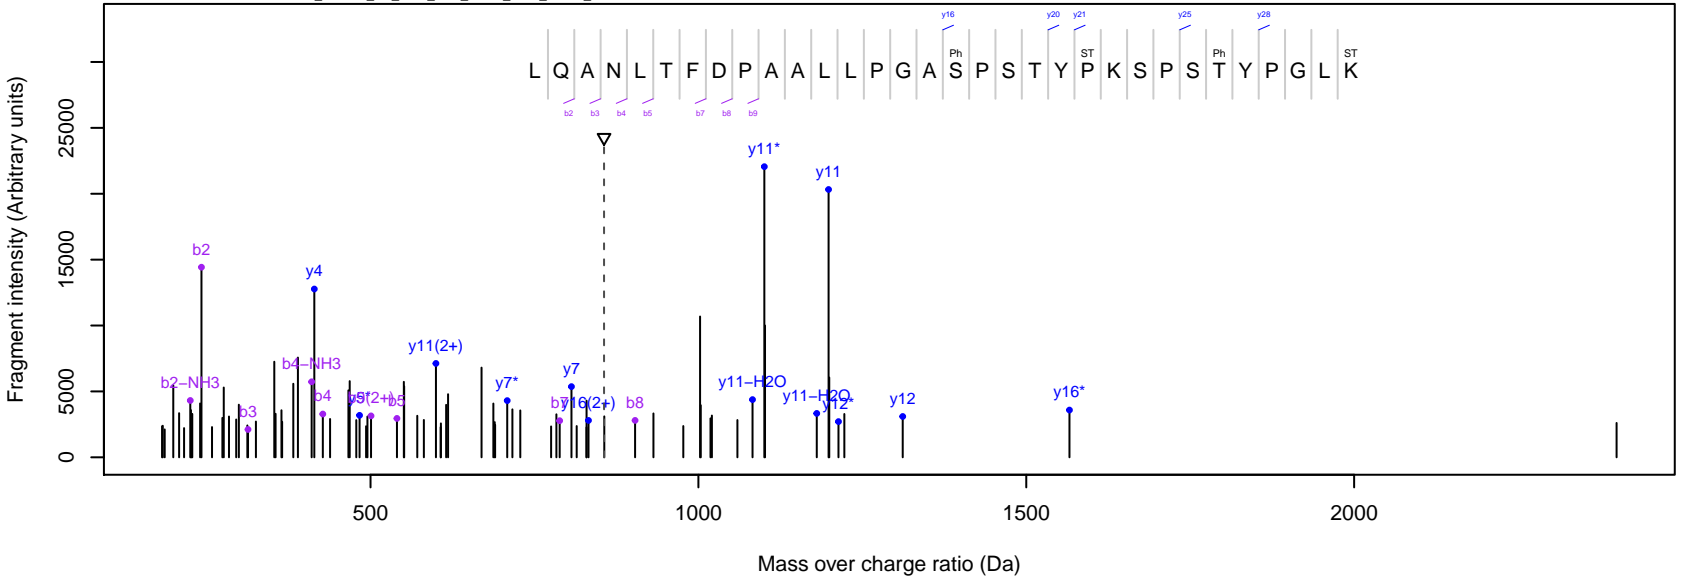

RS(Phospho (STY))LS(Phospho (STY))VEHLETK-3+

Source : QE3\_201126\_FR\_TiOx\_hum\_tissue\_Urea\_RNAB\_N Scan : 15236

Andromeda score : 51.771

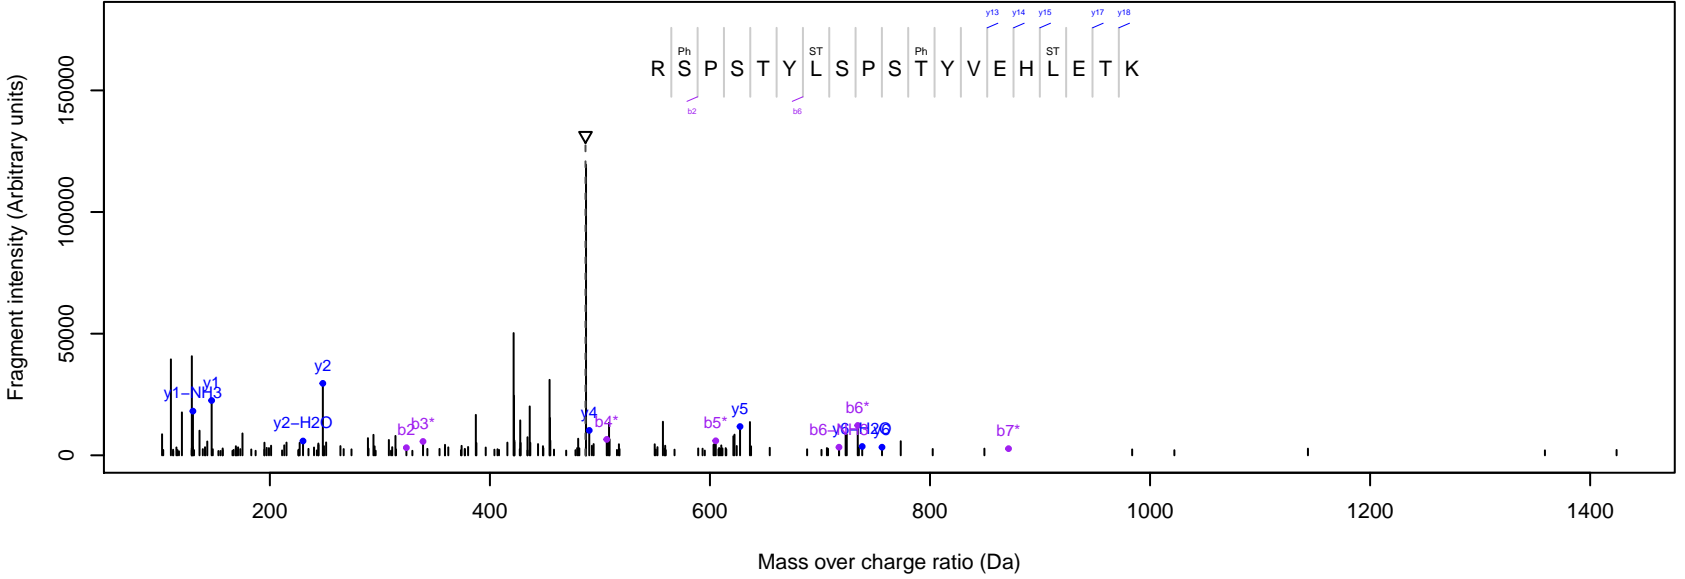

SCS(Phospho (STY))DTALNAIVAK-2+

Source : QE3\_201126\_FR\_TiOx\_hum\_tissue\_Urea\_RNAB\_N Scan : 30966

Andromeda score : 51.762

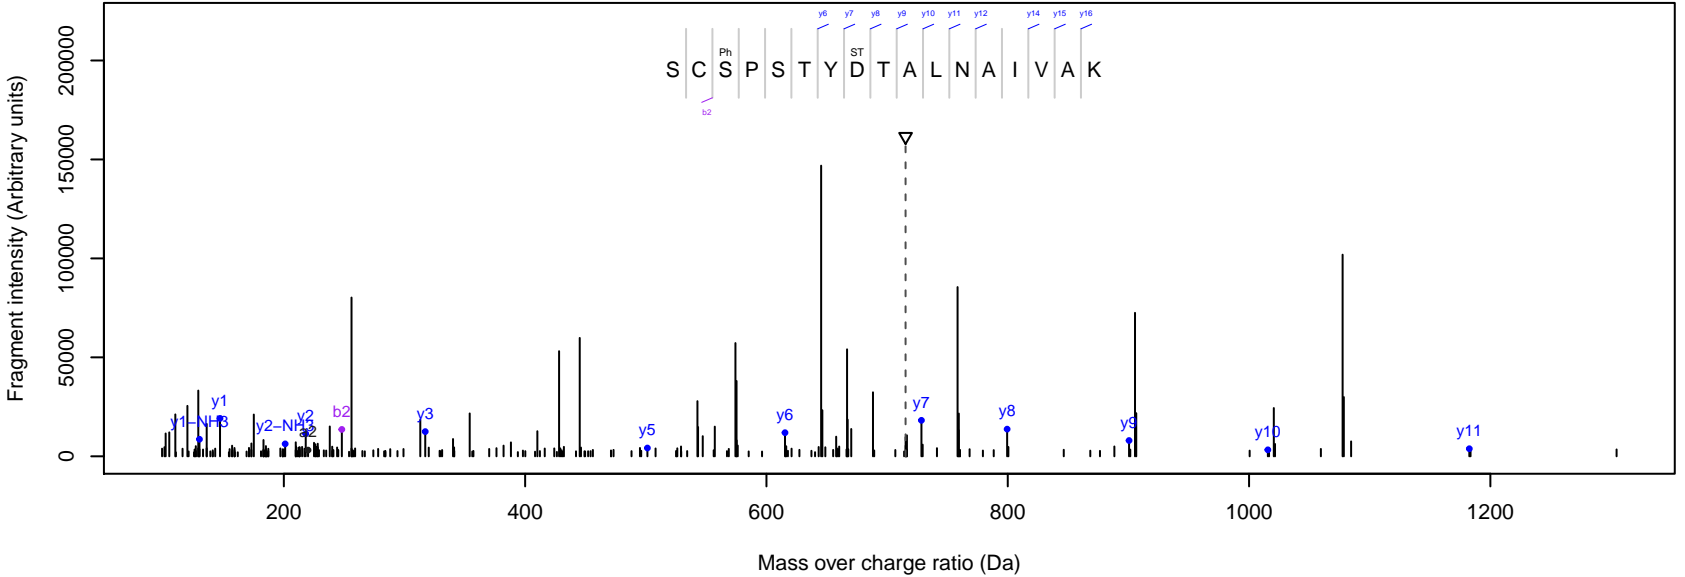

GEQVSQNGLP(AE)QGS(Phospho (STY))PR-2+

Source : QE3\_201126\_FR\_TiOx\_hum\_tissue\_Urea\_RNAB\_N Scan : 15725

Andromeda score : 51.733

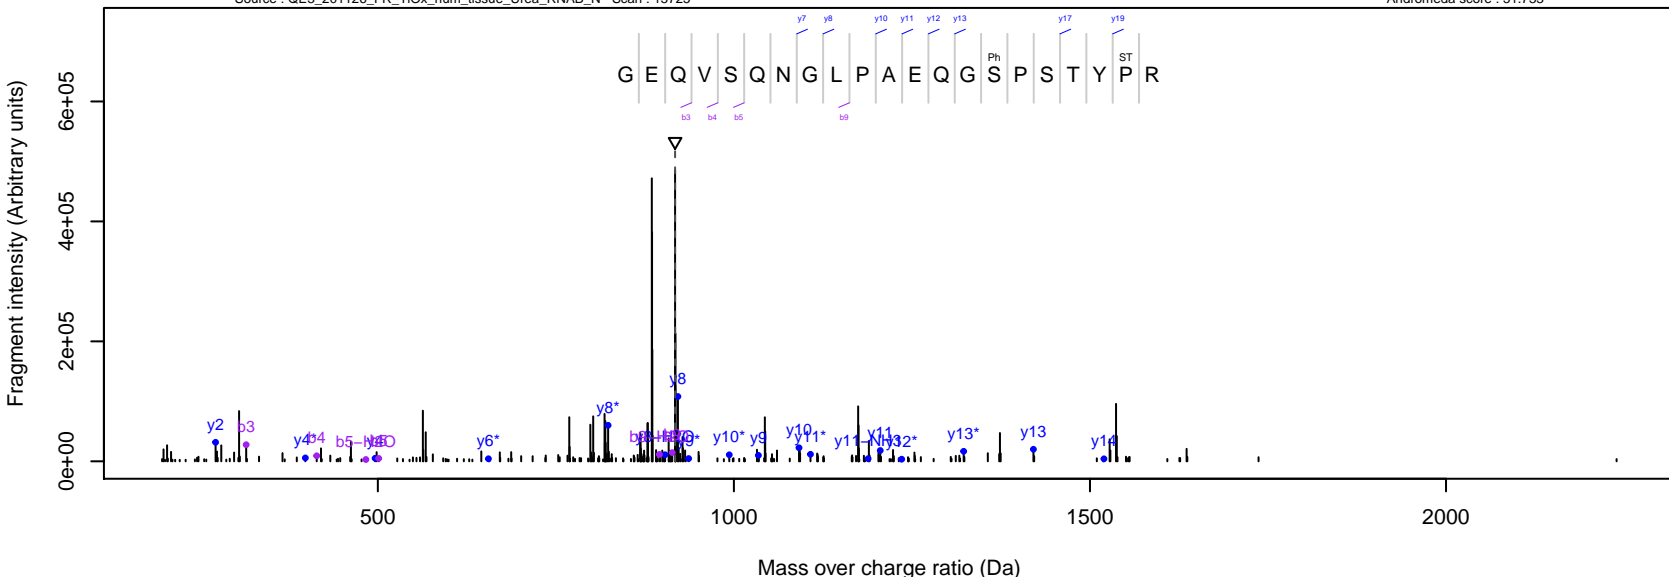

SLS(Phospho (STY))LDPGQSLEPHPEGPQR-3+

Source : QE3\_201126\_FR\_TiOx\_hum\_tissue\_Urea\_RNAB\_B Scan : 30065

Andromeda score : 51.645

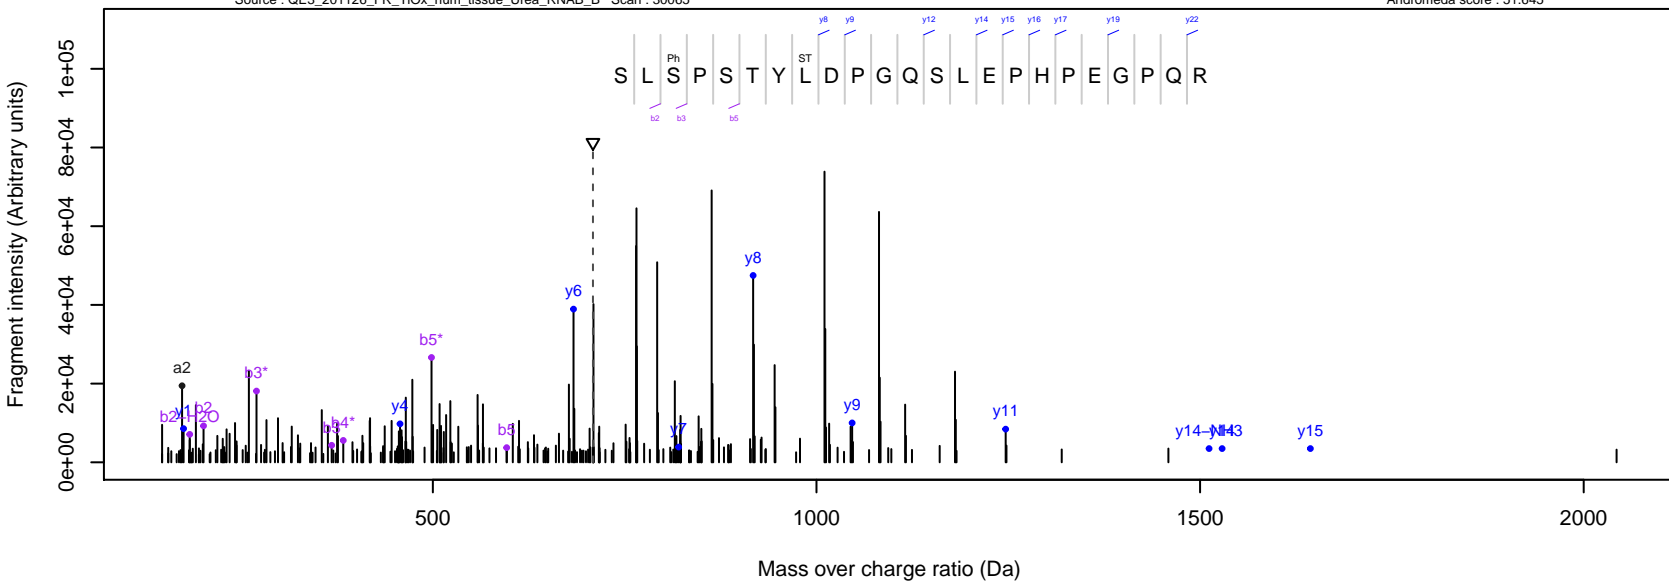

SHSVGGPLQNI(D)FT(Phospho (STY))PSTYQR(P)FHGIS(P)SPSTY(T)PSTY(V)SLPNS(L)QEVV(D)PLGK-4+

Source : QE3\_201126\_FR\_TiOx\_hum\_tissue\_Urea\_RNAB\_B Scan : 61132

Andromeda score : 51.632

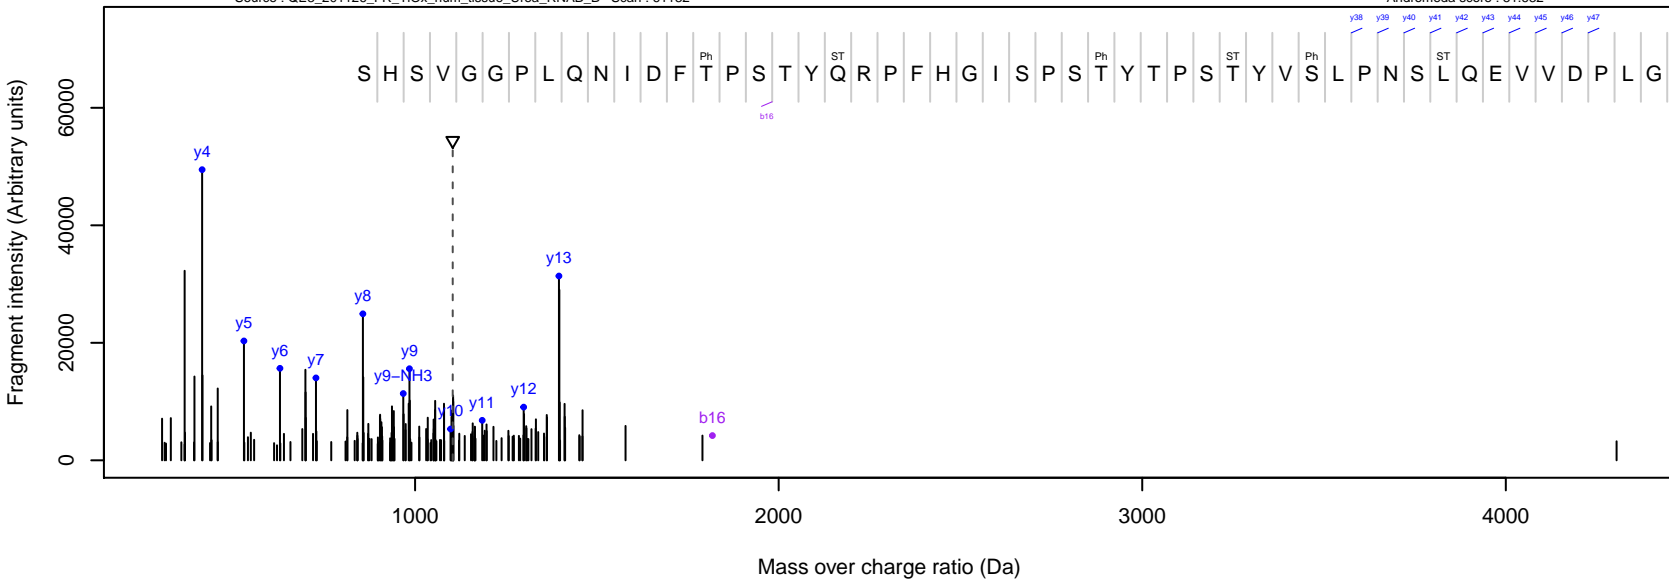

NKPGPNIESGNEDDDA SPSTYFKIK-3+

Source : QE3\_201126\_FR\_TiOx\_hum\_tissue\_Urea\_RNAB\_N Scan : 17957

Andromeda score : 51.586

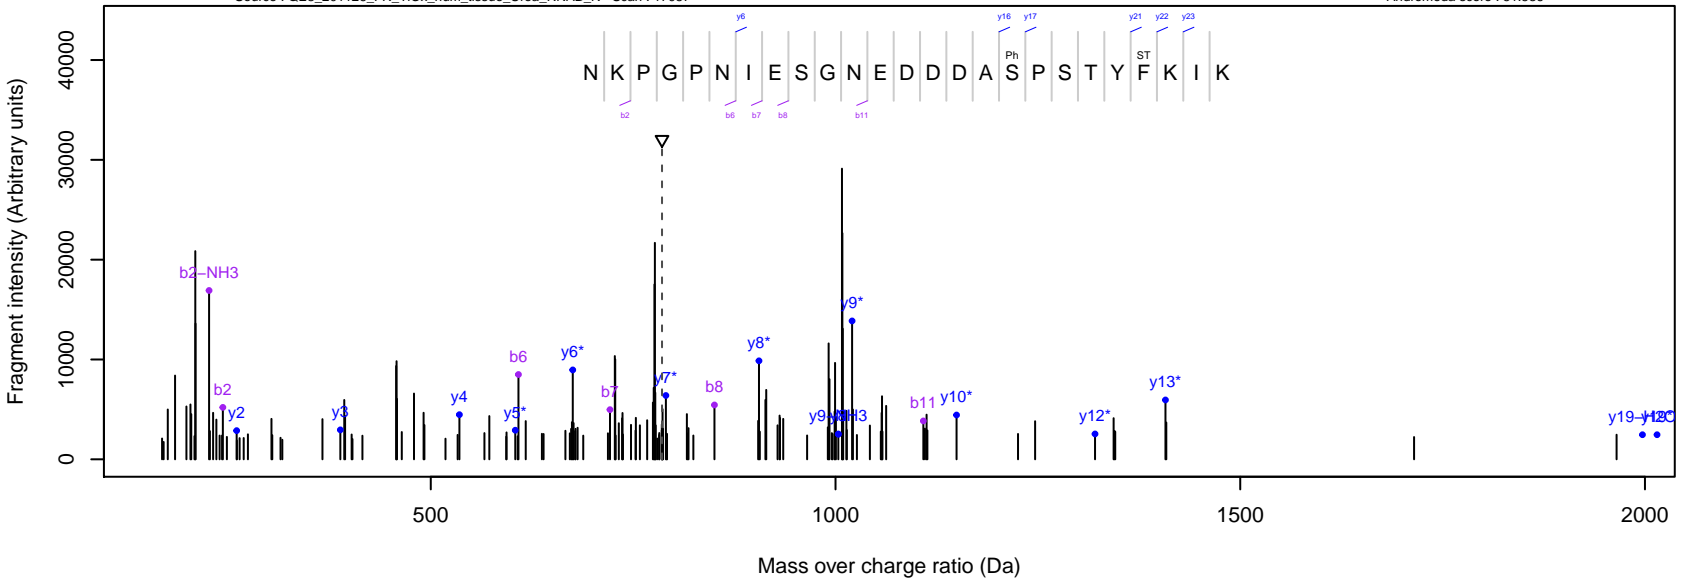

NLALS(Phospho (STY))RES(Phospho (STY))LVV-2+

Source : QE3\_201126\_FR\_TiOx\_hum\_tissue\_Urea\_RNAB\_N Scan : 51252

Andromeda score : 51.569

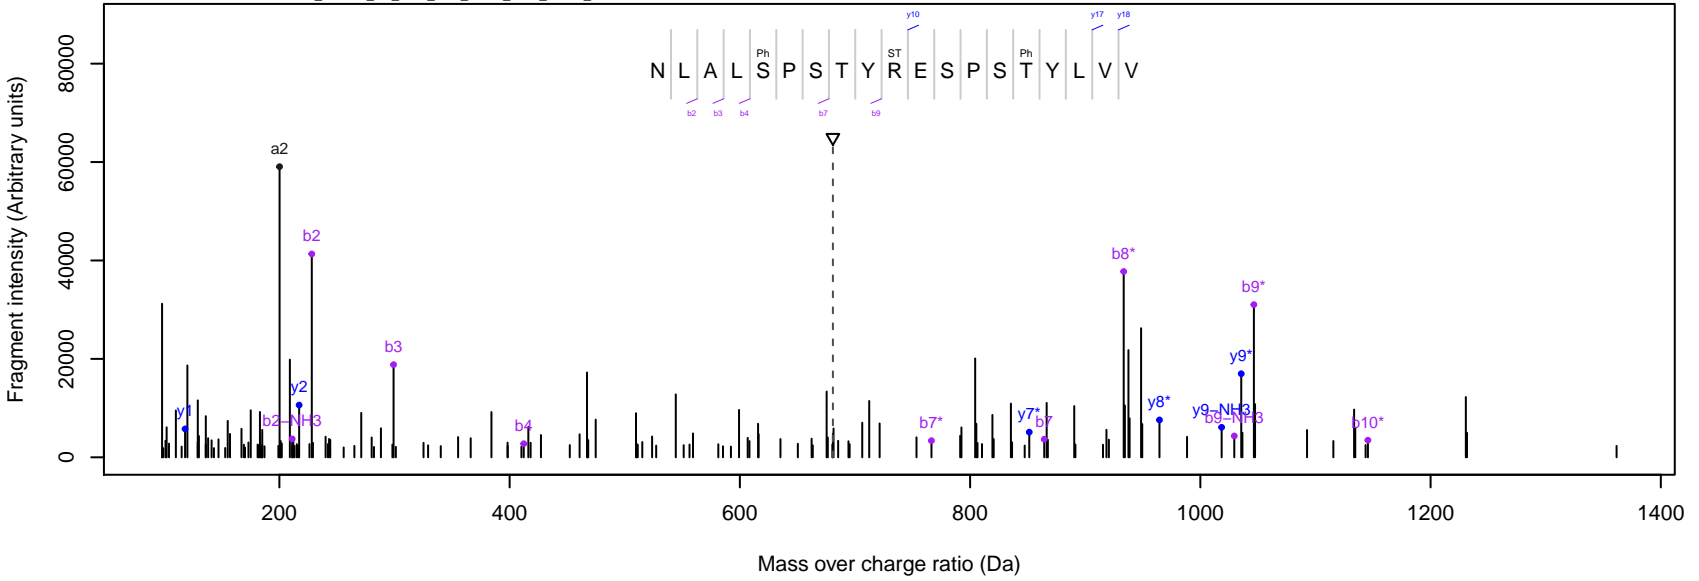

T(Phospho (STY))SSDSALHTSVM(Oxidation (M))NPSPQDTYPGTTPPSILPSR-3+

Source : QE3\_201126\_FR\_TiOx\_hum\_tissue\_Urea\_RNAB\_H Scan : 39535

Andromeda score : 51.566

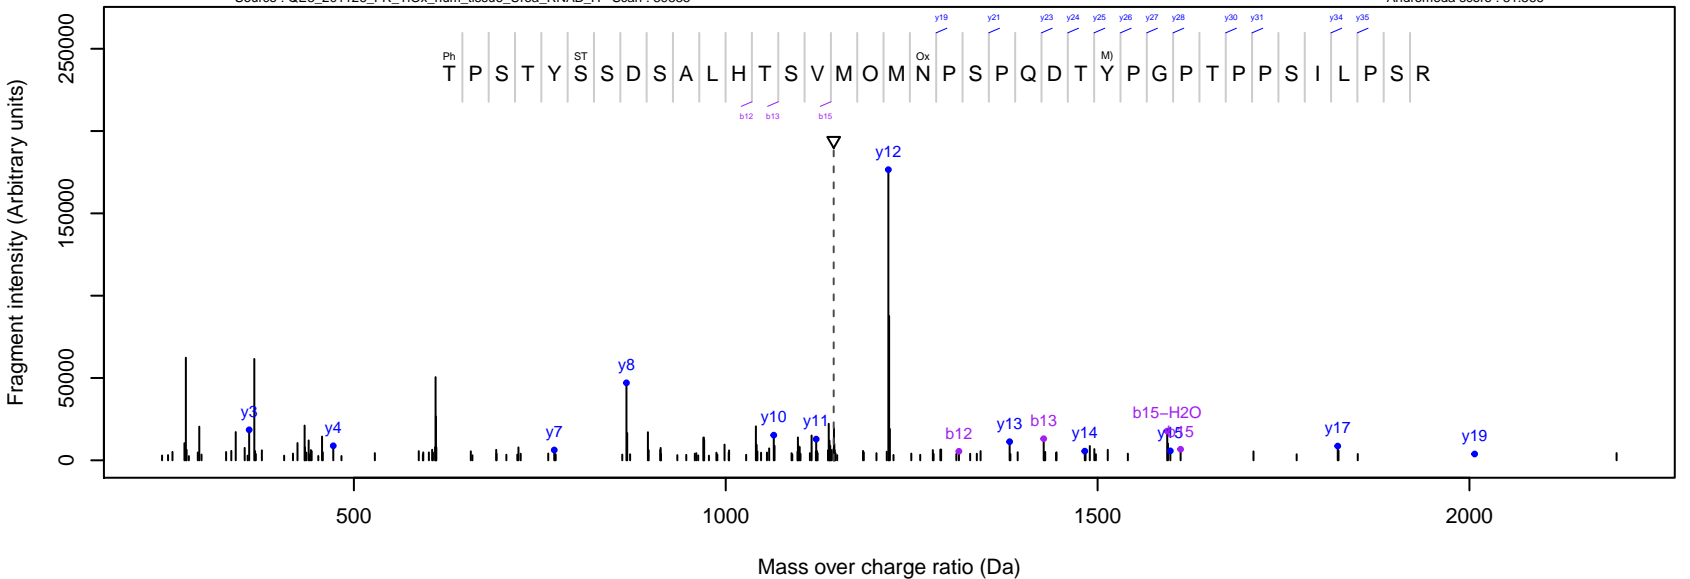

VLAVTDS(Phospho (STY))PARK-3+

Source : QE3\_201126\_FR\_TIOx\_hum\_tissue\_Urea\_RNAB\_N Scan : 9658

Andromeda score : 51.546

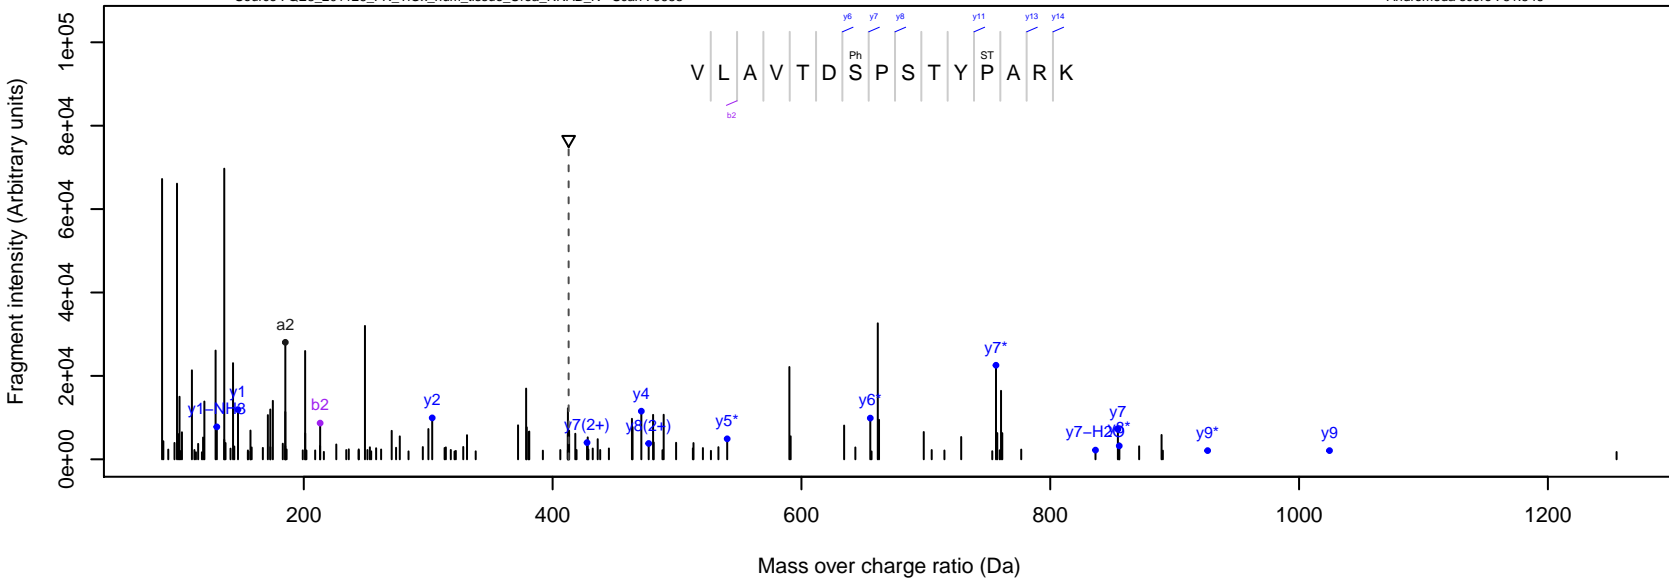

EGIQWEAKEDNS(Phospho (STY))EGEEILEEVGGDLEEDDHHMEFCR-4+

Source : QE3\_201126\_FR\_TIOx\_hum\_tissue\_Urea\_RNAB\_N Scan : 54417

Andromeda score : 51.544

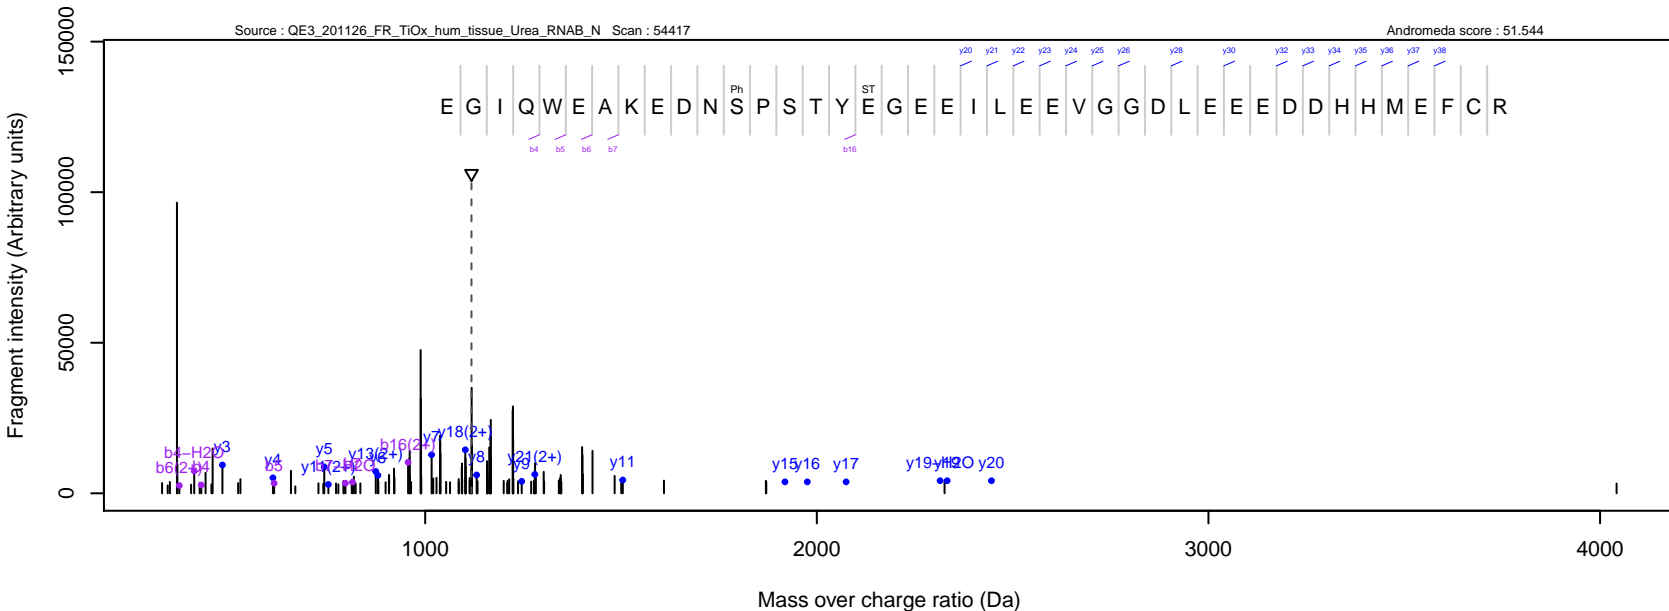

VKGS(Phospho (STY))NYHLSNDASDVE-3+

Source : QE3\_201126\_FR\_TIOx\_hum\_tissue\_Urea\_RNAB\_H Scan : 15233

Andromeda score : 51.526

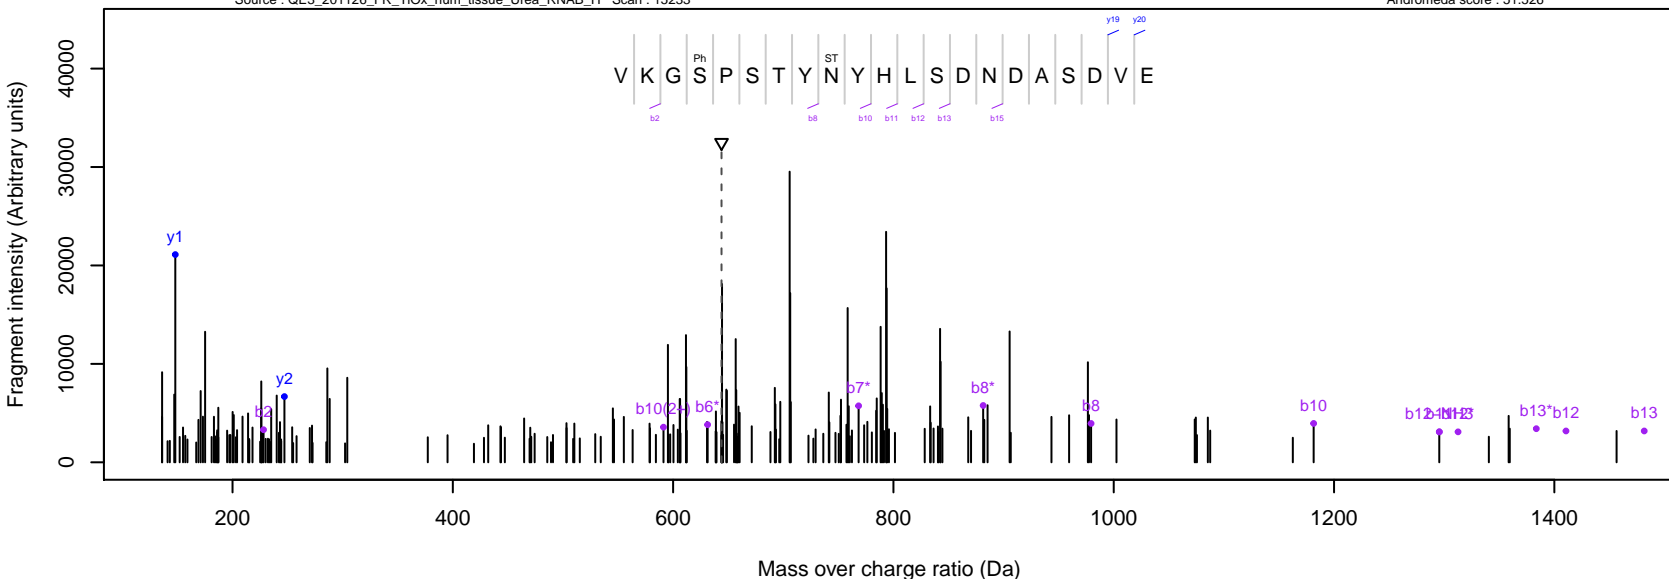

VNS(Phospho (STY))NGKES(Phospho (STY))PGSSEFFQEA VSHGK-3+

Source : QE3\_201126\_FR\_TiOx\_hum\_tissue\_Urea\_RNAB\_H Scan : 29352

Andromeda score : 51.526

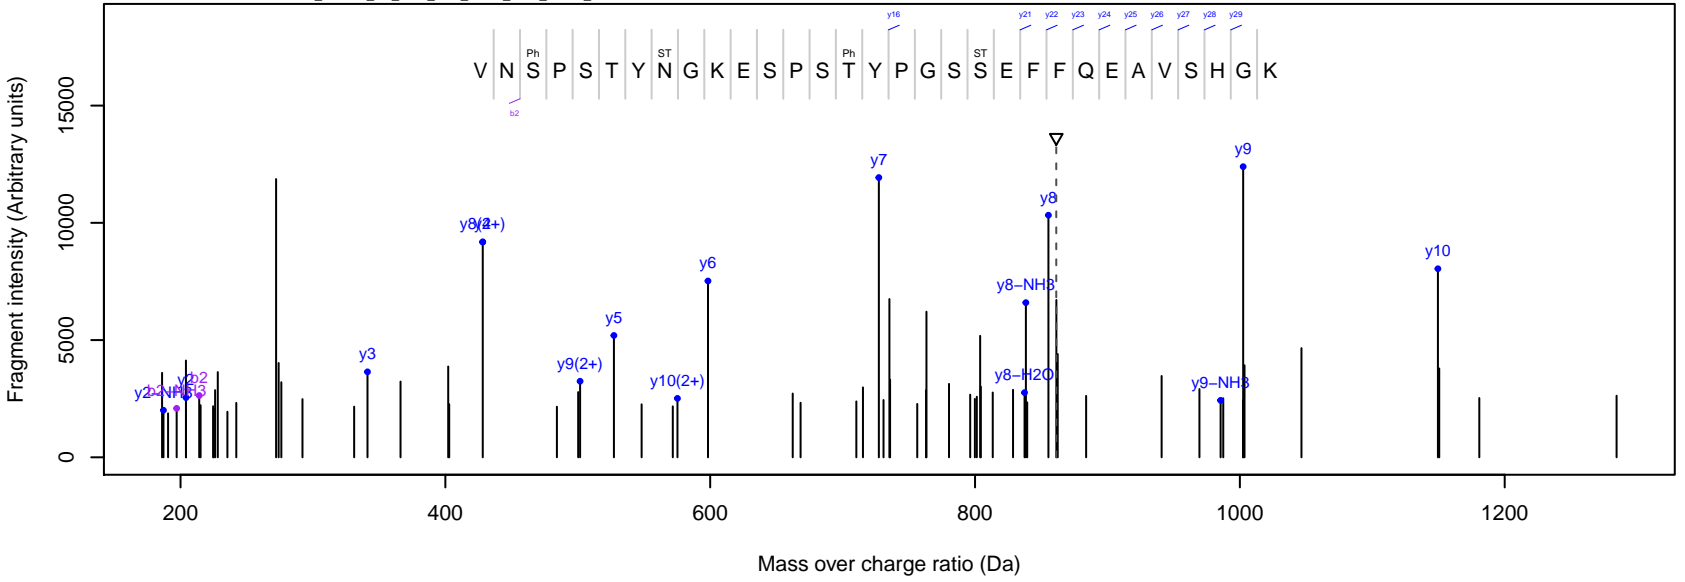

FTDKDQQPS(Phospho (STY))GS(Phospho (STY))EGEDDDAEAL K-3+

Source : QE3\_201126\_FR\_TiOx\_hum\_tissue\_Urea\_RNAB\_N Scan : 22176

Andromeda score : 51.503

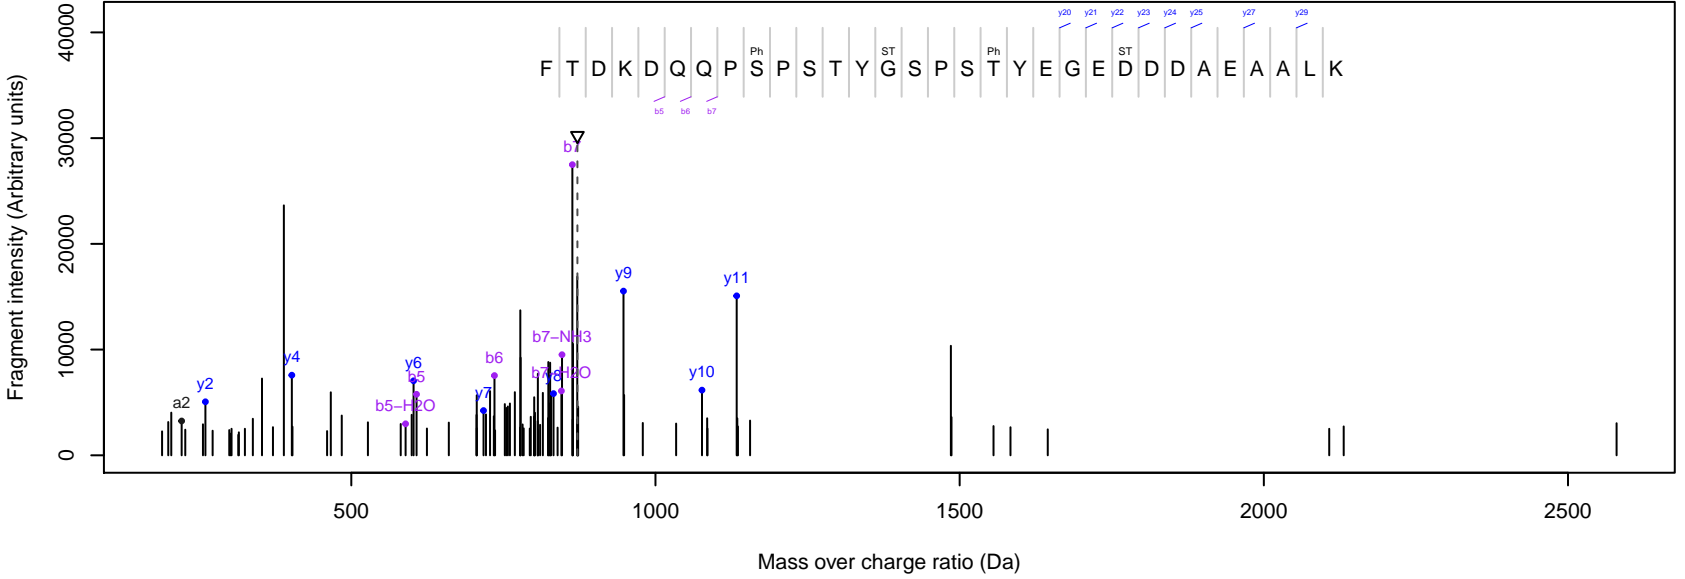

VKPPGGHS(Phospho (STY))PQVNH LK-4+

Source : QE3\_201126\_FR\_TiOx\_hum\_tissue\_Urea\_RNAB\_N Scan : 6305

Andromeda score : 51.495

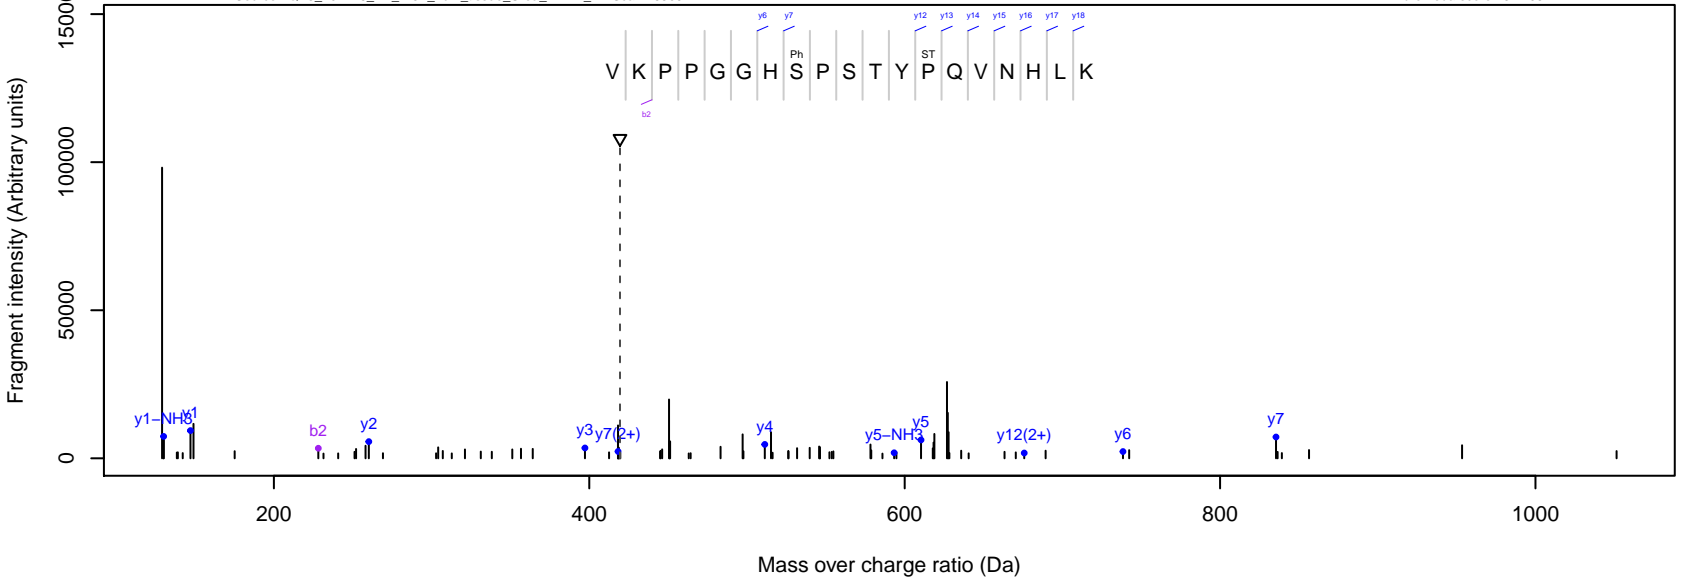

AERLS(Phospho (STY))PPAPSGSER-3+

Source : QE3\_201126\_FR\_TiOx\_hum\_tissue\_Urea\_RNAB\_H Scan : 11560

Andromeda score : 51.487

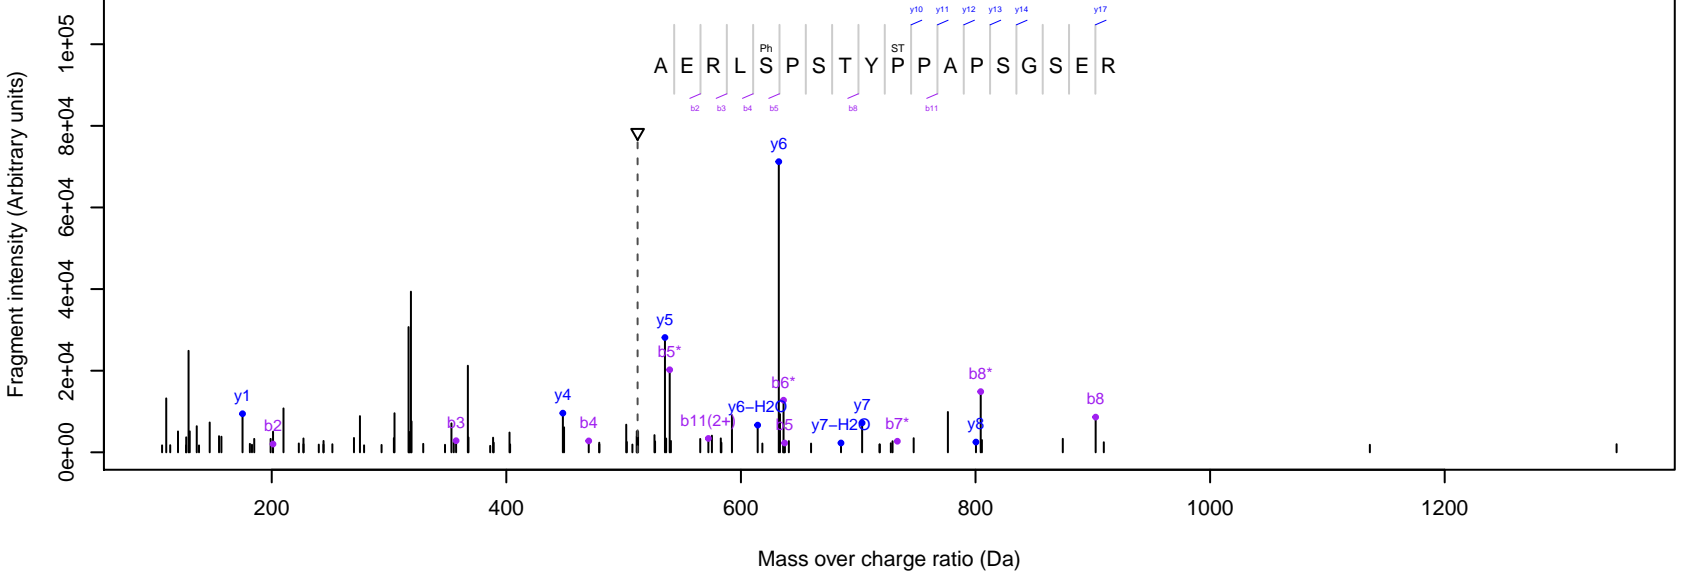

TPAS(Phospho (STY))PHFR-2+

Source : QE3\_201126\_FR\_TiOx\_hum\_tissue\_Urea\_RNAB\_H Scan : 8383

Andromeda score : 51.445

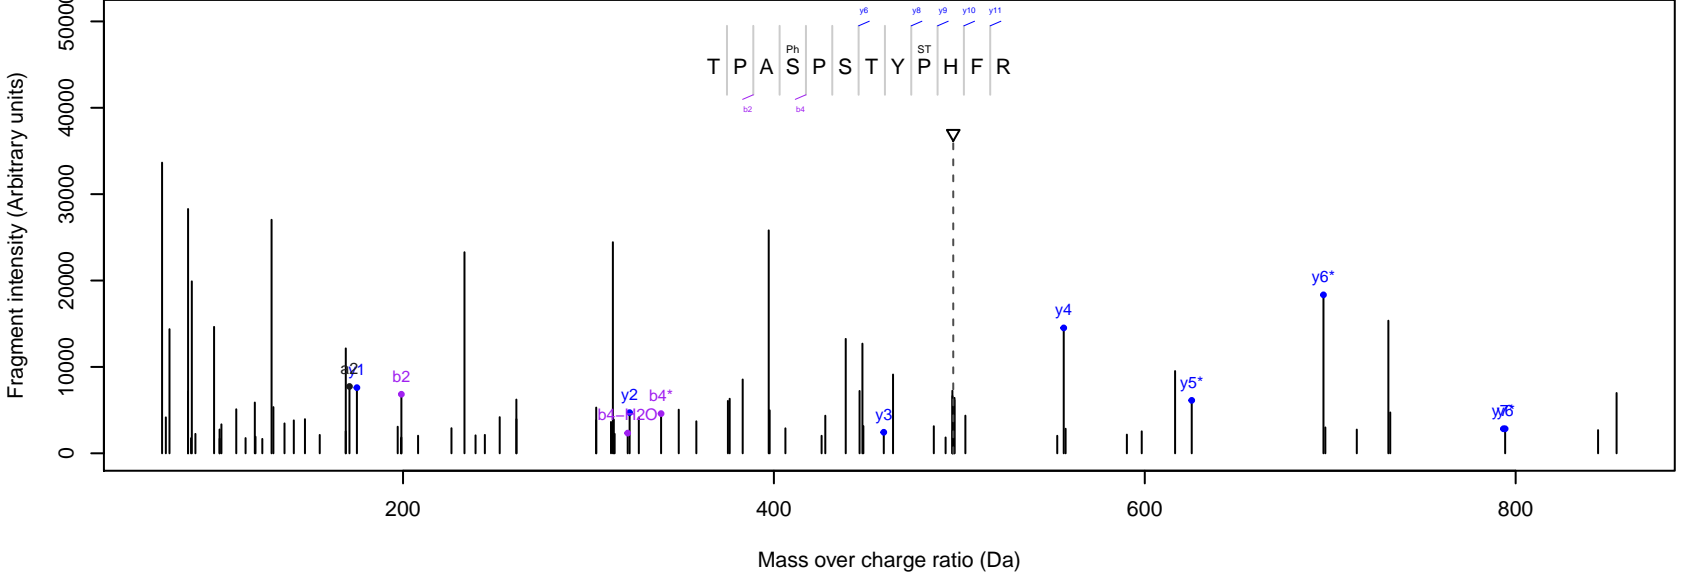

GSLAPQDS(Phospho (STY))DSEVSQNR-3+

Source : QE3\_201126\_FR\_TiOx\_hum\_tissue\_Urea\_RNAB\_H Scan : 14057

Andromeda score : 51.348

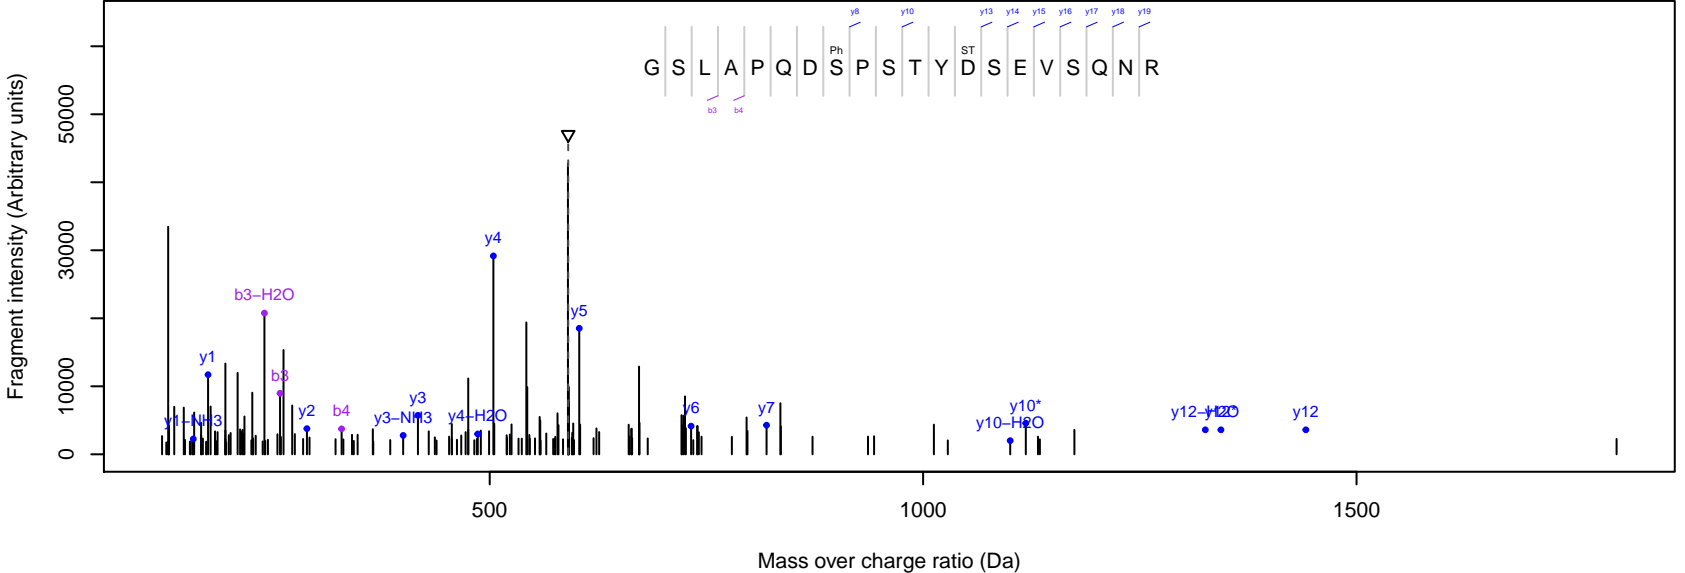



KT(Phospho (STY))PELGIVPPPIRPAK-3+

Source : QE3\_201126\_FR\_TIOx\_hum\_tissue\_Urea\_RNAB\_H Scan : 31311

Andromeda score : 51.31

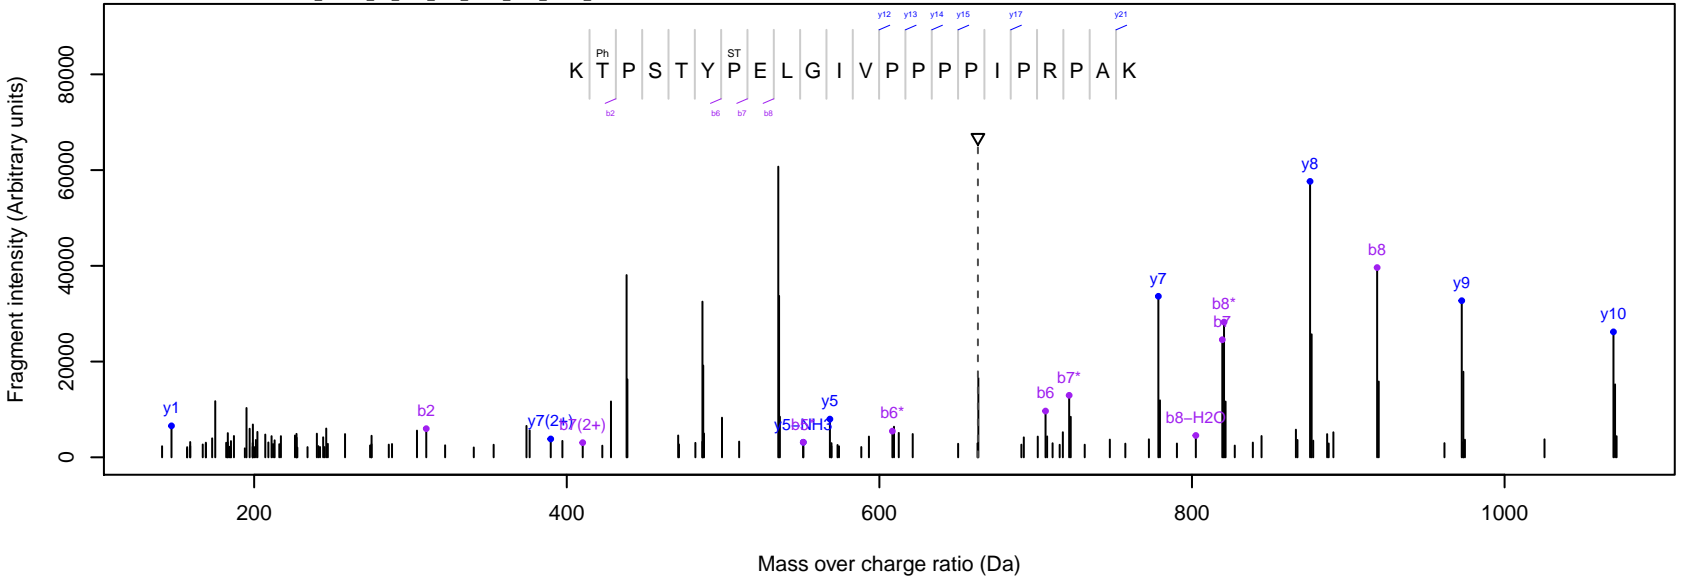

VLSANHGDPISIQTSGSEQTSPSTYPK-3+

Source : QE3\_201126\_FR\_TIOx\_hum\_tissue\_Urea\_RNAB\_H Scan : 12797

Andromeda score : 51.31

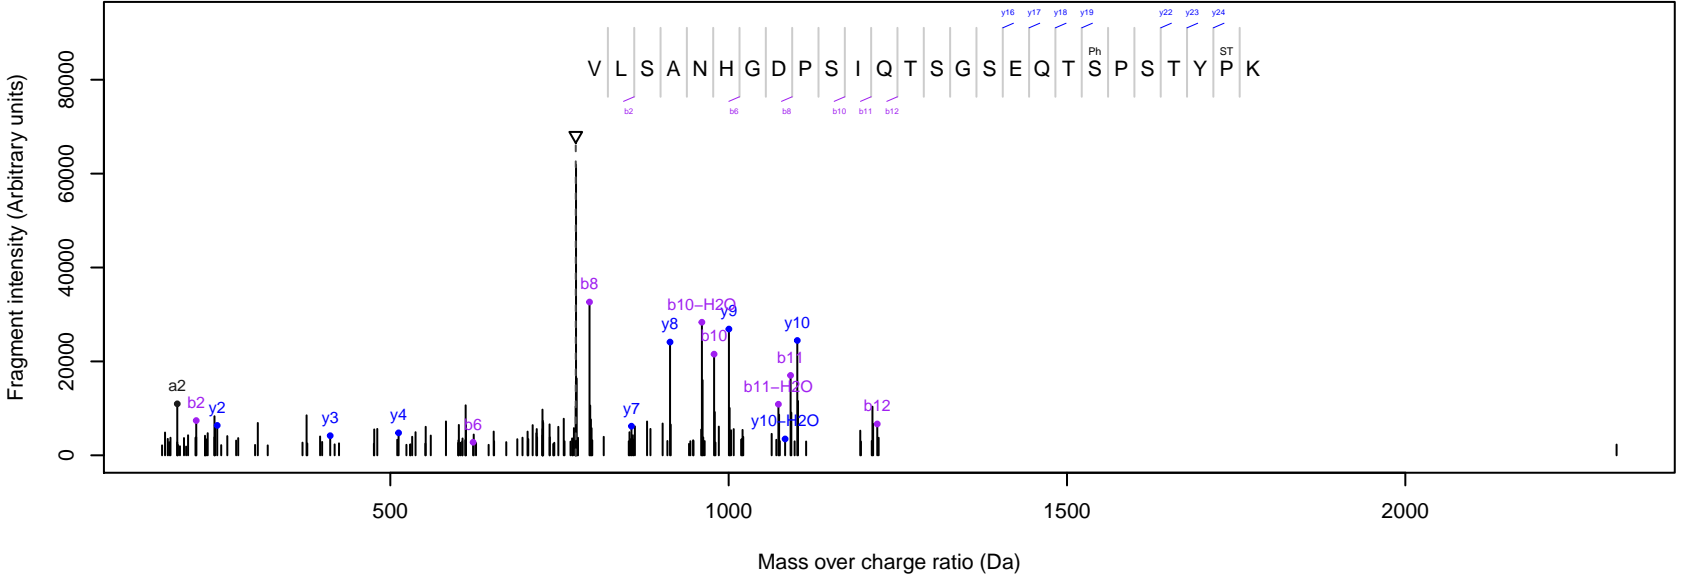

EVEEDESEM(Oxidation (M))SEDEEDS(Phospho (STY))SGEEVIPQKK-3+

Source : QE3\_201126\_FR\_TIOx\_hum\_tissue\_Urea\_RNAB\_B Scan : 21712

Andromeda score : 51.296

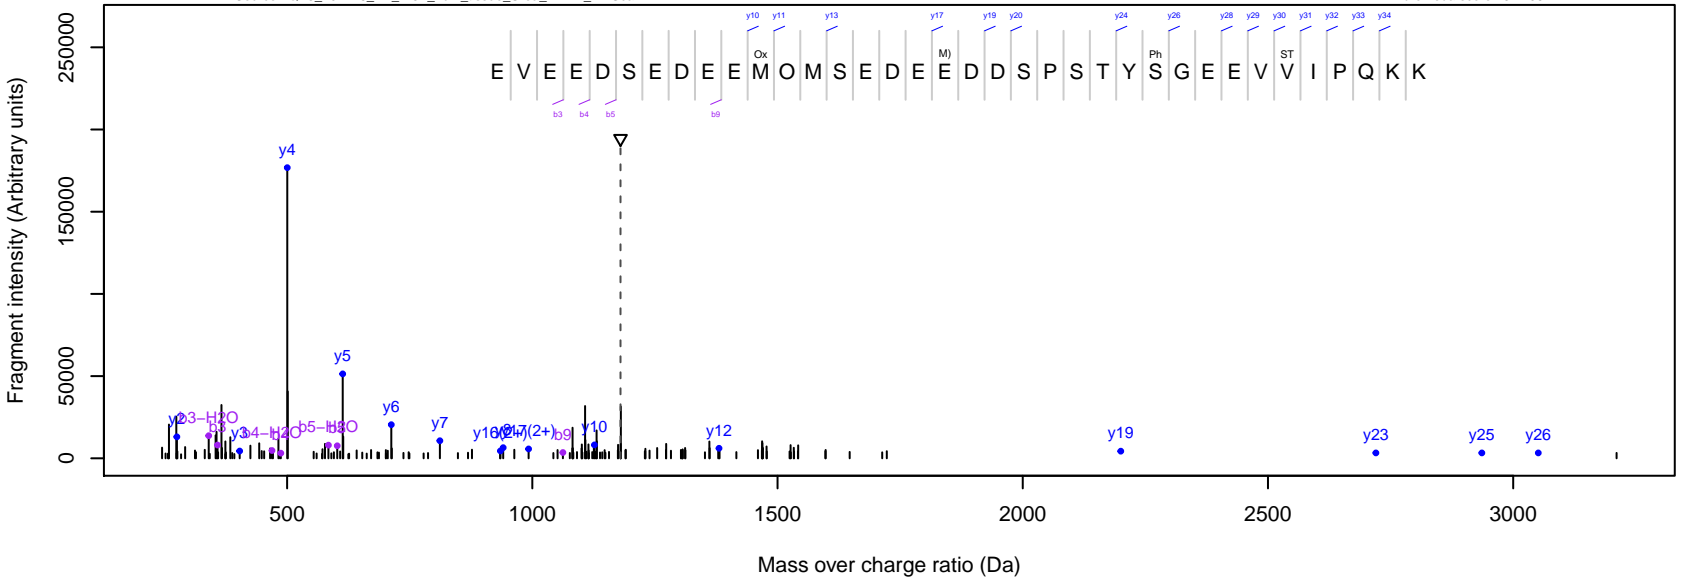

AGLQS(Phospho (STY))LEASGR-2+

Source : QE3\_201126\_FR\_TiOx\_hum\_tissue\_Urea\_RNAB\_B Scan : 22999

Andromeda score : 51.286

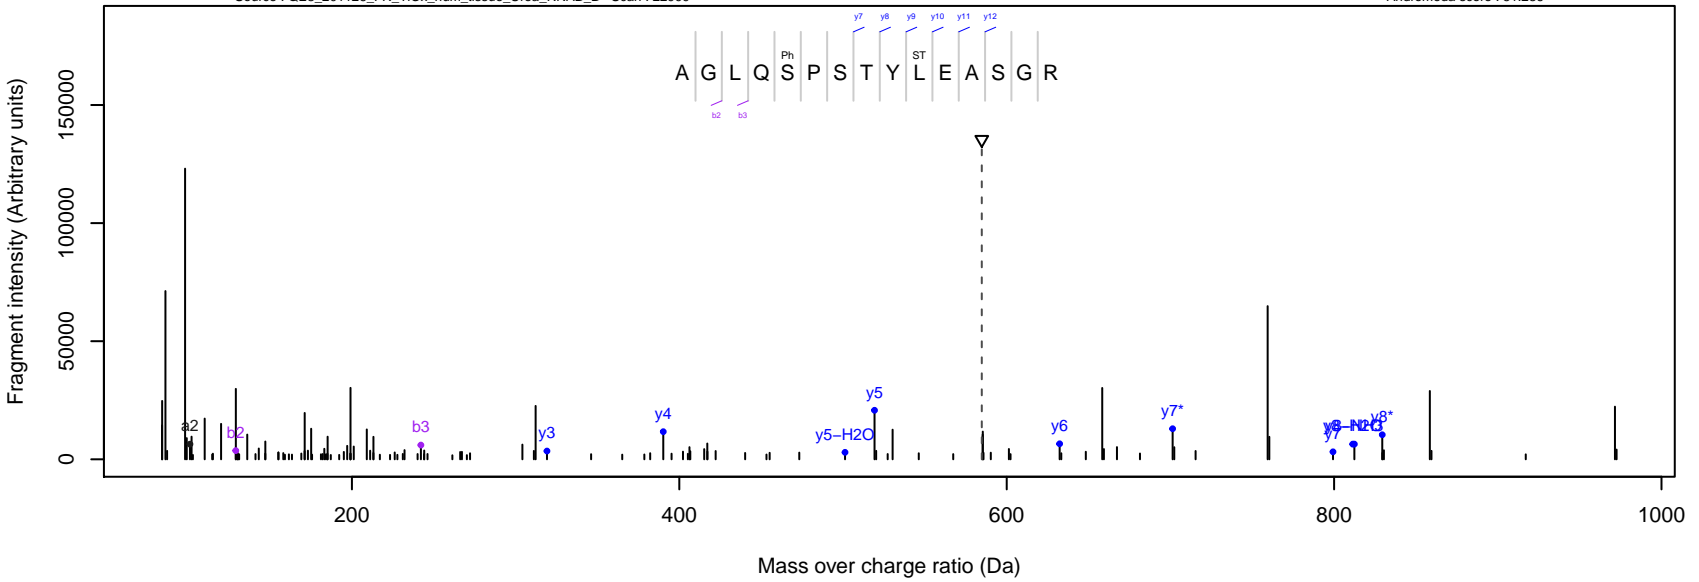

RAPS(Phospho (STY))SPVAKGPVK-3+

Source : QE3\_201126\_FR\_TiOx\_hum\_tissue\_Urea\_RNAB\_N Scan : 5518

Andromeda score : 51.265

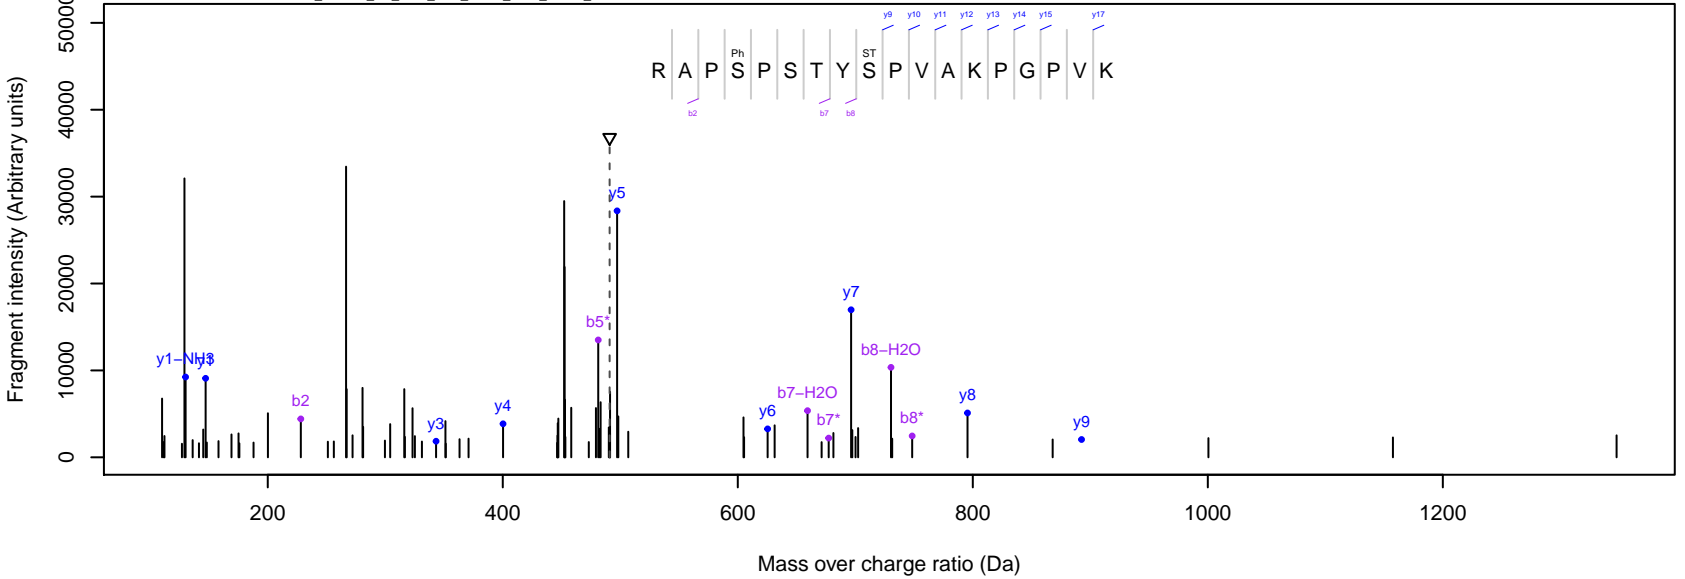

IKPSSS(Phospho (STY))ANAIYSLAARLPVVK-3+

Source : QE3\_201126\_FR\_TiOx\_hum\_tissue\_Urea\_RNAB\_N Scan : 37505

Andromeda score : 51.264

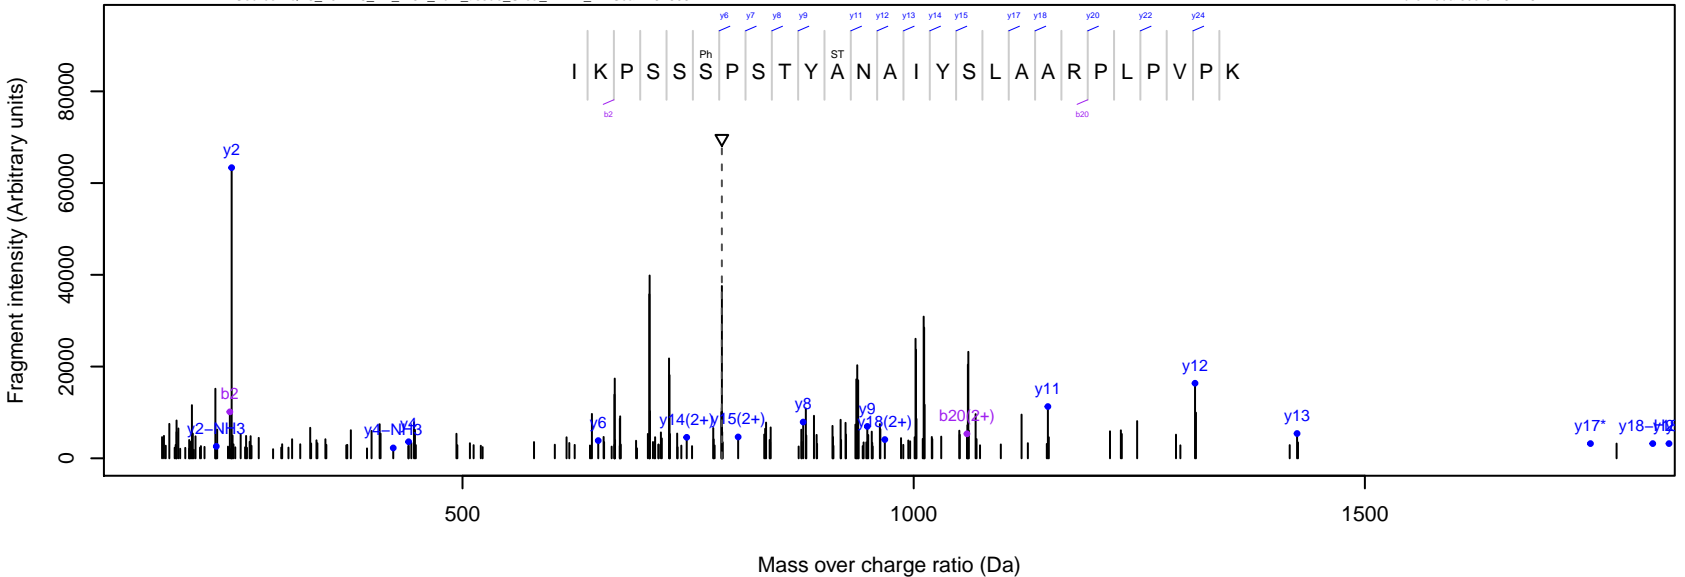

S(Phospho (STY))PGSPGQSPPTGYSILSPAHFSGPR-3+

Source : QE3\_201126\_FR\_TIOx\_hum\_tissue\_Urea\_RNAB\_H Scan : 38675

Andromeda score : 51.236

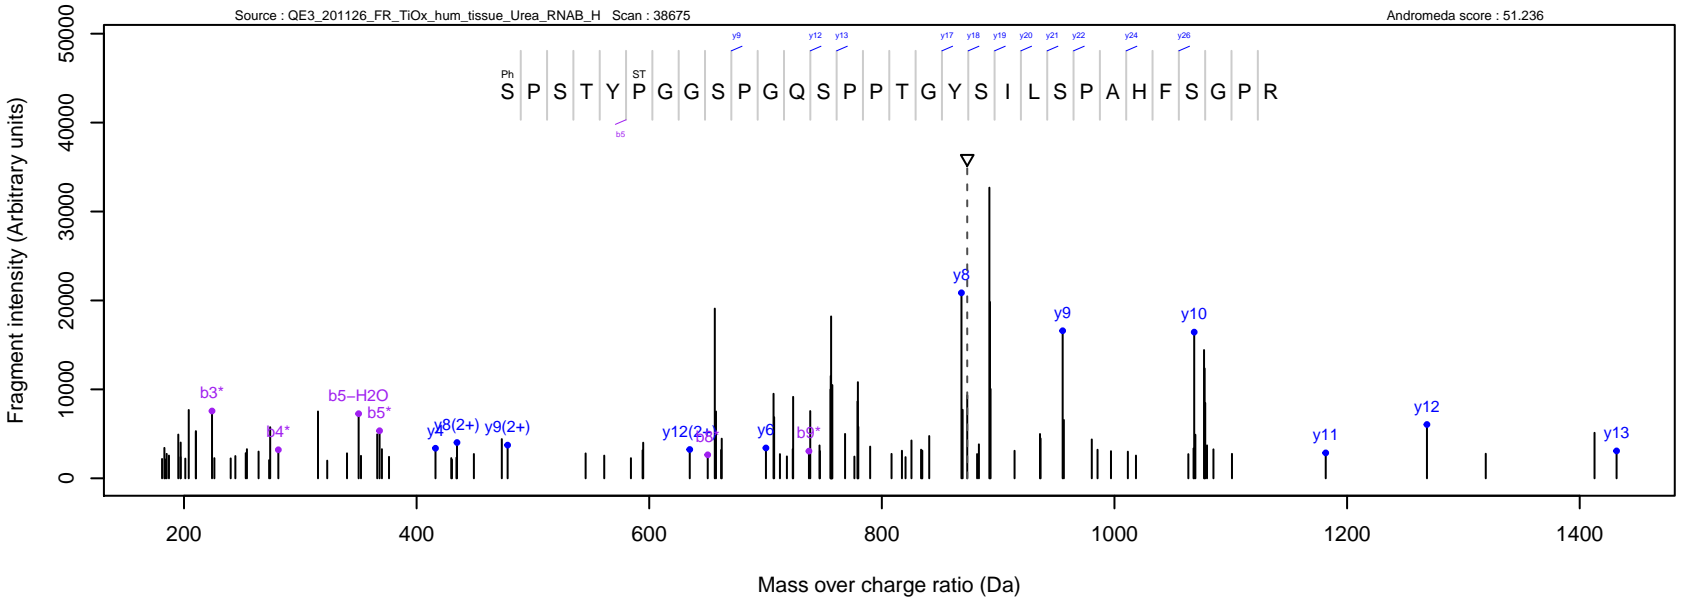

WVEENVSSVTDVALPALLDS(Phospho (STY))DEER-3+

Source : QE3\_201126\_FR\_TIOx\_hum\_tissue\_Urea\_RNAB\_H Scan : 59339

Andromeda score : 51.236

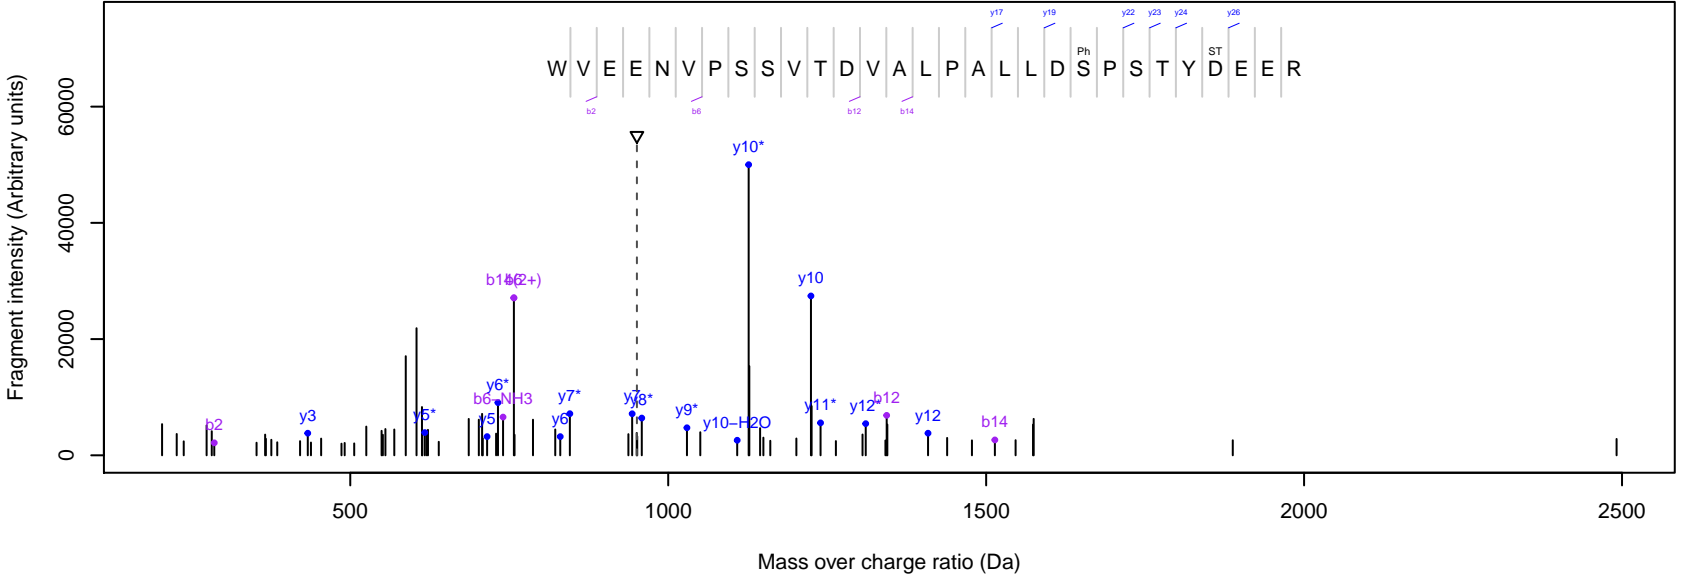

LILTDGSAPT(Phospho (STY))FCSDDEDVAPLSAK-3+

Source : QE3\_201126\_FR\_TIOx\_hum\_tissue\_Urea\_RNAB\_H Scan : 49784

Andromeda score : 51.234

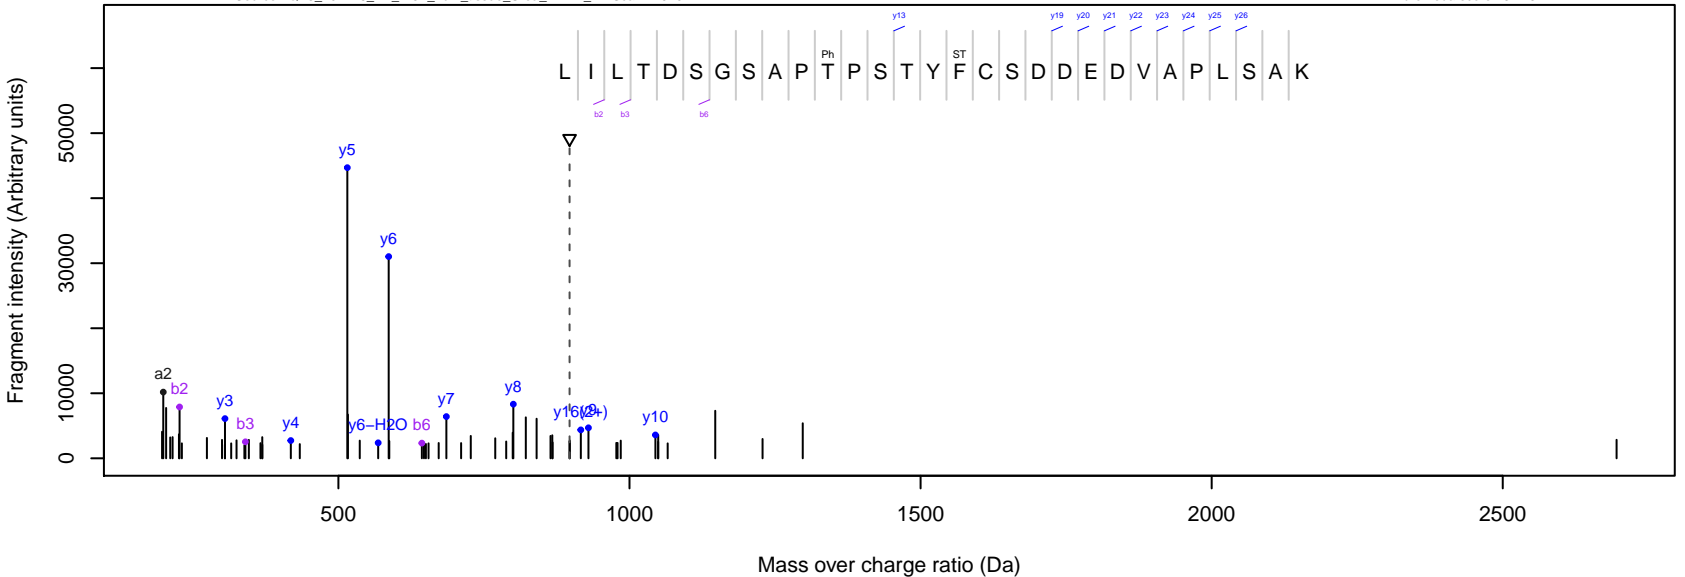

WKSEEEVES(Phospho (STY))DDEYLALPAR-3+

Source : QE3\_201126\_FR\_TiOx\_hum\_tissue\_Urea\_RNAB\_B Scan : 36356

Andromeda score : 51.234

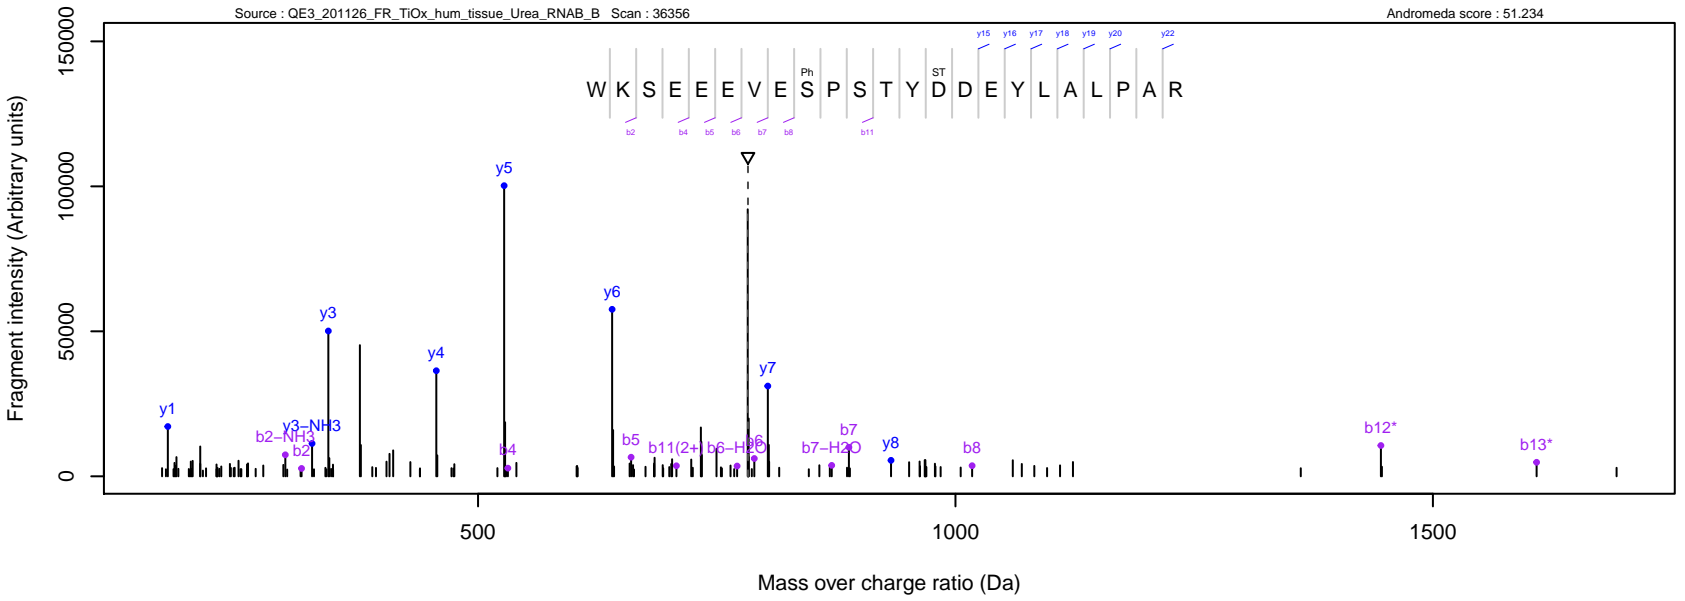

KVEEDLKADEPS(Phospho (STY))S(Phospho (STY))EES(Phospho (STY))DLEIDK-3+

Source : QE3\_201126\_FR\_TiOx\_hum\_tissue\_Urea\_RNAB\_B Scan : 29475

Andromeda score : 51.22

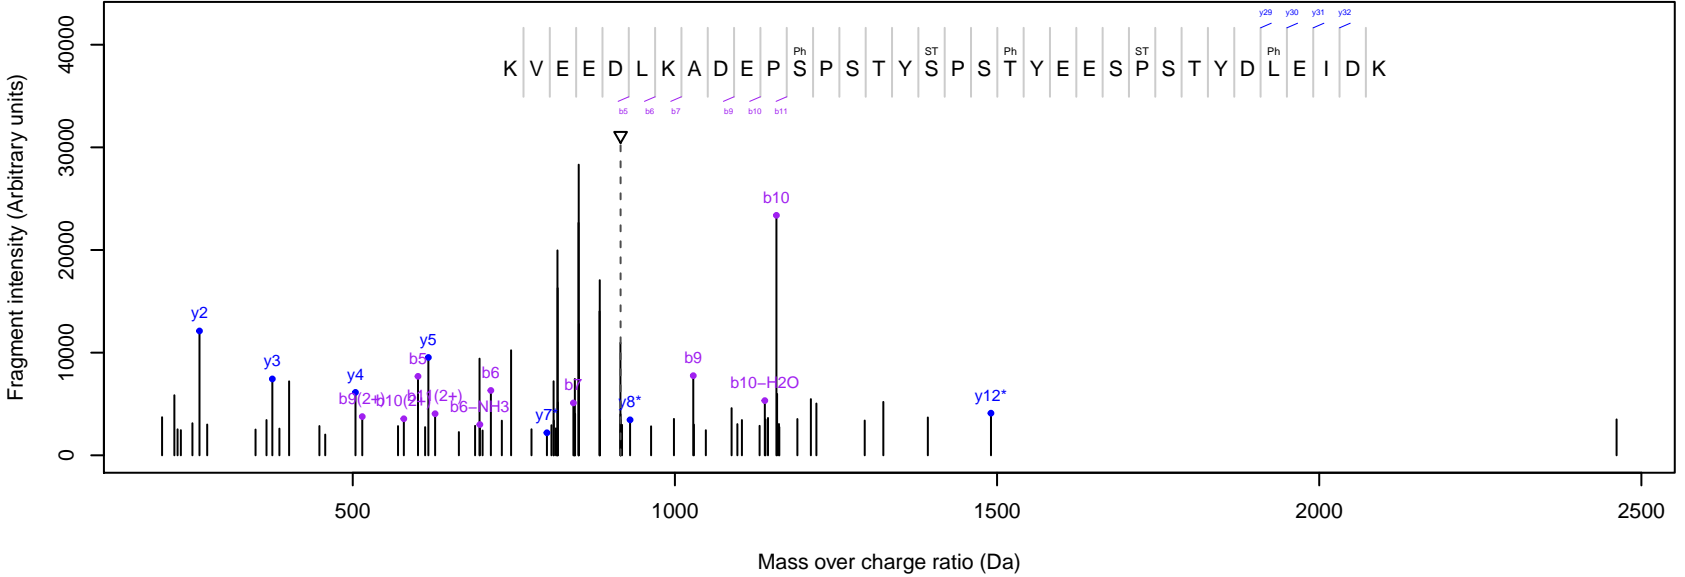

VLSGNCNHQEGT(Phospho (STY))S(Phospho (STY))DDELPSAEMIDFQK-3+

Source : QE3\_201126\_FR\_TiOx\_hum\_tissue\_Urea\_RNAB\_N Scan : 46074

Andromeda score : 51.22

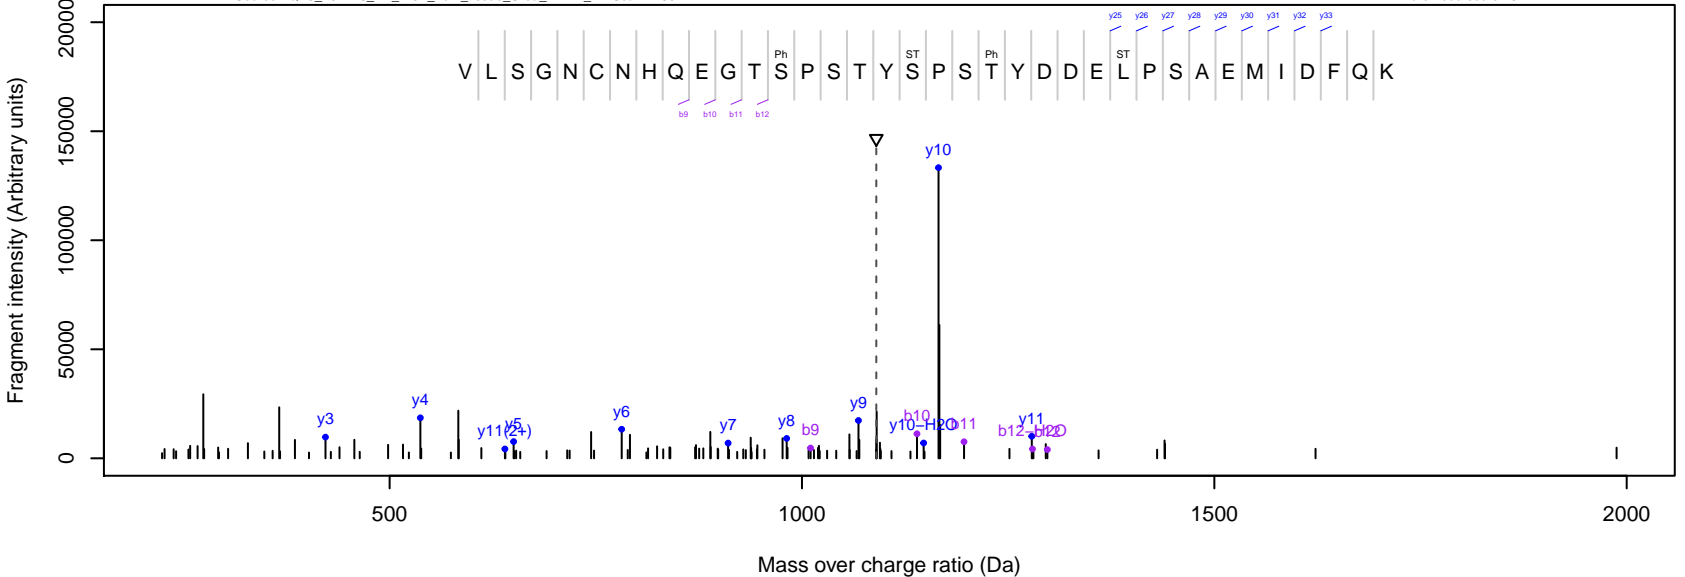

LQDISSELLATGAGLS(Phospho (STY))ESEAPDGDHNITELPQAVAGR-3+

Source : QE3\_201126\_FR\_TIOx\_hum\_tissue\_Urea\_RNAB\_H Scan : 56321

Andromeda score : 51.173

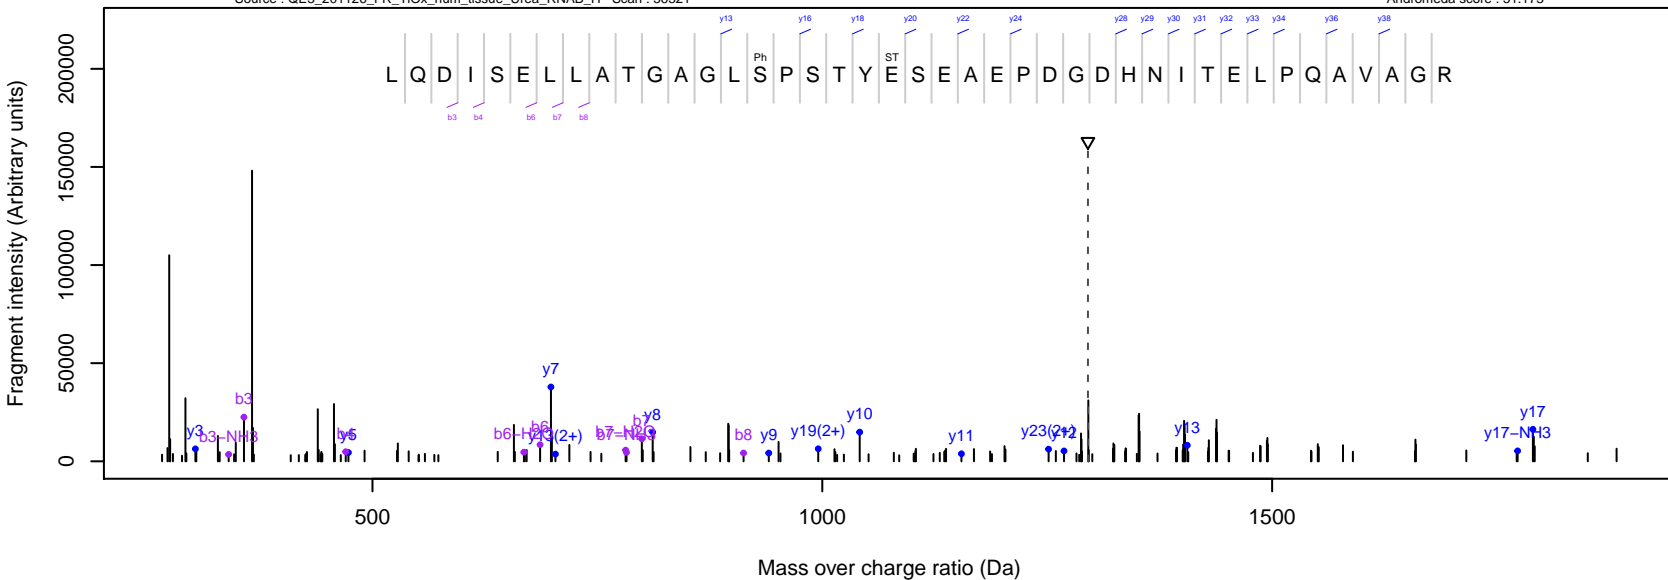

FTSSQT(Phospho (STY))QSPTPKPPSPS(Phospho (STY))FELGLSSFPLPGAAGNLK-3+

Source : QE3\_201126\_FR\_TIOx\_hum\_tissue\_Urea\_RNAB\_N Scan : 60361

Andromeda score : 51.145

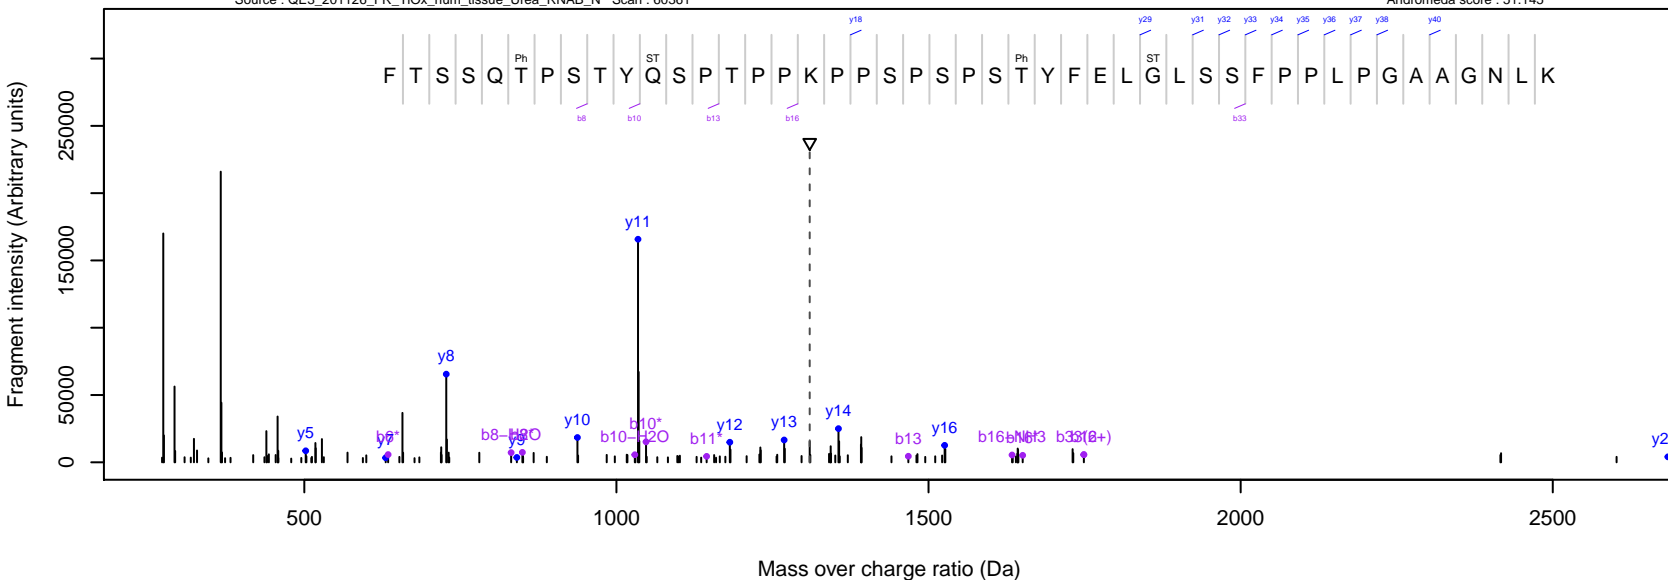

SFHFDPLS(Phospho (STY))SGSR-2+

Source : QE3\_201126\_FR\_TIOx\_hum\_tissue\_Urea\_RNAB\_N Scan : 33641

Andromeda score : 51.135

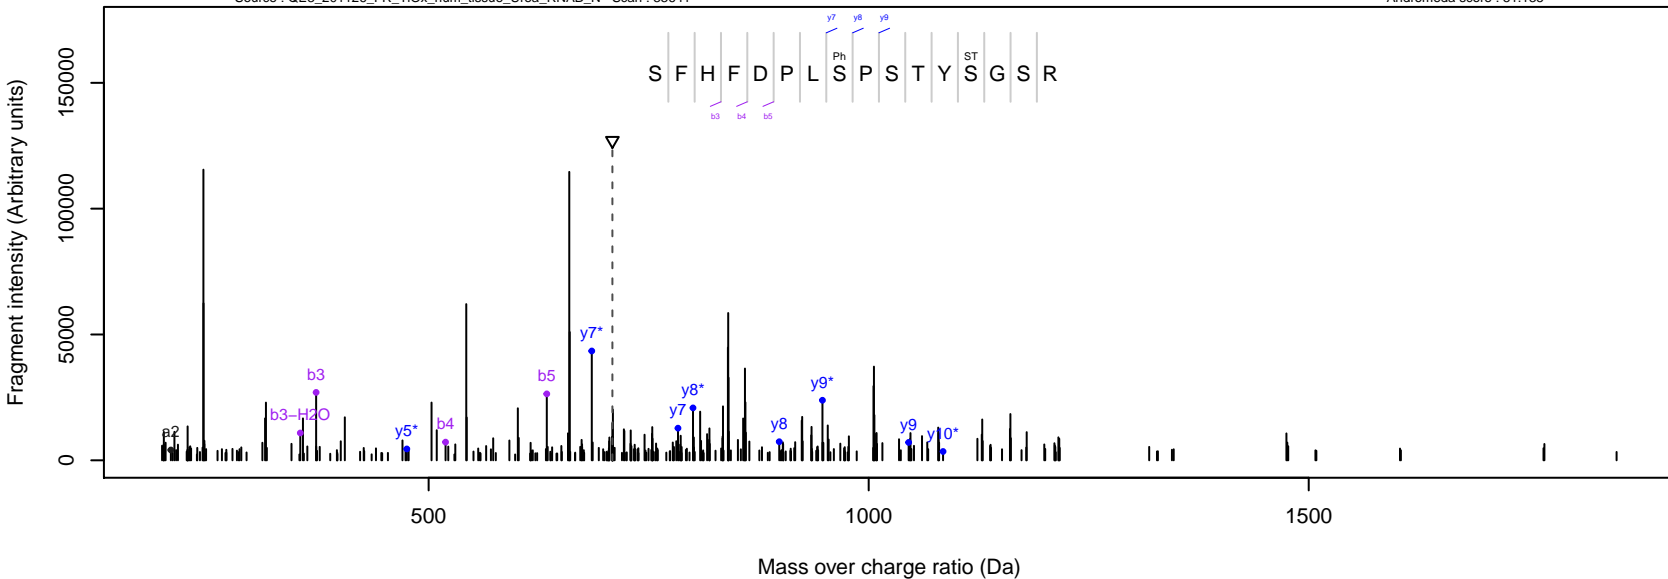

ES(Phospho (STY))EKQQDSQPEEVMVDVLEM(Oxidation (M))VENVK-3+

Source : QE3\_201126\_FR\_TIOx\_hum\_tissue\_Urea\_RNAB\_N Scan : 55928

Andromeda score : 51.119

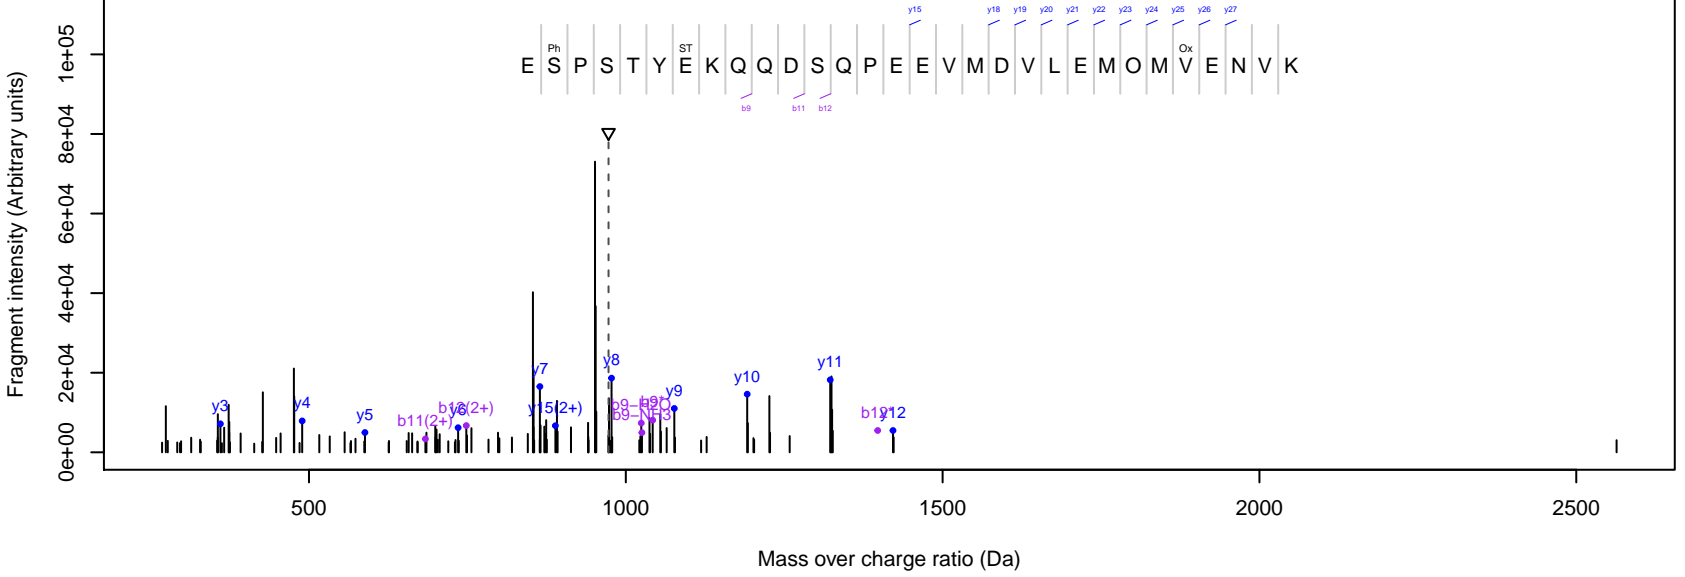

LSGINEIPRPF(Phospho (STY))PPVTSNTS(Phospho (STY))PPAAPLAR-3+

Source : QE3\_201126\_FR\_TIOx\_hum\_tissue\_Urea\_RNAB\_H Scan : 52721

Andromeda score : 51.038

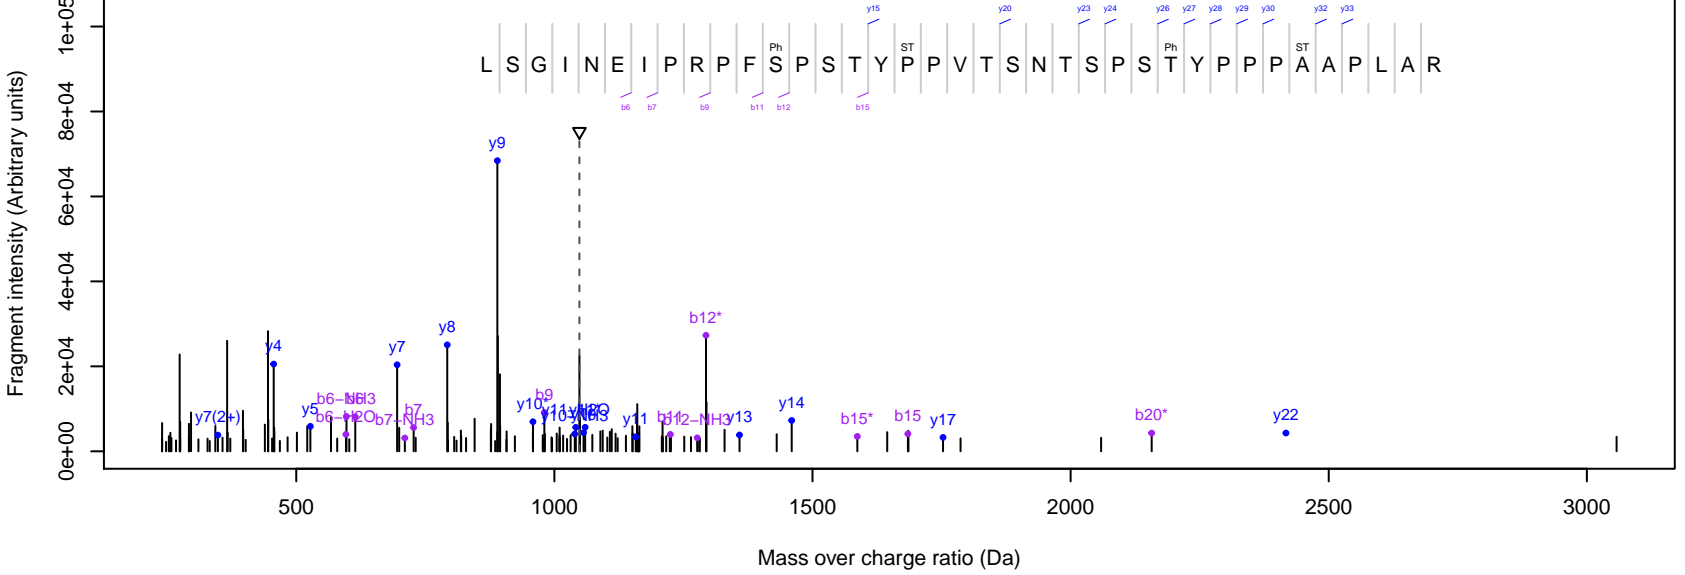

CPS(Phospho (STY))PINEHNGLIK-3+

Source : QE3\_201126\_FR\_TIOx\_hum\_tissue\_Urea\_RNAB\_B Scan : 17346

Andromeda score : 51.03

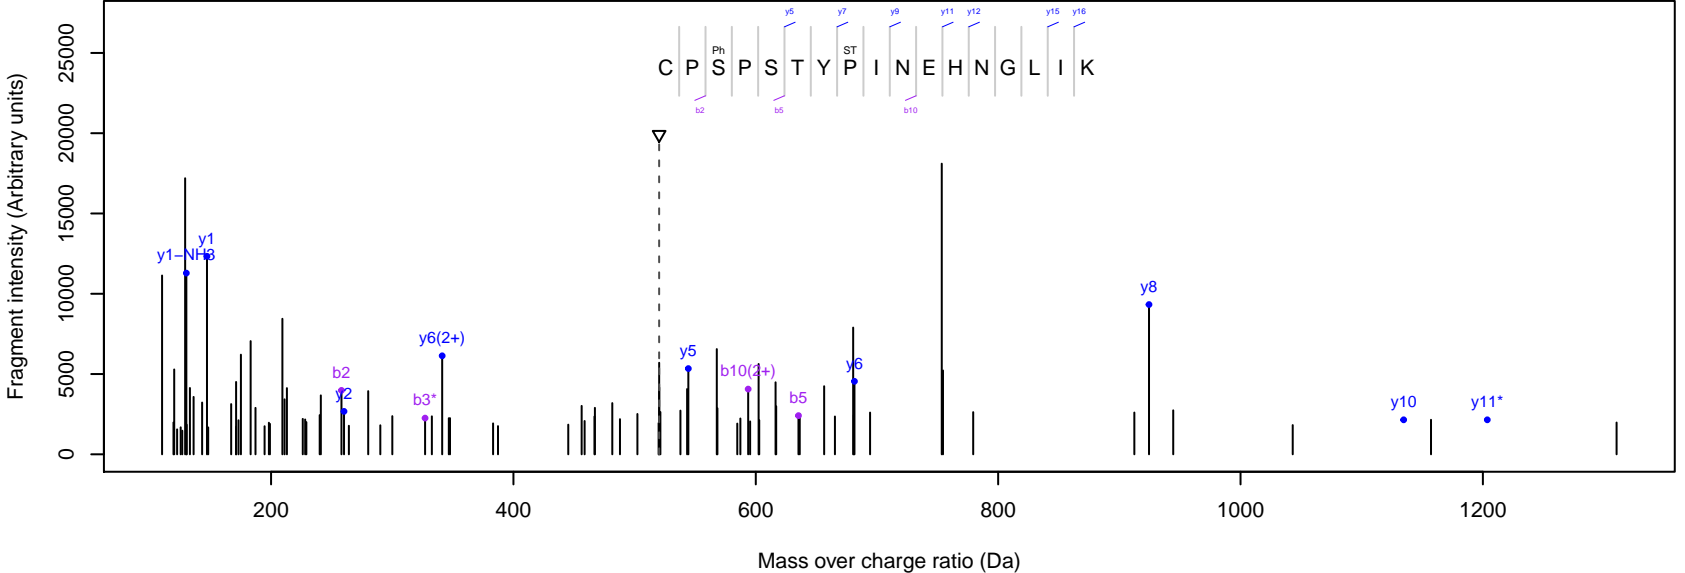

TQFEDLVPS(Phospho (STY))PTSEK-2+

Source : QE3\_201126\_FR\_TiOx\_hum\_tissue\_Urea\_RNAB\_H Scan : 35879

Andromeda score : 51.03

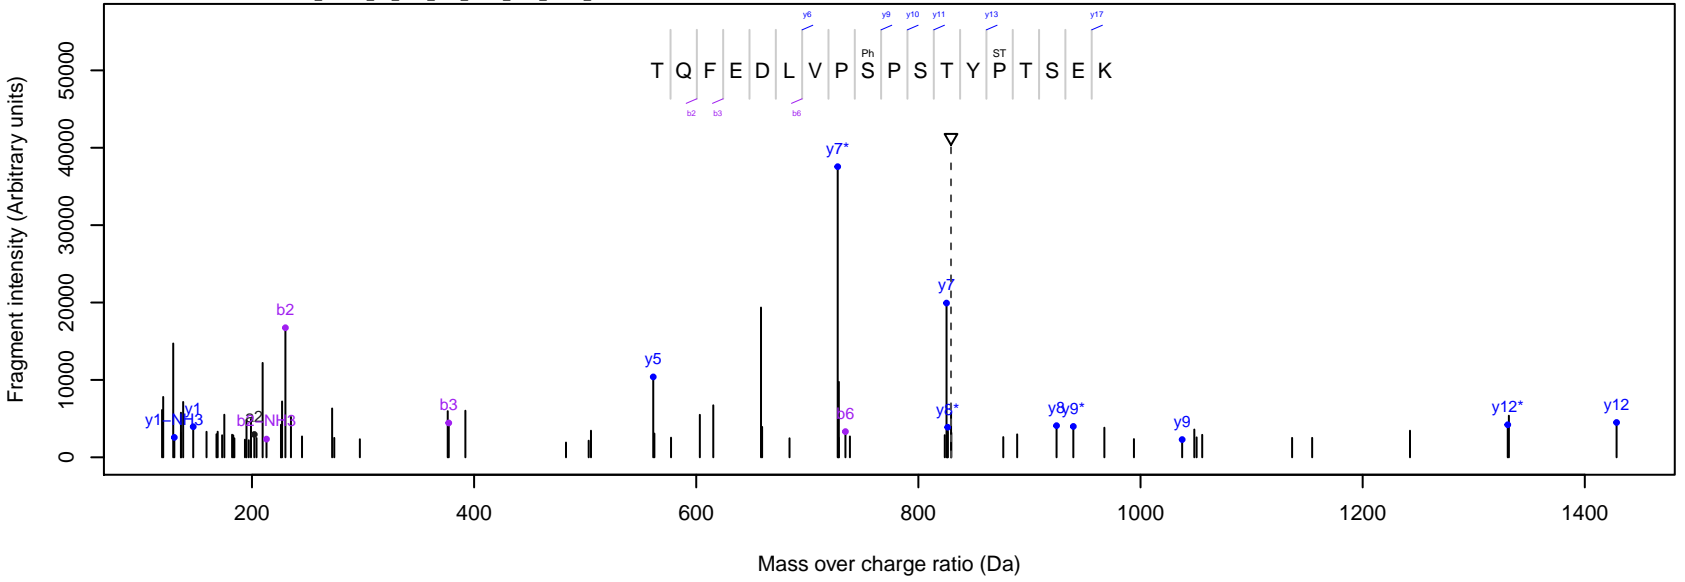

KIT(Phospho (STY))PPS(Phospho (STY))SPHSLTSTLVSLGHEEALEMAGSK-4+

Source : QE3\_201126\_FR\_TiOx\_hum\_tissue\_Urea\_RNAB\_N Scan : 54157

Andromeda score : 51.025

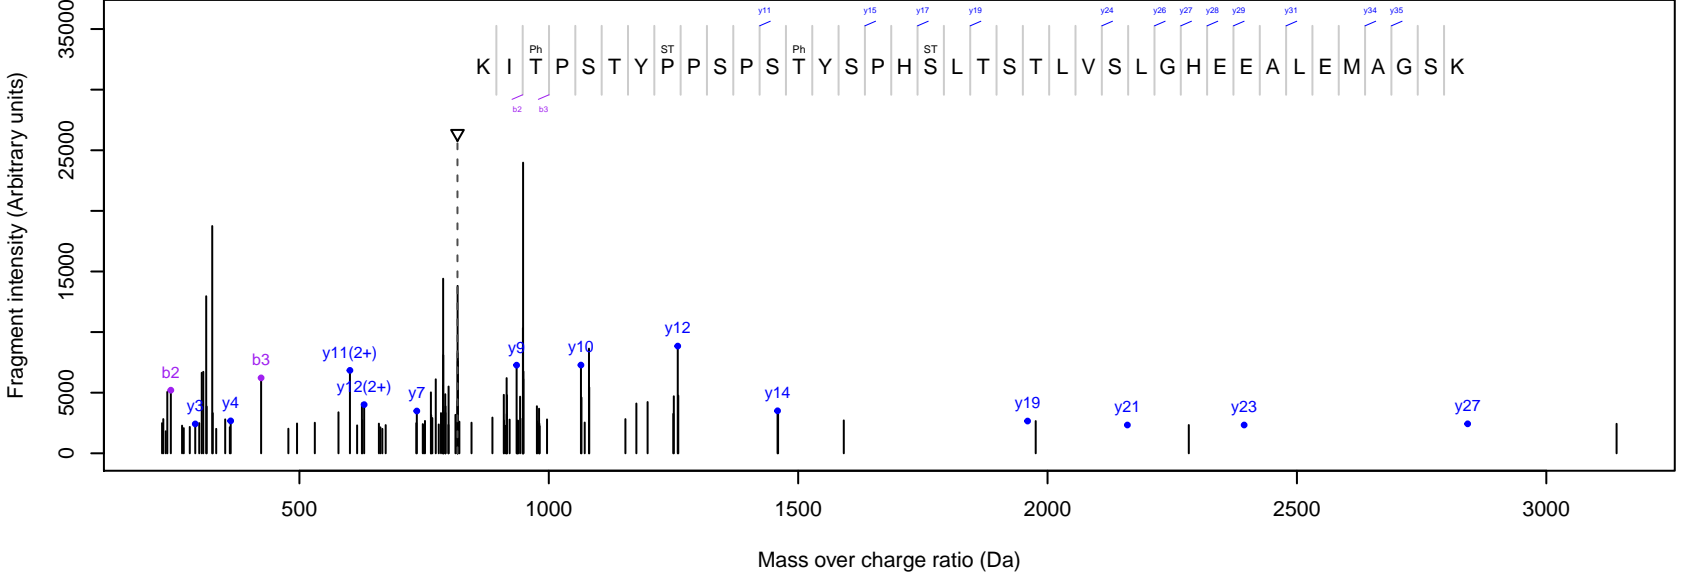

FLKS(Phospho (STY))PPLHK-3+

Source : QE3\_201126\_FR\_TiOx\_hum\_tissue\_Urea\_RNAB\_N Scan : 11538

Andromeda score : 51.013

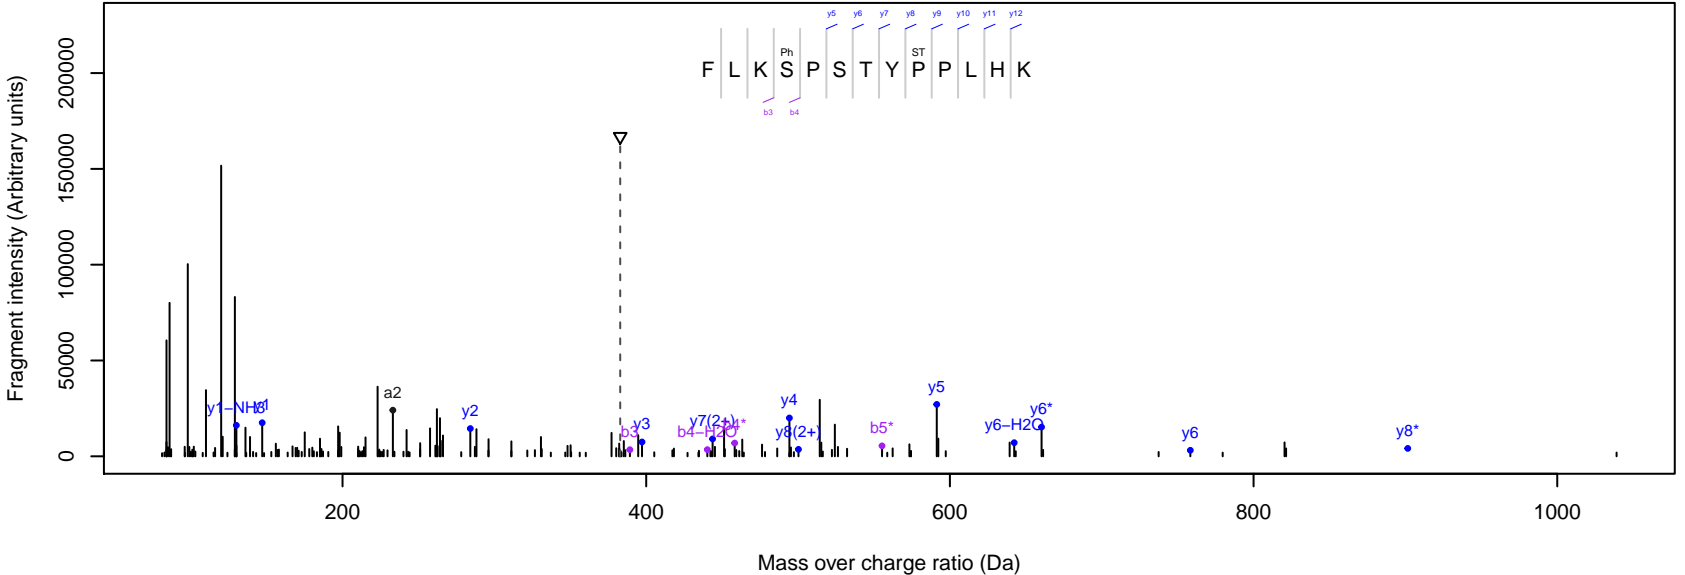

KNQS(Phospho (STY))SEDILR-3+

Source : QE3\_201126\_FR\_TiOx\_hum\_tissue\_Urea\_RNAB\_N Scan : 9861

Andromeda score : 51.013

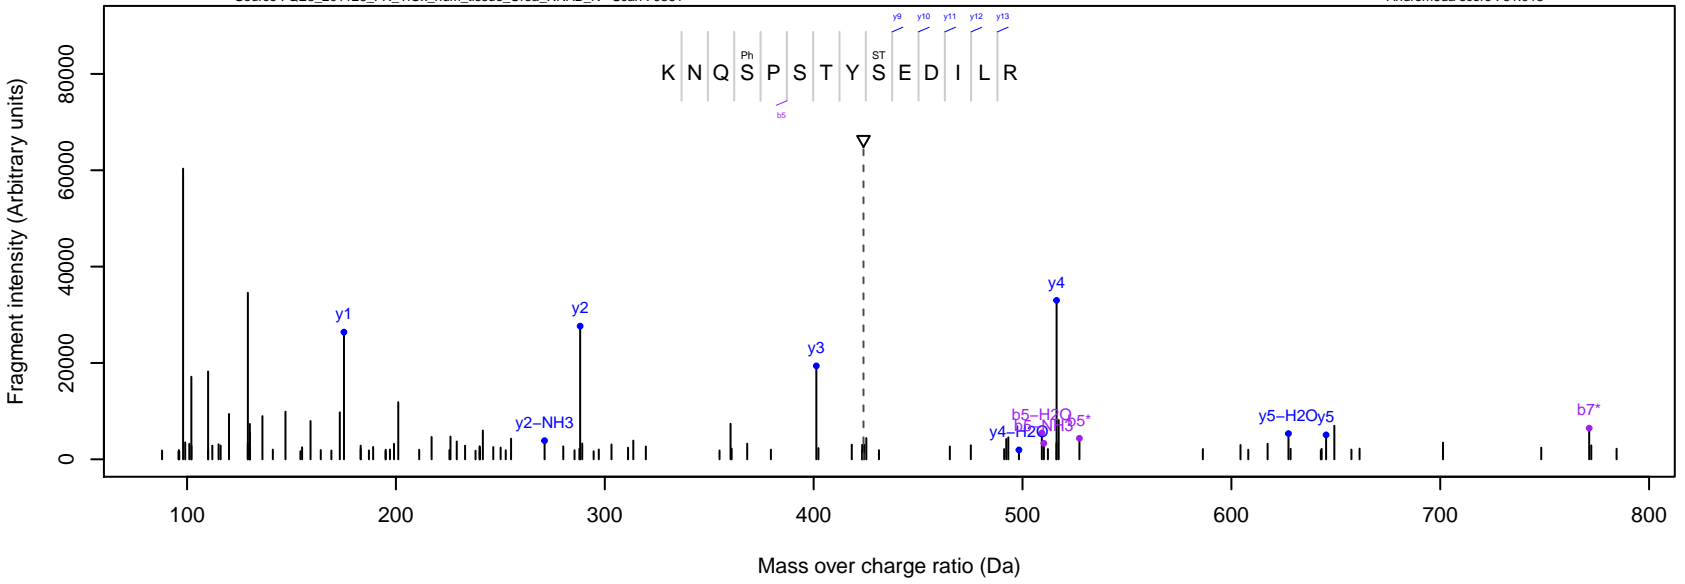

SSS(Phospho (STY))LSDLTHR-2+

Source : QE3\_201126\_FR\_TiOx\_hum\_tissue\_Urea\_RNAB\_N Scan : 13712

Andromeda score : 51.013

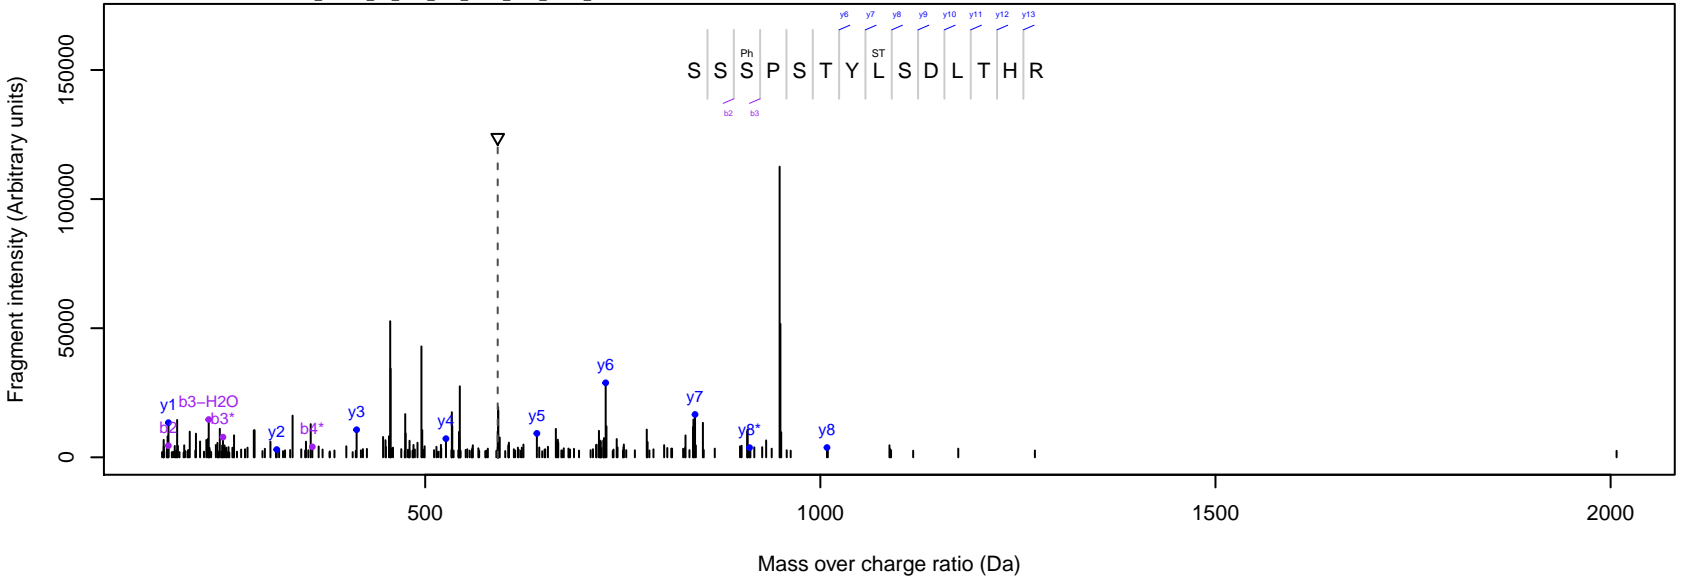

ANS(Phospho (STY))GQAHKDEALKELK-4+

Source : QE3\_201126\_FR\_TiOx\_hum\_tissue\_Urea\_RNAB\_N Scan : 7482

Andromeda score : 50.957

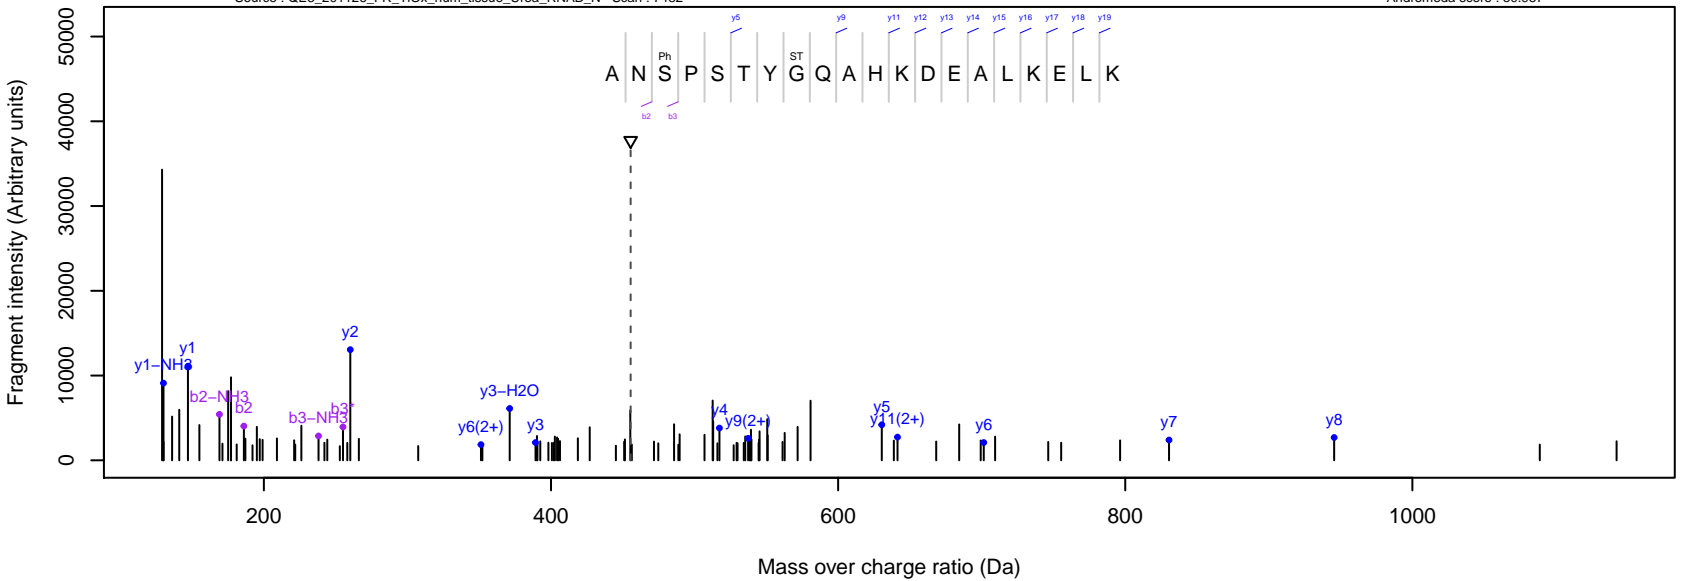



M(Oxidation (M))KVM(Oxidation (M))M(Oxidation (M))SEAALNGDDLNNYDS(Phospho (STY))DDQEKQSK-3+

Source : QE3\_201126\_FR\_TIOx\_hum\_tissue\_Urea\_RNAB\_B Scan : 16153

Andromeda score : 50.935

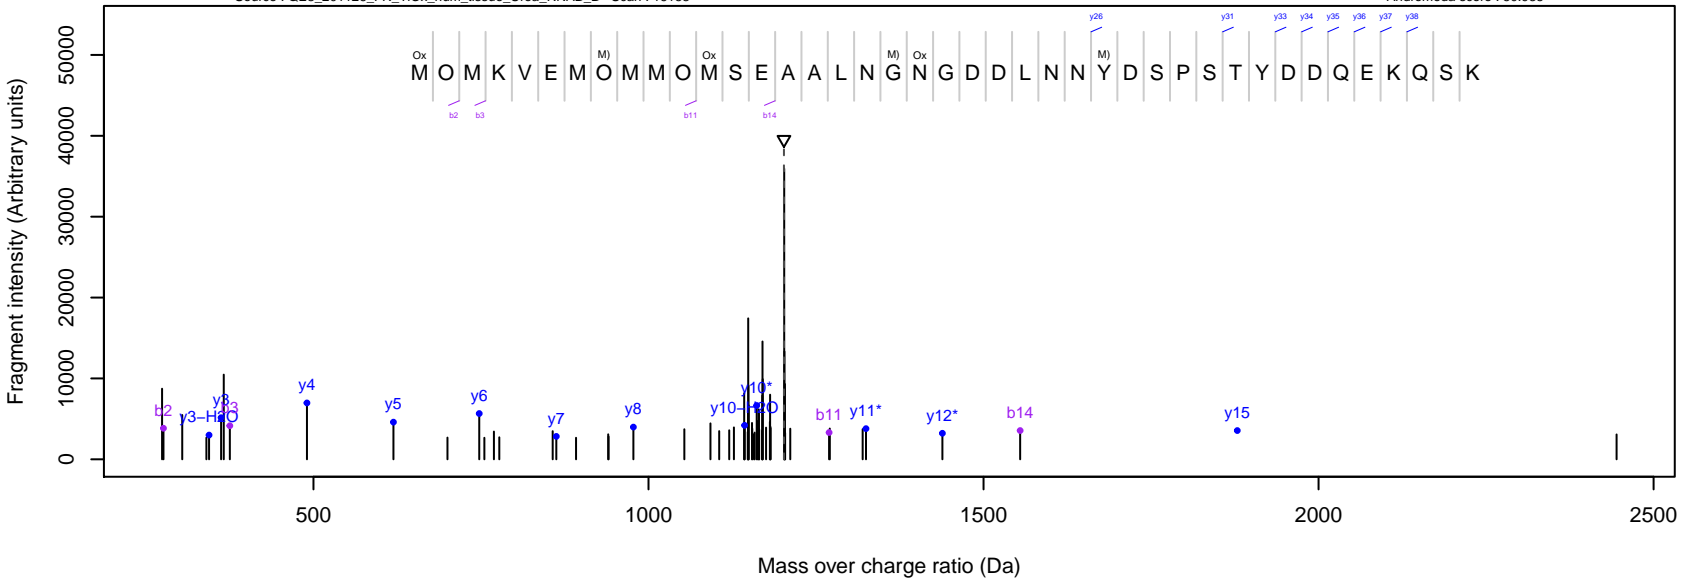

LSVHDM(Oxidation (M))KPLDS(Phospho (STY))PGR-3+

Source : QE3\_201126\_FR\_TIOx\_hum\_tissue\_Urea\_RNAB\_B Scan : 7990

Andromeda score : 50.916

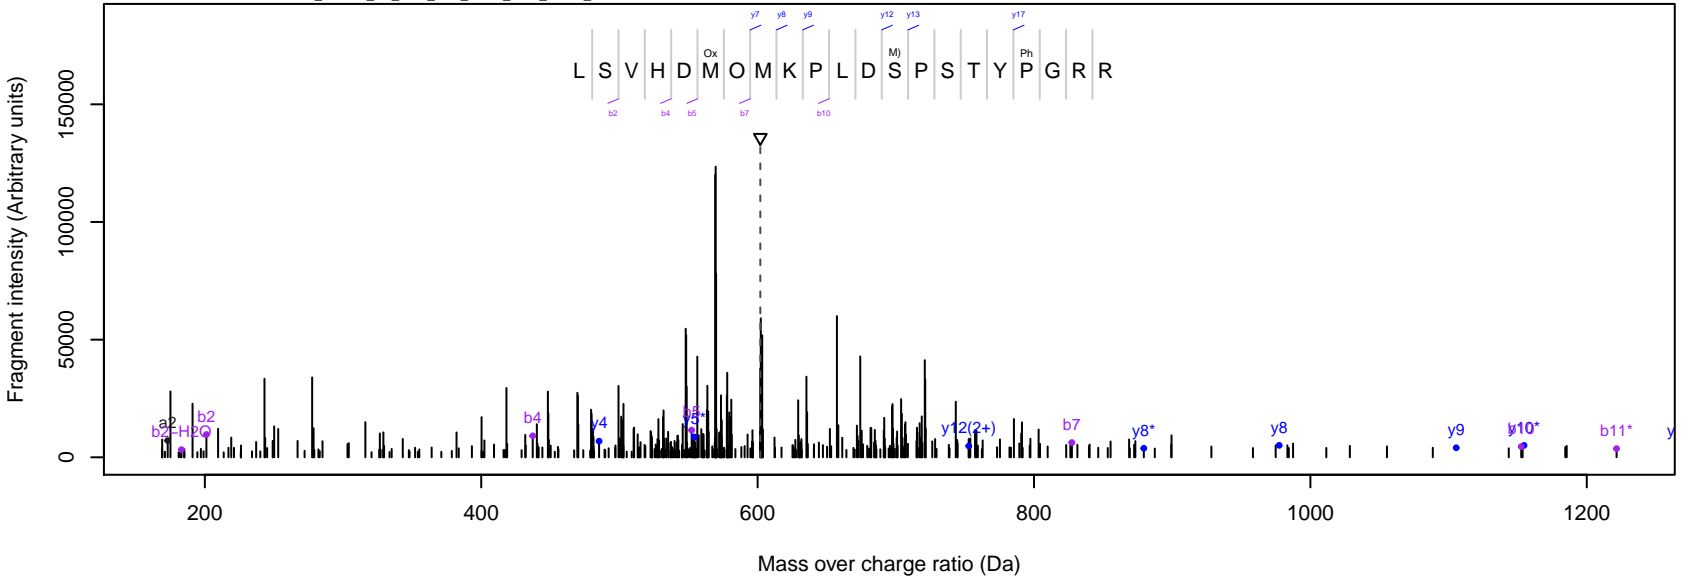

SQGAGS(Phospho (STY))SPRRPQGGSDAPSGHAAPSR-4+

Source : QE3\_201126\_FR\_TIOx\_hum\_tissue\_Urea\_RNAB\_N Scan : 3842

Andromeda score : 50.908

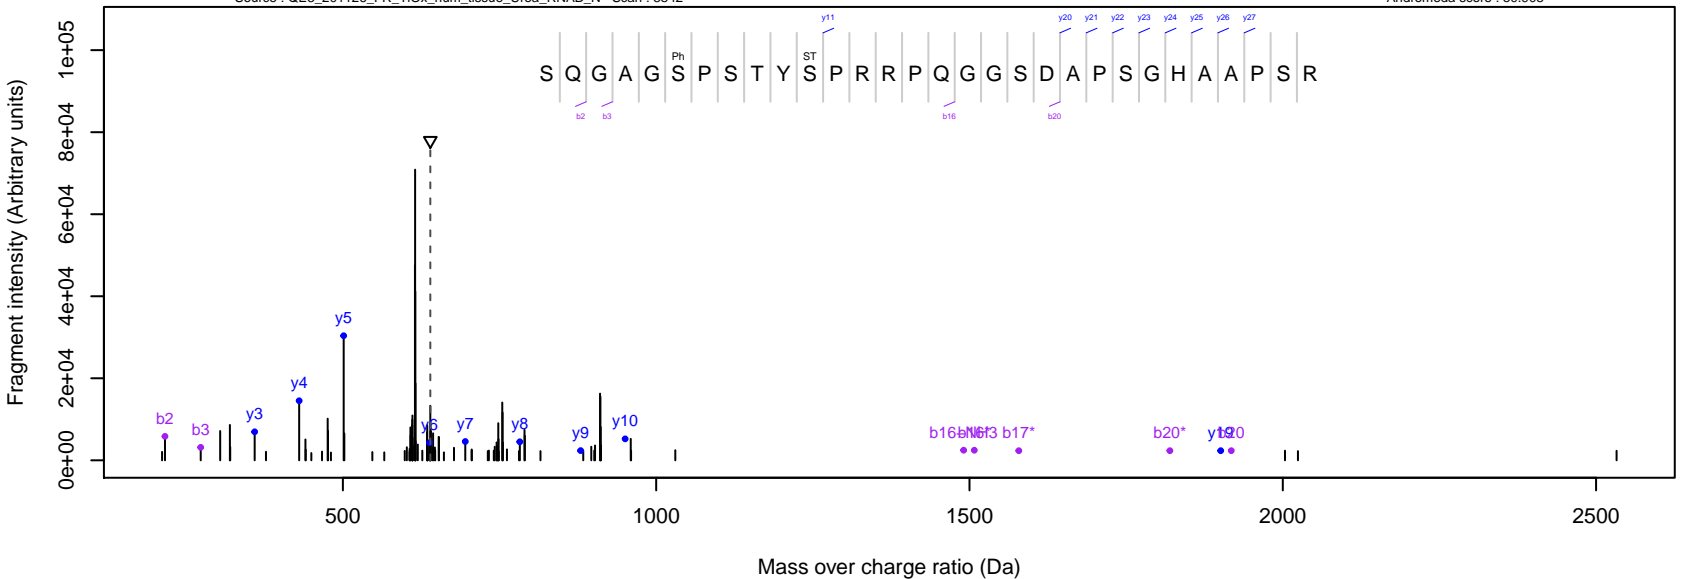

AVAGNIS(Phospho (STY))DPGLQK-2+

Source : QE3\_201126\_FR\_TiOx\_hum\_tissue\_Urea\_RNAB\_N Scan : 18701

Andromeda score : 50.897

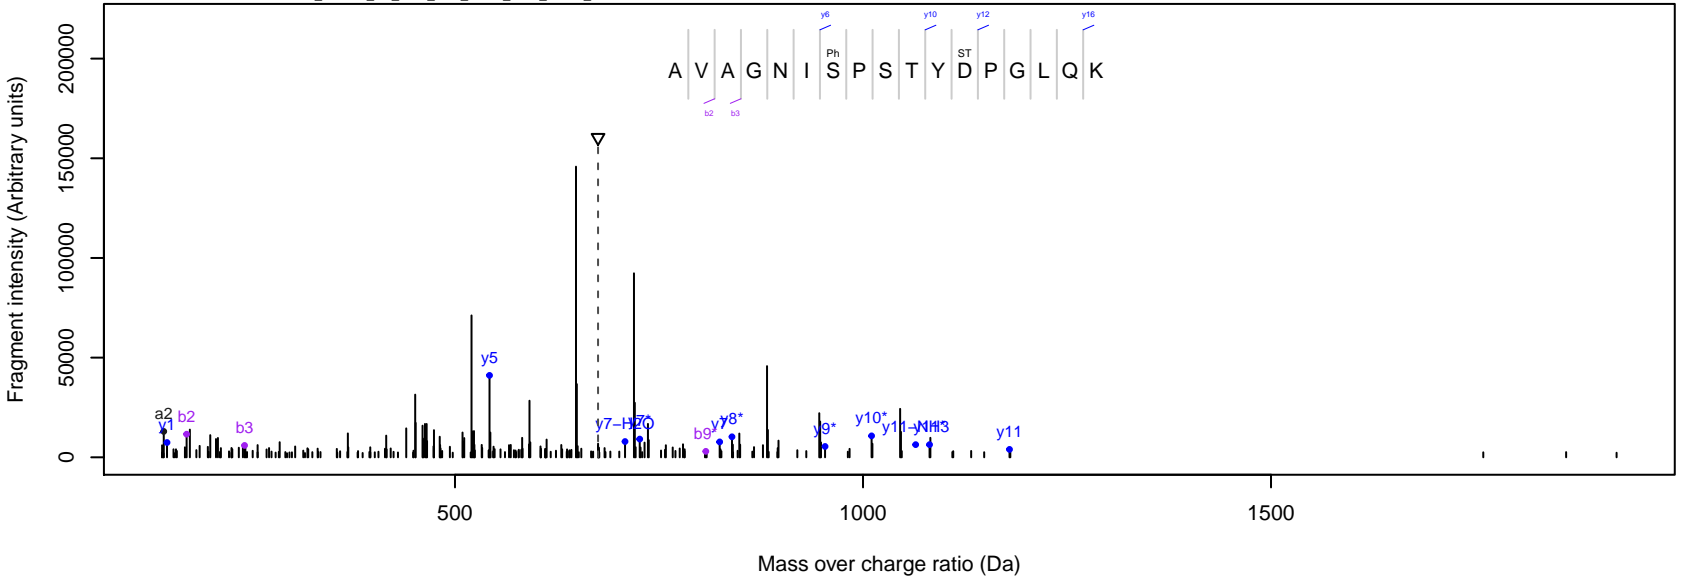

RLS(Phospho (STY))SLSDPVSER-2+

Source : QE3\_201126\_FR\_TiOx\_hum\_tissue\_Urea\_RNAB\_N Scan : 19057

Andromeda score : 50.897

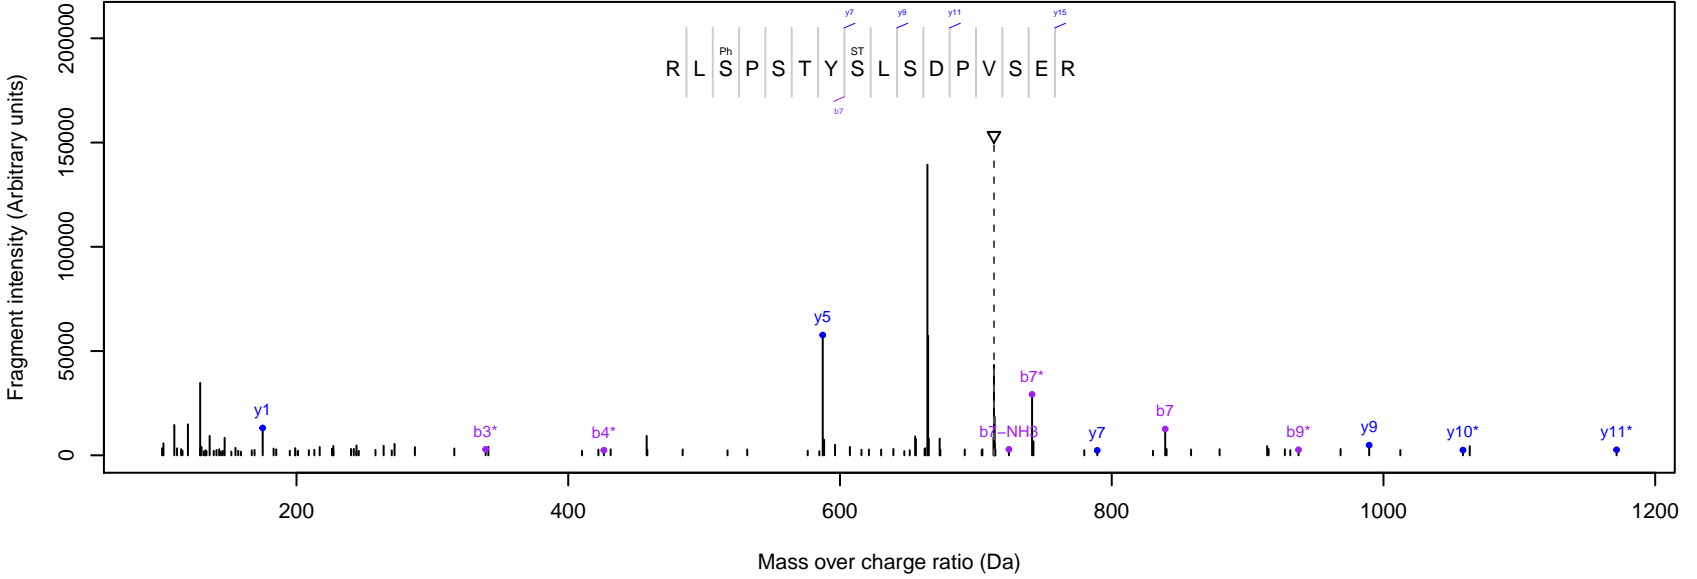

S(Phospho (STY))LS(Phospho (STY))RS(Phospho (STY))PLPSR-2+

Source : QE3\_201126\_FR\_TiOx\_hum\_tissue\_Urea\_RNAB\_N Scan : 19921

Andromeda score : 50.897

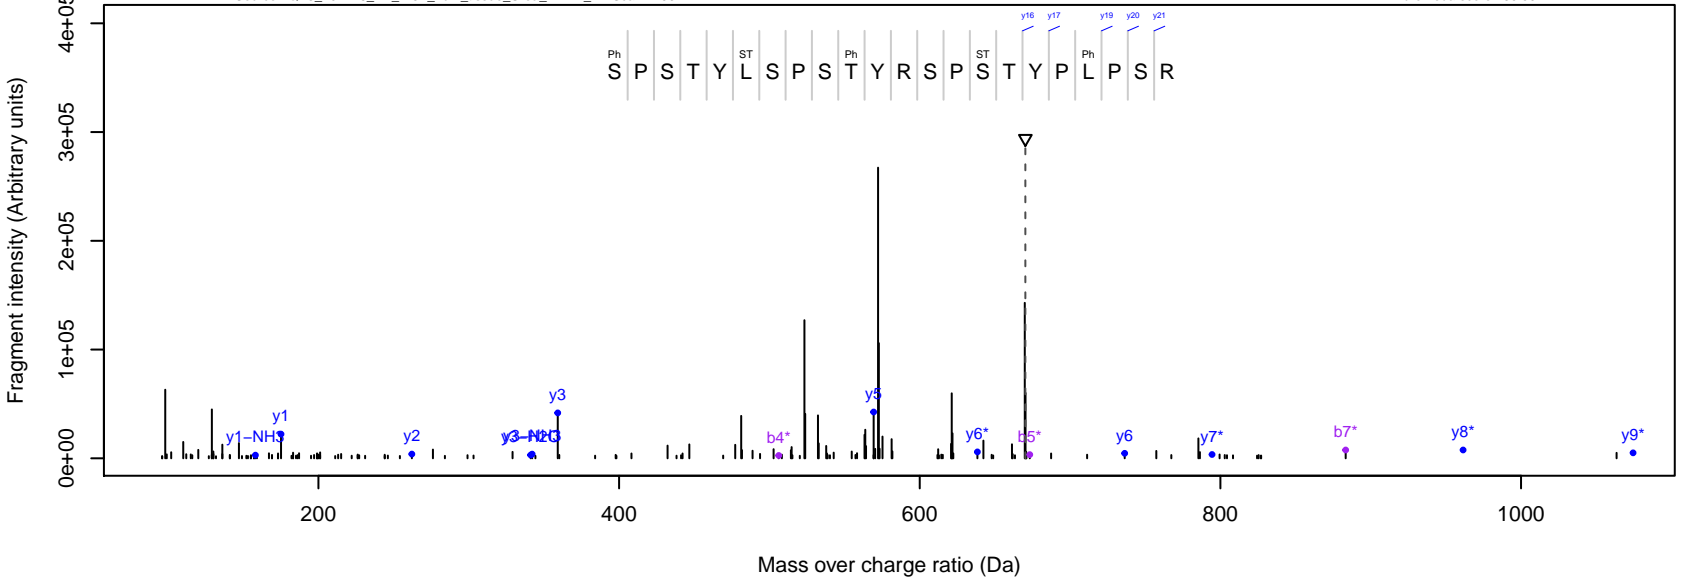

DGHRPVPHS(Phospho (STY))WHNGER-4+

Source : QE3\_201126\_FR\_TIOx\_hum\_tissue\_Urea\_RNAB\_H Scan : 6406

Andromeda score : 50.883

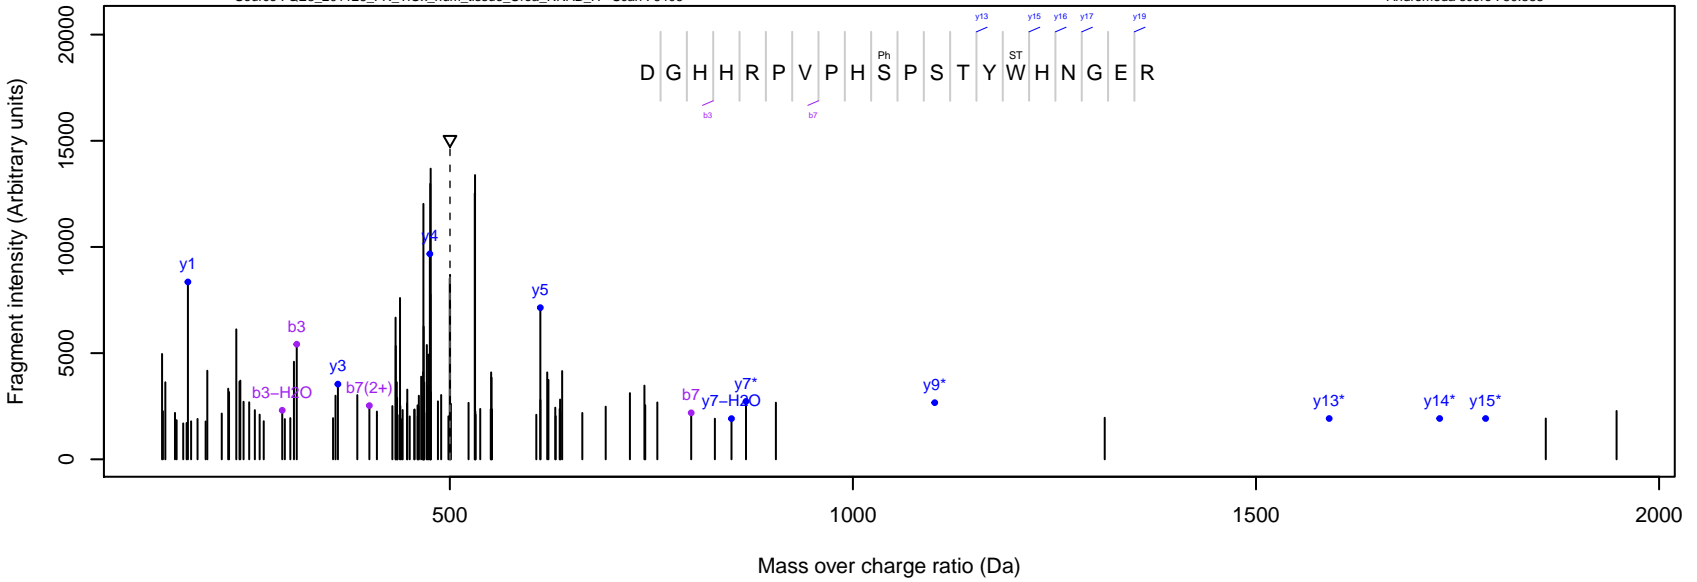

IIAEGANGPT(Phospho (STY))TPEADKIFLER-3+

Source : QE3\_201126\_FR\_TIOx\_hum\_tissue\_Urea\_RNAB\_H Scan : 37519

Andromeda score : 50.883

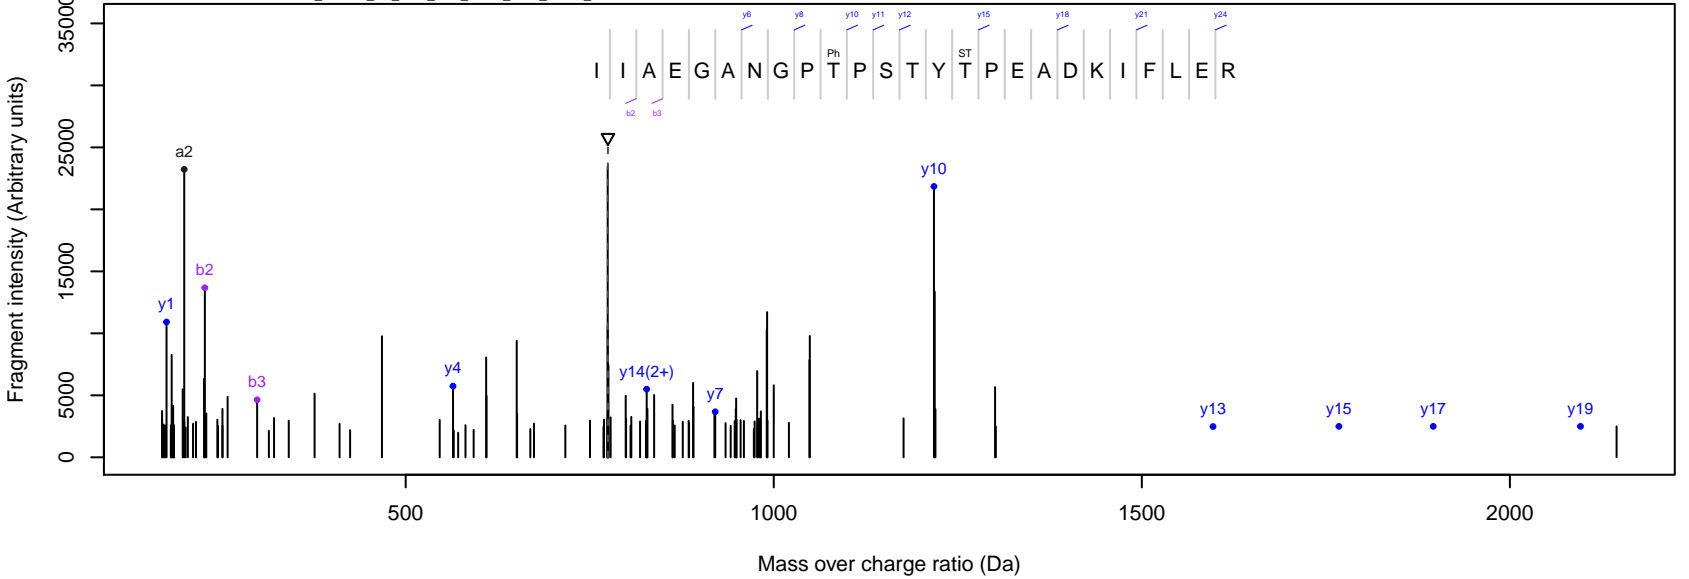

LSDSTTGADS(Phospho (STY))LLDISSEADQQLLSLLQAK-3+

Source : QE3\_201126\_FR\_TIOx\_hum\_tissue\_Urea\_RNAB\_N Scan : 62546

Andromeda score : 50.88

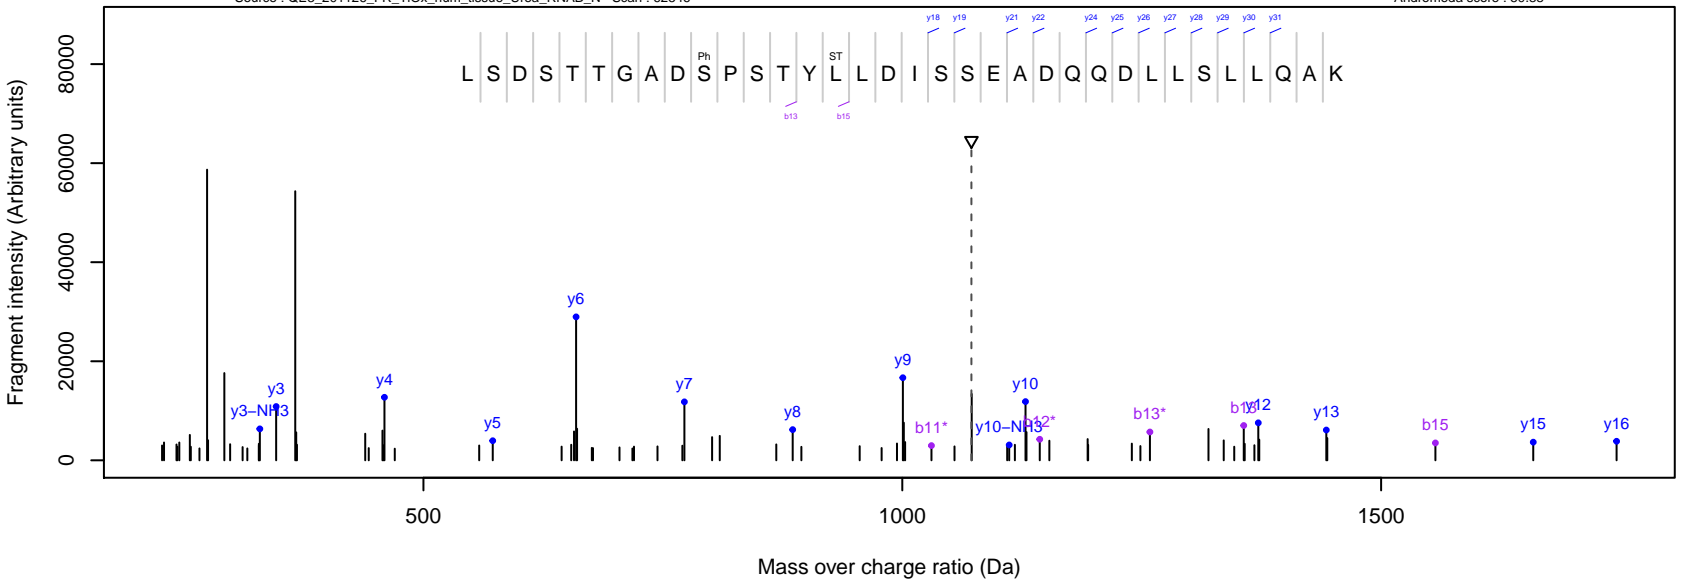

NPLPNIDHELQELLIDRGEDVPS(Phospho (STY))EEEEENGFDER-4+

Source : QE3\_201126\_FR\_TIOx\_hum\_tissue\_Urea\_RNAB\_B Scan : 56896

Andromeda score : 50.88

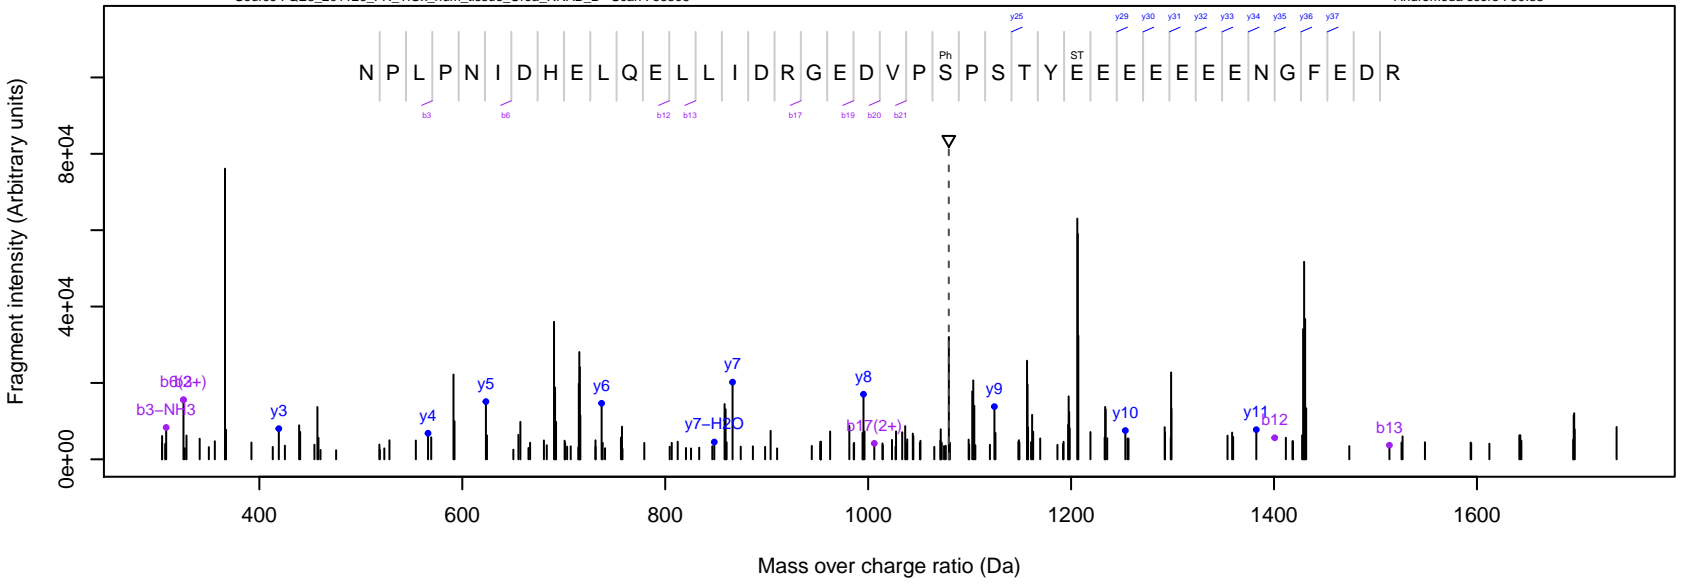

SQSS(Phospho (STY))EGVSSLSS(Phospho (STY))PSNLETQSQSLSR-3+

Source : QE3\_201126\_FR\_TIOx\_hum\_tissue\_Urea\_RNAB\_N Scan : 37933

Andromeda score : 50.88

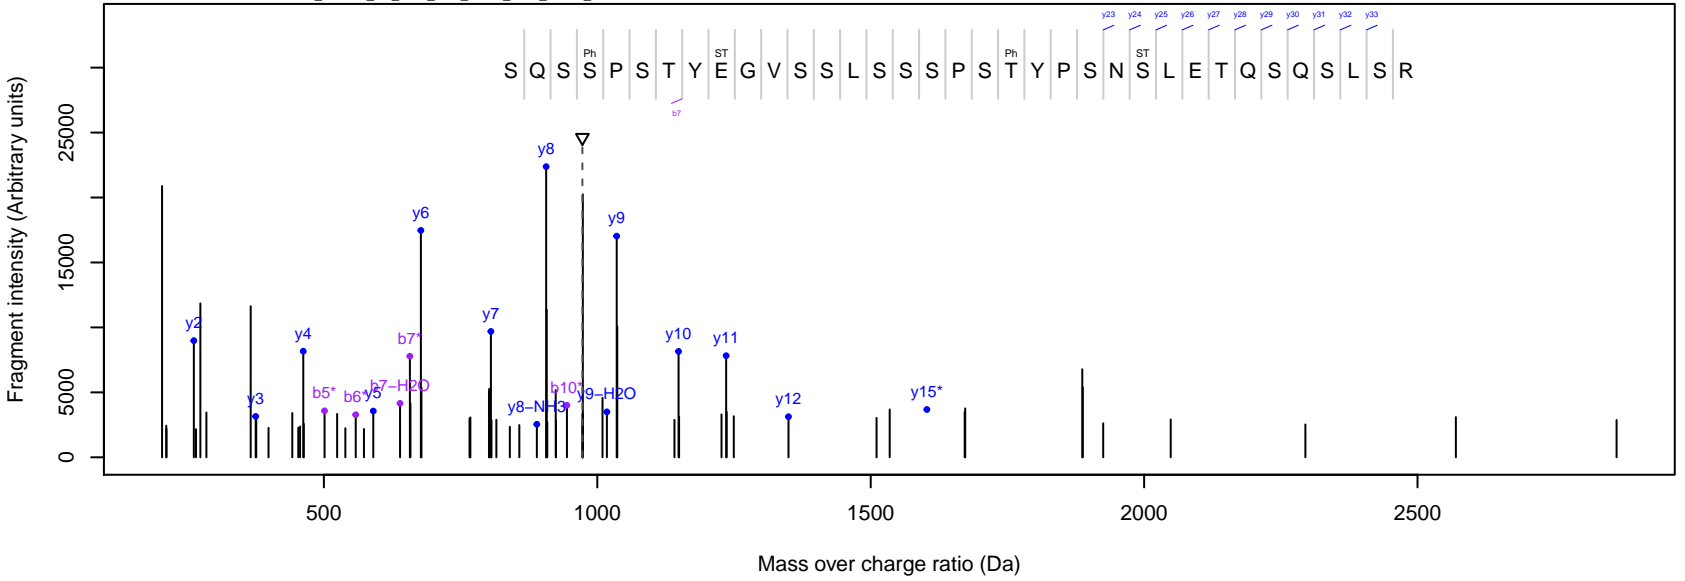

VKEVHDELEDLP(Phospho (STY))PPPPLS(Phospho (STY))PPPTTSPHK-4+

Source : QE3\_201126\_FR\_TIOx\_hum\_tissue\_Urea\_RNAB\_B Scan : 32484

Andromeda score : 50.879

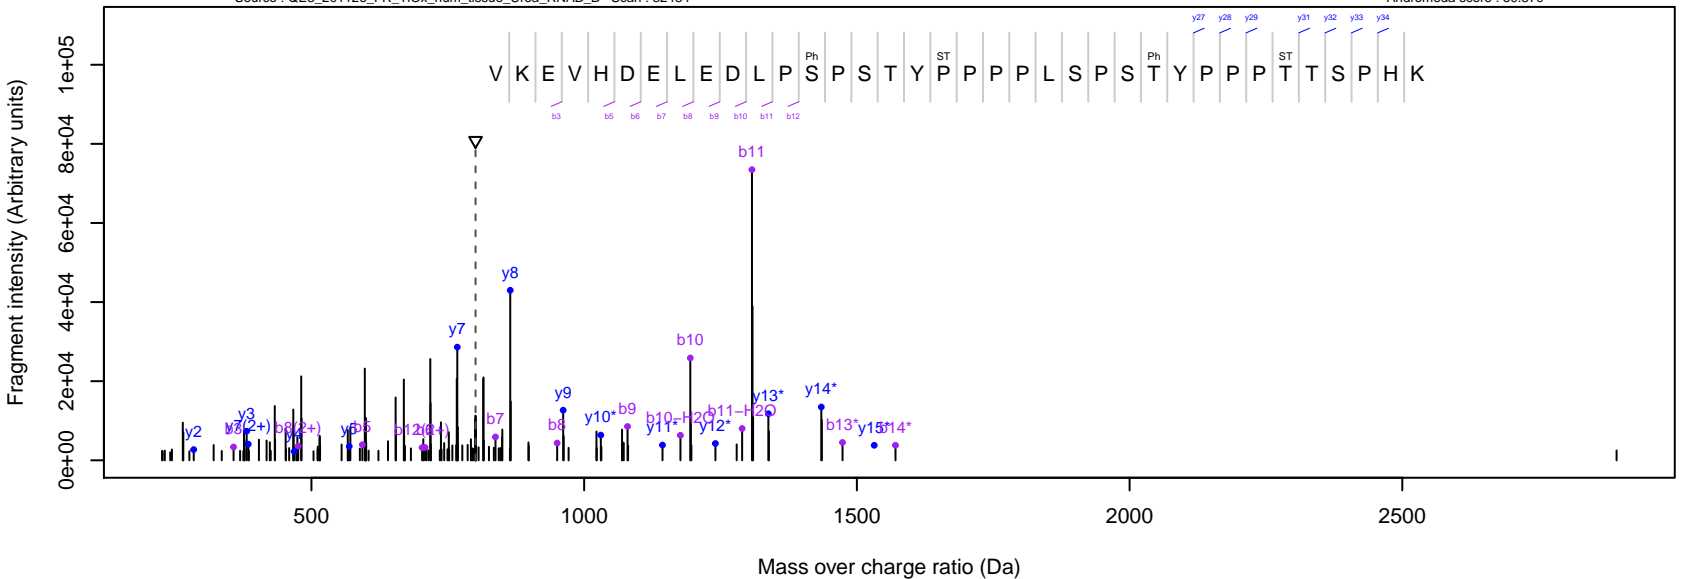

GGMGS(Phospho (STY))GGLATGIAGGLAGMGGIQNEKETM(Oxidation (M))QS(Phospho (STY))LNDR-3+

Source : QE3\_201126\_FR\_TIOx\_hum\_tissue\_Urea\_RNAB\_N Scan : 52347

Andromeda score : 50.869

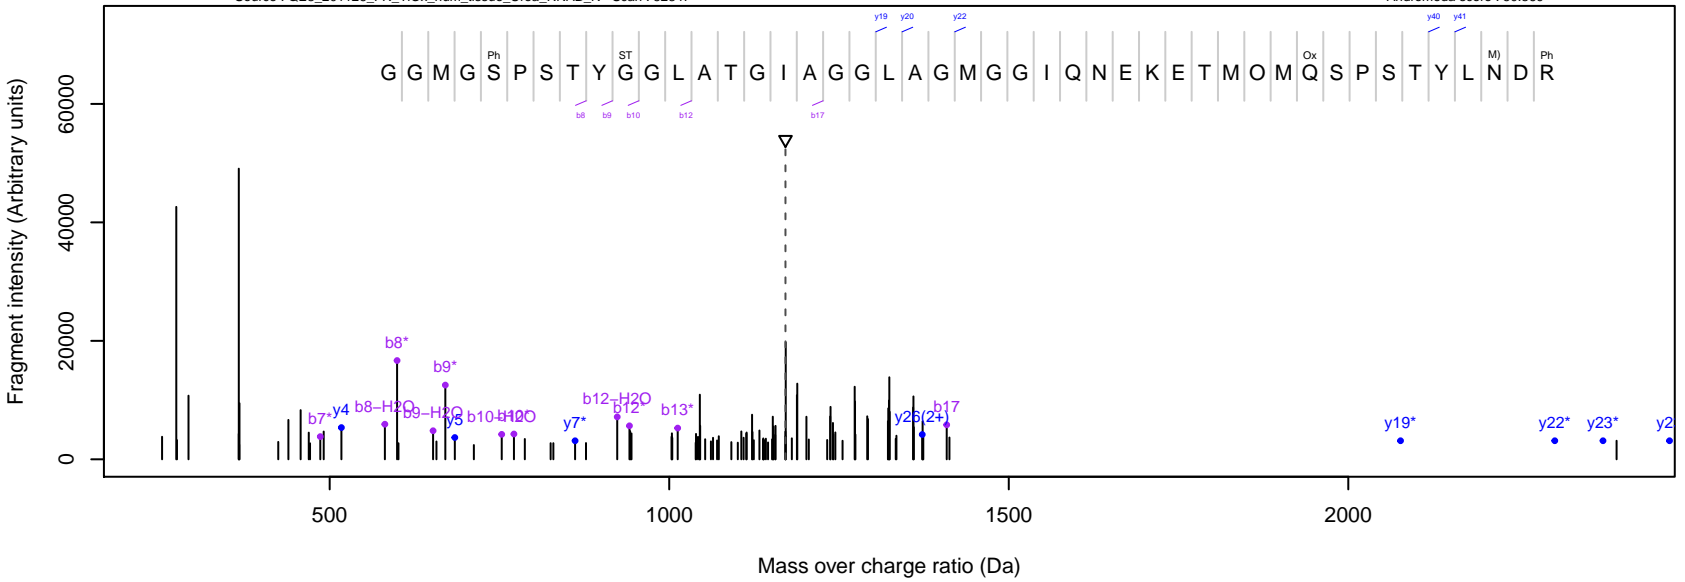

S(Phospho (STY))RS(Phospho (STY))PS(Phospho (STY))PSPLPSPASGPGPGAPGR-3+

Source : QE3\_201126\_FR\_TIOx\_hum\_tissue\_Urea\_RNAB\_H Scan : 34156

Andromeda score : 50.865

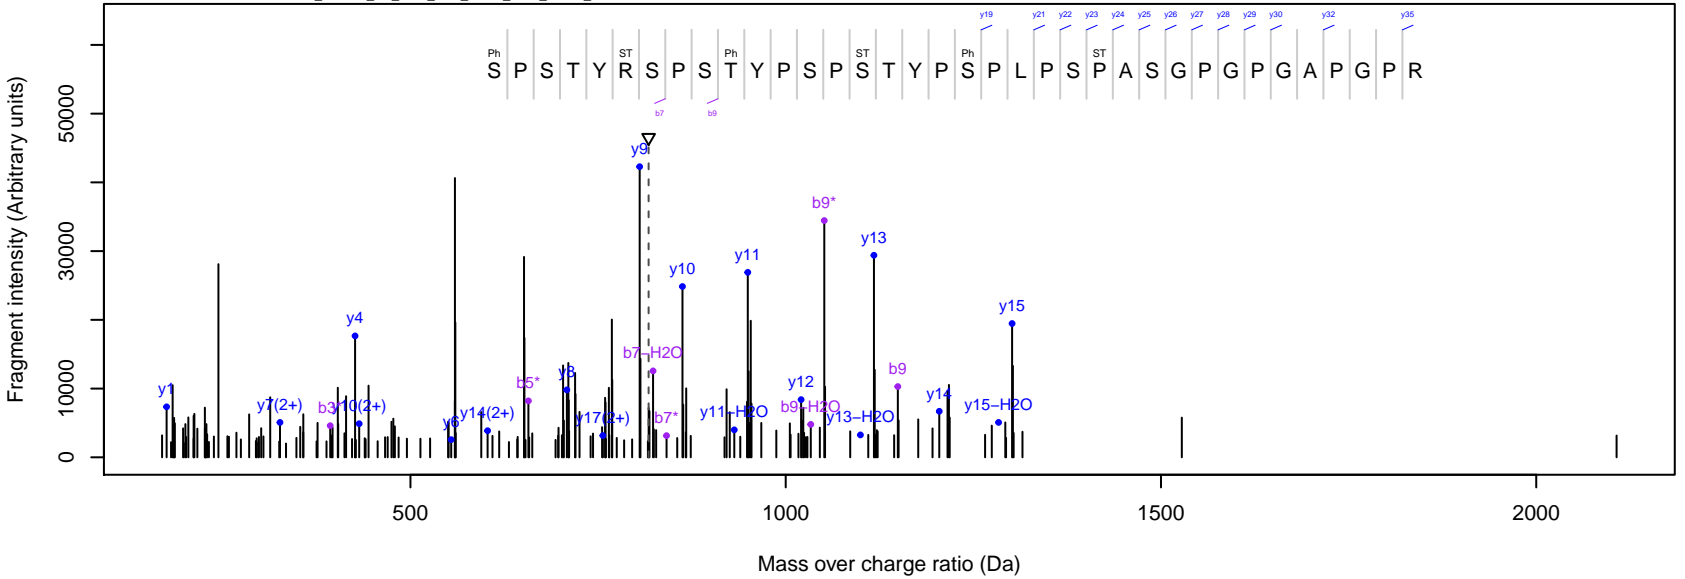

DRAS(Phospho (STY))PAAAEVVPEWAS(Phospho (STY))CLK-3+

Source : QE3\_201126\_FR\_TIOx\_hum\_tissue\_Urea\_RNAB\_H Scan : 52076

Andromeda score : 50.857

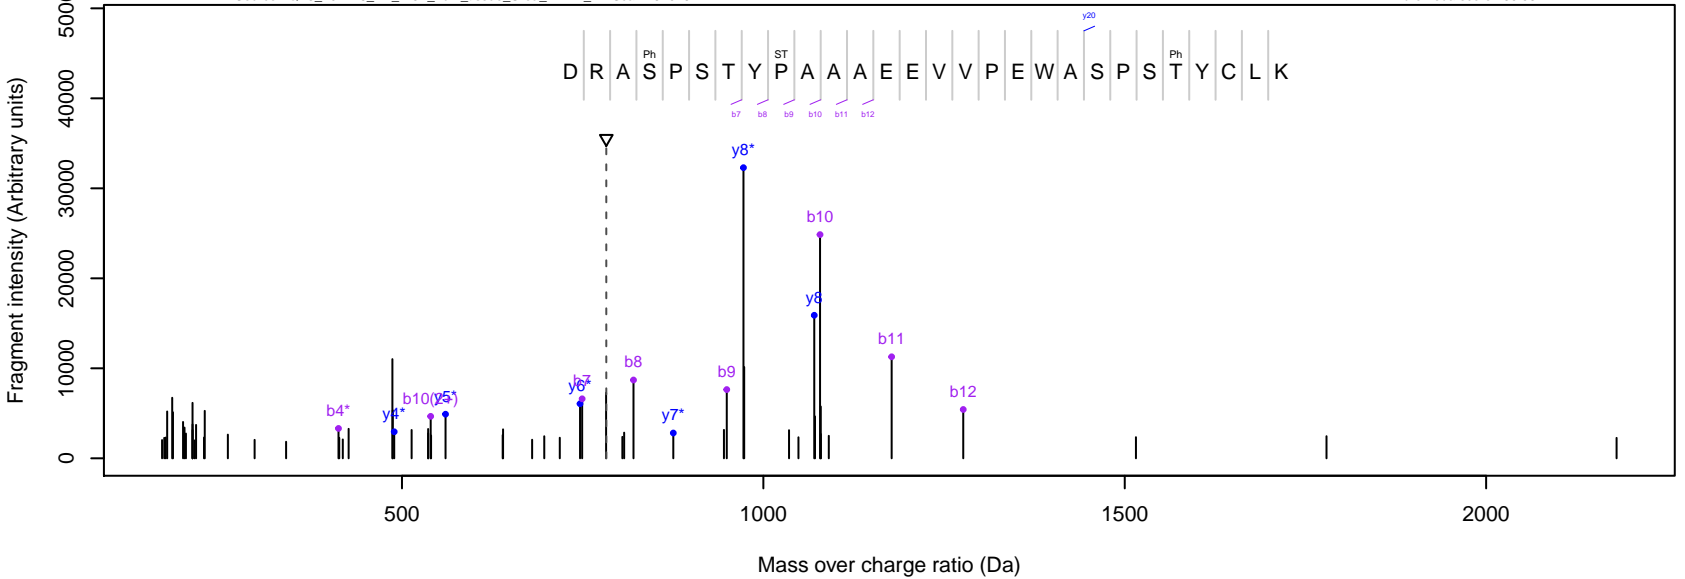

SPEKIEEVL<sup>(Phospho (STY))</sup>PEGSPS<sup>(Phospho (STY))</sup>KS<sup>(Phospho (STY))</sup>PSK-3+

Source : QE3\_201126\_FR\_TiOx\_hum\_tissue\_Urea\_RNAB\_H Scan : 26233

Andromeda score : 50.857

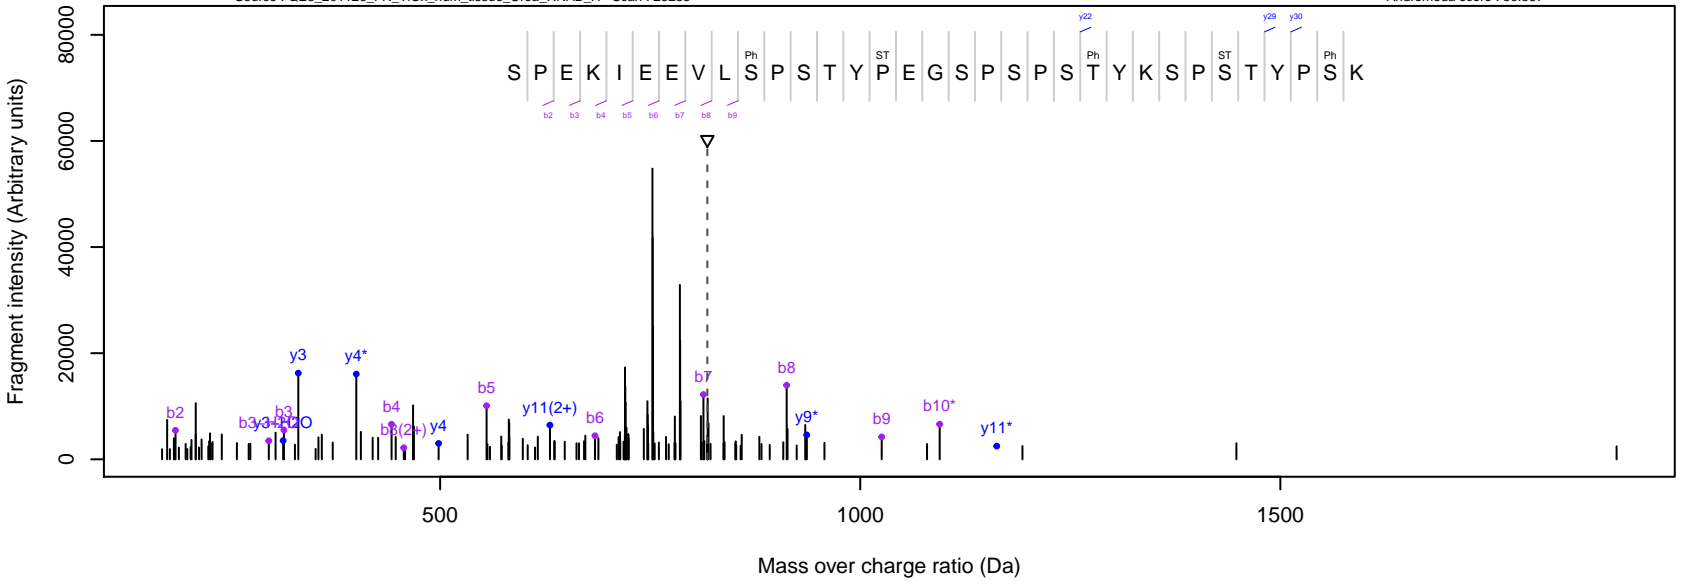

SPQVPSPRPQSQPPHS<sup>(Phospho (STY))</sup>SPSPR-3+

Source : QE3\_201126\_FR\_TiOx\_hum\_tissue\_Urea\_RNAB\_B Scan : 9873

Andromeda score : 50.857

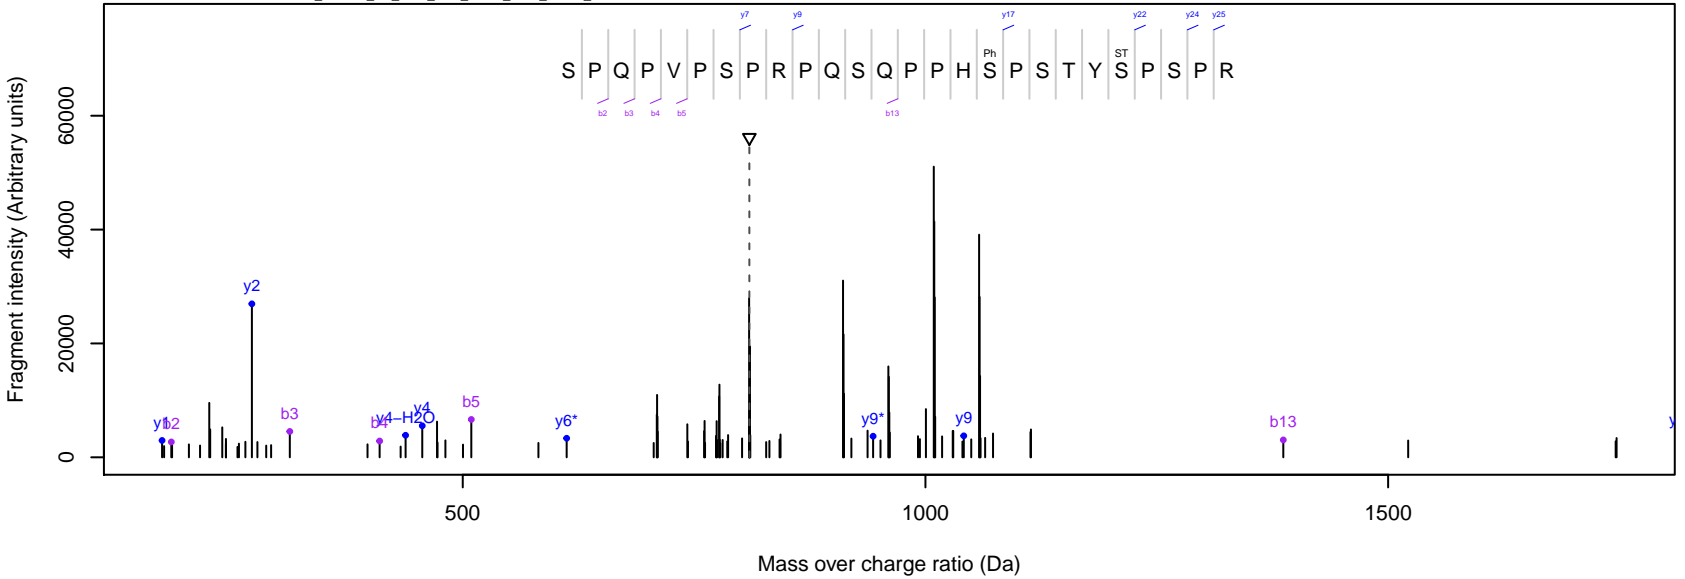

RT<sup>(Phospho (STY))</sup>SIHDFLTK-3+

Source : QE3\_201126\_FR\_TiOx\_hum\_tissue\_Urea\_RNAB\_H Scan : 17336

Andromeda score : 50.843

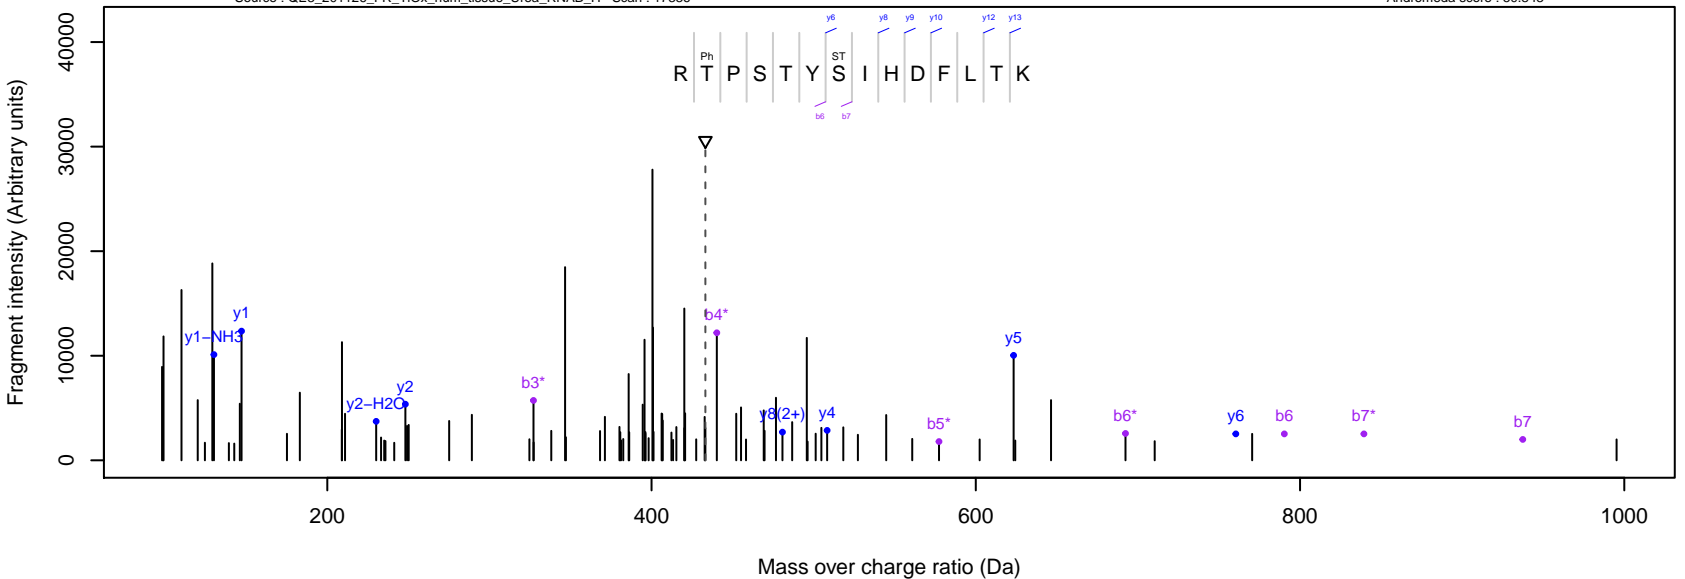

S(Phospho (STY))SSTELLSHYSDIK-3+

Source : QE3\_201126\_FR\_TiOx\_hum\_tissue\_Urea\_RNAB\_H Scan : 28204

Andromeda score : 50.843

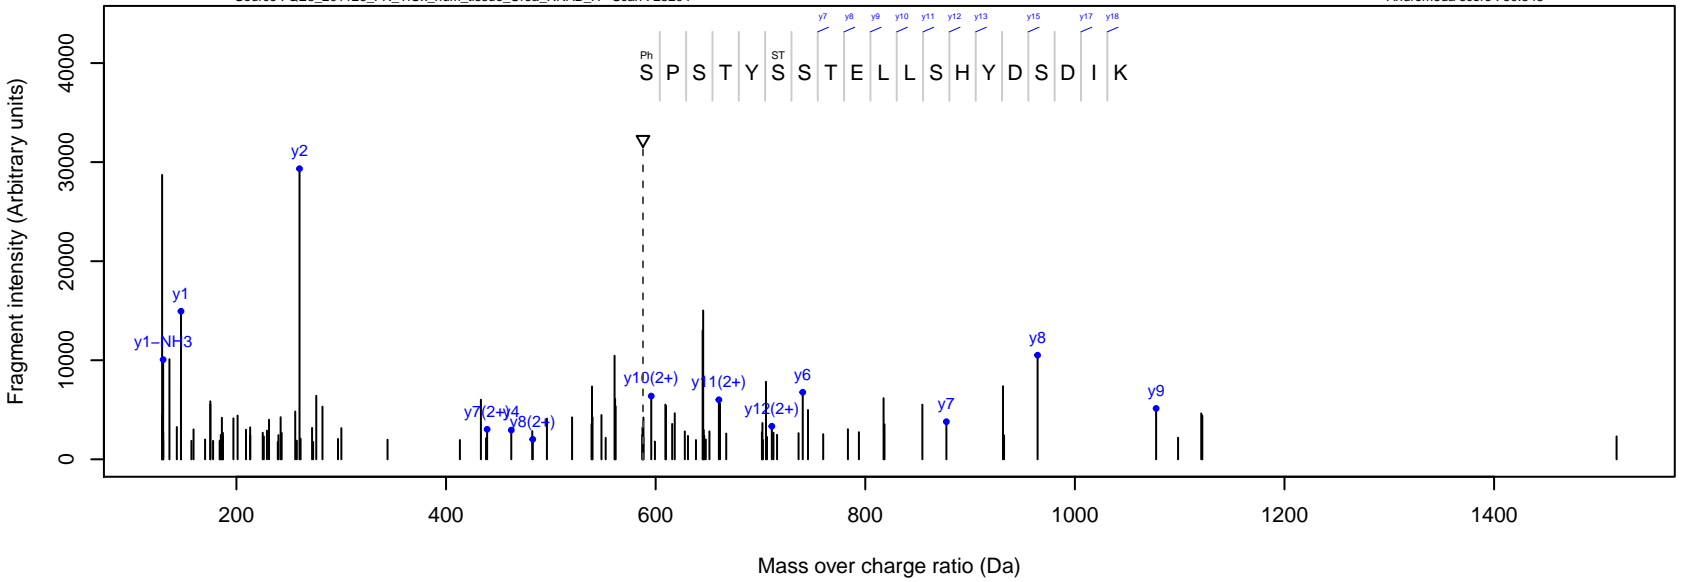

TS(Phospho (STY))HNFMAHPEFR-3+

Source : QE3\_201126\_FR\_TiOx\_hum\_tissue\_Urea\_RNAB\_H Scan : 25285

Andromeda score : 50.831

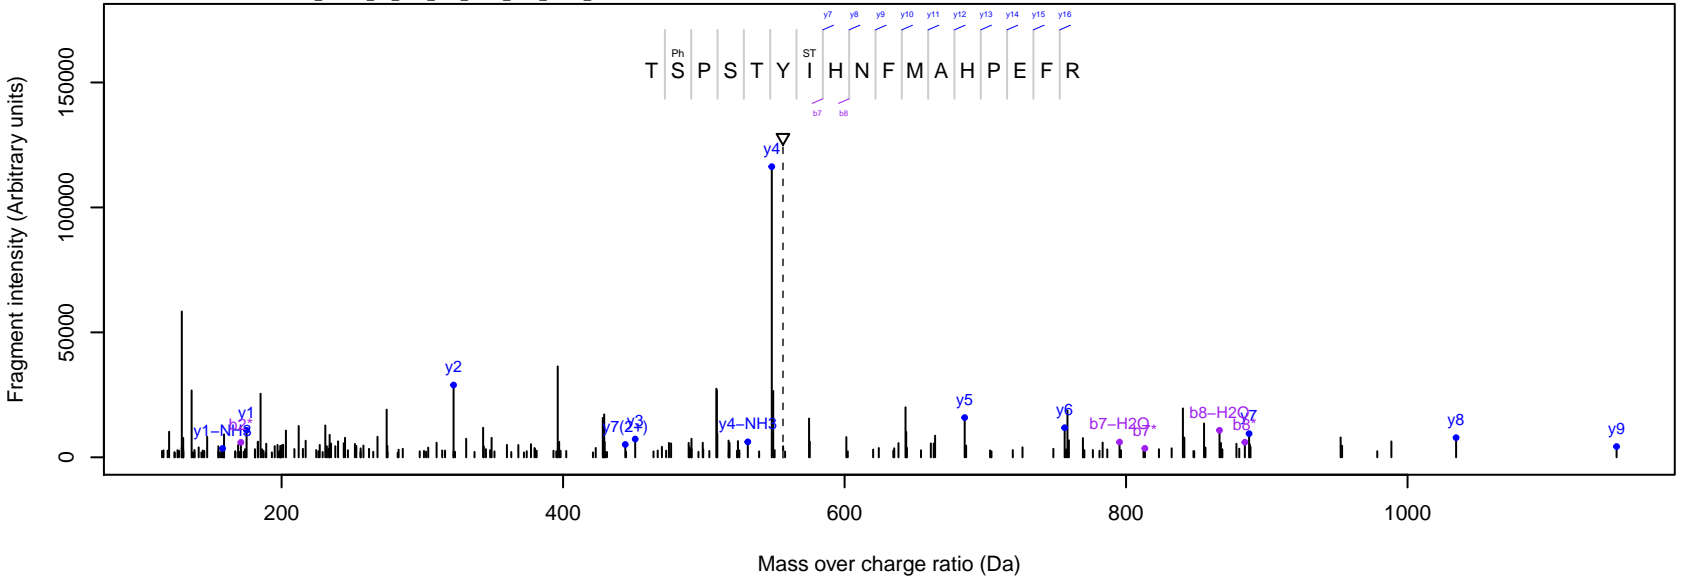

QKS(Phospho (STY))AEPSPSTVMSTSLGNSLSELDLR-3+

Source : QE3\_201126\_FR\_TiOx\_hum\_tissue\_Urea\_RNAB\_H Scan : 46982

Andromeda score : 50.827

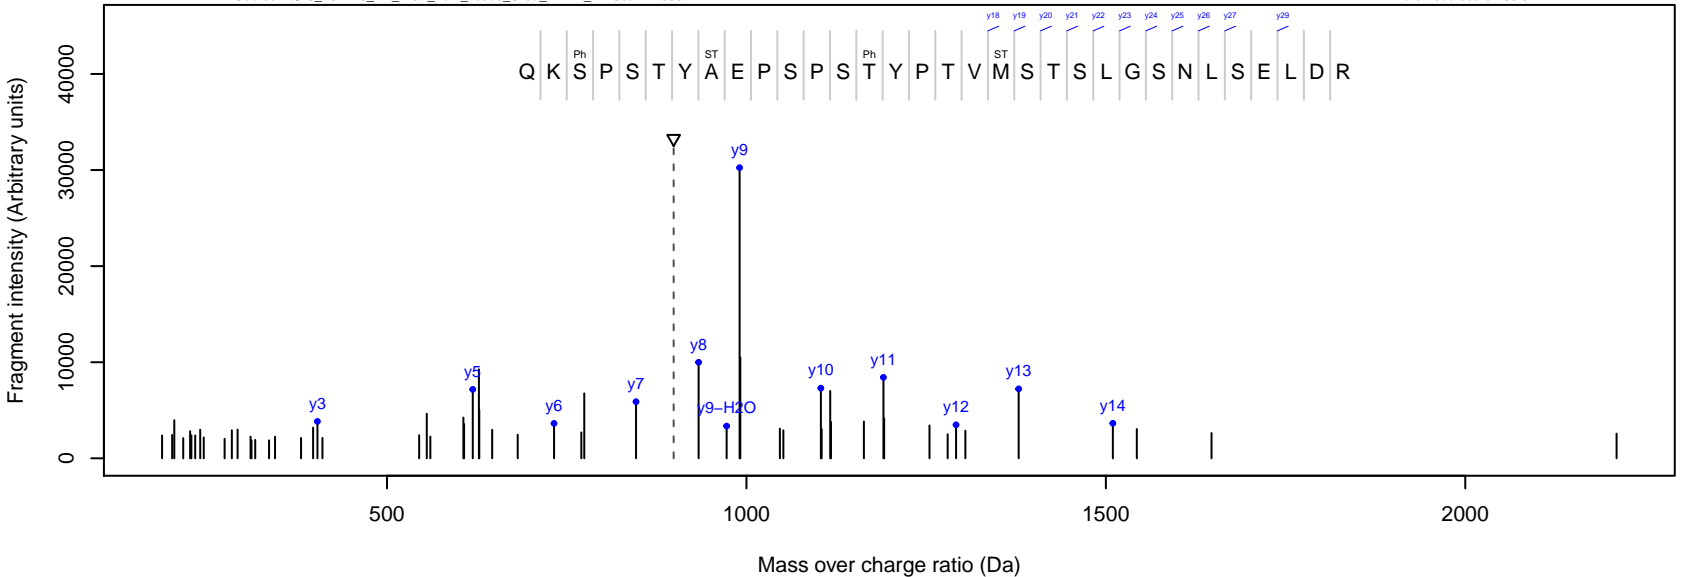

SEPSDHS(Phospho (STY))RHS(Phospho (STY))PQQPSNGSLR-4+

Source : QE3\_201126\_FR\_TiOx\_hum\_tissue\_Urea\_RNAB\_N Scan : 5176

Andromeda score : 50.827

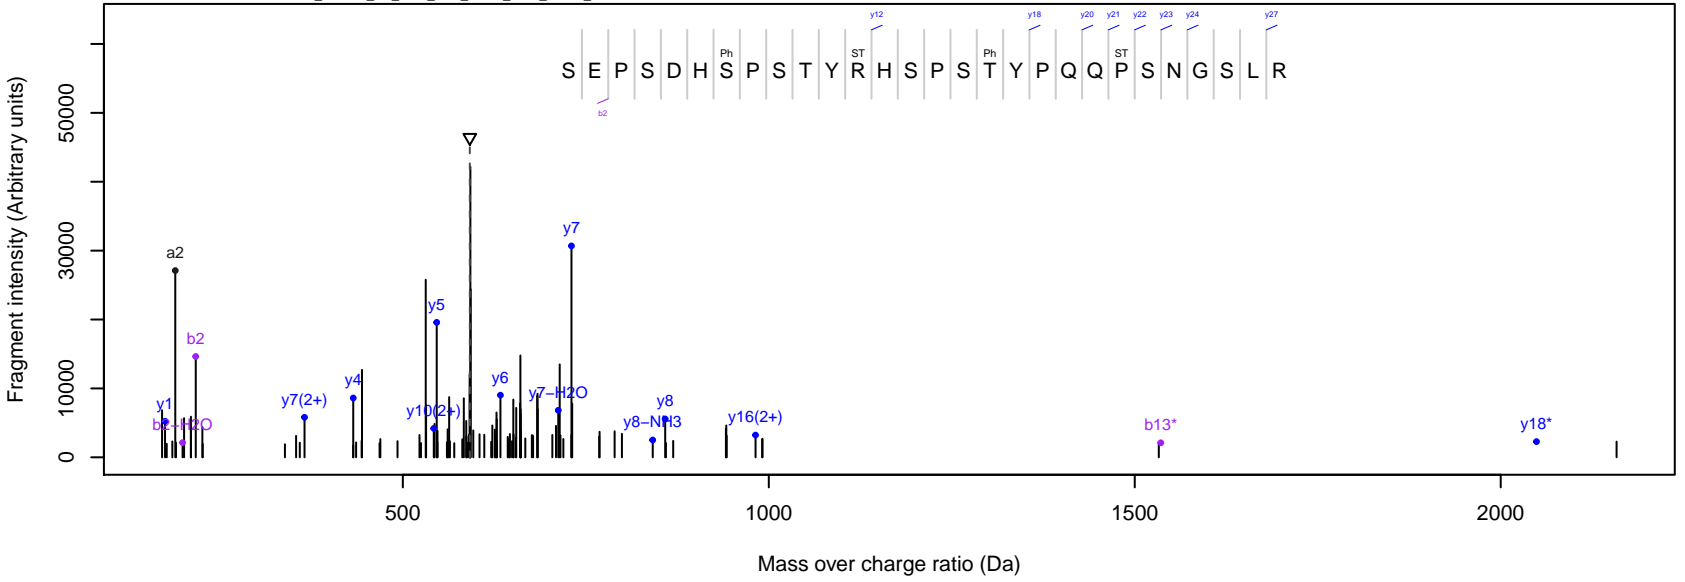

RKS(Phospho (STY))DGIYIINLK-3+

Source : QE3\_201126\_FR\_TiOx\_hum\_tissue\_Urea\_RNAB\_H Scan : 25935

Andromeda score : 50.806

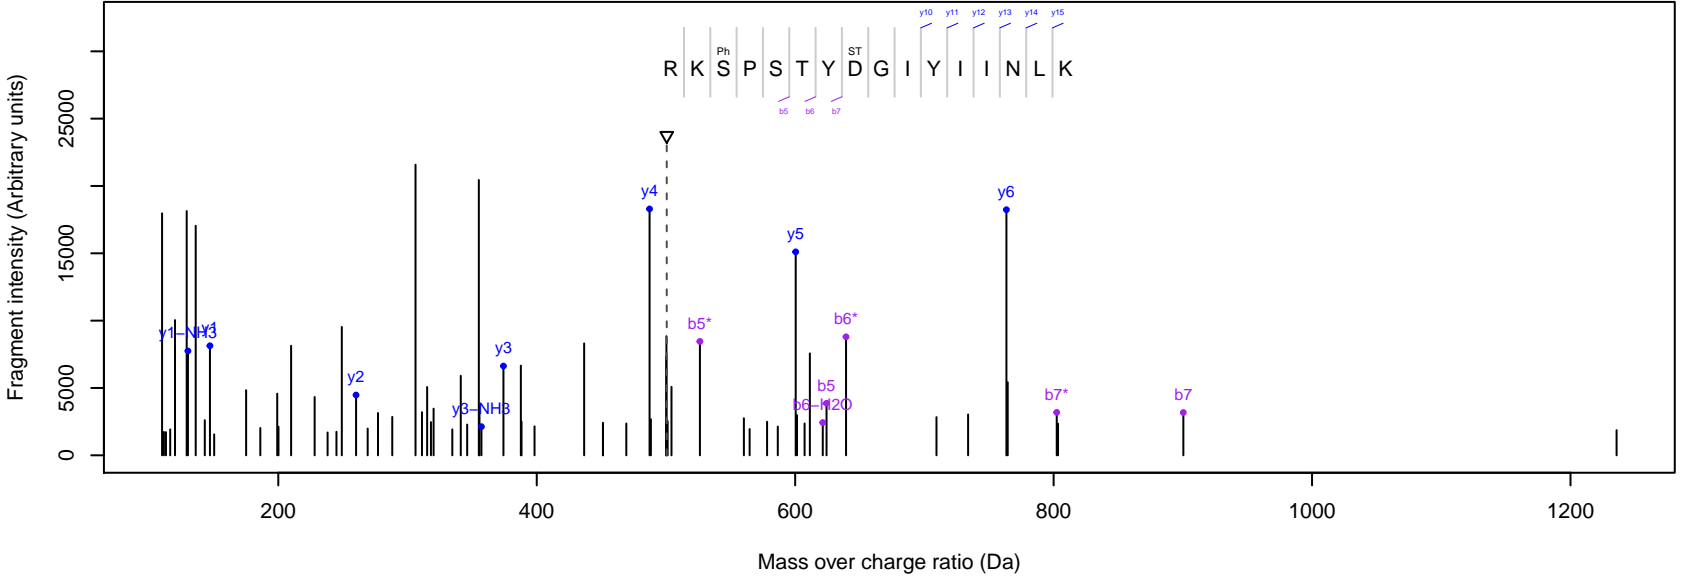

DLS(Phospho (STY))PQHM(Oxidation (M))VVR-2+

Source : QE3\_201126\_FR\_TiOx\_hum\_tissue\_Urea\_RNAB\_N Scan : 11220

Andromeda score : 50.786

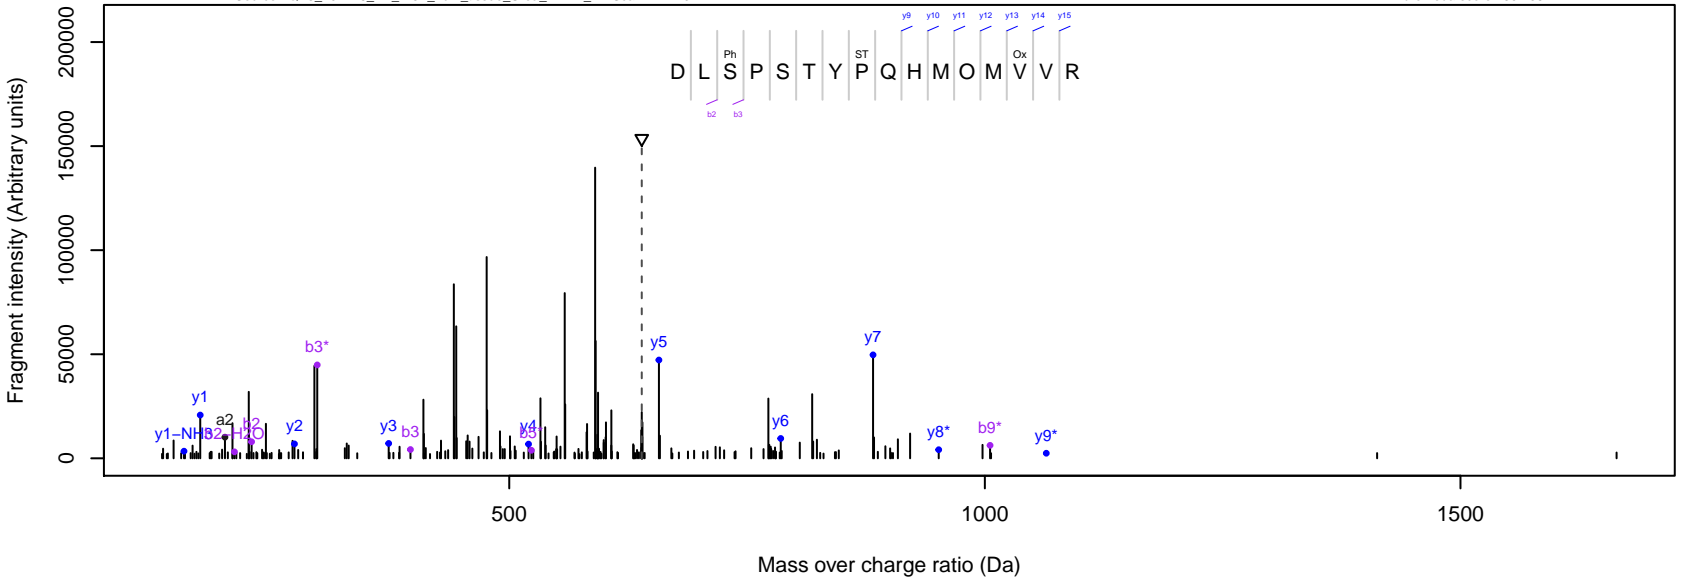



STS(Phospho (STY))MPQLGER-2+

Source : QE3\_201126\_FR\_TiOx\_hum\_tissue\_Urea\_RNAB\_N Scan : 19740

Andromeda score : 50.786

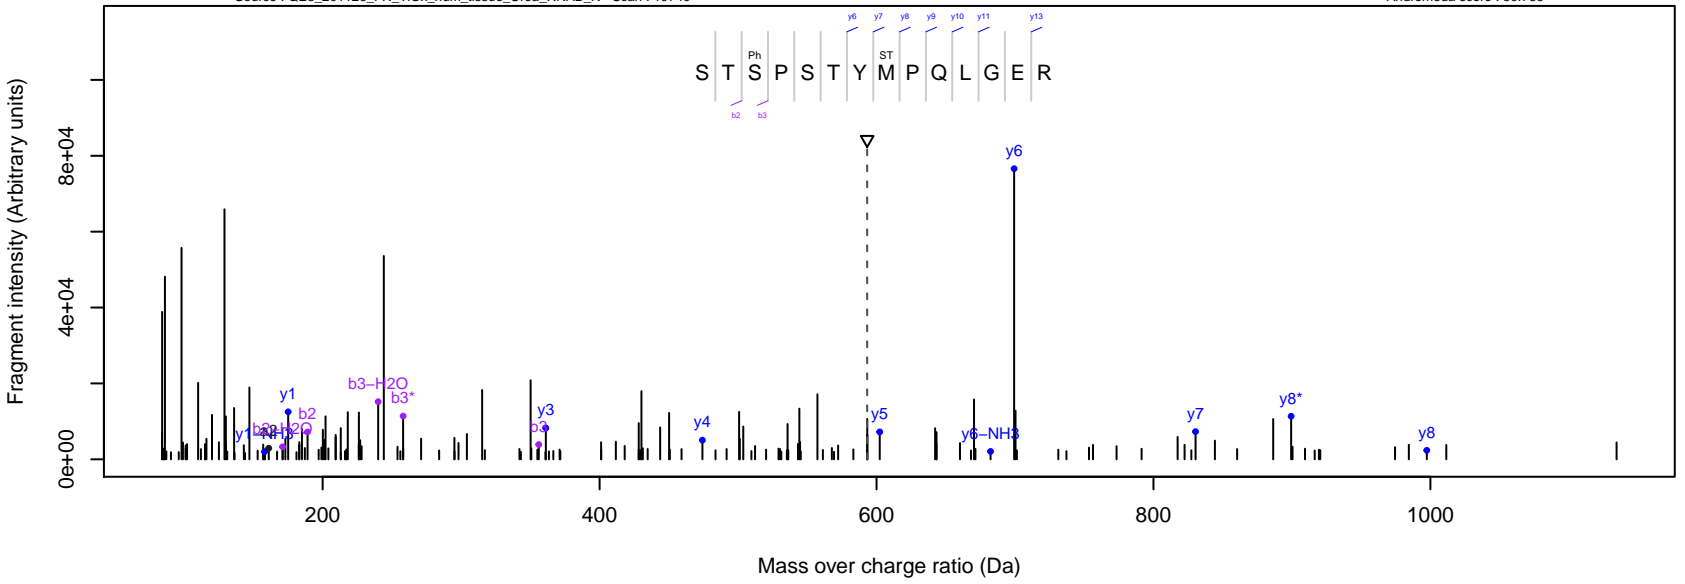

VHS(Phospho (STY))PQQVDFR-2+

Source : QE3\_201126\_FR\_TiOx\_hum\_tissue\_Urea\_RNAB\_N Scan : 11715

Andromeda score : 50.786

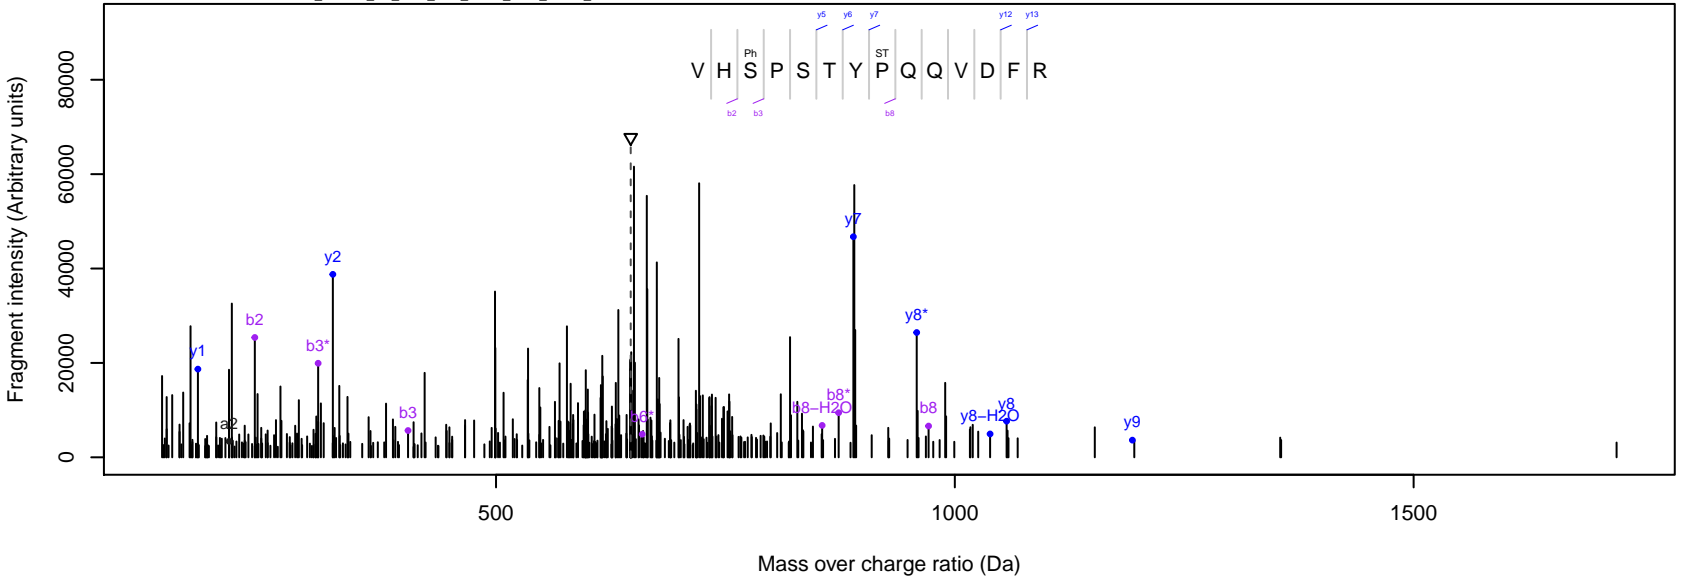

LHDFLAHSSESEETS(Phospho (STY))SPPR-3+

Source : QE3\_201126\_FR\_TiOx\_hum\_tissue\_Urea\_RNAB\_B Scan : 18060

Andromeda score : 50.77

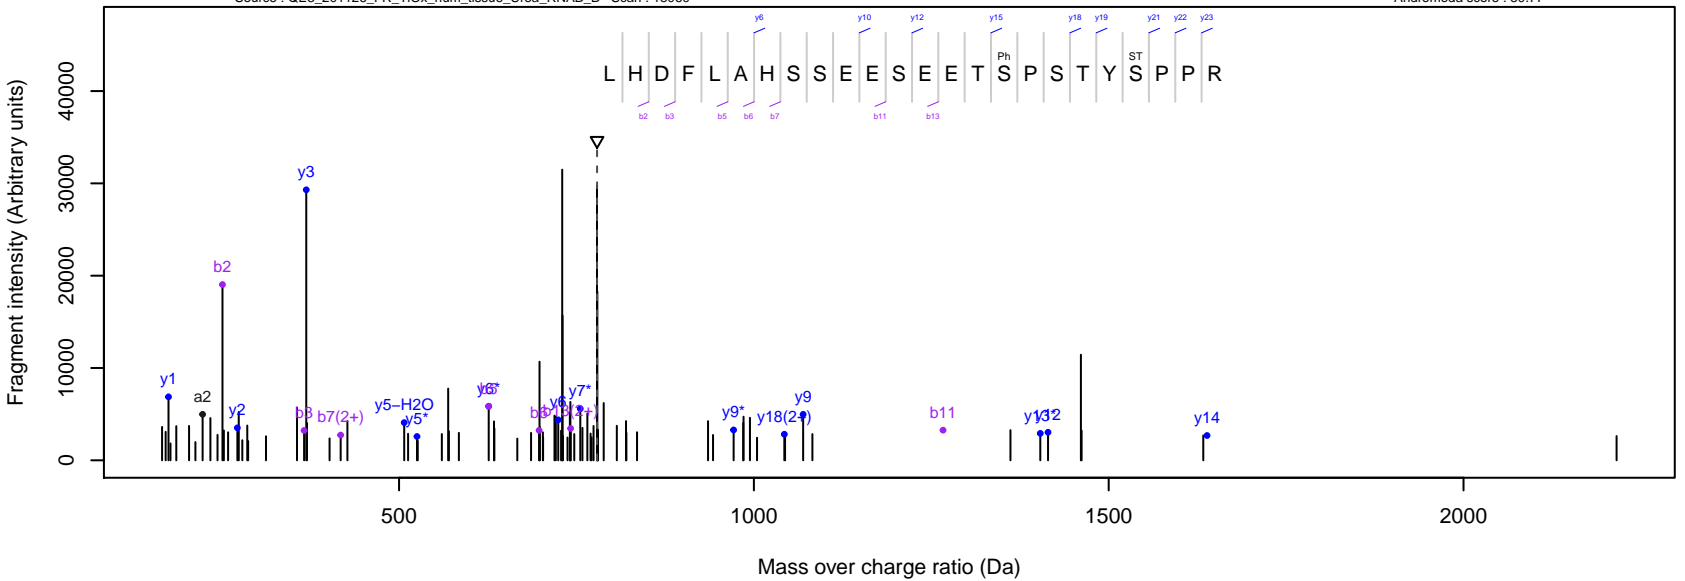

T(Phospho (STY))AFYNEDDSEEEQRQLLFEDTSLFTGTSSR-3+

Source : QE3\_201126\_FR\_TiOx\_hum\_tissue\_Urea\_RNAB\_H Scan : 54500

Andromeda score : 50.757

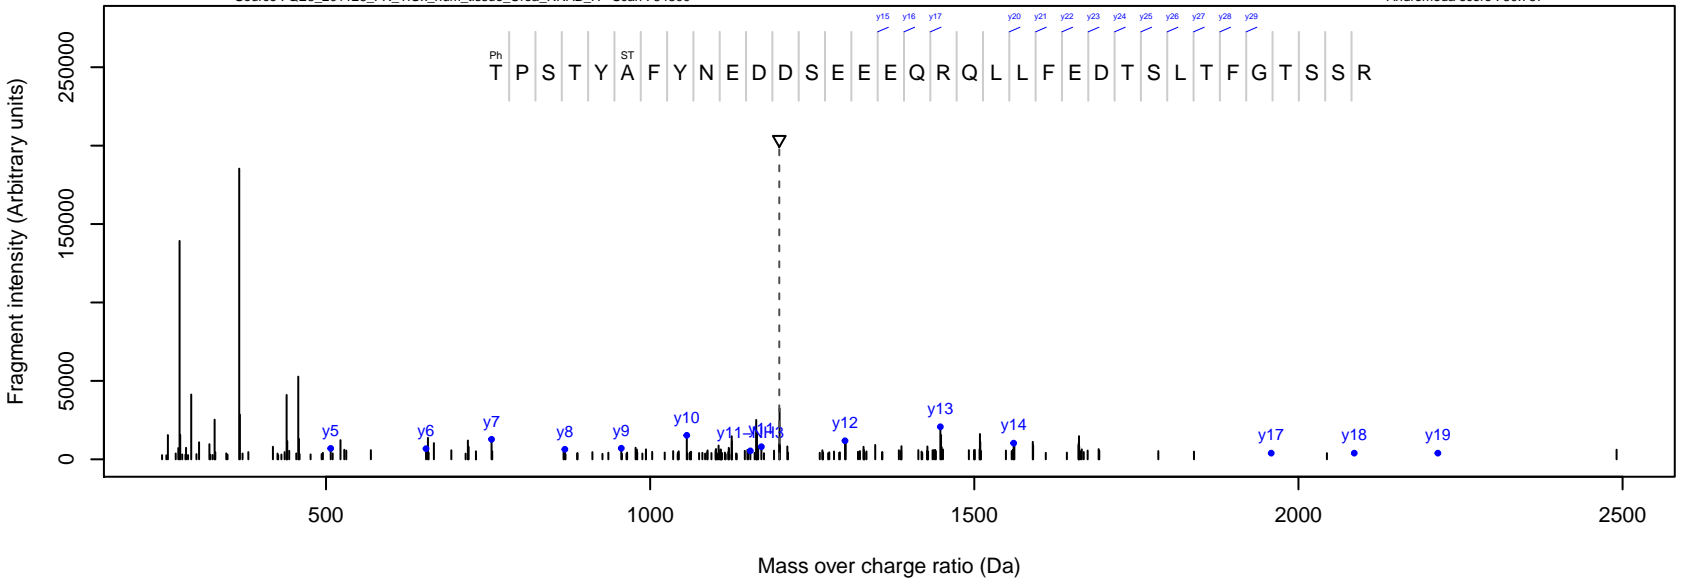

LIESLS(Phospho (STY))QM(Oxidation (M))LSMGFS(Phospho (STY))DEGGWLTR-3+

Source : QE3\_201126\_FR\_TiOx\_hum\_tissue\_Urea\_RNAB\_N Scan : 63166

Andromeda score : 50.705

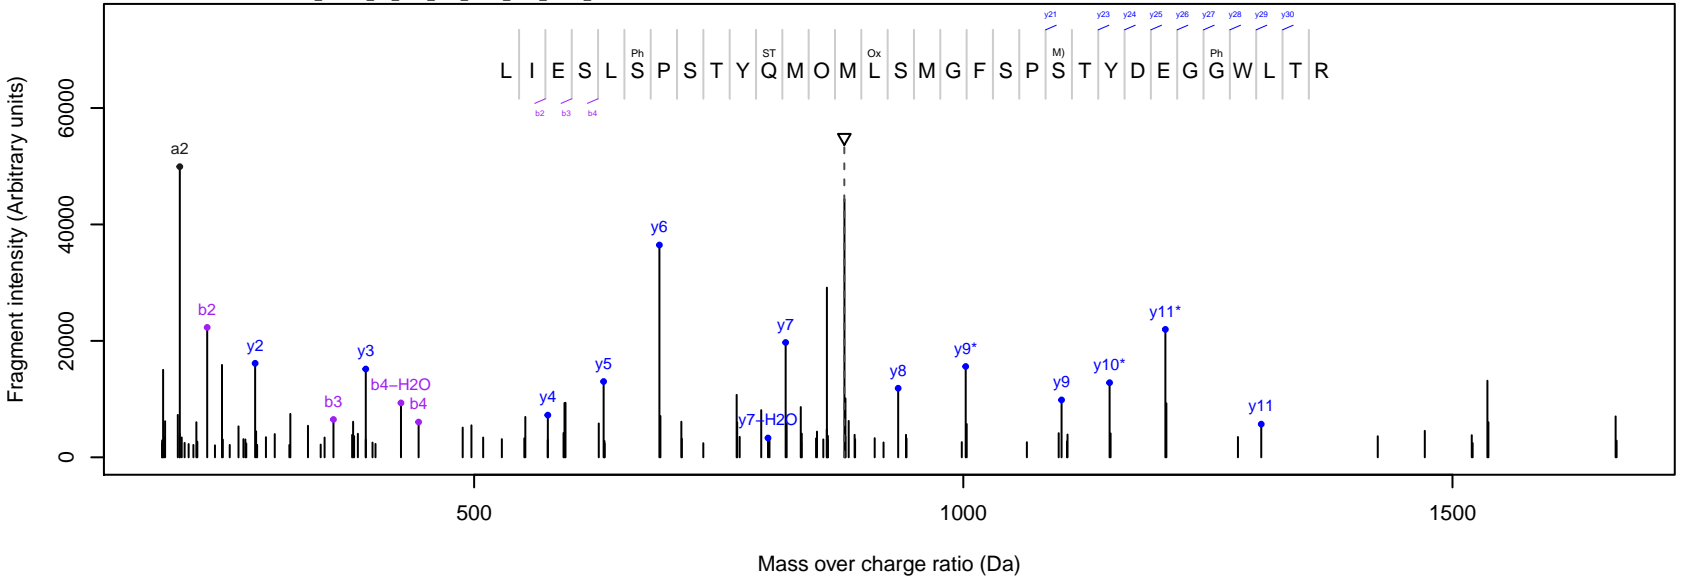

NGAAGPHS(Phospho (STY))PDPLLDEQAFGLDLDLPVVPK-3+

Source : QE3\_201126\_FR\_TiOx\_hum\_tissue\_Urea\_RNAB\_N Scan : 57506

Andromeda score : 50.705

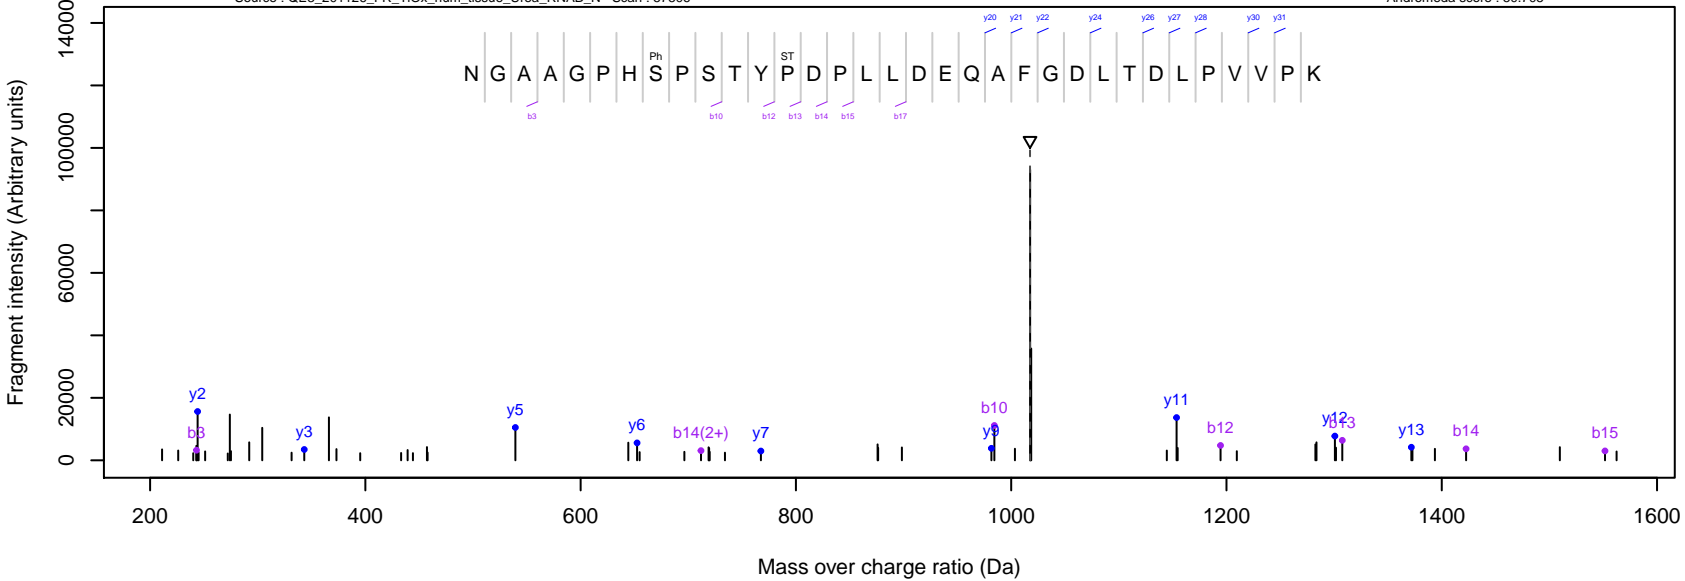

NLTEQNSYSNIPHEGKHT(Phospho (STY))PLYER-4+

Source : QE3\_201126\_FR\_TiOx\_hum\_tissue\_Urea\_RNAB\_B Scan : 17014

Andromeda score : 50.705

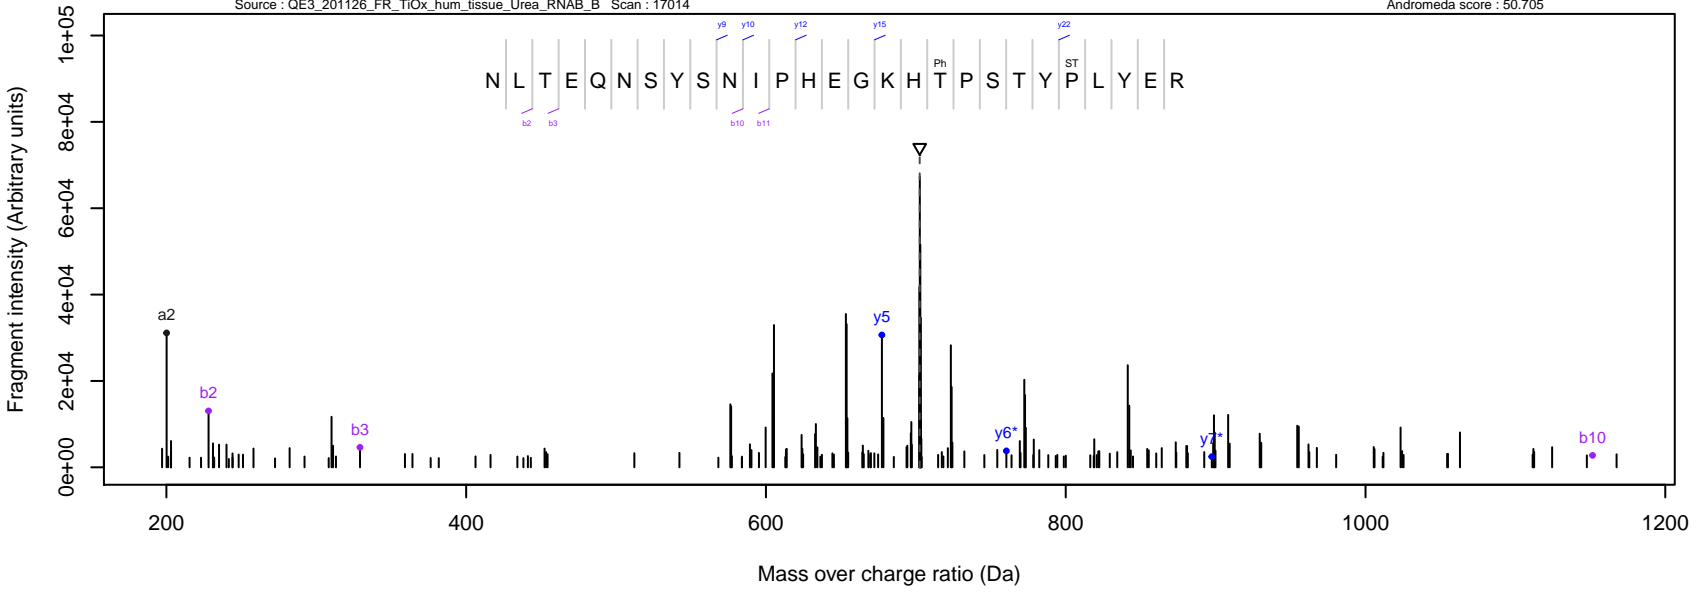

TPRPAS(Phospho (STY))PGPSLARS(Phospho (STY))PS(Phospho (STY))PPR-3+

Source : QE3\_201126\_FR\_TiOx\_hum\_tissue\_Urea\_RNAB\_N Scan : 19539

Andromeda score : 50.705

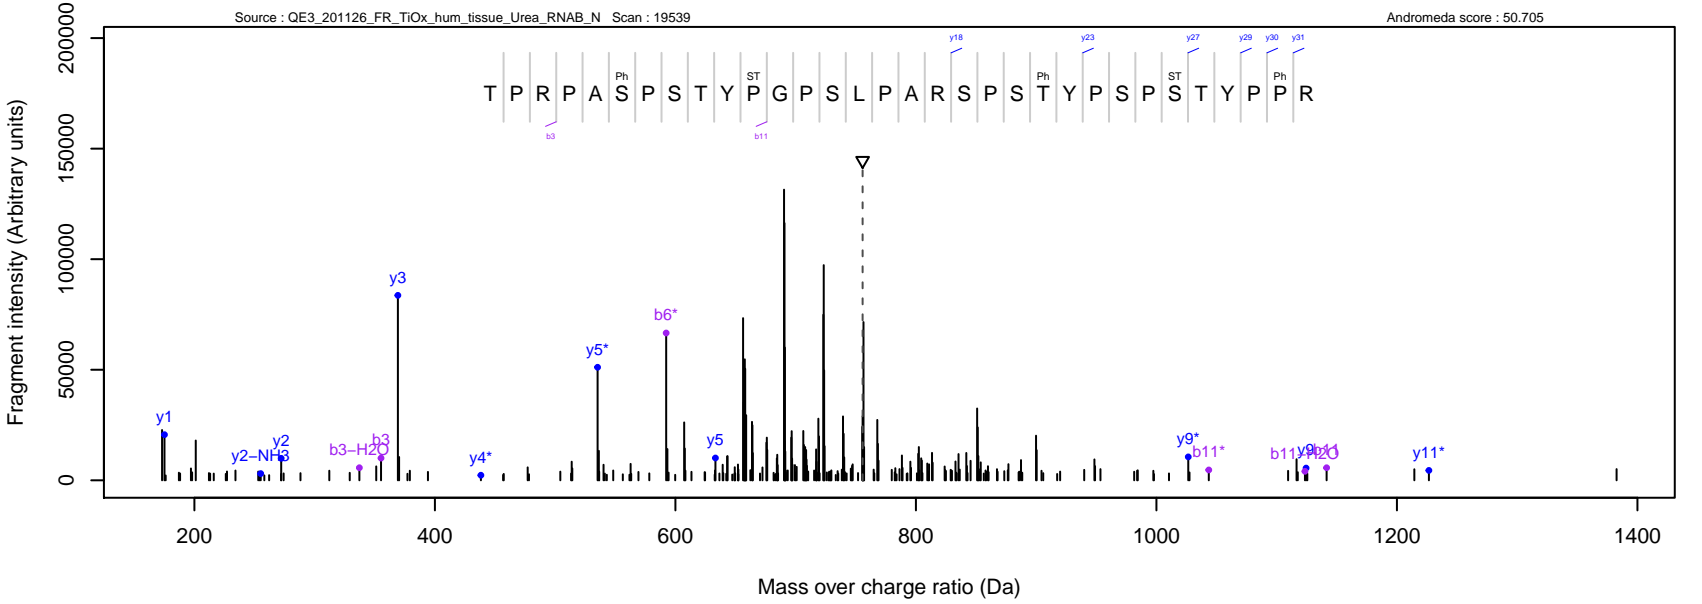

FLSAQSHS(Phospho (STY))TSPQGLDS(Phospho (STY))PLPLEGSGAHQVLHNESK-4+

Source : QE3\_201126\_FR\_TiOx\_hum\_tissue\_Urea\_RNAB\_N Scan : 32486

Andromeda score : 50.665

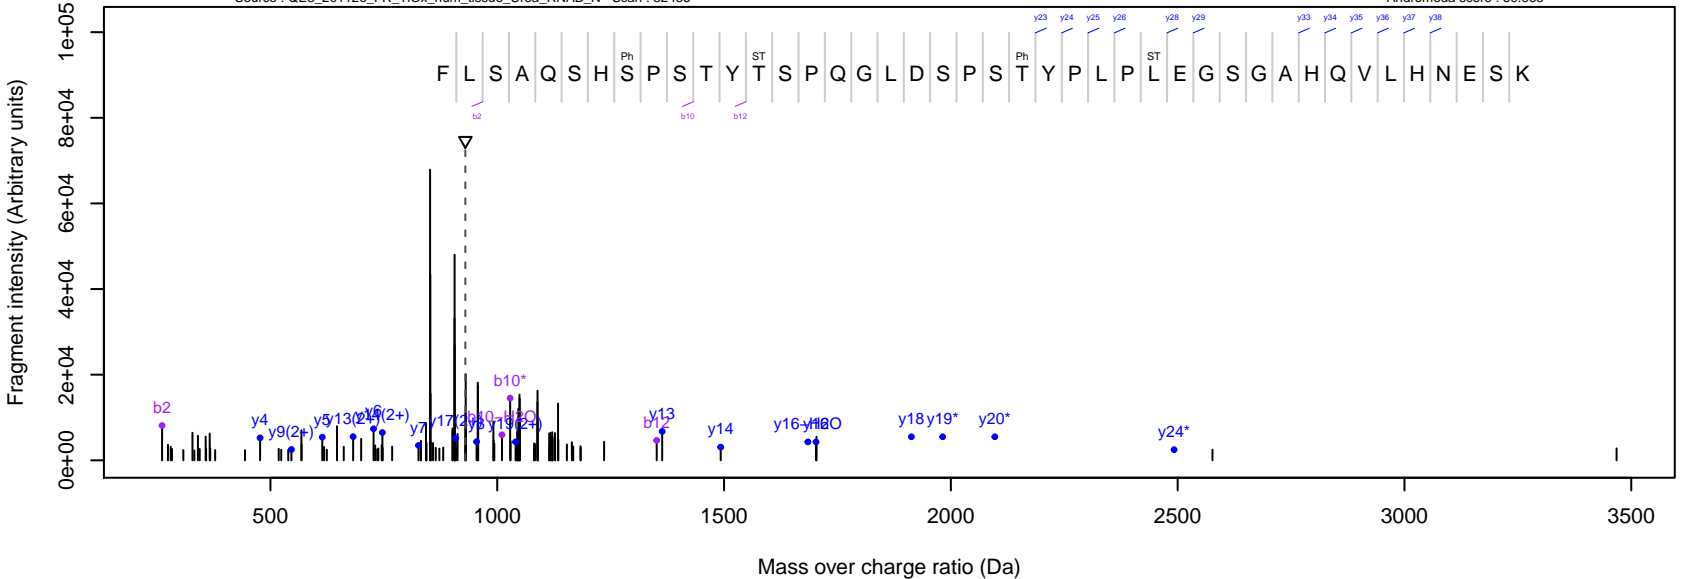

DRS(Phospho (STY))FS(Phospho (STY))EHDLAQLR-3+

Source : QE3\_201126\_FR\_TiOx\_hum\_tissue\_Urea\_RNAB\_N Scan : 26424

Andromeda score : 50.653

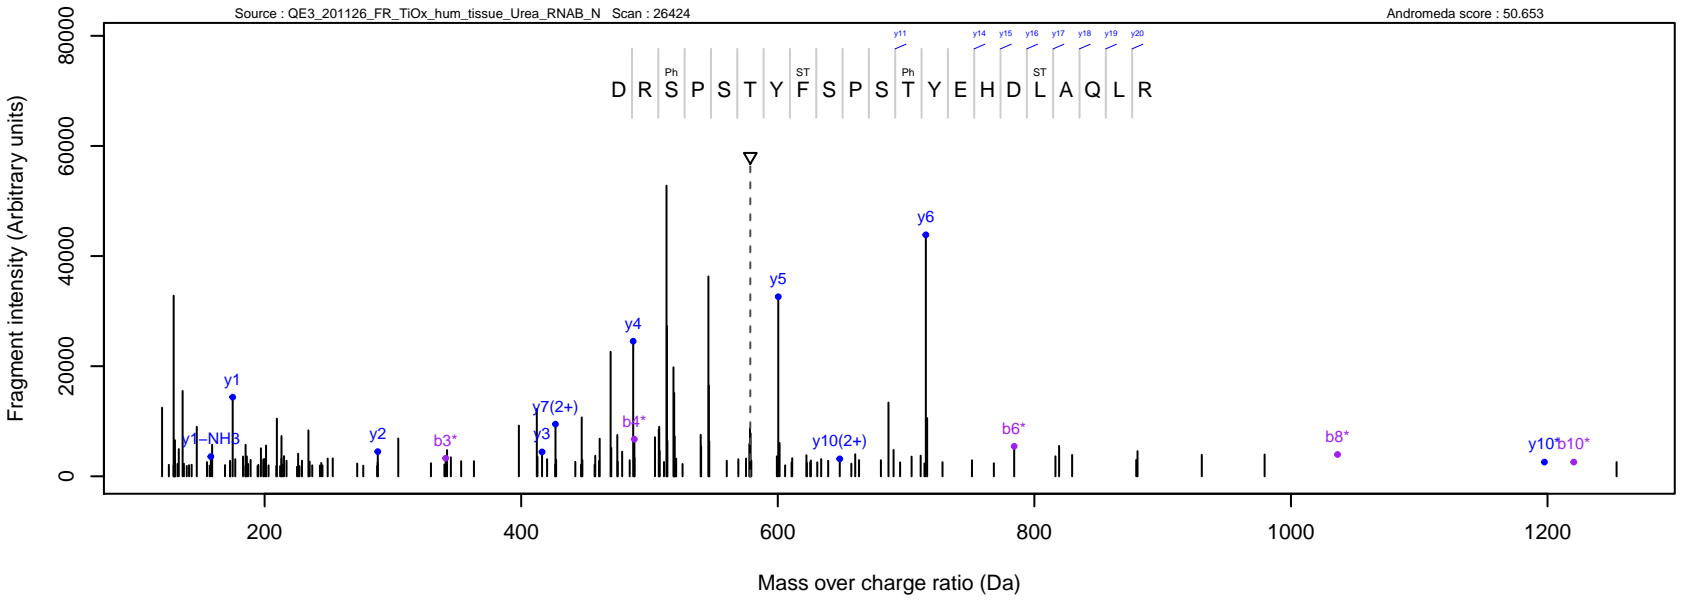

EPAPPS(Phospho (STY))PESHSPR-3+

Source : QE3\_201126\_FR\_TiOx\_hum\_tissue\_Urea\_RNAB\_B Scan : 8429

Andromeda score : 50.653

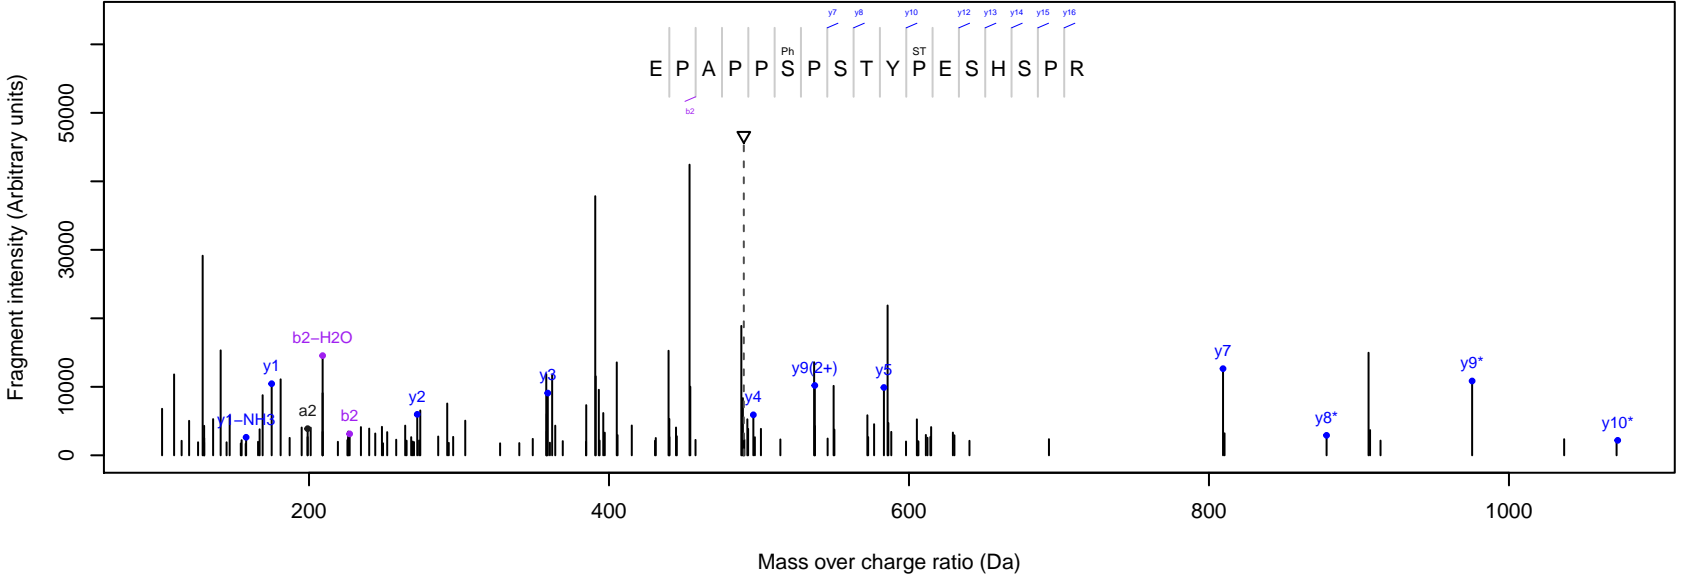

FPPEDFRHS(Phospho (STY))PEDFR-3+

Source : QE3\_201126\_FR\_TiOx\_hum\_tissue\_Urea\_RNAB\_N Scan : 25451

Andromeda score : 50.653

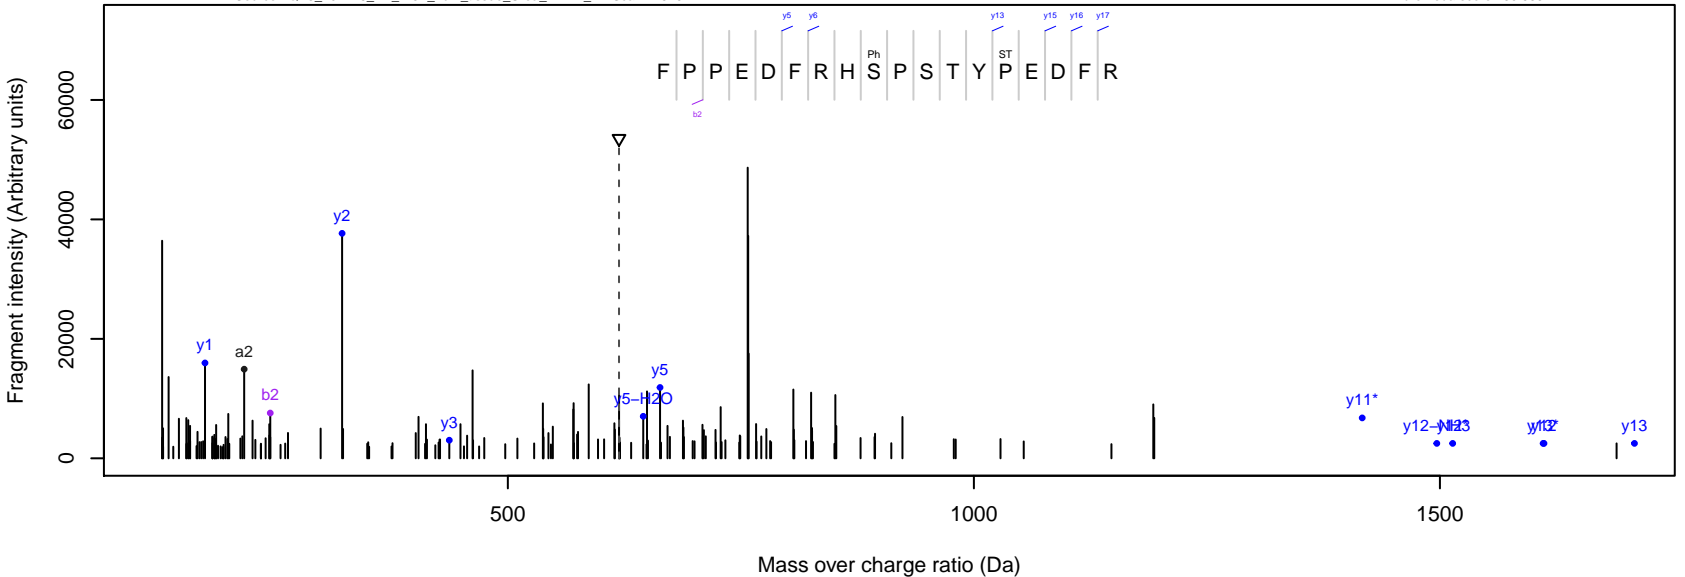

ASLGT(Phospho (STY))GTASPRT(Phospho (STY))SLEVSPNPPEKPV-3+

Source : QE3\_201126\_FR\_TiOx\_hum\_tissue\_Urea\_RNAB\_N Scan : 25651

Andromeda score : 50.627

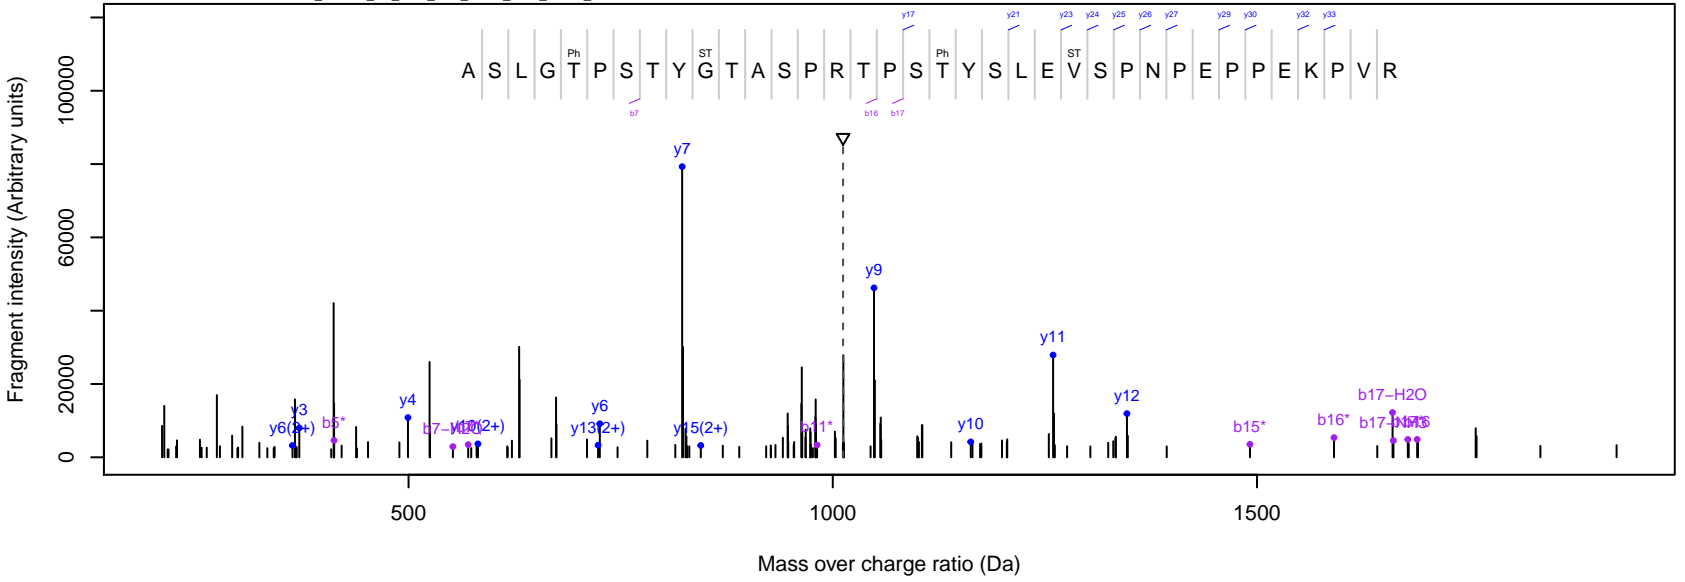

ADDFVRRDDPS(Phospho (STY))DVT(Phospho (STY))DEDEGPAEPPPPKLLPAFR-4+

Source : QE3\_201126\_FR\_TiOx\_hum\_tissue\_Urea\_RNAB\_B Scan : 53427

Andromeda score : 50.583

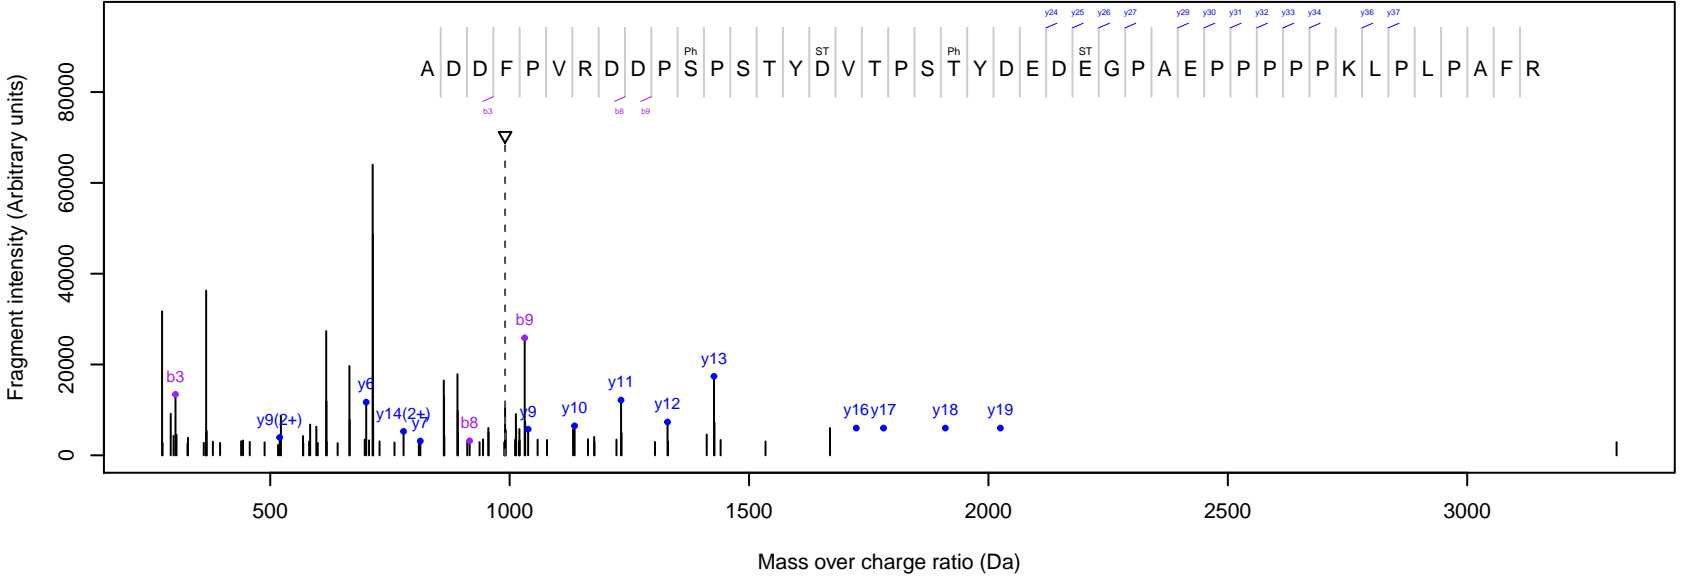

VVNPLIGLLGEY(Phospho (STY))GGDSYEEEEEEQTTPPPQPR-3+

Source : QE3\_201126\_FR\_TiOx\_hum\_tissue\_Urea\_RNAB\_N Scan : 62153

Andromeda score : 50.583

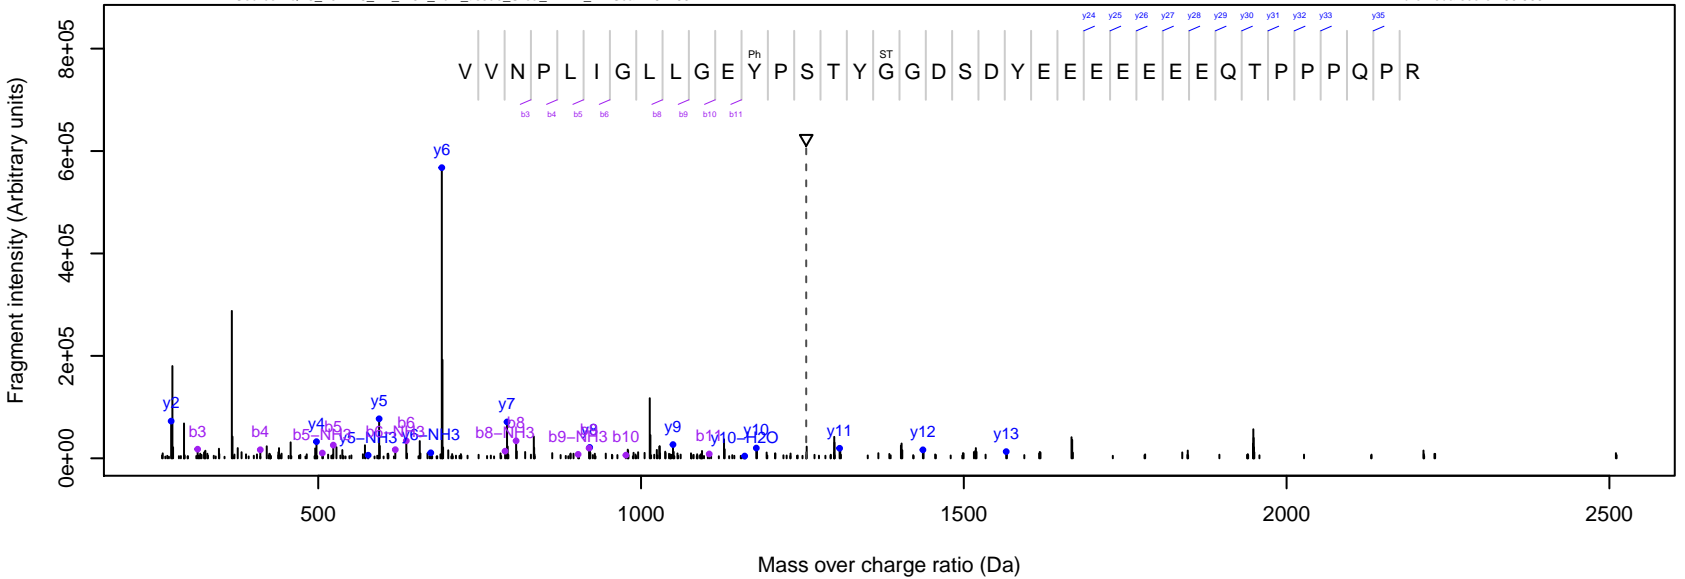

ISVS(Phospho (STY))RS(Phospho (STY))TSFR-2+

Source : QE3\_201126\_FR\_TiOx\_hum\_tissue\_Urea\_RNAB\_N Scan : 17778

Andromeda score : 50.563

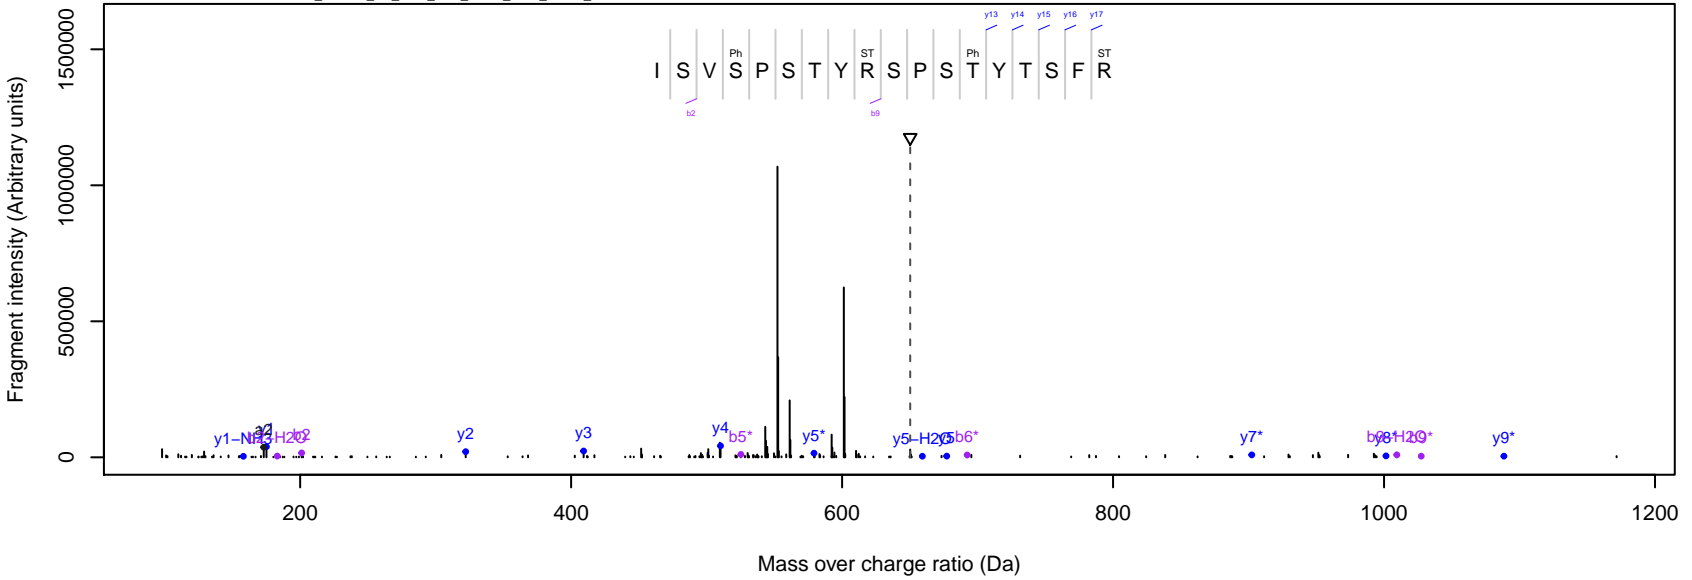

M(Oxidation (M))PLAQKPALAPKPTSQT(Phospho (STY))PPAS(Phospho (STY))PLSK-3+

Source : QE3\_201126\_FR\_TiOx\_hum\_tissue\_Urea\_RNAB\_H Scan : 20305

Andromeda score : 50.492

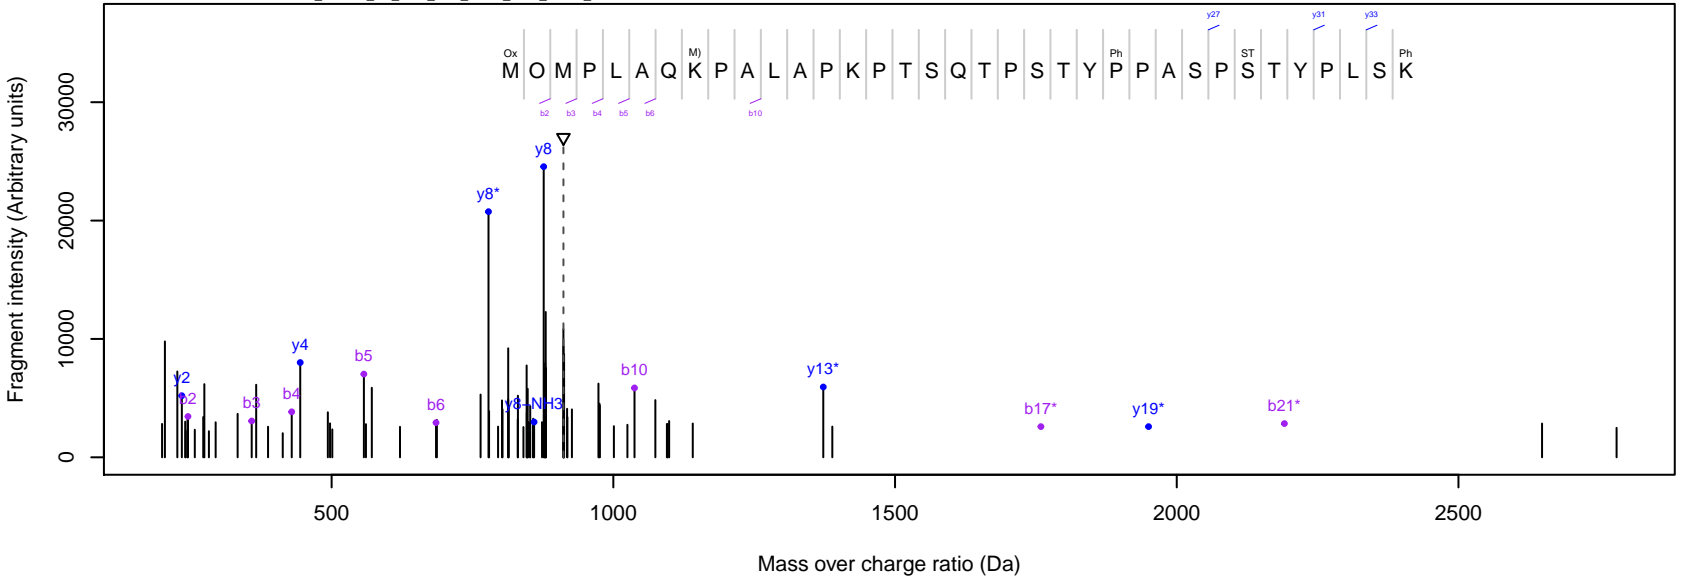

ADVQLFMDSDSYPSTYS(Phospho (STY))S(Phospho (STY))HHS(Phospho (STY))GLEADPEK-3+

Source : QE3\_201126\_FR\_TiOx\_hum\_tissue\_Urea\_RNAB\_N Scan : 50008

Andromeda score : 50.464

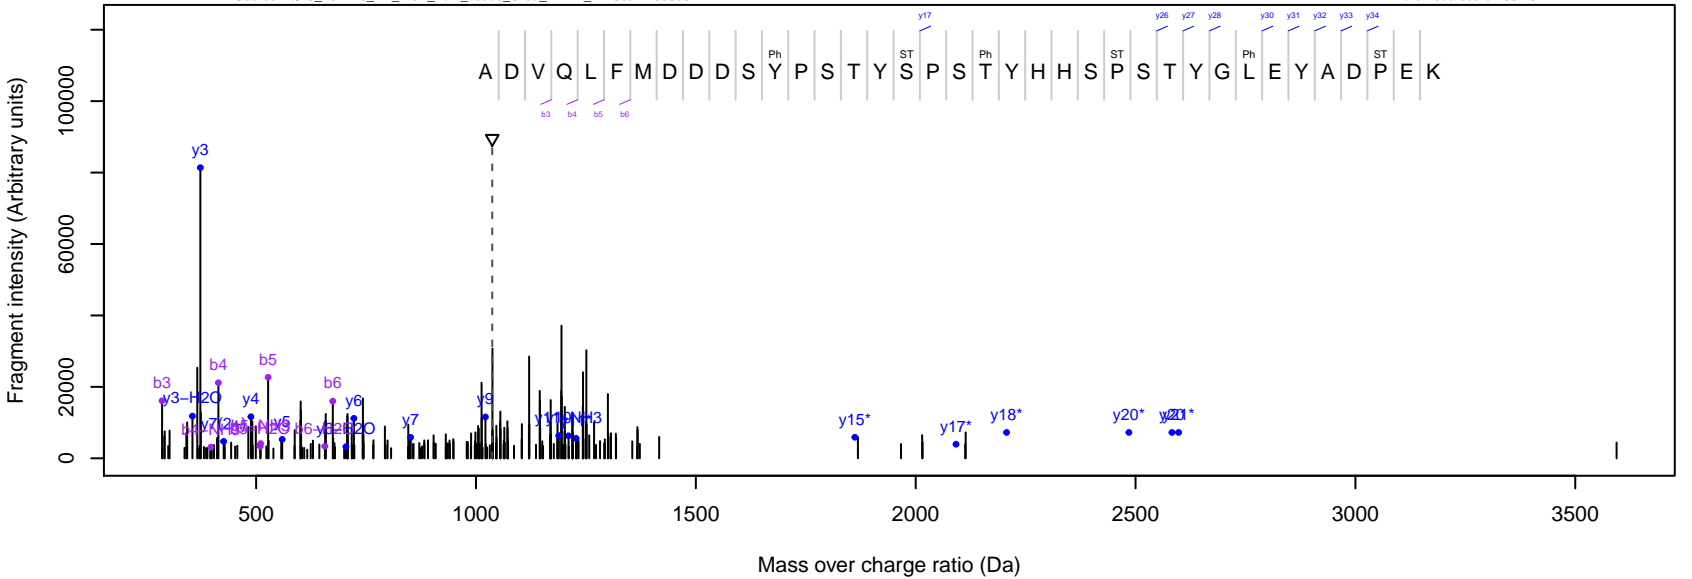

ERTESEVPPRPAS(Phospho (STY))PK-3+

Source : QE3\_201126\_FR\_TiOx\_hum\_tissue\_Urea\_RNAB\_B Scan : 7200

Andromeda score : 50.404

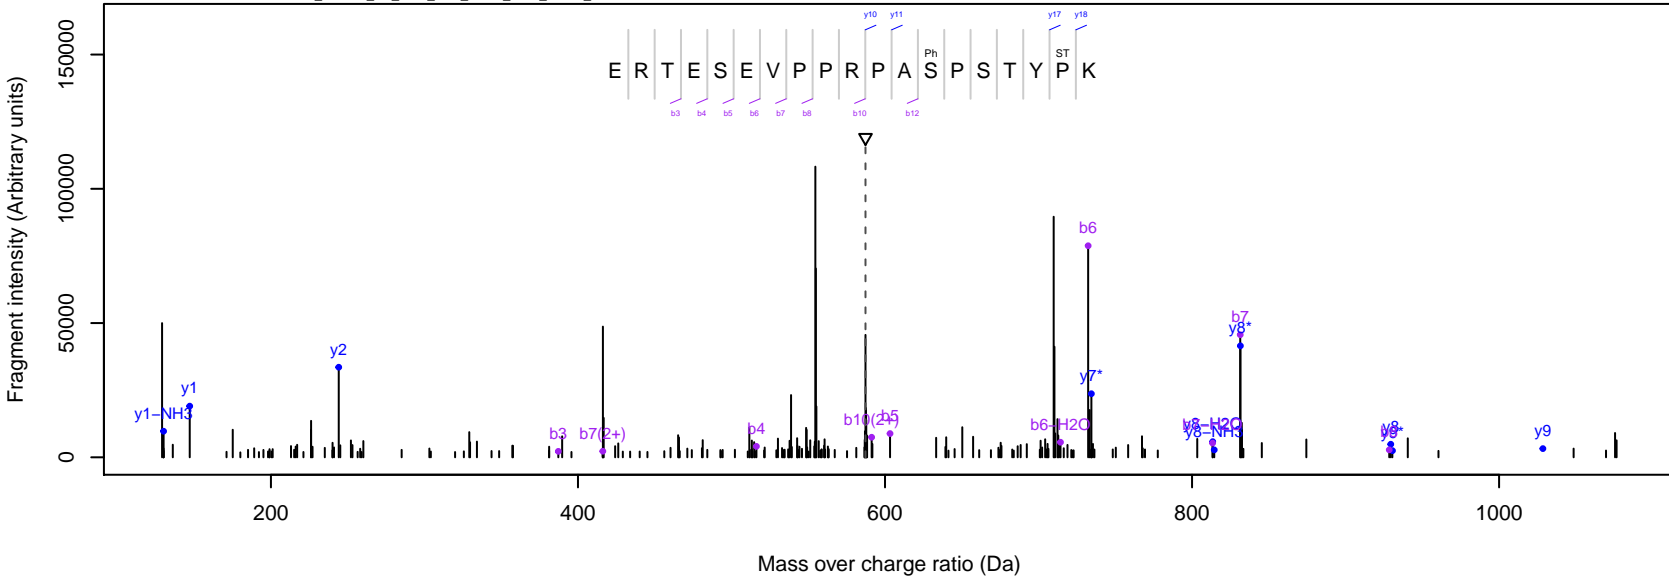

VVKS(Phospho (STY))TQDLSVSMDEVGILR-3+

Source : QE3\_201126\_FR\_TiOx\_hum\_tissue\_Urea\_RNAB\_H Scan : 43156

Andromeda score : 50.397

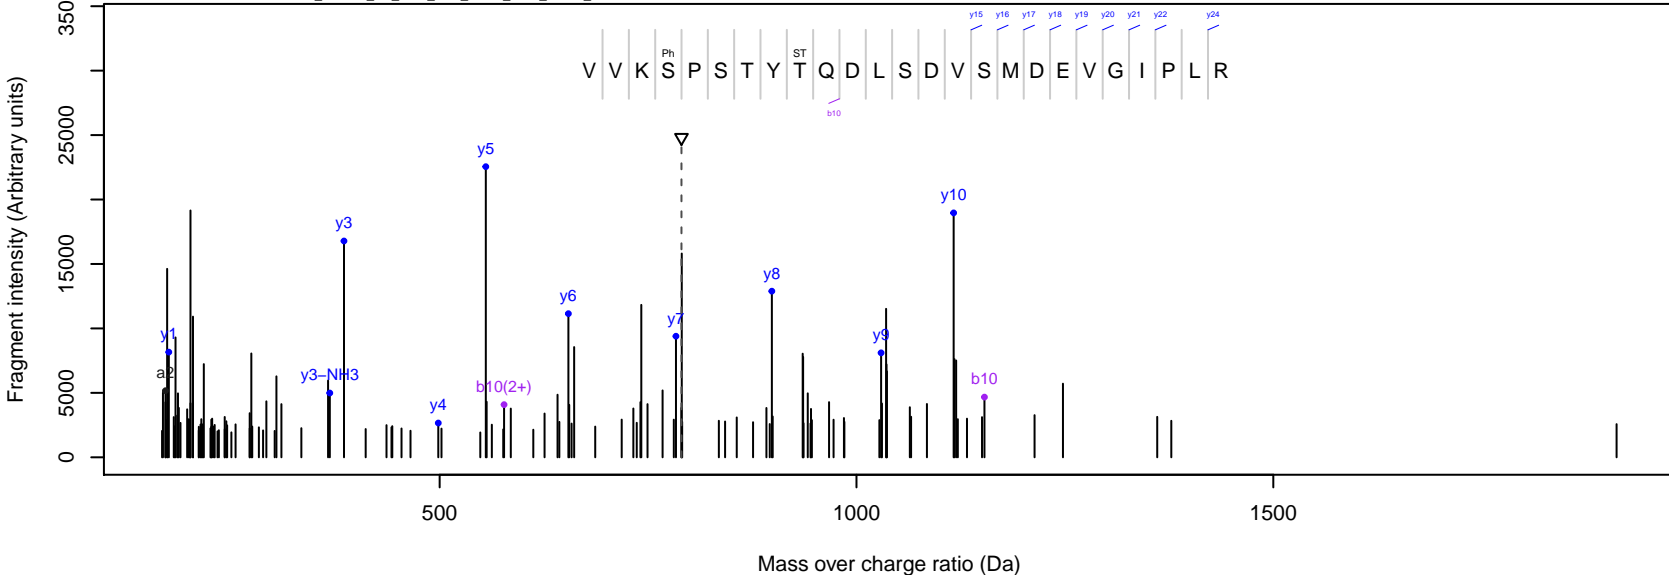

LAALKDEPQTVDPVPSFGES(Phospho (STY))PPLSPIDMDTQER-3+

Source : QE3\_201126\_FR\_TiOx\_hum\_tissue\_Urea\_RNAB\_N Scan : 53508

Andromeda score : 50.393

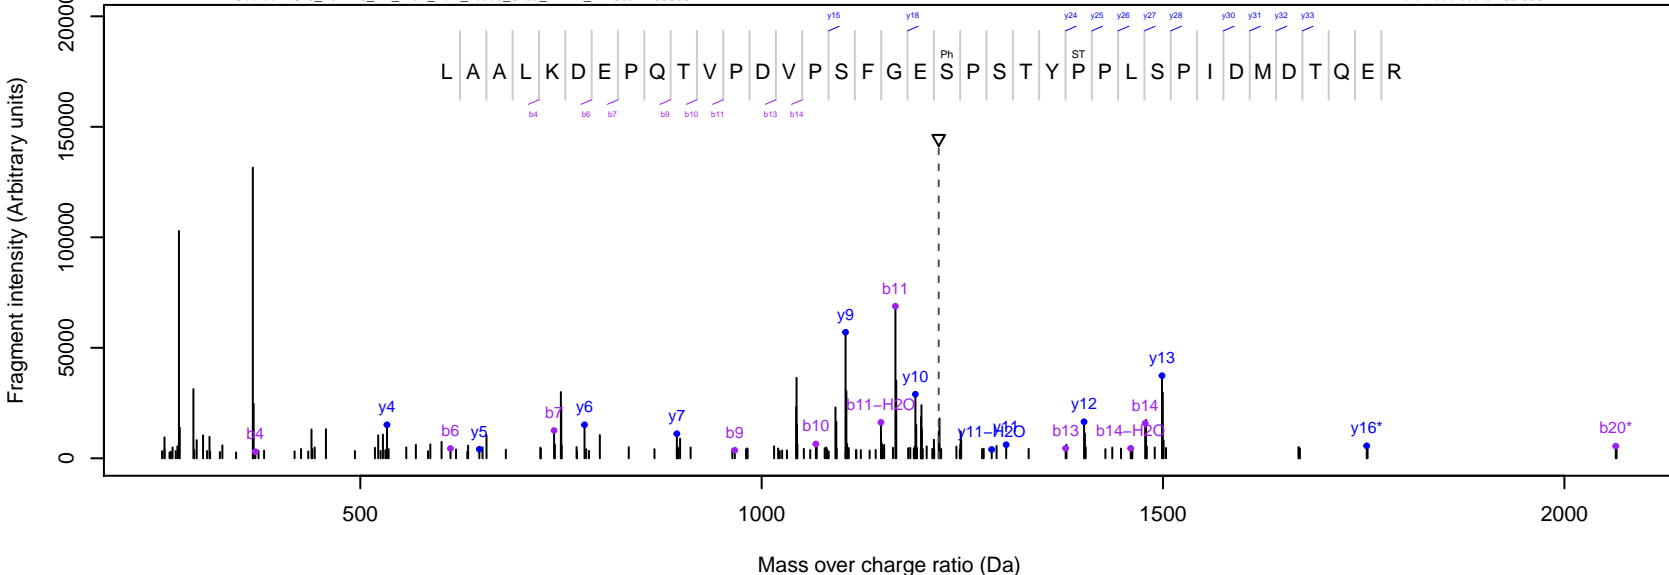

QQS(Phospho (STY))LPLRPIPLVAR-3+

Source : QE3\_201126\_FR\_TiOx\_hum\_tissue\_Urea\_RNAB\_H Scan : 49070

Andromeda score : 50.387

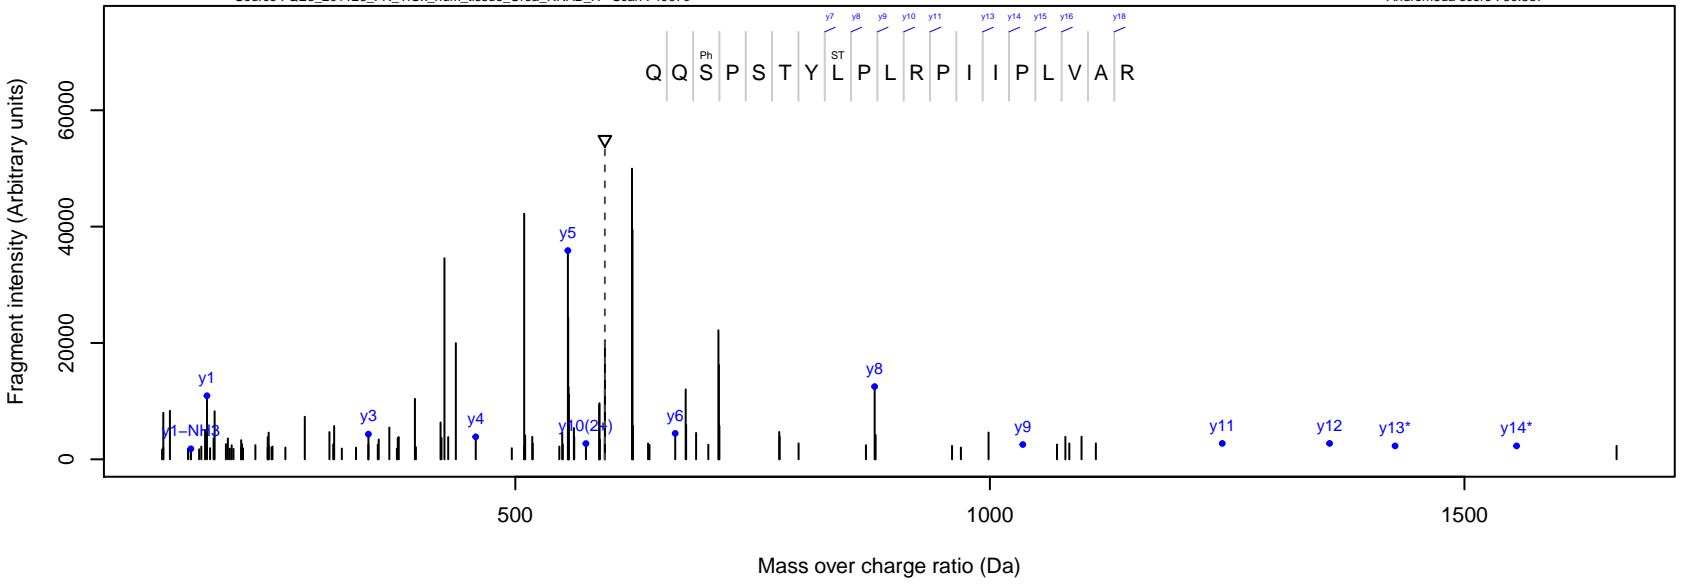

VVES(Phospho (STY))PDFSKDEDYLGK-3+

Source : QE3\_201126\_FR\_TiOx\_hum\_tissue\_Urea\_RNAB\_H Scan : 28333

Andromeda score : 50.358

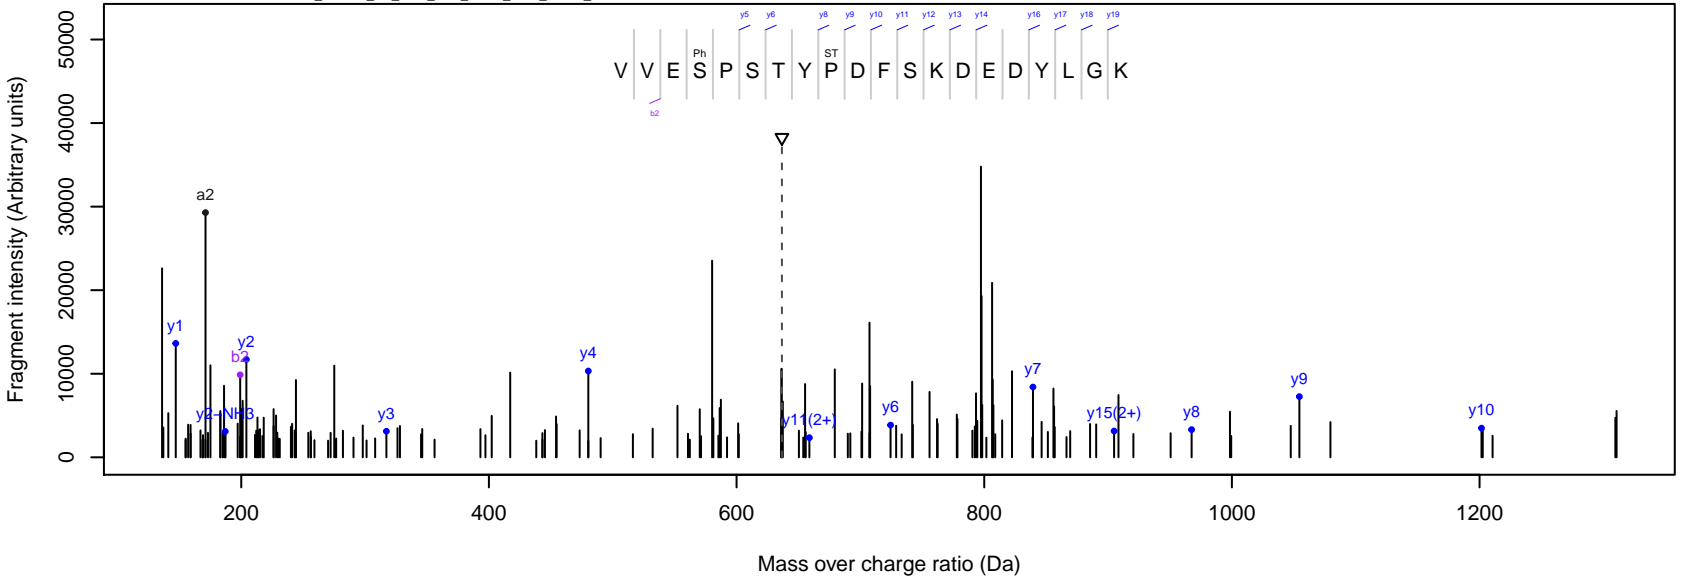

DKVS(Phospho (STY))LIKDE-2+

Source : QE3\_201126\_FR\_TiOx\_hum\_tissue\_Urea\_RNAB\_H Scan : 15359

Andromeda score : 50.354

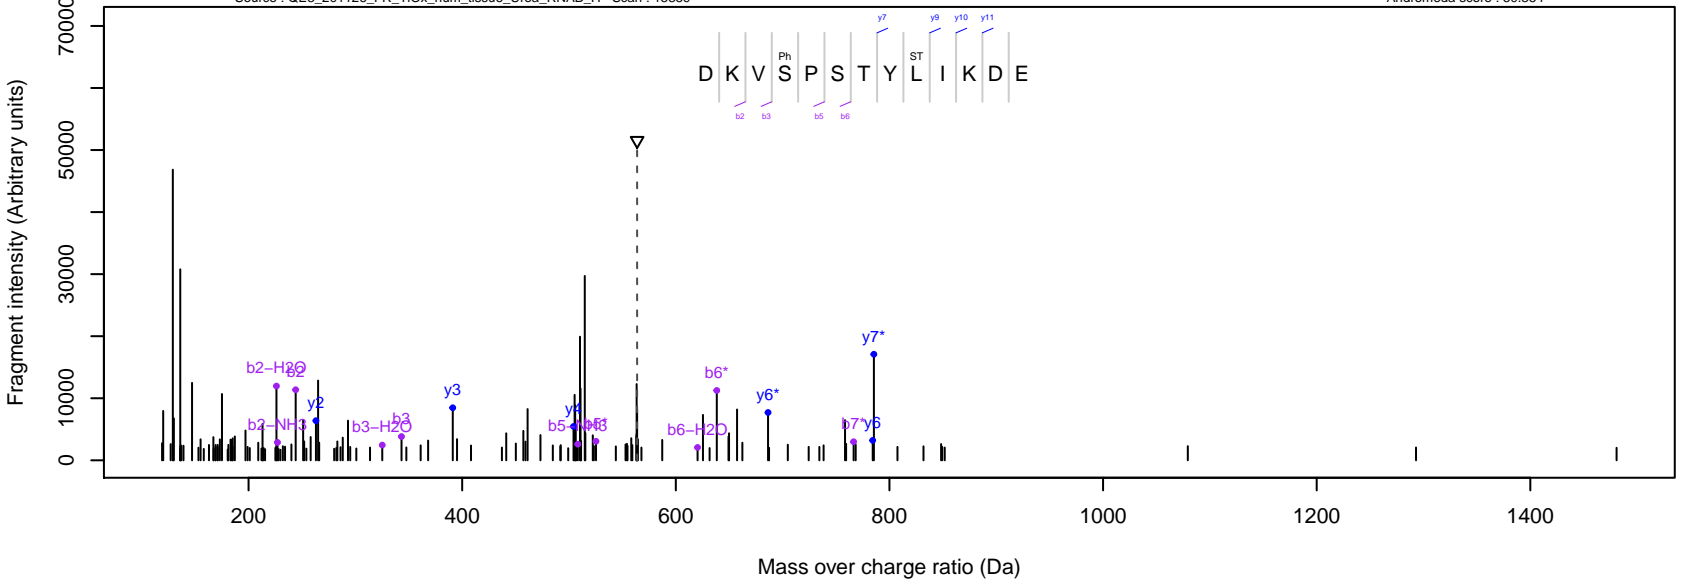



SS(Phospho (STY))IAGLLK-2+

Source : QE3\_201126\_FR\_TiOx\_hum\_tissue\_Urea\_RNAB\_H Scan : 43635

Andromeda score : 50.353

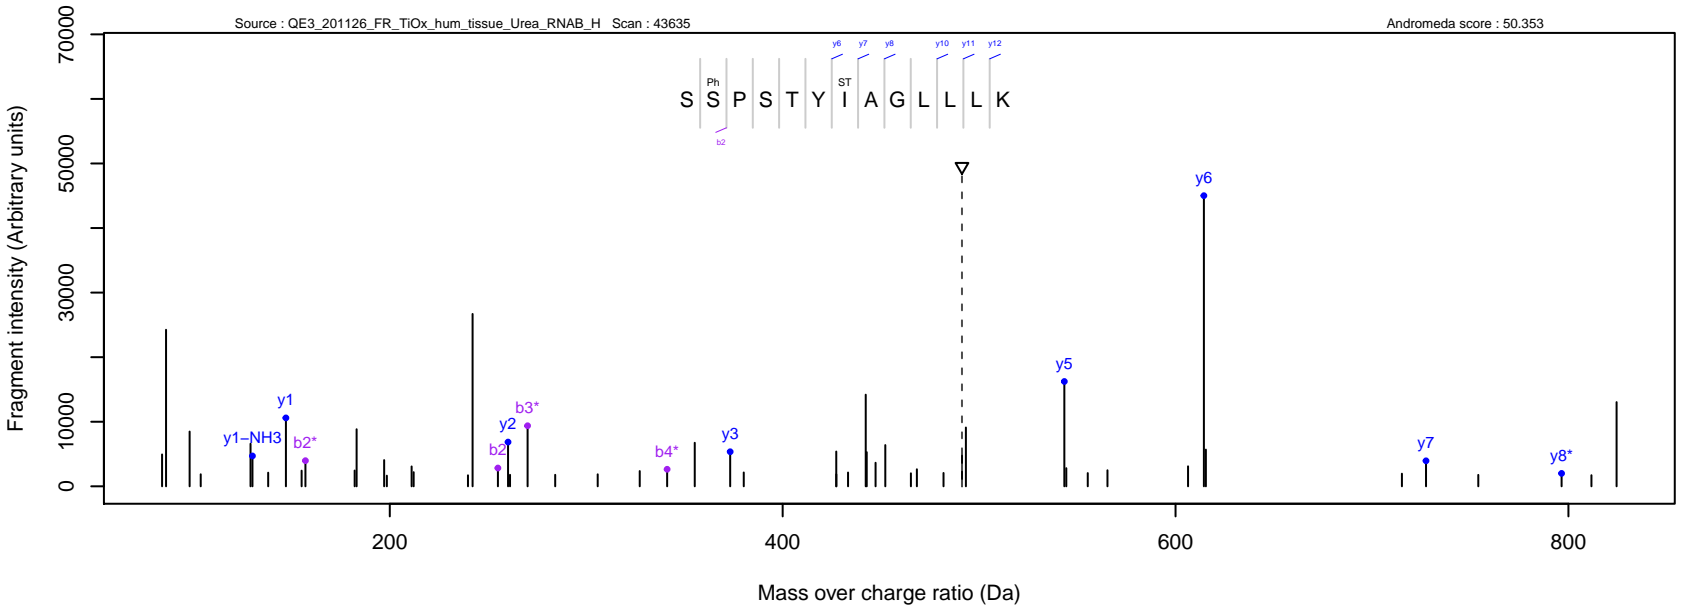

SSPVNNHHS(Phospho (STY))PGQTPTLGQPEAR-3+

Source : QE3\_201126\_FR\_TiOx\_hum\_tissue\_Urea\_RNAB\_N Scan : 10964

Andromeda score : 50.294

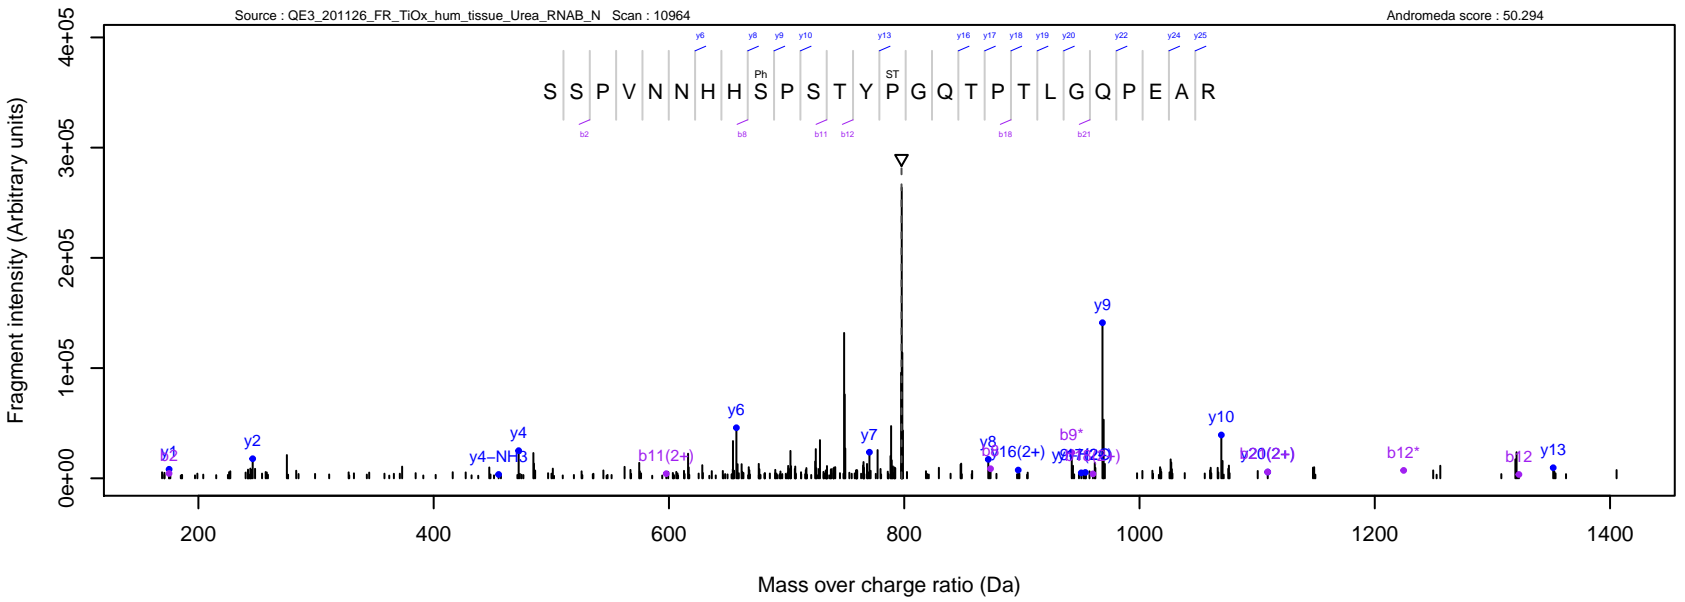

DAS(Phospho (STY))KELFR-2+

Source : QE3\_201126\_FR\_TiOx\_hum\_tissue\_Urea\_RNAB\_B Scan : 15095

Andromeda score : 50.292

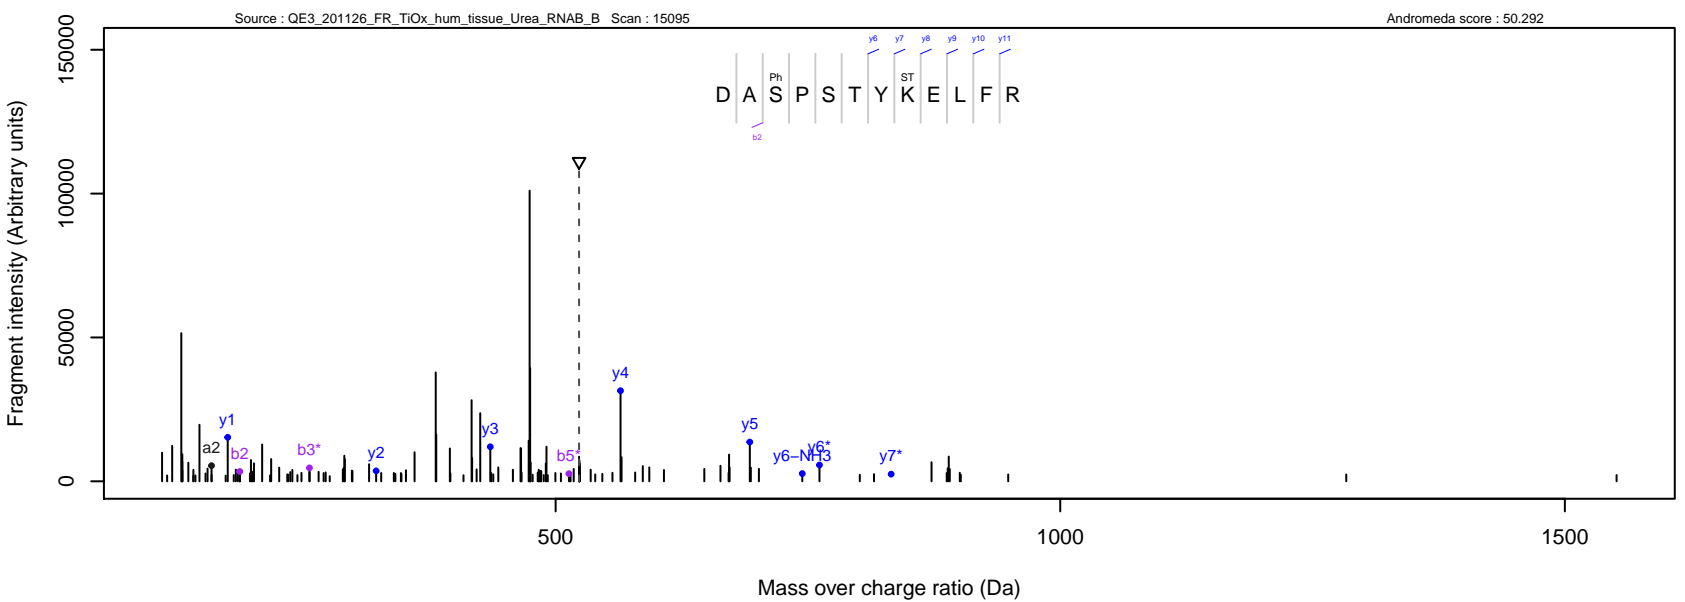

RGS(Phospho (STY))VPILR-2+

Source : QE3\_201126\_FR\_TiOx\_hum\_tissue\_Urea\_RNAB\_B Scan : 14073

Andromeda score : 50.292

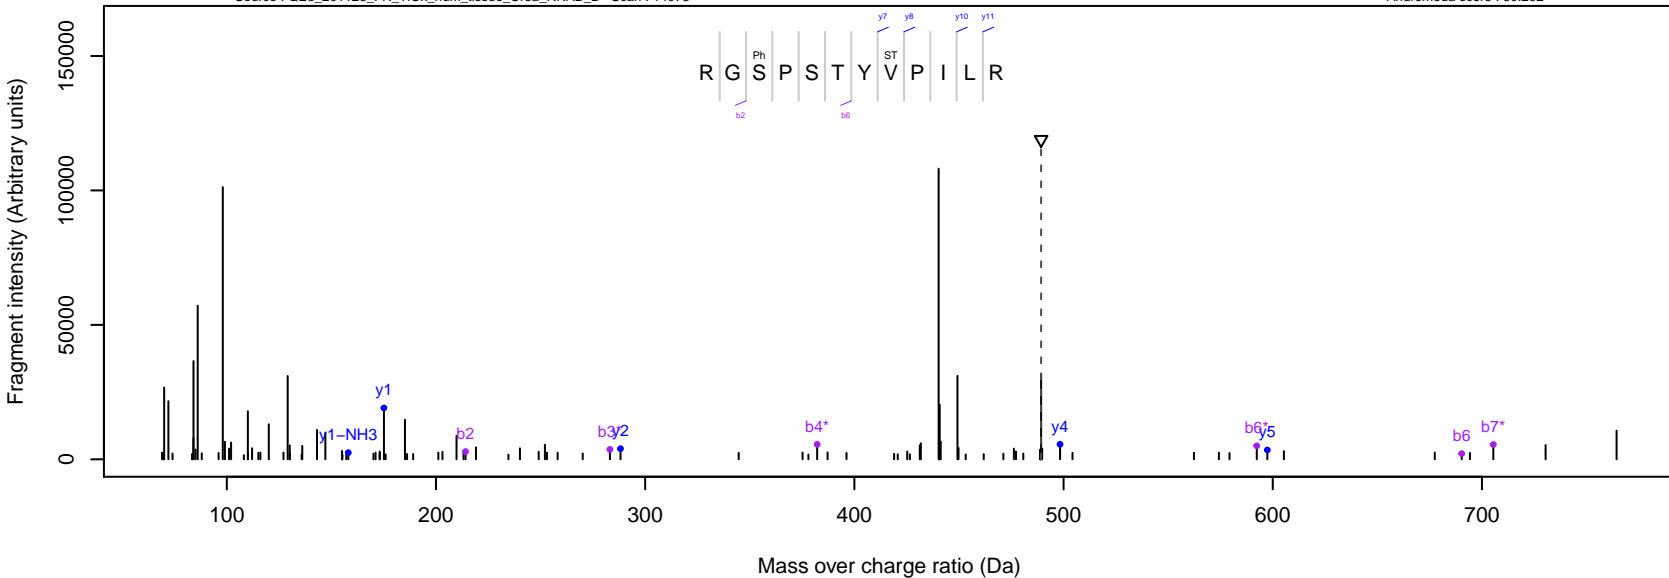

ASQS(Phospho (STY))RPNS(Phospho (STY))SALETLGGEK-3+

Source : QE3\_201126\_FR\_TiOx\_hum\_tissue\_Urea\_RNAB\_N Scan : 23657

Andromeda score : 50.271

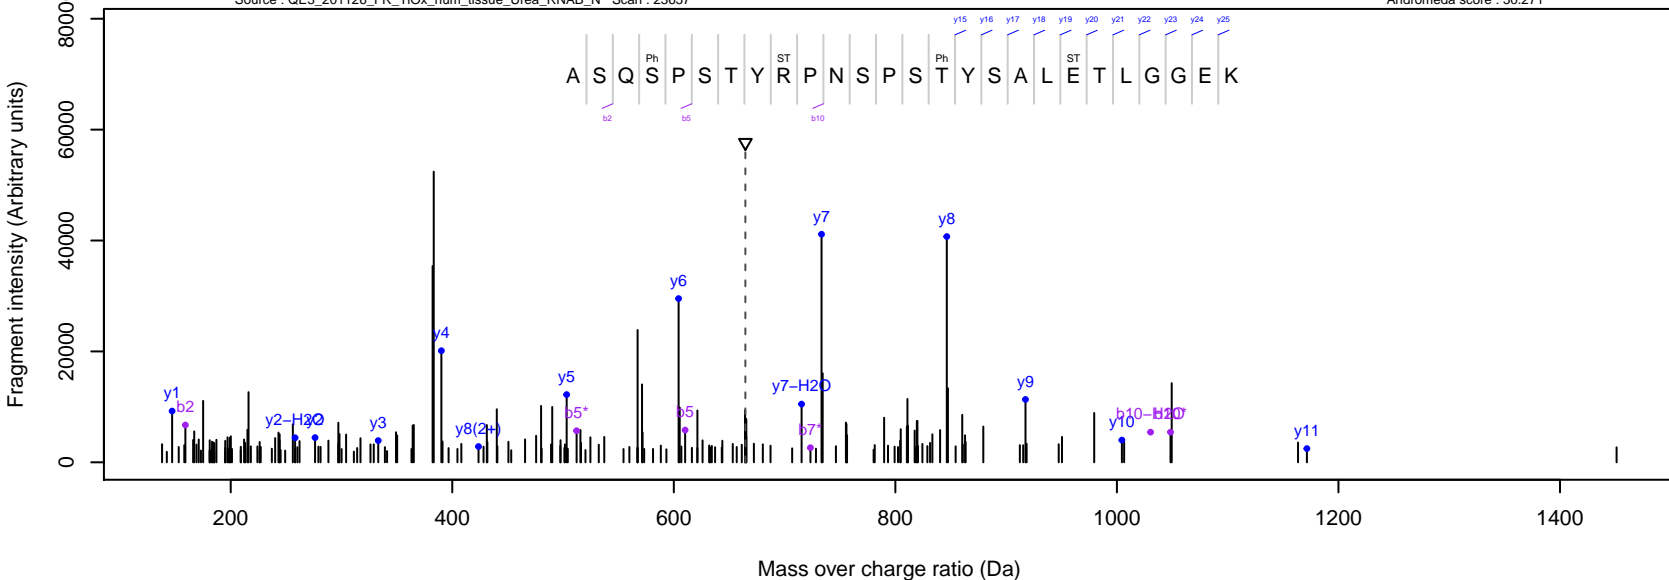

RPS(Phospho (STY))GTGTGPE DGRPSLGSPLYGQPPR-3+

Source : QE3\_201126\_FR\_TiOx\_hum\_tissue\_Urea\_RNAB\_N Scan : 17068

Andromeda score : 50.229

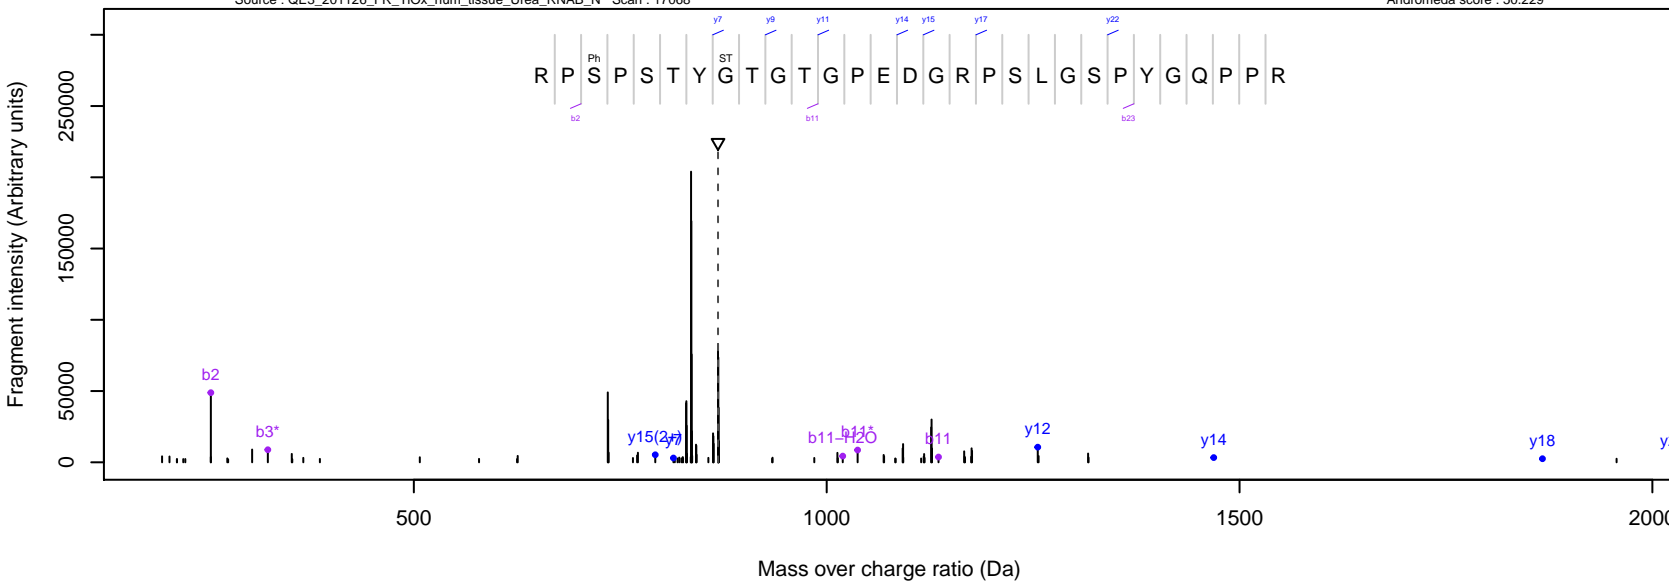

EEPVS(Phospho (STY))SGPEEAVGK-2+

Source : QE3\_201126\_FR\_TiOx\_hum\_tissue\_Urea\_RNAB\_B Scan : 16381

Andromeda score : 50.222

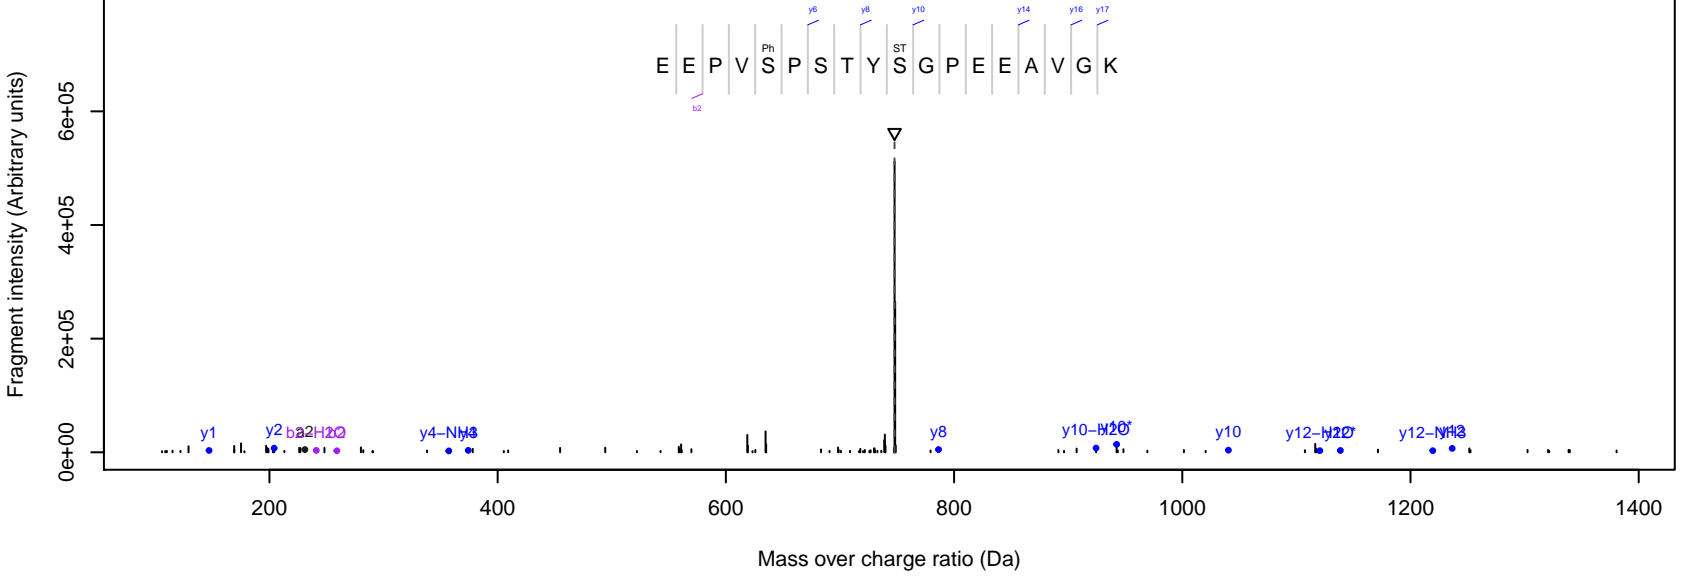

S(Phospho (STY))SENVLDEEGGR-2+

Source : QE3\_201126\_FR\_TiOx\_hum\_tissue\_Urea\_RNAB\_N Scan : 17756

Andromeda score : 50.222

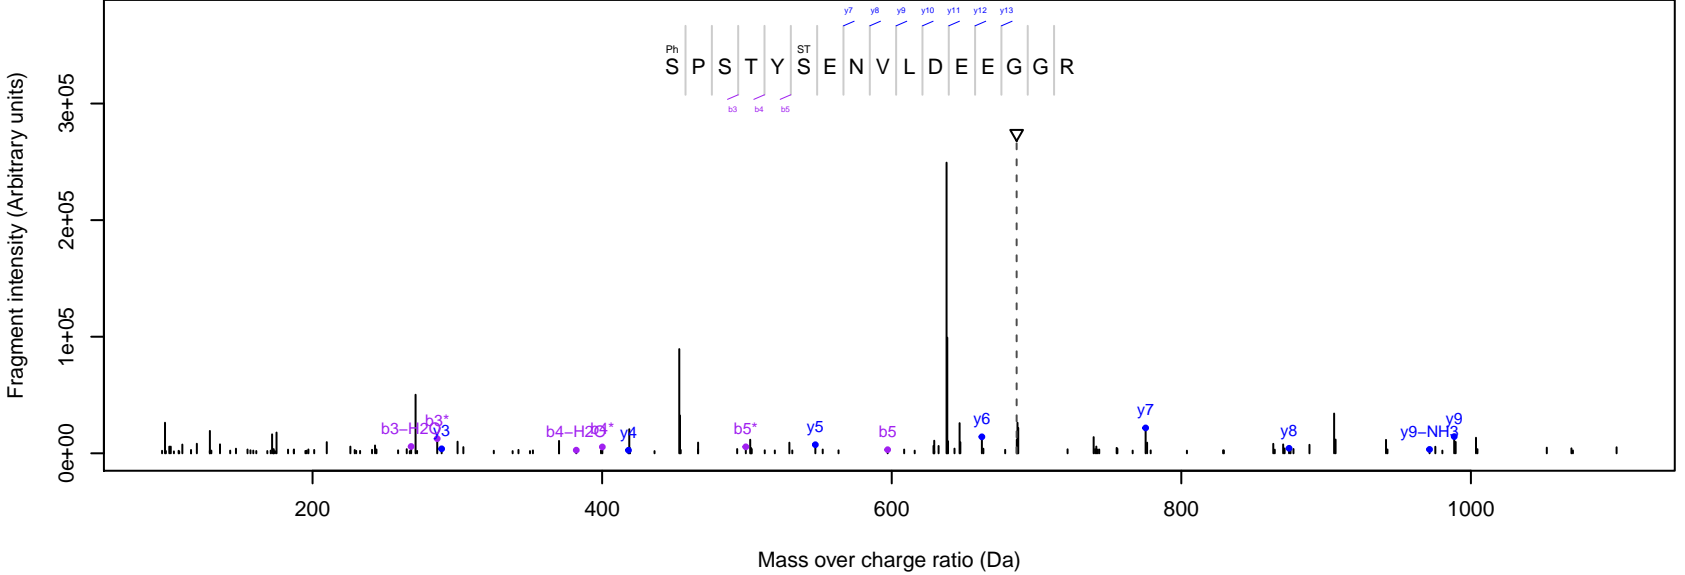

NSVQS(Phospho (STY))GES(Phospho (STY))DS(Phospho (STY))DEEEESKEPPIKLPK-3+

Source : QE3\_201126\_FR\_TiOx\_hum\_tissue\_Urea\_RNAB\_N Scan : 30527

Andromeda score : 50.202

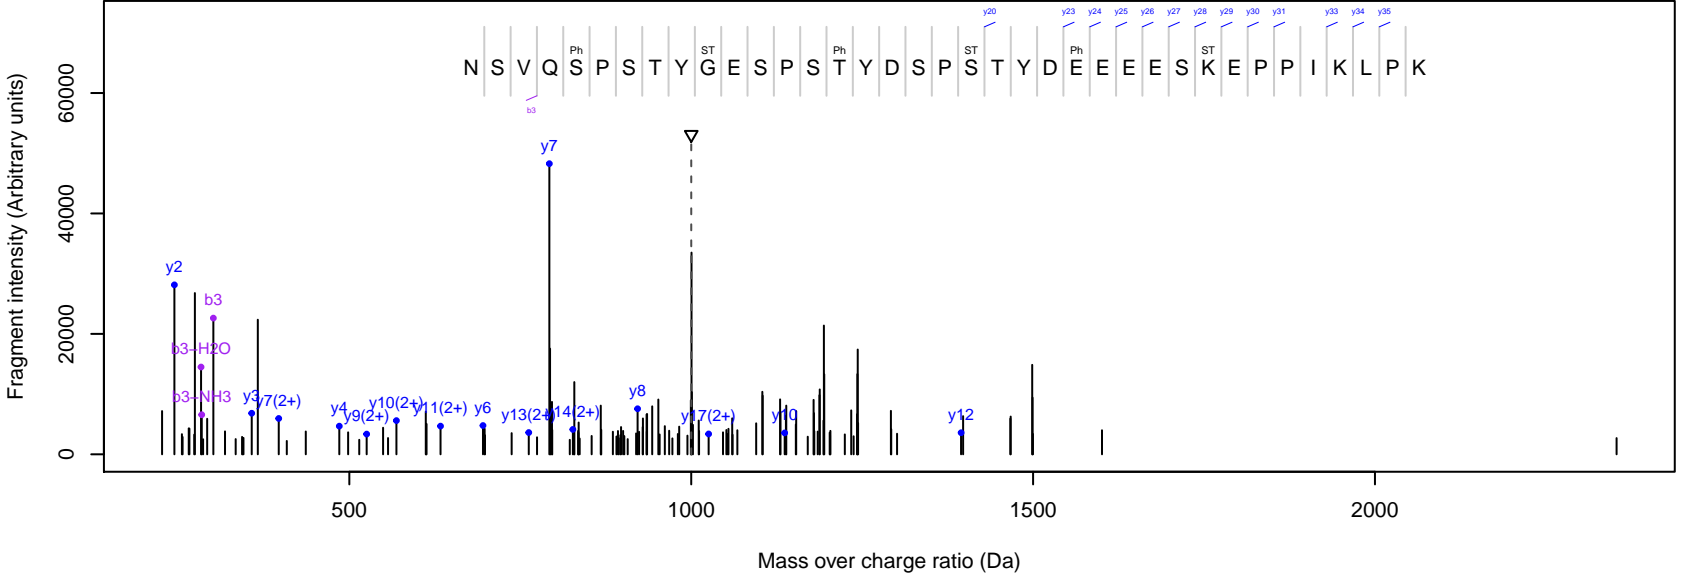

NELLS(Phospho (STY))NNQHLSNEVK-3+

Source : QE3\_201126\_FR\_TiOx\_hum\_tissue\_Urea\_RNAB\_H Scan : 6350

Andromeda score : 50.188

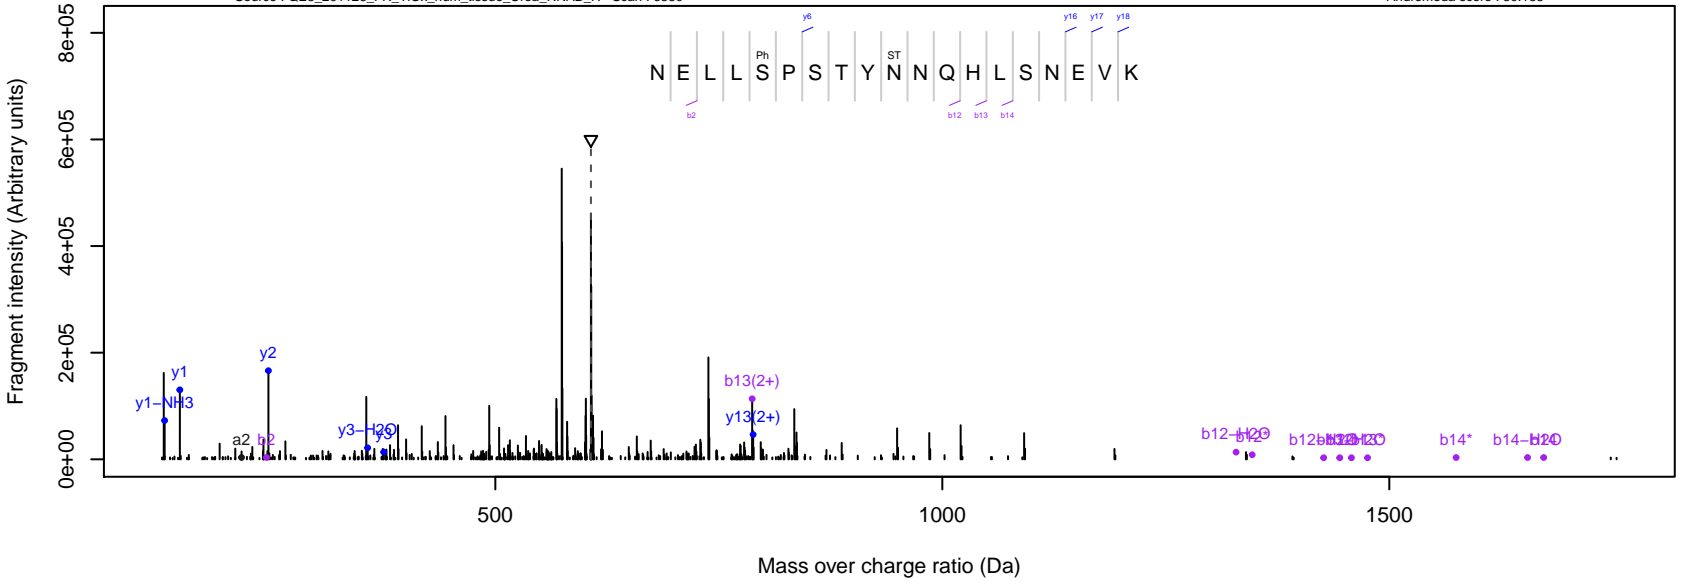

QIDS(Phospho (STY))S(Phospho (STY))EEDDDEEDYDNDKR-3+

Source : QE3\_201126\_FR\_TiOx\_hum\_tissue\_Urea\_RNAB\_B Scan : 16807

Andromeda score : 50.178

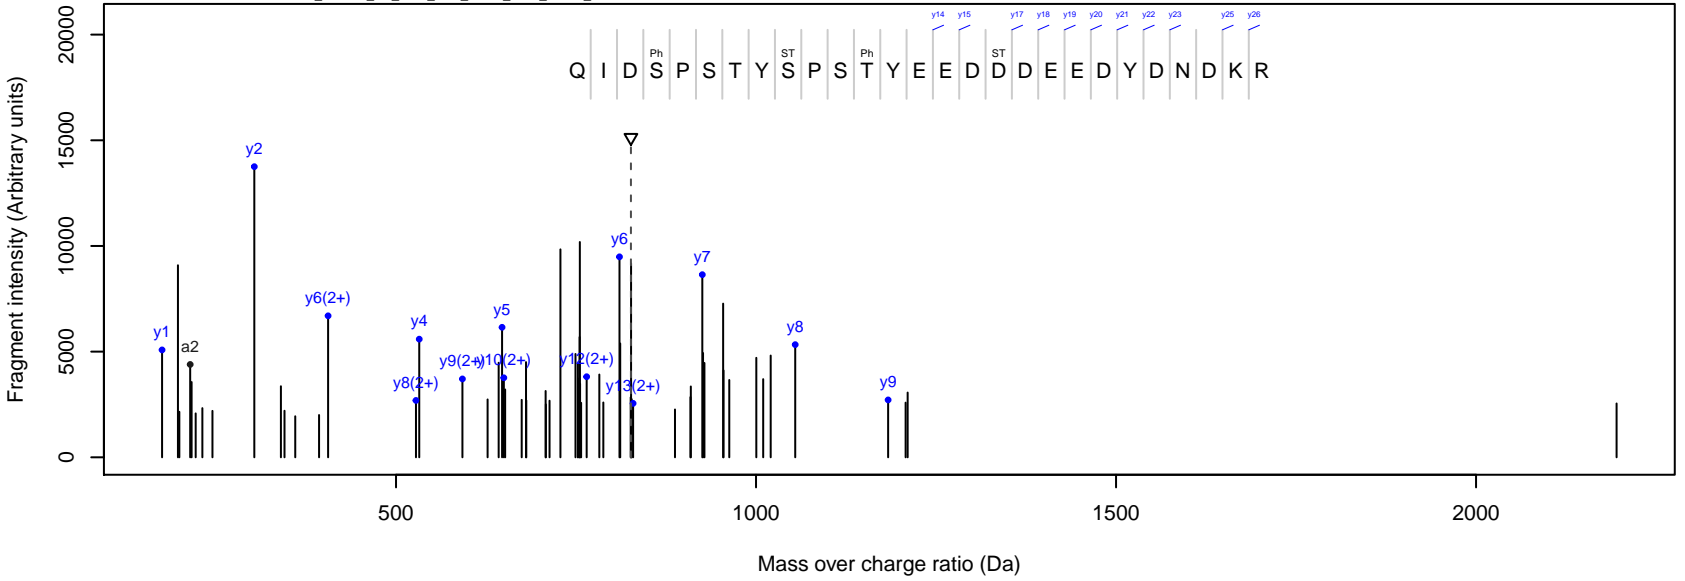

NKS(Phospho (STY))S(Phospho (STY))LLFKESEIR-3+

Source : QE3\_201126\_FR\_TiOx\_hum\_tissue\_Urea\_RNAB\_H Scan : 27822

Andromeda score : 50.155

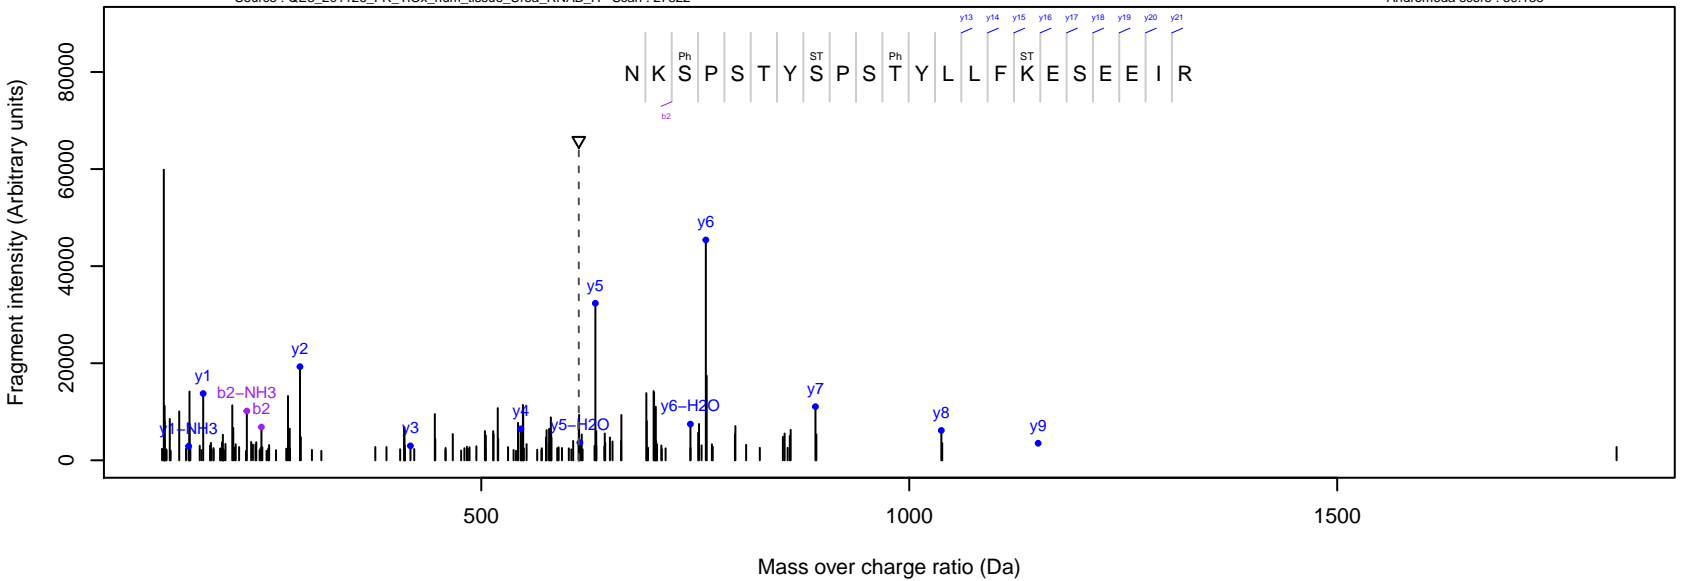

SAPAS(Phospho (STY))PTHPGLM(Oxidation (M))SPR-2+

Source : QE3\_201126\_FR\_TiOx\_hum\_tissue\_Urea\_RNAB\_N Scan : 11494

Andromeda score : 50.155

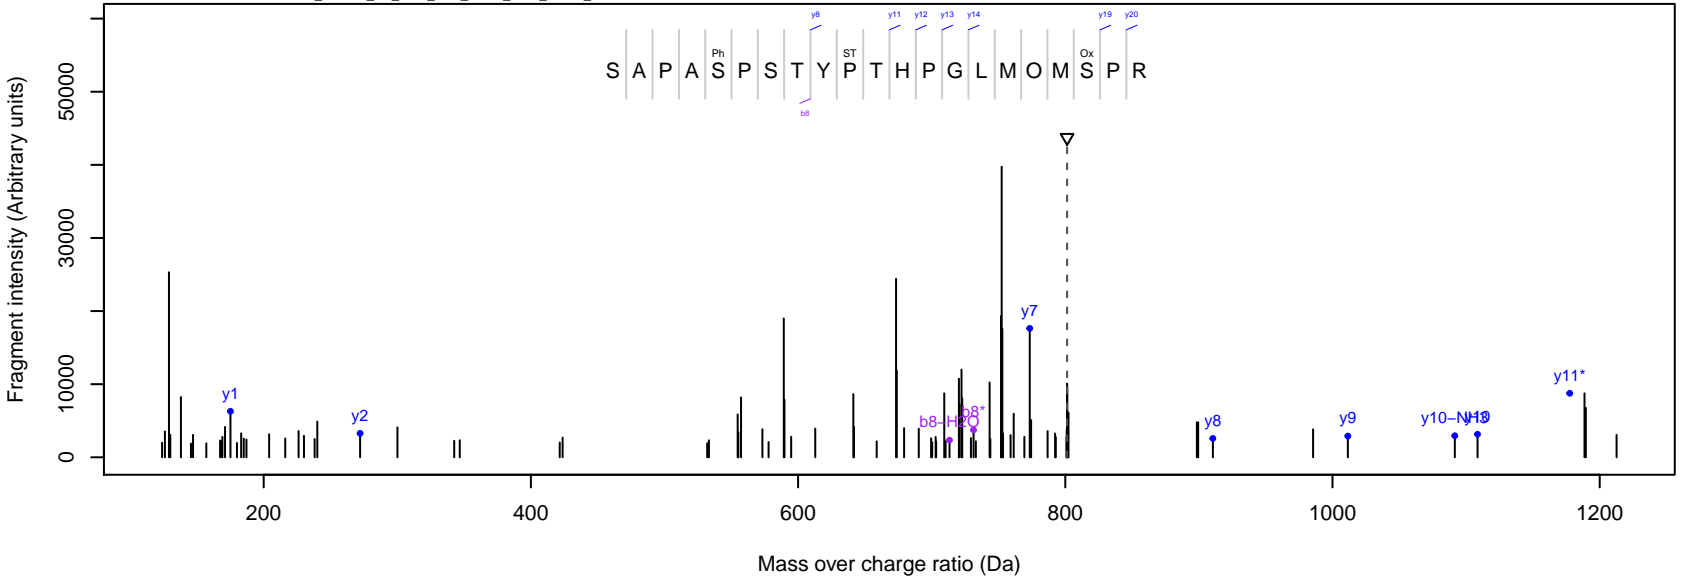

SPS(Phospho (STY))FAS(Phospho (STY))EWDEIEK-2+

Source : QE3\_201126\_FR\_TiOx\_hum\_tissue\_Urea\_RNAB\_N Scan : 57763

Andromeda score : 50.155

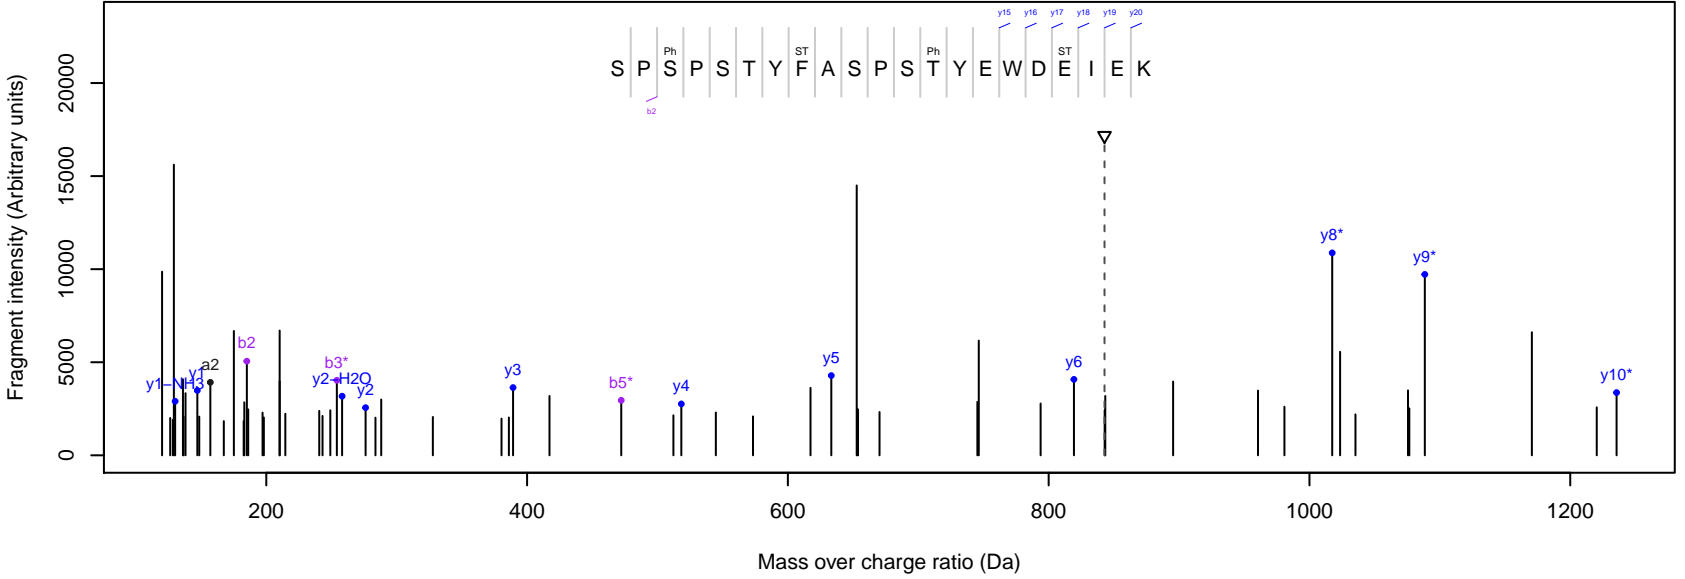

DLS(Phospho (STY))FKEQELK-2+

Source : QE3\_201126\_FR\_TiOx\_hum\_tissue\_Urea\_RNAB\_H Scan : 23058

Andromeda score : 50.149

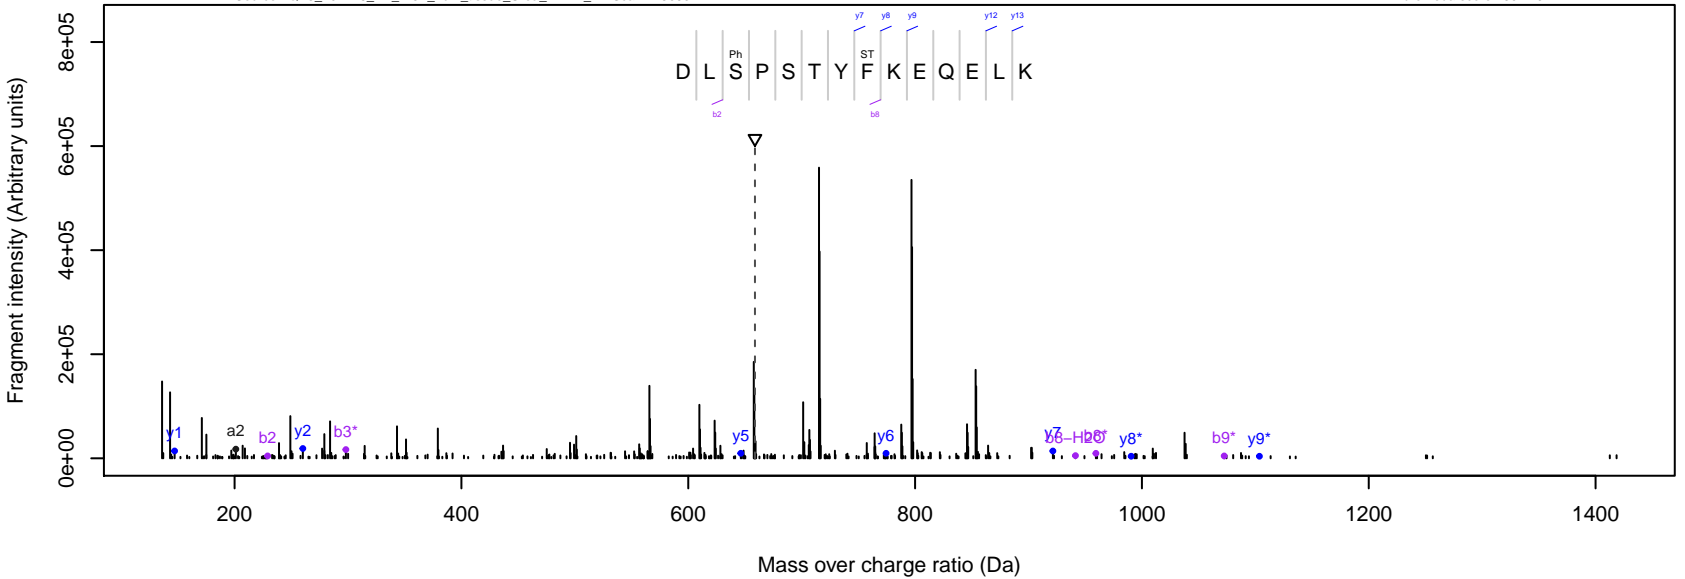

RNLEDD(Phospho (STY))DEEDFFLRGPSGR-3+

Source : QE3\_201126\_FR\_TiOx\_hum\_tissue\_Urea\_RNAB\_H Scan : 44327

Andromeda score : 50.144

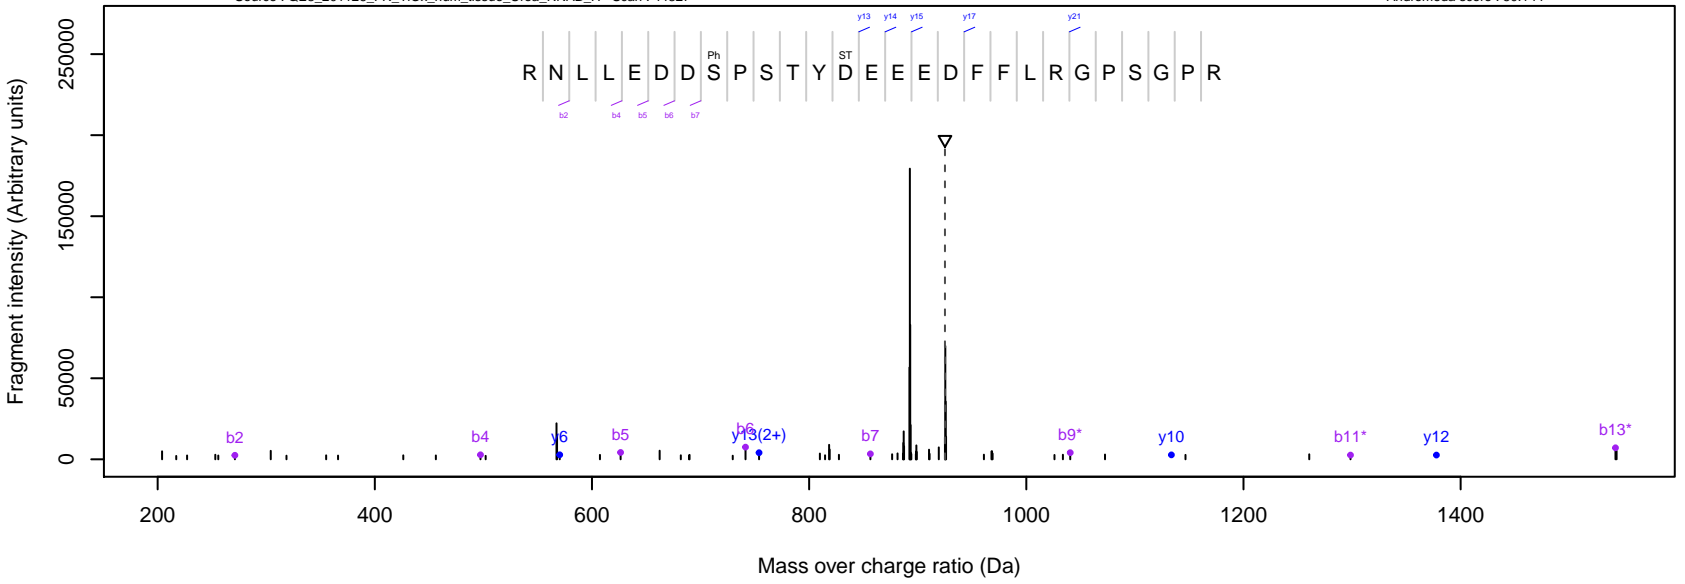

RQVEDLQATFSSIHS(Phospho (STY))FQDLSSSILAQSR-4+

Source : QE3\_201126\_FR\_TiOx\_hum\_tissue\_Urea\_RNAB\_N Scan : 54815

Andromeda score : 50.144

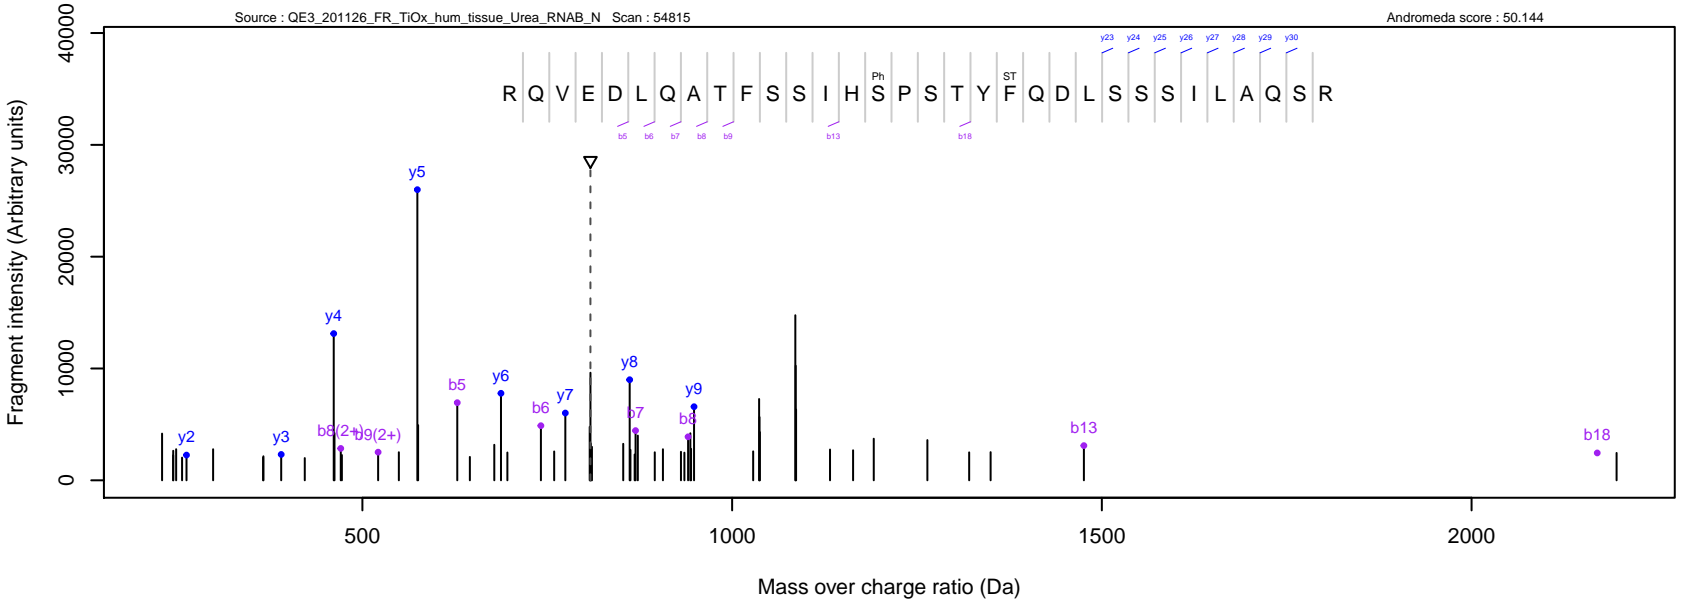

(Acetyl (Protein N-term))AAQGAAAAVAAGTSGVAGEGEPGENAAAEGTAPS(Phospho (STY))PGRVSPPTPAR-4+

Source : QE3\_201126\_FR\_TiOx\_hum\_tissue\_Urea\_RNAB\_B Scan : 42487

Andromeda score : 50.123

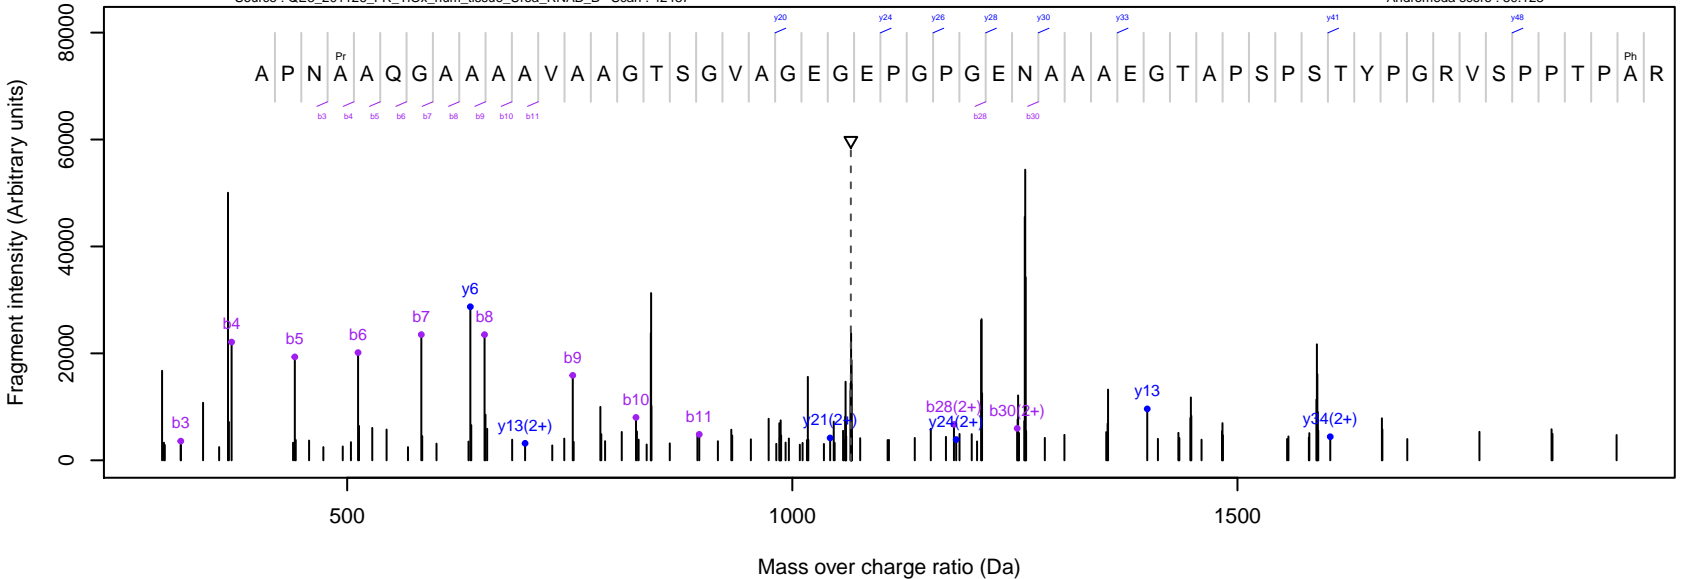

KQS(Phospho (STY))NPLLIHVDTK-3+

Source : QE3\_201126\_FR\_TiOx\_hum\_tissue\_Urea\_RNAB\_B Scan : 18942

Andromeda score : 50.117

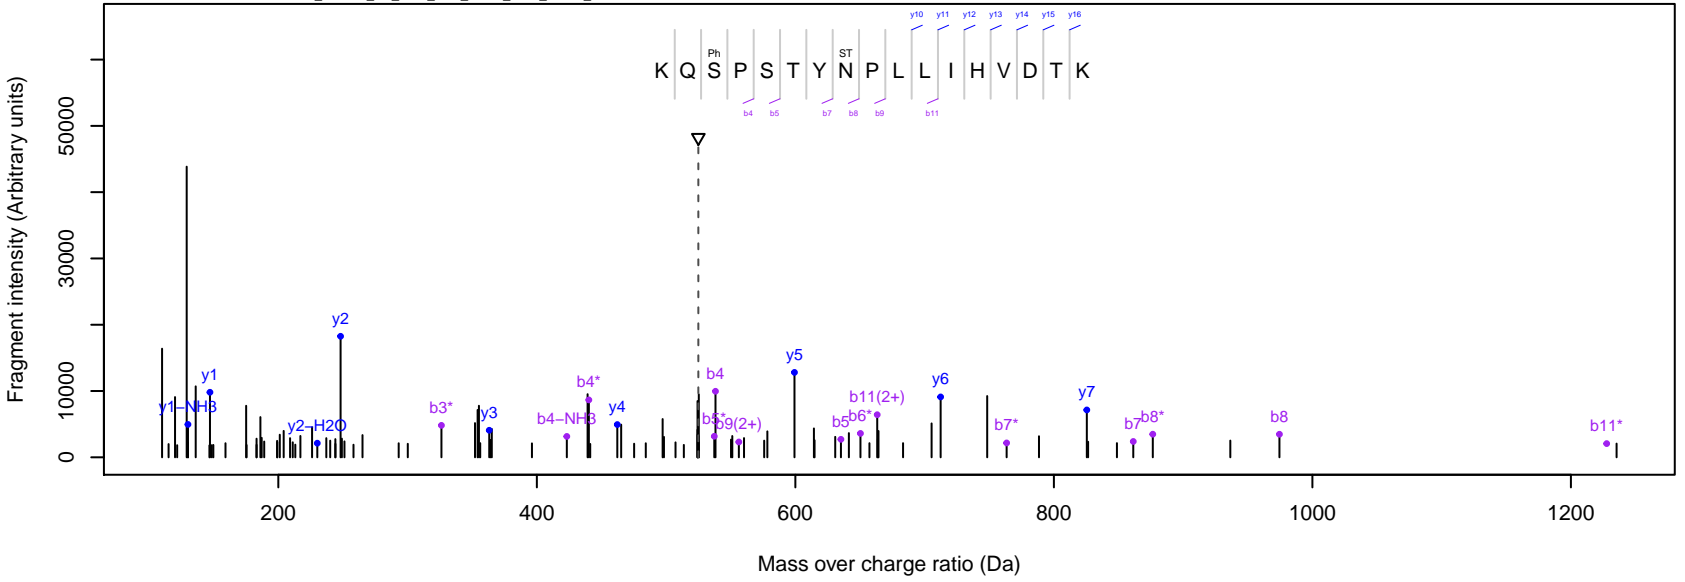

S(Phospho (STY))PPADAIPK-2+

Source : QE3\_201126\_FR\_TiOx\_hum\_tissue\_Urea\_RNAB\_H Scan : 14886

Andromeda score : 50.108

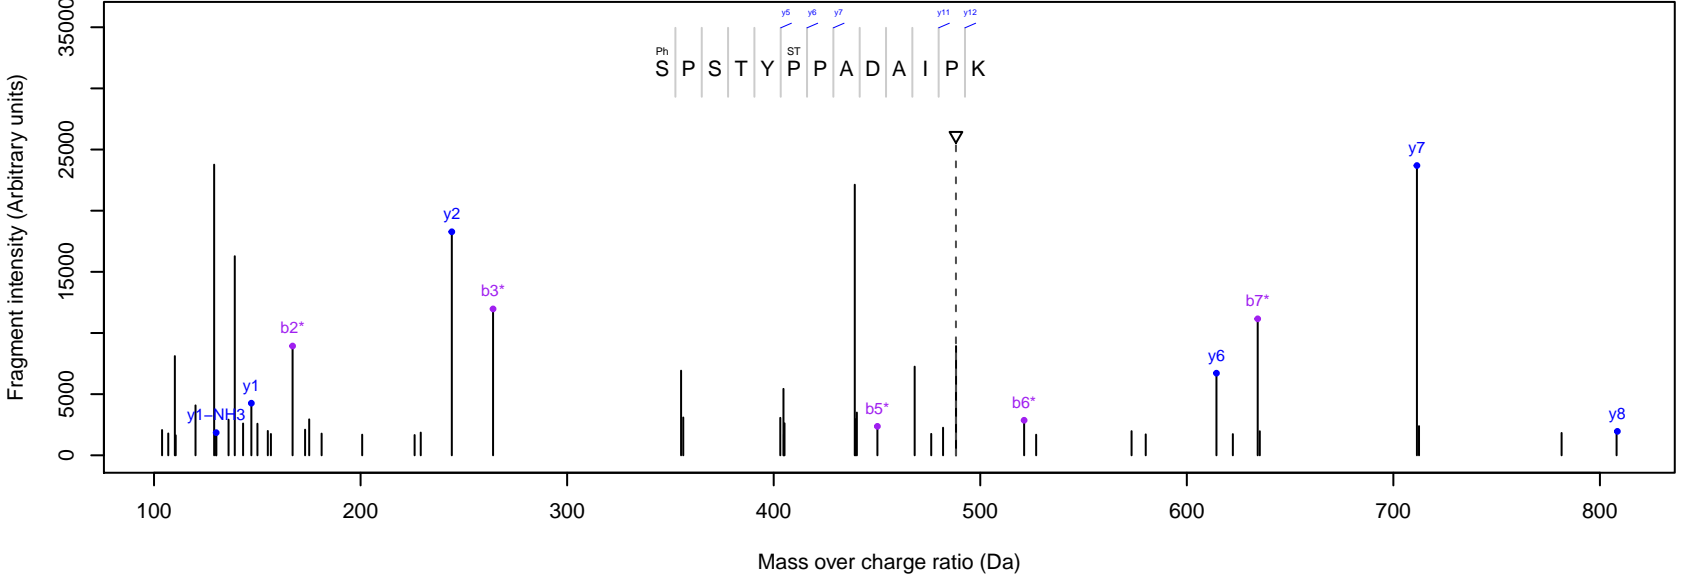

SILS(Phospho (STY))PGGSCGPIK-2+

Source : QE3\_201126\_FR\_TiOx\_hum\_tissue\_Urea\_RNAB\_H Scan : 30635

Andromeda score : 50.088

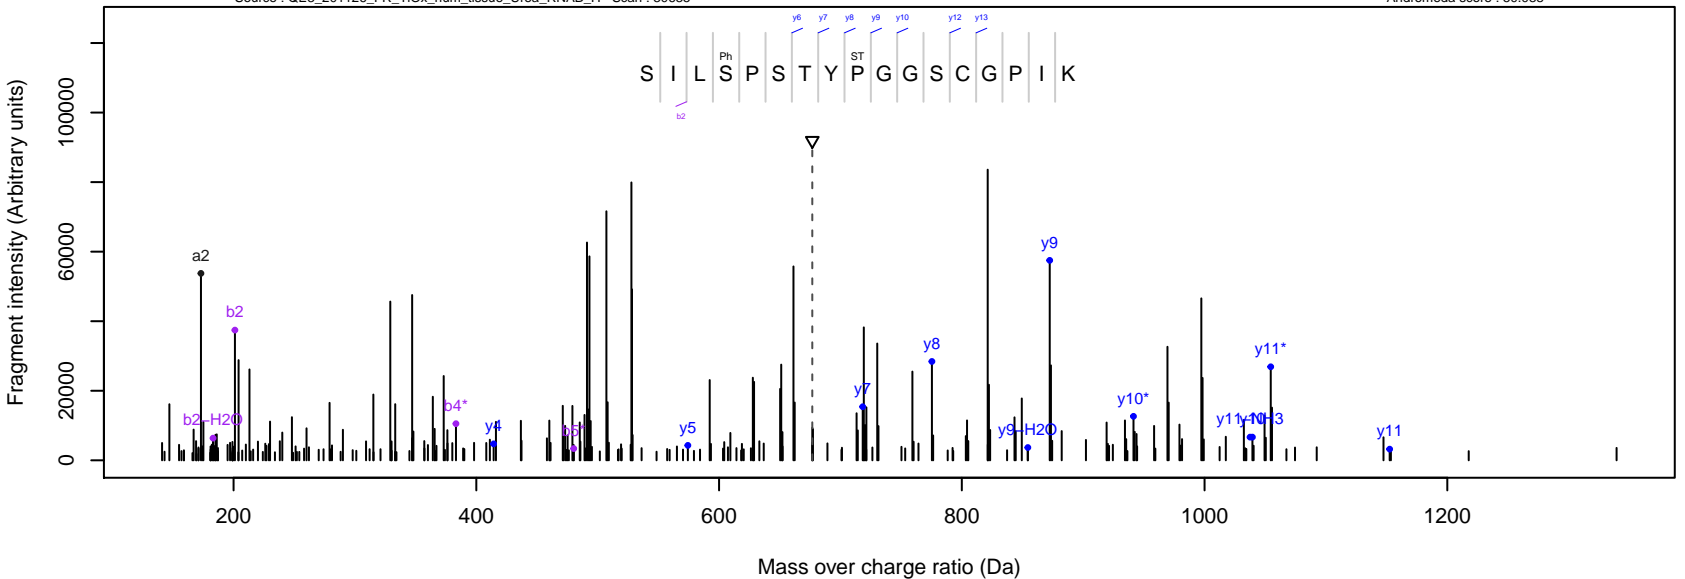

SRS(Phospho (STY))PLLNDRR-3+

Source : QE3\_201126\_FR\_TiOx\_hum\_tissue\_Urea\_RNAB\_H Scan : 6085

Andromeda score : 50.088

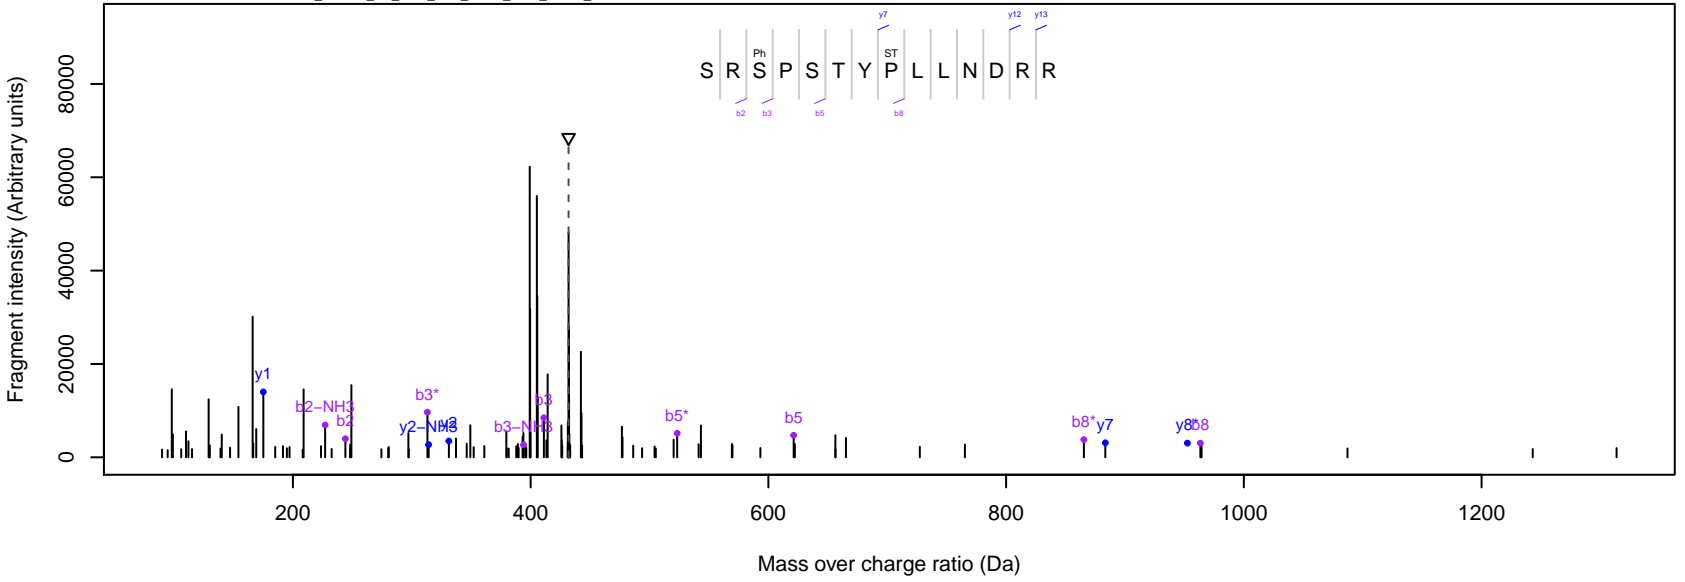

FVAFSGEGQS(Phospho (STY))LRK-3+

Source : QE3\_201126\_FR\_TiOx\_hum\_tissue\_Urea\_RNAB\_H Scan : 21170

Andromeda score : 50.079

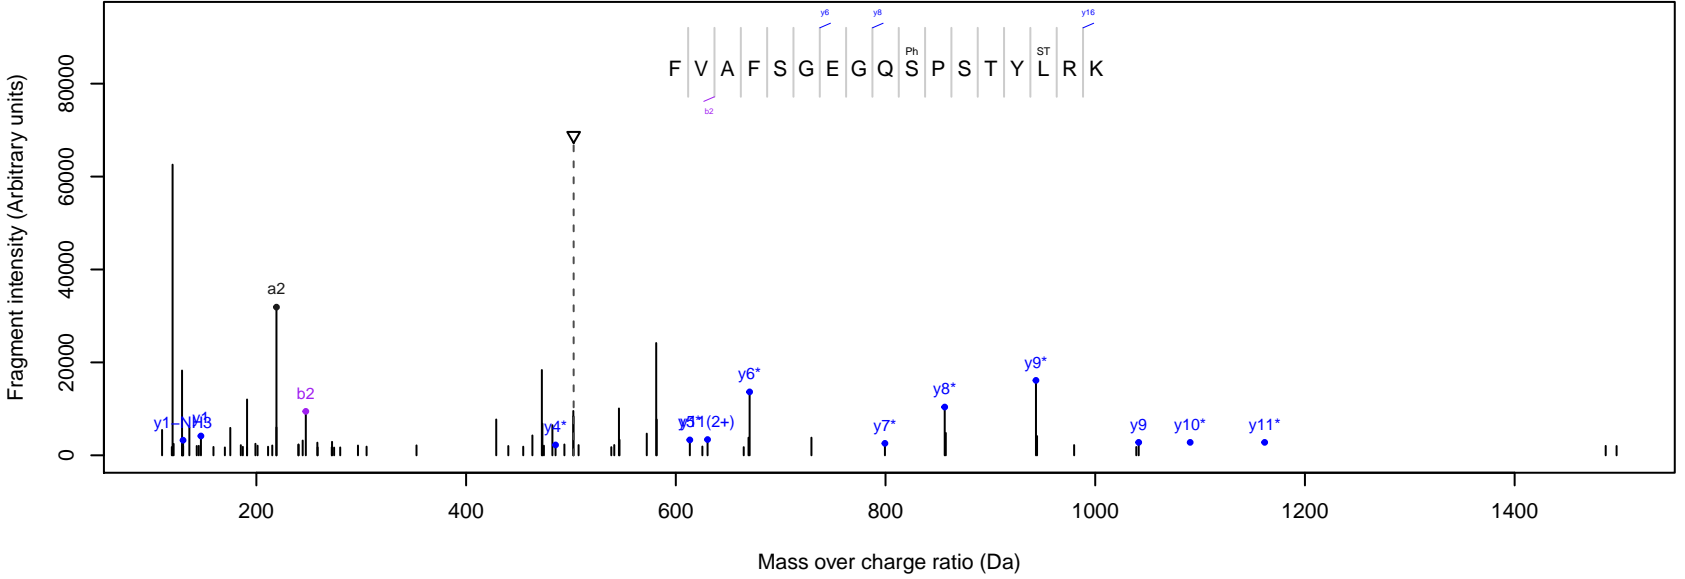

KDPAFGGKHEAPS(Phospho (STY))SPISGQPCGDDQNASPSK-4+

Source : QE3\_201126\_FR\_TiOx\_hum\_tissue\_Urea\_RNAB\_B Scan : 11944

Andromeda score : 50.057

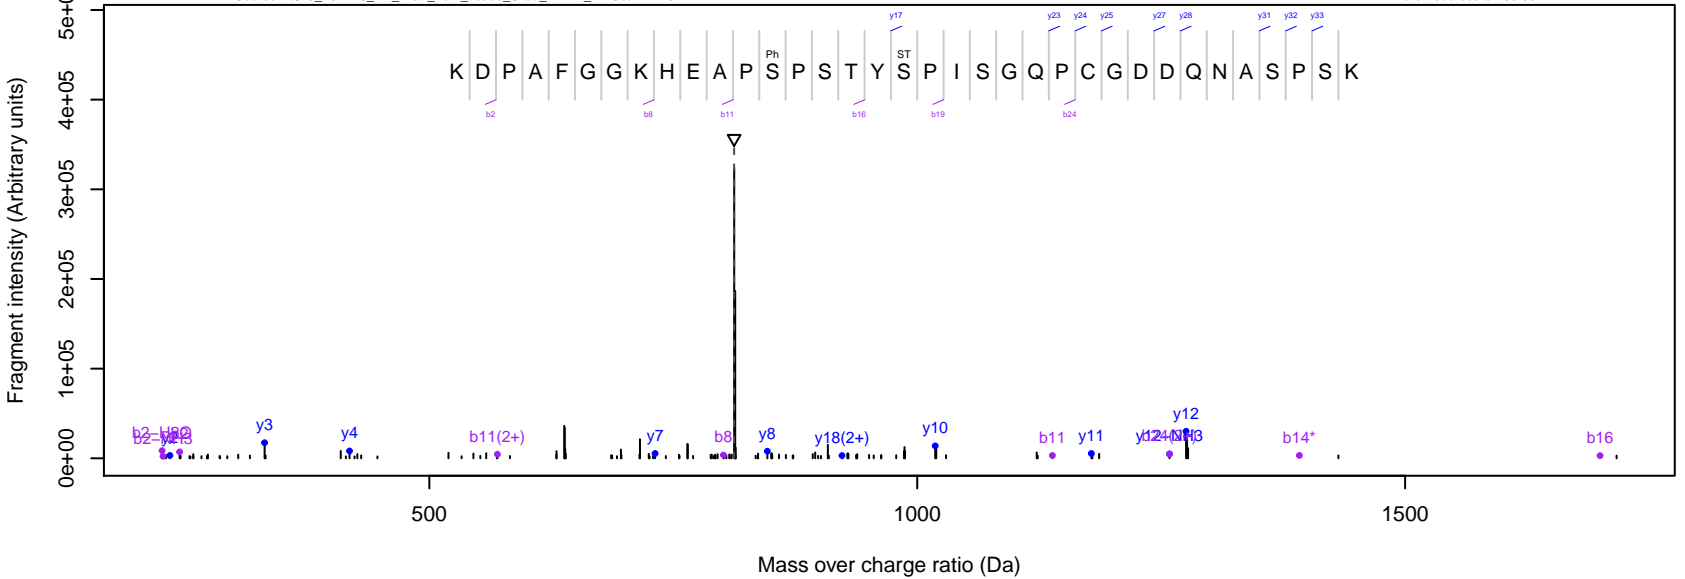



WCNVQSTQDEFEELTMS(Phospho (STY))QK-3+

Source : QE3\_201126\_FR\_TiOx\_hum\_tissue\_Urea\_RNAB\_H Scan : 46442

Andromeda score : 50.055

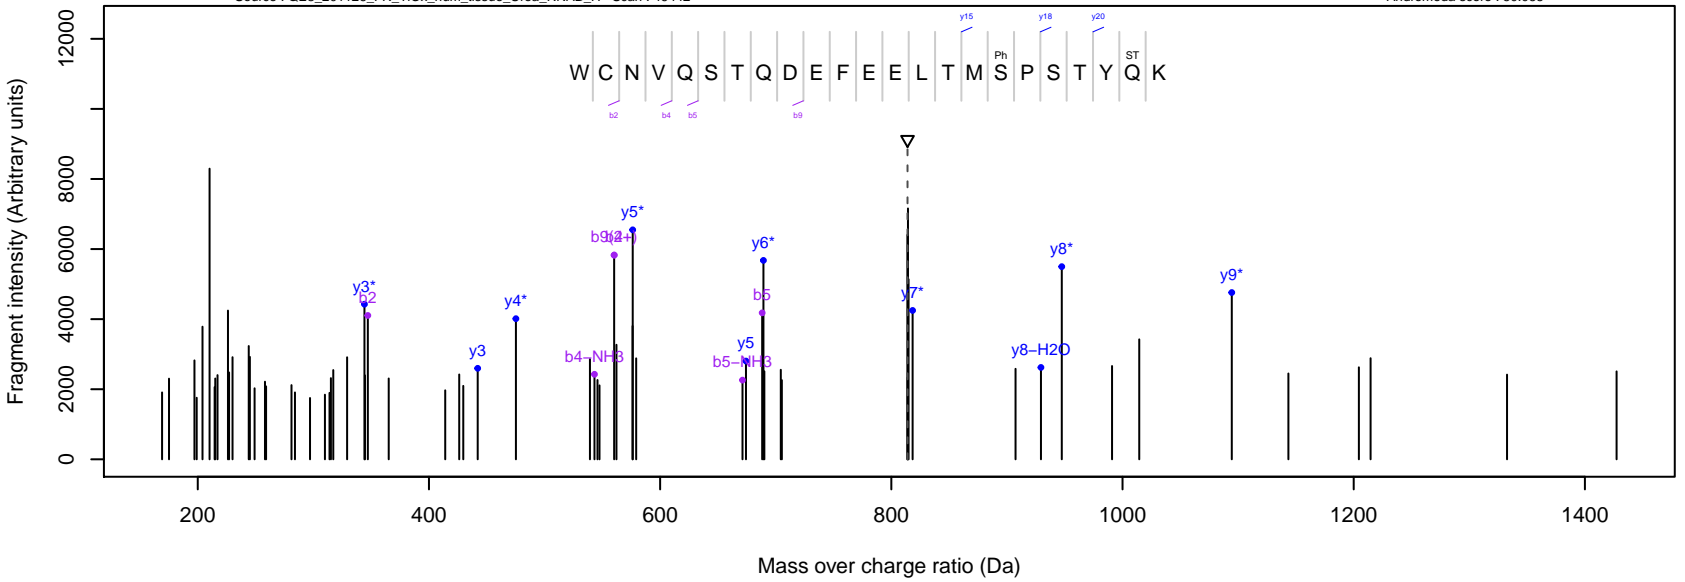

S(Phospho (STY))PILLPK-2+

Source : QE3\_201126\_FR\_TiOx\_hum\_tissue\_Urea\_RNAB\_H Scan : 26011

Andromeda score : 50.04

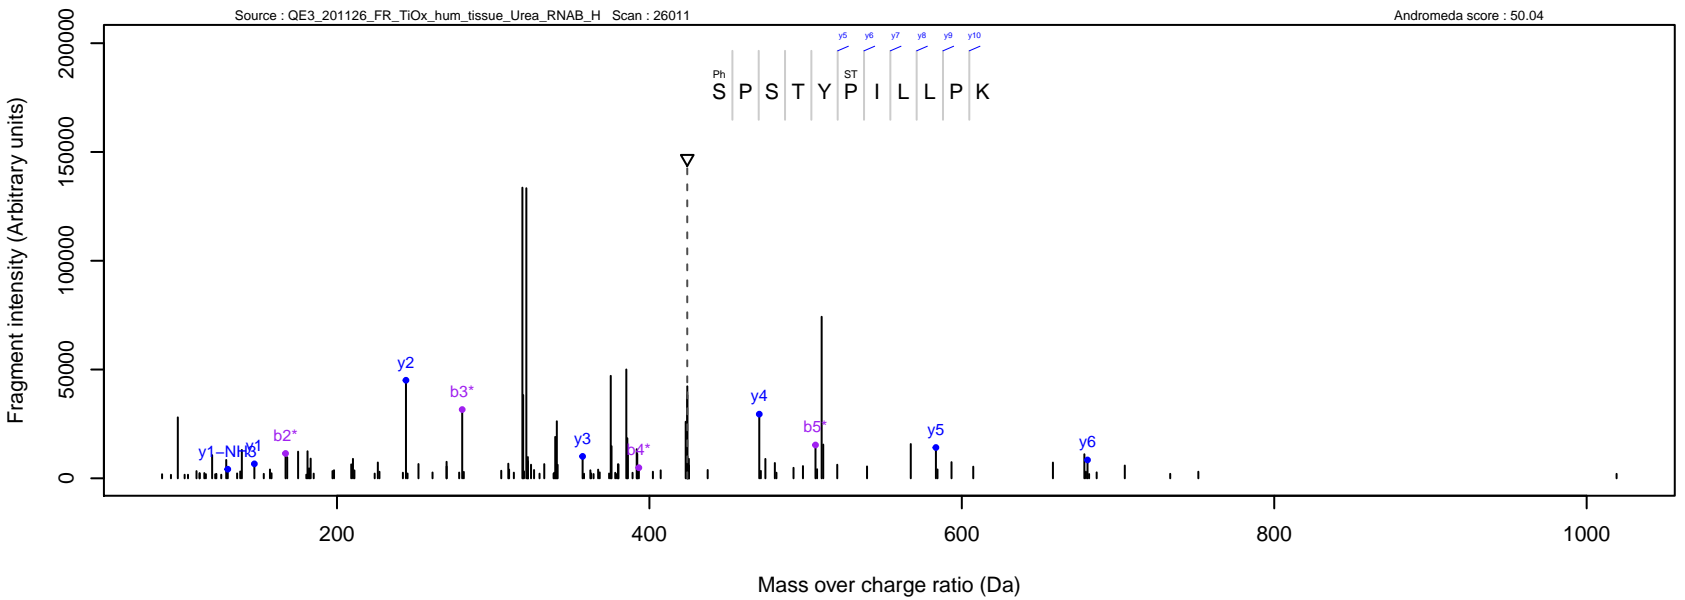

AKLDPEPEKAES(Phospho (STY))PS(Phospho (STY))PR-3+

Source : QE3\_201126\_FR\_TiOx\_hum\_tissue\_Urea\_RNAB\_H Scan : 11361

Andromeda score : 50.029

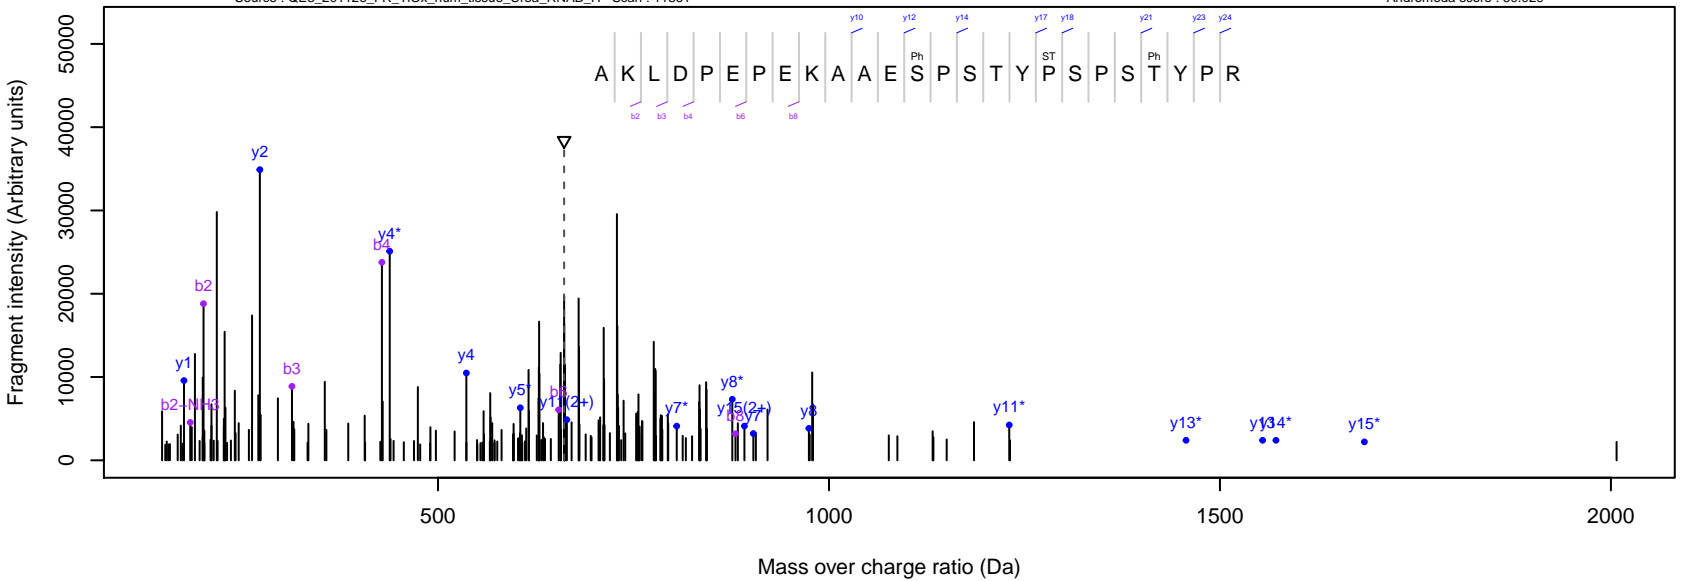

EADPSNFANFSAYPS<sup>Ph</sup>SPSTY<sup>ST</sup>EEDMI<sup>y17</sup>EWA<sup>y21</sup>K<sup>y22</sup><sup>y23</sup><sup>y24</sup><sup>y25</sup><sup>y26</sup>

Source : QE3\_201126\_FR\_TiOx\_hum\_tissue\_Urea\_RNAB\_H Scan : 59103

Andromeda score : 50.029

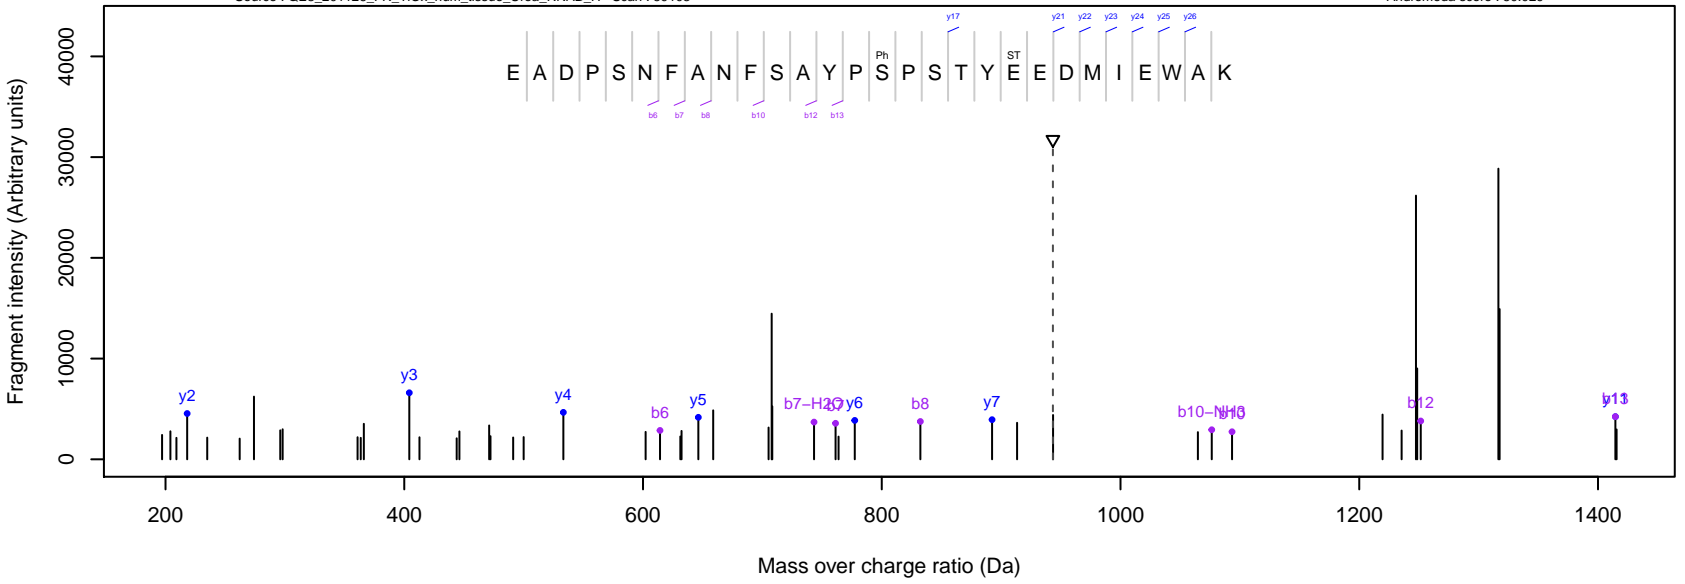

QAH<sup>y17</sup>DL<sup>y18</sup>SP<sup>y19</sup>STY<sup>y21</sup>PA<sup>y22</sup>AE<sup>y23</sup>SS<sup>y24</sup>ST<sup>y25</sup>PS<sup>y26</sup>TY<sup>y27</sup>FS<sup>Ph</sup>FS<sup>ST</sup>GR

Source : QE3\_201126\_FR\_TiOx\_hum\_tissue\_Urea\_RNAB\_H Scan : 33158

Andromeda score : 50.029

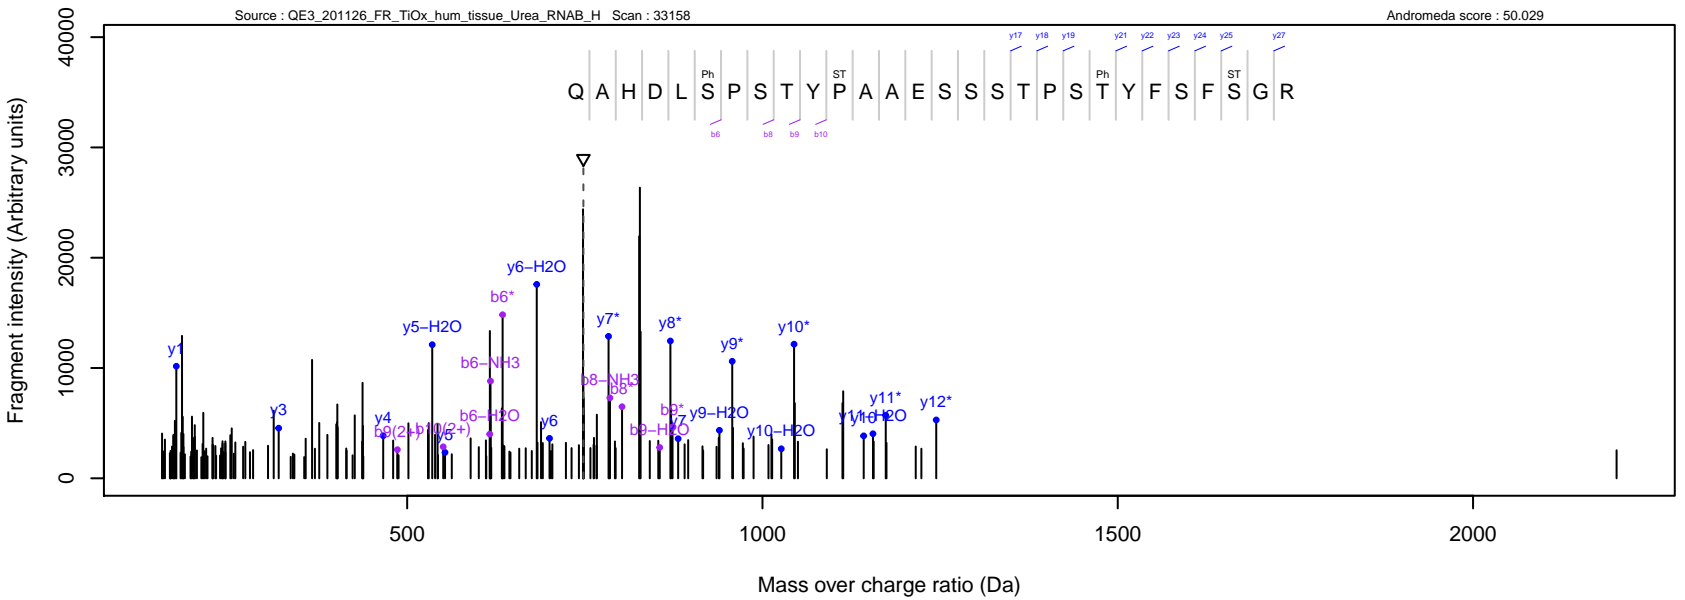

S<sup>Ph</sup>SP<sup>ST</sup>STY<sup>ST</sup>EQSSMS<sup>b11</sup>IEFGQESPEEQSLAMDFSR

Source : QE3\_201126\_FR\_TiOx\_hum\_tissue\_Urea\_RNAB\_H Scan : 55657

Andromeda score : 50.029

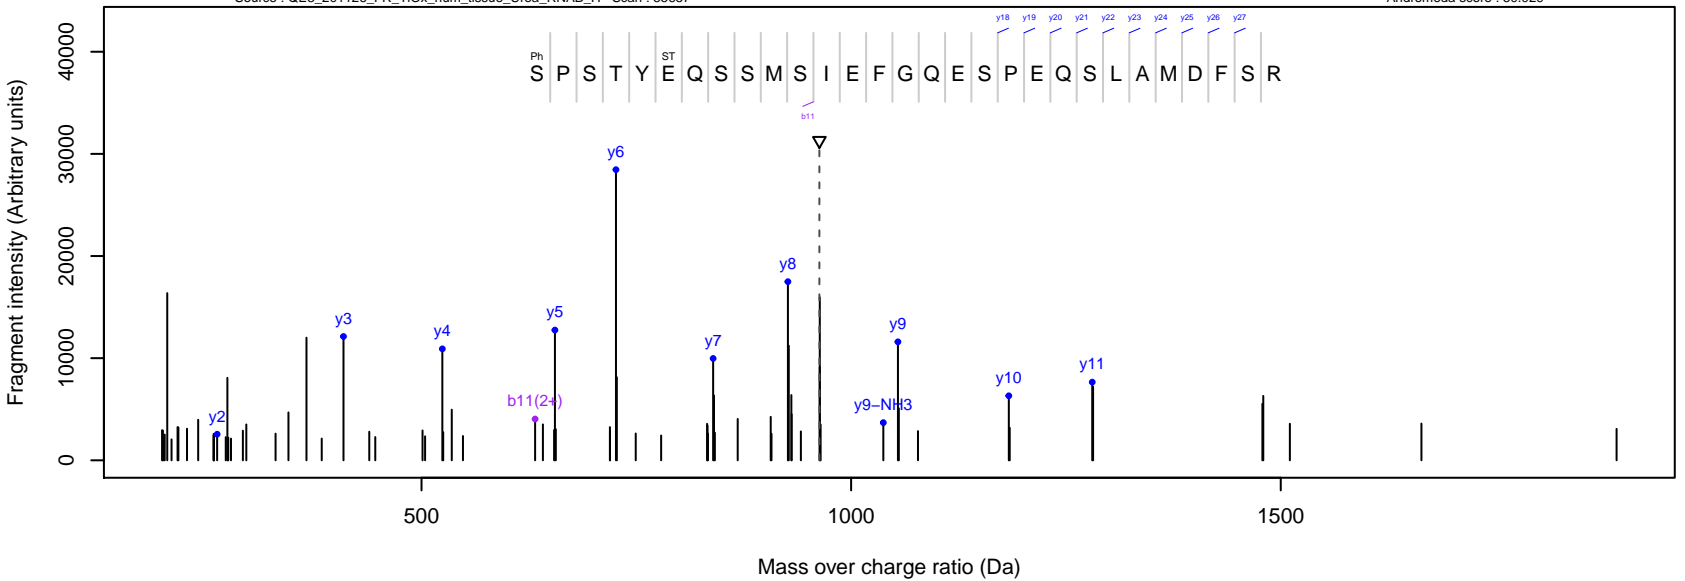

S(Phospho (STY))S(Phospho (STY))SM(Oxidation (M))SSIDLVSASDDVHR-3+

Source : QE3\_201126\_FR\_TiOx\_hum\_tissue\_Urea\_RNAB\_N Scan : 29118

Andromeda score : 49.993

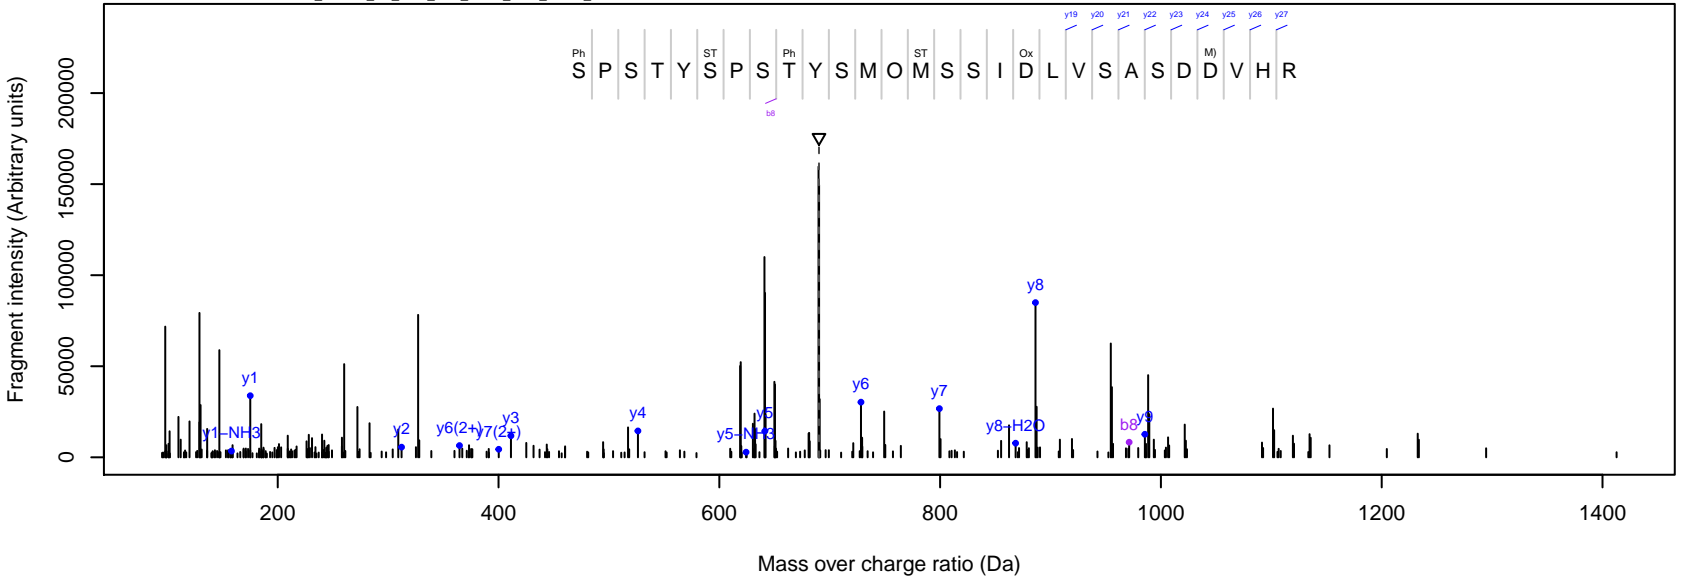

RDS(Phospho (STY))SVIKEEIK-3+

Source : QE3\_201126\_FR\_TiOx\_hum\_tissue\_Urea\_RNAB\_N Scan : 10798

Andromeda score : 49.988

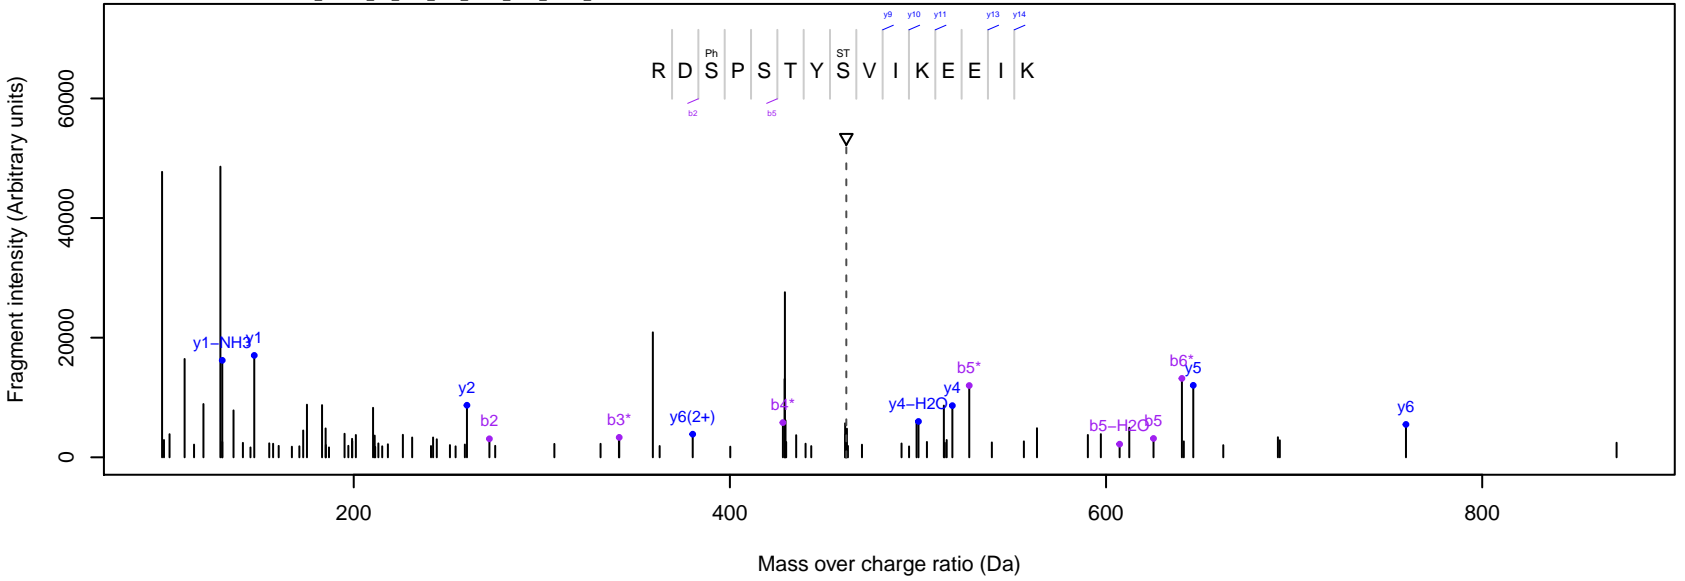

RGS(Phospho (STY))NVALM(Oxidation (M))LDVR-2+

Source : QE3\_201126\_FR\_TiOx\_hum\_tissue\_Urea\_RNAB\_H Scan : 23069

Andromeda score : 49.988

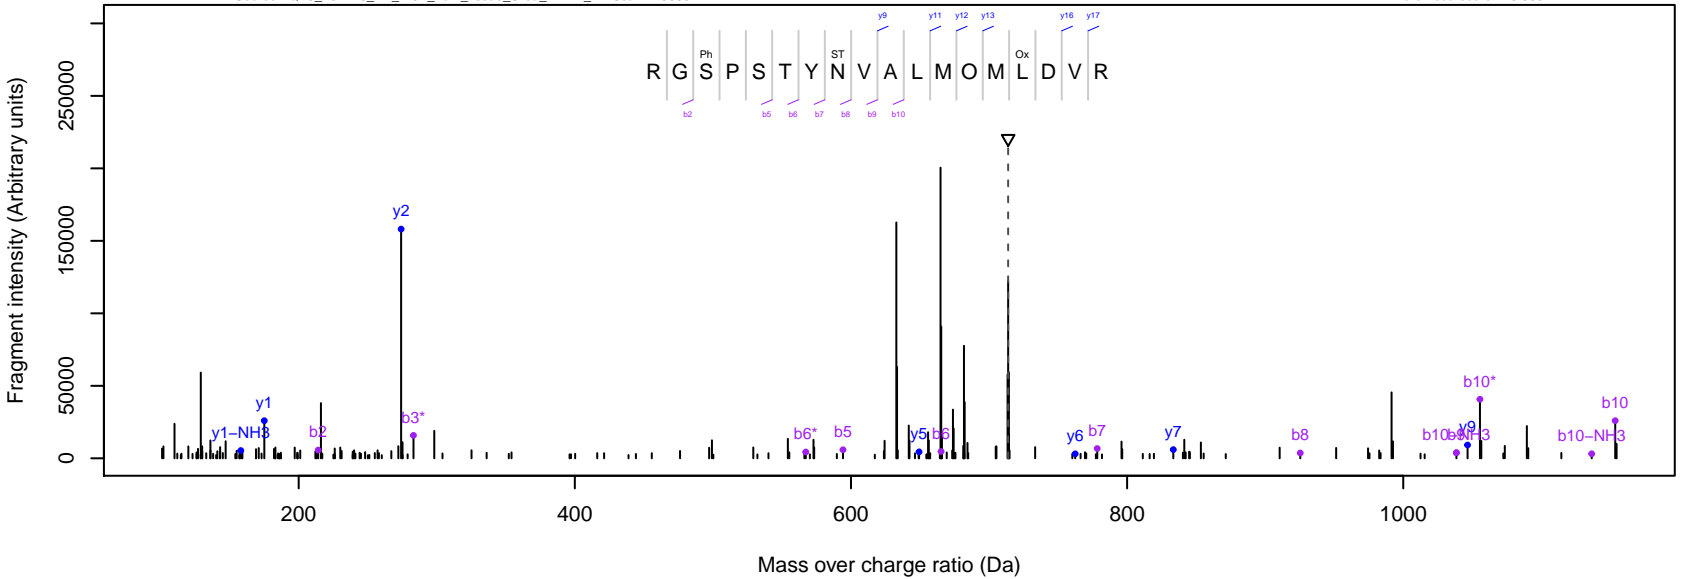

GS(Phospho (STY))LEEFETPWS DQRPR-3+

Source : QE3\_201126\_FR\_TiOx\_hum\_tissue\_Urea\_RNAB\_H Scan : 37553

Andromeda score : 49.973

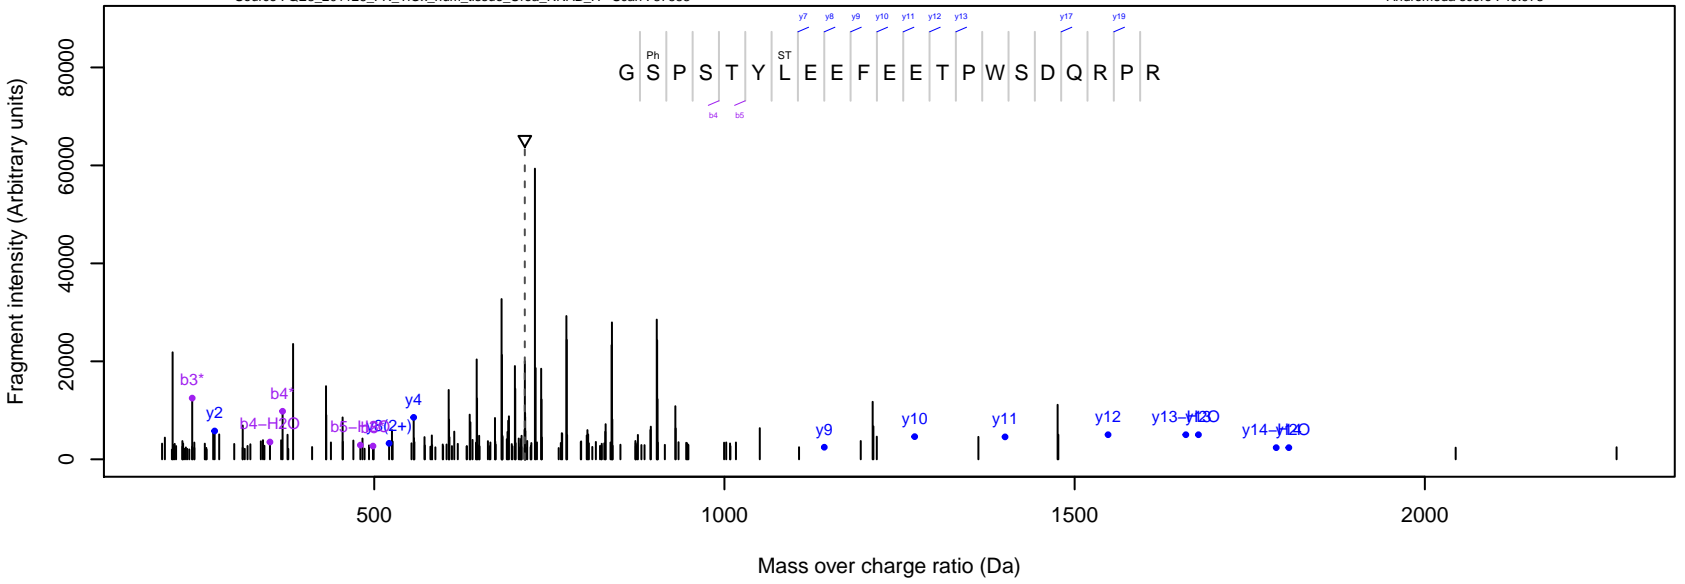

LIHVTS(Phospho (STY))SAFTGLG-2+

Source : QE3\_201126\_FR\_TiOx\_hum\_tissue\_Urea\_RNAB\_N Scan : 44900

Andromeda score : 49.96

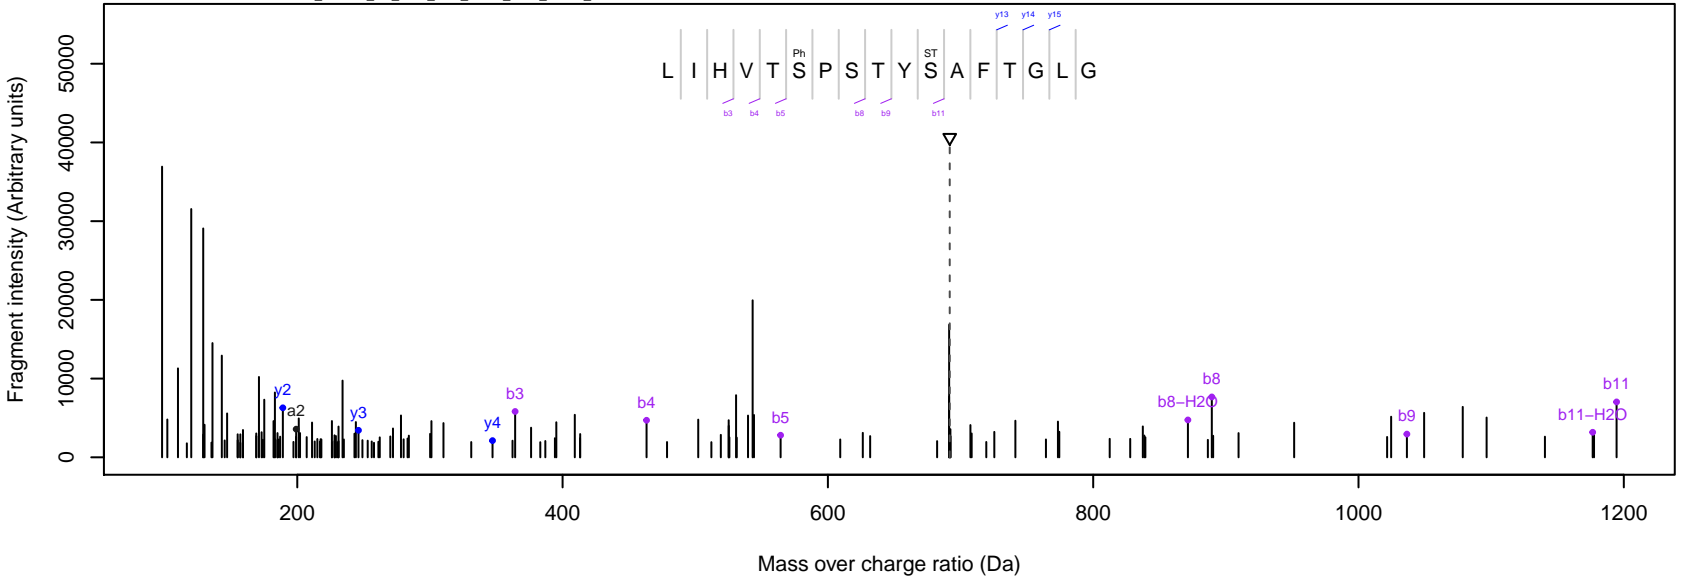

AQDS(Phospho (STY))VGRSDNEM(Oxidation (M))CELDPGQFIDR-3+

Source : QE3\_201126\_FR\_TiOx\_hum\_tissue\_Urea\_RNAB\_N Scan : 35661

Andromeda score : 49.902

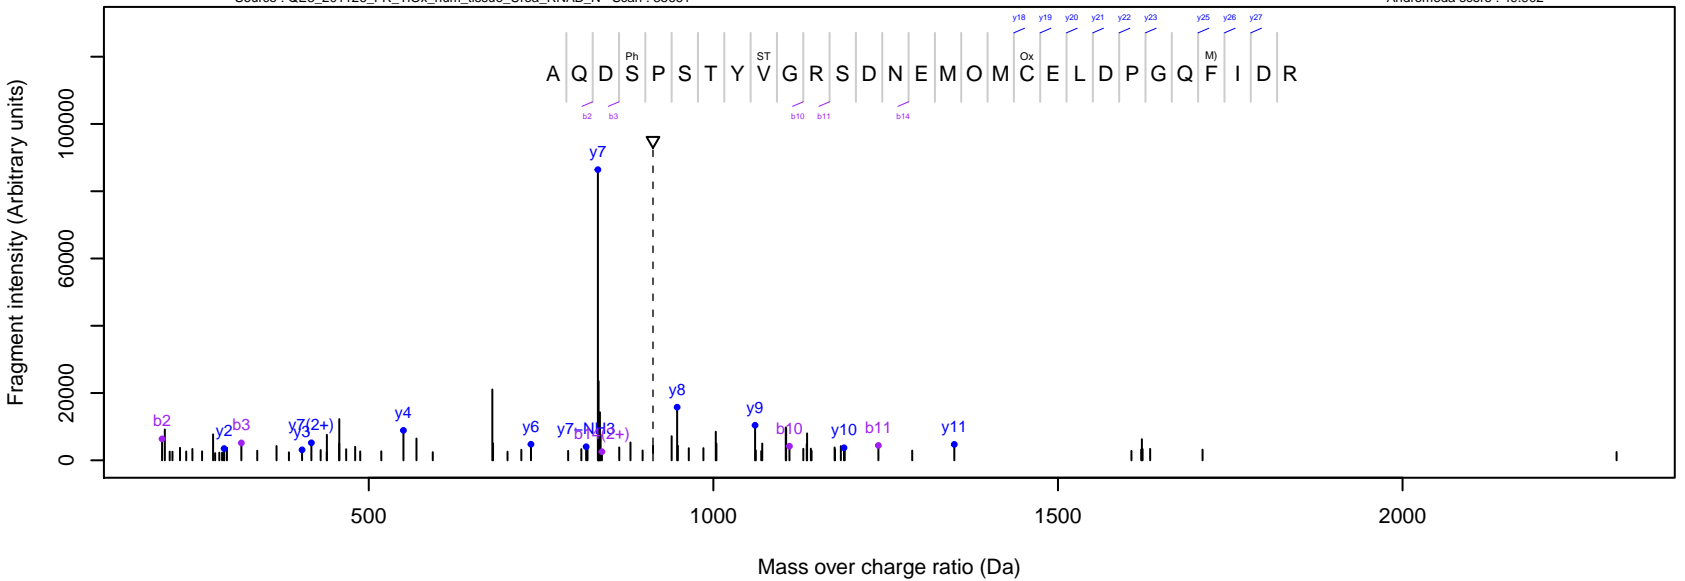

(Acetyl (Protein N-term))ASLGPAAGEQASGAEAEPPGAPPPPPS(Phospho (STY))PSSLGPLLQR-4+

Source : QE3\_201126\_FR\_TiOx\_hum\_tissue\_Urea\_RNAB\_B Scan : 62804

Andromeda score : 49.88

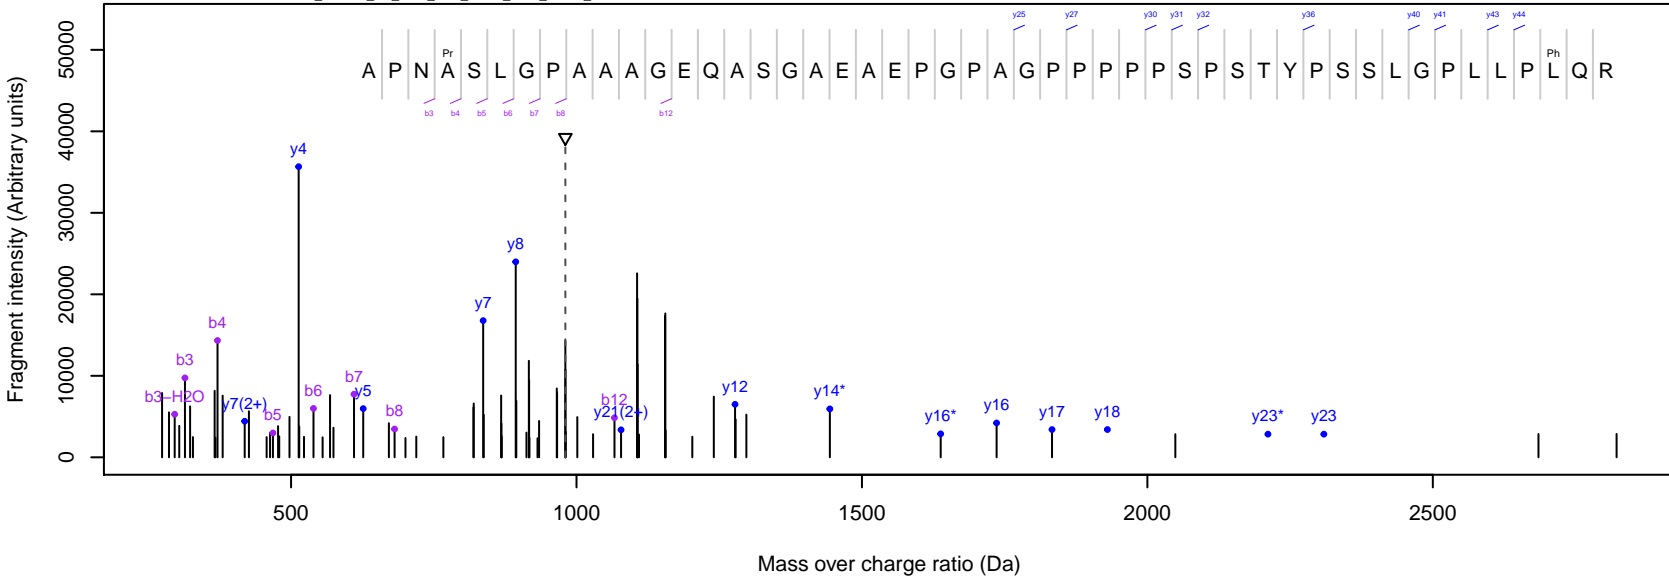

KT(Phospho (STY))PELGIVPPPIPR-3+

Source : QE3\_201126\_FR\_TiOx\_hum\_tissue\_Urea\_RNAB\_H Scan : 38233

Andromeda score : 49.865

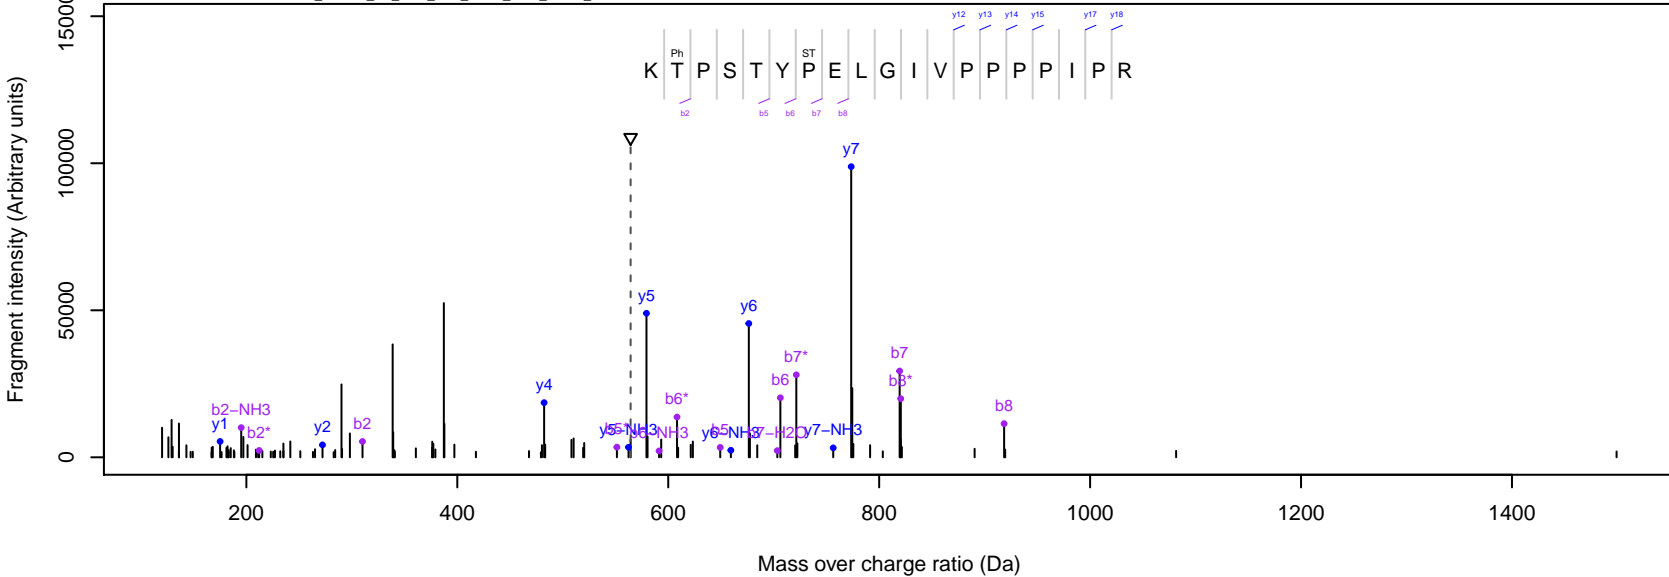

RSPGPGSPRS(Phospho (STY))PK-3+

Source : QE3\_201126\_FR\_TiOx\_hum\_tissue\_Urea\_RNAB\_H Scan : 3787

Andromeda score : 49.865

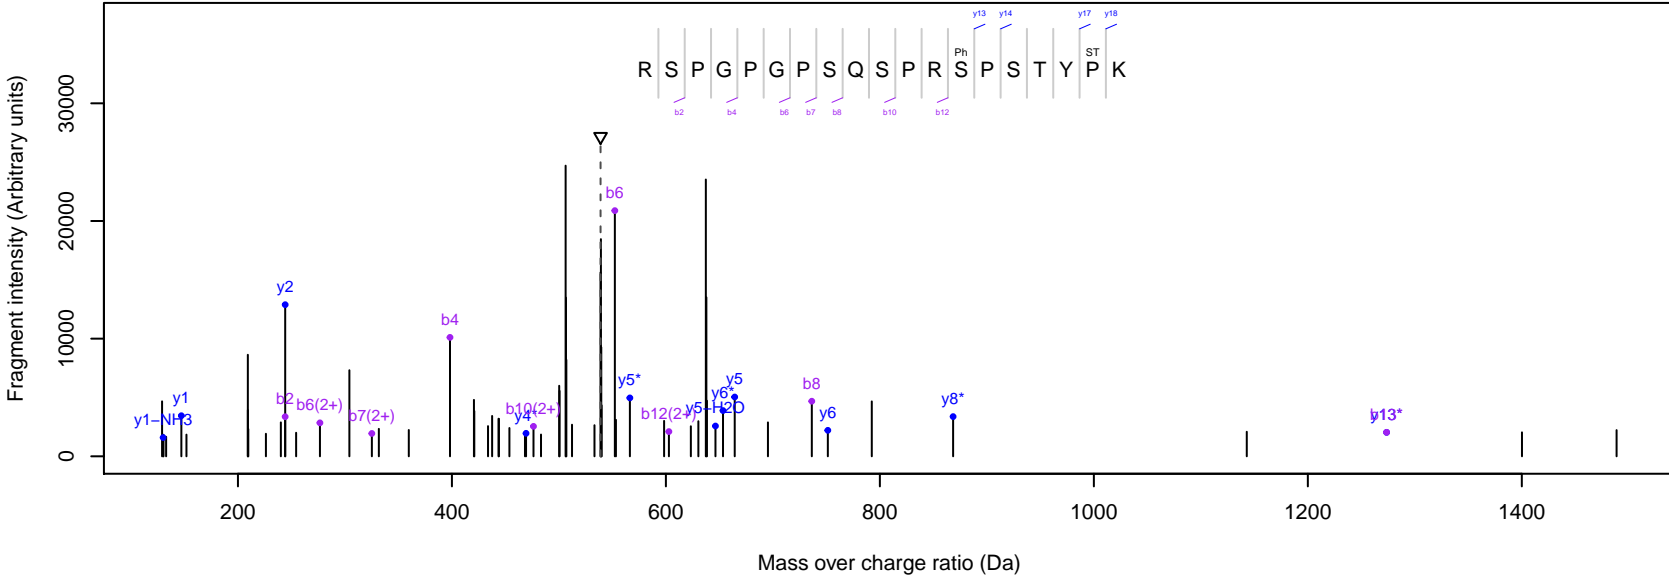

AATAARPPAPPAPQPPS(Phospho (STY))PTSPRRPTLAR-4+

Source : QE3\_201126\_FR\_TiOx\_hum\_tissue\_Urea\_RNAB\_N Scan : 24344

Andromeda score : 49.814

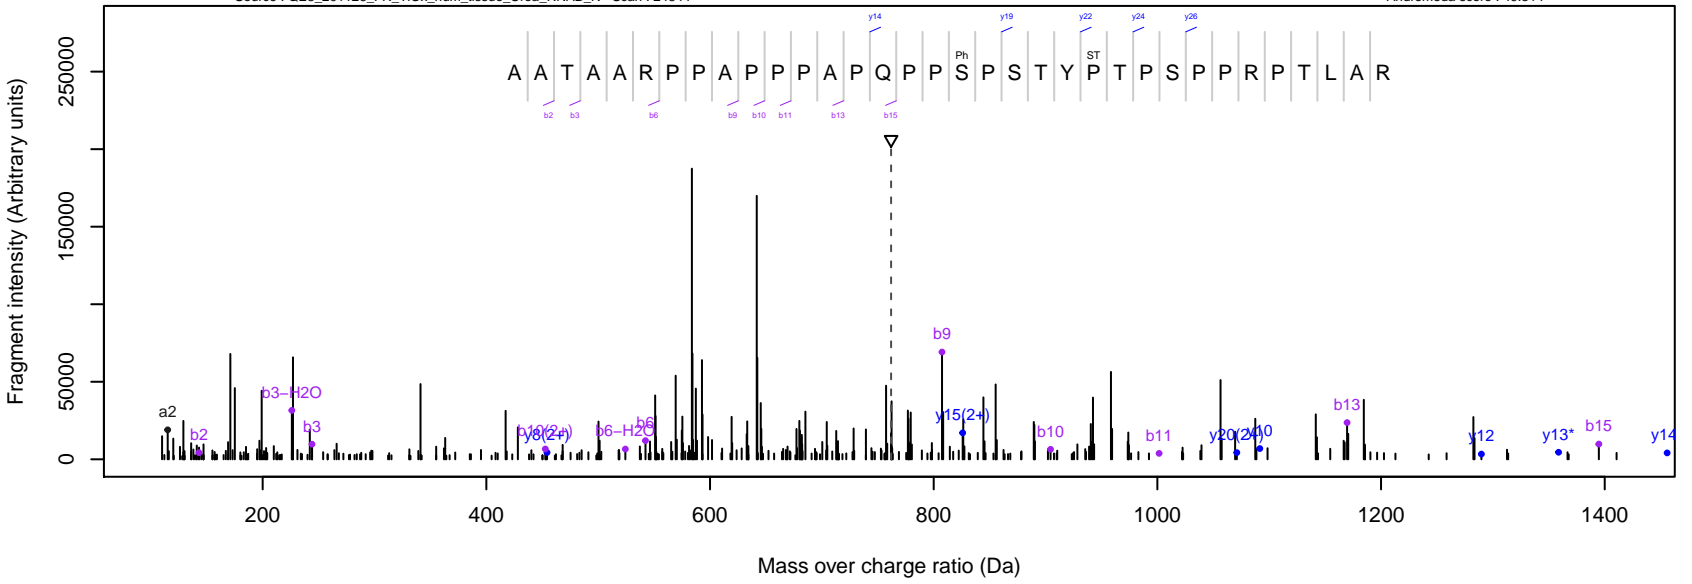

GHAGNRPDRPTDEGIFISKVSPSTYPTGAAGR-4+

Source : QE3\_201126\_FR\_TiOx\_hum\_tissue\_Urea\_RNAB\_H Scan : 21639

Andromeda score : 49.806

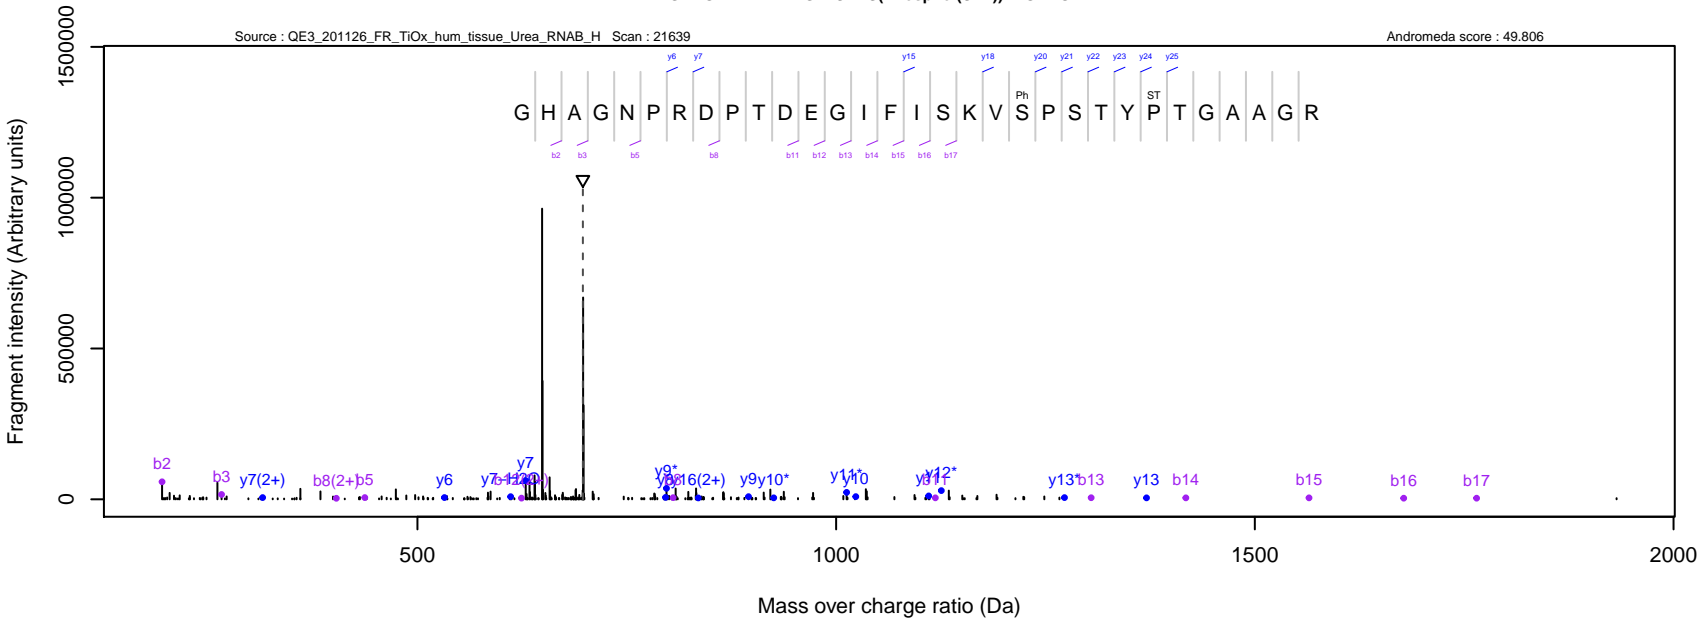

GQLTKS(Phospho (STY))PLAQMEEERR-3+

Source : QE3\_201126\_FR\_TiOx\_hum\_tissue\_Urea\_RNAB\_H Scan : 19012

Andromeda score : 49.768

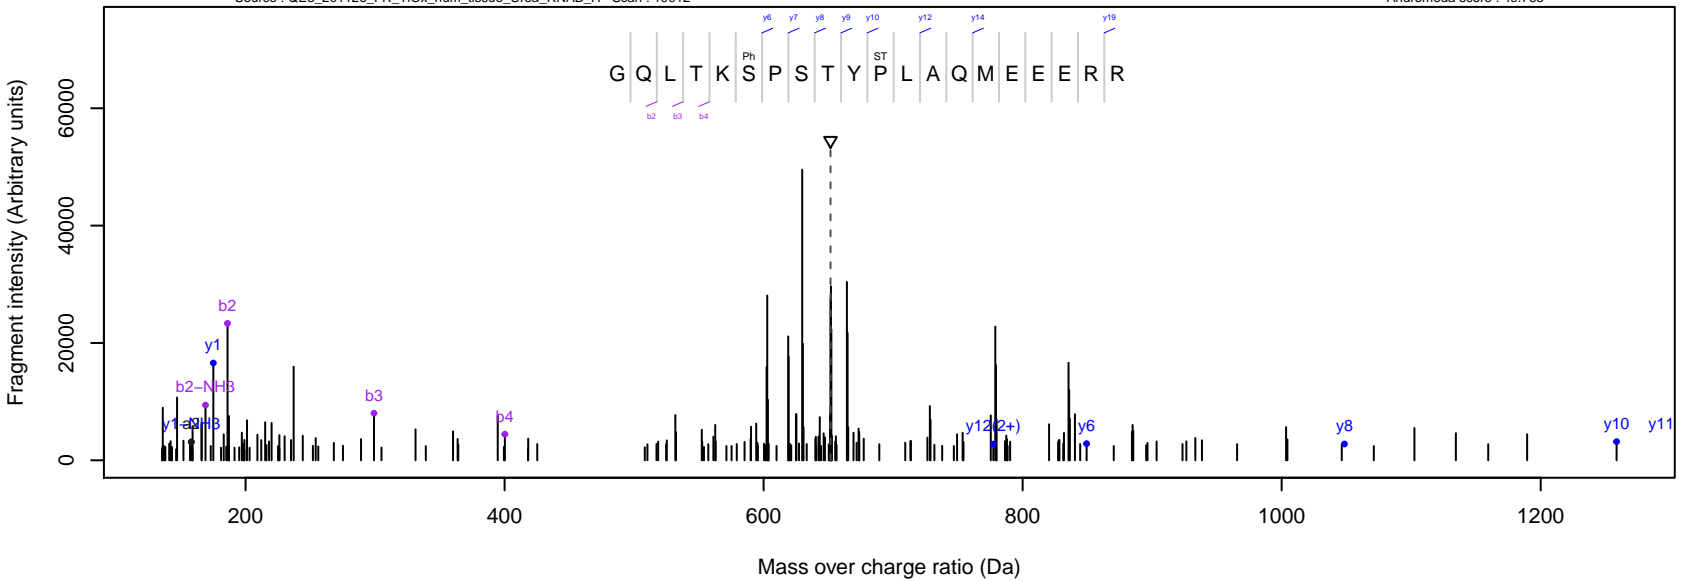

ELDALGHELPLAPQWEGYDELQ(TPhospho (STY))DGNRSSHSR-4+

Source : QE3\_201126\_FR\_TIOx\_hum\_tissue\_Urea\_RNAB\_H Scan : 49373

Andromeda score : 49.767

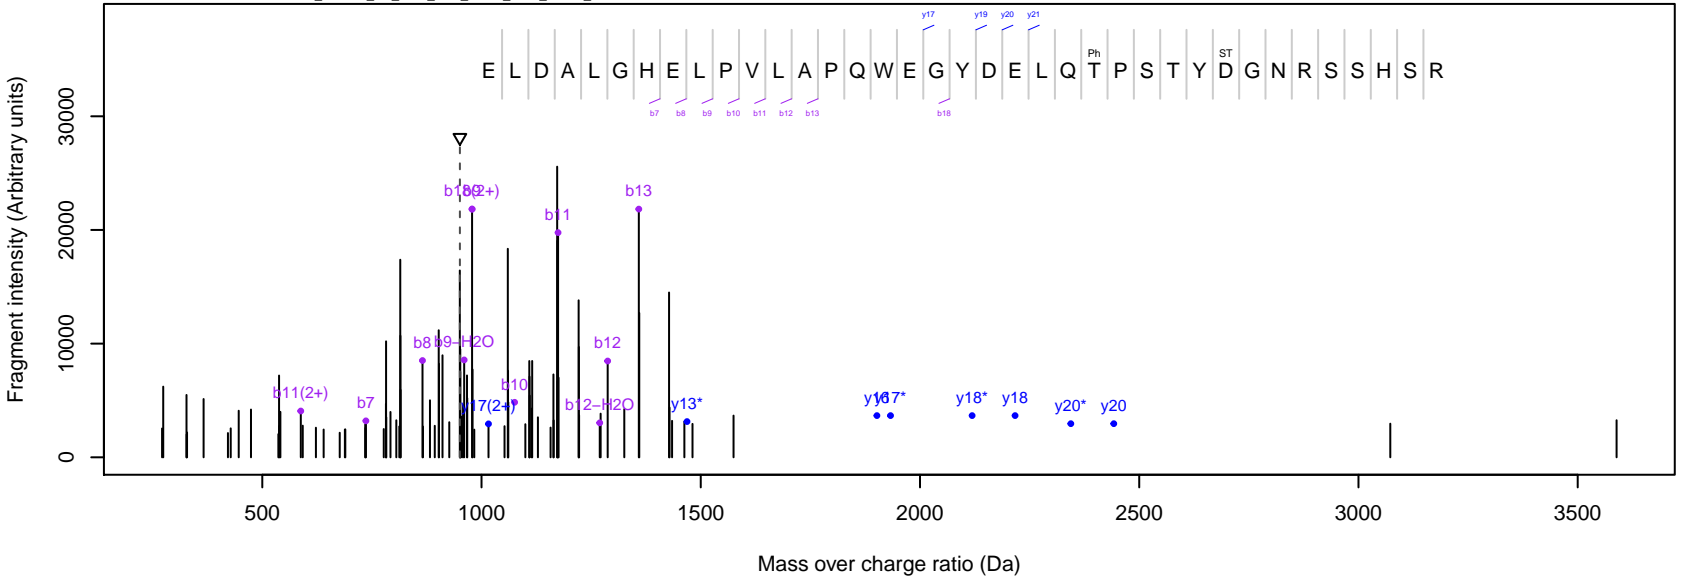

EKDLLPS(Phospho (STY))PAGVPSPKDPK-3+

Source : QE3\_201126\_FR\_TIOx\_hum\_tissue\_Urea\_RNAB\_N Scan : 19681

Andromeda score : 49.662

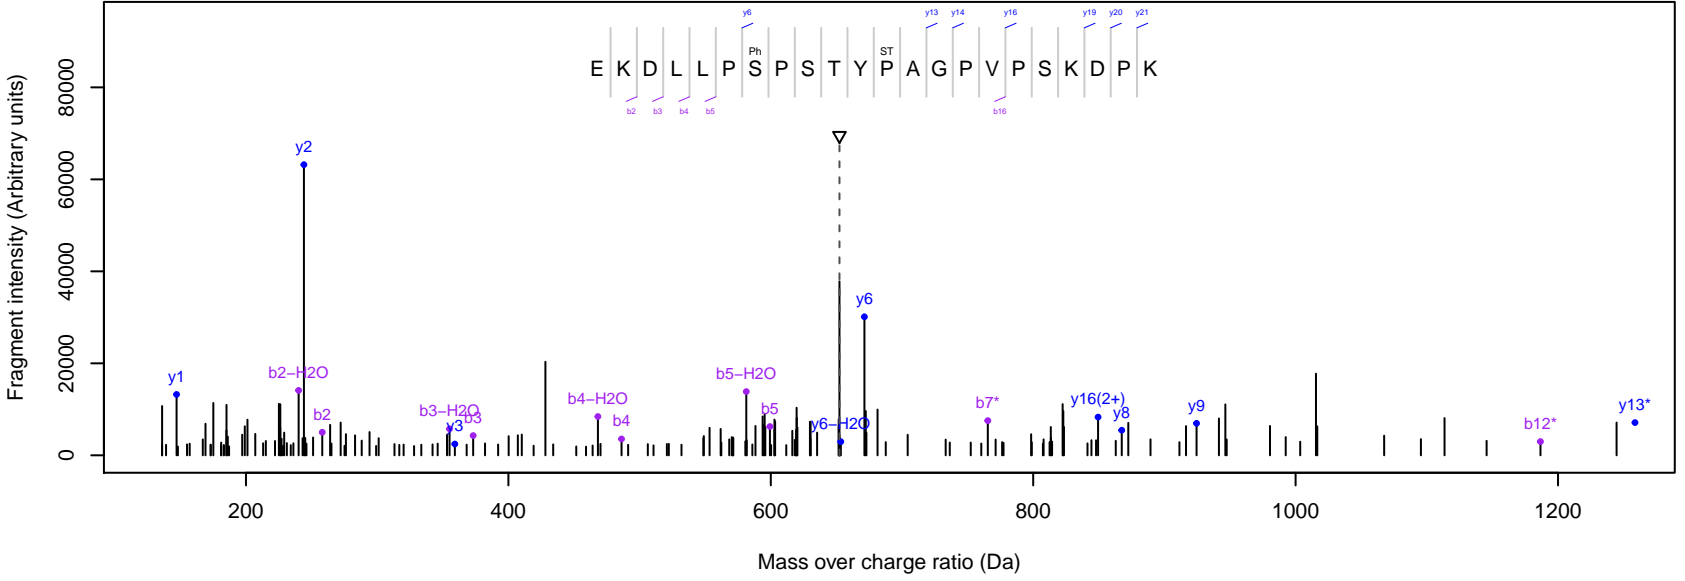

LTTTGQVT(Phospho (STY))SPVKGASFVTSTNPR-3+

Source : QE3\_201126\_FR\_TIOx\_hum\_tissue\_Urea\_RNAB\_H Scan : 26159

Andromeda score : 49.662

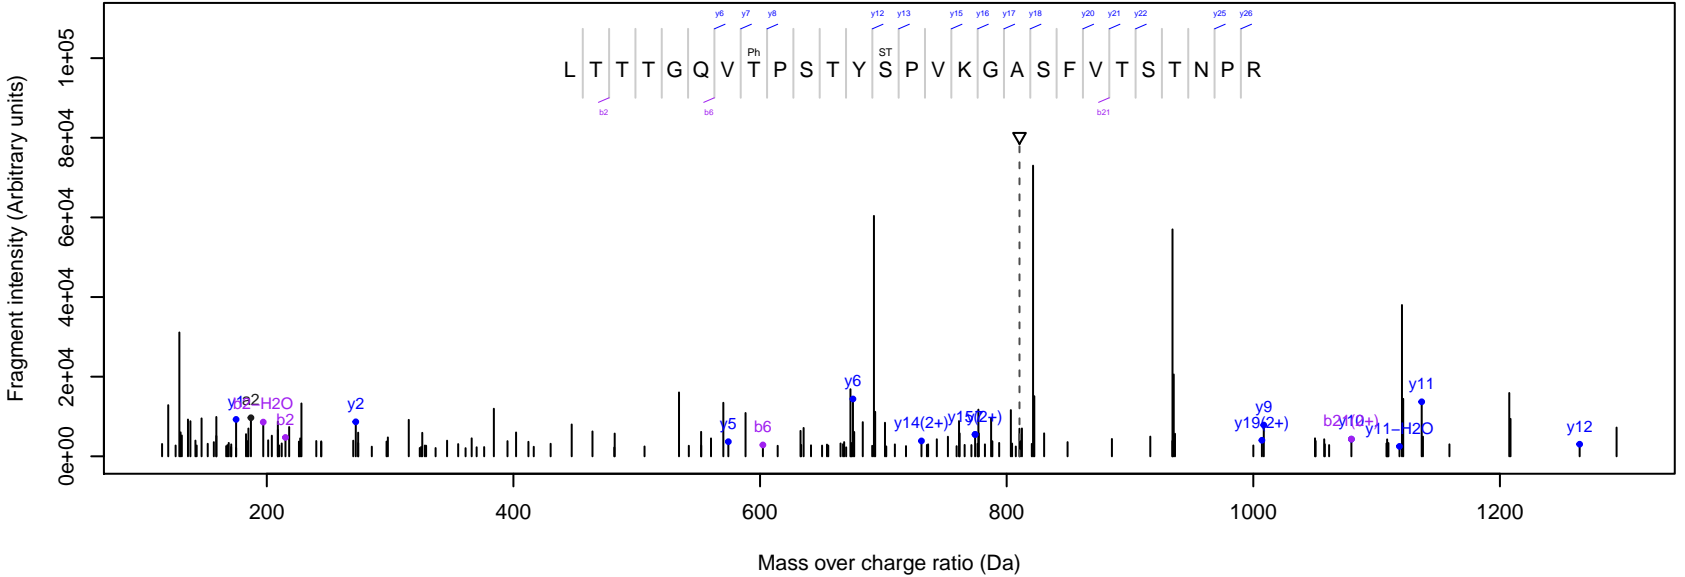

AQGGQT(Phospho (STY))QSPKSHTPSPSPK-3+

Source : QE3\_201126\_FR\_TIOx\_hum\_tissue\_Urea\_RNAB\_B Scan : 4279

Andromeda score : 49.638

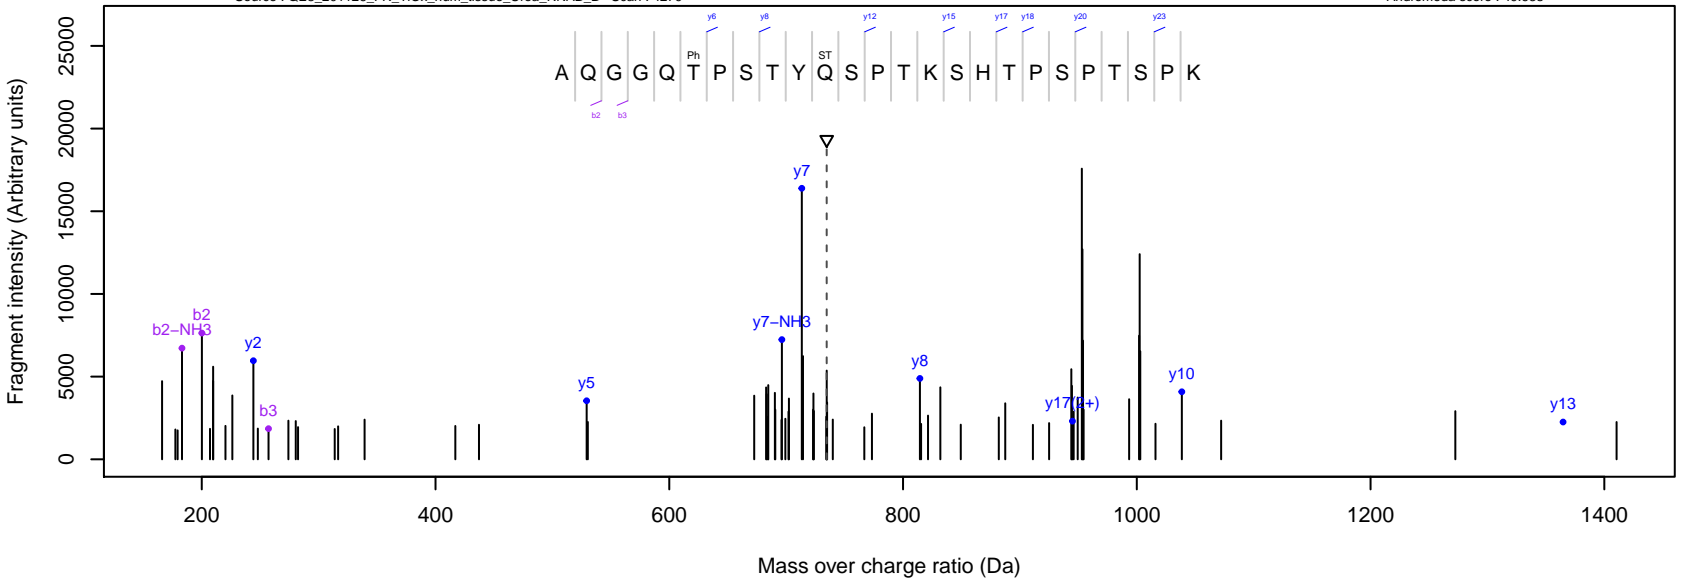

GCDS(Phospho (STY))PDPDTSYVLTPTHEEK-3+

Source : QE3\_201126\_FR\_TIOx\_hum\_tissue\_Urea\_RNAB\_B Scan : 24083

Andromeda score : 49.638

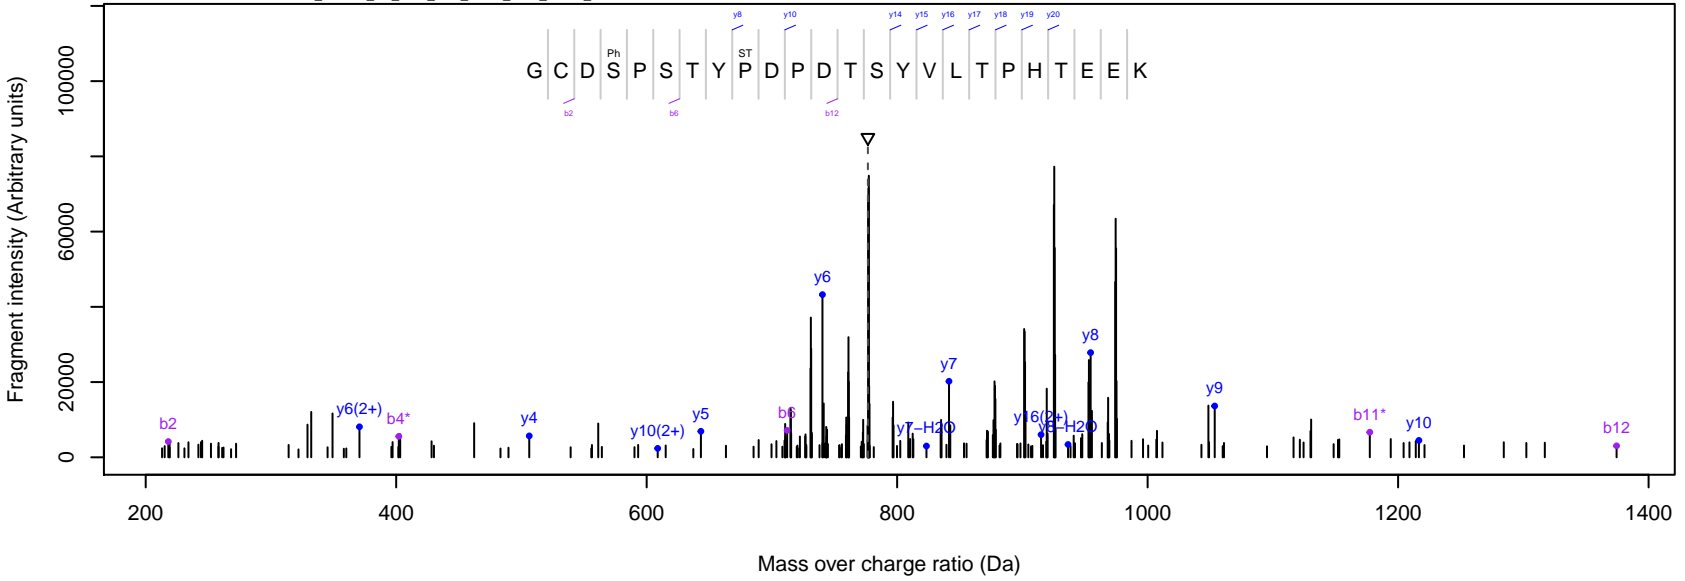

DSALQDT(Phospho (STY))DDS(Phospho (STY))DDDPVLIPGAR-3+

Source : QE3\_201126\_FR\_TIOx\_hum\_tissue\_Urea\_RNAB\_N Scan : 55653

Andromeda score : 49.618

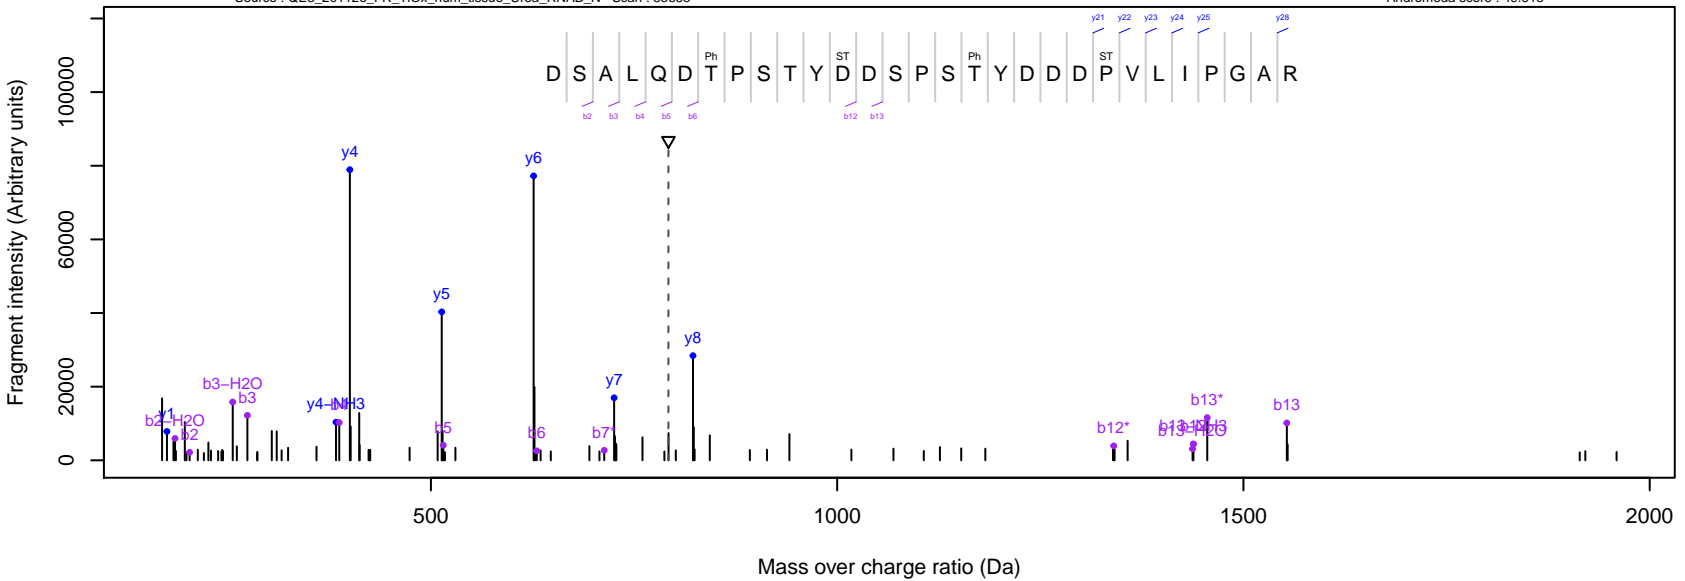



SGS(Phospho (STY))PSDNSGAEE(M))EVSLAKPK-3+

Source : QE3\_201126\_FR\_TiOx\_hum\_tissue\_Urea\_RNAB\_B Scan : 16143

Andromeda score : 49.618

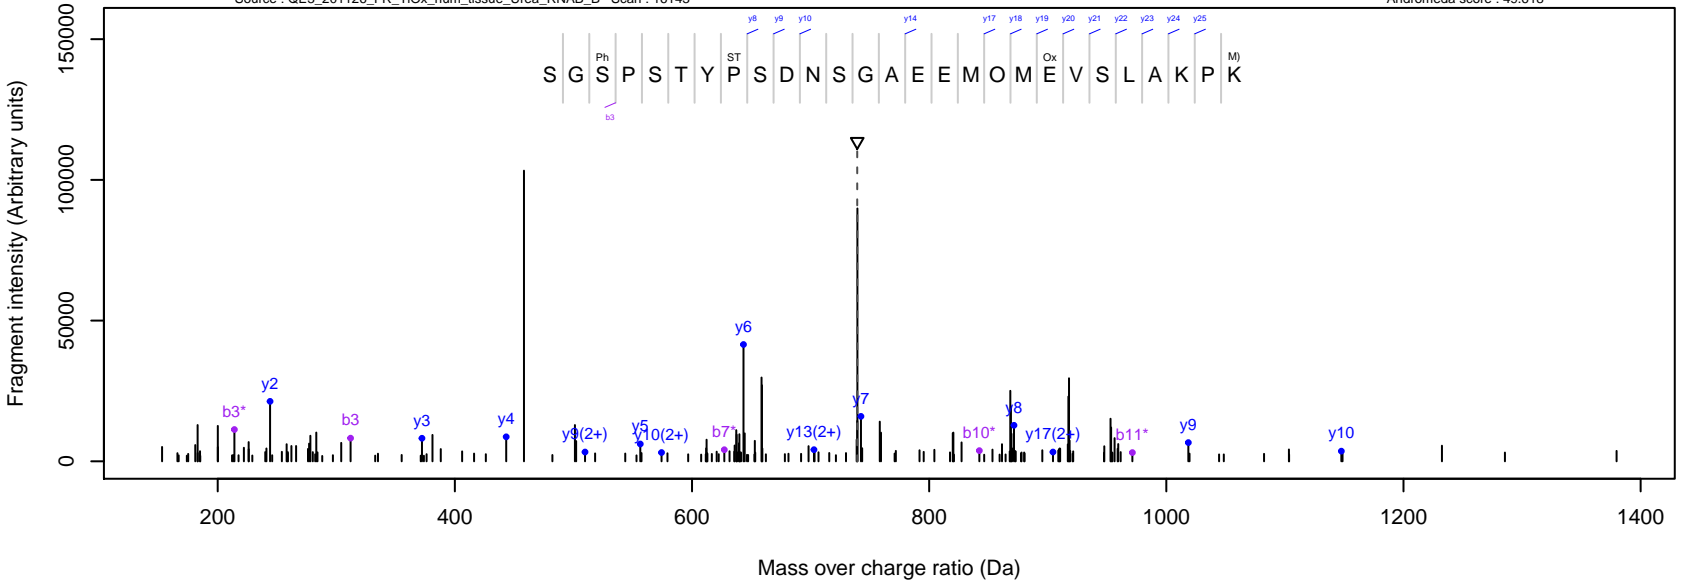

PFSAPKQT(Phospho (STY))SPSPK-3+

Source : QE3\_201126\_FR\_TiOx\_hum\_tissue\_Urea\_RNAB\_B Scan : 12010

Andromeda score : 49.595

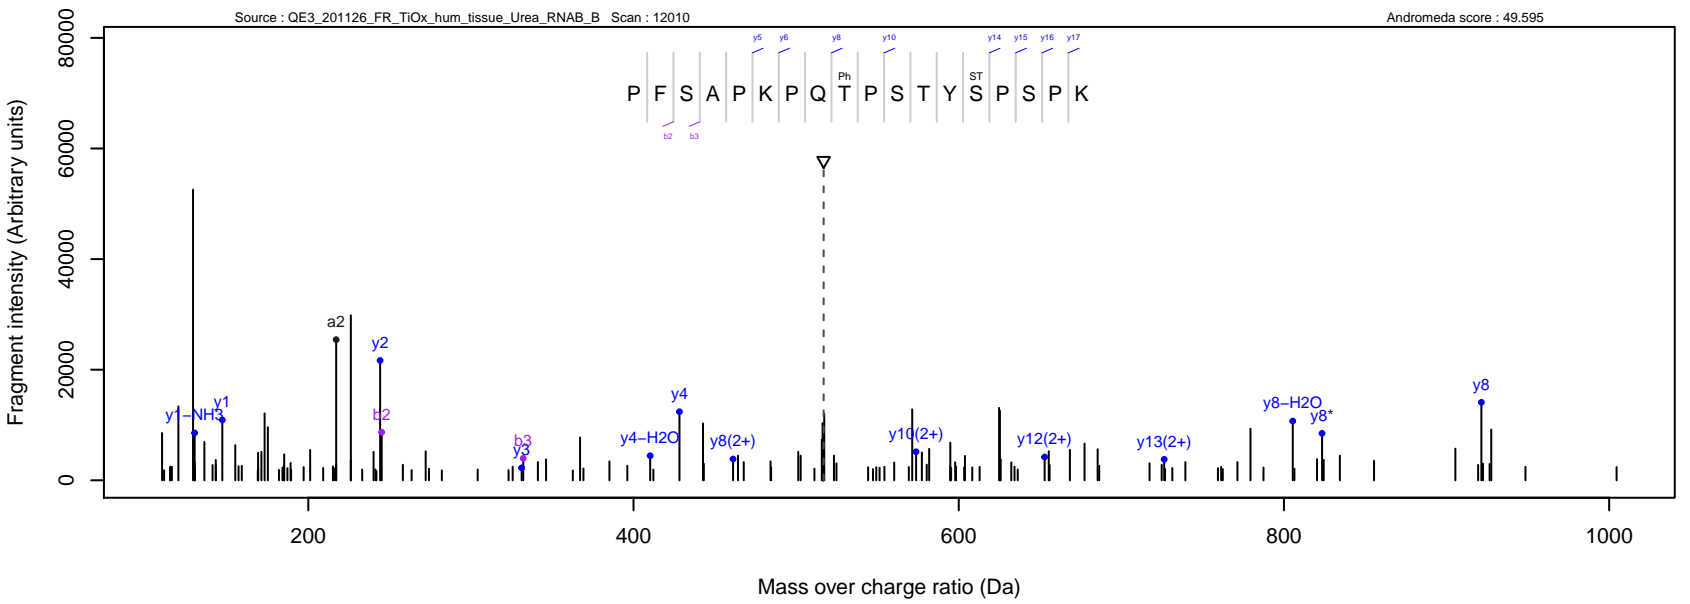

RNS(Phospho (STY))APVSVSAVR-3+

Source : QE3\_201126\_FR\_TiOx\_hum\_tissue\_Urea\_RNAB\_H Scan : 11521

Andromeda score : 49.595

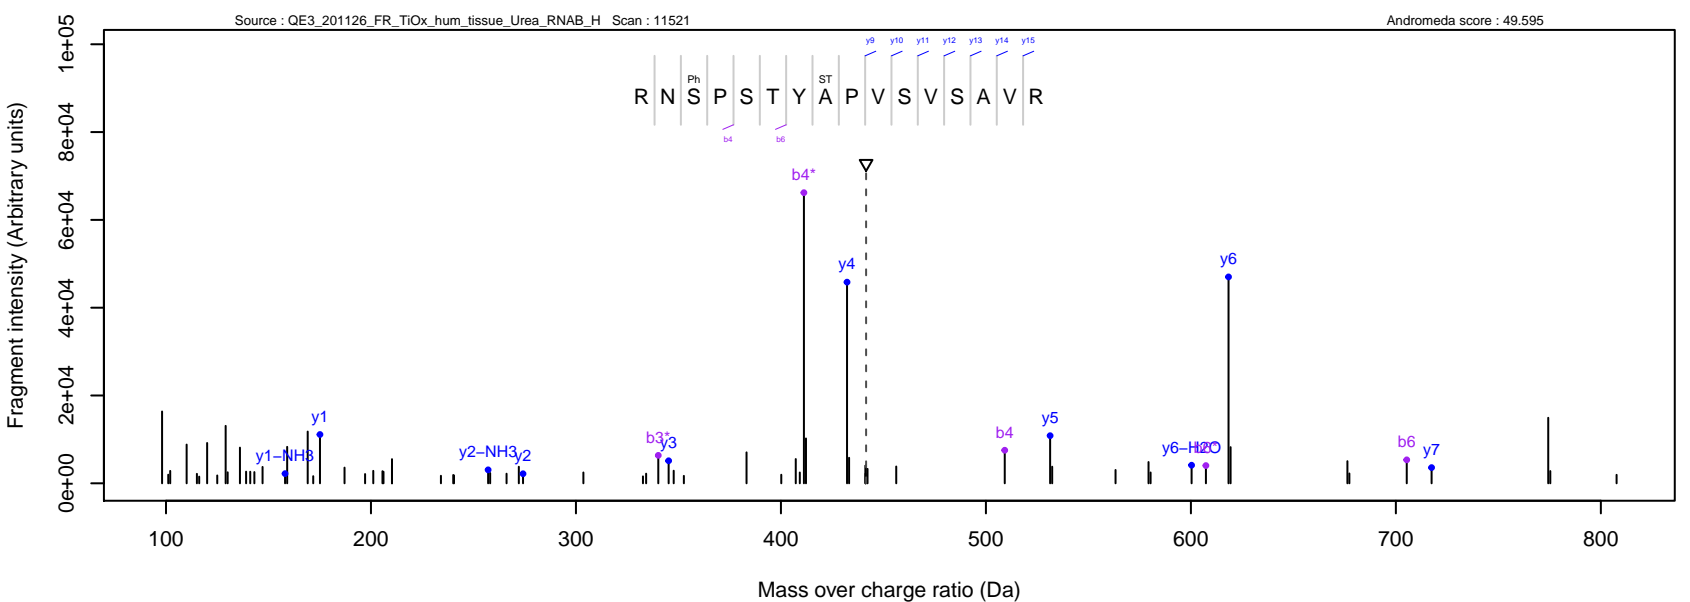

RRGNDPLT(Phospho (STY))SPGR-3+

Source : QE3\_201126\_FR\_TiOx\_hum\_tissue\_Urea\_RNAB\_H Scan : 6654

Andromeda score : 49.595

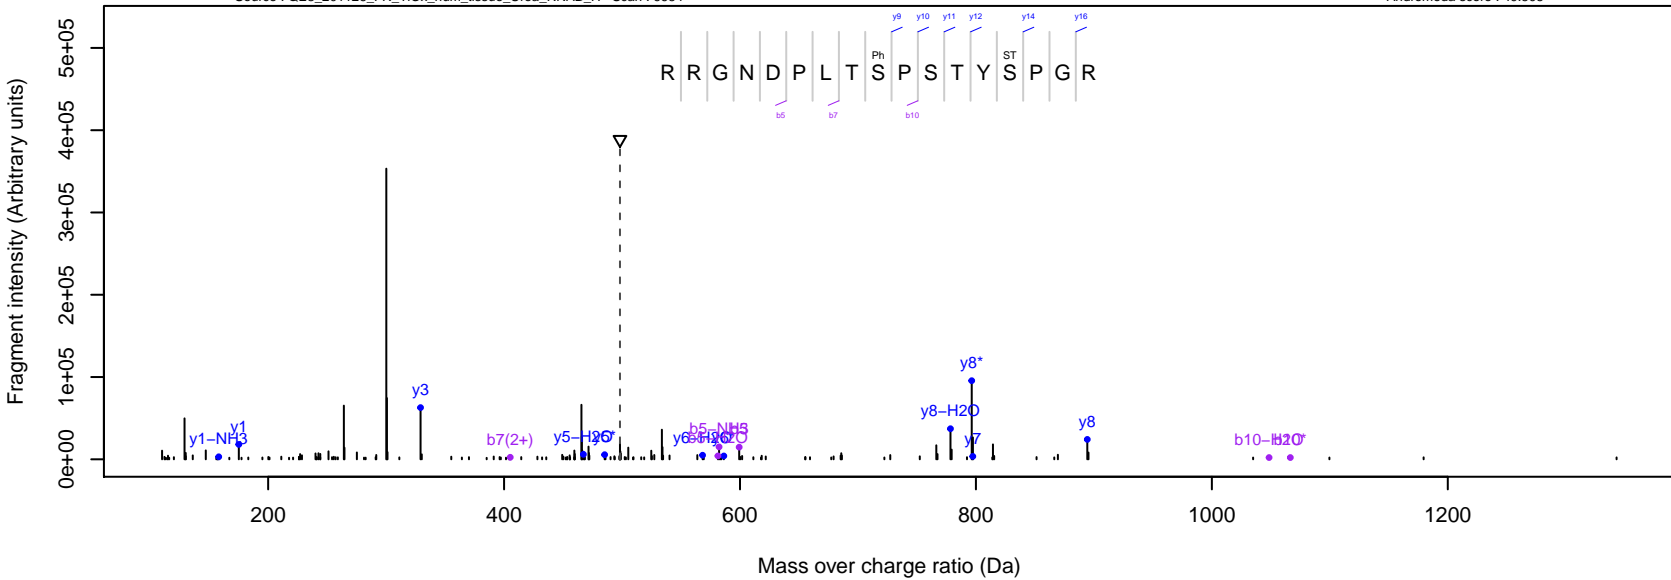

YRRS(Phospho (STY))PS(Phospho (STY))PYYSR-3+

Source : QE3\_201126\_FR\_TiOx\_hum\_tissue\_Urea\_RNAB\_N Scan : 8867

Andromeda score : 49.595

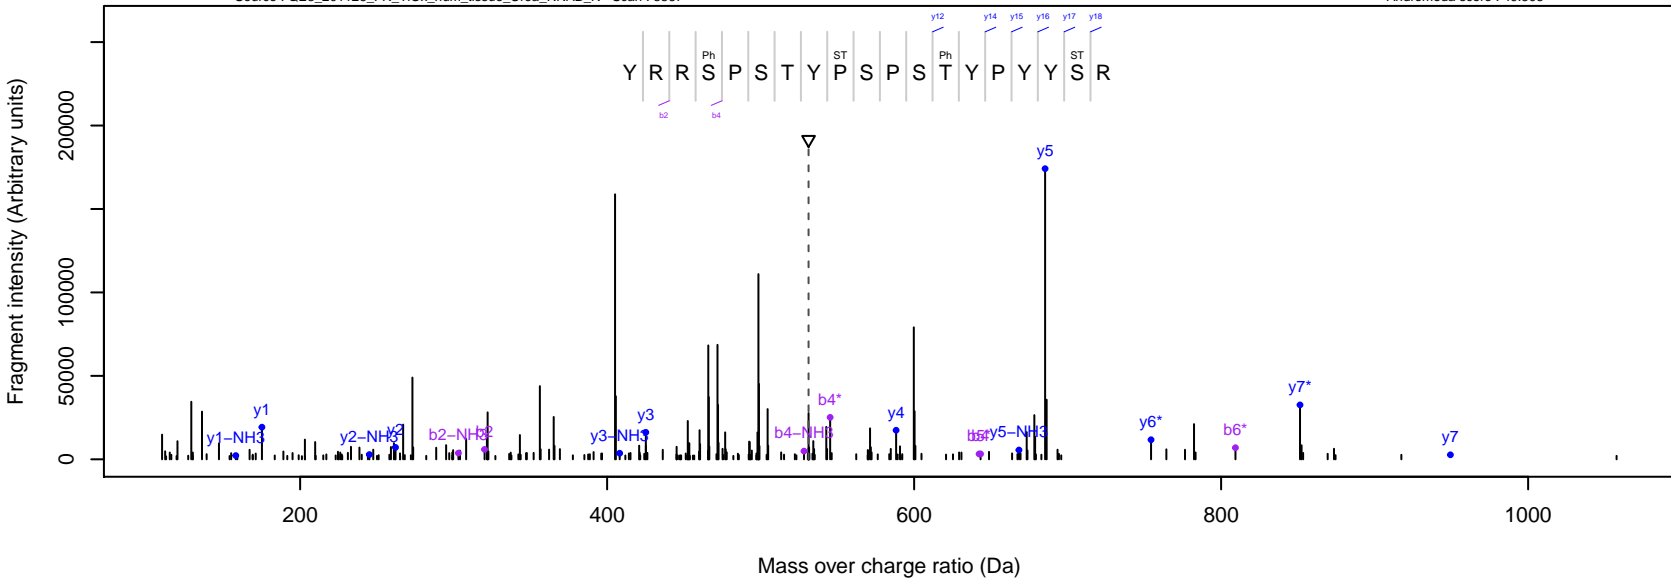

AQQELVPPQQAS(Phospho (STY))PPQLPK-3+

Source : QE3\_201126\_FR\_TiOx\_hum\_tissue\_Urea\_RNAB\_B Scan : 31379

Andromeda score : 49.593

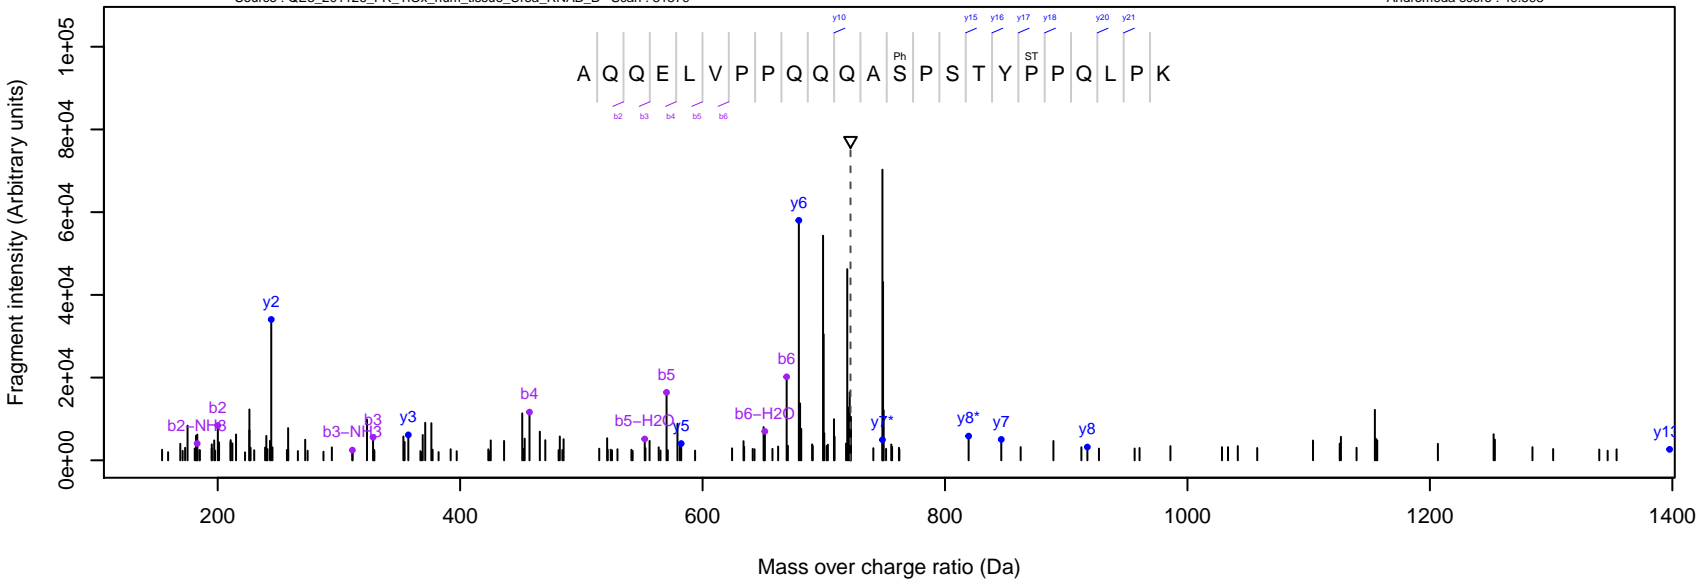

DEEERYFDEEPEPADAPS(Phospho (STY))PELDGD-3+

Source : QE3\_201126\_FR\_TiOx\_hum\_tissue\_Urea\_RNAB\_H Scan : 43686

Andromeda score : 49.559

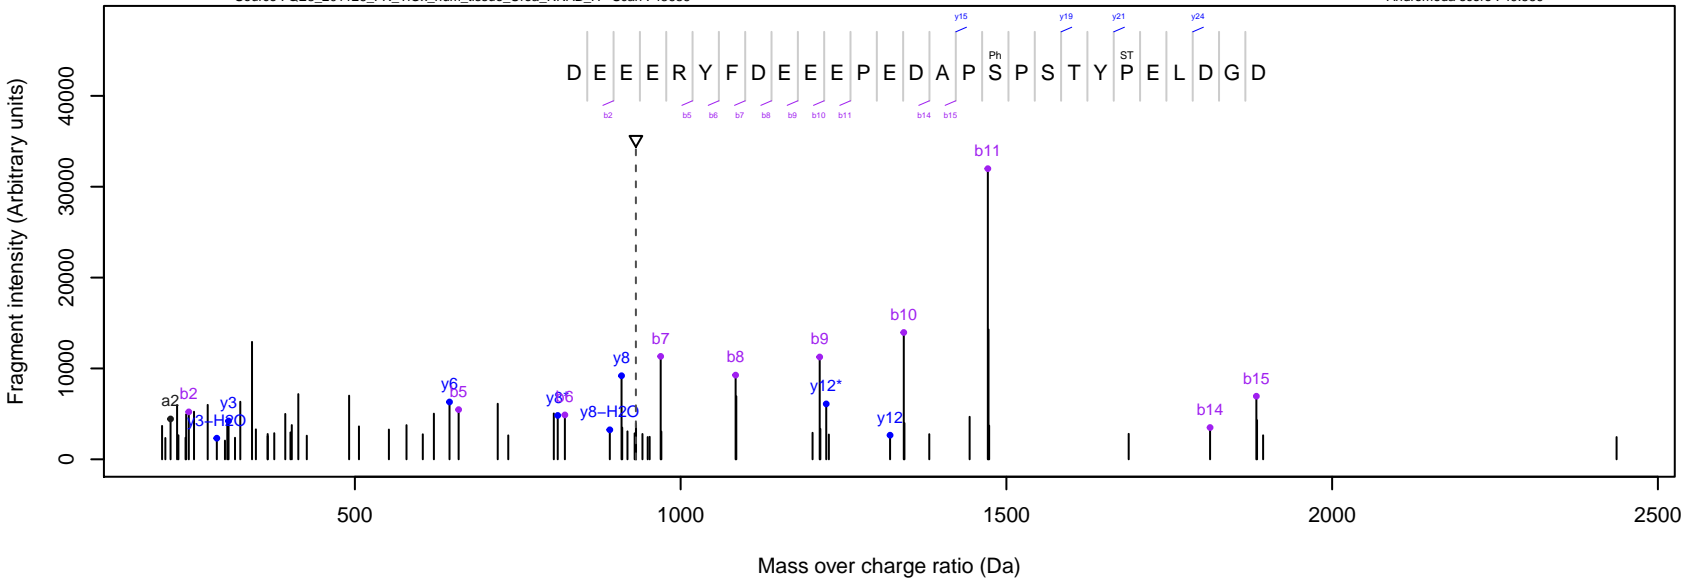

S(Phospho (STY))PTGPSNSFLANM(Oxidation (M))GGTVAHK-3+

Source : QE3\_201126\_FR\_TiOx\_hum\_tissue\_Urea\_RNAB\_H Scan : 21056

Andromeda score : 49.555

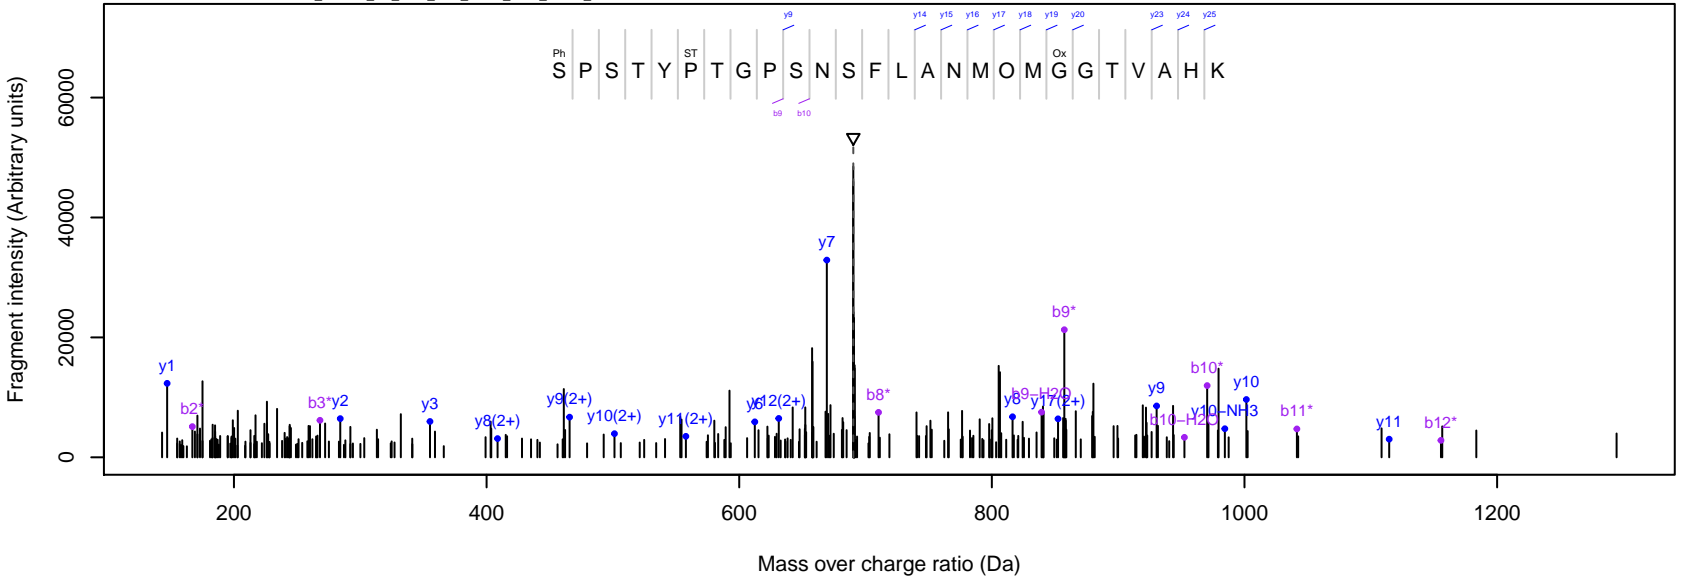

KQPPKEPSEVPT(Phospho (STY))PK-3+

Source : QE3\_201126\_FR\_TiOx\_hum\_tissue\_Urea\_RNAB\_N Scan : 6967

Andromeda score : 49.537

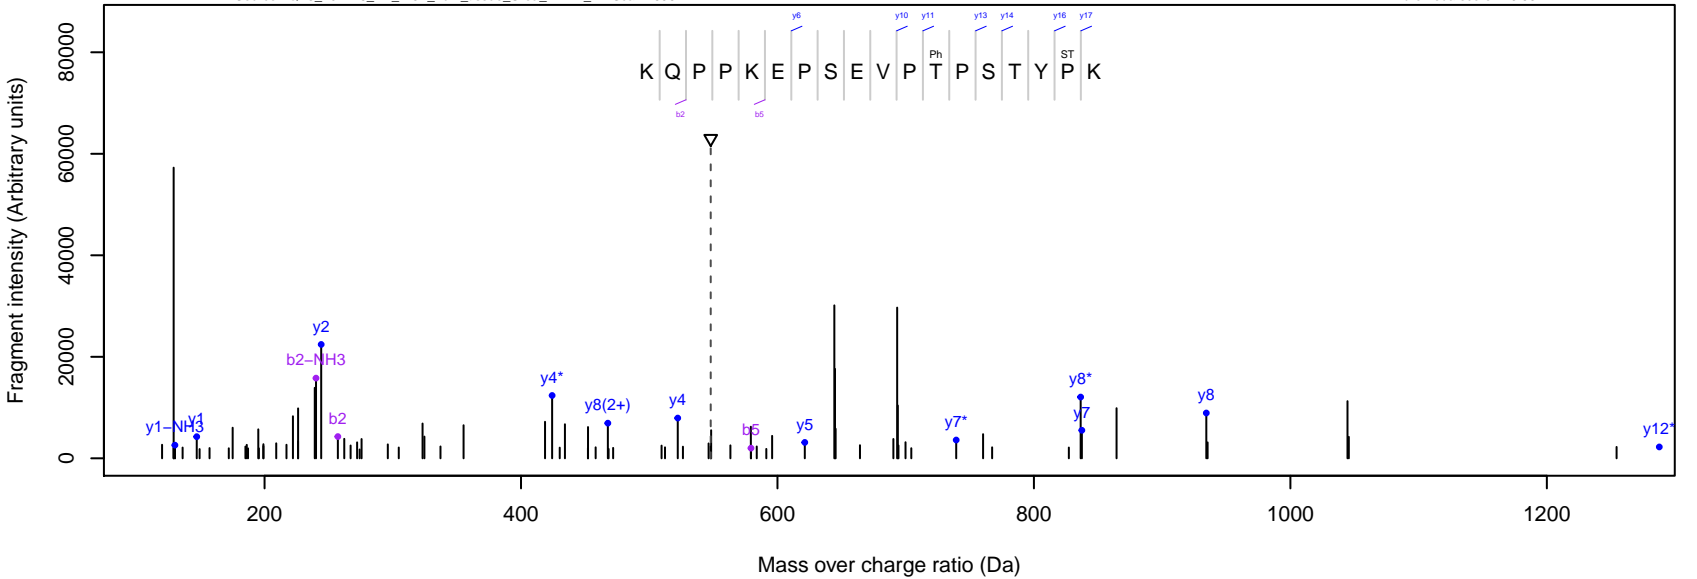

QPASAQSTPTPHS(Phospho (STY))SPK-3+

Source : QE3\_201126\_FR\_TiOx\_hum\_tissue\_Urea\_RNAB\_H Scan : 5408

Andromeda score : 49.537

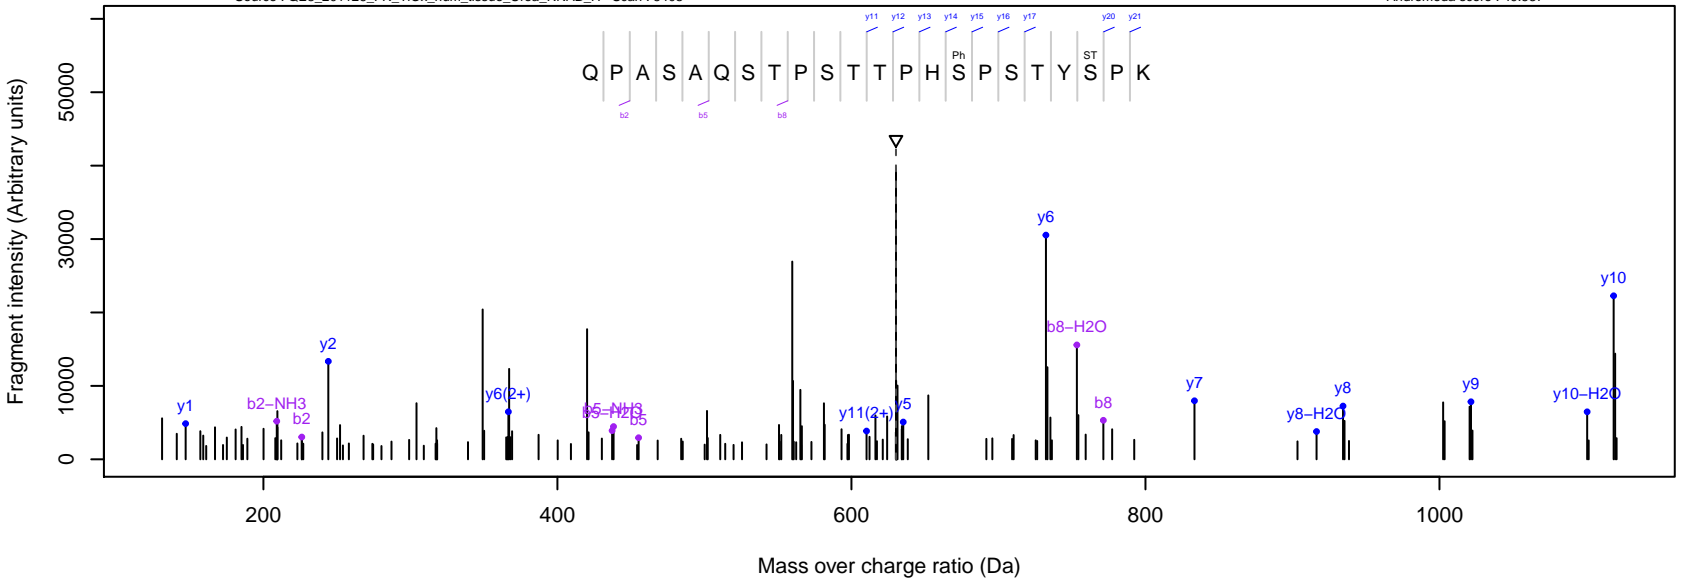

KLS(Phospho (STY))VLGK-2+

Source : QE3\_201126\_FR\_TiOx\_hum\_tissue\_Urea\_RNAB\_N Scan : 12027

Andromeda score : 49.536

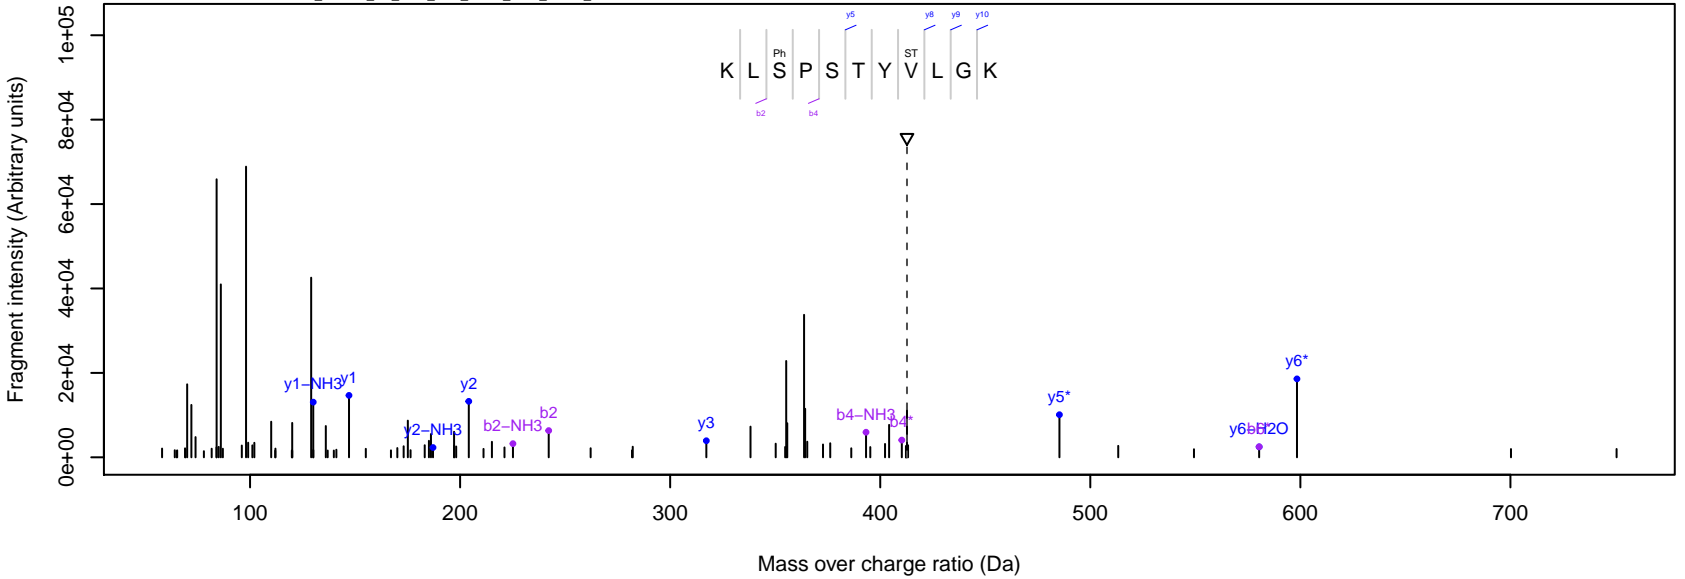

DDTS(Phospho (STY))NELVGIIDYIRT(Phospho (STY))FTWDK-4+

Source : QE3\_201126\_FR\_TiOx\_hum\_tissue\_Urea\_RNAB\_B Scan : 28676

Andromeda score : 49.528

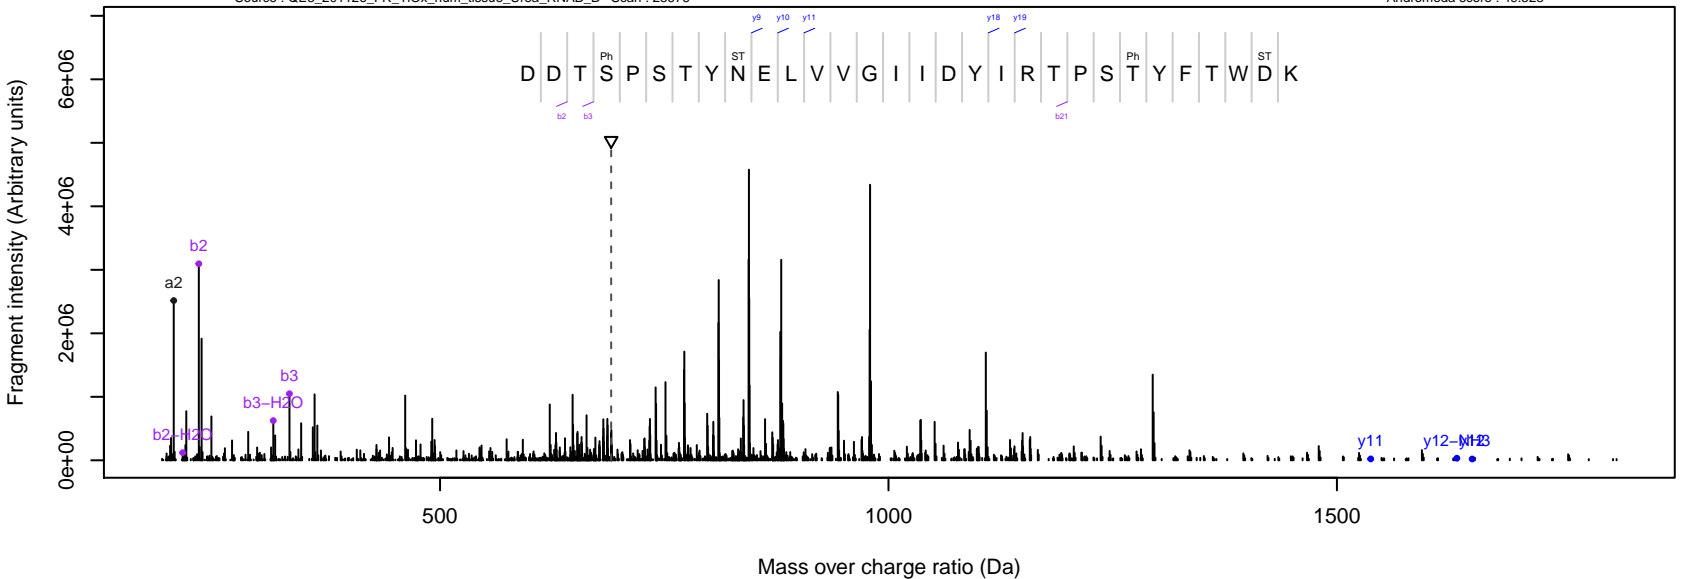

WKGYT(Phospho (STY))SDDDTWEPEIHLLEDCK-3+

Source : QE3\_201126\_FR\_TiOx\_hum\_tissue\_Urea\_RNAB\_N Scan : 38780

Andromeda score : 49.528

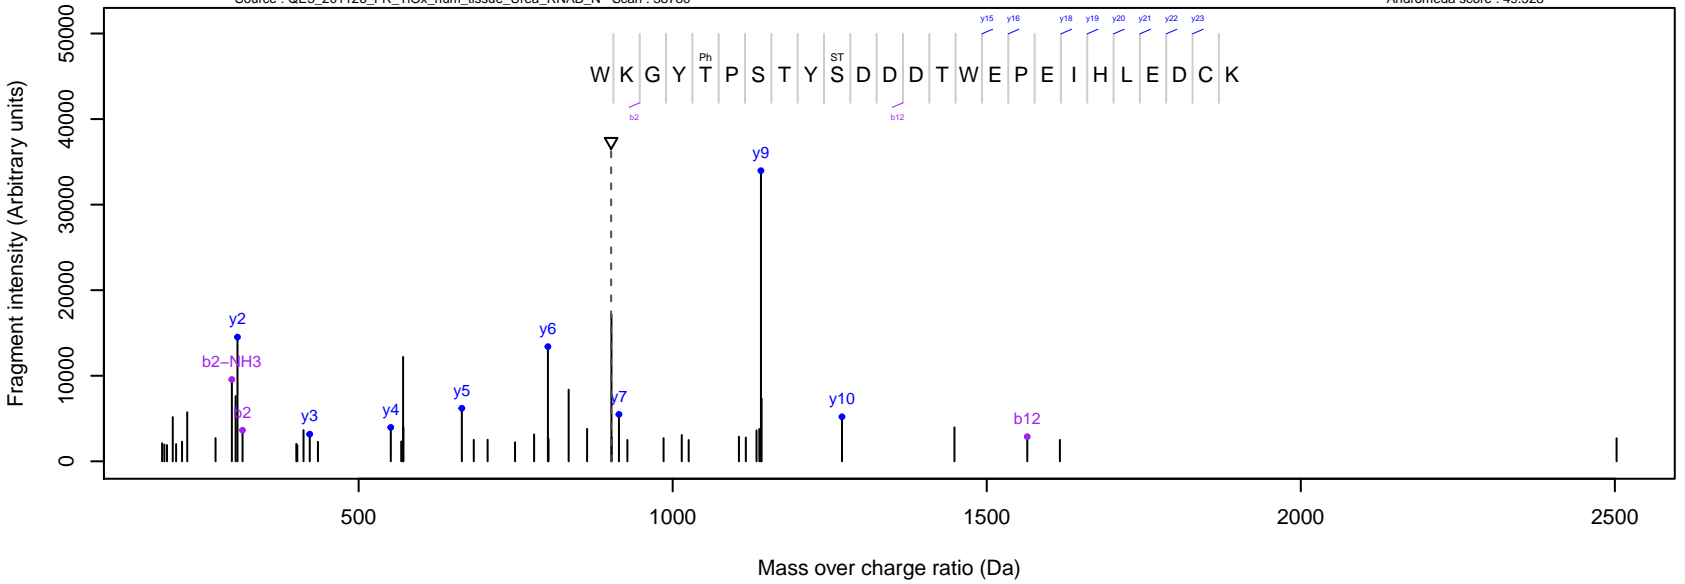

S(Phospho (STY))T(Phospho (STY))S(Phospho (STY))FRGGM(Oxidation (M))GSGGLATGIAGGLAGMGGIQNEKETM(Oxidation (M))QSLNDR-4+

Source : QE3\_201126\_FR\_TiOx\_hum\_tissue\_Urea\_RNAB\_N Scan : 51954

Andromeda score : 49.518

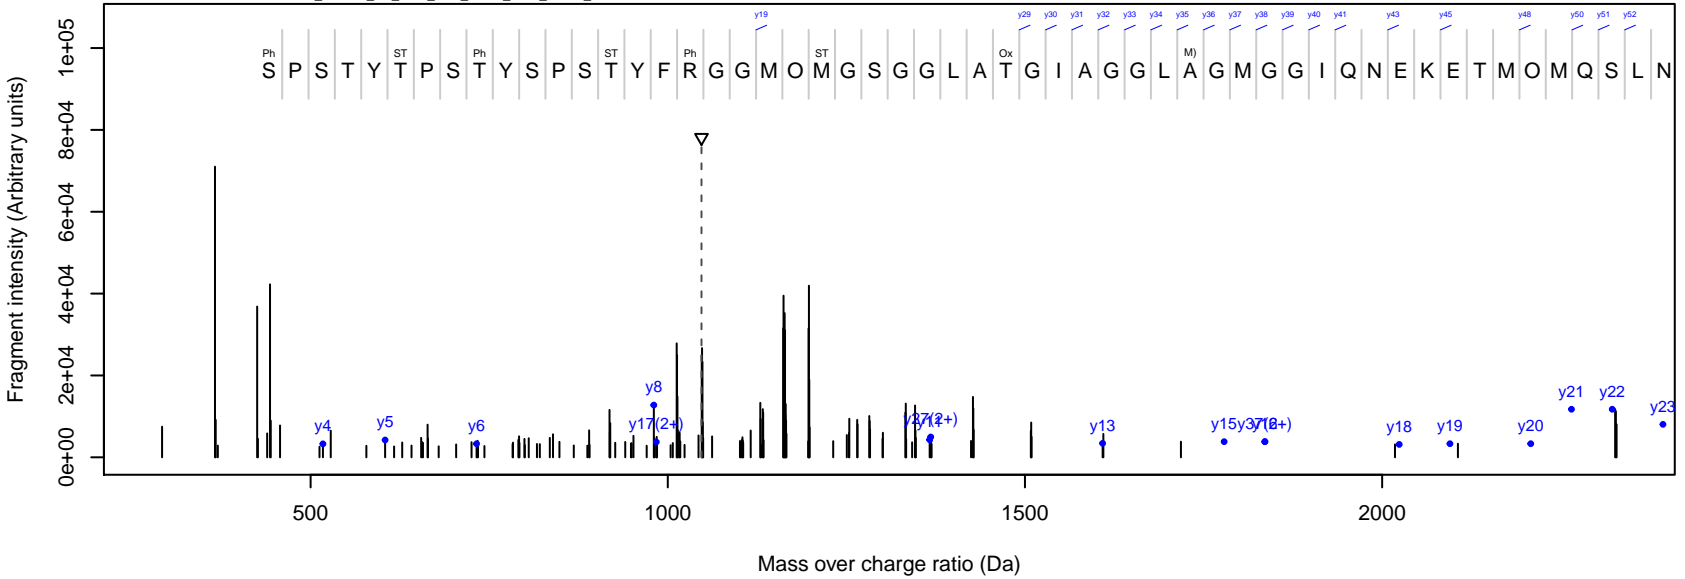

NVIGLQM(Oxidation (M))GT(Phospho (STY))NR-2+

Source : QE3\_201126\_FR\_TiOx\_hum\_tissue\_Urea\_RNAB\_N Scan : 19965

Andromeda score : 49.483

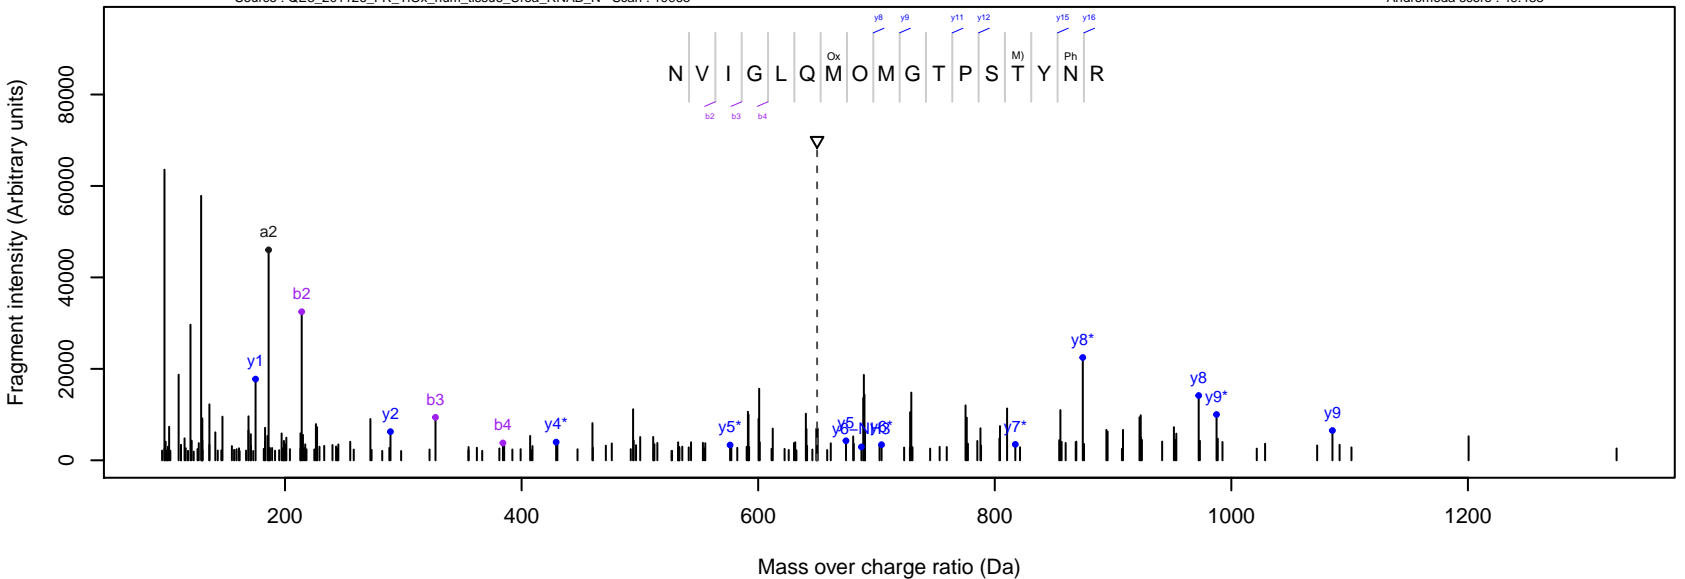

RSS(Phospho (STY))RSS(Phospho (STY))PELTR-3+

Source : QE3\_201126\_FR\_TiOx\_hum\_tissue\_Urea\_RNAB\_H Scan : 5006

Andromeda score : 49.482

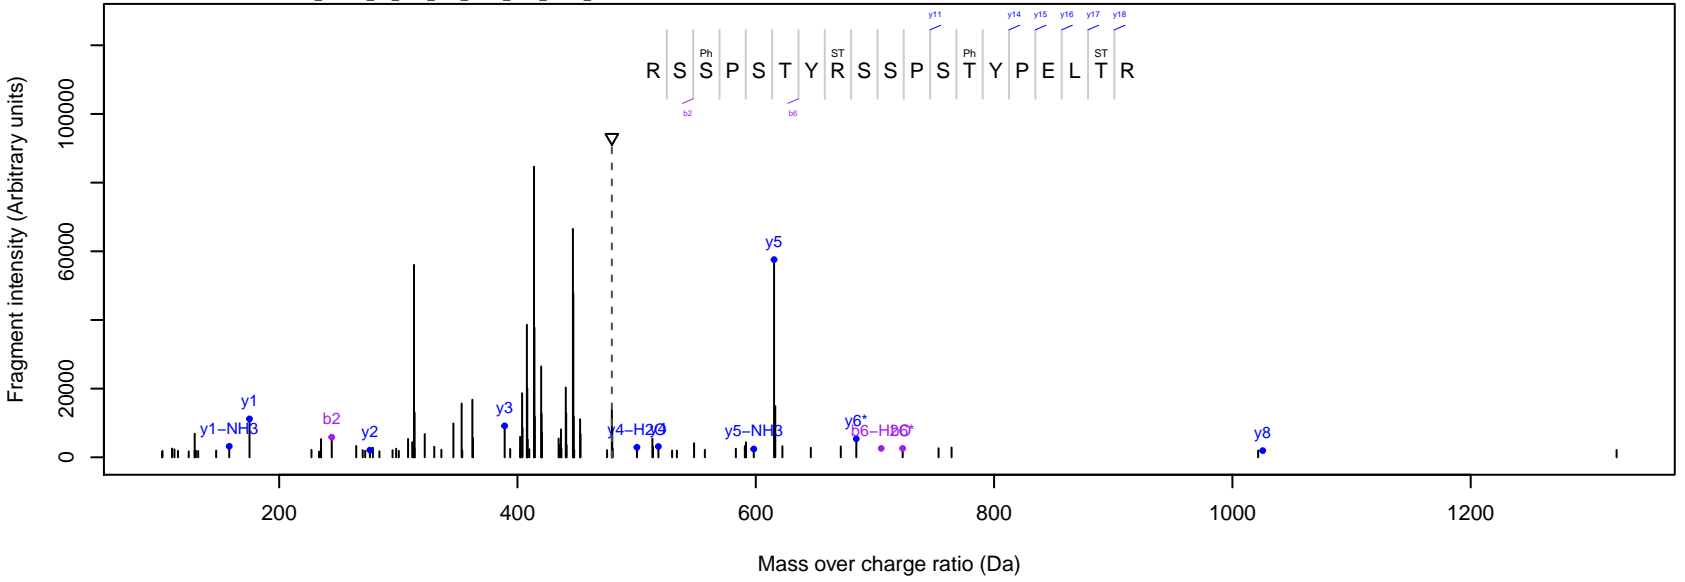

S(Phospho (STY))LGSVQAPS(Phospho (STY))YGARPVS(Phospho (STY))SAASVYAGAGGS(Phospho (STY))GSR-3+

Source : QE3\_201126\_FR\_TiOx\_hum\_tissue\_Urea\_RNAB\_N Scan : 51881

Andromeda score : 49.479

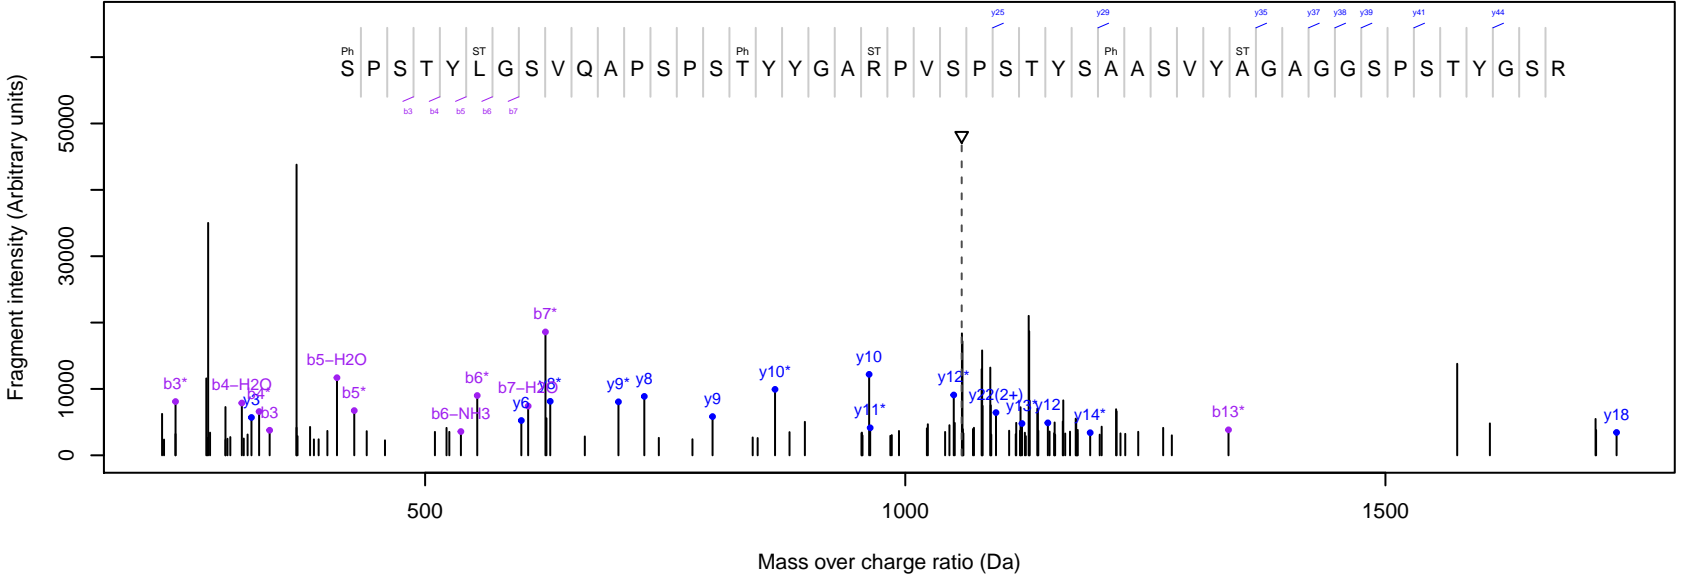

GHYEVTGS(Phospho (STY))DDEETGK-3+

Source : QE3\_201126\_FR\_TiOx\_hum\_tissue\_Urea\_RNAB\_B Scan : 7952

Andromeda score : 49.463

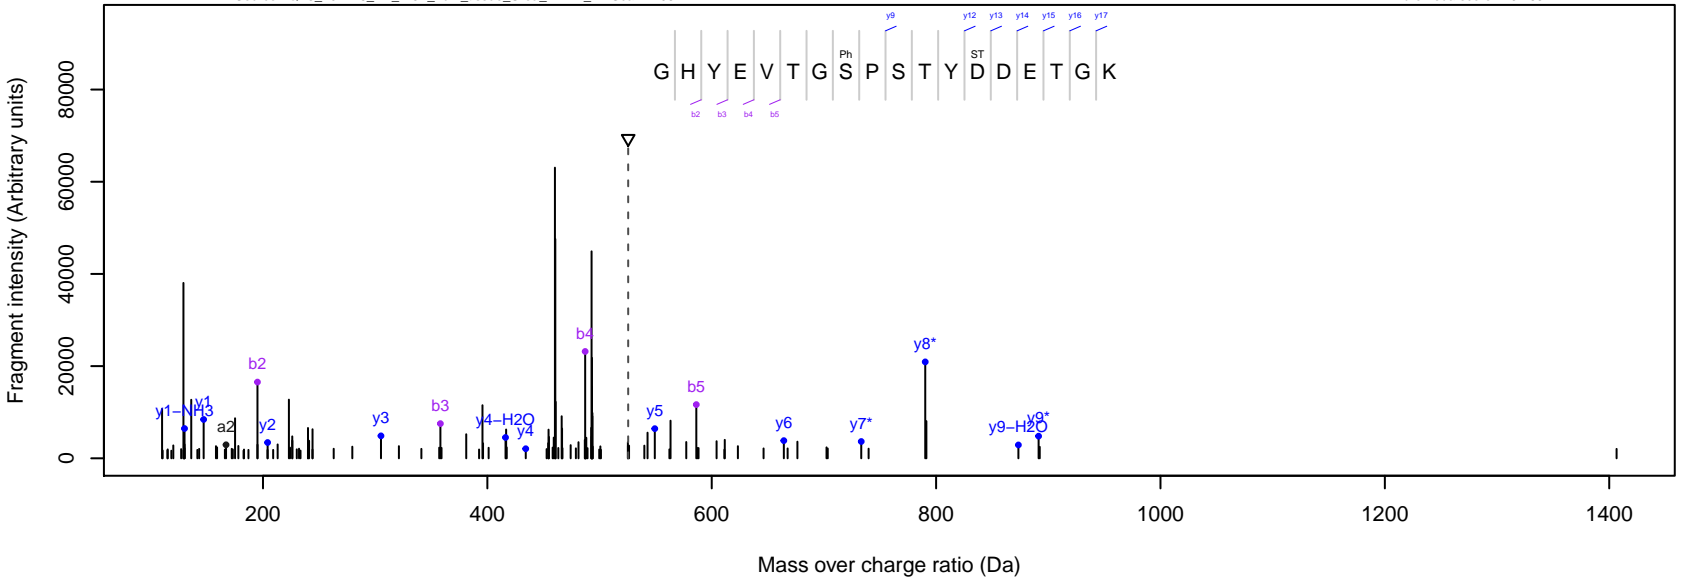

ELPPLS(Phospho (STY))PLSR-2+

Source : QE3\_201126\_FR\_TiOx\_hum\_tissue\_Urea\_RNAB\_H Scan : 33419

Andromeda score : 49.448

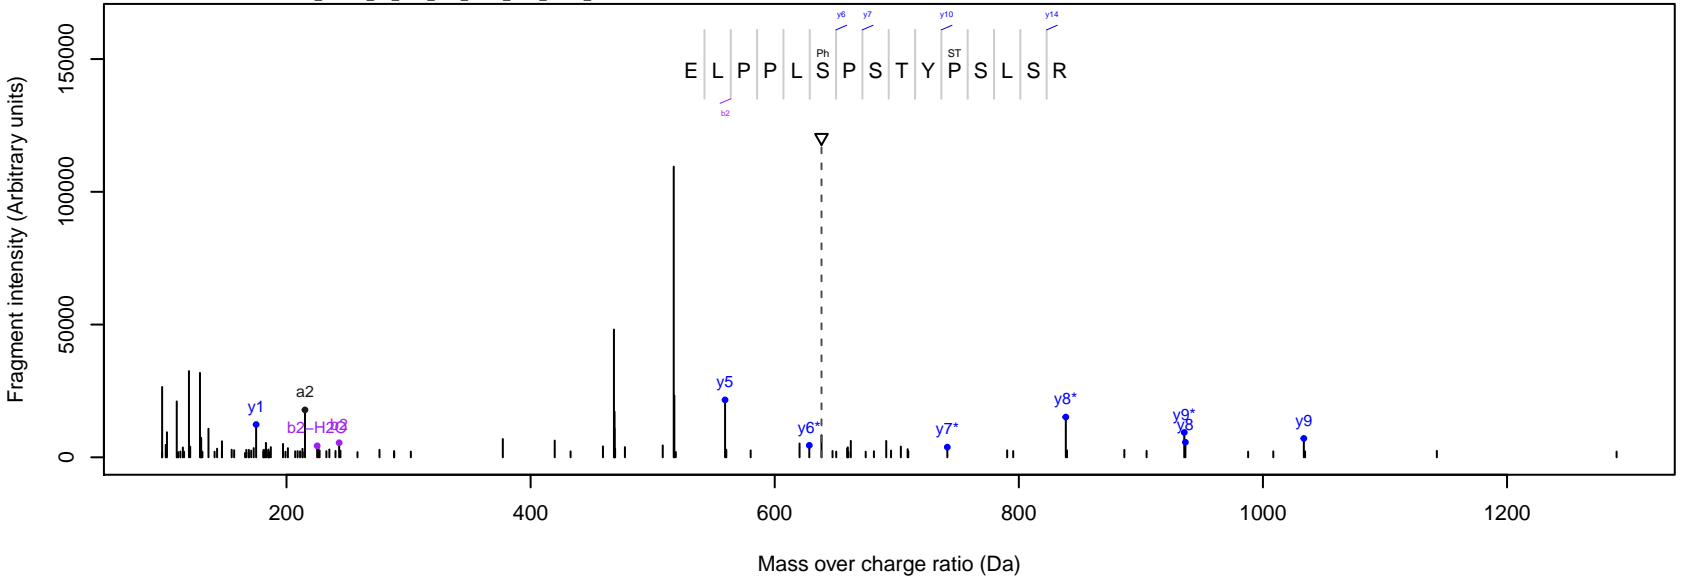

VDLHTSGEHSSELVQEEENL(Phospho (STY))PGTQTPSNDK-4+

Source : QE3\_201126\_FR\_TiOx\_hum\_tissue\_Urea\_RNAB\_H Scan : 21830

Andromeda score : 49.445

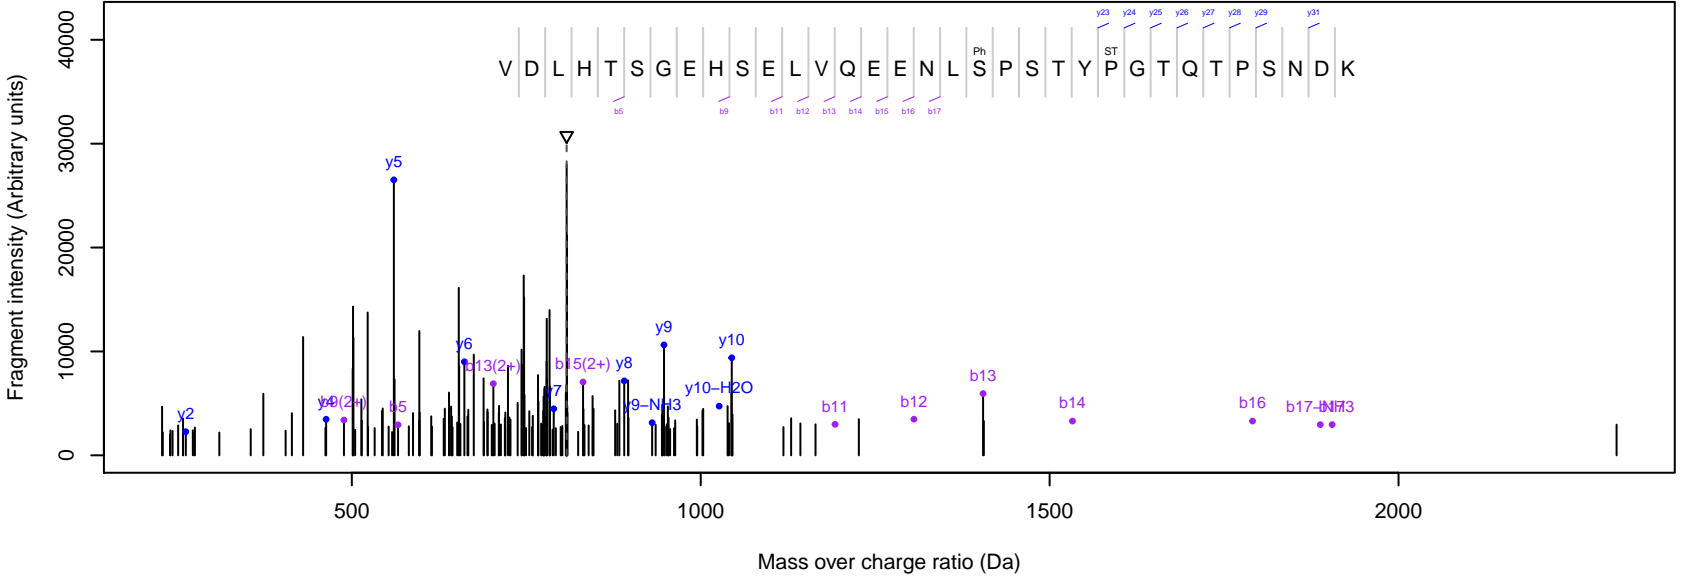

HTPSPGLPAEGAPEAPRPS(Phospho (STY))SPPPEVLEPHSLDQPATSPR-4+

Source : QE3\_201126\_FR\_TiOx\_hum\_tissue\_Urea\_RNAB\_H Scan : 30913

Andromeda score : 49.434

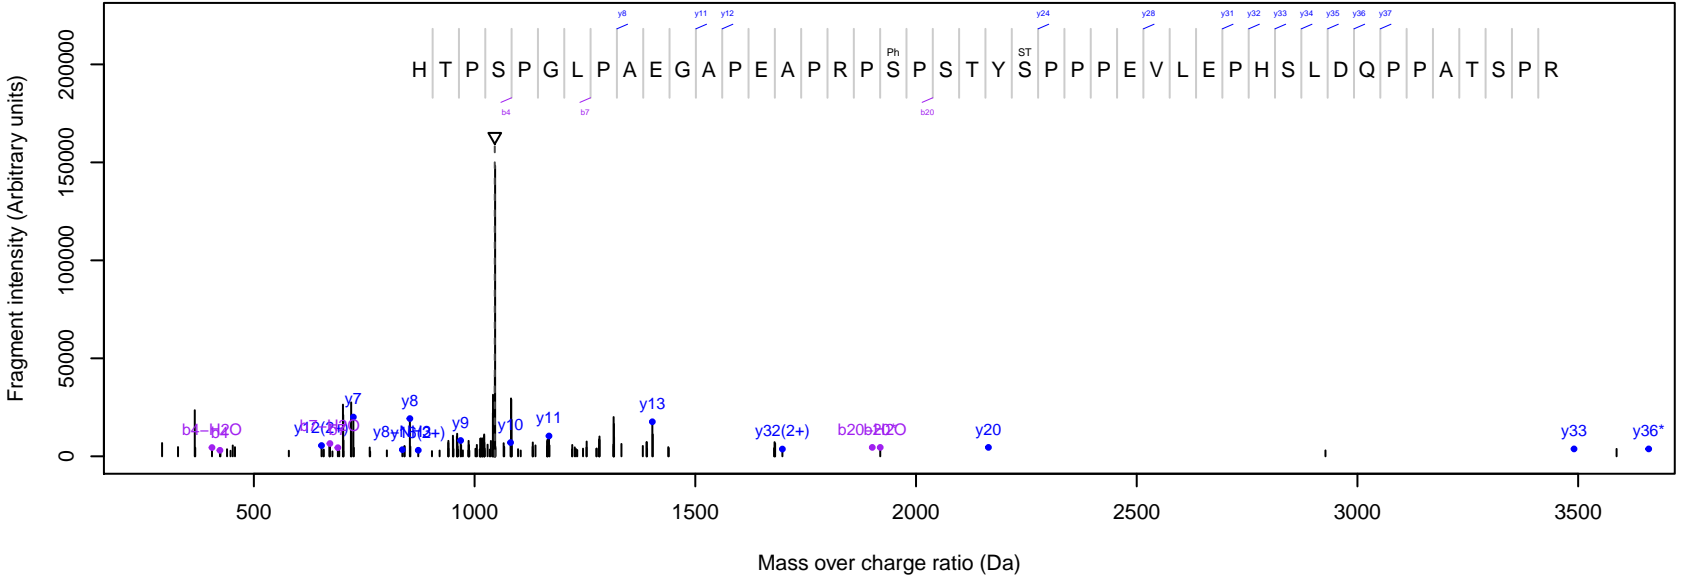

IS(Phospho (STY))FVEEDVHPK-2+

Source : QE3\_201126\_FR\_TiOx\_hum\_tissue\_Urea\_RNAB\_H Scan : 22418

Andromeda score : 49.423

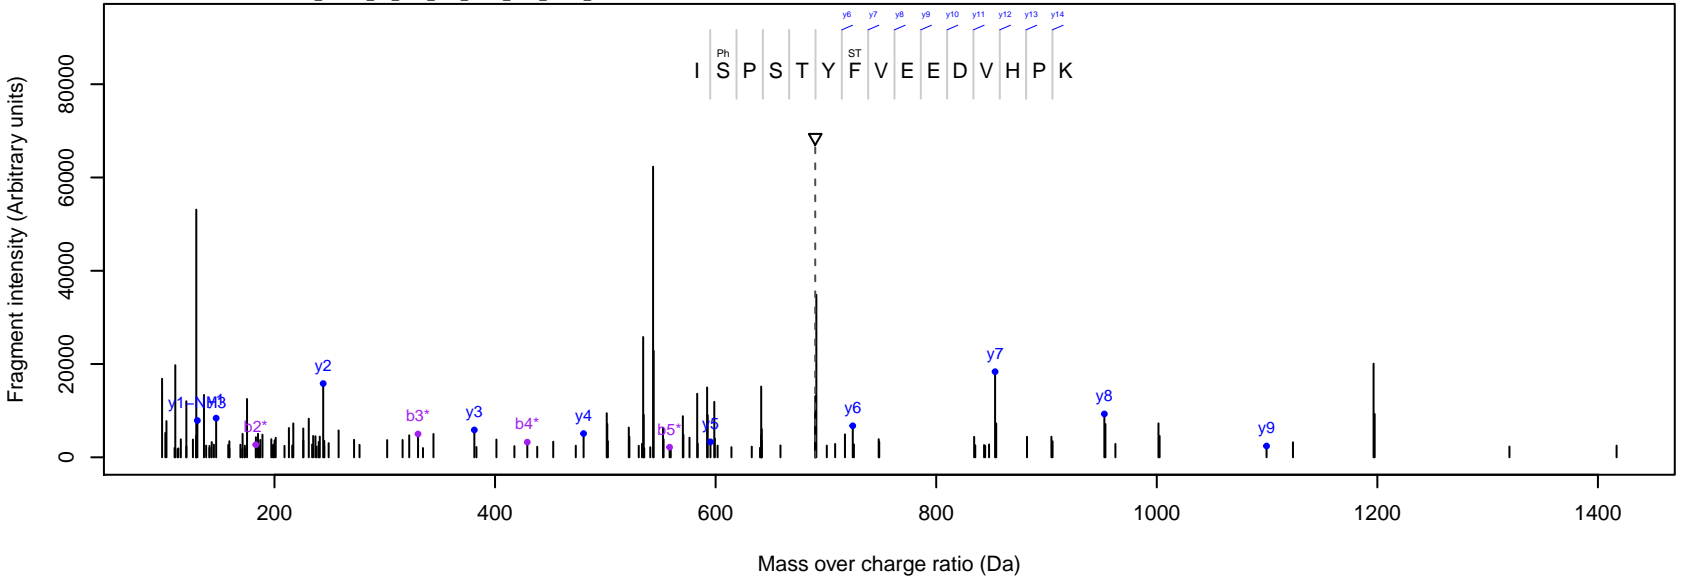

KLGLLPPGGEGGPEATVVS(Phospho (STY))DEDEAAEMEDEV-3+

Source : QE3\_201126\_FR\_TiOx\_hum\_tissue\_Urea\_RNAB\_N Scan : 50162

Andromeda score : 49.385

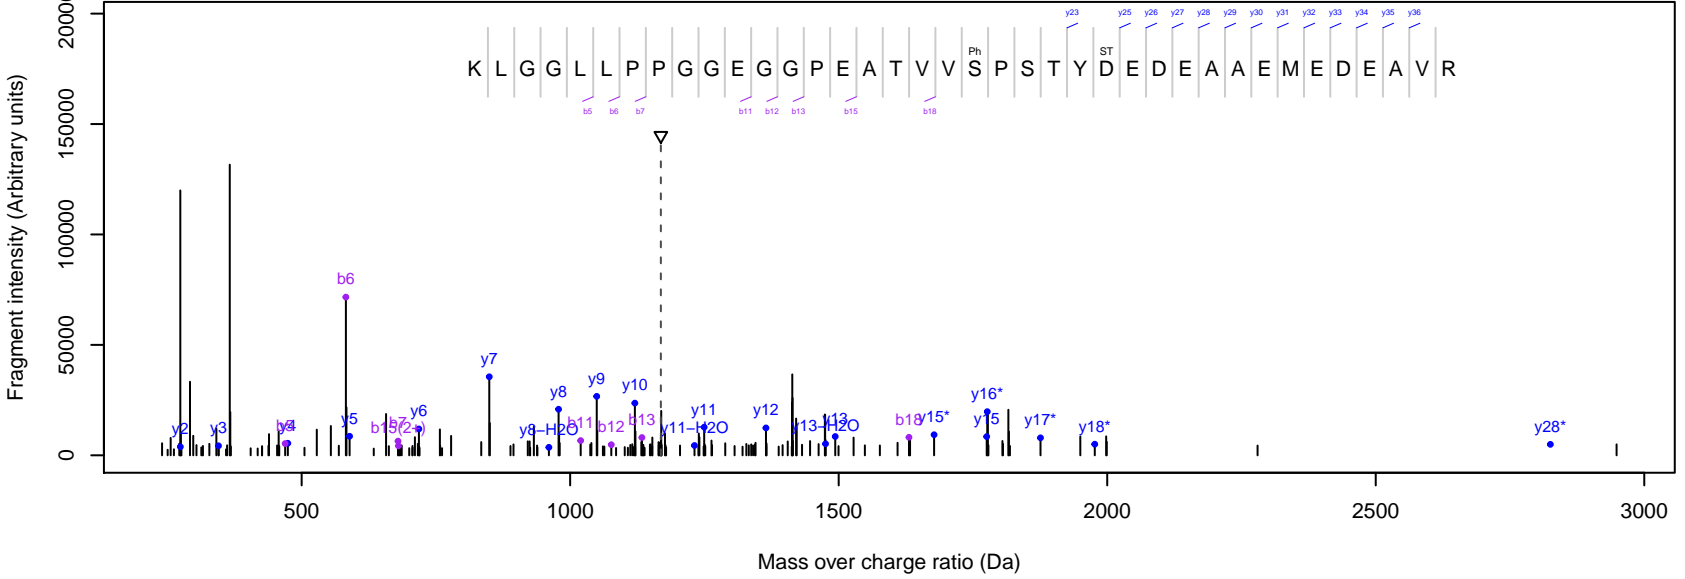

LVS(Phospho (STY))YTNLQGAK-2+

Source : QE3\_201126\_FR\_TiOx\_hum\_tissue\_Urea\_RNAB\_N Scan : 28787

Andromeda score : 49.356

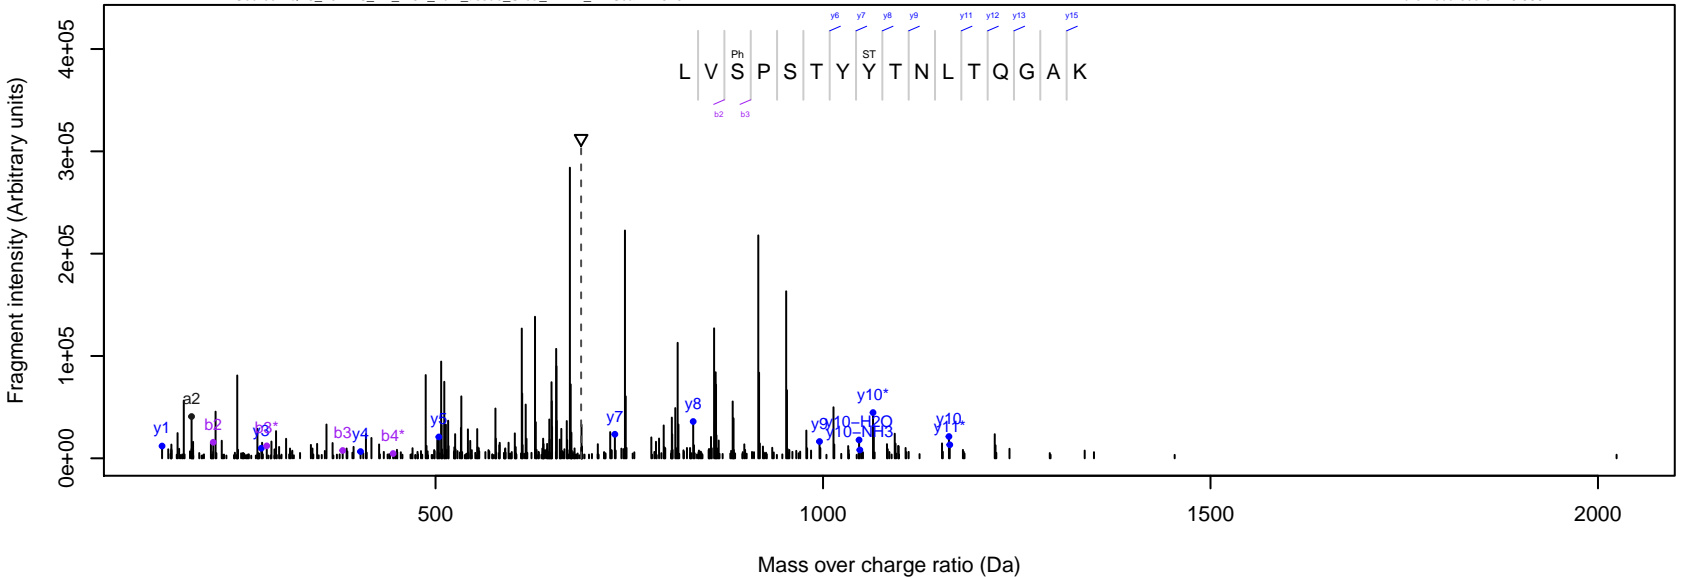



RSS(Phospho (STY))LS(Phospho (STY))S(Phospho (STY))HSHQSQIYR-3+

Source : QE3\_201126\_FR\_TiOx\_hum\_tissue\_Urea\_RNAB\_B Scan : 9054

Andromeda score : 49.34

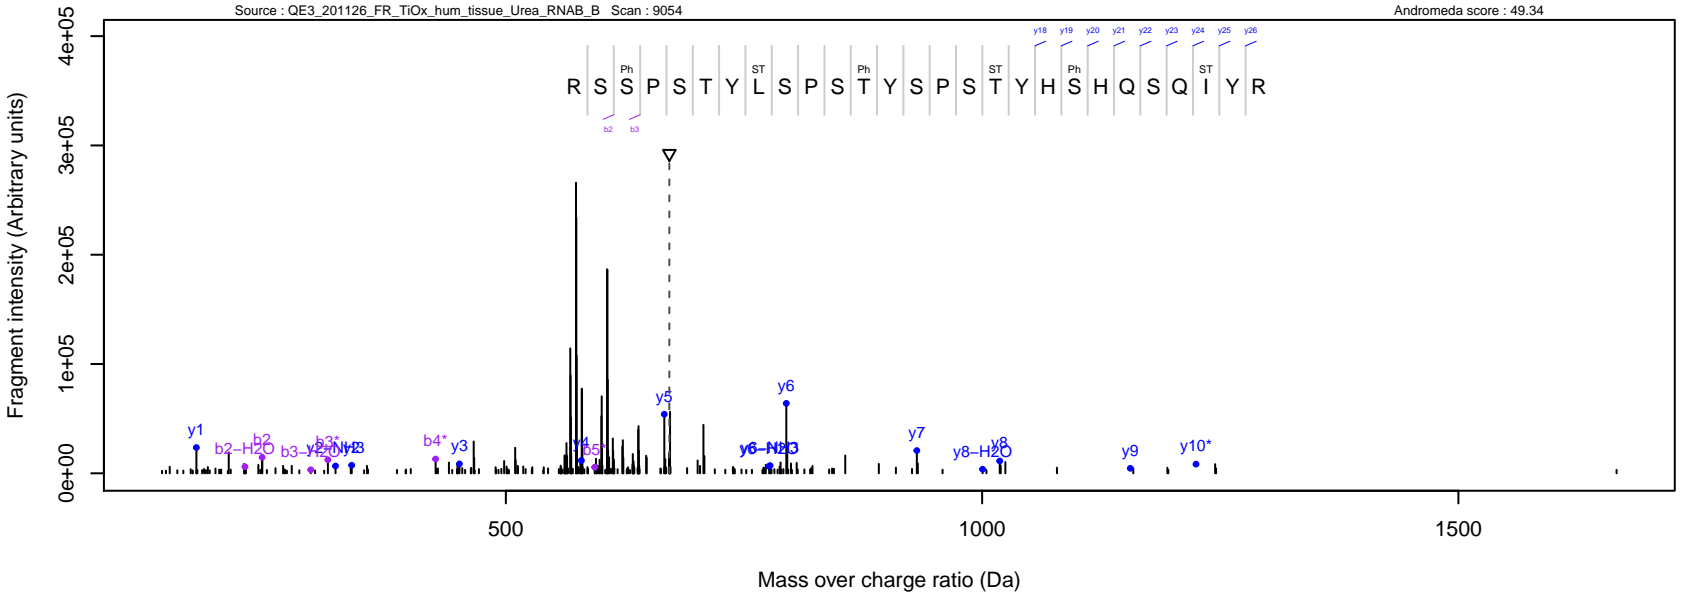

APS(Phospho (STY))PPVEHPR-3+

Source : QE3\_201126\_FR\_TiOx\_hum\_tissue\_Urea\_RNAB\_N Scan : 8134

Andromeda score : 49.333

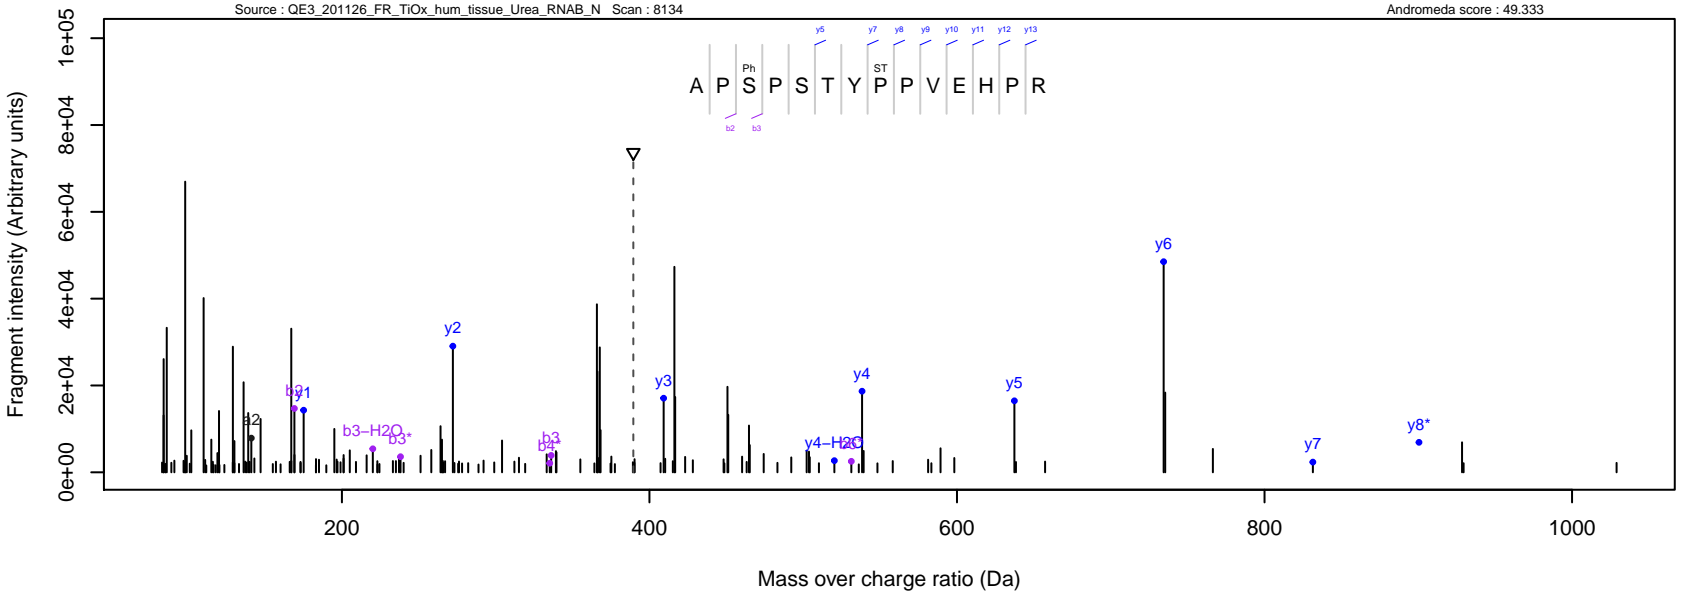

SES(Phospho (STY))SGILPNTTDM(Oxidation (M))R-2+

Source : QE3\_201126\_FR\_TiOx\_hum\_tissue\_Urea\_RNAB\_B Scan : 22553

Andromeda score : 49.333

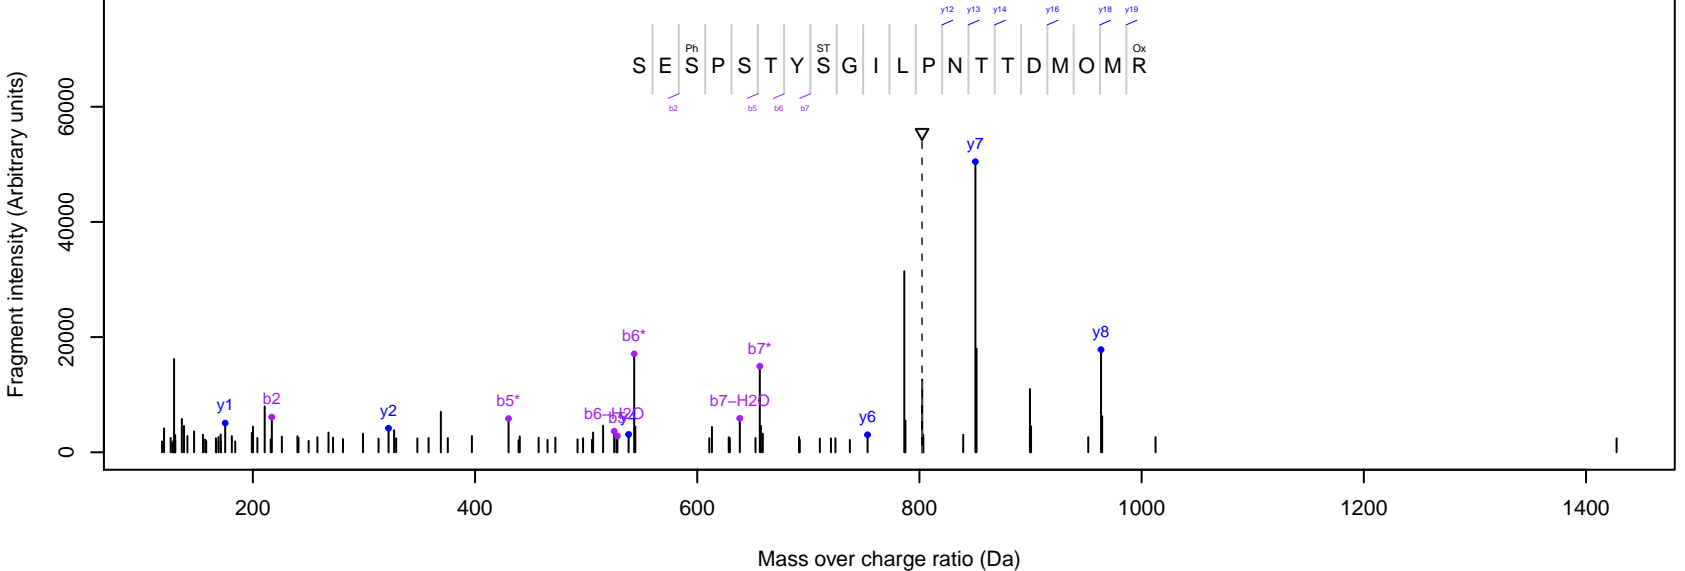

**KSFSKEELM(Oxidation (M))S(Phospho (STY))SDLEETAGSTSIPK-3+**

Source : QE3\_201126\_FR\_TiOx\_hum\_tissue\_Urea\_RNAB\_B Scan : 24078

Andromeda score : 49.318

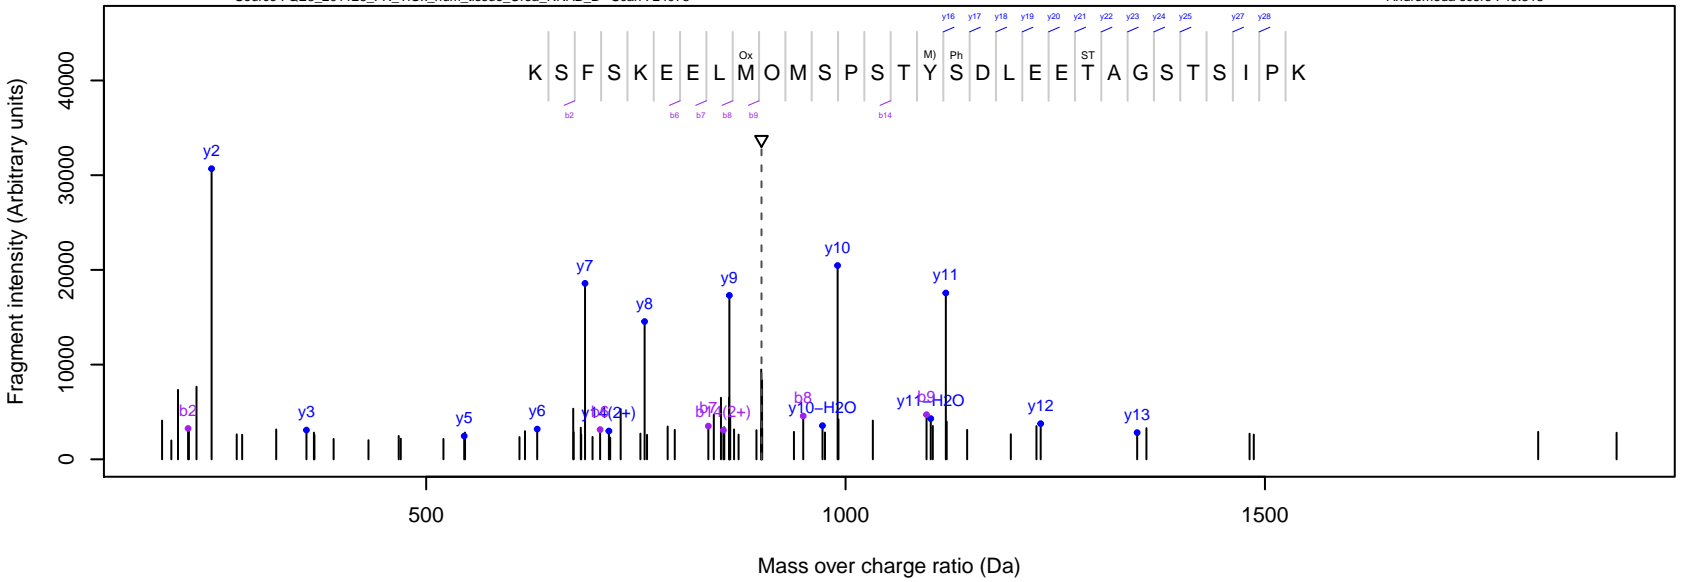

**GRLDS(Phospho (STY))SEM(Oxidation (M))DHS(Phospho (STY))ENEDYTM(Oxidation (M))SSPLPGK-3+**

Source : QE3\_201126\_FR\_TiOx\_hum\_tissue\_Urea\_RNAB\_N Scan : 20244

Andromeda score : 49.312

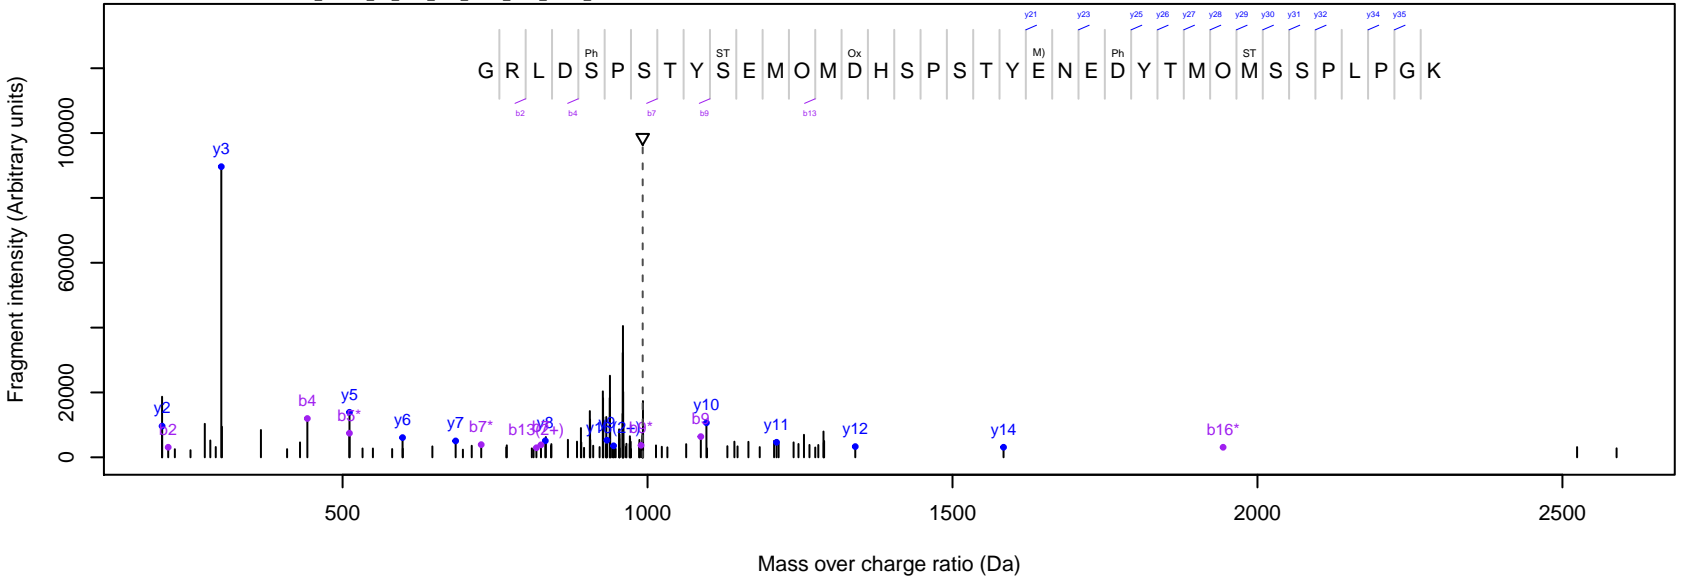

**IDEPSTPYHSMMGDDDEDAC(SPhospho (STY))DTEATEAMAPDILAR-3+**

Source : QE3\_201126\_FR\_TiOx\_hum\_tissue\_Urea\_RNAB\_N Scan : 50080

Andromeda score : 49.312

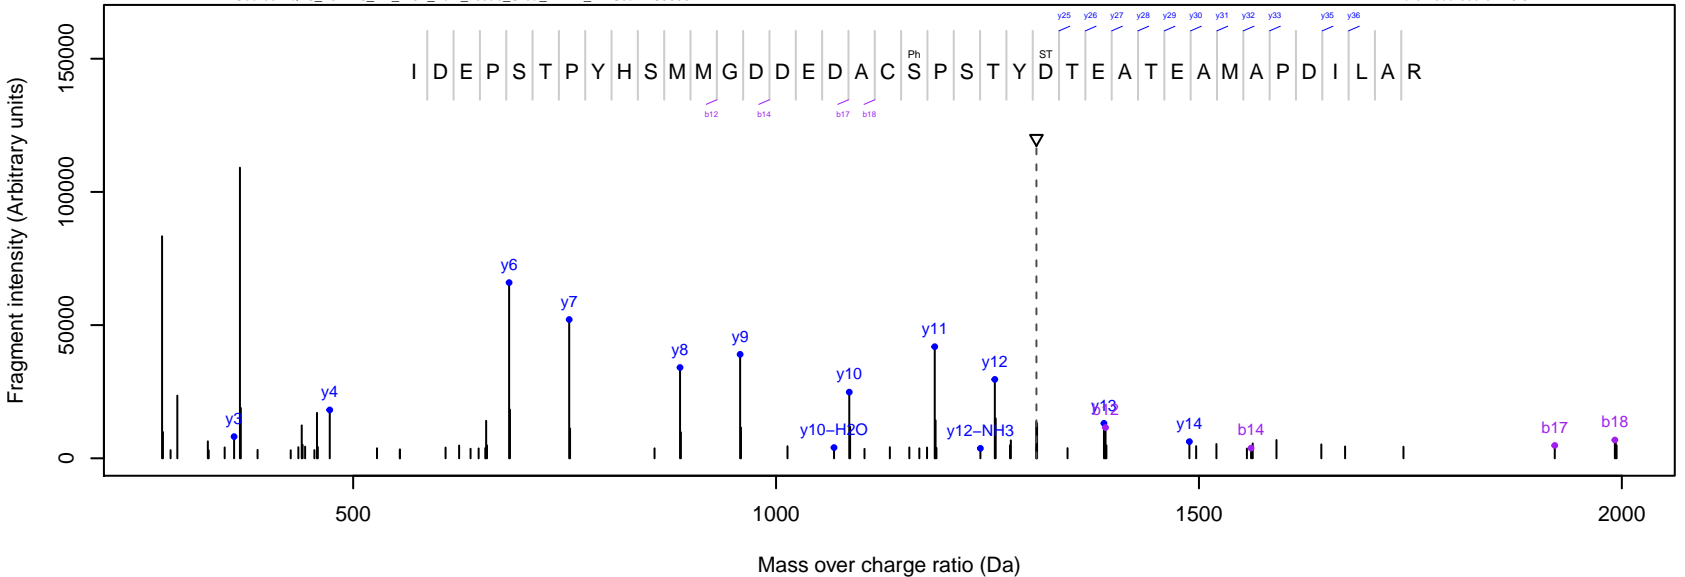

M(Oxidation (M))IRAES(Phospho (STY))GPDLR-2+

Source : QE3\_201126\_FR\_TiOx\_hum\_tissue\_Urea\_RNAB\_H Scan : 10941

Andromeda score : 49.31

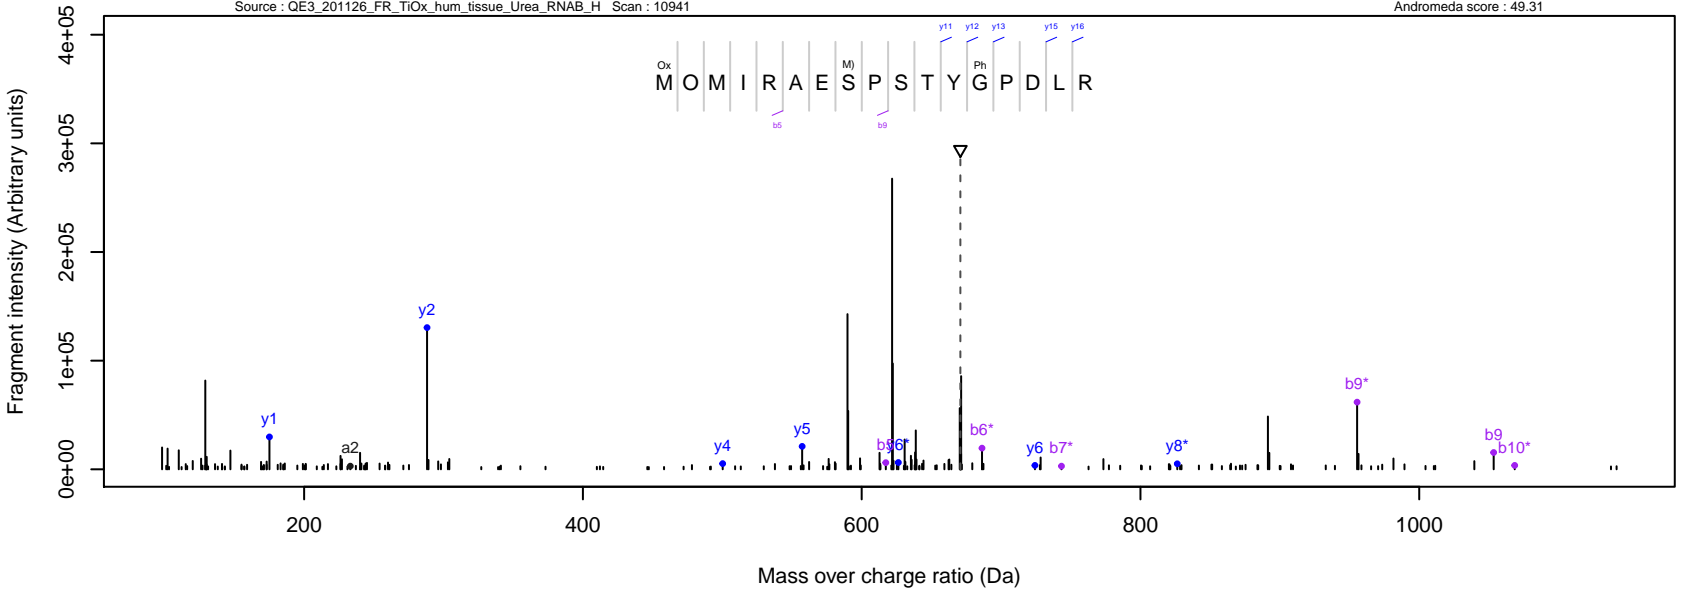

SM(Oxidation (M))S(Phospho (STY))LTLGK-2+

Source : QE3\_201126\_FR\_TiOx\_hum\_tissue\_Urea\_RNAB\_H Scan : 15102

Andromeda score : 49.3

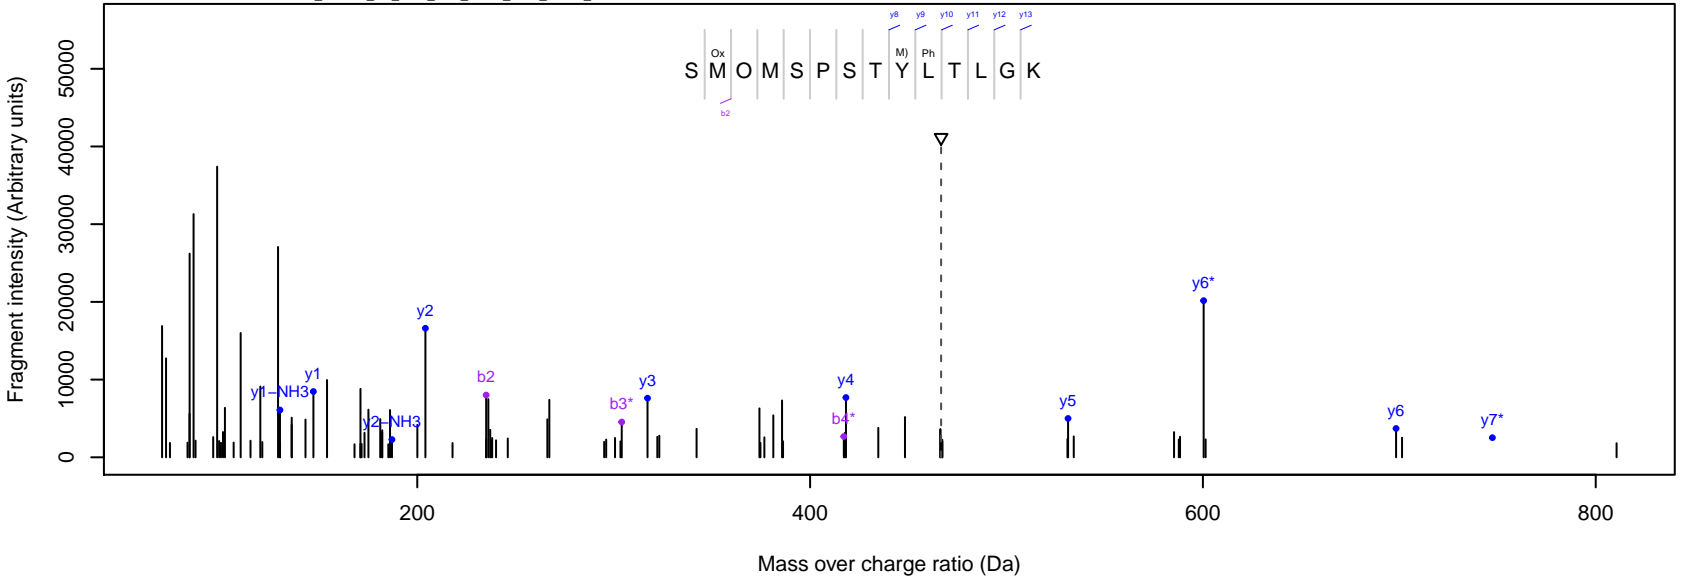

ATVTPS(Phospho (STY))PVKKG-3+

Source : QE3\_201126\_FR\_TiOx\_hum\_tissue\_Urea\_RNAB\_H Scan : 6281

Andromeda score : 49.298

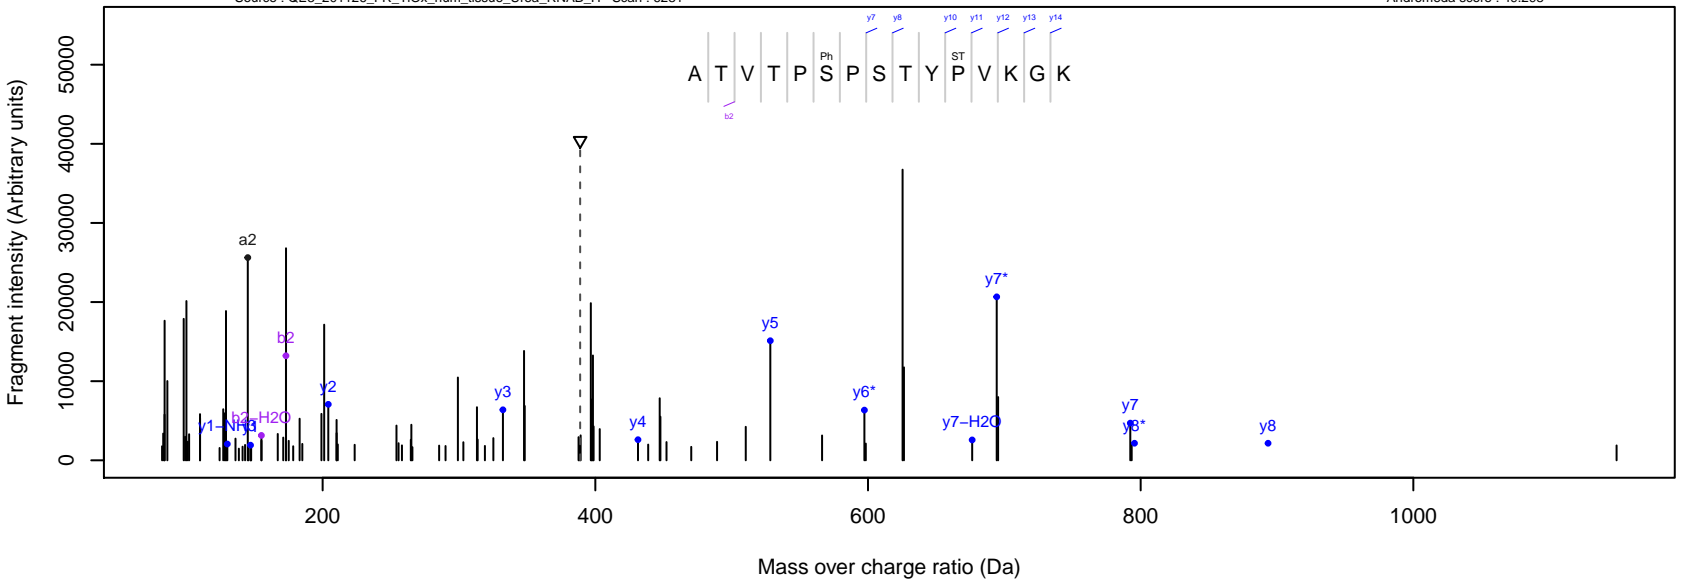

TMFAQVES(Phospho (STY))DDEEAKNEPEWK-3+

Source : QE3\_201126\_FR\_TiOx\_hum\_tissue\_Urea\_RNAB\_N Scan : 32751

Andromeda score : 49.25

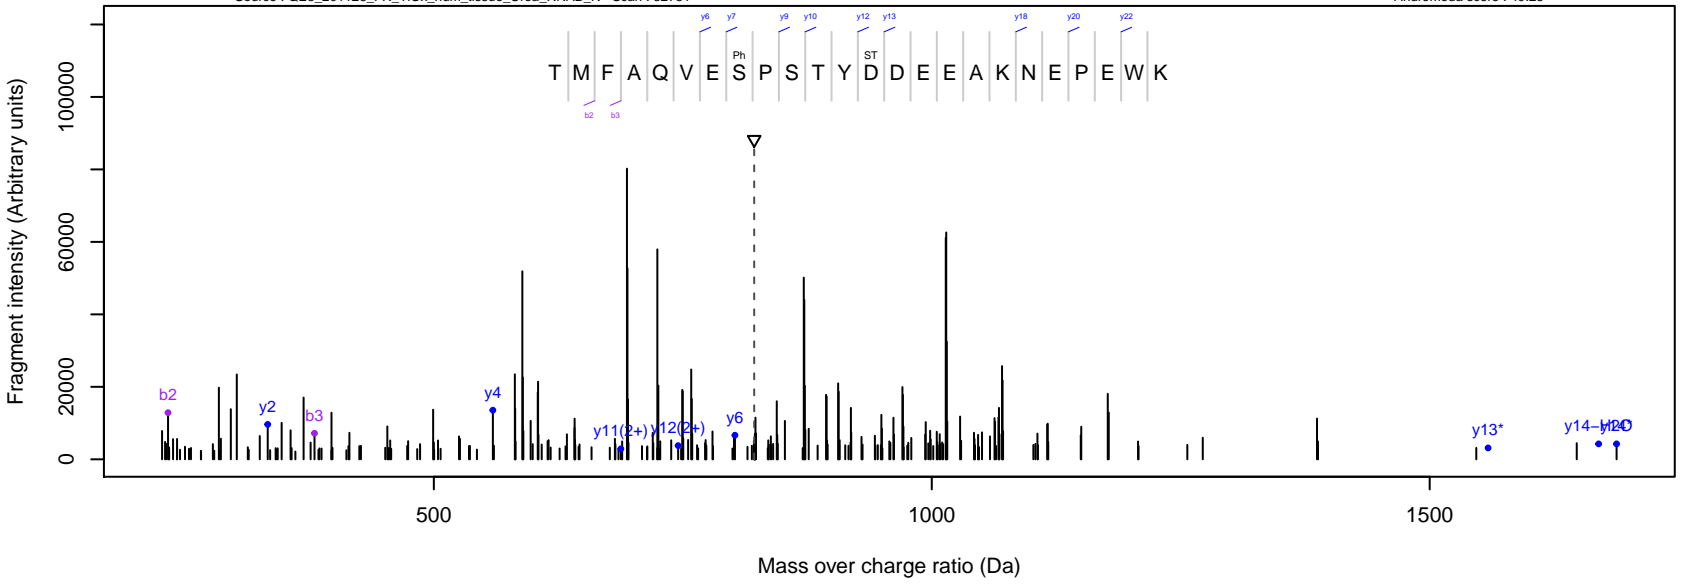

VAPSPDS(Phospho (STY))DS(Phospho (STY))DT(Phospho (STY))DSEDPSLRR-3+

Source : QE3\_201126\_FR\_TiOx\_hum\_tissue\_Urea\_RNAB\_N Scan : 20859

Andromeda score : 49.25

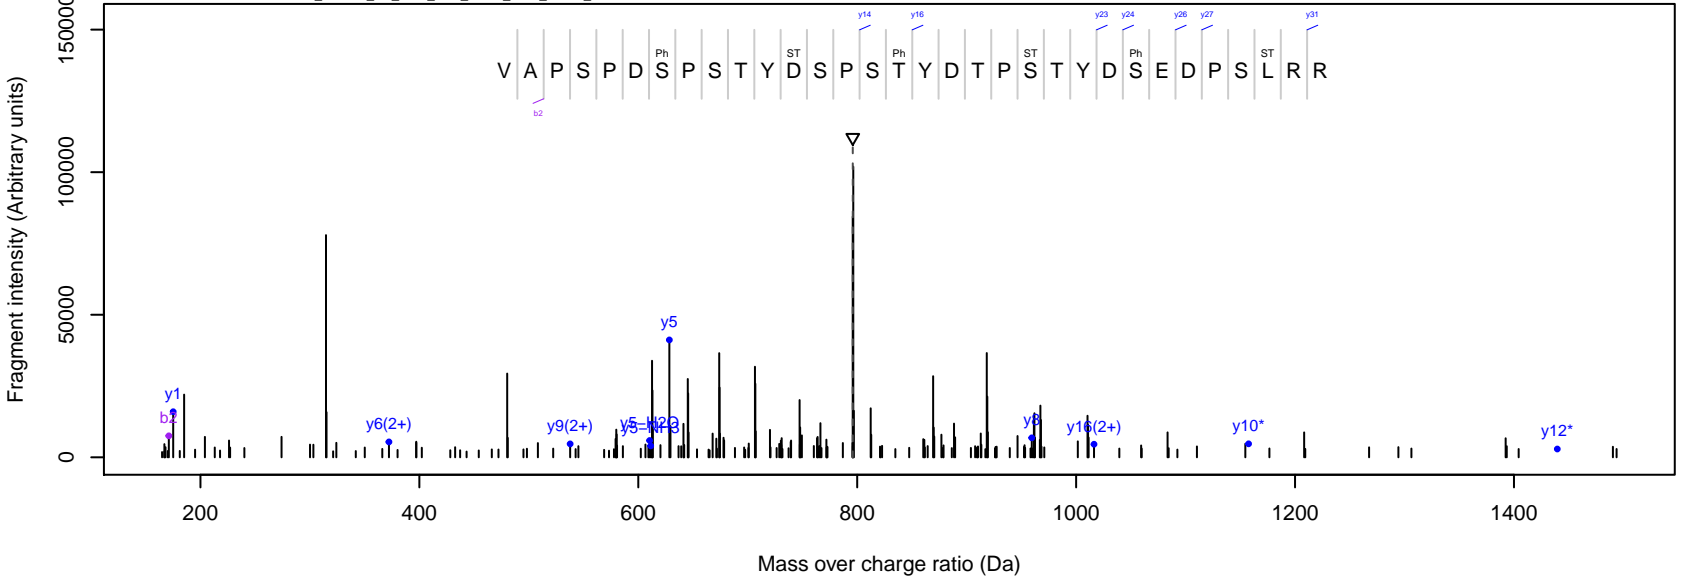

VPSPIAQAT(Phospho (STY))GSPVQEEAIVIIQSALR-3+

Source : QE3\_201126\_FR\_TiOx\_hum\_tissue\_Urea\_RNAB\_B Scan : 63052

Andromeda score : 49.25

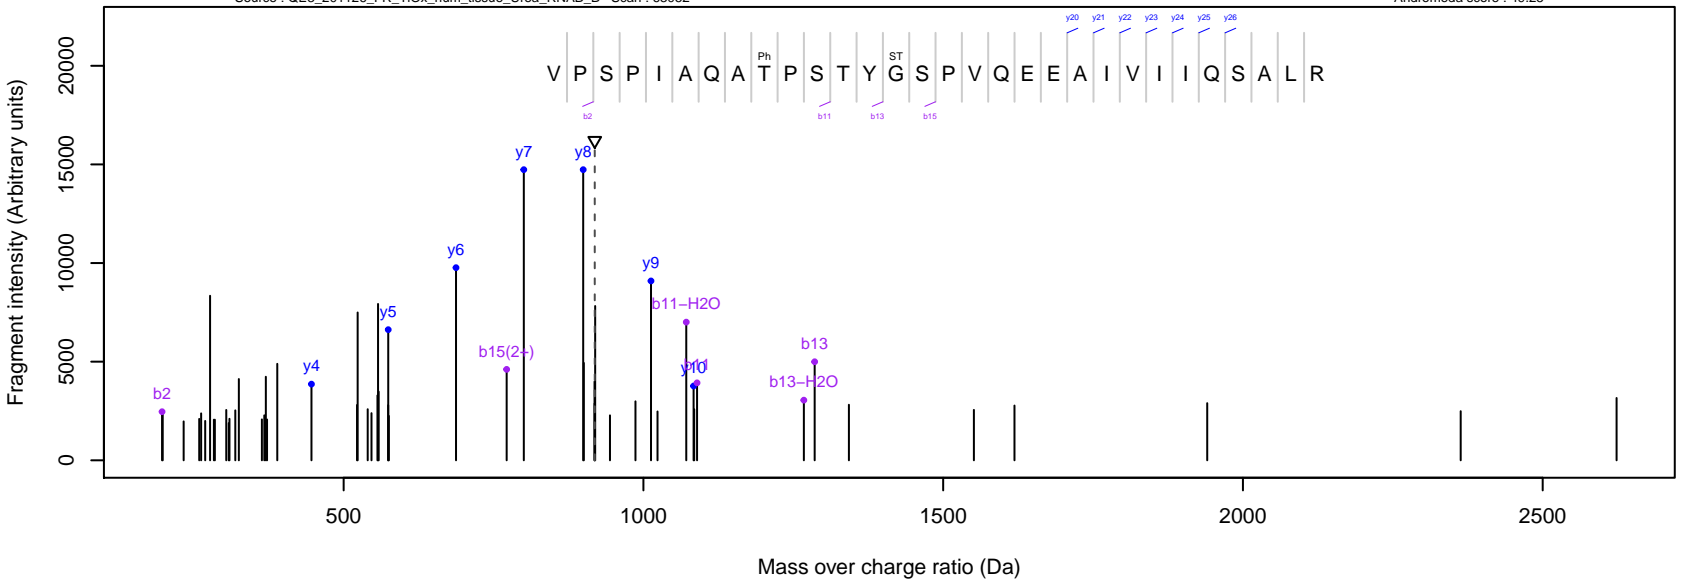

ERS(Phospho (STY))PS(Phospho (STY))PPTIQSK-2+

Source : QE3\_201126\_FR\_TiOx\_hum\_tissue\_Urea\_RNAB\_B Scan : 11786

Andromeda score : 49.243

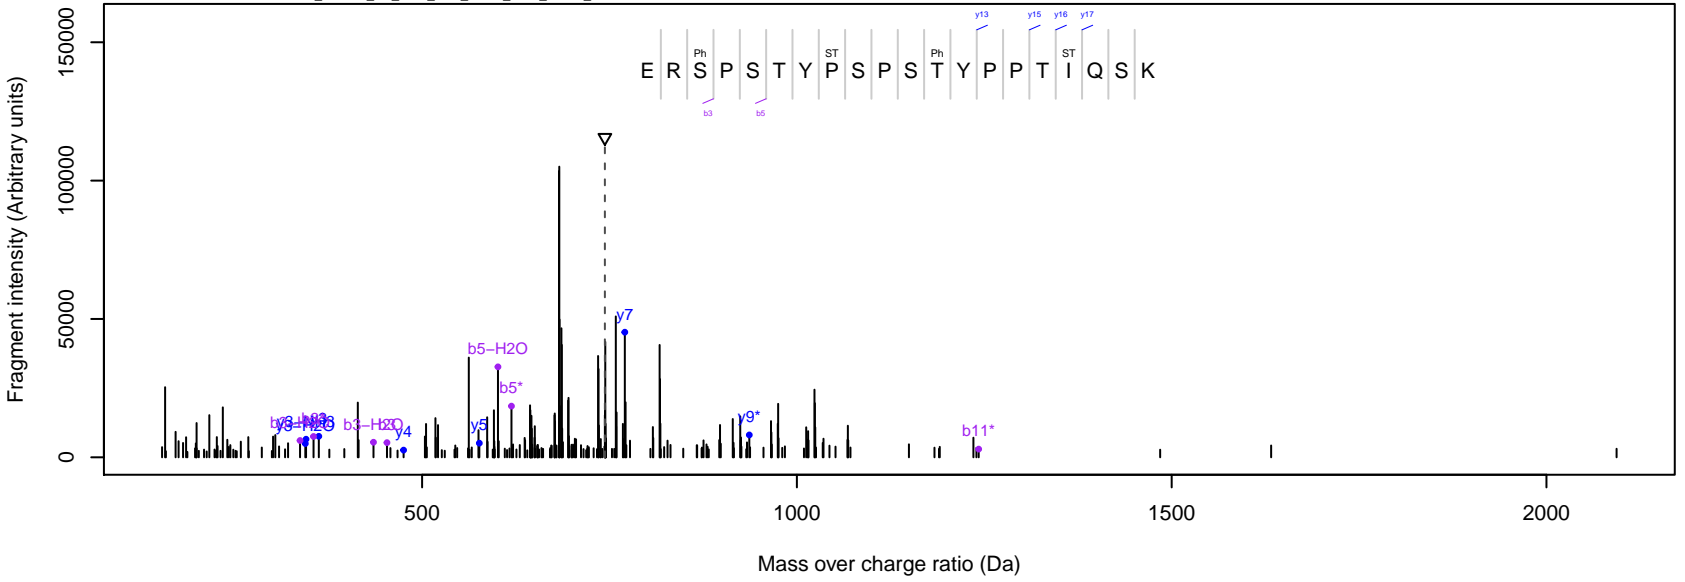

NAS(Phospho (STY))AS(Phospho (STY))FQLEDKKELS(Phospho (STY))EESEDEELQLEEFMLK-3+

Source : QE3\_201126\_FR\_TiOx\_hum\_tissue\_Urea\_RNAB\_H Scan : 58836

Andromeda score : 49.199

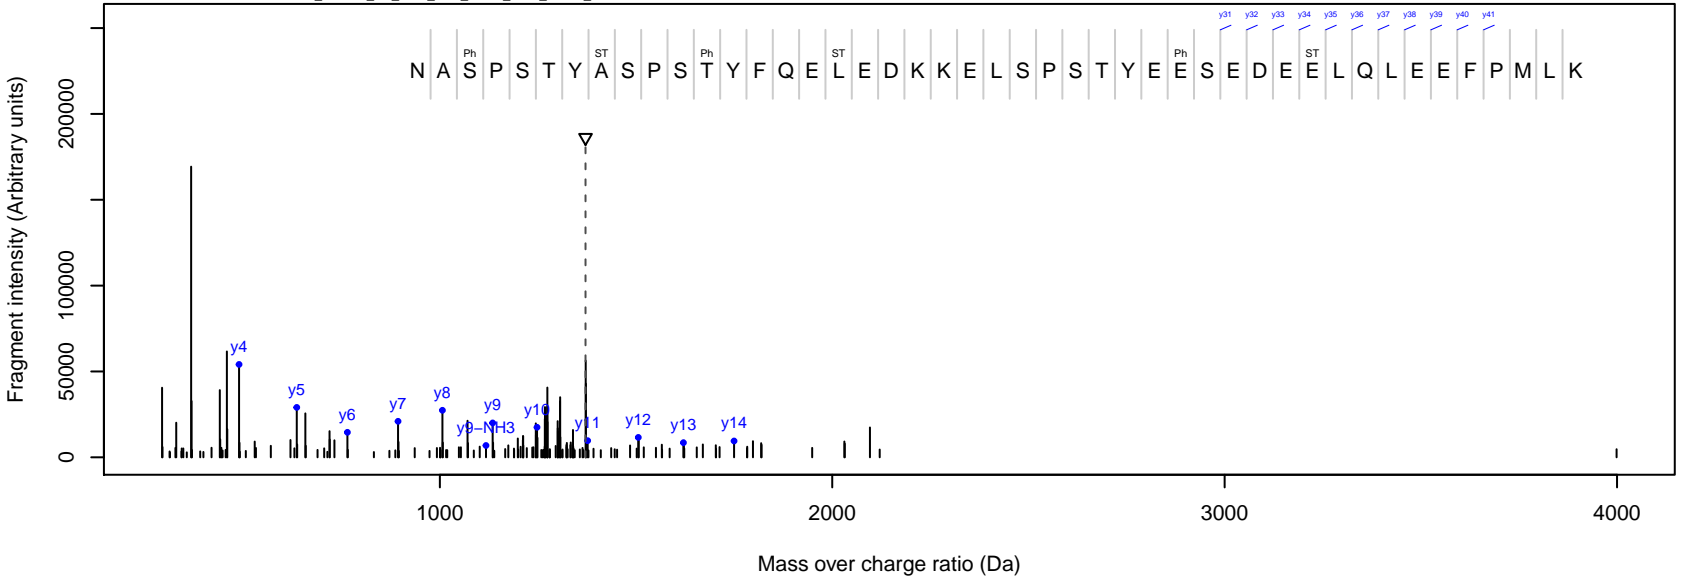

(Acetyl (Protein N-term))ALEVGDMEGQLS(Phospho (STY))DS(Phospho (STY))DSDMTVAPSDRPLQLPK-3+

Source : QE3\_201126\_FR\_TiOx\_hum\_tissue\_Urea\_RNAB\_N Scan : 61973

Andromeda score : 49.193

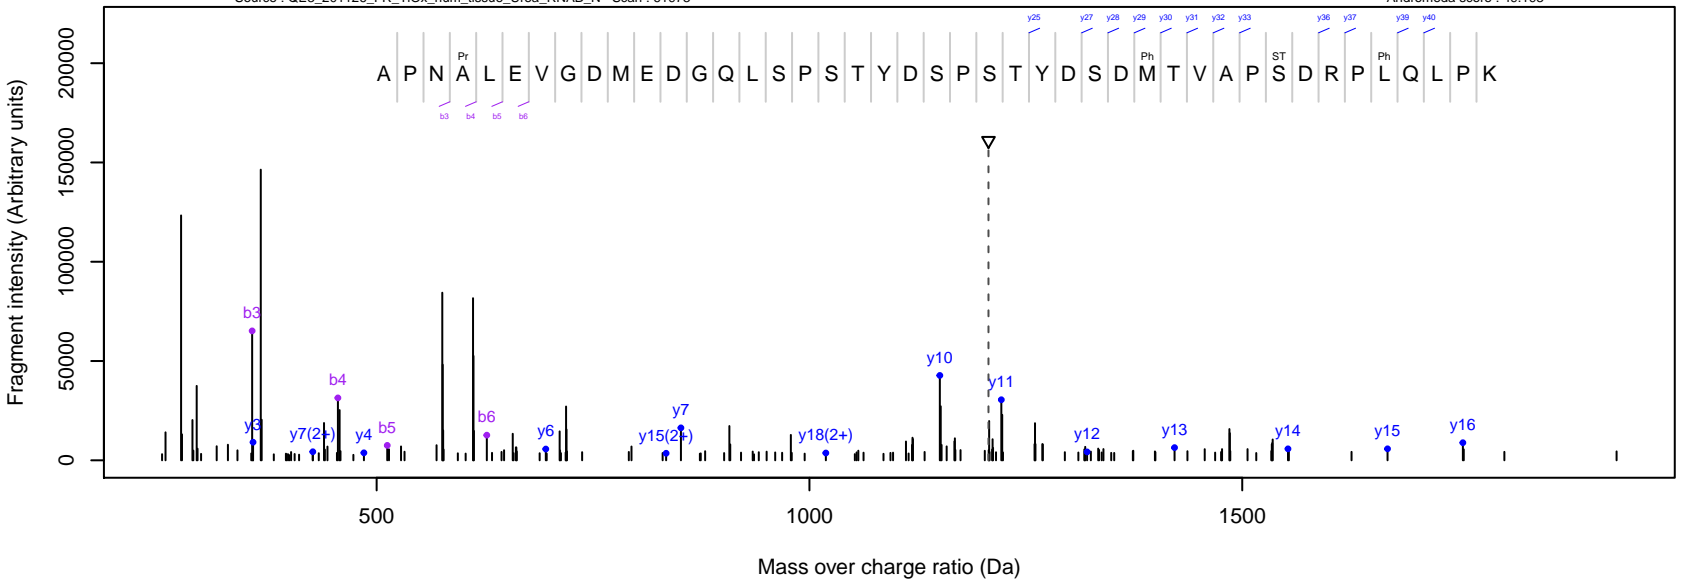

GLNVIGASDQS(Phospho (STY))PLQS(Phospho (STY))PSNLR-2+

Source : QE3\_201126\_FR\_TiOx\_hum\_tissue\_Urea\_RNAB\_N Scan : 46751

Andromeda score : 49.188

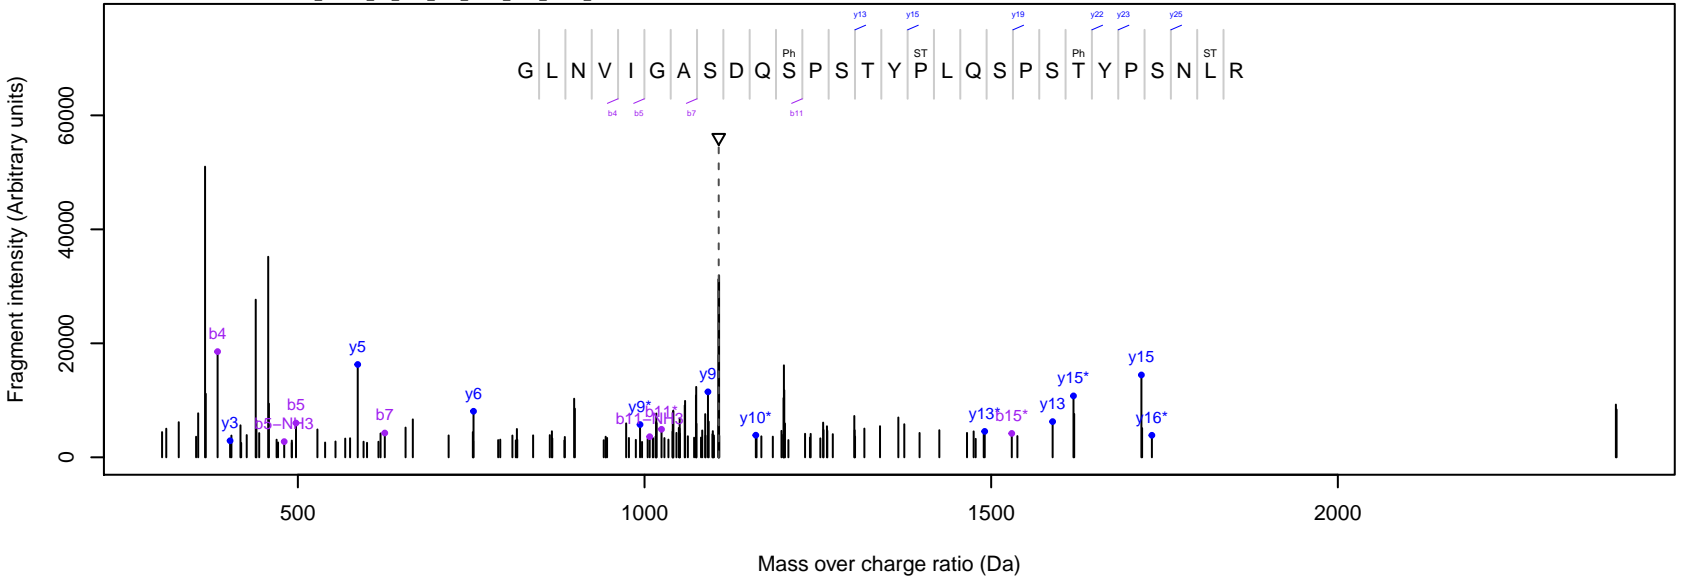

TQDPAKAPNT(Phospho (STY))PDILEIEFKK-3+

Source : QE3\_201126\_FR\_TiOx\_hum\_tissue\_Urea\_RNAB\_N Scan : 33493

Andromeda score : 49.186

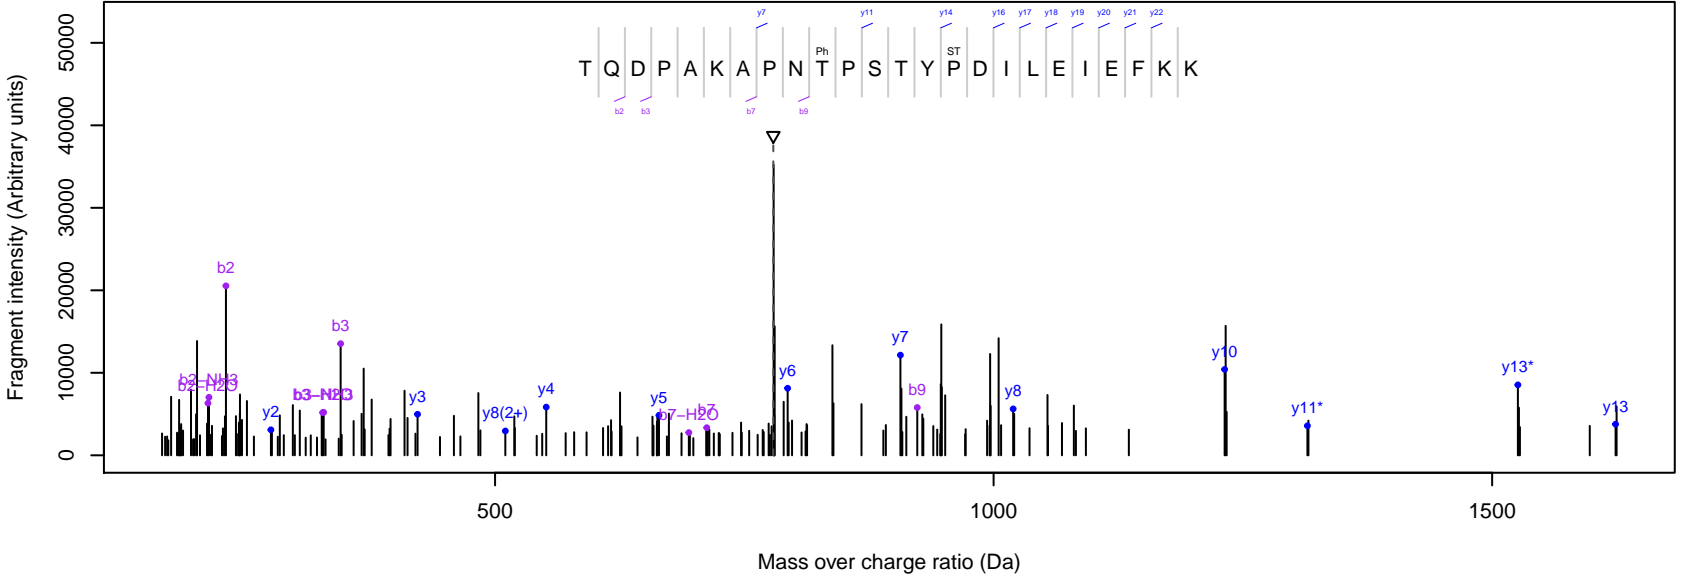

LILELDPTFEPIPTHMNALGSQANGSVS(Phospho (STY))PDSVGGGLR-3+

Source : QE3\_201126\_FR\_TiOx\_hum\_tissue\_Urea\_RNAB\_H Scan : 58255

Andromeda score : 49.139

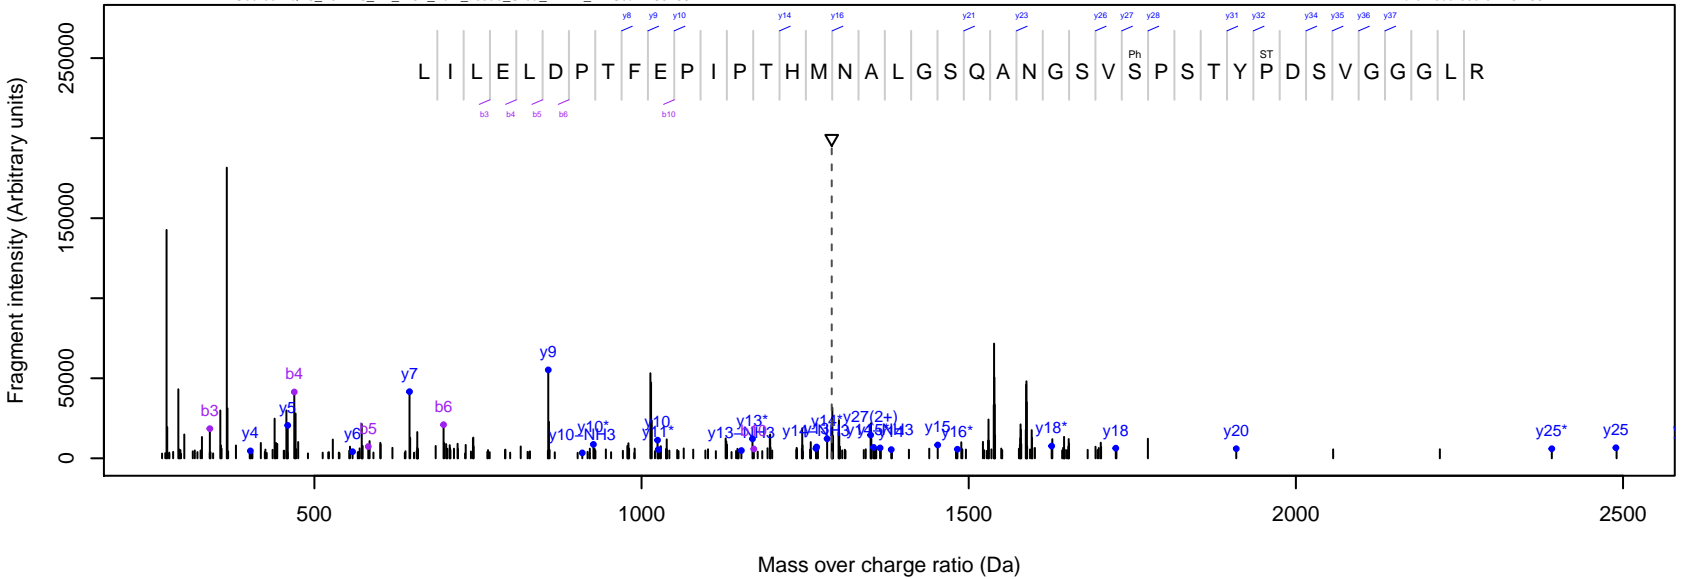

GLNTS(Phospho (STY))QES(Phospho (STY))DDDILDESSSPETQK-3+

Source : QE3\_201126\_FR\_TiOx\_hum\_tissue\_Urea\_RNAB\_H Scan : 37921

Andromeda score : 49.106

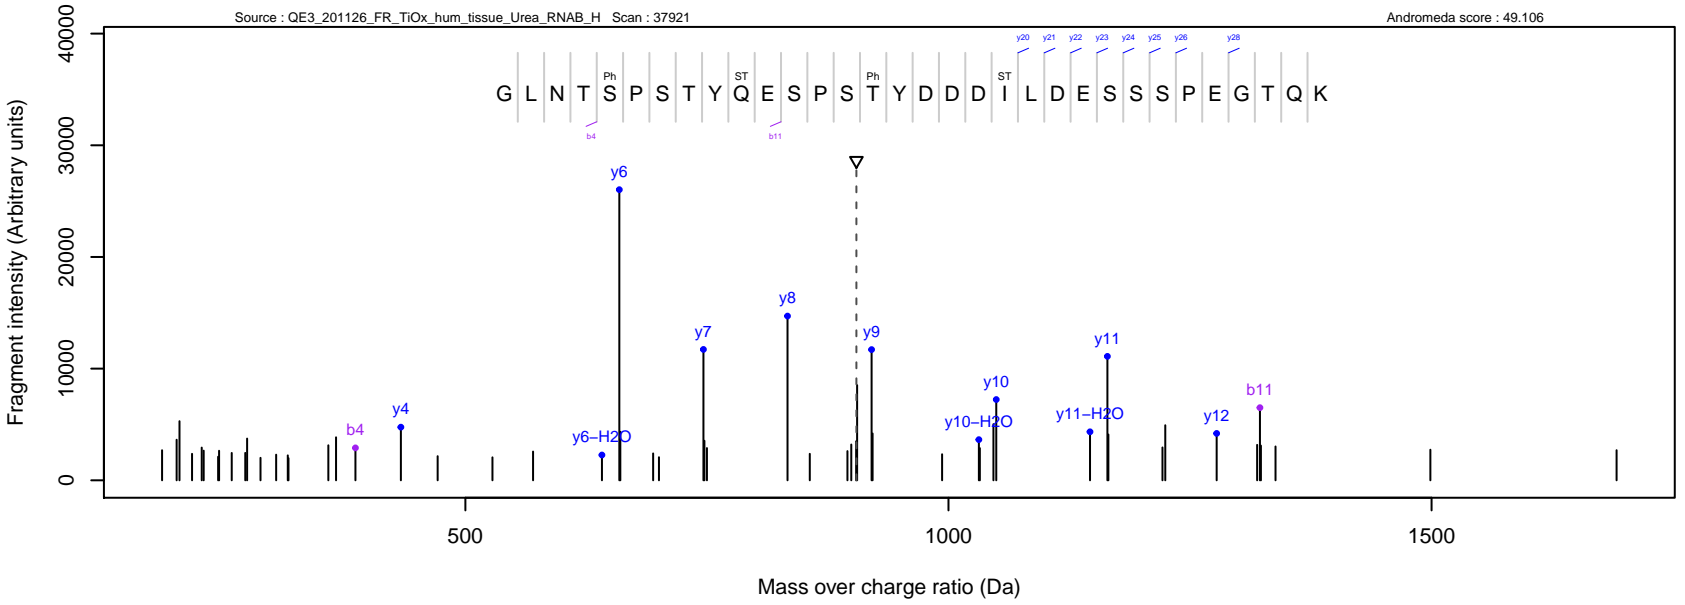

SLYQSAGVAPES(Phospho (STY))FEYIEAHGTGK-3+

Source : QE3\_201126\_FR\_TiOx\_hum\_tissue\_Urea\_RNAB\_B Scan : 37635

Andromeda score : 49.101

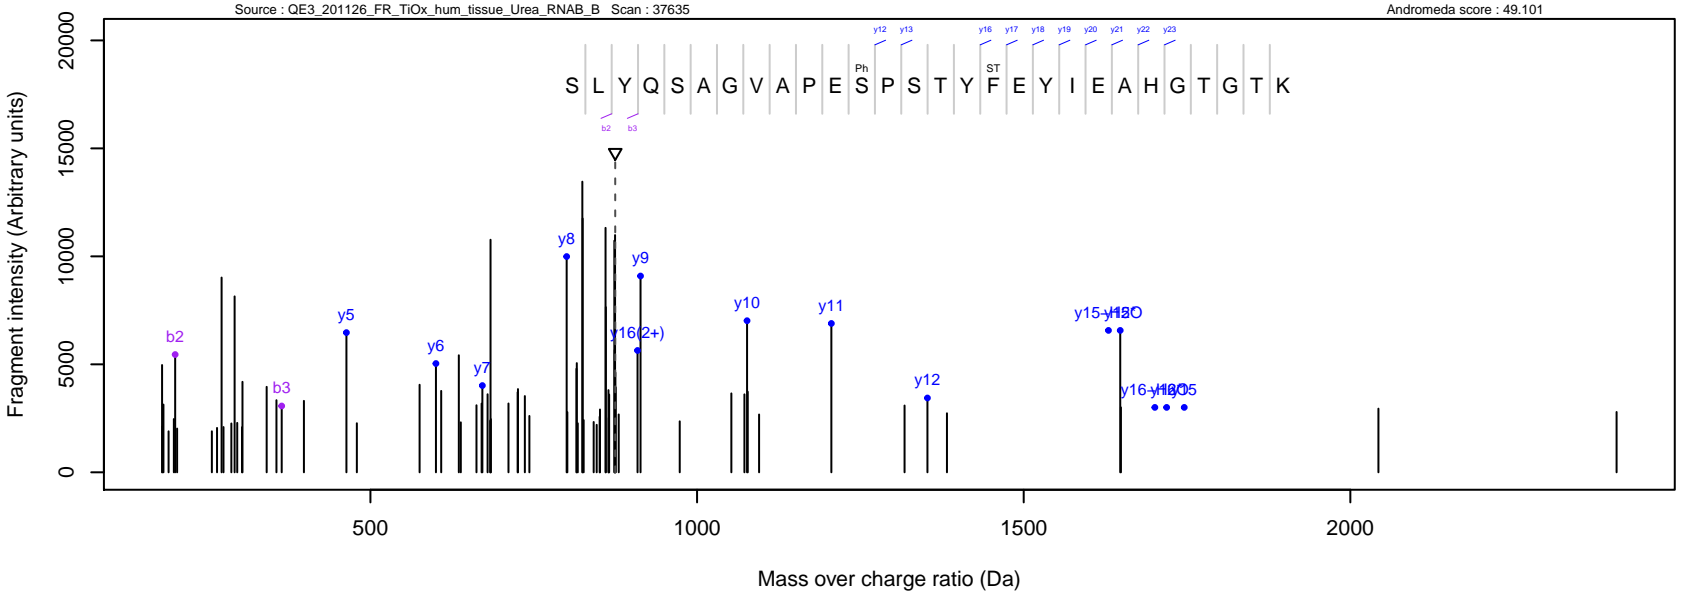

ANS(Phospho (STY))YEDAM(Oxidation (M))MPFPGATIIISQLLK-3+

Source : QE3\_201126\_FR\_TiOx\_hum\_tissue\_Urea\_RNAB\_H Scan : 62922

Andromeda score : 49.094

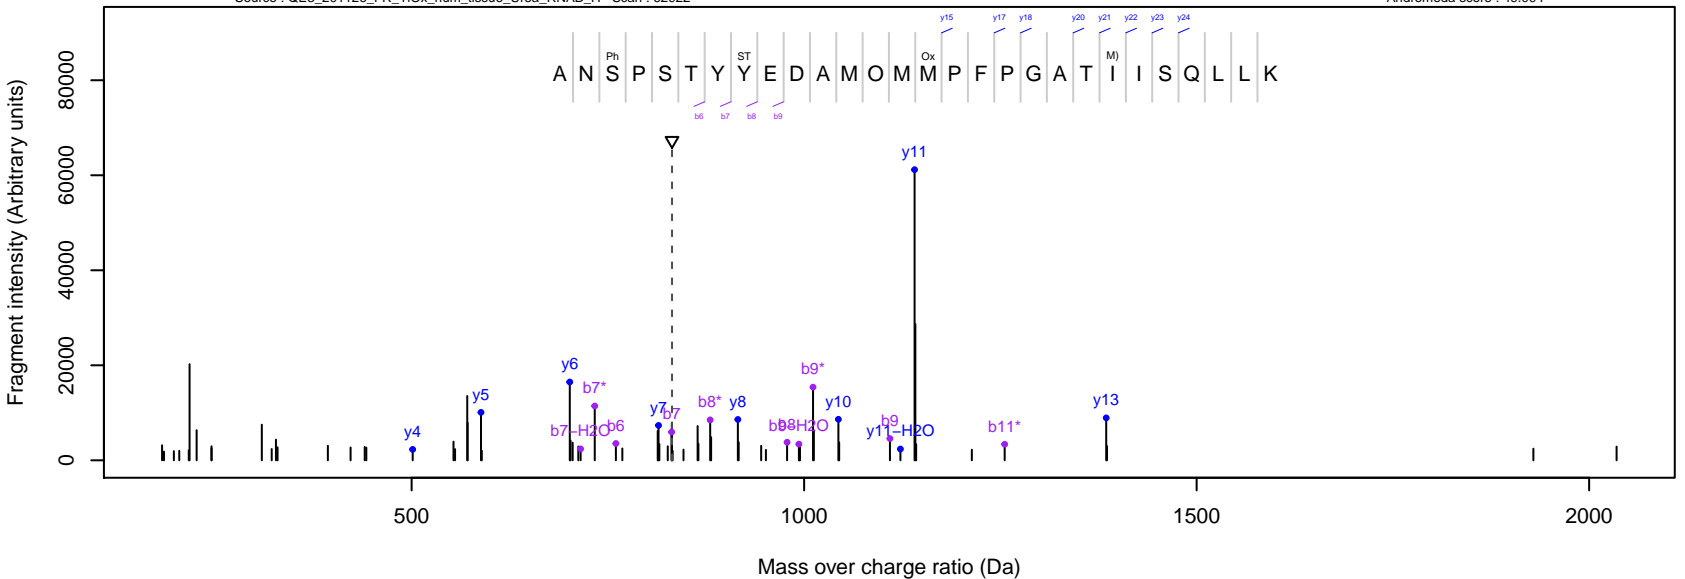

IHRAS(Phospho (STY))DPGLPAEEPK-3+

Source : QE3\_201126\_FR\_TiOx\_hum\_tissue\_Urea\_RNAB\_B Scan : 10251

Andromeda score : 49.089

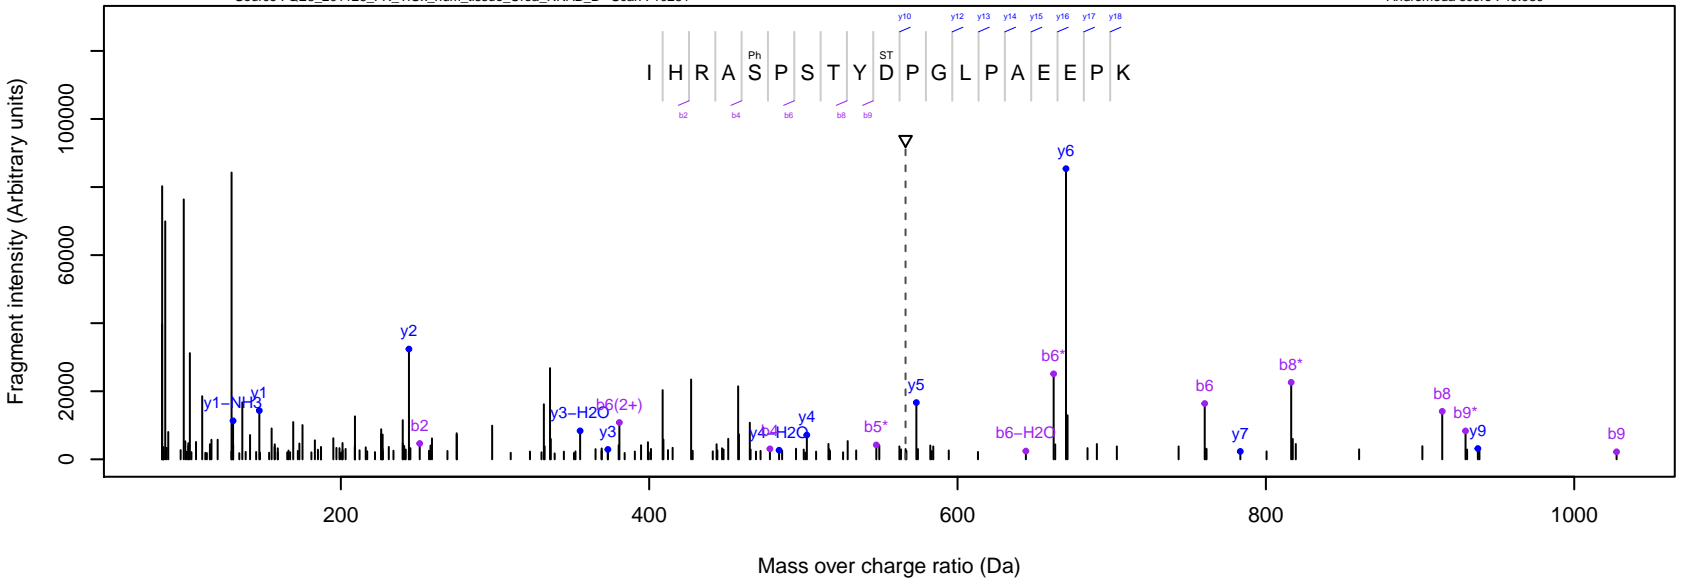

GGG(Phospho (STY))LPKVEAK-2+

Source : QE3\_201126\_FR\_TiOx\_hum\_tissue\_Urea\_RNAB\_N Scan : 9635

Andromeda score : 49.081

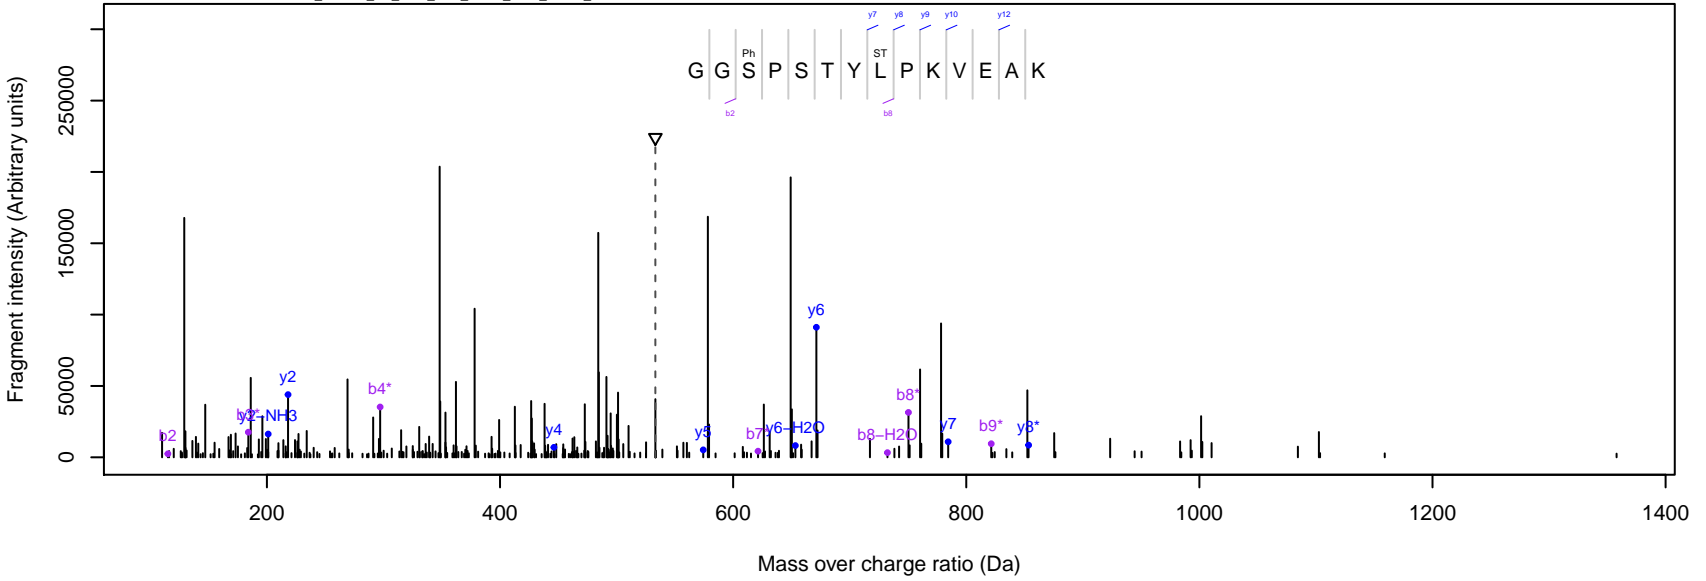

VRDS(Phospho (STY))TLHLK-3+

Source : QE3\_201126\_FR\_TiOx\_hum\_tissue\_Urea\_RNAB\_N Scan : 7785

Andromeda score : 49.081

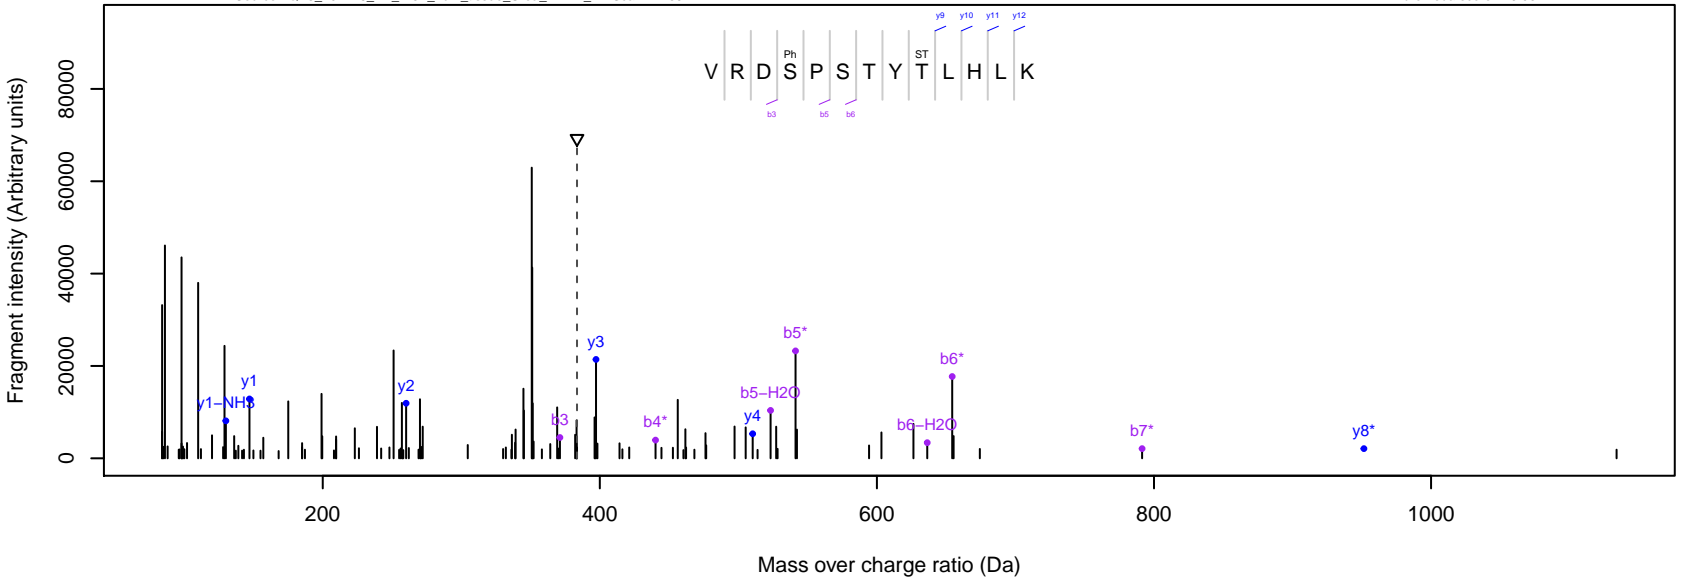



RAS(Phospho (STY))PGLSM(Oxidation (M))PSSSPPIKK-3+

Source : QE3\_201126\_FR\_TiOx\_hum\_tissue\_Urea\_RNAB\_H Scan : 9381

Andromeda score : 49.076

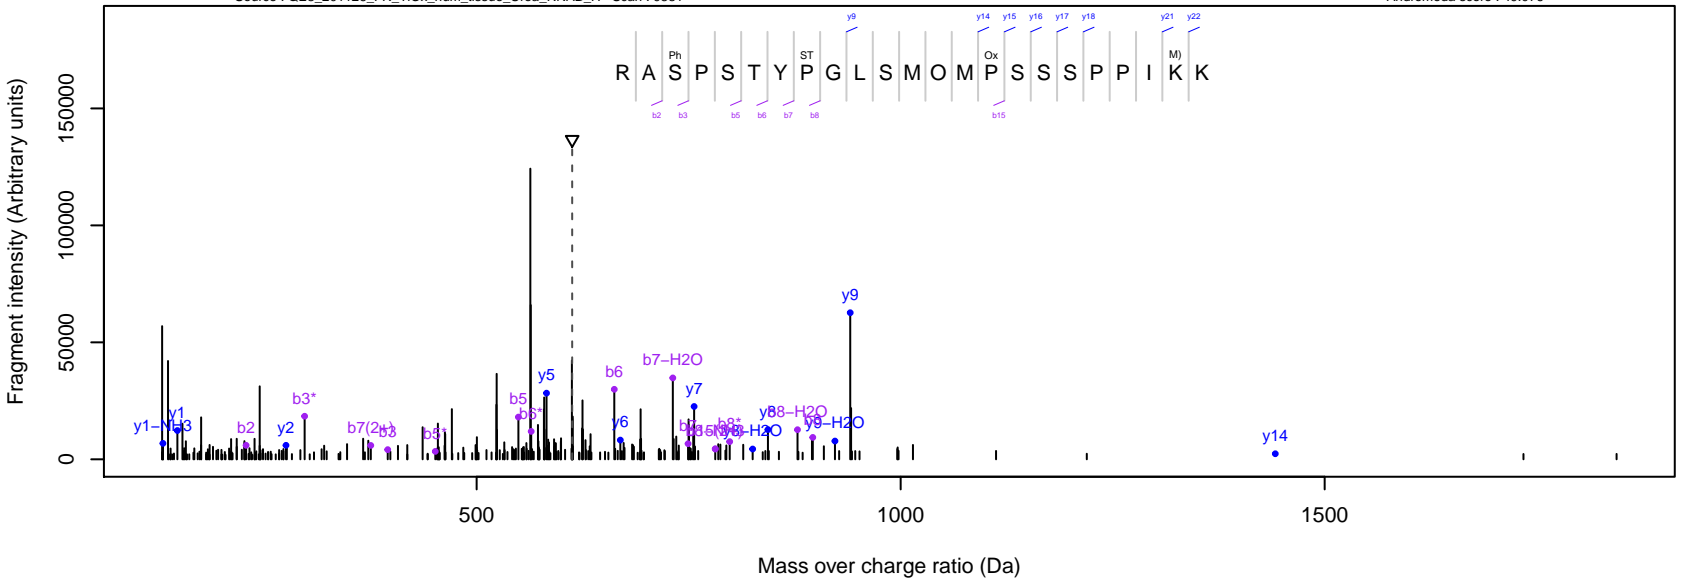

AFS(Phospho (STY))ISQLQK-2+

Source : QE3\_201126\_FR\_TiOx\_hum\_tissue\_Urea\_RNAB\_H Scan : 33147

Andromeda score : 48.998

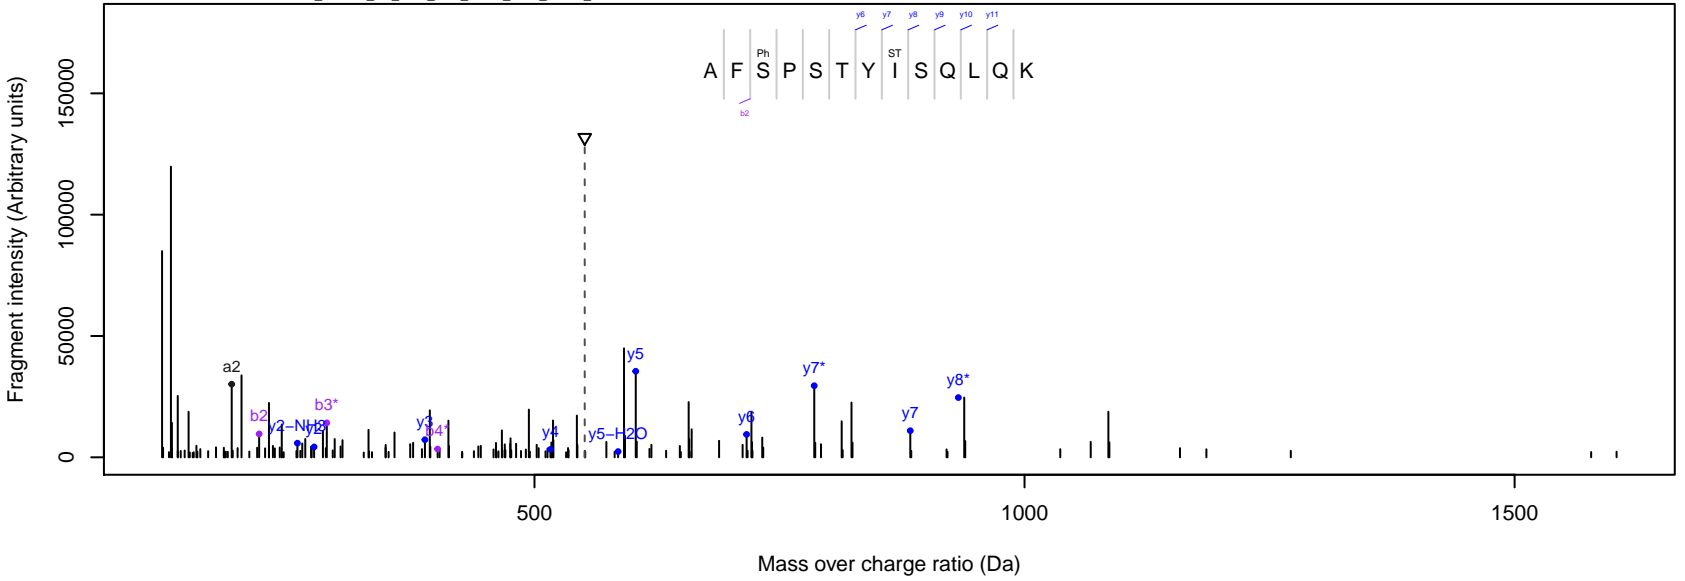

SDS(Phospho (STY))SQPMLLR-2+

Source : QE3\_201126\_FR\_TiOx\_hum\_tissue\_Urea\_RNAB\_N Scan : 26865

Andromeda score : 48.998

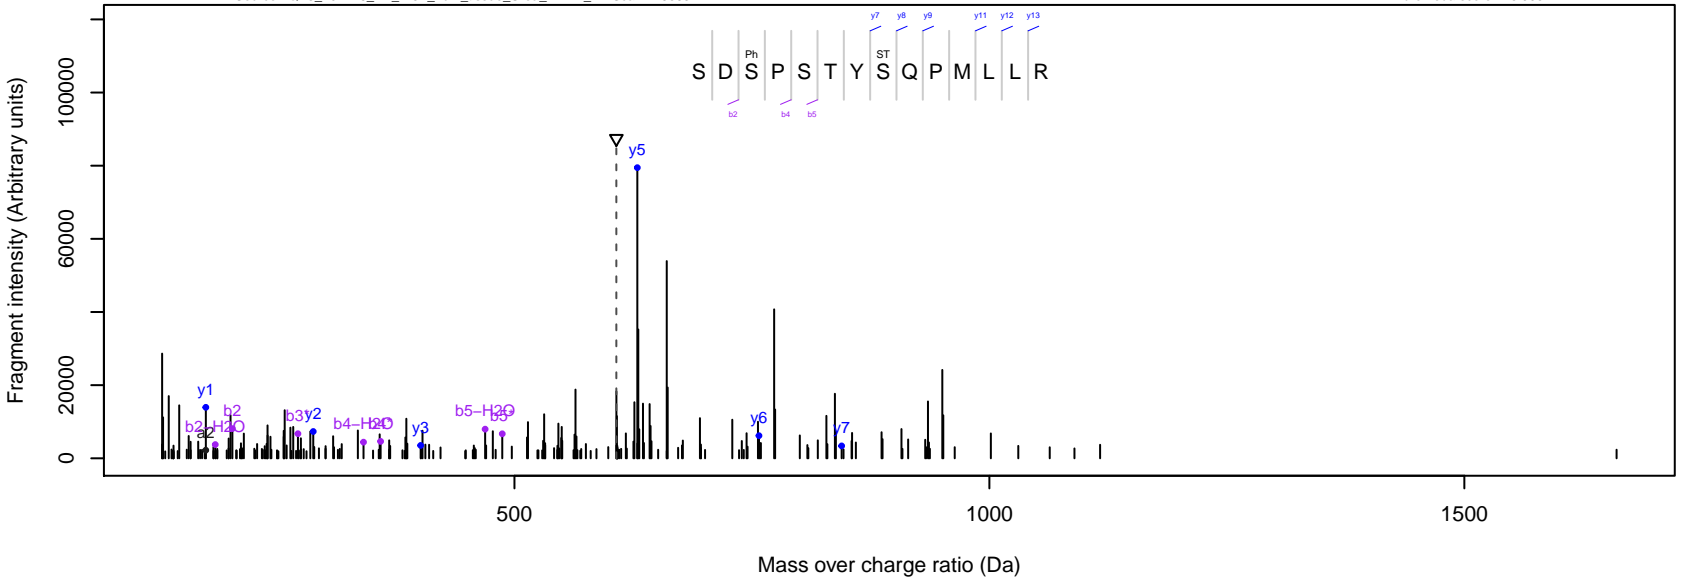

SES(Phospho (STY))WERGEPGRPALYFCGSIR-3+

Source : QE3\_201126\_FR\_TiOx\_hum\_tissue\_Urea\_RNAB\_N Scan : 34432

Andromeda score : 48.984

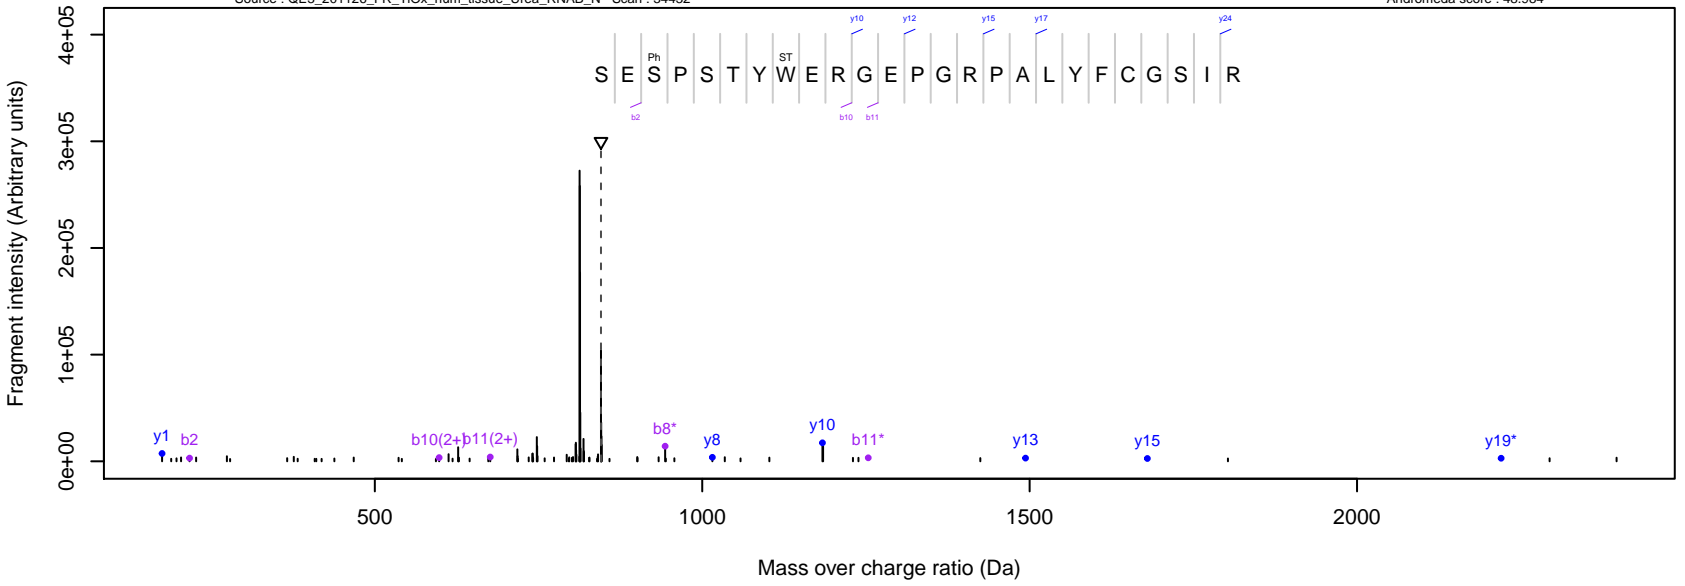

CLS(Phospho (STY))PDDSTVK-2+

Source : QE3\_201126\_FR\_TiOx\_hum\_tissue\_Urea\_RNAB\_H Scan : 12321

Andromeda score : 48.981

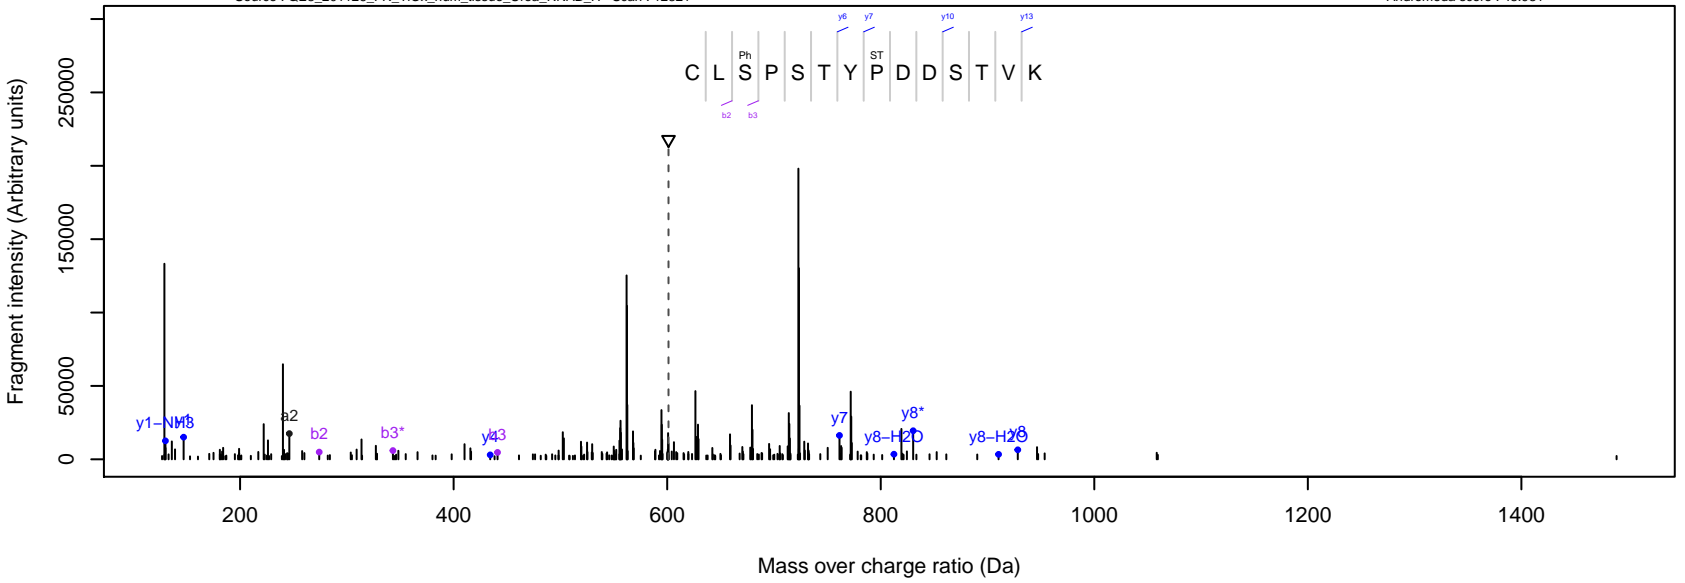

QIT(Phospho (STY))M(Oxidation (M))EELVR-2+

Source : QE3\_201126\_FR\_TiOx\_hum\_tissue\_Urea\_RNAB\_B Scan : 20779

Andromeda score : 48.981

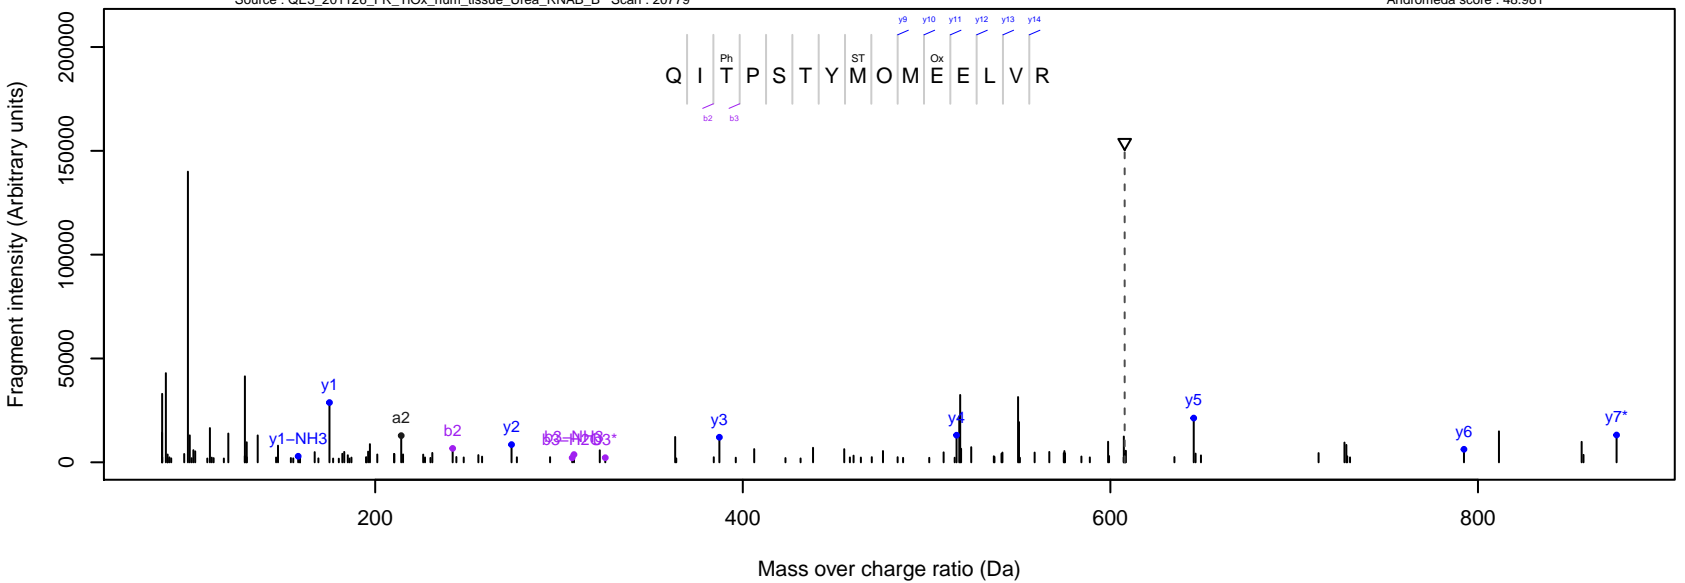

AFLQM(Oxidation (M))DSPKHQS(Phospho (STY))DPS(Phospho (STY))EDEDESSQK-3+

Source : QE3\_201126\_FR\_TIOx\_hum\_tissue\_Urea\_RNAB\_B Scan : 11196

Andromeda score : 48.947

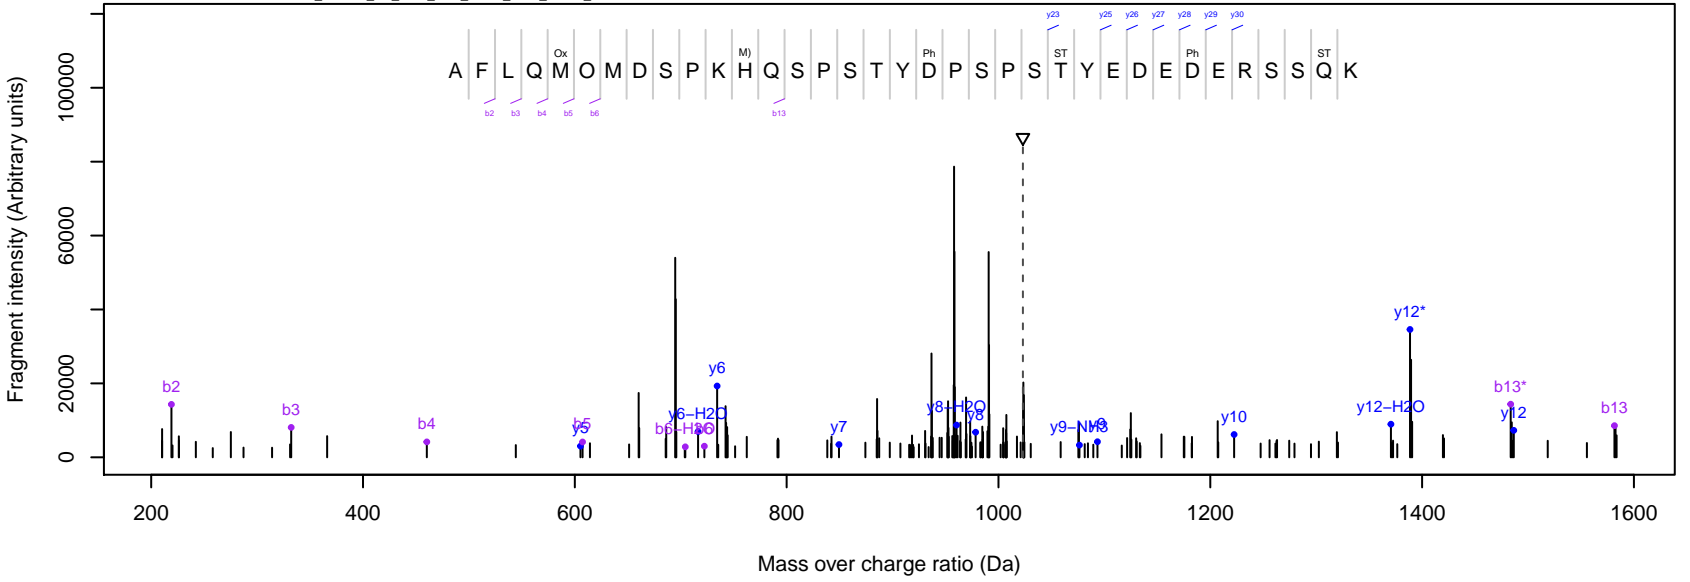

STGGIS(Phospho (STY))VPGPM(Oxidation (M))GPSGPR-2+

Source : QE3\_201126\_FR\_TIOx\_hum\_tissue\_Urea\_RNAB\_H Scan : 24799

Andromeda score : 48.899

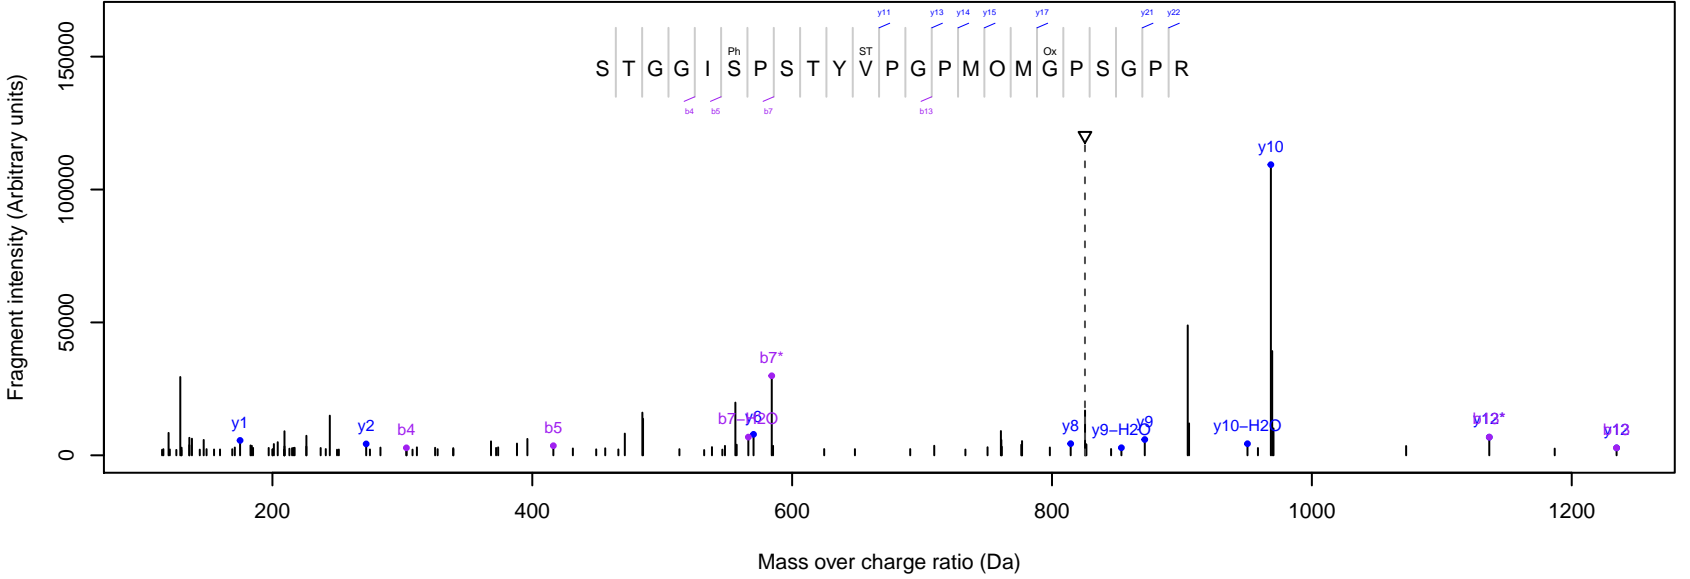

YFGTDAVPDGS(Phospho (STY))DEEEVAYTG-2+

Source : QE3\_201126\_FR\_TIOx\_hum\_tissue\_Urea\_RNAB\_B Scan : 52515

Andromeda score : 48.899

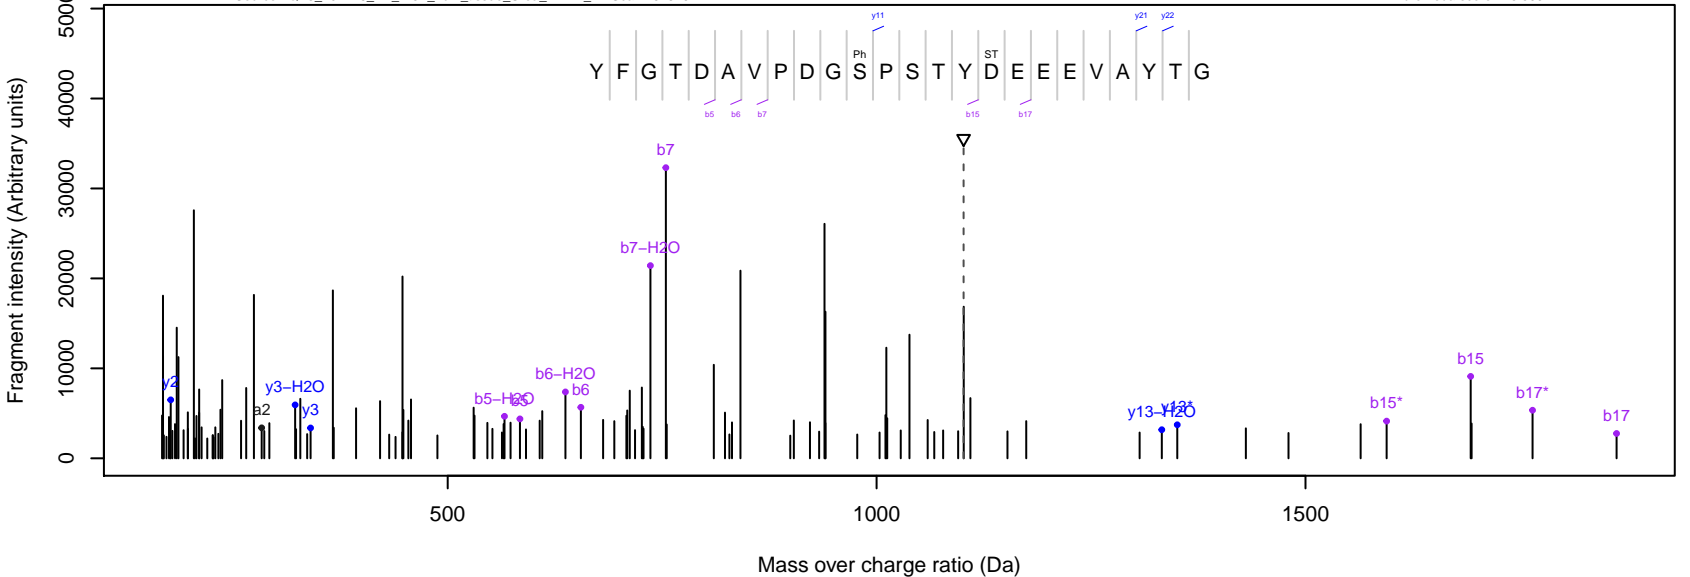

GELALPGLGET(Phospho (STY))RGSEDETDDDDGEDFTPPILK-3+

Source : QE3\_201126\_FR\_TiOx\_hum\_tissue\_Urea\_RNAB\_N Scan : 53614

Andromeda score : 48.867

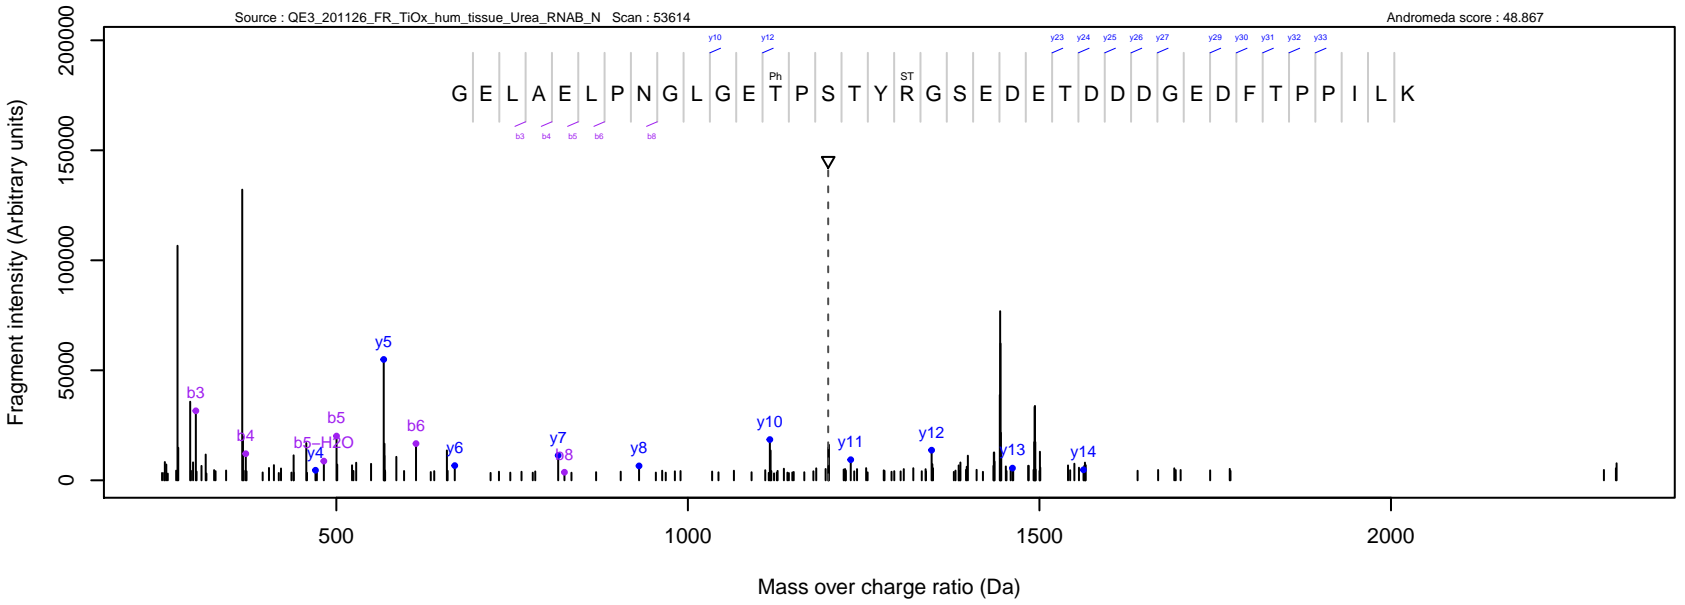

TLDSDISCPLESLAYS(Phospho (STY))DDDVPSVYENGLSQK-3+

Source : QE3\_201126\_FR\_TiOx\_hum\_tissue\_Urea\_RNAB\_B Scan : 59566

Andromeda score : 48.867

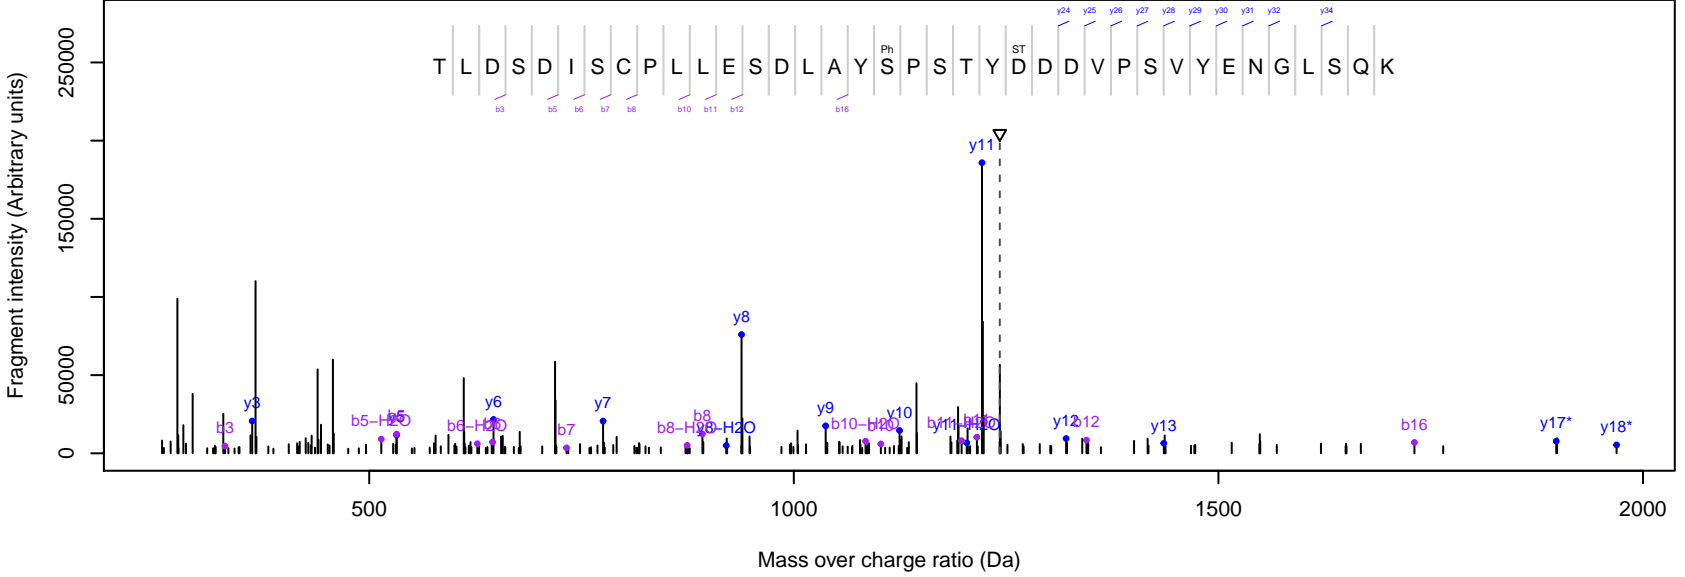

SKT(Phospho (STY))PPPPQTAQT K-3+

Source : QE3\_201126\_FR\_TiOx\_hum\_tissue\_Urea\_RNAB\_H Scan : 5556

Andromeda score : 48.855

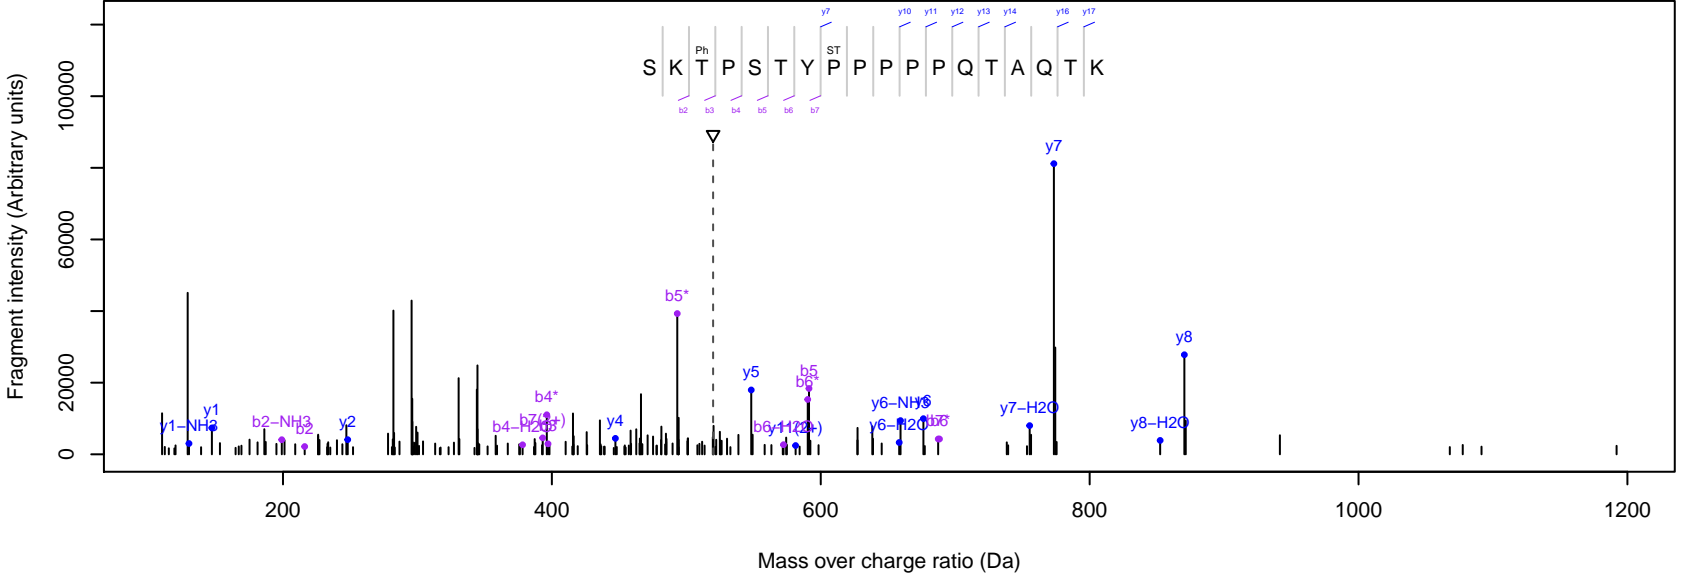

M(Oxidation (M))AESPSPSGQQPPS(Phospho (STY))PPS(Phospho (STY))PDEL PANVK-3+

Source : QE3\_201126\_FR\_TiOx\_hum\_tissue\_Urea\_RNAB\_N Scan : 37108

Andromeda score : 48.847

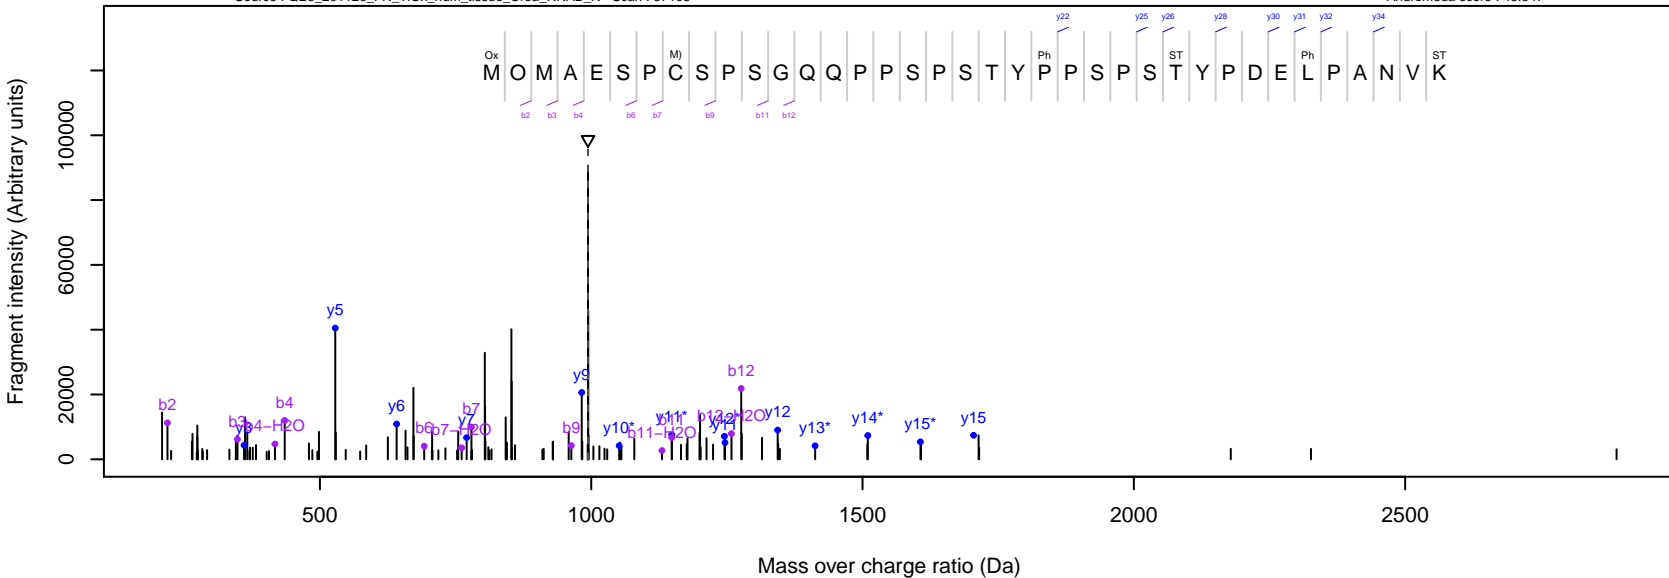

GSPKPS(Phospho (STY))PQPS(Phospho (STY))PKPSPK-3+

Source : QE3\_201126\_FR\_TiOx\_hum\_tissue\_Urea\_RNAB\_N Scan : 4949

Andromeda score : 48.824

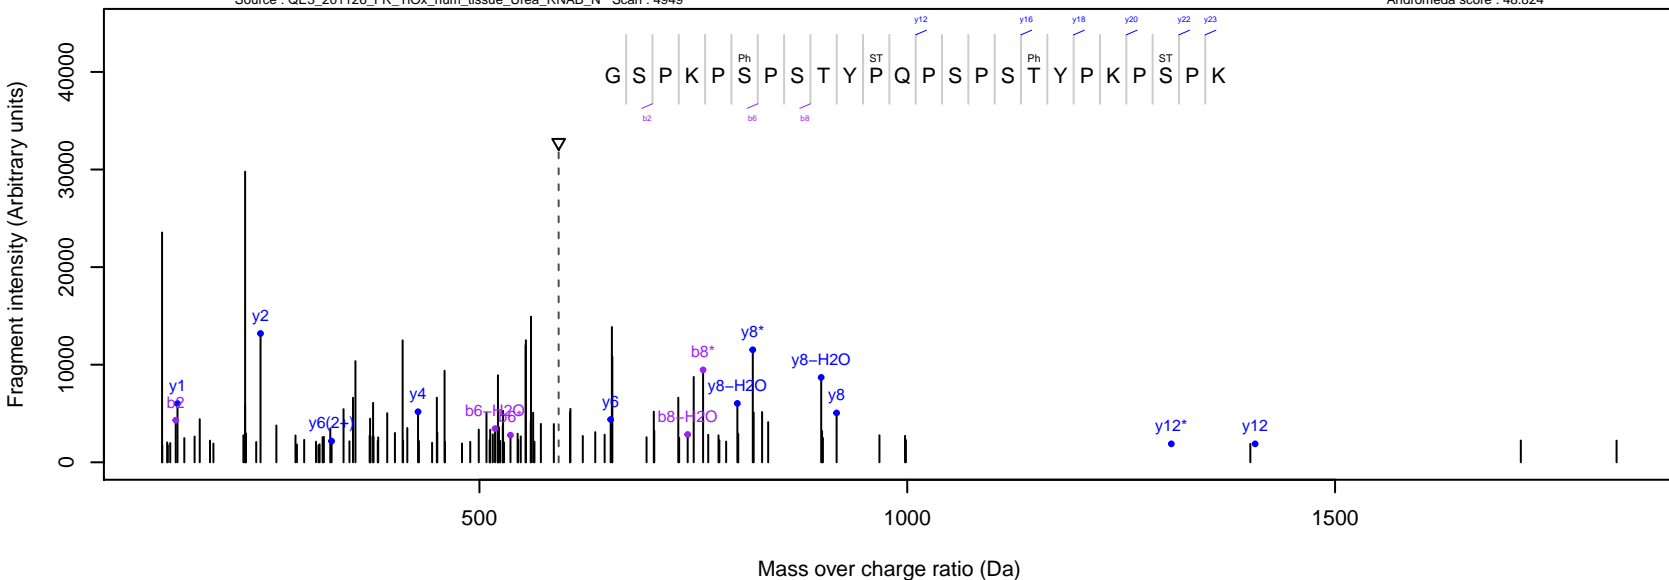

GS(Phospho (STY))PKPSPQPSPKPSPK-3+

Source : QE3\_201126\_FR\_TiOx\_hum\_tissue\_Urea\_RNAB\_H Scan : 4081

Andromeda score : 48.824

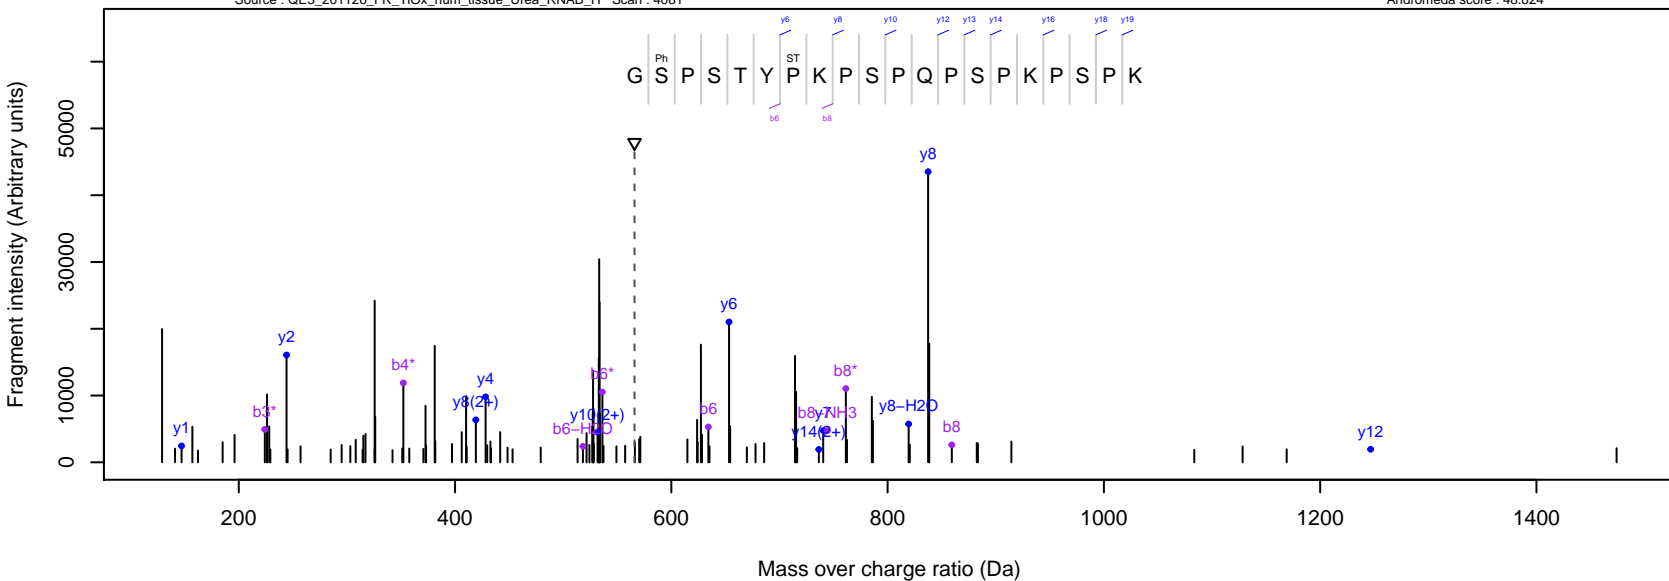

SEDEAKFPT(M(Oxidation (M))NRR-3+

Source : QE3\_201126\_FR\_TiOx\_hum\_tissue\_Urea\_RNAB\_N Scan : 7725

Andromeda score : 48.823

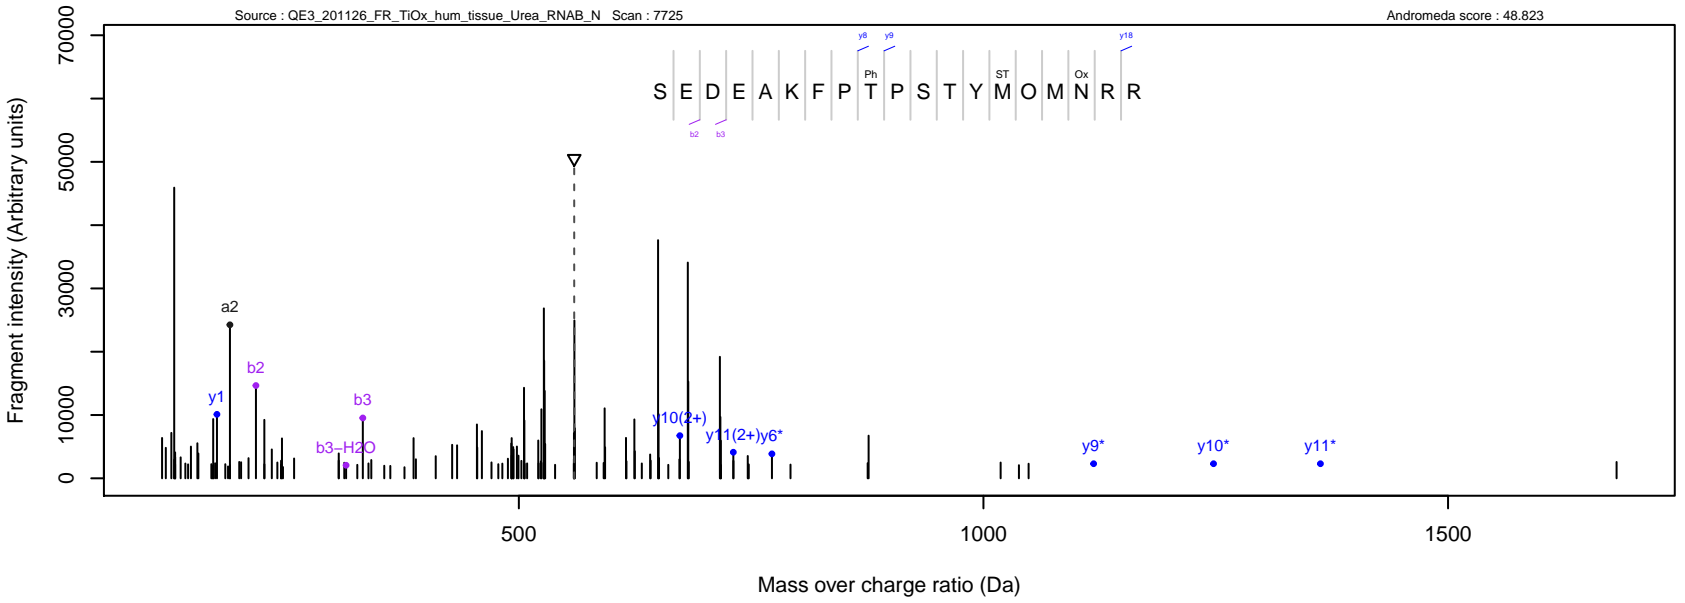

S(Phospho (STY))SDPWSNSHFPHEN-3+

Source : QE3\_201126\_FR\_TiOx\_hum\_tissue\_Urea\_RNAB\_H Scan : 24335

Andromeda score : 48.823

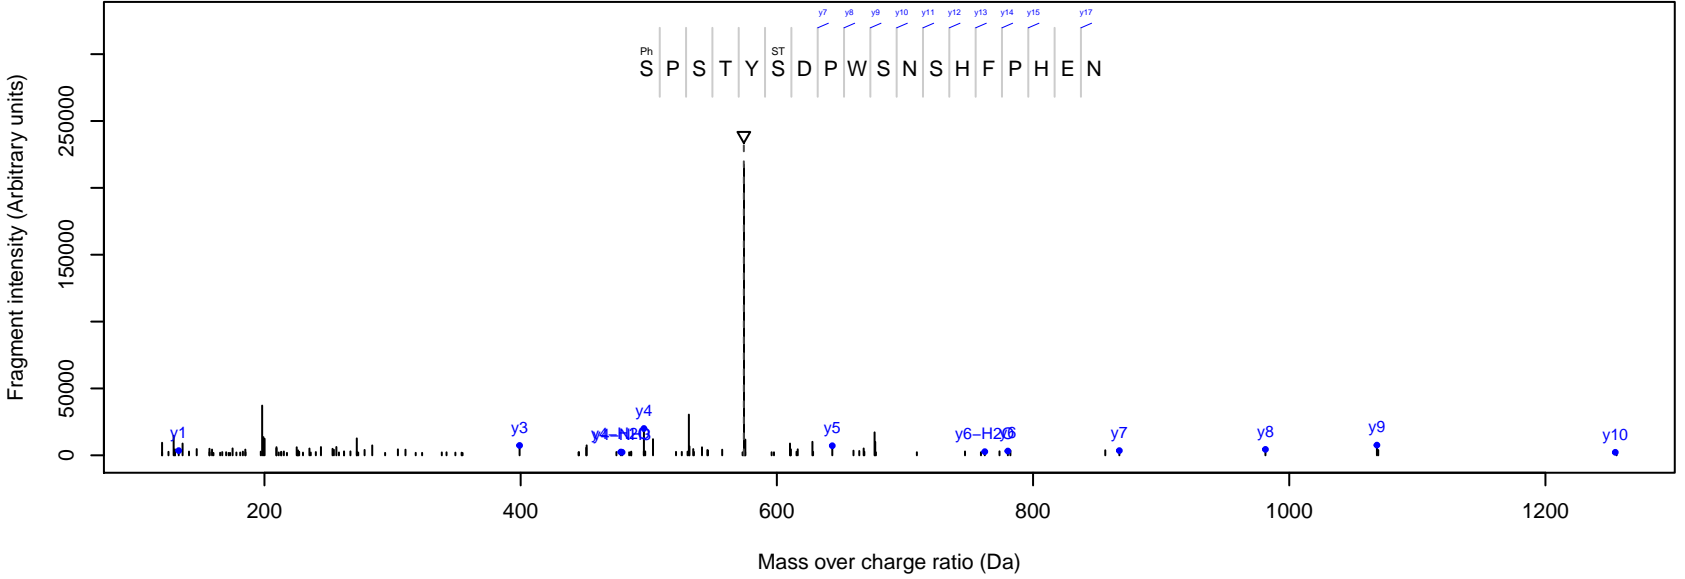

EKLLWS(Phospho (STY))QR-2+

Source : QE3\_201126\_FR\_TiOx\_hum\_tissue\_Urea\_RNAB\_H Scan : 30058

Andromeda score : 48.796

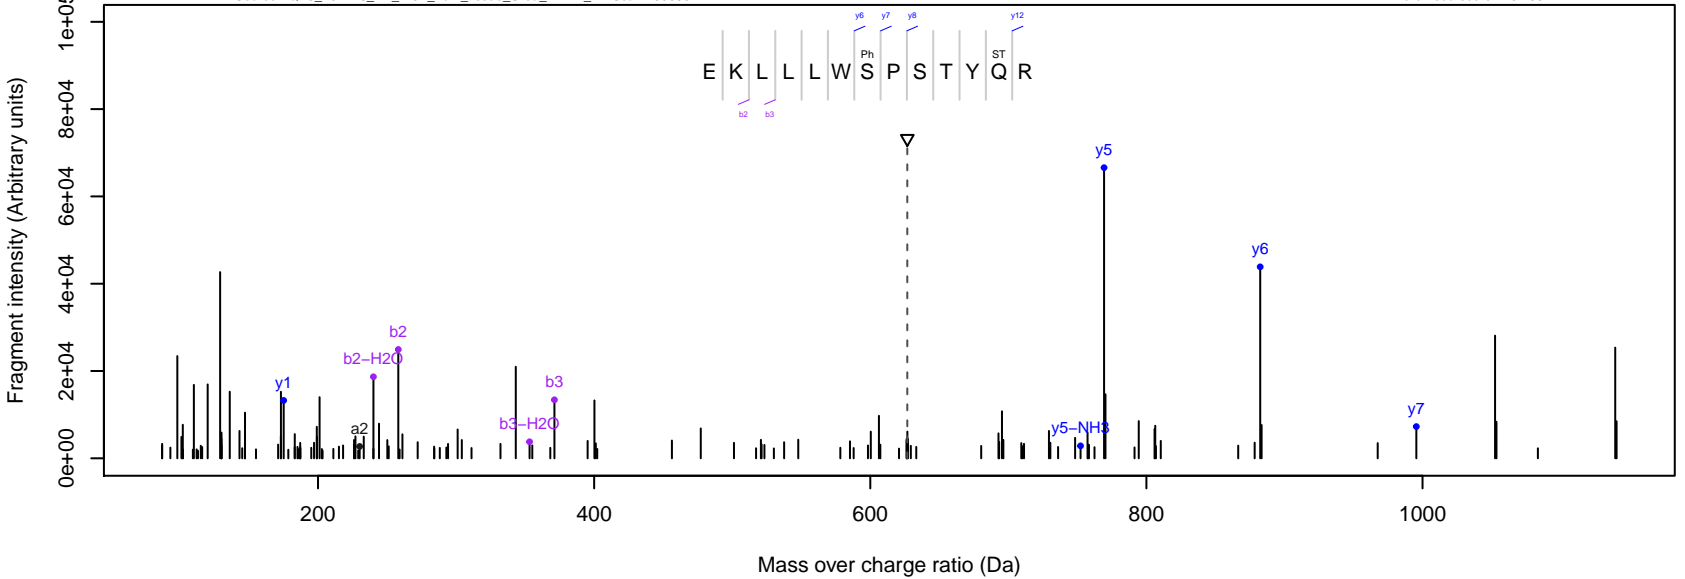

LEAAASIEGEDVPQGS(Phospho (STY))PEGDGGGSGGEEGSFIWVER-3+

Source : QE3\_201126\_FR\_TiOx\_hum\_tissue\_Urea\_RNAB\_N Scan : 54173

Andromeda score : 48.774

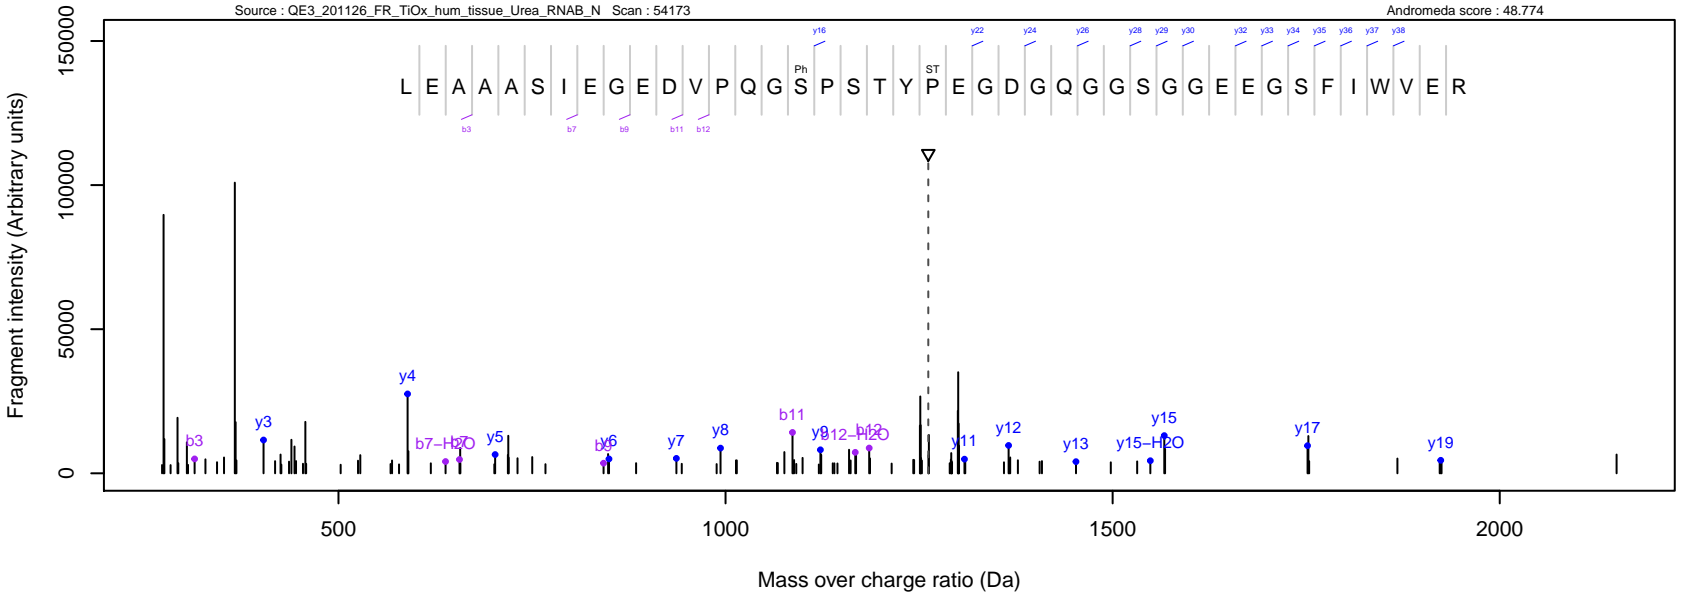

SYEDMIGEEVPSDQYYWAPLAQHERGS(Phospho (STY))LAS(Phospho (STY))LDSLRL-4+

Source : QE3\_201126\_FR\_TiOx\_hum\_tissue\_Urea\_RNAB\_N Scan : 57939

Andromeda score : 48.771

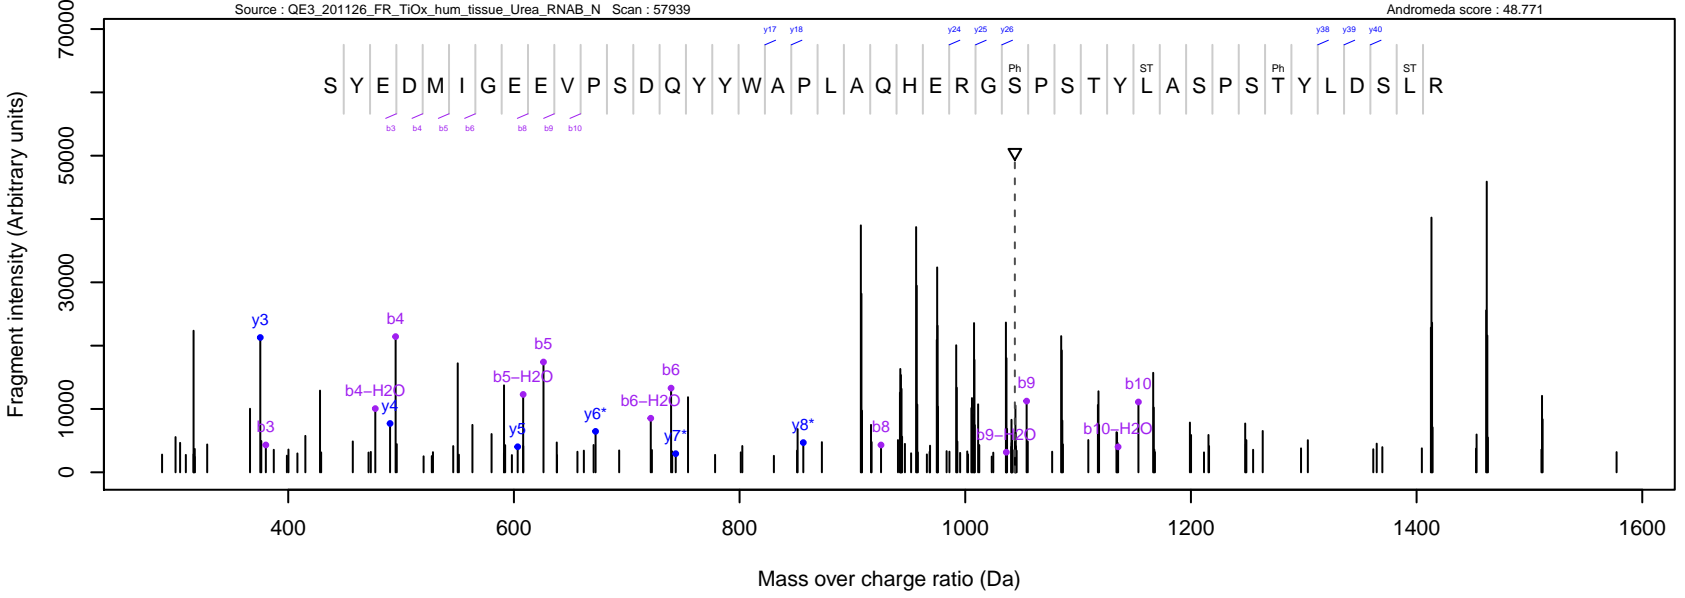

AS(Phospho (STY))SFSGISVLTR-2+

Source : QE3\_201126\_FR\_TiOx\_hum\_tissue\_Urea\_RNAB\_B Scan : 40630

Andromeda score : 48.741

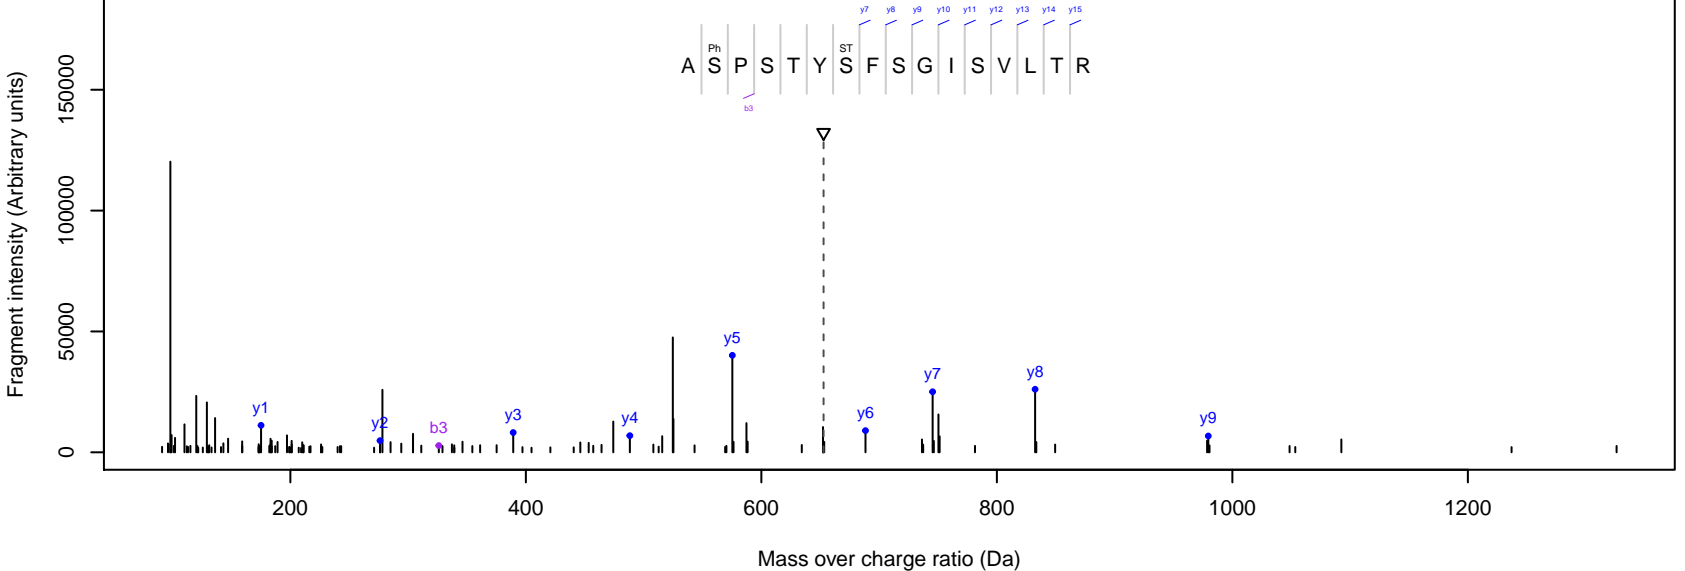

EDS(Phospho (STY))FESLDSLGSR-2+

Source : QE3\_2011126\_FR\_TiOx\_hum\_tissue\_Urea\_RNAB\_H Scan : 38332

Andromeda score : 48.741

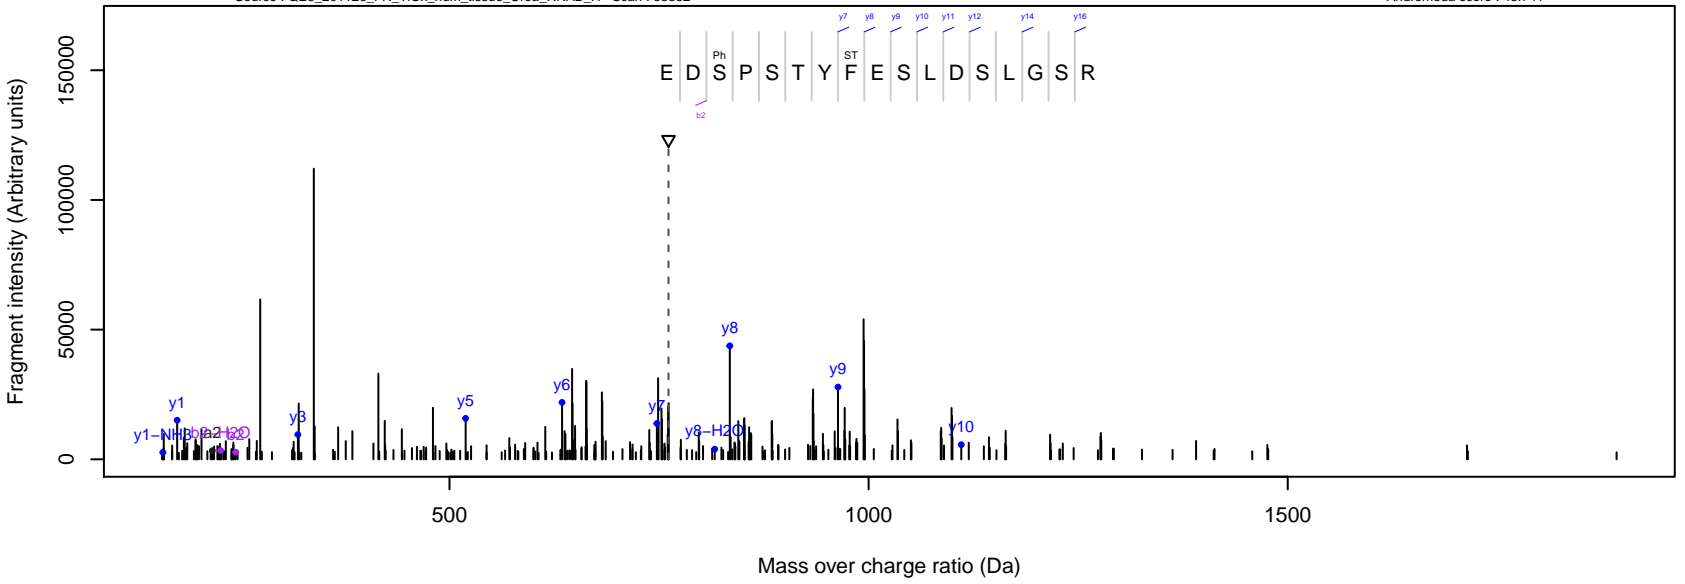

T(Phospho (STY))PSLSPASSLDV-2+

Source : QE3\_2011126\_FR\_TiOx\_hum\_tissue\_Urea\_RNAB\_B Scan : 48108

Andromeda score : 48.741

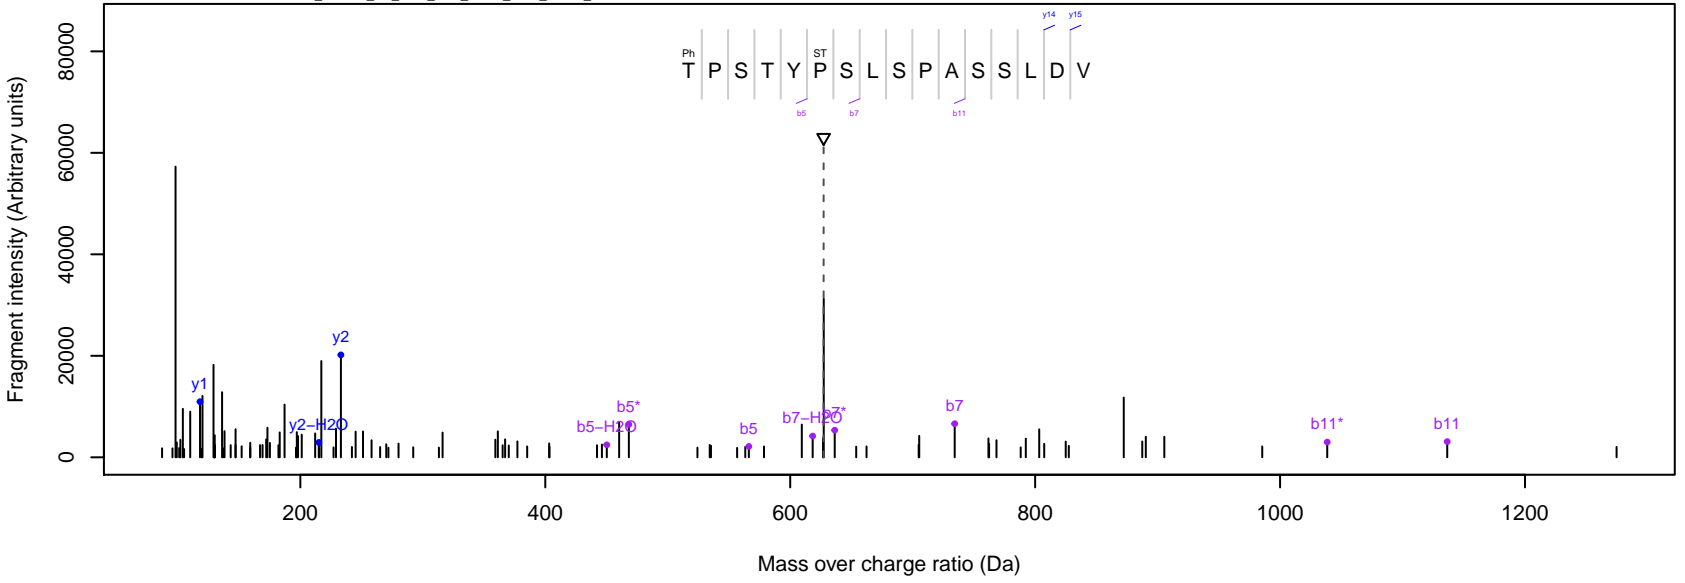

NGS(Phospho (STY))GVFISDIVK-2+

Source : QE3\_2011126\_FR\_TiOx\_hum\_tissue\_Urea\_RNAB\_N Scan : 43938

Andromeda score : 48.704

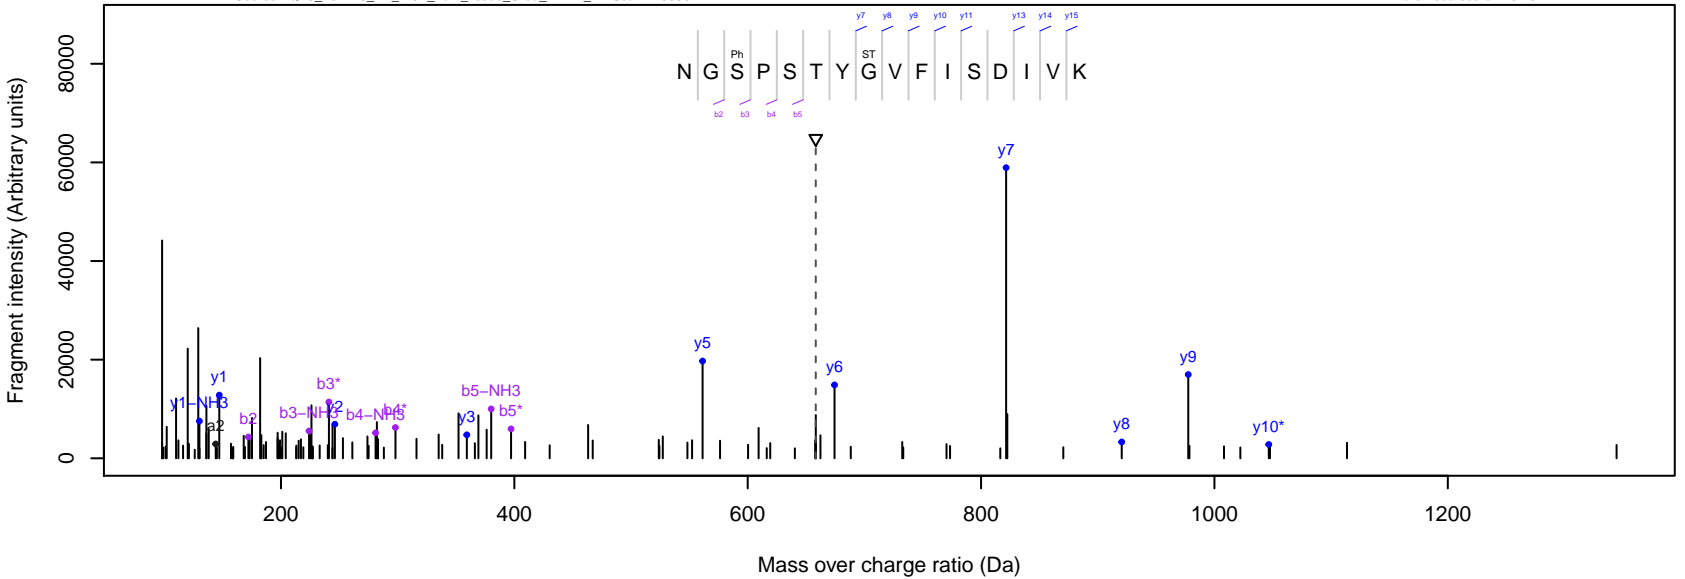



YNEQHVPGS(Phospho (STY))PFTAR-2+

Source : QE3\_201126\_FR\_TiOx\_hum\_tissue\_Urea\_RNAB\_N Scan : 19841

Andromeda score : 48.704

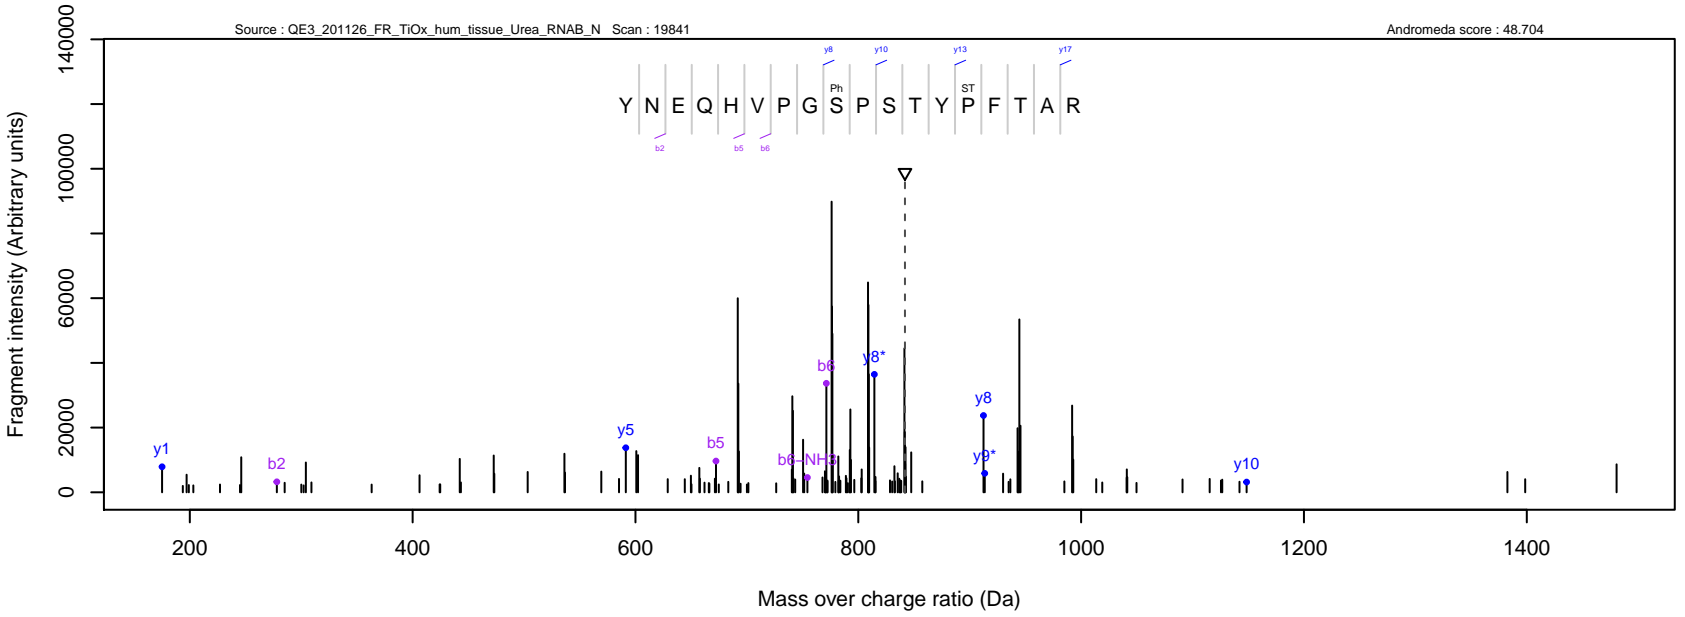

AS(Phospho (STY))SDGEGTM(Oxidation (M))SRPASVDGSPVSPSTNR-3+

Source : QE3\_201126\_FR\_TiOx\_hum\_tissue\_Urea\_RNAB\_B Scan : 13950

Andromeda score : 48.697

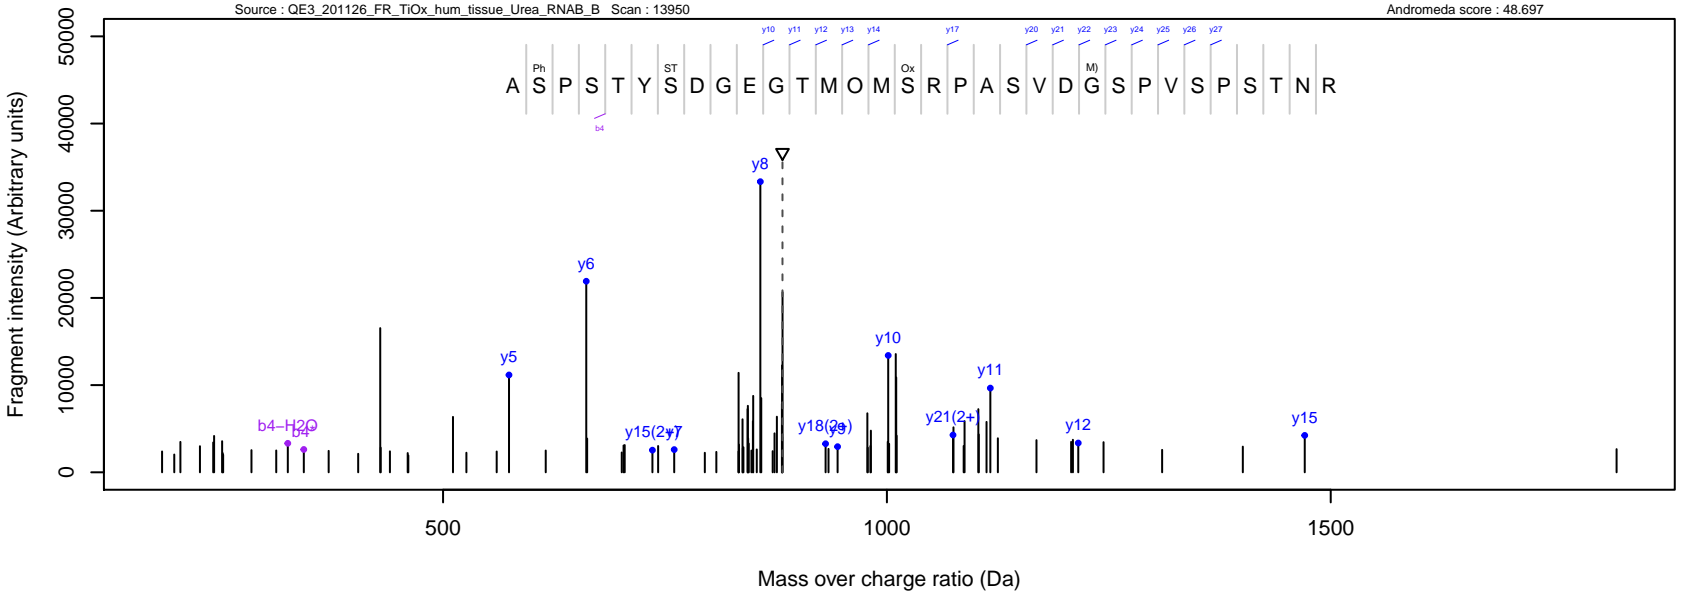

TGQAGS(Phospho (STY))LS(Phospho (STY))GSPKPFSPQLSAPITTK-3+

Source : QE3\_201126\_FR\_TiOx\_hum\_tissue\_Urea\_RNAB\_B Scan : 39934

Andromeda score : 48.697

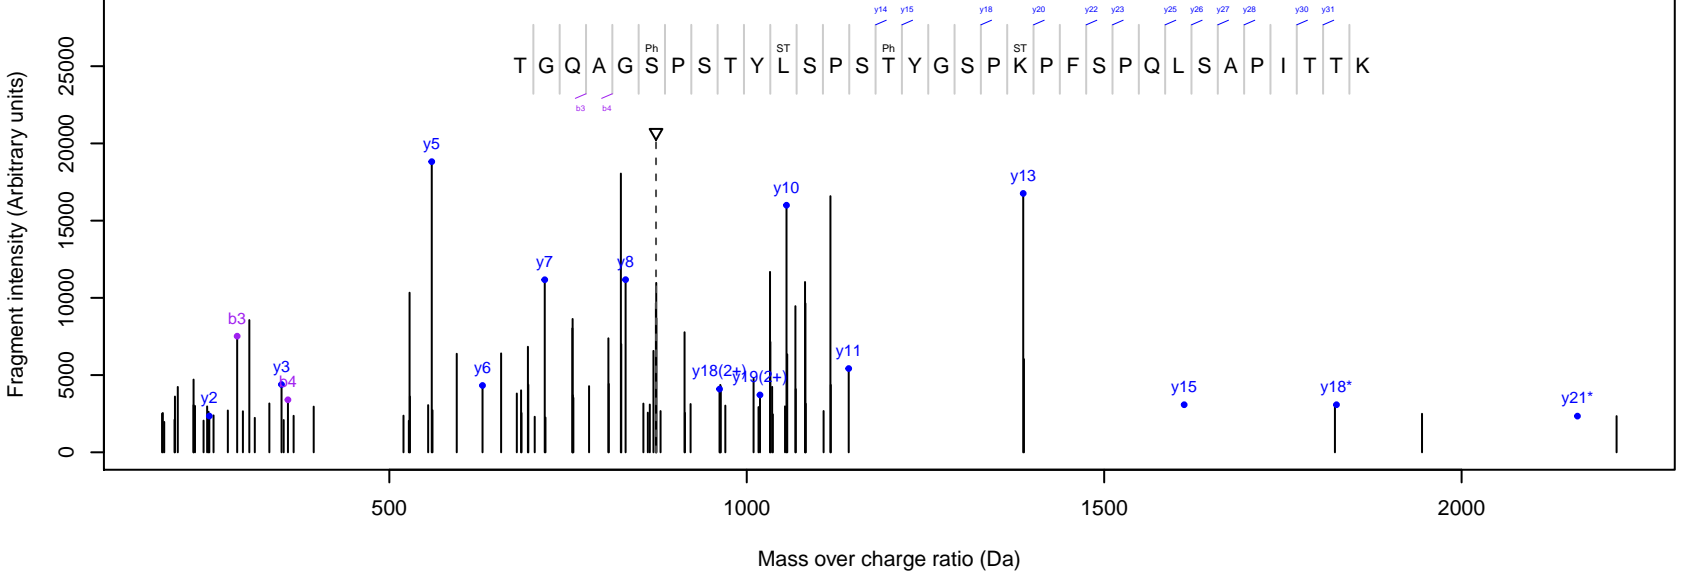

AGTLS(Phospho (STY))ITEFADM(Oxidation (M))LS(Phospho (STY))GNAGGFRS(Phospho (STY))RSSSVGS(Phospho (STY))SSYPISPAVSR-4+

Source : QE3\_201126\_FR\_TIOx\_hum\_tissue\_Urea\_RNAB\_B Scan : 62751

Andromeda score : 48.693

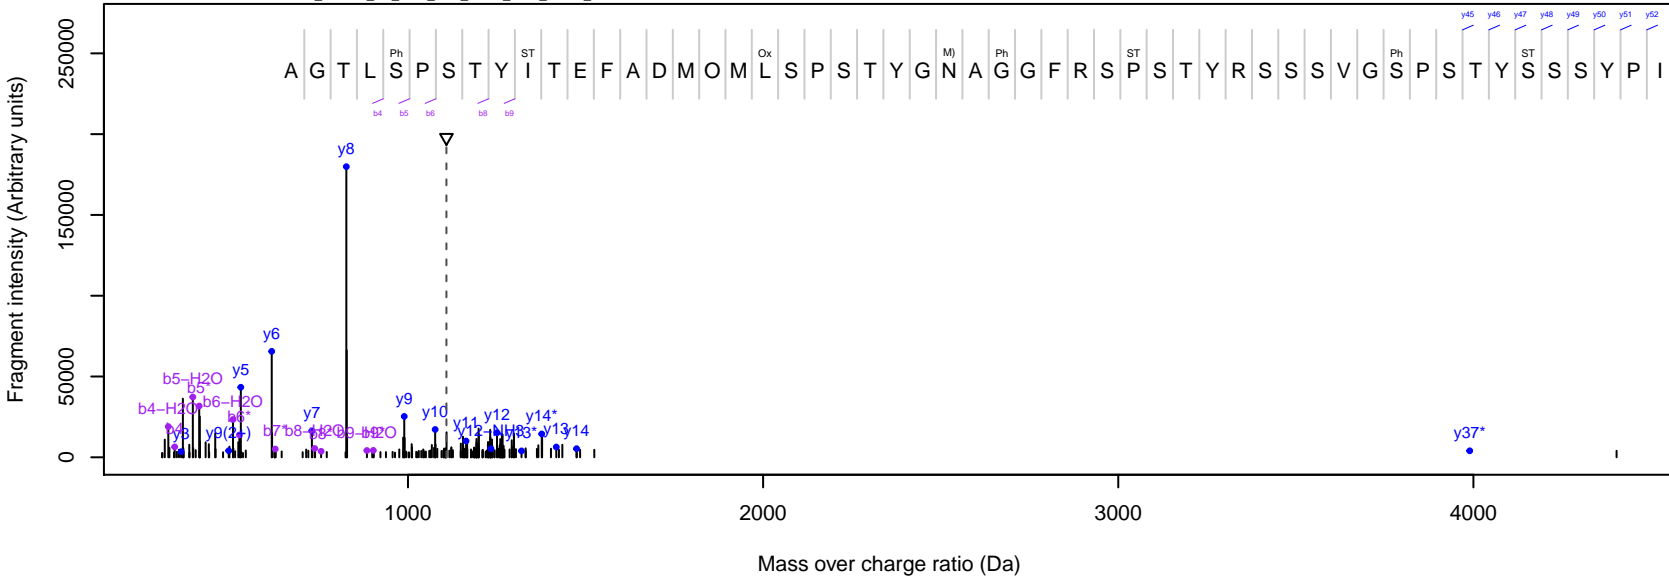

SSPGDPSAVSPNLS(Phospho (STY))PSAS(Phospho (STY))PTSSR-3+

Source : QE3\_201126\_FR\_TIOx\_hum\_tissue\_Urea\_RNAB\_H Scan : 28186

Andromeda score : 48.693

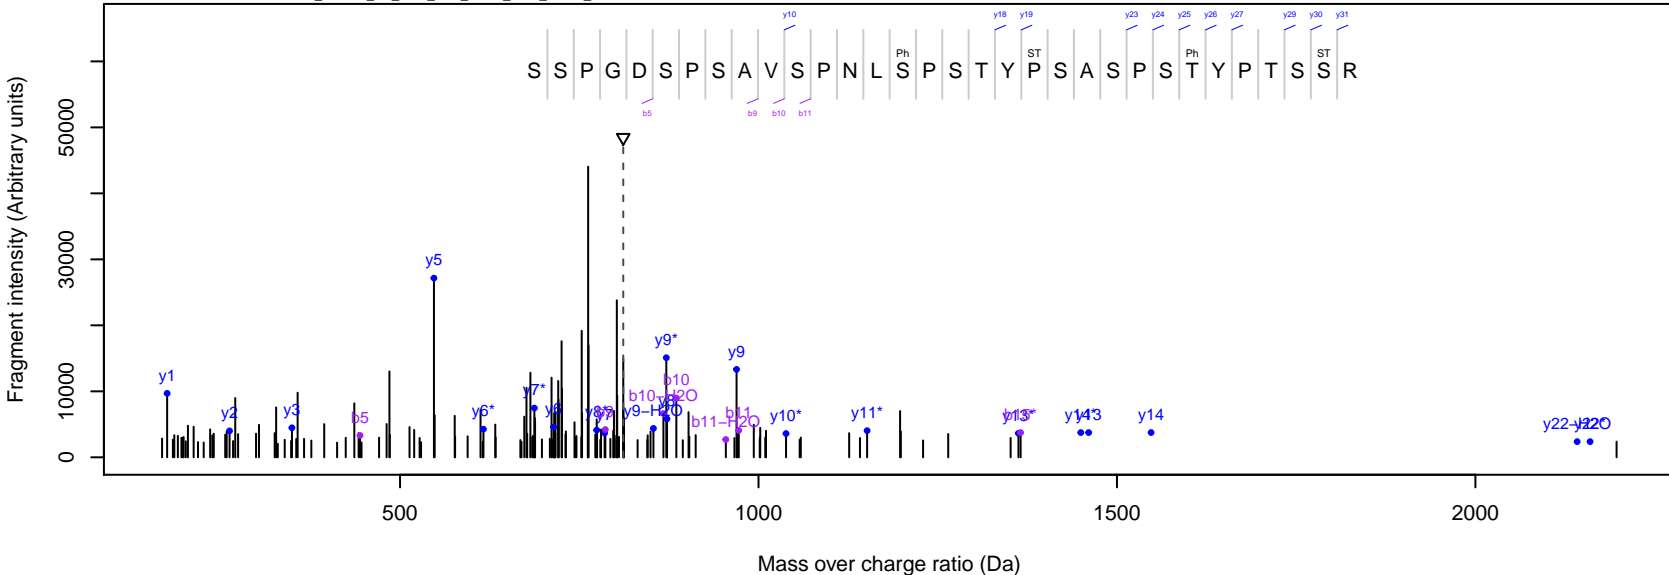

ANM(Oxidation (M))HISES(Phospho (STY))QQEFFR-3+

Source : QE3\_201126\_FR\_TIOx\_hum\_tissue\_Urea\_RNAB\_H Scan : 21632

Andromeda score : 48.677

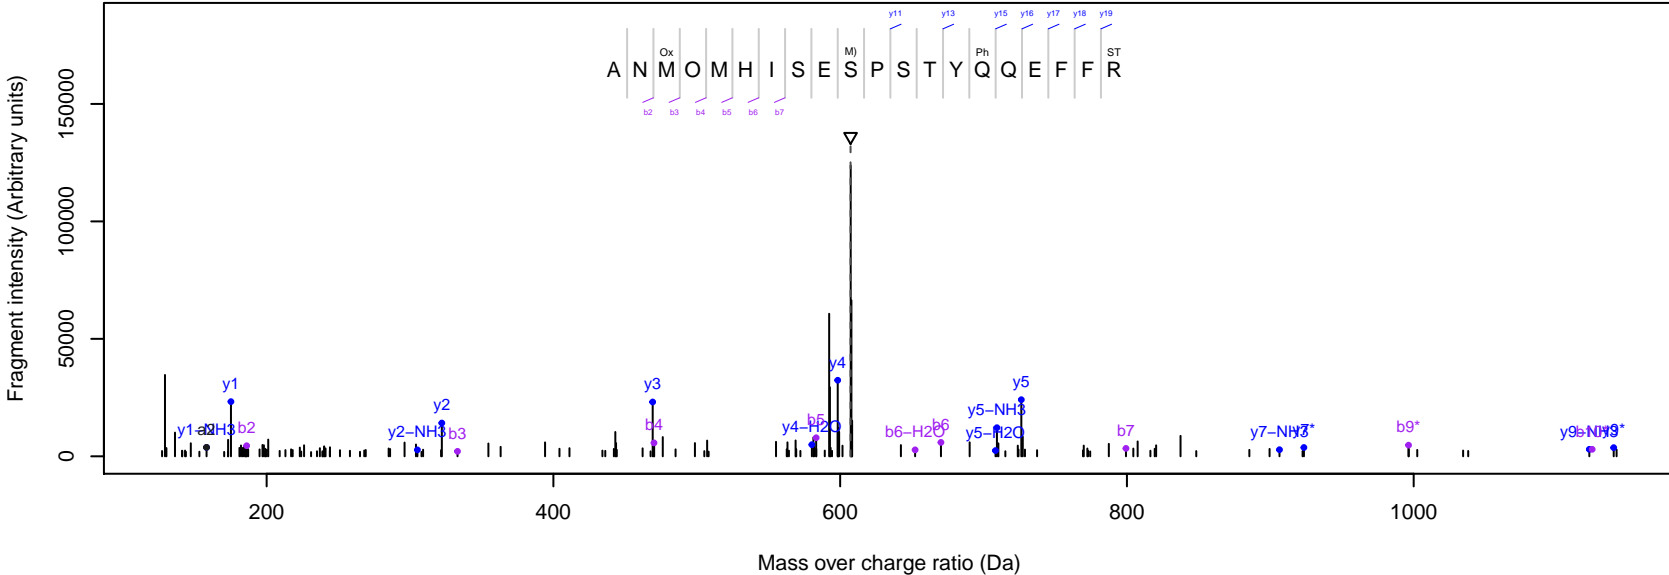

GLAGPPAS(Phospho (STY))PGK-2+

Source : QE3\_201126\_FR\_TIOx\_hum\_tissue\_Urea\_RNAB\_N Scan : 11575

Andromeda score : 48.659

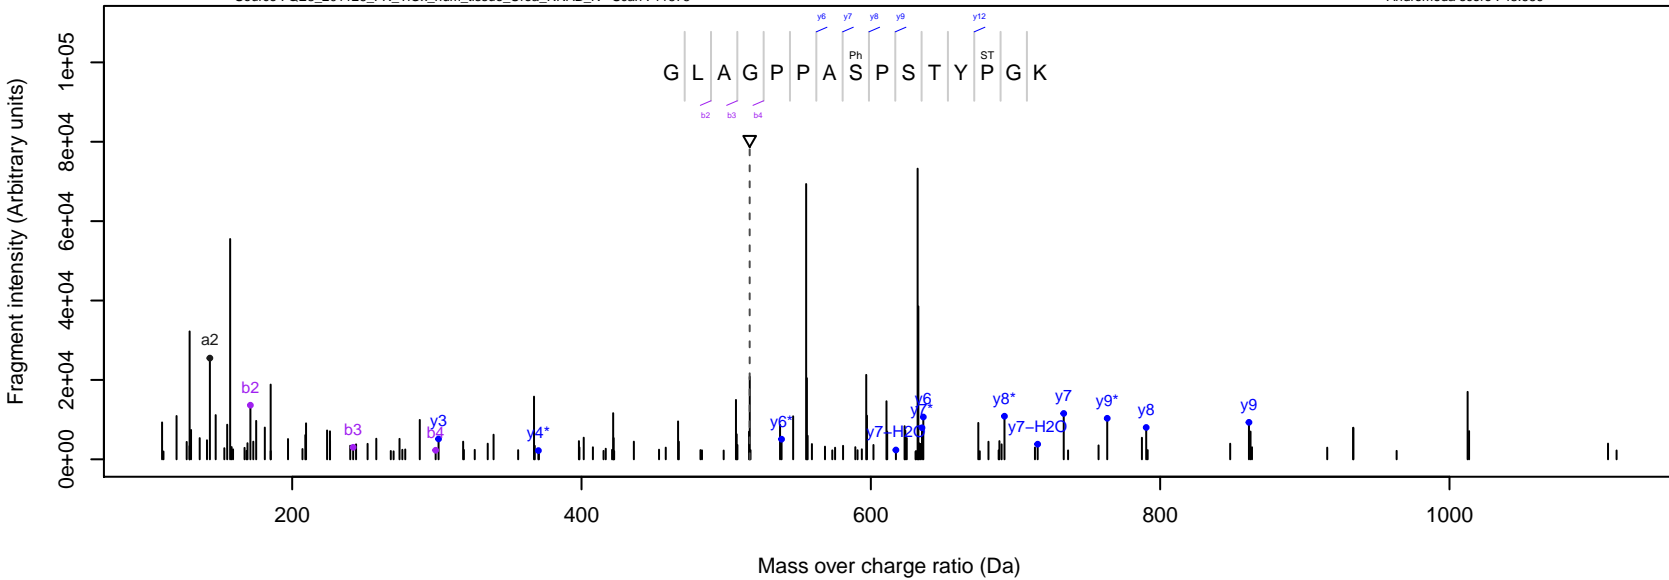

SQS(Phospho (STY))SDLLERER-2+

Source : QE3\_201126\_FR\_TIOx\_hum\_tissue\_Urea\_RNAB\_H Scan : 12831

Andromeda score : 48.659

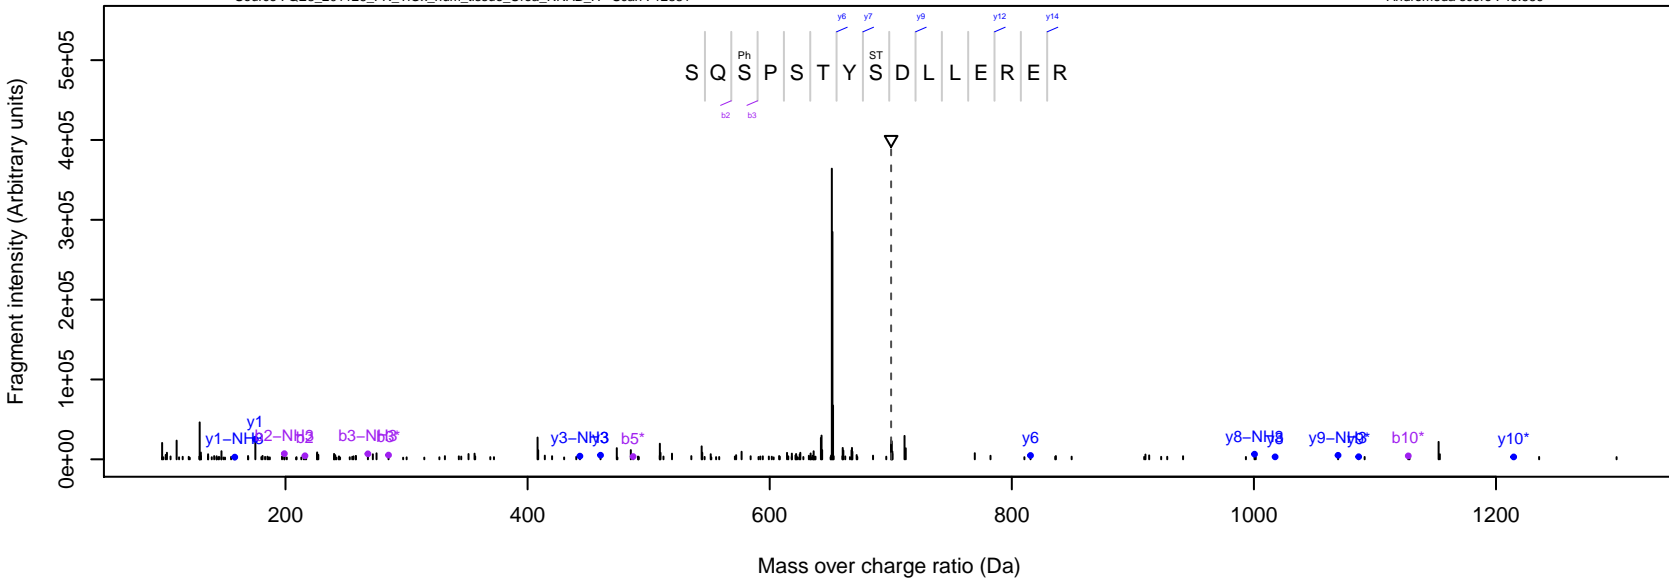

KAS(Phospho (STY))LSVAGPGKPQEEDQLPAR-3+

Source : QE3\_201126\_FR\_TIOx\_hum\_tissue\_Urea\_RNAB\_B Scan : 16938

Andromeda score : 48.656

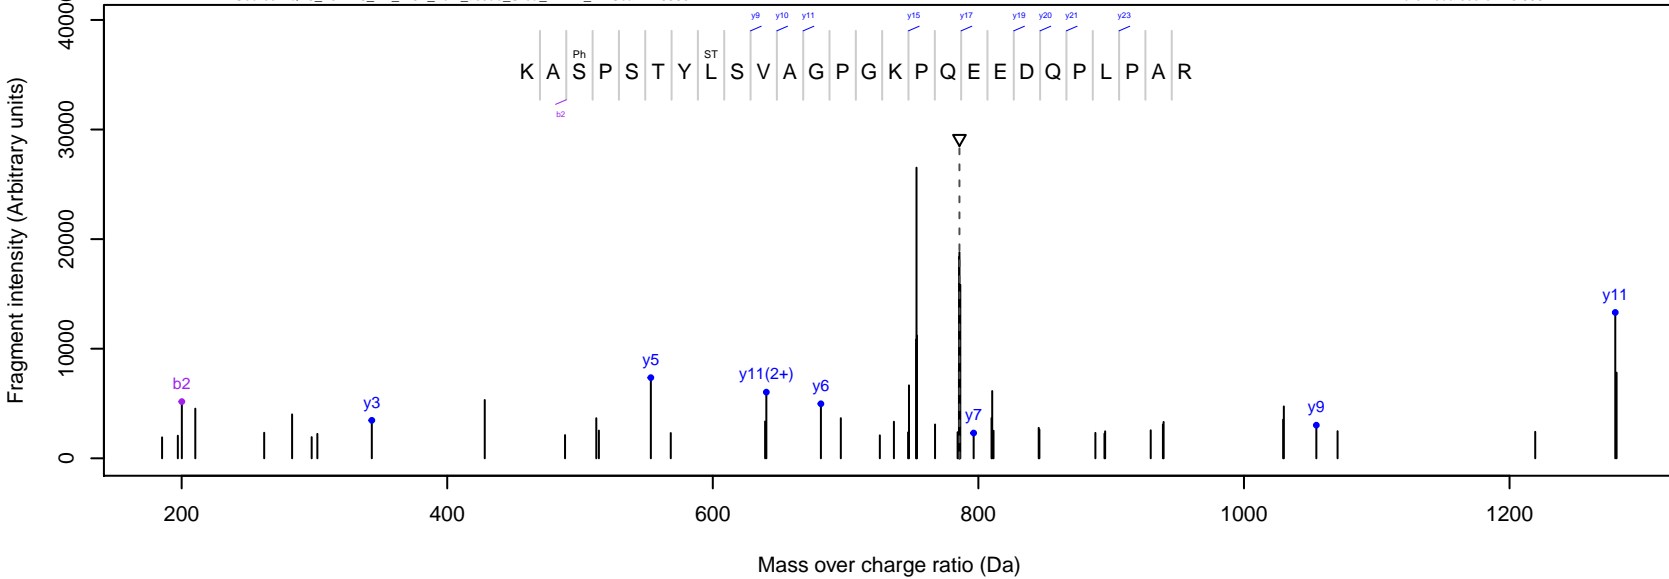

LVINGNPITIFQERDPS(Phospho (STY))K-3+

Source : QE3\_201126\_FR\_TiOx\_hum\_tissue\_Urea\_RNAB\_B Scan : 46350

Andromeda score : 48.656

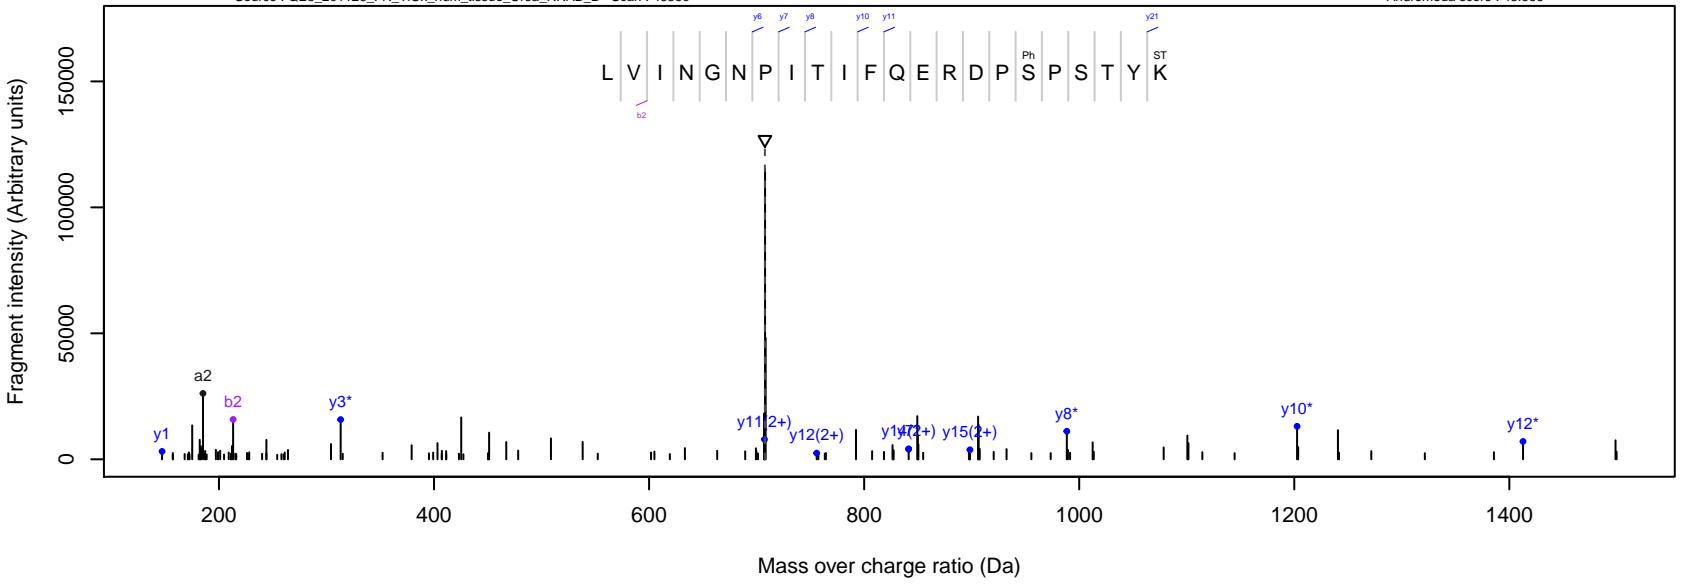

QFSIQADERES(Phospho (STY))T(Phospho (STY))DDESNPLGR-3+

Source : QE3\_201126\_FR\_TiOx\_hum\_tissue\_Urea\_RNAB\_N Scan : 35401

Andromeda score : 48.656

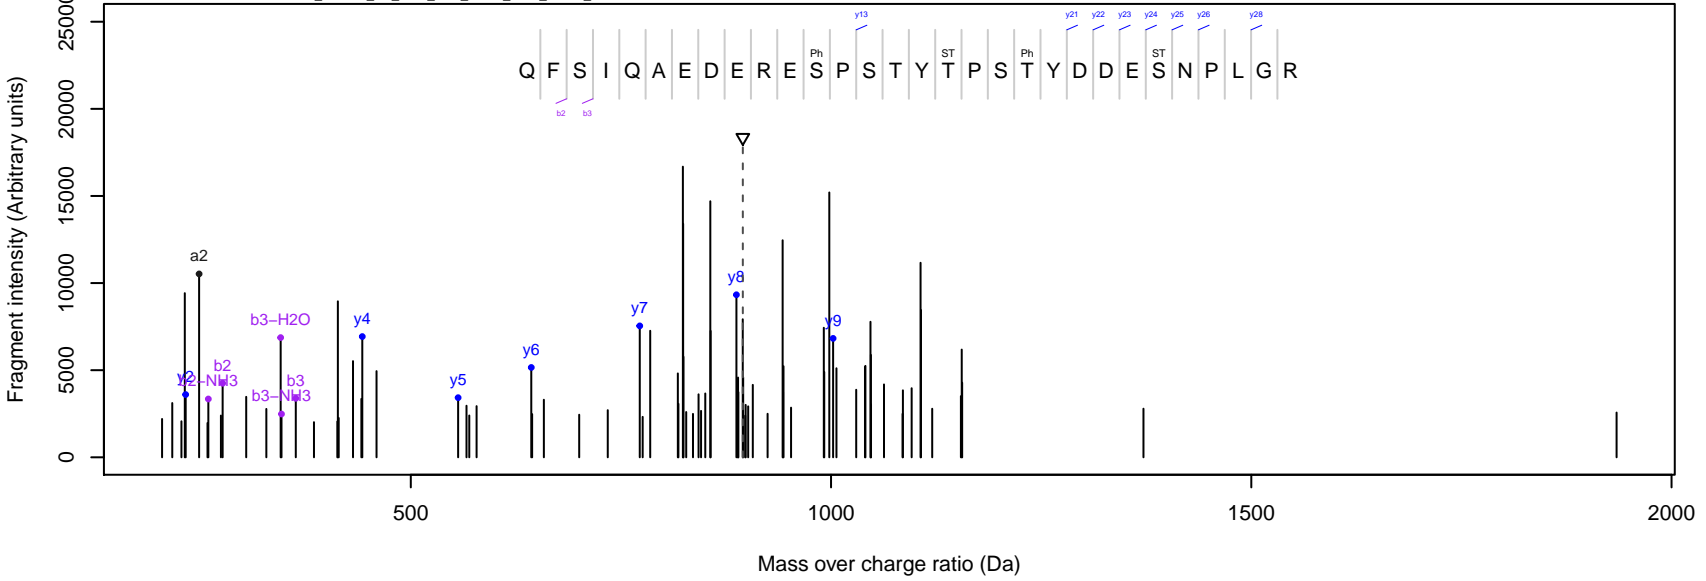

YFGFDDLSPSTYESTPSTYEDDEDDCQVER-3+

Source : QE3\_201126\_FR\_TiOx\_hum\_tissue\_Urea\_RNAB\_N Scan : 59677

Andromeda score : 48.656

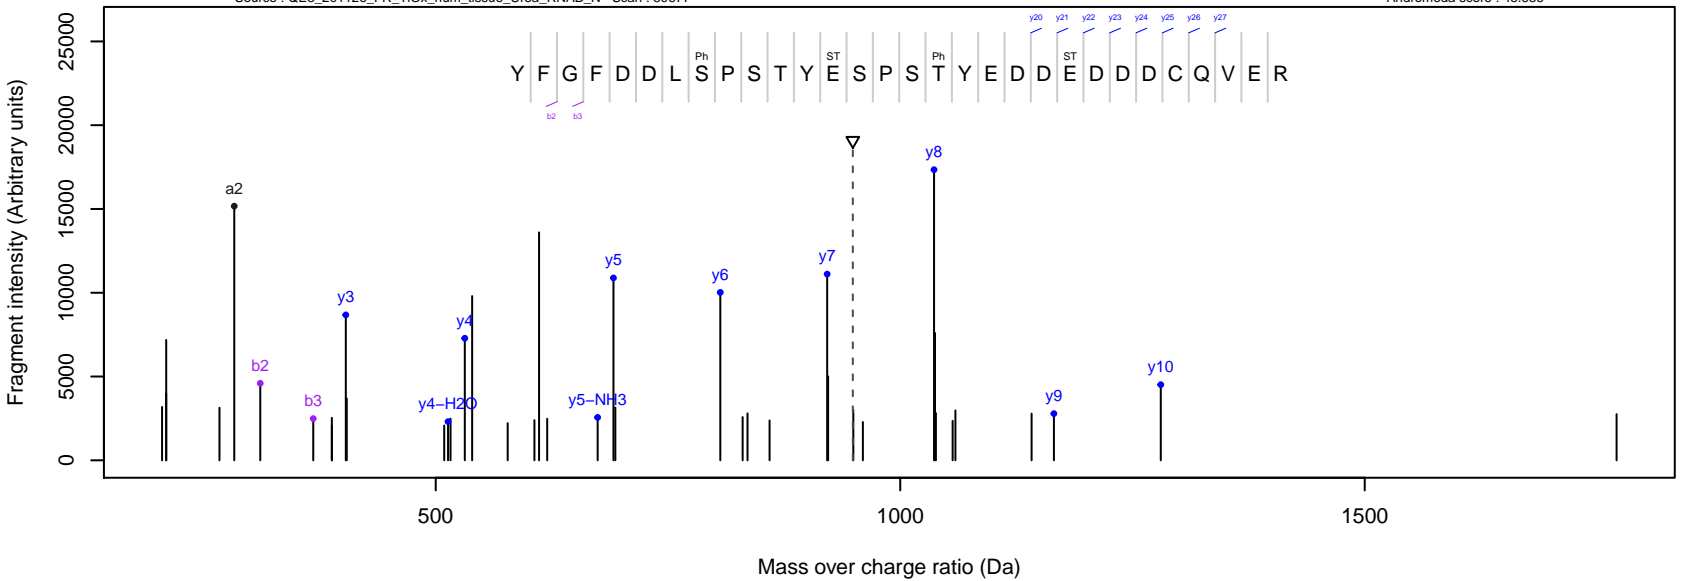

QQSHFAMM(Oxidation (M))HGGTGFAGIDS PSTYSSPEVK-3+

Source : QE3\_201126\_FR\_TiOx\_hum\_tissue\_Urea\_RNAB\_N Scan : 24190

Andromeda score : 48.655

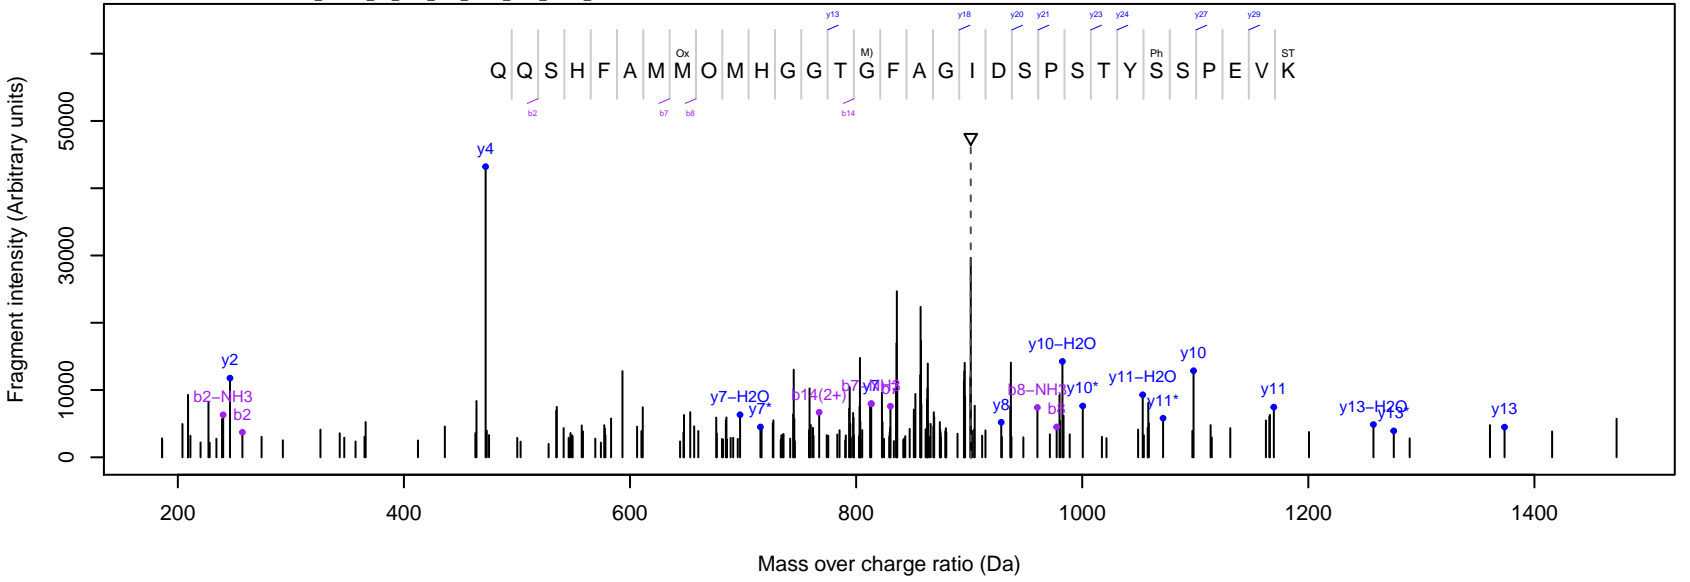

TSGAPGS(Phospho (STY))PQT(Phospho (STY))PPERHDSGGSLLPTR-3+

Source : QE3\_201126\_FR\_TiOx\_hum\_tissue\_Urea\_RNAB\_H Scan : 21332

Andromeda score : 48.655

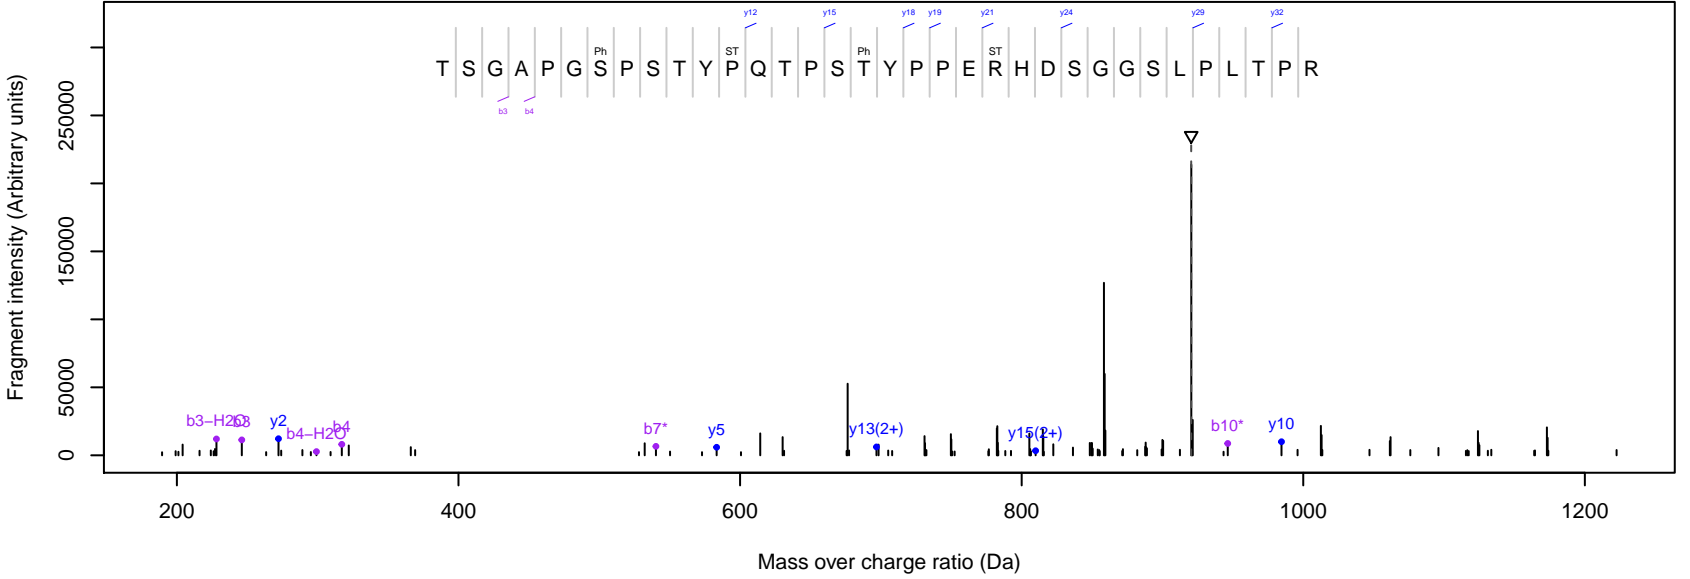

NIPS(Phospho (STY))PGQLDPDTR-2+

Source : QE3\_201126\_FR\_TiOx\_hum\_tissue\_Urea\_RNAB\_N Scan : 30843

Andromeda score : 48.625

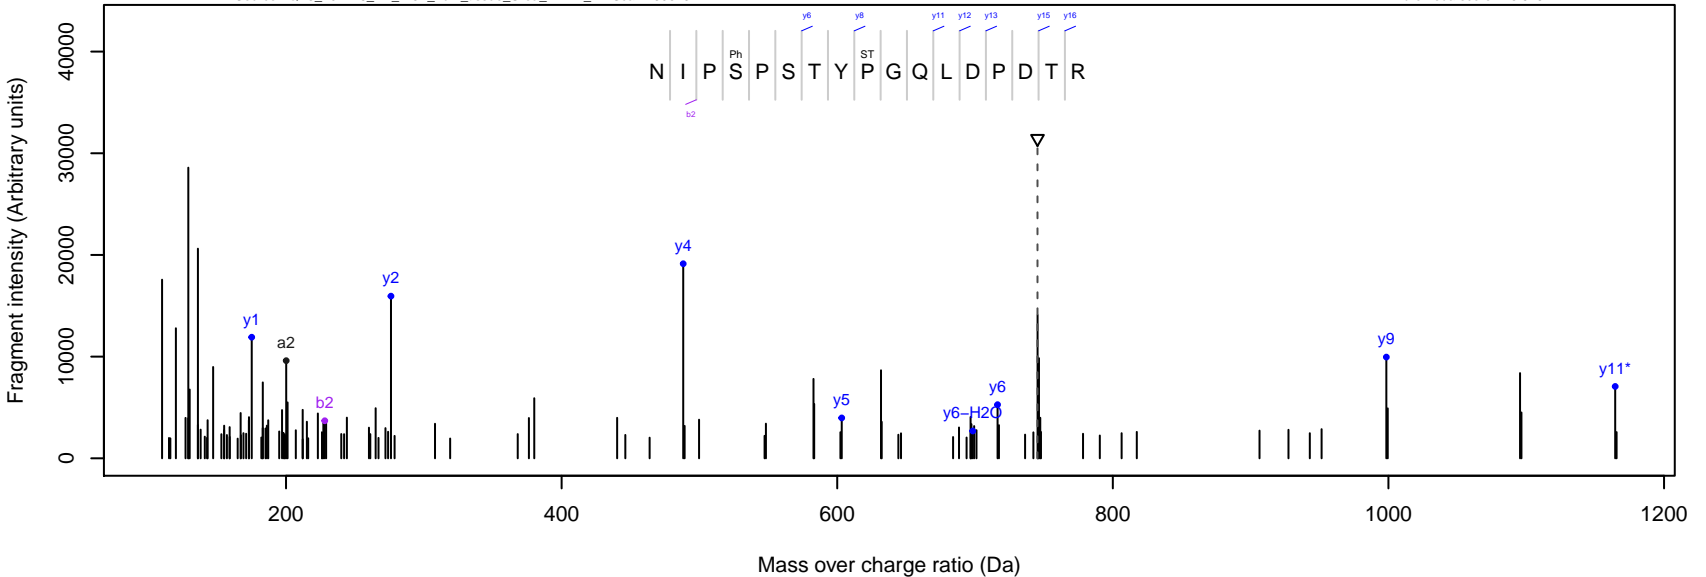

RRS(Phospho (STY))SLPNGEQLK-3+

Source : QE3\_201126\_FR\_TiOx\_hum\_tissue\_Urea\_RNAB\_H Scan : 14660

Andromeda score : 48.623

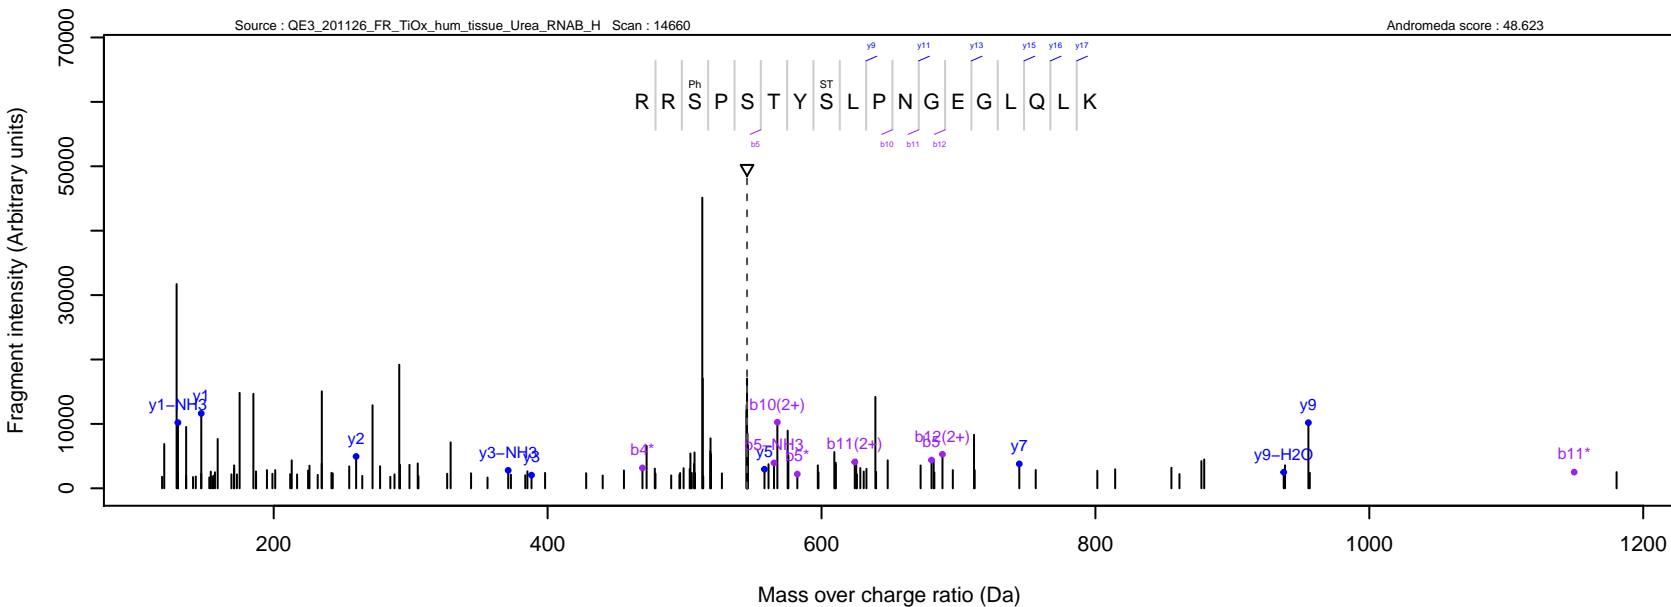

KTAATAAAAAEPPAPPPPPPEEDPEQDS(Phospho (STY))GPEDLPLVR-4+

Source : QE3\_201126\_FR\_TiOx\_hum\_tissue\_Urea\_RNAB\_H Scan : 41331

Andromeda score : 48.588

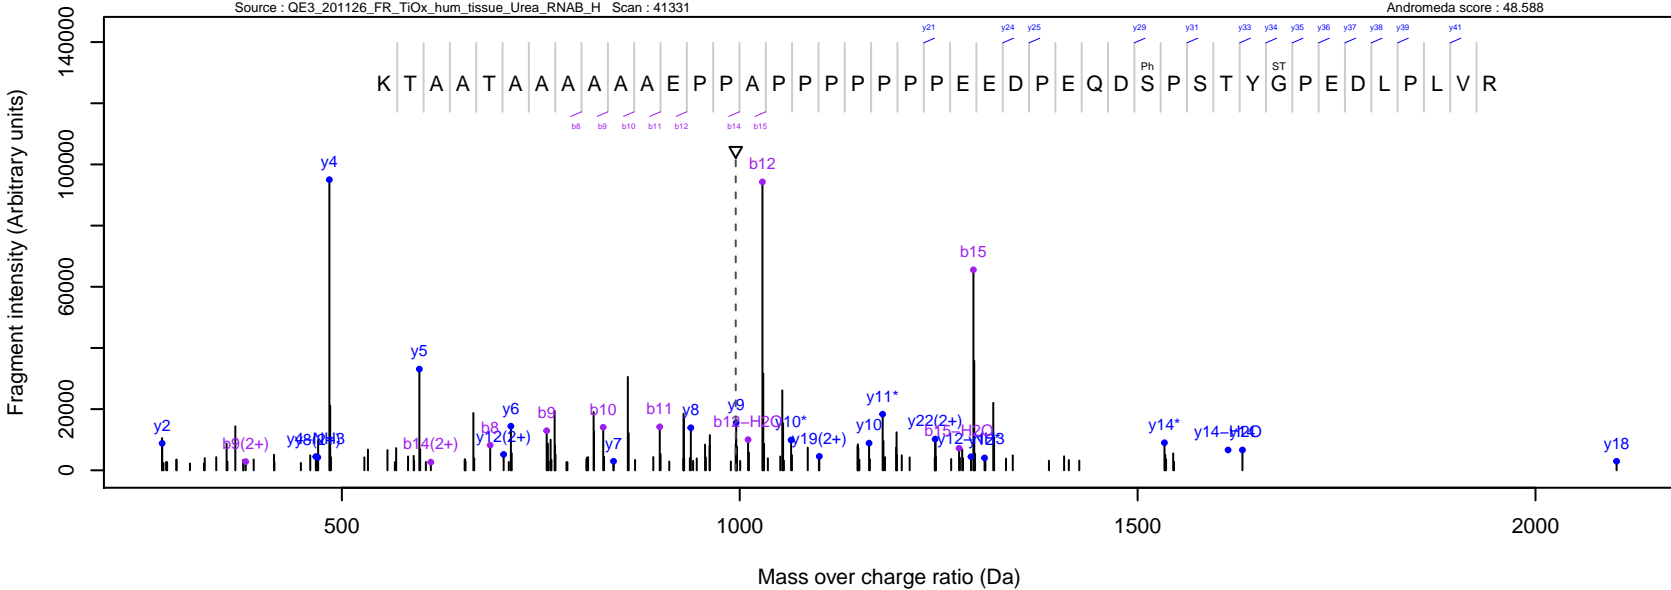

LKEQNVAFS(Phospho (STY))PLKR-3+

Source : QE3\_201126\_FR\_TiOx\_hum\_tissue\_Urea\_RNAB\_N Scan : 17725

Andromeda score : 48.547

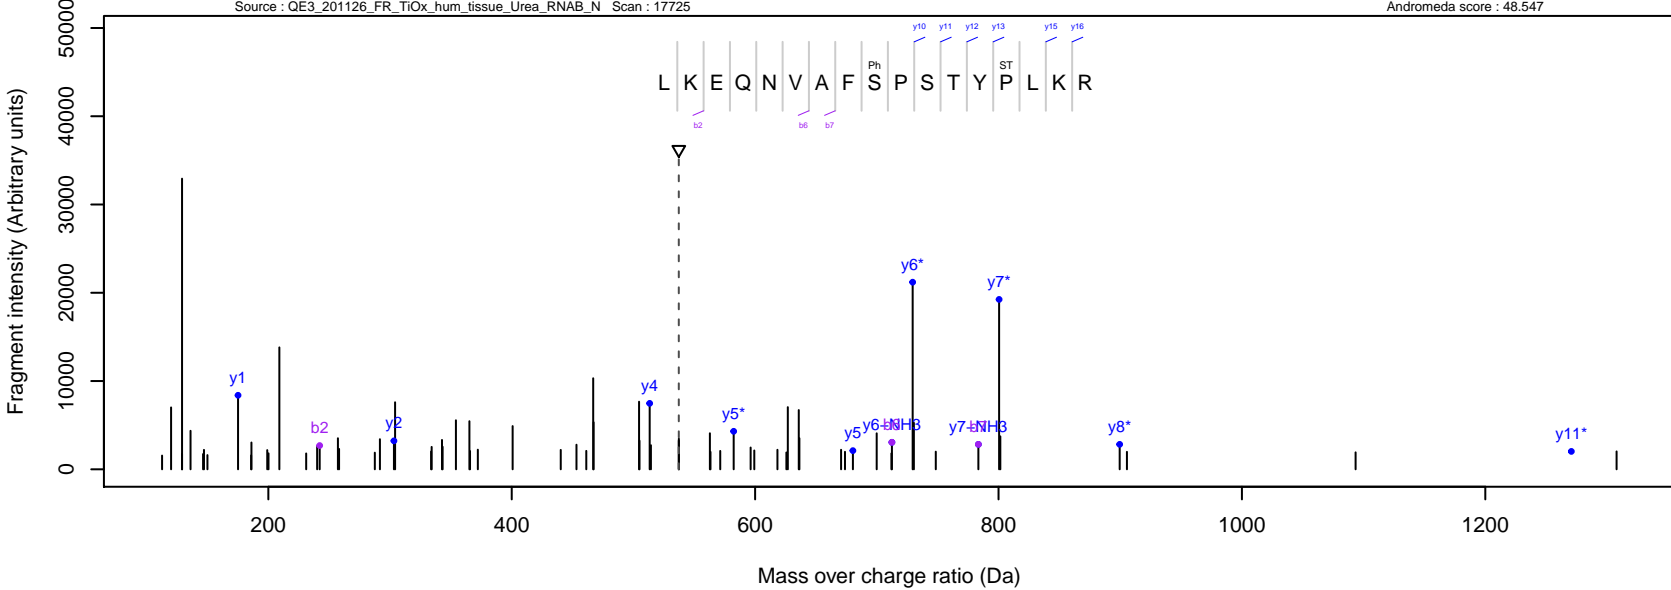

ILDELKDDSTHESLS(Phospho (STY))QES(Phospho (STY))ES(Phospho (STY))EEDGIHVDSQK-3+

Source : QE3\_201126\_FR\_TiOx\_hum\_tissue\_Urea\_RNAB\_B Scan : 32619

Andromeda score : 48.546

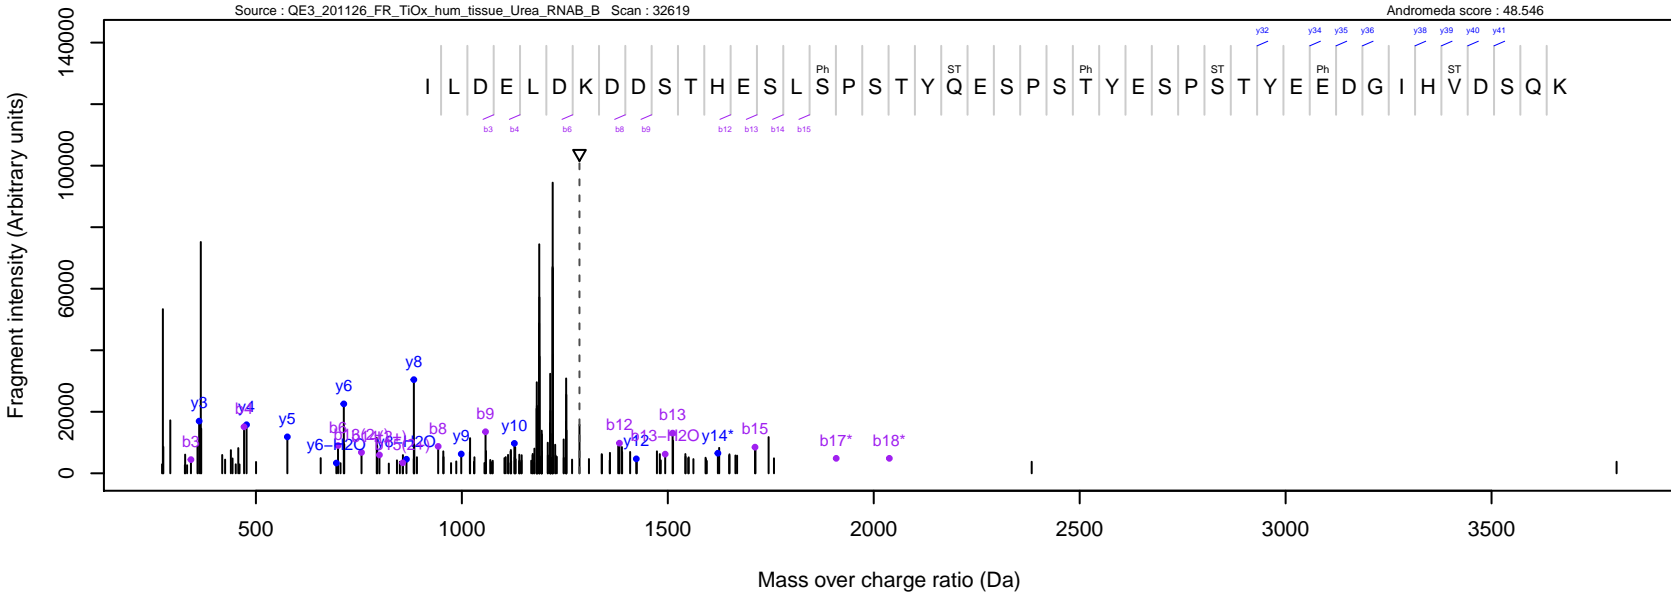

TDCEPVGLEPAVEQSSAAS(Phospho (STY))ELAEASSEELAEAPTEAPS(Phospho (STY))PEAR-4+

Source : QE3\_201126\_FR\_TiOx\_hum\_tissue\_Urea\_RNAB\_N Scan : 55345

Andromeda score : 48.546

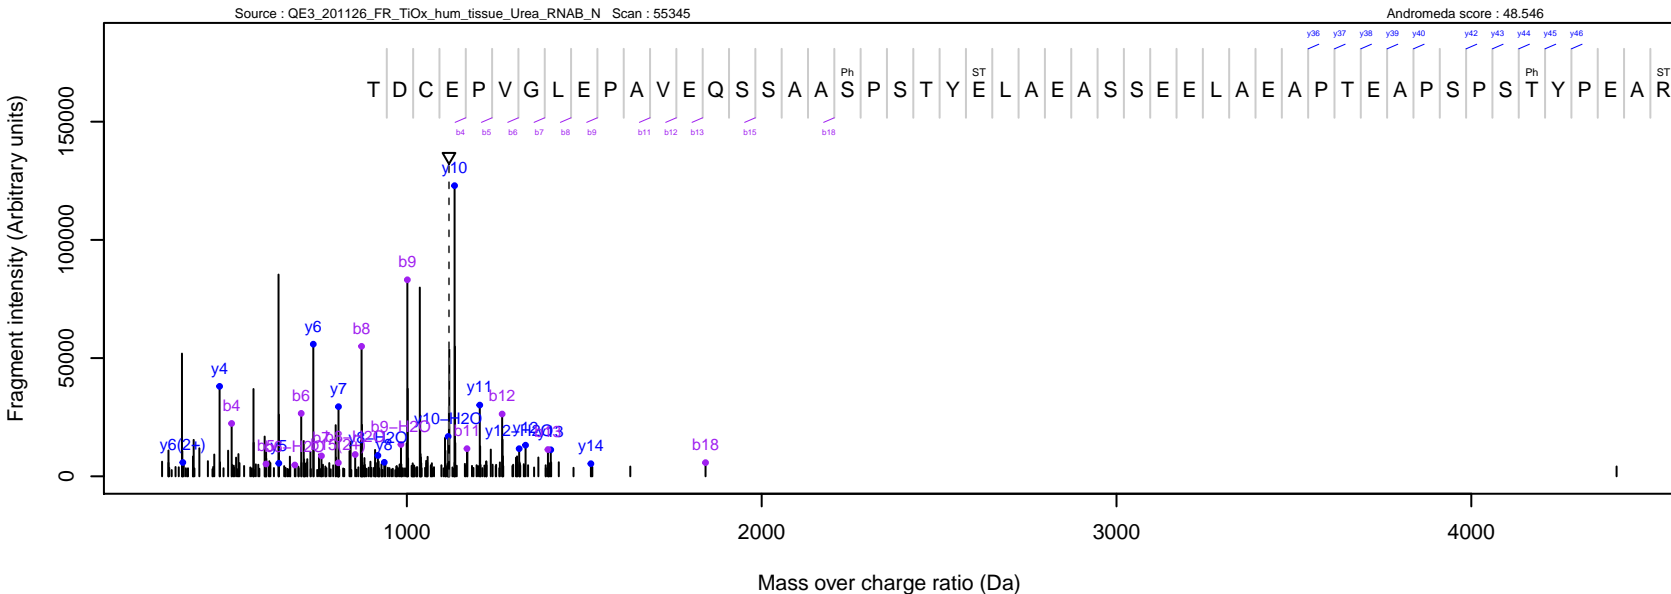

LSSQIS(Phospho (STY))AGEEK-2+

Source : QE3\_201126\_FR\_TiOx\_hum\_tissue\_Urea\_RNAB\_H Scan : 11445

Andromeda score : 48.524

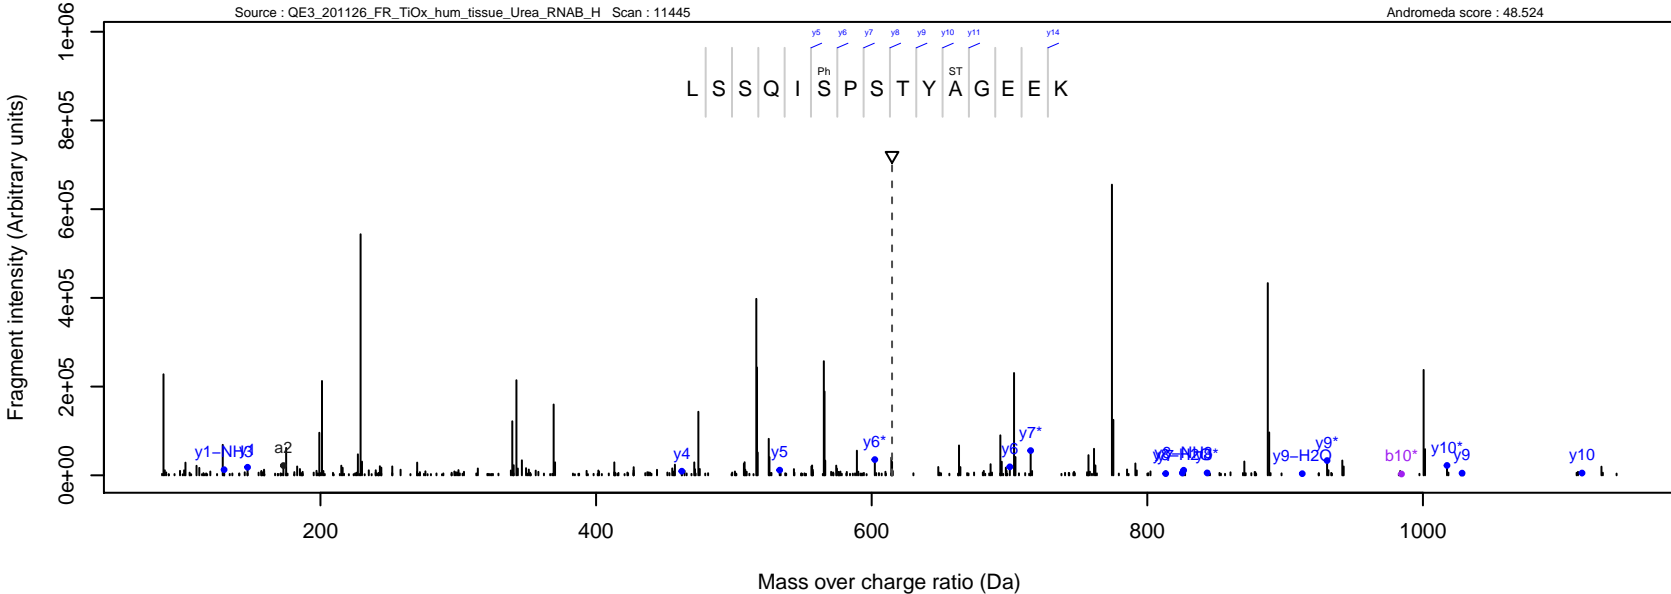

SRTHT(Phospho (STY))S(Phospho (STY))SS(Phospho (STY))LGSGESPF<sup>3+</sup>R

Source : QE3\_201126\_FR\_TiOx\_hum\_tissue\_Urea\_RNAB\_N Scan : 21056

Andromeda score : 48.489

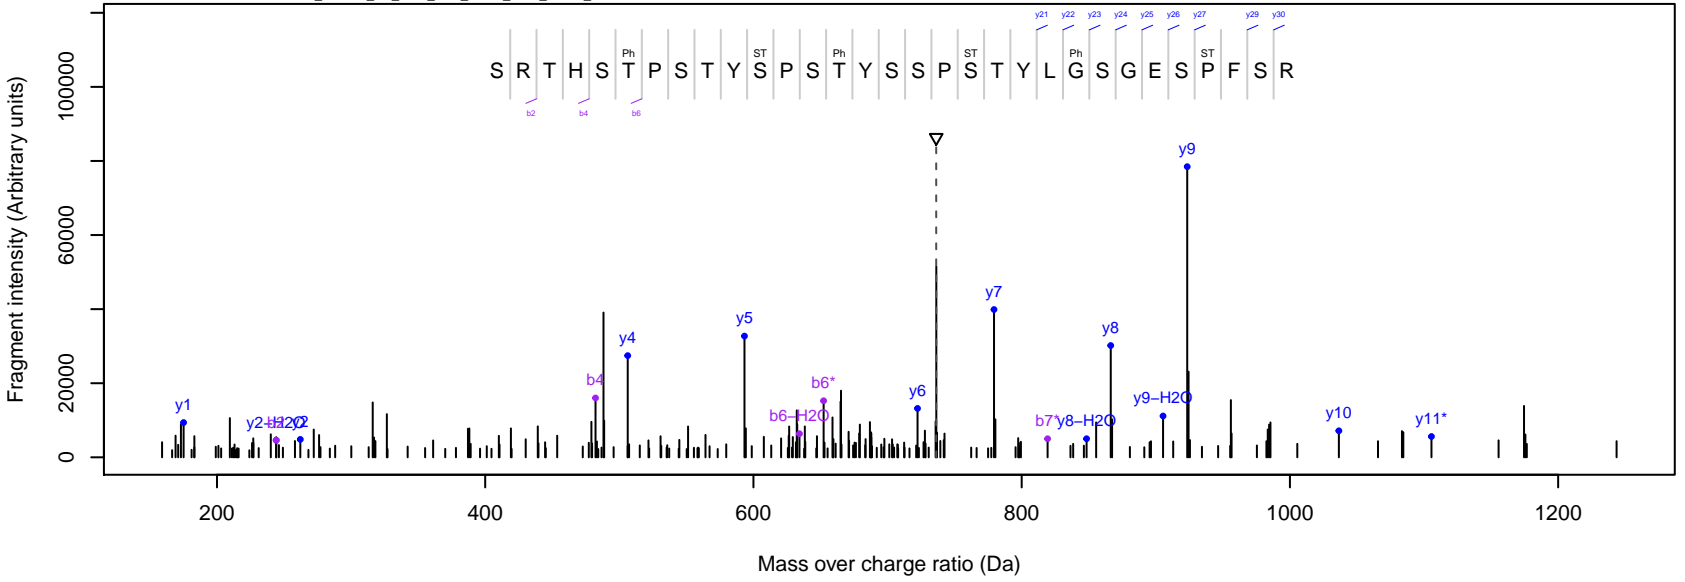

S(Phospho (STY))RSGSHSQEQPAPQPSGGDPSPPQER-3+

Source : QE3\_201126\_FR\_TiOx\_hum\_tissue\_Urea\_RNAB\_H Scan : 8069

Andromeda score : 48.467

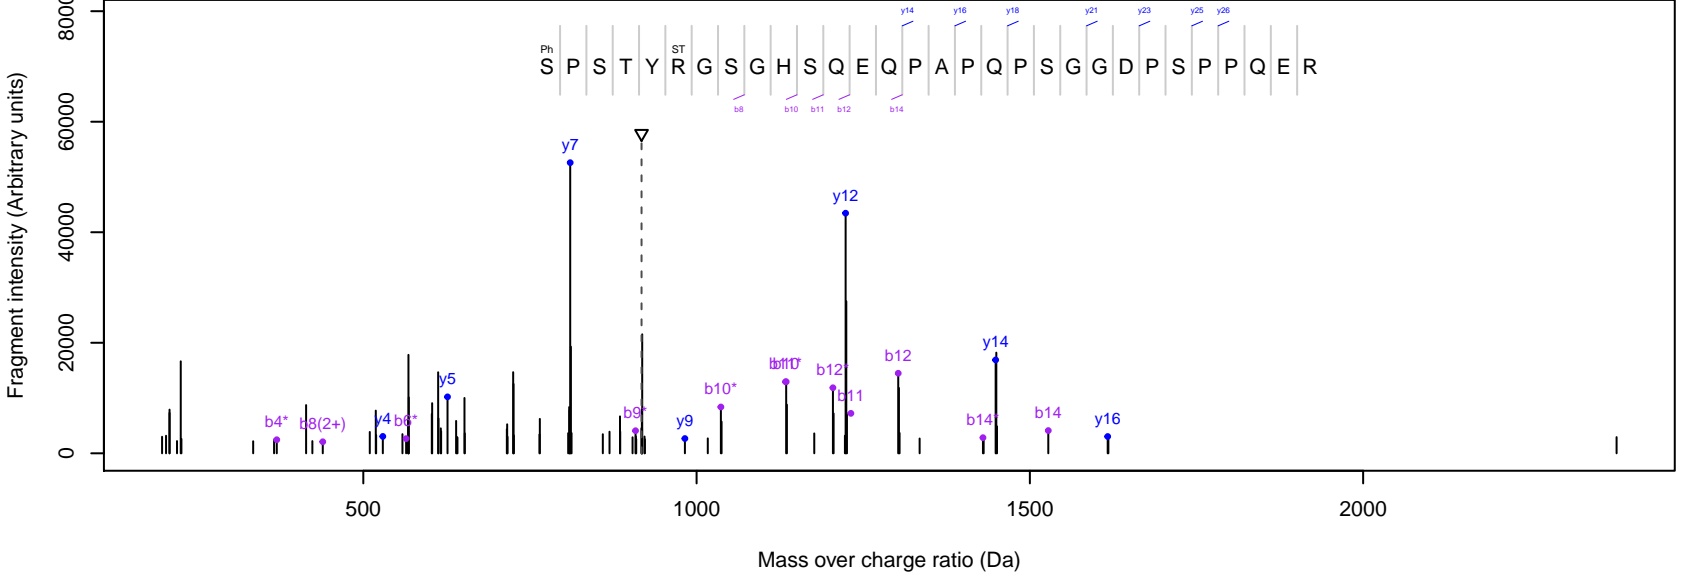

CS(Phospho (STY))VLSNVEAR-2+

Source : QE3\_201126\_FR\_TiOx\_hum\_tissue\_Urea\_RNAB\_B Scan : 22487

Andromeda score : 48.44

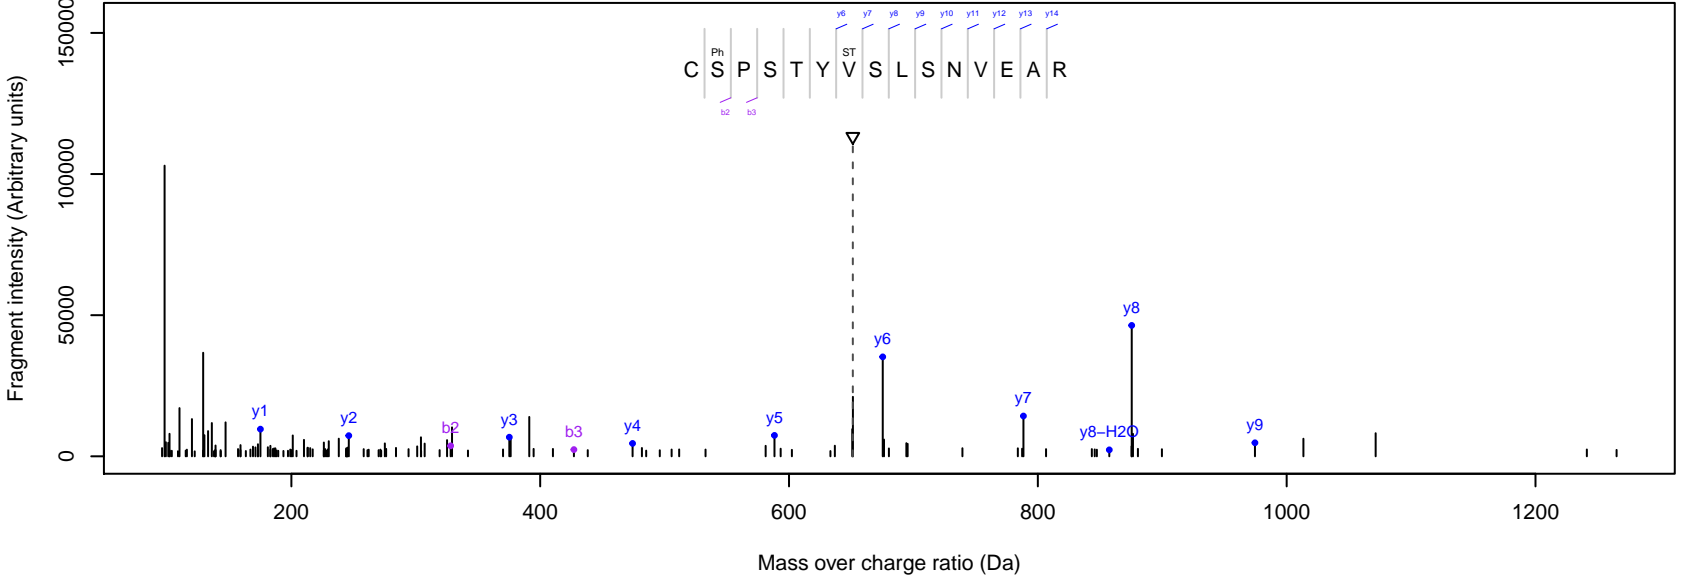



### S(Phospho (STY))AVTALWVGK-2+

Source : QE3\_2011126\_FR\_TiOx\_hum\_tissue\_Urea\_RNAB\_H Scan : 32850

Andromeda score : 48.44

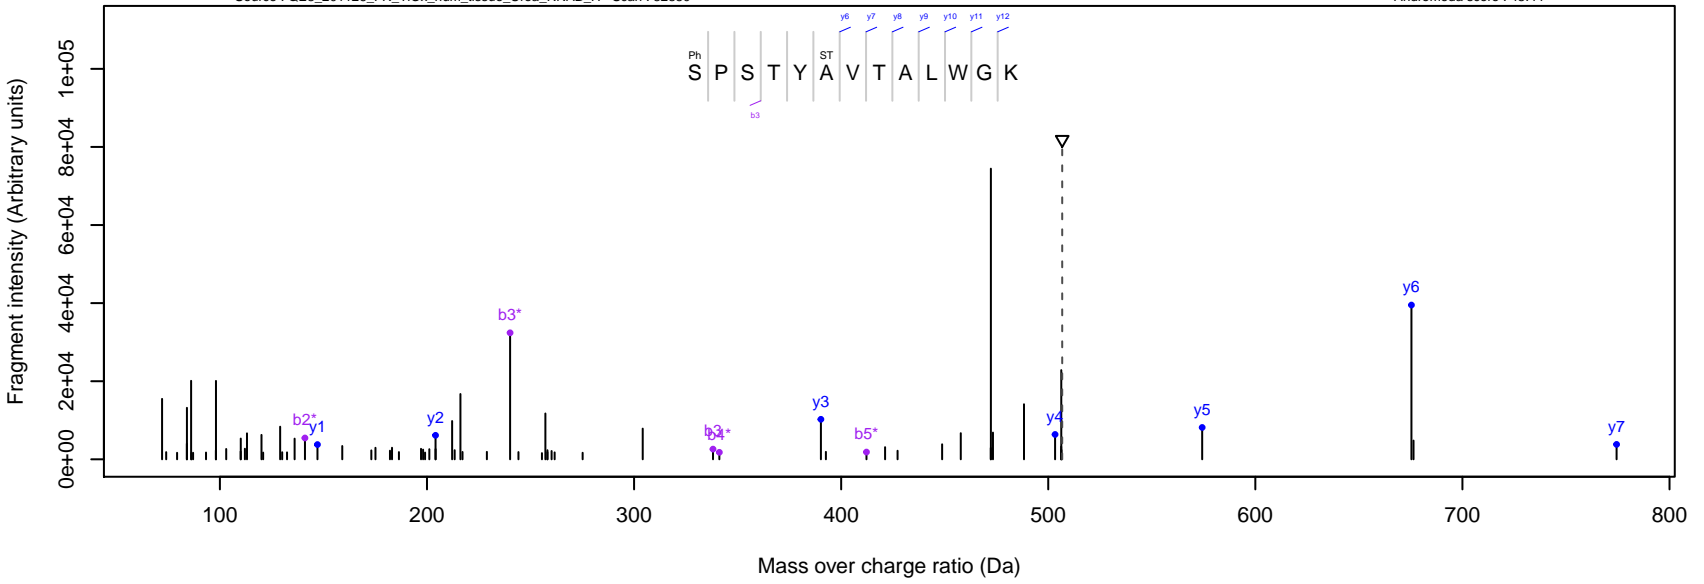

### S(Phospho (STY))WSDFSK-2+

Source : QE3\_2011126\_FR\_TiOx\_hum\_tissue\_Urea\_RNAB\_H Scan : 25234

Andromeda score : 48.423

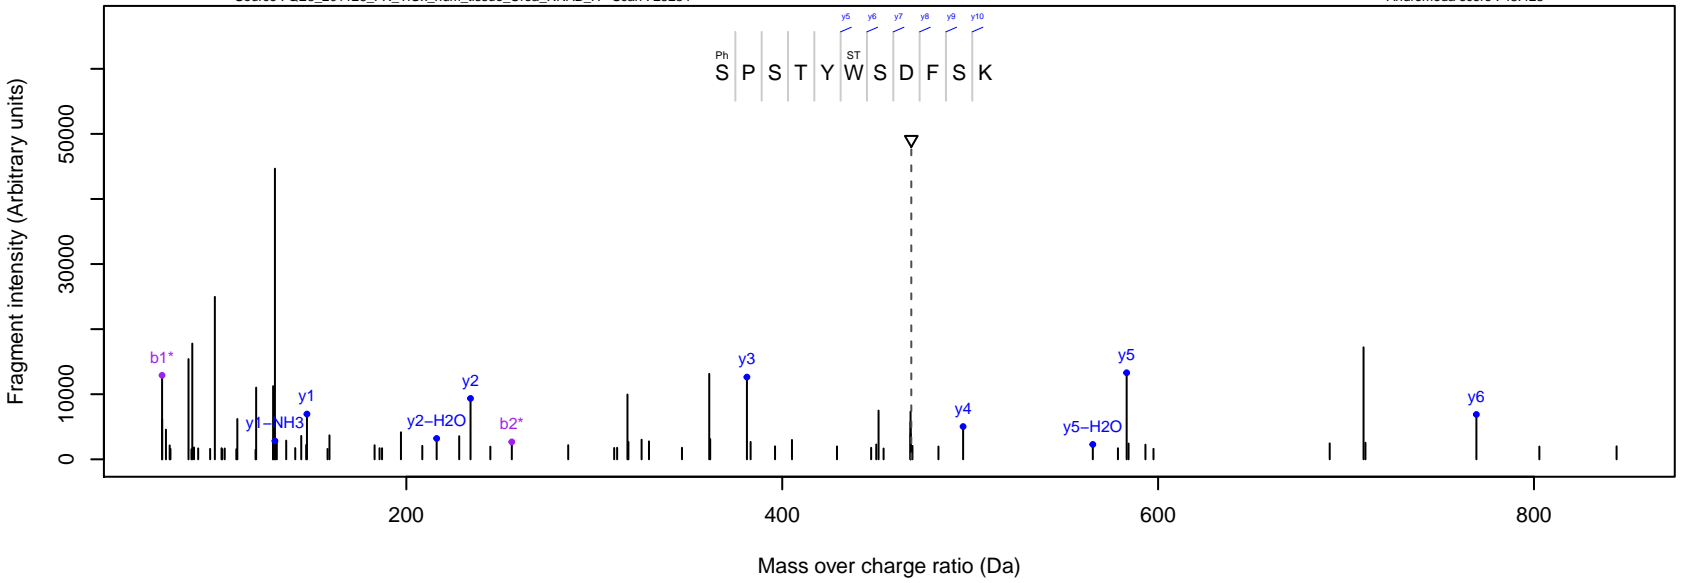

### GPS(Phospho (STY))GLGFNI VGGT DQQYVSNDSGIYVSR-3+

Source : QE3\_2011126\_FR\_TiOx\_hum\_tissue\_Urea\_RNAB\_N Scan : 55563

Andromeda score : 48.392

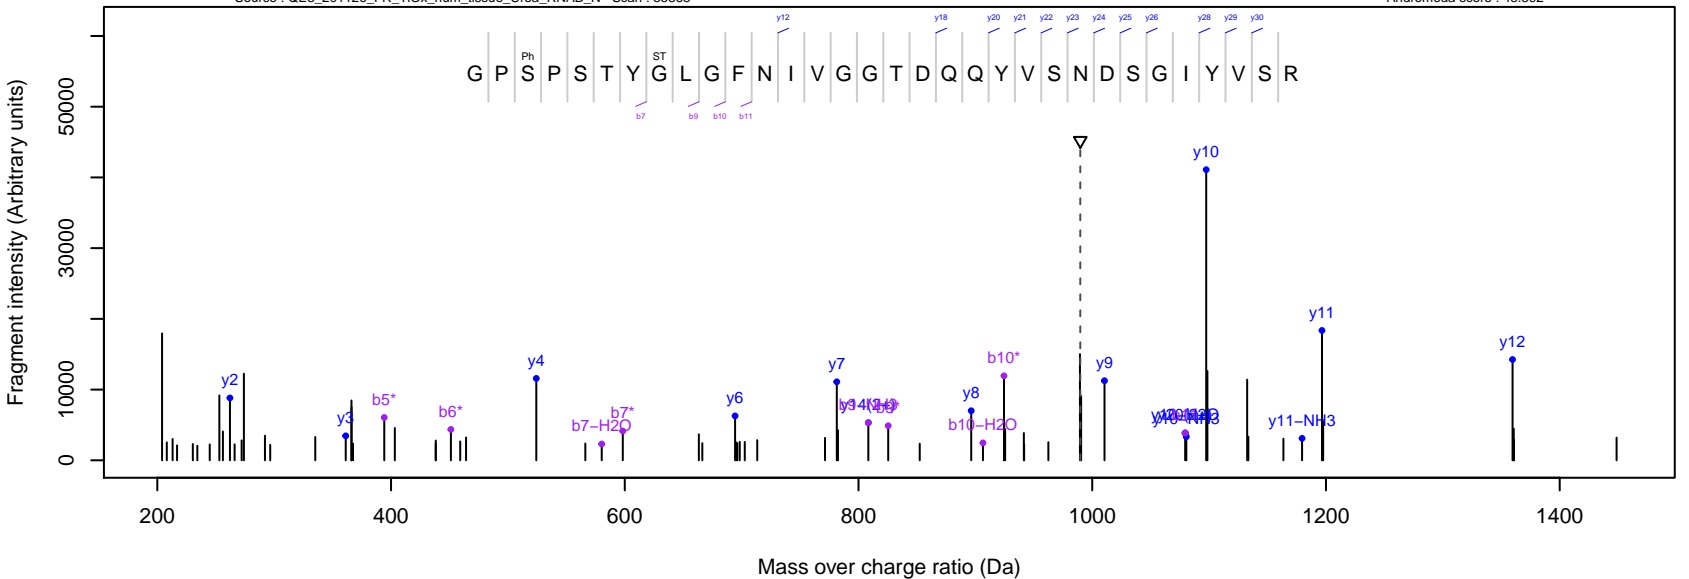

S(Phospho (STY))S(Phospho (STY))GTASSVAFTPLQGLEIVNPQAAEK-3+

Source : QE3\_201126\_FR\_TiOx\_hum\_tissue\_Urea\_RNAB\_N Scan : 61713

Andromeda score : 48.389

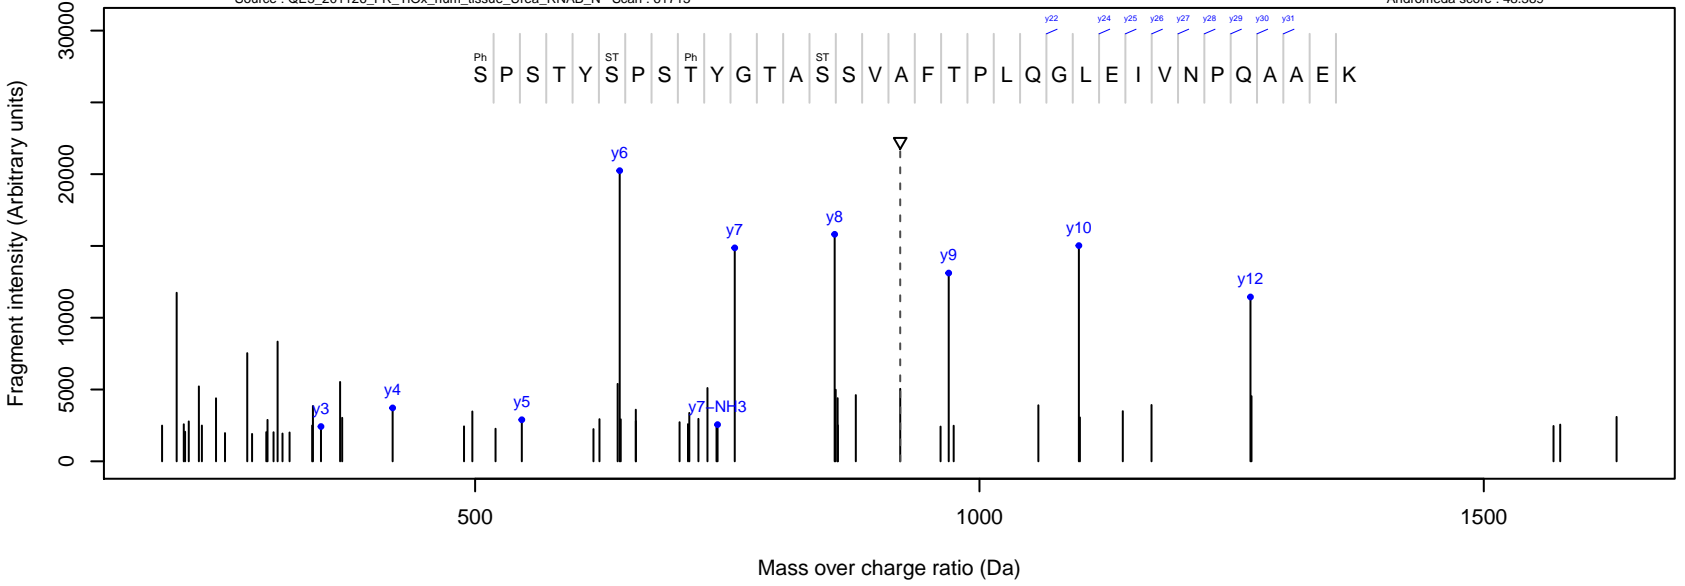

GPPDFS(Phospho (STY))S(Phospho (STY))DEEREPT(Phospho (STY))PVLGSGAAAAGR-3+

Source : QE3\_201126\_FR\_TiOx\_hum\_tissue\_Urea\_RNAB\_N Scan : 41932

Andromeda score : 48.388

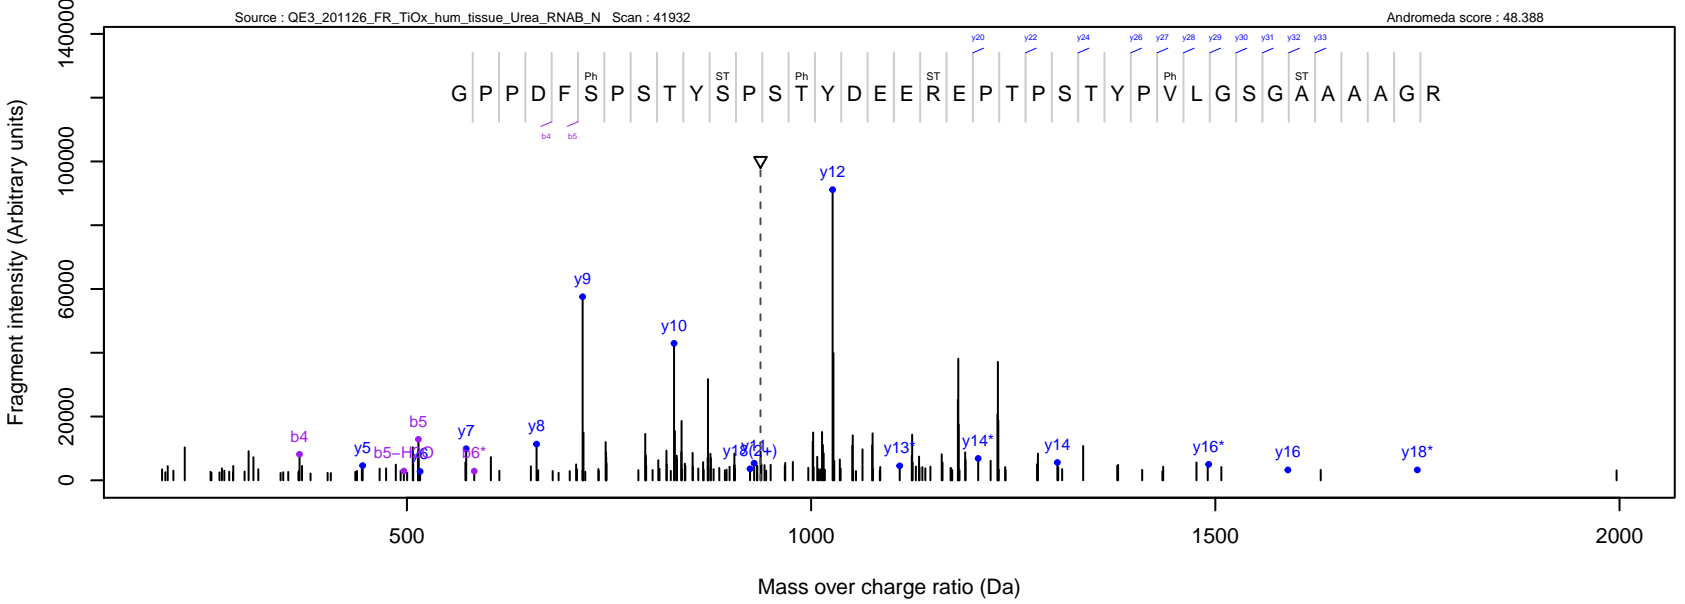

LKNGFPHPEPDCNPSEAASPSTYEEESPSTYNSPSTYIEIQEIPVEQK-4+

Source : QE3\_201126\_FR\_TiOx\_hum\_tissue\_Urea\_RNAB\_B Scan : 41381

Andromeda score : 48.388

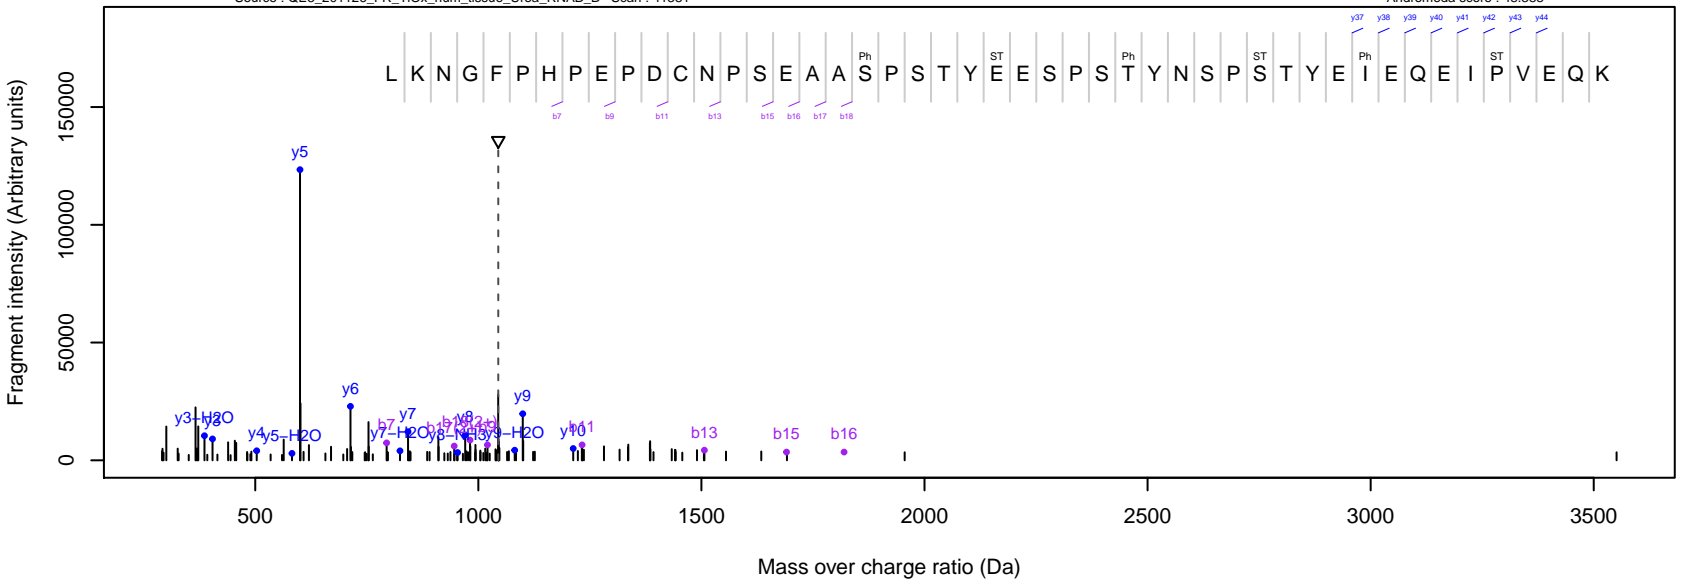

S(Phospho (STY))RS(Phospho (STY))HSDNDRPNC SWNTQYSSAYTSR-4+

Source : QE3\_201126\_FR\_TiOx\_hum\_tissue\_Urea\_RNAB\_H Scan : 21861

Andromeda score : 48.388

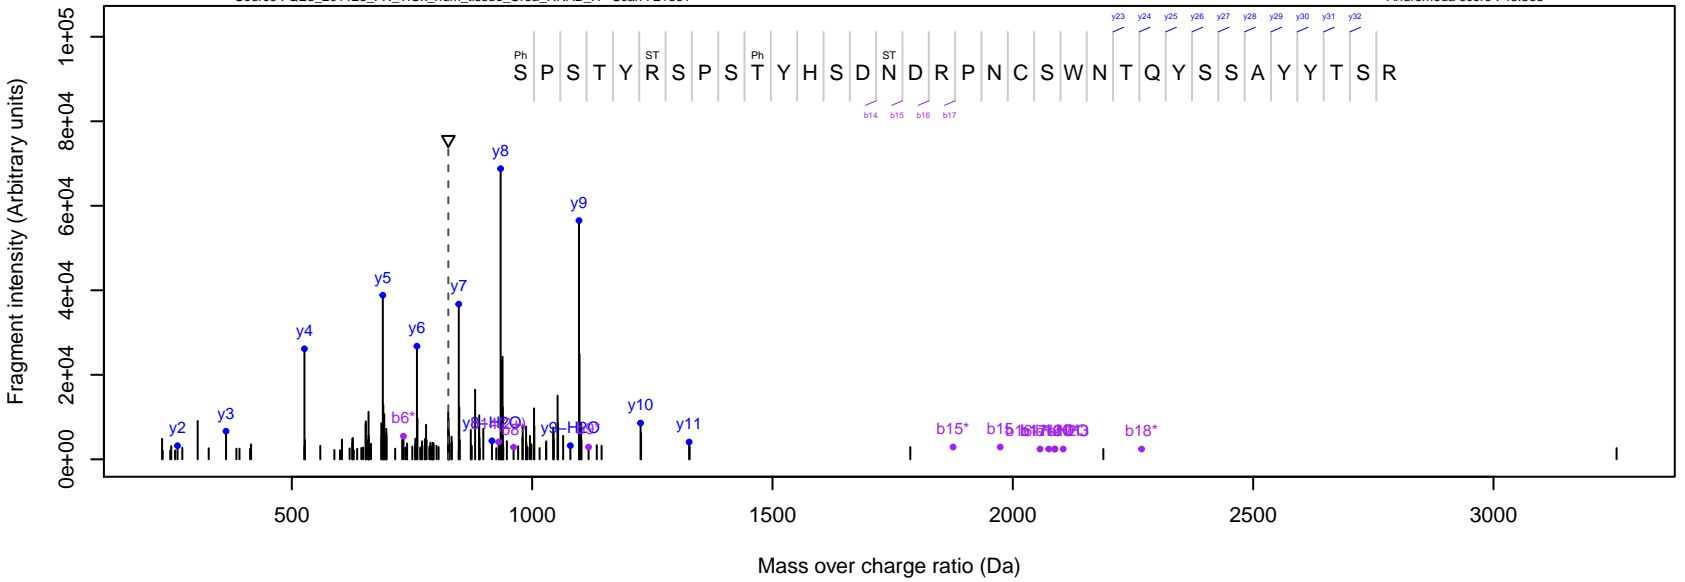

HDS(Phospho (STY))PDPS(Phospho (STY))PPRRPQHNSGASPR-4+

Source : QE3\_201126\_FR\_TiOx\_hum\_tissue\_Urea\_RNAB\_N Scan : 4524

Andromeda score : 48.337

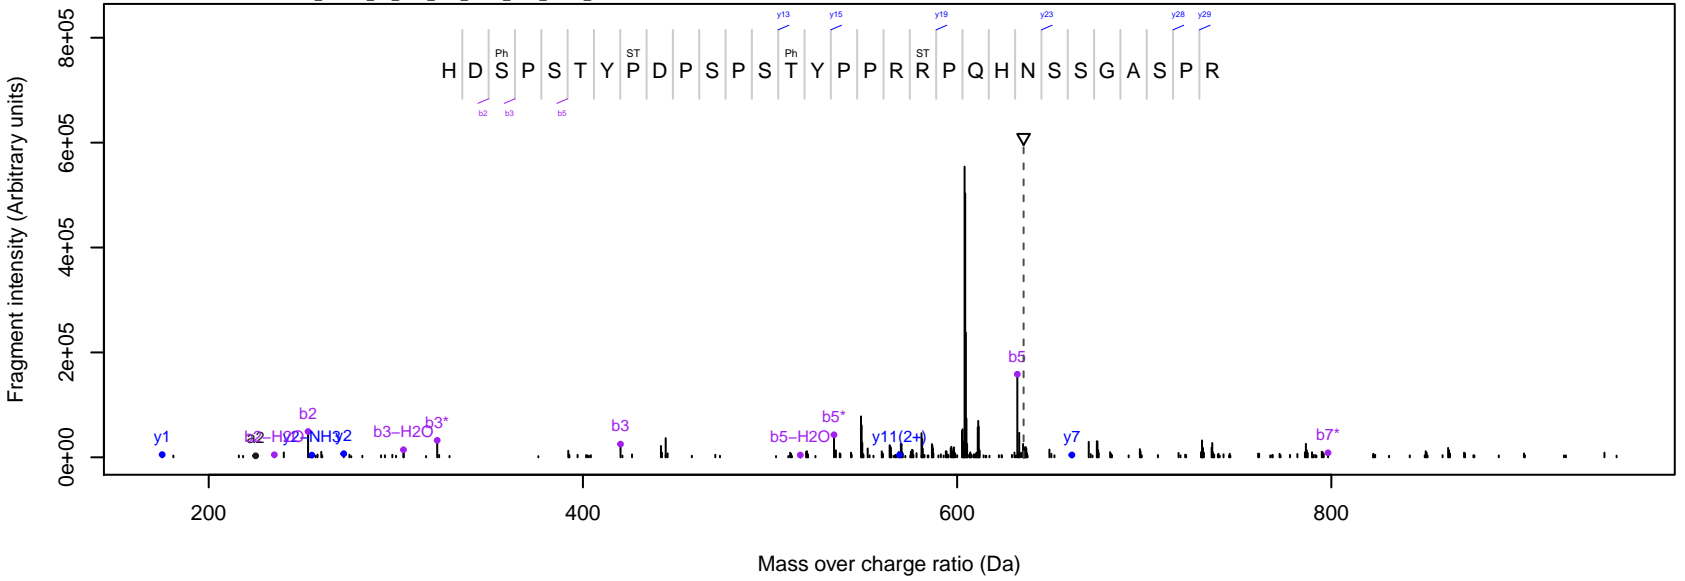

RAAT(Phospho (STY))SPAGPSDATAR-3+

Source : QE3\_201126\_FR\_TiOx\_hum\_tissue\_Urea\_RNAB\_N Scan : 6915

Andromeda score : 48.315

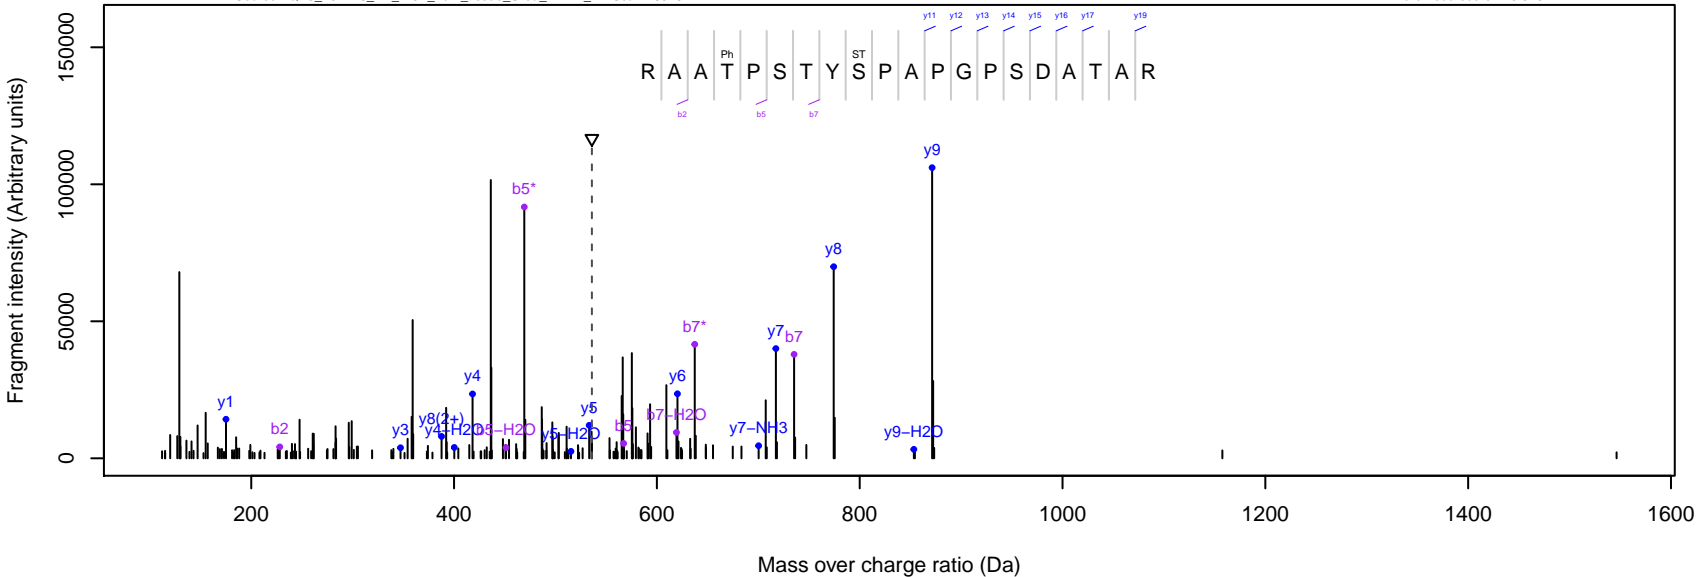

M(Oxidation (M))FVGGLS(Phospho (STY))WDTSKKDLK-3+

Source : QE3\_201126\_FR\_TiOx\_hum\_tissue\_Urea\_RNAB\_H Scan : 27283

Andromeda score : 48.314

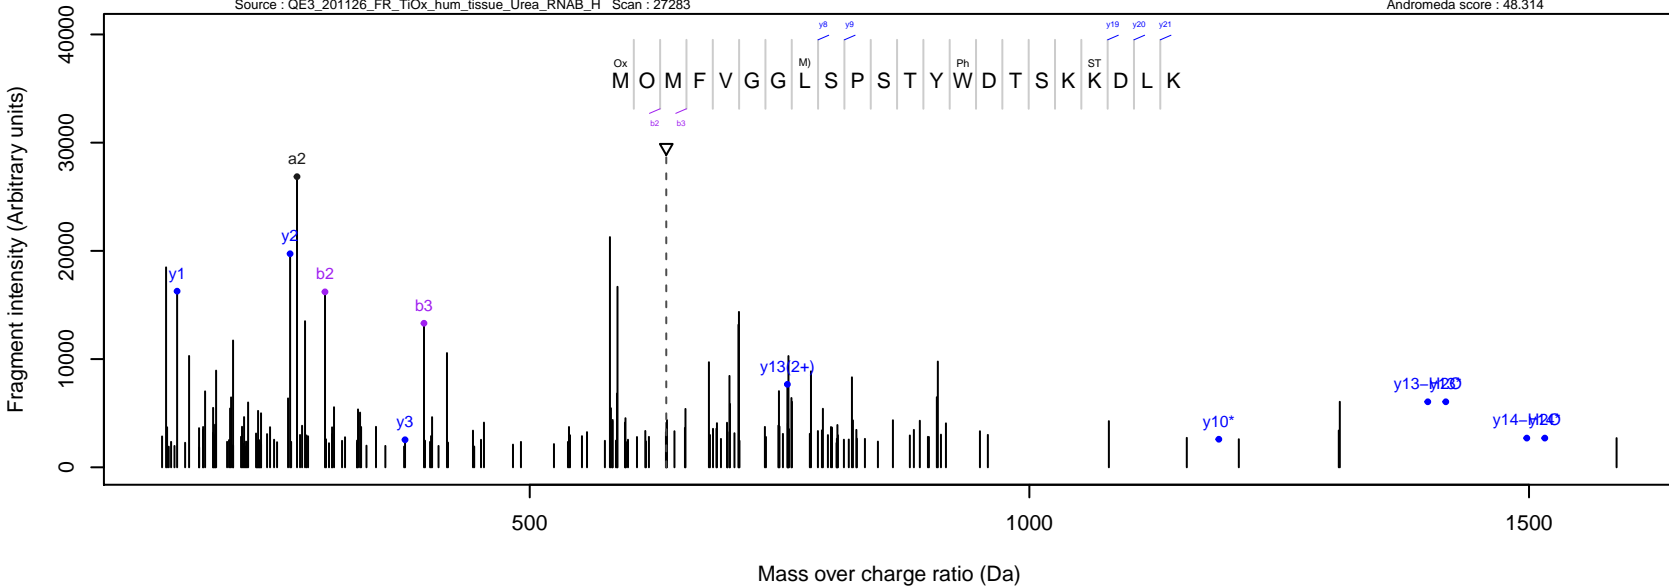

DGAEEQQPEATVEEAAAFGSEKPSM(Oxidation (M))FEPPQVS(Phospho (STY))SPVQEK R-4+

Source : QE3\_201126\_FR\_TiOx\_hum\_tissue\_Urea\_RNAB\_N Scan : 49770

Andromeda score : 48.29

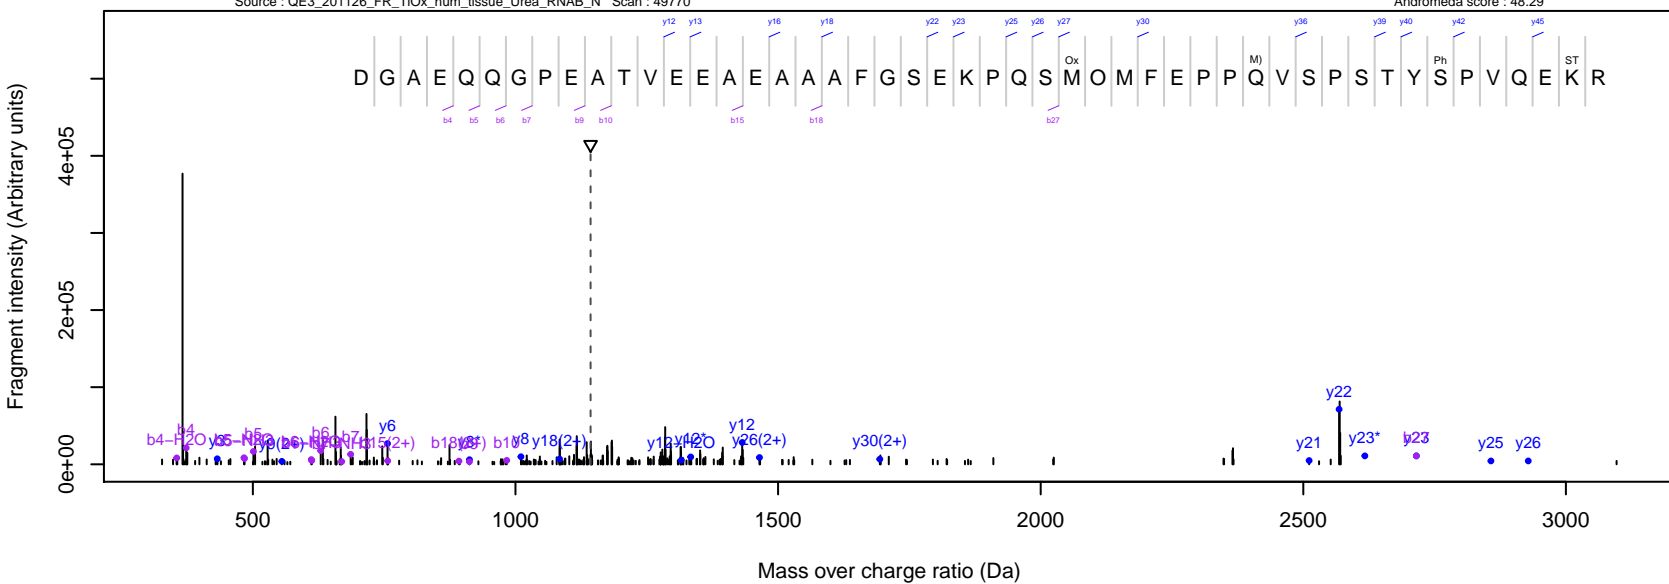

ARGGDHVPVS(Phospho (STY))HEQPR-3+

Source : QE3\_201126\_FR\_TiOx\_hum\_tissue\_Urea\_RNAB\_H Scan : 5048

Andromeda score : 48.288

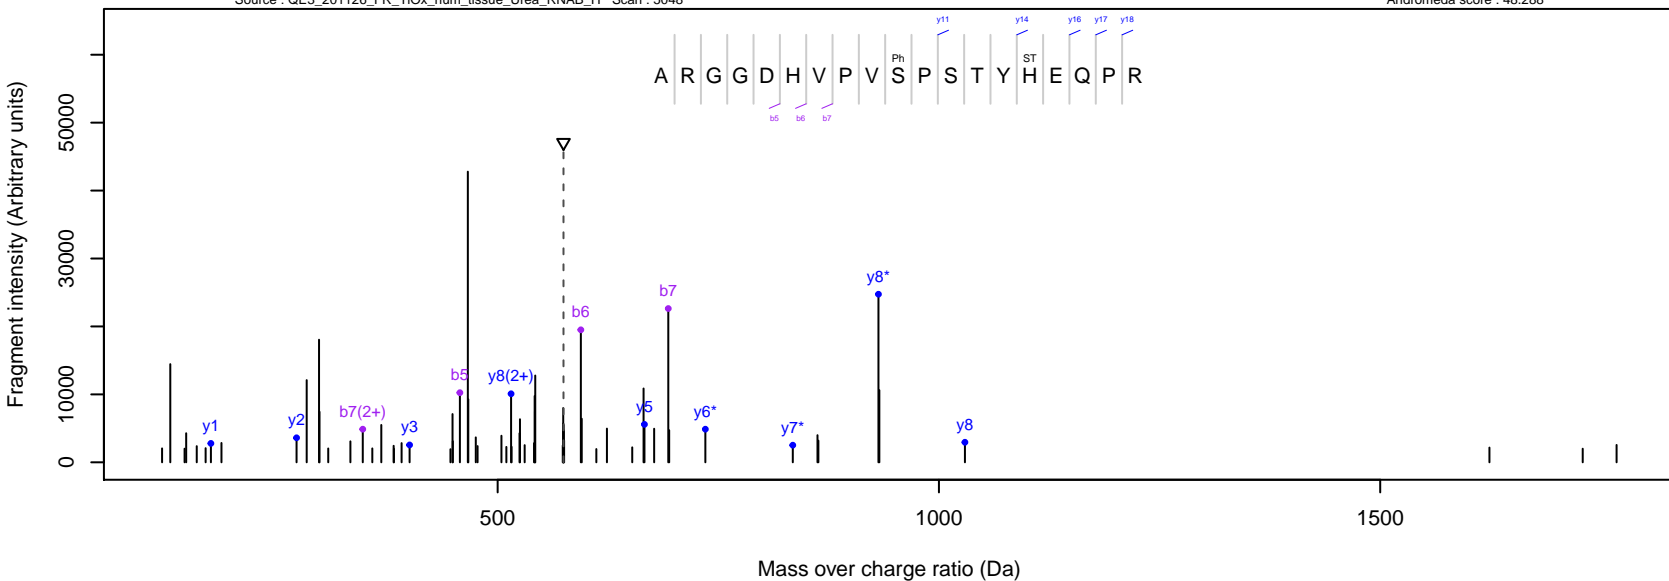



TYS(Phospho (STY))LGSALR-2+

Source : QE3\_201126\_FR\_TIOx\_hum\_tissue\_Urea\_RNAB\_H Scan : 31495

Andromeda score : 48.284

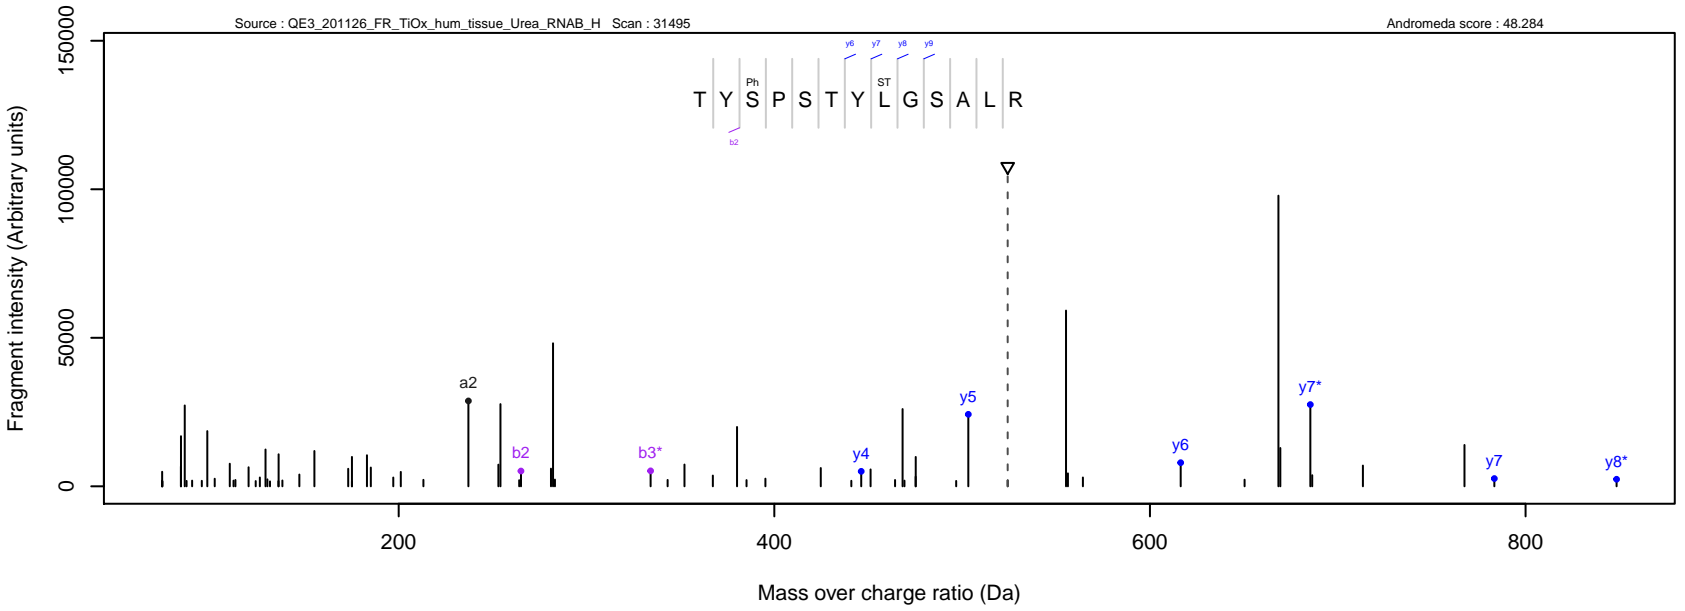

QEEIDES(Phospho (STY))DDLDLDDKPSPIK-3+

Source : QE3\_201126\_FR\_TIOx\_hum\_tissue\_Urea\_RNAB\_H Scan : 21696

Andromeda score : 48.255

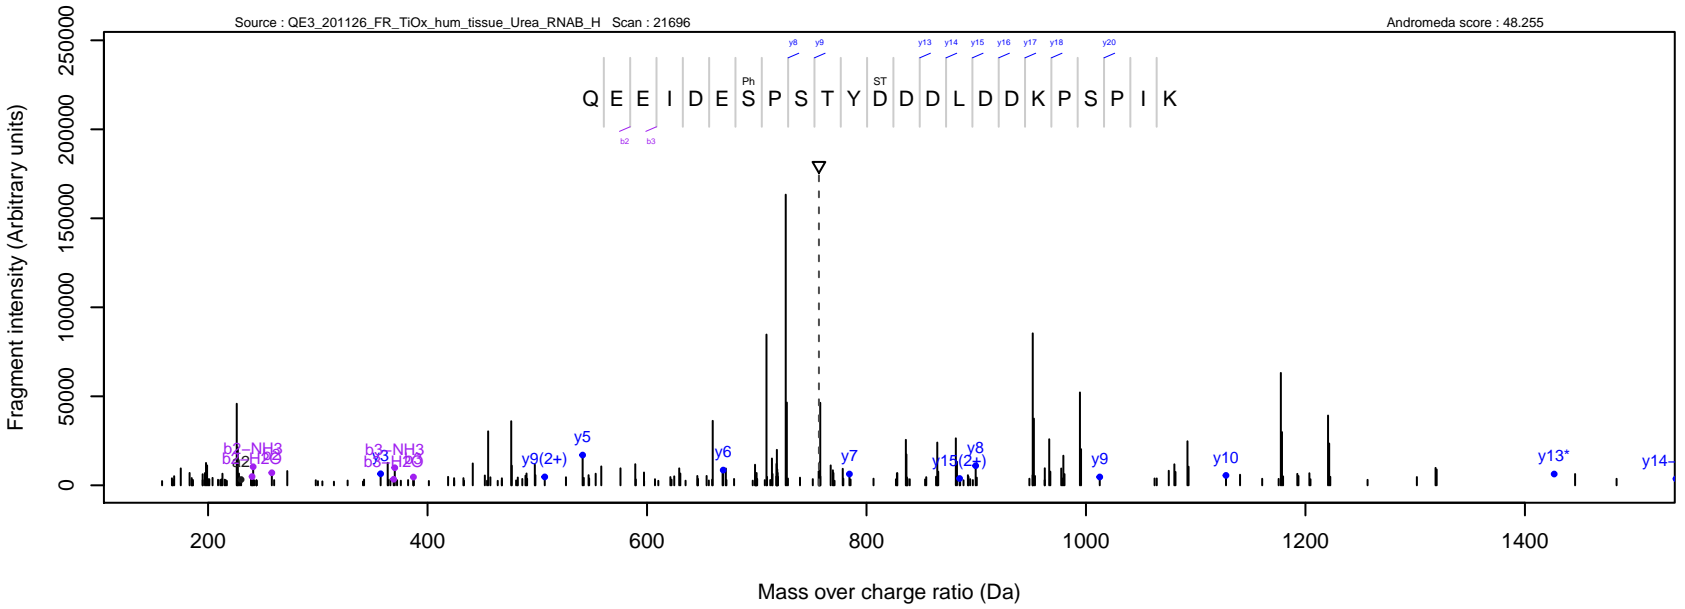

(Acetyl (Protein N-term))AKSPENS(Phospho (STY))TLEEILGQYQR-3+

Source : QE3\_201126\_FR\_TIOx\_hum\_tissue\_Urea\_RNAB\_N Scan : 55984

Andromeda score : 48.229

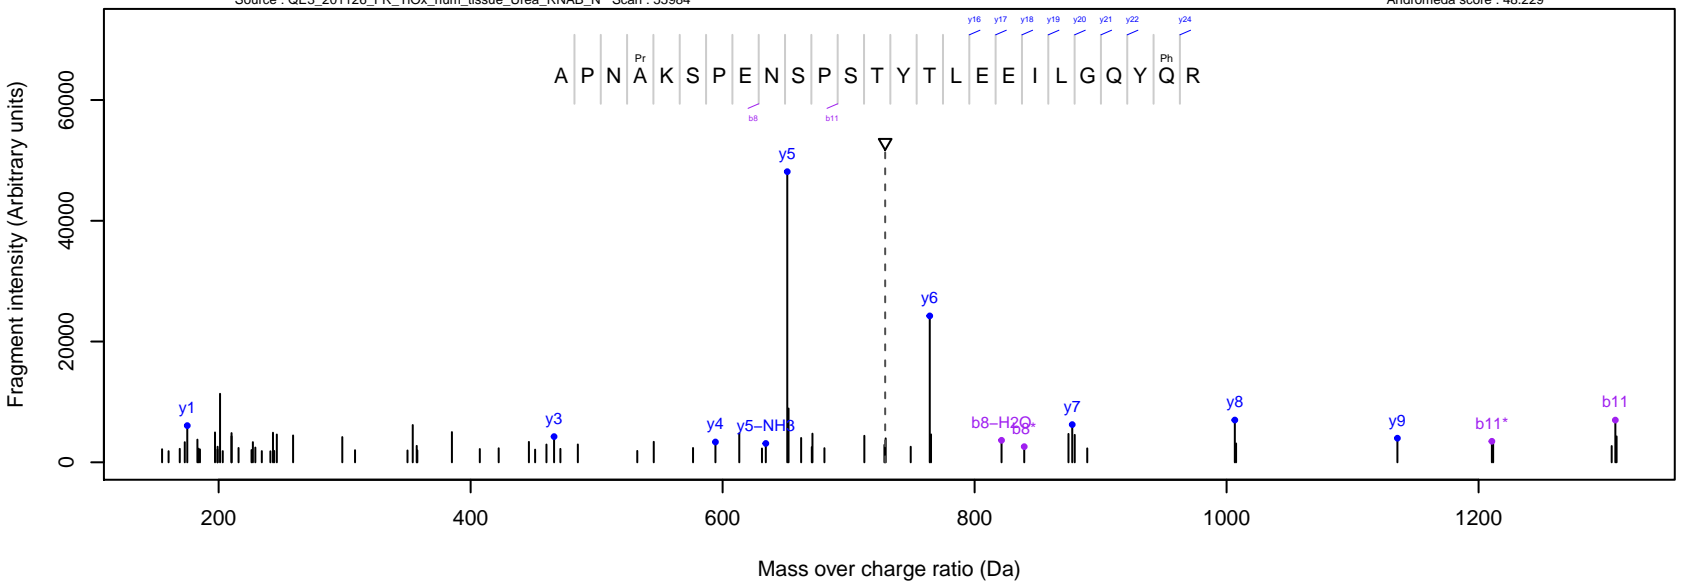

**QAS(Phospho (STY))TGSELCSPPSGSGSFGEEPPAQYTGPFCCR-3+**

Source : QE3\_201126\_FR\_TiOx\_hum\_tissue\_Urea\_RNAB\_B Scan : 46743

Andromeda score : 48.227

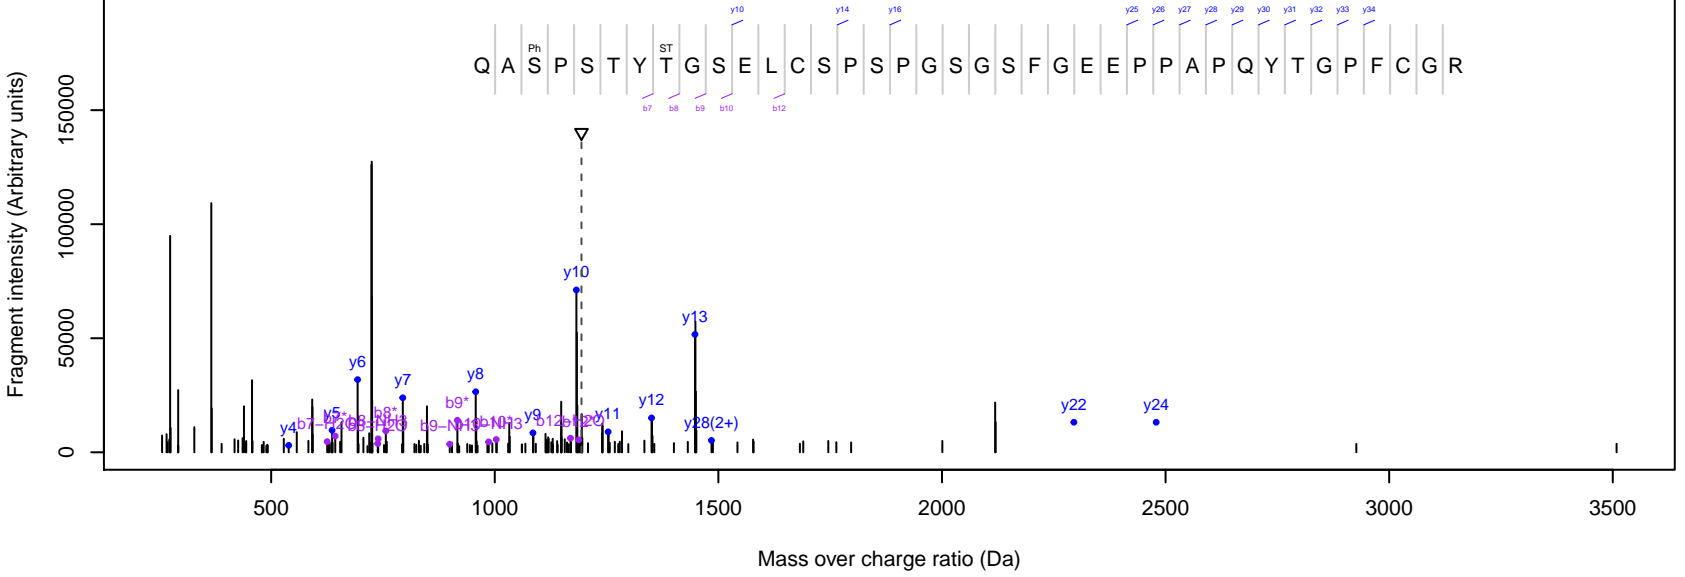

**YADEEIPRS(Phospho (STY))PFVK-3+**

Source : QE3\_201126\_FR\_TiOx\_hum\_tissue\_Urea\_RNAB\_H Scan : 22602

Andromeda score : 48.216

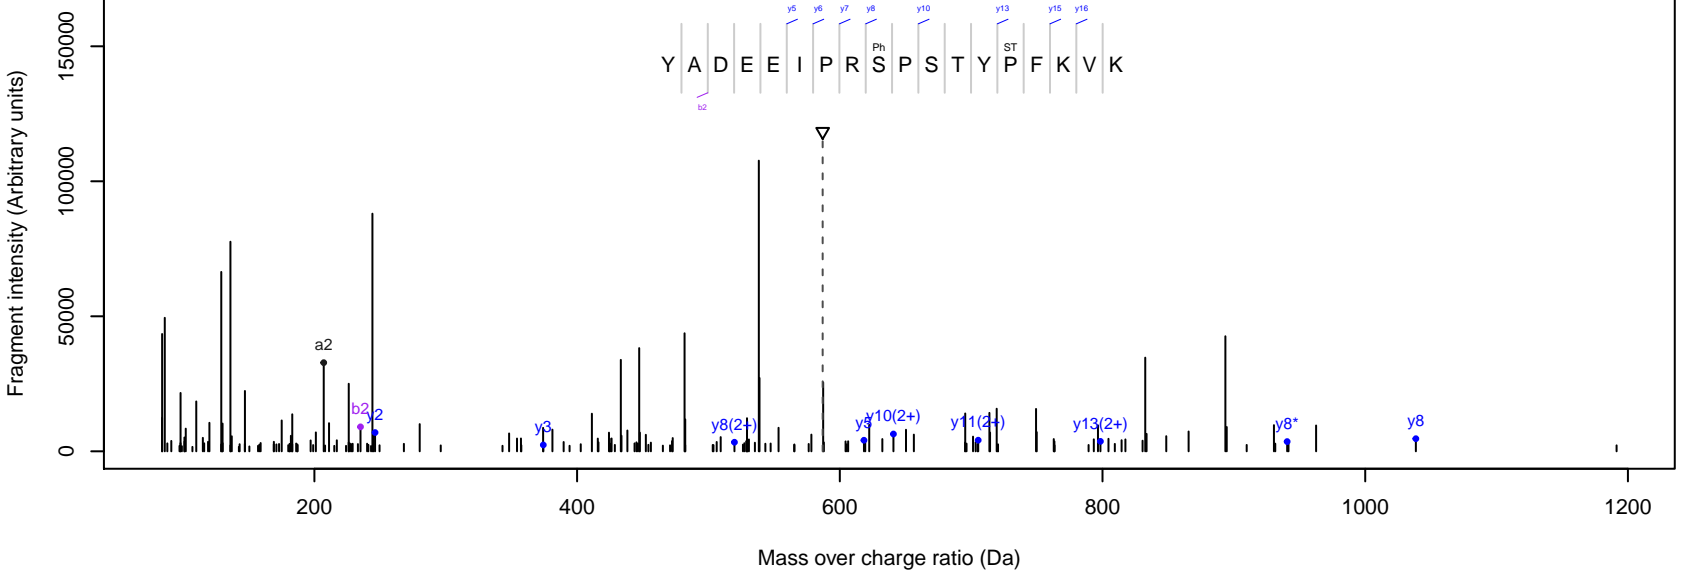

**FICVTPPTCSNT(Phospho (STY))IDLPMSPSTYPR-3+**

Source : QE3\_201126\_FR\_TiOx\_hum\_tissue\_Urea\_RNAB\_N Scan : 56016

Andromeda score : 48.115

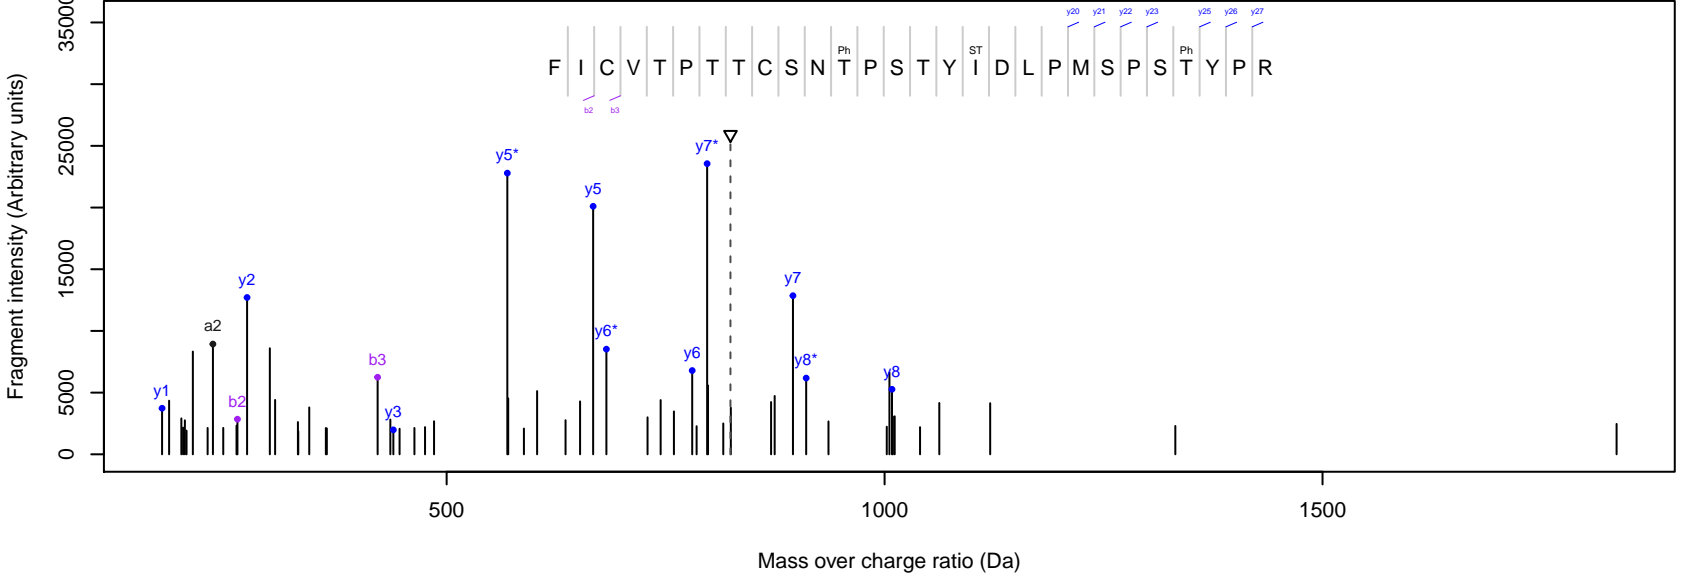

HLDGEEDGS(Phospho (STY))SDQSQASGTTGGRR-3+

Source : QE3\_201126\_FR\_TiOx\_hum\_tissue\_Urea\_RNAB\_B Scan : 5088

Andromeda score : 48.115

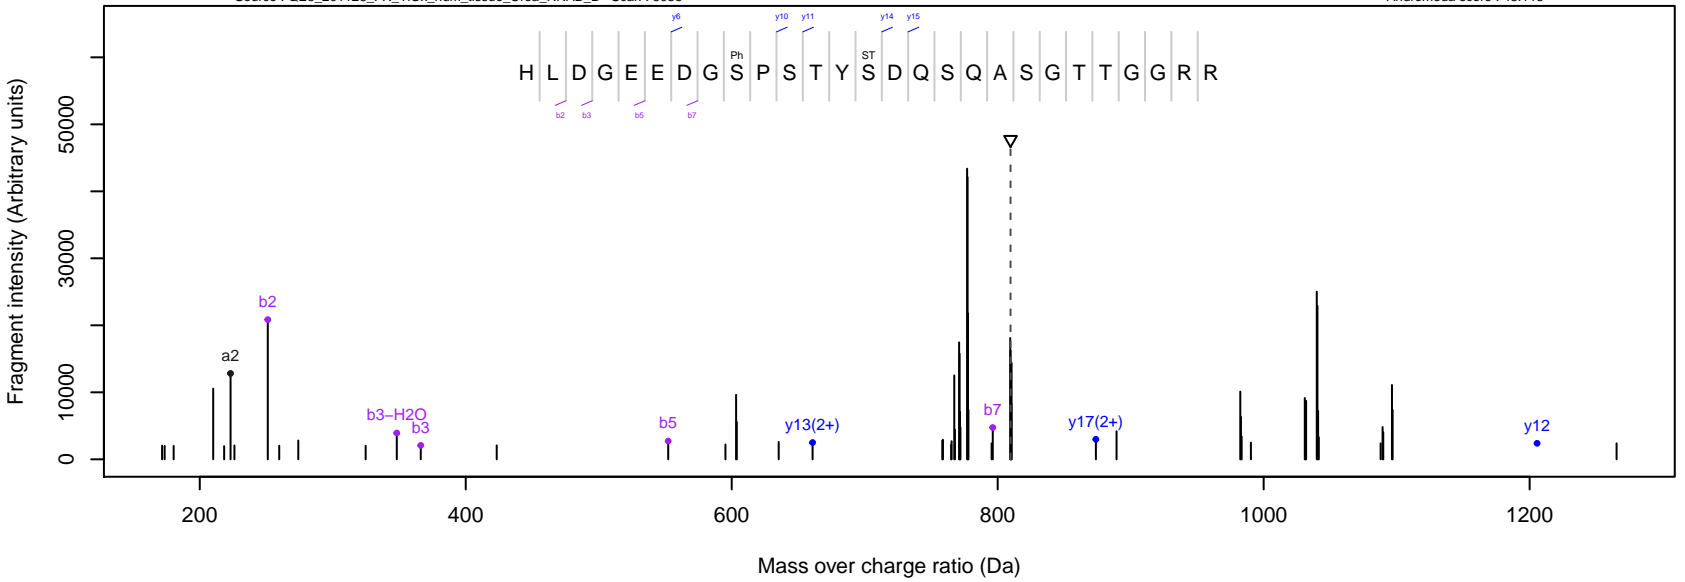

KQQHVISTEEGDM(Oxidation (M))M(Oxidation (M))ETNST(Phospho (STY))DDEKSTAK-4+

Source : QE3\_201126\_FR\_TiOx\_hum\_tissue\_Urea\_RNAB\_B Scan : 6208

Andromeda score : 48.115

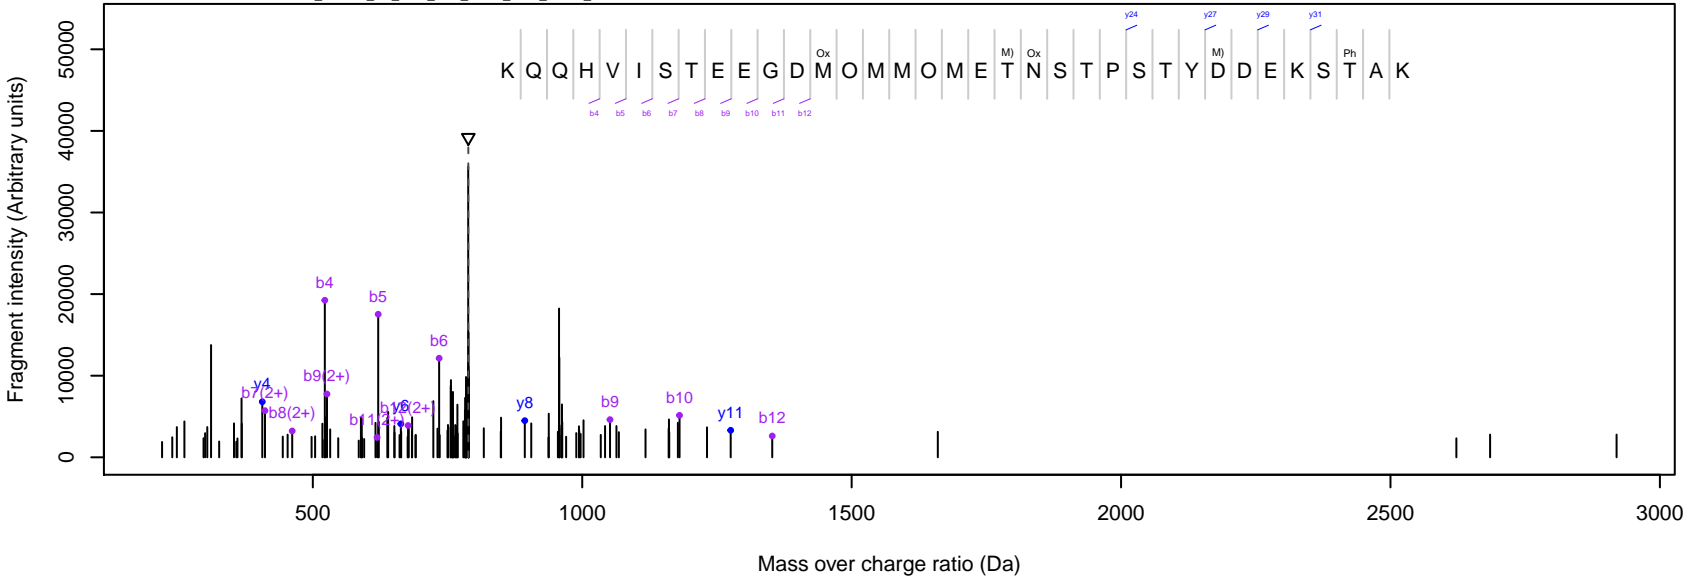

QDS(Phospho (STY))NRSEKEATPVVHETEPESGSQPR-4+

Source : QE3\_201126\_FR\_TiOx\_hum\_tissue\_Urea\_RNAB\_B Scan : 8754

Andromeda score : 48.115

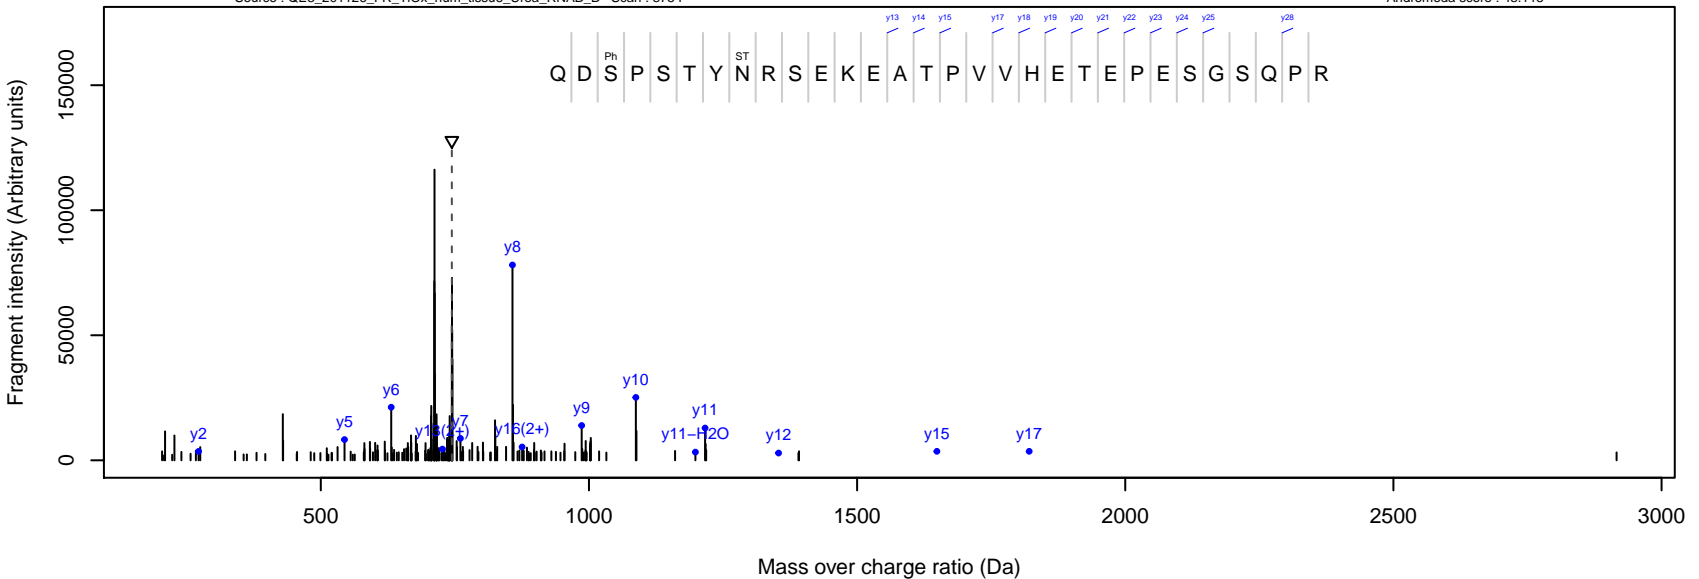



SPLLS(Phospho (STY))ASHSGNVTPTAPPYLQESSPR-3+

Source : QE3\_201126\_FR\_TiOx\_hum\_tissue\_Urea\_RNAB\_H Scan : 34901

Andromeda score : 48.115

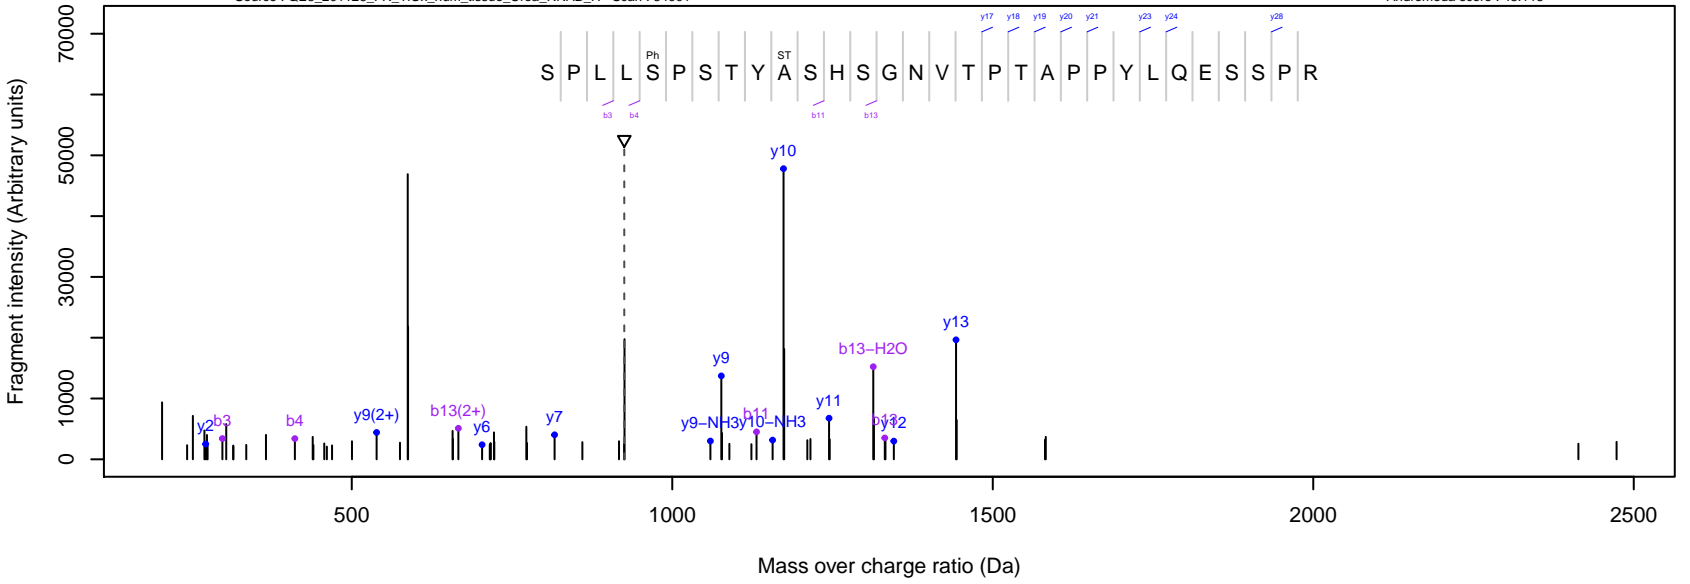

S(Phospho (STY))ISFPALLPIPGSNR-2+

Source : QE3\_201126\_FR\_TiOx\_hum\_tissue\_Urea\_RNAB\_N Scan : 60269

Andromeda score : 48.112

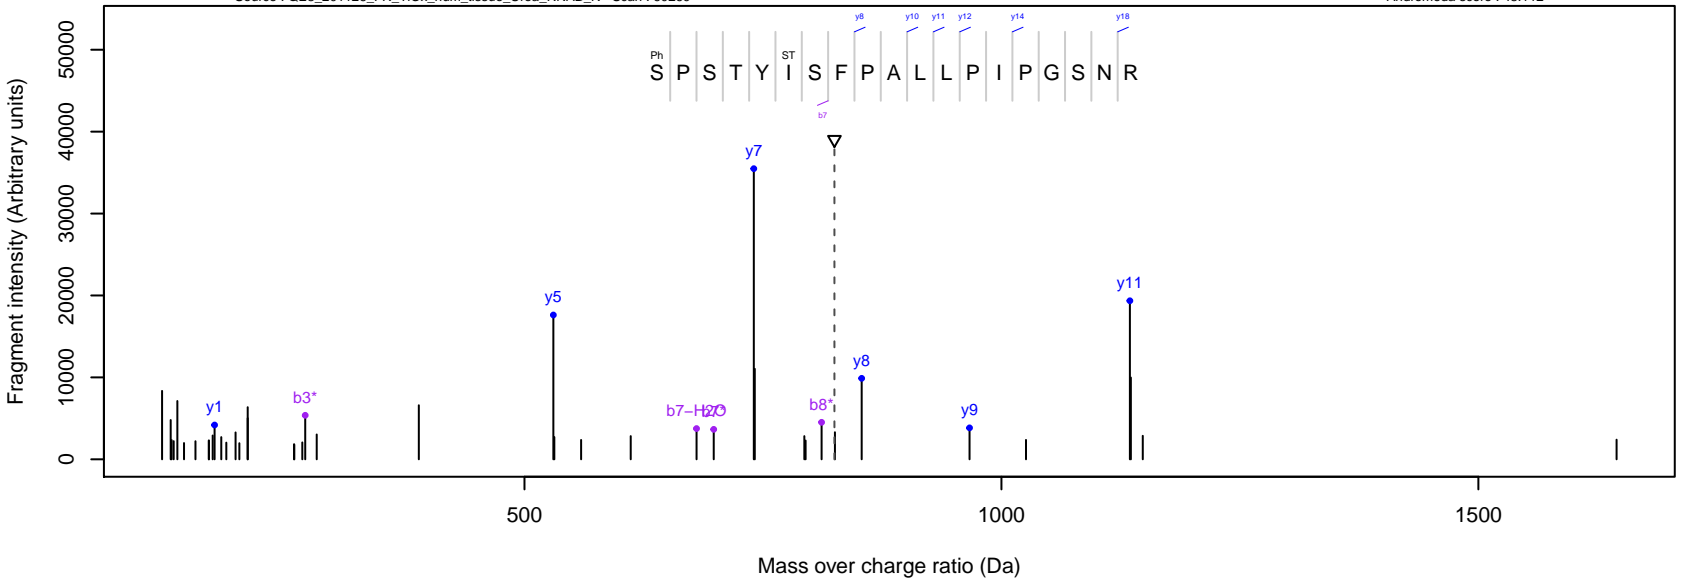

(Acetyl (Protein N-term))AAVAAPLAAGGEEAATTSVPGS(Phospho (STY))PGLPGR-3+

Source : QE3\_201126\_FR\_TiOx\_hum\_tissue\_Urea\_RNAB\_H Scan : 48238

Andromeda score : 48.085

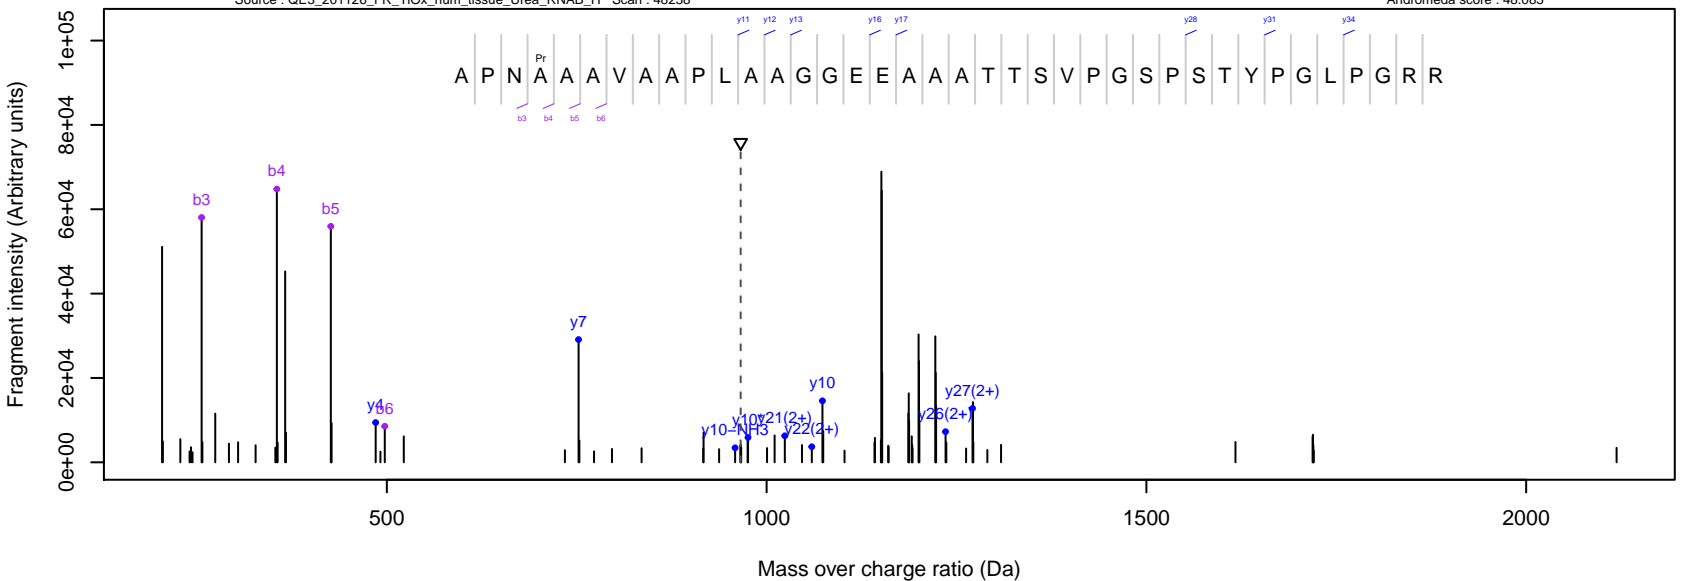

IS(Phospho (STY))VS(Phospho (STY))RS(Phospho (STY))TSFRGGMGSGGLATGIAGGLAGMGGIQNEK-4+

Source : QE3\_201126\_FR\_TIOx\_hum\_tissue\_Urea\_RNAB\_H Scan : 54152

Andromeda score : 48.085

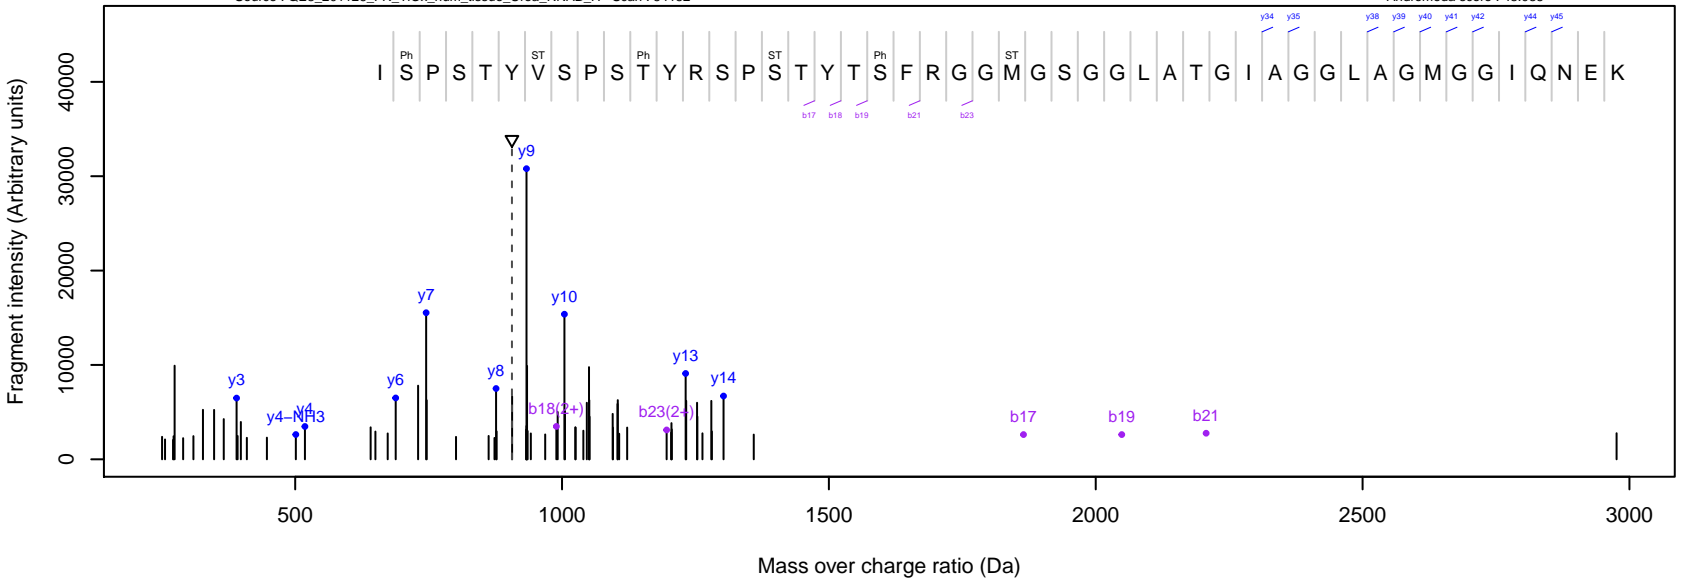

GILEEPLPS(Phospho (STY))TSSEEDPLAGISLPEGVDSFLAALPDDIRR-4+

Source : QE3\_201126\_FR\_TIOx\_hum\_tissue\_Urea\_RNAB\_H Scan : 62232

Andromeda score : 48.07

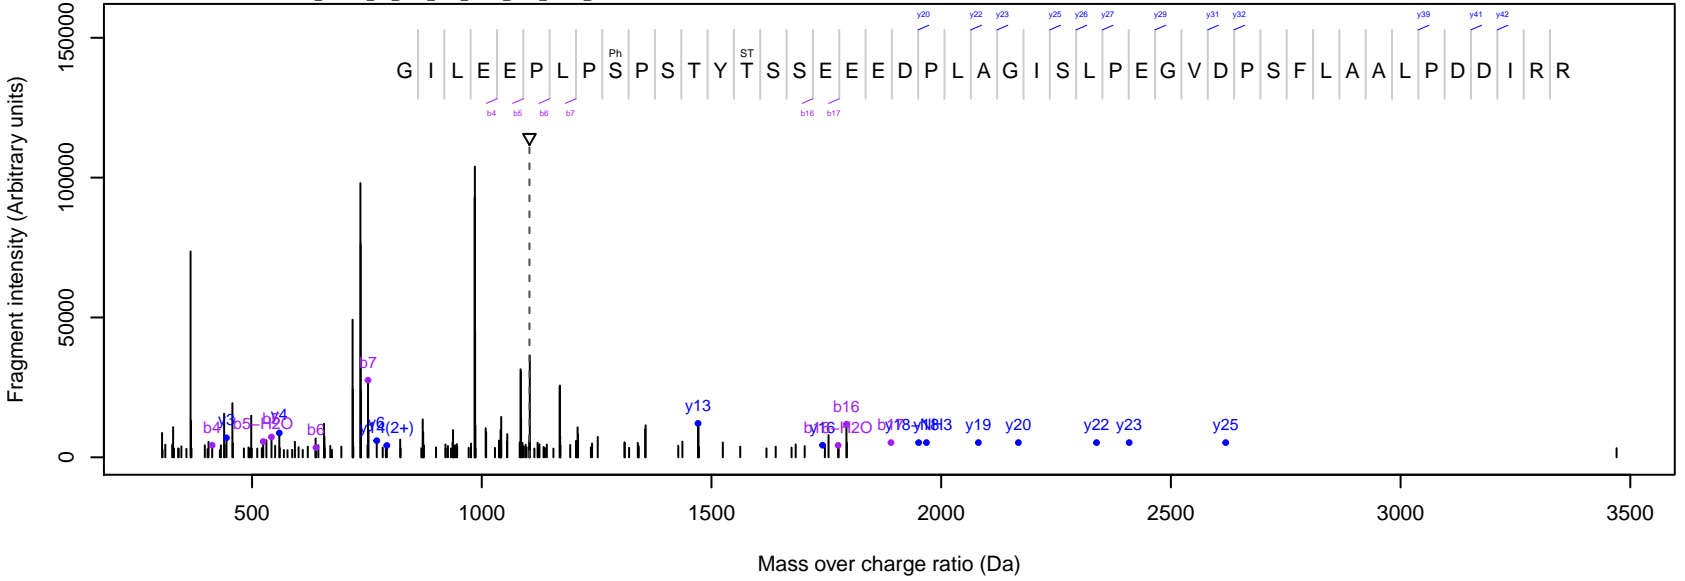

YEPSDKDRQS(Phospho (STY))PPPAK-3+

Source : QE3\_201126\_FR\_TIOx\_hum\_tissue\_Urea\_RNAB\_H Scan : 4820

Andromeda score : 48.053

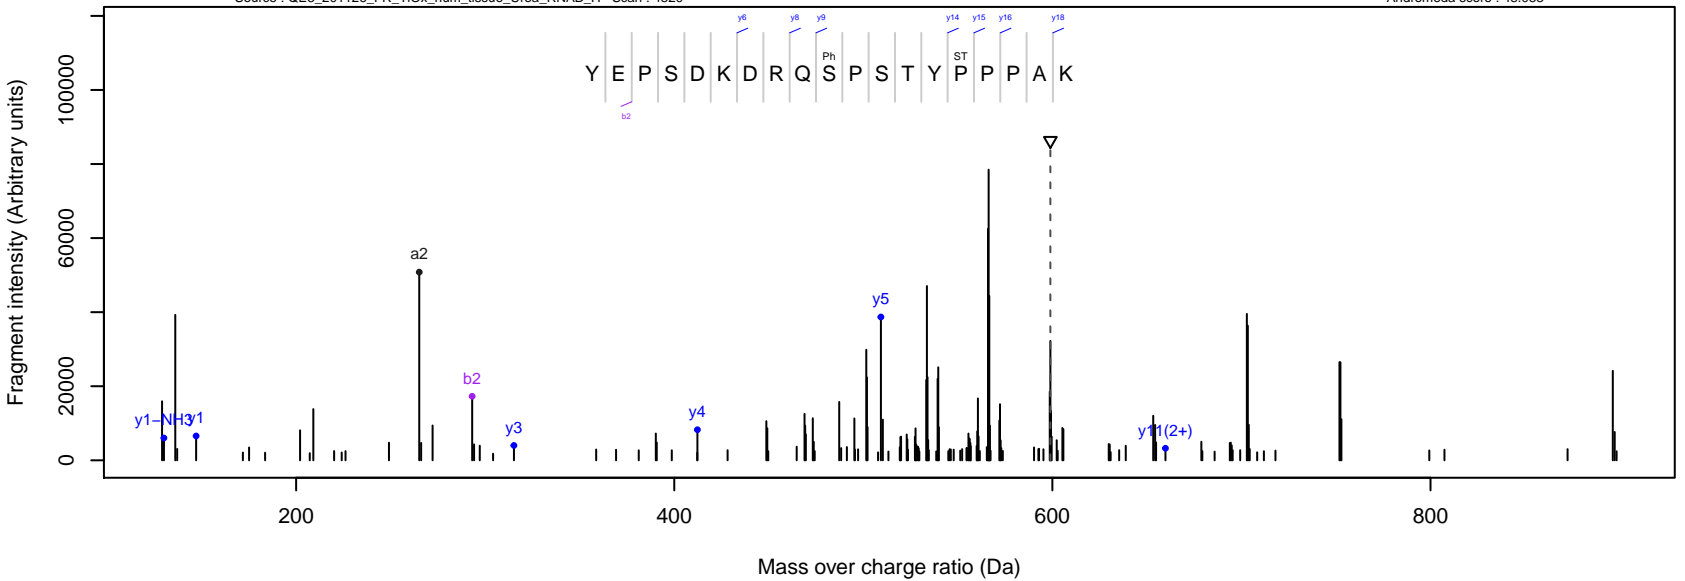

EAALPPVS(Phospho (STY))PLK-2+

Source : QE3\_201126\_FR\_TIOx\_hum\_tissue\_Urea\_RNAB\_H Scan : 30505

Andromeda score : 48.004

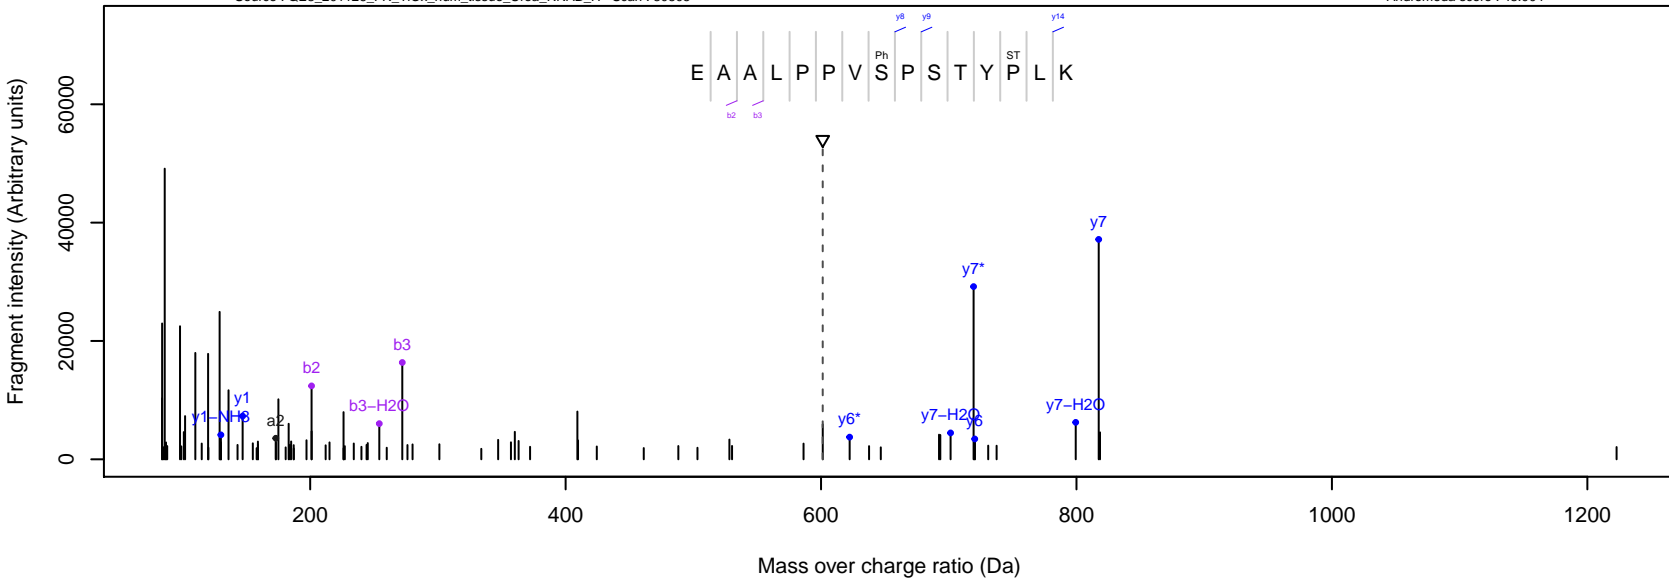

SCTPS(Phospho (STY))PDQISHRAS(Phospho (STY))LEDAPVDLTR-3+

Source : QE3\_201126\_FR\_TIOx\_hum\_tissue\_Urea\_RNAB\_H Scan : 33282

Andromeda score : 47.96

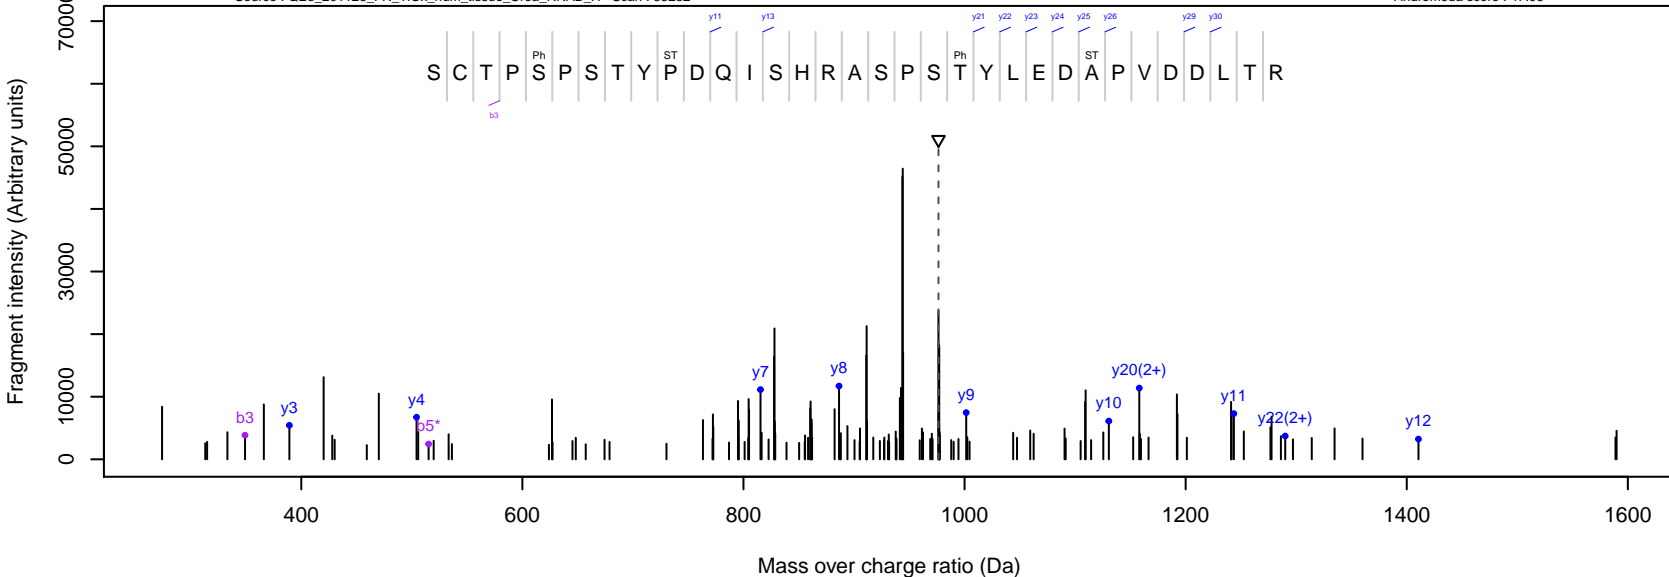

GKDETSPTVHLGLDS(Phospho (STY))DS(Phospho (STY))ESELVIDLGEDHSGR-4+

Source : QE3\_201126\_FR\_TIOx\_hum\_tissue\_Urea\_RNAB\_H Scan : 48758

Andromeda score : 47.919

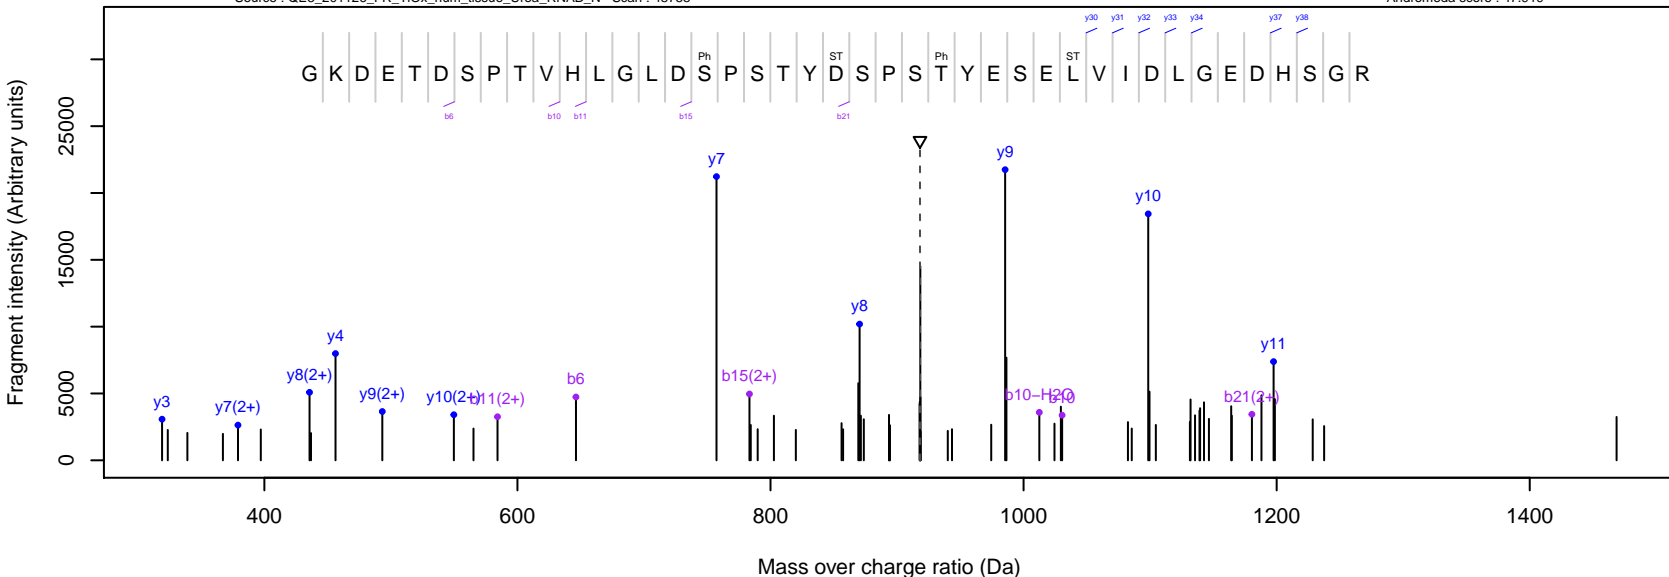

TVT(Phospho (STY))PASS(Phospho (STY))AKT(Phospho (STY))SPAKQAPPVR-3+

Source : QE3\_201126\_FR\_TiOx\_hum\_tissue\_Urea\_RNAB\_B Scan : 12392

Andromeda score : 47.919

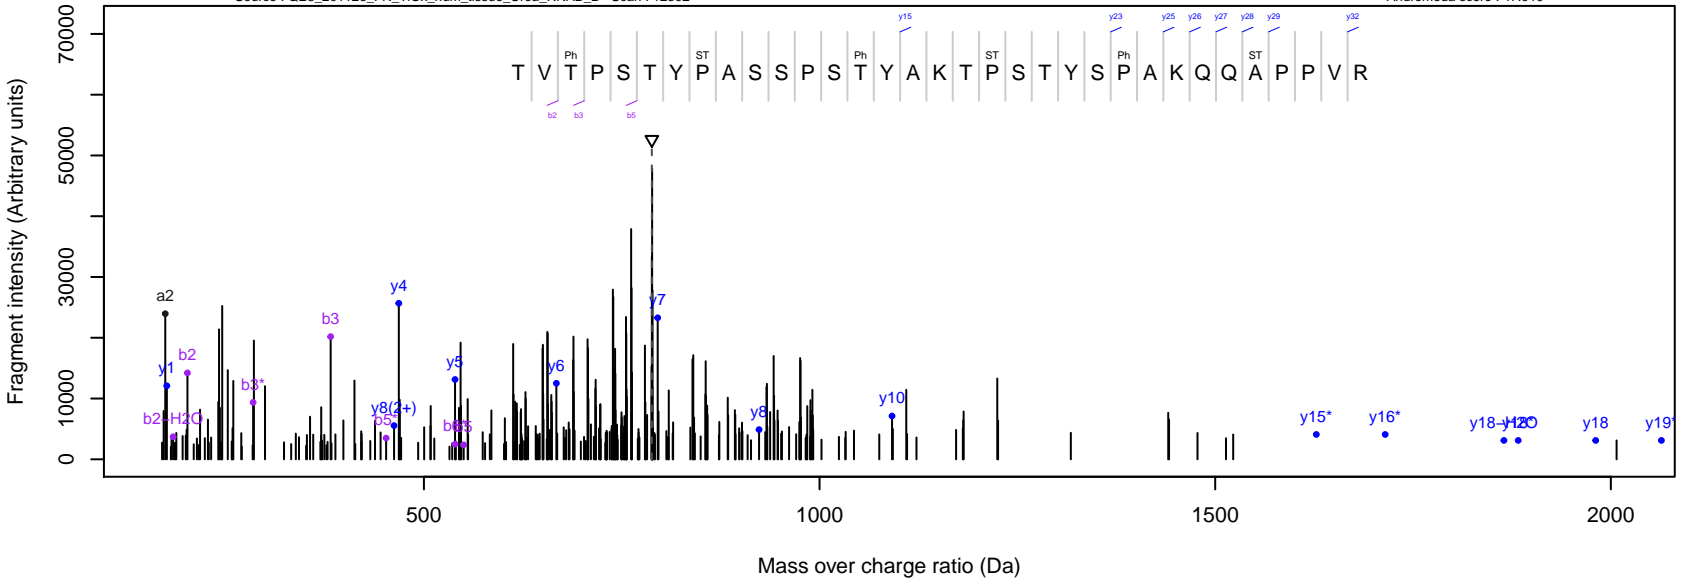

DSLS(Phospho (STY))DDGVDLK-2+

Source : QE3\_201126\_FR\_TiOx\_hum\_tissue\_Urea\_RNAB\_B Scan : 27344

Andromeda score : 47.915

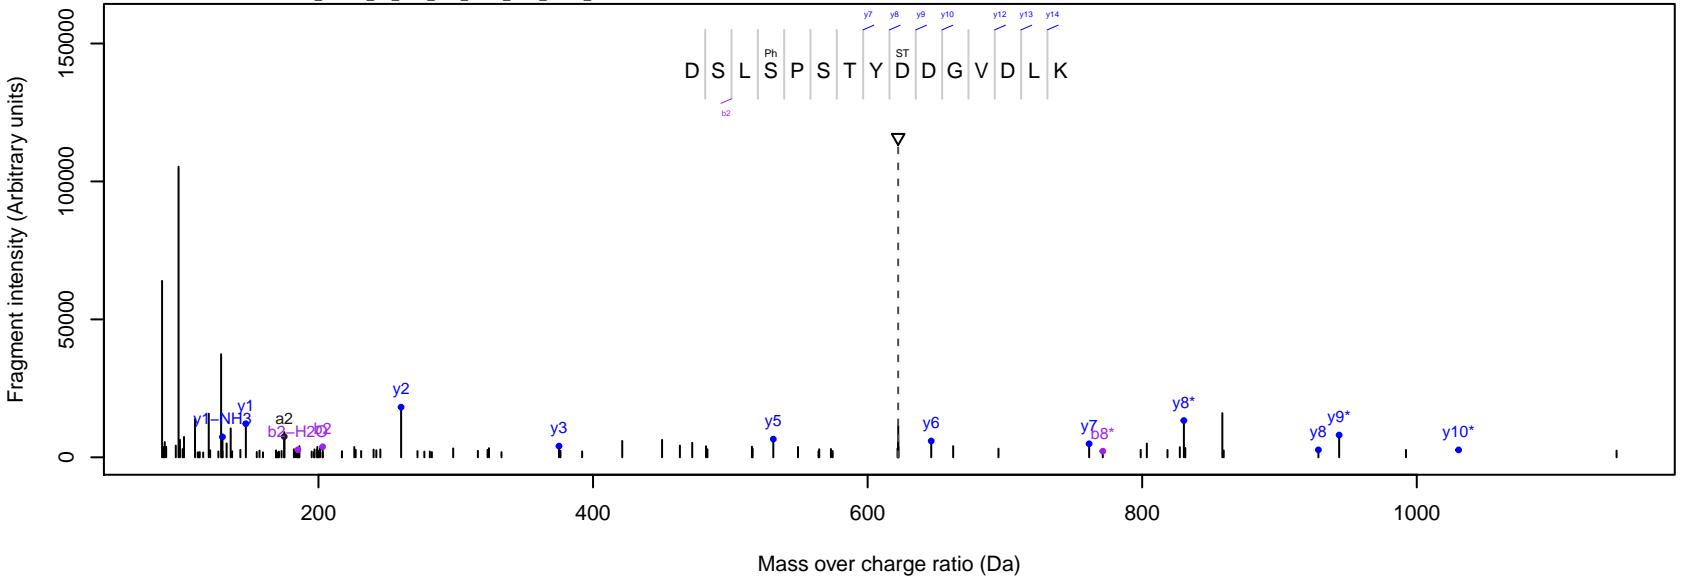

SRVS(Phospho (STY))VS(Phospho (STY))PGR-2+

Source : QE3\_201126\_FR\_TiOx\_hum\_tissue\_Urea\_RNAB\_H Scan : 6721

Andromeda score : 47.915

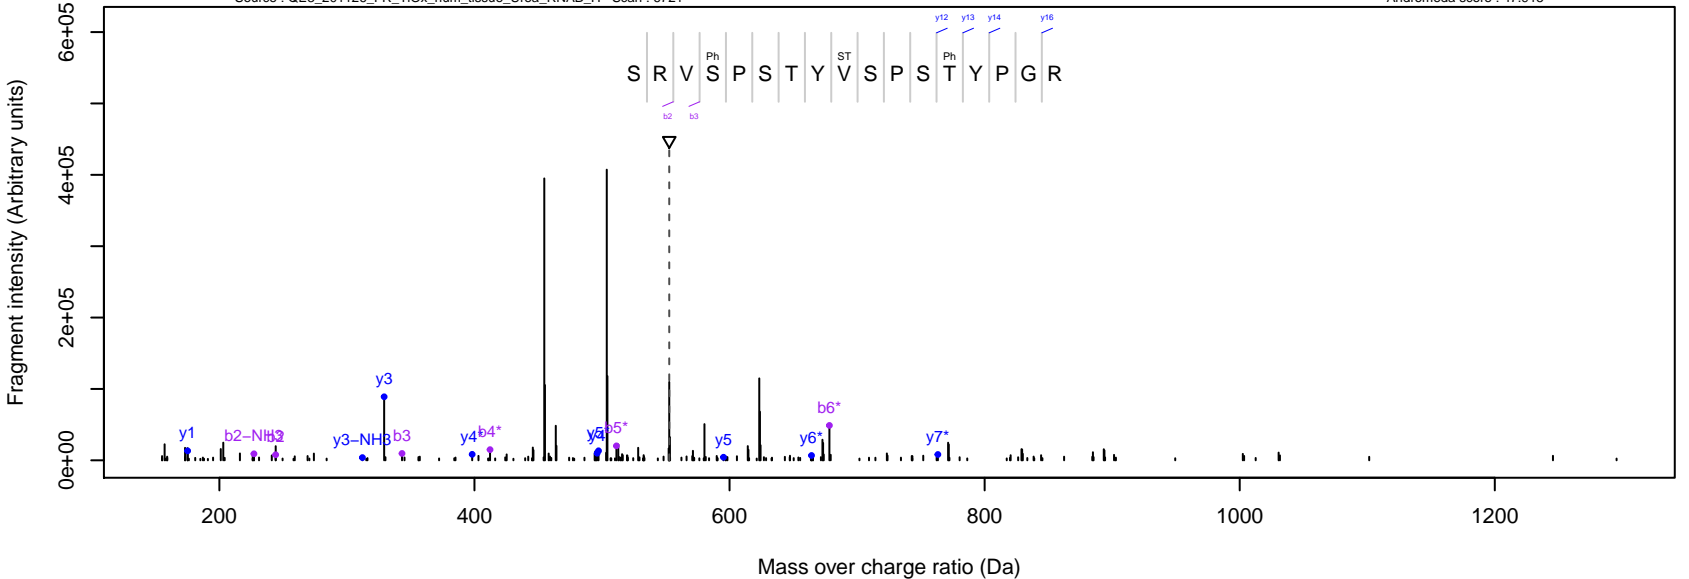

SSSHLS(Phospho (STY))PSEEV-2+

Source : QE3\_201126\_FR\_TiOx\_hum\_tissue\_Urea\_RNAB\_N Scan : 9320

Andromeda score : 47.915

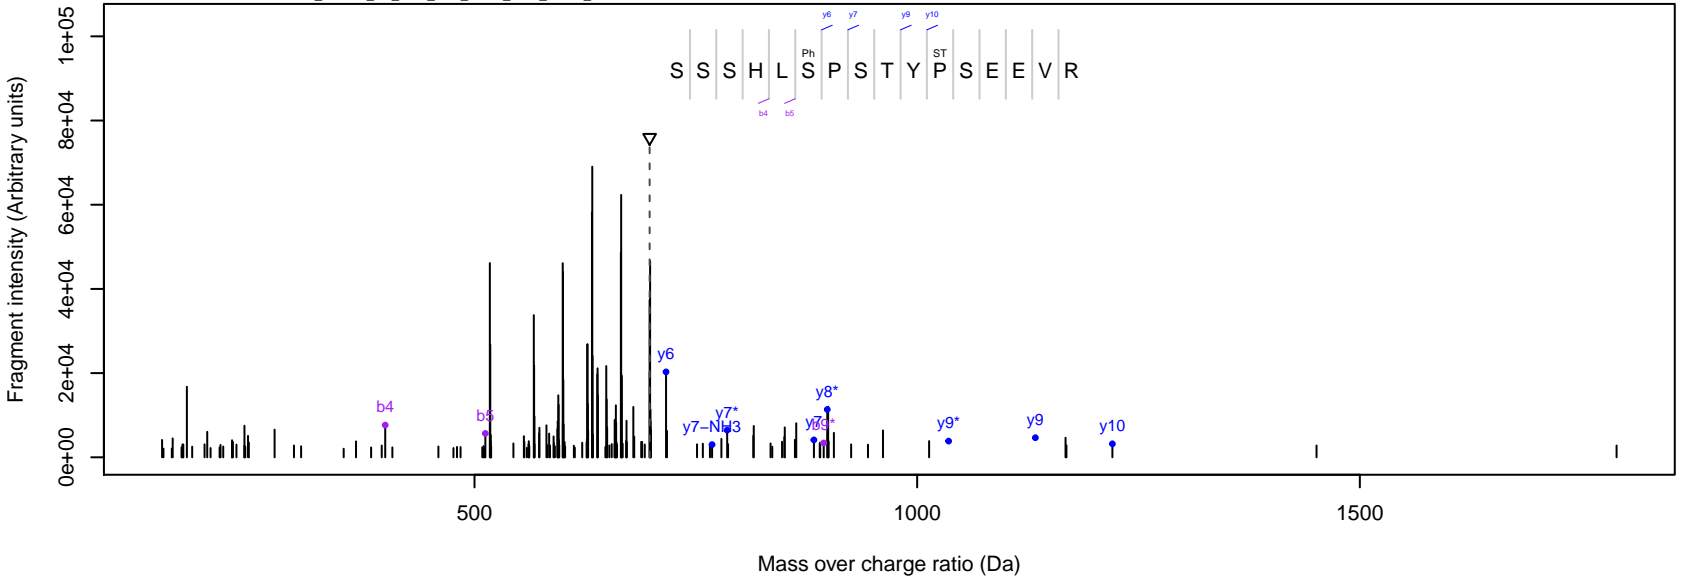

RKTS(Phospho (STY))DDGGDS(Phospho (STY))PEHDTIPEVDFLQLQVNTLR-3+

Source : QE3\_201126\_FR\_TiOx\_hum\_tissue\_Urea\_RNAB\_N Scan : 52880

Andromeda score : 47.91

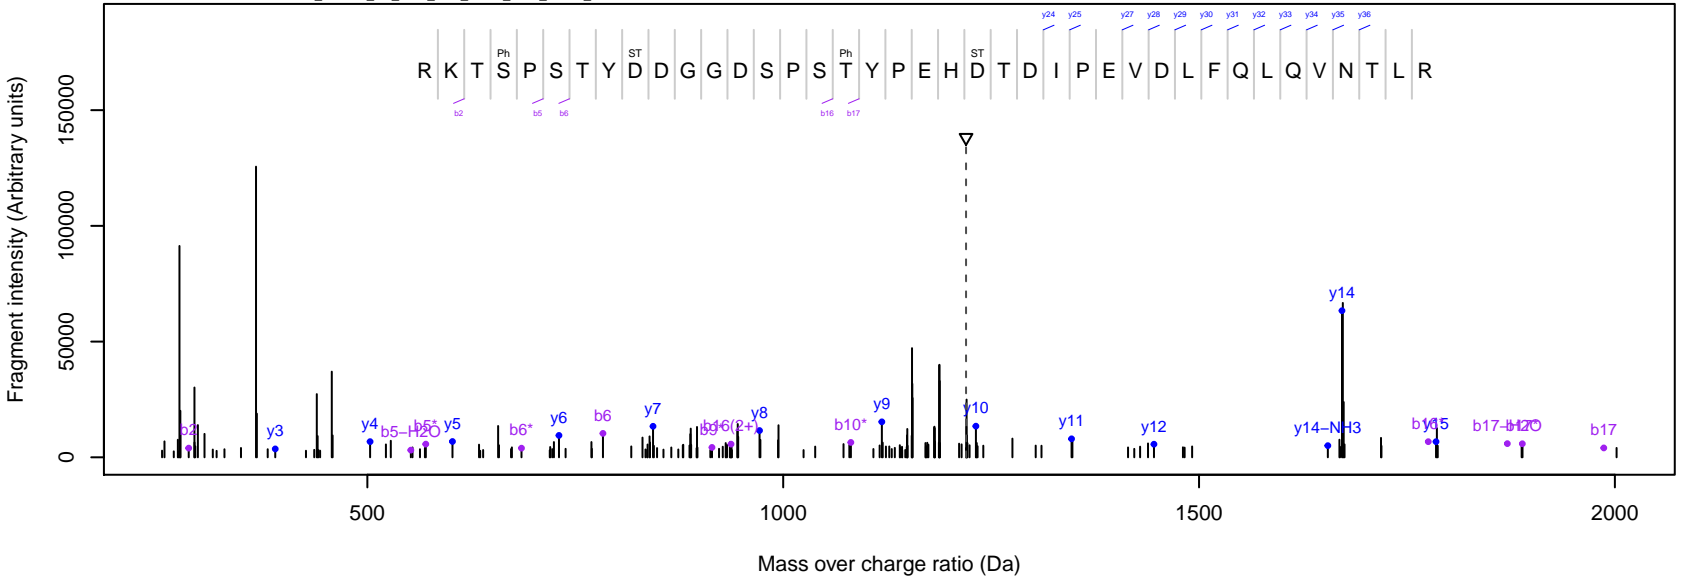

NGITS(Phospho (STY))KDQK-2+

Source : QE3\_201126\_FR\_TiOx\_hum\_tissue\_Urea\_RNAB\_B Scan : 34405

Andromeda score : 47.894

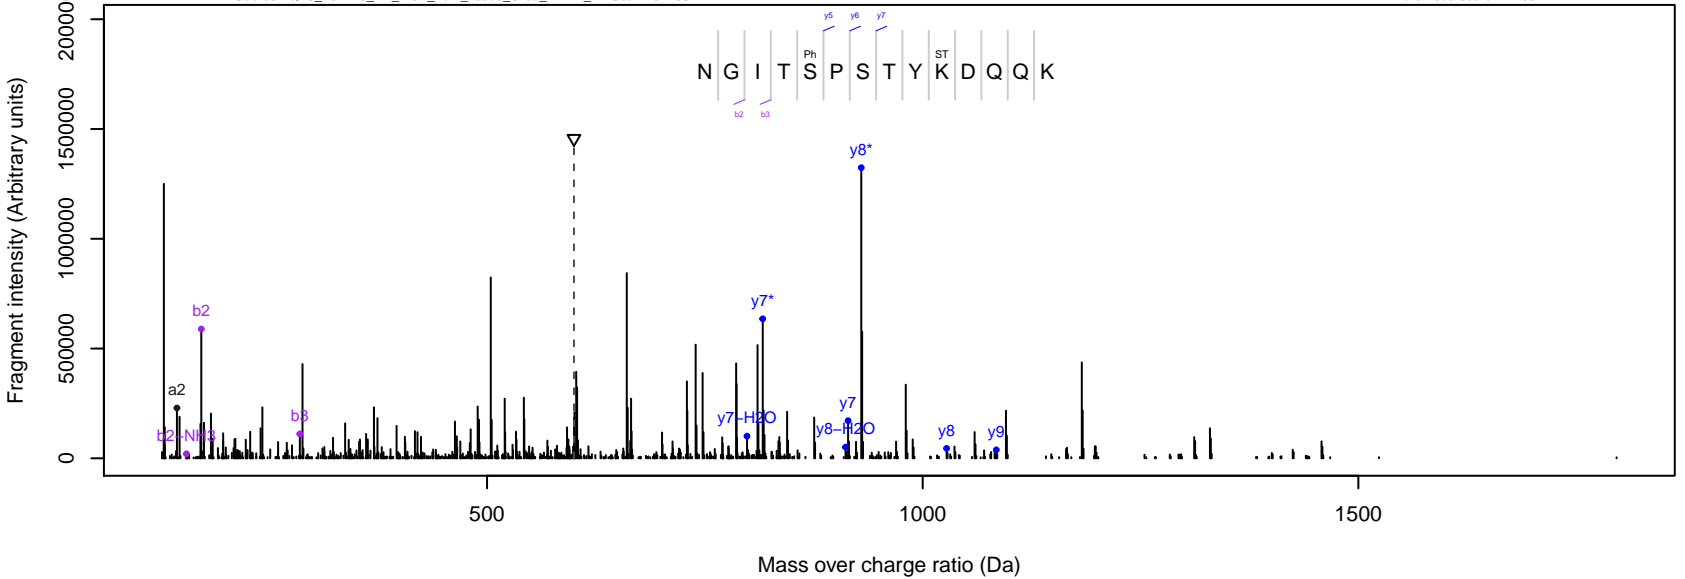

RLS(Phospho (STY))FAVPFR-2+

Source : QE3\_201126\_FR\_TiOx\_hum\_tissue\_Urea\_RNAB\_B Scan : 37803

Andromeda score : 47.894

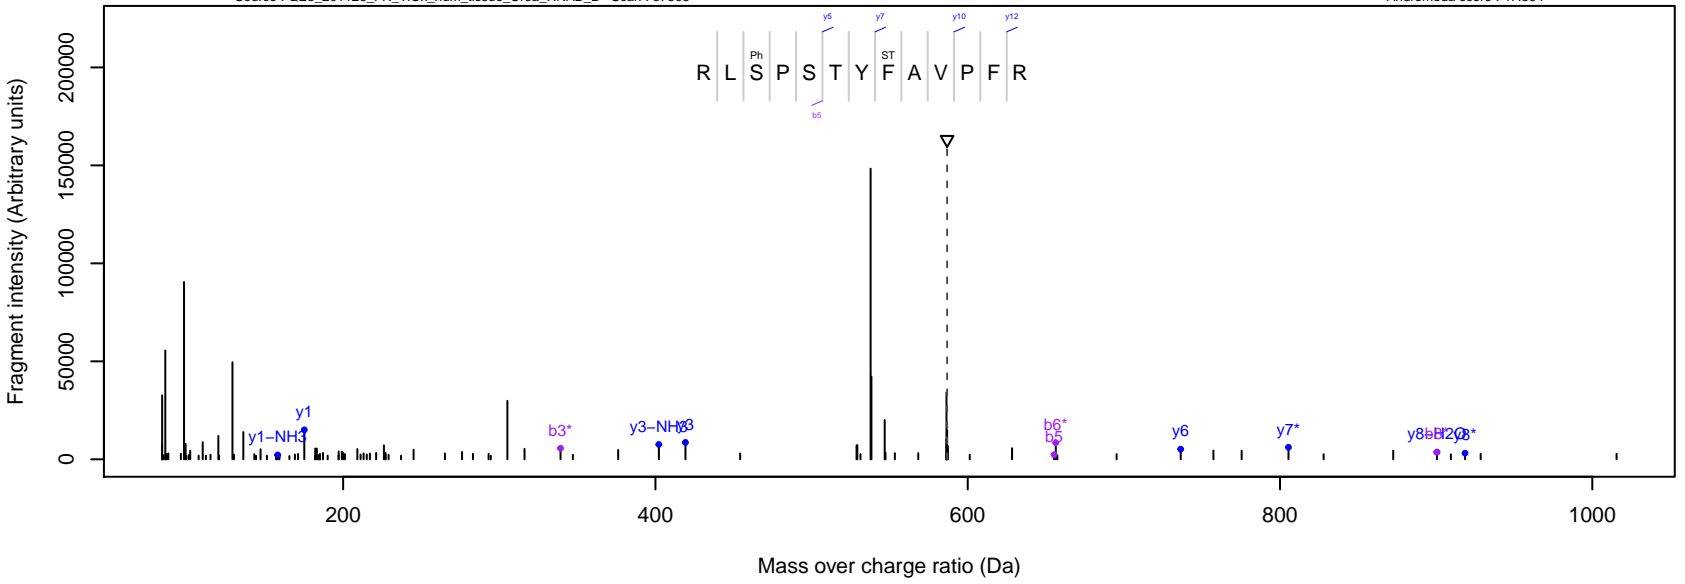

EVAPDGPLQES(Phospho (STY))STRLSLTSDPEEGDPLALGPESPGEPQPPQLK-4+

Source : QE3\_201126\_FR\_TiOx\_hum\_tissue\_Urea\_RNAB\_N Scan : 52247

Andromeda score : 47.871

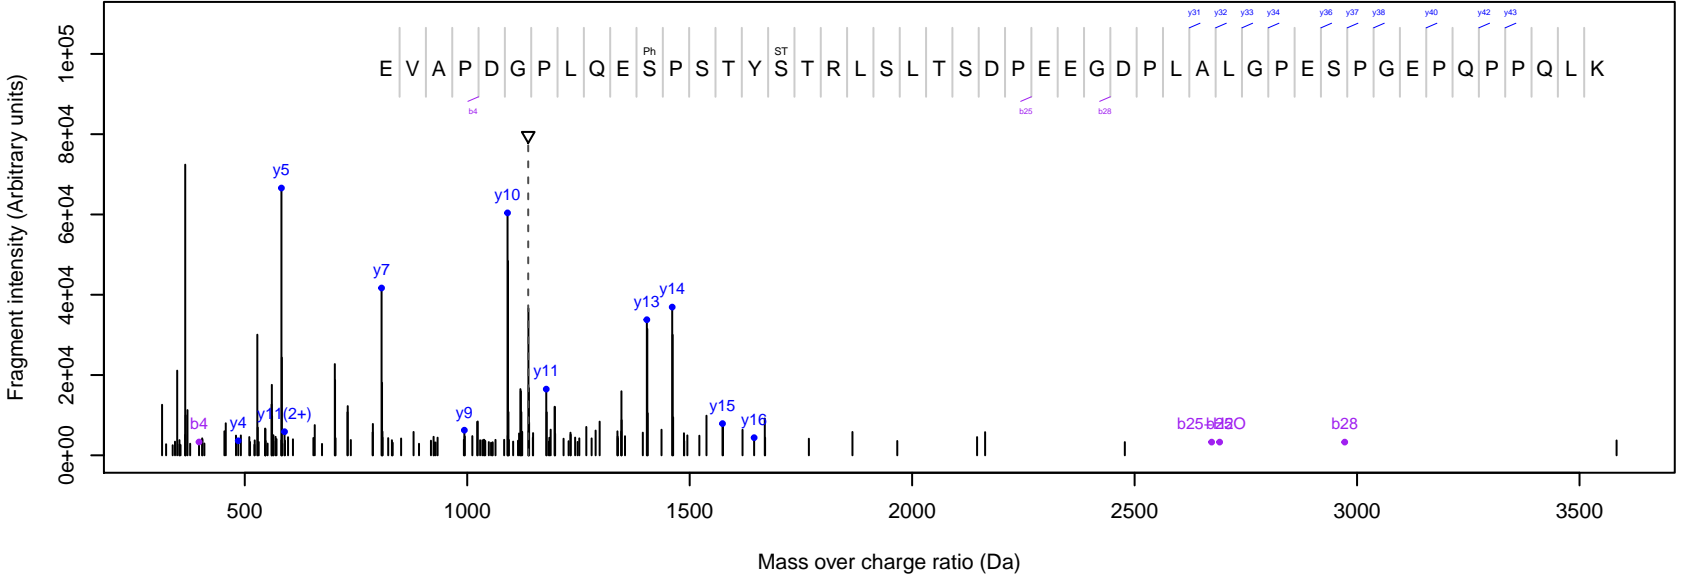

LAESLLALSQQEELADLPKDYLLS(Phospho (STY))ES(Phospho (STY))EDEGDNDGERK-4+

Source : QE3\_201126\_FR\_TiOx\_hum\_tissue\_Urea\_RNAB\_N Scan : 57502

Andromeda score : 47.867

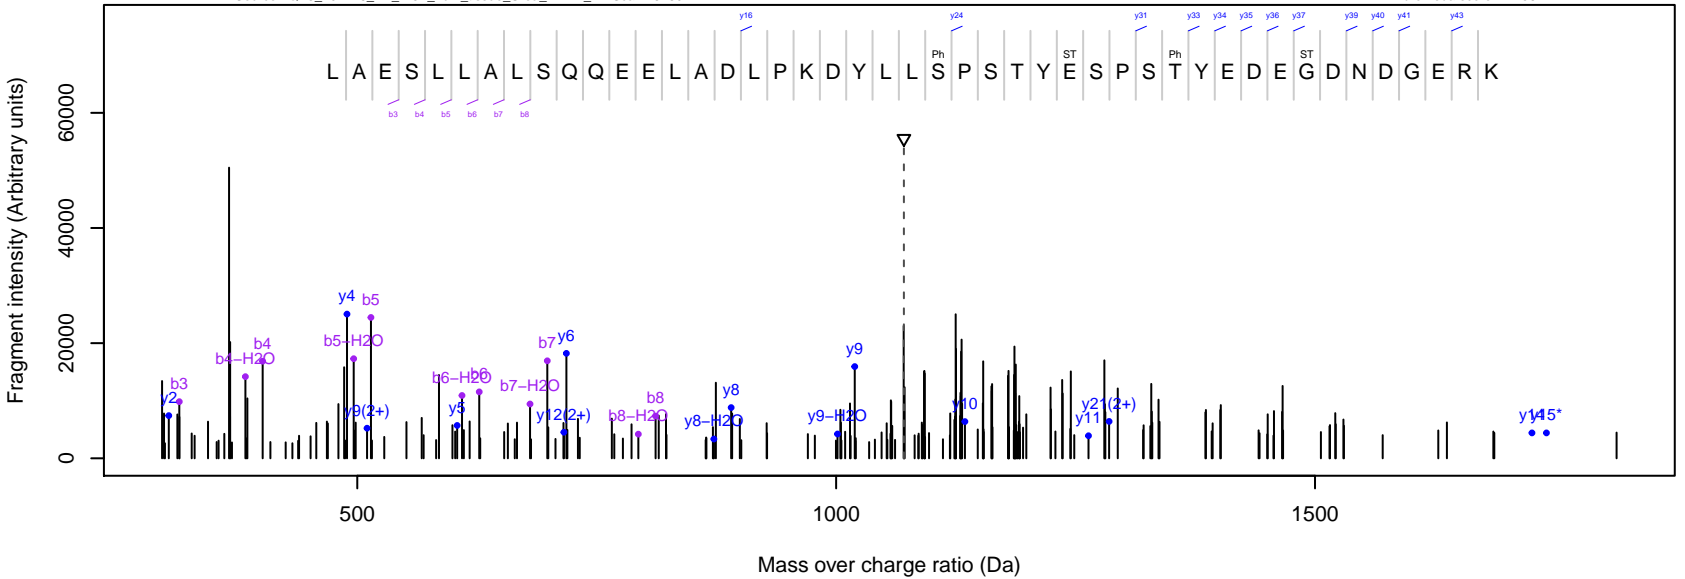

RISAAPVGS(Phospho (STY))R-2+

Source : QE3\_201126\_FR\_TiOx\_hum\_tissue\_Urea\_RNAB\_H Scan : 21885

Andromeda score : 47.844

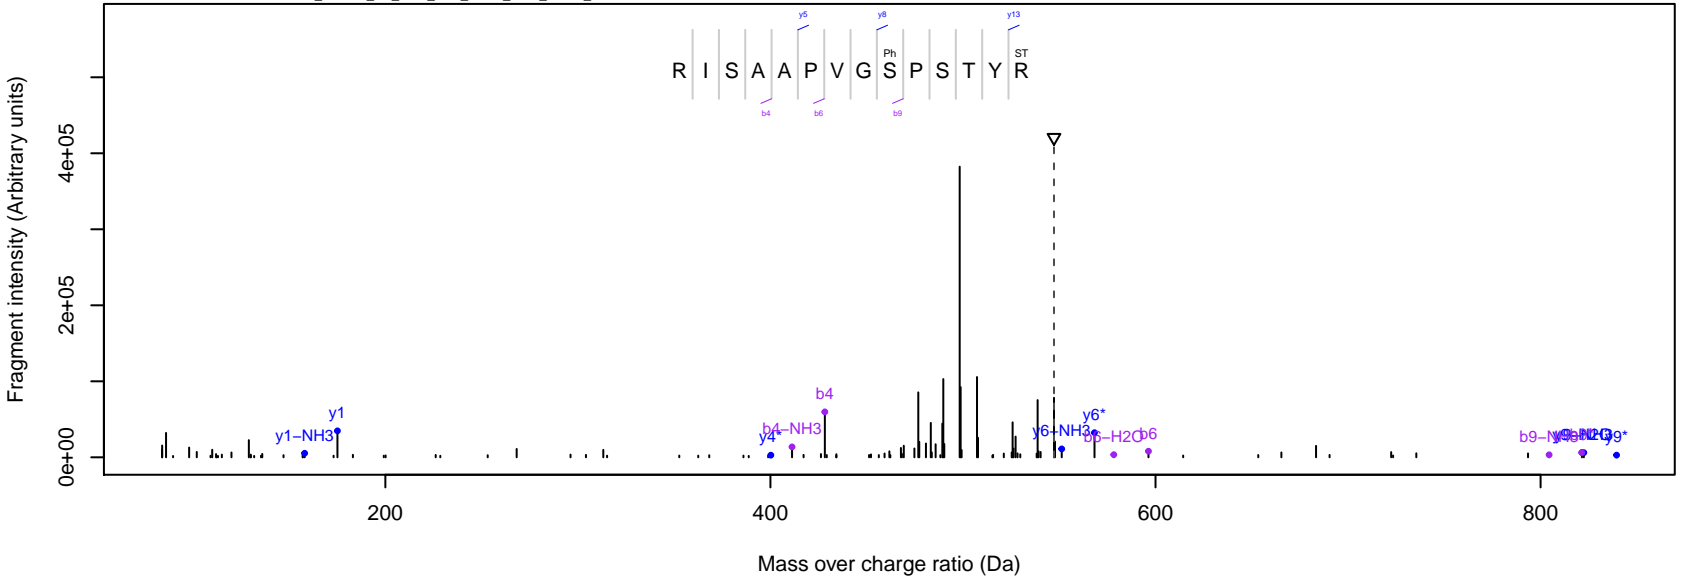

YVIS(Phospho (STY))DEEEEDD-2+

Source : QE3\_201126\_FR\_TiOx\_hum\_tissue\_Urea\_RNAB\_B Scan : 30608

Andromeda score : 47.844

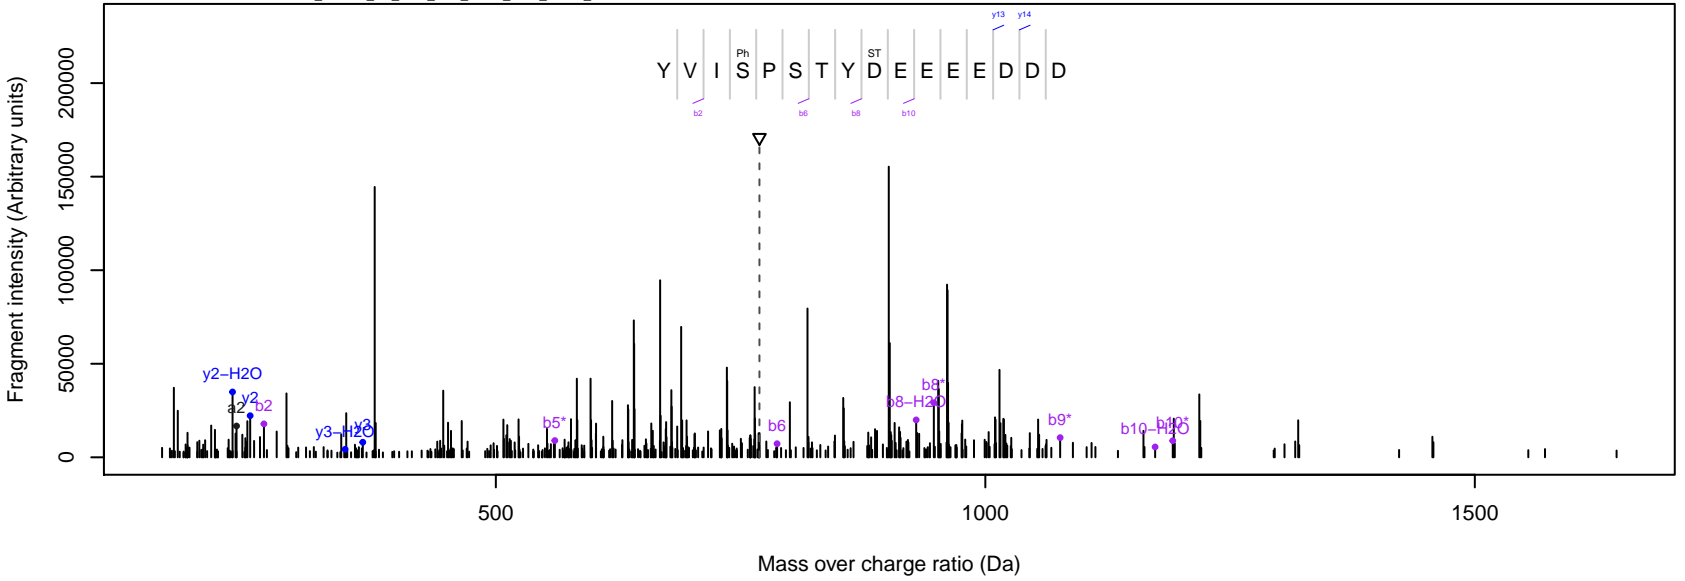

AQSGS(Phospho (STY))DS(Phospho (STY))S(Phospho (STY))PEPKAPAPR-3+

Source : QE3\_201126\_FR\_TiOx\_hum\_tissue\_Urea\_RNAB\_N Scan : 14657

Andromeda score : 47.814

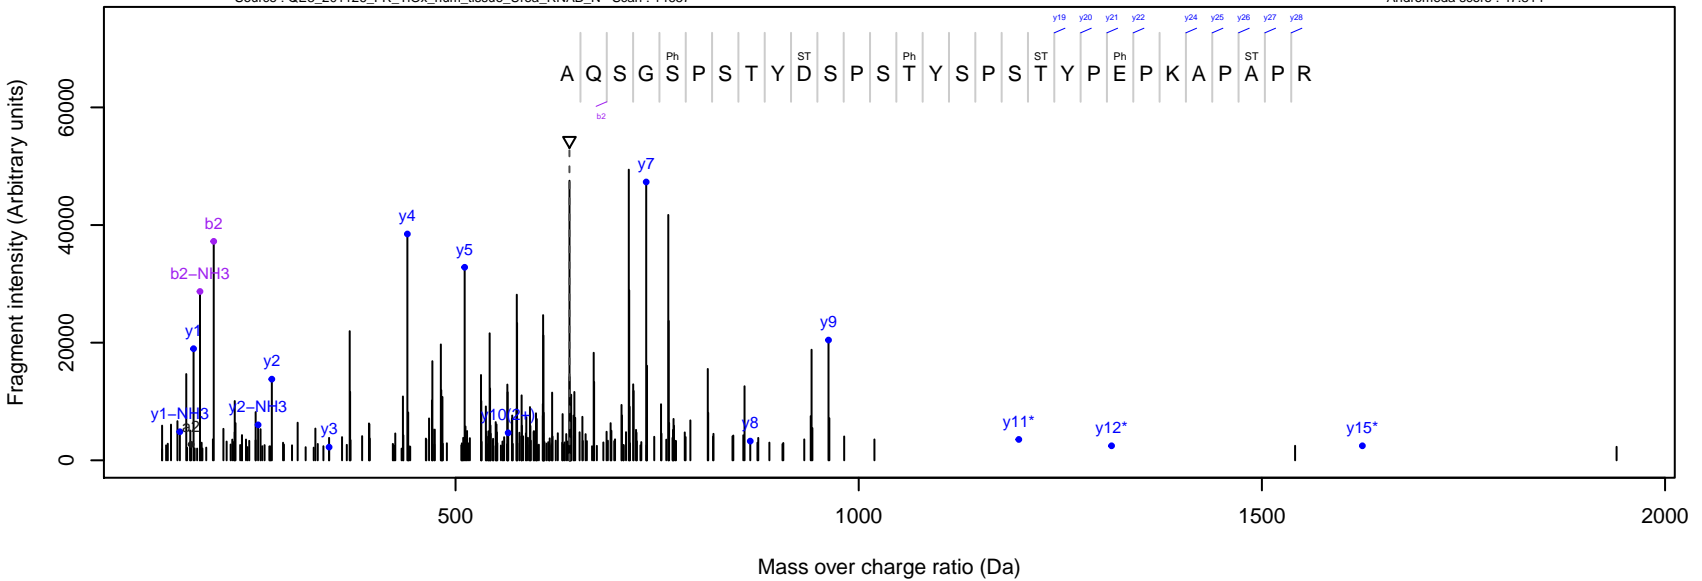

KDS(Phospho (STY))LSVNEFKELVTQQLPHLLK-4+

Source : QE3\_201126\_FR\_TiOx\_hum\_tissue\_Urea\_RNAB\_H Scan : 55307

Andromeda score : 47.808

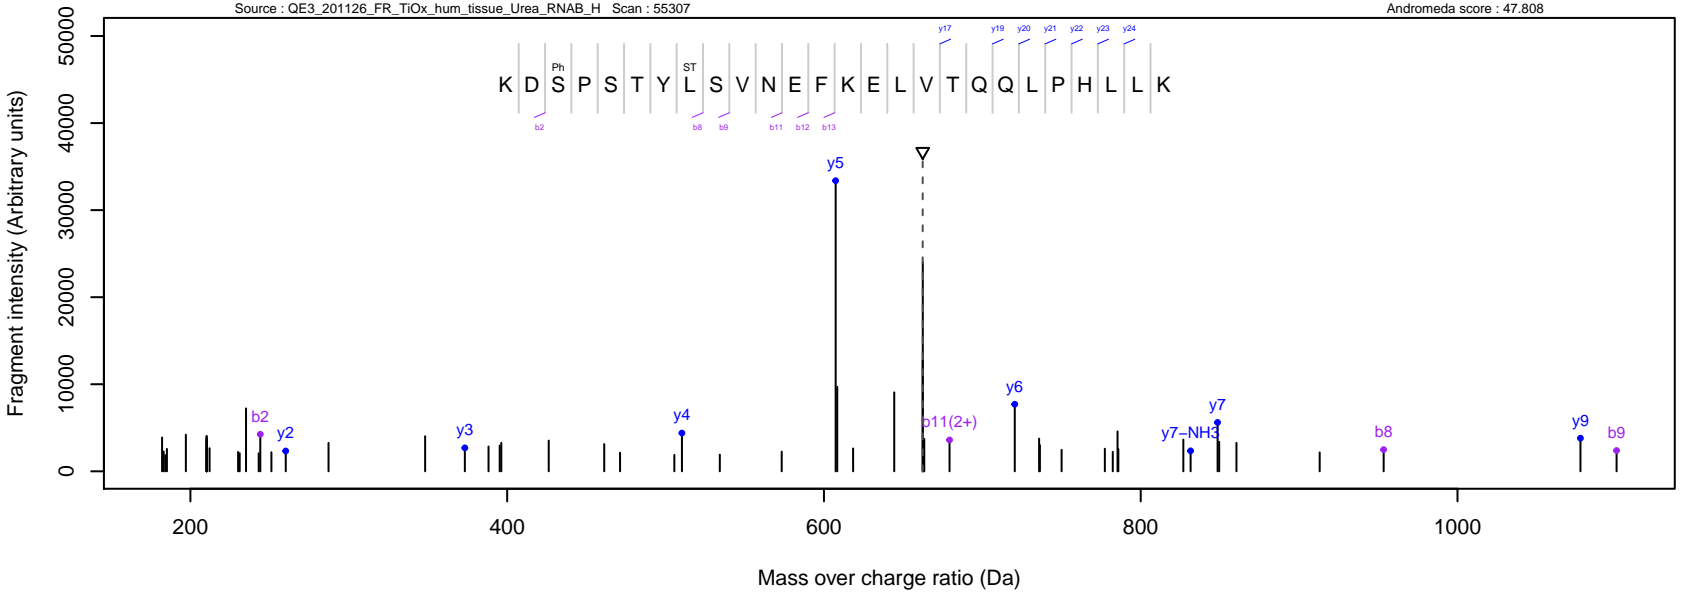

(Acetyl (Protein N-term))M(Oxidation (M))NSS(Phospho (STY))TSTM(Oxidation (M))SEEPDALSVNQLR-3+

Source : QE3\_201126\_FR\_TiOx\_hum\_tissue\_Urea\_RNAB\_N Scan : 57242

Andromeda score : 47.808

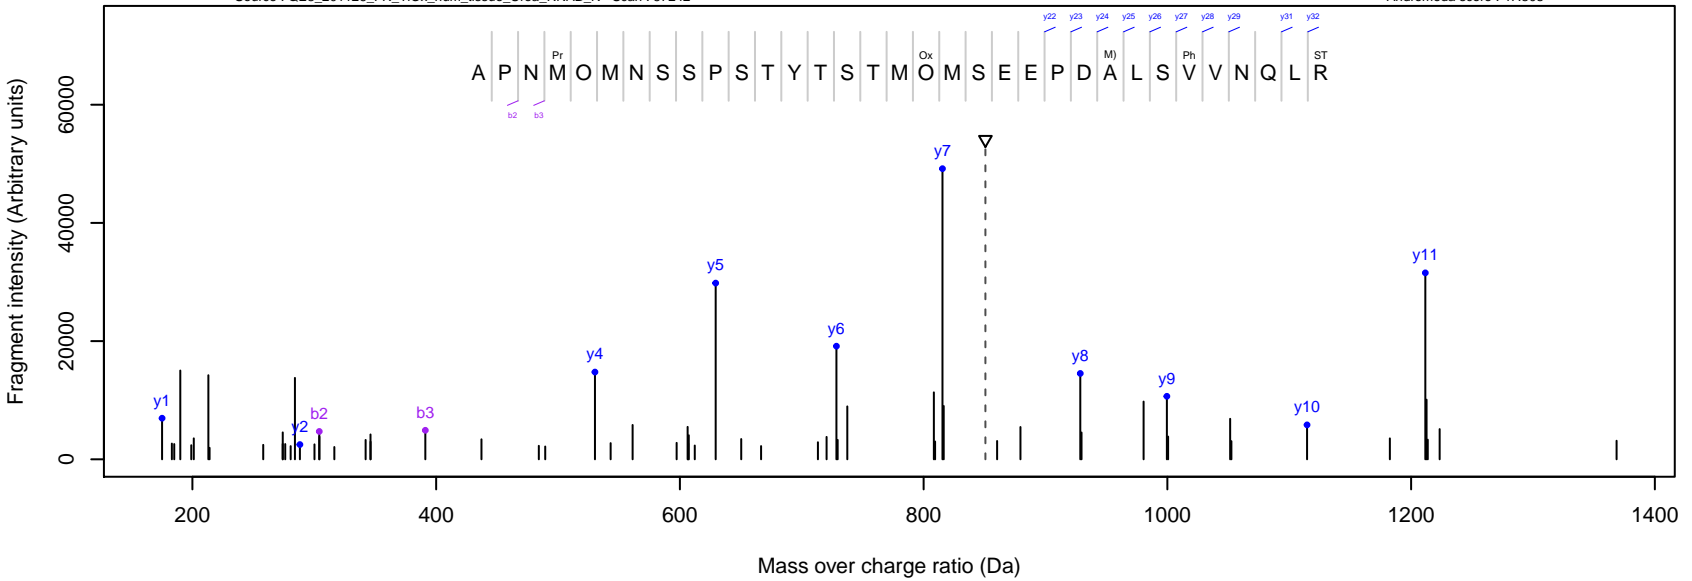

ENS(Phospho (STY))REALAEEALSPRALVR-3+

Source : QE3\_201126\_FR\_TiOx\_hum\_tissue\_Urea\_RNAB\_H Scan : 32815

Andromeda score : 47.806

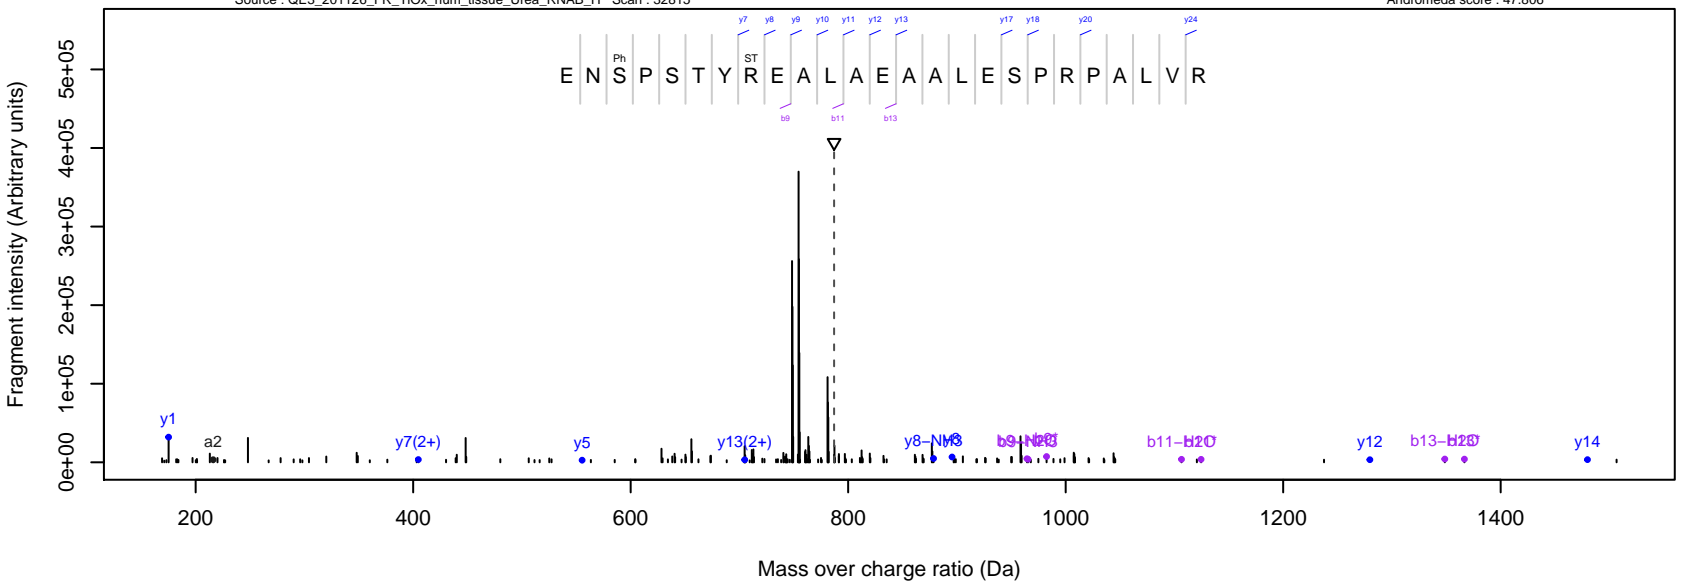



T(Phospho (STY))KNSLSLEQLAINTSPDAVK-3+

Source : QE3\_201126\_FR\_TiOx\_hum\_tissue\_Urea\_RNAB\_H Scan : 26242

Andromeda score : 47.806

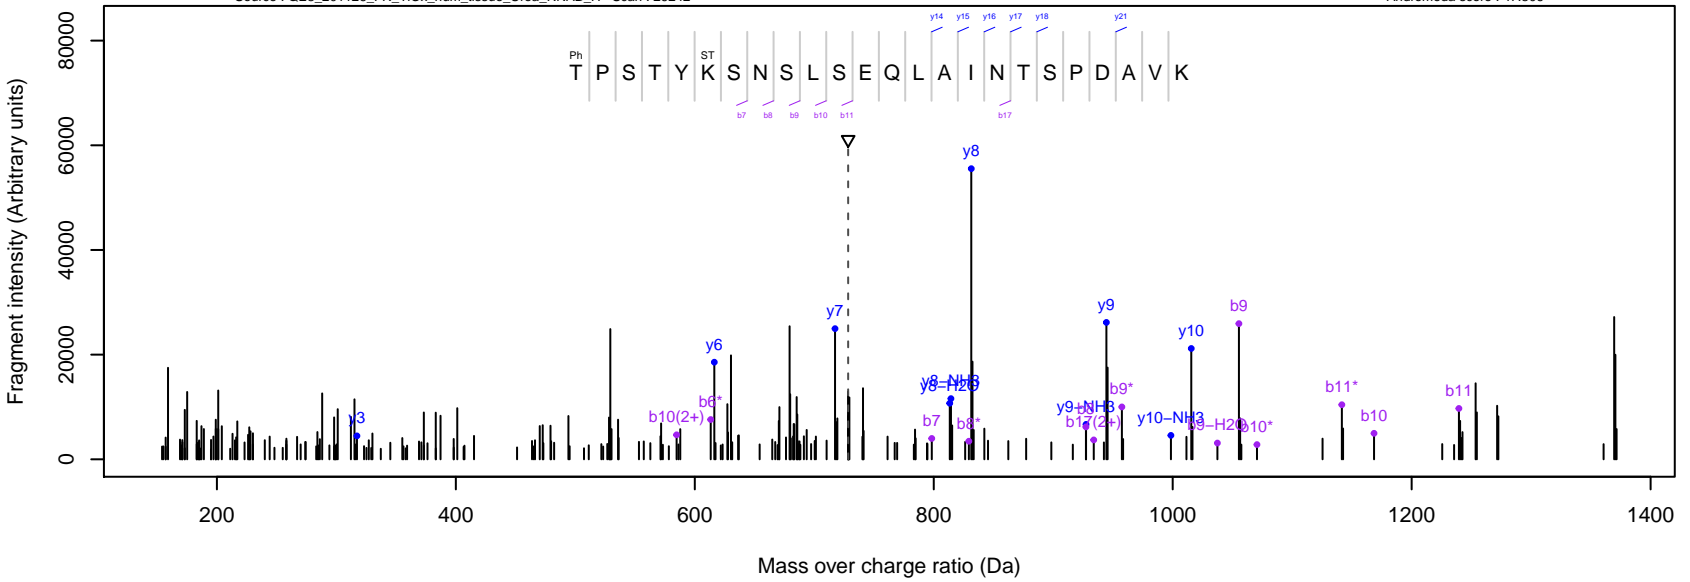

EVAENQQSSDPEEEKGSQPPAAE(Phospho (STY))QSSLRR-4+

Source : QE3\_201126\_FR\_TiOx\_hum\_tissue\_Urea\_RNAB\_B Scan : 11132

Andromeda score : 47.795

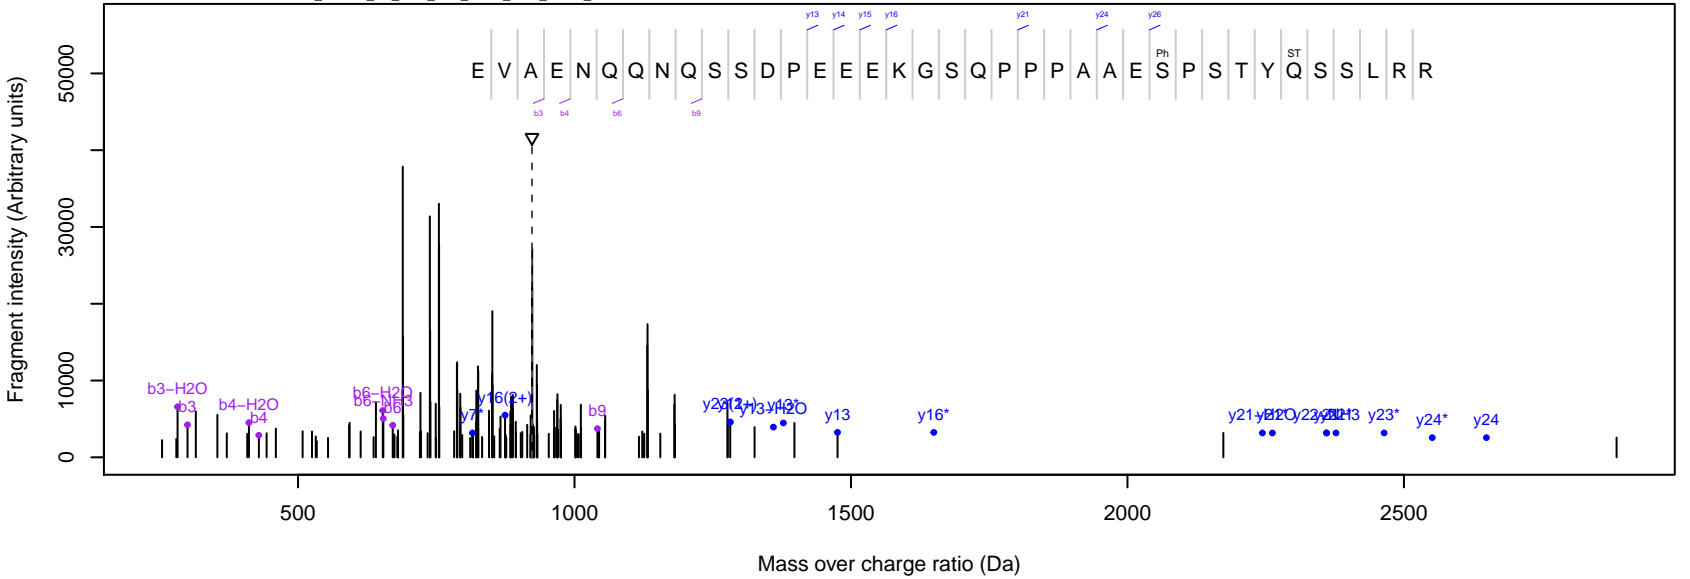

EDS(Phospho (STY))VKPGAHLTVKK-3+

Source : QE3\_201126\_FR\_TiOx\_hum\_tissue\_Urea\_RNAB\_B Scan : 6124

Andromeda score : 47.774

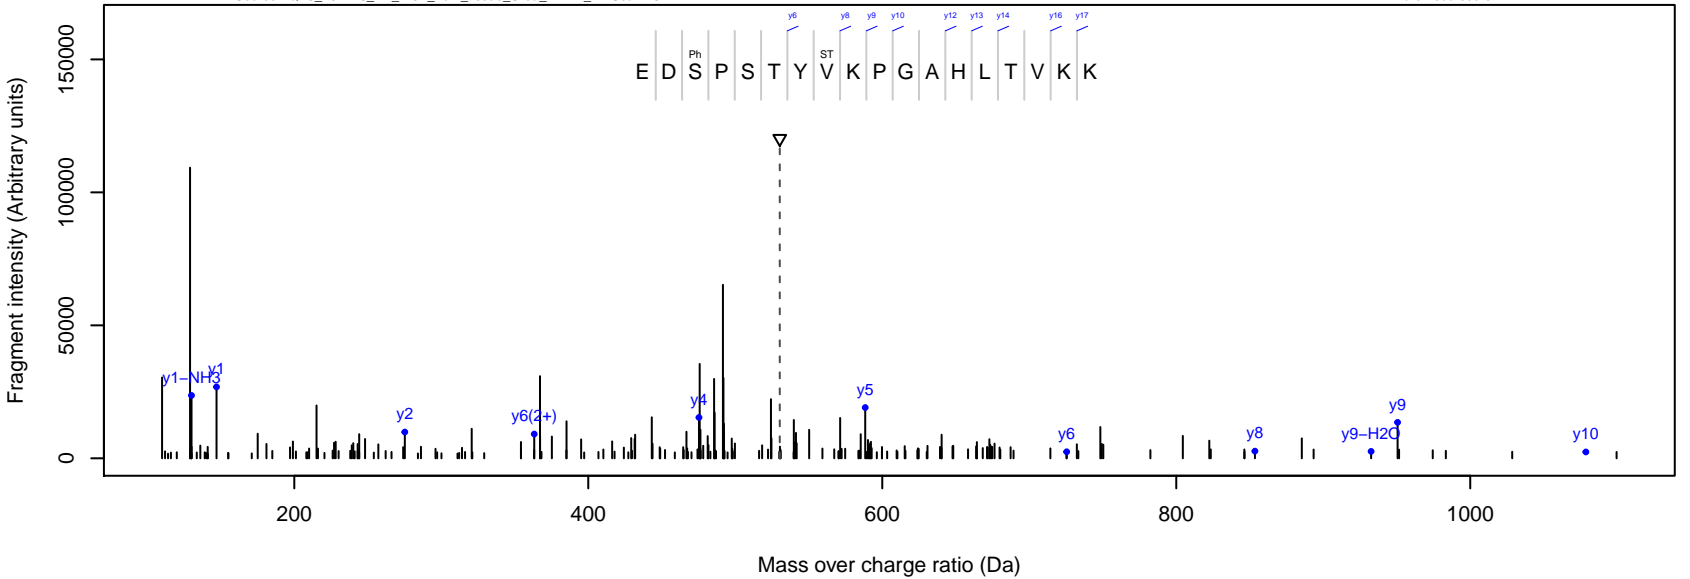

VCS(Phospho (STY))TNDLKELLIFNK-3+

Source : QE3\_201126\_FR\_TiOx\_hum\_tissue\_Urea\_RNAB\_B Scan : 48203

Andromeda score : 47.774

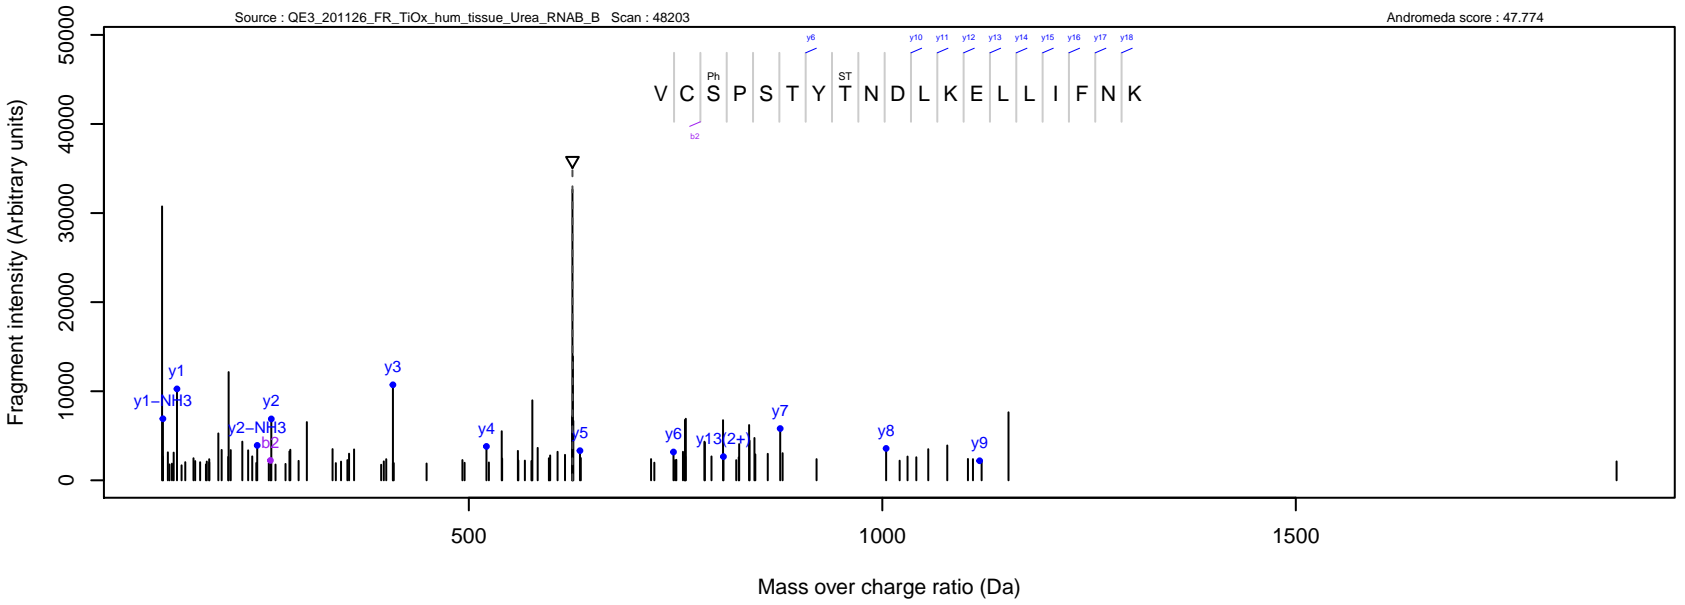

NLEEEENLGKGEY(Phospho (STY))QES(Phospho (STY))LRSLEEEGQELPQSADVQR-4+

Source : QE3\_201126\_FR\_TiOx\_hum\_tissue\_Urea\_RNAB\_H Scan : 43559

Andromeda score : 47.77

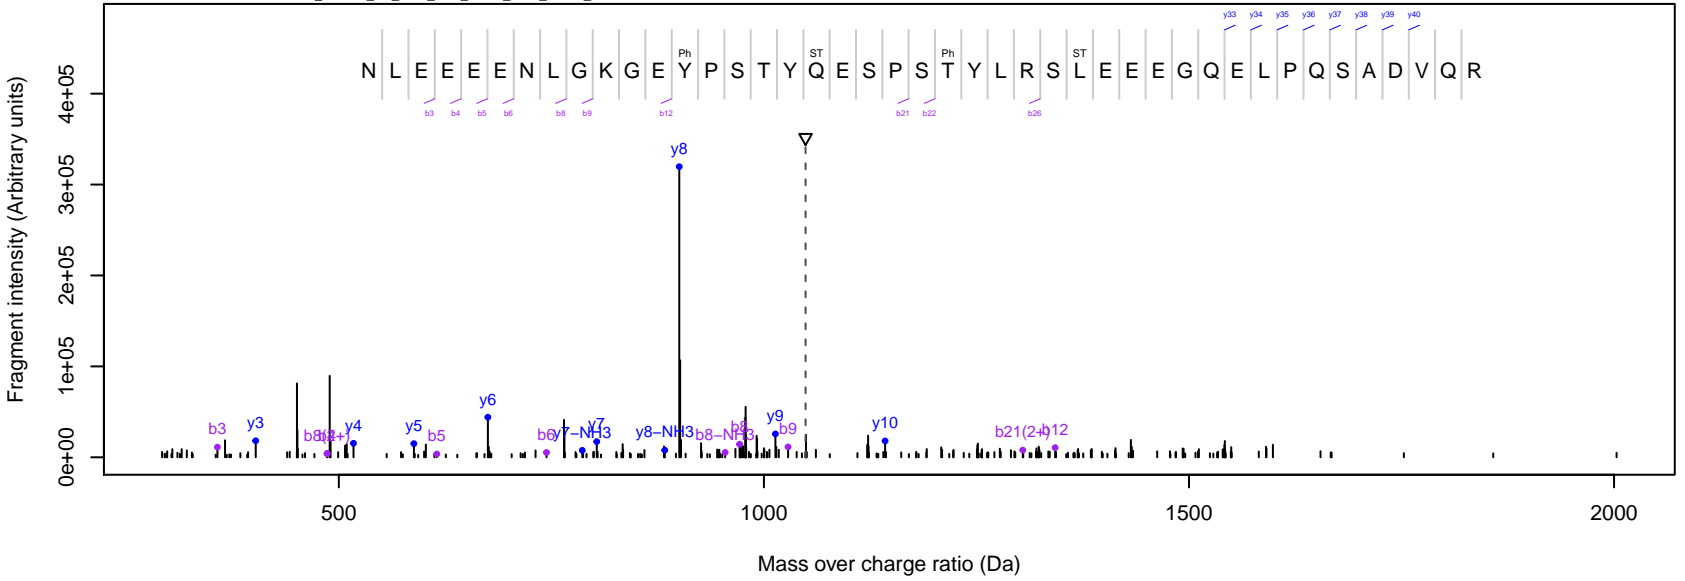

KVAS(Phospho (STY))GVLSPPPAAPPPSSSVPEAGGPIIK-3+

Source : QE3\_201126\_FR\_TiOx\_hum\_tissue\_Urea\_RNAB\_H Scan : 25494

Andromeda score : 47.761

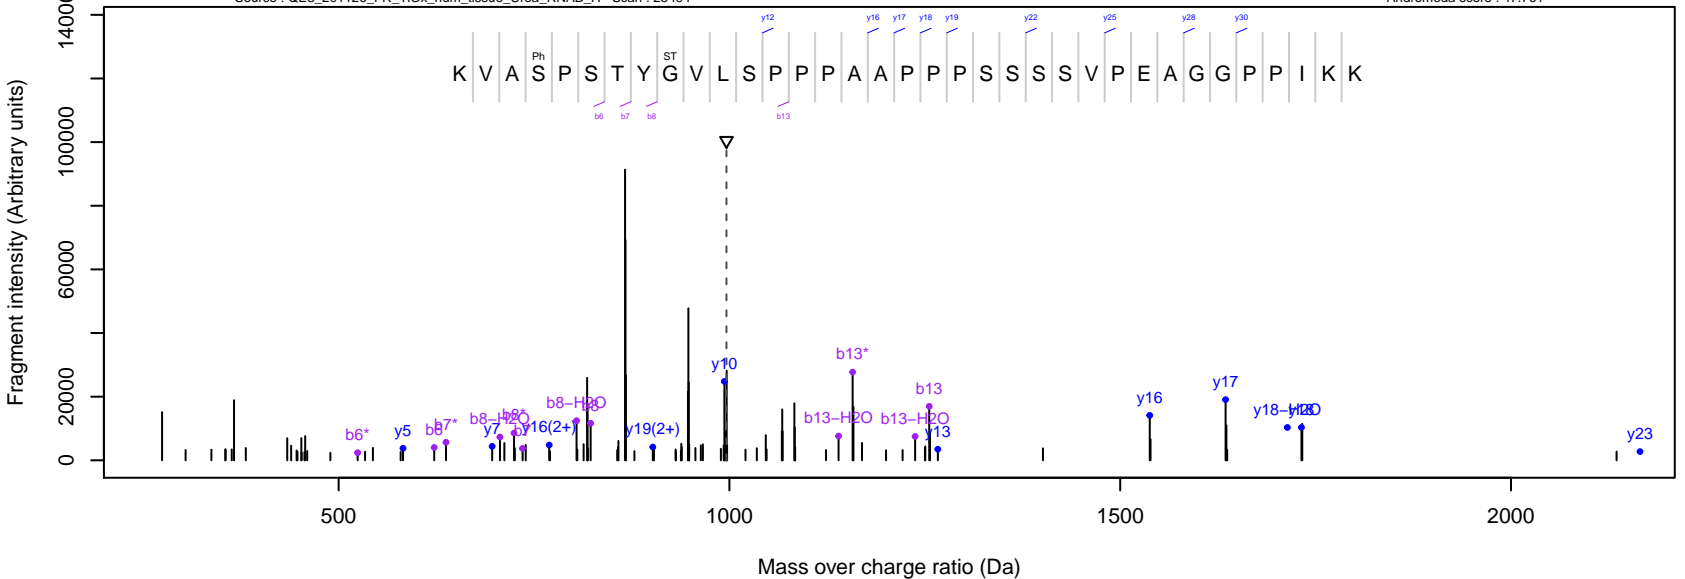

GHT(Phospho (STY))KLAFSPFGHLSEGFHSR-4+

Source : QE3\_201126\_FR\_TIOx\_hum\_tissue\_Urea\_RNAB\_H Scan : 33179

Andromeda score : 47.757

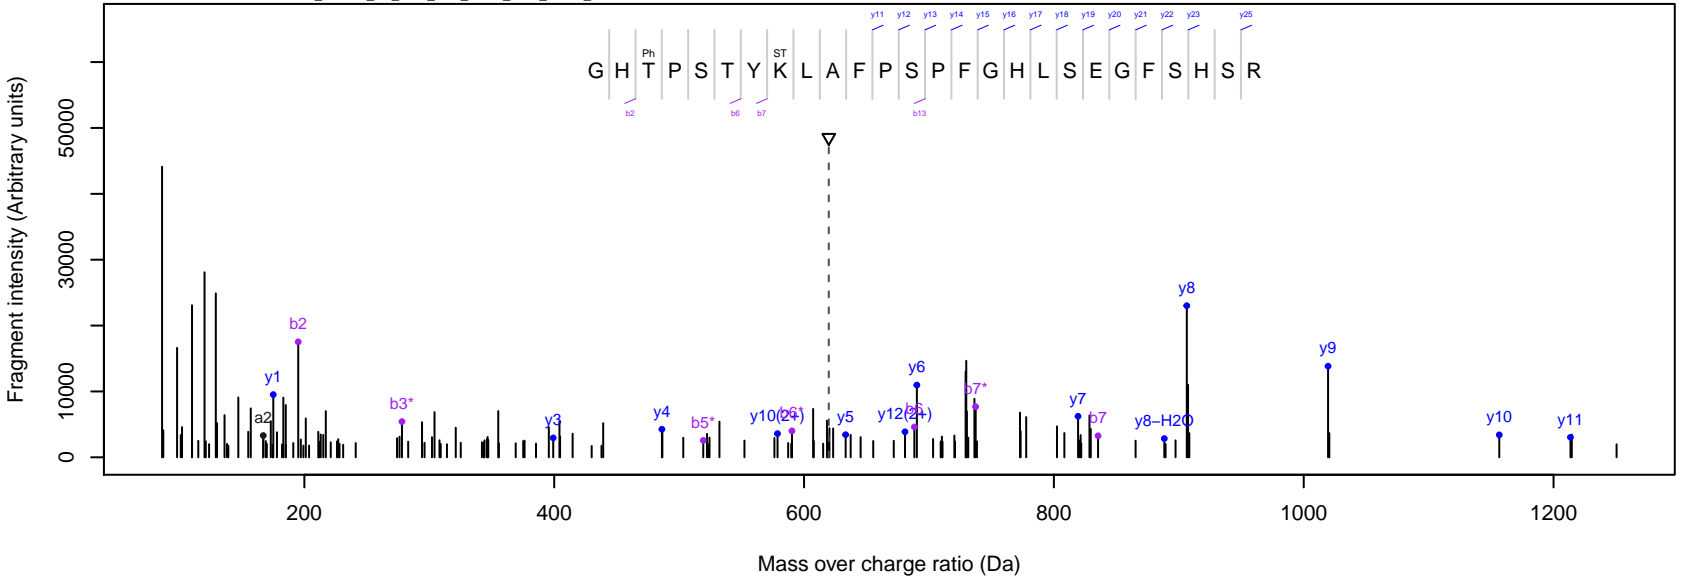

CTGTAANS(Phospho (STY))RDTIFQK-3+

Source : QE3\_201126\_FR\_TIOx\_hum\_tissue\_Urea\_RNAB\_H Scan : 11698

Andromeda score : 47.754

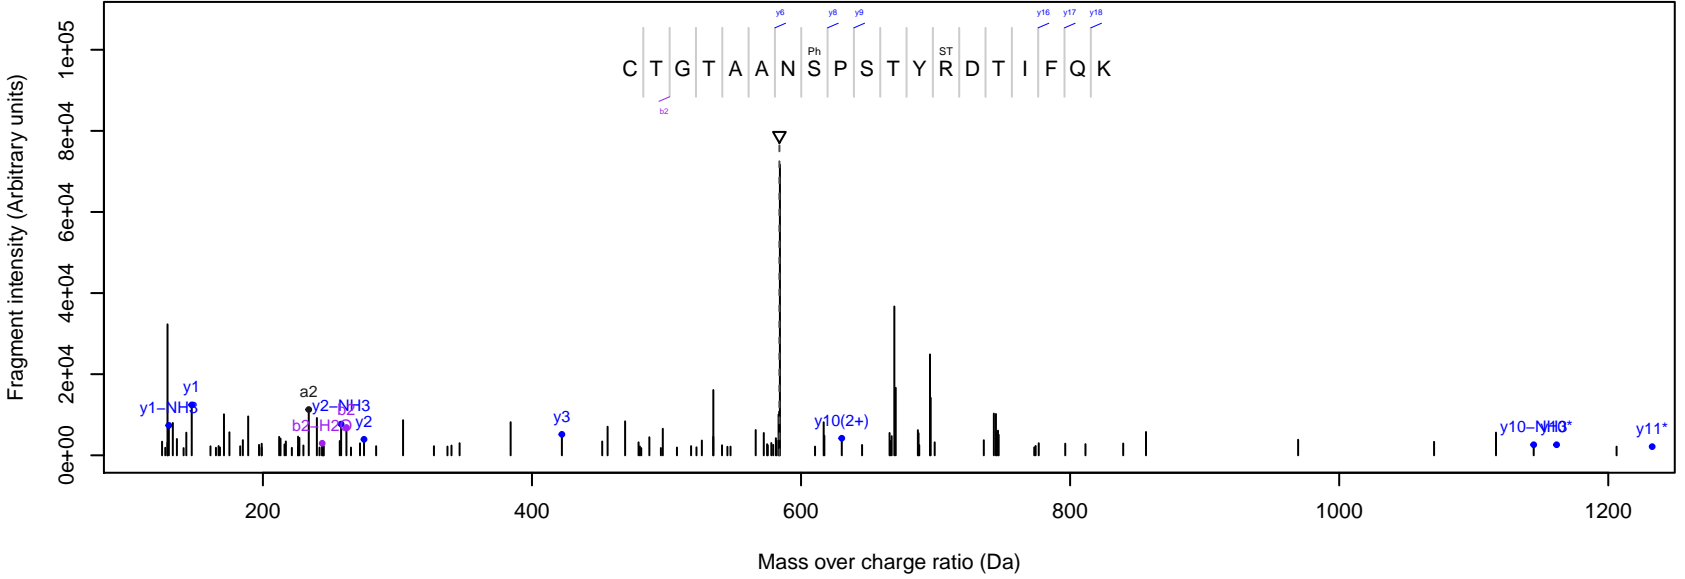

RPRDS(Phospho (STY))PTLSNSGIR-3+

Source : QE3\_201126\_FR\_TIOx\_hum\_tissue\_Urea\_RNAB\_N Scan : 8843

Andromeda score : 47.754

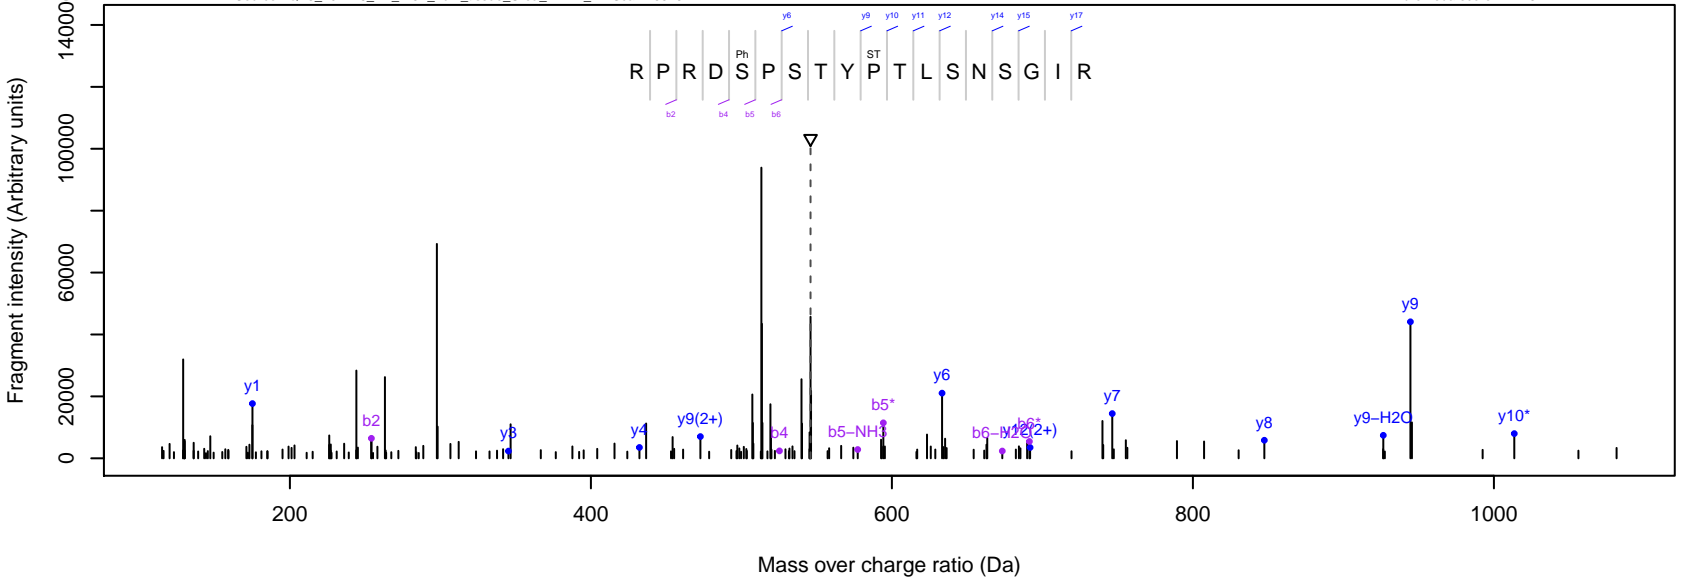

**IKTEPS(Phospho (STY))SPLSDPSDIIR-3+**

Source : QE3\_201126\_FR\_TiOx\_hum\_tissue\_Urea\_RNAB\_H Scan : 29721

Andromeda score : 47.752

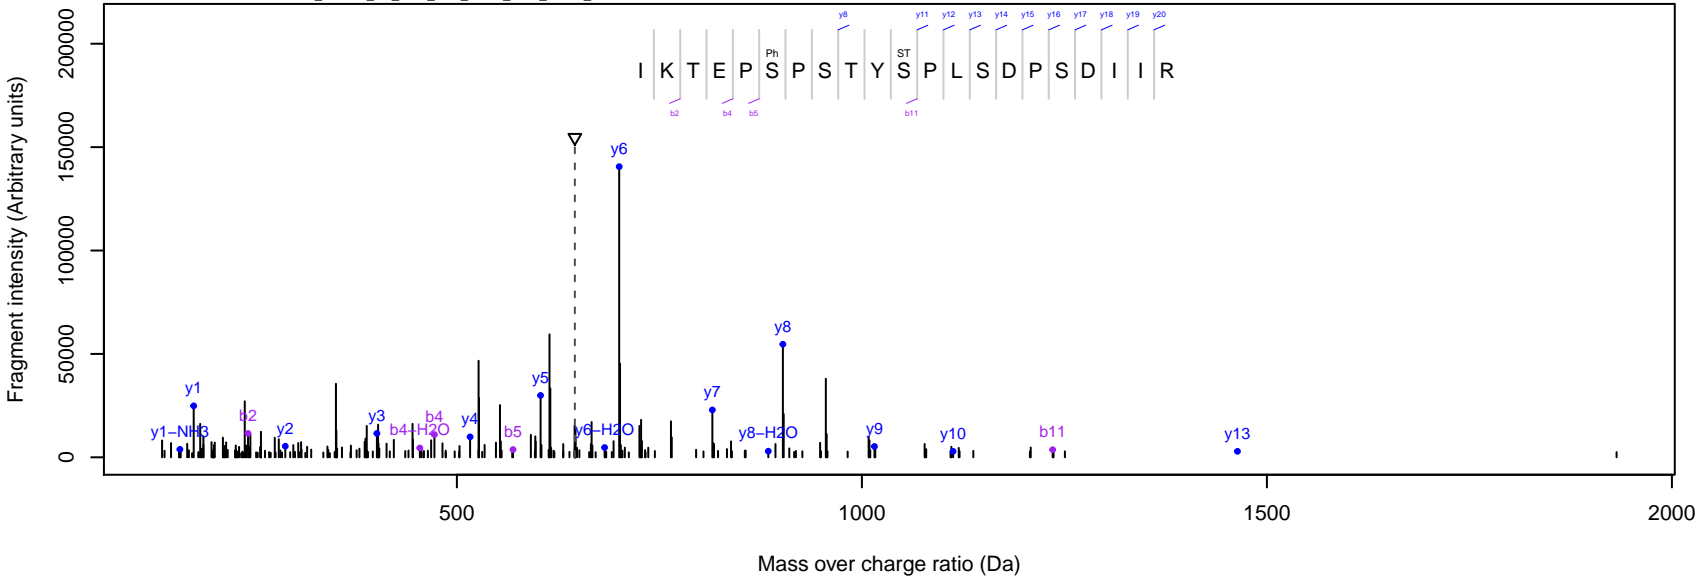

**QKS(Phospho (STY))DHGAYSQSPAIKK-3+**

Source : QE3\_201126\_FR\_TiOx\_hum\_tissue\_Urea\_RNAB\_H Scan : 4872

Andromeda score : 47.752

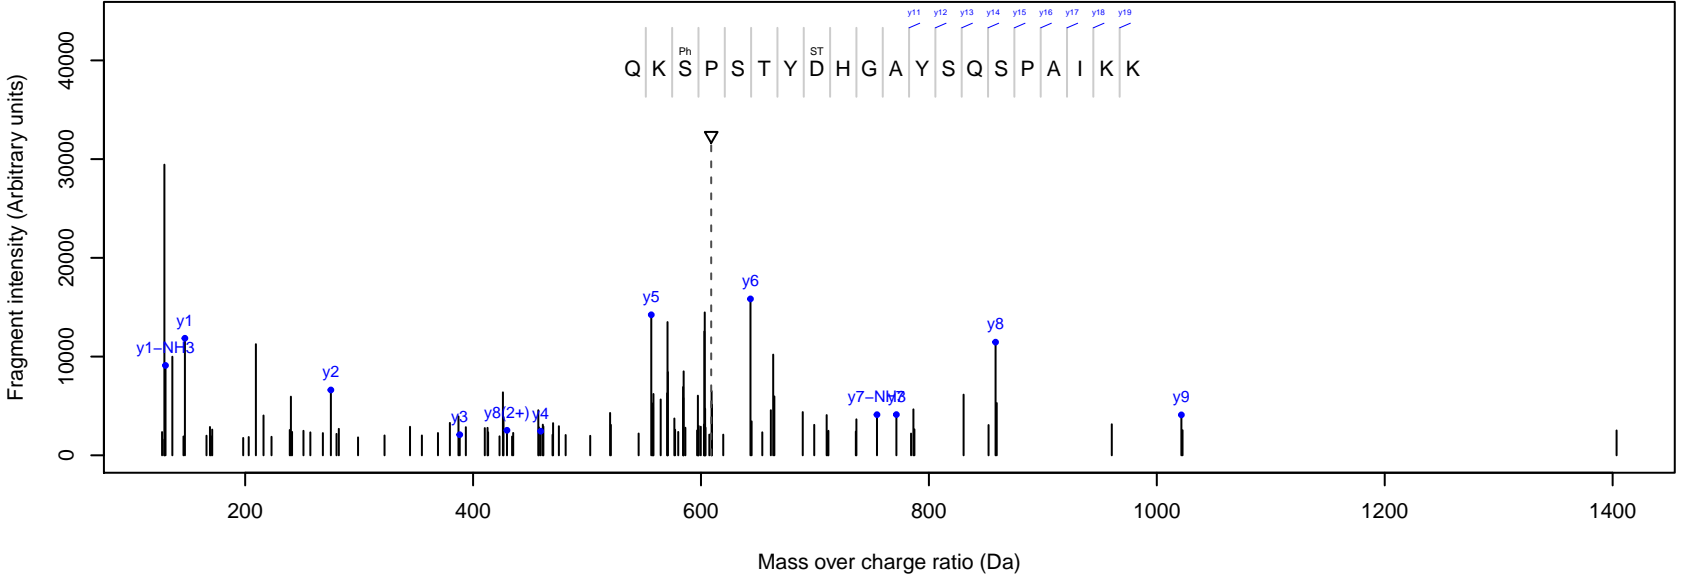

**TYFPHFDS(Phospho (STY))HGSQVVK-3+**

Source : QE3\_201126\_FR\_TiOx\_hum\_tissue\_Urea\_RNAB\_H Scan : 31161

Andromeda score : 47.75

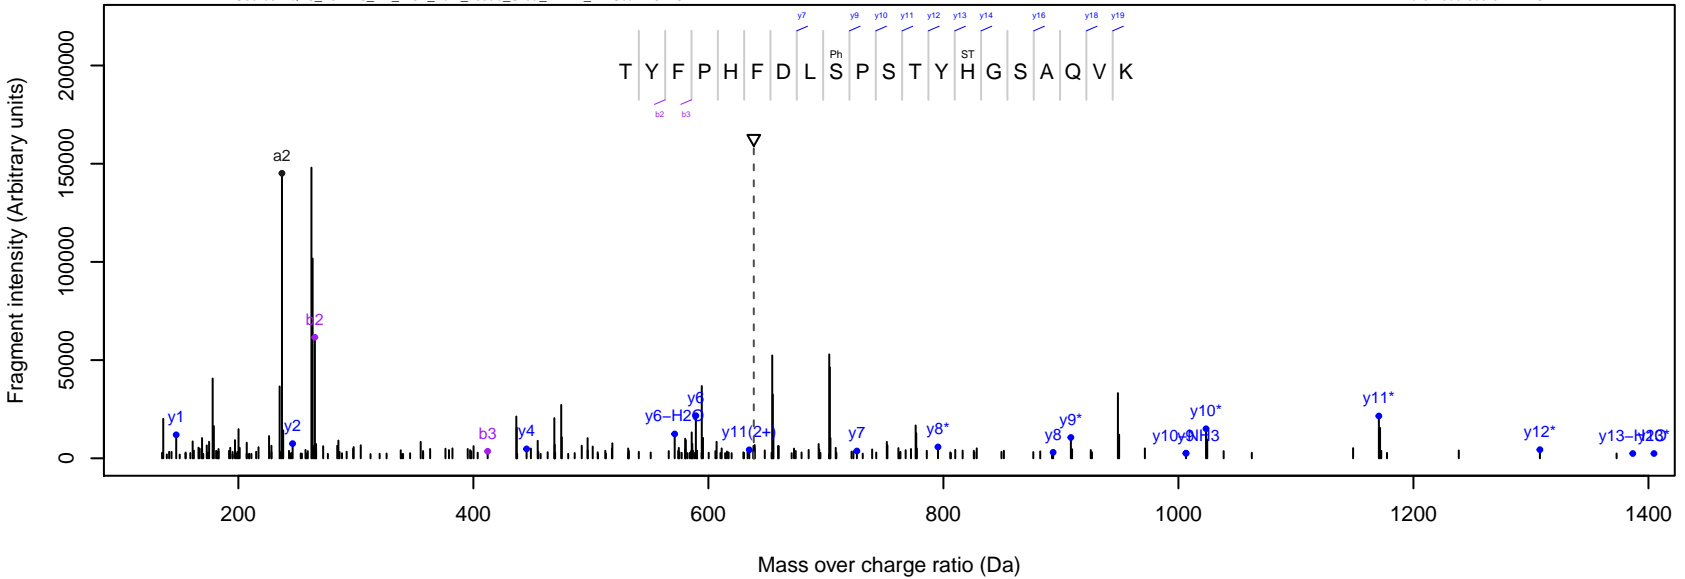

KPGPPLSPEIRS(Phospho (STY))PAGS(Phospho (STY))PELR-3+

Source : QE3\_201126\_FR\_TiOx\_hum\_tissue\_Urea\_RNAB\_H Scan : 24838

Andromeda score : 47.745

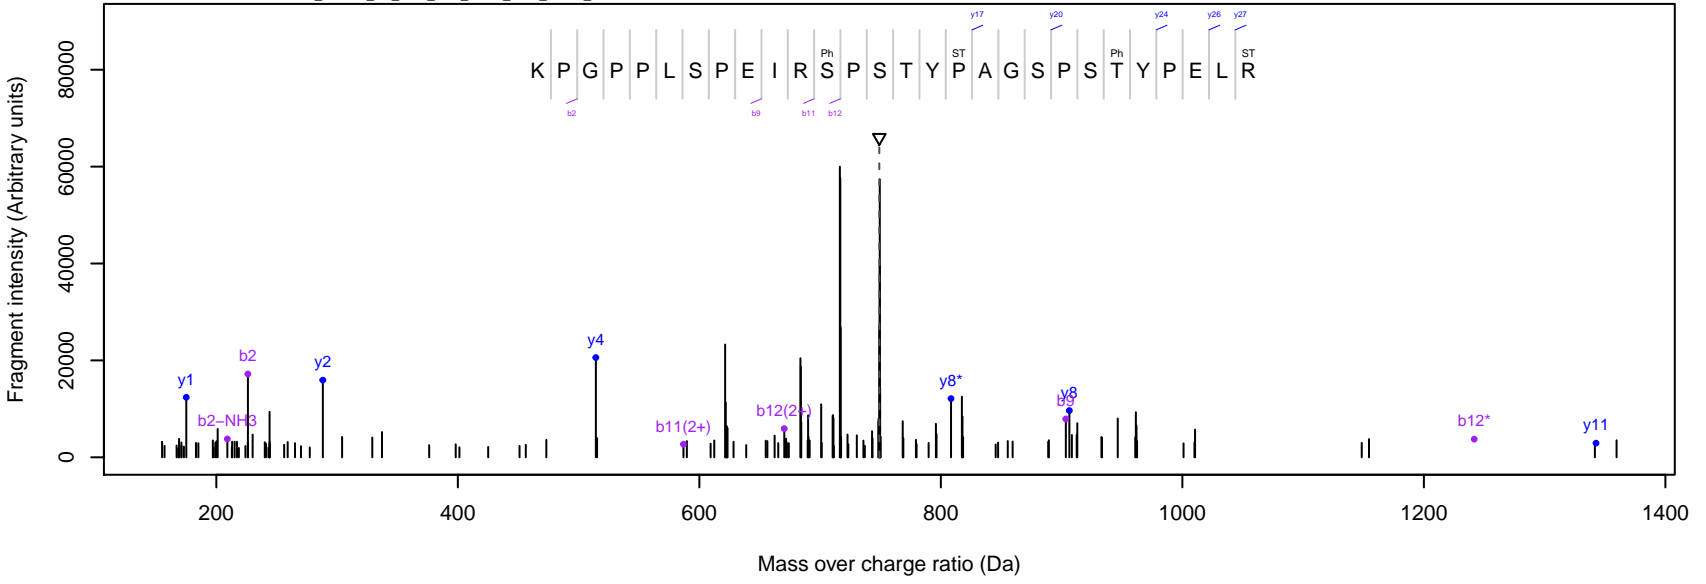

SASSSSSSSSSDS(Phospho (STY))DVSVKKPPR-3+

Source : QE3\_201126\_FR\_TiOx\_hum\_tissue\_Urea\_RNAB\_B Scan : 4925

Andromeda score : 47.745

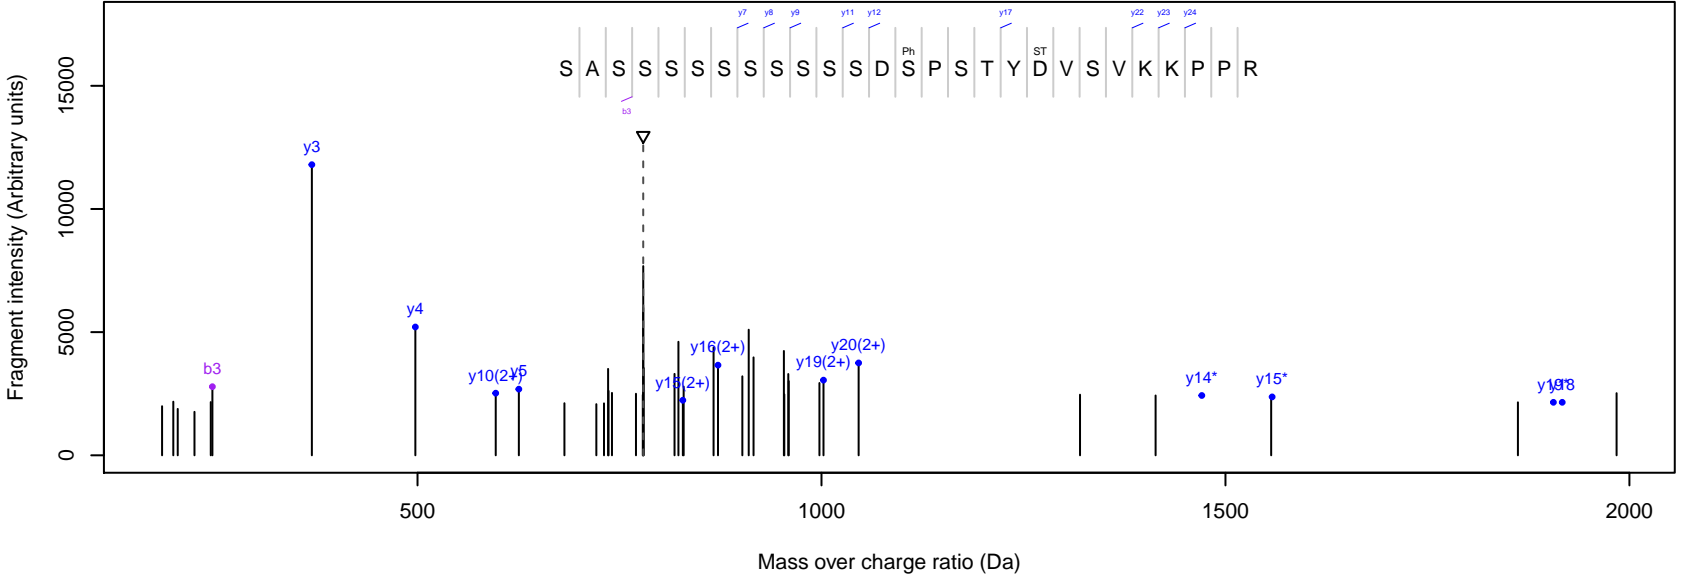

QM(Oxidation (M))LATTSPALMOMNGSGQSPSTYPSVLK-3+

Source : QE3\_201126\_FR\_TiOx\_hum\_tissue\_Urea\_RNAB\_H Scan : 28957

Andromeda score : 47.73

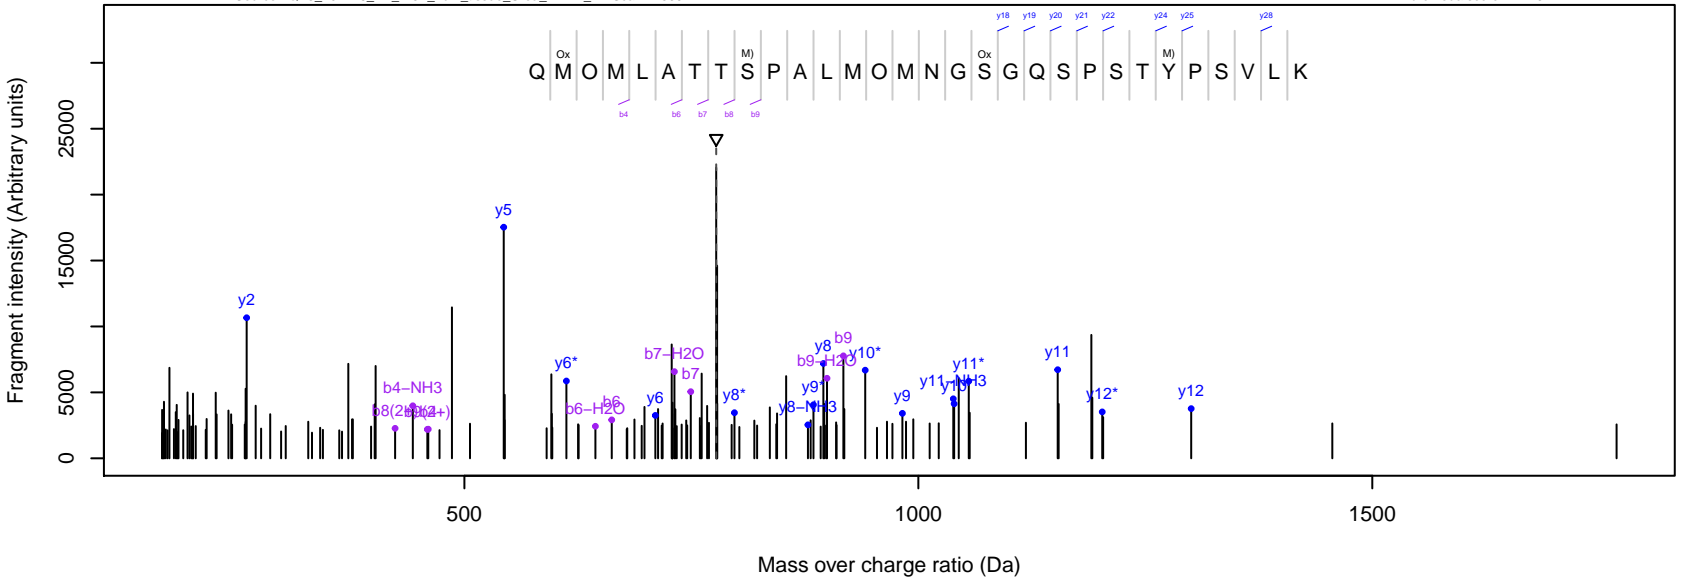

DLQEQDADAGS(Phospho (STY))ERGLSPSTYGEEDDEPDCNCNDR-3+

Source : QE3\_201126\_FR\_TIOx\_hum\_tissue\_Urea\_RNAB\_H Scan : 24675

Andromeda score : 47.719

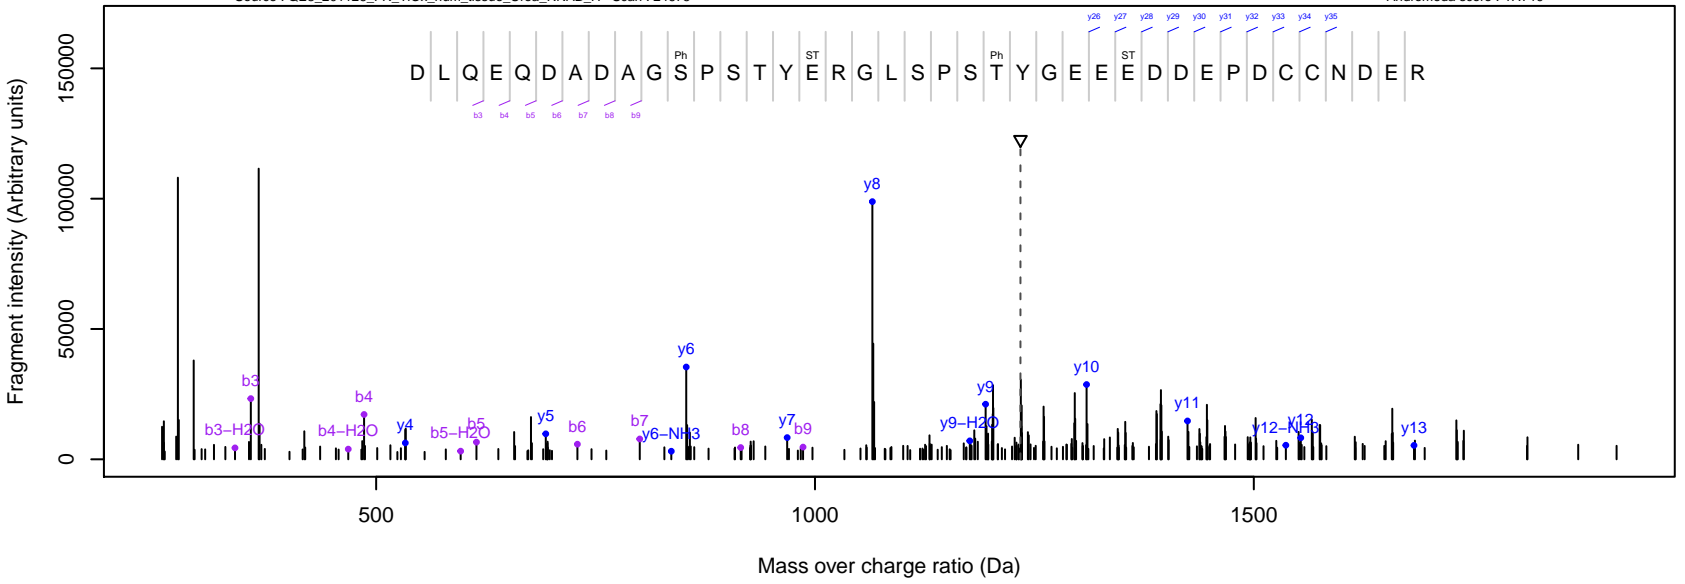

ALVELNGVS(Phospho (STY))LIPK-2+

Source : QE3\_201126\_FR\_TIOx\_hum\_tissue\_Urea\_RNAB\_H Scan : 62853

Andromeda score : 47.706

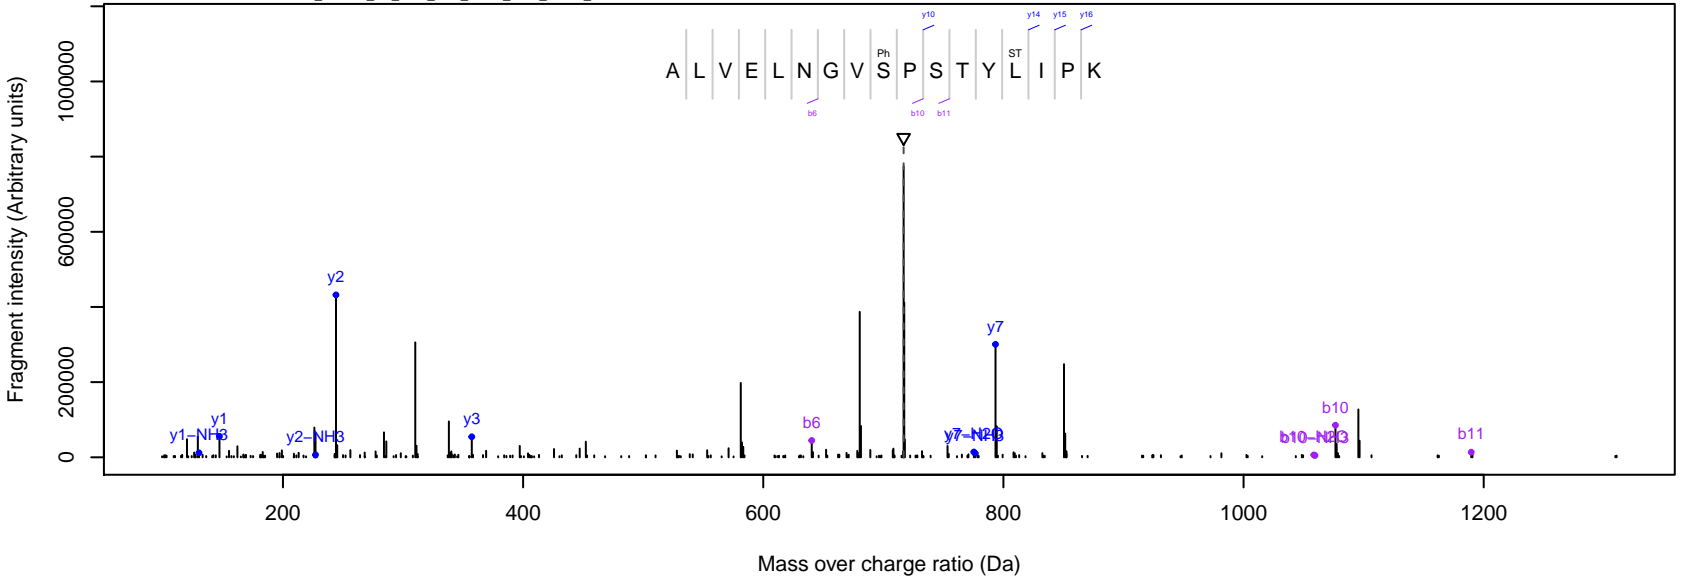

TGRPSS(Phospho (STY))HGGGGPAAAEVVDAAAGPDVGAAGDAPAPNK-4+

Source : QE3\_201126\_FR\_TIOx\_hum\_tissue\_Urea\_RNAB\_H Scan : 22743

Andromeda score : 47.699

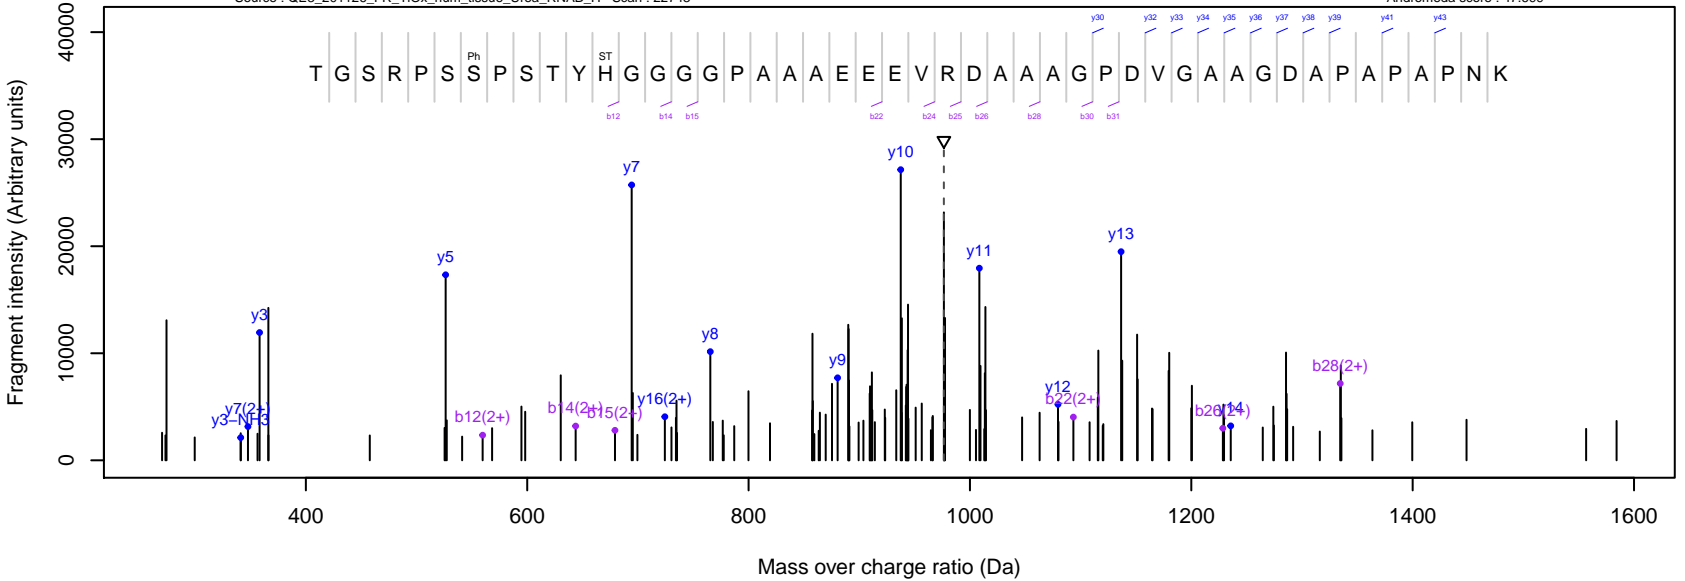

SEGALQVLDGEVGS(Phospho (STY))LDGTPQTR-3+

Source : QE3\_201126\_FR\_TIOx\_hum\_tissue\_Urea\_RNAB\_H Scan : 49382

Andromeda score : 47.616

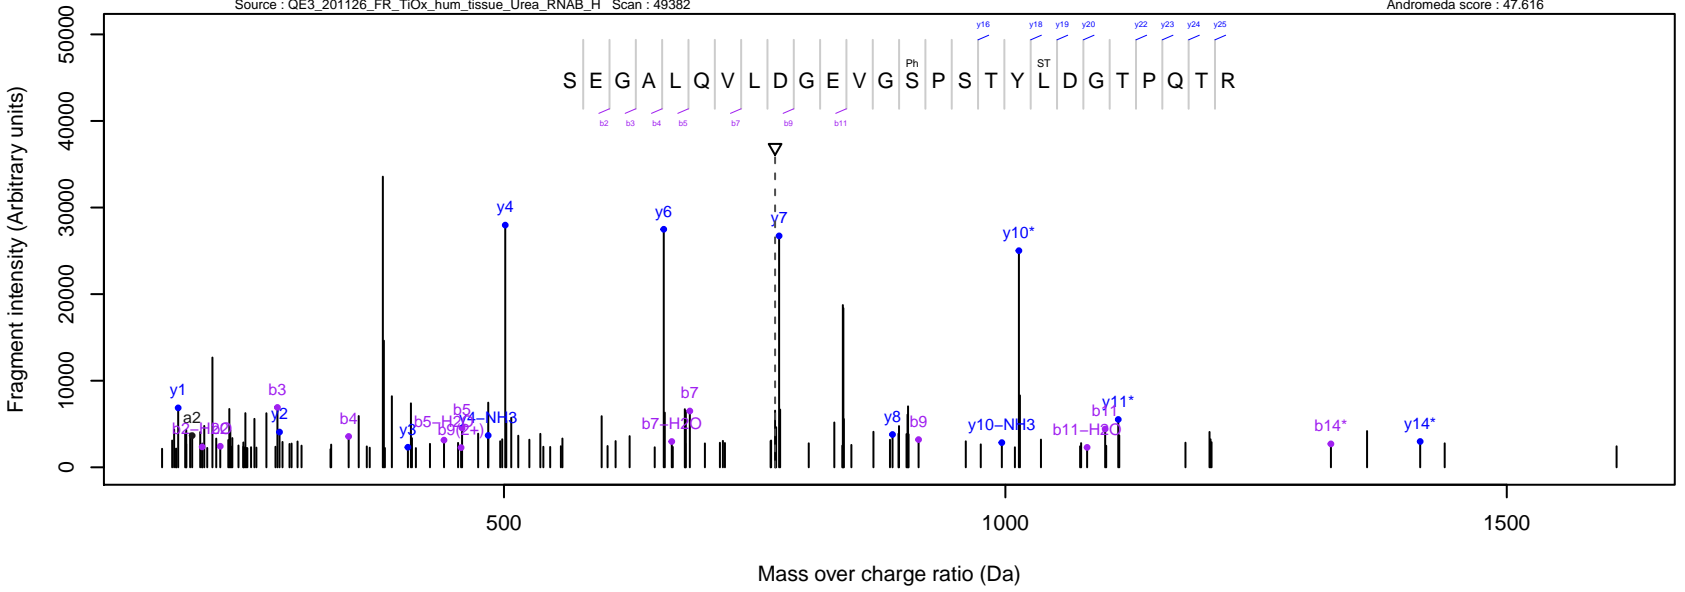

S(Phospho (STY))IDSSFR-2+

Source : QE3\_201126\_FR\_TIOx\_hum\_tissue\_Urea\_RNAB\_N Scan : 17654

Andromeda score : 47.603

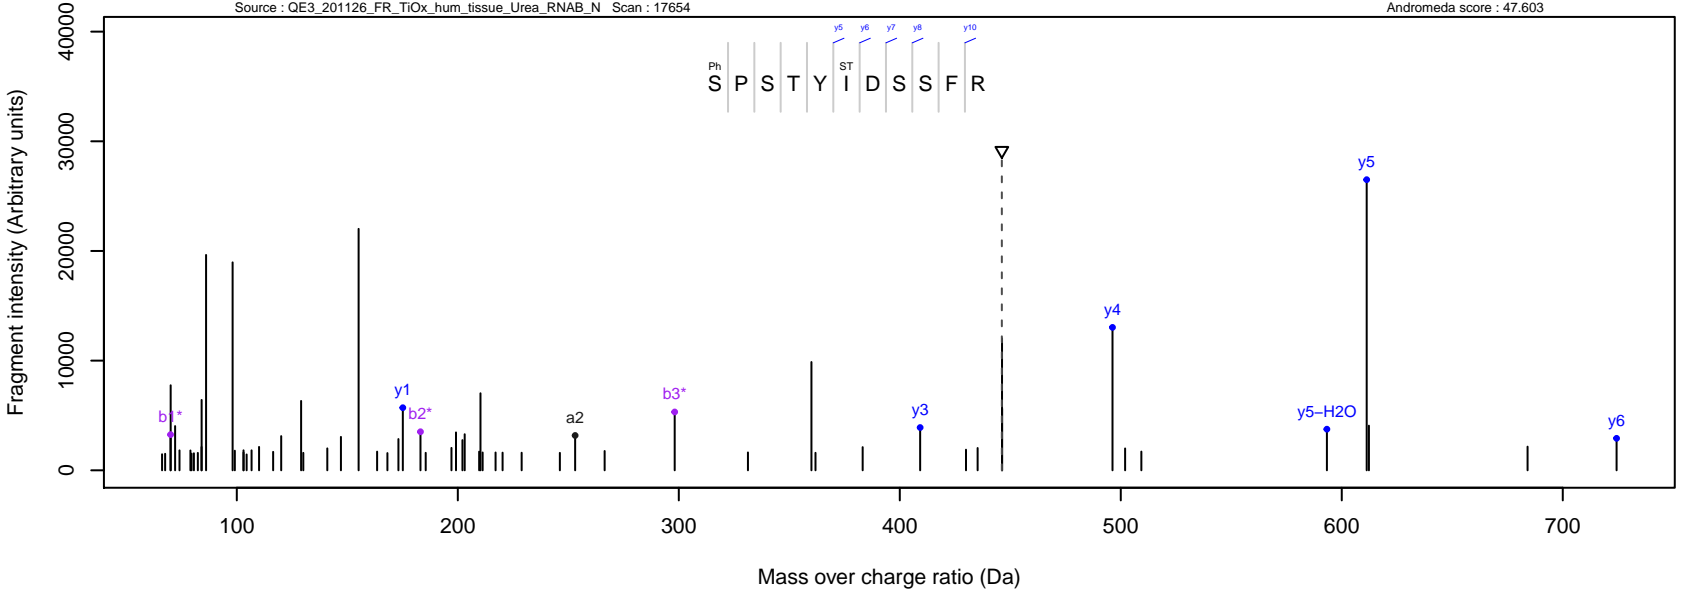

FS(Phospho (STY))PVLGR-2+

Source : QE3\_201126\_FR\_TIOx\_hum\_tissue\_Urea\_RNAB\_H Scan : 24383

Andromeda score : 47.574

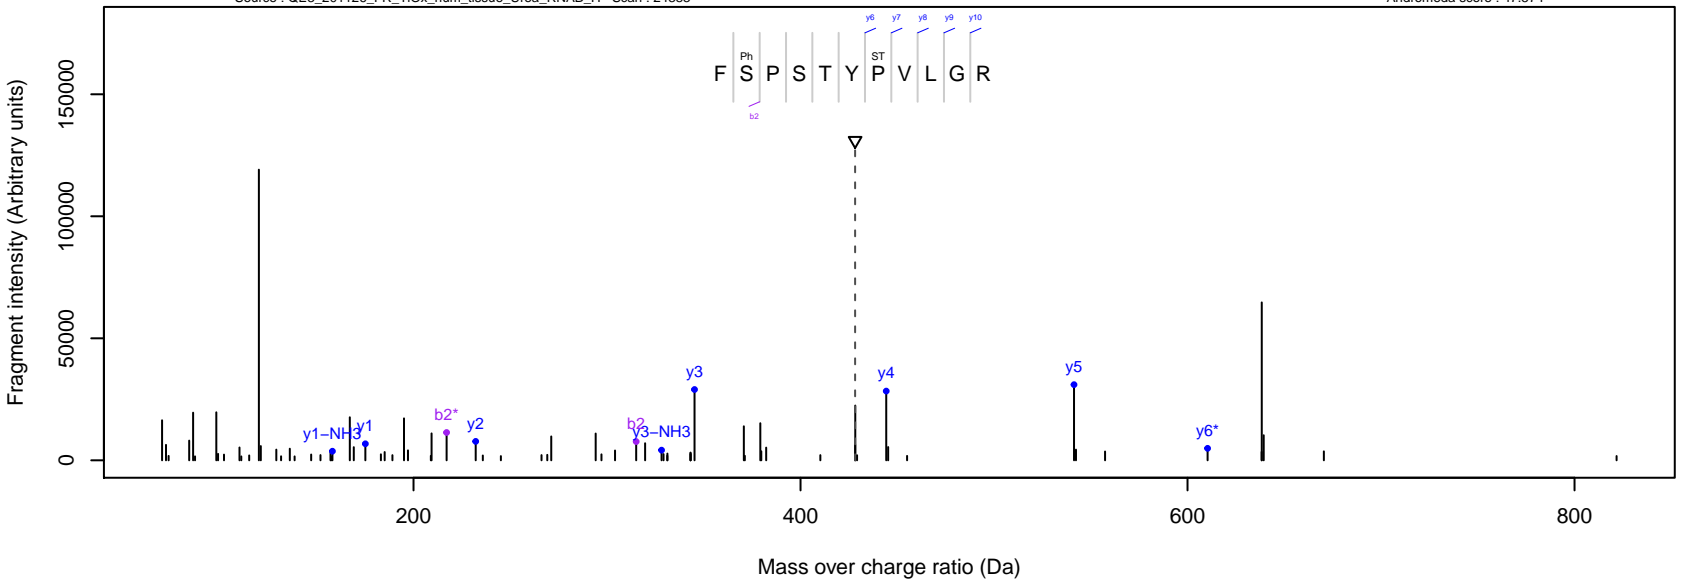

EGDPVSLSTPLETEFGS(Phospho (STY))PSELS(Phospho (STY))PR-3+

Source : QE3\_201126\_FR\_TIOx\_hum\_tissue\_Urea\_RNAB\_N Scan : 60601

Andromeda score : 47.537

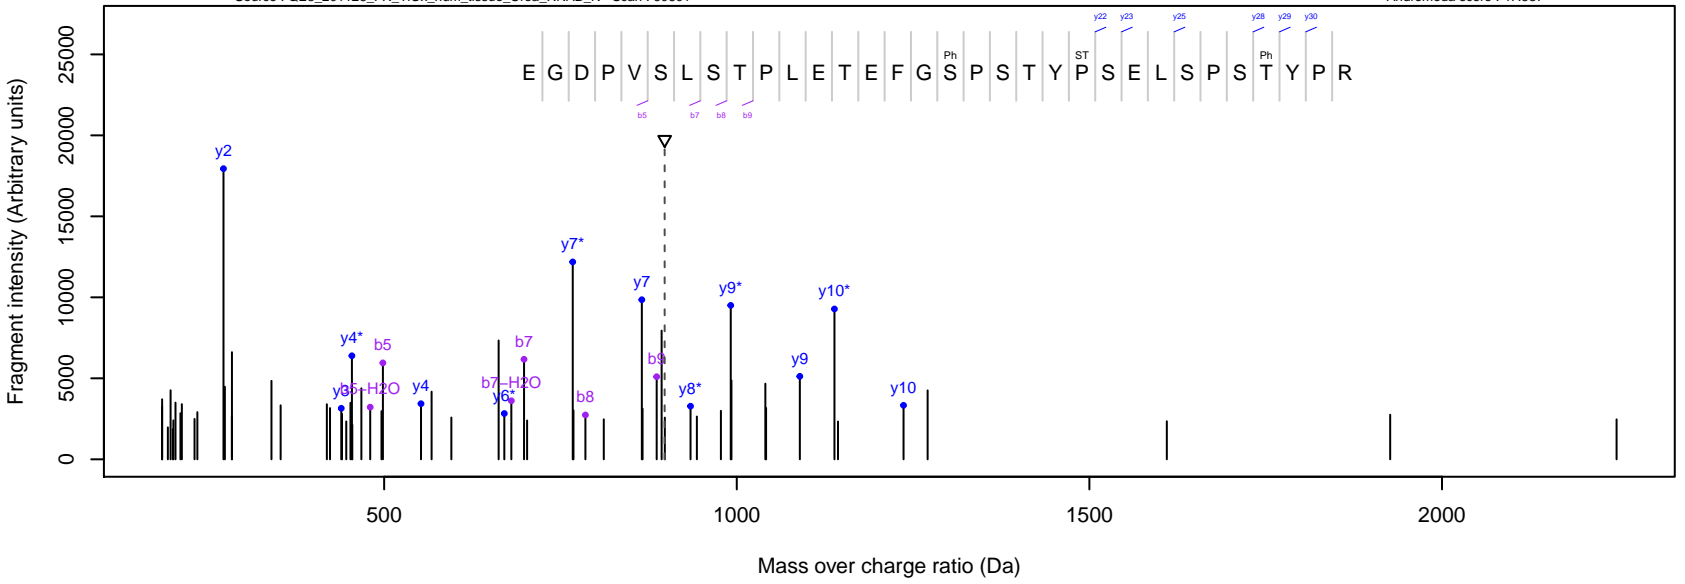

GAPANVSPSTYSDDLTR-2+

Source : QE3\_201126\_FR\_TIOx\_hum\_tissue\_Urea\_RNAB\_N Scan : 18053

Andromeda score : 47.532

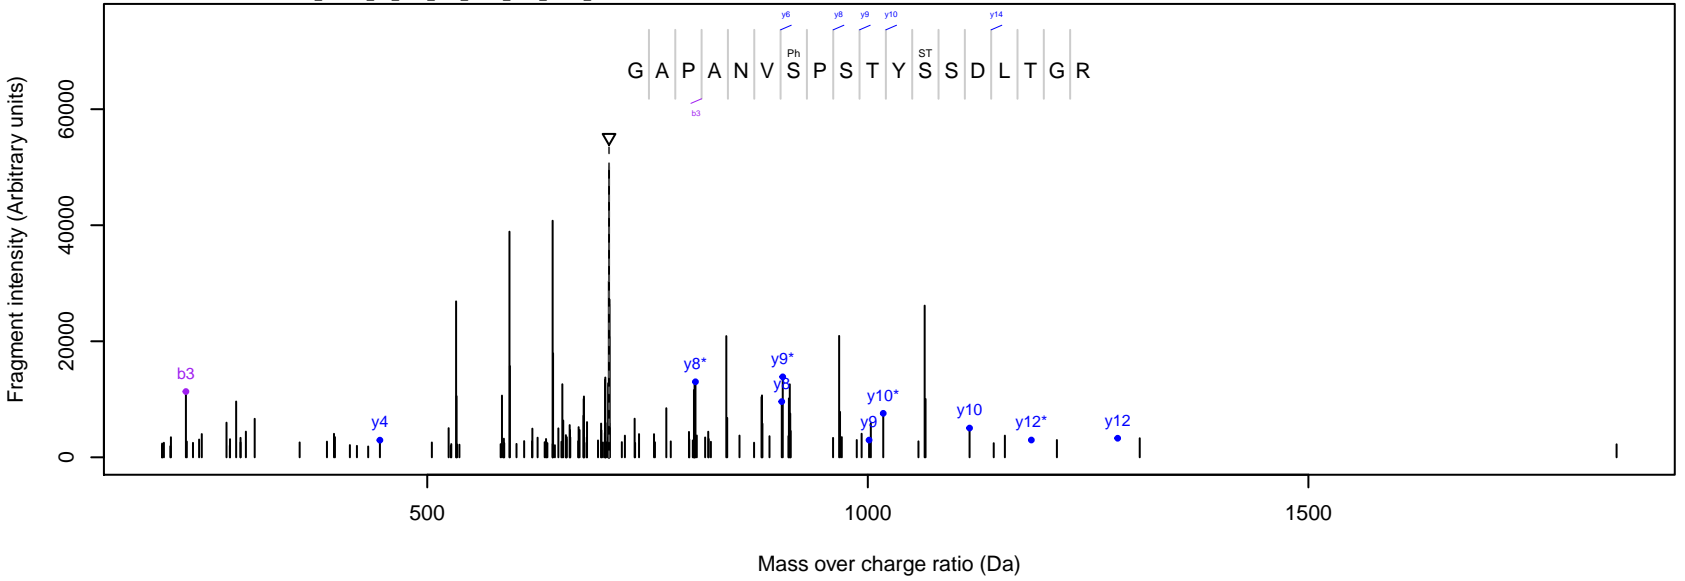

S(Phospho (STY))APPS(Phospho (STY))PPPPGTR-2+

Source : QE3\_201126\_FR\_TIOx\_hum\_tissue\_Urea\_RNAB\_B Scan : 14278

Andromeda score : 47.532

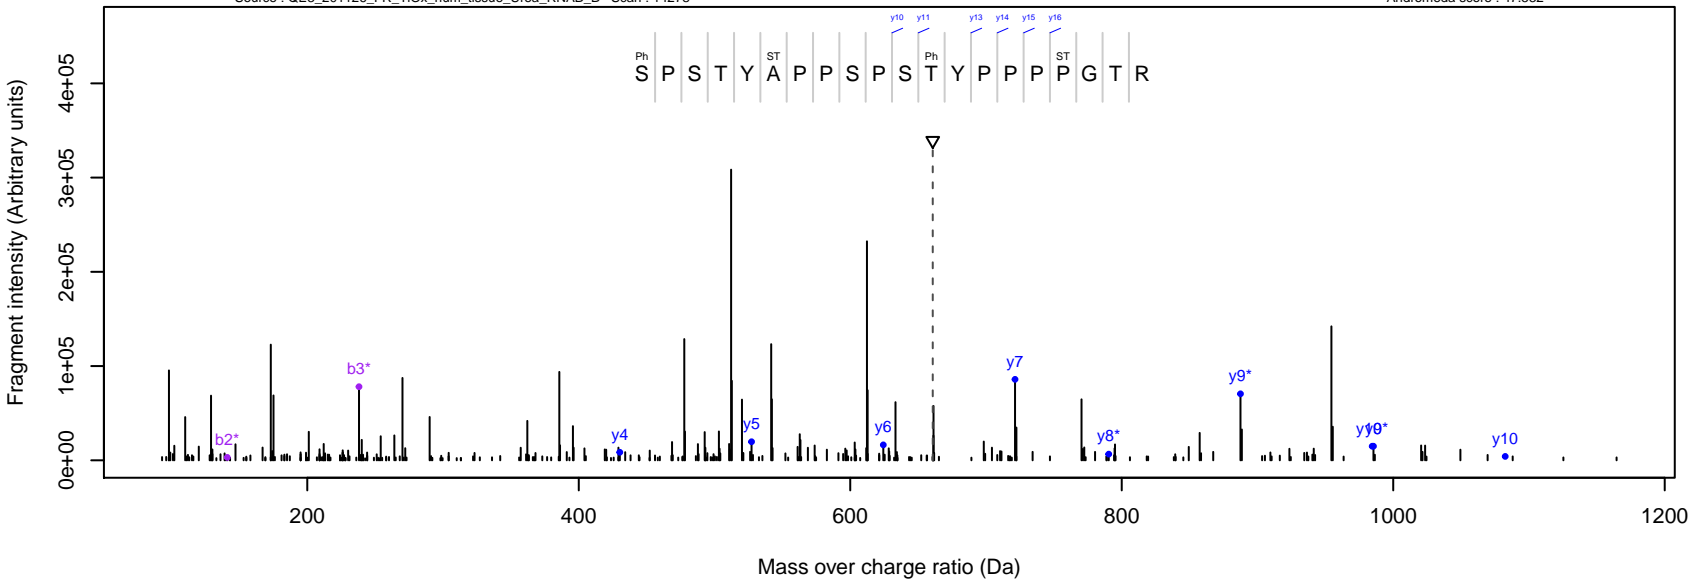



SLHS(Phospho (STY))AHSLASR-3+

Source : QE3\_201126\_FR\_TiOx\_hum\_tissue\_Urea\_RNAB\_H Scan : 5747

Andromeda score : 47.532

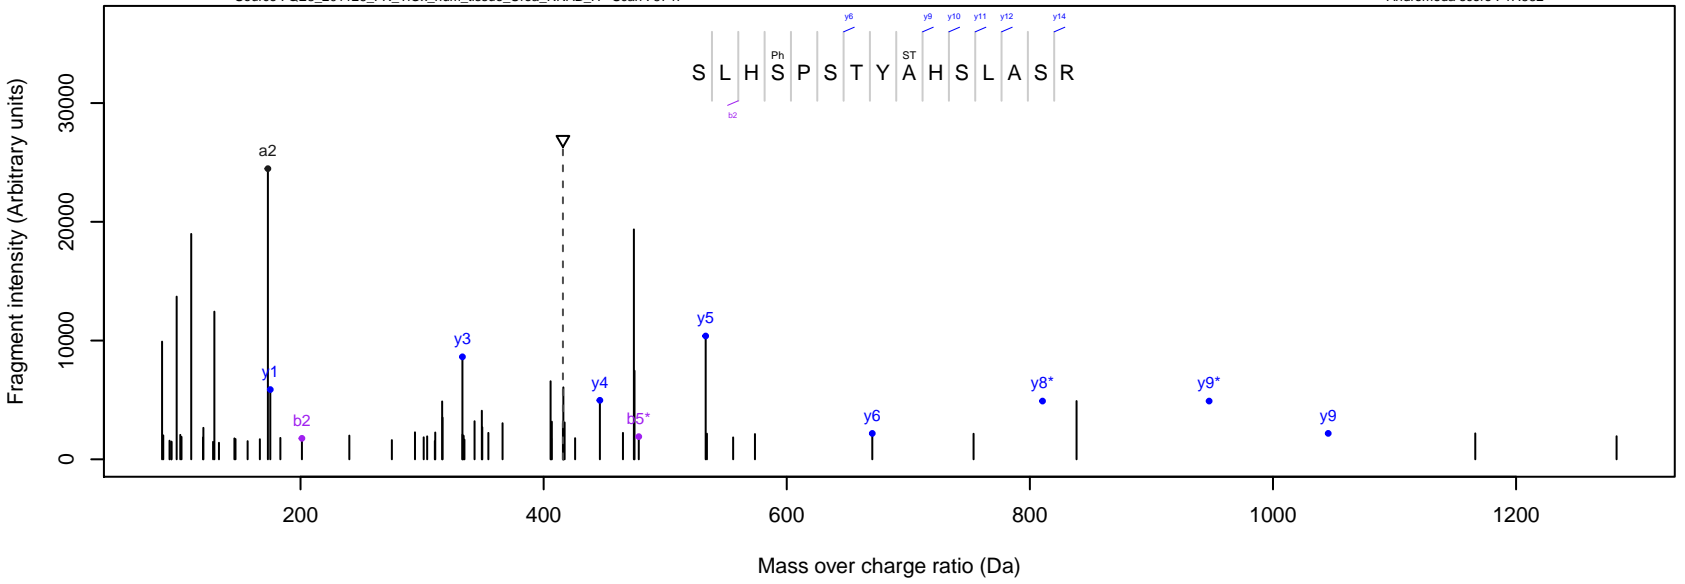

IAAPELHKGDS(Phospho (STY))DS(Phospho (STY))EEDEPTKK-3+

Source : QE3\_201126\_FR\_TiOx\_hum\_tissue\_Urea\_RNAB\_N Scan : 11094

Andromeda score : 47.507

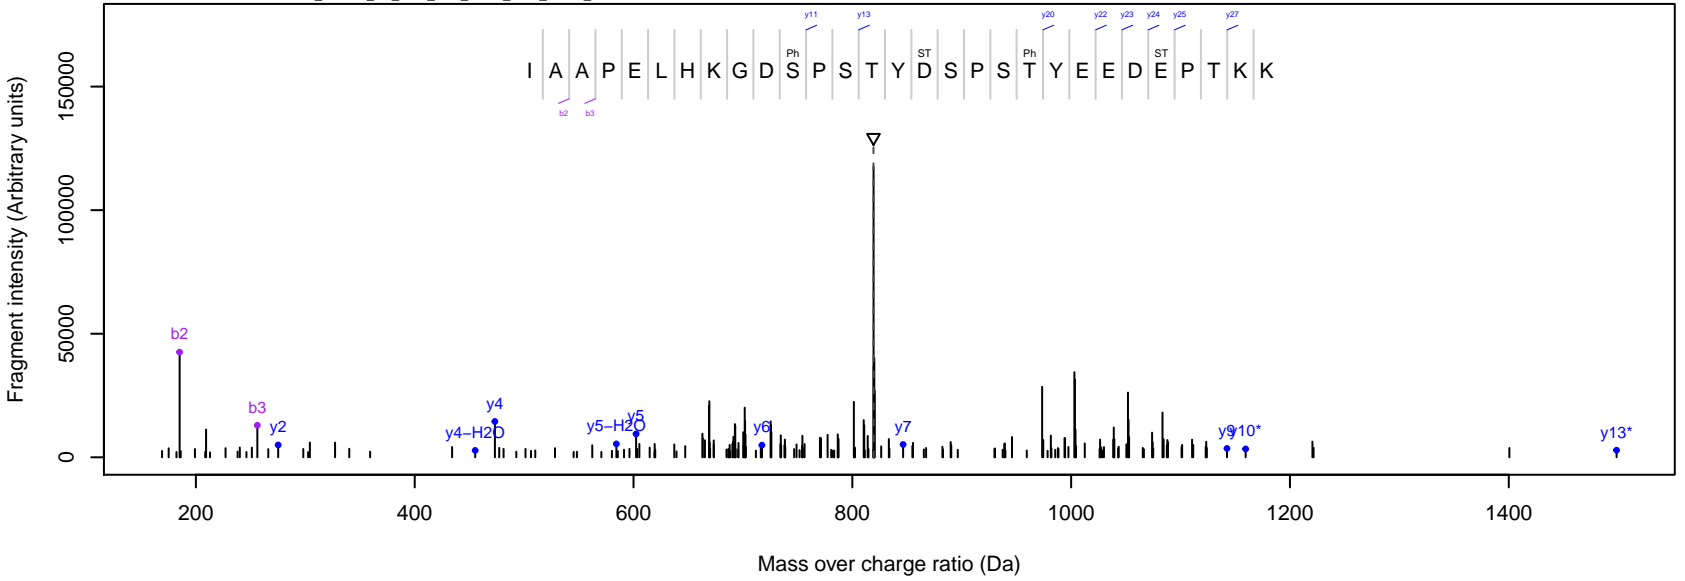

KGRS(Phospho (STY))PDELPSAGGDGGK-3+

Source : QE3\_201126\_FR\_TiOx\_hum\_tissue\_Urea\_RNAB\_N Scan : 6631

Andromeda score : 47.472

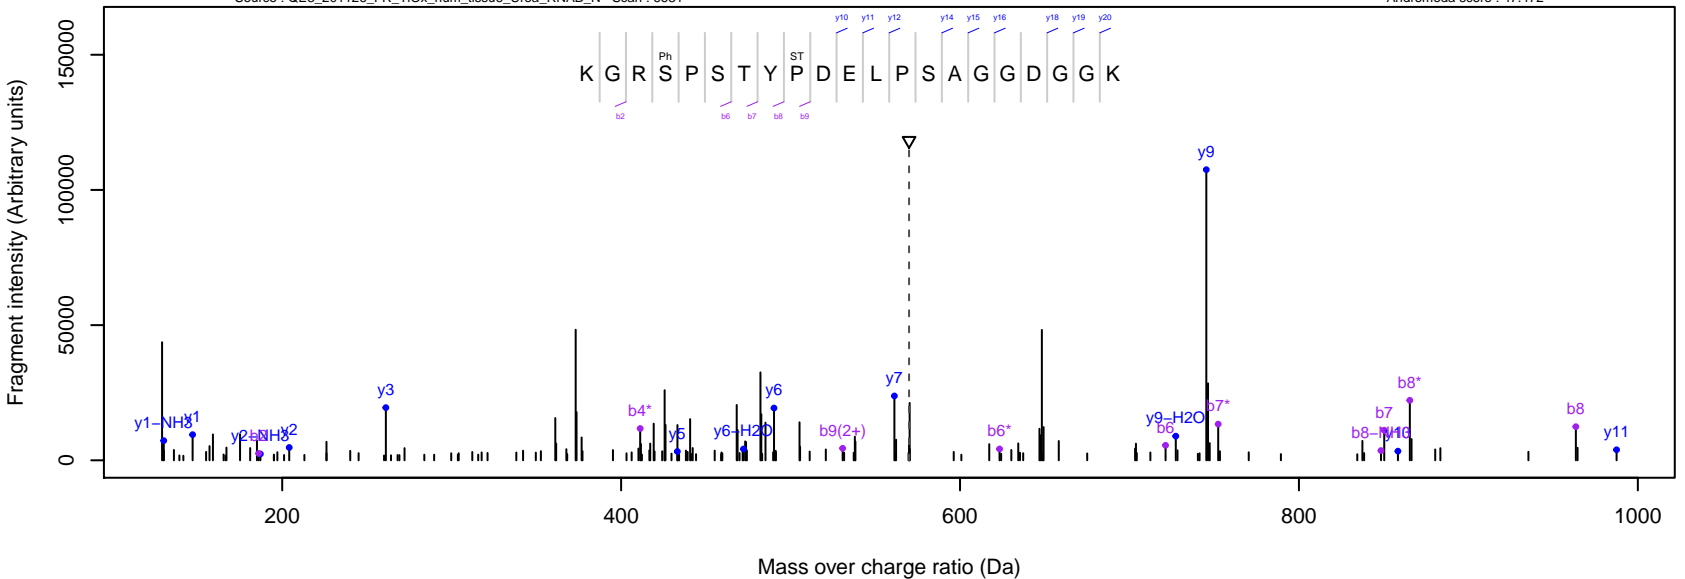

DARPS(Phospho (STY))SPADVANSNSHGYPNDTVSLASSIATQPELITVHIVK-4+

Source : QE3\_201126\_FR\_TiOx\_hum\_tissue\_Urea\_RNAB\_N Scan : 49406

Andromeda score : 47.457

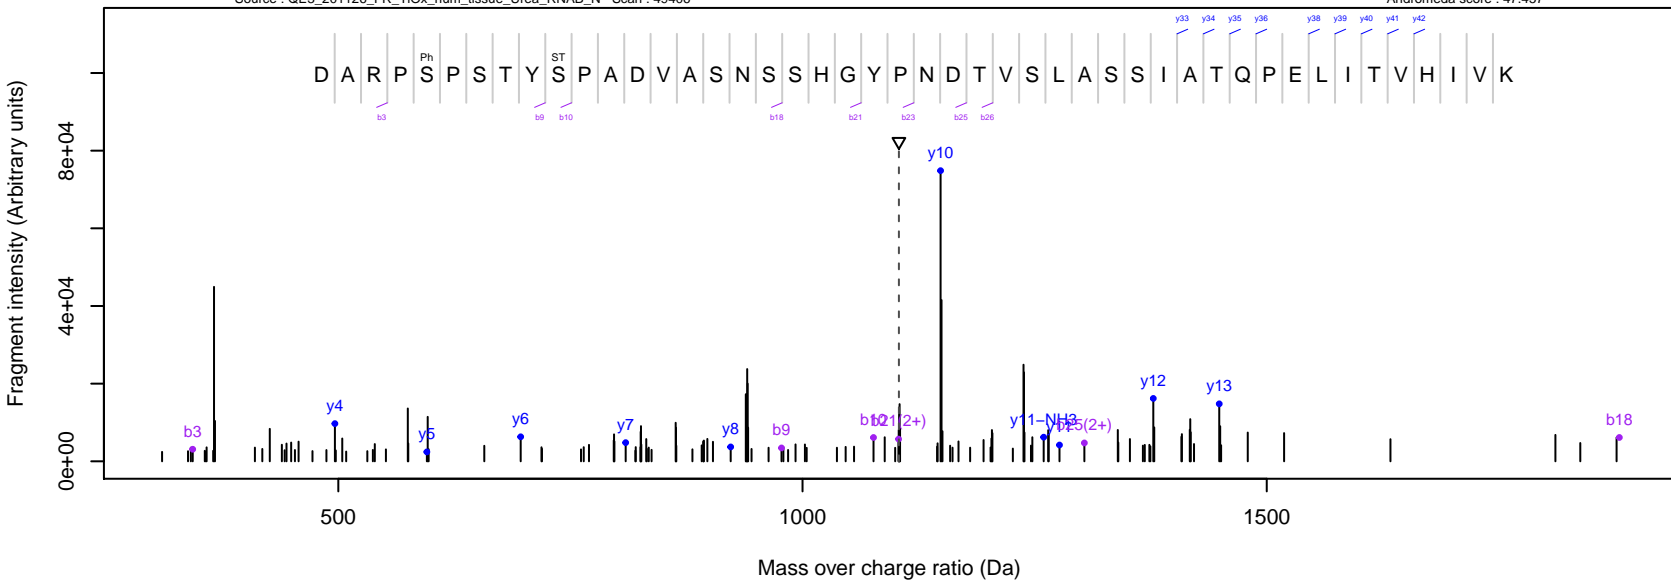

LSEEGNGPPPTVAPSS(Phospho (STY))PSVVPVAR-3+

Source : QE3\_201126\_FR\_TiOx\_hum\_tissue\_Urea\_RNAB\_H Scan : 32759

Andromeda score : 47.429

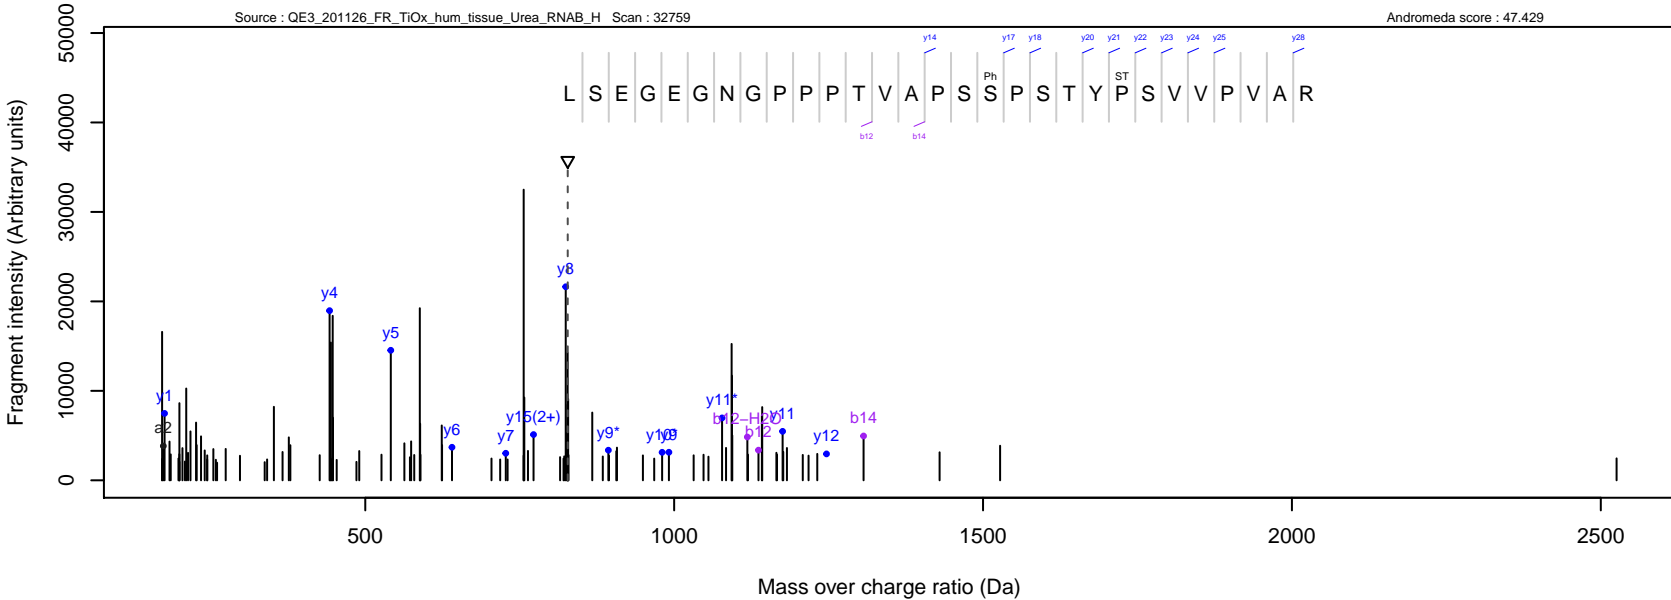

RKS(Phospho (STY))FTSLYK-3+

Source : QE3\_201126\_FR\_TiOx\_hum\_tissue\_Urea\_RNAB\_H Scan : 11195

Andromeda score : 47.429

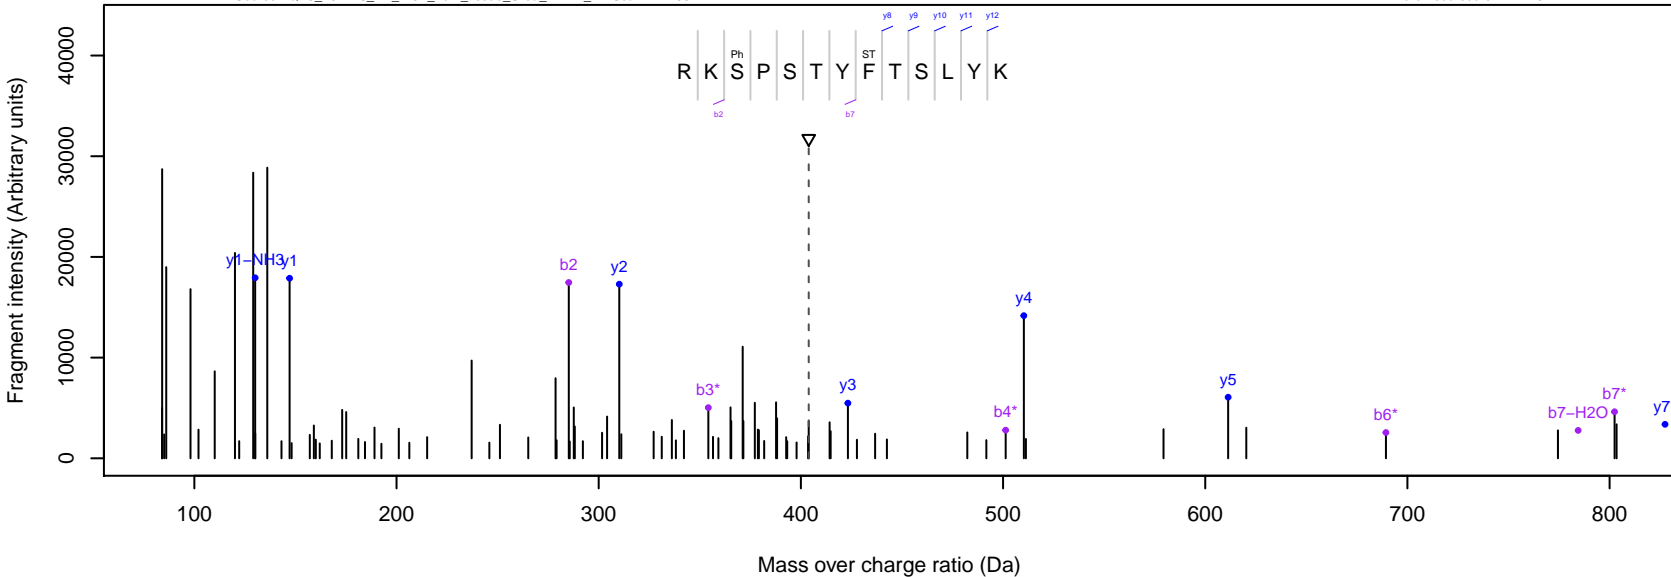

S(Phospho (STY))T(Phospho (STY))S(Phospho (STY))FRGGM(Oxidation (M))GSGGLATGIAGGLAGM(Oxidation (M))GGIQNEK-3+

Source : QE3\_201126\_FR\_TiOx\_hum\_tissue\_Urea\_RNAB\_N Scan : 50284

Andromeda score : 47.429

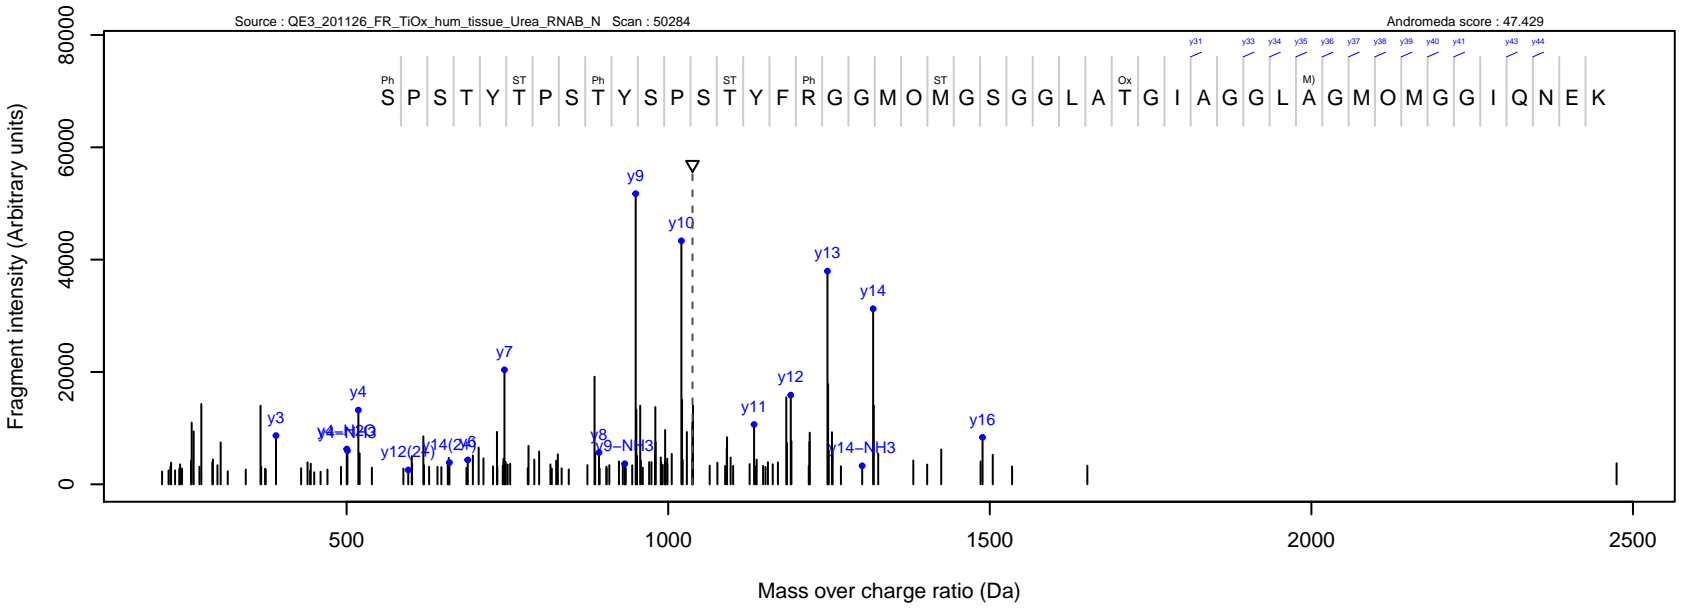

LALDGETLGEEEQEDEQPPWASPS(Phospho (STY))PTSR-3+

Source : QE3\_201126\_FR\_TiOx\_hum\_tissue\_Urea\_RNAB\_H Scan : 50729

Andromeda score : 47.395

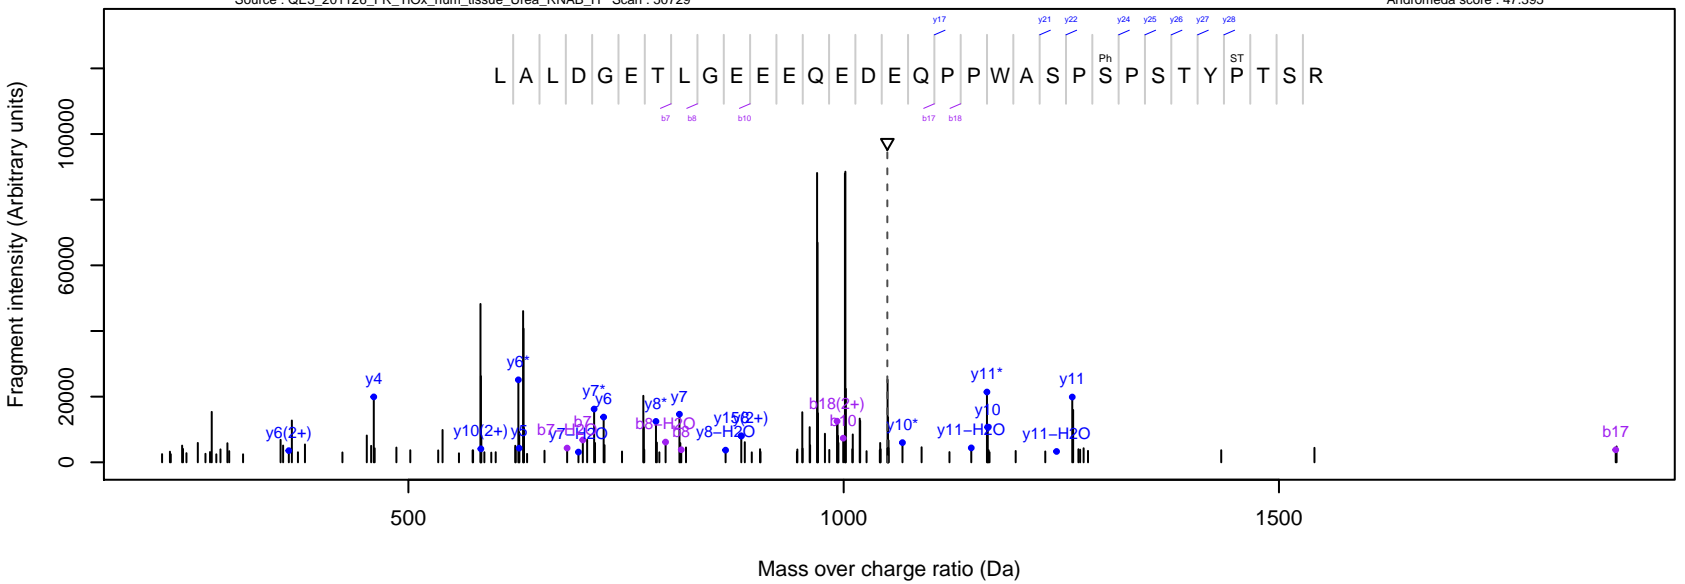

RFS(Phospho (STY))FCCS(Phospho (STY))PEPEAEAEAAAGPGPCER-3+

Source : QE3\_201126\_FR\_TiOx\_hum\_tissue\_Urea\_RNAB\_H Scan : 38457

Andromeda score : 47.395

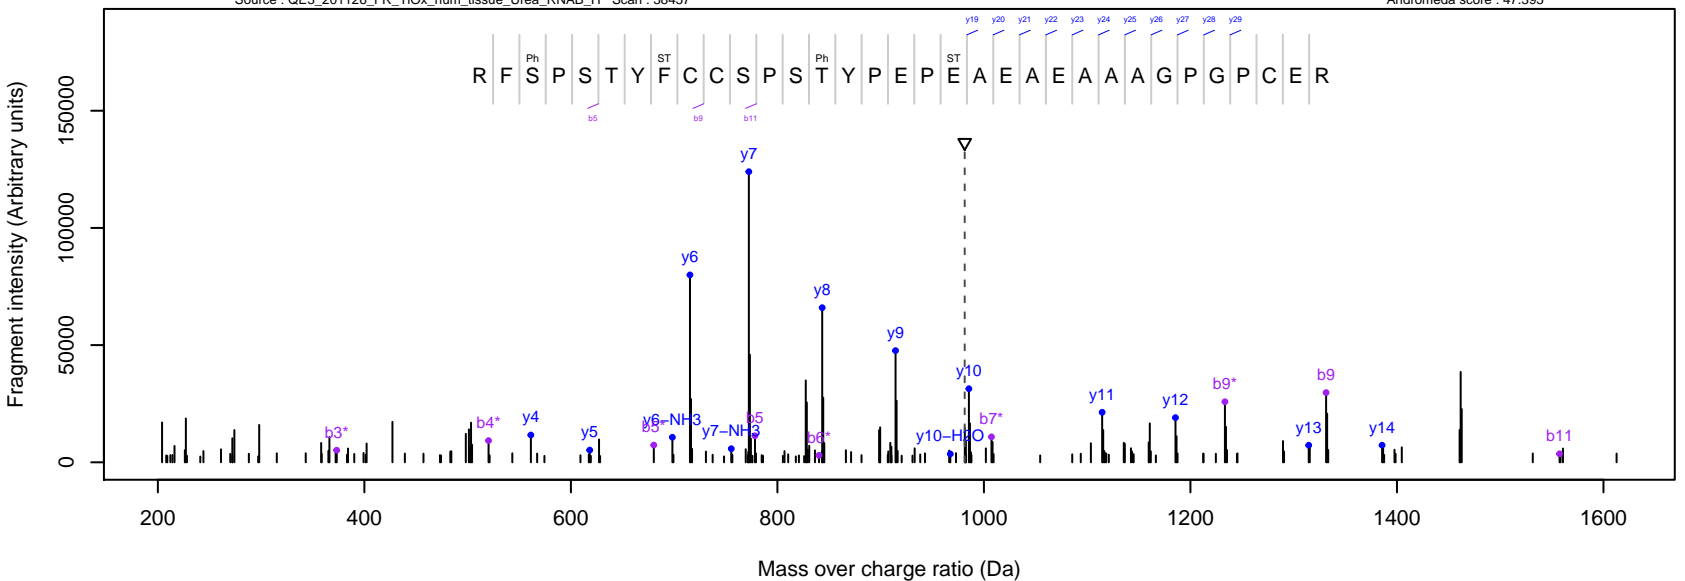

AVVVS(Phospho (STY))PKEENK-2+

Source : QE3\_201126\_FR\_TIOx\_hum\_tissue\_Urea\_RNAB\_H Scan : 6898

Andromeda score : 47.394

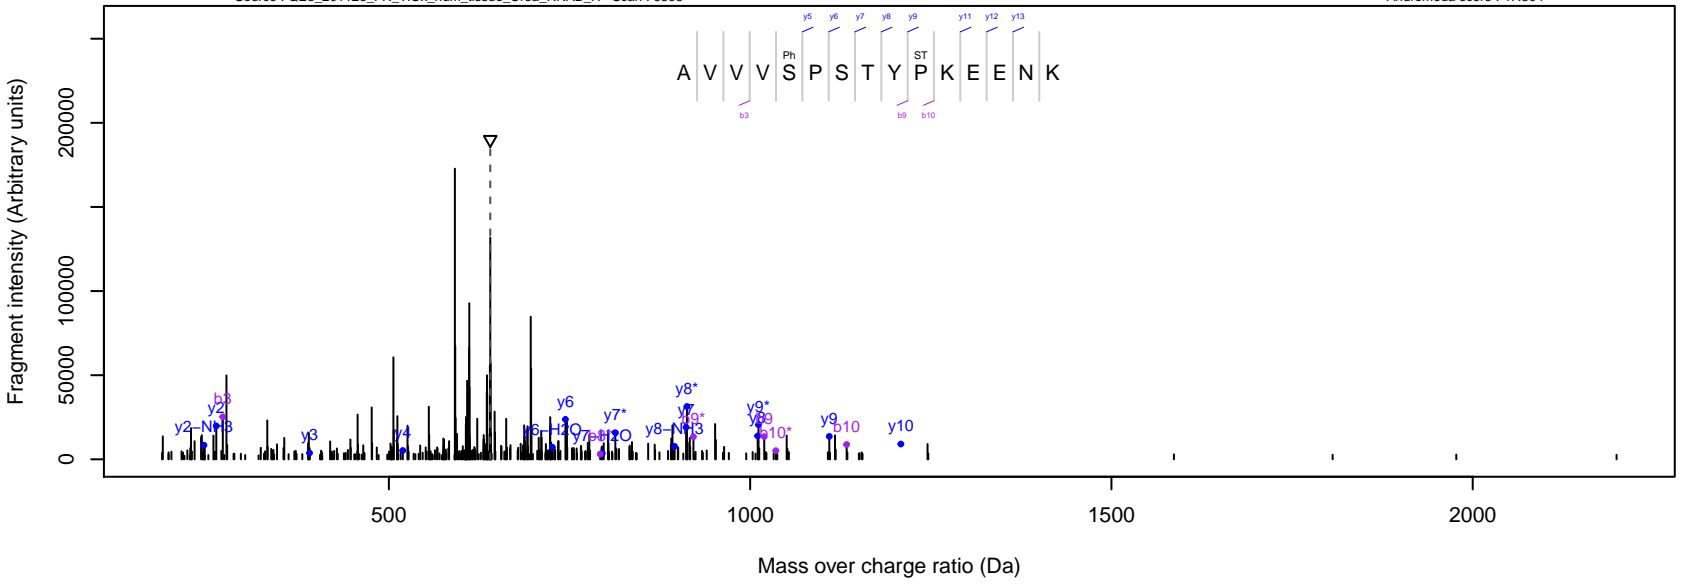

LSQKAPS(Phospho (STY))LEDGSDAFM(Oxidation (M))SPQDVR-3+

Source : QE3\_201126\_FR\_TIOx\_hum\_tissue\_Urea\_RNAB\_H Scan : 27246

Andromeda score : 47.392

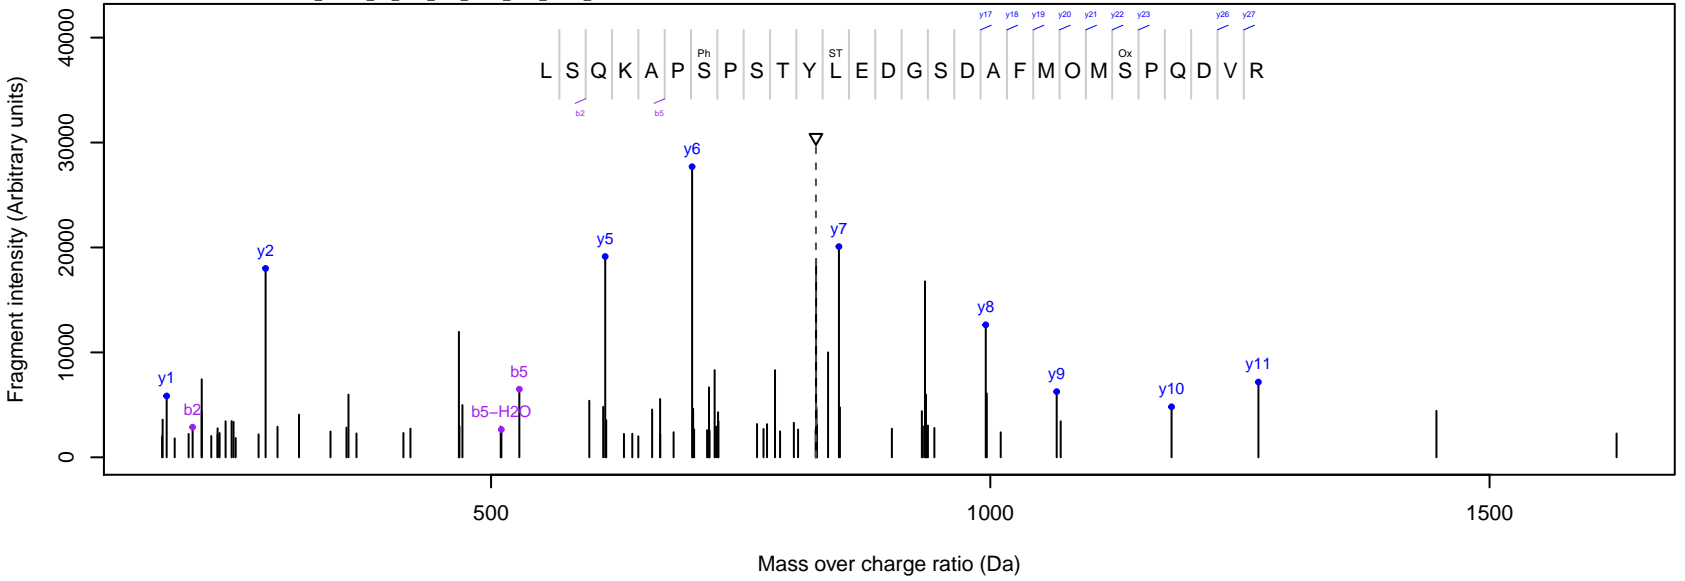

RNDISELEDLS(Phospho (STY))ELEDLKDAK-3+

Source : QE3\_201126\_FR\_TIOx\_hum\_tissue\_Urea\_RNAB\_N Scan : 45498

Andromeda score : 47.392

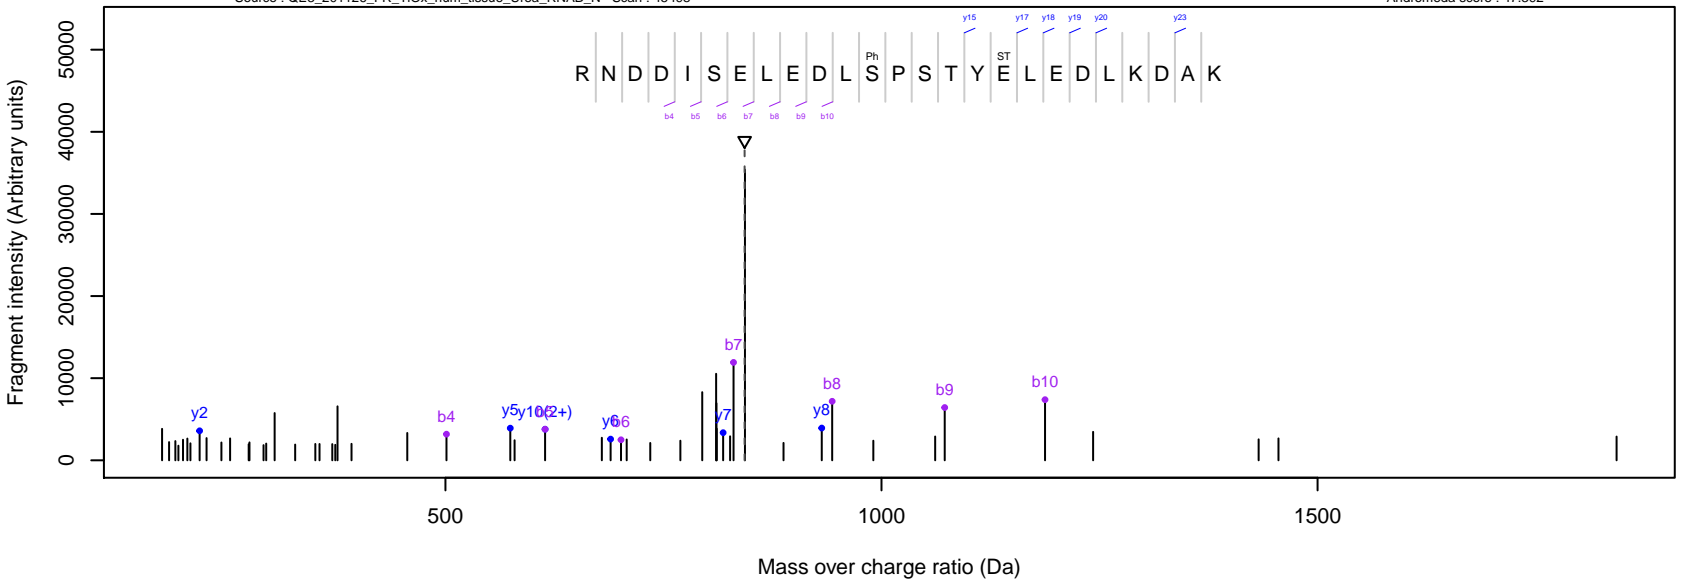

VEAPS(Phospho (STY))LDVHM(Oxidation (M))DSPDINIEGPDVK-3+

Source : QE3\_201126\_FR\_TiOx\_hum\_tissue\_Urea\_RNAB\_B Scan : 36824

Andromeda score : 47.392

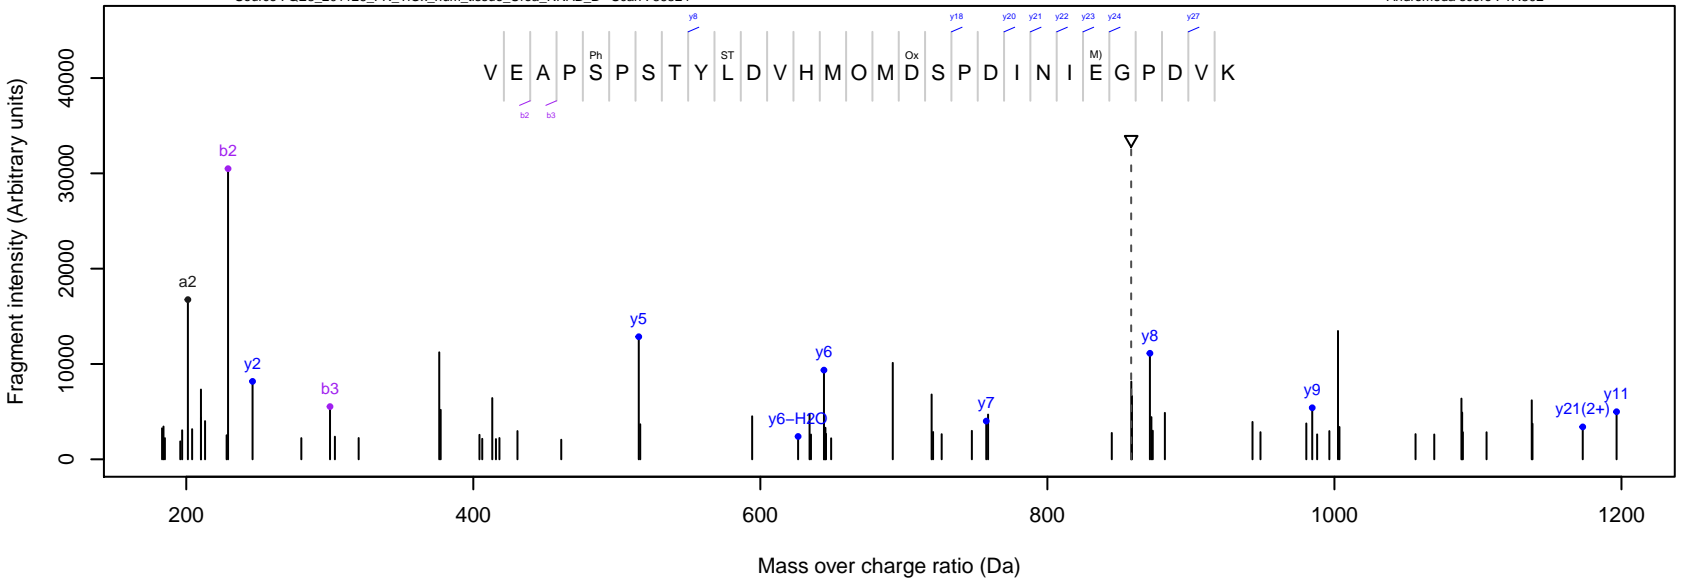

VASPGSTIDT(Phospho (STY))APLSSVDSLINK-3+

Source : QE3\_201126\_FR\_TiOx\_hum\_tissue\_Urea\_RNAB\_H Scan : 54608

Andromeda score : 47.38

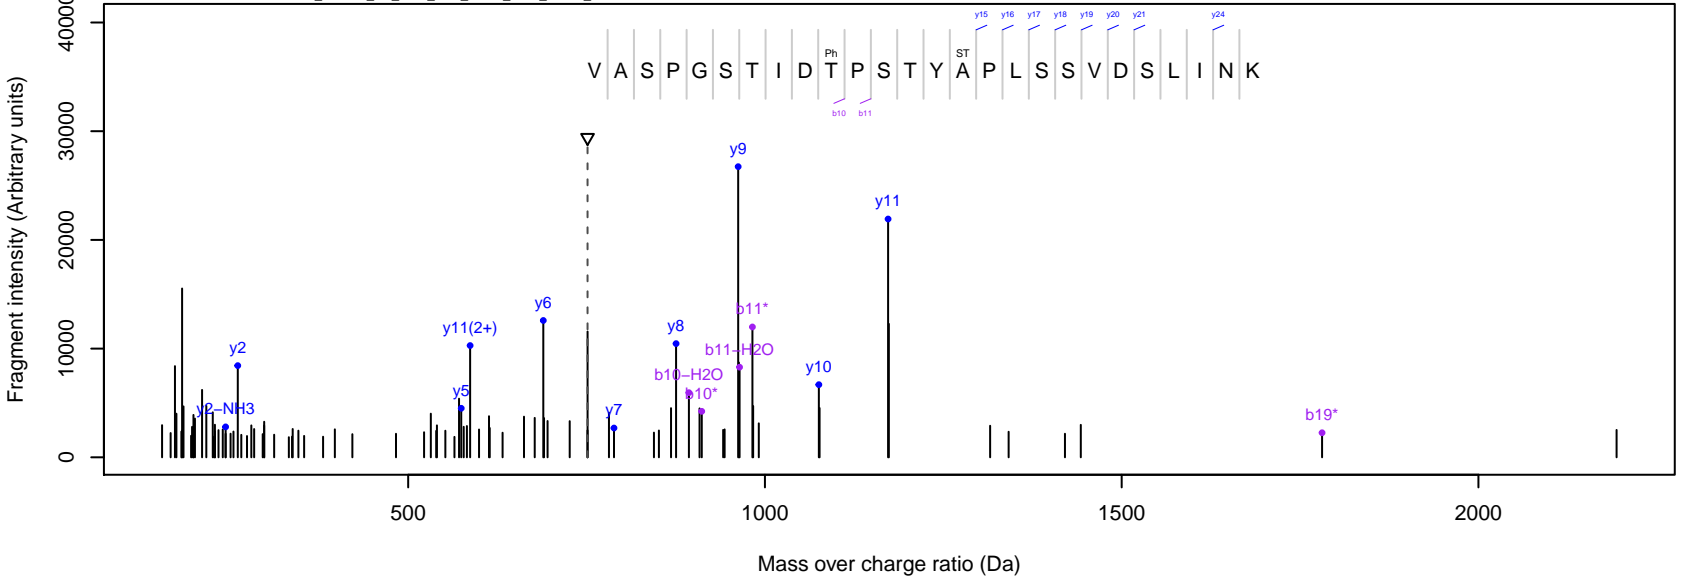

S(Phospho (STY))PTVEPSTLPR-2+

Source : QE3\_201126\_FR\_TiOx\_hum\_tissue\_Urea\_RNAB\_N Scan : 20445

Andromeda score : 47.361

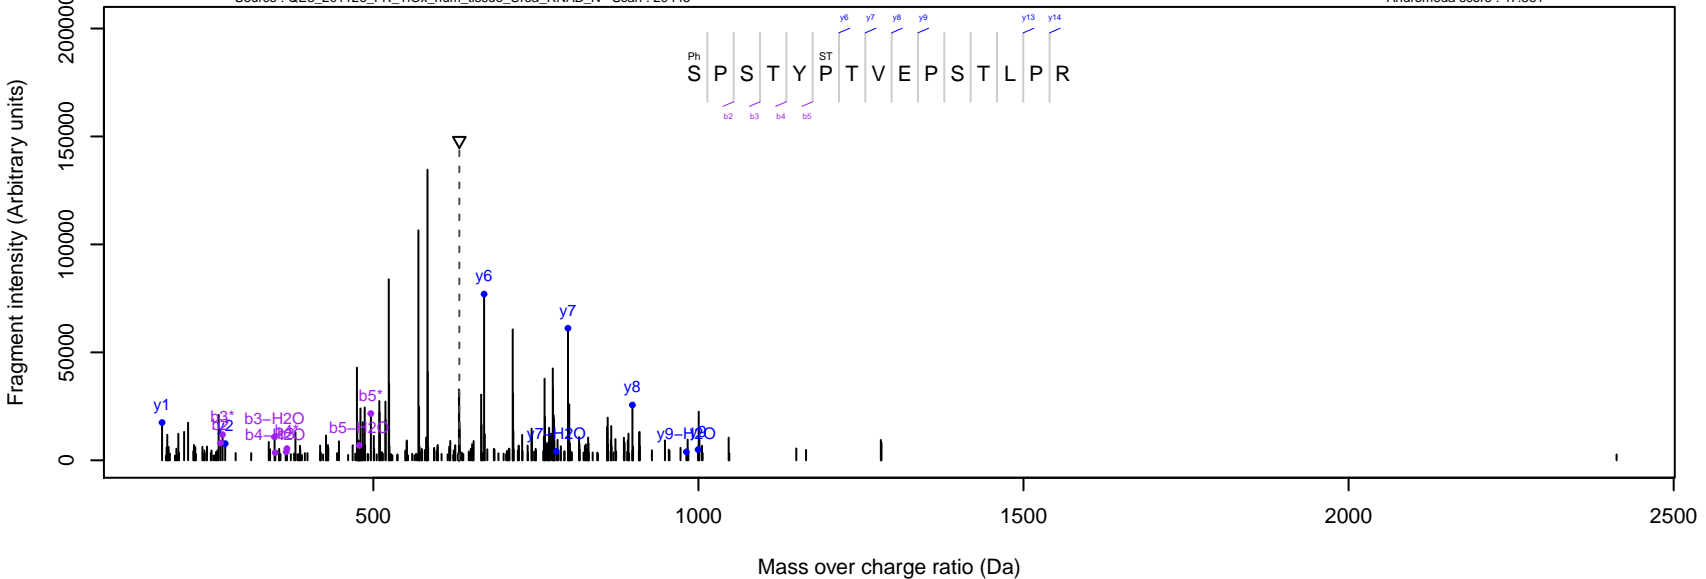

MPS(Phospho (STY))GIKT(Phospho (STY))NIK-2+

Source : QE3\_201126\_FR\_TiOx\_hum\_tissue\_Urea\_RNAB\_B Scan : 38943

Andromeda score : 47.302

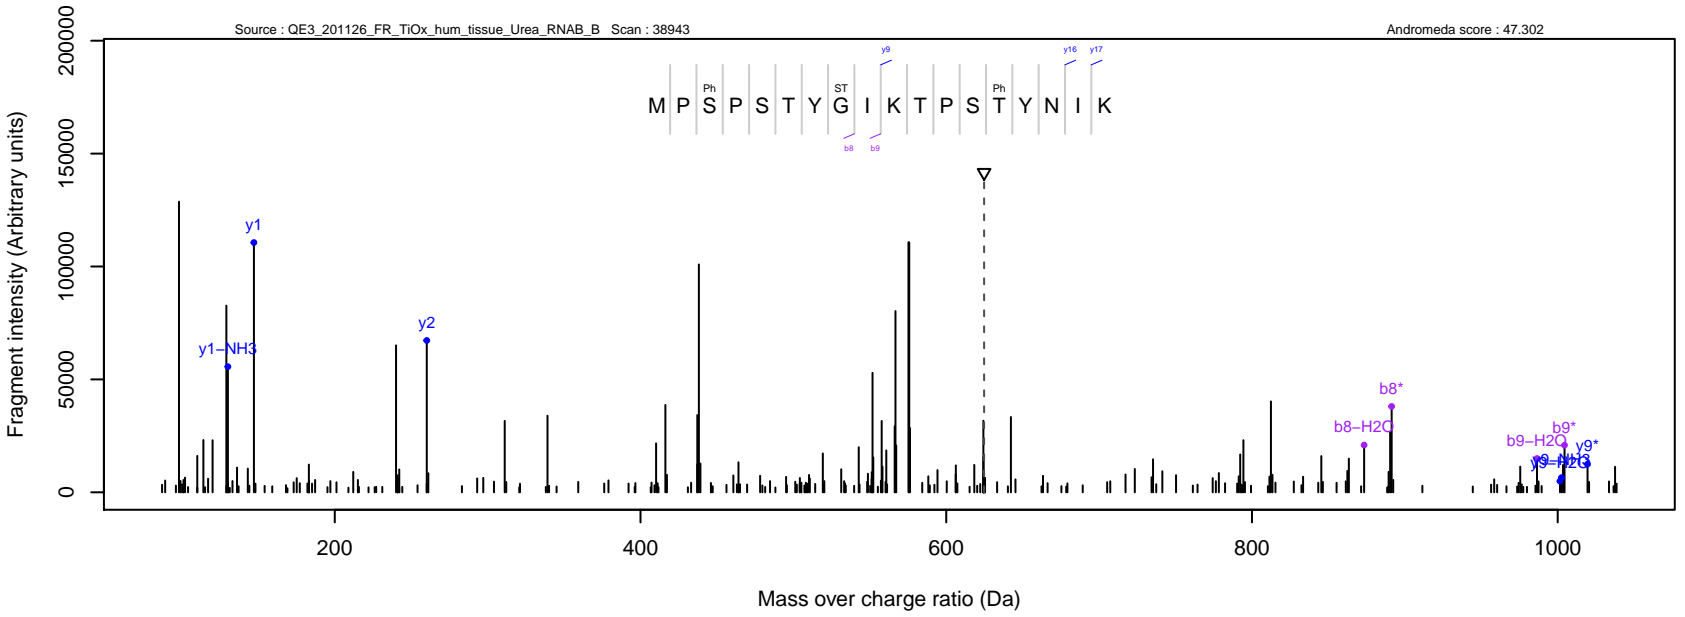

TLLDPGRFS(Phospho (STY))K-2+

Source : QE3\_201126\_FR\_TiOx\_hum\_tissue\_Urea\_RNAB\_N Scan : 23212

Andromeda score : 47.302

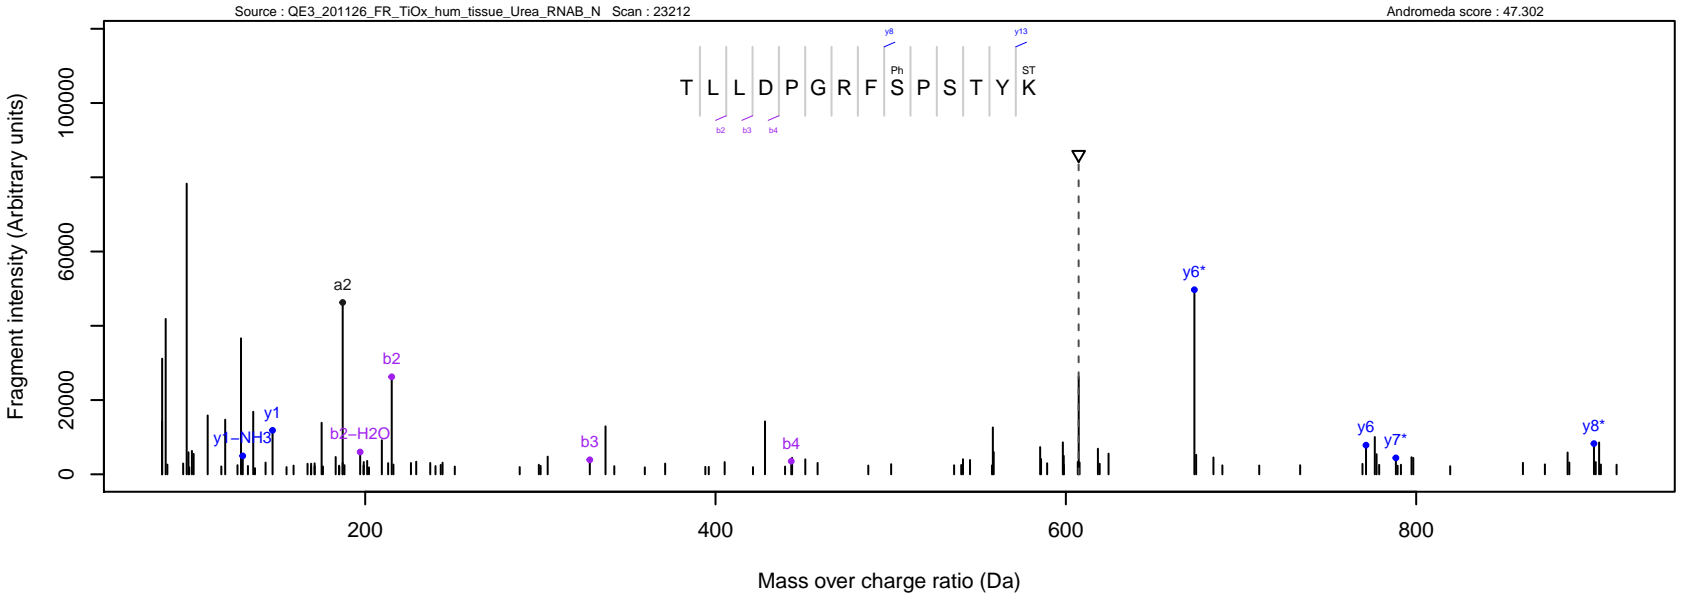

AHT(Phospho (STY))PTPGIYM(Oxidation (M))GR-3+

Source : QE3\_201126\_FR\_TiOx\_hum\_tissue\_Urea\_RNAB\_H Scan : 12329

Andromeda score : 47.288

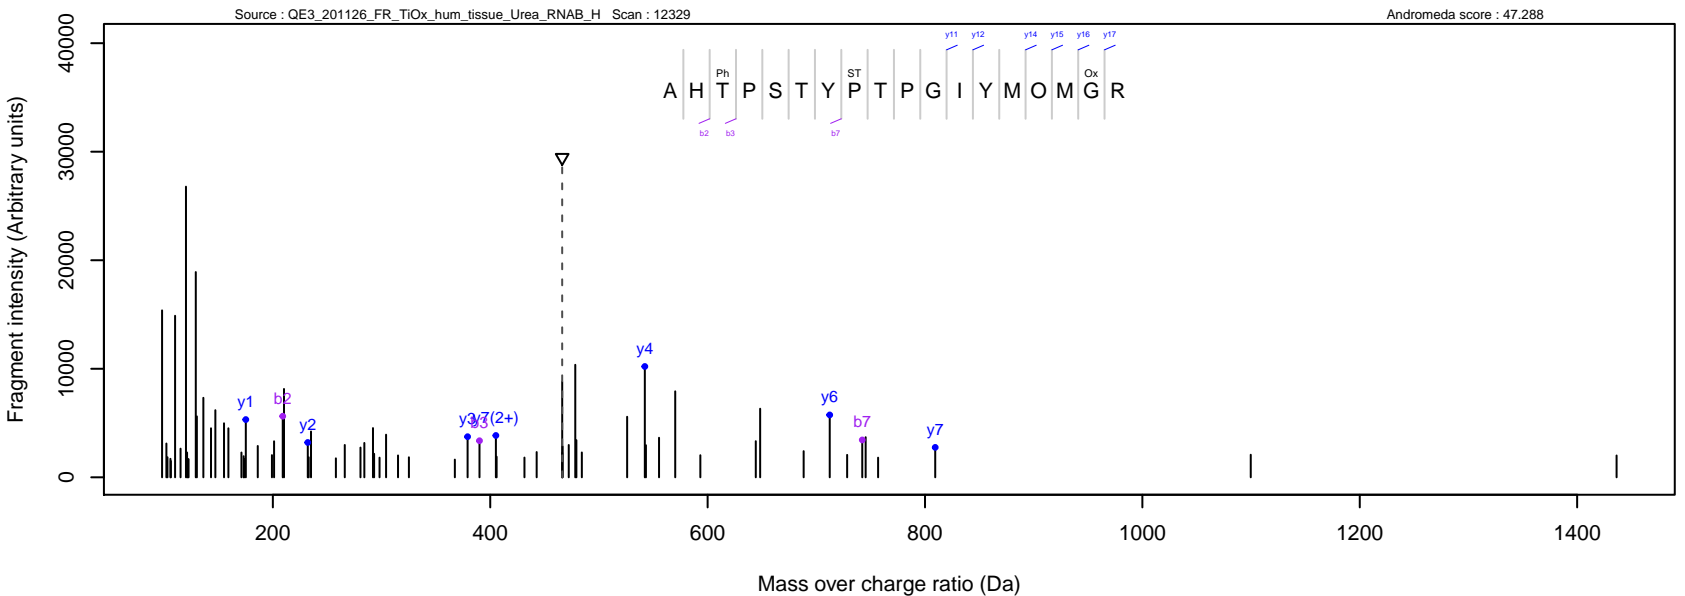

CS(Phospho (STY))NDSFSVIADYFGR-2+

Source : QE3\_201126\_FR\_TiOx\_hum\_tissue\_Urea\_RNAB\_H Scan : 58073

Andromeda score : 47.288

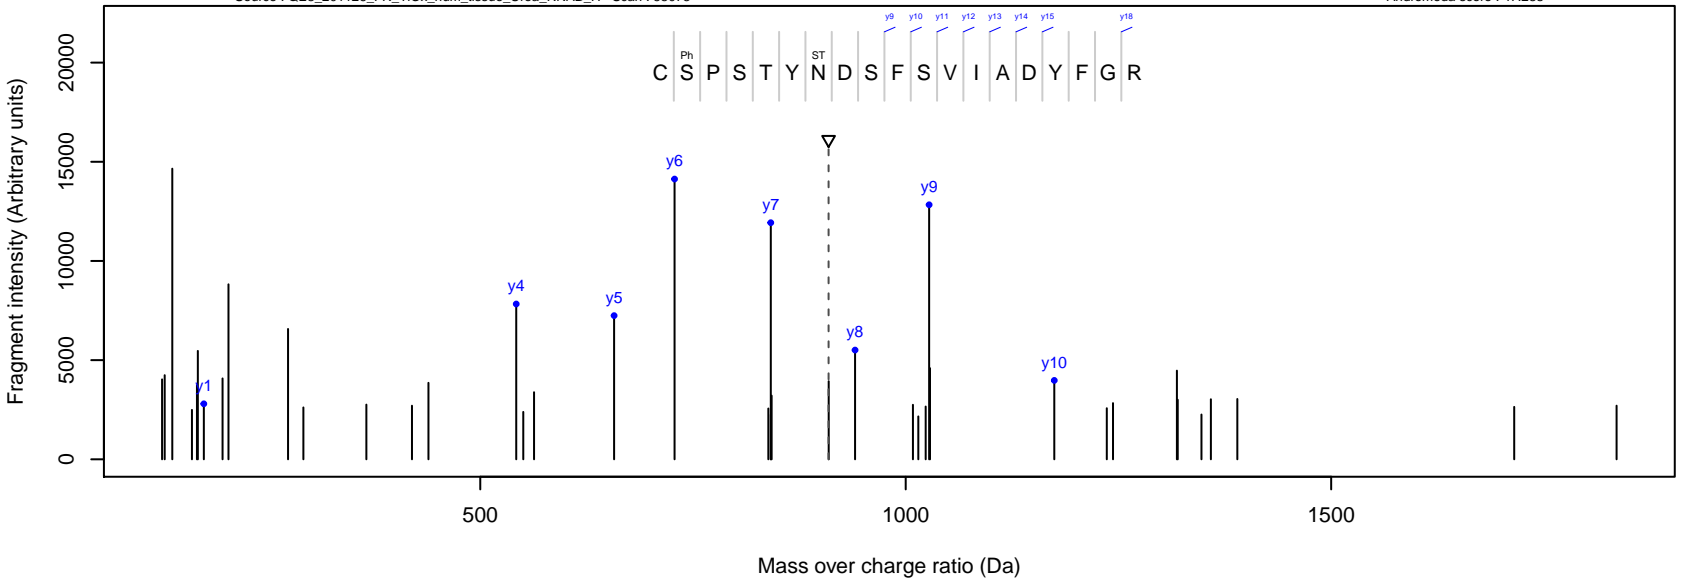

KEEITGT(Phospho (STY))LRK-3+

Source : QE3\_201126\_FR\_TiOx\_hum\_tissue\_Urea\_RNAB\_H Scan : 6197

Andromeda score : 47.242

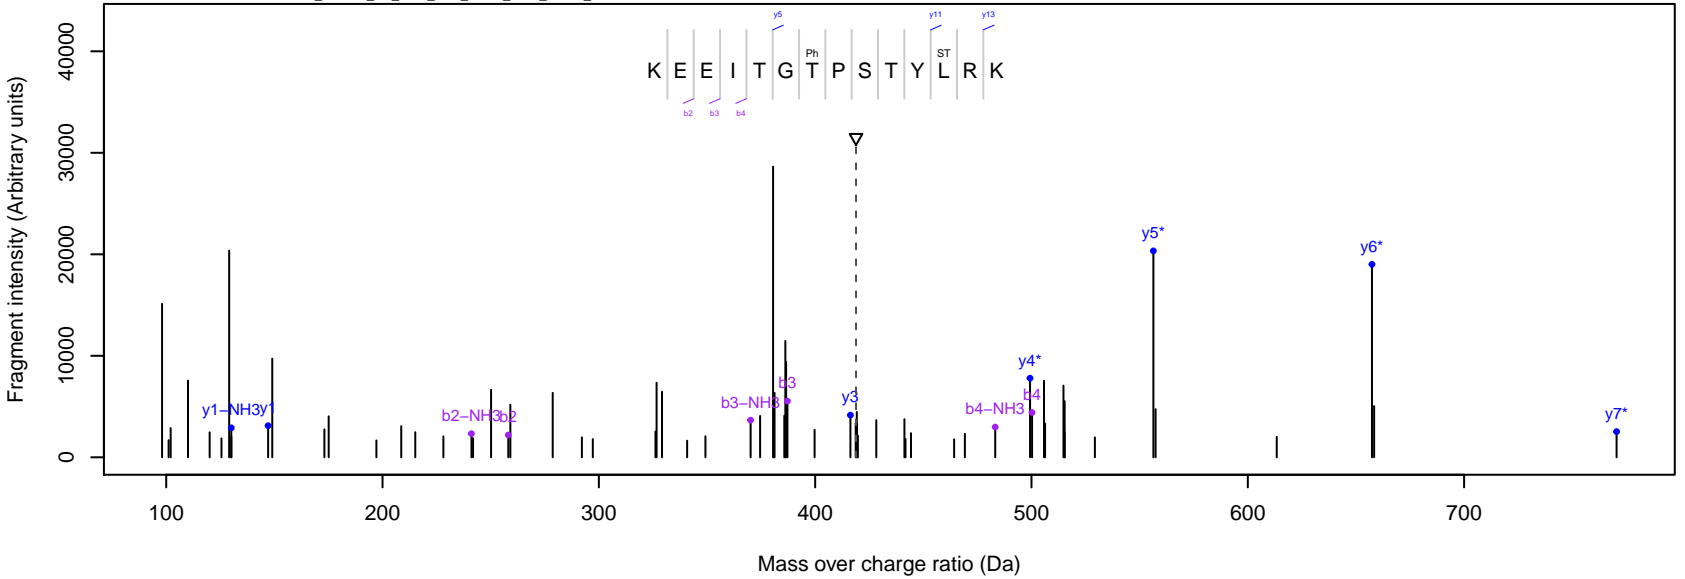

CSKPICDLISDMGNLVHATPSTYNS EEDIK-4+

Source : QE3\_201126\_FR\_TiOx\_hum\_tissue\_Urea\_RNAB\_B Scan : 46778

Andromeda score : 47.241

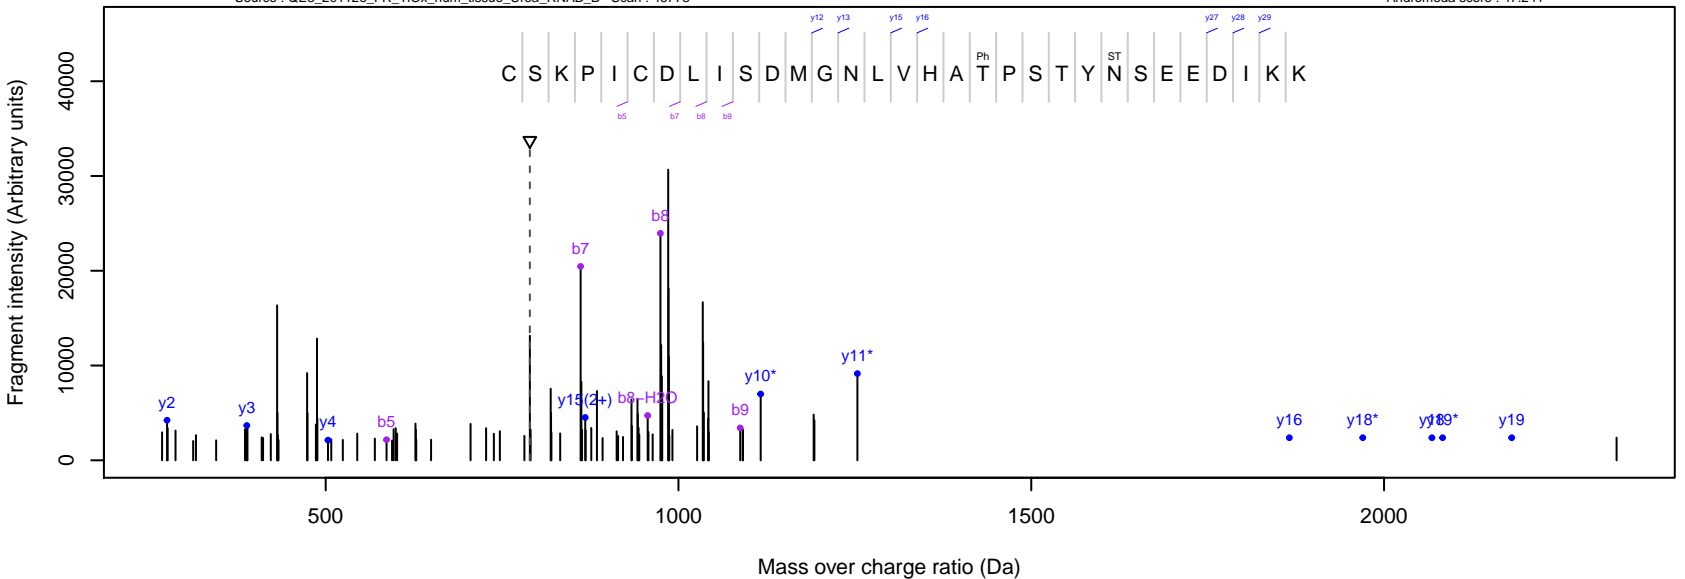

LS(Phospho (STY))IM(Oxidation (M))TSENHLNNSDKVEVDEVDAAALSDLEITLEGGK-4+

Source : QE3\_201126\_FR\_TiOx\_hum\_tissue\_Urea\_RNAB\_B Scan : 60658

Andromeda score : 47.241

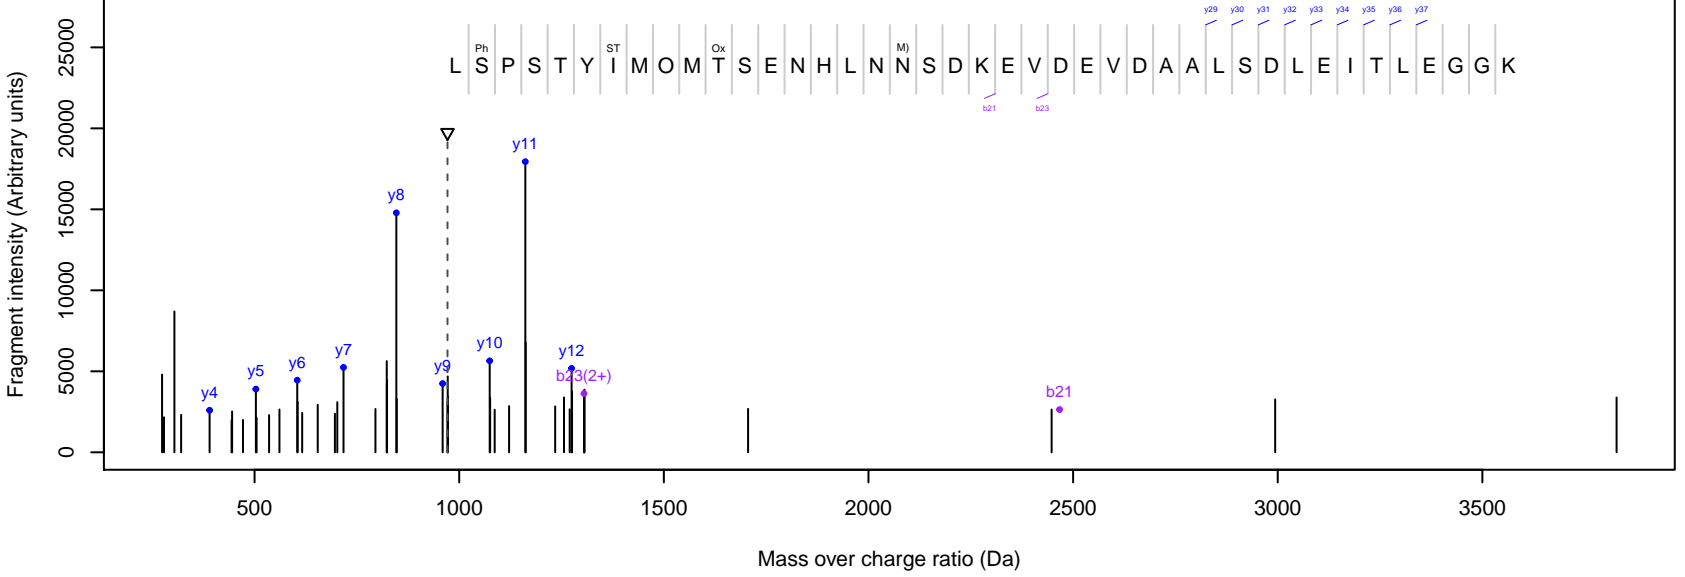

LS(Phospho (STY))SSSSNSDGNKVGILPEVELSVSTK-3+

Source : QE3\_201126\_FR\_TiOx\_hum\_tissue\_Urea\_RNAB\_N Scan : 44240

Andromeda score : 47.237

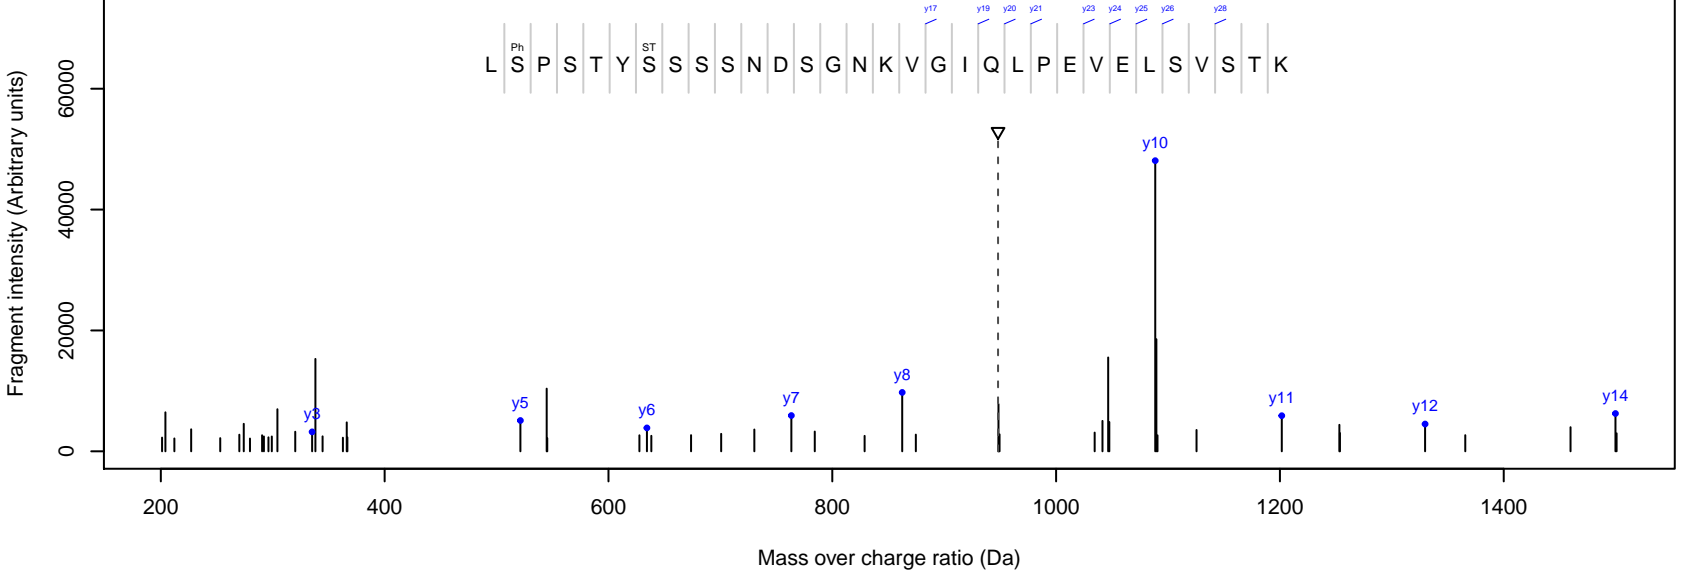

VAIIRT(Phospho (STY))PPKSPATPK-3+

Source : QE3\_201126\_FR\_TiOx\_hum\_tissue\_Urea\_RNAB\_H Scan : 14039

Andromeda score : 47.222

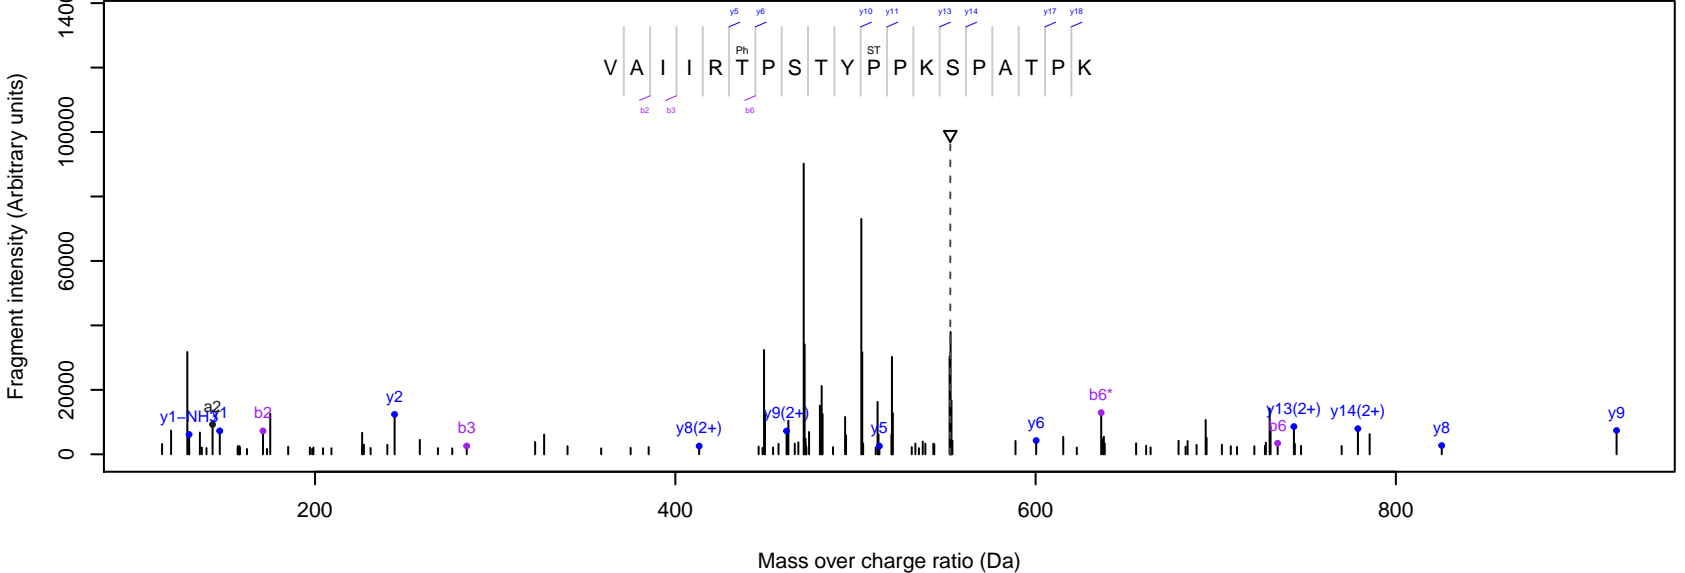



FNDS(Phospho (STY))EGDDT(Phospho (STY))EETEDYR-2+

Source : QE3\_201126\_FR\_TiOx\_hum\_tissue\_Urea\_RNAB\_N Scan : 23776

Andromeda score : 47.204

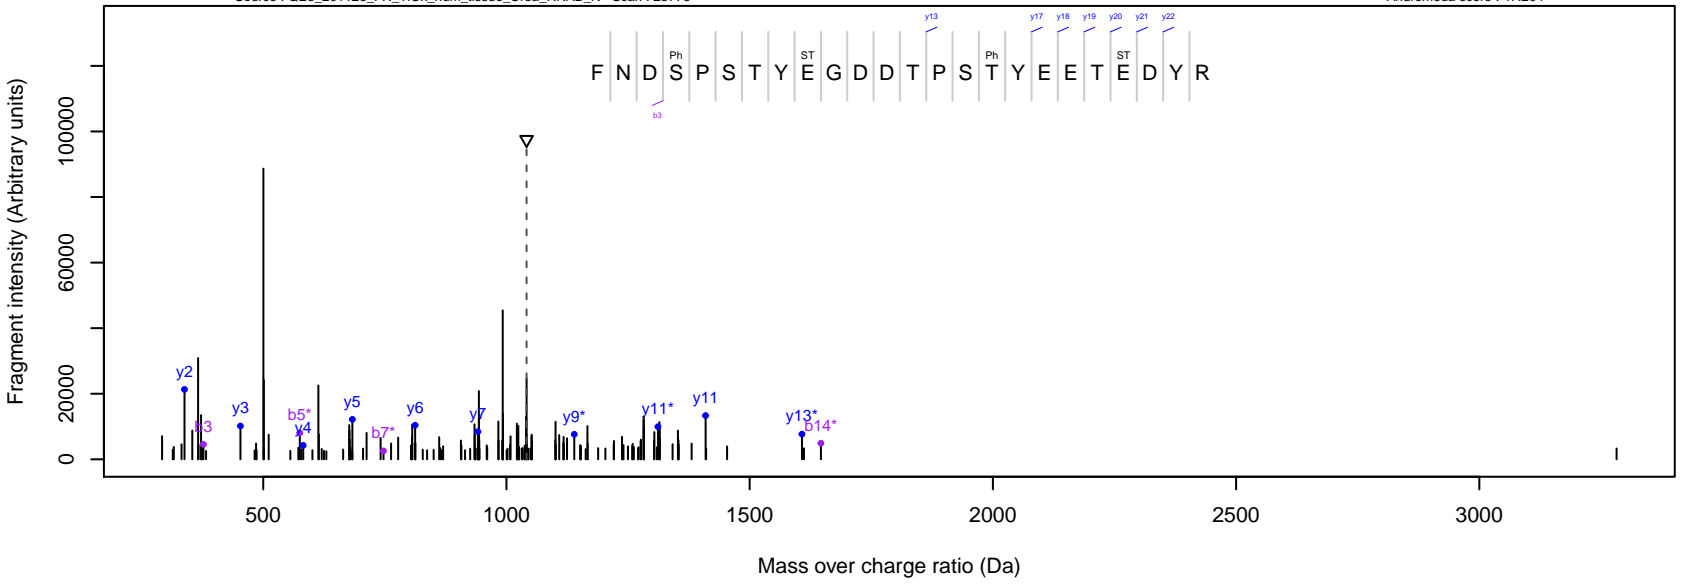

LNHRPS(Phospho (STY))EPELNLNSWPCK-3+

Source : QE3\_201126\_FR\_TiOx\_hum\_tissue\_Urea\_RNAB\_N Scan : 28536

Andromeda score : 47.204

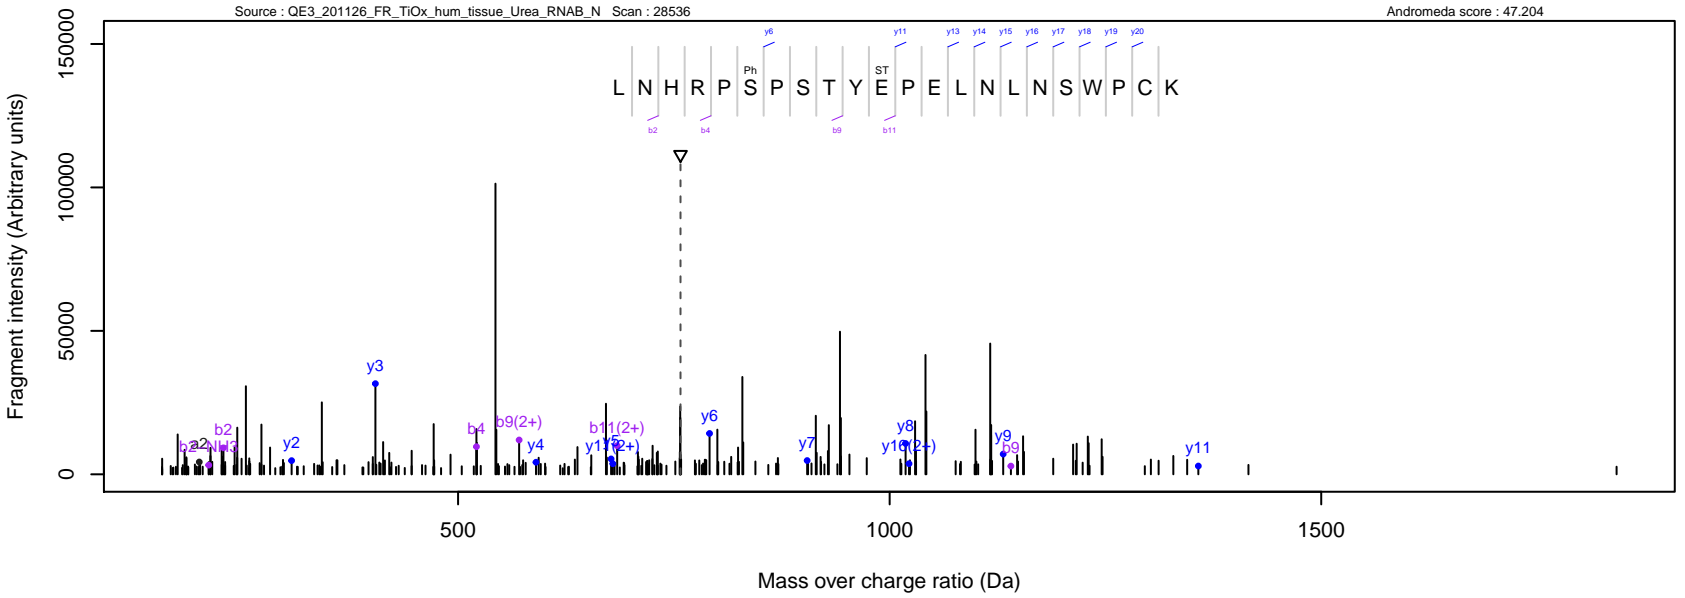

QSSVTQVT(Phospho (STY))EQSPK-2+

Source : QE3\_201126\_FR\_TiOx\_hum\_tissue\_Urea\_RNAB\_H Scan : 10748

Andromeda score : 47.201

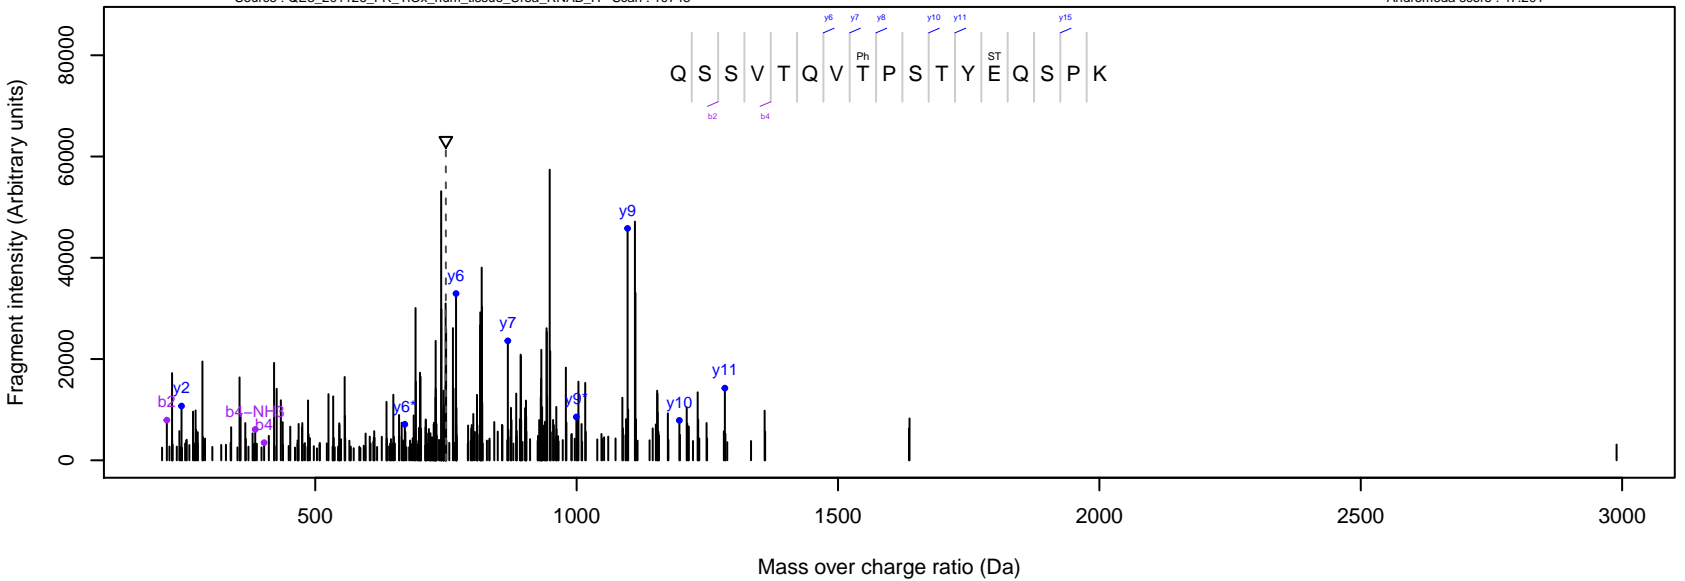

VGIVEPS(Phospho (STY))SATSGDSDDAAPSGGLSSTPPSPAAK-3+

Source : QE3\_201126\_FR\_TIOx\_hum\_tissue\_Urea\_RNAB\_N Scan : 31728

Andromeda score : 47.191

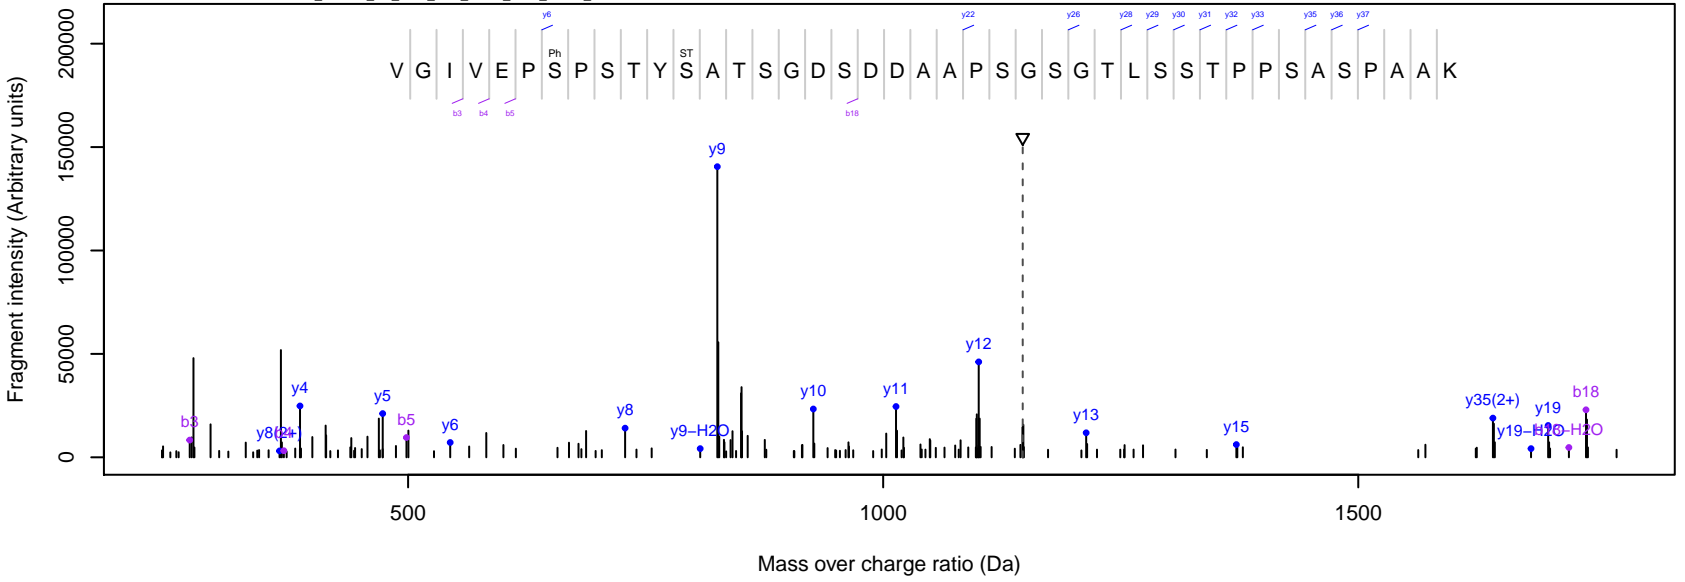

SLVGS(Phospho (STY))WLK-2+

Source : QE3\_201126\_FR\_TIOx\_hum\_tissue\_Urea\_RNAB\_N Scan : 46535

Andromeda score : 47.187

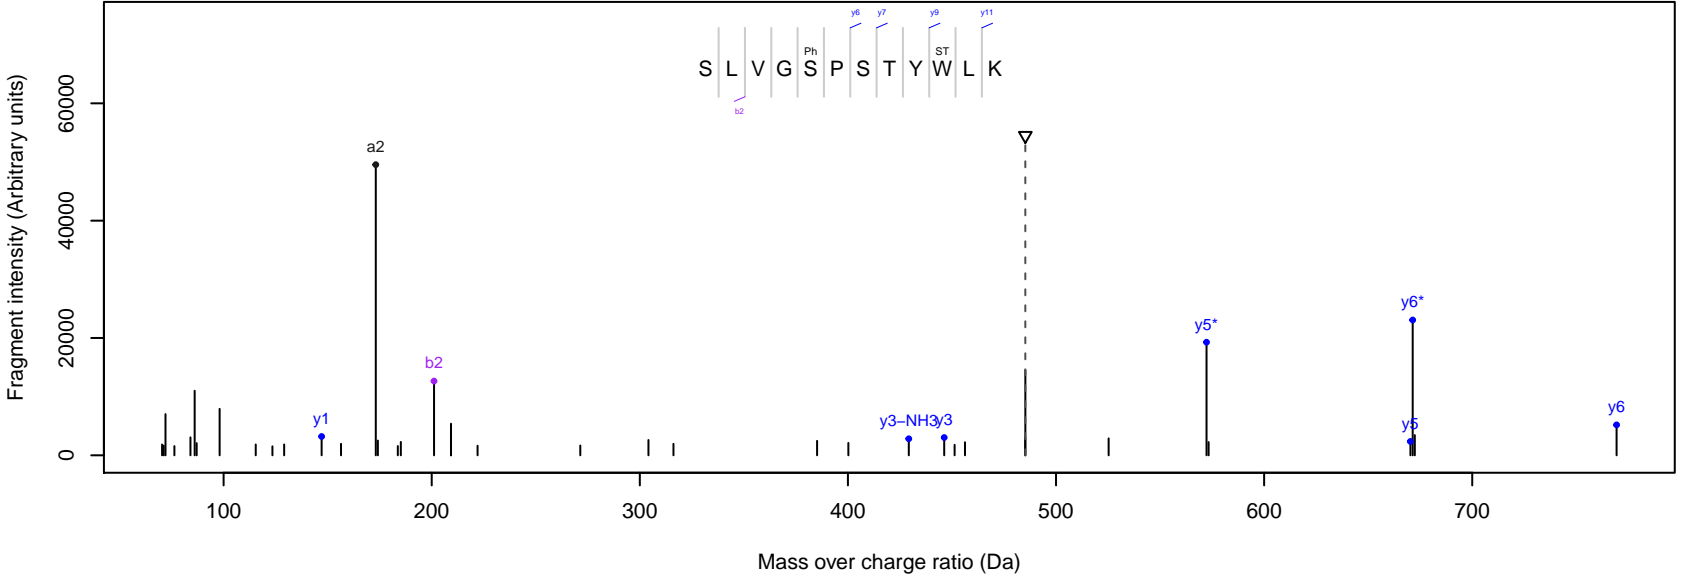

QISLAPETLSSGDVSPSTYPGP-3+

Source : QE3\_201126\_FR\_TIOx\_hum\_tissue\_Urea\_RNAB\_H Scan : 38227

Andromeda score : 47.175

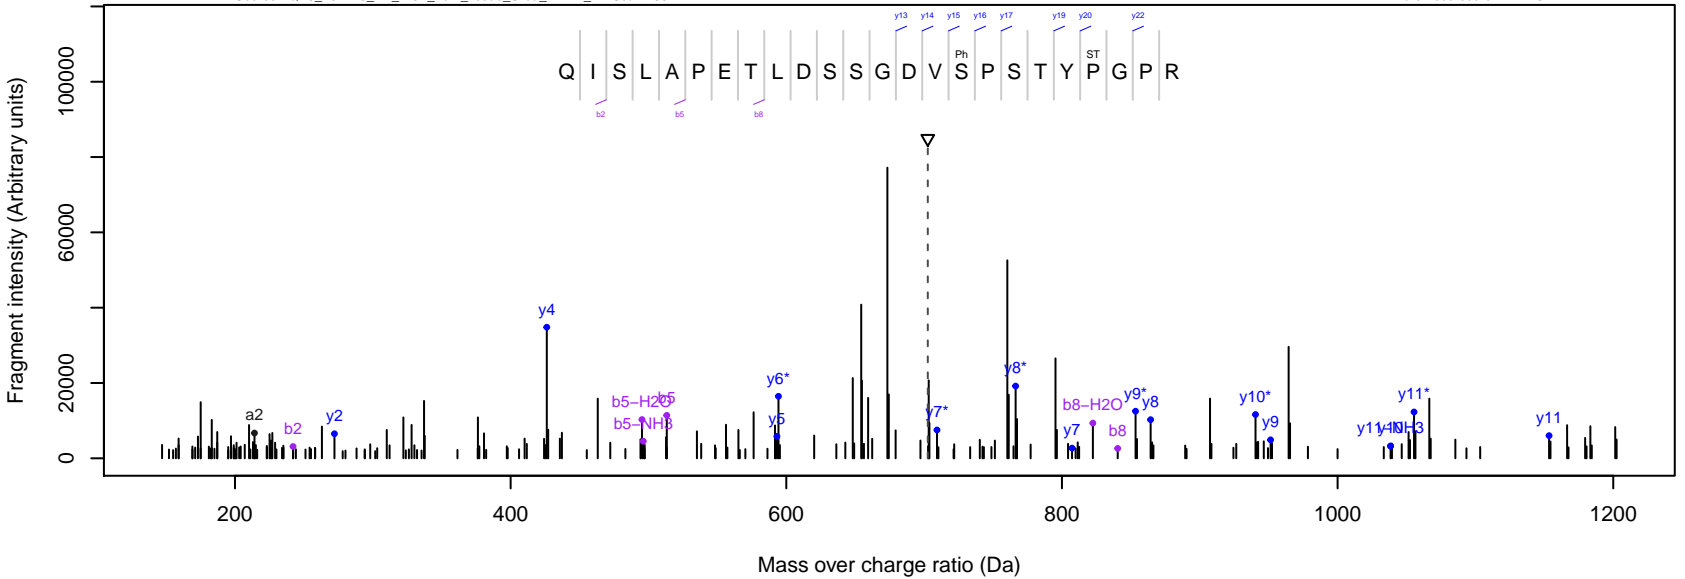

NNTAAET(Phospho (STY))EDES(Phospho (STY))DGEDRGGGTSGVR-3+

Source : QE3\_201126\_FR\_TiOx\_hum\_tissue\_Urea\_RNAB\_N Scan : 9548

Andromeda score : 47.159

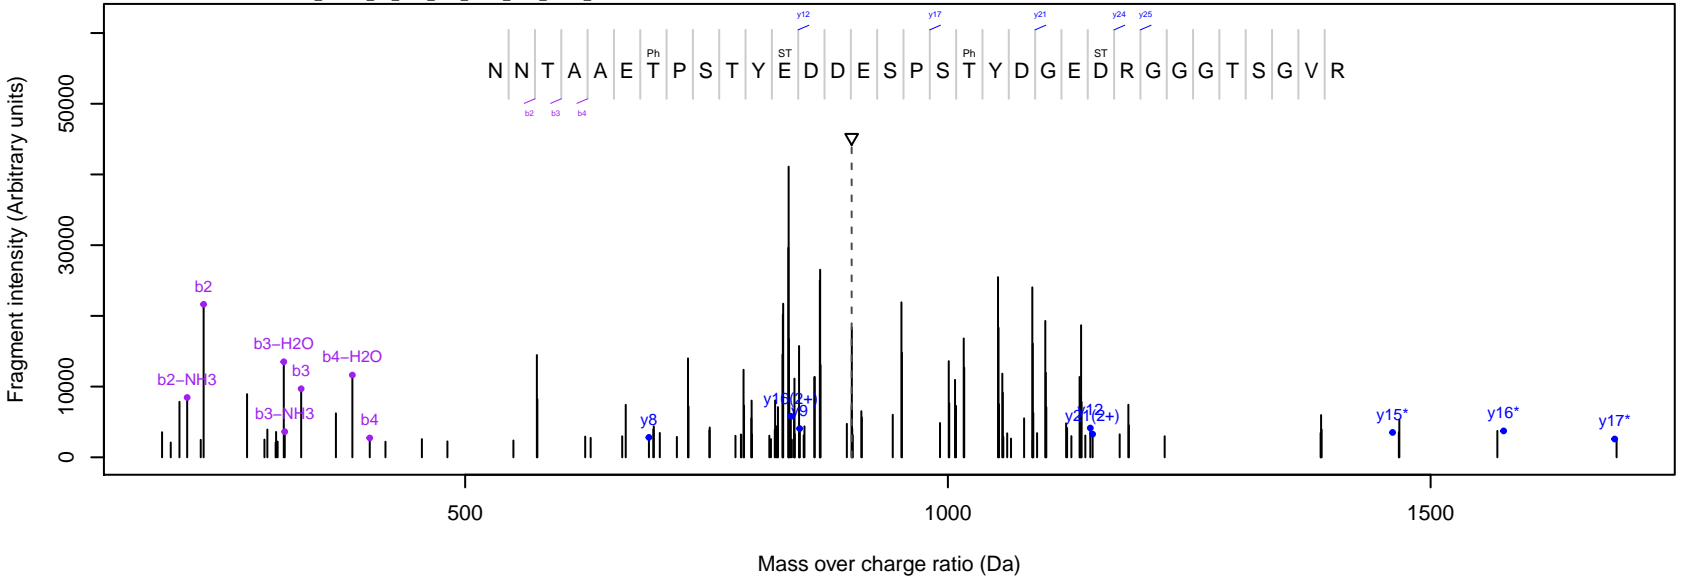

NSS(Phospho (STY))RDSGRGDSVSDSGSDALR-3+

Source : QE3\_201126\_FR\_TiOx\_hum\_tissue\_Urea\_RNAB\_N Scan : 7559

Andromeda score : 47.099

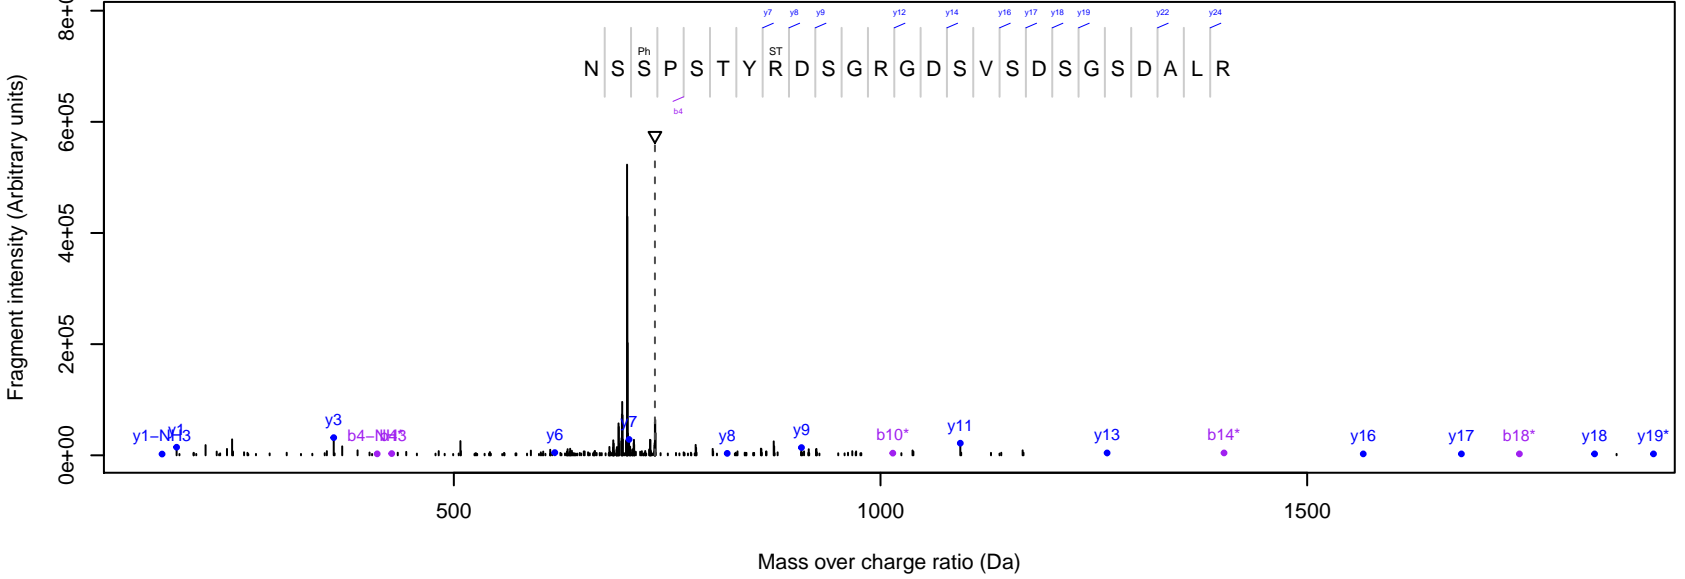

YVDEENS(Phospho (STY))DGETS NHR-3+

Source : QE3\_201126\_FR\_TiOx\_hum\_tissue\_Urea\_RNAB\_N Scan : 5063

Andromeda score : 47.09

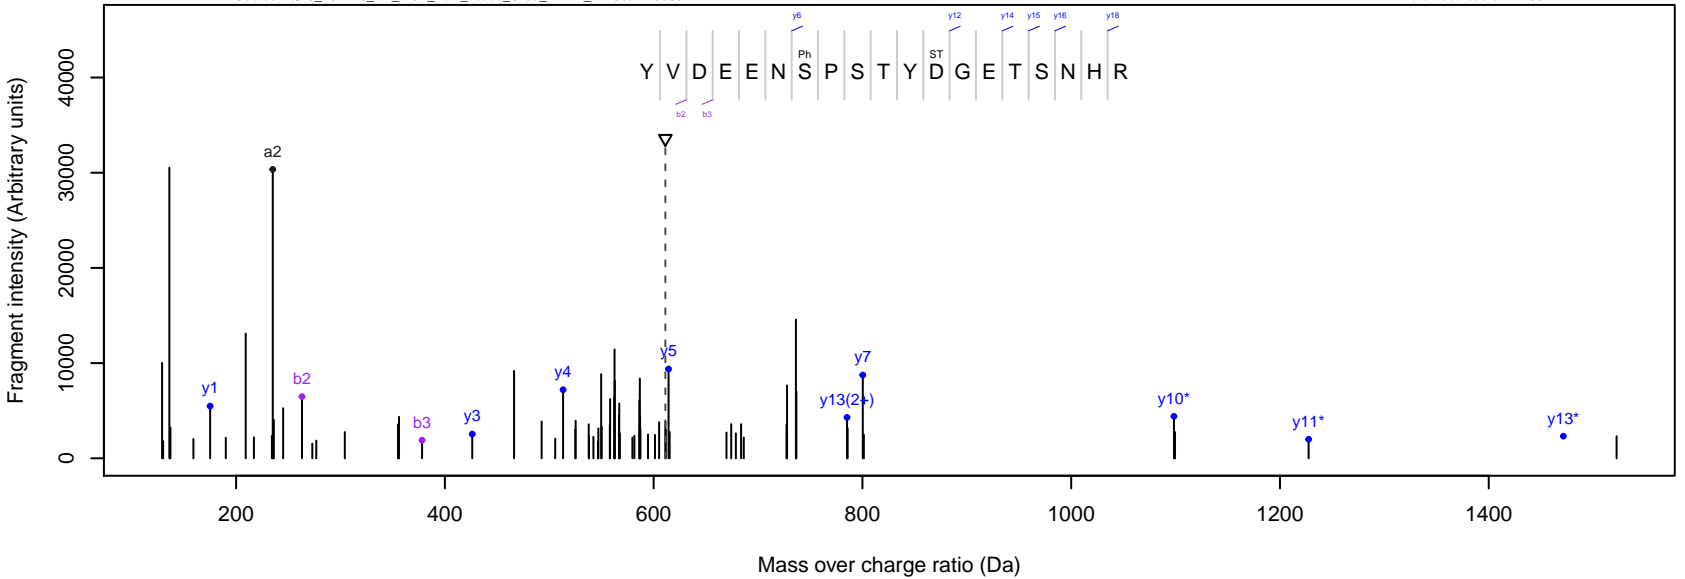

KS(Phospho (STY))NISPNFNMGQLLDFER-3+

Source : QE3\_201126\_FR\_TiOx\_hum\_tissue\_Urea\_RNAB\_N Scan : 60291

Andromeda score : 47.058

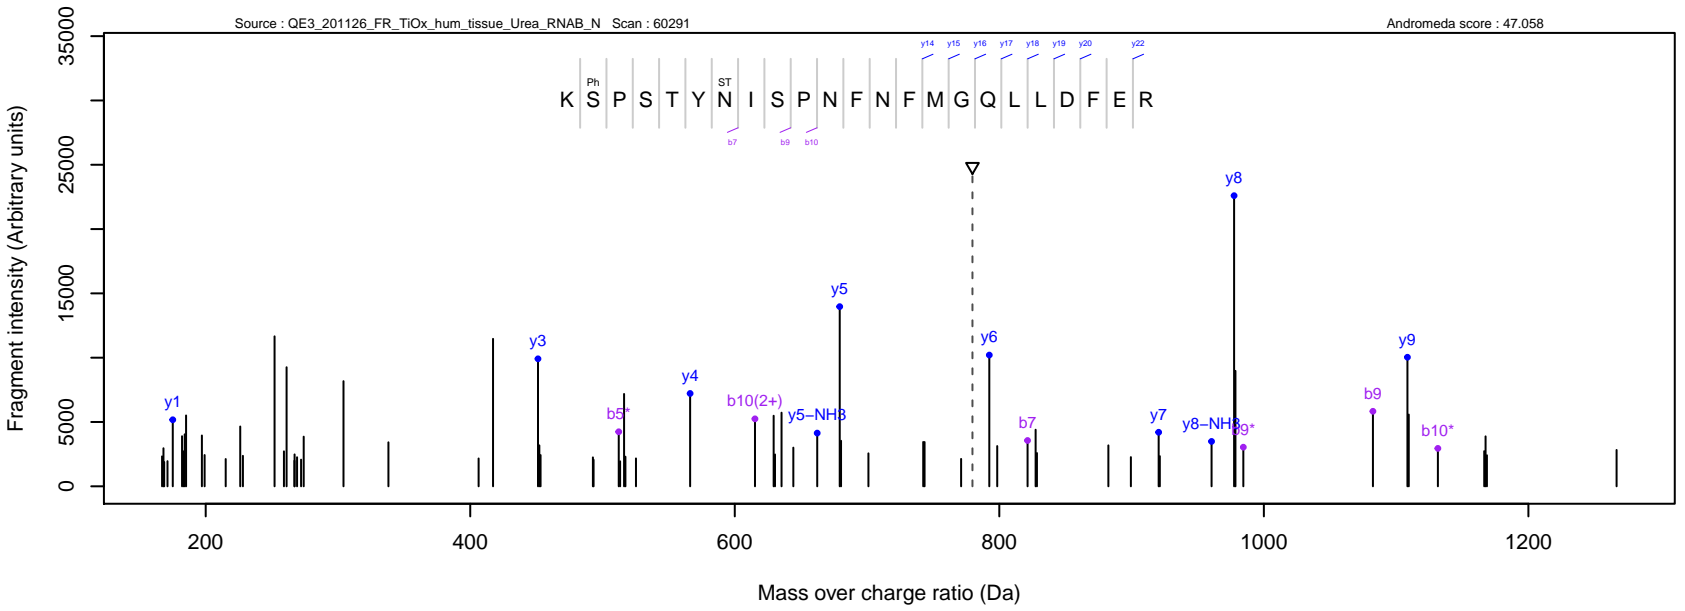

KS(Phospho (STY))TAALEEDAQILK-2+

Source : QE3\_201126\_FR\_TiOx\_hum\_tissue\_Urea\_RNAB\_B Scan : 24235

Andromeda score : 47.037

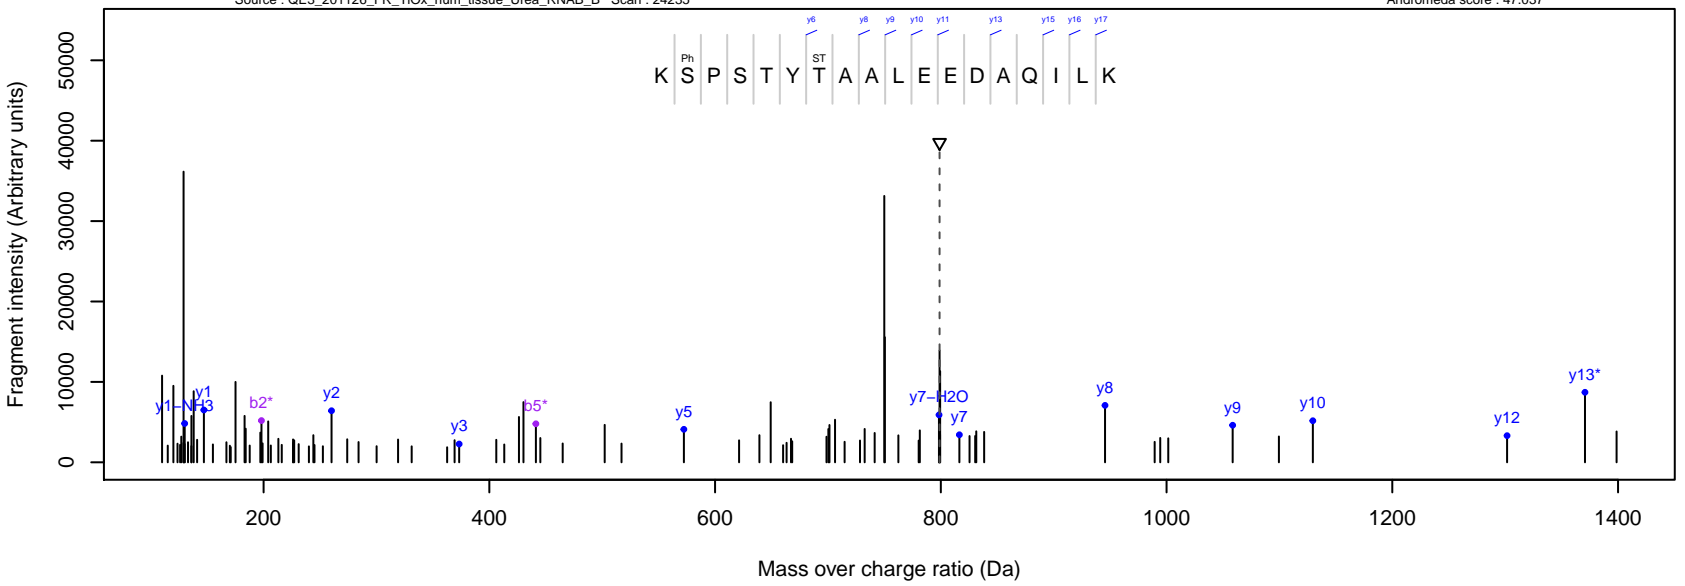

TAKPFGSVNQPAT(Phospho (STY))PFS(Phospho (STY))PTR-3+

Source : QE3\_201126\_FR\_TiOx\_hum\_tissue\_Urea\_RNAB\_B Scan : 31403

Andromeda score : 47.018

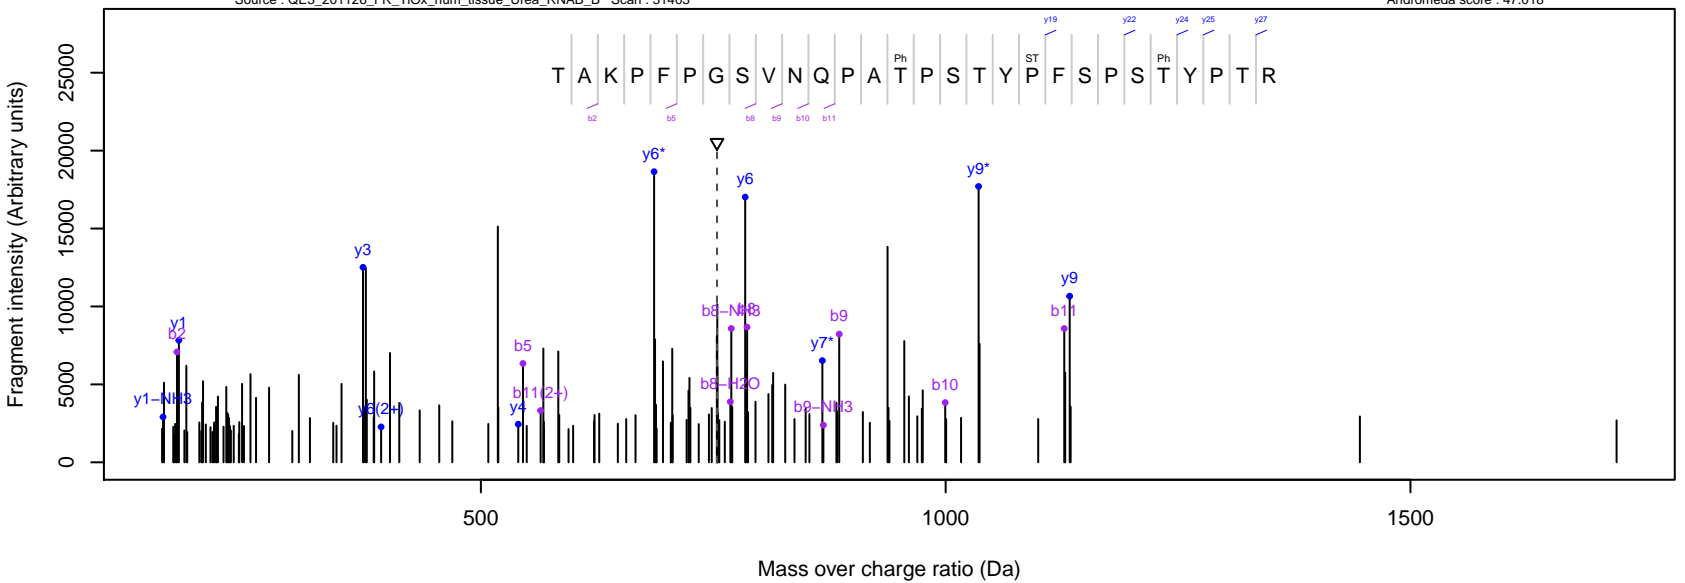

YLDEHHYENQHS(Phospho (STY))PFGTNSETHFQSNSR-5+

Source : QE3\_201126\_FR\_TiOx\_hum\_tissue\_Urea\_RNAB\_N Scan : 16783

Andromeda score : 47.018

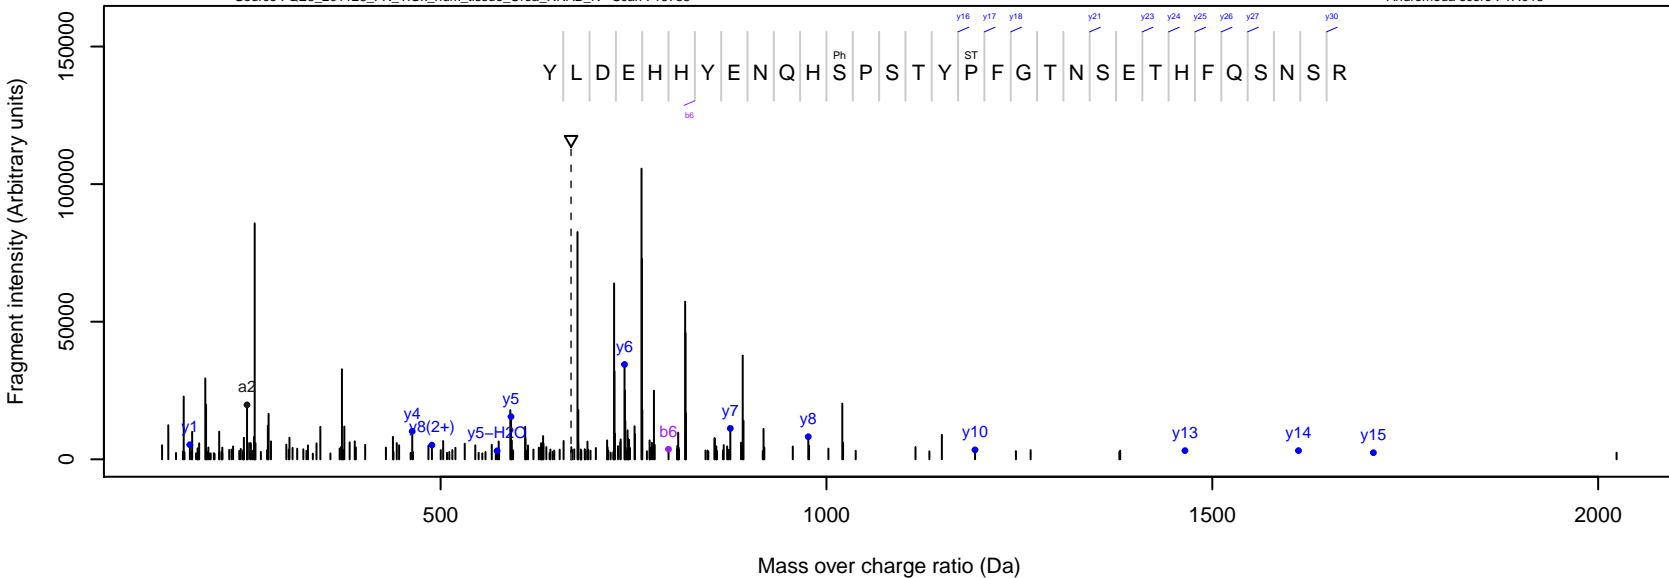

S(Phospho (STY))VDIHDSIQPR-2+

Source : QE3\_201126\_FR\_TiOx\_hum\_tissue\_Urea\_RNAB\_N Scan : 16863

Andromeda score : 46.985

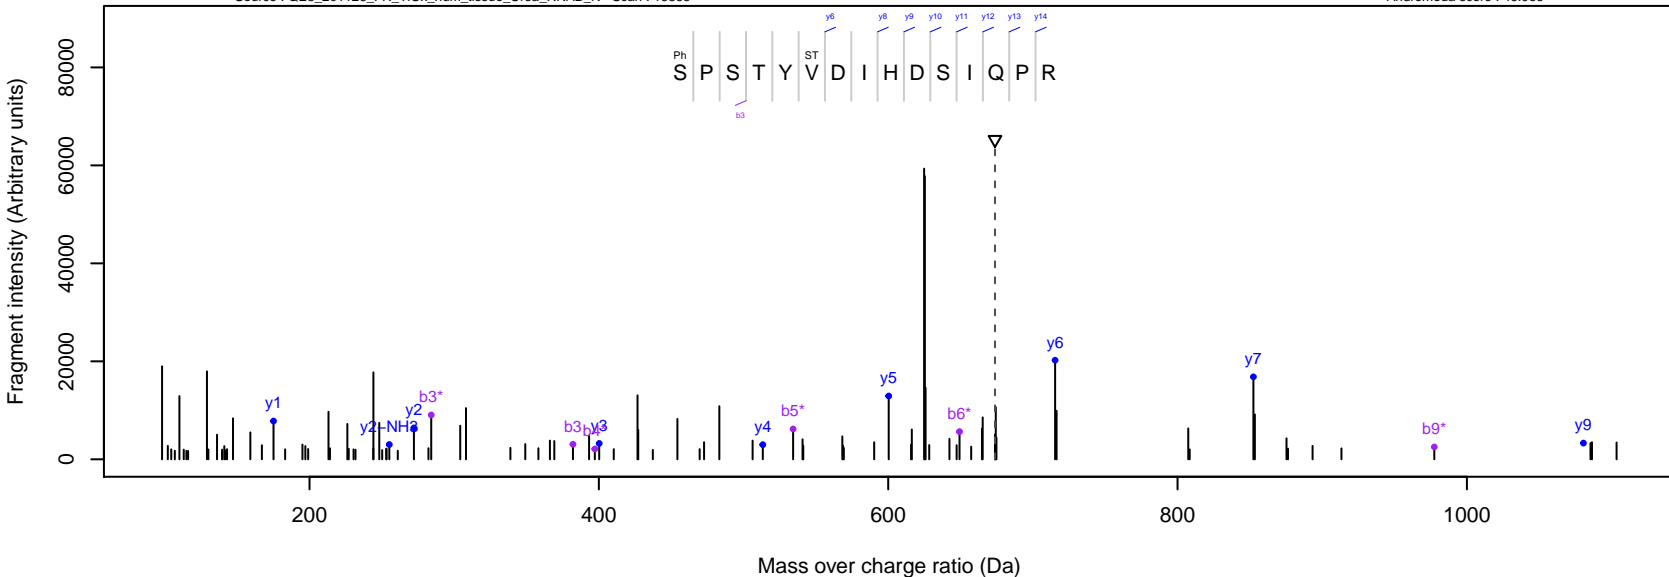

RPQRATPSTYS(Phospho (STY))SPSTYNVFA(Phospho (STY))MOMFDQS(Phospho (STY))IQEFK-3+

Source : QE3\_201126\_FR\_TiOx\_hum\_tissue\_Urea\_RNAB\_H Scan : 43880

Andromeda score : 46.982

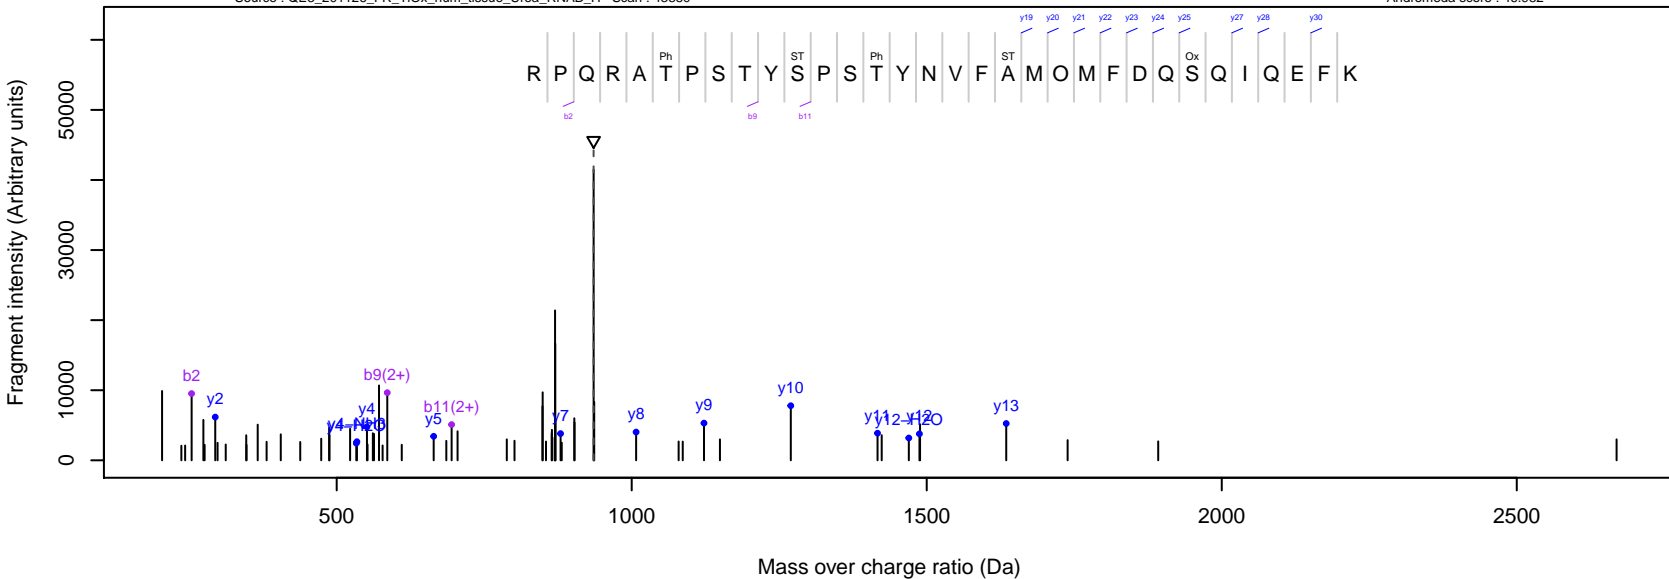

SFS(Phospho (STY))T(Phospho (STY))GSDLGHVWVTPPDIPGSR-3+

Source : QE3\_201126\_FR\_TiOx\_hum\_tissue\_Urea\_RNAB\_N Scan : 55374

Andromeda score : 46.982

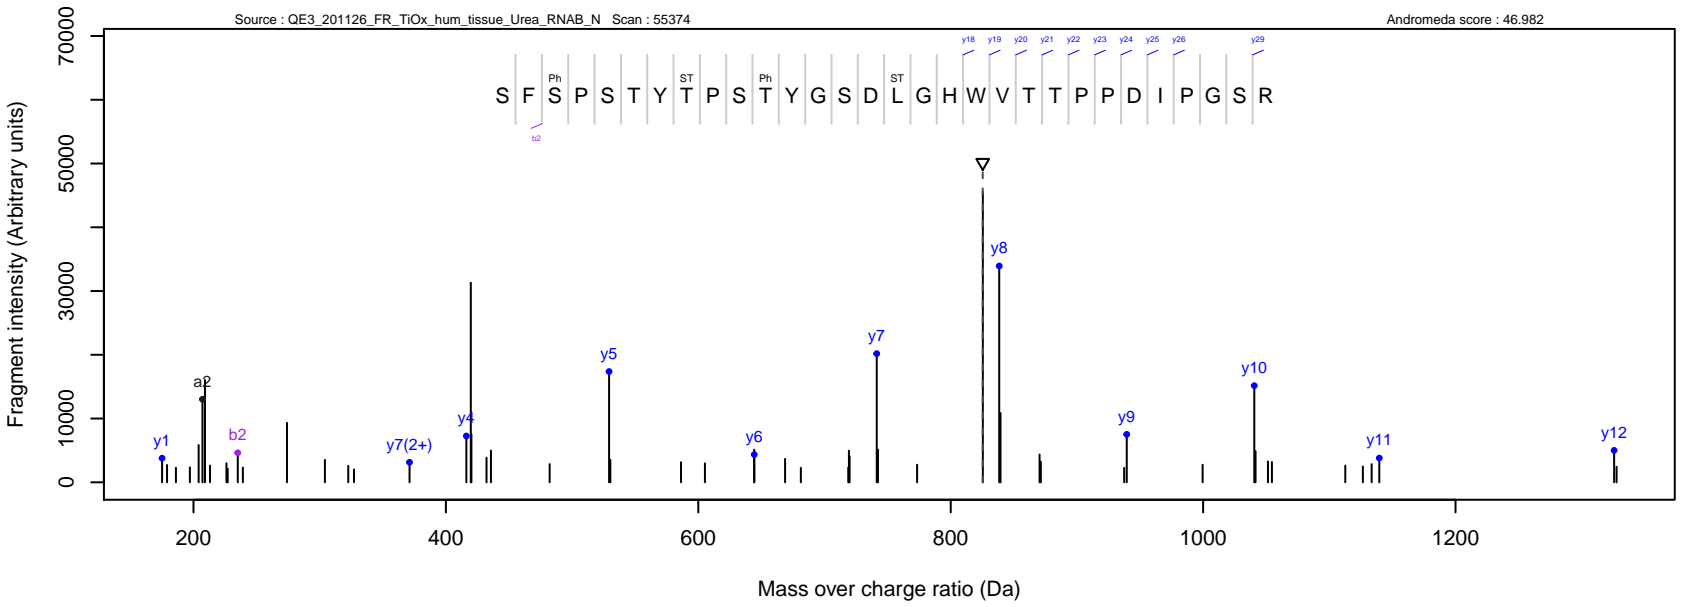

DNS(Phospho (STY))PPPAFKPEPK-2+

Source : QE3\_201126\_FR\_TiOx\_hum\_tissue\_Urea\_RNAB\_H Scan : 18821

Andromeda score : 46.964

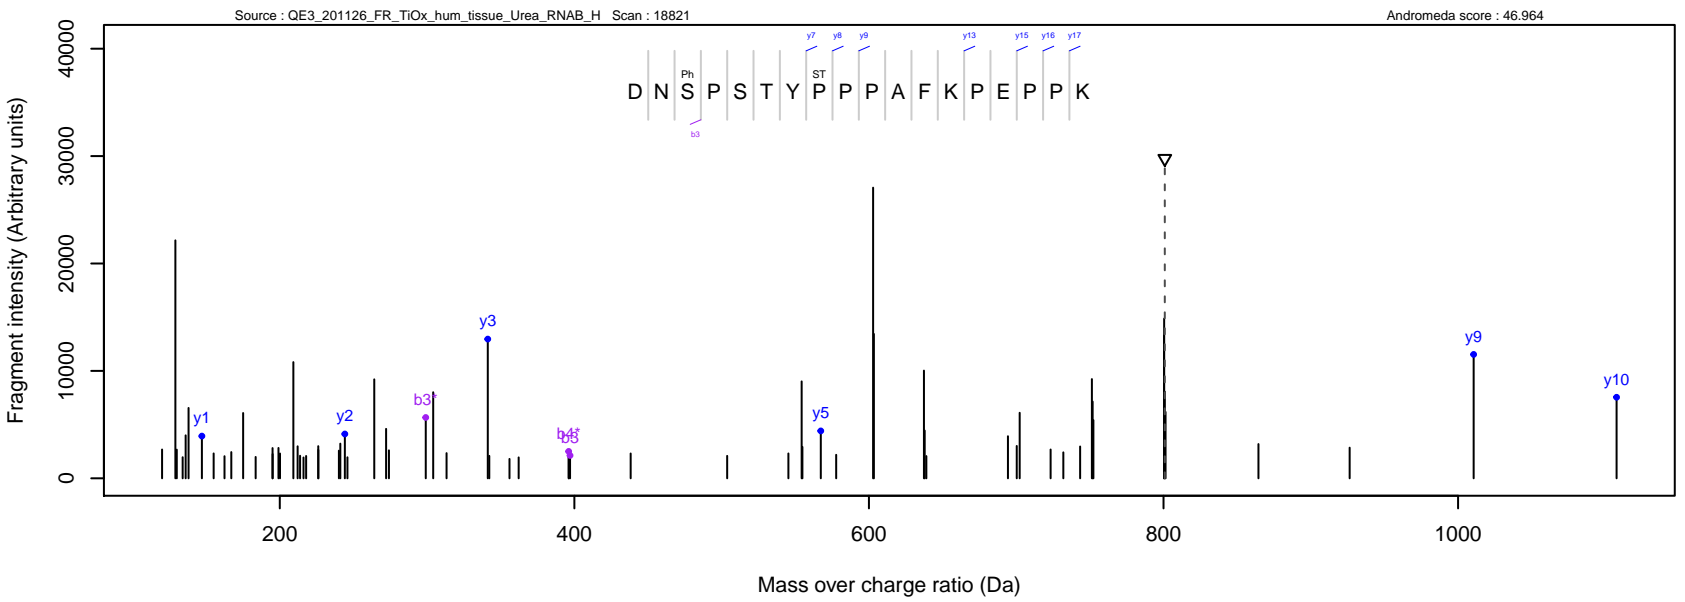

ETS(Phospho (STY))AATLSPGASSR-2+

Source : QE3\_201126\_FR\_TiOx\_hum\_tissue\_Urea\_RNAB\_N Scan : 12284

Andromeda score : 46.964

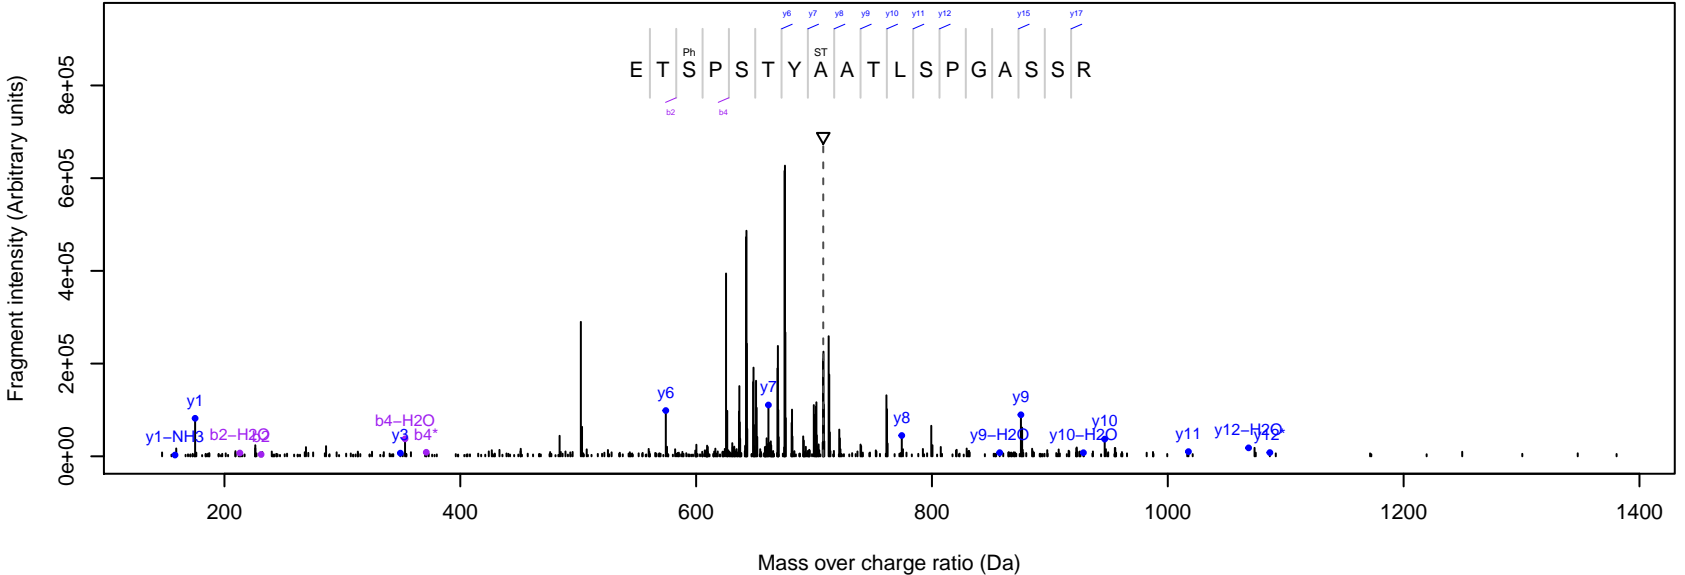

**GVHGS(Phospho (STY))FLARPSR-3+**

Source : QE3\_201126\_FR\_TiOx\_hum\_tissue\_Urea\_RNAB\_H Scan : 11118

Andromeda score : 46.964

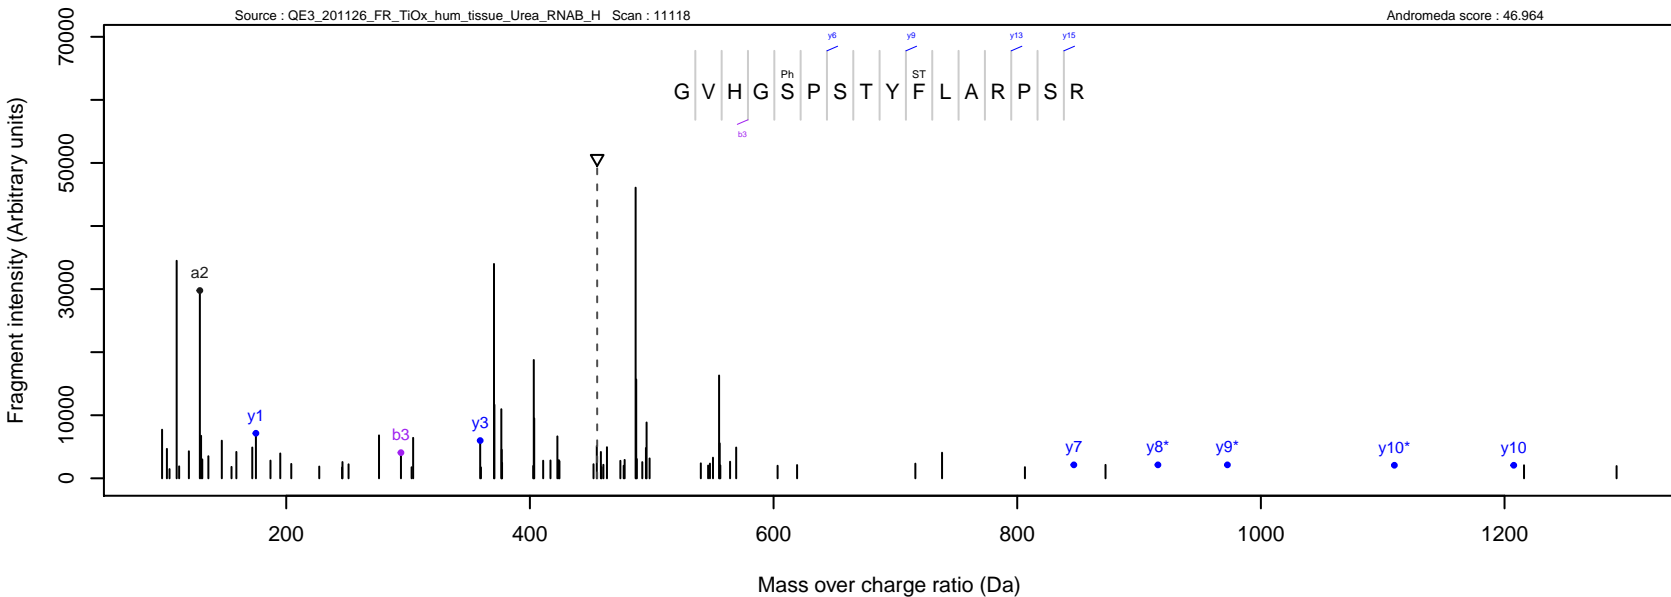

**DEFTNT(Phospho (STY))CPSDKEVEIAYSVDVAK-3+**

Source : QE3\_201126\_FR\_TiOx\_hum\_tissue\_Urea\_RNAB\_H Scan : 38989

Andromeda score : 46.953

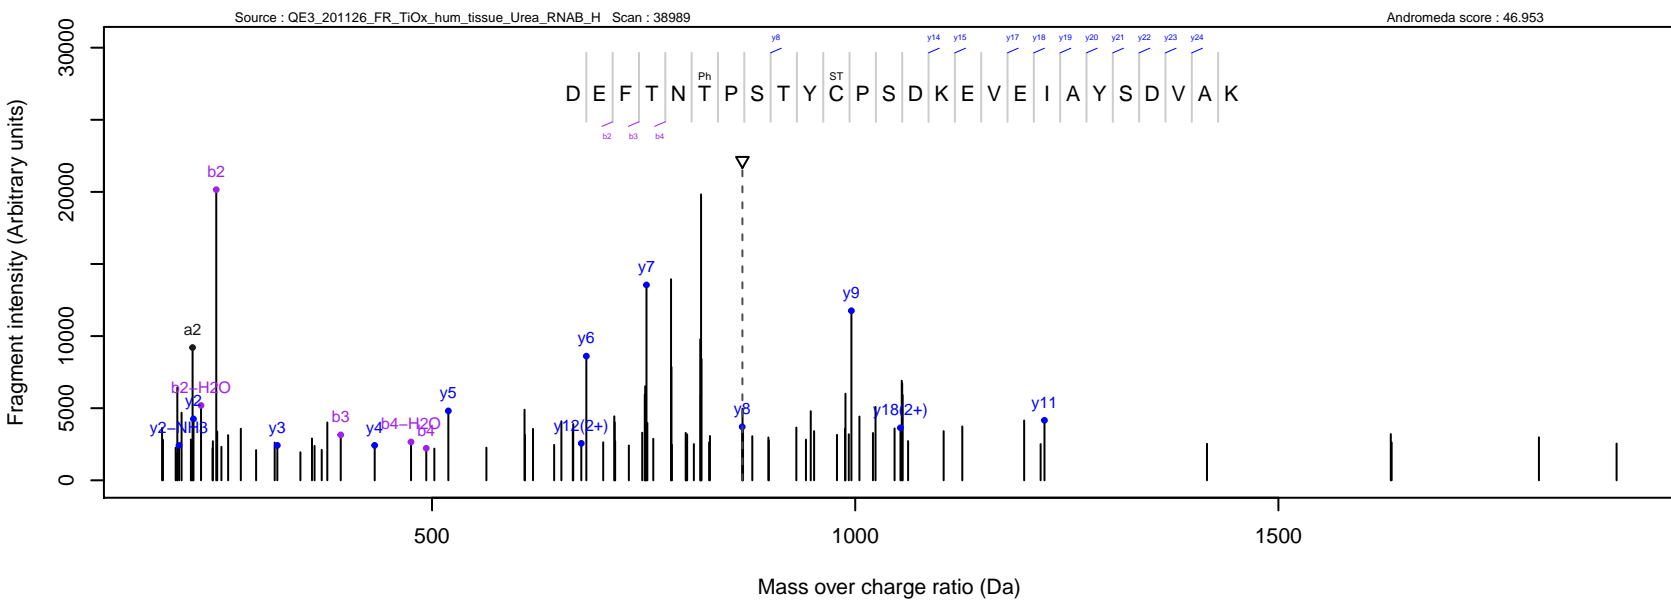

**TSHS(Phospho (STY))DSSIYLRR-3+**

Source : QE3\_201126\_FR\_TiOx\_hum\_tissue\_Urea\_RNAB\_H Scan : 9331

Andromeda score : 46.926

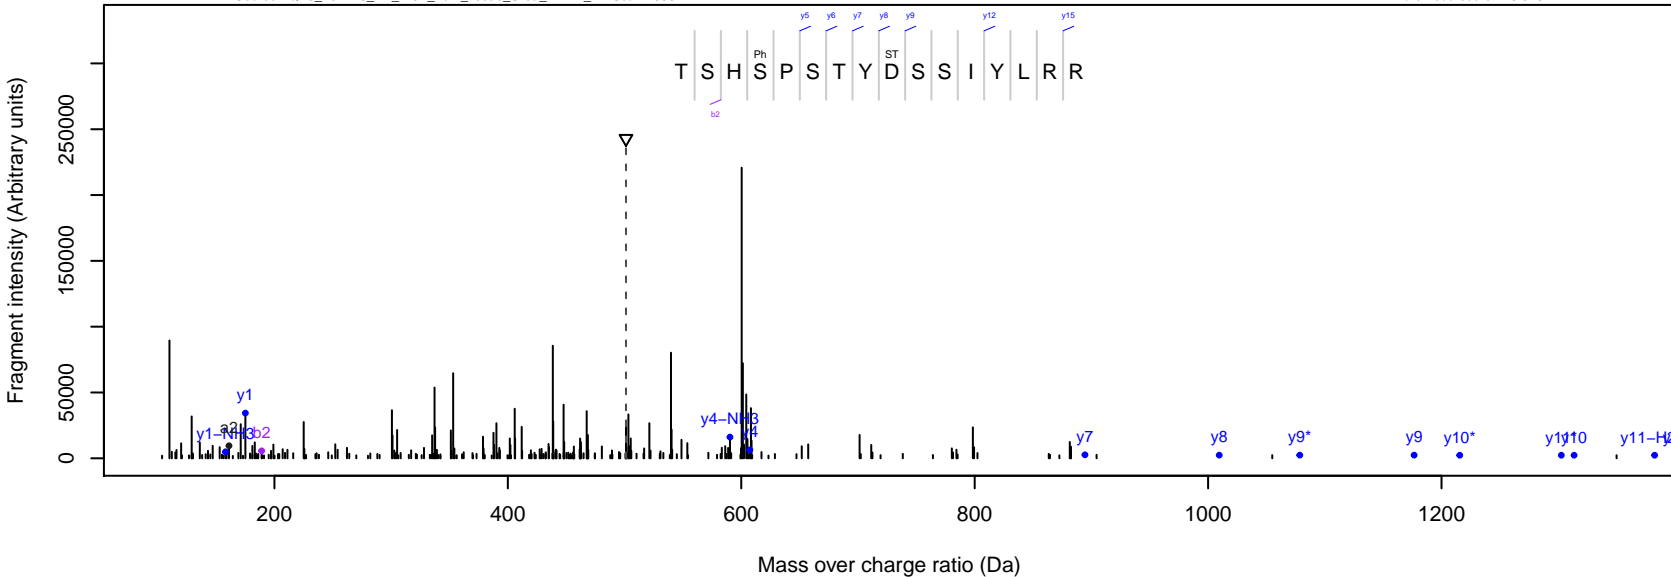

HSSIS(Phospho (STY))PSTLTLK-2+

Source : QE3\_201126\_FR\_TiOx\_hum\_tissue\_Urea\_RNAB\_B Scan : 21606

Andromeda score : 46.88

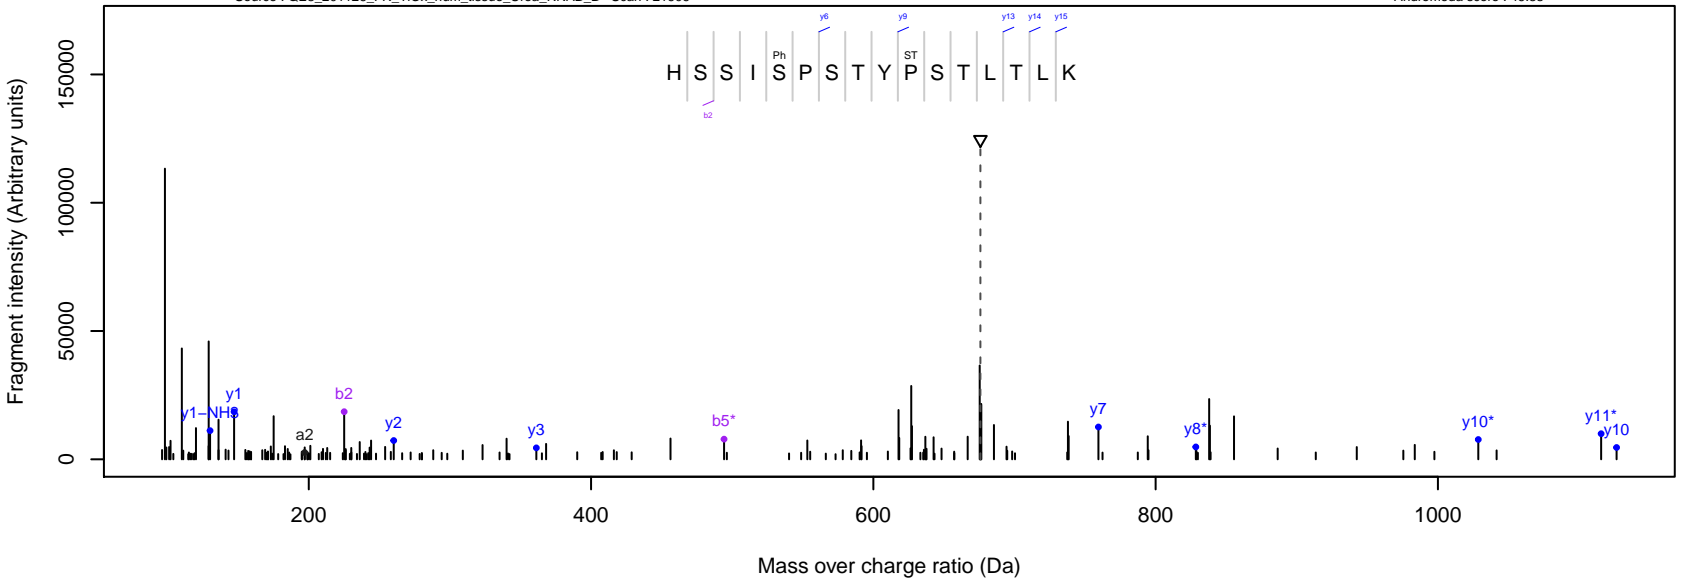

GTEPS(Phospho (STY))PGGT(Phospho (STY))PQPS(Phospho (STY))RPVSPAGPPEGVPEEAQPPR-3+

Source : QE3\_201126\_FR\_TiOx\_hum\_tissue\_Urea\_RNAB\_N Scan : 33930

Andromeda score : 46.846

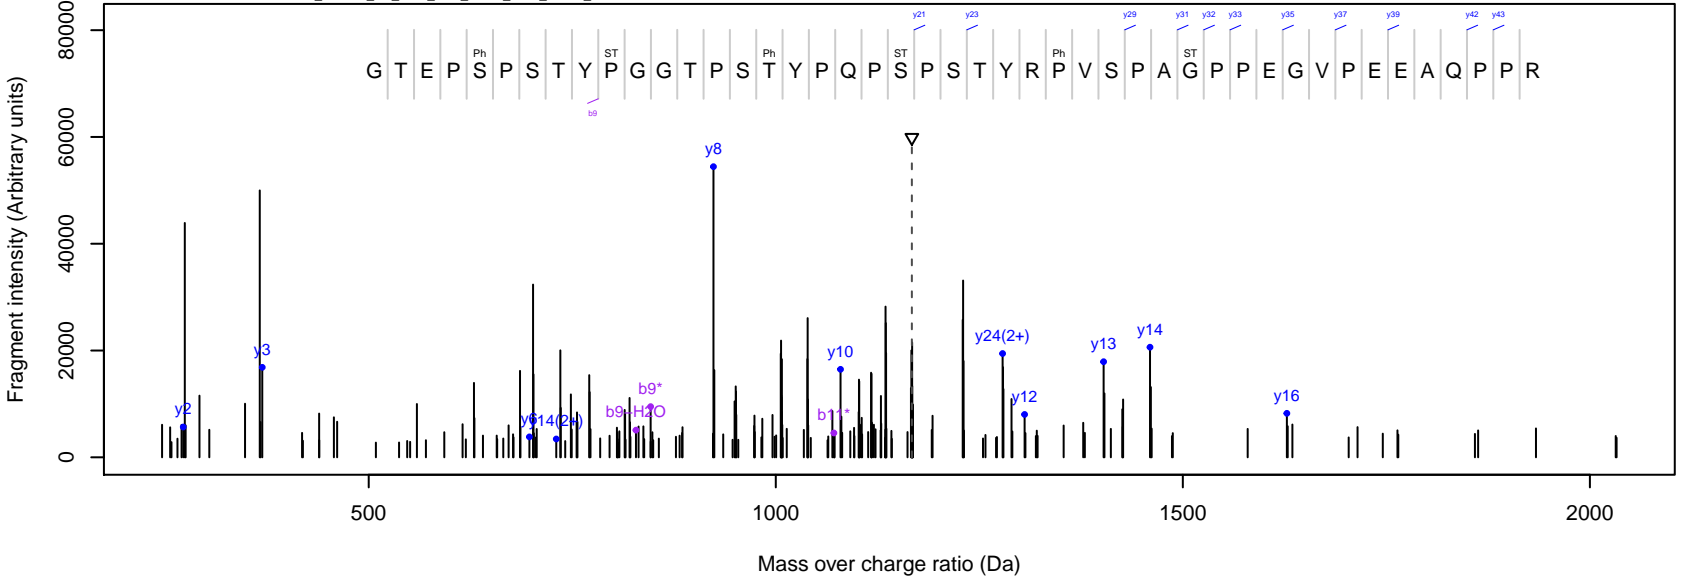

DAPCSASSELSPSTPLHT(Phospho (STY))SSPVQGK-3+

Source : QE3\_201126\_FR\_TiOx\_hum\_tissue\_Urea\_RNAB\_N Scan : 23725

Andromeda score : 46.839

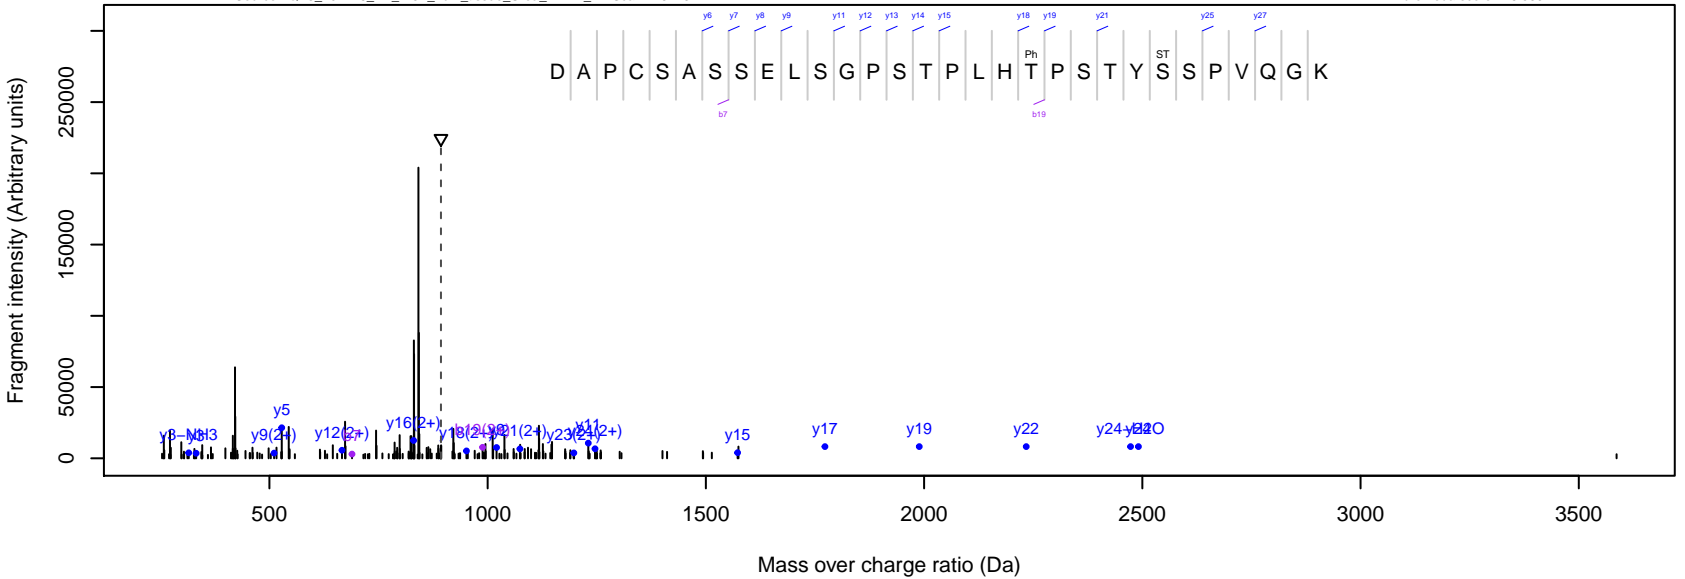



RFS(Phospho (STY))IPESGQGGTEM(Oxidation (M))DGFRR-3+

Source : QE3\_201126\_FR\_TIOx\_hum\_tissue\_Urea\_RNAB\_H Scan : 21253

Andromeda score : 46.839

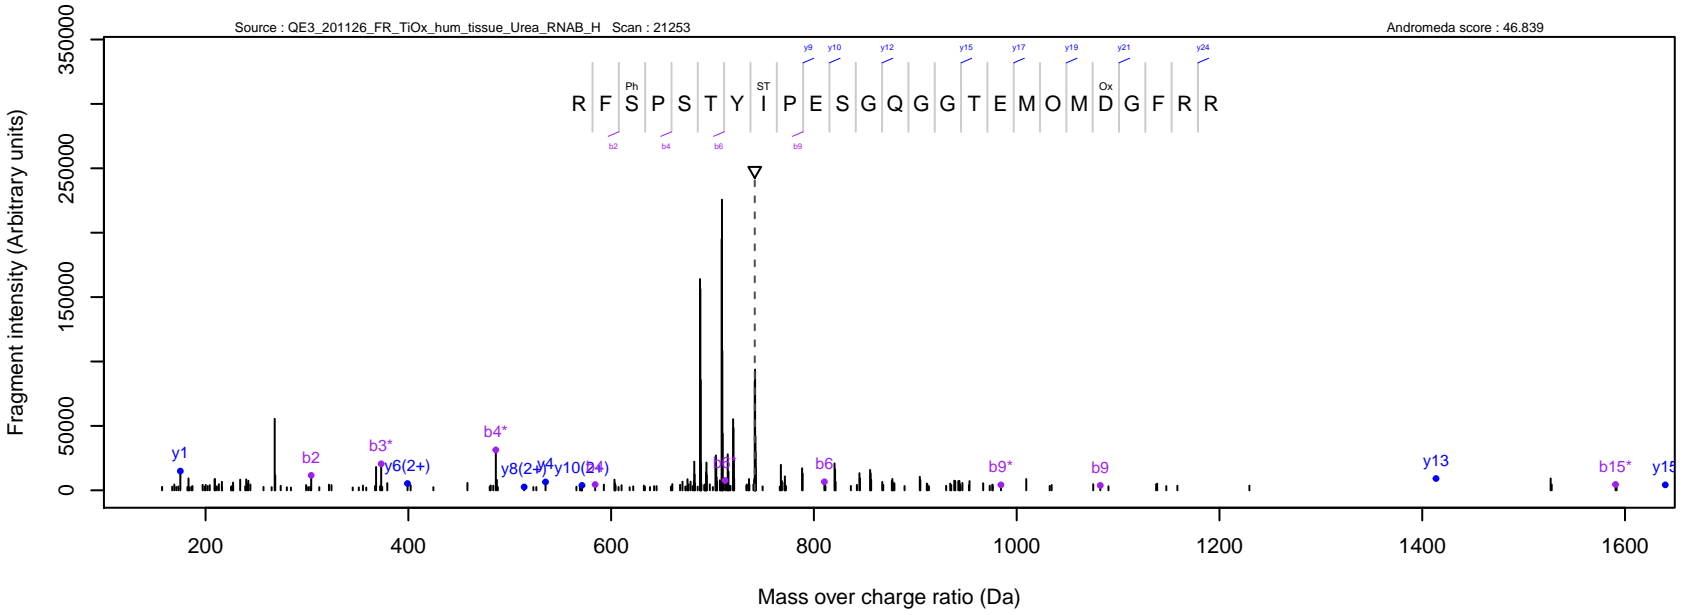

AASPYS(Phospho (STY))QRPASPTAIRR-3+

Source : QE3\_201126\_FR\_TIOx\_hum\_tissue\_Urea\_RNAB\_N Scan : 10916

Andromeda score : 46.833

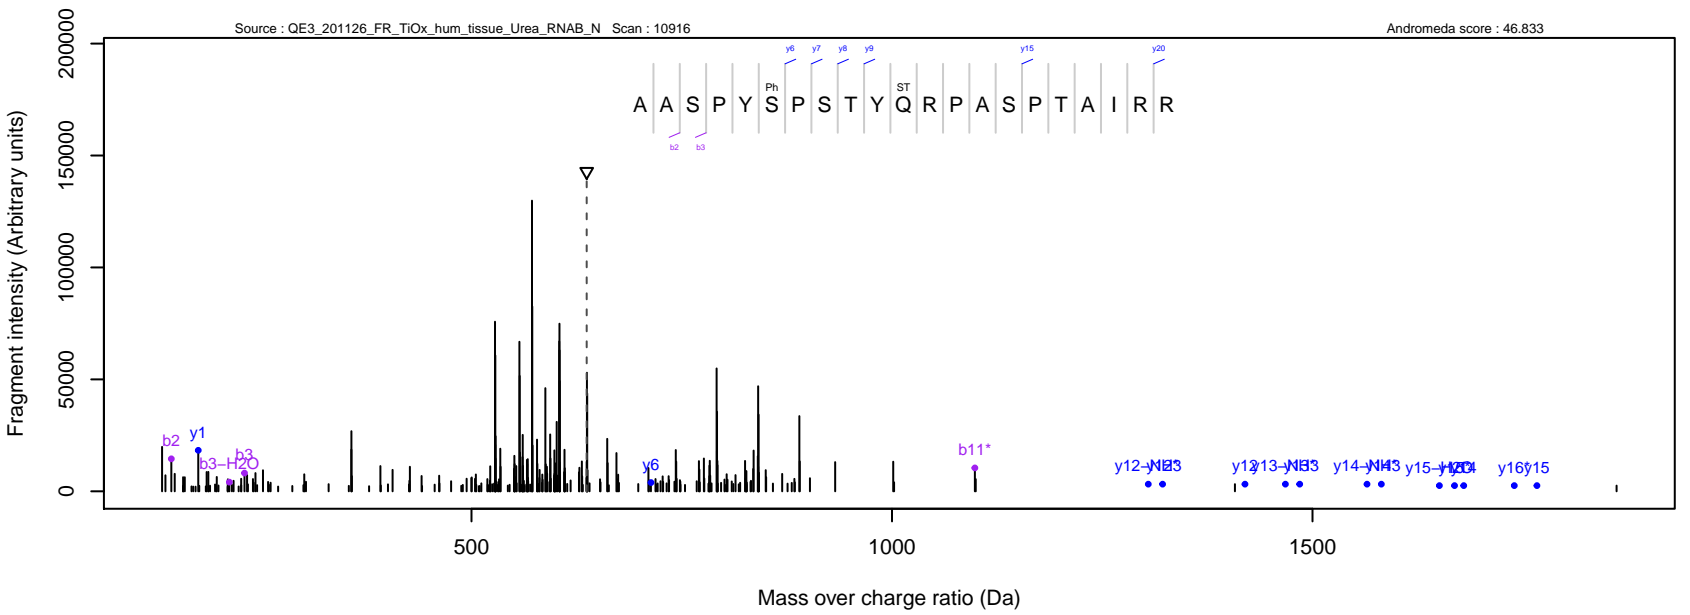

LES(Phospho (STY))FM(Oxidation (M))ETGK-2+

Source : QE3\_201126\_FR\_TIOx\_hum\_tissue\_Urea\_RNAB\_N Scan : 15251

Andromeda score : 46.796

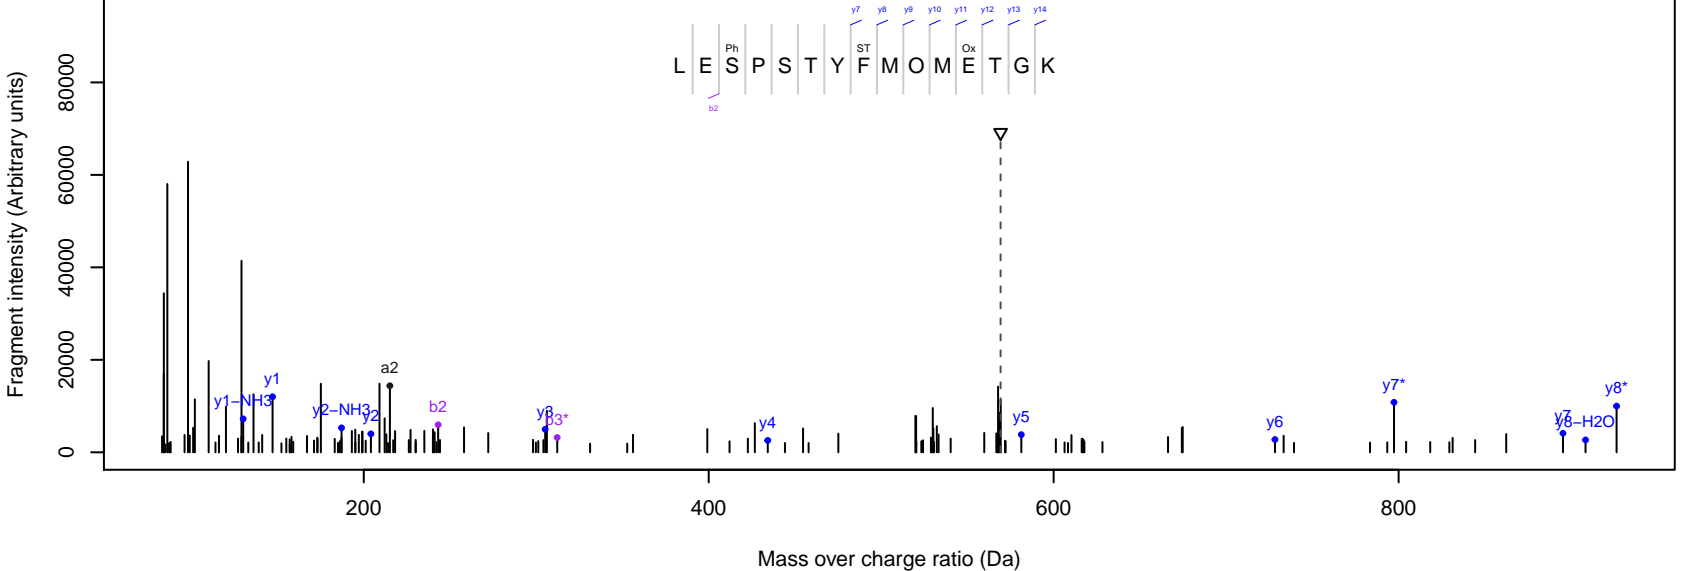

AIPVAQLNAPSDWDS(Phospho (STY))RGKDSY(Phospho (STY))ETSQLDDQSAETHSHK-4+

Source : QE3\_201126\_FR\_TIOx\_hum\_tissue\_Urea\_RNAB\_H Scan : 30012

Andromeda score : 46.77

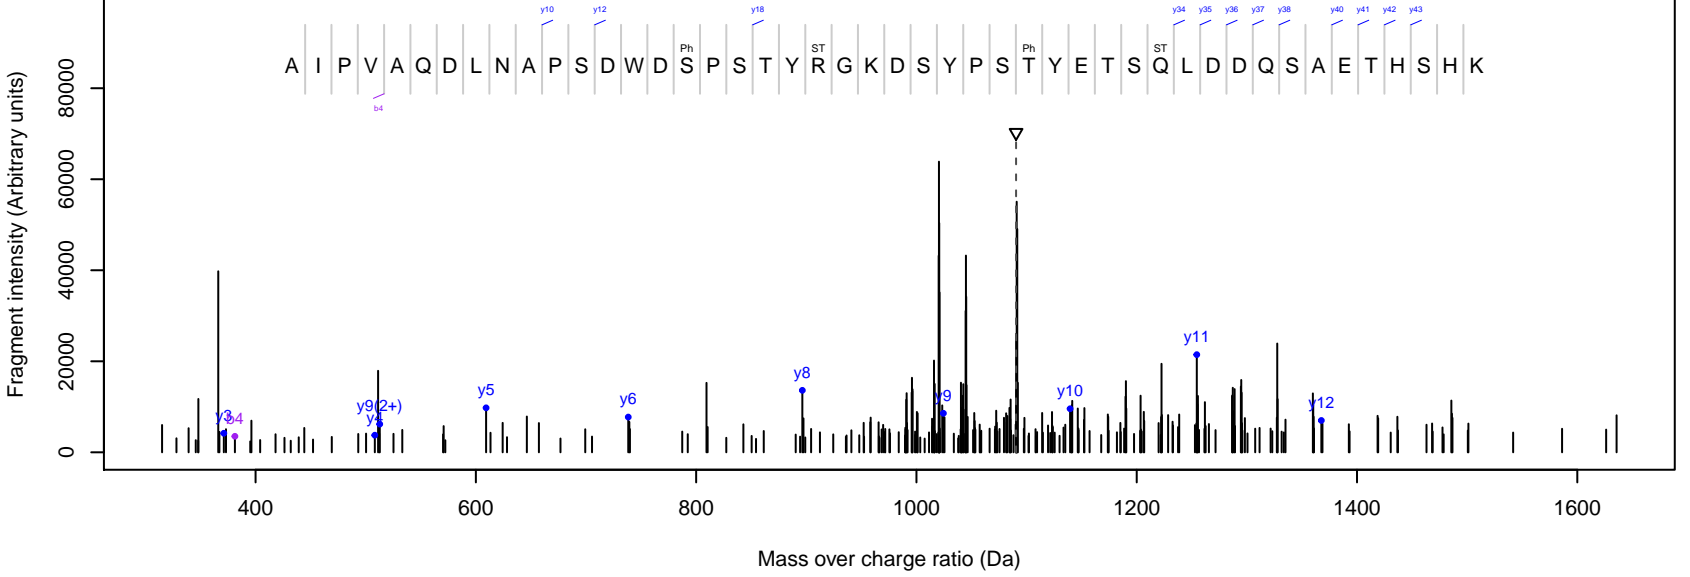

TVAISDAALPHDYCT(Phospho (STY))TPGGTLFSTT(Phospho (STY))PGGTR-3+

Source : QE3\_201126\_FR\_TIOx\_hum\_tissue\_Urea\_RNAB\_B Scan : 48084

Andromeda score : 46.714

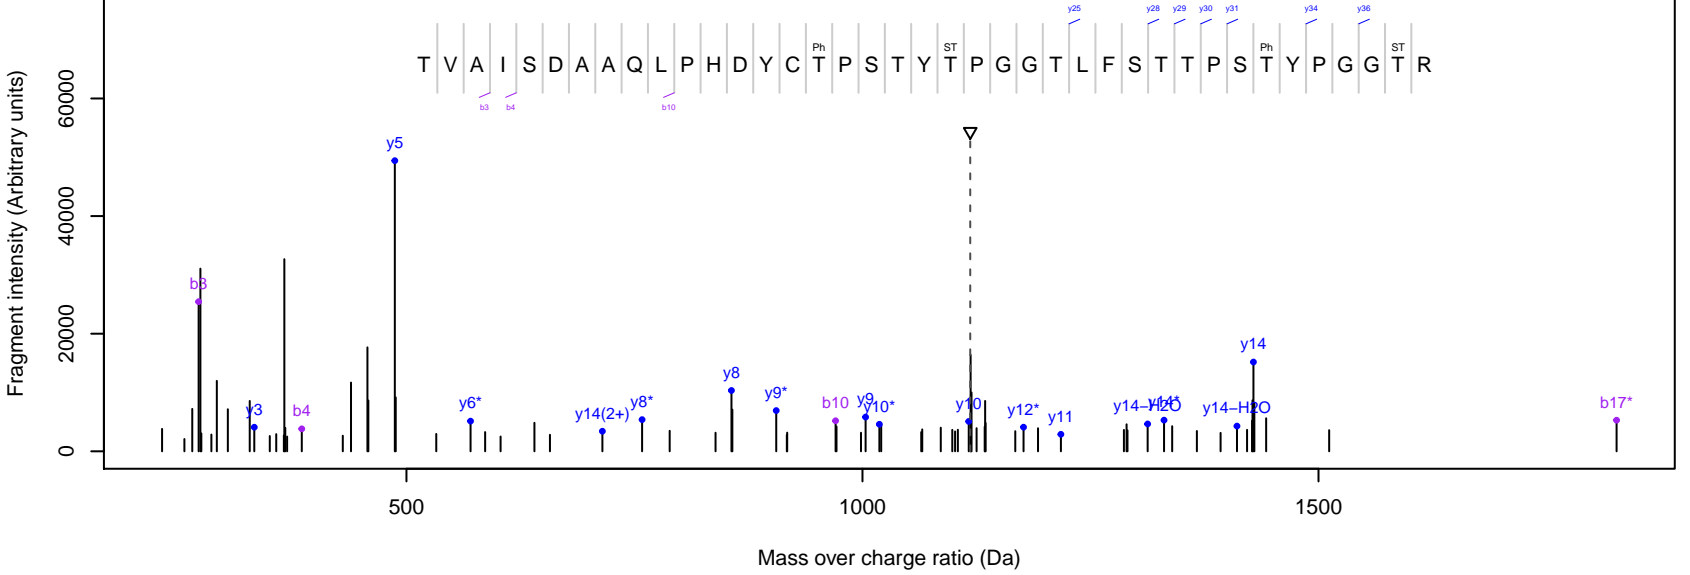

S(Phospho (STY))PFLKPEDER-2+

Source : QE3\_201126\_FR\_TIOx\_hum\_tissue\_Urea\_RNAB\_H Scan : 13961

Andromeda score : 46.706

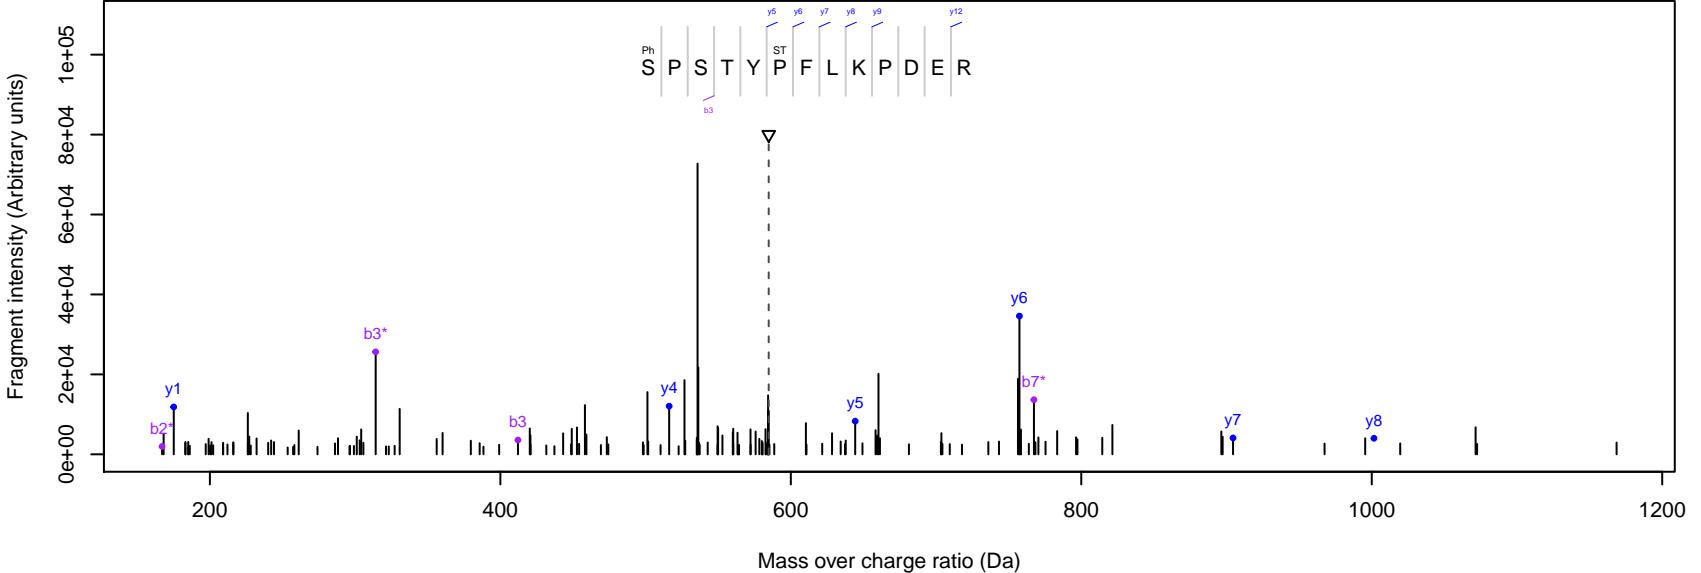

LTS(Phospho (STY))SCPDLPSQTDKK-3+

Source : QE3\_201126\_FR\_TiOx\_hum\_tissue\_Urea\_RNAB\_B Scan : 12575

Andromeda score : 46.68

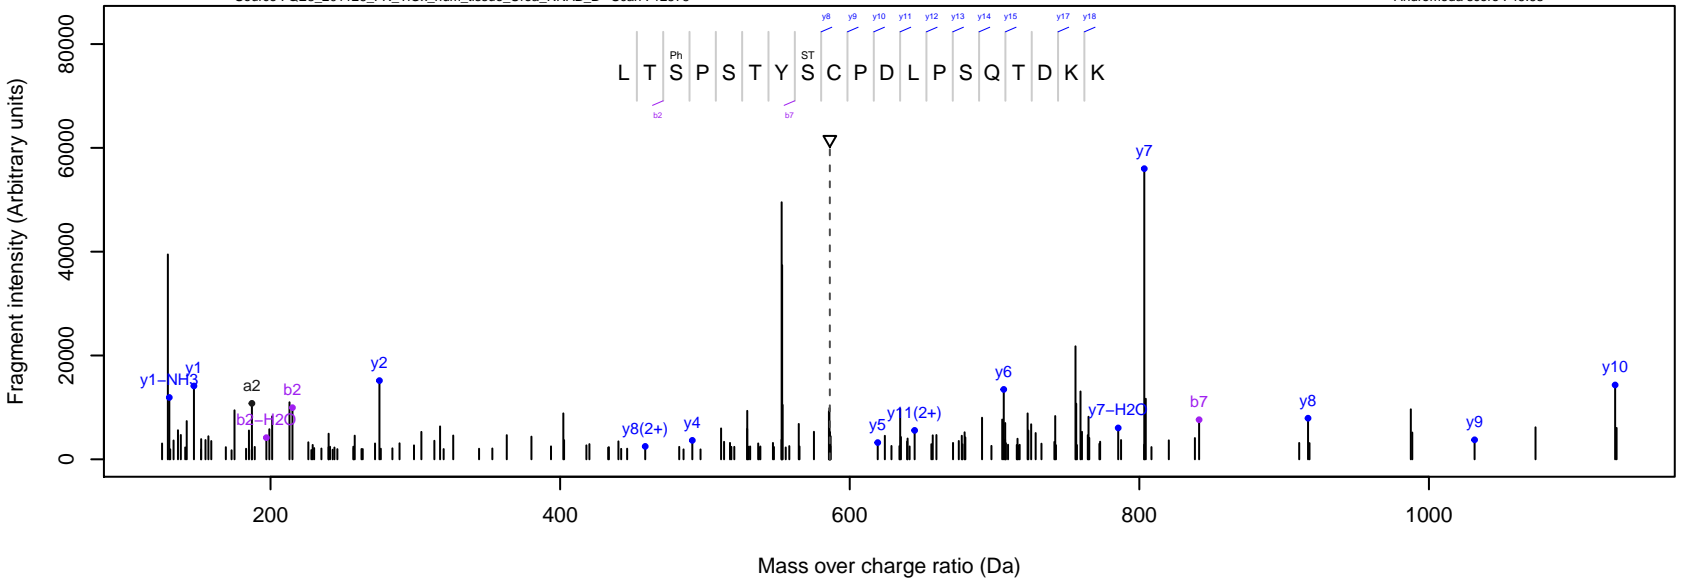

LS(Phospho (STY))S(Phospho (STY))S(Phospho (STY))SSNDSGNKVG IQLPEVELSVSTK-3+

Source : QE3\_201126\_FR\_TiOx\_hum\_tissue\_Urea\_RNAB\_N Scan : 58854

Andromeda score : 46.678

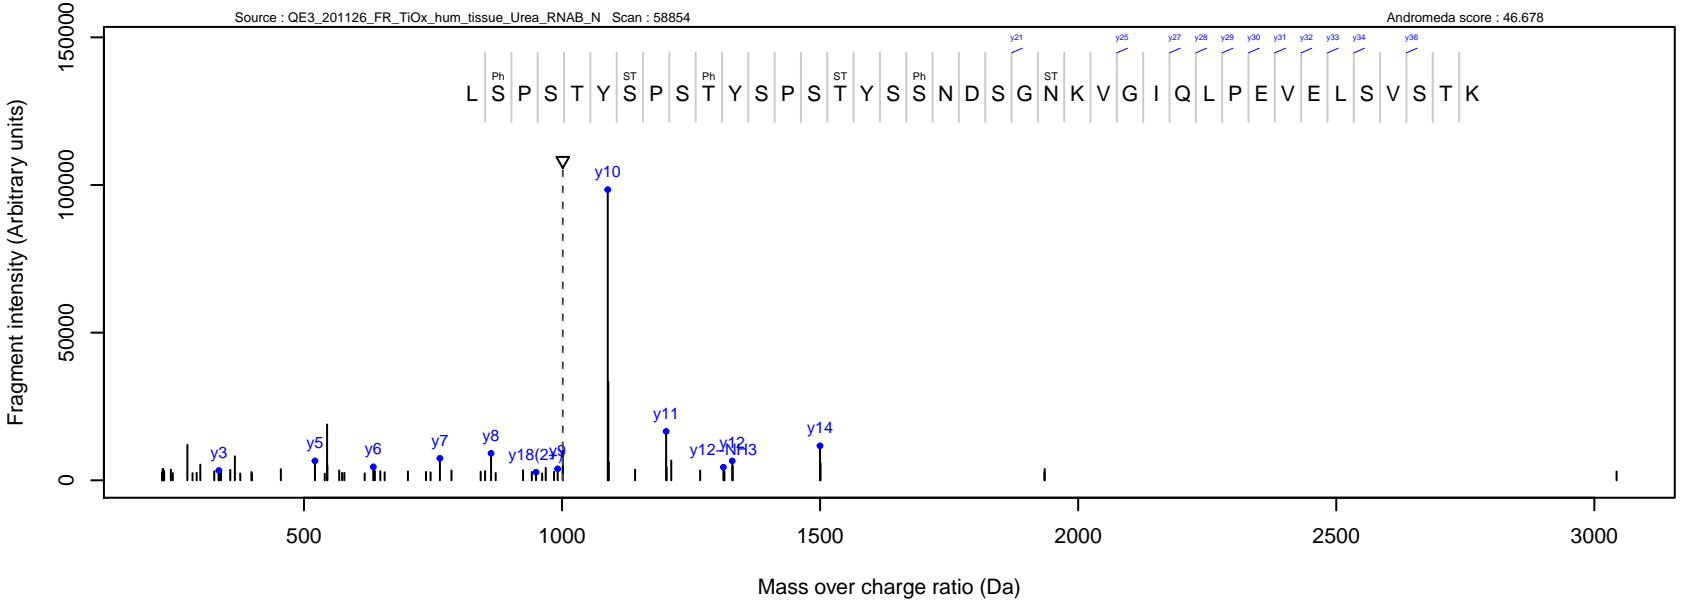

QQIDELRDS(Phospho (STY))DSVCD SGVETSFR-3+

Source : QE3\_201126\_FR\_TiOx\_hum\_tissue\_Urea\_RNAB\_B Scan : 30169

Andromeda score : 46.678

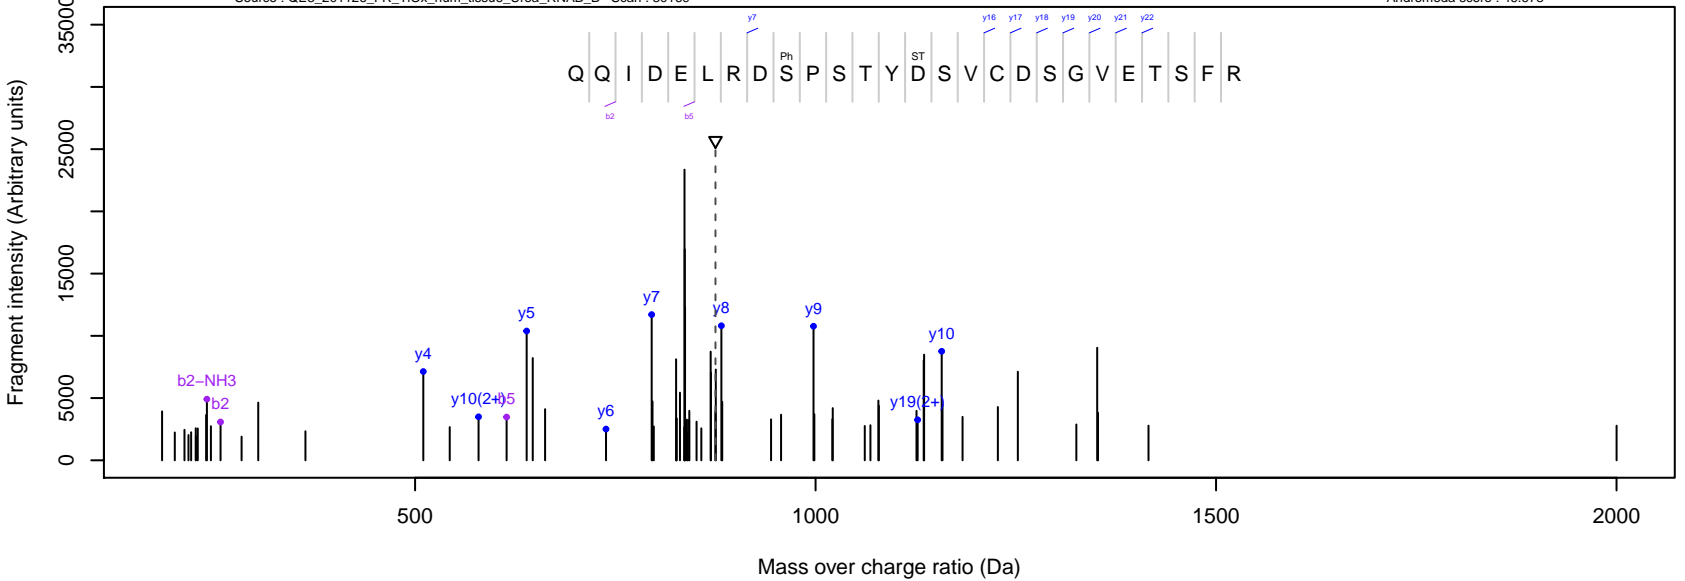

EAAVSADILQES(Phospho (STY))AIHSPGTVEK-3+

Source : QE3\_201126\_FR\_TiOx\_hum\_tissue\_Urea\_RNAB\_B Scan : 35428

Andromeda score : 46.66

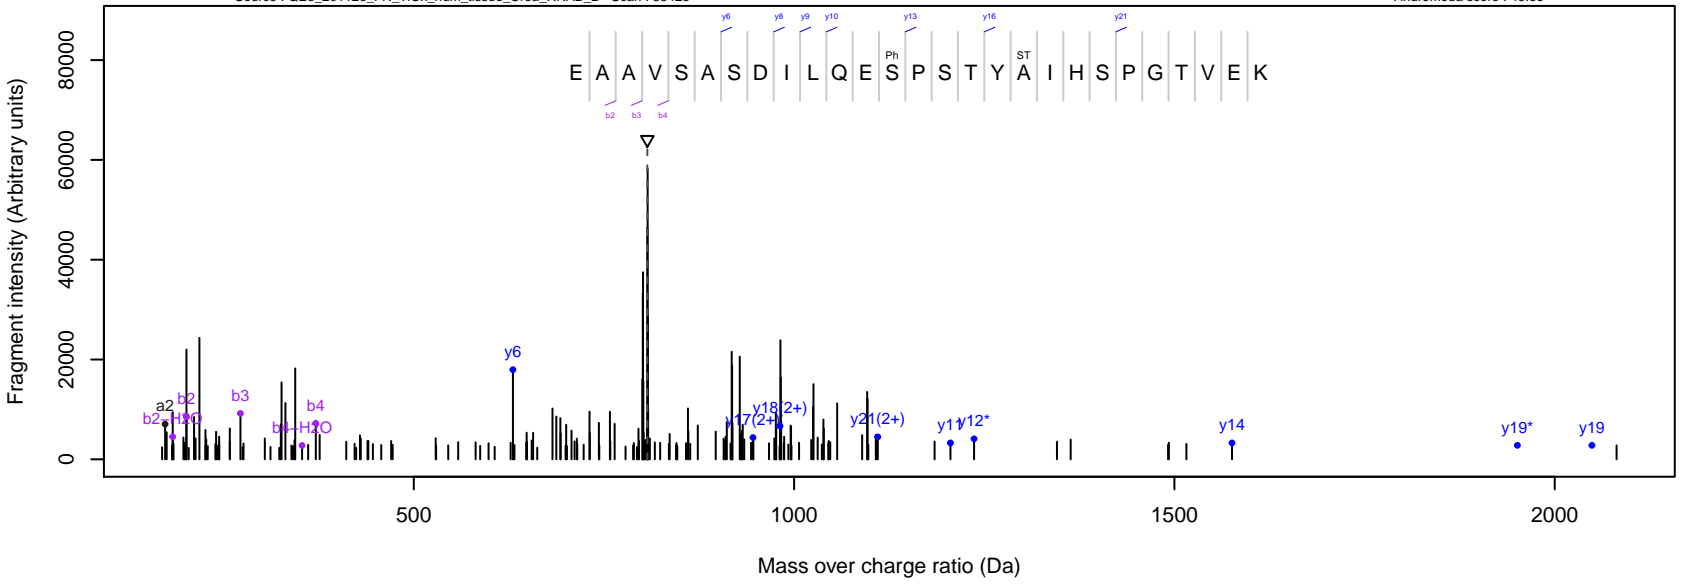

S(Phospho (STY))IDDSEM(Oxidation (M))ESPVDVDFYPGTGR-3+

Source : QE3\_201126\_FR\_TiOx\_hum\_tissue\_Urea\_RNAB\_N Scan : 48716

Andromeda score : 46.66

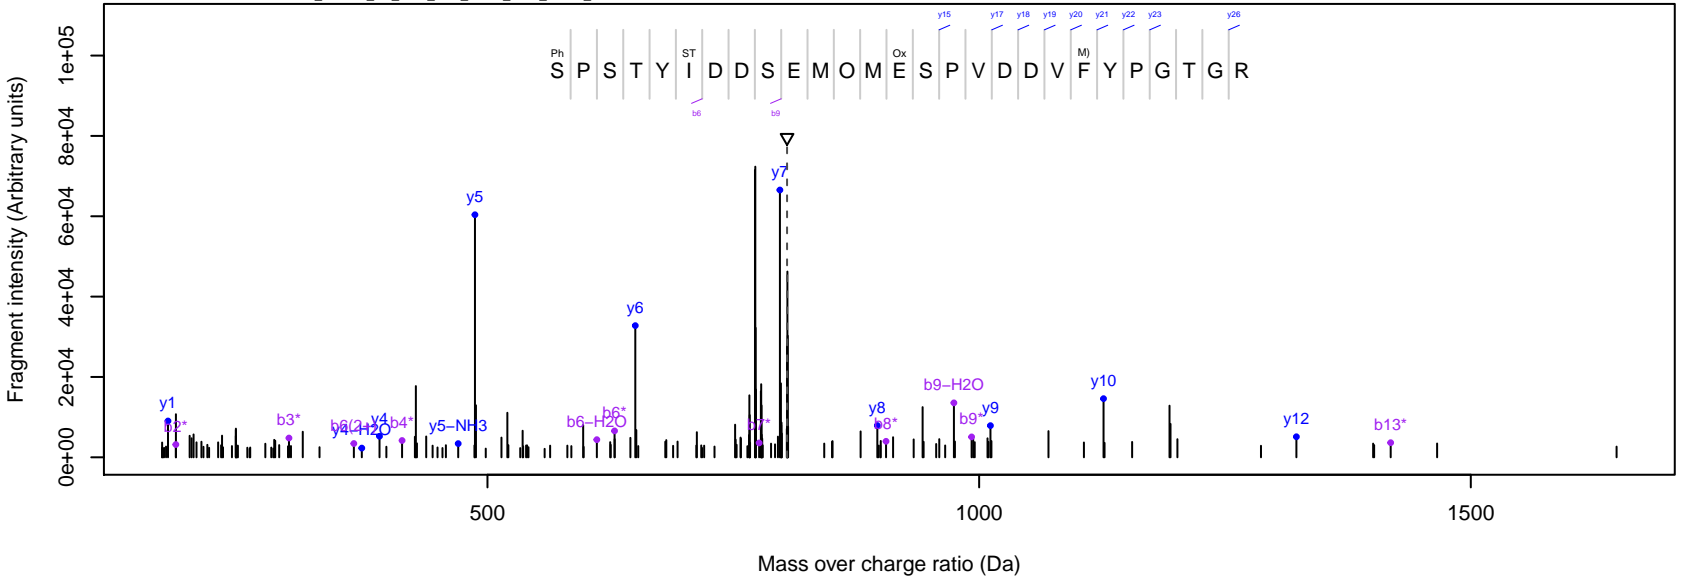

S(Phospho (STY))SSLSAANTSQTNPQGAVSSTVSGLQR-3+

Source : QE3\_201126\_FR\_TiOx\_hum\_tissue\_Urea\_RNAB\_H Scan : 32308

Andromeda score : 46.66

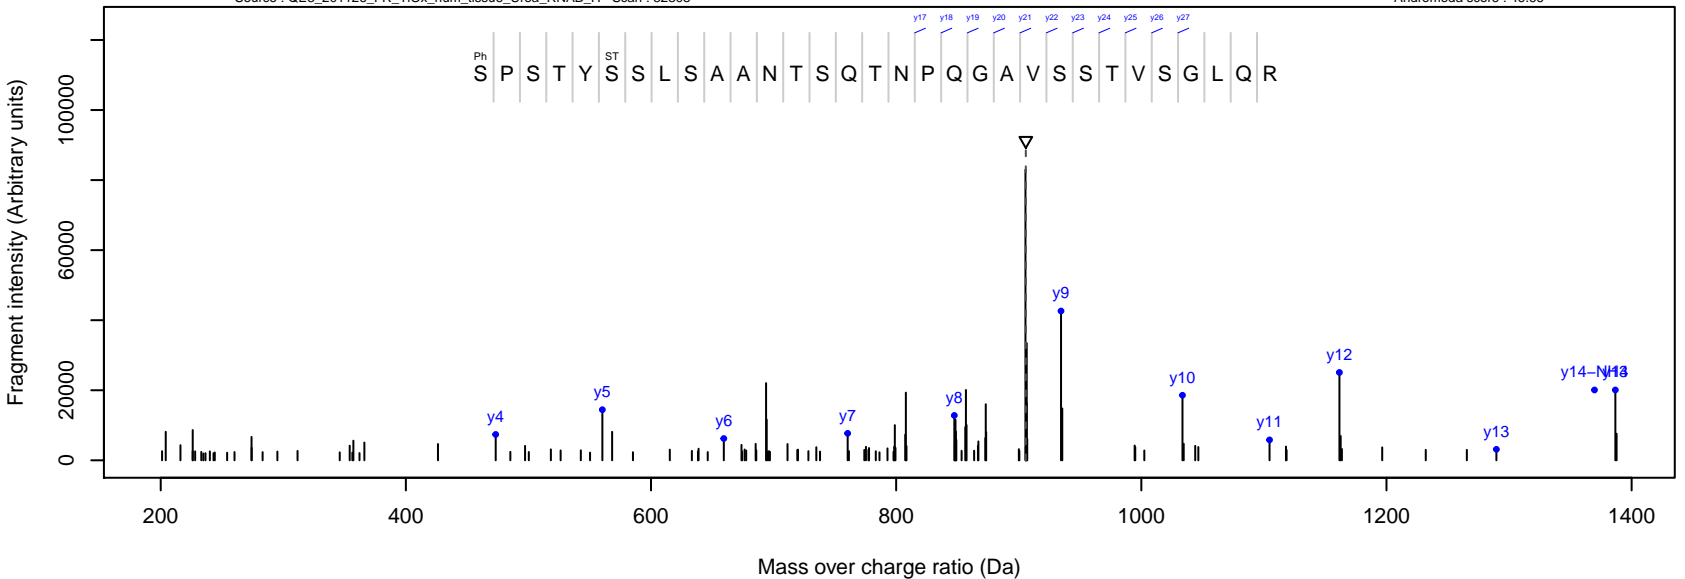

YLVDGTKPNAGS(Phospho (STY))EEIS(Phospho (STY))S(Phospho (STY))EDELVEEK-3+

Source : QE3\_201126\_FR\_TIOx\_hum\_tissue\_Urea\_RNAB\_N Scan : 43559

Andromeda score : 46.66

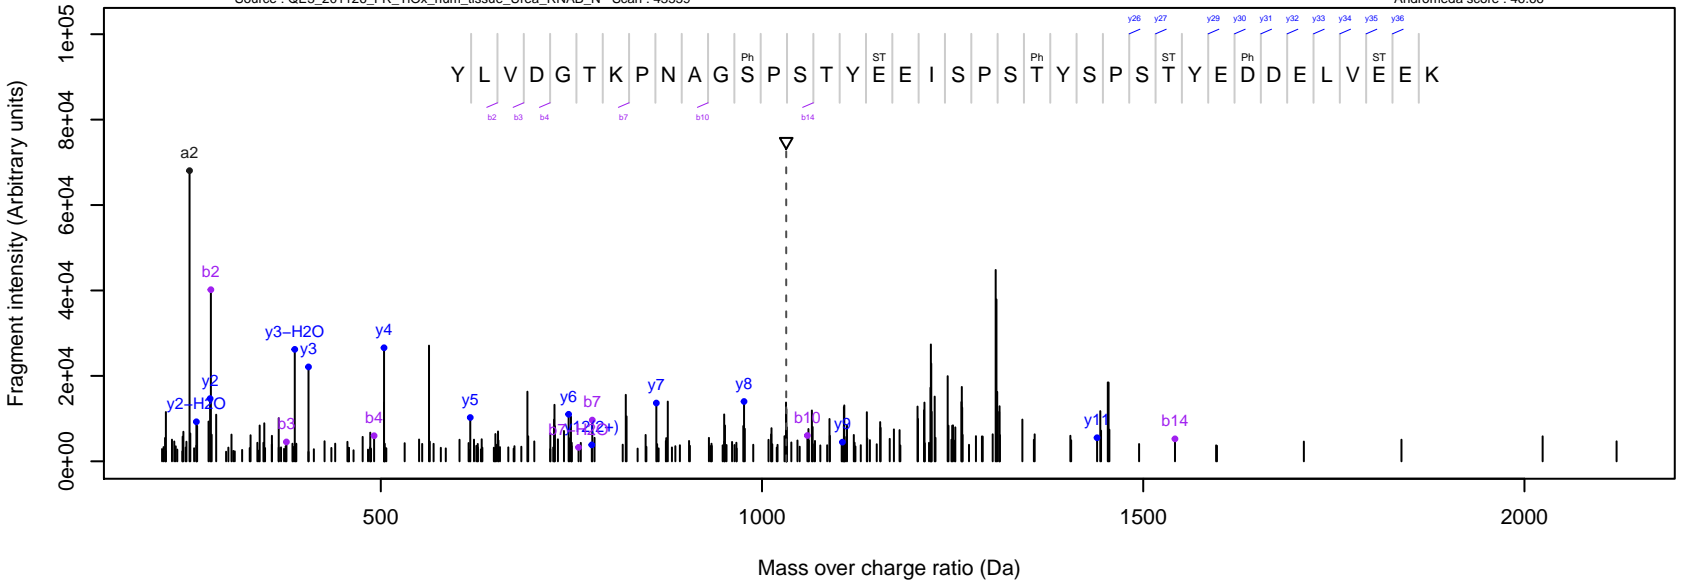

(Acetyl (Protein N-term))ADVLDLHEAGGEDFAM(Oxidation (M))DEGDDES(Phospho (STY))IHKLK-4+

Source : QE3\_201126\_FR\_TIOx\_hum\_tissue\_Urea\_RNAB\_H Scan : 39645

Andromeda score : 46.608

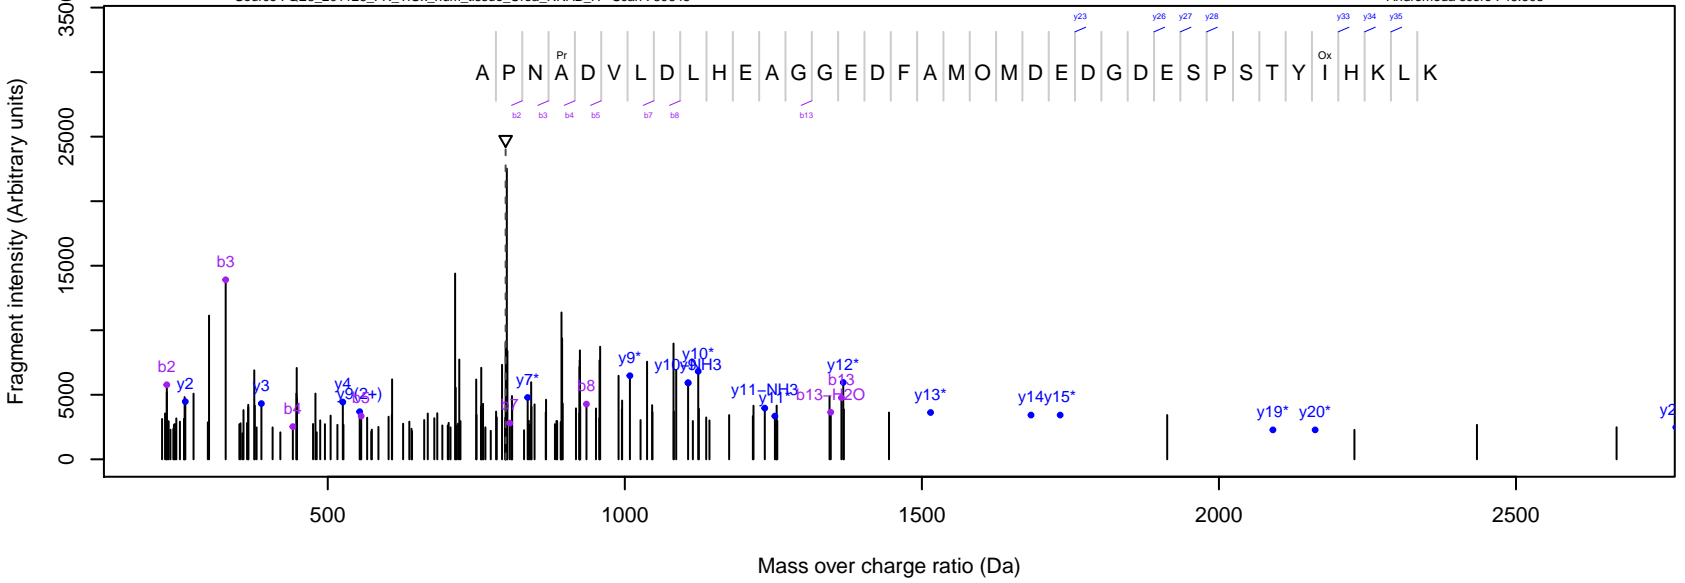

SPQTLAPVGEDAMKT(Phospho (STY))PS(Phospho (STY))PAAEDAREPEAK-4+

Source : QE3\_201126\_FR\_TIOx\_hum\_tissue\_Urea\_RNAB\_H Scan : 25109

Andromeda score : 46.608

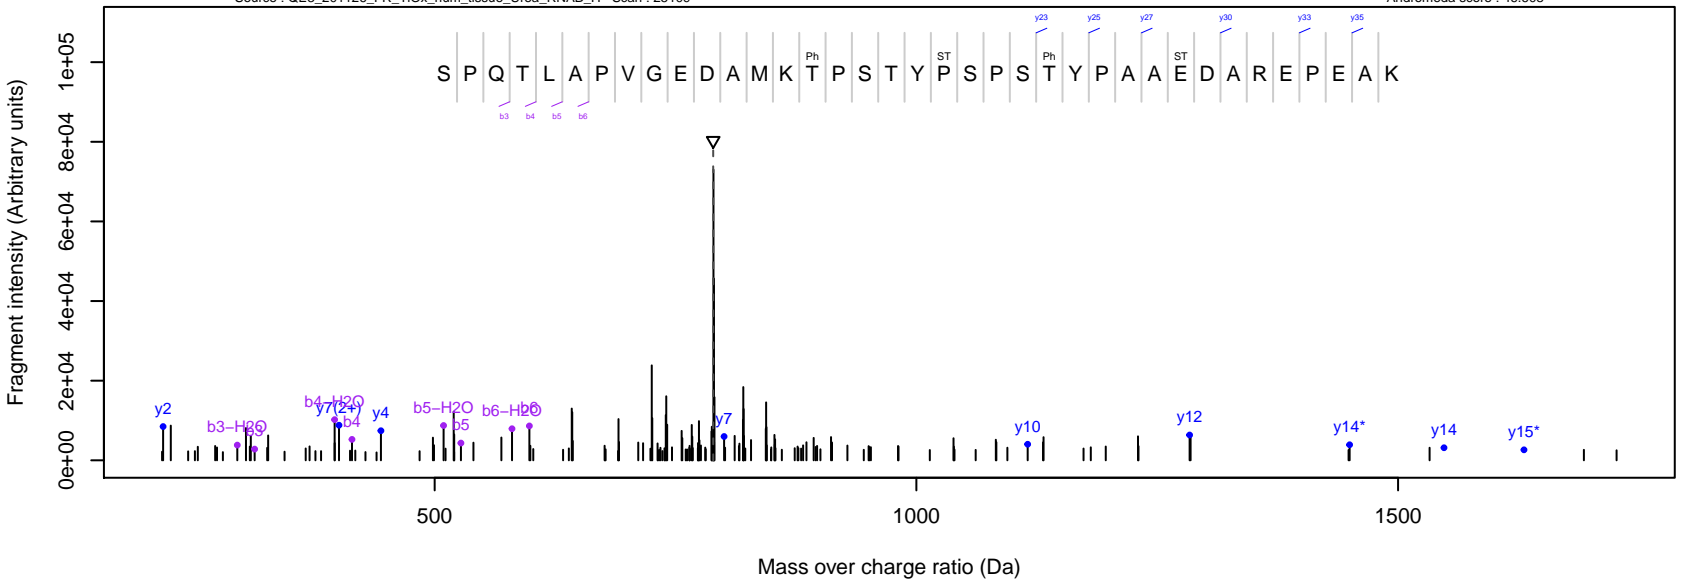

QKS(Phospho (STY))LTLTPTR-2+

Source : QE3\_201126\_FR\_TIOx\_hum\_tissue\_Urea\_RNAB\_H Scan : 12267

Andromeda score : 46.592

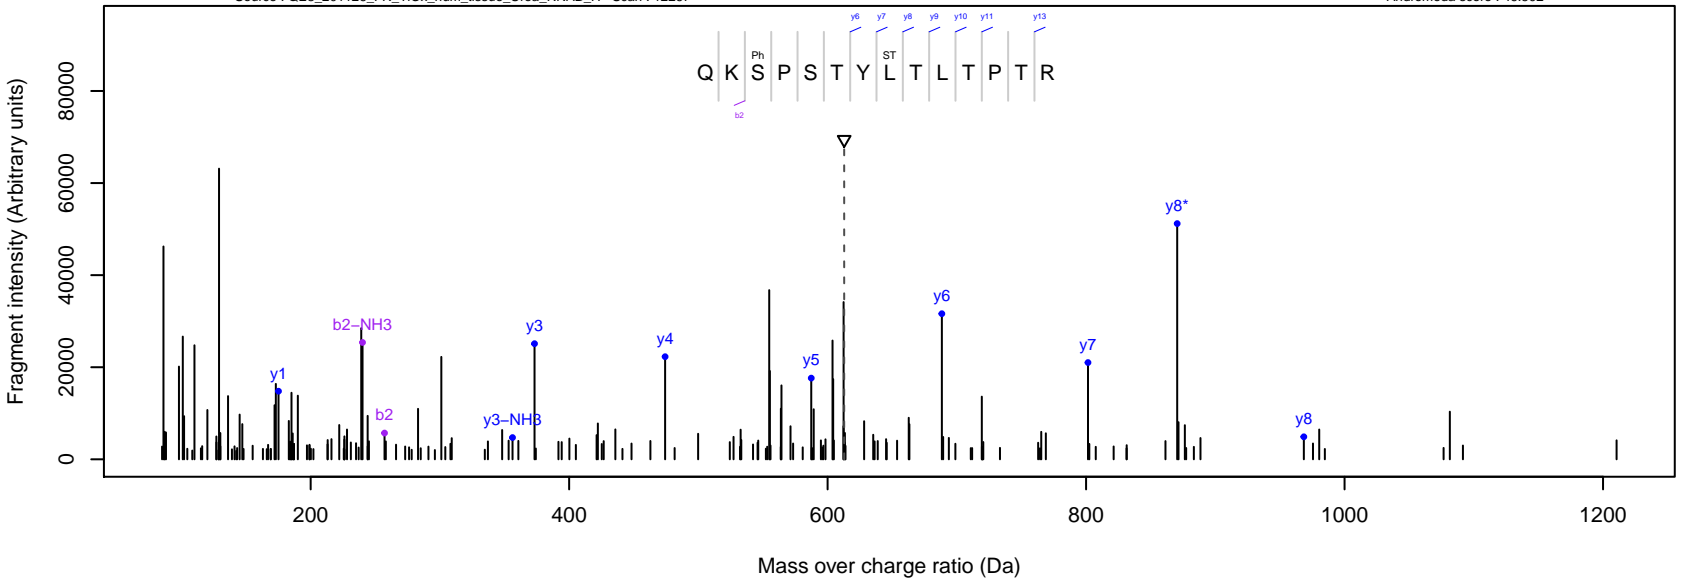

S(Phospho (STY))PVPTTLPLGR-2+

Source : QE3\_201126\_FR\_TIOx\_hum\_tissue\_Urea\_RNAB\_N Scan : 34905

Andromeda score : 46.592

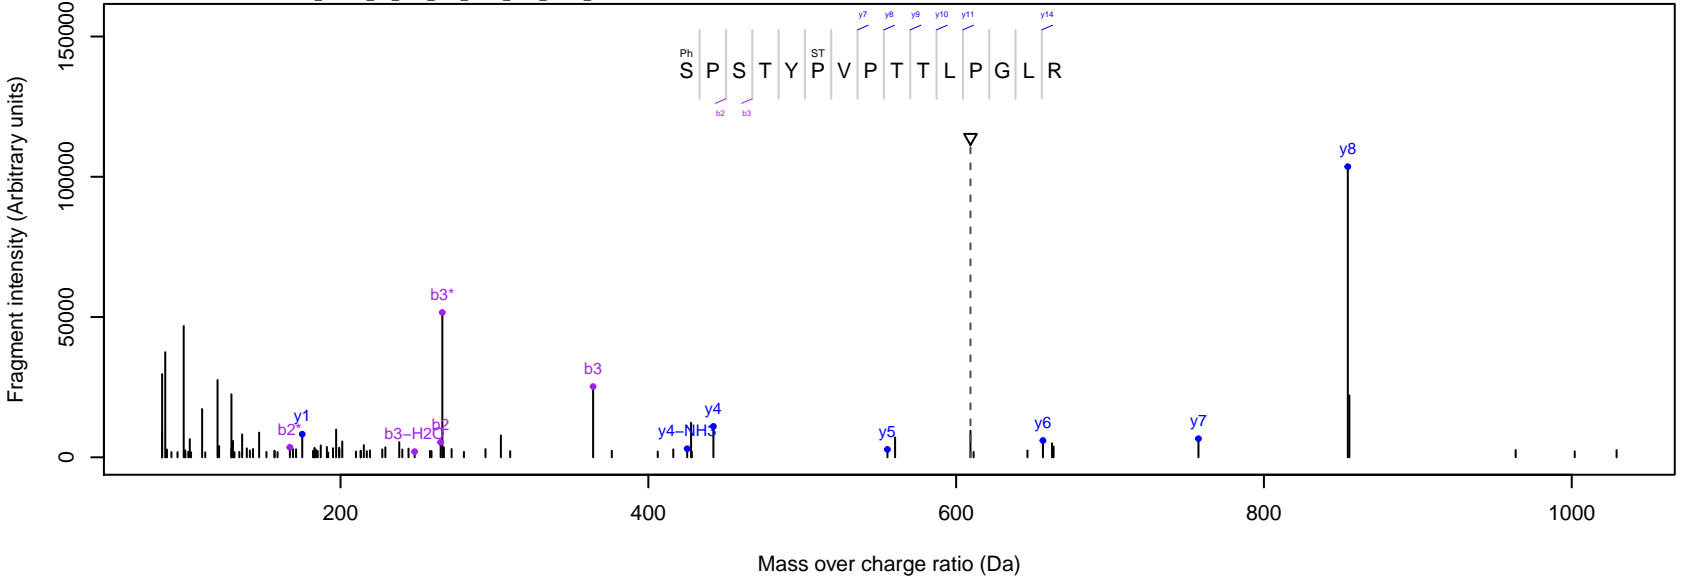

AQSGSDS(Phospho (STY))S(Phospho (STY))PEPKAPAPR-3+

Source : QE3\_201126\_FR\_TIOx\_hum\_tissue\_Urea\_RNAB\_N Scan : 9790

Andromeda score : 46.578

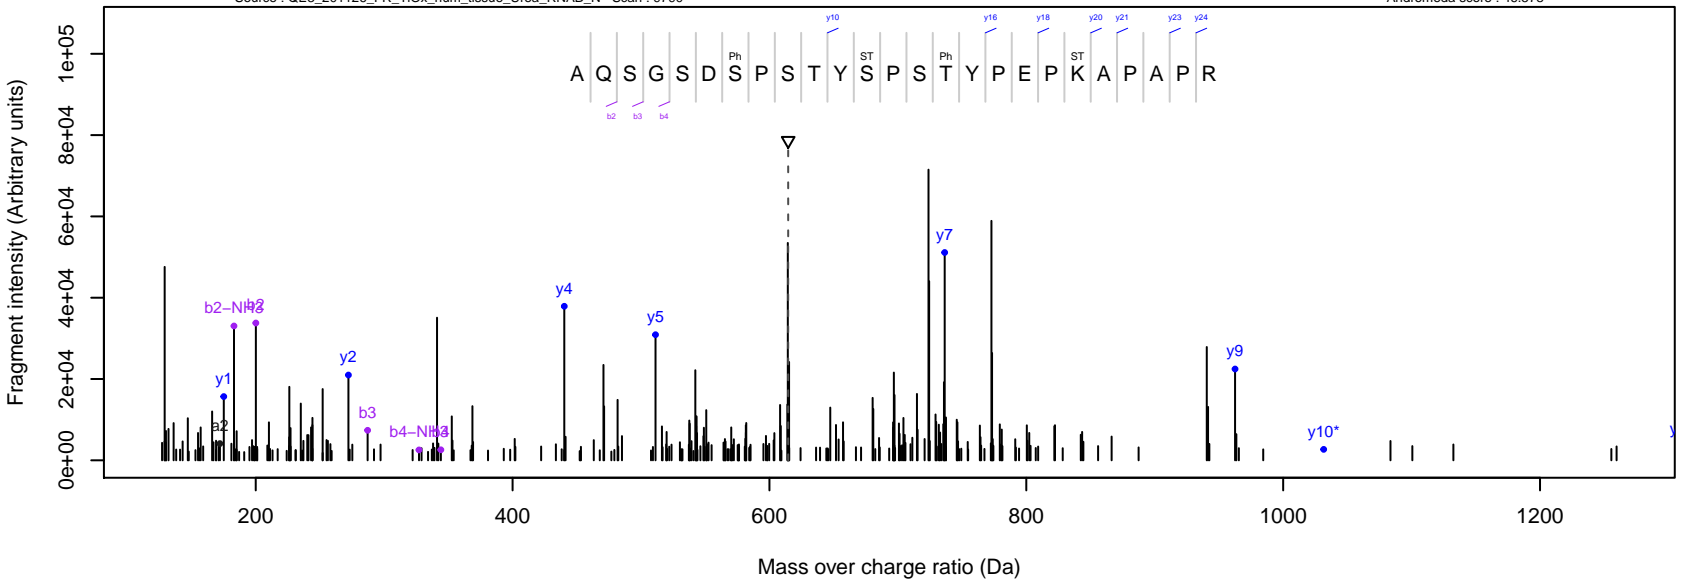

ASAVSELS(Phospho (STY))PRERS(Phospho (STY))PALK-3+

Source : QE3\_201126\_FR\_TiOx\_hum\_tissue\_Urea\_RNAB\_B Scan : 16967

Andromeda score : 46.578

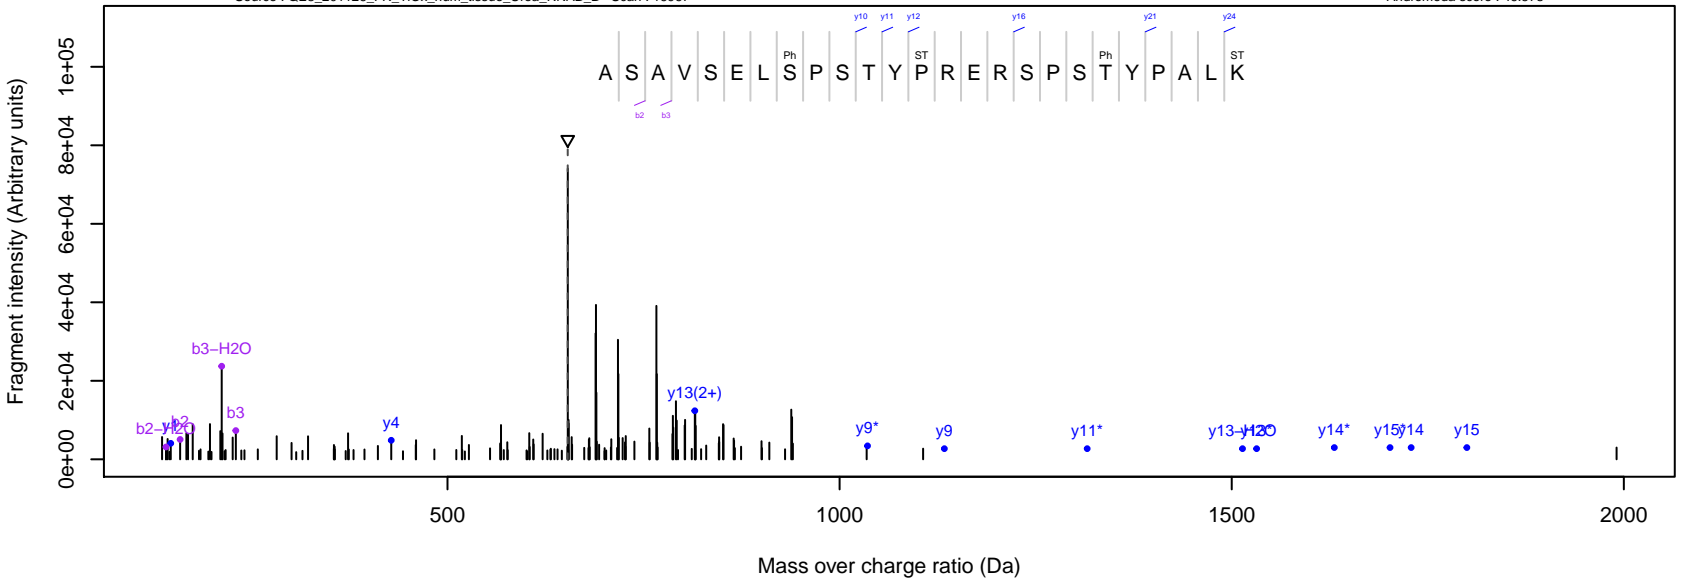

EKFPEFCSSPS(Phospho (STY))PPVEVK-3+

Source : QE3\_201126\_FR\_TiOx\_hum\_tissue\_Urea\_RNAB\_H Scan : 33714

Andromeda score : 46.578

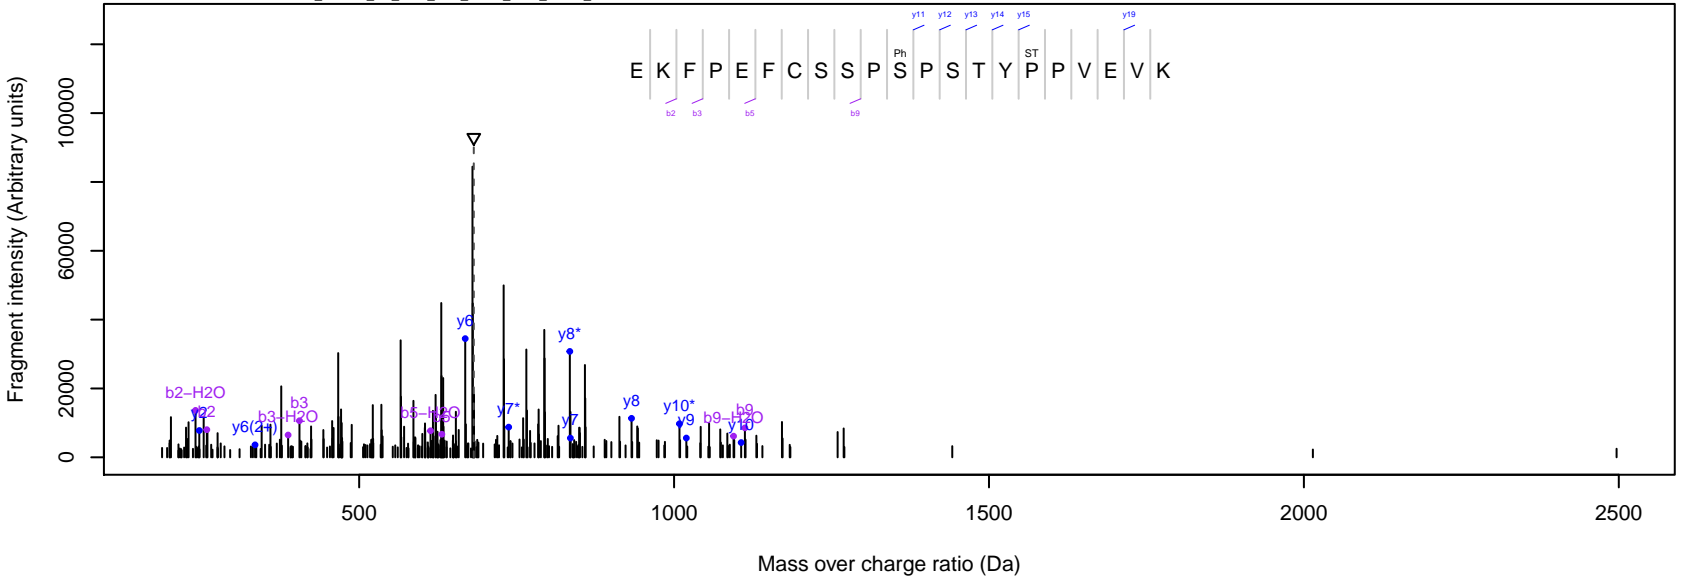

SLEPS(Phospho (STY))PSGPQEEDGEVALLGR-3+

Source : QE3\_201126\_FR\_TiOx\_hum\_tissue\_Urea\_RNAB\_B Scan : 59081

Andromeda score : 46.578

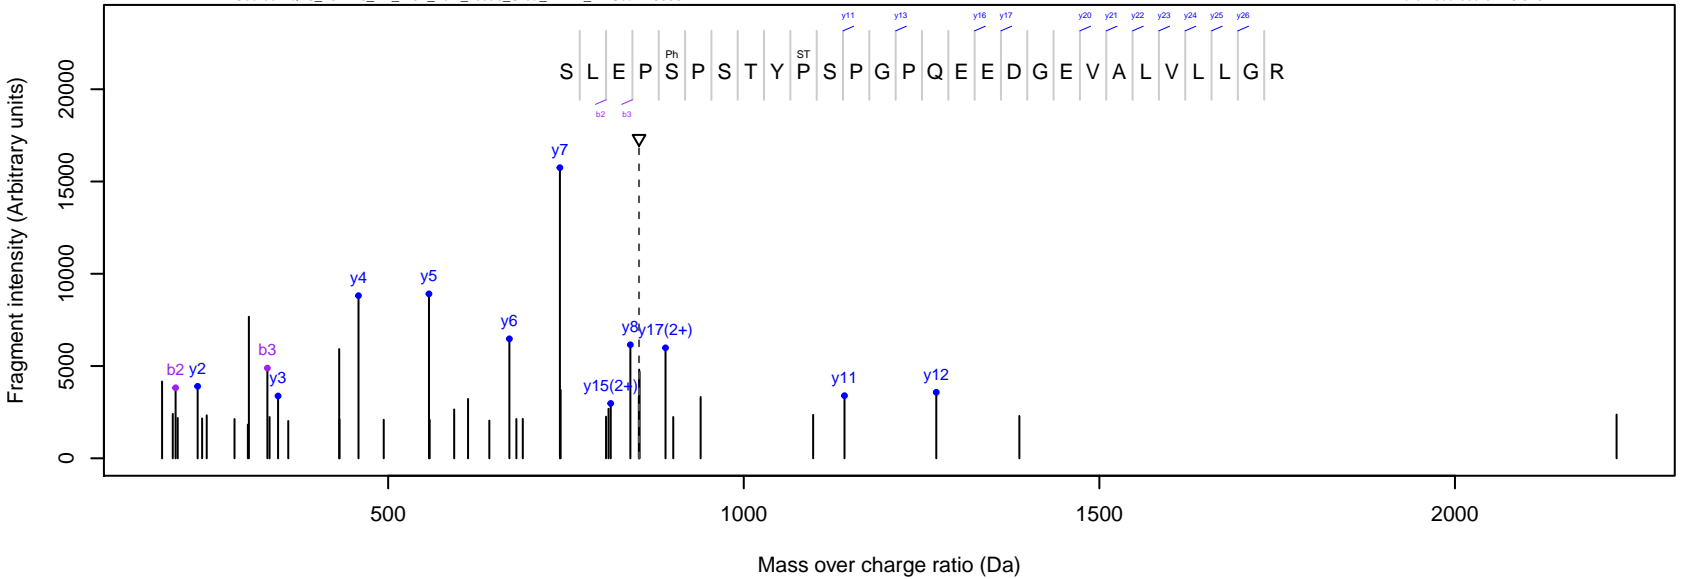

LLSEQDGS(Phospho (STY))LKDLRR-3+

Source : QE3\_201126\_FR\_TiOx\_hum\_tissue\_Urea\_RNAB\_B Scan : 28387

Andromeda score : 46.543

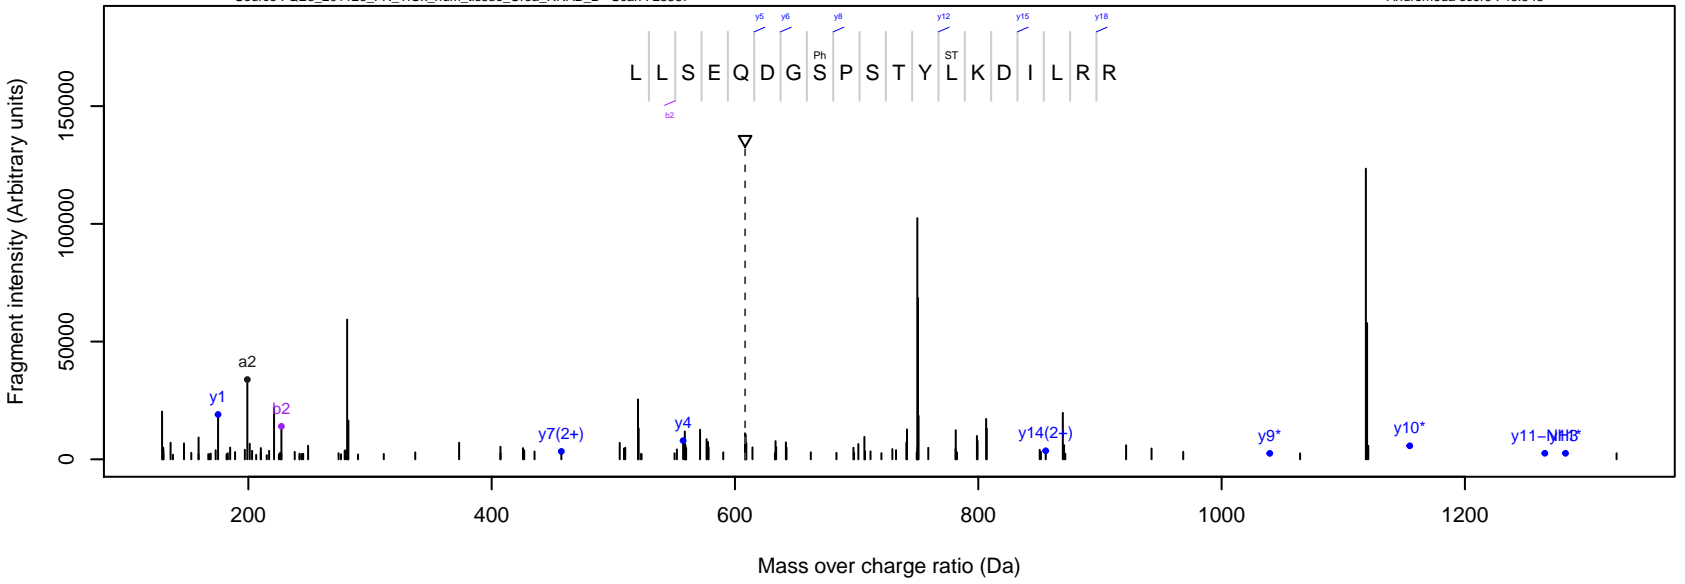

VIS(Phospho (STY))HDRDSPPPPPPPPPQPQLK-4+

Source : QE3\_201126\_FR\_TiOx\_hum\_tissue\_Urea\_RNAB\_N Scan : 20932

Andromeda score : 46.54

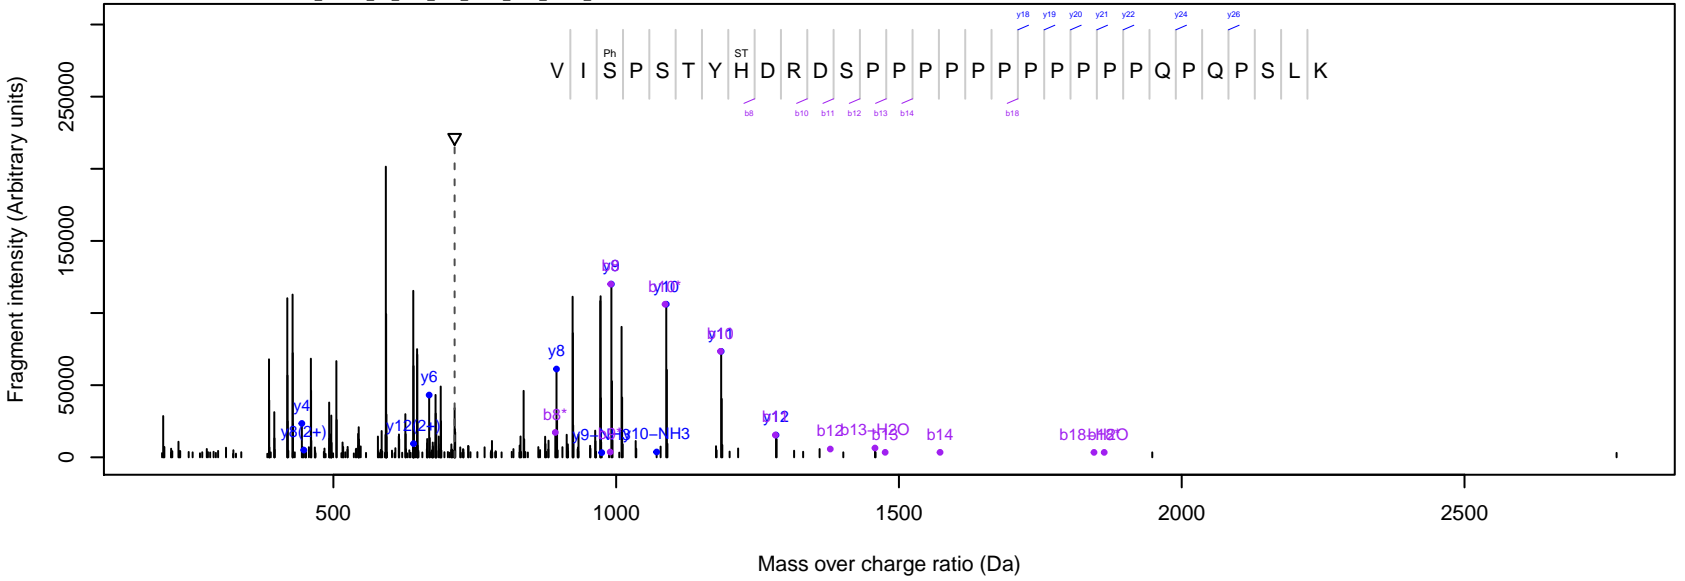

TVS(Phospho (STY))LSQM(Oxidation (M))LR-2+

Source : QE3\_201126\_FR\_TiOx\_hum\_tissue\_Urea\_RNAB\_N Scan : 22365

Andromeda score : 46.524

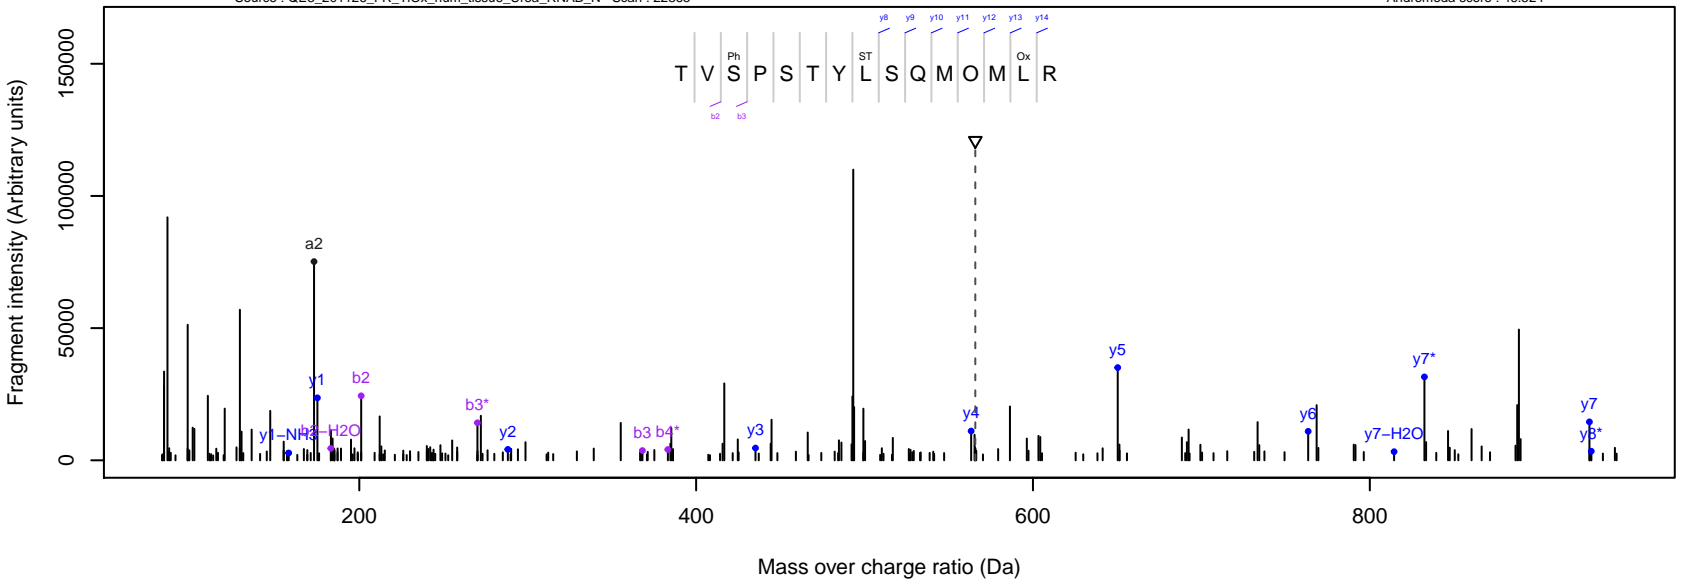



TSSDSALHTS(Phospho (STY))VMNPSPQDTPGPTPPSILPSR-3+

Source : QE3\_2011126\_FR\_TiOx\_hum\_tissue\_Urea\_RNAB\_N Scan : 44237

Andromeda score : 46.516

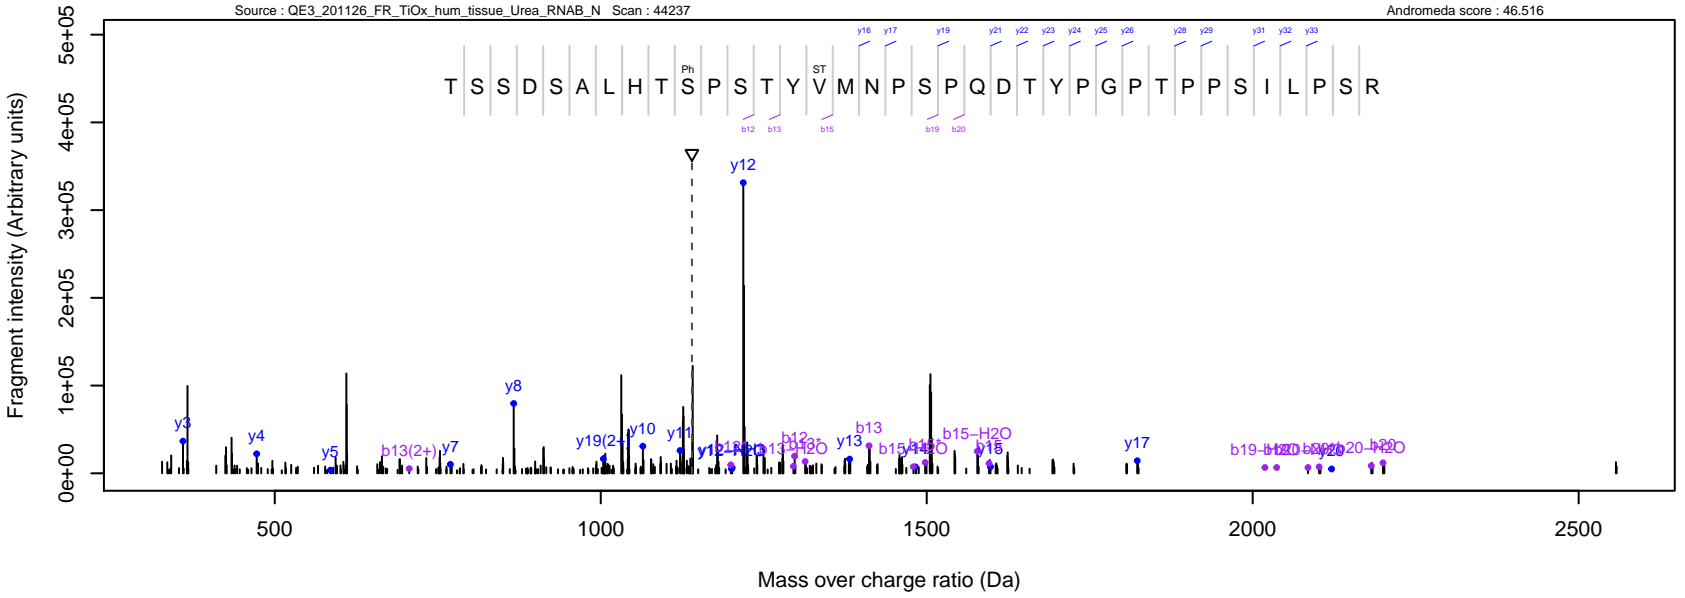

APS(Phospho (STY))LEDGSDAFM(Oxidation (M))SPQDVR-2+

Source : QE3\_2011126\_FR\_TiOx\_hum\_tissue\_Urea\_RNAB\_B Scan : 32922

Andromeda score : 46.481

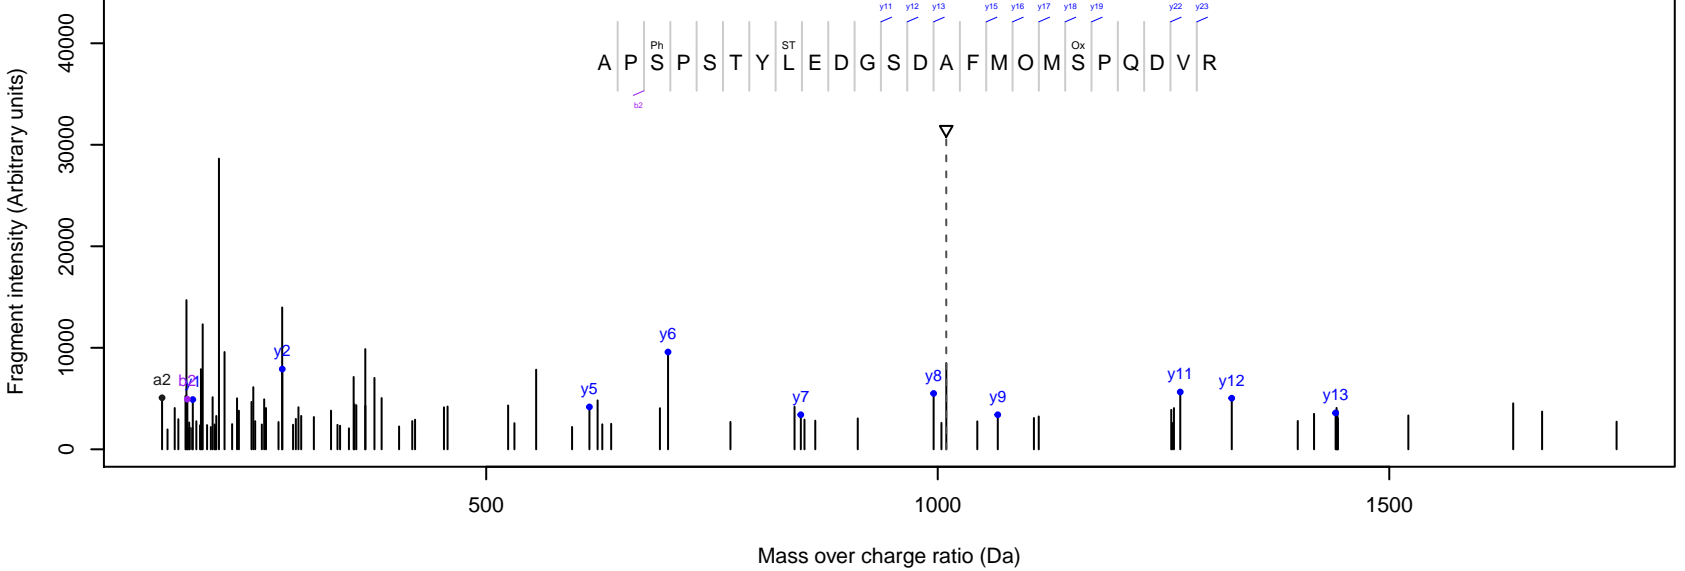

DQS(Phospho (STY))PSRAPGLR-3+

Source : QE3\_2011126\_FR\_TiOx\_hum\_tissue\_Urea\_RNAB\_N Scan : 8246

Andromeda score : 46.481

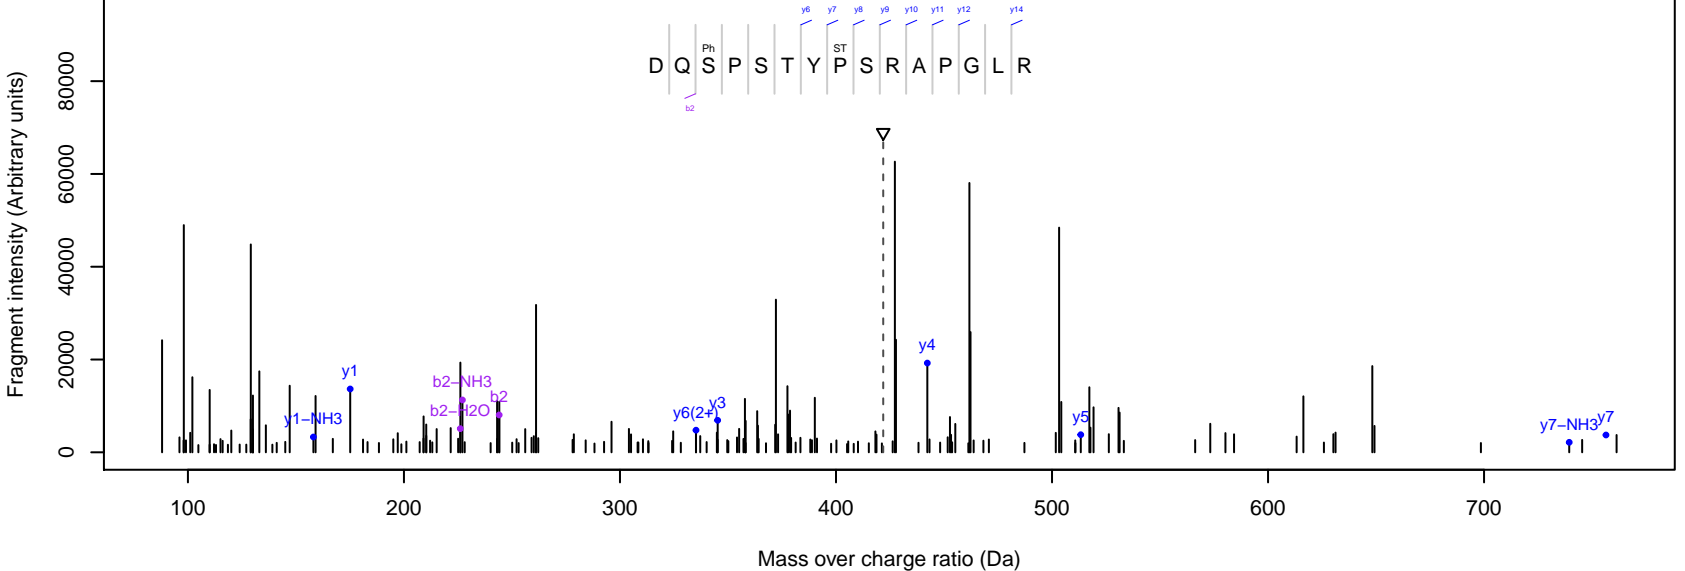

RYS(Phospho (STY))PS(Phospho (STY))PPPKR-3+

Source : QE3\_201126\_FR\_TiOx\_hum\_tissue\_Urea\_RNAB\_H Scan : 5544

Andromeda score : 46.481

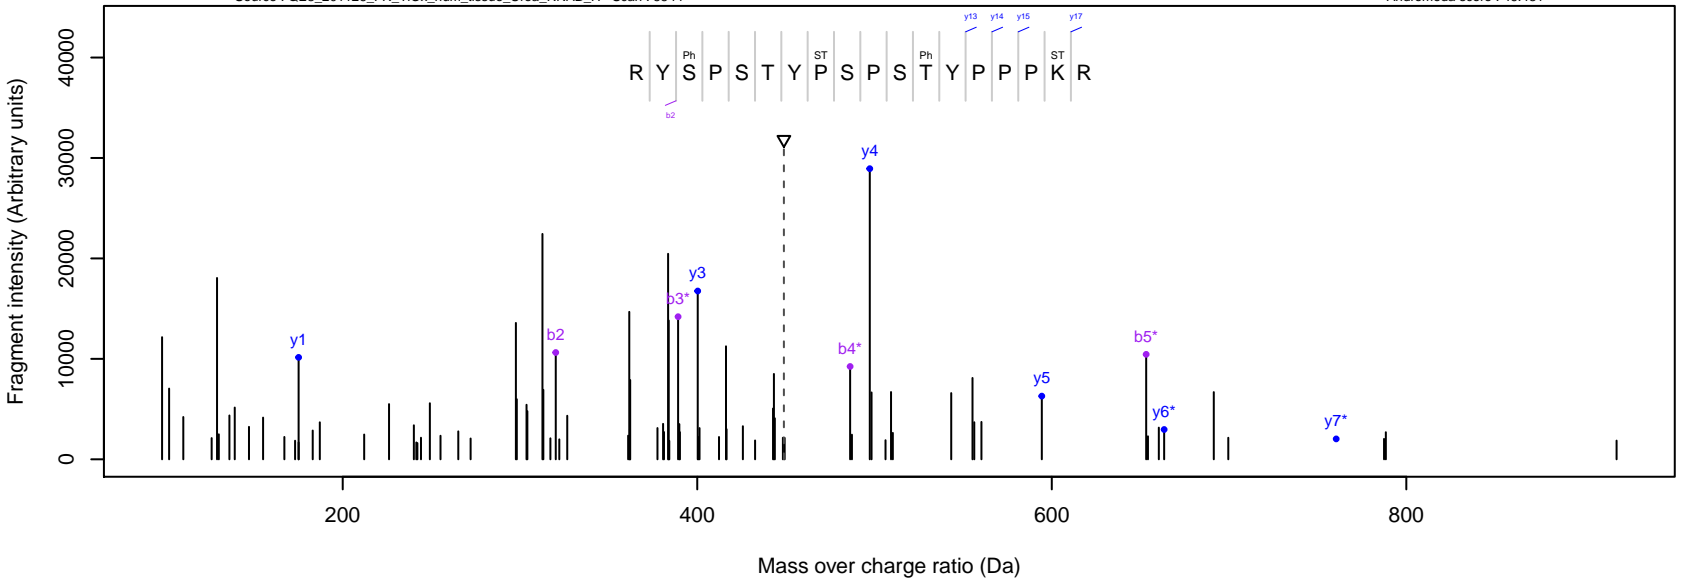

ETA V P G L G I E D I S P N L S P S T Y P D D K S F S R

Source : QE3\_201126\_FR\_TiOx\_hum\_tissue\_Urea\_RNAB\_B Scan : 49875

Andromeda score : 46.464

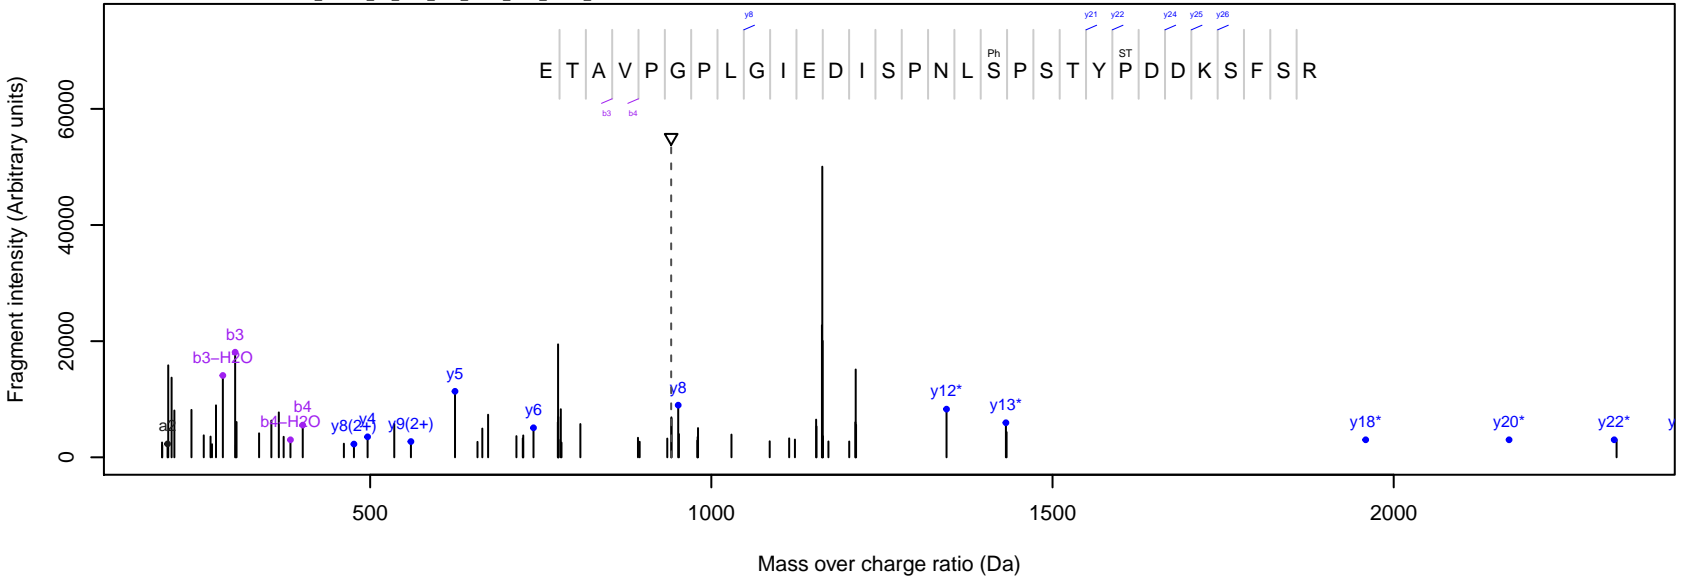

S(Phospho (STY))PPAVSPSPSTDHSSHFSNFNDNSR-3+

Source : QE3\_201126\_FR\_TiOx\_hum\_tissue\_Urea\_RNAB\_N Scan : 21675

Andromeda score : 46.464

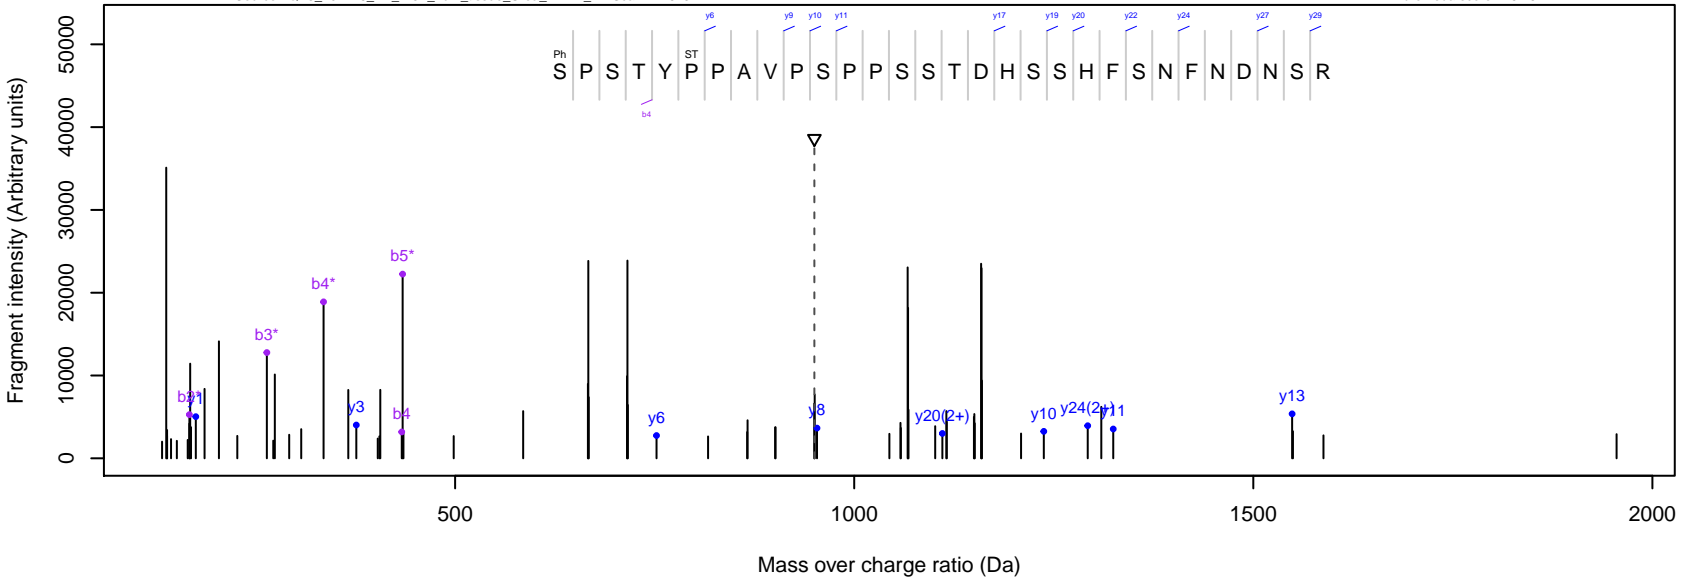

RAT(Phospho (STY))PHPSELK-2+

Source : QE3\_201126\_FR\_TiOx\_hum\_tissue\_Urea\_RNAB\_H Scan : 5056

Andromeda score : 46.462

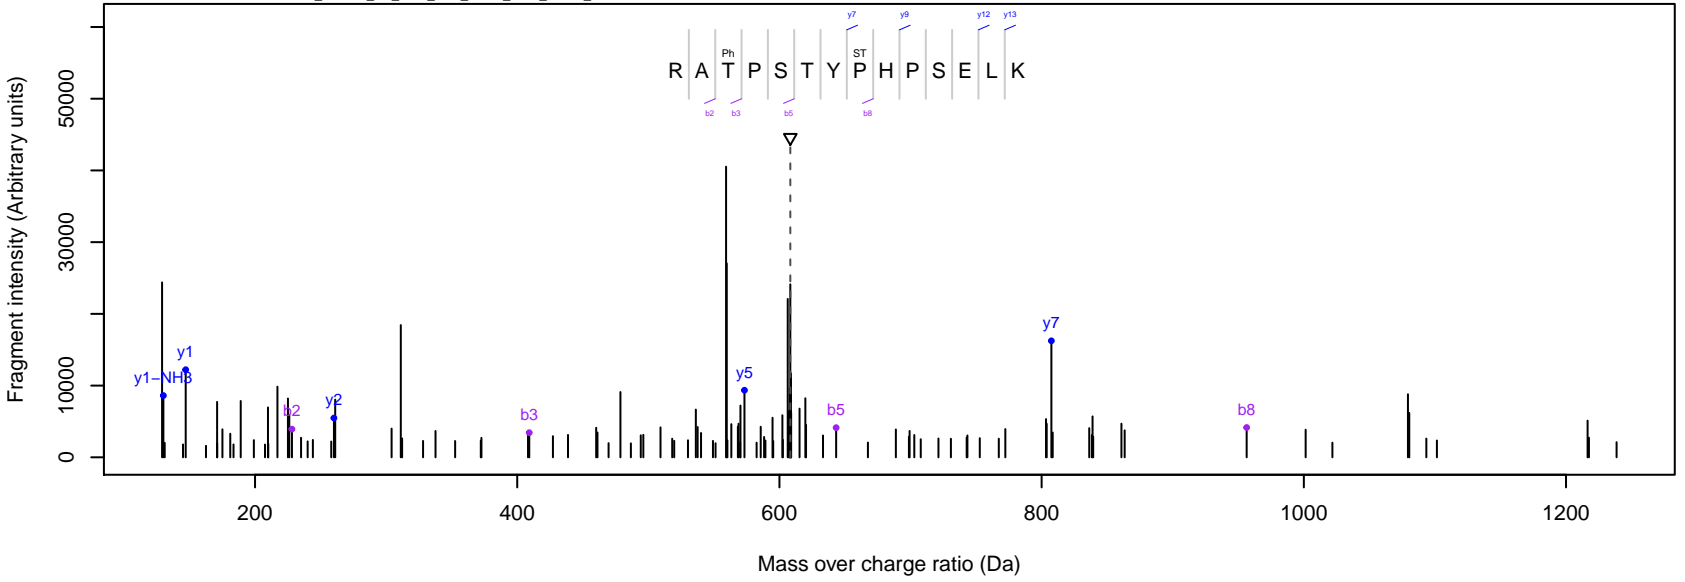

VS(Phospho (STY))SPTVNTTLR-2+

Source : QE3\_201126\_FR\_TiOx\_hum\_tissue\_Urea\_RNAB\_B Scan : 16623

Andromeda score : 46.462

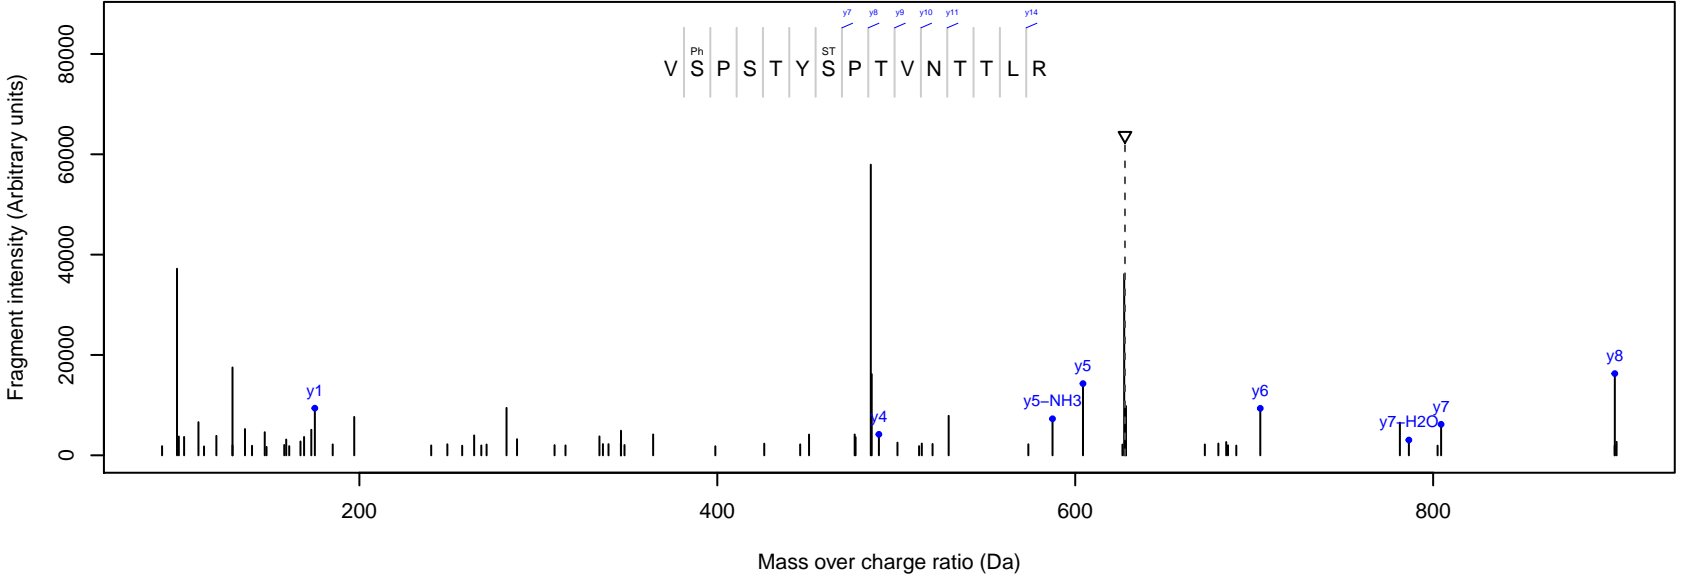

S(Phospho (STY))EGGSGGGAAGGGAGGAGAGCGSGGSSVGR-3+

Source : QE3\_201126\_FR\_TiOx\_hum\_tissue\_Urea\_RNAB\_B Scan : 13160

Andromeda score : 46.449

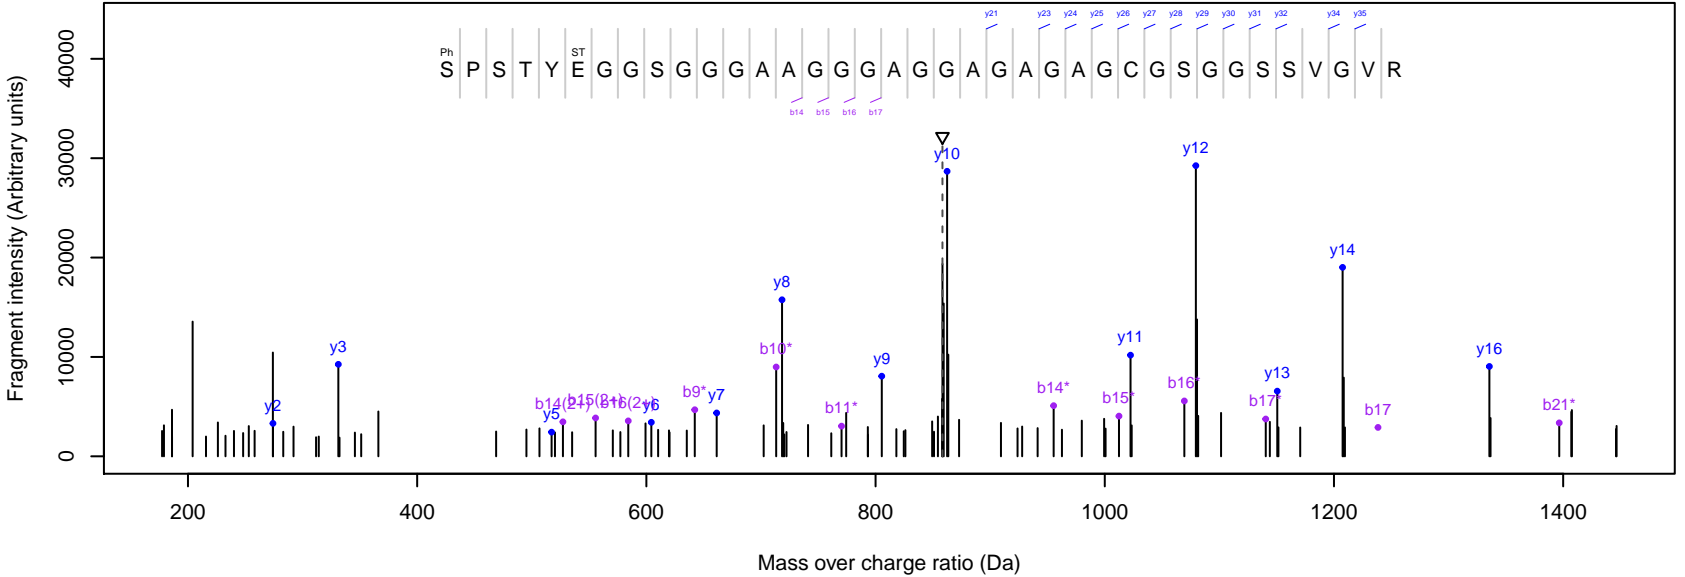

DSFIENSS(Phospho (STY))SNCTSGSSKPN(Phospho (STY))PSIS(Phospho (STY))PSILSNTTEHK-3+

Source : QE3\_201126\_FR\_TiOx\_hum\_tissue\_Urea\_RNAB\_N Scan : 42803

Andromeda score : 46.43

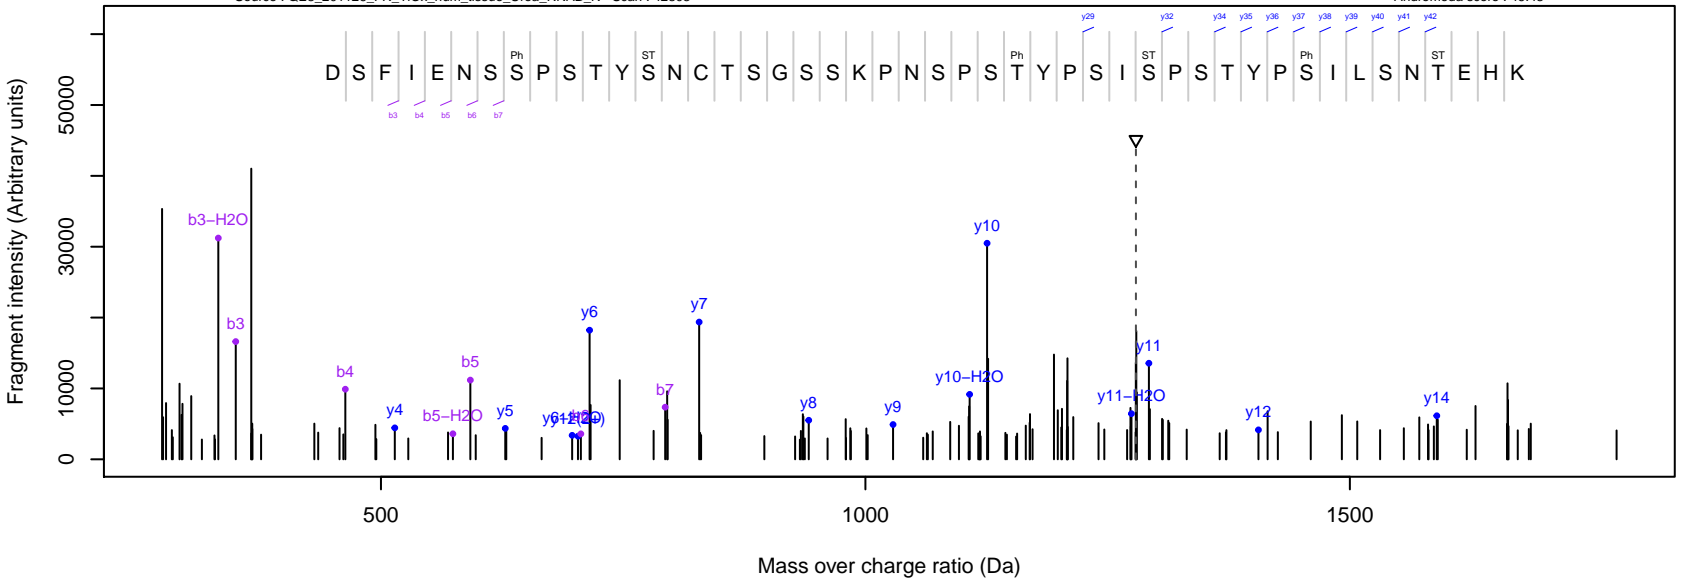

T(Phospho (STY))PGS(Phospho (STY))RQASPTVEVER-3+

Source : QE3\_201126\_FR\_TiOx\_hum\_tissue\_Urea\_RNAB\_N Scan : 15936

Andromeda score : 46.408

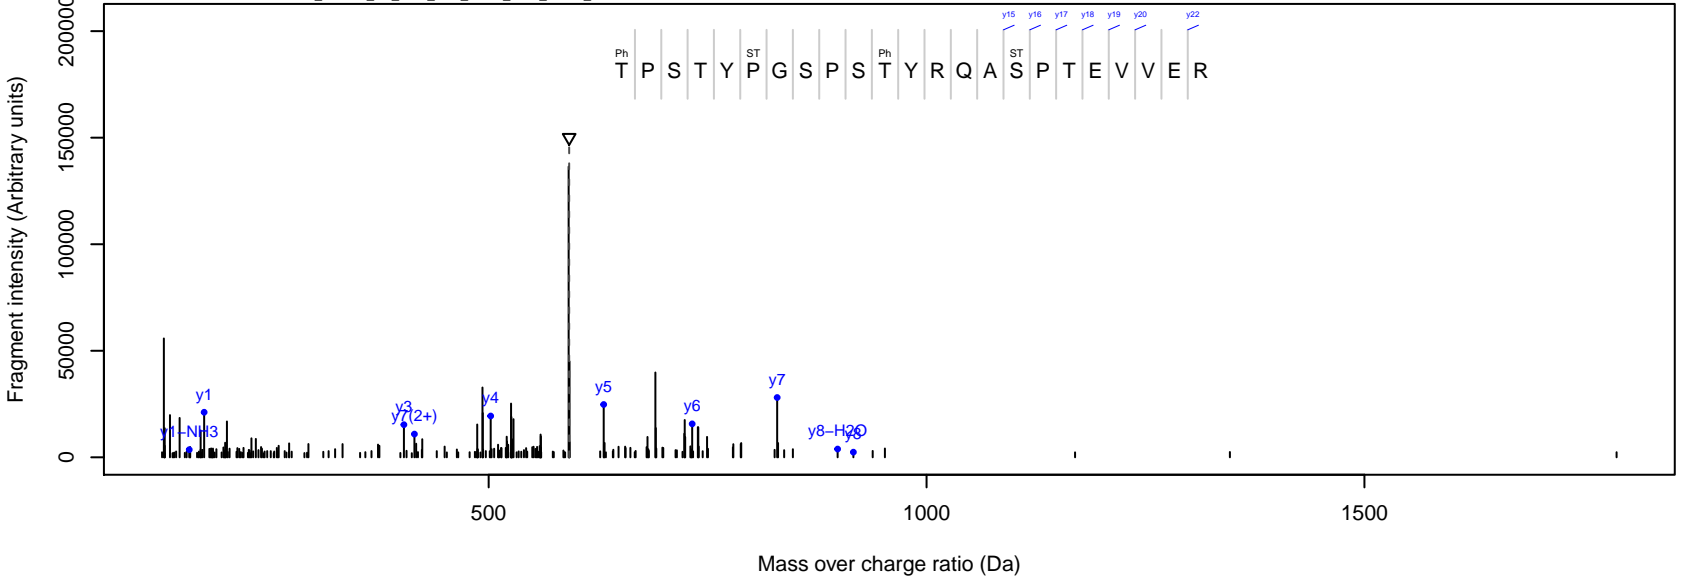

VIGQDHDFS(Phospho (STY))ES(Phospho (STY))S(Phospho (STY))EEEAPAEASSGALR-3+

Source : QE3\_201126\_FR\_TiOx\_hum\_tissue\_Urea\_RNAB\_H Scan : 37372

Andromeda score : 46.404

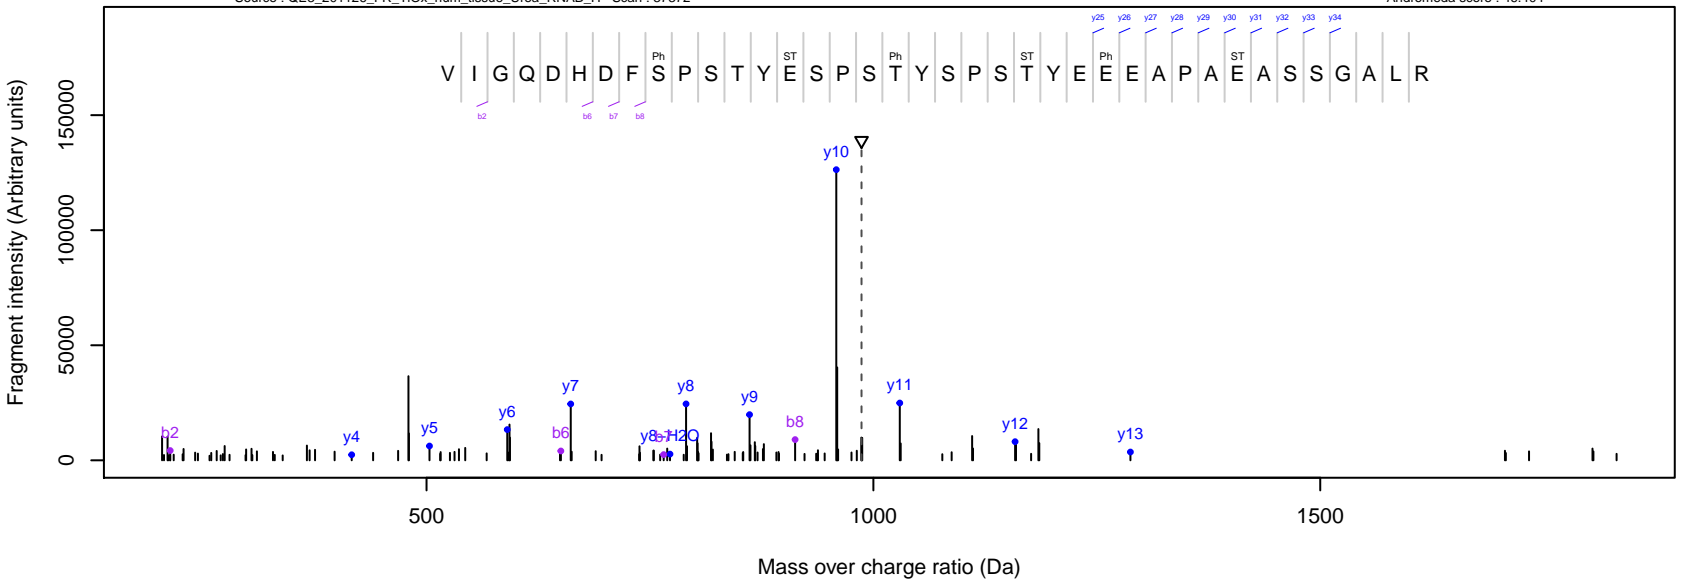

EVGLLKDMS(Phospho (STY))P LSETEMALGK-3+

Source : QE3\_201126\_FR\_TiOx\_hum\_tissue\_Urea\_RNAB\_N Scan : 52984

Andromeda score : 46.403

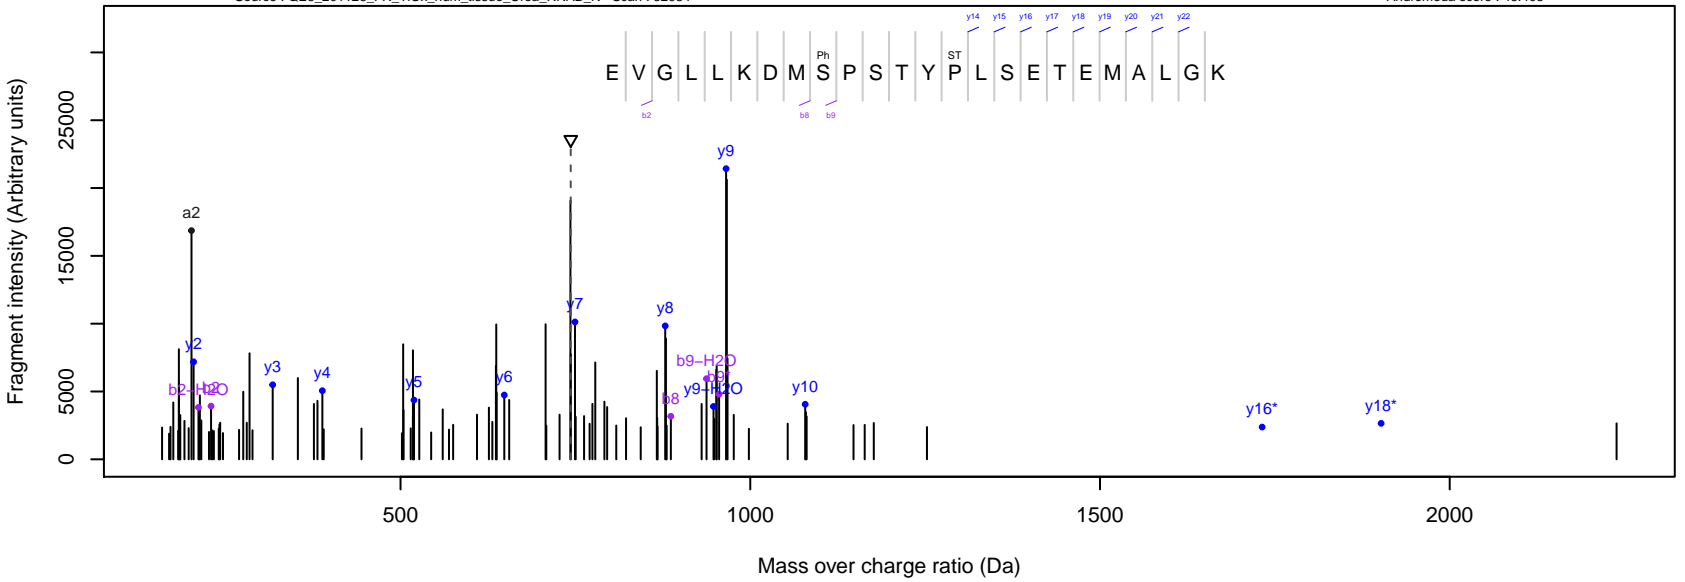

GFSQYGV S(Phospho (STY))G SPTK-2+

Source : QE3\_201126\_FR\_TiOx\_hum\_tissue\_Urea\_RNAB\_N Scan : 20961

Andromeda score : 46.387

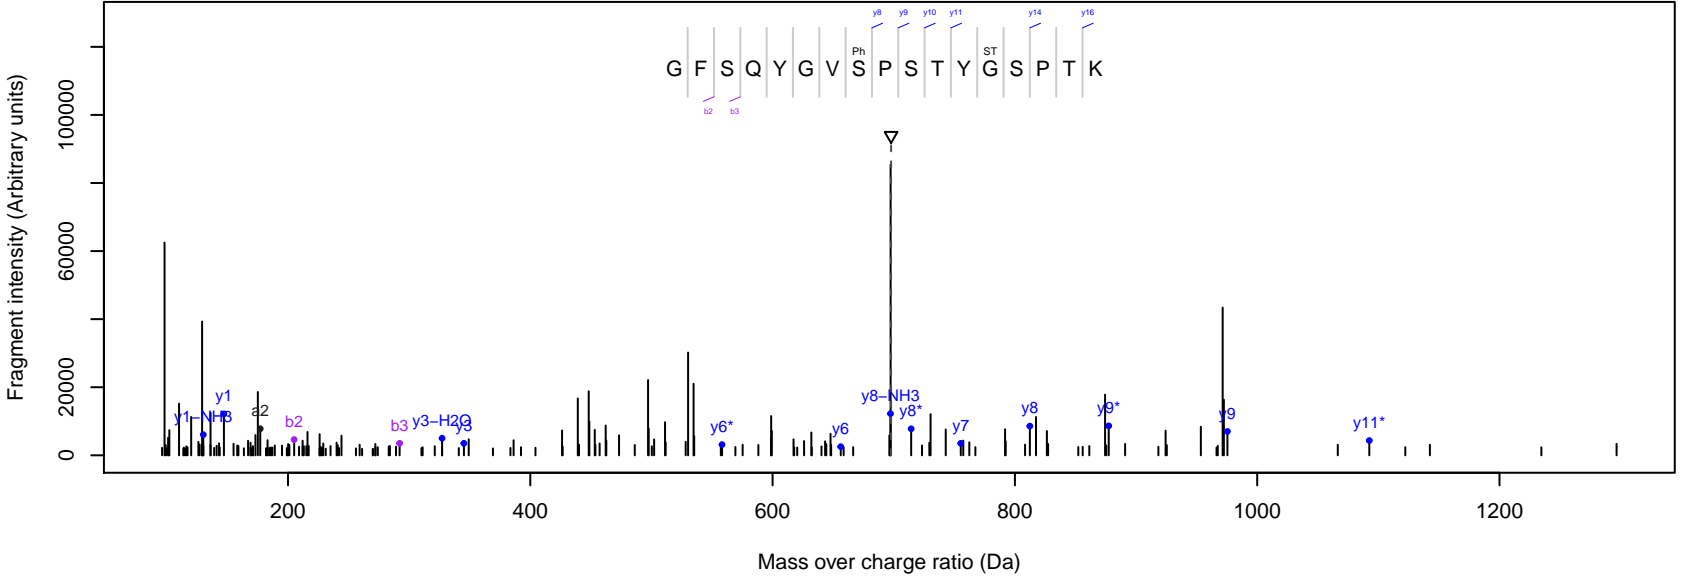

GQEEGGWDVEEDLELPPELDI S(Phospho (STY))P GAAGGAEDGFVPPTK-4+

Source : QE3\_201126\_FR\_TiOx\_hum\_tissue\_Urea\_RNAB\_B Scan : 62669

Andromeda score : 46.364

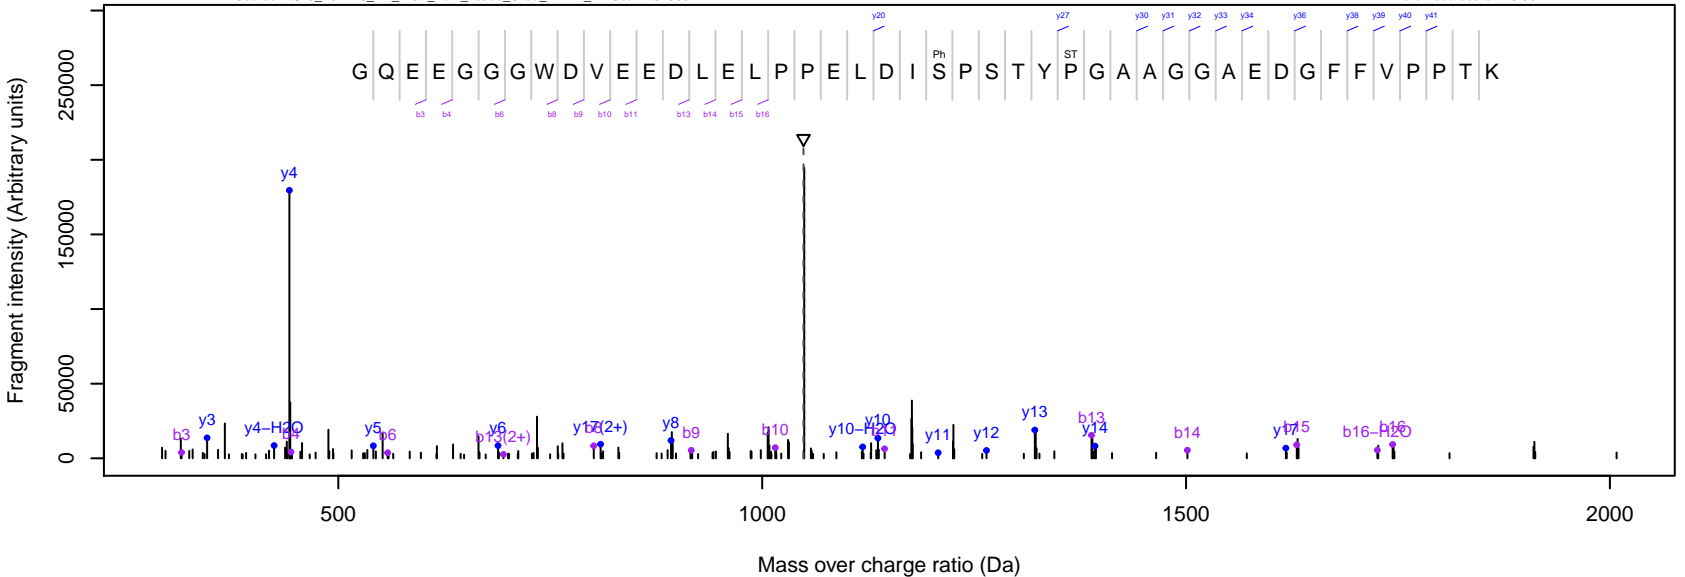

S(Phospho (STY))SDAKPLPASYPAEPR-3+

Source : QE3\_201126\_FR\_TiOx\_hum\_tissue\_Urea\_RNAB\_N Scan : 17917

Andromeda score : 46.362

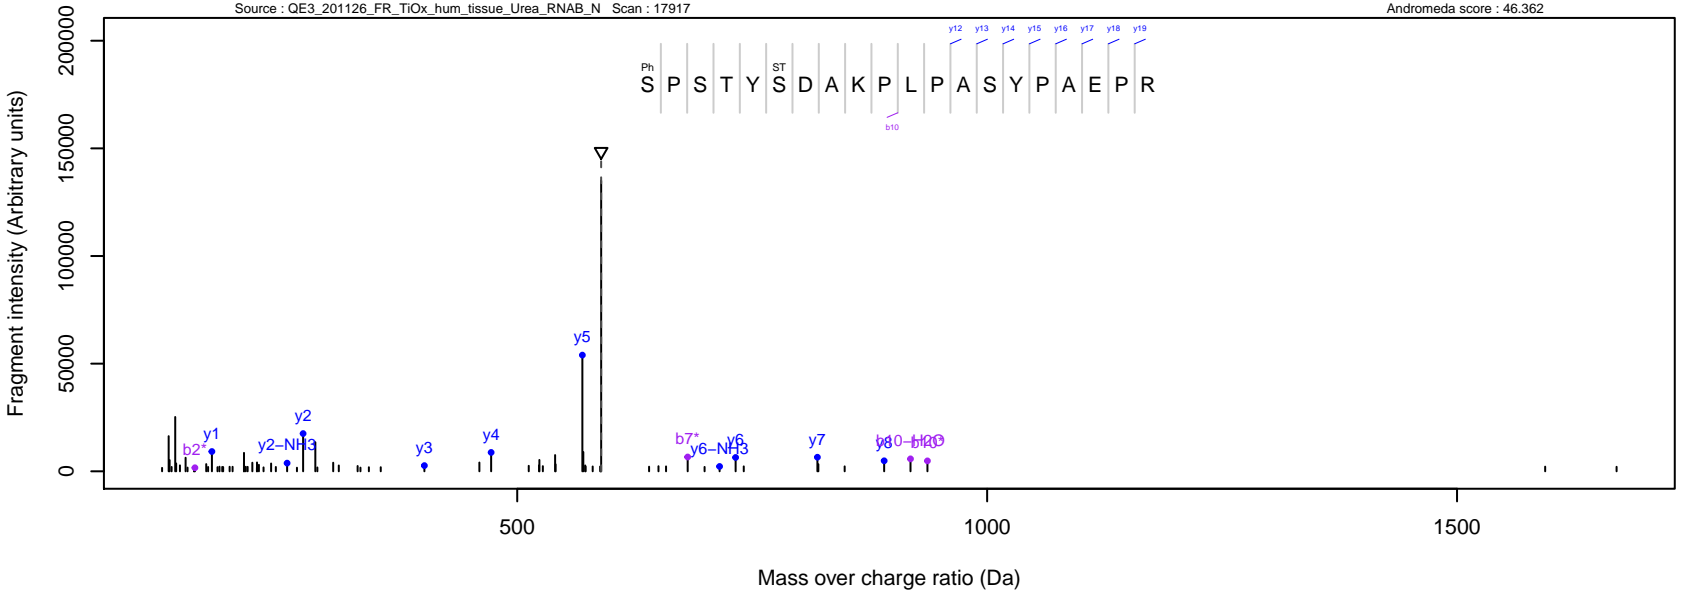

VIY(Phospho (STY))DFIEK-2+

Source : QE3\_201126\_FR\_TiOx\_hum\_tissue\_Urea\_RNAB\_N Scan : 32869

Andromeda score : 46.334

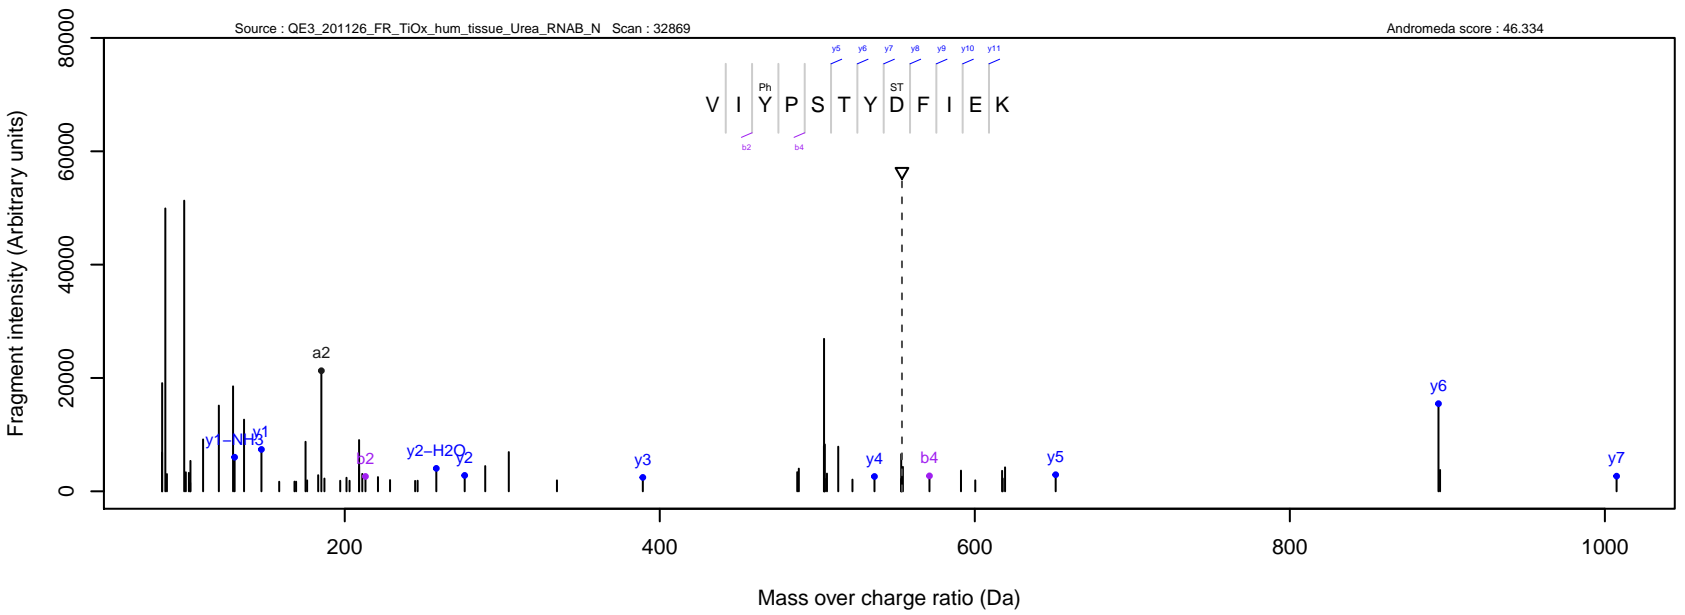

NHEWAVPPT(Phospho (STY))QVVR-3+

Source : QE3\_201126\_FR\_TiOx\_hum\_tissue\_Urea\_RNAB\_B Scan : 7496

Andromeda score : 46.319

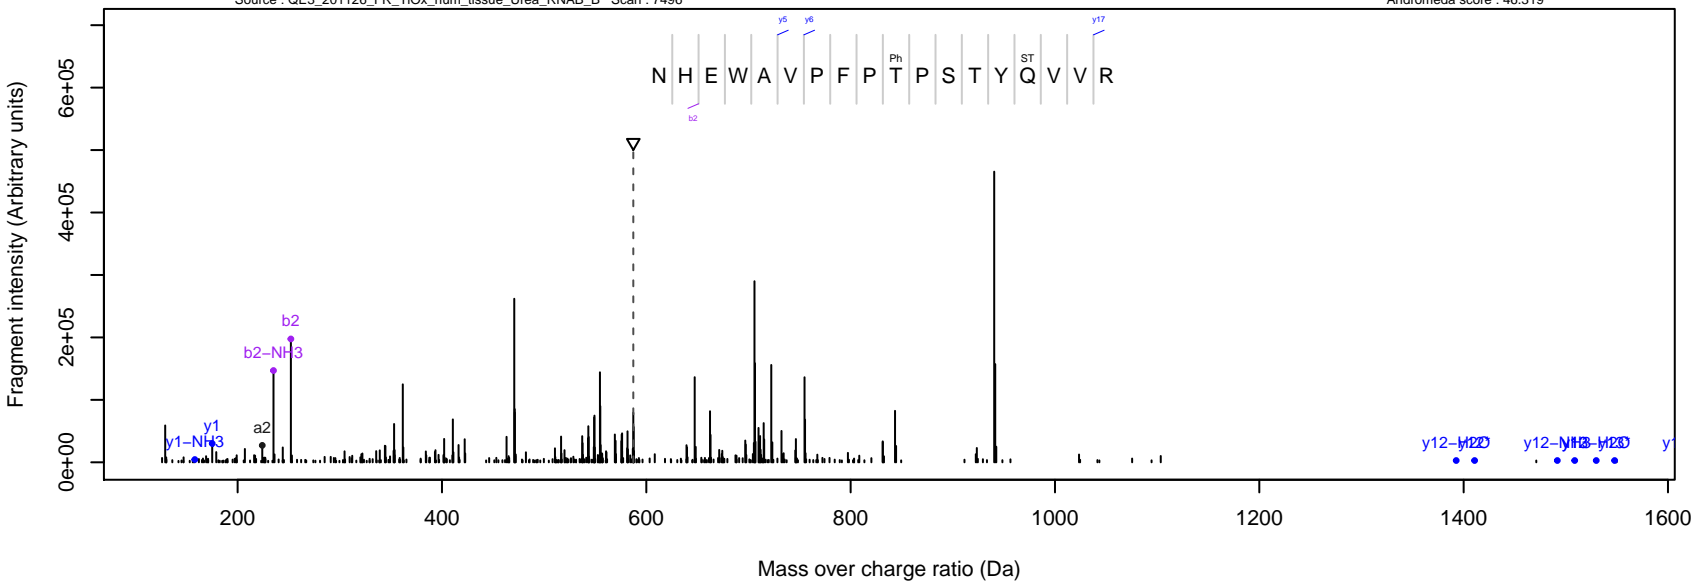

CAPSAGS(Phospho (STY))PAAVGR-2+

Source : QE3\_201126\_FR\_TiOx\_hum\_tissue\_Urea\_RNAB\_N Scan : 13692

Andromeda score : 46.318

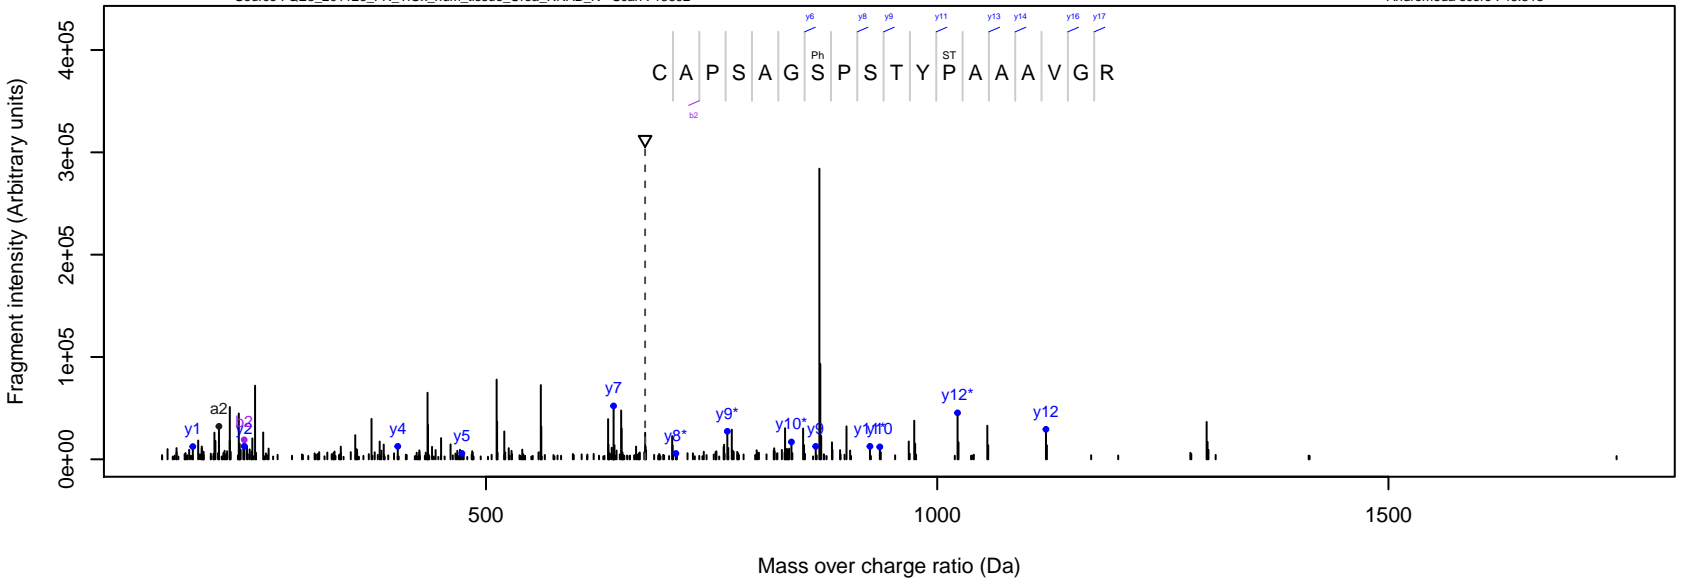

AES(Phospho (STY))IS(Phospho (STY))S(Phospho (STY))DEEVHESVDSNDNQQNK-3+

Source : QE3\_201126\_FR\_TiOx\_hum\_tissue\_Urea\_RNAB\_N Scan : 15767

Andromeda score : 46.307

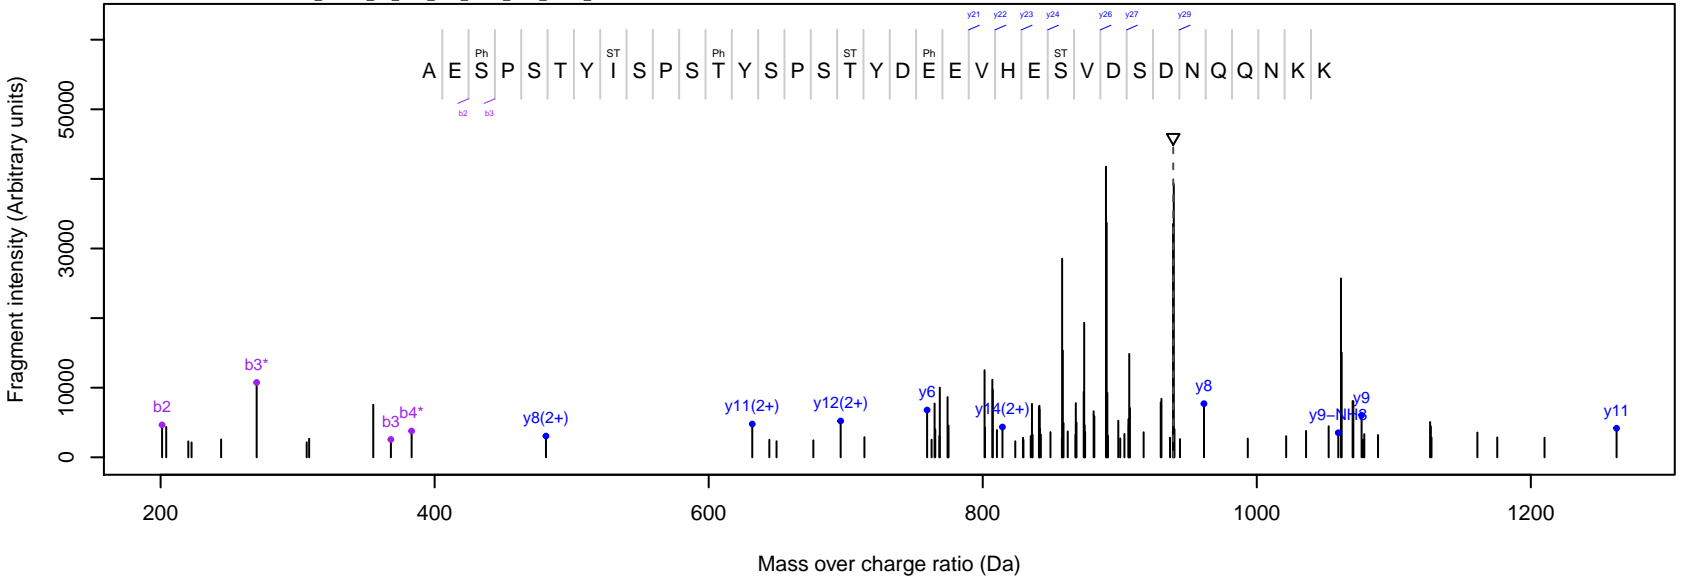

AGTRTDS(Phospho (STY))REDEIS(Phospho (STY))PPPPNVVK-3+

Source : QE3\_201126\_FR\_TiOx\_hum\_tissue\_Urea\_RNAB\_B Scan : 19812

Andromeda score : 46.307

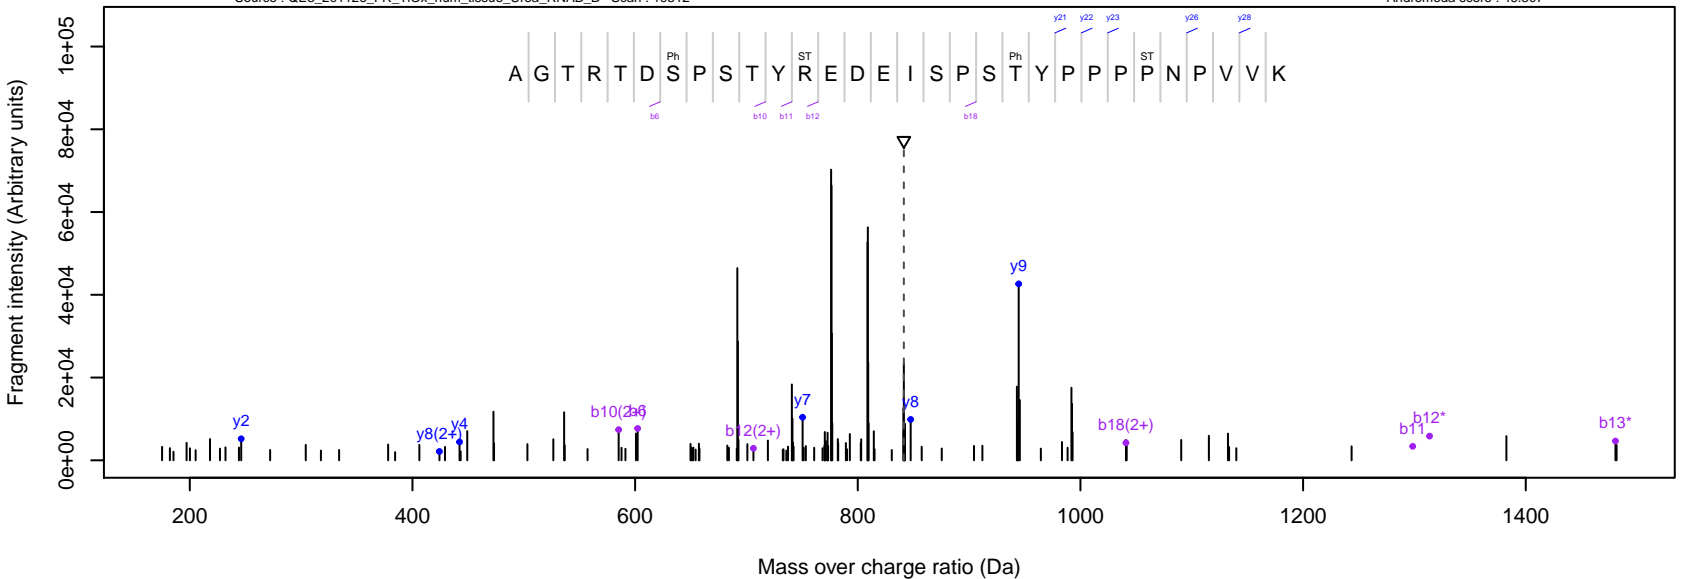

LDPAQS(Phospho (STY))ASRENLLLEEQGSIALR-3+

Source : QE3\_201126\_FR\_TiOx\_hum\_tissue\_Urea\_RNAB\_B Scan : 37063

Andromeda score : 46.307

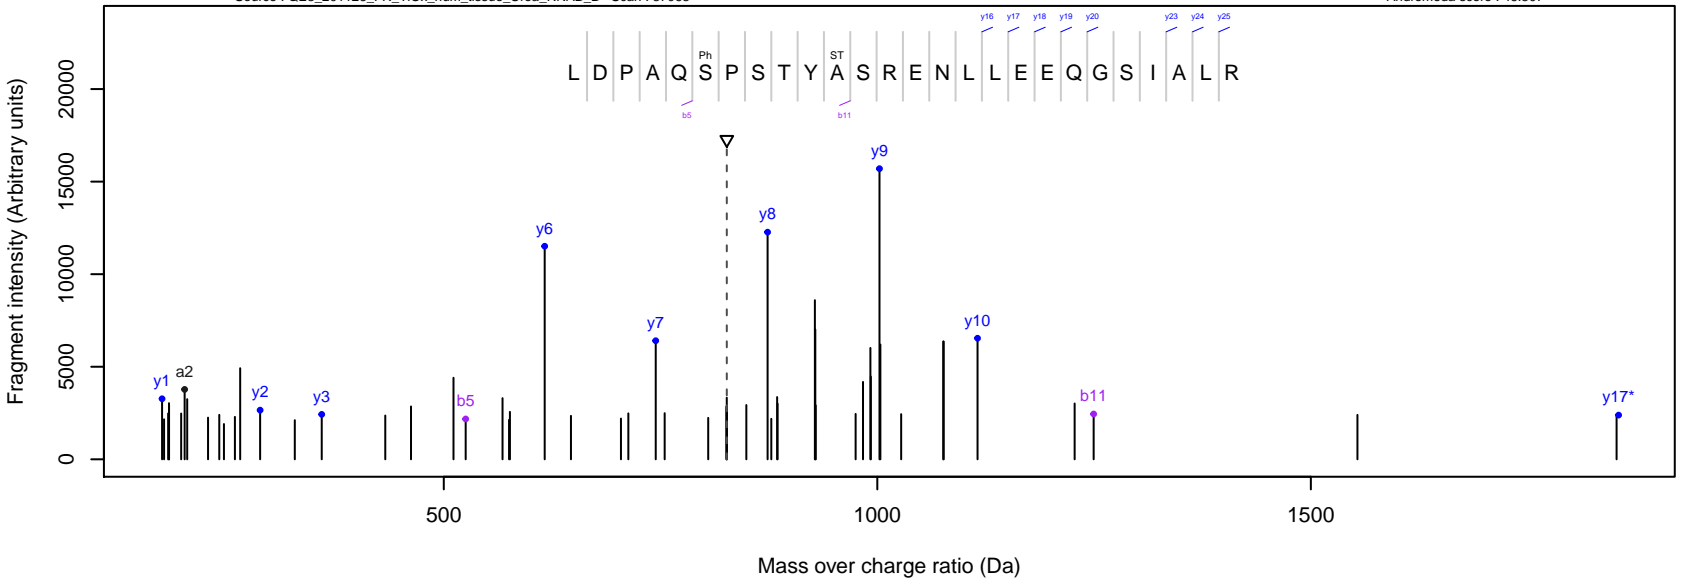

M(Oxidation (M))QNNS(Phospho (STY))S(Phospho (STY))PSISPNTSFTSDGSPSPGGIK-3+

Source : QE3\_201126\_FR\_TiOx\_hum\_tissue\_Urea\_RNAB\_N Scan : 49116

Andromeda score : 46.307

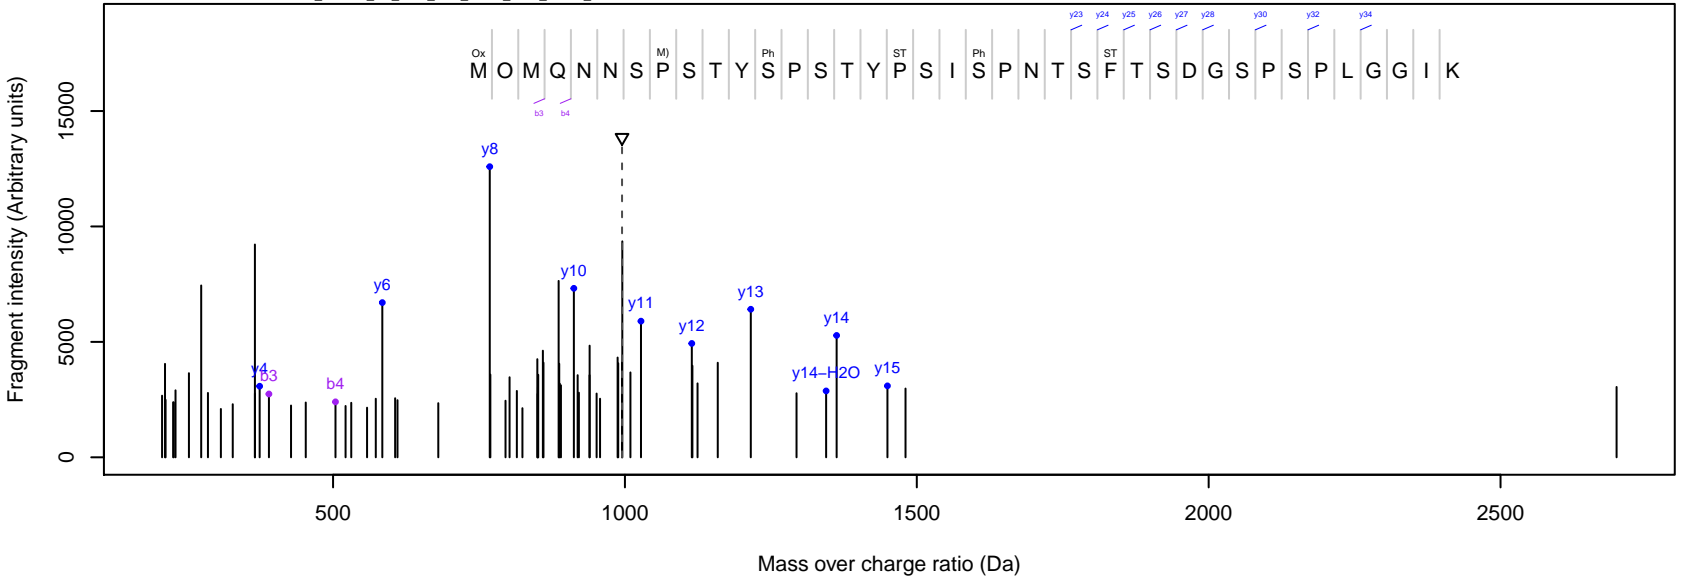

KSFT(Phospho (STY))PDHVVYAR-3+

Source : QE3\_201126\_FR\_TiOx\_hum\_tissue\_Urea\_RNAB\_H Scan : 13993

Andromeda score : 46.3

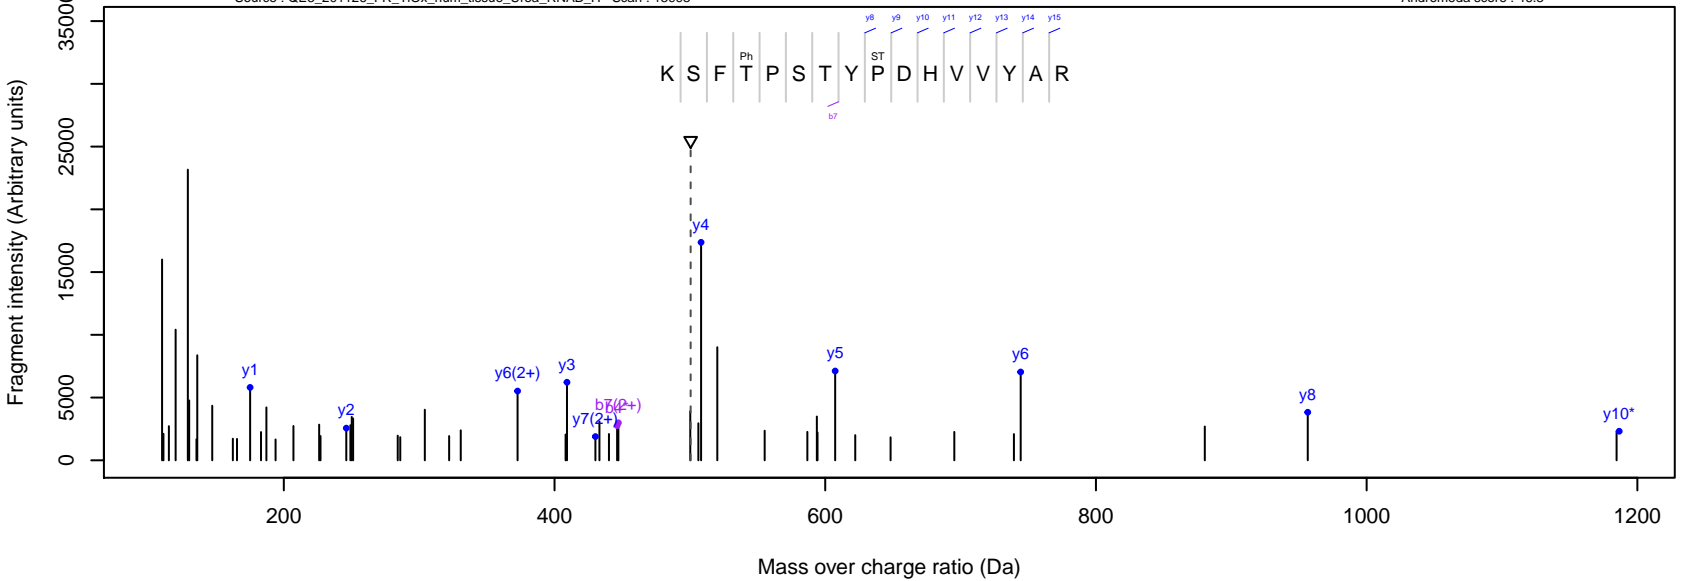



SAS(Phospho (STY))RDS(Phospho (STY))LKGGGALEK-2+

Source : QE3\_201126\_FR\_TiOx\_hum\_tissue\_Urea\_RNAB\_N Scan : 8374

Andromeda score : 46.249

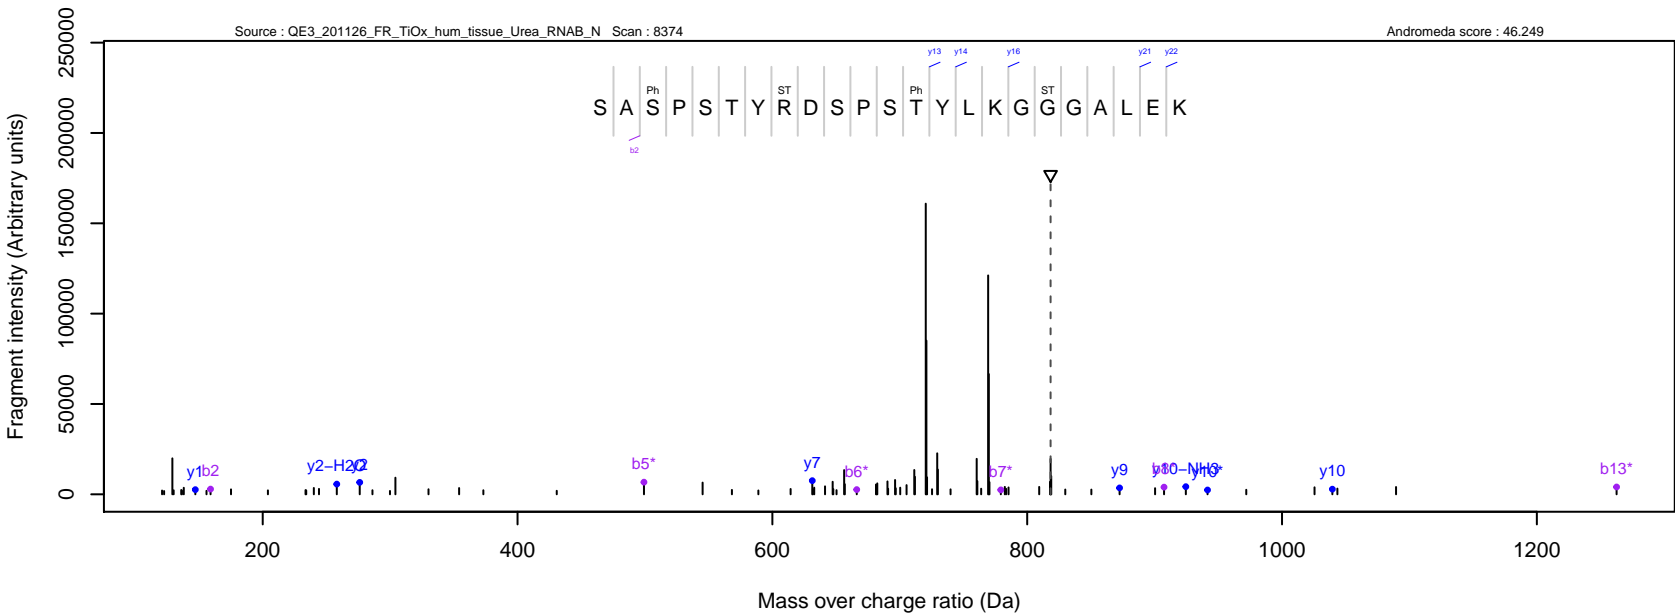

SDIS(Phospho (STY))DQEEDEESEGCPSVINSLSK-3+

Source : QE3\_201126\_FR\_TiOx\_hum\_tissue\_Urea\_RNAB\_N Scan : 35553

Andromeda score : 46.247

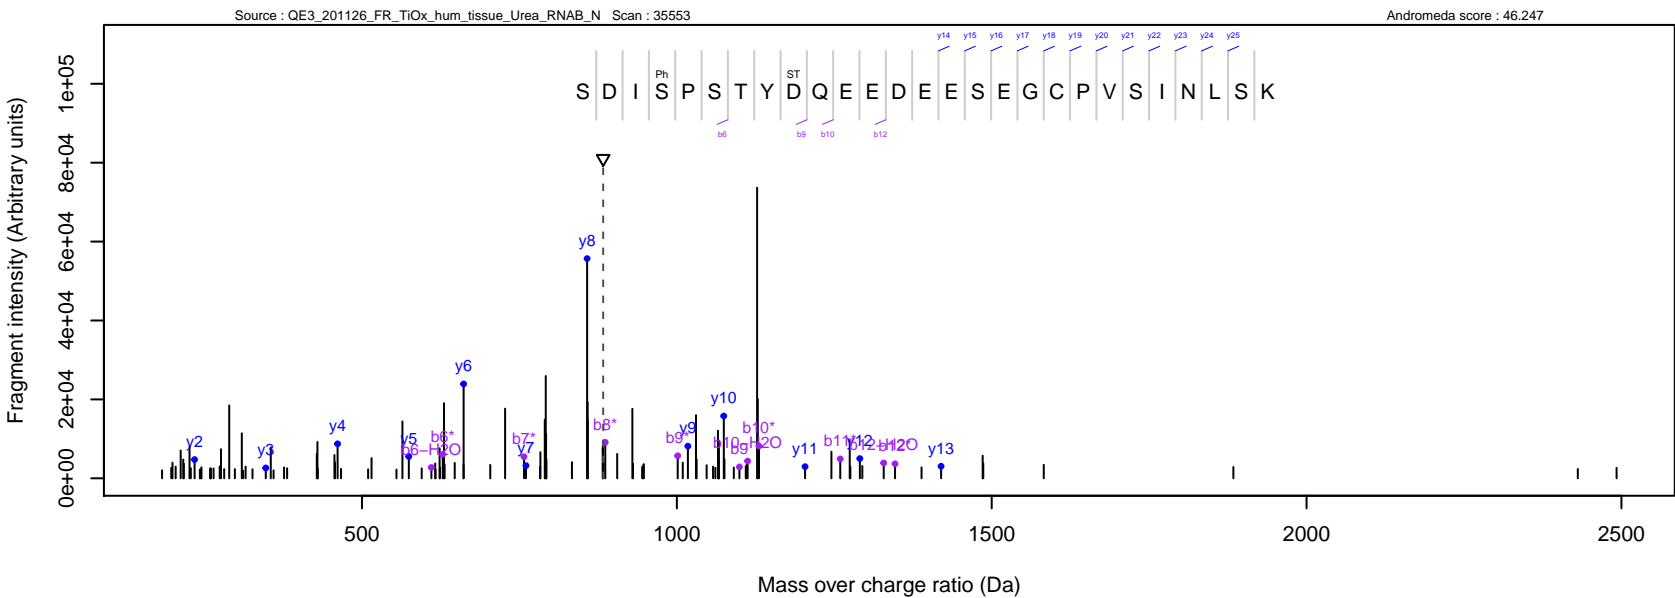

KHEFM(Oxidation (M))S(Phospho (STY))DTNLSEHAAILPK-4+

Source : QE3\_201126\_FR\_TiOx\_hum\_tissue\_Urea\_RNAB\_B Scan : 19918

Andromeda score : 46.178

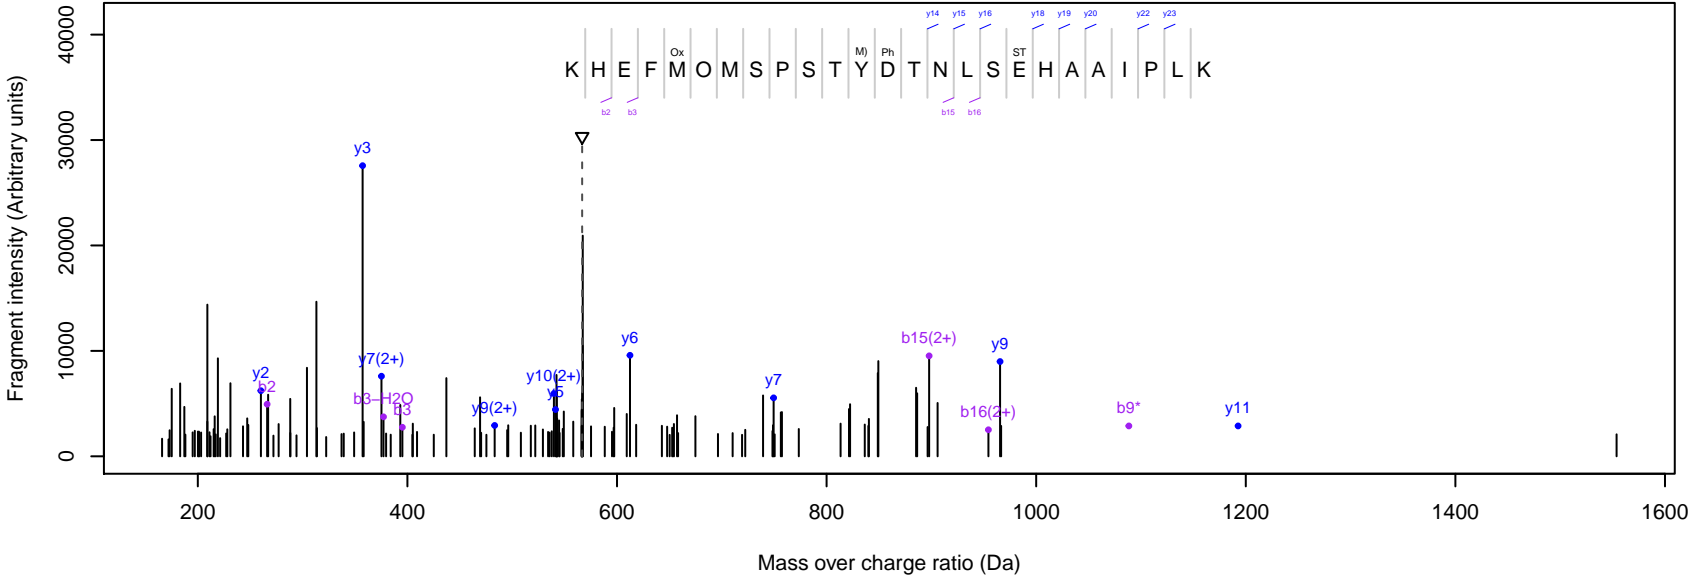

LDS(Phospho (STY))S(Phospho (STY))EM(Oxidation (M))DHSENYDTM(Oxidation (M))SSPLPGKK-3+

Source : QE3\_201126\_FR\_TIOx\_hum\_tissue\_Urea\_RNAB\_N Scan : 18193

Andromeda score : 46.178

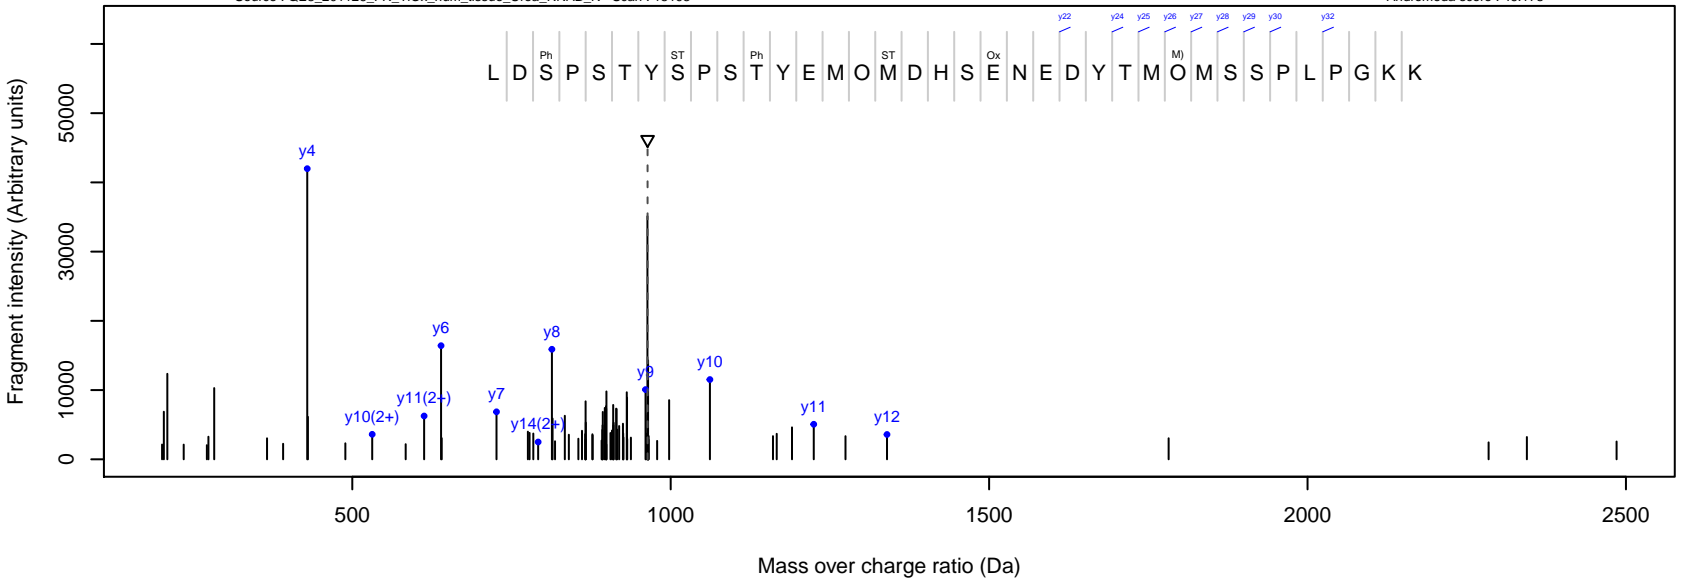

LKFTYAM(Oxidation (M))DTMEQALNKS(Phospho (STY))NK-3+

Source : QE3\_201126\_FR\_TIOx\_hum\_tissue\_Urea\_RNAB\_N Scan : 20017

Andromeda score : 46.178

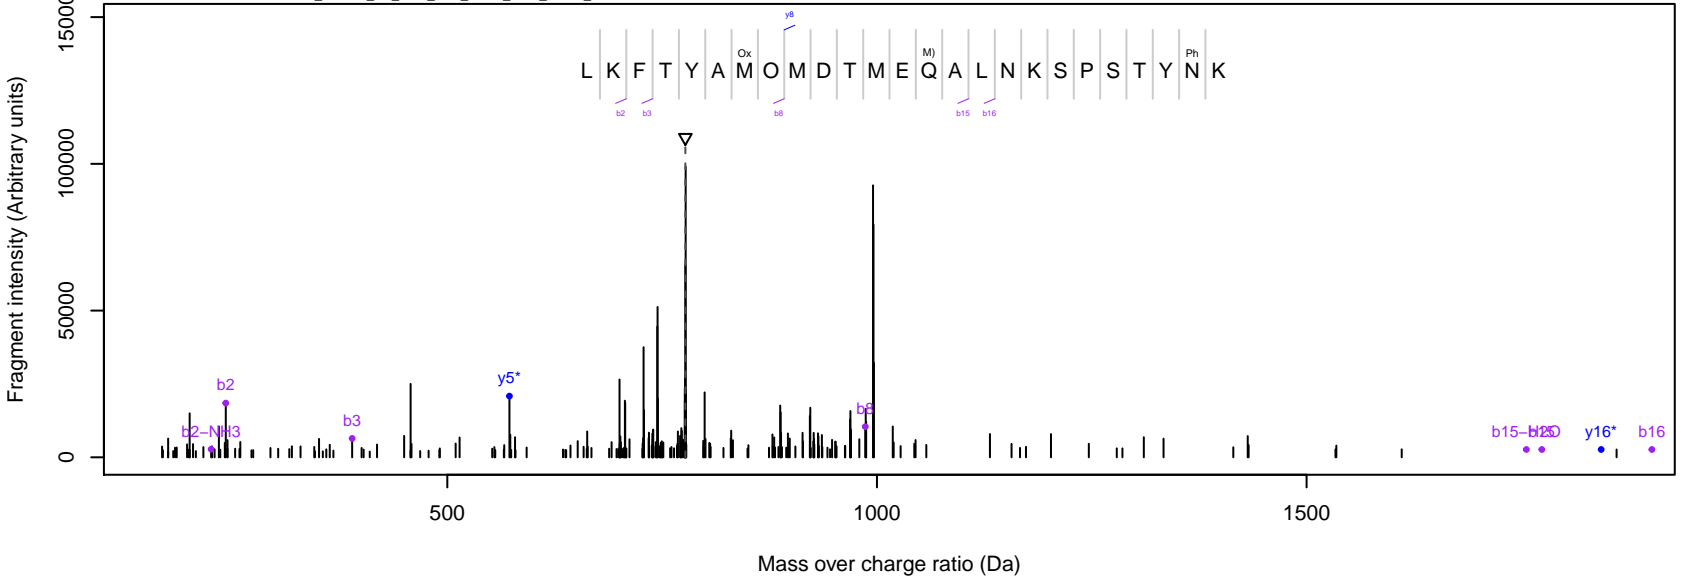

AT(Phospho (STY))PPSPLLSELLKK-3+

Source : QE3\_201126\_FR\_TIOx\_hum\_tissue\_Urea\_RNAB\_N Scan : 46798

Andromeda score : 46.159

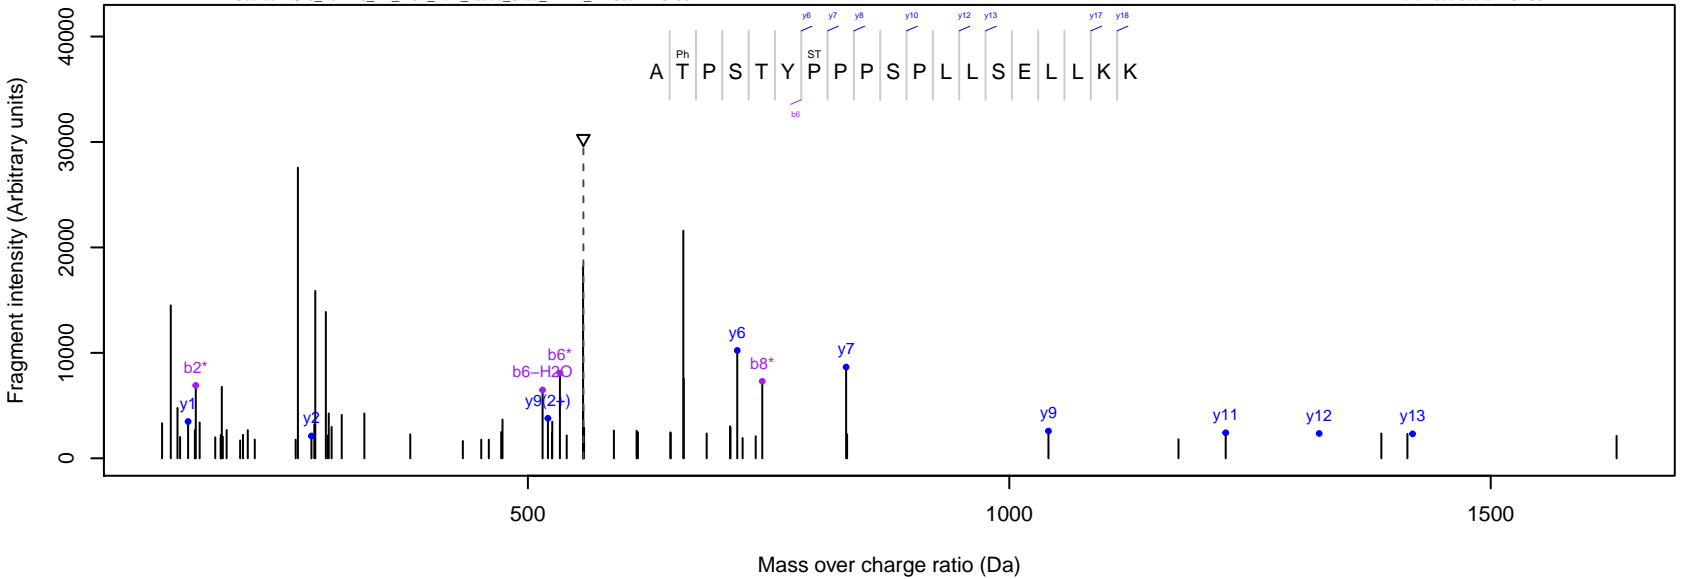

S(Phospho (STY))QPSPVTVKPKPPAR-3+

Source : QE3\_201126\_FR\_TIOx\_hum\_tissue\_Urea\_RNAB\_H Scan : 9492

Andromeda score : 46.159

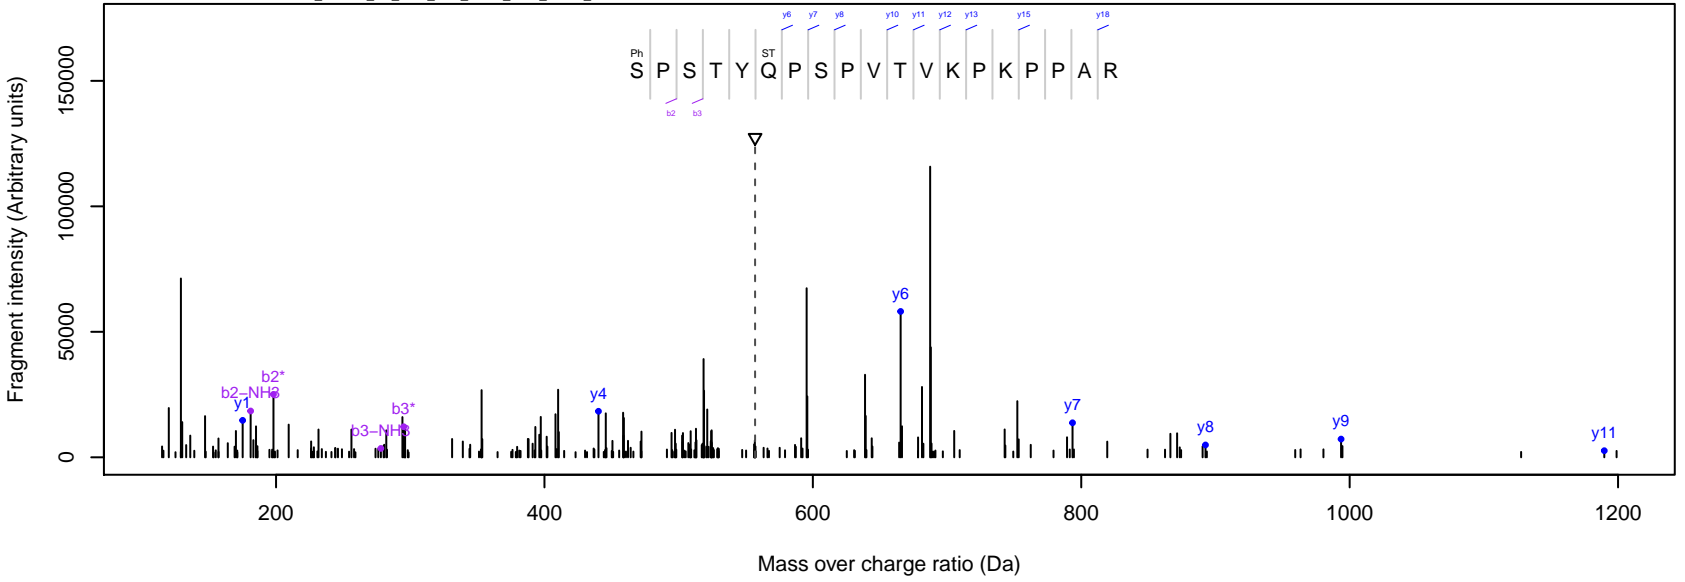

SKPLAAS(Phospho (STY))PKPAGLK-3+

Source : QE3\_201126\_FR\_TIOx\_hum\_tissue\_Urea\_RNAB\_B Scan : 8127

Andromeda score : 46.131

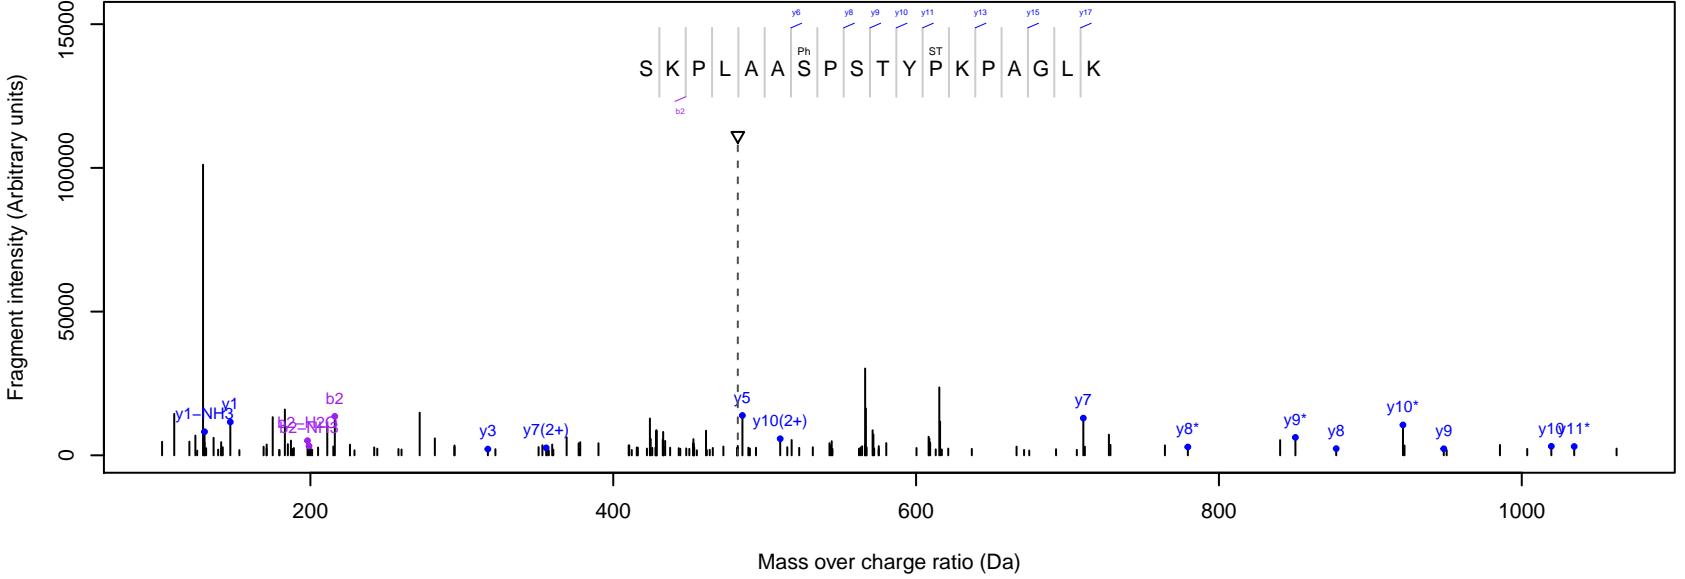

T(Phospho (STY))S(Phospho (STY))DDGGDSPEHDTDIPEVDLFLQLQVNTLR-3+

Source : QE3\_201126\_FR\_TIOx\_hum\_tissue\_Urea\_RNAB\_H Scan : 61714

Andromeda score : 46.082

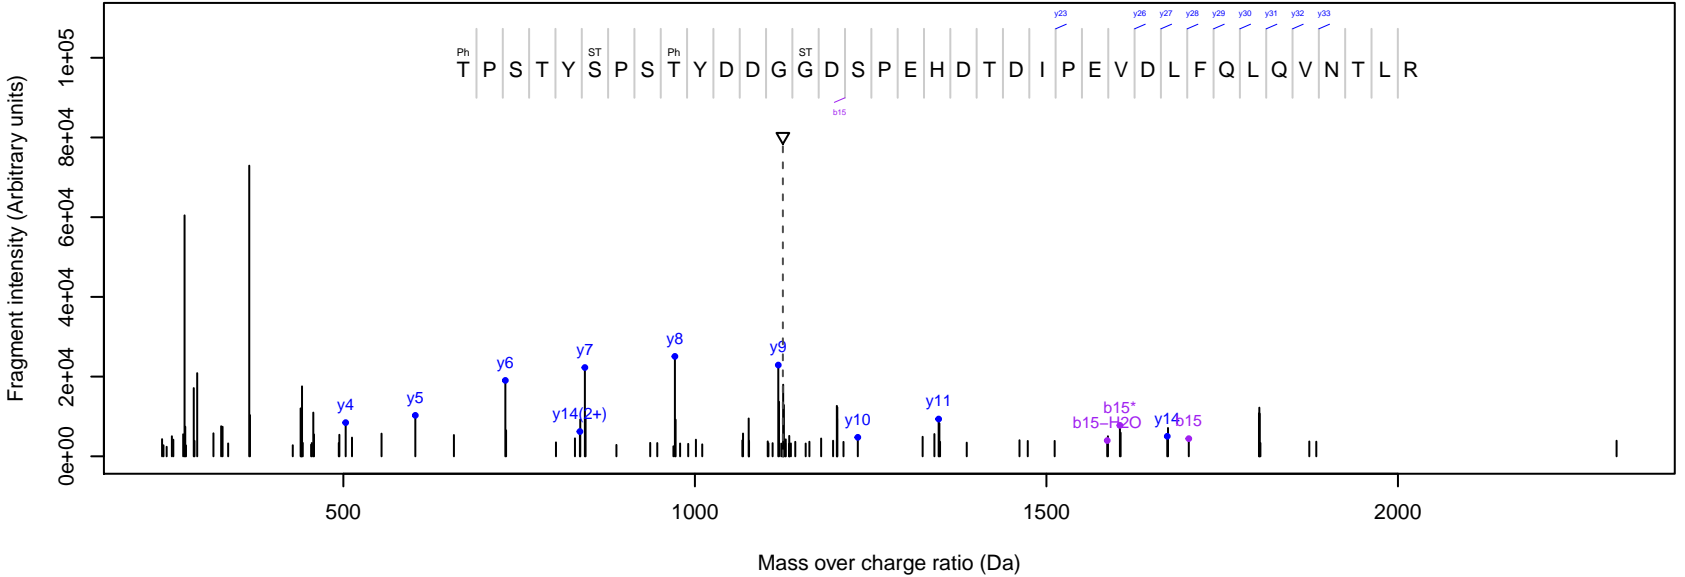

LSSNCSGVEGDV(Phospho (STY))DEDEGAEMSQR-3+

Source : QE3\_201126\_FR\_TiOx\_hum\_tissue\_Urea\_RNAB\_H Scan : 22994

Andromeda score : 46.065

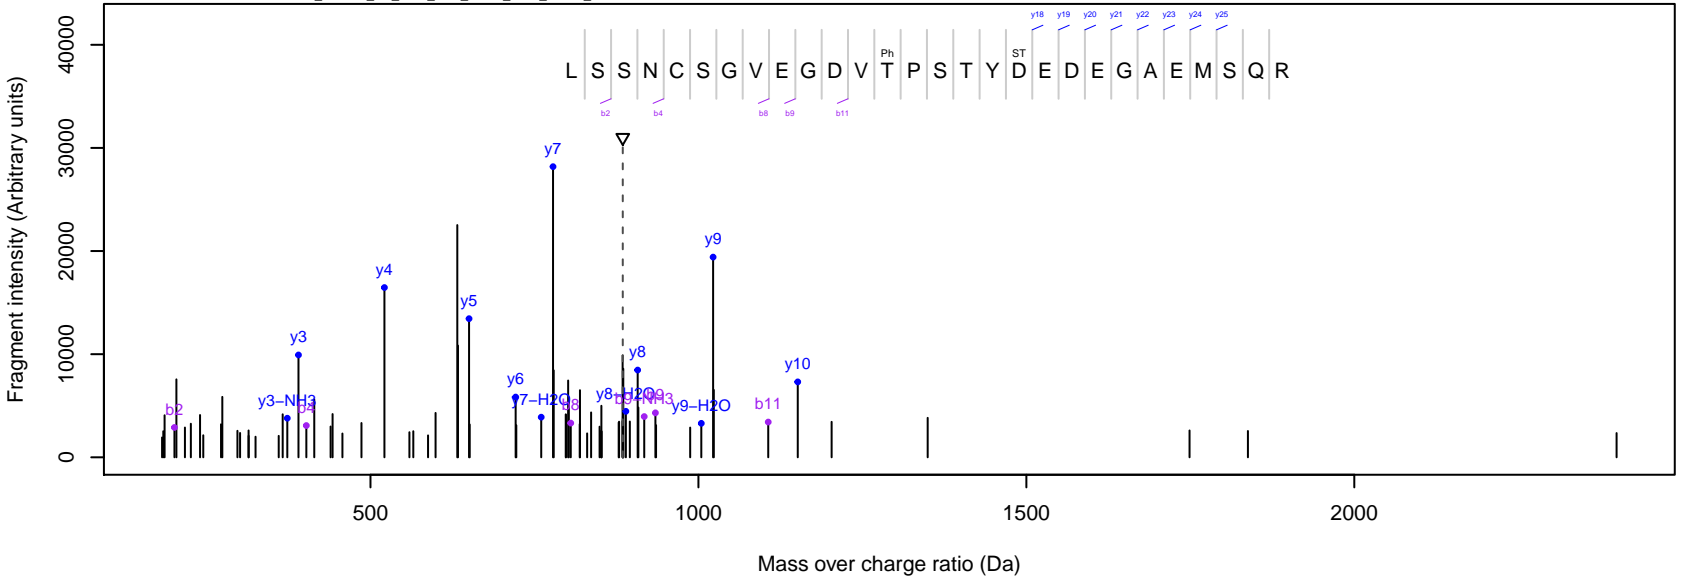

RLS(Phospho (STY))LTLR-2+

Source : QE3\_201126\_FR\_TiOx\_hum\_tissue\_Urea\_RNAB\_N Scan : 21245

Andromeda score : 46.001

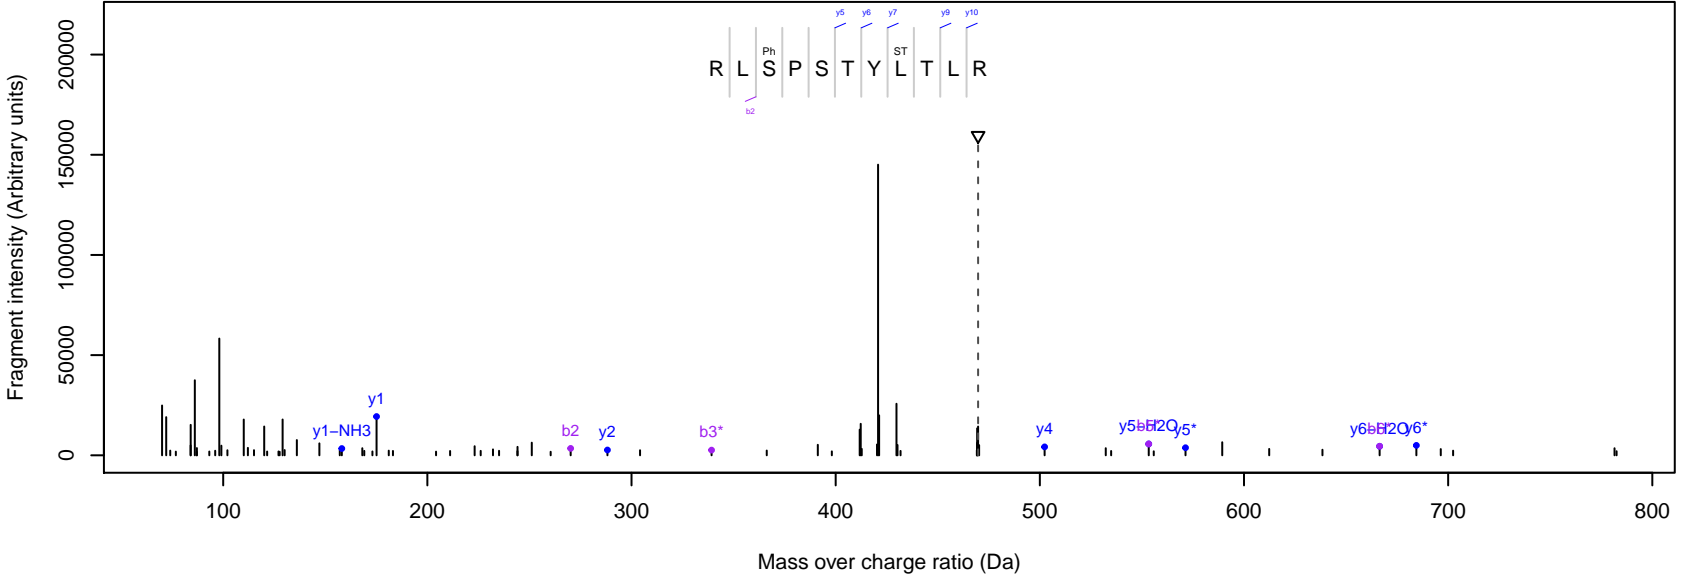

IRT(Phospho (STY))QS(Phospho (STY))FSLQER-2+

Source : QE3\_201126\_FR\_TiOx\_hum\_tissue\_Urea\_RNAB\_H Scan : 22584

Andromeda score : 45.992

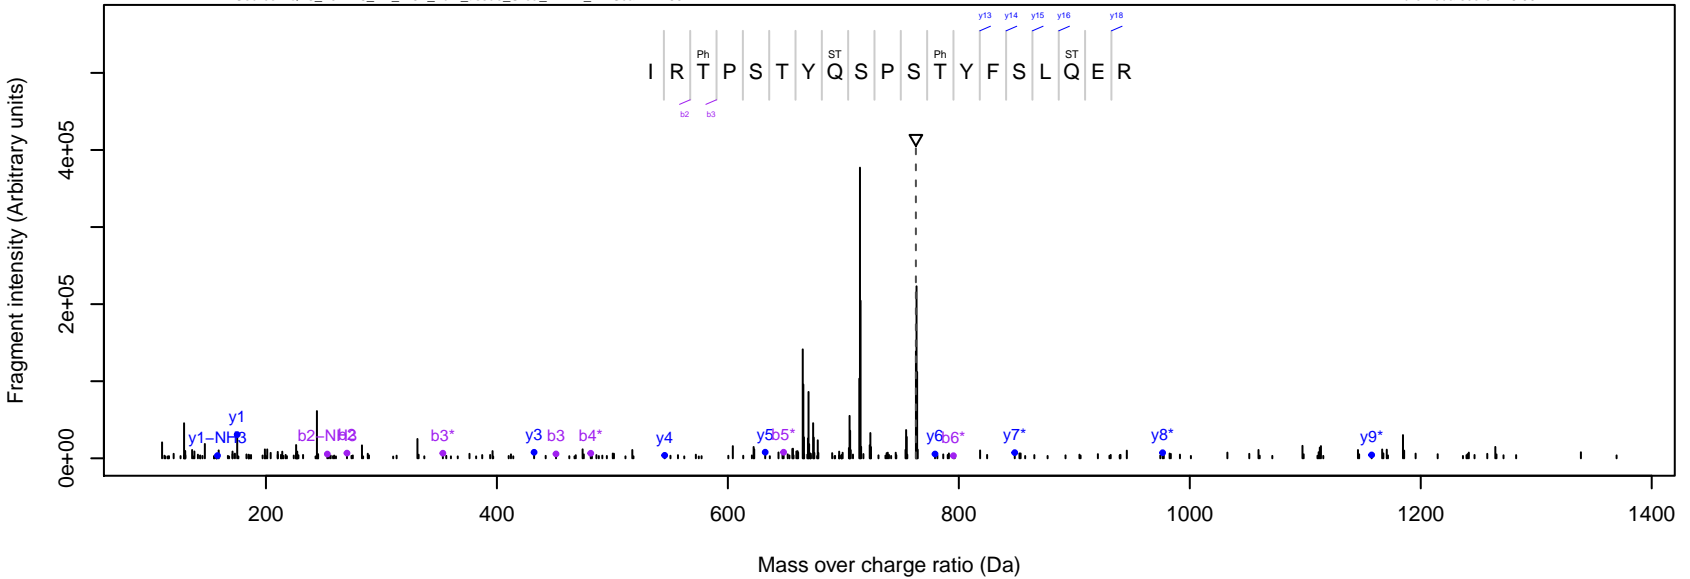

RPQS(Phospho (STY))PGAS(Phospho (STY))PSQAERLPDSER-3+

Source : QE3\_201126\_FR\_TiOx\_hum\_tissue\_Urea\_RNAB\_B Scan : 14185

Andromeda score : 45.957

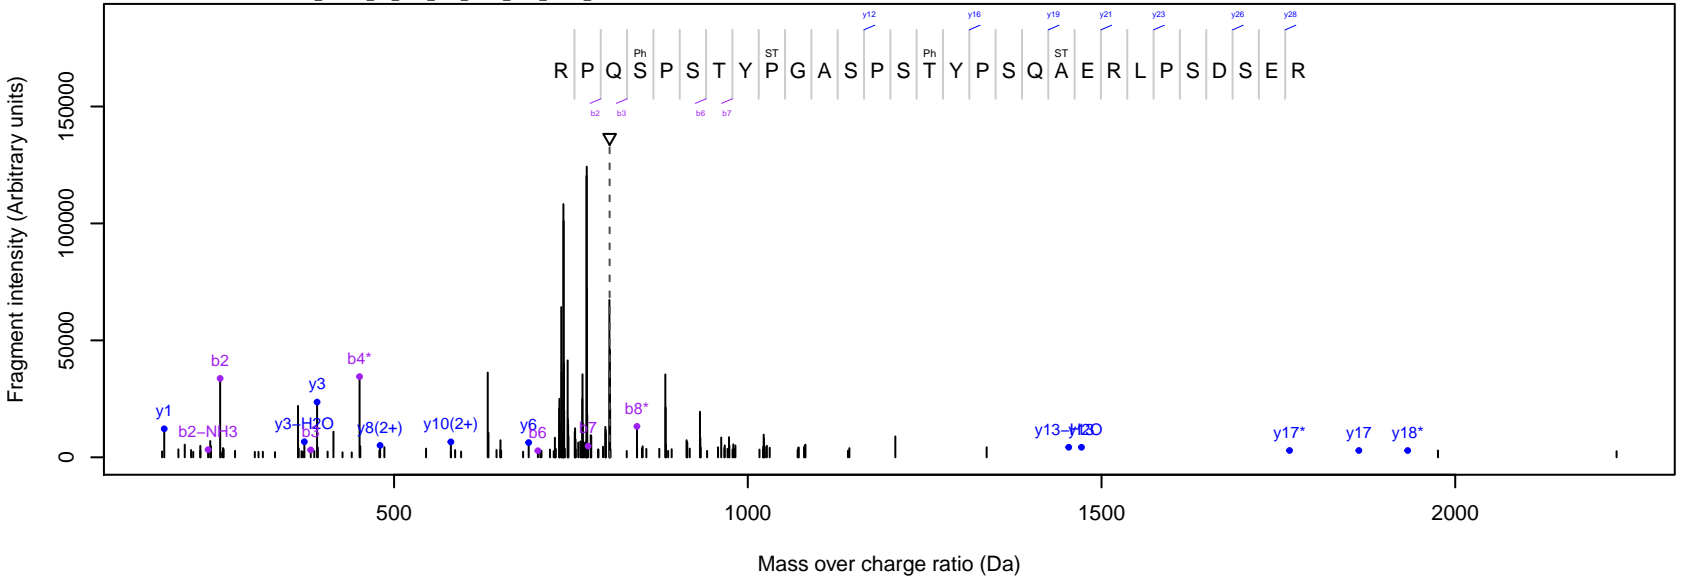

VT(Phospho (STY))ET(Phospho (STY))EDDS(Phospho (STY))DSDSDDDEDVHVTIGDIK-3+

Source : QE3\_201126\_FR\_TiOx\_hum\_tissue\_Urea\_RNAB\_N Scan : 46862

Andromeda score : 45.957

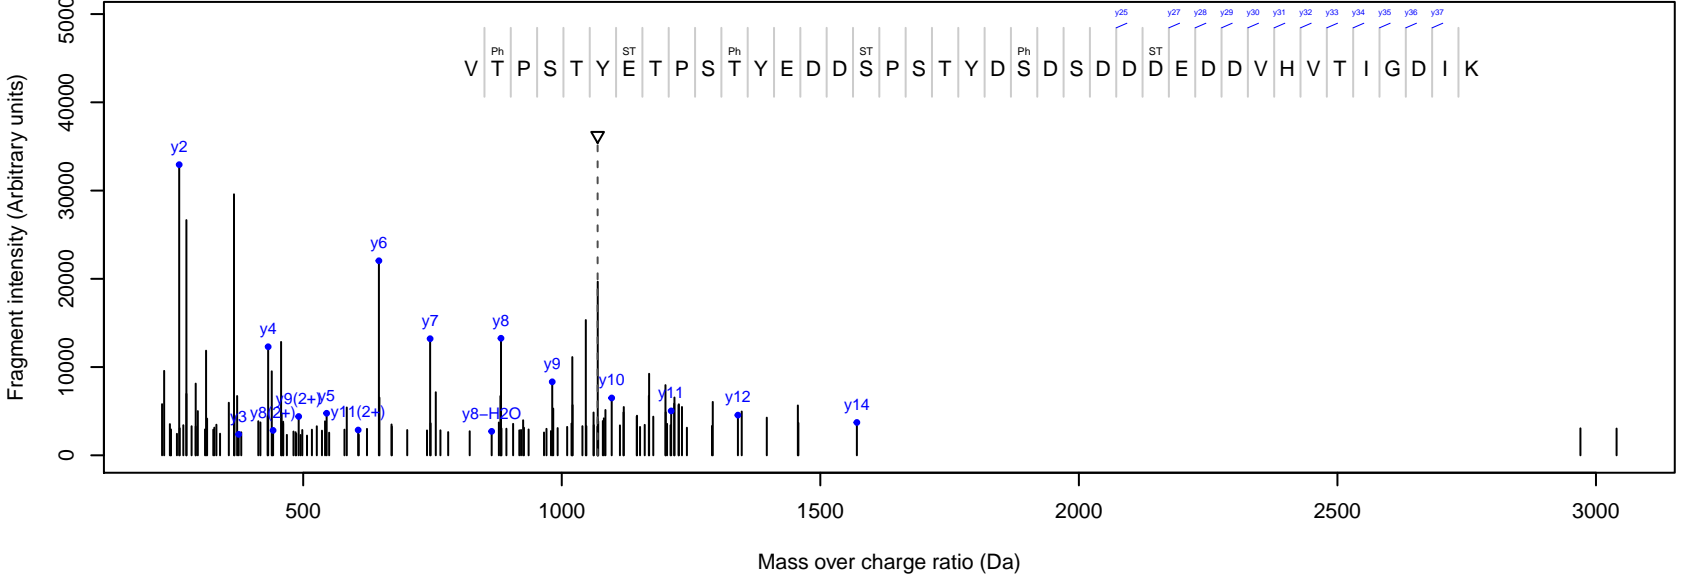

KT(Phospho (STY))SSDDESEEDDLLQR-3+

Source : QE3\_201126\_FR\_TiOx\_hum\_tissue\_Urea\_RNAB\_N Scan : 20046

Andromeda score : 45.916

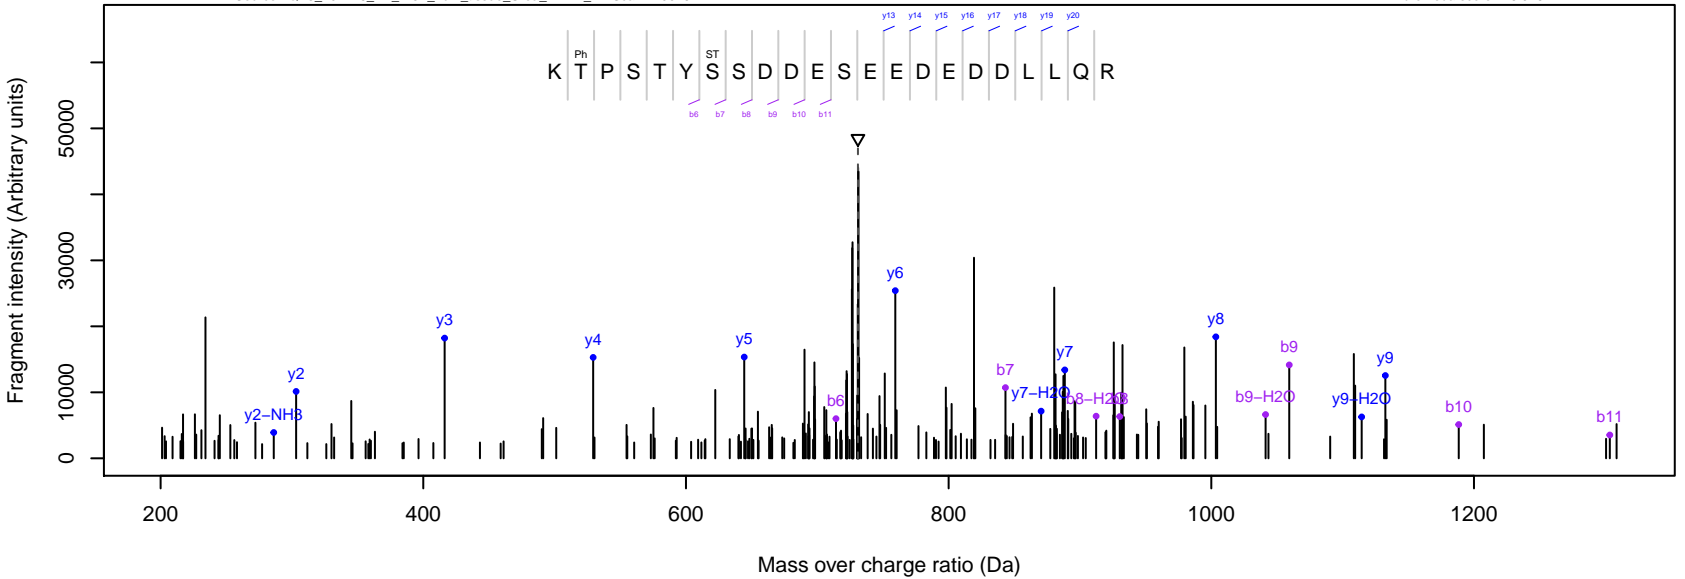

S(Phospho (STY))AS(Phospho (STY))PYPSHLSLSSPQR-3+

Source : QE3\_201126\_FR\_TiOx\_hum\_tissue\_Urea\_RNAB\_N Scan : 16962

Andromeda score : 45.916

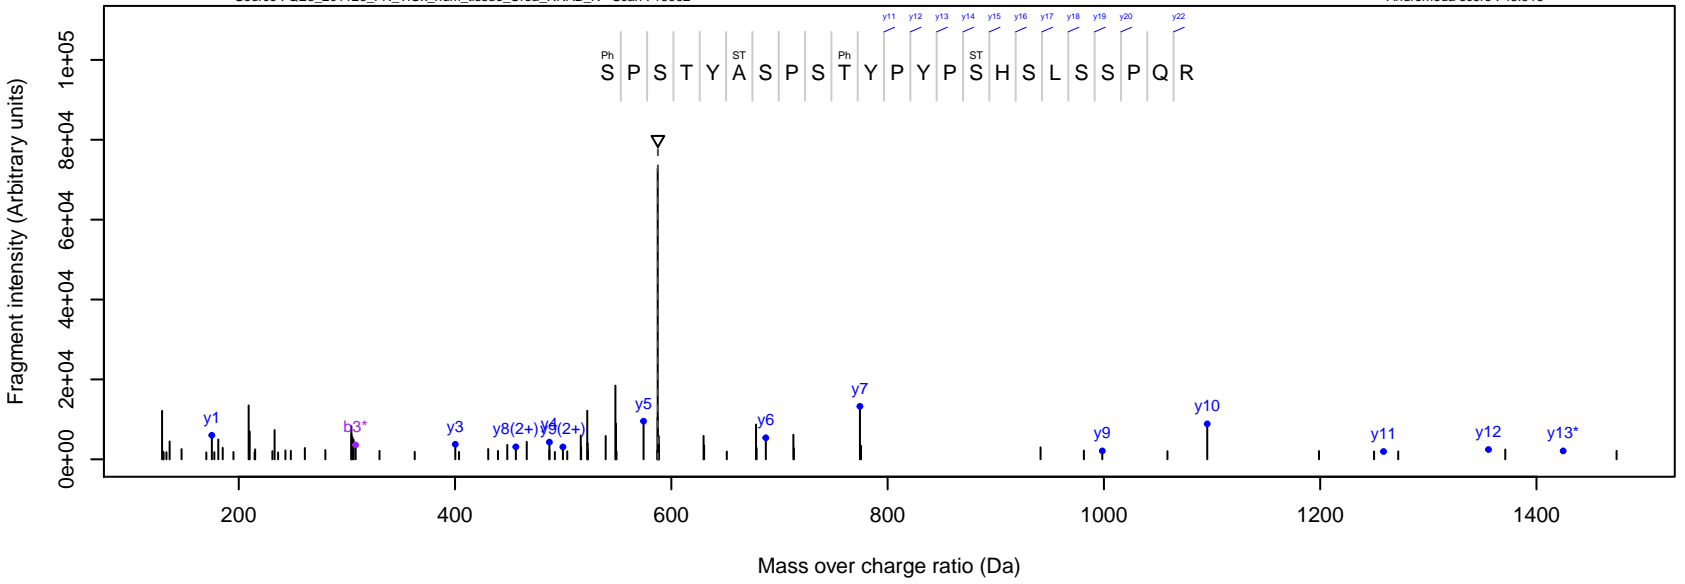

S(Phospho (STY))PLPAPRRPFLYR-2+

Source : QE3\_201126\_FR\_TiOx\_hum\_tissue\_Urea\_RNAB\_N Scan : 36536

Andromeda score : 45.915

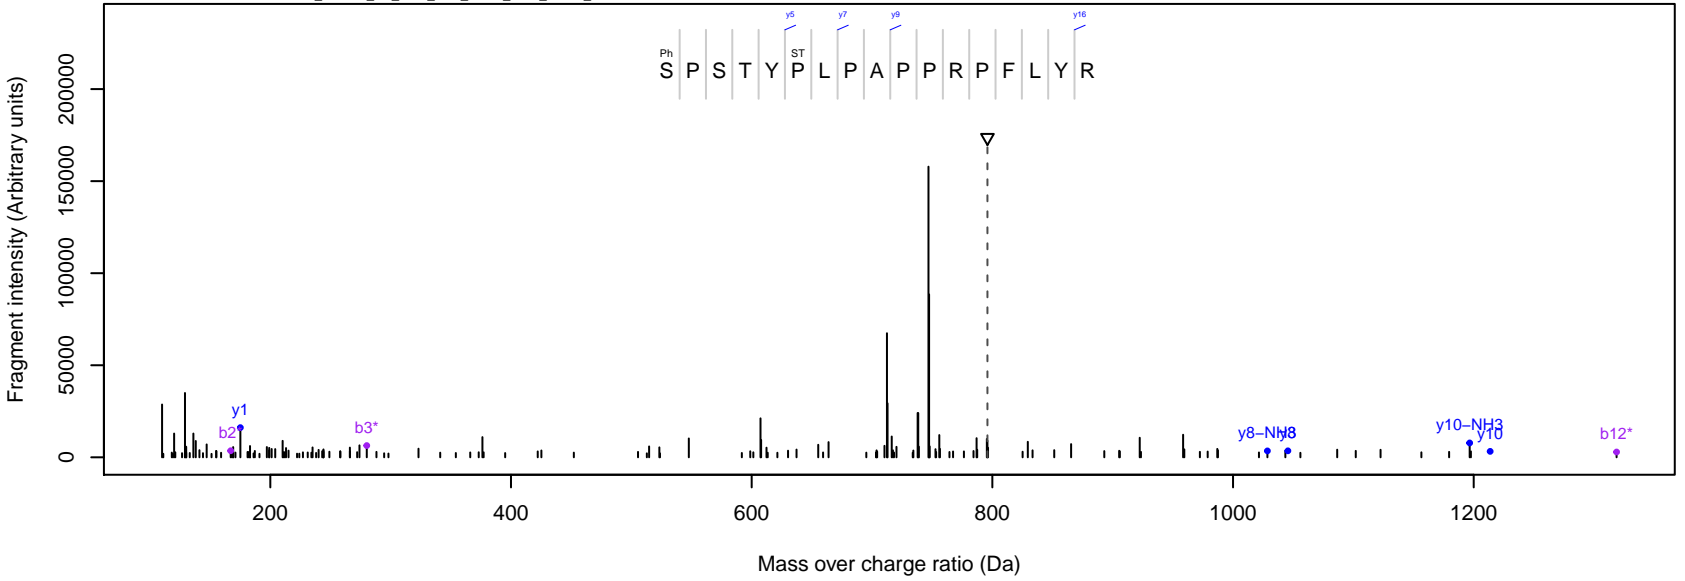

S(Phospho (STY))REDLSALTR-2+

Source : QE3\_201126\_FR\_TiOx\_hum\_tissue\_Urea\_RNAB\_H Scan : 16890

Andromeda score : 45.915

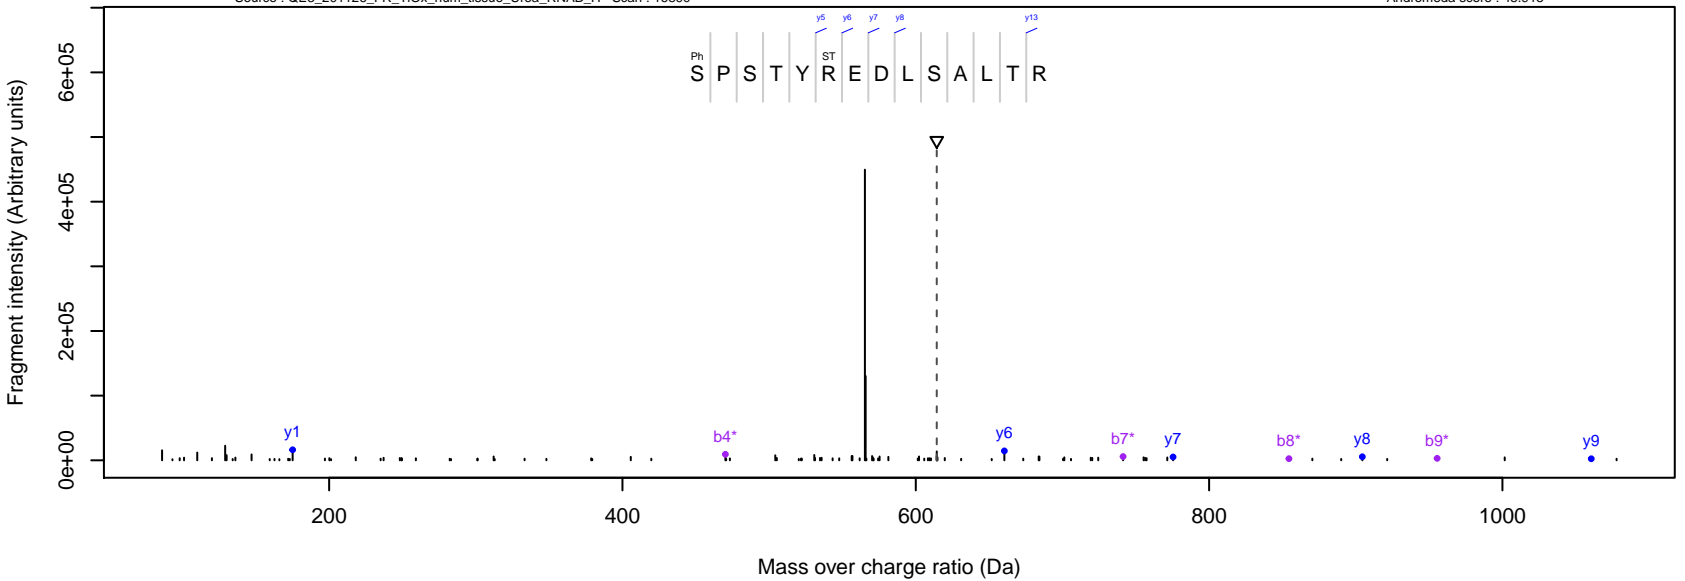

SLS(Phospho (STY))PHKM(Oxidation (M))ADGGSPFLGR-3+

Source : QE3\_201126\_FR\_TiOx\_hum\_tissue\_Urea\_RNAB\_H Scan : 16025

Andromeda score : 45.885

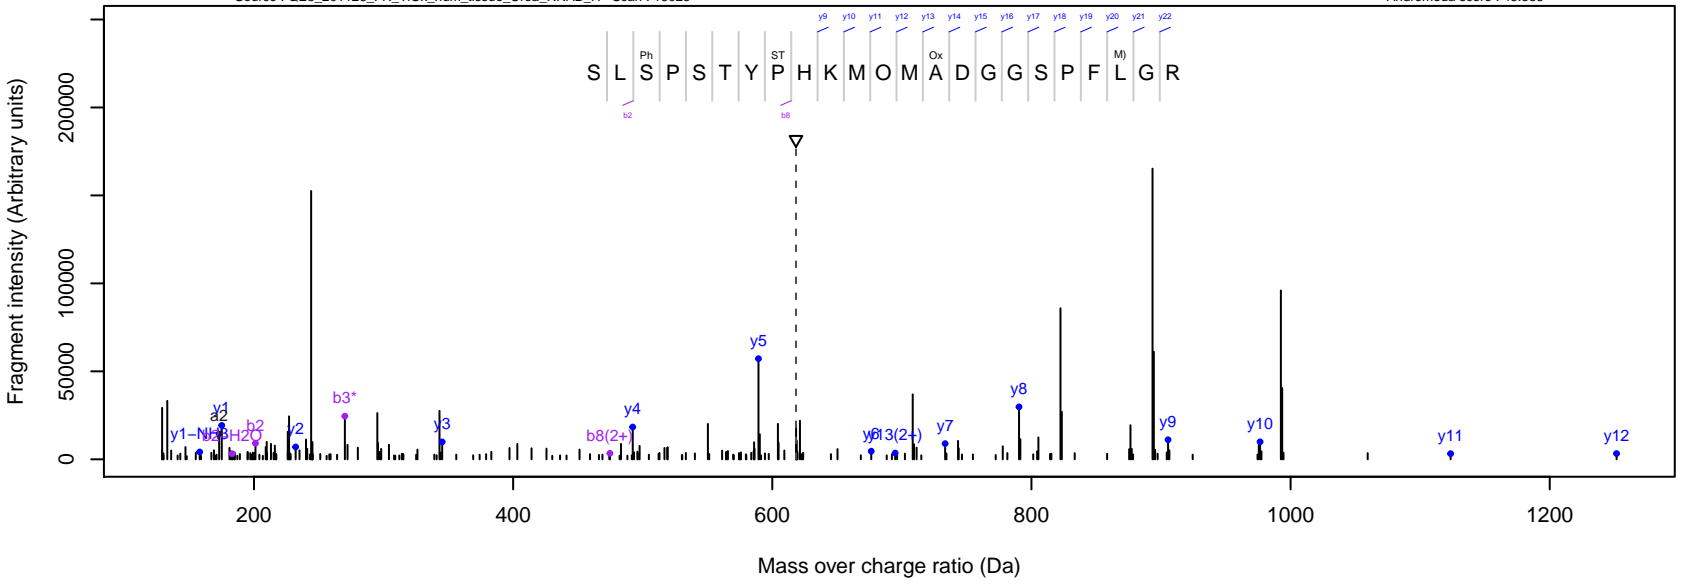

SSSPVTELAS(Phospho (STY))RSPQR-3+

Source : QE3\_201126\_FR\_TiOx\_hum\_tissue\_Urea\_RNAB\_H Scan : 17150

Andromeda score : 45.885

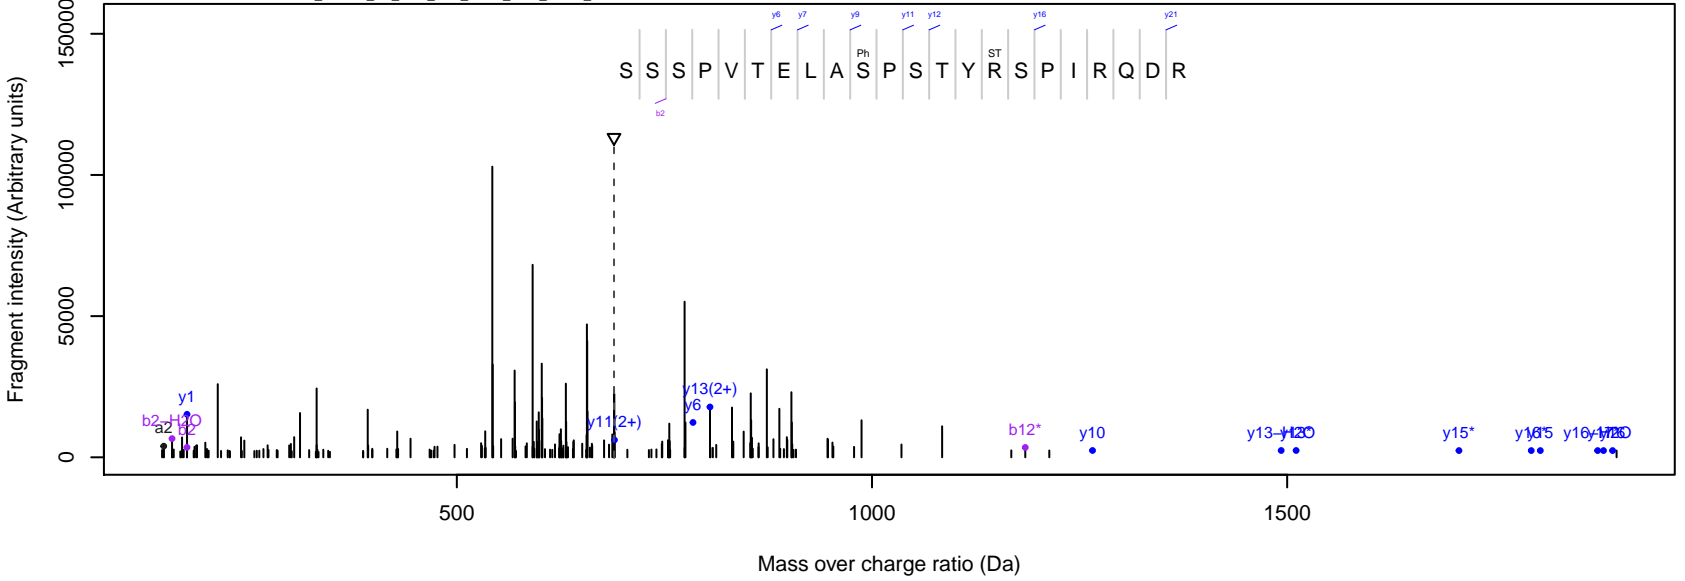

KTS(Phospho (STY))EEEKNGSEELVEK-3+

Source : QE3\_201126\_FR\_TiOx\_hum\_tissue\_Urea\_RNAB\_H Scan : 7060

Andromeda score : 45.88

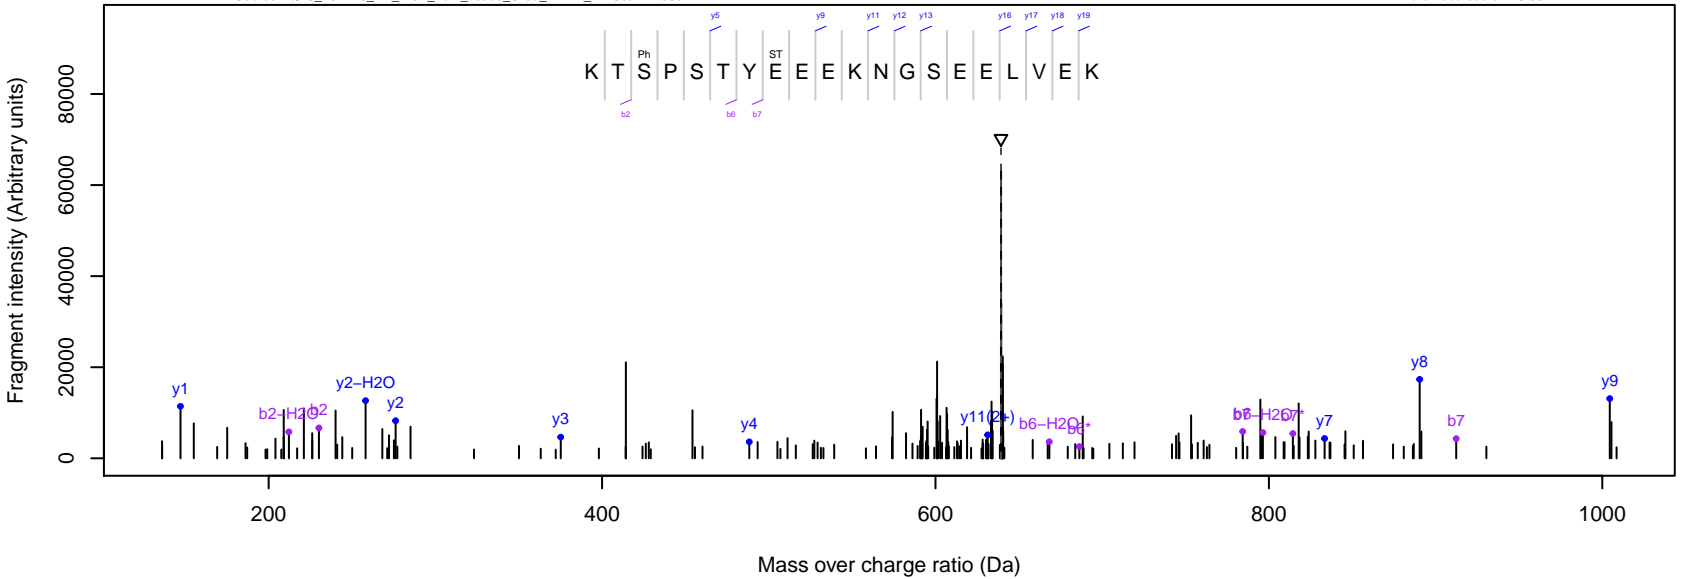

KHS(Phospho (STY))PSPPPPTTESR-3+

Source : QE3\_201126\_FR\_TIOx\_hum\_tissue\_Urea\_RNAB\_N Scan : 5167

Andromeda score : 45.873

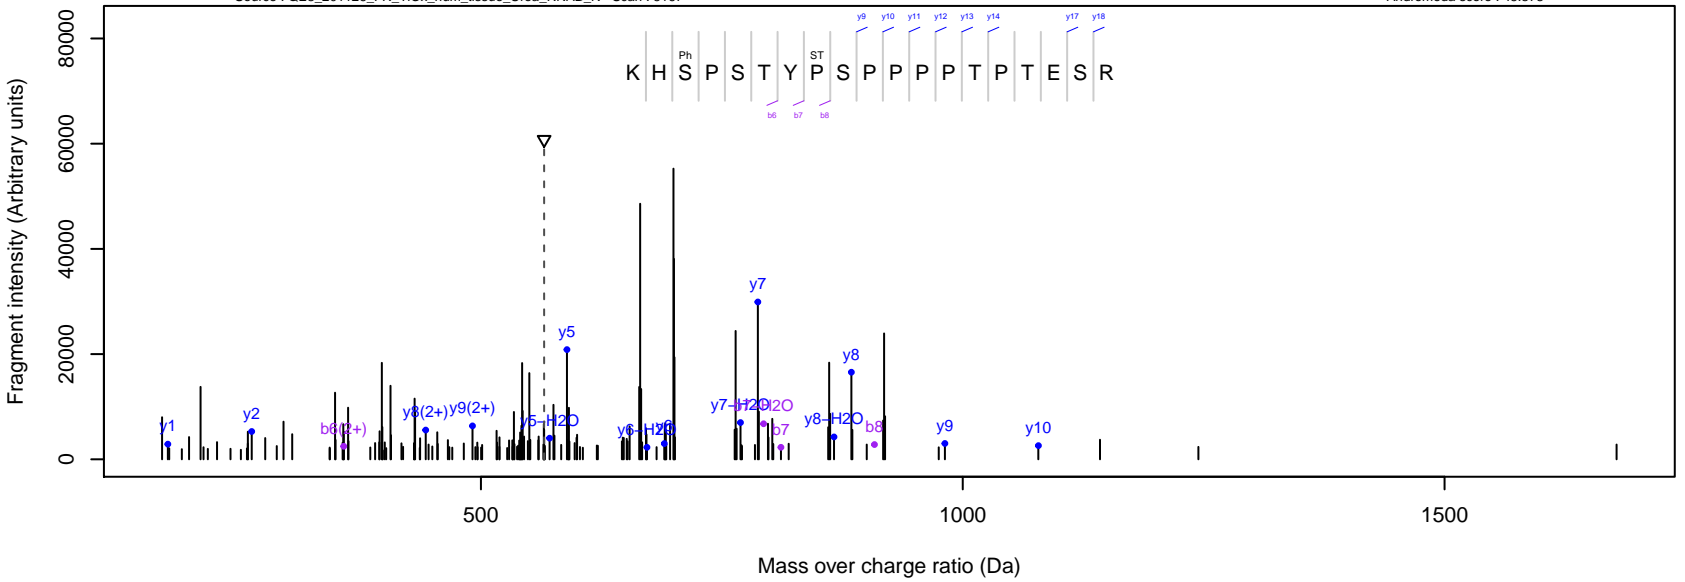

LSS(Phospho (STY))M(Oxidation (M))AM(Oxidation (M))ISGLSGR-2+

Source : QE3\_201126\_FR\_TIOx\_hum\_tissue\_Urea\_RNAB\_N Scan : 22266

Andromeda score : 45.864

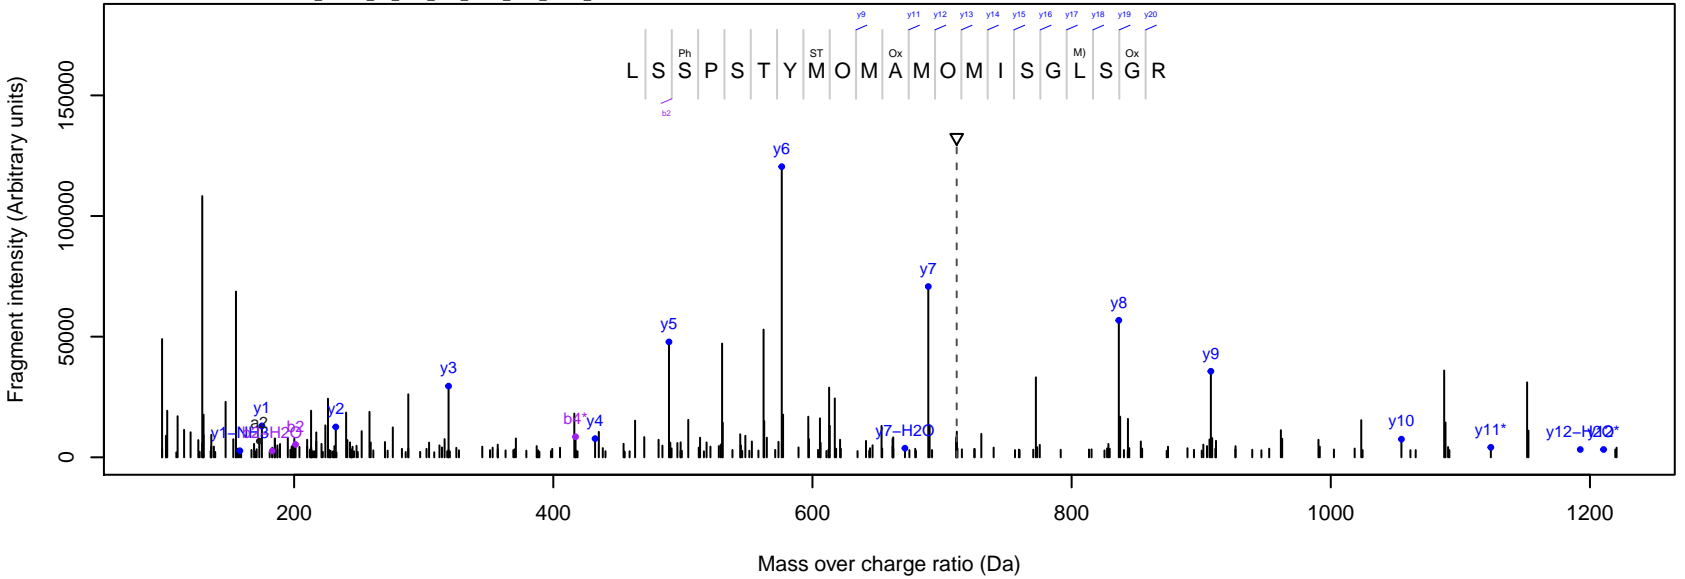

(Acetyl (Protein N-term))S(Phospho (STY))DQEAKPSTEDLGDK-2+

Source : QE3\_201126\_FR\_TIOx\_hum\_tissue\_Urea\_RNAB\_H Scan : 15258

Andromeda score : 45.864

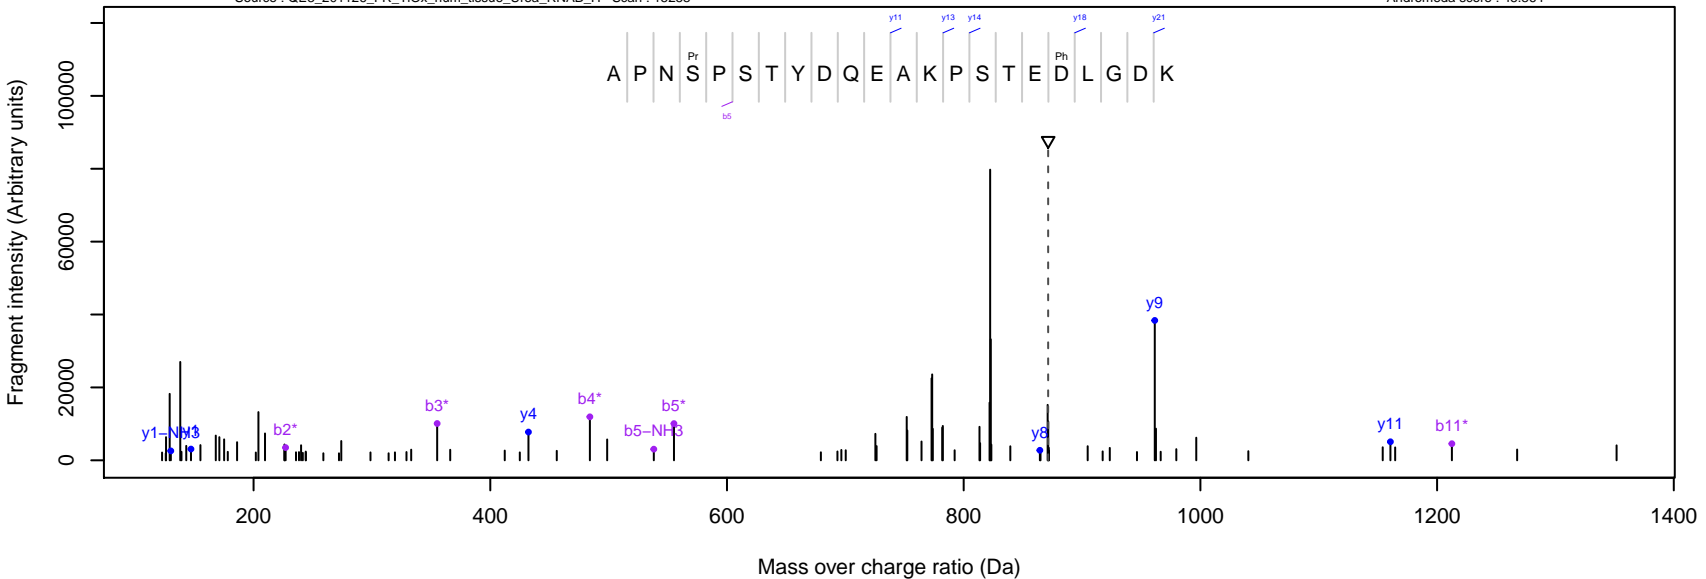



AASDGQYENQSPEATSPSTYPRSPSTYPGVST

Source : QE3\_201126\_FR\_TiOx\_hum\_tissue\_Urea\_RNAB\_N Scan : 15497

Andromeda score : 45.836

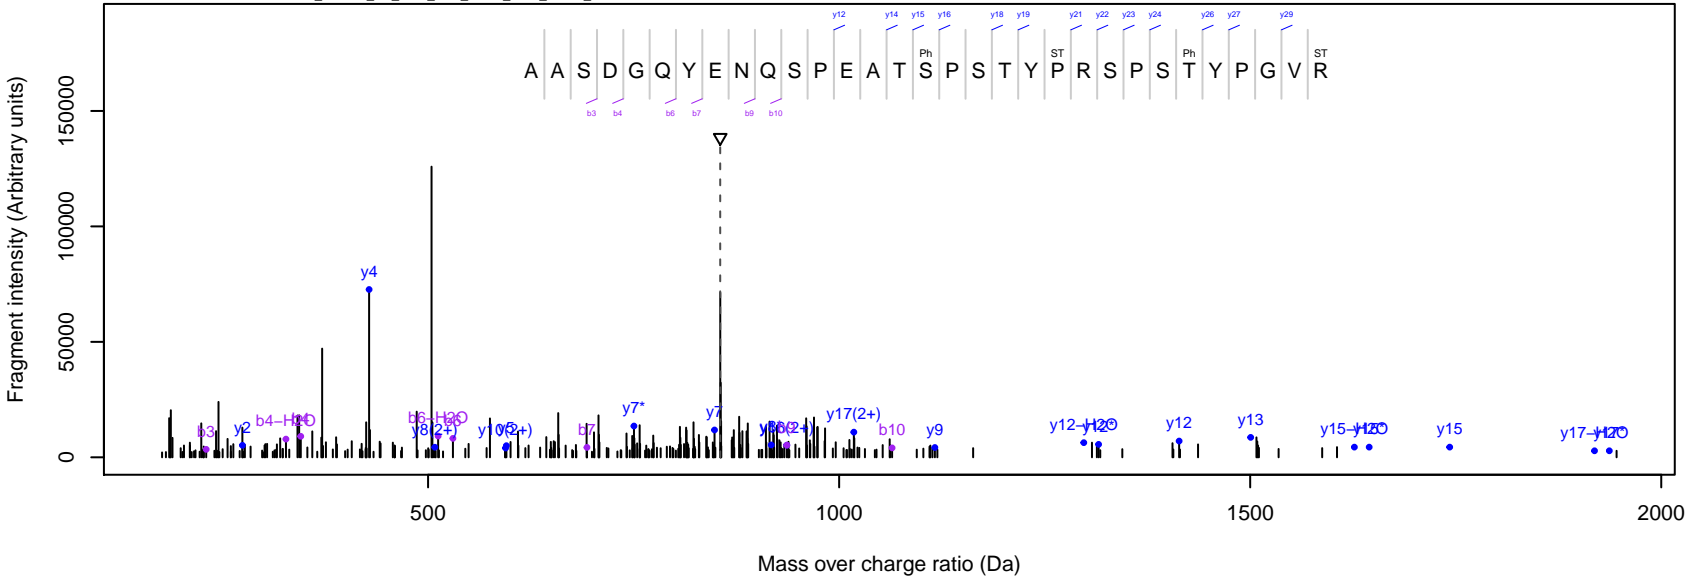

RFS(Phospho (STY))MEDVSK

Source : QE3\_201126\_FR\_TiOx\_hum\_tissue\_Urea\_RNAB\_B Scan : 15637

Andromeda score : 45.829

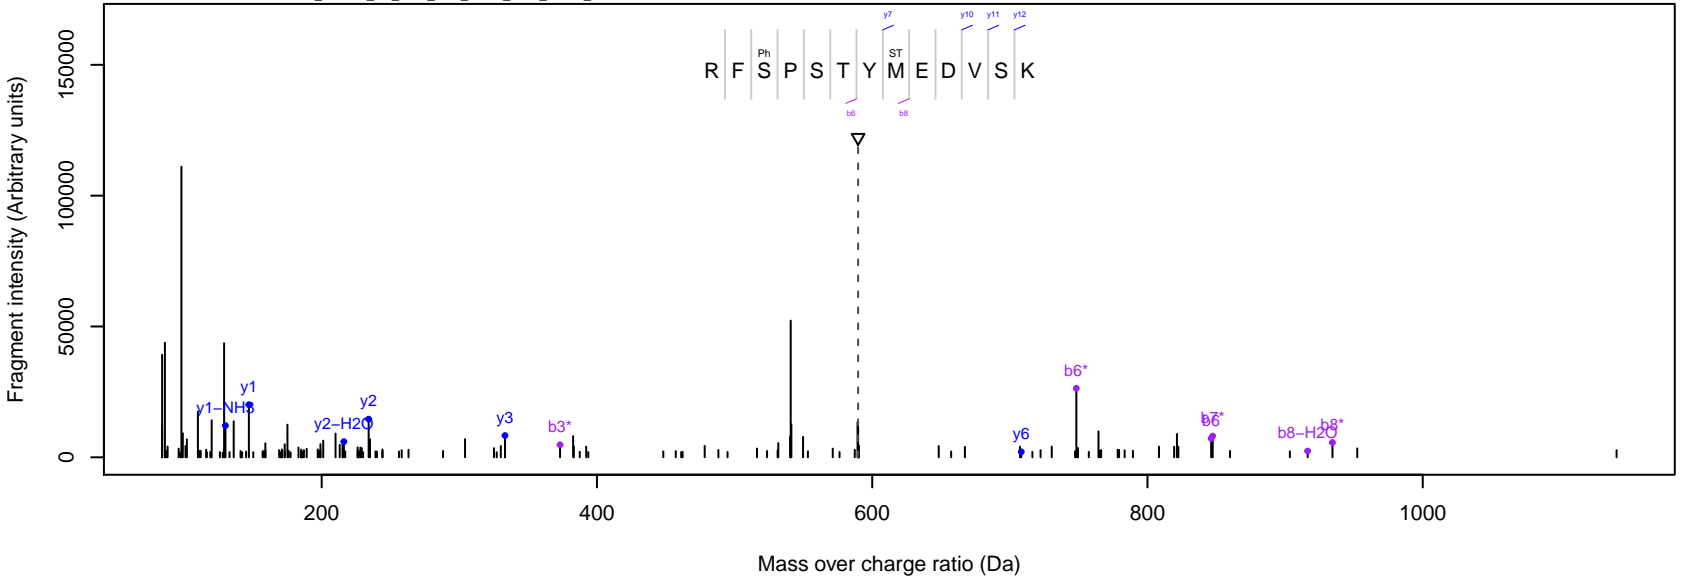

KQS(Phospho (STY))SSEISLAVER

Source : QE3\_201126\_FR\_TiOx\_hum\_tissue\_Urea\_RNAB\_H Scan : 18053

Andromeda score : 45.79

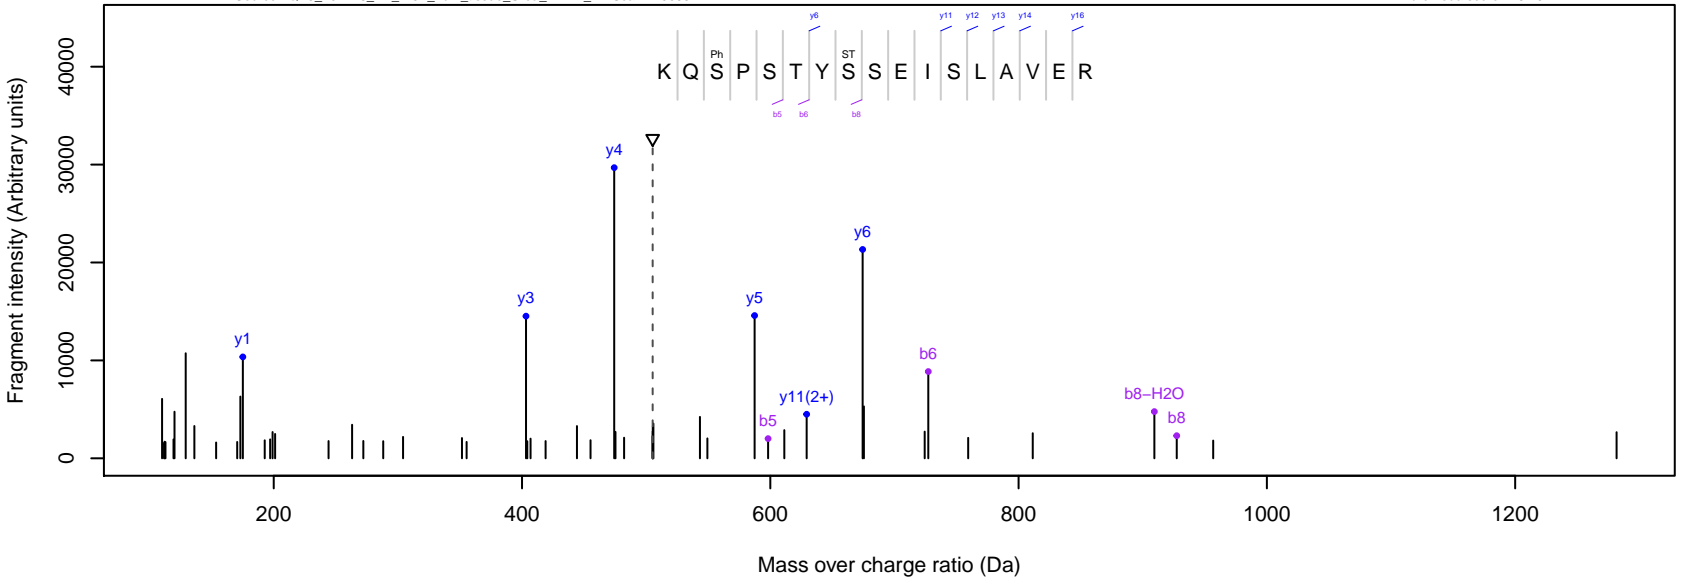

S(Phospho (STY))S(Phospho (STY))SSPELQLQDILGDPGDKADVGR-3+

Source : QE3\_201126\_FR\_TiOx\_hum\_tissue\_Urea\_RNAB\_H Scan : 58885

Andromeda score : 45.784

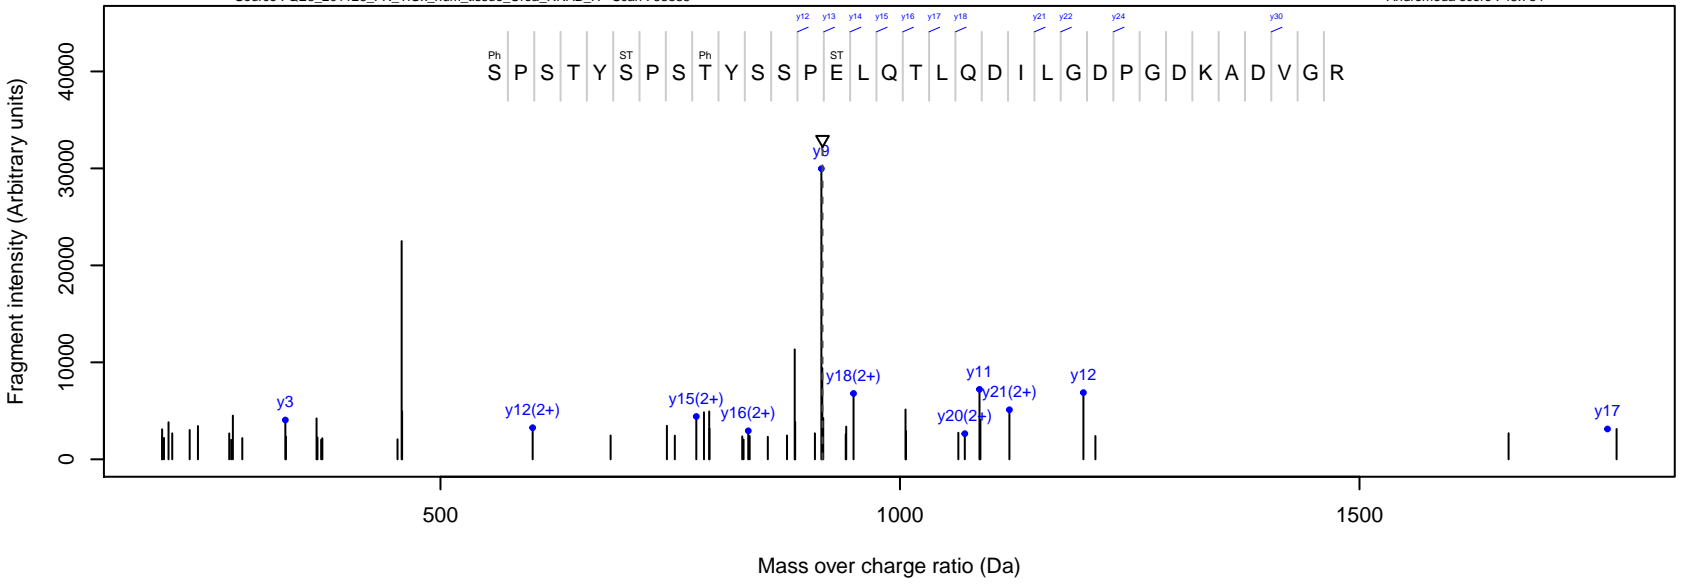

SVTVVEDEDEDGDDLLHHHGHSHCSSS(Phospho (STY))GDPAEYNLR-4+

Source : QE3\_201126\_FR\_TiOx\_hum\_tissue\_Urea\_RNAB\_H Scan : 24054

Andromeda score : 45.761

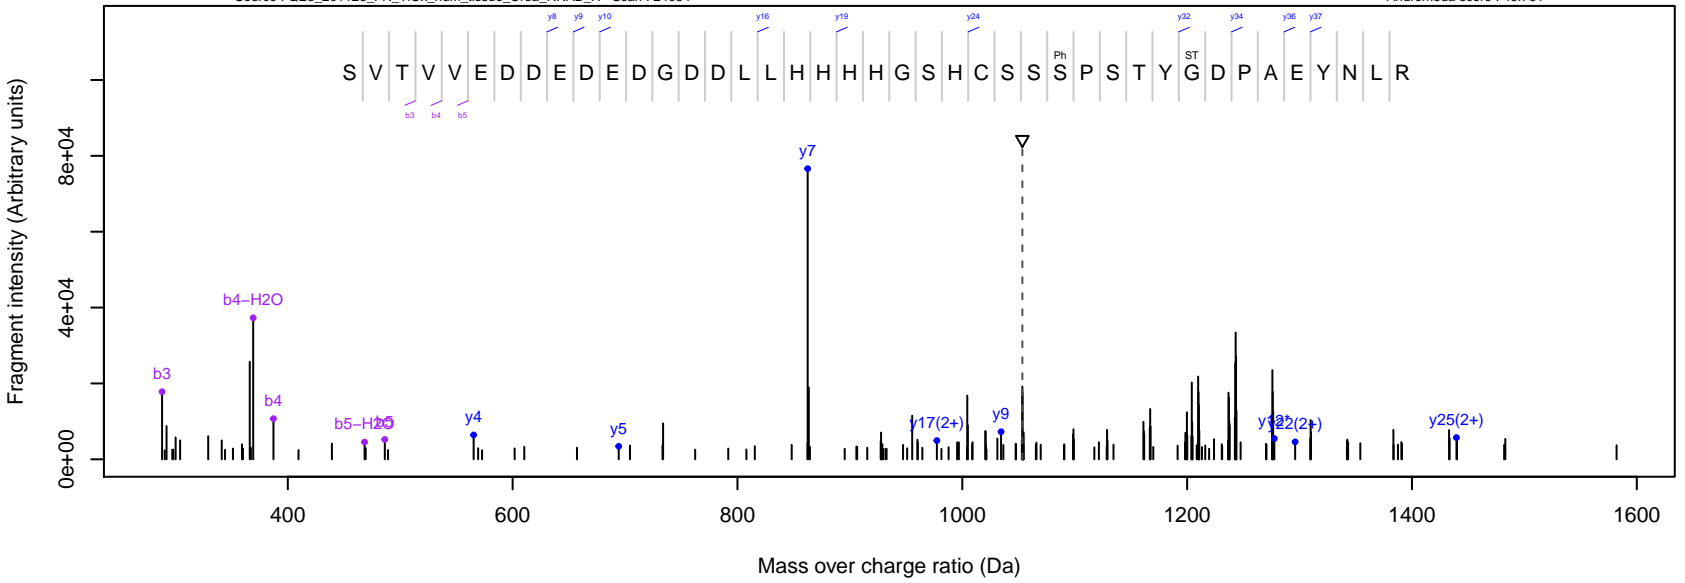

YHS(Phospho (STY))RS(Phospho (STY))RS(Phospho (STY))PQAFR-3+

Source : QE3\_201126\_FR\_TiOx\_hum\_tissue\_Urea\_RNAB\_N Scan : 7242

Andromeda score : 45.723

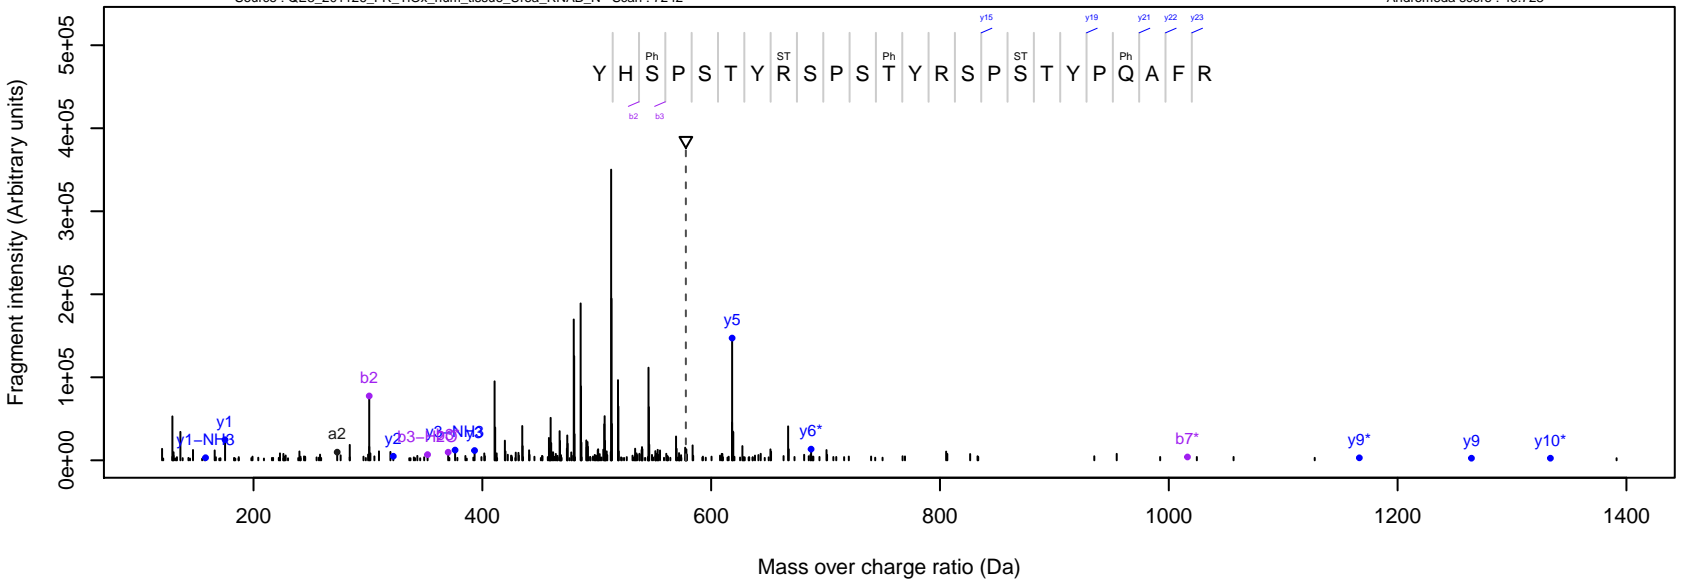

RKSS(Phospho (STY))GFADPSVNYSK-3+

Source : QE3\_201126\_FR\_TiOx\_hum\_tissue\_Urea\_RNAB\_N Scan : 22557

Andromeda score : 45.659

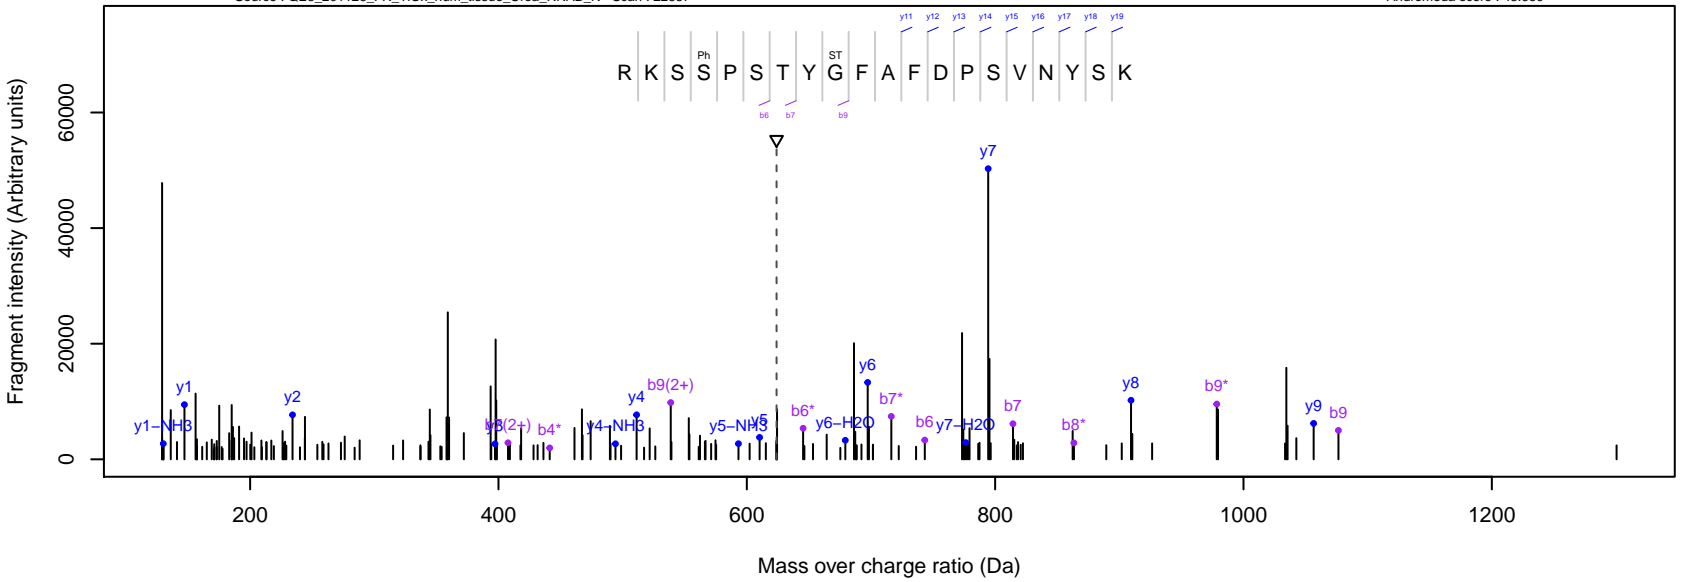

SQS(Phospho (STY))GEDESMNQPGPIK-2+

Source : QE3\_201126\_FR\_TiOx\_hum\_tissue\_Urea\_RNAB\_H Scan : 16899

Andromeda score : 45.614

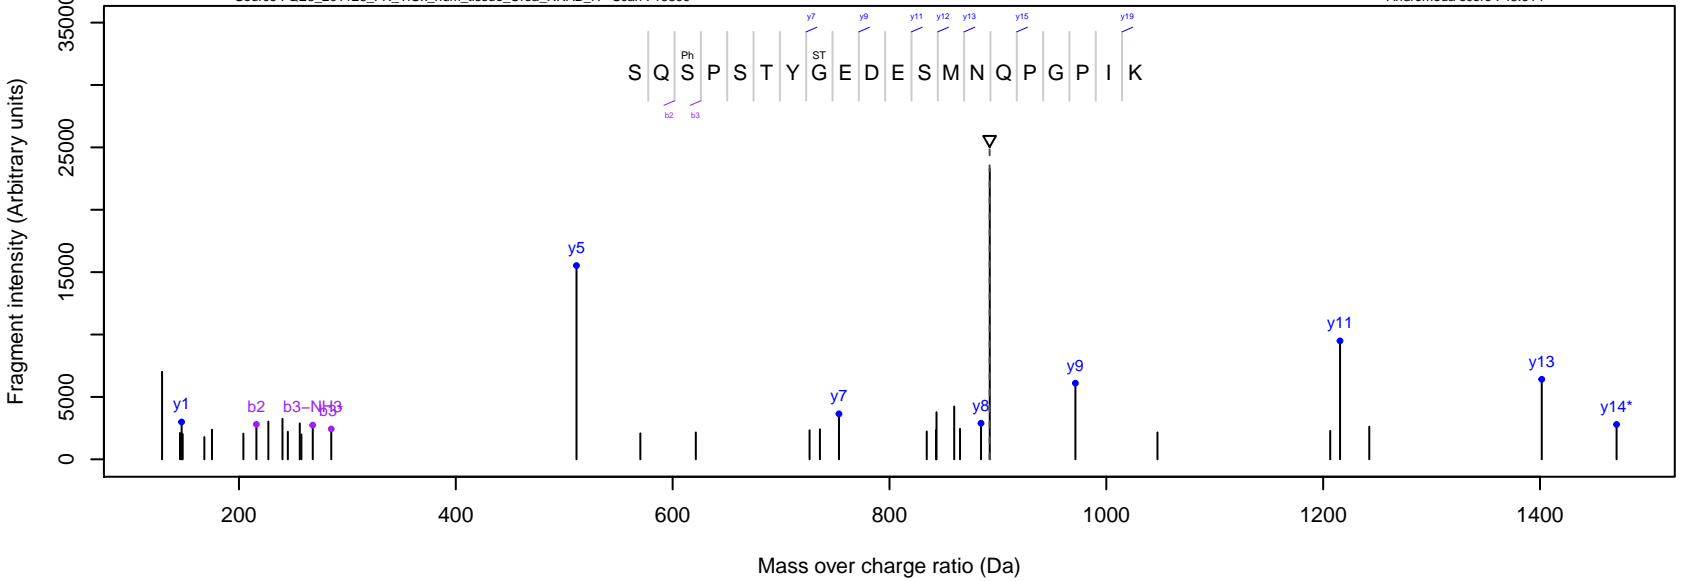

ENQVVELHYDAICQYMGPS(Phospho (STY))DTDDD-3+

Source : QE3\_201126\_FR\_TiOx\_hum\_tissue\_Urea\_RNAB\_B Scan : 50993

Andromeda score : 45.611

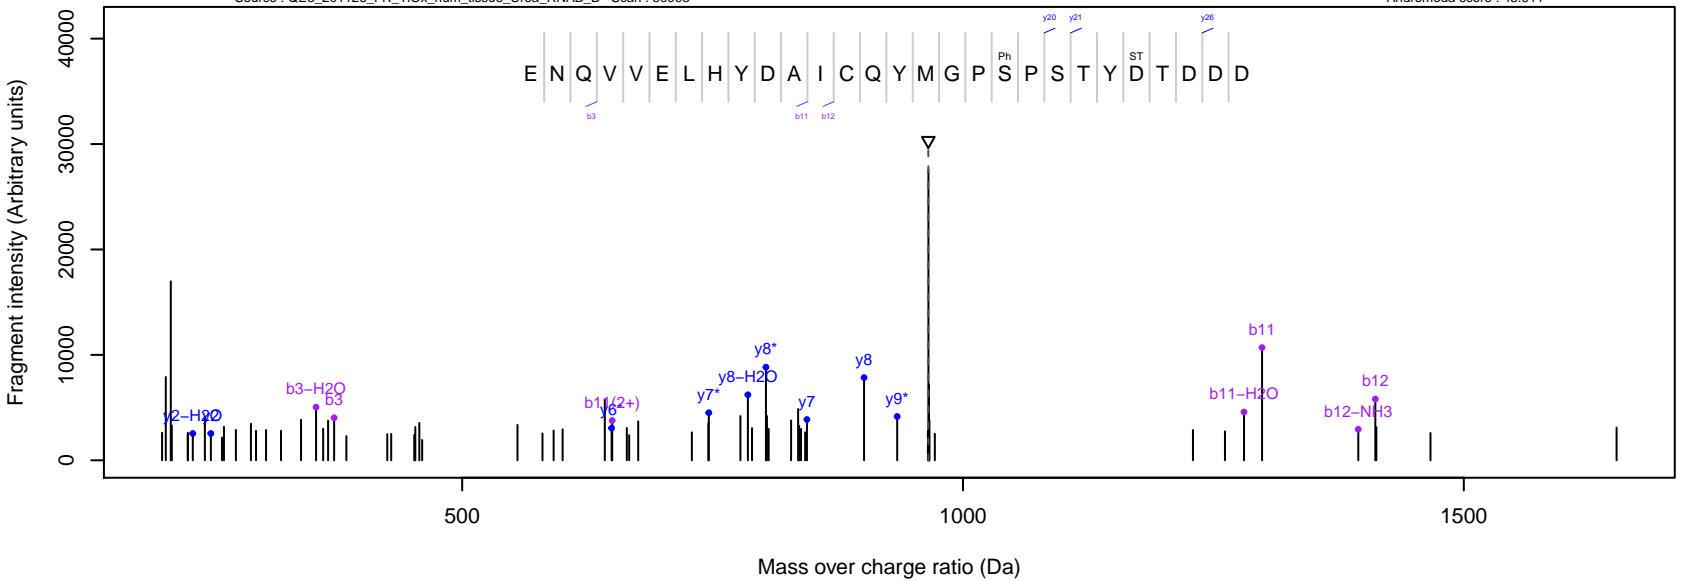

EHQTSAYS(Phospho (STY))PPRAGQE-3+

Source : QE3\_201126\_FR\_TiOx\_hum\_tissue\_Urea\_RNAB\_H Scan : 7161

Andromeda score : 45.608

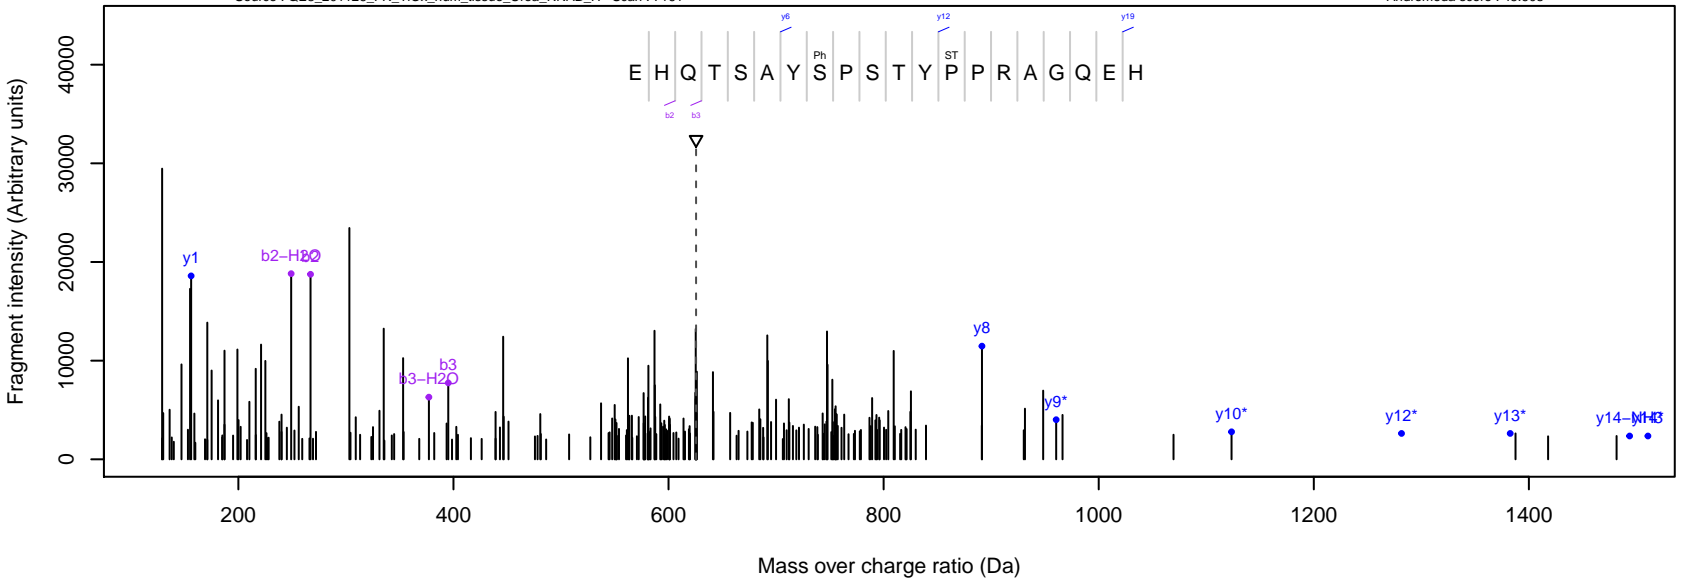

TAS(Phospho (STY))PLPLRPDAPVEK-3+

Source : QE3\_201126\_FR\_TiOx\_hum\_tissue\_Urea\_RNAB\_B Scan : 23035

Andromeda score : 45.608

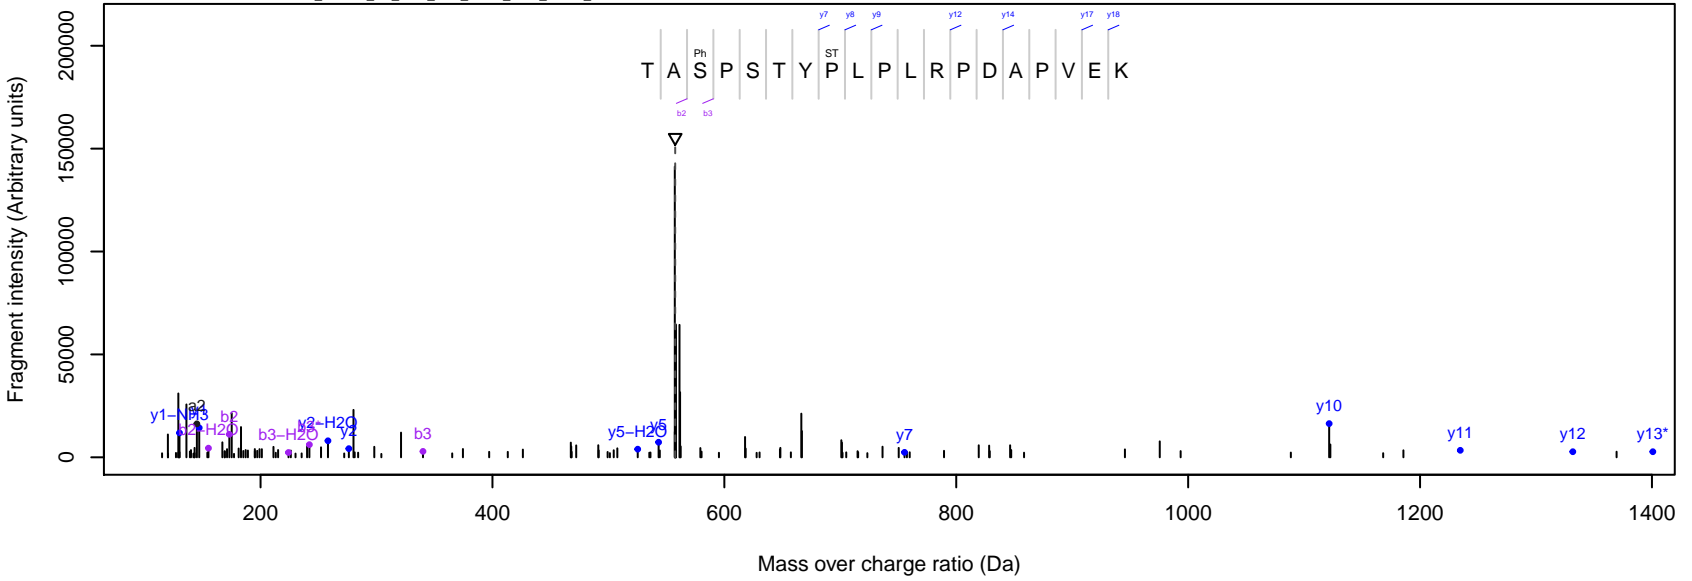

KES(Phospho (STY))PLLFK-2+

Source : QE3\_201126\_FR\_TiOx\_hum\_tissue\_Urea\_RNAB\_H Scan : 18820

Andromeda score : 45.598

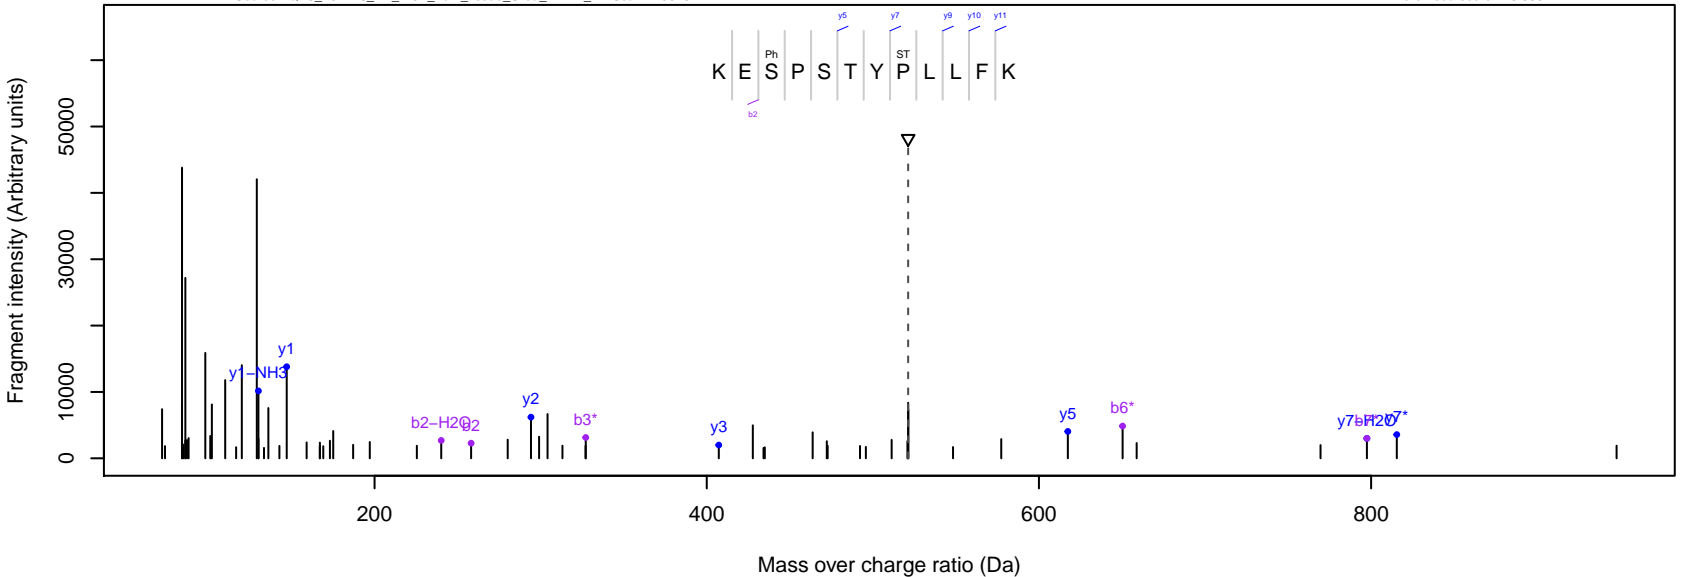

TLS(Phospho (STY))ESFSR-2+

Source : QE3\_201126\_FR\_TiOx\_hum\_tissue\_Urea\_RNAB\_H Scan : 19956

Andromeda score : 45.598

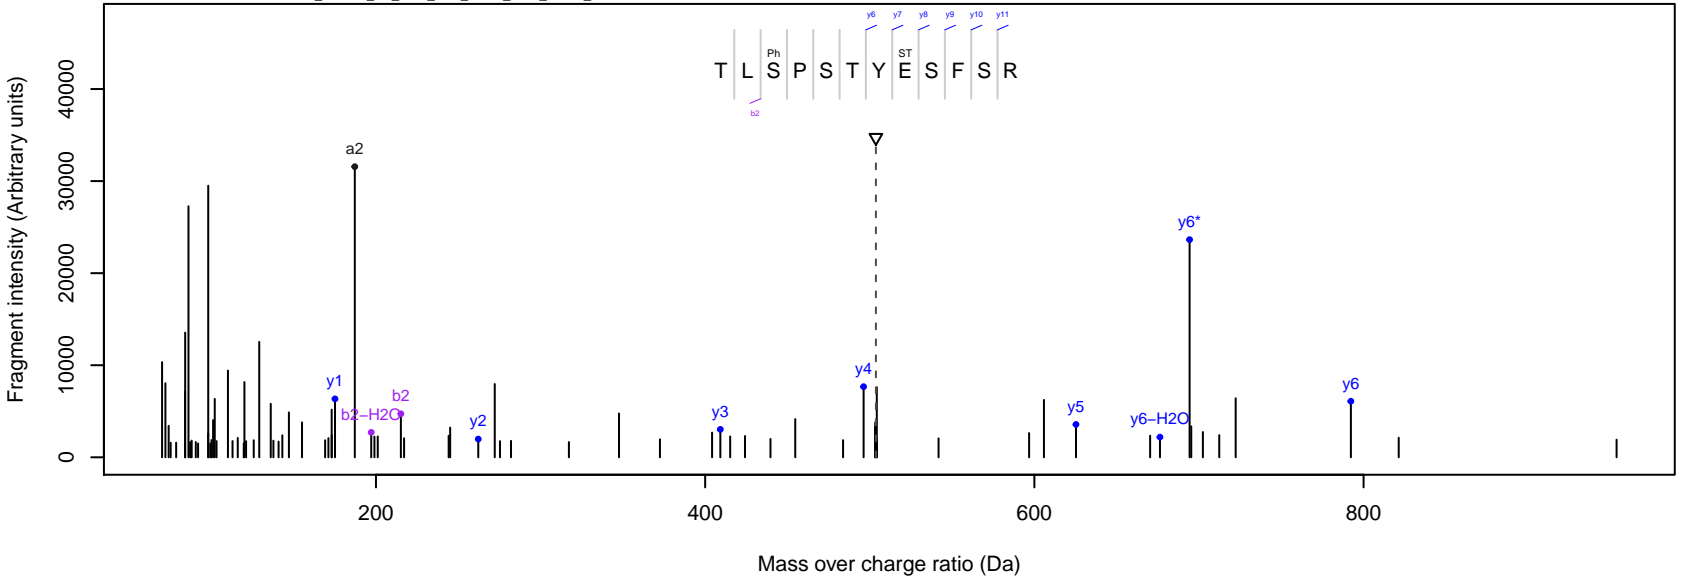

S(Phospho (STY))KS(Phospho (STY))ISSNPDLAVAPGSVDDEVSR-3+

Source : QE3\_201126\_FR\_TiOx\_hum\_tissue\_Urea\_RNAB\_N Scan : 31578

Andromeda score : 45.546

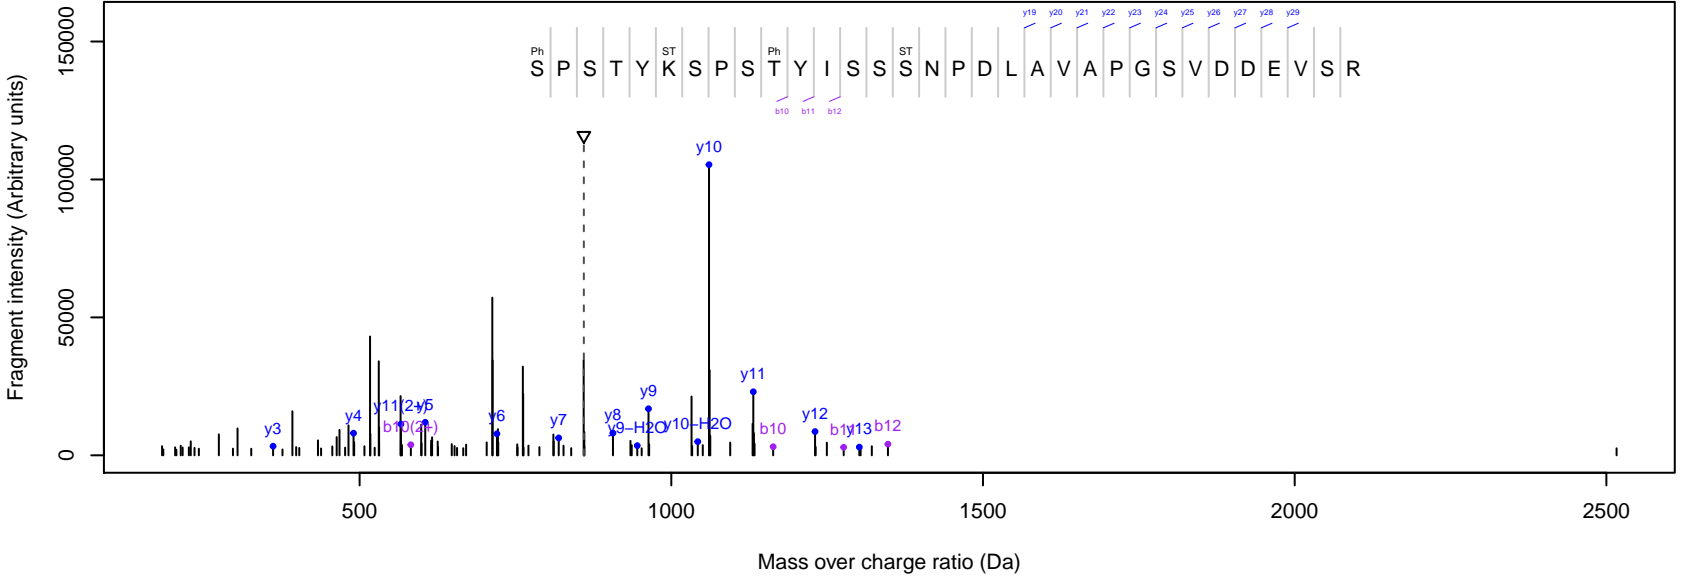

YNS(Phospho (STY))MPVPGPNGT(Phospho (STY))ILM(Oxidation (M))ET(Phospho (STY))HK-3+

Source : QE3\_201126\_FR\_TiOx\_hum\_tissue\_Urea\_RNAB\_B Scan : 9093

Andromeda score : 45.546

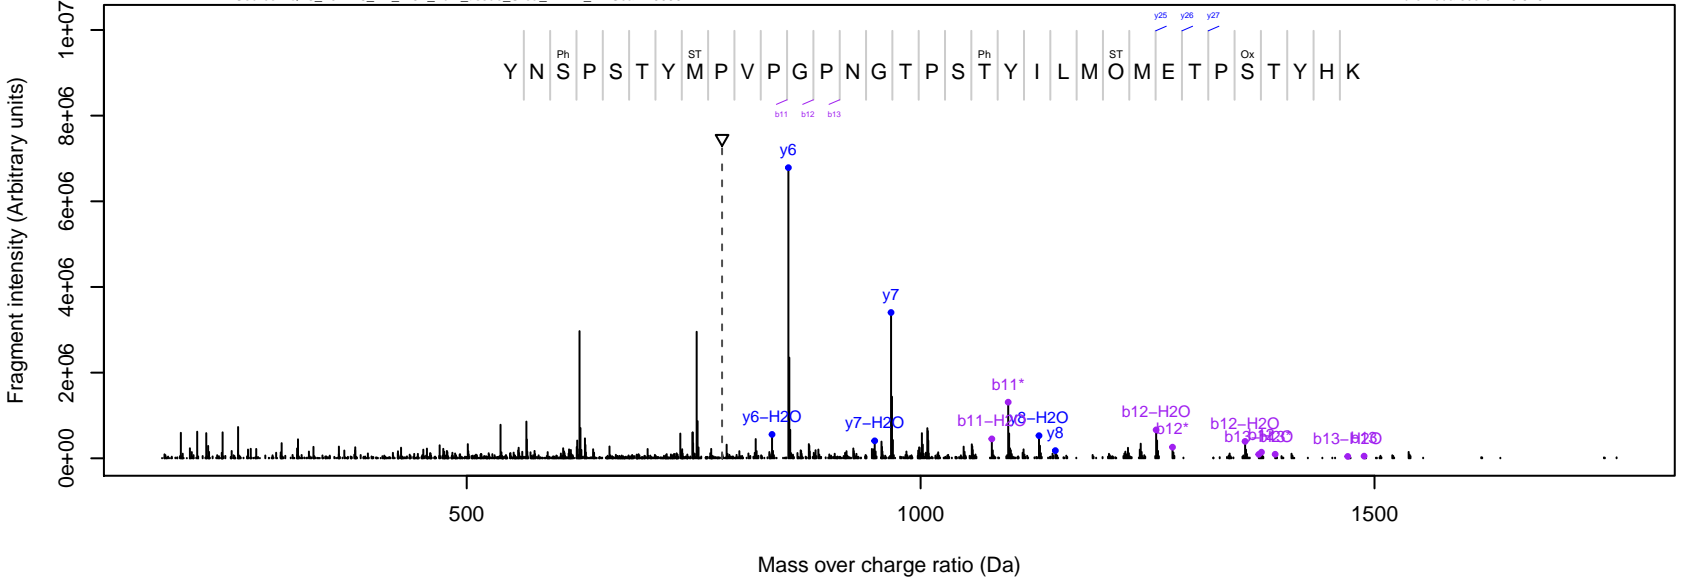

TDRS(Phospho (STY))ILCCLR-2+

Source : QE3\_201126\_FR\_TIOx\_hum\_tissue\_Urea\_RNAB\_H Scan : 22468

Andromeda score : 45.507

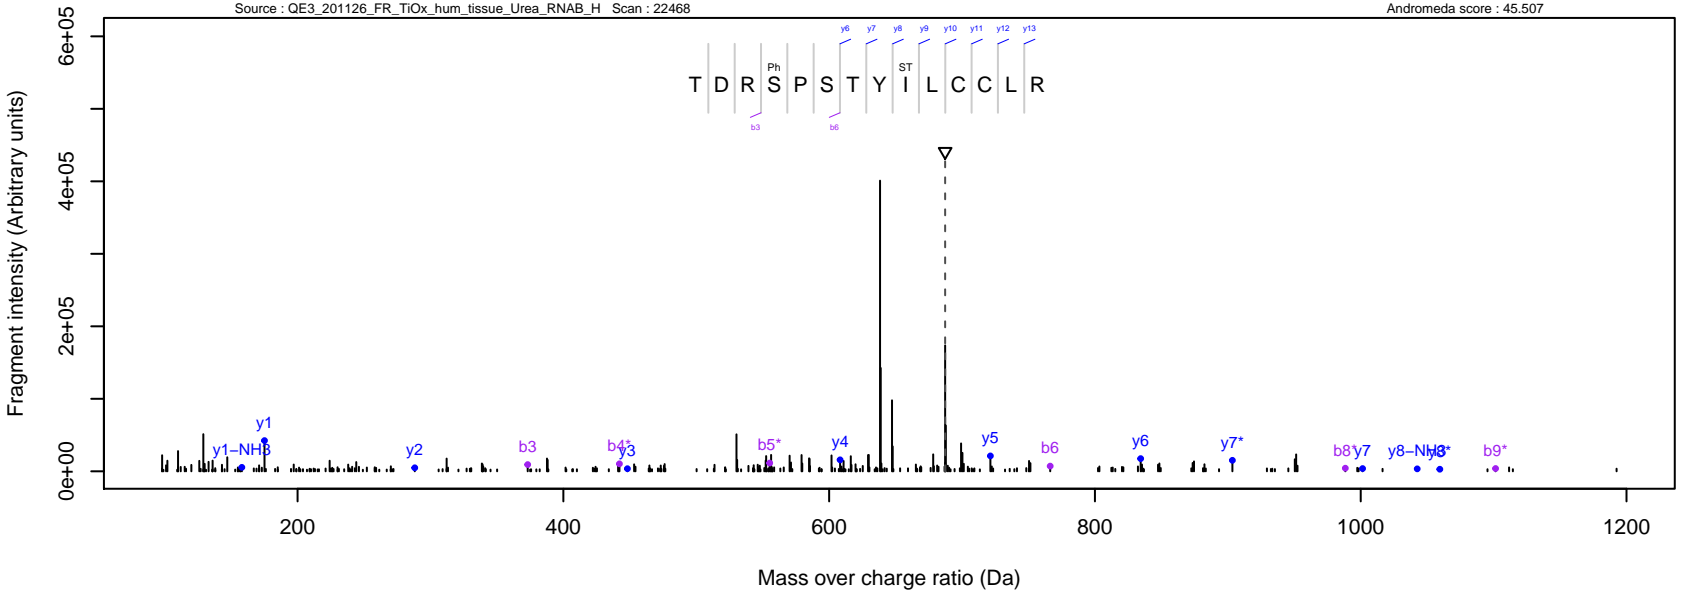

KADTTTPTAILAPGS(Phospho (STY))PAS(Phospho (STY))PPGS(Phospho (STY))LEPK-3+

Source : QE3\_201126\_FR\_TIOx\_hum\_tissue\_Urea\_RNAB\_H Scan : 51185

Andromeda score : 45.47

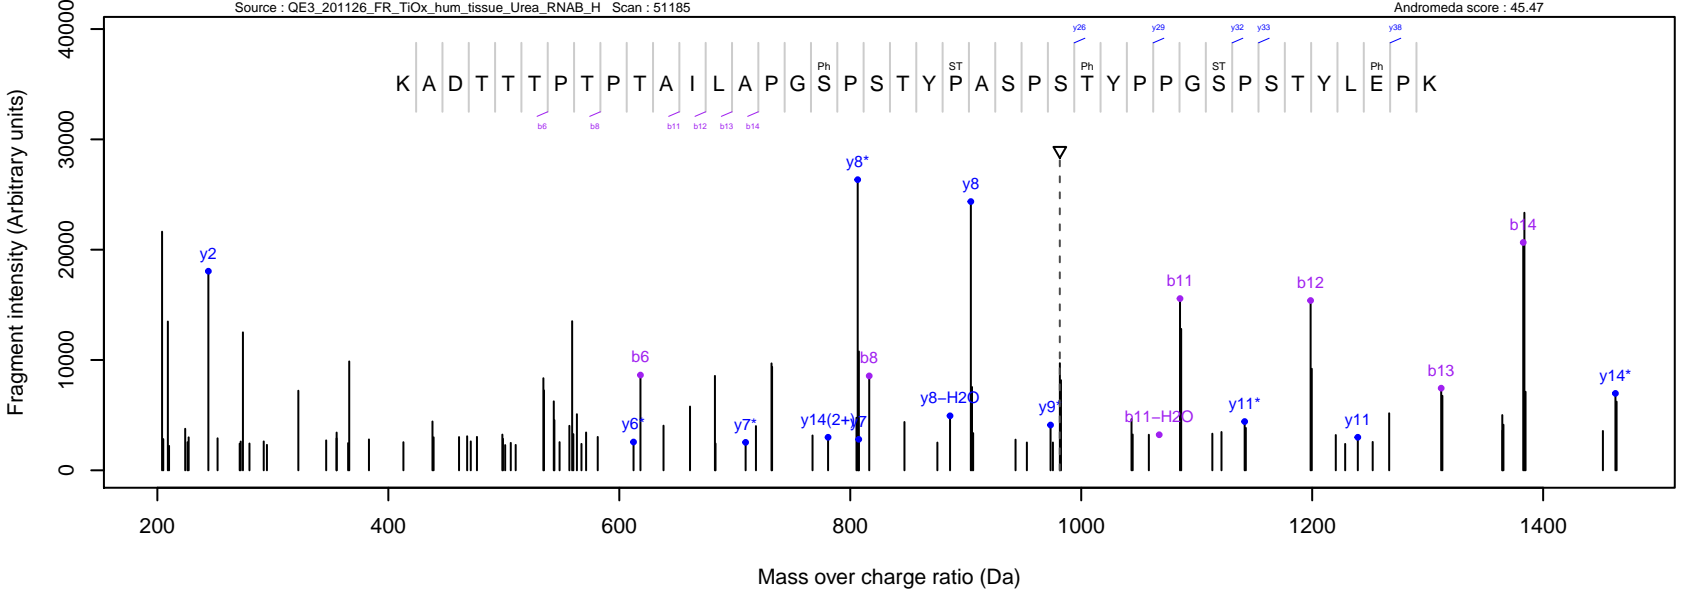

LRRPS(Phospho (STY))PPEPWDEEDGAS(Phospho (STY))CSTFFGSEER-3+

Source : QE3\_201126\_FR\_TIOx\_hum\_tissue\_Urea\_RNAB\_N Scan : 43230

Andromeda score : 45.47

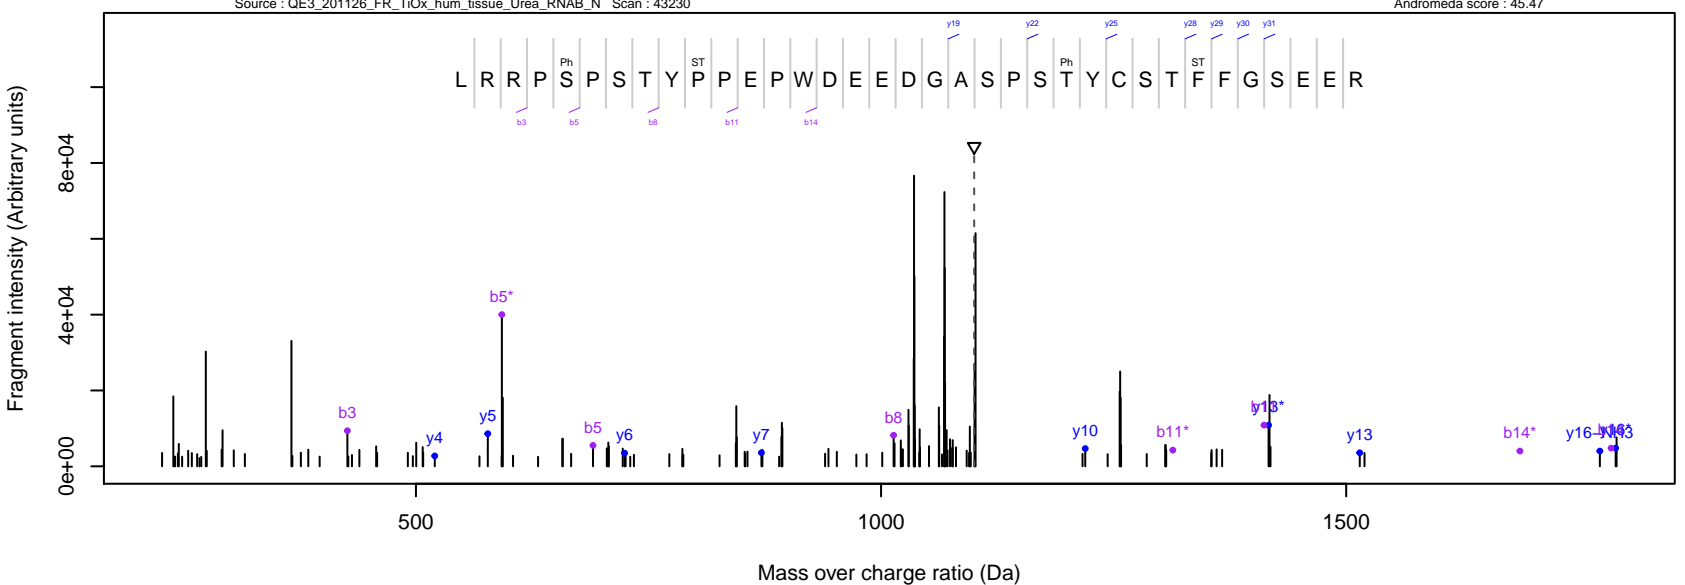

SNFSSGPGFPEYGYPADTVWPAMEQVSSRPT(Phospho (STY))SPEK-3+

Source : QE3\_201126\_FR\_TiOx\_hum\_tissue\_Urea\_RNAB\_N Scan : 54555

Andromeda score : 45.467

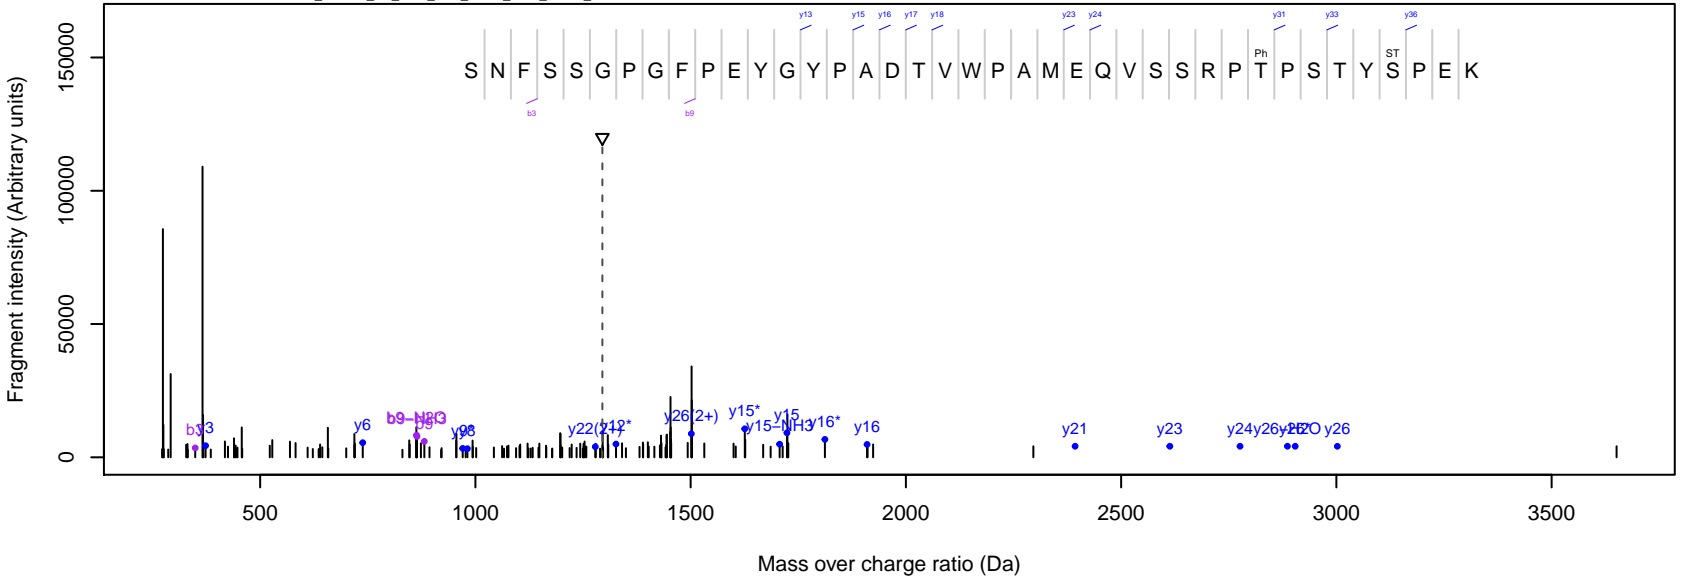

AGHDGSDGDS(Phospho (STY))DDEEGYFICPITDDPSSNQNVNSK-3+

Source : QE3\_201126\_FR\_TiOx\_hum\_tissue\_Urea\_RNAB\_N Scan : 39067

Andromeda score : 45.464

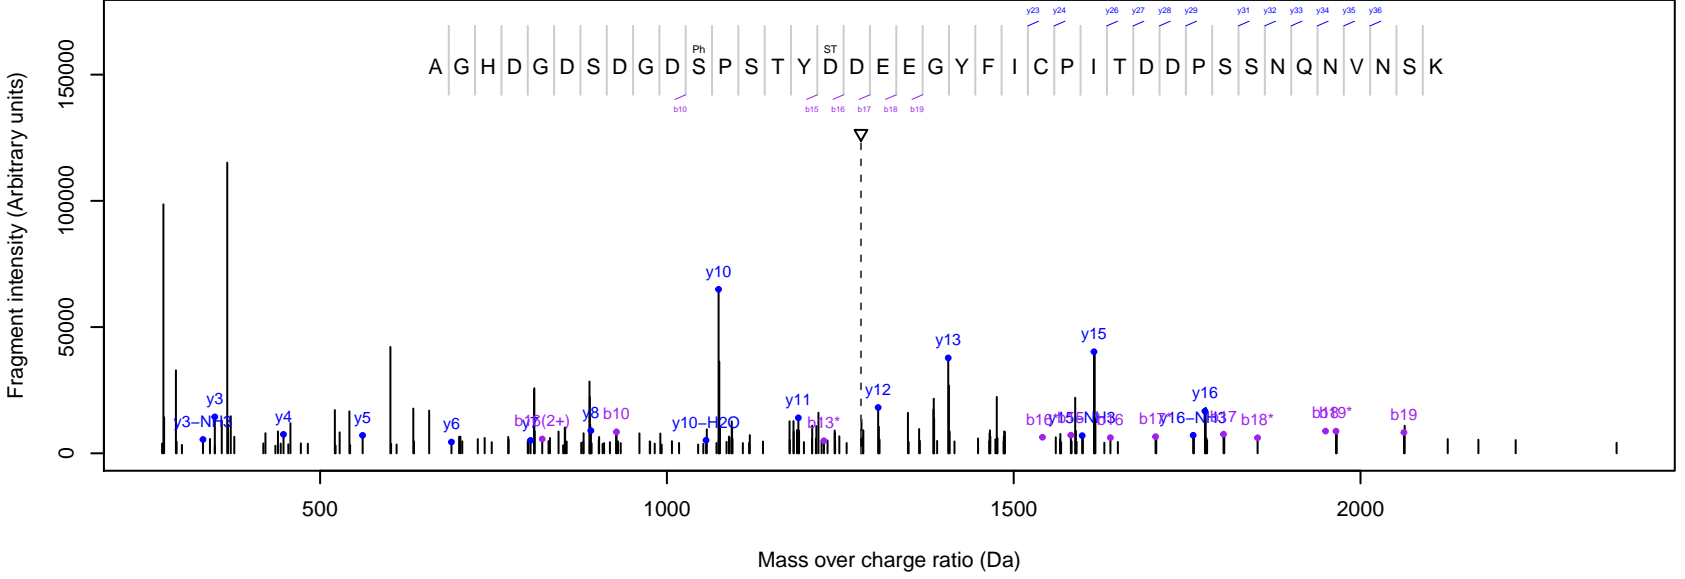

RES(Phospho (STY))PS(Phospho (STY))PAPKPR-3+

Source : QE3\_201126\_FR\_TiOx\_hum\_tissue\_Urea\_RNAB\_H Scan : 3162

Andromeda score : 45.438

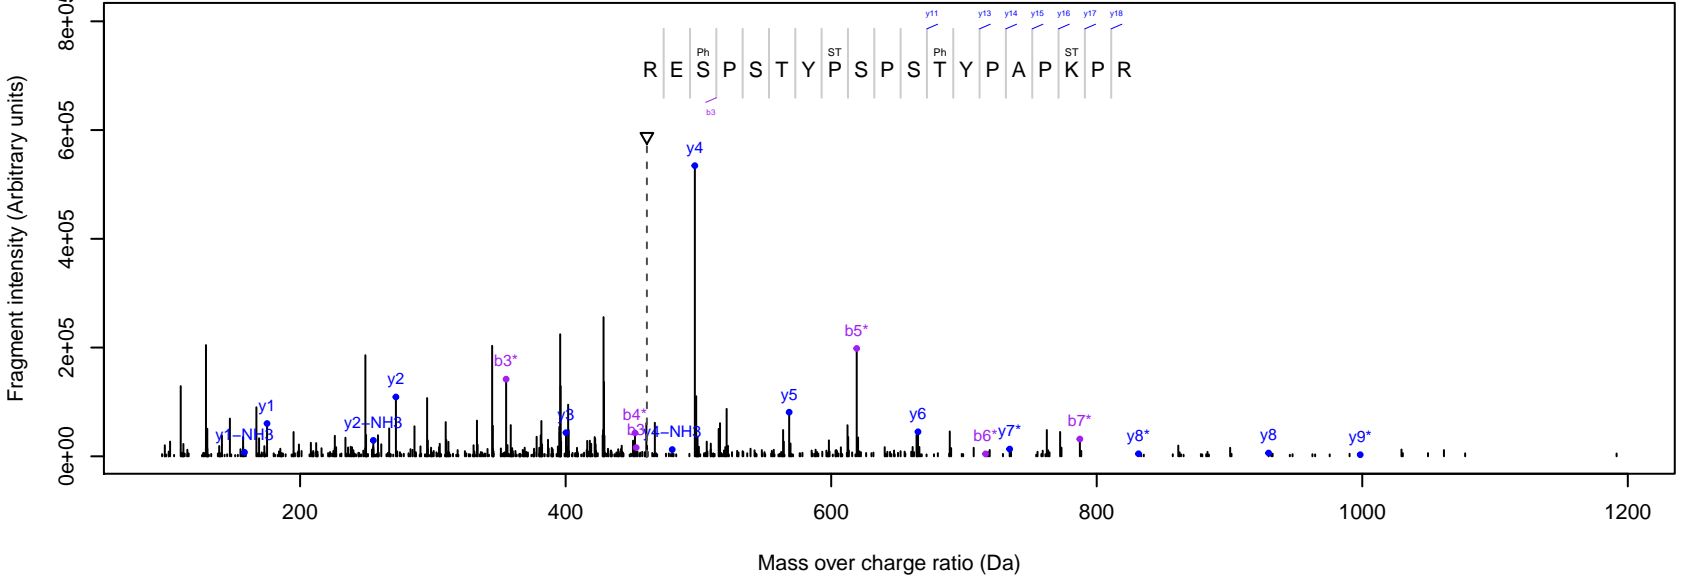

ARGEIGGLSLS(Phospho (STY))PS(Phospho (STY))PER-3+

Source : QE3\_201126\_FR\_TiOx\_hum\_tissue\_Urea\_RNAB\_N Scan : 33023

Andromeda score : 45.423

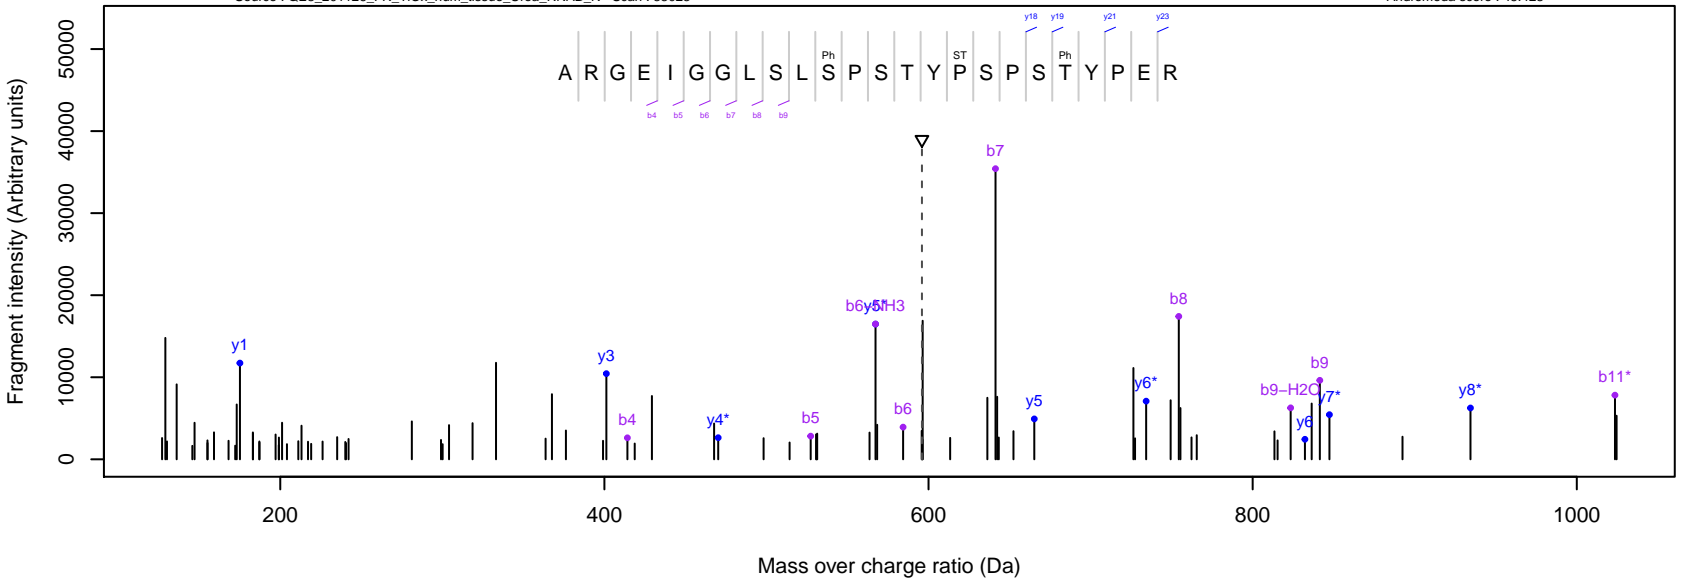

RKHS(Phospho (STY))PS(Phospho (STY))PPPTPTESR-3+

Source : QE3\_201126\_FR\_TiOx\_hum\_tissue\_Urea\_RNAB\_H Scan : 5344

Andromeda score : 45.423

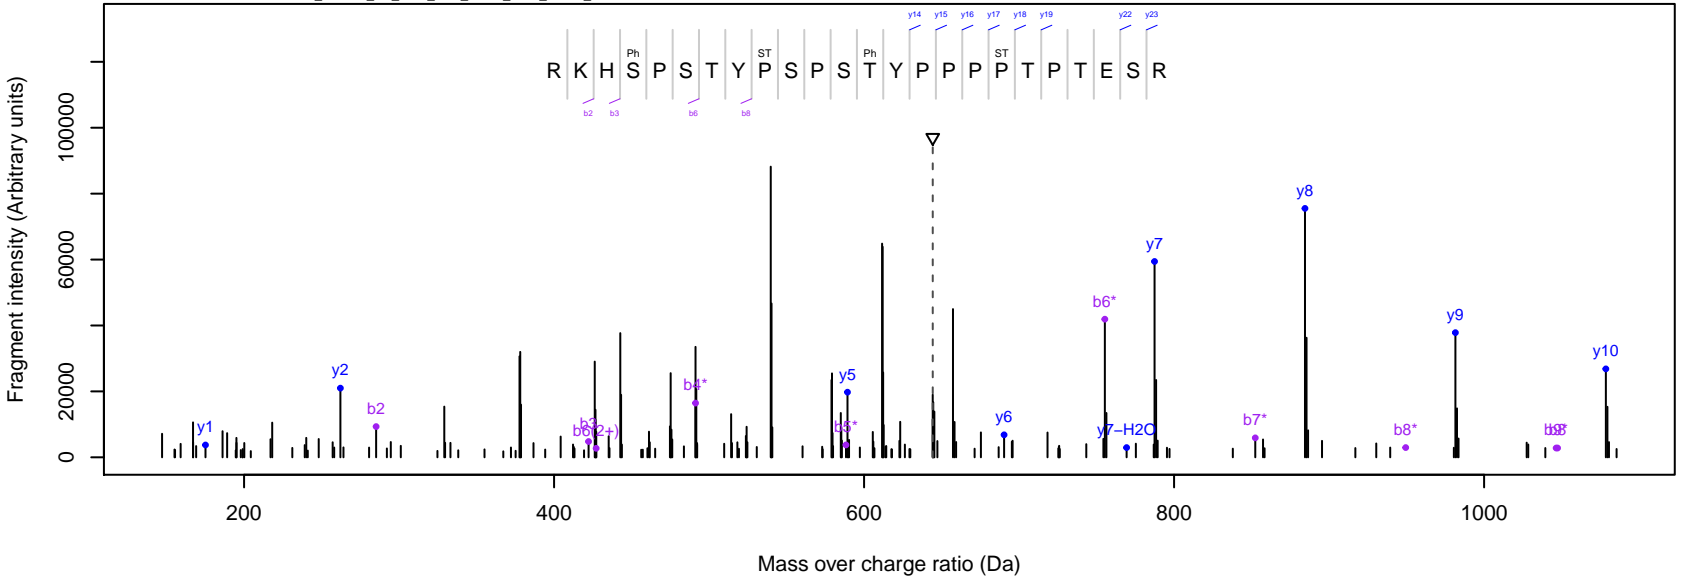

GM(Oxidation (M))SHS(Phospho (STY))PSVALRGNEER-3+

Source : QE3\_201126\_FR\_TiOx\_hum\_tissue\_Urea\_RNAB\_N Scan : 7358

Andromeda score : 45.413

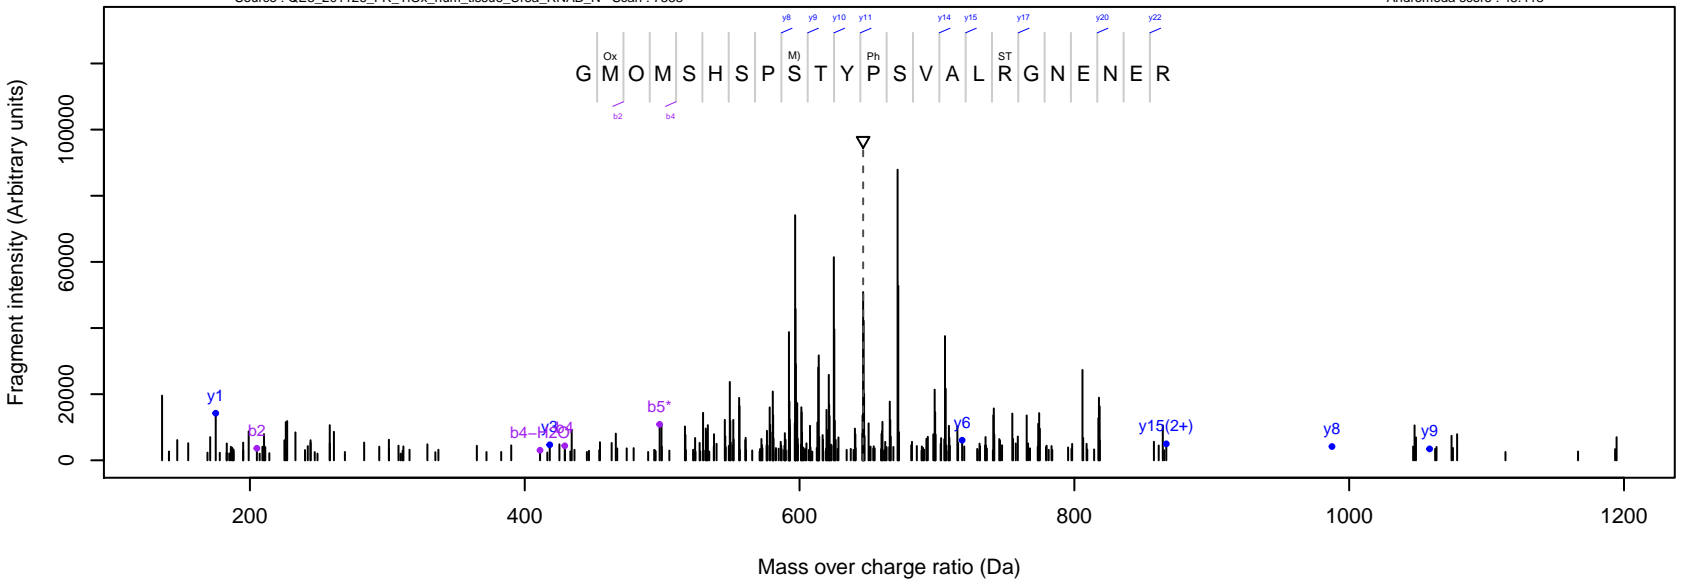



TLENSPIS(Phospho (STY))SCDTSDEGPVNVNSAAVLKK-3+

Source : QE3\_201126\_FR\_TiOx\_hum\_tissue\_Urea\_RNAB\_H Scan : 33894

Andromeda score : 45.408

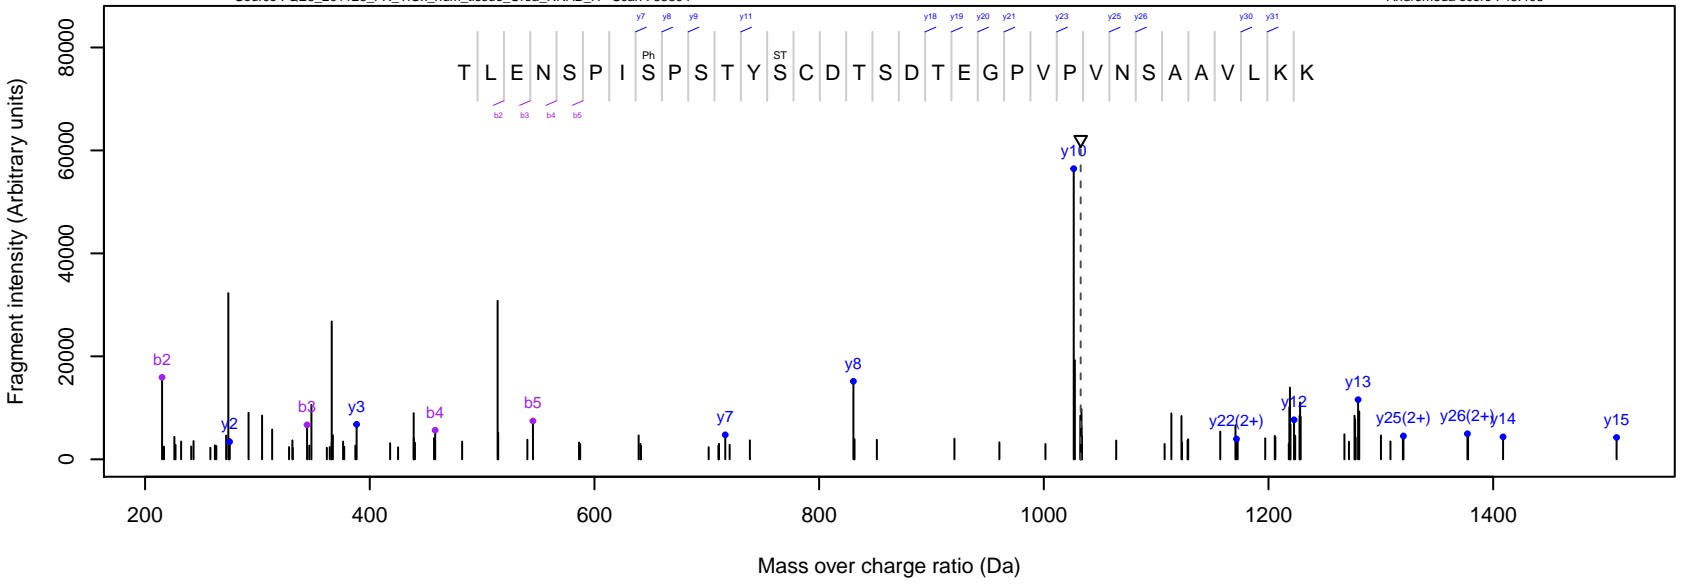

ATFHTPFSLGLQSPGEGCS(Phospho (STY))SYTFPK-3+

Source : QE3\_201126\_FR\_TiOx\_hum\_tissue\_Urea\_RNAB\_H Scan : 33603

Andromeda score : 45.395

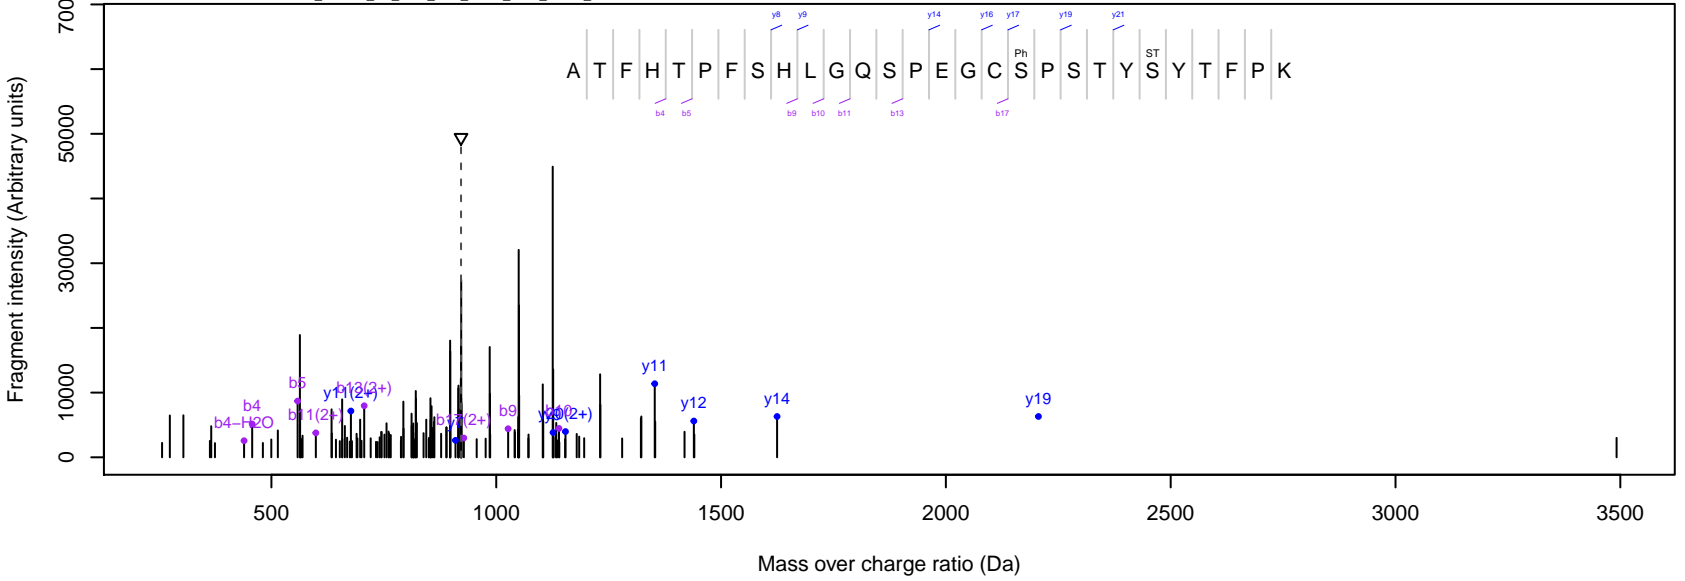

SSHCDSP(Phospho (STY))PPRSQT(Phospho (STY))PQDTNR-3+

Source : QE3\_201126\_FR\_TiOx\_hum\_tissue\_Urea\_RNAB\_H Scan : 4834

Andromeda score : 45.395

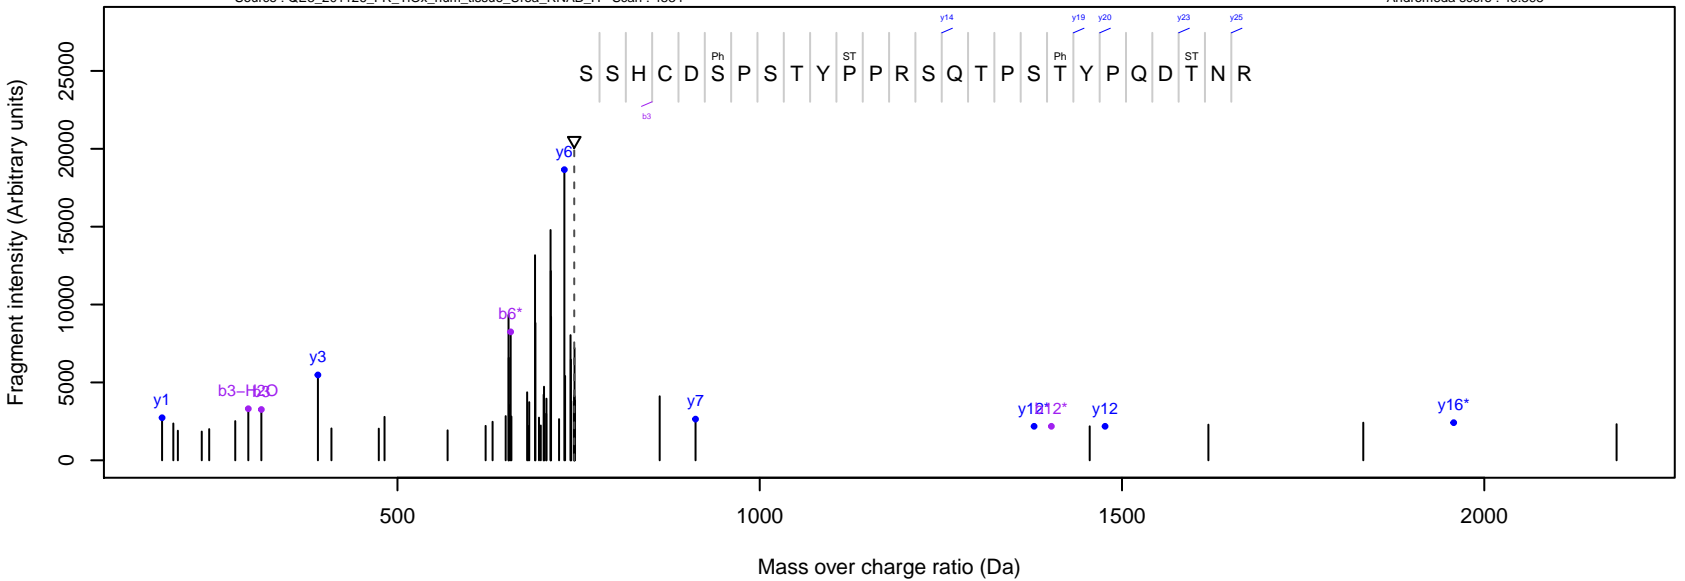

KLS(Phospho (STY))LQER-2+

Source : QE3\_201126\_FR\_TiOx\_hum\_tissue\_Urea\_RNAB\_H Scan : 8706

Andromeda score : 45.368

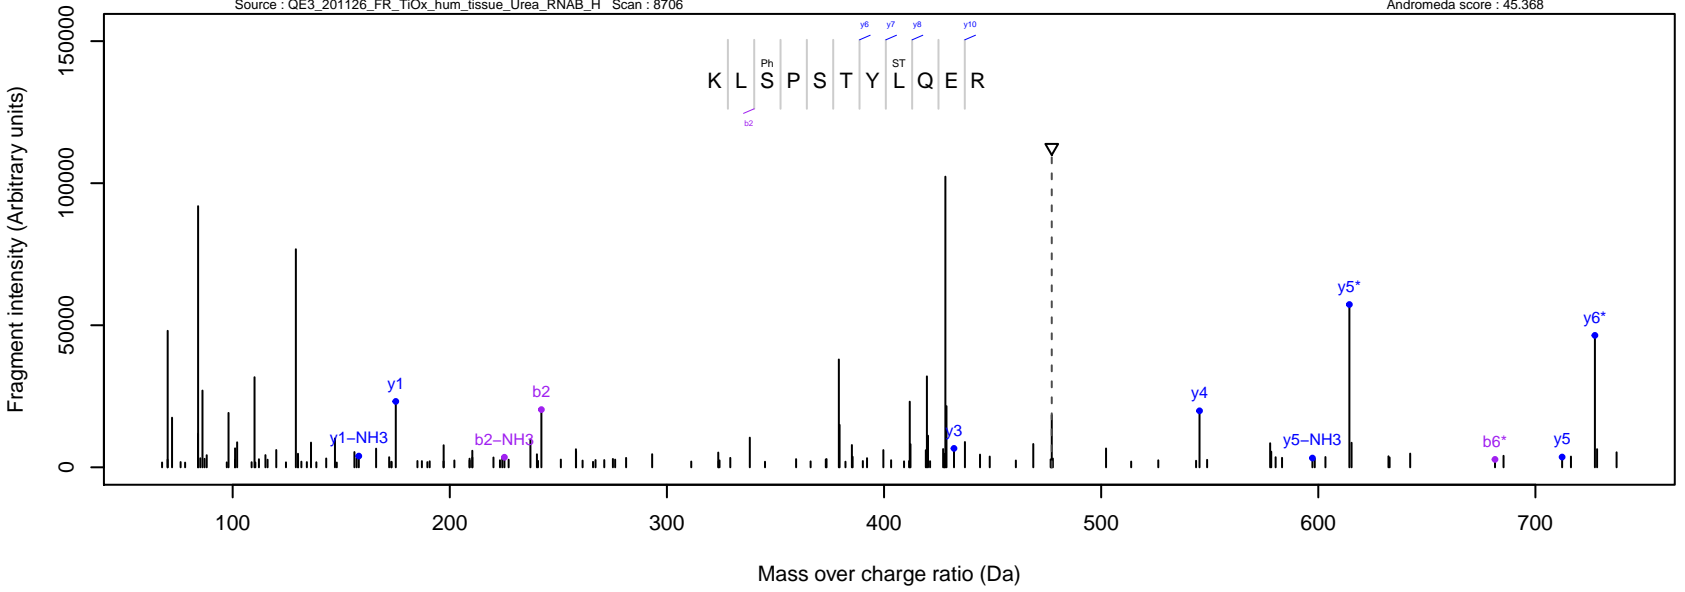

LTGS(Phospho (STY))LGCSIDR-2+

Source : QE3\_201126\_FR\_TiOx\_hum\_tissue\_Urea\_RNAB\_B Scan : 21593

Andromeda score : 45.357

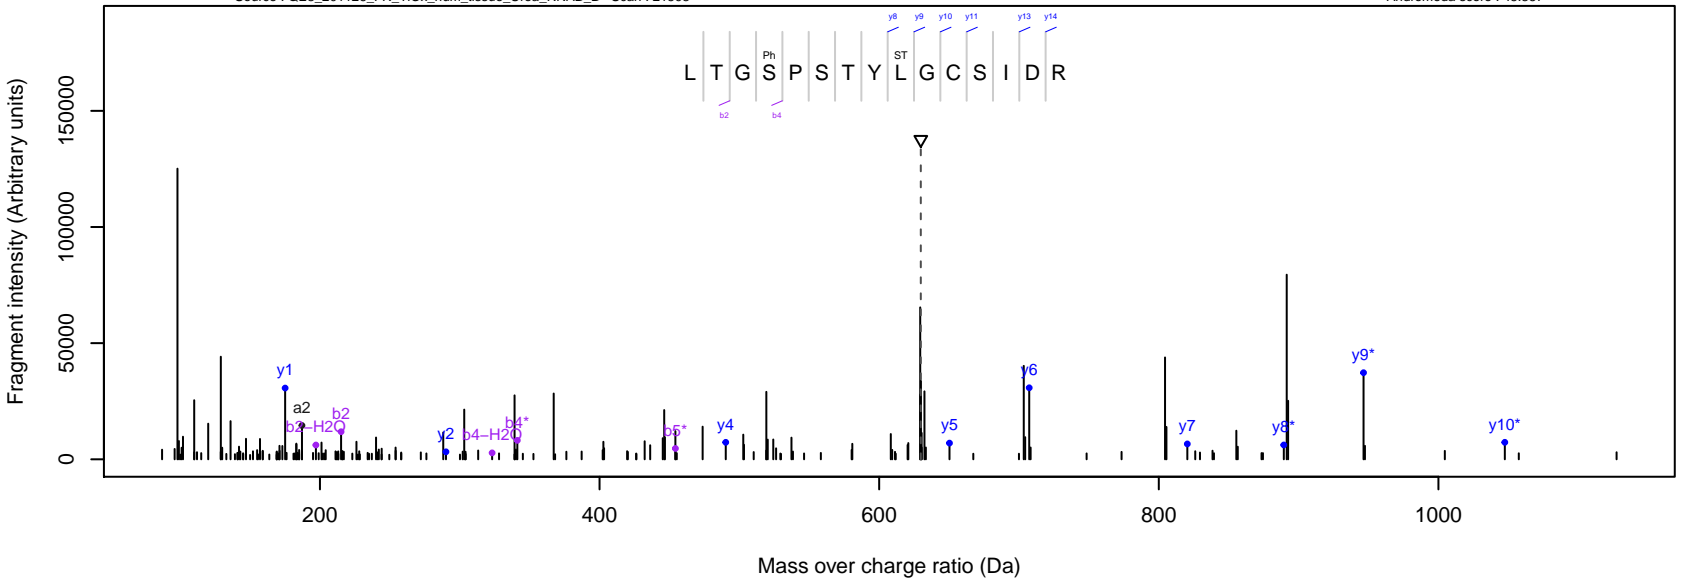

S(Phospho (STY))LGEQDQM(Oxidation (M))TLR-2+

Source : QE3\_201126\_FR\_TiOx\_hum\_tissue\_Urea\_RNAB\_H Scan : 15154

Andromeda score : 45.357

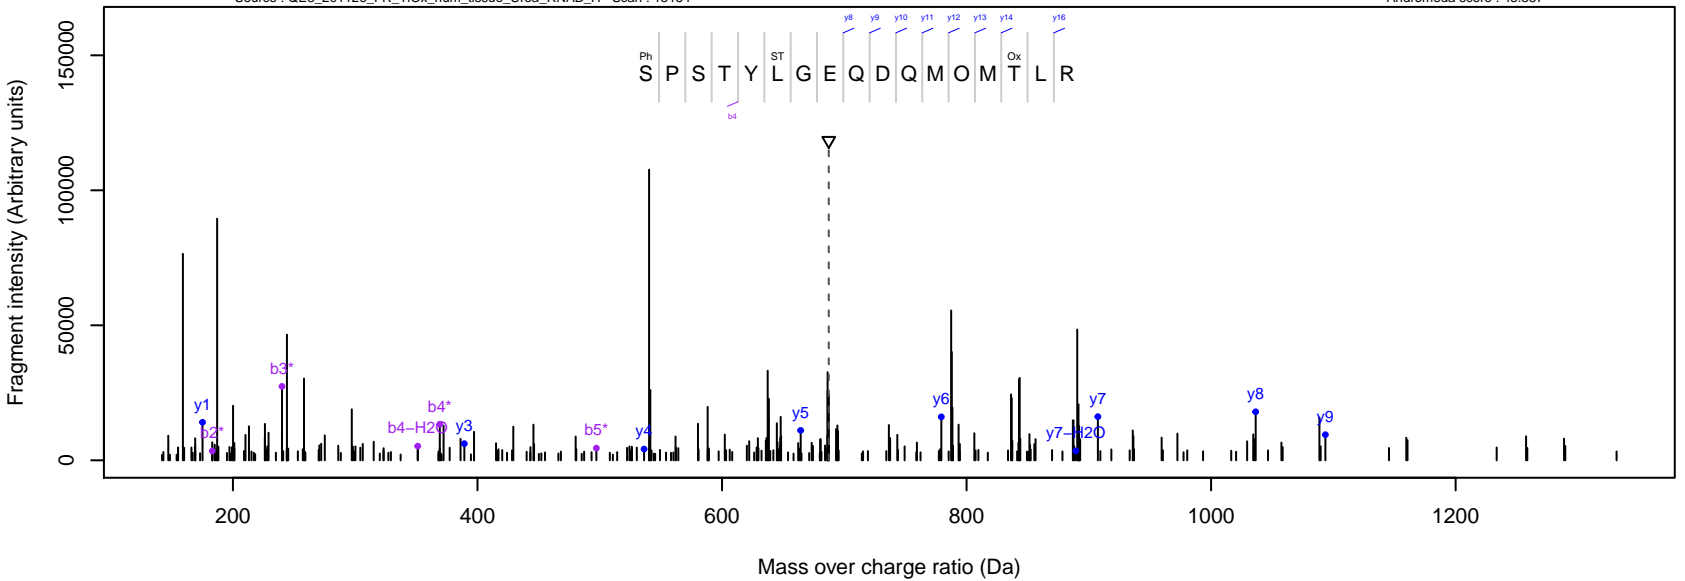

TGVTS(Phospho (STY))T(Phospho (STY))S(Phospho (STY))DSEEEGDDQEGEKKR-3+

Source : QE3\_201126\_FR\_TiOx\_hum\_tissue\_Urea\_RNAB\_N Scan : 7754

Andromeda score : 45.347

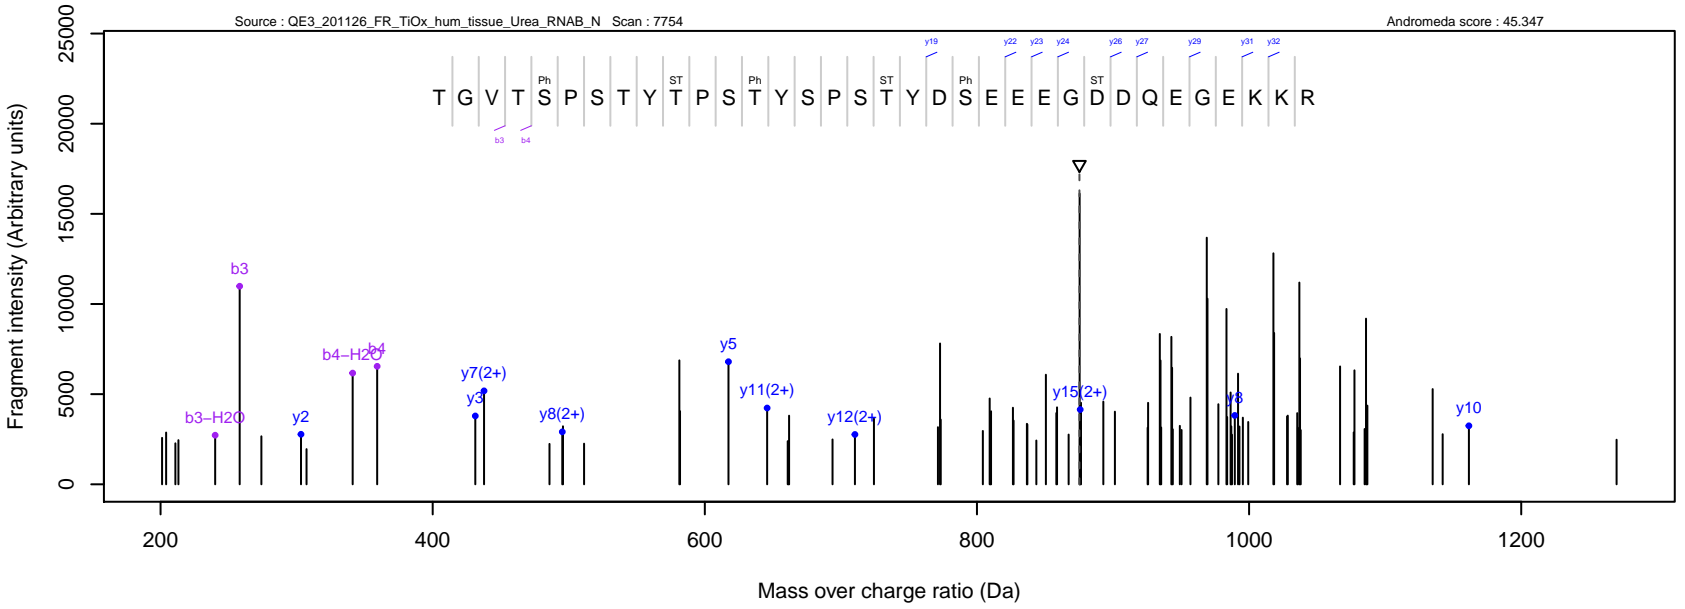

TPPPELLQLTAVGGIGQLT(Phospho (STY))AAKEESGGRSR-4+

Source : QE3\_201126\_FR\_TiOx\_hum\_tissue\_Urea\_RNAB\_B Scan : 53386

Andromeda score : 45.336

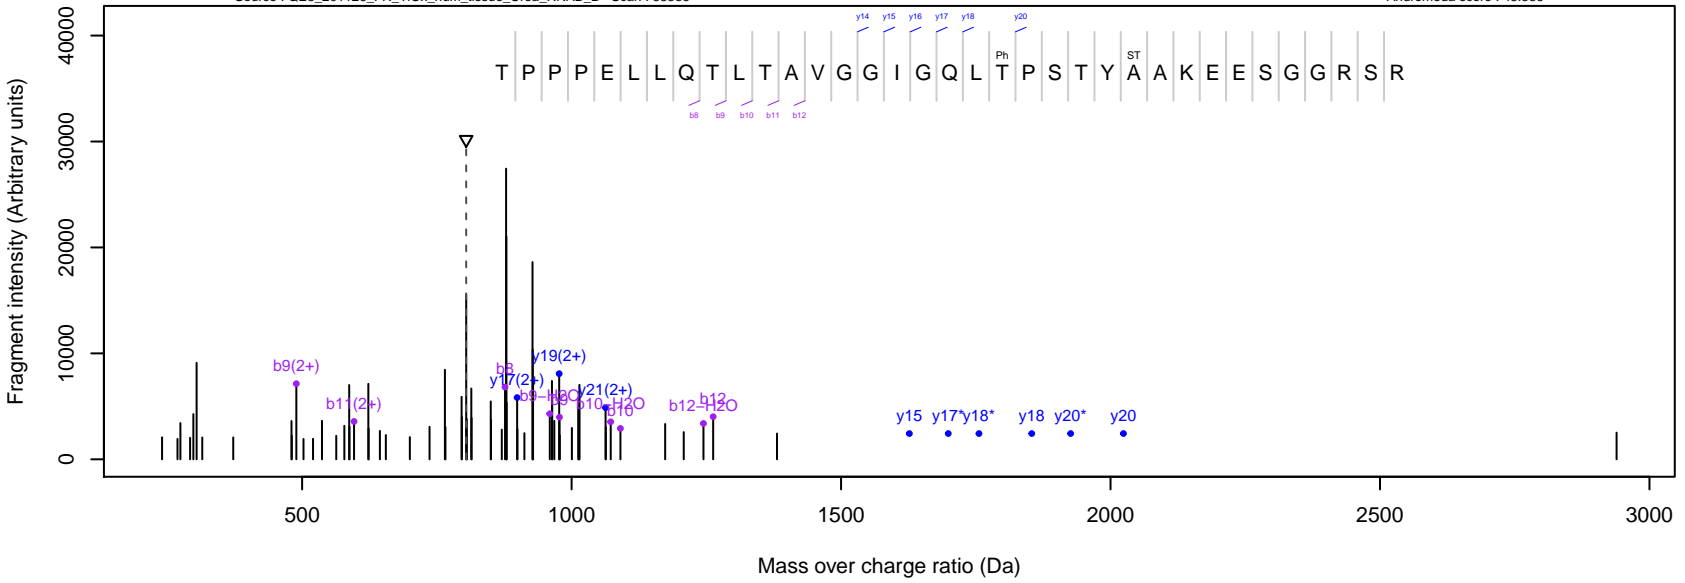

SPSPPLPT(Phospho (STY))HIPPEPRT(Phospho (STY))PPFPAK-4+

Source : QE3\_201126\_FR\_TiOx\_hum\_tissue\_Urea\_RNAB\_H Scan : 39340

Andromeda score : 45.332

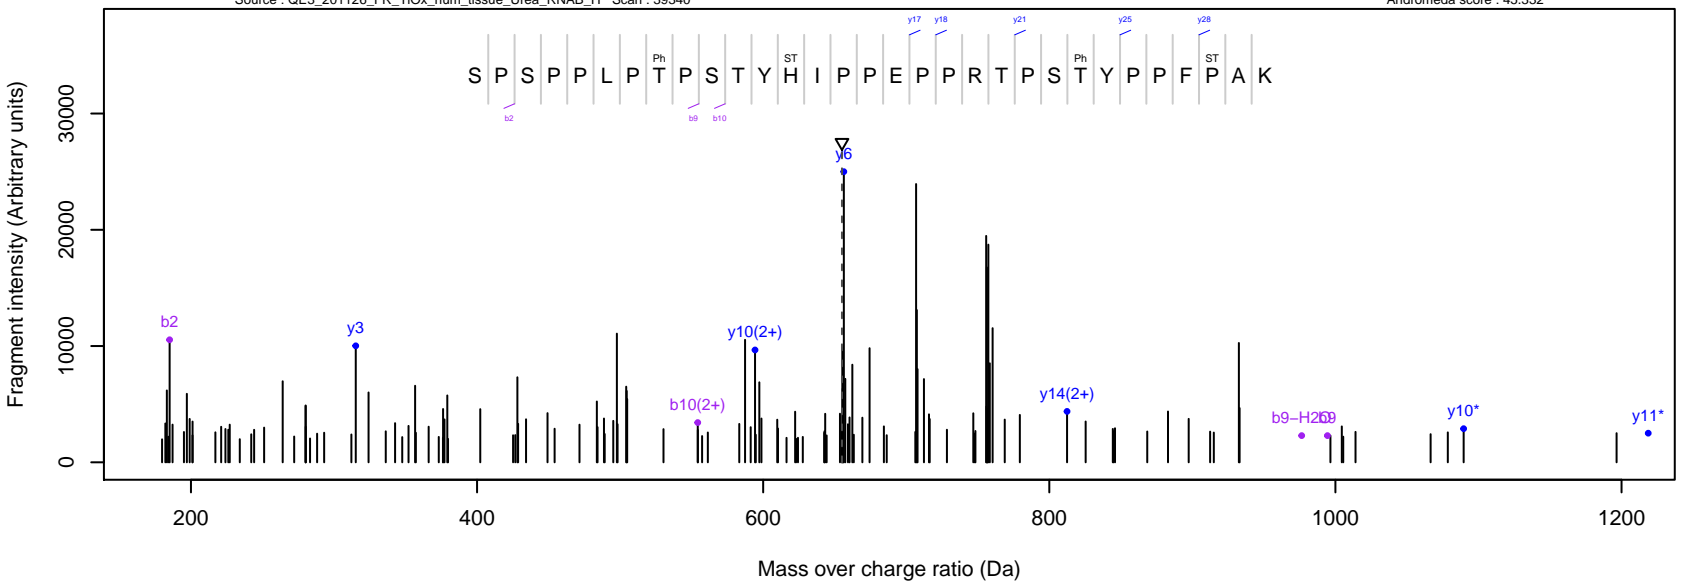

SPNEVSLEQES(Phospho (STY))EDDAR-2+

Source : QE3\_201126\_FR\_TiOx\_hum\_tissue\_Urea\_RNAB\_N Scan : 18543

Andromeda score : 45.33

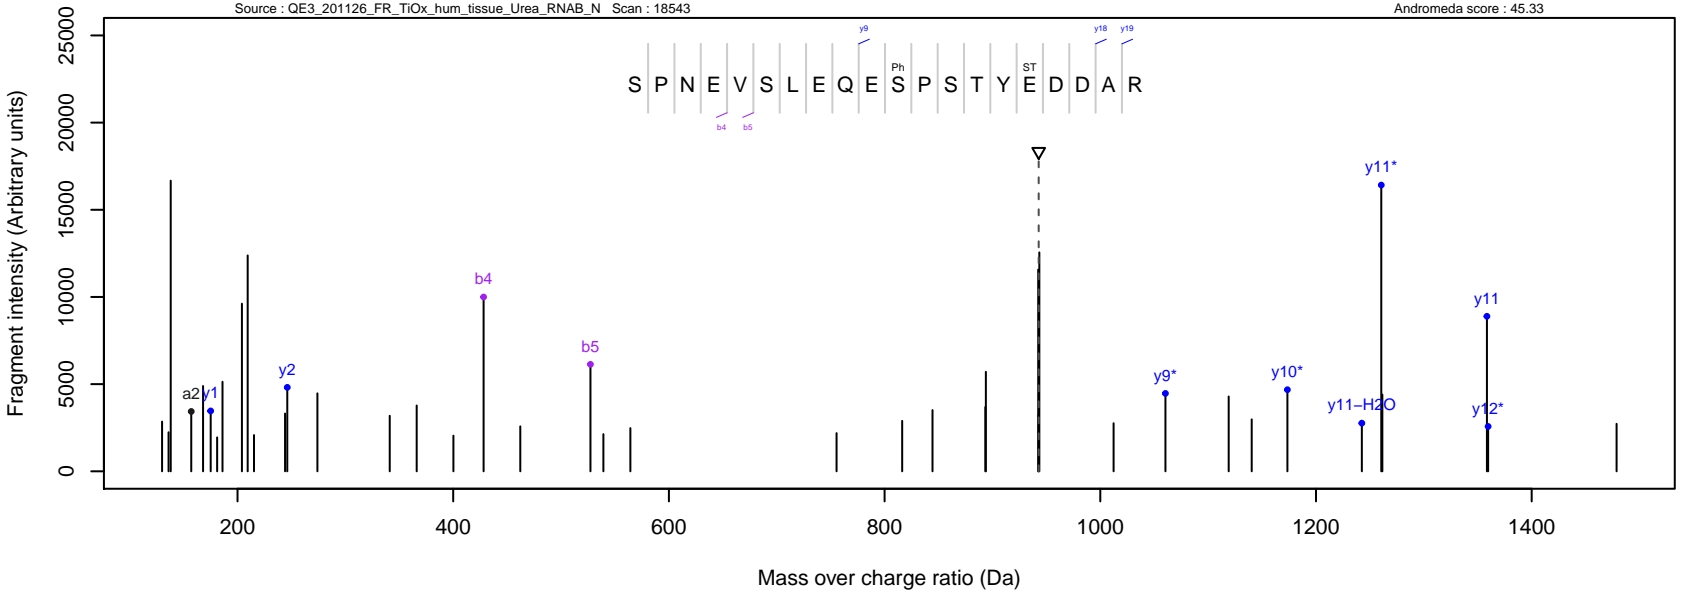

SDDSKS(Phospho (STY))SSQVPPILQETDKSK-3+

Source : QE3\_201126\_FR\_TiOx\_hum\_tissue\_Urea\_RNAB\_N Scan : 19883

Andromeda score : 45.269

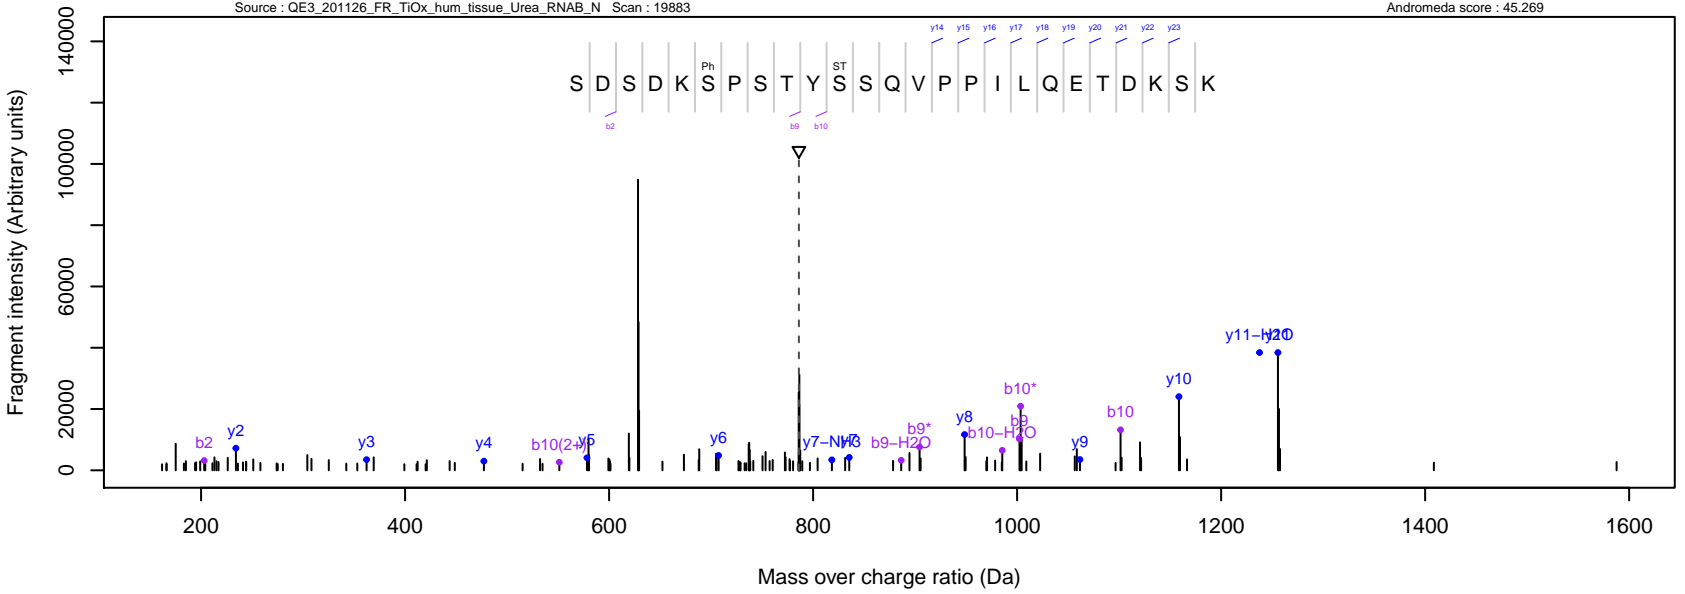

VEENPDADS(Phospho (STY))DFDAKSPSTYSPSTYADDEIETR-3+

Source : QE3\_201126\_FR\_TiOx\_hum\_tissue\_Urea\_RNAB\_N Scan : 32866

Andromeda score : 45.22

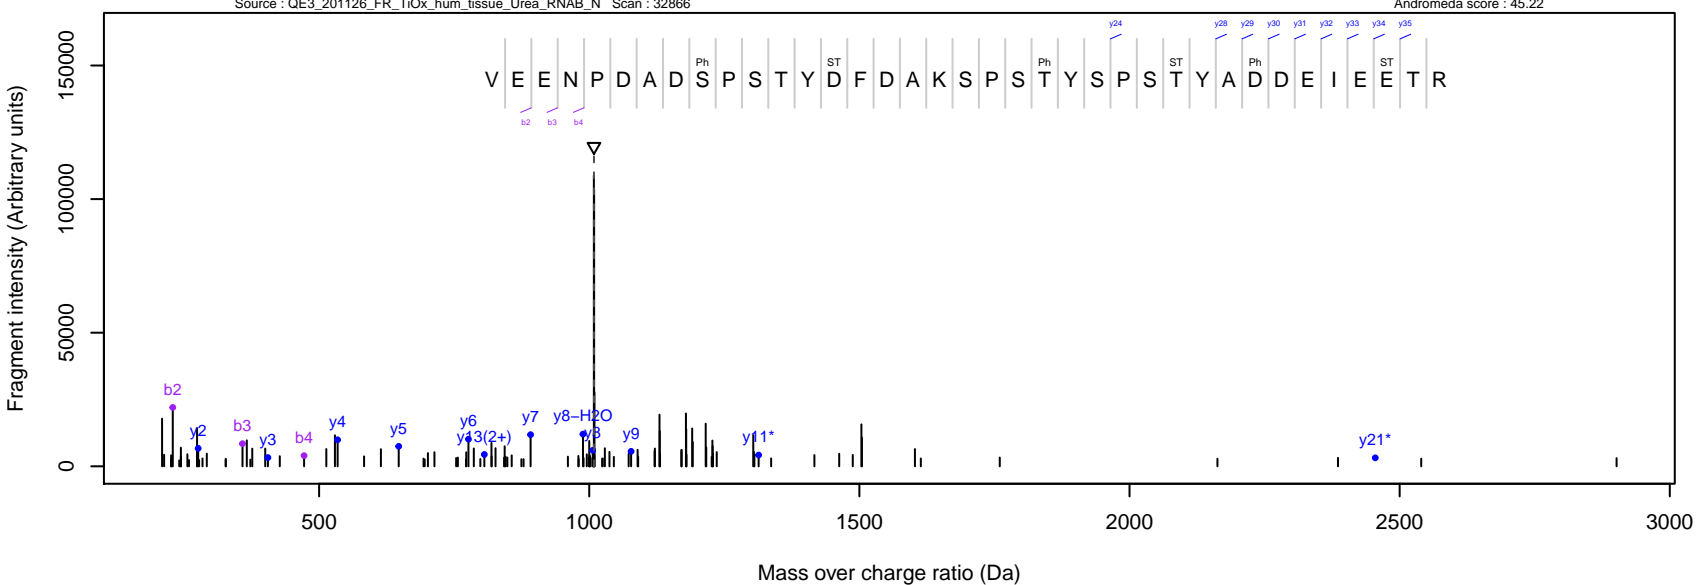

KSSLTQS(Phospho (STY))NTSLGSDSTLSSASGSLAYQGPGEALLTR-3+

Source : QE3\_201126\_FR\_TiOx\_hum\_tissue\_Urea\_RNAB\_B Scan : 46198

Andromeda score : 45.192

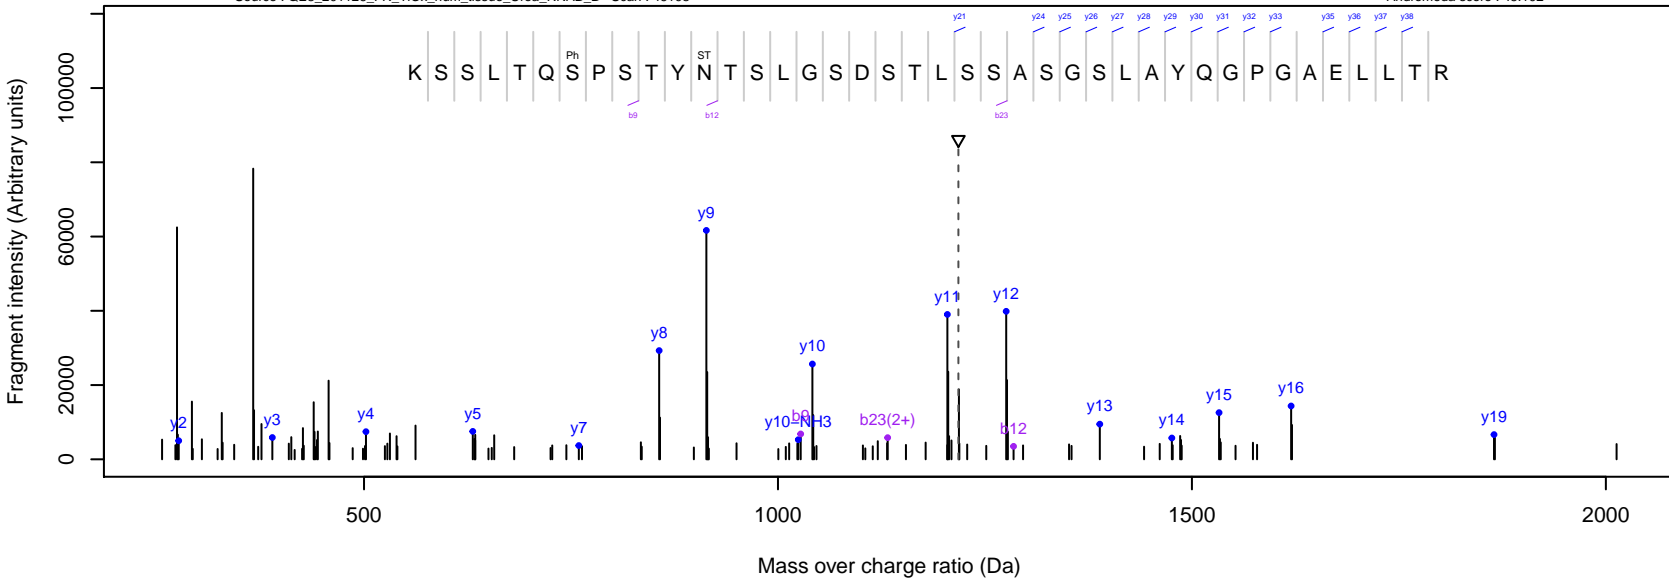

LSS(Phospho (STY))SFSSR-2+

Source : QE3\_201126\_FR\_TiOx\_hum\_tissue\_Urea\_RNAB\_B Scan : 13997

Andromeda score : 45.161

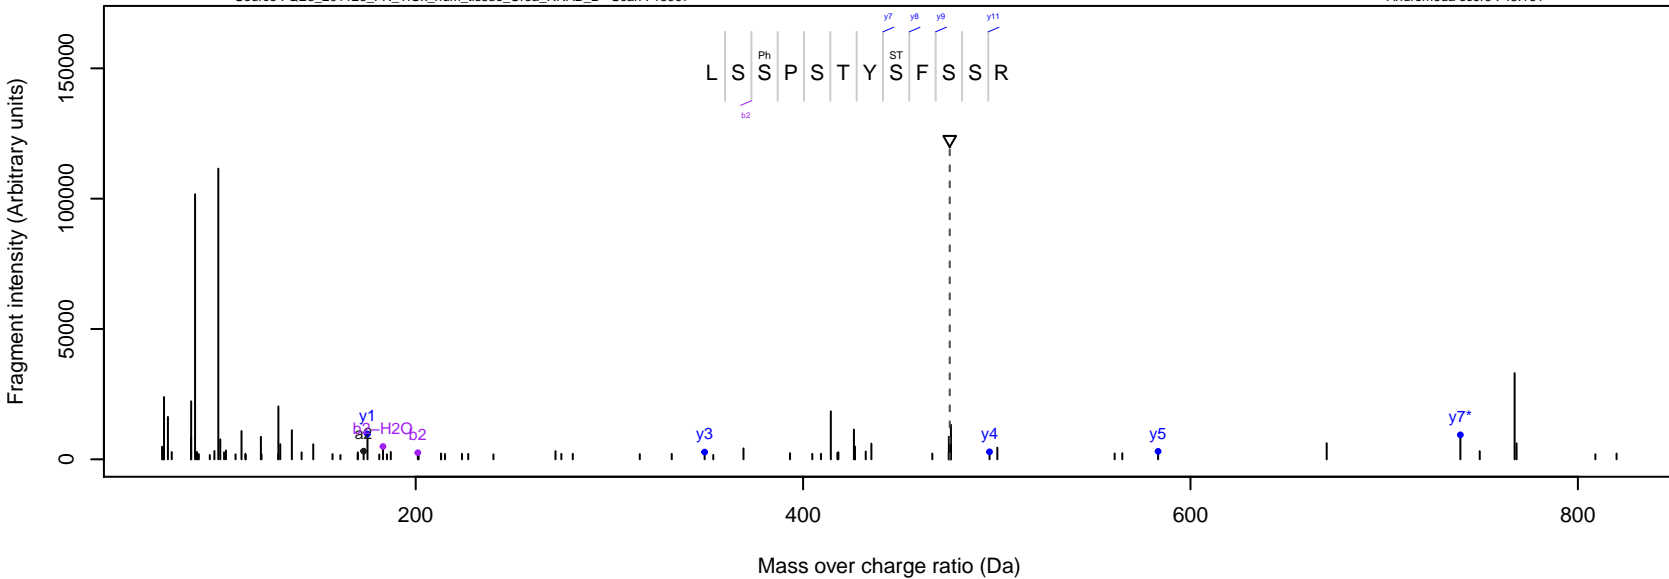

ENIWDGVTTKTFCGT(Phospho (STY))PDYIAPEIIAYQPYGK-3+

Source : QE3\_201126\_FR\_TiOx\_hum\_tissue\_Urea\_RNAB\_N Scan : 58482

Andromeda score : 45.137

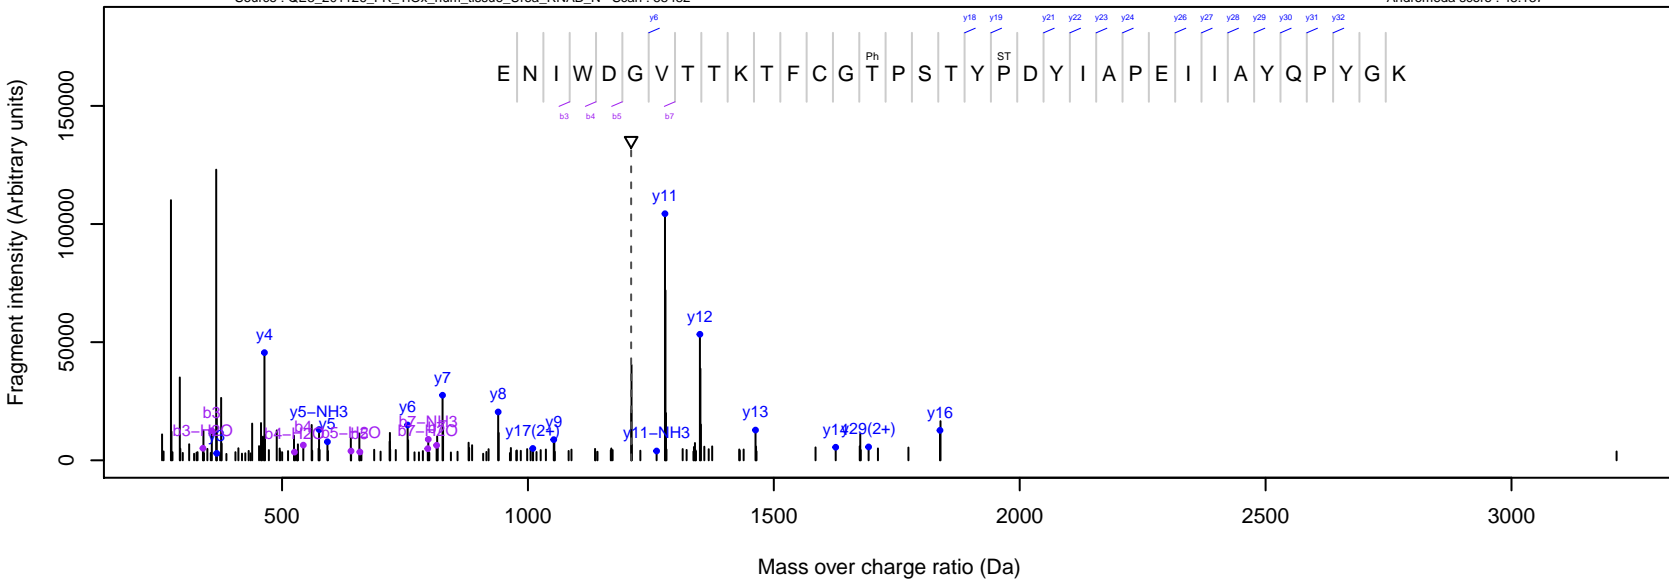

TCSDGGPSS(Phospho (STY))ELAHSPNSGKK-3+

Source : QE3\_201126\_FR\_TiOx\_hum\_tissue\_Urea\_RNAB\_N Scan : 6279

Andromeda score : 45.126

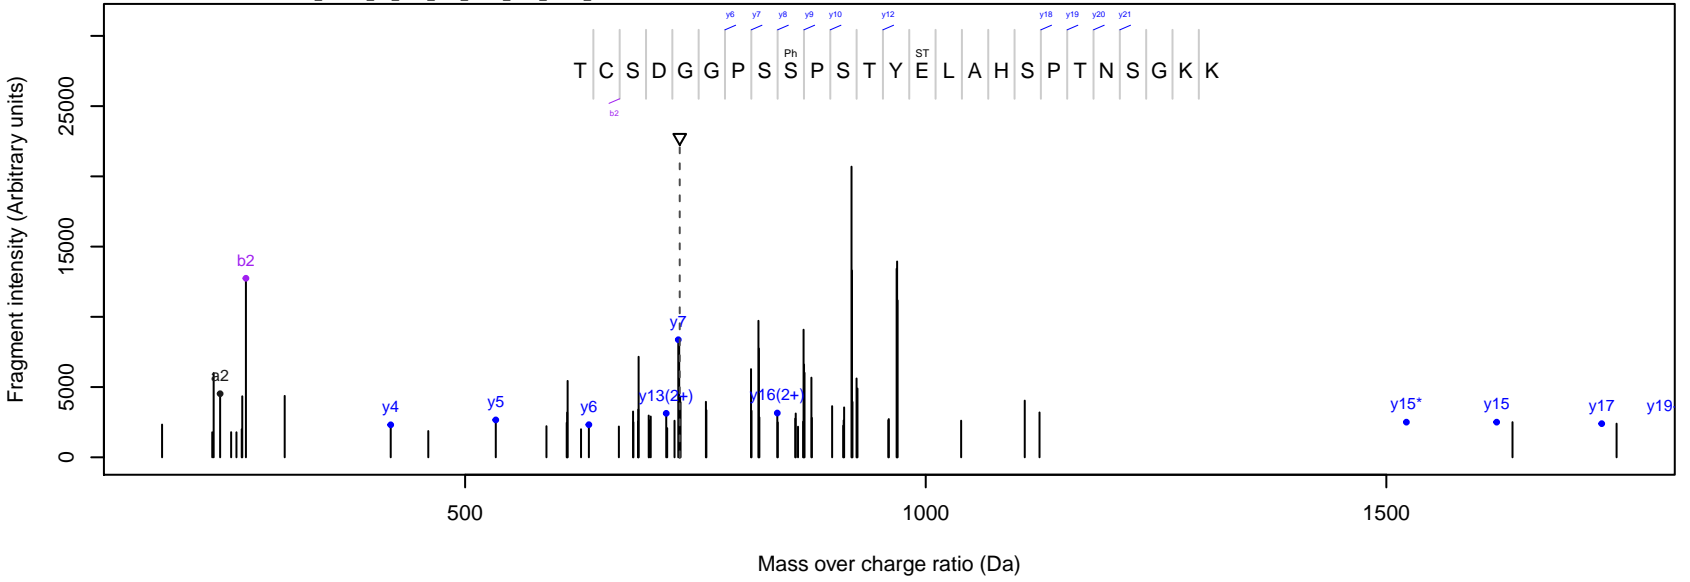

ASGSFAPISQTPPS(Phospho (STY))FSPPPPLVPPAPEDLR-3+

Source : QE3\_201126\_FR\_TiOx\_hum\_tissue\_Urea\_RNAB\_H Scan : 58053

Andromeda score : 45.125

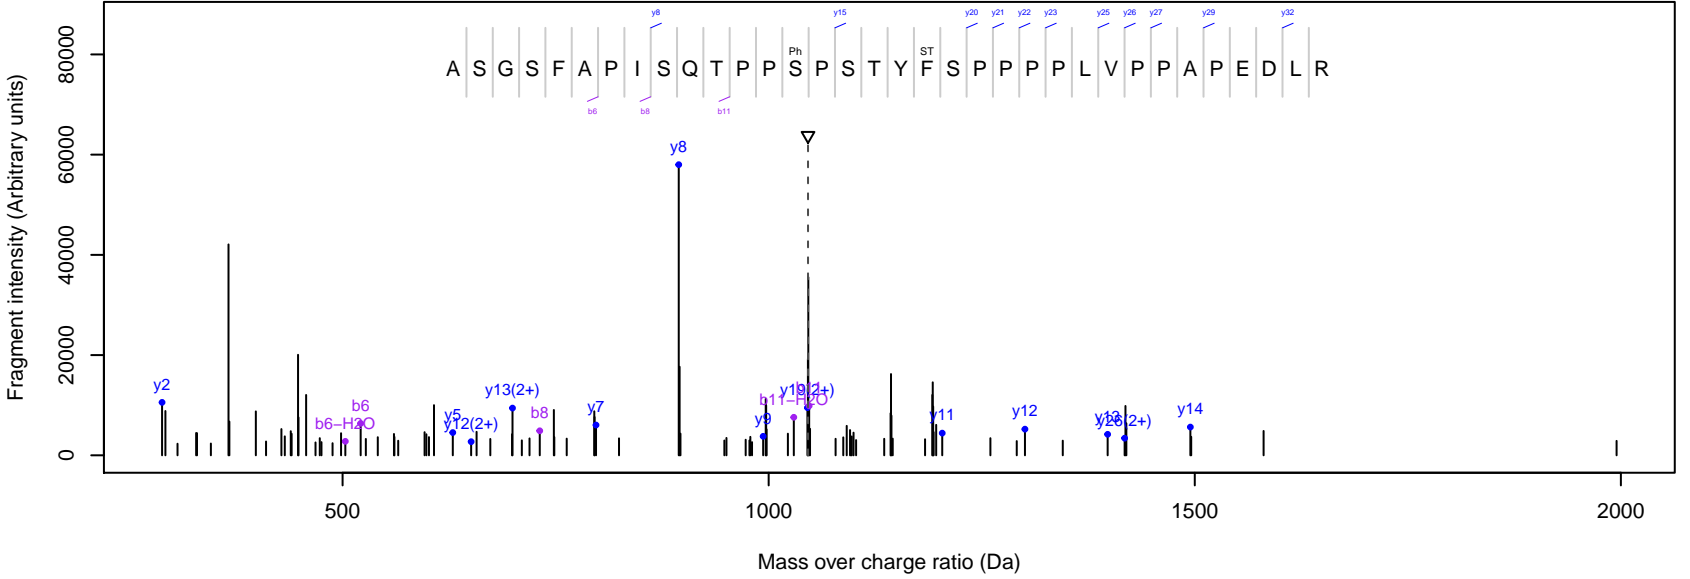

IS(Phospho (STY))MPDFDLNLKGPK-3+

Source : QE3\_201126\_FR\_TiOx\_hum\_tissue\_Urea\_RNAB\_B Scan : 45800

Andromeda score : 45.115

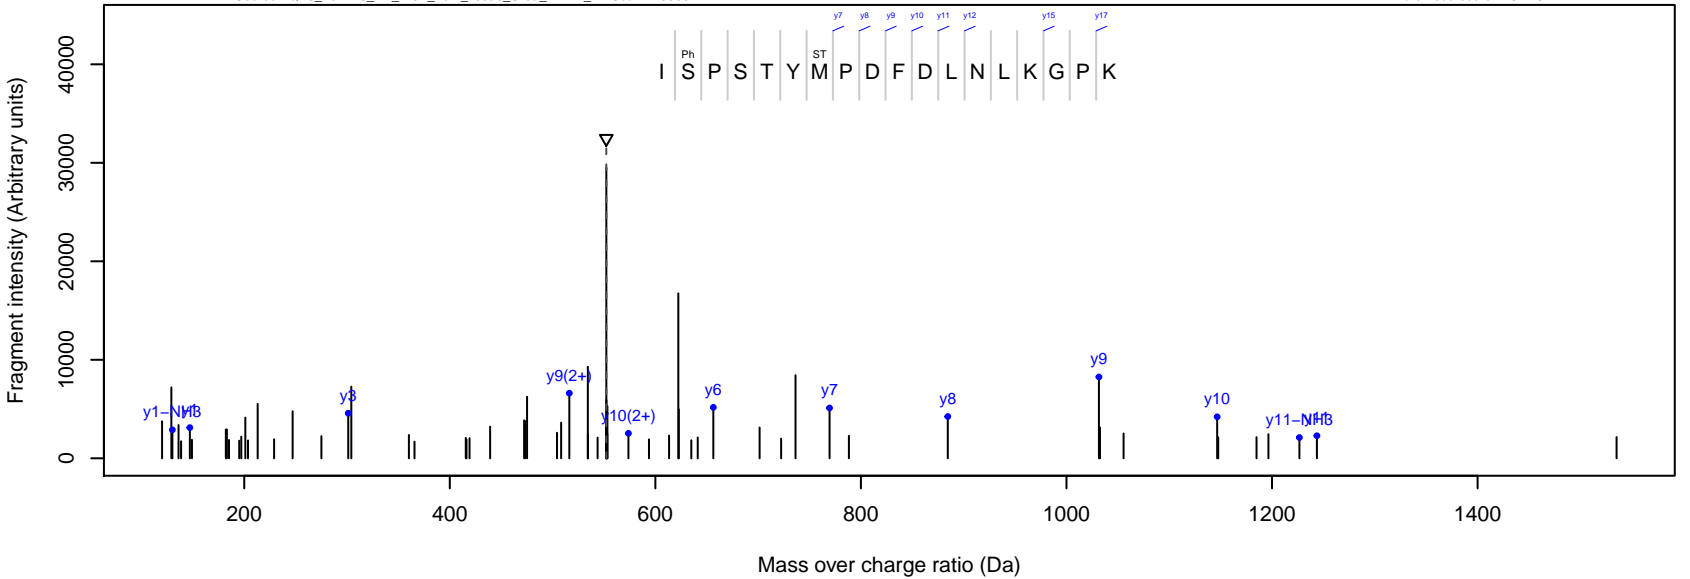

GS(Phospho (STY))PVPPVPER-2+

Source : QE3\_2011126\_FR\_TiOx\_hum\_tissue\_Urea\_RNAB\_N Scan : 16151

Andromeda score : 45.077

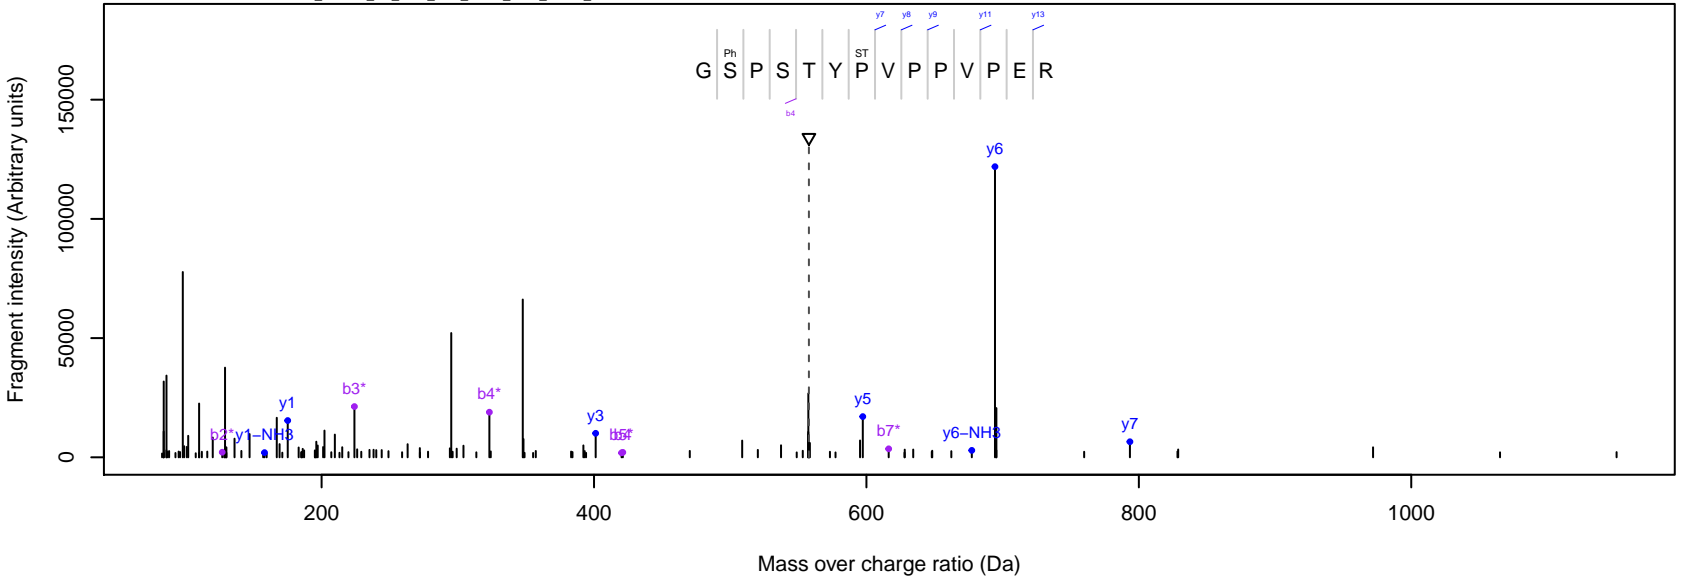

QGMS(Phospho (STY))PTFSR-2+

Source : QE3\_2011126\_FR\_TiOx\_hum\_tissue\_Urea\_RNAB\_H Scan : 18051

Andromeda score : 45.077

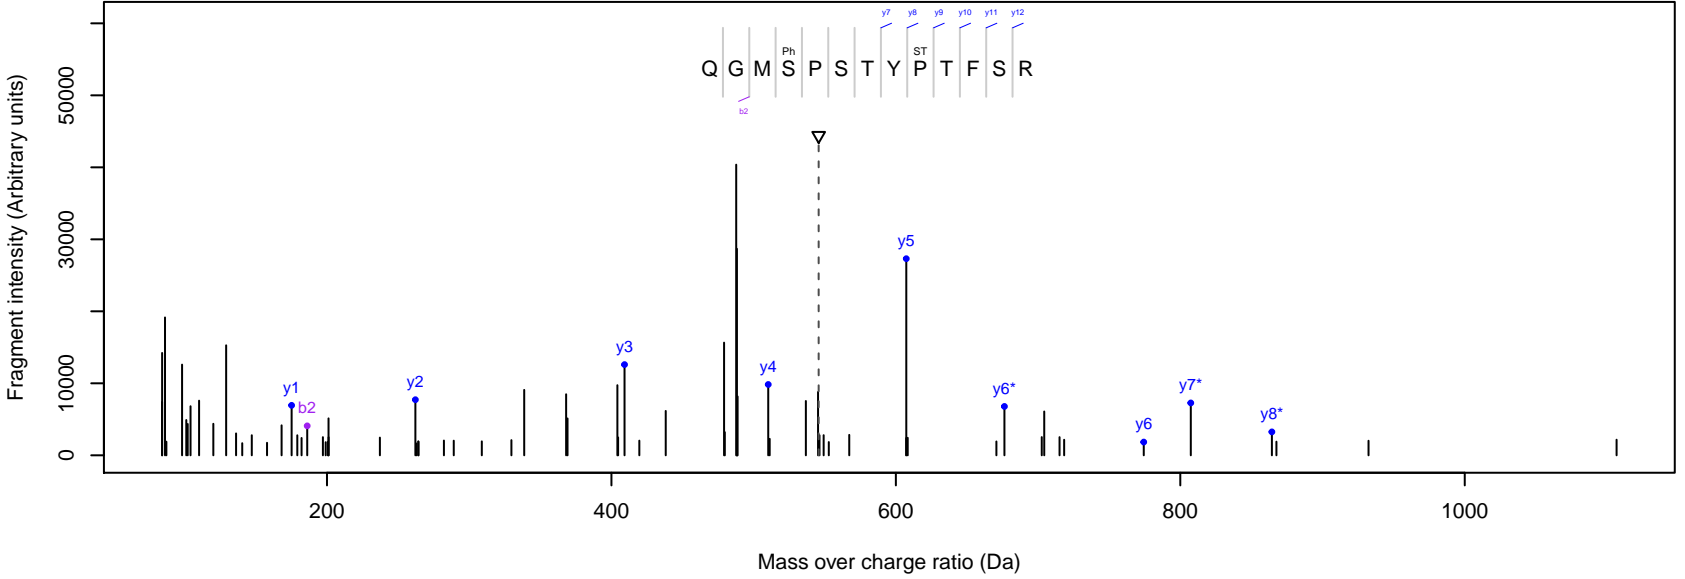

RQS(Phospho (STY))LYENQV-2+

Source : QE3\_2011126\_FR\_TiOx\_hum\_tissue\_Urea\_RNAB\_N Scan : 16447

Andromeda score : 45.077

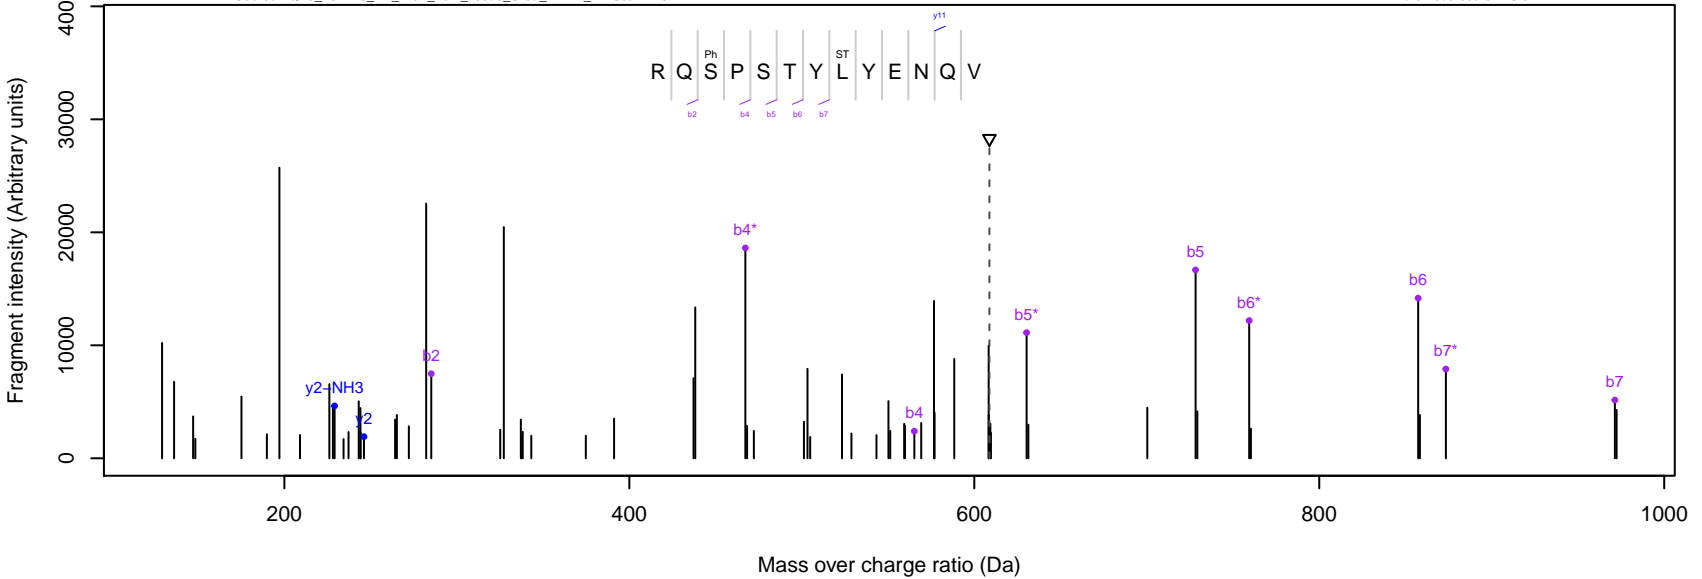

ELVS(Phospho (STY))SSSSGSDS(Phospho (STY))DS(Phospho (STY))EVDKCLK-3+

Source : QE3\_201126\_FR\_TiOx\_hum\_tissue\_Urea\_RNAB\_H Scan : 19975

Andromeda score : 45.07

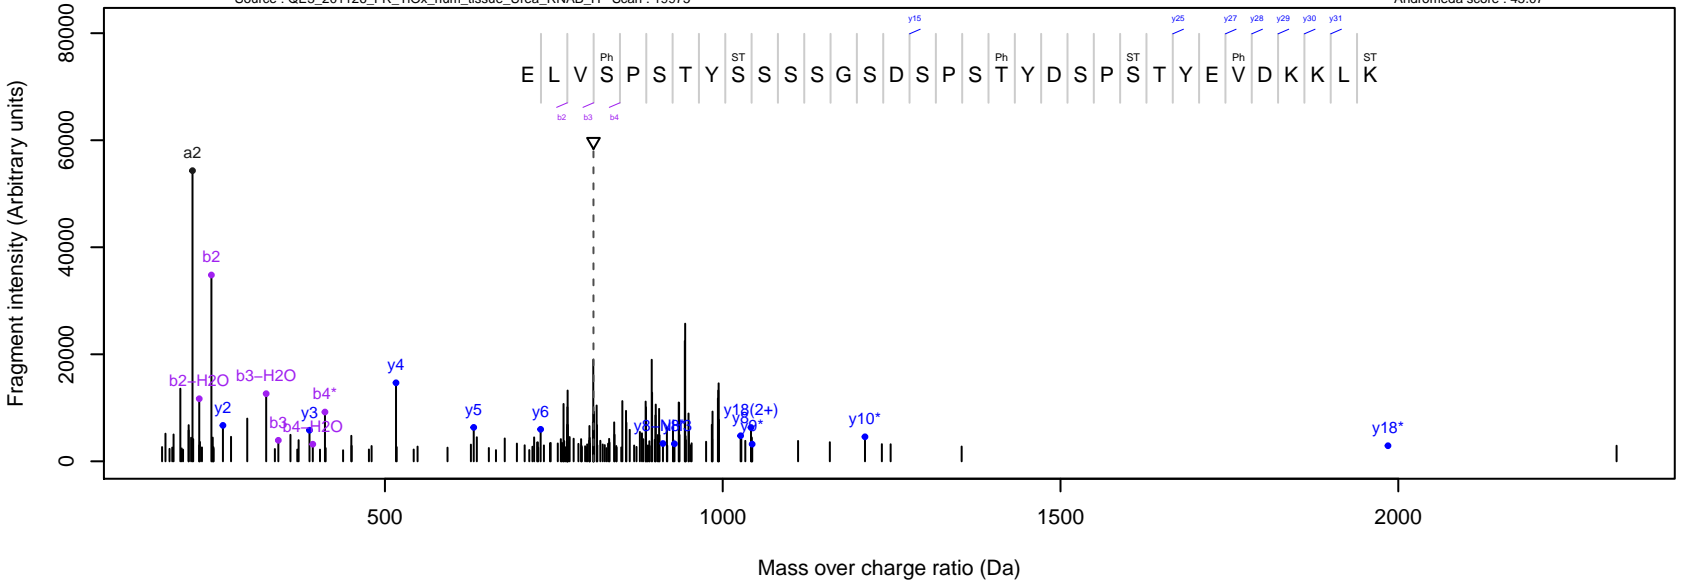

DQS(Phospho (STY))PPSPPPSYHPPPPPTK-3+

Source : QE3\_201126\_FR\_TiOx\_hum\_tissue\_Urea\_RNAB\_N Scan : 18419

Andromeda score : 45.047

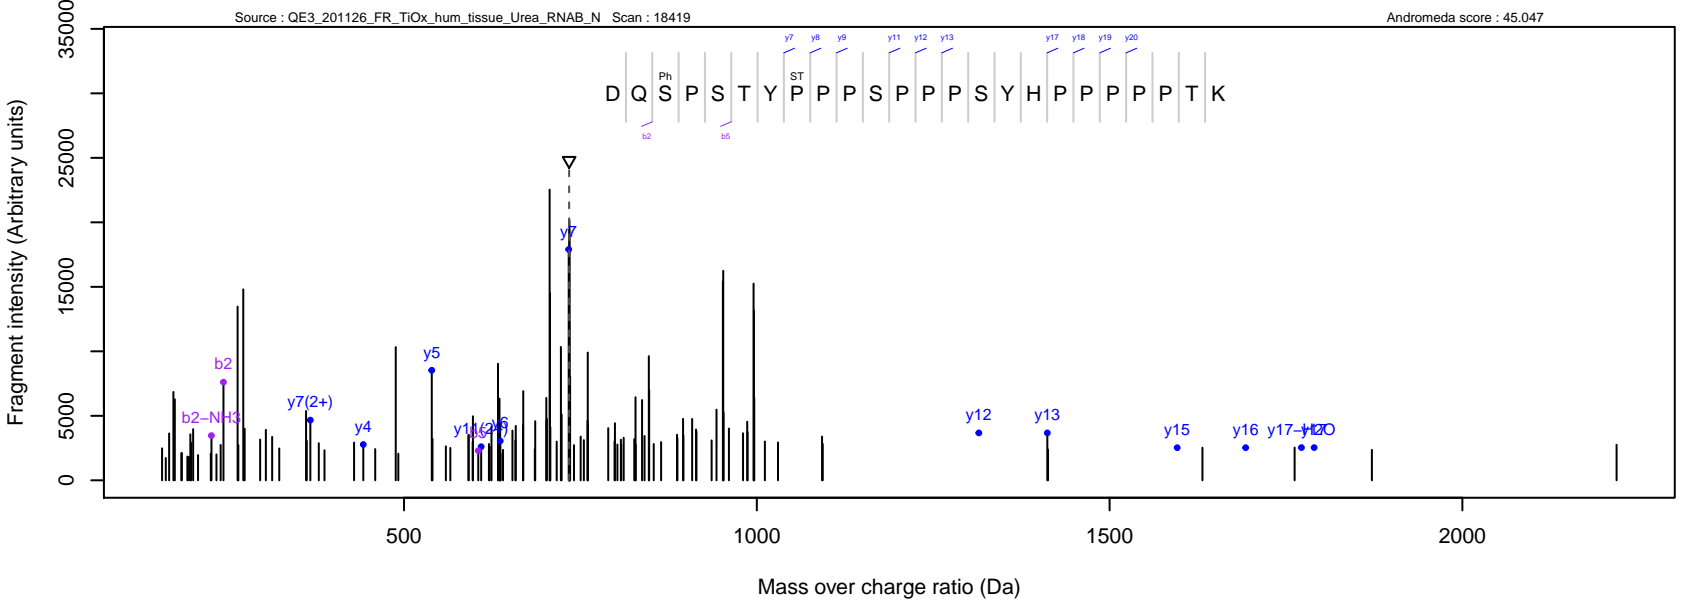

M(Oxidation (M))ENQS(Phospho (STY))ENNDIVEIIP TAPLYK-3+

Source : QE3\_201126\_FR\_TiOx\_hum\_tissue\_Urea\_RNAB\_B Scan : 53842

Andromeda score : 45.047

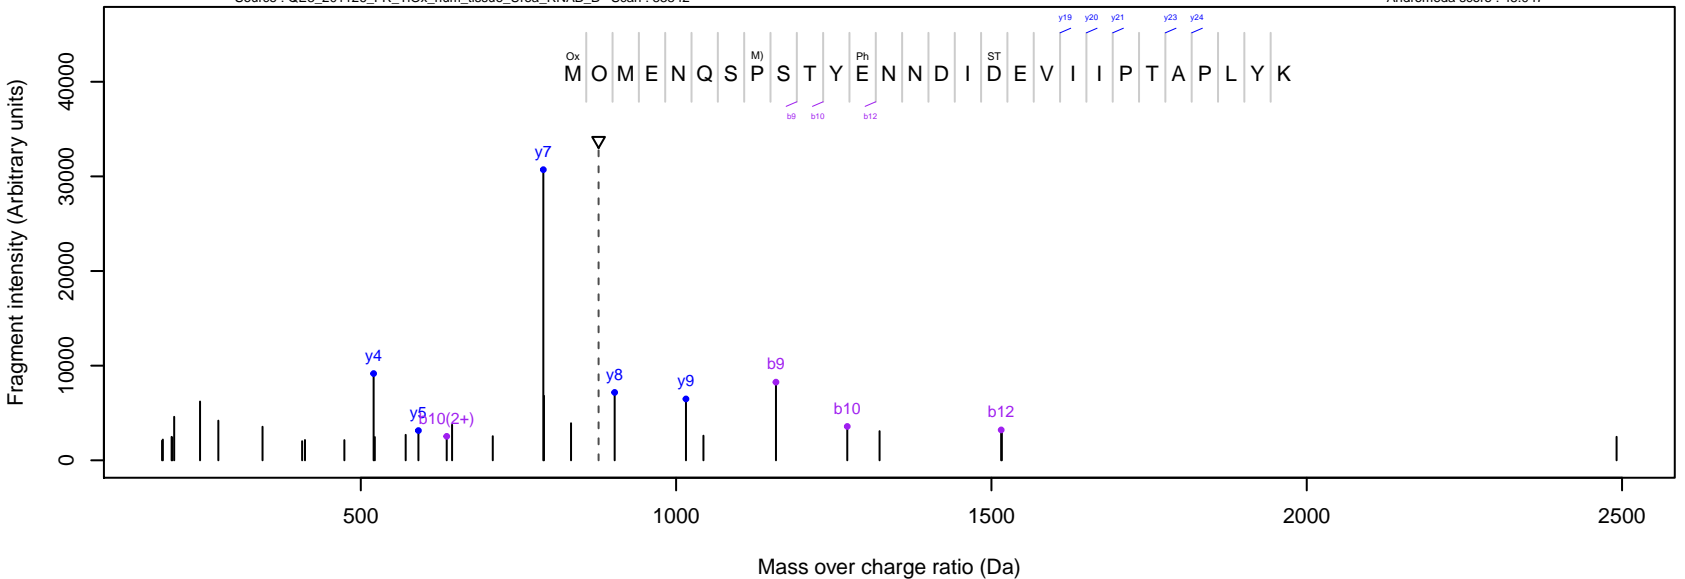



SLSRT(Phospho (STY))PS(Phospho (STY))PPFPR-3+

Source : QE3\_201126\_FR\_TiOx\_hum\_tissue\_Urea\_RNAB\_B Scan : 22120

Andromeda score : 45.014

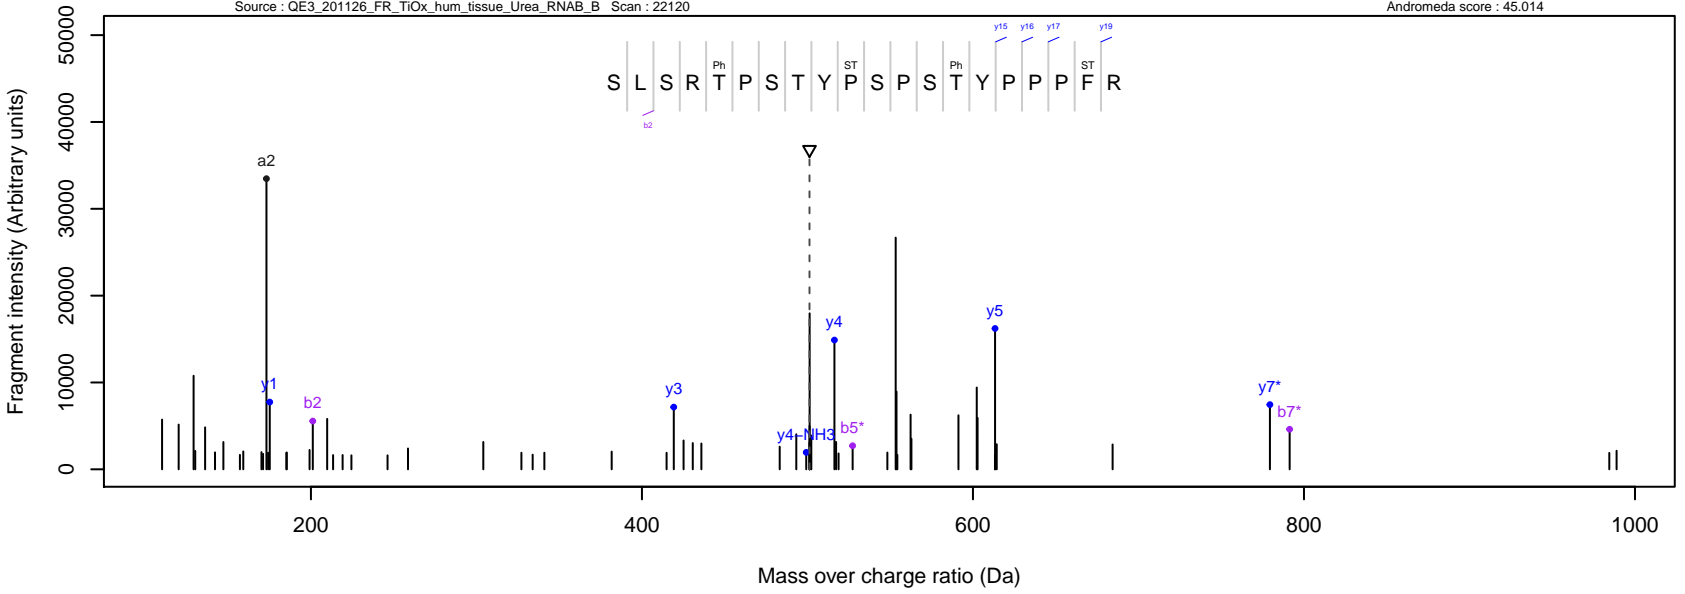

ASPEAAS(Phospho (STY))TPRDPIDVDLPEEAER-3+

Source : QE3\_201126\_FR\_TiOx\_hum\_tissue\_Urea\_RNAB\_H Scan : 33607

Andromeda score : 45.011

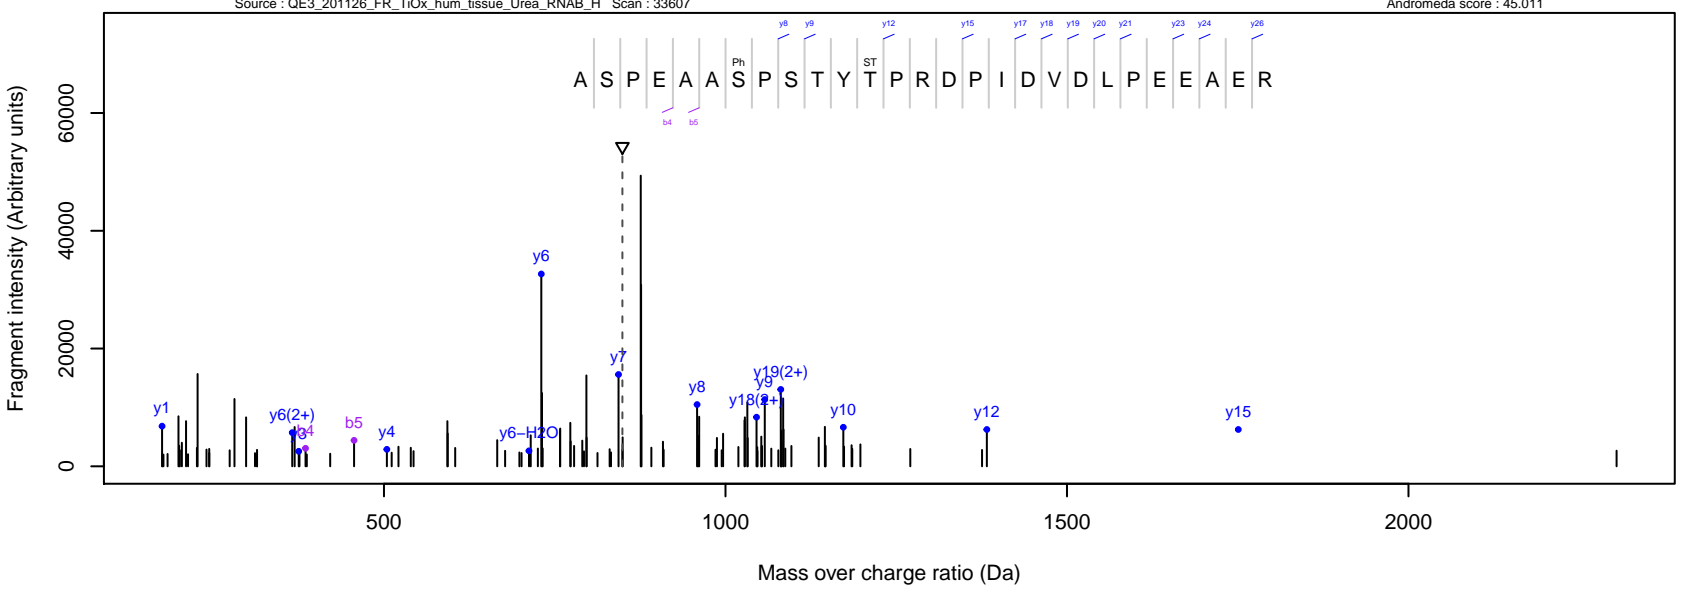

EYGS(Phospho (STY))PLKAY(Phospho (STY))TPVVVTQWYR-3+

Source : QE3\_201126\_FR\_TiOx\_hum\_tissue\_Urea\_RNAB\_N Scan : 54813

Andromeda score : 45.011

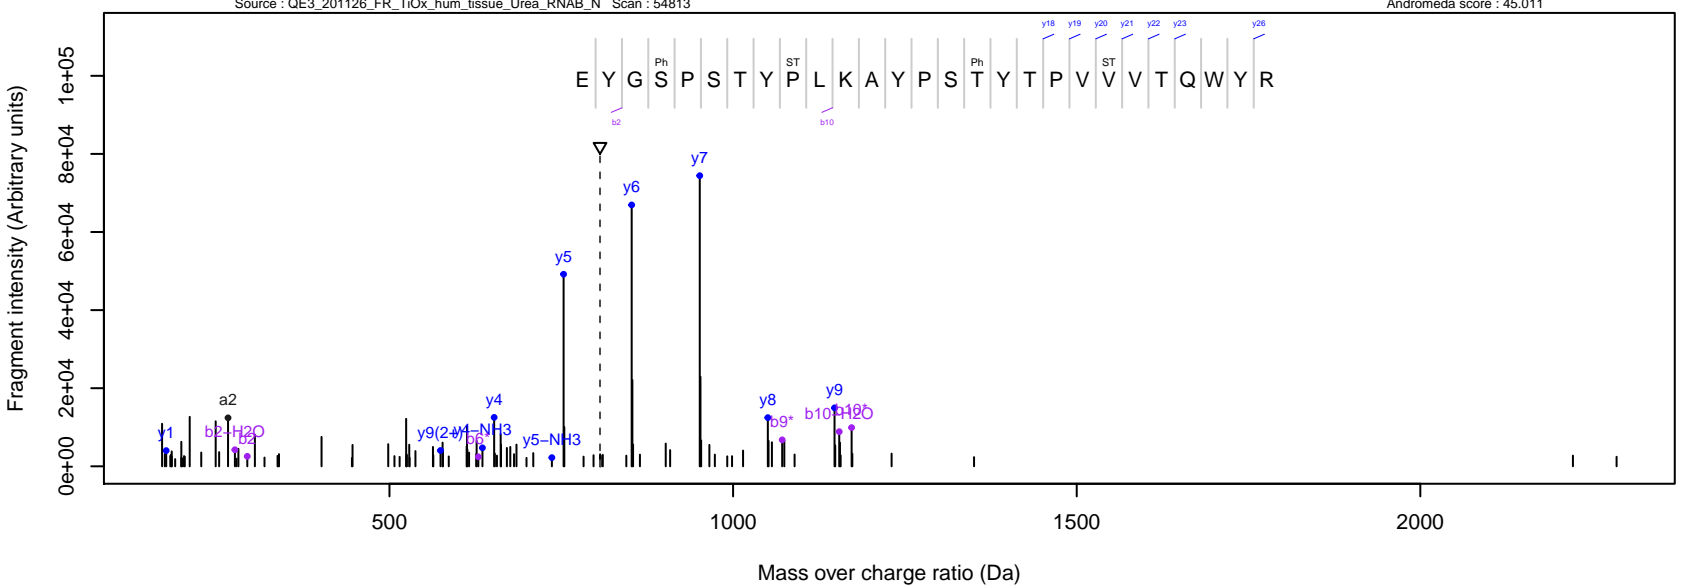

GLIPS(Phospho (STY))SPQNEPTASVPPESDVYR-3+

Source : QE3\_201126\_FR\_TiOx\_hum\_tissue\_Urea\_RNAB\_N Scan : 41328

Andromeda score : 45.011

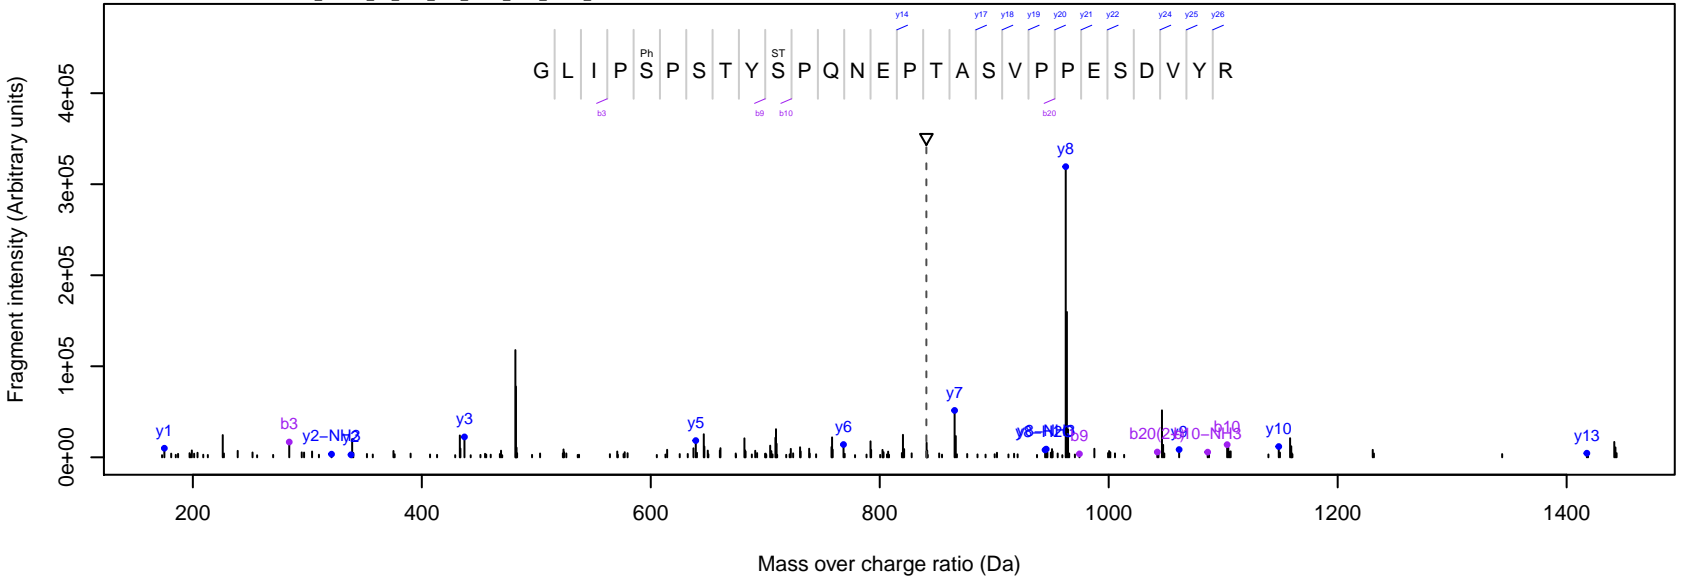

CEERS(Phospho (STY))PS(Phospho (STY))FGEDYGPSR-3+

Source : QE3\_201126\_FR\_TiOx\_hum\_tissue\_Urea\_RNAB\_N Scan : 27461

Andromeda score : 44.998

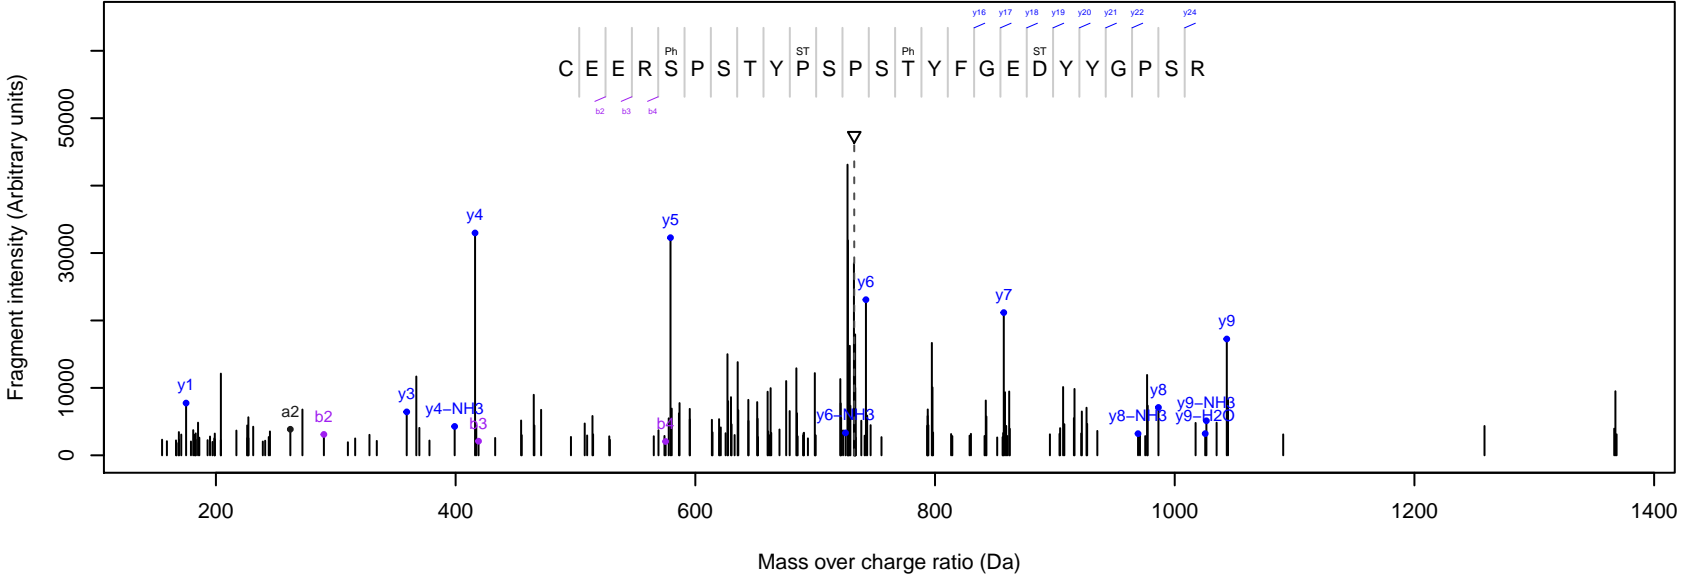

GGs(Phospho (STY))TEDASQYYCDKNDNGDSYLVLIIR-3+

Source : QE3\_201126\_FR\_TiOx\_hum\_tissue\_Urea\_RNAB\_N Scan : 44501

Andromeda score : 44.969

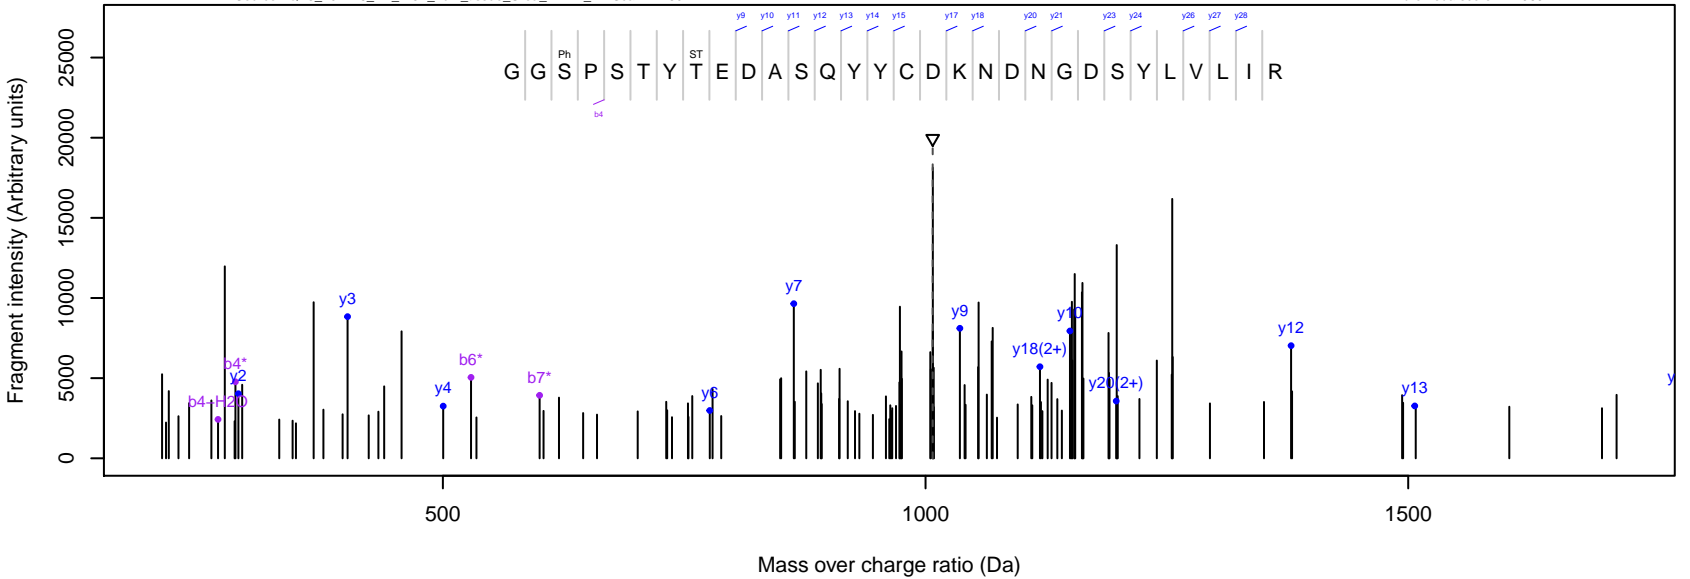

ADVQLFM(Oxidation (M))DDDSY(Phospho (STY))S(Phospho (STY))HHS(Phospho (STY))GLEADPEK-3+

Source : QE3\_201126\_FR\_TiOx\_hum\_tissue\_Urea\_RNAB\_N Scan : 44226

Andromeda score : 44.955

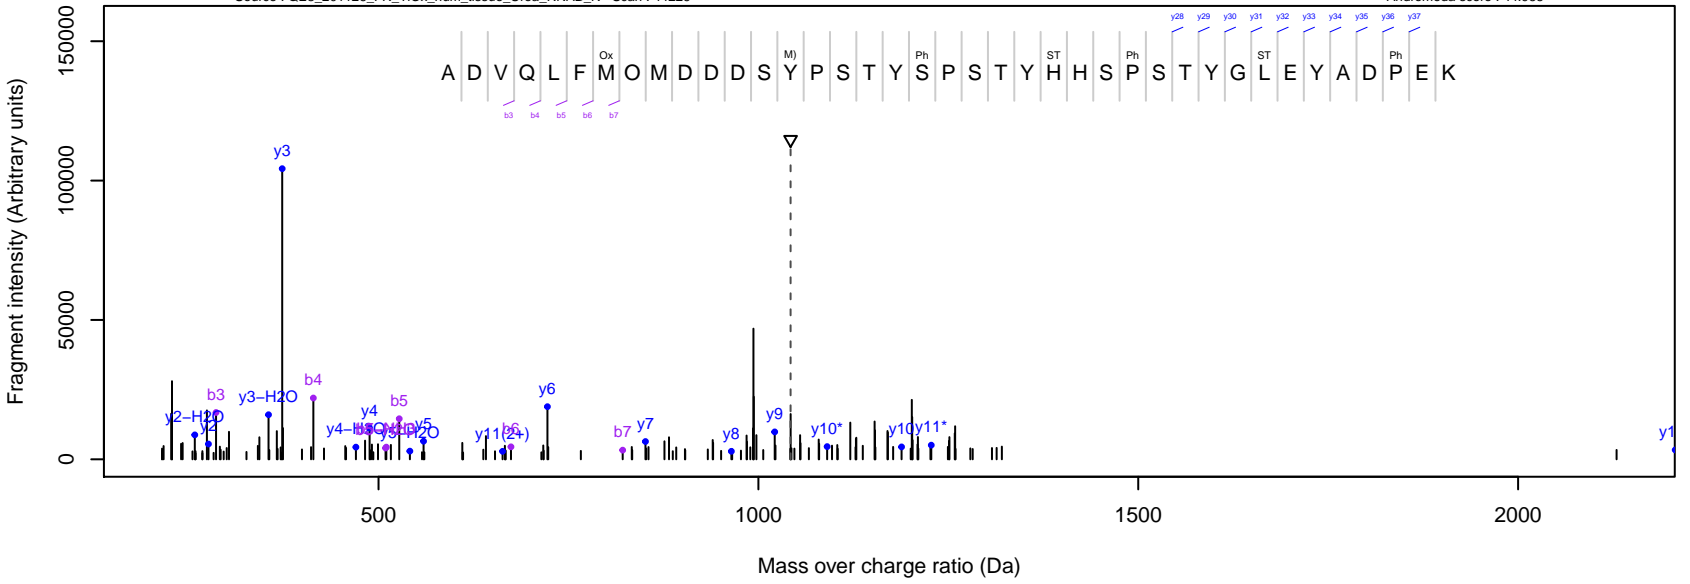

TRS(Phospho (STY))RS(Phospho (STY))PESQVIGENTK-3+

Source : QE3\_201126\_FR\_TiOx\_hum\_tissue\_Urea\_RNAB\_N Scan : 10442

Andromeda score : 44.953

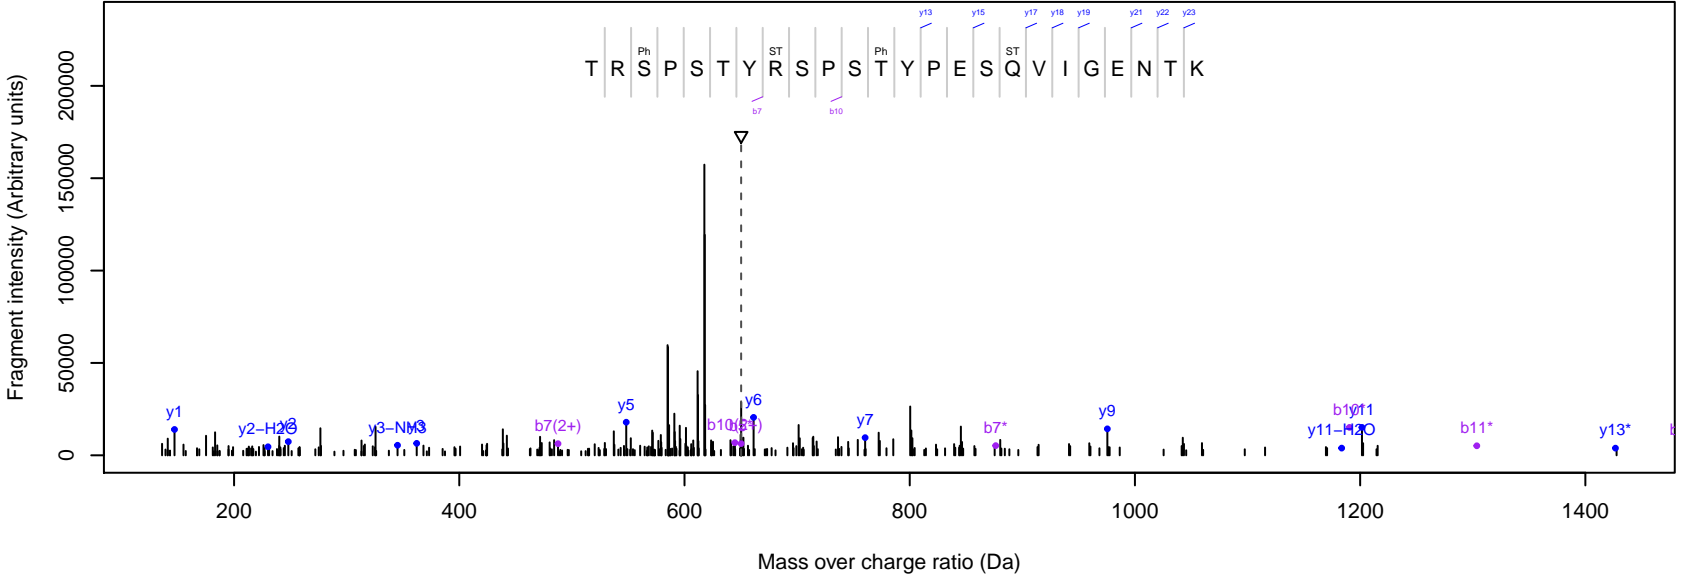

DSRS(Phospho (STY))LS(Phospho (STY))YS(Phospho (STY))PVER-2+

Source : QE3\_201126\_FR\_TiOx\_hum\_tissue\_Urea\_RNAB\_N Scan : 24639

Andromeda score : 44.925

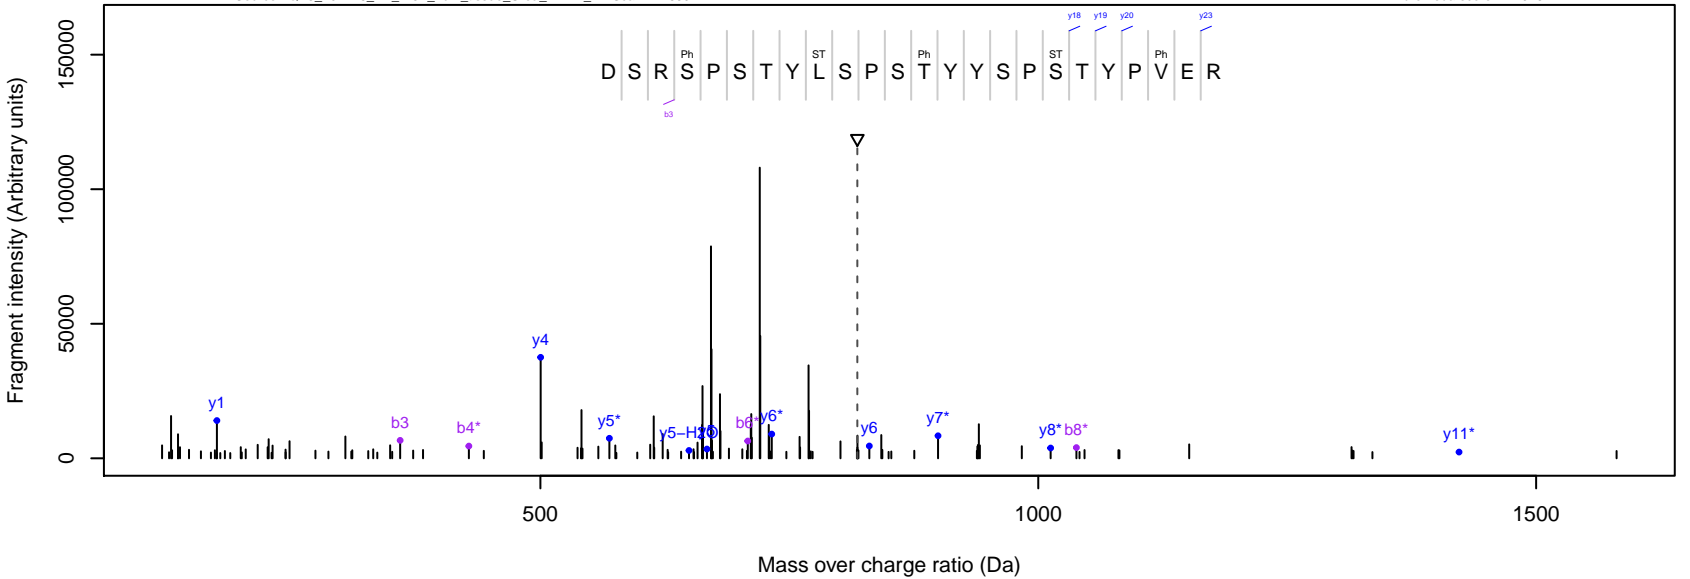

RLEIS(Phospho (STY))PDS(Phospho (STY))S(Phospho (STY))PERAHYTHSDYQYSQR-4+

Source : QE3\_201126\_FR\_TiOx\_hum\_tissue\_Urea\_RNAB\_B Scan : 20073

Andromeda score : 44.916

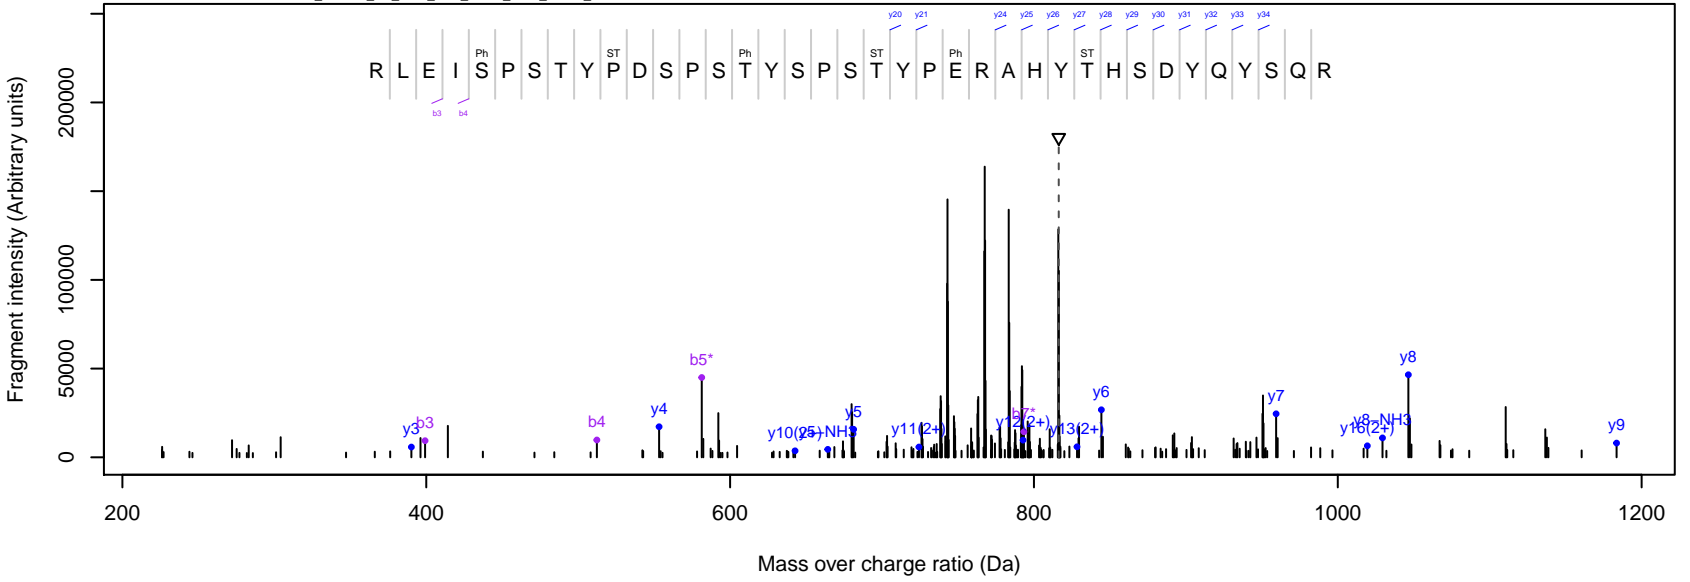

VRGGAPDPSGATATPGAPAQPS(Phospho (STY))SPDARR-3+

Source : QE3\_201126\_FR\_TiOx\_hum\_tissue\_Urea\_RNAB\_B Scan : 12468

Andromeda score : 44.915

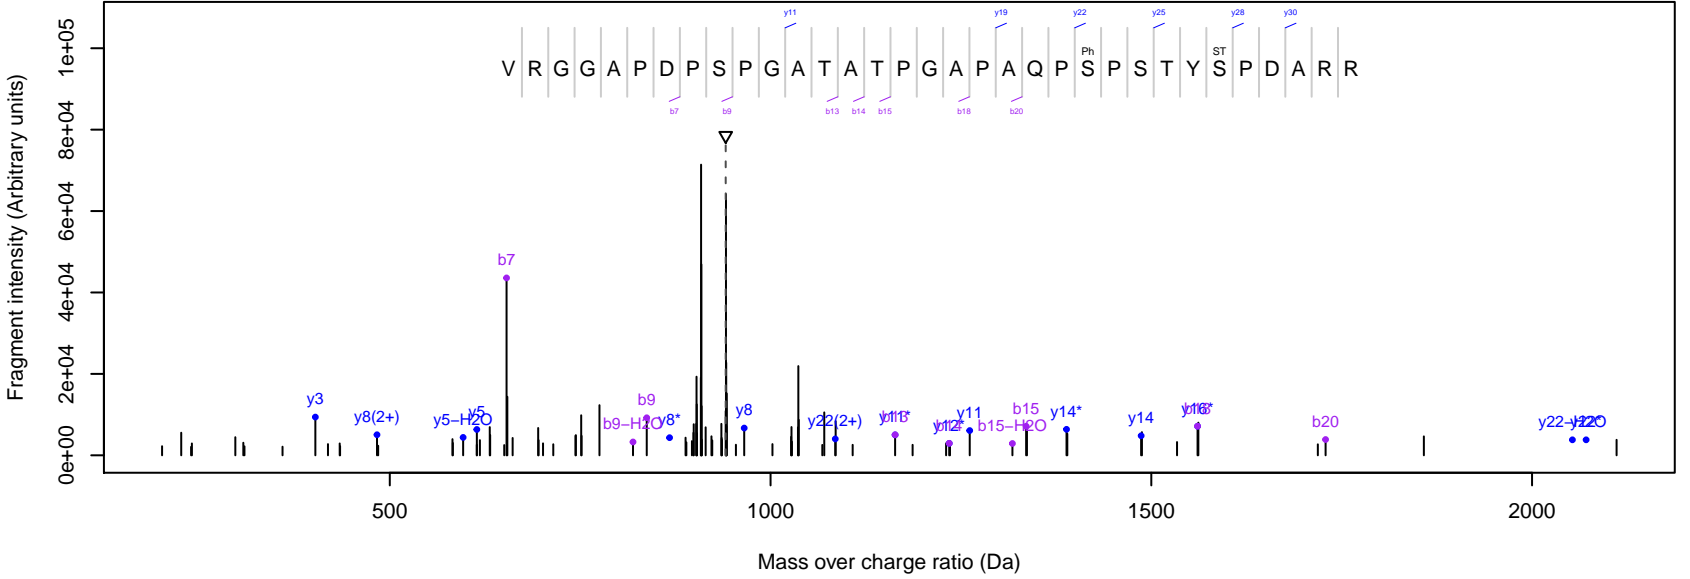

RAS(Phospho (STY))LPLAGLVGT(Phospho (STY))PPES(Phospho (STY))PSEPREDLGLPGPR-3+

Source : QE3\_201126\_FR\_TiOx\_hum\_tissue\_Urea\_RNAB\_N Scan : 59278

Andromeda score : 44.898

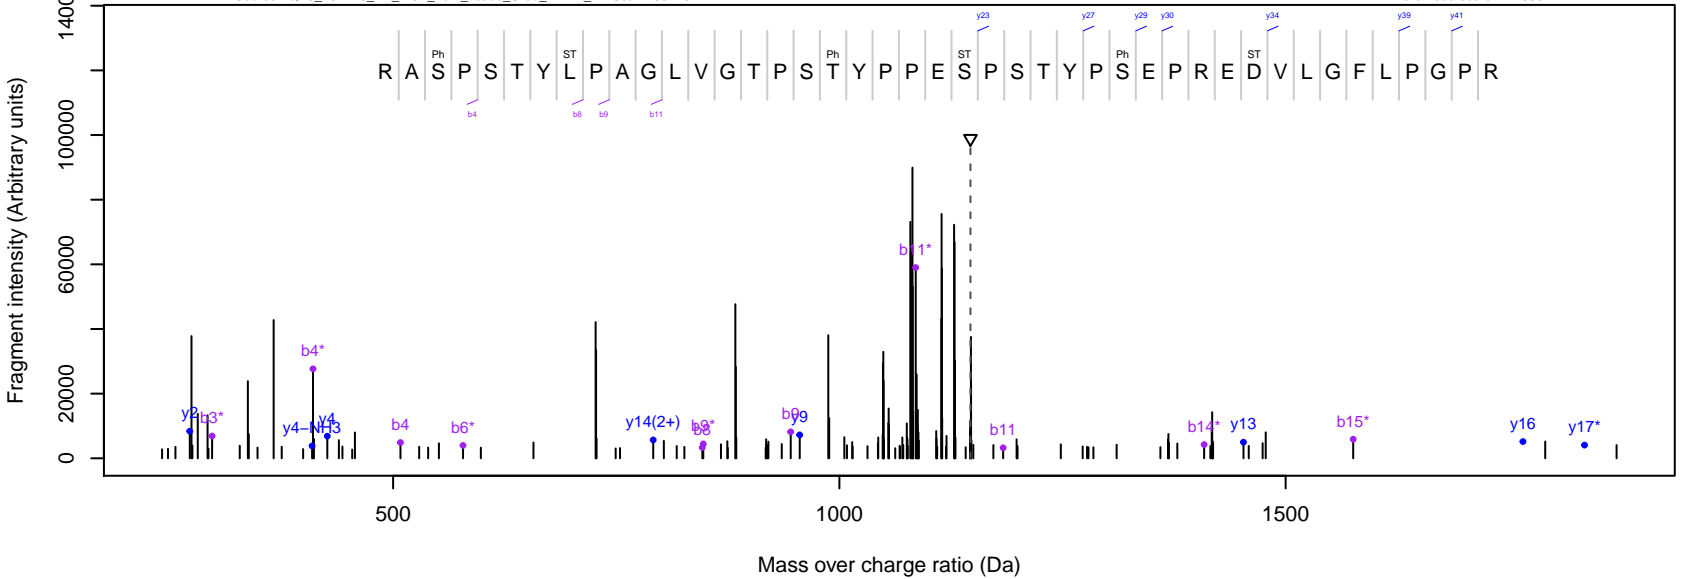

TNLTQSSTTNLPGSPGSPGS(Phospho (STY))PGSPGSPGVK-3+

Source : QE3\_201126\_FR\_TIOx\_hum\_tissue\_Urea\_RNAB\_N Scan : 28853

Andromeda score : 44.898

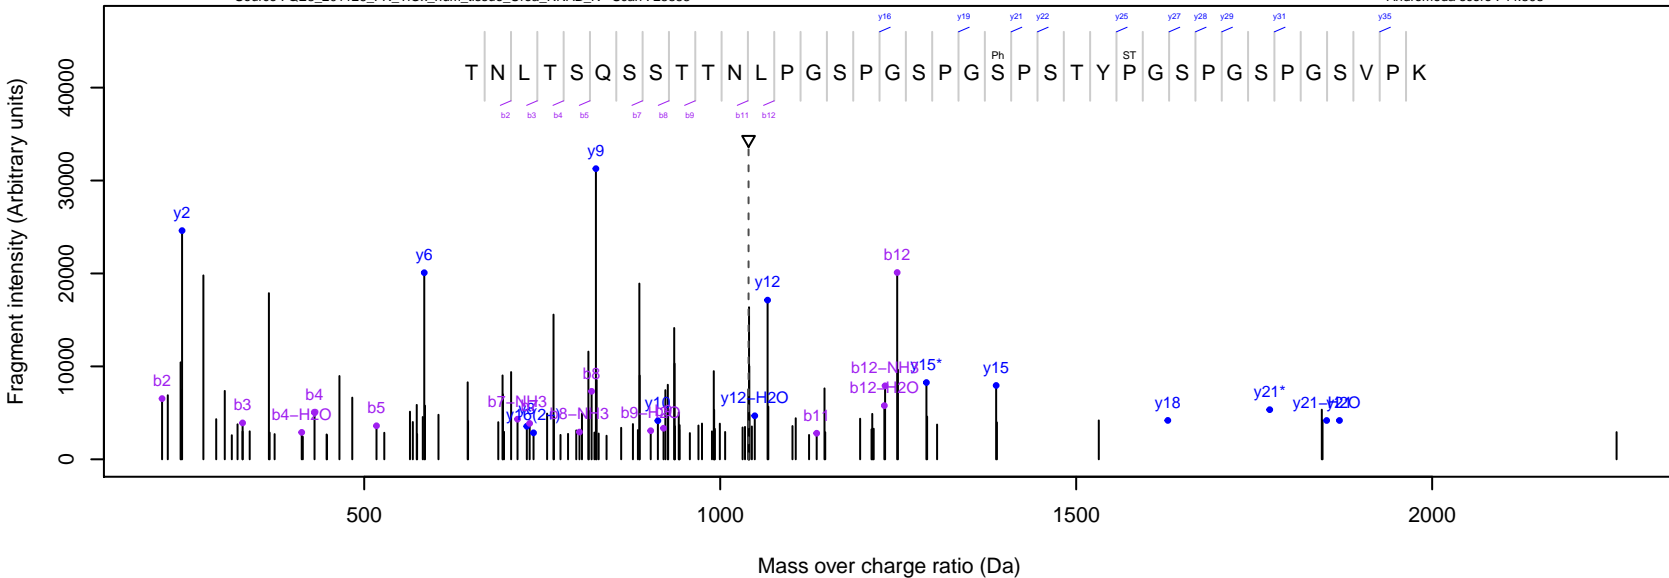

M(Oxidation (M))PAPEPGAAPSNEEDDS(Phospho (STY))DDDDVLAPSGATAAGAGDEGDGQTTGST-4+

Source : QE3\_201126\_FR\_TIOx\_hum\_tissue\_Urea\_RNAB\_N Scan : 40085

Andromeda score : 44.894

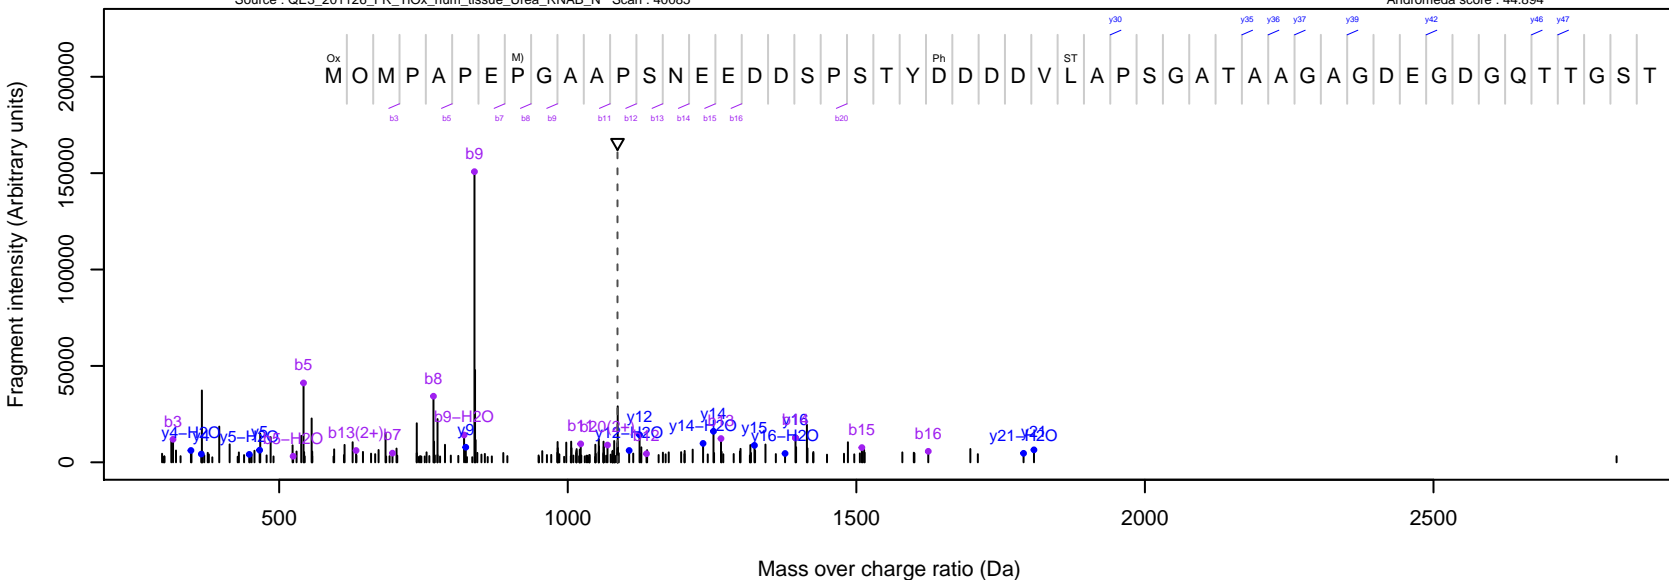

PVSS(Phospho (STY))AASVYAGAGGS(Phospho (STY))GS(Phospho (STY))RIS(Phospho (STY))VSR-3+

Source : QE3\_201126\_FR\_TIOx\_hum\_tissue\_Urea\_RNAB\_H Scan : 39511

Andromeda score : 44.893

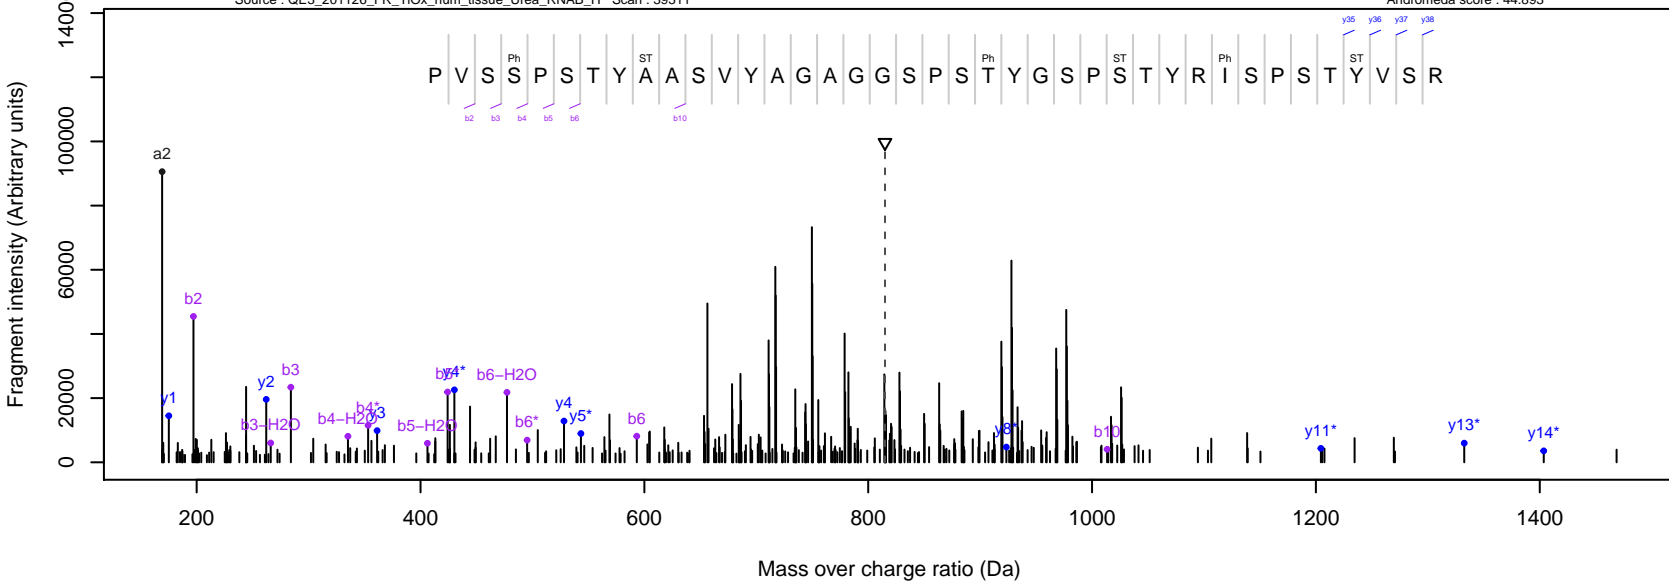

AGS(Phospho (STY))PDVLR-2+

Source : QE3\_201126\_FR\_TiOx\_hum\_tissue\_Urea\_RNAB\_N Scan : 13383

Andromeda score : 44.863

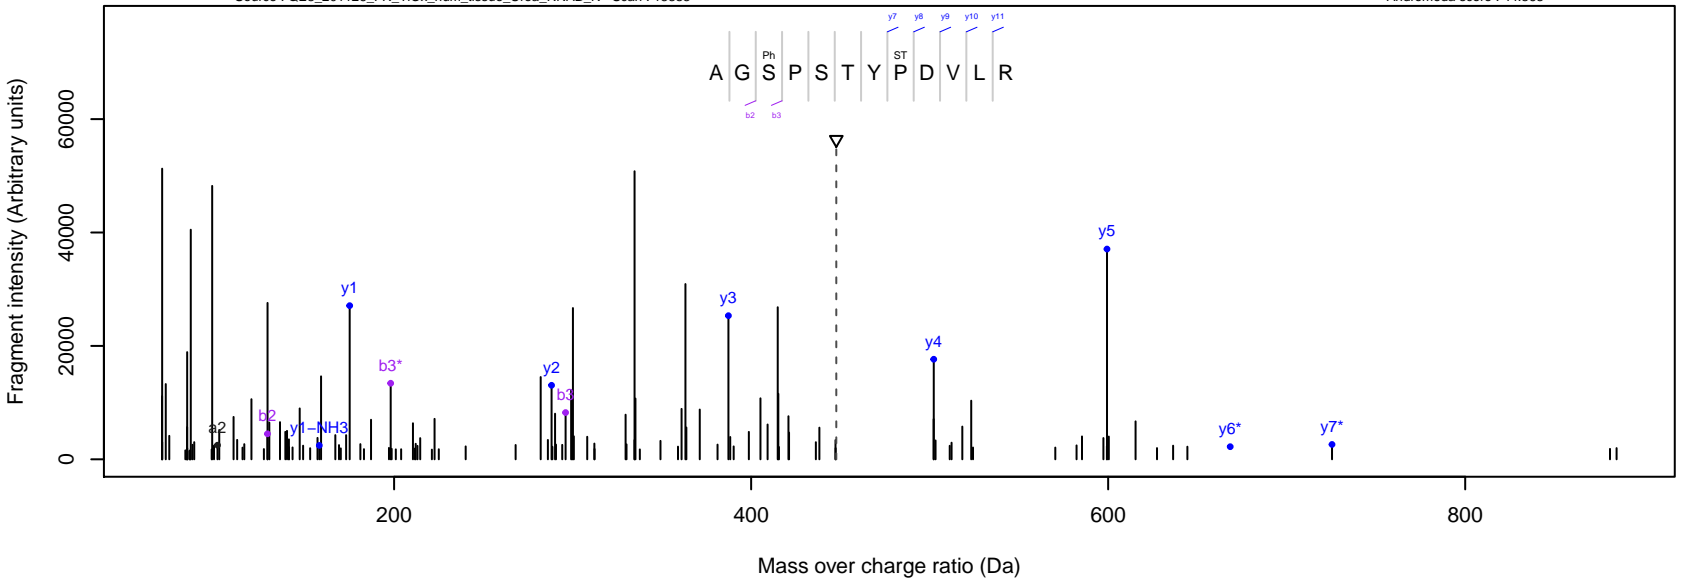

QSGHS(Phospho (STY))PARAGQR-2+

Source : QE3\_201126\_FR\_TiOx\_hum\_tissue\_Urea\_RNAB\_B Scan : 12842

Andromeda score : 44.863

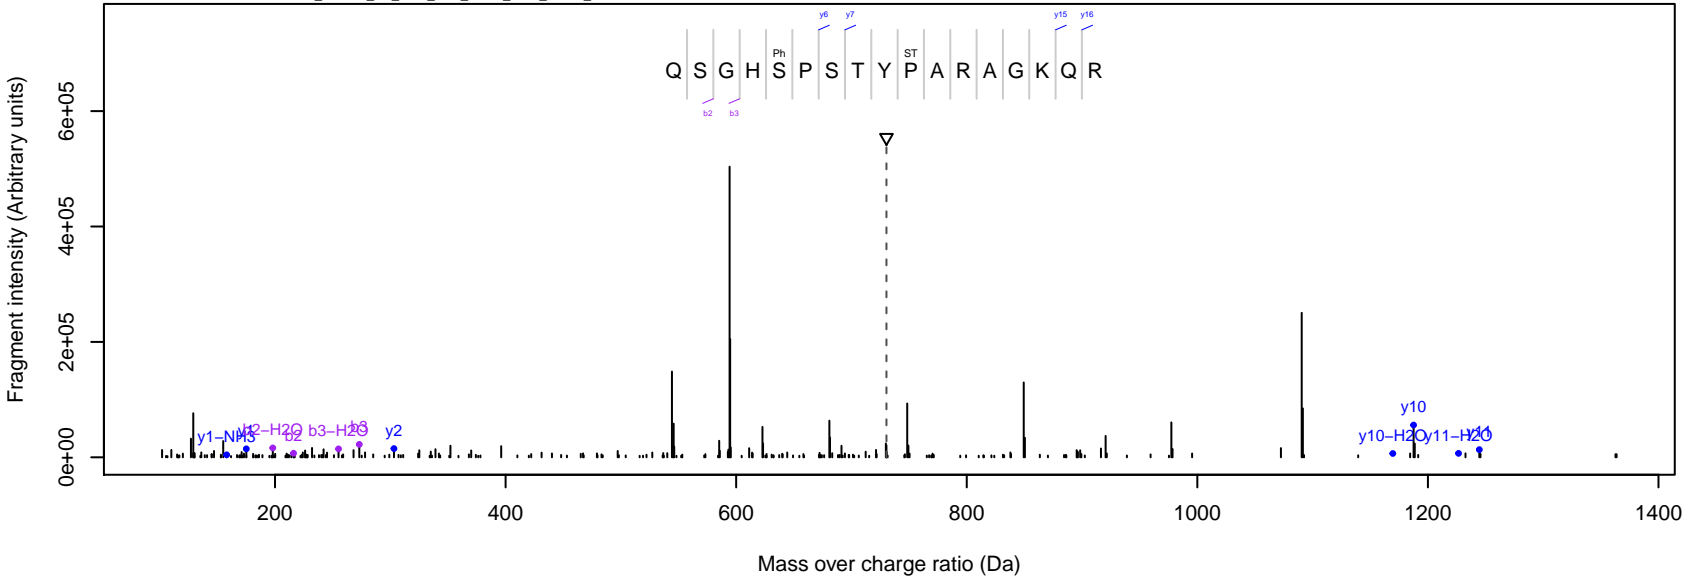

QRKDS(Phospho (STY))FQENEDGYR-3+

Source : QE3\_201126\_FR\_TiOx\_hum\_tissue\_Urea\_RNAB\_B Scan : 7883

Andromeda score : 44.816

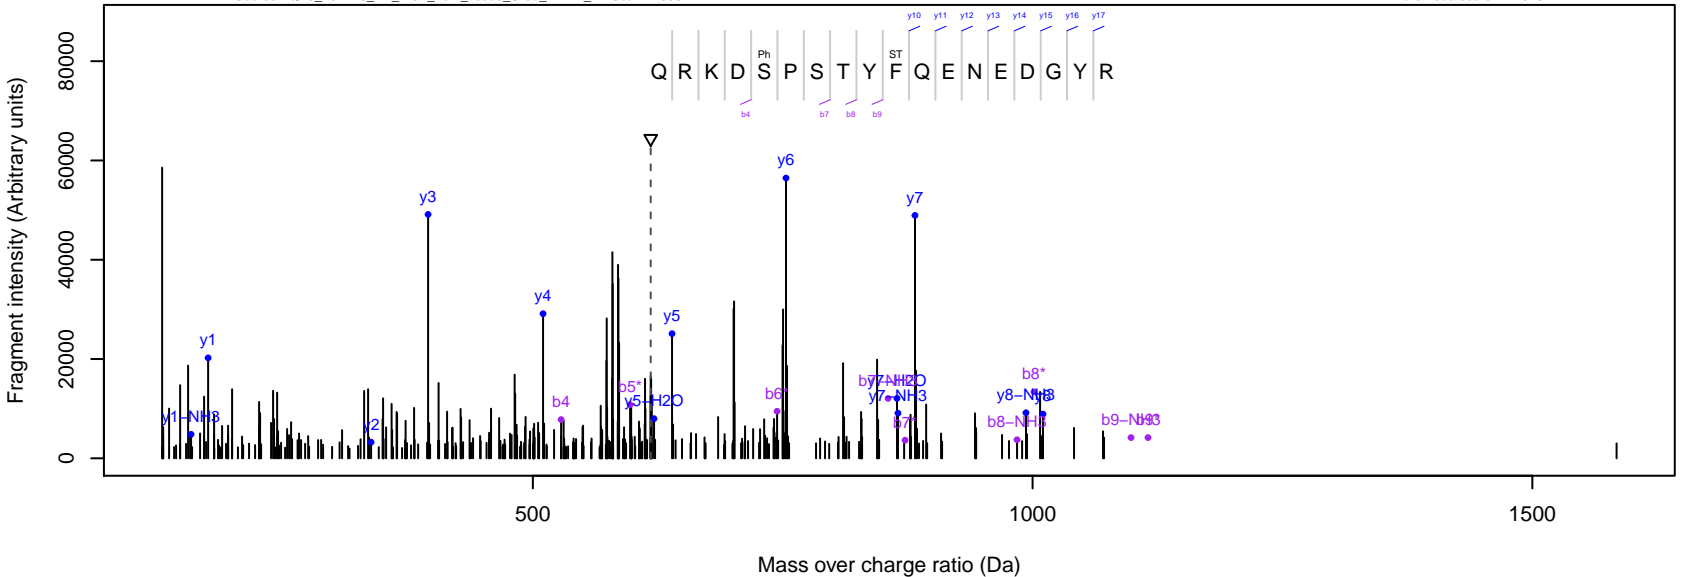

SES(Phospho (STY))PPAELPSLRR-3+

Source : QE3\_201126\_FR\_TiOx\_hum\_tissue\_Urea\_RNAB\_N Scan : 22475

Andromeda score : 44.807

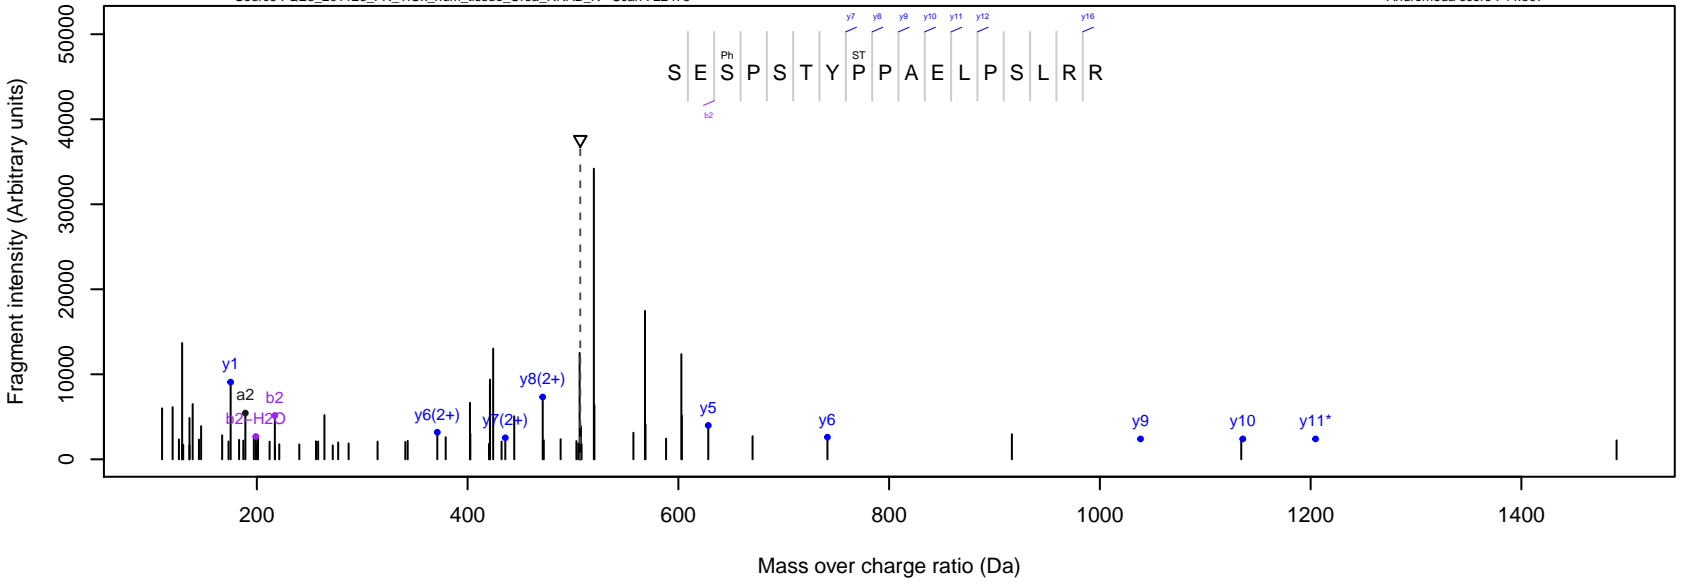

RHS(Phospho (STY))EQVANGPTPPR-3+

Source : QE3\_201126\_FR\_TiOx\_hum\_tissue\_Urea\_RNAB\_B Scan : 5857

Andromeda score : 44.788

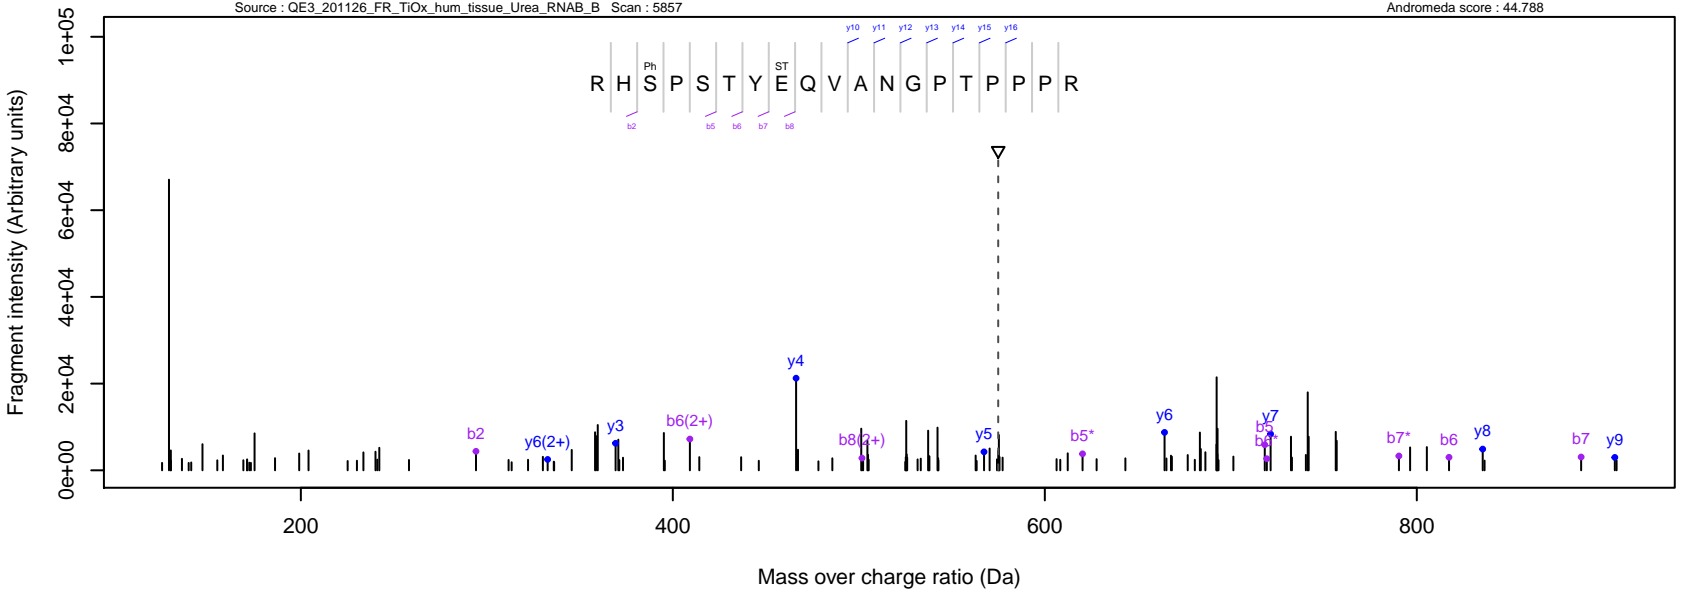

SPT(Phospho (STY))PVHS(Phospho (STY))PDADRPGLFVDVQAR-3+

Source : QE3\_201126\_FR\_TiOx\_hum\_tissue\_Urea\_RNAB\_N Scan : 34793

Andromeda score : 44.743

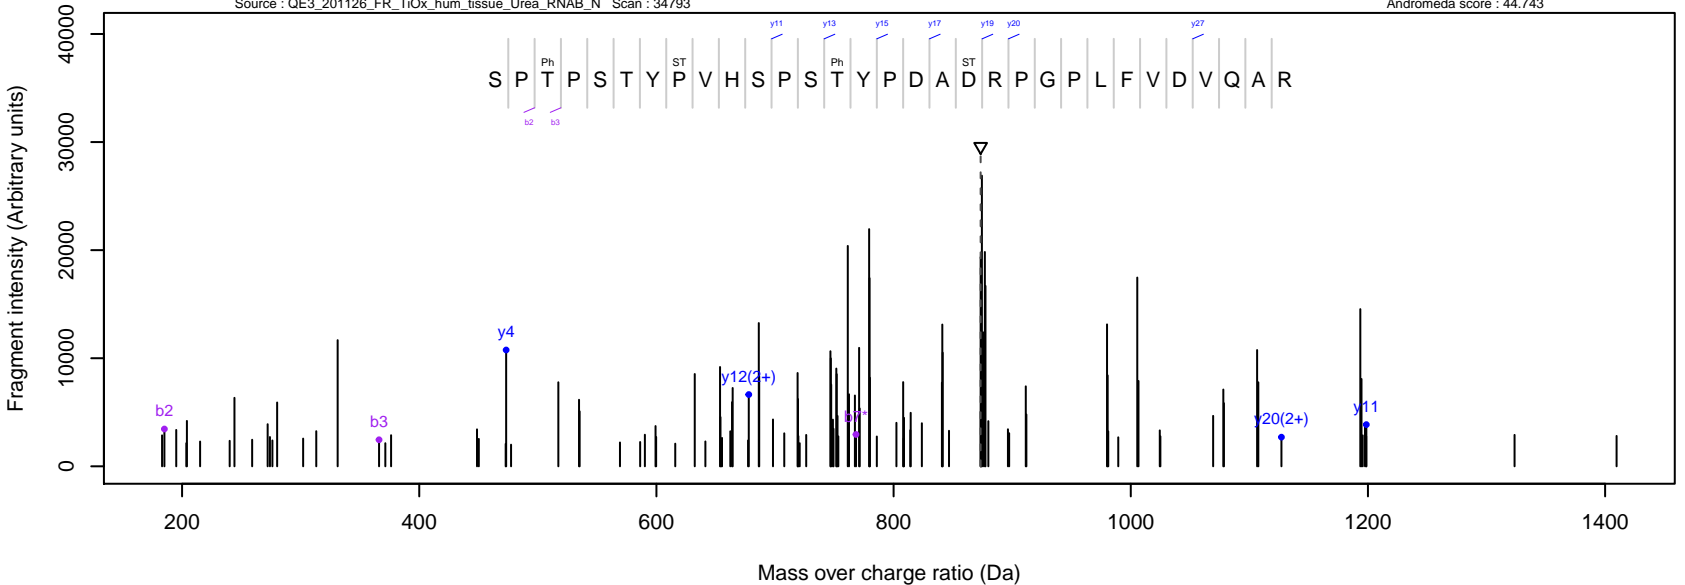

S(Phospho (STY))SSLKS(Phospho (STY))AQGTGFELGQLQSIR-3+

Source : QE3\_201126\_FR\_TiOx\_hum\_tissue\_Urea\_RNAB\_B Scan : 46162

Andromeda score : 44.729

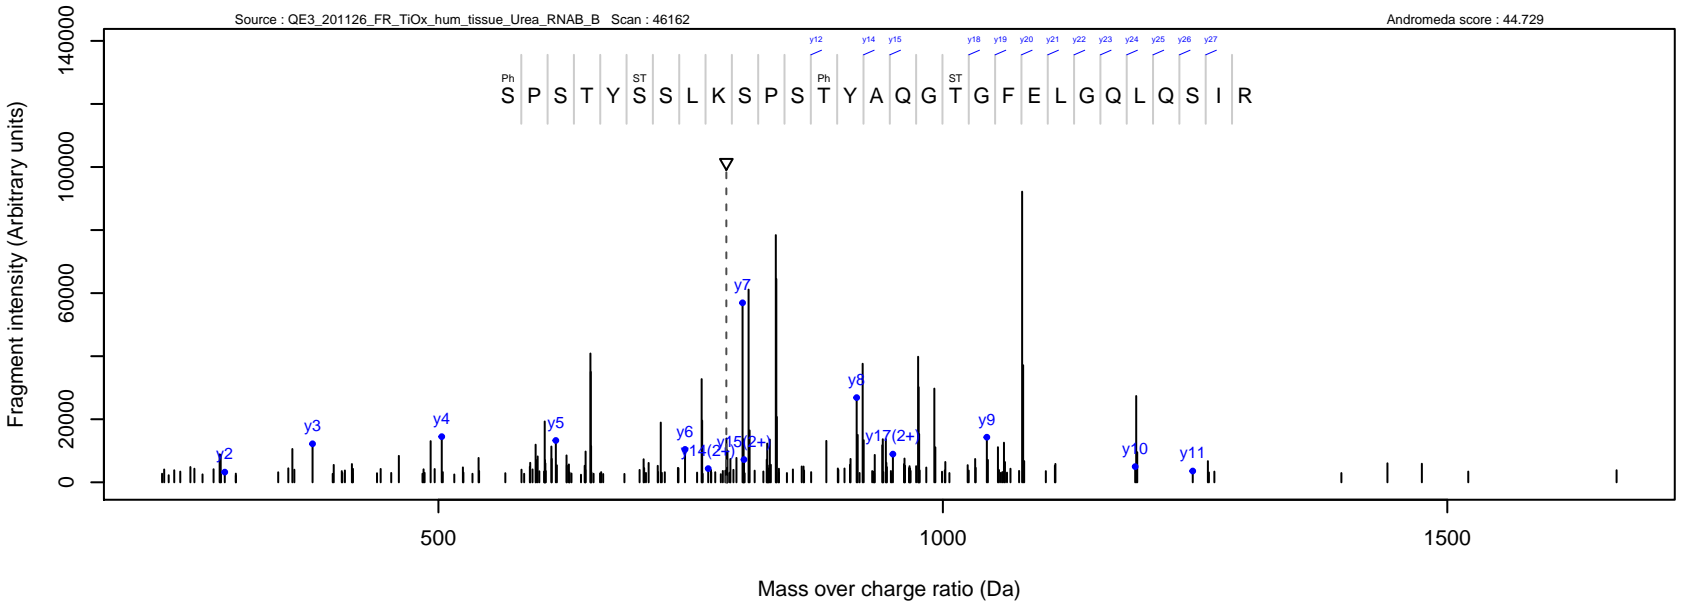

SAQETPESSLAGSPDT(Phospho (STY))ESPVLVNDYEAESGNISQK-3+

Source : QE3\_201126\_FR\_TiOx\_hum\_tissue\_Urea\_RNAB\_H Scan : 45376

Andromeda score : 44.674

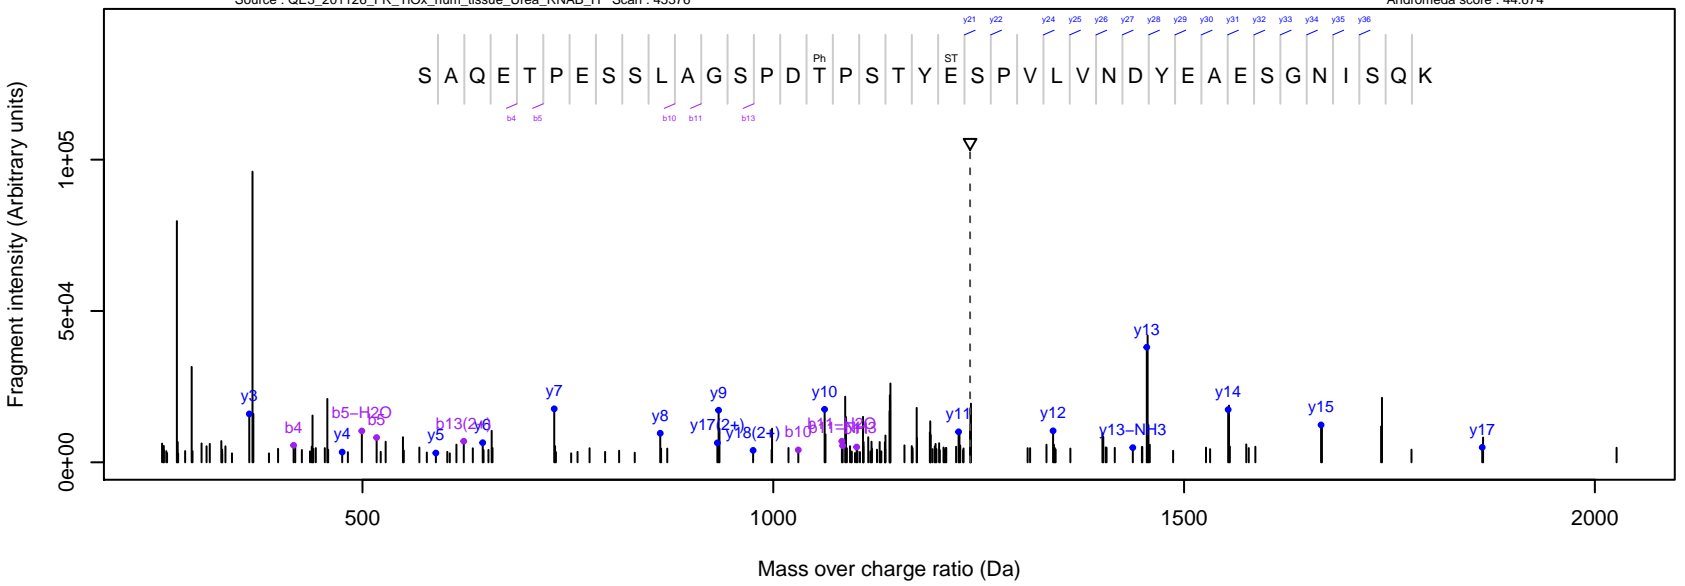

ETTSGTSTEPVKN(Phospho (STY))SPAPPQAPGK-3+

Source : QE3\_201126\_FR\_TiOx\_hum\_tissue\_Urea\_RNAB\_N Scan : 10773

Andromeda score : 44.632

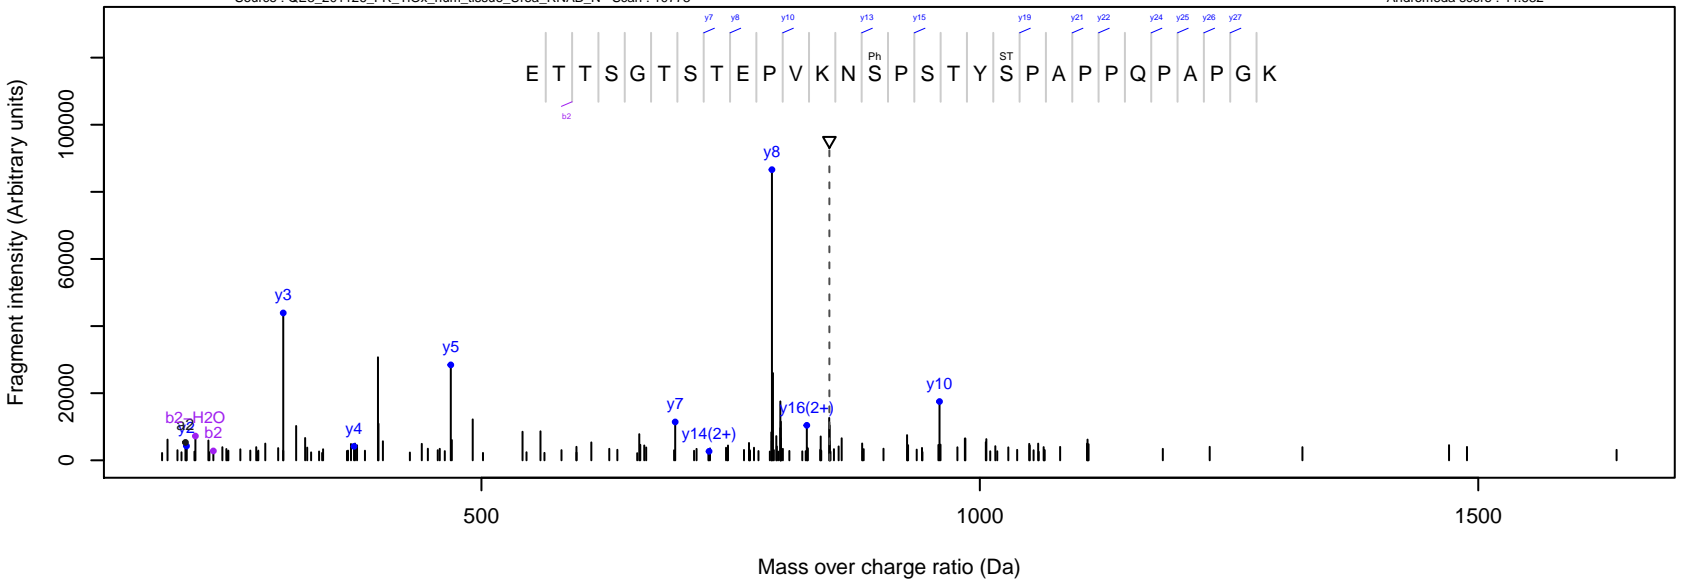



TPS(Phospho (STY))EGGKLQSTFVFEEIGRR-3+

Source : QE3\_201126\_FR\_TIOx\_hum\_tissue\_Urea\_RNAB\_B Scan : 35813

Andromeda score : 44.632

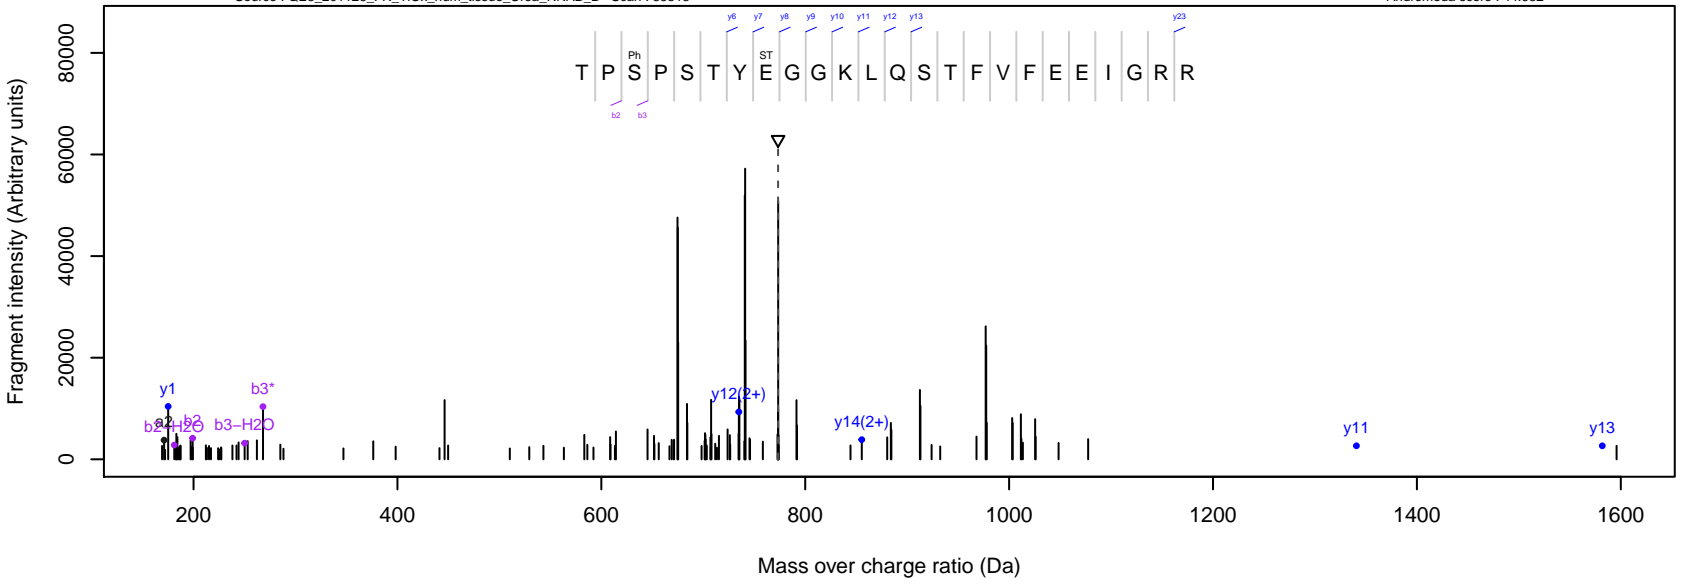

VNPHKVSPAS(Phospho (STY))SVDSNIPSSQGYKK-4+

Source : QE3\_201126\_FR\_TIOx\_hum\_tissue\_Urea\_RNAB\_B Scan : 12357

Andromeda score : 44.632

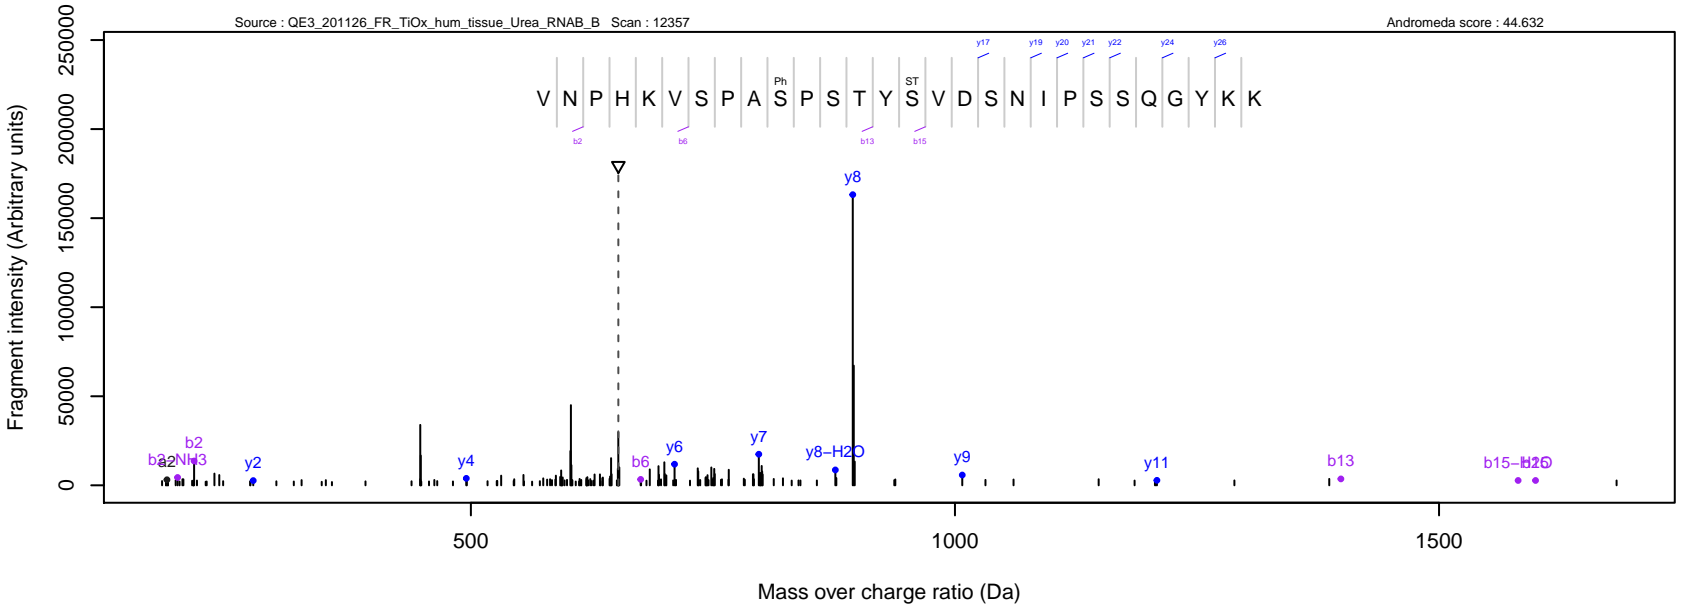

RS(Phospho (STY))SFSM(Oxidation (M))EEES-2+

Source : QE3\_201126\_FR\_TIOx\_hum\_tissue\_Urea\_RNAB\_H Scan : 8659

Andromeda score : 44.616

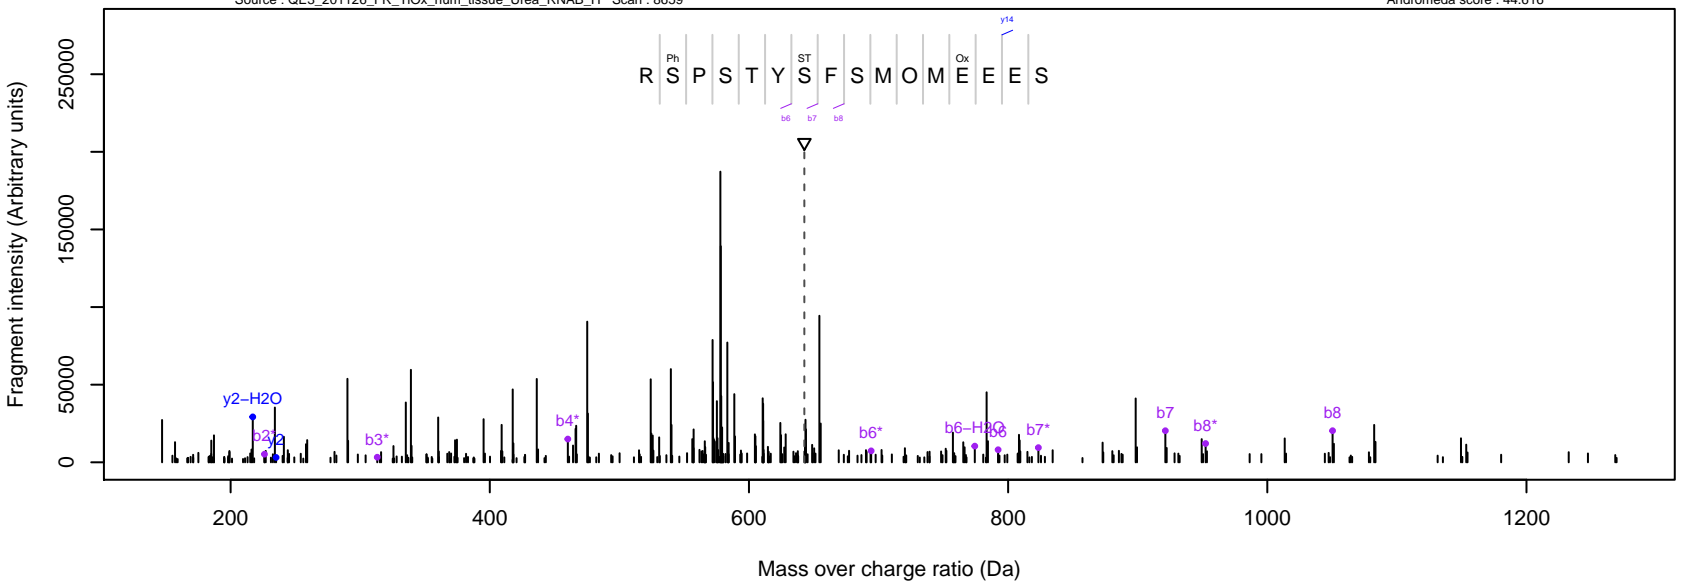

SS(Phospho (STY))RS(Phospho (STY))SPELTR-2+

Source : QE3\_201126\_FR\_TiOx\_hum\_tissue\_Urea\_RNAB\_H Scan : 7717

Andromeda score : 44.616

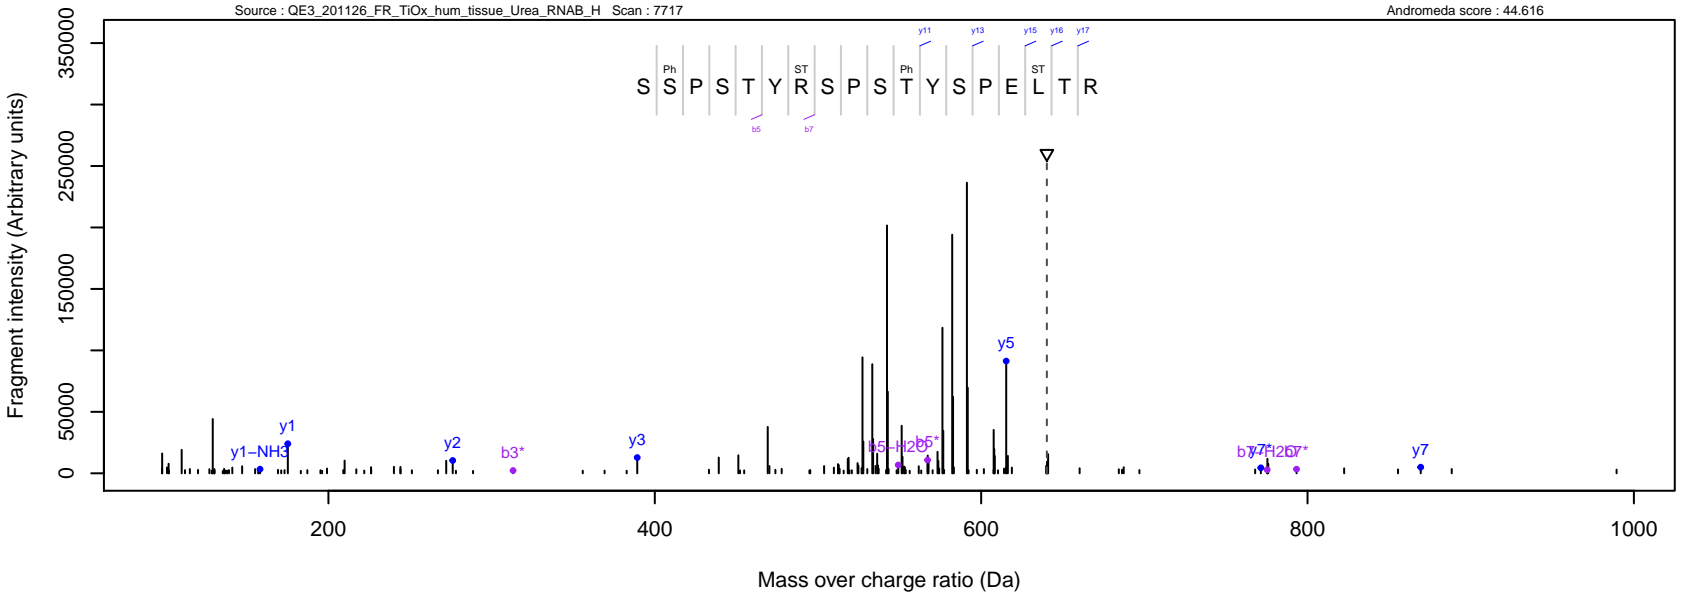

VGDPQPPLPEEPMEVQGAERAS(Phospho (STY))PEPQR-3+

Source : QE3\_201126\_FR\_TiOx\_hum\_tissue\_Urea\_RNAB\_H Scan : 29811

Andromeda score : 44.615

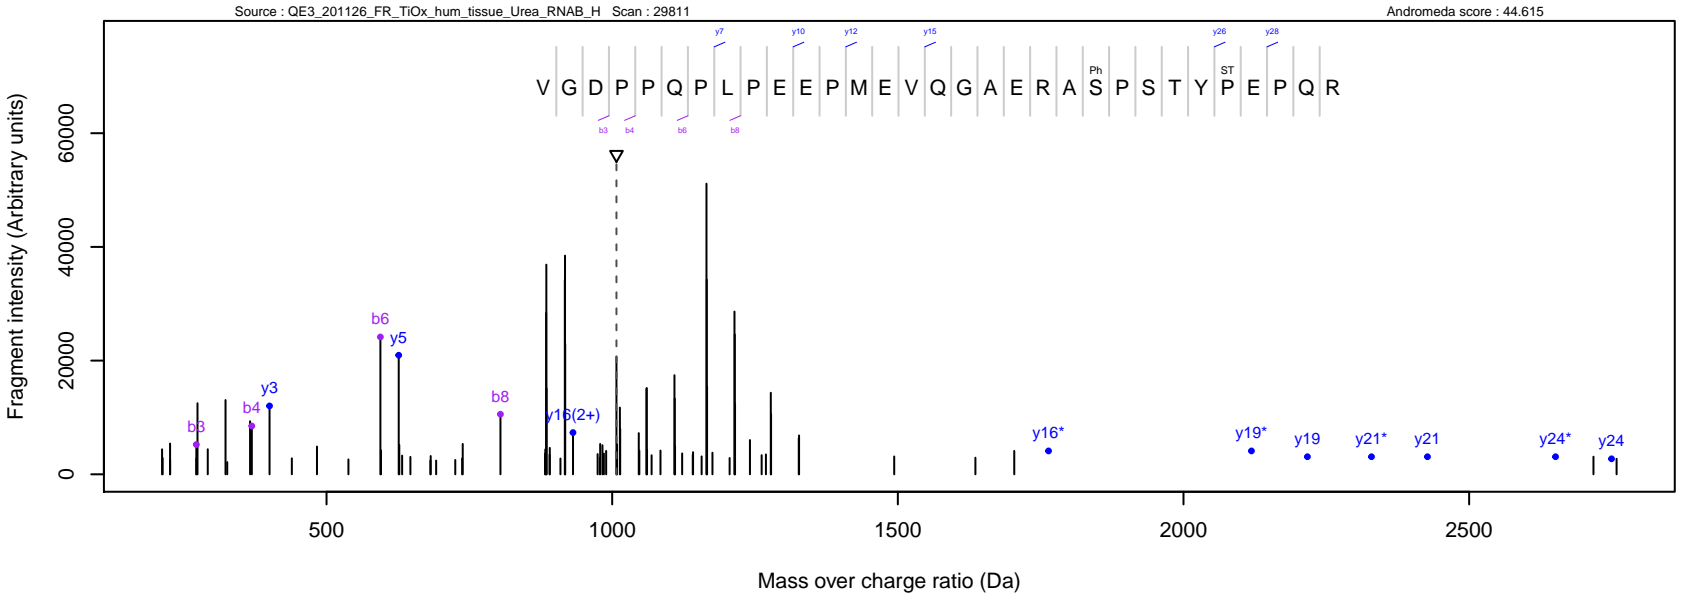

RWS(Phospho (STY))LEALNR-2+

Source : QE3\_201126\_FR\_TiOx\_hum\_tissue\_Urea\_RNAB\_B Scan : 28028

Andromeda score : 44.612

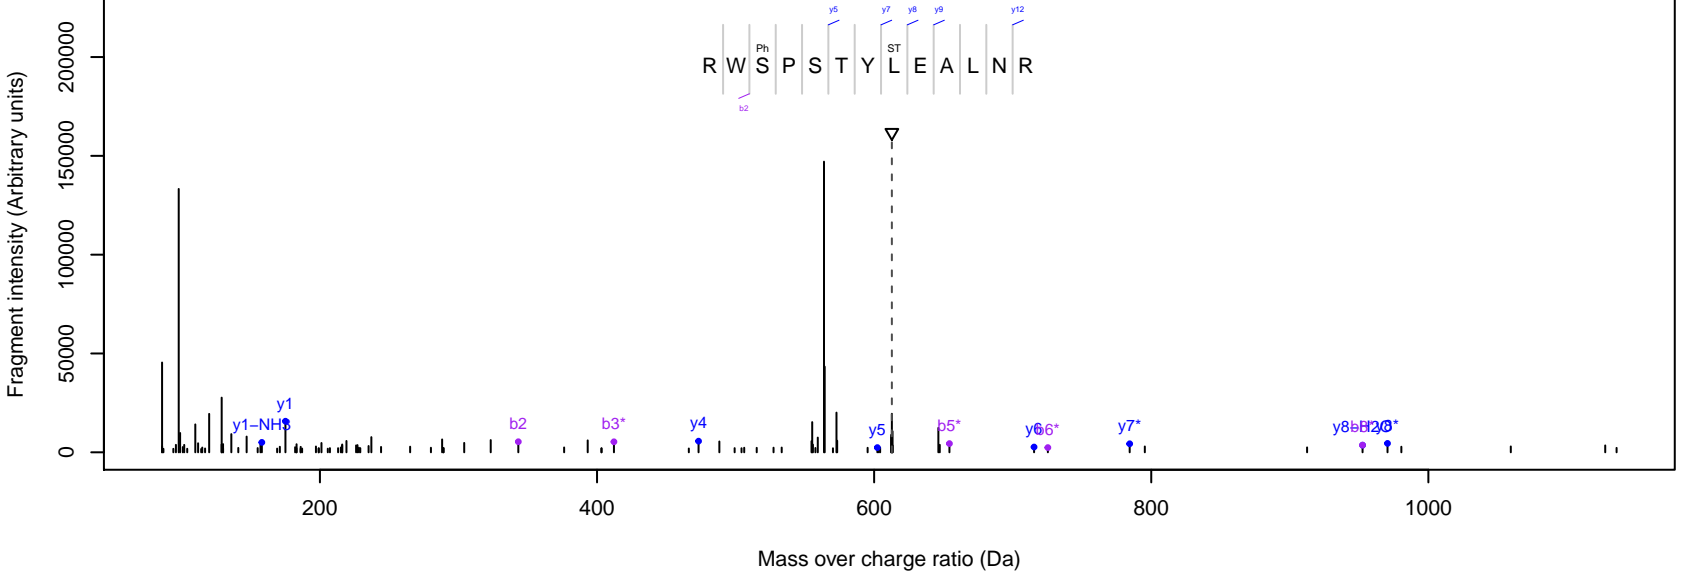

VGAHAGEY(Phospho (STY))GAEALER-2+

Source : QE3\_201126\_FR\_TiOx\_hum\_tissue\_Urea\_RNAB\_H Scan : 14602

Andromeda score : 44.612

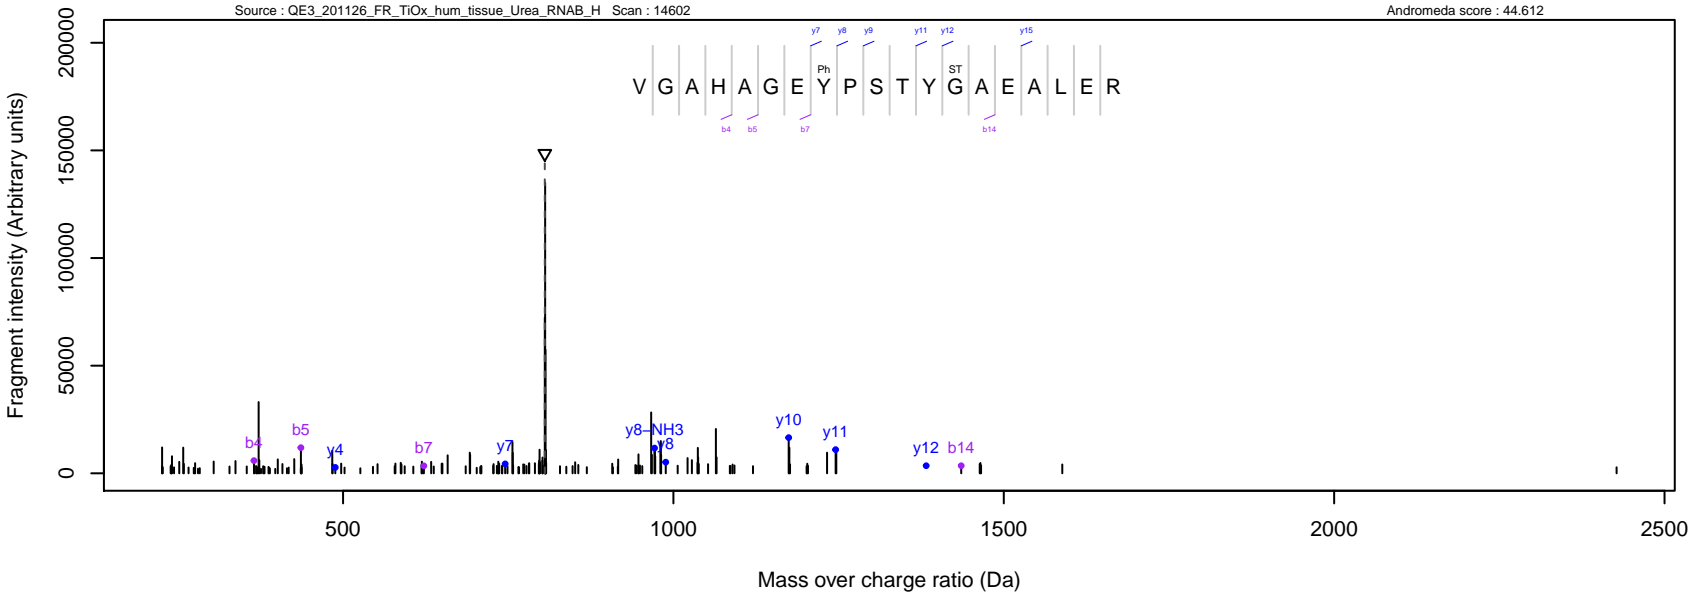

TLPS(Phospho (STY))QSEMMAEISK-2+

Source : QE3\_201126\_FR\_TiOx\_hum\_tissue\_Urea\_RNAB\_B Scan : 39166

Andromeda score : 44.601

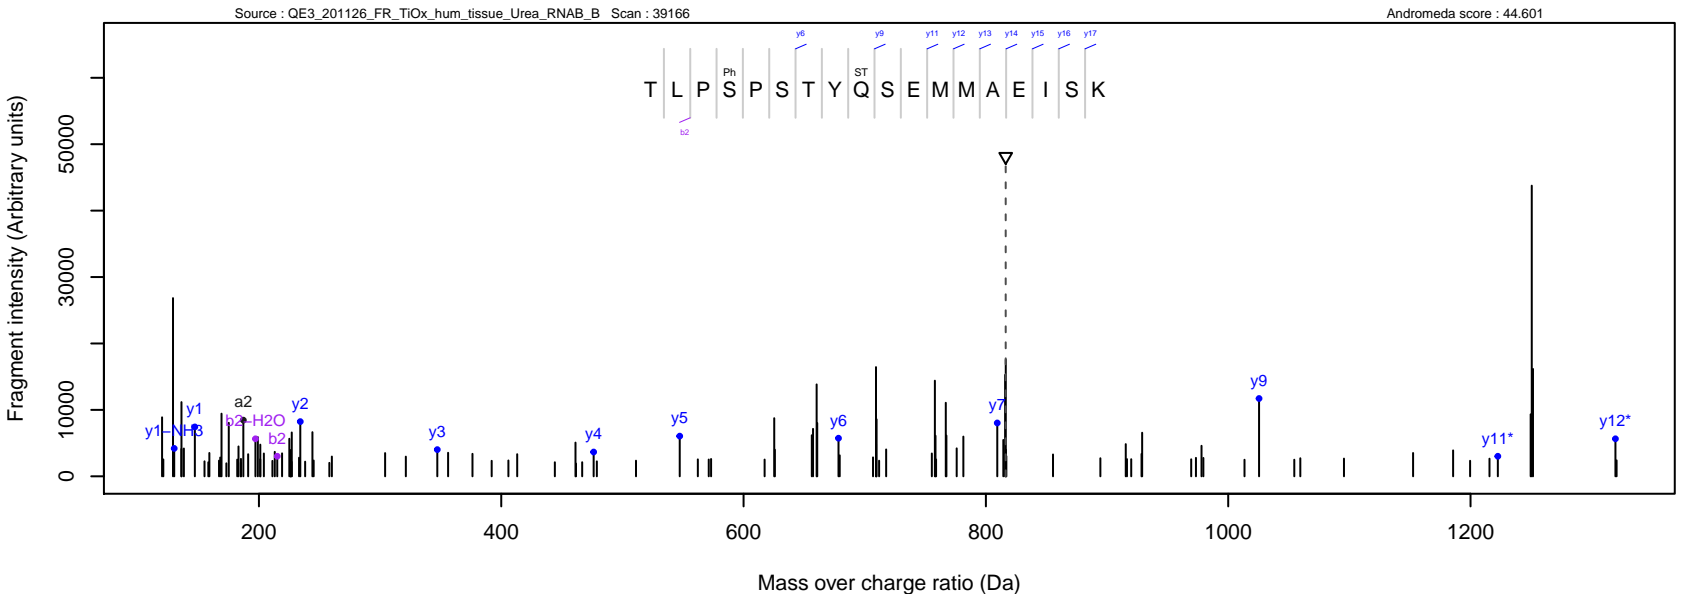

QSVEASGHHTHHQ(Phospho (STY))DSPSSVVK-4+

Source : QE3\_201126\_FR\_TiOx\_hum\_tissue\_Urea\_RNAB\_B Scan : 4866

Andromeda score : 44.596

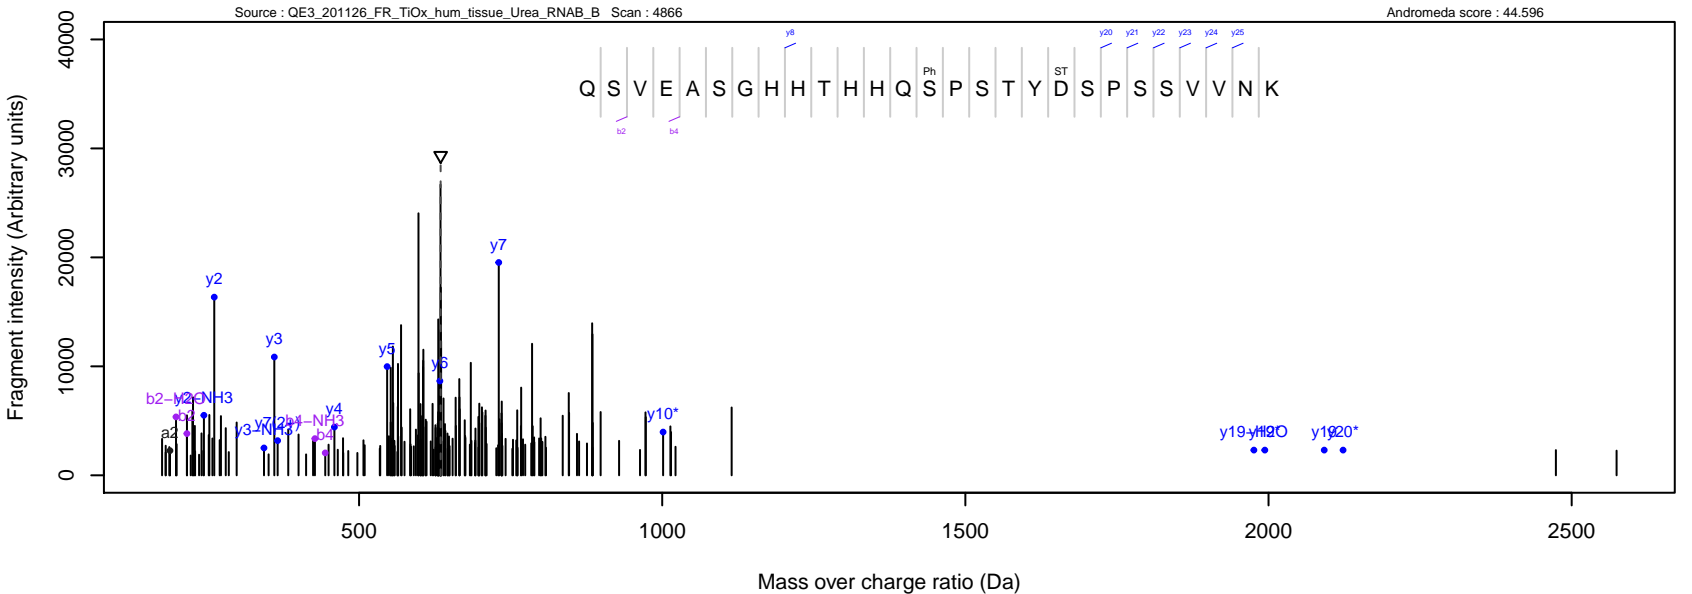

RT(Phospho (STY))SETSISPPGSSIGSPNR-3+

Source : QE3\_201126\_FR\_TiOx\_hum\_tissue\_Urea\_RNAB\_N Scan : 16893

Andromeda score : 44.587

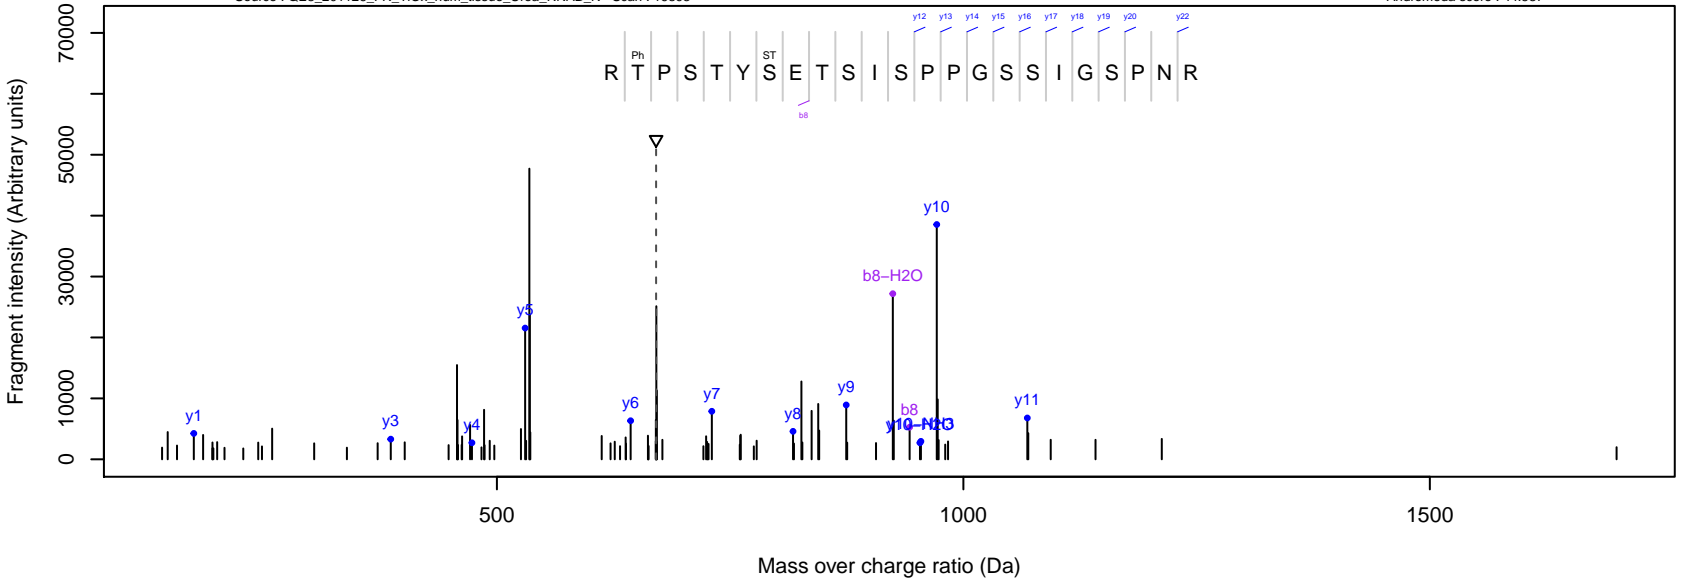

AGGGGGLGAGS(Phospho (STY))PALSGGQGR-2+

Source : QE3\_201126\_FR\_TiOx\_hum\_tissue\_Urea\_RNAB\_B Scan : 17329

Andromeda score : 44.577

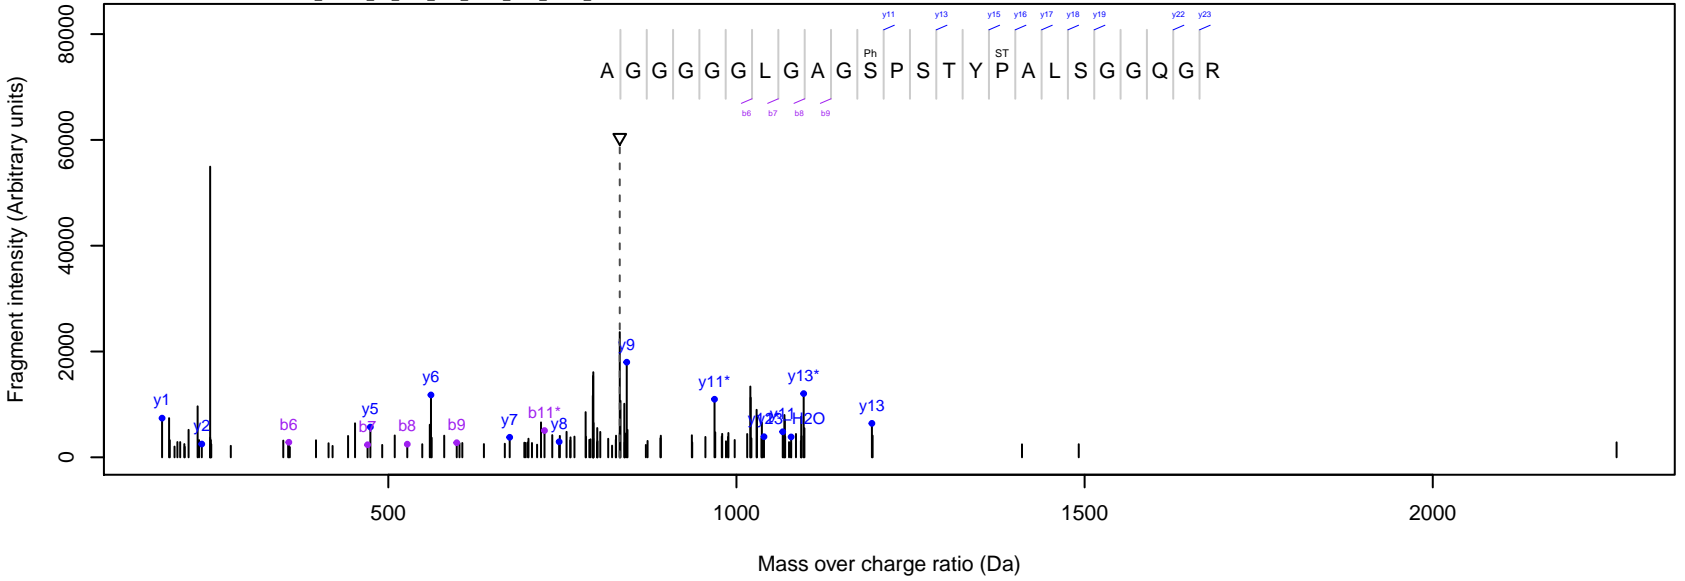

SIM(Oxidation (M))QSQSVM(Oxidation (M))LDLAY(Phospho (STY))GDR-2+

Source : QE3\_201126\_FR\_TiOx\_hum\_tissue\_Urea\_RNAB\_B Scan : 12999

Andromeda score : 44.564

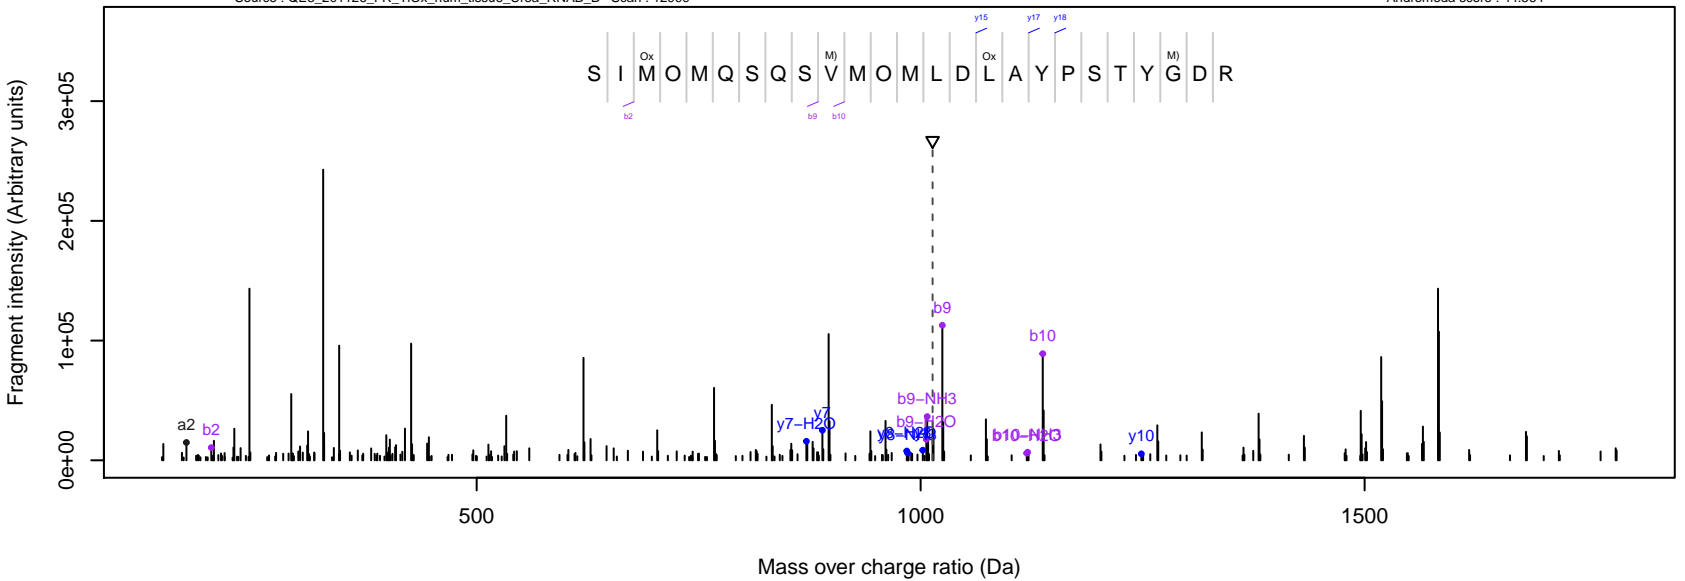

DIHLDLPSNNLVSKDTEEP L P V K E S P S T Y D Q T L A A L L S P K

Source : QE3\_201126\_FR\_TiOx\_hum\_tissue\_Urea\_RNAB\_H Scan : 54653

Andromeda score : 44.534

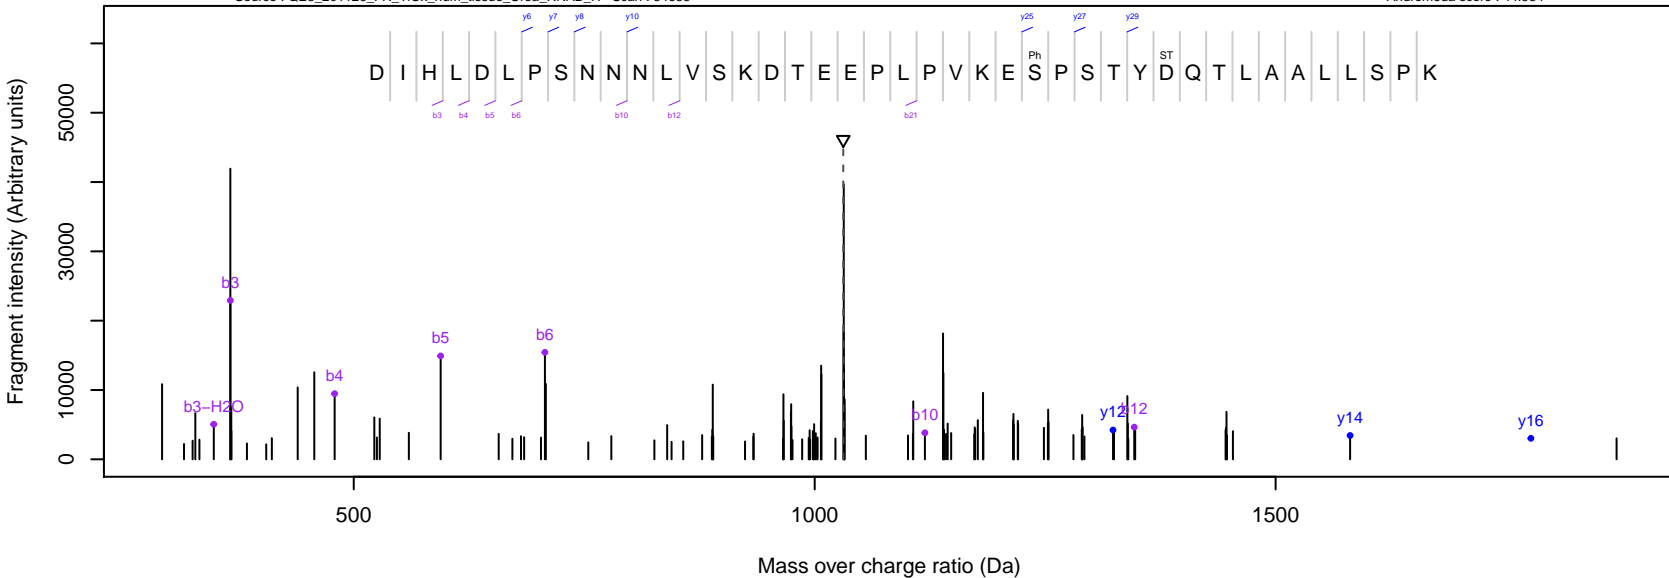

LVTSPSTYKGDKE L R

Source : QE3\_201126\_FR\_TiOx\_hum\_tissue\_Urea\_RNAB\_B Scan : 6364

Andromeda score : 44.511

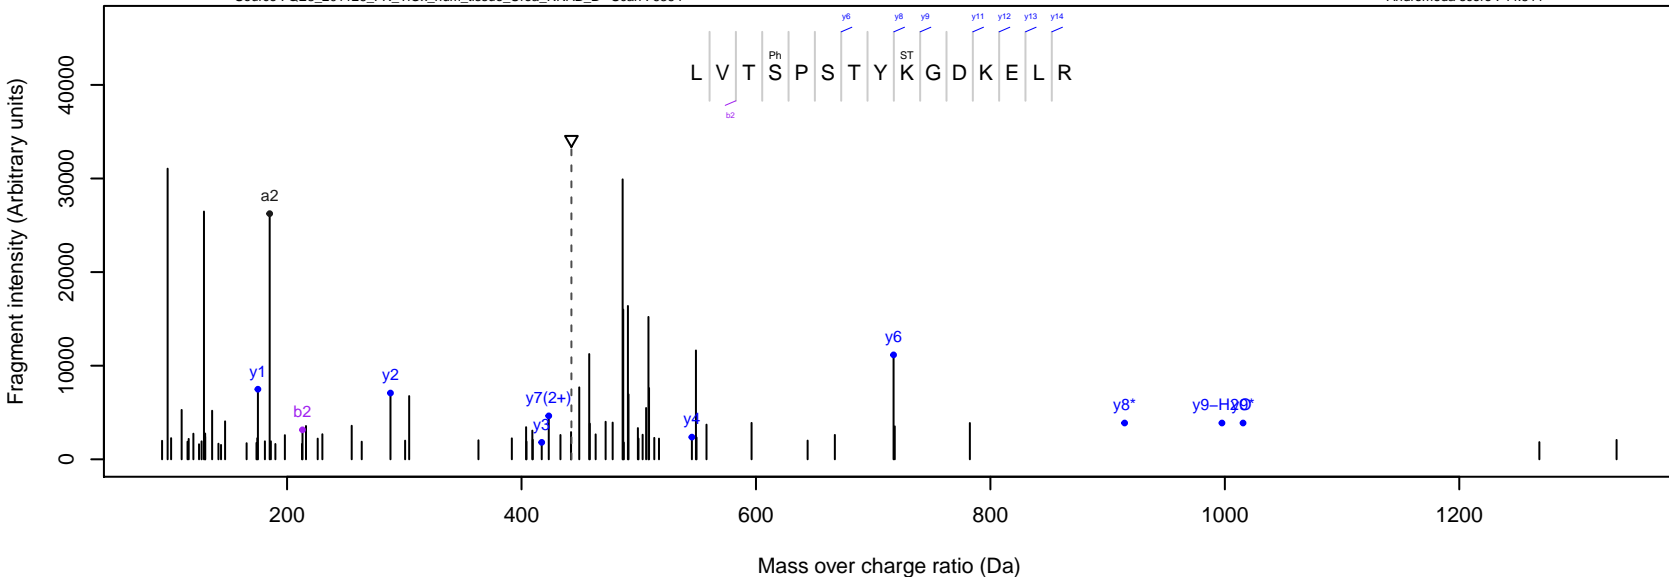

AAEAGGAEQYGLT P S T Y T P T K

Source : QE3\_201126\_FR\_TiOx\_hum\_tissue\_Urea\_RNAB\_B Scan : 33843

Andromeda score : 44.457

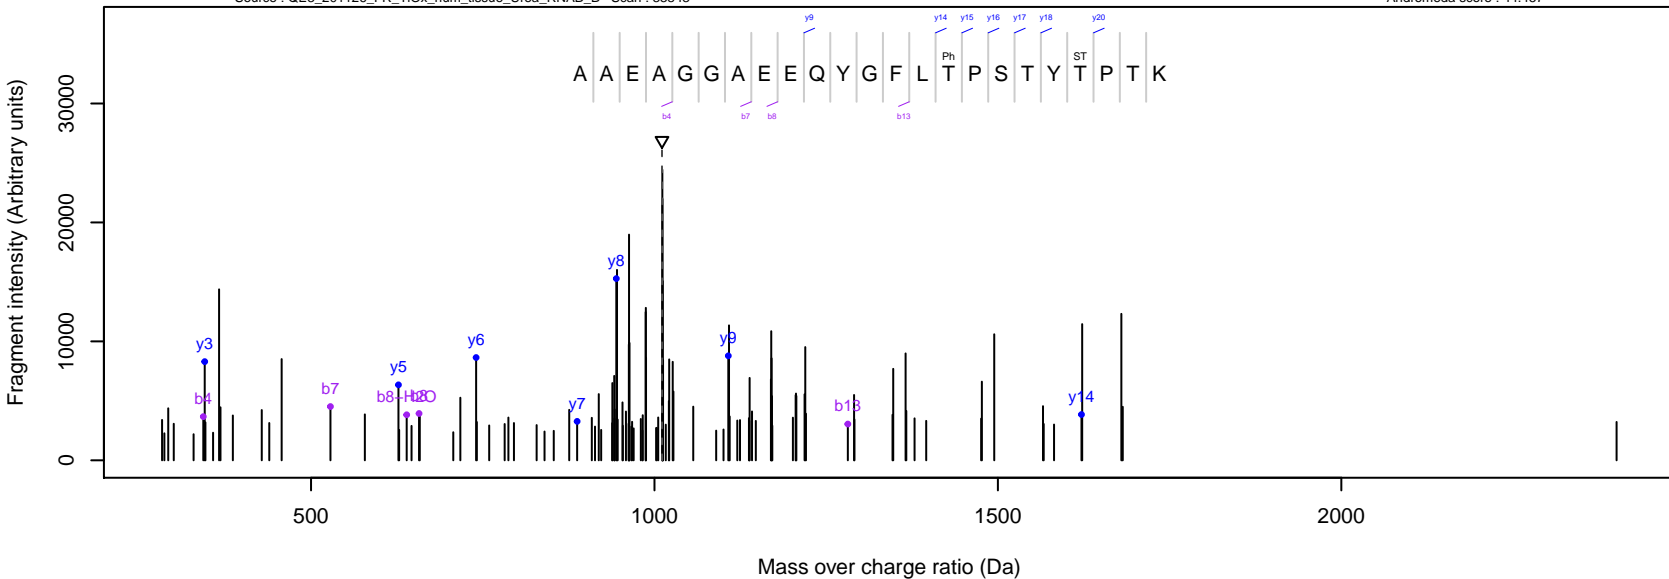

SNSSGLS(Phospho (STY))IGTVFQSSSPGGGGGGGGEEEDSQQESETPDPSGGFR-4+

Source : QE3\_201126\_FR\_TiOx\_hum\_tissue\_Urea\_RNAB\_N Scan : 50719

Andromeda score : 44.447

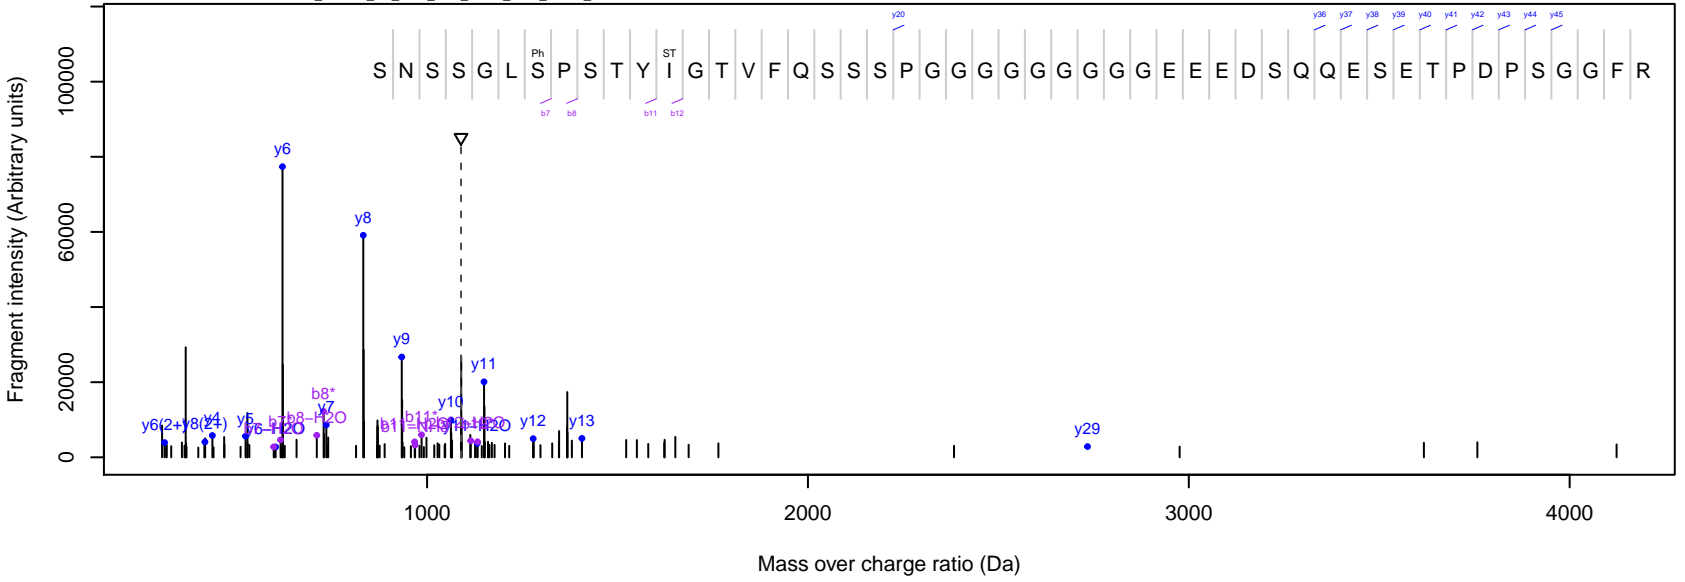

SPS(Phospho (STY))PAVPLR-2+

Source : QE3\_201126\_FR\_TiOx\_hum\_tissue\_Urea\_RNAB\_N Scan : 18865

Andromeda score : 44.447

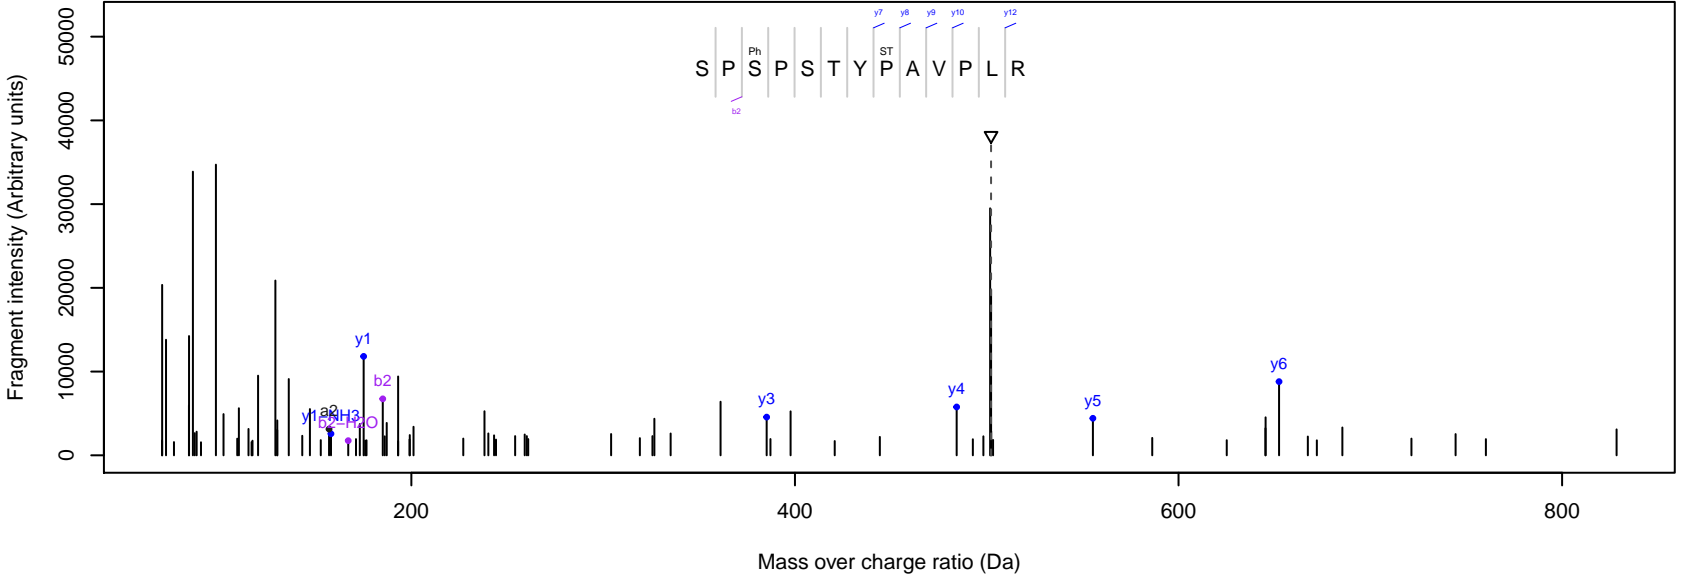

GLS(Phospho (STY))IPRADTLDEY-2+

Source : QE3\_201126\_FR\_TiOx\_hum\_tissue\_Urea\_RNAB\_H Scan : 45991

Andromeda score : 44.426

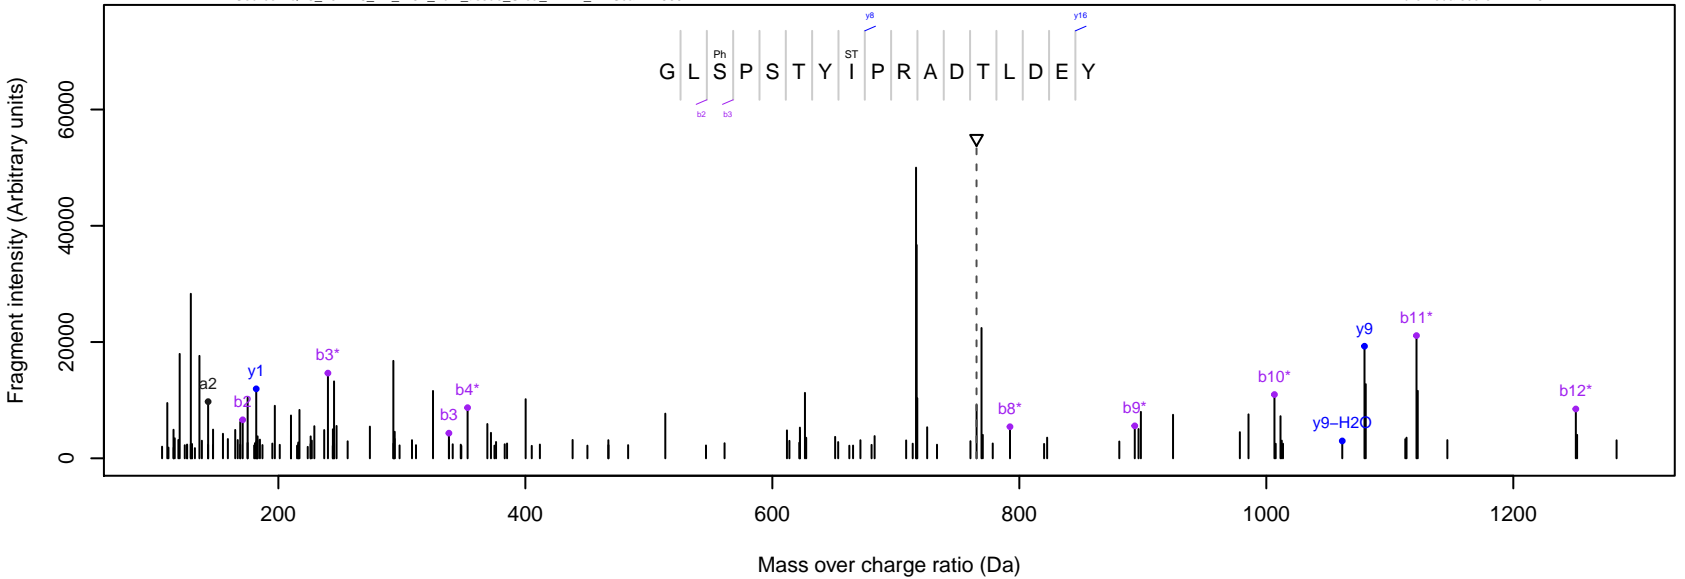

T(Phospho (STY))PS(Phospho (STY))PESHRSPAEGSER-3+

Source : QE3\_201126\_FR\_TiOx\_hum\_tissue\_Urea\_RNAB\_H Scan : 5123

Andromeda score : 44.415

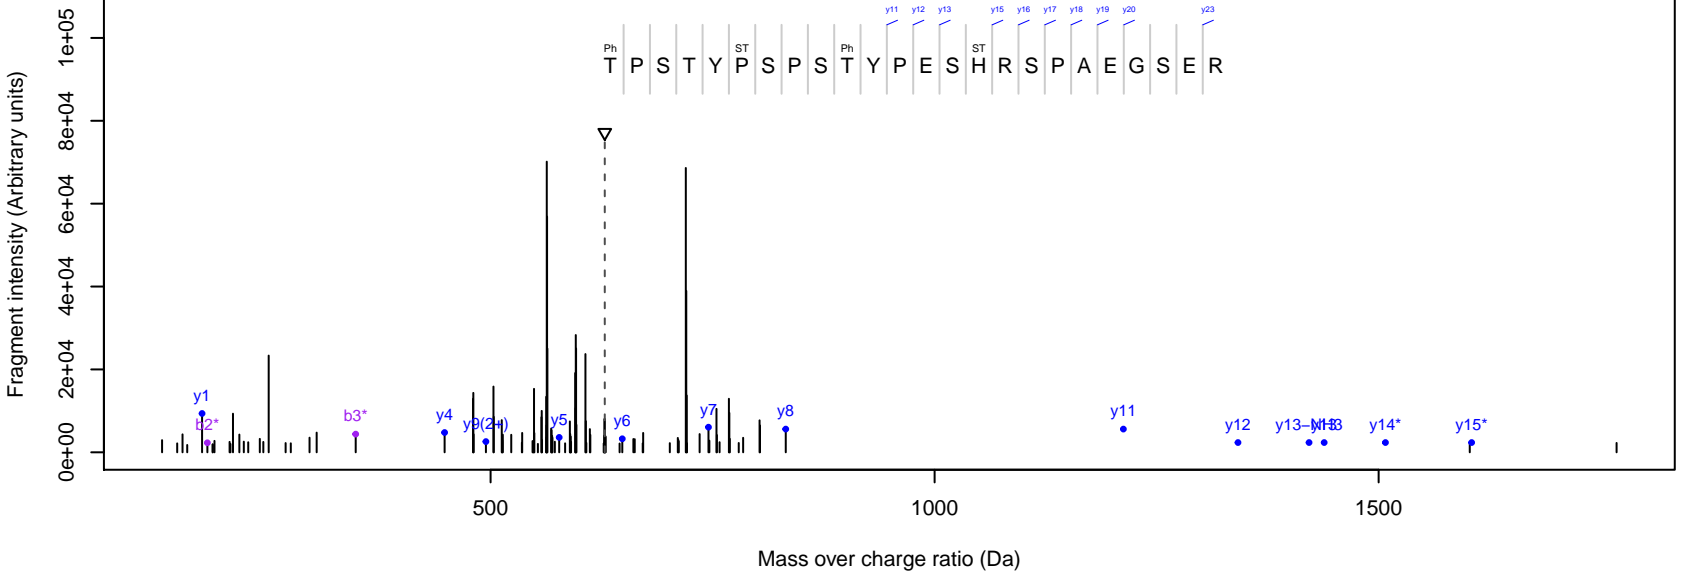

HAHS(Phospho (STY))VNF-2+

Source : QE3\_201126\_FR\_TiOx\_hum\_tissue\_Urea\_RNAB\_H Scan : 8582

Andromeda score : 44.395

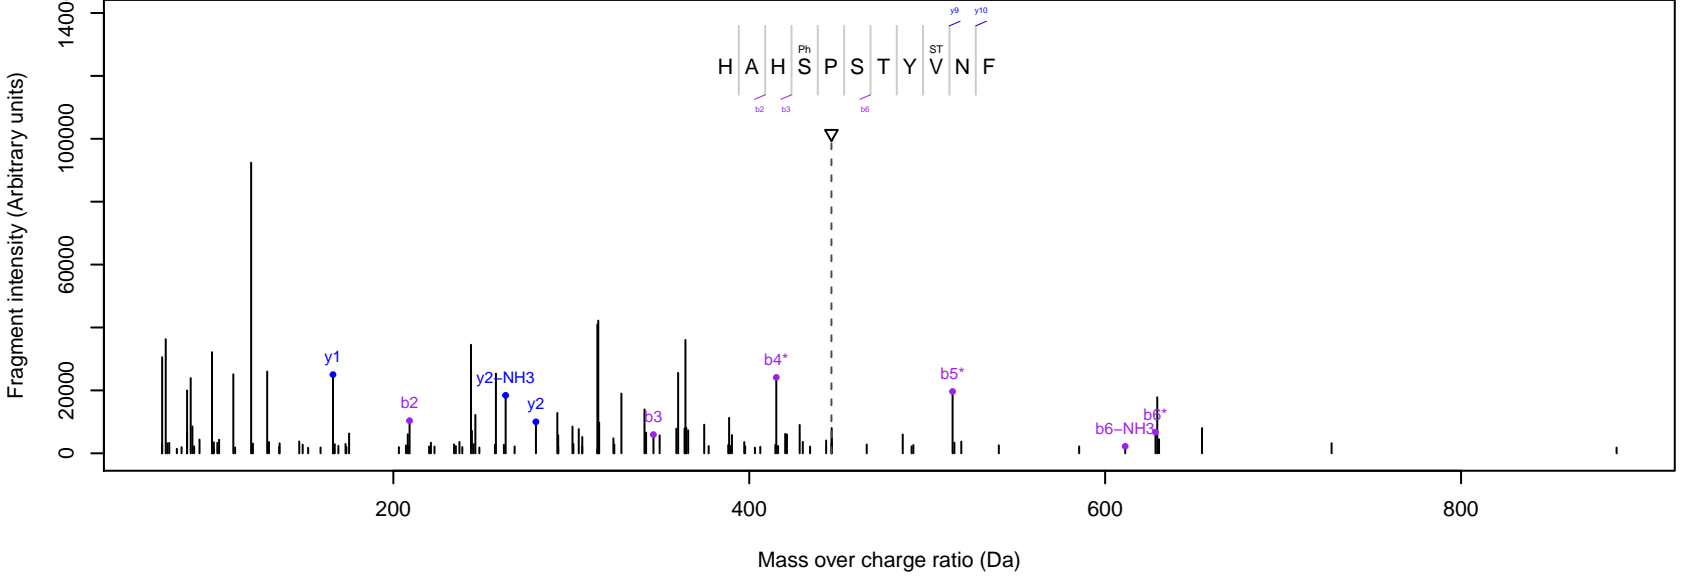

SLS(Phospho (STY))PILPGR-2+

Source : QE3\_201126\_FR\_TiOx\_hum\_tissue\_Urea\_RNAB\_B Scan : 32201

Andromeda score : 44.395

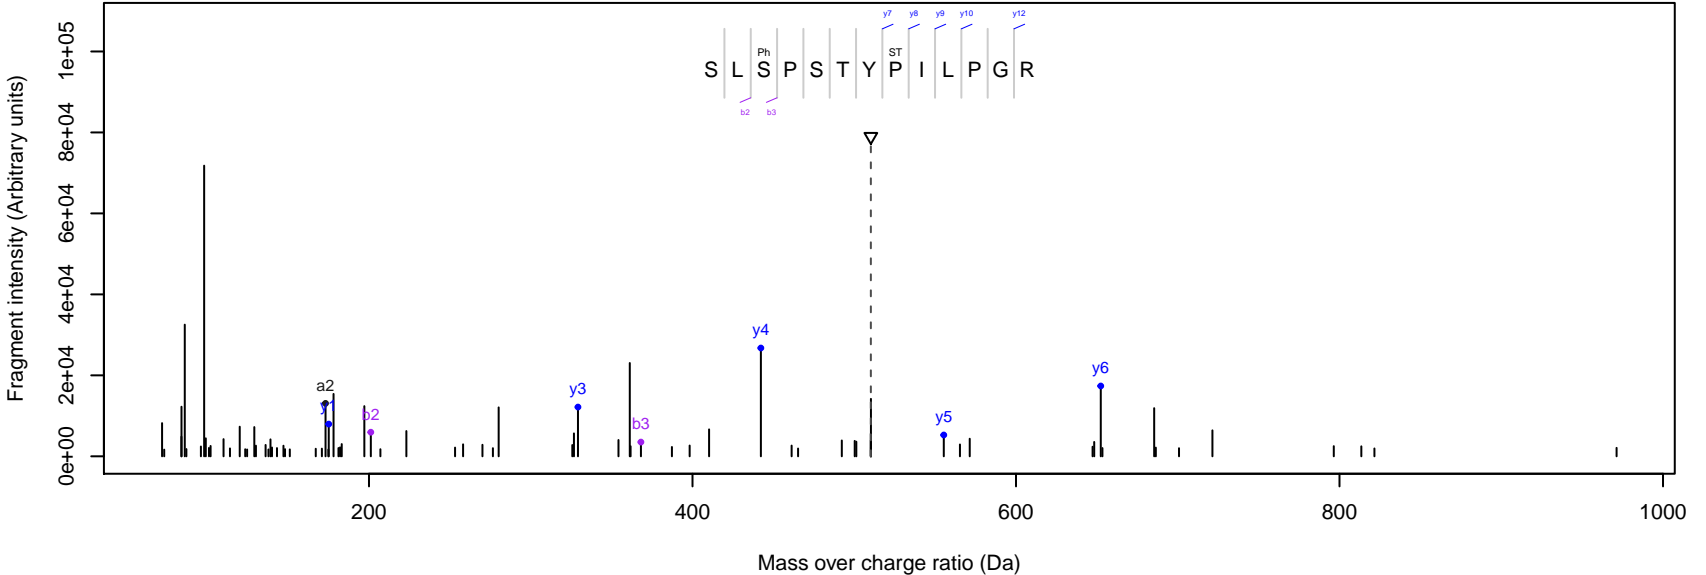

S(Phospho (STY))SSM(Oxidation (M))SSIDLVASDDVHR-3+

Source : QE3\_201126\_FR\_TiOx\_hum\_tissue\_Urea\_RNAB\_H Scan : 24449

Andromeda score : 44.391

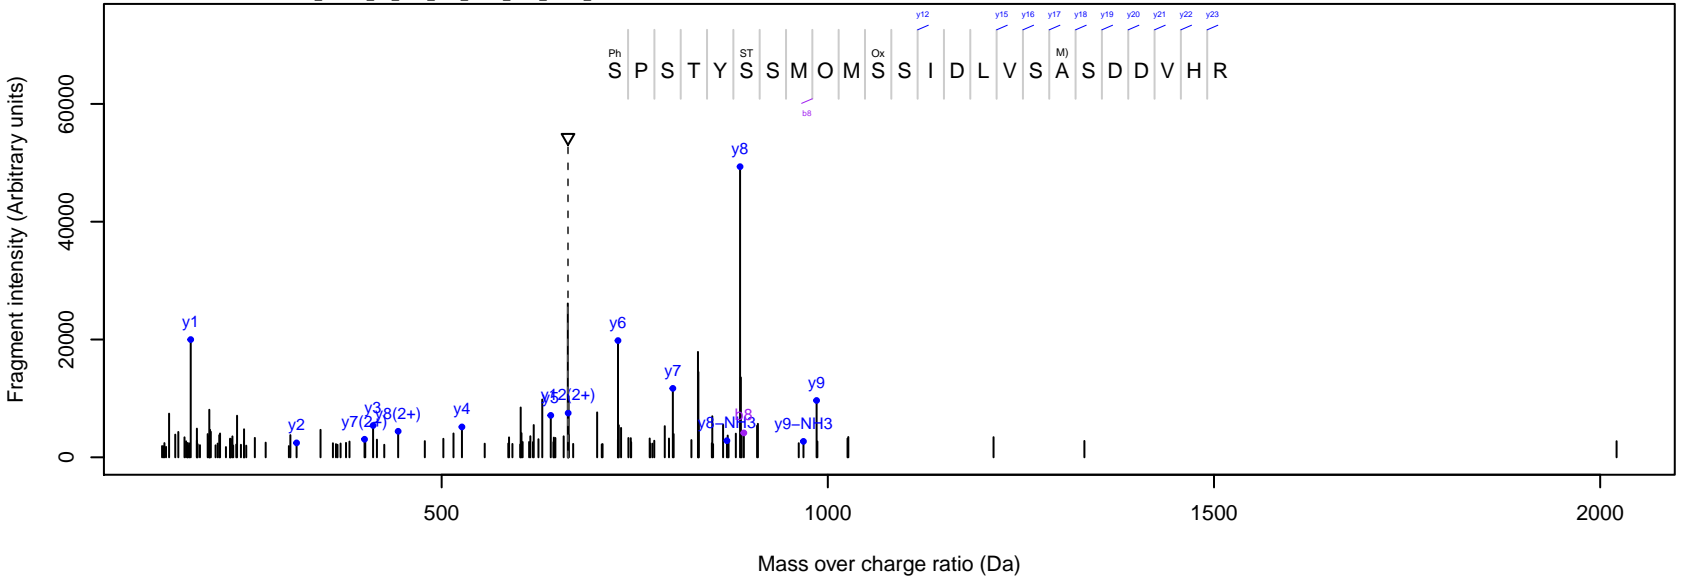

DAS(Phospho (STY))SPVPPPHVPPVPPPLRPR-3+

Source : QE3\_201126\_FR\_TiOx\_hum\_tissue\_Urea\_RNAB\_B Scan : 28335

Andromeda score : 44.382

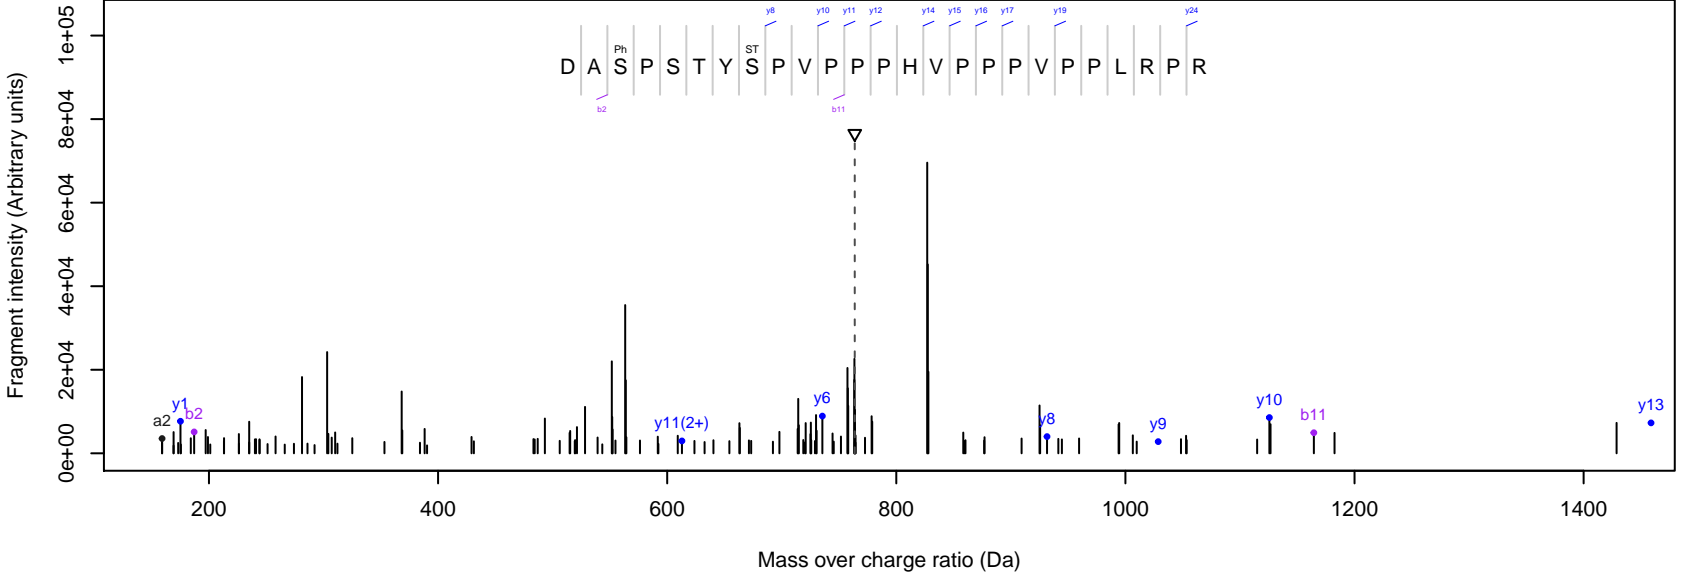

QNS(Phospho (STY))LHGSFHSADVLK-3+

Source : QE3\_201126\_FR\_TiOx\_hum\_tissue\_Urea\_RNAB\_B Scan : 16029

Andromeda score : 44.382

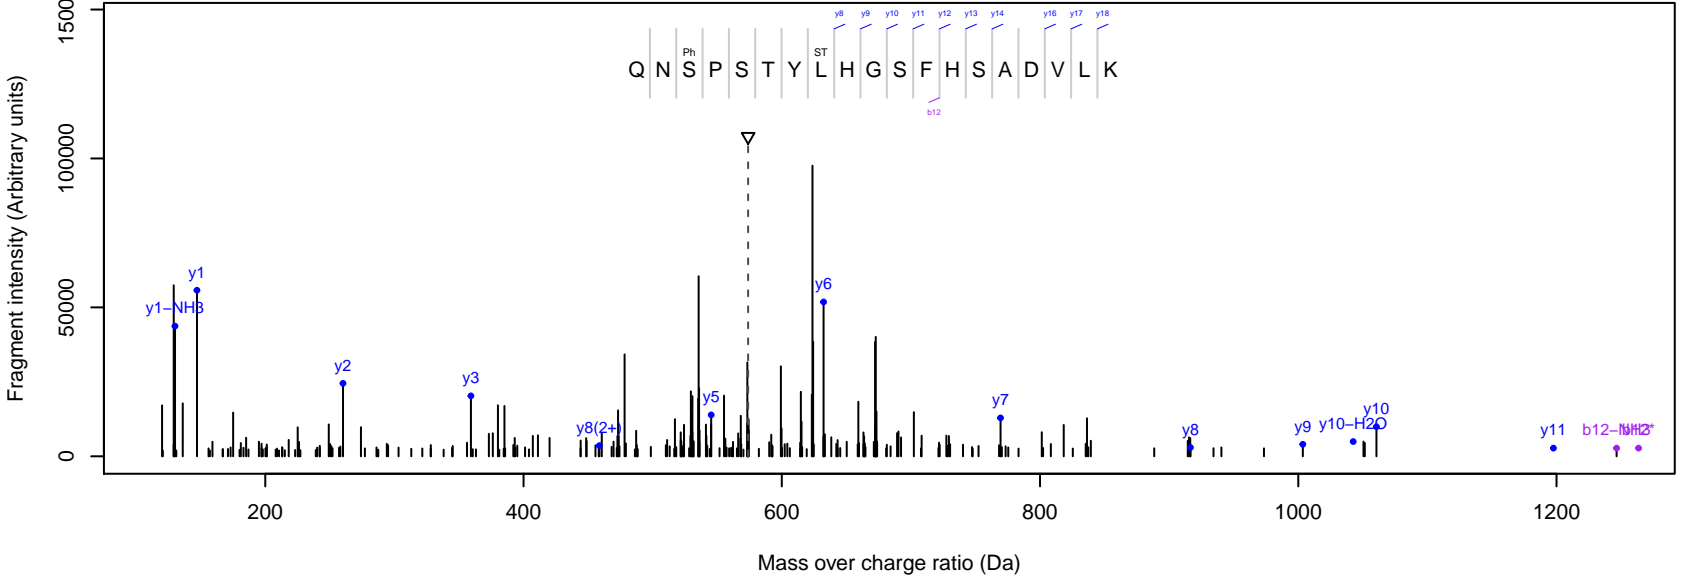



TQLS(Phospho (STY))QGRSSPQLDPLR-3+

Source : QE3\_201126\_FR\_TiOx\_hum\_tissue\_Urea\_RNAB\_N Scan : 21635

Andromeda score : 44.382

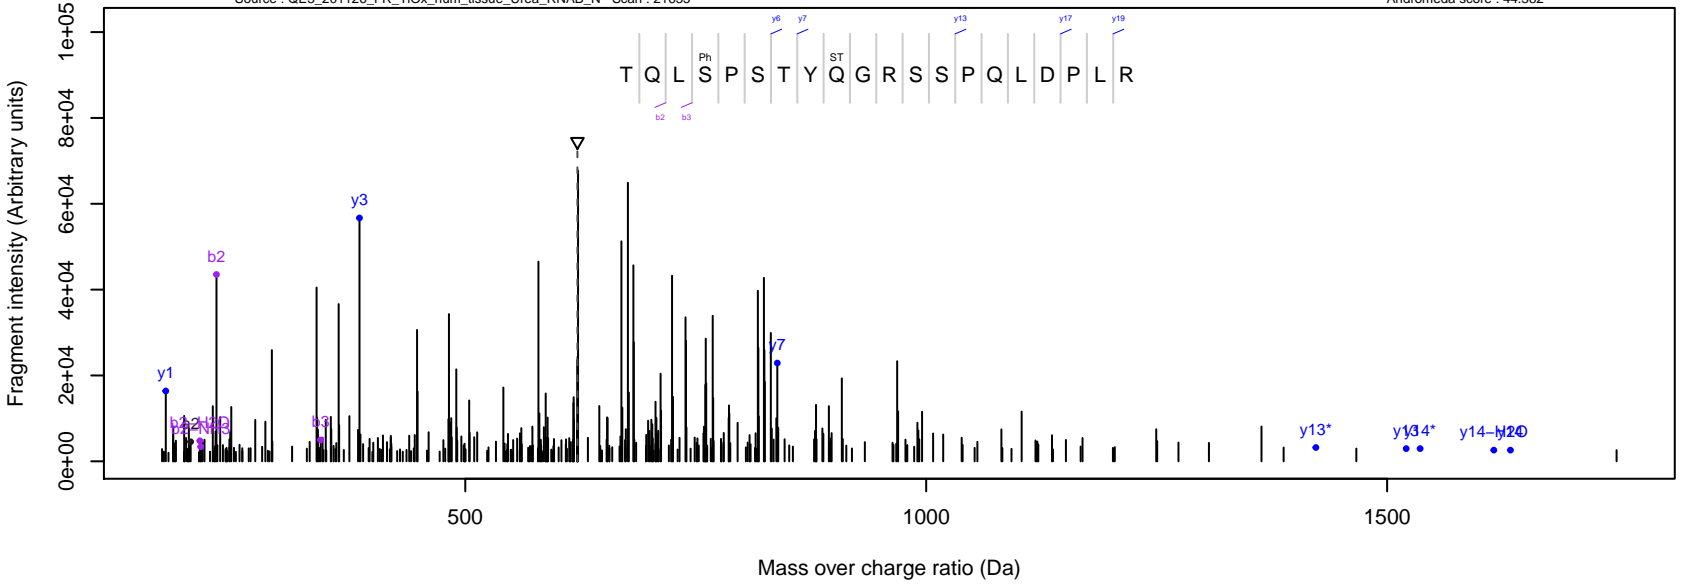

GS(Phospho (STY))GHPAYAEVEPVGKEGFIVSEQC-3+

Source : QE3\_201126\_FR\_TiOx\_hum\_tissue\_Urea\_RNAB\_B Scan : 35894

Andromeda score : 44.365

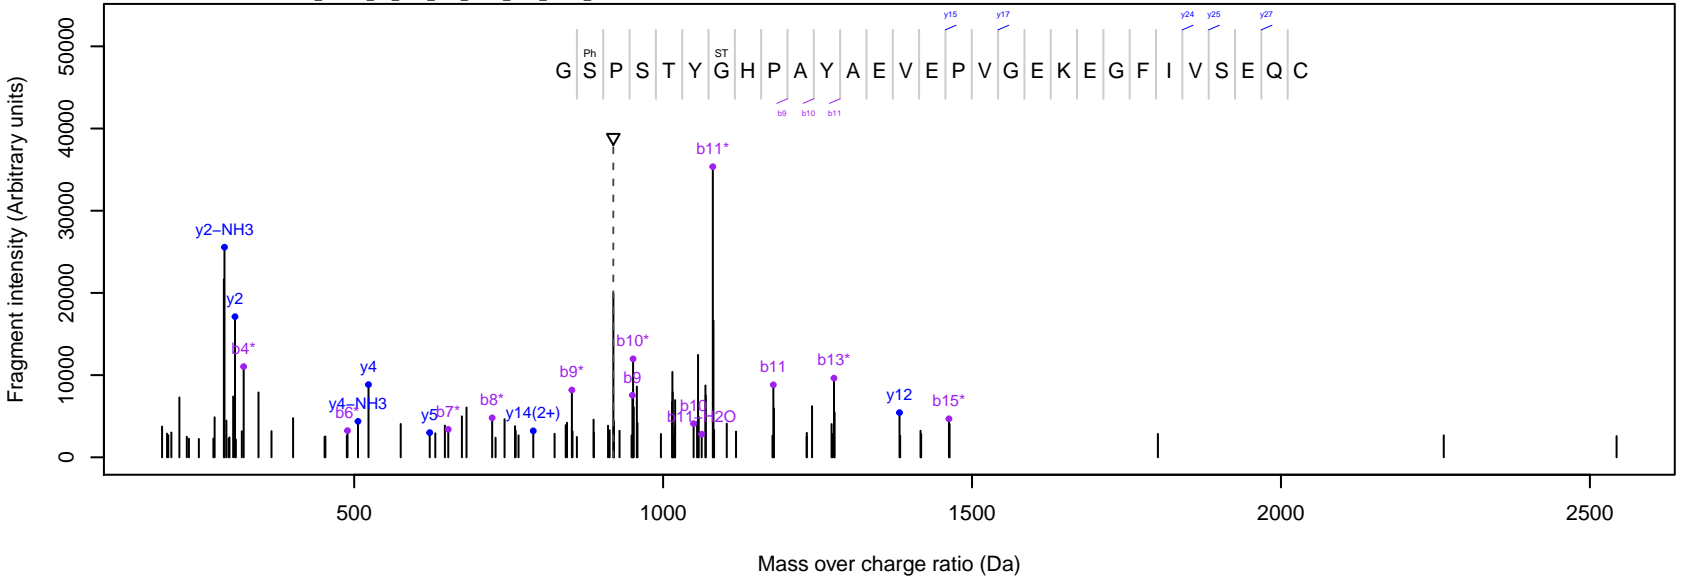

SLS(Phospho (STY))PLGGRDDS(Phospho (STY))PVSHR-3+

Source : QE3\_201126\_FR\_TiOx\_hum\_tissue\_Urea\_RNAB\_N Scan : 16582

Andromeda score : 44.341

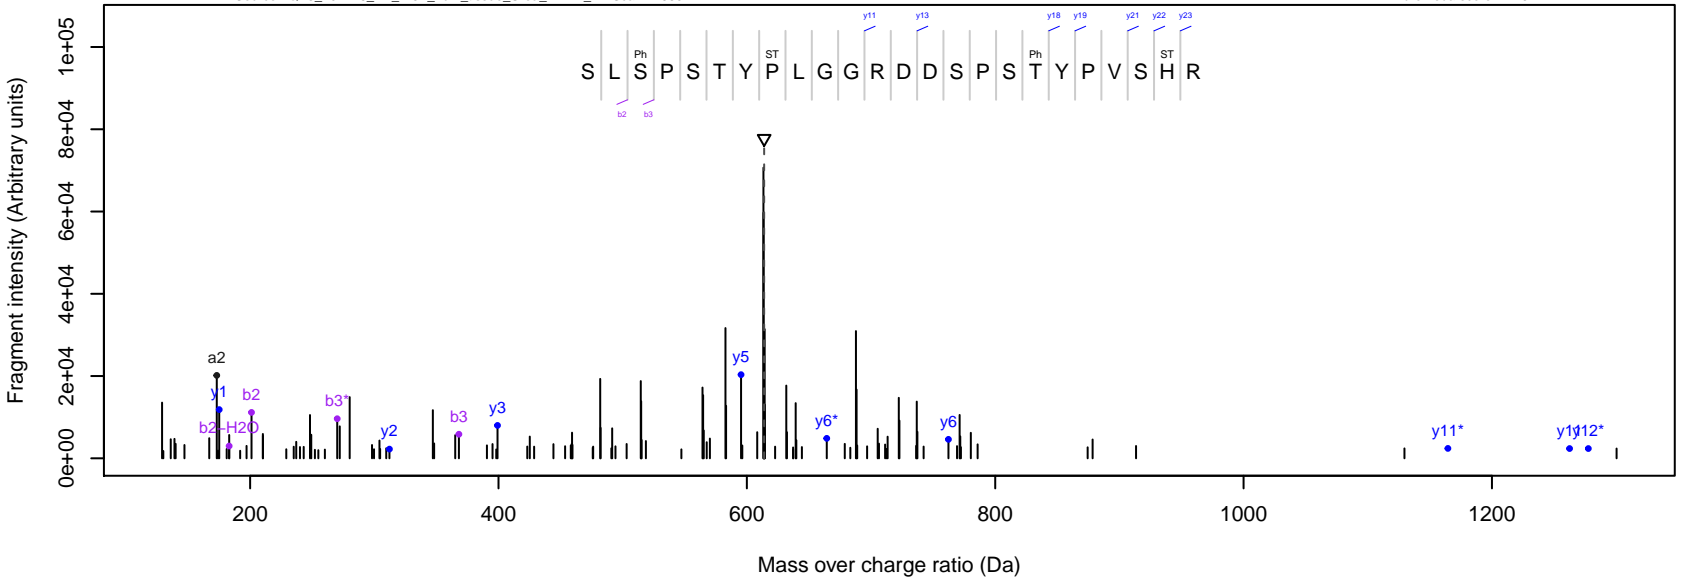

PYT(Phospho (STY))SSSPILSDIK-2+

Source : QE3\_201126\_FR\_TIOx\_hum\_tissue\_Urea\_RNAB\_N Scan : 16730

Andromeda score : 44.318

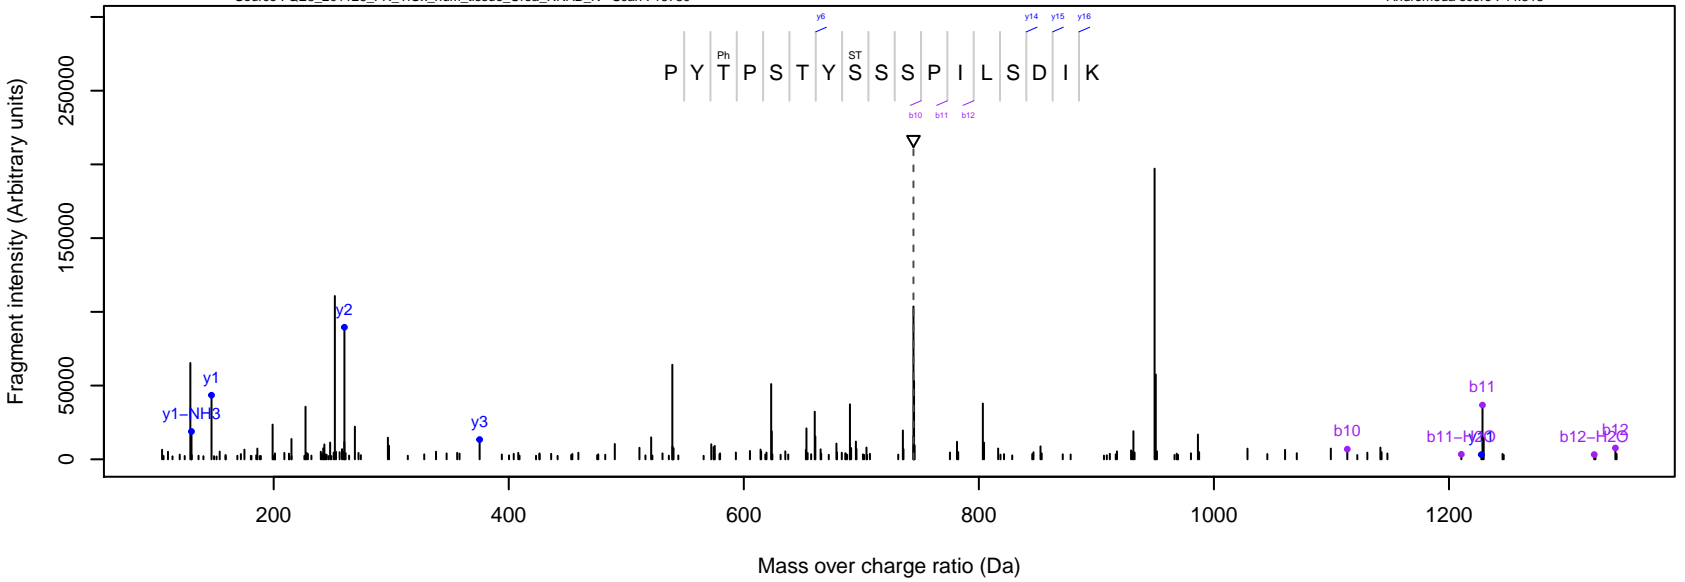

PQELVGTFIQQEVGKPEDEAS(Phospho (STY))GSFFK-3+

Source : QE3\_201126\_FR\_TIOx\_hum\_tissue\_Urea\_RNAB\_H Scan : 52475

Andromeda score : 44.317

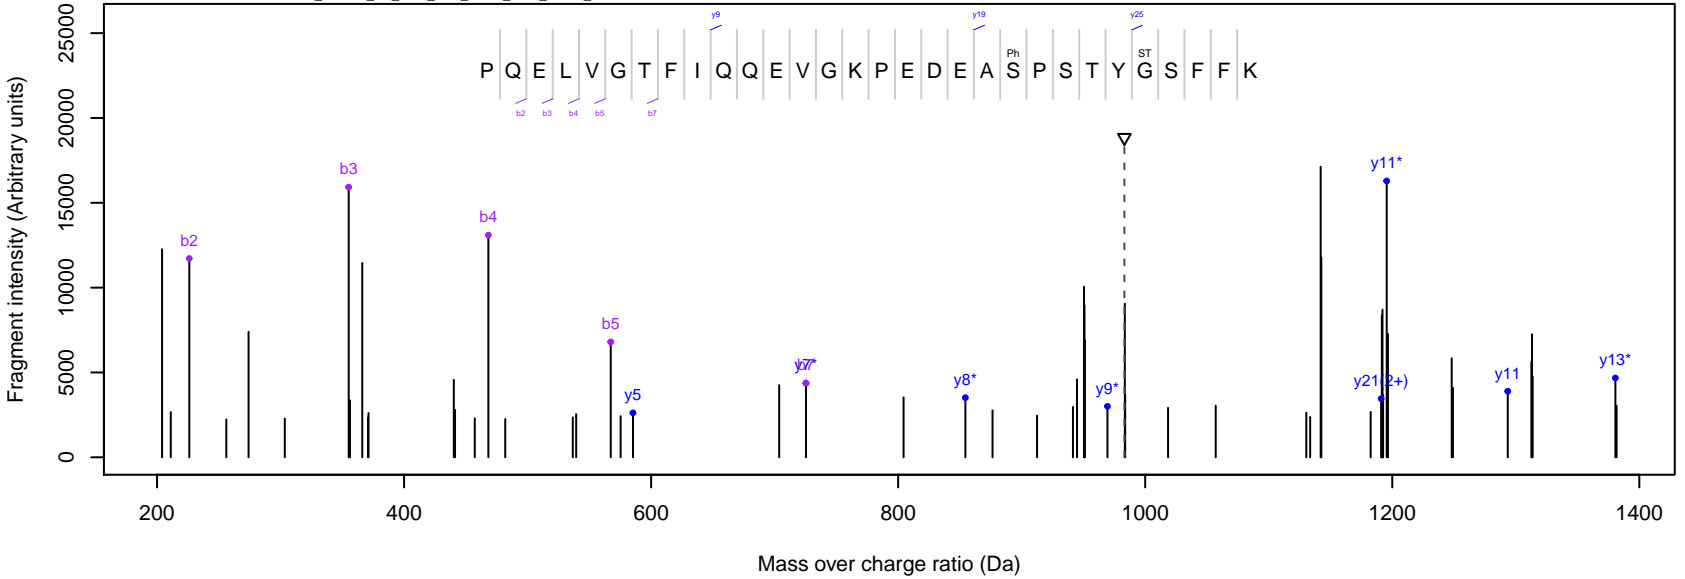

RGS(Phospho (STY))MFYDEGDGLAHEFYEETIVTK-3+

Source : QE3\_201126\_FR\_TIOx\_hum\_tissue\_Urea\_RNAB\_H Scan : 51350

Andromeda score : 44.317

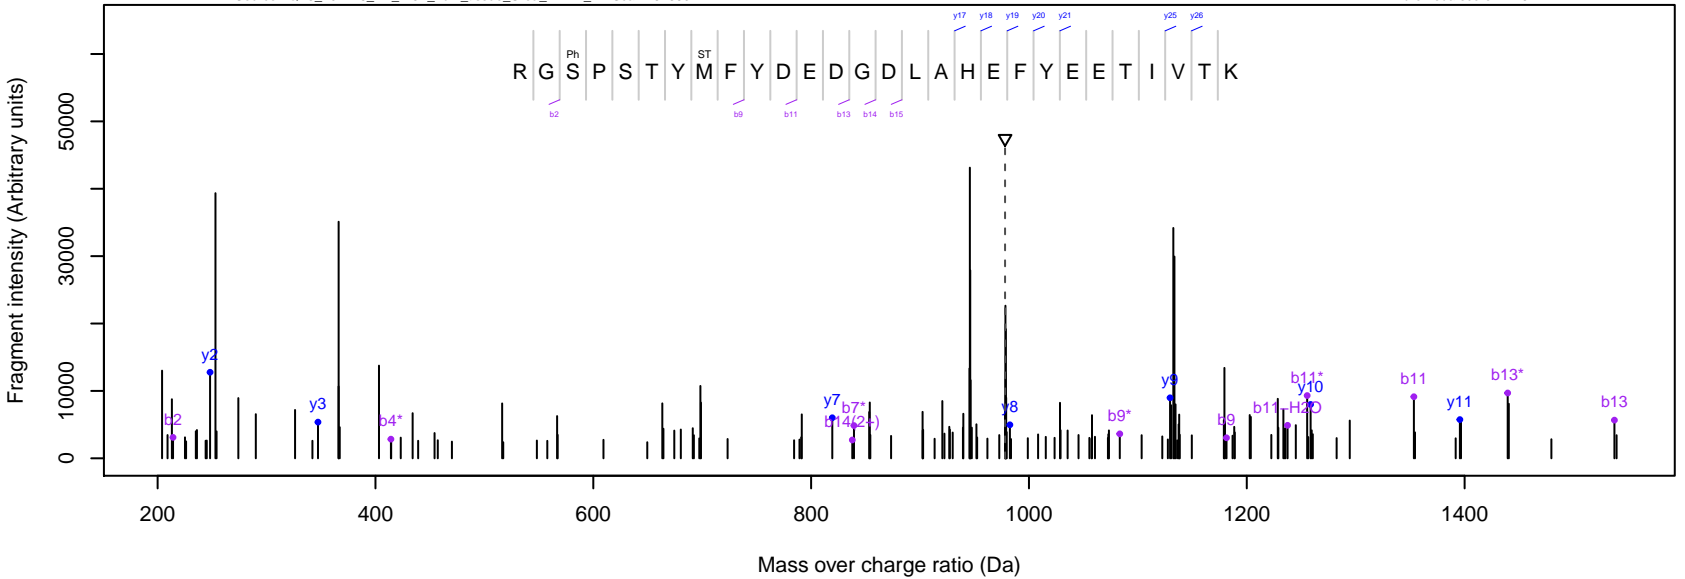

SRS(Phospho (STY))LS(Phospho (STY))NSNPDISGTPPTSPDDEV-3+

Source : QE3\_201126\_FR\_TiOx\_hum\_tissue\_Urea\_RNAB\_B Scan : 22777

Andromeda score : 44.31

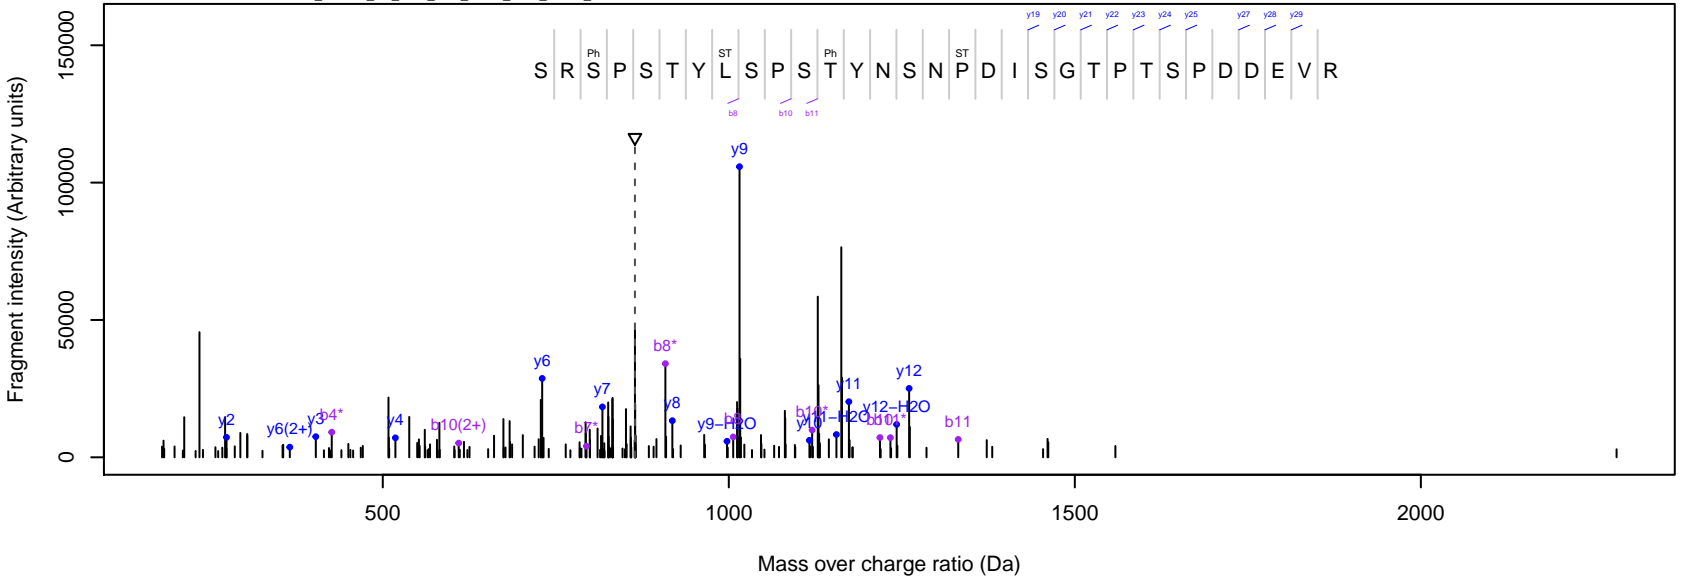

(Acetyl (Protein N-term))S(Phospho (STY))SSPWEPATLR-2+

Source : QE3\_201126\_FR\_TiOx\_hum\_tissue\_Urea\_RNAB\_H Scan : 47296

Andromeda score : 44.309

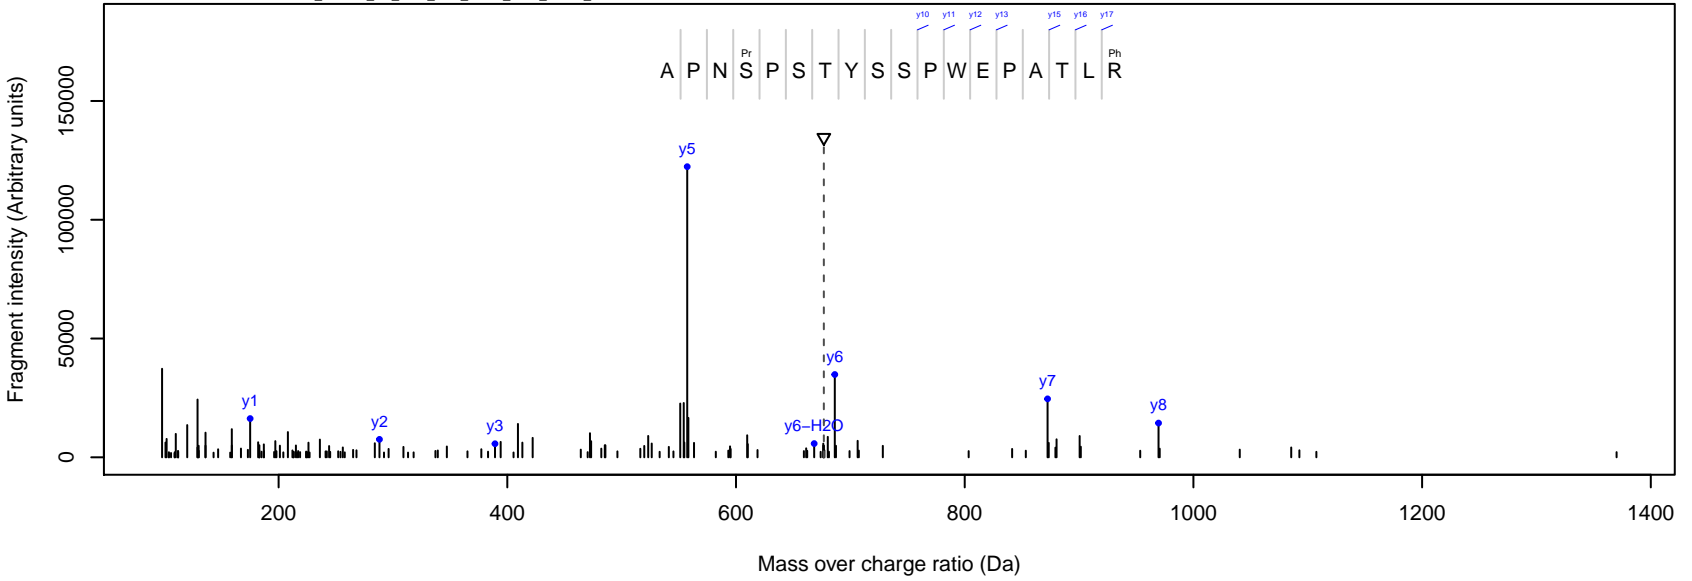

T(Phospho (STY))SPQVLGSILK-2+

Source : QE3\_201126\_FR\_TiOx\_hum\_tissue\_Urea\_RNAB\_B Scan : 40569

Andromeda score : 44.309

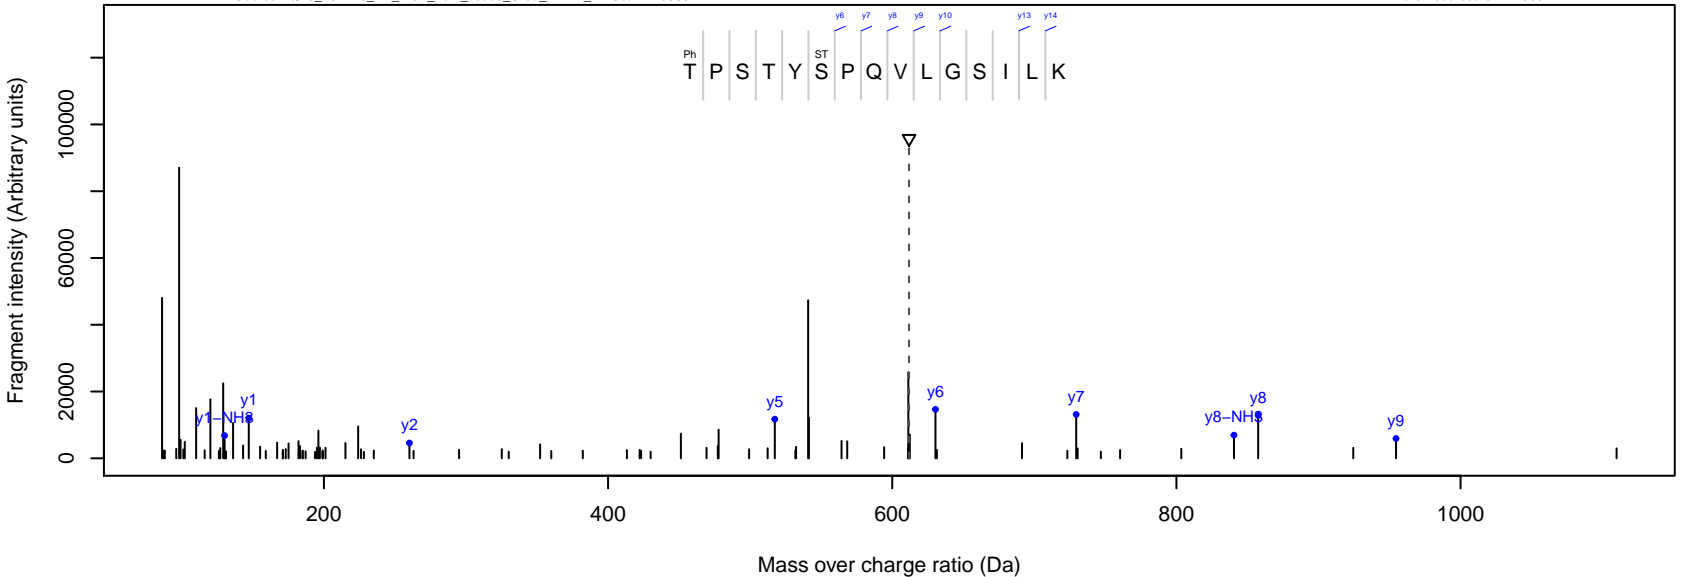

DHNVGSPPKS(Phospho (STY))PTHASPQTQTEK-4+

Source : QE3\_201126\_FR\_TiOx\_hum\_tissue\_Urea\_RNAB\_N Scan : 3895

Andromeda score : 44.301

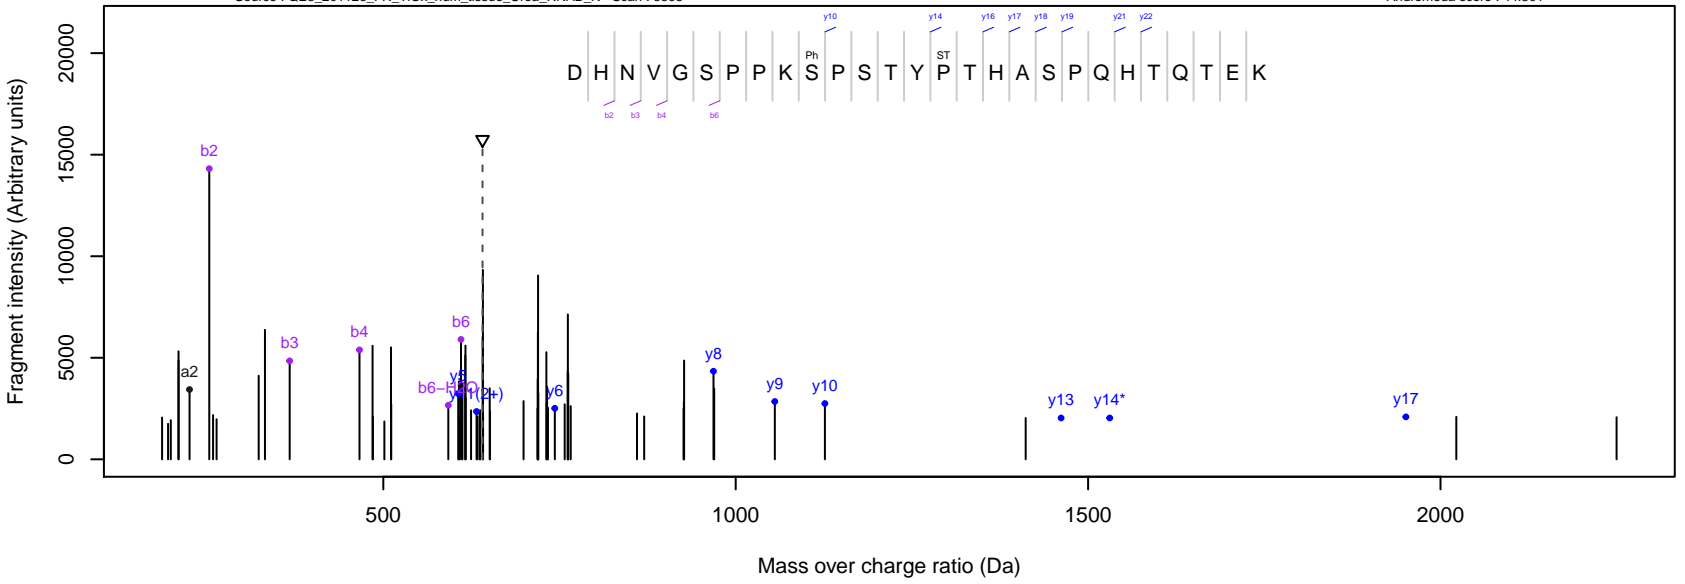

PEEM(Oxidation (M))DKPLISLHLVDS(Phospho (STY))DSLAKVPDEAPK-4+

Source : QE3\_201126\_FR\_TiOx\_hum\_tissue\_Urea\_RNAB\_N Scan : 43658

Andromeda score : 44.301

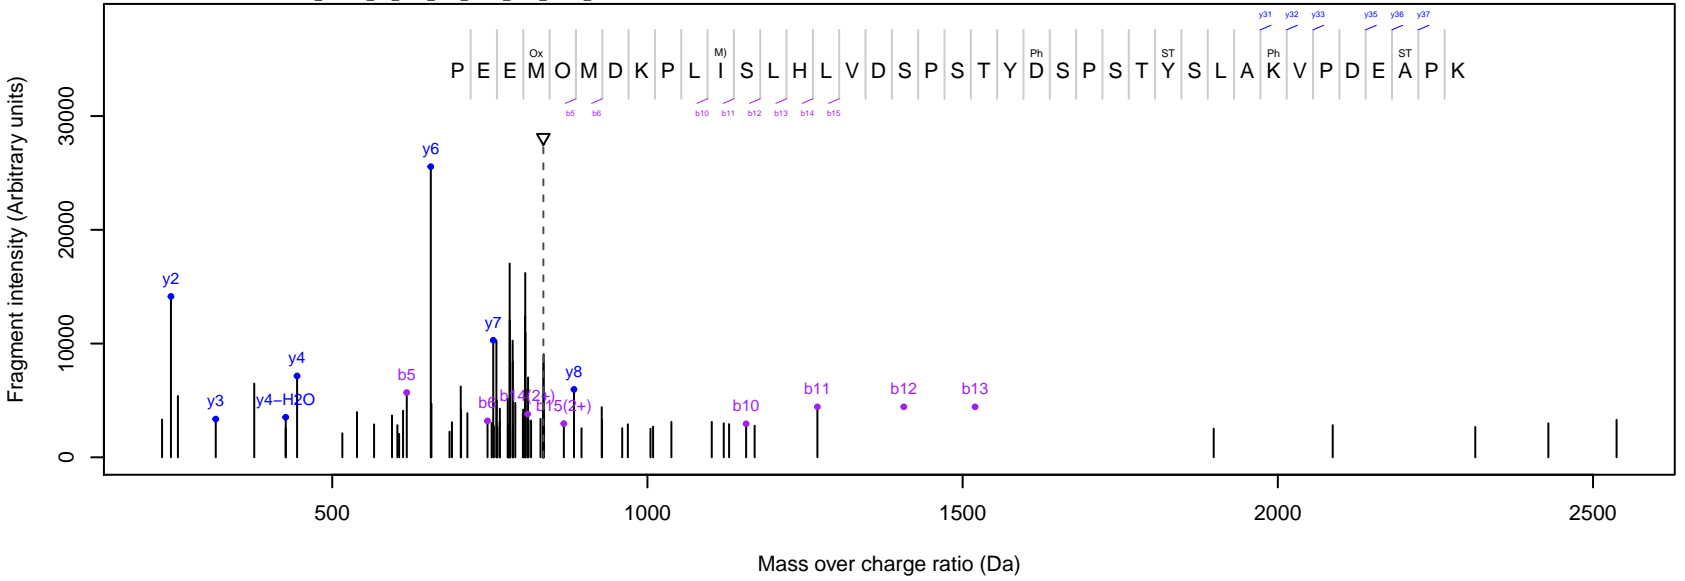

PEEM(Oxidation (M))DKPLISLHLVDS(Phospho (STY))SLAKVPDEAPK-4+

Source : QE3\_201126\_FR\_TiOx\_hum\_tissue\_Urea\_RNAB\_N Scan : 39750

Andromeda score : 44.301

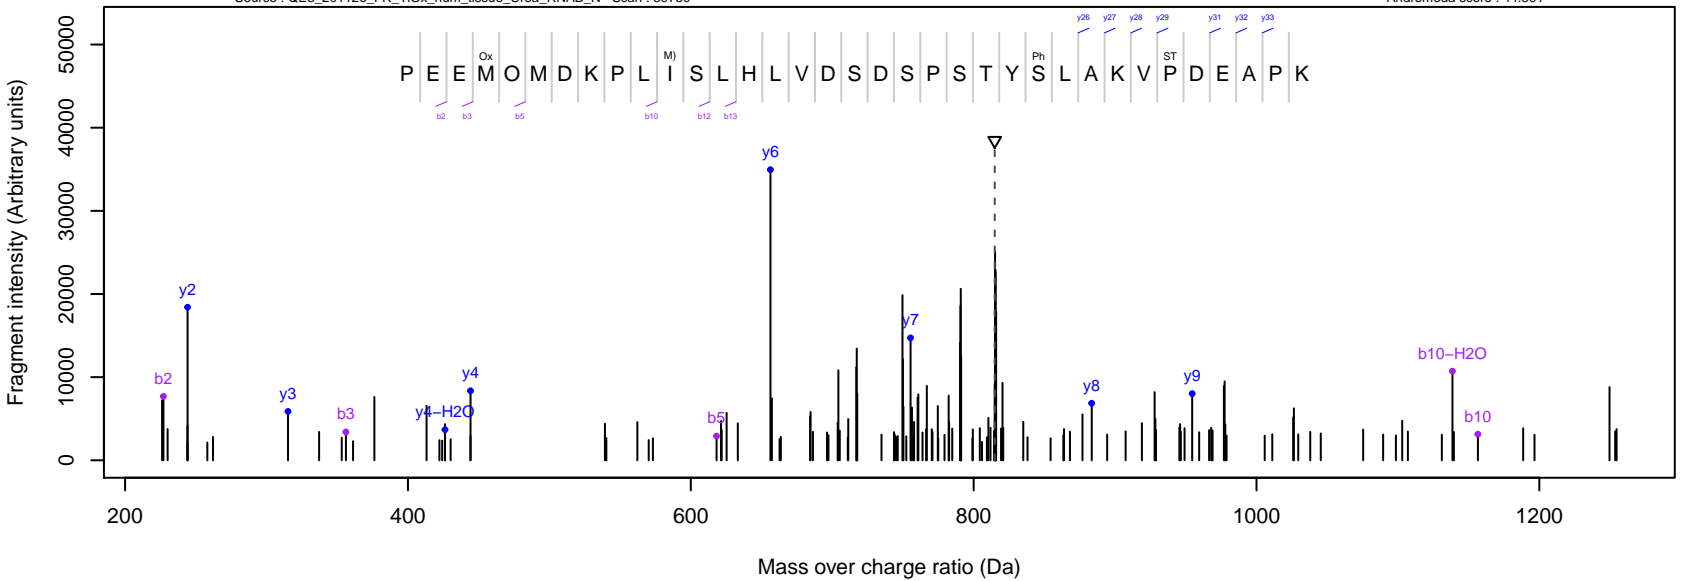

RS(Phospho (STY))TQGVTLTLKAEK-3+

Source : QE3\_201126\_FR\_TiOx\_hum\_tissue\_Urea\_RNAB\_B Scan : 16803

Andromeda score : 44.299

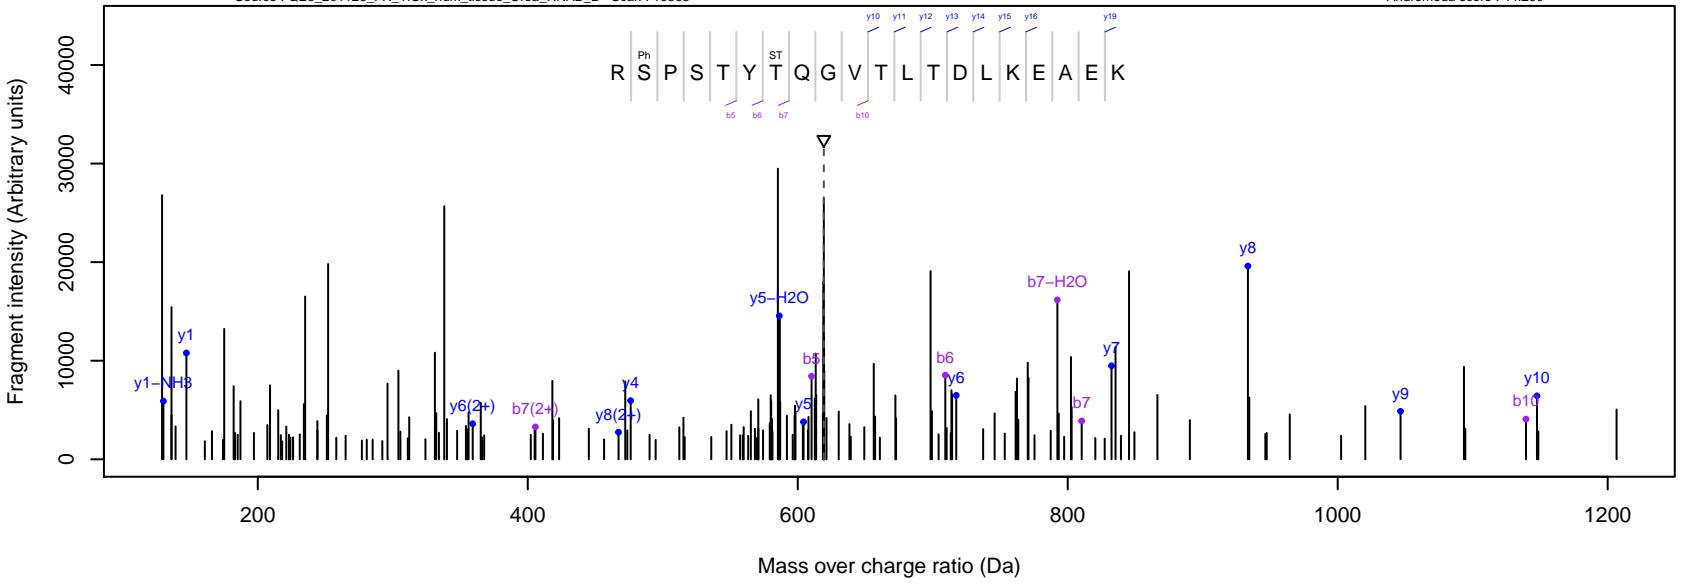

HAS(Phospho (STY))PILPITEFSIDIPR-3+

Source : QE3\_201126\_FR\_TiOx\_hum\_tissue\_Urea\_RNAB\_B Scan : 49071

Andromeda score : 44.294

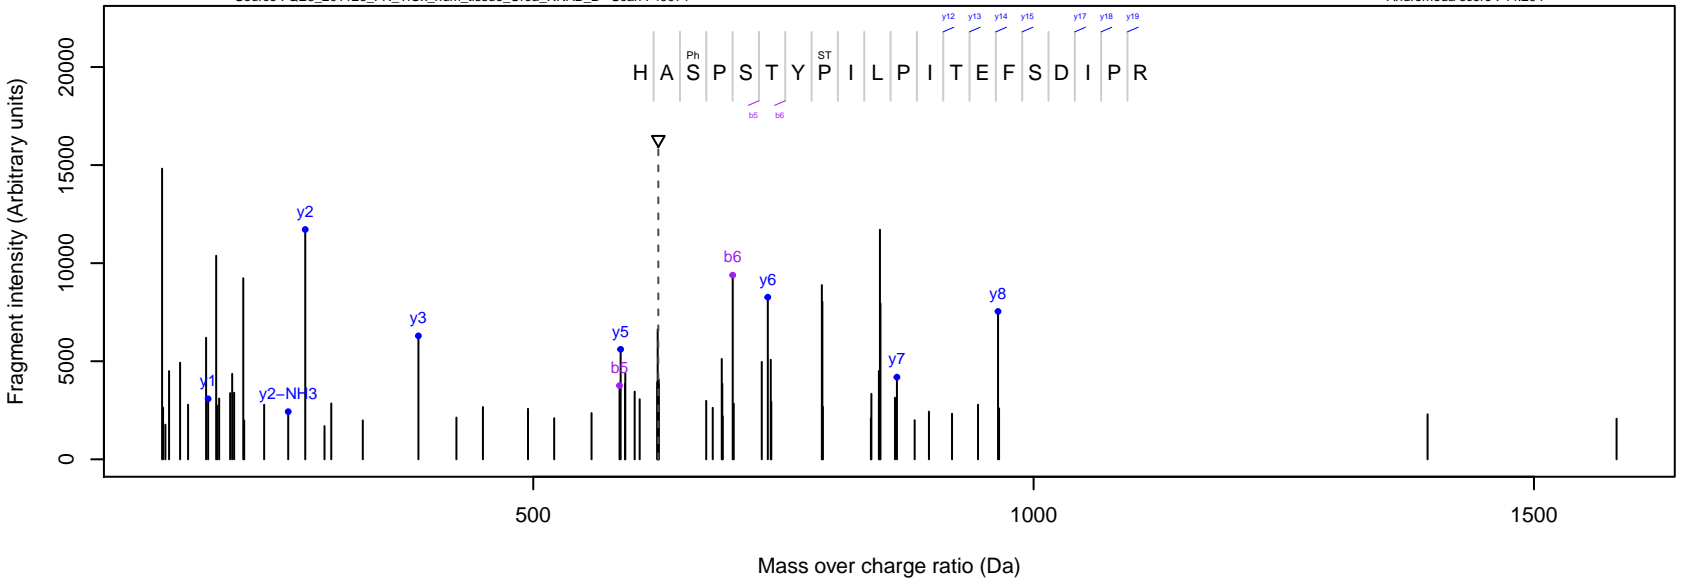

ALEAELDAQHLSETFDNIDNLS(Phospho (STY))PK-3+

Source : QE3\_201126\_FR\_TiOx\_hum\_tissue\_Urea\_RNAB\_B Scan : 52776

Andromeda score : 44.264

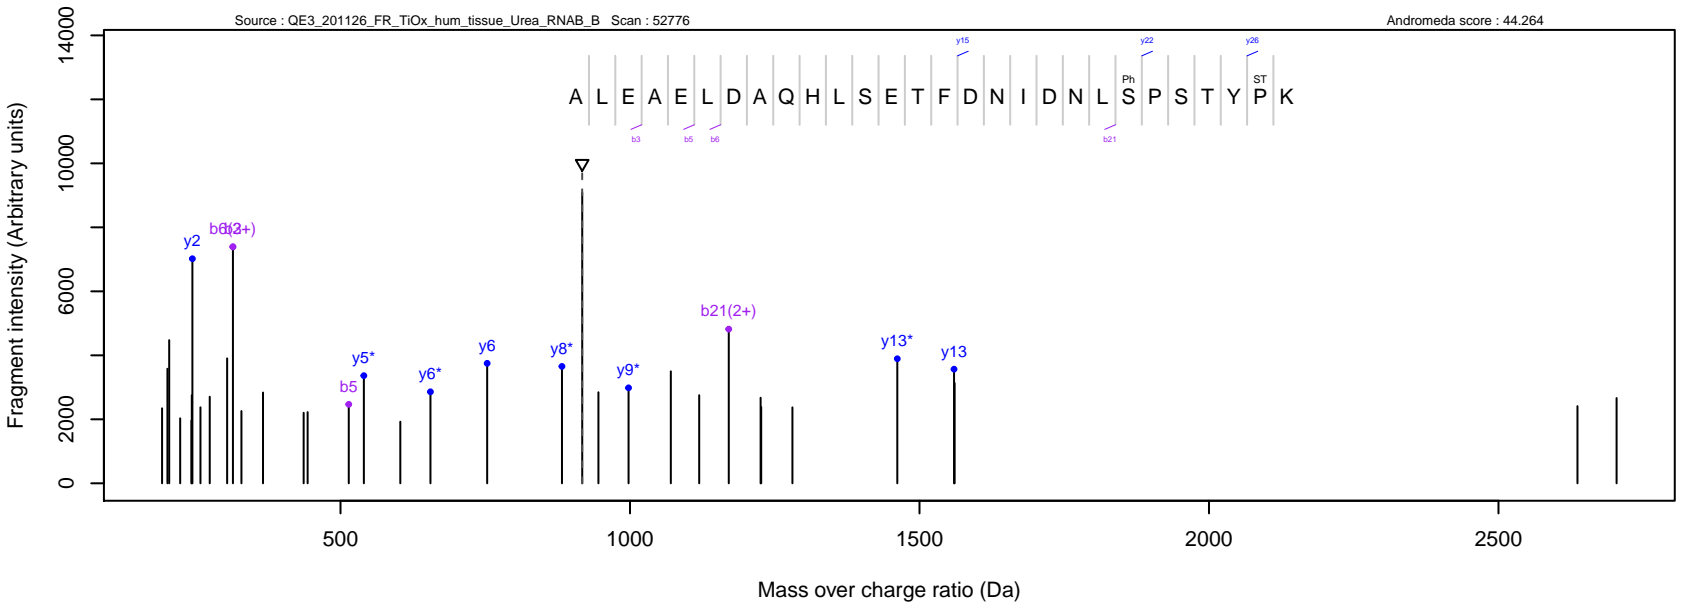

TDVSNFDEEFTGEAPT(Phospho (STY))LSPPRDAR-3+

Source : QE3\_201126\_FR\_TiOx\_hum\_tissue\_Urea\_RNAB\_H Scan : 42428

Andromeda score : 44.264

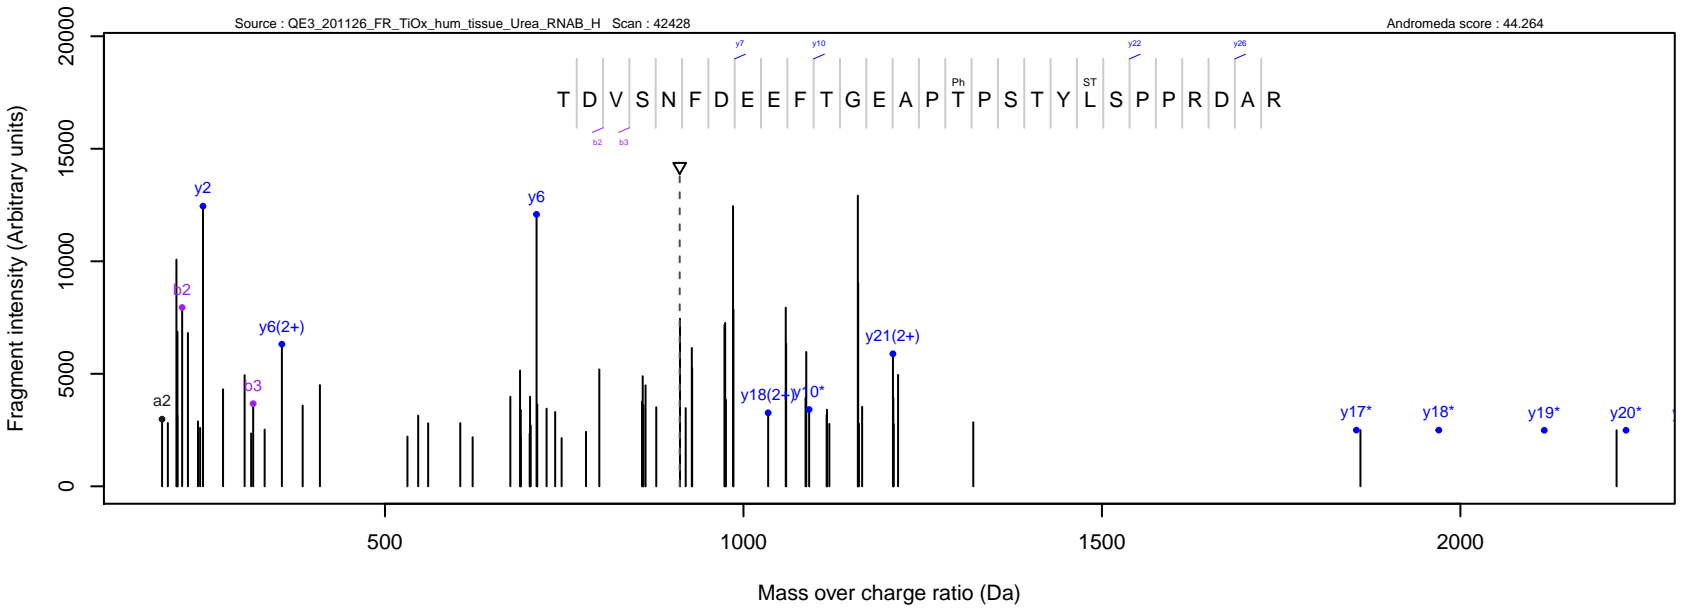

VLSPESLSCTEIPIPLNERHS(Phospho (STY))PK-3+

Source : QE3\_201126\_FR\_TiOx\_hum\_tissue\_Urea\_RNAB\_H Scan : 38887

Andromeda score : 44.264

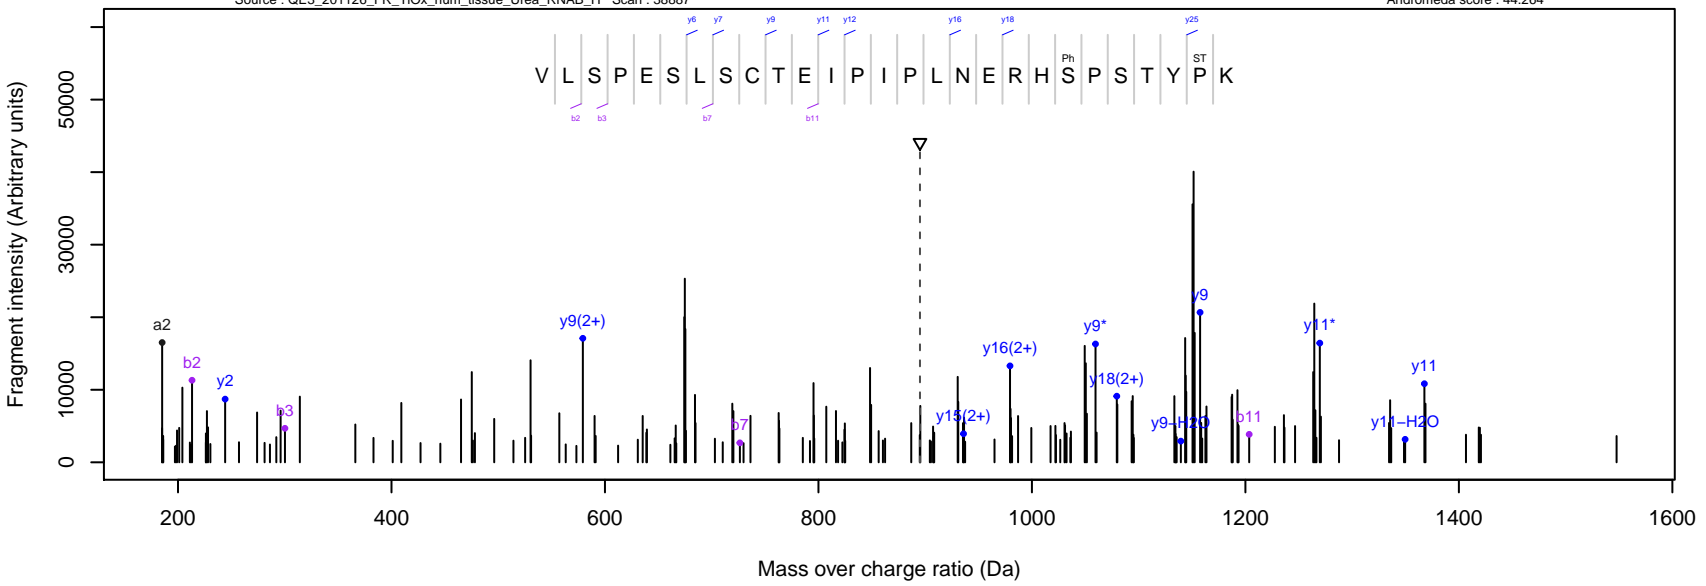

SFLQKS(Phospho (STY))PSKEPHFTDFEGK-4+

Source : QE3\_201126\_FR\_TiOx\_hum\_tissue\_Urea\_RNAB\_H Scan : 23749

Andromeda score : 44.258

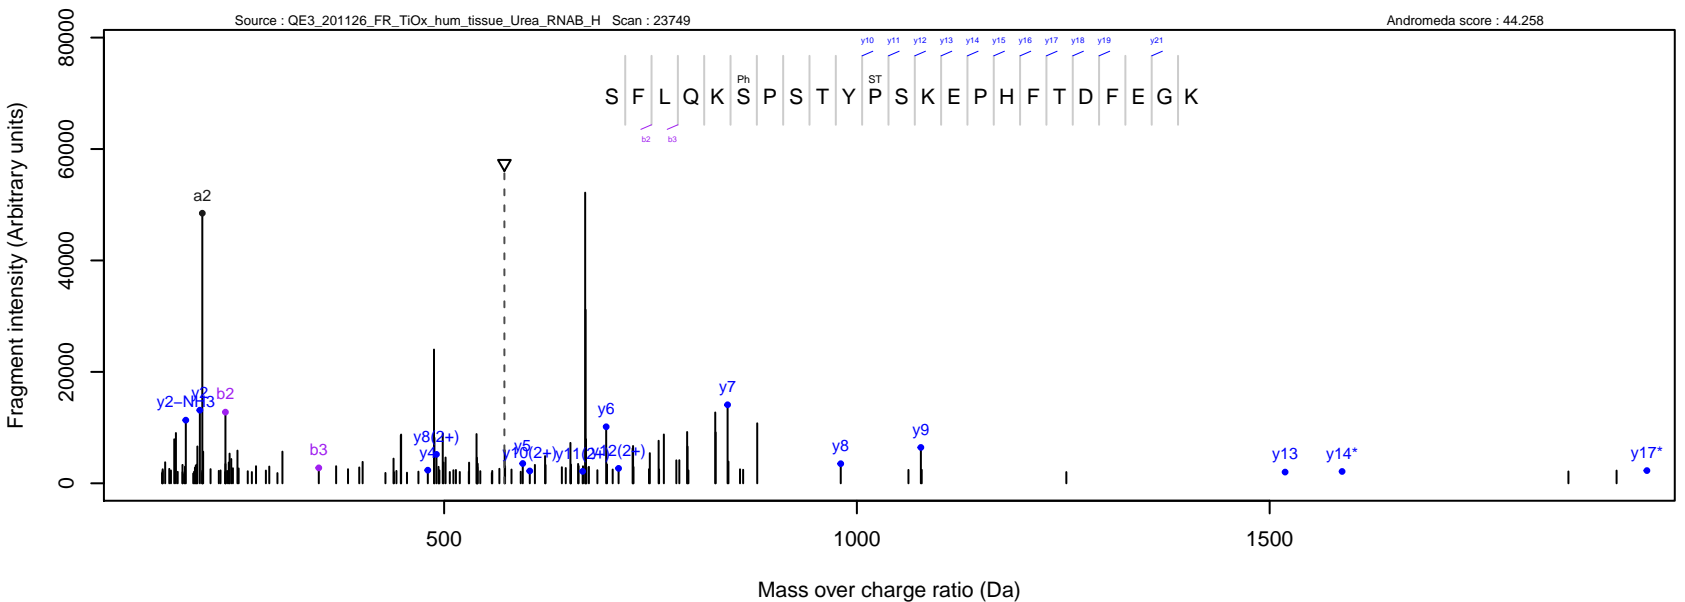

AASGEDS(Phospho (STY))TEELAAAAAPWEGGPVPGVDTSPFAK-3+

Source : QE3\_201126\_FR\_TiOx\_hum\_tissue\_Urea\_RNAB\_N Scan : 61156

Andromeda score : 44.254

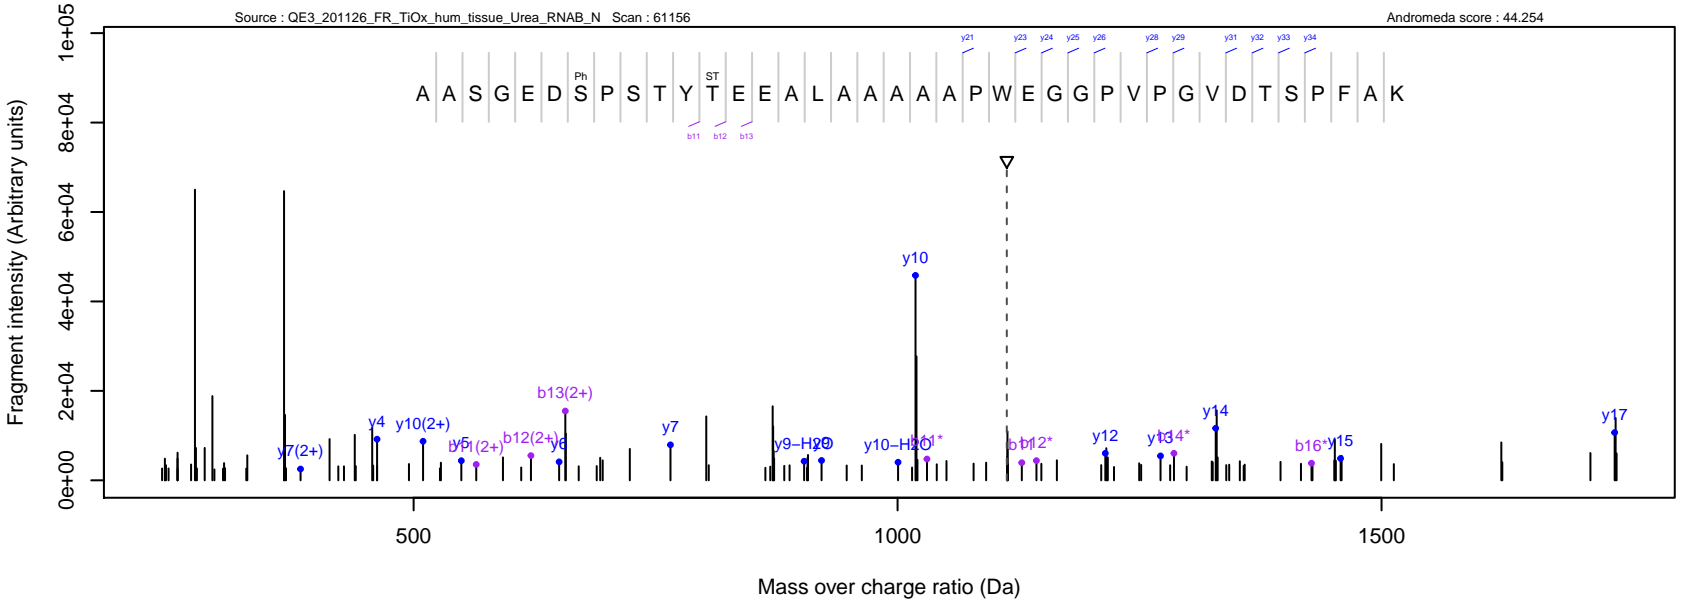

RIS(Phospho (STY))QLFR-2+

Source : QE3\_201126\_FR\_TiOx\_hum\_tissue\_Urea\_RNAB\_N Scan : 25322

Andromeda score : 44.203

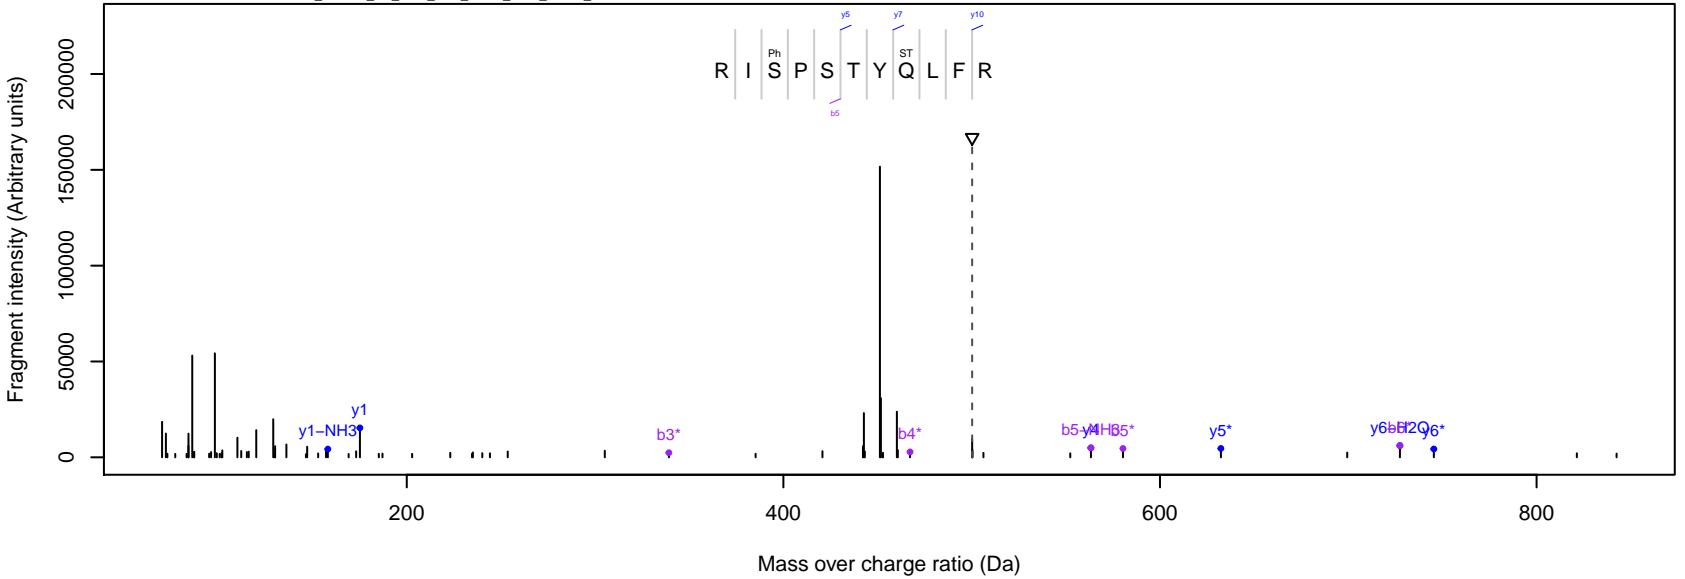

SES(Phospho (STY))T(Phospho (STY))SEFKPGYSLHDTSAVK-3+

Source : QE3\_201126\_FR\_TiOx\_hum\_tissue\_Urea\_RNAB\_B Scan : 27569

Andromeda score : 44.105

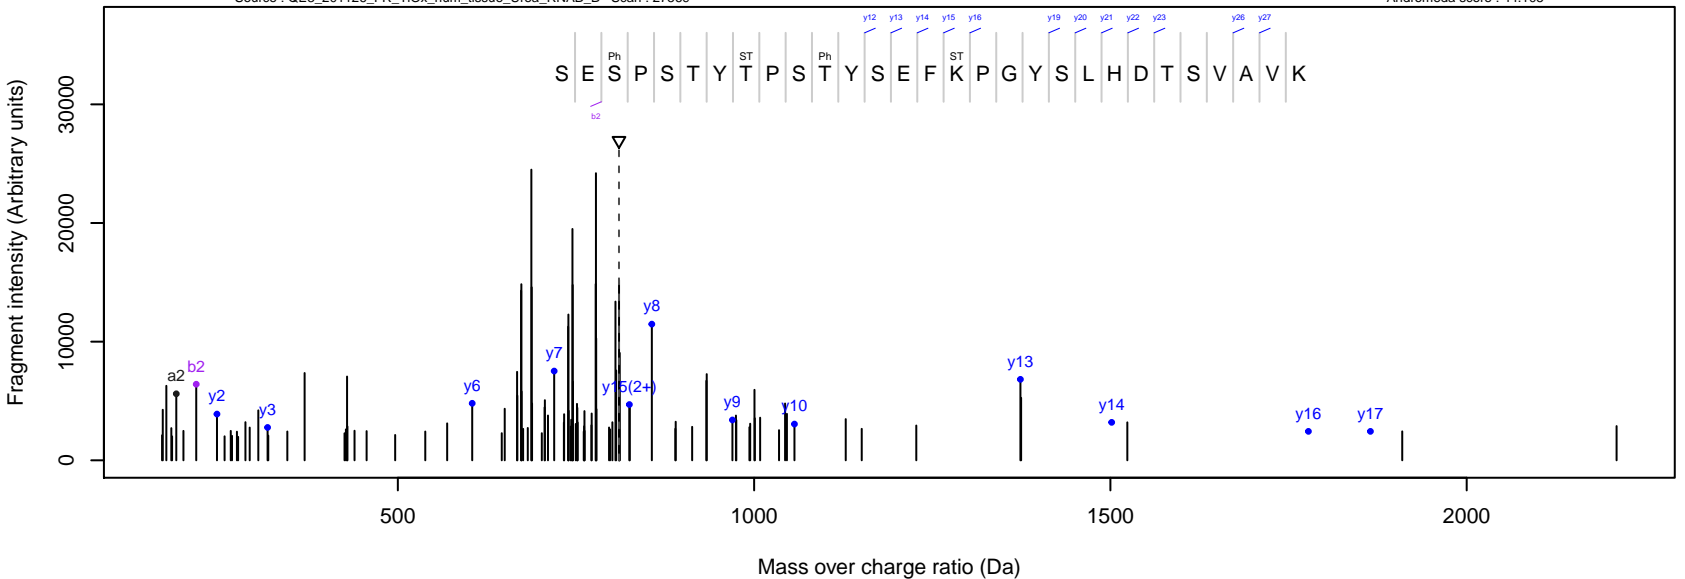

T(Phospho (STY))TNSLEEIMDKYDFDVEIK-4+

Source : QE3\_201126\_FR\_TiOx\_hum\_tissue\_Urea\_RNAB\_H Scan : 51909

Andromeda score : 44.105

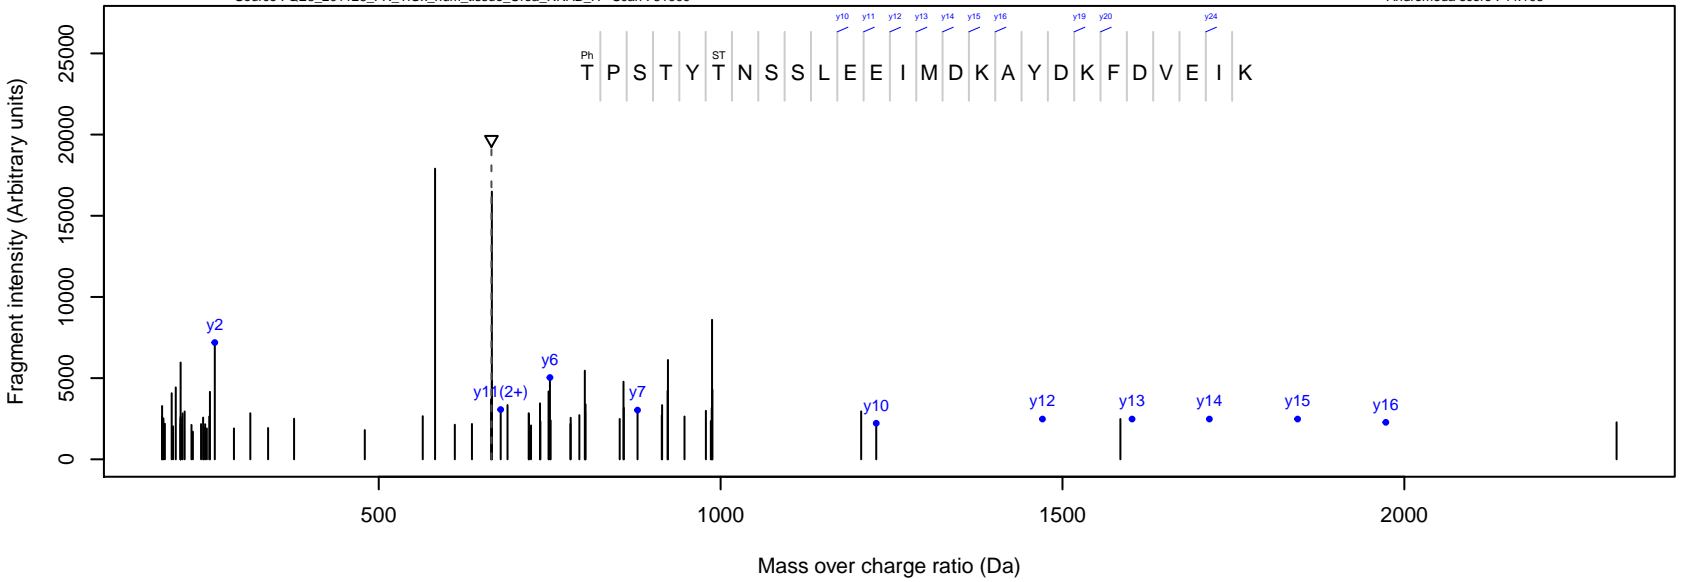

SHTPS(Phospho (STY))PTS(Phospho (STY))PKSYPSQK-3+

Source : QE3\_201126\_FR\_TiOx\_hum\_tissue\_Urea\_RNAB\_N Scan : 8132

Andromeda score : 44.054

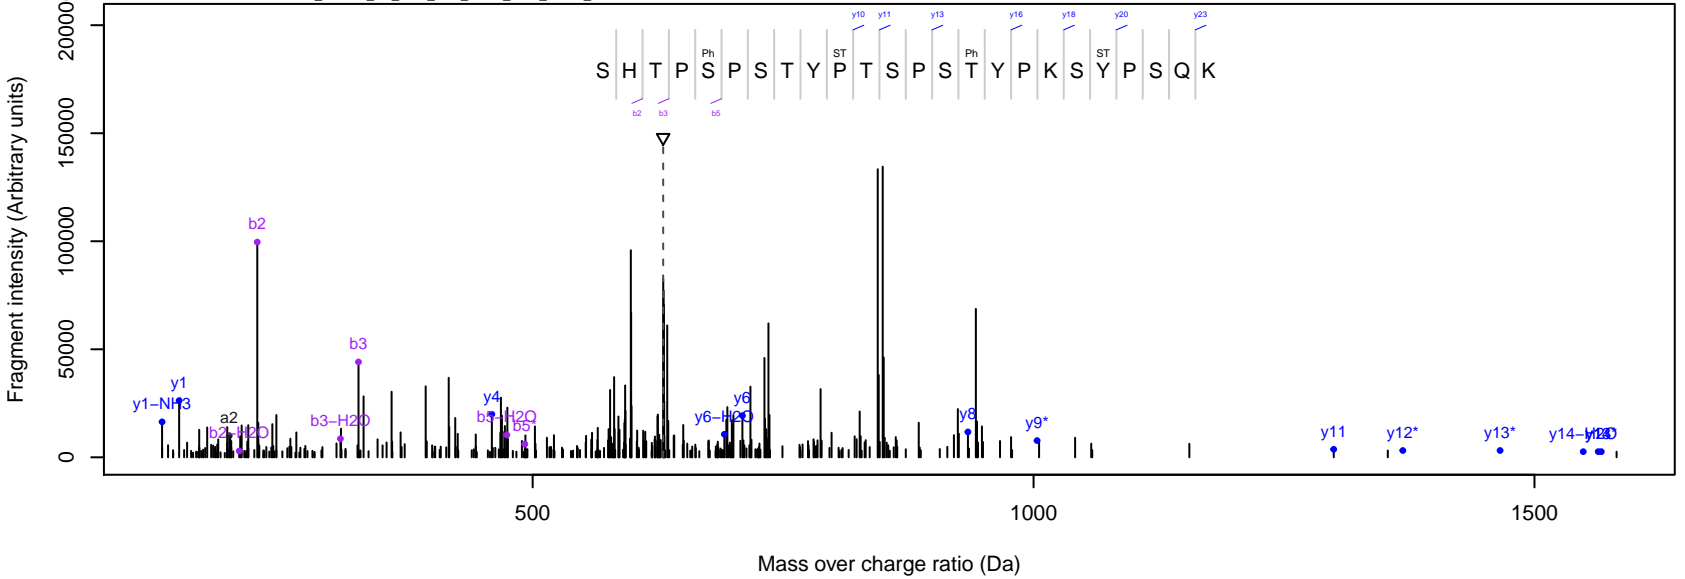

ATTLNAVSSLASTGLS(Phospho (STY))LTKVDER-3+

Source : QE3\_201126\_FR\_TiOx\_hum\_tissue\_Urea\_RNAB\_N Scan : 52938

Andromeda score : 44.05

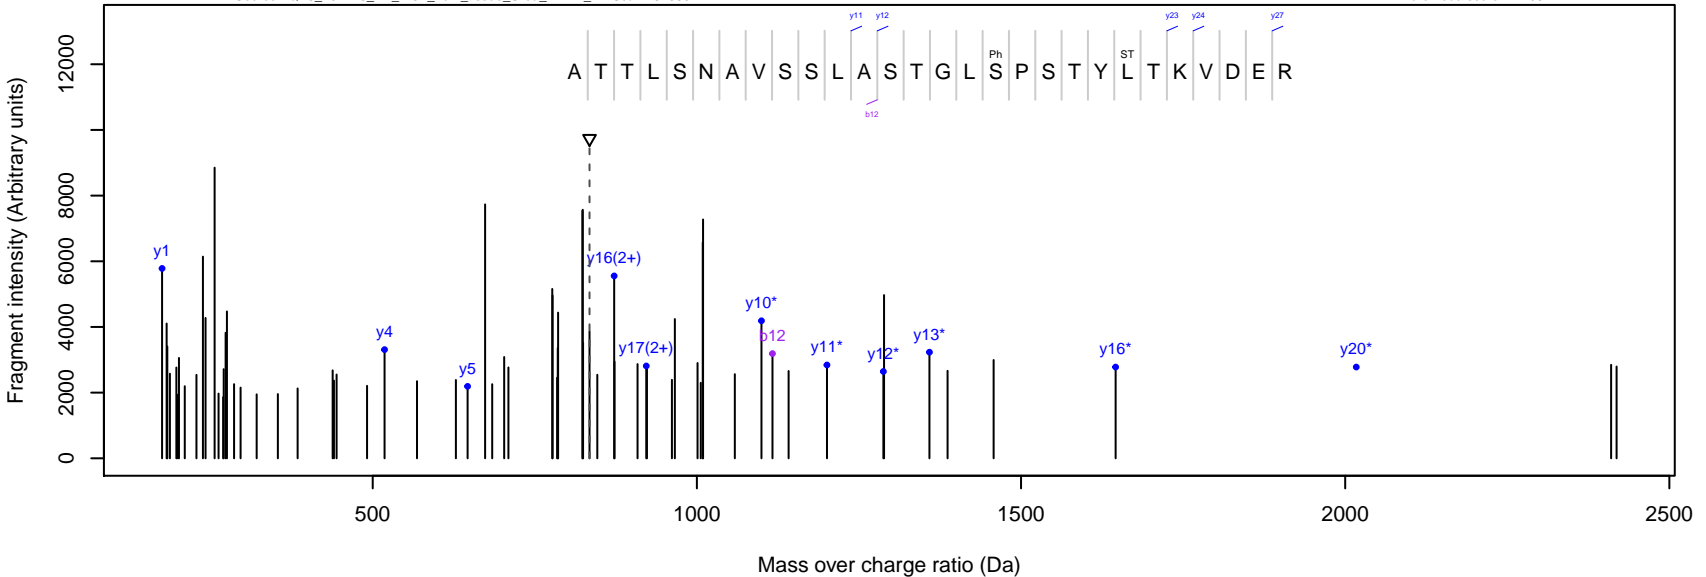



RM(Oxidation (M))EDEGGFPVPQENGQPES(Phospho (STY))PRR-3+

Source : QE3\_201126\_FR\_TiOx\_hum\_tissue\_Urea\_RNAB\_B Scan : 17024

Andromeda score : 44.05

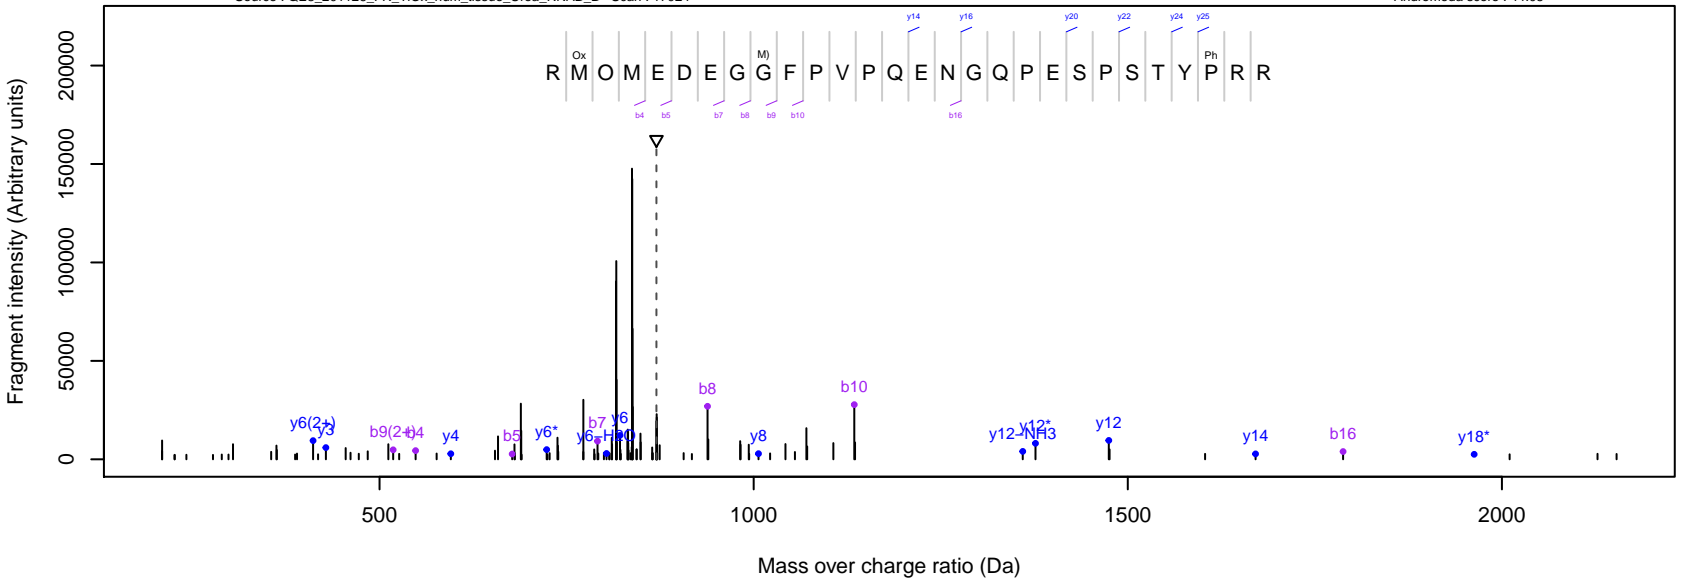

SEDDS(Phospho (STY))AKFDS(Phospho (STY))NEEDSASVFSFGLK-3+

Source : QE3\_201126\_FR\_TiOx\_hum\_tissue\_Urea\_RNAB\_H Scan : 53428

Andromeda score : 44.021

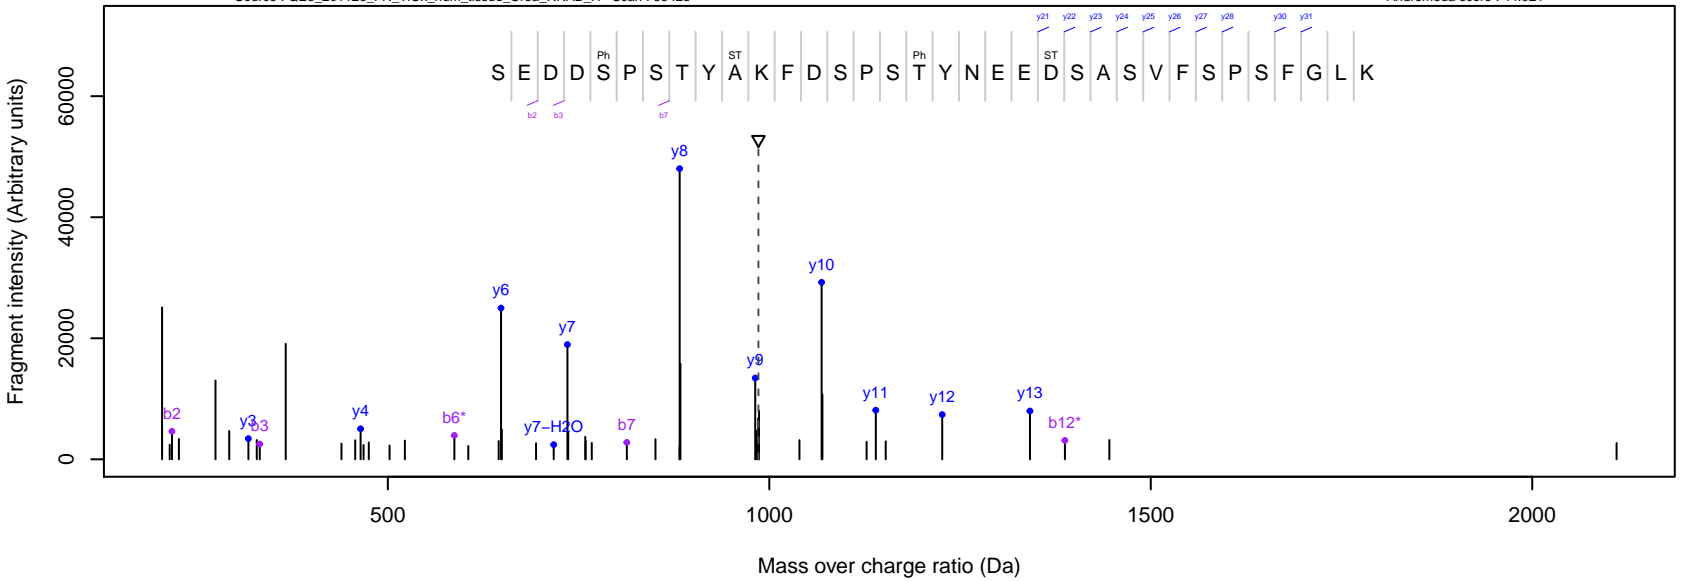

TKPIVKPQT(Phospho (STY))SPEYGGINPISR-3+

Source : QE3\_201126\_FR\_TiOx\_hum\_tissue\_Urea\_RNAB\_H Scan : 20984

Andromeda score : 43.992

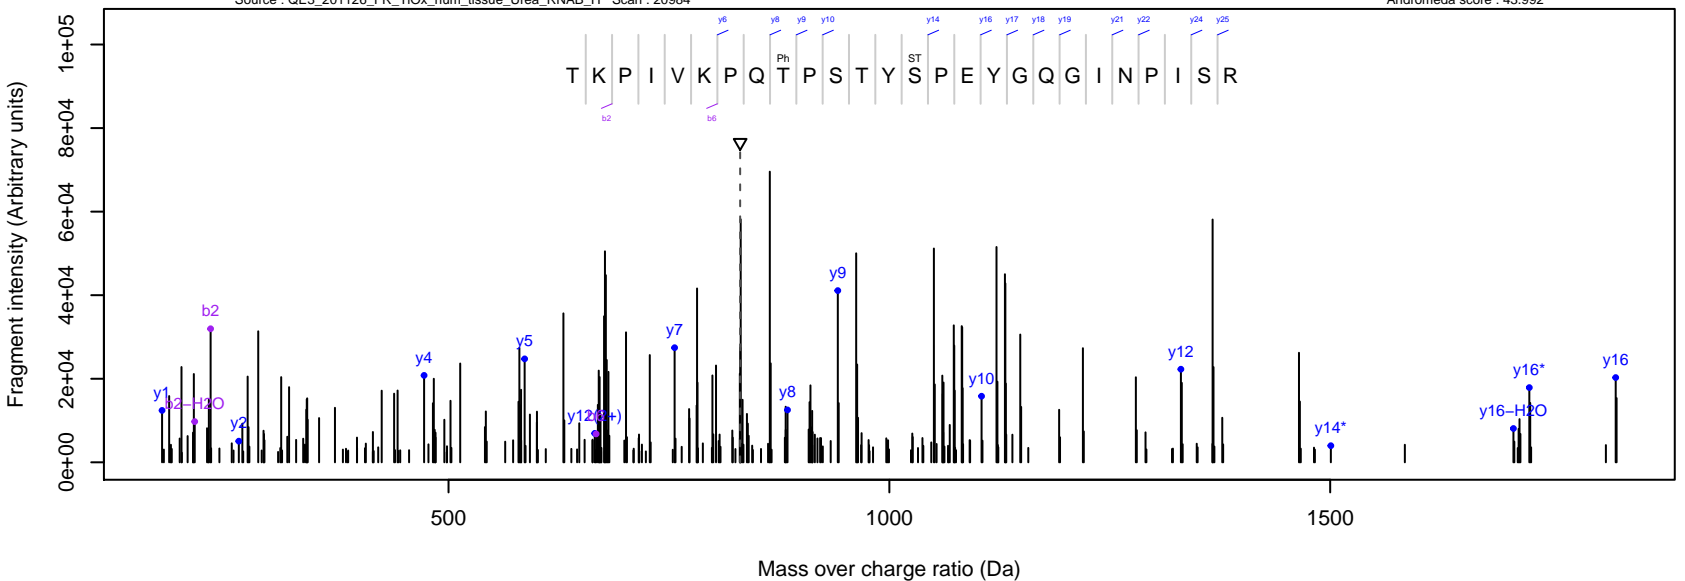

DGLPRT(Phospho (STY))PSRR-3+

Source : QE3\_201126\_FR\_TiOx\_hum\_tissue\_Urea\_RNAB\_H Scan : 6023

Andromeda score : 43.991

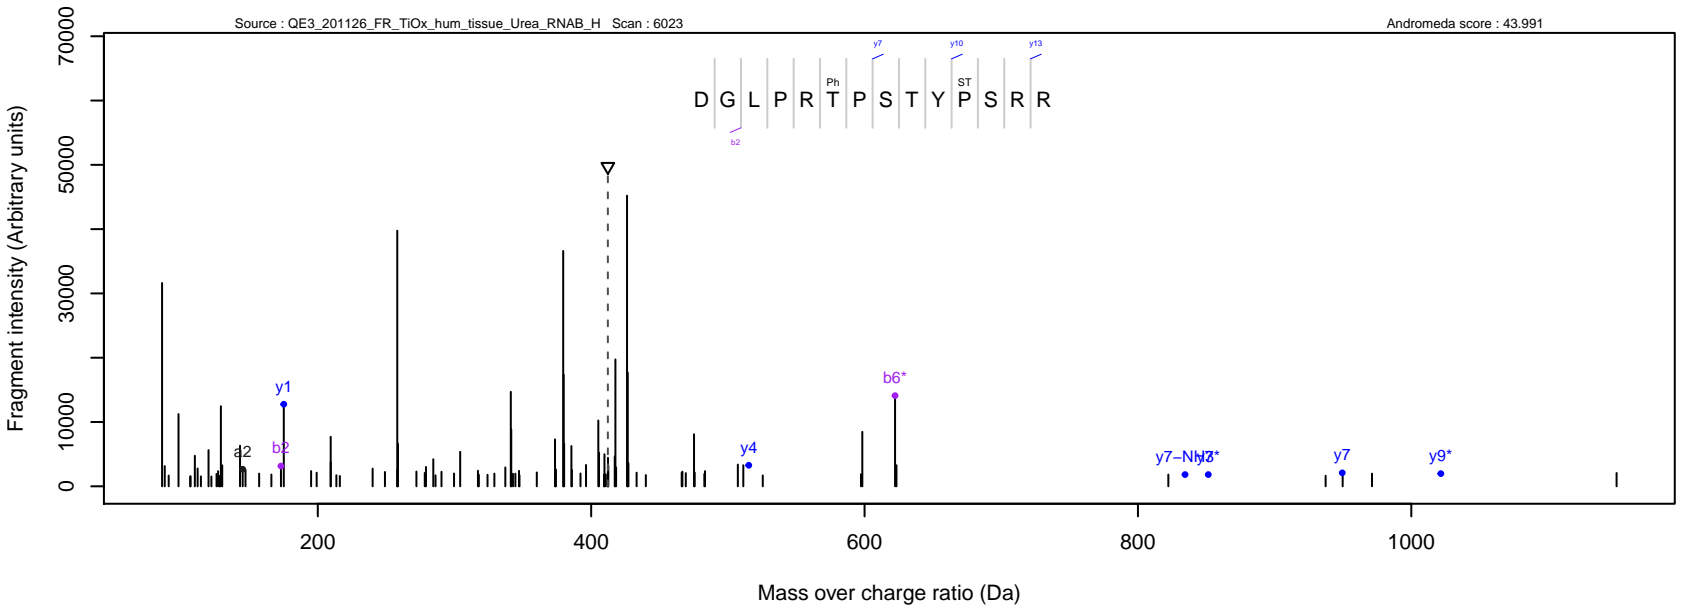

VLT(Phospho (STY))PPHDVDSLPHLR-3+

Source : QE3\_201126\_FR\_TiOx\_hum\_tissue\_Urea\_RNAB\_H Scan : 31751

Andromeda score : 43.955

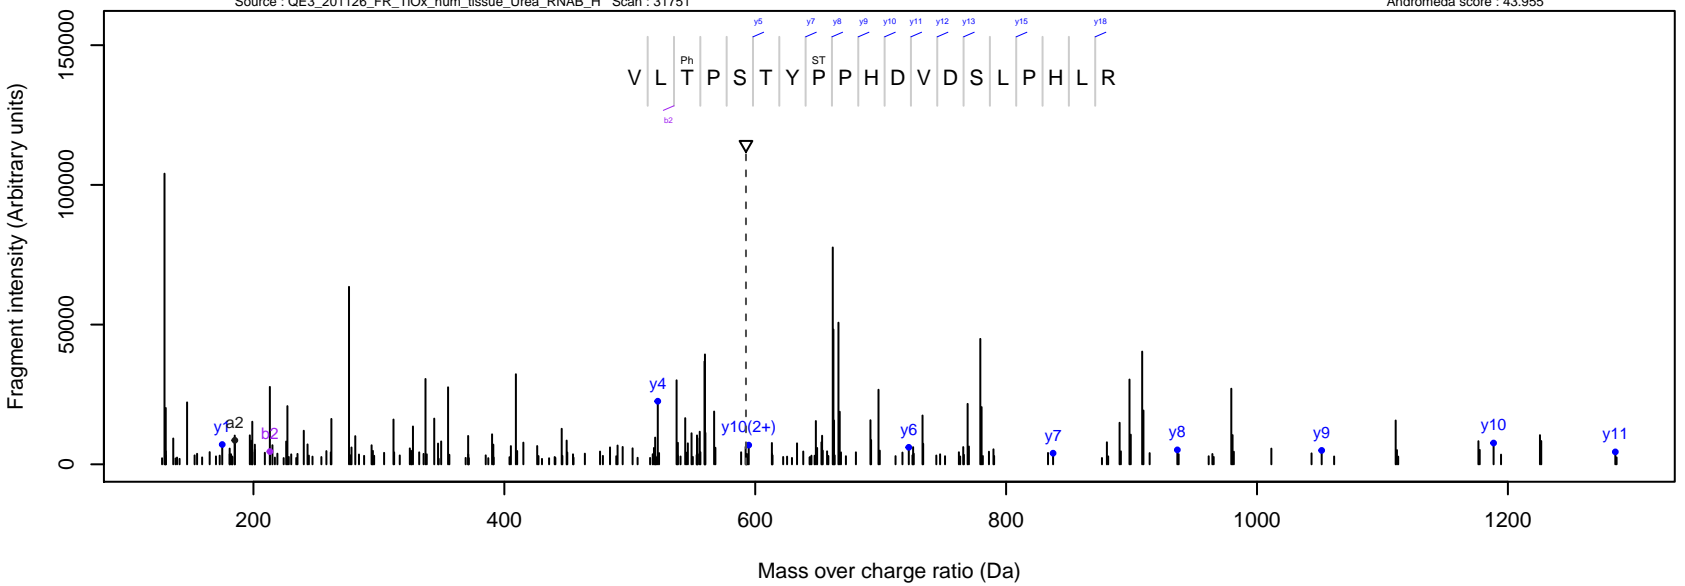

S(Phospho (STY))PDLFTPLS(Phospho (STY))RPPSPLSLPRR-3+

Source : QE3\_201126\_FR\_TiOx\_hum\_tissue\_Urea\_RNAB\_B Scan : 51416

Andromeda score : 43.936

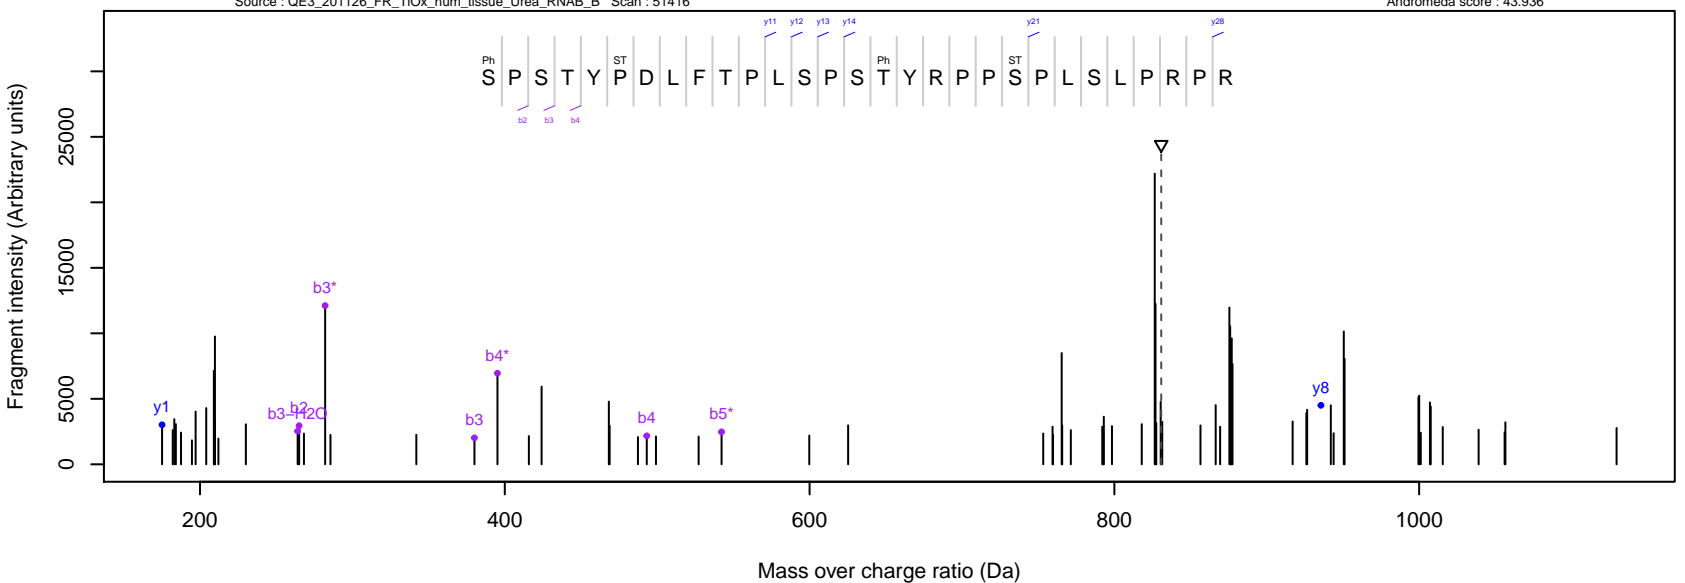

VLGPY(Phospho (STY))TFS(Phospho (STY))ICDTSNFS(Phospho (STY))DYIRGGIV(Phospho (STY))QVK-3+

Source : QE3\_201126\_FR\_TiOx\_hum\_tissue\_Urea\_RNAB\_H Scan : 36708

Andromeda score : 43.896

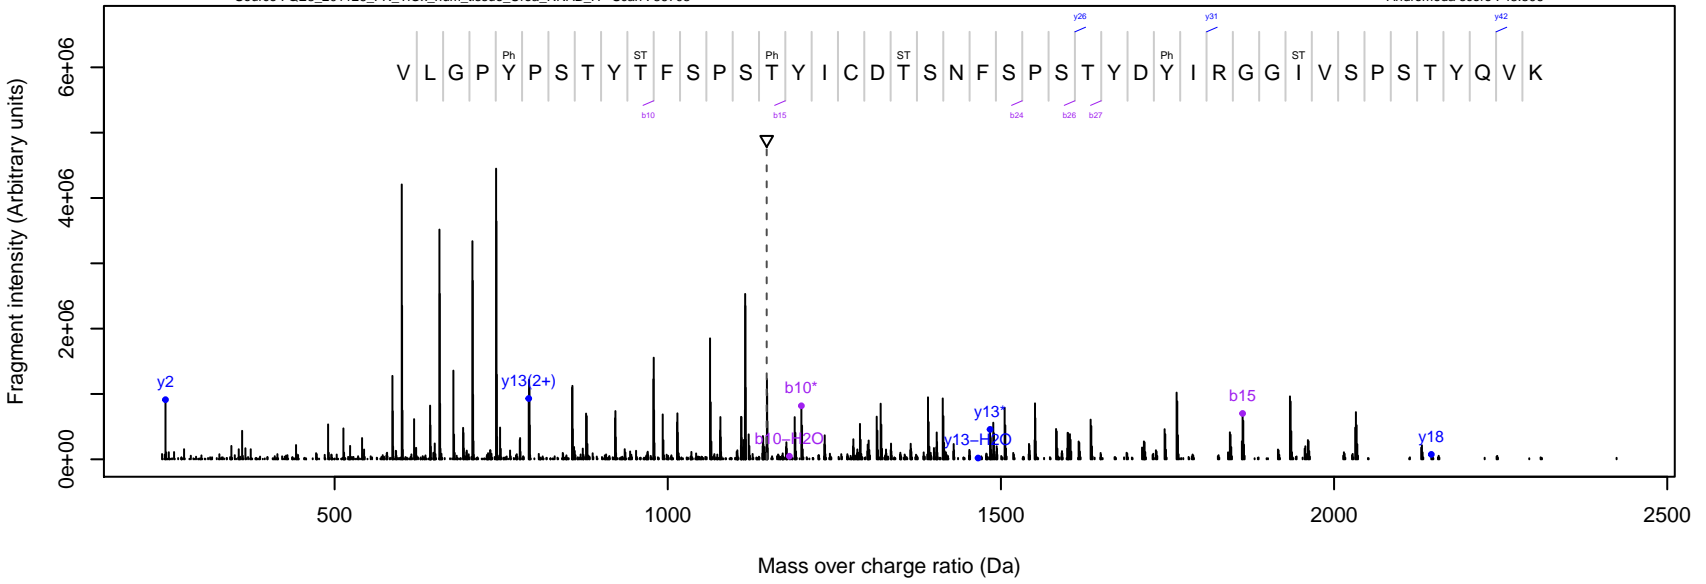

KEELFALYS(Phospho (STY))AHDVT(Phospho (STY))LS(Phospho (STY))PVLS(Phospho (STY))ALGLSEAR-3+

Source : QE3\_201126\_FR\_TiOx\_hum\_tissue\_Urea\_RNAB\_H Scan : 7494

Andromeda score : 43.895

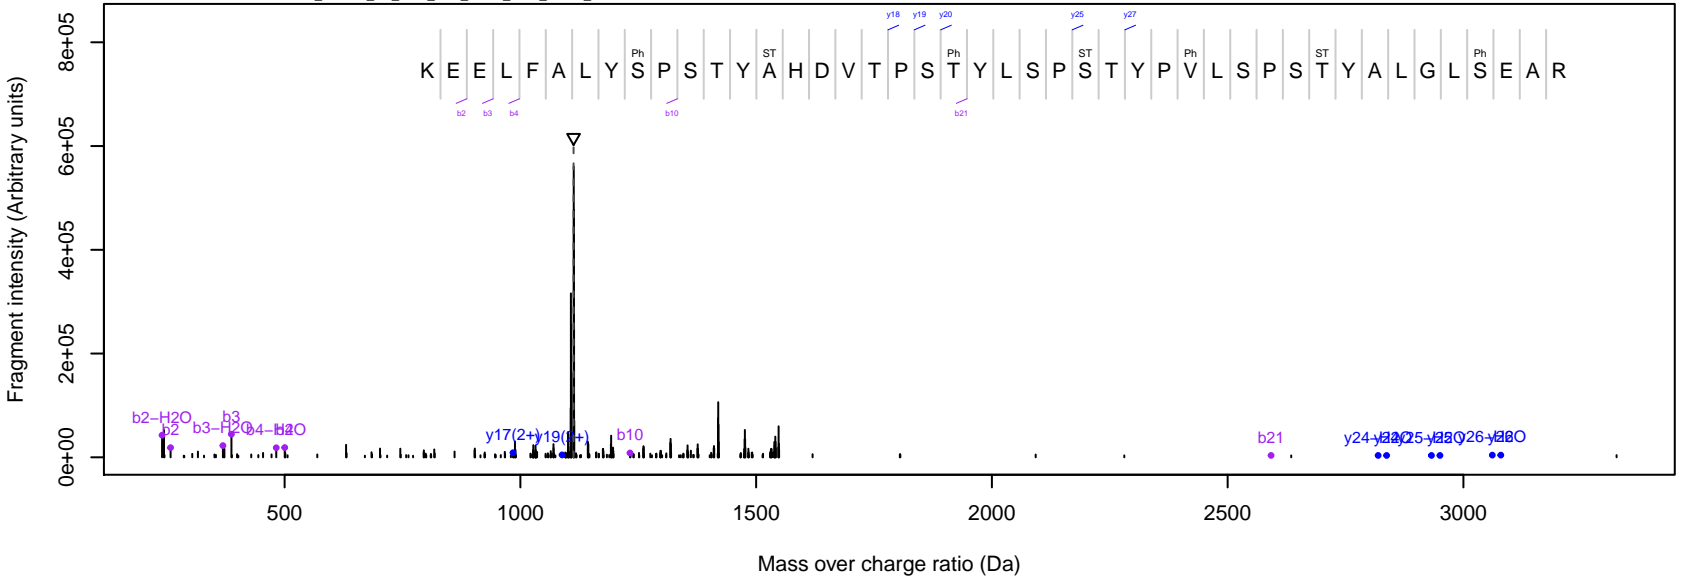

VS(Phospho (STY))NSPEPQKAVEQEDELSDVSGGSK-3+

Source : QE3\_201126\_FR\_TiOx\_hum\_tissue\_Urea\_RNAB\_B Scan : 23053

Andromeda score : 43.895

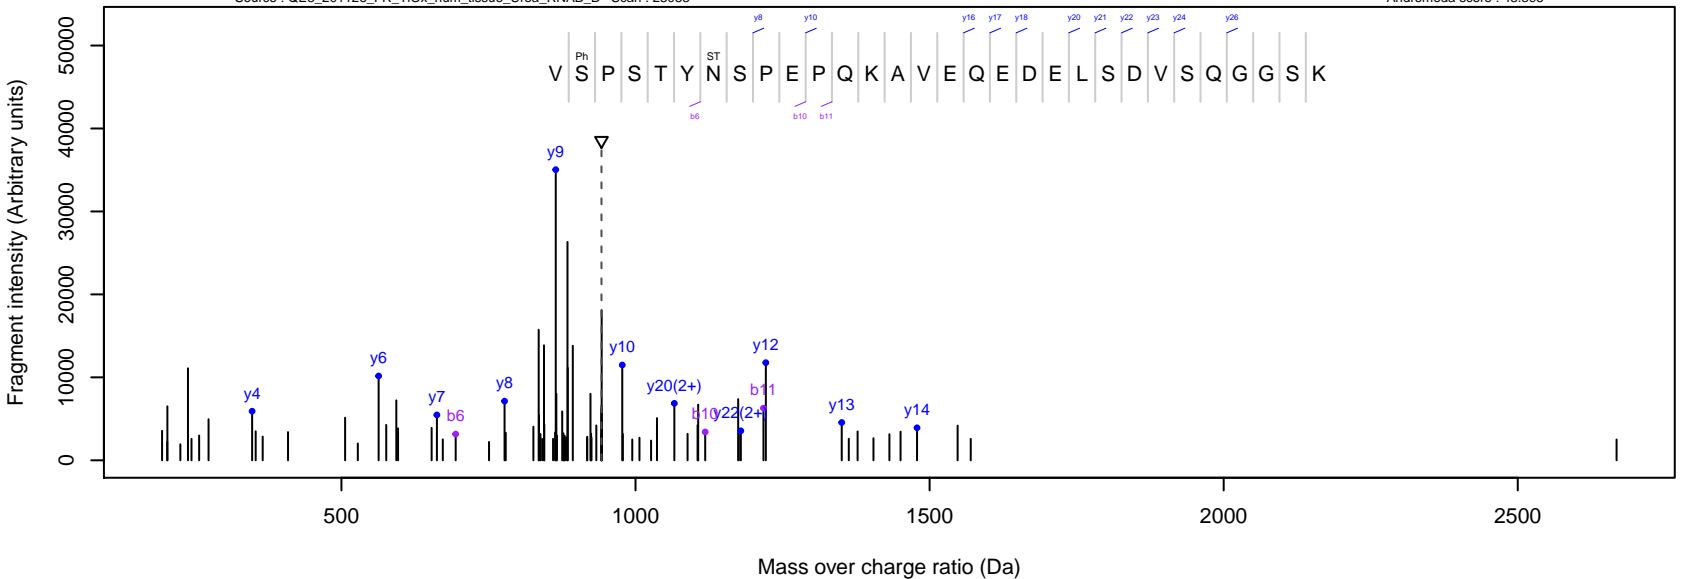

QLS(Phospho (STY))ALS(Phospho (STY))SDGEGGRPVPR-3+

Source : QE3\_201126\_FR\_TiOx\_hum\_tissue\_Urea\_RNAB\_H Scan : 21654

Andromeda score : 43.888

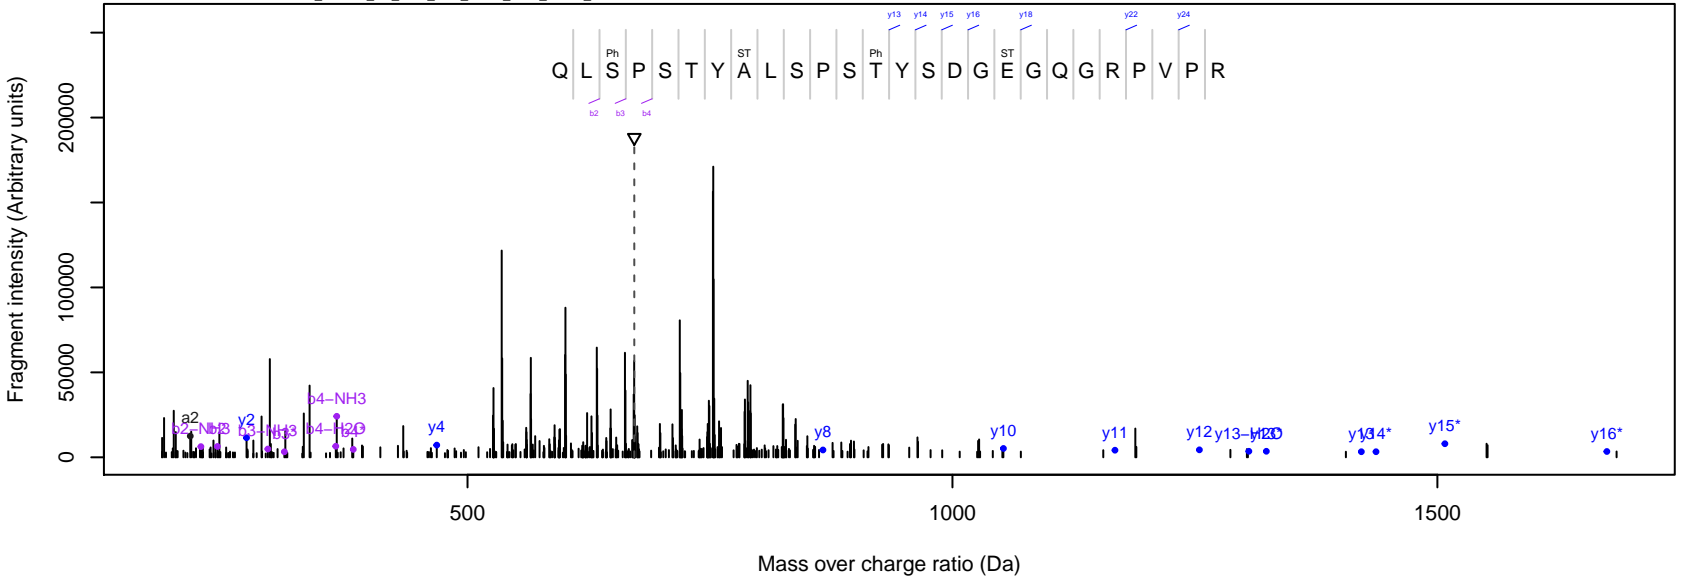

EGHSLMENEENLVENGADS(Phospho (STY))DEDDNSFLKQQSPQEPK-4+

Source : QE3\_201126\_FR\_TiOx\_hum\_tissue\_Urea\_RNAB\_N Scan : 33224

Andromeda score : 43.831

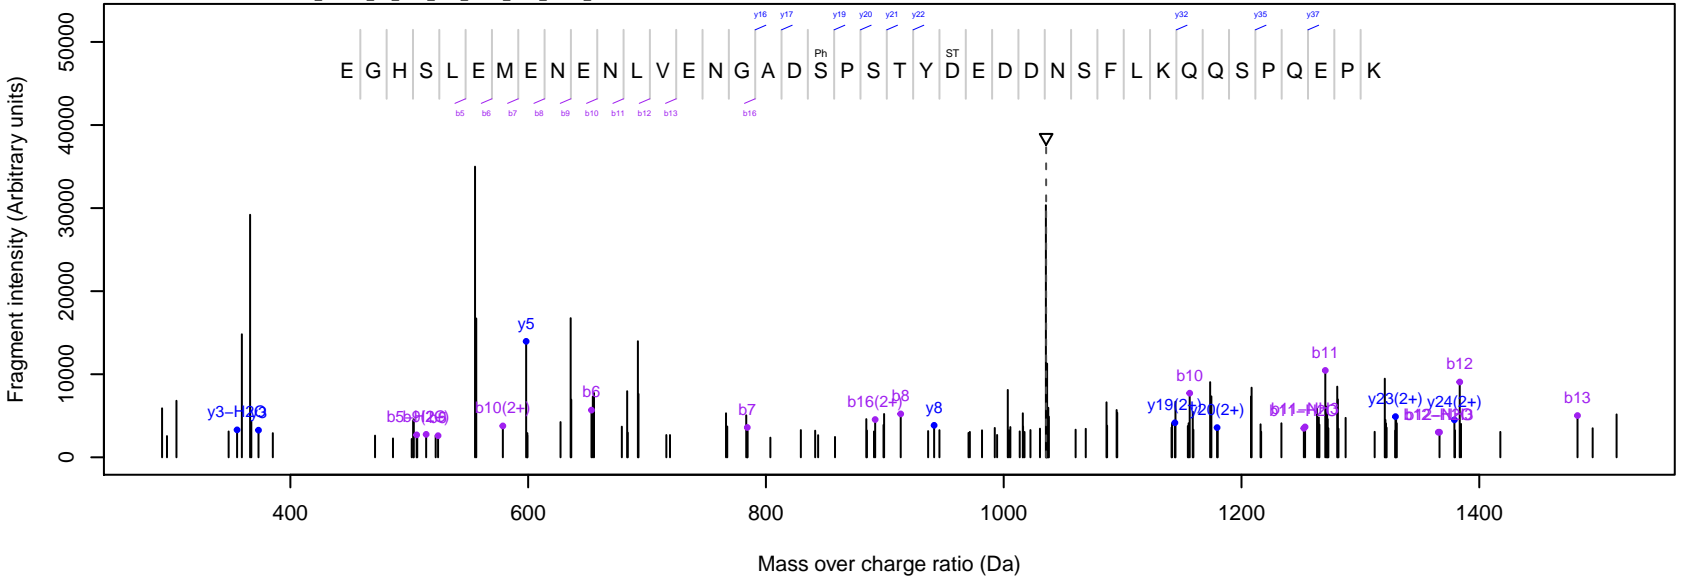

(Acetyl (Protein N-term))AETEERS(Phospho (STY))LDNFFAK-2+

Source : QE3\_201126\_FR\_TiOx\_hum\_tissue\_Urea\_RNAB\_H Scan : 46389

Andromeda score : 43.813

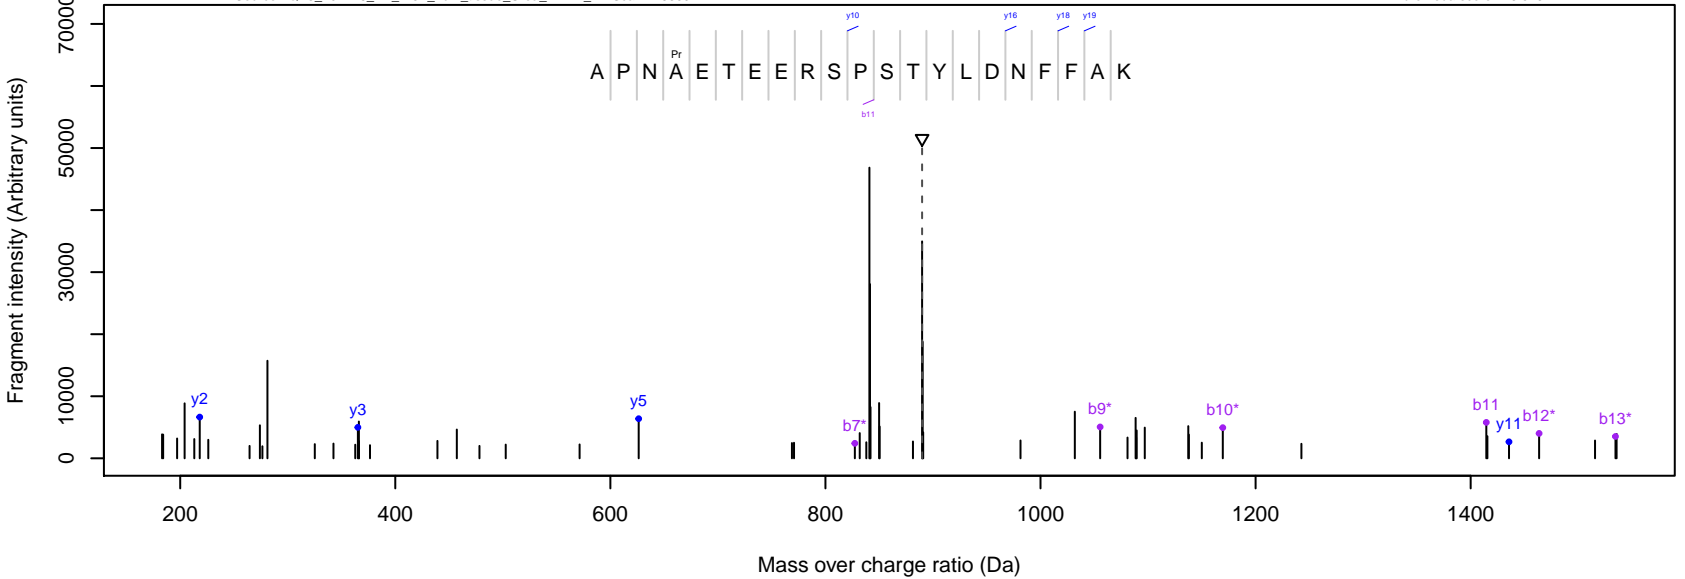

RWS(Phospho (STY))APAAAGQR-3+

Source : QE3\_201126\_FR\_TiOx\_hum\_tissue\_Urea\_RNAB\_B Scan : 11447

Andromeda score : 43.813

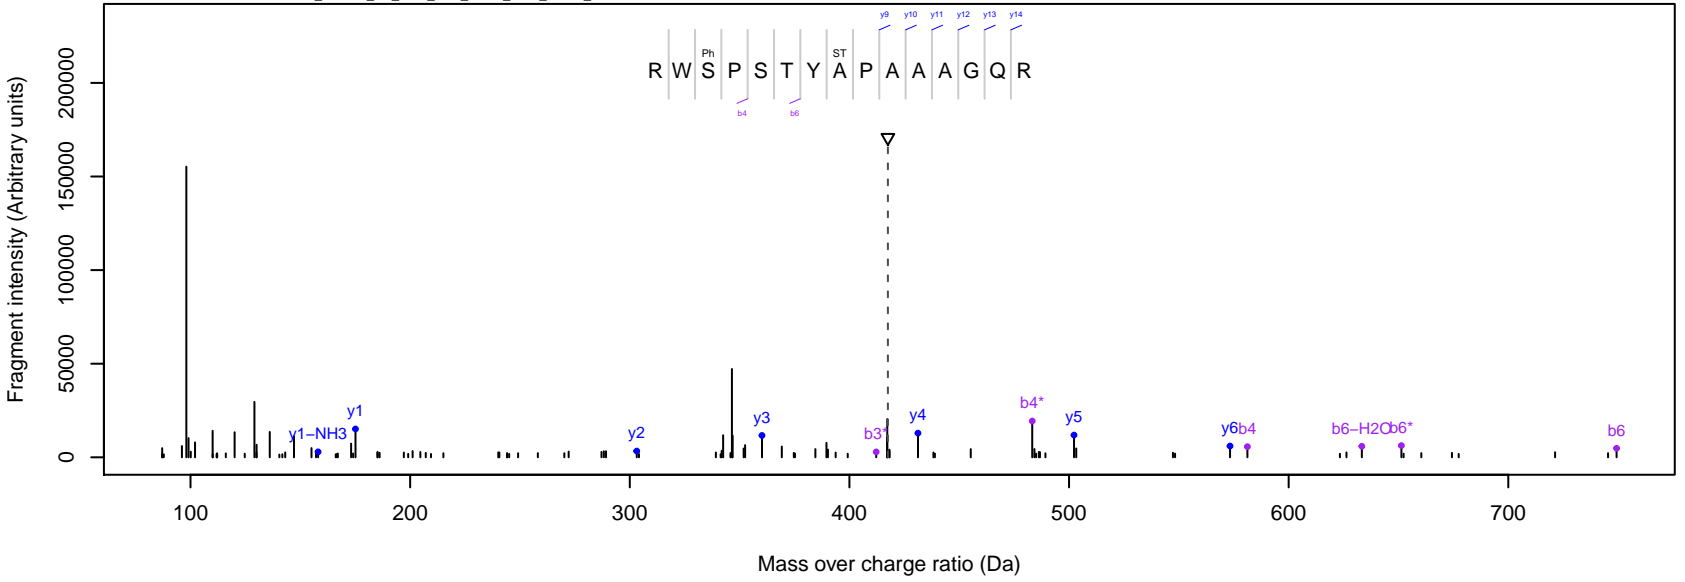

SAPTSPAT(Phospho (STY))NISSK-2+

Source : QE3\_201126\_FR\_TiOx\_hum\_tissue\_Urea\_RNAB\_B Scan : 11827

Andromeda score : 43.813

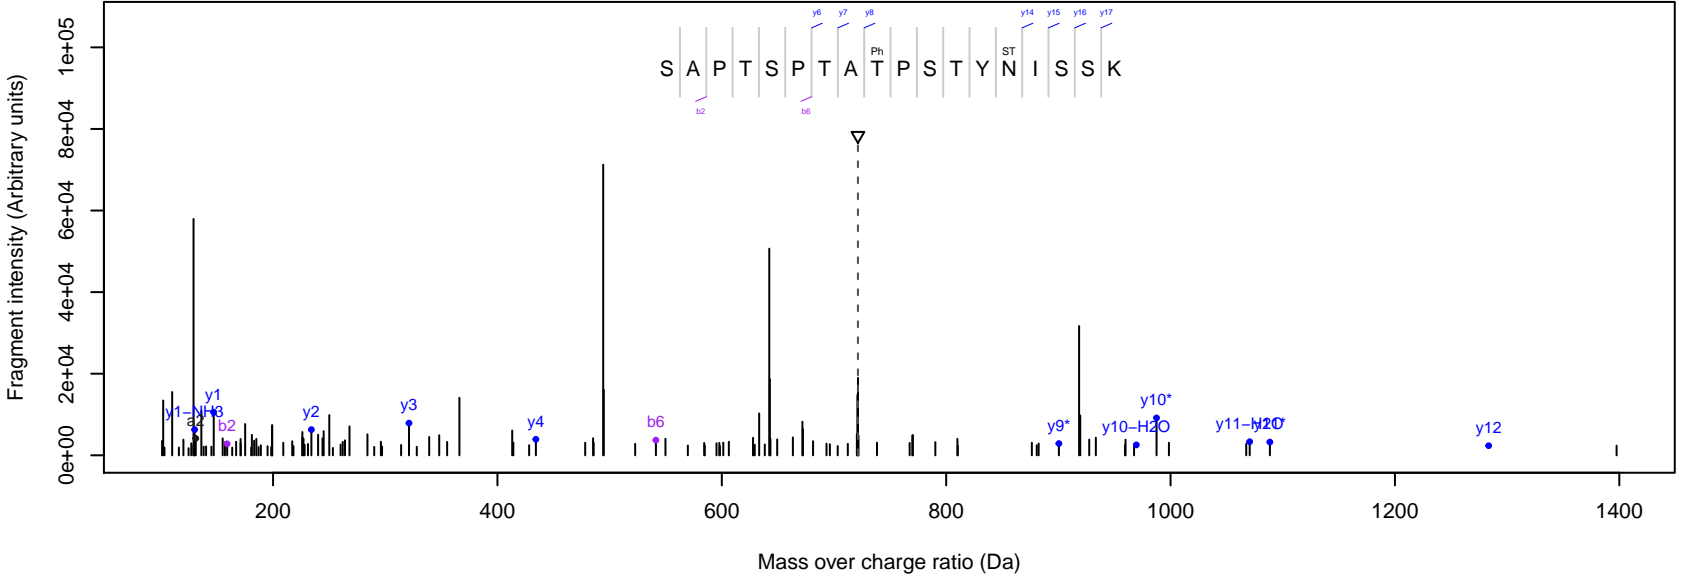

IGFPETEEEELEEIAS(Phospho (STY))ENSDCIFPSAPDVK-3+

Source : QE3\_201126\_FR\_TiOx\_hum\_tissue\_Urea\_RNAB\_H Scan : 61393

Andromeda score : 43.801

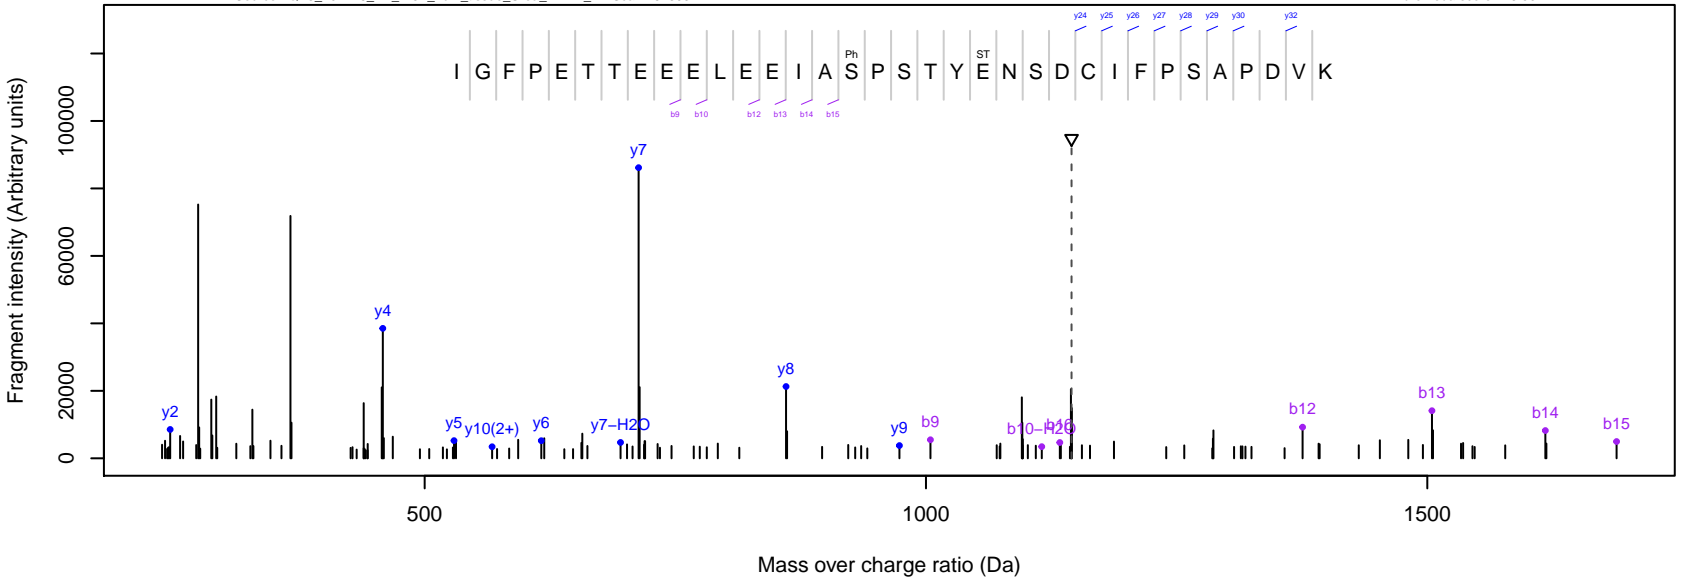

GPPHS(Phospho (STY))DSCPLTLHR-3+

Source : QE3\_201126\_FR\_TiOx\_hum\_tissue\_Urea\_RNAB\_H Scan : 12269

Andromeda score : 43.794

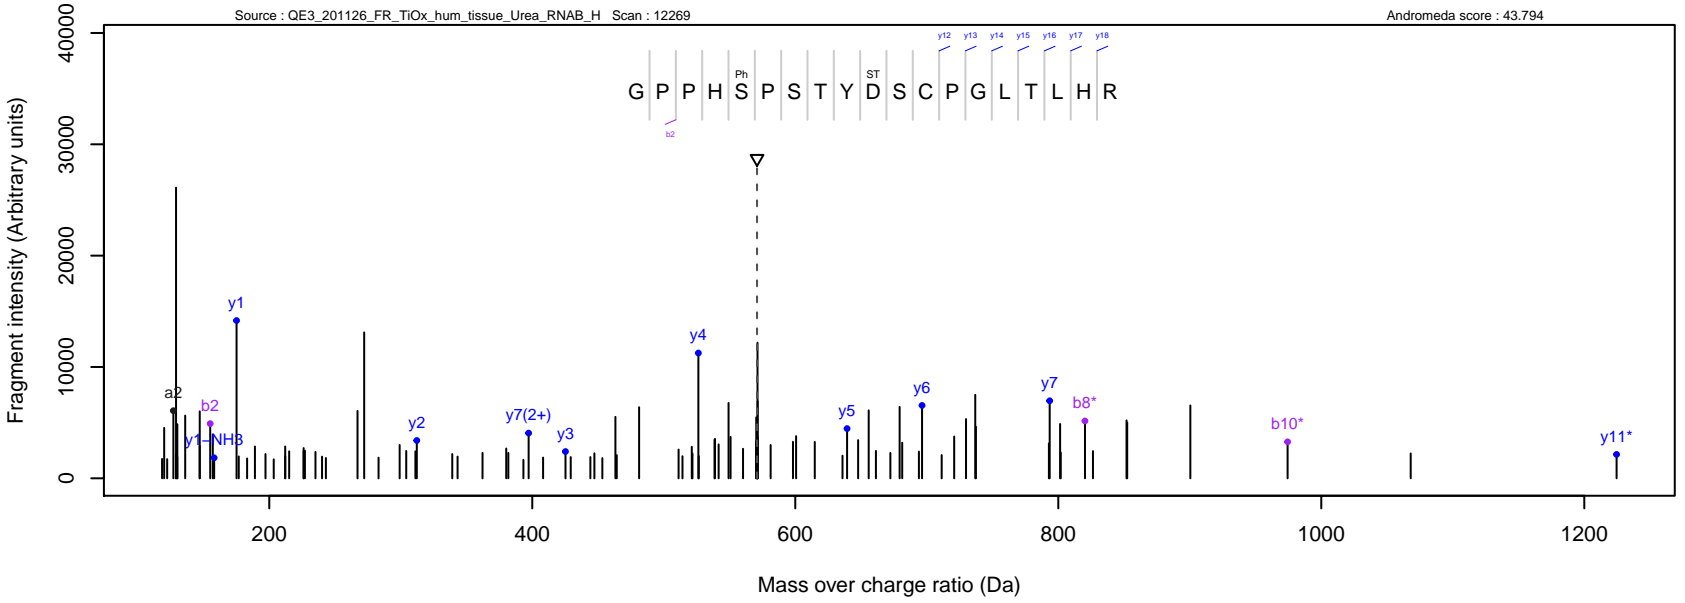

S(Phospho (STY))QSGTLDGESAAWSASGEDSR-2+

Source : QE3\_201126\_FR\_TiOx\_hum\_tissue\_Urea\_RNAB\_H Scan : 28663

Andromeda score : 43.791

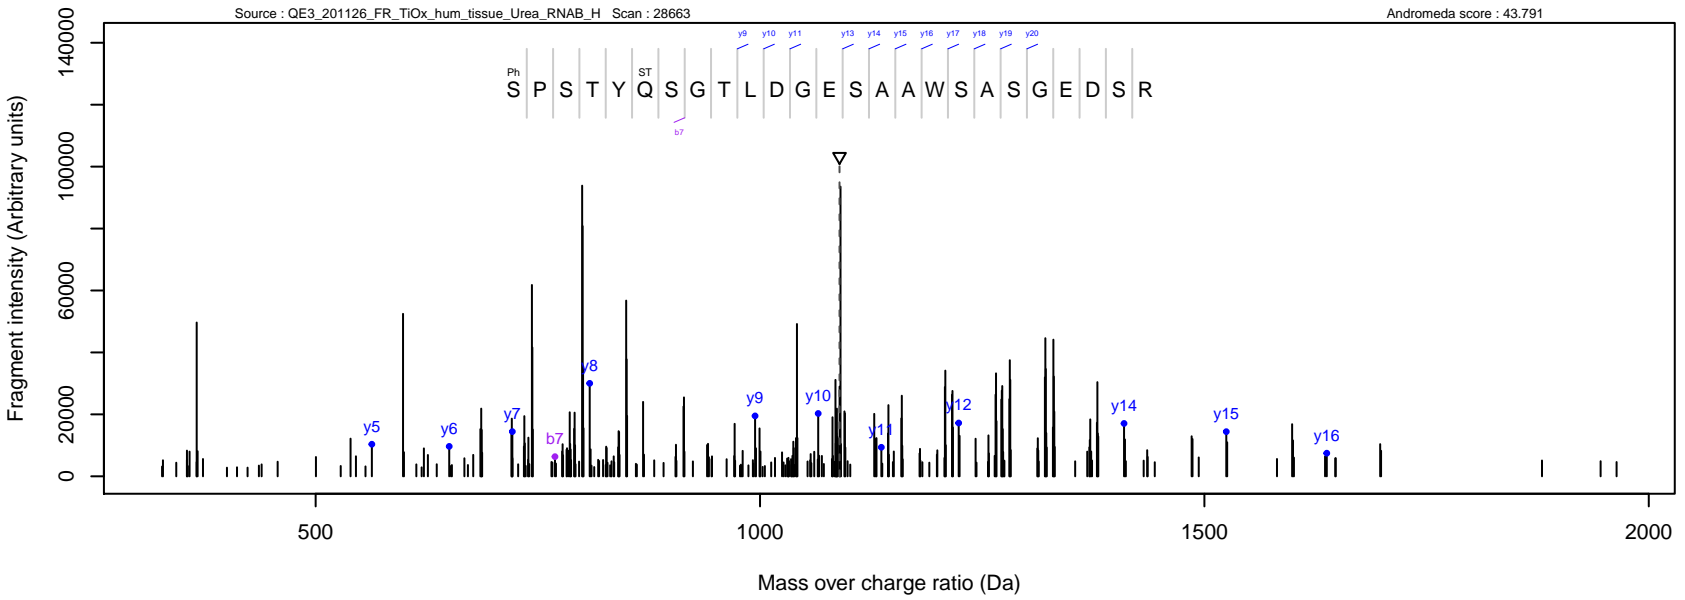

WM(Oxidation (M))EIKIRS(Phospho (STY))PR-2+

Source : QE3\_201126\_FR\_TiOx\_hum\_tissue\_Urea\_RNAB\_H Scan : 14838

Andromeda score : 43.77

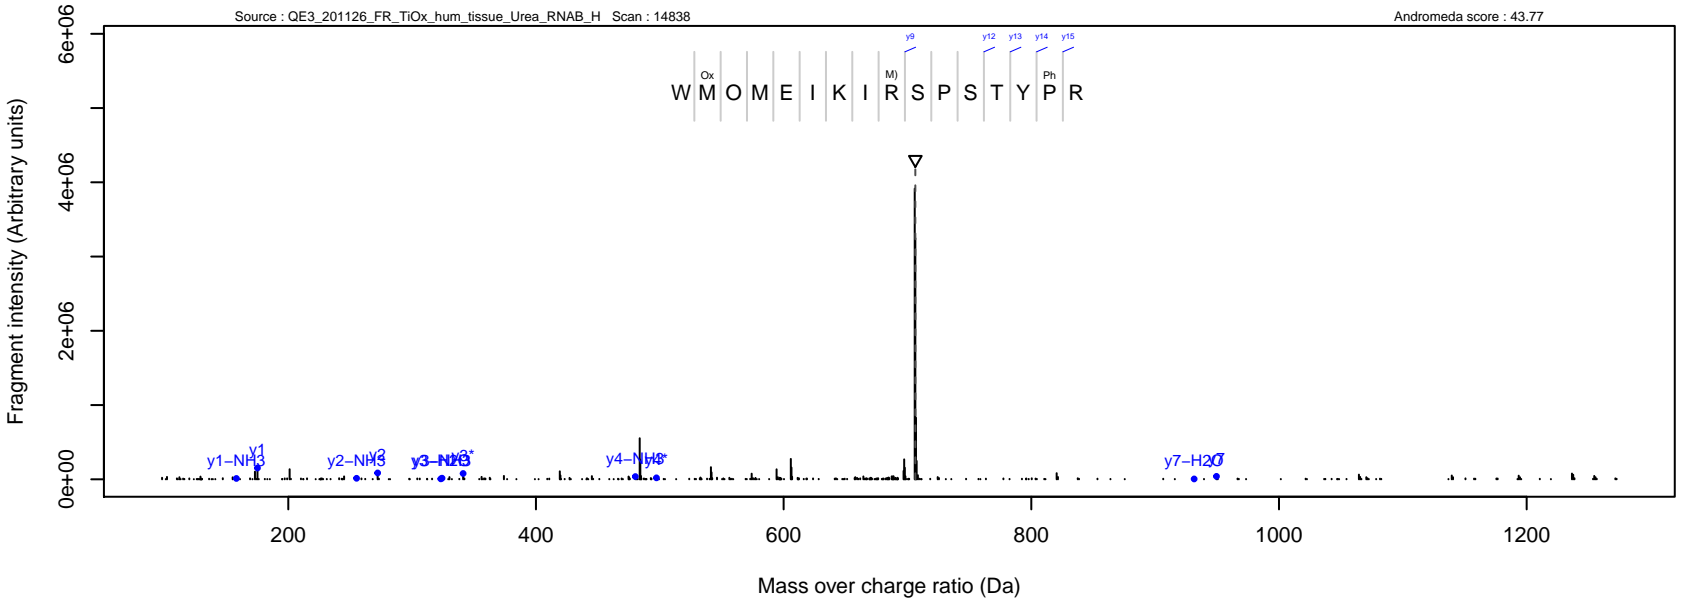

SIQDLT(Phospho (STY))VTGTEPGQVSSR-3+

Source : QE3\_201126\_FR\_TiOx\_hum\_tissue\_Urea\_RNAB\_N Scan : 31416

Andromeda score : 43.768

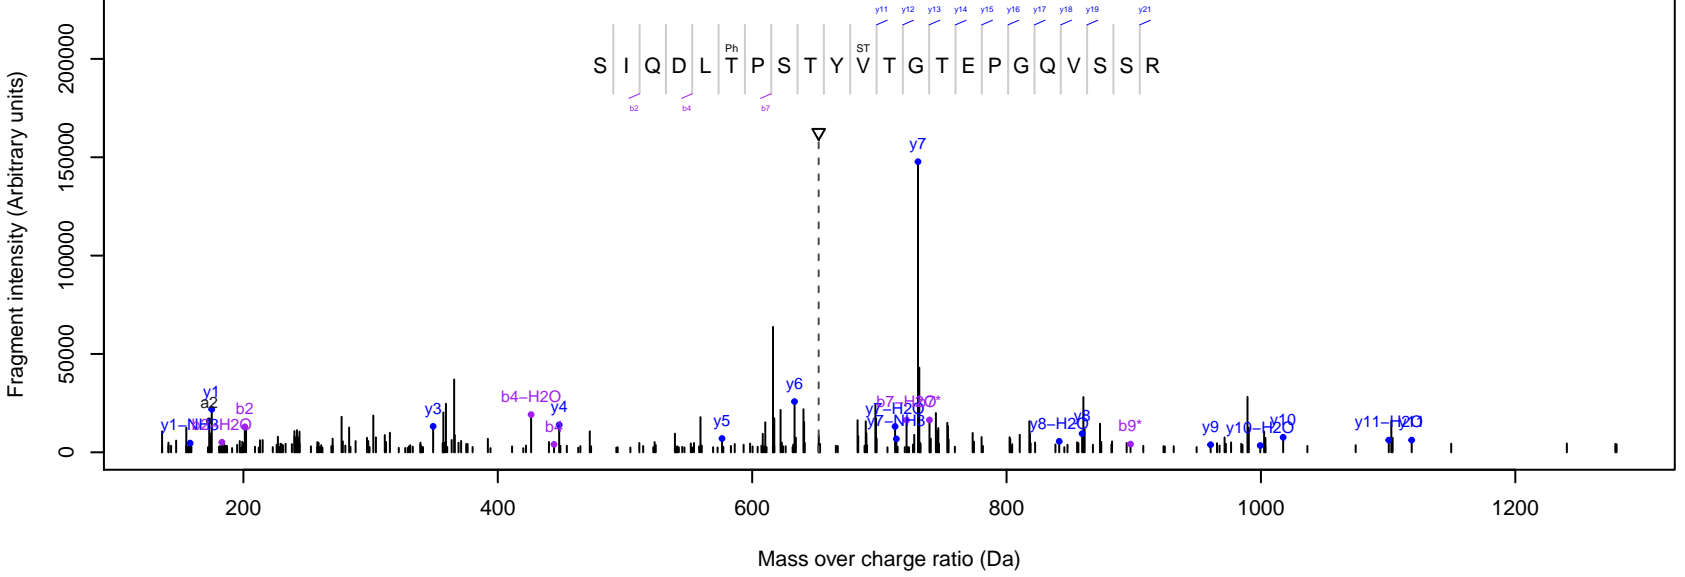

DKNS(Phospho (STY))YSGLEAFGDVK-3+

Source : QE3\_201126\_FR\_TiOx\_hum\_tissue\_Urea\_RNAB\_H Scan : 44115

Andromeda score : 43.696

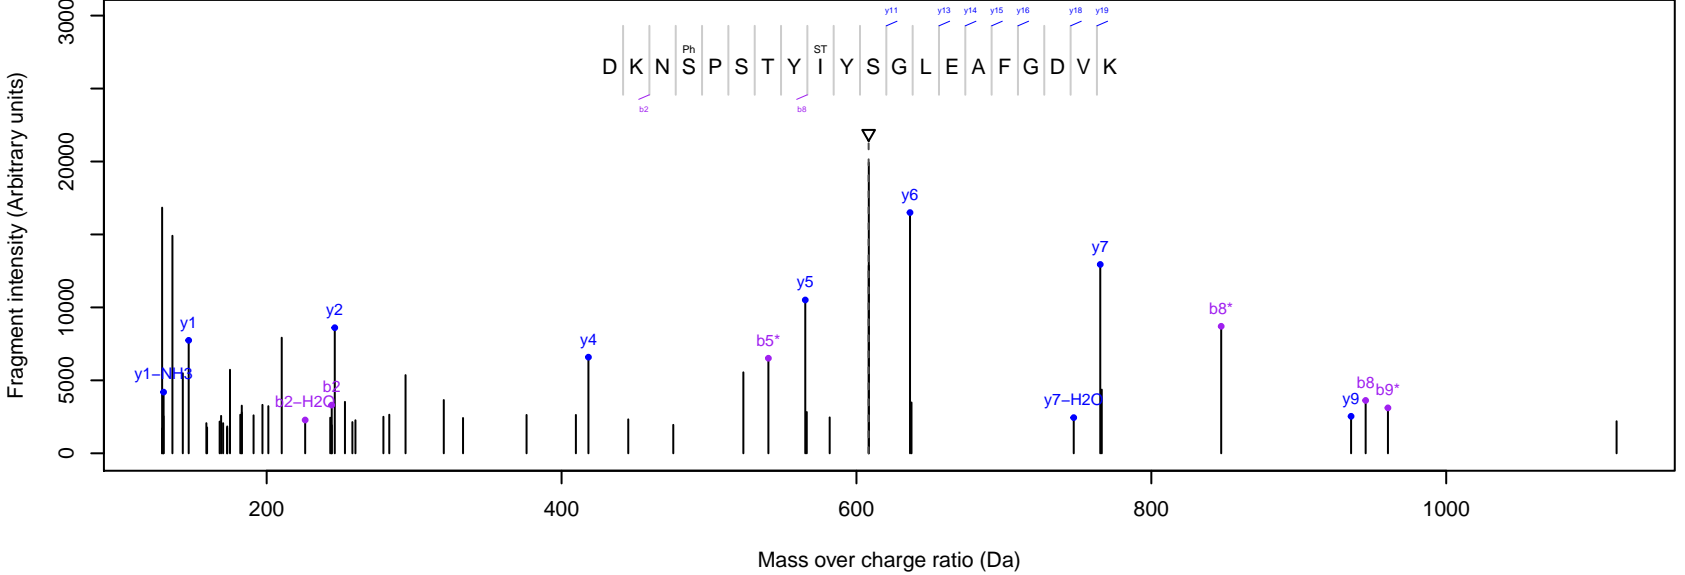

GSVILDSGHL(Phospho (STY))T(Phospho (STY))AS(Phospho (STY))SSDDLKGEESFR-3+

Source : QE3\_201126\_FR\_TiOx\_hum\_tissue\_Urea\_RNAB\_B Scan : 40351

Andromeda score : 43.696

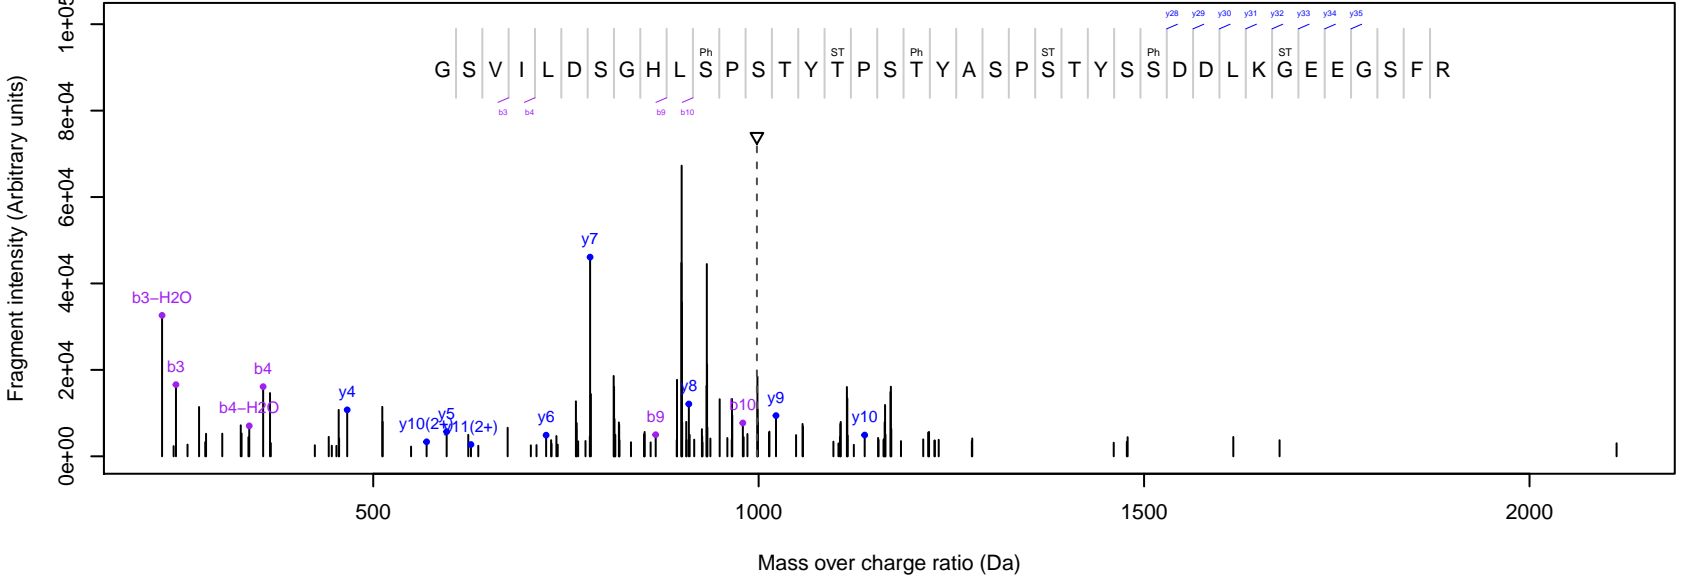





KADGEDAGAES(Phospho (STY))NEEAPGEP SAGSSEEAPGER-4+

Source : QE3\_201126\_FR\_TiOx\_hum\_tissue\_Urea\_RNAB\_N Scan : 18724

Andromeda score : 43.633

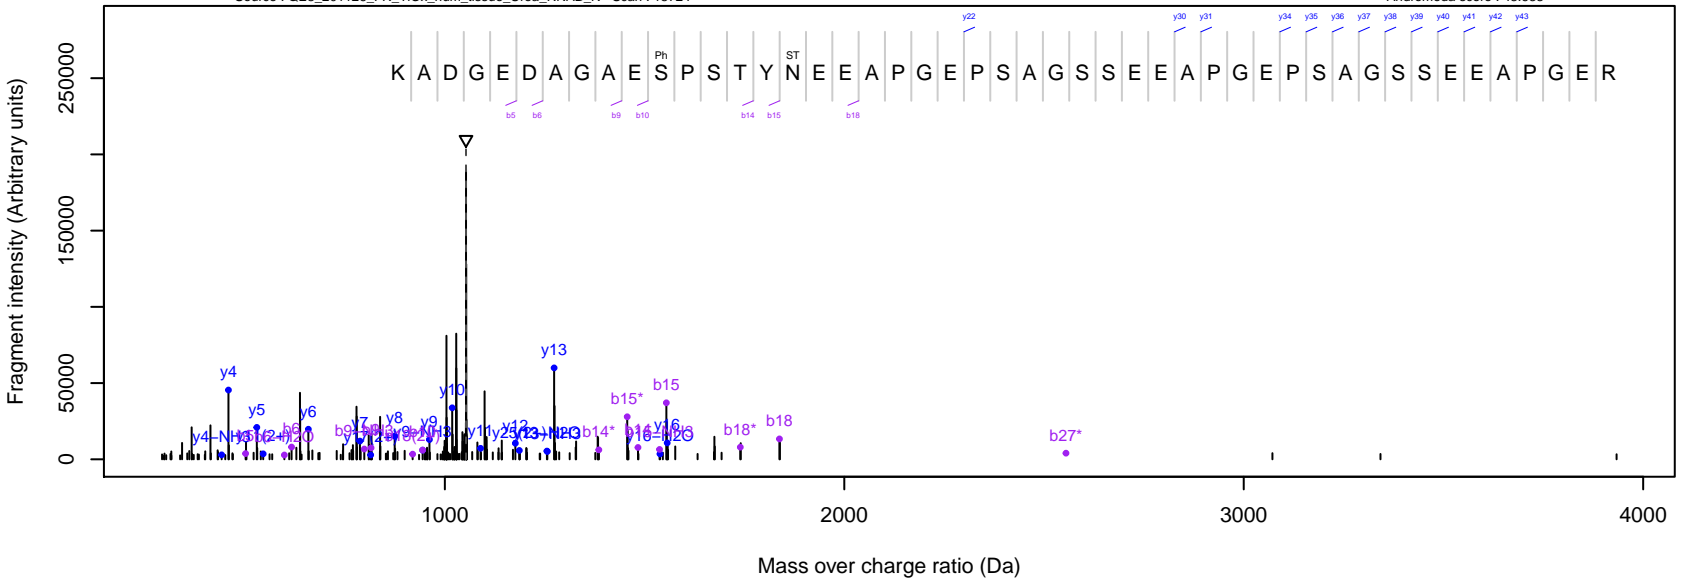

ESAAPAS(Phospho (STY))PAPS(Phospho (STY))PAPS(Phospho (STY))PTPAPPQK-3+

Source : QE3\_201126\_FR\_TiOx\_hum\_tissue\_Urea\_RNAB\_N Scan : 24400

Andromeda score : 43.622

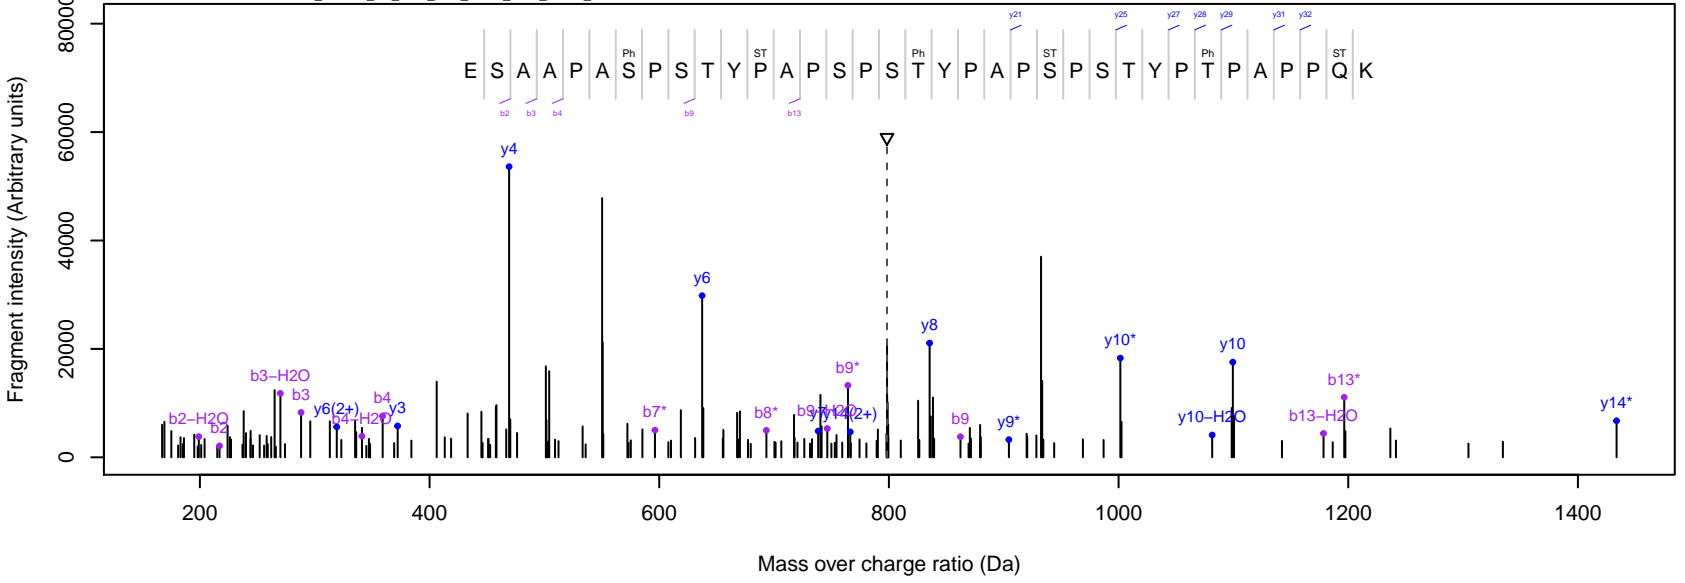

DIKFDDS(Phospho (STY))DTEQIAEEGDDNLANSASPSKR-3+

Source : QE3\_201126\_FR\_TiOx\_hum\_tissue\_Urea\_RNAB\_H Scan : 34197

Andromeda score : 43.612

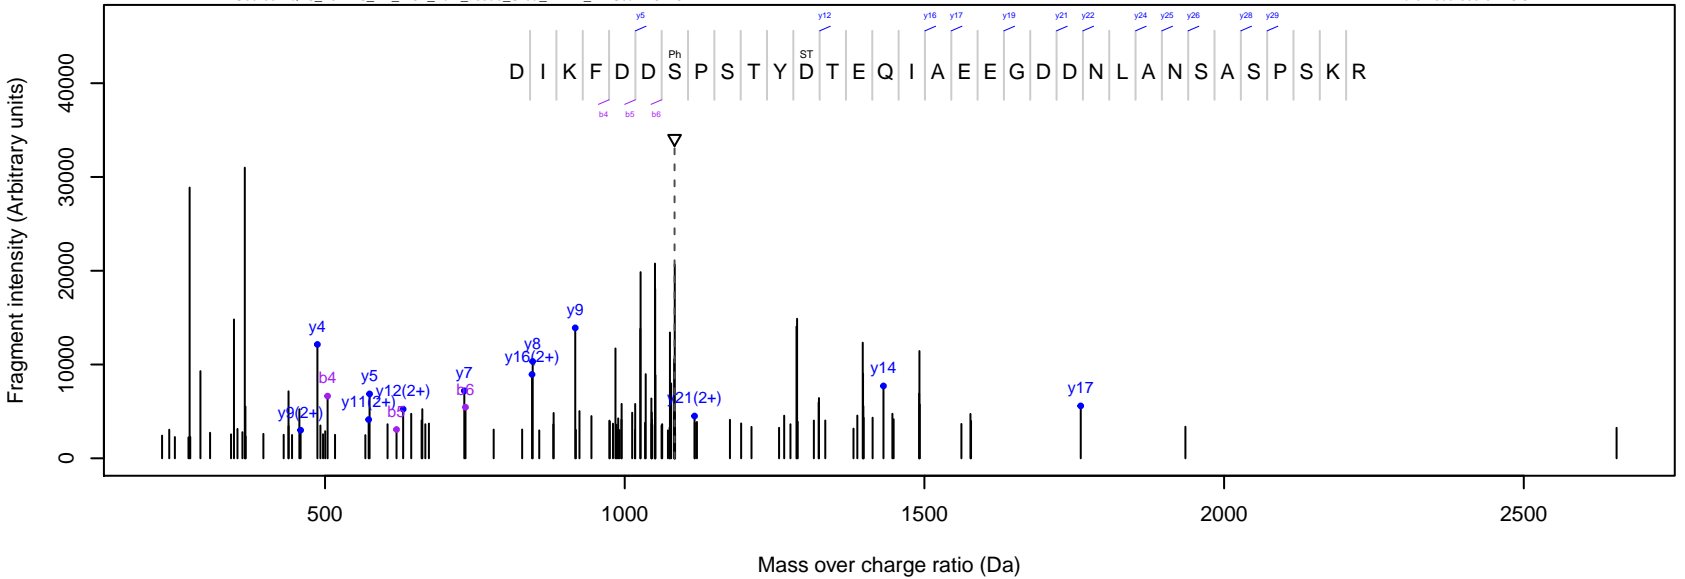

M(Oxidation (M))ITNSLNHDS(Phospho (STY))PPS(Phospho (STY))TPPRRPDTSTSK-4+

Source : QE3\_201126\_FR\_TiOx\_hum\_tissue\_Urea\_RNAB\_N Scan : 12982

Andromeda score : 43.612

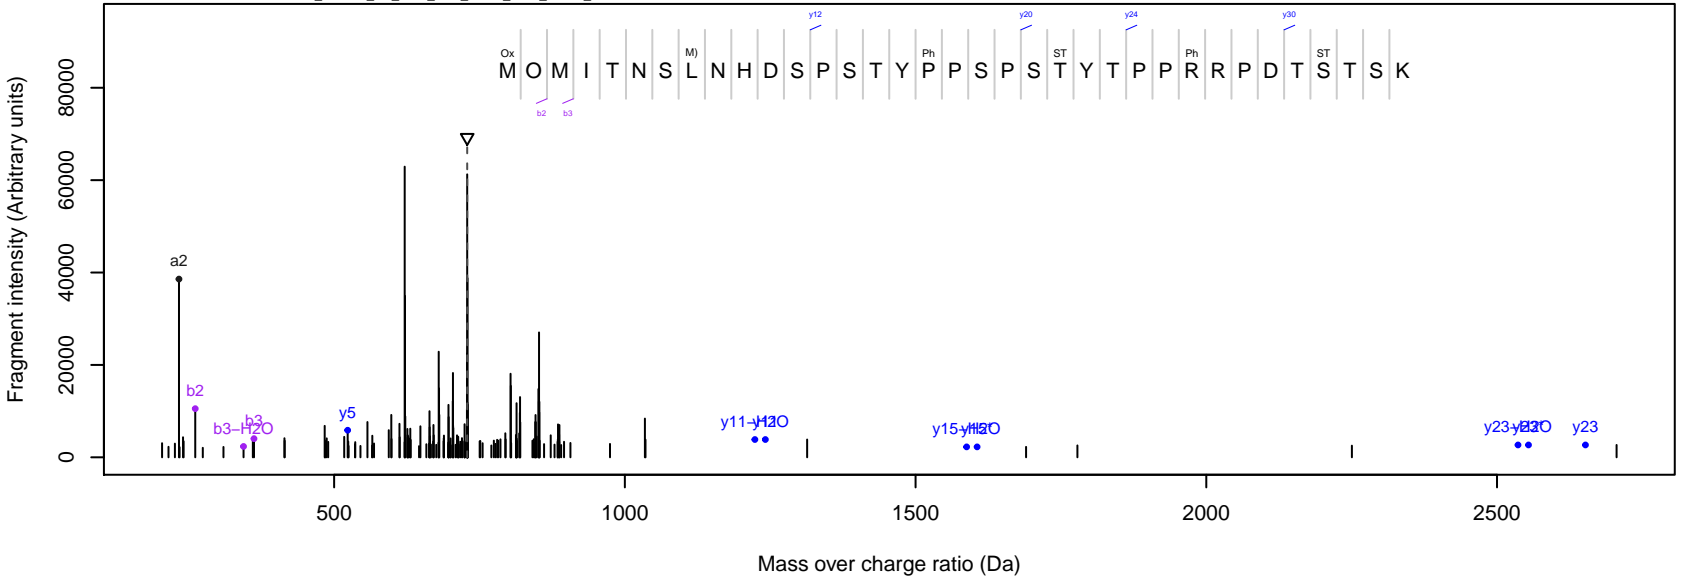

TTQSMQDFPVDS(Phospho (STY))EEEEEEFQK-3+

Source : QE3\_201126\_FR\_TiOx\_hum\_tissue\_Urea\_RNAB\_N Scan : 44881

Andromeda score : 43.612

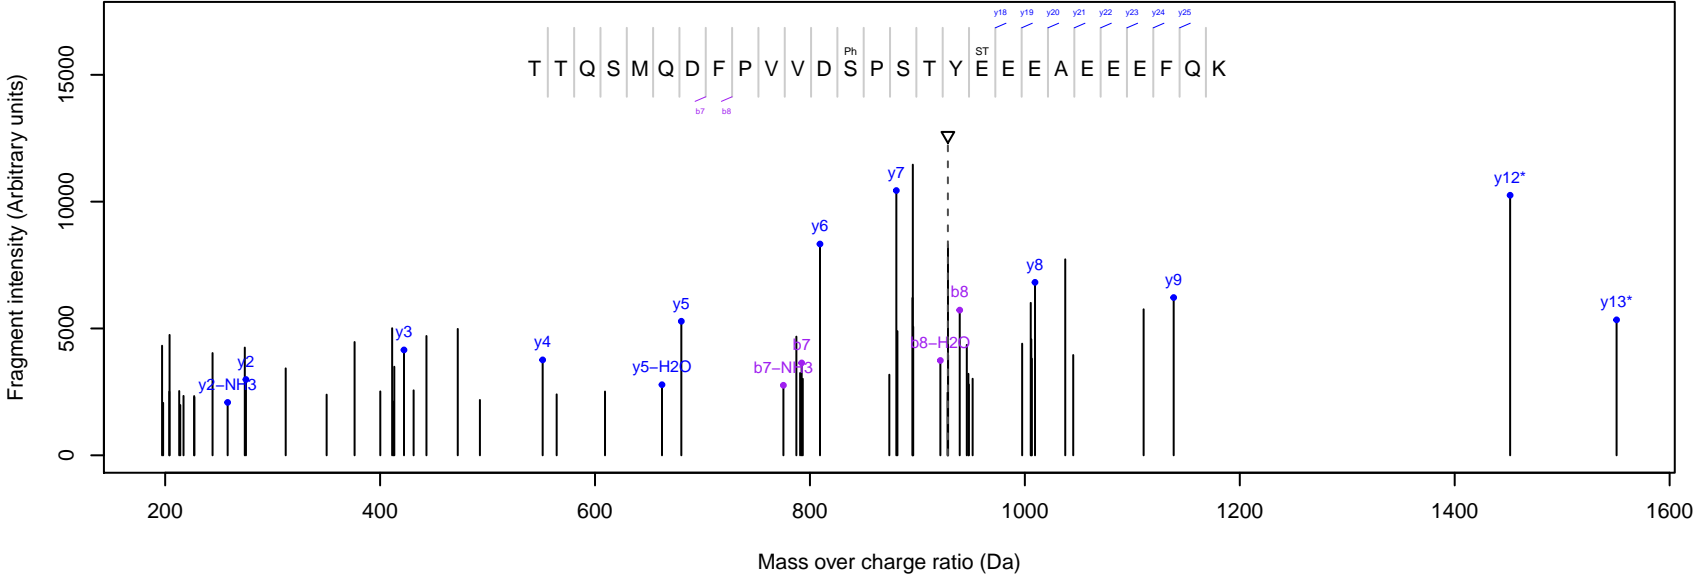

GSGEKPVSA PGDDTES(Phospho (STY))LHS(Phospho (STY))QGEEEFDM(Oxidation (M))PQPPHGHVLR-4+

Source : QE3\_201126\_FR\_TiOx\_hum\_tissue\_Urea\_RNAB\_H Scan : 18999

Andromeda score : 43.6

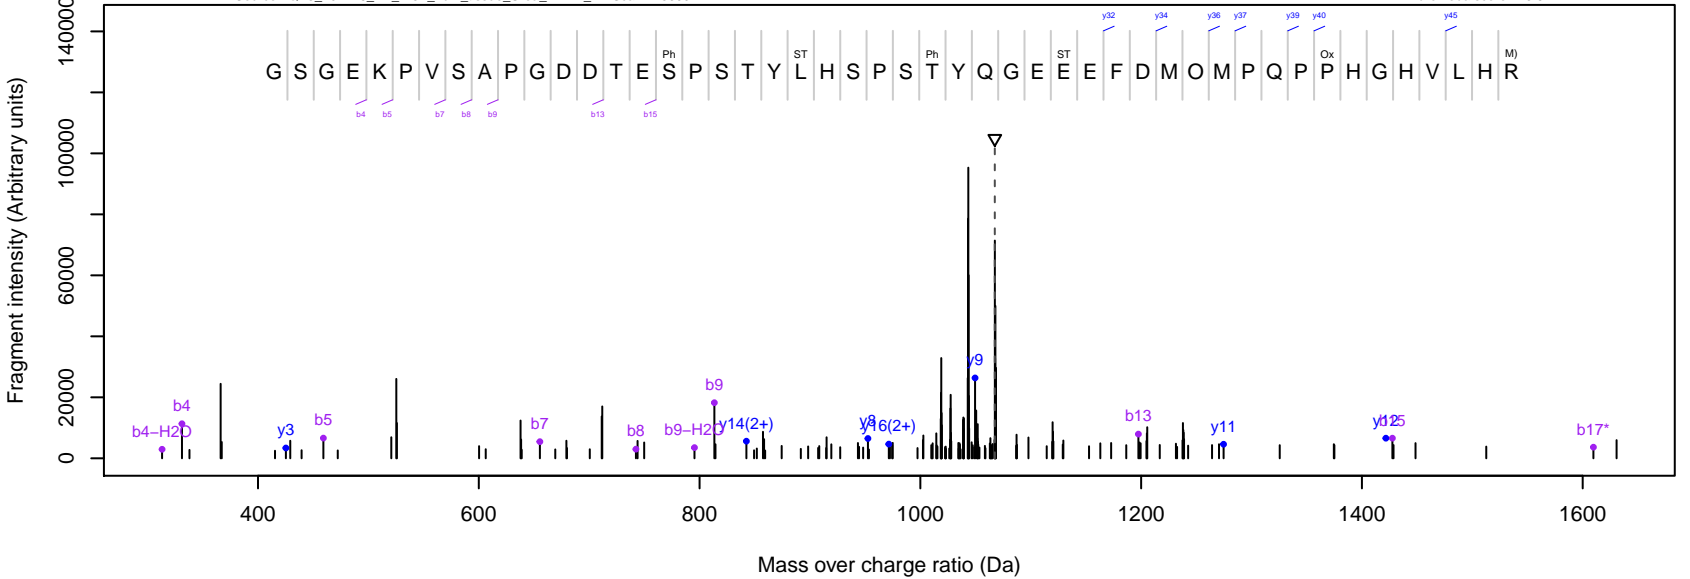

DSVINLS(Phospho (STY))ES(Phospho (STY))VEDGPK-2+

Source : QE3\_201126\_FR\_TiOx\_hum\_tissue\_Urea\_RNAB\_N Scan : 42433

Andromeda score : 43.592

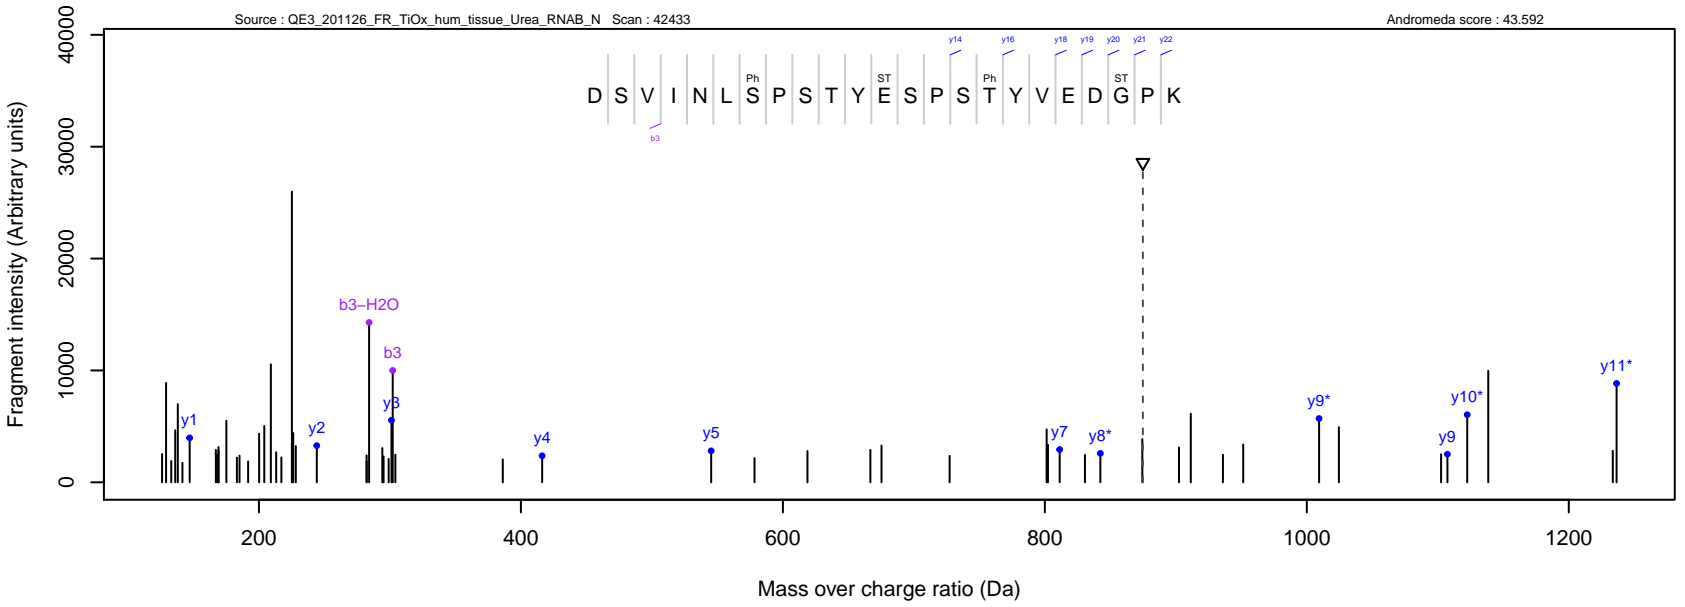

VDGPRS(Phospho (STY))PS(Phospho (STY))YGRSR-3+

Source : QE3\_201126\_FR\_TiOx\_hum\_tissue\_Urea\_RNAB\_B Scan : 6873

Andromeda score : 43.557

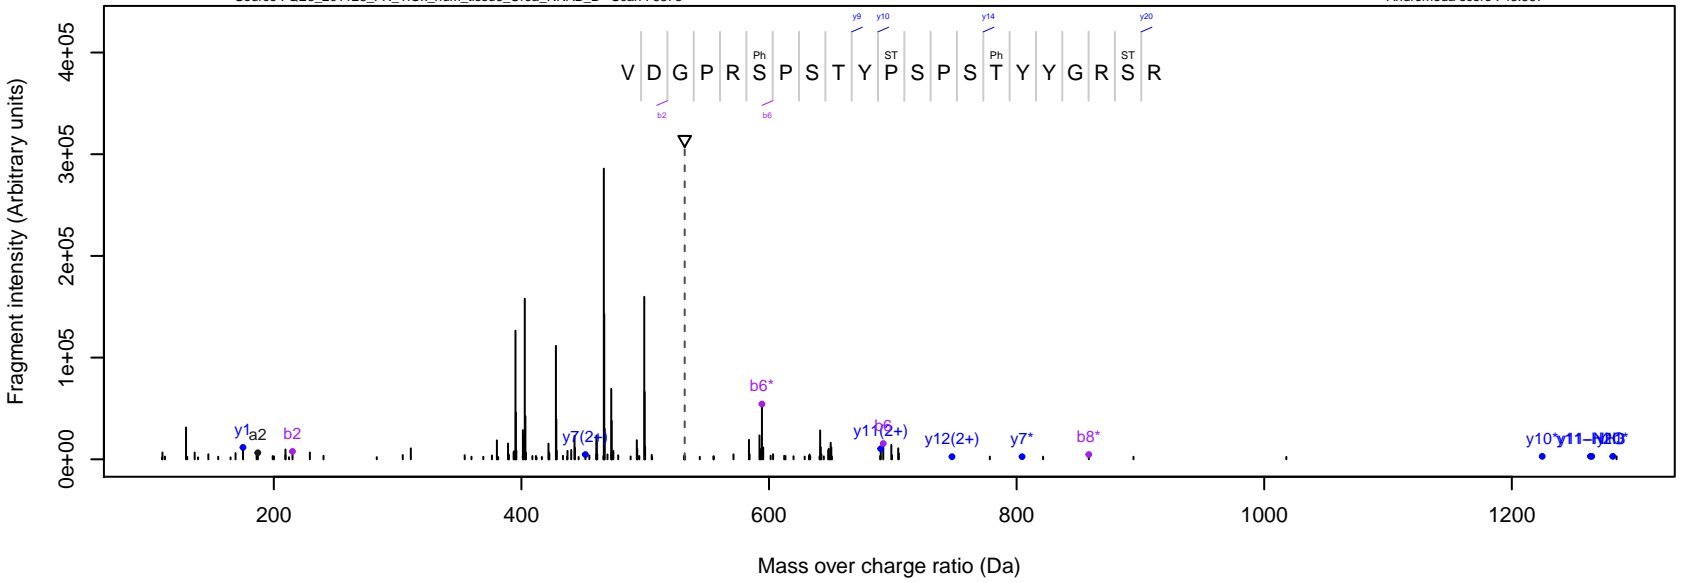

WTKPSSF(Phospho (STY))DSER-3+

Source : QE3\_201126\_FR\_TiOx\_hum\_tissue\_Urea\_RNAB\_N Scan : 15419

Andromeda score : 43.557

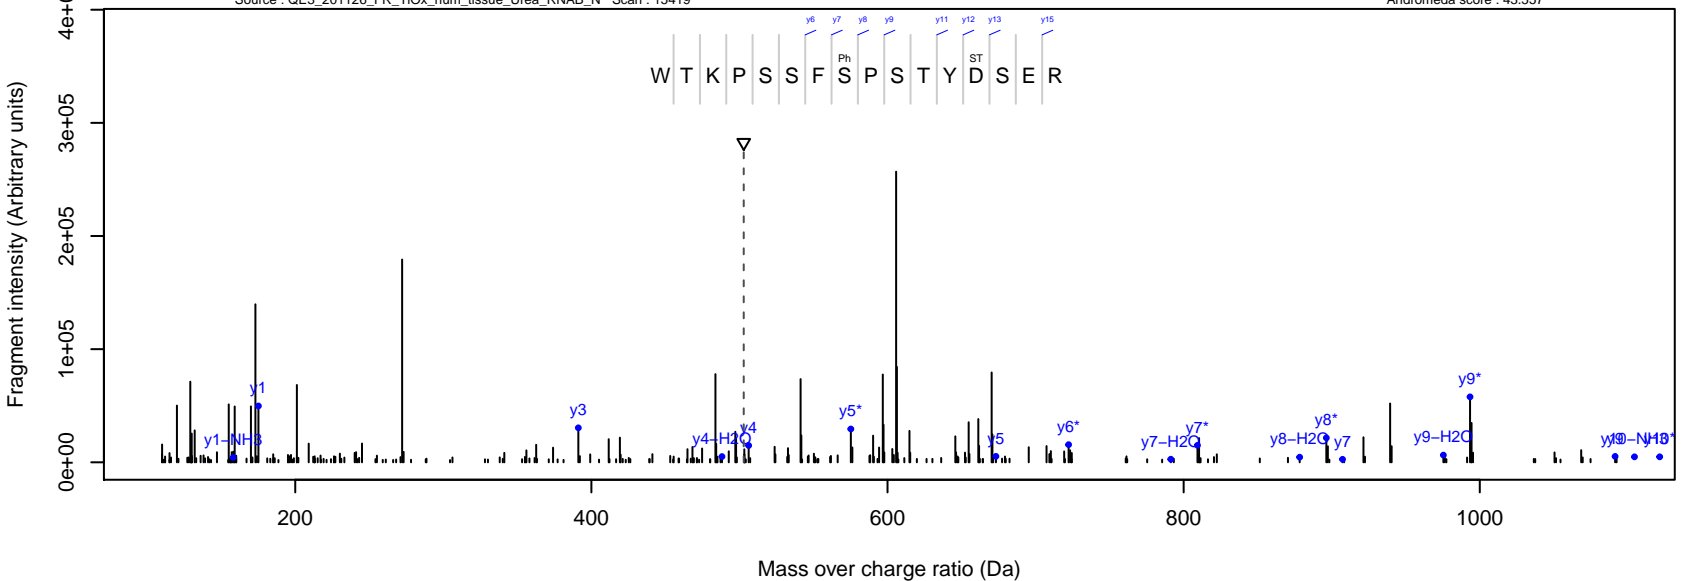

NKPLS(Phospho (STY))PIKLTPTSVLDFYGTGSVQR-3+

Source : QE3\_201126\_FR\_TiOx\_hum\_tissue\_Urea\_RNAB\_B Scan : 52930

Andromeda score : 43.554

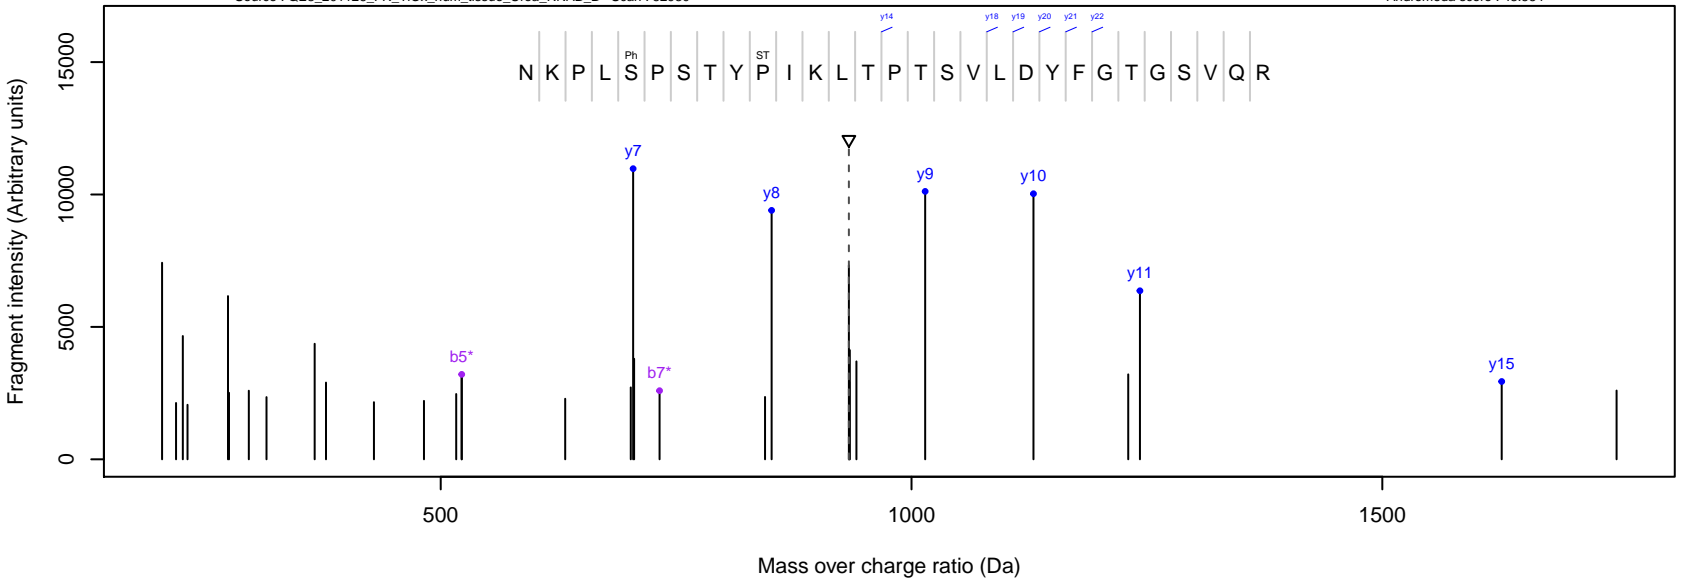

GFPAPS(Phospho (STY))QSSTSDEEPGAYWNGK-3+

Source : QE3\_201126\_FR\_TiOx\_hum\_tissue\_Urea\_RNAB\_B Scan : 37855

Andromeda score : 43.534

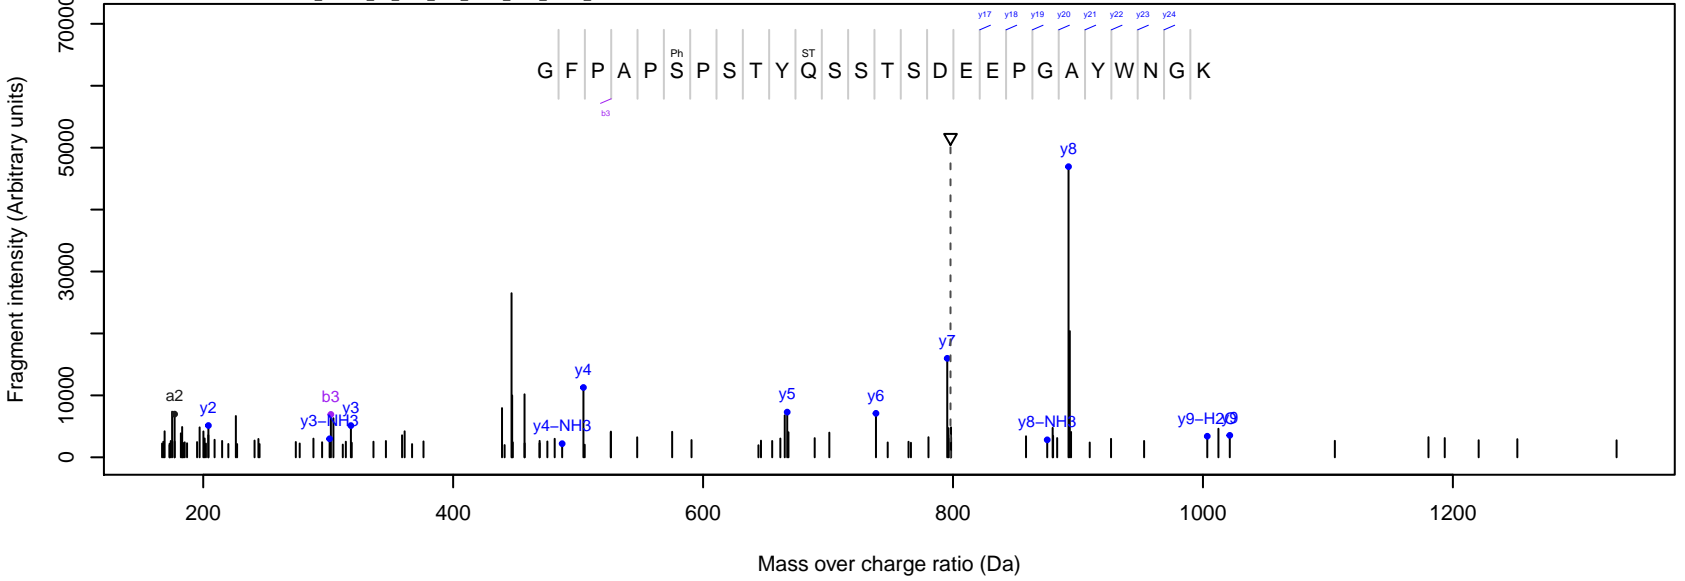

RLDDQRAS(Phospho (STY))VGS(Phospho (STY))LPGLR-3+

Source : QE3\_201126\_FR\_TiOx\_hum\_tissue\_Urea\_RNAB\_B Scan : 27793

Andromeda score : 43.534

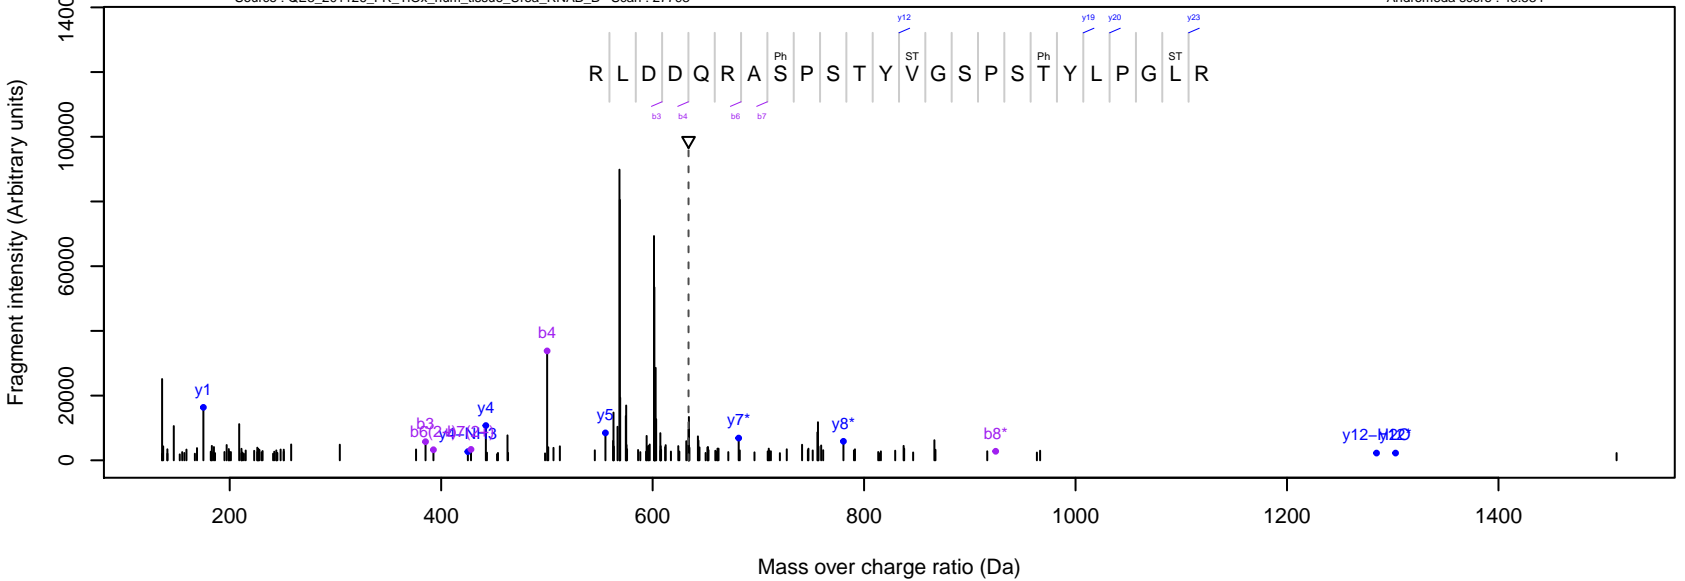

DNS(Phospho (STY))PDSTPNHPSQTTPAQK-3+

Source : QE3\_201126\_FR\_TiOx\_hum\_tissue\_Urea\_RNAB\_B Scan : 6499

Andromeda score : 43.523

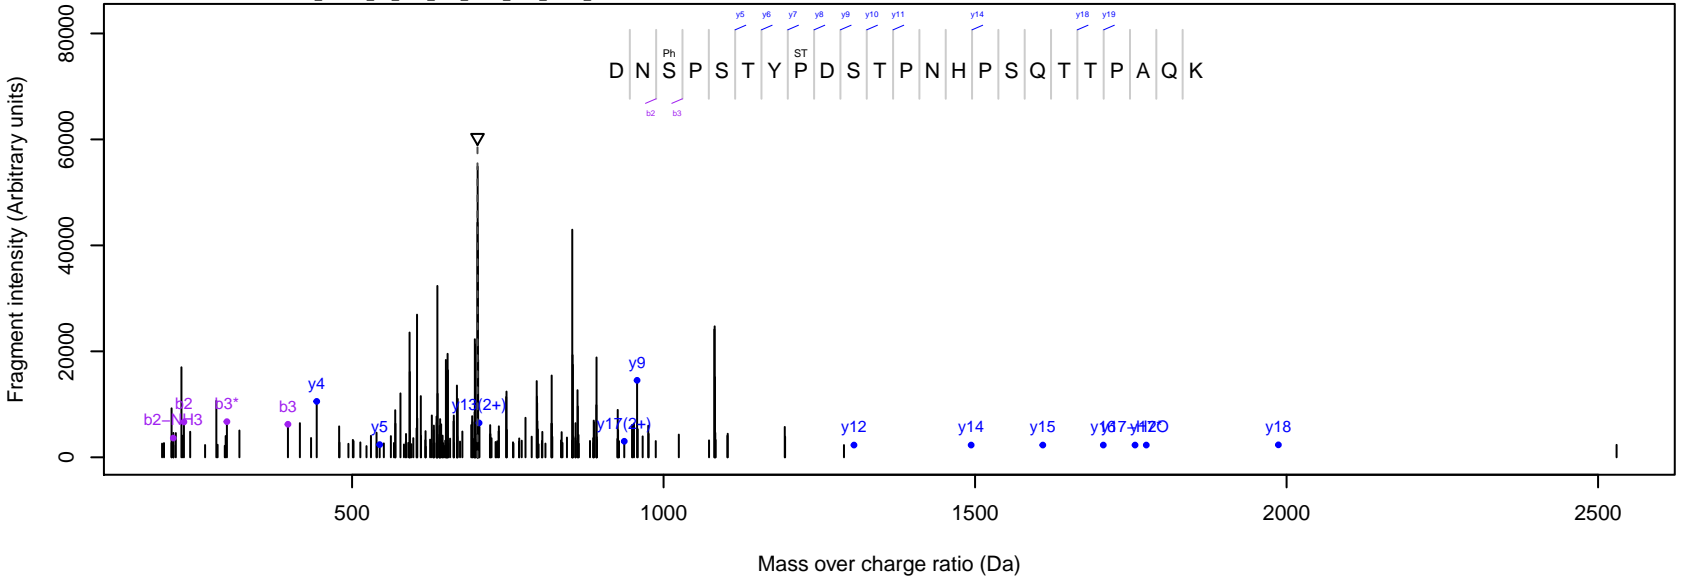

KLQLERPVS(Phospho (STY))PETQADLQR-3+

Source : QE3\_201126\_FR\_TiOx\_hum\_tissue\_Urea\_RNAB\_H Scan : 20304

Andromeda score : 43.523

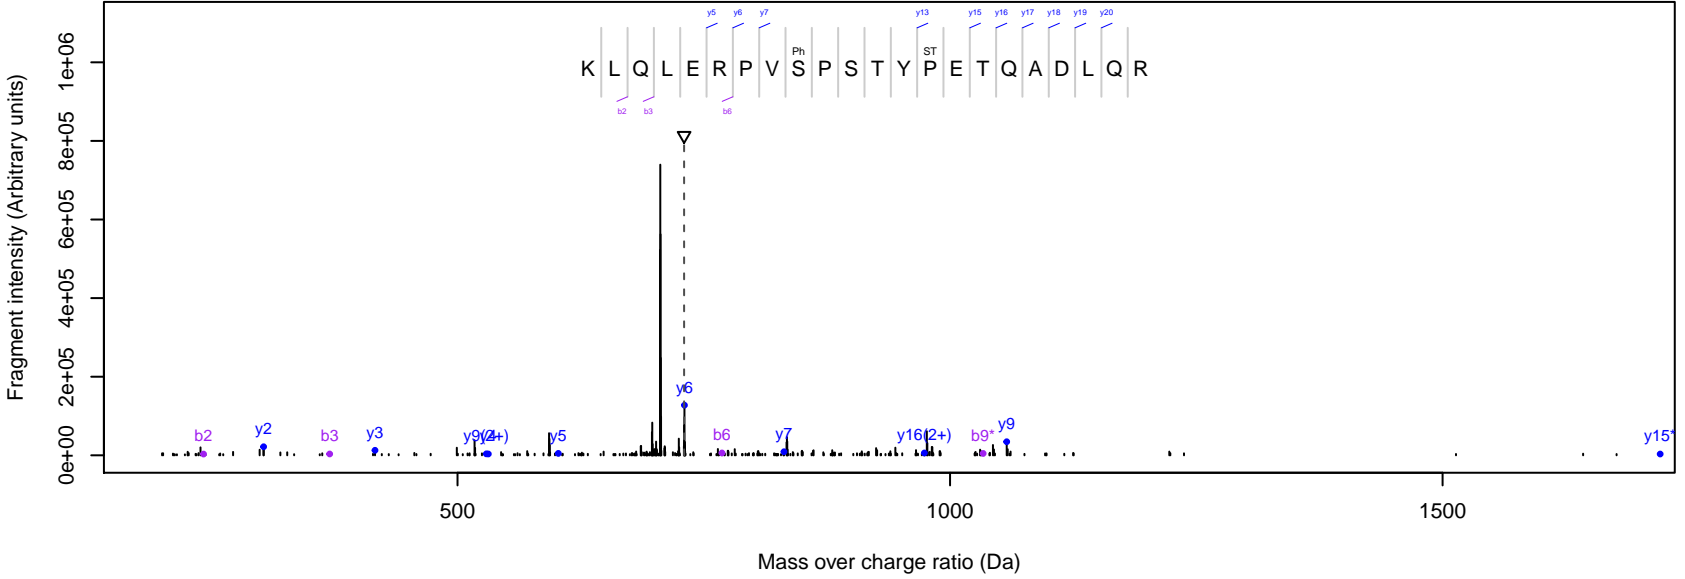

SVDALDDLTPPS(Phospho (STY))TAESGSRSPSTNGGR-3+

Source : QE3\_201126\_FR\_TiOx\_hum\_tissue\_Urea\_RNAB\_B Scan : 29111

Andromeda score : 43.501

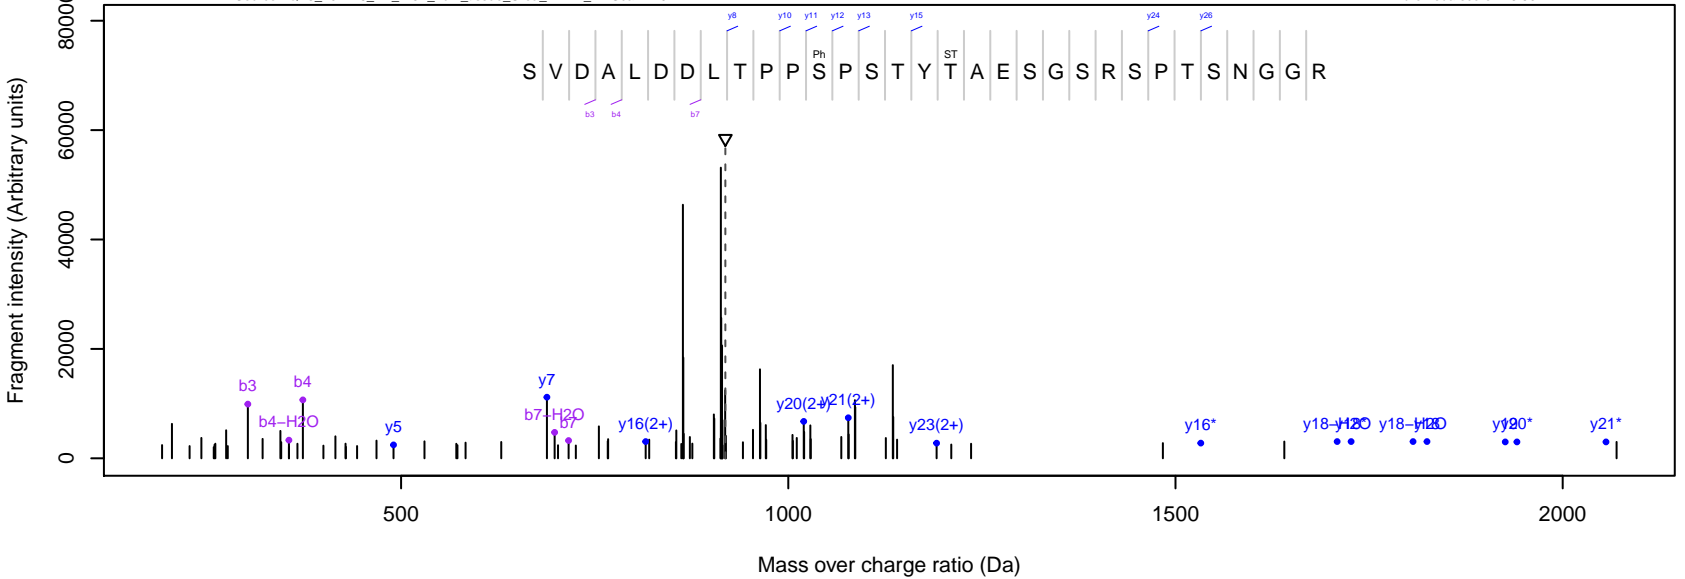

LENEGS(Phospho (STY))DEDIETDVLSPQM(Oxidation (M))ALK-3+

Source : QE3\_201126\_FR\_TiOx\_hum\_tissue\_Urea\_RNAB\_B Scan : 49158

Andromeda score : 43.497

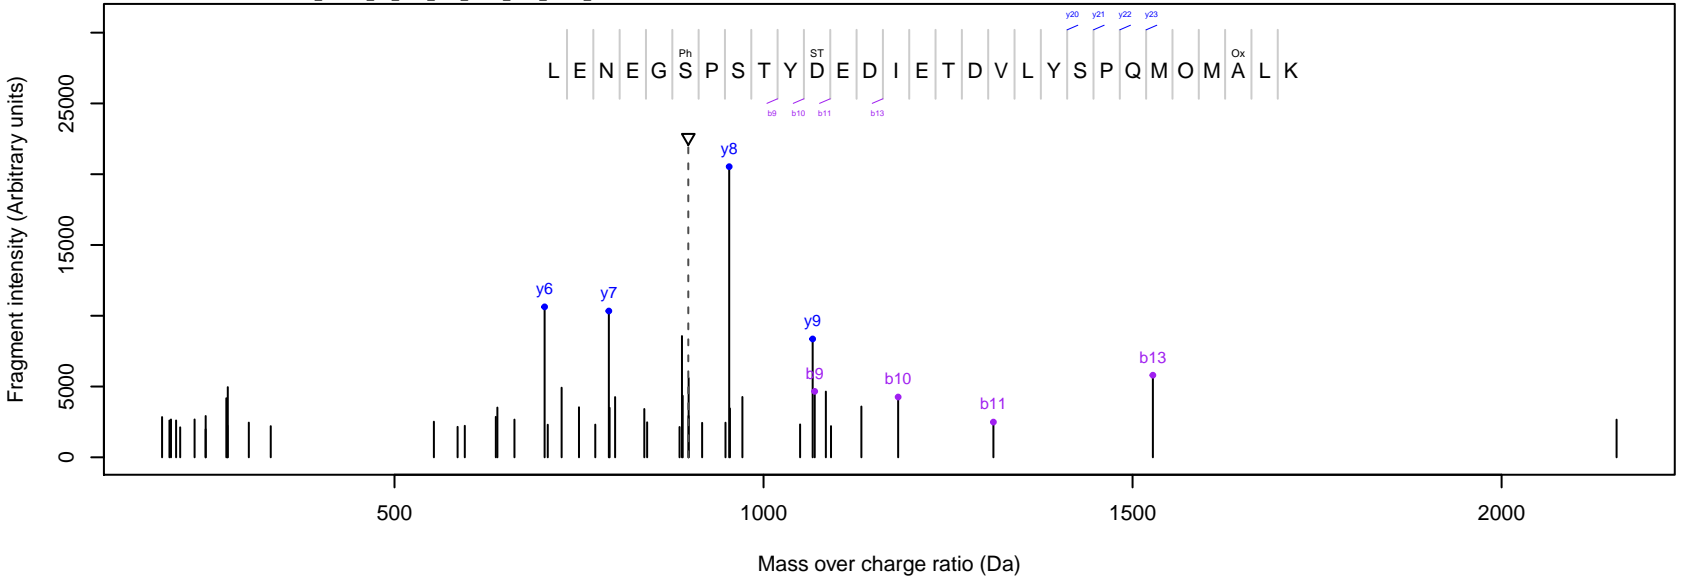

S(Phospho (STY))RS(Phospho (STY))GSPGSSSYEHYESR-3+

Source : QE3\_201126\_FR\_TiOx\_hum\_tissue\_Urea\_RNAB\_H Scan : 10168

Andromeda score : 43.497

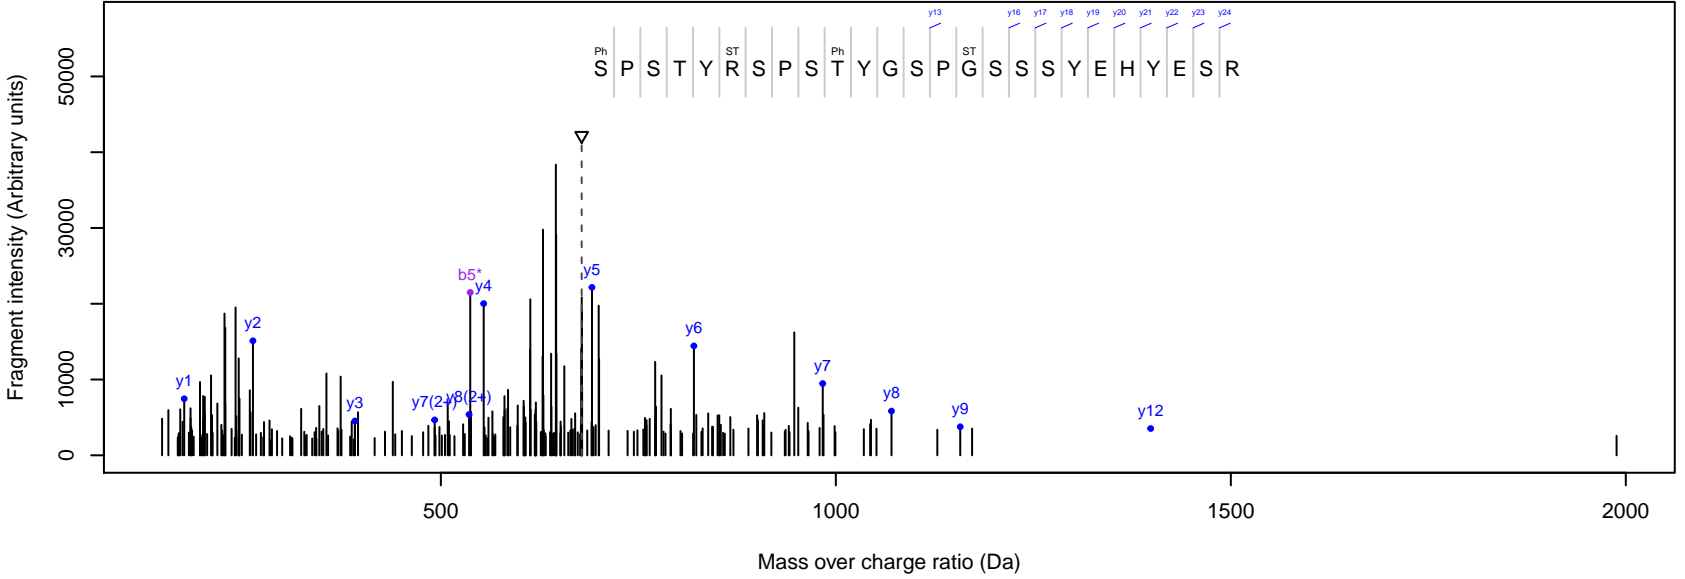

VT(Phospho (STY))IAEVK-1+

Source : QE3\_201126\_FR\_TiOx\_hum\_tissue\_Urea\_RNAB\_H Scan : 18937

Andromeda score : 43.442

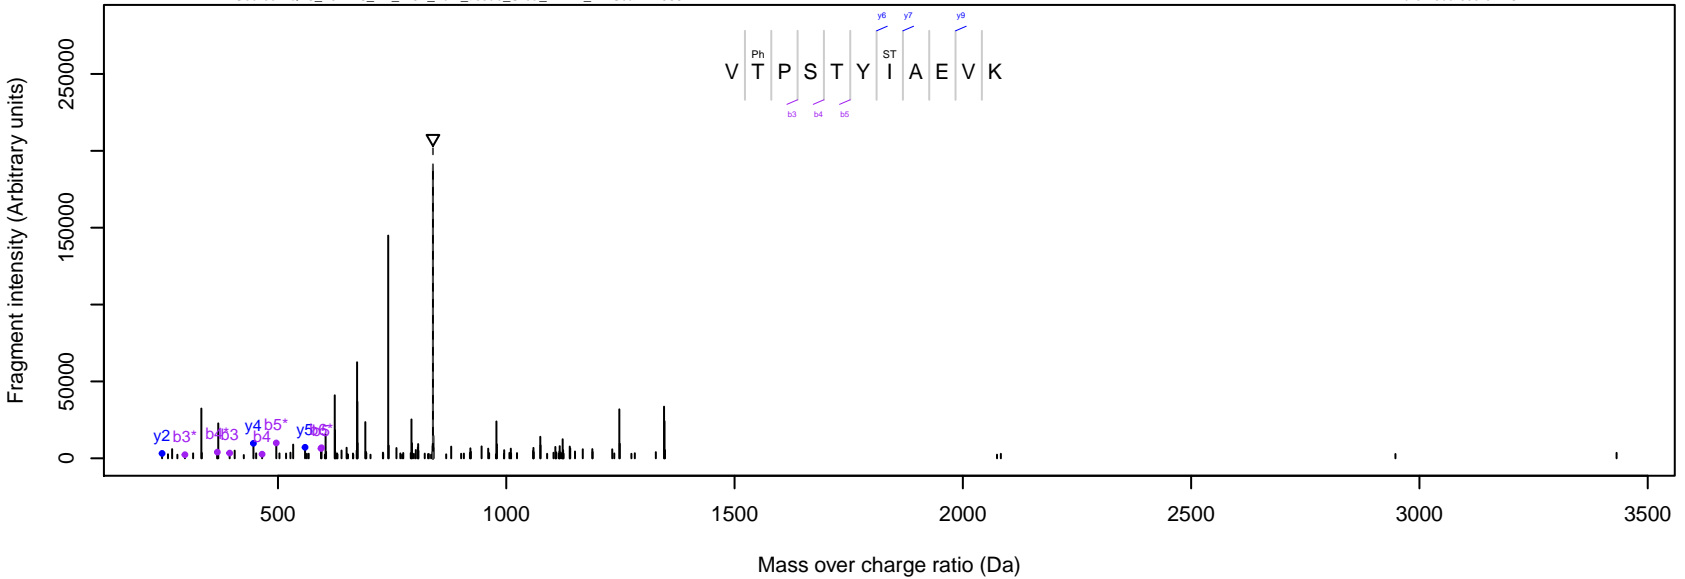

YSL(Phospho (STY))PSK-2+

Source : QE3\_201126\_FR\_TiOx\_hum\_tissue\_Urea\_RNAB\_H Scan : 12294

Andromeda score : 43.442

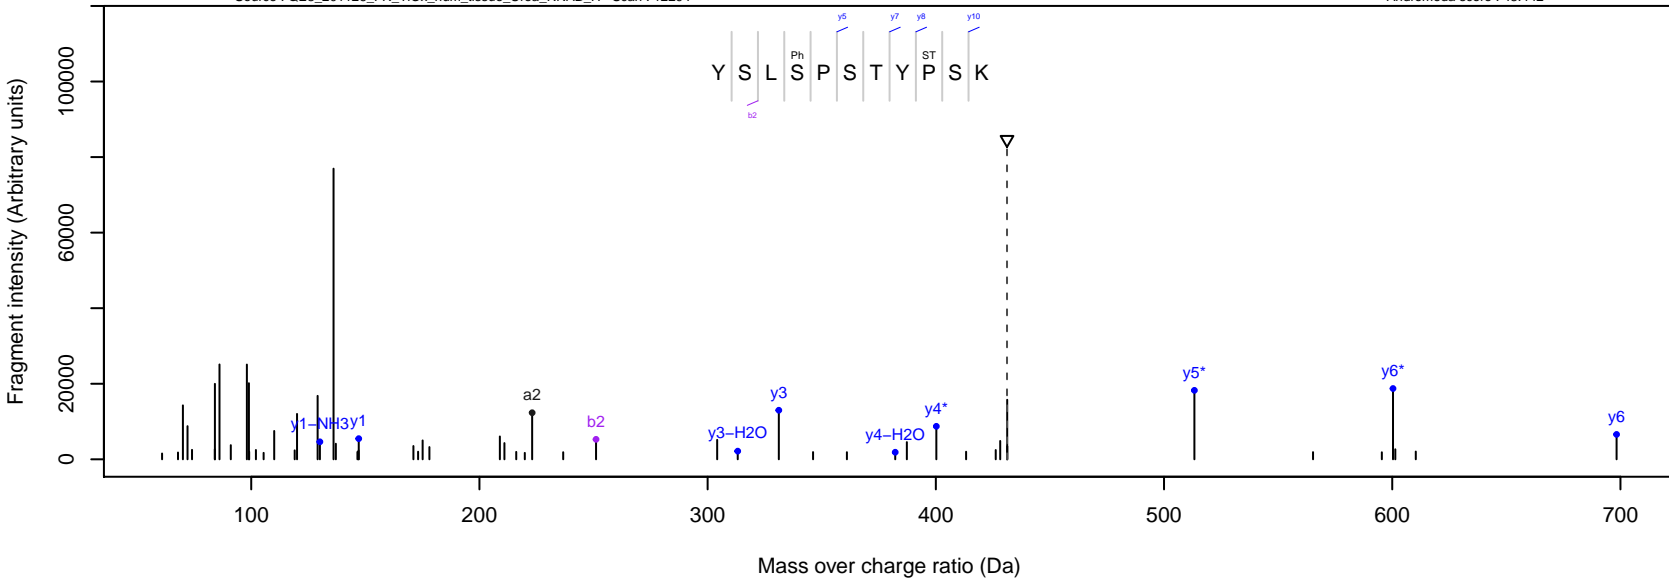

AQS(Phospho (STY))GS(Phospho (STY))DS(Phospho (STY))S(Phospho (STY))PEPKAPAPR-3+

Source : QE3\_201126\_FR\_TiOx\_hum\_tissue\_Urea\_RNAB\_H Scan : 19048

Andromeda score : 43.408

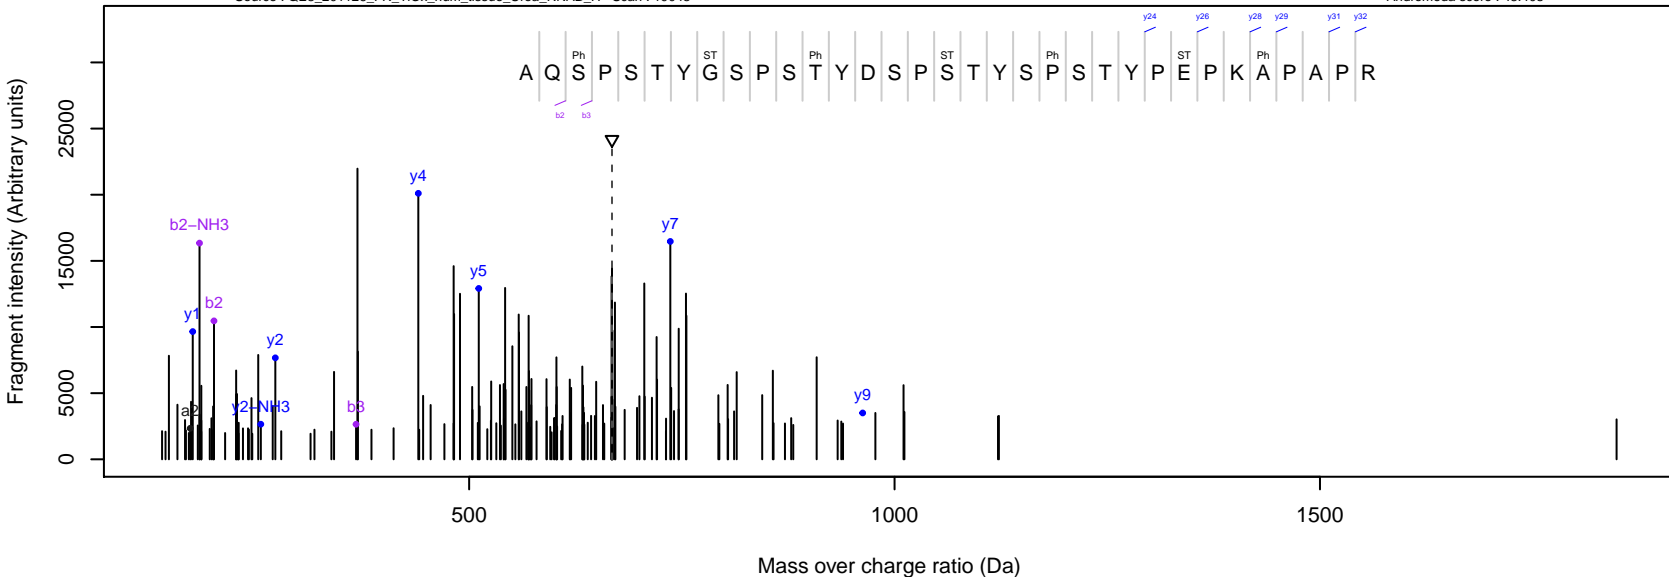

GGRS(Phospho (STY))RS(Phospho (STY))S(Phospho (STY))SPVTELASR-2+

Source : QE3\_201126\_FR\_TiOx\_hum\_tissue\_Urea\_RNAB\_B Scan : 17966

Andromeda score : 43.408

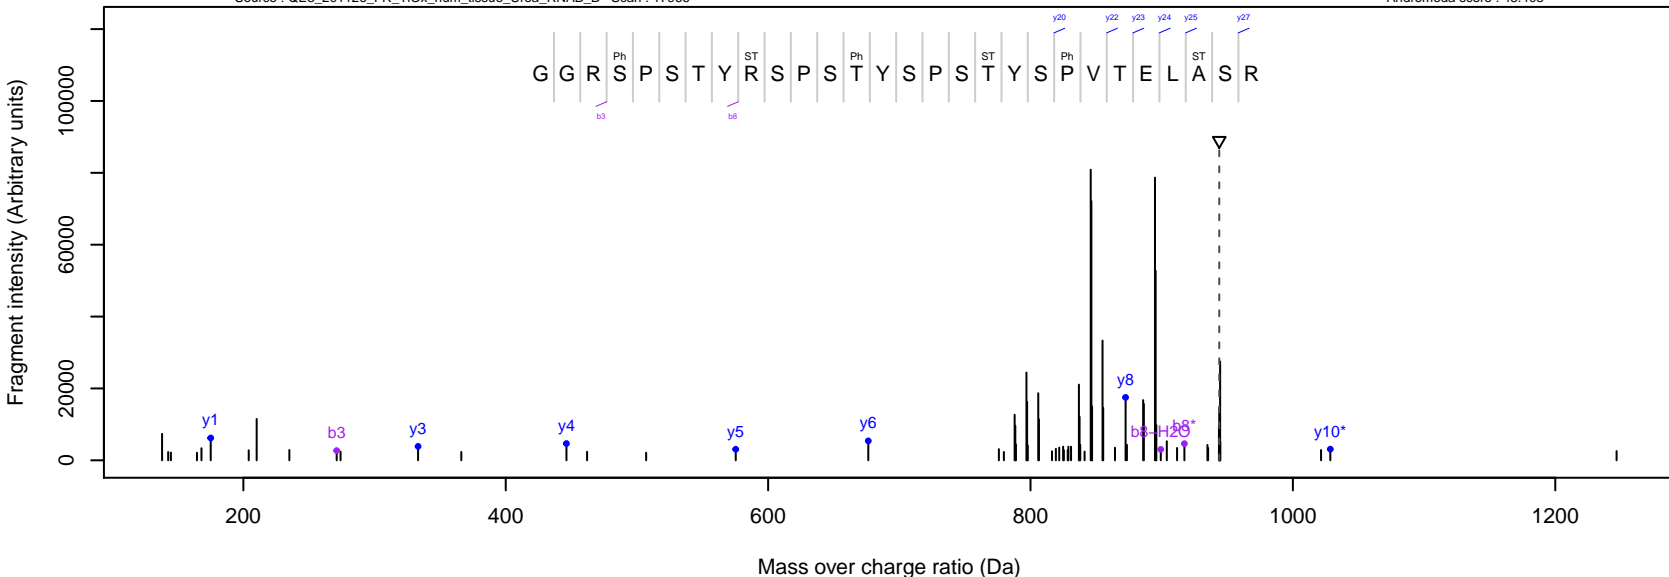

RVQS(Phospho (STY))SPNLLAAGR-2+

Source : QE3\_201126\_FR\_TiOx\_hum\_tissue\_Urea\_RNAB\_B Scan : 17210

Andromeda score : 43.382

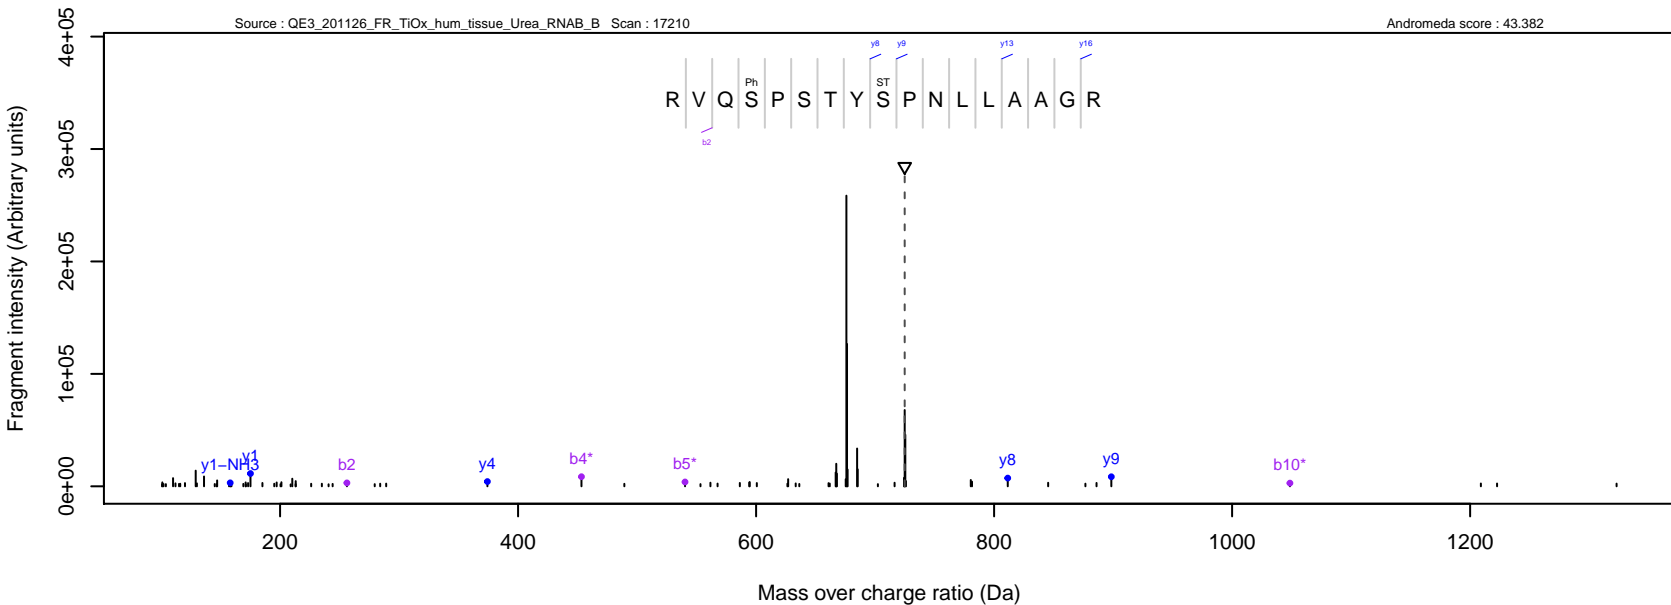

DNLTLWTS(Phospho (STY))DSAGEECDAAEGAEN-3+

Source : QE3\_201126\_FR\_TiOx\_hum\_tissue\_Urea\_RNAB\_H Scan : 56718

Andromeda score : 43.349

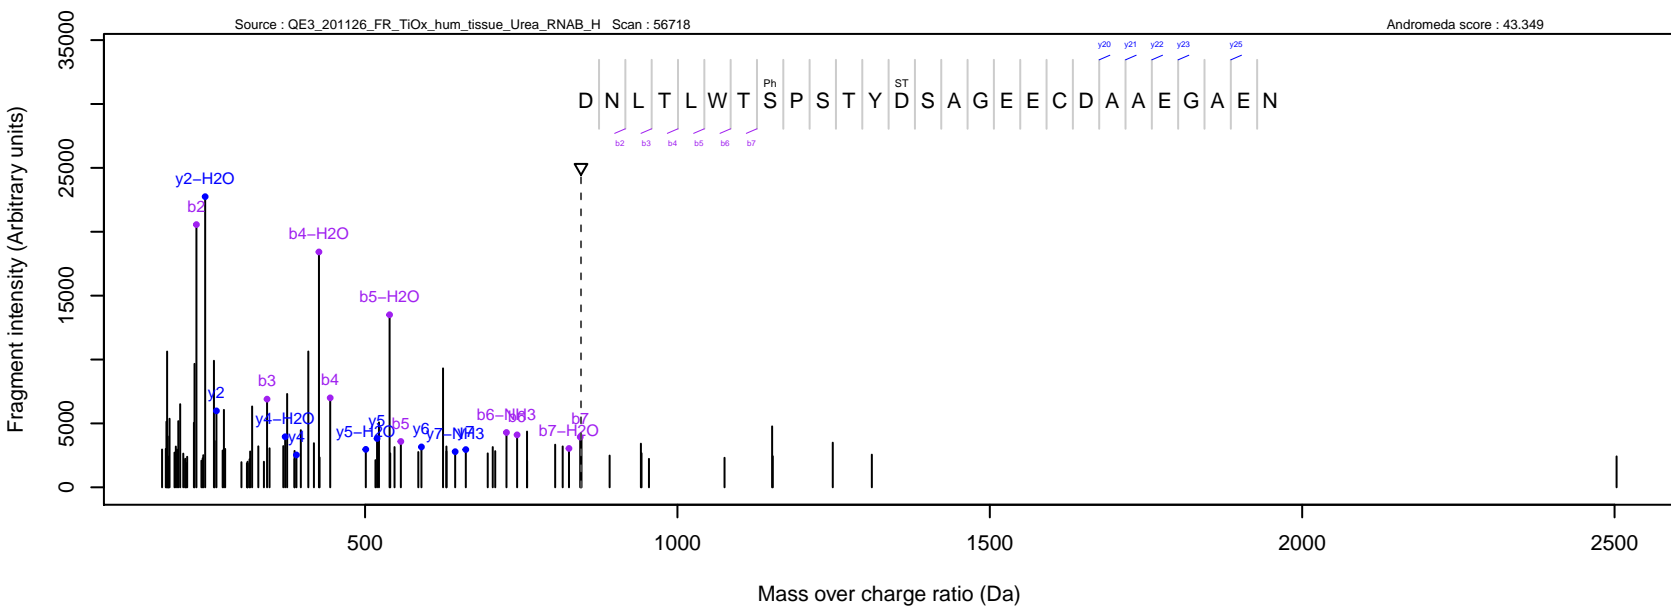

DRPGS(Phospho (STY))PES(Phospho (STY))PLLDAFPSR-3+

Source : QE3\_201126\_FR\_TiOx\_hum\_tissue\_Urea\_RNAB\_B Scan : 45742

Andromeda score : 43.349

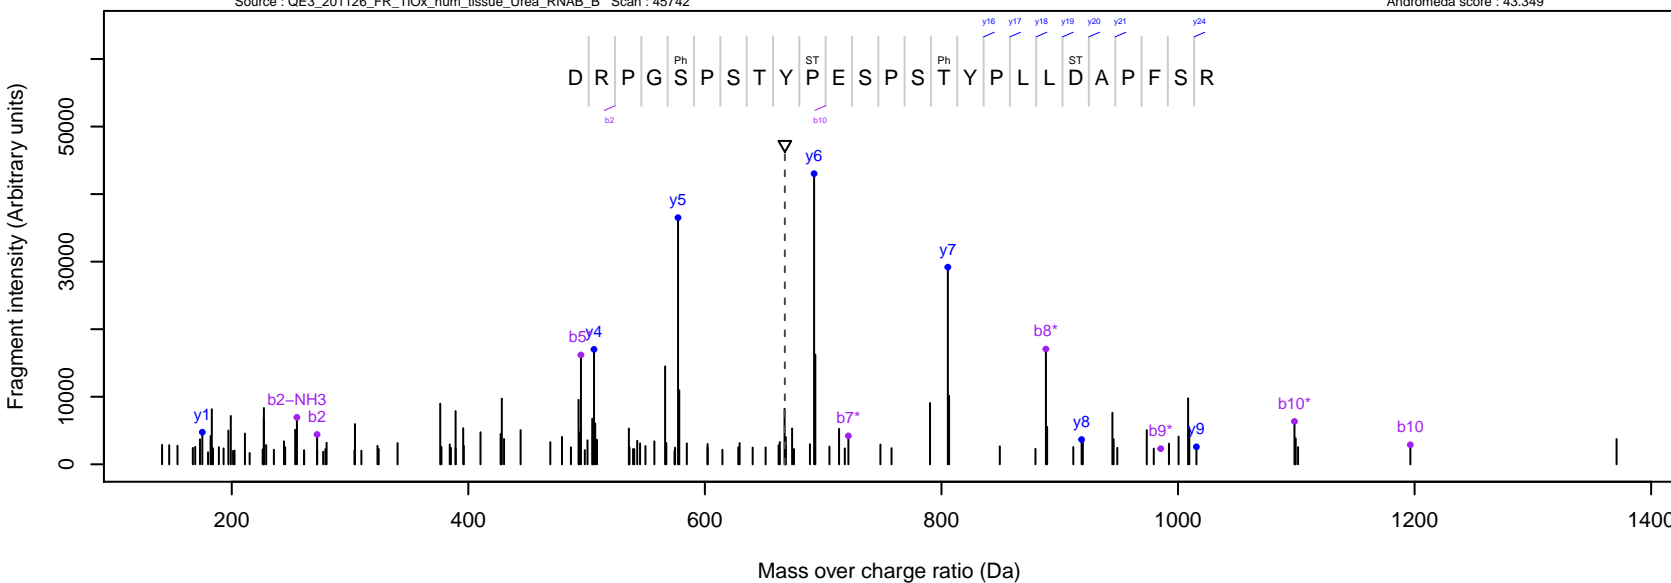



APSASDS(Phospho (STY))DS(Phospho (STY))KADS(Phospho (STY))DGAKPEPVM(Oxidation (M))AR-3+

Source : QE3\_201126\_FR\_TiOx\_hum\_tissue\_Urea\_RNAB\_N Scan : 12459

Andromeda score : 43.31

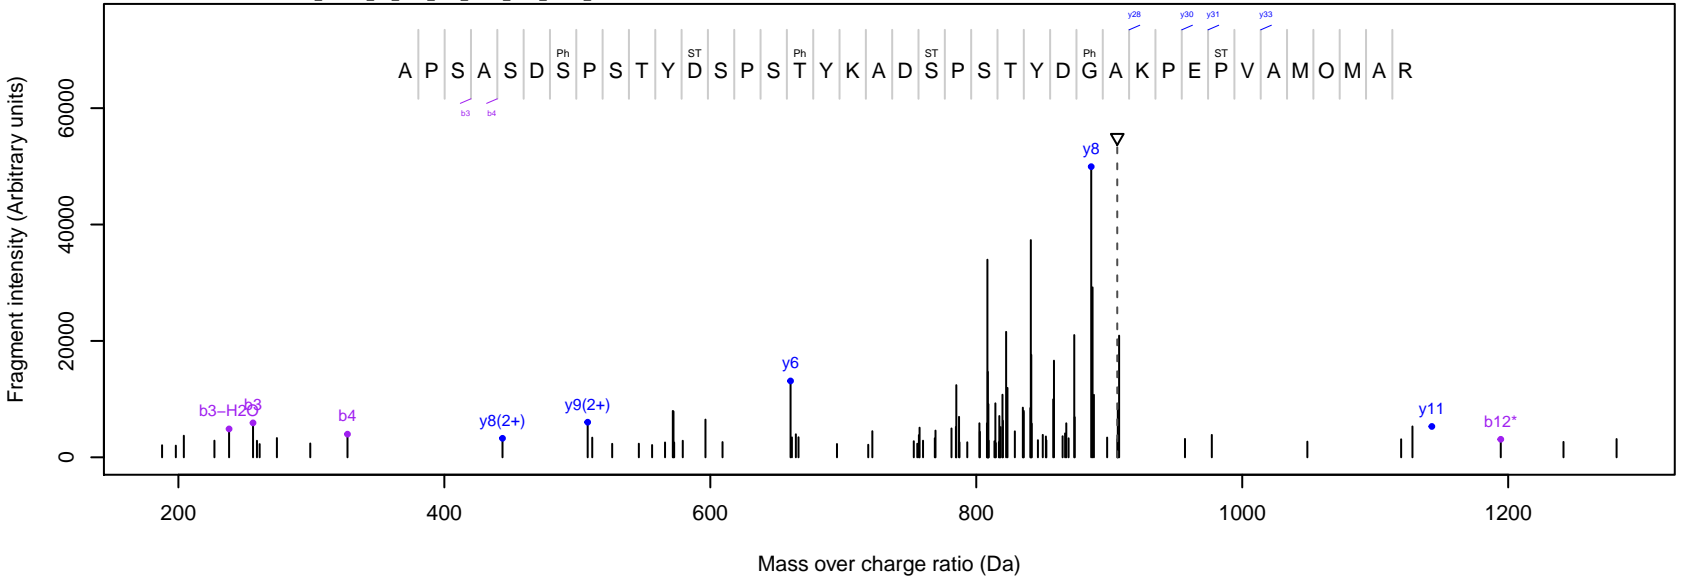

NSFSFSDEKLS(Phospho (STY))PTDSTPALLSATVTPQK-3+

Source : QE3\_201126\_FR\_TiOx\_hum\_tissue\_Urea\_RNAB\_B Scan : 47570

Andromeda score : 43.31

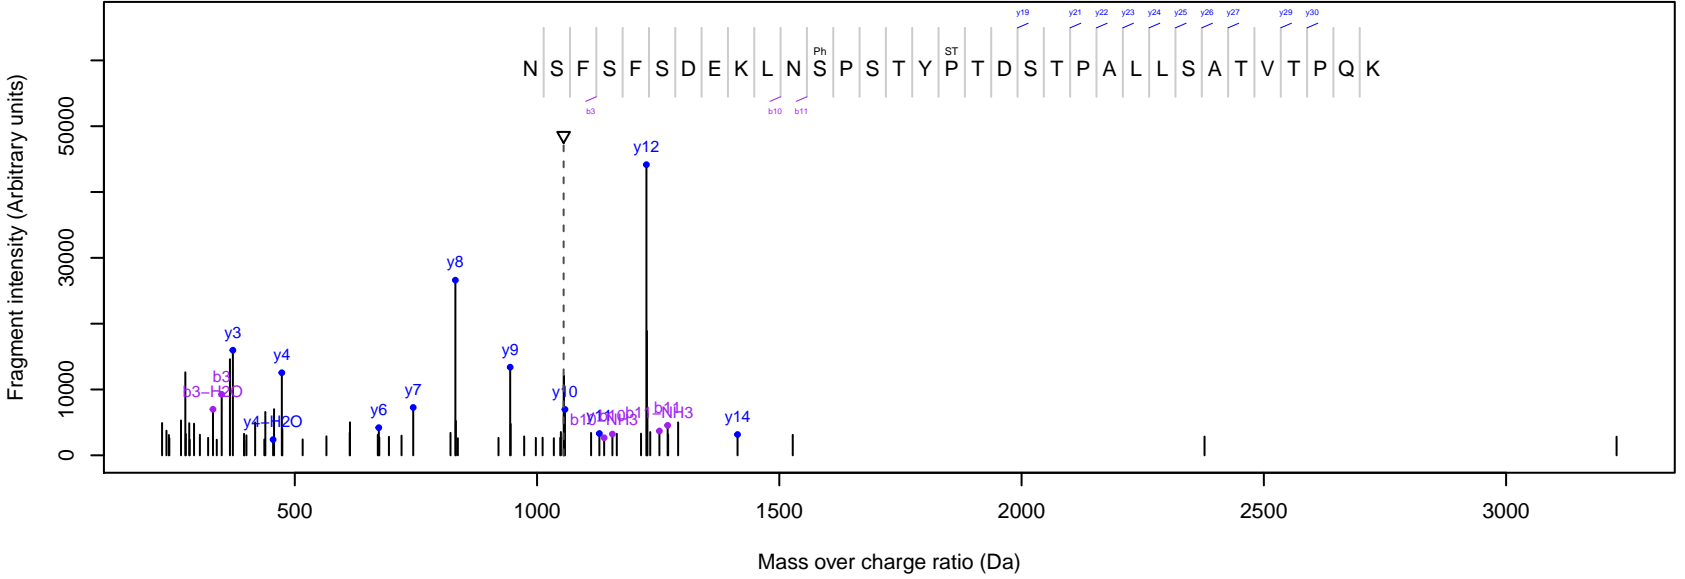

S(Phospho (STY))PSTLLPK-2+

Source : QE3\_201126\_FR\_TiOx\_hum\_tissue\_Urea\_RNAB\_B Scan : 21896

Andromeda score : 43.308

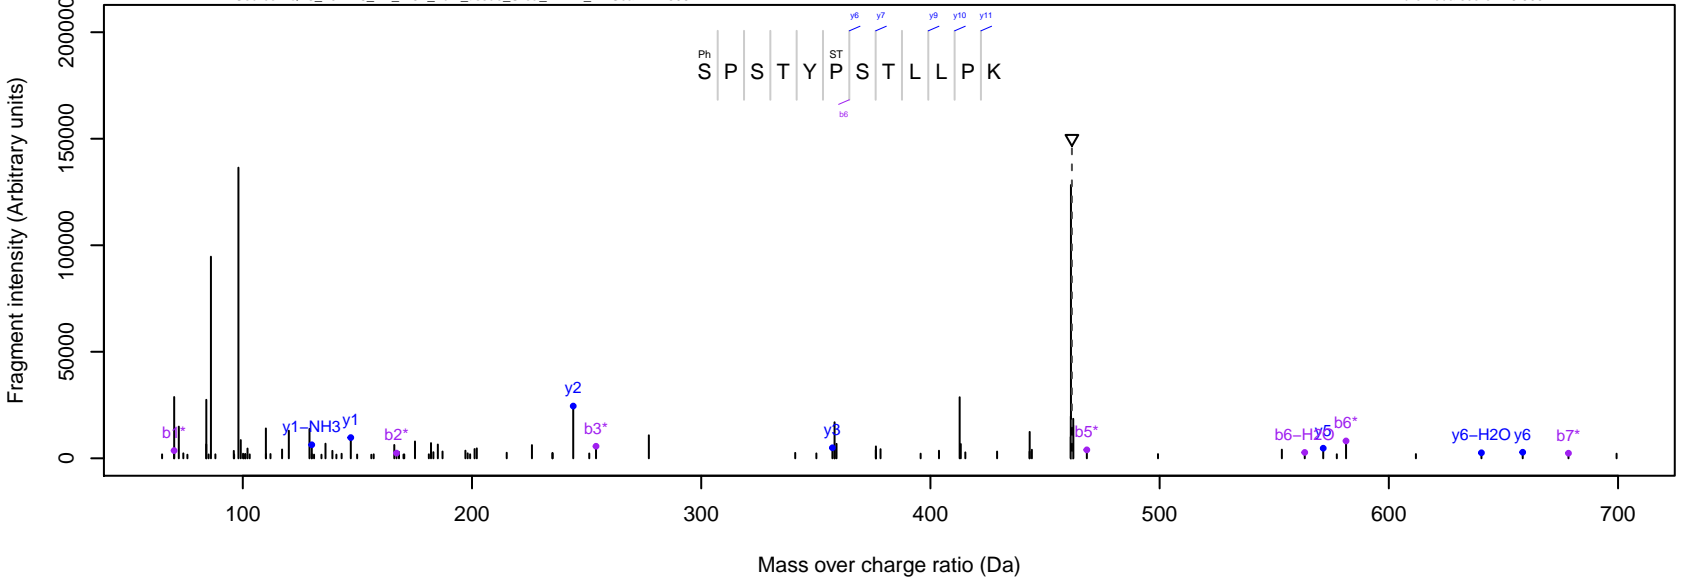

S(Phospho (STY))LFINHHPPGQIAR-3+

Source : QE3\_201126\_FR\_TiOx\_hum\_tissue\_Urea\_RNAB\_N Scan : 19534

Andromeda score : 43.297

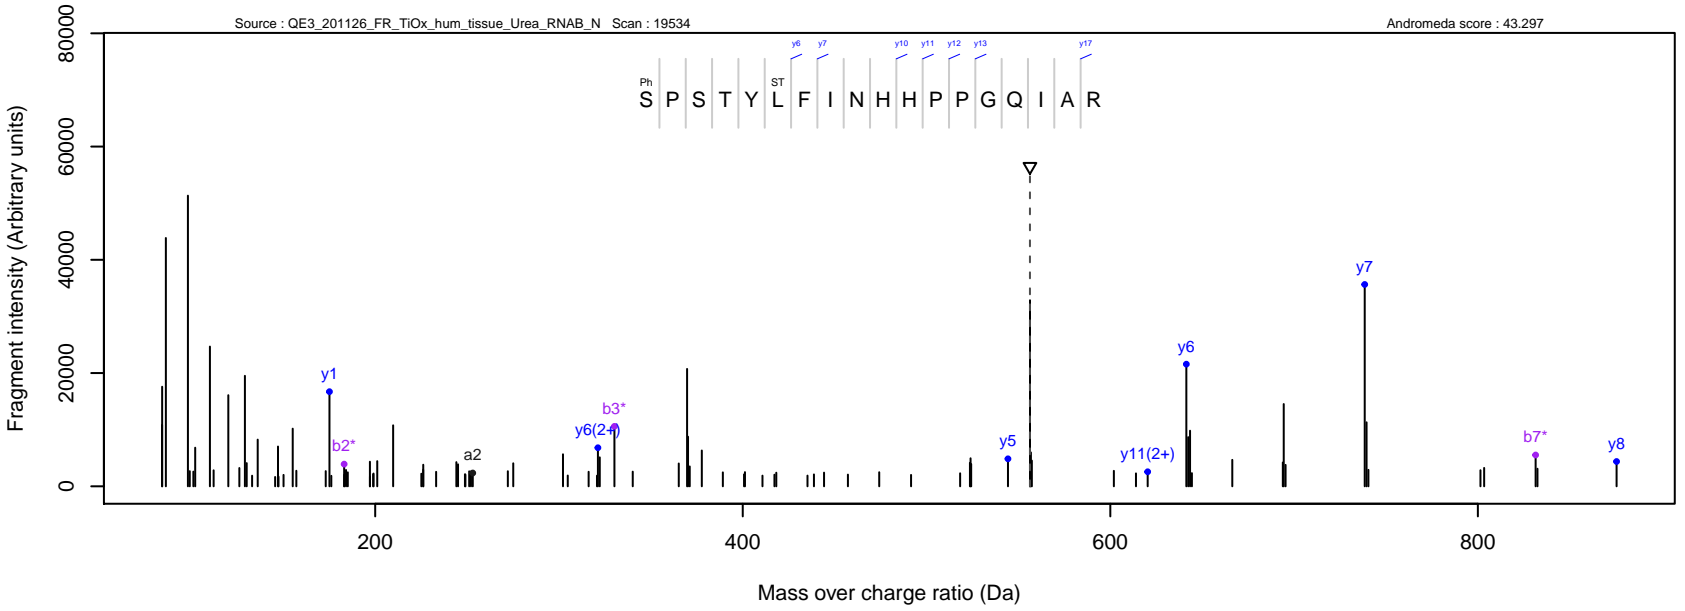

ATGAALT(Phospho (STY))PT(Phospho (STY))EERTSFSTSDVSK-3+

Source : QE3\_201126\_FR\_TiOx\_hum\_tissue\_Urea\_RNAB\_N Scan : 19298

Andromeda score : 43.291

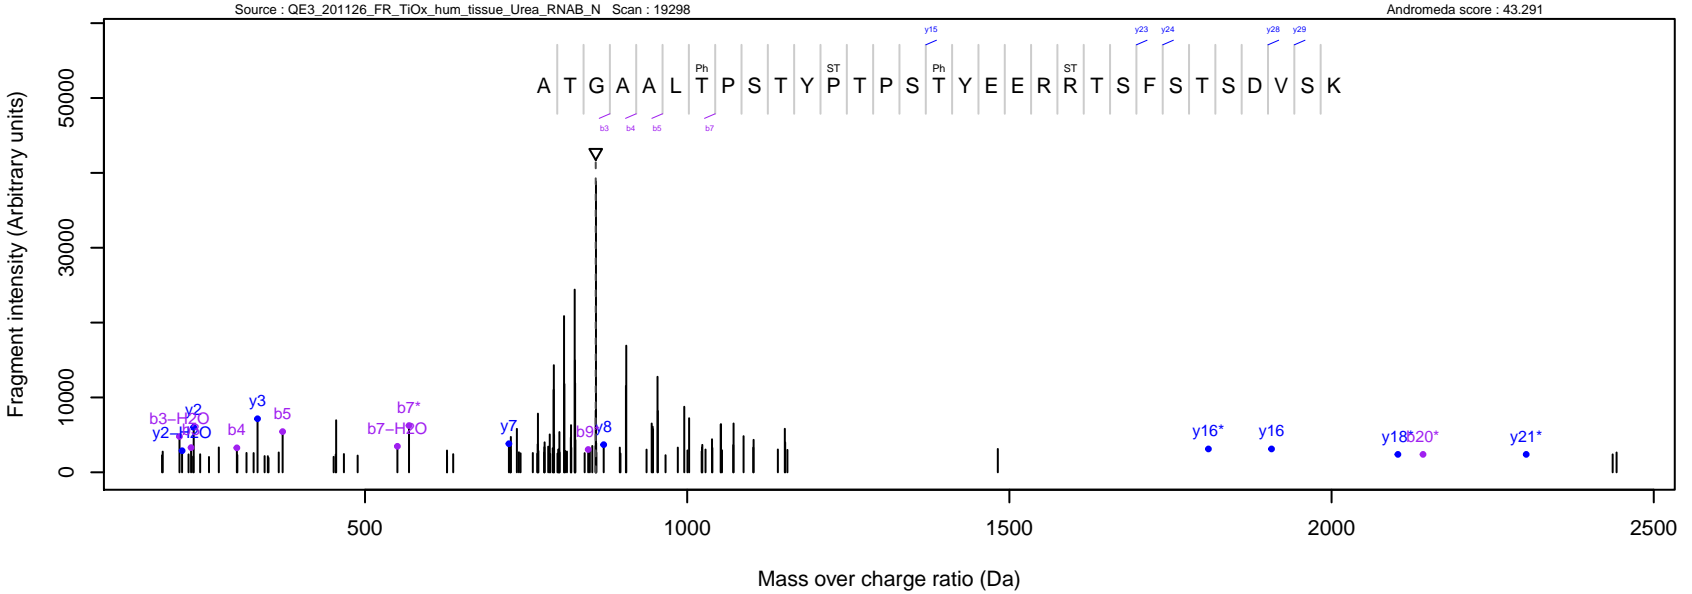

NLS(Phospho (STY))PS(Phospho (STY))QEEAGLEDGVSGEISDTELEQTDSCAEPLSEGR-4+

Source : QE3\_201126\_FR\_TiOx\_hum\_tissue\_Urea\_RNAB\_H Scan : 55475

Andromeda score : 43.271

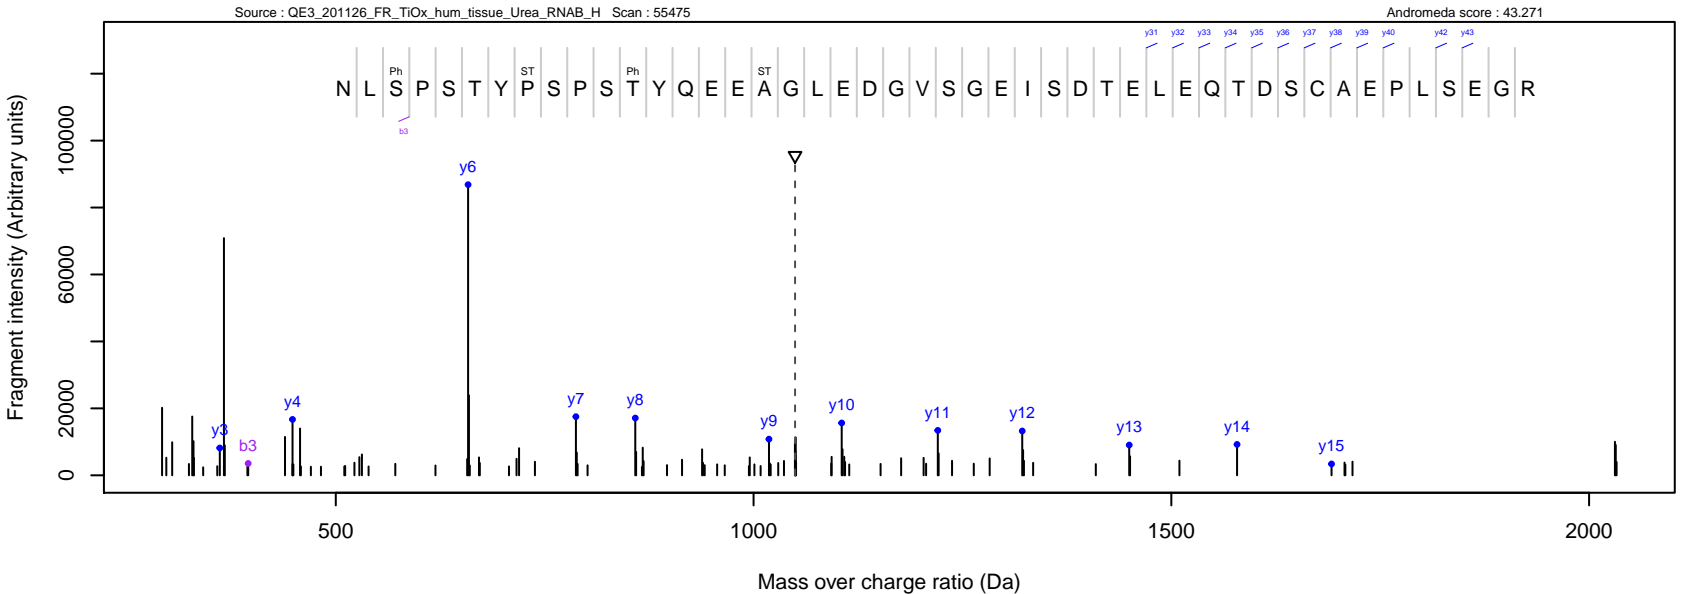

SRES(Phospho (STY))AS(Phospho (STY))PTIPNLDLLEAHTK-3+

Source : QE3\_201126\_FR\_TiOx\_hum\_tissue\_Urea\_RNAB\_B Scan : 41803

Andromeda score : 43.241

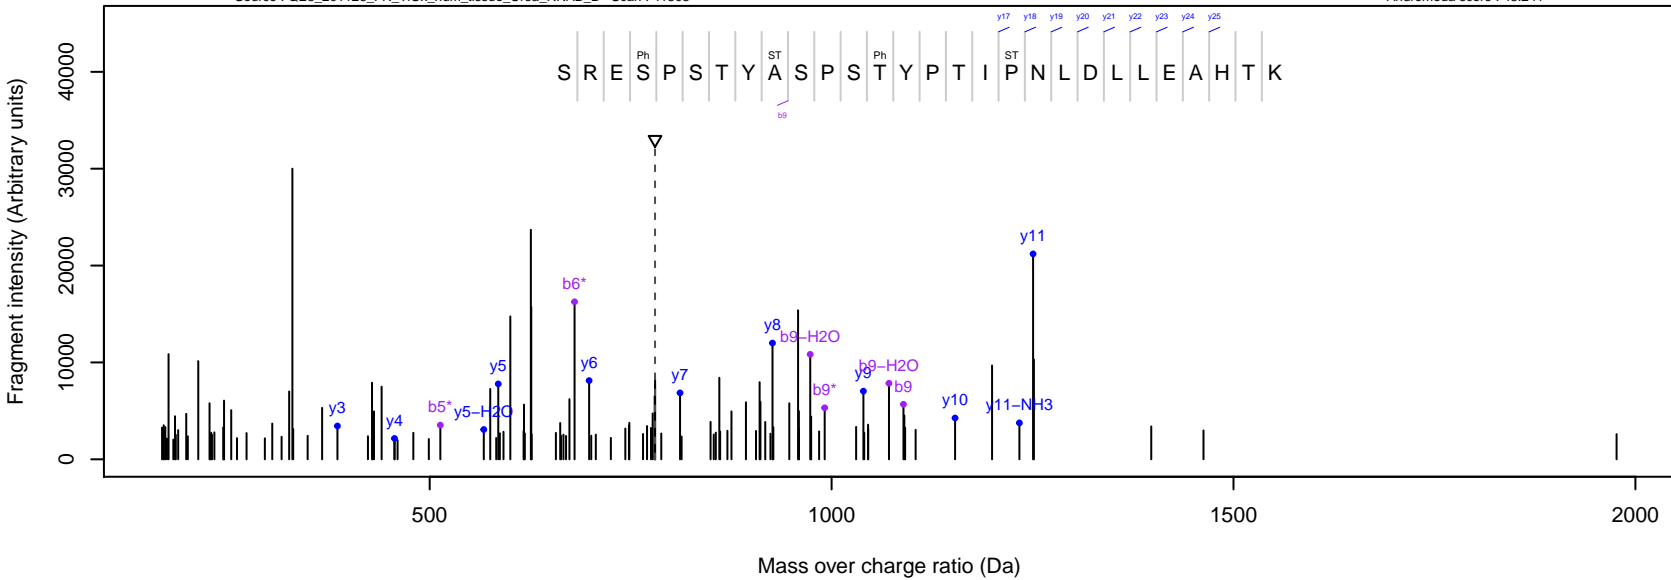

LASVPAGGAVSAAPGS(Phospho (STY))AAPAAGSAPAAEEK-4+

Source : QE3\_201126\_FR\_TiOx\_hum\_tissue\_Urea\_RNAB\_H Scan : 31348

Andromeda score : 43.24

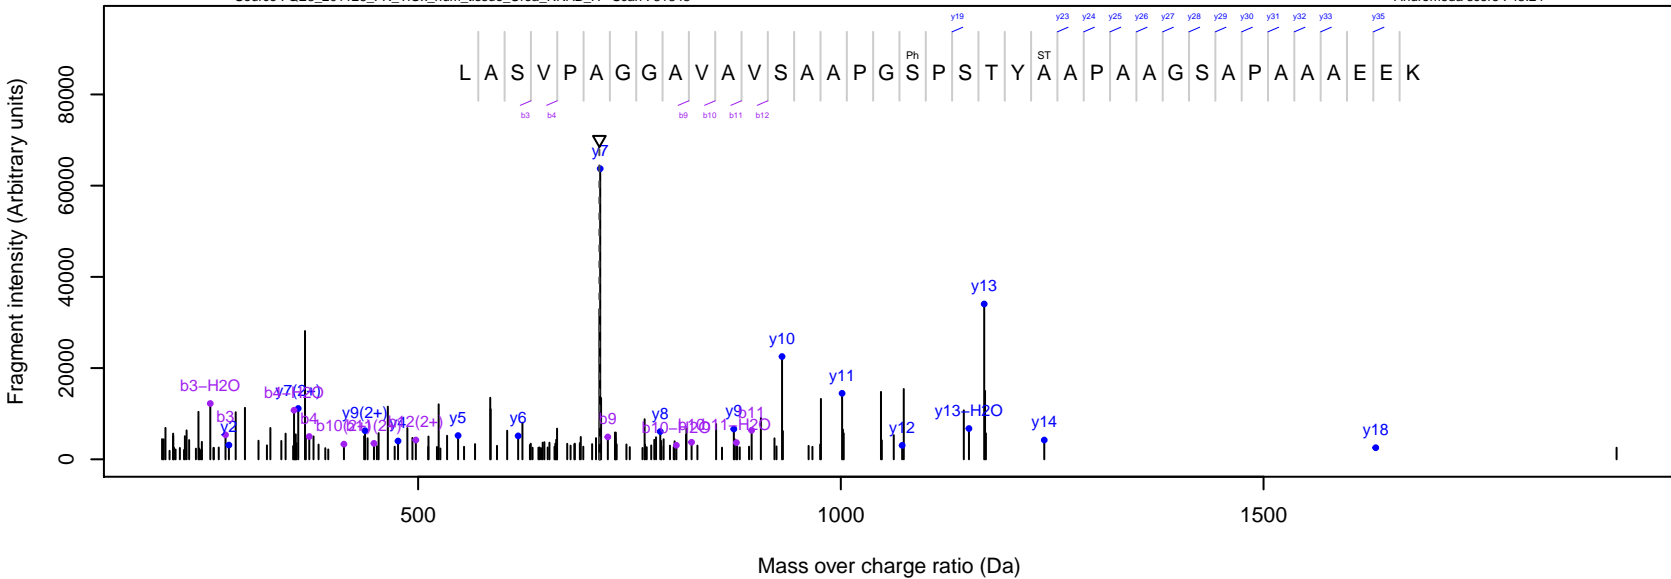

ALS(Phospho (STY))YASLDKEDLLSPINQNTLQR-3+

Source : QE3\_201126\_FR\_TiOx\_hum\_tissue\_Urea\_RNAB\_H Scan : 48103

Andromeda score : 43.198

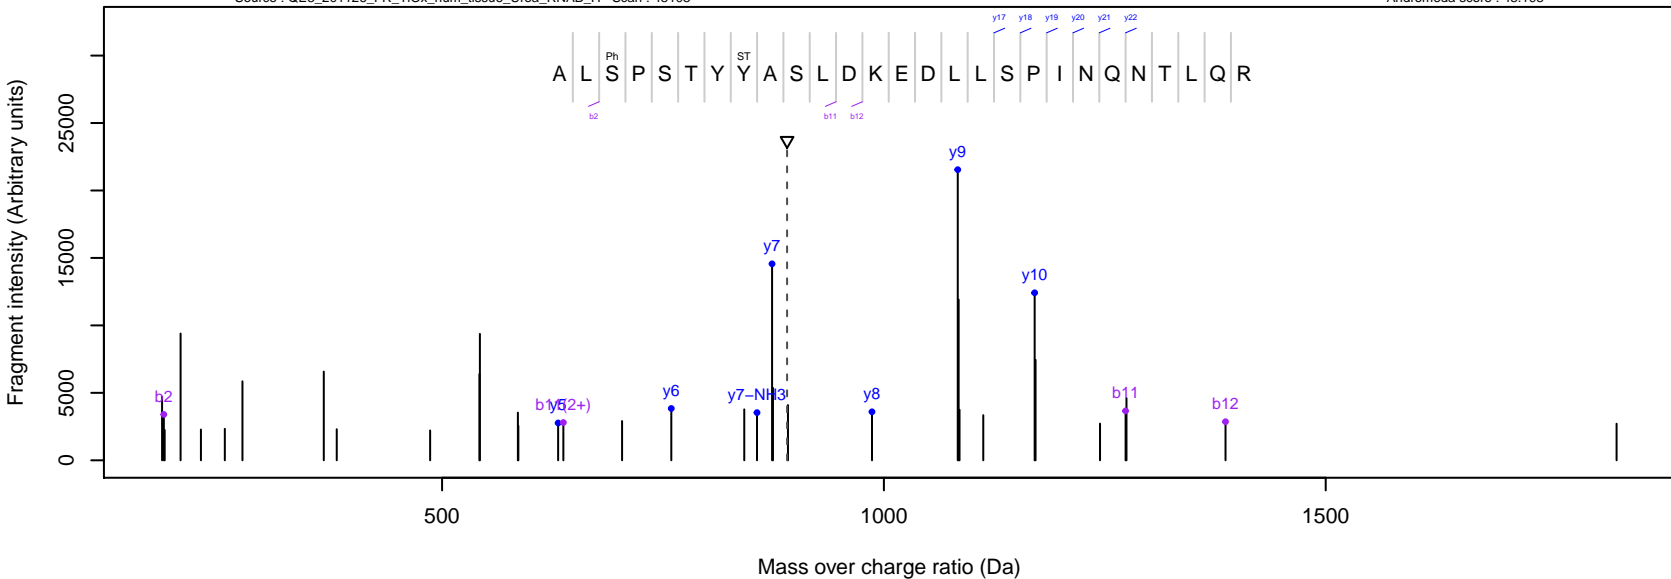

LSAIT(Phospho (STY))MALQYGSES(Phospho (STY))EEDAALAAAR-3+

Source : QE3\_201126\_FR\_TiOx\_hum\_tissue\_Urea\_RNAB\_N Scan : 60379

Andromeda score : 43.198

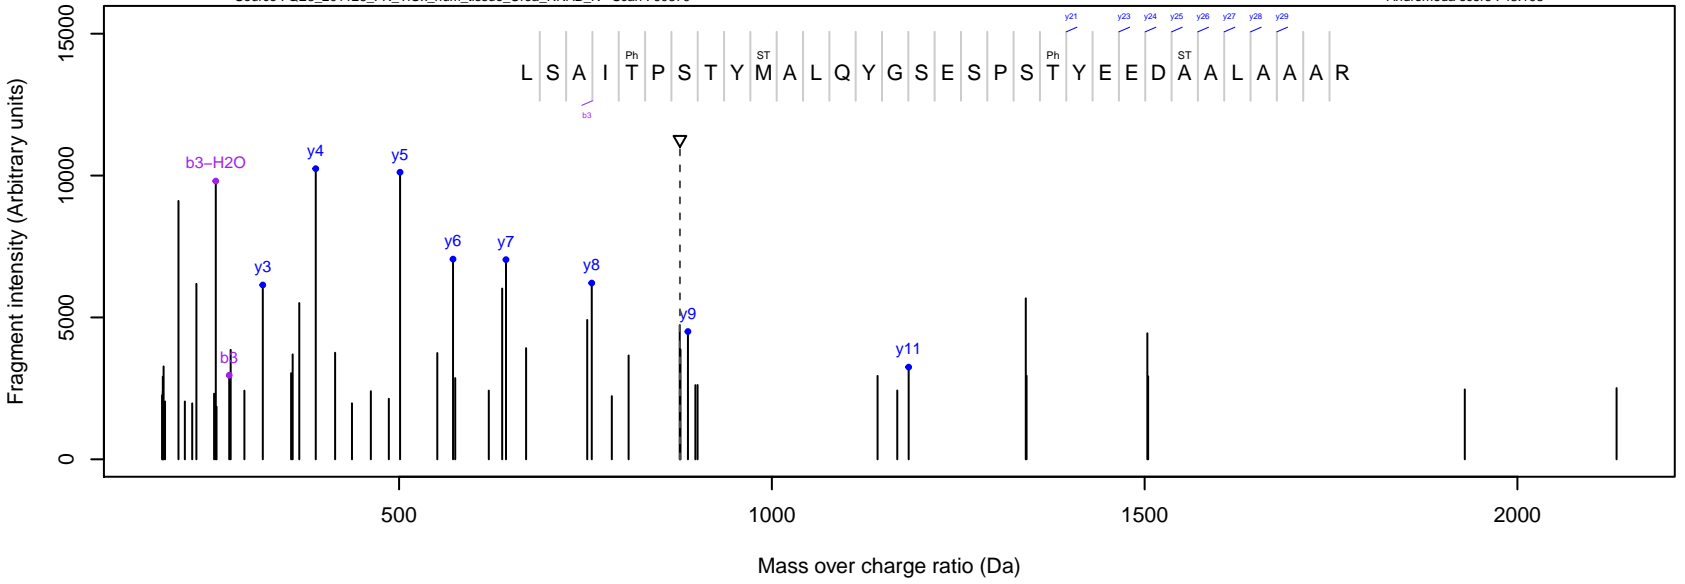

ENY(Phospho (STY))S(Phospho (STY))DSEEEEDDDVASSR-2+

Source : QE3\_201126\_FR\_TiOx\_hum\_tissue\_Urea\_RNAB\_H Scan : 19208

Andromeda score : 43.184

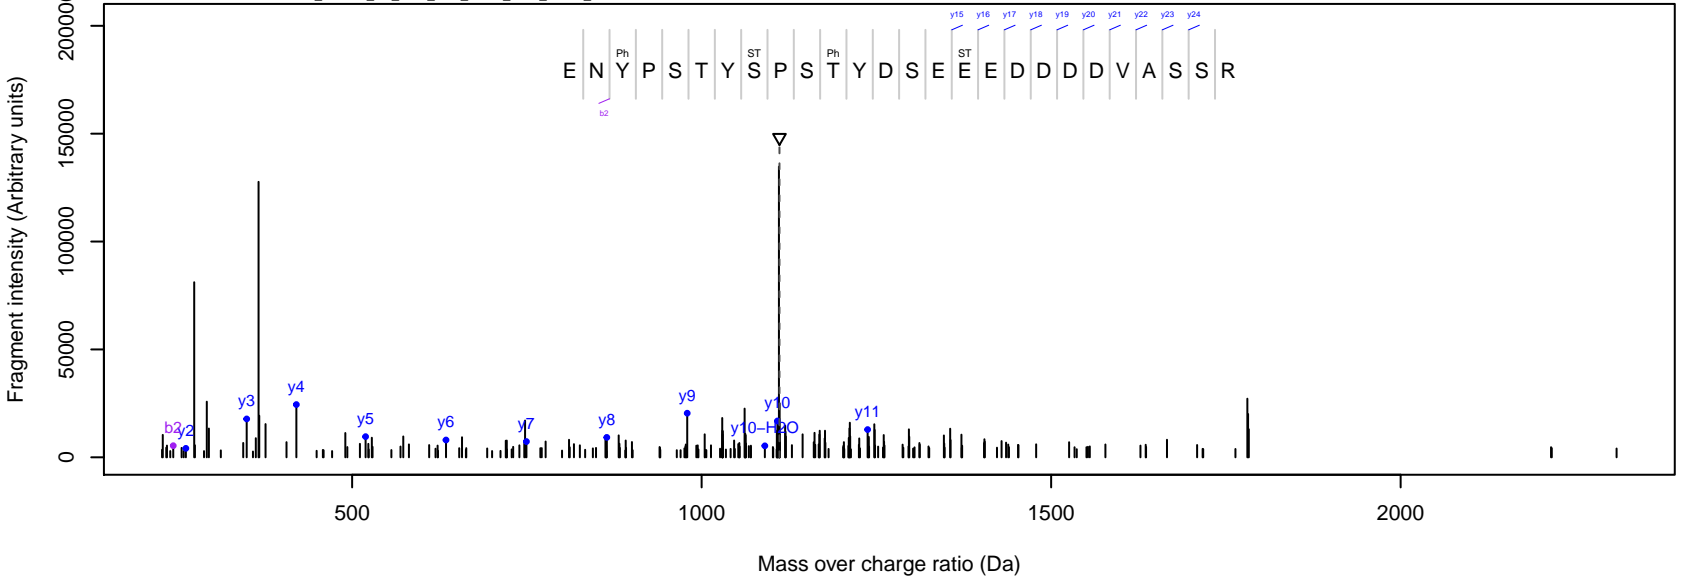

QLQAES(Phospho (STY))VS(Phospho (STY))EVVVNR-2+

Source : QE3\_201126\_FR\_TiOx\_hum\_tissue\_Urea\_RNAB\_B Scan : 20486

Andromeda score : 43.184

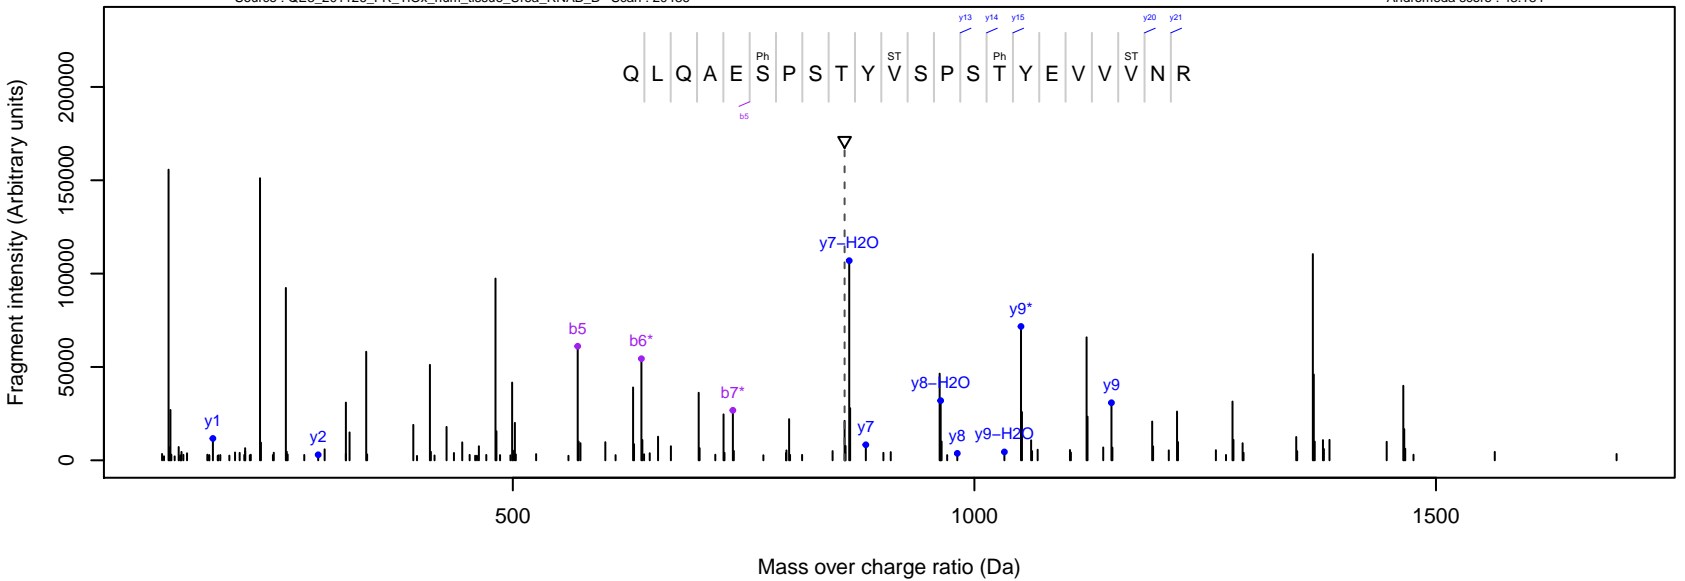

SQSAS(Phospho (STY))VES(Phospho (STY))IPEVLEECTSPADHSDSASVHDM(Oxidation (M))DYVNPR-4+

Source : QE3\_201126\_FR\_TiOx\_hum\_tissue\_Urea\_RNAB\_N Scan : 43782

Andromeda score : 43.17

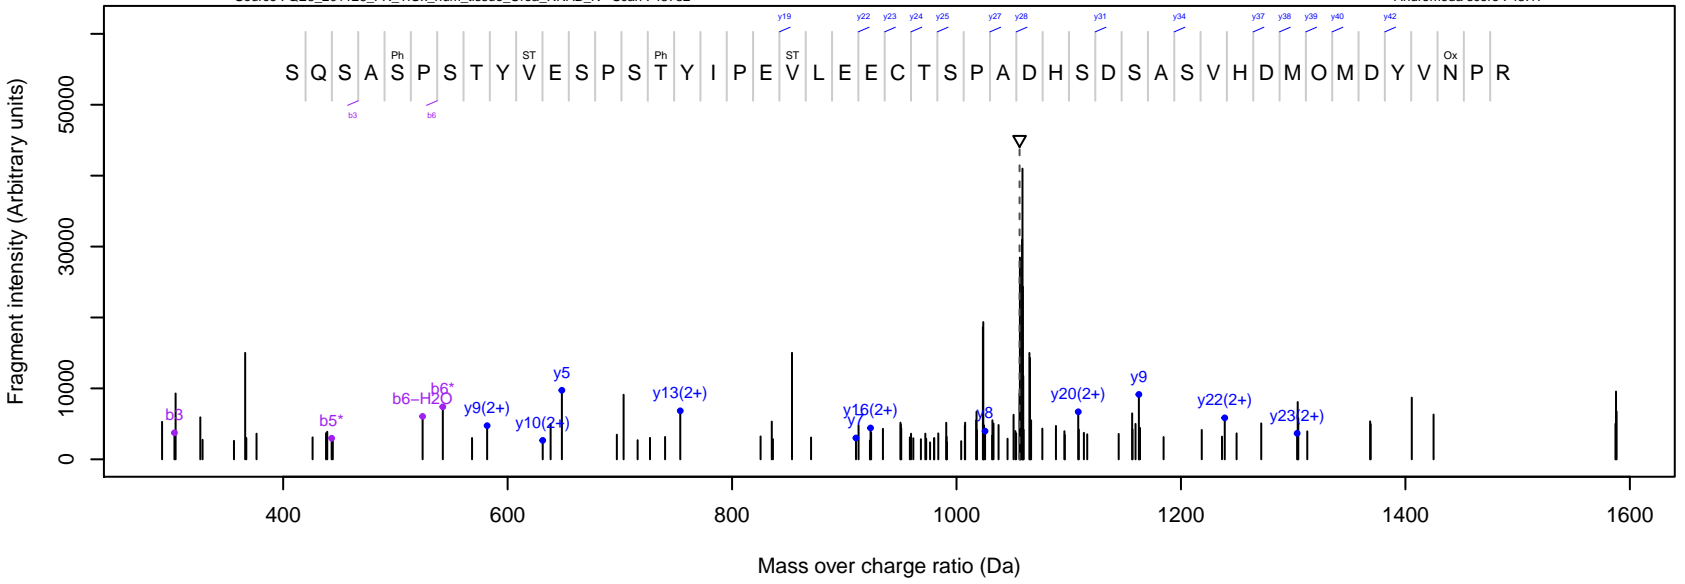

ASNTS(Phospho (STY))TPTKGNTEETSASQTNHVK-3+

Source : QE3\_201126\_FR\_TiOx\_hum\_tissue\_Urea\_RNAB\_H Scan : 4867

Andromeda score : 43.162

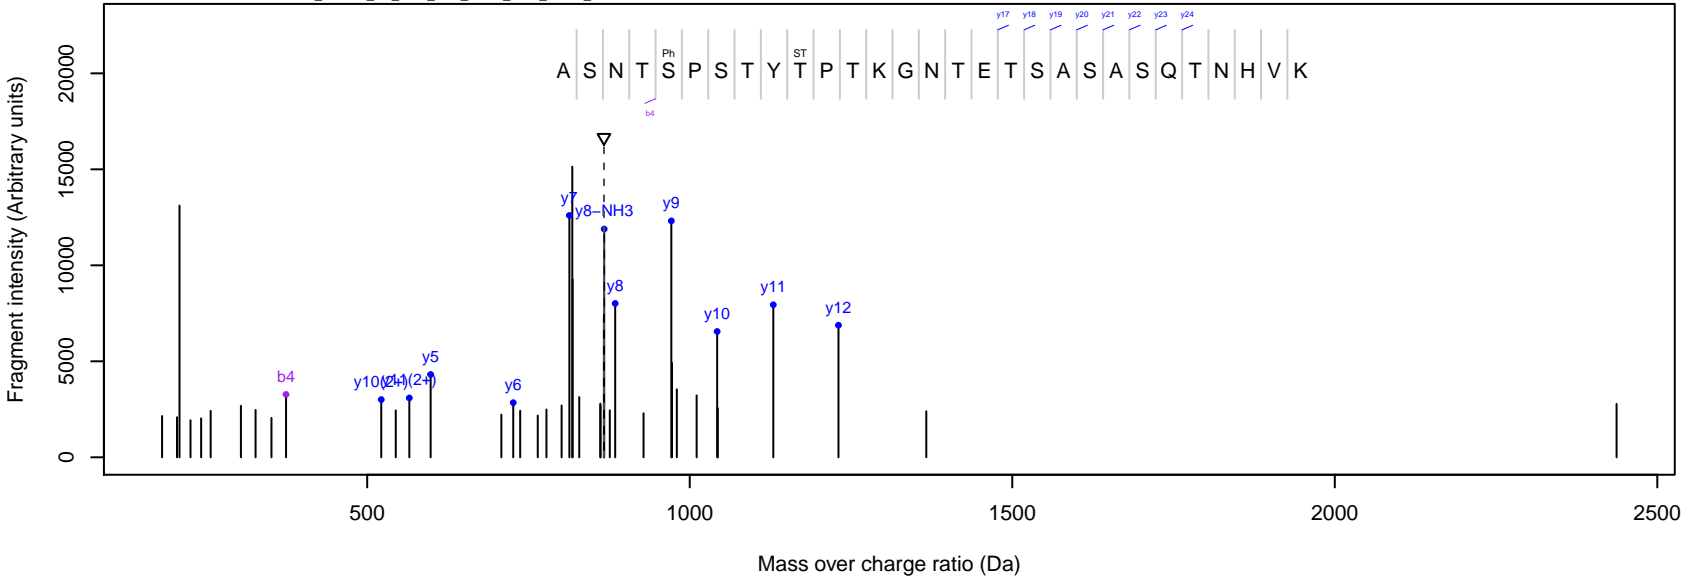

SLTGKLEPVS(Phospho (STY))PPS(Phospho (STY))PPHTDPELELVPPR-3+

Source : QE3\_201126\_FR\_TiOx\_hum\_tissue\_Urea\_RNAB\_N Scan : 46906

Andromeda score : 43.15

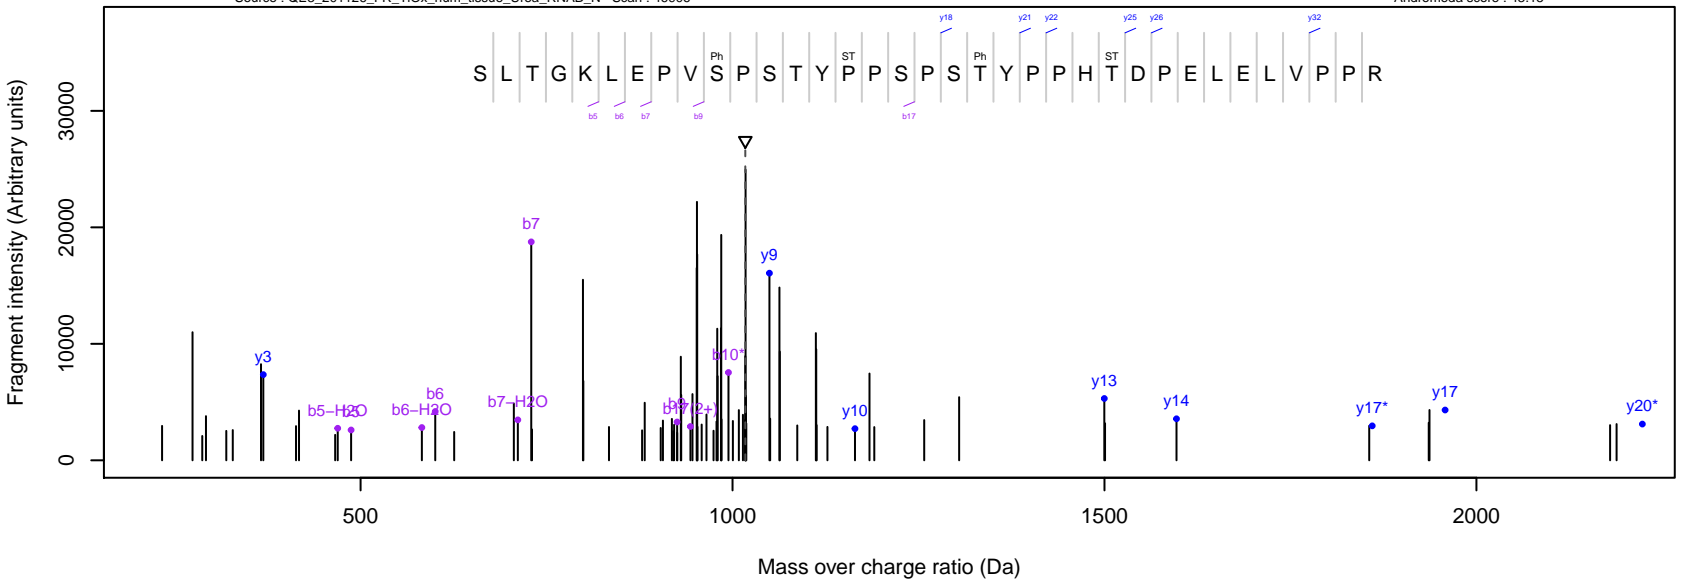

**EQDRVHS(Phospho (STY))PCPTSGSEK-3+**

Source : QE3\_201126\_FR\_TIOx\_hum\_tissue\_Urea\_RNAB\_H Scan : 4083

Andromeda score : 43.12

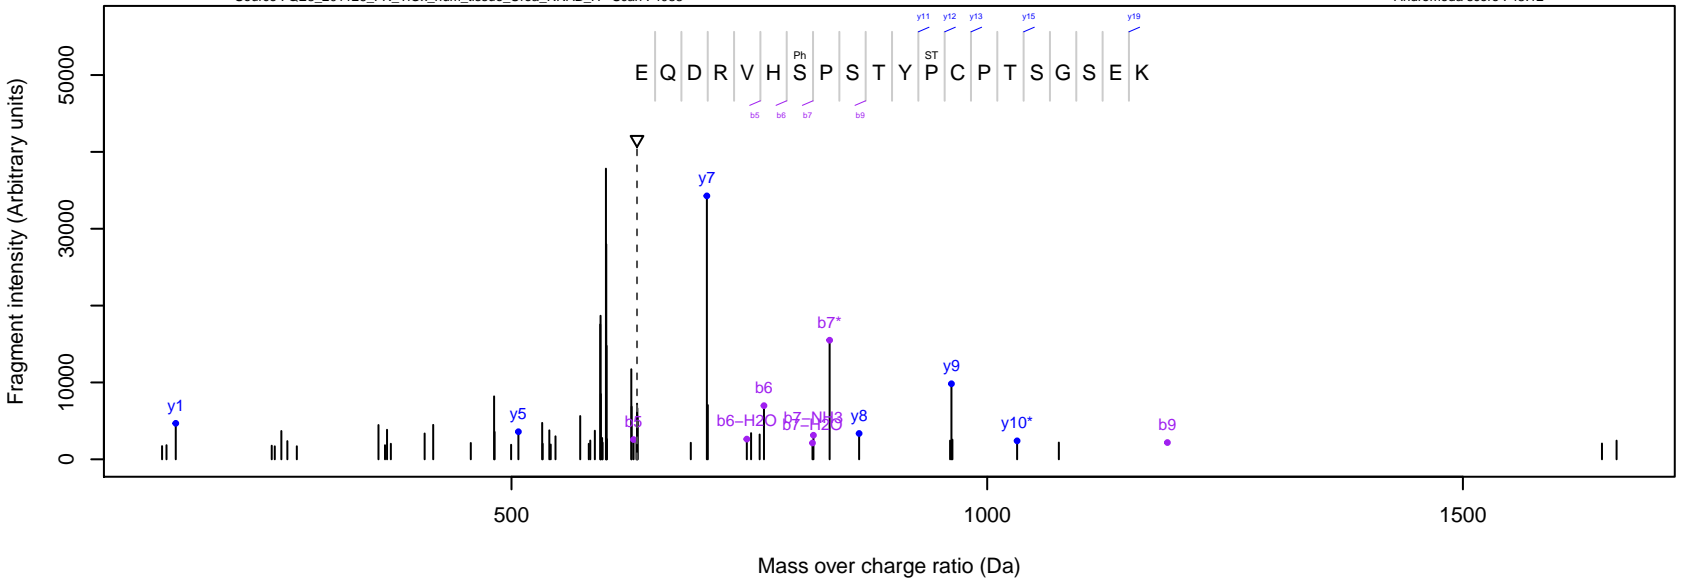

**TSNTLEKDLLASVPS(Phospho (STY))PSSSGSR-3+**

Source : QE3\_201126\_FR\_TIOx\_hum\_tissue\_Urea\_RNAB\_B Scan : 50184

Andromeda score : 43.068

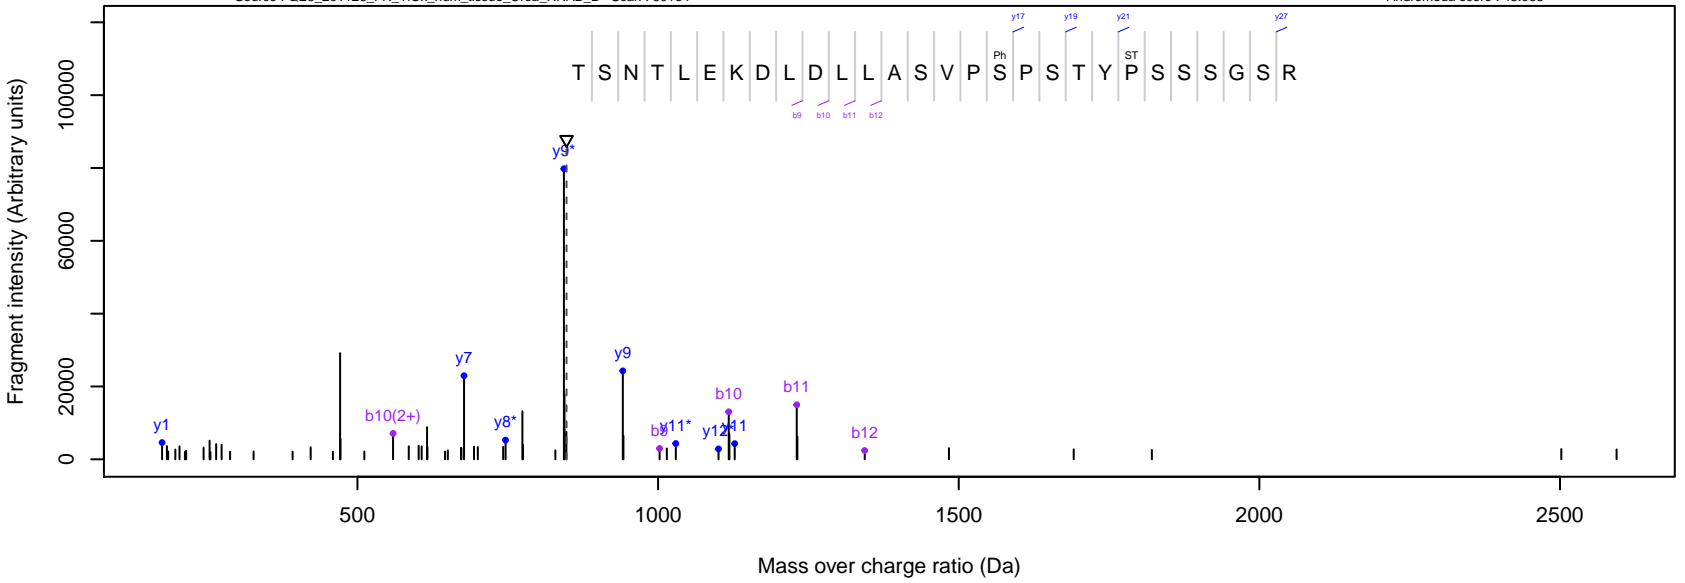

**(Acetyl (Protein N-term))AALMTPGTGAPPAGDFSGEGS(Phospho (STY))QGLPDPSPPEK-3+**

Source : QE3\_201126\_FR\_TIOx\_hum\_tissue\_Urea\_RNAB\_H Scan : 59559

Andromeda score : 43.041

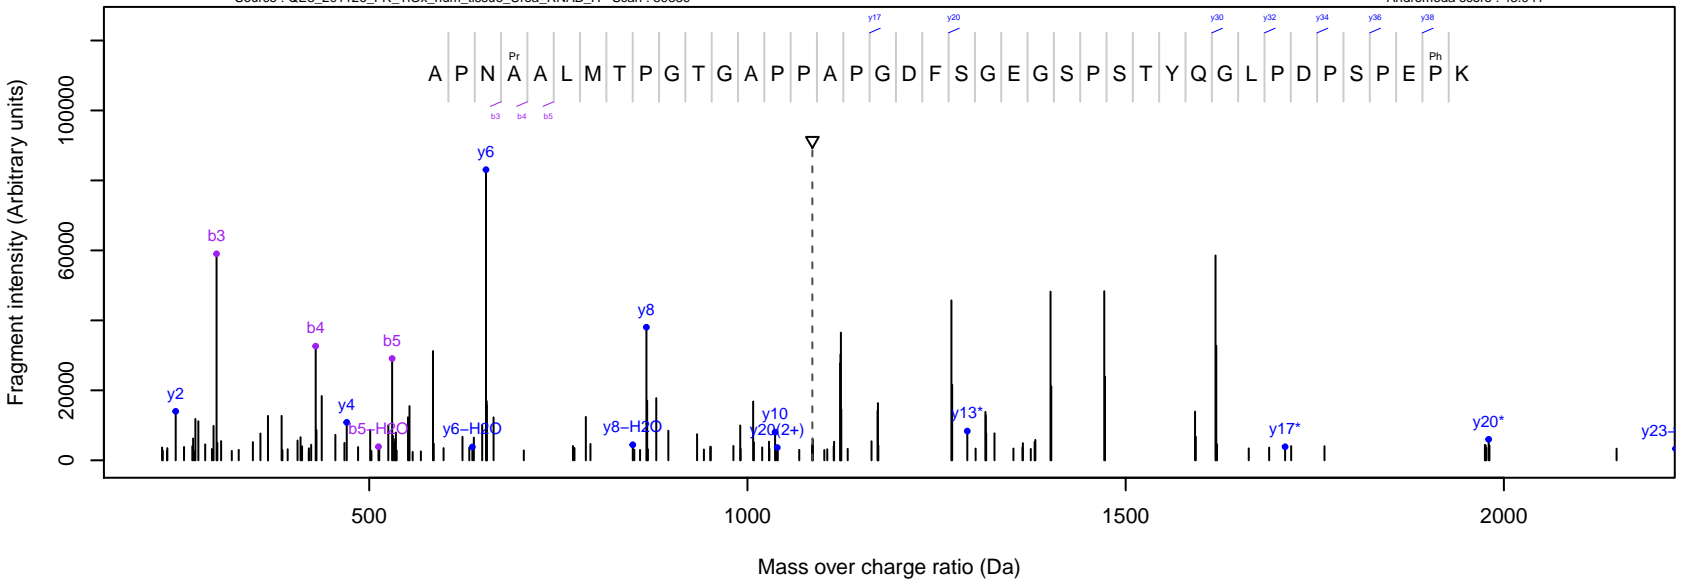

S(Phospho (STY))PLGLVDDAFQPR-2+

Source : QE3\_201126\_FR\_TiOx\_hum\_tissue\_Urea\_RNAB\_H Scan : 52088

Andromeda score : 43.03

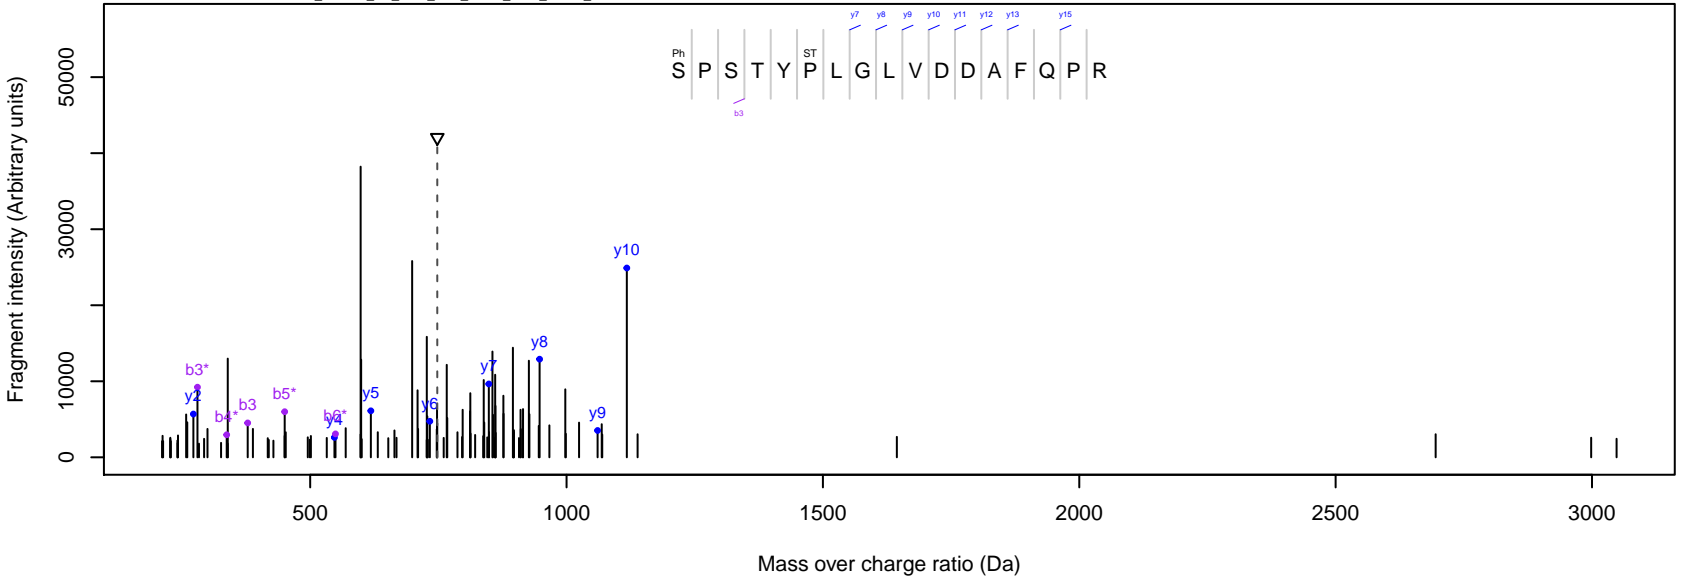

TSPGPTRGS(Phospho (STY))FD-2+

Source : QE3\_201126\_FR\_TiOx\_hum\_tissue\_Urea\_RNAB\_N Scan : 7178

Andromeda score : 43.03

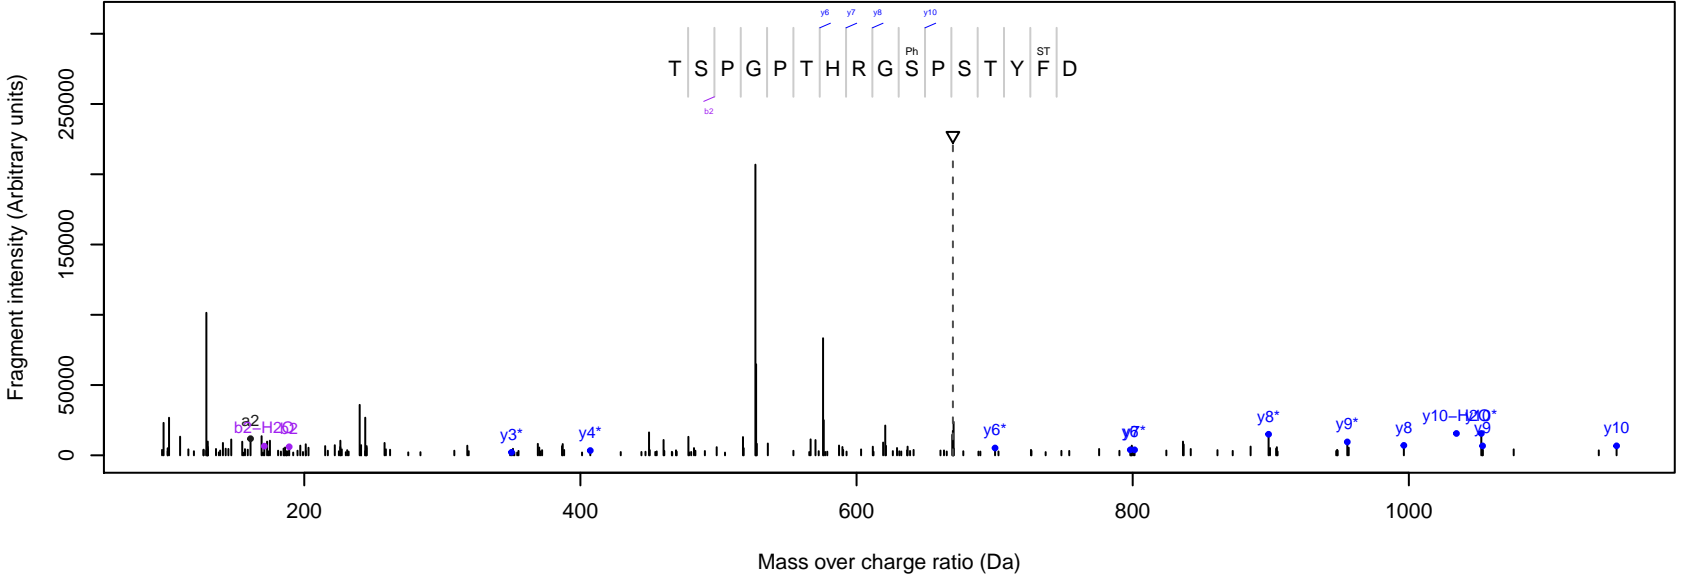

GDM(Oxidation (M))S(Phospho (STY))DEDDENEFFDAPEIITM(Oxidation (M))PENLGHKR-3+

Source : QE3\_201126\_FR\_TiOx\_hum\_tissue\_Urea\_RNAB\_N Scan : 48922

Andromeda score : 42.973

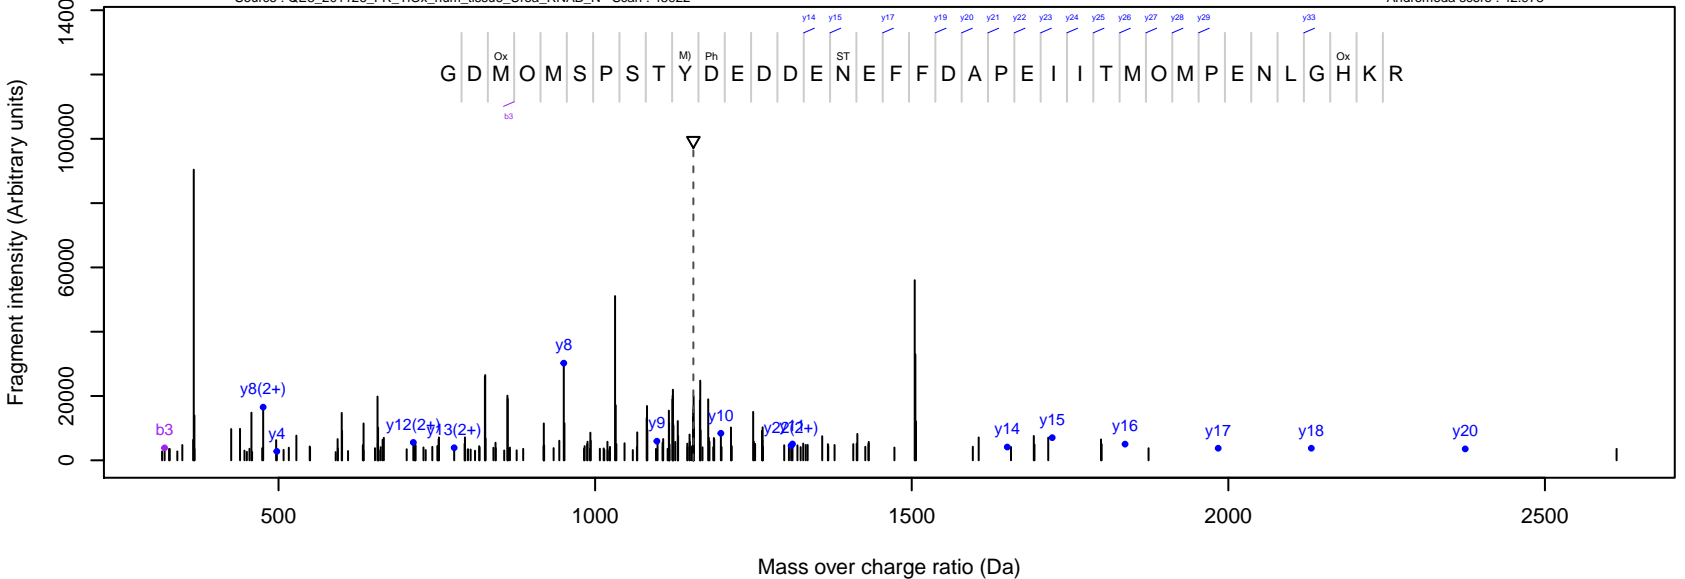

SFS(Phospho (STY))PKS(Phospho (STY))PLELGEK-2+

Source : QE3\_201126\_FR\_TiOx\_hum\_tissue\_Urea\_RNAB\_H Scan : 32944

Andromeda score : 42.958

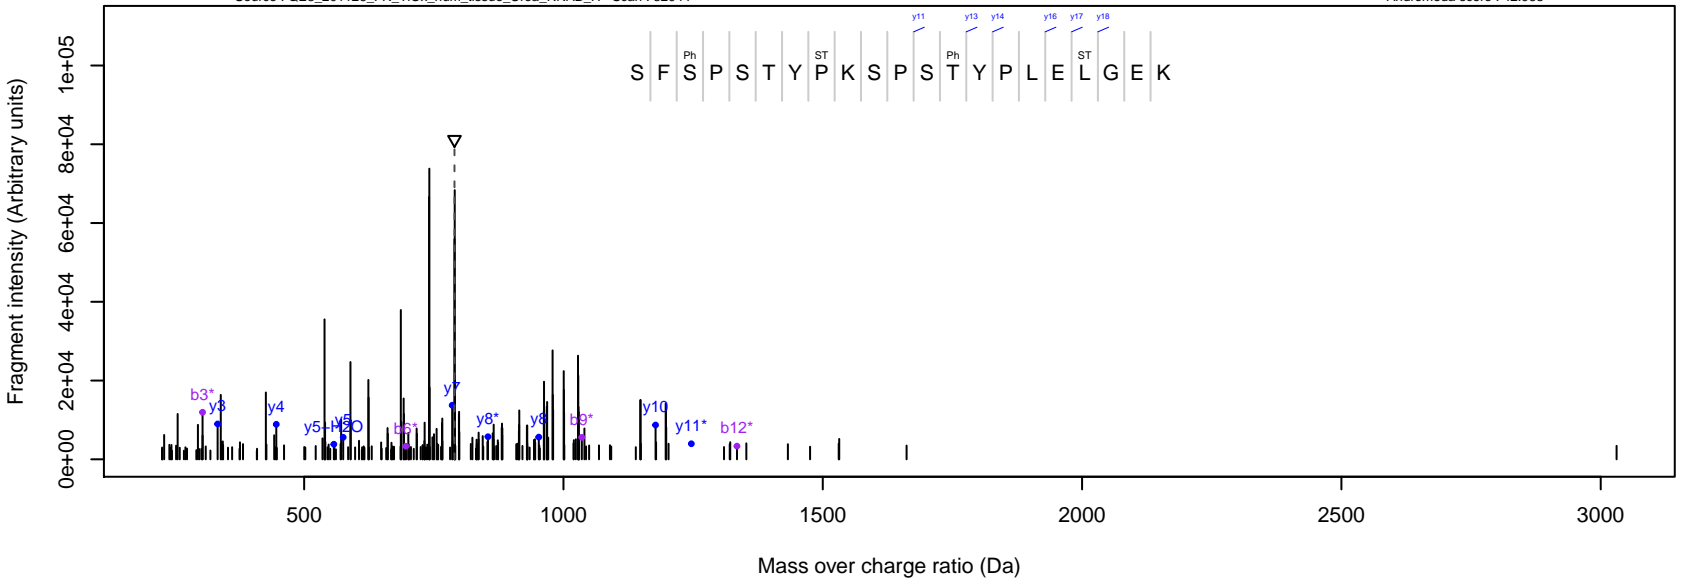

ELCHTQSS(Phospho (STY))HASLR-3+

Source : QE3\_201126\_FR\_TiOx\_hum\_tissue\_Urea\_RNAB\_B Scan : 5317

Andromeda score : 42.947

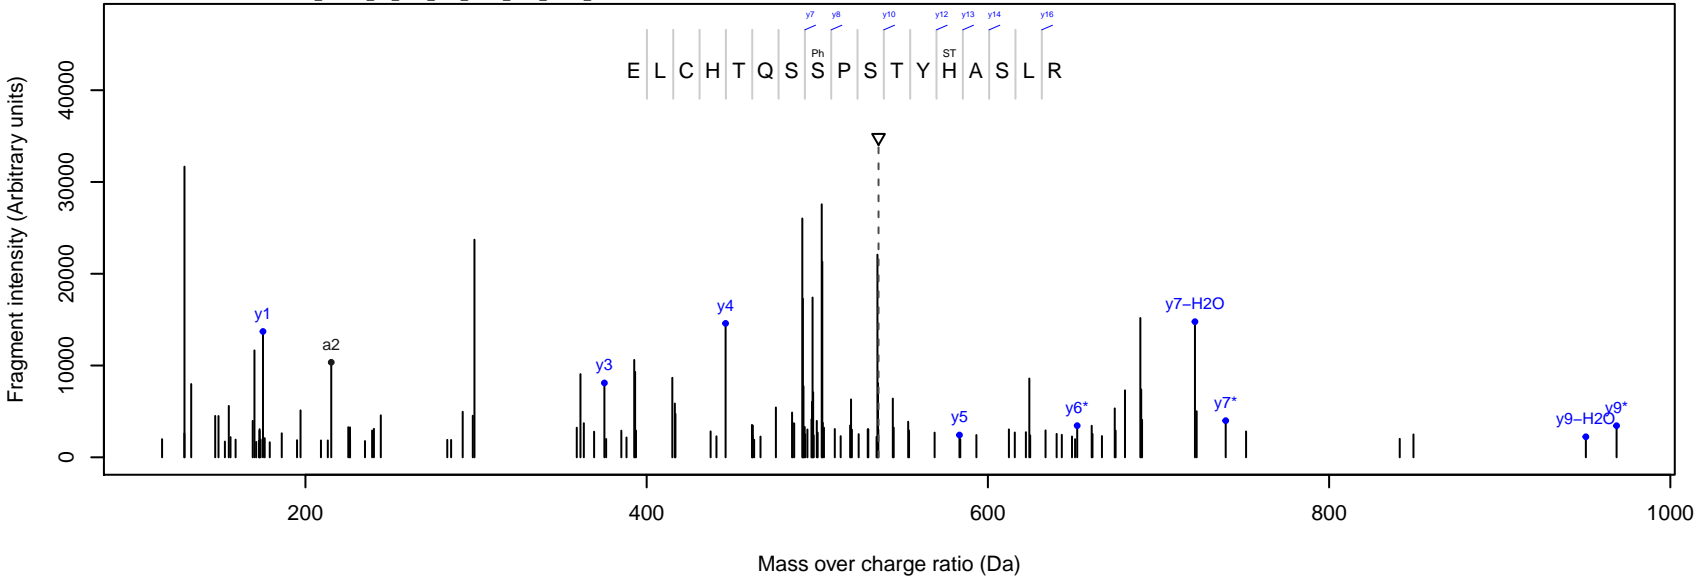

LALWEGRS(Phospho (STY))NAQIR-3+

Source : QE3\_201126\_FR\_TiOx\_hum\_tissue\_Urea\_RNAB\_H Scan : 27897

Andromeda score : 42.947

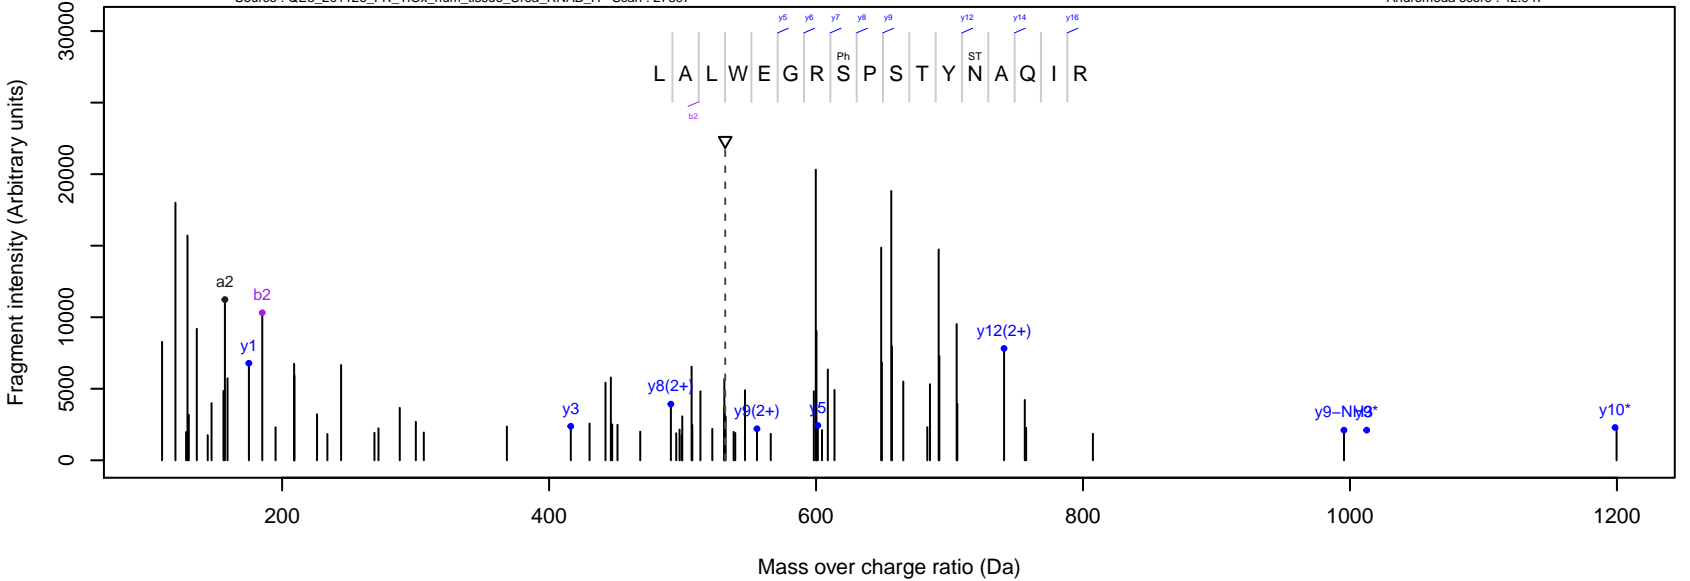



**EVDPST(Phospho (STY))GELQS(Phospho (STY))LQM(Oxidation (M))PES(Phospho (STY))EGPS(Phospho (STY))SLDPSQEGPTGLK-3+**

Source : QE3\_201126\_FR\_TiOx\_hum\_tissue\_Urea\_RNAB\_B Scan : 61502

Andromeda score : 42.931

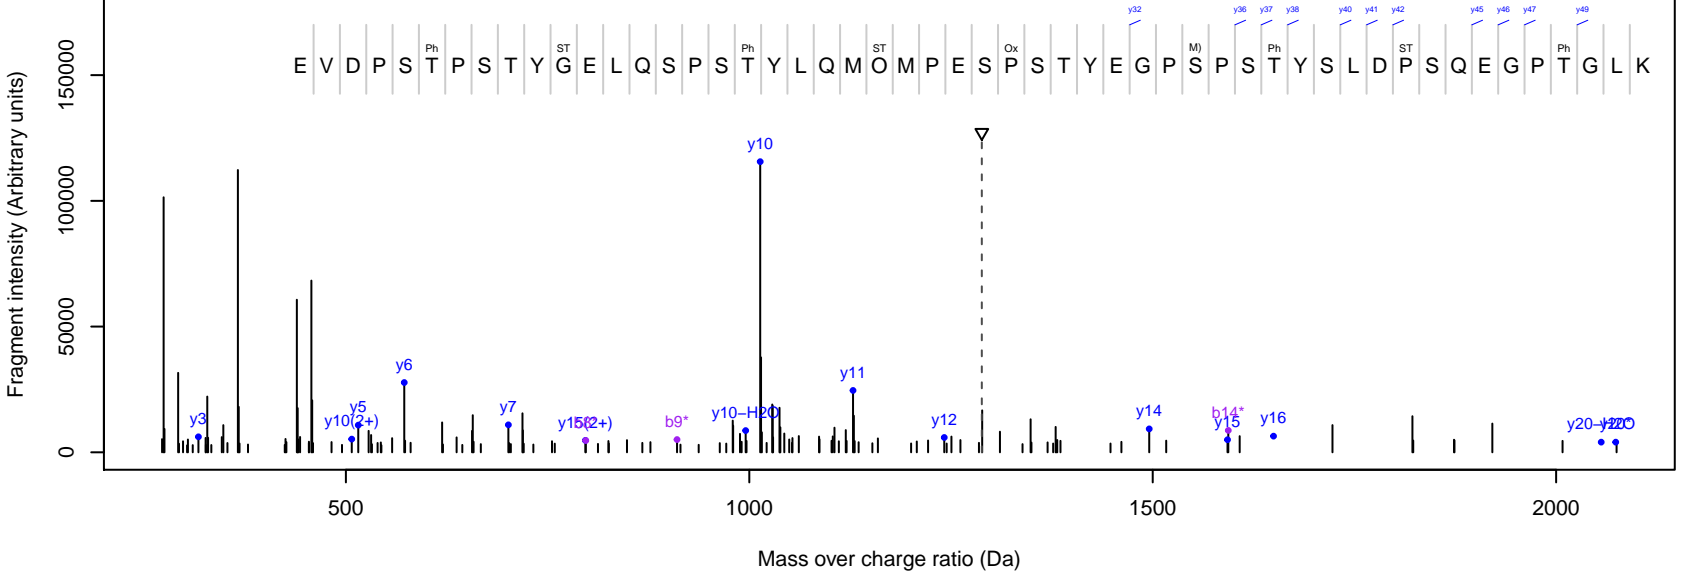

**KLS(Phospho (STY))QRPTVAELLAR-3+**

Source : QE3\_201126\_FR\_TiOx\_hum\_tissue\_Urea\_RNAB\_N Scan : 27158

Andromeda score : 42.913

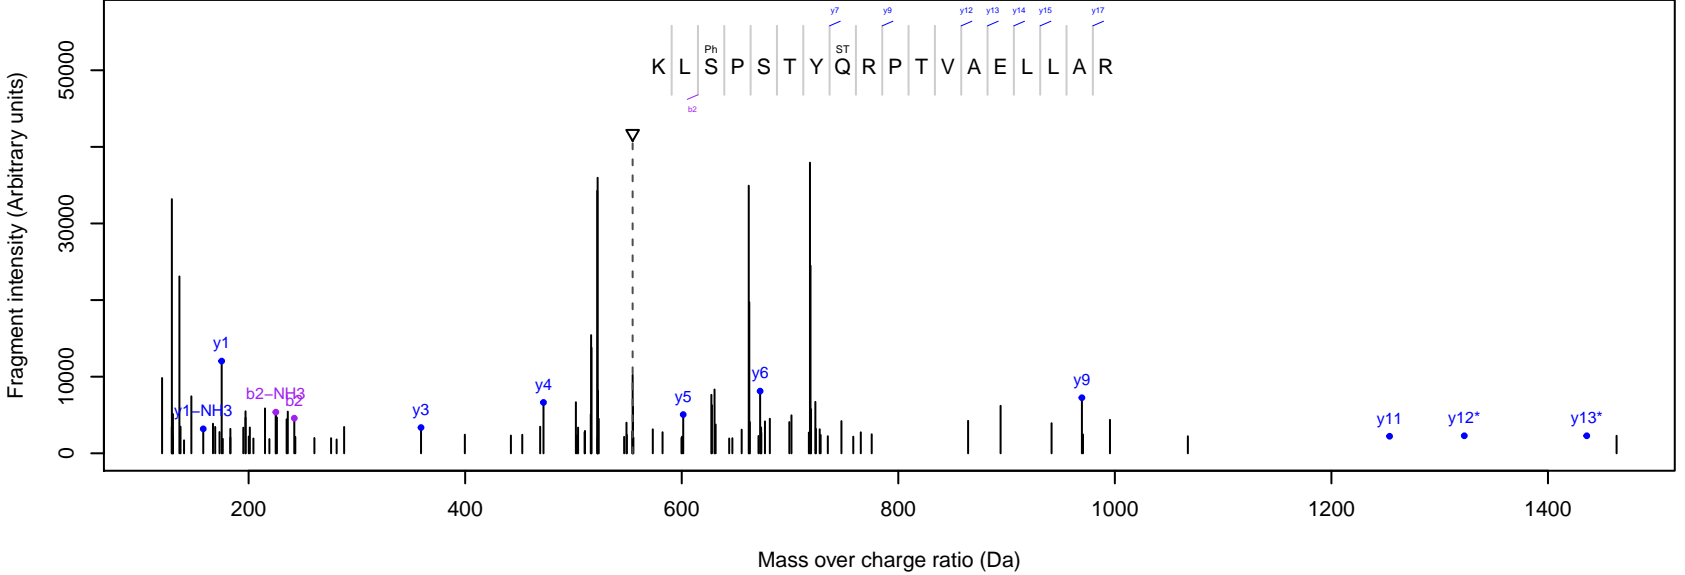

**QTES(Phospho (STY))DPDADRRTLNHADHSSK-4+**

Source : QE3\_201126\_FR\_TiOx\_hum\_tissue\_Urea\_RNAB\_B Scan : 5472

Andromeda score : 42.908

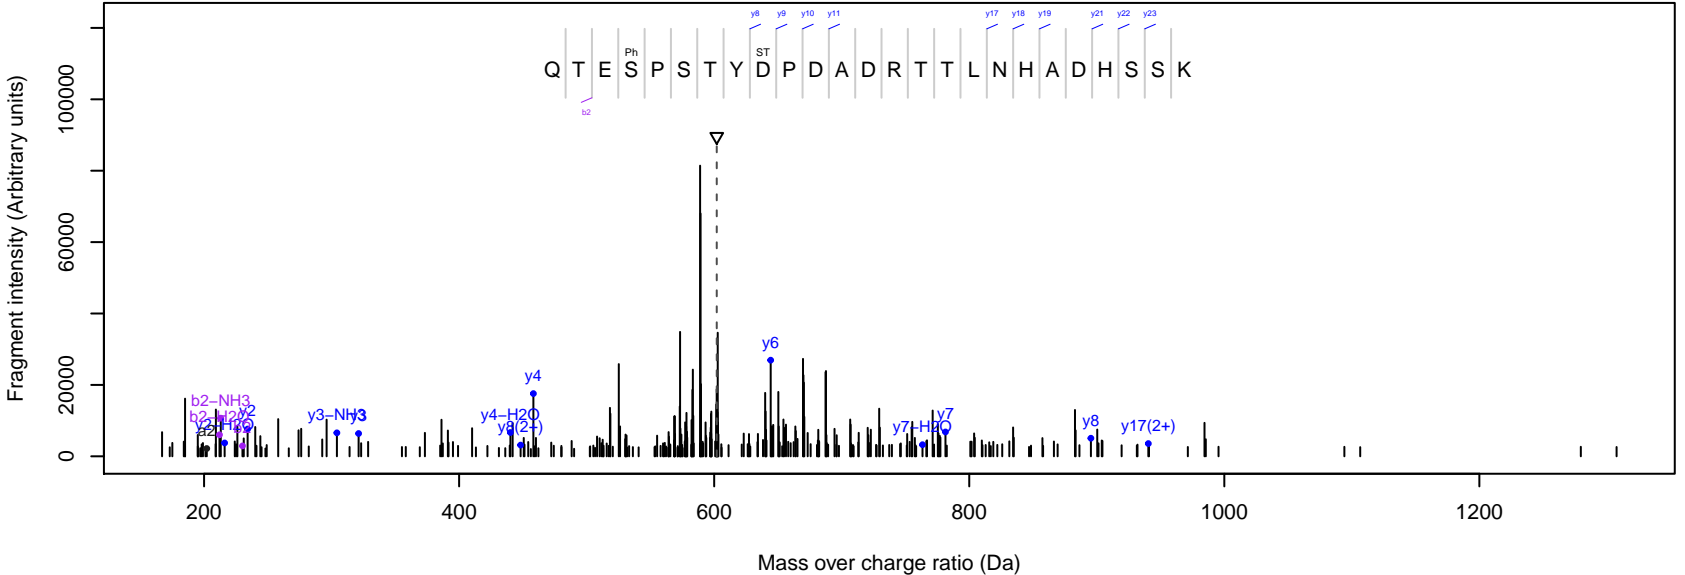

AQLYLP(Phospho (STY))TSPHEGLDGFQAQLSR-3+

Source : QE3\_201126\_FR\_TiOx\_hum\_tissue\_Urea\_RNAB\_N Scan : 51405

Andromeda score : 42.904

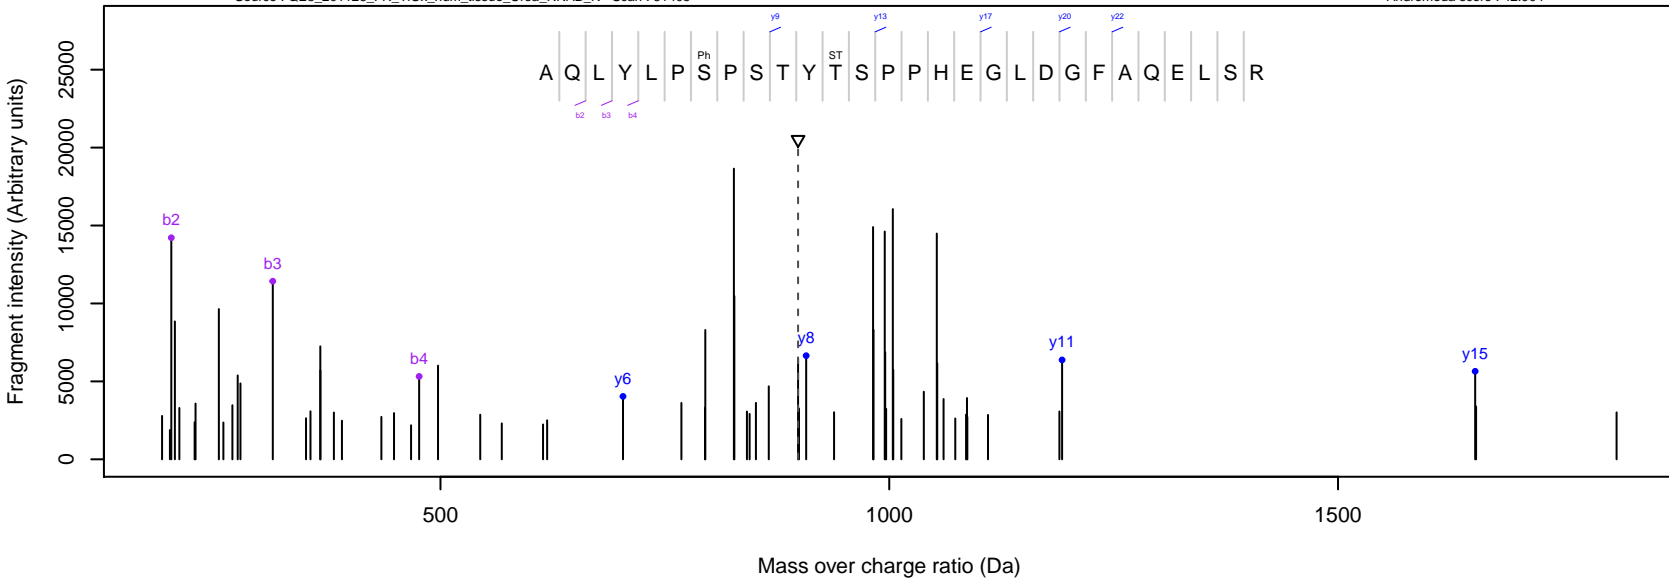

QS(Phospho (STY))LGES(Phospho (STY))PRTLSP TSAEGYQDVR-3+

Source : QE3\_201126\_FR\_TiOx\_hum\_tissue\_Urea\_RNAB\_N Scan : 29538

Andromeda score : 42.904

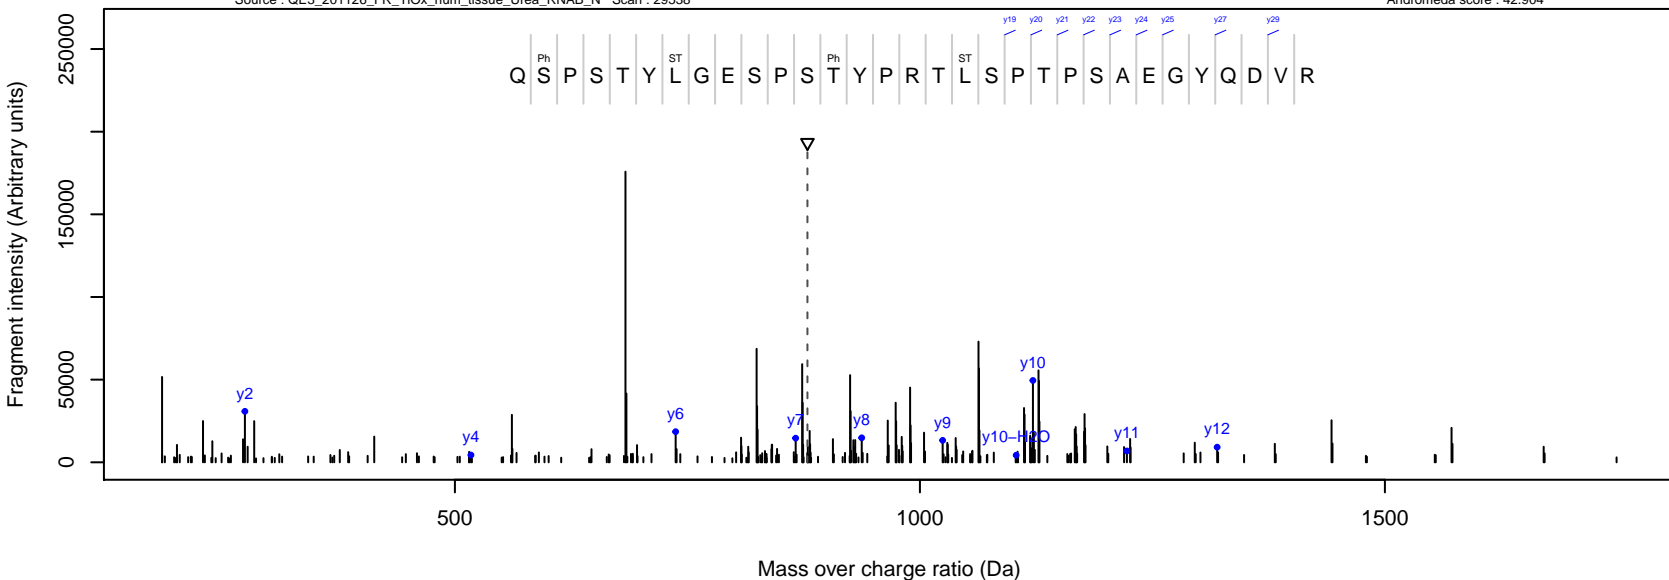

GKLS(Phospho (STY))AEENPDDSEVPSSSGINSTK-3+

Source : QE3\_201126\_FR\_TiOx\_hum\_tissue\_Urea\_RNAB\_B Scan : 17756

Andromeda score : 42.894

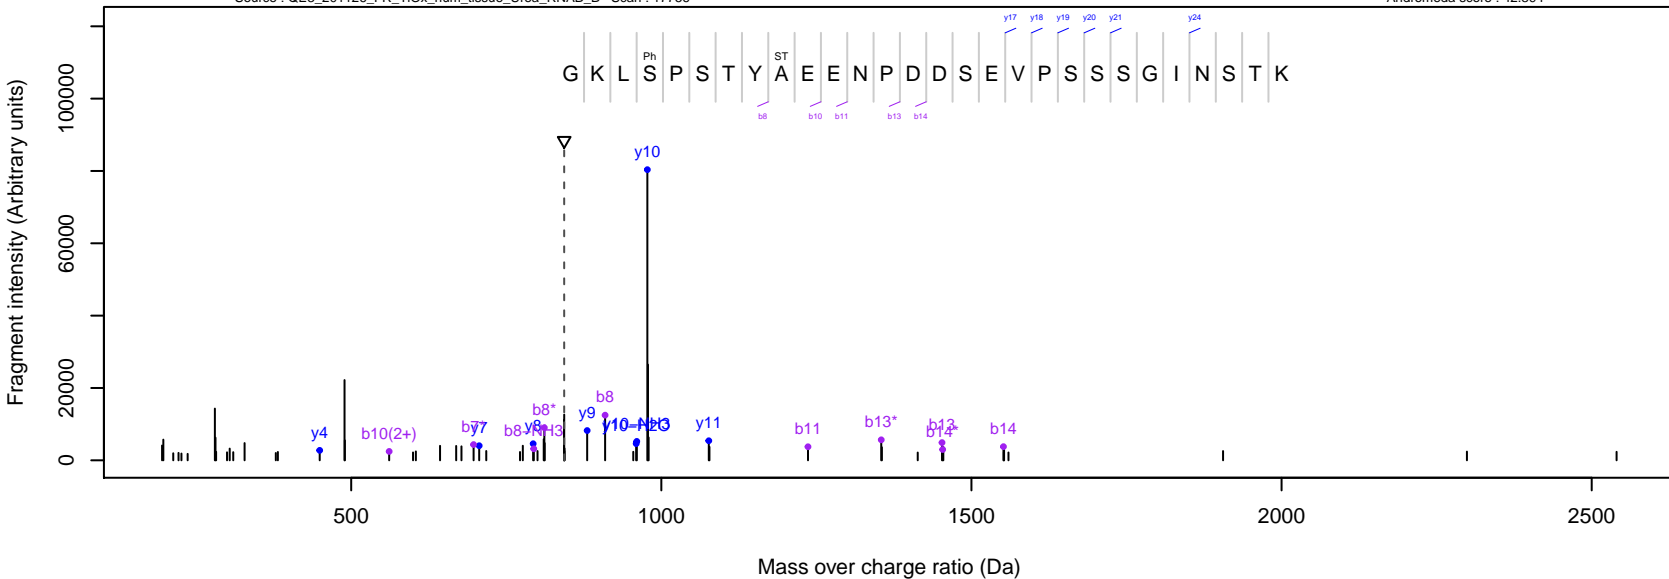

ELALRT(Phospho (STY))ELIRQEK-3+

Source : QE3\_201126\_FR\_TiOx\_hum\_tissue\_Urea\_RNAB\_B Scan : 10694

Andromeda score : 42.843

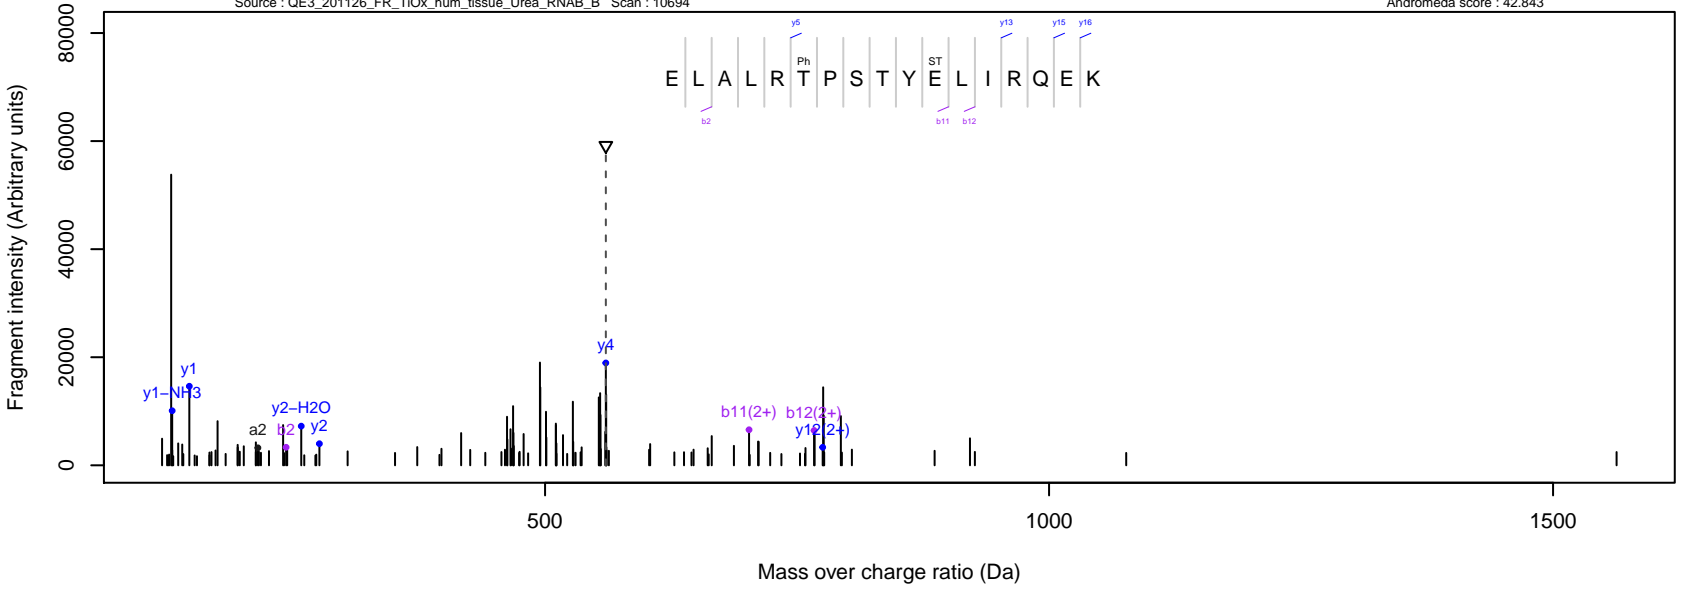

EVS(Phospho (STY))SRPSTPGLSVVSGISATSEDPINKIEDLR-4+

Source : QE3\_201126\_FR\_TiOx\_hum\_tissue\_Urea\_RNAB\_H Scan : 46649

Andromeda score : 42.828

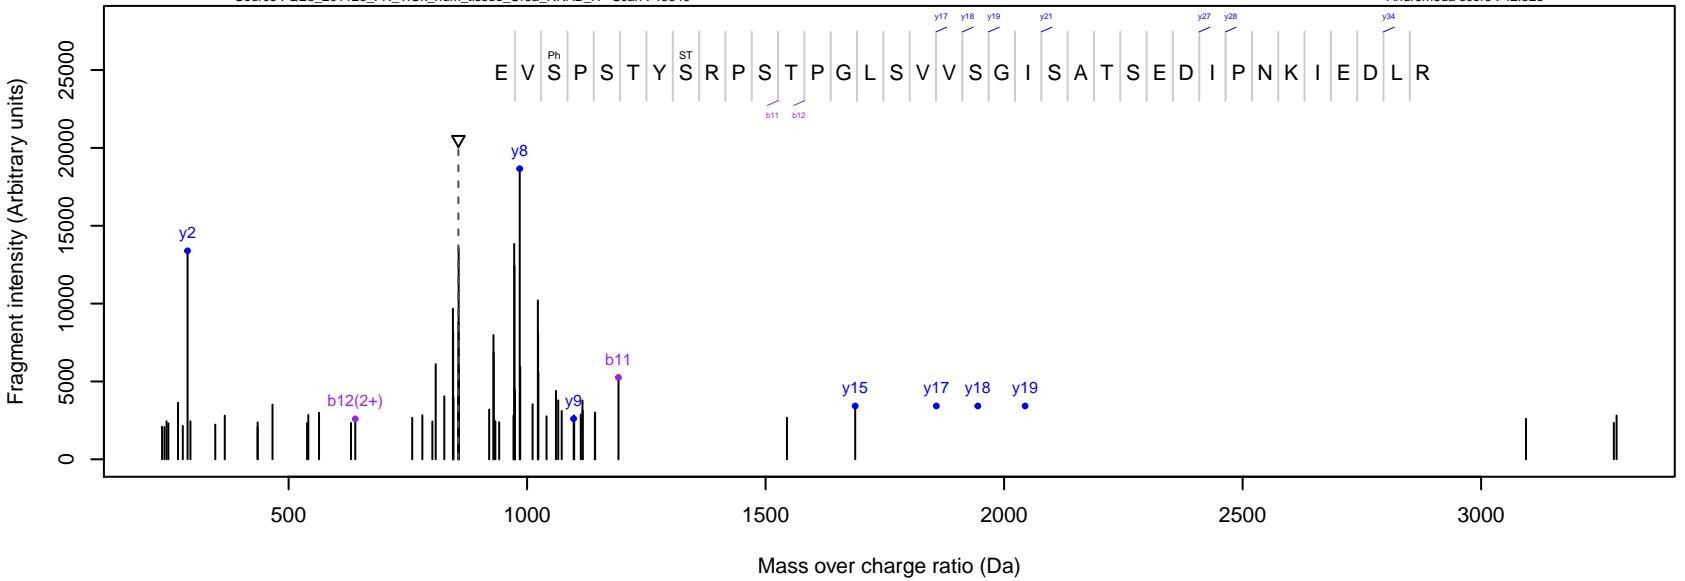

EYFTFPASKS(Phospho (STY))QDR-3+

Source : QE3\_201126\_FR\_TiOx\_hum\_tissue\_Urea\_RNAB\_N Scan : 27539

Andromeda score : 42.818

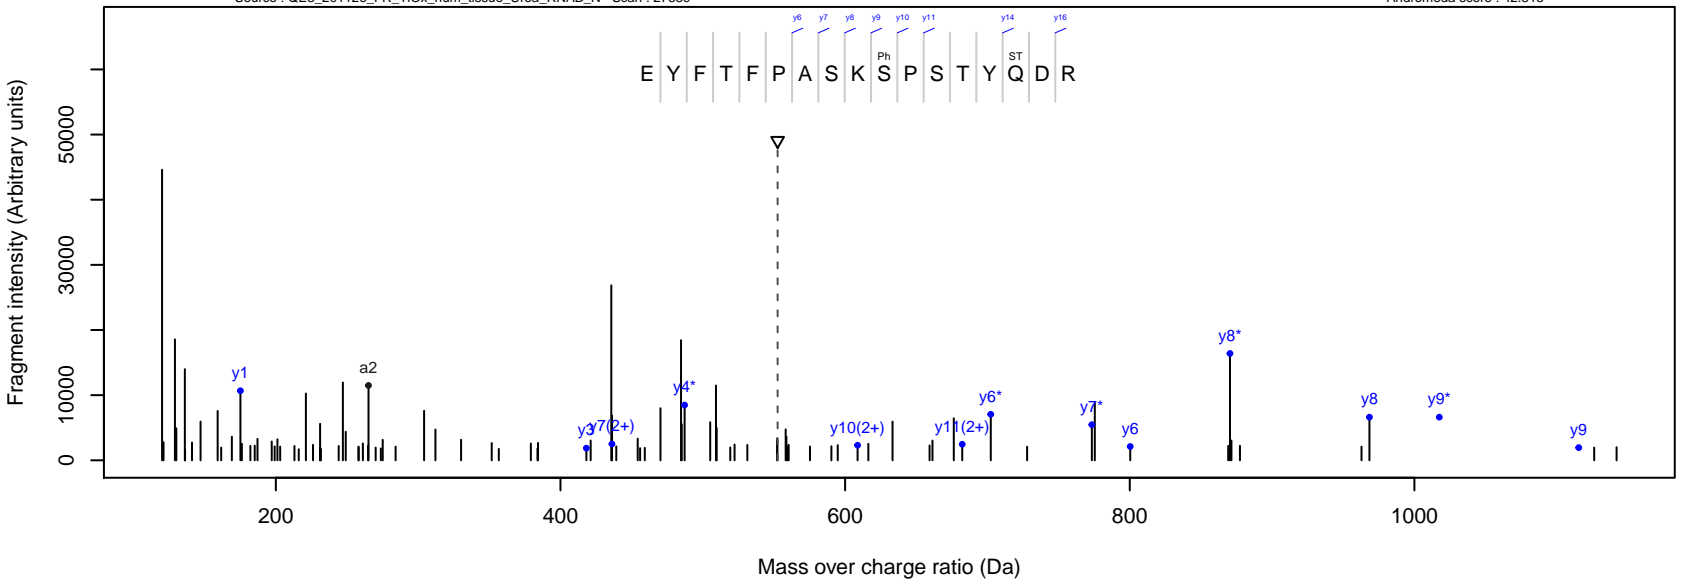

EHS(Phospho (STY))PSESEKVVGDPR-3+

Source : QE3\_201126\_FR\_TiOx\_hum\_tissue\_Urea\_RNAB\_H Scan : 9999

Andromeda score : 42.813

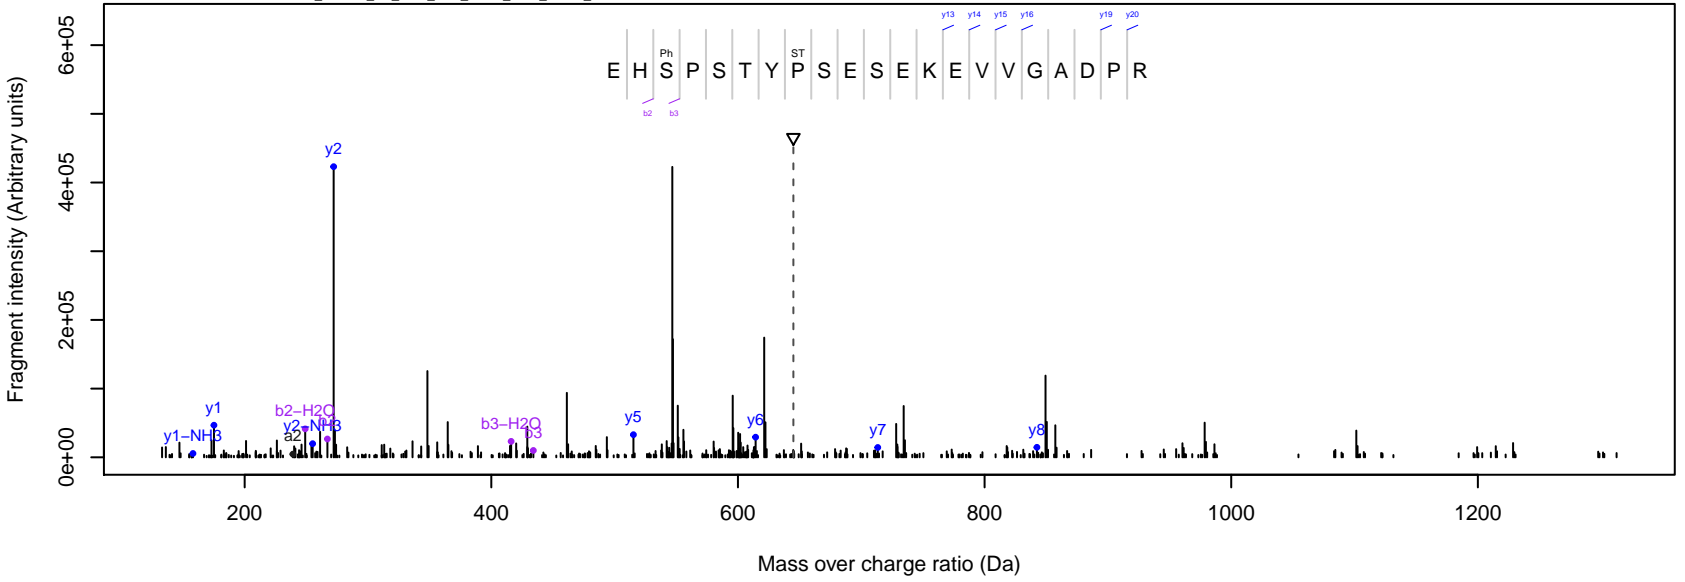

YVIES(Phospho (STY))SSHTPELAR-3+

Source : QE3\_201126\_FR\_TiOx\_hum\_tissue\_Urea\_RNAB\_N Scan : 18591

Andromeda score : 42.813

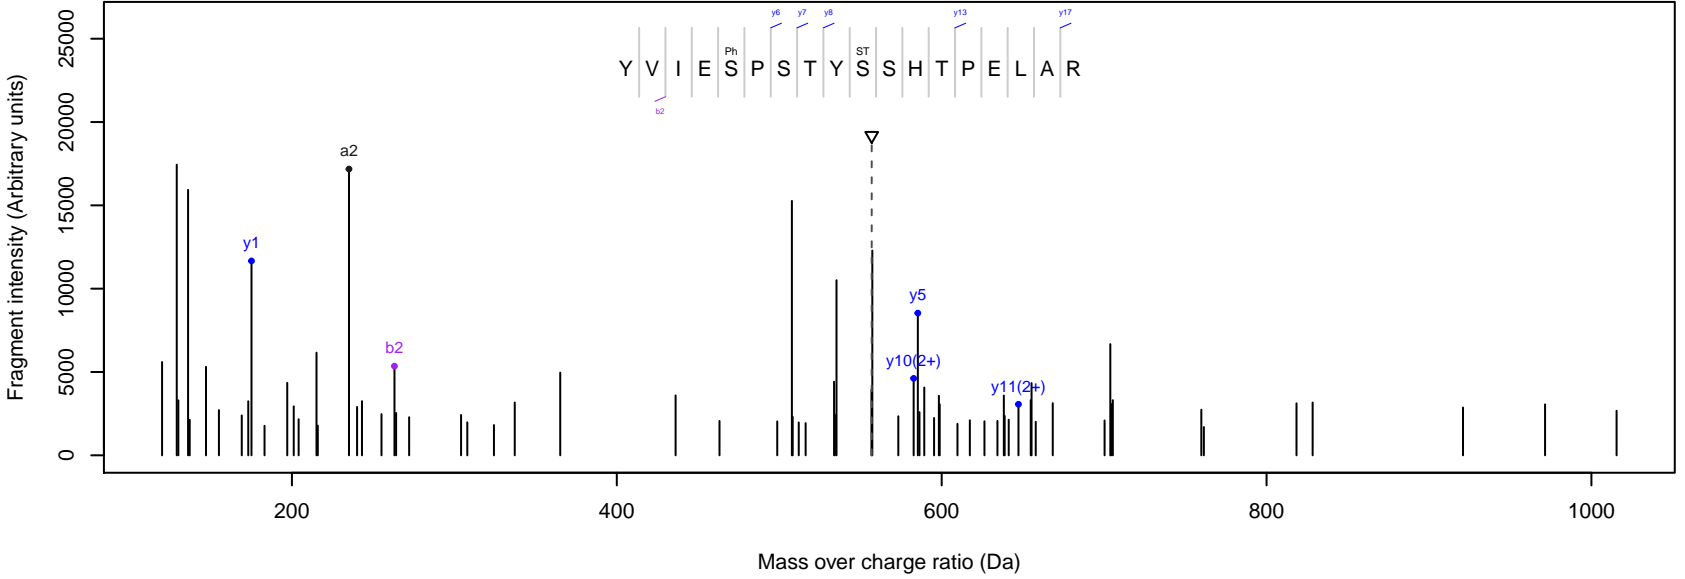

DLPAQRGEES(Phospho (STY))S(Phospho (STY))EEEEKGYK-3+

Source : QE3\_201126\_FR\_TiOx\_hum\_tissue\_Urea\_RNAB\_N Scan : 12304

Andromeda score : 42.806

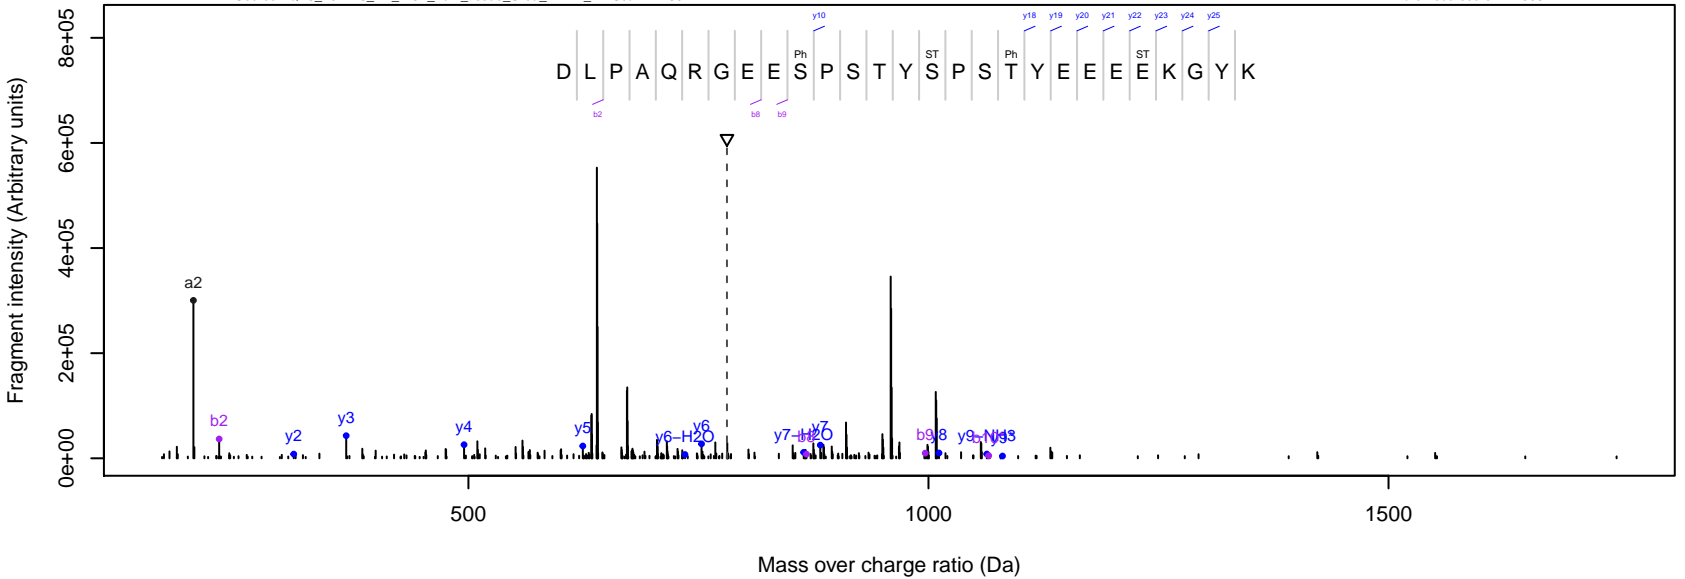

NLHQS(Phospho (STY))GFSLSGAQIDDNIPIRR-3+

Source : QE3\_201126\_FR\_TIOx\_hum\_tissue\_Urea\_RNAB\_H Scan : 29950

Andromeda score : 42.806

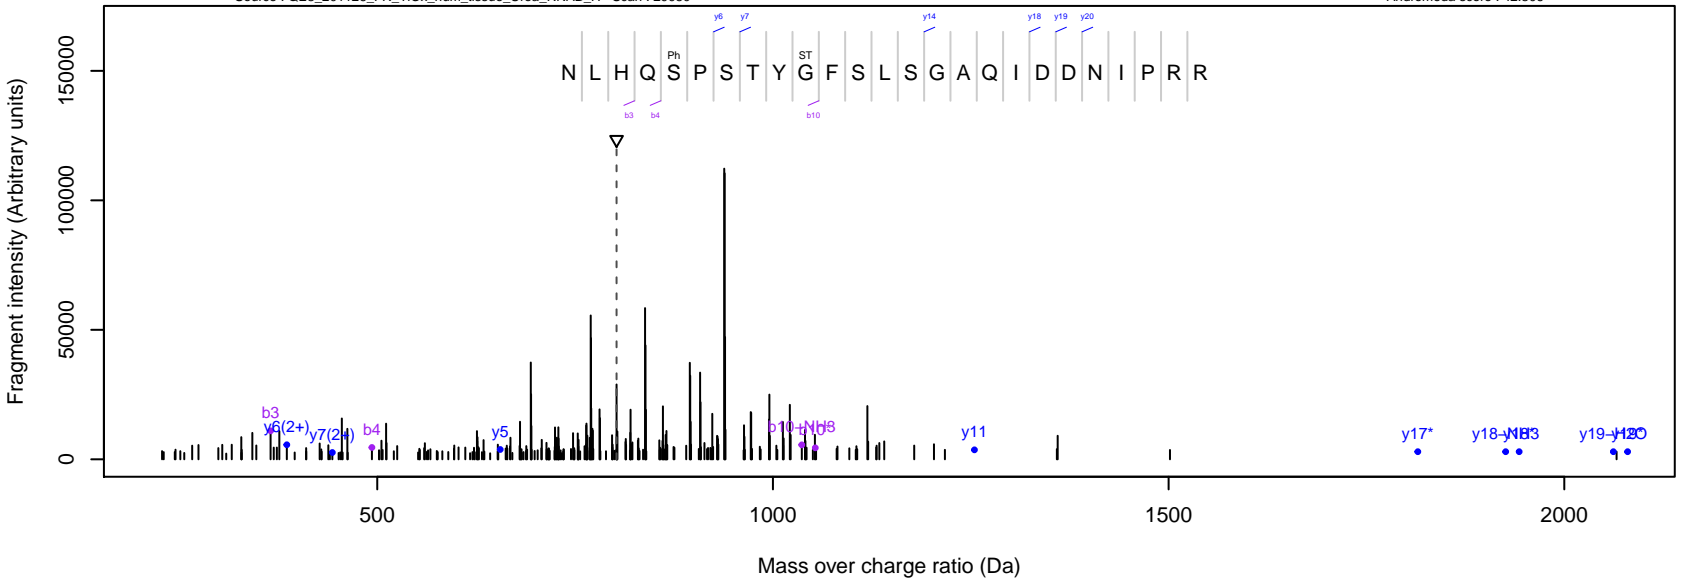

GVS(Phospho (STY))M(Oxidation (M))PNM(Oxidation (M))LEPK-2+

Source : QE3\_201126\_FR\_TIOx\_hum\_tissue\_Urea\_RNAB\_H Scan : 15656

Andromeda score : 42.789

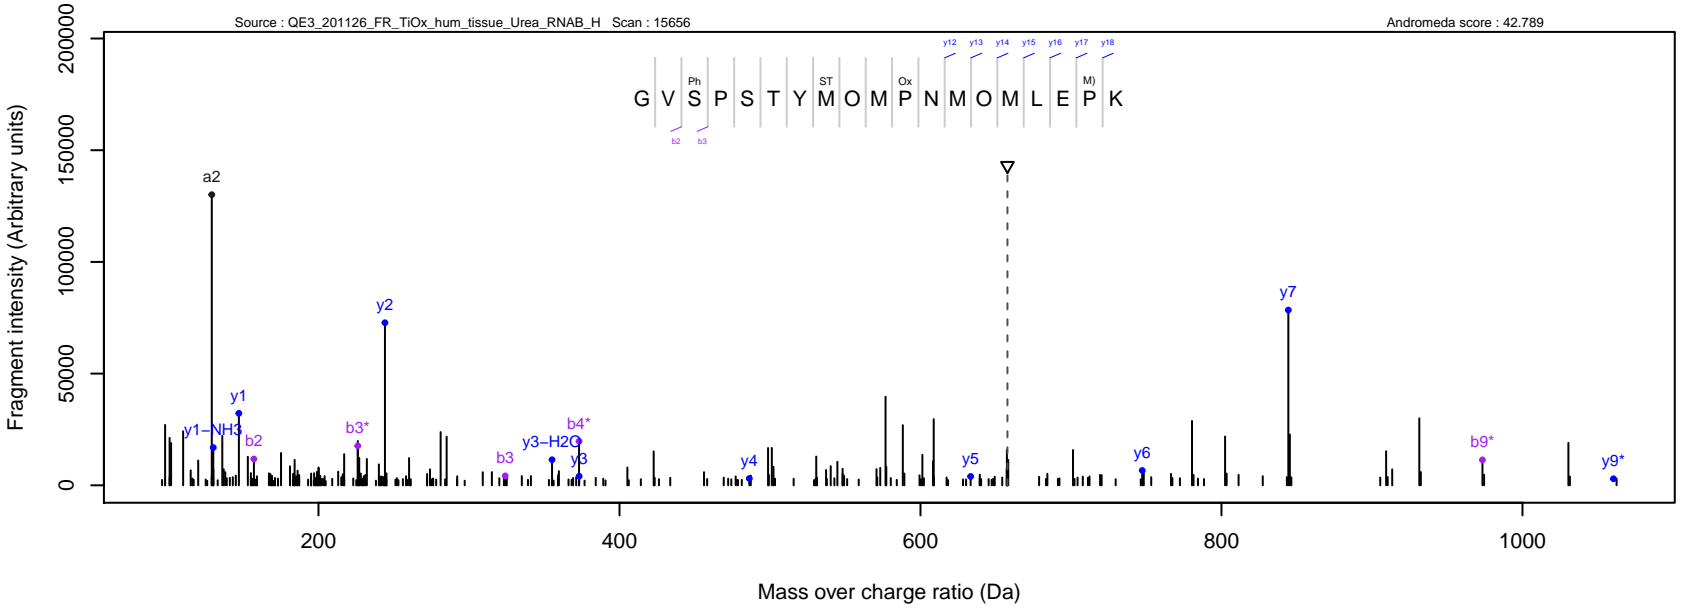

DGLAPEKTS(Phospho (STY))PDRDK-3+

Source : QE3\_201126\_FR\_TIOx\_hum\_tissue\_Urea\_RNAB\_N Scan : 5719

Andromeda score : 42.78

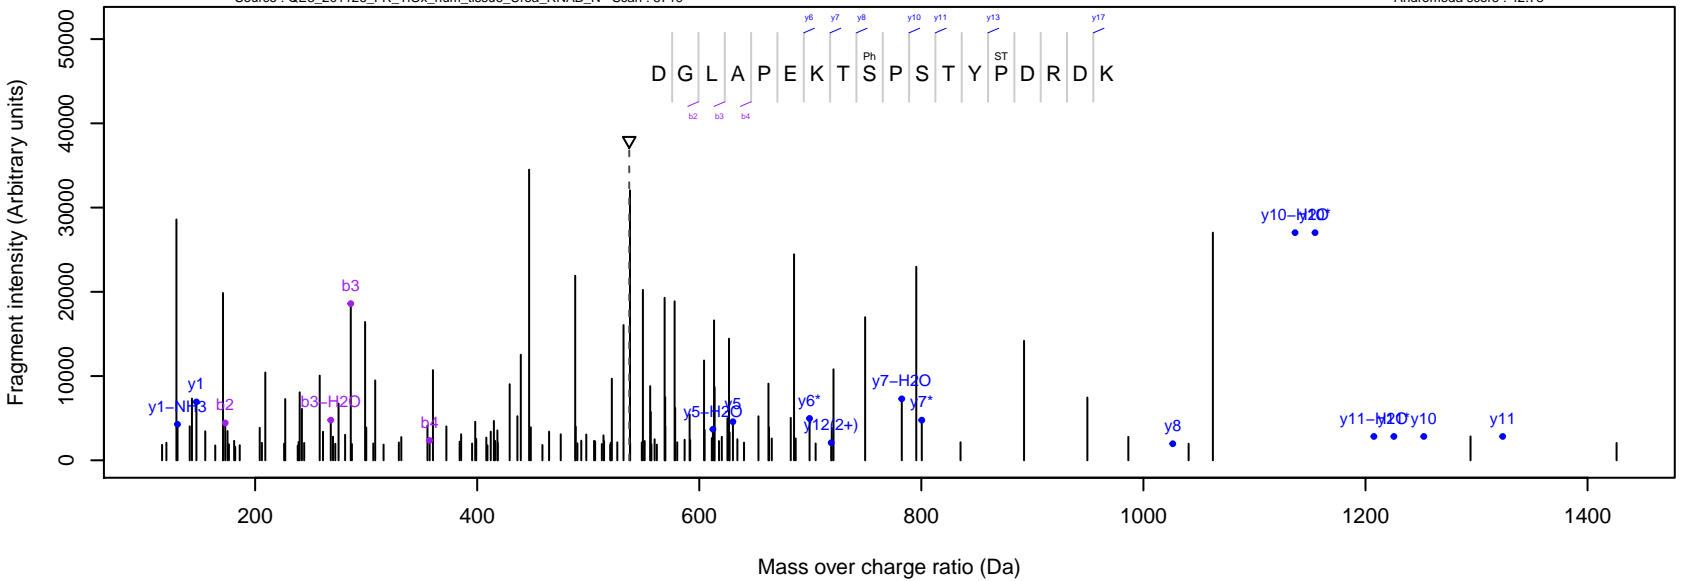

RT(Phospho (STY))ESVPSDINNPDVDR-3+

Source : QE3\_201126\_FR\_TiOx\_hum\_tissue\_Urea\_RNAB\_H Scan : 17070

Andromeda score : 42.711

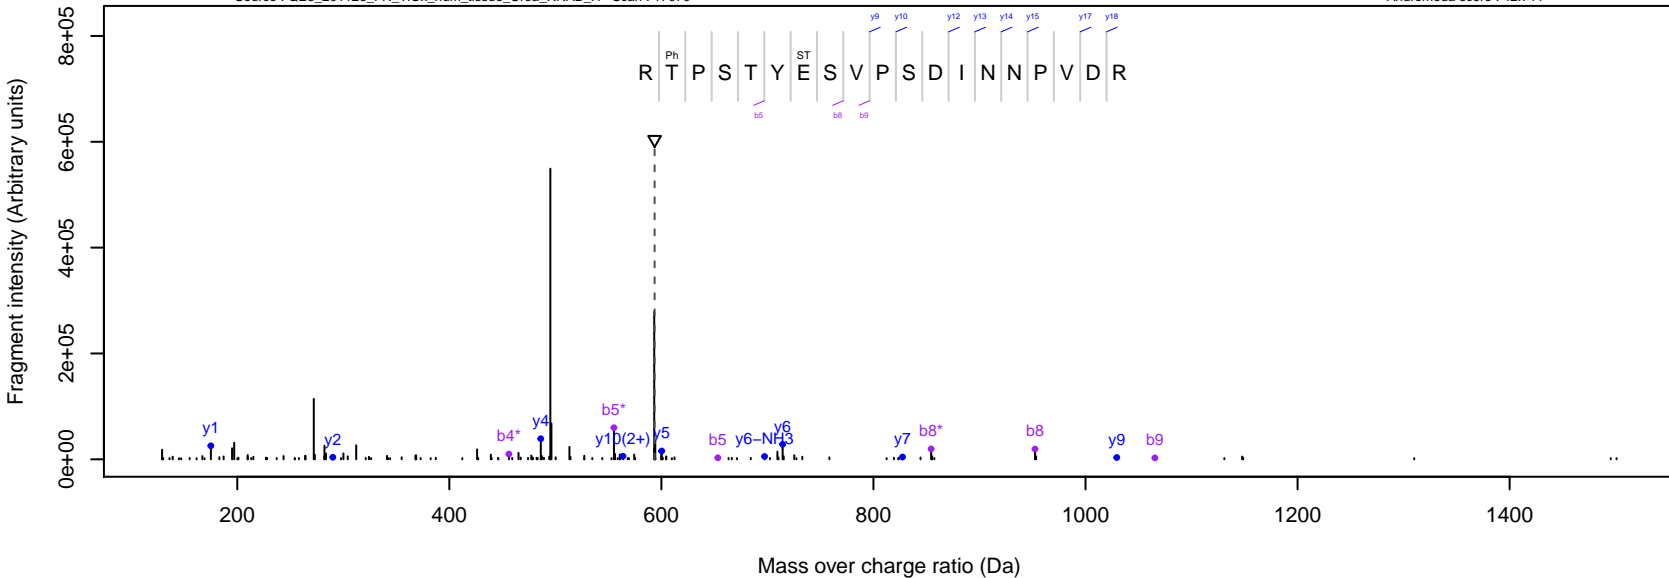

TVS(Phospho (STY))PSTIRDGPSSAPATPTK-3+

Source : QE3\_201126\_FR\_TiOx\_hum\_tissue\_Urea\_RNAB\_H Scan : 15915

Andromeda score : 42.711

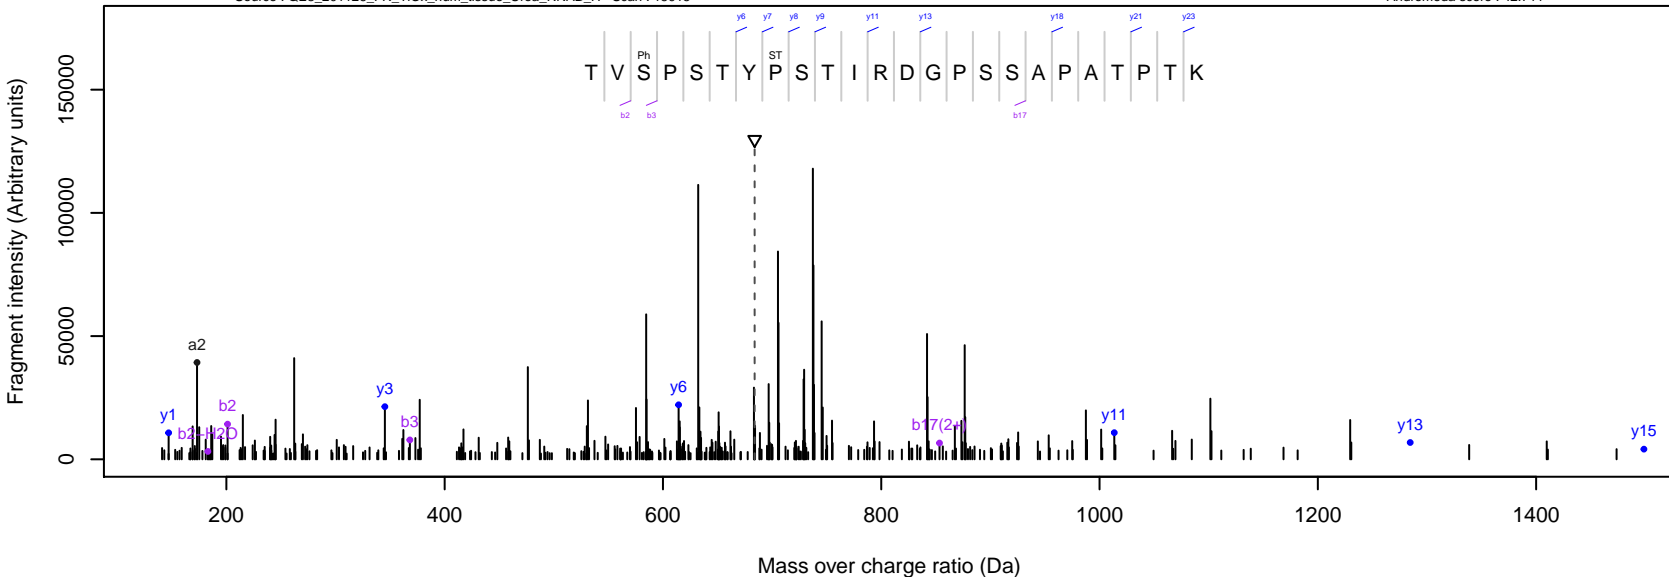

ENPEAETVS(Phospho (STY))VLGEKNCLQEGS(Phospho (STY))QLK-4+

Source : QE3\_201126\_FR\_TiOx\_hum\_tissue\_Urea\_RNAB\_N Scan : 6225

Andromeda score : 42.709

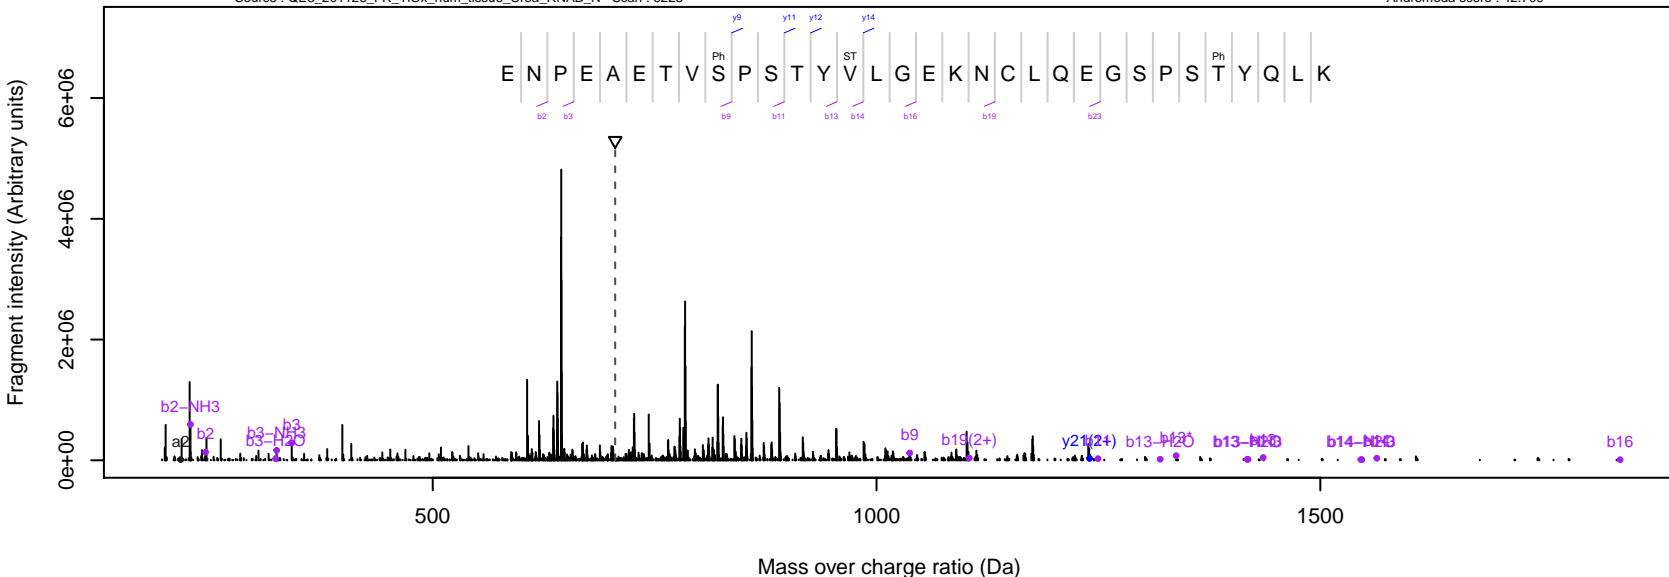

NFSRPDGLSDS(Phospho (STY))EDS(Phospho (STY))KEDENVPTAPDPPSQHLR-4+

Source : QE3\_201126\_FR\_TiOx\_hum\_tissue\_Urea\_RNAB\_B Scan : 25913

Andromeda score : 42.709

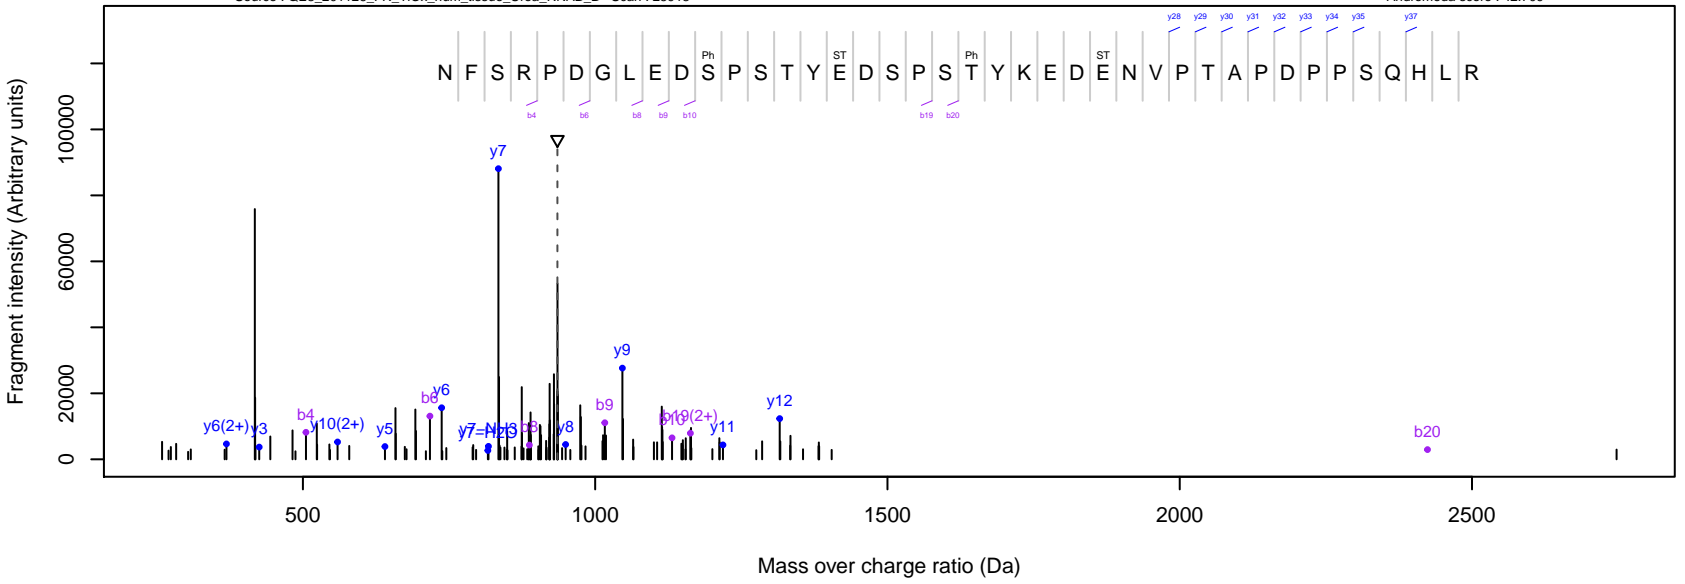

SKAIHS(Phospho (STY))S(Phospho (STY))DEDEDDEEDFEDDEWED-3+

Source : QE3\_201126\_FR\_TiOx\_hum\_tissue\_Urea\_RNAB\_N Scan : 39078

Andromeda score : 42.669

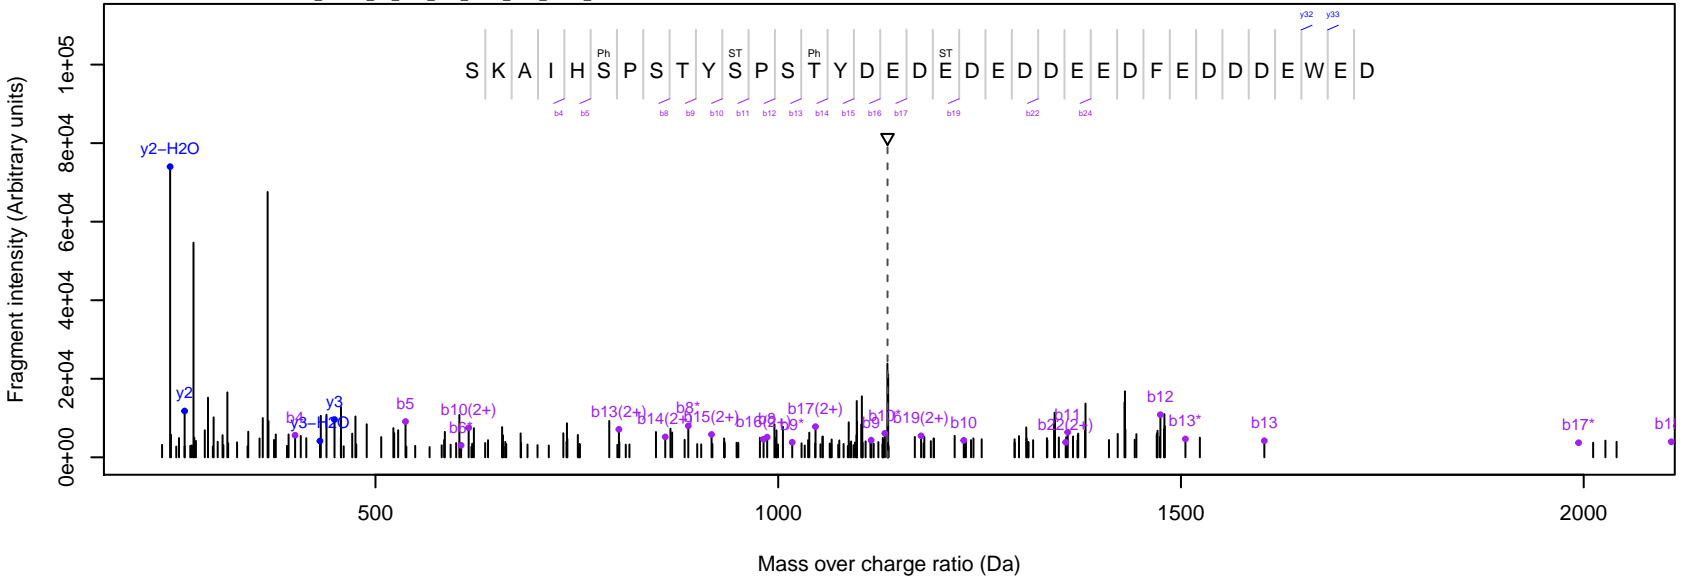

AQDS(Phospho (STY))VGRS(Phospho (STY))DNEMCELDPGQFIDR-3+

Source : QE3\_201126\_FR\_TiOx\_hum\_tissue\_Urea\_RNAB\_B Scan : 49703

Andromeda score : 42.659

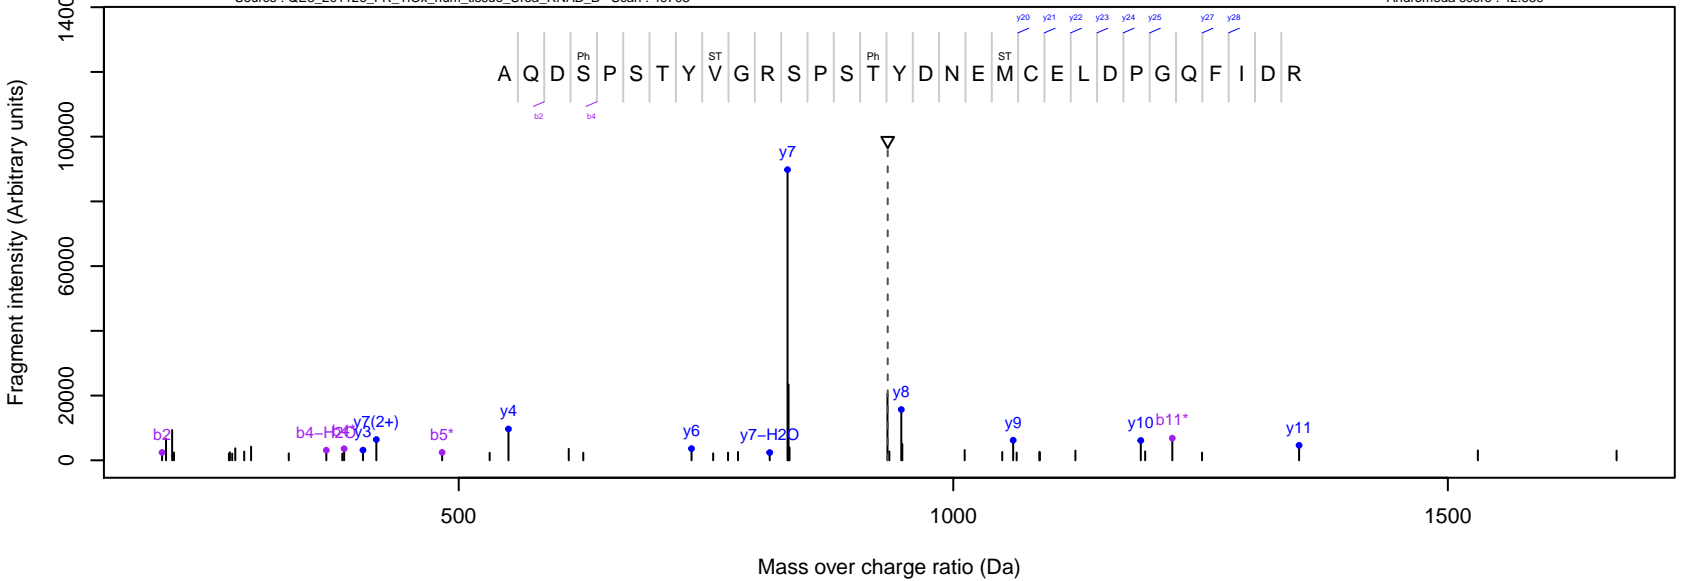

GSPVSEIGWETPPES(Phospho (STY))PRLGGSTSDPPSSQSFHHR-4+

Source : QE3\_201126\_FR\_TiOx\_hum\_tissue\_Urea\_RNAB\_B Scan : 41575

Andromeda score : 42.652

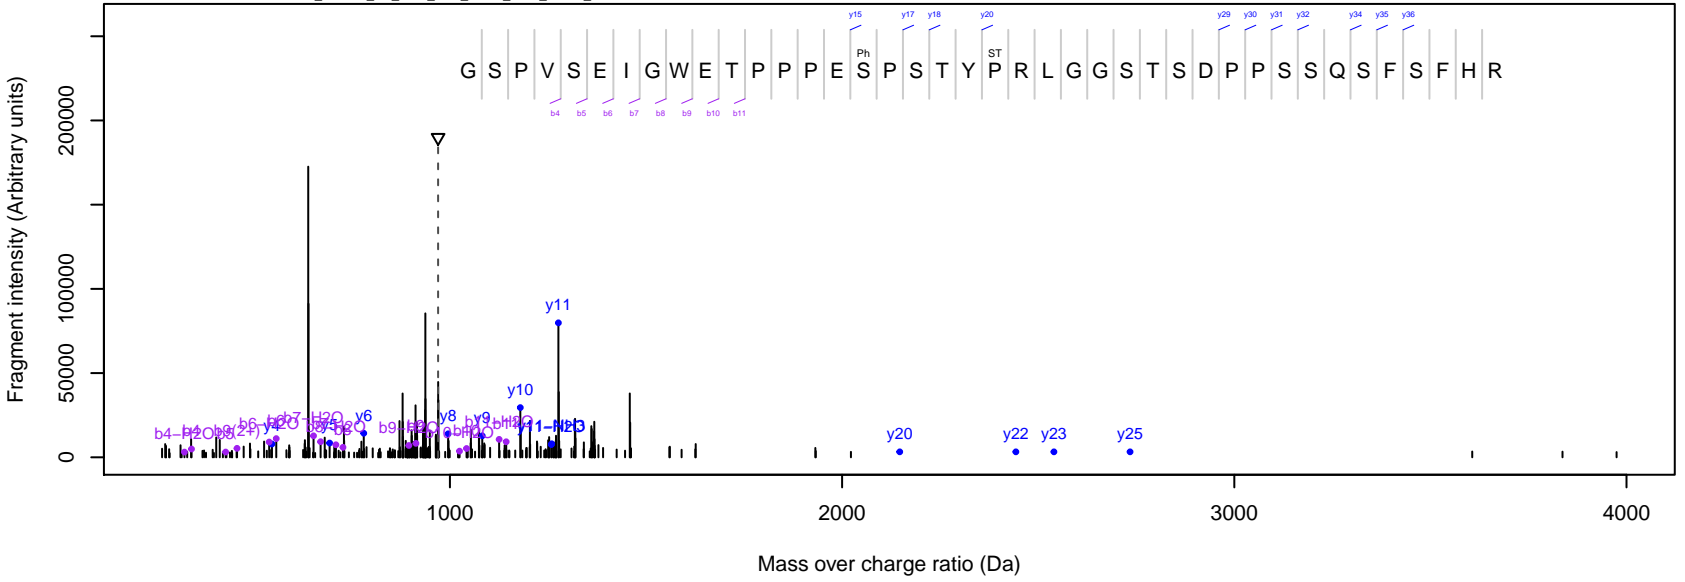

AGM(Oxidation (M))SSNQS(Phospho (STY))IS(Phospho (STY))SPVLDAVPR-3+

Source : QE3\_201126\_FR\_TiOx\_hum\_tissue\_Urea\_RNAB\_N Scan : 43974

Andromeda score : 42.612

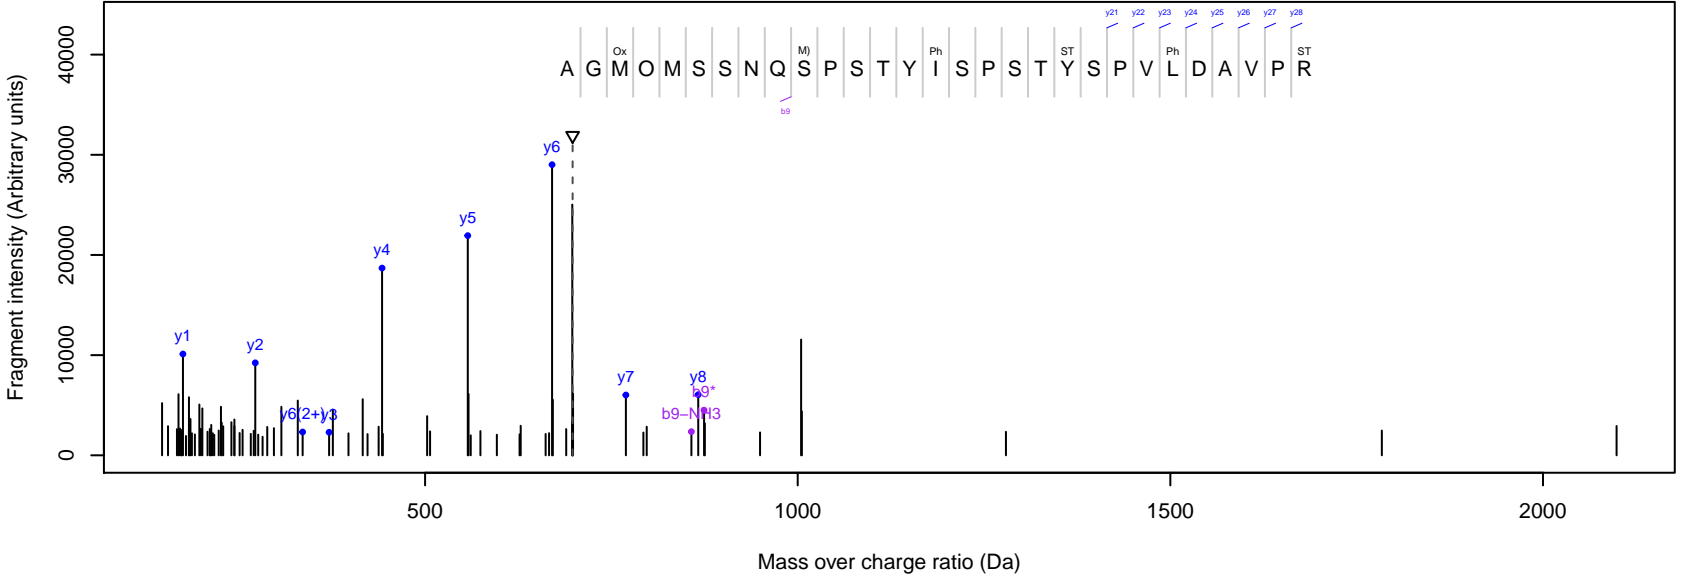

SMS(Phospho (STY))VDLSHIPLKDLLFK-3+

Source : QE3\_201126\_FR\_TiOx\_hum\_tissue\_Urea\_RNAB\_N Scan : 52879

Andromeda score : 42.612

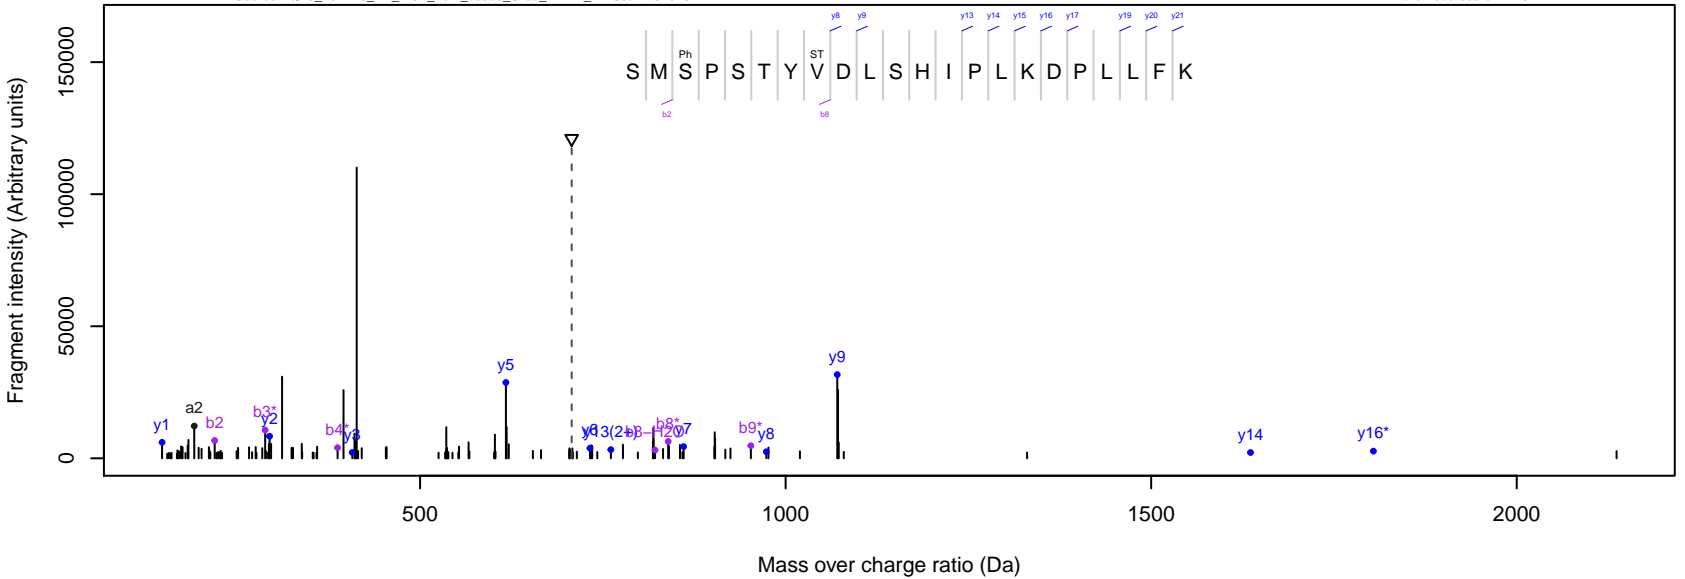



DDGDEEGLLTHSEEELEHS(Phospho (STY))QDTDADDGALQ-3+

Source : QE3\_201126\_FR\_TiOx\_hum\_tissue\_Urea\_RNAB\_H Scan : 37745

Andromeda score : 42.582

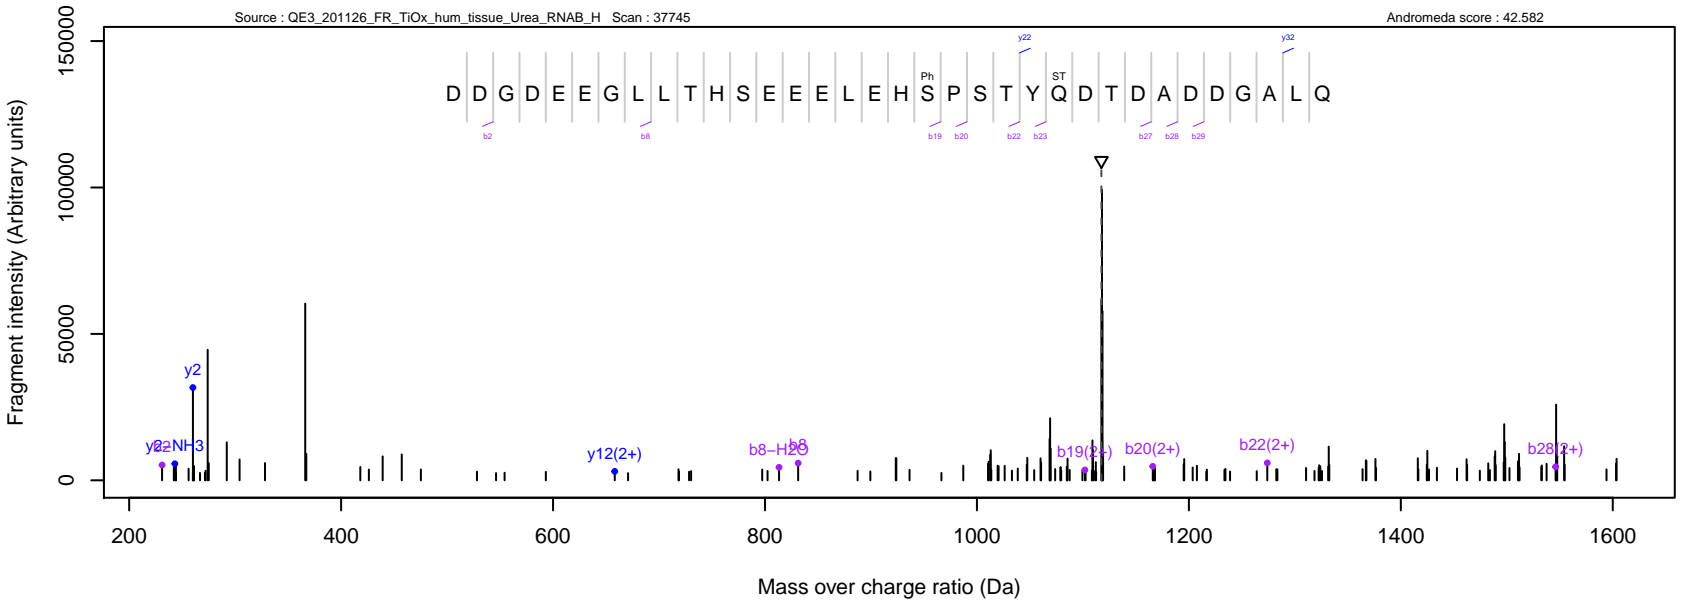

S(Phospho (STY))PLPAGPS(Phospho (STY))SCTSPRS(Phospho (STY))PLPAPRPFLYR-4+

Source : QE3\_201126\_FR\_TiOx\_hum\_tissue\_Urea\_RNAB\_B Scan : 48114

Andromeda score : 42.582

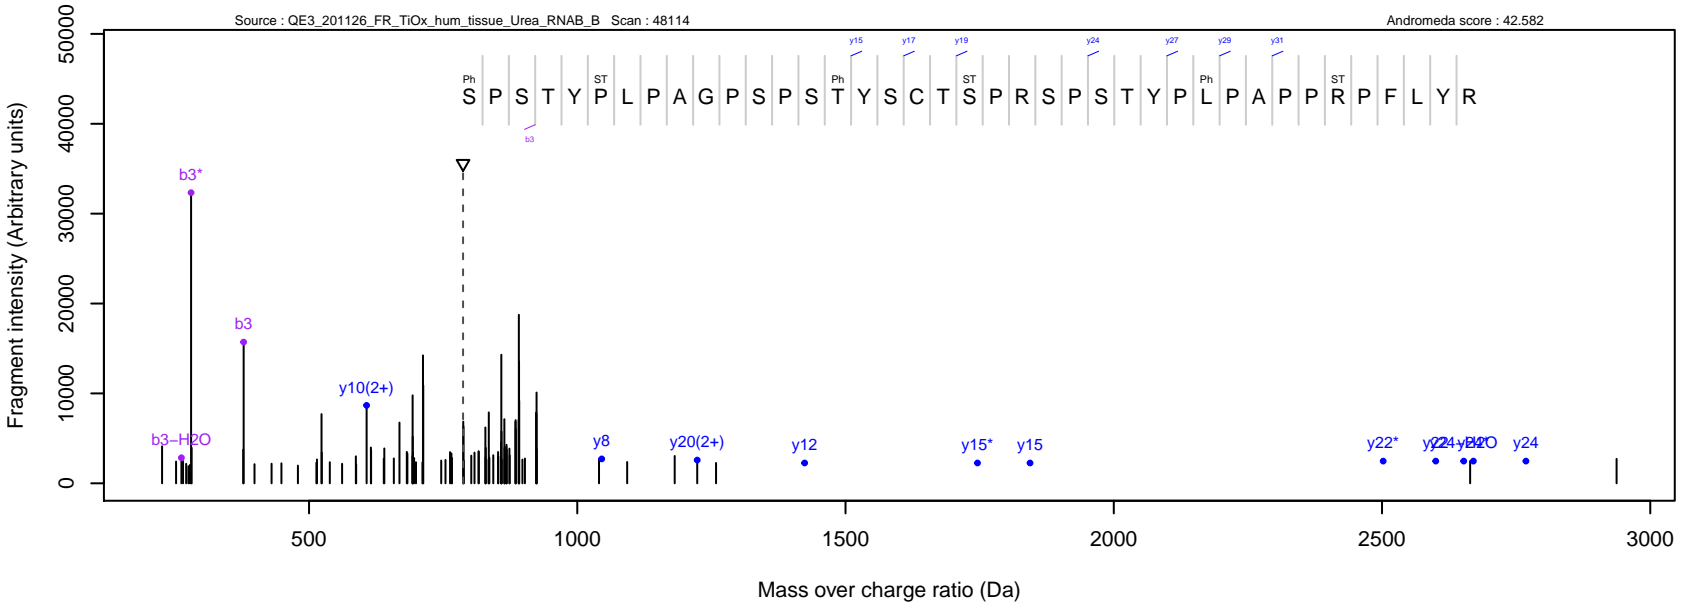

EPHLHSYKEAFEEMEGTSPSS(Phospho (STY))PPPSGVR-4+

Source : QE3\_201126\_FR\_TiOx\_hum\_tissue\_Urea\_RNAB\_H Scan : 31613

Andromeda score : 42.571

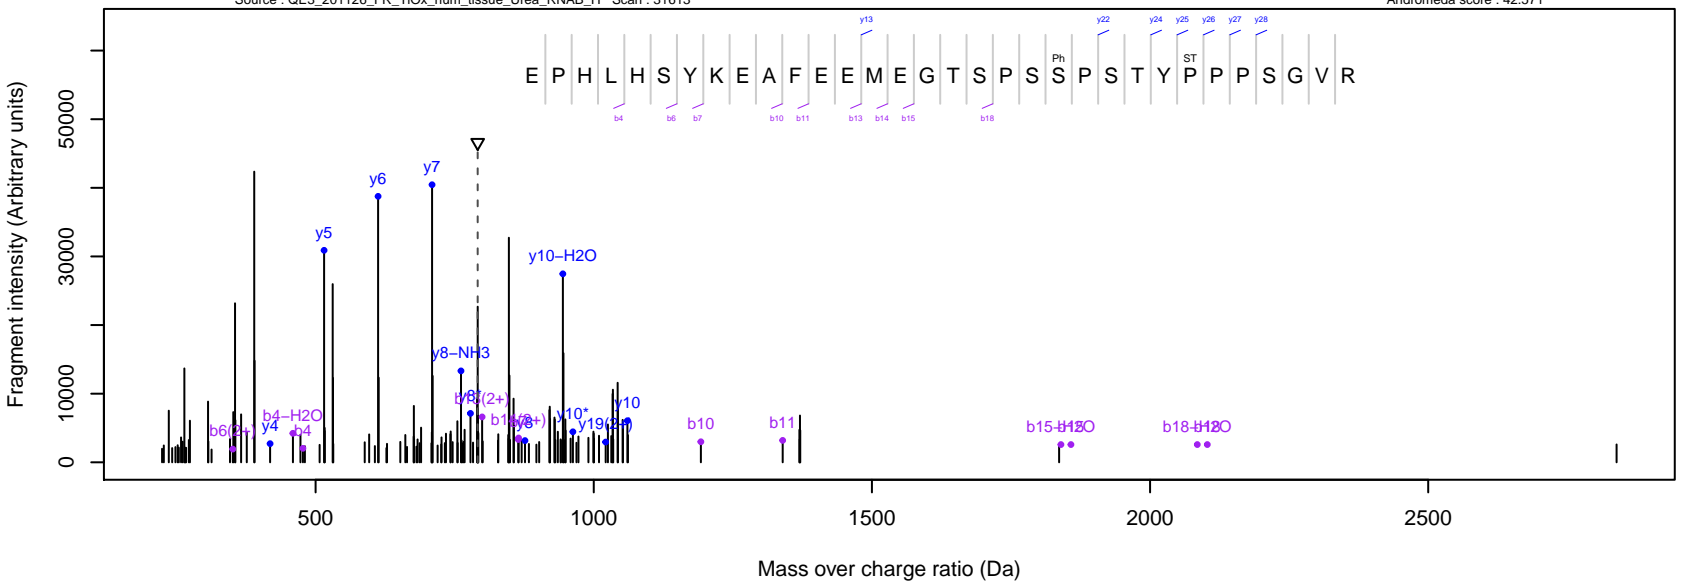

S(Phospho (STY))RS(Phospho (STY))RTPLISR-3+

Source : QE3\_201126\_FR\_TiOx\_hum\_tissue\_Urea\_RNAB\_H Scan : 9816

Andromeda score : 42.568

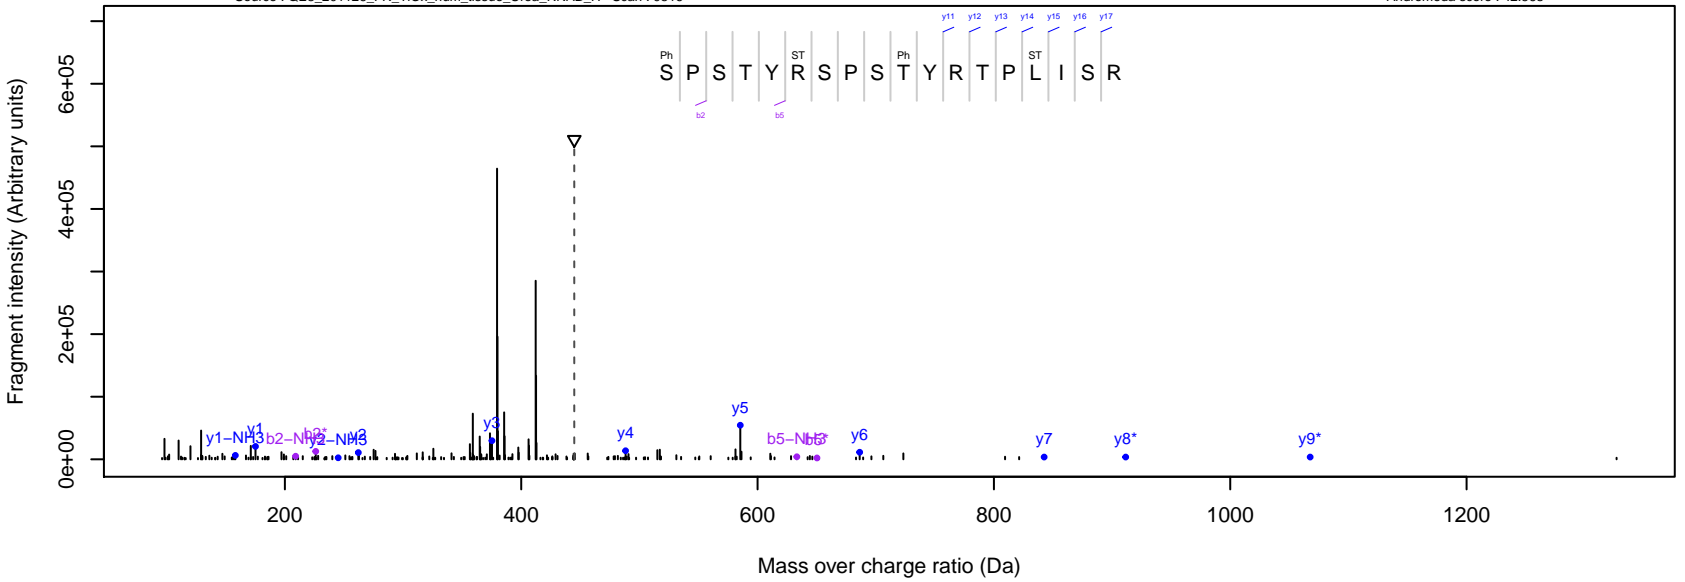

LELSPPPPLLPVVS(Phospho (STY))PVGSSGR-3+

Source : QE3\_201126\_FR\_TiOx\_hum\_tissue\_Urea\_RNAB\_N Scan : 60063

Andromeda score : 42.536

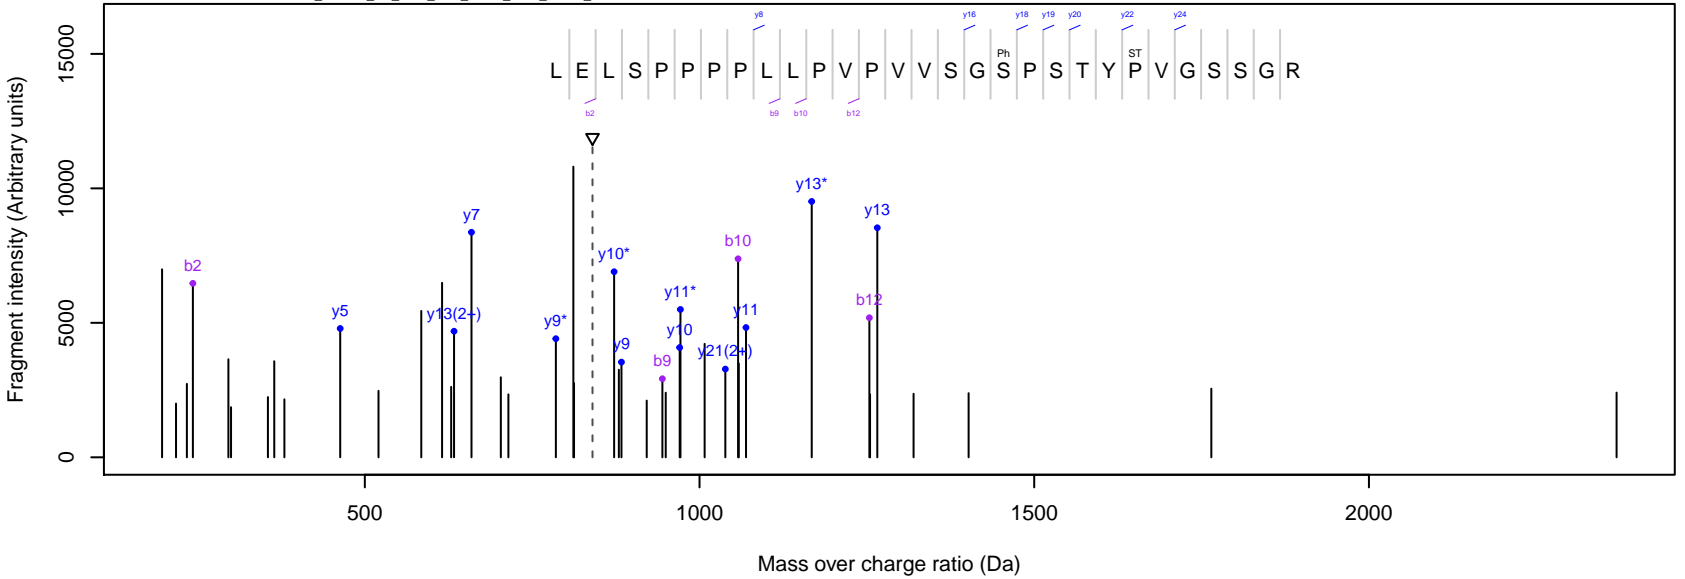

NGQHVAS(Phospho (STY))SPIPVVISQSEIGDASR-3+

Source : QE3\_201126\_FR\_TiOx\_hum\_tissue\_Urea\_RNAB\_N Scan : 35081

Andromeda score : 42.536

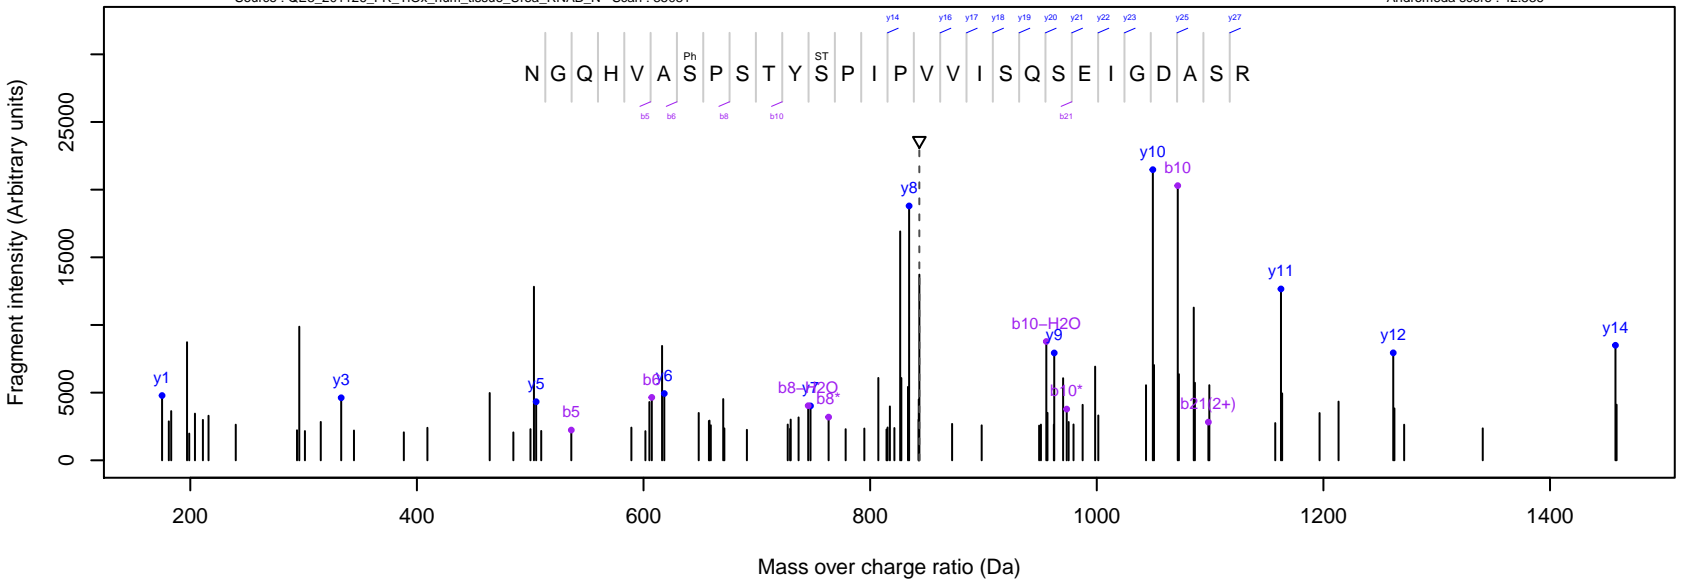

TASES(Phospho (STY))ISNLS(Phospho (STY))EAGS(Phospho (STY))IKKGER-3+

Source : QE3\_201126\_FR\_TIOx\_hum\_tissue\_Urea\_RNAB\_N Scan : 19887

Andromeda score : 42.525

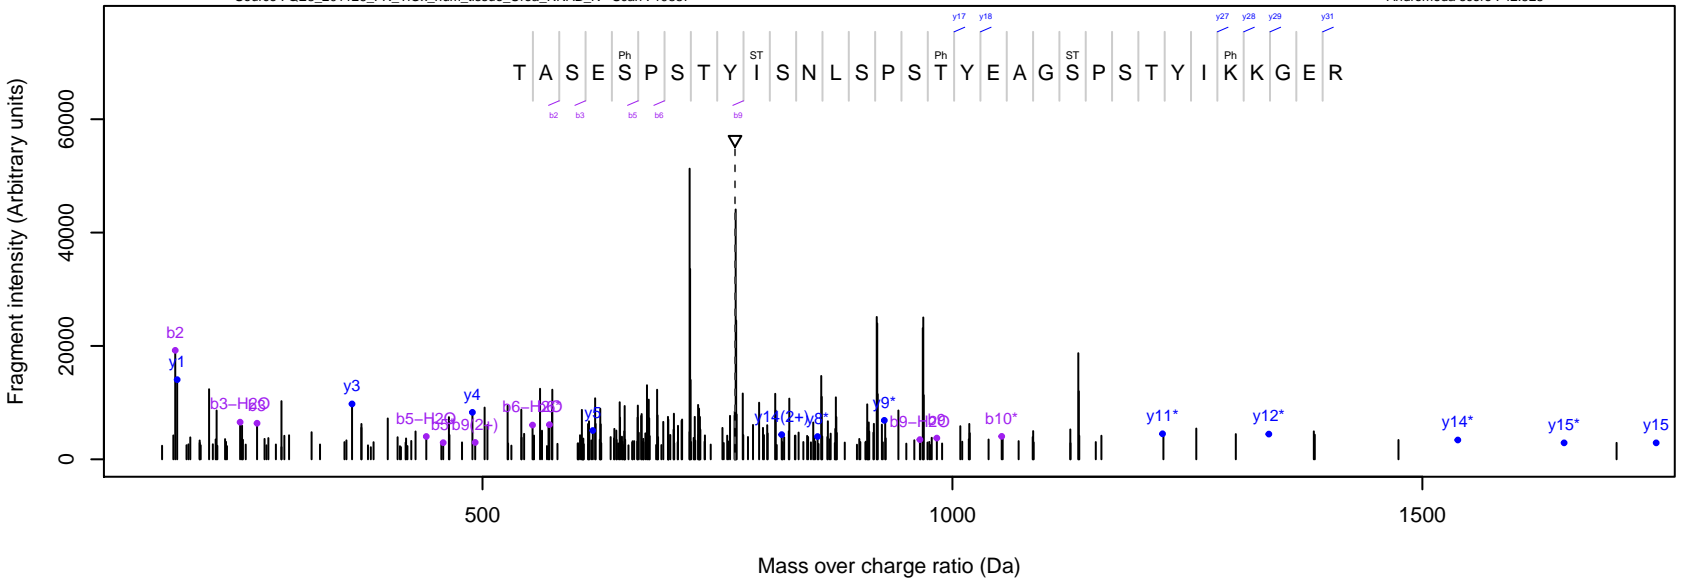

QS(Phospho (STY))PS(Phospho (STY))PSTRPIR-2+

Source : QE3\_201126\_FR\_TIOx\_hum\_tissue\_Urea\_RNAB\_H Scan : 9307

Andromeda score : 42.464

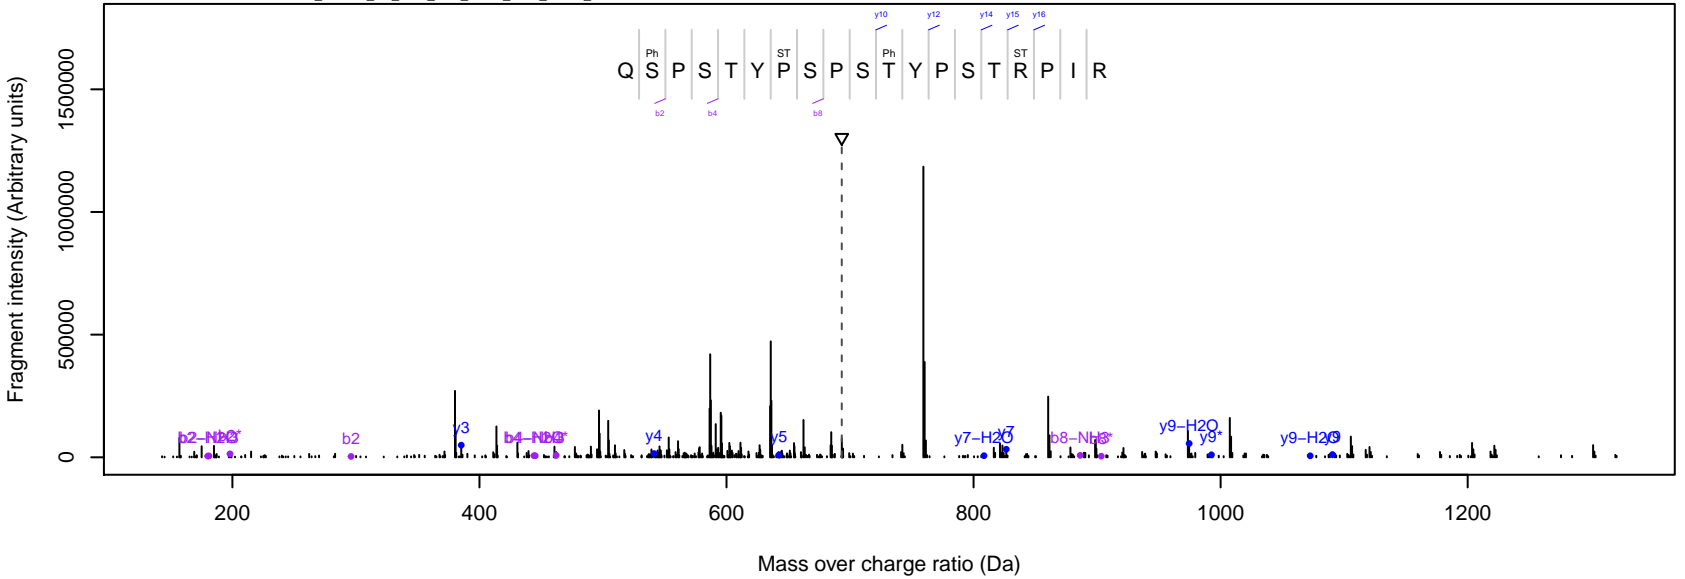

RDPSKS(Phospho (STY))TDWEDDGGWGAWEENEPEEEGNTCK-4+

Source : QE3\_201126\_FR\_TIOx\_hum\_tissue\_Urea\_RNAB\_N Scan : 38571

Andromeda score : 42.461

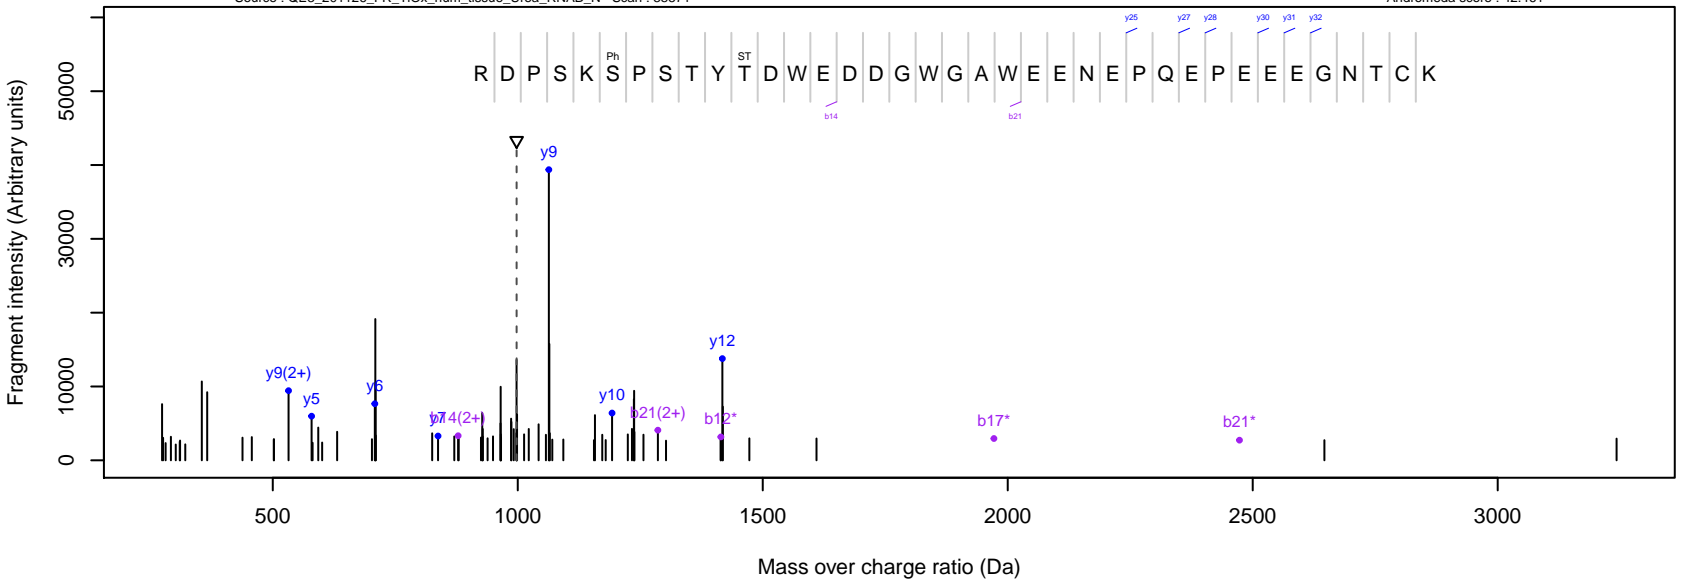

EPLIPAS(Phospho (STY))PKAEIWLPTR-3+

Source : QE3\_201126\_FR\_TiOx\_hum\_tissue\_Urea\_RNAB\_B Scan : 50043

Andromeda score : 42.454

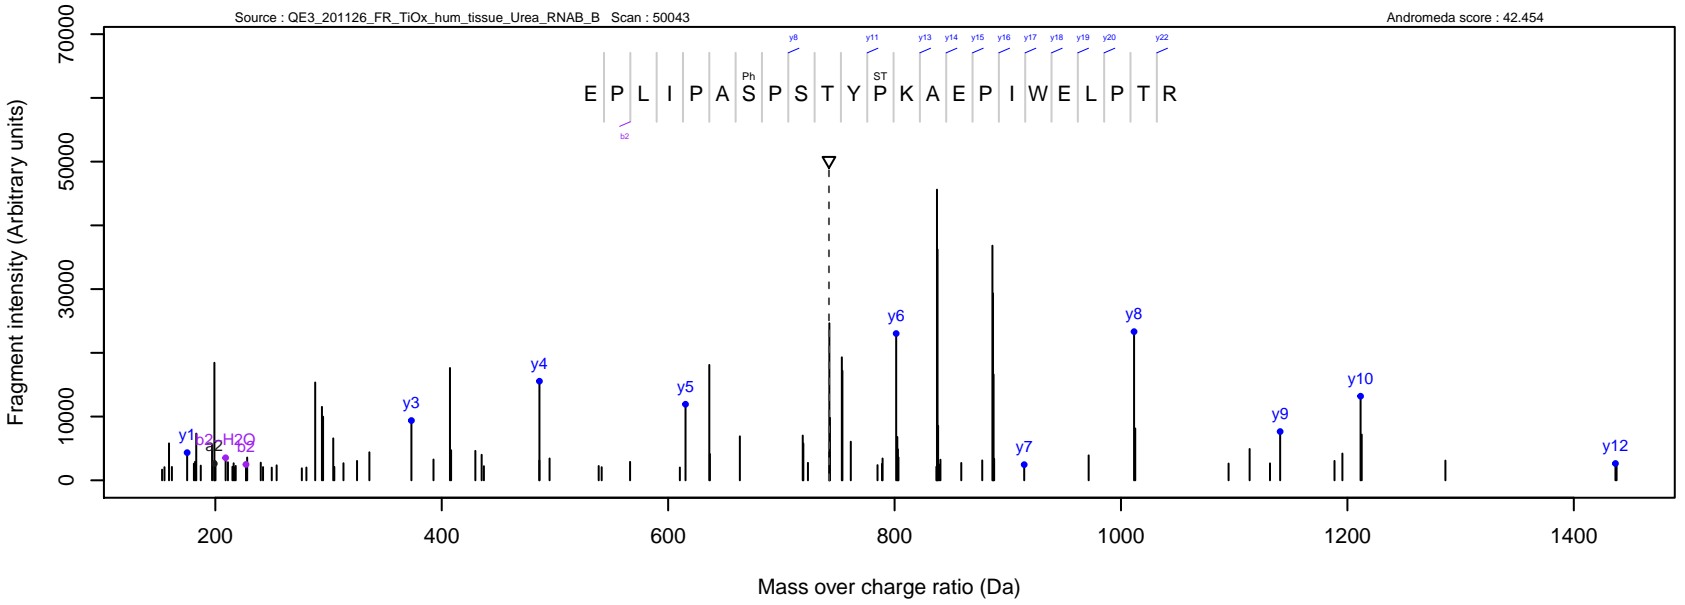

KSDGACDSPA(Phospho (STY))SDKENSSQIAQDHQK-4+

Source : QE3\_201126\_FR\_TiOx\_hum\_tissue\_Urea\_RNAB\_N Scan : 4335

Andromeda score : 42.454

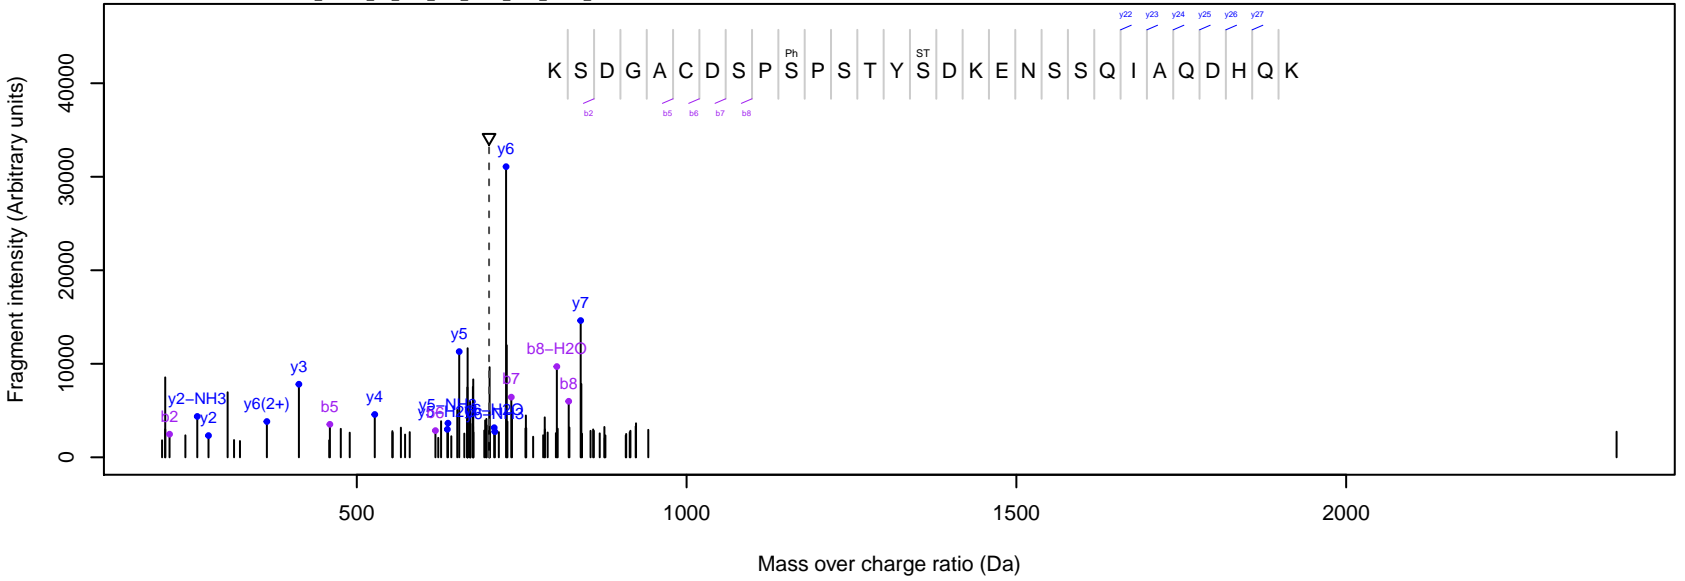

SQS(Phospho (STY))S(Phospho (STY))SQGDNLAPGYLPHYK-3+

Source : QE3\_201126\_FR\_TiOx\_hum\_tissue\_Urea\_RNAB\_H Scan : 38992

Andromeda score : 42.454

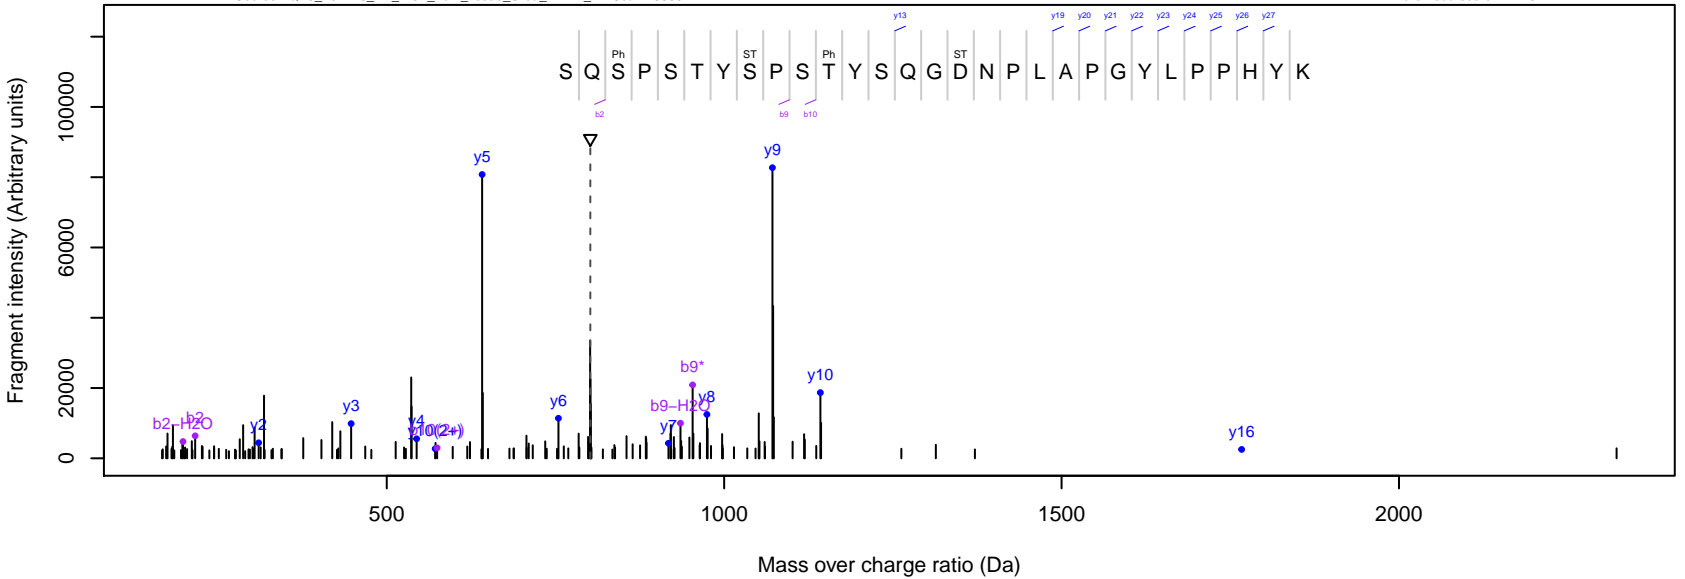

KTM(Oxidation (M))S(Phospho (STY))GTFLLR-2+

Source : QE3\_201126\_FR\_TiOx\_hum\_tissue\_Urea\_RNAB\_N Scan : 20253

Andromeda score : 42.425

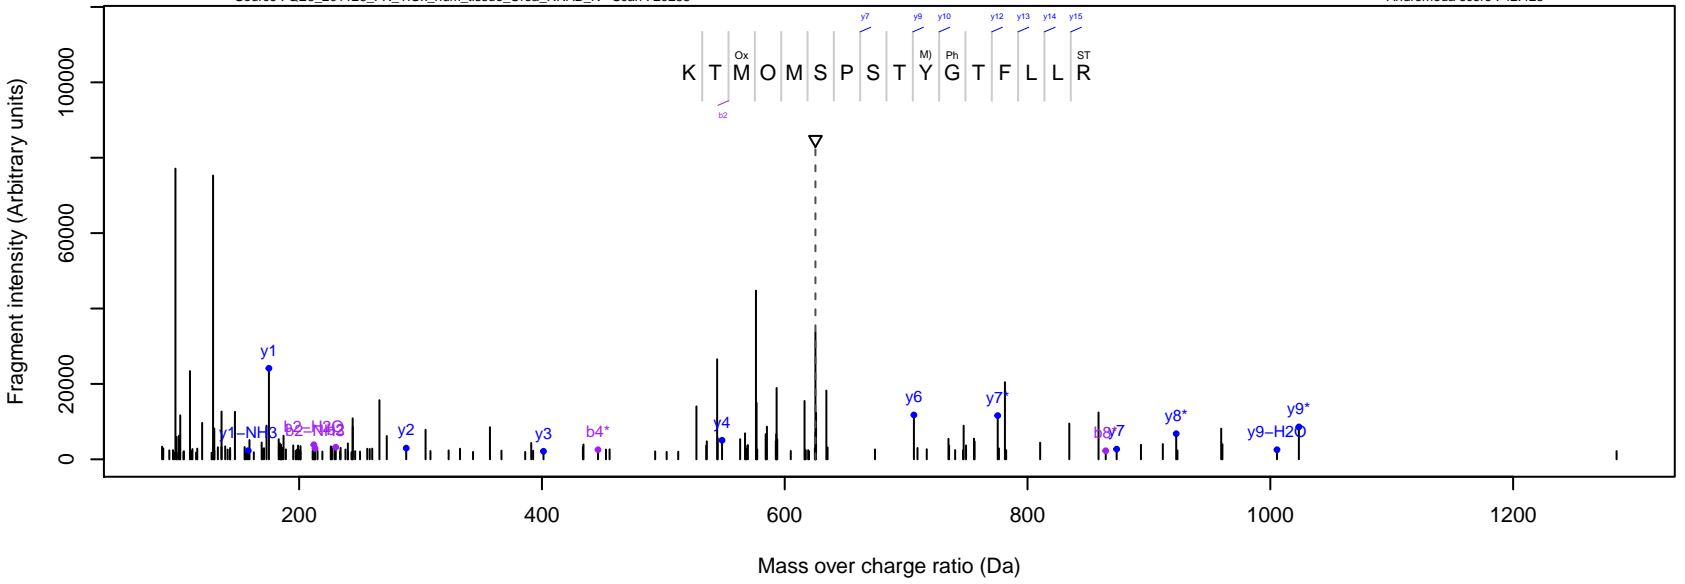

SNEDS(Phospho (STY))LILEK-2+

Source : QE3\_201126\_FR\_TiOx\_hum\_tissue\_Urea\_RNAB\_H Scan : 25061

Andromeda score : 42.425

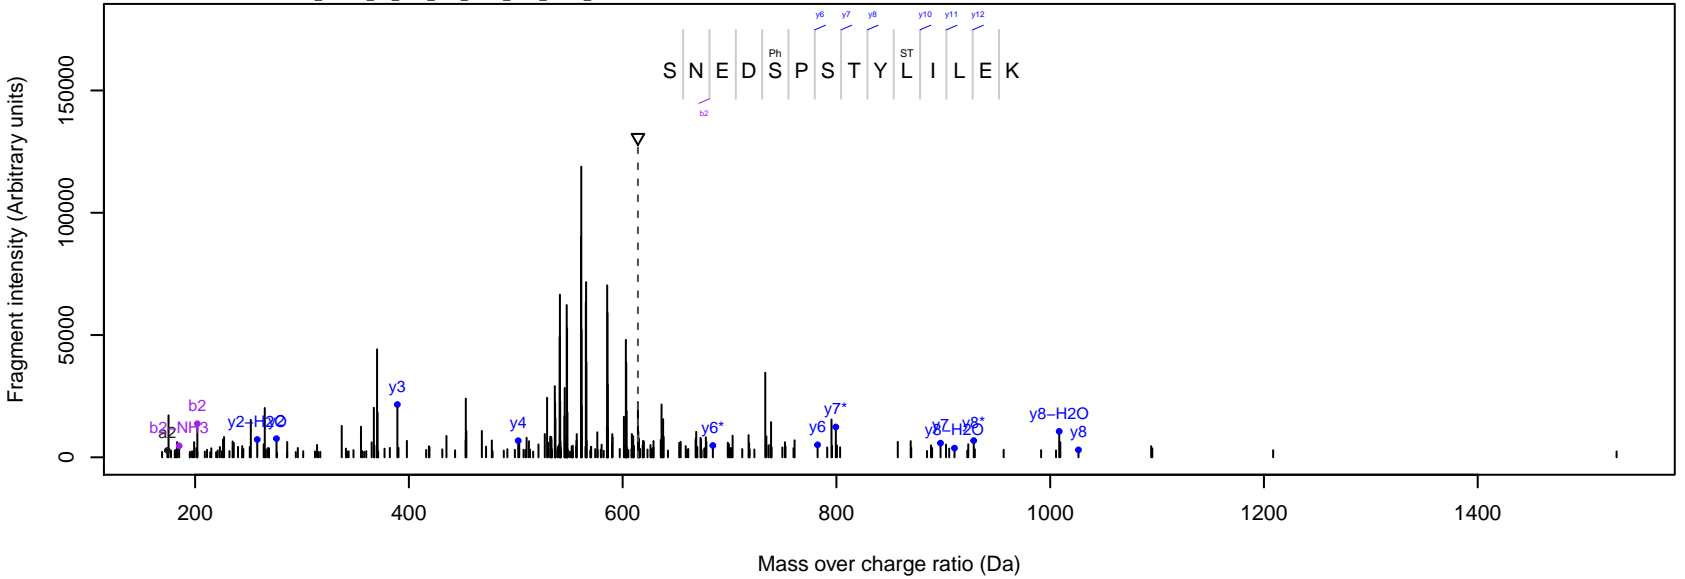

EEFEARKS(Phospho (STY))FLHEQEENVV-4+

Source : QE3\_201126\_FR\_TiOx\_hum\_tissue\_Urea\_RNAB\_N Scan : 22126

Andromeda score : 42.384

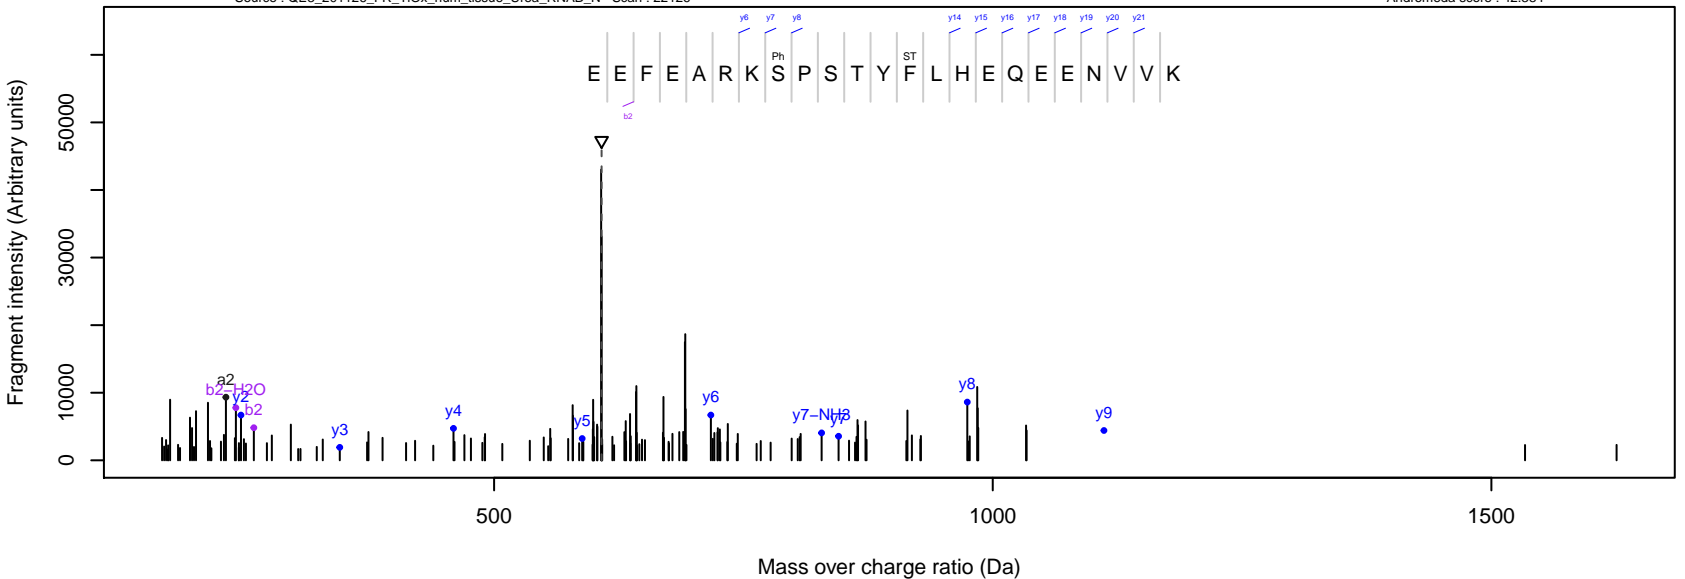

EIT(Phospho (STY))VSFLQKITDLQNQLK-4+

Source : QE3\_201126\_FR\_TiOx\_hum\_tissue\_Urea\_RNAB\_H Scan : 31368

Andromeda score : 42.382

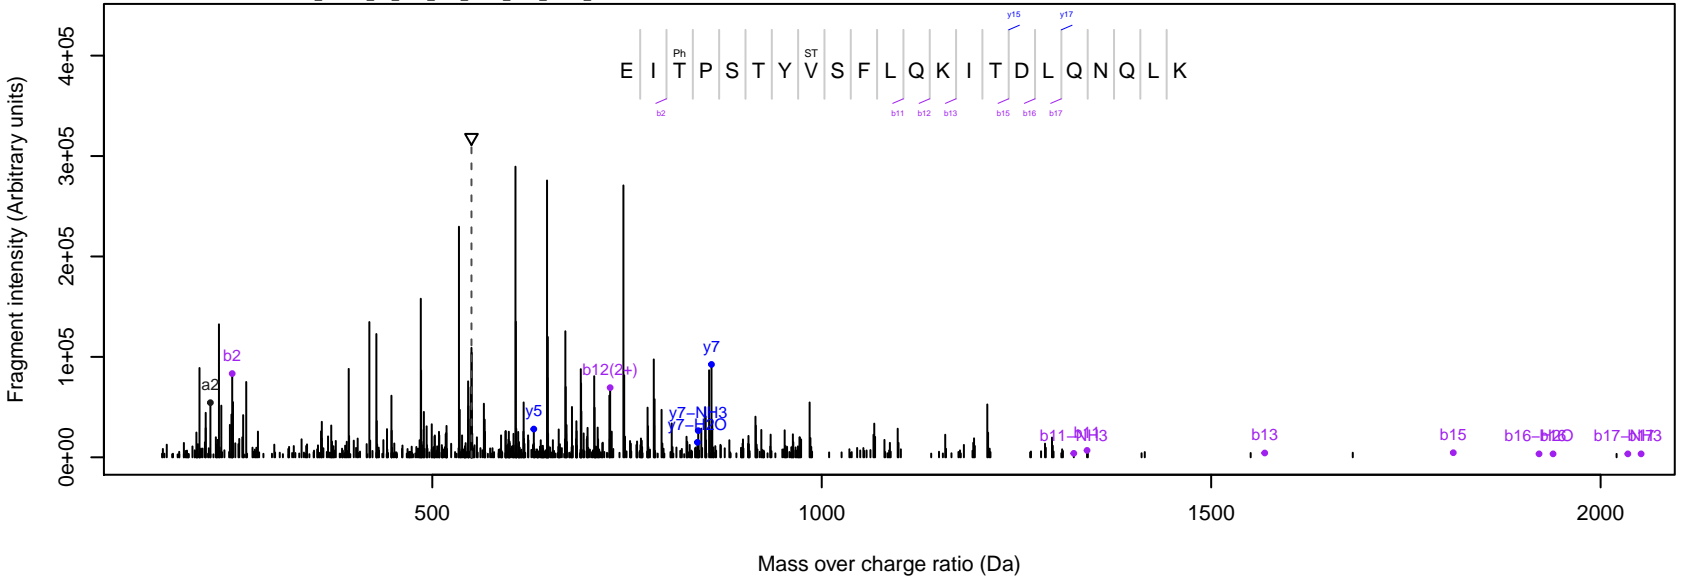

RGEDPPT(Phospho (STY))PPRPQK-3+

Source : QE3\_201126\_FR\_TiOx\_hum\_tissue\_Urea\_RNAB\_N Scan : 6474

Andromeda score : 42.382

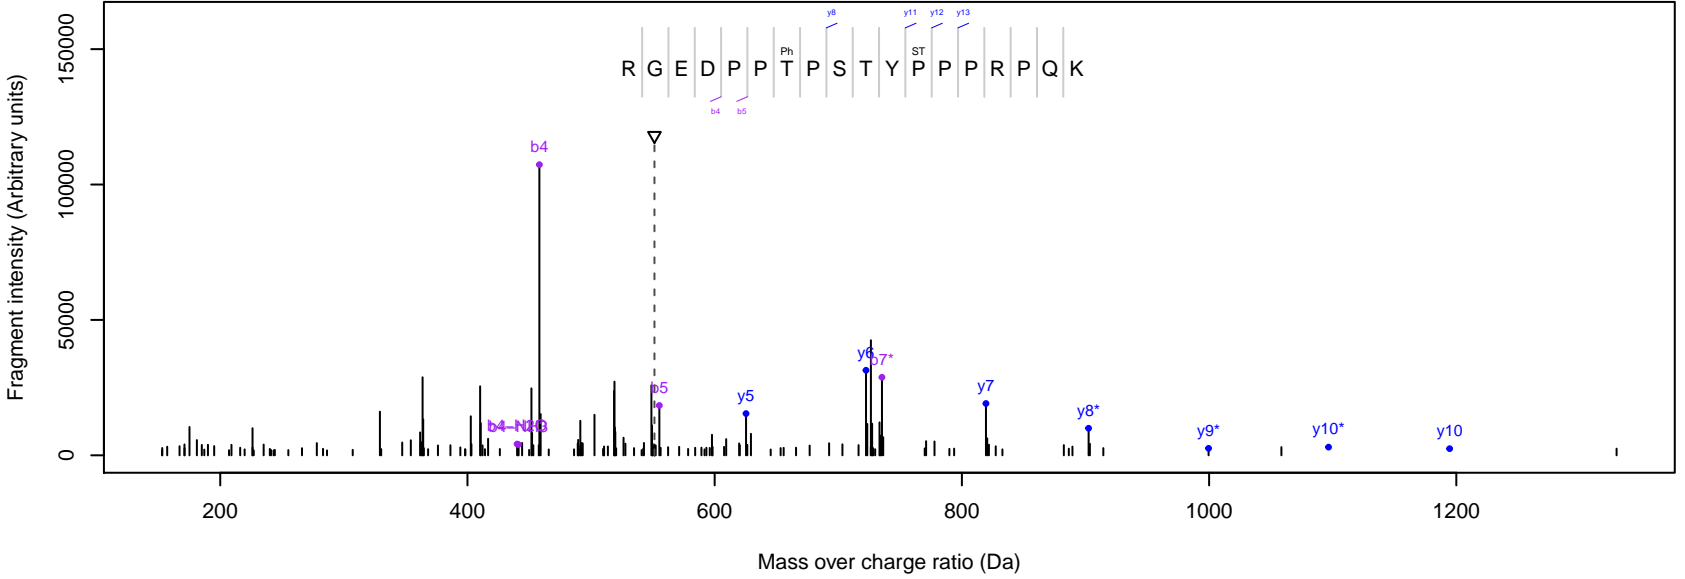

RQES(Phospho (STY))S(Phospho (STY))SSLEM(Oxidation (M))PSGVALEEGAHVLR-3+

Source : QE3\_201126\_FR\_TiOx\_hum\_tissue\_Urea\_RNAB\_H Scan : 34112

Andromeda score : 42.355

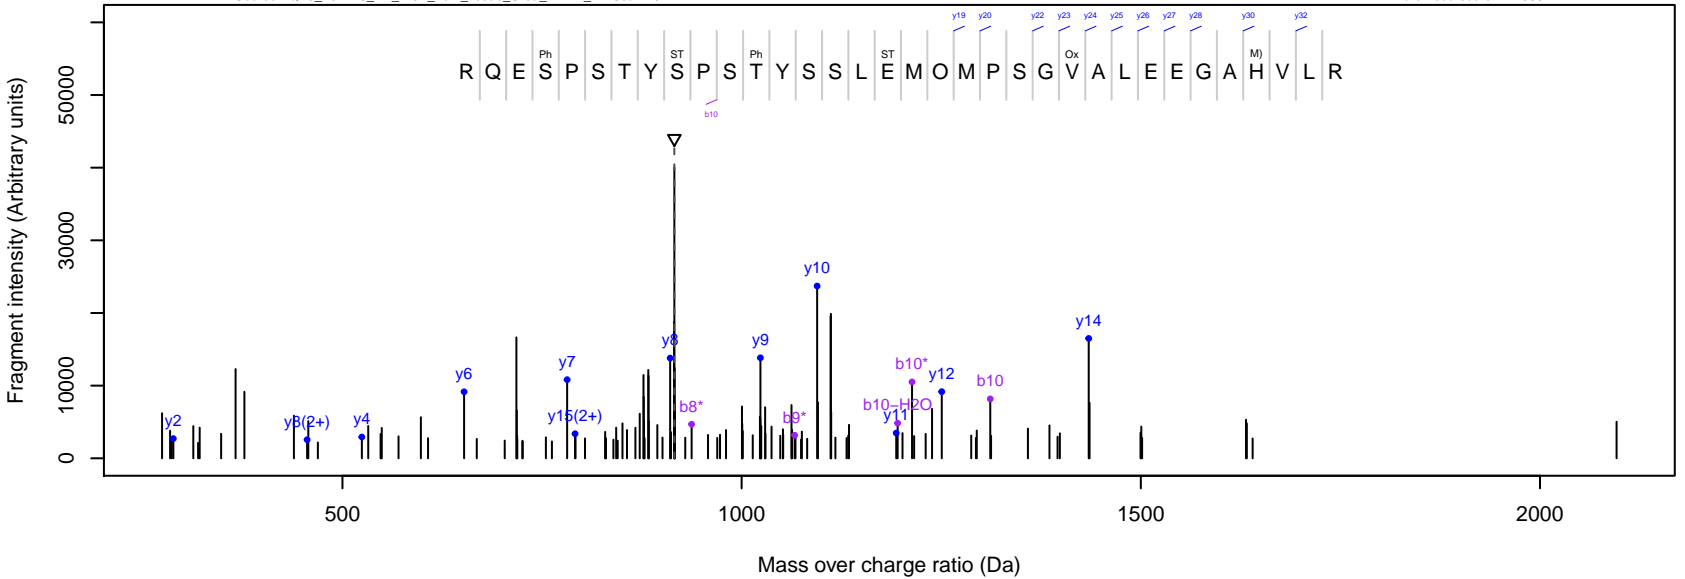

RPPS(Phospho (STY))AFFLFCSEYRPK-3+

Source : QE3\_201126\_FR\_TiOx\_hum\_tissue\_Urea\_RNAB\_B Scan : 41423

Andromeda score : 42.348

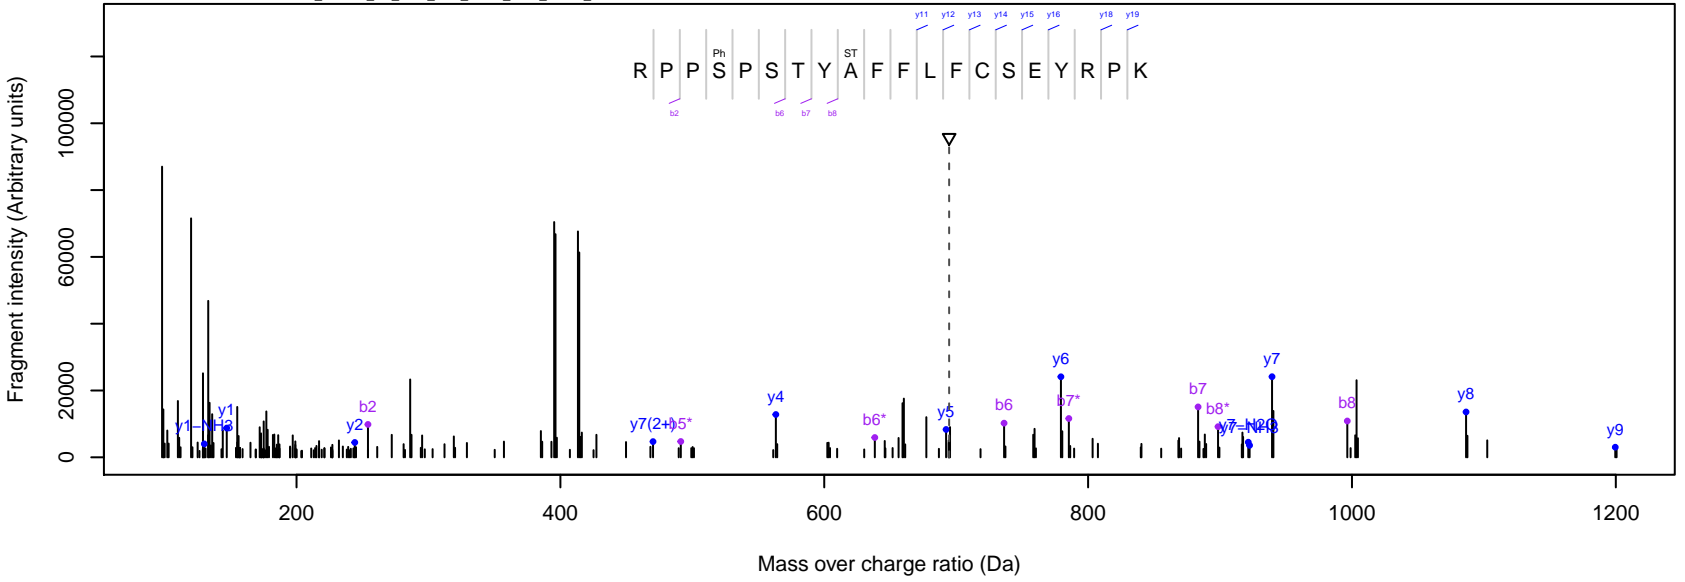

GAS(Phospho (STY))PPISAIIEEFSIIP EAPM(Oxidation (M))R-3+

Source : QE3\_201126\_FR\_TiOx\_hum\_tissue\_Urea\_RNAB\_H Scan : 60191

Andromeda score : 42.347

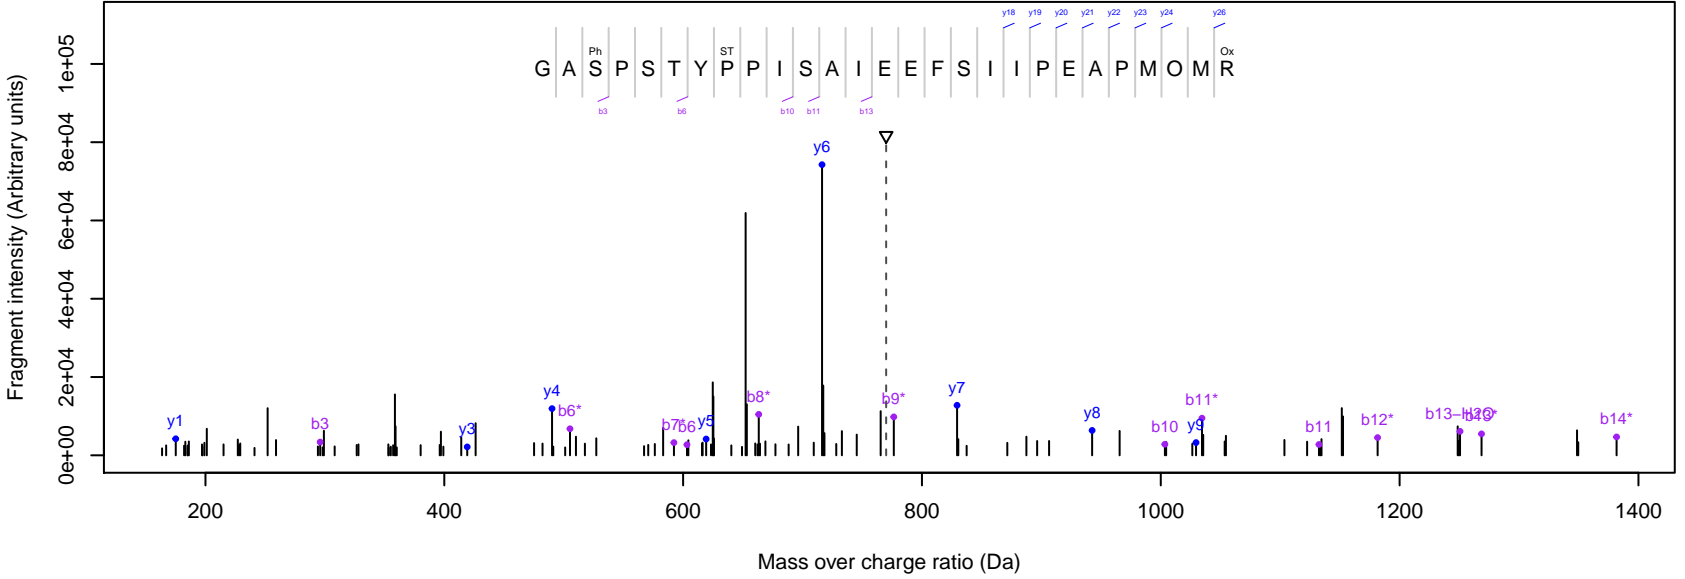

SQDATFS(Phospho (STY))PGS(Phospho (STY))EQA E KSPGPIVSR-3+

Source : QE3\_201126\_FR\_TiOx\_hum\_tissue\_Urea\_RNAB\_B Scan : 25945

Andromeda score : 42.347

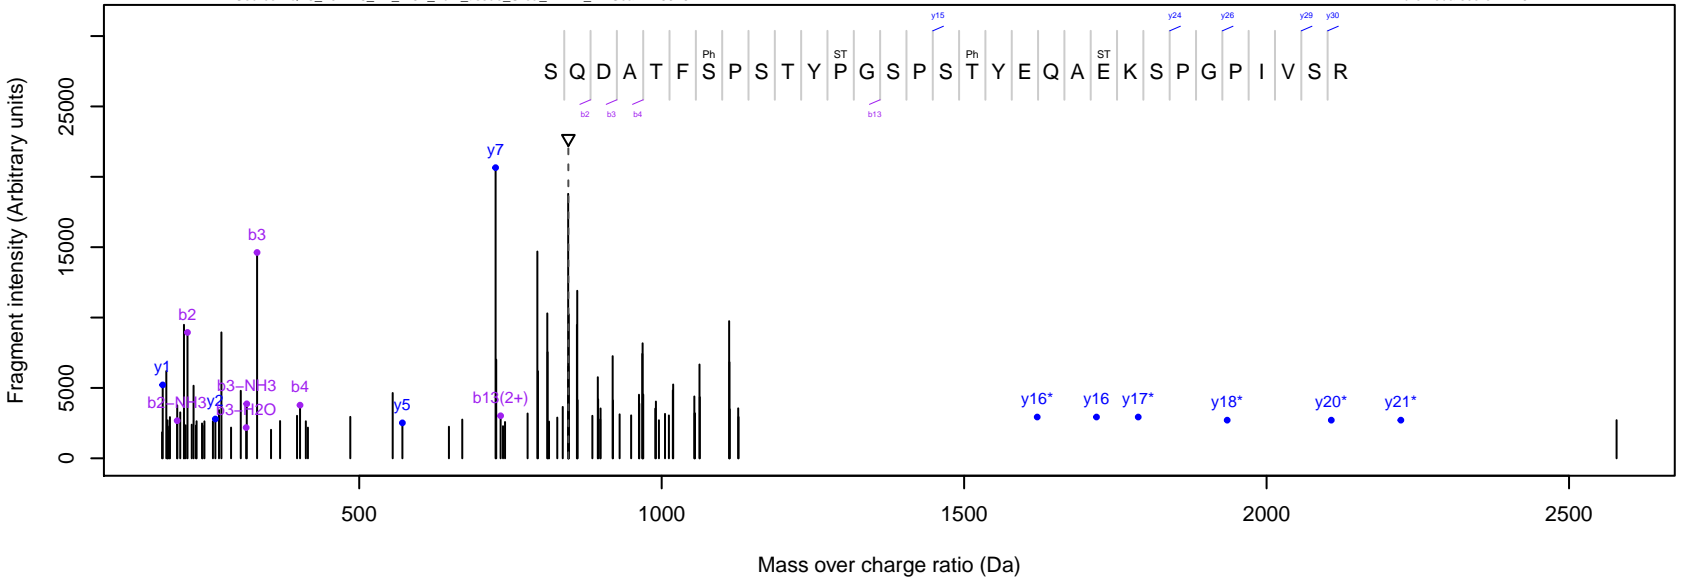

RKT(Phospho (STY))SDFNTFLAQEGCTK-3+

Source : QE3\_201126\_FR\_TIOx\_hum\_tissue\_Urea\_RNAB\_N Scan : 22939

Andromeda score : 42.338

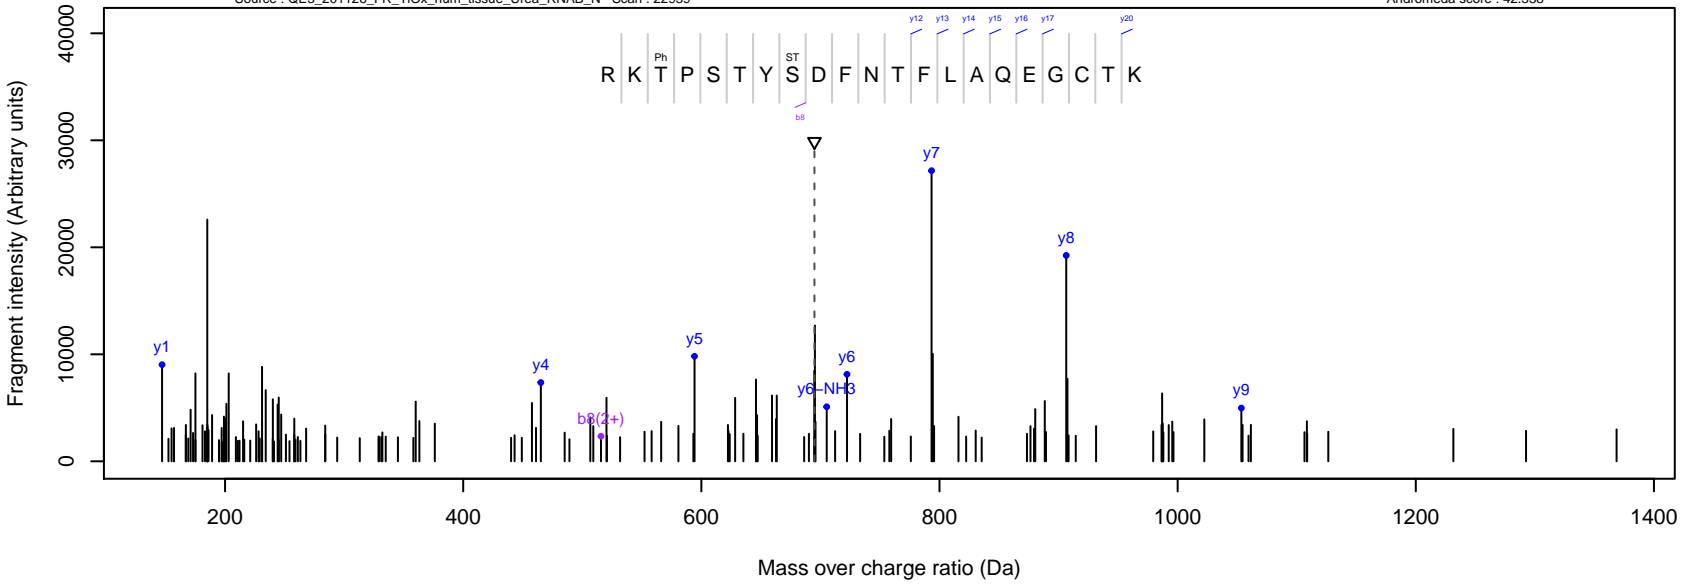

SDS(Phospho (STY))LPSFR-2+

Source : QE3\_201126\_FR\_TIOx\_hum\_tissue\_Urea\_RNAB\_N Scan : 26457

Andromeda score : 42.338

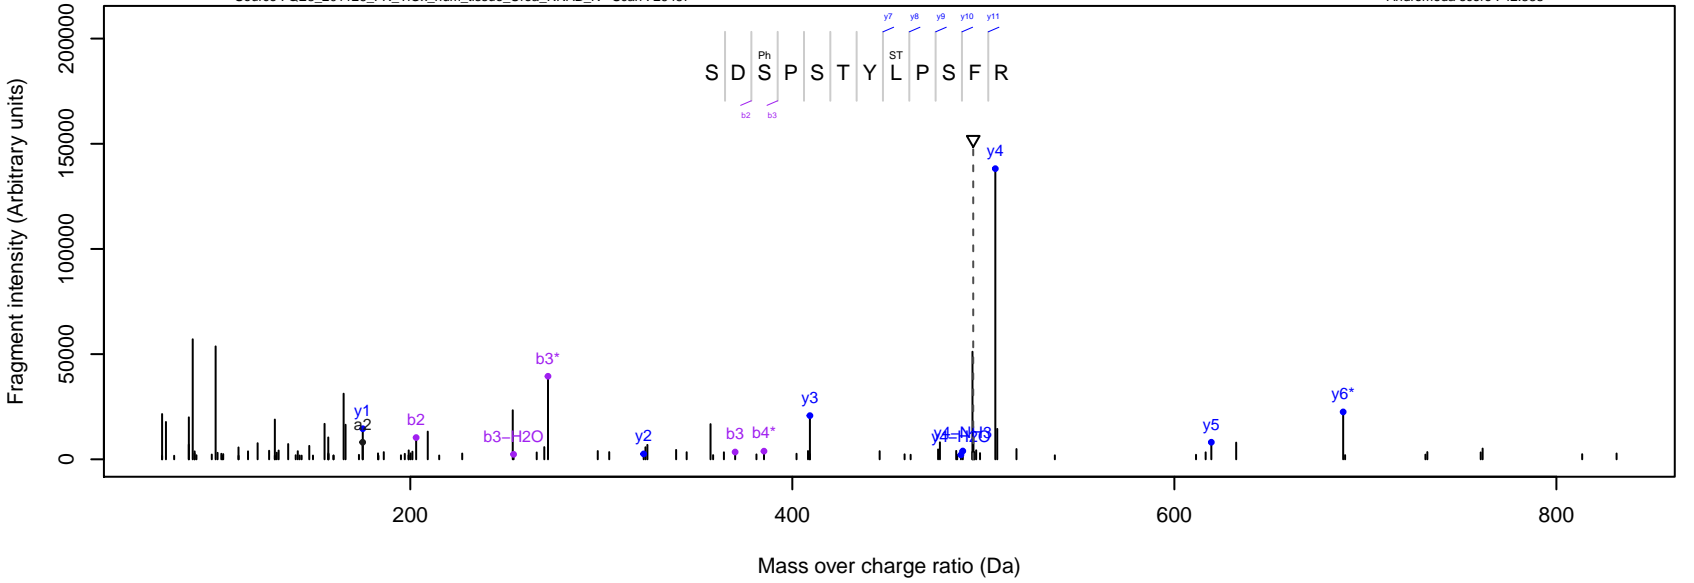

QPPGVNGPS(Phospho (STY))SPTNESAPQLPQR-3+

Source : QE3\_201126\_FR\_TIOx\_hum\_tissue\_Urea\_RNAB\_N Scan : 28614

Andromeda score : 42.325

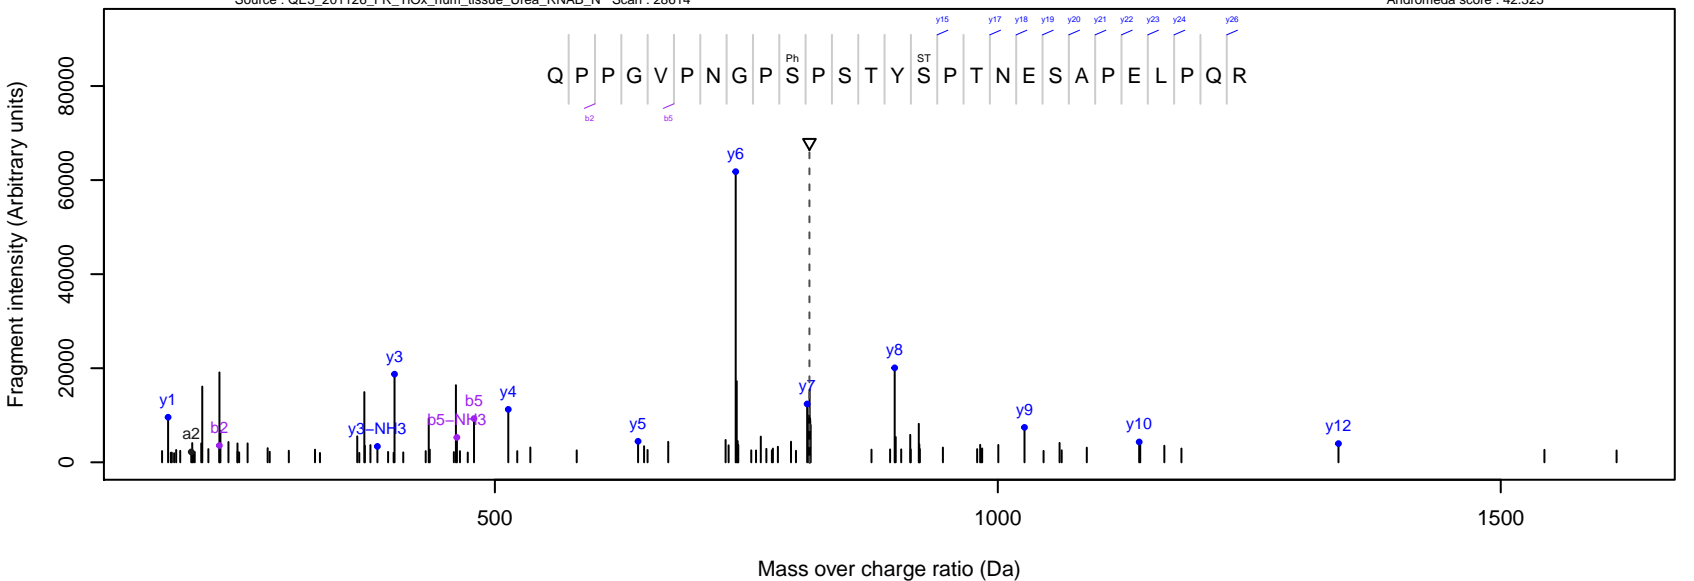



M(Oxidation (M))ENLKEEEDDDSPSTY)STASDVLIR-3+

Source : QE3\_201126\_FR\_TiOx\_hum\_tissue\_Urea\_RNAB\_B Scan : 24589

Andromeda score : 42.322

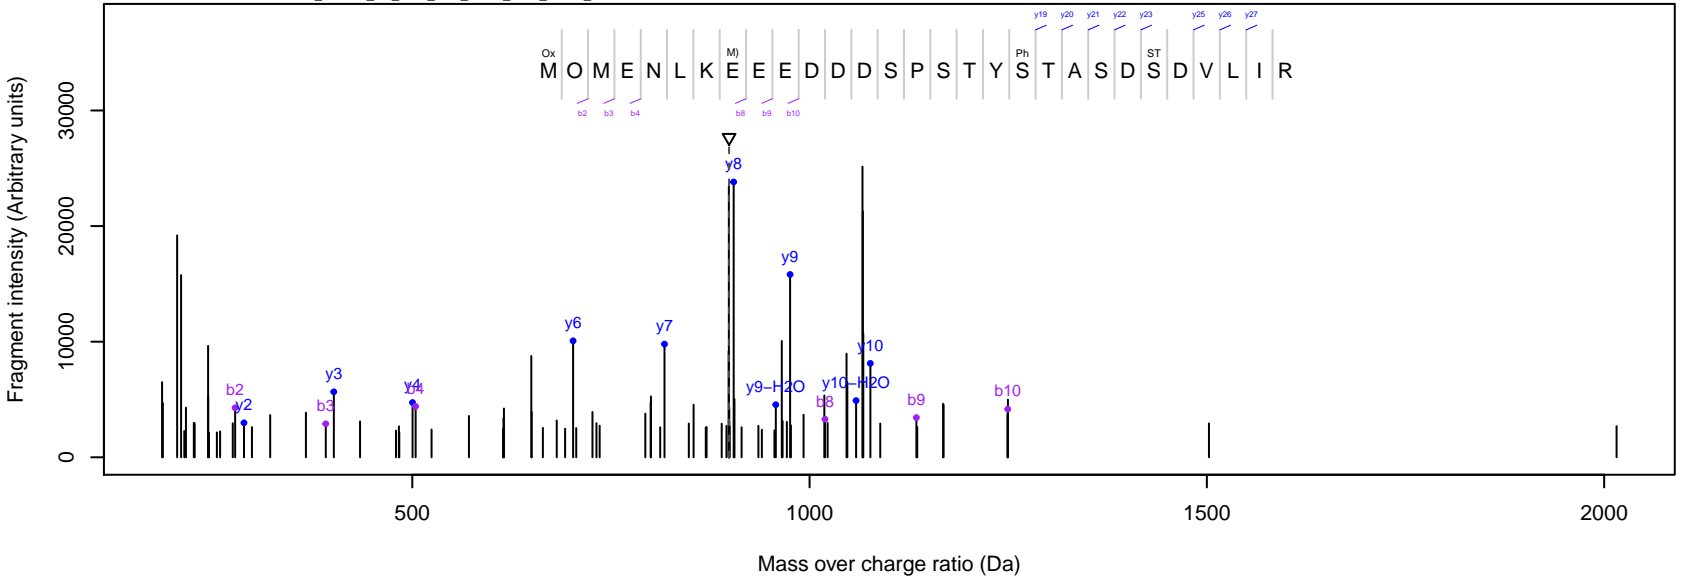

GGHGAASPS(Phospho (STY))EKG AHP SGGADDVAK-4+

Source : QE3\_201126\_FR\_TiOx\_hum\_tissue\_Urea\_RNAB\_B Scan : 3607

Andromeda score : 42.321

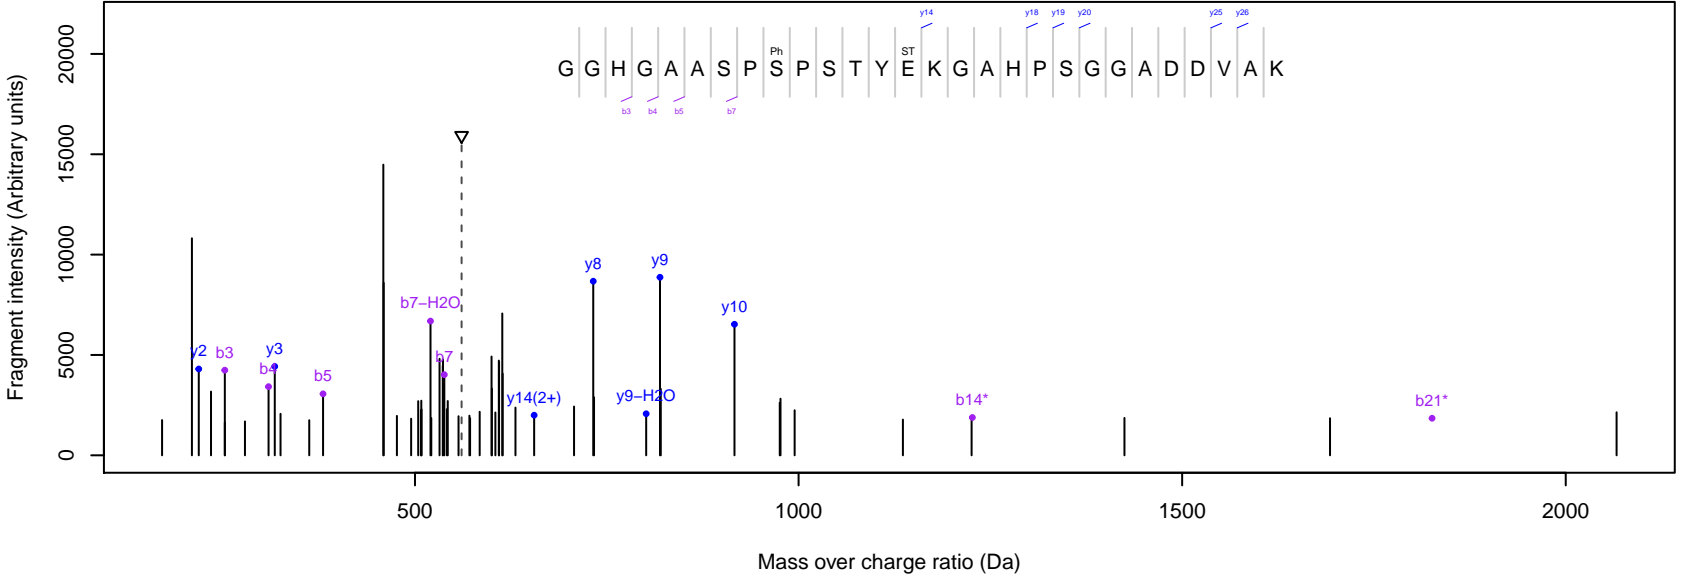

TTSSY(Phospho (STY))QNLVWSDHS(Phospho (STY))QELHSP TLK-3+

Source : QE3\_201126\_FR\_TiOx\_hum\_tissue\_Urea\_RNAB\_N Scan : 37139

Andromeda score : 42.321

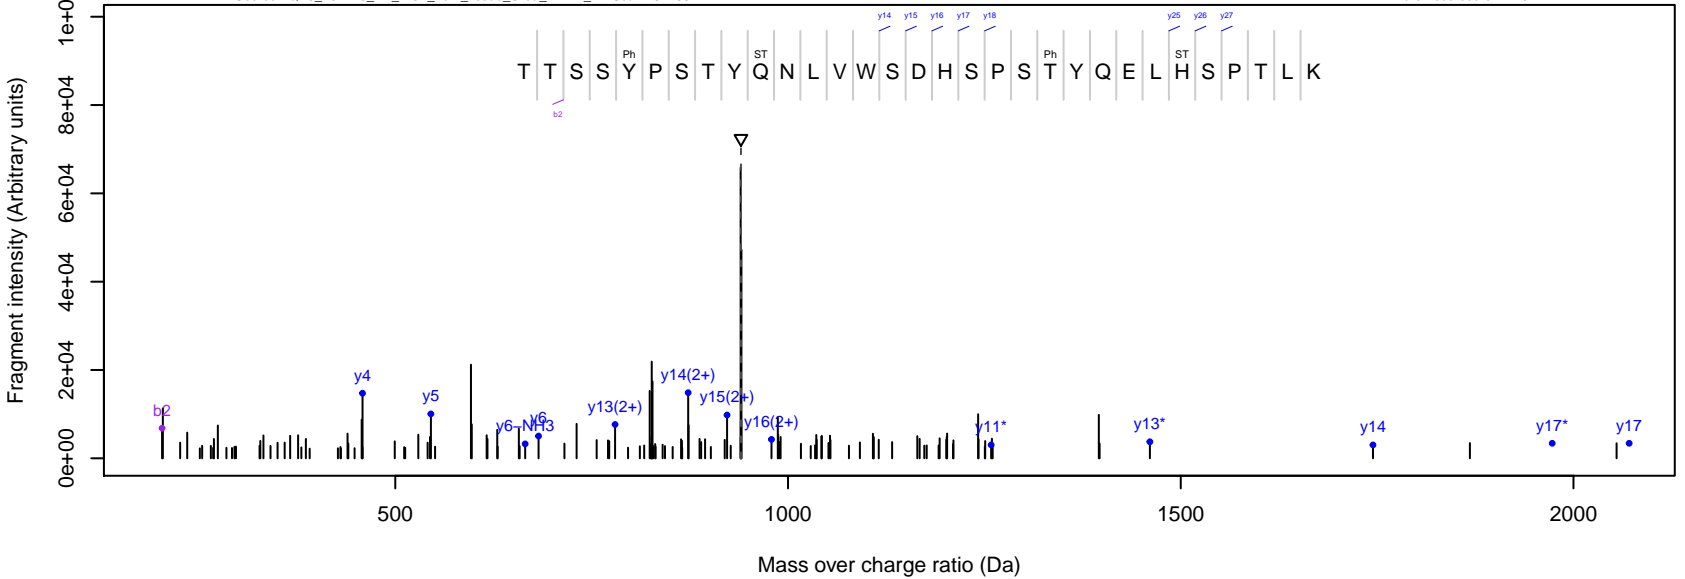

EGS(Phospho (STY))CSDFQFK-2+

Source : QE3\_201126\_FR\_TiOx\_hum\_tissue\_Urea\_RNAB\_N Scan : 25065

Andromeda score : 42.287

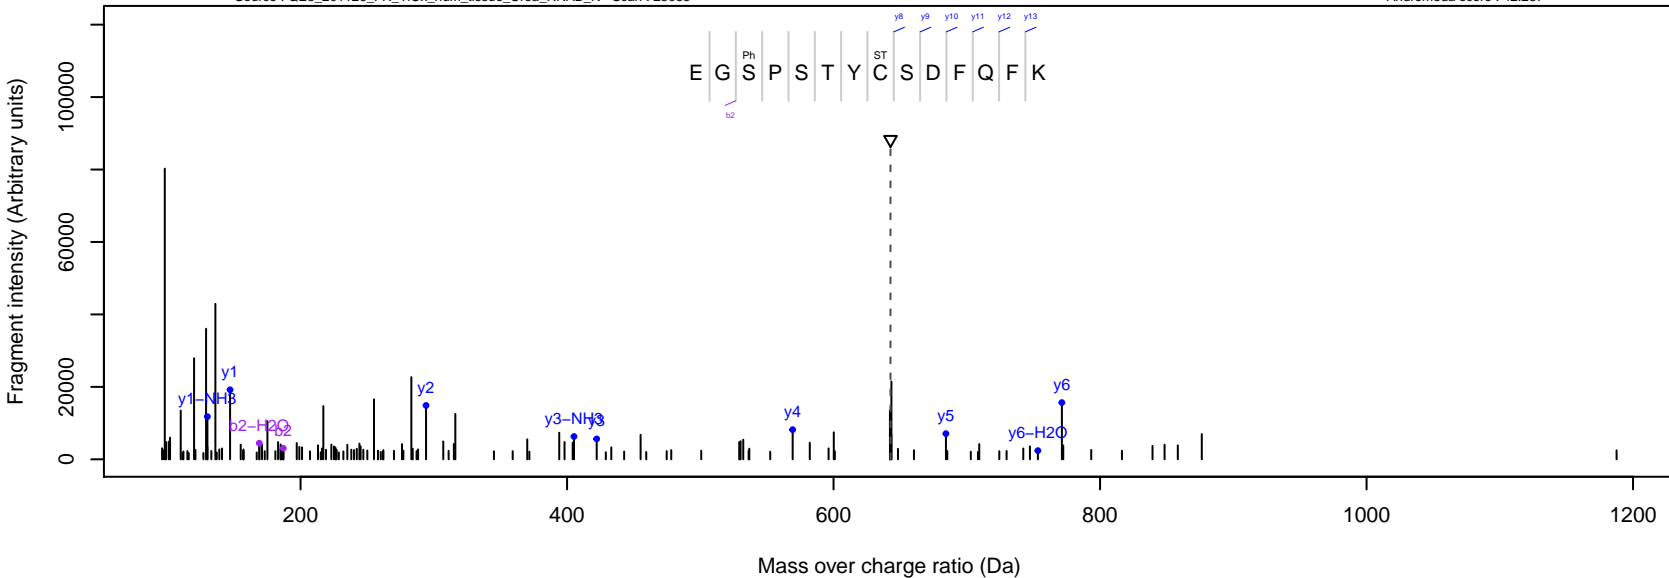

TES(Phospho (STY))LQDTKPANR-2+

Source : QE3\_201126\_FR\_TiOx\_hum\_tissue\_Urea\_RNAB\_H Scan : 14567

Andromeda score : 42.287

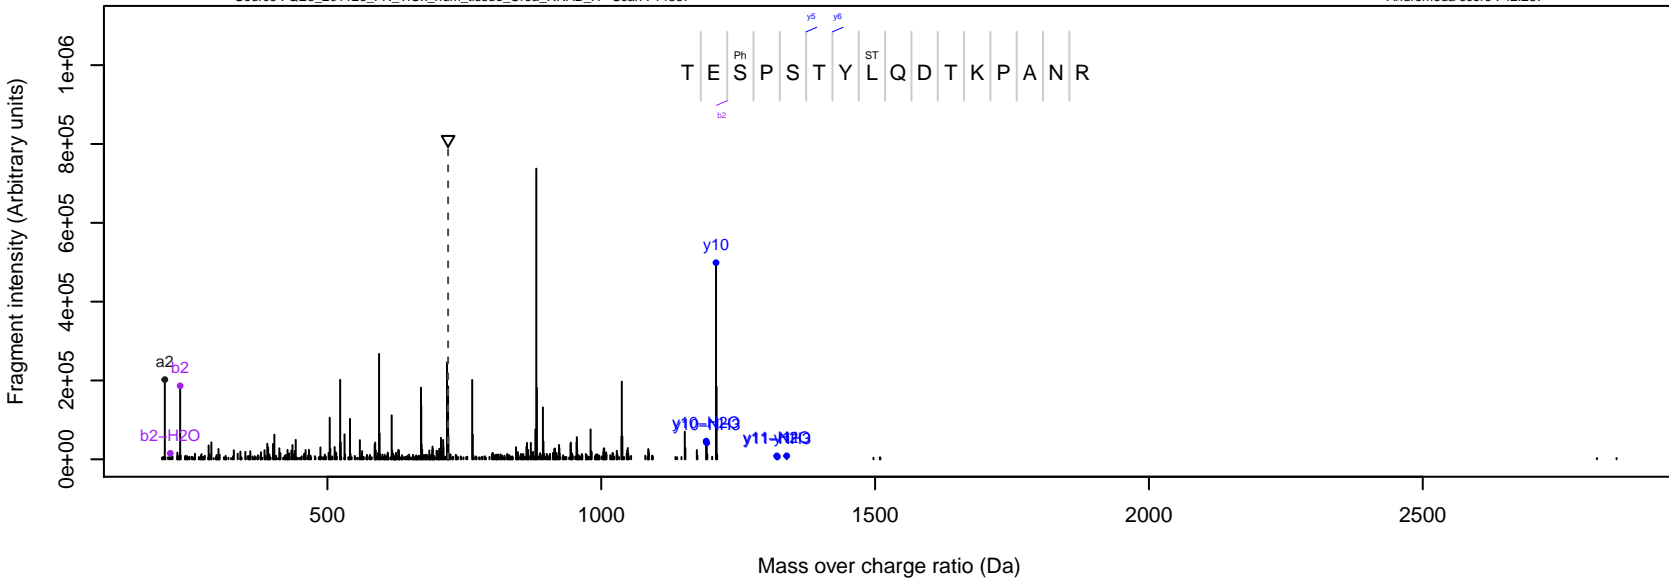

VGSPLDYSLVLDLPS(Phospho (STY))TNGQSPGKA IENLIGKPTEK-4+

Source : QE3\_201126\_FR\_TiOx\_hum\_tissue\_Urea\_RNAB\_N Scan : 55870

Andromeda score : 42.269

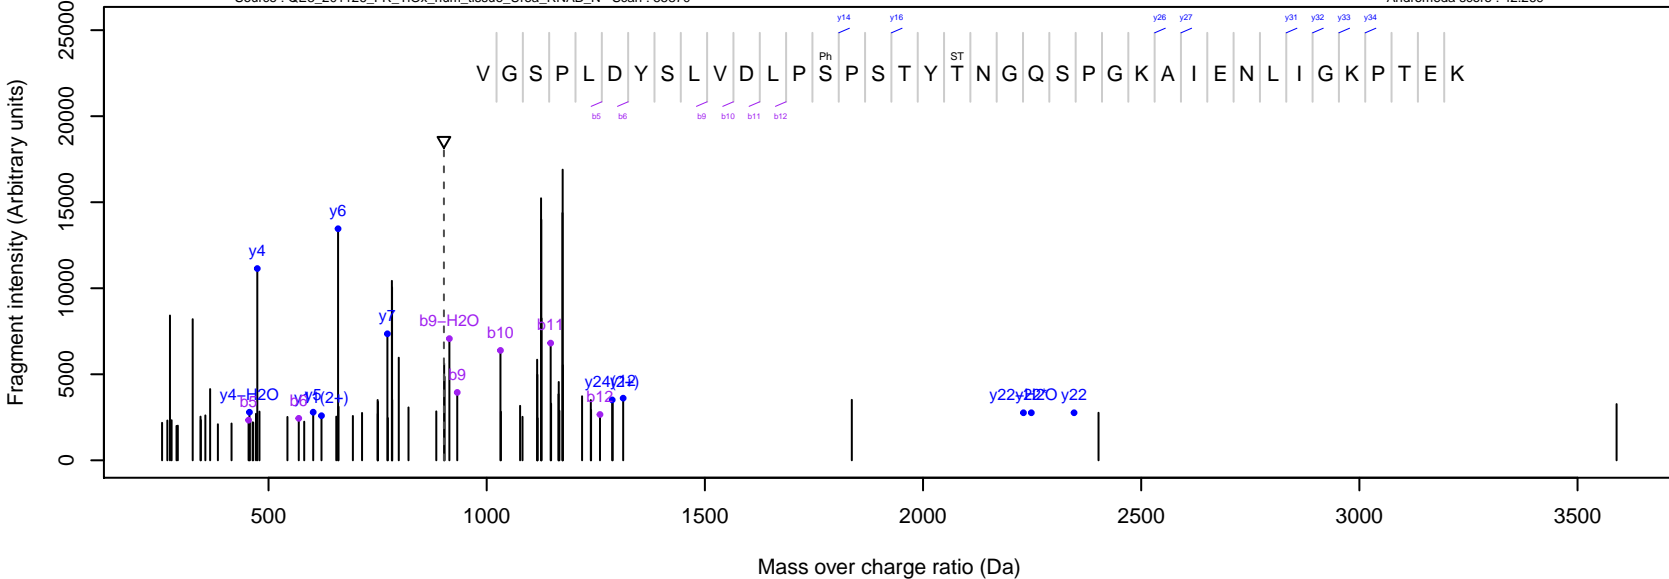



S(Phospho (STY))LLKKPDGVK-3+

Source : QE3\_201126\_FR\_TiOx\_hum\_tissue\_Urea\_RNAB\_N Scan : 9480

Andromeda score : 42.21

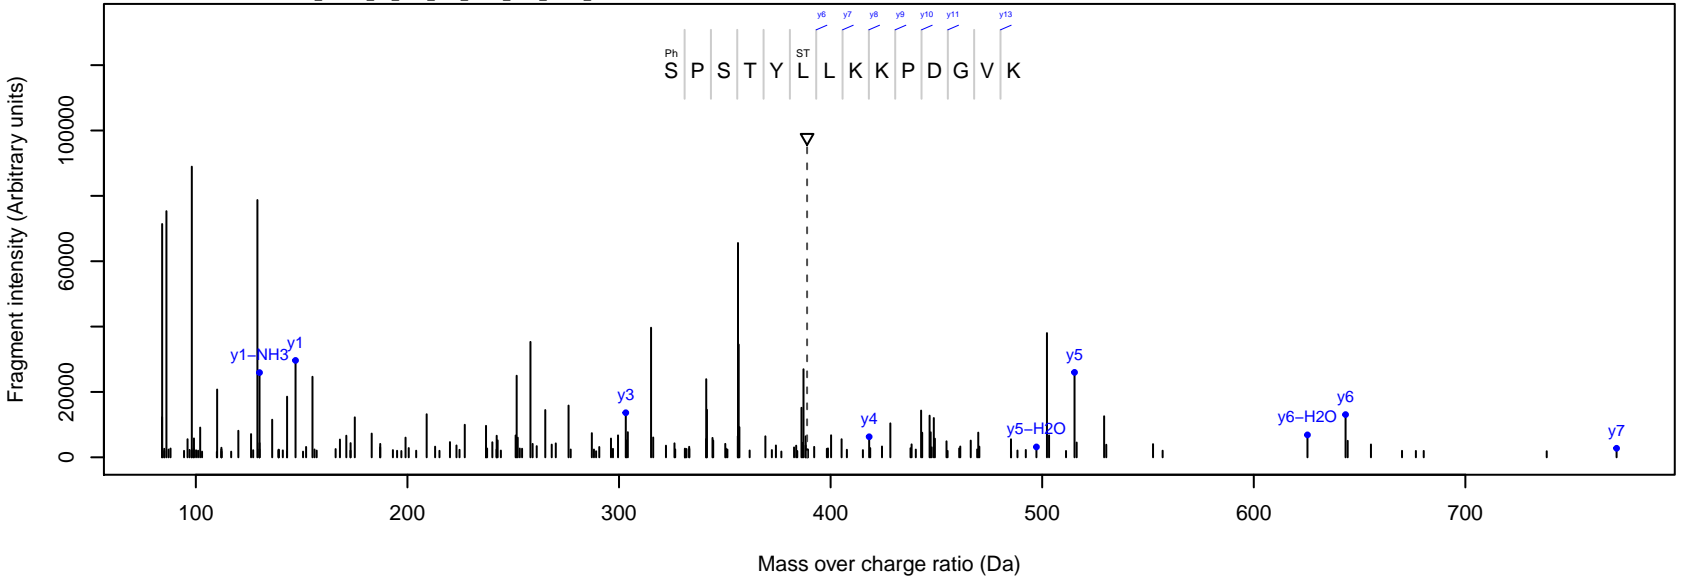

LGLGT(Phospho (STY))LSSLSR-2+

Source : QE3\_201126\_FR\_TiOx\_hum\_tissue\_Urea\_RNAB\_B Scan : 47597

Andromeda score : 42.209

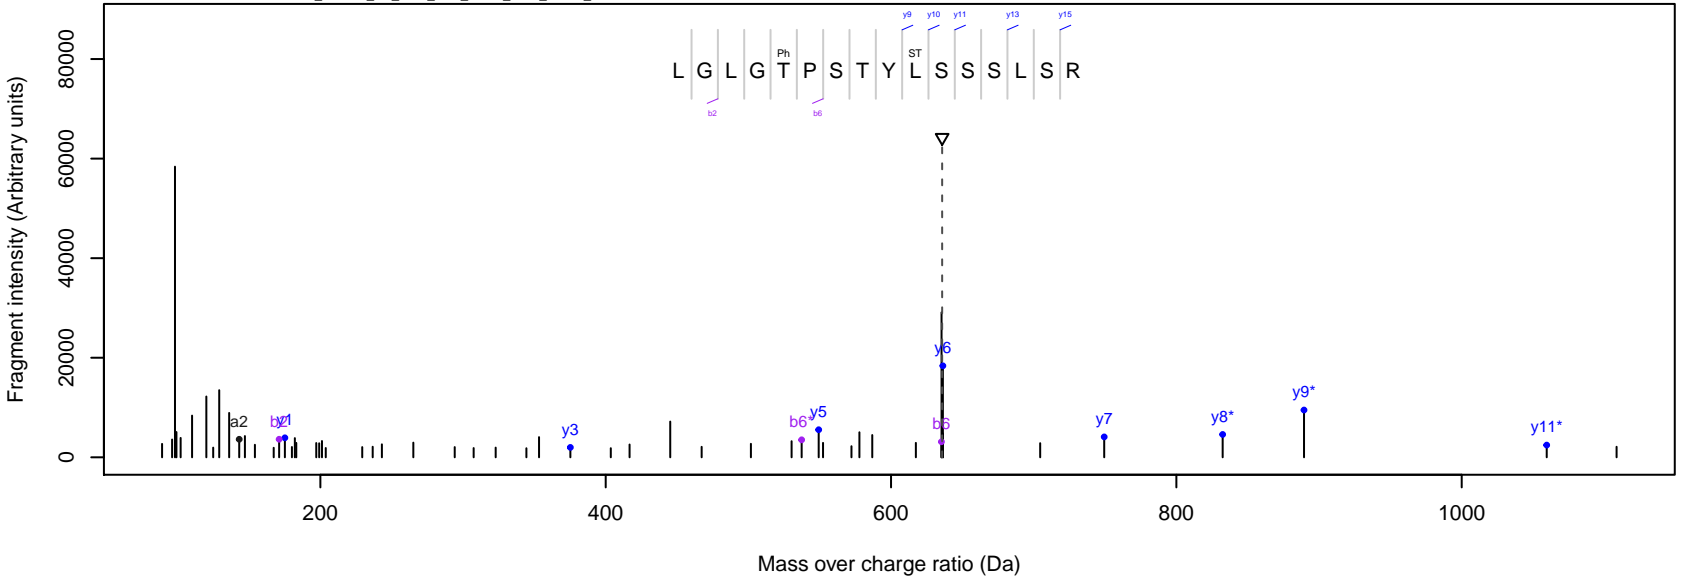

S(Phospho (STY))PEPGQTWTR-2+

Source : QE3\_201126\_FR\_TiOx\_hum\_tissue\_Urea\_RNAB\_N Scan : 16721

Andromeda score : 42.19

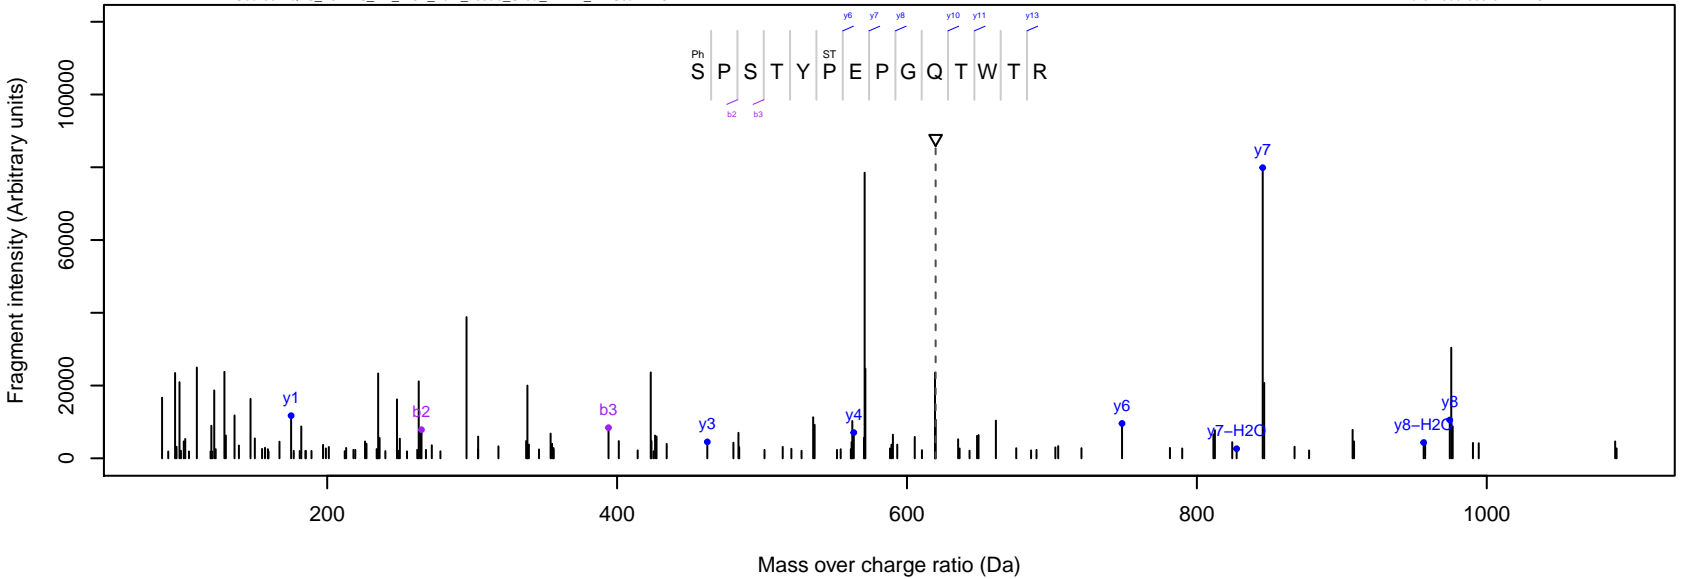

EALREHSNPS(Phospho (STY))PSQDTDGK-3+

Source : QE3\_201126\_FR\_TiOx\_hum\_tissue\_Urea\_RNAB\_N Scan : 5389

Andromeda score : 42.185

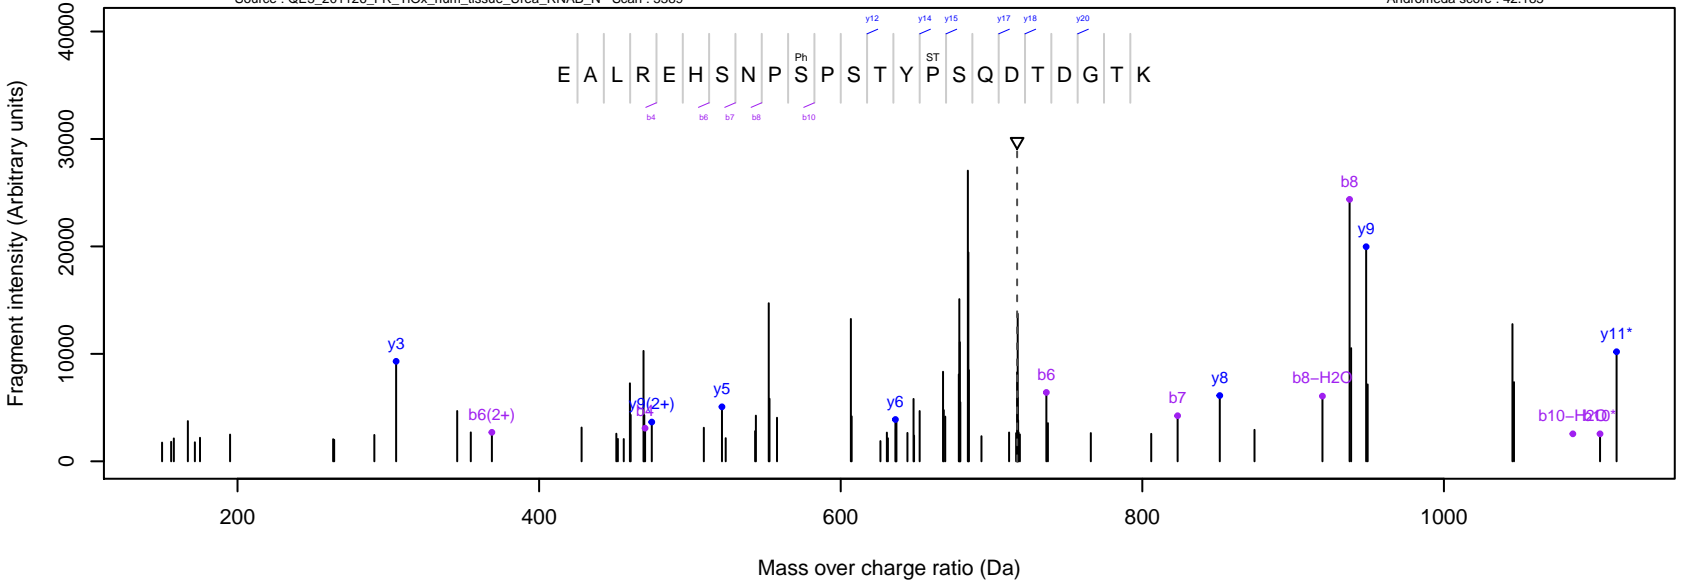

GHCANSCERGD(TPhospho (STY))TTLYSQGGHGHDPK-4+

Source : QE3\_201126\_FR\_TiOx\_hum\_tissue\_Urea\_RNAB\_N Scan : 6743

Andromeda score : 42.181

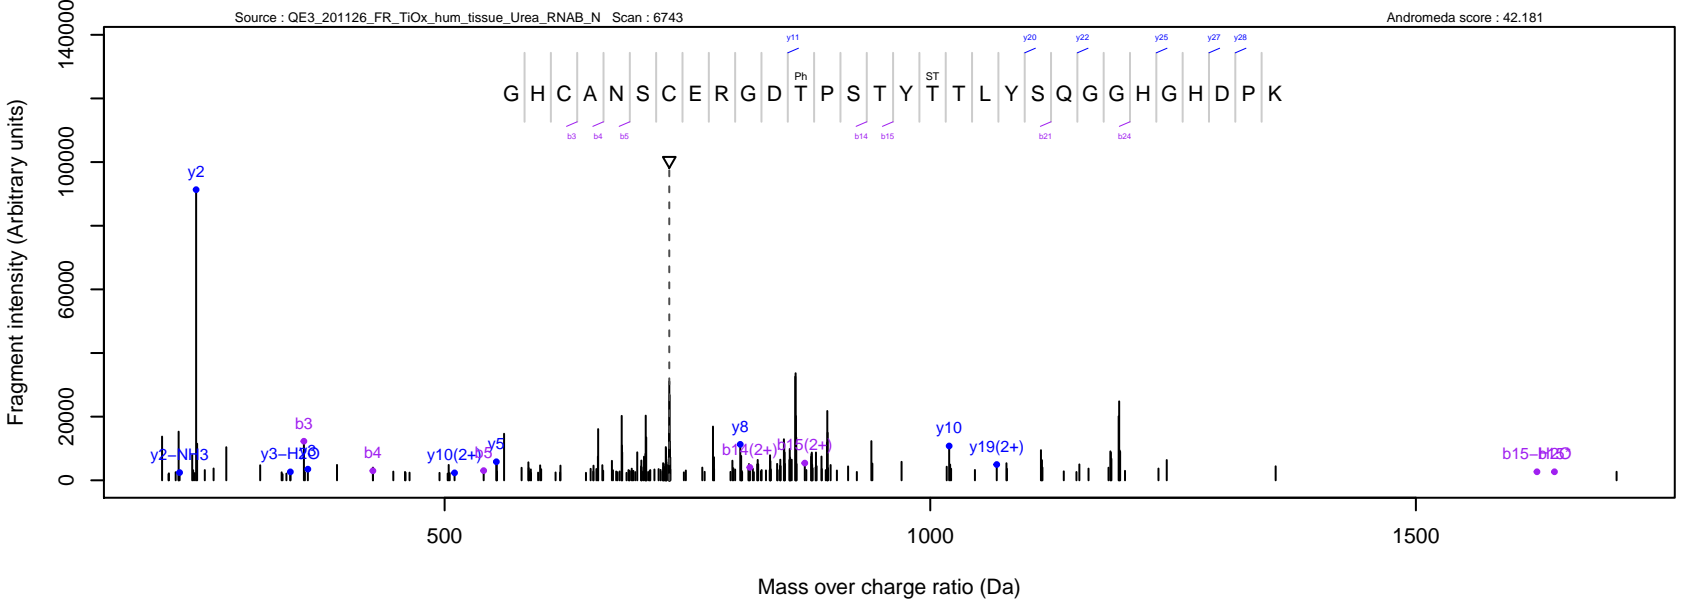

NSVQSGES(Phospho (STY))DS(Phospho (STY))DEEESKEPKLPK-3+

Source : QE3\_201126\_FR\_TiOx\_hum\_tissue\_Urea\_RNAB\_N Scan : 23983

Andromeda score : 42.181

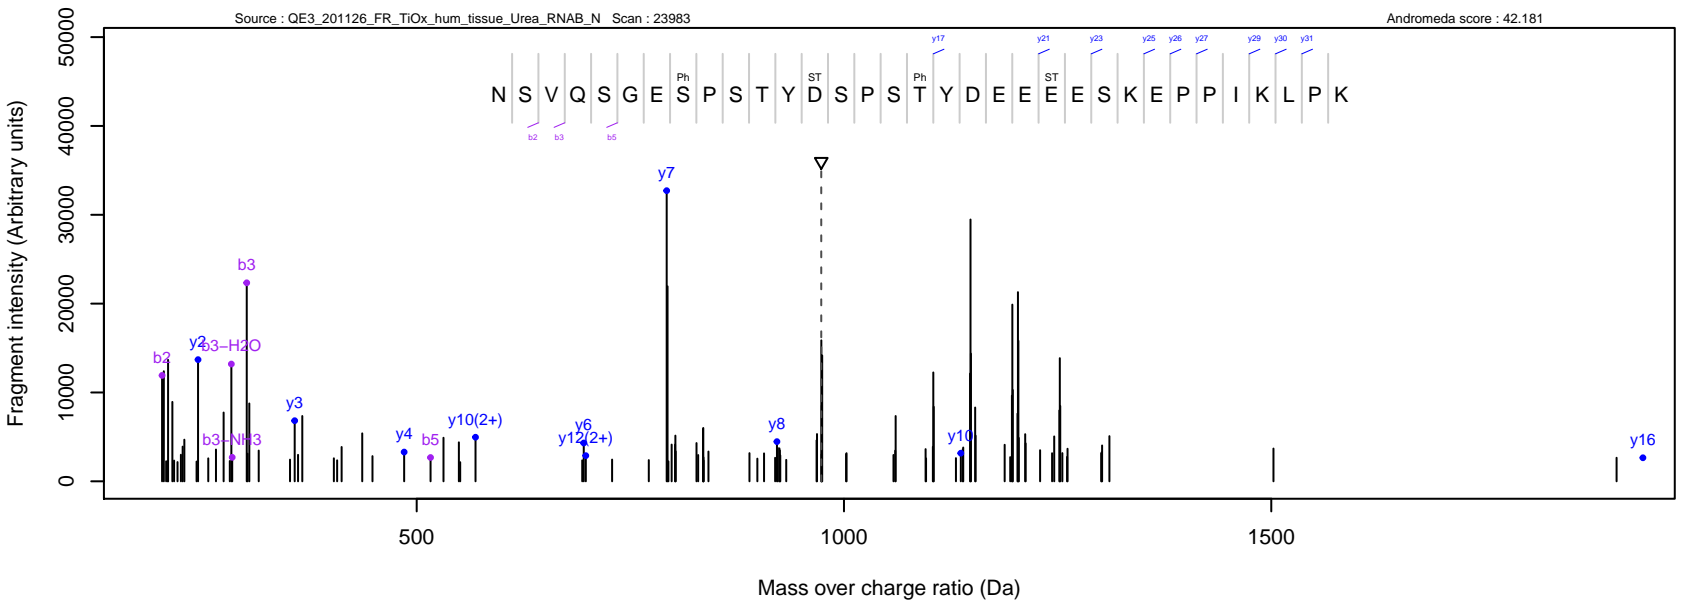

DLESSS(Phospho (STY))DS(Phospho (STY))DEKVPLAK-3+

Source : QE3\_201126\_FR\_TiOx\_hum\_tissue\_Urea\_RNAB\_N Scan : 36679

Andromeda score : 42.123

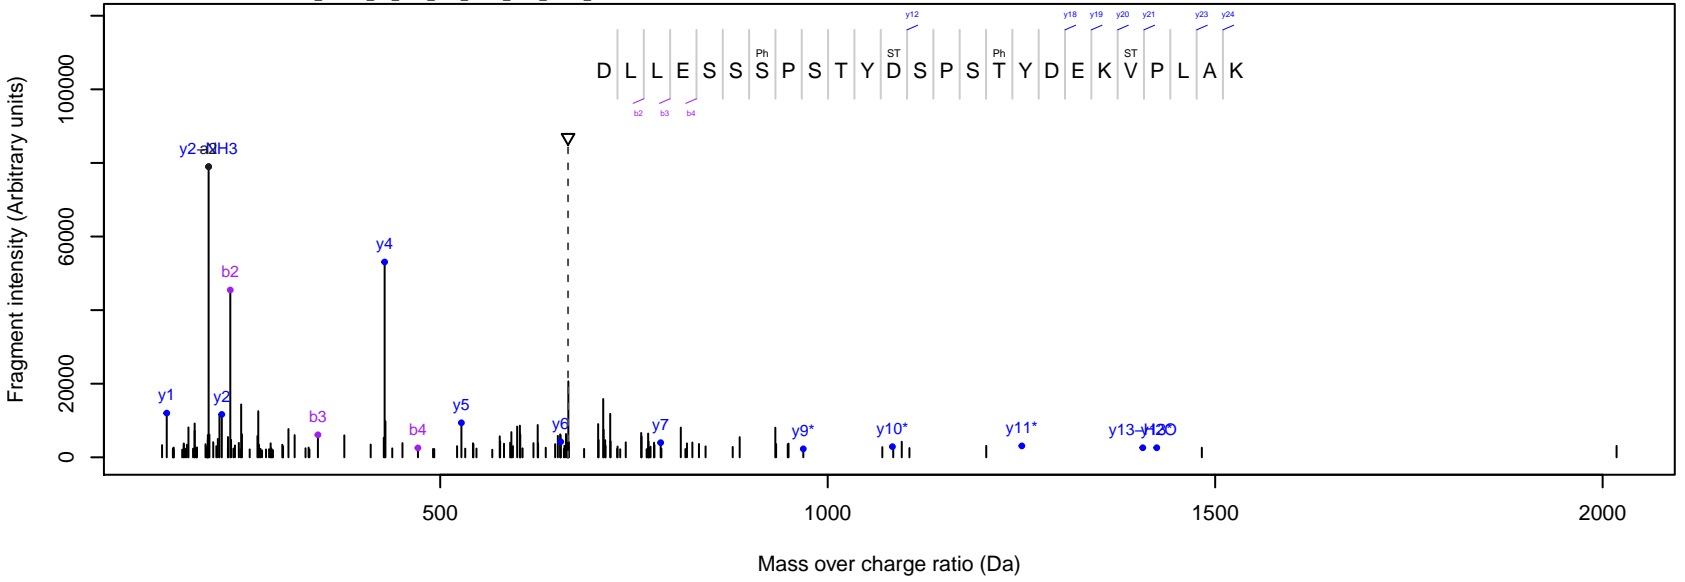

NAS(Phospho (STY))ASFQELEDKKELS(Phospho (STY))EESEDEELQLEEFPM(Oxidation (M))LK-4+

Source : QE3\_201126\_FR\_TiOx\_hum\_tissue\_Urea\_RNAB\_H Scan : 51063

Andromeda score : 42.121

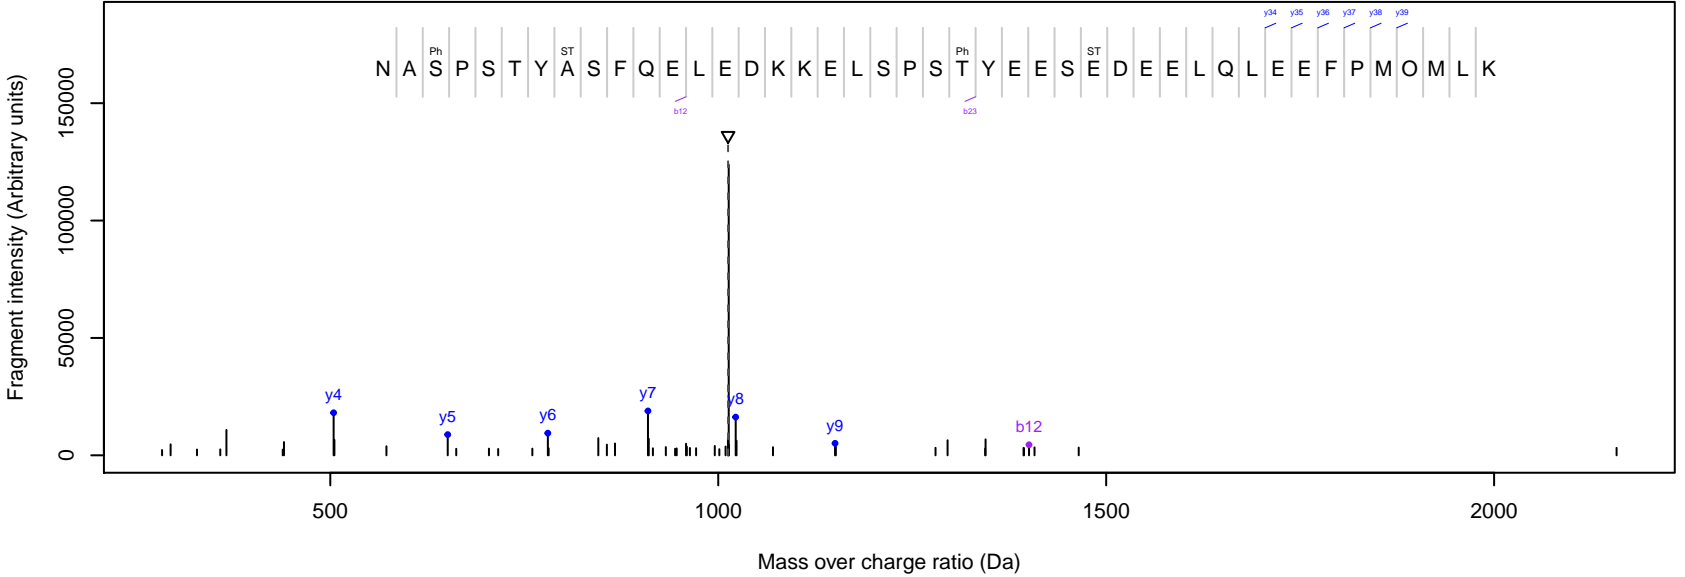

QADS(Phospho (STY))GS(Phospho (STY))S(Phospho (STY))EEKQLYNKYPDAVATWLNPDPSQK-3+

Source : QE3\_201126\_FR\_TiOx\_hum\_tissue\_Urea\_RNAB\_H Scan : 56820

Andromeda score : 42.121

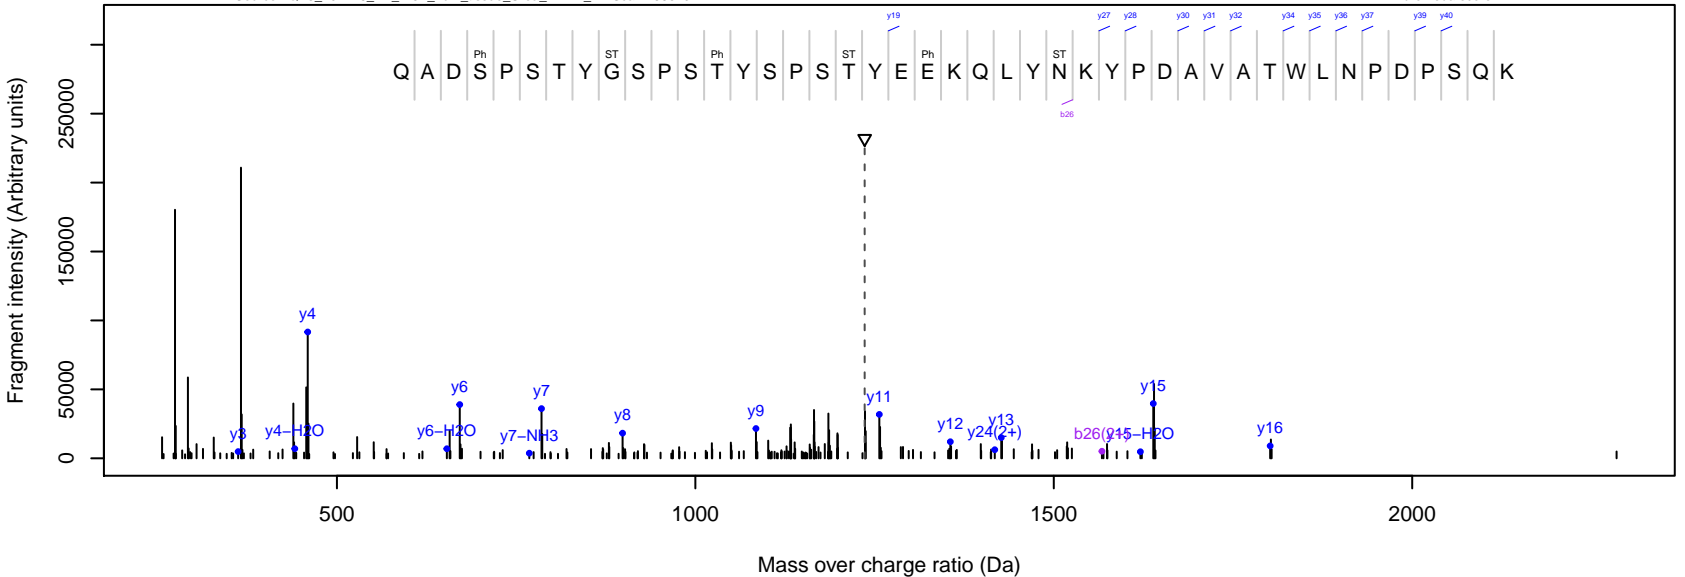

SISREPS(Phospho (STY))PALGPNLDGSGLLPRPIFYCSFPTR-4+

Source : QE3\_201126\_FR\_TIOx\_hum\_tissue\_Urea\_RNAB\_H Scan : 54170

Andromeda score : 42.121

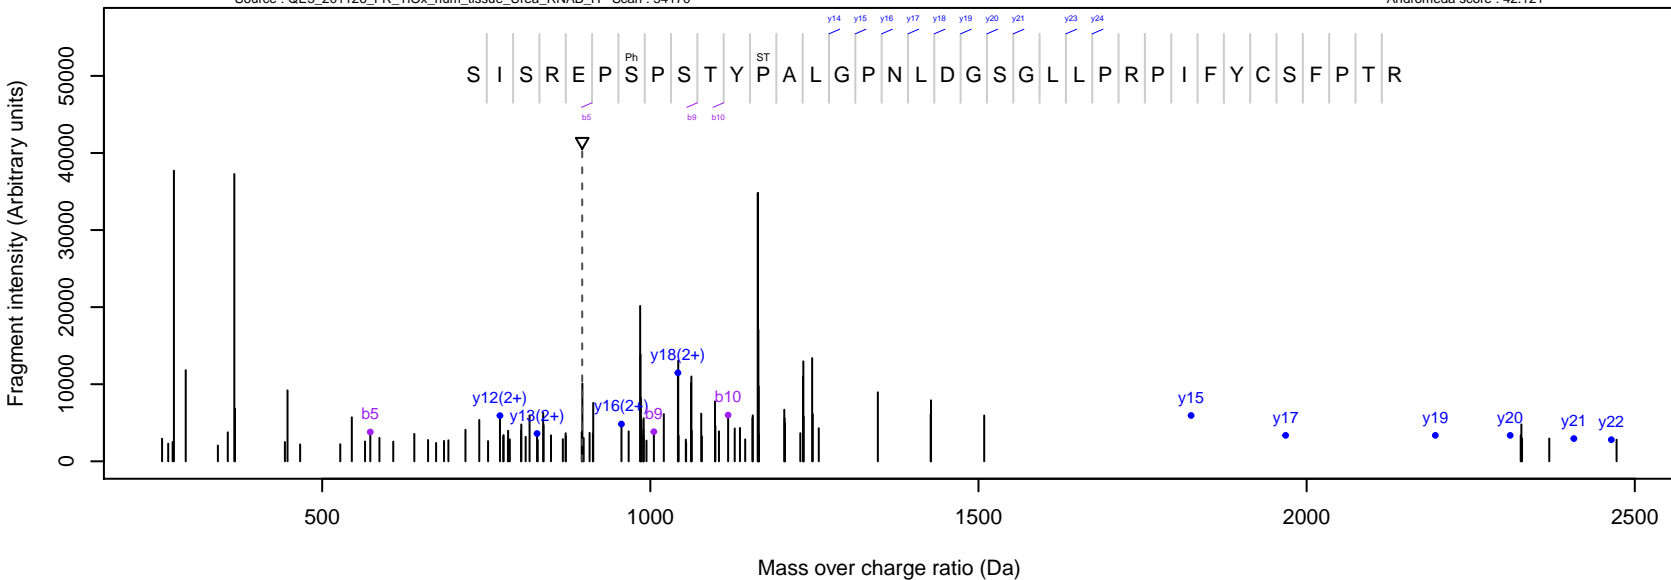

S(Phospho (STY))PGSGSQSSGWHEVEPGMOMPSPPTTLK-3+

Source : QE3\_201126\_FR\_TIOx\_hum\_tissue\_Urea\_RNAB\_B Scan : 24124

Andromeda score : 42.121

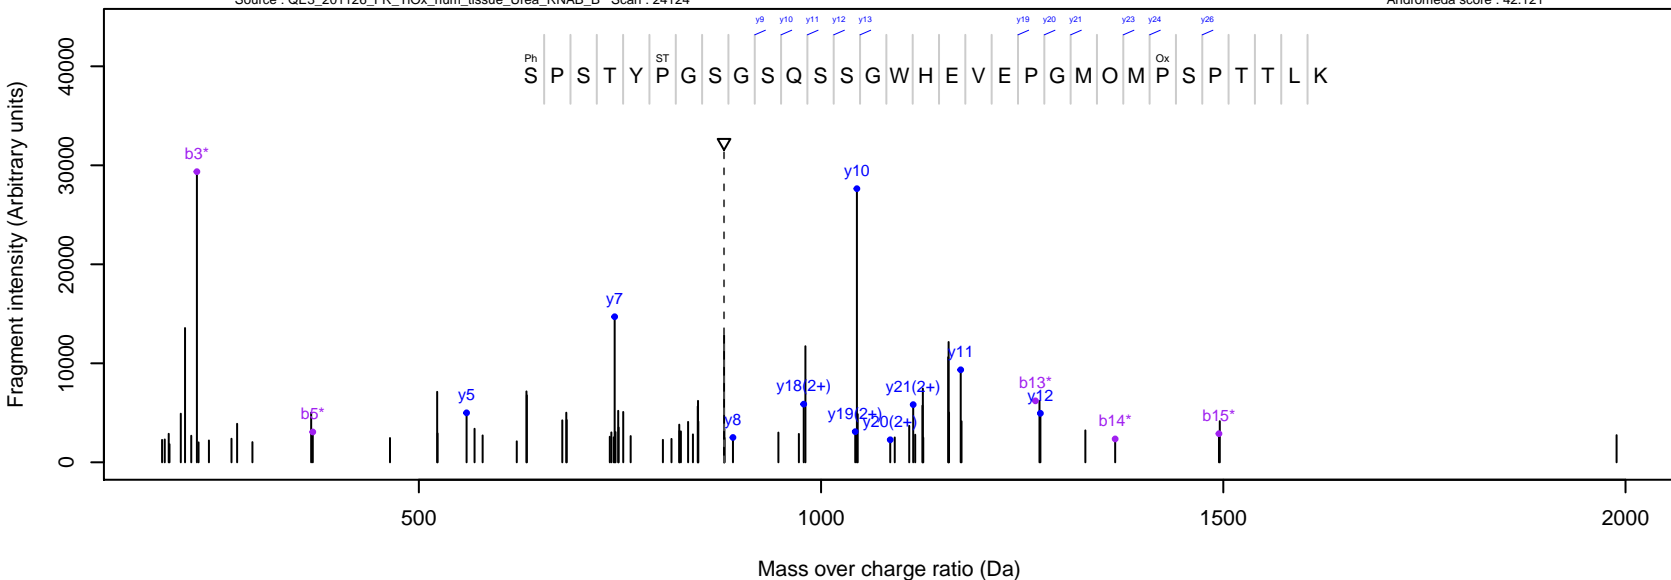

FAELPEFRPEEVLPSPTLQSPSTYLA TSPR-3+

Source : QE3\_201126\_FR\_TIOx\_hum\_tissue\_Urea\_RNAB\_H Scan : 56507

Andromeda score : 42.106

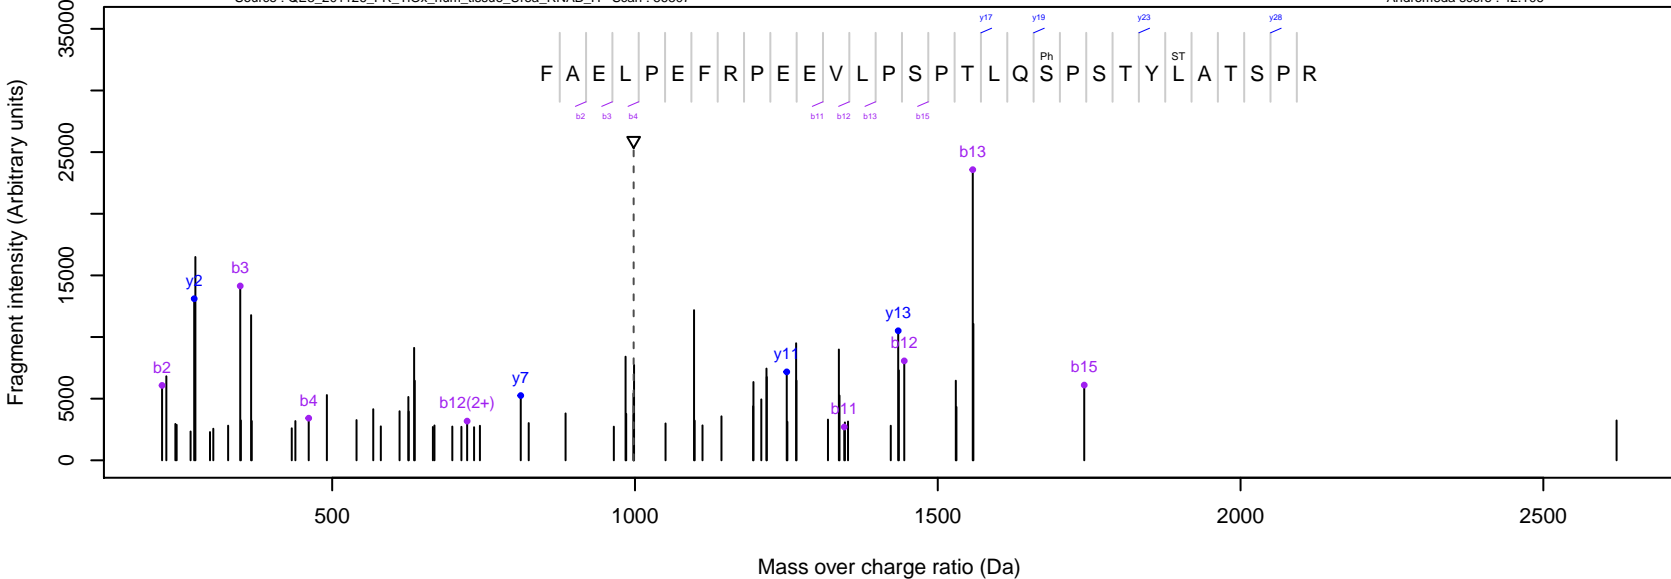

FSSINS(Phospho (STY))DKSLGEK-3+

Source : QE3\_201126\_FR\_TiOx\_hum\_tissue\_Urea\_RNAB\_H Scan : 13331

Andromeda score : 42.095

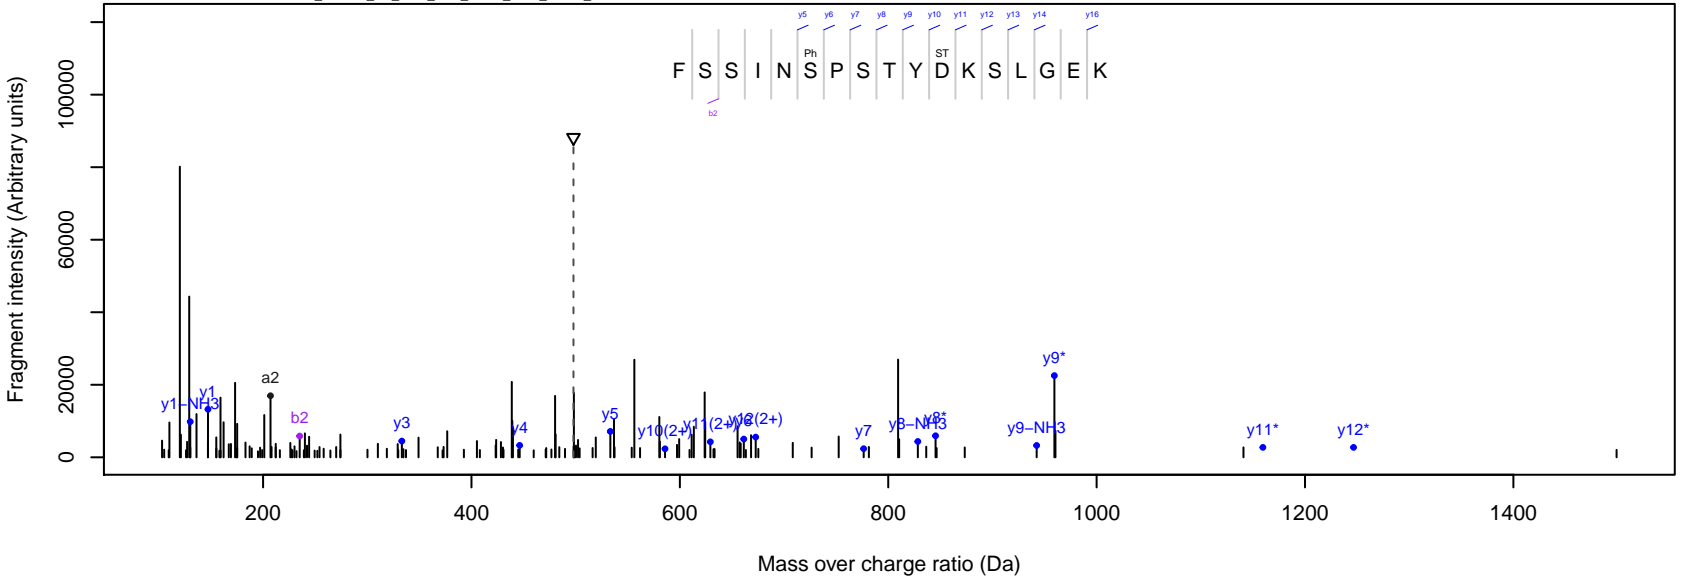

RKDS(Phospho (STY))ILPER-3+

Source : QE3\_201126\_FR\_TiOx\_hum\_tissue\_Urea\_RNAB\_B Scan : 7885

Andromeda score : 42.095

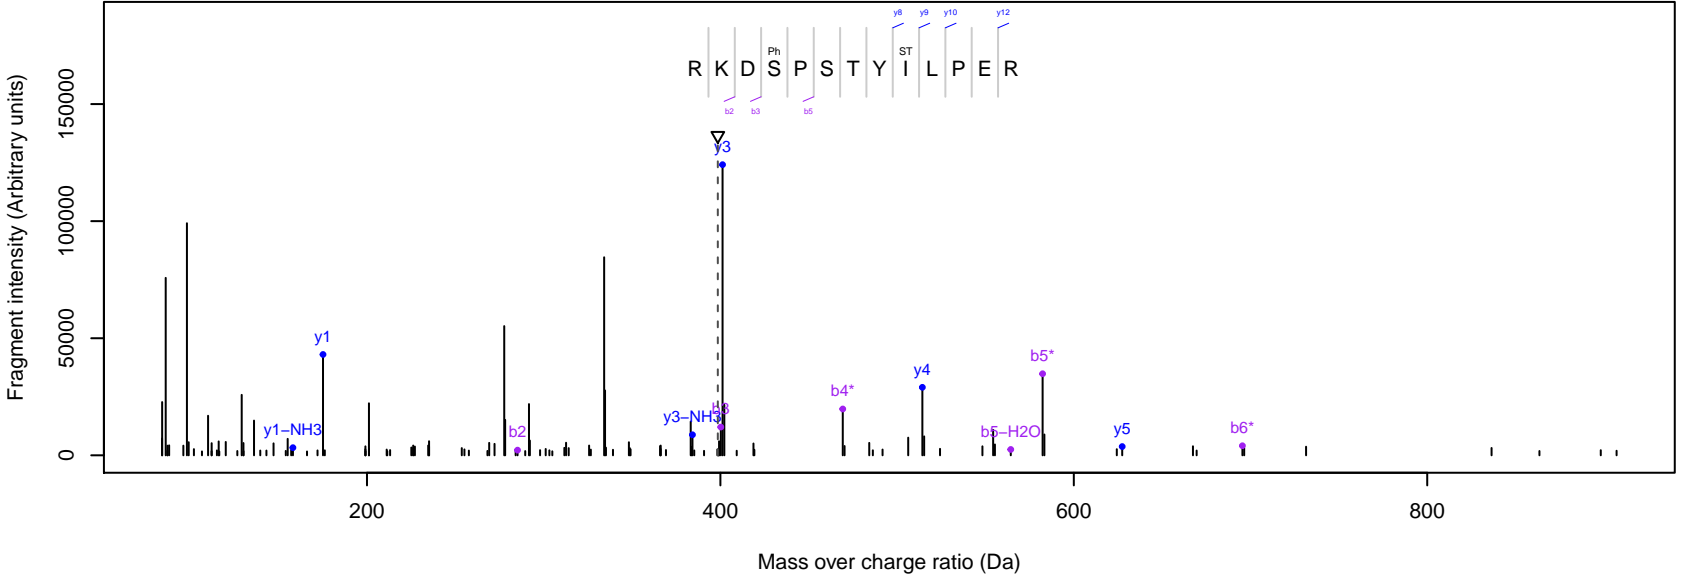

VIACFDS(Phospho (STY))LKGR-2+

Source : QE3\_201126\_FR\_TiOx\_hum\_tissue\_Urea\_RNAB\_H Scan : 21006

Andromeda score : 42.095

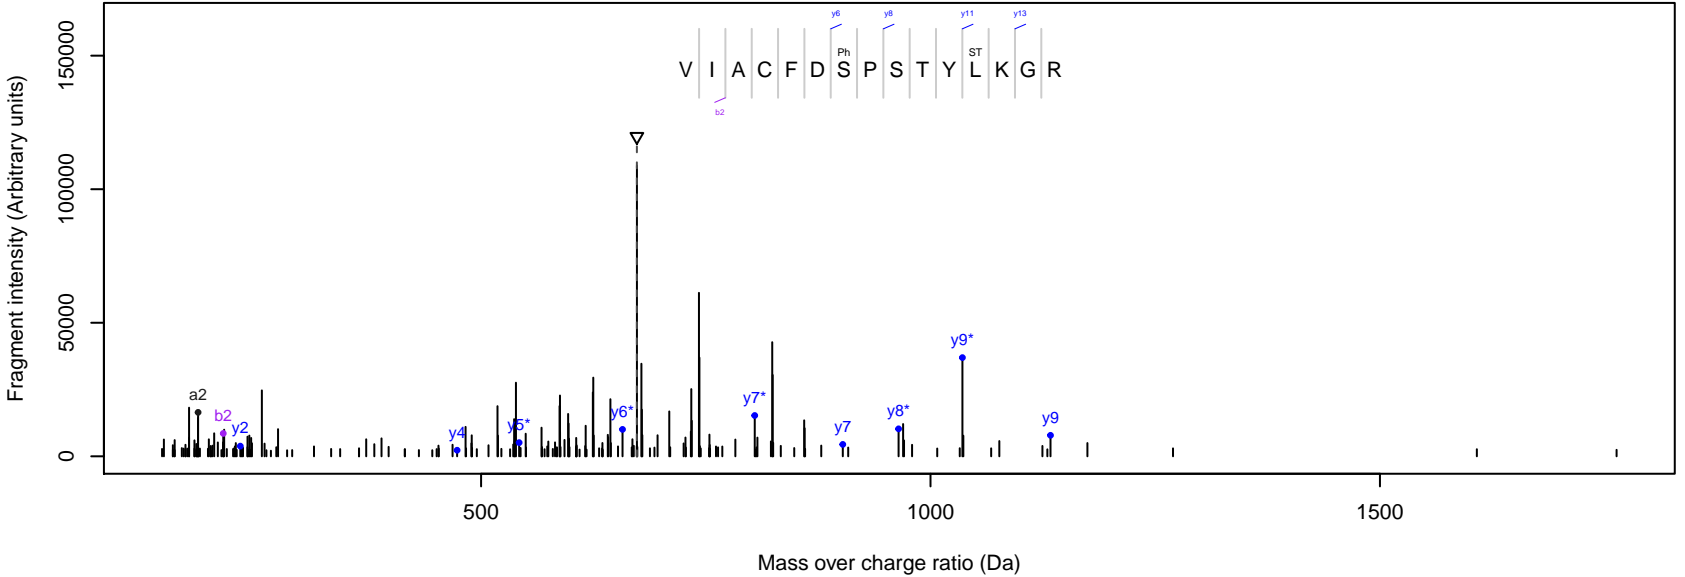



YGS(Phospho (STY))DIVPFSK-2+

Source : QE3\_201126\_FR\_TiOx\_hum\_tissue\_Urea\_RNAB\_H Scan : 38290

Andromeda score : 42.095

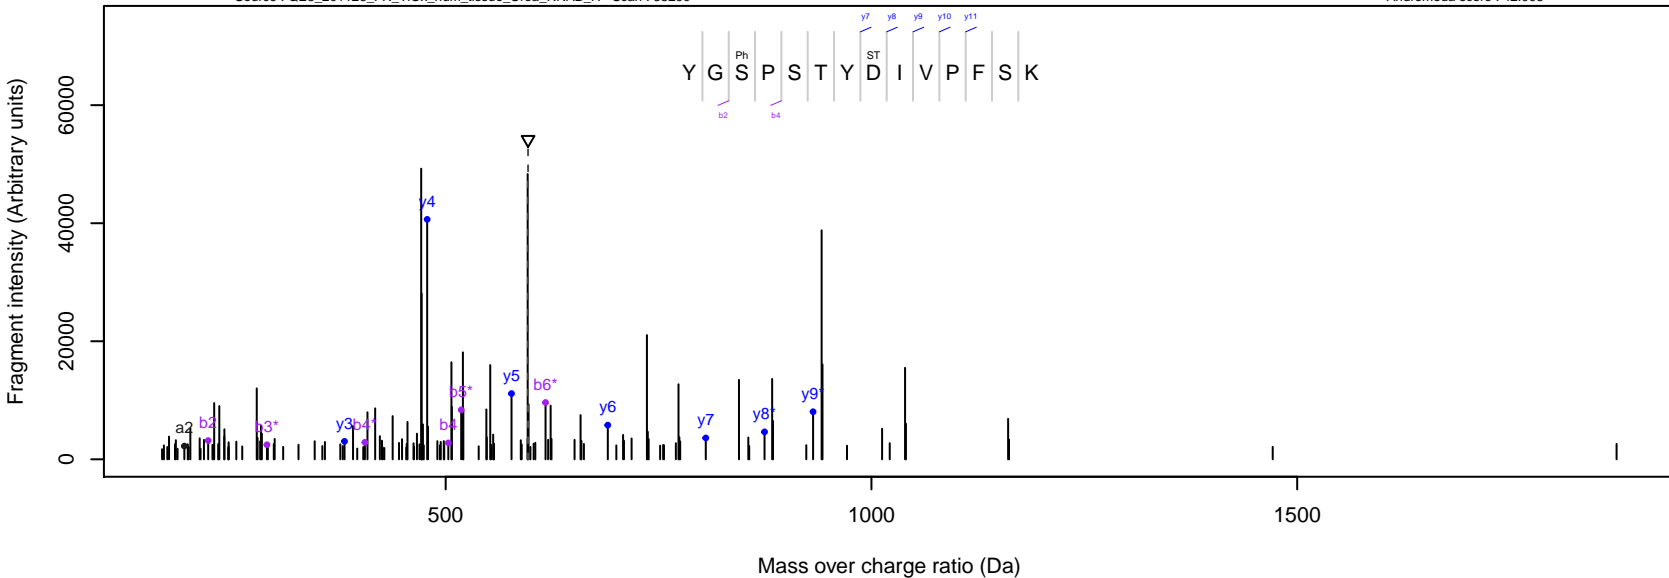

LSS(Phospho (STY))GLVTAALY(Phospho (STY))GR-2+

Source : QE3\_201126\_FR\_TiOx\_hum\_tissue\_Urea\_RNAB\_N Scan : 20744

Andromeda score : 42.083

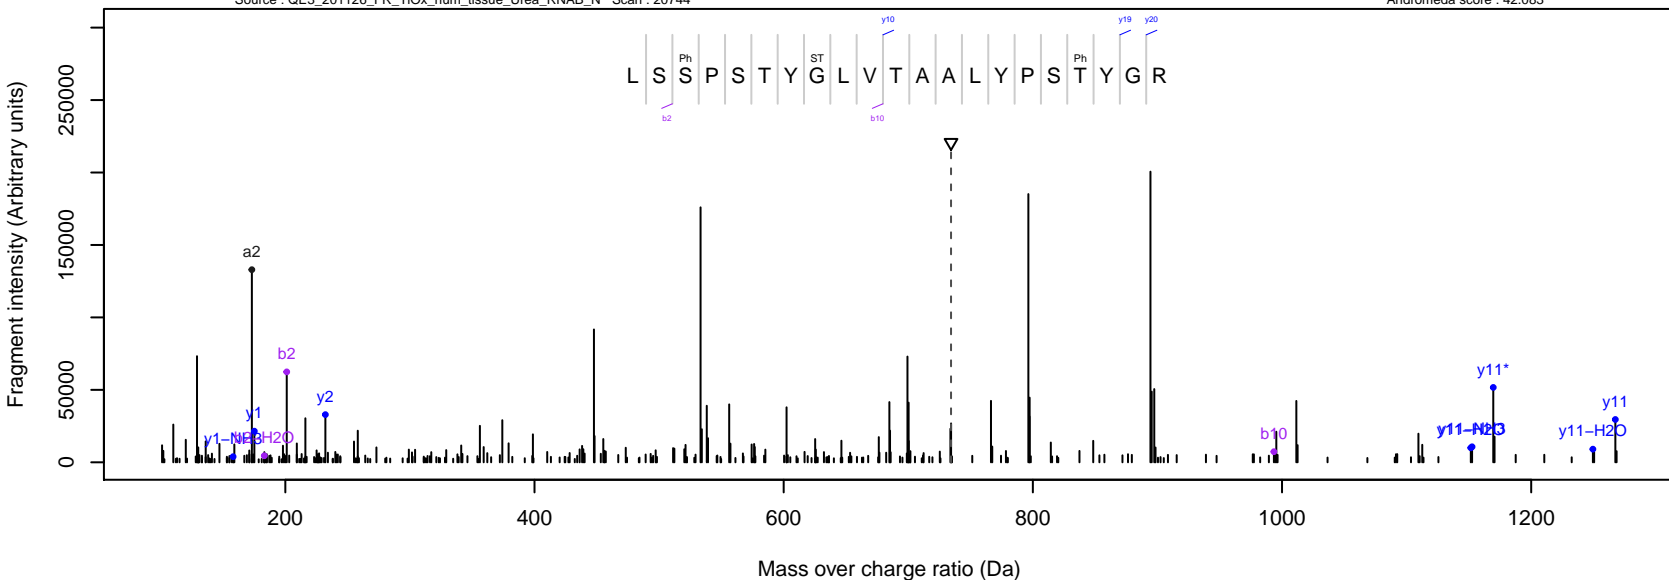

S(Phospho (STY))S(Phospho (STY))EVLSSTVSLDSSPVDLTPRPGSHTIEFFEMCANLIK-4+

Source : QE3\_201126\_FR\_TiOx\_hum\_tissue\_Urea\_RNAB\_H Scan : 60128

Andromeda score : 42.064

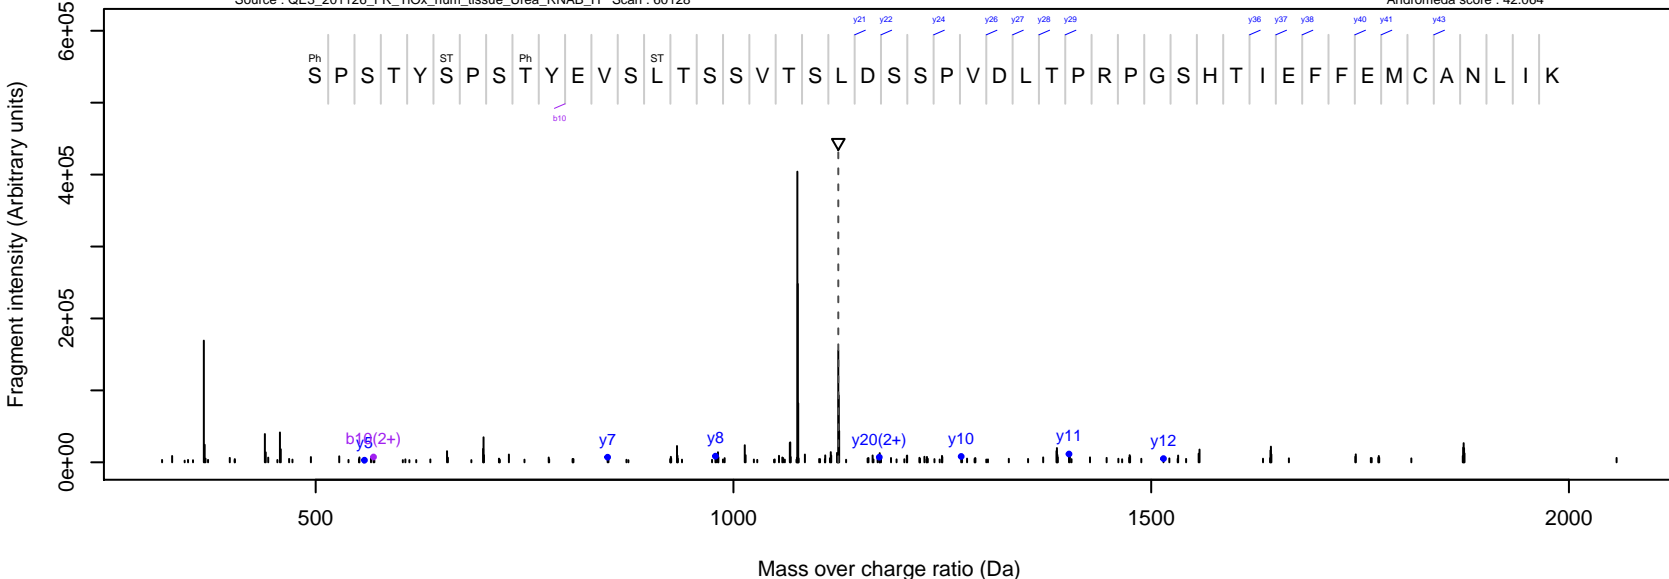

DS(Phospho (STY))ESPRHFIPADYLESTEEFIR-3+

Source : QE3\_201126\_FR\_TiOx\_hum\_tissue\_Urea\_RNAB\_H Scan : 52467

Andromeda score : 42.039

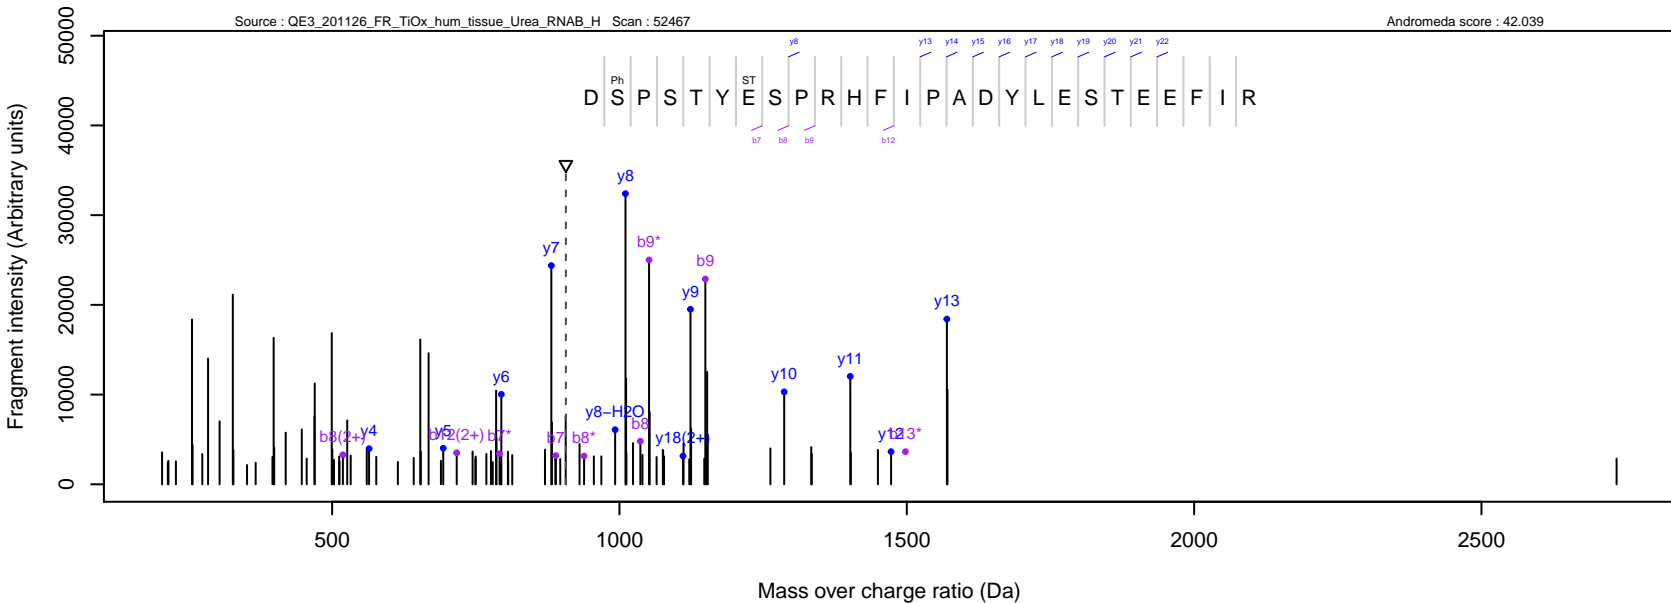

DAPWTASSEKAPDMSSEEFPS(Phospho (STY))FGAQVAPK-3+

Source : QE3\_201126\_FR\_TiOx\_hum\_tissue\_Urea\_RNAB\_N Scan : 48182

Andromeda score : 42.038

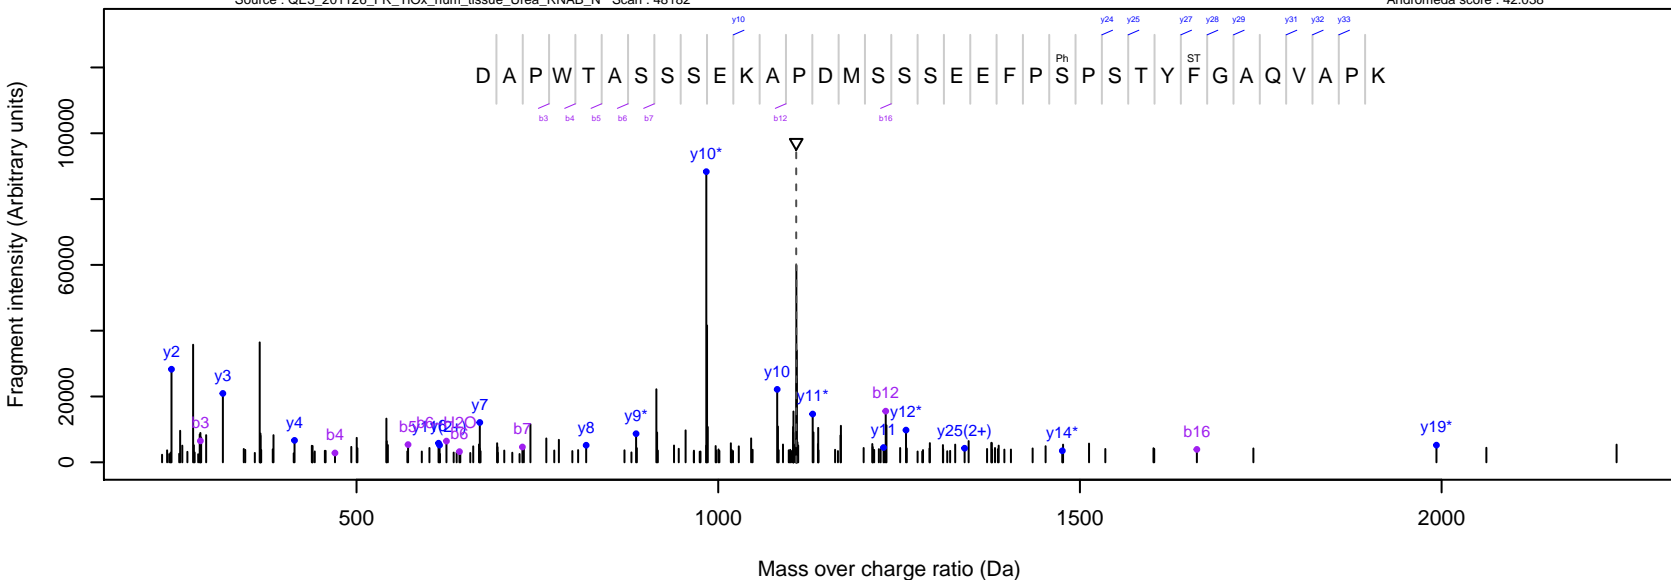

RAS(Phospho (STY))LPAGLVGT(Phospho (STY))PPESPSEPREDLGLPGPR-4+

Source : QE3\_201126\_FR\_TiOx\_hum\_tissue\_Urea\_RNAB\_H Scan : 54775

Andromeda score : 42.015

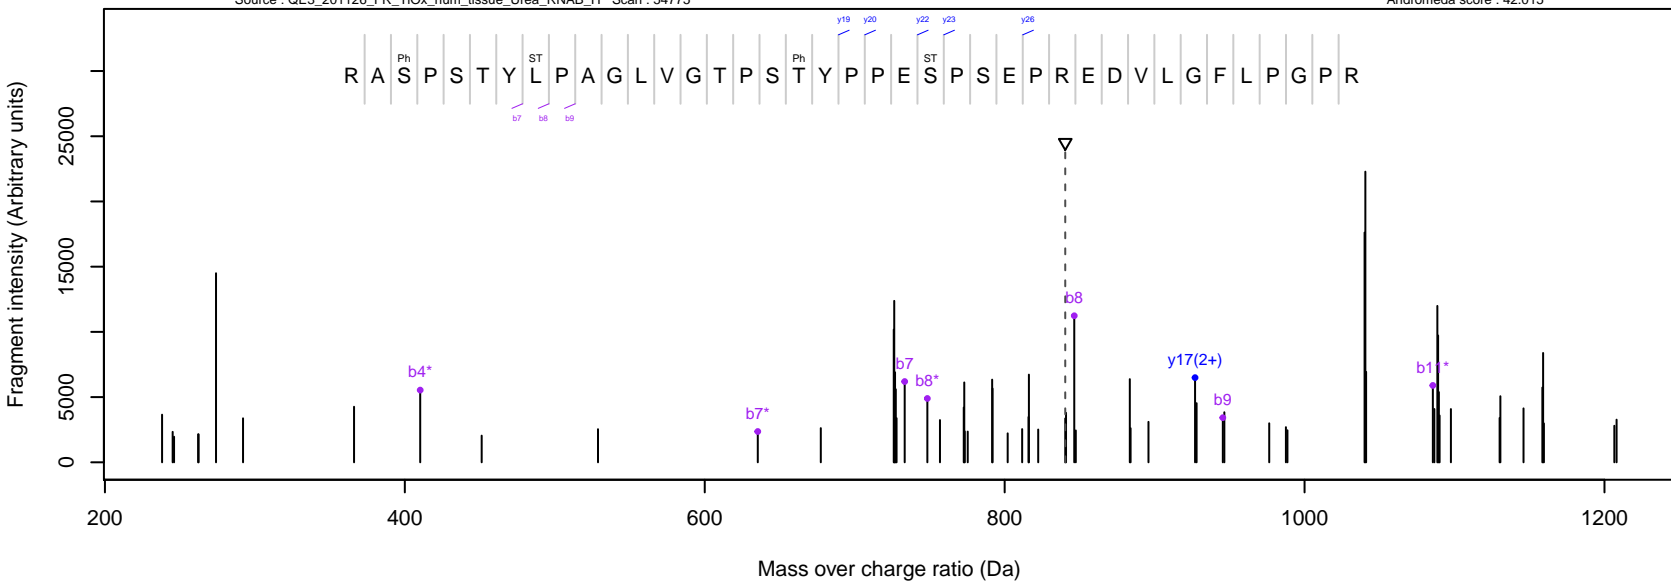

RQLHLEGASLELSPSTYDDDTPTSTYESKTS D V N E T Q P P Q S E

Source : QE3\_201126\_FR\_TiOx\_hum\_tissue\_Urea\_RNAB\_N Scan : 34835

Andromeda score : 42.015

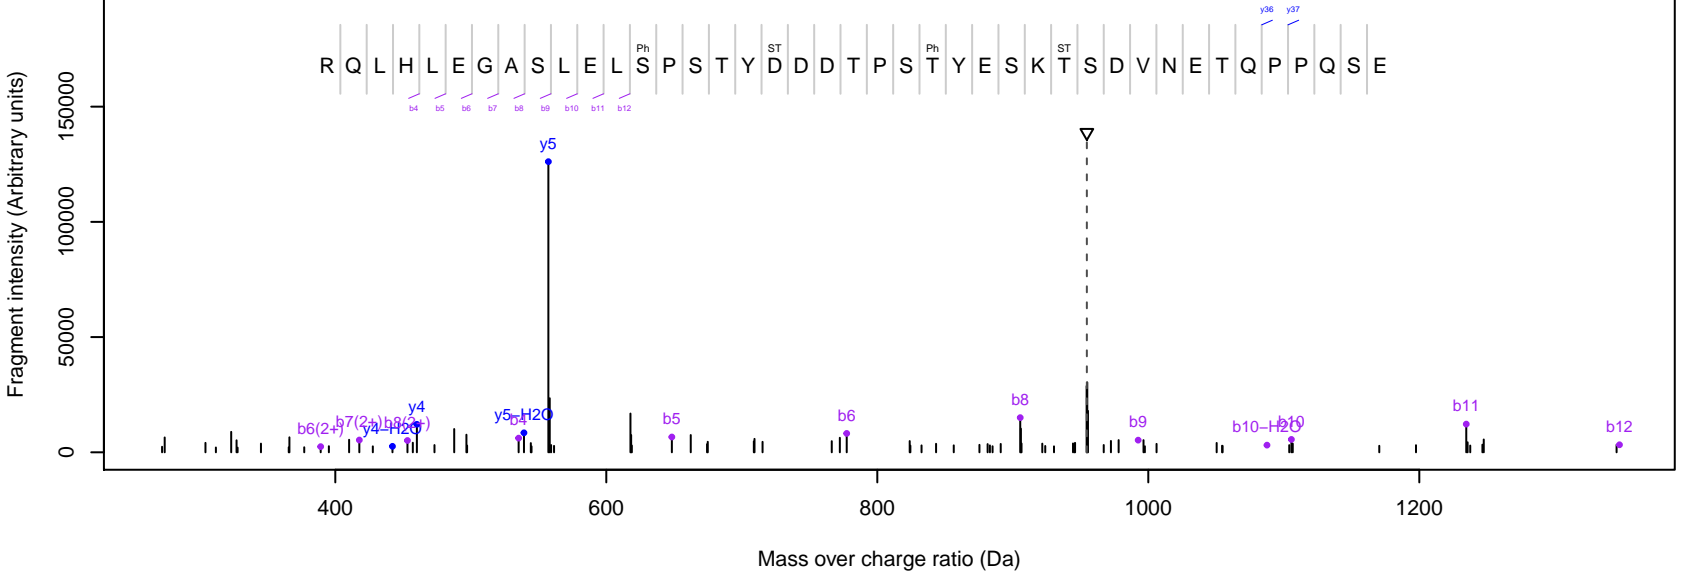

(Acetyl (Protein N-term))S(Phospho (STY))GGGVIRGPA G N N D C R

Source : QE3\_201126\_FR\_TiOx\_hum\_tissue\_Urea\_RNAB\_B Scan : 17397

Andromeda score : 41.967

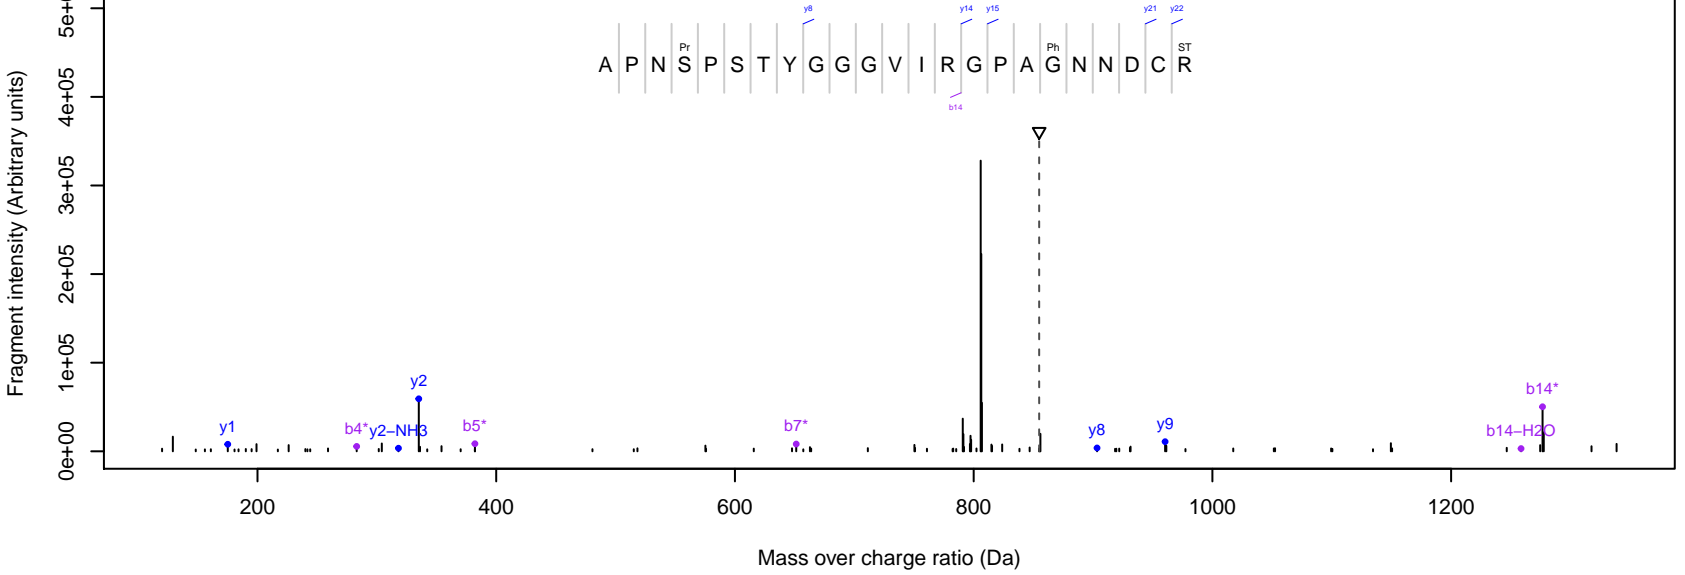

(Acetyl (Protein N-term))S(Phospho (STY))FT(Phospho (STY))T(Phospho (STY))RSTFS(Phospho (STY))TNYR-3+

Source : QE3\_201126\_FR\_TiOx\_hum\_tissue\_Urea\_RNAB\_N Scan : 65158

Andromeda score : 41.912

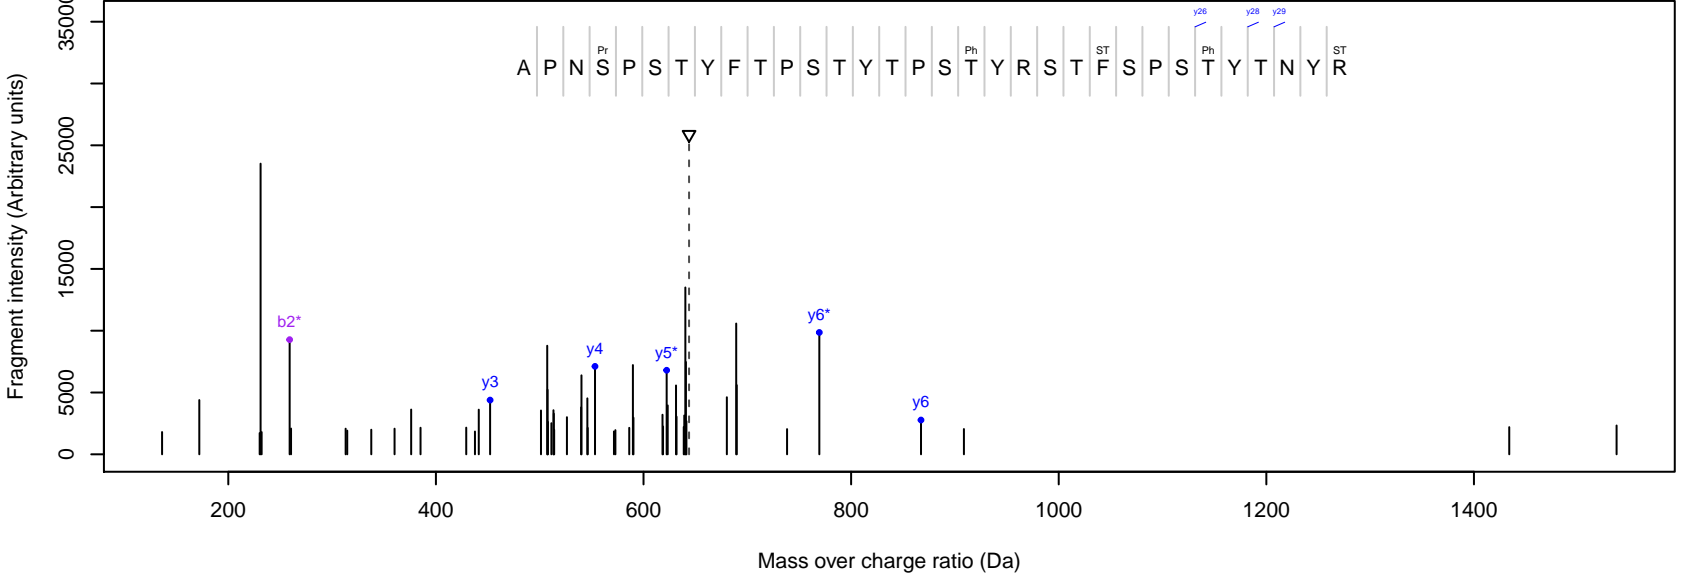

LS(Phospho (STY))AITM(Oxidation (M))ALQYGES(Phospho (STY))EEDAALAAAR-3+

Source : QE3\_201126\_FR\_TIOx\_hum\_tissue\_Urea\_RNAB\_N Scan : 55516

Andromeda score : 41.89

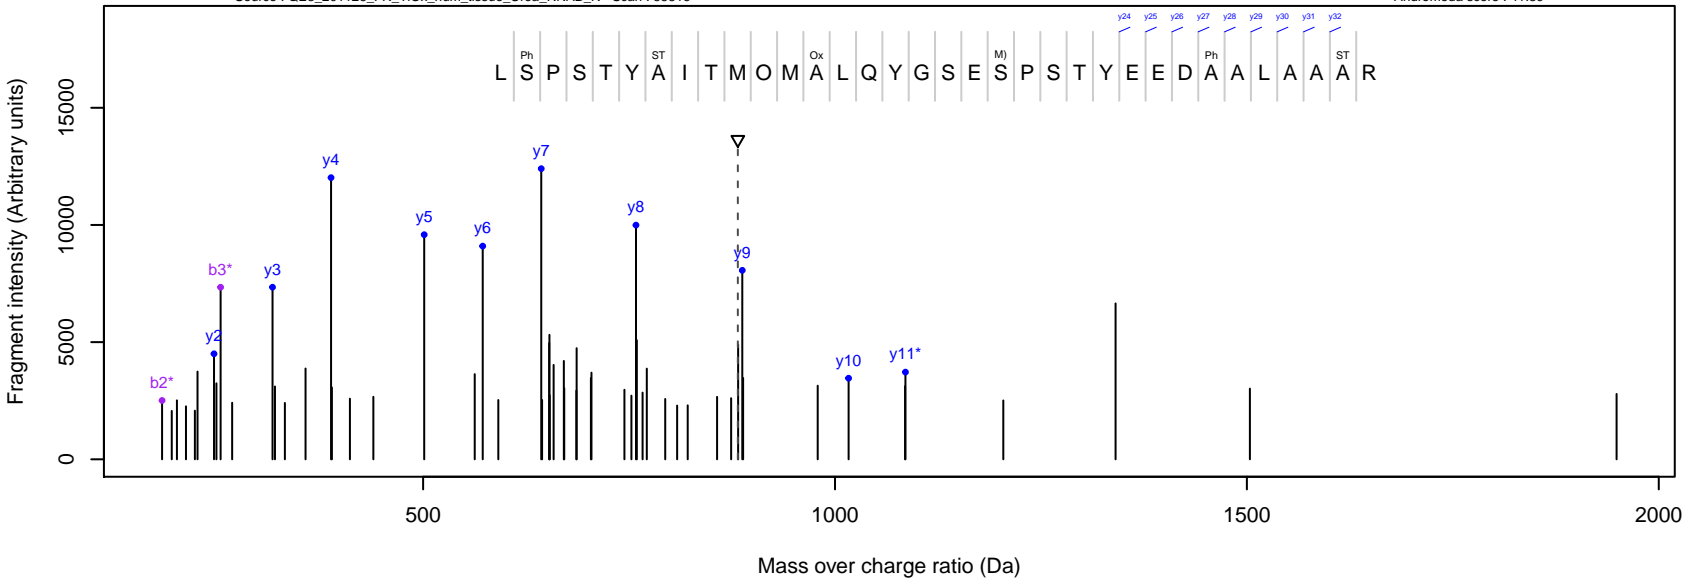

STPQPPS(Phospho (STY))GKT(Phospho (STY))TPNSGDVQVTEDAVRR-4+

Source : QE3\_201126\_FR\_TIOx\_hum\_tissue\_Urea\_RNAB\_N Scan : 20095

Andromeda score : 41.89

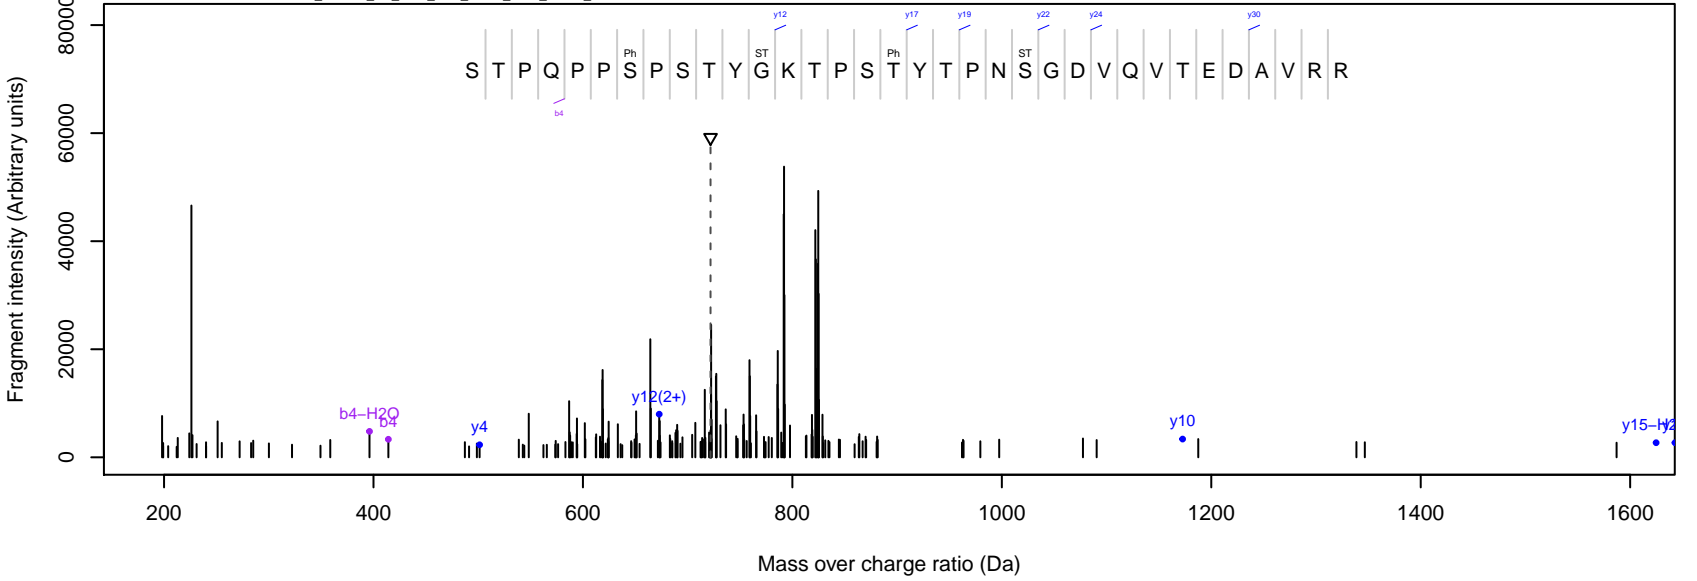

S(Phospho (STY))GSEEAVTDPGER-2+

Source : QE3\_201126\_FR\_TIOx\_hum\_tissue\_Urea\_RNAB\_B Scan : 11356

Andromeda score : 41.87

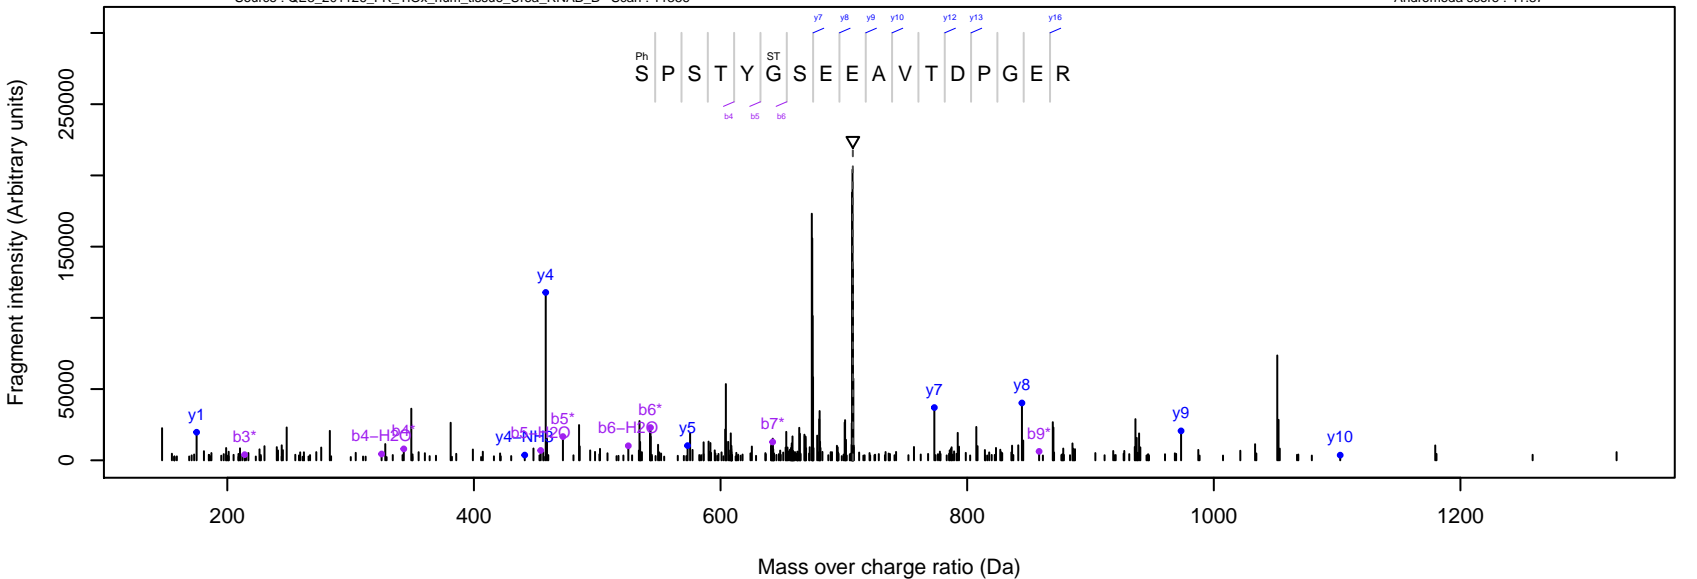

FSEMM(Oxidation (M))NNM(Oxidation (M))GGDEDVLDPEVDGADDDSPSTYQDSDDEK(M)PDLE-4+

Source : QE3\_201126\_FR\_TIOx\_hum\_tissue\_Urea\_RNAB\_B Scan : 46705

Andromeda score : 41.859

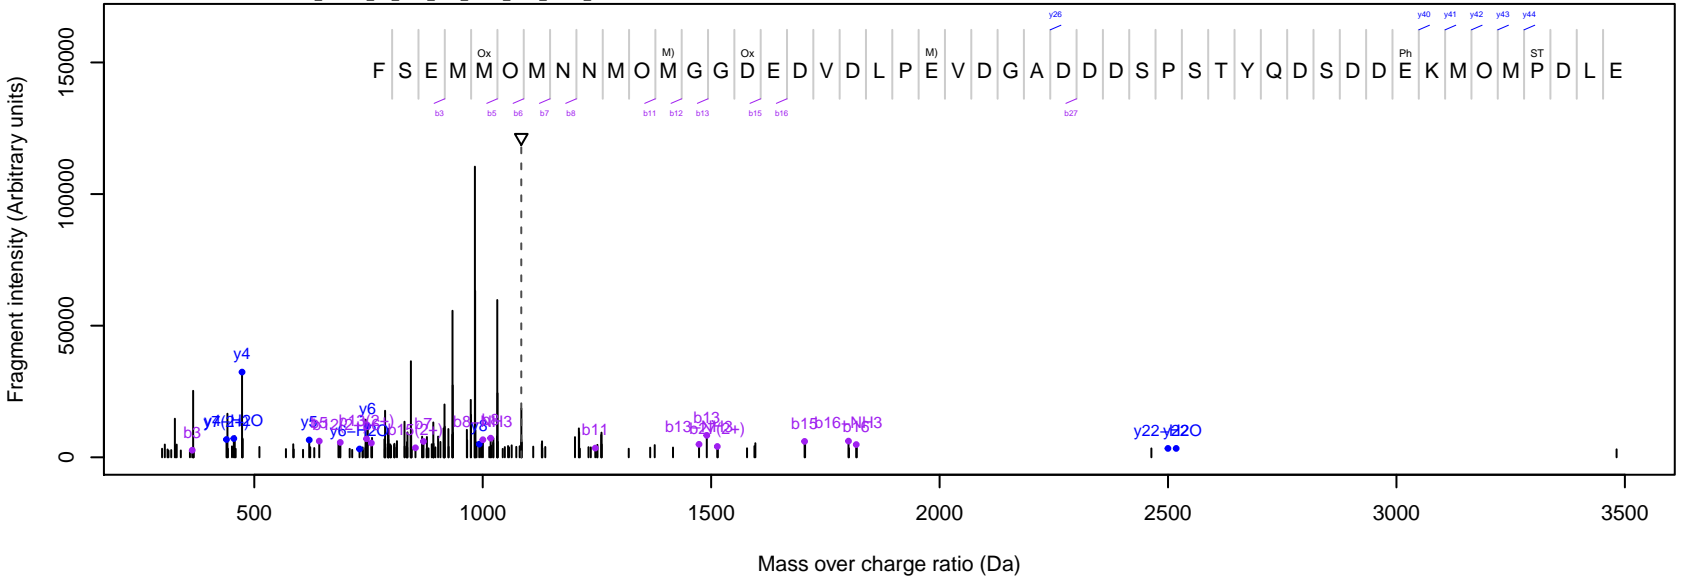

SSS(Phospho (STY))VTS(Phospho (STY))IDKESR-2+

Source : QE3\_201126\_FR\_TIOx\_hum\_tissue\_Urea\_RNAB\_H Scan : 10877

Andromeda score : 41.838

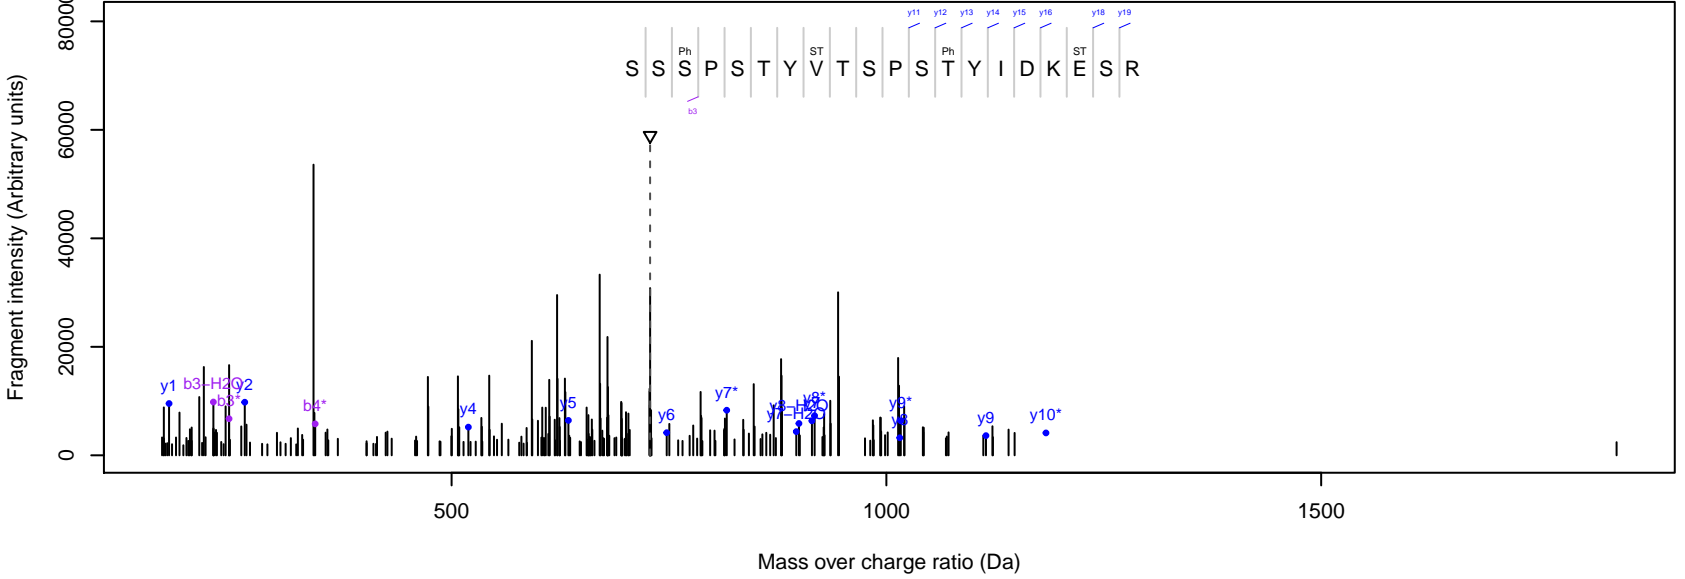

VGLSPDSPAGDRNS(Phospho (STY))VGSEGSVGSIR-3+

Source : QE3\_201126\_FR\_TIOx\_hum\_tissue\_Urea\_RNAB\_B Scan : 23586

Andromeda score : 41.83

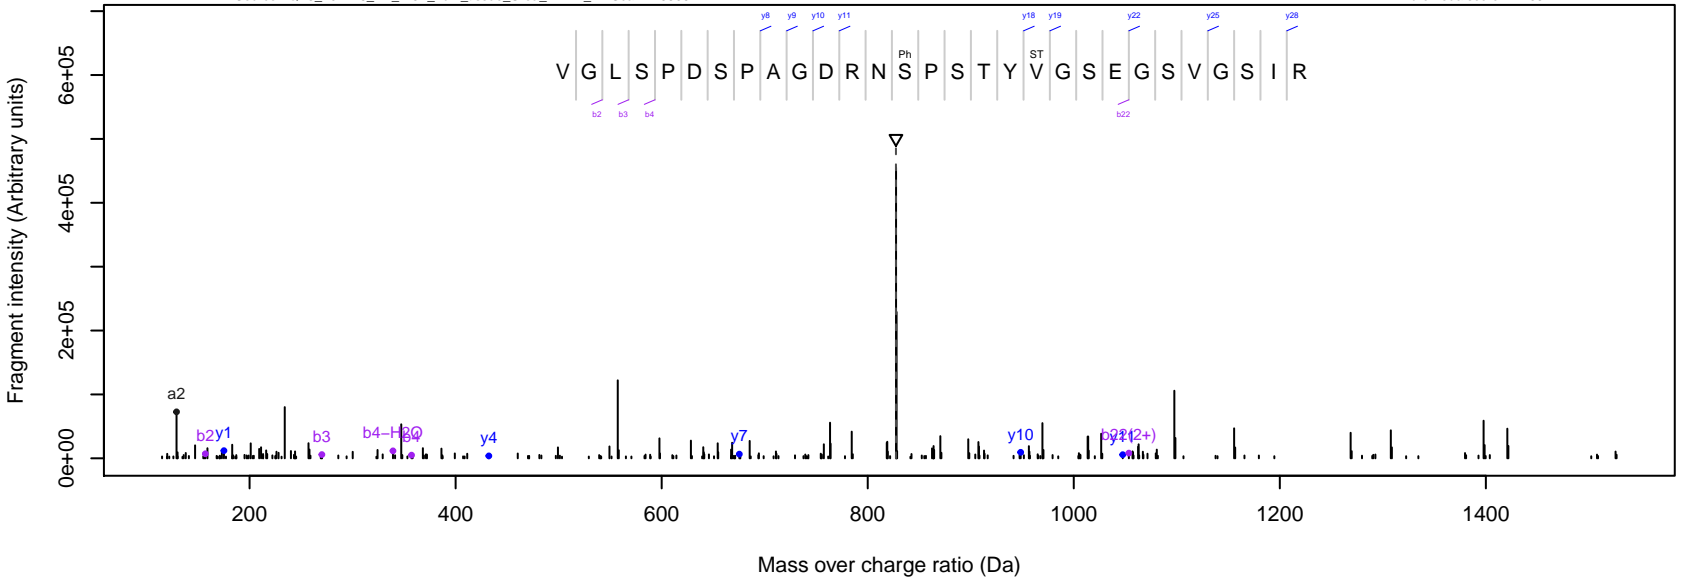

EGT(Phospho (STY))GQKERESRPLQLPGAEGPAISDGEEGGEGPGAGGAAGAAGAGR-4+

Source : QE3\_201126\_FR\_TiOx\_hum\_tissue\_Urea\_RNAB\_H Scan : 29321

Andromeda score : 41.788

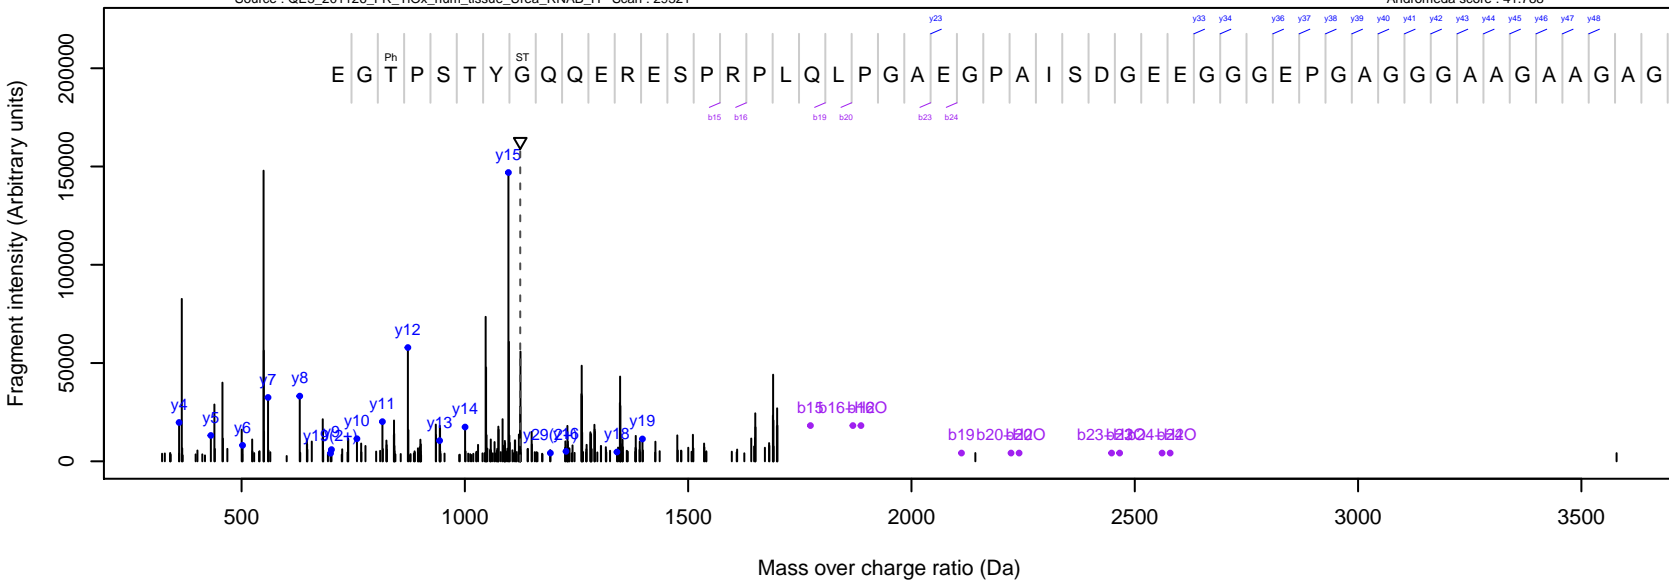

EVEEDS(Phospho (STY))EDEEMSEDEEDDS(Phospho (STY))S(Phospho (STY))GEEVVIPQKK-3+

Source : QE3\_201126\_FR\_TiOx\_hum\_tissue\_Urea\_RNAB\_H Scan : 36207

Andromeda score : 41.764

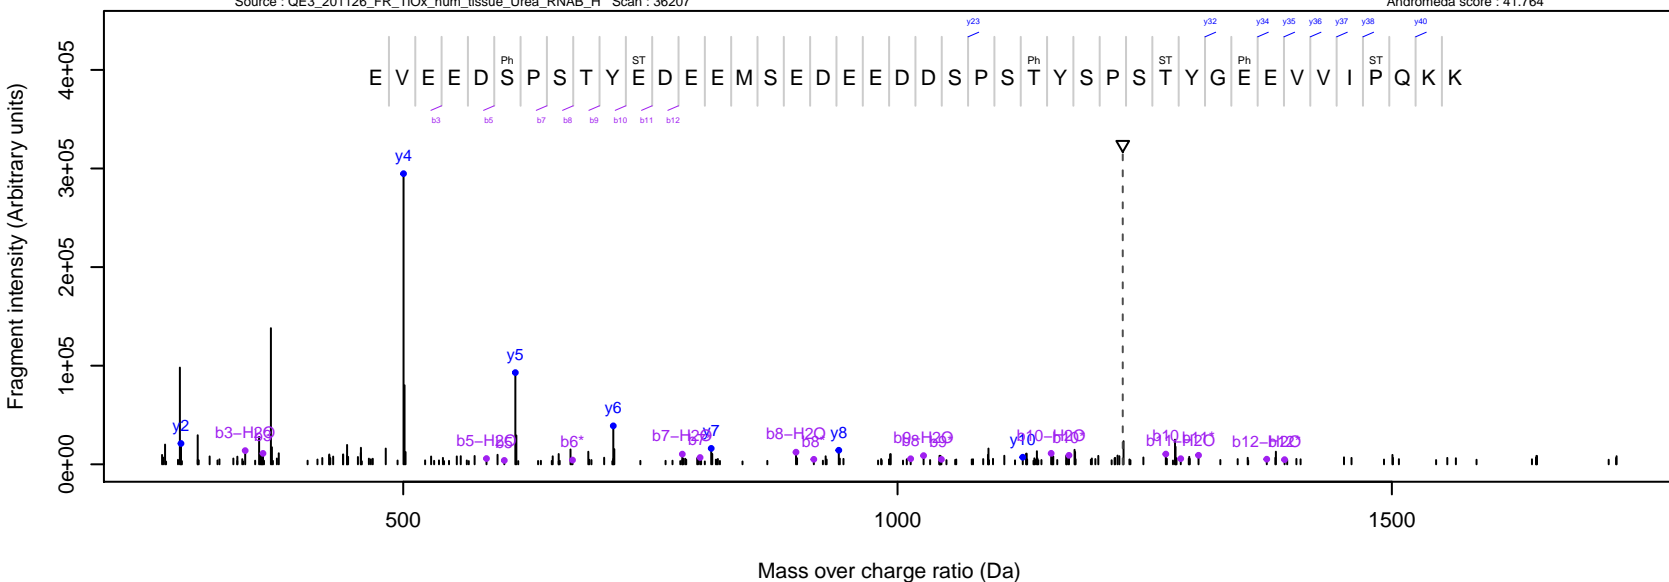

KCHS(Phospho (STY))LGYNFIHK-4+

Source : QE3\_201126\_FR\_TiOx\_hum\_tissue\_Urea\_RNAB\_H Scan : 14485

Andromeda score : 41.749

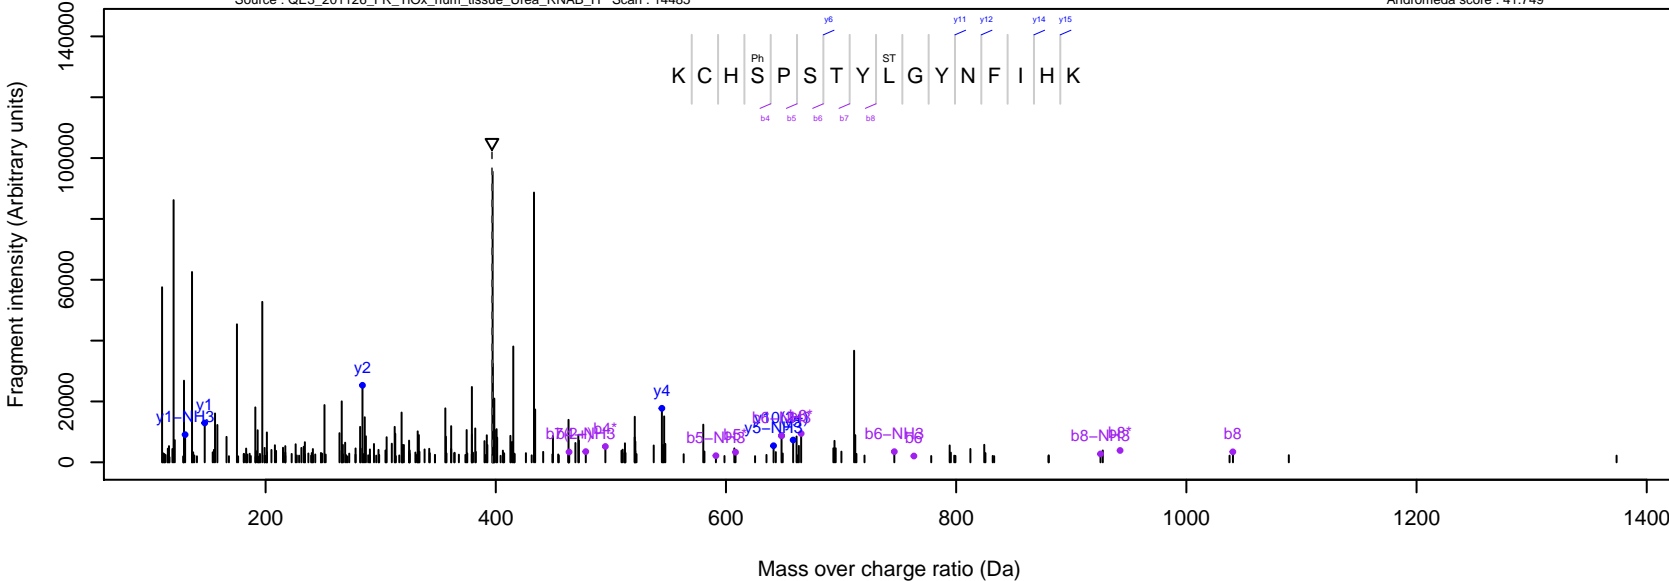

RLS(Phospho (STY))TLILHGGGTVCR-3+

Source : QE3\_201126\_FR\_TIOx\_hum\_tissue\_Urea\_RNAB\_H Scan : 24542

Andromeda score : 41.711

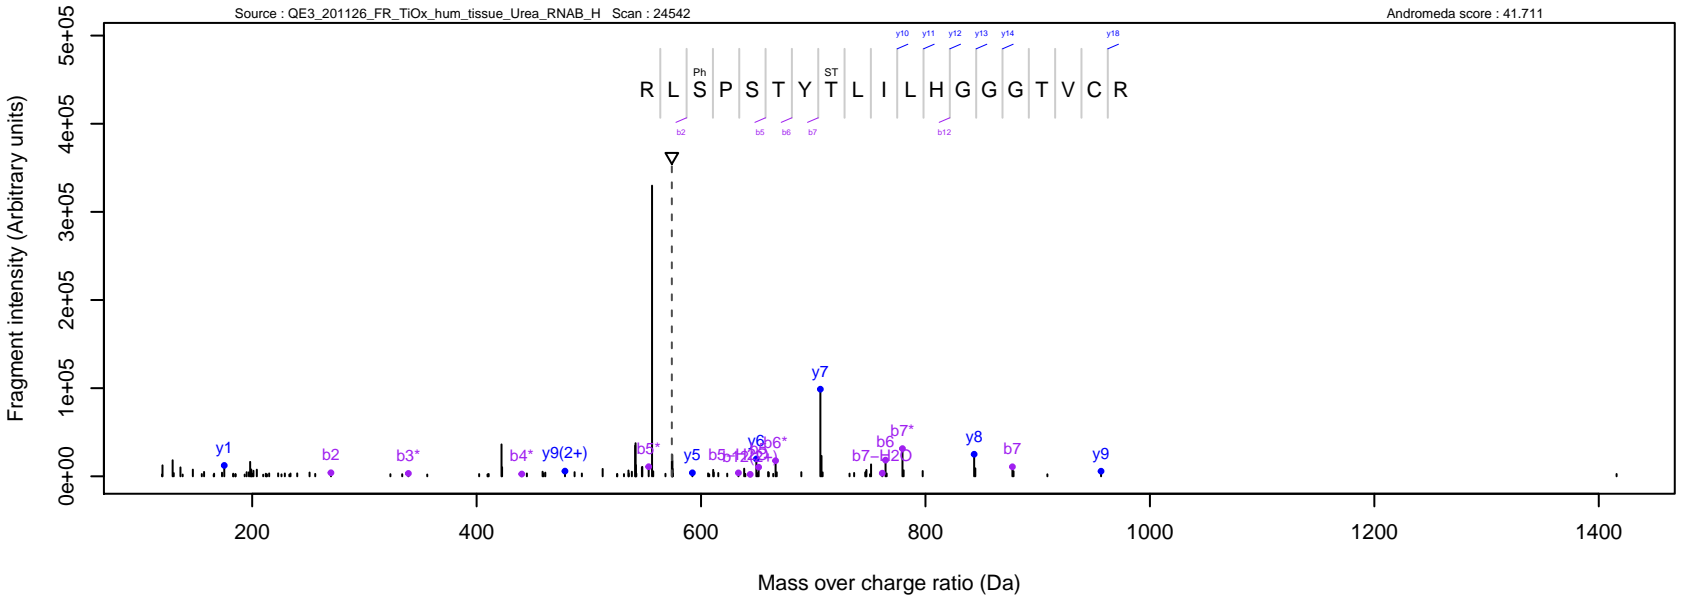

HSGS(Phospho (STY))WPGHR-3+

Source : QE3\_201126\_FR\_TIOx\_hum\_tissue\_Urea\_RNAB\_H Scan : 4889

Andromeda score : 41.704

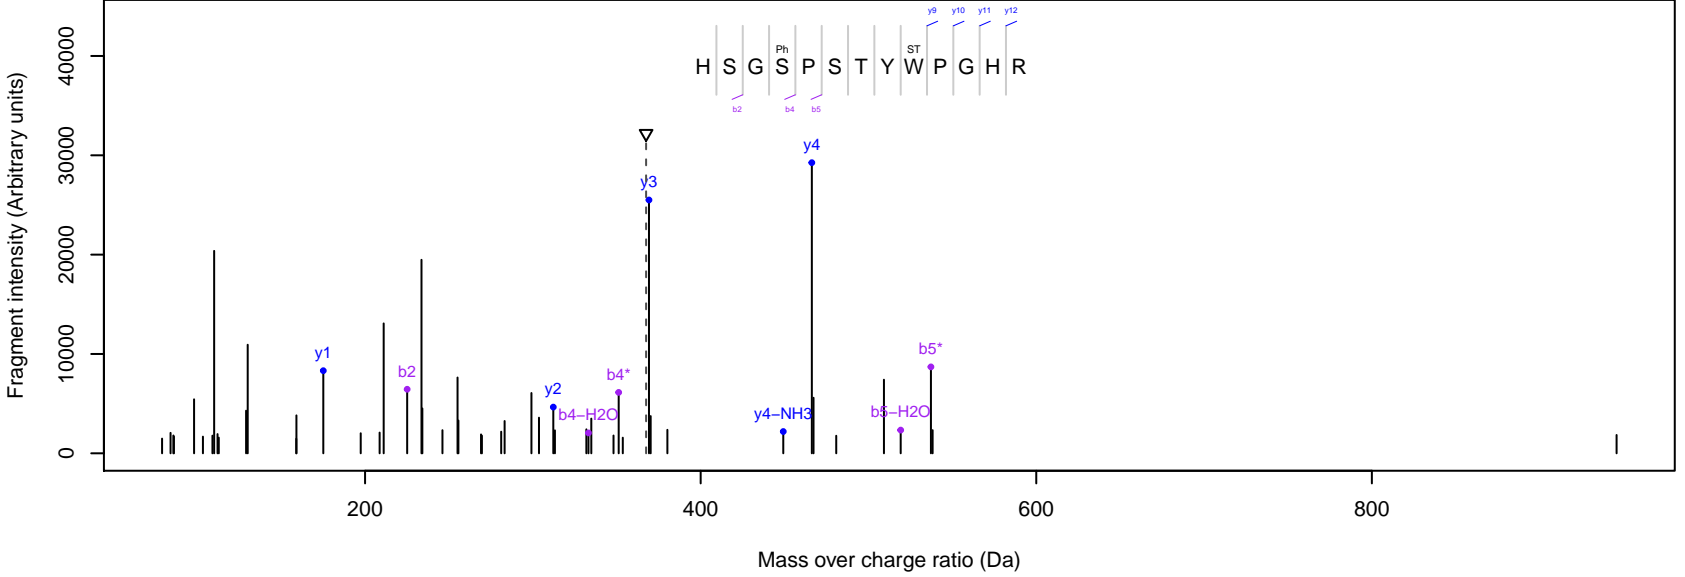

LLS(Phospho (STY))GFGLER-2+

Source : QE3\_201126\_FR\_TIOx\_hum\_tissue\_Urea\_RNAB\_H Scan : 50680

Andromeda score : 41.704

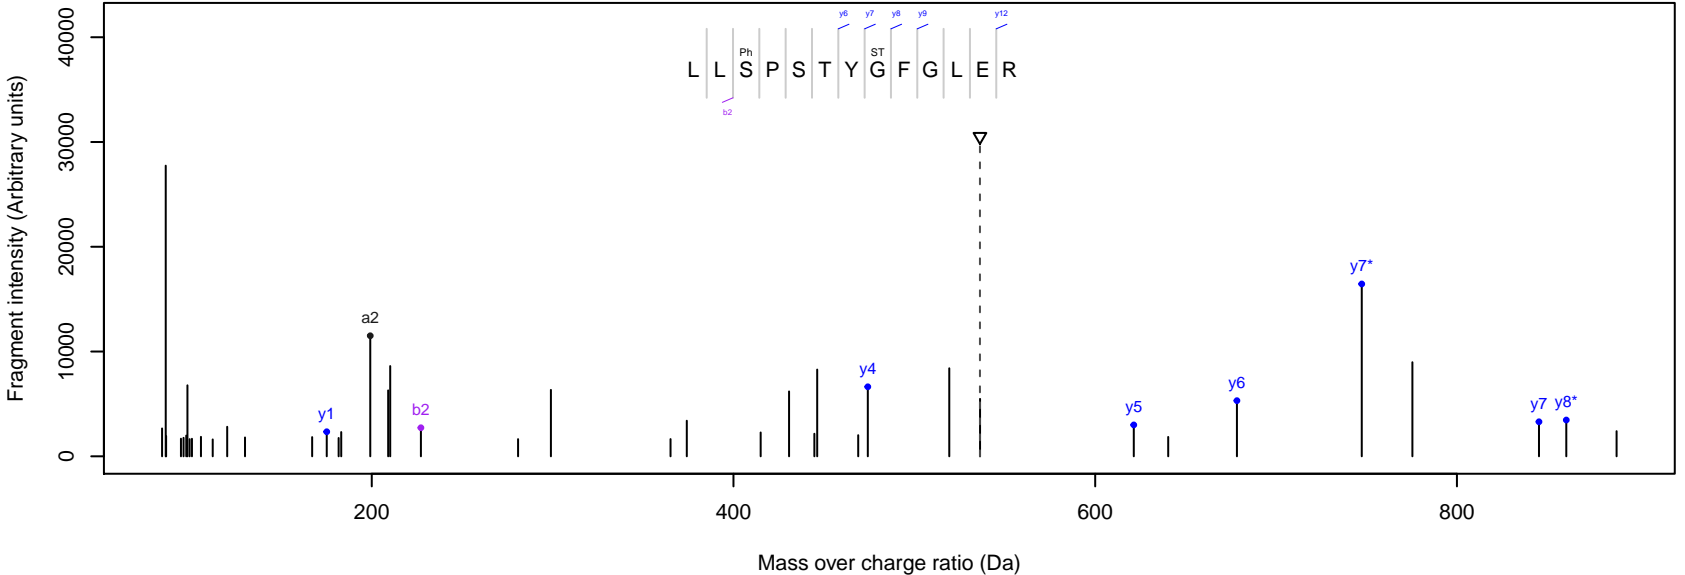

RAS(Phospho (STY))TAFCPAASSEAPDGPSTAR-3+

Source : QE3\_201126\_FR\_TIOx\_hum\_tissue\_Urea\_RNAB\_N Scan : 19829

Andromeda score : 41.703

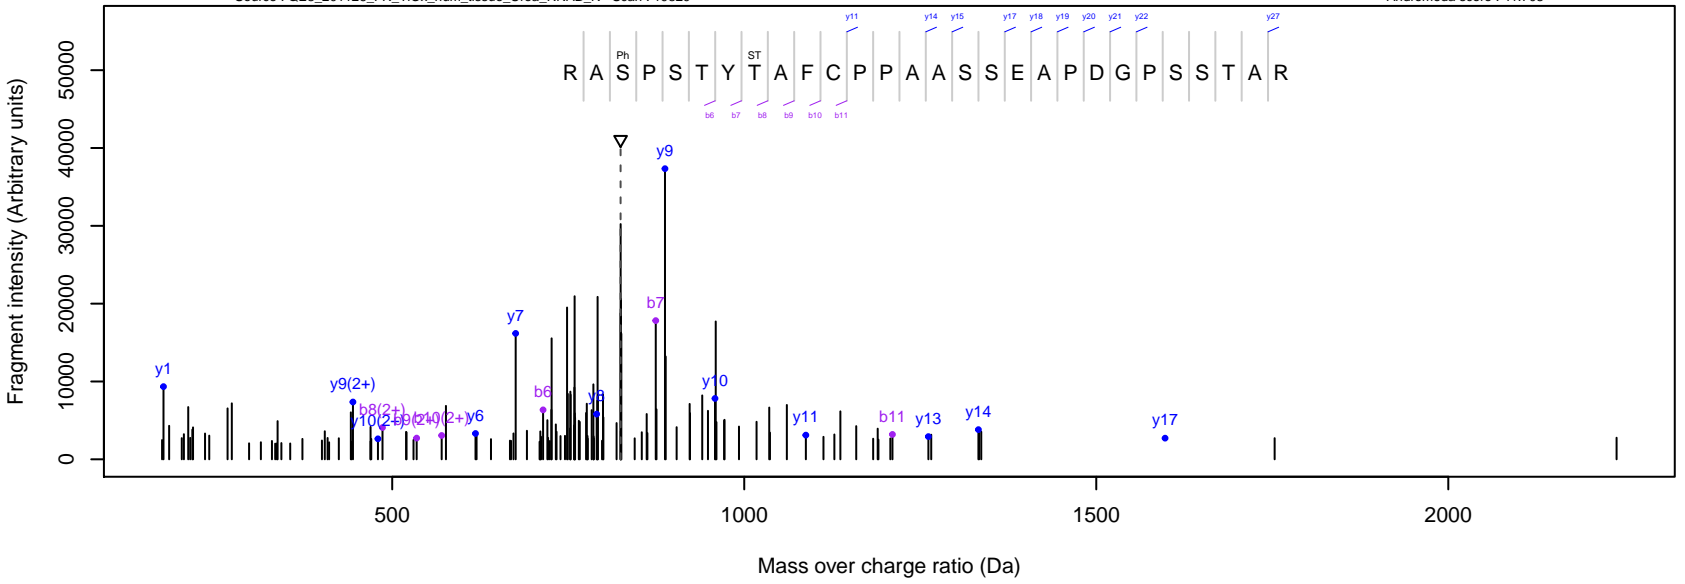

RSS(Phospho (STY))SFGNFDR-2+

Source : QE3\_201126\_FR\_TIOx\_hum\_tissue\_Urea\_RNAB\_B Scan : 13514

Andromeda score : 41.684

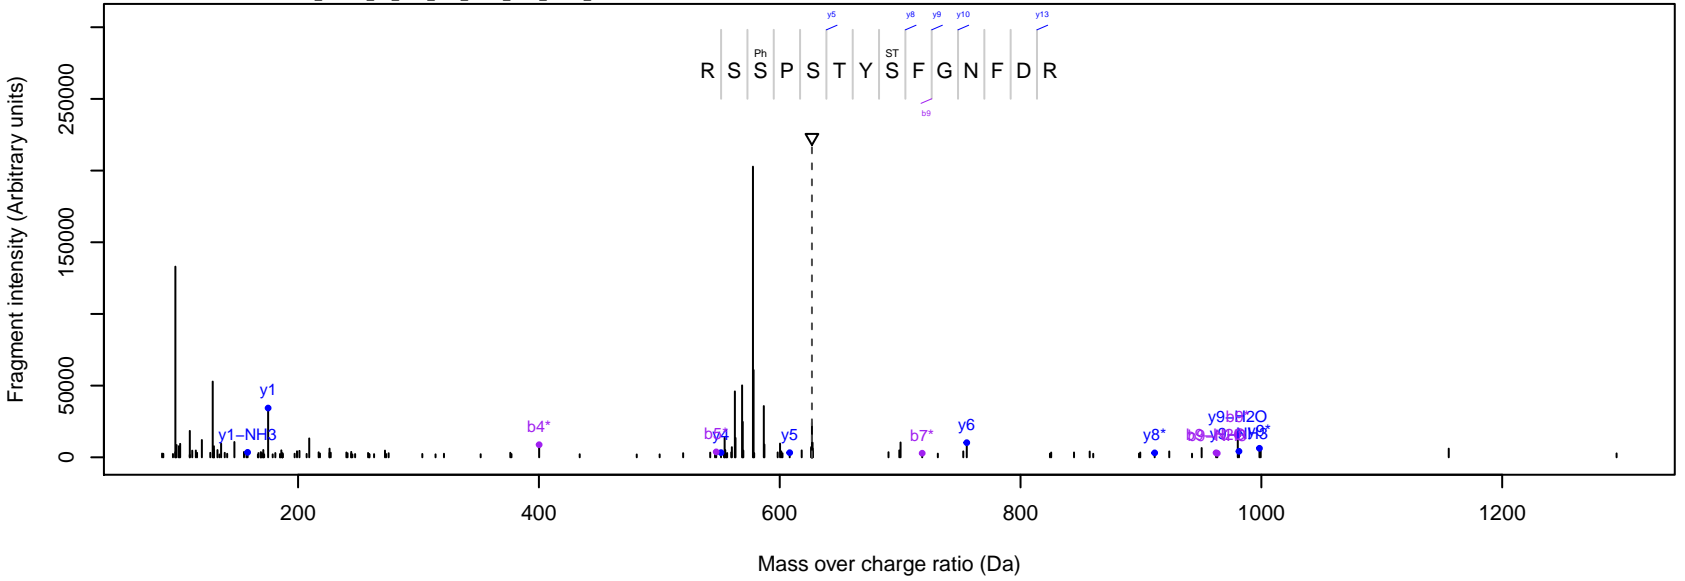

CSS(Phospho (STY))SSGGSSGDELDGAPGGGK-3+

Source : QE3\_201126\_FR\_TIOx\_hum\_tissue\_Urea\_RNAB\_N Scan : 18442

Andromeda score : 41.661

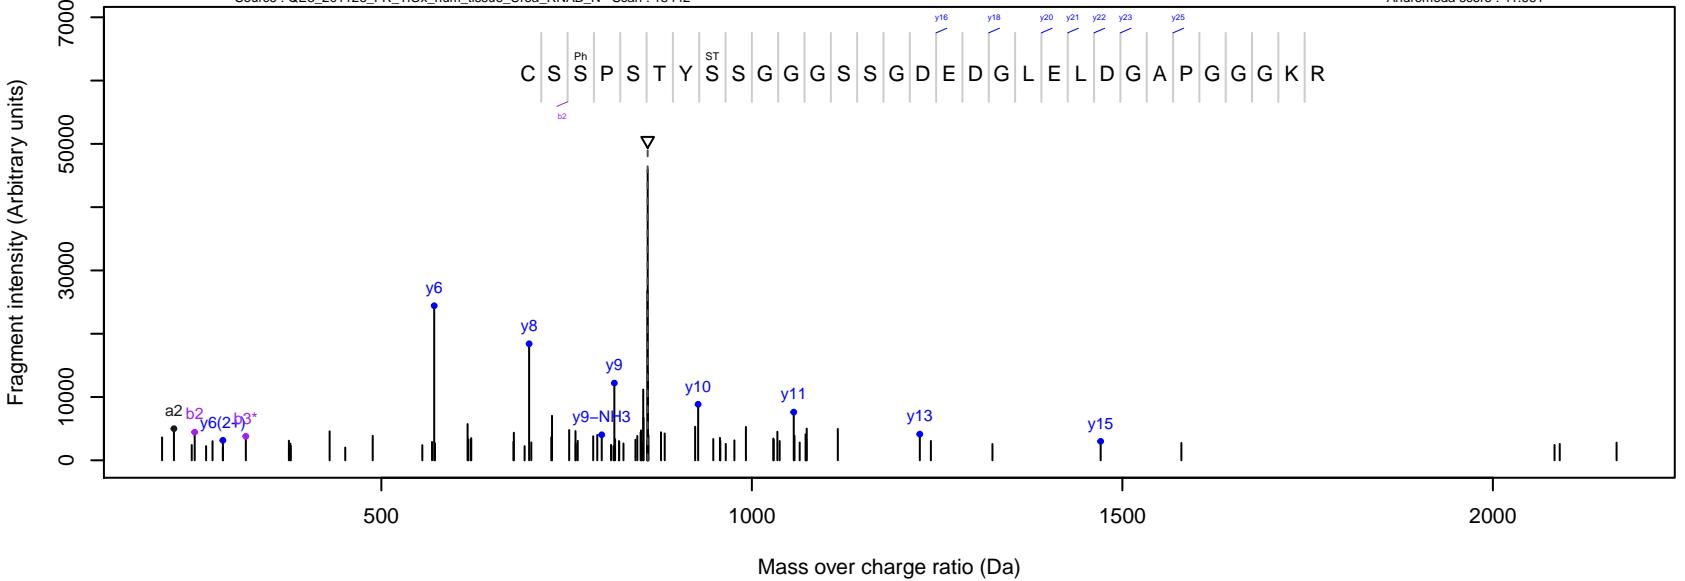



LTDPHRAPS(Phospho (STY))DTGS(Phospho (STY))LS(Phospho (STY))PPWDQDR-3+

Source : QE3\_201126\_FR\_TiOx\_hum\_tissue\_Urea\_RNAB\_N Scan : 28466

Andromeda score : 41.65

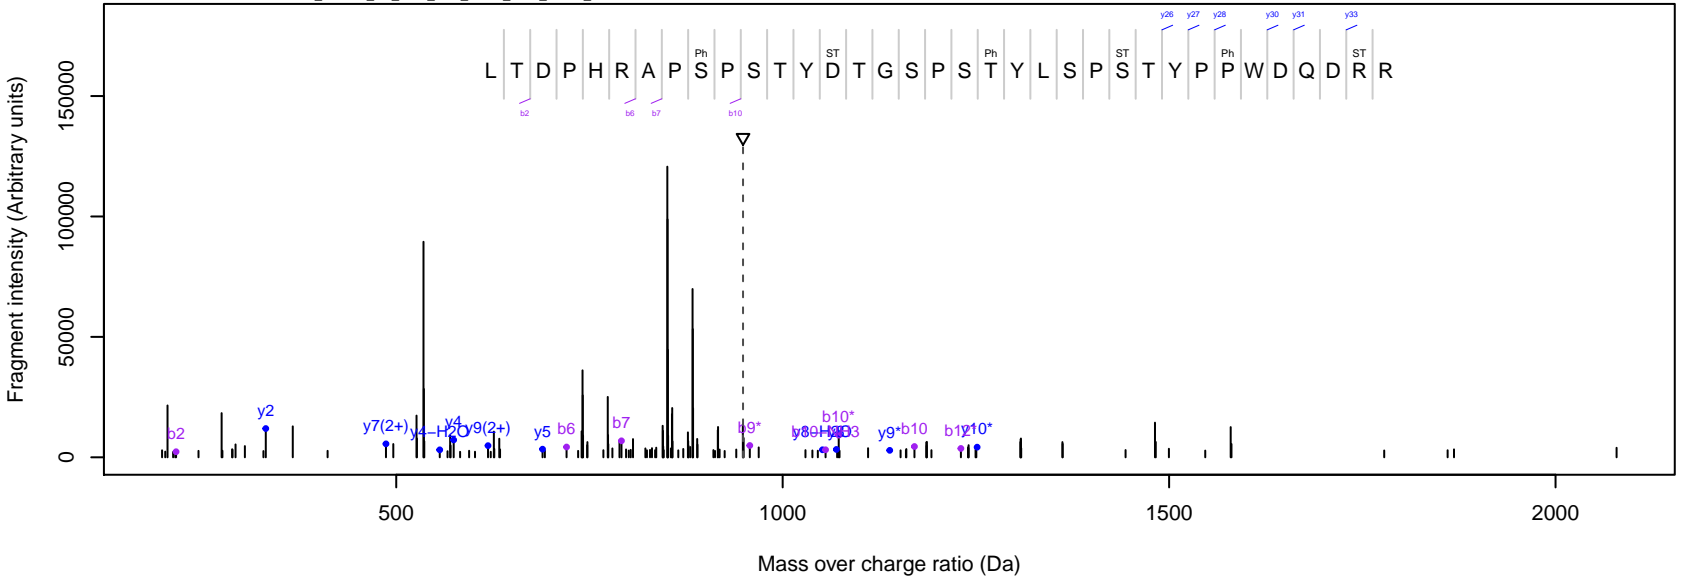

GILSLPHQAS(Phospho (STY))PVS-2+

Source : QE3\_201126\_FR\_TiOx\_hum\_tissue\_Urea\_RNAB\_B Scan : 26121

Andromeda score : 41.644

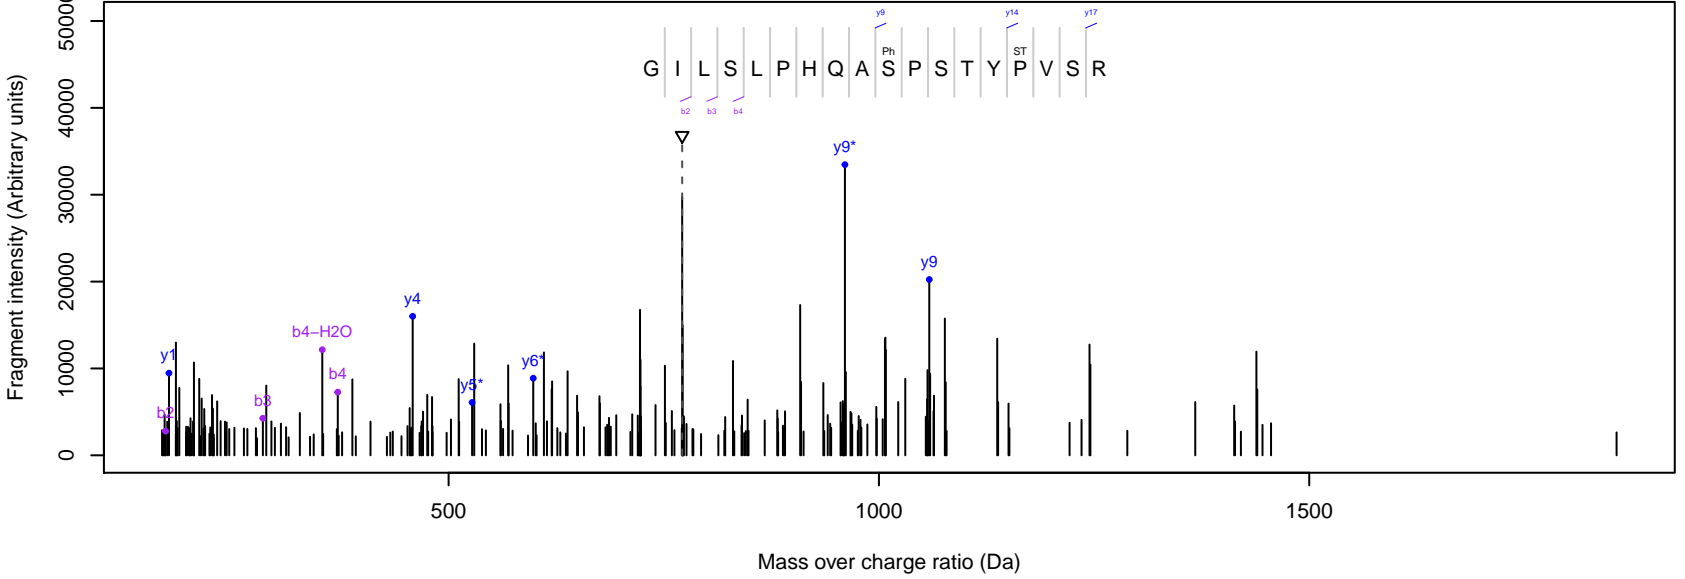

RRS(Phospho (STY))FSIS(Phospho (STY))PVR-3+

Source : QE3\_201126\_FR\_TiOx\_hum\_tissue\_Urea\_RNAB\_N Scan : 16353

Andromeda score : 41.644

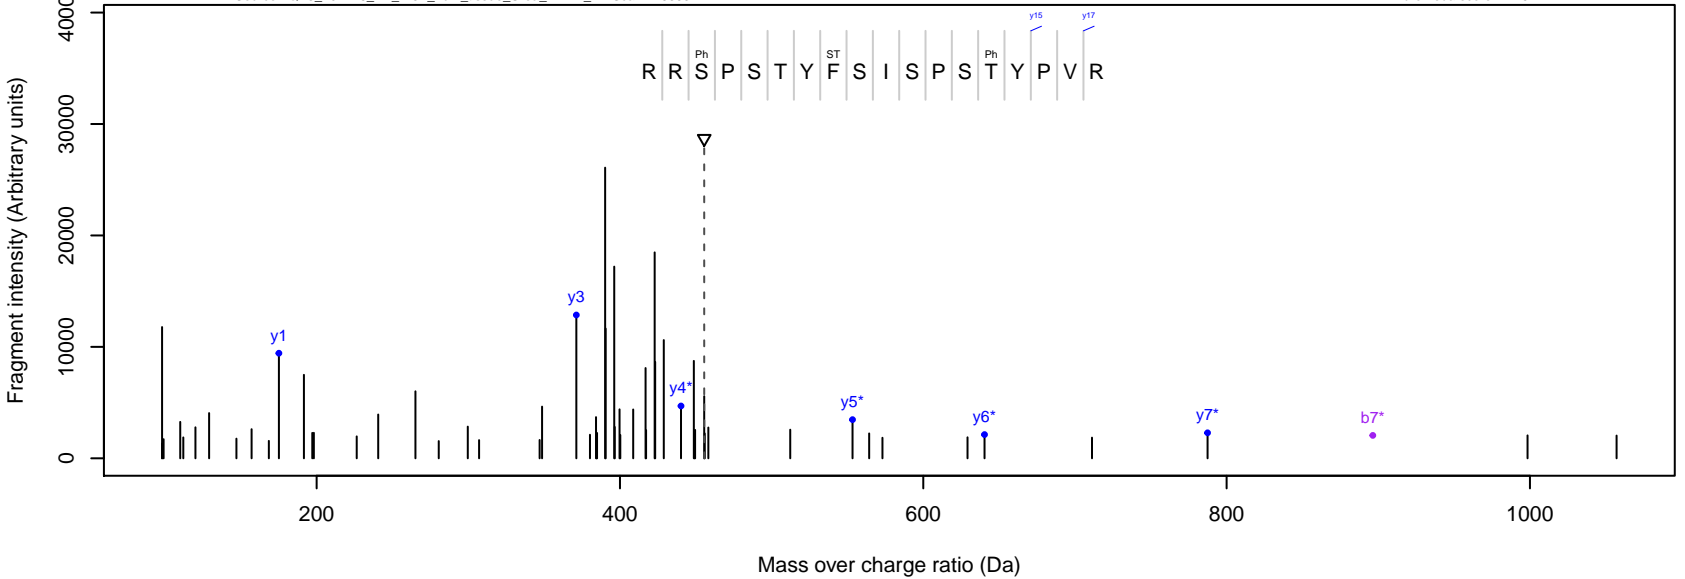

**RRQFDEES(Phospho (STY))LES(Phospho (STY))FSS(Phospho (STY))MPDPVDPPTTVTK-3+**

Source : QE3\_201126\_FR\_TIOx\_hum\_tissue\_Urea\_RNAB\_N Scan : 51229

Andromeda score : 41.603

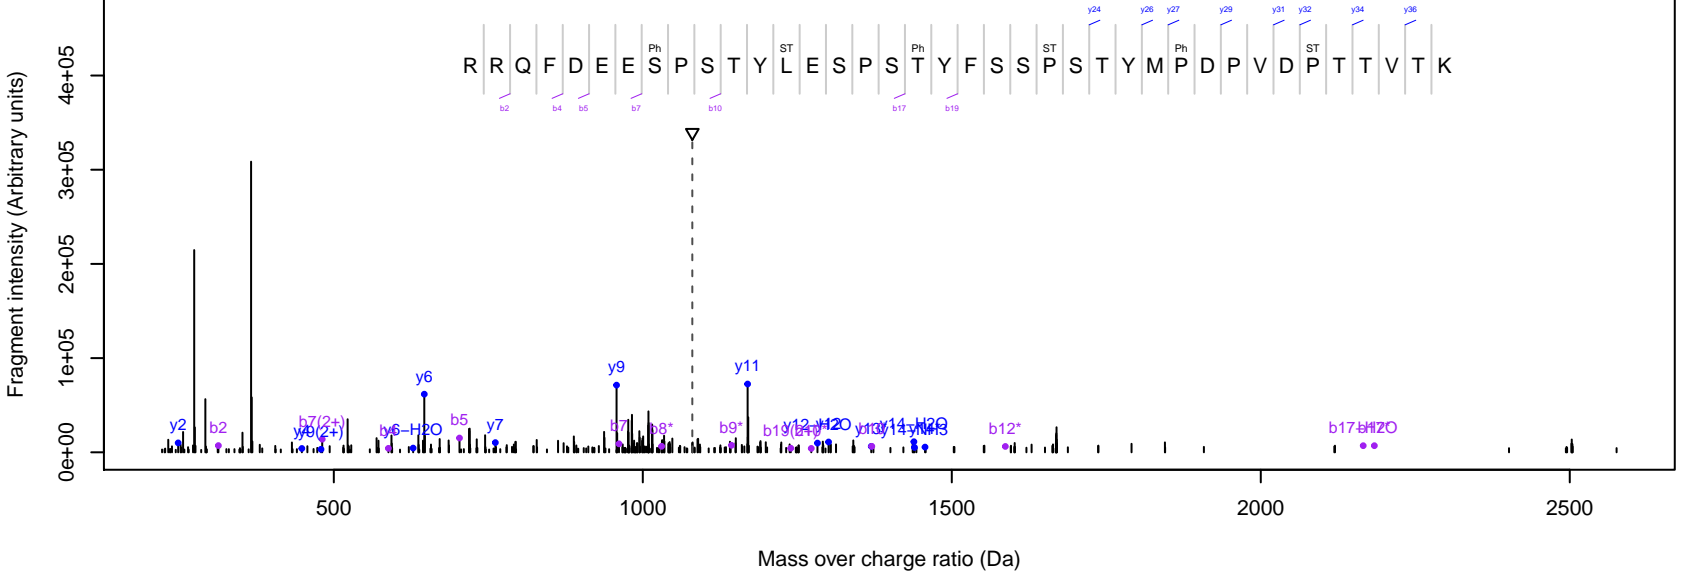

**EDM(Oxidation (M))AALEKDYEEVGVDSPSTY(Phospho (STY))VEGEGEEEGEY-3+**

Source : QE3\_201126\_FR\_TIOx\_hum\_tissue\_Urea\_RNAB\_H Scan : 44081

Andromeda score : 41.562

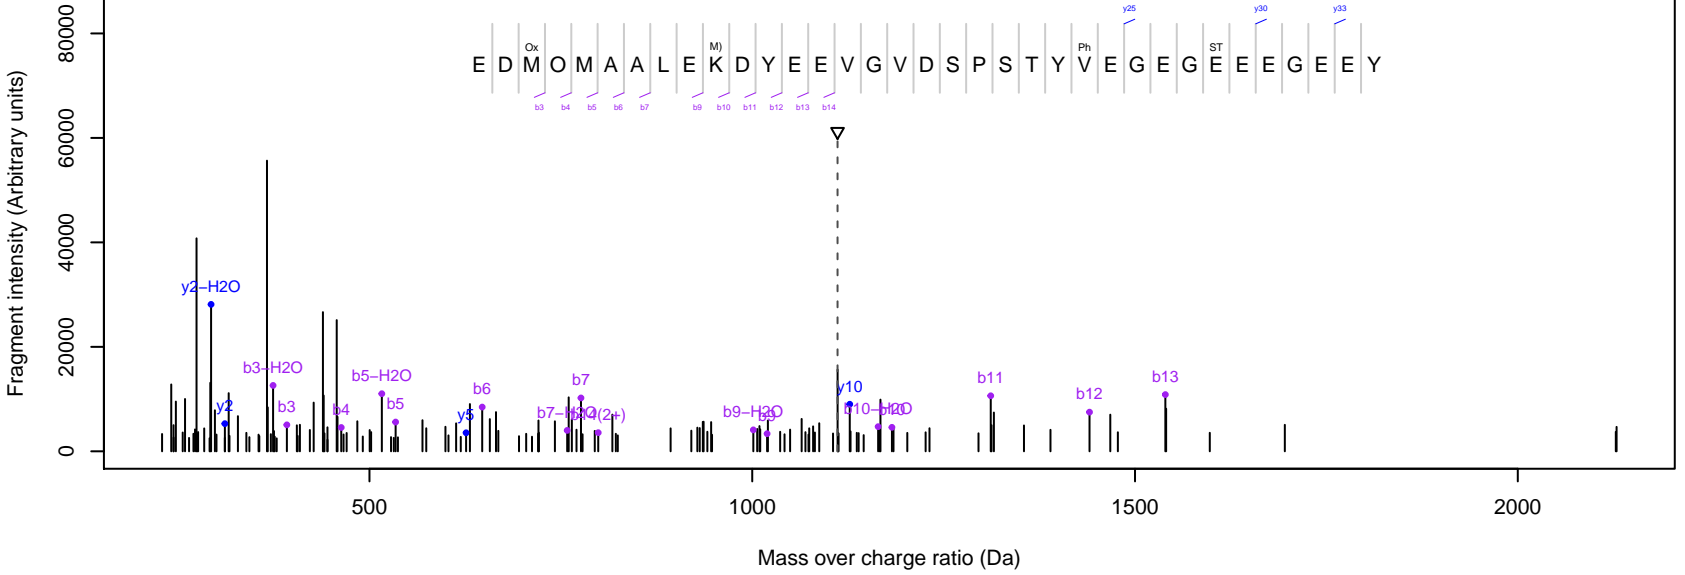

**AAPPPPPPPPLES(Phospho (STY))SPR-3+**

Source : QE3\_201126\_FR\_TIOx\_hum\_tissue\_Urea\_RNAB\_B Scan : 26791

Andromeda score : 41.53

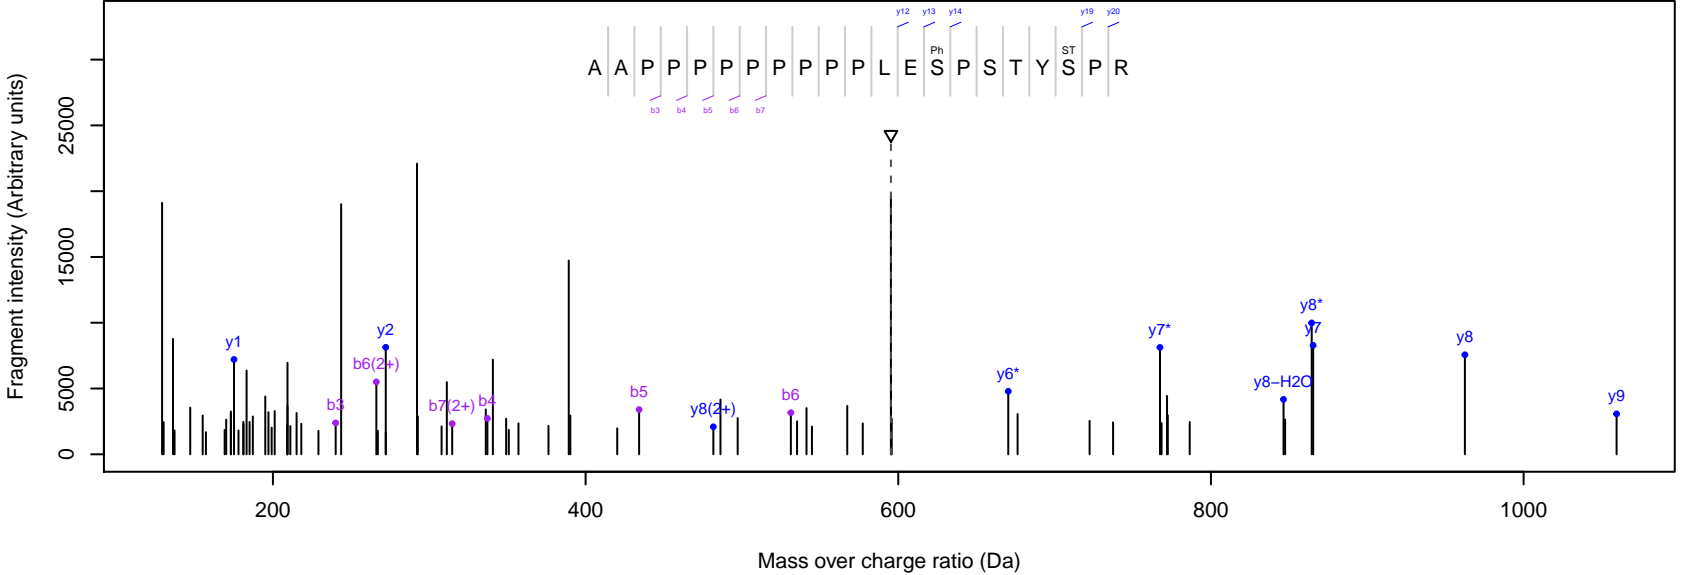

SYS(Phospho (STY))EPEKMNEVGLTR-3+

Source : QE3\_201126\_FR\_TiOx\_hum\_tissue\_Urea\_RNAB\_N Scan : 22412

Andromeda score : 41.513

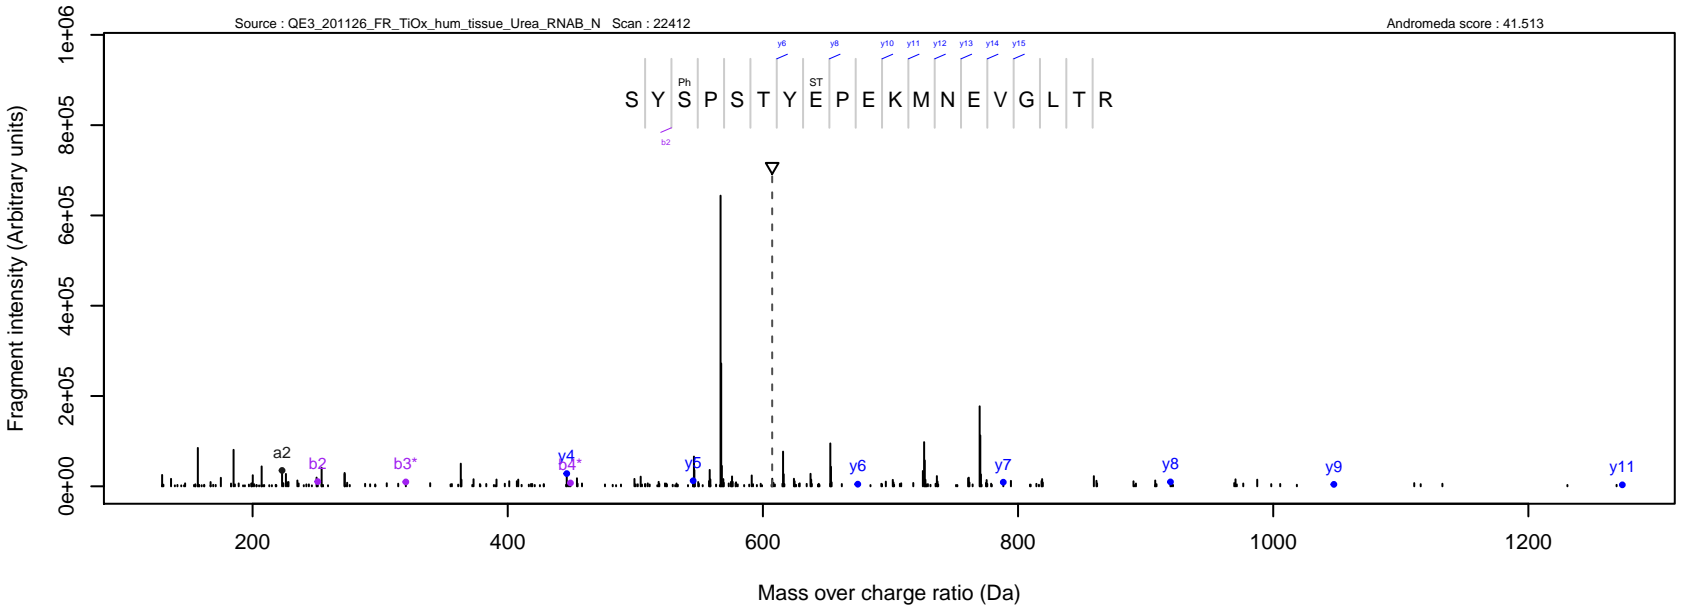

SPS(Phospho (STY))PVLRL-2+

Source : QE3\_201126\_FR\_TiOx\_hum\_tissue\_Urea\_RNAB\_H Scan : 12100

Andromeda score : 41.502

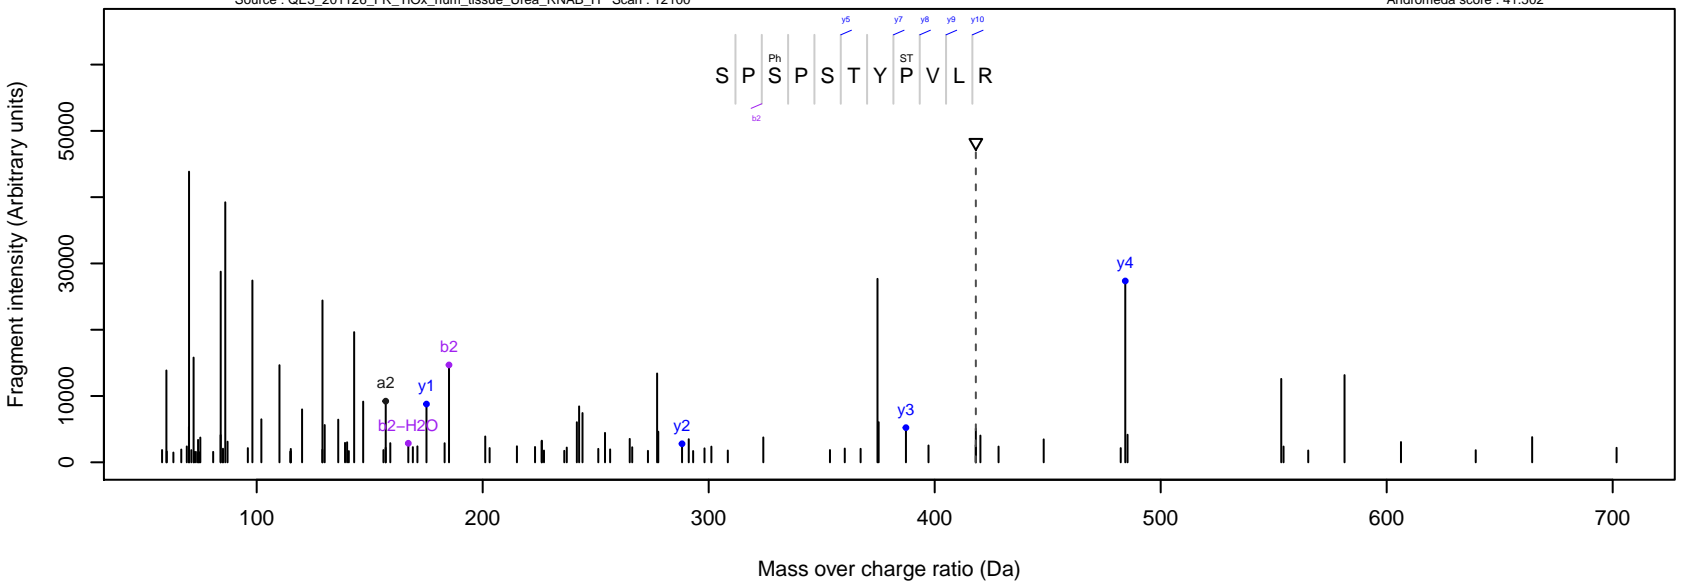

GGG(Phospho (STY))PPWAANSQPQPPRESK-3+

Source : QE3\_201126\_FR\_TiOx\_hum\_tissue\_Urea\_RNAB\_B Scan : 18695

Andromeda score : 41.491

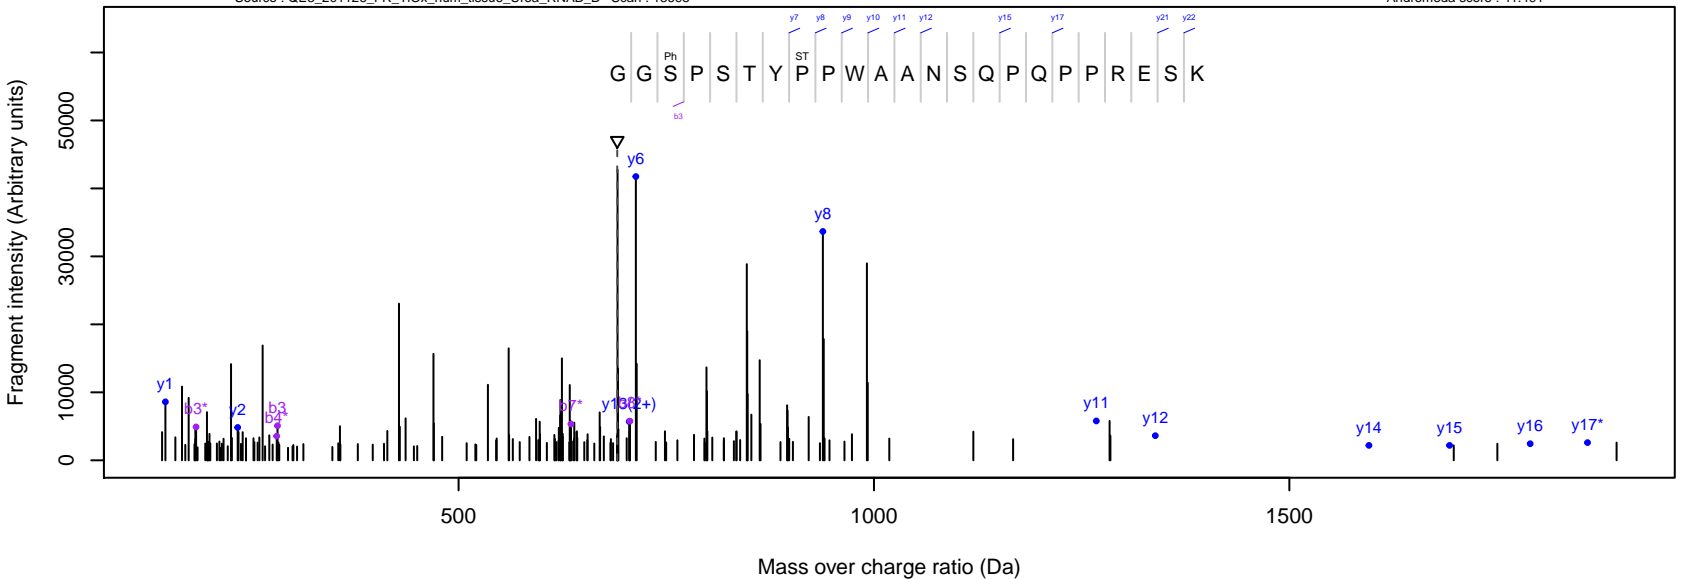

QNS(Phospho (STY))DPTSEGGPSPNPPAWVRPDNEAPPKVPQR-4+

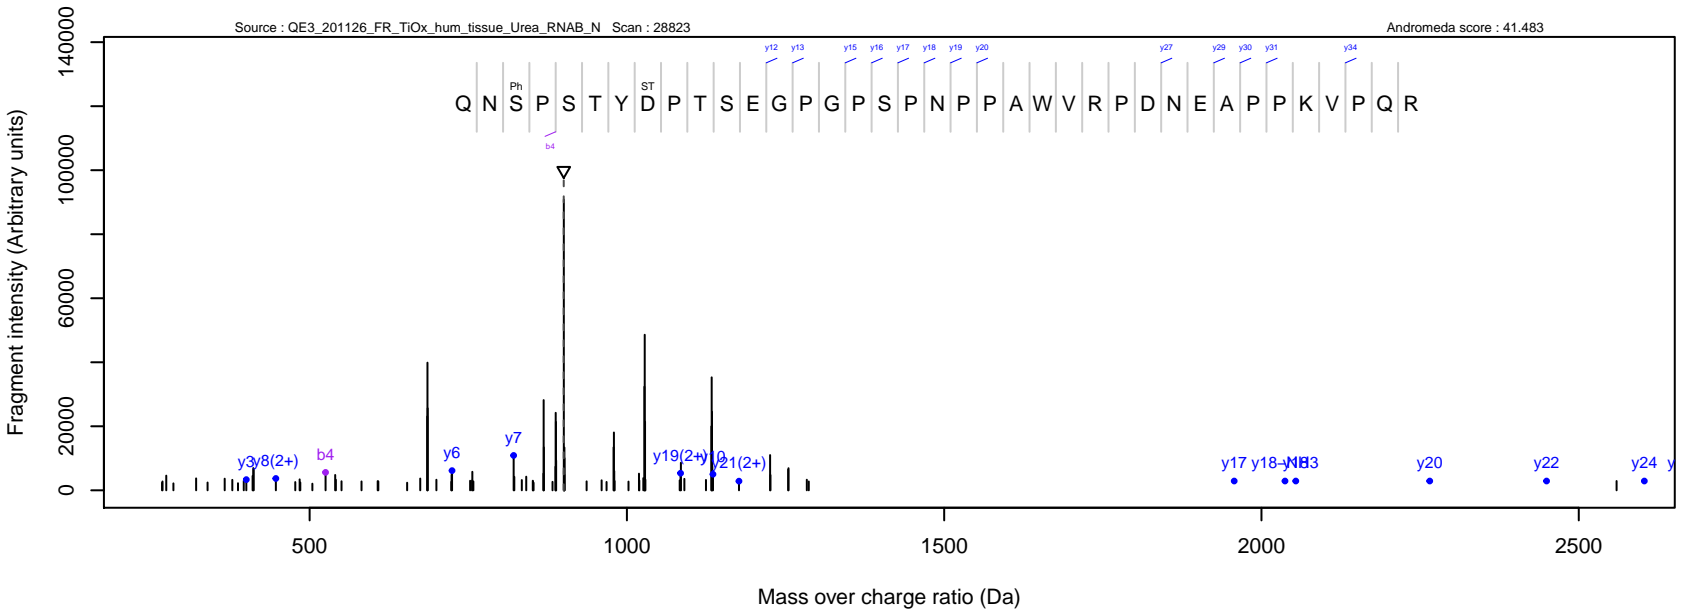

QRGS(Phospho (STY))ETDSDSEIHESASDKDSLK-3+

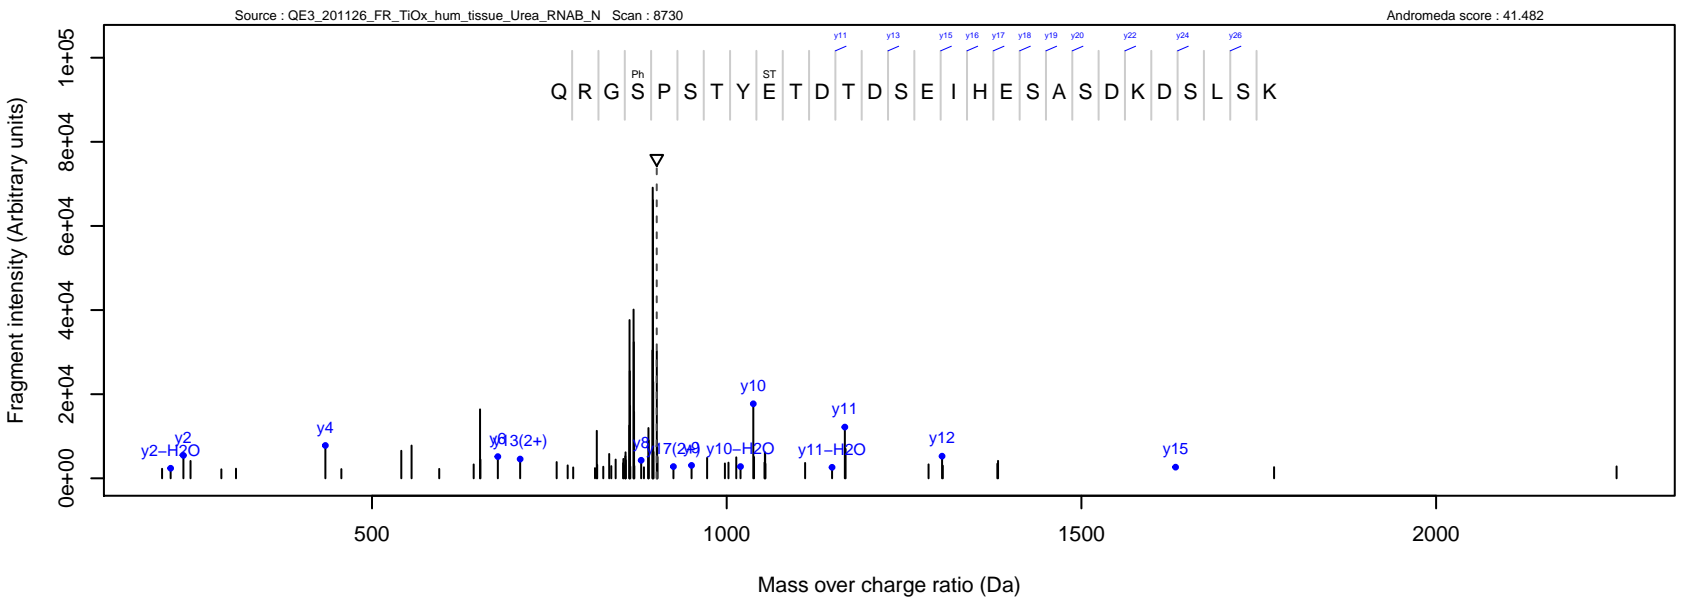

TLSSS(Phospho (STY))SM(Oxidation (M))DLSR-2+

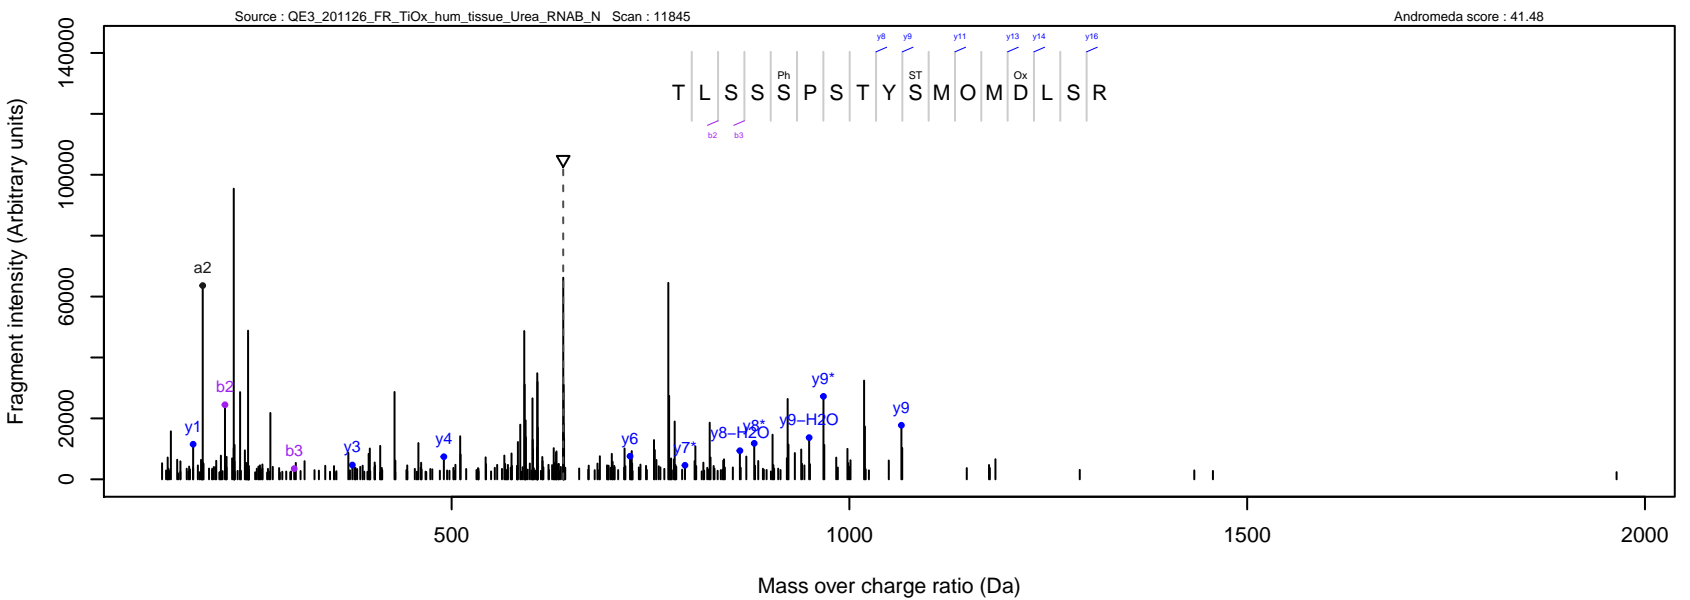

S(Phospho (STY))NSPPALGPEACPVSLSLPSPPEASTLK-3+

Source : QE3\_201126\_FR\_TiOx\_hum\_tissue\_Urea\_RNAB\_H Scan : 48151

Andromeda score : 41.434

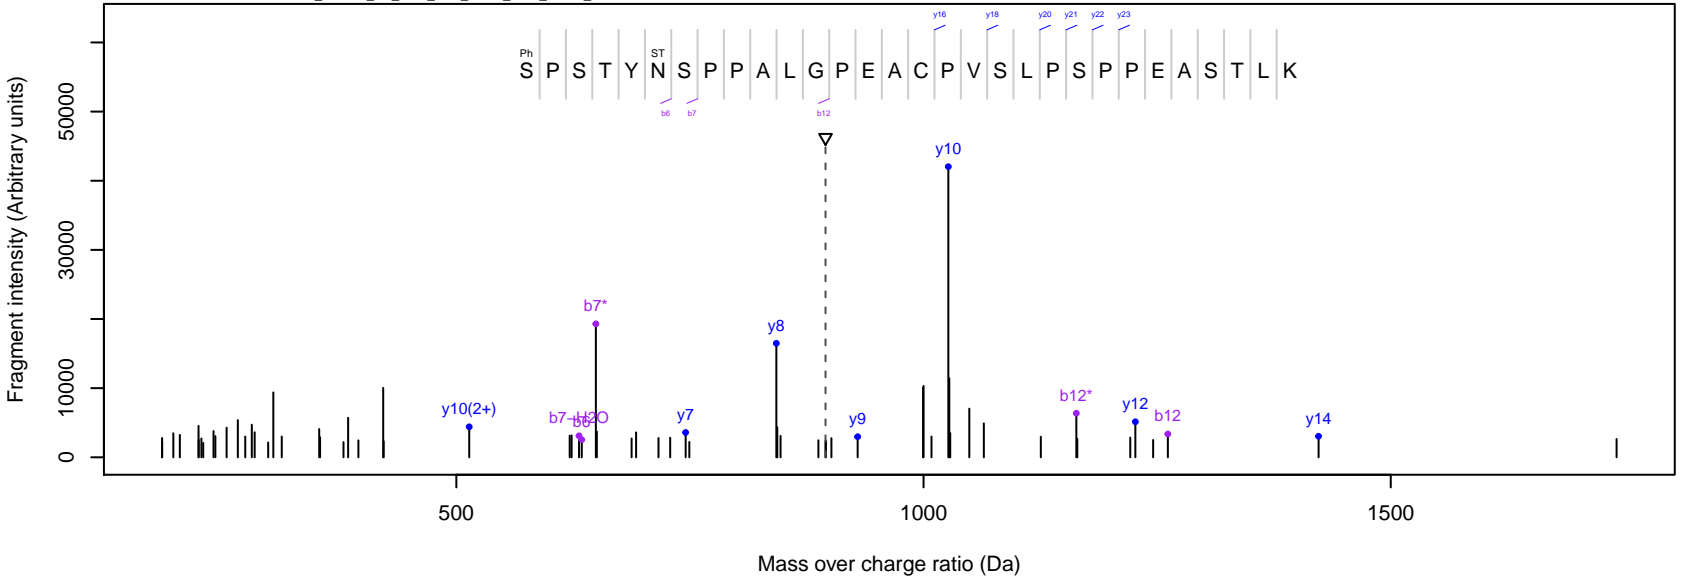

TRSPS(Phospho (STY))PTLGESLAPHKGS(Phospho (STY))FSGR-3+

Source : QE3\_201126\_FR\_TiOx\_hum\_tissue\_Urea\_RNAB\_B Scan : 18962

Andromeda score : 41.432

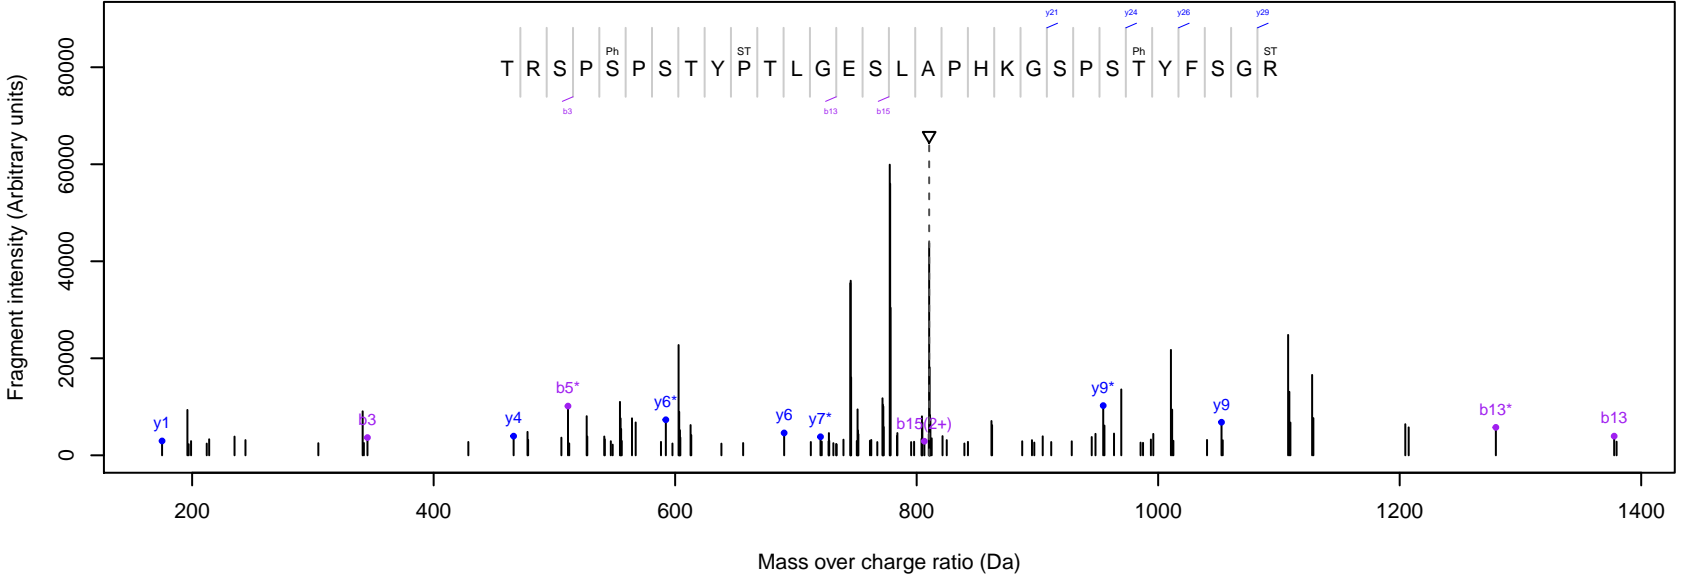

TIS(Phospho (STY))PM(Oxidation (M))VM(Oxidation (M))DAK-2+

Source : QE3\_201126\_FR\_TiOx\_hum\_tissue\_Urea\_RNAB\_B Scan : 12163

Andromeda score : 41.427

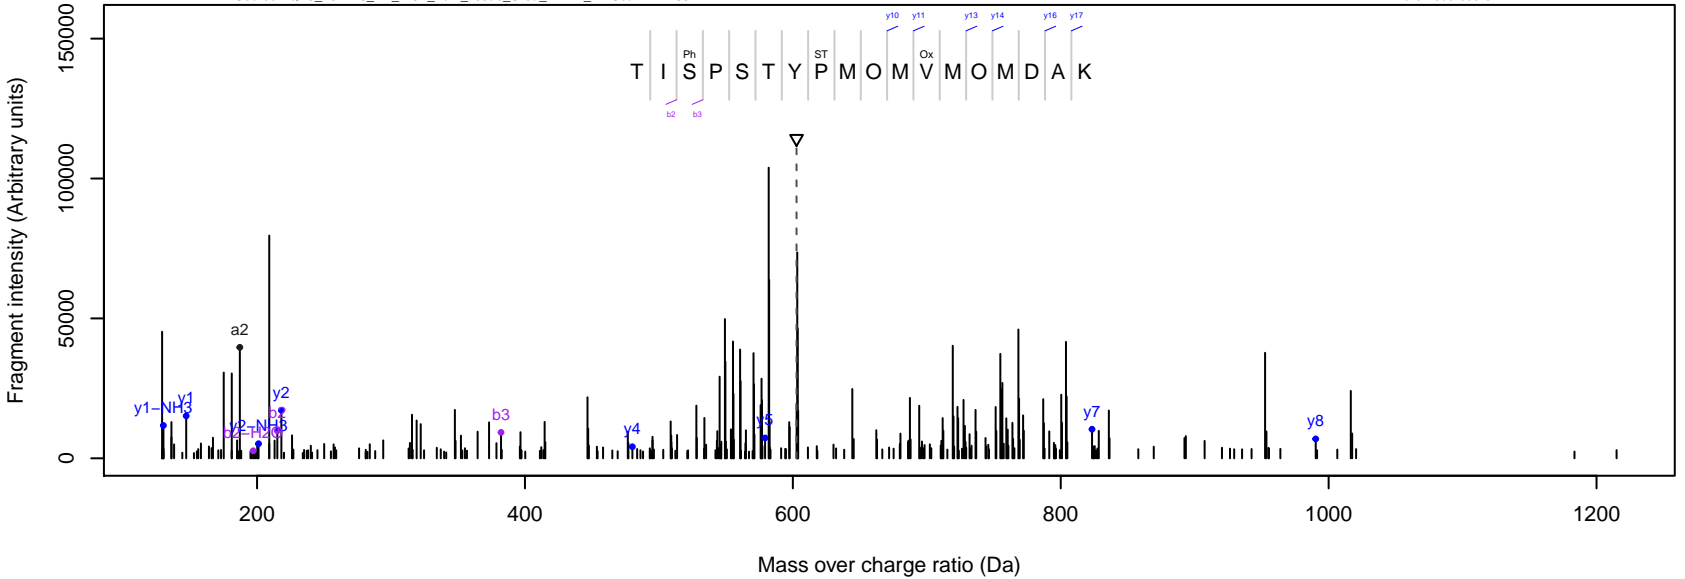

QQS(Phospho (STY))IEDKEDKPPR-3+

Source : QE3\_201126\_FR\_TiOx\_hum\_tissue\_Urea\_RNAB\_N Scan : 5207

Andromeda score : 41.412

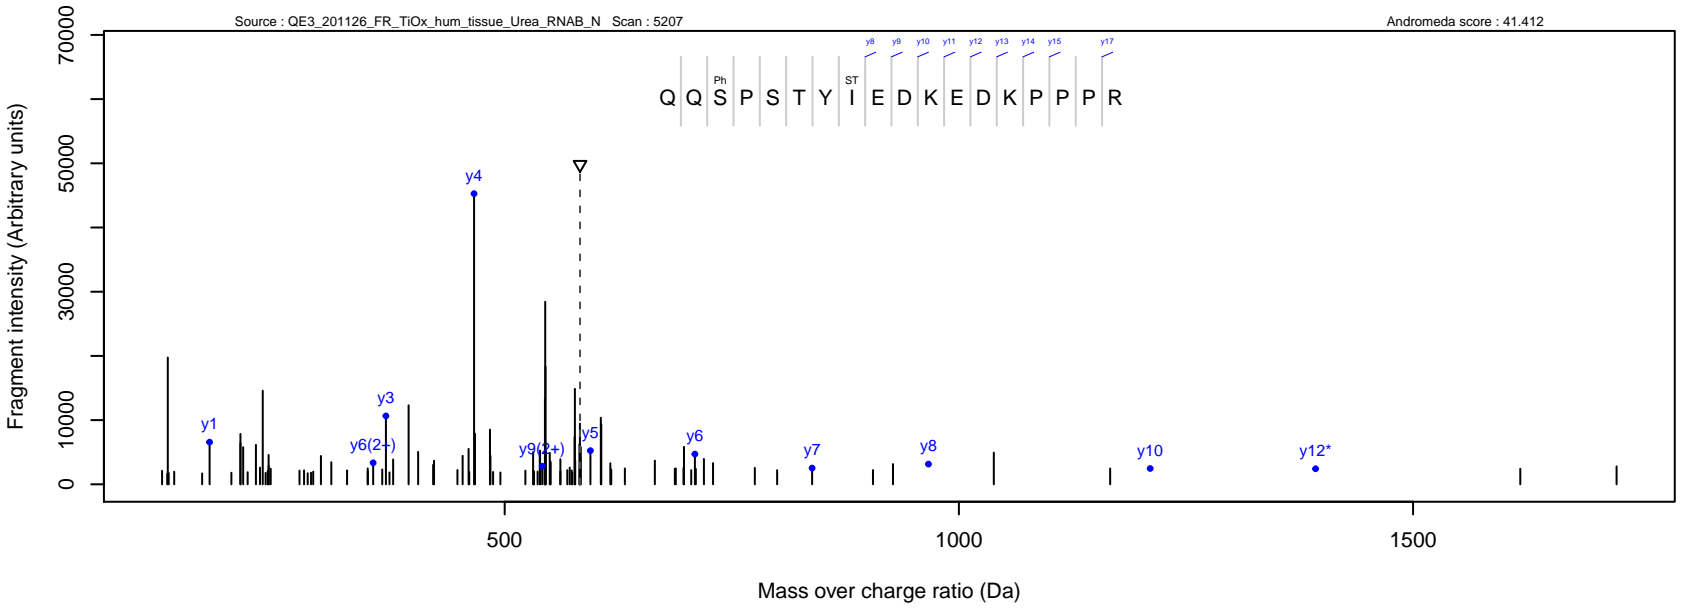

AHS(Phospho (STY))NPM(Oxidation (M))ADHLR-3+

Source : QE3\_201126\_FR\_TiOx\_hum\_tissue\_Urea\_RNAB\_H Scan : 4440

Andromeda score : 41.401

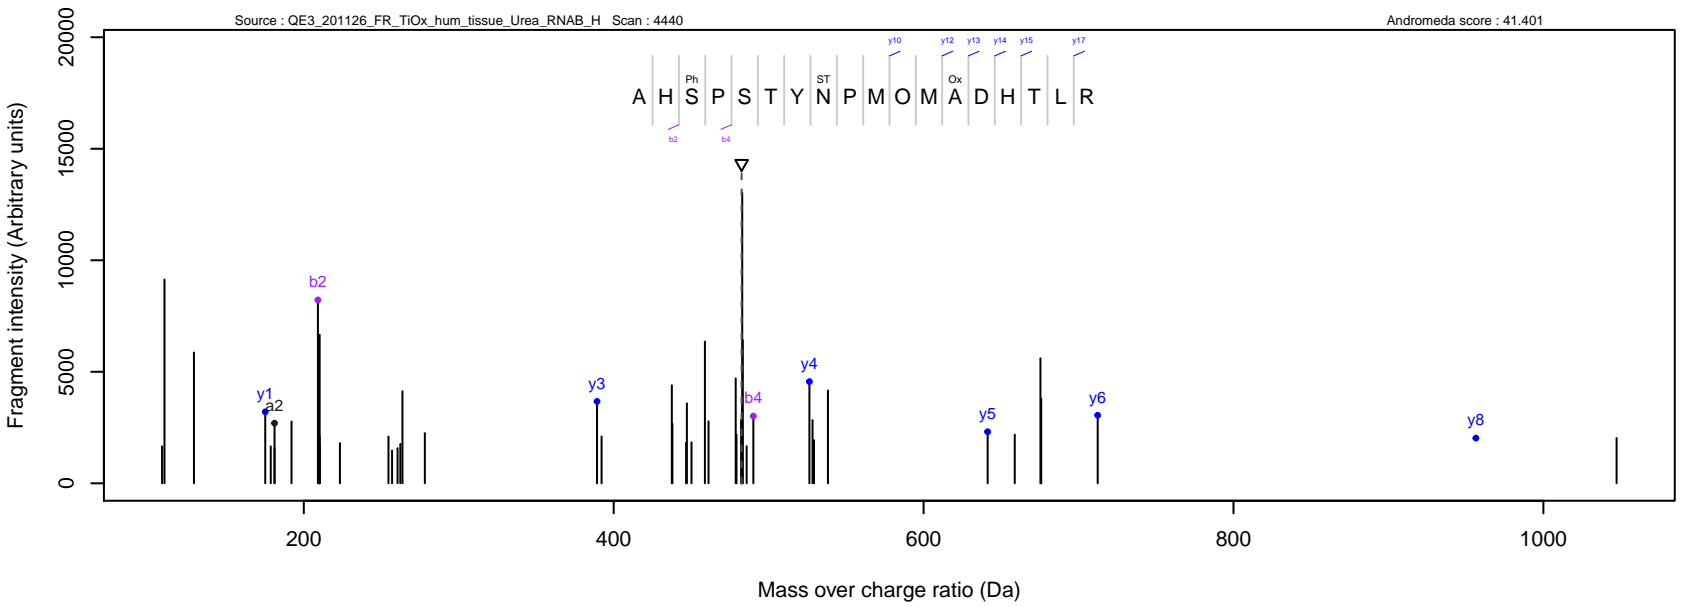

TAS(Phospho (STY))GRELL-2+

Source : QE3\_201126\_FR\_TiOx\_hum\_tissue\_Urea\_RNAB\_N Scan : 19995

Andromeda score : 41.399

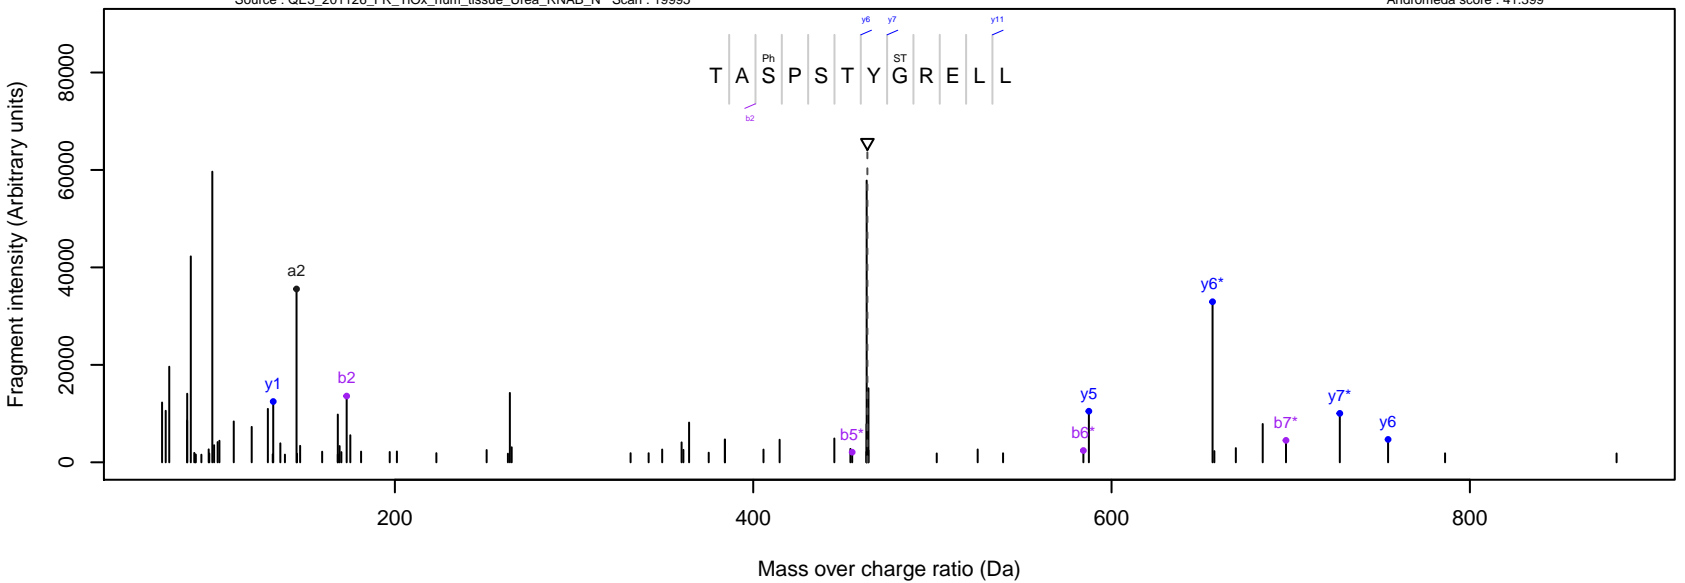

GRKES(Phospho (STY))AQPPAHL-3+

Source : QE3\_2011126\_FR\_TIOx\_hum\_tissue\_Urea\_RNAB\_H Scan : 6931

Andromeda score : 41.378

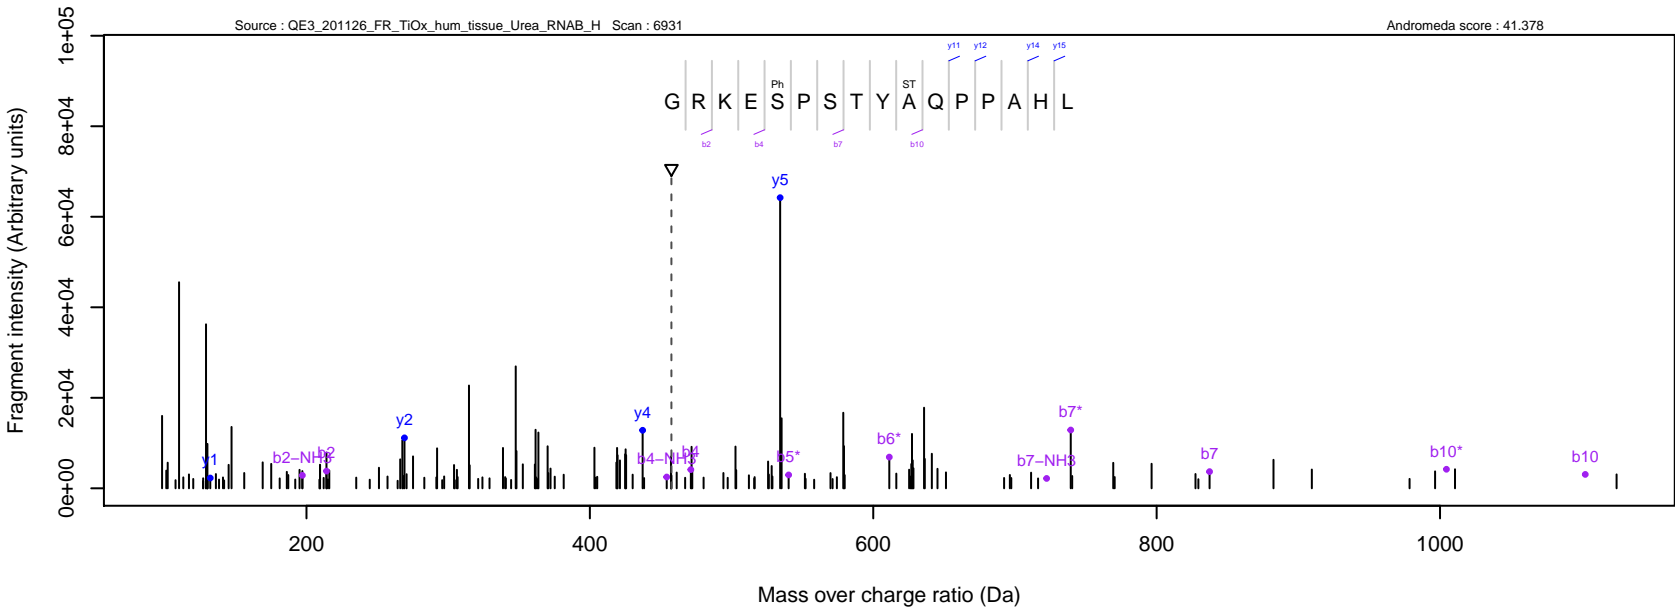

RTHS(Phospho (STY))EGS(Phospho (STY))LLQEPR-3+

Source : QE3\_2011126\_FR\_TIOx\_hum\_tissue\_Urea\_RNAB\_H Scan : 14058

Andromeda score : 41.367

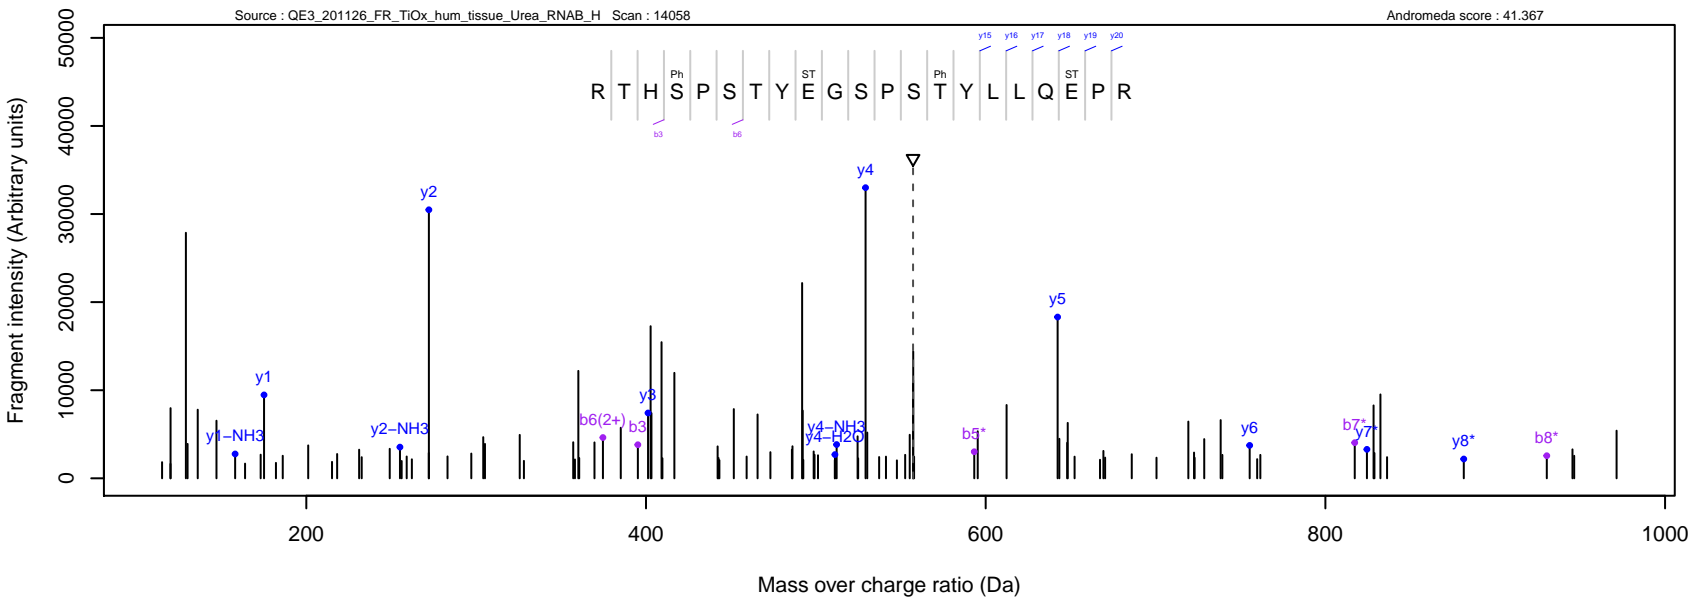

LFPSPGLPT(Phospho (STY))RTSPVR-3+

Source : QE3\_2011126\_FR\_TIOx\_hum\_tissue\_Urea\_RNAB\_N Scan : 29612

Andromeda score : 41.348

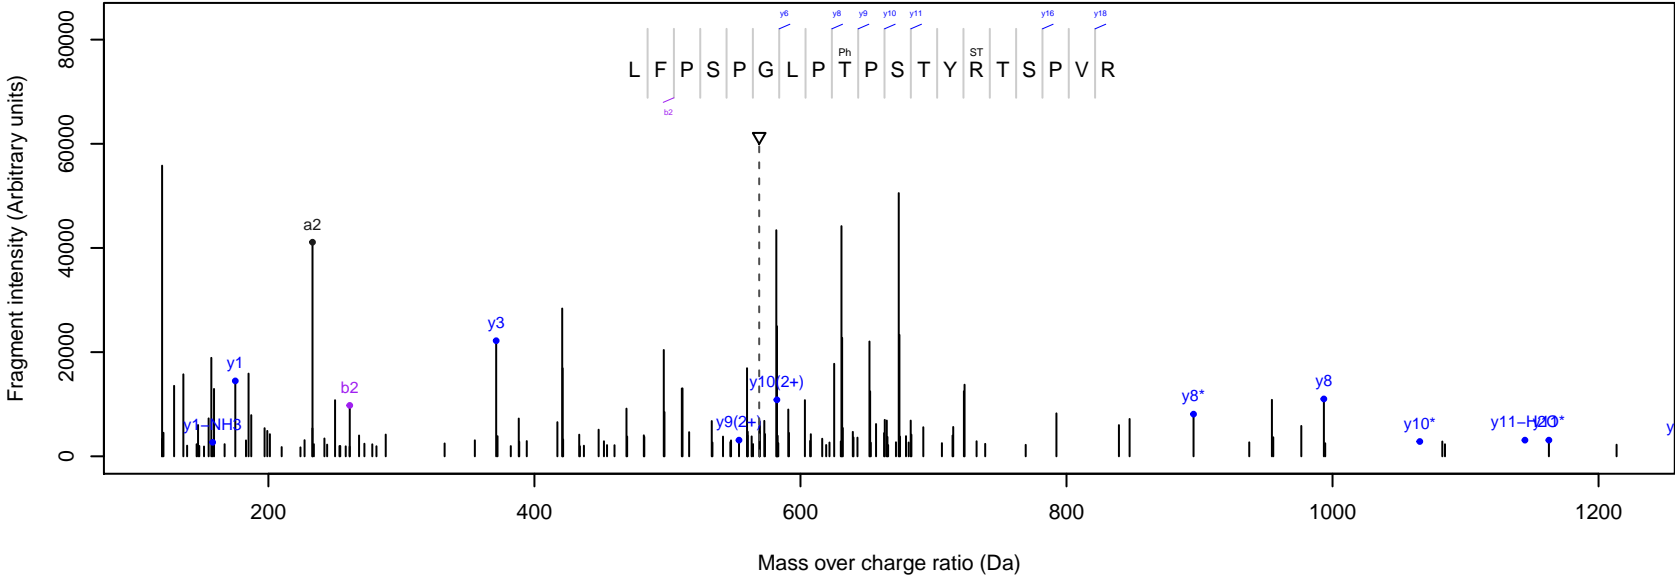

KAS(Phospho (STY))GS(Phospho (STY))ENEGDYNPGRK-3+

Source : QE3\_201126\_FR\_TiOx\_hum\_tissue\_Urea\_RNAB\_H Scan : 5486

Andromeda score : 41.257

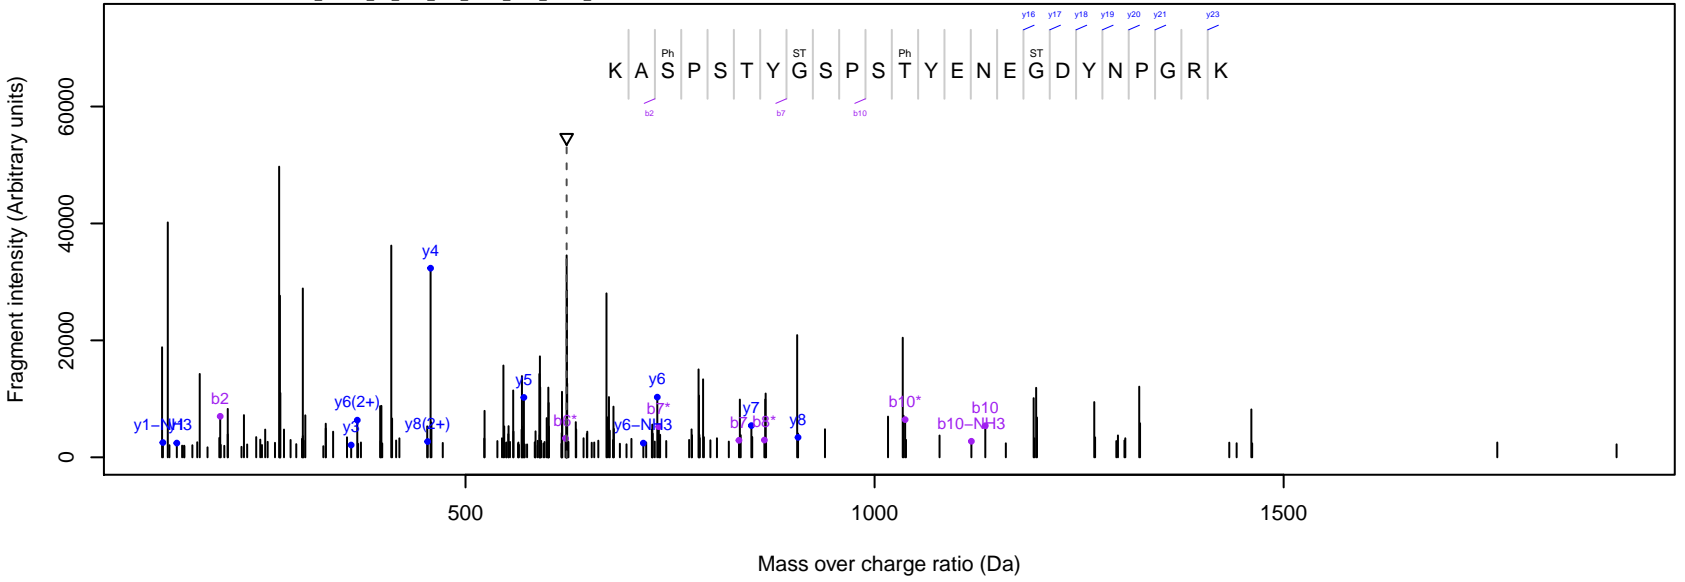

GSSANASKWS(Phospho (STY))PPQNYK-3+

Source : QE3\_201126\_FR\_TiOx\_hum\_tissue\_Urea\_RNAB\_N Scan : 15849

Andromeda score : 41.256

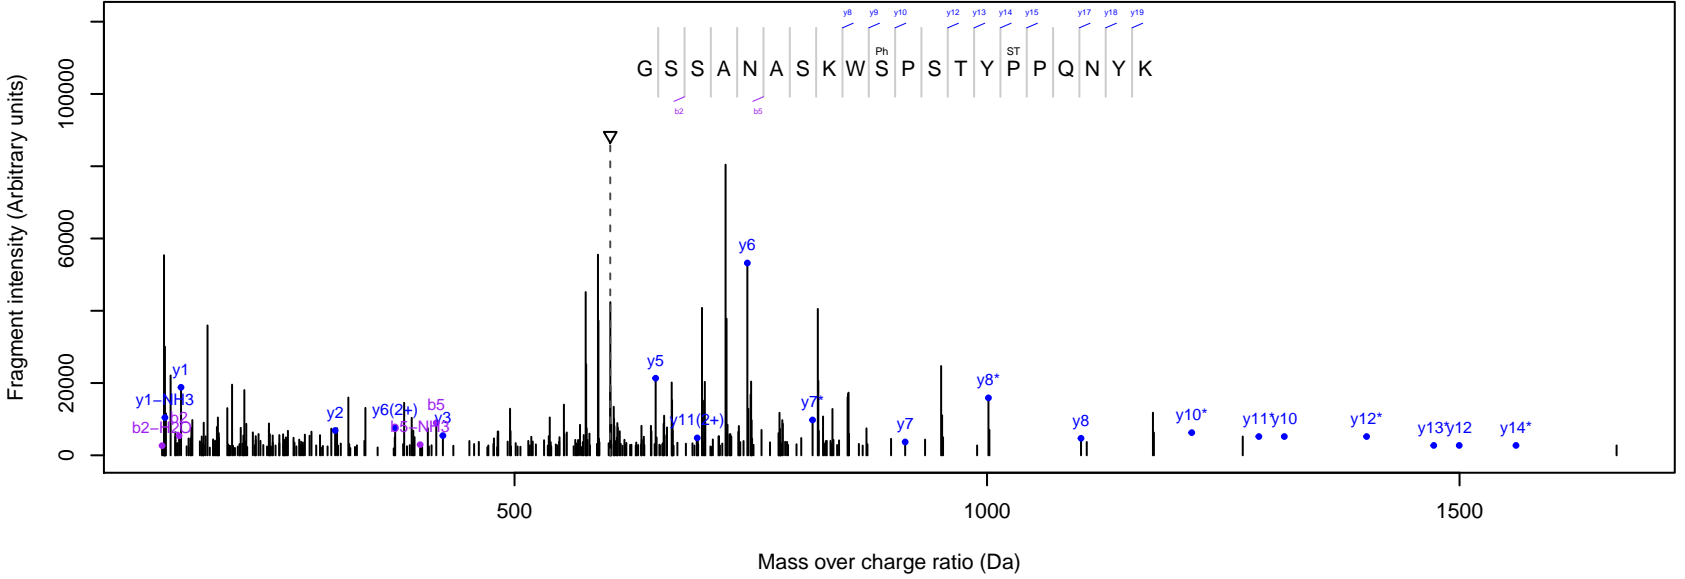

IQPLEPDS(Phospho (STY))PTGLSENPTPA TEK-3+

Source : QE3\_201126\_FR\_TiOx\_hum\_tissue\_Urea\_RNAB\_B Scan : 33184

Andromeda score : 41.256

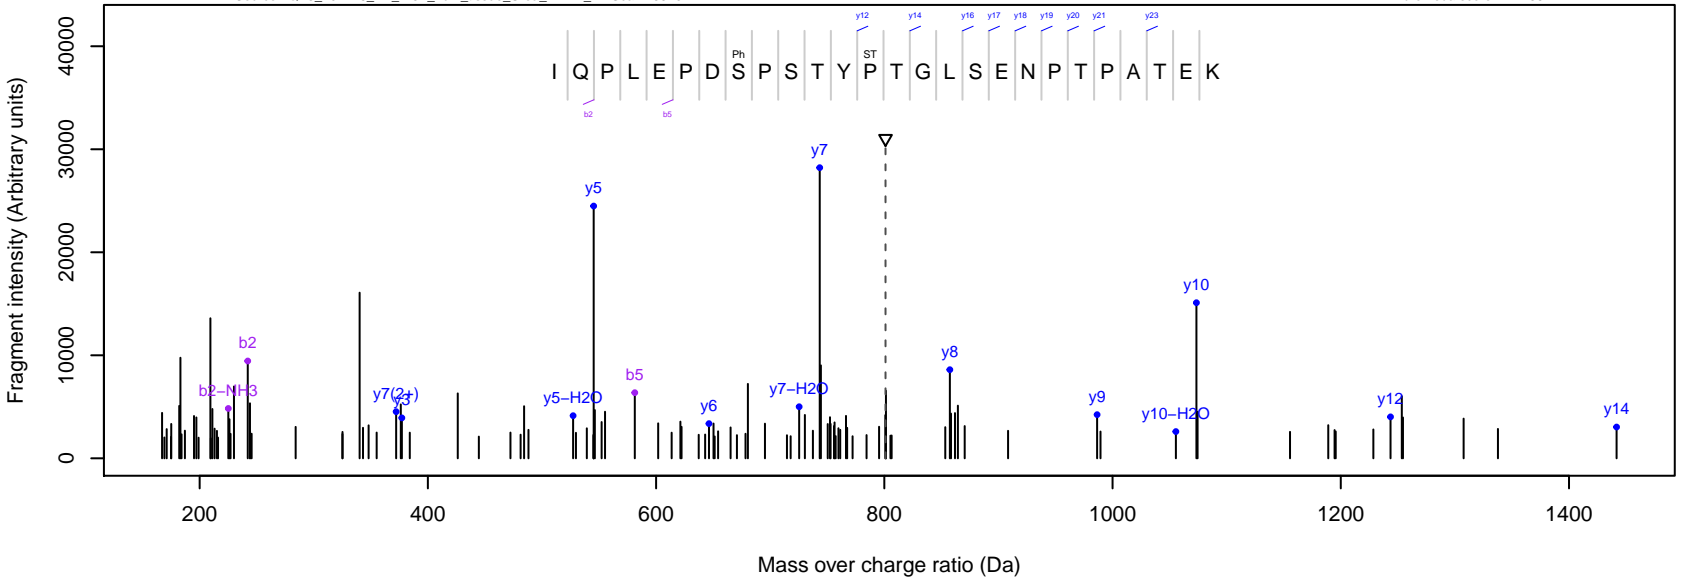



SIST(Phospho (STY))VNLSSENSVIPPDDYLECLSM(Oxidation (M))GAAADRR-3+

Source : QE3\_201126\_FR\_TiOx\_hum\_tissue\_Urea\_RNAB\_H Scan : 55805

Andromeda score : 41.24

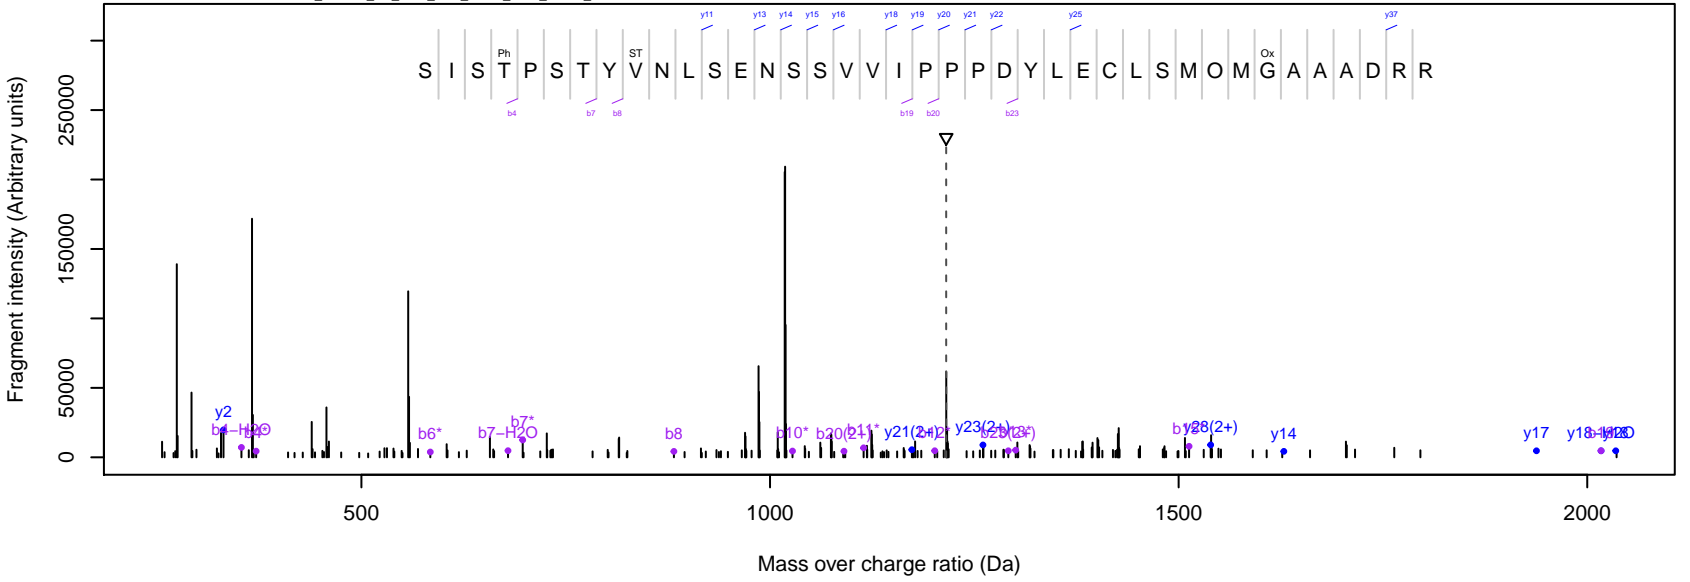

LLPPAS(Phospho (STY))P-2+

Source : QE3\_201126\_FR\_TiOx\_hum\_tissue\_Urea\_RNAB\_H Scan : 28422

Andromeda score : 41.227

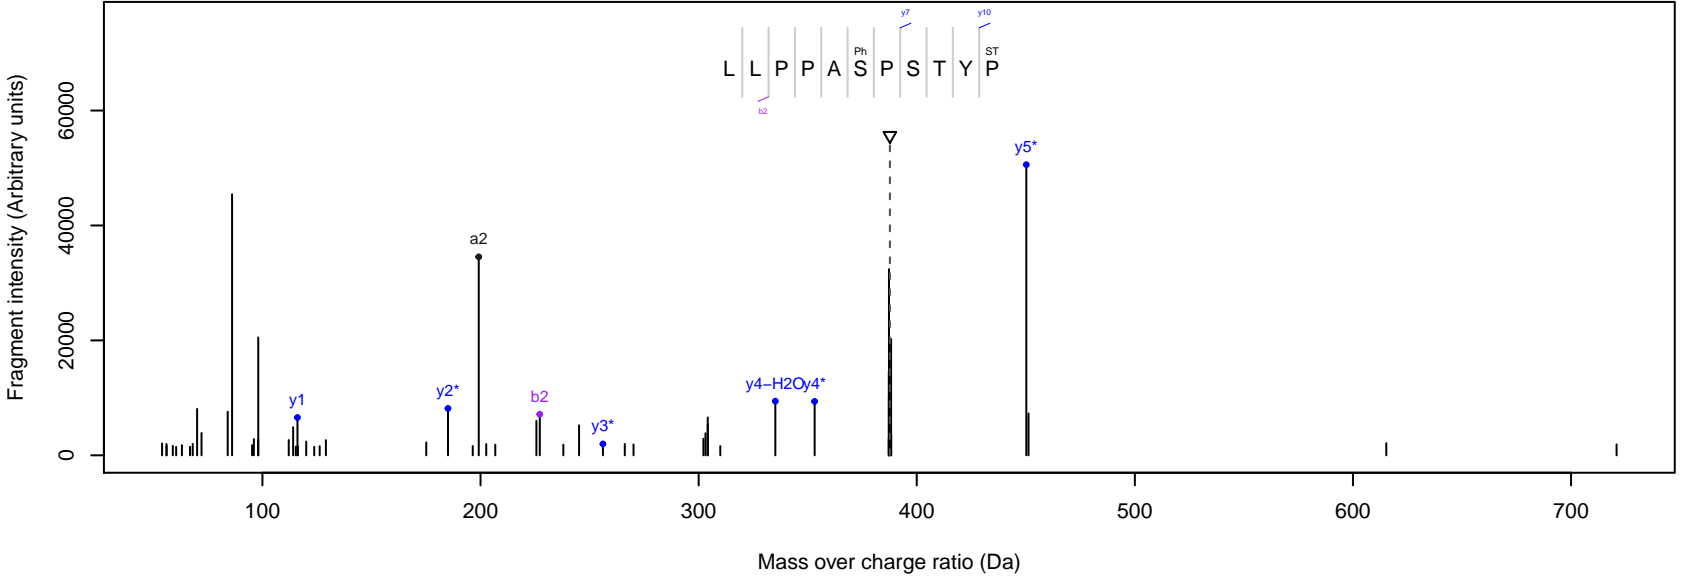

RPS(Phospho (STY))LGELLR-2+

Source : QE3\_201126\_FR\_TiOx\_hum\_tissue\_Urea\_RNAB\_B Scan : 38698

Andromeda score : 41.218

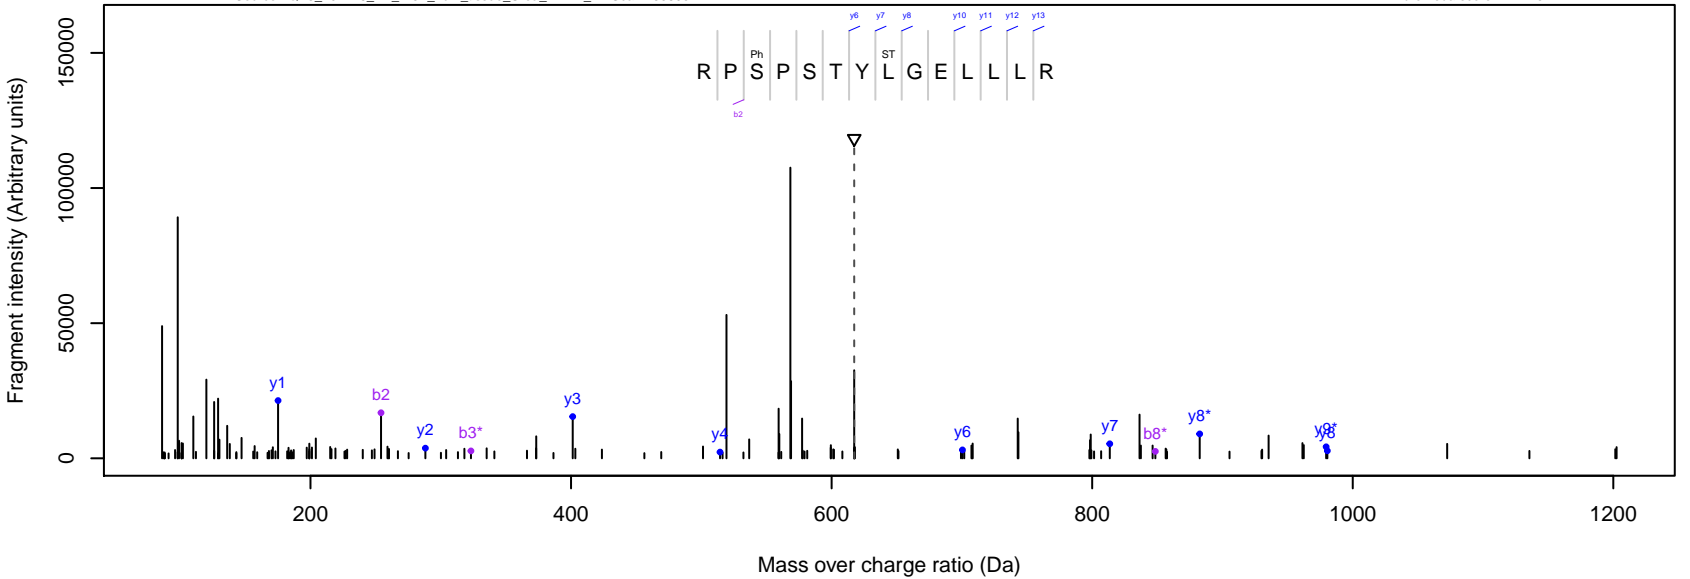

KQPAS(Phospho (STY))PDGRT(Phospho (STY))SPINEDIR-3+

Source : QE3\_201126\_FR\_TIOx\_hum\_tissue\_Urea\_RNAB\_N Scan : 13926

Andromeda score : 41.208

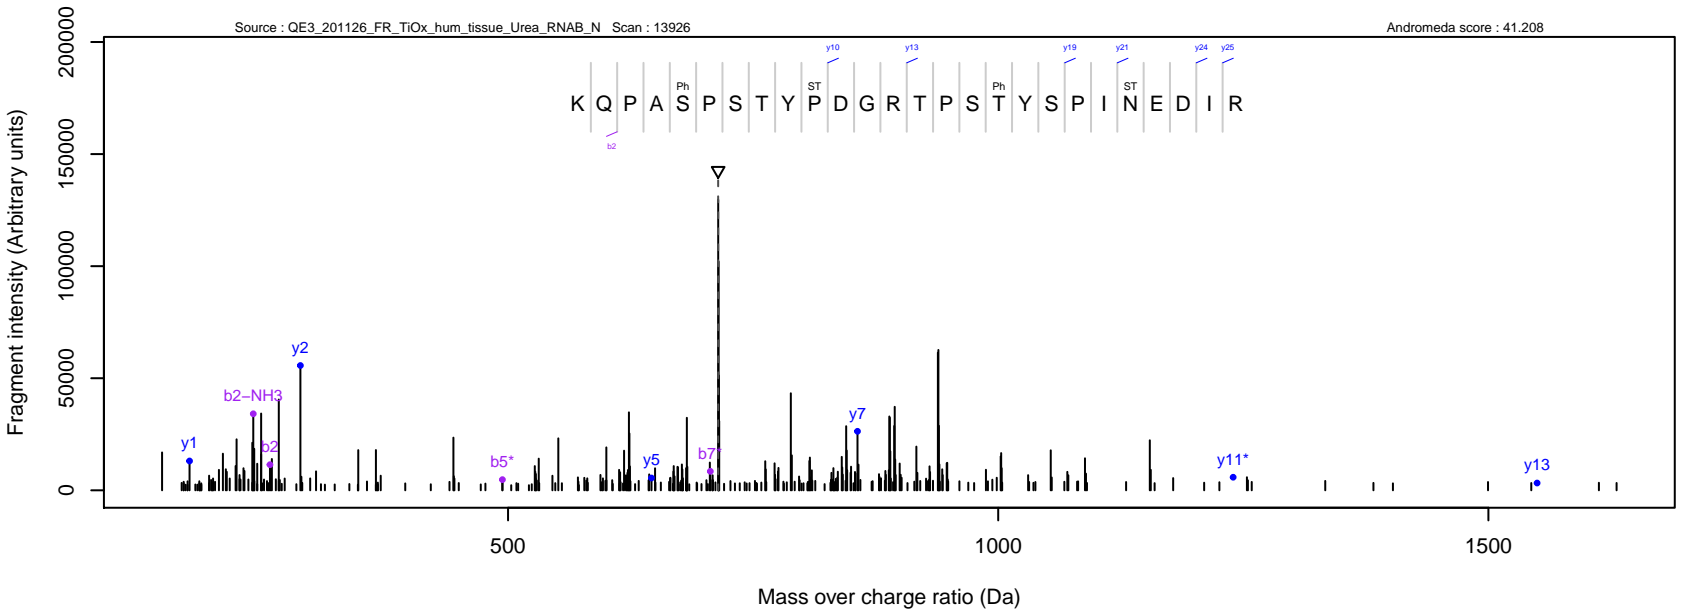

EDEPEERS(Phospho (STY))GDET(Phospho (STY))PGSEVPGDK-3+

Source : QE3\_201126\_FR\_TIOx\_hum\_tissue\_Urea\_RNAB\_N Scan : 16559

Andromeda score : 41.188

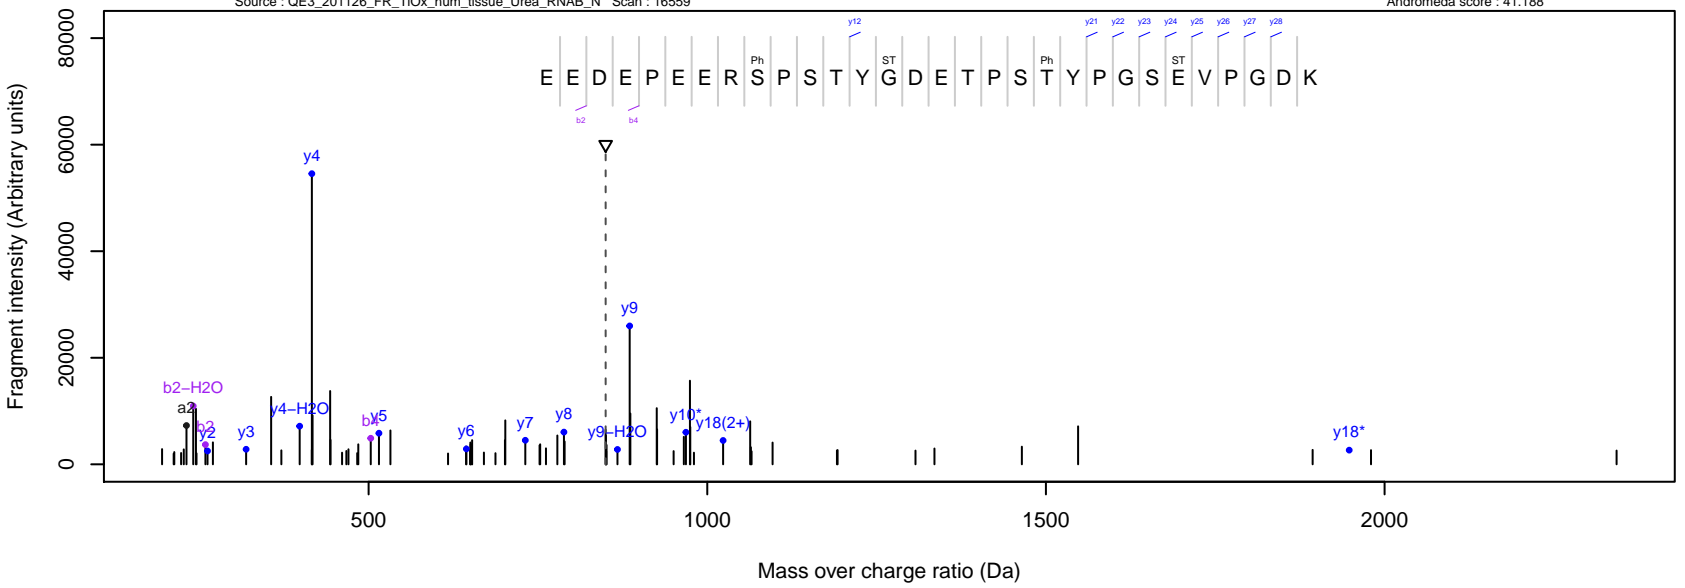

DTYSDRS(Phospho (STY))GS(Phospho (STY))SSPDSEITELKFP SINHD-3+

Source : QE3\_201126\_FR\_TIOx\_hum\_tissue\_Urea\_RNAB\_B Scan : 48274

Andromeda score : 41.174

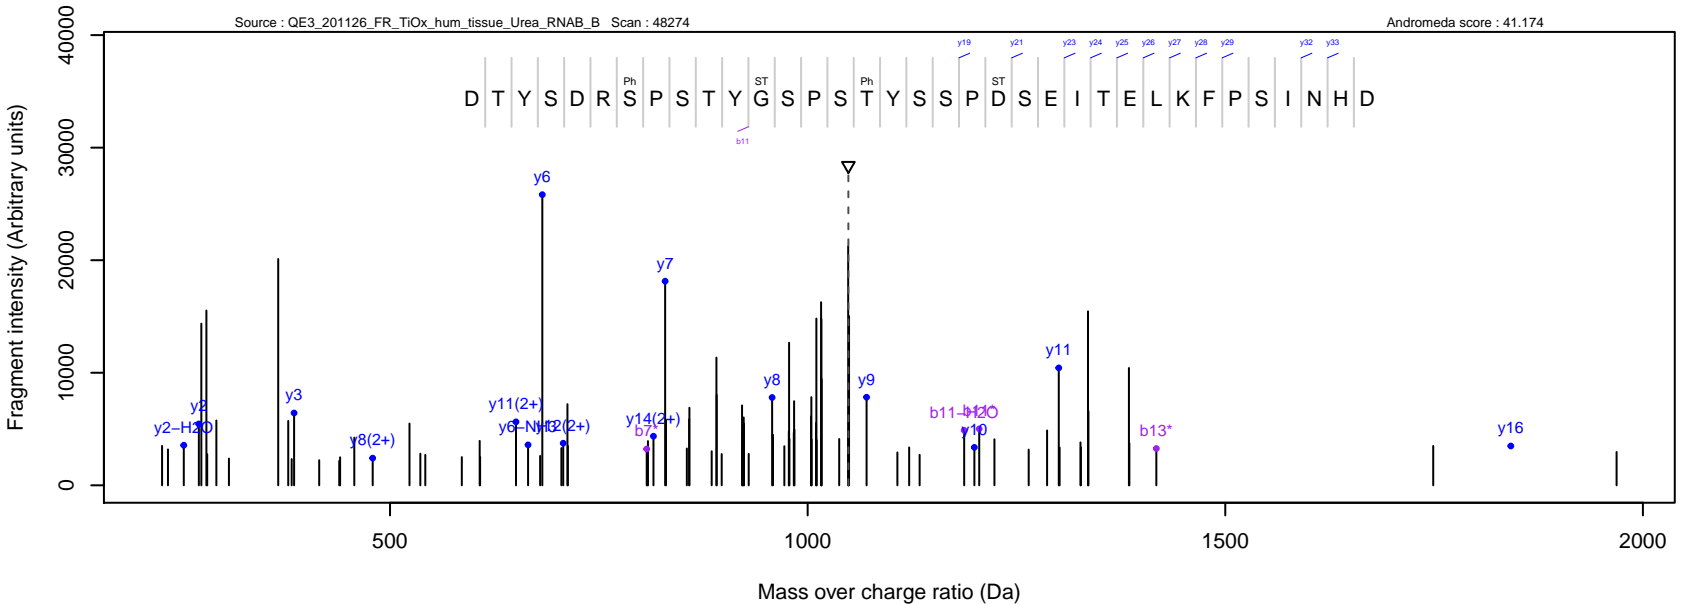

YSDTT(Phospho (STY))DSDPENEPFDEDQHTQITK-3+

Source : QE3\_201126\_FR\_TiOx\_hum\_tissue\_Urea\_RNAB\_N Scan : 23166

Andromeda score : 41.166

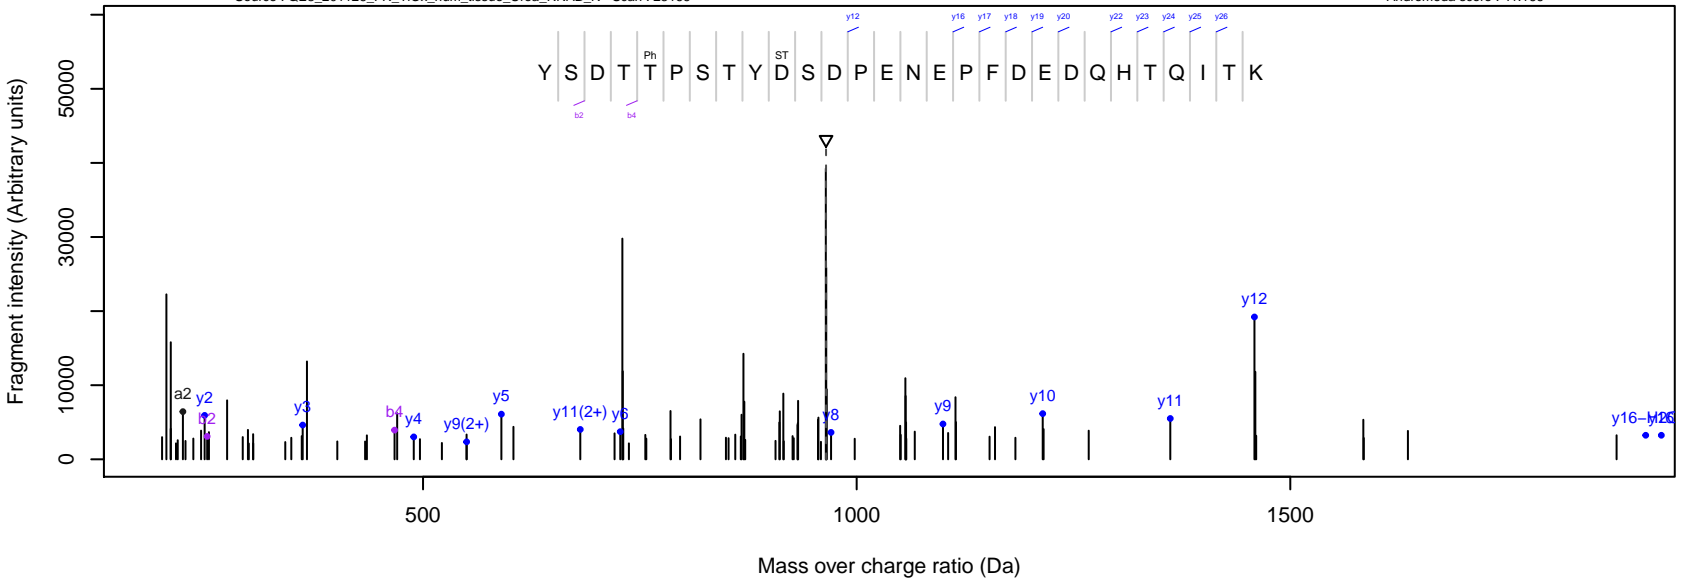

SRT(Phospho (STY))S(Phospho (STY))PAPWK-2+

Source : QE3\_201126\_FR\_TiOx\_hum\_tissue\_Urea\_RNAB\_B Scan : 14346

Andromeda score : 41.164

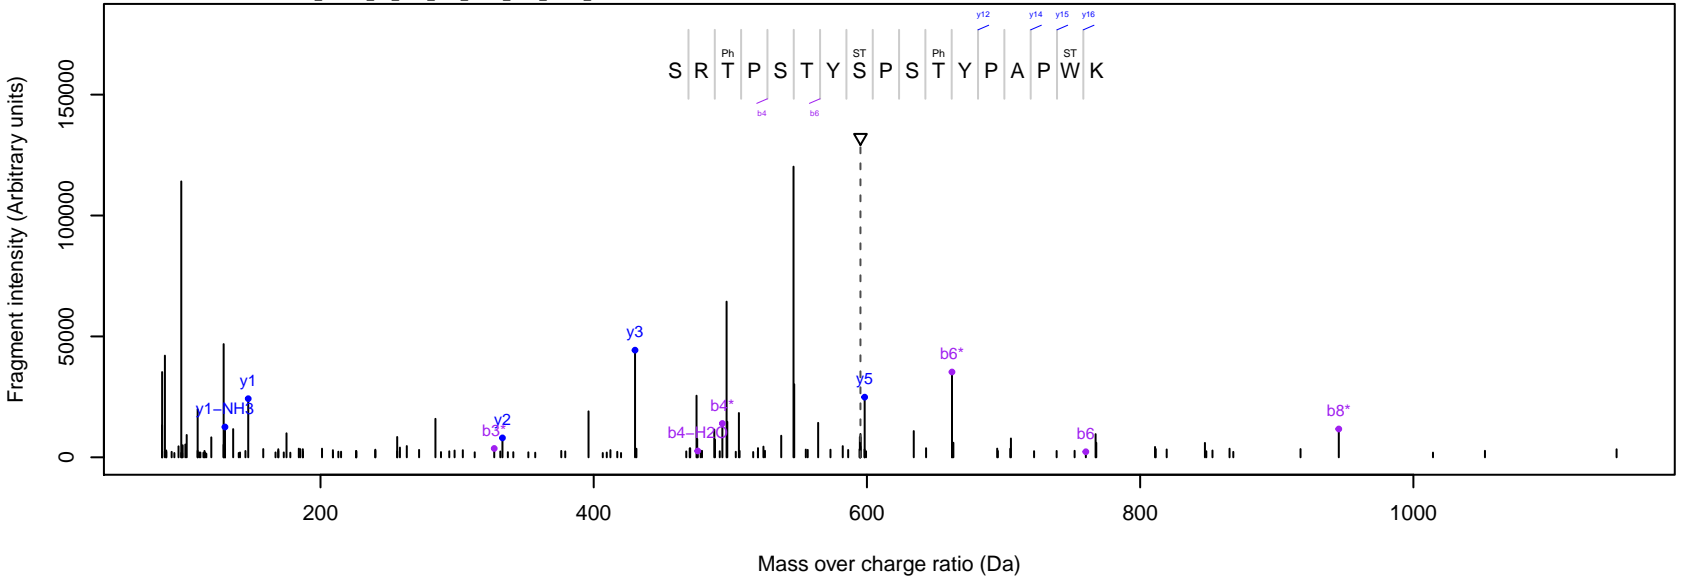

QKAEELVKDNE LLPSP(Phospho (STY))PSLGSFDPLAELTGK-4+

Source : QE3\_201126\_FR\_TiOx\_hum\_tissue\_Urea\_RNAB\_B Scan : 56835

Andromeda score : 41.139

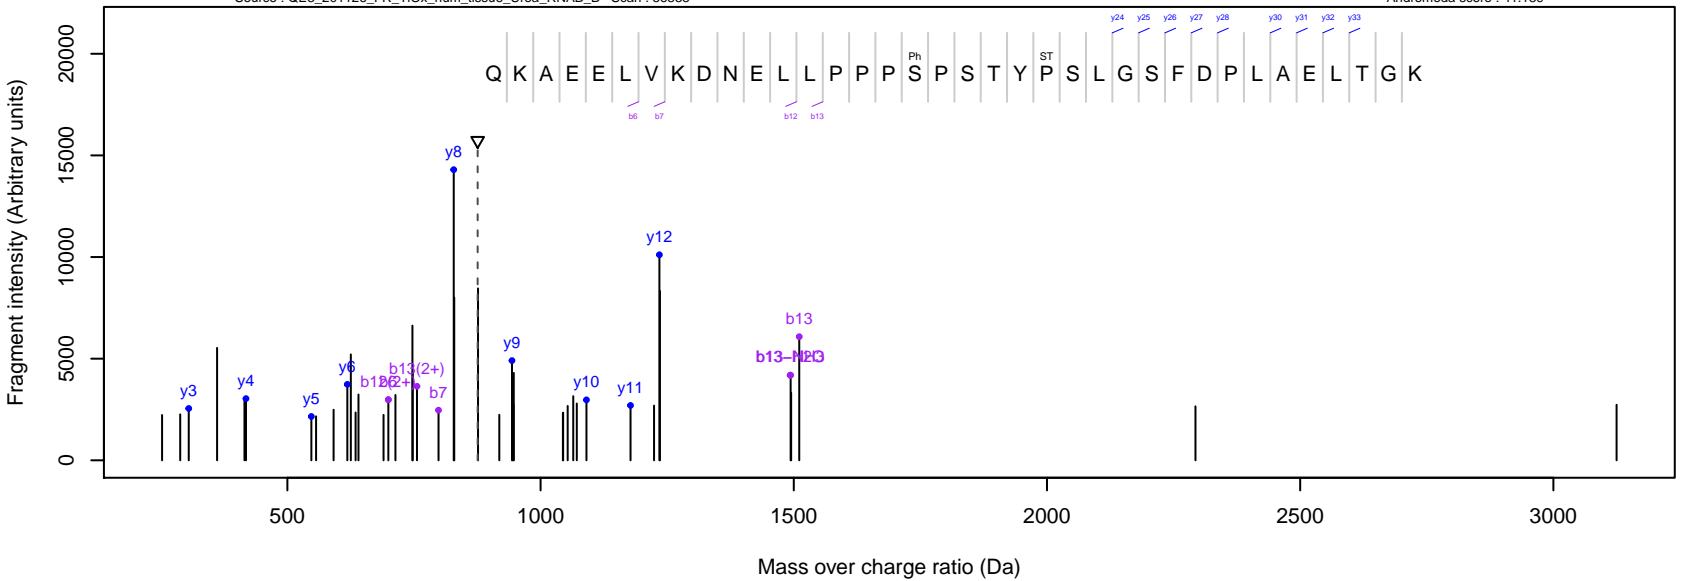

QLAYS(Phospho (STY))TVGTPDYIAPEVFMQTGYNK-3+

Source : QE3\_201126\_FR\_TIOx\_hum\_tissue\_Urea\_RNAB\_N Scan : 58714

Andromeda score : 41.133

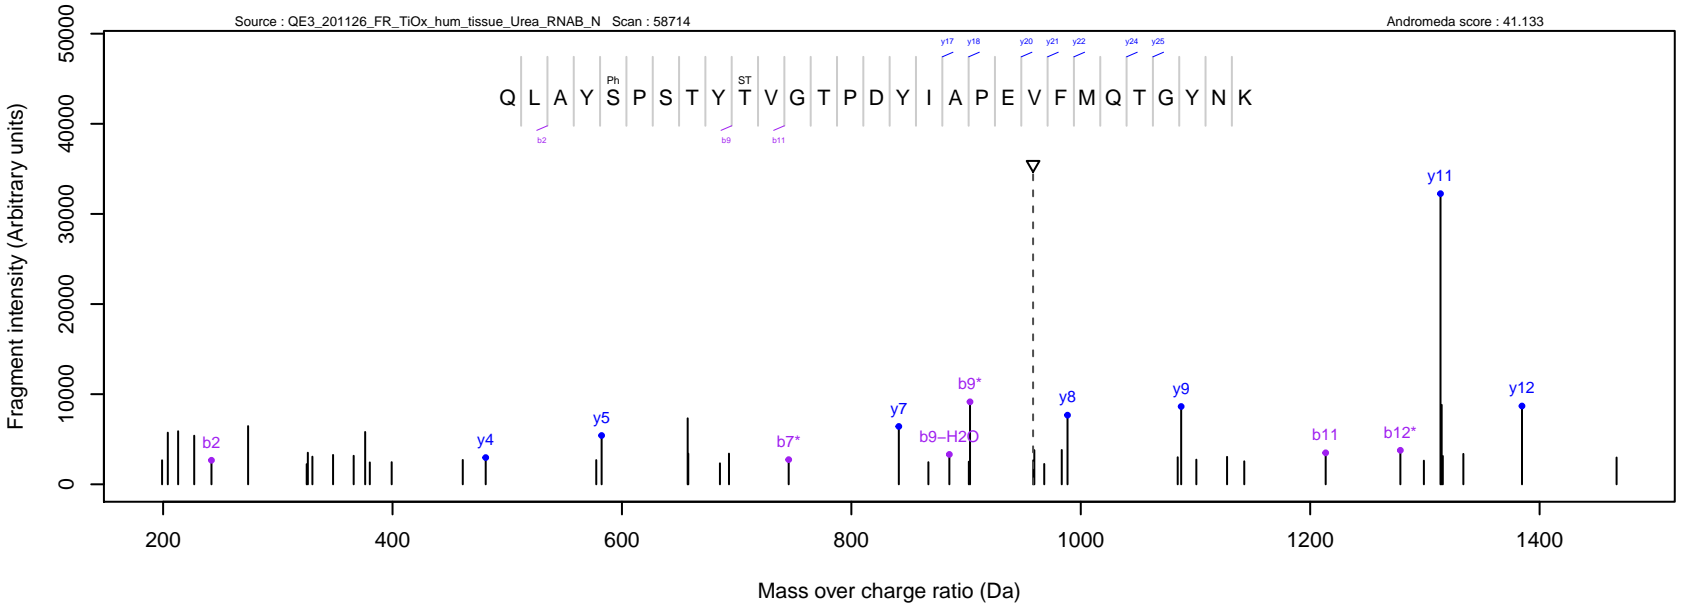

(Acetyl (Protein N-term))M(Oxidation (M))ES(Phospho (STY))GFTSKDYLSHFNPR-3+

Source : QE3\_201126\_FR\_TIOx\_hum\_tissue\_Urea\_RNAB\_B Scan : 35676

Andromeda score : 41.115

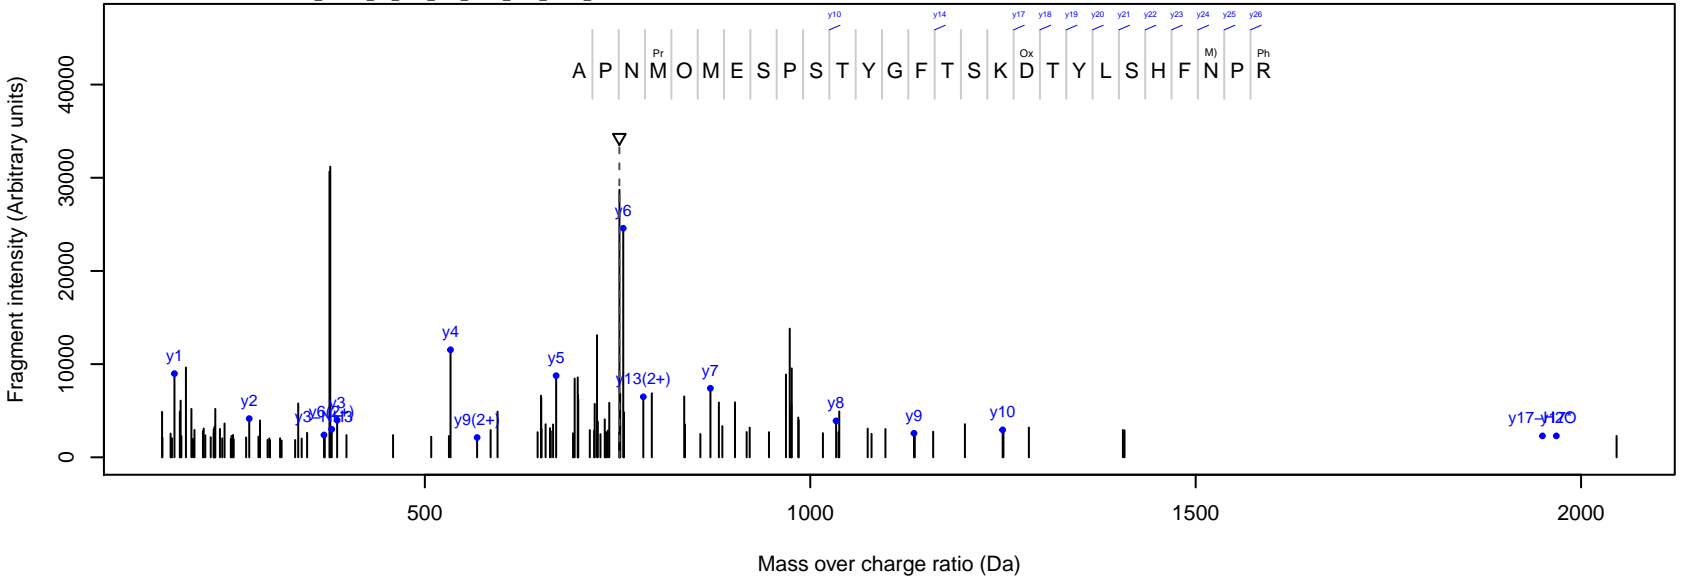

(Acetyl (Protein N-term))M(Oxidation (M))VAGESGLGK(SPhospho (STY))TLVNSLFLTDLY(Phospho (STY))R-2+

Source : QE3\_201126\_FR\_TIOx\_hum\_tissue\_Urea\_RNAB\_B Scan : 54845

Andromeda score : 41.115

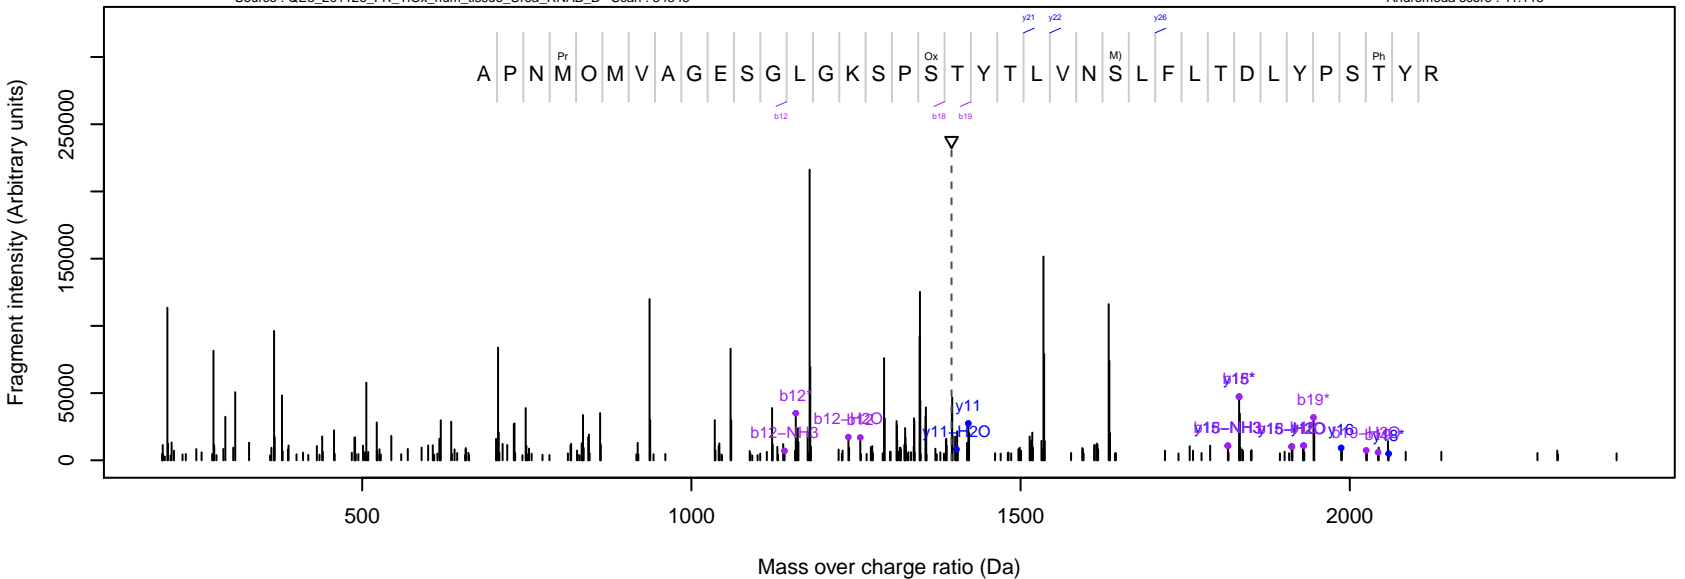

SRT(Phospho (STY))S(Phospho (STY))VQT(Phospho (STY))EDDQLIAGQSAR-2+

Source : QE3\_201126\_FR\_TiOx\_hum\_tissue\_Urea\_RNAB\_B Scan : 29704

Andromeda score : 41.115

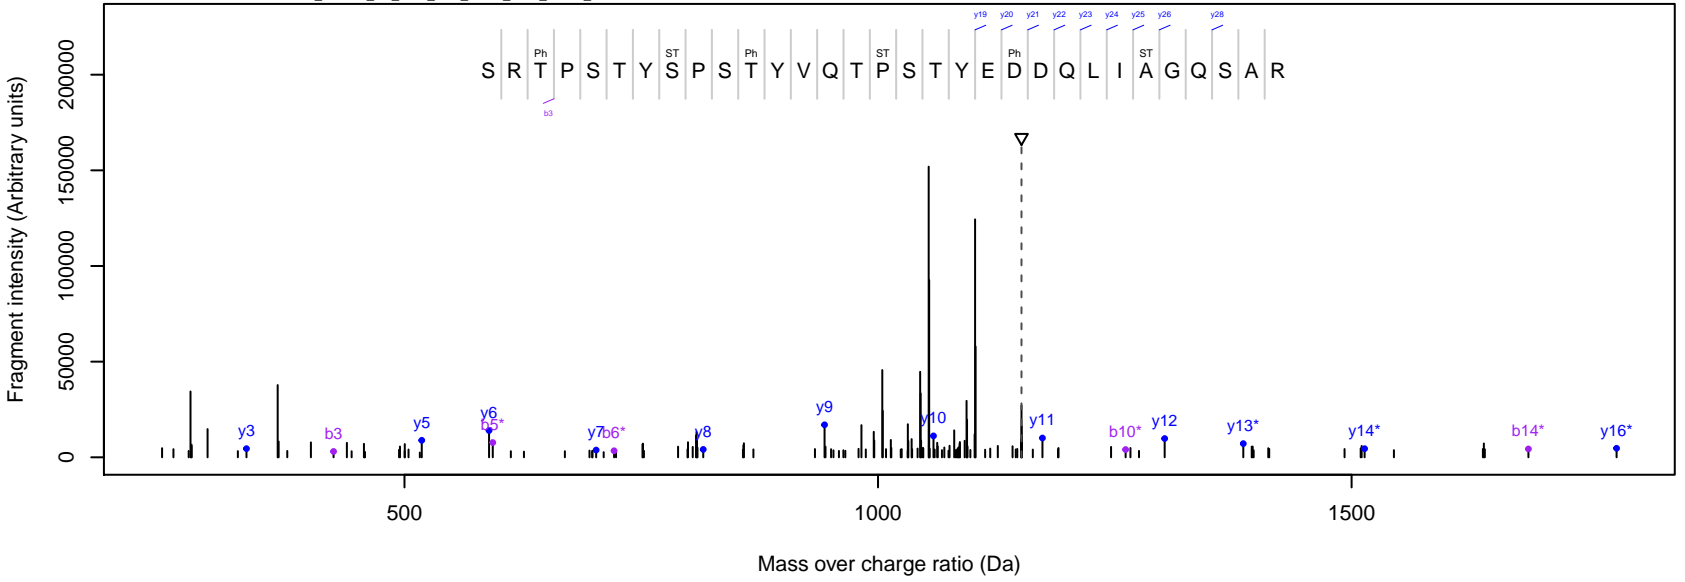

APKIS(Phospho (STY))MPDFDLHLKGP-4+

Source : QE3\_201126\_FR\_TiOx\_hum\_tissue\_Urea\_RNAB\_N Scan : 34799

Andromeda score : 41.088

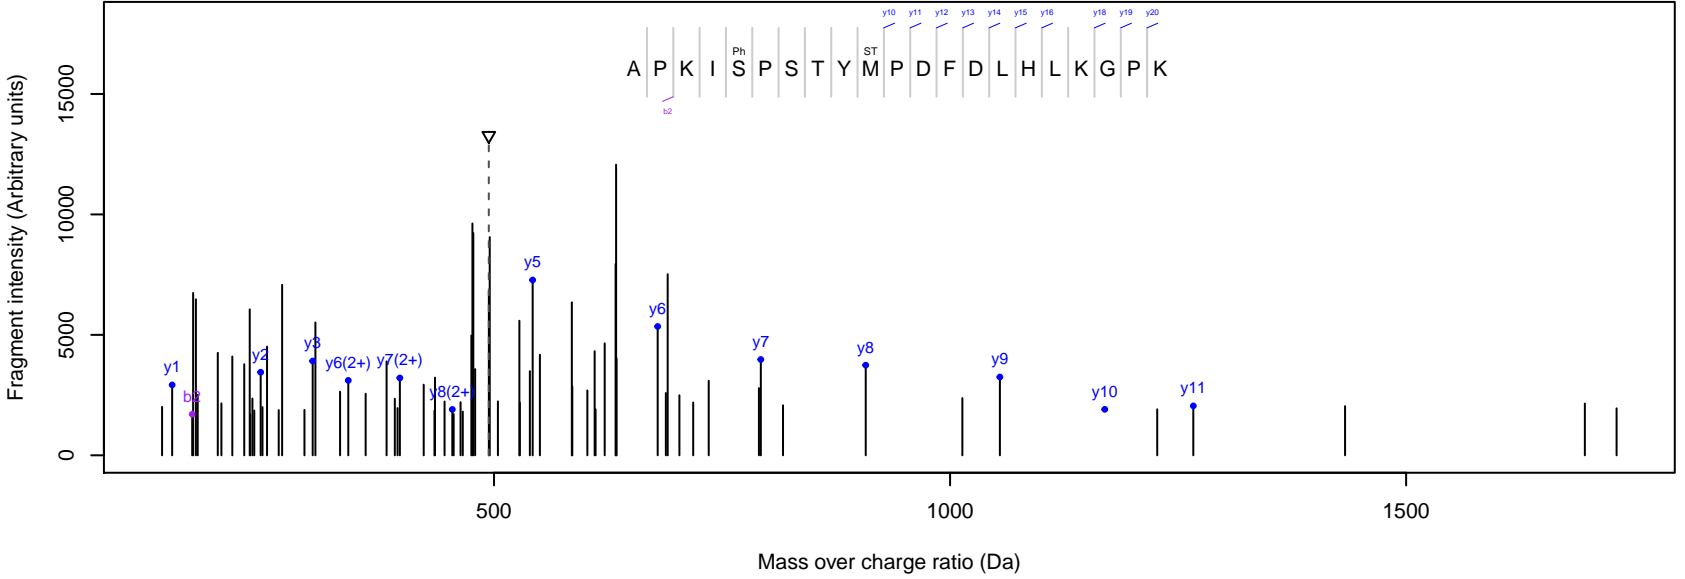

S(Phospho (STY))RKSPS(Phospho (STY))PAGGGS(Phospho (STY))SPYSR-3+

Source : QE3\_201126\_FR\_TiOx\_hum\_tissue\_Urea\_RNAB\_H Scan : 6513

Andromeda score : 41.087

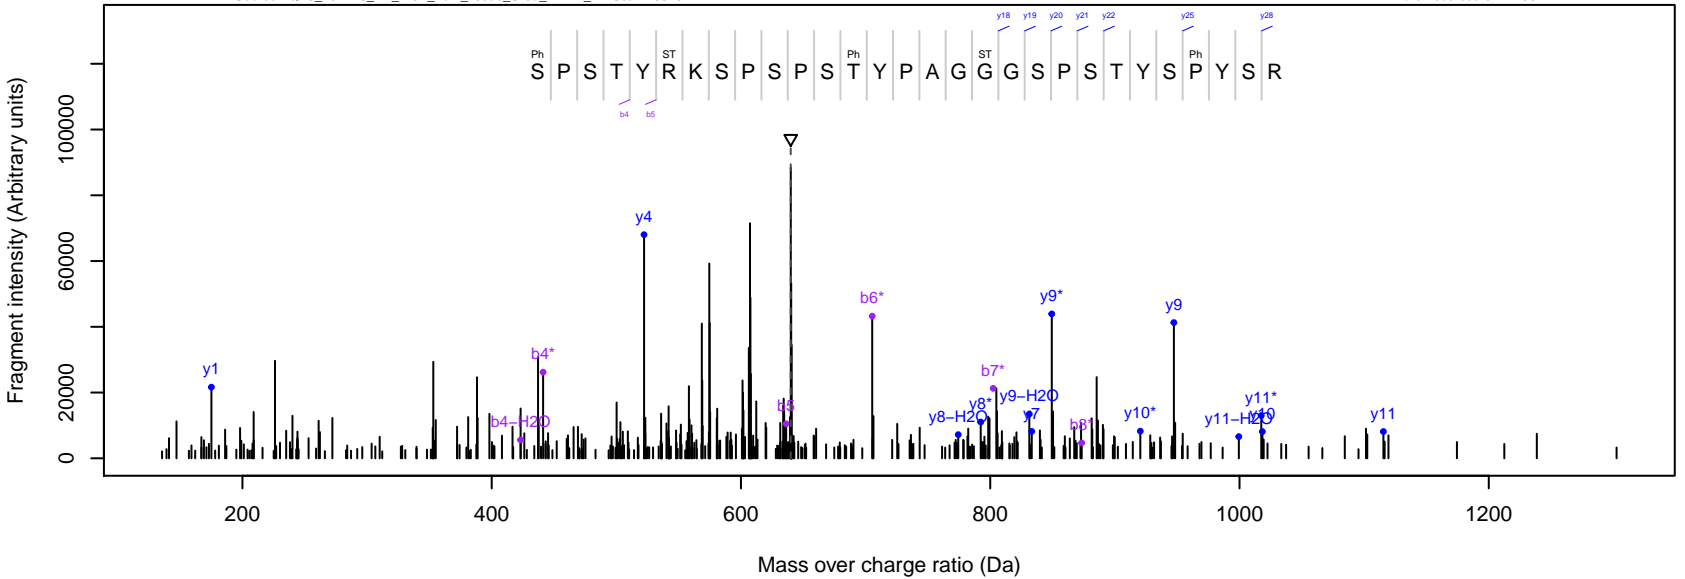

MAGQEIPEEGREVEEFSEDDDEDDSPSTYDDSPSTYEAEKQSQK-4+

Source : QE3\_201126\_FR\_TiOx\_hum\_tissue\_Urea\_RNAB\_B Scan : 32472

Andromeda score : 41.07

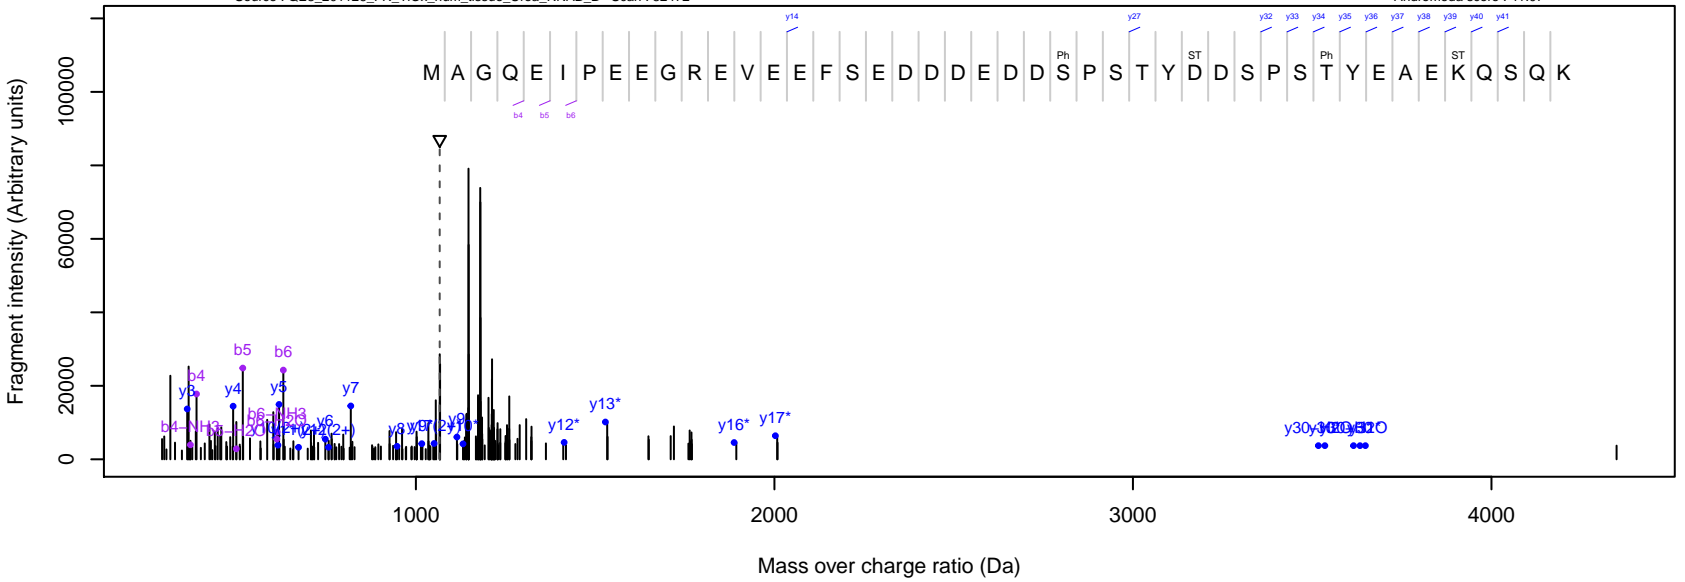

LAFDIT(Phospho (STY))YTL EYSR-2+

Source : QE3\_201126\_FR\_TiOx\_hum\_tissue\_Urea\_RNAB\_B Scan : 41235

Andromeda score : 41.052

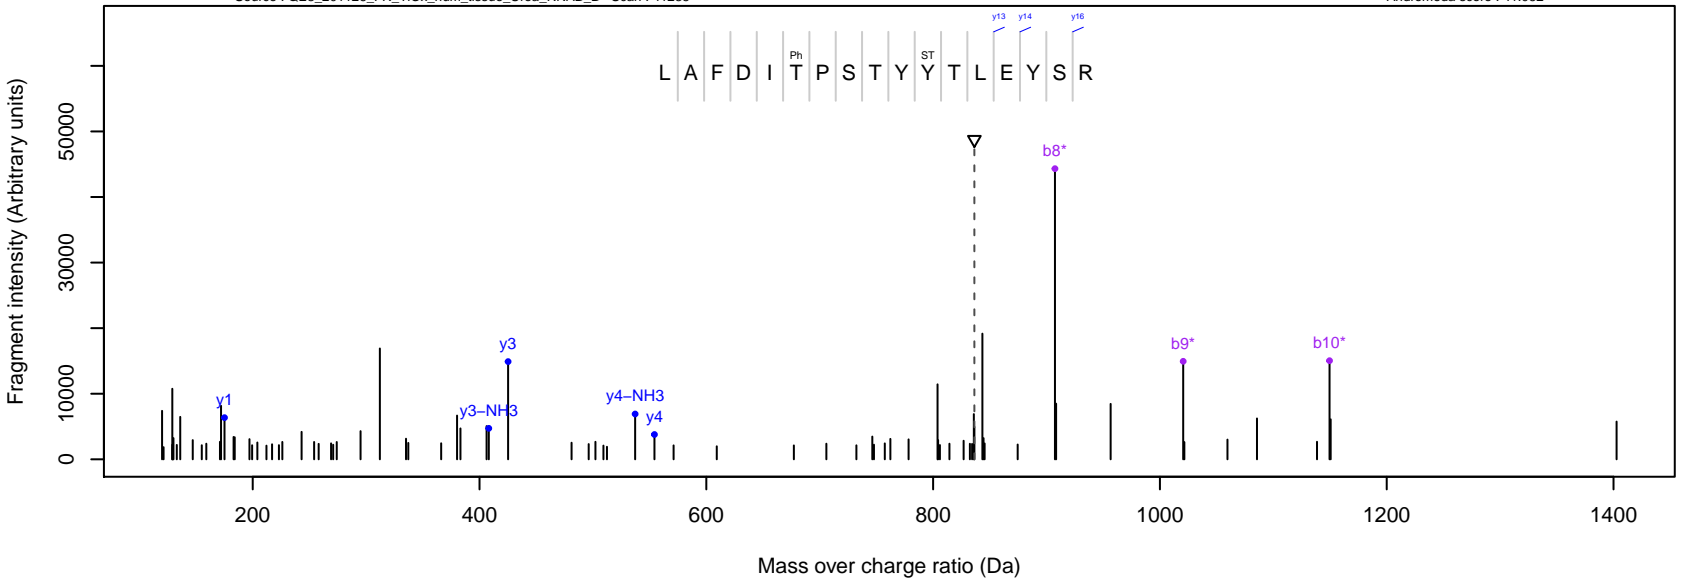

KDM(Oxidation (M))QGT(Phospho (STY))EEEEK-2+

Source : QE3\_201126\_FR\_TiOx\_hum\_tissue\_Urea\_RNAB\_N Scan : 25691

Andromeda score : 41.029

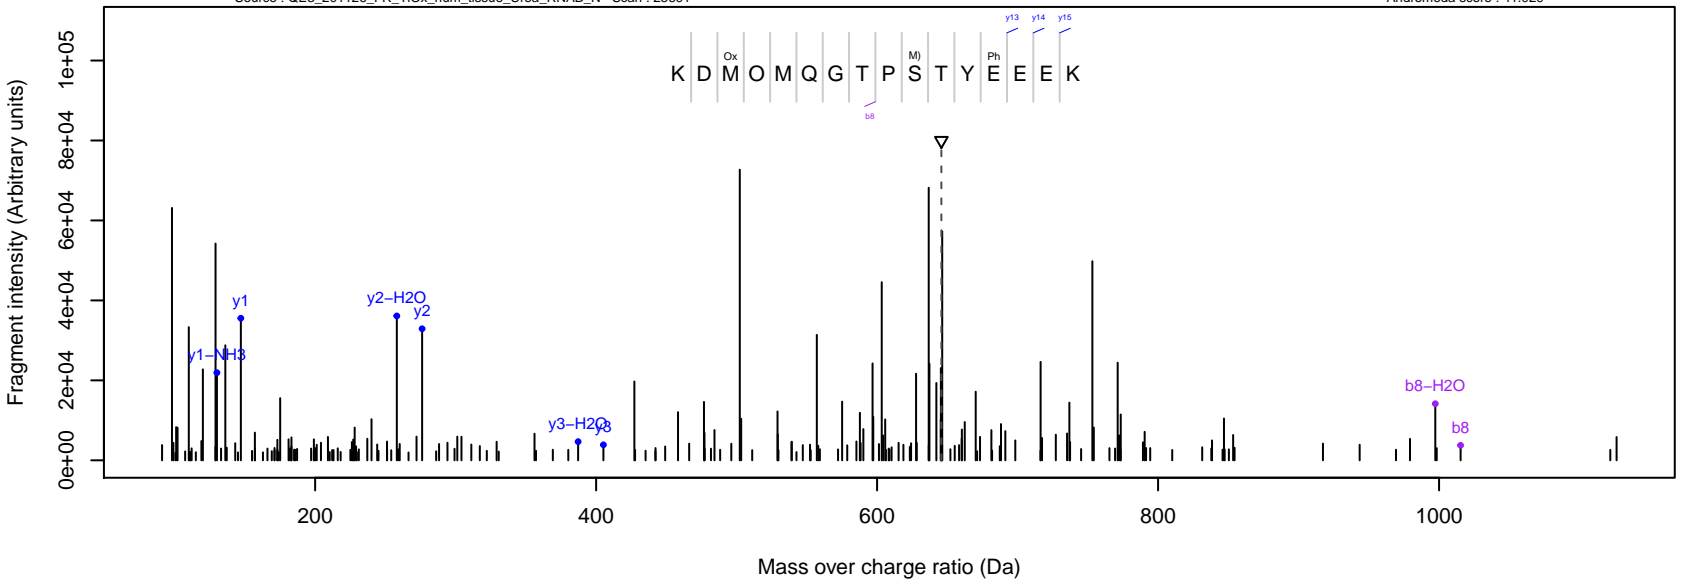

VIQPM(Oxidation (M))GM(Oxidation (M))S(Phospho (STY))PR-2+

Source : QE3\_201126\_FR\_TIOx\_hum\_tissue\_Urea\_RNAB\_B Scan : 8973

Andromeda score : 41.029

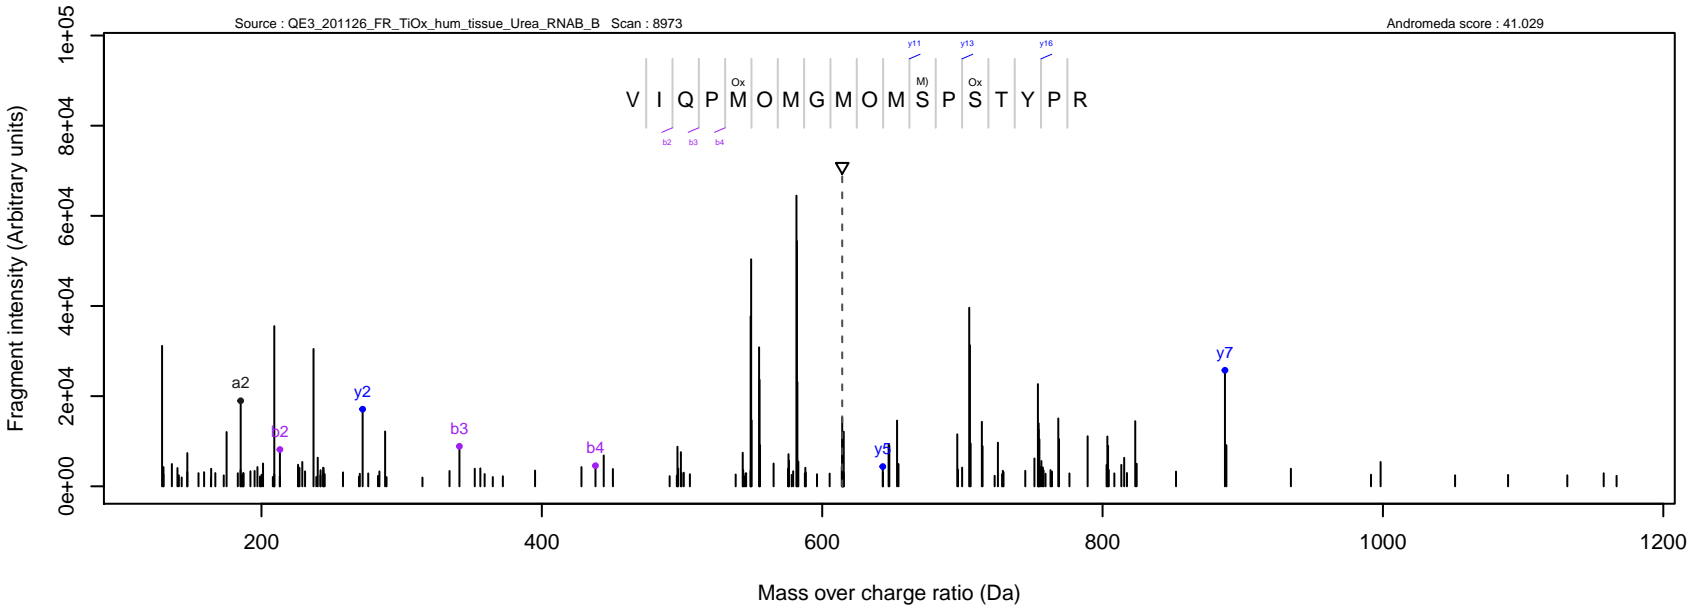

ELLAKPIGPDDAIDALSSDFTCGS(Phospho (STY))PTAAGKK-4+

Source : QE3\_201126\_FR\_TIOx\_hum\_tissue\_Urea\_RNAB\_H Scan : 49693

Andromeda score : 41.017

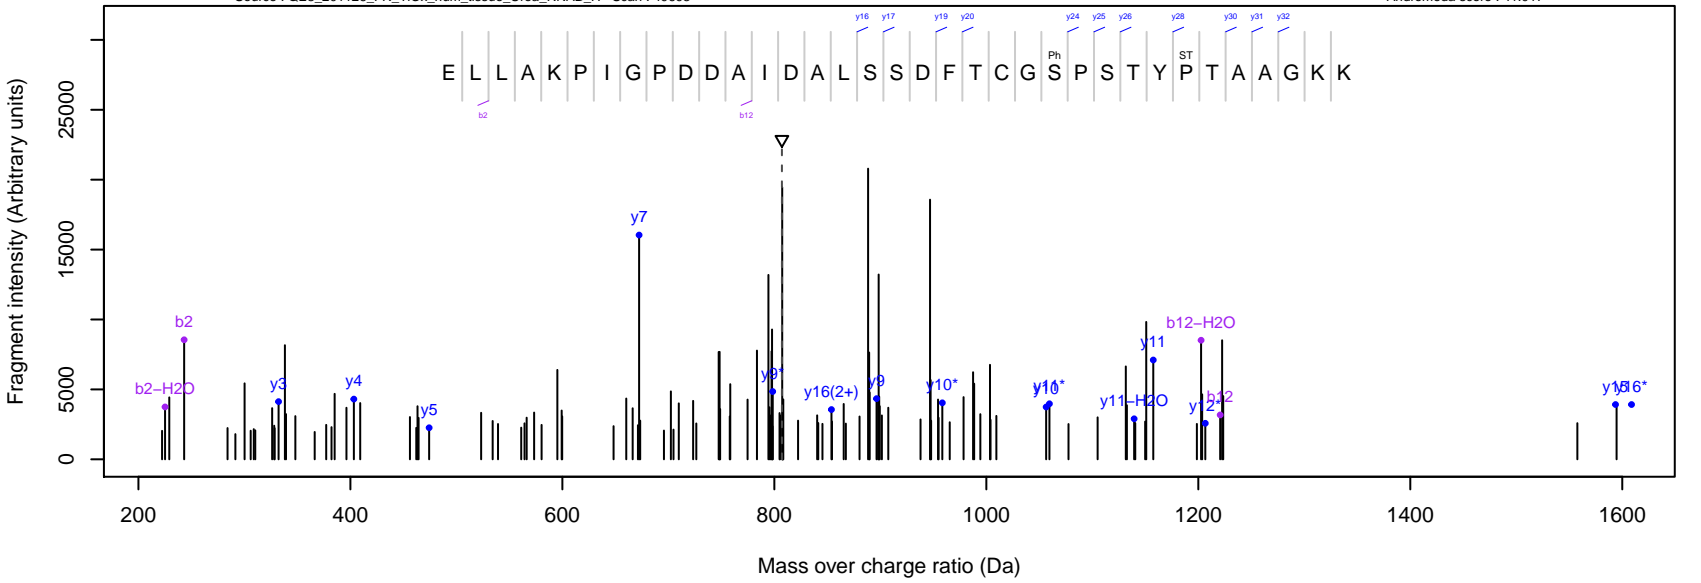

GLVGGQEEASQEAAGLPAGAGPS(Phospho (STY))PTFPALGIGM(Oxidation (M))DSCVIPLR-4+

Source : QE3\_201126\_FR\_TIOx\_hum\_tissue\_Urea\_RNAB\_N Scan : 60383

Andromeda score : 41.005

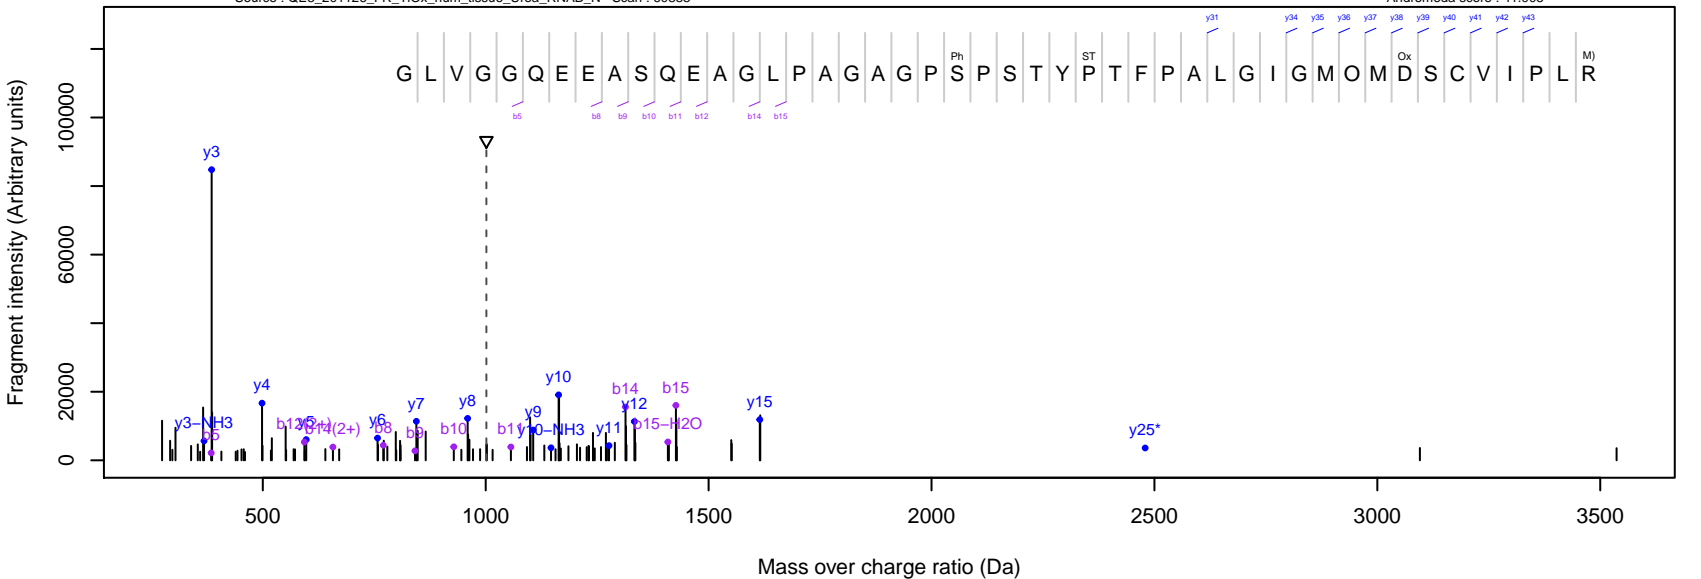

ALAS(Phospho (STY))IDSK-2+

Source : QE3\_201126\_FR\_TiOx\_hum\_tissue\_Urea\_RNAB\_H Scan : 13315

Andromeda score : 40.994

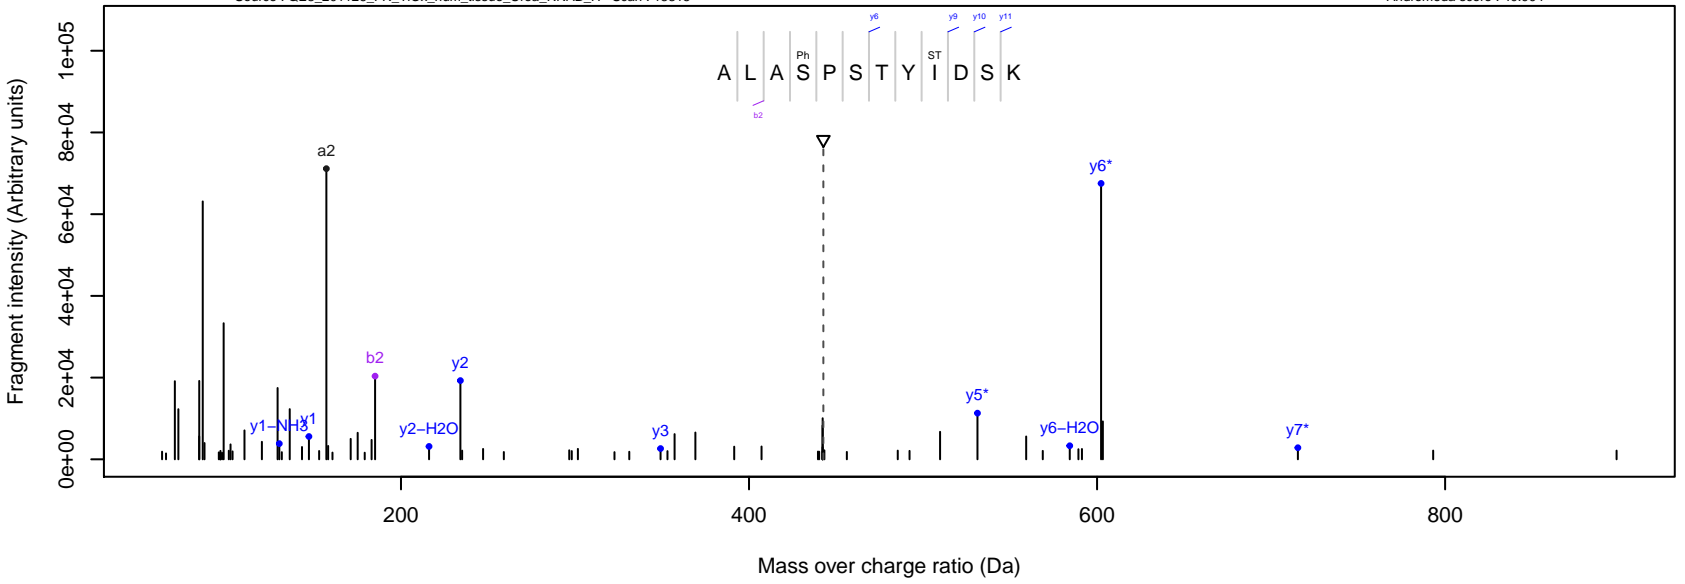

KDPDERPTFEYIQSFLEDYFTATEPQYPSTYQPGENL-3+

Source : QE3\_201126\_FR\_TiOx\_hum\_tissue\_Urea\_RNAB\_H Scan : 62878

Andromeda score : 40.986

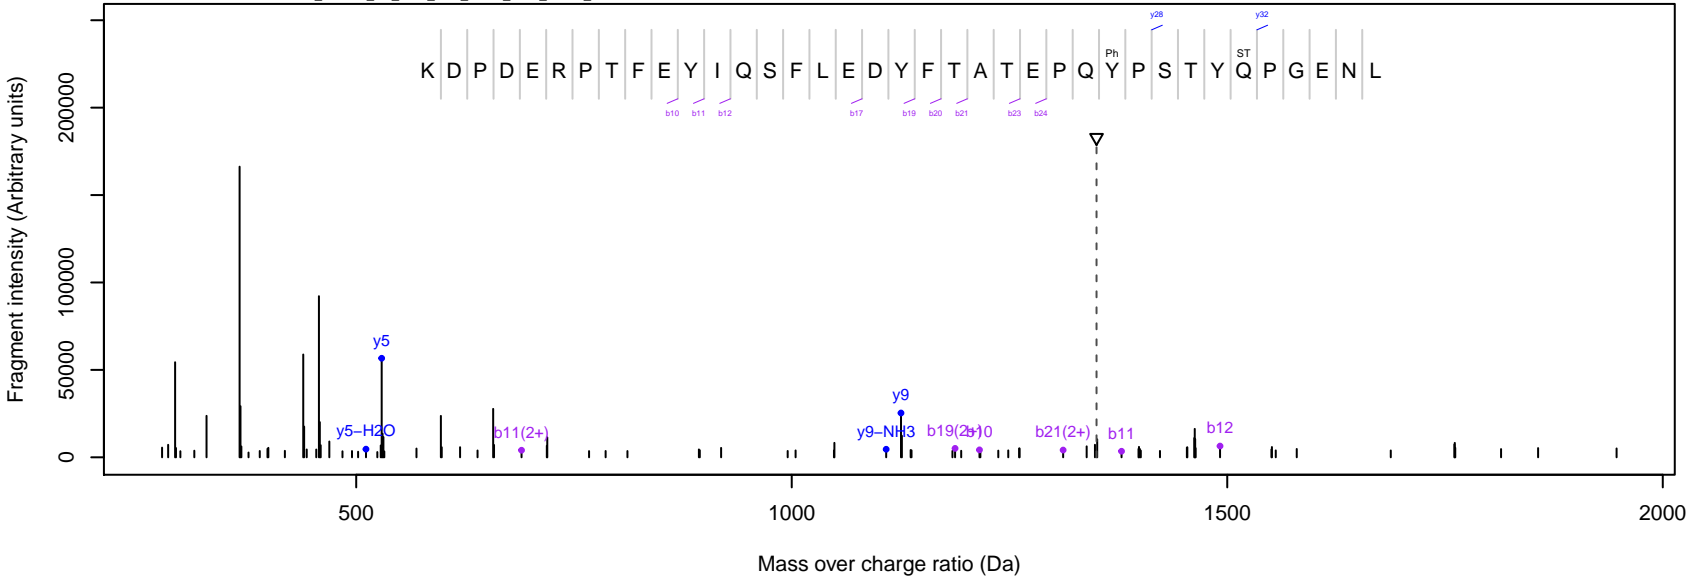

QNS(Phospho (STY))LTQFMSIPSSVIHPAMVR-3+

Source : QE3\_201126\_FR\_TiOx\_hum\_tissue\_Urea\_RNAB\_H Scan : 55215

Andromeda score : 40.986

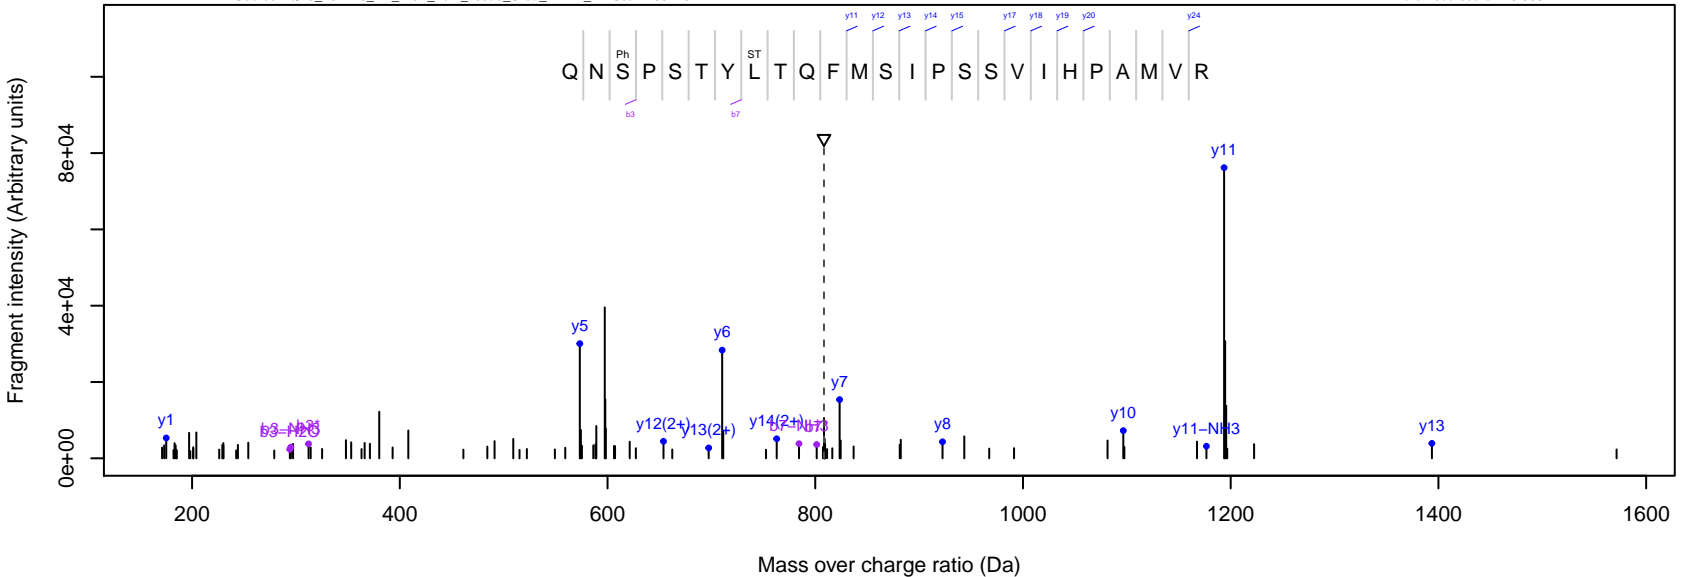



HGS(Phospho (STY))WGSGLDM(Oxidation (M))HTKPWVR-4+

Source : QE3\_201126\_FR\_TiOx\_hum\_tissue\_Urea\_RNAB\_N Scan : 21408

Andromeda score : 40.962

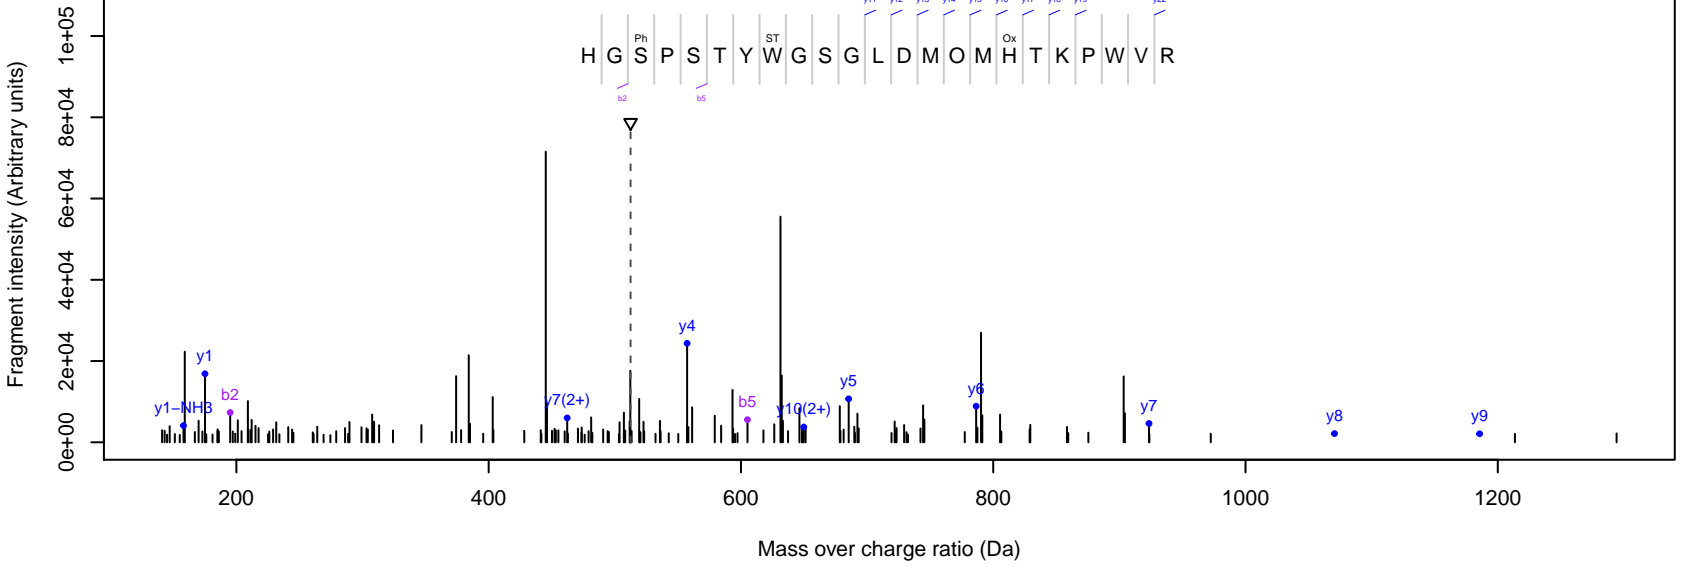

S(Phospho (STY))SSPAGETEGDREPQAR-3+

Source : QE3\_201126\_FR\_TiOx\_hum\_tissue\_Urea\_RNAB\_N Scan : 5961

Andromeda score : 40.962

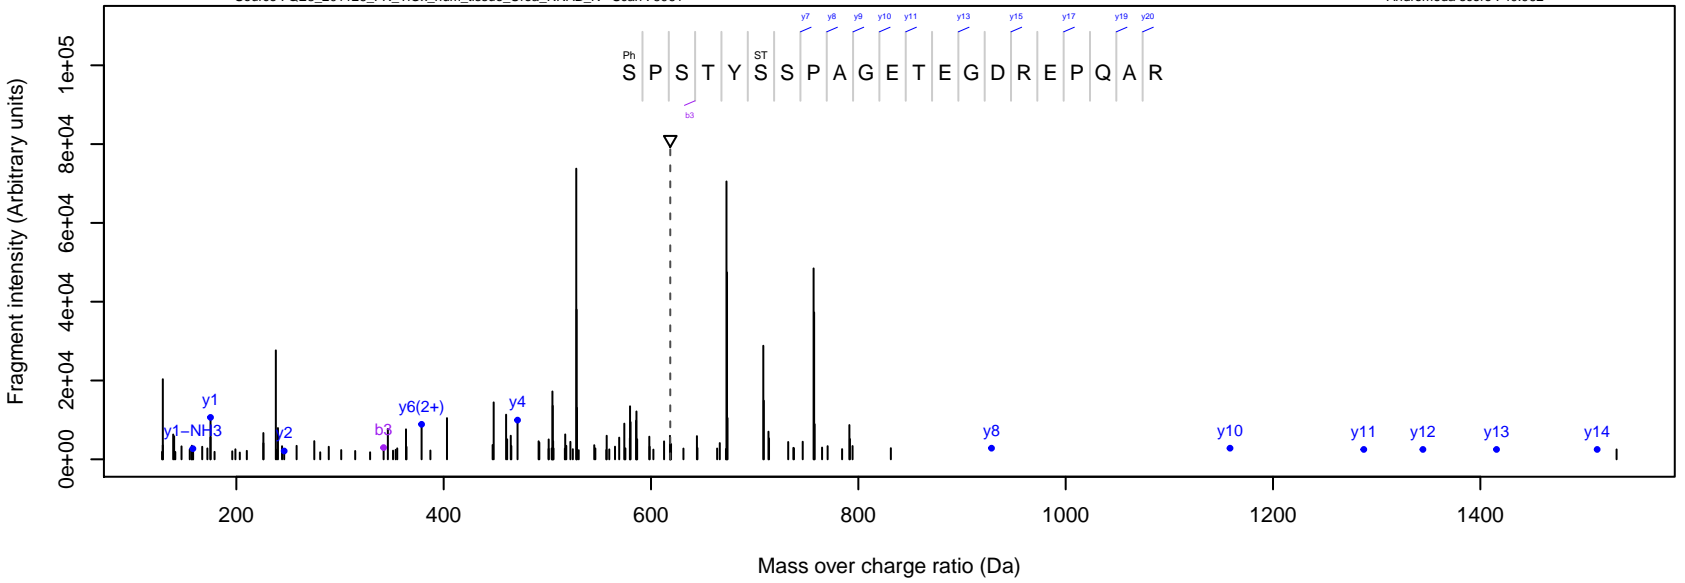

GS(Phospho (STY))GHPAYAEVPEVGEK-3+

Source : QE3\_201126\_FR\_TiOx\_hum\_tissue\_Urea\_RNAB\_B Scan : 15931

Andromeda score : 40.952

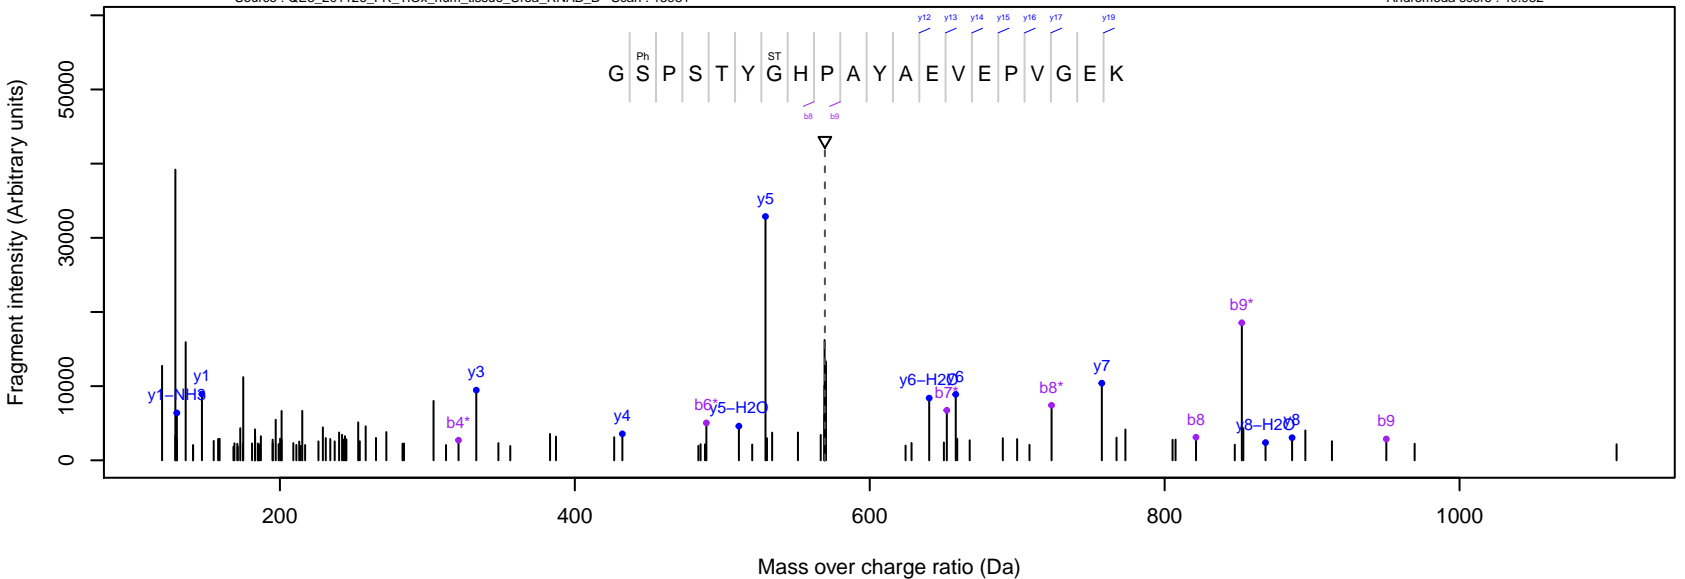

LRNS(Phospho (STY))LDS(Phospho (STY))SDSDSAL-2+

Source : QE3\_201126\_FR\_TiOx\_hum\_tissue\_Urea\_RNAB\_B Scan : 29703

Andromeda score : 40.941

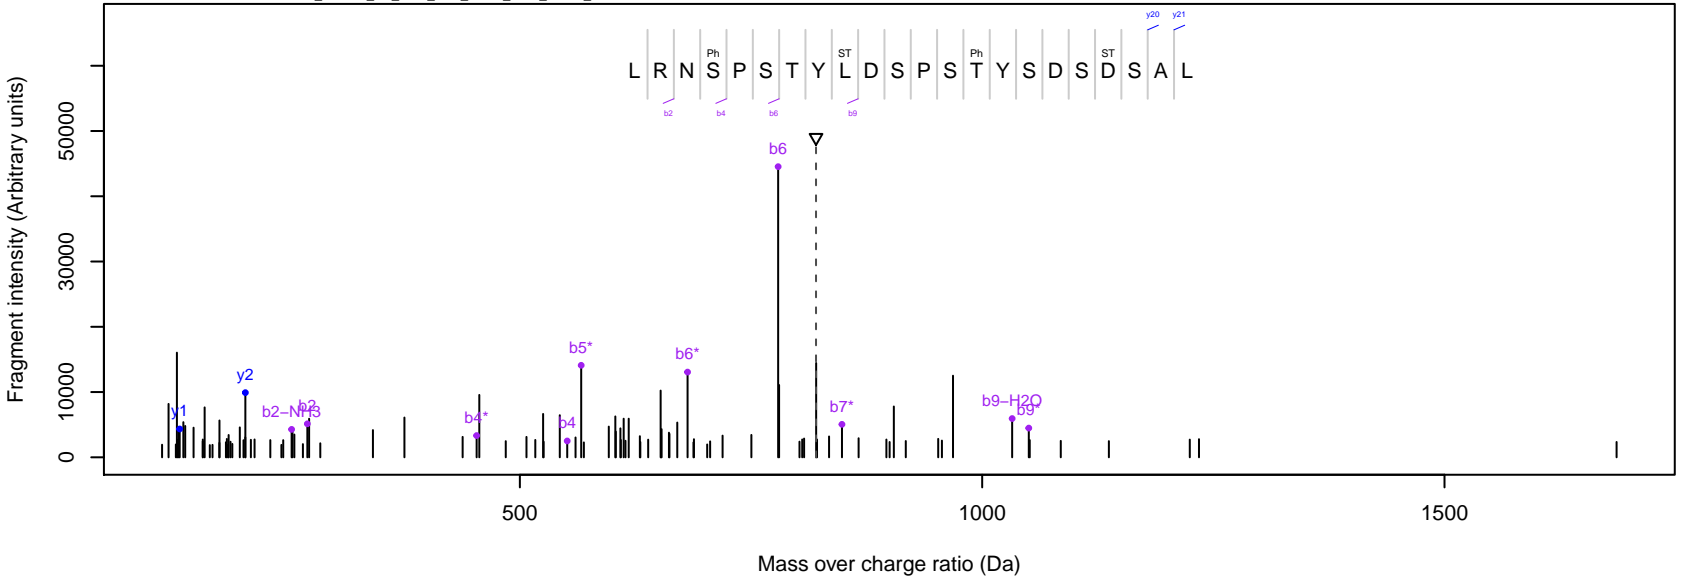

KENPS(Phospho (STY))PLFSIKK-3+

Source : QE3\_201126\_FR\_TiOx\_hum\_tissue\_Urea\_RNAB\_B Scan : 15918

Andromeda score : 40.857

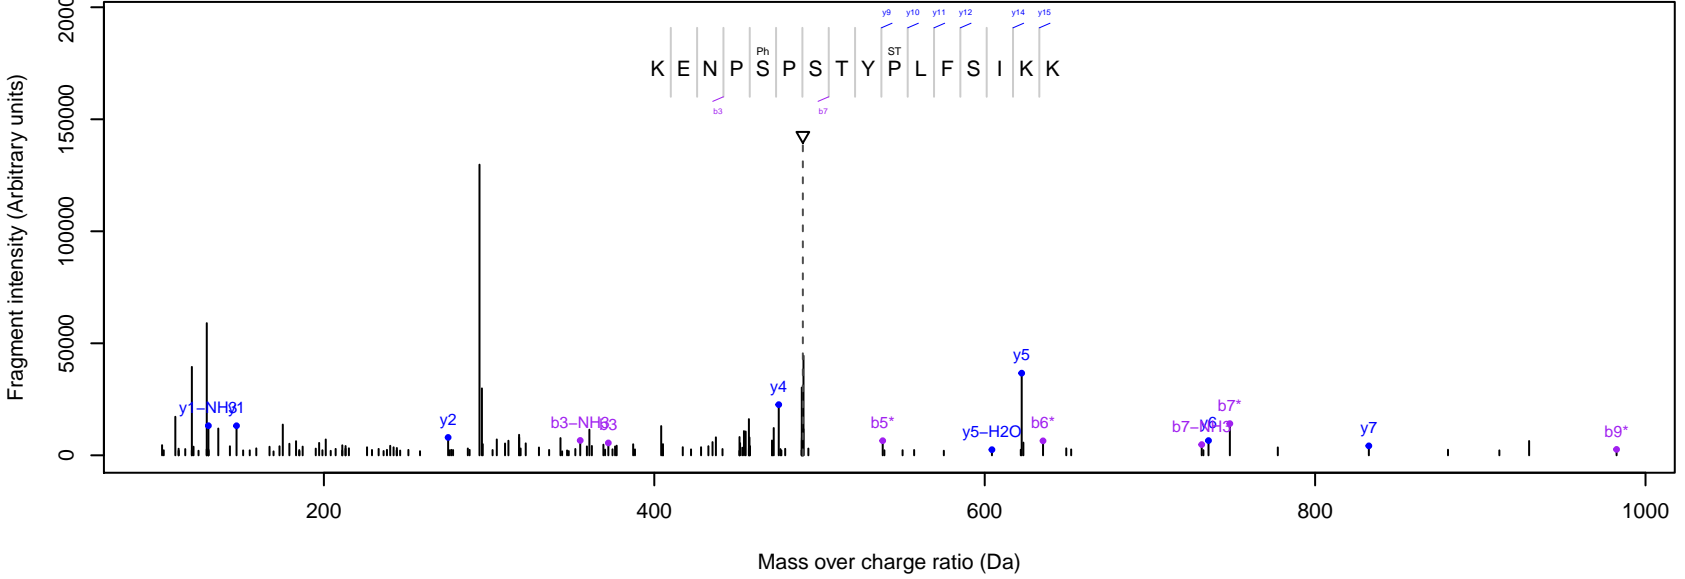

SKSPS(Phospho (STY))PPRLTEDR-3+

Source : QE3\_201126\_FR\_TiOx\_hum\_tissue\_Urea\_RNAB\_H Scan : 9174

Andromeda score : 40.857

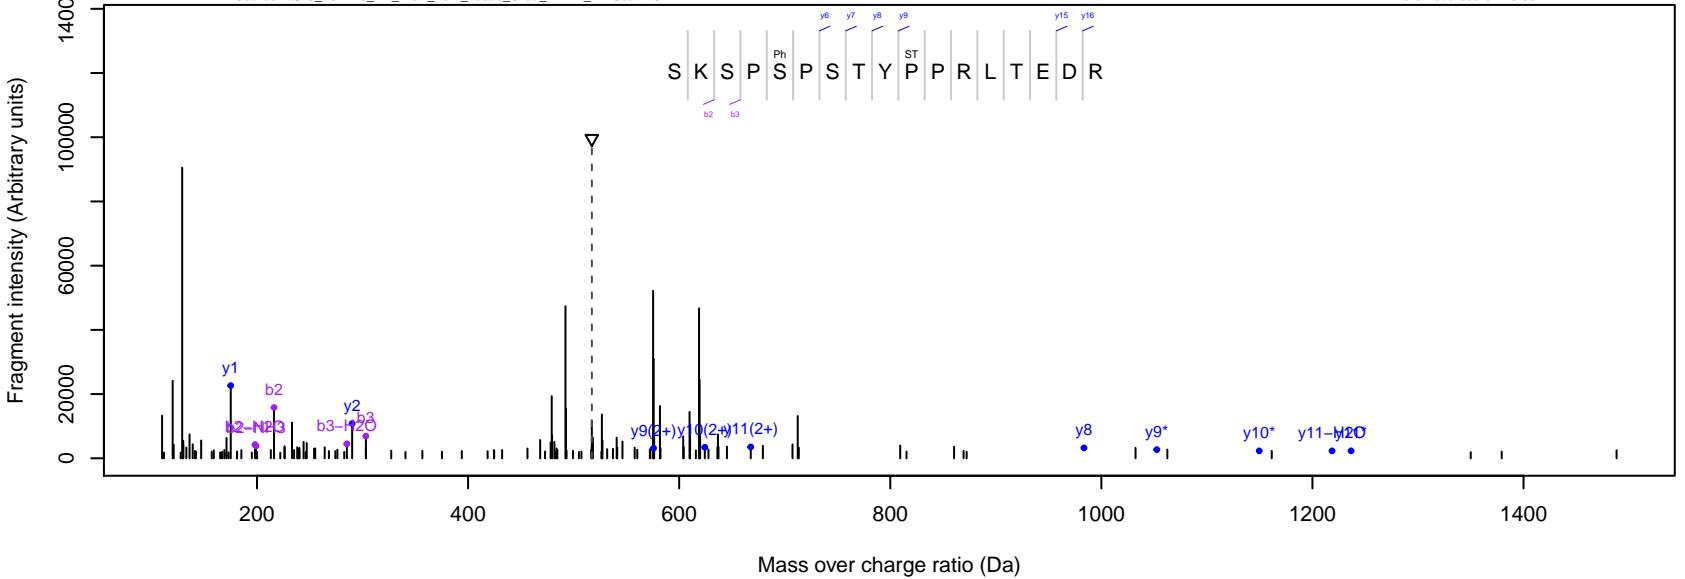

TGS(Phospho (STY))QEGTSMEGSRPAAPAEPTLK-3+

Source : QE3\_201126\_FR\_TiOx\_hum\_tissue\_Urea\_RNAB\_N Scan : 17924

Andromeda score : 40.837

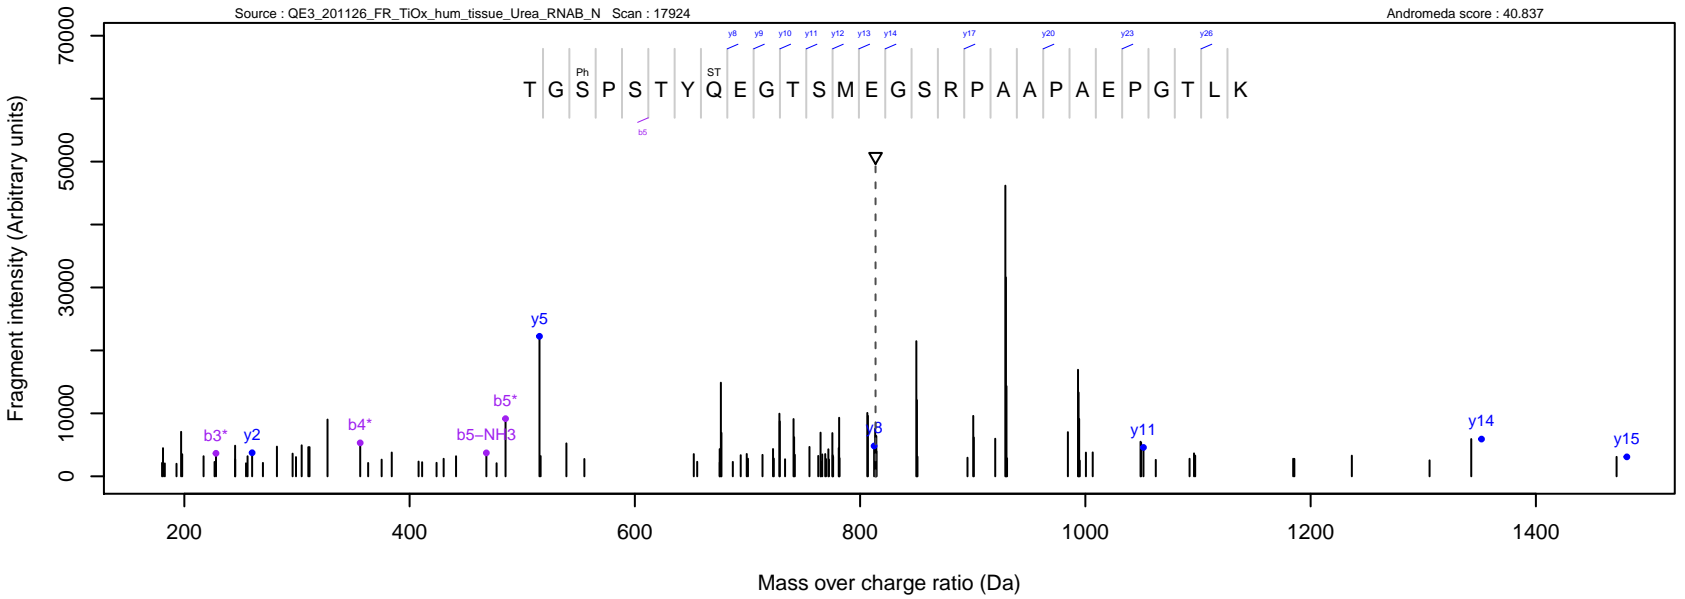

LPELDPRGSDEENLDS(Phospho (STY))ET(Phospho (STY))SASTESLLEER-3+

Source : QE3\_201126\_FR\_TiOx\_hum\_tissue\_Urea\_RNAB\_N Scan : 51772

Andromeda score : 40.819

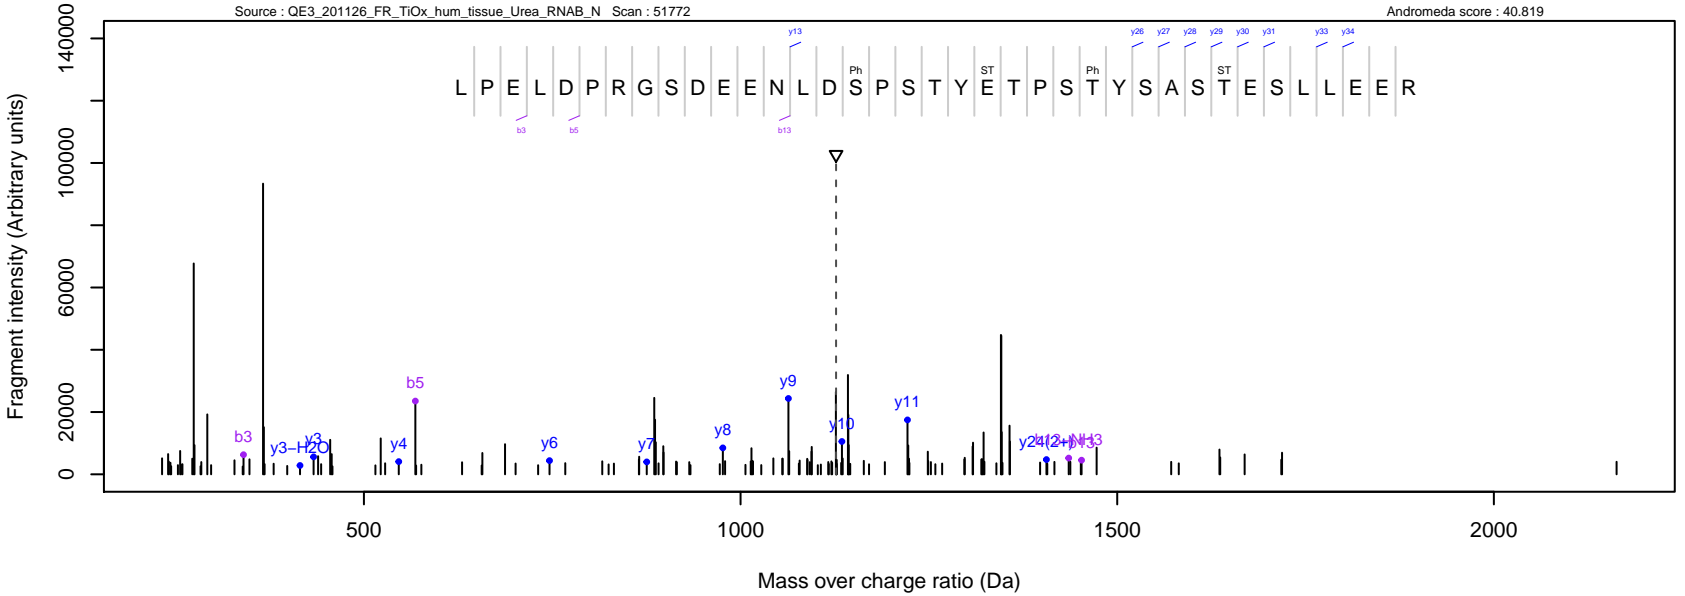

T(Phospho (STY))LSQSSESGTLSSGPPGHTM(Oxidation (M))EVSC-3+

Source : QE3\_201126\_FR\_TiOx\_hum\_tissue\_Urea\_RNAB\_H Scan : 23087

Andromeda score : 40.819

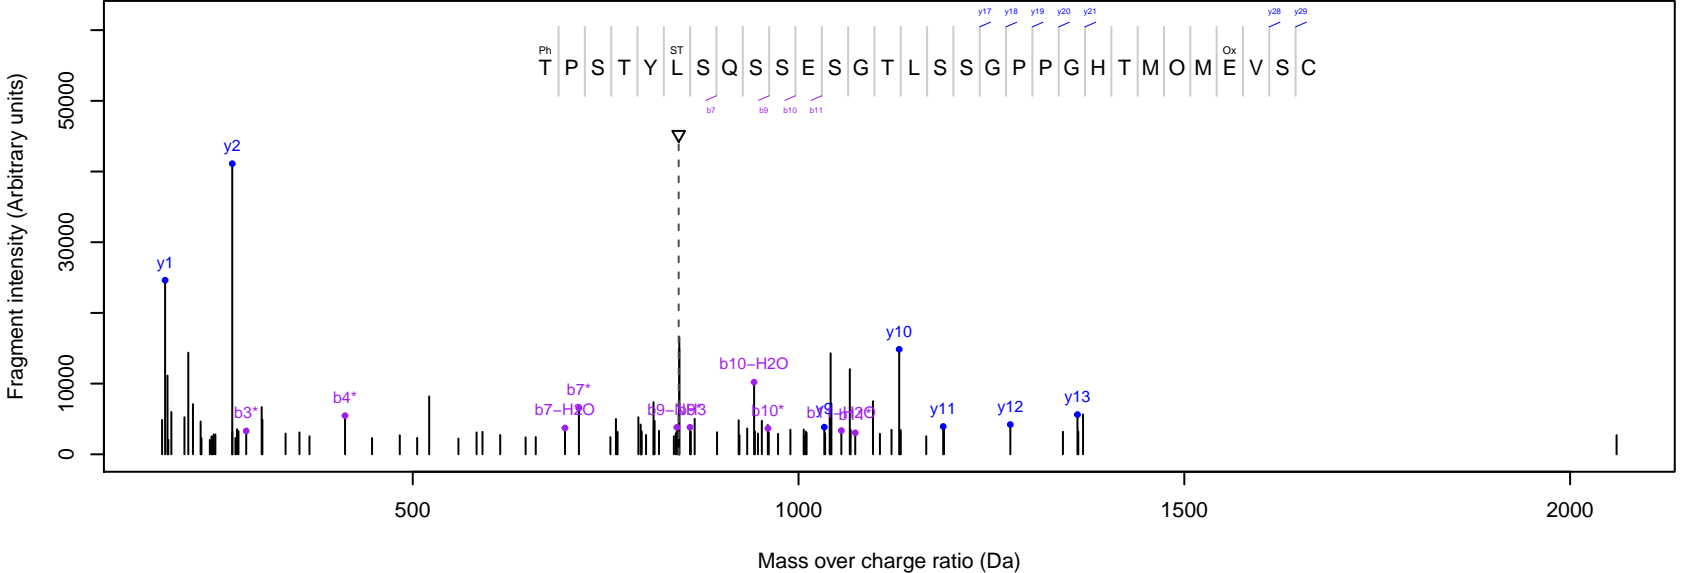

GHR(S(Phospho (STY))LS(Phospho (STY))PSSNSAFSR-3+

Source : QE3\_201126\_FR\_TiOx\_hum\_tissue\_Urea\_RNAB\_H Scan : 11321

Andromeda score : 40.801

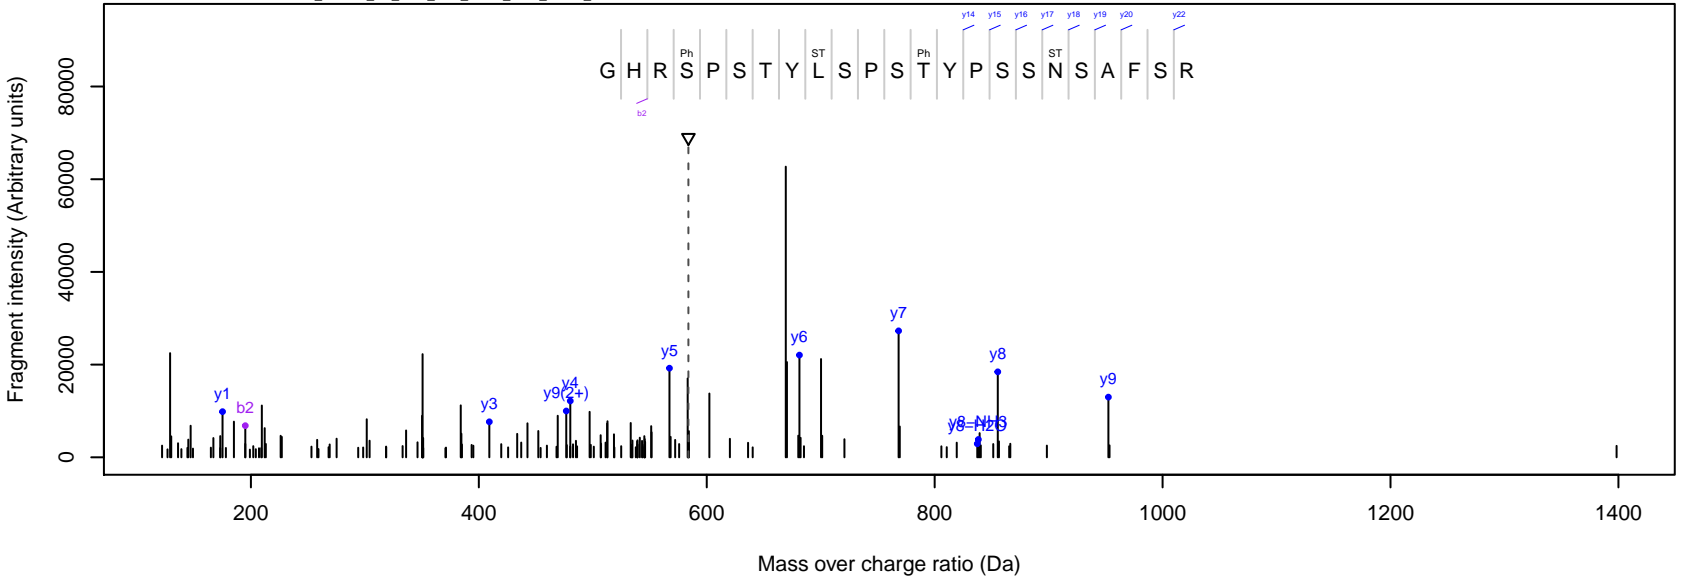

NAS(Phospho (STY))VPNLRGS(Phospho (STY))EER-2+

Source : QE3\_201126\_FR\_TiOx\_hum\_tissue\_Urea\_RNAB\_N Scan : 16614

Andromeda score : 40.801

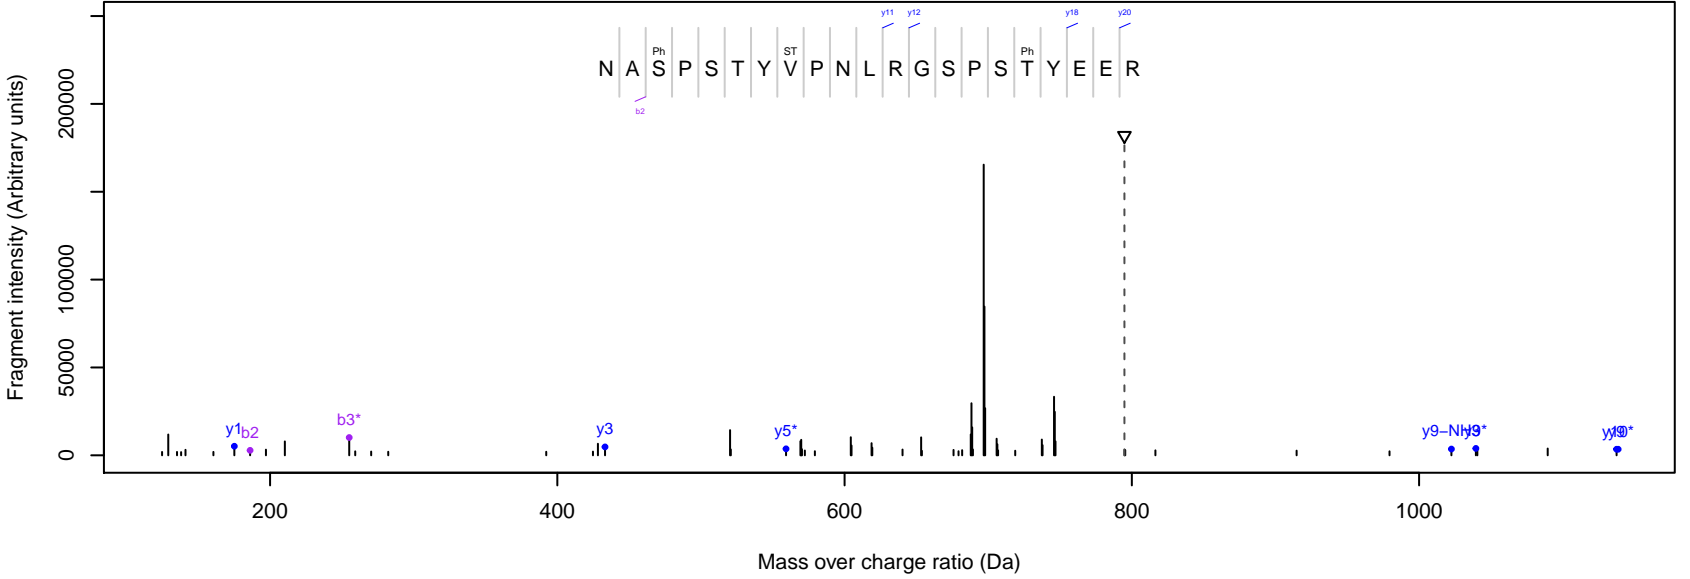

GRGPPS(Phospho (STY))S(Phospho (STY))S(Phospho (STY))DS(Phospho (STY))EPEALER-3+

Source : QE3\_201126\_FR\_TiOx\_hum\_tissue\_Urea\_RNAB\_N Scan : 31423

Andromeda score : 40.798

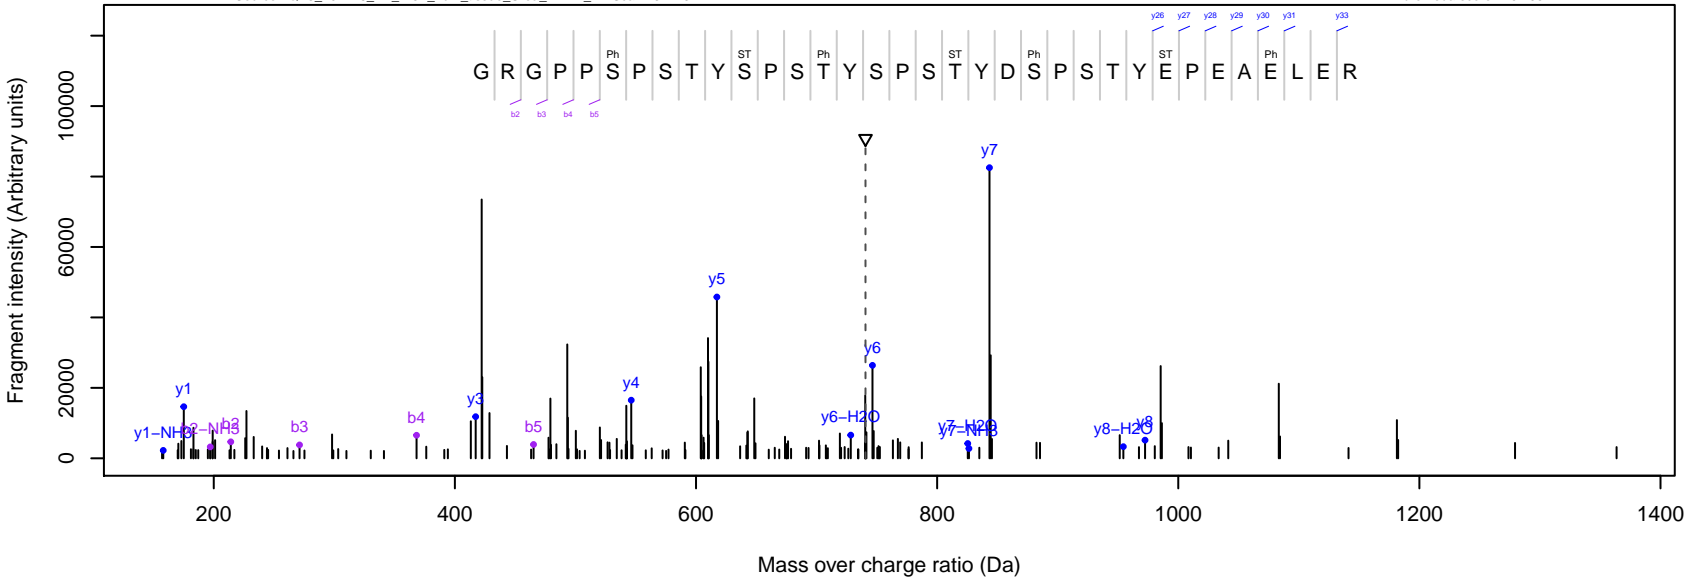

RS(Phospho (STY))SEPLCPGSAPK-3+

Source : QE3\_201126\_FR\_TIOx\_hum\_tissue\_Urea\_RNAB\_H Scan : 10864

Andromeda score : 40.798

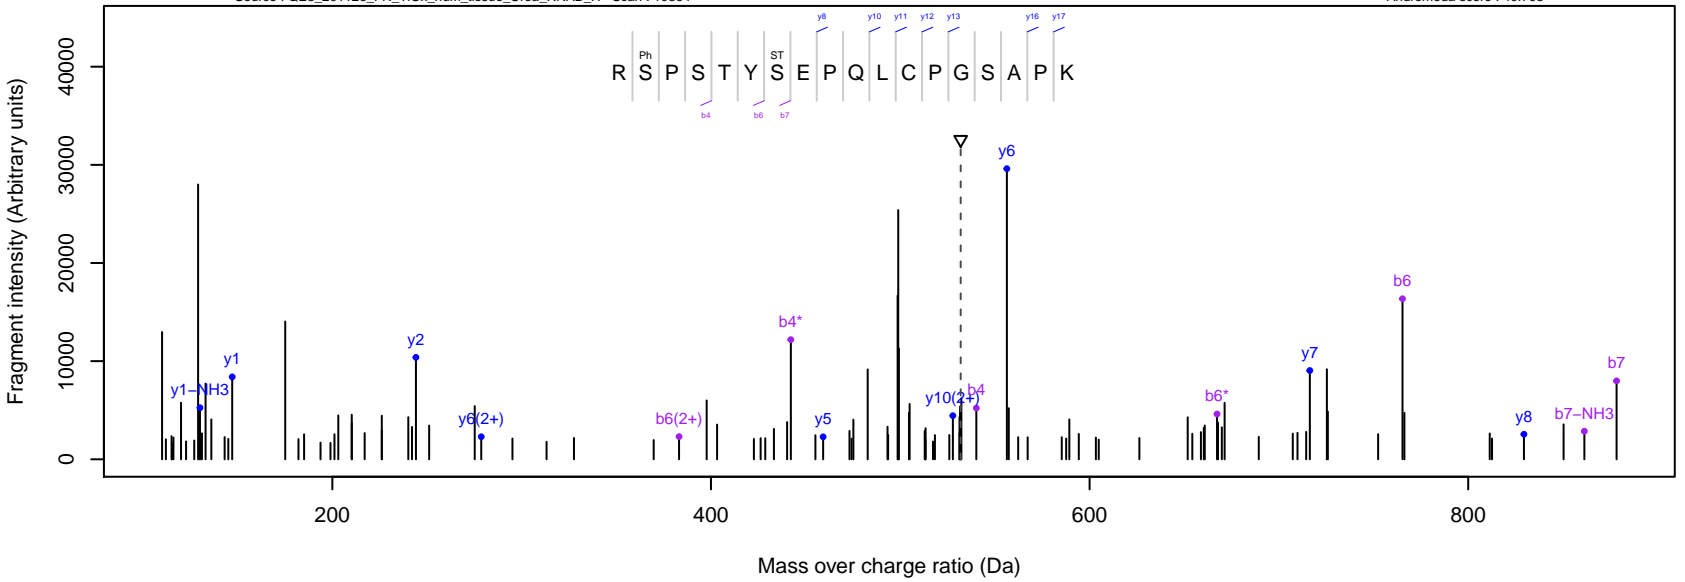

SPQIS(Phospho (STY))MSDIDLNLKGPK-3+

Source : QE3\_201126\_FR\_TIOx\_hum\_tissue\_Urea\_RNAB\_N Scan : 40048

Andromeda score : 40.779

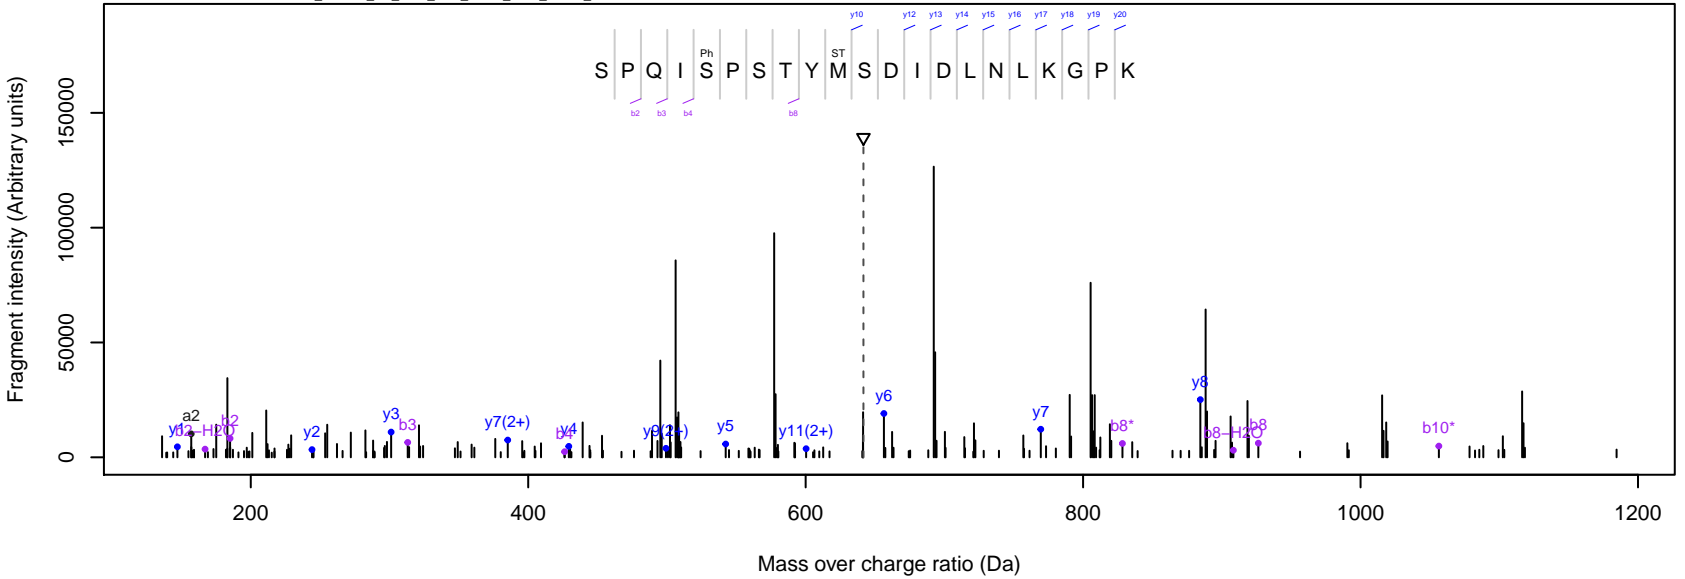

GHHVT(Phospho (STY))DS(Phospho (STY))ENDEPLNLNAS(Phospho (STY))DS(Phospho (STY))ESELHR-3+

Source : QE3\_201126\_FR\_TIOx\_hum\_tissue\_Urea\_RNAB\_N Scan : 30241

Andromeda score : 40.775

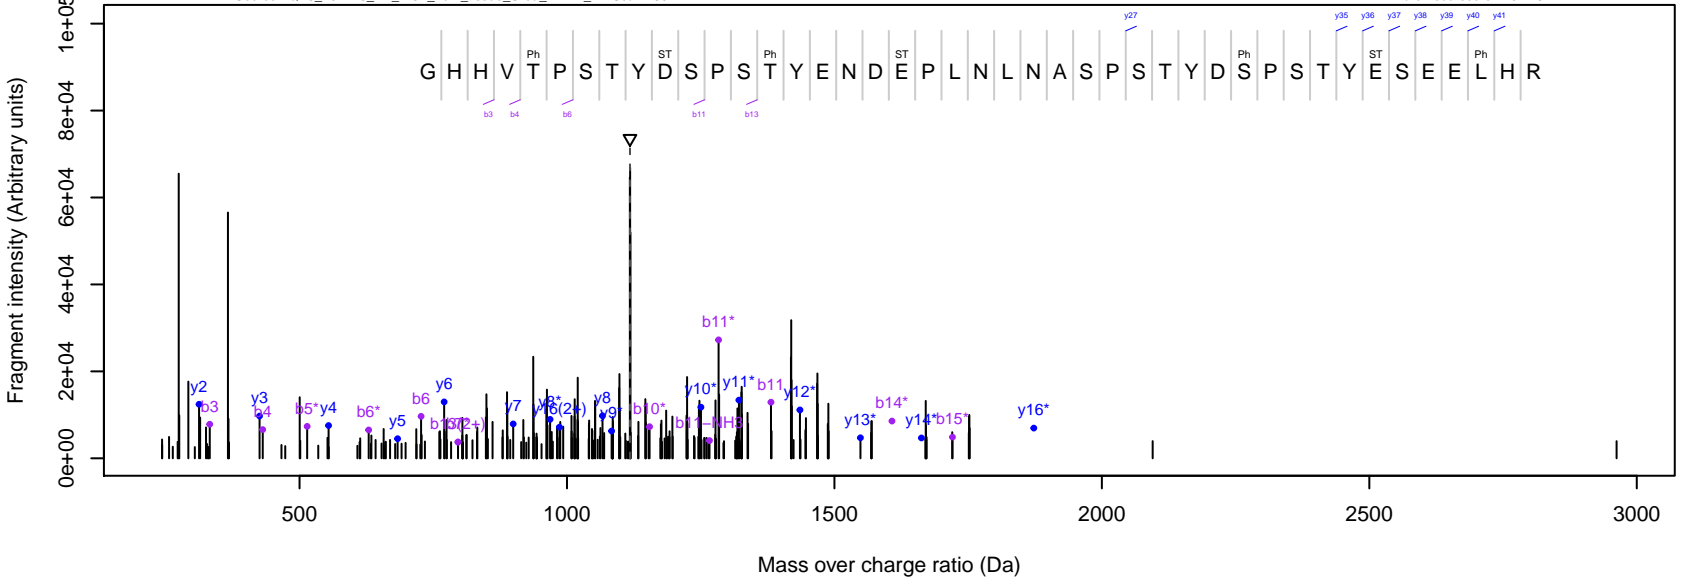

TQS(Phospho (STY))PGGCSEAVLAR-2+

Source : QE3\_201126\_FR\_TiOx\_hum\_tissue\_Urea\_RNAB\_N Scan : 22485

Andromeda score : 40.767

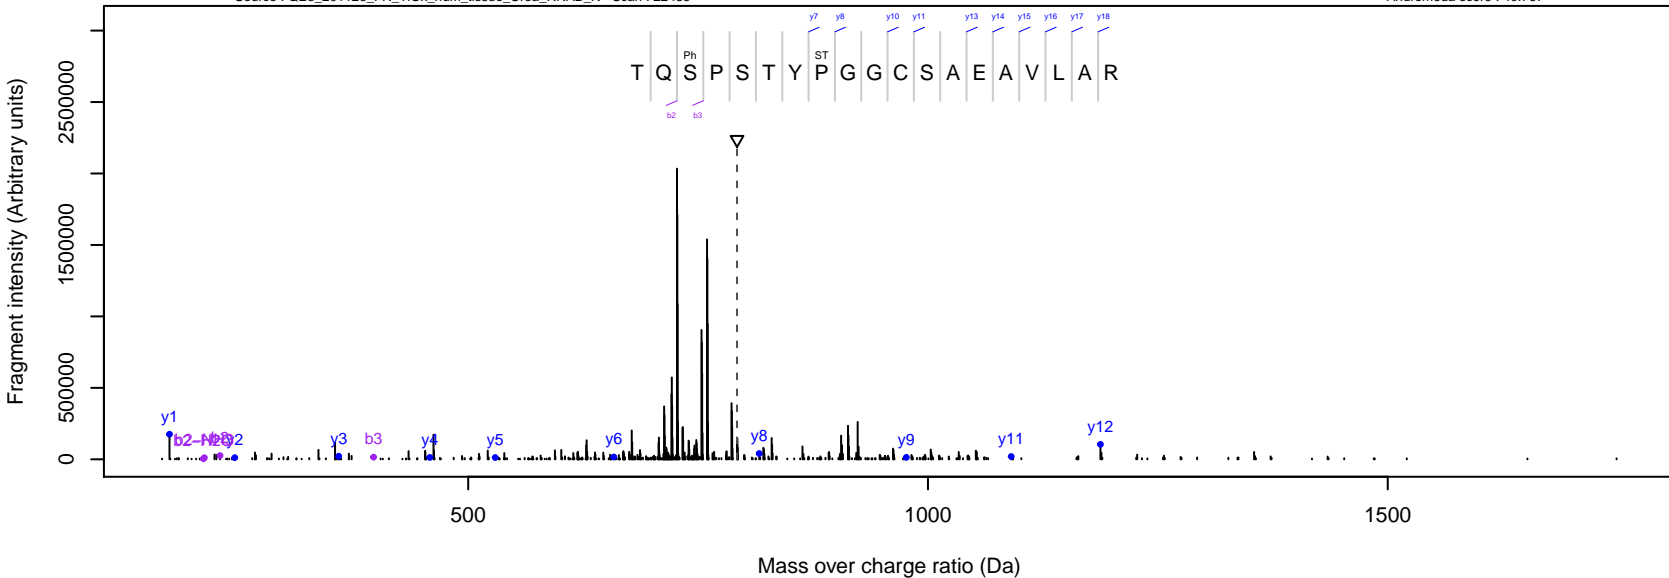

VPVQEIDDDFFP(Phospho (STY))S(Phospho (STY))GEEAEASVGE GGGGR-3+

Source : QE3\_201126\_FR\_TiOx\_hum\_tissue\_Urea\_RNAB\_H Scan : 57715

Andromeda score : 40.764

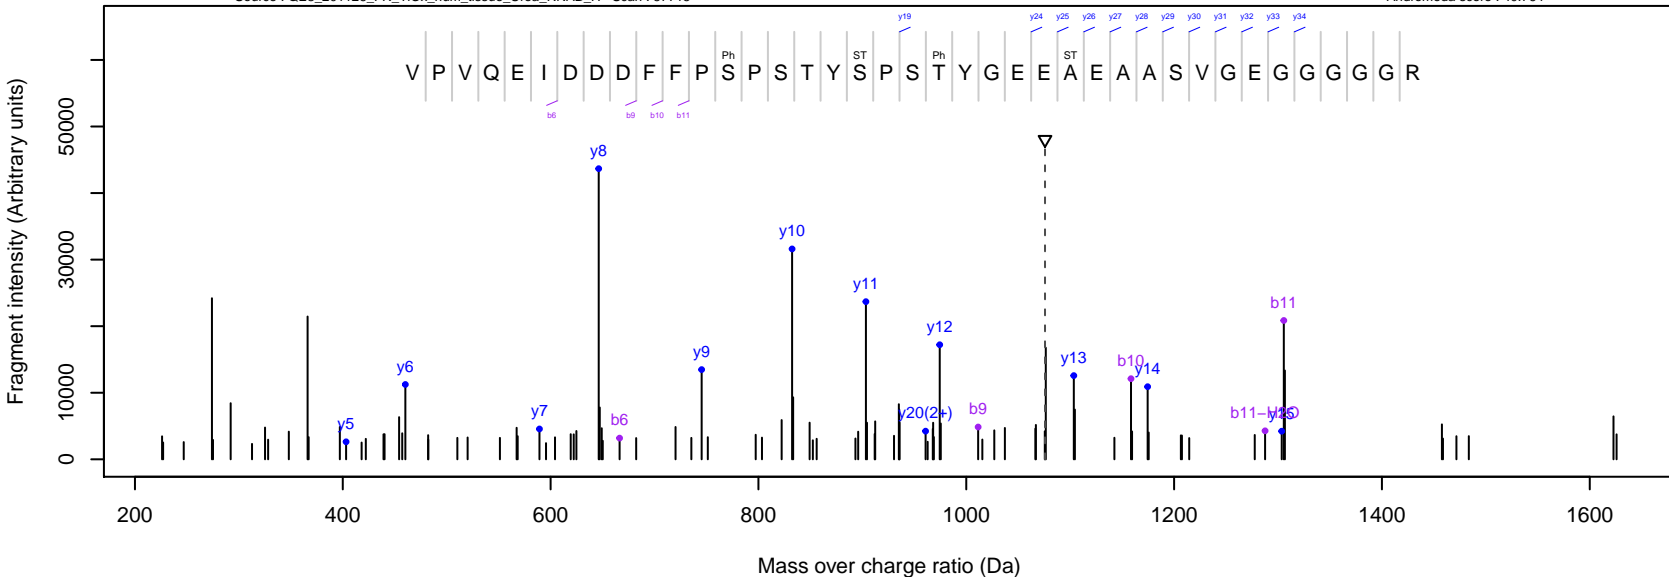

GILT(Phospho (STY))LKYP I E H G I I T N W D D M E K-3+

Source : QE3\_201126\_FR\_TiOx\_hum\_tissue\_Urea\_RNAB\_N Scan : 52982

Andromeda score : 40.756

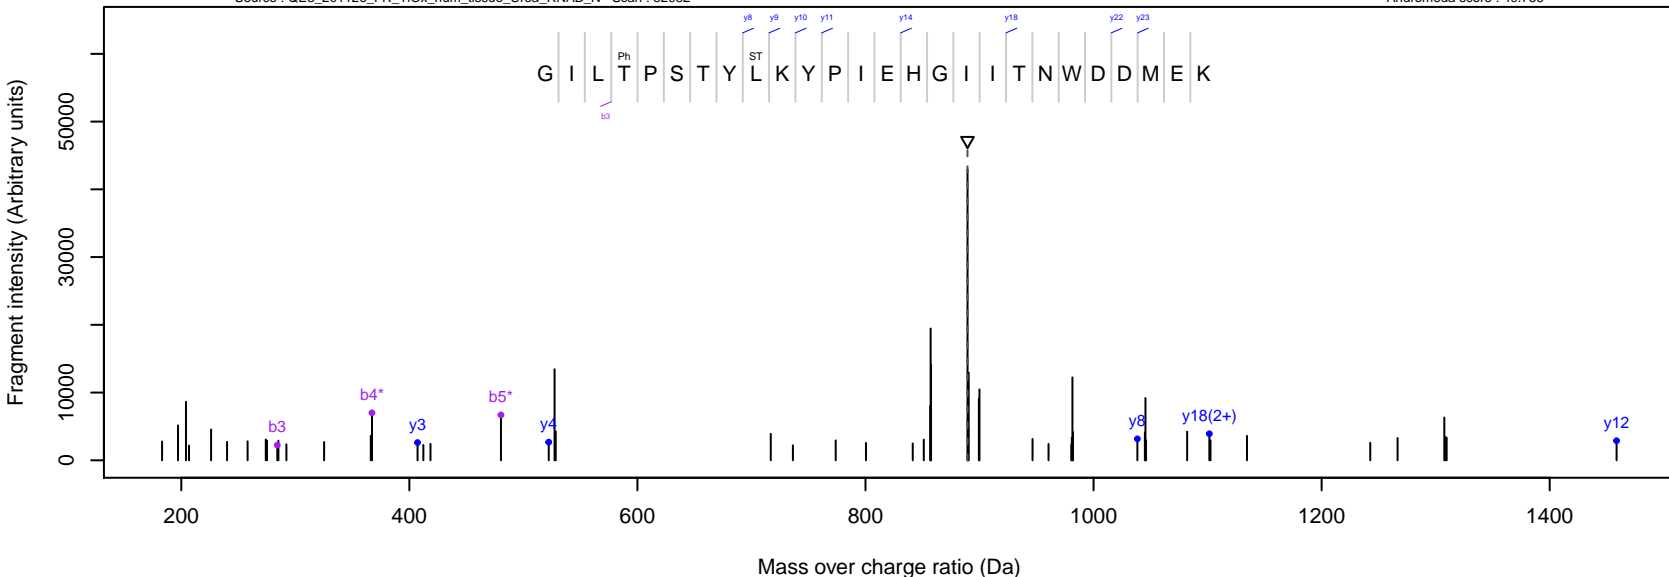

MEREDS(Phospho (STY))S(Phospho (STY))EEEEEEIDDEEIERR-3+

Source : QE3\_201126\_FR\_TiOx\_hum\_tissue\_Urea\_RNAB\_H Scan : 22247

Andromeda score : 40.756

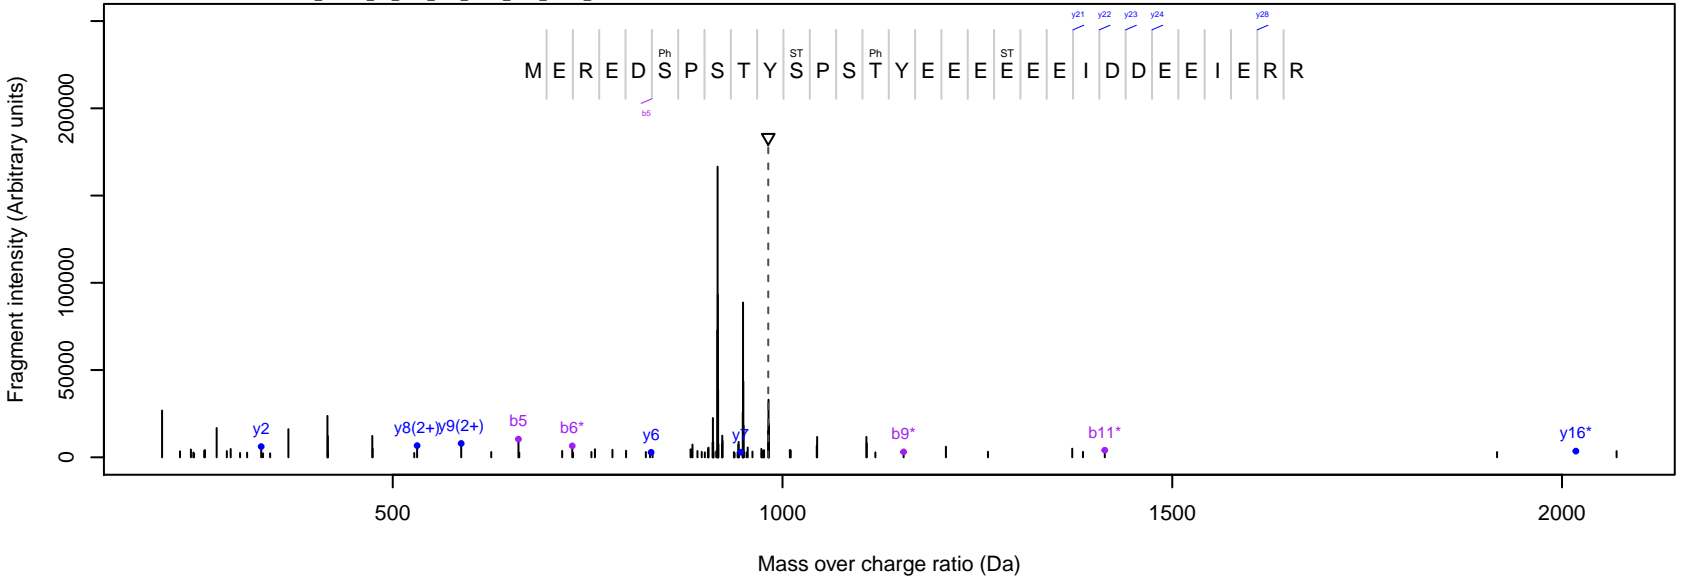

(Acetyl (Protein N-term))MNS(Phospho (STY))STSTMSEEPDALSVDLVNQLR-3+

Source : QE3\_201126\_FR\_TiOx\_hum\_tissue\_Urea\_RNAB\_H Scan : 61359

Andromeda score : 40.756

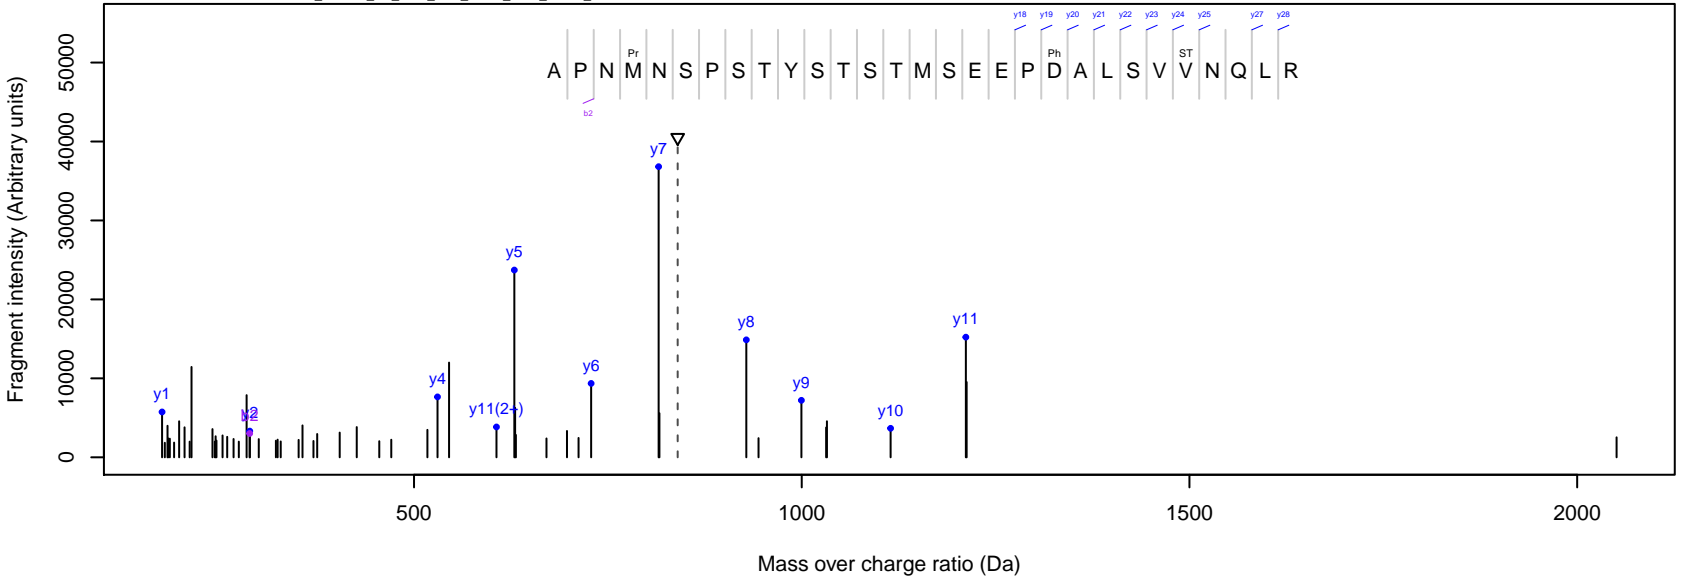

S(Phospho (STY))RS(Phospho (STY))RTPLLPR-3+

Source : QE3\_201126\_FR\_TiOx\_hum\_tissue\_Urea\_RNAB\_N Scan : 14191

Andromeda score : 40.725

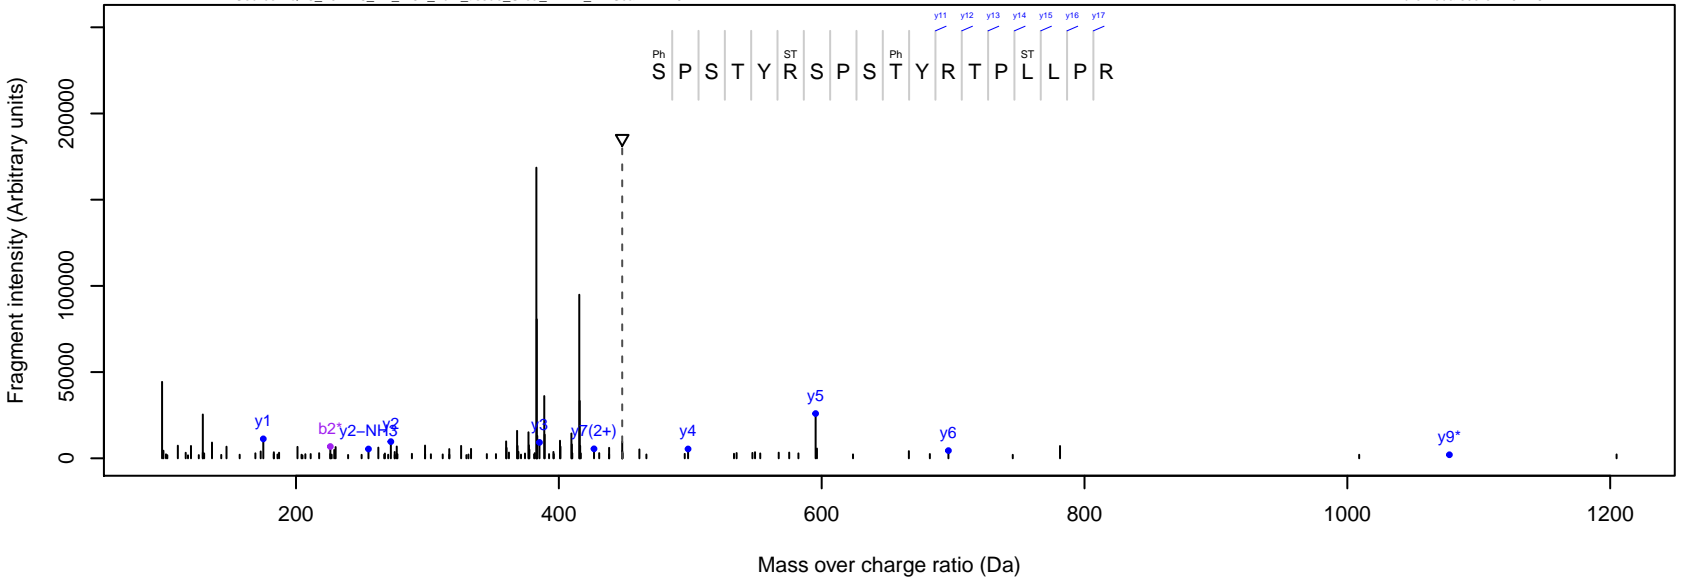

RSIQS(Phospho (STY))IQK-2+

Source : QE3\_201126\_FR\_TiOx\_hum\_tissue\_Urea\_RNAB\_N Scan : 11592

Andromeda score : 40.724

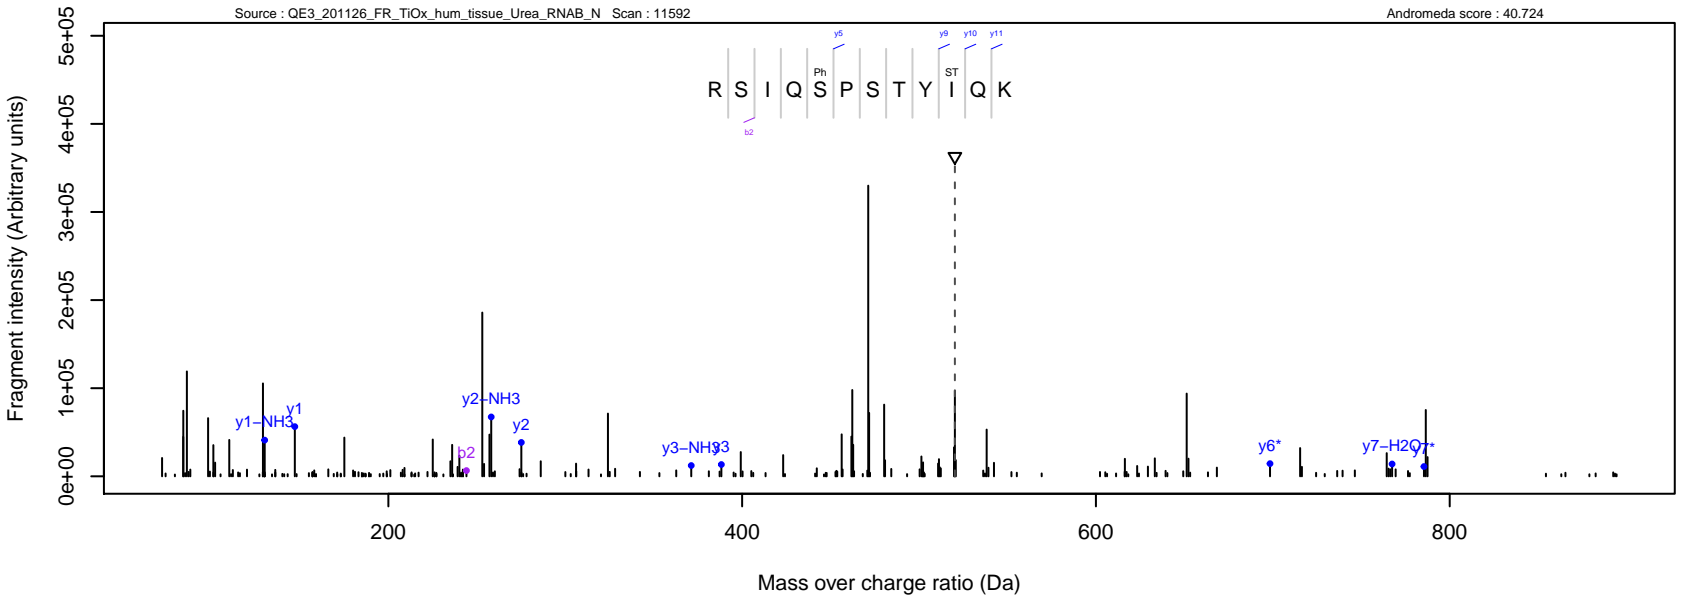

VS(Phospho (STY))PSTSYTPSR-2+

Source : QE3\_201126\_FR\_TiOx\_hum\_tissue\_Urea\_RNAB\_N Scan : 12949

Andromeda score : 40.715

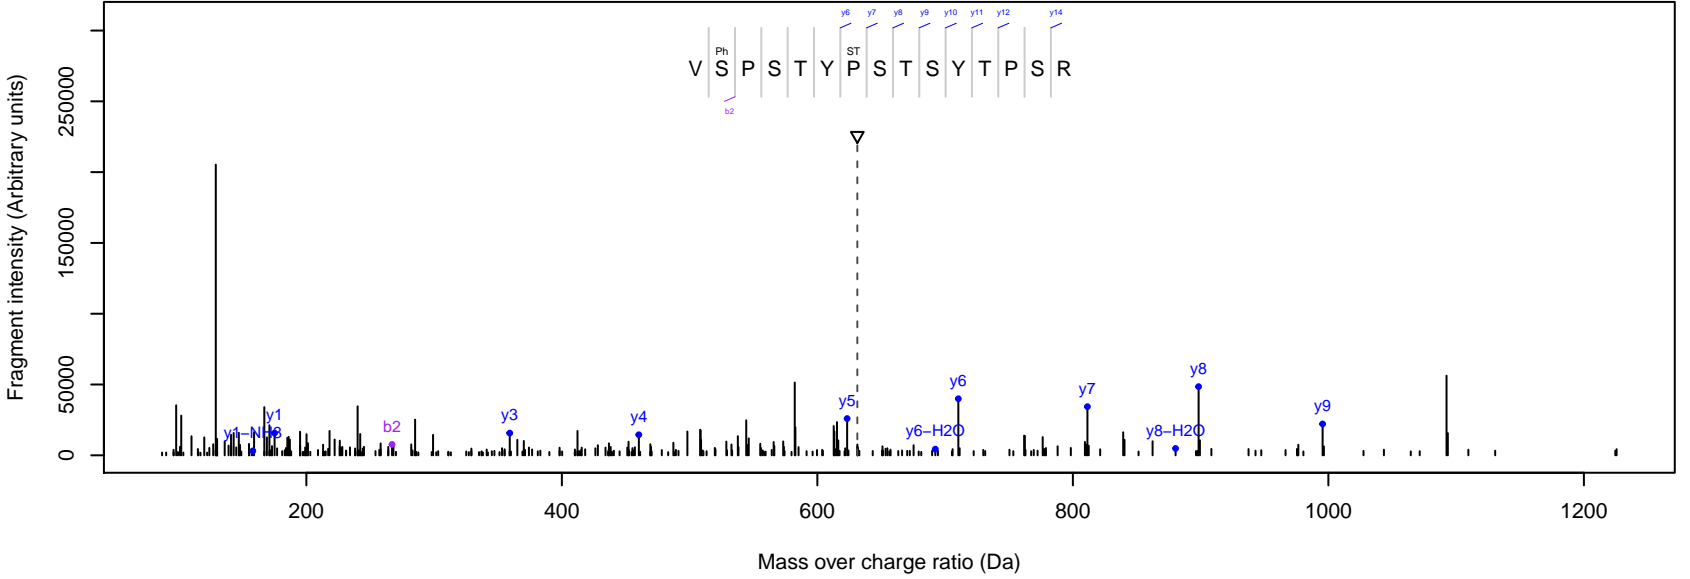

GLPSPYNM(Oxidation (M))SS(Phospho (STY))APGS(Phospho (STY))R-2+

Source : QE3\_201126\_FR\_TiOx\_hum\_tissue\_Urea\_RNAB\_N Scan : 28694

Andromeda score : 40.693

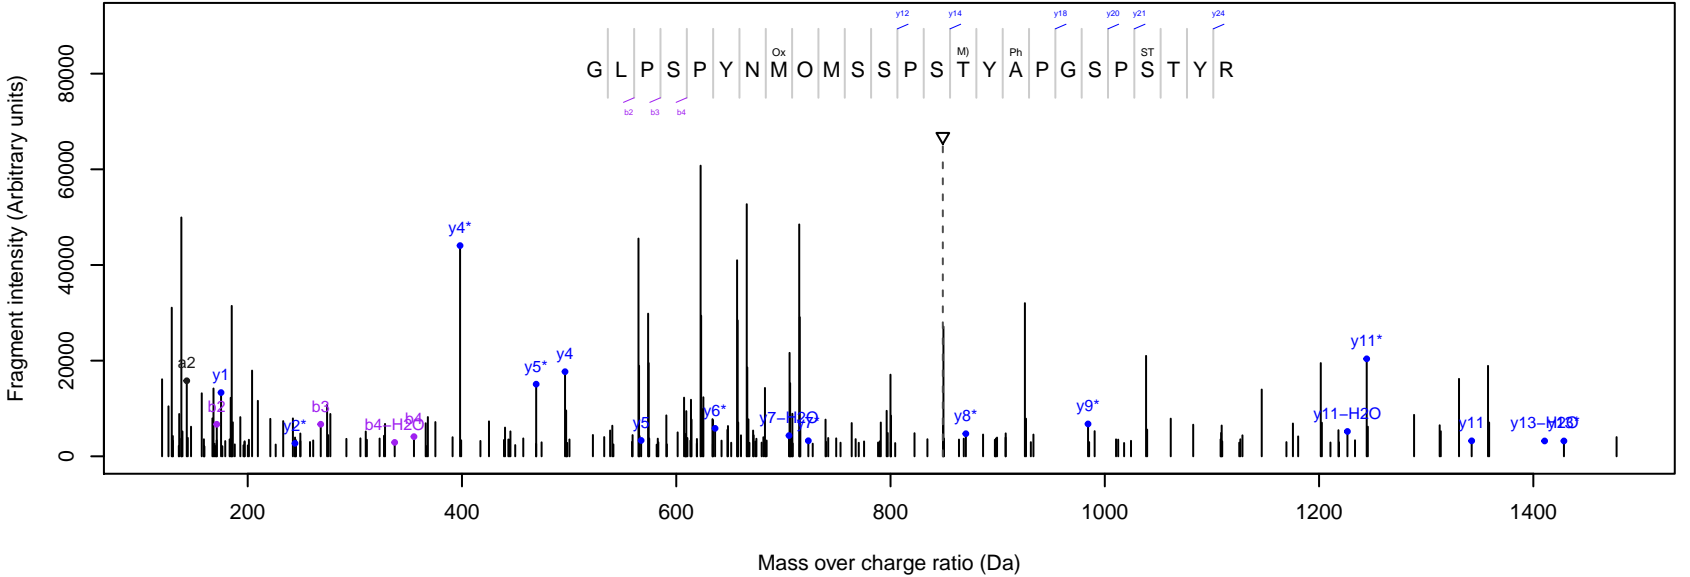



QGGGGGGGS(Phospho (STY))VPGIER-2+

Source : QE3\_201126\_FR\_TiOx\_hum\_tissue\_Urea\_RNAB\_N Scan : 14560

Andromeda score : 40.693

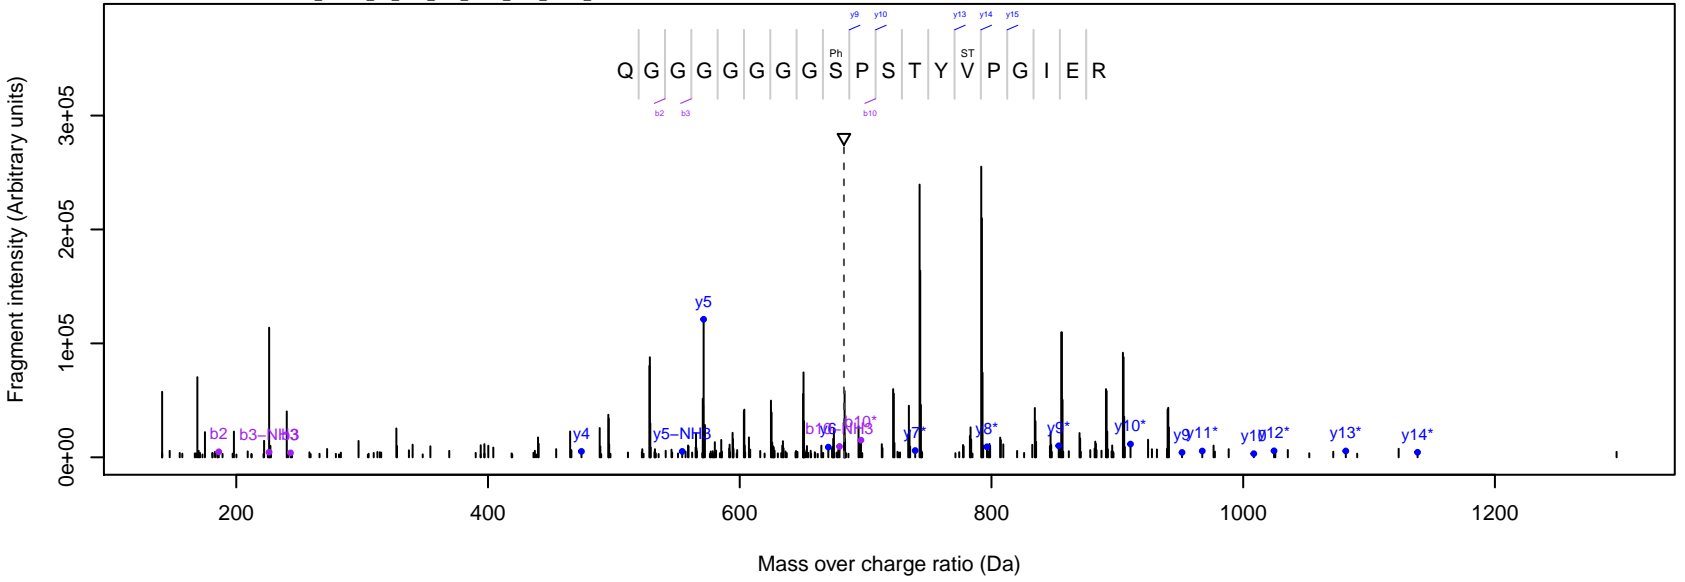

S(Phospho (STY))PILEEKDIPPLEFPK-3+

Source : QE3\_201126\_FR\_TiOx\_hum\_tissue\_Urea\_RNAB\_N Scan : 47645

Andromeda score : 40.689

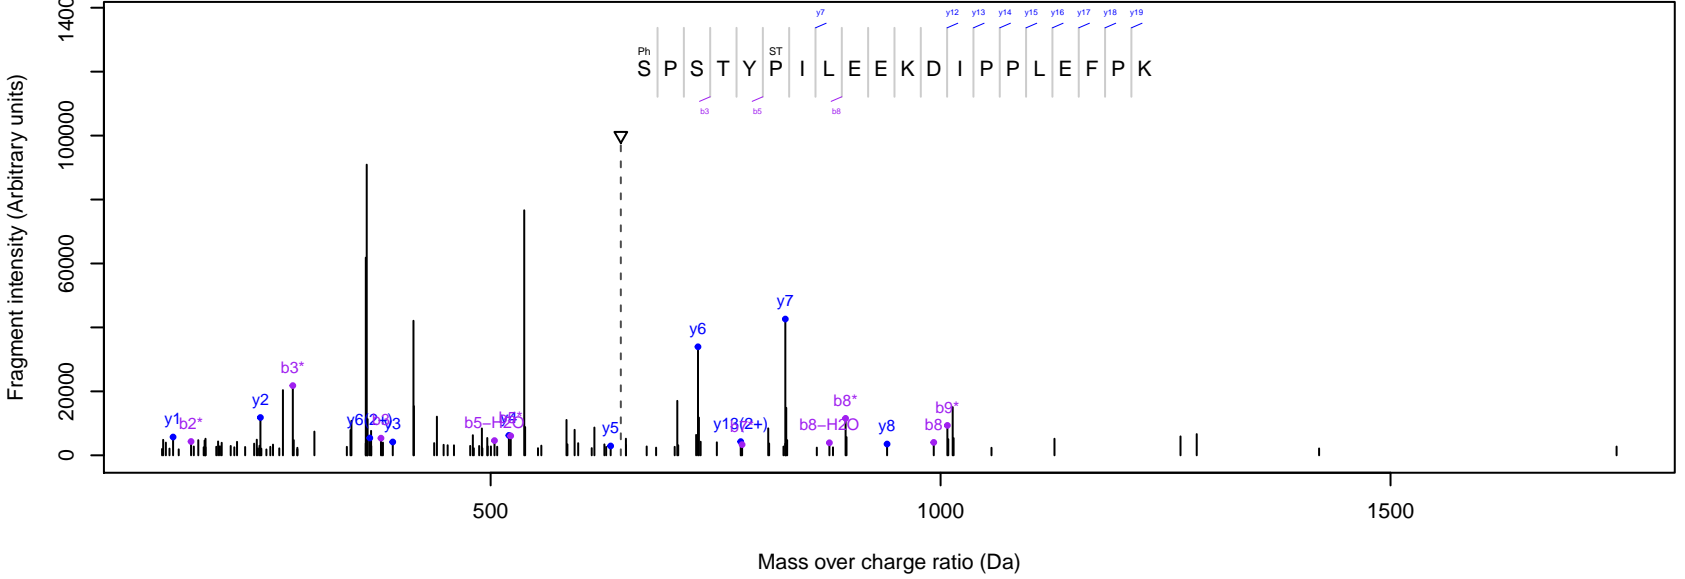

DGPPS(Phospho (STY))ALGS(Phospho (STY))RESLATLSELDLGAER-3+

Source : QE3\_201126\_FR\_TiOx\_hum\_tissue\_Urea\_RNAB\_H Scan : 55377

Andromeda score : 40.669

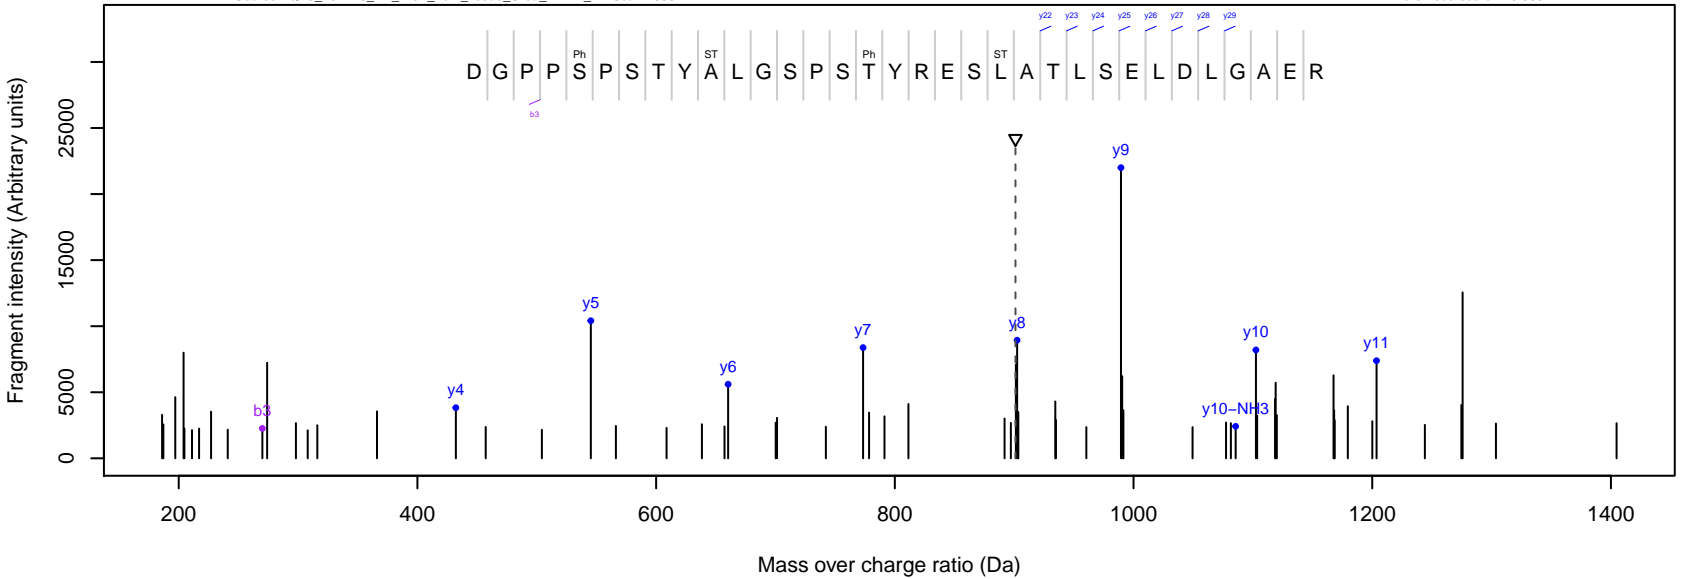

LHHY(Phospho (STY))DERS(Phospho (STY))DGESDSPEKEAEFAPYPR-4+

Source : QE3\_201126\_FR\_TiOx\_hum\_tissue\_Urea\_RNAB\_N Scan : 22178

Andromeda score : 40.669

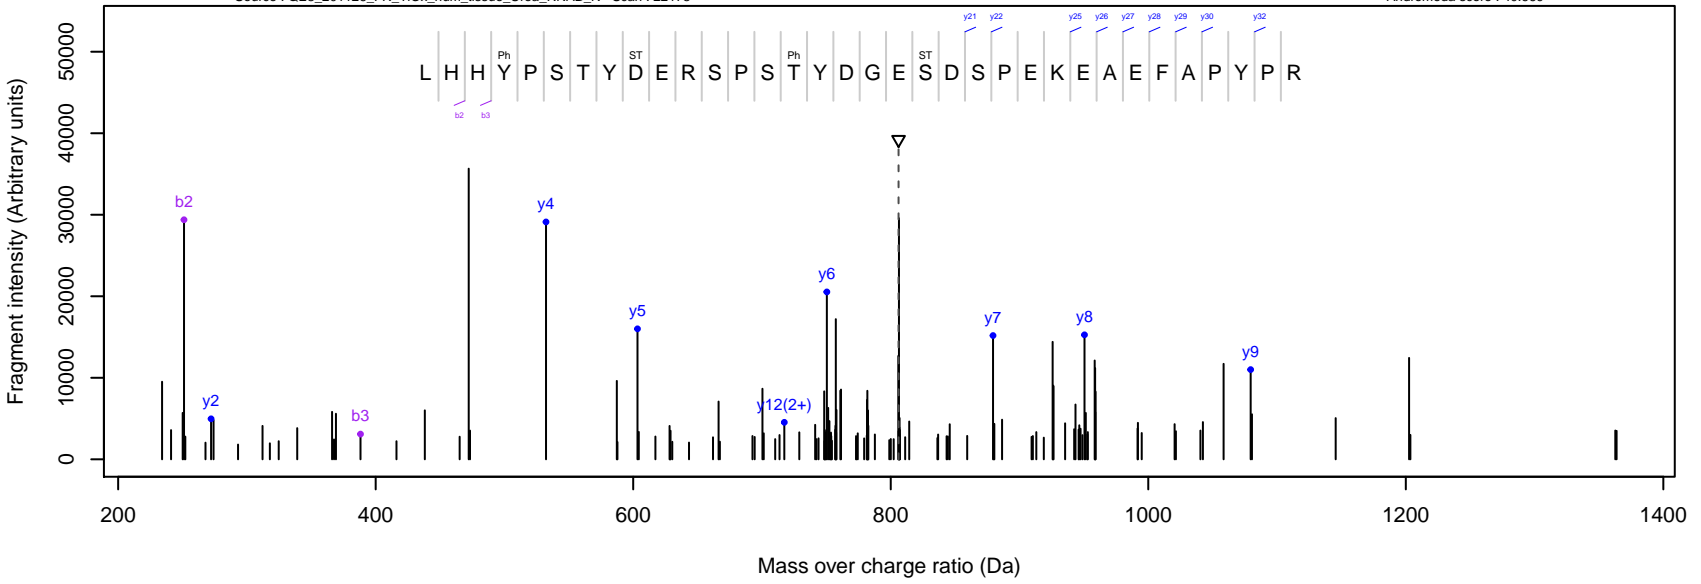

MS(Phospho (STY))ESPTPCSGSSFEETEALVNTAAK-3+

Source : QE3\_201126\_FR\_TiOx\_hum\_tissue\_Urea\_RNAB\_H Scan : 44694

Andromeda score : 40.669

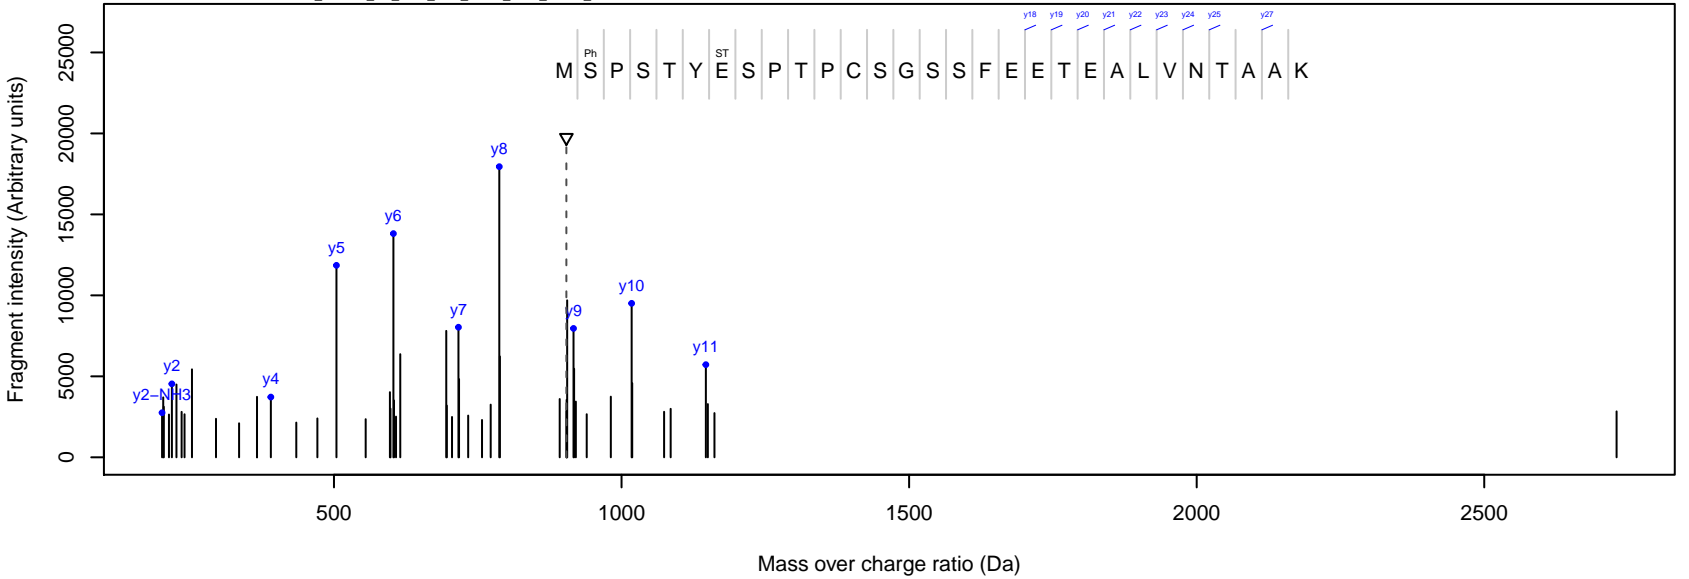

TIS(Phospho (STY))SLEEIVEKQGDTIEYLKR-3+

Source : QE3\_201126\_FR\_TiOx\_hum\_tissue\_Urea\_RNAB\_H Scan : 50932

Andromeda score : 40.669

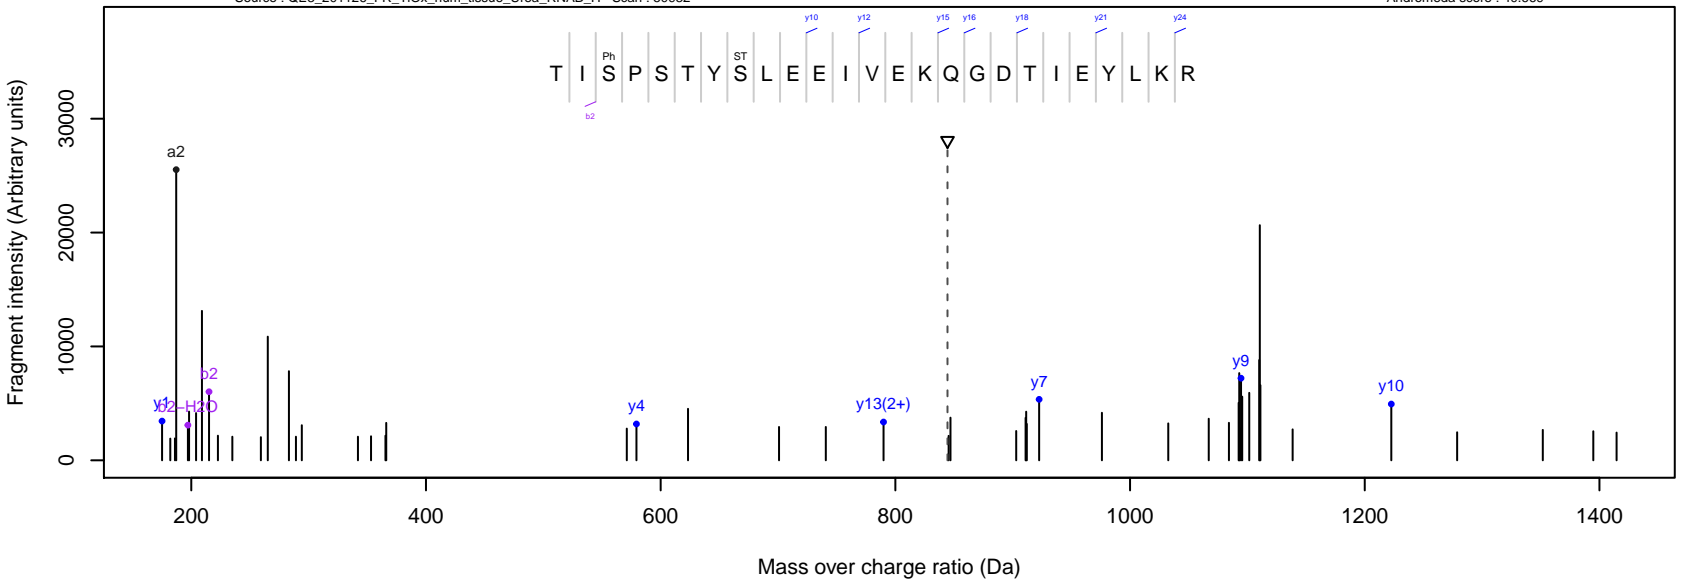

T(Phospho (STY))PS(Phospho (STY))PPPIPEDIALGKK-3+

Source : QE3\_201126\_FR\_TIOx\_hum\_tissue\_Urea\_RNAB\_B Scan : 40451

Andromeda score : 40.622

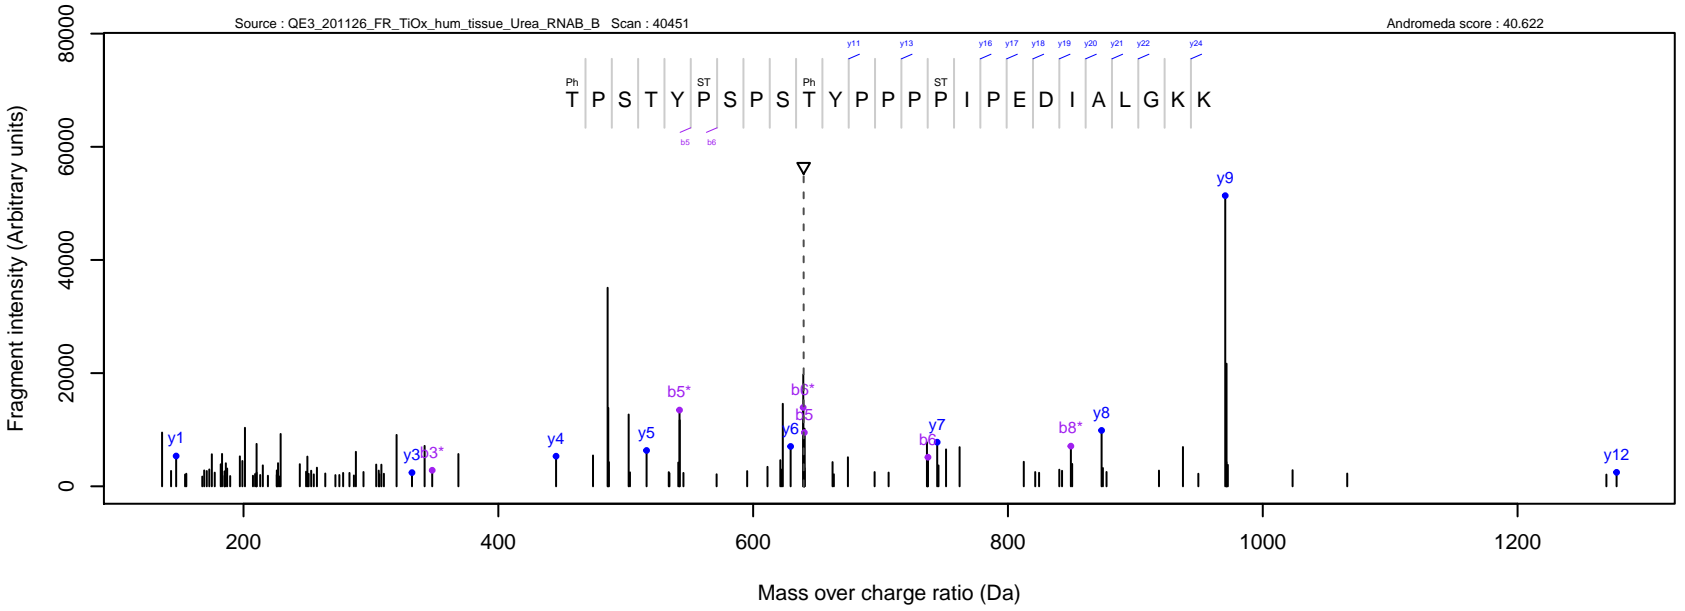

VRDEAEPGGEDPGPEPAGT(Phospho (STY))PS(Phospho (STY))PSGEADGDCAPEDAAPSSGGAPR-4+

Source : QE3\_201126\_FR\_TIOx\_hum\_tissue\_Urea\_RNAB\_B Scan : 25006

Andromeda score : 40.621

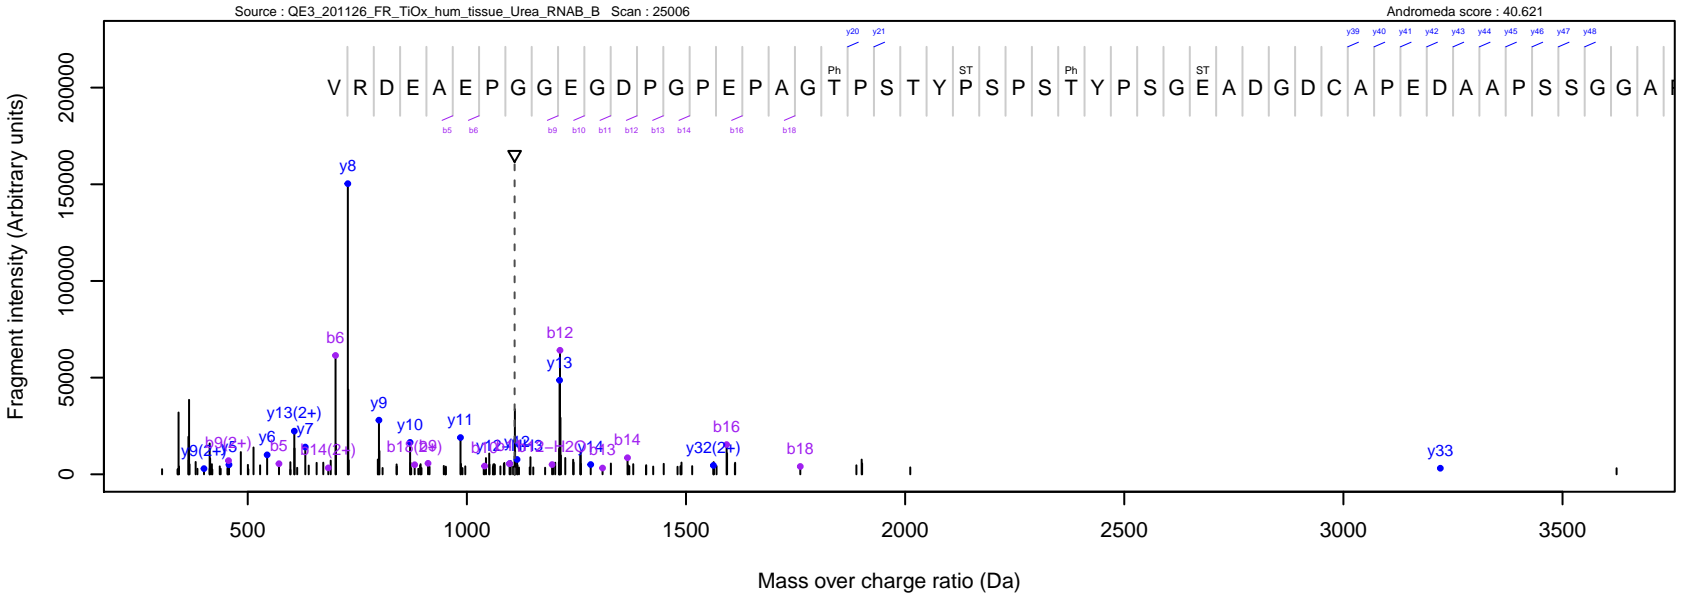

STGEQEIS(Phospho (STY))VGL-2+

Source : QE3\_201126\_FR\_TIOx\_hum\_tissue\_Urea\_RNAB\_N Scan : 41582

Andromeda score : 40.616

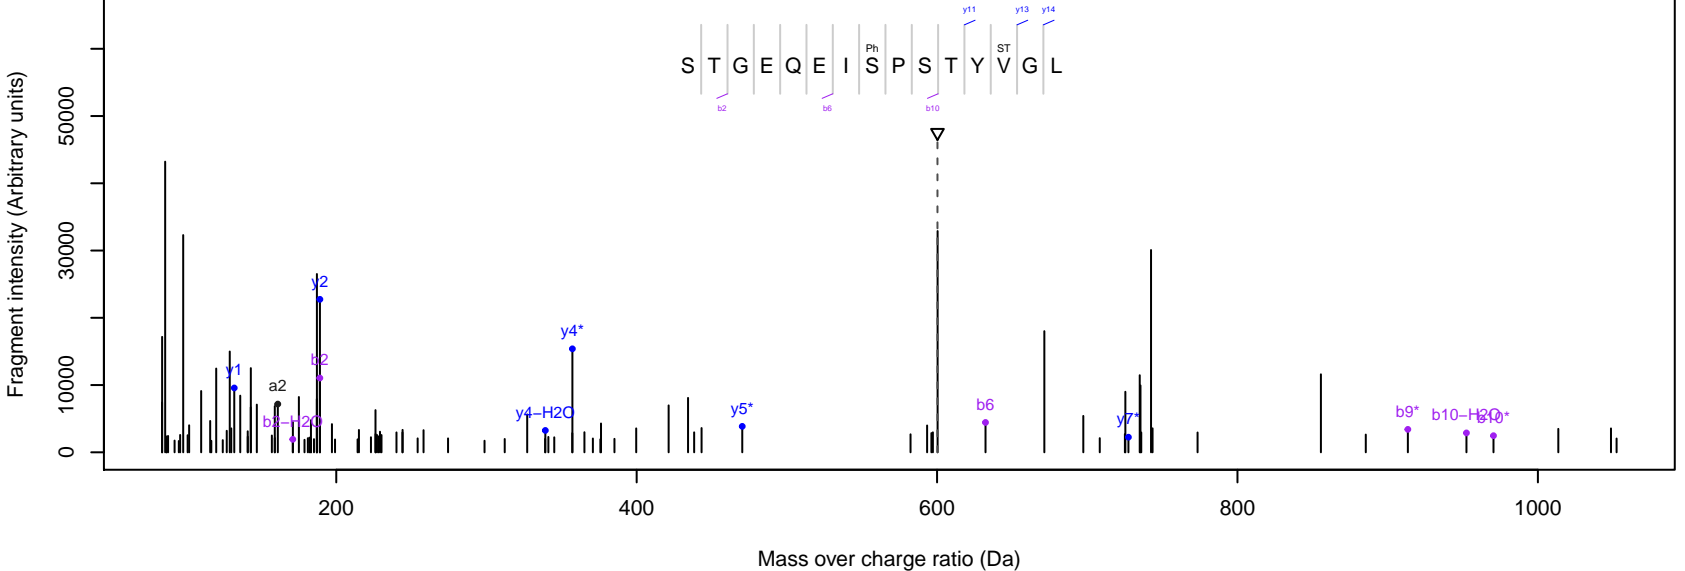

M(Oxidation (M))PIVGLGTWKS(Phospho (STY))PLGK-2+

Source : QE3\_201126\_FR\_TIOx\_hum\_tissue\_Urea\_RNAB\_H Scan : 37851

Andromeda score : 40.552

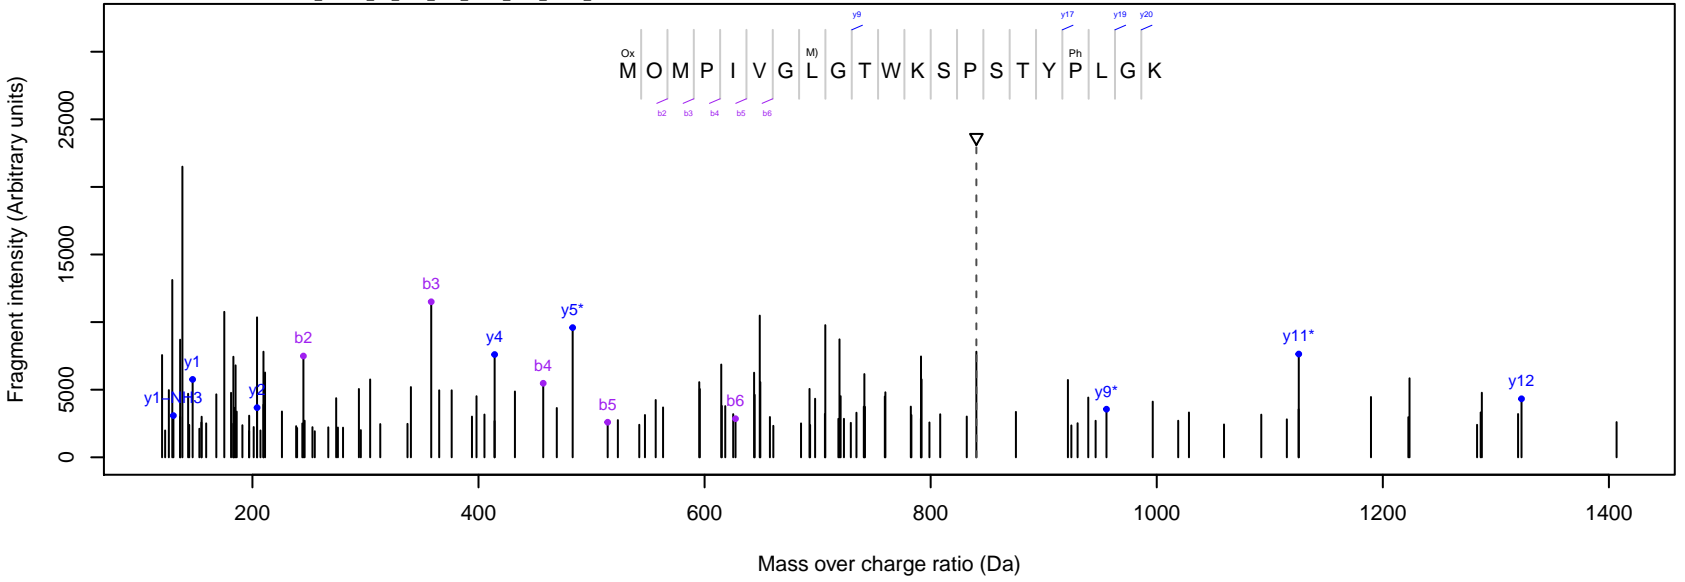

NADSELMPPPERGDPRLS(Phospho (STY))PDPVAGSAVSQELR-4+

Source : QE3\_201126\_FR\_TIOx\_hum\_tissue\_Urea\_RNAB\_H Scan : 38890

Andromeda score : 40.535

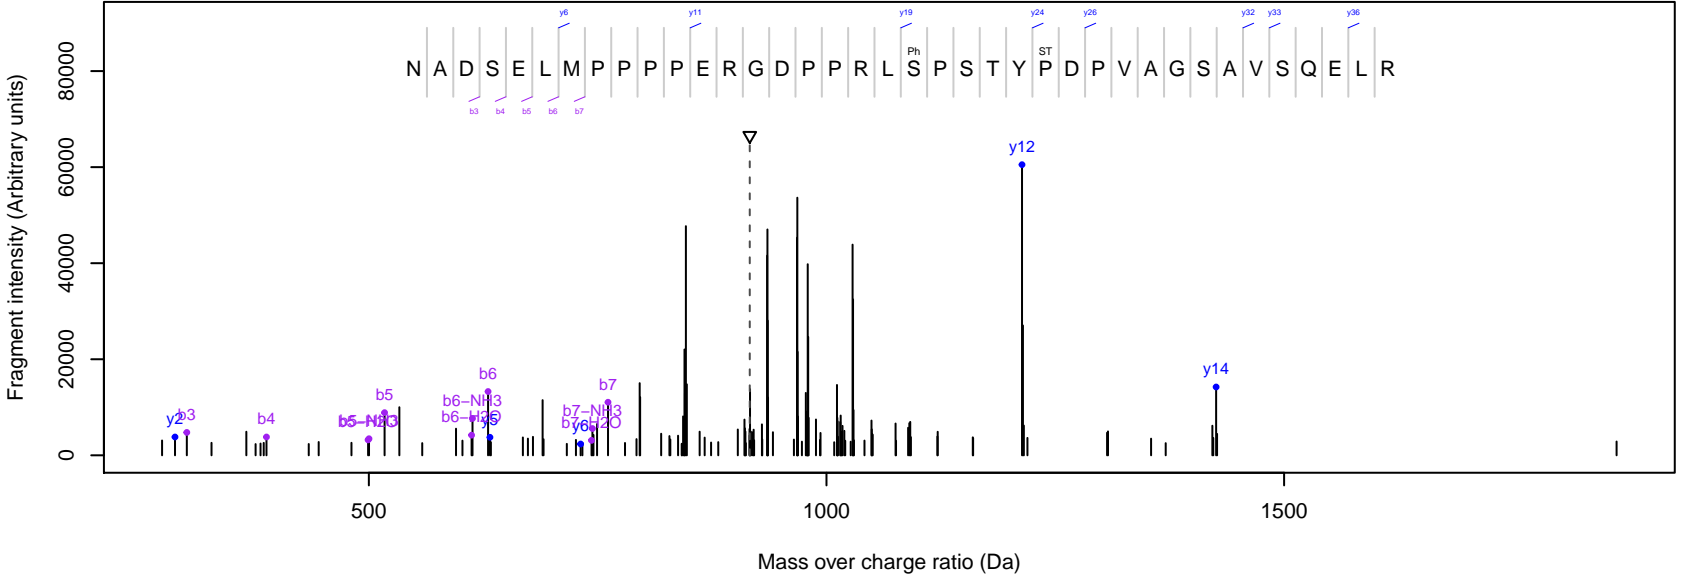

ALSSGGSITS(Phospho (STY))PPLS(Phospho (STY))PALPK-2+

Source : QE3\_201126\_FR\_TIOx\_hum\_tissue\_Urea\_RNAB\_B Scan : 47676

Andromeda score : 40.515

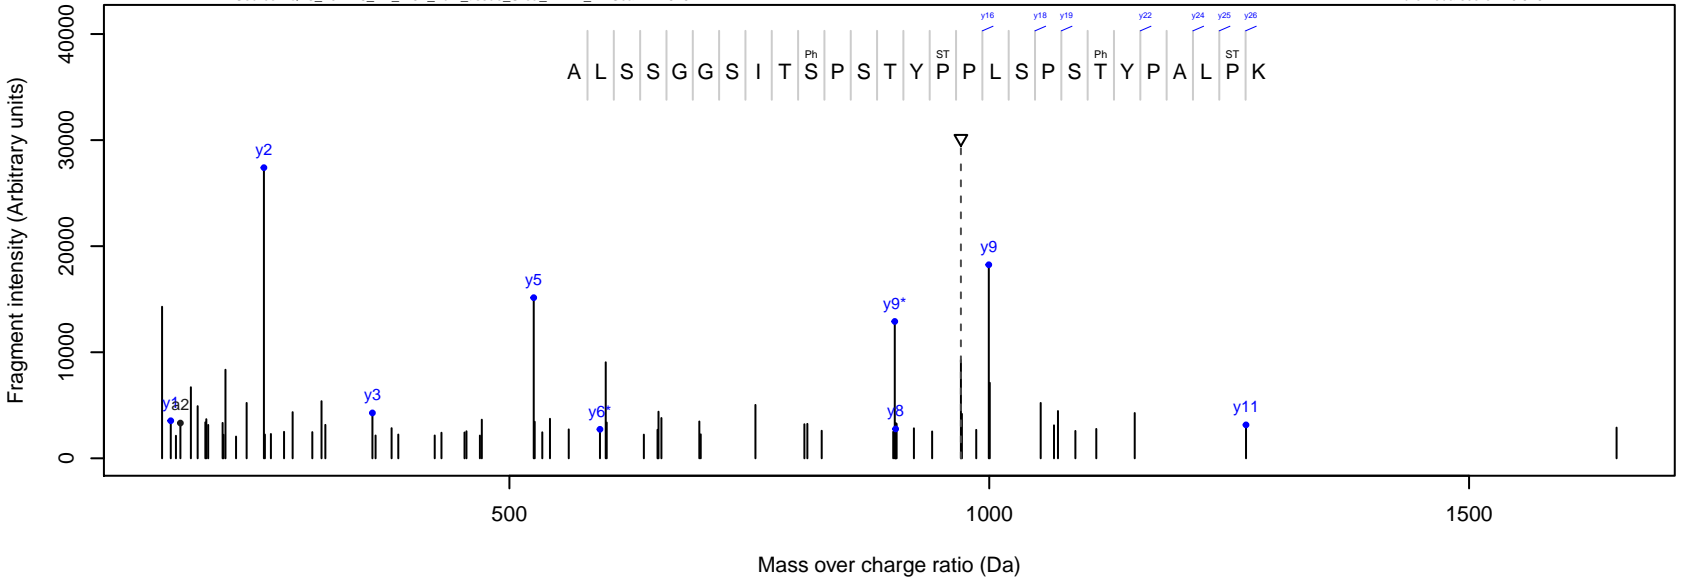

DVAILAQEIHDVAGDGDTLGSPSTYSEPAHSAASLSNMPSTPASTISAR-4+

Source : QE3\_201126\_FR\_TiOx\_hum\_tissue\_Urea\_RNAB\_H Scan : 52914

Andromeda score : 40.491

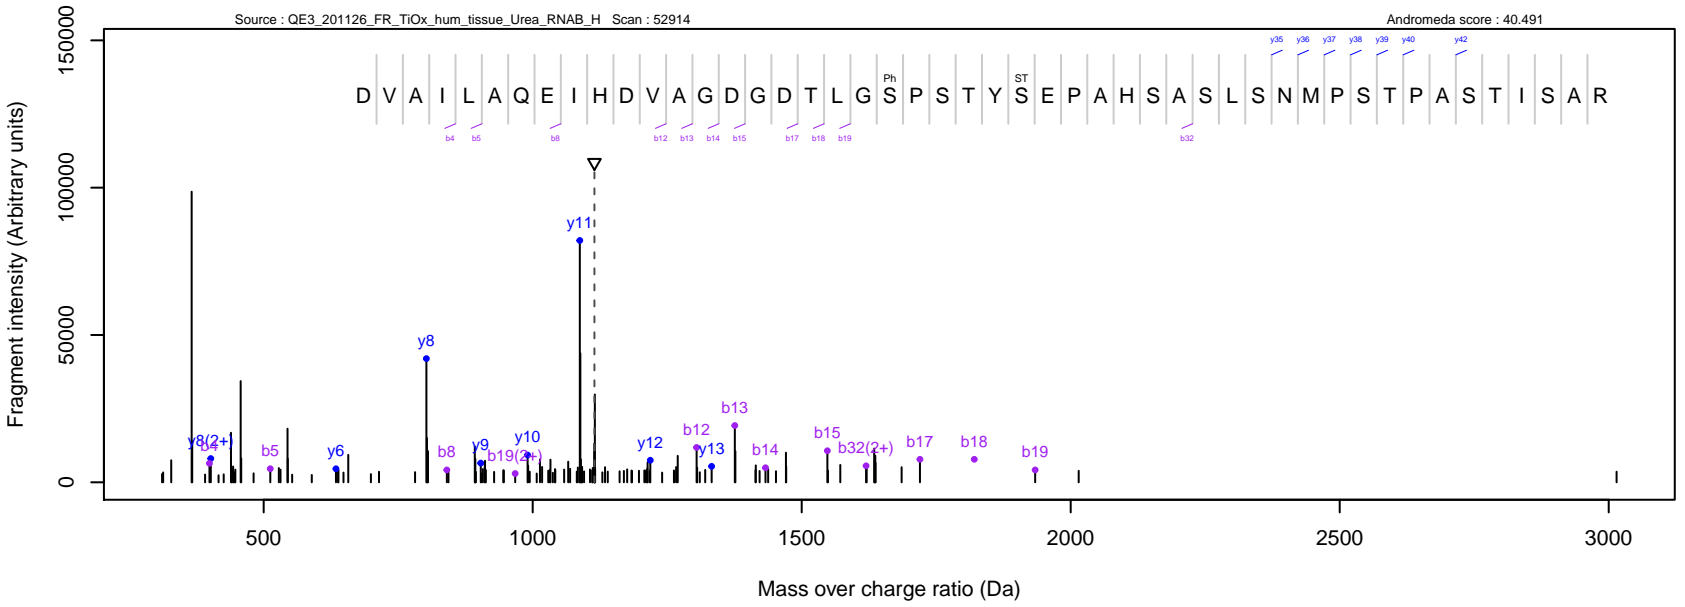

(Acetyl (Protein N-term))AAAAALSGAGT(Phospho (STY))PPAGGGAGGGAGGGGS(Phospho (STY))PPGGWAVAR-4+

Source : QE3\_201126\_FR\_TiOx\_hum\_tissue\_Urea\_RNAB\_N Scan : 62560

Andromeda score : 40.465

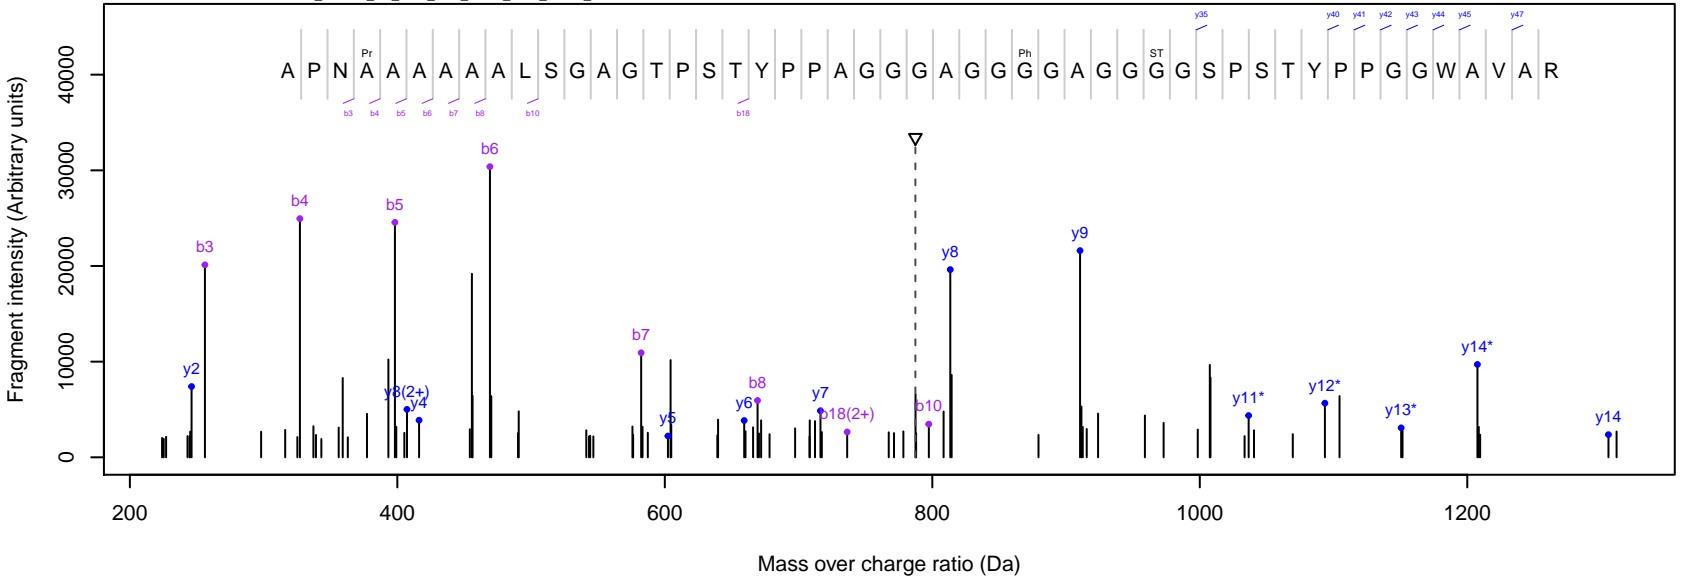

SVCGHLENT(Phospho (STY))SVGNSPNPSSAENSFR-3+

Source : QE3\_201126\_FR\_TiOx\_hum\_tissue\_Urea\_RNAB\_B Scan : 22922

Andromeda score : 40.463

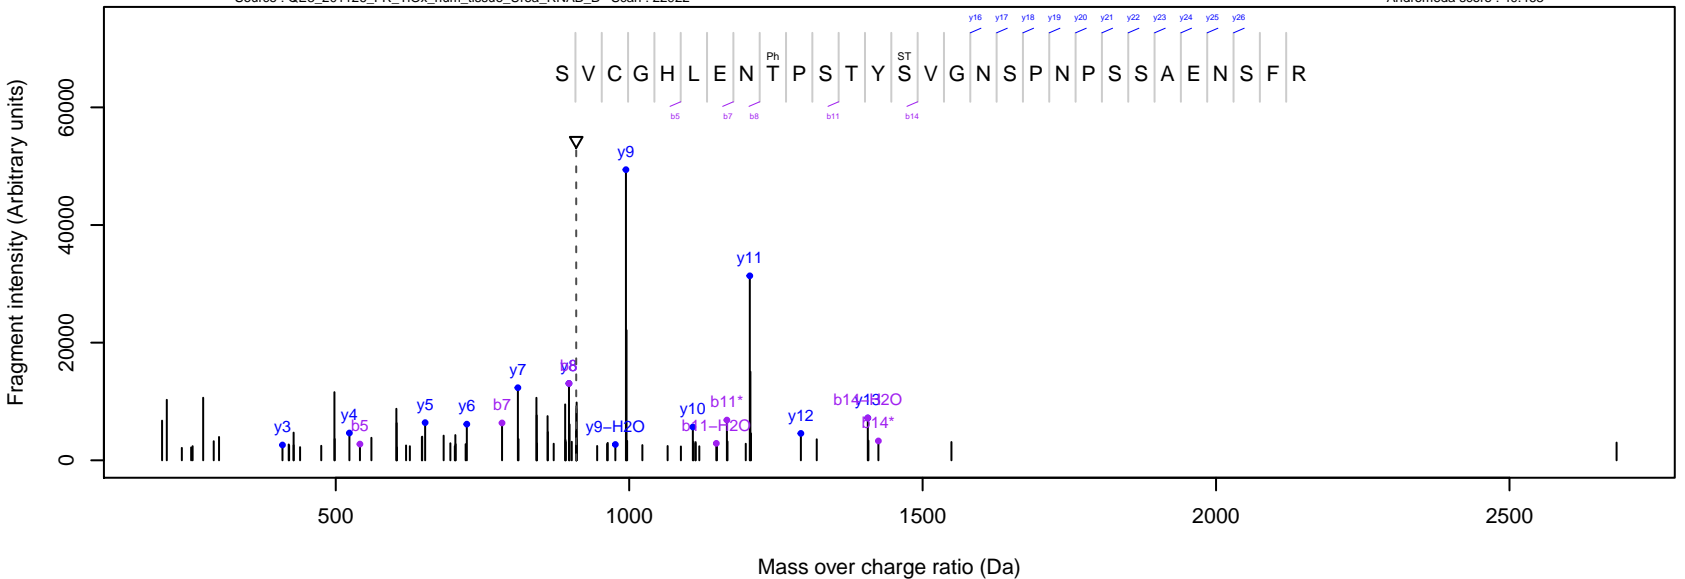

GGDVFGDTSFLSNHGG(Phospho (STY))SGSTHR-3+

Source : QE3\_201126\_FR\_TiOx\_hum\_tissue\_Urea\_RNAB\_B Scan : 27009

Andromeda score : 40.454

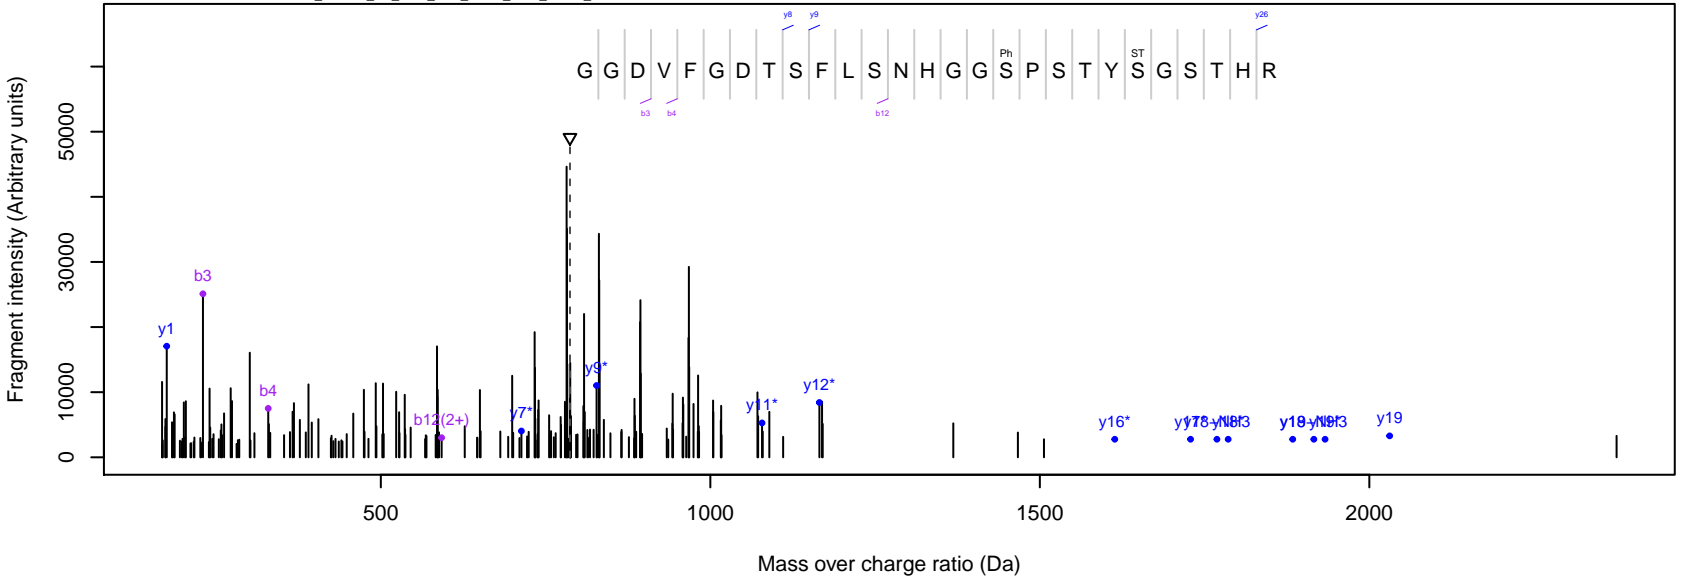

GSIVDTEEEKEEESDEDFAHHS(Phospho (STY))DNEQNR-4+

Source : QE3\_201126\_FR\_TiOx\_hum\_tissue\_Urea\_RNAB\_H Scan : 19192

Andromeda score : 40.407

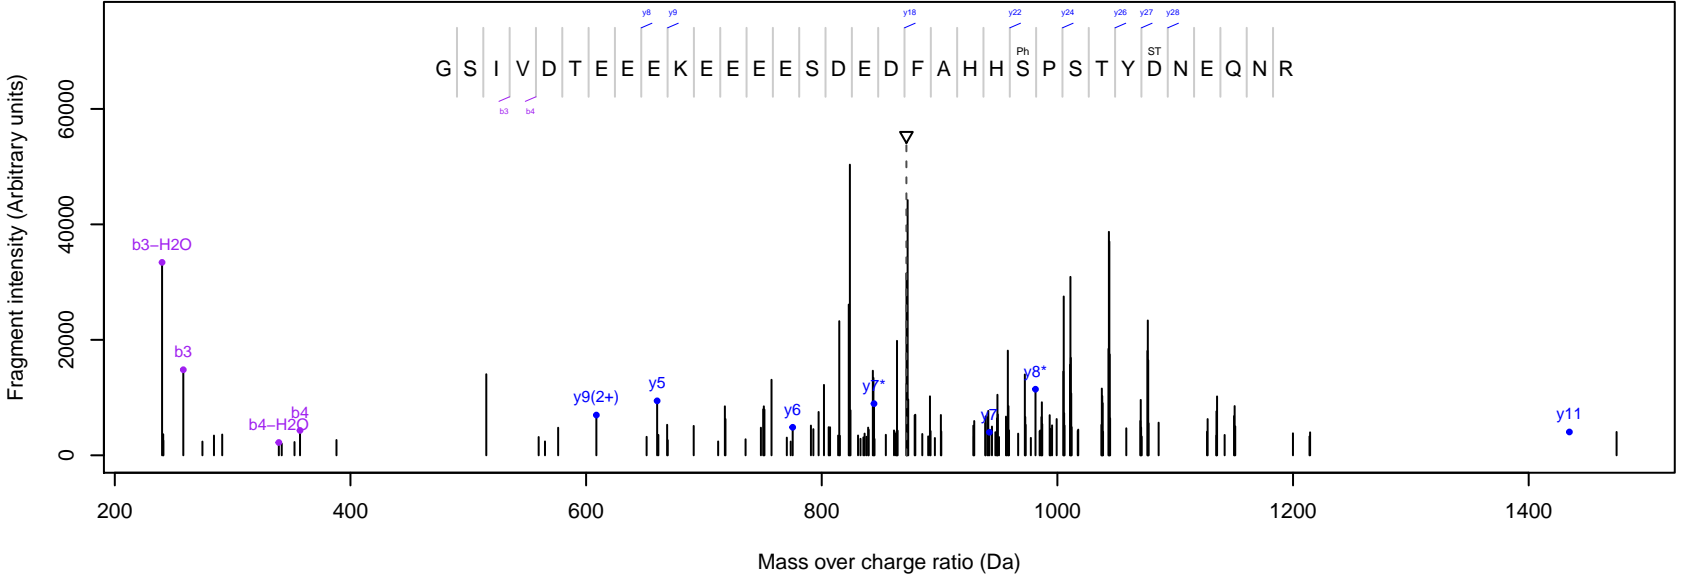

DPS(Phospho (STY))PESNKGESPSLESR-3+

Source : QE3\_201126\_FR\_TiOx\_hum\_tissue\_Urea\_RNAB\_B Scan : 7554

Andromeda score : 40.402

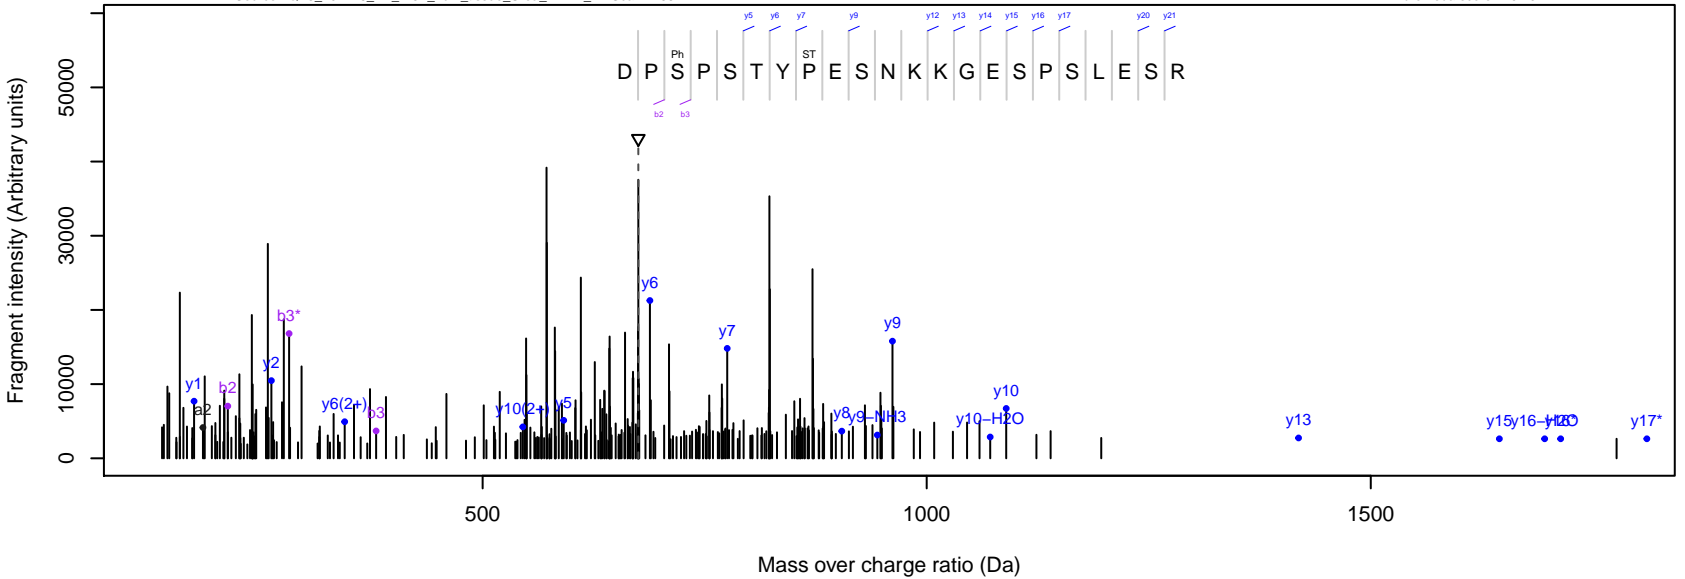

RLS(Phospho (STY))M(Oxidation (M))SEVKDDNSATK-3+

Source : QE3\_201126\_FR\_TiOx\_hum\_tissue\_Urea\_RNAB\_H Scan : 5573

Andromeda score : 40.384

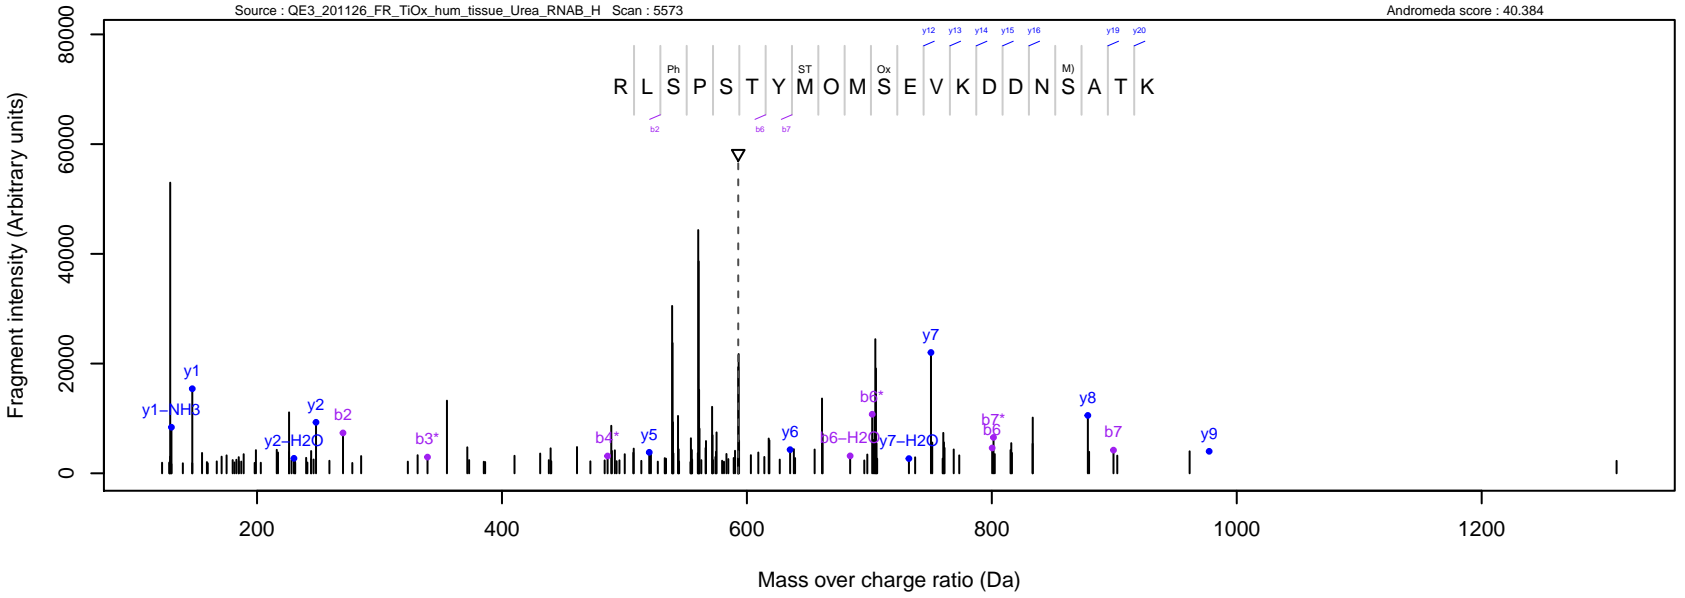

ELVGPPLAETVFTPK(Phospho (STY))SPENVQDR-3+

Source : QE3\_201126\_FR\_TiOx\_hum\_tissue\_Urea\_RNAB\_H Scan : 45638

Andromeda score : 40.381

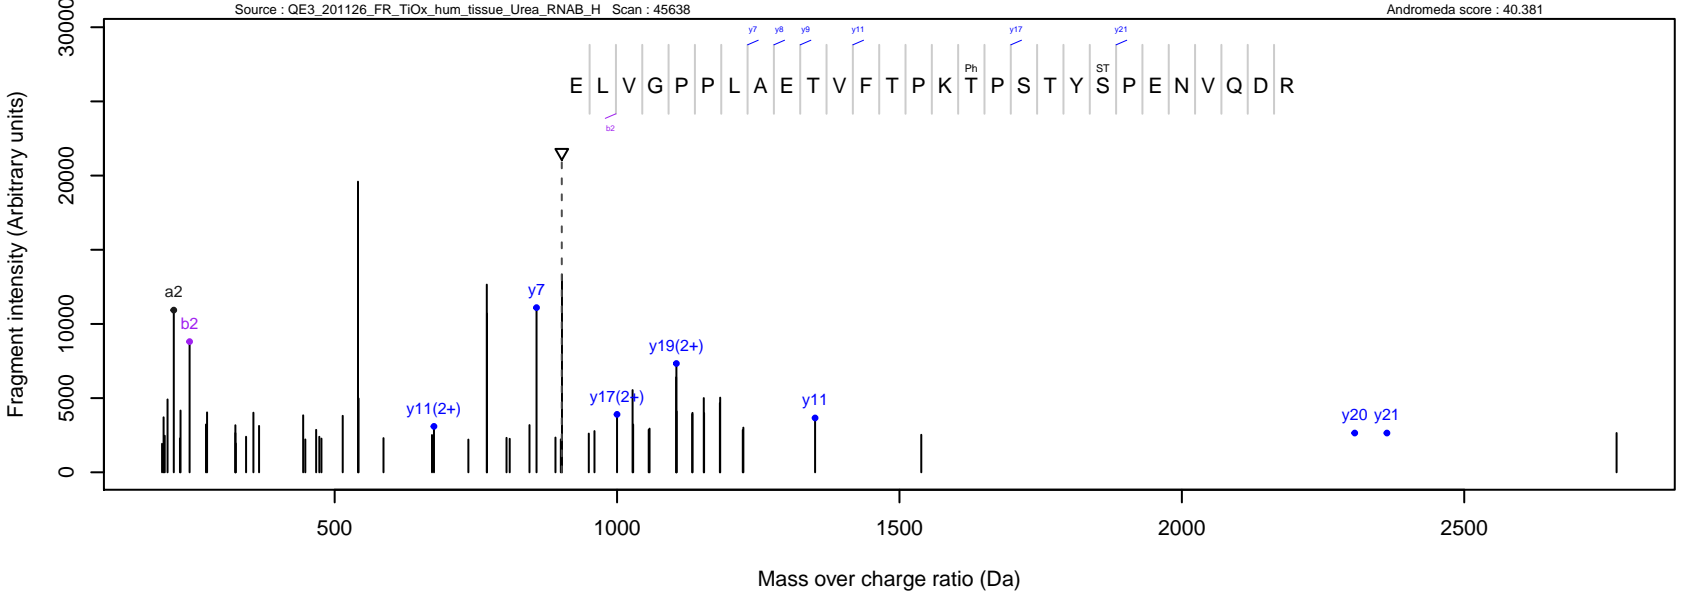

SM(Oxidation (M))S(Phospho (STY))VDLSHIPKDP L L F K-3+

Source : QE3\_201126\_FR\_TiOx\_hum\_tissue\_Urea\_RNAB\_B Scan : 47518

Andromeda score : 40.381

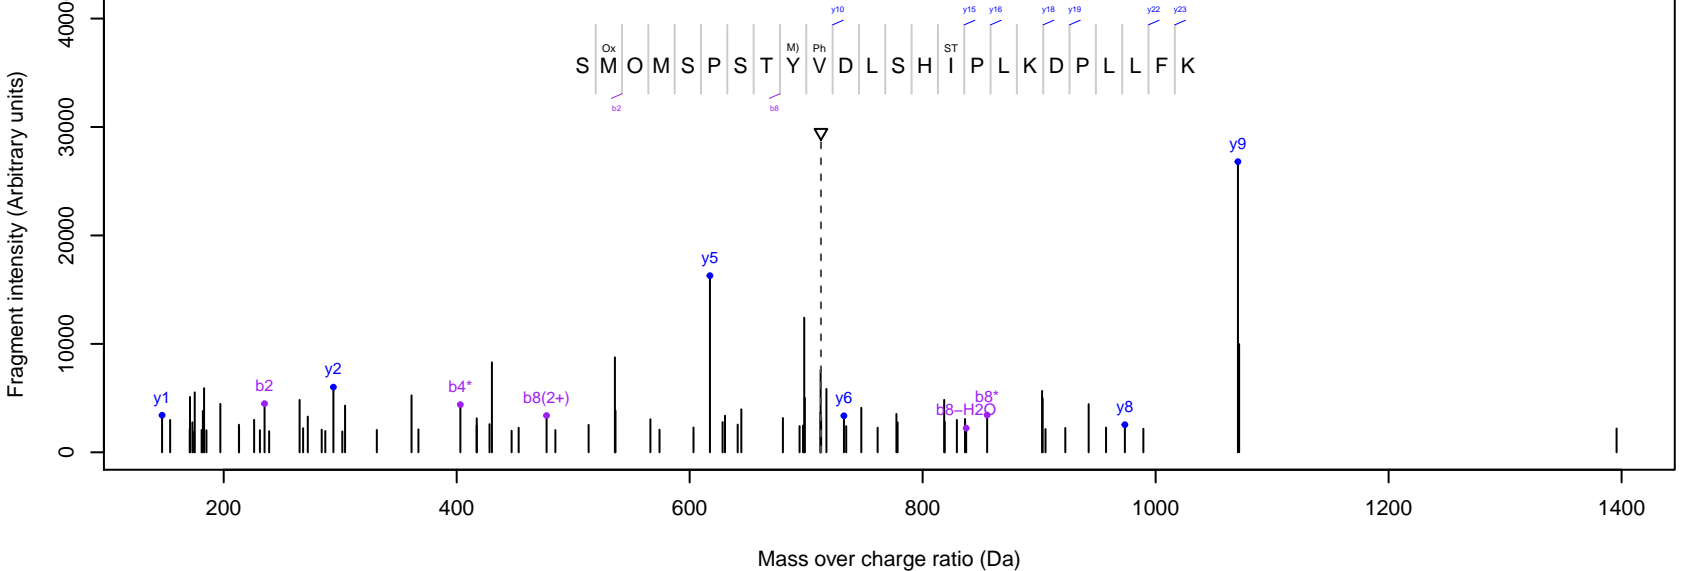

KGS(Phospho (STY))LKNGSM(Oxidation (M))GSPVNQQPK-3+

Source : QE3\_201126\_FR\_TiOx\_hum\_tissue\_Urea\_RNAB\_H Scan : 5189

Andromeda score : 40.369

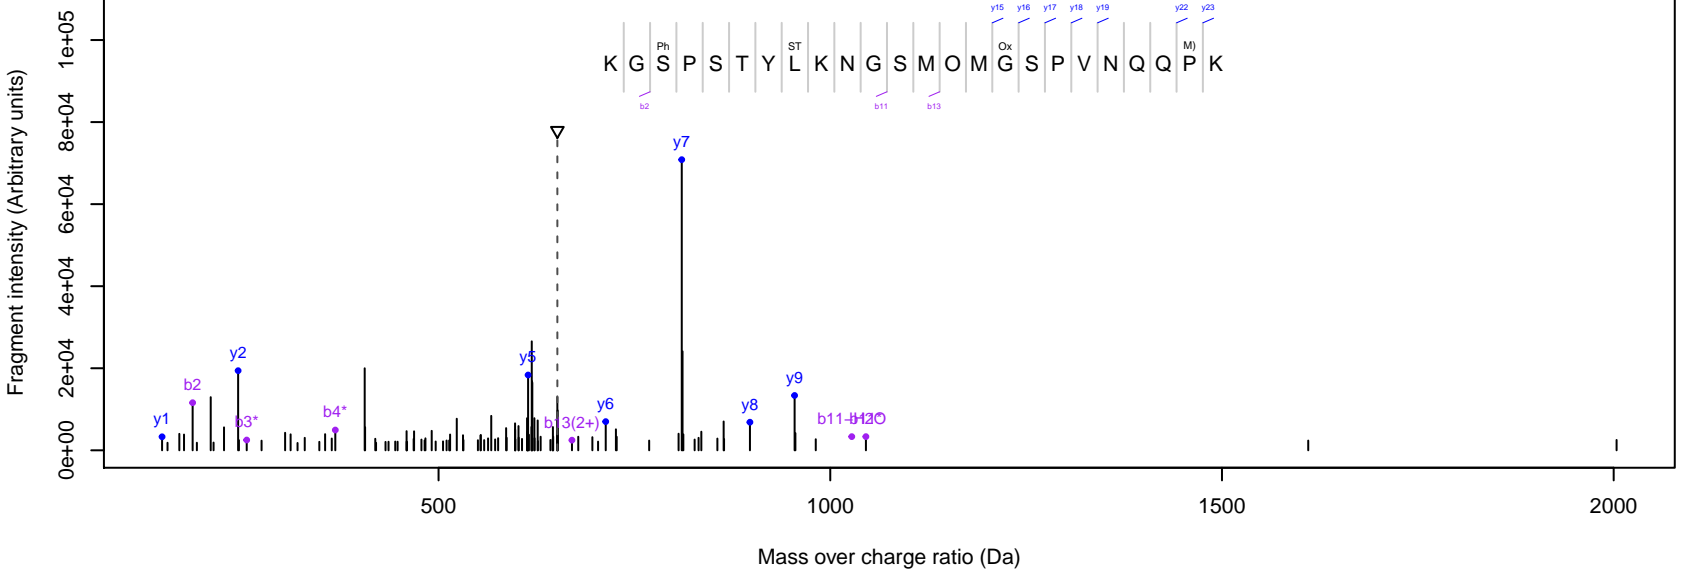

RNS(Phospho (STY))S(Phospho (STY))SPVSPASVPGQR-3+

Source : QE3\_201126\_FR\_TiOx\_hum\_tissue\_Urea\_RNAB\_H Scan : 14713

Andromeda score : 40.369

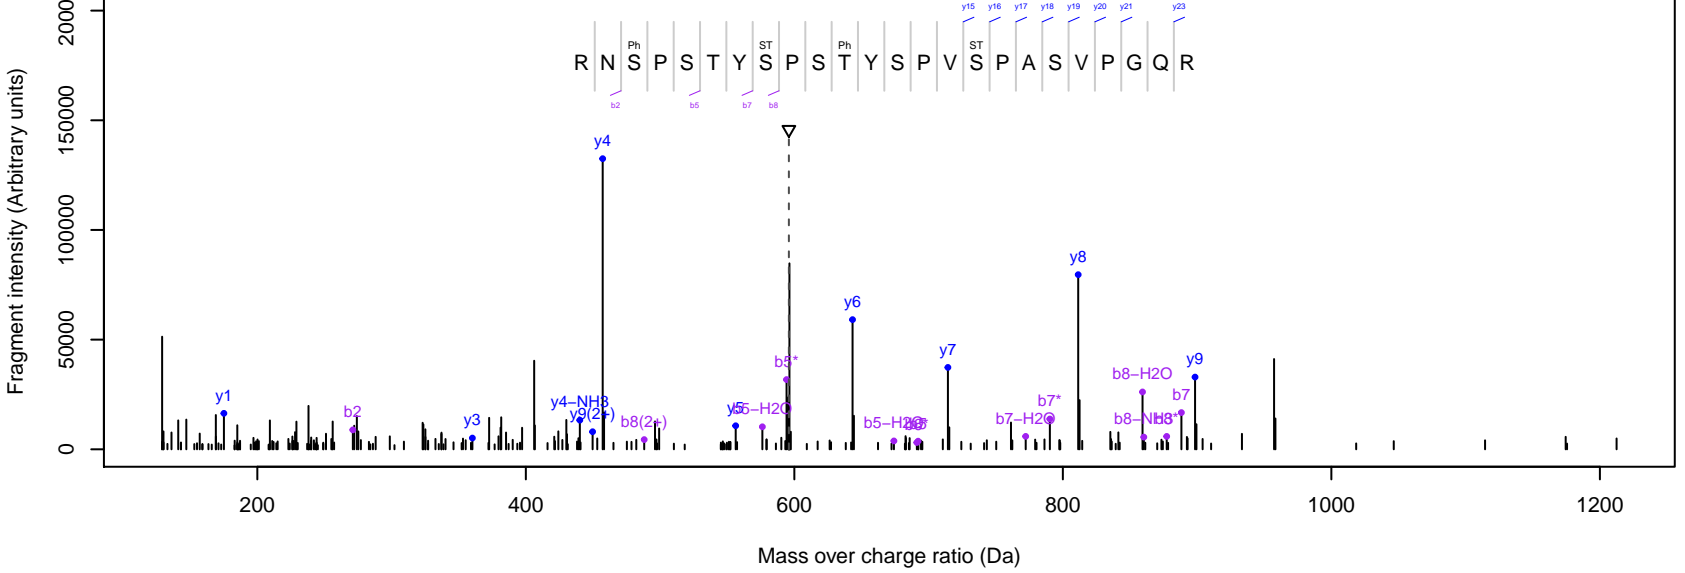

LGS(Phospho (STY))LSER-2+

Source : QE3\_201126\_FR\_TiOx\_hum\_tissue\_Urea\_RNAB\_N Scan : 12153

Andromeda score : 40.352

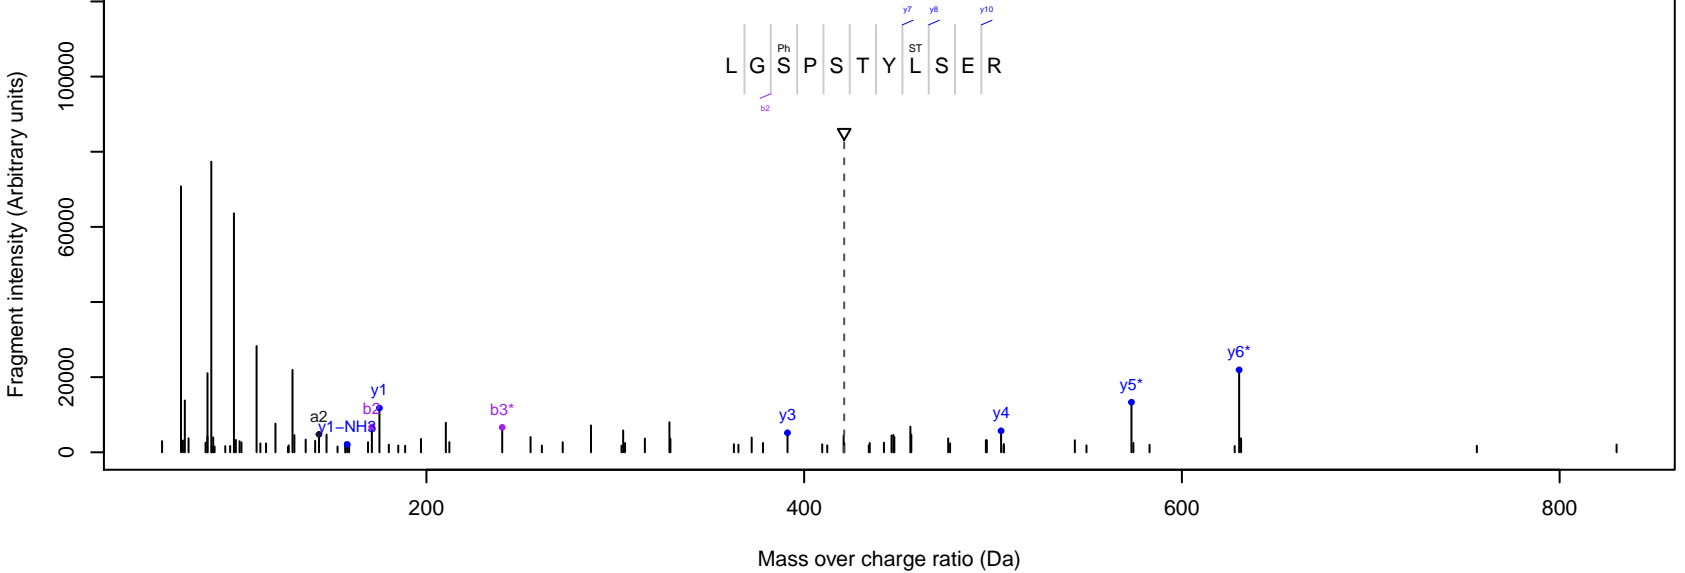



QVCQAPAS(Phospho (STY))RASR-2+

Source : QE3\_201126\_FR\_TiOx\_hum\_tissue\_Urea\_RNAB\_H Scan : 6141

Andromeda score : 40.352

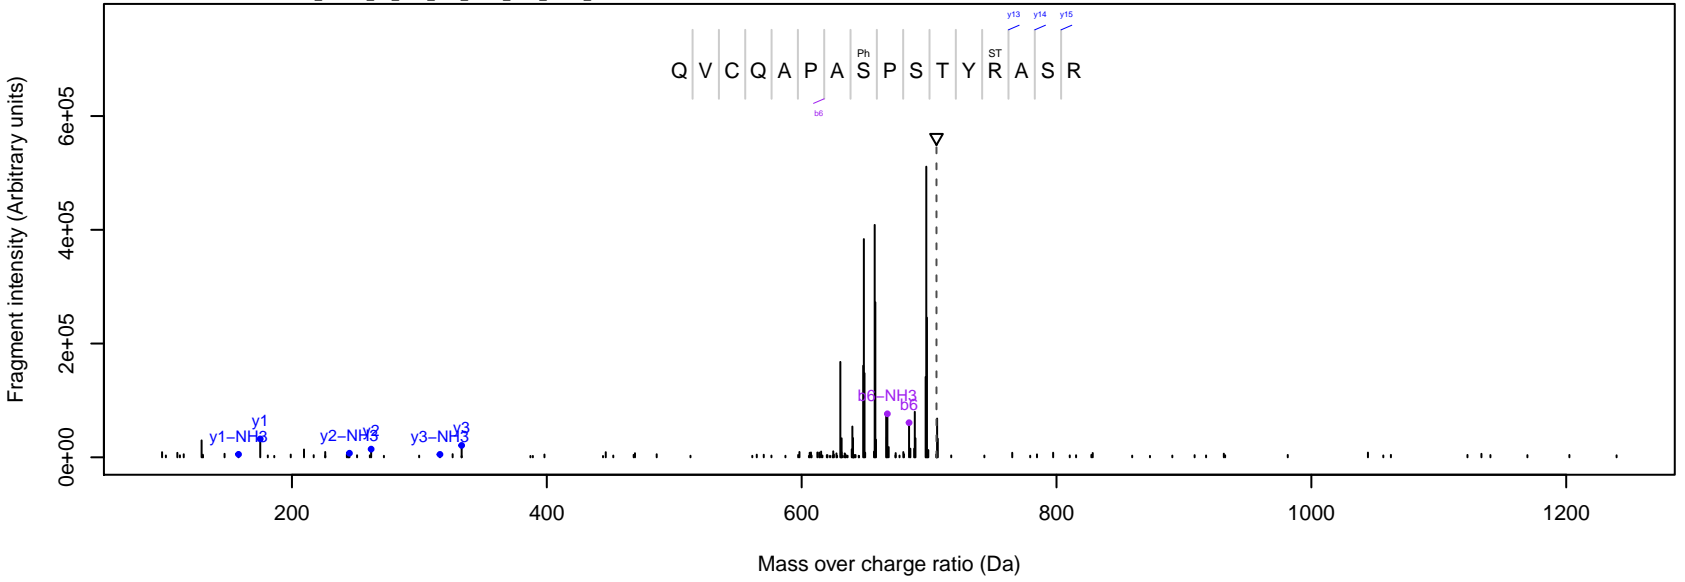

GGREGFES(Phospho (STY))DTDSEFTFK-3+

Source : QE3\_201126\_FR\_TiOx\_hum\_tissue\_Urea\_RNAB\_N Scan : 30958

Andromeda score : 40.349

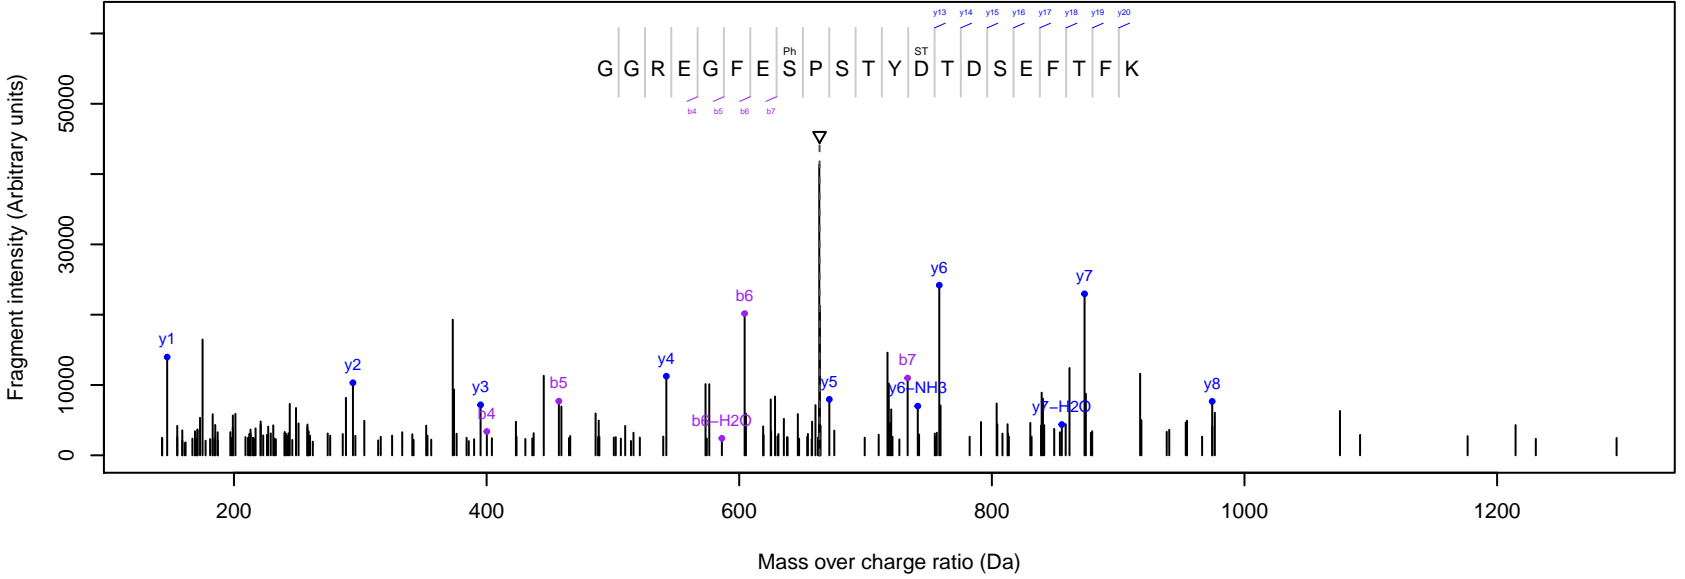

KS(Phospho (STY))HSSPSLHQDEAPTTAK-3+

Source : QE3\_201126\_FR\_TiOx\_hum\_tissue\_Urea\_RNAB\_H Scan : 5529

Andromeda score : 40.349

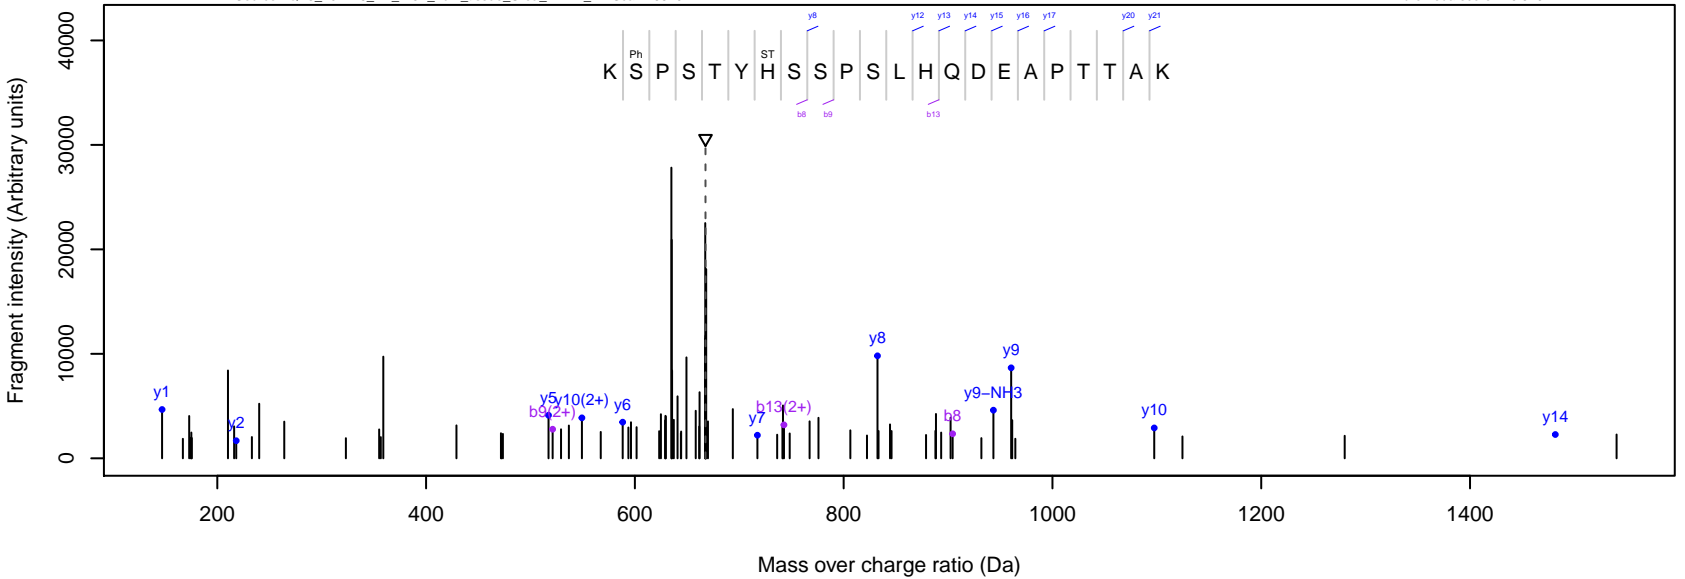

SQS(Phospho (STY))ES(Phospho (STY))SDEVELDL SHGK-3+

Source : QE3\_201126\_FR\_TiOx\_hum\_tissue\_Urea\_RNAB\_N Scan : 27633

Andromeda score : 40.349

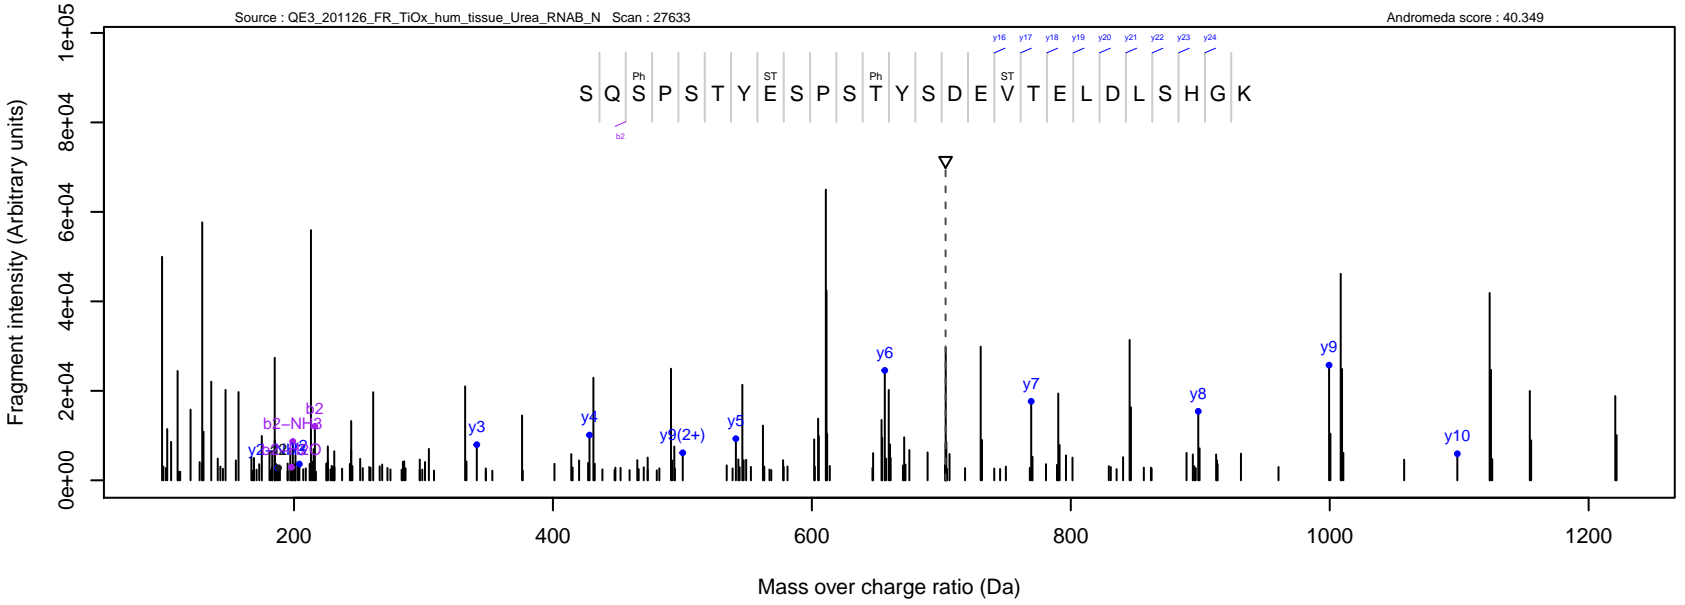

S(Phospho (STY))YLTPVRDEESESQR-3+

Source : QE3\_201126\_FR\_TiOx\_hum\_tissue\_Urea\_RNAB\_H Scan : 19432

Andromeda score : 40.349

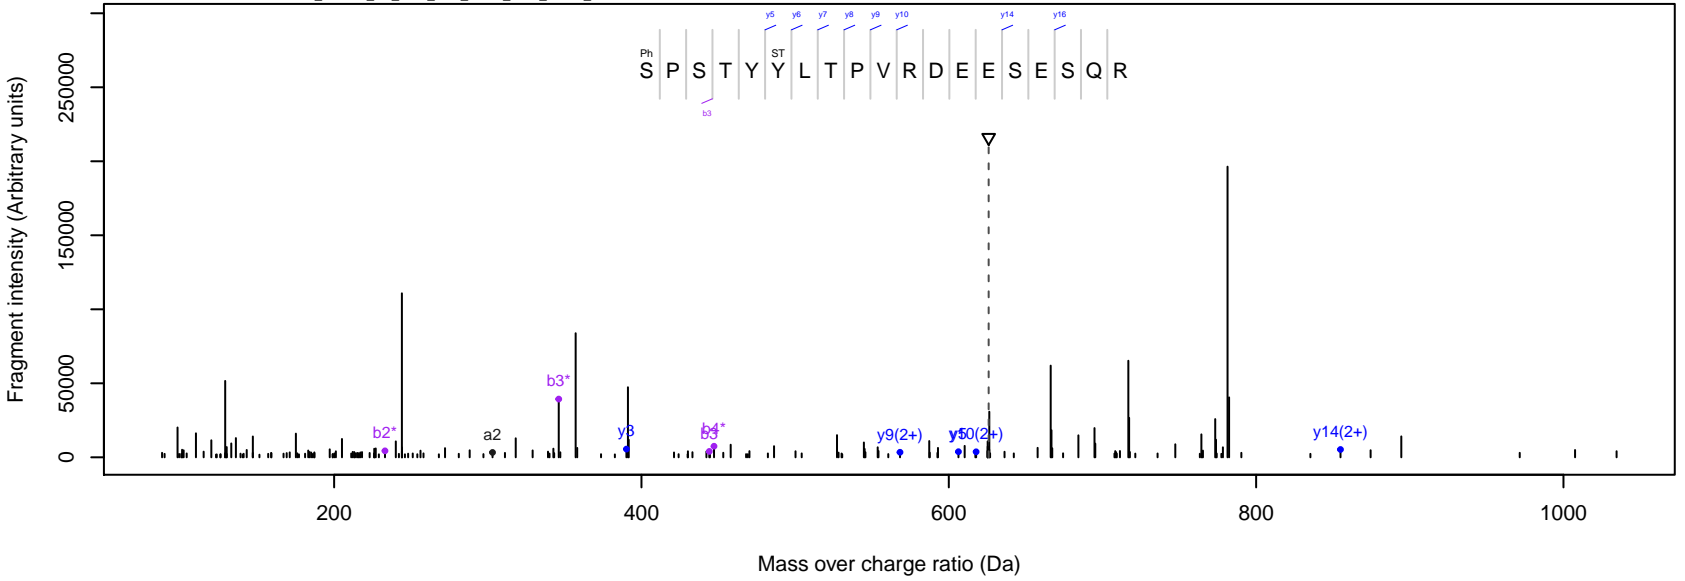

S(Phospho (STY))LQKVDEEDSDEES(Phospho (STY))HHDEMS(Phospho (STY))EQEELEDDPTVVK-4+

Source : QE3\_201126\_FR\_TiOx\_hum\_tissue\_Urea\_RNAB\_H Scan : 32454

Andromeda score : 40.328

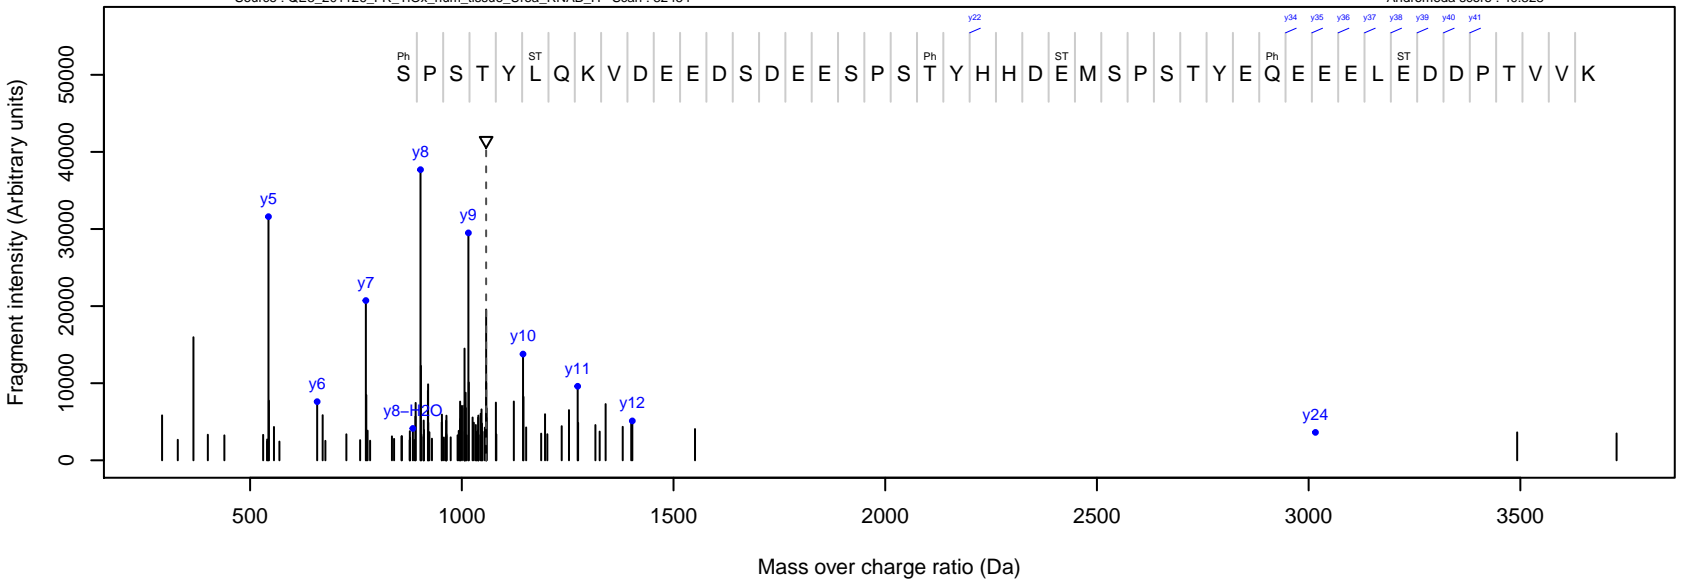

LSVSSLLAAGAPMSSAS(Phospho (STY))VPNLSSR-3+

Source : QE3\_201126\_FR\_TiOx\_hum\_tissue\_Urea\_RNAB\_N Scan : 56458

Andromeda score : 40.254

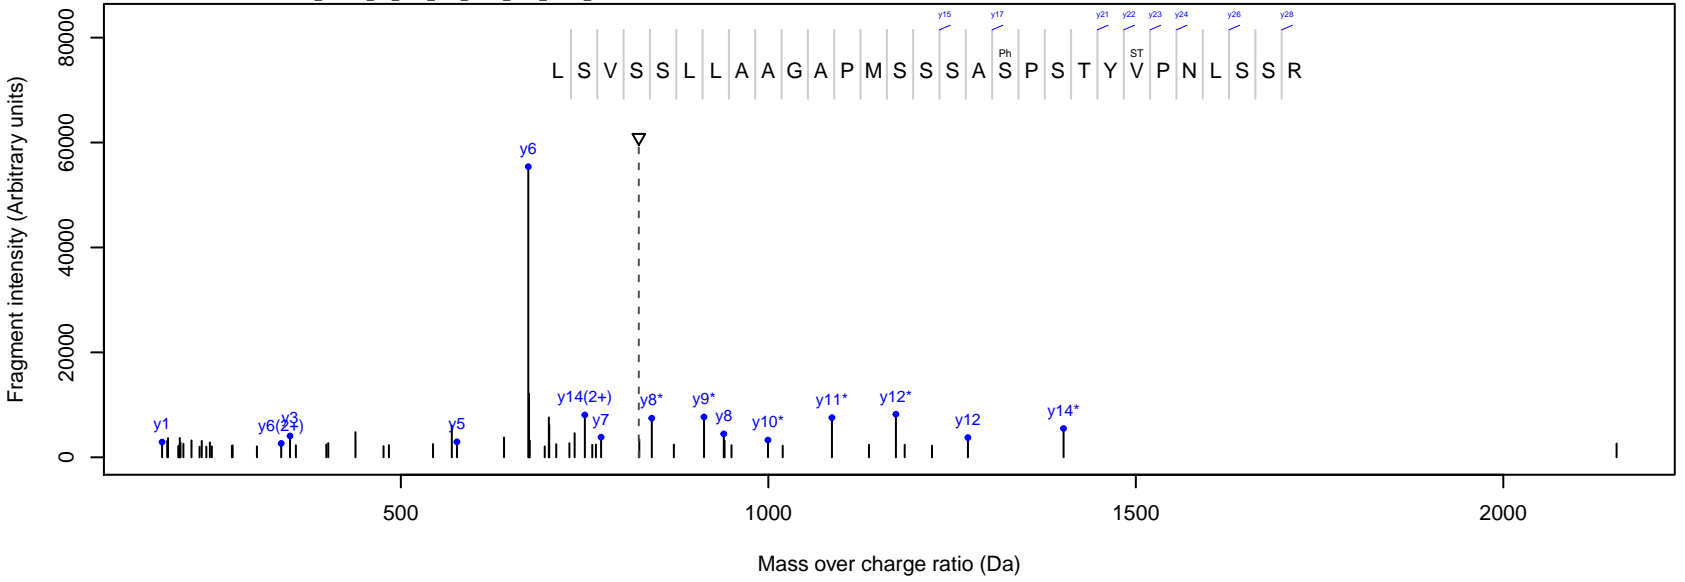

AS(Phospho (STY))GEM(Oxidation (M))ASAQYITAAALR-2+

Source : QE3\_201126\_FR\_TiOx\_hum\_tissue\_Urea\_RNAB\_N Scan : 40225

Andromeda score : 40.237

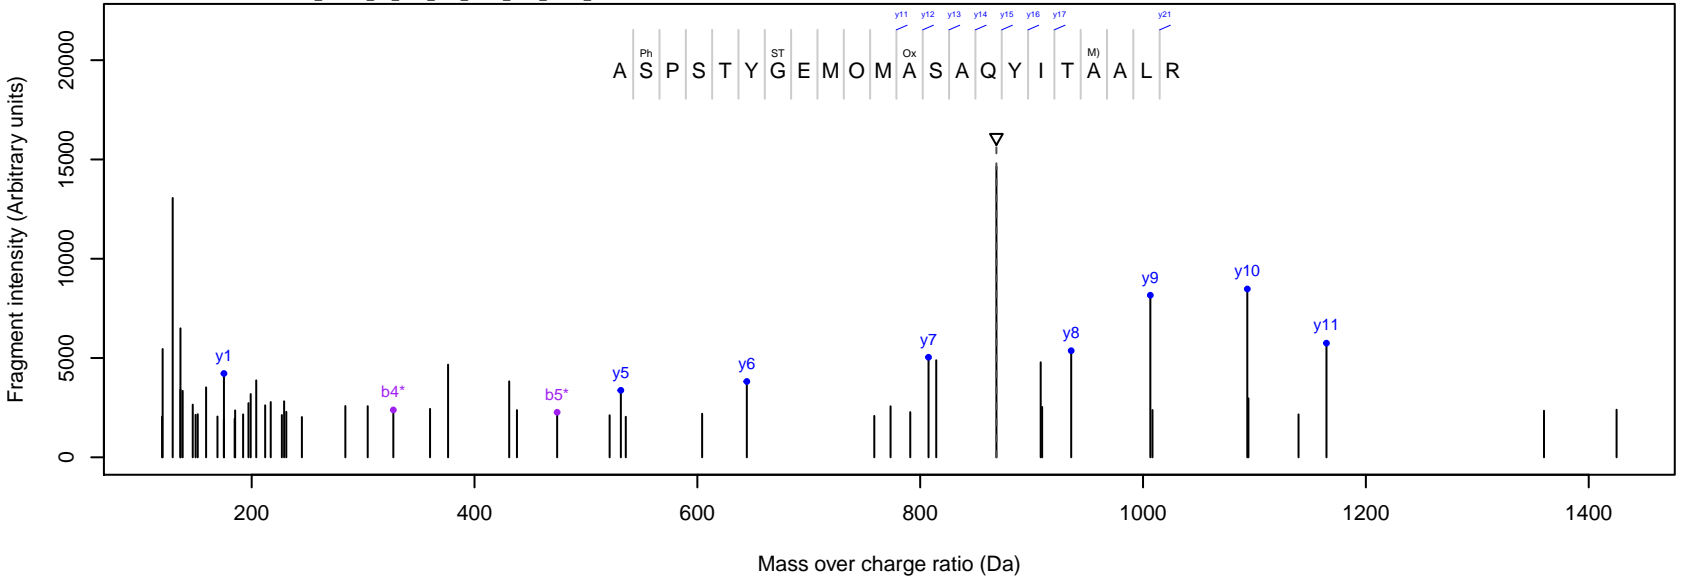

S(Phospho (STY))RS(Phospho (STY))S(Phospho (STY))SPVTELASR-2+

Source : QE3\_201126\_FR\_TiOx\_hum\_tissue\_Urea\_RNAB\_N Scan : 27704

Andromeda score : 40.237

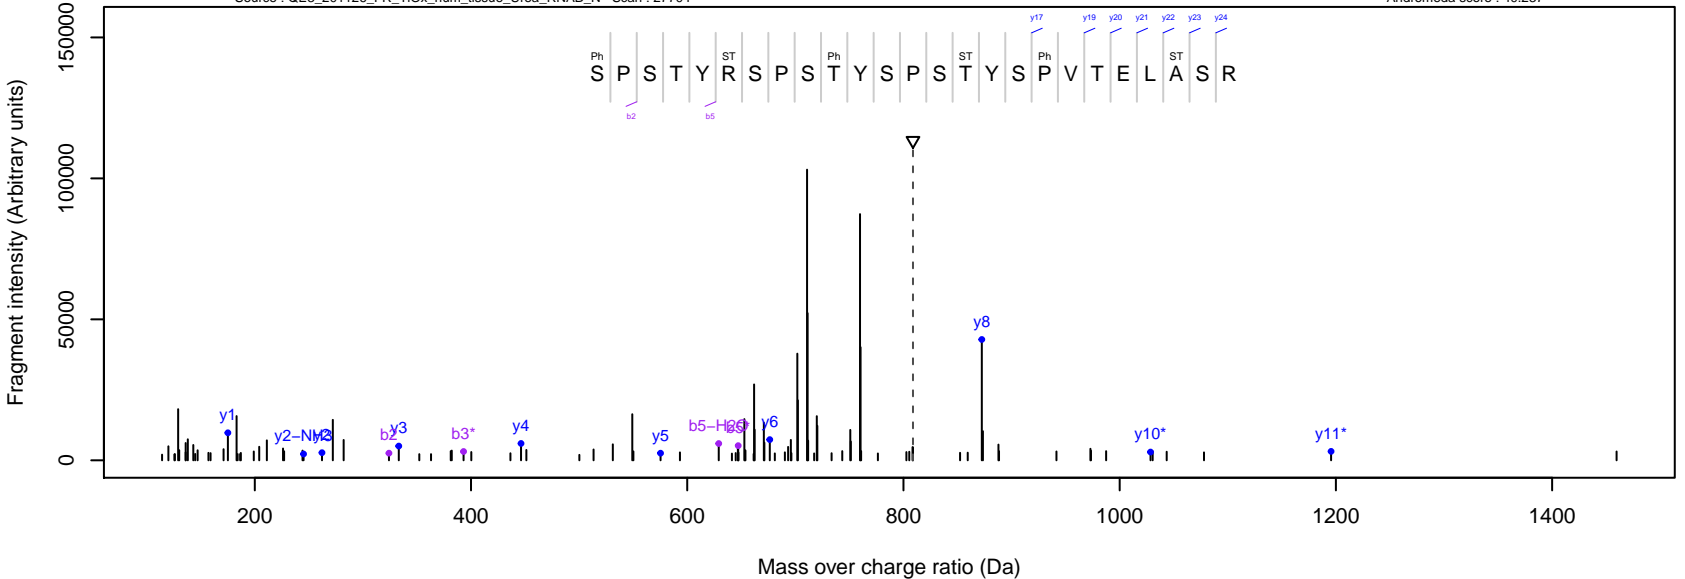

KQDEYHM(Oxidation (M))VHLVCTSRT(Phospho (STY))PPS(Phospho (STY))SPK-4+

Source : QE3\_201126\_FR\_TiOx\_hum\_tissue\_Urea\_RNAB\_H Scan : 13335

Andromeda score : 40.208

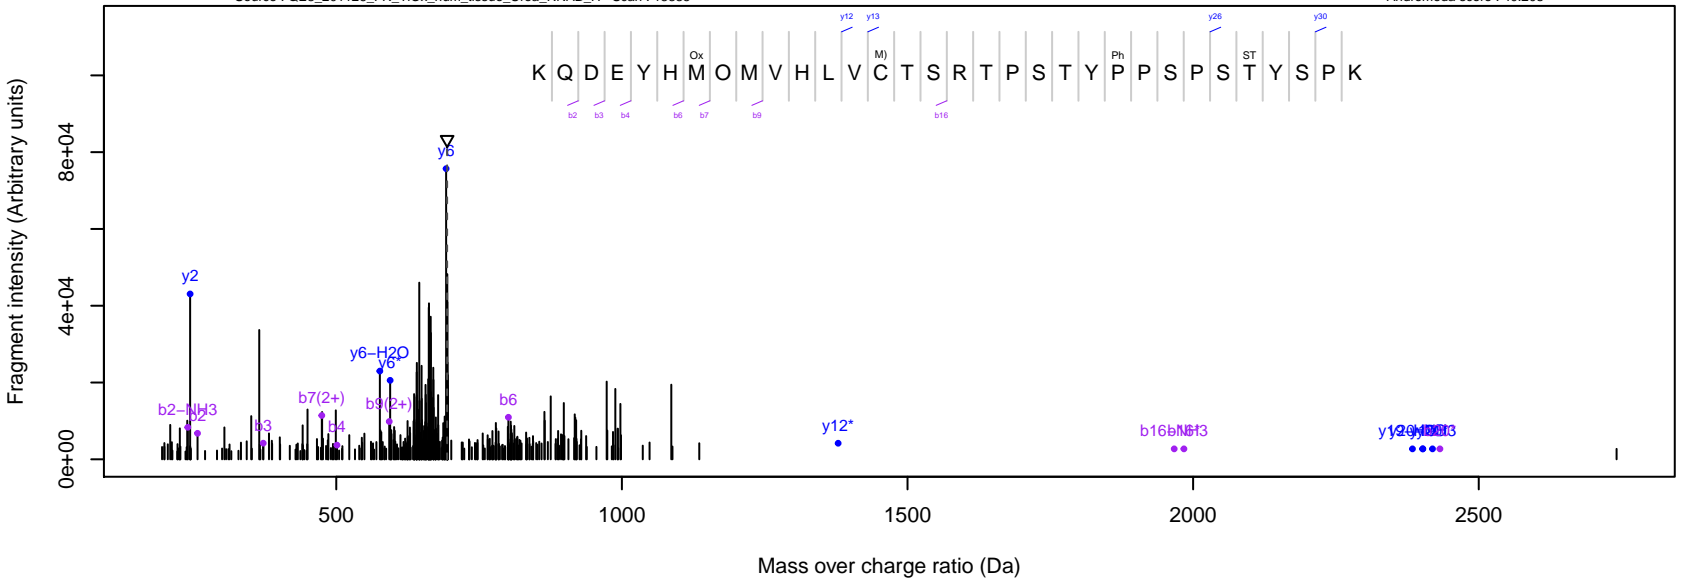

ESLPTS(Phospho (STY))PPWTPGASRPPSSLDGWVS(Phospho (STY))PGPWEPR-3+

Source : QE3\_201126\_FR\_TiOx\_hum\_tissue\_Urea\_RNAB\_N Scan : 59421

Andromeda score : 40.206

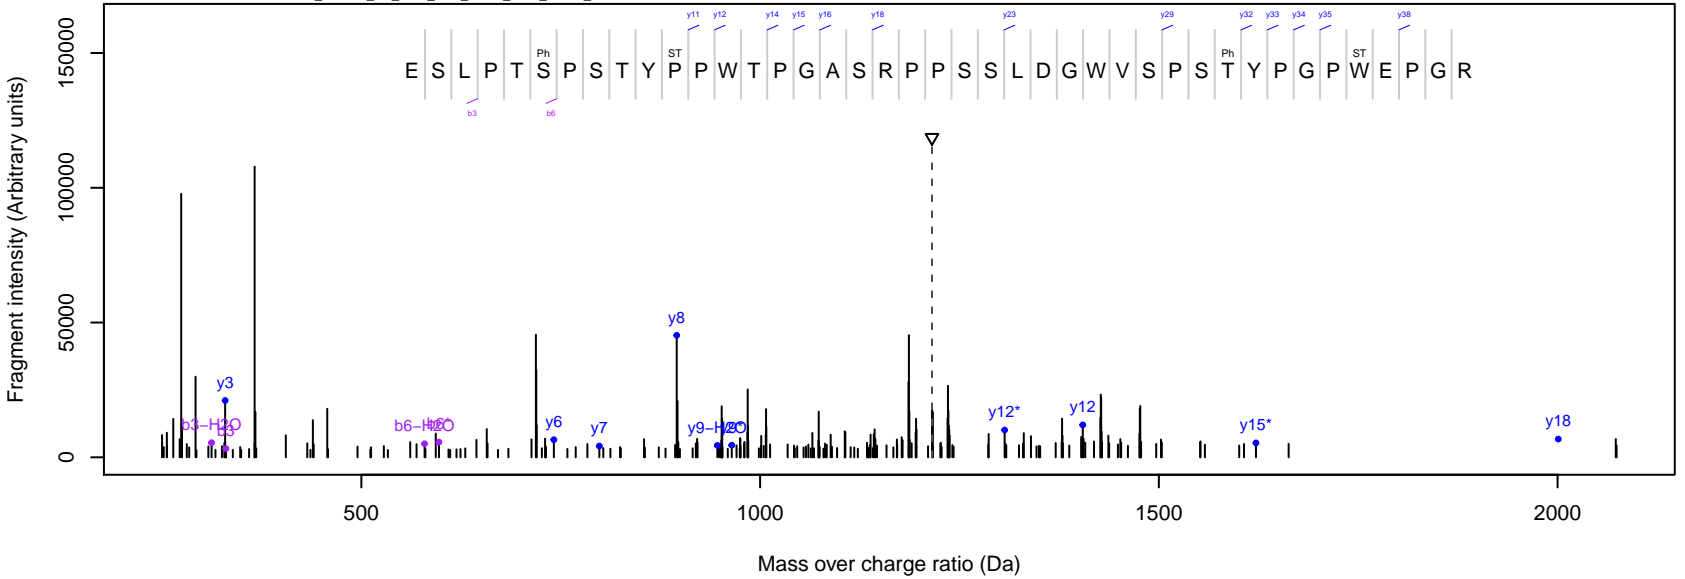

SSGS(Phospho (STY))LGHRSQEM(Oxidation (M))DK-3+

Source : QE3\_201126\_FR\_TiOx\_hum\_tissue\_Urea\_RNAB\_H Scan : 3751

Andromeda score : 40.179

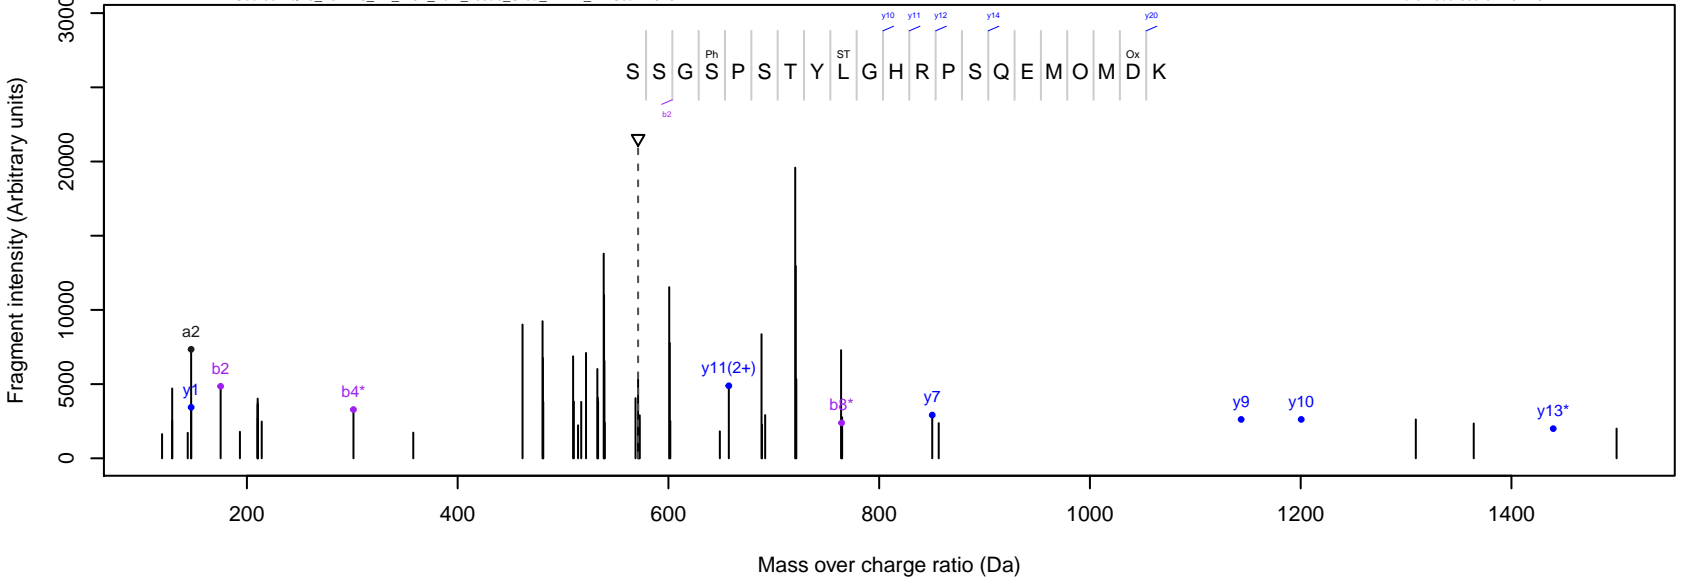



(Acetyl (Protein N-term))TTESGSDS(Phospho (STY))ES(Phospho (STY))KPDQEAEPQEAAGAQR-3+

Source : QE3\_201126\_FR\_TiOx\_hum\_tissue\_Urea\_RNAB\_N Scan : 19556

Andromeda score : 40.112

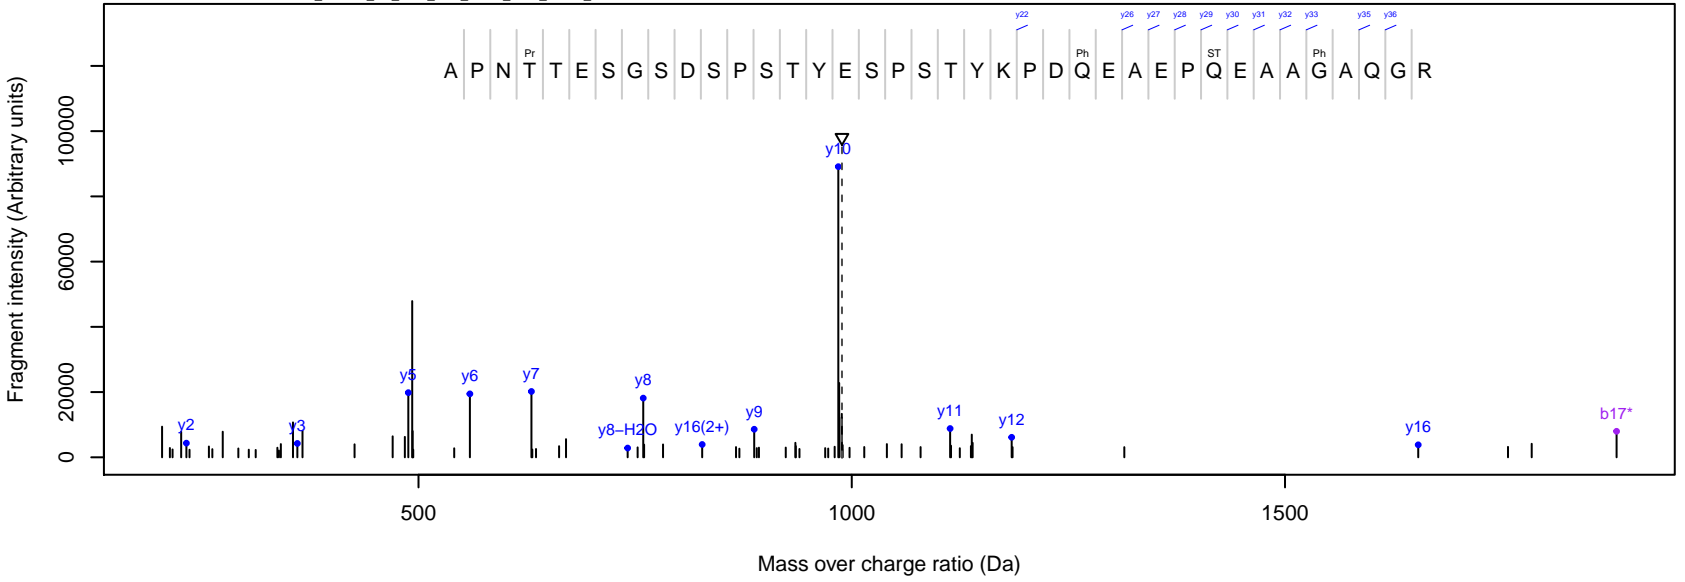

DNLGIQHSQPSSDT(Phospho (STY))LLEVVK-3+

Source : QE3\_201126\_FR\_TiOx\_hum\_tissue\_Urea\_RNAB\_B Scan : 50305

Andromeda score : 40.104

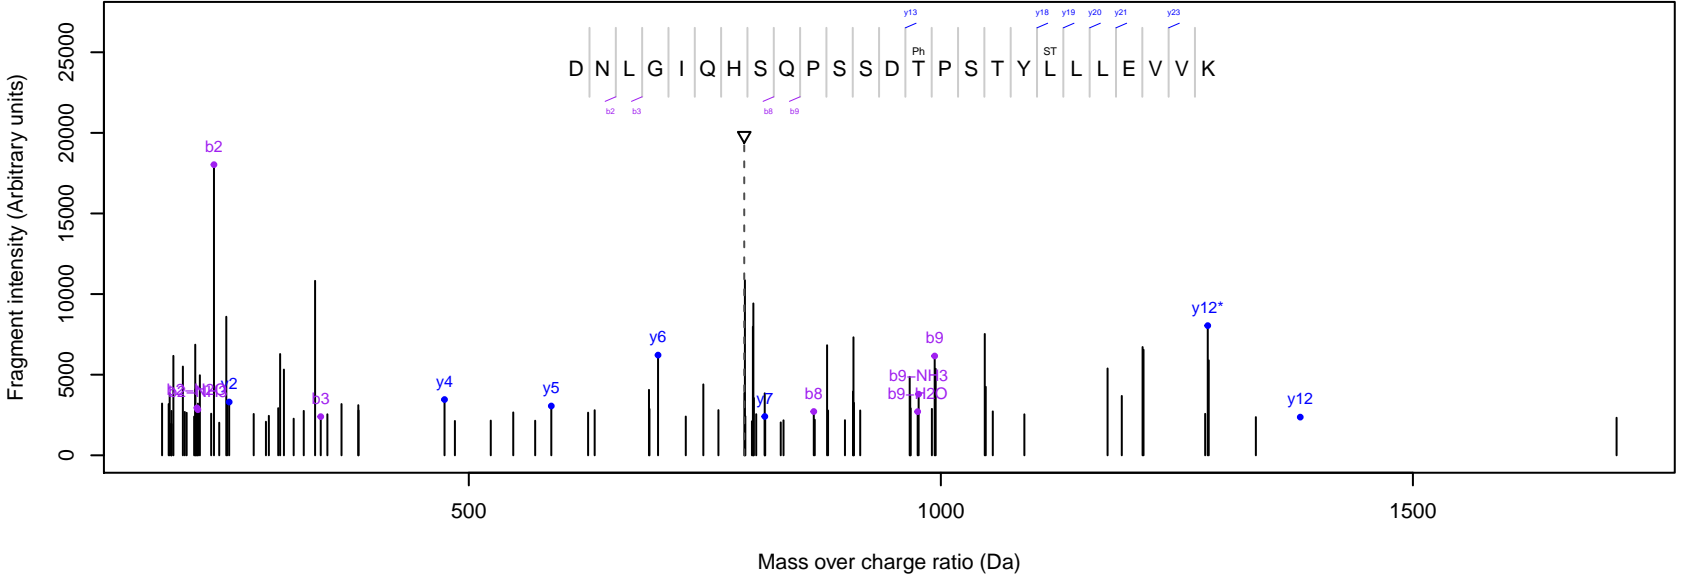

M(Oxidation (M))SKGLPETP(Phospho (STY))RT(Phospho (STY))DAAMS(Phospho (STY))ELVPEPR-3+

Source : QE3\_201126\_FR\_TiOx\_hum\_tissue\_Urea\_RNAB\_N Scan : 24182

Andromeda score : 40.104

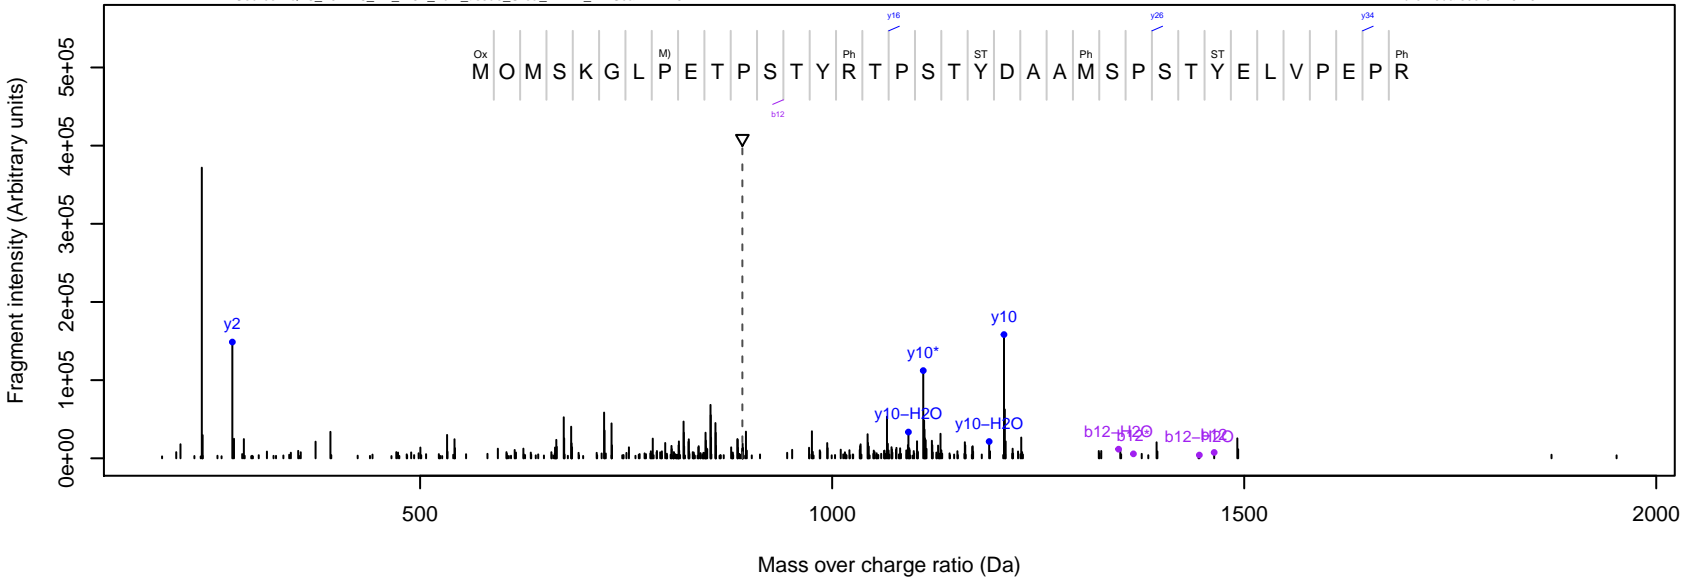

NS(Phospho (STY))LKEANHDGDFGITLAELR-3+

Source : QE3\_201126\_FR\_TiOx\_hum\_tissue\_Urea\_RNAB\_H Scan : 36778

Andromeda score : 40.104

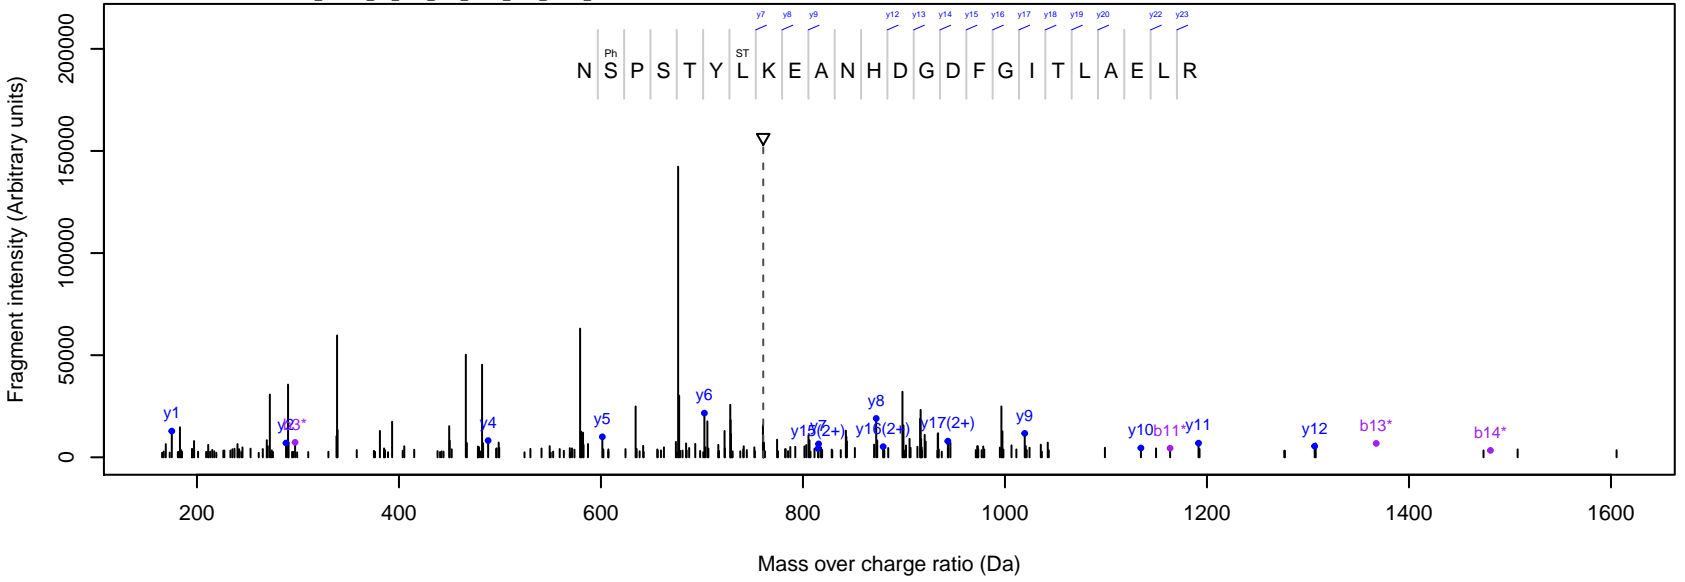

(Acetyl (Protein N-term))AARDS(Phospho (STY))DSEEDLVSYGTGLEPLEEGERPK-3+

Source : QE3\_201126\_FR\_TiOx\_hum\_tissue\_Urea\_RNAB\_H Scan : 45277

Andromeda score : 40.094

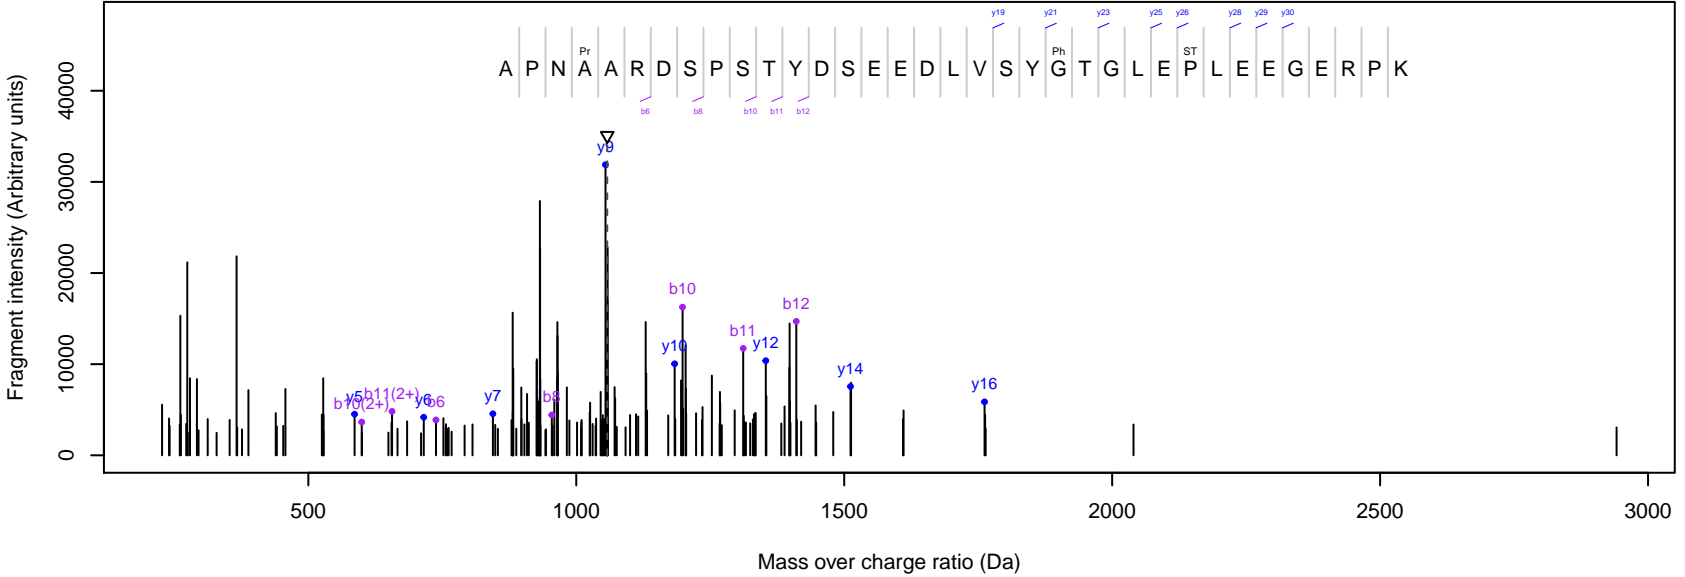

GESLSLPGPS(Phospho (STY))PPPDGTEQVIISR-3+

Source : QE3\_201126\_FR\_TiOx\_hum\_tissue\_Urea\_RNAB\_H Scan : 46308

Andromeda score : 40.094

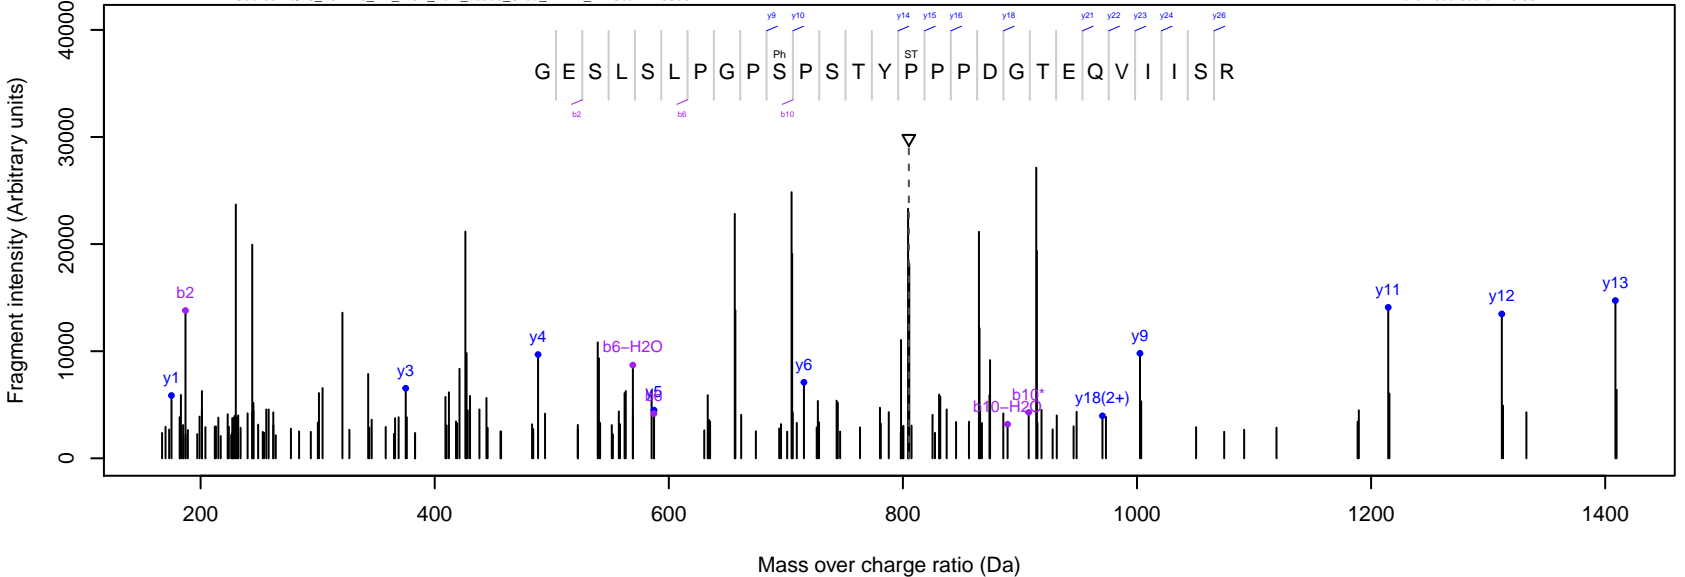

VEAEFHLV(TPhospho (STY))AEEAEKNPVGK-3+

Source : QE3\_201126\_FR\_TiOx\_hum\_tissue\_Urea\_RNAB\_B Scan : 13757

Andromeda score : 40.085

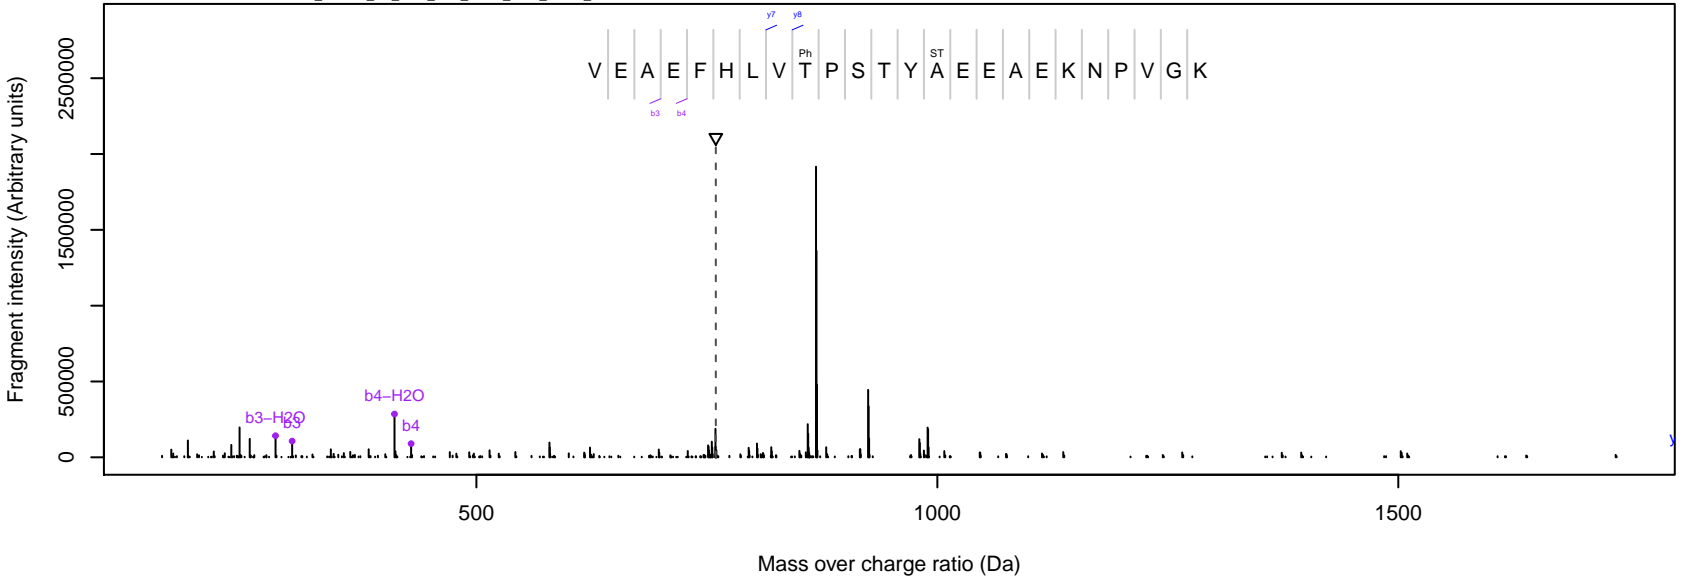

GLSEDT(Phospho (STY))TEETLK-2+

Source : QE3\_201126\_FR\_TiOx\_hum\_tissue\_Urea\_RNAB\_N Scan : 4736

Andromeda score : 40.067

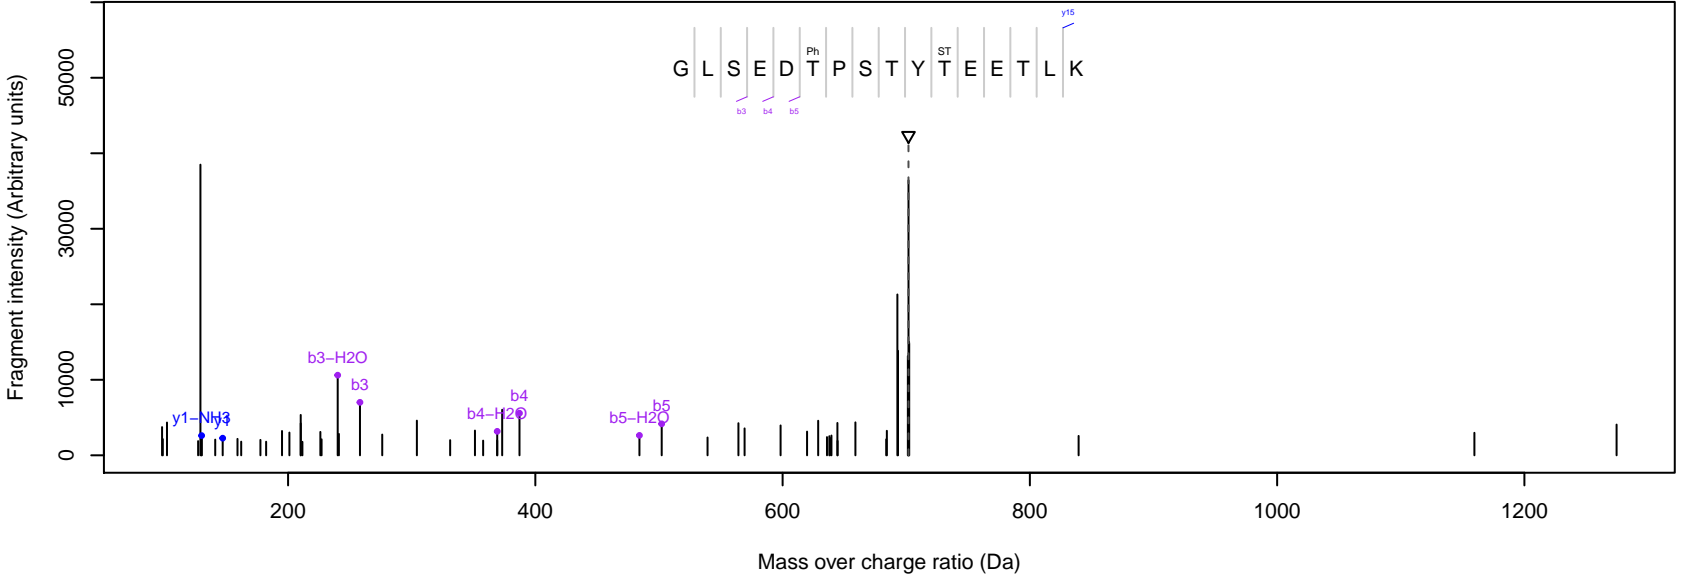

EES(Phospho (STY))GKPGAHVTVK-3+

Source : QE3\_201126\_FR\_TiOx\_hum\_tissue\_Urea\_RNAB\_H Scan : 4741

Andromeda score : 40.066

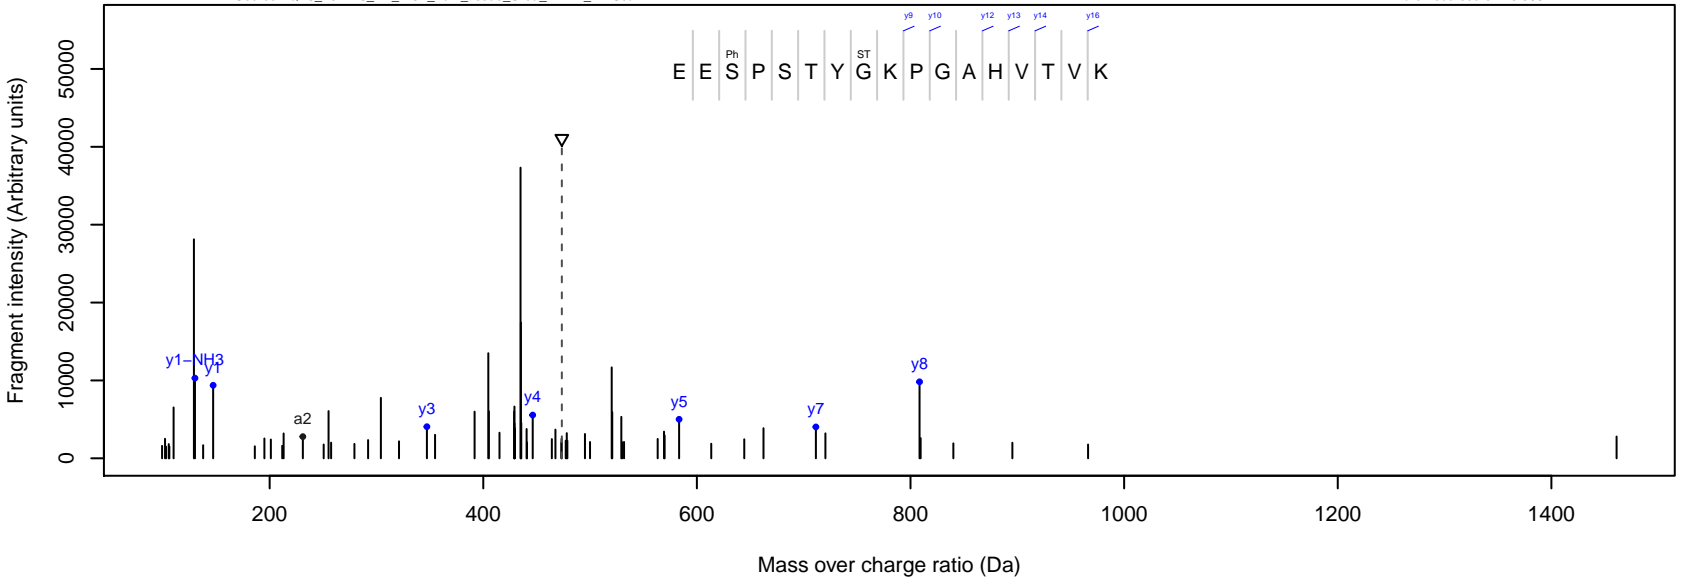



LPTAEVM(Oxidation (M))FCT(Phospho (STY))LNTHK-2+

Source : QE3\_201126\_FR\_TiOx\_hum\_tissue\_Urea\_RNAB\_H Scan : 29638

Andromeda score : 40.066

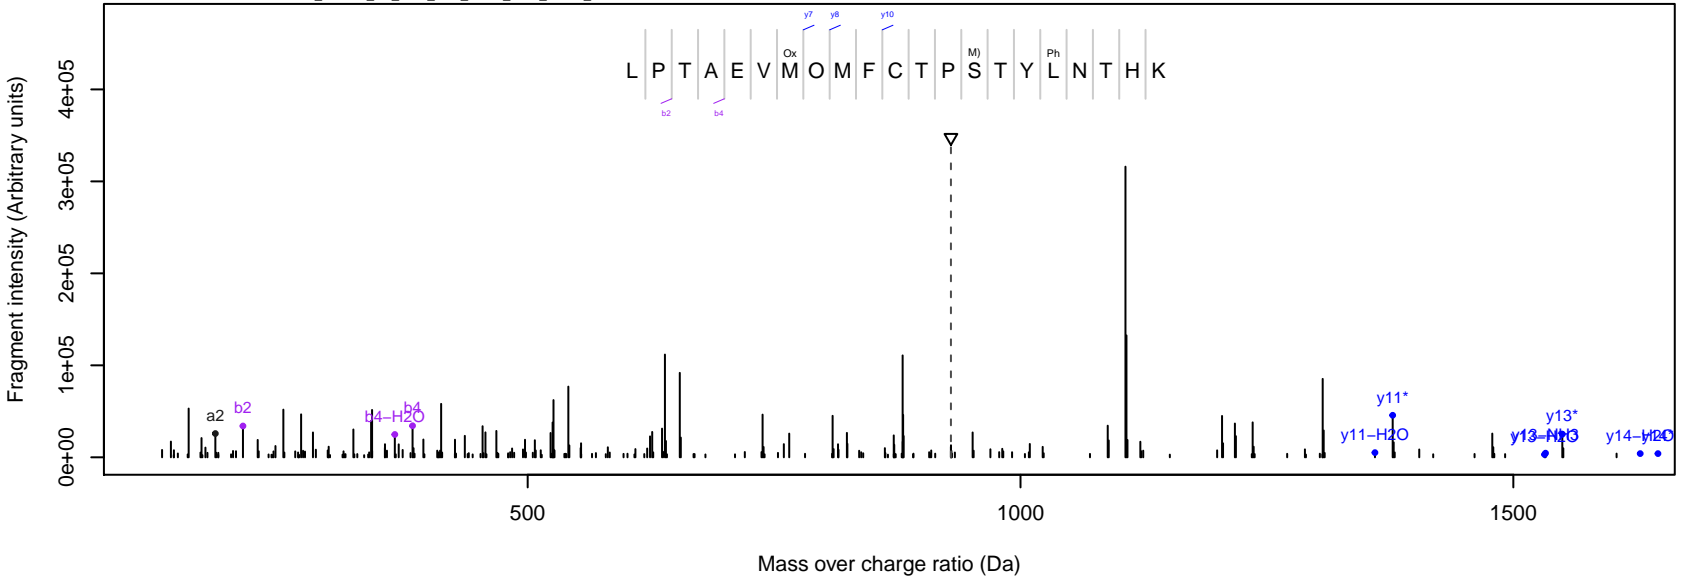

QPDAQPDES(Phospho (STY))AALK-2+

Source : QE3\_201126\_FR\_TiOx\_hum\_tissue\_Urea\_RNAB\_H Scan : 9200

Andromeda score : 40.066

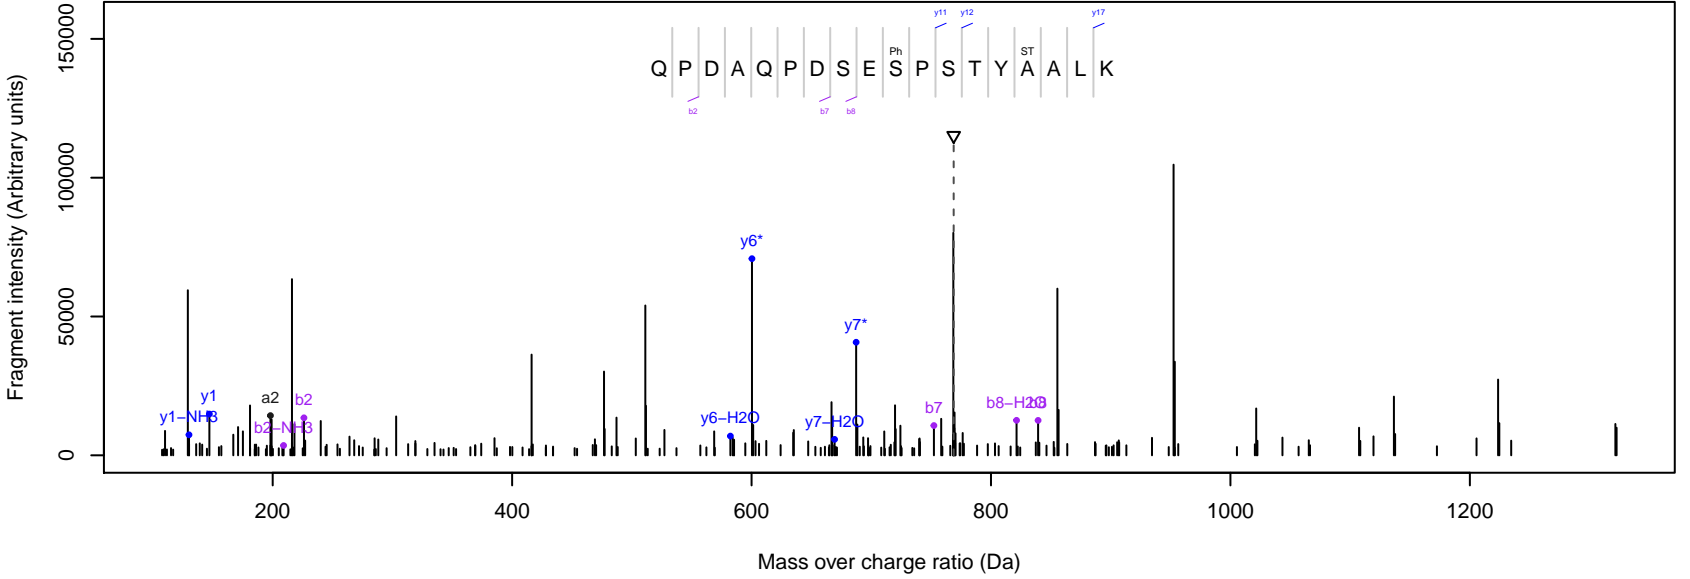

KKS(Phospho (STY))TSLEPVER-3+

Source : QE3\_201126\_FR\_TiOx\_hum\_tissue\_Urea\_RNAB\_H Scan : 6295

Andromeda score : 40.025

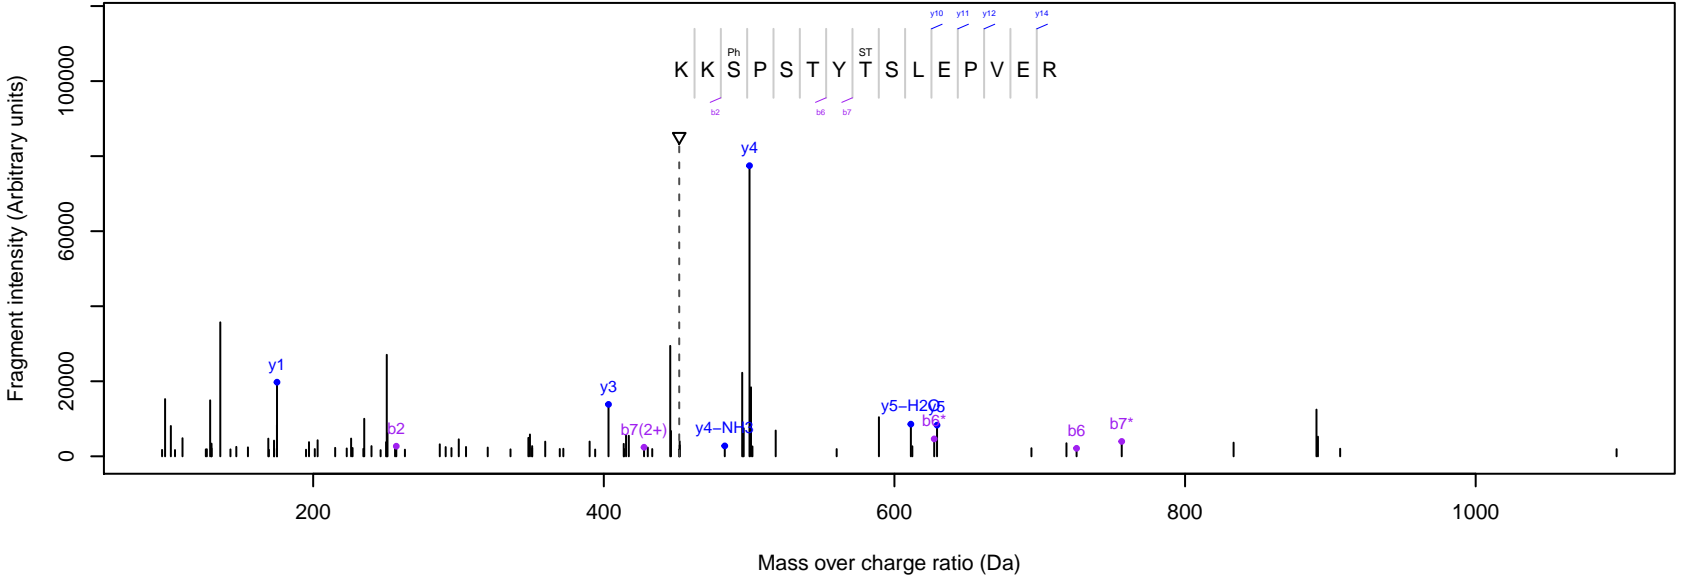

(Acetyl (Protein N-term))AAPEEHDS(Phospho (STY))PTEASQPIVEEEETK-3+

Source : QE3\_201126\_FR\_TiOx\_hum\_tissue\_Urea\_RNAB\_N Scan : 28085

Andromeda score : 40.012

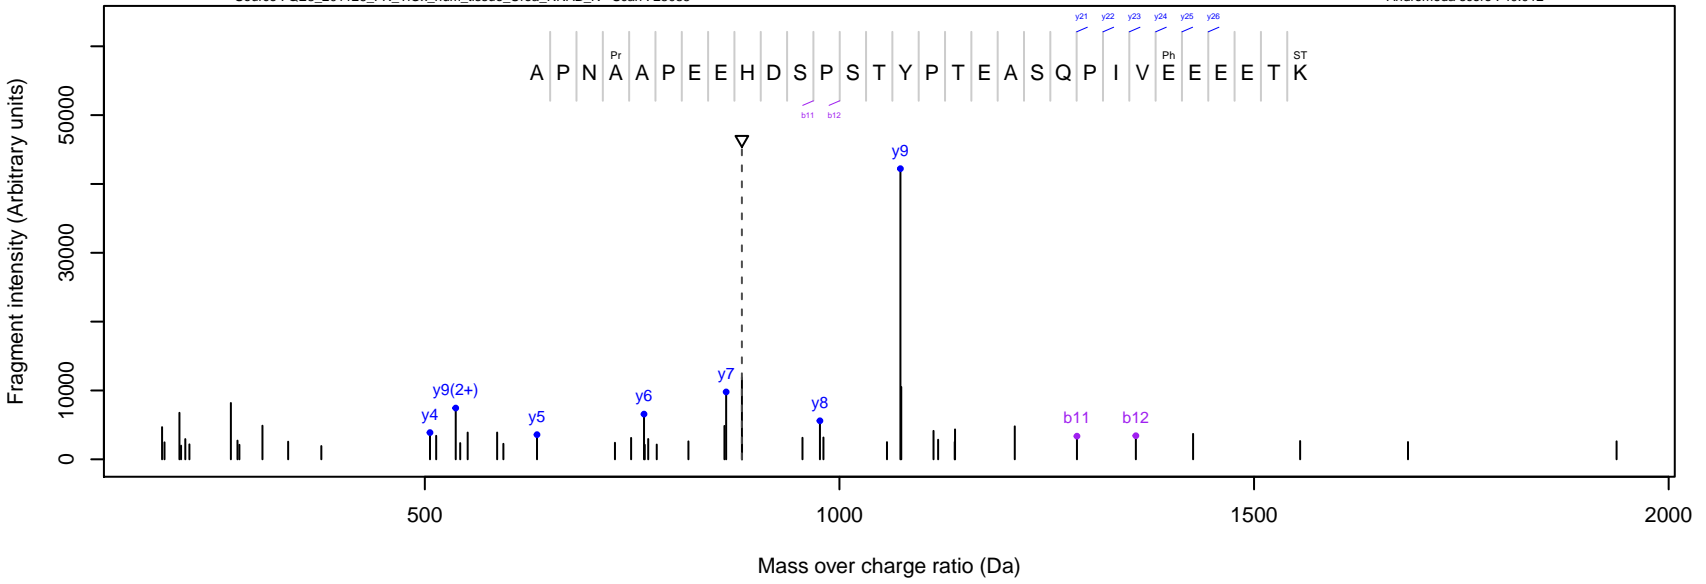

AAS(Phospho (STY))S(Phospho (STY))DQLRDNS(Phospho (STY))PPPAFKPEPPK-4+

Source : QE3\_201126\_FR\_TiOx\_hum\_tissue\_Urea\_RNAB\_H Scan : 15209

Andromeda score : 40.012

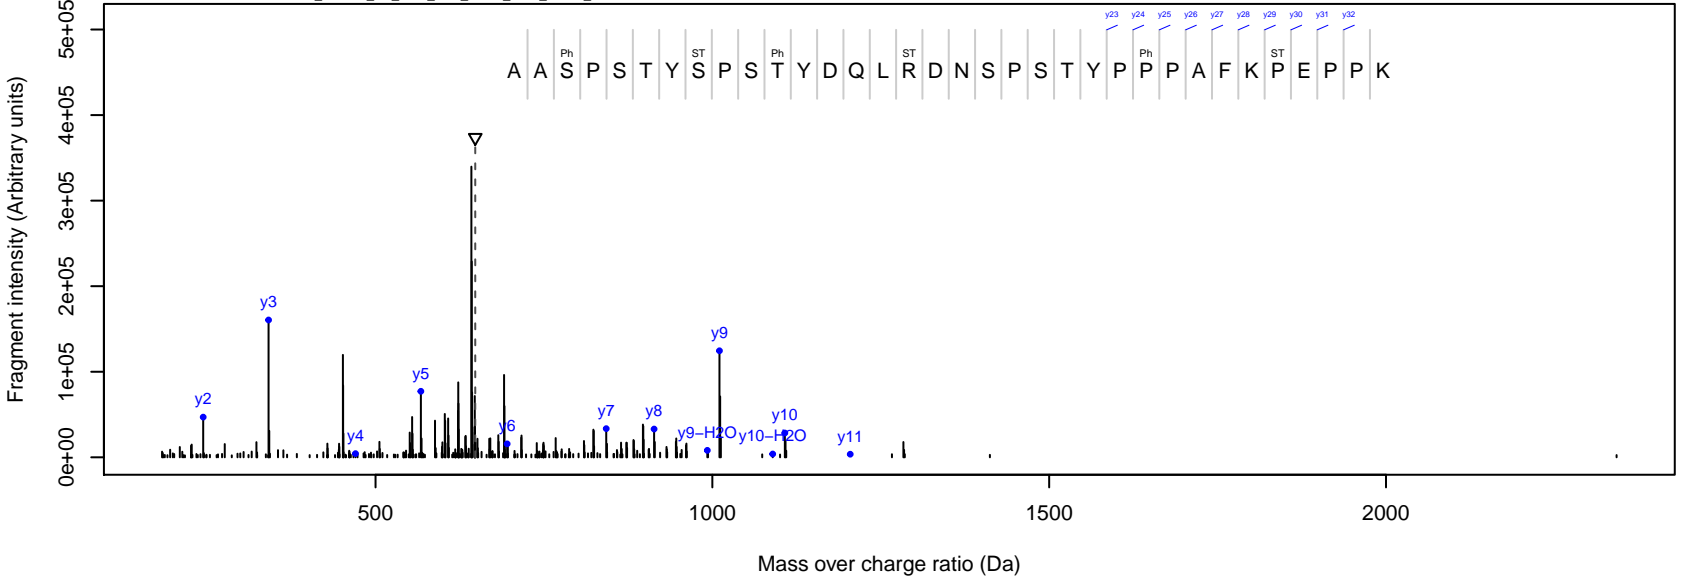

IKDNGDLVLS(Phospho (STY))SPSNVTLQPVK-3+

Source : QE3\_201126\_FR\_TiOx\_hum\_tissue\_Urea\_RNAB\_B Scan : 37914

Andromeda score : 40.012

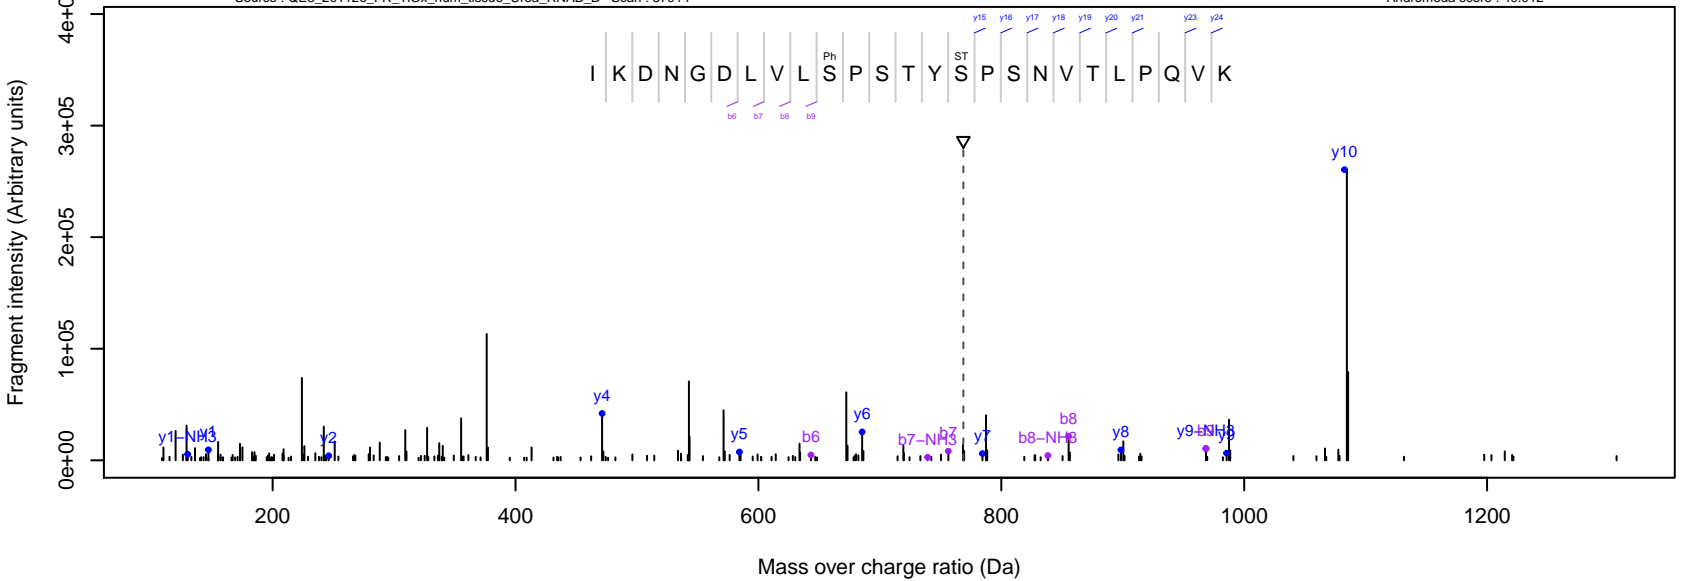

SLEPS(Phospho (STY))PS(Phospho (STY))PGPQEEDGEVALVLLGR-3+

Source : QE3\_201126\_FR\_TiOx\_hum\_tissue\_Urea\_RNAB\_N Scan : 63080

Andromeda score : 40.012

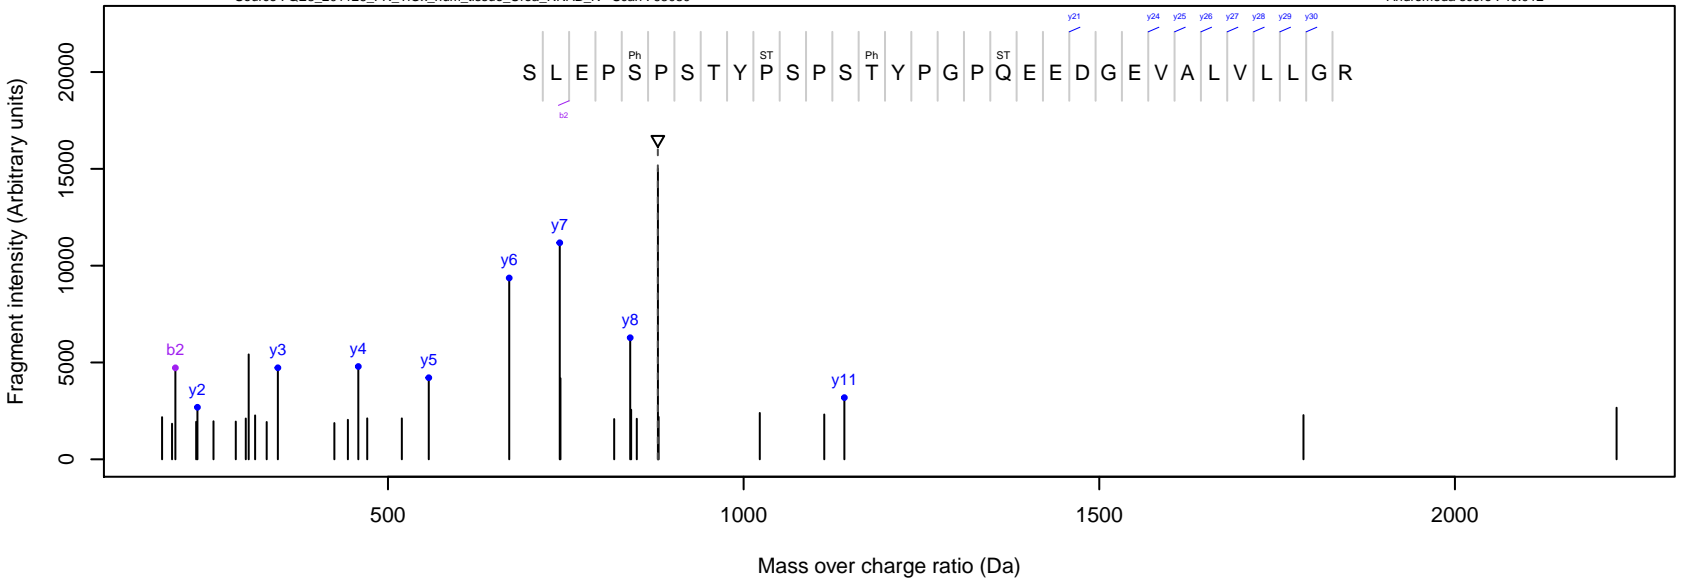

S(Phospho (STY))PSLDNPTFPNLPSENPLKR-3+

Source : QE3\_201126\_FR\_TiOx\_hum\_tissue\_Urea\_RNAB\_H Scan : 44669

Andromeda score : 40.012

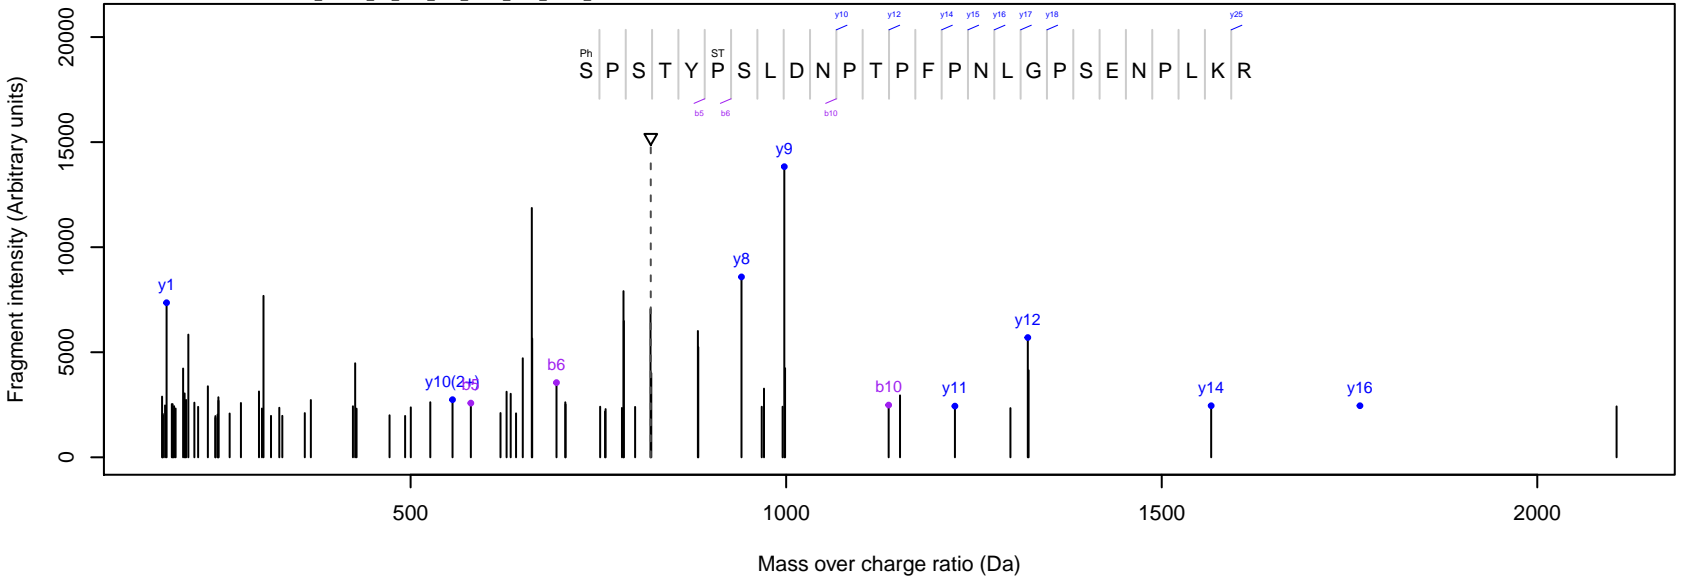
